# Supplementary material for: Genome-wide survey of microRNA–transcription factor feed-forward regulatory circuits in human
Source: Royal Society of Chemistry journal article supplement (doi:10.1039/b900177h), 2009-06-19
Supplement: b900177h_add_file_1.pdf [file b900177h_add_file_1.pdf]

# List of human and mouse pre-miRNAs included in our study as representative of transcriptional units (TUs).  
#  
# In this file we report the list of human and mouse pre-miRNAs, and relative annotations, used in our study as the  
# representative of transcriptional units (TU), defined in Landraf et al, 2007. For each TU, this consist in the  
# most-5' pre-miRNA belonging to it. Only pre-miRNA conserved between human and mouse are considered.

# File is TAB delimited and columns are:  
# col. 0: Transcription unit  
# col. 1: Ensembl miRNA precursor id  
# col. 2: miRNA precursor id  
# col. 3: Chromosome  
# col. 4: Orientation  
# col. 5: Precursor start  
# col. 6: Precursor end  
# col. 7: Numerical suffix (multiple genic relationships) otherwise '-'  
# col. 8: Containing gene  
# col. 9: Genic relationship description  
# col. 10: Ensembl ortholog miRNA precursor id  
# col. 11: Ortholog miRNA precursor id  
# col. 12: Ortholog's chromosome  
# col. 13: Ortholog's strand  
# col. 14: Ortholog's start  
# col. 15: Ortholog's end

# A plain text ASCII version of this file is available at: <http://personalpages.to.infn.it/~cora/circuits/index.html>

# The file is divided in two sections. The first one is for human miRNAs whilst the second one is for mouse miRNAs.

# section for human pre-miRNA

|                           |                 |                |    |   |           |           |   |                   |                    |                |    |   |           |           |           |           |  |  |
|---------------------------|-----------------|----------------|----|---|-----------|-----------|---|-------------------|--------------------|----------------|----|---|-----------|-----------|-----------|-----------|--|--|
| cluster-hsa-mir-29a(2)    | ENSG00000198981 | hsa-mir-29a    | 7  | - | 130212046 | 130212109 | - | Non_Genic         | ENSMUSG00000065610 | mmu-mir-29a    | 6  | - | 30992823  | 30992910  |           |           |  |  |
| cluster-hsa-mir-150(1)    | ENSG00000207782 | hsa-mir-150    | 19 | - | 54695853  | 54695937  | - | Exon_Oppstrand    | ENSMUSG00000065495 | mmu-mir-150    | 7  | + |           |           | 44989799  | 44989863  |  |  |
| cluster-hsa-mir-191(2)    | ENSG00000199032 | hsa-mir-425    | 3  | - | 49032584  | 49032671  | - | UTR_Samestrand    | ENSMUSG00000065579 | mmu-mir-425    | 9  | + |           |           | 108426880 | 108426964 |  |  |
| cluster-hsa-mir-144(2)    | ENSG00000207618 | hsa-mir-144    | 17 | - | 24212677  | 24212762  | - | Non_Genic         | ENSMUSG00000065401 | mmu-mir-144    | 11 | + | 77889200  | 77889265  |           |           |  |  |
| cluster-hsa-mir-100(3)    | ENSG00000207994 | hsa-mir-100    | 11 | - | 121528147 | 121528226 | - | Non_Genic         | ENSMUSG00000065576 | mmu-mir-100    | 9  | + | 41282494  | 41282573  |           |           |  |  |
| cluster-hsa-mir-218-2(2)  | ENSG00000207739 | hsa-mir-218-2  | 5  | - | 168127728 | 168127838 | - | Intron_Samestrand | ENSMUSG00000065583 | mmu-mir-218-2  | 11 | + |           |           | 35460238  | 35460348  |  |  |
| cluster-hsa-mir-101-1(1)  | ENSG00000199135 | hsa-mir-101-1  | 1  | - | 65296705  | 65296779  | - | Non_Genic         | ENSMUSG00000065451 | mmu-mir-101a   | 4  | - | 100844877 | 100844959 |           |           |  |  |
| cluster-hsa-mir-99a(3)    | ENSG00000207638 | hsa-mir-99a    | 21 | + | 16833279  | 16833360  | - | UTR_Samestrand    | ENSMUSG00000065530 | mmu-mir-99a    | 16 | + |           |           | 77481528  | 77481592  |  |  |
| cluster-hsa-mir-140(1)    | ENSG00000208017 | hsa-mir-140    | 16 | + | 68524484  | 68524584  | - | Intron_Samestrand | ENSMUSG00000065439 | mmu-mir-140    | 8  | + |           |           | 110440372 | 110440442 |  |  |
| cluster-hsa-mir-10a(1)    | ENSG00000207777 | hsa-mir-10a    | 17 | - | 44012199  | 44012308  | - | Non_Genic         | ENSMUSG00000065519 | mmu-mir-10a    | 11 | + | 96133255  | 96133364  |           |           |  |  |
| cluster-hsa-mir-135a-2(1) | ENSG00000207586 | hsa-mir-135a-2 | 12 | + | 96481721  | 96481820  | - | Non_Genic         | ENSMUSG00000065524 | mmu-mir-135a-2 | 10 | - | 91501885  | 91501984  |           |           |  |  |
| cluster-hsa-mir-326(1)    | ENSG00000199090 | hsa-mir-326    | 11 | - | 74723783  | 74723878  | - | Intron_Samestrand | ENSMUSG00000065571 | mmu-mir-326    | 7  | + |           |           | 99426351  | 99426446  |  |  |
| cluster-hsa-mir-339(1)    | ENSG00000199023 | hsa-mir-339    | 7  | - | 1029094   | 1029188   | - | Intron_Samestrand | ENSMUSG00000065593 | mmu-mir-339    | 5  | - |           |           | 139623291 | 139623387 |  |  |
| cluster-hsa-mir-342(1)    | ENSG00000199082 | hsa-mir-342    | 14 | + | 99645744  | 99645843  | - | Intron_Samestrand | ENSMUSG00000065436 | mmu-mir-342    | 12 | + |           |           | 109106426 | 109106525 |  |  |
| cluster-hsa-mir-9-1(1)    | ENSG00000207933 | hsa-mir-9-1    | 1  | - | 154656756 | 154656845 | - | Intron_Samestrand | ENSMUSG00000065504 | mmu-mir-9-1    | 3  | + |           |           | 88301525  | 88301613  |  |  |
| cluster-hsa-mir-143(2)    | ENSG00000208035 | hsa-mir-143    | 5  | + | 148788674 | 148788779 | - | Non_Genic         | ENSMUSG00000065445 | mmu-mir-143    | 18 | - | 61774565  | 61774627  |           |           |  |  |
| cluster-hsa-mir-592(1)    | ENSG00000207692 | hsa-mir-592    | 7  | - | 126485377 | 126485474 | - | Intron_Samestrand | ENSMUSG00000070667 | mmu-mir-592    | 6  | - |           |           | 27886664  | 27886760  |  |  |
| cluster-hsa-mir-15a(2)    | ENSG00000207718 | hsa-mir-15a    | 13 | - | 49521256  | 49521338  | - | Non_Genic         | ENSMUSG00000065459 | mmu-mir-15a    | 14 | - | 60586137  | 60586220  |           |           |  |  |
| cluster-hsa-mir-505(1)    | ENSG00000207633 | hsa-mir-505    | X  | - | 138833973 | 138834056 | - | Non_Genic         | ENSMUSG00000070081 | mmu-mir-505    | X  | - | 56741072  | 56741162  |           |           |  |  |
| cluster-hsa-mir-155(1)    | ENSG00000207795 | hsa-mir-155    | 21 | + | 25868163  | 25868227  | - | Non_Genic         | ENSMUSG00000065397 | mmu-mir-155    | 16 | + | 84596732  | 84596796  |           |           |  |  |
| cluster-hsa-mir-34b(2)    | ENSG00000207811 | hsa-mir-34b    | 11 | + | 110888873 | 110888956 | - | Non_Genic         | ENSMUSG00000065492 | mmu-mir-34b    | 9  | - | 50855792  | 50855875  |           |           |  |  |
| cluster-hsa-mir-320(1)    | ENSG00000208037 | hsa-mir-320    | 8  | - | 22158420  | 22158501  | - | Non_Genic         | ENSMUSG00000065528 | mmu-mir-320    | 14 | + | 69178590  | 69178671  |           |           |  |  |
| cluster-hsa-mir-134(37)   | ENSG00000199088 | hsa-mir-379    | 14 | + | 100558156 | 100558222 | - | Non_Genic         | ENSMUSG00000065498 | mmu-mir-379    | 12 | + | 110156867 | 110156932 |           |           |  |  |
| cluster-hsa-mir-29b-2(2)  | ENSG00000207790 | hsa-mir-29b-2  | 1  | - | 206042411 | 206042491 | - | Non_Genic         | ENSMUSG00000065412 | mmu-mir-29b-2  | 1  | + | 196737764 | 196737844 |           |           |  |  |
| cluster-hsa-mir-101-2(1)  | ENSG00000199065 | hsa-mir-101-2  | 9  | + | 4840296   | 4840375   | - | Intron_Samestrand | ENSMUSG00000065556 | mmu-mir-101b   | 19 | + |           |           | 29201275  | 29201372  |  |  |
| cluster-hsa-mir-10b(1)    | ENSG00000207744 | hsa-mir-10b    | 2  | + | 176723277 | 176723386 | - | Non_Genic         | ENSMUSG00000065500 | mmu-mir-10b    | 2  | + | 74526908  | 74526976  |           |           |  |  |
| cluster-hsa-mir-142(1)    | ENSG00000207567 | hsa-mir-142    | 17 | - | 53763592  | 53763678  | - | Non_Genic         | ENSMUSG00000065420 | mmu-mir-142    | 11 | + | 87573059  | 87573122  |           |           |  |  |
| cluster-hsa-mir-455(1)    | ENSG00000207726 | hsa-mir-455    | 9  | + | 116011534 | 116011630 | - | Intron_Samestrand | ENSMUSG00000070102 | mmu-mir-455    | 4  | + |           |           | 62743211  | 62743293  |  |  |
| cluster-hsa-mir-484(1)    | ENSG00000202641 | hsa-mir-484    | 16 | + | 15644652  | 15644730  | - | Non_Genic         | ENSMUSG00000070074 | mmu-mir-484    | 16 | + | 14073203  | 14073270  |           |           |  |  |
| cluster-hsa-mir-338(2)    | ENSG00000211563 | hsa-mir-338    | 17 | - | 76714277  | 76714344  | - | Intron_Samestrand | ENSMUSG00000065600 | mmu-mir-338    | 11 | - |           |           | 119830854 | 119830952 |  |  |
| cluster-hsa-mir-340(1)    | ENSG00000198995 | hsa-mir-340    | 5  | - | 179374908 | 179375003 | - | Intron_Samestrand | ENSMUSG00000065417 | mmu-mir-340    | 11 | + | 49913124  | 49913222  |           |           |  |  |
| cluster-hsa-mir-126(1)    | ENSG00000199161 | hsa-mir-126    | 9  | + | 138684874 | 138684959 | - | Intron_Samestrand | ENSMUSG00000065540 | mmu-mir-126    | 2  | + | 26413365  | 26413438  |           |           |  |  |
| cluster-hsa-mir-490(1)    | ENSG00000207597 | hsa-mir-490    | 7  | + | 136238453 | 136238581 | - | UTR_Samestrand    | ENSMUSG00000070075 | mmu-mir-490    | 6  | + | 36351894  | 36351977  |           |           |  |  |
| cluster-hsa-mir-200a(3)   | ENSG00000207730 | hsa-mir-200b   | 1  | + | 1092347   | 1092441   | - | Non_Genic         | ENSMUSG00000065549 | mmu-mir-200b   | 4  | - | 154899480 | 154899550 |           |           |  |  |
| cluster-hsa-mir-216a(3)   | ENSG00000207548 | hsa-mir-217    | 2  | - | 56063606  | 56063715  | - | Non_Genic         | ENSMUSG00000065415 | mmu-mir-217    | 11 | + | 28663728  | 28663835  |           |           |  |  |
| cluster-hsa-mir-211(1)    | ENSG00000207702 | hsa-mir-211    | 15 | - | 29144526  | 29144636  | - | Intron_Samestrand | ENSMUSG00000065585 | mmu-mir-211    | 7  | + | 64084755  | 64084861  |           |           |  |  |
| cluster-hsa-mir-208(2)    | ENSG00000199157 | hsa-mir-208    | 14 | - | 22927644  | 22927715  | - | Intron_Samestrand | ENSMUSG00000065432 | mmu-mir-208    | 14 | - | 53903268  | 53903351  |           |           |  |  |
| cluster-hsa-mir-186(1)    | ENSG00000207721 | hsa-mir-186    | 1  | - | 71305901  | 71305987  | - | Intron_Samestrand | ENSMUSG00000065431 | mmu-mir-186    | 3  | + | 157479571 | 157479642 |           |           |  |  |
| cluster-hsa-mir-331(1)    | ENSG00000199172 | hsa-mir-331    | 12 | + | 94226327  | 94226420  | - | Non_Genic         | ENSMUSG00000065607 | mmu-mir-331    | 10 | - | 93393567  | 93393662  |           |           |  |  |
| cluster-hsa-mir-138-2(1)  | ENSG00000207649 | hsa-mir-138-2  | 16 | + | 55449931  | 55450014  | - | Non_Genic         | ENSMUSG00000065512 | mmu-mir-138-2  | 8  | + | 97213440  | 97213510  |           |           |  |  |
| cluster-hsa-mir-196a-1(1) | ENSG00000210741 | hsa-mir-196a-1 | 17 | - | 44064851  | 44064920  | - | Non_Genic         | ENSMUSG00000065546 | mmu-mir-196a-1 | 11 | + | 96081254  | 96081355  |           |           |  |  |
| cluster-hsa-mir-129-2(1)  | ENSG00000199077 | hsa-mir-129-2  | 11 | + | 43559520  | 43559609  | - | Non_Genic         | ENSMUSG00000065511 | mmu-mir-129-2  | 2  | - | 94042203  | 94042292  |           |           |  |  |
| cluster-hsa-mir-449a(2)   | ENSG00000207728 | hsa-mir-449b   | 5  | - | 54502230  | 54502327  | - | Intron_Samestrand | ENSMUSG00000076146 | mmu-mir-449b   | 13 | + |           |           | 114156861 | 114156969 |  |  |
| cluster-hsa-mir-99b(3)    | ENSG00000207550 | hsa-mir-99b    | 19 | + | 56887677  | 56887746  | - | Non_Genic         | ENSMUSG00000065396 | mmu-mir-99b    | 17 | + | 17534806  | 17534875  |           |           |  |  |
| cluster-hsa-mir-28(1)     | ENSG00000207651 | hsa-mir-28     | 3  | + | 189889262 | 189889348 | - | Intron_Samestrand | ENSMUSG00000065494 | mmu-mir-28     | 16 | + | 24743203  | 24743289  |           |           |  |  |
| cluster-hsa-mir-205(1)    | ENSG00000207623 | hsa-mir-205    | 1  | + | 207672100 | 207672210 | - | UTR_Samestrand    | ENSMUSG00000065533 | mmu-mir-205    | 1  | + | 195208187 | 195208254 |           |           |  |  |
| cluster-hsa-mir-199a-1(1) | ENSG00000207752 | hsa-mir-199a-1 | 19 | - | 10789101  | 10789172  | - | UTR_Oppstrand     | ENSMUSG00000065547 | mmu-mir-199a-1 | 9  | - | 21246896  | 21246966  |           |           |  |  |
| cluster-hsa-mir-551b(1)   | ENSG00000207717 | hsa-mir-551b   | 3  | + | 169752336 | 169752431 | - | Non_Genic         | ENSMUSG00000076120 | mmu-mir-551b   | 3  | + | 29607895  | 29607993  |           |           |  |  |
| cluster-hsa-mir-423(1)    | ENSG00000199071 | hsa-mir-423    | 17 | + | 25468222  | 25468316  | - | Intron_Samestrand | ENSMUSG00000065518 | mmu-mir-423    | 11 | - |           |           | 76894259  | 76894367  |  |  |
| cluster-hsa-mir-193a(2)   | ENSG00000207614 | hsa-mir-193a   | 17 | + | 26911128  | 26911215  | - | Non_Genic         | ENSMUSG00000065395 | mmu-mir-193    | 11 | + | 79528164  | 79528229  |           |           |  |  |
| cluster-hsa-mir-223(1)    | ENSG00000207939 | hsa-mir-223    | X  | + | 65155437  | 65155546  | - | Non_Genic         | ENSMUSG00000076066 | mmu-mir-223    | X  | + | 92445535  | 92445645  |           |           |  |  |
| cluster-hsa-mir-219-1(1)  | ENSG00000199036 | hsa-mir-219-1  | 6  | + | 33283590  | 33283699  | - | Non_Genic         | ENSMUSG00000065555 | mmu-mir-219-1  | 17 | - | 33635437  | 33635546  |           |           |  |  |
| cluster-hsa-mir-194-1(2)  | ENSG00000207624 | hsa-mir-194-1  | 1  | - | 218358121 | 218358206 | - | Intron_Oppstrand  | ENSMUSG00000065581 | mmu-mir-194-1  | 1  | + |           |           | 187014106 | 187014173 |  |  |
| cluster-hsa-mir-345(1)    | ENSG00000198984 | hsa-mir-345    | 14 | + | 99843949  | 99844046  | - | Non_Genic         | ENSMUSG00000065429 | mmu-mir-345    | 12 | + | 109284780 | 109284875 |           |           |  |  |
| cluster-hsa-mir-130b(2)   | ENSG00000207751 | hsa-mir-130b   | 22 | + | 20337593  | 20337674  | - | Non_Genic         | ENSMUSG00000065572 | mmu-mir-130b   | 16 | - | 17037623  | 17037705  |           |           |  |  |
| cluster-hsa-mir-193b(2)   | ENSG00000199130 | hsa-mir-365-1  | 16 | + | 14310643  | 14310729  | - | Non_Genic         | ENSMUSG00000065449 | mmu-mir-365-1  | 16 | + | 13367418  | 13367504  |           |           |  |  |
| cluster-hsa-mir-483(1)    | ENSG00000207805 | hsa-mir-483    | 11 | - | 2111939   | 2112015   | - | Intron_Samestrand | ENSMUSG00000070140 | mmu-mir-483    | 7  | - |           |           | 142464313 | 142464386 |  |  |
| cluster-hsa-mir-302a(5)   | ENSG00000199058 | hsa-mir-302b   | 4  | - | 113789089 | 113789162 | - | UTR_Oppstrand     | ENSMUSG00000076252 | mmu-mir-302b   | 3  | + | 127537250 | 127537323 |           |           |  |  |
| cluster-hsa-mir-204(1)    | ENSG00000207935 | hsa-mir-204    | 9  | - | 72614710  | 72614820  | - | Intron_Samestrand | ENSMUSG00000065507 | mmu-mir-204    | 19 | + | 22817701  | 22817769  |           |           |  |  |
| cluster-hsa-mir-488(1)    | ENSG00000202609 | hsa-mir-488    | 1  | - | 175265121 | 175265204 | - | Intron_Samestrand | ENSMUSG00000070103 | mmu-mir-488    | 1  | + | 160342301 | 160342410 |           |           |  |  |
| cluster-hsa-mir-499(1)    | ENSG00000207635 | hsa-mir-499    | 20 | + | 33041839  | 33041961  | - | Intron_Samestrand | ENSMUSG00000076312 | mmu-mir-499    | 2  | + | 155314320 | 155314399 |           |           |  |  |
| cluster-hsa-mir-149(1)    | ENSG00000207611 | hsa-mir-149    | 2  | + | 241044090 | 241044179 | - | Intron_Samestrand | ENSMUS             |                |    |   |           |           |           |           |  |  |

|                           |                  |                |    |   |           |           |   |                 |                    |                    |                |    |           |           |           |
|---------------------------|------------------|----------------|----|---|-----------|-----------|---|-----------------|--------------------|--------------------|----------------|----|-----------|-----------|-----------|
| cluster-hsa-mir-346(1)    | ENSG00000199104  | hsa-mir-346    | 10 | - | 88014430  | 88014525  | - | ENSG00000182771 | Intron Samestrand  | ENSMUSG00000065481 | mmu-mir-346    | 14 | +         | 33723700  | 33723798  |
| cluster-hsa-mir-328(1)    | ENSG000000207948 | hsa-mir-328    | 16 | - | 65793724  | 65793799  | - | ENSG00000102890 | Intron Oppstrand   | ENSMUSG00000070130 | mmu-mir-328    | 8  | -         | 108197492 | 108197589 |
| cluster-hsa-mir-151(1)    | ENSG000000207792 | hsa-mir-151    | 8  | - | 141811844 | 141811934 | - | ENSG00000169398 | Intron Samestrand  | ENSMUSG00000065612 | mmu-mir-151    | 15 | -         | 73082070  | 73082138  |
| cluster-hsa-mir-671(1)    | ENSG000000211517 | hsa-mir-671    | 7  | + | 150566439 | 150566557 | - | ENSG00000033100 | Intron Samestrand  | ENSMUSG00000076387 | mmu-mir-671    | 5  | +         | 24102178  | 24102276  |
| cluster-hsa-mir-491(1)    | ENSG000000207609 | hsa-mir-491    | 9  | + | 20706103  | 20706187  | - | ENSG00000188352 | Intron Samestrand  | ENSMUSG00000070077 | mmu-mir-491    | 4  | +         | 87593270  | 87593356  |
| cluster-hsa-mir-192(2)    | ENSG000000207596 | hsa-mir-194-2  | 11 | - | 64415403  | 64415487  | - | Non_Genic       | ENSMUSG00000065582 | mmu-mir-194-2      | 19             | +  | 6264643   | 6264728   |           |
| cluster-hsa-mir-181c(2)   | ENSG000000207585 | hsa-mir-181d   | 19 | + | 13846689  | 13846825  | - | Non_Genic       | ENSMUSG00000076338 | mmu-mir-181d       | 8              | -  | 87068821  | 87068892  |           |
| cluster-hsa-mir-378(1)    | ENSG00000199047  | hsa-mir-378    | 5  | + | 149092580 | 149092646 | - | ENSG00000155846 | Intron Samestrand  | ENSMUSG00000065535 | mmu-mir-378    | 18 | -         | 61523203  | 61523269  |
| cluster-hsa-mir-199b(1)   | ENSG000000207581 | hsa-mir-199b   | 9  | - | 130046820 | 130046930 | - | ENSG00000106976 | Intron Oppstrand   | ENSMUSG00000065554 | mmu-mir-199b   | 2  | +         | 32140468  | 32140578  |
| cluster-hsa-mir-325(2)    | ENSG000000207995 | hsa-mir-325    | X  | - | 76142220  | 76142317  | - | Non_Genic       | ENSMUSG00000065425 | mmu-mir-325        | X              | -  | 101581801 | 101581898 |           |
| cluster-hsa-mir-30b(2)    | ENSG00000199153  | hsa-mir-30d    | 8  | - | 135886301 | 135886370 | - | Non_Genic       | ENSMUSG00000065437 | mmu-mir-30d        | 15             | -  | 68170877  | 68170958  |           |
| cluster-hsa-let-7a-1(3)   | ENSG00000199165  | hsa-let-7a-1   | 9  | + | 95978060  | 95978139  | - | Non_Genic       | ENSMUSG00000065421 | mmu-let-7a-1       | 13             | -  | 48550116  | 48550209  |           |
| cluster-hsa-mir-32(1)     | ENSG000000207698 | hsa-mir-32     | 9  | - | 110848329 | 110848399 | - | ENSG00000106771 | Intron Samestrand  | ENSMUSG00000065544 | mmu-mir-32     | 4  | -         | 56989283  | 56989352  |
| cluster-hsa-mir-26b(1)    | ENSG00000199121  | hsa-mir-26b    | 2  | + | 218975612 | 218975689 | - | ENSG00000144579 | Intron Samestrand  | ENSMUSG00000065468 | mmu-mir-26b    | 1  | +         | 74327516  | 74327601  |
| cluster-hsa-mir-335(1)    | ENSG00000199043  | hsa-mir-335    | 7  | + | 129923187 | 129923281 | - | ENSG00000106484 | Intron Samestrand  | ENSMUSG00000065501 | mmu-mir-335    | 6  | +         | 30691308  | 30691406  |
| cluster-hsa-mir-129-1(1)  | ENSG000000207705 | hsa-mir-129-1  | 7  | + | 127635161 | 127635232 | - | Non_Genic       | ENSMUSG00000065469 | mmu-mir-129-1      | 6              | +  | 28972629  | 28972701  |           |
| cluster-hsa-mir-184(1)    | ENSG000000207695 | hsa-mir-184    | 15 | + | 77289185  | 77289268  | - | Non_Genic       | ENSMUSG00000065596 | mmu-mir-184        | 9              | -  | 89600153  | 89600221  |           |
| cluster-hsa-mir-34a(1)    | ENSG000000207865 | hsa-mir-34a    | 1  | - | 9134423   | 9134423   | - | Non_Genic       | ENSMUSG00000065493 | mmu-mir-34a        | 4              | +  | 148912254 | 148912355 |           |
| cluster-hsa-mir-1-1(2)    | ENSG00000199017  | hsa-mir-1-1    | 20 | + | 60561957  | 60562028  | - | ENSG00000174407 | Intron Samestrand  | ENSMUSG00000070144 | mmu-mir-1-1    | 2  | +         | 180318456 | 180318532 |
| cluster-hsa-mir-135b(1)   | ENSG00000199059  | hsa-mir-135b   | 1  | - | 203684052 | 203684149 | - | ENSG00000186007 | UTR Samestrand     | ENSMUSG00000065435 | mmu-mir-135b   | 1  | +         | 134025634 | 134025730 |
| cluster-hsa-mir-7-3(1)    | ENSG000000207630 | hsa-mir-7-3    | 19 | + | 4721681   | 4721791   | - | ENSG00000176840 | Intron Samestrand  | ENSMUSG00000065491 | mmu-mir-7b     | 17 | +         | 55876697  | 55876807  |
| cluster-hsa-mir-152(1)    | ENSG000000207947 | hsa-mir-152    | 17 | - | 43469525  | 43469612  | - | ENSG00000005243 | Intron Samestrand  | ENSMUSG00000065515 | mmu-mir-152    | 11 | +         | 96666482  | 96666555  |
| cluster-hsa-mir-9-3(1)    | ENSG000000207819 | hsa-mir-9-3    | 15 | + | 87712252  | 87712341  | - | Non_Genic       | ENSMUSG00000065545 | mmu-mir-9-3        | 7              | +  | 79378777  | 79378866  |           |
| cluster-hsa-mir-96(3)     | ENSG000000207691 | hsa-mir-183    | 7  | - | 129201981 | 129202090 | - | Non_Genic       | ENSMUSG00000065619 | mmu-mir-183        | 6              | -  | 30119678  | 30119747  |           |
| cluster-hsa-mir-375(1)    | ENSG00000198973  | hsa-mir-375    | 2  | - | 219574611 | 219574674 | - | Non_Genic       | ENSMUSG00000065616 | mmu-mir-375        | 1              | -  | 74833865  | 74833928  |           |
| cluster-hsa-mir-141(2)    | ENSG000000207713 | hsa-mir-200c   | 12 | + | 6943123   | 6943190   | - | Non_Genic       | ENSMUSG00000065462 | mmu-mir-200c       | 6              | -  | 124683941 | 124684009 |           |
| cluster-hsa-mir-802(1)    | ENSG00000211590  | hsa-mir-802    | 21 | + | 36014883  | 36014976  | - | Non_Genic       | ENSMUSG00000076457 | mmu-mir-802        | 16             | +  | 93258260  | 93258356  |           |
| cluster-hsa-mir-15b(2)    | ENSG00000198987  | hsa-mir-16-2   | 3  | + | 161605226 | 161605307 | - | ENSG00000113810 | Intron Samestrand  | ENSMUSG00000065606 | mmu-mir-16-2   | 3  | +         | 69097830  | 69097925  |
| cluster-hsa-mir-148b(1)   | ENSG00000199122  | hsa-mir-148b   | 12 | + | 53017266  | 53017365  | - | ENSG00000111481 | Intron Samestrand  | ENSMUSG00000065560 | mmu-mir-148b   | 15 | +         | 103113158 | 103113255 |
| cluster-hsa-mir-330(1)    | ENSG00000199066  | hsa-mir-330    | 19 | - | 50834091  | 50834185  | - | ENSG00000125746 | Intron Samestrand  | ENSMUSG00000065543 | mmu-mir-330    | 7  | +         | 18339986  | 18340084  |
| cluster-hsa-mir-133b(2)   | ENSG000000207604 | hsa-mir-206    | 6  | + | 52117106  | 52117191  | - | Non_Genic       | ENSMUSG00000065559 | mmu-mir-206        | 1              | +  | 20664161  | 20664233  |           |
| cluster-hsa-mir-26a-2(1)  | ENSG000000207789 | hsa-mir-26a-2  | 12 | - | 56504658  | 56504742  | - | ENSG00000175215 | Intron Samestrand  | ENSMUSG00000065430 | mmu-mir-26a-2  | 10 | +         | 126398479 | 126398562 |
| cluster-hsa-mir-23a(3)    | ENSG000000207980 | hsa-mir-23a    | 19 | - | 13808401  | 13808473  | - | Non_Genic       | ENSMUSG00000065611 | mmu-mir-23a        | 8              | +  | 87098623  | 87098697  |           |
| cluster-hsa-mir-221(2)    | ENSG000000207725 | hsa-mir-222    | X  | - | 45491365  | 45491474  | - | Non_Genic       | ENSMUSG00000065471 | mmu-mir-222        | X              | -  | 18303852  | 18303930  |           |
| cluster-hsa-mir-146b(1)   | ENSG000000202569 | hsa-mir-146b   | 10 | + | 104186259 | 104186331 | - | Non_Genic       | ENSMUSG00000070127 | mmu-mir-146b       | 19             | +  | 46396073  | 46396181  |           |
| cluster-hsa-mir-103-2(1)  | ENSG00000199024  | hsa-mir-103-2  | 20 | + | 3846140   | 3846218   | - | ENSG00000125779 | Intron Samestrand  | ENSMUSG00000065563 | mmu-mir-103-2  | 2  | +         | 130979492 | 130979578 |
| cluster-hsa-mir-130a(1)   | ENSG000000208009 | hsa-mir-130a   | 11 | + | 57165247  | 57165335  | - | Non_Genic       | ENSMUSG00000065484 | mmu-mir-130a       | 2              | -  | 84541954  | 84542017  |           |
| cluster-hsa-mir-210(1)    | ENSG00000199038  | hsa-mir-210    | 11 | - | 558089    | 558198    | - | Non_Genic       | ENSMUSG00000065551 | mmu-mir-210        | 7              | -  | 141072704 | 141072813 |           |
| cluster-hsa-mir-18b(6)    | ENSG000000207602 | hsa-mir-106a   | X  | - | 133131894 | 133131974 | - | Non_Genic       | ENSMUSG00000065456 | mmu-mir-106a       | X              | -  | 48987130  | 48987194  |           |
| cluster-hsa-mir-30a(2)    | ENSG000000207827 | hsa-mir-30a    | 6  | - | 72169975  | 72170045  | - | Non_Genic       | ENSMUSG00000065405 | mmu-mir-30a        | 1              | +  | 23226544  | 23226614  |           |
| cluster-hsa-let-7a-3(2)   | ENSG00000198986  | hsa-let-7a-3   | 22 | + | 44887293  | 44887366  | - | Non_Genic       | ENSMUSG00000065608 | mmu-let-7c-2       | 15             | +  | 85534369  | 85534463  |           |
| cluster-hsa-mir-17(6)     | ENSG000000207745 | hsa-mir-17     | 13 | + | 90800860  | 90800943  | - | Non_Genic       | ENSMUSG00000065508 | mmu-mir-17         | 14             | +  | 113925508 | 113925591 |           |
| cluster-hsa-mir-489(2)    | ENSG000000207656 | hsa-mir-489    | 7  | - | 92951183  | 92951267  | - | ENSG0000004948  | Intron Samestrand  | ENSMUSG00000070107 | mmu-mir-489    | 6  | -         | 3671896   | 3672003   |
| cluster-hsa-mir-132(2)    | ENSG000000207953 | hsa-mir-212    | 17 | - | 1900315   | 1900424   | - | Non_Genic       | ENSMUSG00000065590 | mmu-mir-212        | 11             | +  | 74989583  | 74989673  |           |
| cluster-hsa-mir-21(1)     | ENSG00000199004  | hsa-mir-21     | 17 | + | 55273409  | 55273480  | - | Non_Genic       | ENSMUSG00000065455 | mmu-mir-21         | 11             | -  | 86400261  | 86400353  |           |
| cluster-hsa-mir-324(1)    | ENSG00000199053  | hsa-mir-324    | 17 | - | 7067339   | 7067422   | - | ENSG00000072778 | Intron Oppstrand   | ENSMUSG00000065534 | mmu-mir-324    | 11 | +         | 69828237  | 69828326  |
| cluster-hsa-mir-138-1(1)  | ENSG000000207954 | hsa-mir-138-1  | 3  | + | 44130708  | 44130806  | - | Non_Genic       | ENSMUSG00000065414 | mmu-mir-138-1      | 9              | +  | 122531574 | 122531672 |           |
| cluster-hsa-mir-219-2(1)  | ENSG000000207955 | hsa-mir-219-2  | 9  | - | 130194718 | 130194814 | - | Non_Genic       | ENSMUSG00000065485 | mmu-mir-219-2      | 2              | -  | 29667640  | 29667736  |           |
| cluster-hsa-mir-195(2)    | ENSG000000207791 | hsa-mir-497    | 17 | - | 6861954   | 6862065   | - | Non_Genic       | ENSMUSG00000070109 | mmu-mir-497        | 11             | +  | 70050912  | 70050995  |           |
| cluster-hsa-mir-203(1)    | ENSG000000207568 | hsa-mir-203    | 14 | + | 103653495 | 103653604 | - | Non_Genic       | ENSMUSG00000065574 | mmu-mir-203        | 12             | +  | 112578688 | 112578763 |           |
| cluster-hsa-mir-199a-2(2) | ENSG00000208024  | hsa-mir-199a-2 | 1  | - | 170380297 | 170380407 | - | ENSG00000197959 | Intron Oppstrand   | ENSMUSG00000070126 | mmu-mir-199a-2 | 1  | +         | 164054490 | 164054600 |
| cluster-hsa-mir-127(10)   | ENSG00000211574  | hsa-mir-770    | 14 | + | 100388479 | 100388577 | - | ENSG00000186316 | UTR Samestrand     | ENSMUSG00000076451 | mmu-mir-770    | 12 | +         | 110011499 | 110011592 |
| cluster-hsa-mir-202(1)    | ENSG00000199089  | hsa-mir-202    | 10 | - | 134911006 | 134911115 | - | Non_Genic       | ENSMUSG00000065502 | mmu-mir-202        | 7              | -  | 139809009 | 139809080 |           |

# section for mouse pre-miRNA

|                          |                    |               |    |   |           |           |   |                    |                   |                    |               |    |           |           |          |
|--------------------------|--------------------|---------------|----|---|-----------|-----------|---|--------------------|-------------------|--------------------|---------------|----|-----------|-----------|----------|
| cluster-mmu-mir-322(7)   | ENSMUSG00000076122 | mmu-mir-503   | X  | - | 49298611  | 49298681  | - | Non_Genic          | ENSG00000208005   | hsa-mir-503        | X             | -  | 133508024 | 133508094 |          |
| cluster-mmu-mir-10a(1)   | ENSMUSG00000065519 | mmu-mir-10a   | 11 | + | 96133255  | 96133364  | - | Non_Genic          | ENSG00000207777   | hsa-mir-10a        | 17            | -  | 44012199  | 44012308  |          |
| cluster-mmu-mir-205(1)   | ENSMUSG00000065533 | mmu-mir-205   | 1  | - | 195208187 | 195208254 | - | Non_Genic          | ENSG00000207623   | hsa-mir-205        | 1             | +  | 207672100 | 207672210 |          |
| cluster-mmu-mir-130b(2)  | ENSMUSG00000065572 | mmu-mir-130b  | 16 | - | 17037623  | 17037705  | - | ENSMUSG00000049916 | UTR Samestrand    | ENSMUSG00000207751 | hsa-mir-130b  | 22 | +         | 20337593  | 20337674 |
| cluster-mmu-mir-331(1)   | ENSMUSG00000065607 | mmu-mir-331   | 10 | - | 93393567  | 93393662  | - | Non_Genic          | ENSG00000199172   | hsa-mir-331        | 12            | +  | 94226327  | 94226420  |          |
| cluster-mmu-mir-103-2(1) | ENSMUSG00000065563 | mmu-mir-103-2 | 2  | + | 130979492 | 130979578 | - | ENSMUSG00000037514 | Intron Samestrand | ENSMUSG0000199024  | hsa-mir-103-2 | 20 | +         | 3846140   | 3846218  |
| cluster-mmu-mir-155(1)   | ENSMUSG00000065397 | mmu-mir-155   | 16 | + | 84596732  | 84596796  | - | Non_Genic          | ENSG00000207795   | hsa-mir-155        | 21            | +  | 25868163  | 25868227  |          |
| cluster-mmu-mir-202(1)   | ENSMUSG00000065502 | mmu-mir-202   | 7  | - | 139809009 | 139809080 | - | Non_Genic          | ENSG00000199089   | hsa-mir-202        | 10            | -  | 134911006 | 134911115 |          |
| cluster-mmu-mir-10b(1)   | ENSMUSG            |               |    |   |           |           |   |                    |                   |                    |               |    |           |           |          |

|                            |                    |                |    |          |           |           |   |   |                    |                   |                 |                |    |           |           |           |           |           |
|----------------------------|--------------------|----------------|----|----------|-----------|-----------|---|---|--------------------|-------------------|-----------------|----------------|----|-----------|-----------|-----------|-----------|-----------|
| cluster-mmu-mir-490 (1)    | ENSMUSG00000070075 | mmu-mir-490    | 6  | +        | 36351894  | 36351977  | - | - | Non_Genic          | ENSG00000207597   | hsa-mir-490     | 7              | +  | 136238453 | 136238581 |           |           |           |
| cluster-mmu-mir-23a (3)    | ENSMUSG00000065611 | mmu-mir-23a    | 8  | +        | 87098623  | 87098697  | - | - | Non_Genic          | ENSG00000207980   | hsa-mir-23a     | 19             | -  | 13808401  | 13808473  |           |           |           |
| cluster-mmu-mir-592 (1)    | ENSMUSG00000076067 | mmu-mir-592    | 6  | -        | 27886664  | 27886760  | - | - | ENSMUSG0000024211  | Intron Samestrand | ENSG00000207692 | hsa-mir-592    | 7  | -         | 13808401  | 13808473  | 126485377 | 126485474 |
| cluster-mmu-mir-144 (2)    | ENSMUSG00000065401 | mmu-mir-144    | 11 | +        | 77889200  | 77889265  | - | - | Non_Genic          | ENSG00000207618   | hsa-mir-144     | 17             | -  | 24212677  | 24212762  |           |           |           |
| cluster-mmu-mir-181c (2)   | ENSMUSG00000076338 | mmu-mir-181d   | 8  | -        | 87068821  | 87068892  | - | - | Non_Genic          | ENSG00000207585   | hsa-mir-181d    | 19             | +  | 13846689  | 13846825  |           |           |           |
| cluster-mmu-mir-488 (1)    | ENSMUSG00000070103 | mmu-mir-488    | 1  | +        | 160342301 | 160342410 | - | - | ENSMUSG0000026587  | Intron Samestrand | ENSG00000202609 | hsa-mir-488    | 1  | -         | -         | -         | 175265121 | 175265204 |
| cluster-mmu-mir-302a (5)   | ENSMUSG00000076252 | mmu-mir-302b   | 3  | +        | 127537250 | 127537323 | - | - | Non_Genic          | ENSG00000199058   | hsa-mir-302b    | 4              | -  | 113789089 | 113789162 |           |           |           |
| cluster-mmu-mir-28 (1)     | ENSMUSG00000065494 | mmu-mir-28     | 16 | +        | 24743203  | 24743289  | - | - | ENSMUSG0000033306  | Intron Samestrand | ENSG00000207651 | hsa-mir-28     | 3  | +         | -         | -         | 189889262 | 189889348 |
| cluster-mmu-mir-149 (1)    | ENSMUSG00000065470 | mmu-mir-149    | +  | 94680783 | 94680849  | 1         | - | - | ENSMUSG0000034220  | Intron Samestrand | ENSG00000207611 | hsa-mir-149    | 2  | +         | -         | -         | 241044090 | 241044179 |
| cluster-mmu-mir-152 (1)    | ENSMUSG00000065515 | mmu-mir-152    | 11 | +        | 96666482  | 96666555  | - | - | ENSMUSG0000018672  | Intron Samestrand | ENSG00000207947 | hsa-mir-152    | 17 | -         | -         | -         | 43469525  | 43469612  |
| cluster-mmu-mir-296 (2)    | ENSMUSG00000065521 | mmu-mir-296    | 2  | -        | 173909986 | 173910064 | - | - | Non_Genic          | ENSG00000207950   | hsa-mir-296     | 20             | -  | 56826065  | 56826144  |           |           |           |
| cluster-mmu-mir-449a (2)   | ENSMUSG00000076146 | mmu-mir-449b   | 13 | +        | 114156861 | 114156969 | - | - | Non_Genic          | ENSG00000207728   | hsa-mir-449b    | 5              | -  | 54502230  | 54502327  |           |           |           |
| cluster-mmu-mir-499 (1)    | ENSMUSG00000076312 | mmu-mir-499    | 2  | +        | 155314320 | 155314399 | - | - | ENSMUSG00000074652 | Intron Samestrand | ENSG00000207635 | hsa-mir-499    | 20 | +         | -         | -         | 33041839  | 33041961  |
| cluster-mmu-mir-375 (1)    | ENSMUSG00000065616 | mmu-mir-375    | 1  | -        | 74833865  | 74833928  | - | - | Non_Genic          | ENSG00000198973   | hsa-mir-375     | 2              | -  | 219574611 | 219574674 |           |           |           |
| cluster-mmu-mir-218-1 (1)  | ENSMUSG00000065603 | mmu-mir-218-1  | 5  | +        | 48512189  | 48512299  | - | - | ENSMUSG0000031558  | Intron Samestrand | ENSG00000207732 | hsa-mir-218-1  | 4  | +         | -         | -         | 20138995  | 20139105  |
| cluster-mmu-mir-15a (2)    | ENSMUSG00000065459 | mmu-mir-15a    | 14 | -        | 60586137  | 60586220  | - | - | Non_Genic          | ENSG00000207718   | hsa-mir-15a     | 13             | -  | 49521256  | 49521338  |           |           |           |
| cluster-mmu-mir-99b (3)    | ENSMUSG00000065396 | mmu-mir-99b    | 17 | +        | 17534806  | 17534875  | - | - | Non_Genic          | ENSG00000207550   | hsa-mir-99b     | 19             | +  | 56887677  | 56887746  |           |           |           |
| cluster-mmu-mir-219-2 (1)  | ENSMUSG00000065485 | mmu-mir-219-2  | 2  | -        | 29667640  | 29667736  | - | - | Non_Genic          | ENSG00000207955   | hsa-mir-219-2   | 9              | -  | 130194718 | 130194814 |           |           |           |
| cluster-mmu-mir-191 (2)    | ENSMUSG00000065579 | mmu-mir-425    | 9  | +        | 108426880 | 108426964 | - | - | Non_Genic          | ENSG00000199032   | hsa-mir-425     | 3              | -  | 49032584  | 49032671  |           |           |           |
| cluster-mmu-mir-21 (1)     | ENSMUSG00000065455 | mmu-mir-21     | 11 | -        | 86400261  | 86400353  | - | - | ENSMUSG00000018171 | UTR Samestrand    | ENSG00000199004 | hsa-mir-21     | 17 | +         | -         | -         | 55273409  | 55273480  |
| cluster-mmu-mir-802 (1)    | ENSMUSG00000076457 | mmu-mir-802    | 16 | +        | 93258260  | 93258356  | - | - | Non_Genic          | ENSG00000211590   | hsa-mir-802     | 21             | +  | 36014883  | 36014976  |           |           |           |
| cluster-mmu-mir-9-1 (1)    | ENSMUSG00000065504 | mmu-mir-9-1    | 3  | +        | 88301525  | 88301613  | - | - | Non_Genic          | ENSG00000207933   | hsa-mir-9-1     | 1              | -  | 154656756 | 154656845 |           |           |           |
| cluster-mmu-mir-148a (1)   | ENSMUSG00000065505 | mmu-mir-148a   | 6  | -        | 51199398  | 51199496  | - | - | Non_Genic          | ENSG00000199085   | hsa-mir-148a    | 7              | -  | 25956064  | 25956131  |           |           |           |
| cluster-mmu-mir-18b (6)    | ENSMUSG00000065456 | mmu-mir-106a   | X  | -        | 48987130  | 48987194  | - | - | Non_Genic          | ENSG00000207602   | hsa-mir-106a    | X              | -  | -         | -         | 133131894 | 133131974 |           |
| cluster-mmu-mir-199b (1)   | ENSMUSG00000065554 | mmu-mir-199b   | 2  | +        | 32140468  | 32140578  | - | - | ENSMUSG00000026825 | Intron Oppstrand  | ENSG00000207581 | hsa-mir-199b   | 9  | -         | -         | -         | 130046820 | 130046930 |
| cluster-mmu-mir-335 (1)    | ENSMUSG00000065501 | mmu-mir-335    | 6  | +        | 30691308  | 30691406  | - | - | ENSMUSG00000051855 | Intron Samestrand | ENSG00000199043 | hsa-mir-335    | 7  | +         | -         | -         | 129923187 | 129923281 |
| cluster-mmu-mir-345 (1)    | ENSMUSG00000065429 | mmu-mir-345    | 12 | +        | 109284780 | 109284875 | - | - | Non_Genic          | ENSG00000198984   | hsa-mir-345     | 14             | +  | 99843949  | 99844046  |           |           |           |
| cluster-mmu-mir-30c-1 (2)  | ENSMUSG00000065409 | mmu-mir-30e    | 4  | -        | 120270240 | 120270332 | - | - | ENSMUSG00000032897 | Intron Samestrand | ENSG00000198974 | hsa-mir-30e    | 1  | +         | -         | -         | 40992613  | 40992705  |
| cluster-mmu-mir-378 (1)    | ENSMUSG00000065323 | mmu-mir-378    | 18 | -        | 61523203  | 61523269  | - | - | ENSMUSG00000033871 | Intron Samestrand | ENSG00000199047 | hsa-mir-378    | 5  | +         | -         | -         | 149092580 | 149092646 |
| cluster-mmu-mir-99a (3)    | ENSMUSG00000065530 | mmu-mir-99a    | 16 | +        | 77481528  | 77481592  | - | - | Non_Genic          | ENSG00000207638   | hsa-mir-99a     | 21             | +  | 16833279  | 16833360  |           |           |           |
| cluster-mmu-mir-148b (1)   | ENSMUSG00000065560 | mmu-mir-148b   | 15 | +        | 103113158 | 103113255 | - | - | ENSMUSG00000060992 | Intron Samestrand | ENSG00000199122 | hsa-mir-148b   | 12 | +         | -         | -         | 53017266  | 53017365  |
| cluster-mmu-mir-101b (1)   | ENSMUSG00000065556 | mmu-mir-101b   | 19 | +        | 29201275  | 29201372  | - | - | ENSMUSG00000024785 | Intron Samestrand | ENSG00000199065 | hsa-mir-101-2  | 9  | +         | -         | -         | 4840296   | 4840375   |
| cluster-mmu-mir-219-1 (1)  | ENSMUSG00000065555 | mmu-mir-219-1  | 17 | -        | 33635437  | 33635546  | - | - | Non_Genic          | ENSG00000199036   | hsa-mir-219-1   | 6              | +  | 33283590  | 33283699  |           |           |           |
| cluster-mmu-mir-15b (2)    | ENSMUSG00000065606 | mmu-mir-16-2   | 3  | +        | 69097830  | 69097925  | - | - | ENSMUSG00000034349 | Intron Samestrand | ENSG00000198987 | hsa-mir-16-2   | 3  | +         | -         | -         | 161605226 | 161605307 |
| cluster-mmu-mir-143 (2)    | ENSMUSG00000065445 | mmu-mir-143    | 18 | -        | 61774565  | 61774627  | - | - | Non_Genic          | ENSG00000208035   | hsa-mir-143     | 5              | +  | 148788674 | 148788779 |           |           |           |
| cluster-mmu-mir-31 (1)     | ENSMUSG00000065408 | mmu-mir-31     | 4  | -        | 88381788  | 88381893  | - | - | Non_Genic          | ENSG00000199177   | hsa-mir-31      | 9              | -  | 21502114  | 21502184  |           |           |           |
| cluster-mmu-mir-138-2 (1)  | ENSMUSG00000065510 | mmu-mir-138-2  | 8  | +        | 97213440  | 97213510  | - | - | Non_Genic          | ENSG00000207649   | hsa-mir-138-2   | 16             | +  | 55449931  | 55450014  |           |           |           |
| cluster-mmu-mir-126 (1)    | ENSMUSG00000065540 | mmu-mir-126    | 2  | +        | 26413365  | 26413438  | - | - | ENSMUSG00000026921 | Intron Samestrand | ENSG00000199161 | hsa-mir-126    | 9  | +         | -         | -         | 138684874 | 138684959 |
| cluster-mmu-mir-132 (2)    | ENSMUSG00000065590 | mmu-mir-212    | 11 | +        | 74989583  | 74989673  | - | - | Non_Genic          | ENSG00000207953   | hsa-mir-212     | 17             | -  | 1900315   | 1900424   |           |           |           |
| cluster-mmu-let-7a-1 (3)   | ENSMUSG00000065421 | mmu-let-7a-1   | 13 | -        | 48550116  | 48550209  | - | - | Non_Genic          | ENSG00000199165   | hsa-let-7a-1    | 9              | +  | 95978060  | 95978139  |           |           |           |
| cluster-mmu-mir-325 (2)    | ENSMUSG00000065425 | mmu-mir-325    | X  | -        | 101581801 | 101581898 | - | - | Non_Genic          | ENSG00000207995   | hsa-mir-325     | X              | -  | -         | -         | 76142220  | 76142317  |           |
| cluster-mmu-let-7b (2)     | ENSMUSG00000065608 | mmu-let-7c-2   | 15 | +        | 85534369  | 85534463  | - | - | Non_Genic          | ENSG00000198986   | hsa-let-7a-3    | 22             | +  | 44887293  | 44887366  |           |           |           |
| cluster-mmu-mir-199a-1 (1) | ENSMUSG00000065547 | mmu-mir-199a-1 | 9  | -        | 21246896  | 21246966  | - | - | ENSMUSG00000033335 | Intron Oppstrand  | ENSG00000207752 | hsa-mir-199a-1 | 19 | -         | -         | -         | 10789101  | 10789172  |
| cluster-mmu-mir-342 (1)    | ENSMUSG00000065436 | mmu-mir-342    | 12 | +        | 109106426 | 109106525 | - | - | ENSMUSG00000021262 | Intron Samestrand | ENSG00000199082 | hsa-mir-342    | 14 | +         | -         | -         | 99645744  | 99645843  |
| cluster-mmu-mir-142 (1)    | ENSMUSG00000065420 | mmu-mir-142    | 11 | +        | 87573059  | 87573122  | - | - | Non_Genic          | ENSG00000207567   | hsa-mir-142     | 17             | -  | 53763592  | 53763678  |           |           |           |
| cluster-mmu-mir-203 (1)    | ENSMUSG00000065574 | mmu-mir-203    | 12 | +        | 112578688 | 112578763 | - | - | Non_Genic          | ENSG00000207568   | hsa-mir-203     | 14             | +  | 103653495 | 103653604 |           |           |           |
| cluster-mmu-mir-26b (1)    | ENSMUSG00000065468 | mmu-mir-26b    | 1  | +        | 74327516  | 74327601  | - | - | ENSMUSG00000026176 | Intron Samestrand | ENSG00000199121 | hsa-mir-26b    | 2  | +         | -         | -         | 218975612 | 218975689 |
| cluster-mmu-mir-26a-2 (1)  | ENSMUSG00000065430 | mmu-mir-26a-2  | 10 | +        | 126398479 | 126398562 | - | - | Non_Genic          | ENSG00000207789   | hsa-mir-26a-2   | 12             | -  | 56504658  | 56504742  |           |           |           |
| cluster-mmu-mir-346 (1)    | ENSMUSG00000065481 | mmu-mir-346    | 14 | +        | 33723700  | 33723798  | - | - | ENSMUSG00000041078 | Intron Samestrand | ENSG00000199104 | hsa-mir-346    | 10 | -         | -         | -         | 88014430  | 88014525  |
| cluster-mmu-mir-671 (1)    | ENSMUSG00000076387 | mmu-mir-671    | 5  | +        | 24102178  | 24102276  | - | - | ENSMUSG00000038181 | Exon Samestrand   | ENSG00000211517 | hsa-mir-671    | 7  | +         | -         | -         | 150566439 | 150566557 |
| cluster-mmu-mir-489 (2)    | ENSMUSG00000070107 | mmu-mir-489    | 6  | -        | 3671896   | 3672003   | - | - | ENSMUSG0000023964  | Intron Samestrand | ENSG00000207656 | hsa-mir-489    | 7  | -         | -         | -         | 92951183  | 92951267  |
| cluster-mmu-mir-96 (3)     | ENSMUSG00000065619 | mmu-mir-183    | 6  | -        | 30119678  | 30119747  | - | - | Non_Genic          | ENSG00000207691   | hsa-mir-183     | 7              | -  | 129201981 | 129202090 |           |           |           |
| cluster-mmu-mir-218-2 (1)  | ENSMUSG00000065583 | mmu-mir-218-2  | 11 | +        | 35460238  | 35460348  | - | - | ENSMUSG00000056427 | Intron Samestrand | ENSG00000207739 | hsa-mir-218-2  | 5  | -         | -         | -         | 168127728 | 168127838 |
| cluster-mmu-mir-221 (2)    | ENSMUSG00000065471 | mmu-mir-222    | X  | -        | 18303852  | 18303930  | - | - | Non_Genic          | ENSG00000207725   | hsa-mir-222     | X              | -  | 45491365  | 45491474  |           |           |           |
| cluster-mmu-mir-339 (1)    | ENSMUSG00000065593 | mmu-mir-339    | 5  | -        | 139623291 | 139623387 | - | - | ENSMUSG00000053553 | Intron Samestrand | ENSG00000199023 | hsa-mir-339    | 7  | -         | -         | -         | 1029094   | 1029188   |
| cluster-mmu-mir-23b (3)    | ENSMUSG00000065487 | mmu-mir-24-1   | 13 | +        | 63310429  | 63310497  | - | - | ENSMUSG00000021458 | UTR Samestrand    | ENSG00000207617 | hsa-mir-24-1   | 9  | +         | -         | -         | 96888123  | 96888191  |
| cluster-mmu-mir-129-2 (1)  | ENSMUSG00000065511 | mmu-mir-129-2  | 2  | -        | 94042203  | 94042292  | - | - | Non_Genic          | ENSG00000199077   | hsa-mir-129-2   | 11             | +  | 43559520  | 43559609  |           |           |           |
| cluster-mmu-mir-141 (2)    | ENSMUSG00000065462 | mmu-mir-200c   | 6  | -        | 124683941 | 124684009 | - | - | Non_Genic          | ENSG00000207713   | hsa-mir-200c    | 12             | +  | 6943123   | 6943190   |           |           |           |
| cluster-mmu-mir-320 (1)    | ENSMUSG00000065528 | mmu-mir-320    | 14 | +        | 69178590  | 69178671  | - | - | Non_Genic          | ENSG00000208037   | hsa-mir-320     | 8              | -  | 22158420  | 22158501  |           |           |           |
| cluster-mmu-mir-210 (1)    | ENSMUSG00000065551 | mmu-mir-210    | 7  | -        | 141072704 | 141072813 | - | - | Non_Genic          | ENSG00000199038   | hsa-mir-210     | 11             | -  | 558089    | 558198    |           |           |           |
| cluster-mmu-mir-153 (1)    | ENSMUSG00000065538 | mmu-mir-153    | 12 | +        | 117692825 | 117692894 | - | - | ENSMUSG00000056553 | Intron Samestrand | ENSG00000207960 | hsa-mir-153-2  | 7  | -         | -         | -         | 157059788 | 157059875 |
| cluster-mmu-mir-135b (1)   | ENSMUSG00000065435 | mmu-mir-135b   | 1  | +        | 134025634 | 134025730 | - | - | Non_Genic          | ENSG00000199059   | hsa-mir-135b    | 1              | -  | 203684052 | 203684149 |           |           |           |
| cluster-mmu-mir-199a-2 (2) | ENSMUSG00000070126 | mmu-mir-199a-2 | 1  | +        | 164054490 | 16405460  |   |   |                    |                   |                 |                |    |           |           |           |           |           |
