# Supplementary material for: Genome-wide survey of microRNA–transcription factor feed-forward regulatory circuits in human
Source: Royal Society of Chemistry journal article supplement (doi:10.1039/b900177h), 2009-06-19
Supplement: b900177h_add_file_2.pdf [file b900177h_add_file_2.pdf]

# List of human and mouse mature miRNAs included in our study.

# In this file we report the list of human and mouse mature miRNAs used in our study and belonging  
# to the transcriptional units (TU) previously defined.

# File is TAB delimited and columns are:  
# col. 0: Transcription unit  
# col. 1: miRNA precursor id  
# col. 2: Ensembl miRNA precursor id  
# col. 3: miRNA mature id

# Mature miRNA belonging to the same transcriptional unit are reported on different lines.

# A plain text ASCII version of this file is available at: <http://personalpages.to.infn.it/~cora/circuits/index.html>

# The file is divided in two sections. The first one is for human miRNAs whilst the second one is  
# for mouse miRNAs.

# section for human miRNA

|                            |                |                 |                |
|----------------------------|----------------|-----------------|----------------|
| cluster-hsa-mir-29a(2)     | hsa-mir-29a    | ENSG00000198981 | hsa-miR-29a    |
| cluster-hsa-mir-150(1)     | hsa-mir-150    | ENSG00000207782 | hsa-miR-150    |
| cluster-hsa-mir-191(2)     | hsa-mir-425    | ENSG00000199032 | hsa-miR-425-5p |
| cluster-hsa-mir-191(2)     | hsa-mir-425    | ENSG00000199032 | hsa-miR-425-3p |
| cluster-hsa-mir-144(2)     | hsa-mir-451    | ENSG00000207794 | hsa-miR-451    |
| cluster-hsa-mir-144(2)     | hsa-mir-144    | ENSG00000207618 | hsa-miR-144    |
| cluster-hsa-mir-100(3)     | hsa-mir-125b-1 | ENSG00000207971 | hsa-miR-125b   |
| cluster-hsa-mir-100(3)     | hsa-let-7a-2   | ENSG00000198975 | hsa-let-7a     |
| cluster-hsa-mir-100(3)     | hsa-mir-100    | ENSG00000207994 | hsa-miR-100    |
| cluster-hsa-mir-101-1(1)   | hsa-mir-101-1  | ENSG00000199135 | hsa-miR-101    |
| cluster-hsa-mir-10a(1)     | hsa-mir-10a    | ENSG00000207777 | hsa-miR-10a    |
| cluster-hsa-mir-342(1)     | hsa-mir-342    | ENSG00000199082 | hsa-miR-342    |
| cluster-hsa-mir-9-1(1)     | hsa-mir-9-1    | ENSG00000207933 | hsa-miR-9      |
| cluster-hsa-mir-9-1(1)     | hsa-mir-9-1    | ENSG00000207933 | hsa-miR-9*     |
| cluster-hsa-mir-143(2)     | hsa-mir-143    | ENSG00000208035 | hsa-miR-143    |
| cluster-hsa-mir-155(1)     | hsa-mir-155    | ENSG00000207795 | hsa-miR-155    |
| cluster-hsa-mir-34b(2)     | hsa-mir-34b    | ENSG00000207811 | hsa-miR-34b    |
| cluster-hsa-mir-34b(2)     | hsa-mir-34c    | ENSG00000207562 | hsa-miR-34c    |
| cluster-hsa-mir-320(1)     | hsa-mir-320    | ENSG00000208037 | hsa-miR-320    |
| cluster-hsa-mir-29b-2(2)   | hsa-mir-29c    | ENSG00000207966 | hsa-miR-29c    |
| cluster-hsa-mir-29b-2(2)   | hsa-mir-29b-2  | ENSG00000207790 | hsa-miR-29b    |
| cluster-hsa-mir-101-2(1)   | hsa-mir-101-2  | ENSG00000199065 | hsa-miR-101    |
| cluster-hsa-mir-10b(1)     | hsa-mir-10b    | ENSG00000207744 | hsa-miR-10b    |
| cluster-hsa-mir-142(1)     | hsa-mir-142    | ENSG00000207567 | hsa-miR-142-5p |
| cluster-hsa-mir-142(1)     | hsa-mir-142    | ENSG00000207567 | hsa-miR-142-3p |
| cluster-hsa-mir-455(1)     | hsa-mir-455    | ENSG00000207726 | hsa-miR-455    |
| cluster-hsa-mir-484(1)     | hsa-mir-484    | ENSG00000202641 | hsa-miR-484    |
| cluster-hsa-mir-340(1)     | hsa-mir-340    | ENSG00000198995 | hsa-miR-340    |
| cluster-hsa-mir-126(1)     | hsa-mir-126    | ENSG00000199161 | hsa-miR-126*   |
| cluster-hsa-mir-126(1)     | hsa-mir-126    | ENSG00000199161 | hsa-miR-126    |
| cluster-hsa-mir-200a(3)    | hsa-mir-200b   | ENSG00000207730 | hsa-miR-200b   |
| cluster-hsa-mir-200a(3)    | hsa-mir-200a   | ENSG00000207607 | hsa-miR-200a*  |
| cluster-hsa-mir-200a(3)    | hsa-mir-200a   | ENSG00000207607 | hsa-miR-200a   |
| cluster-hsa-mir-200a(3)    | hsa-mir-429    | ENSG00000198976 | hsa-miR-429    |
| cluster-hsa-mir-449a(2)    | hsa-mir-449b   | ENSG00000207728 | hsa-miR-449b   |
| cluster-hsa-mir-28(1)      | hsa-mir-28     | ENSG00000207651 | hsa-miR-28     |
| cluster-hsa-mir-551b(1)    | hsa-mir-551b   | ENSG00000207717 | hsa-miR-551b   |
| cluster-hsa-mir-423(1)     | hsa-mir-423    | ENSG00000199071 | hsa-miR-423    |
| cluster-hsa-mir-219-1(1)   | hsa-mir-219-1  | ENSG00000199036 | hsa-miR-219    |
| cluster-hsa-mir-345(1)     | hsa-mir-345    | ENSG00000198984 | hsa-miR-345    |
| cluster-hsa-mir-483(1)     | hsa-mir-483    | ENSG00000207805 | hsa-miR-483    |
| cluster-hsa-mir-204(1)     | hsa-mir-204    | ENSG00000207935 | hsa-miR-204    |
| cluster-hsa-mir-488(1)     | hsa-mir-488    | ENSG00000202609 | hsa-miR-488    |
| cluster-hsa-mir-424/322(6) | hsa-mir-542    | ENSG00000207784 | hsa-miR-542-5p |
| cluster-hsa-mir-424/322(6) | hsa-mir-542    | ENSG00000207784 | hsa-miR-542-3p |
| cluster-hsa-mir-424/322(6) | hsa-mir-503    | ENSG00000208005 | hsa-miR-503    |
| cluster-hsa-mir-31(1)      | hsa-mir-31     | ENSG00000199177 | hsa-miR-31     |
| cluster-hsa-mir-135a-1(2)  | hsa-mir-135a-1 | ENSG00000207926 | hsa-miR-135a   |
| cluster-hsa-mir-1-2(2)     | hsa-mir-1-2    | ENSG00000207694 | hsa-miR-1      |
| cluster-hsa-mir-218-1(1)   | hsa-mir-218-1  | ENSG00000207732 | hsa-miR-218    |
| cluster-hsa-mir-23b(3)     | hsa-mir-24-1   | ENSG00000207617 | hsa-miR-189    |
| cluster-hsa-mir-23b(3)     | hsa-mir-24-1   | ENSG00000207617 | hsa-miR-24     |
| cluster-hsa-mir-346(1)     | hsa-mir-346    | ENSG00000199104 | hsa-miR-346    |
| cluster-hsa-mir-192(2)     | hsa-mir-192    | ENSG00000207648 | hsa-miR-192    |
| cluster-hsa-mir-192(2)     | hsa-mir-194-2  | ENSG00000207596 | hsa-miR-194    |
| cluster-hsa-mir-378(1)     | hsa-mir-378    | ENSG00000199047 | hsa-miR-378    |
| cluster-hsa-mir-378(1)     | hsa-mir-378    | ENSG00000199047 | hsa-miR-422b   |
| cluster-hsa-mir-199b(1)    | hsa-mir-199b   | ENSG00000207581 | hsa-miR-199b   |
| cluster-hsa-mir-30b(2)     | hsa-mir-30b    | ENSG00000207582 | hsa-miR-30b    |
| cluster-hsa-mir-30b(2)     | hsa-mir-30d    | ENSG00000199153 | hsa-miR-30d    |
| cluster-hsa-let-7a-1(3)    | hsa-let-7a-1   | ENSG00000199165 | hsa-let-7a     |
| cluster-hsa-let-7a-1(3)    | hsa-let-7f-1   | ENSG00000199072 | hsa-let-7f     |
| cluster-hsa-let-7a-1(3)    | hsa-let-7d     | ENSG00000199133 | hsa-let-7d     |
| cluster-hsa-mir-32(1)      | hsa-mir-32     | ENSG00000207698 | hsa-miR-32     |
| cluster-hsa-mir-184(1)     | hsa-mir-184    | ENSG00000207695 | hsa-miR-184    |
| cluster-hsa-mir-1-1(2)     | hsa-mir-1-1    | ENSG00000199017 | hsa-miR-1      |
| cluster-hsa-mir-1-1(2)     | hsa-mir-133a-2 | ENSG00000207764 | hsa-miR-133a   |
| cluster-hsa-mir-135b(1)    | hsa-mir-135b   | ENSG00000199059 | hsa-miR-135b   |
| cluster-hsa-mir-152(1)     | hsa-mir-152    | ENSG00000207947 | hsa-miR-152    |
| cluster-hsa-mir-96(3)      | hsa-mir-182    | ENSG00000207990 | hsa-miR-182    |

|                            |                |                 |                |
|----------------------------|----------------|-----------------|----------------|
| cluster-hsa-mir-96 (3)     | hsa-mir-182    | ENSG00000207990 | hsa-miR-182*   |
| cluster-hsa-mir-96 (3)     | hsa-mir-96     | ENSG00000199158 | hsa-miR-96     |
| cluster-hsa-mir-96 (3)     | hsa-mir-183    | ENSG00000207691 | hsa-miR-183    |
| cluster-hsa-mir-9-3 (1)    | hsa-mir-9-3    | ENSG00000207819 | hsa-miR-9      |
| cluster-hsa-mir-9-3 (1)    | hsa-mir-9-3    | ENSG00000207819 | hsa-miR-9*     |
| cluster-hsa-mir-375 (1)    | hsa-mir-375    | ENSG00000198973 | hsa-miR-375    |
| cluster-hsa-mir-141 (2)    | hsa-mir-200c   | ENSG00000207713 | hsa-miR-200c   |
| cluster-hsa-mir-141 (2)    | hsa-mir-141    | ENSG00000207708 | hsa-miR-141    |
| cluster-hsa-mir-15b (2)    | hsa-mir-16-2   | ENSG00000198987 | hsa-miR-16     |
| cluster-hsa-mir-148b (1)   | hsa-mir-148b   | ENSG00000199122 | hsa-miR-148b   |
| cluster-hsa-mir-330 (1)    | hsa-mir-330    | ENSG00000199066 | hsa-miR-330    |
| cluster-hsa-mir-133b (2)   | hsa-mir-206    | ENSG00000207604 | hsa-miR-206    |
| cluster-hsa-mir-133b (2)   | hsa-mir-133b   | ENSG00000199080 | hsa-miR-133b   |
| cluster-hsa-mir-26a-2 (1)  | hsa-mir-26a-2  | ENSG00000207789 | hsa-miR-26a    |
| cluster-hsa-mir-23a (3)    | hsa-mir-24-2   | ENSG00000209707 | hsa-miR-24     |
| cluster-hsa-mir-23a (3)    | hsa-mir-27a    | ENSG00000207808 | hsa-miR-27a    |
| cluster-hsa-mir-23a (3)    | hsa-mir-23a    | ENSG00000207980 | hsa-miR-23a    |
| cluster-hsa-mir-221 (2)    | hsa-mir-221    | ENSG00000207870 | hsa-miR-221    |
| cluster-hsa-mir-221 (2)    | hsa-mir-222    | ENSG00000207725 | hsa-miR-222    |
| cluster-hsa-mir-146b (1)   | hsa-mir-146b   | ENSG00000202569 | hsa-miR-146b   |
| cluster-hsa-mir-103-2 (1)  | hsa-mir-103-2  | ENSG00000199024 | hsa-miR-103    |
| cluster-hsa-mir-30a (2)    | hsa-mir-30c-2  | ENSG00000199094 | hsa-miR-30c    |
| cluster-hsa-mir-30a (2)    | hsa-mir-30a    | ENSG00000207827 | hsa-miR-30a-5p |
| cluster-hsa-mir-30a (2)    | hsa-mir-30a    | ENSG00000207827 | hsa-miR-30a-3p |
| cluster-hsa-mir-489 (2)    | hsa-mir-489    | ENSG00000207656 | hsa-miR-489    |
| cluster-hsa-mir-17 (6)     | hsa-mir-17     | ENSG00000207745 | hsa-miR-17-5p  |
| cluster-hsa-mir-17 (6)     | hsa-mir-17     | ENSG00000207745 | hsa-miR-17-3p  |
| cluster-hsa-mir-17 (6)     | hsa-mir-19a    | ENSG00000207610 | hsa-miR-19a    |
| cluster-hsa-mir-17 (6)     | hsa-mir-20a    | ENSG00000199149 | hsa-miR-20a    |
| cluster-hsa-mir-138-1 (1)  | hsa-mir-138-1  | ENSG00000207954 | hsa-miR-138    |
| cluster-hsa-mir-219-2 (1)  | hsa-mir-219-2  | ENSG00000207955 | hsa-miR-219    |
| cluster-hsa-mir-203 (1)    | hsa-mir-203    | ENSG00000207568 | hsa-miR-203    |
| cluster-hsa-mir-127 (10)   | hsa-mir-770    | ENSG00000211574 | hsa-miR-770-5p |
| cluster-hsa-mir-127 (10)   | hsa-mir-431    | ENSG00000208001 | hsa-miR-431    |
| cluster-hsa-mir-127 (10)   | hsa-mir-370    | ENSG00000199005 | hsa-miR-370    |
| cluster-hsa-mir-202 (1)    | hsa-mir-202    | ENSG00000199089 | hsa-miR-202*   |
| cluster-hsa-mir-202 (1)    | hsa-mir-202    | ENSG00000199089 | hsa-miR-202    |
| cluster-hsa-mir-218-2 (2)  | hsa-mir-218-2  | ENSG00000207739 | hsa-miR-218    |
| cluster-hsa-mir-140 (1)    | hsa-mir-140    | ENSG00000208017 | hsa-miR-140    |
| cluster-hsa-mir-99a (3)    | hsa-mir-99a    | ENSG00000207638 | hsa-miR-99a    |
| cluster-hsa-mir-99a (3)    | hsa-mir-125b-2 | ENSG00000207863 | hsa-miR-125b   |
| cluster-hsa-mir-326 (1)    | hsa-mir-326    | ENSG00000199090 | hsa-miR-326    |
| cluster-hsa-mir-135a-2 (1) | hsa-mir-135a-2 | ENSG00000207586 | hsa-miR-135a   |
| cluster-hsa-mir-339 (1)    | hsa-mir-339    | ENSG00000199023 | hsa-miR-339    |
| cluster-hsa-mir-592 (1)    | hsa-mir-592    | ENSG00000207692 | hsa-miR-592    |
| cluster-hsa-mir-15a (2)    | hsa-mir-16-1   | ENSG00000208006 | hsa-miR-16     |
| cluster-hsa-mir-15a (2)    | hsa-mir-15a    | ENSG00000207718 | hsa-miR-15a    |
| cluster-hsa-mir-505 (1)    | hsa-mir-505    | ENSG00000207633 | hsa-miR-505    |
| cluster-hsa-mir-134 (37)   | hsa-mir-379    | ENSG00000199088 | hsa-miR-379    |
| cluster-hsa-mir-134 (37)   | hsa-mir-299    | ENSG00000207749 | hsa-miR-299-5p |
| cluster-hsa-mir-134 (37)   | hsa-mir-299    | ENSG00000207749 | hsa-miR-299-3p |
| cluster-hsa-mir-134 (37)   | hsa-mir-380    | ENSG00000198982 | hsa-miR-380-5p |
| cluster-hsa-mir-134 (37)   | hsa-mir-380    | ENSG00000198982 | hsa-miR-380-3p |
| cluster-hsa-mir-134 (37)   | hsa-mir-323    | ENSG00000199069 | hsa-miR-323    |
| cluster-hsa-mir-134 (37)   | hsa-mir-758    | ENSG00000211582 | hsa-miR-758    |
| cluster-hsa-mir-134 (37)   | hsa-mir-329-1  | ENSG00000207761 | hsa-miR-329    |
| cluster-hsa-mir-134 (37)   | hsa-mir-494    | ENSG00000194717 | hsa-miR-494    |
| cluster-hsa-mir-134 (37)   | hsa-mir-495    | ENSG00000207743 | hsa-miR-495    |
| cluster-hsa-mir-134 (37)   | hsa-mir-381    | ENSG00000199020 | hsa-miR-381    |
| cluster-hsa-mir-134 (37)   | hsa-mir-487b   | ENSG00000207754 | hsa-miR-487b   |
| cluster-hsa-mir-134 (37)   | hsa-mir-539    | ENSG00000202560 | hsa-miR-539    |
| cluster-hsa-mir-134 (37)   | hsa-mir-134    | ENSG00000207993 | hsa-miR-134    |
| cluster-hsa-mir-134 (37)   | hsa-mir-496    | ENSG00000207961 | hsa-miR-496    |
| cluster-hsa-mir-134 (37)   | hsa-mir-377    | ENSG00000199015 | hsa-miR-377    |
| cluster-hsa-mir-134 (37)   | hsa-mir-409    | ENSG00000199107 | hsa-miR-409-5p |
| cluster-hsa-mir-134 (37)   | hsa-mir-409    | ENSG00000199107 | hsa-miR-409-3p |
| cluster-hsa-mir-134 (37)   | hsa-mir-412    | ENSG00000199012 | hsa-miR-412    |
| cluster-hsa-mir-134 (37)   | hsa-mir-369    | ENSG00000199025 | hsa-miR-369-5p |
| cluster-hsa-mir-134 (37)   | hsa-mir-369    | ENSG00000199025 | hsa-miR-369-3p |
| cluster-hsa-mir-134 (37)   | hsa-mir-410    | ENSG00000199092 | hsa-miR-410    |
| cluster-hsa-mir-338 (2)    | hsa-mir-338    | ENSG00000211563 | hsa-miR-338    |
| cluster-hsa-mir-490 (1)    | hsa-mir-490    | ENSG00000207597 | hsa-miR-490    |
| cluster-hsa-mir-216a (3)   | hsa-mir-217    | ENSG00000207548 | hsa-miR-217    |
| cluster-hsa-mir-211 (1)    | hsa-mir-211    | ENSG00000207702 | hsa-miR-211    |
| cluster-hsa-mir-208 (2)    | hsa-mir-208    | ENSG00000199157 | hsa-miR-208    |
| cluster-hsa-mir-186 (1)    | hsa-mir-186    | ENSG00000207721 | hsa-miR-186    |
| cluster-hsa-mir-331 (1)    | hsa-mir-331    | ENSG00000199172 | hsa-miR-331    |
| cluster-hsa-mir-138-2 (1)  | hsa-mir-138-2  | ENSG00000207649 | hsa-miR-138    |
| cluster-hsa-mir-196a-1 (1) | hsa-mir-196a-1 | ENSG00000210741 | hsa-miR-196a   |
| cluster-hsa-mir-129-2 (1)  | hsa-mir-129-2  | ENSG00000199077 | hsa-miR-129    |
| cluster-hsa-mir-99b (3)    | hsa-mir-99b    | ENSG00000207550 | hsa-miR-99b    |
| cluster-hsa-mir-99b (3)    | hsa-let-7e     | ENSG00000198972 | hsa-let-7e     |
| cluster-hsa-mir-205 (1)    | hsa-mir-205    | ENSG00000207623 | hsa-miR-205    |
| cluster-hsa-mir-199a-1 (1) | hsa-mir-199a-1 | ENSG00000207752 | hsa-miR-199a   |
| cluster-hsa-mir-199a-1 (1) | hsa-mir-199a-1 | ENSG00000207752 | hsa-miR-199a*  |
| cluster-hsa-mir-193a (2)   | hsa-mir-193a   | ENSG00000207614 | hsa-miR-193a   |
| cluster-hsa-mir-193a (2)   | hsa-mir-365-2  | ENSG00000199187 | hsa-miR-365    |
| cluster-hsa-mir-223 (1)    | hsa-mir-223    | ENSG00000207939 | hsa-miR-223    |
| cluster-hsa-mir-194-1 (2)  | hsa-mir-215    | ENSG00000207590 | hsa-miR-215    |
| cluster-hsa-mir-194-1 (2)  | hsa-mir-194-1  | ENSG00000207624 | hsa-miR-194    |

|                           |                |                 |                |
|---------------------------|----------------|-----------------|----------------|
| cluster-hsa-mir-193b(2)   | hsa-mir-365-1  | ENSG00000199130 | hsa-miR-365    |
| cluster-hsa-mir-130b(2)   | hsa-mir-130b   | ENSG00000207751 | hsa-miR-130b   |
| cluster-hsa-mir-302a(5)   | hsa-mir-367    | ENSG00000199169 | hsa-miR-367    |
| cluster-hsa-mir-302a(5)   | hsa-mir-302d   | ENSG00000199145 | hsa-miR-302d   |
| cluster-hsa-mir-302a(5)   | hsa-mir-302c   | ENSG00000199102 | hsa-miR-302c*  |
| cluster-hsa-mir-302a(5)   | hsa-mir-302c   | ENSG00000199102 | hsa-miR-302c   |
| cluster-hsa-mir-302a(5)   | hsa-mir-302b   | ENSG00000199058 | hsa-miR-302b*  |
| cluster-hsa-mir-302a(5)   | hsa-mir-302b   | ENSG00000199058 | hsa-miR-302b   |
| cluster-hsa-mir-149(1)    | hsa-mir-149    | ENSG00000207611 | hsa-miR-149    |
| cluster-hsa-mir-499(1)    | hsa-mir-499    | ENSG00000207635 | hsa-miR-499    |
| cluster-hsa-mir-296(2)    | hsa-mir-296    | ENSG00000207950 | hsa-miR-296    |
| cluster-hsa-mir-506(12)   | hsa-mir-506    | ENSG00000207731 | hsa-miR-506    |
| cluster-hsa-mir-25(3)     | hsa-mir-25     | ENSG00000207547 | hsa-miR-25     |
| cluster-hsa-mir-25(3)     | hsa-mir-93     | ENSG00000207757 | hsa-miR-93     |
| cluster-hsa-mir-25(3)     | hsa-mir-106b   | ENSG00000208036 | hsa-miR-106b   |
| cluster-hsa-mir-148a(1)   | hsa-mir-148a   | ENSG00000199085 | hsa-miR-148a   |
| cluster-hsa-mir-187(1)    | hsa-mir-187    | ENSG00000207797 | hsa-miR-187    |
| cluster-hsa-mir-139(1)    | hsa-mir-139    | ENSG00000207809 | hsa-miR-139    |
| cluster-hsa-mir-30c-1(2)  | hsa-mir-30e    | ENSG00000198974 | hsa-miR-30e-5p |
| cluster-hsa-mir-30c-1(2)  | hsa-mir-30e    | ENSG00000198974 | hsa-miR-30e-3p |
| cluster-hsa-mir-30c-1(2)  | hsa-mir-30c-1  | ENSG00000207962 | hsa-miR-30c    |
| cluster-hsa-mir-153-2(2)  | hsa-mir-153-2  | ENSG00000207960 | hsa-miR-153    |
| cluster-hsa-mir-196a-2(2) | hsa-mir-615    | ENSG00000207571 | hsa-miR-615    |
| cluster-hsa-mir-328(1)    | hsa-mir-328    | ENSG00000207948 | hsa-miR-328    |
| cluster-hsa-mir-151(1)    | hsa-mir-151    | ENSG00000207792 | hsa-miR-151    |
| cluster-hsa-mir-491(1)    | hsa-mir-491    | ENSG00000207609 | hsa-miR-491    |
| cluster-hsa-mir-671(1)    | hsa-mir-671    | ENSG00000211517 | hsa-miR-671    |
| cluster-hsa-mir-181c(2)   | hsa-mir-181d   | ENSG00000207585 | hsa-miR-181d   |
| cluster-hsa-mir-325(2)    | hsa-mir-325    | ENSG00000207995 | hsa-miR-325    |
| cluster-hsa-mir-26b(1)    | hsa-mir-26b    | ENSG00000199121 | hsa-miR-26b    |
| cluster-hsa-mir-335(1)    | hsa-mir-335    | ENSG00000199043 | hsa-miR-335    |
| cluster-hsa-mir-129-1(1)  | hsa-mir-129-1  | ENSG00000207705 | hsa-miR-129    |
| cluster-hsa-mir-34a(1)    | hsa-mir-34a    | ENSG00000207865 | hsa-miR-34a    |
| cluster-hsa-mir-7-3(1)    | hsa-mir-7-3    | ENSG00000207630 | hsa-miR-7      |
| cluster-hsa-mir-802(1)    | hsa-mir-802    | ENSG00000211590 | hsa-miR-802    |
| cluster-hsa-mir-130a(1)   | hsa-mir-130a   | ENSG00000208009 | hsa-miR-130a   |
| cluster-hsa-mir-210(1)    | hsa-mir-210    | ENSG00000199038 | hsa-miR-210    |
| cluster-hsa-mir-18b(6)    | hsa-mir-363    | ENSG00000207572 | hsa-miR-363*   |
| cluster-hsa-mir-18b(6)    | hsa-mir-363    | ENSG00000207572 | hsa-miR-363    |
| cluster-hsa-mir-18b(6)    | hsa-mir-20b    | ENSG00000207710 | hsa-miR-20b    |
| cluster-hsa-mir-18b(6)    | hsa-mir-106a   | ENSG00000207602 | hsa-miR-106a   |
| cluster-hsa-let-7a-3(2)   | hsa-let-7a-3   | ENSG00000198986 | hsa-let-7a     |
| cluster-hsa-let-7a-3(2)   | hsa-let-7b     | ENSG00000207875 | hsa-let-7b     |
| cluster-hsa-mir-132(2)    | hsa-mir-212    | ENSG00000207953 | hsa-miR-212    |
| cluster-hsa-mir-21(1)     | hsa-mir-21     | ENSG00000199004 | hsa-miR-21     |
| cluster-hsa-mir-324(1)    | hsa-mir-324    | ENSG00000199053 | hsa-miR-324-5p |
| cluster-hsa-mir-324(1)    | hsa-mir-324    | ENSG00000199053 | hsa-miR-324-3p |
| cluster-hsa-mir-195(2)    | hsa-mir-195    | ENSG00000207929 | hsa-miR-195    |
| cluster-hsa-mir-195(2)    | hsa-mir-497    | ENSG00000207791 | hsa-miR-497    |
| cluster-hsa-mir-199a-2(2) | hsa-mir-214    | ENSG00000207949 | hsa-miR-214    |
| cluster-hsa-mir-199a-2(2) | hsa-mir-199a-2 | ENSG00000208024 | hsa-miR-199a   |
| cluster-hsa-mir-199a-2(2) | hsa-mir-199a-2 | ENSG00000208024 | hsa-miR-199a*  |

# section for mouse miRNA

|                          |                |                    |                |
|--------------------------|----------------|--------------------|----------------|
| cluster-mmu-mir-322(7)   | mmu-mir-542    | ENSMUSG00000076140 | mmu-miR-542-5p |
| cluster-mmu-mir-322(7)   | mmu-mir-542    | ENSMUSG00000076140 | mmu-miR-542-3p |
| cluster-mmu-mir-503      | mmu-mir-503    | ENSMUSG00000076122 | mmu-miR-503    |
| cluster-mmu-mir-10a(1)   | mmu-mir-10a    | ENSMUSG00000065519 | mmu-miR-10a    |
| cluster-mmu-mir-205(1)   | mmu-mir-205    | ENSMUSG00000065533 | mmu-miR-205    |
| cluster-mmu-mir-130b(2)  | mmu-mir-130b   | ENSMUSG00000065572 | mmu-miR-130b   |
| cluster-mmu-mir-331(1)   | mmu-mir-331    | ENSMUSG00000065607 | mmu-miR-331    |
| cluster-mmu-mir-103-2(1) | mmu-mir-103-2  | ENSMUSG00000065563 | mmu-miR-103    |
| cluster-mmu-mir-155(1)   | mmu-mir-155    | ENSMUSG00000065397 | mmu-miR-155    |
| cluster-mmu-mir-202(1)   | mmu-mir-202    | ENSMUSG00000065502 | mmu-miR-202    |
| cluster-mmu-mir-10b(1)   | mmu-mir-10b    | ENSMUSG00000065500 | mmu-miR-10b    |
| cluster-mmu-mir-328(1)   | mmu-mir-328    | ENSMUSG00000070130 | mmu-miR-328    |
| cluster-mmu-mir-1-1(2)   | mmu-mir-1-1    | ENSMUSG00000070144 | mmu-miR-1      |
| cluster-mmu-mir-1-1(2)   | mmu-mir-133a-2 | ENSMUSG00000065460 | mmu-miR-133a*  |
| cluster-mmu-mir-1-1(2)   | mmu-mir-133a-2 | ENSMUSG00000065460 | mmu-miR-133a   |
| cluster-mmu-mir-326(1)   | mmu-mir-326    | ENSMUSG00000065571 | mmu-miR-326    |
| cluster-mmu-mir-194-1(2) | mmu-mir-194-1  | ENSMUSG00000065581 | mmu-miR-194    |
| cluster-mmu-mir-194-1(2) | mmu-mir-215    | ENSMUSG00000065562 | mmu-miR-215    |
| cluster-mmu-mir-151(1)   | mmu-mir-151    | ENSMUSG00000065612 | mmu-miR-151    |
| cluster-mmu-mir-483(1)   | mmu-mir-483    | ENSMUSG00000070140 | mmu-miR-483    |
| cluster-mmu-mir-324(1)   | mmu-mir-324    | ENSMUSG00000065534 | mmu-miR-324-5p |
| cluster-mmu-mir-324(1)   | mmu-mir-324    | ENSMUSG00000065534 | mmu-miR-324-3p |
| cluster-mmu-mir-101a(1)  | mmu-mir-101a   | ENSMUSG00000065451 | mmu-miR-101a   |
| cluster-mmu-mir-484(1)   | mmu-mir-484    | ENSMUSG00000070074 | mmu-miR-484    |
| cluster-mmu-mir-34a(1)   | mmu-mir-34a    | ENSMUSG00000065493 | mmu-miR-34a    |
| cluster-mmu-mir-134(33)  | mmu-mir-379    | ENSMUSG00000065498 | mmu-miR-379    |
| cluster-mmu-mir-134(33)  | mmu-mir-299    | ENSMUSG00000065550 | mmu-miR-299    |
| cluster-mmu-mir-134(33)  | mmu-mir-380    | ENSMUSG00000065595 | mmu-miR-380-5p |
| cluster-mmu-mir-134(33)  | mmu-mir-380    | ENSMUSG00000065595 | mmu-miR-380-3p |
| cluster-mmu-mir-134(33)  | mmu-mir-323    | ENSMUSG00000065617 | mmu-miR-323    |
| cluster-mmu-mir-134(33)  | mmu-mir-758    | ENSMUSG00000076459 | mmu-miR-758    |
| cluster-mmu-mir-134(33)  | mmu-mir-329    | ENSMUSG00000065577 | mmu-miR-329    |
| cluster-mmu-mir-134(33)  | mmu-mir-494    | ENSMUSG00000070141 | mmu-miR-494    |
| cluster-mmu-mir-134(33)  | mmu-mir-495    | ENSMUSG00000070105 | mmu-miR-495    |
| cluster-mmu-mir-134(33)  | mmu-mir-381    | ENSMUSG00000065566 | mmu-miR-381    |

|                            |                |                    |                |
|----------------------------|----------------|--------------------|----------------|
| cluster-mmu-mir-134 (33)   | mmu-mir-487b   | ENSMUSG00000076219 | mmu-miR-487b   |
| cluster-mmu-mir-134 (33)   | mmu-mir-539    | ENSMUSG00000076063 | mmu-miR-539    |
| cluster-mmu-mir-134 (33)   | mmu-mir-134    | ENSMUSG00000065426 | mmu-miR-134    |
| cluster-mmu-mir-134 (33)   | mmu-mir-496    | ENSMUSG00000070136 | mmu-miR-496    |
| cluster-mmu-mir-134 (33)   | mmu-mir-377    | ENSMUSG00000065438 | mmu-miR-377    |
| cluster-mmu-mir-134 (33)   | mmu-mir-409    | ENSMUSG00000065478 | mmu-miR-409    |
| cluster-mmu-mir-134 (33)   | mmu-mir-412    | ENSMUSG00000065570 | mmu-miR-412    |
| cluster-mmu-mir-134 (33)   | mmu-mir-369    | ENSMUSG00000065561 | mmu-miR-369-5p |
| cluster-mmu-mir-134 (33)   | mmu-mir-369    | ENSMUSG00000065561 | mmu-miR-369-3p |
| cluster-mmu-mir-134 (33)   | mmu-mir-410    | ENSMUSG00000065497 | mmu-miR-410    |
| cluster-mmu-mir-1-2 (2)    | mmu-mir-1-2    | ENSMUSG00000065531 | mmu-miR-1      |
| cluster-mmu-mir-150 (1)    | mmu-mir-150    | ENSMUSG00000065495 | mmu-miR-150    |
| cluster-mmu-mir-455 (1)    | mmu-mir-455    | ENSMUSG00000070102 | mmu-miR-455-5p |
| cluster-mmu-mir-455 (1)    | mmu-mir-455    | ENSMUSG00000070102 | mmu-miR-455-3p |
| cluster-mmu-mir-129-1 (1)  | mmu-mir-129-1  | ENSMUSG00000065469 | mmu-miR-129-5p |
| cluster-mmu-mir-29b-2 (2)  | mmu-mir-29b-2  | ENSMUSG00000065412 | mmu-miR-29b    |
| cluster-mmu-mir-29b-2 (2)  | mmu-mir-29c    | ENSMUSG00000065548 | mmu-miR-29c    |
| cluster-mmu-mir-140 (1)    | mmu-mir-140    | ENSMUSG00000065439 | mmu-miR-140    |
| cluster-mmu-mir-140 (1)    | mmu-mir-140    | ENSMUSG00000065439 | mmu-miR-140*   |
| cluster-mmu-mir-25 (3)     | mmu-mir-25     | ENSMUSG00000065394 | mmu-miR-25     |
| cluster-mmu-mir-25 (3)     | mmu-mir-93     | ENSMUSG00000065527 | mmu-miR-93     |
| cluster-mmu-mir-25 (3)     | mmu-mir-106b   | ENSMUSG00000065514 | mmu-miR-106b   |
| cluster-mmu-mir-34b (2)    | mmu-mir-34c    | ENSMUSG00000065587 | mmu-miR-34c    |
| cluster-mmu-mir-34b (2)    | mmu-mir-34b    | ENSMUSG00000065492 | mmu-miR-34b    |
| cluster-mmu-mir-338 (1)    | mmu-mir-338    | ENSMUSG00000065600 | mmu-miR-338    |
| cluster-mmu-mir-216a (3)   | mmu-mir-217    | ENSMUSG00000065415 | mmu-miR-217    |
| cluster-mmu-mir-505 (1)    | mmu-mir-505    | ENSMUSG00000070081 | mmu-miR-505    |
| cluster-mmu-mir-139 (1)    | mmu-mir-139    | ENSMUSG00000065446 | mmu-miR-139    |
| cluster-mmu-mir-7b (1)     | mmu-mir-7b     | ENSMUSG00000065491 | mmu-miR-7b     |
| cluster-mmu-mir-30b (2)    | mmu-mir-30b    | ENSMUSG00000065476 | mmu-miR-30b    |
| cluster-mmu-mir-30b (2)    | mmu-mir-30d    | ENSMUSG00000065437 | mmu-miR-30d    |
| cluster-mmu-mir-340 (1)    | mmu-mir-340    | ENSMUSG00000065417 | mmu-miR-340    |
| cluster-mmu-mir-133b (2)   | mmu-mir-206    | ENSMUSG00000065559 | mmu-miR-206    |
| cluster-mmu-mir-133b (2)   | mmu-mir-133b   | ENSMUSG00000065480 | mmu-miR-133b   |
| cluster-mmu-mir-223 (1)    | mmu-mir-223    | ENSMUSG00000076066 | mmu-miR-223    |
| cluster-mmu-mir-192 (2)    | mmu-mir-194-2  | ENSMUSG00000065582 | mmu-miR-194    |
| cluster-mmu-mir-192 (2)    | mmu-mir-192    | ENSMUSG00000065523 | mmu-miR-192    |
| cluster-mmu-mir-196a-2 (2) | mmu-mir-615    | ENSMUSG00000076010 | mmu-miR-615    |
| cluster-mmu-mir-29a (2)    | mmu-mir-29a    | ENSMUSG00000065610 | mmu-miR-29a    |
| cluster-mmu-mir-208 (2)    | mmu-mir-208    | ENSMUSG00000065432 | mmu-miR-208    |
| cluster-mmu-mir-201 (3)    | mmu-mir-201    | ENSMUSG00000065404 | mmu-miR-201    |
| cluster-mmu-mir-130a (1)   | mmu-mir-130a   | ENSMUSG00000065484 | mmu-miR-130a   |
| cluster-mmu-mir-146b (1)   | mmu-mir-146b   | ENSMUSG00000070127 | mmu-miR-146b   |
| cluster-mmu-mir-200a (3)   | mmu-mir-429    | ENSMUSG00000065427 | mmu-miR-429    |
| cluster-mmu-mir-200a (3)   | mmu-mir-200a   | ENSMUSG00000065400 | mmu-miR-200a   |
| cluster-mmu-mir-200a (3)   | mmu-mir-200b   | ENSMUSG00000065549 | mmu-miR-200b   |
| cluster-mmu-mir-9-3 (1)    | mmu-mir-9-3    | ENSMUSG00000065545 | mmu-miR-9      |
| cluster-mmu-mir-9-3 (1)    | mmu-mir-9-3    | ENSMUSG00000065545 | mmu-miR-9*     |
| cluster-mmu-mir-32 (1)     | mmu-mir-32     | ENSMUSG00000065544 | mmu-miR-32     |
| cluster-mmu-mir-100 (3)    | mmu-mir-100    | ENSMUSG00000065576 | mmu-miR-100    |
| cluster-mmu-mir-100 (3)    | mmu-let-7a-2   | ENSMUSG00000065614 | mmu-let-7a     |
| cluster-mmu-mir-100 (3)    | mmu-mir-125b-1 | ENSMUSG00000065506 | mmu-miR-125b   |
| cluster-mmu-mir-195 (2)    | mmu-mir-497    | ENSMUSG00000070109 | mmu-miR-497    |
| cluster-mmu-mir-195 (2)    | mmu-mir-195    | ENSMUSG00000065411 | mmu-miR-195    |
| cluster-mmu-mir-138-1 (1)  | mmu-mir-138-1  | ENSMUSG00000065414 | mmu-miR-138    |
| cluster-mmu-mir-17 (4)     | mmu-mir-17     | ENSMUSG00000065508 | mmu-miR-17-5p  |
| cluster-mmu-mir-17 (4)     | mmu-mir-17     | ENSMUSG00000065508 | mmu-miR-17-3p  |
| cluster-mmu-mir-17 (4)     | mmu-mir-19a    | ENSMUSG00000065416 | mmu-miR-19a    |
| cluster-mmu-mir-17 (4)     | mmu-mir-20a    | ENSMUSG00000065442 | mmu-miR-20a    |
| cluster-mmu-mir-490 (1)    | mmu-mir-490    | ENSMUSG00000070075 | mmu-miR-490    |
| cluster-mmu-mir-23a (3)    | mmu-mir-23a    | ENSMUSG00000065611 | mmu-miR-23a    |
| cluster-mmu-mir-23a (3)    | mmu-mir-27a    | ENSMUSG00000065444 | mmu-miR-27a    |
| cluster-mmu-mir-23a (3)    | mmu-mir-24-2   | ENSMUSG00000065541 | mmu-miR-24     |
| cluster-mmu-mir-592 (1)    | mmu-mir-592    | ENSMUSG00000076067 | mmu-miR-592    |
| cluster-mmu-mir-144 (2)    | mmu-mir-144    | ENSMUSG00000065401 | mmu-miR-144    |
| cluster-mmu-mir-144 (2)    | mmu-mir-451    | ENSMUSG00000070065 | mmu-miR-451    |
| cluster-mmu-mir-181c (2)   | mmu-mir-181d   | ENSMUSG00000076338 | mmu-miR-181d   |
| cluster-mmu-mir-488 (1)    | mmu-mir-488    | ENSMUSG00000070103 | mmu-miR-488    |
| cluster-mmu-mir-488 (1)    | mmu-mir-488    | ENSMUSG00000070103 | mmu-miR-488*   |
| cluster-mmu-mir-302a (5)   | mmu-mir-302b   | ENSMUSG00000076252 | mmu-miR-302b*  |
| cluster-mmu-mir-302a (5)   | mmu-mir-302b   | ENSMUSG00000076252 | mmu-miR-302b   |
| cluster-mmu-mir-302a (5)   | mmu-mir-302c   | ENSMUSG00000065482 | mmu-miR-302c*  |
| cluster-mmu-mir-302a (5)   | mmu-mir-302c   | ENSMUSG00000065482 | mmu-miR-302c   |
| cluster-mmu-mir-302a (5)   | mmu-mir-302d   | ENSMUSG00000065447 | mmu-miR-302d   |
| cluster-mmu-mir-302a (5)   | mmu-mir-367    | ENSMUSG00000065413 | mmu-miR-367    |
| cluster-mmu-mir-28 (1)     | mmu-mir-28     | ENSMUSG00000065494 | mmu-miR-28     |
| cluster-mmu-mir-149 (1)    | mmu-mir-149    | ENSMUSG00000065470 | mmu-miR-149    |
| cluster-mmu-mir-152 (1)    | mmu-mir-152    | ENSMUSG00000065515 | mmu-miR-152    |
| cluster-mmu-mir-296 (2)    | mmu-mir-296    | ENSMUSG00000065521 | mmu-miR-296    |
| cluster-mmu-mir-449a (2)   | mmu-mir-449b   | ENSMUSG00000076146 | mmu-miR-449b   |
| cluster-mmu-mir-499 (1)    | mmu-mir-499    | ENSMUSG00000076312 | mmu-miR-499    |
| cluster-mmu-mir-218-1 (1)  | mmu-mir-218-1  | ENSMUSG00000065603 | mmu-miR-218    |
| cluster-mmu-mir-375 (1)    | mmu-mir-375    | ENSMUSG00000065616 | mmu-miR-375    |
| cluster-mmu-mir-15a (2)    | mmu-mir-16-1   | ENSMUSG00000065605 | mmu-miR-16     |
| cluster-mmu-mir-15a (2)    | mmu-mir-15a    | ENSMUSG00000065459 | mmu-miR-15a    |
| cluster-mmu-mir-99b (3)    | mmu-mir-99b    | ENSMUSG00000065396 | mmu-miR-99b    |
| cluster-mmu-mir-99b (3)    | mmu-let-7e     | ENSMUSG00000065618 | mmu-let-7e     |
| cluster-mmu-mir-219-2 (1)  | mmu-mir-219-2  | ENSMUSG00000065485 | mmu-miR-219    |
| cluster-mmu-mir-191 (2)    | mmu-mir-425    | ENSMUSG00000065579 | mmu-miR-425    |
| cluster-mmu-mir-21 (1)     | mmu-mir-21     | ENSMUSG00000065455 | mmu-miR-21     |

|                            |                |                    |                |
|----------------------------|----------------|--------------------|----------------|
| cluster-mmu-mir-802 (1)    | mmu-mir-802    | ENSMUSG00000076457 | mmu-miR-802    |
| cluster-mmu-mir-9-1 (1)    | mmu-mir-9-1    | ENSMUSG00000065504 | mmu-miR-9      |
| cluster-mmu-mir-9-1 (1)    | mmu-mir-9-1    | ENSMUSG00000065504 | mmu-miR-9*     |
| cluster-mmu-mir-148a (1)   | mmu-mir-148a   | ENSMUSG00000065505 | mmu-miR-148a   |
| cluster-mmu-mir-18b (6)    | mmu-mir-363    | ENSMUSG00000070106 | mmu-miR-363    |
| cluster-mmu-mir-18b (6)    | mmu-mir-20b    | ENSMUSG00000076041 | mmu-miR-20b    |
| cluster-mmu-mir-18b (6)    | mmu-mir-106a   | ENSMUSG00000065456 | mmu-miR-106a   |
| cluster-mmu-mir-335 (1)    | mmu-mir-335    | ENSMUSG00000065501 | mmu-miR-335    |
| cluster-mmu-mir-199b (1)   | mmu-mir-199b   | ENSMUSG00000065554 | mmu-miR-199b   |
| cluster-mmu-mir-345 (1)    | mmu-mir-345    | ENSMUSG00000065429 | mmu-miR-345    |
| cluster-mmu-mir-30c-1 (2)  | mmu-mir-30c-1  | ENSMUSG00000065490 | mmu-miR-30c    |
| cluster-mmu-mir-30c-1 (2)  | mmu-mir-30e    | ENSMUSG00000065409 | mmu-miR-30e    |
| cluster-mmu-mir-30c-1 (2)  | mmu-mir-30e    | ENSMUSG00000065409 | mmu-miR-30e*   |
| cluster-mmu-mir-378 (1)    | mmu-mir-378    | ENSMUSG00000065535 | mmu-miR-378    |
| cluster-mmu-mir-378 (1)    | mmu-mir-378    | ENSMUSG00000065535 | mmu-miR-422b   |
| cluster-mmu-mir-99a (3)    | mmu-mir-99a    | ENSMUSG00000065530 | mmu-miR-99a    |
| cluster-mmu-mir-99a (3)    | mmu-mir-125b-2 | ENSMUSG00000065472 | mmu-miR-125b   |
| cluster-mmu-mir-148b (1)   | mmu-mir-148b   | ENSMUSG00000065560 | mmu-miR-148b   |
| cluster-mmu-mir-101b (1)   | mmu-mir-101b   | ENSMUSG00000065556 | mmu-miR-101b   |
| cluster-mmu-mir-219-1 (1)  | mmu-mir-219-1  | ENSMUSG00000065555 | mmu-miR-219    |
| cluster-mmu-mir-15b (2)    | mmu-mir-16-2   | ENSMUSG00000065606 | mmu-miR-16     |
| cluster-mmu-mir-138-2 (1)  | mmu-mir-138-2  | ENSMUSG00000065512 | mmu-miR-138    |
| cluster-mmu-mir-143 (2)    | mmu-mir-143    | ENSMUSG00000065445 | mmu-miR-143    |
| cluster-mmu-mir-31 (1)     | mmu-mir-31     | ENSMUSG00000065408 | mmu-miR-31     |
| cluster-mmu-mir-126 (1)    | mmu-mir-126    | ENSMUSG00000065540 | mmu-miR-126-5p |
| cluster-mmu-mir-126 (1)    | mmu-mir-126    | ENSMUSG00000065540 | mmu-miR-126-3p |
| cluster-mmu-mir-325 (2)    | mmu-mir-325    | ENSMUSG00000065425 | mmu-miR-325    |
| cluster-mmu-mir-132 (2)    | mmu-mir-212    | ENSMUSG00000065590 | mmu-miR-212    |
| cluster-mmu-let-7a-1 (3)   | mmu-let-7d     | ENSMUSG00000065453 | mmu-let-7d     |
| cluster-mmu-let-7a-1 (3)   | mmu-let-7d     | ENSMUSG00000065453 | mmu-let-7d*    |
| cluster-mmu-let-7a-1 (3)   | mmu-let-7f-1   | ENSMUSG00000065517 | mmu-let-7f     |
| cluster-mmu-let-7a-1 (3)   | mmu-let-7a-1   | ENSMUSG00000065421 | mmu-let-7a     |
| cluster-mmu-let-7b (2)     | mmu-let-7c-2   | ENSMUSG00000065608 | mmu-let-7c     |
| cluster-mmu-let-7b (2)     | mmu-let-7b     | ENSMUSG00000065564 | mmu-let-7b     |
| cluster-mmu-mir-199a-1 (1) | mmu-mir-199a-1 | ENSMUSG00000065547 | mmu-miR-199a   |
| cluster-mmu-mir-199a-1 (1) | mmu-mir-199a-1 | ENSMUSG00000065547 | mmu-miR-199a*  |
| cluster-mmu-mir-142 (1)    | mmu-mir-142    | ENSMUSG00000065420 | mmu-miR-142-5p |
| cluster-mmu-mir-142 (1)    | mmu-mir-142    | ENSMUSG00000065420 | mmu-miR-142-3p |
| cluster-mmu-mir-342 (1)    | mmu-mir-342    | ENSMUSG00000065436 | mmu-miR-342    |
| cluster-mmu-mir-203 (1)    | mmu-mir-203    | ENSMUSG00000065574 | mmu-miR-203    |
| cluster-mmu-mir-26b (1)    | mmu-mir-26b    | ENSMUSG00000065468 | mmu-miR-26b    |
| cluster-mmu-mir-26a-2 (1)  | mmu-mir-26a-2  | ENSMUSG00000065430 | mmu-miR-26a    |
| cluster-mmu-mir-346 (1)    | mmu-mir-346    | ENSMUSG00000065481 | mmu-miR-346    |
| cluster-mmu-mir-489 (2)    | mmu-mir-489    | ENSMUSG00000070107 | mmu-miR-489    |
| cluster-mmu-mir-671 (1)    | mmu-mir-671    | ENSMUSG00000076387 | mmu-miR-671    |
| cluster-mmu-mir-96 (3)     | mmu-mir-182    | ENSMUSG00000076361 | mmu-miR-182    |
| cluster-mmu-mir-96 (3)     | mmu-mir-96     | ENSMUSG00000065586 | mmu-miR-96     |
| cluster-mmu-mir-96 (3)     | mmu-mir-183    | ENSMUSG00000065619 | mmu-miR-183    |
| cluster-mmu-mir-218-2 (1)  | mmu-mir-218-2  | ENSMUSG00000065583 | mmu-miR-218    |
| cluster-mmu-mir-221 (2)    | mmu-mir-221    | ENSMUSG00000065422 | mmu-miR-221    |
| cluster-mmu-mir-221 (2)    | mmu-mir-222    | ENSMUSG00000065471 | mmu-miR-222    |
| cluster-mmu-mir-339 (1)    | mmu-mir-339    | ENSMUSG00000065593 | mmu-miR-339    |
| cluster-mmu-mir-23b (3)    | mmu-mir-24-1   | ENSMUSG00000065487 | mmu-miR-24*    |
| cluster-mmu-mir-23b (3)    | mmu-mir-24-1   | ENSMUSG00000065487 | mmu-miR-24     |
| cluster-mmu-mir-141 (2)    | mmu-mir-141    | ENSMUSG00000065474 | mmu-miR-141    |
| cluster-mmu-mir-141 (2)    | mmu-mir-200c   | ENSMUSG00000065462 | mmu-miR-200c   |
| cluster-mmu-mir-129-2 (1)  | mmu-mir-129-2  | ENSMUSG00000065511 | mmu-miR-129-5p |
| cluster-mmu-mir-129-2 (1)  | mmu-mir-129-2  | ENSMUSG00000065511 | mmu-miR-129-3p |
| cluster-mmu-mir-320 (1)    | mmu-mir-320    | ENSMUSG00000065528 | mmu-miR-320    |
| cluster-mmu-mir-210 (1)    | mmu-mir-210    | ENSMUSG00000065551 | mmu-miR-210    |
| cluster-mmu-mir-153 (1)    | mmu-mir-153    | ENSMUSG00000065538 | mmu-miR-153    |
| cluster-mmu-mir-135b (1)   | mmu-mir-135b   | ENSMUSG00000065435 | mmu-miR-135b   |
| cluster-mmu-mir-330 (1)    | mmu-mir-330    | ENSMUSG00000065543 | mmu-miR-330    |
| cluster-mmu-mir-199a-2 (2) | mmu-mir-199a-2 | ENSMUSG00000070126 | mmu-miR-199a   |
| cluster-mmu-mir-199a-2 (2) | mmu-mir-199a-2 | ENSMUSG00000070126 | mmu-miR-199a*  |
| cluster-mmu-mir-199a-2 (2) | mmu-mir-214    | ENSMUSG00000065516 | mmu-miR-214    |
| cluster-mmu-mir-423 (1)    | mmu-mir-423    | ENSMUSG00000065518 | mmu-miR-423    |
| cluster-mmu-mir-211 (1)    | mmu-mir-211    | ENSMUSG00000065585 | mmu-miR-211    |
| cluster-mmu-mir-193 (2)    | mmu-mir-193    | ENSMUSG00000065395 | mmu-miR-193    |
| cluster-mmu-mir-193 (2)    | mmu-mir-365-2  | ENSMUSG00000065489 | mmu-miR-365    |
| cluster-mmu-mir-127 (13)   | mmu-mir-770    | ENSMUSG00000076451 | mmu-miR-770-3p |
| cluster-mmu-mir-127 (13)   | mmu-mir-431    | ENSMUSG00000070080 | mmu-miR-431    |
| cluster-mmu-mir-127 (13)   | mmu-mir-370    | ENSMUSG00000065433 | mmu-miR-370    |
| cluster-mmu-mir-135a-1 (2) | mmu-mir-135a-1 | ENSMUSG00000065407 | mmu-miR-135a   |
| cluster-mmu-mir-204 (1)    | mmu-mir-204    | ENSMUSG00000065507 | mmu-miR-204    |
| cluster-mmu-mir-551b (1)   | mmu-mir-551b   | ENSMUSG00000076120 | mmu-miR-551b   |
| cluster-mmu-mir-193b (2)   | mmu-mir-365-1  | ENSMUSG00000065449 | mmu-miR-365    |
| cluster-mmu-mir-30a (2)    | mmu-mir-30a    | ENSMUSG00000065405 | mmu-miR-30a-5p |
| cluster-mmu-mir-30a (2)    | mmu-mir-30a    | ENSMUSG00000065405 | mmu-miR-30a-3p |
| cluster-mmu-mir-30a (2)    | mmu-mir-30c-2  | ENSMUSG00000065567 | mmu-miR-30c    |
| cluster-mmu-mir-135a-2 (1) | mmu-mir-135a-2 | ENSMUSG00000065524 | mmu-miR-135a   |
| cluster-mmu-mir-184 (1)    | mmu-mir-184    | ENSMUSG00000065596 | mmu-miR-184    |
| cluster-mmu-mir-186 (1)    | mmu-mir-186    | ENSMUSG00000065431 | mmu-miR-186    |
| cluster-mmu-mir-187 (1)    | mmu-mir-187    | ENSMUSG00000065532 | mmu-miR-187    |
| cluster-mmu-mir-196a-1 (1) | mmu-mir-196a-1 | ENSMUSG00000065546 | mmu-miR-196a   |
| cluster-mmu-mir-491 (1)    | mmu-mir-491    | ENSMUSG00000070077 | mmu-miR-491    |
