# Supplementary material for: Genome-wide survey of microRNA–transcription factor feed-forward regulatory circuits in human
Source: PubMed Central journal article supplement — Mol Biosyst. 2009 Jun 19;5(8):854–67. doi: 10.1039/b900177h (PMC2898627; doi:10.1039/b900177h), 2009-06-19
Supplement: b900177h_add_file_4.pdf [file b900177h_add_file_4.pdf]

# Transcriptional regulatory network: conserved-overrepresented oligos for promoter regions only  
# for microRNA genes and their association to known transcription factors binding sites.

# Column 0 is the overrepresented DNA oligo S labeling the set. Columns 1 ... n are the Ensembl gene\_id  
# of the microRNA in whose promoter region the oligo S is overrepresented (p < 0.01). Only oligos surviving  
# the conserved-overrepresentation test (BY < 0.1) are retained. For each oligos, we report also its  
# association with known Transcription Factor Binding Sites, where possible. We divided the dataset according  
# motif length, from 6 to 9 nt in this study. In this dataset are included only microRNA genes.

# At the end of each section, a validation with known TFBSs is reported, if possible.

# A plain text ASCII version of this file is available at: <http://personalpages.to.infn.it/~cora/circuits/index.html>

|        |                                |                                |                              |                                |                                |                              |
|--------|--------------------------------|--------------------------------|------------------------------|--------------------------------|--------------------------------|------------------------------|
| AAAACA | ENSG00000207827 hsa-mir-30a    | ENSG00000199094 hsa-mir-30c-2  |                              |                                |                                |                              |
|        | AAAACA Xie:RWAAACAA FOXO1      |                                |                              |                                |                                |                              |
|        | TGTTTT Xie:TRTTTRYTYW HNF-3    |                                |                              |                                |                                |                              |
| AAAATA | ENSG00000199077 hsa-mir-129-2  | ENSG00000207635 hsa-mir-499    | ENSG00000199177 hsa-mir-31   |                                |                                |                              |
|        | TATTTT Xie:TRTTTRYTYW HNF-3    |                                |                              |                                |                                |                              |
| AAAATG | ENSG00000207717 hsa-mir-551b   | ENSG00000207725 hsa-mir-222    | ENSG00000207870 hsa-mir-221  | ENSG00000207994 hsa-mir-100    | ENSG00000207971 hsa-mir-125b-1 | ENSG00000198975 hsa-let-7a-2 |
|        | CATTTT Xie:GCCATnTT YY1        |                                |                              |                                |                                |                              |
| AAAGAA | ENSG00000207694 hsa-mir-1-2    | ENSG00000207718 hsa-mir-15a    | ENSG00000208006 hsa-mir-16-1 |                                |                                |                              |
| AAAGGC | ENSG00000199058 hsa-mir-302b   | ENSG00000199169 hsa-mir-367    | ENSG00000199145 hsa-mir-302d | ENSG00000199102 hsa-mir-302c   | ENSG00000207777 hsa-mir-10a    |                              |
| AAAGTT | ENSG00000199085 hsa-mir-148a   | ENSG00000202609 hsa-mir-488    |                              |                                |                                |                              |
|        | AAAGTT Xie:GAAnnWTCK HSF2      |                                |                              |                                |                                |                              |
|        | AACTTT Xie:GAAnnWTCK HSF2      |                                |                              |                                |                                |                              |
| AAATAA | ENSG00000199177 hsa-mir-31     | ENSG00000207586 hsa-mir-135a-2 |                              |                                |                                |                              |
|        | AAATAA Xie:ATGCAATnA OCTAMER   |                                |                              |                                |                                |                              |
|        | AAATAA Xie:WADTAAWTA NKX6-2    |                                |                              |                                |                                |                              |
|        | TTATTT Xie:TRTTTRYTYW HNF-3    |                                |                              |                                |                                |                              |
| AAATGA | ENSG00000207705 hsa-mir-129-1  | ENSG00000199172 hsa-mir-331    | ENSG00000207994 hsa-mir-100  | ENSG00000207971 hsa-mir-125b-1 | ENSG00000198975 hsa-let-7a-2   |                              |
|        | AAATGA Xie:ATGCAATnA OCTAMER   |                                |                              |                                |                                |                              |
|        | TCATTT Xie:TTTCAnTT IRF        |                                |                              |                                |                                |                              |
| AAATGG | ENSG00000207995 hsa-mir-325    |                                |                              |                                |                                |                              |
|        | CCATTT Xie:GCCATnTT YY1        |                                |                              |                                |                                |                              |
| AACACA | ENSG00000207954 hsa-mir-138-1  |                                |                              |                                |                                |                              |
| AACTAC | ENSG00000208017 hsa-mir-140    | ENSG00000199177 hsa-mir-31     | ENSG00000207731 hsa-mir-506  |                                |                                |                              |
|        | GTAGTT Xie:KTWGTTT SRY         |                                |                              |                                |                                |                              |
| AAGAAG | ENSG00000207596 hsa-mir-194-2  | ENSG00000207648 hsa-mir-192    |                              |                                |                                |                              |
| AAGATG | ENSG00000199036 hsa-mir-219-1  | ENSG00000207791 hsa-mir-497    | ENSG00000207929 hsa-mir-195  |                                |                                |                              |
|        | CATCTT Xie:GCCATnTT YY1        |                                |                              |                                |                                |                              |
| AAGCGC | ENSG00000199104 hsa-mir-346    |                                |                              |                                |                                |                              |
| AAGGGG | ENSG00000199036 hsa-mir-219-1  |                                |                              |                                |                                |                              |
| AATAAC | ENSG00000199177 hsa-mir-31     |                                |                              |                                |                                |                              |
| AATATT | ENSG00000199077 hsa-mir-129-2  |                                |                              |                                |                                |                              |
|        | AAATATT Xie:GAAnnWTCK HSF2     |                                |                              |                                |                                |                              |
|        | AAATATT Xie:GAAnnWTCK HSF2     |                                |                              |                                |                                |                              |
| AATGAA | ENSG00000199165 hsa-let-7a-1   | ENSG00000199072 hsa-let-7f-1   | ENSG00000199133 hsa-let-7d   | ENSG00000199172 hsa-mir-331    |                                |                              |
|        | TTCATT Xie:TTTCAnTT IRF        |                                |                              |                                |                                |                              |
| AATGAC | ENSG00000207633 hsa-mir-505    |                                |                              |                                |                                |                              |
|        | AAATGAC Xie:MnTGWCCT T3R       |                                |                              |                                |                                |                              |
|        | GTCATT Xie:KGTCAATTA IPF1      |                                |                              |                                |                                |                              |
| AATTAG | ENSG00000207745 hsa-mir-17     | ENSG00000207610 hsa-mir-19a    | ENSG00000199149 hsa-mir-20a  |                                |                                |                              |
|        | AATTAG Xie:AAWAATTAnS PAX-4    |                                |                              |                                |                                |                              |
|        | AAATTAG Xie:GTAATnG NCX        |                                |                              |                                |                                |                              |
|        | CTAATT Xie:CYAATTWT HOXA4      |                                |                              |                                |                                |                              |
|        | CTAATT Xie:GCTAATTA CHX10      |                                |                              |                                |                                |                              |
| ACAATG | ENSG00000207649 hsa-mir-138-2  |                                |                              |                                |                                |                              |
| ACACAC | ENSG00000207581 hsa-mir-199b   |                                |                              |                                |                                |                              |
| ACAGAC | ENSG00000207950 hsa-mir-296    |                                |                              |                                |                                |                              |
|        | GTCGTG Xie:TGTCTGCT SMAD-3     |                                |                              |                                |                                |                              |
| ACAGAG | ENSG00000199157 hsa-mir-208    |                                |                              |                                |                                |                              |
| ACCCCC | ENSG00000199036 hsa-mir-219-1  | ENSG00000207811 hsa-mir-34b    | ENSG00000207562 hsa-mir-34c  |                                |                                |                              |
|        | GGGGGT Xie:GRGGSTGGG CAC-BP    |                                |                              |                                |                                |                              |
|        | GGGGGT Xie:SGGRnTTTCC C-REL    |                                |                              |                                |                                |                              |
| ACCCGG | ENSG00000199121 hsa-mir-26b    |                                |                              |                                |                                |                              |
| ACCGCG | ENSG00000199121 hsa-mir-26b    |                                |                              |                                |                                |                              |
| ACCGGA | ENSG00000199122 hsa-mir-148b   |                                |                              |                                |                                |                              |
| ACCGGC | ENSG00000210741 hsa-mir-196a-1 |                                |                              |                                |                                |                              |
| ACCTGC | ENSG00000208005 hsa-mir-503    | ENSG00000207784 hsa-mir-542    |                              |                                |                                |                              |
|        | GCAGGT Xie:GKCRGKTT TCF-1 (P)  |                                |                              |                                |                                |                              |
|        | GCAGGT Xie:RnCAGGTG MYOD       |                                |                              |                                |                                |                              |
| ACGCCC | ENSG00000199032 hsa-mir-425    | ENSG00000199038 hsa-mir-210    |                              |                                |                                |                              |
| ACGCGC | ENSG00000198995 hsa-mir-340    | ENSG00000199038 hsa-mir-210    | ENSG00000207953 hsa-mir-212  |                                |                                |                              |
| ACGGCG | ENSG00000207819 hsa-mir-9-3    |                                |                              |                                |                                |                              |
| ACGTCA | ENSG00000207953 hsa-mir-212    |                                |                              |                                |                                |                              |
|        | ACGTCA Xie:TGACGTMA CREB       |                                |                              |                                |                                |                              |
|        | TGACGT Xie:GTGACGTARS E4F1     |                                |                              |                                |                                |                              |
|        | TGACGT Xie:TGACGTGG ATF6       |                                |                              |                                |                                |                              |
|        | TGACGT Xie:TGACGTMA CREB       |                                |                              |                                |                                |                              |
| ACTAAT | ENSG00000207694 hsa-mir-1-2    |                                |                              |                                |                                |                              |
| ACTACA | ENSG00000208017 hsa-mir-140    |                                |                              |                                |                                |                              |
| AGAGAC | ENSG00000207635 hsa-mir-499    |                                |                              |                                |                                |                              |
| AGAGAG | ENSG00000199157 hsa-mir-208    | ENSG00000207809 hsa-mir-139    |                              |                                |                                |                              |
| AGATAA | ENSG00000207635 hsa-mir-499    | ENSG00000199165 hsa-let-7a-1   | ENSG00000199072 hsa-let-7f-1 | ENSG00000199133 hsa-let-7d     |                                |                              |
|        | TTATCT Xie:GAAnnWTCK HSF2      |                                |                              |                                |                                |                              |
| AGCCCC | ENSG00000207550 hsa-mir-99b    | ENSG00000198972 hsa-let-7e     | ENSG00000207568 hsa-mir-203  |                                |                                |                              |
|        | GGGGCT Xie:GRGGSTGGG CAC-BP    |                                |                              |                                |                                |                              |
|        | GGGGCT Xie:SGGRnTTTCC C-REL    |                                |                              |                                |                                |                              |
| AGCCCG | ENSG00000207955 hsa-mir-219-2  |                                |                              |                                |                                |                              |
|        | CGGGCT Xie:SGGRnTTTCC C-REL    |                                |                              |                                |                                |                              |

|        |                                |                                |                               |                               |                               |                             |
|--------|--------------------------------|--------------------------------|-------------------------------|-------------------------------|-------------------------------|-----------------------------|
| AGCCGC | ENSG00000199104 hsa-mir-346    | ENSG00000207953 hsa-mir-212    |                               |                               |                               |                             |
| AGCCGC | ENSG00000199066 hsa-mir-330    | ENSG00000207611 hsa-mir-149    | ENSG00000207953 hsa-mir-212   |                               |                               |                             |
| AGCCGA | ENSG00000199047 hsa-mir-378    | ENSG00000208024 hsa-mir-199a-2 | ENSG00000207949 hsa-mir-214   |                               |                               |                             |
| AGCCGC | ENSG00000198984 hsa-mir-345    | ENSG00000207955 hsa-mir-219-2  | ENSG00000199122 hsa-mir-148b  |                               |                               |                             |
| AGCCGC | ENSG00000199032 hsa-mir-425    | ENSG00000207611 hsa-mir-149    |                               |                               |                               |                             |
| AGGAGC | ENSG00000207691 hsa-mir-183    | ENSG00000207990 hsa-mir-182    | ENSG00000199158 hsa-mir-96    |                               |                               |                             |
| AGCCGC | ENSG00000207698 hsa-mir-32     |                                |                               |                               |                               |                             |
| AGGCCG | ENSG00000207630 hsa-mir-7-3    |                                |                               |                               |                               |                             |
| AGGGGG | ENSG00000199036 hsa-mir-219-1  |                                |                               |                               |                               |                             |
| AGGTTA | ENSG00000202641 hsa-mir-484    | ENSG00000207827 hsa-mir-30a    | ENSG00000199094 hsa-mir-30c-2 |                               |                               |                             |
| ATAAAA | ENSG00000208017 hsa-mir-140    | ENSG00000199172 hsa-mir-331    | ENSG00000207717 hsa-mir-551b  | ENSG00000207718 hsa-mir-15a   | ENSG00000208006 hsa-mir-16-1  |                             |
|        | ATAAAA Xie:GGYMATAAAA CDX-2    |                                |                               |                               |                               |                             |
| ATACAA | ENSG00000207717 hsa-mir-551b   |                                |                               |                               |                               |                             |
| ATACAT | ENSG00000207721 hsa-mir-186    | ENSG00000207995 hsa-mir-325    |                               |                               |                               |                             |
| ATAGGC | ENSG00000207571 hsa-mir-615    |                                |                               |                               |                               |                             |
| ATCCGG | ENSG00000211517 hsa-mir-671    | ENSG00000199071 hsa-mir-423    |                               |                               |                               |                             |
| ATCTCG | ENSG00000207698 hsa-mir-32     |                                |                               |                               |                               |                             |
| ATCTTC | ENSG00000207950 hsa-mir-296    | ENSG00000207718 hsa-mir-15a    | ENSG00000208006 hsa-mir-16-1  |                               |                               |                             |
|        | ATCTTC Xie:GAAnnWTCK HSF2      |                                |                               |                               |                               |                             |
|        | GAAGAT Xie:GAAnnWTCK HSF2      |                                |                               |                               |                               |                             |
| ATGCAC | ENSG00000202609 hsa-mir-488    |                                |                               |                               |                               |                             |
| ATGCTA | ENSG00000199065 hsa-mir-101-2  | ENSG00000207705 hsa-mir-129-1  | ENSG00000207624 hsa-mir-194-1 | ENSG00000207590 hsa-mir-215   |                               |                             |
|        | TAGCAT Xie:ATTARCATAA POU3F2   |                                |                               |                               |                               |                             |
| ATGCTG | ENSG00000207586 hsa-mir-135a-2 |                                |                               |                               |                               |                             |
| ATTAGC | ENSG00000207752 hsa-mir-199a-1 |                                |                               |                               |                               |                             |
|        | ATTAGC Xie:AAWAATTAnS PAX-4    |                                |                               |                               |                               |                             |
|        | ATTAGC Xie:ATTARCATAA POU3F2   |                                |                               |                               |                               |                             |
|        | GCTAAT Xie:GCTAATTA CHX10      |                                |                               |                               |                               |                             |
| ATTTAG | ENSG00000199165 hsa-let-7a-1   | ENSG00000199072 hsa-let-7f-1   | ENSG00000199133 hsa-let-7d    | ENSG00000207624 hsa-mir-194-1 | ENSG00000207590 hsa-mir-215   |                             |
| CAACTG | ENSG00000199135 hsa-mir-101-1  |                                |                               |                               |                               |                             |
| CAAGTC | ENSG00000199032 hsa-mir-425    | ENSG00000207809 hsa-mir-139    |                               |                               |                               |                             |
| CACACA | ENSG00000199090 hsa-mir-326    | ENSG00000207581 hsa-mir-199b   |                               |                               |                               |                             |
| CACACC | ENSG00000207777 hsa-mir-10a    |                                |                               |                               |                               |                             |
| CACATG | ENSG00000207702 hsa-mir-211    | ENSG00000207731 hsa-mir-506    | ENSG00000211574 hsa-mir-770   | ENSG00000208001 hsa-mir-431   | ENSG00000199005 hsa-mir-370   |                             |
| CACCTG | ENSG00000198973 hsa-mir-375    |                                |                               |                               |                               |                             |
|        | CAGGTG Xie:CAGGTGW AREB6       |                                |                               |                               |                               |                             |
|        | CAGGTG Xie:RnCAGGTG MYOD       |                                |                               |                               |                               |                             |
| CACGCC | ENSG00000199032 hsa-mir-425    |                                |                               |                               |                               |                             |
|        | GGCGTG Xie:TnGCGTG AHR         |                                |                               |                               |                               |                             |
| CAGACA | ENSG00000207730 hsa-mir-200b   | ENSG00000207607 hsa-mir-200a   | ENSG00000198976 hsa-mir-429   |                               |                               |                             |
|        | TGTCTG Xie:TGTCTGTCT SMAD-3    |                                |                               |                               |                               |                             |
| CAGCCG | ENSG00000199104 hsa-mir-346    | ENSG00000207953 hsa-mir-212    |                               |                               |                               |                             |
| CAGCCG | ENSG00000207568 hsa-mir-203    | ENSG00000207811 hsa-mir-34b    | ENSG00000207562 hsa-mir-34c   |                               |                               |                             |
| CAGGGA | ENSG00000199161 hsa-mir-126    | ENSG00000207751 hsa-mir-130b   |                               |                               |                               |                             |
| CAGTGA | ENSG00000207604 hsa-mir-206    | ENSG00000199080 hsa-mir-133b   |                               |                               |                               |                             |
| CATATG | ENSG00000207638 hsa-mir-99a    | ENSG00000207863 hsa-mir-125b-2 | ENSG00000211590 hsa-mir-802   |                               |                               |                             |
| CATGCG | ENSG00000198995 hsa-mir-340    |                                |                               |                               |                               |                             |
|        | CATGCG Xie:YGCATGCG NRF-1      |                                |                               |                               |                               |                             |
|        | CGCATG Xie:YGCATGCG NRF-1      |                                |                               |                               |                               |                             |
| CATTCA | ENSG00000207995 hsa-mir-325    |                                |                               |                               |                               |                             |
| CCACCC | ENSG00000199090 hsa-mir-326    |                                |                               |                               |                               |                             |
|        | GGGTGG Xie:GRGGSTGGG CAC-BP    |                                |                               |                               |                               |                             |
| CCACGC | ENSG00000199032 hsa-mir-425    |                                |                               |                               |                               |                             |
| CCAGGG | ENSG00000199059 hsa-mir-135b   | ENSG00000207791 hsa-mir-497    | ENSG00000207929 hsa-mir-195   | ENSG00000207948 hsa-mir-328   |                               |                             |
| CCAGGC | ENSG00000207713 hsa-mir-200c   | ENSG00000207708 hsa-mir-141    | ENSG00000207960 hsa-mir-153-2 |                               |                               |                             |
| CCCATC | ENSG00000199085 hsa-mir-148a   | ENSG00000207604 hsa-mir-206    | ENSG00000199080 hsa-mir-133b  | ENSG00000207695 hsa-mir-184   |                               |                             |
| CCCCCC | ENSG00000207730 hsa-mir-200b   | ENSG00000207607 hsa-mir-200a   | ENSG00000198976 hsa-mir-429   | ENSG00000207980 hsa-mir-23a   | ENSG00000209707 hsa-mir-24-2  | ENSG00000207808 hsa-mir-27a |
| CCCCCG | ENSG00000199032 hsa-mir-425    | ENSG00000207811 hsa-mir-34b    | ENSG00000207562 hsa-mir-34c   | ENSG00000207865 hsa-mir-34a   |                               |                             |
| CCCCGC | ENSG00000199032 hsa-mir-425    | ENSG00000199038 hsa-mir-210    | ENSG00000207568 hsa-mir-203   | ENSG00000207611 hsa-mir-149   | ENSG00000207739 hsa-mir-218-2 |                             |
|        | CGGGG Xie:GGGGCGGGC SP-1       |                                |                               |                               |                               |                             |
| CCCCTC | ENSG00000207623 hsa-mir-205    | ENSG00000207933 hsa-mir-9-1    |                               |                               |                               |                             |
| CCCCGC | ENSG00000199038 hsa-mir-210    | ENSG00000207611 hsa-mir-149    |                               |                               |                               |                             |
|        | GGCGGG Xie:GGGGCGGGC SP-1      |                                |                               |                               |                               |                             |
|        | GGCGGG Xie:GKCRGKTT TCF-1 (P)  |                                |                               |                               |                               |                             |
| CCCCGC | ENSG00000199032 hsa-mir-425    | ENSG00000199038 hsa-mir-210    | ENSG00000207568 hsa-mir-203   | ENSG00000207960 hsa-mir-153-2 |                               |                             |
| CCCCGA | ENSG00000199071 hsa-mir-423    |                                |                               |                               |                               |                             |
|        | TCCGGG Xie:TTCGGGAA STATX      |                                |                               |                               |                               |                             |
| CCCCGC | ENSG00000199038 hsa-mir-210    | ENSG00000199104 hsa-mir-346    | ENSG00000207611 hsa-mir-149   | ENSG00000207953 hsa-mir-212   |                               |                             |
| CCCCGG | ENSG00000198973 hsa-mir-375    | ENSG00000199038 hsa-mir-210    | ENSG00000207568 hsa-mir-203   |                               |                               |                             |
| CCCTCC | ENSG00000198973 hsa-mir-375    | ENSG00000207933 hsa-mir-9-1    |                               |                               |                               |                             |
|        | GGAGGG Xie:GGGAGGG MAZ         |                                |                               |                               |                               |                             |
|        | GGAGGG Xie:RGAGGKAGG TFII-I    |                                |                               |                               |                               |                             |
| CCGCAC | ENSG00000199121 hsa-mir-26b    |                                |                               |                               |                               |                             |
| CCGCAG | ENSG00000199104 hsa-mir-346    |                                |                               |                               |                               |                             |
| CCGCCC | ENSG00000198973 hsa-mir-375    | ENSG00000199038 hsa-mir-210    | ENSG00000211563 hsa-mir-338   |                               |                               |                             |
|        | GGGCGG Xie:GGGGCGGGC SP-1      |                                |                               |                               |                               |                             |
| CCGCCG | ENSG00000207611 hsa-mir-149    | ENSG00000207960 hsa-mir-153-2  |                               |                               |                               |                             |
| CCGCGC | ENSG00000199032 hsa-mir-425    | ENSG00000199038 hsa-mir-210    | ENSG00000207611 hsa-mir-149   | ENSG00000207792 hsa-mir-151   | ENSG00000207960 hsa-mir-153-2 |                             |
| CCGCTC | ENSG00000207811 hsa-mir-34b    | ENSG00000207562 hsa-mir-34c    |                               |                               |                               |                             |
| CCGGCC | ENSG00000199104 hsa-mir-346    |                                |                               |                               |                               |                             |
| CCGGCG | ENSG00000199104 hsa-mir-346    | ENSG00000207728 hsa-mir-449b   |                               |                               |                               |                             |
| CCGGGC | ENSG00000198973 hsa-mir-375    | ENSG00000199038 hsa-mir-210    | ENSG00000207960 hsa-mir-153-2 |                               |                               |                             |
| CCGTAC | ENSG00000207568 hsa-mir-203    |                                |                               |                               |                               |                             |
| CCTCCG | ENSG00000198973 hsa-mir-375    |                                |                               |                               |                               |                             |
| CCTTTA | ENSG00000207795 hsa-mir-155    |                                |                               |                               |                               |                             |
| CGAACC | ENSG00000199104 hsa-mir-346    |                                |                               |                               |                               |                             |
|        | GTTTCG Xie:GAAnnWTCK HSF2      |                                |                               |                               |                               |                             |
| CGCACC | ENSG00000207614 hsa-mir-193a   | ENSG00000199187 hsa-mir-365-2  |                               |                               |                               |                             |
| CGCACG | ENSG00000199090 hsa-mir-326    | ENSG00000199121 hsa-mir-26b    |                               |                               |                               |                             |
| CGCCAG | ENSG00000207955 hsa-mir-219-2  | ENSG00000208036 hsa-mir-106b   | ENSG00000207547 hsa-mir-25    | ENSG00000207757 hsa-mir-93    | ENSG00000198987 hsa-mir-16-2  |                             |
| CGCCCA | ENSG00000199038 hsa-mir-210    | ENSG00000208036 hsa-mir-106b   | ENSG00000207547 hsa-mir-25    | ENSG00000207757 hsa-mir-93    |                               |                             |

|        |                                                                                        |                                |                               |                               |                             |
|--------|----------------------------------------------------------------------------------------|--------------------------------|-------------------------------|-------------------------------|-----------------------------|
| CGCCCC | TGGGCG Xie:GTGGGSGC EGR<br>ENSG00000207614 hsa-mir-193a<br>GGGGCG Xie:GGGGCGGGC SP-1   | ENSG00000199187 hsa-mir-365-2  | ENSG00000198974 hsa-mir-30e   | ENSG00000207962 hsa-mir-30c-1 |                             |
| CGCCCG | ENSG00000199038 hsa-mir-210                                                            | ENSG00000207568 hsa-mir-203    |                               |                               |                             |
| CGCCCA | ENSG00000207614 hsa-mir-193a                                                           | ENSG00000199187 hsa-mir-365-2  |                               |                               |                             |
| CGCCGC | ENSG00000199104 hsa-mir-346                                                            | ENSG00000207960 hsa-mir-153-2  |                               |                               |                             |
| CGCCTC | ENSG00000207698 hsa-mir-32                                                             |                                |                               |                               |                             |
| CGCGAG | ENSG00000207698 hsa-mir-32                                                             | ENSG00000208005 hsa-mir-503    | ENSG00000207784 hsa-mir-542   |                               |                             |
| CGCGCA | ENSG00000207792 hsa-mir-151<br>CGCGCA Xie:YGCATGCG NRF-1                               |                                |                               |                               |                             |
| CGCGCC | ENSG00000199038 hsa-mir-210                                                            | ENSG00000207614 hsa-mir-193a   | ENSG00000199187 hsa-mir-365-2 | ENSG00000207617 hsa-mir-24-1  | ENSG00000207792 hsa-mir-151 |
| CGCGCG | ENSG00000199032 hsa-mir-425                                                            | ENSG00000207960 hsa-mir-153-2  |                               |                               |                             |
| CGCGGC | ENSG00000199104 hsa-mir-346                                                            | ENSG00000207953 hsa-mir-212    |                               |                               |                             |
| CGCTGC | ENSG00000207744 hsa-mir-10b                                                            |                                |                               |                               |                             |
| CGGCC  | ENSG00000199038 hsa-mir-210                                                            |                                |                               |                               |                             |
| CGGCCG | ENSG00000199104 hsa-mir-346                                                            | ENSG00000207953 hsa-mir-212    |                               |                               |                             |
| CGGCTC | ENSG00000199104 hsa-mir-346                                                            | ENSG00000207611 hsa-mir-149    | ENSG00000207614 hsa-mir-193a  | ENSG00000199187 hsa-mir-365-2 |                             |
| CGGGAG | ENSG00000207614 hsa-mir-193a                                                           | ENSG00000199187 hsa-mir-365-2  | ENSG00000207698 hsa-mir-32    |                               |                             |
| CGGGAG | ENSG00000199017 hsa-mir-1-1                                                            | ENSG00000207764 hsa-mir-133a-2 | ENSG00000208005 hsa-mir-503   | ENSG00000207784 hsa-mir-542   |                             |
| CGGGCC | ENSG00000199038 hsa-mir-210                                                            | ENSG00000199121 hsa-mir-26b    | ENSG00000207568 hsa-mir-203   | ENSG00000207960 hsa-mir-153-2 | ENSG00000199071 hsa-mir-423 |
| CGTAAA | ENSG00000207745 hsa-mir-17                                                             | ENSG00000207610 hsa-mir-19a    | ENSG00000199149 hsa-mir-20a   |                               |                             |
| CGTCAC | ENSG00000199071 hsa-mir-423<br>GTGACG Xie:GTGACGTARS E4F1                              |                                |                               |                               |                             |
| CGTGAC | ENSG00000199071 hsa-mir-423<br>CGTGAC Xie:ATCACGTGAY SREBP-1<br>CGTGAC Xie:MnTGWCC T3R |                                |                               |                               |                             |
| CGTTCC | ENSG00000199121 hsa-mir-26b                                                            | ENSG00000207614 hsa-mir-193a   | ENSG00000199187 hsa-mir-365-2 |                               |                             |
| CTAATC | ENSG00000207702 hsa-mir-211                                                            |                                |                               |                               |                             |
| CTCACA | ENSG00000207702 hsa-mir-211                                                            | ENSG00000198981 hsa-mir-29a    |                               |                               |                             |
| CTCAC  | ENSG00000207656 hsa-mir-489                                                            |                                |                               |                               |                             |
| CTCATC | ENSG00000199053 hsa-mir-324                                                            | ENSG00000207618 hsa-mir-144    | ENSG00000207794 hsa-mir-451   | ENSG00000207731 hsa-mir-506   |                             |
| CTCCCC | ENSG00000207865 hsa-mir-34a<br>GGGGAG Xie:GGGGAGGG MAZ                                 |                                |                               |                               |                             |
| CTCCGA | ENSG00000207789 hsa-mir-26a-2                                                          |                                |                               |                               |                             |
| CTCCGC | ENSG00000198973 hsa-mir-375                                                            |                                |                               |                               |                             |
| CTGACA | ENSG00000207635 hsa-mir-499                                                            |                                |                               |                               |                             |
| CTGGCG | ENSG00000199047 hsa-mir-378                                                            |                                |                               |                               |                             |
| CTGGAC | ENSG00000207954 hsa-mir-138-1                                                          |                                |                               |                               |                             |
| CTGGCC | ENSG00000207695 hsa-mir-184                                                            |                                |                               |                               |                             |
| CTGTGC | ENSG00000198986 hsa-let-7a-3                                                           | ENSG00000207875 hsa-let-7b     | ENSG00000208035 hsa-mir-143   |                               |                             |
| CTTTAA | ENSG00000208037 hsa-mir-320                                                            | ENSG00000199172 hsa-mir-331    |                               |                               |                             |
| GACACA | ENSG00000208036 hsa-mir-106b                                                           | ENSG00000207547 hsa-mir-25     | ENSG00000207757 hsa-mir-93    |                               |                             |
| GACCAA | ENSG00000207939 hsa-mir-223<br>TTGGTC Xie:YSATTGGYY NF-Y                               |                                |                               |                               |                             |
| GACGTC | ENSG00000207953 hsa-mir-212<br>GACGTC Xie:TGACGTMA CREB<br>GACGTC Xie:TGACGTMA CREB    |                                |                               |                               |                             |
| GAGCGC | ENSG00000207819 hsa-mir-9-3                                                            |                                |                               |                               |                             |
| GATCAA | ENSG00000199157 hsa-mir-208                                                            |                                |                               |                               |                             |
| GATTCC | ENSG00000207630 hsa-mir-7-3                                                            |                                |                               |                               |                             |
| GCACAC | ENSG00000199090 hsa-mir-326<br>GTGTGC Xie:GTdTGCT DBP                                  | ENSG00000207604 hsa-mir-206    | ENSG00000199080 hsa-mir-133b  |                               |                             |
| GCAGCA | ENSG00000207950 hsa-mir-296                                                            | ENSG00000207926 hsa-mir-135a-1 |                               |                               |                             |
| GCAGGA | ENSG00000199047 hsa-mir-378                                                            |                                |                               |                               |                             |
| GCCCCA | ENSG00000207695 hsa-mir-184                                                            |                                |                               |                               |                             |
| GCCCCC | ENSG00000207611 hsa-mir-149<br>GGGGC Xie:GTGGGSGC EGR                                  |                                |                               |                               |                             |
| GCCCGC | ENSG00000199038 hsa-mir-210                                                            |                                |                               |                               |                             |
| GCCGCC | ENSG00000207960 hsa-mir-153-2                                                          |                                |                               |                               |                             |
| GCGAGA | ENSG00000207698 hsa-mir-32                                                             |                                |                               |                               |                             |
| GCGAGC | ENSG00000207695 hsa-mir-184                                                            |                                |                               |                               |                             |
| GCGCAA | ENSG00000198987 hsa-mir-16-2                                                           |                                |                               |                               |                             |
| GCGCAC | ENSG00000207819 hsa-mir-9-3                                                            |                                |                               |                               |                             |
| GCGCCC | ENSG00000199038 hsa-mir-210                                                            | ENSG00000207568 hsa-mir-203    | ENSG00000207614 hsa-mir-193a  | ENSG00000199187 hsa-mir-365-2 |                             |
| GCGCGA | GGGGC Xie:GTGGGSGC EGR<br>ENSG00000207611 hsa-mir-149<br>GCGCGA Xie:GCGCSAAA E2F       |                                |                               |                               |                             |
| GCGCGC | ENSG00000207792 hsa-mir-151                                                            |                                |                               |                               |                             |
| GCGGAA | ENSG00000207721 hsa-mir-186                                                            |                                |                               |                               |                             |
| GCGTCA | ENSG00000199043 hsa-mir-335                                                            | ENSG00000199071 hsa-mir-423    |                               |                               |                             |
| GCTCCC | ENSG00000199104 hsa-mir-346                                                            |                                |                               |                               |                             |
| GCTGCC | ENSG00000207713 hsa-mir-200c<br>GCTGCC Xie:GCAGCTGnY AP-4                              | ENSG00000207708 hsa-mir-141    | ENSG00000211574 hsa-mir-770   | ENSG00000208001 hsa-mir-431   | ENSG00000199005 hsa-mir-370 |
| GCTTCC | ENSG00000207623 hsa-mir-205                                                            |                                |                               |                               |                             |
| GGACCC | ENSG00000207954 hsa-mir-138-1                                                          |                                |                               |                               |                             |
| GGAGCC | ENSG00000199104 hsa-mir-346                                                            |                                |                               |                               |                             |
| GGAGGA | ENSG00000207695 hsa-mir-184                                                            | ENSG00000207865 hsa-mir-34a    |                               |                               |                             |
| GGATTA | ENSG00000208017 hsa-mir-140<br>GGATTA Xie:KGRGATTA CRX<br>GGATTA Xie:YTGGAATTA PITX2   |                                |                               |                               |                             |
| GGCAAC | ENSG00000199065 hsa-mir-101-2                                                          |                                |                               |                               |                             |
| GGCCCC | ENSG00000207739 hsa-mir-218-2                                                          | ENSG00000207791 hsa-mir-497    | ENSG00000207929 hsa-mir-195   |                               |                             |
| GGCGAA | ENSG00000199024 hsa-mir-103-2                                                          |                                |                               |                               |                             |
| GGCGCA | ENSG00000207568 hsa-mir-203                                                            |                                |                               |                               |                             |
| GGCGCC | ENSG00000207953 hsa-mir-212                                                            | ENSG00000208036 hsa-mir-106b   | ENSG00000207547 hsa-mir-25    | ENSG00000207757 hsa-mir-93    |                             |
| GGCGGA | ENSG00000198973 hsa-mir-375                                                            |                                |                               |                               |                             |
| GGGACC | ENSG00000207568 hsa-mir-203                                                            | ENSG00000207933 hsa-mir-9-1    |                               |                               |                             |
| GGGGAA | ENSG00000199077 hsa-mir-129-2                                                          | ENSG00000211563 hsa-mir-338    |                               |                               |                             |
| GGGTGA | ENSG00000207980 hsa-mir-23a                                                            | ENSG00000209707 hsa-mir-24-2   | ENSG00000207808 hsa-mir-27a   |                               |                             |
| GGTAAC | ENSG00000207935 hsa-mir-204                                                            |                                |                               |                               |                             |
| GTGTGA | ENSG00000207726 hsa-mir-455                                                            | ENSG00000207939 hsa-mir-223    |                               |                               |                             |

|          |                                   |                                |                              |                              |                             |                              |  |  |  |
|----------|-----------------------------------|--------------------------------|------------------------------|------------------------------|-----------------------------|------------------------------|--|--|--|
| TAAGGA   | ENSG00000202569 hsa-mir-146b      |                                |                              |                              |                             |                              |  |  |  |
| TAATTA   | ENSG00000207638 hsa-mir-99a       | ENSG00000207863 hsa-mir-125b-2 |                              |                              |                             |                              |  |  |  |
|          | TAATTA Xie:AAWAATTAnS PAX-4       |                                |                              |                              |                             |                              |  |  |  |
|          | TAATTA Xie:CYAATTWT HOXA4         |                                |                              |                              |                             |                              |  |  |  |
|          | TAATTA Xie:GCTAATTA CHX10         |                                |                              |                              |                             |                              |  |  |  |
|          | TAATTA Xie:GTAAKTnG NCX           |                                |                              |                              |                             |                              |  |  |  |
|          | TAATTA Xie:TTAATTAATT LHX3        |                                |                              |                              |                             |                              |  |  |  |
|          | TAATTA Xie:WadTAAWTA NKX6-2       |                                |                              |                              |                             |                              |  |  |  |
|          | TAATTA Xie:AAWAATTAnS PAX-4       |                                |                              |                              |                             |                              |  |  |  |
|          | TAATTA Xie:CYAATTWT HOXA4         |                                |                              |                              |                             |                              |  |  |  |
|          | TAATTA Xie:GCTAATTA CHX10         |                                |                              |                              |                             |                              |  |  |  |
|          | TAATTA Xie:GTAAKTnG NCX           |                                |                              |                              |                             |                              |  |  |  |
|          | TAATTA Xie:TTAATTAATT LHX3        |                                |                              |                              |                             |                              |  |  |  |
|          | TAATTA Xie:WadTAAWTA NKX6-2       |                                |                              |                              |                             |                              |  |  |  |
| TACGGA   | ENSG00000207789 hsa-mir-26a-2     |                                |                              |                              |                             |                              |  |  |  |
| TGCAAA   | ENSG00000202641 hsa-mir-484       |                                |                              |                              |                             |                              |  |  |  |
|          | TGCAAA Xie:ATGCAAATnA OCTAMER     |                                |                              |                              |                             |                              |  |  |  |
| TGGCCA   | ENSG00000199032 hsa-mir-425       |                                |                              |                              |                             |                              |  |  |  |
| TTTAAA   | ENSG00000198995 hsa-mir-340       | ENSG00000207548 hsa-mir-217    |                              |                              |                             |                              |  |  |  |
| AAAAGTT  | ENSG00000199085 hsa-mir-148a      |                                |                              |                              |                             |                              |  |  |  |
| AAAAATAG | ENSG00000199017 hsa-mir-1-1       | ENSG00000207764 hsa-mir-133a-2 |                              |                              |                             |                              |  |  |  |
|          | AAAAATAG Xie:YTAAAWATAGCY MEF-2   |                                |                              |                              |                             |                              |  |  |  |
|          | CTATTTT Xie:TGACCTAnWTW RORALPHA2 |                                |                              |                              |                             |                              |  |  |  |
| AAACTCC  | ENSG00000199077 hsa-mir-129-2     | ENSG00000207726 hsa-mir-455    |                              |                              |                             |                              |  |  |  |
|          | GGAGTTT Xie:SGGRnTTTCC C-REL      |                                |                              |                              |                             |                              |  |  |  |
| AAAGGCA  | ENSG00000199058 hsa-mir-302b      | ENSG00000199169 hsa-mir-367    | ENSG00000199145 hsa-mir-302d | ENSG00000199102 hsa-mir-302c |                             |                              |  |  |  |
| AAATATT  | ENSG00000199077 hsa-mir-129-2     | ENSG00000207633 hsa-mir-505    |                              |                              |                             |                              |  |  |  |
| AAATGAA  | ENSG00000207705 hsa-mir-129-1     | ENSG00000199172 hsa-mir-331    |                              |                              |                             |                              |  |  |  |
|          | TTCATTT Xie:CAGTTTCAYTTY ICSBP    |                                |                              |                              |                             |                              |  |  |  |
|          | TTCATTT Xie:TTTCAnTT IRF          |                                |                              |                              |                             |                              |  |  |  |
| AAATGCA  | ENSG00000207994 hsa-mir-100       | ENSG00000207971 hsa-mir-125b-1 | ENSG00000198975 hsa-let-7a-2 |                              |                             |                              |  |  |  |
| AACAAGC  | ENSG00000207618 hsa-mir-144       | ENSG00000207794 hsa-mir-451    |                              |                              |                             |                              |  |  |  |
| AACACCA  | ENSG00000207725 hsa-mir-222       | ENSG00000207870 hsa-mir-221    |                              |                              |                             |                              |  |  |  |
| AACCTGC  | ENSG00000207705 hsa-mir-129-1     |                                |                              |                              |                             |                              |  |  |  |
|          | GCAGGTT Xie:GKCRGKTT TCF-1 (P)    |                                |                              |                              |                             |                              |  |  |  |
| AACCTTG  | ENSG00000207777 hsa-mir-10a       |                                |                              |                              |                             |                              |  |  |  |
| AACTACA  | ENSG00000208017 hsa-mir-140       | ENSG00000199177 hsa-mir-31     | ENSG00000207698 hsa-mir-32   |                              |                             |                              |  |  |  |
|          | TGTAGTT Xie:GTGYARTTAAT AFP1      |                                |                              |                              |                             |                              |  |  |  |
| AACTGCC  | ENSG00000207638 hsa-mir-99a       | ENSG00000207863 hsa-mir-125b-2 | ENSG00000207744 hsa-mir-10b  |                              |                             |                              |  |  |  |
| AAGACCC  | ENSG00000199036 hsa-mir-219-1     | ENSG00000199121 hsa-mir-26b    | ENSG00000207782 hsa-mir-150  |                              |                             |                              |  |  |  |
| AAGATGG  | ENSG00000199036 hsa-mir-219-1     | ENSG00000199085 hsa-mir-148a   | ENSG00000199157 hsa-mir-208  | ENSG00000207791 hsa-mir-497  | ENSG00000207929 hsa-mir-195 | ENSG00000198987 hsa-mir-16-2 |  |  |  |
|          | CCATCTT Xie:GCCATnTT YY1          |                                |                              |                              |                             |                              |  |  |  |
| AAGCGGG  | ENSG00000207953 hsa-mir-212       |                                |                              |                              |                             |                              |  |  |  |
| AAGTGAC  | ENSG00000207586 hsa-mir-135a-2    |                                |                              |                              |                             |                              |  |  |  |
| AATGGGC  | ENSG00000207597 hsa-mir-490       |                                |                              |                              |                             |                              |  |  |  |
| AATTTAA  | ENSG00000207795 hsa-mir-155       |                                |                              |                              |                             |                              |  |  |  |
|          | AATTTAA Xie:WadTAAWTA NKX6-2      |                                |                              |                              |                             |                              |  |  |  |
| AATTAGT  | ENSG00000199165 hsa-let-7a-1      | ENSG00000199072 hsa-let-7f-1   | ENSG00000199133 hsa-let-7d   | ENSG00000207745 hsa-mir-17   | ENSG00000207610 hsa-mir-19a | ENSG00000199149 hsa-mir-20a  |  |  |  |
| ACATGGA  | ENSG00000207954 hsa-mir-138-1     |                                |                              |                              |                             |                              |  |  |  |
| ACATTTT  | ENSG00000198995 hsa-mir-340       | ENSG00000207795 hsa-mir-155    |                              |                              |                             |                              |  |  |  |
| ACCACTG  | ENSG00000207950 hsa-mir-296       | ENSG00000198981 hsa-mir-29a    |                              |                              |                             |                              |  |  |  |
| ACCATAG  | ENSG00000211517 hsa-mir-671       | ENSG00000207782 hsa-mir-150    |                              |                              |                             |                              |  |  |  |
| ACCCCCG  | ENSG00000207953 hsa-mir-212       |                                |                              |                              |                             |                              |  |  |  |
| ACCCCTT  | ENSG00000199036 hsa-mir-219-1     | ENSG00000199077 hsa-mir-129-2  | ENSG00000199085 hsa-mir-148a | ENSG00000207782 hsa-mir-150  |                             |                              |  |  |  |
| ACCGATA  | ENSG00000199085 hsa-mir-148a      | ENSG00000202641 hsa-mir-484    |                              |                              |                             |                              |  |  |  |
| ACCGGAA  | ENSG00000199122 hsa-mir-148b      |                                |                              |                              |                             |                              |  |  |  |
|          | ACCGGAA Xie:vCCGGAAGnGCR GABP     |                                |                              |                              |                             |                              |  |  |  |
| ACCGGAG  | ENSG00000199104 hsa-mir-346       |                                |                              |                              |                             |                              |  |  |  |
| ACCTCCA  | ENSG00000207571 hsa-mir-615       | ENSG00000208009 hsa-mir-130a   |                              |                              |                             |                              |  |  |  |
| ACCTGCT  | ENSG00000207623 hsa-mir-205       |                                |                              |                              |                             |                              |  |  |  |
|          | AGCAGGT Xie:RncAGGTG MYOD         |                                |                              |                              |                             |                              |  |  |  |
| ACGCCCC  | ENSG00000199032 hsa-mir-425       |                                |                              |                              |                             |                              |  |  |  |
| ACTACAA  | ENSG00000207698 hsa-mir-32        | ENSG00000207790 hsa-mir-29b-2  | ENSG00000207966 hsa-mir-29c  |                              |                             |                              |  |  |  |
| ACTGCGG  | ENSG00000199104 hsa-mir-346       |                                |                              |                              |                             |                              |  |  |  |
| ACTTCAC  | ENSG00000207731 hsa-mir-506       | ENSG00000208005 hsa-mir-503    | ENSG00000207784 hsa-mir-542  |                              |                             |                              |  |  |  |
| ACTTCCG  | ENSG00000207721 hsa-mir-186       |                                |                              |                              |                             |                              |  |  |  |
|          | ACTTCCG Xie:CAntTCCS STAT1        |                                |                              |                              |                             |                              |  |  |  |
|          | CGGAAGT Xie:CCGGAART ELK-1        |                                |                              |                              |                             |                              |  |  |  |
|          | CGGAAGT Xie:MGGAWGT PEA3          |                                |                              |                              |                             |                              |  |  |  |
|          | CGGAAGT Xie:vCCGGAAGnGCR GABP     |                                |                              |                              |                             |                              |  |  |  |
| ACTTCCCT | ENSG00000207980 hsa-mir-23a       | ENSG00000209707 hsa-mir-24-2   | ENSG00000207808 hsa-mir-27a  |                              |                             |                              |  |  |  |
|          | ACTTCCCT Xie:CACTTCCTG ETS        |                                |                              |                              |                             |                              |  |  |  |
|          | AGGAAGT Xie:AGGAART ELF-1         |                                |                              |                              |                             |                              |  |  |  |
|          | AGGAAGT Xie:CAGGAAGTAR TEL-2      |                                |                              |                              |                             |                              |  |  |  |
|          | AGGAAGT Xie:MGGAWGT PEA3          |                                |                              |                              |                             |                              |  |  |  |
| AGAGAAG  | ENSG00000202641 hsa-mir-484       |                                |                              |                              |                             |                              |  |  |  |
| AGAGTCA  | ENSG00000199082 hsa-mir-342       | ENSG00000199177 hsa-mir-31     |                              |                              |                             |                              |  |  |  |
| AGATGCC  | ENSG00000207691 hsa-mir-183       | ENSG00000207990 hsa-mir-182    | ENSG00000199158 hsa-mir-96   |                              |                             |                              |  |  |  |
| AGATGGA  | ENSG00000199157 hsa-mir-208       |                                |                              |                              |                             |                              |  |  |  |
| AGCACCG  | ENSG00000207960 hsa-mir-153-2     |                                |                              |                              |                             |                              |  |  |  |
| AGCCCGG  | ENSG00000198973 hsa-mir-375       |                                |                              |                              |                             |                              |  |  |  |
| AGCCGCG  | ENSG00000199032 hsa-mir-425       | ENSG00000199104 hsa-mir-346    | ENSG00000207953 hsa-mir-212  |                              |                             |                              |  |  |  |
| AGCGCAG  | ENSG00000207656 hsa-mir-489       |                                |                              |                              |                             |                              |  |  |  |
| AGCGGGA  | ENSG00000207732 hsa-mir-218-1     | ENSG00000207811 hsa-mir-34b    | ENSG00000207562 hsa-mir-34c  |                              |                             |                              |  |  |  |
| AGCTATA  | ENSG00000202609 hsa-mir-488       |                                |                              |                              |                             |                              |  |  |  |
|          | TATAGCT Xie:YTAAAWATAGCY MEF-2    |                                |                              |                              |                             |                              |  |  |  |
| AGGAAGA  | ENSG00000199090 hsa-mir-326       | ENSG00000207791 hsa-mir-497    | ENSG00000207929 hsa-mir-195  | ENSG00000207819 hsa-mir-9-3  | ENSG00000207933 hsa-mir-9-1 |                              |  |  |  |
| AGGACAC  | ENSG00000207635 hsa-mir-499       |                                |                              |                              |                             |                              |  |  |  |
|          | GTGTCTT Xie:MnTGWCCT T3R          |                                |                              |                              |                             |                              |  |  |  |
| AGGAGAC  | ENSG00000207805 hsa-mir-483       | ENSG00000207960 hsa-mir-153-2  |                              |                              |                             |                              |  |  |  |
| AGGATAT  | ENSG00000199172 hsa-mir-331       | ENSG00000207995 hsa-mir-325    |                              |                              |                             |                              |  |  |  |

AGGCCGA ENSG00000207630|hsa-mir-7-3  
AGGGAGC ENSG00000207611|hsa-mir-149 ENSG00000208036|hsa-mir-106b ENSG00000207547|hsa-mir-25 ENSG00000207757|hsa-mir-93  
AGGGCGG ENSG00000207751|hsa-mir-130b  
AGGGGCG ENSG00000202641|hsa-mir-484  
AGGTGCG ENSG00000198973|hsa-mir-375 ENSG00000207739|hsa-mir-218-2  
AGGTTCC ENSG00000198984|hsa-mir-345  
AGTTACC ENSG00000207651|hsa-mir-28  
ATCAAAT ENSG00000207718|hsa-mir-15a ENSG00000208006|hsa-mir-16-1  
ATCCACG ENSG00000207633|hsa-mir-505  
ATCCAGG ENSG00000199165|hsa-let-7a-1 ENSG00000199072|hsa-let-7f-1 ENSG00000199133|hsa-let-7d ENSG00000208009|hsa-mir-130a  
ATCCCGG ENSG00000199017|hsa-mir-1-1 ENSG00000207764|hsa-mir-133a-2 ENSG00000207751|hsa-mir-130b  
ATCCGGG ENSG00000199071|hsa-mir-423  
ATCGATA ENSG00000207611|hsa-mir-149 ENSG00000198987|hsa-mir-16-2 ENSG00000199071|hsa-mir-423  
ATCGATA Xie:RnTAATCGATnW CDP  
ATCTCGC ENSG00000207698|hsa-mir-32  
ATCTCTC ENSG00000207809|hsa-mir-139  
ATGCAAA ENSG00000202641|hsa-mir-484  
ATGCAAA Xie:ATGCAAAtnA OCTAMER  
ATGCACA ENSG00000202609|hsa-mir-488  
ATGCCCA ENSG00000207792|hsa-mir-151  
ATGTATA ENSG00000207721|hsa-mir-186  
ATTCATA ENSG00000207695|hsa-mir-184  
ATTGACA ENSG00000207717|hsa-mir-551b  
ATTGGAC ENSG00000207702|hsa-mir-211  
ATTGGCC ENSG00000199122|hsa-mir-148b ENSG00000207638|hsa-mir-99a ENSG00000207863|hsa-mir-125b-2  
ATTGGCC Xie:YSATTGGYY NF-Y  
ATTGGTG ENSG00000199077|hsa-mir-129-2  
ATTTACC ENSG00000207694|hsa-mir-1-2  
ATTTCTA ENSG00000199077|hsa-mir-129-2  
ATTTTTA ENSG00000207721|hsa-mir-186  
TAAAAAT Xie:YTAAAWATAGCY MEF-2  
CAAATA ENSG00000199058|hsa-mir-302b ENSG00000199169|hsa-mir-367 ENSG00000199145|hsa-mir-302d ENSG00000199102|hsa-mir-302c  
CAAAACAG ENSG00000207805|hsa-mir-483  
CAAGATG ENSG00000199036|hsa-mir-219-1 ENSG00000207691|hsa-mir-183 ENSG00000207990|hsa-mir-182 ENSG00000199158|hsa-mir-96  
CAATCCC ENSG00000199059|hsa-mir-135b ENSG00000207995|hsa-mir-325  
CAATCCC Xie:RTGCAATMCCC CHOP-C/EBPALPHA  
CAATGGG ENSG00000199036|hsa-mir-219-1 ENSG00000207739|hsa-mir-218-2  
CAATTCC ENSG00000207571|hsa-mir-615  
CAATTCC Xie:CANtTCCS STAT1  
CACAAAC ENSG00000207730|hsa-mir-200b ENSG00000207607|hsa-mir-200a ENSG00000198976|hsa-mir-429  
CACCTGC ENSG00000198973|hsa-mir-375  
GCAGGTG Xie:RnCAGGTG MYOD  
CACCTGG ENSG00000199032|hsa-mir-425 ENSG00000207571|hsa-mir-615 ENSG00000207797|hsa-mir-187  
CCAGGTG Xie:RnCAGGTG MYOD  
CACCTTA ENSG00000202609|hsa-mir-488  
CACGCCC ENSG00000199032|hsa-mir-425  
CACGCGC ENSG00000207617|hsa-mir-24-1  
CACGTGA ENSG00000207950|hsa-mir-296  
CACGTGA Xie:ATCACGTGAY SREBP-1  
TCACGTG Xie:ATCACGTGAY SREBP-1  
CACTAAC ENSG00000207694|hsa-mir-1-2  
CACTTCC ENSG00000207939|hsa-mir-223  
CACTTCC Xie:CACTTCCTG ETS  
CACTTCC Xie:CANtTCCS STAT1  
GGAAGTG Xie:vCCGGAAGnGCR GABP  
CACTTTC ENSG00000199161|hsa-mir-126 ENSG00000211574|hsa-mir-770 ENSG00000208001|hsa-mir-431 ENSG00000199005|hsa-mir-370  
CAGAAAA ENSG00000207745|hsa-mir-17 ENSG00000207610|hsa-mir-19a ENSG00000199149|hsa-mir-20a  
CAGACAG ENSG00000207730|hsa-mir-200b ENSG00000207607|hsa-mir-200a ENSG00000198976|hsa-mir-429  
CAGCATG ENSG00000207586|hsa-mir-135a-2  
CAGCGCC ENSG00000199122|hsa-mir-148b ENSG00000207744|hsa-mir-10b  
CAGGCCG ENSG00000199043|hsa-mir-335  
CATAATG ENSG00000199004|hsa-mir-21  
CATAGAG ENSG00000202569|hsa-mir-146b ENSG00000211517|hsa-mir-671  
CATGCGC ENSG00000207792|hsa-mir-151  
GCGCATG Xie:YCGCATGCG NRF-1  
CATGCTC ENSG00000199088|hsa-mir-379 ENSG00000207749|hsa-mir-299 ENSG00000198982|hsa-mir-380 ENSG00000199069|hsa-mir-323 ENSG00000211582|hsa-mir-758 ENSG00000207761|hsa-mir-329-1 ENSG00000194717|hsa-mir-494  
ENSG00000207743|hsa-mir-495 ENSG00000199020|hsa-mir-381 ENSG00000207754|hsa-mir-487b ENSG00000202560|hsa-mir-539  
ENSG00000199107|hsa-mir-409 ENSG00000199012|hsa-mir-412 ENSG00000199025|hsa-mir-369 ENSG00000199092|hsa-mir-410  
CAATCAC ENSG00000199165|hsa-let-7a-1 ENSG00000199072|hsa-let-7f-1 ENSG00000199133|hsa-let-7d  
CAATTCC ENSG00000207797|hsa-mir-187 ENSG00000207995|hsa-mir-325  
CAATTCC Xie:CANtTCCS STAT1  
CCAATCC ENSG00000199059|hsa-mir-135b  
CCAATGA ENSG00000199122|hsa-mir-148b  
CCAATGA Xie:CAGCCAATGAG ALPHA-CP1  
TCATTGG Xie:YSATTGGYY NF-Y  
CCACATC ENSG00000207691|hsa-mir-183 ENSG00000207990|hsa-mir-182 ENSG00000199158|hsa-mir-96  
CCACCAA ENSG00000207694|hsa-mir-1-2  
CCATAGA ENSG00000211517|hsa-mir-671  
CCATTAA ENSG00000207602|hsa-mir-106a ENSG00000207572|hsa-mir-363 ENSG00000207710|hsa-mir-20b  
CCCAATC ENSG00000210741|hsa-mir-196a-1  
CCCCCTC ENSG00000207980|hsa-mir-23a ENSG00000209707|hsa-mir-24-2 ENSG00000207808|hsa-mir-27a  
CCCCCGC ENSG00000207960|hsa-mir-153-2  
CCCCTTC ENSG00000199036|hsa-mir-219-1 ENSG00000207933|hsa-mir-9-1  
CCCGCCC ENSG00000199038|hsa-mir-210 ENSG00000207698|hsa-mir-32  
GGCGGG Xie:GGGCGGGC SP-1  
CCCGCGC ENSG00000199032|hsa-mir-425 ENSG00000207611|hsa-mir-149 ENSG00000207792|hsa-mir-151 ENSG00000207960|hsa-mir-153-2  
CCCGCTC ENSG00000207732|hsa-mir-218-1  
CCGAAAG ENSG00000198974|hsa-mir-30e ENSG00000207962|hsa-mir-30c-1  
CCGCCCG ENSG00000198973|hsa-mir-375 ENSG00000199038|hsa-mir-210  
CCGCCCG ENSG00000199104|hsa-mir-346  
CCGCCCG MATCH:V\$ETF\_Q6 ETF

|          |                                 |                               |                              |                              |                              |                              |                            |  |
|----------|---------------------------------|-------------------------------|------------------------------|------------------------------|------------------------------|------------------------------|----------------------------|--|
| CCGCCTC  | ENSG00000207630 hsa-mir-7-3     | ENSG00000207721 hsa-mir-186   |                              |                              |                              |                              |                            |  |
| CCGCGCG  | ENSG00000199032 hsa-mir-425     | ENSG00000207960 hsa-mir-153-2 |                              |                              |                              |                              |                            |  |
| CCGGGCG  | ENSG00000198973 hsa-mir-375     | ENSG00000199038 hsa-mir-210   |                              |                              |                              |                              |                            |  |
| CCGTTTCG | ENSG00000198987 hsa-mir-16-2    | ENSG00000207744 hsa-mir-10b   | ENSG00000208005 hsa-mir-503  | ENSG00000207784 hsa-mir-542  |                              |                              |                            |  |
| CCTATGC  | ENSG00000207571 hsa-mir-615     |                               |                              |                              |                              |                              |                            |  |
| CCTCCCC  | ENSG00000207777 hsa-mir-10a     | ENSG00000207865 hsa-mir-34a   |                              |                              |                              |                              |                            |  |
|          | GGGGAGG Xie:GGGGAGGG MAZ        |                               |                              |                              |                              |                              |                            |  |
| CCTCCGC  | ENSG00000198973 hsa-mir-375     |                               |                              |                              |                              |                              |                            |  |
| CCTGAAG  | ENSG00000207630 hsa-mir-7-3     |                               |                              |                              |                              |                              |                            |  |
| CCTGACA  | ENSG00000198984 hsa-mir-345     |                               |                              |                              |                              |                              |                            |  |
| CCTGCAA  | ENSG00000207695 hsa-mir-184     | ENSG00000207698 hsa-mir-32    |                              |                              |                              |                              |                            |  |
| CCTGCGC  | ENSG00000199047 hsa-mir-378     |                               |                              |                              |                              |                              |                            |  |
| CCTTTAA  | ENSG00000199172 hsa-mir-331     |                               |                              |                              |                              |                              |                            |  |
| CGACGCC  | ENSG00000207568 hsa-mir-203     |                               |                              |                              |                              |                              |                            |  |
| CGAGCGC  | ENSG00000207739 hsa-mir-218-2   |                               |                              |                              |                              |                              |                            |  |
| CGCAACG  | ENSG00000208005 hsa-mir-503     | ENSG00000207784 hsa-mir-542   |                              |                              |                              |                              |                            |  |
| CGCACAC  | ENSG00000199090 hsa-mir-326     |                               |                              |                              |                              |                              |                            |  |
| CGCAGGC  | ENSG00000199047 hsa-mir-378     |                               |                              |                              |                              |                              |                            |  |
|          | CGCAGGC Xie:GCCnnnGGC AP-2ALPHA |                               |                              |                              |                              |                              |                            |  |
|          | GCCTGCG Xie:GCCnnnGGC AP-2ALPHA |                               |                              |                              |                              |                              |                            |  |
| CGCATGC  | ENSG00000207792 hsa-mir-151     |                               |                              |                              |                              |                              |                            |  |
|          | CGCATGC Xie:YGCATGCG NRF-1      |                               |                              |                              |                              |                              |                            |  |
|          | GCATGCG Xie:YGCATGCG NRF-1      |                               |                              |                              |                              |                              |                            |  |
| CGCCCC   | ENSG00000198974 hsa-mir-30e     | ENSG00000207962 hsa-mir-30c-1 |                              |                              |                              |                              |                            |  |
| CGCCCGC  | ENSG00000199038 hsa-mir-210     |                               |                              |                              |                              |                              |                            |  |
| CGCCGAG  | ENSG00000207614 hsa-mir-193a    | ENSG00000199187 hsa-mir-365-2 |                              |                              |                              |                              |                            |  |
| CGCCGCA  | ENSG00000199104 hsa-mir-346     |                               |                              |                              |                              |                              |                            |  |
| CGCCGCC  | ENSG00000207960 hsa-mir-153-2   |                               |                              |                              |                              |                              |                            |  |
| CGCCGCG  | ENSG00000199038 hsa-mir-210     |                               |                              |                              |                              |                              |                            |  |
| CGCCGTA  | ENSG00000199071 hsa-mir-423     |                               |                              |                              |                              |                              |                            |  |
| CGCCTCC  | ENSG00000207611 hsa-mir-149     | ENSG00000207960 hsa-mir-153-2 | ENSG00000207698 hsa-mir-32   |                              |                              |                              |                            |  |
| CGCCTGA  | ENSG00000198995 hsa-mir-340     |                               |                              |                              |                              |                              |                            |  |
| CGCCTGC  | ENSG00000207744 hsa-mir-10b     |                               |                              |                              |                              |                              |                            |  |
| CGCGAGA  | ENSG00000207698 hsa-mir-32      |                               |                              |                              |                              |                              |                            |  |
| CGCGCCC  | ENSG00000207614 hsa-mir-193a    | ENSG00000199187 hsa-mir-365-2 |                              |                              |                              |                              |                            |  |
| CGCGCCG  | ENSG00000199038 hsa-mir-210     | ENSG00000207792 hsa-mir-151   |                              |                              |                              |                              |                            |  |
| CGCGCGC  | ENSG00000207960 hsa-mir-153-2   |                               |                              |                              |                              |                              |                            |  |
| CGCTCCG  | ENSG00000211563 hsa-mir-338     |                               |                              |                              |                              |                              |                            |  |
| CGGGCAC  | ENSG00000208005 hsa-mir-503     | ENSG00000207784 hsa-mir-542   |                              |                              |                              |                              |                            |  |
| CGGGGGA  | ENSG00000199032 hsa-mir-425     | ENSG00000207865 hsa-mir-34a   |                              |                              |                              |                              |                            |  |
| CGGGTCA  | ENSG00000208017 hsa-mir-140     |                               |                              |                              |                              |                              |                            |  |
| CGGTGCC  | ENSG00000199065 hsa-mir-101-2   |                               |                              |                              |                              |                              |                            |  |
| CGTCACC  | ENSG00000199032 hsa-mir-425     |                               |                              |                              |                              |                              |                            |  |
|          | CGTCACC Xie:CCGCACGMnnC HIF-1   |                               |                              |                              |                              |                              |                            |  |
| CGTCACG  | ENSG00000199071 hsa-mir-423     |                               |                              |                              |                              |                              |                            |  |
| CGTCGTA  | ENSG00000199065 hsa-mir-101-2   |                               |                              |                              |                              |                              |                            |  |
| CGTGCGC  | ENSG00000199090 hsa-mir-326     |                               |                              |                              |                              |                              |                            |  |
| CGTGGGA  | ENSG00000207568 hsa-mir-203     |                               |                              |                              |                              |                              |                            |  |
|          | TCCCACG Xie:GGYATTCCCAnd IK-1   |                               |                              |                              |                              |                              |                            |  |
| CTAATCC  | ENSG00000207702 hsa-mir-211     | ENSG00000199122 hsa-mir-148b  |                              |                              |                              |                              |                            |  |
| CTCACAC  | ENSG00000207726 hsa-mir-455     |                               |                              |                              |                              |                              |                            |  |
| CTCACCC  | ENSG00000199059 hsa-mir-135b    | ENSG00000207980 hsa-mir-23a   | ENSG00000209707 hsa-mir-24-2 | ENSG00000207808 hsa-mir-27a  |                              |                              |                            |  |
| CTCCGAG  | ENSG00000198973 hsa-mir-375     |                               |                              |                              |                              |                              |                            |  |
| CTCCGCC  | ENSG00000198973 hsa-mir-375     |                               |                              |                              |                              |                              |                            |  |
| CTGAACA  | ENSG00000199153 hsa-mir-30d     | ENSG00000207582 hsa-mir-30b   |                              |                              |                              |                              |                            |  |
| CTGCAAA  | ENSG00000207805 hsa-mir-483     |                               |                              |                              |                              |                              |                            |  |
| CTGGGGC  | ENSG00000207695 hsa-mir-184     |                               |                              |                              |                              |                              |                            |  |
|          | CTGGGGC Xie:GCCnnnGGC AP-2ALPHA |                               |                              |                              |                              |                              |                            |  |
|          | GCCCCAG Xie:GCCnnnGGC AP-2ALPHA |                               |                              |                              |                              |                              |                            |  |
| CTGTCTC  | ENSG00000207705 hsa-mir-129-1   |                               |                              |                              |                              |                              |                            |  |
| CTTAAAG  | ENSG00000199172 hsa-mir-331     |                               |                              |                              |                              |                              |                            |  |
| CTTCCGC  | ENSG00000207721 hsa-mir-186     |                               |                              |                              |                              |                              |                            |  |
| CTTGACA  | ENSG00000207782 hsa-mir-150     |                               |                              |                              |                              |                              |                            |  |
| CTTGCAA  | ENSG00000211590 hsa-mir-802     |                               |                              |                              |                              |                              |                            |  |
| CTTTGCA  | ENSG00000207805 hsa-mir-483     | ENSG00000202609 hsa-mir-488   |                              |                              |                              |                              |                            |  |
| GAAATAA  | ENSG00000207692 hsa-mir-592     |                               |                              |                              |                              |                              |                            |  |
| GAAATGA  | ENSG00000211590 hsa-mir-802     |                               |                              |                              |                              |                              |                            |  |
|          | TCATTTC Xie:CAGTTTCAYTTY ICSBP  |                               |                              |                              |                              |                              |                            |  |
| GAAGTCC  | ENSG00000207792 hsa-mir-151     | ENSG00000199058 hsa-mir-302b  | ENSG00000199169 hsa-mir-367  | ENSG00000199145 hsa-mir-302d | ENSG00000199102 hsa-mir-302c |                              |                            |  |
| GAAGTGA  | ENSG00000207939 hsa-mir-223     |                               |                              |                              |                              |                              |                            |  |
|          | TCACTTC Xie:CAGTTTCAYTTY ICSBP  |                               |                              |                              |                              |                              |                            |  |
| GACGCAC  | ENSG00000208037 hsa-mir-320     |                               |                              |                              |                              |                              |                            |  |
| GACGTCA  | ENSG00000207953 hsa-mir-212     |                               |                              |                              |                              |                              |                            |  |
|          | GACGTCA Xie:TGACGTCARRG ATF-1   |                               |                              |                              |                              |                              |                            |  |
|          | GACGTCA Xie:TGACGTMA CREB       |                               |                              |                              |                              |                              |                            |  |
|          | TGACGTC Xie:TGACGTCARRG ATF-1   |                               |                              |                              |                              |                              |                            |  |
|          | TGACGTC Xie:TGACGTMA CREB       |                               |                              |                              |                              |                              |                            |  |
| GACTACA  | ENSG00000208009 hsa-mir-130a    |                               |                              |                              |                              |                              |                            |  |
| GACTTCA  | ENSG00000199058 hsa-mir-302b    | ENSG00000199169 hsa-mir-367   | ENSG00000199145 hsa-mir-302d | ENSG00000199102 hsa-mir-302c | ENSG00000199165 hsa-let-7a-1 | ENSG00000199072 hsa-let-7f-1 | ENSG00000199133 hsa-let-7d |  |
|          | ENSG00000207718 hsa-mir-15a     | ENSG00000208006 hsa-mir-16-1  |                              |                              |                              |                              |                            |  |
| GAGACGC  | ENSG00000207953 hsa-mir-212     | ENSG00000208005 hsa-mir-503   | ENSG00000207784 hsa-mir-542  |                              |                              |                              |                            |  |
| GAGAGGA  | ENSG00000207865 hsa-mir-34a     |                               |                              |                              |                              |                              |                            |  |
| GATCAAA  | ENSG00000207777 hsa-mir-10a     |                               |                              |                              |                              |                              |                            |  |
| GATGCAA  | ENSG00000207586 hsa-mir-135a-2  |                               |                              |                              |                              |                              |                            |  |
| GATGTCC  | ENSG00000208005 hsa-mir-503     | ENSG00000207784 hsa-mir-542   |                              |                              |                              |                              |                            |  |
| GCACCGC  | ENSG00000199065 hsa-mir-101-2   | ENSG00000208005 hsa-mir-503   | ENSG00000207784 hsa-mir-542  |                              |                              |                              |                            |  |
| GCAGCGC  | ENSG00000207811 hsa-mir-34b     | ENSG00000207562 hsa-mir-34c   |                              |                              |                              |                              |                            |  |
| GCAGGTA  | ENSG00000208005 hsa-mir-503     | ENSG00000207784 hsa-mir-542   |                              |                              |                              |                              |                            |  |
| GCATGCC  | ENSG00000207792 hsa-mir-151     |                               |                              |                              |                              |                              |                            |  |
| GCCACCC  | ENSG00000207568 hsa-mir-203     |                               |                              |                              |                              |                              |                            |  |
| GCCACGC  | ENSG00000199032 hsa-mir-425     |                               |                              |                              |                              |                              |                            |  |

|          |                                |                                |                                |                               |                             |                                |
|----------|--------------------------------|--------------------------------|--------------------------------|-------------------------------|-----------------------------|--------------------------------|
| GCCCCC   | ENSG00000207730 hsa-mir-200b   | ENSG00000207607 hsa-mir-200a   | ENSG00000198976 hsa-mir-429    |                               |                             |                                |
| GCCCCG   | ENSG00000199038 hsa-mir-210    | ENSG00000207614 hsa-mir-193a   | ENSG00000199187 hsa-mir-365-2  | ENSG00000207739 hsa-mir-218-2 |                             |                                |
|          | GCGGGG Xie:GGGCGGGG SP-1       |                                |                                |                               |                             |                                |
| GCCCGG   | ENSG00000199038 hsa-mir-210    |                                |                                |                               |                             |                                |
| GCCCGC   | ENSG00000199104 hsa-mir-346    | ENSG00000207960 hsa-mir-153-2  |                                |                               |                             |                                |
| GCCGTC   | ENSG00000207960 hsa-mir-153-2  |                                |                                |                               |                             |                                |
| GCGCCG   | ENSG00000207960 hsa-mir-153-2  |                                |                                |                               |                             |                                |
| GCGGAG   | ENSG00000207953 hsa-mir-212    |                                |                                |                               |                             |                                |
| GCTGAC   | ENSG00000199172 hsa-mir-331    |                                |                                |                               |                             |                                |
| GGAAAG   | ENSG00000207995 hsa-mir-325    |                                |                                |                               |                             |                                |
|          | GGAAAG Xie:WGGAAAnW NF-AT      |                                |                                |                               |                             |                                |
| GGAGGG   | ENSG00000207933 hsa-mir-9-1    |                                |                                |                               |                             |                                |
|          | GGAGGG Xie:RGAGGKAGG TFII-I    |                                |                                |                               |                             |                                |
| GGATGC   | ENSG00000207586 hsa-mir-135a-2 |                                |                                |                               |                             |                                |
| GGCAAC   | ENSG00000199023 hsa-mir-339    |                                |                                |                               |                             |                                |
| GGCCAA   | ENSG00000207791 hsa-mir-497    | ENSG00000207929 hsa-mir-195    | ENSG00000207926 hsa-mir-135a-1 |                               |                             |                                |
| GCCCGC   | ENSG00000198973 hsa-mir-375    |                                |                                |                               |                             |                                |
| GCGCCA   | ENSG00000207567 hsa-mir-142    | ENSG00000208036 hsa-mir-106b   | ENSG00000207547 hsa-mir-25     | ENSG00000207757 hsa-mir-93    |                             |                                |
| GCGGGA   | ENSG00000208037 hsa-mir-320    |                                |                                |                               |                             |                                |
| GCGGGA   | ENSG00000207960 hsa-mir-153-2  | ENSG00000207698 hsa-mir-32     |                                |                               |                             |                                |
| GGGCAA   | ENSG00000199036 hsa-mir-219-1  |                                |                                |                               |                             |                                |
| GGGAGG   | ENSG00000207865 hsa-mir-34a    |                                |                                |                               |                             |                                |
| GGGATTA  | ENSG00000199122 hsa-mir-148b   |                                |                                |                               |                             |                                |
|          | GGGATTA Xie:KGRGATTA CRX       |                                |                                |                               |                             |                                |
|          | GGGATTA Xie:YTGGAATTA PITX2    |                                |                                |                               |                             |                                |
| GGCGGA   | ENSG00000198973 hsa-mir-375    | ENSG00000199038 hsa-mir-210    |                                |                               |                             |                                |
| GTAATTA  | ENSG00000207638 hsa-mir-99a    | ENSG00000207863 hsa-mir-125b-2 |                                |                               |                             |                                |
|          | GTAATTA Xie:GTAAKTnG NCX       |                                |                                |                               |                             |                                |
|          | GTAATTA Xie:GTGYARTTAAT AFP1   |                                |                                |                               |                             |                                |
|          | GTAATTA Xie:WAdTAAWTA NKX6-2   |                                |                                |                               |                             |                                |
|          | TAATTAC Xie:AAWAATTAnS PAX-4   |                                |                                |                               |                             |                                |
| GTGACAC  | ENSG00000199036 hsa-mir-219-1  |                                |                                |                               |                             |                                |
| GTCCTGA  | ENSG00000199089 hsa-mir-202    | ENSG00000210741 hsa-mir-196a-1 |                                |                               |                             |                                |
| GTGGCCA  | ENSG00000207638 hsa-mir-99a    | ENSG00000207863 hsa-mir-125b-2 |                                |                               |                             |                                |
| GTGTCCA  | ENSG00000199122 hsa-mir-148b   |                                |                                |                               |                             |                                |
| GTTGCCA  | ENSG00000199065 hsa-mir-101-2  |                                |                                |                               |                             |                                |
| GTTTACA  | ENSG00000207777 hsa-mir-10a    | ENSG00000207797 hsa-mir-187    |                                |                               |                             |                                |
|          | TGTAAAC Xie:TTATRTWAACAT TEF   |                                |                                |                               |                             |                                |
| TAATCGA  | ENSG00000199036 hsa-mir-219-1  |                                |                                |                               |                             |                                |
|          | TAATCGA Xie:RnTAATCGATnW CDP   |                                |                                |                               |                             |                                |
|          | TCGATTA Xie:RnTAATCGATnW CDP   |                                |                                |                               |                             |                                |
| TACCAA   | ENSG00000207717 hsa-mir-551b   | ENSG00000207725 hsa-mir-222    | ENSG00000207870 hsa-mir-221    |                               |                             |                                |
| TATGACA  | ENSG00000207597 hsa-mir-490    |                                |                                |                               |                             |                                |
| TCACAAA  | ENSG00000207995 hsa-mir-325    |                                |                                |                               |                             |                                |
| TCACACA  | ENSG00000199017 hsa-mir-1-1    | ENSG00000207764 hsa-mir-133a-2 |                                |                               |                             |                                |
| TCATAAA  | ENSG00000198981 hsa-mir-29a    |                                |                                |                               |                             |                                |
|          | TCATAAA Xie:GGYMATAAAA CDX-2   |                                |                                |                               |                             |                                |
| TCTTTAA  | ENSG00000208037 hsa-mir-320    |                                |                                |                               |                             |                                |
| TGACCAA  | ENSG00000207939 hsa-mir-223    |                                |                                |                               |                             |                                |
| TGCAAAA  | ENSG00000202641 hsa-mir-484    |                                |                                |                               |                             |                                |
| TGCGACA  | ENSG00000208036 hsa-mir-106b   | ENSG00000207547 hsa-mir-25     | ENSG00000207757 hsa-mir-93     |                               |                             |                                |
| TTAGCAA  | ENSG00000207745 hsa-mir-17     | ENSG00000207610 hsa-mir-19a    | ENSG00000199149 hsa-mir-20a    |                               |                             |                                |
| TTATGAA  | ENSG00000198981 hsa-mir-29a    |                                |                                |                               |                             |                                |
| AAAAAGCG | ENSG00000207797 hsa-mir-187    |                                |                                |                               |                             |                                |
| AAAAATTT | ENSG00000199058 hsa-mir-302b   | ENSG00000199169 hsa-mir-367    | ENSG00000199145 hsa-mir-302d   | ENSG00000199102 hsa-mir-302c  | ENSG00000199177 hsa-mir-31  |                                |
| AAACCGGA | ENSG00000207649 hsa-mir-138-2  |                                |                                |                               |                             |                                |
| AAACGAAC | ENSG00000207721 hsa-mir-186    |                                |                                |                               |                             |                                |
| AAACGCCT | ENSG00000207698 hsa-mir-32     |                                |                                |                               |                             |                                |
| AAACGGCT | ENSG00000207597 hsa-mir-490    |                                |                                |                               |                             |                                |
| AAACGGTT | ENSG00000207960 hsa-mir-153-2  |                                |                                |                               |                             |                                |
| AAACGTTG | ENSG00000199065 hsa-mir-101-2  |                                |                                |                               |                             |                                |
| AAACGTTT | ENSG00000207791 hsa-mir-497    | ENSG00000207929 hsa-mir-195    | ENSG00000207633 hsa-mir-505    |                               |                             |                                |
| AAAGATCG | ENSG00000207728 hsa-mir-449b   |                                |                                |                               |                             |                                |
|          | AAAGATCG Xie:GAAnnWTCK HSF2    |                                |                                |                               |                             |                                |
| AAATAGCG | ENSG00000199017 hsa-mir-1-1    | ENSG00000207764 hsa-mir-133a-2 |                                |                               |                             |                                |
| AAATCGGC | ENSG00000207596 hsa-mir-194-2  | ENSG00000207648 hsa-mir-192    | ENSG00000207611 hsa-mir-149    | ENSG00000199122 hsa-mir-148b  | ENSG00000207638 hsa-mir-99a | ENSG00000207863 hsa-mir-125b-2 |
| AAATGCAA | ENSG00000207994 hsa-mir-100    | ENSG00000207971 hsa-mir-125b-1 | ENSG00000198975 hsa-let-7a-2   |                               |                             |                                |
| AAATGCCG | ENSG00000202609 hsa-mir-488    |                                |                                |                               |                             |                                |
| AAATCCCG | ENSG00000207656 hsa-mir-489    |                                |                                |                               |                             |                                |
|          | CGGAATTT Xie:SGGRnTTTCC C-REL  |                                |                                |                               |                             |                                |
| AAATTCGA | ENSG00000207865 hsa-mir-34a    |                                |                                |                               |                             |                                |
| AAATTCCT | ENSG00000199172 hsa-mir-331    |                                |                                |                               |                             |                                |
| AACAACGG | ENSG00000207950 hsa-mir-296    |                                |                                |                               |                             |                                |
| AACAAGCG | ENSG00000198974 hsa-mir-30e    | ENSG00000207962 hsa-mir-30c-1  |                                |                               |                             |                                |
| AACACGCT | ENSG00000207624 hsa-mir-194-1  | ENSG00000207590 hsa-mir-215    |                                |                               |                             |                                |
| AACATATT | ENSG00000207751 hsa-mir-130b   |                                |                                |                               |                             |                                |
| AACATGGT | ENSG00000207791 hsa-mir-497    | ENSG00000207929 hsa-mir-195    |                                |                               |                             |                                |
| AACCATGG | ENSG00000207739 hsa-mir-218-2  |                                |                                |                               |                             |                                |
| AACCCGAC | ENSG00000207568 hsa-mir-203    |                                |                                |                               |                             |                                |
| AACCCGCT | ENSG00000199130 hsa-mir-365-1  |                                |                                |                               |                             |                                |
| AACCCGTC | ENSG00000207568 hsa-mir-203    |                                |                                |                               |                             |                                |
| AACCTTAT | ENSG00000207656 hsa-mir-489    |                                |                                |                               |                             |                                |
| AACGAATT | ENSG00000198987 hsa-mir-16-2   |                                |                                |                               |                             |                                |
| AACGACGC | ENSG00000207994 hsa-mir-100    | ENSG00000207971 hsa-mir-125b-1 | ENSG00000198975 hsa-let-7a-2   |                               |                             |                                |
| AACGACTC | ENSG00000198987 hsa-mir-16-2   |                                |                                |                               |                             |                                |
| AACGAGCA | ENSG00000207947 hsa-mir-152    |                                |                                |                               |                             |                                |
| AACGCGCG | ENSG00000211517 hsa-mir-671    |                                |                                |                               |                             |                                |
| AACGGGTC | ENSG00000199085 hsa-mir-148a   |                                |                                |                               |                             |                                |
| AACGGTCG | ENSG00000199032 hsa-mir-425    | ENSG00000207933 hsa-mir-9-1    |                                |                               |                             |                                |
| AACGTAAG | ENSG00000199165 hsa-let-7a-1   | ENSG00000199072 hsa-let-7f-1   | ENSG00000199133 hsa-let-7d     | ENSG00000207790 hsa-mir-29b-2 | ENSG00000207966 hsa-mir-29c |                                |
| AACTACAA | ENSG00000207698 hsa-mir-32     |                                |                                |                               |                             |                                |

AACTACCG ENSG00000199085|hsa-mir-148a  
AACTACCG ENSG00000199071|hsa-mir-423  
AACTCCCG ENSG00000199071|hsa-mir-423 ENSG00000207698|hsa-mir-32  
AACTCGAA ENSG00000198987|hsa-mir-16-2  
AACTCTCG ENSG00000199071|hsa-mir-423 ENSG00000207777|hsa-mir-10a  
AAGATGGA ENSG00000199157|hsa-mir-208  
AAGCCGAT ENSG00000199122|hsa-mir-148b  
AAGCGATT ENSG00000199089|hsa-mir-202  
AAGCGCTT ENSG00000207698|hsa-mir-32  
AAGCTCGC ENSG00000198974|hsa-mir-30e ENSG00000207962|hsa-mir-30c-1  
AAGGAAGT ENSG00000207795|hsa-mir-155  
AAGGAAGT Xie:AGGAART ELF-1  
AAGGAAGT Xie:MGGAWGT PEA3  
AAGGACCG ENSG00000207586|hsa-mir-135a-2  
AAGTCGCG ENSG00000207744|hsa-mir-10b  
AAGTCTCG ENSG00000207726|hsa-mir-455 ENSG00000207624|hsa-mir-194-1 ENSG00000207590|hsa-mir-215  
AAGTCCGG ENSG00000198987|hsa-mir-16-2 ENSG00000207744|hsa-mir-10b  
AAGTTGCG ENSG00000202609|hsa-mir-488 ENSG00000207623|hsa-mir-205  
AAGTTTCG ENSG00000202609|hsa-mir-488 ENSG00000210741|hsa-mir-196a-1  
AAGTTTCG Xie:GAAnnWTCK HSF2  
AATAATGC ENSG00000199023|hsa-mir-339  
AATAGCCG ENSG00000199023|hsa-mir-339 ENSG00000199153|hsa-mir-30d ENSG00000207582|hsa-mir-30b ENSG00000208009|hsa-mir-130a  
AATAGCCG ENSG00000198987|hsa-mir-16-2  
AATAGCCG ENSG00000199017|hsa-mir-1-1 ENSG00000207764|hsa-mir-133a-2 ENSG00000199065|hsa-mir-101-2  
AATAGCCG ENSG00000202641|hsa-mir-484  
AATATGGT ENSG00000199017|hsa-mir-1-1 ENSG00000207764|hsa-mir-133a-2 ENSG00000207618|hsa-mir-144 ENSG00000207794|hsa-mir-451  
AATATTCG ENSG00000199065|hsa-mir-101-2  
AATCAAAAT ENSG00000208017|hsa-mir-140  
AATCATTC ENSG00000211590|hsa-mir-802  
AATCGAAC ENSG00000207597|hsa-mir-490  
AATCGCCG ENSG00000198987|hsa-mir-16-2  
AATCGCTA ENSG00000199122|hsa-mir-148b ENSG00000207731|hsa-mir-506  
AATCGGAT ENSG00000199071|hsa-mir-423  
AATCGGCA ENSG00000207611|hsa-mir-149 ENSG00000207638|hsa-mir-99a ENSG00000207863|hsa-mir-125b-2  
AATCGGCT ENSG00000199122|hsa-mir-148b ENSG00000207777|hsa-mir-10a  
AATCGTCA ENSG00000199077|hsa-mir-129-2 ENSG00000207694|hsa-mir-1-2  
AATCTCGC ENSG00000199058|hsa-mir-302b ENSG00000199169|hsa-mir-367 ENSG00000199145|hsa-mir-302d ENSG00000199102|hsa-mir-302c ENSG00000207698|hsa-mir-32  
AATGAATG ENSG00000207995|hsa-mir-325  
AATGACGA ENSG00000199065|hsa-mir-101-2  
AATGCGCG ENSG00000198987|hsa-mir-16-2 ENSG00000207744|hsa-mir-10b  
AATGTGCG ENSG00000207827|hsa-mir-30a ENSG00000199094|hsa-mir-30c-2  
AATTACCT ENSG00000207649|hsa-mir-138-2  
AATTACGA ENSG00000207550|hsa-mir-99b ENSG00000198972|hsa-let-7e  
AATTATAG ENSG00000207811|hsa-mir-34b ENSG00000207562|hsa-mir-34c  
AATTATGC ENSG00000207702|hsa-mir-211  
GCATAATT Xie:GCATAAWTTAT POU6F1  
AATTATGG ENSG00000199085|hsa-mir-148a  
AATTCGGT ENSG00000207732|hsa-mir-218-1 ENSG00000207777|hsa-mir-10a  
AATTCGAC ENSG00000207960|hsa-mir-153-2  
AATTGATG ENSG00000207656|hsa-mir-489  
AATTGCAA ENSG00000199053|hsa-mir-324 ENSG00000207617|hsa-mir-24-1  
AATTGCGA ENSG00000199043|hsa-mir-335  
AATTTCCG ENSG00000198987|hsa-mir-16-2  
AATTTCCG Xie:AWTTTCC IY  
AATTTCCG MATCH:V\$HMG1Y\_Q6 HMG1Y  
AATTTCCG ENSG00000199043|hsa-mir-335  
ACAACCGA ENSG00000199088|hsa-mir-379 ENSG00000207749|hsa-mir-299 ENSG00000198982|hsa-mir-380 ENSG00000199069|hsa-mir-323 ENSG00000211582|hsa-mir-758 ENSG00000207761|hsa-mir-329-1 ENSG00000194717|hsa-mir-494  
ENSG00000207743|hsa-mir-495 ENSG00000199020|hsa-mir-381 ENSG00000207754|hsa-mir-487b ENSG00000202560|hsa-mir-539 ENSG00000207993|hsa-mir-134 ENSG00000207961|hsa-mir-496 ENSG00000199015|hsa-mir-377  
ENSG00000199107|hsa-mir-409 ENSG00000199012|hsa-mir-412 ENSG00000199025|hsa-mir-369 ENSG00000199092|hsa-mir-410  
ACAACTCG ENSG00000207728|hsa-mir-449b ENSG00000207935|hsa-mir-204  
ACAAGCGA ENSG00000199089|hsa-mir-202 ENSG00000199024|hsa-mir-103-2  
ACAATAGT ENSG00000207617|hsa-mir-24-1  
ACAATCGC ENSG00000199122|hsa-mir-148b  
ACAATGGG ENSG00000207702|hsa-mir-211  
ACACGACG ENSG00000207614|hsa-mir-193a ENSG00000199187|hsa-mir-365-2  
ACACGACT ENSG00000198995|hsa-mir-340  
ACACGCCG ENSG00000207567|hsa-mir-142  
ACACGTCG ENSG00000198973|hsa-mir-375  
ACACTGCG ENSG00000207623|hsa-mir-205  
ACAGCGAC ENSG00000207571|hsa-mir-615  
ACATACGG ENSG00000207586|hsa-mir-135a-2  
ACATCACG ENSG00000207611|hsa-mir-149 ENSG00000207586|hsa-mir-135a-2  
ACATCGCG ENSG00000199077|hsa-mir-129-2  
ACATCGCG ENSG00000199071|hsa-mir-423  
ACATGGCG ENSG00000198974|hsa-mir-30e ENSG00000207962|hsa-mir-30c-1 ENSG00000199043|hsa-mir-335  
ACATTATG ENSG00000198986|hsa-let-7a-3 ENSG00000207875|hsa-let-7b  
ACATTCCG ENSG00000207568|hsa-mir-203  
ACATTCCG ENSG00000198984|hsa-mir-345 ENSG00000207718|hsa-mir-15a ENSG00000208006|hsa-mir-16-1  
ACCAACCG ENSG00000207811|hsa-mir-34b ENSG00000207562|hsa-mir-34c  
ACCAATCG ENSG00000207717|hsa-mir-551b  
CGATTGGT Xie:YSATTGGYY NF-Y  
ACCAATGA ENSG00000208036|hsa-mir-106b ENSG00000207547|hsa-mir-25 ENSG00000207757|hsa-mir-93  
TCATTGGT Xie:YSATTGGYY NF-Y  
ACCACCTG ENSG00000207692|hsa-mir-592  
ACCACGGA ENSG00000199088|hsa-mir-379 ENSG00000207749|hsa-mir-299 ENSG00000198982|hsa-mir-380 ENSG00000199069|hsa-mir-323 ENSG00000211582|hsa-mir-758 ENSG00000207761|hsa-mir-329-1 ENSG00000194717|hsa-mir-494  
ENSG00000207743|hsa-mir-495 ENSG00000199020|hsa-mir-381 ENSG00000207754|hsa-mir-487b ENSG00000202560|hsa-mir-539 ENSG00000207993|hsa-mir-134 ENSG00000207961|hsa-mir-496 ENSG00000199015|hsa-mir-377  
ENSG00000199107|hsa-mir-409 ENSG00000199012|hsa-mir-412 ENSG00000199025|hsa-mir-369 ENSG00000199092|hsa-mir-410  
ACCATAGA ENSG00000211517|hsa-mir-671  
ACCATCGT ENSG00000207585|hsa-mir-181d ENSG00000207732|hsa-mir-218-1 ENSG00000199004|hsa-mir-21  
ACCCCCAG ENSG00000199089|hsa-mir-202  
ACCCGTAC ENSG00000207623|hsa-mir-205



|                                          |                                |                                |                               |
|------------------------------------------|--------------------------------|--------------------------------|-------------------------------|
| ACCGAATC ENSG00000207691 hsa-mir-183     | ENSG00000207990 hsa-mir-182    | ENSG00000199158 hsa-mir-96     |                               |
| ACCGAATG ENSG00000198984 hsa-mir-345     |                                |                                |                               |
| ACCGATAA ENSG00000199085 hsa-mir-148a    |                                |                                |                               |
| ACCGCAAC ENSG00000199038 hsa-mir-210     |                                |                                |                               |
| ACCGCTAG ENSG00000208024 hsa-mir-199a-2  | ENSG00000207949 hsa-mir-214    |                                |                               |
| ACCGGAAC ENSG00000207789 hsa-mir-26a-2   |                                |                                |                               |
| ACCGGAAT ENSG00000199122 hsa-mir-148b    |                                |                                |                               |
| ACCGGCC ENSG00000207604 hsa-mir-206      | ENSG00000199080 hsa-mir-133b   |                                |                               |
| ACCGGGTA ENSG00000199090 hsa-mir-326     |                                |                                |                               |
| ACCGGTCG ENSG00000207568 hsa-mir-203     |                                |                                |                               |
| ACCTCATA ENSG00000207728 hsa-mir-449b    |                                |                                |                               |
| ACCTCCAG ENSG00000198984 hsa-mir-345     | ENSG00000207571 hsa-mir-615    |                                |                               |
| ACCTGTGC ENSG00000207717 hsa-mir-551b    |                                |                                |                               |
| ACCTGTTG ENSG00000207865 hsa-mir-34a     |                                |                                |                               |
| ACGAAACG ENSG00000207726 hsa-mir-455     |                                |                                |                               |
| ACGAAGCC ENSG00000207933 hsa-mir-9-1     |                                |                                |                               |
| ACGACAAC ENSG00000207726 hsa-mir-455     |                                |                                |                               |
| ACGACACC ENSG00000207728 hsa-mir-449b    |                                |                                |                               |
| ACGACACG ENSG00000207953 hsa-mir-212     |                                |                                |                               |
| ACGACGCC ENSG00000207994 hsa-mir-100     | ENSG00000207971 hsa-mir-125b-1 | ENSG00000198975 hsa-let-7a-2   |                               |
| ACGACTCT ENSG00000198995 hsa-mir-340     | ENSG00000207698 hsa-mir-32     |                                |                               |
| ACGAGACA ENSG00000207550 hsa-mir-99b     | ENSG00000198972 hsa-let-7e     |                                |                               |
| ACGAGGCA ENSG00000211574 hsa-mir-770     | ENSG00000208001 hsa-mir-431    | ENSG00000199005 hsa-mir-370    |                               |
| ACGATCCC ENSG00000207752 hsa-mir-199a-1  | ENSG00000207638 hsa-mir-99a    | ENSG00000207863 hsa-mir-125b-2 |                               |
| ACGATTGG ENSG00000207717 hsa-mir-551b    |                                |                                |                               |
| ACGATTTT ENSG00000211590 hsa-mir-802     |                                |                                |                               |
| ACGCAAAAT ENSG00000207633 hsa-mir-505    | ENSG00000207797 hsa-mir-187    |                                |                               |
| ACGCAAGT ENSG00000207717 hsa-mir-551b    |                                |                                |                               |
| ACGCAATC ENSG00000207698 hsa-mir-32      |                                |                                |                               |
| ACGCACGA ENSG00000199036 hsa-mir-219-1   |                                |                                |                               |
| ACGCCCAT ENSG00000207954 hsa-mir-138-1   |                                |                                |                               |
| ACGCCGCC ENSG00000199122 hsa-mir-148b    |                                |                                |                               |
| ACGGCACC ENSG00000198974 hsa-mir-30e     | ENSG00000207962 hsa-mir-30c-1  |                                |                               |
| ACGGGTCA ENSG00000199090 hsa-mir-326     |                                |                                |                               |
| ACGCTGAC ENSG00000199071 hsa-mir-423     |                                |                                |                               |
| ACGCTGAT ENSG00000207624 hsa-mir-194-1   | ENSG00000207590 hsa-mir-215    | ENSG00000207695 hsa-mir-184    |                               |
| ACGGACCA ENSG00000207953 hsa-mir-212     |                                |                                |                               |
| ACGGATTC ENSG00000199161 hsa-mir-126     |                                |                                |                               |
| ACGGCGCA ENSG00000199047 hsa-mir-378     |                                |                                |                               |
| ACGGCGTC ENSG00000207819 hsa-mir-9-3     |                                |                                |                               |
| ACGGGATA ENSG00000199157 hsa-mir-208     |                                |                                |                               |
| ACGGGGCC ENSG00000207947 hsa-mir-152     |                                |                                |                               |
| ACGGGGGG ENSG00000199023 hsa-mir-339     |                                |                                |                               |
| ACGGTTGG ENSG00000207567 hsa-mir-142     | ENSG00000207811 hsa-mir-34b    | ENSG00000207562 hsa-mir-34c    | ENSG00000207960 hsa-mir-153-2 |
| ACGTAAAC ENSG00000199071 hsa-mir-423     |                                |                                |                               |
| ACGTAAAC Xie:CCGCACGTMnnC HIF-1          |                                |                                |                               |
| ACGTAAAG ENSG00000207702 hsa-mir-211     | ENSG00000198974 hsa-mir-30e    | ENSG00000207962 hsa-mir-30c-1  |                               |
| ACGTAGGG ENSG00000207819 hsa-mir-9-3     |                                |                                |                               |
| ACGTCAA ENSG00000207581 hsa-mir-199b     | ENSG00000207953 hsa-mir-212    |                                |                               |
| ACGTCAA Xie:TGACGTCARRG ATF-1            |                                |                                |                               |
| ACGTCAAG ENSG00000199121 hsa-mir-26b     | ENSG00000208024 hsa-mir-199a-2 | ENSG00000207949 hsa-mir-214    |                               |
| ACGTCAAG Xie:TGACGTCARRG ATF-1           |                                |                                |                               |
| ACGTCACG ENSG00000199130 hsa-mir-365-1   |                                |                                |                               |
| ACGTCAGT ENSG00000207630 hsa-mir-7-3     |                                |                                |                               |
| ACGTCATC ENSG00000207617 hsa-mir-24-1    |                                |                                |                               |
| ACGTCATC Xie:CCGCACGTMnnC HIF-1          |                                |                                |                               |
| ACGTCATG ENSG00000198995 hsa-mir-340     |                                |                                |                               |
| ACGTCGAG ENSG00000207933 hsa-mir-9-1     |                                |                                |                               |
| ACGTGACG ENSG00000199071 hsa-mir-423     | ENSG00000199130 hsa-mir-365-1  |                                |                               |
| ACGTGAGG ENSG00000199135 hsa-mir-101-1   |                                |                                |                               |
| ACGTGATA ENSG00000199122 hsa-mir-148b    | ENSG00000199165 hsa-let-7a-1   | ENSG00000199072 hsa-let-7f-1   | ENSG00000199133 hsa-let-7d    |
| ACGTGTCA ENSG00000198973 hsa-mir-375     | ENSG00000207635 hsa-mir-499    |                                |                               |
| ACGTTCCG ENSG00000207614 hsa-mir-193a    | ENSG00000199187 hsa-mir-365-2  |                                |                               |
| ACGTTGCA ENSG00000207585 hsa-mir-181d    |                                |                                |                               |
| ACGTTGTC ENSG00000199071 hsa-mir-423     | ENSG00000199172 hsa-mir-331    |                                |                               |
| ACGTTTAA ENSG00000207791 hsa-mir-497     | ENSG00000207929 hsa-mir-195    | ENSG00000207960 hsa-mir-153-2  |                               |
| ACTAATCC ENSG00000208017 hsa-mir-140     | ENSG00000207597 hsa-mir-490    |                                |                               |
| ACTAATTA ENSG00000207702 hsa-mir-211     |                                |                                |                               |
| ACTAATTG ENSG00000207865 hsa-mir-34a     |                                |                                |                               |
| ACTACGGA ENSG00000199065 hsa-mir-101-2   | ENSG00000207954 hsa-mir-138-1  |                                |                               |
| ACTACGGC ENSG00000199071 hsa-mir-423     |                                |                                |                               |
| ACTCGTGC ENSG00000207953 hsa-mir-212     |                                |                                |                               |
| ACTGCGGA ENSG00000199104 hsa-mir-346     |                                |                                |                               |
| ACTTATAC ENSG00000207581 hsa-mir-199b    | ENSG00000207721 hsa-mir-186    |                                |                               |
| ACTTCCGC ENSG00000207721 hsa-mir-186     |                                |                                |                               |
| GCGGAAGT Xie:MGGAWGT PEA3                |                                |                                |                               |
| ACTTCCCTG ENSG00000208024 hsa-mir-199a-2 | ENSG00000207949 hsa-mir-214    |                                |                               |
| ACTTCCCTG Xie:CACTTCCTG ETS              |                                |                                |                               |
| CAGGAAGT Xie:AGGAART ELF-1               |                                |                                |                               |
| CAGGAAGT Xie:CAGGAAGTAR TEL-2            |                                |                                |                               |
| CAGGAAGT Xie:MGGAWGT PEA3                |                                |                                |                               |
| ACTTCCCTG MATCH:V\$ETS_Q6 ETS            |                                |                                |                               |
| ACTTCGTC ENSG00000207994 hsa-mir-100     | ENSG00000207971 hsa-mir-125b-1 | ENSG00000198975 hsa-let-7a-2   |                               |
| AGAAATCGA ENSG00000207726 hsa-mir-455    |                                |                                |                               |
| AGATCGAA ENSG00000199004 hsa-mir-21      | ENSG00000202609 hsa-mir-488    |                                |                               |
| AGATCTCG ENSG00000198974 hsa-mir-30e     | ENSG00000207962 hsa-mir-30c-1  |                                |                               |
| AGATCGCC ENSG00000207933 hsa-mir-9-1     |                                |                                |                               |
| AGCCCTCG ENSG00000207947 hsa-mir-152     |                                |                                |                               |
| AGCCGCCG ENSG00000199065 hsa-mir-101-2   | ENSG00000199104 hsa-mir-346    | ENSG00000199071 hsa-mir-423    |                               |
| AGCGCAA ENSG00000199032 hsa-mir-425      | ENSG00000198987 hsa-mir-16-2   |                                |                               |
| AGCGCAC ENSG00000207571 hsa-mir-615      |                                |                                |                               |



ATGACCGC ENSG00000207617|hsa-mir-24-1  
 ATGACCGC ENSG00000207739|hsa-mir-218-2  
 ATGACGGG ENSG00000207752|hsa-mir-199a-1 ENSG00000207777|hsa-mir-10a  
 ATGACGTC ENSG00000207617|hsa-mir-24-1  
 ATGACGTC ENSG00000198995|hsa-mir-340  
 CACGTAT Xie:CCGCACGTmnnC HIF-1  
 ATGCAACG ENSG00000207585|hsa-mir-181d ENSG00000202609|hsa-mir-488  
 ATGCGAAG ENSG00000198987|hsa-mir-16-2  
 ATGCGCAA ENSG00000207960|hsa-mir-153-2 ENSG00000207623|hsa-mir-205  
 ATGCGCCA ENSG00000208035|hsa-mir-143 ENSG00000207638|hsa-mir-99a ENSG00000207863|hsa-mir-125b-2 ENSG00000207777|hsa-mir-10a  
 ATGCGCCC ENSG00000207933|hsa-mir-9-1 ENSG00000208005|hsa-mir-503 ENSG00000207784|hsa-mir-542  
 ATGCGCGA ENSG00000207744|hsa-mir-10b  
 ATGCGCGC ENSG00000198987|hsa-mir-16-2  
 ATGCGGTC ENSG00000211517|hsa-mir-671  
 ATGGCCCG ENSG00000199071|hsa-mir-423  
 ATGGCGAA ENSG00000199043|hsa-mir-335  
 ATGGCGGA ENSG00000207731|hsa-mir-506  
 ATGGCGTC ENSG00000199023|hsa-mir-339  
 ATGGCTCG ENSG00000207732|hsa-mir-218-1  
 ATGGTAAG ENSG00000211563|hsa-mir-338  
 ATGGTCGC ENSG00000211517|hsa-mir-671  
 ATGTCAAC ENSG00000198995|hsa-mir-340 ENSG00000207728|hsa-mir-449b  
 ATGTCACG ENSG00000207611|hsa-mir-149 ENSG00000199004|hsa-mir-21  
 ATGTCGCG ENSG00000207792|hsa-mir-151  
 ATGTCGCG ENSG00000207960|hsa-mir-153-2  
 ATGTTAGA ENSG00000207751|hsa-mir-130b  
 ATTAACGA ENSG00000207698|hsa-mir-32 ENSG00000207994|hsa-mir-100 ENSG00000207971|hsa-mir-125b-1 ENSG00000198975|hsa-let-7a-2  
 ATTAATAG ENSG00000207624|hsa-mir-194-1 ENSG00000207590|hsa-mir-215  
 ATTAATAG MATCH:V\$CDXA\_02 CdxA  
 ATTACCCG ENSG00000207955|hsa-mir-219-2  
 ATTACCGC ENSG00000207638|hsa-mir-99a ENSG00000207863|hsa-mir-125b-2  
 ATTACCTC ENSG00000207980|hsa-mir-23a ENSG00000209707|hsa-mir-24-2 ENSG00000207808|hsa-mir-27a  
 ATTACGTA ENSG00000207725|hsa-mir-222 ENSG00000207870|hsa-mir-221  
 ATTACGTA Xie:RTTACRTAAY E4BP4  
 TACGTAAT Xie:RTTACRTAAY E4BP4  
 ATTAGCCG ENSG00000199023|hsa-mir-339  
 ATTAGCGC ENSG00000199036|hsa-mir-219-1 ENSG00000207744|hsa-mir-10b  
 ATTAGGCG ENSG00000199071|hsa-mir-423  
 ATTATAGC ENSG00000207792|hsa-mir-151 ENSG00000202609|hsa-mir-488  
 ATTATAGG ENSG00000207811|hsa-mir-34b ENSG00000207562|hsa-mir-34c  
 ATTCACA ENSG00000207995|hsa-mir-325  
 TGTGAAT Xie:CTGTGAAWATT HP1  
 ATTCGTC ENSG00000207732|hsa-mir-218-1  
 ATTCGCGC ENSG00000207718|hsa-mir-15a ENSG00000208006|hsa-mir-16-1  
 ATTCGTTA ENSG00000198987|hsa-mir-16-2 ENSG00000207698|hsa-mir-32  
 ATTGACGG ENSG00000199017|hsa-mir-1-1 ENSG00000207764|hsa-mir-133a-2  
 ATTGATGC ENSG00000199065|hsa-mir-101-2 ENSG00000207585|hsa-mir-181d  
 ATTGCGAC ENSG00000199032|hsa-mir-425 ENSG00000199085|hsa-mir-148a ENSG00000199122|hsa-mir-148b  
 ATTGCGCG ENSG00000199065|hsa-mir-101-2 ENSG00000198987|hsa-mir-16-2 ENSG00000207797|hsa-mir-187  
 ATTGCGTC ENSG00000207698|hsa-mir-32  
 ATTGCGTA ENSG00000199071|hsa-mir-423  
 ATTGCTAC ENSG00000207955|hsa-mir-219-2  
 ATTGTCGG ENSG00000207702|hsa-mir-211 ENSG00000207597|hsa-mir-490  
 ATTGTCGC ENSG00000199032|hsa-mir-425 ENSG00000198987|hsa-mir-16-2 ENSG00000207744|hsa-mir-10b  
 ATTGTCGC ENSG00000207581|hsa-mir-199b  
 ATTTAAGA ENSG00000199153|hsa-mir-30d ENSG00000207582|hsa-mir-30b  
 ATTTAGTA ENSG00000207624|hsa-mir-194-1 ENSG00000207590|hsa-mir-215  
 ATTTATCG ENSG00000207694|hsa-mir-1-2  
 ATTTCCGA ENSG00000207777|hsa-mir-10a  
 ATTTCCGA ENSG00000199043|hsa-mir-335  
 ATTTCTCG ENSG00000207752|hsa-mir-199a-1 ENSG00000207698|hsa-mir-32  
 ATTTGACC ENSG00000199024|hsa-mir-103-2  
 ATTTGGCG ENSG00000208036|hsa-mir-106b ENSG00000207547|hsa-mir-25 ENSG00000207757|hsa-mir-93 ENSG00000207597|hsa-mir-490  
 ATTTTCGA ENSG00000198987|hsa-mir-16-2 ENSG00000207717|hsa-mir-551b  
 CAAATAAA ENSG00000208017|hsa-mir-140 ENSG00000208036|hsa-mir-106b ENSG00000207547|hsa-mir-25 ENSG00000207757|hsa-mir-93  
 CAAATCGG ENSG00000207596|hsa-mir-194-2 ENSG00000207648|hsa-mir-192  
 CAAATTAC ENSG00000207550|hsa-mir-99b ENSG00000198972|hsa-let-7e ENSG00000207792|hsa-mir-151  
 GTAATTG Xie:GTAAKTnG NCX  
 CAACACGA ENSG00000202609|hsa-mir-488  
 TCGTGTG Xie:TnYGTGTRKTG FAC1  
 CAACCGAC ENSG00000199071|hsa-mir-423  
 CAACCGTC ENSG00000207789|hsa-mir-26a-2 ENSG00000207811|hsa-mir-34b ENSG00000207562|hsa-mir-34c  
 CAACGCAG ENSG00000199024|hsa-mir-103-2  
 CAACGGAC ENSG00000207728|hsa-mir-449b  
 CAACGGCA ENSG00000199135|hsa-mir-101-1  
 CAACGGTC ENSG00000199032|hsa-mir-425 ENSG00000207933|hsa-mir-9-1  
 CAACGTGC ENSG00000207994|hsa-mir-100 ENSG00000207971|hsa-mir-125b-1 ENSG00000198975|hsa-let-7a-2  
 CAACTTAC ENSG00000202569|hsa-mir-146b  
 GTAAGTTG Xie:GTAAKTnG NCX  
 CAAGATGG ENSG00000199036|hsa-mir-219-1  
 CAAGCGCA ENSG00000198974|hsa-mir-30e ENSG00000207962|hsa-mir-30c-1  
 CAAGTCCC ENSG00000207809|hsa-mir-139  
 CAAGTTCG ENSG00000207630|hsa-mir-7-3  
 CAATACGG ENSG00000207955|hsa-mir-219-2  
 CAATAGCG ENSG00000199065|hsa-mir-101-2  
 CAATAGGC ENSG00000202641|hsa-mir-484  
 CAATAGTC ENSG00000207617|hsa-mir-24-1  
 CAATCGCA ENSG00000208017|hsa-mir-140  
 CAATCGGA ENSG00000207790|hsa-mir-29b-2 ENSG00000207966|hsa-mir-29c  
 CAATCGGC ENSG00000207638|hsa-mir-99a ENSG00000207863|hsa-mir-125b-2 ENSG00000207777|hsa-mir-10a  
 CAATGACG ENSG00000199065|hsa-mir-101-2

|                                        |                                |                               |                                |                             |                             |                               |  |  |
|----------------------------------------|--------------------------------|-------------------------------|--------------------------------|-----------------------------|-----------------------------|-------------------------------|--|--|
| CAATGCCG ENSG00000199043 hsa-mir-335   |                                |                               |                                |                             |                             |                               |  |  |
| CAATGCGA ENSG00000198981 hsa-mir-29a   |                                |                               |                                |                             |                             |                               |  |  |
| CAATGCCG ENSG00000199047 hsa-mir-378   |                                |                               |                                |                             |                             |                               |  |  |
| CAATGTAA ENSG00000207585 hsa-mir-181d  |                                |                               |                                |                             |                             |                               |  |  |
| CAATGTTA ENSG00000207618 hsa-mir-144   | ENSG00000207794 hsa-mir-451    |                               | ENSG00000207649 hsa-mir-138-2  |                             |                             |                               |  |  |
| CAATTACC ENSG00000207649 hsa-mir-138-2 |                                |                               |                                |                             |                             |                               |  |  |
| CAATTCCG ENSG00000207751 hsa-mir-130b  |                                |                               |                                |                             |                             |                               |  |  |
| CACACGTA ENSG00000207726 hsa-mir-455   |                                |                               |                                |                             |                             |                               |  |  |
| CACATAAC ENSG00000207581 hsa-mir-199b  |                                |                               |                                |                             |                             |                               |  |  |
| CACATCGC ENSG00000198995 hsa-mir-340   |                                |                               |                                |                             |                             |                               |  |  |
| CACCGCCC ENSG00000199065 hsa-mir-101-2 |                                |                               |                                |                             |                             |                               |  |  |
| CACGCAAG ENSG00000199066 hsa-mir-330   |                                |                               |                                |                             |                             |                               |  |  |
| CTTGCGTG Xie:TnCGGTG AHR               |                                |                               |                                |                             |                             |                               |  |  |
| CACGCCCA ENSG00000199038 hsa-mir-210   |                                |                               |                                |                             |                             |                               |  |  |
| CACGCCCC ENSG00000199032 hsa-mir-425   | ENSG00000207789 hsa-mir-26a-2  |                               |                                |                             |                             |                               |  |  |
| CACGGCCC ENSG00000207617 hsa-mir-24-1  |                                |                               |                                |                             |                             |                               |  |  |
| CACGCTGA ENSG00000207695 hsa-mir-184   |                                |                               |                                |                             |                             |                               |  |  |
| CACGCTCG ENSG00000199121 hsa-mir-26b   |                                |                               |                                |                             |                             |                               |  |  |
| CACGTCAA ENSG00000207581 hsa-mir-199b  | ENSG00000208024 hsa-mir-199a-2 |                               | ENSG00000207949 hsa-mir-214    |                             |                             |                               |  |  |
| CACGTCAA Xie:CCGCACGTMnnc HIF-1        |                                |                               |                                |                             |                             |                               |  |  |
| CACGTTTA ENSG00000207791 hsa-mir-497   | ENSG00000207929 hsa-mir-195    |                               | ENSG00000207926 hsa-mir-135a-1 |                             |                             |                               |  |  |
| CACCTTCG ENSG00000208005 hsa-mir-503   | ENSG00000207784 hsa-mir-542    |                               |                                |                             |                             |                               |  |  |
| CAGCTGCC ENSG00000207604 hsa-mir-206   | ENSG00000199080 hsa-mir-133b   |                               |                                |                             |                             |                               |  |  |
| CAGCTGCC Xie:GCAGCTGnY AP-4            |                                |                               |                                |                             |                             |                               |  |  |
| CAGGGCAG ENSG00000207790 hsa-mir-29b-2 | ENSG00000207966 hsa-mir-29c    |                               |                                |                             |                             |                               |  |  |
| CAGGGCCC ENSG00000207739 hsa-mir-218-2 |                                |                               |                                |                             |                             |                               |  |  |
| CAGTCCGAG ENSG00000207623 hsa-mir-205  |                                |                               |                                |                             |                             |                               |  |  |
| CAGTCCGC ENSG00000199104 hsa-mir-346   | ENSG00000207777 hsa-mir-10a    |                               |                                |                             |                             |                               |  |  |
| CATAAAAA ENSG00000208017 hsa-mir-140   |                                |                               |                                |                             |                             |                               |  |  |
| CATAAGCG ENSG00000199085 hsa-mir-148a  |                                |                               |                                |                             |                             |                               |  |  |
| CATAATGC ENSG00000199004 hsa-mir-21    |                                |                               |                                |                             |                             |                               |  |  |
| CATAATTA ENSG00000199085 hsa-mir-148a  | ENSG00000207638 hsa-mir-99a    |                               | ENSG00000207863 hsa-mir-125b-2 |                             |                             |                               |  |  |
| TAATTATG Xie:AAWAATTAnS PAX-4          |                                |                               |                                |                             |                             |                               |  |  |
| CATACGGG ENSG00000199038 hsa-mir-210   |                                |                               |                                |                             |                             |                               |  |  |
| CATAGAGA ENSG00000202569 hsa-mir-146b  | ENSG00000211517 hsa-mir-671    |                               |                                |                             |                             |                               |  |  |
| CATATATG ENSG00000199071 hsa-mir-423   |                                |                               |                                |                             |                             |                               |  |  |
| CATATATG Xie:GnCCAWATAWGGM SRF         |                                |                               |                                |                             |                             |                               |  |  |
| CATATATG Xie:GnCCAWATAWGGM SRF         |                                |                               |                                |                             |                             |                               |  |  |
| CATATCGG ENSG00000202641 hsa-mir-484   |                                |                               |                                |                             |                             |                               |  |  |
| CATATGGC ENSG00000207728 hsa-mir-449b  |                                |                               |                                |                             |                             |                               |  |  |
| CATCATAA ENSG00000207618 hsa-mir-144   | ENSG00000207794 hsa-mir-451    |                               |                                |                             |                             |                               |  |  |
| CATCGACA ENSG00000199157 hsa-mir-208   |                                |                               |                                |                             |                             |                               |  |  |
| CATCGTGC ENSG00000207585 hsa-mir-181d  |                                |                               |                                |                             |                             |                               |  |  |
| CATCTTGG ENSG00000207691 hsa-mir-183   | ENSG00000207990 hsa-mir-182    |                               | ENSG00000199158 hsa-mir-96     |                             |                             |                               |  |  |
| CATGACCG ENSG00000207739 hsa-mir-218-2 |                                |                               |                                |                             |                             |                               |  |  |
| CATGCCGA ENSG00000207638 hsa-mir-99a   | ENSG00000207863 hsa-mir-125b-2 |                               |                                |                             |                             |                               |  |  |
| CATGCCGG ENSG00000208009 hsa-mir-130a  |                                |                               |                                |                             |                             |                               |  |  |
| CATGCCCG ENSG00000207792 hsa-mir-151   |                                |                               |                                |                             |                             |                               |  |  |
| CGCGCATG Xie:YCGCATGCG NRF-1           |                                |                               |                                |                             |                             |                               |  |  |
| CATGCCGA ENSG00000199043 hsa-mir-335   | ENSG00000199088 hsa-mir-379    | ENSG00000207749 hsa-mir-299   | ENSG00000198982 hsa-mir-380    | ENSG00000199069 hsa-mir-323 | ENSG00000211582 hsa-mir-758 | ENSG00000207761 hsa-mir-329-1 |  |  |
| ENSG00000194717 hsa-mir-494            | ENSG00000207743 hsa-mir-495    | ENSG00000199020 hsa-mir-381   | ENSG00000207754 hsa-mir-487b   | ENSG00000202560 hsa-mir-539 | ENSG00000207993 hsa-mir-134 | ENSG00000207961 hsa-mir-496   |  |  |
| ENSG00000199015 hsa-mir-377            | ENSG00000199107 hsa-mir-409    | ENSG00000199012 hsa-mir-412   | ENSG00000199025 hsa-mir-369    | ENSG00000199092 hsa-mir-410 |                             |                               |  |  |
| CATTACCG ENSG00000207618 hsa-mir-144   | ENSG00000207794 hsa-mir-451    |                               |                                |                             |                             |                               |  |  |
| CATTAGCG ENSG00000207744 hsa-mir-10b   |                                |                               |                                |                             |                             |                               |  |  |
| CATTCAAC ENSG00000207995 hsa-mir-325   |                                |                               |                                |                             |                             |                               |  |  |
| CATTGACG ENSG00000199017 hsa-mir-1-1   | ENSG00000207764 hsa-mir-133a-2 |                               |                                |                             |                             |                               |  |  |
| CATTGTCG ENSG00000199032 hsa-mir-425   |                                |                               |                                |                             |                             |                               |  |  |
| CATTTACG ENSG00000207651 hsa-mir-28    |                                |                               |                                |                             |                             |                               |  |  |
| CCAATGTA ENSG00000207728 hsa-mir-449b  |                                |                               |                                |                             |                             |                               |  |  |
| CCAATTGG ENSG00000211517 hsa-mir-671   |                                |                               |                                |                             |                             |                               |  |  |
| CCACCTGG ENSG00000199032 hsa-mir-425   |                                |                               |                                |                             |                             |                               |  |  |
| CCACGCC ENSG00000199038 hsa-mir-210    | ENSG00000207789 hsa-mir-26a-2  |                               |                                |                             |                             |                               |  |  |
| CCACGCC MATCH:V\$CADC_01 CACD          |                                |                               |                                |                             |                             |                               |  |  |
| CCACGTTA ENSG00000199024 hsa-mir-103-2 |                                |                               |                                |                             |                             |                               |  |  |
| CCAGCCCA ENSG00000199059 hsa-mir-135b  |                                |                               |                                |                             |                             |                               |  |  |
| CCAGCCCC ENSG00000202569 hsa-mir-146b  | ENSG00000207568 hsa-mir-203    |                               |                                |                             |                             |                               |  |  |
| GGGGCTGG Xie:GRGGTGGG CAC-BP           |                                |                               |                                |                             |                             |                               |  |  |
| CCATAGAG ENSG00000211517 hsa-mir-671   |                                |                               |                                |                             |                             |                               |  |  |
| CCATATGG ENSG00000207728 hsa-mir-449b  | ENSG00000199172 hsa-mir-331    |                               |                                |                             |                             |                               |  |  |
| CCATCCGG ENSG00000208017 hsa-mir-140   |                                |                               |                                |                             |                             |                               |  |  |
| CCATCGAC ENSG00000211574 hsa-mir-770   | ENSG00000208001 hsa-mir-431    |                               | ENSG00000199005 hsa-mir-370    |                             |                             |                               |  |  |
| CCCATACG ENSG00000207596 hsa-mir-194-2 | ENSG00000207648 hsa-mir-192    |                               |                                |                             |                             |                               |  |  |
| CCCCACCC ENSG00000207623 hsa-mir-205   |                                |                               |                                |                             |                             |                               |  |  |
| CCCCGCC ENSG00000198973 hsa-mir-375    |                                |                               |                                |                             |                             |                               |  |  |
| CCCCCTCA ENSG00000207980 hsa-mir-23a   | ENSG00000209707 hsa-mir-24-2   | ENSG00000207808 hsa-mir-27a   |                                |                             |                             |                               |  |  |
| CCCCGCC ENSG00000199032 hsa-mir-425    | ENSG00000198974 hsa-mir-30e    | ENSG00000207962 hsa-mir-30c-1 | ENSG00000208005 hsa-mir-503    | ENSG00000207784 hsa-mir-542 |                             |                               |  |  |
| GGGCGGGG Xie:GGGCGGGG SP-1             |                                |                               |                                |                             |                             |                               |  |  |
| CCCCTCCC ENSG00000207623 hsa-mir-205   | ENSG00000207777 hsa-mir-10a    |                               |                                |                             |                             |                               |  |  |
| CCCCGCC ENSG00000198974 hsa-mir-30e    | ENSG00000207962 hsa-mir-30c-1  | ENSG00000199122 hsa-mir-148b  |                                |                             |                             |                               |  |  |
| GGGCGGGG Xie:GGGCGGGG SP-1             |                                |                               |                                |                             |                             |                               |  |  |
| CCCGGATA ENSG00000207777 hsa-mir-10a   |                                |                               |                                |                             |                             |                               |  |  |
| CCCGGCGA ENSG00000207695 hsa-mir-184   |                                |                               |                                |                             |                             |                               |  |  |
| CCCGTAAC ENSG00000211517 hsa-mir-671   |                                |                               |                                |                             |                             |                               |  |  |
| CCCGTCGA ENSG00000211574 hsa-mir-770   | ENSG00000208001 hsa-mir-431    | ENSG00000199005 hsa-mir-370   |                                |                             |                             |                               |  |  |
| CCCTCCGC ENSG00000198973 hsa-mir-375   |                                |                               |                                |                             |                             |                               |  |  |
| CCCTGGCC ENSG00000199059 hsa-mir-135b  |                                |                               |                                |                             |                             |                               |  |  |
| CCCTGGGA ENSG00000199059 hsa-mir-135b  |                                |                               |                                |                             |                             |                               |  |  |
| CCCTTACG ENSG00000207702 hsa-mir-211   |                                |                               |                                |                             |                             |                               |  |  |
| CCGACAAA ENSG00000207597 hsa-mir-490   | ENSG00000207604 hsa-mir-206    | ENSG00000199080 hsa-mir-133b  |                                |                             |                             |                               |  |  |
| CCGATTCG ENSG00000199085 hsa-mir-148a  |                                |                               |                                |                             |                             |                               |  |  |
| CCGATTTA ENSG00000207713 hsa-mir-200c  | ENSG00000207708 hsa-mir-141    | ENSG00000207638 hsa-mir-99a   | ENSG00000207863 hsa-mir-125b-2 |                             |                             |                               |  |  |

|                                         |                                |                               |
|-----------------------------------------|--------------------------------|-------------------------------|
| CCGCATGA ENSG00000198995 hsa-mir-340    | ENSG00000207953 hsa-mir-212    |                               |
| CCGCCCC ENSG00000207611 hsa-mir-149     | ENSG00000198974 hsa-mir-30e    | ENSG00000207962 hsa-mir-30c-1 |
| CCGCCCGG ENSG00000198973 hsa-mir-375    | ENSG00000199038 hsa-mir-210    |                               |
| CCGCCGCA ENSG00000199104 hsa-mir-346    | ENSG00000207732 hsa-mir-218-1  |                               |
| CCGCCGCA MATCH:V\$ETF_Q6 ETF            |                                |                               |
| CCGCCGCG ENSG00000199038 hsa-mir-210    |                                |                               |
| CCGCCGCG MATCH:V\$ETF_Q6 ETF            |                                |                               |
| CCGCCGTA ENSG00000199130 hsa-mir-365-1  |                                |                               |
| CCGCCGTC ENSG00000207960 hsa-mir-153-2  |                                |                               |
| CCGCCGAA ENSG00000207777 hsa-mir-10a    |                                |                               |
| CCGCCGCG ENSG00000207960 hsa-mir-153-2  |                                |                               |
| CCGGATGC ENSG00000207865 hsa-mir-34a    |                                |                               |
| CCGGCCGC ENSG00000199104 hsa-mir-346    | ENSG00000211517 hsa-mir-671    |                               |
| CCGGCCGG ENSG00000199038 hsa-mir-210    |                                |                               |
| CCGGCGAA ENSG00000207571 hsa-mir-615    |                                |                               |
| CCGGCTAA ENSG00000199023 hsa-mir-339    |                                |                               |
| CCGGTCCG ENSG00000207792 hsa-mir-151    |                                |                               |
| CCGTACCA ENSG00000199017 hsa-mir-1-1    | ENSG00000207764 hsa-mir-133a-2 | ENSG00000199038 hsa-mir-210   |
| CCGTACCG ENSG00000207568 hsa-mir-203    |                                |                               |
| CCGTACTC ENSG00000207789 hsa-mir-26a-2  |                                |                               |
| CCGTATGC ENSG00000199038 hsa-mir-210    |                                |                               |
| CCGTCAA ENSG00000199024 hsa-mir-103-2   |                                |                               |
| CCGTGCGC ENSG00000199038 hsa-mir-210    |                                |                               |
| CCGTGACG ENSG00000199071 hsa-mir-423    |                                |                               |
| CCGTGGTA ENSG00000207581 hsa-mir-199b   |                                |                               |
| CCGTTACG ENSG00000207960 hsa-mir-153-2  |                                |                               |
| CCGTTCGA ENSG00000207581 hsa-mir-199b   | ENSG00000198987 hsa-mir-16-2   | ENSG00000207744 hsa-mir-10b   |
| CCGTTGAC ENSG00000199135 hsa-mir-101-1  |                                |                               |
| CCTAATCG ENSG00000207623 hsa-mir-205    |                                |                               |
| CCTATAGG ENSG00000199082 hsa-mir-342    | ENSG00000207797 hsa-mir-187    |                               |
| CCTATCGC ENSG00000199065 hsa-mir-101-2  |                                |                               |
| CCTATTAG ENSG00000199090 hsa-mir-326    |                                |                               |
| CCTCCGCC ENSG00000198973 hsa-mir-375    |                                |                               |
| CCTCCGTA ENSG00000211563 hsa-mir-338    |                                |                               |
| CCTCGTTA ENSG00000207827 hsa-mir-30a    | ENSG00000199094 hsa-mir-30c-2  |                               |
| CCTCTCCA ENSG00000207649 hsa-mir-138-2  | ENSG00000207995 hsa-mir-325    |                               |
| CCTCTTCC ENSG00000199090 hsa-mir-326    |                                |                               |
| CCTGGCAA ENSG00000207618 hsa-mir-144    | ENSG00000207794 hsa-mir-451    |                               |
| CCTGGCAG ENSG00000207567 hsa-mir-142    |                                |                               |
| CCTTAATC ENSG00000208017 hsa-mir-140    |                                |                               |
| CCTTATAA ENSG00000207728 hsa-mir-449b   |                                |                               |
| CCTTTAAG ENSG00000199172 hsa-mir-331    |                                |                               |
| CGAAAATC ENSG00000198987 hsa-mir-16-2   |                                |                               |
| CGAAACAA ENSG00000199071 hsa-mir-423    |                                |                               |
| CGAAATCA ENSG00000207744 hsa-mir-10b    |                                |                               |
| CGAAATTA ENSG00000199043 hsa-mir-335    |                                |                               |
| CGAACCTA ENSG00000207960 hsa-mir-153-2  |                                |                               |
| CGAACGAG ENSG00000199047 hsa-mir-378    |                                |                               |
| CGAACGGA ENSG00000198987 hsa-mir-16-2   |                                |                               |
| CGAACTGC ENSG00000199104 hsa-mir-346    |                                |                               |
| CGAATCAC ENSG00000208009 hsa-mir-130a   |                                |                               |
| CGAATTC ENSG00000198987 hsa-mir-16-2    |                                |                               |
| CGACAACC ENSG00000207726 hsa-mir-455    |                                |                               |
| CGACACAA ENSG00000207955 hsa-mir-219-2  |                                |                               |
| CGACAGTC ENSG00000207656 hsa-mir-489    |                                |                               |
| CGACATGA ENSG00000207739 hsa-mir-218-2  |                                |                               |
| CGACATTC ENSG00000207586 hsa-mir-135a-2 |                                |                               |
| CGACGTGA ENSG00000207933 hsa-mir-9-1    |                                |                               |
| CGAGACGA ENSG00000207752 hsa-mir-199a-1 |                                |                               |
| CGAGATCA ENSG00000207809 hsa-mir-139    | ENSG00000208037 hsa-mir-320    | ENSG00000198987 hsa-mir-16-2  |
| CGAGTTCA ENSG00000207585 hsa-mir-181d   | ENSG00000207777 hsa-mir-10a    |                               |
| CGATCTCC ENSG00000202609 hsa-mir-488    |                                |                               |
| CGATTAGC ENSG00000199036 hsa-mir-219-1  | ENSG00000207819 hsa-mir-9-3    | ENSG00000207597 hsa-mir-490   |
| GCTAATCG Xie:RnTAATCGATnW CDP           |                                |                               |
| CGATTCAA ENSG00000199071 hsa-mir-423    | ENSG00000207795 hsa-mir-155    |                               |
| CGATTCTA ENSG00000208024 hsa-mir-199a-2 | ENSG00000207949 hsa-mir-214    |                               |
| CGATTGGA ENSG00000208017 hsa-mir-140    |                                |                               |
| CGATTTAA ENSG00000207726 hsa-mir-455    |                                |                               |
| CGATTTAC ENSG00000207713 hsa-mir-200c   | ENSG00000207708 hsa-mir-141    |                               |
| CGATTTCC ENSG00000211590 hsa-mir-802    |                                |                               |
| CGAAAAAC ENSG00000202641 hsa-mir-484    |                                |                               |
| CGCAACTC ENSG00000207777 hsa-mir-10a    |                                |                               |
| CGCAATGA ENSG00000199065 hsa-mir-101-2  | ENSG00000198987 hsa-mir-16-2   |                               |
| CGCAATGC ENSG00000199065 hsa-mir-101-2  |                                |                               |
| CGCAATTA ENSG00000199043 hsa-mir-335    |                                |                               |
| CGCACACA ENSG00000199090 hsa-mir-326    |                                |                               |
| CGCACTGA ENSG00000207638 hsa-mir-99a    | ENSG00000207863 hsa-mir-125b-2 | ENSG00000207947 hsa-mir-152   |
| CGCACTTA ENSG00000207935 hsa-mir-204    | ENSG00000199177 hsa-mir-31     |                               |
| CGCACTTC ENSG00000199043 hsa-mir-335    |                                |                               |
| GAAGTGCG Xie:vCCGGAAGnGCR GABP          |                                |                               |
| CGCAGAGA ENSG00000199121 hsa-mir-26b    |                                |                               |
| CGCAGGCC ENSG00000199038 hsa-mir-210    |                                |                               |
| CGCATACC ENSG00000208024 hsa-mir-199a-2 | ENSG00000207949 hsa-mir-214    |                               |
| CGCATCTC ENSG00000207604 hsa-mir-206    | ENSG00000199080 hsa-mir-133b   |                               |
| CGCATGAA ENSG00000207953 hsa-mir-212    | ENSG00000207777 hsa-mir-10a    |                               |
| CGCATGAC ENSG00000198995 hsa-mir-340    |                                |                               |
| CGCATTAG ENSG00000199122 hsa-mir-148b   |                                |                               |
| CGCATTGC ENSG00000199047 hsa-mir-378    |                                |                               |
| CGCCACCC ENSG00000207581 hsa-mir-199b   |                                |                               |
| CGCCACCG ENSG00000199082 hsa-mir-342    |                                |                               |
| CGCCCTAG ENSG00000199071 hsa-mir-423    |                                |                               |

CGCCTATA ENSG00000207953|hsa-mir-212  
CGCCTCCG ENSG00000207698|hsa-mir-32  
CGCGACCA ENSG00000199047|hsa-mir-378  
CGCGAGAA ENSG00000207698|hsa-mir-32  
CGCGAGAG ENSG00000199071|hsa-mir-423  
CGCGCGCC ENSG00000207960|hsa-mir-153-2  
CGCGCGGC ENSG00000199104|hsa-mir-346  
CGCGCGTA ENSG00000207953|hsa-mir-212  
CGCGCTAA ENSG00000207744|hsa-mir-10b  
CGCGCTTA ENSG00000199104|hsa-mir-346 ENSG00000207695|hsa-mir-184  
CGCGGGTA ENSG00000207960|hsa-mir-153-2  
CGCGGTGC ENSG00000208005|hsa-mir-503 ENSG00000207784|hsa-mir-542  
CGCGTTAC ENSG00000202641|hsa-mir-484  
CGCTAATC ENSG00000199036|hsa-mir-219-1  
CGCTAGAA ENSG00000208024|hsa-mir-199a-2 ENSG00000207949|hsa-mir-214  
CGCTATAA ENSG00000198995|hsa-mir-340  
CGCTGACC ENSG00000199043|hsa-mir-335 ENSG00000199071|hsa-mir-423  
CGCTTAGC ENSG00000199090|hsa-mir-326  
CGCTTTAC ENSG00000199047|hsa-mir-378 ENSG00000207827|hsa-mir-30a ENSG00000199094|hsa-mir-30c-2  
CGCTTTTA ENSG00000207630|hsa-mir-7-3  
CGGAAGTA ENSG00000207721|hsa-mir-186  
CGGAAGTA Xie:MGAWGT PEA3  
CGGAATGC ENSG00000208036|hsa-mir-106b ENSG00000207547|hsa-mir-25 ENSG00000207757|hsa-mir-93  
CGGACACC ENSG00000207698|hsa-mir-32  
CGGACCCC ENSG00000207955|hsa-mir-219-2  
CGGACTAC ENSG00000208005|hsa-mir-503 ENSG00000207784|hsa-mir-542  
CGGAGGGC ENSG00000198973|hsa-mir-375  
CGGATCCC ENSG00000198974|hsa-mir-30e ENSG00000207962|hsa-mir-30c-1  
CGGATTGA ENSG00000207751|hsa-mir-130b  
CGGCAACG ENSG00000198995|hsa-mir-340  
CGGCATGC ENSG00000198974|hsa-mir-30e ENSG00000207962|hsa-mir-30c-1 ENSG00000207638|hsa-mir-99a ENSG00000207863|hsa-mir-125b-2 ENSG00000208009|hsa-mir-130a  
CGGCCAGC ENSG00000207739|hsa-mir-218-2  
CGGCGAAA ENSG00000207571|hsa-mir-615  
CGGCGCCC ENSG00000199104|hsa-mir-346 ENSG00000207585|hsa-mir-181d  
CGGCGGTA ENSG00000207935|hsa-mir-204  
CGGCGTCA ENSG00000199071|hsa-mir-423  
CGGCTGCC ENSG00000198995|hsa-mir-340  
CGGGAATA ENSG00000199085|hsa-mir-148a  
CGGGACAA ENSG00000199122|hsa-mir-148b ENSG00000207571|hsa-mir-615  
CGGGCAGC ENSG00000207713|hsa-mir-200c ENSG00000207708|hsa-mir-141  
CGGGCATA ENSG00000199053|hsa-mir-324  
CGGGGAG ENSG00000207865|hsa-mir-34a  
CGGGGTCA ENSG00000198974|hsa-mir-30e ENSG00000207962|hsa-mir-30c-1  
CGGTAATA ENSG00000207947|hsa-mir-152  
CGGTCAAC ENSG00000199135|hsa-mir-101-1  
CGGTCAACG ENSG00000208017|hsa-mir-140  
CGGTCCCT ENSG00000208024|hsa-mir-199a-2 ENSG00000207949|hsa-mir-214  
CGGTTCAA ENSG00000199024|hsa-mir-103-2  
CGGTTCCA ENSG00000199023|hsa-mir-339  
CGGTTGAA ENSG00000199071|hsa-mir-423  
CGGTTGAC ENSG00000198995|hsa-mir-340  
CGGTTGTC ENSG00000199088|hsa-mir-379 ENSG00000207749|hsa-mir-299 ENSG00000198982|hsa-mir-380 ENSG00000199069|hsa-mir-323 ENSG00000211582|hsa-mir-758 ENSG00000207761|hsa-mir-329-1 ENSG00000194717|hsa-mir-494  
ENSG00000207743|hsa-mir-495 ENSG00000199020|hsa-mir-381 ENSG00000207754|hsa-mir-487b ENSG00000202560|hsa-mir-539 ENSG00000207993|hsa-mir-134 ENSG00000207961|hsa-mir-496 ENSG00000199015|hsa-mir-377  
ENSG00000199107|hsa-mir-409 ENSG00000199012|hsa-mir-412 ENSG00000199025|hsa-mir-369  
CGTAAACA ENSG00000207656|hsa-mir-489  
CGTAAAGA ENSG00000199077|hsa-mir-129-2  
CGTAAAGC ENSG00000207827|hsa-mir-30a ENSG00000199094|hsa-mir-30c-2  
CGTACCAA ENSG00000207789|hsa-mir-26a-2  
CGTACTCA ENSG00000207926|hsa-mir-135a-1  
CGTAGTAG ENSG00000199165|hsa-let-7a-1 ENSG00000199072|hsa-let-7f-1 ENSG00000199133|hsa-let-7d  
CGTAGTGA ENSG00000199038|hsa-mir-210 ENSG00000207947|hsa-mir-152  
CGTCAAAA ENSG00000208024|hsa-mir-199a-2 ENSG00000207949|hsa-mir-214  
CGTCAAAG ENSG00000207953|hsa-mir-212  
CGTCAAAG Xie:TGACGTCARRG ATF-1  
CTTTGACG Xie:CTTTGA LEF1  
CGTCACAA ENSG00000208037|hsa-mir-320  
CGTCAGTA ENSG00000199023|hsa-mir-339  
CGTCATGC ENSG00000198995|hsa-mir-340  
CGTCCAGA ENSG00000207695|hsa-mir-184  
CGTCGAGC ENSG00000207933|hsa-mir-9-1  
CGTCGCAA ENSG00000198986|hsa-let-7a-3 ENSG00000207875|hsa-let-7b  
CGTCTCTA ENSG00000211517|hsa-mir-671  
CGTCTTAC ENSG00000199089|hsa-mir-202  
CGTGACAC ENSG00000199036|hsa-mir-219-1  
CGTGACGA ENSG00000199071|hsa-mir-423  
CGTGACTA ENSG00000199077|hsa-mir-129-2  
CGTGACTC ENSG00000208036|hsa-mir-106b ENSG00000207547|hsa-mir-25 ENSG00000207757|hsa-mir-93 ENSG00000207571|hsa-mir-615  
CGTGAGCA ENSG00000210741|hsa-mir-196a-1  
CGTGATAG ENSG00000198995|hsa-mir-340 ENSG00000198987|hsa-mir-16-2 ENSG00000199165|hsa-let-7a-1 ENSG00000199072|hsa-let-7f-1 ENSG00000199133|hsa-let-7d  
CGTGCAAC ENSG00000199085|hsa-mir-148a  
CGTGCTGA ENSG00000199023|hsa-mir-339  
CGTGGCCA ENSG00000199032|hsa-mir-425  
CGTGGTAC ENSG00000207581|hsa-mir-199b  
CGTGGTCA ENSG00000199066|hsa-mir-330  
CGTGTCAA ENSG00000207732|hsa-mir-218-1  
CGTTAAAA ENSG00000199085|hsa-mir-148a  
CGTTAAAC ENSG00000207602|hsa-mir-106a ENSG00000207572|hsa-mir-363 ENSG00000207710|hsa-mir-20b  
CGTTAACC ENSG00000199043|hsa-mir-335  
CGTTACAA ENSG00000202641|hsa-mir-484 ENSG00000198987|hsa-mir-16-2  
CGTTTCGAA ENSG00000199047|hsa-mir-378  
CGTTGGAA ENSG00000211590|hsa-mir-802

|                                         |                                |                               |                                |                             |
|-----------------------------------------|--------------------------------|-------------------------------|--------------------------------|-----------------------------|
| CGTTGTCA ENSG00000199071 hsa-mir-423    | ENSG00000199172 hsa-mir-331    |                               |                                |                             |
| CGTTTAAG ENSG00000207791 hsa-mir-497    | ENSG00000207929 hsa-mir-195    |                               |                                |                             |
| CTAACCGC ENSG00000207726 hsa-mir-455    |                                |                               |                                |                             |
| CTAATCGA ENSG00000199036 hsa-mir-219-1  | ENSG00000207597 hsa-mir-490    |                               |                                |                             |
| CTAATCGA Xie:RnTAATCGAtNw CDP           |                                |                               |                                |                             |
| CTAATCGC ENSG00000207819 hsa-mir-9-3    |                                |                               |                                |                             |
| CTAATTAC ENSG00000207702 hsa-mir-211    |                                |                               |                                |                             |
| GTAATTAG Xie:GTAAKTnG NCX               |                                |                               |                                |                             |
| CTAATTGA ENSG00000207865 hsa-mir-34a    |                                |                               |                                |                             |
| CTACGGAA ENSG00000207954 hsa-mir-138-1  |                                |                               |                                |                             |
| CTACTTAC ENSG00000199065 hsa-mir-101-2  |                                |                               |                                |                             |
| GTAAGTAG Xie:GTAAKTnG NCX               |                                |                               |                                |                             |
| CTATAACA ENSG00000207649 hsa-mir-138-2  |                                |                               |                                |                             |
| CTATAATA ENSG00000202609 hsa-mir-488    |                                |                               |                                |                             |
| CTATGCAA ENSG00000199053 hsa-mir-324    |                                |                               |                                |                             |
| CTATTAAG ENSG00000199032 hsa-mir-425    |                                |                               |                                |                             |
| CTATTTAA ENSG00000207571 hsa-mir-615    |                                |                               |                                |                             |
| CTCAATTA ENSG00000207702 hsa-mir-211    |                                |                               |                                |                             |
| CTCACGAC ENSG00000211563 hsa-mir-338    | ENSG00000198981 hsa-mir-29a    | ENSG00000199122 hsa-mir-148b  |                                |                             |
| CTCCACAC ENSG00000199077 hsa-mir-129-2  |                                |                               |                                |                             |
| CTCCGCC ENSG00000198973 hsa-mir-375     |                                |                               |                                |                             |
| CTCCGTAC ENSG00000207611 hsa-mir-149    | ENSG00000207789 hsa-mir-26a-2  | ENSG00000211563 hsa-mir-338   |                                |                             |
| CTCGCGAG ENSG00000207698 hsa-mir-32     |                                |                               |                                |                             |
| CTCGTTAA ENSG00000199085 hsa-mir-148a   |                                |                               |                                |                             |
| CTCTTATA ENSG00000198973 hsa-mir-375    |                                |                               |                                |                             |
| CTCTTTCC ENSG00000199036 hsa-mir-219-1  |                                |                               |                                |                             |
| CTGACGCA ENSG00000207717 hsa-mir-551b   |                                |                               |                                |                             |
| CTGACGTA ENSG00000207947 hsa-mir-152    |                                |                               |                                |                             |
| CTGCGTAA ENSG00000199077 hsa-mir-129-2  |                                |                               |                                |                             |
| CTGCGTTA ENSG00000207656 hsa-mir-489    |                                |                               |                                |                             |
| CTGGCCA ENSG00000199059 hsa-mir-135b    |                                |                               |                                |                             |
| CTGGCGTA ENSG00000207692 hsa-mir-592    |                                |                               |                                |                             |
| CTGGGCCA ENSG00000199059 hsa-mir-135b   |                                |                               |                                |                             |
| CTGGTCCG ENSG00000199047 hsa-mir-378    |                                |                               |                                |                             |
| CTGTGCAA ENSG00000198986 hsa-let-7a-3   | ENSG00000207875 hsa-let-7b     |                               |                                |                             |
| CTTACGTC ENSG00000207702 hsa-mir-211    | ENSG00000198974 hsa-mir-30e    | ENSG00000207962 hsa-mir-30c-1 |                                |                             |
| GACGTAAG Xie:GTGACGTARS E4F1            |                                |                               |                                |                             |
| CTTATAGC ENSG00000199082 hsa-mir-342    |                                |                               |                                |                             |
| CTTATATA ENSG00000199017 hsa-mir-1-1    | ENSG00000207764 hsa-mir-133a-2 |                               |                                |                             |
| CTTCATAA ENSG00000207617 hsa-mir-24-1   |                                |                               |                                |                             |
| CTTCCGTA ENSG00000199043 hsa-mir-335    |                                |                               |                                |                             |
| CTTCCGTC ENSG00000199161 hsa-mir-126    | ENSG00000207618 hsa-mir-144    | ENSG00000207794 hsa-mir-451   | ENSG00000208024 hsa-mir-199a-2 | ENSG00000207949 hsa-mir-214 |
| CTTCGATC ENSG00000207955 hsa-mir-219-2  |                                |                               |                                |                             |
| CTTGATTA ENSG00000208035 hsa-mir-143    |                                |                               |                                |                             |
| CTTTCGAC ENSG00000198984 hsa-mir-345    |                                |                               |                                |                             |
| CTTTCGGA ENSG00000207623 hsa-mir-205    |                                |                               |                                |                             |
| CTTTTCCC ENSG00000199085 hsa-mir-148a   |                                |                               |                                |                             |
| CTTTTCGA ENSG00000207865 hsa-mir-34a    |                                |                               |                                |                             |
| GAACGCGC ENSG00000207695 hsa-mir-184    |                                |                               |                                |                             |
| GAACGGCA ENSG00000198974 hsa-mir-30e    | ENSG00000207962 hsa-mir-30c-1  | ENSG00000208005 hsa-mir-503   | ENSG00000207784 hsa-mir-542    |                             |
| GAAGGGGA ENSG00000207811 hsa-mir-34b    | ENSG00000207562 hsa-mir-34c    |                               |                                |                             |
| GAATATGC ENSG00000199077 hsa-mir-129-2  |                                |                               |                                |                             |
| GAATATTC ENSG00000199085 hsa-mir-148a   |                                |                               |                                |                             |
| GAATATTC Xie:GAAnnWTCK HSF2             |                                |                               |                                |                             |
| GAATATTC Xie:GAAnnWTCK HSF2             |                                |                               |                                |                             |
| GAATGCGA ENSG00000208017 hsa-mir-140    |                                |                               |                                |                             |
| GAATGTTA ENSG00000198984 hsa-mir-345    | ENSG00000198995 hsa-mir-340    |                               |                                |                             |
| GACACGTA ENSG00000207745 hsa-mir-17     | ENSG00000207610 hsa-mir-19a    | ENSG00000199149 hsa-mir-20a   |                                |                             |
| GACAGGGA ENSG00000207635 hsa-mir-499    |                                |                               |                                |                             |
| GACCATAA ENSG00000199036 hsa-mir-219-1  |                                |                               |                                |                             |
| GACCCGTC ENSG00000207777 hsa-mir-10a    |                                |                               |                                |                             |
| GACCGGTA ENSG00000208024 hsa-mir-199a-2 | ENSG00000207949 hsa-mir-214    |                               |                                |                             |
| GACCCGTC ENSG00000207732 hsa-mir-218-1  |                                |                               |                                |                             |
| GACCTCCA ENSG00000208009 hsa-mir-130a   |                                |                               |                                |                             |
| GACGACAC ENSG00000207728 hsa-mir-449b   | ENSG00000207953 hsa-mir-212    |                               |                                |                             |
| GACGCAAA ENSG00000207935 hsa-mir-204    |                                |                               |                                |                             |
| GACGCACC ENSG00000208037 hsa-mir-320    |                                |                               |                                |                             |
| GACGCGTC ENSG00000199090 hsa-mir-326    |                                |                               |                                |                             |
| GACGCTGA ENSG00000199071 hsa-mir-423    |                                |                               |                                |                             |
| GAGCGTGA ENSG00000210741 hsa-mir-196a-1 |                                |                               |                                |                             |
| GAGGGCGC ENSG00000207960 hsa-mir-153-2  |                                |                               |                                |                             |
| GAGTCGAA ENSG00000199023 hsa-mir-339    |                                |                               |                                |                             |
| GAGTCGTA ENSG00000207698 hsa-mir-32     |                                |                               |                                |                             |
| GATAAATC ENSG00000207581 hsa-mir-199b   |                                |                               |                                |                             |
| GATAACCC ENSG00000207782 hsa-mir-150    |                                |                               |                                |                             |
| GATAAGGC ENSG00000207739 hsa-mir-218-2  |                                |                               |                                |                             |
| GATAATTA ENSG00000207745 hsa-mir-17     | ENSG00000207610 hsa-mir-19a    | ENSG00000199149 hsa-mir-20a   |                                |                             |
| TAATTATC Xie:AAWAATTAnS PAX-4           |                                |                               |                                |                             |
| GATATTA ENSG00000207950 hsa-mir-296     |                                |                               |                                |                             |
| GATCAATC ENSG00000207692 hsa-mir-592    |                                |                               |                                |                             |
| GATCGATA ENSG00000207611 hsa-mir-149    | ENSG00000198987 hsa-mir-16-2   |                               |                                |                             |
| GATCGCCA ENSG00000207819 hsa-mir-9-3    |                                |                               |                                |                             |
| GATCGTGA ENSG00000207728 hsa-mir-449b   |                                |                               |                                |                             |
| GATCTAGC ENSG00000207819 hsa-mir-9-3    |                                |                               |                                |                             |
| GATCTCGC ENSG00000207698 hsa-mir-32     |                                |                               |                                |                             |
| GATGCAAC ENSG00000207585 hsa-mir-181d   |                                |                               |                                |                             |
| GATGCCGA ENSG00000207611 hsa-mir-149    |                                |                               |                                |                             |
| GATGCGAC ENSG00000199085 hsa-mir-148a   |                                |                               |                                |                             |
| GATGCGCA ENSG00000207739 hsa-mir-218-2  |                                |                               |                                |                             |
| GATGCGCC ENSG00000199130 hsa-mir-365-1  | ENSG00000207933 hsa-mir-9-1    |                               |                                |                             |
| GATGTTGA ENSG00000208037 hsa-mir-320    |                                |                               |                                |                             |

|                                         |                                |                              |                              |
|-----------------------------------------|--------------------------------|------------------------------|------------------------------|
| GATTAGCA ENSG00000207702 hsa-mir-211    |                                |                              |                              |
| GATTCAAC ENSG00000207618 hsa-mir-144    | ENSG00000207794 hsa-mir-451    | ENSG00000199071 hsa-mir-423  |                              |
| GATTGCGC ENSG00000207797 hsa-mir-187    |                                |                              |                              |
| GATTGGTA ENSG00000199059 hsa-mir-135b   |                                |                              |                              |
| GATTGTTA ENSG00000199122 hsa-mir-148b   |                                |                              |                              |
| GATTGTTA Xie:ATTGTT SOX-5               |                                |                              |                              |
| GCAATCGC ENSG00000207731 hsa-mir-506    |                                |                              |                              |
| GCACCGCC ENSG00000199065 hsa-mir-101-2  |                                |                              |                              |
| GCACCGGC ENSG00000207955 hsa-mir-219-2  | ENSG00000202609 hsa-mir-488    |                              |                              |
| GCAGCCGC ENSG00000199104 hsa-mir-346    |                                |                              |                              |
| GCAGCGCA ENSG00000198981 hsa-mir-29a    |                                |                              |                              |
| GCAGCGCC ENSG00000207811 hsa-mir-34b    | ENSG00000207562 hsa-mir-34c    |                              |                              |
| GCAGTATA ENSG00000198973 hsa-mir-375    |                                |                              |                              |
| GCATGCGC ENSG00000207792 hsa-mir-151    |                                |                              |                              |
| GCGCATGC Xie:YGGCATGCG NRF-1            |                                |                              |                              |
| GCATTATA ENSG00000207792 hsa-mir-151    |                                |                              |                              |
| GCCACGCC ENSG00000199032 hsa-mir-425    | ENSG00000207789 hsa-mir-26a-2  |                              |                              |
| GCCCCGCC ENSG00000199038 hsa-mir-210    |                                |                              |                              |
| GGCGGGGC Xie:GGGCGGGGC SP-1             |                                |                              |                              |
| GCCCCCTCC ENSG00000207777 hsa-mir-10a   | ENSG00000207933 hsa-mir-9-1    |                              |                              |
| GCCCCGTTA ENSG00000207960 hsa-mir-153-2 |                                |                              |                              |
| GCCCTATA ENSG00000207618 hsa-mir-144    | ENSG00000207794 hsa-mir-451    |                              |                              |
| GCCGCAGC ENSG00000199104 hsa-mir-346    | ENSG00000207732 hsa-mir-218-1  |                              |                              |
| GCCGCGCC ENSG00000207960 hsa-mir-153-2  |                                |                              |                              |
| GCCGCTAA ENSG00000199104 hsa-mir-346    | ENSG00000207789 hsa-mir-26a-2  |                              |                              |
| GCCGCTTA ENSG00000207797 hsa-mir-187    |                                |                              |                              |
| GCCGGAGC ENSG00000207611 hsa-mir-149    |                                |                              |                              |
| GCCGGCGA ENSG00000207571 hsa-mir-615    |                                |                              |                              |
| GCCGTAAA ENSG00000207638 hsa-mir-99a    | ENSG00000207863 hsa-mir-125b-2 |                              |                              |
| GCCGTACA ENSG00000199130 hsa-mir-365-1  |                                |                              |                              |
| GCCGTACC ENSG00000199017 hsa-mir-1-1    | ENSG00000207764 hsa-mir-133a-2 | ENSG00000199038 hsa-mir-210  | ENSG00000207568 hsa-mir-203  |
| GCCGTCAA ENSG00000199017 hsa-mir-1-1    | ENSG00000207764 hsa-mir-133a-2 |                              |                              |
| GCCTATAA ENSG00000207953 hsa-mir-212    |                                |                              |                              |
| GCCTATAC ENSG00000199065 hsa-mir-101-2  |                                |                              |                              |
| GCCTCGAC ENSG00000207623 hsa-mir-205    |                                |                              |                              |
| GCCTGCGC ENSG00000199047 hsa-mir-378    |                                |                              |                              |
| GCCTTATA ENSG00000207811 hsa-mir-34b    | ENSG00000207562 hsa-mir-34c    |                              |                              |
| TATAAGGC Xie:GnCCAWATAWGGM              | SRF                            |                              |                              |
| GCGAACAA ENSG00000207744 hsa-mir-10b    |                                |                              |                              |
| GCGAATAA ENSG00000207651 hsa-mir-28     |                                |                              |                              |
| GCGAATCA ENSG00000208009 hsa-mir-130a   |                                |                              |                              |
| GCGACCAC ENSG00000199085 hsa-mir-148a   |                                |                              |                              |
| GCGAGGAC ENSG00000208005 hsa-mir-503    | ENSG00000207784 hsa-mir-542    |                              |                              |
| GCGATTTA ENSG00000207726 hsa-mir-455    |                                |                              |                              |
| GCGCAACA ENSG00000199085 hsa-mir-148a   |                                |                              |                              |
| GCGCAATA ENSG00000198987 hsa-mir-16-2   |                                |                              |                              |
| GCGCACGC ENSG00000207792 hsa-mir-151    |                                |                              |                              |
| GCGCATCA ENSG00000207935 hsa-mir-204    | ENSG00000199130 hsa-mir-365-1  |                              |                              |
| GCGCATGA ENSG00000207777 hsa-mir-10a    |                                |                              |                              |
| GCGCCAAC ENSG00000207865 hsa-mir-34a    |                                |                              |                              |
| GCGCGAGA ENSG00000199071 hsa-mir-423    | ENSG00000207698 hsa-mir-32     |                              |                              |
| GCGCGGGA ENSG00000207611 hsa-mir-149    | ENSG00000207819 hsa-mir-9-3    |                              |                              |
| GCGCTCAC ENSG00000207819 hsa-mir-9-3    | ENSG00000199130 hsa-mir-365-1  |                              |                              |
| GCGCTGAC ENSG00000199043 hsa-mir-335    |                                |                              |                              |
| GCGCTTAC ENSG00000199104 hsa-mir-346    | ENSG00000207695 hsa-mir-184    |                              |                              |
| GCGCTTTA ENSG00000199047 hsa-mir-378    |                                |                              |                              |
| GCGGACAA ENSG00000207597 hsa-mir-490    |                                |                              |                              |
| GCGGGGCC ENSG00000199038 hsa-mir-210    | ENSG00000207739 hsa-mir-218-2  |                              |                              |
| GCGGTAAA ENSG00000202641 hsa-mir-484    |                                |                              |                              |
| GCGGTTGA ENSG00000198995 hsa-mir-340    |                                |                              |                              |
| GCGGTTTA ENSG00000199122 hsa-mir-148b   |                                |                              |                              |
| GCGTCTTA ENSG00000211517 hsa-mir-671    |                                |                              |                              |
| GCGTGGTA ENSG00000199065 hsa-mir-101-2  |                                |                              |                              |
| GCGTGTCA ENSG00000208037 hsa-mir-320    |                                |                              |                              |
| GCGTTAAC ENSG00000199043 hsa-mir-335    |                                |                              |                              |
| GCGTTTAA ENSG00000198995 hsa-mir-340    |                                |                              |                              |
| GCGTTTTA ENSG00000199122 hsa-mir-148b   |                                |                              |                              |
| GCTAACAA ENSG00000207698 hsa-mir-32     |                                |                              |                              |
| GCTAATCC ENSG00000207702 hsa-mir-211    | ENSG00000207752 hsa-mir-199a-1 |                              |                              |
| GCTCGTTA ENSG00000207792 hsa-mir-151    |                                |                              |                              |
| GCTTAATA ENSG00000199032 hsa-mir-425    | ENSG00000202641 hsa-mir-484    |                              |                              |
| GCTTTTCC ENSG00000208024 hsa-mir-199a-2 | ENSG00000207949 hsa-mir-214    |                              |                              |
| GGAAGGCC ENSG00000207782 hsa-mir-150    |                                |                              |                              |
| GGAAGTGA ENSG00000207939 hsa-mir-223    |                                |                              |                              |
| GGACGCAC ENSG00000208037 hsa-mir-320    |                                |                              |                              |
| GGACTTCA ENSG00000199058 hsa-mir-302b   | ENSG00000199169 hsa-mir-367    | ENSG00000199145 hsa-mir-302d | ENSG00000199102 hsa-mir-302c |
| GGATTGAC ENSG00000199038 hsa-mir-210    |                                |                              |                              |
| GGCAACGA ENSG00000207827 hsa-mir-30a    | ENSG00000199094 hsa-mir-30c-2  |                              |                              |
| GGCAGTTA ENSG00000199104 hsa-mir-346    |                                |                              |                              |
| GGCCGTAC ENSG00000199017 hsa-mir-1-1    | ENSG00000207764 hsa-mir-133a-2 | ENSG00000199038 hsa-mir-210  |                              |
| GGCCGTTA ENSG00000207728 hsa-mir-449b   |                                |                              |                              |
| GGCGAGCC ENSG00000199043 hsa-mir-335    |                                |                              |                              |
| GGCGATAA ENSG00000199090 hsa-mir-326    |                                |                              |                              |
| GGCGATTA ENSG00000207819 hsa-mir-9-3    | ENSG00000198987 hsa-mir-16-2   |                              |                              |
| GGCGCACA ENSG00000207947 hsa-mir-152    |                                |                              |                              |
| GGCGCCAC ENSG00000207698 hsa-mir-32     |                                |                              |                              |
| GGCGCGAA ENSG00000207718 hsa-mir-15a    | ENSG00000208006 hsa-mir-16-1   | ENSG00000207777 hsa-mir-10a  |                              |
| GGCGGCAA ENSG00000208009 hsa-mir-130a   |                                |                              |                              |
| GGCGGTAA ENSG00000207935 hsa-mir-204    |                                |                              |                              |
| GGCTATAA ENSG00000199082 hsa-mir-342    |                                |                              |                              |
| GGCTGCAC ENSG00000207692 hsa-mir-592    |                                |                              |                              |



|                                        |                                |                              |                             |
|----------------------------------------|--------------------------------|------------------------------|-----------------------------|
| GGGACGCA ENSG00000208037 hsa-mir-320   |                                |                              |                             |
| GGGATATA ENSG00000199157 hsa-mir-208   | ENSG00000207791 hsa-mir-497    | ENSG00000207929 hsa-mir-195  |                             |
| GGTACGCA ENSG00000207567 hsa-mir-142   |                                |                              |                             |
| GGTATATA ENSG00000199017 hsa-mir-1-1   | ENSG00000207764 hsa-mir-133a-2 |                              |                             |
| GGTCGCAA ENSG00000199032 hsa-mir-425   | ENSG00000199085 hsa-mir-148a   |                              |                             |
| GGTCGCAC ENSG00000207960 hsa-mir-153-2 |                                |                              |                             |
| GGTCGTCA ENSG00000207585 hsa-mir-181d  |                                |                              |                             |
| GGTCGTGA ENSG00000198981 hsa-mir-29a   |                                |                              |                             |
| GGTGAATA ENSG00000207618 hsa-mir-144   | ENSG00000207794 hsa-mir-451    | ENSG00000207726 hsa-mir-455  |                             |
| GGTGTAAAC ENSG00000207721 hsa-mir-186  |                                |                              |                             |
| GGTTAACCC ENSG00000207827 hsa-mir-30a  | ENSG00000199094 hsa-mir-30c-2  |                              |                             |
| GTAACCGA ENSG00000207614 hsa-mir-193a  | ENSG00000199187 hsa-mir-365-2  |                              |                             |
| GTAACGAA ENSG00000198987 hsa-mir-16-2  |                                |                              |                             |
| GTAACGGA ENSG00000207935 hsa-mir-204   |                                |                              |                             |
| GTAAGACA ENSG00000199053 hsa-mir-324   |                                |                              |                             |
| GTACCATA ENSG00000199071 hsa-mir-423   |                                |                              |                             |
| GTAGATTA ENSG00000208017 hsa-mir-140   |                                |                              |                             |
| GTAGCGAA ENSG00000199032 hsa-mir-425   |                                |                              |                             |
| GTATATAA ENSG00000199017 hsa-mir-1-1   | ENSG00000207764 hsa-mir-133a-2 |                              |                             |
| GTCACGCA ENSG00000207635 hsa-mir-499   | ENSG00000208036 hsa-mir-106b   | ENSG00000207547 hsa-mir-25   | ENSG00000207757 hsa-mir-93  |
| GTCACGGA ENSG00000199071 hsa-mir-423   |                                |                              |                             |
| GTCACGAC ENSG00000207865 hsa-mir-34a   |                                |                              |                             |
| GTCATGAC ENSG00000199017 hsa-mir-1-1   | ENSG00000207764 hsa-mir-133a-2 |                              |                             |
| GTCCACTA ENSG00000207731 hsa-mir-506   |                                |                              |                             |
| GTCCGAAA ENSG00000211563 hsa-mir-338   |                                |                              |                             |
| GTCGACTA ENSG00000207739 hsa-mir-218-2 | ENSG00000198987 hsa-mir-16-2   |                              |                             |
| GTCGCAAA ENSG00000198986 hsa-let-7a-3  | ENSG00000207875 hsa-let-7b     | ENSG00000202641 hsa-mir-484  |                             |
| GTCGCAAC ENSG00000208005 hsa-mir-503   | ENSG00000207784 hsa-mir-542    |                              |                             |
| GTCGCCAA ENSG00000207744 hsa-mir-10b   |                                |                              |                             |
| GTCGCGAA ENSG00000199038 hsa-mir-210   |                                |                              |                             |
| GTCGGTCA ENSG00000199135 hsa-mir-101-1 |                                |                              |                             |
| GTCGTAC ENSG00000199071 hsa-mir-423    |                                |                              |                             |
| GTCGTGAA ENSG00000211563 hsa-mir-338   |                                |                              |                             |
| GTCGTGTA ENSG00000207614 hsa-mir-193a  | ENSG00000199187 hsa-mir-365-2  |                              |                             |
| GTCTCGTA ENSG00000207550 hsa-mir-99b   | ENSG00000198972 hsa-let-7e     |                              |                             |
| GTCTTCGA ENSG00000207694 hsa-mir-1-2   |                                |                              |                             |
| GTTAATAA ENSG00000207726 hsa-mir-455   |                                |                              |                             |
| GTCGCTCA ENSG00000207827 hsa-mir-30a   | ENSG00000199094 hsa-mir-30c-2  |                              |                             |
| GTGTGCGA ENSG00000208036 hsa-mir-106b  | ENSG00000207547 hsa-mir-25     | ENSG00000207757 hsa-mir-93   |                             |
| GTTACATA ENSG00000199017 hsa-mir-1-1   | ENSG00000207764 hsa-mir-133a-2 |                              |                             |
| GTACATA Xie:RTTACRTAAY E4BP4           |                                |                              |                             |
| GTTACGAA ENSG00000207725 hsa-mir-222   | ENSG00000207870 hsa-mir-221    |                              |                             |
| GTTATTCa ENSG00000207955 hsa-mir-219-2 |                                |                              |                             |
| GTTGAATA ENSG00000199077 hsa-mir-129-2 | ENSG00000207791 hsa-mir-497    | ENSG00000207929 hsa-mir-195  | ENSG00000207633 hsa-mir-505 |
| GTTGAATA Xie:CTGTTGAAWATT HP1          |                                |                              |                             |
| GTTGATAA ENSG00000207865 hsa-mir-34a   |                                |                              |                             |
| GTTGCCTA ENSG00000211517 hsa-mir-671   |                                |                              |                             |
| TAGGCAAC Xie:GTTGCWGGYAAC              | MIF-1                          |                              |                             |
| GTTGCGCA ENSG00000207623 hsa-mir-205   |                                |                              |                             |
| GTTTACGA ENSG00000207745 hsa-mir-17    | ENSG00000207610 hsa-mir-19a    | ENSG00000199149 hsa-mir-20a  |                             |
| TAAAGGTA ENSG00000207795 hsa-mir-155   |                                |                              |                             |
| TAACCGGA ENSG00000199122 hsa-mir-148b  |                                |                              |                             |
| TAACGTCA ENSG00000208037 hsa-mir-320   | ENSG00000199153 hsa-mir-30d    | ENSG00000207582 hsa-mir-30b  |                             |
| TAATCCAA ENSG00000199065 hsa-mir-101-2 | ENSG00000208017 hsa-mir-140    |                              |                             |
| TAATCCGA ENSG00000207623 hsa-mir-205   | ENSG00000207717 hsa-mir-551b   |                              |                             |
| TAATCGAA ENSG00000207597 hsa-mir-490   |                                |                              |                             |
| TAATTCGA ENSG00000207960 hsa-mir-153-2 |                                |                              |                             |
| TAATTGAA ENSG00000207811 hsa-mir-34b   | ENSG00000207562 hsa-mir-34c    | ENSG00000198987 hsa-mir-16-2 |                             |
| TACCGCCA ENSG00000207732 hsa-mir-218-1 | ENSG00000207935 hsa-mir-204    |                              |                             |
| TACCGGAA ENSG00000202641 hsa-mir-484   | ENSG00000199122 hsa-mir-148b   |                              |                             |
| TACGGCAA ENSG00000199065 hsa-mir-101-2 |                                |                              |                             |
| TAGCAACA ENSG00000202641 hsa-mir-484   |                                |                              |                             |
| TAGCGCAA ENSG00000198987 hsa-mir-16-2  |                                |                              |                             |
| TAGCGGAA ENSG00000207617 hsa-mir-24-1  | ENSG00000208009 hsa-mir-130a   |                              |                             |
| TATGATAA ENSG00000207618 hsa-mir-144   | ENSG00000207794 hsa-mir-451    |                              |                             |
| TATTAATA ENSG00000199071 hsa-mir-423   |                                |                              |                             |
| TATTAATA MATCH:V\$CDXA_02 CdxA         |                                |                              |                             |
| TATTGCAA ENSG00000199065 hsa-mir-101-2 |                                |                              |                             |
| TATTGGGA ENSG00000199023 hsa-mir-339   |                                |                              |                             |
| TATTGTAA ENSG00000199036 hsa-mir-219-1 |                                |                              |                             |
| TCACACGA ENSG00000207726 hsa-mir-455   |                                |                              |                             |
| TCACGCAA ENSG00000207633 hsa-mir-505   | ENSG00000211590 hsa-mir-802    |                              |                             |
| TTGCGTGA Xie:TnGCGTG AHR               |                                |                              |                             |
| TCACGTAA ENSG00000199071 hsa-mir-423   |                                |                              |                             |
| TCACGTCA ENSG00000198995 hsa-mir-340   |                                |                              |                             |
| TCACGTCA MATCH:V\$ATF6_01 ATF6         |                                |                              |                             |
| TCACGTGA ENSG00000208017 hsa-mir-140   |                                |                              |                             |
| TCACGTGA Xie:ATCACGTGAY SREBP-1        |                                |                              |                             |
| TCACGTGA Xie:ATCACGTGAY SREBP-1        |                                |                              |                             |
| TCAGACGA ENSG00000198973 hsa-mir-375   |                                |                              |                             |
| TCCGAAA ENSG00000211563 hsa-mir-338    | ENSG00000207630 hsa-mir-7-3    |                              |                             |
| TCCGTCAA ENSG00000199024 hsa-mir-103-2 |                                |                              |                             |
| TCGACTAA ENSG00000207739 hsa-mir-218-2 | ENSG00000198987 hsa-mir-16-2   |                              |                             |
| TCGATAAA ENSG00000207694 hsa-mir-1-2   |                                |                              |                             |
| TCGCACAA ENSG00000207581 hsa-mir-199b  |                                |                              |                             |
| TCGCCACA ENSG00000199024 hsa-mir-103-2 |                                |                              |                             |
| TCGCGACA ENSG00000208037 hsa-mir-320   |                                |                              |                             |
| TCGCGAGA ENSG00000207698 hsa-mir-32    |                                |                              |                             |
| TCGCTAAA ENSG00000199122 hsa-mir-148b  |                                |                              |                             |
| TCGGGCAA ENSG00000198984 hsa-mir-345   |                                |                              |                             |
| TCGTGAGA ENSG00000207728 hsa-mir-449b  | ENSG00000207933 hsa-mir-9-1    |                              |                             |

TCGTGACA ENSG00000199004|hsa-mir-21  
TCGTGTAA ENSG00000207614|hsa-mir-193a ENSG00000199187|hsa-mir-365-2  
TCGTTACA ENSG00000198987|hsa-mir-16-2  
TGACCGCA ENSG00000211517|hsa-mir-671  
TGACGACA ENSG00000207728|hsa-mir-449b ENSG00000199071|hsa-mir-423  
TGACGTCA ENSG00000207953|hsa-mir-212  
TGACGTCA Xie: TGACGTARRG ATF-1  
TGACGTCA Xie: TGACGTMA CREB  
TGACGTCA Xie: TGACGTARRG ATF-1  
TGACGTCA Xie: TGACGTMA CREB  
TGATGCAA ENSG00000207585|hsa-mir-181d  
TGCCGGCA ENSG00000207752|hsa-mir-199a-1 ENSG00000207980|hsa-mir-23a ENSG00000209707|hsa-mir-24-2 ENSG00000207808|hsa-mir-27a  
TGCCGTAA ENSG00000199065|hsa-mir-101-2 ENSG00000207638|hsa-mir-99a ENSG00000207863|hsa-mir-125b-2  
TGCGCTAA ENSG00000199036|hsa-mir-219-1  
TGCGTAAA ENSG00000199077|hsa-mir-129-2  
TGGCGCCA ENSG00000207567|hsa-mir-142  
TGGCGGAA ENSG00000208036|hsa-mir-106b ENSG00000207547|hsa-mir-25 ENSG00000207757|hsa-mir-93  
TGGCGTAA ENSG00000207618|hsa-mir-144 ENSG00000207794|hsa-mir-451 ENSG00000207692|hsa-mir-592  
TGGTACCA ENSG00000207705|hsa-mir-129-1 ENSG00000208024|hsa-mir-199a-2 ENSG00000207949|hsa-mir-214  
TGTCGCAA ENSG00000202641|hsa-mir-484 ENSG00000208005|hsa-mir-503 ENSG00000207784|hsa-mir-542  
TTAATGAA ENSG00000208017|hsa-mir-140  
TTAGTCAA ENSG00000199017|hsa-mir-1-1 ENSG00000207764|hsa-mir-133a-2  
TTCATAAA ENSG00000207617|hsa-mir-24-1  
TTCCGAAA ENSG00000198995|hsa-mir-340 ENSG00000207694|hsa-mir-1-2  
TTCGAAAA ENSG00000207865|hsa-mir-34a  
TTGCGAAA ENSG00000199043|hsa-mir-335  
AAAAACACC ENSG00000202641|hsa-mir-484 ENSG00000207791|hsa-mir-497 ENSG00000207929|hsa-mir-195  
AAAAACCCA ENSG00000207702|hsa-mir-211  
AAAAACGTT ENSG00000207791|hsa-mir-497 ENSG00000207929|hsa-mir-195 ENSG00000207633|hsa-mir-505  
AAAAAGAGC ENSG00000207597|hsa-mir-490  
AAAAAGTCC ENSG00000207602|hsa-mir-106a ENSG00000207572|hsa-mir-363 ENSG00000207710|hsa-mir-20b  
AAAAAGTGC ENSG00000198987|hsa-mir-16-2  
AAAAAGTTG ENSG00000199085|hsa-mir-148a  
AAAAATACC ENSG00000207635|hsa-mir-499 ENSG00000207633|hsa-mir-505  
AAAAATAGC ENSG00000199017|hsa-mir-1-1 ENSG00000207764|hsa-mir-133a-2 ENSG00000207635|hsa-mir-499 ENSG00000207548|hsa-mir-217  
AAAAATAGC Xie: YTAATAWATAGCY MEF-2  
AAAAATATT ENSG00000199077|hsa-mir-129-2  
AAAAACAGCT ENSG00000207611|hsa-mir-149  
AAAACAGTT ENSG00000199053|hsa-mir-324  
AAAACCCCC ENSG00000202641|hsa-mir-484  
AAAACCGGA ENSG00000207649|hsa-mir-138-2  
AAAACCGGT ENSG00000207568|hsa-mir-203  
AAAACCTAG ENSG00000199077|hsa-mir-129-2  
AAAATCCC ENSG00000199077|hsa-mir-129-2 ENSG00000207726|hsa-mir-455  
AAAATCGG ENSG00000207933|hsa-mir-9-1  
AAAATGCC ENSG00000199157|hsa-mir-208  
GGCAGTTTT Xie: GKCRGKTT TCF-1(P)  
AAAATTTCG ENSG00000207717|hsa-mir-551b  
AAAAGACCC ENSG00000199036|hsa-mir-219-1  
AAAAGCATT ENSG00000199065|hsa-mir-101-2  
AAAAGCCCG ENSG00000207955|hsa-mir-219-2  
AAAAGCCCG ENSG00000207953|hsa-mir-212  
AAAAGCCGG ENSG00000207728|hsa-mir-449b  
AAAAGCGAG ENSG00000207811|hsa-mir-34b ENSG00000207562|hsa-mir-34c ENSG00000207586|hsa-mir-135a-2  
AAAAGCGGA ENSG00000199177|hsa-mir-31  
AAAAGCGGC ENSG00000210741|hsa-mir-196a-1  
AAAAGGCC ENSG00000199058|hsa-mir-302b ENSG00000199169|hsa-mir-367 ENSG00000199145|hsa-mir-302d ENSG00000199102|hsa-mir-302c ENSG00000199135|hsa-mir-101-1  
AAAAGGCCG ENSG00000207568|hsa-mir-203 ENSG00000207698|hsa-mir-32  
AAAAGGGTT ENSG00000198987|hsa-mir-16-2  
AAAAGGTGT ENSG00000202641|hsa-mir-484  
AAAAGTCTG ENSG00000207630|hsa-mir-7-3  
AAAAGTGAC ENSG00000198973|hsa-mir-375  
AAAATGCG ENSG00000198987|hsa-mir-16-2  
AAAAGTTGC ENSG00000199085|hsa-mir-148a ENSG00000207732|hsa-mir-218-1 ENSG00000207995|hsa-mir-325  
AAAATAACC ENSG00000198987|hsa-mir-16-2  
AAAATAAGC ENSG00000199065|hsa-mir-101-2  
AAAATACCA ENSG00000207633|hsa-mir-505  
AAAATAGCA ENSG00000207789|hsa-mir-26a-2  
AAAATAGCC ENSG00000199017|hsa-mir-1-1 ENSG00000207764|hsa-mir-133a-2 ENSG00000207635|hsa-mir-499  
AAAATAGCC Xie: YTAATAWATAGCY MEF-2  
AAAATAGCT ENSG00000207548|hsa-mir-217  
AAAATAGCT Xie: YTAATAWATAGCY MEF-2  
AAAATATAG ENSG00000207635|hsa-mir-499  
AAAATATTG ENSG00000199077|hsa-mir-129-2  
AAAATCAAG ENSG00000207791|hsa-mir-497 ENSG00000207929|hsa-mir-195  
AAAATCAGG ENSG00000199023|hsa-mir-339  
AAAATCCAA ENSG00000207791|hsa-mir-497 ENSG00000207929|hsa-mir-195  
AAAATCCCC ENSG00000207630|hsa-mir-7-3  
AAAATGACA ENSG00000199077|hsa-mir-129-2  
AAAATGCCT ENSG00000207809|hsa-mir-139  
AAAATGGCT ENSG00000199032|hsa-mir-425 ENSG00000207585|hsa-mir-181d  
AGCCATTTT Xie: GCCATnTT YY1  
AAAATTAGG ENSG00000207950|hsa-mir-296  
AAAATTAGG Xie: AAWAATTAnS PAX-4  
CCTAATTTT Xie: CYAATTWT HOXA4  
AAACAAACG ENSG00000207585|hsa-mir-181d  
CGTTTGTTT Xie: KTWGTTT SRY  
AAACAACCC ENSG00000207789|hsa-mir-26a-2 ENSG00000199122|hsa-mir-148b ENSG00000207731|hsa-mir-506  
GGTTGTTT Xie: GGGKKGTTTGGGG RREB-1  
GGTTGTTT Xie: KTWGTTT SRY  
AAACAGACC ENSG00000199104|hsa-mir-346

|            |                                     |                               |                             |                               |
|------------|-------------------------------------|-------------------------------|-----------------------------|-------------------------------|
| AAACAGCAC  | ENSG00000207585 hsa-mir-181d        |                               |                             |                               |
| AAACAGTCC  | ENSG00000199047 hsa-mir-378         | ENSG00000208009 hsa-mir-130a  |                             |                               |
| AAACATGCC  | ENSG00000207791 hsa-mir-497         | ENSG00000207929 hsa-mir-195   |                             |                               |
| AAACATGGC  | ENSG00000207791 hsa-mir-497         | ENSG00000207929 hsa-mir-195   |                             |                               |
|            | GCCATGTTT Xie:GCCATnTT YY1          |                               |                             |                               |
|            | AAACATGGC MATCH:V\$YY1_Q6 YY1       |                               |                             |                               |
| AAACATTTTC | ENSG00000198995 hsa-mir-340         | ENSG00000211517 hsa-mir-671   |                             |                               |
| AAACCAGAC  | ENSG00000207691 hsa-mir-183         | ENSG00000207990 hsa-mir-182   | ENSG00000199158 hsa-mir-96  | ENSG00000207954 hsa-mir-138-1 |
| AAACCAGGA  | ENSG00000207694 hsa-mir-1-2         |                               |                             |                               |
| AAACCAGTC  | ENSG00000199053 hsa-mir-324         |                               |                             |                               |
| AAACCCATT  | ENSG00000199032 hsa-mir-425         |                               |                             |                               |
| AAACCGCCC  | ENSG00000207789 hsa-mir-26a-2       |                               |                             |                               |
|            | GGGCGGTTT Xie:GKCRGKTT TCF-1 (P)    |                               |                             |                               |
| AAACCGGAG  | ENSG00000207649 hsa-mir-138-2       |                               |                             |                               |
| AAACCGGTC  | ENSG00000207568 hsa-mir-203         |                               |                             |                               |
| AAACCTATT  | ENSG00000207721 hsa-mir-186         |                               |                             |                               |
| AAACCTGAA  | ENSG00000207596 hsa-mir-194-2       | ENSG00000207648 hsa-mir-192   |                             |                               |
| AAACGCCCTC | ENSG00000207698 hsa-mir-32          |                               |                             |                               |
| AAACGCGAC  | ENSG00000207955 hsa-mir-219-2       |                               |                             |                               |
| AAACGGCCG  | ENSG00000202641 hsa-mir-484         |                               |                             |                               |
| AAACGGGCG  | ENSG00000198973 hsa-mir-375         |                               |                             |                               |
| AAACGTACAC | ENSG00000199130 hsa-mir-365-1       |                               |                             |                               |
| AAACGTGGC  | ENSG00000198984 hsa-mir-345         | ENSG00000207728 hsa-mir-449b  | ENSG00000207791 hsa-mir-497 | ENSG00000207929 hsa-mir-195   |
| AAACTACAA  | ENSG00000207698 hsa-mir-32          |                               |                             |                               |
|            | TTGTAGTTT Xie:KTWGT TT SRY          |                               |                             |                               |
| AAACTCACC  | ENSG00000207656 hsa-mir-489         | ENSG00000207694 hsa-mir-1-2   |                             |                               |
| AAACTCATT  | ENSG00000207739 hsa-mir-218-2       |                               |                             |                               |
| AAACTCCGA  | ENSG00000207795 hsa-mir-155         |                               |                             |                               |
| AAACTGACC  | ENSG00000199043 hsa-mir-335         |                               |                             |                               |
|            | GGTCAGTTT Xie:GKCRGKTT TCF-1 (P)    |                               |                             |                               |
| AAACTTATC  | ENSG00000207548 hsa-mir-217         |                               |                             |                               |
| AAACTTATG  | ENSG00000208005 hsa-mir-503         | ENSG00000207784 hsa-mir-542   |                             |                               |
| AAACTTCAG  | ENSG00000199121 hsa-mir-26b         |                               |                             |                               |
| AAACTTCGT  | ENSG00000199023 hsa-mir-339         | ENSG00000207717 hsa-mir-551b  |                             |                               |
| AAACTTCTG  | ENSG00000199085 hsa-mir-148a        |                               |                             |                               |
|            | CAGAAGTTT Xie:TTCCMGARGYTTC         | HSF                           |                             |                               |
| AAACTTGAA  | ENSG00000199161 hsa-mir-126         |                               |                             |                               |
| AAACTTGTT  | ENSG00000207698 hsa-mir-32          |                               |                             |                               |
| AAACTTTTG  | ENSG00000199085 hsa-mir-148a        | ENSG00000207726 hsa-mir-455   |                             |                               |
| AAAGAAACG  | ENSG00000207960 hsa-mir-153-2       | ENSG00000207624 hsa-mir-194-1 | ENSG00000207590 hsa-mir-215 |                               |
| AAAGACAAA  | ENSG00000207732 hsa-mir-218-1       |                               |                             |                               |
| AAAGACCAA  | ENSG00000199085 hsa-mir-148a        |                               |                             |                               |
| AAAGACGCA  | ENSG00000199157 hsa-mir-208         |                               |                             |                               |
| AAAGACGTG  | ENSG00000199090 hsa-mir-326         |                               |                             |                               |
| AAAGAGGAT  | ENSG00000207635 hsa-mir-499         |                               |                             |                               |
| AAAGAGTCC  | ENSG00000207705 hsa-mir-129-1       | ENSG00000207795 hsa-mir-155   |                             |                               |
| AAAGATCTC  | ENSG00000207950 hsa-mir-296         |                               |                             |                               |
| AAAGATGGT  | ENSG00000199043 hsa-mir-335         |                               |                             |                               |
| AAAGCAGCG  | ENSG00000207732 hsa-mir-218-1       |                               |                             |                               |
| AAAGCAGTG  | ENSG00000207725 hsa-mir-222         | ENSG00000207870 hsa-mir-221   |                             |                               |
| AAAGCATGC  | ENSG00000202569 hsa-mir-146b        | ENSG00000207790 hsa-mir-29b-2 | ENSG00000207966 hsa-mir-29c |                               |
| AAAGCCCGC  | ENSG00000207955 hsa-mir-219-2       |                               |                             |                               |
| AAAGCCGCG  | ENSG00000199071 hsa-mir-423         |                               |                             |                               |
| AAAGCGCAC  | ENSG00000199177 hsa-mir-31          |                               |                             |                               |
| AAAGCGCAG  | ENSG00000199047 hsa-mir-378         | ENSG00000207630 hsa-mir-7-3   |                             |                               |
| AAAGCGCCA  | ENSG00000207955 hsa-mir-219-2       | ENSG00000199122 hsa-mir-148b  |                             |                               |
| AAAGCGCCG  | ENSG00000207656 hsa-mir-489         |                               |                             |                               |
| AAAGCGCTC  | ENSG00000211517 hsa-mir-671         | ENSG00000199130 hsa-mir-365-1 |                             |                               |
| AAAGCGGAC  | ENSG00000199177 hsa-mir-31          |                               |                             |                               |
| AAAGGACTA  | ENSG00000207795 hsa-mir-155         | ENSG00000207865 hsa-mir-34a   | ENSG00000207995 hsa-mir-325 |                               |
| AAAGGCATC  | ENSG00000207954 hsa-mir-138-1       |                               |                             |                               |
| AAAGGCAGG  | ENSG00000207790 hsa-mir-29b-2       | ENSG00000207966 hsa-mir-29c   |                             |                               |
| AAAGGCAGC  | ENSG00000207698 hsa-mir-32          |                               |                             |                               |
| AAAGGCGGA  | ENSG00000207635 hsa-mir-499         |                               |                             |                               |
| AAAGGCTCG  | ENSG00000199065 hsa-mir-101-2       |                               |                             |                               |
| AAAGGGTGT  | ENSG00000207933 hsa-mir-9-1         |                               |                             |                               |
| AAAGGTCTC  | ENSG00000199059 hsa-mir-135b        |                               |                             |                               |
| AAAGTAAAT  | ENSG00000208037 hsa-mir-320         |                               |                             |                               |
|            | ATTTACTTT Xie:TRTTTRYTYW HNF-3      |                               |                             |                               |
| AAAGTACAA  | ENSG00000207789 hsa-mir-26a-2       |                               |                             |                               |
| AAAGTACCA  | ENSG00000207939 hsa-mir-223         |                               |                             |                               |
| AAAGTAGCA  | ENSG00000207651 hsa-mir-28          |                               |                             |                               |
| AAAGTAGGC  | ENSG00000207602 hsa-mir-106a        | ENSG00000207572 hsa-mir-363   | ENSG00000207710 hsa-mir-20b |                               |
| AAAGTAGGT  | ENSG00000207745 hsa-mir-17          | ENSG00000207610 hsa-mir-19a   | ENSG00000199149 hsa-mir-20a |                               |
|            | ACCTACTTT Xie:TGACCTAnWTW RORALPHA2 |                               |                             |                               |
| AAAGTATGC  | ENSG00000207717 hsa-mir-551b        |                               |                             |                               |
| AAAGTCACC  | ENSG00000211590 hsa-mir-802         |                               |                             |                               |
| AAAGTCCAG  | ENSG00000199161 hsa-mir-126         | ENSG00000207596 hsa-mir-194-2 | ENSG00000207648 hsa-mir-192 | ENSG00000207630 hsa-mir-7-3   |
| AAAGTCCCG  | ENSG00000207571 hsa-mir-615         |                               |                             |                               |
| AAAGTCCCTC | ENSG00000207792 hsa-mir-151         |                               |                             |                               |
| AAAGTCTCG  | ENSG00000207726 hsa-mir-455         | ENSG00000207624 hsa-mir-194-1 | ENSG00000207590 hsa-mir-215 |                               |
| AAAGTGAAC  | ENSG00000199161 hsa-mir-126         | ENSG00000199071 hsa-mir-423   |                             |                               |
|            | AAAGTGAAC Xie:AAGTGAA IRF1          |                               |                             |                               |
| AAAGTGACC  | ENSG00000207827 hsa-mir-30a         | ENSG00000199094 hsa-mir-30c-2 |                             |                               |
| AAAGTGATG  | ENSG00000207611 hsa-mir-149         |                               |                             |                               |
| AAAGTGCGG  | ENSG00000199161 hsa-mir-126         | ENSG00000198987 hsa-mir-16-2  | ENSG00000207744 hsa-mir-10b |                               |
| AAAGTGCTC  | ENSG00000211574 hsa-mir-770         | ENSG00000208001 hsa-mir-431   | ENSG00000199005 hsa-mir-370 |                               |
| AAAGTGCTG  | ENSG00000207950 hsa-mir-296         |                               |                             |                               |
| AAAGTGCTT  | ENSG00000199085 hsa-mir-148a        |                               |                             |                               |
| AAAGTGCTA  | ENSG00000207656 hsa-mir-489         |                               |                             |                               |
| AAAGTTACA  | ENSG00000207726 hsa-mir-455         |                               |                             |                               |

|            |                                      |                                |                                |                             |
|------------|--------------------------------------|--------------------------------|--------------------------------|-----------------------------|
| AAAGTCAA   | ENSG00000207694 hsa-mir-1-2          |                                |                                |                             |
| AAAGTCCC   | ENSG00000207739 hsa-mir-218-2        |                                |                                |                             |
| AAAGTTGAT  | ENSG00000199177 hsa-mir-31           |                                |                                |                             |
| AAAGTTGCC  | ENSG00000199085 hsa-mir-148a         | ENSG00000207935 hsa-mir-204    |                                |                             |
| AAAGTTGCT  | ENSG00000207732 hsa-mir-218-1        |                                |                                |                             |
| AAAGTTGGG  | ENSG00000207614 hsa-mir-193a         | ENSG00000199187 hsa-mir-365-2  |                                |                             |
| AAAGTTTAA  | ENSG00000199085 hsa-mir-148a         |                                |                                |                             |
| AAAGTTTCG  | ENSG00000202609 hsa-mir-488          | ENSG00000210741 hsa-mir-196a-1 |                                |                             |
| AAAGTTTGC  | ENSG00000207726 hsa-mir-455          | ENSG00000199130 hsa-mir-365-1  |                                |                             |
| AAATAAACCC | ENSG00000199077 hsa-mir-129-2        |                                |                                |                             |
| AAATAACCT  | ENSG00000207782 hsa-mir-150          |                                |                                |                             |
| AAATAAGCA  | ENSG00000199065 hsa-mir-101-2        |                                |                                |                             |
| AAATAATGG  | ENSG00000207792 hsa-mir-151          |                                |                                |                             |
| AAATAACCTG | ENSG00000199053 hsa-mir-324          | ENSG00000199130 hsa-mir-365-1  |                                |                             |
| AAATAGAGC  | ENSG00000211590 hsa-mir-802          |                                |                                |                             |
| AAATAGAGG  | ENSG00000207809 hsa-mir-139          |                                |                                |                             |
| AAATAGATC  | ENSG00000198981 hsa-mir-29a          | ENSG00000207602 hsa-mir-106a   | ENSG00000207572 hsa-mir-363    | ENSG00000207710 hsa-mir-20b |
| AAATAGCAA  | ENSG00000207789 hsa-mir-26a-2        |                                |                                |                             |
| AAATAGCCC  | ENSG00000207635 hsa-mir-499          |                                |                                |                             |
| AAATAGCCT  | ENSG00000199017 hsa-mir-1-1          | ENSG00000207764 hsa-mir-133a-2 |                                |                             |
| AAATAGCGG  | ENSG00000199017 hsa-mir-1-1          | ENSG00000207764 hsa-mir-133a-2 |                                |                             |
| AAATAGCTG  | ENSG00000207950 hsa-mir-296          |                                |                                |                             |
| AAATAGGAC  | ENSG00000202609 hsa-mir-488          |                                |                                |                             |
| AAATAGGTC  | ENSG00000199130 hsa-mir-365-1        |                                |                                |                             |
|            | GACCTATTT Xie: TGACCTAnWTW RORALPHA2 |                                |                                |                             |
| AAATATAGA  | ENSG00000207635 hsa-mir-499          |                                |                                |                             |
| AAATATGGG  | ENSG00000207721 hsa-mir-186          |                                |                                |                             |
| AAATATTGA  | ENSG00000198973 hsa-mir-375          |                                |                                |                             |
| AAATATTTT  | ENSG00000199077 hsa-mir-129-2        |                                |                                |                             |
| AAATCAATG  | ENSG00000207939 hsa-mir-223          |                                |                                |                             |
| AAATCAGCC  | ENSG00000207692 hsa-mir-592          |                                |                                |                             |
| AAATCAGCT  | ENSG00000199153 hsa-mir-30d          | ENSG00000207582 hsa-mir-30b    |                                |                             |
| AAATCAGGA  | ENSG00000199023 hsa-mir-339          |                                |                                |                             |
| AAATCAGGC  | ENSG00000207596 hsa-mir-194-2        | ENSG00000207648 hsa-mir-192    | ENSG00000207950 hsa-mir-296    |                             |
| AAATCAGGG  | ENSG00000199157 hsa-mir-208          |                                |                                |                             |
| AAATCCAAC  | ENSG00000207702 hsa-mir-211          |                                |                                |                             |
| AAATCCATG  | ENSG00000211590 hsa-mir-802          |                                |                                |                             |
| AAATCCCCC  | ENSG00000207604 hsa-mir-206          | ENSG00000199080 hsa-mir-133b   |                                |                             |
| AAATCCCCCT | ENSG00000207630 hsa-mir-7-3          |                                |                                |                             |
| AAATCCCCG  | ENSG00000199017 hsa-mir-1-1          | ENSG00000207764 hsa-mir-133a-2 | ENSG00000207752 hsa-mir-199a-1 |                             |
| AAATCCCTT  | ENSG00000198987 hsa-mir-16-2         |                                |                                |                             |
| AAATCCGAG  | ENSG00000207596 hsa-mir-194-2        | ENSG00000207648 hsa-mir-192    |                                |                             |
| AAATCCTAA  | ENSG00000207752 hsa-mir-199a-1       |                                |                                |                             |
| AAATCCTGT  | ENSG00000207698 hsa-mir-32           |                                |                                |                             |
| AAATCCTTC  | ENSG00000207726 hsa-mir-455          | ENSG00000199024 hsa-mir-103-2  |                                |                             |
| AAATCGCCT  | ENSG00000207726 hsa-mir-455          |                                |                                |                             |
| AAATCGGCT  | ENSG00000199122 hsa-mir-148b         |                                |                                |                             |
| AAATCTGTC  | ENSG00000207656 hsa-mir-489          |                                |                                |                             |
| AAATCTTTA  | ENSG00000202569 hsa-mir-146b         | ENSG00000207617 hsa-mir-24-1   |                                |                             |
| AAATGACAA  | ENSG00000199077 hsa-mir-129-2        |                                |                                |                             |
| AAATGACTC  | ENSG00000208037 hsa-mir-320          | ENSG00000199153 hsa-mir-30d    | ENSG00000207582 hsa-mir-30b    |                             |
| AAATGAGGT  | ENSG00000207550 hsa-mir-99b          | ENSG00000198972 hsa-let-7e     |                                |                             |
| AAATGAGTT  | ENSG00000207935 hsa-mir-204          |                                |                                |                             |
| AAATGCAAC  | ENSG00000207548 hsa-mir-217          |                                |                                |                             |
| AAATGCAAT  | ENSG00000202641 hsa-mir-484          |                                |                                |                             |
| AAATGCACA  | ENSG00000207635 hsa-mir-499          |                                |                                |                             |
| AAATGCCGC  | ENSG00000198986 hsa-let-7a-3         | ENSG00000207875 hsa-let-7b     |                                |                             |
| AAATGGAAC  | ENSG00000199177 hsa-mir-31           |                                |                                |                             |
| AAATGGCAG  | ENSG00000208035 hsa-mir-143          |                                |                                |                             |
| AAATGGCGG  | ENSG00000207731 hsa-mir-506          |                                |                                |                             |
| AAATGGCTC  | ENSG00000199032 hsa-mir-425          |                                |                                |                             |
| AAATGGCTG  | ENSG00000207571 hsa-mir-615          | ENSG00000211590 hsa-mir-802    |                                |                             |
| AAATGGCTT  | ENSG00000207585 hsa-mir-181d         | ENSG00000207819 hsa-mir-9-3    |                                |                             |
| AAATGGGGT  | ENSG00000207811 hsa-mir-34b          | ENSG00000207562 hsa-mir-34c    | ENSG00000207777 hsa-mir-10a    |                             |
| AAATGGTGC  | ENSG00000207692 hsa-mir-592          |                                |                                |                             |
| AAATGGTGG  | ENSG00000207567 hsa-mir-142          |                                |                                |                             |
| AAATGTCAG  | ENSG00000207702 hsa-mir-211          |                                |                                |                             |
| AAATGTCTT  | ENSG00000207717 hsa-mir-551b         |                                |                                |                             |
| AAATGTGCA  | ENSG00000199066 hsa-mir-330          |                                |                                |                             |
| AAATTAAC   | ENSG00000199059 hsa-mir-135b         |                                |                                |                             |
| AAATTAAT   | ENSG00000198995 hsa-mir-340          |                                |                                |                             |
| AAATTACGA  | ENSG00000207550 hsa-mir-99b          | ENSG00000198972 hsa-let-7e     |                                |                             |
| AAATAGGC   | ENSG00000207638 hsa-mir-99a          | ENSG00000207863 hsa-mir-125b-2 |                                |                             |
| AAATATATCA | ENSG00000207548 hsa-mir-217          |                                |                                |                             |
| AAATATATC  | ENSG00000207728 hsa-mir-449b         |                                |                                |                             |
| AAATCAAAA  | ENSG00000207811 hsa-mir-34b          | ENSG00000207562 hsa-mir-34c    |                                |                             |
| AAATCCCCC  | ENSG00000207953 hsa-mir-212          |                                |                                |                             |
| AAATTCGTT  | ENSG00000198987 hsa-mir-16-2         |                                |                                |                             |
| AAATTGAAC  | ENSG00000207692 hsa-mir-592          |                                |                                |                             |
| AAATTGCTG  | ENSG00000199082 hsa-mir-342          |                                |                                |                             |
| AAATTGCTT  | ENSG00000199085 hsa-mir-148a         | ENSG00000208037 hsa-mir-320    |                                |                             |
| AAATTTGGT  | ENSG00000199024 hsa-mir-103-2        |                                |                                |                             |
| AAATTTGTC  | ENSG00000207571 hsa-mir-615          | ENSG00000207597 hsa-mir-490    |                                |                             |
| AACAAACCC  | ENSG00000199082 hsa-mir-342          |                                |                                |                             |
| AACAAACCG  | ENSG00000207691 hsa-mir-183          | ENSG00000207990 hsa-mir-182    | ENSG00000199158 hsa-mir-96     |                             |
| AACAAACTG  | ENSG00000199177 hsa-mir-31           |                                |                                |                             |
| AACAAATCA  | ENSG00000199036 hsa-mir-219-1        |                                |                                |                             |
| AACAACAAT  | ENSG00000199077 hsa-mir-129-2        |                                |                                |                             |
|            | ATTGTTGTT Xie: ATTGTT SOX-5          |                                |                                |                             |
| AACAACACC  | ENSG00000198973 hsa-mir-375          |                                |                                |                             |
| AACAACAGT  | ENSG00000198974 hsa-mir-30e          | ENSG00000207962 hsa-mir-30c-1  |                                |                             |

|            |                                         |                                |                                |                                |                              |                             |                                |  |  |
|------------|-----------------------------------------|--------------------------------|--------------------------------|--------------------------------|------------------------------|-----------------------------|--------------------------------|--|--|
| AACAACCAG  | ENSG00000198995 hsa-mir-340             | ENSG00000207571 hsa-mir-615    | ENSG00000207744 hsa-mir-10b    |                                |                              |                             |                                |  |  |
| AACAACCCG  | ENSG00000207789 hsa-mir-26a-2           |                                |                                |                                |                              |                             |                                |  |  |
| AACAAGTGC  | ENSG00000199135 hsa-mir-101-1           |                                |                                |                                |                              |                             |                                |  |  |
| AACAAGAAAG | ENSG00000199082 hsa-mir-342             |                                |                                |                                |                              |                             |                                |  |  |
| AACAAGACC  | ENSG00000207586 hsa-mir-135a-2          |                                |                                |                                |                              |                             |                                |  |  |
| AACAAGAGC  | ENSG00000207732 hsa-mir-218-1           | ENSG00000211590 hsa-mir-802    |                                |                                |                              |                             |                                |  |  |
| AACAAGCAC  | ENSG00000207604 hsa-mir-206             | ENSG00000199080 hsa-mir-133b   |                                |                                |                              |                             |                                |  |  |
| AACAAGTGA  | ENSG00000199130 hsa-mir-365-1           |                                |                                |                                |                              |                             |                                |  |  |
| AACAAGTTC  | ENSG00000199043 hsa-mir-335             |                                |                                |                                |                              |                             |                                |  |  |
| AACAATAAC  | ENSG00000199177 hsa-mir-31              |                                |                                |                                |                              |                             |                                |  |  |
|            | GTTATTGTT Xie:ATTGTT SOX-5              |                                |                                |                                |                              |                             |                                |  |  |
| AACAATAGC  | ENSG00000199153 hsa-mir-30d             | ENSG00000207582 hsa-mir-30b    | ENSG00000207933 hsa-mir-9-1    |                                |                              |                             |                                |  |  |
|            | GCTATTGTT Xie:ATTGTT SOX-5              |                                |                                |                                |                              |                             |                                |  |  |
| AACAATAGT  | ENSG00000207617 hsa-mir-24-1            |                                |                                |                                |                              |                             |                                |  |  |
|            | ACTATTGTT Xie:ATTGTT SOX-5              |                                |                                |                                |                              |                             |                                |  |  |
| AACAATCAG  | ENSG00000207827 hsa-mir-30a             | ENSG00000199094 hsa-mir-30c-2  |                                |                                |                              |                             |                                |  |  |
|            | CTGATTGTT Xie:ATTGTT SOX-5              |                                |                                |                                |                              |                             |                                |  |  |
| AACAATCGC  | ENSG00000199122 hsa-mir-148b            |                                |                                |                                |                              |                             |                                |  |  |
|            | CGCATTGTT Xie:ATTGTT SOX-5              |                                |                                |                                |                              |                             |                                |  |  |
| AACAATGAG  | ENSG00000199058 hsa-mir-302b            | ENSG00000199169 hsa-mir-367    | ENSG00000199145 hsa-mir-302d   | ENSG00000199102 hsa-mir-302c   | ENSG00000207623 hsa-mir-205  | ENSG00000207994 hsa-mir-100 | ENSG00000207971 hsa-mir-125b-1 |  |  |
|            | ENSG00000198975 hsa-let-7a-2            |                                |                                |                                |                              |                             |                                |  |  |
|            | CTCATTGTT Xie:ATTGTT SOX-5              |                                |                                |                                |                              |                             |                                |  |  |
| AACAATGGA  | ENSG00000207649 hsa-mir-138-2           |                                |                                |                                |                              |                             |                                |  |  |
|            | TCCATTGTT Xie:ATTGTT SOX-5              |                                |                                |                                |                              |                             |                                |  |  |
| AACAATGGT  | ENSG00000207604 hsa-mir-206             | ENSG00000199080 hsa-mir-133b   |                                |                                |                              |                             |                                |  |  |
|            | ACCATTGTT Xie:ATTGTT SOX-5              |                                |                                |                                |                              |                             |                                |  |  |
| AACACCCCT  | ENSG00000207791 hsa-mir-497             | ENSG00000207929 hsa-mir-195    | ENSG00000208035 hsa-mir-143    |                                |                              |                             |                                |  |  |
| AACACCCCTC | ENSG00000207571 hsa-mir-615             |                                |                                |                                |                              |                             |                                |  |  |
| AACACCTCC  | ENSG00000199130 hsa-mir-365-1           |                                |                                |                                |                              |                             |                                |  |  |
| AACACCTGG  | ENSG00000199032 hsa-mir-425             | ENSG00000207819 hsa-mir-9-3    | ENSG00000207692 hsa-mir-592    |                                |                              |                             |                                |  |  |
|            | CCAGGTGTT Xie:CAGGTGW AREB6             |                                |                                |                                |                              |                             |                                |  |  |
| AACACGCCT  | ENSG00000207728 hsa-mir-449b            |                                |                                |                                |                              |                             |                                |  |  |
| AACACTGGC  | ENSG00000207618 hsa-mir-144             | ENSG00000207794 hsa-mir-451    | ENSG00000198987 hsa-mir-16-2   | ENSG00000199122 hsa-mir-148b   | ENSG00000207602 hsa-mir-106a | ENSG00000207572 hsa-mir-363 | ENSG00000207710 hsa-mir-20b    |  |  |
|            | ENSG00000207624 hsa-mir-194-1           | ENSG00000207590 hsa-mir-215    |                                |                                |                              |                             |                                |  |  |
| AACAGATGG  | ENSG00000207611 hsa-mir-149             | ENSG00000202609 hsa-mir-488    |                                |                                |                              |                             |                                |  |  |
|            | AACAGATGG Xie:AACAGATGKT TAL-1ALPHA/E47 |                                |                                |                                |                              |                             |                                |  |  |
| AACAGCAGA  | ENSG00000199043 hsa-mir-335             |                                |                                |                                |                              |                             |                                |  |  |
| AACAGCGCG  | ENSG00000199065 hsa-mir-101-2           |                                |                                |                                |                              |                             |                                |  |  |
| AACAGCGGC  | ENSG00000202641 hsa-mir-484             |                                |                                |                                |                              |                             |                                |  |  |
| AACAGCTGT  | ENSG00000199085 hsa-mir-148a            | ENSG00000199121 hsa-mir-26b    | ENSG00000207611 hsa-mir-149    |                                |                              |                             |                                |  |  |
| AACAGCTTA  | ENSG00000208035 hsa-mir-143             |                                |                                |                                |                              |                             |                                |  |  |
| AACAGGAAT  | ENSG00000202569 hsa-mir-146b            | ENSG00000207705 hsa-mir-129-1  |                                |                                |                              |                             |                                |  |  |
| AACAGGGAC  | ENSG00000199036 hsa-mir-219-1           | ENSG00000199090 hsa-mir-326    |                                |                                |                              |                             |                                |  |  |
| AACAGGTCT  | ENSG00000199085 hsa-mir-148a            |                                |                                |                                |                              |                             |                                |  |  |
| AACAGGTGA  | ENSG00000207568 hsa-mir-203             |                                |                                |                                |                              |                             |                                |  |  |
|            | AACAGGTGA Xie:CAGGTGW AREB6             |                                |                                |                                |                              |                             |                                |  |  |
|            | AACAGGTGA Xie:RnCAGGTG MYOD             |                                |                                |                                |                              |                             |                                |  |  |
| AACAGGTGC  | ENSG00000207865 hsa-mir-34a             |                                |                                |                                |                              |                             |                                |  |  |
|            | AACAGGTGC Xie:RnCAGGTG MYOD             |                                |                                |                                |                              |                             |                                |  |  |
| AACAGGTGG  | ENSG00000199036 hsa-mir-219-1           |                                |                                |                                |                              |                             |                                |  |  |
|            | AACAGGTGG Xie:RnCAGGTG MYOD             |                                |                                |                                |                              |                             |                                |  |  |
| AACAGTATC  | ENSG00000207692 hsa-mir-592             |                                |                                |                                |                              |                             |                                |  |  |
| AACAGTCCT  | ENSG00000199047 hsa-mir-378             |                                |                                |                                |                              |                             |                                |  |  |
| AACAGTTCC  | ENSG00000207752 hsa-mir-199a-1          |                                |                                |                                |                              |                             |                                |  |  |
| AACAGTTGC  | ENSG00000210741 hsa-mir-196a-1          |                                |                                |                                |                              |                             |                                |  |  |
| AACATAAAA  | ENSG00000199077 hsa-mir-129-2           |                                |                                |                                |                              |                             |                                |  |  |
| AACATATGC  | ENSG00000199153 hsa-mir-30d             | ENSG00000207582 hsa-mir-30b    | ENSG00000207604 hsa-mir-206    | ENSG00000199080 hsa-mir-133b   |                              |                             |                                |  |  |
| AACATCCAG  | ENSG00000199165 hsa-let-7a-1            | ENSG00000199072 hsa-let-7f-1   | ENSG00000199133 hsa-let-7d     |                                |                              |                             |                                |  |  |
| AACATCTGG  | ENSG00000207581 hsa-mir-199b            | ENSG00000208024 hsa-mir-199a-2 | ENSG00000207949 hsa-mir-214    |                                |                              |                             |                                |  |  |
|            | CCAGATGTT Xie:TCCAGATGTT RP58           |                                |                                |                                |                              |                             |                                |  |  |
| AACATGCAA  | ENSG00000207630 hsa-mir-7-3             |                                |                                |                                |                              |                             |                                |  |  |
| AACATGCCT  | ENSG00000207791 hsa-mir-497             | ENSG00000207929 hsa-mir-195    | ENSG00000207638 hsa-mir-99a    | ENSG00000207863 hsa-mir-125b-2 |                              |                             |                                |  |  |
| AACATGCTG  | ENSG00000207947 hsa-mir-152             |                                |                                |                                |                              |                             |                                |  |  |
| AACATGGAC  | ENSG00000207954 hsa-mir-138-1           |                                |                                |                                |                              |                             |                                |  |  |
| AACATGGCC  | ENSG00000207567 hsa-mir-142             |                                |                                |                                |                              |                             |                                |  |  |
|            | GGCCATGTT Xie:GCCATnTT YY1              |                                |                                |                                |                              |                             |                                |  |  |
| AACATGGCT  | ENSG00000207995 hsa-mir-325             |                                |                                |                                |                              |                             |                                |  |  |
|            | AGCCATGTT Xie:GCCATnTT YY1              |                                |                                |                                |                              |                             |                                |  |  |
| AACATTAGC  | ENSG00000207777 hsa-mir-10a             |                                |                                |                                |                              |                             |                                |  |  |
| AACATTGAC  | ENSG00000199058 hsa-mir-302b            | ENSG00000199169 hsa-mir-367    | ENSG00000199145 hsa-mir-302d   | ENSG00000199102 hsa-mir-302c   |                              |                             |                                |  |  |
| AACCAACTT  | ENSG00000207624 hsa-mir-194-1           | ENSG00000207590 hsa-mir-215    |                                |                                |                              |                             |                                |  |  |
| AACCAAGTC  | ENSG00000207635 hsa-mir-499             |                                |                                |                                |                              |                             |                                |  |  |
| AACCAATCC  | ENSG00000207745 hsa-mir-17              | ENSG00000207610 hsa-mir-19a    | ENSG00000199149 hsa-mir-20a    |                                |                              |                             |                                |  |  |
| AACCAATGG  | ENSG00000207649 hsa-mir-138-2           | ENSG00000207571 hsa-mir-615    | ENSG00000207623 hsa-mir-205    |                                |                              |                             |                                |  |  |
|            | CCATTGTT Xie:YSATTGGYY NF-Y             |                                |                                |                                |                              |                             |                                |  |  |
| AACCACACC  | ENSG00000207728 hsa-mir-449b            | ENSG00000207777 hsa-mir-10a    |                                |                                |                              |                             |                                |  |  |
|            | AACCACACC Xie:ACCACA AML1               |                                |                                |                                |                              |                             |                                |  |  |
| AACCACAGG  | ENSG00000199177 hsa-mir-31              |                                |                                |                                |                              |                             |                                |  |  |
|            | AACCACAGG Xie:ACCACA AML1               |                                |                                |                                |                              |                             |                                |  |  |
| AACCACCTG  | ENSG00000199032 hsa-mir-425             |                                |                                |                                |                              |                             |                                |  |  |
| AACCAGACA  | ENSG00000207550 hsa-mir-99b             | ENSG00000198972 hsa-let-7e     | ENSG00000208037 hsa-mir-320    | ENSG00000207954 hsa-mir-138-1  |                              |                             |                                |  |  |
| AACCAGATG  | ENSG00000207728 hsa-mir-449b            |                                |                                |                                |                              |                             |                                |  |  |
| AACCAGCCG  | ENSG00000199036 hsa-mir-219-1           |                                |                                |                                |                              |                             |                                |  |  |
| AACCAGCGG  | ENSG00000207698 hsa-mir-32              |                                |                                |                                |                              |                             |                                |  |  |
| AACCAGCTG  | ENSG00000199130 hsa-mir-365-1           | ENSG00000207721 hsa-mir-186    |                                |                                |                              |                             |                                |  |  |
| AACCAGGAC  | ENSG00000207649 hsa-mir-138-2           | ENSG00000207694 hsa-mir-1-2    |                                |                                |                              |                             |                                |  |  |
| AACCAGGTG  | ENSG00000207602 hsa-mir-106a            | ENSG00000207572 hsa-mir-363    | ENSG00000207710 hsa-mir-20b    |                                |                              |                             |                                |  |  |
|            | AACCAGGTG Xie:RnCAGGTG MYOD             |                                |                                |                                |                              |                             |                                |  |  |
| AACCAGTAG  | ENSG00000207611 hsa-mir-149             |                                |                                |                                |                              |                             |                                |  |  |
| AACCAGTCT  | ENSG00000199053 hsa-mir-324             |                                |                                |                                |                              |                             |                                |  |  |
| AACCATAGA  | ENSG00000199122 hsa-mir-148b            | ENSG00000207994 hsa-mir-100    | ENSG00000207971 hsa-mir-125b-1 | ENSG00000198975 hsa-let-7a-2   |                              |                             |                                |  |  |

|            |                                |                                |                              |                              |
|------------|--------------------------------|--------------------------------|------------------------------|------------------------------|
| AACCATCCA  | ENSG00000207745 hsa-mir-17     | ENSG00000207610 hsa-mir-19a    | ENSG00000199149 hsa-mir-20a  |                              |
| AACCATGGC  | ENSG00000207739 hsa-mir-218-2  |                                |                              |                              |
| AACCATGGG  | ENSG00000207947 hsa-mir-152    |                                |                              |                              |
| AACCATTAC  | ENSG00000199058 hsa-mir-302b   | ENSG00000199169 hsa-mir-367    | ENSG00000199145 hsa-mir-302d | ENSG00000199102 hsa-mir-302c |
| AACCCAAAC  | ENSG00000199077 hsa-mir-129-2  | ENSG00000207702 hsa-mir-211    |                              |                              |
| AACCCAAAT  | ENSG00000207630 hsa-mir-7-3    |                                |                              |                              |
| AACCCACAC  | ENSG00000207623 hsa-mir-205    |                                |                              |                              |
| AACCCAGTT  | ENSG00000210741 hsa-mir-196a-1 |                                |                              |                              |
| AACCCATTC  | ENSG00000199085 hsa-mir-148a   |                                |                              |                              |
| AACCCGAGC  | ENSG00000207955 hsa-mir-219-2  |                                |                              |                              |
| AACCCGCGG  | ENSG00000207789 hsa-mir-26a-2  |                                |                              |                              |
| AACCCGCTT  | ENSG00000207728 hsa-mir-449b   |                                |                              |                              |
| AACCCGGCT  | ENSG00000207732 hsa-mir-218-1  |                                |                              |                              |
| AACCCCTAC  | ENSG00000199085 hsa-mir-148a   | ENSG00000198981 hsa-mir-29a    |                              |                              |
| AACCCCTCT  | ENSG00000207744 hsa-mir-10b    |                                |                              |                              |
| AACCCTGAC  | ENSG00000199059 hsa-mir-135b   | ENSG00000207744 hsa-mir-10b    |                              |                              |
| AACCCGAATC | ENSG00000207691 hsa-mir-183    | ENSG00000207990 hsa-mir-182    | ENSG00000199158 hsa-mir-96   |                              |
| AACCCGCCA  | ENSG00000207691 hsa-mir-183    | ENSG00000207990 hsa-mir-182    | ENSG00000199158 hsa-mir-96   |                              |
| AACCGCTCG  | ENSG00000207792 hsa-mir-151    |                                |                              |                              |
| AACCGGAGG  | ENSG00000207649 hsa-mir-138-2  |                                |                              |                              |
| AACCGGCCG  | ENSG00000211517 hsa-mir-671    |                                |                              |                              |
| AACCGGCTG  | ENSG00000207585 hsa-mir-181d   |                                |                              |                              |
| AACCGGCTT  | ENSG00000210741 hsa-mir-196a-1 |                                |                              |                              |
| AACCGGGAA  | ENSG00000207954 hsa-mir-138-1  |                                |                              |                              |
| AACCGTCAC  | ENSG00000199032 hsa-mir-425    |                                |                              |                              |
| AACCTAACA  | ENSG00000207694 hsa-mir-1-2    |                                |                              |                              |
| AACCTAATT  | ENSG00000207638 hsa-mir-99a    | ENSG00000207863 hsa-mir-125b-2 |                              |                              |
| AACCTCCCC  | ENSG00000208024 hsa-mir-199a-2 | ENSG00000207949 hsa-mir-214    |                              |                              |
| AACCTCCCG  | ENSG00000207571 hsa-mir-615    |                                |                              |                              |
| AACCTGACA  | ENSG00000198984 hsa-mir-345    |                                |                              |                              |
|            | TGTCAGGTT Xie:GKCRGKT TCF-1(P) |                                |                              |                              |
| AACCTGCGC  | ENSG00000207955 hsa-mir-219-2  |                                |                              |                              |
| AACCTGCTC  | ENSG00000199130 hsa-mir-365-1  |                                |                              |                              |
| AACCTGTTC  | ENSG00000207617 hsa-mir-24-1   |                                |                              |                              |
| AACCTTGAC  | ENSG00000208035 hsa-mir-143    |                                |                              |                              |
| AACCTTGGA  | ENSG00000207995 hsa-mir-325    |                                |                              |                              |
| AACCTTGTC  | ENSG00000207819 hsa-mir-9-3    |                                |                              |                              |
| AACCTTTAA  | ENSG00000199172 hsa-mir-331    |                                |                              |                              |
| AACGAGTTA  | ENSG00000199085 hsa-mir-148a   |                                |                              |                              |
| AACGATTGG  | ENSG00000207717 hsa-mir-551b   |                                |                              |                              |
| AACGCAGCC  | ENSG00000199038 hsa-mir-210    |                                |                              |                              |
| AACGCCGAG  | ENSG00000207819 hsa-mir-9-3    |                                |                              |                              |
| AACGCCGCC  | ENSG00000199122 hsa-mir-148b   |                                |                              |                              |
| AACGCCTCC  | ENSG00000207698 hsa-mir-32     |                                |                              |                              |
| AACGCGCAG  | ENSG00000198995 hsa-mir-340    |                                |                              |                              |
| AACGCGCCG  | ENSG00000199038 hsa-mir-210    | ENSG00000208037 hsa-mir-320    |                              |                              |
| AACGCGCCG  | ENSG00000198995 hsa-mir-340    |                                |                              |                              |
| AACGCGCGG  | ENSG00000199121 hsa-mir-26b    | ENSG00000211517 hsa-mir-671    |                              |                              |
| AACGCGGGA  | ENSG00000199065 hsa-mir-101-2  |                                |                              |                              |
| AACGCGGGC  | ENSG00000207955 hsa-mir-219-2  | ENSG00000207698 hsa-mir-32     |                              |                              |
| AACGCTCCG  | ENSG00000207751 hsa-mir-130b   |                                |                              |                              |
| AACGGAAT   | ENSG00000198987 hsa-mir-16-2   |                                |                              |                              |
| AACGGAAGT  | ENSG00000211563 hsa-mir-338    |                                |                              |                              |
|            | AACGGAAGT Xie:MGGAWGT PEA3     |                                |                              |                              |
| AACGGCAGA  | ENSG00000199161 hsa-mir-126    |                                |                              |                              |
| AACGGCGCG  | ENSG00000208037 hsa-mir-320    |                                |                              |                              |
| AACGGCTTG  | ENSG00000199122 hsa-mir-148b   |                                |                              |                              |
| AACGGGACC  | ENSG00000199077 hsa-mir-129-2  |                                |                              |                              |
| AACGGGACT  | ENSG00000207571 hsa-mir-615    |                                |                              |                              |
| AACGGTCCG  | ENSG00000199032 hsa-mir-425    |                                |                              |                              |
| AACGTCACT  | ENSG00000208037 hsa-mir-320    |                                |                              |                              |
| AACGTCTGT  | ENSG00000207926 hsa-mir-135a-1 |                                |                              |                              |
| AACGTGGCA  | ENSG00000198984 hsa-mir-345    | ENSG00000207728 hsa-mir-449b   |                              |                              |
| AACGTGGCT  | ENSG00000207791 hsa-mir-497    | ENSG00000207929 hsa-mir-195    |                              |                              |
| AACGTTGGA  | ENSG00000199065 hsa-mir-101-2  |                                |                              |                              |
| AACGTTGTC  | ENSG00000199071 hsa-mir-423    |                                |                              |                              |
| AACTAACTC  | ENSG00000207745 hsa-mir-17     | ENSG00000207610 hsa-mir-19a    | ENSG00000199149 hsa-mir-20a  |                              |
| AACTACAAC  | ENSG00000207698 hsa-mir-32     |                                |                              |                              |
| AACTACAAG  | ENSG00000207790 hsa-mir-29b-2  | ENSG00000207966 hsa-mir-29c    |                              |                              |
| AACTACATC  | ENSG00000199177 hsa-mir-31     |                                |                              |                              |
| AACTACCCA  | ENSG00000199177 hsa-mir-31     | ENSG00000207731 hsa-mir-506    |                              |                              |
| AACTACCGA  | ENSG00000199085 hsa-mir-148a   |                                |                              |                              |
| AACTACCTG  | ENSG00000202609 hsa-mir-488    |                                |                              |                              |
| AACTACTCC  | ENSG00000198995 hsa-mir-340    |                                |                              |                              |
| AACTACTTC  | ENSG00000207731 hsa-mir-506    |                                |                              |                              |
| AACTAGGCA  | ENSG00000207950 hsa-mir-296    |                                |                              |                              |
| AACTAGTGG  | ENSG00000202609 hsa-mir-488    | ENSG00000211590 hsa-mir-802    |                              |                              |
| AACTCAAGG  | ENSG00000198974 hsa-mir-30e    | ENSG00000207962 hsa-mir-30c-1  |                              |                              |
| AACTCAAGT  | ENSG00000207950 hsa-mir-296    |                                |                              |                              |
| AACTCACCT  | ENSG00000207656 hsa-mir-489    |                                |                              |                              |
| AACTCACTC  | ENSG00000199085 hsa-mir-148a   |                                |                              |                              |
| AACTCAGCT  | ENSG00000207791 hsa-mir-497    | ENSG00000207929 hsa-mir-195    |                              |                              |
| AACTCATTG  | ENSG00000207744 hsa-mir-10b    |                                |                              |                              |
| AACTCCACC  | ENSG00000207695 hsa-mir-184    |                                |                              |                              |
| AACTCCATG  | ENSG00000207926 hsa-mir-135a-1 |                                |                              |                              |
| AACTCCCAC  | ENSG00000207698 hsa-mir-32     |                                |                              |                              |
| AACTCCGCG  | ENSG00000199071 hsa-mir-423    |                                |                              |                              |
| AACTCCGCC  | ENSG00000207649 hsa-mir-138-2  | ENSG00000207739 hsa-mir-218-2  |                              |                              |
| AACTCCTAC  | ENSG00000207797 hsa-mir-187    |                                |                              |                              |
| AACTCGACC  | ENSG00000207611 hsa-mir-149    |                                |                              |                              |
| AACTCTCAC  | ENSG00000198974 hsa-mir-30e    | ENSG00000207962 hsa-mir-30c-1  |                              |                              |

|            |                                |                                |                                |                               |
|------------|--------------------------------|--------------------------------|--------------------------------|-------------------------------|
| AACTCTCGC  | ENSG00000199071 hsa-mir-423    |                                |                                |                               |
| AACTCTCGG  | ENSG00000207777 hsa-mir-10a    |                                |                                |                               |
| AACTCTTAA  | ENSG00000207698 hsa-mir-32     |                                |                                |                               |
| AACTGACCT  | ENSG00000199157 hsa-mir-208    |                                |                                |                               |
| AACTGACCT  | Xie:MnTGWCCT                   | T3R                            |                                |                               |
| AACTGACCT  | Xie:TGACCT                     | ER                             |                                |                               |
| AACTGACGC  | ENSG00000199043 hsa-mir-335    |                                |                                |                               |
| AACTGAGTC  | ENSG00000207752 hsa-mir-199a-1 |                                |                                |                               |
| AACTGCACA  | ENSG00000199090 hsa-mir-326    |                                |                                |                               |
| AACTGCCCT  | ENSG00000199104 hsa-mir-346    |                                |                                |                               |
| AACTGGATC  | ENSG00000207618 hsa-mir-144    | ENSG00000207794 hsa-mir-451    |                                |                               |
| AACTGGCTC  | ENSG00000207792 hsa-mir-151    |                                |                                |                               |
| AACTGGTAC  | ENSG00000207790 hsa-mir-29b-2  | ENSG00000207966 hsa-mir-29c    |                                |                               |
| AACTGGTTC  | ENSG00000199071 hsa-mir-423    |                                |                                |                               |
| AACTGTCAG  | ENSG00000207950 hsa-mir-296    |                                |                                |                               |
| CTGACAGTT  | Xie:TGACAG                     | MEIS1                          |                                |                               |
| AACTGTTTA  | ENSG00000207752 hsa-mir-199a-1 |                                |                                |                               |
| AACTTAATC  | ENSG00000207571 hsa-mir-615    | ENSG00000207827 hsa-mir-30a    | ENSG00000199094 hsa-mir-30c-2  |                               |
| AACTTATCT  | ENSG00000207548 hsa-mir-217    | ENSG00000208024 hsa-mir-199a-2 | ENSG00000207949 hsa-mir-214    |                               |
| AACTTATGA  | ENSG00000208005 hsa-mir-503    | ENSG00000207784 hsa-mir-542    |                                |                               |
| AACTTCAAC  | ENSG00000207795 hsa-mir-155    |                                |                                |                               |
| AACTTCACC  | ENSG00000208005 hsa-mir-503    | ENSG00000207784 hsa-mir-542    |                                |                               |
| AACTTCAGC  | ENSG00000199038 hsa-mir-210    |                                |                                |                               |
| AACTTCCGA  | ENSG00000207789 hsa-mir-26a-2  |                                |                                |                               |
| TCGGAAGTT  | Xie:MGGAWGT                    | PEA3                           |                                |                               |
| AACTTCGCC  | ENSG00000207614 hsa-mir-193a   | ENSG00000199187 hsa-mir-365-2  |                                |                               |
| AACTTCTGC  | ENSG00000207819 hsa-mir-9-3    |                                |                                |                               |
| AACTTGAGC  | ENSG00000199032 hsa-mir-425    | ENSG00000199122 hsa-mir-148b   |                                |                               |
| AACTTGCAA  | ENSG00000207705 hsa-mir-129-1  |                                |                                |                               |
| AACTTGCAAT | ENSG00000207980 hsa-mir-23a    | ENSG00000209707 hsa-mir-24-2   | ENSG00000207808 hsa-mir-27a    |                               |
| AACTTGTTA  | ENSG00000207694 hsa-mir-1-2    | ENSG00000207698 hsa-mir-32     |                                |                               |
| AACTTGTTG  | ENSG00000199043 hsa-mir-335    |                                |                                |                               |
| AACTTTCCA  | ENSG00000199085 hsa-mir-148a   |                                |                                |                               |
| TGGAAGTT   | Xie:WGGAAAnW                   | NF-AT                          |                                |                               |
| AACTTTGCT  | ENSG00000207726 hsa-mir-455    | ENSG00000207739 hsa-mir-218-2  |                                |                               |
| AACTTTGGC  | ENSG00000202569 hsa-mir-146b   |                                |                                |                               |
| AACTTTGGT  | ENSG00000199077 hsa-mir-129-2  | ENSG00000207692 hsa-mir-592    |                                |                               |
| AACTTTGGT  | ENSG00000202609 hsa-mir-488    |                                |                                |                               |
| AACTTTTGC  | ENSG00000199085 hsa-mir-148a   |                                |                                |                               |
| AAGAAACGC  | ENSG00000207739 hsa-mir-218-2  |                                |                                |                               |
| AAGAAACTT  | ENSG00000199085 hsa-mir-148a   |                                |                                |                               |
| AAGAACTGC  | ENSG00000199017 hsa-mir-1-1    | ENSG00000207764 hsa-mir-133a-2 |                                |                               |
| AAGAAGTGT  | ENSG00000207596 hsa-mir-194-2  | ENSG00000207648 hsa-mir-192    |                                |                               |
| AAGACAATA  | ENSG00000207651 hsa-mir-28     |                                |                                |                               |
| AAGACCAGC  | ENSG00000207947 hsa-mir-152    |                                |                                |                               |
| AAGACGCAG  | ENSG00000199157 hsa-mir-208    |                                |                                |                               |
| AAGACGCGT  | ENSG00000207739 hsa-mir-218-2  | ENSG00000211517 hsa-mir-671    |                                |                               |
| AAGACGGAA  | ENSG00000207695 hsa-mir-184    |                                |                                |                               |
| AAGACGTGC  | ENSG00000199090 hsa-mir-326    |                                |                                |                               |
| GCACGTCTT  | Xie:CCGCACGTMnnC               | HIF-1                          |                                |                               |
| AAGACTACA  | ENSG00000208009 hsa-mir-130a   |                                |                                |                               |
| AAGAGCCTT  | ENSG00000198987 hsa-mir-16-2   |                                |                                |                               |
| AAGAGCGCA  | ENSG00000207571 hsa-mir-615    |                                |                                |                               |
| AAGAGCGGA  | ENSG00000207713 hsa-mir-200c   | ENSG00000207708 hsa-mir-141    |                                |                               |
| AAGAGGATC  | ENSG00000207790 hsa-mir-29b-2  | ENSG00000207966 hsa-mir-29c    | ENSG00000207939 hsa-mir-223    | ENSG00000207954 hsa-mir-138-1 |
| AAGAGCGCA  | ENSG00000199090 hsa-mir-326    |                                |                                |                               |
| AAGAGGCGG  | ENSG00000207721 hsa-mir-186    |                                |                                |                               |
| AAGAGGCTG  | ENSG00000208017 hsa-mir-140    |                                |                                |                               |
| AAGAGGGAT  | ENSG00000207596 hsa-mir-194-2  | ENSG00000207648 hsa-mir-192    |                                |                               |
| AAGAGGTCC  | ENSG00000207960 hsa-mir-153-2  | ENSG00000207782 hsa-mir-150    |                                |                               |
| AAGAGGTGC  | ENSG00000207571 hsa-mir-615    |                                |                                |                               |
| AAGAGTGAC  | ENSG00000199047 hsa-mir-378    |                                |                                |                               |
| AAGAGTTAA  | ENSG00000199085 hsa-mir-148a   |                                |                                |                               |
| AAGAGTTGC  | ENSG00000207995 hsa-mir-325    |                                |                                |                               |
| AAGATAAAT  | ENSG00000199161 hsa-mir-126    |                                |                                |                               |
| AAGATAAGG  | ENSG00000199053 hsa-mir-324    |                                |                                |                               |
| AAGATGACC  | ENSG00000207691 hsa-mir-183    | ENSG00000207990 hsa-mir-182    | ENSG00000199158 hsa-mir-96     |                               |
| AAGATGGAT  | ENSG00000207994 hsa-mir-100    | ENSG00000207971 hsa-mir-125b-1 | ENSG00000198975 hsa-let-7a-2   |                               |
| AAGATGGCC  | ENSG00000198987 hsa-mir-16-2   |                                |                                |                               |
| CGCCATCTT  | Xie:GCCATnTT                   | YY1                            |                                |                               |
| AAGATGGTG  | ENSG00000199043 hsa-mir-335    |                                |                                |                               |
| AAGATGTCT  | ENSG00000207705 hsa-mir-129-1  | ENSG00000207718 hsa-mir-15a    | ENSG00000208006 hsa-mir-16-1   |                               |
| AAGCAACAA  | ENSG00000207725 hsa-mir-222    | ENSG00000207870 hsa-mir-221    |                                |                               |
| AAGCAGGAT  | ENSG00000207926 hsa-mir-135a-1 | ENSG00000199071 hsa-mir-423    |                                |                               |
| AAGCATGCC  | ENSG00000199157 hsa-mir-208    | ENSG00000198974 hsa-mir-30e    | ENSG00000207962 hsa-mir-30c-1  |                               |
| AAGCATGGC  | ENSG00000207618 hsa-mir-144    | ENSG00000207794 hsa-mir-451    | ENSG00000207633 hsa-mir-505    | ENSG00000207694 hsa-mir-1-2   |
| AAGCCAATC  | ENSG00000199032 hsa-mir-425    |                                |                                |                               |
| AAGCCAATG  | ENSG00000199065 hsa-mir-101-2  | ENSG00000207994 hsa-mir-100    | ENSG00000207971 hsa-mir-125b-1 | ENSG00000198975 hsa-let-7a-2  |
| AAGCCACGC  | ENSG00000198986 hsa-let-7a-3   | ENSG00000207875 hsa-let-7b     | ENSG00000199043 hsa-mir-335    |                               |
| AAGCCACTC  | ENSG00000207548 hsa-mir-217    |                                |                                |                               |
| AAGCCCCGC  | ENSG00000208005 hsa-mir-503    | ENSG00000207784 hsa-mir-542    |                                |                               |
| AAGCCCGGA  | ENSG00000199024 hsa-mir-103-2  |                                |                                |                               |
| AAGCCGATT  | ENSG00000199122 hsa-mir-148b   |                                |                                |                               |
| AAGCCGCGC  | ENSG00000207960 hsa-mir-153-2  | ENSG00000199071 hsa-mir-423    |                                |                               |
| AAGCCGGCG  | ENSG00000207649 hsa-mir-138-2  | ENSG00000207728 hsa-mir-449b   | ENSG00000207571 hsa-mir-615    |                               |
| AAGCGATTC  | ENSG00000199089 hsa-mir-202    |                                |                                |                               |
| AAGCGATTG  | ENSG00000199122 hsa-mir-148b   |                                |                                |                               |
| AAGCGCACT  | ENSG00000199177 hsa-mir-31     |                                |                                |                               |
| AAGCGCTCC  | ENSG00000207585 hsa-mir-181d   | ENSG00000207819 hsa-mir-9-3    |                                |                               |
| AAGCGGAAG  | ENSG00000207721 hsa-mir-186    |                                |                                |                               |
| AAGCGTGCC  | ENSG00000207954 hsa-mir-138-1  |                                |                                |                               |

|            |                                |                               |                             |                             |                               |
|------------|--------------------------------|-------------------------------|-----------------------------|-----------------------------|-------------------------------|
| AAGCGTGGG  | ENSG00000207630 hsa-mir-7-3    |                               |                             |                             |                               |
| AAGCTAAC   | ENSG00000207586 hsa-mir-135a-2 |                               |                             |                             |                               |
| AAGCTAGTA  | ENSG00000199122 hsa-mir-148b   | ENSG00000207797 hsa-mir-187   |                             |                             |                               |
| AAGCTCCAC  | ENSG00000199059 hsa-mir-135b   | ENSG00000207935 hsa-mir-204   |                             |                             |                               |
| AAGCTGGCA  | ENSG00000207623 hsa-mir-205    |                               |                             |                             |                               |
| AAGCTTAGC  | ENSG00000199172 hsa-mir-331    |                               |                             |                             |                               |
| AAGCTTGCA  | ENSG00000207795 hsa-mir-155    |                               |                             |                             |                               |
| AAGCTTTGC  | ENSG00000207728 hsa-mir-449b   | ENSG00000207695 hsa-mir-184   |                             |                             |                               |
| AAGGAACCT  | ENSG00000199165 hsa-let-7a-1   | ENSG00000199072 hsa-let-7f-1  | ENSG00000199133 hsa-let-7d  |                             |                               |
| AAGGAACCT  | ENSG00000198986 hsa-let-7a-3   | ENSG00000207875 hsa-let-7b    |                             |                             |                               |
| AAGGAACCT  | ENSG00000202569 hsa-mir-146b   |                               |                             |                             |                               |
| AAGGAATAA  | ENSG00000207617 hsa-mir-24-1   |                               |                             |                             |                               |
| AAGGCACAT  | ENSG00000208035 hsa-mir-143    |                               |                             |                             |                               |
| AAGGACCCG  | ENSG00000207777 hsa-mir-10a    |                               |                             |                             |                               |
| AAGGACTAC  | ENSG00000207732 hsa-mir-218-1  |                               |                             |                             |                               |
| AAGGAGATT  | ENSG00000207705 hsa-mir-129-1  |                               |                             |                             |                               |
| AAGGAGCTC  | ENSG00000207795 hsa-mir-155    |                               |                             |                             |                               |
| AAGGATCAA  | ENSG00000199157 hsa-mir-208    |                               |                             |                             |                               |
| AAGGATTGC  | ENSG00000207797 hsa-mir-187    |                               |                             |                             |                               |
| AAGGATTGT  | ENSG00000207827 hsa-mir-30a    | ENSG00000199094 hsa-mir-30c-2 |                             |                             |                               |
| AAGGATTTT  | ENSG00000199135 hsa-mir-101-1  |                               |                             |                             |                               |
| AAGGATTTG  | ENSG00000207726 hsa-mir-455    |                               |                             |                             |                               |
| AAGGCAAAT  | ENSG00000207585 hsa-mir-181d   | ENSG00000207635 hsa-mir-499   |                             |                             |                               |
| AAGGCCAAC  | ENSG00000199024 hsa-mir-103-2  | ENSG00000199122 hsa-mir-148b  |                             |                             |                               |
| AAGGCCATG  | ENSG00000207809 hsa-mir-139    |                               |                             |                             |                               |
| AAGGCCCGT  | ENSG00000207789 hsa-mir-26a-2  |                               |                             |                             |                               |
| AAGGCGATT  | ENSG00000207726 hsa-mir-455    |                               |                             |                             |                               |
| AAGGCGCCA  | ENSG00000199161 hsa-mir-126    | ENSG00000207698 hsa-mir-32    |                             |                             |                               |
| AAGGCGGCA  | ENSG00000207702 hsa-mir-211    | ENSG00000208009 hsa-mir-130a  |                             |                             |                               |
| AAGGCGTCC  | ENSG00000207568 hsa-mir-203    |                               |                             |                             |                               |
| AAGGCTCCC  | ENSG00000199135 hsa-mir-101-1  | ENSG00000207571 hsa-mir-615   |                             |                             |                               |
| AAGGGAATT  | ENSG00000207635 hsa-mir-499    |                               |                             |                             |                               |
| AAGGGGAGC  | ENSG00000207623 hsa-mir-205    |                               |                             |                             |                               |
| AAGGGGATT  | ENSG00000207571 hsa-mir-615    |                               |                             |                             |                               |
| AAGGGGCGA  | ENSG00000208037 hsa-mir-320    |                               |                             |                             |                               |
| AAGGGGTTA  | ENSG00000207713 hsa-mir-200c   | ENSG00000207708 hsa-mir-141   |                             |                             |                               |
| AAGGGTAC   | ENSG00000207618 hsa-mir-144    | ENSG00000207794 hsa-mir-451   |                             |                             |                               |
| AAGGTAGGG  | ENSG00000207948 hsa-mir-328    |                               |                             |                             |                               |
| AAGGTAGTA  | ENSG00000207745 hsa-mir-17     | ENSG00000207610 hsa-mir-19a   | ENSG00000199149 hsa-mir-20a |                             |                               |
| AAGGTCAGC  | ENSG00000199059 hsa-mir-135b   | ENSG00000207691 hsa-mir-183   | ENSG00000207990 hsa-mir-182 | ENSG00000199158 hsa-mir-96  |                               |
| GCTGACCTT  | Xie: TGACCT ER                 |                               |                             |                             |                               |
| AAGGTCCCTG | ENSG00000207698 hsa-mir-32     |                               |                             |                             |                               |
| AAGGTCTAA  | ENSG00000207656 hsa-mir-489    |                               |                             |                             |                               |
| AAGGTGAGC  | ENSG00000207656 hsa-mir-489    |                               |                             |                             |                               |
| AAGGTGCAG  | ENSG00000207692 hsa-mir-592    |                               |                             |                             |                               |
| AAGGTGGAC  | ENSG00000207955 hsa-mir-219-2  |                               |                             |                             |                               |
| AAGGTGTGT  | ENSG00000199059 hsa-mir-135b   |                               |                             |                             |                               |
| AAGGTGTTA  | ENSG00000207744 hsa-mir-10b    |                               |                             |                             |                               |
| AAGGTGTTG  | ENSG00000207649 hsa-mir-138-2  |                               |                             |                             |                               |
| AAGGTATA   | ENSG00000199130 hsa-mir-365-1  |                               |                             |                             |                               |
| AAGGTTCAA  | ENSG00000207692 hsa-mir-592    |                               |                             |                             |                               |
| AAGGTTCAG  | ENSG00000211563 hsa-mir-338    |                               |                             |                             |                               |
| AAGGTTCAT  | ENSG00000211590 hsa-mir-802    |                               |                             |                             |                               |
| AAGGTTCCT  | ENSG00000198984 hsa-mir-345    | ENSG00000207618 hsa-mir-144   | ENSG00000207794 hsa-mir-451 |                             |                               |
| AAGGTTCCT  | ENSG00000207777 hsa-mir-10a    |                               |                             |                             |                               |
| AAGTAAATA  | ENSG00000208037 hsa-mir-320    |                               |                             |                             |                               |
| AAGTAAATA  | Xie: WAdTAAWTA NKX6-2          |                               |                             |                             |                               |
| TATTTACTT  | Xie: TRTTTRYTYW HNF-3          |                               |                             |                             |                               |
| AAGTAACCT  | ENSG00000207827 hsa-mir-30a    | ENSG00000199094 hsa-mir-30c-2 |                             |                             |                               |
| AAGTAAGGG  | ENSG00000207995 hsa-mir-325    |                               |                             |                             |                               |
| AAGTAATCC  | ENSG00000207827 hsa-mir-30a    | ENSG00000199094 hsa-mir-30c-2 |                             |                             |                               |
| AAGTAATCT  | ENSG00000199165 hsa-let-7a-1   | ENSG00000199072 hsa-let-7f-1  | ENSG00000199133 hsa-let-7d  |                             |                               |
| AAGTACAAA  | ENSG00000207809 hsa-mir-139    | ENSG00000199082 hsa-mir-342   |                             |                             |                               |
| AAGTACCAT  | ENSG00000208035 hsa-mir-143    |                               |                             |                             |                               |
| AAGTACCTG  | ENSG00000202569 hsa-mir-146b   |                               |                             |                             |                               |
| AAGTAGCCT  | ENSG00000207694 hsa-mir-1-2    |                               |                             |                             |                               |
| AAGTAGGGC  | ENSG00000199059 hsa-mir-135b   | ENSG00000207581 hsa-mir-199b  |                             |                             |                               |
| AAGTAGGTA  | ENSG00000207995 hsa-mir-325    |                               |                             |                             |                               |
| AAGTAGTCC  | ENSG00000199177 hsa-mir-31     |                               |                             |                             |                               |
| AAGTAGTGA  | ENSG00000207827 hsa-mir-30a    | ENSG00000199094 hsa-mir-30c-2 | ENSG00000207947 hsa-mir-152 |                             |                               |
| AAGTACAAA  | ENSG00000207705 hsa-mir-129-1  |                               |                             |                             |                               |
| AAGTACAT   | ENSG00000207789 hsa-mir-26a-2  |                               |                             |                             |                               |
| AAGTCCGGG  | ENSG00000199036 hsa-mir-219-1  |                               |                             |                             |                               |
| AAGTCCGTC  | ENSG00000207792 hsa-mir-151    |                               |                             |                             |                               |
| AAGTCTTAC  | ENSG00000210741 hsa-mir-196a-1 |                               |                             |                             |                               |
| AAGTCTTAG  | ENSG00000199023 hsa-mir-339    |                               |                             |                             |                               |
| AAGTCTCA   | ENSG00000199121 hsa-mir-26b    |                               |                             |                             |                               |
| AAGTCGCCC  | ENSG00000207791 hsa-mir-497    | ENSG00000207929 hsa-mir-195   |                             |                             |                               |
| AAGTCTCGG  | ENSG00000207726 hsa-mir-455    |                               |                             |                             |                               |
| AAGTCTGCT  | ENSG00000207623 hsa-mir-205    | ENSG00000207790 hsa-mir-29b-2 | ENSG00000207966 hsa-mir-29c | ENSG00000207827 hsa-mir-30a | ENSG00000199094 hsa-mir-30c-2 |
| AAGTGAAC   | ENSG00000207568 hsa-mir-203    |                               |                             |                             |                               |
| AAGTGAAC   | Xie: AAGTAAA IRF1              |                               |                             |                             |                               |
| GTTTCACTT  | Xie: CAGTTTCAYTTY ICSPB        |                               |                             |                             |                               |
| GTTTCACTT  | Xie: GGTTCRCCTTTTS             | IRF-1                         |                             |                             |                               |
| GTTTCACTT  | Xie: TTTCAnTT IRF              |                               |                             |                             |                               |
| AAGTGAAT   | ENSG00000199065 hsa-mir-101-2  |                               |                             |                             |                               |
| AAGTGAAT   | Xie: AAGTAAA IRF1              |                               |                             |                             |                               |
| ATTTCACTT  | Xie: TTTCAnTT IRF              |                               |                             |                             |                               |
| AAGTGAACC  | ENSG00000199161 hsa-mir-126    |                               |                             |                             |                               |
| AAGTGAACC  | Xie: AAGTAAA IRF1              |                               |                             |                             |                               |
| AAGTGAATG  | ENSG00000198981 hsa-mir-29a    |                               |                             |                             |                               |





|            |                                |                                |                                |                              |
|------------|--------------------------------|--------------------------------|--------------------------------|------------------------------|
| AATATCATT  | ENSG00000207548 hsa-mir-217    |                                |                                |                              |
| AATATCCAC  | ENSG00000207732 hsa-mir-218-1  |                                |                                |                              |
| AATATGAGC  | ENSG00000207597 hsa-mir-490    |                                |                                |                              |
| AATATGCAT  | ENSG00000207725 hsa-mir-222    | ENSG00000207870 hsa-mir-221    |                                |                              |
| AATATGGGT  | ENSG00000199177 hsa-mir-31     |                                |                                |                              |
| AATATGTGG  | ENSG00000199165 hsa-let-7a-1   | ENSG00000199072 hsa-let-7f-1   | ENSG00000199133 hsa-let-7d     |                              |
| AATATTGAC  | ENSG00000198973 hsa-mir-375    |                                |                                |                              |
| AATATTTAC  | ENSG00000202641 hsa-mir-484    |                                |                                |                              |
| AATATTTAC  | Xie:GGTTAATnWTTAMC             | HNF-1                          |                                |                              |
| AATATTTCC  | ENSG00000199077 hsa-mir-129-2  |                                |                                |                              |
| AATATTTGC  | ENSG00000198973 hsa-mir-375    | ENSG00000207633 hsa-mir-505    |                                |                              |
| AATCAAAAT  | ENSG00000207791 hsa-mir-497    | ENSG00000207929 hsa-mir-195    |                                |                              |
| AATCAAAAT  | ENSG00000207792 hsa-mir-151    | ENSG00000208017 hsa-mir-140    |                                |                              |
| AATCAAGTC  | ENSG00000207791 hsa-mir-497    | ENSG00000207929 hsa-mir-195    |                                |                              |
| AATCAATTG  | ENSG00000207939 hsa-mir-223    |                                |                                |                              |
| AATCAACAAC | ENSG00000207585 hsa-mir-181d   |                                |                                |                              |
| AATCACACG  | ENSG00000199121 hsa-mir-26b    | ENSG00000207819 hsa-mir-9-3    |                                |                              |
| AATCACATC  | ENSG00000207633 hsa-mir-505    |                                |                                |                              |
| AATCACATG  | ENSG00000211574 hsa-mir-770    | ENSG00000208001 hsa-mir-431    | ENSG00000199005 hsa-mir-370    |                              |
| AATCAGACT  | ENSG00000207795 hsa-mir-155    |                                |                                |                              |
| AATCAGATC  | ENSG00000199165 hsa-let-7a-1   | ENSG00000199072 hsa-let-7f-1   | ENSG00000199133 hsa-let-7d     |                              |
| AATCAGCCA  | ENSG00000207950 hsa-mir-296    |                                |                                |                              |
| AATCAGCCT  | ENSG00000207692 hsa-mir-592    |                                |                                |                              |
| AATCAGCGG  | ENSG00000199122 hsa-mir-148b   |                                |                                |                              |
| AATCAGCGT  | ENSG00000207695 hsa-mir-184    |                                |                                |                              |
| AATCAGCTG  | ENSG00000199153 hsa-mir-30d    | ENSG00000207582 hsa-mir-30b    | ENSG00000208005 hsa-mir-503    | ENSG00000207784 hsa-mir-542  |
| AATCAGGCT  | ENSG00000207705 hsa-mir-129-1  |                                |                                |                              |
| AATCAGGGG  | ENSG00000199157 hsa-mir-208    | ENSG00000207611 hsa-mir-149    |                                |                              |
| AATCAGGTC  | ENSG00000202609 hsa-mir-488    |                                |                                |                              |
| AATCAGTCC  | ENSG00000198973 hsa-mir-375    | ENSG00000199122 hsa-mir-148b   |                                |                              |
| AATCATTCC  | ENSG00000211590 hsa-mir-802    |                                |                                |                              |
| AATCCAACCT | ENSG00000202609 hsa-mir-488    |                                |                                |                              |
| AATCCAATA  | ENSG00000207994 hsa-mir-100    | ENSG00000207971 hsa-mir-125b-1 | ENSG00000198975 hsa-let-7a-2   |                              |
| AATCCAATC  | ENSG00000208017 hsa-mir-140    |                                |                                |                              |
| AATCCAATT  | ENSG00000199058 hsa-mir-302b   | ENSG00000199169 hsa-mir-367    | ENSG00000199145 hsa-mir-302d   | ENSG00000199102 hsa-mir-302c |
| AATCCACGC  | ENSG00000199032 hsa-mir-425    |                                |                                |                              |
| AATCCAGAG  | ENSG00000207751 hsa-mir-130b   | ENSG00000211517 hsa-mir-671    | ENSG00000207725 hsa-mir-222    | ENSG00000207870 hsa-mir-221  |
| AATCCAGCC  | ENSG00000207585 hsa-mir-181d   |                                |                                |                              |
| AATCCAGGA  | ENSG00000207550 hsa-mir-99b    | ENSG00000198972 hsa-let-7e     |                                |                              |
| AATCCAGGT  | ENSG00000198987 hsa-mir-16-2   |                                |                                |                              |
| AATCCATGA  | ENSG00000211590 hsa-mir-802    |                                |                                |                              |
| AATCCAAAA  | ENSG00000199085 hsa-mir-148a   | ENSG00000207721 hsa-mir-186    |                                |                              |
| AATCCAGCG  | ENSG00000199059 hsa-mir-135b   | ENSG00000211574 hsa-mir-770    | ENSG00000208001 hsa-mir-431    | ENSG00000199005 hsa-mir-370  |
| AATCCAGT   | ENSG00000210741 hsa-mir-196a-1 |                                |                                |                              |
| AATCCCAT   | ENSG00000207630 hsa-mir-7-3    |                                |                                |                              |
| AATCCCCCC  | ENSG00000207604 hsa-mir-206    | ENSG00000199080 hsa-mir-133b   |                                |                              |
| AATCCCCCT  | ENSG00000199077 hsa-mir-129-2  | ENSG00000207702 hsa-mir-211    | ENSG00000207630 hsa-mir-7-3    |                              |
| AATCCCGGA  | ENSG00000199017 hsa-mir-1-1    | ENSG00000207764 hsa-mir-133a-2 | ENSG00000207751 hsa-mir-130b   |                              |
| AATCCCTTC  | ENSG00000198987 hsa-mir-16-2   |                                |                                |                              |
| AATCCGAAA  | ENSG00000207623 hsa-mir-205    |                                |                                |                              |
| AATCCGAGC  | Xie:AnTTTCGnWTTCSnA            | IRF-7                          |                                |                              |
| AATCCGCTC  | ENSG00000199059 hsa-mir-135b   | ENSG00000207596 hsa-mir-194-2  | ENSG00000207648 hsa-mir-192    |                              |
| AATCCGCTC  | ENSG00000199165 hsa-let-7a-1   | ENSG00000199072 hsa-let-7f-1   | ENSG00000199133 hsa-let-7d     |                              |
| AATCCGGAA  | ENSG00000207955 hsa-mir-219-2  |                                |                                |                              |
| AATCCTAGC  | ENSG00000207656 hsa-mir-489    |                                |                                |                              |
| AATCCCTCT  | ENSG00000207935 hsa-mir-204    |                                |                                |                              |
| AATCCCTGCC | ENSG00000199004 hsa-mir-21     |                                |                                |                              |
| AATCCCTGCT | ENSG00000199165 hsa-let-7a-1   | ENSG00000199072 hsa-let-7f-1   | ENSG00000199133 hsa-let-7d     | ENSG00000207695 hsa-mir-184  |
| AATCCCTGG  | ENSG00000207795 hsa-mir-155    | ENSG00000207797 hsa-mir-187    |                                |                              |
| AATCCGCC   | ENSG00000207819 hsa-mir-9-3    |                                |                                |                              |
| AATCCGCCG  | ENSG00000198987 hsa-mir-16-2   |                                |                                |                              |
| AATCCGCTG  | ENSG00000208024 hsa-mir-199a-2 | ENSG00000207949 hsa-mir-214    |                                |                              |
| AATCCGCTAA | ENSG00000199122 hsa-mir-148b   |                                |                                |                              |
| AATCCGCTTC | ENSG00000199122 hsa-mir-148b   |                                |                                |                              |
| AATCCGAAG  | ENSG00000207790 hsa-mir-29b-2  | ENSG00000207966 hsa-mir-29c    |                                |                              |
| AATCCGGAG  | ENSG00000207789 hsa-mir-26a-2  |                                |                                |                              |
| AATCCGGCAG | ENSG00000207638 hsa-mir-99a    | ENSG00000207863 hsa-mir-125b-2 |                                |                              |
| AATCCGGCTC | ENSG00000207777 hsa-mir-10a    |                                |                                |                              |
| AATCCGGGCT | ENSG00000199085 hsa-mir-148a   |                                |                                |                              |
| AATCGTAC   | ENSG00000199077 hsa-mir-129-2  |                                |                                |                              |
| AATCTATCA  | ENSG00000207745 hsa-mir-17     | ENSG00000207610 hsa-mir-19a    | ENSG00000199149 hsa-mir-20a    |                              |
| AATCTCCAC  | ENSG00000207635 hsa-mir-499    |                                |                                |                              |
| AATCTCCCG  | ENSG00000198995 hsa-mir-340    |                                |                                |                              |
| AATCTCCGC  | ENSG00000207955 hsa-mir-219-2  |                                |                                |                              |
| AATCTCCCT  | ENSG00000207955 hsa-mir-219-2  |                                |                                |                              |
| AATCTCGCC  | ENSG00000199058 hsa-mir-302b   | ENSG00000199169 hsa-mir-367    | ENSG00000199145 hsa-mir-302d   | ENSG00000199102 hsa-mir-302c |
| AATCTCGCG  | ENSG00000207698 hsa-mir-32     |                                |                                |                              |
| AATCTGACA  | ENSG00000207695 hsa-mir-184    |                                |                                |                              |
| AATCTGAGC  | ENSG00000210741 hsa-mir-196a-1 |                                |                                |                              |
| AATCTGGCA  | ENSG00000199089 hsa-mir-202    |                                |                                |                              |
| AATCTGGGC  | ENSG00000207994 hsa-mir-100    | ENSG00000207971 hsa-mir-125b-1 | ENSG00000198975 hsa-let-7a-2   |                              |
| AATCTTCTG  | ENSG00000207597 hsa-mir-490    |                                |                                |                              |
| AATGAACCT  | ENSG00000199177 hsa-mir-31     | ENSG00000207638 hsa-mir-99a    | ENSG00000207863 hsa-mir-125b-2 |                              |
| AATGAAGCC  | ENSG00000207705 hsa-mir-129-1  |                                |                                |                              |
| AATGAAGCG  | ENSG00000207726 hsa-mir-455    |                                |                                |                              |
| AATGAAGTA  | ENSG00000207865 hsa-mir-34a    |                                |                                |                              |
| AATGACAAC  | ENSG00000199071 hsa-mir-423    |                                |                                |                              |
| AATGACATC  | ENSG00000207947 hsa-mir-152    |                                |                                |                              |
| AATGACCAT  | ENSG00000207955 hsa-mir-219-2  | ENSG00000207995 hsa-mir-325    |                                |                              |
| AATGACGGG  | ENSG00000207777 hsa-mir-10a    |                                |                                |                              |
| AATGACTAC  | ENSG00000199065 hsa-mir-101-2  |                                |                                |                              |



|                              |                               |                                |                             |                             |                              |                             |                              |  |  |
|------------------------------|-------------------------------|--------------------------------|-----------------------------|-----------------------------|------------------------------|-----------------------------|------------------------------|--|--|
| AATTCAAAC                    | ENSG00000207811 hsa-mir-34b   | ENSG00000207562 hsa-mir-34c    |                             |                             |                              |                             |                              |  |  |
| AATTCACCC                    | ENSG00000207694 hsa-mir-1-2   |                                |                             |                             |                              |                             |                              |  |  |
| AATTCAGGG                    | ENSG00000207721 hsa-mir-186   |                                |                             |                             |                              |                             |                              |  |  |
| AATTCATGA                    | ENSG00000207725 hsa-mir-222   | ENSG00000207870 hsa-mir-221    |                             |                             |                              |                             |                              |  |  |
| AATTCATGC                    | ENSG00000207777 hsa-mir-10a   |                                |                             |                             |                              |                             |                              |  |  |
| AATTCATTA                    | ENSG00000208017 hsa-mir-140   |                                |                             |                             |                              |                             |                              |  |  |
| AATTCATTG                    | ENSG00000207797 hsa-mir-187   | ENSG00000208024 hsa-mir-199a-2 | ENSG00000207949 hsa-mir-214 |                             |                              |                             |                              |  |  |
| AATTCCTCC                    | ENSG00000202609 hsa-mir-488   | ENSG00000207571 hsa-mir-615    |                             |                             |                              |                             |                              |  |  |
| AATTCCTCG                    | ENSG00000207953 hsa-mir-212   |                                |                             |                             |                              |                             |                              |  |  |
| AATTCCTCA                    | ENSG00000208035 hsa-mir-143   |                                |                             |                             |                              |                             |                              |  |  |
| AATTCGTTA                    | ENSG00000198987 hsa-mir-16-2  |                                |                             |                             |                              |                             |                              |  |  |
| AATTCCTACT                   | ENSG00000207726 hsa-mir-455   |                                |                             |                             |                              |                             |                              |  |  |
| AATTCCTCAC                   | ENSG00000207726 hsa-mir-455   | ENSG00000199024 hsa-mir-103-2  |                             |                             |                              |                             |                              |  |  |
| AATTCCTCCC                   | ENSG00000207939 hsa-mir-223   |                                |                             |                             |                              |                             |                              |  |  |
| AATTCCTTCC                   | ENSG00000207819 hsa-mir-9-3   |                                |                             |                             |                              |                             |                              |  |  |
| AATTGACAA                    | ENSG00000207865 hsa-mir-34a   |                                |                             |                             |                              |                             |                              |  |  |
| AATTGACCA                    | ENSG00000199177 hsa-mir-31    |                                |                             |                             |                              |                             |                              |  |  |
| AATTGACTG                    | ENSG00000207745 hsa-mir-17    | ENSG00000207610 hsa-mir-19a    | ENSG00000199149 hsa-mir-20a |                             |                              |                             |                              |  |  |
| AATTGAGAC                    | ENSG00000207702 hsa-mir-211   |                                |                             |                             |                              |                             |                              |  |  |
| AATTGATGA                    | ENSG00000207656 hsa-mir-489   |                                |                             |                             |                              |                             |                              |  |  |
| AATTGCAAA                    | ENSG00000199053 hsa-mir-324   | ENSG00000207617 hsa-mir-24-1   | ENSG00000207548 hsa-mir-217 |                             |                              |                             |                              |  |  |
| AATTGCAGC                    | ENSG00000207955 hsa-mir-219-2 | ENSG00000207790 hsa-mir-29b-2  | ENSG00000207966 hsa-mir-29c |                             |                              |                             |                              |  |  |
| AATTGCCAA                    | ENSG00000207939 hsa-mir-223   |                                |                             |                             |                              |                             |                              |  |  |
| AATTGCCCG                    | ENSG00000207777 hsa-mir-10a   |                                |                             |                             |                              |                             |                              |  |  |
| AATTGCCTC                    | ENSG00000208005 hsa-mir-503   | ENSG00000207784 hsa-mir-542    |                             |                             |                              |                             |                              |  |  |
| AATTGCTCA                    | ENSG00000207726 hsa-mir-455   | ENSG00000207935 hsa-mir-204    | ENSG00000199082 hsa-mir-342 |                             |                              |                             |                              |  |  |
| AATTGCTGG                    | ENSG00000207618 hsa-mir-144   | ENSG00000207794 hsa-mir-451    |                             |                             |                              |                             |                              |  |  |
| AATTGGACT                    | ENSG00000207602 hsa-mir-106a  | ENSG00000207572 hsa-mir-363    | ENSG00000207710 hsa-mir-20b |                             |                              |                             |                              |  |  |
| AATTGGCTG                    | ENSG00000211517 hsa-mir-671   |                                |                             |                             |                              |                             |                              |  |  |
| AATTGGGAA                    | ENSG00000207548 hsa-mir-217   |                                |                             |                             |                              |                             |                              |  |  |
| AATTGGGCT                    | ENSG00000211574 hsa-mir-770   | ENSG00000208001 hsa-mir-431    | ENSG00000199005 hsa-mir-370 |                             |                              |                             |                              |  |  |
| AATTGGGGG                    | ENSG00000207571 hsa-mir-615   |                                |                             |                             |                              |                             |                              |  |  |
| AATTGGTAC                    | ENSG00000207955 hsa-mir-219-2 |                                |                             |                             |                              |                             |                              |  |  |
| AATTGGTGG                    | ENSG00000207638 hsa-mir-99a   | ENSG00000207863 hsa-mir-125b-2 |                             |                             |                              |                             |                              |  |  |
| AATTTAAAG                    | ENSG00000208037 hsa-mir-320   |                                |                             |                             |                              |                             |                              |  |  |
| AATTTAGAA                    | ENSG00000208035 hsa-mir-143   |                                |                             |                             |                              |                             |                              |  |  |
| AATTTAGGC                    | ENSG00000207618 hsa-mir-144   | ENSG00000207794 hsa-mir-451    |                             |                             |                              |                             |                              |  |  |
| AATTTATTC                    | ENSG00000199177 hsa-mir-31    |                                |                             |                             |                              |                             |                              |  |  |
| AATTTCTCC                    | ENSG00000198987 hsa-mir-16-2  |                                |                             |                             |                              |                             |                              |  |  |
| AATTTCTCTC                   | Xie:AWTTTCC                   | IY                             |                             |                             |                              |                             |                              |  |  |
| GAGGAAATT                    | Xie:AGGAART                   | ELF-1                          |                             |                             |                              |                             |                              |  |  |
| GAGGAAATT                    | Xie:WGGAAAnW                  | NF-AT                          |                             |                             |                              |                             |                              |  |  |
| AATTTCTCTC                   | MATCH:V\$HMGY_Q6              | HMGY                           |                             |                             |                              |                             |                              |  |  |
| AATTTCTCG                    | ENSG00000207698 hsa-mir-32    |                                |                             |                             |                              |                             |                              |  |  |
| AATTTCTGC                    | ENSG00000199177 hsa-mir-31    |                                |                             |                             |                              |                             |                              |  |  |
| AATTTGAGG                    | ENSG00000207811 hsa-mir-34b   | ENSG00000207562 hsa-mir-34c    |                             |                             |                              |                             |                              |  |  |
| AATTTGATC                    | ENSG00000207718 hsa-mir-15a   | ENSG00000208006 hsa-mir-16-1   |                             |                             |                              |                             |                              |  |  |
| AATTTGCAA                    | ENSG00000207548 hsa-mir-217   |                                |                             |                             |                              |                             |                              |  |  |
| AATTTGCAT                    | ENSG00000207656 hsa-mir-489   |                                |                             |                             |                              |                             |                              |  |  |
| ATGCAAATT                    | Xie:ATGCAAATnA                | OCTAMER                        |                             |                             |                              |                             |                              |  |  |
| AATTTGCC                     | ENSG00000207726 hsa-mir-455   |                                |                             |                             |                              |                             |                              |  |  |
| AATTTGGCC                    | ENSG00000207550 hsa-mir-99b   | ENSG00000198972 hsa-let-7e     | ENSG00000207726 hsa-mir-455 |                             |                              |                             |                              |  |  |
| AATTTGTCC                    | ENSG00000207792 hsa-mir-151   |                                |                             |                             |                              |                             |                              |  |  |
| ACAAAACCT                    | ENSG00000199077 hsa-mir-129-2 |                                |                             |                             |                              |                             |                              |  |  |
| ACAAAAGAG                    | ENSG00000207548 hsa-mir-217   |                                |                             |                             |                              |                             |                              |  |  |
| ACAAAAGCC                    | ENSG00000207611 hsa-mir-149   |                                |                             |                             |                              |                             |                              |  |  |
| ACAAAAGGC                    | ENSG00000207635 hsa-mir-499   |                                |                             |                             |                              |                             |                              |  |  |
| ACAAACAGT                    | ENSG00000207633 hsa-mir-505   |                                |                             |                             |                              |                             |                              |  |  |
| ACAAACCGC                    | ENSG00000207730 hsa-mir-200b  | ENSG00000207607 hsa-mir-200a   | ENSG00000198976 hsa-mir-429 |                             |                              |                             |                              |  |  |
| ACAAAGAAC                    | ENSG00000199053 hsa-mir-324   |                                |                             |                             |                              |                             |                              |  |  |
| ACAAAGACG                    | ENSG00000199090 hsa-mir-326   | ENSG00000207751 hsa-mir-130b   |                             |                             |                              |                             |                              |  |  |
| ACAAAGATG                    | ENSG00000199077 hsa-mir-129-2 |                                |                             |                             |                              |                             |                              |  |  |
| ACAAAGGCG                    | ENSG00000207635 hsa-mir-499   | ENSG00000207790 hsa-mir-29b-2  | ENSG00000207966 hsa-mir-29c |                             |                              |                             |                              |  |  |
| ACAAAGGTC                    | ENSG00000199059 hsa-mir-135b  |                                |                             |                             |                              |                             |                              |  |  |
| ACAAAGTCC                    | ENSG00000199161 hsa-mir-126   |                                |                             |                             |                              |                             |                              |  |  |
| ACAAATCAC                    | ENSG00000199036 hsa-mir-219-1 |                                |                             |                             |                              |                             |                              |  |  |
| ACAAATGCA                    | ENSG00000202641 hsa-mir-484   |                                |                             |                             |                              |                             |                              |  |  |
| ACAACAAC                     | ENSG00000207935 hsa-mir-204   |                                |                             |                             |                              |                             |                              |  |  |
| ACAACAGCC                    | ENSG00000208035 hsa-mir-143   |                                |                             |                             |                              |                             |                              |  |  |
| ACAACAGGG                    | ENSG00000199090 hsa-mir-326   | ENSG00000202609 hsa-mir-488    |                             |                             |                              |                             |                              |  |  |
| ACAACATTA                    | ENSG00000207797 hsa-mir-187   |                                |                             |                             |                              |                             |                              |  |  |
| ACAACATTC                    | ENSG00000207789 hsa-mir-26a-2 |                                |                             |                             |                              |                             |                              |  |  |
| ACAACCCCA                    | ENSG00000207731 hsa-mir-506   |                                |                             |                             |                              |                             |                              |  |  |
| ACAACCCCC                    | ENSG00000207751 hsa-mir-130b  |                                |                             |                             |                              |                             |                              |  |  |
| ACAACCCGC                    | ENSG00000207789 hsa-mir-26a-2 |                                |                             |                             |                              |                             |                              |  |  |
| ACAACCTTG                    | ENSG00000199085 hsa-mir-148a  |                                |                             |                             |                              |                             |                              |  |  |
| ACAACCTCC                    | ENSG00000207698 hsa-mir-32    |                                |                             |                             |                              |                             |                              |  |  |
| ACAACCTGCA                   | ENSG00000199090 hsa-mir-326   | ENSG00000199135 hsa-mir-101-1  |                             |                             |                              |                             |                              |  |  |
| ACAACCTTCC                   | ENSG00000198987 hsa-mir-16-2  |                                |                             |                             |                              |                             |                              |  |  |
| ACAACCTTA                    | ENSG00000207548 hsa-mir-217   |                                |                             |                             |                              |                             |                              |  |  |
| ACAAGAAGC                    | ENSG00000199082 hsa-mir-342   |                                |                             |                             |                              |                             |                              |  |  |
| ACAAGAGGC                    | ENSG00000211590 hsa-mir-802   |                                |                             |                             |                              |                             |                              |  |  |
| ACAAGATGG                    | ENSG00000199036 hsa-mir-219-1 | ENSG00000207791 hsa-mir-497    | ENSG00000207929 hsa-mir-195 |                             |                              |                             |                              |  |  |
| ACAAGATGT                    | ENSG00000208037 hsa-mir-320   | ENSG00000207695 hsa-mir-184    |                             |                             |                              |                             |                              |  |  |
| ACAAGCCGC                    | ENSG00000207789 hsa-mir-26a-2 |                                |                             |                             |                              |                             |                              |  |  |
| ACAAGGGCC                    | ENSG00000207730 hsa-mir-200b  | ENSG00000207607 hsa-mir-200a   | ENSG00000198976 hsa-mir-429 | ENSG00000199043 hsa-mir-335 | ENSG00000199058 hsa-mir-302b | ENSG00000199169 hsa-mir-367 | ENSG00000199145 hsa-mir-302d |  |  |
| ENSG00000199102 hsa-mir-302c |                               |                                |                             |                             |                              |                             |                              |  |  |
| ACAAGTCTC                    | ENSG00000207827 hsa-mir-30a   | ENSG00000199094 hsa-mir-30c-2  |                             |                             |                              |                             |                              |  |  |
| ACAAGTGGC                    | ENSG00000207604 hsa-mir-206   | ENSG00000199080 hsa-mir-133b   | ENSG00000211590 hsa-mir-802 |                             |                              |                             |                              |  |  |
| ACAAGTGTC                    | ENSG00000199157 hsa-mir-208   |                                |                             |                             |                              |                             |                              |  |  |
| ACAAGTTCC                    | ENSG00000202569 hsa-mir-146b  | ENSG00000199043 hsa-mir-335    |                             |                             |                              |                             |                              |  |  |



|            |                                |                                |                               |                               |                             |
|------------|--------------------------------|--------------------------------|-------------------------------|-------------------------------|-----------------------------|
| ACAGCCATC  | ENSG00000199059 hsa-mir-135b   | ENSG00000198981 hsa-mir-29a    |                               |                               |                             |
| ACAGCCCAT  | ENSG00000207581 hsa-mir-199b   | ENSG00000207728 hsa-mir-449b   |                               |                               |                             |
| ACAGCCGCG  | ENSG00000199104 hsa-mir-346    |                                |                               |                               |                             |
| ACAGCCTTA  | ENSG00000207602 hsa-mir-106a   | ENSG00000207572 hsa-mir-363    | ENSG00000207710 hsa-mir-20b   | ENSG00000207790 hsa-mir-29b-2 | ENSG00000207966 hsa-mir-29c |
| ACAGCGACA  | ENSG00000207571 hsa-mir-615    |                                |                               |                               |                             |
| ACAGCGCAC  | ENSG00000199047 hsa-mir-378    |                                |                               |                               |                             |
| ACAGCGCCA  | ENSG00000198986 hsa-let-7a-3   | ENSG00000207875 hsa-let-7b     |                               |                               |                             |
| ACAGCGCCC  | ENSG00000199122 hsa-mir-148b   |                                |                               |                               |                             |
| ACAGCGTCG  | ENSG00000198986 hsa-let-7a-3   | ENSG00000207875 hsa-let-7b     |                               |                               |                             |
| ACAGCTGAT  | ENSG00000207790 hsa-mir-29b-2  | ENSG00000207966 hsa-mir-29c    |                               |                               |                             |
| ACAGCTGGC  | ENSG00000207596 hsa-mir-194-2  | ENSG00000207648 hsa-mir-192    | ENSG00000199082 hsa-mir-342   |                               |                             |
| ACAGGACAC  | ENSG00000207635 hsa-mir-499    |                                |                               |                               |                             |
| ACAGGATGC  | ENSG00000207995 hsa-mir-325    |                                |                               |                               |                             |
| ACAGGATTA  | ENSG00000207597 hsa-mir-490    |                                |                               |                               |                             |
| ACAGGGCGA  | ENSG00000199036 hsa-mir-219-1  | ENSG00000199090 hsa-mir-326    |                               |                               |                             |
| ACAGGGCGC  | ENSG00000211574 hsa-mir-770    | ENSG00000208001 hsa-mir-431    | ENSG00000199005 hsa-mir-370   |                               |                             |
| ACAGGGGCG  | ENSG00000202641 hsa-mir-484    |                                |                               |                               |                             |
| ACAGGGTTA  | ENSG00000199157 hsa-mir-208    |                                |                               |                               |                             |
| ACAGGTACT  | ENSG00000207586 hsa-mir-135a-2 |                                |                               |                               |                             |
| ACAGGTAGG  | ENSG00000198984 hsa-mir-345    |                                |                               |                               |                             |
| ACAGGTCTG  | ENSG00000199085 hsa-mir-148a   |                                |                               |                               |                             |
| ACAGGTGCA  | ENSG00000207995 hsa-mir-325    |                                |                               |                               |                             |
| ACAGTGGG   | ENSG00000211563 hsa-mir-338    | ENSG00000207721 hsa-mir-186    |                               |                               |                             |
| ACAGTGGT   | ENSG00000207611 hsa-mir-149    | ENSG00000207692 hsa-mir-592    |                               |                               |                             |
| ACAGTTAA   | ENSG00000207795 hsa-mir-155    |                                |                               |                               |                             |
| ACAGTCATG  | ENSG00000207731 hsa-mir-506    |                                |                               |                               |                             |
| ACAGTCGTG  | ENSG00000199172 hsa-mir-331    |                                |                               |                               |                             |
| ACAGTGACG  | ENSG00000207827 hsa-mir-30a    | ENSG00000199094 hsa-mir-30c-2  |                               |                               |                             |
| ACAGTGAGT  | ENSG00000199053 hsa-mir-324    |                                |                               |                               |                             |
| ACAGTGCGG  | ENSG00000207691 hsa-mir-183    | ENSG00000207990 hsa-mir-182    | ENSG00000199158 hsa-mir-96    |                               |                             |
| ACAGTTCAA  | ENSG00000199153 hsa-mir-30d    | ENSG00000207582 hsa-mir-30b    |                               |                               |                             |
| ACAGTTCAT  | ENSG00000207926 hsa-mir-135a-1 |                                |                               |                               |                             |
| ACATAATCT  | ENSG00000207994 hsa-mir-100    | ENSG00000207971 hsa-mir-125b-1 | ENSG00000198975 hsa-let-7a-2  |                               |                             |
| ACATAGCTC  | ENSG00000207635 hsa-mir-499    |                                |                               |                               |                             |
| ACATCAAAG  | ENSG00000207950 hsa-mir-296    |                                |                               |                               |                             |
| CTTTGATGT  | Xie:CTTTGA                     | LEF1                           |                               |                               |                             |
| ACATCAAAT  | ENSG00000199135 hsa-mir-101-1  |                                |                               |                               |                             |
| ACATCACCC  | ENSG00000207691 hsa-mir-183    | ENSG00000207990 hsa-mir-182    | ENSG00000199158 hsa-mir-96    |                               |                             |
| ACATCACCT  | ENSG00000207745 hsa-mir-17     | ENSG00000207610 hsa-mir-19a    | ENSG00000199149 hsa-mir-20a   |                               |                             |
| ACATCAGAG  | ENSG00000207705 hsa-mir-129-1  |                                |                               |                               |                             |
| ACATCAGCG  | ENSG00000207624 hsa-mir-194-1  | ENSG00000207590 hsa-mir-215    |                               |                               |                             |
| ACATCATCC  | ENSG00000208024 hsa-mir-199a-2 | ENSG00000207949 hsa-mir-214    |                               |                               |                             |
| ACATCCATG  | ENSG00000207827 hsa-mir-30a    | ENSG00000199094 hsa-mir-30c-2  |                               |                               |                             |
| ACATCCCAT  | ENSG00000207721 hsa-mir-186    |                                |                               |                               |                             |
| ACATCCCGG  | ENSG00000199066 hsa-mir-330    |                                |                               |                               |                             |
| ACATCTCCC  | ENSG00000207939 hsa-mir-223    |                                |                               |                               |                             |
| ACATCTGAC  | ENSG00000207948 hsa-mir-328    |                                |                               |                               |                             |
| ACATCTGCA  | ENSG00000207635 hsa-mir-499    |                                |                               |                               |                             |
| ACATCTGGA  | ENSG00000207581 hsa-mir-199b   | ENSG00000207752 hsa-mir-199a-1 |                               |                               |                             |
| TCCAGATGT  | Xie:TCCAGATGTT                 | RP58                           |                               |                               |                             |
| ACATCTGGT  | ENSG00000198973 hsa-mir-375    | ENSG00000208024 hsa-mir-199a-2 | ENSG00000207949 hsa-mir-214   |                               |                             |
| ACATCTTGG  | ENSG00000207827 hsa-mir-30a    | ENSG00000199094 hsa-mir-30c-2  |                               |                               |                             |
| ACATGACAA  | ENSG00000199135 hsa-mir-101-1  |                                |                               |                               |                             |
| ACATGACCC  | ENSG00000199104 hsa-mir-346    |                                |                               |                               |                             |
| ACATGACTC  | ENSG00000207702 hsa-mir-211    | ENSG00000207926 hsa-mir-135a-1 |                               |                               |                             |
| ACATGAGGT  | ENSG00000207705 hsa-mir-129-1  |                                |                               |                               |                             |
| ACATGCCTC  | ENSG00000207791 hsa-mir-497    | ENSG00000207929 hsa-mir-195    |                               |                               |                             |
| ACATGCTGA  | ENSG00000207865 hsa-mir-34a    |                                |                               |                               |                             |
| ACATGCTGC  | ENSG00000207827 hsa-mir-30a    | ENSG00000199094 hsa-mir-30c-2  | ENSG00000207947 hsa-mir-152   |                               |                             |
| ACATGGAAC  | ENSG00000207795 hsa-mir-155    |                                |                               |                               |                             |
| ACATGGCAA  | ENSG00000202569 hsa-mir-146b   |                                |                               |                               |                             |
| ACATGGCTG  | ENSG00000199059 hsa-mir-135b   | ENSG00000207926 hsa-mir-135a-1 | ENSG00000207995 hsa-mir-325   |                               |                             |
| ACATGGTGA  | ENSG00000199088 hsa-mir-379    | ENSG00000207749 hsa-mir-299    | ENSG00000198982 hsa-mir-380   | ENSG00000199069 hsa-mir-323   | ENSG00000211582 hsa-mir-758 |
|            | ENSG00000207743 hsa-mir-495    | ENSG00000199020 hsa-mir-381    | ENSG00000207754 hsa-mir-487b  | ENSG00000202560 hsa-mir-539   | ENSG00000207993 hsa-mir-134 |
|            | ENSG00000199107 hsa-mir-409    | ENSG00000199012 hsa-mir-412    | ENSG00000199025 hsa-mir-369   | ENSG00000199092 hsa-mir-410   | ENSG00000207961 hsa-mir-496 |
|            |                                |                                |                               |                               | ENSG00000199015 hsa-mir-377 |
| ACATGTAC   | ENSG00000207994 hsa-mir-100    | ENSG00000207971 hsa-mir-125b-1 | ENSG00000198975 hsa-let-7a-2  |                               |                             |
| ACATTAAC   | ENSG00000207827 hsa-mir-30a    |                                |                               |                               |                             |
| ACATTAAGC  | ENSG00000207624 hsa-mir-194-1  |                                |                               |                               |                             |
| ACATTATGG  | ENSG00000198986 hsa-let-7a-3   | ENSG00000207590 hsa-mir-215    |                               |                               |                             |
| ACATTCAAC  | ENSG00000207717 hsa-mir-551b   | ENSG00000207875 hsa-let-7b     |                               |                               |                             |
| ACATTCGAC  | ENSG00000207568 hsa-mir-203    |                                |                               |                               |                             |
| ACATTCCTC  | ENSG00000199157 hsa-mir-208    | ENSG00000207752 hsa-mir-199a-1 |                               |                               |                             |
| ACATTCGCA  | ENSG00000198984 hsa-mir-345    |                                |                               |                               |                             |
| ACATTCCTG  | ENSG00000207728 hsa-mir-449b   |                                |                               |                               |                             |
| ACATTGAAC  | ENSG00000207586 hsa-mir-135a-2 |                                |                               |                               |                             |
| ACATTGACA  | ENSG00000199058 hsa-mir-302b   | ENSG00000199169 hsa-mir-367    | ENSG00000199145 hsa-mir-302d  | ENSG00000199102 hsa-mir-302c  |                             |
| ACATTGCAA  | ENSG00000202609 hsa-mir-488    |                                |                               |                               |                             |
| ACATTGCCT  | ENSG00000207618 hsa-mir-144    | ENSG00000207794 hsa-mir-451    | ENSG00000199024 hsa-mir-103-2 |                               |                             |
| ACATTGCTC  | ENSG00000207586 hsa-mir-135a-2 |                                |                               |                               |                             |
| ACATTGGCT  | ENSG00000207994 hsa-mir-100    | ENSG00000207971 hsa-mir-125b-1 | ENSG00000198975 hsa-let-7a-2  |                               |                             |
| ACATTTAAT  | ENSG00000198995 hsa-mir-340    |                                |                               |                               |                             |
| ACCAAAGGG  | ENSG00000207618 hsa-mir-144    | ENSG00000207794 hsa-mir-451    |                               |                               |                             |
| ACCAAGATA  | ENSG00000207602 hsa-mir-106a   | ENSG00000207572 hsa-mir-363    | ENSG00000207710 hsa-mir-20b   |                               |                             |
| ACCAAATAC  | ENSG00000198984 hsa-mir-345    | ENSG00000211574 hsa-mir-770    | ENSG00000208001 hsa-mir-431   | ENSG00000199005 hsa-mir-370   |                             |
| ACCAACCCAG | ENSG00000198986 hsa-let-7a-3   | ENSG00000207875 hsa-let-7b     |                               |                               |                             |
| ACCAACTTC  | ENSG00000207624 hsa-mir-194-1  | ENSG00000207590 hsa-mir-215    |                               |                               |                             |
| ACCAAGATG  | ENSG00000199036 hsa-mir-219-1  |                                |                               |                               |                             |
| ACCAAGTCA  | ENSG00000207635 hsa-mir-499    | ENSG00000207789 hsa-mir-26a-2  |                               |                               |                             |
| ACCAATAAG  | ENSG00000207694 hsa-mir-1-2    |                                |                               |                               |                             |
| ACCAATAGC  | ENSG00000199059 hsa-mir-135b   |                                |                               |                               |                             |
| ACCAATCAT  | ENSG00000199024 hsa-mir-103-2  | ENSG00000207586 hsa-mir-135a-2 |                               |                               |                             |







|            |                                |                                |                               |                             |                             |                               |                             |  |
|------------|--------------------------------|--------------------------------|-------------------------------|-----------------------------|-----------------------------|-------------------------------|-----------------------------|--|
| ACGCACGCA  | MATCH:V\$AHRHIF_Q6             | AHR Arnt HIF-1                 |                               |                             |                             |                               |                             |  |
| ACGCACGGC  | ENSG00000207752 hsa-mir-199a-1 |                                |                               |                             |                             |                               |                             |  |
| ACGCACCTG  | ENSG00000199088 hsa-mir-379    | ENSG00000207749 hsa-mir-299    | ENSG00000198982 hsa-mir-380   | ENSG00000199069 hsa-mir-323 | ENSG00000211582 hsa-mir-758 | ENSG00000207761 hsa-mir-329-1 | ENSG00000194717 hsa-mir-494 |  |
|            | ENSG00000207743 hsa-mir-495    | ENSG00000199020 hsa-mir-381    | ENSG00000207754 hsa-mir-487b  | ENSG00000202560 hsa-mir-539 | ENSG00000207993 hsa-mir-134 | ENSG00000207961 hsa-mir-496   | ENSG00000199015 hsa-mir-377 |  |
|            | ENSG00000199107 hsa-mir-409    | ENSG00000199012 hsa-mir-412    | ENSG00000199025 hsa-mir-369   | ENSG00000199092 hsa-mir-410 |                             |                               |                             |  |
| ACGCACCTC  | ENSG00000199043 hsa-mir-335    |                                |                               |                             |                             |                               |                             |  |
| ACGCACCCA  | ENSG00000207744 hsa-mir-10b    |                                |                               |                             |                             |                               |                             |  |
| ACGCACCCG  | ENSG00000199121 hsa-mir-26b    |                                |                               |                             |                             |                               |                             |  |
| ACGCACGGC  | ENSG00000199024 hsa-mir-103-2  |                                |                               |                             |                             |                               |                             |  |
| ACGCATACA  | ENSG00000199036 hsa-mir-219-1  |                                |                               |                             |                             |                               |                             |  |
| ACGCATCTG  | ENSG00000198973 hsa-mir-375    |                                |                               |                             |                             |                               |                             |  |
| ACGCATGCG  | ENSG00000198995 hsa-mir-340    |                                |                               |                             |                             |                               |                             |  |
| ACGCCAAAA  | ENSG00000199122 hsa-mir-148b   |                                |                               |                             |                             |                               |                             |  |
| ACGCCACGG  | ENSG00000207955 hsa-mir-219-2  |                                |                               |                             |                             |                               |                             |  |
| ACGCCATTG  | ENSG00000199017 hsa-mir-1-1    | ENSG00000207764 hsa-mir-133a-2 |                               |                             |                             |                               |                             |  |
| ACGCCCCAG  | ENSG00000207726 hsa-mir-455    |                                |                               |                             |                             |                               |                             |  |
| ACGCCCACT  | ENSG00000199066 hsa-mir-330    | ENSG00000199024 hsa-mir-103-2  |                               |                             |                             |                               |                             |  |
| ACGCCCAGG  | ENSG00000207571 hsa-mir-615    |                                |                               |                             |                             |                               |                             |  |
| ACGCCCGCT  | ENSG00000207792 hsa-mir-151    |                                |                               |                             |                             |                               |                             |  |
| ACGCCCTGC  | ENSG00000198995 hsa-mir-340    |                                |                               |                             |                             |                               |                             |  |
| ACGCCGACG  | ENSG00000207567 hsa-mir-142    |                                |                               |                             |                             |                               |                             |  |
| ACGCCCTGAC | ENSG00000198995 hsa-mir-340    |                                |                               |                             |                             |                               |                             |  |
| ACGCCCTAG  | ENSG00000207568 hsa-mir-203    |                                |                               |                             |                             |                               |                             |  |
| ACGCGACCA  | ENSG00000199032 hsa-mir-425    |                                |                               |                             |                             |                               |                             |  |
| ACGCGACCC  | ENSG00000207955 hsa-mir-219-2  |                                |                               |                             |                             |                               |                             |  |
| ACGCGACCT  | ENSG00000202641 hsa-mir-484    |                                |                               |                             |                             |                               |                             |  |
| ACGCGAGCC  | ENSG00000208005 hsa-mir-503    | ENSG00000207784 hsa-mir-542    |                               |                             |                             |                               |                             |  |
| ACGCGACACA | ENSG00000198974 hsa-mir-30e    | ENSG00000207962 hsa-mir-30c-1  |                               |                             |                             |                               |                             |  |
| ACGCGACCC  | ENSG00000199036 hsa-mir-219-1  |                                |                               |                             |                             |                               |                             |  |
| ACGCGCCGT  | ENSG00000208037 hsa-mir-320    |                                |                               |                             |                             |                               |                             |  |
| ACGCGCCTC  | ENSG00000198995 hsa-mir-340    |                                |                               |                             |                             |                               |                             |  |
| ACGCGCGAG  | ENSG00000199038 hsa-mir-210    |                                |                               |                             |                             |                               |                             |  |
| ACGCGGAAA  | ENSG00000199036 hsa-mir-219-1  |                                |                               |                             |                             |                               |                             |  |
| ACGCGGAAG  | ENSG00000199032 hsa-mir-425    |                                |                               |                             |                             |                               |                             |  |
| ACGCGTCCG  | ENSG00000208005 hsa-mir-503    | ENSG00000207784 hsa-mir-542    |                               |                             |                             |                               |                             |  |
| ACGCGTGCG  | ENSG00000207752 hsa-mir-199a-1 |                                |                               |                             |                             |                               |                             |  |
| ACGCTCTCT  | ENSG00000199089 hsa-mir-202    | ENSG00000207732 hsa-mir-218-1  |                               |                             |                             |                               |                             |  |
| ACGCTGACG  | ENSG00000199071 hsa-mir-423    |                                |                               |                             |                             |                               |                             |  |
| ACGCTGGGT  | ENSG00000199017 hsa-mir-1-1    | ENSG00000207764 hsa-mir-133a-2 | ENSG00000199089 hsa-mir-202   |                             |                             |                               |                             |  |
| ACGCTGTTG  | ENSG00000207585 hsa-mir-181d   |                                |                               |                             |                             |                               |                             |  |
| ACGCTTCTT  | ENSG00000199043 hsa-mir-335    |                                |                               |                             |                             |                               |                             |  |
| ACGGAAGGA  | ENSG00000207586 hsa-mir-135a-2 |                                |                               |                             |                             |                               |                             |  |
| ACGGAAGGC  | ENSG00000199043 hsa-mir-335    |                                |                               |                             |                             |                               |                             |  |
| ACGGAAGTC  | ENSG00000211563 hsa-mir-338    |                                |                               |                             |                             |                               |                             |  |
| ACGGAAGTC  | Xie:MGGAWGT                    | PEA3                           |                               |                             |                             |                               |                             |  |
| ACGGACACA  | ENSG00000207791 hsa-mir-497    | ENSG00000207929 hsa-mir-195    |                               |                             |                             |                               |                             |  |
| ACGGACAGA  | ENSG00000207567 hsa-mir-142    | ENSG00000207728 hsa-mir-449b   | ENSG00000199130 hsa-mir-365-1 |                             |                             |                               |                             |  |
| ACGGACGGG  | ENSG00000207953 hsa-mir-212    |                                |                               |                             |                             |                               |                             |  |
| ACGGCGCAG  | ENSG00000199047 hsa-mir-378    |                                |                               |                             |                             |                               |                             |  |
| ACGGCGCCT  | ENSG00000207954 hsa-mir-138-1  |                                |                               |                             |                             |                               |                             |  |
| ACGGCTCCT  | ENSG00000207614 hsa-mir-193a   | ENSG00000199187 hsa-mir-365-2  |                               |                             |                             |                               |                             |  |
| ACGGCTTCC  | ENSG00000207953 hsa-mir-212    |                                |                               |                             |                             |                               |                             |  |
| ACGGGCACC  | ENSG00000207713 hsa-mir-200c   | ENSG00000207708 hsa-mir-141    |                               |                             |                             |                               |                             |  |
| ACGGGGCCA  | ENSG00000207955 hsa-mir-219-2  |                                |                               |                             |                             |                               |                             |  |
| ACGGGGTCC  | ENSG00000199085 hsa-mir-148a   | ENSG00000199089 hsa-mir-202    |                               |                             |                             |                               |                             |  |
| ACGGTCGCG  | ENSG00000199032 hsa-mir-425    |                                |                               |                             |                             |                               |                             |  |
| ACGTCAAAG  | ENSG00000207581 hsa-mir-199b   | ENSG00000207953 hsa-mir-212    |                               |                             |                             |                               |                             |  |
| ACGTCAAAG  | Xie:TGACGTCARRG                | ATF-1                          |                               |                             |                             |                               |                             |  |
| CTTTGACGT  | Xie:CTTTGA                     | LEF1                           |                               |                             |                             |                               |                             |  |
| ACGTCAAGA  | ENSG00000199121 hsa-mir-26b    | ENSG00000208024 hsa-mir-199a-2 | ENSG00000207949 hsa-mir-214   |                             |                             |                               |                             |  |
| ACGTCAACC  | ENSG00000207617 hsa-mir-24-1   |                                |                               |                             |                             |                               |                             |  |
| ACGTCAACG  | ENSG00000207953 hsa-mir-212    |                                |                               |                             |                             |                               |                             |  |
| ACGTCAACG  | ENSG00000199130 hsa-mir-365-1  |                                |                               |                             |                             |                               |                             |  |
| ACGTCAAG   | ENSG00000207953 hsa-mir-212    |                                |                               |                             |                             |                               |                             |  |
| ACGTCAAG   | Xie:TGACGTCARRG                | ATF-1                          |                               |                             |                             |                               |                             |  |
| ACGTCAAGG  | ENSG00000207953 hsa-mir-212    | ENSG00000199153 hsa-mir-30d    | ENSG00000207582 hsa-mir-30b   |                             |                             |                               |                             |  |
| ACGTCAAGG  | Xie:TGACGTCARRG                | ATF-1                          |                               |                             |                             |                               |                             |  |
| ACGTCAAGC  | ENSG00000207819 hsa-mir-9-3    |                                |                               |                             |                             |                               |                             |  |
| ACGTCAATC  | ENSG00000207617 hsa-mir-24-1   |                                |                               |                             |                             |                               |                             |  |
| ACGTCAATG  | ENSG00000198995 hsa-mir-340    |                                |                               |                             |                             |                               |                             |  |
| ACGTCCGGC  | ENSG00000207611 hsa-mir-149    |                                |                               |                             |                             |                               |                             |  |
| ACGTCTCG   | ENSG00000198995 hsa-mir-340    |                                |                               |                             |                             |                               |                             |  |
| ACGTCCGGC  | ENSG00000198973 hsa-mir-375    |                                |                               |                             |                             |                               |                             |  |
| ACGTCTCCA  | ENSG00000199135 hsa-mir-101-1  |                                |                               |                             |                             |                               |                             |  |
| ACGTCTTTG  | ENSG00000199090 hsa-mir-326    |                                |                               |                             |                             |                               |                             |  |
| ACGTGAAGA  | ENSG00000199161 hsa-mir-126    |                                |                               |                             |                             |                               |                             |  |
| ACGTGACAG  | ENSG00000207933 hsa-mir-9-1    |                                |                               |                             |                             |                               |                             |  |
| ACGTGACAG  | Xie:TGACAG                     | MEIS1                          |                               |                             |                             |                               |                             |  |
| ACGTGACAT  | ENSG00000207611 hsa-mir-149    |                                |                               |                             |                             |                               |                             |  |
| ACGTGACCC  | ENSG00000208017 hsa-mir-140    |                                |                               |                             |                             |                               |                             |  |
| ACGTGACCG  | ENSG00000208017 hsa-mir-140    |                                |                               |                             |                             |                               |                             |  |
| ACGTGACGA  | ENSG00000199071 hsa-mir-423    |                                |                               |                             |                             |                               |                             |  |
| ACGTGACTC  | ENSG00000207571 hsa-mir-615    |                                |                               |                             |                             |                               |                             |  |
| ACGTGACTG  | ENSG00000199104 hsa-mir-346    |                                |                               |                             |                             |                               |                             |  |
| ACGTGAGCA  | ENSG00000199089 hsa-mir-202    |                                |                               |                             |                             |                               |                             |  |
| ACGTGAGCC  | ENSG00000207819 hsa-mir-9-3    | ENSG00000207950 hsa-mir-296    |                               |                             |                             |                               |                             |  |
| ACGTGAGGA  | ENSG00000199135 hsa-mir-101-1  |                                |                               |                             |                             |                               |                             |  |
| ACGTGAGGC  | ENSG00000207950 hsa-mir-296    |                                |                               |                             |                             |                               |                             |  |
| ACGTGACCA  | ENSG00000199090 hsa-mir-326    |                                |                               |                             |                             |                               |                             |  |
| ACGTGACGA  | ENSG00000199038 hsa-mir-210    |                                |                               |                             |                             |                               |                             |  |



|             |                                |                                |                                |                              |                                |                              |
|-------------|--------------------------------|--------------------------------|--------------------------------|------------------------------|--------------------------------|------------------------------|
| ACTGATGTC   | ENSG00000198981 hsa-mir-29a    |                                |                                |                              |                                |                              |
| ACTGATTC    | ENSG00000198973 hsa-mir-375    |                                |                                |                              |                                |                              |
| ACTGCAACC   | ENSG00000198995 hsa-mir-340    | ENSG00000207649 hsa-mir-138-2  | ENSG00000207713 hsa-mir-200c   | ENSG00000207708 hsa-mir-141  |                                |                              |
| ACTGCACCA   | ENSG00000199066 hsa-mir-330    | ENSG00000211563 hsa-mir-338    | ENSG00000207745 hsa-mir-17     | ENSG00000207610 hsa-mir-19a  | ENSG00000199149 hsa-mir-20a    |                              |
| ACTGCAGCG   | ENSG00000199161 hsa-mir-126    |                                |                                |                              |                                |                              |
| ACTGCATAA   | ENSG00000207745 hsa-mir-17     | ENSG00000207610 hsa-mir-19a    |                                |                              |                                |                              |
| ACTGCATCA   | ENSG00000207790 hsa-mir-29b-2  | ENSG00000207966 hsa-mir-29c    | ENSG00000199149 hsa-mir-20a    |                              |                                |                              |
| ACTGCCGGC   | ENSG00000199065 hsa-mir-101-2  |                                |                                |                              |                                |                              |
| ACTGCCCTTG  | ENSG00000207635 hsa-mir-499    |                                |                                |                              |                                |                              |
| ACTGCGCCT   | ENSG00000198995 hsa-mir-340    |                                |                                |                              |                                |                              |
| ACTGCGGAG   | ENSG00000199104 hsa-mir-346    |                                |                                |                              |                                |                              |
| ACTGCGGCA   | ENSG00000199085 hsa-mir-148a   |                                |                                |                              |                                |                              |
| ACTGCGGGT   | ENSG00000207751 hsa-mir-130b   |                                |                                |                              |                                |                              |
| ACTGCGTGG   | ENSG00000208009 hsa-mir-130a   |                                |                                |                              |                                |                              |
| ACTGTCTAC   | ENSG00000207586 hsa-mir-135a-2 |                                |                                |                              |                                |                              |
| ACTGGCGCG   | ENSG00000199032 hsa-mir-425    | ENSG00000202641 hsa-mir-484    |                                |                              |                                |                              |
| ACTGGCTTA   | ENSG00000207745 hsa-mir-17     | ENSG00000207610 hsa-mir-19a    | ENSG00000199149 hsa-mir-20a    |                              |                                |                              |
| ACTGGGACG   | ENSG00000202641 hsa-mir-484    |                                |                                |                              |                                |                              |
| ACTGGGCAT   | ENSG00000207732 hsa-mir-218-1  | ENSG00000207792 hsa-mir-151    |                                |                              |                                |                              |
| ACTGGGGCC   | ENSG00000208024 hsa-mir-199a-2 | ENSG00000207949 hsa-mir-214    |                                |                              |                                |                              |
| ACTGGGTAA   | ENSG00000207692 hsa-mir-592    | ENSG00000207695 hsa-mir-184    |                                |                              |                                |                              |
| ACTGGTACC   | ENSG00000207790 hsa-mir-29b-2  | ENSG00000207966 hsa-mir-29c    |                                |                              |                                |                              |
| ACTGGTCAA   | ENSG00000207694 hsa-mir-1-2    |                                |                                |                              |                                |                              |
| ACTGGTGTCT  | ENSG00000199036 hsa-mir-219-1  |                                |                                |                              |                                |                              |
| ACTGGTTCA   | ENSG00000208036 hsa-mir-106b   | ENSG00000207547 hsa-mir-25     | ENSG00000207757 hsa-mir-93     | ENSG00000199071 hsa-mir-423  |                                |                              |
| ACTGTACCT   | ENSG00000199077 hsa-mir-129-2  |                                |                                |                              |                                |                              |
| ACTGTCAAT   | ENSG00000207717 hsa-mir-551b   |                                |                                |                              |                                |                              |
|             | ATTGACAGT Xie: TGACAG MEIS1    |                                |                                |                              |                                |                              |
| ACTGTCAGC   | ENSG00000199065 hsa-mir-101-2  |                                |                                |                              |                                |                              |
|             | GCTGACAGT Xie: TGACAG MEIS1    |                                |                                |                              |                                |                              |
| ACTGTCCGC   | ENSG00000207656 hsa-mir-489    |                                |                                |                              |                                |                              |
| ACTGTTTAC   | ENSG00000207752 hsa-mir-199a-1 |                                |                                |                              |                                |                              |
|             | GTAACAGT Xie: CTWAWGTAAACanWG  | FREAC-4                        |                                |                              |                                |                              |
| ACTTAAAAAC  | ENSG00000199082 hsa-mir-342    |                                |                                |                              |                                |                              |
| ACTTAAACT   | ENSG00000199023 hsa-mir-339    |                                |                                |                              |                                |                              |
| ACTTAATCC   | ENSG00000207571 hsa-mir-615    |                                |                                |                              |                                |                              |
| ACTTACCAC   | ENSG00000202569 hsa-mir-146b   | ENSG00000207745 hsa-mir-17     | ENSG00000207610 hsa-mir-19a    | ENSG00000199149 hsa-mir-20a  |                                |                              |
| ACTTACTCA   | ENSG00000202569 hsa-mir-146b   |                                |                                |                              |                                |                              |
| ACTTAGCAA   | ENSG00000207745 hsa-mir-17     | ENSG00000207610 hsa-mir-19a    | ENSG00000199149 hsa-mir-20a    | ENSG00000207994 hsa-mir-100  | ENSG00000207971 hsa-mir-125b-1 | ENSG00000198975 hsa-let-7a-2 |
| ACTTAGTCG   | ENSG00000207739 hsa-mir-218-2  |                                |                                |                              |                                |                              |
| ACTTATCTG   | ENSG00000199059 hsa-mir-135b   | ENSG00000207721 hsa-mir-186    | ENSG00000208024 hsa-mir-199a-2 | ENSG00000207949 hsa-mir-214  |                                |                              |
| ACTTATTCA   | ENSG00000207726 hsa-mir-455    |                                |                                |                              |                                |                              |
| ACTTCAACT   | ENSG00000207623 hsa-mir-205    |                                |                                |                              |                                |                              |
| ACTTCACCC   | ENSG00000207638 hsa-mir-99a    | ENSG00000207863 hsa-mir-125b-2 |                                |                              |                                |                              |
| ACTTCAGCC   | ENSG00000199058 hsa-mir-302b   | ENSG00000199169 hsa-mir-367    | ENSG00000199145 hsa-mir-302d   | ENSG00000199102 hsa-mir-302c |                                |                              |
| ACTTCAGTC   | ENSG00000207797 hsa-mir-187    |                                |                                |                              |                                |                              |
| ACTTCATTG   | ENSG00000207865 hsa-mir-34a    |                                |                                |                              |                                |                              |
| ACTTCCAAG   | ENSG00000207960 hsa-mir-153-2  |                                |                                |                              |                                |                              |
| ACTTCCGCC   | ENSG00000207721 hsa-mir-186    |                                |                                |                              |                                |                              |
|             | GGCGGAAGT Xie: MGGAWGT PEA3    |                                |                                |                              |                                |                              |
| ACTTCCGCT   | ENSG00000207721 hsa-mir-186    |                                |                                |                              |                                |                              |
|             | AGCGGAAGT Xie: MGGAWGT PEA3    |                                |                                |                              |                                |                              |
| ACTTCCGGA   | ENSG00000207585 hsa-mir-181d   |                                |                                |                              |                                |                              |
|             | TCCGGAAGT Xie: CCGGAART ELK-1  |                                |                                |                              |                                |                              |
|             | TCCGGAAGT Xie: MGGAWGT PEA3    |                                |                                |                              |                                |                              |
| ACTTCCCTAC  | ENSG00000207604 hsa-mir-206    | ENSG00000199080 hsa-mir-133b   |                                |                              |                                |                              |
|             | GTAGGAAGT Xie: AGGAART ELF-1   |                                |                                |                              |                                |                              |
|             | GTAGGAAGT Xie: MGGAWGT PEA3    |                                |                                |                              |                                |                              |
| ACTTCCCTAT  | ENSG00000199082 hsa-mir-342    |                                |                                |                              |                                |                              |
|             | ATAGGAAGT Xie: AGGAART ELF-1   |                                |                                |                              |                                |                              |
|             | ATAGGAAGT Xie: MGGAWGT PEA3    |                                |                                |                              |                                |                              |
| ACTTCGCCA   | ENSG00000207614 hsa-mir-193a   | ENSG00000199187 hsa-mir-365-2  |                                |                              |                                |                              |
| ACTTCGTCC   | ENSG00000207994 hsa-mir-100    | ENSG00000207971 hsa-mir-125b-1 | ENSG00000198975 hsa-let-7a-2   |                              |                                |                              |
| ACTTCTAGC   | ENSG00000199032 hsa-mir-425    |                                |                                |                              |                                |                              |
| ACTTCTCCT   | ENSG00000207656 hsa-mir-489    | ENSG00000207935 hsa-mir-204    | ENSG00000207597 hsa-mir-490    |                              |                                |                              |
| ACTTGAAAC   | ENSG00000207789 hsa-mir-26a-2  |                                |                                |                              |                                |                              |
| ACTTGAAGC   | ENSG00000207633 hsa-mir-505    |                                |                                |                              |                                |                              |
| ACTTGAATC   | ENSG00000199058 hsa-mir-302b   | ENSG00000199169 hsa-mir-367    | ENSG00000199145 hsa-mir-302d   | ENSG00000199102 hsa-mir-302c |                                |                              |
| ACTTGATTA   | ENSG00000208035 hsa-mir-143    | ENSG00000207623 hsa-mir-205    |                                |                              |                                |                              |
| ACTTGCAAA   | ENSG00000207731 hsa-mir-506    |                                |                                |                              |                                |                              |
| ACTTGCCCT   | ENSG00000211590 hsa-mir-802    |                                |                                |                              |                                |                              |
| ACTTGCGCA   | ENSG00000207960 hsa-mir-153-2  |                                |                                |                              |                                |                              |
| ACTTGCGTC   | ENSG00000207717 hsa-mir-551b   |                                |                                |                              |                                |                              |
| ACTTGCTAA   | ENSG00000207692 hsa-mir-592    | ENSG00000207994 hsa-mir-100    | ENSG00000207971 hsa-mir-125b-1 | ENSG00000198975 hsa-let-7a-2 |                                |                              |
| ACTTGGAAT   | ENSG00000207585 hsa-mir-181d   |                                |                                |                              |                                |                              |
| ACTTGGATC   | ENSG00000199032 hsa-mir-425    |                                |                                |                              |                                |                              |
| ACTTGTGAG   | ENSG00000207596 hsa-mir-194-2  | ENSG00000207648 hsa-mir-192    |                                |                              |                                |                              |
| ACTTGTGGC   | ENSG00000199085 hsa-mir-148a   | ENSG00000211590 hsa-mir-802    |                                |                              |                                |                              |
| ACTTGTGTTAC | ENSG00000207694 hsa-mir-1-2    |                                |                                |                              |                                |                              |
| ACTTGTGTTAG | ENSG00000207698 hsa-mir-32     |                                |                                |                              |                                |                              |
| ACTTGTGTTGA | ENSG00000207745 hsa-mir-17     | ENSG00000207610 hsa-mir-19a    | ENSG00000199149 hsa-mir-20a    | ENSG00000207797 hsa-mir-187  |                                |                              |
| ACTTTAAAT   | ENSG00000207656 hsa-mir-489    | ENSG00000207726 hsa-mir-455    |                                |                              |                                |                              |
| ACTTTACAC   | ENSG00000207717 hsa-mir-551b   |                                |                                |                              |                                |                              |
| ACTTTATTC   | ENSG00000207548 hsa-mir-217    |                                |                                |                              |                                |                              |
| ACTTTCACCT  | ENSG00000207656 hsa-mir-489    |                                |                                |                              |                                |                              |
| ACTTTCACAC  | ENSG00000211574 hsa-mir-770    | ENSG00000208001 hsa-mir-431    | ENSG00000199005 hsa-mir-370    |                              |                                |                              |
|             | GTGGAAGT Xie: WGGAAAnW NF-AT   |                                |                                |                              |                                |                              |
| ACTTTCAT    | ENSG00000199085 hsa-mir-148a   |                                |                                |                              |                                |                              |
|             | ATGGAAGT Xie: WGGAAAnW NF-AT   |                                |                                |                              |                                |                              |
| ACTTTCGCG   | ENSG00000207777 hsa-mir-10a    |                                |                                |                              |                                |                              |
| ACTTTCCTAT  | ENSG00000199082 hsa-mir-342    |                                |                                |                              |                                |                              |

|            |                                |                                |                               |                                |                              |
|------------|--------------------------------|--------------------------------|-------------------------------|--------------------------------|------------------------------|
| ACTTTGATC  | ENSG00000207698 hsa-mir-32     | ENSG00000207827 hsa-mir-30a    | ENSG00000199094 hsa-mir-30c-2 |                                |                              |
| ACTTTGATC  | Xie:CTTTGA LEP1                |                                |                               |                                |                              |
| ACTTTGGCC  | ENSG00000202569 hsa-mir-146b   |                                |                               |                                |                              |
| ACTTTGTGC  | ENSG00000199161 hsa-mir-126    |                                |                               |                                |                              |
| ACTTTTCCA  | ENSG00000198973 hsa-mir-375    |                                |                               |                                |                              |
| AGAAAACGG  | ENSG00000208009 hsa-mir-130a   |                                |                               |                                |                              |
| AGAAAAGCG  | ENSG00000211517 hsa-mir-671    |                                |                               |                                |                              |
| AGAAAACGCT | ENSG00000211590 hsa-mir-802    |                                |                               |                                |                              |
| AGAAAACGGC | ENSG00000207597 hsa-mir-490    |                                |                               |                                |                              |
| AGAAAACGGC | MATCH:V\$VMB_02 v-Myb          |                                |                               |                                |                              |
| AGAAACTCA  | ENSG00000208037 hsa-mir-320    |                                |                               |                                |                              |
| AGAAAGCGC  | ENSG00000198984 hsa-mir-345    | ENSG00000207811 hsa-mir-34b    | ENSG00000207562 hsa-mir-34c   | ENSG00000199122 hsa-mir-148b   |                              |
| AGAAAGTTC  | ENSG00000207752 hsa-mir-199a-1 |                                |                               |                                |                              |
| GAACCTTCT  | Xie:GAAnnWTCK HSF2             |                                |                               |                                |                              |
| AGAAATCTC  | ENSG00000202569 hsa-mir-146b   |                                |                               |                                |                              |
| AGAACAGAT  | ENSG00000199053 hsa-mir-324    | ENSG00000199157 hsa-mir-208    |                               |                                |                              |
| AGAACCTCA  | ENSG00000207692 hsa-mir-592    | ENSG00000207731 hsa-mir-506    |                               |                                |                              |
| AGAACCGCC  | ENSG00000199038 hsa-mir-210    | ENSG00000211517 hsa-mir-671    | ENSG00000207695 hsa-mir-184   |                                |                              |
| AGAACTAAT  | ENSG00000207745 hsa-mir-17     | ENSG00000207610 hsa-mir-19a    | ENSG00000199149 hsa-mir-20a   |                                |                              |
| AGAACTCCG  | ENSG00000207649 hsa-mir-138-2  |                                |                               |                                |                              |
| AGAACTGCG  | ENSG00000207732 hsa-mir-218-1  |                                |                               |                                |                              |
| AGAACTGTC  | ENSG00000207950 hsa-mir-296    | ENSG00000207947 hsa-mir-152    |                               |                                |                              |
| AGAAACCGC  | ENSG00000199053 hsa-mir-324    | ENSG00000207705 hsa-mir-129-1  |                               |                                |                              |
| AGAAAGCGAT | ENSG00000199122 hsa-mir-148b   |                                |                               |                                |                              |
| AGAAAGCGCC | ENSG00000202609 hsa-mir-488    |                                |                               |                                |                              |
| AGAAAGCTAA | ENSG00000199082 hsa-mir-342    |                                |                               |                                |                              |
| AGAAAGGACG | ENSG00000207732 hsa-mir-218-1  |                                |                               |                                |                              |
| AGAAATAACT | ENSG00000199085 hsa-mir-148a   |                                |                               |                                |                              |
| AGAAATAGCC | ENSG00000207950 hsa-mir-296    |                                |                               |                                |                              |
| AGAAATCCCC | ENSG00000207702 hsa-mir-211    |                                |                               |                                |                              |
| AGAAATCCCT | ENSG00000198986 hsa-let-7a-3   | ENSG00000207875 hsa-let-7b     |                               |                                |                              |
| AGAAATCGCC | ENSG00000208024 hsa-mir-199a-2 | ENSG00000207949 hsa-mir-214    |                               |                                |                              |
| AGAAATGCTC | ENSG00000207819 hsa-mir-9-3    |                                |                               |                                |                              |
| AGAAATCTCT | ENSG00000199024 hsa-mir-103-2  | ENSG00000207731 hsa-mir-506    |                               |                                |                              |
| AGAAATTTCA | ENSG00000199121 hsa-mir-26b    |                                |                               |                                |                              |
| AGACAAACC  | ENSG00000207717 hsa-mir-551b   |                                |                               |                                |                              |
| AGACAACTC  | ENSG00000199082 hsa-mir-342    |                                |                               |                                |                              |
| AGACAAATGG | ENSG00000207638 hsa-mir-99a    | ENSG00000207863 hsa-mir-125b-2 | ENSG00000207994 hsa-mir-100   | ENSG00000207971 hsa-mir-125b-1 | ENSG00000198975 hsa-let-7a-2 |
| AGACACCGG  | ENSG00000207730 hsa-mir-200b   | ENSG00000207607 hsa-mir-200a   | ENSG00000198976 hsa-mir-429   | ENSG00000207739 hsa-mir-218-2  |                              |
| AGACACTAA  | ENSG00000207649 hsa-mir-138-2  |                                |                               |                                |                              |
| AGACAGAAC  | ENSG00000207730 hsa-mir-200b   | ENSG00000207607 hsa-mir-200a   | ENSG00000198976 hsa-mir-429   |                                |                              |
| AGACAGAGC  | ENSG00000207947 hsa-mir-152    |                                |                               |                                |                              |
| AGACAGGGG  | ENSG00000199043 hsa-mir-335    | ENSG00000199153 hsa-mir-30d    | ENSG00000207582 hsa-mir-30b   |                                |                              |
| AGACATCTG  | ENSG00000207635 hsa-mir-499    |                                |                               |                                |                              |
| AGACCACAA  | ENSG00000207939 hsa-mir-223    |                                |                               |                                |                              |
| AGACCACAA  | Xie:ACCACA AML1                |                                |                               |                                |                              |
| AGACCACCC  | ENSG00000199066 hsa-mir-330    | ENSG00000207751 hsa-mir-130b   | ENSG00000211574 hsa-mir-770   | ENSG00000208001 hsa-mir-431    | ENSG00000199005 hsa-mir-370  |
| AGACCAAC   | ENSG00000207955 hsa-mir-219-2  |                                |                               |                                |                              |
| AGACCGCCG  | ENSG00000207732 hsa-mir-218-1  |                                |                               |                                |                              |
| AGACCGGAG  | ENSG00000198973 hsa-mir-375    | ENSG00000198984 hsa-mir-345    |                               |                                |                              |
| AGACCGGGG  | ENSG00000199104 hsa-mir-346    | ENSG00000207596 hsa-mir-194-2  | ENSG00000207648 hsa-mir-192   |                                |                              |
| AGACCTAGC  | ENSG00000208035 hsa-mir-143    |                                |                               |                                |                              |
| AGACCTGAC  | ENSG00000207585 hsa-mir-181d   |                                |                               |                                |                              |
| AGACCTTTC  | ENSG00000199059 hsa-mir-135b   |                                |                               |                                |                              |
| AGACGCAGG  | ENSG00000207953 hsa-mir-212    |                                |                               |                                |                              |
| AGACGCGGA  | ENSG00000199032 hsa-mir-425    |                                |                               |                                |                              |
| AGACGCGGG  | ENSG00000207739 hsa-mir-218-2  |                                |                               |                                |                              |
| AGACGGAAG  | ENSG00000207695 hsa-mir-184    |                                |                               |                                |                              |
| AGACGTCAG  | ENSG00000207630 hsa-mir-7-3    |                                |                               |                                |                              |
| AGACGTGAC  | ENSG00000199130 hsa-mir-365-1  |                                |                               |                                |                              |
| AGACGTGGG  | ENSG00000199161 hsa-mir-126    |                                |                               |                                |                              |
| AGACTAAAT  | ENSG00000207597 hsa-mir-490    | ENSG00000207694 hsa-mir-1-2    |                               |                                |                              |
| AGACTACAA  | ENSG00000198995 hsa-mir-340    | ENSG00000207694 hsa-mir-1-2    |                               |                                |                              |
| AGACTAGAT  | ENSG00000199082 hsa-mir-342    |                                |                               |                                |                              |
| AGACTCACT  | ENSG00000207744 hsa-mir-10b    |                                |                               |                                |                              |
| AGACTCCCG  | ENSG00000208037 hsa-mir-320    |                                |                               |                                |                              |
| AGACTGGAC  | ENSG00000199036 hsa-mir-219-1  |                                |                               |                                |                              |
| AGACTTAGC  | ENSG00000207731 hsa-mir-506    |                                |                               |                                |                              |
| AGACTTCAA  | ENSG00000207623 hsa-mir-205    |                                |                               |                                |                              |
| AGACTTCAC  | ENSG00000207695 hsa-mir-184    | ENSG00000207718 hsa-mir-15a    | ENSG00000208006 hsa-mir-16-1  |                                |                              |
| AGACTTCCC  | ENSG00000207585 hsa-mir-181d   |                                |                               |                                |                              |
| AGACTTTAA  | ENSG00000207726 hsa-mir-455    |                                |                               |                                |                              |
| AGAGACGGA  | ENSG00000199023 hsa-mir-339    | ENSG00000207953 hsa-mir-212    |                               |                                |                              |
| AGAGATAAA  | ENSG00000207809 hsa-mir-139    |                                |                               |                                |                              |
| AGAGATAAC  | ENSG00000199090 hsa-mir-326    | ENSG00000199058 hsa-mir-302b   | ENSG00000199169 hsa-mir-367   | ENSG00000199145 hsa-mir-302d   | ENSG00000199102 hsa-mir-302c |
| AGAGATAGC  | ENSG00000207602 hsa-mir-106a   | ENSG00000207572 hsa-mir-363    | ENSG00000207710 hsa-mir-20b   | ENSG00000207623 hsa-mir-205    |                              |
| AGAGATATC  | ENSG00000207571 hsa-mir-615    | ENSG00000207624 hsa-mir-194-1  | ENSG00000207590 hsa-mir-215   |                                |                              |
| AGAGATCAC  | ENSG00000199121 hsa-mir-26b    |                                |                               |                                |                              |
| AGAGATCCT  | ENSG00000207939 hsa-mir-223    |                                |                               |                                |                              |
| AGAGATGGC  | ENSG00000199023 hsa-mir-339    | ENSG00000199130 hsa-mir-365-1  |                               |                                |                              |
| AGAGATTAC  | ENSG00000199088 hsa-mir-379    | ENSG00000207749 hsa-mir-299    | ENSG00000198982 hsa-mir-380   | ENSG00000199069 hsa-mir-323    | ENSG00000211582 hsa-mir-758  |
|            | ENSG00000207743 hsa-mir-495    | ENSG00000199020 hsa-mir-381    | ENSG00000207754 hsa-mir-487b  | ENSG00000202560 hsa-mir-539    | ENSG00000207993 hsa-mir-134  |
|            | ENSG00000199107 hsa-mir-409    | ENSG00000199012 hsa-mir-412    | ENSG00000199025 hsa-mir-369   | ENSG00000199092 hsa-mir-410    | ENSG00000207961 hsa-mir-496  |
| AGAGCAAAC  | ENSG00000207656 hsa-mir-489    | ENSG00000199130 hsa-mir-365-1  |                               |                                | ENSG00000199015 hsa-mir-377  |
| GTTTGCTCT  | Xie:GTdTGCT DBP                |                                |                               |                                |                              |
| GTTTGCTCT  | Xie:TRTTTRYTYW HNF-3           |                                |                               |                                |                              |
| AGAGCAAAC  | MATCH:V\$DBP_Q6 DBP            |                                |                               |                                |                              |
| AGAGCCAAA  | ENSG00000199157 hsa-mir-208    | ENSG00000199130 hsa-mir-365-1  |                               |                                |                              |
| AGAGCCAAT  | ENSG00000207789 hsa-mir-26a-2  |                                |                               |                                |                              |
| AGAGCCGAT  | ENSG00000199017 hsa-mir-1-1    | ENSG00000207764 hsa-mir-133a-2 |                               |                                |                              |
| AGAGCCTCG  | ENSG00000199053 hsa-mir-324    | ENSG00000207744 hsa-mir-10b    |                               |                                |                              |



|            |                                |                                |                                |                              |
|------------|--------------------------------|--------------------------------|--------------------------------|------------------------------|
| AGCACCCAG  | ENSG00000207705 hsa-mir-129-1  | ENSG00000207926 hsa-mir-135a-1 | ENSG00000207604 hsa-mir-206    | ENSG00000199080 hsa-mir-133b |
| AGCACGTGA  | ENSG00000207950 hsa-mir-296    |                                |                                |                              |
| AGCACGTGA  | Xie:SCACGTG MYC                |                                |                                |                              |
| AGCAGCTTG  | ENSG00000207617 hsa-mir-24-1   | ENSG00000208024 hsa-mir-199a-2 | ENSG00000207949 hsa-mir-214    |                              |
| AGCAGGCCA  | ENSG00000207656 hsa-mir-489    | ENSG00000207744 hsa-mir-10b    | ENSG00000208024 hsa-mir-199a-2 | ENSG00000207949 hsa-mir-214  |
| AGCAGGTAA  | ENSG00000207623 hsa-mir-205    | ENSG00000207939 hsa-mir-223    |                                |                              |
| AGCAGGTAG  | ENSG00000207596 hsa-mir-194-2  | ENSG00000207648 hsa-mir-192    | ENSG00000208005 hsa-mir-503    | ENSG00000207784 hsa-mir-542  |
| AGCAGTAAC  | ENSG00000210741 hsa-mir-196a-1 |                                |                                |                              |
| AGCAGTTAA  | ENSG00000199165 hsa-let-7a-1   | ENSG00000199072 hsa-let-7f-1   | ENSG00000199133 hsa-let-7d     |                              |
| AGCAGTTCC  | ENSG00000210741 hsa-mir-196a-1 |                                |                                |                              |
| AGCATACAT  | ENSG00000198981 hsa-mir-29a    |                                |                                |                              |
| ATGTATGCT  | Xie:GtdTGCT DBP                |                                |                                |                              |
| AGCATCACC  | ENSG00000199032 hsa-mir-425    | ENSG00000207811 hsa-mir-34b    | ENSG00000207562 hsa-mir-34c    |                              |
| AGCATGCCC  | ENSG00000199157 hsa-mir-208    | ENSG00000202641 hsa-mir-484    |                                |                              |
| AGCATGGAG  | ENSG00000199065 hsa-mir-101-2  |                                |                                |                              |
| AGCATGGAT  | ENSG00000198974 hsa-mir-30e    | ENSG00000207962 hsa-mir-30c-1  |                                |                              |
| AGCATGGCA  | ENSG00000207694 hsa-mir-1-2    |                                |                                |                              |
| AGCATGGCC  | ENSG00000207948 hsa-mir-328    | ENSG00000207586 hsa-mir-135a-2 |                                |                              |
| AGCATGTCA  | ENSG00000207725 hsa-mir-222    | ENSG00000207870 hsa-mir-221    |                                |                              |
| AGCATTAAT  | ENSG00000199058 hsa-mir-302b   | ENSG00000199169 hsa-mir-367    | ENSG00000199145 hsa-mir-302d   | ENSG00000199102 hsa-mir-302c |
| AGCATTTGC  | ENSG00000198973 hsa-mir-375    |                                |                                |                              |
| AGCCAAAAC  | ENSG00000199130 hsa-mir-365-1  |                                |                                |                              |
| AGCCAAATG  | ENSG00000202641 hsa-mir-484    |                                |                                |                              |
| AGCCAACAT  | ENSG00000207954 hsa-mir-138-1  |                                |                                |                              |
| AGCCAACCA  | ENSG00000207550 hsa-mir-99b    | ENSG00000198972 hsa-let-7e     |                                |                              |
| AGCCAAATTA | ENSG00000199130 hsa-mir-365-1  |                                |                                |                              |
| AGCCAAATTG | ENSG00000211517 hsa-mir-671    |                                |                                |                              |
| AGCCACATA  | ENSG00000207581 hsa-mir-199b   |                                |                                |                              |
| AGCCACGTG  | ENSG00000207585 hsa-mir-181d   |                                |                                |                              |
| AGCCACGTG  | Xie:SCACGTG MYC                |                                |                                |                              |
| AGCCAGTCA  | ENSG00000207731 hsa-mir-506    |                                |                                |                              |
| AGCCATAAT  | ENSG00000207797 hsa-mir-187    |                                |                                |                              |
| AGCCATCAT  | ENSG00000199059 hsa-mir-135b   |                                |                                |                              |
| AGCCATTGG  | ENSG00000207649 hsa-mir-138-2  | ENSG00000207745 hsa-mir-17     | ENSG00000207610 hsa-mir-19a    | ENSG00000199149 hsa-mir-20a  |
| AGCCCAATG  | ENSG00000198981 hsa-mir-29a    |                                |                                |                              |
| AGCCCACGC  | ENSG00000207960 hsa-mir-153-2  |                                |                                |                              |
| AGCCCATCA  | ENSG00000207604 hsa-mir-206    | ENSG00000199080 hsa-mir-133b   |                                |                              |
| AGCCCATTA  | ENSG00000207744 hsa-mir-10b    |                                |                                |                              |
| AGCCCATTC  | ENSG00000207713 hsa-mir-200c   | ENSG00000207708 hsa-mir-141    |                                |                              |
| AGCCCATTG  | ENSG00000207581 hsa-mir-199b   |                                |                                |                              |
| AGCCCAAT   | ENSG00000210741 hsa-mir-196a-1 |                                |                                |                              |
| AGCCCCCCC  | ENSG00000207635 hsa-mir-499    |                                |                                |                              |
| AGCCCTTA   | ENSG00000198973 hsa-mir-375    |                                |                                |                              |
| AGCCCTTG   | ENSG00000207649 hsa-mir-138-2  | ENSG00000207827 hsa-mir-30a    | ENSG00000199094 hsa-mir-30c-2  |                              |
| AGCCCGCCC  | ENSG00000207713 hsa-mir-200c   | ENSG00000207708 hsa-mir-141    |                                |                              |
| AGCCCGGAA  | ENSG00000199024 hsa-mir-103-2  |                                |                                |                              |
| AGCCCGGAT  | ENSG00000211517 hsa-mir-671    | ENSG00000207744 hsa-mir-10b    |                                |                              |
| AGCCCTGAT  | ENSG00000207635 hsa-mir-499    |                                |                                |                              |
| AGCCCTTAT  | ENSG00000199053 hsa-mir-324    |                                |                                |                              |
| AGCCGAAGG  | ENSG00000207635 hsa-mir-499    |                                |                                |                              |
| AGCCGAGGA  | ENSG00000211517 hsa-mir-671    |                                |                                |                              |
| AGCCGATGA  | ENSG00000199036 hsa-mir-219-1  |                                |                                |                              |
| AGCCGATTG  | ENSG00000207777 hsa-mir-10a    |                                |                                |                              |
| AGCCGCCAA  | ENSG00000207568 hsa-mir-203    |                                |                                |                              |
| AGCCGCCAT  | ENSG00000207744 hsa-mir-10b    |                                |                                |                              |
| AGCCGGCAC  | ENSG00000207550 hsa-mir-99b    | ENSG00000198972 hsa-let-7e     |                                |                              |
| AGCCGTGAC  | ENSG00000199077 hsa-mir-129-2  |                                |                                |                              |
| AGCCTAAAT  | ENSG00000207618 hsa-mir-144    | ENSG00000207794 hsa-mir-451    |                                |                              |
| AGCCTATAA  | ENSG00000199177 hsa-mir-31     | ENSG00000207630 hsa-mir-7-3    |                                |                              |
| AGCCTGAAC  | ENSG00000207795 hsa-mir-155    |                                |                                |                              |
| AGCCTGCTA  | ENSG00000199024 hsa-mir-103-2  |                                |                                |                              |
| AGCCTTATC  | ENSG00000207739 hsa-mir-218-2  |                                |                                |                              |
| AGCCTTTAA  | ENSG00000199122 hsa-mir-148b   |                                |                                |                              |
| AGCCTTTAG  | ENSG00000207777 hsa-mir-10a    |                                |                                |                              |
| AGCCTTTAT  | ENSG00000199065 hsa-mir-101-2  | ENSG00000199082 hsa-mir-342    |                                |                              |
| AGCGAAAGC  | ENSG00000199032 hsa-mir-425    |                                |                                |                              |
| AGCGAATTG  | ENSG00000207751 hsa-mir-130b   |                                |                                |                              |
| AGCGACACC  | ENSG00000207571 hsa-mir-615    |                                |                                |                              |
| AGCGACAGG  | ENSG00000207717 hsa-mir-551b   |                                |                                |                              |
| AGCGACCTC  | ENSG00000199077 hsa-mir-129-2  |                                |                                |                              |
| AGCGACTCC  | ENSG00000198973 hsa-mir-375    |                                |                                |                              |
| AGCGAGCTC  | ENSG00000199089 hsa-mir-202    |                                |                                |                              |
| AGCGCACCT  | ENSG00000198973 hsa-mir-375    |                                |                                |                              |
| AGCGCACGC  | ENSG00000207792 hsa-mir-151    |                                |                                |                              |
| AGCGCACTG  | ENSG00000199065 hsa-mir-101-2  | ENSG00000207819 hsa-mir-9-3    |                                |                              |
| AGCGCAGGC  | ENSG00000199047 hsa-mir-378    |                                |                                |                              |
| AGCGCATAG  | ENSG00000207571 hsa-mir-615    |                                |                                |                              |
| AGCGCATGC  | ENSG00000198995 hsa-mir-340    |                                |                                |                              |
| AGCGCCAAC  | ENSG00000207935 hsa-mir-204    | ENSG00000207865 hsa-mir-34a    |                                |                              |
| AGCGCCACC  | ENSG00000199043 hsa-mir-335    |                                |                                |                              |
| AGCGCCCCC  | ENSG00000199122 hsa-mir-148b   |                                |                                |                              |
| AGCGCCCCC  | MATCH:V\$LRF_Q2 LRF            |                                |                                |                              |
| AGCGCCCGC  | ENSG00000199122 hsa-mir-148b   |                                |                                |                              |
| AGCGCGCCG  | ENSG00000207744 hsa-mir-10b    |                                |                                |                              |
| AGCGCTCAC  | ENSG00000207819 hsa-mir-9-3    | ENSG00000199130 hsa-mir-365-1  |                                |                              |
| AGCGCTCCA  | ENSG00000207585 hsa-mir-181d   |                                |                                |                              |
| AGCGCTGTC  | ENSG00000207614 hsa-mir-193a   | ENSG00000199187 hsa-mir-365-2  |                                |                              |
| AGCGCTTTC  | ENSG00000207811 hsa-mir-34b    | ENSG00000207562 hsa-mir-34c    | ENSG00000199130 hsa-mir-365-1  |                              |
| AGCGGAAAA  | ENSG00000207731 hsa-mir-506    |                                |                                |                              |
| AGCGGAAAT  | ENSG00000208009 hsa-mir-130a   |                                |                                |                              |
| AGCGGAACG  | ENSG00000207744 hsa-mir-10b    |                                |                                |                              |

AGCGGCAAC ENSG00000198995|hsa-mir-340 ENSG00000207611|hsa-mir-149  
AGCGGCACA ENSG00000208024|hsa-mir-199a-2 ENSG00000207949|hsa-mir-214  
AGCGGCGTG ENSG00000199065|hsa-mir-101-2  
AGCGGGCGA ENSG00000199104|hsa-mir-346  
AGCGGGGCA ENSG00000207739|hsa-mir-218-2  
AGCGGTCC ENSG00000207792|hsa-mir-151  
AGCGTCACA ENSG00000199017|hsa-mir-1-1 ENSG00000207764|hsa-mir-133a-2  
AGCGTCGCC ENSG00000207732|hsa-mir-218-1  
AGCGTGCGG ENSG00000207614|hsa-mir-193a ENSG00000199187|hsa-mir-365-2  
AGCGTTCTC ENSG00000207611|hsa-mir-149  
AGCTAACCA ENSG00000207586|hsa-mir-135a-2  
AGCTAATAA ENSG00000199153|hsa-mir-30d ENSG00000207582|hsa-mir-30b  
AGCTAATGG ENSG00000207597|hsa-mir-490  
AGCTACCGG ENSG00000208005|hsa-mir-503 ENSG00000207784|hsa-mir-542  
AGCTACGGG ENSG00000207811|hsa-mir-34b ENSG00000207562|hsa-mir-34c  
AGCTACTGG ENSG00000198974|hsa-mir-30e ENSG00000207962|hsa-mir-30c-1 ENSG00000207745|hsa-mir-17 ENSG00000207610|hsa-mir-19a ENSG00000199149|hsa-mir-20a  
AGCTAGAGC ENSG00000207702|hsa-mir-211  
AGCTATGTC ENSG00000207635|hsa-mir-499  
AGCTATTAA ENSG00000199032|hsa-mir-425  
AGCTCAAAT ENSG00000202609|hsa-mir-488  
AGCTCACAC ENSG00000199088|hsa-mir-379 ENSG00000207749|hsa-mir-299 ENSG00000198982|hsa-mir-380 ENSG00000199069|hsa-mir-323 ENSG00000211582|hsa-mir-758 ENSG00000207761|hsa-mir-329-1 ENSG00000194717|hsa-mir-494  
ENSG00000207743|hsa-mir-495 ENSG00000199020|hsa-mir-381 ENSG00000207754|hsa-mir-487b ENSG00000202560|hsa-mir-539 ENSG00000207993|hsa-mir-134 ENSG00000207961|hsa-mir-496 ENSG00000199015|hsa-mir-377  
ENSG00000199107|hsa-mir-409 ENSG00000199012|hsa-mir-412 ENSG00000199025|hsa-mir-369 ENSG00000199092|hsa-mir-410 ENSG00000211574|hsa-mir-770 ENSG00000208001|hsa-mir-431 ENSG00000199005|hsa-mir-370  
AGCTCACAT ENSG00000199077|hsa-mir-129-2  
AGCTCATAA ENSG00000207721|hsa-mir-186  
AGCTCATTA ENSG00000207623|hsa-mir-205 ENSG00000207795|hsa-mir-155  
AGCTCATTG ENSG00000199077|hsa-mir-129-2  
AGCTCCATA ENSG00000199023|hsa-mir-339  
AGCTCCTAC ENSG00000199122|hsa-mir-148b  
AGCTCGACG ENSG00000207933|hsa-mir-9-1  
AGCTCGGTG ENSG00000207739|hsa-mir-218-2 ENSG00000207827|hsa-mir-30a ENSG00000199094|hsa-mir-30c-2  
AGCTCTAGC ENSG00000207702|hsa-mir-211  
AGCTGACGC ENSG00000207717|hsa-mir-551b  
AGCTGATAA ENSG00000207656|hsa-mir-489 ENSG00000207933|hsa-mir-9-1  
AGCTGATAC ENSG00000198995|hsa-mir-340 ENSG00000199058|hsa-mir-302b ENSG00000199169|hsa-mir-367 ENSG00000199145|hsa-mir-302d ENSG00000199102|hsa-mir-302c  
AGCTGATTC ENSG00000208005|hsa-mir-503 ENSG00000207784|hsa-mir-542  
AGCTGCAAC ENSG00000207955|hsa-mir-219-2  
AGCTGCCTA ENSG00000199059|hsa-mir-135b ENSG00000207691|hsa-mir-183 ENSG00000207990|hsa-mir-182 ENSG00000199158|hsa-mir-96  
AGCTGCCTG ENSG00000207955|hsa-mir-219-2  
AGCTGGTTG ENSG00000199023|hsa-mir-339 ENSG00000207571|hsa-mir-615  
AGCTGTAAT ENSG00000207705|hsa-mir-129-1  
AGCTGTCAA ENSG00000207611|hsa-mir-149  
TTGACAGCT Xie: TGACAG MEIS1  
AGCTGTCCC ENSG00000198981|hsa-mir-29a  
AGCTGTTGA ENSG00000207604|hsa-mir-206 ENSG00000199080|hsa-mir-133b  
AGCTTAAAA ENSG00000208017|hsa-mir-140  
AGCTTACTA ENSG00000207694|hsa-mir-1-2  
AGCTTCATC ENSG00000207935|hsa-mir-204 ENSG00000207695|hsa-mir-184  
AGCTTGTC ENSG00000207638|hsa-mir-99a ENSG00000207863|hsa-mir-125b-2  
AGCTTTGAC ENSG00000207597|hsa-mir-490  
AGCTTTGAC Xie: CTTTGA LEF1  
AGCTTTGGC ENSG00000198981|hsa-mir-29a  
AGCTTTGTC ENSG00000202609|hsa-mir-488  
AGCTTTTGA ENSG00000199066|hsa-mir-330 ENSG00000207630|hsa-mir-7-3  
AGCTTTTGG ENSG00000198987|hsa-mir-16-2  
AGGAAATCG ENSG00000211590|hsa-mir-802  
AGGAAATCG Xie: AGGAART ELF-1  
CGATTTCCT Xie: AnTTTCGnWTTCSnA IRF-7  
AGGAATAAA ENSG00000207617|hsa-mir-24-1  
AGGAATCAC ENSG00000207585|hsa-mir-181d ENSG00000199165|hsa-let-7a-1 ENSG00000199072|hsa-let-7f-1 ENSG00000199133|hsa-let-7d  
AGGAATGAC ENSG00000199071|hsa-mir-423 ENSG00000207633|hsa-mir-505  
AGGAATGTC ENSG00000207752|hsa-mir-199a-1 ENSG00000207694|hsa-mir-1-2  
AGGACACAA ENSG00000207635|hsa-mir-499  
AGGACACGC ENSG00000207960|hsa-mir-153-2  
GCGTGTCCCT Xie: MntGWCCCT T3R  
AGGACACTC ENSG00000207635|hsa-mir-499  
GAGTGTCCCT Xie: MntGWCCCT T3R  
AGGACGAAT ENSG00000199085|hsa-mir-148a  
AGGACGGAT ENSG00000207739|hsa-mir-218-2  
AGGACGGTC ENSG00000199053|hsa-mir-324  
AGGACGTGA ENSG00000199121|hsa-mir-26b  
AGGACTTTA ENSG00000199088|hsa-mir-379 ENSG00000207749|hsa-mir-299 ENSG00000198982|hsa-mir-380 ENSG00000199069|hsa-mir-323 ENSG00000211582|hsa-mir-758 ENSG00000207761|hsa-mir-329-1 ENSG00000194717|hsa-mir-494  
ENSG00000207743|hsa-mir-495 ENSG00000199020|hsa-mir-381 ENSG00000207754|hsa-mir-487b ENSG00000202560|hsa-mir-539 ENSG00000207993|hsa-mir-134 ENSG00000207961|hsa-mir-496 ENSG00000199015|hsa-mir-377  
ENSG00000199107|hsa-mir-409 ENSG00000199012|hsa-mir-412 ENSG00000199025|hsa-mir-369 ENSG00000199092|hsa-mir-410  
AGGACTTTC ENSG00000207792|hsa-mir-151 ENSG00000207926|hsa-mir-135a-1  
AGGAGATTC ENSG00000207705|hsa-mir-129-1 ENSG00000207955|hsa-mir-219-2 ENSG00000207624|hsa-mir-194-1 ENSG00000207590|hsa-mir-215  
AGGAGCATG ENSG00000207702|hsa-mir-211  
AGGAGCGAA ENSG00000199104|hsa-mir-346 ENSG00000207955|hsa-mir-219-2  
AGGAGCGGA ENSG00000199165|hsa-let-7a-1 ENSG00000199072|hsa-let-7f-1 ENSG00000199133|hsa-let-7d  
AGGAGGGTA ENSG00000207550|hsa-mir-99b ENSG00000198972|hsa-let-7e  
AGGATAAAC ENSG00000202609|hsa-mir-488 ENSG00000207548|hsa-mir-217  
AGGATAAAG ENSG00000207809|hsa-mir-139  
AGGATAACT ENSG00000199130|hsa-mir-365-1 ENSG00000207694|hsa-mir-1-2  
AGGATCAGA ENSG00000199135|hsa-mir-101-1  
AGGATCTCA ENSG00000207581|hsa-mir-199b  
AGGATGACA ENSG00000198986|hsa-let-7a-3 ENSG00000207875|hsa-let-7b  
AGGATGACT ENSG00000199077|hsa-mir-129-2  
AGGATGCAA ENSG00000202609|hsa-mir-488 ENSG00000207571|hsa-mir-615  
AGGATGCCA ENSG00000207731|hsa-mir-506  
AGGATGCGA ENSG00000199085|hsa-mir-148a  
AGGATGTCC ENSG00000207792|hsa-mir-151





|            |                                |                                |                                |
|------------|--------------------------------|--------------------------------|--------------------------------|
| AGGTGAGTC  | ENSG00000207602 hsa-mir-106a   | ENSG00000207572 hsa-mir-363    | ENSG00000207710 hsa-mir-20b    |
| AGGTGATGA  | ENSG00000207752 hsa-mir-199a-1 |                                |                                |
| AGGTGATGC  | ENSG00000199032 hsa-mir-425    |                                |                                |
| AGGTGATTA  | ENSG00000199165 hsa-let-7a-1   | ENSG00000199072 hsa-let-7f-1   | ENSG00000199133 hsa-let-7d     |
| AGGTGCAAG  | ENSG00000207623 hsa-mir-205    |                                |                                |
| AGGTGCACA  | ENSG00000202609 hsa-mir-488    |                                |                                |
| AGGTGCAGC  | ENSG00000207692 hsa-mir-592    |                                |                                |
| AGGTGCATC  | ENSG00000210741 hsa-mir-196a-1 |                                |                                |
| AGGTGGACT  | ENSG00000207955 hsa-mir-219-2  |                                |                                |
| AGGTGGCGC  | ENSG00000199043 hsa-mir-335    |                                |                                |
| AGGTGGCCG  | ENSG00000199047 hsa-mir-378    |                                |                                |
| AGGTGGCTA  | ENSG00000207777 hsa-mir-10a    |                                |                                |
| AGGTGGTGC  | ENSG00000207692 hsa-mir-592    |                                |                                |
| AGGTGGTTG  | ENSG00000208037 hsa-mir-320    |                                |                                |
| AGGTGTCCAC | ENSG00000207797 hsa-mir-187    |                                |                                |
| AGGTGTCCG  | ENSG00000207571 hsa-mir-615    |                                |                                |
| AGGTGTCTC  | ENSG00000199161 hsa-mir-126    | ENSG00000207947 hsa-mir-152    |                                |
| AGGTGTGAC  | ENSG00000207939 hsa-mir-223    |                                |                                |
| AGGTGTGCC  | ENSG00000207550 hsa-mir-99b    | ENSG00000198972 hsa-let-7e     |                                |
| AGGTGTGTC  | ENSG00000199059 hsa-mir-135b   | ENSG00000207649 hsa-mir-138-2  |                                |
| AGGTGTAAA  | ENSG00000207745 hsa-mir-17     | ENSG00000207610 hsa-mir-19a    | ENSG00000199149 hsa-mir-20a    |
| AGGTTAACC  | ENSG00000207827 hsa-mir-30a    | ENSG00000199094 hsa-mir-30c-2  |                                |
| AGGTTAGTG  | ENSG00000207571 hsa-mir-615    |                                |                                |
| AGGTTCAAA  | ENSG00000207705 hsa-mir-129-1  |                                |                                |
| TTTGAACCT  | Xie: TGAMCTTTGMMCYT            | HNF-4                          |                                |
| AGGTTCCAC  | ENSG00000199157 hsa-mir-208    |                                |                                |
| AGGTTCCCA  | ENSG00000199130 hsa-mir-365-1  |                                |                                |
| AGGTTCTTG  | ENSG00000207656 hsa-mir-489    |                                |                                |
| AGGTTGGCG  | ENSG00000199038 hsa-mir-210    |                                |                                |
| AGGTTGTAA  | ENSG00000207777 hsa-mir-10a    | ENSG00000207995 hsa-mir-325    |                                |
| AGGTTTAAG  | ENSG00000199077 hsa-mir-129-2  |                                |                                |
| AGTAAACAG  | ENSG00000208024 hsa-mir-199a-2 | ENSG00000207949 hsa-mir-214    |                                |
| AGTAAACAG  | Xie: CTWAWGTAAACAnWG           | FREAC-4                        |                                |
| AGTAAAGTC  | ENSG00000207624 hsa-mir-194-1  | ENSG00000207590 hsa-mir-215    | ENSG00000207995 hsa-mir-325    |
| AGTAAATAA  | ENSG00000207585 hsa-mir-181d   | ENSG00000208037 hsa-mir-320    | ENSG00000211590 hsa-mir-802    |
| AGTAACAGG  | ENSG00000207795 hsa-mir-155    |                                |                                |
| AGTAAGAAA  | ENSG00000199065 hsa-mir-101-2  |                                |                                |
| AGTAAGAGG  | ENSG00000207635 hsa-mir-499    |                                |                                |
| AGTAAGCAA  | ENSG00000207721 hsa-mir-186    |                                |                                |
| AGTAAGGAG  | ENSG00000207789 hsa-mir-26a-2  | ENSG00000207790 hsa-mir-29b-2  | ENSG00000207966 hsa-mir-29c    |
| AGTAAGTGA  | ENSG00000207638 hsa-mir-99a    | ENSG00000207863 hsa-mir-125b-2 |                                |
| AGTAATGCA  | ENSG00000199135 hsa-mir-101-1  |                                |                                |
| AGTAATTAG  | ENSG00000207702 hsa-mir-211    | ENSG00000208005 hsa-mir-503    | ENSG00000207784 hsa-mir-542    |
| AGTAATTAG  | Xie: GTAAKTnG NCX              |                                |                                |
| AGTAATTGA  | ENSG00000198974 hsa-mir-30e    | ENSG00000207962 hsa-mir-30c-1  |                                |
| AGTACACAA  | ENSG00000207790 hsa-mir-29b-2  | ENSG00000207966 hsa-mir-29c    |                                |
| AGTACCAAT  | ENSG00000207955 hsa-mir-219-2  |                                |                                |
| AGTACCATA  | ENSG00000199071 hsa-mir-423    |                                |                                |
| AGTACCCCC  | ENSG00000211563 hsa-mir-338    |                                |                                |
| AGTAGCTGG  | ENSG00000207730 hsa-mir-200b   | ENSG00000207607 hsa-mir-200a   | ENSG00000198976 hsa-mir-429    |
| AGTAGCTTG  | ENSG00000211590 hsa-mir-802    |                                |                                |
| AGTAGGAAC  | ENSG00000207797 hsa-mir-187    |                                |                                |
| AGTAGGAAG  | ENSG00000207604 hsa-mir-206    | ENSG00000199080 hsa-mir-133b   |                                |
| AGTAGGACA  | ENSG00000199065 hsa-mir-101-2  |                                |                                |
| AGTAGTGAC  | ENSG00000207827 hsa-mir-30a    | ENSG00000199094 hsa-mir-30c-2  |                                |
| AGTAGTGAG  | ENSG00000207947 hsa-mir-152    |                                |                                |
| AGTAGTTTG  | ENSG00000207795 hsa-mir-155    |                                |                                |
| AGTAGTTTG  | Xie: KTWGTTT SRY               |                                |                                |
| AGTATAAGG  | ENSG00000207811 hsa-mir-34b    | ENSG00000207562 hsa-mir-34c    |                                |
| AGTATTTAT  | ENSG00000208037 hsa-mir-320    |                                |                                |
| AGTCAAGAT  | ENSG00000208024 hsa-mir-199a-2 | ENSG00000207949 hsa-mir-214    |                                |
| AGTCAAGGA  | ENSG00000207950 hsa-mir-296    |                                |                                |
| AGTCAATTG  | ENSG00000207745 hsa-mir-17     | ENSG00000207610 hsa-mir-19a    | ENSG00000199149 hsa-mir-20a    |
| AGTCAACCG  | ENSG00000211517 hsa-mir-671    |                                |                                |
| AGTCAACGC  | ENSG00000207567 hsa-mir-142    | ENSG00000207953 hsa-mir-212    |                                |
| AGTCAACGG  | ENSG00000199077 hsa-mir-129-2  | ENSG00000207995 hsa-mir-325    |                                |
| AGTCAACGTG | ENSG00000199104 hsa-mir-346    | ENSG00000207571 hsa-mir-615    |                                |
| AGTCACTCG  | ENSG00000207811 hsa-mir-34b    | ENSG00000207562 hsa-mir-34c    |                                |
| AGTCAGCAC  | ENSG00000207732 hsa-mir-218-1  | ENSG00000207865 hsa-mir-34a    |                                |
| AGTCAGCGC  | ENSG00000208024 hsa-mir-199a-2 | ENSG00000207949 hsa-mir-214    |                                |
| AGTCATATG  | ENSG00000207638 hsa-mir-99a    | ENSG00000207863 hsa-mir-125b-2 |                                |
| AGTCATCCA  | ENSG00000208005 hsa-mir-503    | ENSG00000207784 hsa-mir-542    |                                |
| AGTCATGAG  | ENSG00000207933 hsa-mir-9-1    |                                |                                |
| AGTCATGGC  | ENSG00000207638 hsa-mir-99a    | ENSG00000207863 hsa-mir-125b-2 |                                |
| AGTCATGTG  | ENSG00000207702 hsa-mir-211    | ENSG00000207926 hsa-mir-135a-1 | ENSG00000199135 hsa-mir-101-1  |
| AGTCATTAC  | ENSG00000207731 hsa-mir-506    |                                | ENSG00000207586 hsa-mir-135a-2 |
| AGTCATTCC  | ENSG00000207791 hsa-mir-497    | ENSG00000207929 hsa-mir-195    | ENSG00000198974 hsa-mir-30e    |
| AGTCATTGG  | ENSG00000199165 hsa-let-7a-1   | ENSG00000199072 hsa-let-7f-1   | ENSG00000199133 hsa-let-7d     |
| AGTCATTTT  | ENSG00000208037 hsa-mir-320    |                                |                                |
| AGTCATTTG  | ENSG00000199065 hsa-mir-101-2  |                                |                                |
| AGTCCAAG   | ENSG00000207751 hsa-mir-130b   | ENSG00000207809 hsa-mir-139    |                                |
| AGTCCACAG  | ENSG00000199066 hsa-mir-330    |                                |                                |
| AGTCCATAT  | ENSG00000208024 hsa-mir-199a-2 | ENSG00000207949 hsa-mir-214    |                                |
| AGTCCCTTA  | ENSG00000207947 hsa-mir-152    |                                |                                |
| AGTCCGAAA  | ENSG00000211563 hsa-mir-338    |                                |                                |
| AGTCCTTAT  | ENSG00000199036 hsa-mir-219-1  | ENSG00000210741 hsa-mir-196a-1 |                                |
| AGTCGCGCA  | ENSG00000207744 hsa-mir-10b    |                                |                                |
| AGTCGGCGC  | ENSG00000207728 hsa-mir-449b   |                                |                                |
| AGTCGGGCC  | ENSG00000198984 hsa-mir-345    | ENSG00000207732 hsa-mir-218-1  |                                |
| AGTCGTGAG  | ENSG00000211563 hsa-mir-338    | ENSG00000199122 hsa-mir-148b   |                                |
| AGTCGTGTG  | ENSG00000198995 hsa-mir-340    |                                |                                |



|           |                                |                                |                               |                                |                             |
|-----------|--------------------------------|--------------------------------|-------------------------------|--------------------------------|-----------------------------|
| AGTTTCGGG | ENSG00000210741 hsa-mir-196a-1 |                                |                               |                                |                             |
| AGTTTGAAC | ENSG00000207705 hsa-mir-129-1  |                                |                               |                                |                             |
| AGTTTGCGC | ENSG00000207656 hsa-mir-489    | ENSG00000207726 hsa-mir-455    |                               |                                |                             |
| AGTTTGCTC | ENSG00000207656 hsa-mir-489    | ENSG00000199130 hsa-mir-365-1  |                               |                                |                             |
| AGTTTGCTC | Xie:GTDGCT DBP                 |                                |                               |                                |                             |
| AGTTTGCTC | MATCH:V\$DBP_Q6 DBP            |                                |                               |                                |                             |
| AGTTTGGAC | ENSG00000198974 hsa-mir-30e    | ENSG00000207962 hsa-mir-30c-1  |                               |                                |                             |
| AGTTTGGGC | ENSG00000207791 hsa-mir-497    | ENSG00000207929 hsa-mir-195    | ENSG00000199130 hsa-mir-365-1 |                                |                             |
| ATAAAAAGC | ENSG00000208017 hsa-mir-140    |                                |                               |                                |                             |
| ATAAACGCG | ENSG00000199122 hsa-mir-148b   | ENSG00000207797 hsa-mir-187    |                               |                                |                             |
| ATAAAAGCC | ENSG00000207953 hsa-mir-212    |                                |                               |                                |                             |
| ATAAAAGCG | ENSG00000207630 hsa-mir-7-3    |                                |                               |                                |                             |
| ATAAAAGGC | ENSG00000207568 hsa-mir-203    | ENSG00000207618 hsa-mir-144    | ENSG00000207794 hsa-mir-451   |                                |                             |
| ATAAAAGGG | ENSG00000207635 hsa-mir-499    |                                |                               |                                |                             |
| ATAAAAGTC | ENSG00000207630 hsa-mir-7-3    |                                |                               |                                |                             |
| ATAACAAG  | ENSG00000207585 hsa-mir-181d   |                                |                               |                                |                             |
| ATAACAAG  | Xie:RWAAACA FOXO1              |                                |                               |                                |                             |
| ATAAACTTA | ENSG00000207548 hsa-mir-217    |                                |                               |                                |                             |
| ATAAGAAG  | ENSG00000207950 hsa-mir-296    |                                |                               |                                |                             |
| ATAAGCCC  | ENSG00000207581 hsa-mir-199b   | ENSG00000199135 hsa-mir-101-1  |                               |                                |                             |
| ATAAGGGG  | ENSG00000207728 hsa-mir-449b   |                                |                               |                                |                             |
| ATAAGTCC  | ENSG00000207695 hsa-mir-184    |                                |                               |                                |                             |
| ATAAGTTC  | ENSG00000207651 hsa-mir-28     |                                |                               |                                |                             |
| ATAATACA  | ENSG00000199077 hsa-mir-129-2  |                                |                               |                                |                             |
| ATAATAGA  | ENSG00000199058 hsa-mir-302b   | ENSG00000199169 hsa-mir-367    | ENSG00000199145 hsa-mir-302d  | ENSG00000199102 hsa-mir-302c   |                             |
| ATAATAGC  | ENSG00000202641 hsa-mir-484    | ENSG00000207721 hsa-mir-186    |                               |                                |                             |
| ATAATATG  | ENSG00000207728 hsa-mir-449b   |                                |                               |                                |                             |
| ATAATCAA  | ENSG00000207581 hsa-mir-199b   |                                |                               |                                |                             |
| ATAATCAA  | Xie:hWAAATCAATAW HNF-6         |                                |                               |                                |                             |
| ATAATCAG  | ENSG00000207698 hsa-mir-32     |                                |                               |                                |                             |
| ATAATCCC  | ENSG00000207586 hsa-mir-135a-2 | ENSG00000207721 hsa-mir-186    |                               |                                |                             |
| ATAATTAT  | ENSG00000207728 hsa-mir-449b   |                                |                               |                                |                             |
| ATAATTAT  | Xie:GCATAAWTTAT POU6F1         |                                |                               |                                |                             |
| ATAATTAT  | Xie:GCATAAWTTAT POU6F1         |                                |                               |                                |                             |
| ATAATTCC  | ENSG00000202569 hsa-mir-146b   |                                |                               |                                |                             |
| ATAACATTG | ENSG00000207649 hsa-mir-138-2  | ENSG00000207718 hsa-mir-15a    | ENSG00000208006 hsa-mir-16-1  |                                |                             |
| ATAACCAAG | ENSG00000199165 hsa-let-7a-1   | ENSG00000199072 hsa-let-7f-1   | ENSG00000199133 hsa-let-7d    | ENSG00000207790 hsa-mir-29b-2  | ENSG00000207966 hsa-mir-29c |
| ATAACTACC | ENSG00000199085 hsa-mir-148a   |                                |                               |                                |                             |
| ATAACTTCA | ENSG00000199065 hsa-mir-101-2  | ENSG00000208005 hsa-mir-503    | ENSG00000207784 hsa-mir-542   |                                |                             |
| ATAACTTGG | ENSG00000207596 hsa-mir-194-2  | ENSG00000207648 hsa-mir-192    |                               |                                |                             |
| ATAAGACCA | ENSG00000199165 hsa-let-7a-1   | ENSG00000199072 hsa-let-7f-1   | ENSG00000199133 hsa-let-7d    |                                |                             |
| ATAAGAGGG | ENSG00000199077 hsa-mir-129-2  |                                |                               |                                |                             |
| ATAAGCAAC | ENSG00000199065 hsa-mir-101-2  |                                |                               |                                |                             |
| ATAAGGAAA | ENSG00000207728 hsa-mir-449b   |                                |                               |                                |                             |
| ATAAGGCAT | ENSG00000207721 hsa-mir-186    |                                |                               |                                |                             |
| ATAAGGCTG | ENSG00000207790 hsa-mir-29b-2  | ENSG00000207966 hsa-mir-29c    |                               |                                |                             |
| ATAAGGGAG | ENSG00000207571 hsa-mir-615    |                                |                               |                                |                             |
| ATAAGGTTA | ENSG00000208005 hsa-mir-503    | ENSG00000207784 hsa-mir-542    |                               |                                |                             |
| ATAATAGTA | ENSG00000199165 hsa-let-7a-1   | ENSG00000199072 hsa-let-7f-1   | ENSG00000199133 hsa-let-7d    |                                |                             |
| ATAATACC  | ENSG00000199165 hsa-let-7a-1   | ENSG00000199072 hsa-let-7f-1   | ENSG00000199133 hsa-let-7d    |                                |                             |
| ATAATTAGA | ENSG00000199077 hsa-mir-129-2  |                                |                               |                                |                             |
| TCTAATTAT | Xie:CYAATTWT HOXA4             |                                |                               |                                |                             |
| ATAATTCAT | ENSG00000208017 hsa-mir-140    |                                |                               |                                |                             |
| ATAATTGAG | ENSG00000207702 hsa-mir-211    | ENSG00000207602 hsa-mir-106a   | ENSG00000207572 hsa-mir-363   | ENSG00000207710 hsa-mir-20b    |                             |
| ATAATTGGC | ENSG00000199122 hsa-mir-148b   | ENSG00000199130 hsa-mir-365-1  |                               |                                |                             |
| GCCAATTAT | Xie:CYAATTWT HOXA4             |                                |                               |                                |                             |
| ATAATTTGA | ENSG00000207811 hsa-mir-34b    | ENSG00000207562 hsa-mir-34c    |                               |                                |                             |
| ATACAACAG | ENSG00000207717 hsa-mir-551b   |                                |                               |                                |                             |
| ATACATCAC | ENSG00000207692 hsa-mir-592    |                                |                               |                                |                             |
| ATACATTCC | ENSG00000199058 hsa-mir-302b   | ENSG00000199169 hsa-mir-367    | ENSG00000199145 hsa-mir-302d  | ENSG00000199102 hsa-mir-302c   |                             |
| ATACCACCC | ENSG00000199038 hsa-mir-210    |                                |                               |                                |                             |
| ATACCCCTA | ENSG00000199059 hsa-mir-135b   |                                |                               |                                |                             |
| ATACCTGTC | ENSG00000207994 hsa-mir-100    | ENSG00000207971 hsa-mir-125b-1 | ENSG00000198975 hsa-let-7a-2  |                                |                             |
| ATACCTTAC | ENSG00000199071 hsa-mir-423    |                                |                               |                                |                             |
| ATACTGACA | ENSG00000207950 hsa-mir-296    |                                |                               |                                |                             |
| ATACTGCAG | ENSG00000207827 hsa-mir-30a    | ENSG00000199094 hsa-mir-30c-2  |                               |                                |                             |
| ATACTGGGG | ENSG00000207581 hsa-mir-199b   | ENSG00000208024 hsa-mir-199a-2 | ENSG00000207949 hsa-mir-214   |                                |                             |
| ATAGAGACG | ENSG00000211517 hsa-mir-671    |                                |                               |                                |                             |
| ATAGAGATG | ENSG00000202569 hsa-mir-146b   | ENSG00000207586 hsa-mir-135a-2 |                               |                                |                             |
| ATAGAGTCA | ENSG00000207571 hsa-mir-615    |                                |                               |                                |                             |
| ATAGATTTC | ENSG00000207795 hsa-mir-155    |                                |                               |                                |                             |
| ATAGCCTTG | ENSG00000207567 hsa-mir-142    |                                |                               |                                |                             |
| ATAGCTGAG | ENSG00000199032 hsa-mir-425    | ENSG00000207819 hsa-mir-9-3    |                               |                                |                             |
| ATAGGAATC | ENSG00000199071 hsa-mir-423    |                                |                               |                                |                             |
| ATAGGACAA | ENSG00000202609 hsa-mir-488    |                                |                               |                                |                             |
| ATAGGCCAG | ENSG00000207623 hsa-mir-205    |                                |                               |                                |                             |
| ATAGGCTGC | ENSG00000199065 hsa-mir-101-2  | ENSG00000202569 hsa-mir-146b   | ENSG00000207713 hsa-mir-200c  | ENSG00000207708 hsa-mir-141    |                             |
| ATAGGGGAG | ENSG00000207623 hsa-mir-205    |                                |                               |                                |                             |
| ATAGTGCA  | ENSG00000207638 hsa-mir-99a    | ENSG00000207863 hsa-mir-125b-2 |                               |                                |                             |
| ATAGTGGA  | ENSG00000207571 hsa-mir-615    |                                |                               |                                |                             |
| ATAGTTGAT | ENSG00000207721 hsa-mir-186    |                                |                               |                                |                             |
| ATAGTTTAA | ENSG00000199059 hsa-mir-135b   |                                |                               |                                |                             |
| ATATAAGGA | ENSG00000199043 hsa-mir-335    | ENSG00000207624 hsa-mir-194-1  | ENSG00000207590 hsa-mir-215   |                                |                             |
| ATATAAGGA | Xie:GnCCAWATAWGGM              | SRF                            |                               |                                |                             |
| ATATAATTG | ENSG00000207597 hsa-mir-490    |                                |                               |                                |                             |
| ATATACCTG | ENSG00000207994 hsa-mir-100    | ENSG00000207971 hsa-mir-125b-1 | ENSG00000198975 hsa-let-7a-2  | ENSG00000210741 hsa-mir-196a-1 |                             |
| ATATAGGGC | ENSG00000207777 hsa-mir-10a    |                                |                               |                                |                             |
| ATATATGGA | ENSG00000207994 hsa-mir-100    | ENSG00000207971 hsa-mir-125b-1 | ENSG00000198975 hsa-let-7a-2  | ENSG00000208024 hsa-mir-199a-2 | ENSG00000207949 hsa-mir-214 |
| ATATATGGA | Xie:GnCCAWATAWGGM              | SRF                            |                               |                                |                             |
| TCCATATAT | Xie:GnCCAWATAWGGM              | SRF                            |                               |                                |                             |
| ATATATGGG | ENSG00000208024 hsa-mir-199a-2 | ENSG00000207949 hsa-mir-214    |                               |                                |                             |



|           |                                |                                |                              |                               |                              |                               |                               |
|-----------|--------------------------------|--------------------------------|------------------------------|-------------------------------|------------------------------|-------------------------------|-------------------------------|
| ATCCAATCC | ENSG00000199088 hsa-mir-379    | ENSG00000207749 hsa-mir-299    | ENSG00000198982 hsa-mir-380  | ENSG00000199069 hsa-mir-323   | ENSG00000211582 hsa-mir-758  | ENSG00000207761 hsa-mir-329-1 | ENSG00000194717 hsa-mir-494   |
|           | ENSG00000207743 hsa-mir-495    | ENSG00000199020 hsa-mir-381    | ENSG00000207754 hsa-mir-487b | ENSG00000202560 hsa-mir-539   | ENSG00000207993 hsa-mir-134  | ENSG00000207961 hsa-mir-496   | ENSG00000199015 hsa-mir-377   |
|           | ENSG00000199107 hsa-mir-409    | ENSG00000199012 hsa-mir-412    | ENSG00000199025 hsa-mir-369  | ENSG00000199092 hsa-mir-410   |                              |                               |                               |
| ATCCAATCG | ENSG00000208017 hsa-mir-140    |                                |                              |                               |                              |                               |                               |
| ATCCAATGA | ENSG00000199165 hsa-let-7a-1   | ENSG00000199072 hsa-let-7f-1   | ENSG00000199133 hsa-let-7d   |                               |                              |                               |                               |
| ATCCACGTG | ENSG00000207745 hsa-mir-17     | ENSG00000207610 hsa-mir-19a    | ENSG00000199149 hsa-mir-20a  |                               |                              |                               |                               |
|           | ATCCACGTG Xie:SCACGTG MYC      |                                |                              |                               |                              |                               |                               |
| ATCCACTAG | ENSG00000207732 hsa-mir-218-1  |                                |                              |                               |                              |                               |                               |
| ATCCAGACC | ENSG00000199058 hsa-mir-302b   | ENSG00000199169 hsa-mir-367    | ENSG00000199145 hsa-mir-302d | ENSG00000199102 hsa-mir-302c  | ENSG00000207604 hsa-mir-206  | ENSG00000199080 hsa-mir-133b  |                               |
| ATCCAGATG | ENSG00000208005 hsa-mir-503    | ENSG00000207784 hsa-mir-542    | ENSG00000208009 hsa-mir-130a |                               |                              |                               |                               |
| ATCCAGCAT | ENSG00000198981 hsa-mir-29a    | ENSG00000207604 hsa-mir-206    | ENSG00000199080 hsa-mir-133b |                               |                              |                               |                               |
| ATCCAGGTC | ENSG00000198987 hsa-mir-16-2   |                                |                              |                               |                              |                               |                               |
| ATCCAGTAC | ENSG00000207955 hsa-mir-219-2  |                                |                              |                               |                              |                               |                               |
| ATCCATCTA | ENSG00000202609 hsa-mir-488    |                                |                              |                               |                              |                               |                               |
| ATCCATGGC | ENSG00000207954 hsa-mir-138-1  |                                |                              |                               |                              |                               |                               |
| ATCCCAAAA | ENSG00000198987 hsa-mir-16-2   | ENSG00000207698 hsa-mir-32     |                              |                               |                              |                               |                               |
| ATCCCAACA | ENSG00000207567 hsa-mir-142    | ENSG00000199043 hsa-mir-335    | ENSG00000207692 hsa-mir-592  | ENSG00000207731 hsa-mir-506   | ENSG00000207995 hsa-mir-325  |                               |                               |
| ATCCCATGT | ENSG00000207630 hsa-mir-7-3    |                                |                              |                               |                              |                               |                               |
| ATCCCCAGA | ENSG00000207597 hsa-mir-490    |                                |                              |                               |                              |                               |                               |
| ATCCCCCTG | ENSG00000207935 hsa-mir-204    |                                |                              |                               |                              |                               |                               |
| ATCCCGGAA | ENSG00000199017 hsa-mir-1-1    | ENSG00000207764 hsa-mir-133a-2 |                              |                               |                              |                               |                               |
| ATCCCTCCG | ENSG00000199038 hsa-mir-210    |                                |                              |                               |                              |                               |                               |
| ATCCCTCGC | ENSG00000199038 hsa-mir-210    |                                |                              |                               |                              |                               |                               |
| ATCCCTGTG | ENSG00000199177 hsa-mir-31     | ENSG00000207744 hsa-mir-10b    |                              |                               |                              |                               |                               |
| ATCCCTTAA | ENSG00000199172 hsa-mir-331    |                                |                              |                               |                              |                               |                               |
| ATCCCTTCA | ENSG00000198987 hsa-mir-16-2   |                                |                              |                               |                              |                               |                               |
| ATCCGCTCC | ENSG00000199165 hsa-let-7a-1   | ENSG00000199072 hsa-let-7f-1   | ENSG00000199133 hsa-let-7d   |                               |                              |                               |                               |
| ATCCGGCGC | ENSG00000199065 hsa-mir-101-2  | ENSG00000207568 hsa-mir-203    |                              |                               |                              |                               |                               |
| ATCCGGCTC | ENSG00000199157 hsa-mir-208    |                                |                              |                               |                              |                               |                               |
| ATCCGGGAG | ENSG00000207726 hsa-mir-455    | ENSG00000199071 hsa-mir-423    |                              |                               |                              |                               |                               |
| ATCCGGGGA | ENSG00000207751 hsa-mir-130b   | ENSG00000207819 hsa-mir-9-3    |                              |                               |                              |                               |                               |
| ATCCGGGGC | ENSG00000207596 hsa-mir-194-2  | ENSG00000207648 hsa-mir-192    | ENSG00000207777 hsa-mir-10a  |                               |                              |                               |                               |
| ATCCGTTGG | ENSG00000207994 hsa-mir-100    | ENSG00000207971 hsa-mir-125b-1 | ENSG00000198975 hsa-let-7a-2 |                               |                              |                               |                               |
| ATCCATATG | ENSG00000207571 hsa-mir-615    |                                |                              |                               |                              |                               |                               |
| ATCCTGGCA | ENSG00000207623 hsa-mir-205    |                                |                              |                               |                              |                               |                               |
| ATCCTGTCA | ENSG00000207597 hsa-mir-490    | ENSG00000207698 hsa-mir-32     |                              |                               |                              |                               |                               |
|           | TGACAGGAT Xie:TGACAG MEIS1     |                                |                              |                               |                              |                               |                               |
| ATCCTGTGA | ENSG00000207725 hsa-mir-222    | ENSG00000207870 hsa-mir-221    |                              |                               |                              |                               |                               |
| ATCCTTCCG | ENSG00000199024 hsa-mir-103-2  |                                |                              |                               |                              |                               |                               |
| ATCCTTGGG | ENSG00000207935 hsa-mir-204    | ENSG00000202609 hsa-mir-488    | ENSG00000207744 hsa-mir-10b  |                               |                              |                               |                               |
| ATCCTTTTG | ENSG00000199135 hsa-mir-101-1  |                                |                              |                               |                              |                               |                               |
| ATCGATCTG | ENSG00000208005 hsa-mir-503    | ENSG00000207784 hsa-mir-542    |                              |                               |                              |                               |                               |
| ATCGCCCGG | ENSG00000207819 hsa-mir-9-3    |                                |                              |                               |                              |                               |                               |
| ATCGCCGCA | ENSG00000198987 hsa-mir-16-2   |                                |                              |                               |                              |                               |                               |
| ATCGCCTGC | ENSG00000208024 hsa-mir-199a-2 | ENSG00000207949 hsa-mir-214    |                              |                               |                              |                               |                               |
| ATCGCGGCC | ENSG00000207955 hsa-mir-219-2  |                                |                              |                               |                              |                               |                               |
| ATCGCGGGC | ENSG00000207935 hsa-mir-204    |                                |                              |                               |                              |                               |                               |
| ATCGCTTCA | ENSG00000207702 hsa-mir-211    |                                |                              |                               |                              |                               |                               |
| ATCGCGGGG | ENSG00000207739 hsa-mir-218-2  |                                |                              |                               |                              |                               |                               |
| ATCGGGGCG | ENSG00000207960 hsa-mir-153-2  |                                |                              |                               |                              |                               |                               |
| ATCGTCACC | ENSG00000199077 hsa-mir-129-2  |                                |                              |                               |                              |                               |                               |
| ATCTATAGC | ENSG00000207728 hsa-mir-449b   |                                |                              |                               |                              |                               |                               |
| ATCTCACCA | ENSG00000207651 hsa-mir-28     |                                |                              |                               |                              |                               |                               |
| ATCTCATTA | ENSG00000207980 hsa-mir-23a    | ENSG00000209707 hsa-mir-24-2   | ENSG00000207808 hsa-mir-27a  |                               |                              |                               |                               |
| ATCTCCAAG | ENSG00000199053 hsa-mir-324    | ENSG00000199121 hsa-mir-26b    | ENSG00000207618 hsa-mir-144  | ENSG00000207794 hsa-mir-451   |                              |                               |                               |
| ATCTCCACG | ENSG00000207585 hsa-mir-181d   | ENSG00000207635 hsa-mir-499    |                              |                               |                              |                               |                               |
| ATCTCCGAC | ENSG00000207597 hsa-mir-490    |                                |                              |                               |                              |                               |                               |
| ATCTCCGGC | ENSG00000207955 hsa-mir-219-2  |                                |                              |                               |                              |                               |                               |
| ATCTCCTTG | ENSG00000207691 hsa-mir-183    | ENSG00000207990 hsa-mir-182    | ENSG00000199158 hsa-mir-96   | ENSG00000207705 hsa-mir-129-1 | ENSG00000198974 hsa-mir-30e  | ENSG00000207962 hsa-mir-30c-1 |                               |
| ATCTCGCGC | ENSG00000207698 hsa-mir-32     |                                |                              |                               |                              |                               |                               |
| ATCTGACAA | ENSG00000207935 hsa-mir-204    |                                |                              |                               |                              |                               |                               |
| ATCTGACAG | ENSG00000207698 hsa-mir-32     |                                |                              |                               |                              |                               |                               |
|           | ATCTGACAG Xie:TGACAG MEIS1     |                                |                              |                               |                              |                               |                               |
| ATCTGACAT | ENSG00000207695 hsa-mir-184    |                                |                              |                               |                              |                               |                               |
| ATCTGAGCC | ENSG00000207623 hsa-mir-205    |                                |                              |                               |                              |                               |                               |
| ATCTGAGTG | ENSG00000207950 hsa-mir-296    | ENSG00000199177 hsa-mir-31     |                              |                               |                              |                               |                               |
| ATCTGCAAC | ENSG00000202569 hsa-mir-146b   | ENSG00000207731 hsa-mir-506    |                              |                               |                              |                               |                               |
| ATCTGCATA | ENSG00000207638 hsa-mir-99a    | ENSG00000207863 hsa-mir-125b-2 |                              |                               |                              |                               |                               |
| ATCTGCATG | ENSG00000207638 hsa-mir-99a    | ENSG00000207863 hsa-mir-125b-2 |                              |                               |                              |                               |                               |
| ATCTGCTGC | ENSG00000207691 hsa-mir-183    | ENSG00000207990 hsa-mir-182    | ENSG00000199158 hsa-mir-96   |                               |                              |                               |                               |
| ATCTGCTTA | ENSG00000207602 hsa-mir-106a   | ENSG00000207572 hsa-mir-363    | ENSG00000207710 hsa-mir-20b  | ENSG00000207790 hsa-mir-29b-2 | ENSG00000207966 hsa-mir-29c  |                               |                               |
| ATCTGGAAC | ENSG00000207581 hsa-mir-199b   | ENSG00000207752 hsa-mir-199a-1 | ENSG00000198974 hsa-mir-30e  | ENSG00000207962 hsa-mir-30c-1 |                              |                               |                               |
| ATCTGGACC | ENSG00000207791 hsa-mir-497    | ENSG00000207929 hsa-mir-195    |                              |                               |                              |                               |                               |
| ATCTGGGTC | ENSG00000207649 hsa-mir-138-2  |                                |                              |                               |                              |                               |                               |
| ATCTGGTTC | ENSG00000207728 hsa-mir-449b   | ENSG00000207995 hsa-mir-325    |                              |                               |                              |                               |                               |
| ATCTGTAGC | ENSG00000199071 hsa-mir-423    |                                |                              |                               |                              |                               |                               |
| ATCTGTGAG | ENSG00000207789 hsa-mir-26a-2  | ENSG00000207602 hsa-mir-106a   | ENSG00000207572 hsa-mir-363  | ENSG00000207710 hsa-mir-20b   | ENSG00000207604 hsa-mir-206  | ENSG00000199080 hsa-mir-133b  | ENSG00000207624 hsa-mir-194-1 |
|           | ENSG00000207590 hsa-mir-215    |                                |                              |                               |                              |                               |                               |
| ATCTGTGTC | ENSG00000207611 hsa-mir-149    |                                |                              |                               |                              |                               |                               |
| ATCTTCAAT | ENSG00000207624 hsa-mir-194-1  | ENSG00000207590 hsa-mir-215    |                              |                               |                              |                               |                               |
| ATCTTCAGC | ENSG00000207596 hsa-mir-194-2  | ENSG00000207648 hsa-mir-192    | ENSG00000199153 hsa-mir-30d  | ENSG00000207582 hsa-mir-30b   |                              |                               |                               |
| ATCTTCAGG | ENSG00000207939 hsa-mir-223    |                                |                              |                               |                              |                               |                               |
| ATCTTCCGG | ENSG00000208009 hsa-mir-130a   |                                |                              |                               |                              |                               |                               |
| ATCTTGATG | ENSG00000199088 hsa-mir-379    | ENSG00000207749 hsa-mir-299    | ENSG00000198982 hsa-mir-380  | ENSG00000199069 hsa-mir-323   | ENSG00000211582 hsa-mir-758  | ENSG00000207761 hsa-mir-329-1 | ENSG00000194717 hsa-mir-494   |
|           | ENSG00000207743 hsa-mir-495    | ENSG00000199020 hsa-mir-381    | ENSG00000207754 hsa-mir-487b | ENSG00000202560 hsa-mir-539   | ENSG00000207993 hsa-mir-134  | ENSG00000207961 hsa-mir-496   | ENSG00000199015 hsa-mir-377   |
|           | ENSG00000199107 hsa-mir-409    | ENSG00000199012 hsa-mir-412    | ENSG00000199025 hsa-mir-369  | ENSG00000199092 hsa-mir-410   |                              |                               |                               |
| ATCTTGTTG | ENSG00000199153 hsa-mir-30d    | ENSG00000207582 hsa-mir-30b    |                              |                               |                              |                               |                               |
| ATCTTGTGA | ENSG00000207691 hsa-mir-183    | ENSG00000207990 hsa-mir-182    | ENSG00000199158 hsa-mir-96   |                               |                              |                               |                               |
| ATCTTGTGC | ENSG00000207791 hsa-mir-497    | ENSG00000207929 hsa-mir-195    | ENSG00000199058 hsa-mir-302b | ENSG00000199169 hsa-mir-367   | ENSG00000199145 hsa-mir-302d | ENSG00000199102 hsa-mir-302c  |                               |
| ATCTTTGAC | ENSG00000207953 hsa-mir-212    |                                |                              |                               |                              |                               |                               |
|           | ATCTTTGAC Xie:CTTTGA LEF1      |                                |                              |                               |                              |                               |                               |

|            |                                  |                                |                               |                              |
|------------|----------------------------------|--------------------------------|-------------------------------|------------------------------|
| ATCTTTTAG  | ENSG00000199135 hsa-mir-101-1    |                                |                               |                              |
| ATGAAAGCC  | ENSG00000208037 hsa-mir-320      |                                |                               |                              |
| ATGAAAGGG  | ENSG00000207705 hsa-mir-129-1    | ENSG00000207792 hsa-mir-151    |                               |                              |
| ATGAAAGTC  | ENSG00000207571 hsa-mir-615      |                                |                               |                              |
| ATGAAATCA  | ENSG00000207596 hsa-mir-194-2    | ENSG00000207648 hsa-mir-192    |                               |                              |
| ATGAACCTC  | ENSG00000199177 hsa-mir-31       |                                |                               |                              |
| ATGAAGCCC  | ENSG00000207705 hsa-mir-129-1    |                                |                               |                              |
| ATGAAGGCG  | ENSG00000207726 hsa-mir-455      |                                |                               |                              |
| ATGAAGGGC  | ENSG00000199059 hsa-mir-135b     | ENSG00000207777 hsa-mir-10a    |                               |                              |
| ATGAAGGTC  | ENSG00000198974 hsa-mir-30e      | ENSG00000207962 hsa-mir-30c-1  | ENSG00000207717 hsa-mir-551b  |                              |
| ATGAAGTCA  | ENSG00000207939 hsa-mir-223      |                                |                               |                              |
| ATGAATCAC  | ENSG00000207638 hsa-mir-99a      | ENSG00000207863 hsa-mir-125b-2 |                               |                              |
| ATGAATCAG  | ENSG00000207695 hsa-mir-184      |                                |                               |                              |
| ATGAATCTC  | ENSG00000207955 hsa-mir-219-2    |                                |                               |                              |
| ATGAATGAG  | ENSG00000198984 hsa-mir-345      | ENSG00000207953 hsa-mir-212    |                               |                              |
| ATGAATGGC  | ENSG00000207950 hsa-mir-296      | ENSG00000207695 hsa-mir-184    |                               |                              |
| ATGAATTAG  | ENSG00000207995 hsa-mir-325      |                                |                               |                              |
| ATGACAAAG  | ENSG00000199077 hsa-mir-129-2    |                                |                               |                              |
| ATGACACAA  | ENSG00000211590 hsa-mir-802      |                                |                               |                              |
| ATGACAGGG  | ENSG00000207728 hsa-mir-449b     |                                |                               |                              |
| ATGACAGGG  | Xie: TGACAG MEIS1                |                                |                               |                              |
| ATGACCAAT  | ENSG00000207624 hsa-mir-194-1    | ENSG00000207590 hsa-mir-215    |                               |                              |
| ATGACCCAA  | ENSG00000207550 hsa-mir-99b      | ENSG00000198972 hsa-let-7e     |                               |                              |
| ATGACCCCA  | ENSG00000207596 hsa-mir-194-2    | ENSG00000207648 hsa-mir-192    | ENSG00000207790 hsa-mir-29b-2 | ENSG00000207966 hsa-mir-29c  |
| ATGACCTCC  | ENSG00000207571 hsa-mir-615      |                                |                               |                              |
| ATGACCTCC  | Xie: TGACCT ER                   |                                |                               |                              |
| ATGACGCCA  | ENSG00000207581 hsa-mir-199b     |                                |                               |                              |
| ATGACGCGC  | ENSG00000207739 hsa-mir-218-2    |                                |                               |                              |
| ATGACGGGC  | ENSG00000207777 hsa-mir-10a      |                                |                               |                              |
| ATGACGTCA  | ENSG00000207617 hsa-mir-24-1     |                                |                               |                              |
| ATGACGTCA  | Xie: TGACGTMA CREB               |                                |                               |                              |
| TGACGTCAT  | Xie: TGACGTMA CREB               |                                |                               |                              |
| ATGACTAAC  | ENSG00000207548 hsa-mir-217      |                                |                               |                              |
| ATGAGCCGC  | ENSG00000207953 hsa-mir-212      |                                |                               |                              |
| ATGAGCTAA  | ENSG00000202609 hsa-mir-488      |                                |                               |                              |
| ATGAGCTCA  | ENSG00000207791 hsa-mir-497      | ENSG00000207929 hsa-mir-195    |                               |                              |
| ATGAGCTCC  | ENSG00000207795 hsa-mir-155      |                                |                               |                              |
| ATGAGCTGG  | ENSG00000211590 hsa-mir-802      |                                |                               |                              |
| ATGAGCTTG  | ENSG00000207623 hsa-mir-205      | ENSG00000208009 hsa-mir-130a   |                               |                              |
| ATGAGGAGC  | ENSG00000207702 hsa-mir-211      |                                |                               |                              |
| ATGAGGGCC  | ENSG00000207702 hsa-mir-211      |                                |                               |                              |
| ATGAGGGGG  | ENSG00000207980 hsa-mir-23a      | ENSG00000209707 hsa-mir-24-2   | ENSG00000207808 hsa-mir-27a   |                              |
| ATGAGGTAA  | ENSG00000207624 hsa-mir-194-1    | ENSG00000207590 hsa-mir-215    | ENSG00000207630 hsa-mir-7-3   |                              |
| ATGAGGTCA  | ENSG00000207705 hsa-mir-129-1    |                                |                               |                              |
| TGACCTCAT  | Xie: TGACCT ER                   |                                |                               |                              |
| ATGAGGTGA  | ENSG00000207651 hsa-mir-28       |                                |                               |                              |
| ATGAGTCAA  | ENSG00000198973 hsa-mir-375      |                                |                               |                              |
| ATGAGTCAA  | Xie: SRTGAGTCAnC BACH2           |                                |                               |                              |
| ATGAGTCAC  | ENSG00000207731 hsa-mir-506      |                                |                               |                              |
| ATGAGTCAC  | Xie: SRTGAGTCAnC BACH2           |                                |                               |                              |
| ATGAGTGAA  | ENSG00000199135 hsa-mir-101-1    | ENSG00000207698 hsa-mir-32     |                               |                              |
| ATGAGTGGC  | ENSG00000207571 hsa-mir-615      | ENSG00000207604 hsa-mir-206    | ENSG00000199080 hsa-mir-133b  |                              |
| ATGAGTTCC  | ENSG00000207744 hsa-mir-10b      |                                |                               |                              |
| ATGATCTAA  | ENSG00000199130 hsa-mir-365-1    | ENSG00000207624 hsa-mir-194-1  | ENSG00000207590 hsa-mir-215   |                              |
| ATGATGAAG  | ENSG00000207939 hsa-mir-223      |                                |                               |                              |
| ATGATGTCA  | ENSG00000198995 hsa-mir-340      |                                |                               |                              |
| ATGATTAAC  | ENSG00000207745 hsa-mir-17       | ENSG00000207610 hsa-mir-19a    | ENSG00000199149 hsa-mir-20a   |                              |
| ATGATTAAC  | Xie: GGTTAATnWTTAMC              | HNF-1                          |                               |                              |
| GTTAATCAT  | Xie: GGTTAATnWTTAMC              | HNF-1                          |                               |                              |
| ATGATTGCA  | ENSG00000207994 hsa-mir-100      | ENSG00000207971 hsa-mir-125b-1 | ENSG00000198975 hsa-let-7a-2  |                              |
| ATGCAAAAC  | ENSG00000202641 hsa-mir-484      |                                |                               |                              |
| ATGCAAAAG  | ENSG00000202641 hsa-mir-484      |                                |                               |                              |
| ATGCAAAAC  | ENSG00000202569 hsa-mir-146b     | ENSG00000207702 hsa-mir-211    |                               |                              |
| ATGCAAAATG | ENSG00000199038 hsa-mir-210      |                                |                               |                              |
| ATGCAAAATG | Xie: ATGCAAAATnA OCTAMER         |                                |                               |                              |
| ATGCAATCC  | ENSG00000207630 hsa-mir-7-3      |                                |                               |                              |
| ATGCAATCC  | Xie: RTGCAATMCCC CHOP-C/EBPALPHA |                                |                               |                              |
| ATGCAATTC  | ENSG00000207571 hsa-mir-615      |                                |                               |                              |
| ATGCACAGC  | ENSG00000207809 hsa-mir-139      | ENSG00000207797 hsa-mir-187    | ENSG00000207954 hsa-mir-138-1 |                              |
| ATGCACATC  | ENSG00000207732 hsa-mir-218-1    | ENSG00000207623 hsa-mir-205    |                               |                              |
| ATGCAGACC  | ENSG00000207933 hsa-mir-9-1      |                                |                               |                              |
| ATGCAGCCA  | ENSG00000207581 hsa-mir-199b     | ENSG00000199135 hsa-mir-101-1  | ENSG00000207777 hsa-mir-10a   |                              |
| ATGCAGTGC  | ENSG00000207692 hsa-mir-592      |                                |                               |                              |
| ATGCCAAGC  | ENSG00000207702 hsa-mir-211      |                                |                               |                              |
| ATGCCAGAC  | ENSG00000207630 hsa-mir-7-3      |                                |                               |                              |
| ATGCCAGCA  | ENSG00000207926 hsa-mir-135a-1   |                                |                               |                              |
| ATGCCAGTC  | ENSG00000199017 hsa-mir-1-1      | ENSG00000207764 hsa-mir-133a-2 |                               |                              |
| ATGCCATCA  | ENSG00000199058 hsa-mir-302b     | ENSG00000199169 hsa-mir-367    | ENSG00000199145 hsa-mir-302d  | ENSG00000199102 hsa-mir-302c |
| ATGCCCAAG  | ENSG00000207702 hsa-mir-211      |                                |                               |                              |
| ATGCCCATC  | ENSG00000199036 hsa-mir-219-1    |                                |                               |                              |
| ATGCCCTTC  | ENSG00000202569 hsa-mir-146b     |                                |                               |                              |
| ATGCCGGCC  | ENSG00000208009 hsa-mir-130a     |                                |                               |                              |
| ATGCCTAAT  | ENSG00000207638 hsa-mir-99a      | ENSG00000207863 hsa-mir-125b-2 |                               |                              |
| ATGCCCTGTA | ENSG00000207809 hsa-mir-139      |                                |                               |                              |
| ATGCCGAGC  | ENSG00000207739 hsa-mir-218-2    |                                |                               |                              |
| ATGCCGAGG  | ENSG00000199089 hsa-mir-202      | ENSG00000207926 hsa-mir-135a-1 |                               |                              |
| ATGCCCCAC  | ENSG00000207638 hsa-mir-99a      | ENSG00000207863 hsa-mir-125b-2 | ENSG00000207777 hsa-mir-10a   |                              |
| ATGCCCGCC  | ENSG00000207935 hsa-mir-204      | ENSG00000207955 hsa-mir-219-2  |                               |                              |
| ATGCCCGGG  | ENSG00000199090 hsa-mir-326      | ENSG00000207792 hsa-mir-151    |                               |                              |
| ATGCCGCTCG | ENSG00000198995 hsa-mir-340      |                                |                               |                              |
| ATGCCGCCG  | ENSG00000207953 hsa-mir-212      |                                |                               |                              |









|            |                                |                                |                               |                              |                              |                             |  |
|------------|--------------------------------|--------------------------------|-------------------------------|------------------------------|------------------------------|-----------------------------|--|
| ATTGTTTCAG | ENSG00000199153 hsa-mir-30d    | ENSG00000207582 hsa-mir-30b    |                               |                              |                              |                             |  |
| ATTGTTTCAG | Xie:ATTGTT SOX-5               |                                |                               |                              |                              |                             |  |
| ATTGTTCTG  | ENSG00000207731 hsa-mir-506    |                                |                               |                              |                              |                             |  |
| ATTGTTCTG  | Xie:ATTGTT SOX-5               |                                |                               |                              |                              |                             |  |
| ATTGTTGAC  | ENSG00000207692 hsa-mir-592    |                                |                               |                              |                              |                             |  |
| ATTGTTGAC  | Xie:ATTGTT SOX-5               |                                |                               |                              |                              |                             |  |
| ATTGTTGGA  | ENSG00000207611 hsa-mir-149    | ENSG00000207955 hsa-mir-219-2  | ENSG00000198981 hsa-mir-29a   |                              |                              |                             |  |
| ATTGTTGGA  | Xie:ATTGTT SOX-5               |                                |                               |                              |                              |                             |  |
| ATTTAACCC  | ENSG00000207694 hsa-mir-1-2    | ENSG00000207790 hsa-mir-29b-2  | ENSG00000207966 hsa-mir-29c   |                              |                              |                             |  |
| ATTTAAGGC  | ENSG00000207571 hsa-mir-615    |                                |                               |                              |                              |                             |  |
| ATTTAAGGG  | ENSG00000207718 hsa-mir-15a    | ENSG00000208006 hsa-mir-16-1   |                               |                              |                              |                             |  |
| ATTTACAAC  | ENSG00000207550 hsa-mir-99b    | ENSG00000198972 hsa-let-7e     | ENSG00000207596 hsa-mir-194-2 | ENSG00000207648 hsa-mir-192  |                              |                             |  |
| ATTTACATC  | ENSG00000207695 hsa-mir-184    |                                |                               |                              |                              |                             |  |
| ATTTACTCC  | ENSG00000199122 hsa-mir-148b   |                                |                               |                              |                              |                             |  |
| ATTTAGCAG  | ENSG00000207939 hsa-mir-223    |                                |                               |                              |                              |                             |  |
| ATTTAGGAC  | ENSG00000208024 hsa-mir-199a-2 | ENSG00000207949 hsa-mir-214    |                               |                              |                              |                             |  |
| ATTTAGGTC  | ENSG00000207995 hsa-mir-325    |                                |                               |                              |                              |                             |  |
| GACCTAAAT  | Xie:TGACCTAnWTW RORALPHA2      |                                |                               |                              |                              |                             |  |
| ATTTAGTAA  | ENSG00000198981 hsa-mir-29a    | ENSG00000207624 hsa-mir-194-1  | ENSG00000207590 hsa-mir-215   |                              |                              |                             |  |
| ATTTAGTTC  | ENSG00000199085 hsa-mir-148a   |                                |                               |                              |                              |                             |  |
| ATTTATCCC  | ENSG00000199165 hsa-let-7a-1   | ENSG00000199072 hsa-let-7f-1   | ENSG00000199133 hsa-let-7d    |                              |                              |                             |  |
| ATTTATGCA  | ENSG00000207728 hsa-mir-449b   |                                |                               |                              |                              |                             |  |
| ATTTATGTC  | ENSG00000199153 hsa-mir-30d    | ENSG00000207582 hsa-mir-30b    |                               |                              |                              |                             |  |
| ATTTATTGC  | ENSG00000207728 hsa-mir-449b   |                                |                               |                              |                              |                             |  |
| ATTTATTTT  | ENSG00000207548 hsa-mir-217    |                                |                               |                              |                              |                             |  |
| ATTTCAAAC  | ENSG00000211574 hsa-mir-770    | ENSG00000208001 hsa-mir-431    | ENSG00000199005 hsa-mir-370   |                              |                              |                             |  |
| ATTTCAACA  | ENSG00000208037 hsa-mir-320    |                                |                               |                              |                              |                             |  |
| ATTTCACAA  | ENSG00000207950 hsa-mir-296    |                                |                               |                              |                              |                             |  |
| ATTTCAGCC  | ENSG00000199043 hsa-mir-335    | ENSG00000199135 hsa-mir-101-1  |                               |                              |                              |                             |  |
| ATTTCCATA  | ENSG00000198995 hsa-mir-340    |                                |                               |                              |                              |                             |  |
| ATTTCCAC   | ENSG00000207568 hsa-mir-203    |                                |                               |                              |                              |                             |  |
| ATTTCCCGC  | ENSG00000207728 hsa-mir-449b   |                                |                               |                              |                              |                             |  |
| ATTTCCCGG  | ENSG00000207695 hsa-mir-184    |                                |                               |                              |                              |                             |  |
| ATTTCCGAA  | ENSG00000207777 hsa-mir-10a    |                                |                               |                              |                              |                             |  |
| ATTTCCGGC  | ENSG00000198973 hsa-mir-375    |                                |                               |                              |                              |                             |  |
| ATTTCTAGA  | ENSG00000199077 hsa-mir-129-2  |                                |                               |                              |                              |                             |  |
| ATTTCTAGG  | ENSG00000207939 hsa-mir-223    |                                |                               |                              |                              |                             |  |
| ATTTCTGCC  | ENSG00000207732 hsa-mir-218-1  | ENSG00000207809 hsa-mir-139    |                               |                              |                              |                             |  |
| ATTTCTTGG  | ENSG00000207649 hsa-mir-138-2  |                                |                               |                              |                              |                             |  |
| ATTTGAACC  | ENSG00000207994 hsa-mir-100    | ENSG00000207971 hsa-mir-125b-1 | ENSG00000198975 hsa-let-7a-2  |                              |                              |                             |  |
| ATTTGAATG  | ENSG00000207819 hsa-mir-9-3    | ENSG00000207548 hsa-mir-217    |                               |                              |                              |                             |  |
| ATTTGAGGC  | ENSG00000207692 hsa-mir-592    | ENSG00000207695 hsa-mir-184    | ENSG00000207954 hsa-mir-138-1 |                              |                              |                             |  |
| ATTTGCACC  | ENSG00000207995 hsa-mir-325    |                                |                               |                              |                              |                             |  |
| ATTTGCAGC  | ENSG00000207702 hsa-mir-211    |                                |                               |                              |                              |                             |  |
| ATTTGCATA  | ENSG00000199038 hsa-mir-210    |                                |                               |                              |                              |                             |  |
| ATTTGCCCC  | ENSG00000198973 hsa-mir-375    | ENSG00000211590 hsa-mir-802    |                               |                              |                              |                             |  |
| ATTTGCTCC  | ENSG00000199085 hsa-mir-148a   |                                |                               |                              |                              |                             |  |
| ATTTGCTGC  | ENSG00000199043 hsa-mir-335    | ENSG00000208024 hsa-mir-199a-2 | ENSG00000207949 hsa-mir-214   |                              |                              |                             |  |
| ATTTGGAAG  | ENSG00000207635 hsa-mir-499    |                                |                               |                              |                              |                             |  |
| ATTTGTGGC  | ENSG00000207695 hsa-mir-184    |                                |                               |                              |                              |                             |  |
| ATTTGTTAG  | ENSG00000199065 hsa-mir-101-2  | ENSG00000207548 hsa-mir-217    | ENSG00000207694 hsa-mir-1-2   |                              |                              |                             |  |
| ATTTGTTCA  | ENSG00000199036 hsa-mir-219-1  |                                |                               |                              |                              |                             |  |
| ATTTGTTCA  | Xie:TRTTTRYTYW HNF-3           |                                |                               |                              |                              |                             |  |
| ATTTTAAGG  | ENSG00000199032 hsa-mir-425    |                                |                               |                              |                              |                             |  |
| ATTTTACAG  | ENSG00000199121 hsa-mir-26b    |                                |                               |                              |                              |                             |  |
| ATTTTCCGC  | ENSG00000207731 hsa-mir-506    |                                |                               |                              |                              |                             |  |
| ATTTTCCGC  | Xie:AWTTTCC IY                 |                                |                               |                              |                              |                             |  |
| ATTTTGACC  | ENSG00000207954 hsa-mir-138-1  |                                |                               |                              |                              |                             |  |
| ATTTTGCAA  | ENSG00000207617 hsa-mir-24-1   |                                |                               |                              |                              |                             |  |
| ATTTTGAGC  | ENSG00000199165 hsa-let-7a-1   | ENSG00000199072 hsa-let-7f-1   | ENSG00000199133 hsa-let-7d    | ENSG00000207602 hsa-mir-106a | ENSG00000207572 hsa-mir-363  | ENSG00000207710 hsa-mir-20b |  |
| ATTTTTACC  | ENSG00000207635 hsa-mir-499    |                                |                               |                              |                              |                             |  |
| ATTTTTACC  | Xie:GGTTAATnWTTAMC             | HNF-1                          |                               |                              |                              |                             |  |
| ATTTTTAGC  | ENSG00000199017 hsa-mir-1-1    | ENSG00000207764 hsa-mir-133a-2 |                               |                              |                              |                             |  |
| ATTTTTGGC  | ENSG00000199059 hsa-mir-135b   |                                |                               |                              |                              |                             |  |
| CAAAAATGG  | ENSG00000207567 hsa-mir-142    |                                |                               |                              |                              |                             |  |
| CAAAAATTA  | ENSG00000199059 hsa-mir-135b   |                                |                               |                              |                              |                             |  |
| CAAAACAGG  | ENSG00000198987 hsa-mir-16-2   |                                |                               |                              |                              |                             |  |
| CAAAACCAC  | ENSG00000202609 hsa-mir-488    |                                |                               |                              |                              |                             |  |
| CAAAACCCC  | ENSG00000207604 hsa-mir-206    | ENSG00000199080 hsa-mir-133b   | ENSG00000207777 hsa-mir-10a   |                              |                              |                             |  |
| CAAAAGGCC  | ENSG00000199024 hsa-mir-103-2  | ENSG00000199058 hsa-mir-302b   | ENSG00000199169 hsa-mir-367   | ENSG00000199145 hsa-mir-302d | ENSG00000199102 hsa-mir-302c |                             |  |
| CAAAAGTGA  | ENSG00000207827 hsa-mir-30a    | ENSG00000199094 hsa-mir-30c-2  |                               |                              |                              |                             |  |
| CAAAATAGC  | Xie:GGTTTCRCRTTTS              | IRF-1                          |                               |                              |                              |                             |  |
| CAAAATGTC  | ENSG00000207789 hsa-mir-26a-2  |                                |                               |                              |                              |                             |  |
| CAAAATGTC  | ENSG00000199043 hsa-mir-335    | ENSG00000207725 hsa-mir-222    | ENSG00000207870 hsa-mir-221   |                              |                              |                             |  |
| CAAAACAGAC | ENSG00000211574 hsa-mir-770    | ENSG00000208001 hsa-mir-431    | ENSG00000199005 hsa-mir-370   |                              |                              |                             |  |
| CAAAACAGCA | ENSG00000207585 hsa-mir-181d   |                                |                               |                              |                              |                             |  |
| CAAAACATGG | ENSG00000207791 hsa-mir-497    | ENSG00000207929 hsa-mir-195    |                               |                              |                              |                             |  |
| CAAAACACC  | ENSG00000207790 hsa-mir-29b-2  | ENSG00000207966 hsa-mir-29c    |                               |                              |                              |                             |  |
| CAAAACACC  | Xie:GGGKGTGGGG                 | RREB-1                         |                               |                              |                              |                             |  |
| CAAAACAGA  | ENSG00000199121 hsa-mir-26b    | ENSG00000207691 hsa-mir-183    | ENSG00000207990 hsa-mir-182   | ENSG00000199158 hsa-mir-96   |                              |                             |  |
| CAAAACCCG  | ENSG00000199032 hsa-mir-425    |                                |                               |                              |                              |                             |  |
| CAAAACCCGA | ENSG00000207730 hsa-mir-200b   | ENSG00000207607 hsa-mir-200a   | ENSG00000198976 hsa-mir-429   |                              |                              |                             |  |
| CAAAACCTGA | ENSG00000207596 hsa-mir-194-2  | ENSG00000207648 hsa-mir-192    |                               |                              |                              |                             |  |
| CAAAACCTGC | ENSG00000207705 hsa-mir-129-1  |                                |                               |                              |                              |                             |  |
| CAAAACCTTG | ENSG00000208035 hsa-mir-143    |                                |                               |                              |                              |                             |  |
| CAAACTCTA  | ENSG00000207745 hsa-mir-17     | ENSG00000207610 hsa-mir-19a    | ENSG00000199149 hsa-mir-20a   |                              |                              |                             |  |
| CAAACTGCG  | ENSG00000207656 hsa-mir-489    |                                |                               |                              |                              |                             |  |
| CAAACTTAC  | ENSG00000207954 hsa-mir-138-1  |                                |                               |                              |                              |                             |  |
| CAAACTTGC  | ENSG00000207994 hsa-mir-100    | ENSG00000207971 hsa-mir-125b-1 | ENSG00000198975 hsa-let-7a-2  |                              |                              |                             |  |
| CAAAAGAAC  | ENSG00000207695 hsa-mir-184    |                                |                               |                              |                              |                             |  |
| CAAAAGATGA | ENSG00000199077 hsa-mir-129-2  |                                |                               |                              |                              |                             |  |





|           |                                |                                |                               |                              |
|-----------|--------------------------------|--------------------------------|-------------------------------|------------------------------|
| CAATGGAGG | ENSG00000199065 hsa-mir-101-2  | ENSG00000207649 hsa-mir-138-2  | ENSG00000207795 hsa-mir-155   |                              |
| CAATGGCCC | ENSG00000199071 hsa-mir-423    |                                |                               |                              |
| CAATGGCCG | ENSG00000199038 hsa-mir-210    |                                |                               |                              |
| CAATGGGCG | ENSG00000208036 hsa-mir-106b   | ENSG00000207547 hsa-mir-25     | ENSG00000207757 hsa-mir-93    | ENSG00000207597 hsa-mir-490  |
| CAATGGGGC | ENSG00000207739 hsa-mir-218-2  |                                |                               |                              |
| CAATGGTCA | ENSG00000207955 hsa-mir-219-2  |                                |                               |                              |
| CAATGTCAA | ENSG00000207586 hsa-mir-135a-2 |                                |                               |                              |
| CAATGTCA  | ENSG00000199085 hsa-mir-148a   | ENSG00000207586 hsa-mir-135a-2 | ENSG00000207939 hsa-mir-223   |                              |
| CAATGTCTA | ENSG00000202641 hsa-mir-484    |                                |                               |                              |
| CAATGTGAC | ENSG00000207717 hsa-mir-551b   | ENSG00000211574 hsa-mir-770    | ENSG00000208001 hsa-mir-431   | ENSG00000199005 hsa-mir-370  |
| CAATTAAGA | ENSG00000211574 hsa-mir-770    | ENSG00000208001 hsa-mir-431    | ENSG00000199005 hsa-mir-370   |                              |
|           | TCTTAATTG Xie:CWTAATTG NKX2-5  |                                |                               |                              |
| CAATTAAGG | ENSG00000207935 hsa-mir-204    |                                |                               |                              |
|           | CCTTAATTG Xie:CWTAATTG NKX2-5  |                                |                               |                              |
| CAATTAATG | ENSG00000199177 hsa-mir-31     |                                |                               |                              |
| CAATTACAA | ENSG00000207692 hsa-mir-592    |                                |                               |                              |
| CAATTACCC | ENSG00000199043 hsa-mir-335    |                                |                               |                              |
| CAATTAGGA | ENSG00000207617 hsa-mir-24-1   |                                |                               |                              |
| CAATTAGGG | ENSG00000207702 hsa-mir-211    |                                |                               |                              |
| CAATTAGTC | ENSG00000207865 hsa-mir-34a    | ENSG00000207995 hsa-mir-325    |                               |                              |
| CAATTCAAG | ENSG00000207586 hsa-mir-135a-2 | ENSG00000210741 hsa-mir-196a-1 |                               |                              |
| CAATTCAGG | ENSG00000199065 hsa-mir-101-2  | ENSG00000207721 hsa-mir-186    |                               |                              |
| CAATTCATG | ENSG00000207692 hsa-mir-592    | ENSG00000207725 hsa-mir-222    | ENSG00000207870 hsa-mir-221   |                              |
| CAATTCCAA | ENSG00000207571 hsa-mir-615    |                                |                               |                              |
| CAATTGCCA | ENSG00000207581 hsa-mir-199b   | ENSG00000207939 hsa-mir-223    |                               |                              |
| CAATTGGA  | ENSG00000207726 hsa-mir-455    |                                |                               |                              |
| CAATTGGA  | ENSG00000207955 hsa-mir-219-2  | ENSG00000199122 hsa-mir-148b   |                               |                              |
| CAATTTGAG | ENSG00000199058 hsa-mir-302b   | ENSG00000199169 hsa-mir-367    | ENSG00000199145 hsa-mir-302d  | ENSG00000199102 hsa-mir-302c |
| CACAAAGC  | ENSG00000207611 hsa-mir-149    |                                |                               |                              |
| CACAAAGAC | ENSG00000199089 hsa-mir-202    | ENSG00000199090 hsa-mir-326    | ENSG00000207751 hsa-mir-130b  |                              |
| CACAACACG | ENSG00000207811 hsa-mir-34b    | ENSG00000207562 hsa-mir-34c    | ENSG00000199130 hsa-mir-365-1 |                              |
|           | CGTGTGTG Xie:TnYGTGTTKTG FAC1  |                                |                               |                              |
| CACAACAGC | ENSG00000207585 hsa-mir-181d   |                                |                               |                              |
| CACAACAGG | ENSG00000199090 hsa-mir-326    |                                |                               |                              |
| CACAACCCG | ENSG00000199161 hsa-mir-126    |                                |                               |                              |
| CACAACGTC | ENSG00000199090 hsa-mir-326    |                                |                               |                              |
| CACAAGATC | ENSG00000207691 hsa-mir-183    | ENSG00000207990 hsa-mir-182    | ENSG00000199158 hsa-mir-96    |                              |
| CACAAGATG | ENSG00000199036 hsa-mir-219-1  | ENSG00000207791 hsa-mir-497    | ENSG00000207929 hsa-mir-195   |                              |
| CACAAGGCA | ENSG00000207585 hsa-mir-181d   |                                |                               |                              |
| CACAAGGGC | ENSG00000207950 hsa-mir-296    |                                |                               |                              |
| CACAAGGGG | ENSG00000207649 hsa-mir-138-2  | ENSG00000207623 hsa-mir-205    |                               |                              |
| CACAAGTGG | ENSG00000211590 hsa-mir-802    |                                |                               |                              |
| CACAATCTC | ENSG00000207698 hsa-mir-32     |                                |                               |                              |
| CACAATGAC | ENSG00000207955 hsa-mir-219-2  |                                |                               |                              |
| CACAATGCA | ENSG00000207623 hsa-mir-205    |                                |                               |                              |
| CACAATGCC | ENSG00000199058 hsa-mir-302b   | ENSG00000199169 hsa-mir-367    | ENSG00000199145 hsa-mir-302d  | ENSG00000199102 hsa-mir-302c |
| CACAATGGA | ENSG00000198981 hsa-mir-29a    |                                |                               |                              |
| CACAATGTC | ENSG00000198986 hsa-let-7a-3   | ENSG00000207875 hsa-let-7b     | ENSG00000207656 hsa-mir-489   |                              |
| CACAATTAG | ENSG00000207995 hsa-mir-325    |                                |                               |                              |
| CACACAAAG | ENSG00000199090 hsa-mir-326    |                                |                               |                              |
| CACACATGG | ENSG00000207581 hsa-mir-199b   |                                |                               |                              |
| CACACCGGG | ENSG00000207809 hsa-mir-139    |                                |                               |                              |
| CACACCTTA | ENSG00000199059 hsa-mir-135b   |                                |                               |                              |
| CACACGCTC | ENSG00000207726 hsa-mir-455    |                                |                               |                              |
| CACACGTGA | ENSG00000199089 hsa-mir-202    |                                |                               |                              |
| CACACTAAA | ENSG00000207651 hsa-mir-28     |                                |                               |                              |
| CACAGACGG | ENSG00000199024 hsa-mir-103-2  |                                |                               |                              |
| CACAGCGCC | ENSG00000199122 hsa-mir-148b   |                                |                               |                              |
| CACAGTAAC | ENSG00000198973 hsa-mir-375    |                                |                               |                              |
| CACATAATC | ENSG00000207994 hsa-mir-100    | ENSG00000207971 hsa-mir-125b-1 | ENSG00000198975 hsa-let-7a-2  |                              |
| CACATACGG | ENSG00000207586 hsa-mir-135a-2 |                                |                               |                              |
| CACATCACC | ENSG00000207691 hsa-mir-183    | ENSG00000207990 hsa-mir-182    | ENSG00000199158 hsa-mir-96    |                              |
| CACATCCCG | ENSG00000199066 hsa-mir-330    |                                |                               |                              |
| CACATCTGG | ENSG00000207752 hsa-mir-199a-1 |                                |                               |                              |
| CACATGCAA | ENSG00000199089 hsa-mir-202    | ENSG00000207731 hsa-mir-506    |                               |                              |
| CACATGGCA | ENSG00000202569 hsa-mir-146b   | ENSG00000207702 hsa-mir-211    |                               |                              |
| CACATGGGC | ENSG00000207581 hsa-mir-199b   |                                |                               |                              |
| CACATGGTG | ENSG00000199088 hsa-mir-379    | ENSG00000207749 hsa-mir-299    | ENSG00000198982 hsa-mir-380   | ENSG00000199069 hsa-mir-323  |
|           | ENSG00000207743 hsa-mir-495    | ENSG00000199020 hsa-mir-381    | ENSG00000207754 hsa-mir-487b  | ENSG00000202560 hsa-mir-539  |
|           | ENSG00000199107 hsa-mir-409    | ENSG00000199012 hsa-mir-412    | ENSG00000199025 hsa-mir-369   | ENSG00000199092 hsa-mir-410  |
|           | ENSG00000211574 hsa-mir-770    | ENSG00000208001 hsa-mir-431    | ENSG00000199005 hsa-mir-370   |                              |
| CACATGTGA | ENSG00000207731 hsa-mir-506    |                                |                               |                              |
| CACCAACCA | ENSG00000198986 hsa-let-7a-3   | ENSG00000207875 hsa-let-7b     |                               |                              |
| CACCAATAG | ENSG00000199059 hsa-mir-135b   |                                |                               |                              |
| CACCAATCA | ENSG00000199077 hsa-mir-129-2  |                                |                               |                              |
| CACCAATCC | ENSG00000207725 hsa-mir-222    | ENSG00000207870 hsa-mir-221    |                               |                              |
| CACCAATCG | ENSG00000207717 hsa-mir-551b   |                                |                               |                              |
| CACCAATGA | ENSG00000199077 hsa-mir-129-2  | ENSG00000198987 hsa-mir-16-2   | ENSG00000207947 hsa-mir-152   |                              |
| CACCAATTA | ENSG00000207651 hsa-mir-28     |                                |                               |                              |
| CACCACGGC | ENSG00000199036 hsa-mir-219-1  |                                |                               |                              |
| CACCACTTC | ENSG00000207745 hsa-mir-17     | ENSG00000207610 hsa-mir-19a    | ENSG00000199149 hsa-mir-20a   |                              |
| CACCAGCAA | ENSG00000202641 hsa-mir-484    | ENSG00000207777 hsa-mir-10a    |                               |                              |
| CACCAGGTG | ENSG00000207571 hsa-mir-615    | ENSG00000208005 hsa-mir-503    | ENSG00000207784 hsa-mir-542   |                              |
|           | CACCAGGTG Xie:RnCAGGTG MYOD    |                                |                               |                              |
| CACCATCGC | ENSG00000207550 hsa-mir-99b    | ENSG00000198972 hsa-let-7e     |                               |                              |
| CACCATCTG | ENSG00000211517 hsa-mir-671    |                                |                               |                              |
| CACCCTTCA | ENSG00000207618 hsa-mir-144    | ENSG00000207794 hsa-mir-451    |                               |                              |
| CACCGCACC | ENSG00000202641 hsa-mir-484    |                                |                               |                              |
| CACCGCCGC | ENSG00000207797 hsa-mir-187    |                                |                               |                              |
|           | CACCGCCGC MATCH:V\$ETF_Q6 ETF  |                                |                               |                              |
| CACCGCGTG | ENSG00000199121 hsa-mir-26b    |                                |                               |                              |

|            |                                |                                |                              |                             |
|------------|--------------------------------|--------------------------------|------------------------------|-----------------------------|
| CACCGGAAC  | ENSG00000207789 hsa-mir-26a-2  |                                |                              |                             |
| CACCGGCTG  | ENSG00000199071 hsa-mir-423    |                                |                              |                             |
| CACCGTCTG  | ENSG00000207819 hsa-mir-9-3    |                                |                              |                             |
| CACCGTGGA  | ENSG00000199090 hsa-mir-326    |                                |                              |                             |
| CACCTACCC  | ENSG00000207585 hsa-mir-181d   | ENSG00000208036 hsa-mir-106b   | ENSG00000207547 hsa-mir-25   | ENSG00000207757 hsa-mir-93  |
| CACCTACTG  | ENSG00000211574 hsa-mir-770    | ENSG00000208001 hsa-mir-431    | ENSG00000199005 hsa-mir-370  |                             |
| CACCTAGGG  | ENSG00000207550 hsa-mir-99b    | ENSG00000198972 hsa-let-7e     | ENSG00000207630 hsa-mir-7-3  |                             |
| CACCTATAA  | ENSG00000207571 hsa-mir-615    |                                |                              |                             |
| CACCTCATC  | ENSG00000207651 hsa-mir-28     |                                |                              |                             |
| CACCTCCGG  | ENSG00000207954 hsa-mir-138-1  |                                |                              |                             |
| CACCTGAAG  | ENSG00000207623 hsa-mir-205    | ENSG00000207782 hsa-mir-150    |                              |                             |
| CACCTGACG  | ENSG00000207732 hsa-mir-218-1  |                                |                              |                             |
|            | CGTCAGGTG Xie:RnCAGGTG MYOD    |                                |                              |                             |
| CACCTGAGG  | ENSG00000199177 hsa-mir-31     |                                |                              |                             |
| CACCTGTTC  | ENSG00000199036 hsa-mir-219-1  |                                |                              |                             |
|            | GAACAGGTG Xie:RnCAGGTG MYOD    |                                |                              |                             |
| CACCTTCCG  | ENSG00000198995 hsa-mir-340    |                                |                              |                             |
| CACCTTGGA  | ENSG00000207705 hsa-mir-129-1  |                                |                              |                             |
| CACCTTTAA  | ENSG00000207819 hsa-mir-9-3    |                                |                              |                             |
| CACGACAAC  | ENSG00000207726 hsa-mir-455    |                                |                              |                             |
| CACGAGGGG  | ENSG00000198995 hsa-mir-340    |                                |                              |                             |
| CACGAGGGG  | ENSG00000211574 hsa-mir-770    | ENSG00000208001 hsa-mir-431    | ENSG00000199005 hsa-mir-370  |                             |
| CACGACCCG  | ENSG00000207726 hsa-mir-455    |                                |                              |                             |
| CACGCACCG  | ENSG00000207955 hsa-mir-219-2  |                                |                              |                             |
| CACGCAGCC  | ENSG00000199047 hsa-mir-378    |                                |                              |                             |
| CACGCATAC  | ENSG00000199036 hsa-mir-219-1  | ENSG00000207702 hsa-mir-211    |                              |                             |
| CACGCATGC  | ENSG00000198995 hsa-mir-340    |                                |                              |                             |
| CACGCCCAC  | ENSG00000199066 hsa-mir-330    | ENSG00000199024 hsa-mir-103-2  |                              |                             |
| CACGCCCTA  | ENSG00000207728 hsa-mir-449b   |                                |                              |                             |
| CACGCCTTA  | ENSG00000207728 hsa-mir-449b   |                                |                              |                             |
| CACGCGCAC  | ENSG00000198974 hsa-mir-30e    | ENSG00000207962 hsa-mir-30c-1  |                              |                             |
| CACGCGGAA  | ENSG00000199036 hsa-mir-219-1  |                                |                              |                             |
| CACGCGGAC  | ENSG00000208037 hsa-mir-320    |                                |                              |                             |
| CACGCGGGA  | ENSG00000207819 hsa-mir-9-3    |                                |                              |                             |
| CACGCGTCC  | ENSG00000207819 hsa-mir-9-3    | ENSG00000208005 hsa-mir-503    | ENSG00000207784 hsa-mir-542  |                             |
| CACGCTCAC  | ENSG00000207726 hsa-mir-455    | ENSG00000210741 hsa-mir-196a-1 |                              |                             |
| CACGCTGAG  | ENSG00000207819 hsa-mir-9-3    |                                |                              |                             |
| CACGGACAG  | ENSG00000199130 hsa-mir-365-1  |                                |                              |                             |
| CACGGCGCA  | ENSG00000199047 hsa-mir-378    |                                |                              |                             |
| CACGGCTTC  | ENSG00000207819 hsa-mir-9-3    | ENSG00000207953 hsa-mir-212    |                              |                             |
| CACGGGCCA  | ENSG00000199121 hsa-mir-26b    | ENSG00000199071 hsa-mir-423    |                              |                             |
| CACGGTCGG  | ENSG00000199121 hsa-mir-26b    |                                |                              |                             |
| CACGTCAAA  | ENSG00000207581 hsa-mir-199b   |                                |                              |                             |
| CACGTCAGA  | ENSG00000207752 hsa-mir-199a-1 |                                |                              |                             |
| CACGTCCGG  | ENSG00000207611 hsa-mir-149    |                                |                              |                             |
| CACGTGAGC  | ENSG00000199089 hsa-mir-202    | ENSG00000207950 hsa-mir-296    |                              |                             |
| CACGTGATA  | ENSG00000199122 hsa-mir-148b   |                                |                              |                             |
| CACGTGGAG  | ENSG00000207635 hsa-mir-499    |                                |                              |                             |
|            | CTCCACGTG Xie:SCACGTG MYC      |                                |                              |                             |
| CACGTGGCA  | ENSG00000207745 hsa-mir-17     | ENSG00000207610 hsa-mir-19a    | ENSG00000199149 hsa-mir-20a  |                             |
|            | TGCCACGTG Xie:SCACGTG MYC      |                                |                              |                             |
| CACGTGGCG  | ENSG00000208037 hsa-mir-320    |                                |                              |                             |
|            | CGCCACGTG Xie:SCACGTG MYC      |                                |                              |                             |
| CACGTGGTC  | ENSG00000207950 hsa-mir-296    |                                |                              |                             |
|            | GACCACGTG Xie:SCACGTG MYC      |                                |                              |                             |
| CACGTGTGC  | ENSG00000199089 hsa-mir-202    |                                |                              |                             |
| CACGTGTTC  | ENSG00000199157 hsa-mir-208    |                                |                              |                             |
| CACGTTGAG  | ENSG00000199122 hsa-mir-148b   |                                |                              |                             |
| CACGTTGCA  | ENSG00000207585 hsa-mir-181d   |                                |                              |                             |
| CACGTTTCC  | ENSG00000198984 hsa-mir-345    | ENSG00000207604 hsa-mir-206    | ENSG00000199080 hsa-mir-133b |                             |
| CACTAAAGC  | ENSG00000208009 hsa-mir-130a   |                                |                              |                             |
| CACTAAATA  | ENSG00000199077 hsa-mir-129-2  |                                |                              |                             |
| CACTAACC   | ENSG00000199122 hsa-mir-148b   |                                |                              |                             |
| CACTAATCC  | ENSG00000208017 hsa-mir-140    |                                |                              |                             |
| CACTAATTA  | ENSG00000207702 hsa-mir-211    | ENSG00000207797 hsa-mir-187    |                              |                             |
| CACTAATTC  | ENSG00000208005 hsa-mir-503    | ENSG00000207784 hsa-mir-542    |                              |                             |
| CACTACAGG  | ENSG00000207792 hsa-mir-151    |                                |                              |                             |
| CACTAGAGG  | ENSG00000207717 hsa-mir-551b   |                                |                              |                             |
| CACTCACGA  | ENSG00000211563 hsa-mir-338    |                                |                              |                             |
| CACTCAGTC  | ENSG00000207732 hsa-mir-218-1  | ENSG00000207548 hsa-mir-217    |                              |                             |
| CACTCGGCC  | ENSG00000207811 hsa-mir-34b    | ENSG00000207562 hsa-mir-34c    |                              |                             |
|            | CATCTGGCC Xie:TbTGCAChCGGCC    | MTF-1                          |                              |                             |
| CACTCTGAC  | ENSG00000207933 hsa-mir-9-1    |                                |                              |                             |
| CACTCTGGC  | ENSG00000207948 hsa-mir-328    |                                |                              |                             |
| CACTGACGC  | ENSG00000207953 hsa-mir-212    |                                |                              |                             |
| CACTGCATC  | ENSG00000207692 hsa-mir-592    |                                |                              |                             |
| CACTGCCCTA | ENSG00000199085 hsa-mir-148a   | ENSG00000207950 hsa-mir-296    |                              |                             |
| CACTGCGAA  | ENSG00000198984 hsa-mir-345    |                                |                              |                             |
| CACTGCGGA  | ENSG00000207819 hsa-mir-9-3    |                                |                              |                             |
| CACTGGAAC  | ENSG00000211590 hsa-mir-802    |                                |                              |                             |
| CACTGGCTA  | ENSG00000207819 hsa-mir-9-3    | ENSG00000207624 hsa-mir-194-1  | ENSG00000207590 hsa-mir-215  |                             |
| CACTGGGTA  | ENSG00000207695 hsa-mir-184    | ENSG00000207795 hsa-mir-155    |                              |                             |
| CACTGTGCG  | ENSG00000207947 hsa-mir-152    |                                |                              |                             |
| CACTGTTTA  | ENSG00000207721 hsa-mir-186    |                                |                              |                             |
|            | TAAACAGTG Xie:CTWAWGTAAACAnWG  | FREAC-4                        |                              |                             |
| CACTTAATC  | ENSG00000207933 hsa-mir-9-1    |                                |                              |                             |
|            | GATTAAGTG Xie:TYAAGTG NKX2-5   |                                |                              |                             |
| CACTTAGCA  | ENSG00000207705 hsa-mir-129-1  | ENSG00000207745 hsa-mir-17     | ENSG00000207610 hsa-mir-19a  | ENSG00000199149 hsa-mir-20a |
| CACTTATTA  | ENSG00000207994 hsa-mir-100    | ENSG00000207971 hsa-mir-125b-1 | ENSG00000198975 hsa-let-7a-2 |                             |
| CACTTCCGC  | ENSG00000207721 hsa-mir-186    |                                |                              |                             |
|            | CACTTCCGC Xie:CANttCCS STAT1   |                                |                              |                             |

| GC         | Xie: MGGAWGT                   | PEA3                           |                               |                               |                              |
|------------|--------------------------------|--------------------------------|-------------------------------|-------------------------------|------------------------------|
| CACTTCGGG  | ENSG00000208035 hsa-mir-143    | ENSG00000207623 hsa-mir-205    |                               |                               |                              |
| CACTTGTGA  | ENSG00000199059 hsa-mir-135b   |                                |                               |                               |                              |
| CACTTGTGG  | ENSG00000211590 hsa-mir-802    |                                |                               |                               |                              |
| CACTTTAAA  | ENSG00000207656 hsa-mir-489    |                                |                               |                               |                              |
| CACTTTAAC  | ENSG00000199071 hsa-mir-423    | ENSG00000207725 hsa-mir-222    | ENSG00000207870 hsa-mir-221   |                               |                              |
| CACTTTTAC  | ENSG00000207585 hsa-mir-181d   | ENSG00000198974 hsa-mir-30e    | ENSG00000207962 hsa-mir-30c-1 |                               |                              |
| CACTTTTAC  | ENSG00000207656 hsa-mir-489    |                                |                               |                               |                              |
| CACTTTCCG  | ENSG00000207602 hsa-mir-106a   | ENSG00000207572 hsa-mir-363    | ENSG00000207710 hsa-mir-20b   |                               |                              |
| CACTTTGAC  | ENSG00000207586 hsa-mir-135a-2 | ENSG00000207933 hsa-mir-9-1    |                               |                               |                              |
| CACTTTGAC  | Xie:CTTTGA                     | LEF1                           |                               |                               |                              |
| CACTTTGTA  | ENSG00000207692 hsa-mir-592    |                                |                               |                               |                              |
| CACTTTTGC  | ENSG00000207827 hsa-mir-30a    | ENSG00000199094 hsa-mir-30c-2  |                               |                               |                              |
| CAGAAATAG  | ENSG00000207809 hsa-mir-139    |                                |                               |                               |                              |
| CAGAATGCC  | ENSG00000207635 hsa-mir-499    |                                |                               |                               |                              |
| CAGACAATG  | ENSG00000207638 hsa-mir-99a    | ENSG00000207863 hsa-mir-125b-2 |                               |                               |                              |
| CAGACATAA  | ENSG00000199153 hsa-mir-30d    | ENSG00000207582 hsa-mir-30b    |                               |                               |                              |
| CAGACATTC  | ENSG00000199036 hsa-mir-219-1  | ENSG00000207752 hsa-mir-199a-1 |                               |                               |                              |
| CAGACGTCA  | ENSG00000207630 hsa-mir-7-3    |                                |                               |                               |                              |
| CAGACGTGA  | ENSG00000199161 hsa-mir-126    |                                |                               |                               |                              |
| CAGACTAAA  | ENSG00000207694 hsa-mir-1-2    |                                |                               |                               |                              |
| CAGAGCGTC  | ENSG00000207732 hsa-mir-218-1  |                                |                               |                               |                              |
| CAGAGCTCG  | ENSG00000199104 hsa-mir-346    |                                |                               |                               |                              |
| CAGAGGGCC  | ENSG00000207730 hsa-mir-200b   | ENSG00000207607 hsa-mir-200a   | ENSG00000198976 hsa-mir-429   |                               |                              |
| CAGATAACC  | ENSG00000199165 hsa-let-7a-1   | ENSG00000199072 hsa-let-7f-1   | ENSG00000199133 hsa-let-7d    | ENSG00000207623 hsa-mir-205   |                              |
| CAGATAAGC  | ENSG00000207732 hsa-mir-218-1  | ENSG00000207604 hsa-mir-206    | ENSG00000199080 hsa-mir-133b  |                               |                              |
| CAGATACAG  | ENSG00000207635 hsa-mir-499    |                                |                               |                               |                              |
| CAGATAGGA  | ENSG00000199058 hsa-mir-302b   | ENSG00000199169 hsa-mir-367    | ENSG00000199145 hsa-mir-302d  | ENSG00000199102 hsa-mir-302c  |                              |
| CAGATATCA  | ENSG00000207602 hsa-mir-106a   | ENSG00000207572 hsa-mir-363    | ENSG00000207710 hsa-mir-20b   |                               |                              |
| CAGATCAGC  | ENSG00000198984 hsa-mir-345    | ENSG00000207948 hsa-mir-328    |                               |                               |                              |
| CAGATCTAG  | ENSG00000207585 hsa-mir-181d   | ENSG00000211590 hsa-mir-802    |                               |                               |                              |
| CAGATGGCC  | ENSG00000207791 hsa-mir-497    | ENSG00000207929 hsa-mir-195    |                               |                               |                              |
| CAGATGTCA  | ENSG00000198973 hsa-mir-375    |                                |                               |                               |                              |
| CAGATGTCC  | ENSG00000208005 hsa-mir-503    | ENSG00000207784 hsa-mir-542    |                               |                               |                              |
| CAGATTAGC  | ENSG00000207602 hsa-mir-106a   | ENSG00000207572 hsa-mir-363    | ENSG00000207710 hsa-mir-20b   |                               |                              |
| CAGATTTAC  | ENSG00000199153 hsa-mir-30d    | ENSG00000207582 hsa-mir-30b    | ENSG00000207795 hsa-mir-155   |                               |                              |
| CAGCAATC   | ENSG00000207702 hsa-mir-211    |                                |                               |                               |                              |
| CAGCAAGAC  | ENSG00000198986 hsa-let-7a-3   | ENSG00000207875 hsa-let-7b     |                               |                               |                              |
| CAGCAATGC  | ENSG00000199047 hsa-mir-378    | ENSG00000207705 hsa-mir-129-1  |                               |                               |                              |
| CAGCAATTA  | ENSG00000207618 hsa-mir-144    | ENSG00000207794 hsa-mir-451    | ENSG00000207935 hsa-mir-204   |                               |                              |
| CAGCACAAA  | ENSG00000199161 hsa-mir-126    |                                |                               |                               |                              |
| CAGCACTCA  | ENSG00000211574 hsa-mir-770    | ENSG00000208001 hsa-mir-431    | ENSG00000199005 hsa-mir-370   |                               |                              |
| CAGCACTCG  | ENSG00000198986 hsa-let-7a-3   | ENSG00000207875 hsa-let-7b     |                               |                               |                              |
| CAGCAGGTA  | ENSG00000207623 hsa-mir-205    |                                |                               |                               |                              |
| CAGCATAAG  | ENSG00000199085 hsa-mir-148a   |                                |                               |                               |                              |
| CAGCATGCC  | ENSG00000199053 hsa-mir-324    | ENSG00000202641 hsa-mir-484    |                               |                               |                              |
| CAGCATGTC  | ENSG00000207865 hsa-mir-34a    |                                |                               |                               |                              |
| CAGCCAACG  | ENSG00000207732 hsa-mir-218-1  |                                |                               |                               |                              |
| CAGCCATCA  | ENSG00000199059 hsa-mir-135b   |                                |                               |                               |                              |
| CAGCCGAAA  | ENSG00000207611 hsa-mir-149    |                                |                               |                               |                              |
| CAGCCGAAC  | ENSG00000199032 hsa-mir-425    | ENSG00000208024 hsa-mir-199a-2 | ENSG00000207949 hsa-mir-214   |                               |                              |
| CAGCCGCGG  | ENSG00000199032 hsa-mir-425    | ENSG00000199024 hsa-mir-103-2  |                               |                               |                              |
| CAGCCGTGA  | ENSG00000199077 hsa-mir-129-2  |                                |                               |                               |                              |
| CAGCCCTATA | ENSG00000199065 hsa-mir-101-2  | ENSG00000207947 hsa-mir-152    |                               |                               |                              |
| CAGCCATATC | ENSG00000202569 hsa-mir-146b   |                                |                               |                               |                              |
| CAGCCTTAC  | ENSG00000207819 hsa-mir-9-3    | ENSG00000207602 hsa-mir-106a   | ENSG00000207572 hsa-mir-363   | ENSG00000207710 hsa-mir-20b   |                              |
| CAGCGACAC  | ENSG00000207571 hsa-mir-615    |                                |                               |                               |                              |
| CAGCGCATA  | ENSG00000208024 hsa-mir-199a-2 | ENSG00000207949 hsa-mir-214    |                               |                               |                              |
| CAGCGCCAA  | ENSG00000207935 hsa-mir-204    |                                |                               |                               |                              |
| CAGCGCCAC  | ENSG00000199043 hsa-mir-335    |                                |                               |                               |                              |
| CAGCGCCCG  | ENSG00000199122 hsa-mir-148b   |                                |                               |                               |                              |
| CAGCGGAAC  | ENSG00000207744 hsa-mir-10b    |                                |                               |                               |                              |
| CAGCGGCAC  | ENSG00000208024 hsa-mir-199a-2 | ENSG00000207949 hsa-mir-214    |                               |                               |                              |
| CAGCGGGAA  | ENSG00000207789 hsa-mir-26a-2  |                                |                               |                               |                              |
| CAGCGTGGA  | ENSG00000207695 hsa-mir-184    |                                |                               |                               |                              |
| CAGCTAATC  | ENSG00000207597 hsa-mir-490    |                                |                               |                               |                              |
| CAGCTAATG  | ENSG00000207752 hsa-mir-199a-1 | ENSG00000207597 hsa-mir-490    |                               |                               |                              |
| CAGCTATAA  | ENSG00000202609 hsa-mir-488    |                                |                               |                               |                              |
| CAGCTCCTA  | ENSG00000199122 hsa-mir-148b   |                                |                               |                               |                              |
| CAGCTGACA  | ENSG00000199172 hsa-mir-331    |                                |                               |                               |                              |
| CAGCTGATA  | ENSG00000199172 hsa-mir-331    |                                |                               |                               |                              |
| CAGCTGGTC  | ENSG00000198981 hsa-mir-29a    | ENSG00000207623 hsa-mir-205    |                               |                               |                              |
| CAGGACAAC  | ENSG00000207790 hsa-mir-29b-2  | ENSG00000207966 hsa-mir-29c    |                               |                               |                              |
| CAGGAGTCC  | ENSG00000198984 hsa-mir-345    |                                |                               |                               |                              |
| CAGGATATC  | ENSG00000198981 hsa-mir-29a    |                                |                               |                               |                              |
| CAGGATGCG  | ENSG00000199085 hsa-mir-148a   |                                |                               |                               |                              |
| CAGGATTAG  | ENSG00000207752 hsa-mir-199a-1 | ENSG00000207597 hsa-mir-490    |                               |                               |                              |
| CAGGATTGG  | ENSG00000207695 hsa-mir-184    | ENSG00000207725 hsa-mir-222    | ENSG00000207870 hsa-mir-221   |                               |                              |
| CAGGCAACG  | ENSG00000199032 hsa-mir-425    | ENSG00000207827 hsa-mir-30a    | ENSG00000199094 hsa-mir-30c-2 |                               |                              |
| CAGGCCAAC  | ENSG00000207705 hsa-mir-129-1  | ENSG00000211563 hsa-mir-338    |                               |                               |                              |
| CAGGCGAGA  | ENSG00000207953 hsa-mir-212    |                                |                               |                               |                              |
| CAGGCGCCG  | ENSG00000207954 hsa-mir-138-1  |                                |                               |                               |                              |
| CAGGCGGAA  | ENSG00000199024 hsa-mir-103-2  |                                |                               |                               |                              |
| CAGGCGGGG  | ENSG00000208009 hsa-mir-130a   |                                |                               |                               |                              |
| CAGGGCTTA  | ENSG00000207705 hsa-mir-129-1  | ENSG00000207980 hsa-mir-23a    | ENSG00000209707 hsa-mir-24-2  | ENSG00000207808 hsa-mir-27a   |                              |
| CAGGGGGTA  | ENSG00000207728 hsa-mir-449b   |                                |                               |                               |                              |
| CAGGGTGAC  | ENSG00000208024 hsa-mir-199a-2 | ENSG00000207949 hsa-mir-214    |                               |                               |                              |
| CAGGTAAAG  | ENSG00000207713 hsa-mir-200c   | ENSG00000207708 hsa-mir-141    | ENSG00000207939 hsa-mir-223   |                               |                              |
| CAGGTAACG  | ENSG00000207614 hsa-mir-193a   | ENSG00000199187 hsa-mir-365-2  | ENSG00000207623 hsa-mir-205   |                               |                              |
| CAGGTAAGG  | ENSG00000207713 hsa-mir-200c   | ENSG00000207708 hsa-mir-141    | ENSG00000207694 hsa-mir-1-2   | ENSG00000207718 hsa-mir-15a   | ENSG00000208006 hsa-mir-16-1 |
| CAGGTAGCC  | ENSG00000207624 hsa-mir-194-1  | ENSG00000207590 hsa-mir-215    | ENSG00000207744 hsa-mir-10b   | ENSG00000207954 hsa-mir-138-1 |                              |







CATGGCACCA ENSG00000199088|hsa-mir-379 ENSG00000207749|hsa-mir-299 ENSG00000198982|hsa-mir-380 ENSG00000199069|hsa-mir-323 ENSG00000211582|hsa-mir-758 ENSG00000207761|hsa-mir-329-1 ENSG00000194717|hsa-mir-494  
 ENSG00000207743|hsa-mir-495 ENSG00000199020|hsa-mir-381 ENSG00000207754|hsa-mir-487b ENSG00000202560|hsa-mir-539 ENSG00000207993|hsa-mir-134 ENSG00000207961|hsa-mir-496 ENSG00000199015|hsa-mir-377  
 ENSG00000199107|hsa-mir-409 ENSG00000199012|hsa-mir-412 ENSG00000199025|hsa-mir-369 ENSG00000199092|hsa-mir-410  
 CATGGCCGC ENSG00000207960|hsa-mir-153-2  
 CATGGCGAA ENSG00000199043|hsa-mir-335  
 CATGGCGCC ENSG00000207567|hsa-mir-142 ENSG00000207950|hsa-mir-296  
 CATGGCGCG ENSG00000207732|hsa-mir-218-1  
 CATGGCGTC ENSG00000207953|hsa-mir-212  
 CATGGCTCC ENSG00000207954|hsa-mir-138-1  
 CATGGCTGA ENSG00000207995|hsa-mir-325  
 CATGGCTTC ENSG00000207695|hsa-mir-184  
 CATGGGGAA ENSG00000207649|hsa-mir-138-2 ENSG00000199122|hsa-mir-148b ENSG00000207692|hsa-mir-592  
 CATGGGTCC ENSG00000198974|hsa-mir-30e ENSG00000207962|hsa-mir-30c-1  
 CATGGTCCC ENSG00000207623|hsa-mir-205  
 CATGGTGAA ENSG00000199088|hsa-mir-379 ENSG00000207749|hsa-mir-299 ENSG00000198982|hsa-mir-380 ENSG00000199069|hsa-mir-323 ENSG00000211582|hsa-mir-758 ENSG00000207761|hsa-mir-329-1 ENSG00000194717|hsa-mir-494  
 ENSG00000207743|hsa-mir-495 ENSG00000199020|hsa-mir-381 ENSG00000207754|hsa-mir-487b ENSG00000202560|hsa-mir-539 ENSG00000207993|hsa-mir-134 ENSG00000207961|hsa-mir-496 ENSG00000199015|hsa-mir-377  
 ENSG00000199107|hsa-mir-409 ENSG00000199012|hsa-mir-412 ENSG00000199025|hsa-mir-369 ENSG00000199092|hsa-mir-410  
 CATGTCAAC ENSG00000199088|hsa-mir-379 ENSG00000207749|hsa-mir-299 ENSG00000198982|hsa-mir-380 ENSG00000199069|hsa-mir-323 ENSG00000211582|hsa-mir-758 ENSG00000207761|hsa-mir-329-1 ENSG00000194717|hsa-mir-494  
 ENSG00000207743|hsa-mir-495 ENSG00000199020|hsa-mir-381 ENSG00000207754|hsa-mir-487b ENSG00000202560|hsa-mir-539 ENSG00000207993|hsa-mir-134 ENSG00000207961|hsa-mir-496 ENSG00000199015|hsa-mir-377  
 ENSG00000199107|hsa-mir-409 ENSG00000199012|hsa-mir-412 ENSG00000199025|hsa-mir-369 ENSG00000199092|hsa-mir-410  
 CATGTCTGA ENSG00000207695|hsa-mir-184 ENSG00000207994|hsa-mir-100 ENSG00000207971|hsa-mir-125b-1 ENSG00000198975|hsa-let-7a-2 ENSG00000208024|hsa-mir-199a-2 ENSG00000207949|hsa-mir-214  
 CATGTGACA ENSG00000199089|hsa-mir-202  
 CATGTGACC ENSG00000198984|hsa-mir-345  
 CATGTGAGC ENSG00000207702|hsa-mir-211 ENSG00000211574|hsa-mir-770 ENSG00000208001|hsa-mir-431 ENSG00000199005|hsa-mir-370  
 CATGTGCCG ENSG00000207702|hsa-mir-211  
 CATGTGTGG ENSG00000207731|hsa-mir-506  
 CATTAACAG ENSG00000207692|hsa-mir-592  
 CATTAAGTC ENSG00000207827|hsa-mir-30a ENSG00000199094|hsa-mir-30c-2  
 CATTAAGGC ENSG00000211590|hsa-mir-802  
 CATTAATAG ENSG00000199165|hsa-let-7a-1 ENSG00000199072|hsa-let-7f-1 ENSG00000199133|hsa-let-7d ENSG00000207602|hsa-mir-106a ENSG00000207572|hsa-mir-363 ENSG00000207710|hsa-mir-20b ENSG00000207624|hsa-mir-194-1  
 ENSG00000207590|hsa-mir-215  
 CATTAATAG MATCH:V\$CDXA\_02 CdxA  
 CATTAATCC ENSG00000207994|hsa-mir-100 ENSG00000207971|hsa-mir-125b-1 ENSG00000198975|hsa-let-7a-2  
 CATTAATGG ENSG00000207694|hsa-mir-1-2  
 CATTAATTA ENSG00000199085|hsa-mir-148a  
 CATTACAAG ENSG00000199058|hsa-mir-302b ENSG00000199169|hsa-mir-367 ENSG00000199145|hsa-mir-302d ENSG00000199102|hsa-mir-302c  
 CATTACAGA ENSG00000199165|hsa-let-7a-1 ENSG00000199072|hsa-let-7f-1 ENSG00000199133|hsa-let-7d  
 CATTACCTC ENSG00000207980|hsa-mir-23a ENSG00000207970|hsa-mir-24-2 ENSG00000207808|hsa-mir-27a  
 CATTAGCAA ENSG00000207692|hsa-mir-592  
 CATTAGCGC ENSG00000207744|hsa-mir-10b  
 CATTATGGG ENSG00000199024|hsa-mir-103-2  
 CATTATGTA ENSG00000207827|hsa-mir-30a ENSG00000199094|hsa-mir-30c-2  
 CATTATTGA ENSG00000199177|hsa-mir-31  
 CATTCAACA ENSG00000207995|hsa-mir-325  
 CATTCACAA ENSG00000207995|hsa-mir-325  
 CATTCACCC ENSG00000199165|hsa-let-7a-1 ENSG00000199072|hsa-let-7f-1 ENSG00000199133|hsa-let-7d  
 CATTACAGAA ENSG00000199077|hsa-mir-129-2  
 CATTCAATA ENSG00000207695|hsa-mir-184  
 CATTATGTC ENSG00000207953|hsa-mir-212  
 CATTCCGGC ENSG00000208036|hsa-mir-106b ENSG00000207547|hsa-mir-25 ENSG00000207757|hsa-mir-93  
 CATTCCGGC ENSG00000207568|hsa-mir-203  
 CATTCCGGC ENSG00000207718|hsa-mir-15a ENSG00000208006|hsa-mir-16-1  
 CATTCTGAC ENSG00000207795|hsa-mir-155  
 CATTCTTGC ENSG00000208005|hsa-mir-503 ENSG00000207784|hsa-mir-542  
 CATTGACCC ENSG00000207926|hsa-mir-135a-1  
 CATTGCAGG ENSG00000207705|hsa-mir-129-1  
 CATTGCCTA ENSG00000207618|hsa-mir-144 ENSG00000207794|hsa-mir-451  
 CATTGCTGA ENSG00000207705|hsa-mir-129-1 ENSG00000199172|hsa-mir-331  
 CATTGCTGC ENSG00000199047|hsa-mir-378  
 CATTGGAGG ENSG00000207726|hsa-mir-455 ENSG00000199088|hsa-mir-379 ENSG00000207749|hsa-mir-299 ENSG00000198982|hsa-mir-380 ENSG00000199069|hsa-mir-323 ENSG00000211582|hsa-mir-758 ENSG00000207761|hsa-mir-329-1  
 ENSG00000194717|hsa-mir-494 ENSG00000207743|hsa-mir-495 ENSG00000199020|hsa-mir-381 ENSG00000207754|hsa-mir-487b ENSG00000202560|hsa-mir-539 ENSG00000207993|hsa-mir-134 ENSG00000207961|hsa-mir-496  
 ENSG00000199015|hsa-mir-377 ENSG00000199107|hsa-mir-409 ENSG00000199012|hsa-mir-412 ENSG00000199025|hsa-mir-369 ENSG00000199092|hsa-mir-410 ENSG00000207597|hsa-mir-490  
 CATTGGCCA ENSG00000207630|hsa-mir-7-3  
 CATTGGGGG ENSG00000199024|hsa-mir-103-2  
 CATTGGGTA ENSG00000199071|hsa-mir-423 ENSG00000199122|hsa-mir-148b  
 CATTGGTCA ENSG00000207624|hsa-mir-194-1 ENSG00000207590|hsa-mir-215  
 CATTGGTGG ENSG00000207947|hsa-mir-152 ENSG00000207954|hsa-mir-138-1  
 CATTGGTTC ENSG00000207571|hsa-mir-615  
 CATTGTCAG ENSG00000207635|hsa-mir-499  
 CATTGTCCA ENSG00000207649|hsa-mir-138-2  
 CATTGTCCG ENSG00000207702|hsa-mir-211  
 CATTGTGAC ENSG00000207656|hsa-mir-489  
 CATTGTGCC ENSG00000198981|hsa-mir-29a  
 CATTGTGGA ENSG00000207630|hsa-mir-7-3  
 CATTGTGTA ENSG00000207623|hsa-mir-205  
 CATTGTGTC ENSG00000207955|hsa-mir-219-2  
 CATTGTTCA ENSG00000207731|hsa-mir-506  
 CATTGTTCA Xie:ATTGTT SOX-5  
 CATTGTTTC ENSG00000207649|hsa-mir-138-2  
 CATTGTTTC Xie:ATTGTT SOX-5  
 CATTAAAA ENSG00000207728|hsa-mir-449b  
 CATTAGAAC ENSG00000207926|hsa-mir-135a-1 ENSG00000207745|hsa-mir-17 ENSG00000207610|hsa-mir-19a ENSG00000199149|hsa-mir-20a  
 CATTAGTA ENSG00000207623|hsa-mir-205 ENSG00000207651|hsa-mir-28  
 CATTATAGG ENSG00000207994|hsa-mir-100 ENSG00000207971|hsa-mir-125b-1 ENSG00000198975|hsa-let-7a-2  
 CATTACAGG ENSG00000207947|hsa-mir-152  
 CATTACCCG ENSG00000207728|hsa-mir-449b  
 CATTACCCG Xie:CaNTCCS STAT1  
 CATTACCGA ENSG00000207777|hsa-mir-10a  
 CATTACCGA Xie:CaNTCCS STAT1  
 CATTACCGC ENSG00000208009|hsa-mir-130a  
 CATTACCGC Xie:CaNTCCS STAT1

CATTGGCC ENSG00000207926|hsa-mir-135a-1 ENSG00000207980|hsa-mir-23a ENSG00000209707|hsa-mir-24-2 ENSG00000207808|hsa-mir-27a  
 CATTGGCC ENSG00000207795|hsa-mir-155 ENSG00000207994|hsa-mir-100 ENSG00000207971|hsa-mir-125b-1 ENSG00000198975|hsa-let-7a-2  
 CATTTAAG ENSG00000199032|hsa-mir-425  
 CATTTACA ENSG00000199121|hsa-mir-26b  
 CATTTCGG ENSG00000207731|hsa-mir-506  
 CATTTCGG Xie:AWTTCC Y  
 CATTTGAG ENSG00000207705|hsa-mir-129-1  
 CCAAAGTC ENSG00000207726|hsa-mir-455 ENSG00000207752|hsa-mir-199a-1 ENSG00000207791|hsa-mir-497 ENSG00000207929|hsa-mir-195  
 CCAAAGGC ENSG00000207698|hsa-mir-32  
 CCAAACATC ENSG00000207725|hsa-mir-222 ENSG00000207870|hsa-mir-221  
 CCAAAGTAG ENSG00000207602|hsa-mir-106a ENSG00000207572|hsa-mir-363 ENSG00000207710|hsa-mir-20b  
 CCAAAGTGC ENSG00000211563|hsa-mir-338 ENSG00000207797|hsa-mir-187  
 CCAAAGTTC ENSG00000199077|hsa-mir-129-2 ENSG00000202569|hsa-mir-146b ENSG00000202609|hsa-mir-488  
 CCAAATAAA ENSG00000208036|hsa-mir-106b ENSG00000207547|hsa-mir-25 ENSG00000207757|hsa-mir-93  
 CCAAATGAG ENSG00000207567|hsa-mir-142 ENSG00000208024|hsa-mir-199a-2 ENSG00000207949|hsa-mir-214  
 CCAAATGGC ENSG00000199088|hsa-mir-379 ENSG00000207749|hsa-mir-299 ENSG00000198982|hsa-mir-380 ENSG00000199069|hsa-mir-323 ENSG00000211582|hsa-mir-758 ENSG00000207761|hsa-mir-329-1 ENSG00000194717|hsa-mir-494  
 ENSG00000207743|hsa-mir-495 ENSG00000199020|hsa-mir-381 ENSG00000207754|hsa-mir-487b ENSG00000202560|hsa-mir-539 ENSG00000207993|hsa-mir-134 ENSG00000207961|hsa-mir-496 ENSG00000199015|hsa-mir-377  
 ENSG00000199107|hsa-mir-409 ENSG00000199012|hsa-mir-412 ENSG00000199025|hsa-mir-369 ENSG00000199092|hsa-mir-410  
 CCAAATGGG ENSG00000207980|hsa-mir-23a ENSG00000209707|hsa-mir-24-2 ENSG00000207808|hsa-mir-27a ENSG00000211590|hsa-mir-802  
 CCAAATTAC ENSG00000207550|hsa-mir-99b ENSG00000198972|hsa-let-7e  
 GTAATTTGG Xie:GTAAKTnG NCX  
 CCAAATTGC ENSG00000207935|hsa-mir-204 ENSG00000207933|hsa-mir-9-1  
 CCAACAATA ENSG00000207955|hsa-mir-219-2  
 TATTGTTGG Xie:ATTGTT SOX-5  
 CCAACATCA ENSG00000207692|hsa-mir-592  
 CCAACATGG ENSG00000207567|hsa-mir-142 ENSG00000207717|hsa-mir-551b ENSG00000207954|hsa-mir-138-1 ENSG00000207995|hsa-mir-325  
 CCAACCCAG ENSG00000207596|hsa-mir-194-2 ENSG00000207648|hsa-mir-192 ENSG00000199122|hsa-mir-148b ENSG00000199135|hsa-mir-101-1  
 CCAACCCAGG ENSG00000207695|hsa-mir-184  
 CCAACCCATC ENSG00000207550|hsa-mir-99b ENSG00000198972|hsa-let-7e ENSG00000207745|hsa-mir-17 ENSG00000207610|hsa-mir-19a ENSG00000199149|hsa-mir-20a  
 CCAACCCGC ENSG00000211517|hsa-mir-671  
 CCAACCCGTC ENSG00000207811|hsa-mir-34b ENSG00000207562|hsa-mir-34c  
 CCAACGCAG ENSG00000199024|hsa-mir-103-2  
 CCAACGGAC ENSG00000207728|hsa-mir-449b  
 CCAACGGGC ENSG00000208037|hsa-mir-320  
 CCAACGGTC ENSG00000199032|hsa-mir-425  
 CCAACTTAG ENSG00000207702|hsa-mir-211 ENSG00000207705|hsa-mir-129-1 ENSG00000207739|hsa-mir-218-2 ENSG00000207792|hsa-mir-151  
 CCAACTTCA ENSG00000199038|hsa-mir-210 ENSG00000199088|hsa-mir-379 ENSG00000207749|hsa-mir-299 ENSG00000198982|hsa-mir-380 ENSG00000199069|hsa-mir-323 ENSG00000211582|hsa-mir-758 ENSG00000207761|hsa-mir-329-1  
 ENSG00000194717|hsa-mir-494 ENSG00000207743|hsa-mir-495 ENSG00000199020|hsa-mir-381 ENSG00000207754|hsa-mir-487b ENSG00000202560|hsa-mir-539 ENSG00000207993|hsa-mir-134 ENSG00000207961|hsa-mir-496  
 ENSG00000199015|hsa-mir-377 ENSG00000199107|hsa-mir-409 ENSG00000199012|hsa-mir-412 ENSG00000199025|hsa-mir-369 ENSG00000199092|hsa-mir-410 ENSG00000207797|hsa-mir-187  
 CCAACTTGG ENSG00000199038|hsa-mir-210  
 CCAACTTTC ENSG00000207614|hsa-mir-193a ENSG00000199187|hsa-mir-365-2  
 CCAAGATA ENSG00000198974|hsa-mir-30e ENSG00000207962|hsa-mir-30c-1  
 CCAAGATGA ENSG00000207691|hsa-mir-183 ENSG00000207990|hsa-mir-182 ENSG00000199158|hsa-mir-96  
 CCAAGATGG ENSG00000199036|hsa-mir-219-1  
 CCAAGCAAC ENSG00000199023|hsa-mir-339  
 GTTGCTTGG Xie:GTTGCWGGYAAC MIF-1  
 CCAAGGACG ENSG00000207732|hsa-mir-218-1 ENSG00000207739|hsa-mir-218-2 ENSG00000207811|hsa-mir-34b ENSG00000207562|hsa-mir-34c  
 CCAAGGTCG ENSG00000199090|hsa-mir-326  
 CCAAGGTTTC ENSG00000199077|hsa-mir-129-2  
 CCAAGTAAG ENSG00000199059|hsa-mir-135b  
 CCAAGTCAA ENSG00000199032|hsa-mir-425  
 CCAAGTCAC ENSG00000199161|hsa-mir-126 ENSG00000207635|hsa-mir-499 ENSG00000207789|hsa-mir-26a-2  
 CCAAGTTAC ENSG00000211517|hsa-mir-671 ENSG00000199177|hsa-mir-31  
 CCAATAAAG ENSG00000199122|hsa-mir-148b ENSG00000208005|hsa-mir-503 ENSG00000207784|hsa-mir-542  
 CCAATAAGA ENSG00000207728|hsa-mir-449b  
 CCAATAGCC ENSG00000199023|hsa-mir-339 ENSG00000199059|hsa-mir-135b  
 CCAATATAA ENSG00000207624|hsa-mir-194-1 ENSG00000207590|hsa-mir-215  
 CCAATCCAG ENSG00000207585|hsa-mir-181d ENSG00000202609|hsa-mir-488  
 CCAATCCGG ENSG00000207926|hsa-mir-135a-1  
 CCAATCGCA ENSG00000208017|hsa-mir-140  
 CCAATCGCG ENSG00000207935|hsa-mir-204  
 CCAATCGGA ENSG00000207789|hsa-mir-26a-2  
 CCAATCGGC ENSG00000207638|hsa-mir-99a ENSG00000207863|hsa-mir-125b-2 ENSG00000207777|hsa-mir-10a  
 CCAATCTGG ENSG00000199089|hsa-mir-202 ENSG00000207691|hsa-mir-183 ENSG00000207990|hsa-mir-182 ENSG00000199158|hsa-mir-96  
 CCAATCTGG MATCH:V\$HOXA7\_01 HOXA7  
 CCAATGAAC ENSG00000208036|hsa-mir-106b ENSG00000207547|hsa-mir-25 ENSG00000207757|hsa-mir-93  
 CCAATGACA ENSG00000207947|hsa-mir-152  
 CCAATGGAG ENSG00000199065|hsa-mir-101-2 ENSG00000207623|hsa-mir-205  
 CCAATGGGA ENSG00000207630|hsa-mir-7-3  
 CCAATGTCC ENSG00000207604|hsa-mir-206 ENSG00000199080|hsa-mir-133b  
 CCAATTCAC ENSG00000210741|hsa-mir-196a-1  
 CCAATTCAC ENSG00000207571|hsa-mir-615  
 CCAATCTC ENSG00000199053|hsa-mir-324 ENSG00000207586|hsa-mir-135a-2 ENSG00000211574|hsa-mir-770 ENSG00000208001|hsa-mir-431 ENSG00000199005|hsa-mir-370  
 CCAATTTGG ENSG00000211517|hsa-mir-671  
 CCAATTTGG ENSG00000211517|hsa-mir-671  
 CCACAAAAG ENSG00000207611|hsa-mir-149  
 CCACAAACC ENSG00000199177|hsa-mir-31  
 CCACAAAC ENSG00000199130|hsa-mir-365-1 ENSG00000207939|hsa-mir-223  
 CCACAAGGC ENSG00000207649|hsa-mir-138-2  
 CCACACTTC ENSG00000207596|hsa-mir-194-2 ENSG00000207648|hsa-mir-192  
 CCACAGACA ENSG00000208035|hsa-mir-143  
 CCACATAAA ENSG00000207581|hsa-mir-199b  
 CCACATCAC ENSG00000207691|hsa-mir-183 ENSG00000207990|hsa-mir-182 ENSG00000199158|hsa-mir-96  
 CCACATGCC ENSG00000199088|hsa-mir-379 ENSG00000207749|hsa-mir-299 ENSG00000198982|hsa-mir-380 ENSG00000199069|hsa-mir-323 ENSG00000211582|hsa-mir-758 ENSG00000207761|hsa-mir-329-1 ENSG00000194717|hsa-mir-494  
 ENSG00000207743|hsa-mir-495 ENSG00000199020|hsa-mir-381 ENSG00000207754|hsa-mir-487b ENSG00000202560|hsa-mir-539 ENSG00000207993|hsa-mir-134 ENSG00000207961|hsa-mir-496 ENSG00000199015|hsa-mir-377  
 ENSG00000199107|hsa-mir-409 ENSG00000199012|hsa-mir-412 ENSG00000199025|hsa-mir-369 ENSG00000199092|hsa-mir-410 ENSG00000207695|hsa-mir-184  
 CCACATGGA ENSG00000207950|hsa-mir-296  
 CCACATGGC ENSG00000207809|hsa-mir-139  
 CCACCAACG ENSG00000199161|hsa-mir-126  
 CCACCGGAA ENSG00000207571|hsa-mir-615  
 CCACCTAAG ENSG00000207656|hsa-mir-489 ENSG00000207721|hsa-mir-186

|           |                                |                                |                                |                              |                             |
|-----------|--------------------------------|--------------------------------|--------------------------------|------------------------------|-----------------------------|
| CCACCTACC | ENSG00000208036 hsa-mir-106b   | ENSG00000207547 hsa-mir-25     | ENSG00000207757 hsa-mir-93     | ENSG00000208005 hsa-mir-503  | ENSG00000207784 hsa-mir-542 |
| CCACCTAGG | ENSG00000208017 hsa-mir-140    | ENSG00000211563 hsa-mir-338    | ENSG00000207630 hsa-mir-7-3    |                              |                             |
| CCACCTATA | ENSG00000207571 hsa-mir-615    |                                |                                |                              |                             |
| CCACCTGAG | ENSG00000207692 hsa-mir-592    |                                |                                |                              |                             |
| CCACCTGTA | ENSG00000207721 hsa-mir-186    |                                |                                |                              |                             |
| CCACCTTAC | ENSG00000207955 hsa-mir-219-2  | ENSG00000207571 hsa-mir-615    |                                |                              |                             |
| CCACCTTTA | ENSG00000208035 hsa-mir-143    |                                |                                |                              |                             |
| CCACGAAAC | ENSG00000202569 hsa-mir-146b   |                                |                                |                              |                             |
| CCACGACAA | ENSG00000207726 hsa-mir-455    |                                |                                |                              |                             |
| CCACGCCCA | ENSG00000199038 hsa-mir-210    |                                |                                |                              |                             |
| CCACGCCCA | MATCH:V\$CACD_01 CACD          |                                |                                |                              |                             |
| CCACGCCCC | ENSG00000199032 hsa-mir-425    | ENSG00000207789 hsa-mir-26a-2  |                                |                              |                             |
| CCACGCCCC | MATCH:V\$CACD_01 CACD          |                                |                                |                              |                             |
| CCACGCGGA | ENSG00000199036 hsa-mir-219-1  |                                |                                |                              |                             |
| CCACGCGTC | ENSG00000207739 hsa-mir-218-2  |                                |                                |                              |                             |
| CCACGCTGA | ENSG00000207695 hsa-mir-184    |                                |                                |                              |                             |
| CCACGGTGC | ENSG00000199090 hsa-mir-326    |                                |                                |                              |                             |
| CCACGTCAA | ENSG00000207581 hsa-mir-199b   | ENSG00000208024 hsa-mir-199a-2 | ENSG00000207949 hsa-mir-214    |                              |                             |
| TTGACGTGG | Xie:TGACGTGG ATF6              |                                |                                |                              |                             |
| CCACGTCAA | MATCH:V\$ATF6_01 ATF6          |                                |                                |                              |                             |
| CCACGTGAG | ENSG00000207752 hsa-mir-199a-1 |                                |                                |                              |                             |
| CTGACGTGG | Xie:TGACGTGG ATF6              |                                |                                |                              |                             |
| CCACGTGAG | MATCH:V\$ATF6_01 ATF6          |                                |                                |                              |                             |
| CCACGTCTC | ENSG00000199161 hsa-mir-126    |                                |                                |                              |                             |
| CCACGTGAG | ENSG00000207950 hsa-mir-296    |                                |                                |                              |                             |
| CCACGTGAG | Xie:SCACGTG MYC                |                                |                                |                              |                             |
| CCACGTGGA | ENSG00000207745 hsa-mir-17     | ENSG00000207610 hsa-mir-19a    | ENSG00000199149 hsa-mir-20a    |                              |                             |
| CCACGTGGA | Xie:SCACGTG MYC                |                                |                                |                              |                             |
| TCCACGTGG | Xie:SCACGTG MYC                |                                |                                |                              |                             |
| CCACGTGGC | ENSG00000207745 hsa-mir-17     | ENSG00000207610 hsa-mir-19a    | ENSG00000199149 hsa-mir-20a    |                              |                             |
| CCACGTGGC | Xie:SCACGTG MYC                |                                |                                |                              |                             |
| GCCACGTGG | Xie:SCACGTG MYC                |                                |                                |                              |                             |
| CCACGTGTC | ENSG00000207635 hsa-mir-499    |                                |                                |                              |                             |
| CCACGTGTC | Xie:SCACGTG MYC                |                                |                                |                              |                             |
| CCACGTTTC | ENSG00000198984 hsa-mir-345    | ENSG00000207604 hsa-mir-206    | ENSG00000199080 hsa-mir-133b   |                              |                             |
| CCACTACCG | ENSG00000207656 hsa-mir-489    |                                |                                |                              |                             |
| CCACTAGTC | ENSG00000207732 hsa-mir-218-1  |                                |                                |                              |                             |
| CCACTCACG | ENSG00000207585 hsa-mir-181d   | ENSG00000211563 hsa-mir-338    |                                |                              |                             |
| CCACTGCGA | ENSG00000198984 hsa-mir-345    |                                |                                |                              |                             |
| CCACTTAGC | ENSG00000207745 hsa-mir-17     | ENSG00000207610 hsa-mir-19a    | ENSG00000199149 hsa-mir-20a    |                              |                             |
| CCACTTATA | ENSG00000207571 hsa-mir-615    | ENSG00000207586 hsa-mir-135a-2 |                                |                              |                             |
| CCAGAAGGC | ENSG00000207725 hsa-mir-222    | ENSG00000207870 hsa-mir-221    |                                |                              |                             |
| CCAGACACG | ENSG00000199047 hsa-mir-378    |                                |                                |                              |                             |
| CCAGACCAA | ENSG00000207730 hsa-mir-200b   | ENSG00000207607 hsa-mir-200a   | ENSG00000198976 hsa-mir-429    |                              |                             |
| CCAGAGTAA | ENSG00000207691 hsa-mir-183    | ENSG00000207990 hsa-mir-182    | ENSG00000199158 hsa-mir-96     |                              |                             |
| CCAGAGTCG | ENSG00000199036 hsa-mir-219-1  |                                |                                |                              |                             |
| CCAGAGTGC | ENSG00000207948 hsa-mir-328    |                                |                                |                              |                             |
| CCAGATAAA | ENSG00000207635 hsa-mir-499    | ENSG00000207789 hsa-mir-26a-2  |                                |                              |                             |
| CCAGATAAG | ENSG00000207732 hsa-mir-218-1  |                                |                                |                              |                             |
| CCAGATAGA | ENSG00000199058 hsa-mir-302b   | ENSG00000199169 hsa-mir-367    | ENSG00000199145 hsa-mir-302d   | ENSG00000199102 hsa-mir-302c | ENSG00000207731 hsa-mir-506 |
| CCAGATGCG | ENSG00000207752 hsa-mir-199a-1 |                                |                                |                              |                             |
| CCAGATGTC | ENSG00000198973 hsa-mir-375    | ENSG00000208005 hsa-mir-503    | ENSG00000207784 hsa-mir-542    |                              |                             |
| CCAGCAGTA | ENSG00000199053 hsa-mir-324    |                                |                                |                              |                             |
| CCAGCATGC | ENSG00000199053 hsa-mir-324    | ENSG00000202641 hsa-mir-484    |                                |                              |                             |
| CCAGCATGG | ENSG00000207586 hsa-mir-135a-2 |                                |                                |                              |                             |
| CCAGCCGAA | ENSG00000199032 hsa-mir-425    | ENSG00000207611 hsa-mir-149    |                                |                              |                             |
| CCAGCCTTA | ENSG00000199066 hsa-mir-330    | ENSG00000207819 hsa-mir-9-3    |                                |                              |                             |
| CCAGCGGCA | ENSG00000208024 hsa-mir-199a-2 | ENSG00000207949 hsa-mir-214    |                                |                              |                             |
| CCAGCTAAA | ENSG00000207809 hsa-mir-139    |                                |                                |                              |                             |
| CCAGGAATA | ENSG00000208005 hsa-mir-503    | ENSG00000207784 hsa-mir-542    |                                |                              |                             |
| CCAGGATTC | ENSG00000207630 hsa-mir-7-3    |                                |                                |                              |                             |
| CCAGGGTGC | ENSG00000207954 hsa-mir-138-1  | ENSG00000211574 hsa-mir-770    | ENSG00000208001 hsa-mir-431    | ENSG00000199005 hsa-mir-370  |                             |
| CCAGGGTTA | ENSG00000198974 hsa-mir-30e    | ENSG00000207962 hsa-mir-30c-1  |                                |                              |                             |
| CCAGGTAGC | ENSG00000207624 hsa-mir-194-1  | ENSG00000207590 hsa-mir-215    |                                |                              |                             |
| CCAGTGCG  | ENSG00000207739 hsa-mir-218-2  |                                |                                |                              |                             |
| CCAGTAGGC | ENSG00000199032 hsa-mir-425    |                                |                                |                              |                             |
| CCAGTCAAG | ENSG00000202609 hsa-mir-488    |                                |                                |                              |                             |
| CCAGTGACC | ENSG00000198974 hsa-mir-30e    | ENSG00000207962 hsa-mir-30c-1  | ENSG00000199071 hsa-mir-423    | ENSG00000207597 hsa-mir-490  |                             |
| CCAGTGTC  | ENSG00000199090 hsa-mir-326    | ENSG00000198974 hsa-mir-30e    | ENSG00000207962 hsa-mir-30c-1  |                              |                             |
| CCAGTAAA  | ENSG00000199071 hsa-mir-423    |                                |                                |                              |                             |
| CCAGTTTCA | ENSG00000207568 hsa-mir-203    |                                |                                |                              |                             |
| CCATAAACA | ENSG00000199177 hsa-mir-31     |                                |                                |                              |                             |
| CCATAAATC | ENSG00000207586 hsa-mir-135a-2 |                                |                                |                              |                             |
| CCATAATTA | ENSG00000199085 hsa-mir-148a   | ENSG00000207638 hsa-mir-99a    | ENSG00000207863 hsa-mir-125b-2 |                              |                             |
| CCATACTAA | ENSG00000207651 hsa-mir-28     |                                |                                |                              |                             |
| CCATAGAGA | ENSG00000202569 hsa-mir-146b   | ENSG00000211517 hsa-mir-671    |                                |                              |                             |
| CCATAGCAA | ENSG00000207585 hsa-mir-181d   |                                |                                |                              |                             |
| CCATAGCTA | ENSG00000207939 hsa-mir-223    |                                |                                |                              |                             |
| CCATATAAG | ENSG00000207717 hsa-mir-551b   |                                |                                |                              |                             |
| CCATATAAG | Xie:GnCCAWATAWGGM              | SRF                            |                                |                              |                             |
| CCATATGCA | ENSG00000207649 hsa-mir-138-2  |                                |                                |                              |                             |
| CCATATGGA | ENSG00000199172 hsa-mir-331    |                                |                                |                              |                             |
| CCATATGGC | ENSG00000207728 hsa-mir-449b   |                                |                                |                              |                             |
| CCATATTTA | ENSG00000199017 hsa-mir-1-1    | ENSG00000207764 hsa-mir-133a-2 | ENSG00000199177 hsa-mir-31     |                              |                             |
| CCATCACAC | ENSG00000199017 hsa-mir-1-1    | ENSG00000207764 hsa-mir-133a-2 | ENSG00000207933 hsa-mir-9-1    |                              |                             |
| CCATCACTA | ENSG00000207571 hsa-mir-615    |                                |                                |                              |                             |
| CCATCAGGG | ENSG00000199036 hsa-mir-219-1  | ENSG00000207692 hsa-mir-592    |                                |                              |                             |
| CCATCCGGC | ENSG00000207568 hsa-mir-203    | ENSG00000207955 hsa-mir-219-2  |                                |                              |                             |
| CCATCCGGC | ENSG00000207726 hsa-mir-455    | ENSG00000207751 hsa-mir-130b   |                                |                              |                             |
| CCATCGCGG | ENSG00000199077 hsa-mir-129-2  | ENSG00000207550 hsa-mir-99b    | ENSG00000198972 hsa-let-7e     |                              |                             |
| CCATCGGCG | ENSG00000207739 hsa-mir-218-2  |                                |                                |                              |                             |

CCATCGTGC ENSG00000207585|hsa-mir-181d  
 CCATCTAAA ENSG00000202609|hsa-mir-488  
 CCATCTTAC ENSG00000199135|hsa-mir-101-1  
 CCATCTTGA ENSG00000207809|hsa-mir-139  
 CCATCTTGC ENSG00000207623|hsa-mir-205  
 CCATCTTTA ENSG00000199043|hsa-mir-335  
 CCATGACAA ENSG00000207618|hsa-mir-144 ENSG00000207794|hsa-mir-451  
 CCATGGAAA ENSG00000207751|hsa-mir-130b  
 CCATGGCAA ENSG00000199024|hsa-mir-103-2  
 CCATGGCGG ENSG00000207702|hsa-mir-211  
 CCATGGGGA ENSG00000199122|hsa-mir-148b  
 CCATGTAAA ENSG00000211590|hsa-mir-802  
 CCATGTGAC ENSG00000198984|hsa-mir-345  
 CCATGTGAG ENSG00000202569|hsa-mir-146b  
 CCATGTGCC ENSG00000207702|hsa-mir-211 ENSG00000199088|hsa-mir-379 ENSG00000207749|hsa-mir-299 ENSG00000198982|hsa-mir-380 ENSG00000199069|hsa-mir-323 ENSG00000211582|hsa-mir-758 ENSG00000207761|hsa-mir-329-1  
 ENSG00000194717|hsa-mir-494 ENSG00000207743|hsa-mir-495 ENSG00000199020|hsa-mir-381 ENSG00000207754|hsa-mir-487b ENSG00000202560|hsa-mir-539 ENSG00000207993|hsa-mir-134 ENSG00000207961|hsa-mir-496  
 ENSG00000199015|hsa-mir-377 ENSG00000199107|hsa-mir-409 ENSG00000199012|hsa-mir-412 ENSG00000199025|hsa-mir-369 ENSG00000199092|hsa-mir-410  
 CCATGTTC ENSG00000207791|hsa-mir-497 ENSG00000207929|hsa-mir-195  
 CCATTAATC ENSG00000207994|hsa-mir-100 ENSG00000207971|hsa-mir-125b-1 ENSG00000198975|hsa-let-7a-2  
 CCATTAGCC ENSG00000199023|hsa-mir-339  
 CCATTAGCG ENSG00000207744|hsa-mir-10b  
 CCATTCAAA ENSG00000207819|hsa-mir-9-3  
 CCATTCACC ENSG00000199165|hsa-let-7a-1 ENSG00000199072|hsa-let-7f-1 ENSG00000199133|hsa-let-7d  
 CCATTCACG ENSG00000211563|hsa-mir-338  
 CCATTCAGC ENSG00000207732|hsa-mir-218-1  
 CCATTCATA ENSG00000207695|hsa-mir-184  
 CCATTCATC ENSG00000207950|hsa-mir-296  
 CCATTGACG ENSG00000199017|hsa-mir-1-1 ENSG00000207764|hsa-mir-133a-2  
 CCATTGGAC ENSG00000199023|hsa-mir-339  
 CCATTGGAG ENSG00000207726|hsa-mir-455  
 CCATTGGCC ENSG00000207630|hsa-mir-7-3  
 CCATTGGCC Xie:YSATTGGYY NF-Y  
 CCATTGTAA ENSG00000207819|hsa-mir-9-3  
 CCATTGTAC ENSG00000207581|hsa-mir-199b  
 CCATTGTCA ENSG00000207635|hsa-mir-499 ENSG00000211574|hsa-mir-770 ENSG00000208001|hsa-mir-431 ENSG00000199005|hsa-mir-370  
 CCATTGTGC ENSG00000198981|hsa-mir-29a  
 CCATTGTTC ENSG00000207604|hsa-mir-206 ENSG00000199080|hsa-mir-133b  
 CCATTGTTC Xie:ATTGTT SOX-5  
 CCATTTAAA ENSG00000207728|hsa-mir-449b  
 CCATTTACC ENSG00000207718|hsa-mir-15a ENSG00000208006|hsa-mir-16-1  
 CCATTTCTA ENSG00000199077|hsa-mir-129-2  
 CCATTTGGA ENSG00000207811|hsa-mir-34b ENSG00000207562|hsa-mir-34c ENSG00000211590|hsa-mir-802  
 CCATTTGGC ENSG00000207926|hsa-mir-135a-1 ENSG00000207980|hsa-mir-23a ENSG00000209707|hsa-mir-24-2 ENSG00000207808|hsa-mir-27a  
 CCATTTTAA ENSG00000199032|hsa-mir-425 ENSG00000207585|hsa-mir-181d  
 CCCAACCC ENSG00000198995|hsa-mir-340  
 CCCAACCGG ENSG00000211517|hsa-mir-671  
 CCCAACTTA ENSG00000207702|hsa-mir-211 ENSG00000207739|hsa-mir-218-2 ENSG00000207792|hsa-mir-151 ENSG00000207745|hsa-mir-17 ENSG00000207610|hsa-mir-19a ENSG00000199149|hsa-mir-20a  
 CCCAAGTTC ENSG00000199088|hsa-mir-379 ENSG00000207749|hsa-mir-299 ENSG00000198982|hsa-mir-380 ENSG00000199069|hsa-mir-323 ENSG00000211582|hsa-mir-758 ENSG00000207761|hsa-mir-329-1 ENSG00000207761|hsa-mir-496 ENSG00000194717|hsa-mir-494  
 ENSG00000207743|hsa-mir-495 ENSG00000199020|hsa-mir-381 ENSG00000207754|hsa-mir-487b ENSG00000202560|hsa-mir-539 ENSG00000207993|hsa-mir-134 ENSG00000207961|hsa-mir-496 ENSG00000199015|hsa-mir-377  
 ENSG00000199107|hsa-mir-409 ENSG00000199012|hsa-mir-412 ENSG00000199025|hsa-mir-369 ENSG00000199092|hsa-mir-410  
 CCCAATCAG ENSG00000207611|hsa-mir-149  
 CCCAATCGG ENSG00000207777|hsa-mir-10a  
 CCCAATGAG ENSG00000199122|hsa-mir-148b  
 CCCAATGGC ENSG00000199071|hsa-mir-423  
 CCCAATTTAA ENSG00000207795|hsa-mir-155  
 CCCACAAGG ENSG00000207567|hsa-mir-142 ENSG00000207649|hsa-mir-138-2  
 CCCACAATC ENSG00000207604|hsa-mir-206 ENSG00000199080|hsa-mir-133b ENSG00000207698|hsa-mir-32  
 CCCACATAA ENSG00000199036|hsa-mir-219-1 ENSG00000207744|hsa-mir-10b  
 CCCACATCA ENSG00000202569|hsa-mir-146b  
 CCCACATGA ENSG00000207702|hsa-mir-211 ENSG00000207950|hsa-mir-296  
 CCCACATGC ENSG00000207695|hsa-mir-184  
 CCCACATTA ENSG00000199065|hsa-mir-101-2  
 CCCACCCCC ENSG00000207585|hsa-mir-181d ENSG00000207623|hsa-mir-205  
 GGGGTGGG Xie:GRGGSTGGG CAC-BP  
 CCCACCCCC MATCH:V\$CACD\_01 CACD  
 CCCACTTGC ENSG00000207947|hsa-mir-152  
 CCCAGACCG ENSG00000207948|hsa-mir-328 ENSG00000210741|hsa-mir-196a-1  
 CCCAGATAA ENSG00000207732|hsa-mir-218-1  
 CCCAGATCG ENSG00000208005|hsa-mir-503 ENSG00000207784|hsa-mir-542  
 CCCAGCCCC ENSG00000207550|hsa-mir-99b ENSG00000198972|hsa-let-7e ENSG00000207568|hsa-mir-203  
 GGGGCTGGG Xie:GRGGSTGGG CAC-BP  
 CCCAGCTAA ENSG00000199085|hsa-mir-148a ENSG00000207809|hsa-mir-139  
 CCCAGGATA ENSG00000198986|hsa-let-7a-3 ENSG00000207875|hsa-let-7b  
 CCCAGGTAA ENSG00000199023|hsa-mir-339 ENSG00000199157|hsa-mir-208 ENSG00000207713|hsa-mir-200c ENSG00000207708|hsa-mir-141  
 CCCAGGTAC ENSG00000202569|hsa-mir-146b  
 CCCAGTGAC ENSG00000198974|hsa-mir-30e ENSG00000207962|hsa-mir-30c-1 ENSG00000199177|hsa-mir-31  
 CCCAGTTGA ENSG00000199135|hsa-mir-101-1 ENSG00000208024|hsa-mir-199a-2 ENSG00000207949|hsa-mir-214  
 CCCATCCGG ENSG00000207726|hsa-mir-455  
 CCCATGCAA ENSG00000207730|hsa-mir-200b ENSG00000207607|hsa-mir-200a ENSG00000198976|hsa-mir-429 ENSG00000198974|hsa-mir-30e ENSG00000207962|hsa-mir-30c-1  
 CCCATGGAA ENSG00000199122|hsa-mir-148b  
 CCCATGGGC ENSG00000207692|hsa-mir-592  
 CCCATGGTC ENSG00000207791|hsa-mir-497 ENSG00000207929|hsa-mir-195  
 CCCATGTGA ENSG00000199088|hsa-mir-379 ENSG00000207749|hsa-mir-299 ENSG00000198982|hsa-mir-380 ENSG00000199069|hsa-mir-323 ENSG00000211582|hsa-mir-758 ENSG00000207761|hsa-mir-329-1 ENSG00000194717|hsa-mir-494  
 ENSG00000207743|hsa-mir-495 ENSG00000199020|hsa-mir-381 ENSG00000207754|hsa-mir-487b ENSG00000202560|hsa-mir-539 ENSG00000207993|hsa-mir-134 ENSG00000207961|hsa-mir-496 ENSG00000199015|hsa-mir-377  
 ENSG00000199107|hsa-mir-409 ENSG00000199012|hsa-mir-412 ENSG00000199025|hsa-mir-369 ENSG00000199092|hsa-mir-410  
 CCCATTAGC ENSG00000207597|hsa-mir-490  
 CCCATTGAC ENSG00000208036|hsa-mir-106b ENSG00000207547|hsa-mir-25 ENSG00000207757|hsa-mir-93  
 CCCATTGCA ENSG00000207597|hsa-mir-490  
 CCCATTGGA ENSG00000199023|hsa-mir-339 ENSG00000207726|hsa-mir-455  
 CCCATTGGC ENSG00000207630|hsa-mir-7-3  
 CCCATTGTA ENSG00000207581|hsa-mir-199b

CCATTGTC ENSG00000207635|hsa-mir-499 ENSG00000211574|hsa-mir-770 ENSG00000208001|hsa-mir-431 ENSG00000199005|hsa-mir-370  
 CCCCACCG ENSG00000207567|hsa-mir-142 ENSG00000211517|hsa-mir-671  
 CCCCATCG ENSG00000207777|hsa-mir-10a  
 CCCCATGA ENSG00000199122|hsa-mir-148b ENSG00000207731|hsa-mir-506  
 CCCCCTAA ENSG00000199122|hsa-mir-148b  
 CCCCCTTA ENSG00000207571|hsa-mir-615  
 CCCCAGTAG ENSG00000199065|hsa-mir-101-2  
 CCCCATAGG ENSG00000207926|hsa-mir-135a-1  
 CCCCATGGA ENSG00000199122|hsa-mir-148b  
 CCCCATTAA ENSG00000207602|hsa-mir-106a ENSG00000207572|hsa-mir-363 ENSG00000207710|hsa-mir-20b  
 CCCCATTGA ENSG00000199036|hsa-mir-219-1  
 CCCCACAG ENSG00000207581|hsa-mir-199b  
 CCCCAGAC ENSG00000207948|hsa-mir-328 ENSG00000207623|hsa-mir-205  
 CCCCAGAG ENSG00000198986|hsa-let-7a-3 ENSG00000207875|hsa-let-7b ENSG00000207635|hsa-mir-499  
 CCCCAGAGA ENSG00000207792|hsa-mir-151  
 CCCCCTAAC ENSG00000208037|hsa-mir-320 ENSG00000210741|hsa-mir-196a-1  
 CCCCCTGAA ENSG00000208024|hsa-mir-199a-2 ENSG00000207949|hsa-mir-214  
 CCCCCTGGC ENSG00000208005|hsa-mir-503 ENSG00000207784|hsa-mir-542  
 CCCCCTCCC ENSG00000198974|hsa-mir-30e ENSG00000207962|hsa-mir-30c-1  
 GGGCGGGG Xie:GGGCGGGG SP-1  
 CCCCCTAG ENSG00000198973|hsa-mir-375  
 CCCCAGATA ENSG00000207777|hsa-mir-10a  
 CCCCAGGCG ENSG00000207568|hsa-mir-203  
 CCCCCTCAG ENSG00000199017|hsa-mir-1-1 ENSG00000207764|hsa-mir-133a-2 ENSG00000207635|hsa-mir-499  
 CCCCCTGAG ENSG00000207635|hsa-mir-499  
 CCCCCTGTC ENSG00000207789|hsa-mir-26a-2 ENSG00000199088|hsa-mir-379 ENSG00000207749|hsa-mir-299 ENSG00000198982|hsa-mir-380 ENSG00000199069|hsa-mir-323 ENSG00000211582|hsa-mir-758 ENSG00000207761|hsa-mir-329-1  
 ENSG00000194717|hsa-mir-494 ENSG00000207743|hsa-mir-495 ENSG00000199020|hsa-mir-381 ENSG00000207754|hsa-mir-487b ENSG00000202560|hsa-mir-539 ENSG00000207993|hsa-mir-134 ENSG00000207961|hsa-mir-496  
 ENSG00000199015|hsa-mir-377 ENSG00000199107|hsa-mir-409 ENSG00000199012|hsa-mir-412 ENSG00000199025|hsa-mir-369 ENSG00000199092|hsa-mir-410  
 CCCCCTACG ENSG00000198984|hsa-mir-345  
 CCCCCTCTTA ENSG00000199077|hsa-mir-129-2 ENSG00000202569|hsa-mir-146b  
 CCCCCTGAGC ENSG00000207571|hsa-mir-615  
 CCCCCTGTCC ENSG00000199043|hsa-mir-335  
 CCCCCTGTCC ENSG00000202641|hsa-mir-484  
 CCCCCTGTGA ENSG00000207692|hsa-mir-592  
 CCCCCTTAGC ENSG00000198973|hsa-mir-375  
 CCCCCTTAGG ENSG00000207617|hsa-mir-24-1 ENSG00000208009|hsa-mir-130a  
 CCCCCTTAGG ENSG00000207567|hsa-mir-142  
 CCCCCTTTCG ENSG00000198974|hsa-mir-30e ENSG00000207962|hsa-mir-30c-1  
 CCCCAGAAC ENSG00000198973|hsa-mir-375  
 CCCCAGCGG ENSG00000208036|hsa-mir-106b ENSG00000207547|hsa-mir-25 ENSG00000207757|hsa-mir-93  
 CCCCAGTGC ENSG00000208017|hsa-mir-140  
 CCCCAGCCG ENSG00000207698|hsa-mir-32  
 CCCCAGCCG ENSG00000198973|hsa-mir-375  
 CCCCAGCCG ENSG00000199038|hsa-mir-210  
 CCCCAGCCG MATCH:V\$ETF\_Q6 ETF  
 CCCCAGCCG ENSG00000207792|hsa-mir-151  
 CCCCAGAGA ENSG00000208017|hsa-mir-140 ENSG00000208009|hsa-mir-130a  
 CCCCAGAGA Xie:vCCGGAAGnGCR GABP  
 CCCCAGATGA ENSG00000207596|hsa-mir-194-2 ENSG00000207648|hsa-mir-192  
 CCCCAGCAA ENSG00000207726|hsa-mir-455  
 CCCCAGCCG ENSG00000198973|hsa-mir-375  
 CCCCAGTAC ENSG00000199090|hsa-mir-326  
 CCCCATATG ENSG00000199038|hsa-mir-210  
 CCCCCTCAGC ENSG00000207751|hsa-mir-130b  
 CCCCCTGAGC ENSG00000199089|hsa-mir-202 ENSG00000207635|hsa-mir-499 ENSG00000208009|hsa-mir-130a  
 CCCCCTGCAC ENSG00000207732|hsa-mir-218-1  
 CCCCCTAAAGA ENSG00000198984|hsa-mir-345 ENSG00000199043|hsa-mir-335  
 CCCCCTAATCC ENSG00000199122|hsa-mir-148b  
 CCCCCTACTTA ENSG00000198974|hsa-mir-30e ENSG00000207962|hsa-mir-30c-1 ENSG00000207651|hsa-mir-28  
 CCCCCTATTA ENSG00000199130|hsa-mir-365-1  
 CCCCCTCCCC ENSG00000199059|hsa-mir-135b  
 GGGGAGGG Xie:GGGAGGG MAZ  
 CCCCCTCCCC MATCH:V\$MAZ\_Q6 MAZ  
 CCCCCTCCGAG ENSG00000199088|hsa-mir-379 ENSG00000207749|hsa-mir-299 ENSG00000198982|hsa-mir-380 ENSG00000199069|hsa-mir-323 ENSG00000211582|hsa-mir-758 ENSG00000207761|hsa-mir-329-1 ENSG00000194717|hsa-mir-494  
 ENSG00000207743|hsa-mir-495 ENSG00000199020|hsa-mir-381 ENSG00000207754|hsa-mir-487b ENSG00000202560|hsa-mir-539 ENSG00000207993|hsa-mir-134 ENSG00000207961|hsa-mir-496 ENSG00000199015|hsa-mir-377  
 ENSG00000199107|hsa-mir-409 ENSG00000199012|hsa-mir-412 ENSG00000199025|hsa-mir-369 ENSG00000199092|hsa-mir-410  
 CCCCCTCCG ENSG00000198973|hsa-mir-375  
 CCCCCTCCTC ENSG00000198986|hsa-let-7a-3 ENSG00000207875|hsa-let-7b  
 CCCCCTCGAAG ENSG00000202641|hsa-mir-484  
 CCCCCTCGGTA ENSG00000199085|hsa-mir-148a  
 CCCCCTCGTGC ENSG00000198995|hsa-mir-340  
 CCCCCTTAGG ENSG00000207980|hsa-mir-23a ENSG00000209707|hsa-mir-24-2 ENSG00000207808|hsa-mir-27a ENSG00000207939|hsa-mir-223  
 CCCCCTTTAA ENSG00000202569|hsa-mir-146b  
 CCCCCTTTAC ENSG00000199165|hsa-let-7a-1 ENSG00000199072|hsa-let-7f-1 ENSG00000199133|hsa-let-7d  
 CCCCCTTTGA ENSG00000207550|hsa-mir-99b ENSG00000198972|hsa-let-7e  
 CCCCCTGACAA ENSG00000207635|hsa-mir-499 ENSG00000207717|hsa-mir-551b  
 CCCCCTGACCA ENSG00000207995|hsa-mir-325  
 CCCCCTGATCA ENSG00000207635|hsa-mir-499 ENSG00000207954|hsa-mir-138-1  
 CCCCCTGCCAA ENSG00000207567|hsa-mir-142 ENSG00000198981|hsa-mir-29a  
 CCCCCTGCTAA ENSG00000198973|hsa-mir-375 ENSG00000207728|hsa-mir-449b  
 CCCCCTGGCGG ENSG00000198987|hsa-mir-16-2 ENSG00000207954|hsa-mir-138-1  
 CCCCCTGTCCG ENSG00000202641|hsa-mir-484  
 CCCCCTGTTC ENSG00000207728|hsa-mir-449b  
 CCCCCTGTGA ENSG00000199023|hsa-mir-339  
 CCCCCTTTTA ENSG00000207692|hsa-mir-592  
 CCCCCTAAAG ENSG00000199172|hsa-mir-331  
 CCCCCTTAGCA ENSG00000198973|hsa-mir-375  
 CCCCCTTATAA ENSG00000207795|hsa-mir-155  
 CCCCCTTGCAA ENSG00000207638|hsa-mir-99a ENSG00000207863|hsa-mir-125b-2  
 CCCCCTTGCTC ENSG00000199088|hsa-mir-379 ENSG00000207749|hsa-mir-299 ENSG00000198982|hsa-mir-380 ENSG00000199069|hsa-mir-323 ENSG00000211582|hsa-mir-758 ENSG00000207761|hsa-mir-329-1 ENSG00000194717|hsa-mir-494  
 ENSG00000207743|hsa-mir-495 ENSG00000199020|hsa-mir-381 ENSG00000207754|hsa-mir-487b ENSG00000202560|hsa-mir-539 ENSG00000207993|hsa-mir-134 ENSG00000207961|hsa-mir-496 ENSG00000199015|hsa-mir-377



CCGGCGGTA ENSG00000207955|hsa-mir-219-2  
 CCGGTACC ENSG00000207571|hsa-mir-615  
 CCGGAAAC ENSG00000207586|hsa-mir-135a-2  
 CCGGGAATA ENSG00000199085|hsa-mir-148a  
 CCGGATGC ENSG00000199090|hsa-mir-326  
 CCGGGTAG ENSG00000207617|hsa-mir-24-1 ENSG00000207935|hsa-mir-204  
 CCGGTATA ENSG00000199017|hsa-mir-1-1 ENSG00000207764|hsa-mir-133a-2  
 CCGGTACAC ENSG00000199066|hsa-mir-330 ENSG00000208017|hsa-mir-140  
 CCGGTACAG ENSG00000208017|hsa-mir-140  
 CCGGTGCGA ENSG00000207568|hsa-mir-203  
 CCGGTGAC ENSG00000207617|hsa-mir-24-1  
 CCGGTCCAC ENSG00000199161|hsa-mir-126  
 CCGGTGACG ENSG00000199032|hsa-mir-425  
 CCGGTGAGC ENSG00000207819|hsa-mir-9-3 ENSG00000208017|hsa-mir-140  
 CCGGTGCGA ENSG00000207611|hsa-mir-149  
 CCGTATGCA ENSG00000199038|hsa-mir-210  
 CCGTCAGCG ENSG00000198984|hsa-mir-345  
 CCGTCAGTC ENSG00000207635|hsa-mir-499  
 CCGTCGCCA ENSG00000199038|hsa-mir-210  
 CCGTCTCTA ENSG00000211517|hsa-mir-671  
 CCGTGACGC ENSG00000199071|hsa-mir-423  
 CCGTGCGCA ENSG00000199090|hsa-mir-326  
 CCGTGCGTC ENSG00000207819|hsa-mir-9-3  
 CCGTGGACA ENSG00000211574|hsa-mir-770 ENSG00000208001|hsa-mir-431 ENSG00000199005|hsa-mir-370  
 CCGTGGTAC ENSG00000207581|hsa-mir-199b  
 CCGTGGTGC ENSG00000207705|hsa-mir-129-1 ENSG00000207926|hsa-mir-135a-1  
 CCGTTGCCA ENSG00000207585|hsa-mir-181d  
 CCGTTGCCA MATCH:V\$RFX\_Q6 RFX  
 CCGTTGGGA ENSG00000199077|hsa-mir-129-2  
 CCGTTTAAAC ENSG00000199085|hsa-mir-148a  
 CCGTTTACA ENSG00000207777|hsa-mir-10a ENSG00000207995|hsa-mir-325  
 CCTAAAAAG ENSG00000207955|hsa-mir-219-2  
 CCTAAAGAG ENSG00000207752|hsa-mir-199a-1 ENSG00000199122|hsa-mir-148b  
 CCTAAAGCC ENSG00000199130|hsa-mir-365-1  
 CCTAAATCC ENSG00000207604|hsa-mir-206 ENSG00000199080|hsa-mir-133b  
 CCTACAAC ENSG00000207789|hsa-mir-26a-2  
 CCTAAGGAG ENSG00000199088|hsa-mir-379 ENSG00000207749|hsa-mir-299 ENSG00000198982|hsa-mir-380 ENSG00000199069|hsa-mir-323 ENSG00000211582|hsa-mir-758 ENSG00000207761|hsa-mir-329-1 ENSG00000194717|hsa-mir-494  
 ENSG00000207743|hsa-mir-495 ENSG00000199020|hsa-mir-381 ENSG00000207754|hsa-mir-487b ENSG00000202560|hsa-mir-539 ENSG00000207993|hsa-mir-134 ENSG00000207961|hsa-mir-496 ENSG00000199015|hsa-mir-377  
 ENSG00000199107|hsa-mir-409 ENSG00000199012|hsa-mir-412 ENSG00000199025|hsa-mir-369 ENSG00000199092|hsa-mir-410  
 CCTAATAAG ENSG00000208037|hsa-mir-320 ENSG00000199165|hsa-let-7a-1 ENSG00000199072|hsa-let-7f-1 ENSG00000199133|hsa-let-7d  
 CCTAATAGG ENSG00000199090|hsa-mir-326  
 CCTAATTAC ENSG00000207638|hsa-mir-99a ENSG00000207863|hsa-mir-125b-2  
 GTAATTAGG Xie:GTAAKTng NCX  
 CCTAATTGC ENSG00000207617|hsa-mir-24-1 ENSG00000207702|hsa-mir-211  
 CCTACAGAC ENSG00000199121|hsa-mir-26b  
 CCTACCAGA ENSG00000207947|hsa-mir-152  
 CCTACCATC ENSG00000199004|hsa-mir-21  
 CCTACCCTGC ENSG00000208005|hsa-mir-503 ENSG00000207784|hsa-mir-542  
 CCTACTGGC ENSG00000199032|hsa-mir-425  
 CCTACTTAA ENSG00000199082|hsa-mir-342  
 CCTAGAGGA ENSG00000207731|hsa-mir-506 ENSG00000207933|hsa-mir-9-1  
 CCTAGTGGA ENSG00000207618|hsa-mir-144 ENSG00000207794|hsa-mir-451 ENSG00000207731|hsa-mir-506  
 CCTAGTGTC ENSG00000207581|hsa-mir-199b  
 CCTATAAAA ENSG00000207953|hsa-mir-212  
 CCTATAGCA ENSG00000198981|hsa-mir-29a ENSG00000207718|hsa-mir-15a ENSG00000208006|hsa-mir-16-1  
 CCTATCAGA ENSG00000199077|hsa-mir-129-2  
 CCTATCAGC ENSG00000207571|hsa-mir-615 ENSG00000207995|hsa-mir-325  
 CCTATCTCC ENSG00000199157|hsa-mir-208 ENSG00000207691|hsa-mir-182 ENSG00000199158|hsa-mir-96  
 CCTATCTGC ENSG00000199058|hsa-mir-302b ENSG00000199169|hsa-mir-367 ENSG00000199145|hsa-mir-302d ENSG00000199102|hsa-mir-302c ENSG00000207790|hsa-mir-29b-2 ENSG00000207966|hsa-mir-29c  
 CCTATGCGC ENSG00000207571|hsa-mir-615 ENSG00000208005|hsa-mir-503 ENSG00000207784|hsa-mir-542  
 CCTATGGCA ENSG00000207713|hsa-mir-200c ENSG00000207708|hsa-mir-141  
 CCTATTAGA ENSG00000207995|hsa-mir-325  
 CCTCACAAAC ENSG00000208035|hsa-mir-143 ENSG00000207604|hsa-mir-206 ENSG00000199080|hsa-mir-133b  
 CCTCACGAC ENSG00000198981|hsa-mir-29a ENSG00000199122|hsa-mir-148b  
 CCTCATAAA ENSG00000207596|hsa-mir-194-2 ENSG00000207648|hsa-mir-192 ENSG00000198987|hsa-mir-16-2 ENSG00000207717|hsa-mir-551b  
 CCTCATCAA ENSG00000207651|hsa-mir-28  
 CCTCATTTGA ENSG00000207980|hsa-mir-23a ENSG00000207907|hsa-mir-24-2 ENSG00000207808|hsa-mir-27a  
 CCTCATTTGC ENSG00000207777|hsa-mir-10a  
 CCTCCCCCG ENSG00000207865|hsa-mir-34a  
 CCTCCCCGA ENSG00000207571|hsa-mir-615  
 CCTCCGCCG ENSG00000198973|hsa-mir-375 ENSG00000199038|hsa-mir-210  
 CCTCCGCCG ENSG00000207777|hsa-mir-10a  
 CCTCCGGAA ENSG00000207585|hsa-mir-181d  
 CCTCCGGCC ENSG00000207623|hsa-mir-205  
 CCTCCGGGA ENSG00000207571|hsa-mir-615  
 CCTCCGTAC ENSG00000207611|hsa-mir-149 ENSG00000207789|hsa-mir-26a-2 ENSG00000211563|hsa-mir-338  
 CCTCCGTCA ENSG00000198984|hsa-mir-345  
 CCTCCGTGC ENSG00000211563|hsa-mir-338 ENSG00000207777|hsa-mir-10a  
 CCTCCTTAC ENSG00000207789|hsa-mir-26a-2 ENSG00000207744|hsa-mir-10b  
 CCTCGAAGG ENSG00000202641|hsa-mir-484  
 CCTCGCCCA ENSG00000207797|hsa-mir-187  
 CCTCGGTTA ENSG00000207614|hsa-mir-193a ENSG00000199187|hsa-mir-365-2  
 CCTCTGACG ENSG00000207953|hsa-mir-212  
 CCTCTTAAA ENSG00000207702|hsa-mir-211  
 CCTCTTAAC ENSG00000202569|hsa-mir-146b ENSG00000207618|hsa-mir-144 ENSG00000207794|hsa-mir-451  
 CCTCTTATA ENSG00000207602|hsa-mir-106a ENSG00000207572|hsa-mir-363 ENSG00000207710|hsa-mir-20b  
 CCTCTTATC ENSG00000199077|hsa-mir-129-2  
 CCTCTTCCG ENSG00000208017|hsa-mir-140 ENSG00000211517|hsa-mir-671  
 CCTCTTGAC ENSG00000207782|hsa-mir-150  
 CCTGAATAA ENSG00000202569|hsa-mir-146b  
 CCTGACAAC ENSG00000207717|hsa-mir-551b



|            |                                |                               |                              |                              |                               |
|------------|--------------------------------|-------------------------------|------------------------------|------------------------------|-------------------------------|
| CCTGACAAG  | ENSG00000199053 hsa-mir-324    | ENSG00000199059 hsa-mir-135b  |                              |                              |                               |
| CCTGACGCA  | ENSG00000199089 hsa-mir-202    |                               |                              |                              |                               |
| CCTGACGCG  | ENSG00000199090 hsa-mir-326    | ENSG00000207732 hsa-mir-218-1 |                              |                              |                               |
| CCTGACTAC  | ENSG00000207728 hsa-mir-449b   |                               |                              |                              |                               |
| CCTGAGTTA  | ENSG00000207586 hsa-mir-135a-2 | ENSG00000207717 hsa-mir-551b  | ENSG00000207797 hsa-mir-187  |                              |                               |
| CCTGATAGC  | ENSG00000210741 hsa-mir-196a-1 |                               |                              |                              |                               |
| CCTGATGGA  | ENSG00000207797 hsa-mir-187    |                               |                              |                              |                               |
| CCTGATTTAA | ENSG00000207705 hsa-mir-129-1  | ENSG00000199088 hsa-mir-379   | ENSG00000207749 hsa-mir-299  | ENSG00000198982 hsa-mir-380  | ENSG00000199069 hsa-mir-323   |
|            | ENSG00000194717 hsa-mir-494    | ENSG00000207743 hsa-mir-495   | ENSG00000199020 hsa-mir-381  | ENSG00000207754 hsa-mir-487b | ENSG00000202560 hsa-mir-539   |
|            | ENSG00000199015 hsa-mir-377    | ENSG00000199107 hsa-mir-409   | ENSG00000199012 hsa-mir-412  | ENSG00000199025 hsa-mir-369  | ENSG00000207993 hsa-mir-134   |
|            |                                |                               |                              | ENSG00000199092 hsa-mir-410  | ENSG00000207761 hsa-mir-329-1 |
|            |                                |                               |                              |                              | ENSG00000207961 hsa-mir-496   |
| CCTGATTCC  | ENSG00000199071 hsa-mir-423    | ENSG00000202609 hsa-mir-488   |                              |                              |                               |
| CCTGCAAAAC | ENSG00000207698 hsa-mir-32     |                               |                              |                              |                               |
| CCTGCACAA  | ENSG00000199065 hsa-mir-101-2  | ENSG00000207698 hsa-mir-32    |                              |                              |                               |
| CCTGCATTC  | ENSG00000207751 hsa-mir-130b   |                               |                              |                              |                               |
| CCTGCCAAA  | ENSG00000199059 hsa-mir-135b   |                               |                              |                              |                               |
| CCTGCCAAC  | ENSG00000198981 hsa-mir-29a    |                               |                              |                              |                               |
| CCTGCTAAG  | ENSG00000198973 hsa-mir-375    | ENSG00000207728 hsa-mir-449b  |                              |                              |                               |
| CCTGGCTTA  | ENSG00000207604 hsa-mir-206    | ENSG00000199080 hsa-mir-133b  |                              |                              |                               |
| CCTGGGATC  | ENSG00000199066 hsa-mir-330    |                               |                              |                              |                               |
| CCTGGTGAG  | ENSG00000198987 hsa-mir-16-2   |                               |                              |                              |                               |
| CCTGGTGCC  | ENSG00000207571 hsa-mir-615    |                               |                              |                              |                               |
| CCTGGTTGC  | ENSG00000207649 hsa-mir-138-2  |                               |                              |                              |                               |
| CCTGTCAAG  | ENSG00000207782 hsa-mir-150    |                               |                              |                              |                               |
|            | CCTTGACAGG Xie: TGACAG MEIS1   |                               |                              |                              |                               |
| CCTGTCCGC  | ENSG00000198995 hsa-mir-340    |                               |                              |                              |                               |
| CCTGTCCGC  | ENSG00000202641 hsa-mir-484    |                               |                              |                              |                               |
| CCTGTCTAG  | ENSG00000207585 hsa-mir-181d   | ENSG00000207751 hsa-mir-130b  |                              |                              |                               |
| CCTGTGTAA  | ENSG00000207790 hsa-mir-29b-2  | ENSG00000207966 hsa-mir-29c   |                              |                              |                               |
| CCTGTGTAT  | ENSG00000199036 hsa-mir-219-1  |                               |                              |                              |                               |
| CCTGTTCGG  | ENSG00000207568 hsa-mir-203    |                               |                              |                              |                               |
| CCTGTTGCA  | ENSG00000199085 hsa-mir-148a   | ENSG00000207809 hsa-mir-139   |                              |                              |                               |
| CCTGTTCGC  | ENSG00000207960 hsa-mir-153-2  |                               |                              |                              |                               |
| CCTGTTGGA  | ENSG00000202569 hsa-mir-146b   |                               |                              |                              |                               |
| CCTGTTTAC  | ENSG00000207692 hsa-mir-592    |                               |                              |                              |                               |
| CCTGTTTAG  | ENSG00000207692 hsa-mir-592    |                               |                              |                              |                               |
| CCTTAAAGC  | ENSG00000207713 hsa-mir-200c   | ENSG00000207708 hsa-mir-141   |                              |                              |                               |
| CCTTAAAGG  | ENSG00000199172 hsa-mir-331    |                               |                              |                              |                               |
| CCTTAAATA  | ENSG00000202569 hsa-mir-146b   |                               |                              |                              |                               |
| CCTTAACAA  | ENSG00000207726 hsa-mir-455    |                               |                              |                              |                               |
| CCTTAAGTA  | ENSG00000199172 hsa-mir-331    |                               |                              |                              |                               |
| CCTTAATCC  | ENSG00000207651 hsa-mir-28     |                               |                              |                              |                               |
| CCTTATAAG  | ENSG00000207692 hsa-mir-592    |                               |                              |                              |                               |
| CCTTATCAG  | ENSG00000207933 hsa-mir-9-1    |                               |                              |                              |                               |
| CCTTCAACA  | ENSG00000199130 hsa-mir-365-1  | ENSG00000207597 hsa-mir-490   |                              |                              |                               |
| CCTTCAACC  | ENSG00000199059 hsa-mir-135b   | ENSG00000208037 hsa-mir-320   |                              |                              |                               |
| CCTTCAAGG  | ENSG00000207935 hsa-mir-204    |                               |                              |                              |                               |
| CCTTCAACG  | ENSG00000199161 hsa-mir-126    | ENSG00000207777 hsa-mir-10a   |                              |                              |                               |
| CCTTCGCGC  | ENSG00000207777 hsa-mir-10a    |                               |                              |                              |                               |
| CCTTCTTCG  | ENSG00000207596 hsa-mir-194-2  | ENSG00000207648 hsa-mir-192   | ENSG00000207777 hsa-mir-10a  |                              |                               |
| CCTTGAAC   | ENSG00000211590 hsa-mir-802    |                               |                              |                              |                               |
| CCTTGCCCA  | ENSG00000207604 hsa-mir-206    | ENSG00000199080 hsa-mir-133b  |                              |                              |                               |
| CCTTGCCGA  | ENSG00000207732 hsa-mir-218-1  |                               |                              |                              |                               |
| CCTTGTCAA  | ENSG00000207865 hsa-mir-34a    |                               |                              |                              |                               |
| CCTTGTGAC  | ENSG00000207725 hsa-mir-222    | ENSG00000207870 hsa-mir-221   |                              |                              |                               |
| CCTTGTGTC  | ENSG00000207571 hsa-mir-615    |                               |                              |                              |                               |
| CCTTTAAGC  | ENSG00000207827 hsa-mir-30a    | ENSG00000199094 hsa-mir-30c-2 |                              |                              |                               |
| CCTTTATAA  | ENSG00000207548 hsa-mir-217    |                               |                              |                              |                               |
| CCTTTATAC  | ENSG00000207694 hsa-mir-1-2    |                               |                              |                              |                               |
|            | CCTTTATAC MATCH: V\$TBP_Q6 TBP |                               |                              |                              |                               |
| CCTTTGACG  | ENSG00000207581 hsa-mir-199b   |                               |                              |                              |                               |
|            | CCTTTGACG Xie: CTTTGA LEF1     |                               |                              |                              |                               |
| CCTTTGAGC  | ENSG00000207939 hsa-mir-223    | ENSG00000207954 hsa-mir-138-1 |                              |                              |                               |
|            | CCTTTGAGC Xie: CTTTGA LEF1     |                               |                              |                              |                               |
| CCTTTGATC  | ENSG00000207980 hsa-mir-23a    | ENSG00000209707 hsa-mir-24-2  | ENSG00000207808 hsa-mir-27a  | ENSG00000207777 hsa-mir-10a  |                               |
|            | CCTTTGATC Xie: CTTTGA LEF1     |                               |                              |                              |                               |
|            | GATCAAAGG Xie: WTCAAAGS TCF-4  |                               |                              |                              |                               |
| CCTTTGGAC  | ENSG00000207809 hsa-mir-139    |                               |                              |                              |                               |
| CCTTTGTAG  | ENSG00000198995 hsa-mir-340    | ENSG00000207597 hsa-mir-490   |                              |                              |                               |
| CCTTTGTGA  | ENSG00000207635 hsa-mir-499    |                               |                              |                              |                               |
| CCTTTGTTA  | ENSG00000199059 hsa-mir-135b   | ENSG00000207604 hsa-mir-206   | ENSG00000199080 hsa-mir-133b |                              |                               |
| CCTTTTAAG  | ENSG00000198984 hsa-mir-345    | ENSG00000199053 hsa-mir-324   | ENSG00000207791 hsa-mir-497  | ENSG00000207929 hsa-mir-195  |                               |
| CCTTTTATC  | ENSG00000207618 hsa-mir-144    | ENSG00000207794 hsa-mir-451   | ENSG00000207635 hsa-mir-499  |                              |                               |
| CCTTTTGGA  | ENSG00000207865 hsa-mir-34a    |                               |                              |                              |                               |
| CCTTTTTCG  | ENSG00000199130 hsa-mir-365-1  |                               |                              |                              |                               |
| CCTTTTTGA  | ENSG00000208024 hsa-mir-199a-2 | ENSG00000207949 hsa-mir-214   |                              |                              |                               |
| CGAAACAAA  | ENSG00000199071 hsa-mir-423    |                               |                              |                              |                               |
|            | TTTGTTCG Xie: KTWGTTT SRY      |                               |                              |                              |                               |
| CGAAACTCC  | ENSG00000199161 hsa-mir-126    |                               |                              |                              |                               |
| CGAACACGC  | ENSG00000207728 hsa-mir-449b   |                               |                              |                              |                               |
| CGAACCCGA  | ENSG00000199032 hsa-mir-425    | ENSG00000199104 hsa-mir-346   |                              |                              |                               |
| CGAACGGAA  | ENSG00000198987 hsa-mir-16-2   |                               |                              |                              |                               |
| CGAAGCCGC  | ENSG00000199104 hsa-mir-346    | ENSG00000207739 hsa-mir-218-2 |                              |                              |                               |
| CGAAGTGCA  | ENSG00000207732 hsa-mir-218-1  | ENSG00000207623 hsa-mir-205   |                              |                              |                               |
| CGAAGTTTA  | ENSG00000199023 hsa-mir-339    | ENSG00000208037 hsa-mir-320   |                              |                              |                               |
| CGAATACAA  | ENSG00000199043 hsa-mir-335    |                               |                              |                              |                               |
| CGAATCCCC  | ENSG00000199077 hsa-mir-129-2  |                               |                              |                              |                               |
| CGAATCTGC  | ENSG00000207691 hsa-mir-183    | ENSG00000207990 hsa-mir-182   | ENSG00000199158 hsa-mir-96   |                              |                               |
| CGAATGAAG  | ENSG00000207777 hsa-mir-10a    |                               |                              |                              |                               |
| CGACAACCC  | ENSG00000207726 hsa-mir-455    |                               |                              |                              |                               |
| CGACACGCC  | ENSG00000208037 hsa-mir-320    |                               |                              |                              |                               |
| CGACAGCCA  | ENSG00000207732 hsa-mir-218-1  |                               |                              |                              |                               |

|           |                               |                                |                               |                             |
|-----------|-------------------------------|--------------------------------|-------------------------------|-----------------------------|
| CGACAGGAA | ENSG00000199077 hsa-mir-129-2 |                                |                               |                             |
| CGACAGGCG | ENSG00000207656 hsa-mir-489   |                                |                               |                             |
| CGACAGGTA | ENSG00000207717 hsa-mir-551b  |                                |                               |                             |
| CGACCAACC | ENSG00000207811 hsa-mir-34b   | ENSG00000207562 hsa-mir-34c    |                               |                             |
| CGACCACTC | ENSG00000199085 hsa-mir-148a  |                                |                               |                             |
| CGACCAGAA | ENSG00000199085 hsa-mir-148a  |                                |                               |                             |
| CGACCAGCC | ENSG00000199017 hsa-mir-1-1   | ENSG00000207764 hsa-mir-133a-2 |                               |                             |
| CGACCCCCC | ENSG00000207585 hsa-mir-181d  | ENSG00000207614 hsa-mir-193a   | ENSG00000199187 hsa-mir-365-2 |                             |
| CGACCTGCC | ENSG00000207614 hsa-mir-193a  | ENSG00000199187 hsa-mir-365-2  |                               |                             |
| CGACCTGGC | ENSG00000207614 hsa-mir-193a  | ENSG00000199187 hsa-mir-365-2  |                               |                             |
| CGACCTTCA | ENSG00000198974 hsa-mir-30e   | ENSG00000207962 hsa-mir-30c-1  |                               |                             |
| CGACGACCC | ENSG00000207751 hsa-mir-130b  |                                |                               |                             |
| CGACGTCAG | ENSG00000207953 hsa-mir-212   |                                |                               |                             |
| CGACGTCAG | MATCH:V\$ATF6_01 ATF6         |                                |                               |                             |
| CGACGTGAC | ENSG00000207933 hsa-mir-9-1   |                                |                               |                             |
| CGACGTGTC | ENSG00000198973 hsa-mir-375   |                                |                               |                             |
| CGACTCCCA | ENSG00000207698 hsa-mir-32    |                                |                               |                             |
| CGACTCGCC | ENSG00000198987 hsa-mir-16-2  |                                |                               |                             |
| CGACTCTCC | ENSG00000199089 hsa-mir-202   |                                |                               |                             |
| CGACTTCCG | ENSG00000207791 hsa-mir-497   | ENSG00000207929 hsa-mir-195    | ENSG00000211563 hsa-mir-338   |                             |
| CGGAAGTCG | Xie:MGGAWGT PEA3              |                                |                               |                             |
| CGACTTCTC | ENSG00000199089 hsa-mir-202   |                                |                               |                             |
| CGAGACAAA | ENSG00000207550 hsa-mir-99b   | ENSG00000198972 hsa-let-7e     |                               |                             |
| CGAGACAGA | ENSG00000207730 hsa-mir-200b  | ENSG00000207607 hsa-mir-200a   | ENSG00000198976 hsa-mir-429   |                             |
| CGAGACAGC | ENSG00000207656 hsa-mir-489   |                                |                               |                             |
| CGAGACCCG | ENSG00000207617 hsa-mir-24-1  |                                |                               |                             |
| CGAGAGCAC | ENSG00000199043 hsa-mir-335   |                                |                               |                             |
| CGAGATCAC | ENSG00000208037 hsa-mir-320   |                                |                               |                             |
| CGAGCAAAG | ENSG00000207726 hsa-mir-455   |                                |                               |                             |
| CGAGCTCCA | ENSG00000199023 hsa-mir-339   |                                |                               |                             |
| CGAGGACAA | ENSG00000199032 hsa-mir-425   |                                |                               |                             |
| CGAGGCTCA | ENSG00000199089 hsa-mir-202   |                                |                               |                             |
| CGAGGTAC  | ENSG00000198973 hsa-mir-375   | ENSG00000207732 hsa-mir-218-1  |                               |                             |
| GTGACCTCG | Xie:TGACCT ER                 |                                |                               |                             |
| CGAGGTGCG | ENSG00000202641 hsa-mir-484   |                                |                               |                             |
| CGAGTCACG | ENSG00000207571 hsa-mir-615   |                                |                               |                             |
| CGAGTGACA | ENSG00000207819 hsa-mir-9-3   | ENSG00000207939 hsa-mir-223    |                               |                             |
| CGAGTGAGA | ENSG00000207728 hsa-mir-449b  |                                |                               |                             |
| CGATCCCCG | ENSG00000207611 hsa-mir-149   |                                |                               |                             |
| CGATCTGGC | ENSG00000198984 hsa-mir-345   |                                |                               |                             |
| CGATGGTGA | ENSG00000207550 hsa-mir-99b   | ENSG00000198972 hsa-let-7e     |                               |                             |
| CGATGTGTC | ENSG00000199161 hsa-mir-126   |                                |                               |                             |
| CGATTAGCG | ENSG00000199036 hsa-mir-219-1 |                                |                               |                             |
| CGATTCAAA | ENSG00000207795 hsa-mir-155   |                                |                               |                             |
| CGATTCAAC | ENSG00000199071 hsa-mir-423   |                                |                               |                             |
| CGATTCCCA | ENSG00000199071 hsa-mir-423   |                                |                               |                             |
| CGATTGGCC | ENSG00000207638 hsa-mir-99a   | ENSG00000207863 hsa-mir-125b-2 |                               |                             |
| CGATTGGCC | Xie:YSATTGGYY NF-Y            |                                |                               |                             |
| CGATTGTTA | ENSG00000199122 hsa-mir-148b  |                                |                               |                             |
| CGATTGTTA | Xie:ATTGTT SOX-5              |                                |                               |                             |
| CGATTTAAA | ENSG00000207726 hsa-mir-455   |                                |                               |                             |
| CGATTTTAG | ENSG00000199077 hsa-mir-129-2 |                                |                               |                             |
| CGCAAAGCG | ENSG00000199085 hsa-mir-148a  |                                |                               |                             |
| CGCAACAGC | ENSG00000199085 hsa-mir-148a  |                                |                               |                             |
| CGCAATGAC | ENSG00000199065 hsa-mir-101-2 |                                |                               |                             |
| CGCACCTGA | ENSG00000199085 hsa-mir-148a  |                                |                               |                             |
| CGCACGGGA | ENSG00000199036 hsa-mir-219-1 |                                |                               |                             |
| CGCACTGAC | ENSG00000207947 hsa-mir-152   |                                |                               |                             |
| CGCACTGCA | ENSG00000198986 hsa-let-7a-3  | ENSG00000207875 hsa-let-7b     |                               |                             |
| CGCACTGGA | ENSG00000207819 hsa-mir-9-3   | ENSG00000207935 hsa-mir-204    |                               |                             |
| CGCACTTTC | ENSG00000199161 hsa-mir-126   | ENSG00000207744 hsa-mir-10b    |                               |                             |
| CGCAGACTC | ENSG00000207744 hsa-mir-10b   |                                |                               |                             |
| CGCAGCAGC | ENSG00000207792 hsa-mir-151   |                                |                               |                             |
| CGCAGCTGA | ENSG00000199038 hsa-mir-210   |                                |                               |                             |
| CGCAGGTAA | ENSG00000207614 hsa-mir-193a  | ENSG00000199187 hsa-mir-365-2  |                               |                             |
| CGCAGGTAC | ENSG00000208005 hsa-mir-503   | ENSG00000207784 hsa-mir-542    |                               |                             |
| CGCAGGTGA | ENSG00000199038 hsa-mir-210   |                                |                               |                             |
| CGCAGGTGA | Xie:CAGGTGW AREB6             |                                |                               |                             |
| CGCAGGTGC | ENSG00000208017 hsa-mir-140   |                                |                               |                             |
| CGCAGGTTC | ENSG00000207705 hsa-mir-129-1 |                                |                               |                             |
| CGCAGTCAC | ENSG00000199104 hsa-mir-346   | ENSG00000207691 hsa-mir-183    | ENSG00000207990 hsa-mir-182   | ENSG00000199158 hsa-mir-96  |
| CGCATAGGA | ENSG00000207571 hsa-mir-615   |                                |                               |                             |
| CGCATGCCC | ENSG00000207792 hsa-mir-151   |                                |                               |                             |
| CGCATGGGC | ENSG00000207980 hsa-mir-23a   | ENSG00000209707 hsa-mir-24-2   | ENSG00000207808 hsa-mir-27a   |                             |
| CGCATGTGC | ENSG00000207795 hsa-mir-155   |                                |                               |                             |
| CGCATTCCA | ENSG00000207955 hsa-mir-219-2 | ENSG00000208035 hsa-mir-143    |                               |                             |
| CGCATTCCA | Xie:AnTTTCGnWTTCSnA           | IRF-7                          |                               |                             |
| CGCCAAAAC | ENSG00000199122 hsa-mir-148b  |                                |                               |                             |
| CGCCAACTC | ENSG00000207739 hsa-mir-218-2 | ENSG00000207865 hsa-mir-34a    |                               |                             |
| CGCCACCTA | ENSG00000207819 hsa-mir-9-3   | ENSG00000199043 hsa-mir-335    |                               |                             |
| CGCCACGTC | ENSG00000207819 hsa-mir-9-3   |                                |                               |                             |
| CGCCACTTC | ENSG00000207980 hsa-mir-23a   | ENSG00000209707 hsa-mir-24-2   | ENSG00000207808 hsa-mir-27a   |                             |
| CGCCAGACC | ENSG00000199090 hsa-mir-326   |                                |                               |                             |
| CGCCAGGTA | ENSG00000207953 hsa-mir-212   |                                |                               |                             |
| CGCCATCTC | ENSG00000199023 hsa-mir-339   | ENSG00000199065 hsa-mir-101-2  | ENSG00000207618 hsa-mir-144   | ENSG00000207794 hsa-mir-451 |
| CGCCATGGA | ENSG00000198995 hsa-mir-340   | ENSG00000207950 hsa-mir-296    |                               |                             |
| CGCCATGGC | ENSG00000207702 hsa-mir-211   |                                |                               |                             |
| CGCCATGTC | ENSG00000198974 hsa-mir-30e   | ENSG00000207962 hsa-mir-30c-1  |                               |                             |
| CGCCATTTT | ENSG00000207731 hsa-mir-506   |                                |                               |                             |
| CGCCACAAA | ENSG00000207567 hsa-mir-142   |                                |                               |                             |
| CGCCACGGA | ENSG00000207726 hsa-mir-455   | ENSG00000207739 hsa-mir-218-2  |                               |                             |

|            |                                |                                |                                |                             |
|------------|--------------------------------|--------------------------------|--------------------------------|-----------------------------|
| CGCCGCTAG  | ENSG00000207792 hsa-mir-151    |                                |                                |                             |
| CGCCGGAAA  | ENSG00000208005 hsa-mir-503    | ENSG00000207784 hsa-mir-542    |                                |                             |
| CGCCGGACG  | ENSG00000207611 hsa-mir-149    |                                |                                |                             |
| CGCCGGATC  | ENSG00000199065 hsa-mir-101-2  |                                |                                |                             |
| CGCCGGGAA  | ENSG00000207695 hsa-mir-184    |                                |                                |                             |
| CGCCTATAA  | ENSG00000207953 hsa-mir-212    |                                |                                |                             |
| CGCCTCAGA  | ENSG00000207630 hsa-mir-7-3    |                                |                                |                             |
| CGCCTCCGC  | ENSG00000207698 hsa-mir-32     |                                |                                |                             |
| CGCCTCTTA  | ENSG00000207721 hsa-mir-186    |                                |                                |                             |
| CGCCTCTTC  | ENSG00000207777 hsa-mir-10a    |                                |                                |                             |
| CGCCTGACA  | ENSG00000198995 hsa-mir-340    |                                |                                |                             |
| CGCCTGCTC  | ENSG00000208024 hsa-mir-199a-2 | ENSG00000207949 hsa-mir-214    | ENSG00000210741 hsa-mir-196a-1 |                             |
| CGCCTTCCG  | ENSG00000207617 hsa-mir-24-1   |                                |                                |                             |
| CGCCTTTGA  | ENSG00000207777 hsa-mir-10a    |                                |                                |                             |
| CGCCTTTGA  | Xie:CTTTGA LEF1                |                                |                                |                             |
| CGCCTTTTA  | ENSG00000207568 hsa-mir-203    |                                |                                |                             |
| CGCGACCA   | ENSG00000199032 hsa-mir-425    | ENSG00000199047 hsa-mir-378    | ENSG00000207568 hsa-mir-203    | ENSG00000207953 hsa-mir-212 |
| CGCGACTTC  | ENSG00000207744 hsa-mir-10b    |                                |                                |                             |
| CGCGAGACG  | ENSG00000207611 hsa-mir-149    |                                |                                |                             |
| CGCGAGCCA  | ENSG00000208037 hsa-mir-320    |                                |                                |                             |
| CGCGAGCCC  | ENSG00000208005 hsa-mir-503    | ENSG00000207784 hsa-mir-542    |                                |                             |
| CGCGATCCC  | ENSG00000199077 hsa-mir-129-2  |                                |                                |                             |
| CGCGCAATC  | ENSG00000207797 hsa-mir-187    |                                |                                |                             |
| CGCGCATGC  | ENSG00000207792 hsa-mir-151    |                                |                                |                             |
| CGCGCATGC  | Xie:YCGCATGCG NRF-1            |                                |                                |                             |
| CGCGCAGA   | ENSG00000207789 hsa-mir-26a-2  |                                |                                |                             |
| CGCGCCTAA  | ENSG00000207718 hsa-mir-15a    | ENSG00000208006 hsa-mir-16-1   |                                |                             |
| CGCGCGAGA  | ENSG00000199071 hsa-mir-423    | ENSG00000207698 hsa-mir-32     |                                |                             |
| CGCGCGCAA  | ENSG00000199065 hsa-mir-101-2  | ENSG00000199085 hsa-mir-148a   |                                |                             |
| CGCGCGTCA  | ENSG00000199038 hsa-mir-210    | ENSG00000207739 hsa-mir-218-2  | ENSG00000208037 hsa-mir-320    |                             |
| CGCGCGTTC  | ENSG00000199121 hsa-mir-26b    | ENSG00000211517 hsa-mir-671    |                                |                             |
| CGCGCTAGC  | ENSG00000207568 hsa-mir-203    |                                |                                |                             |
| CGCGCTTAC  | ENSG00000199104 hsa-mir-346    | ENSG00000207695 hsa-mir-184    |                                |                             |
| CGCGGAAAC  | ENSG00000199036 hsa-mir-219-1  |                                |                                |                             |
| CGCGGACAG  | ENSG00000202641 hsa-mir-484    |                                |                                |                             |
| CGCGGCAAA  | ENSG00000207728 hsa-mir-449b   |                                |                                |                             |
| CGCGGCTAG  | ENSG00000199104 hsa-mir-346    |                                |                                |                             |
| CGCGGCTGC  | ENSG00000199032 hsa-mir-425    |                                |                                |                             |
| CGCGGGCTA  | ENSG00000199023 hsa-mir-339    |                                |                                |                             |
| CGCGGGTAG  | ENSG00000199032 hsa-mir-425    | ENSG00000207960 hsa-mir-153-2  |                                |                             |
| CGCGGTAC   | ENSG00000207585 hsa-mir-181d   | ENSG00000208017 hsa-mir-140    |                                |                             |
| CGCGTCACA  | ENSG00000208037 hsa-mir-320    |                                |                                |                             |
| CGCGTCACC  | ENSG00000199038 hsa-mir-210    |                                |                                |                             |
| CGCGTCGGC  | ENSG00000207811 hsa-mir-34b    | ENSG00000207562 hsa-mir-34c    |                                |                             |
| CGCGTGCAA  | ENSG00000199085 hsa-mir-148a   |                                |                                |                             |
| CGCGTGCCG  | ENSG00000207617 hsa-mir-24-1   |                                |                                |                             |
| CGCGTGGCA  | ENSG00000207568 hsa-mir-203    |                                |                                |                             |
| CGCGTGTGA  | ENSG00000207819 hsa-mir-9-3    |                                |                                |                             |
| CGCGTTCCG  | ENSG00000207614 hsa-mir-193a   | ENSG00000199187 hsa-mir-365-2  |                                |                             |
| CGCGTTCTC  | ENSG00000211517 hsa-mir-671    | ENSG00000207695 hsa-mir-184    |                                |                             |
| CGCGTTGCC  | ENSG00000198995 hsa-mir-340    |                                |                                |                             |
| CGCTATAAA  | ENSG00000198995 hsa-mir-340    |                                |                                |                             |
| CGCTCACAA  | ENSG00000207752 hsa-mir-199a-1 |                                |                                |                             |
| CGCTCCAAC  | ENSG00000207955 hsa-mir-219-2  |                                |                                |                             |
| CGCTCCTCC  | ENSG00000207597 hsa-mir-490    |                                |                                |                             |
| CGCTCGCAC  | ENSG00000199090 hsa-mir-326    |                                |                                |                             |
| CGCTCTAGC  | ENSG00000199104 hsa-mir-346    |                                |                                |                             |
| CGCTCTCCC  | ENSG00000207638 hsa-mir-99a    | ENSG00000207863 hsa-mir-125b-2 |                                |                             |
| CGCTCTTCC  | ENSG00000207571 hsa-mir-615    |                                |                                |                             |
| GGAAGAGCG  | Xie:vCCGGAAGnGCR GABP          |                                |                                |                             |
| CGCTGACCA  | ENSG00000199066 hsa-mir-330    |                                |                                |                             |
| CGCTGACGC  | ENSG00000199043 hsa-mir-335    | ENSG00000199071 hsa-mir-423    |                                |                             |
| CGCTGACTC  | ENSG00000207819 hsa-mir-9-3    |                                |                                |                             |
| CGCTGCCGA  | ENSG00000199121 hsa-mir-26b    | ENSG00000207792 hsa-mir-151    | ENSG00000207953 hsa-mir-212    |                             |
| CGCTGCCGC  | ENSG00000198987 hsa-mir-16-2   |                                |                                |                             |
| CGCTGCGCA  | ENSG00000207739 hsa-mir-218-2  |                                |                                |                             |
| CGCTGCGTA  | ENSG00000199077 hsa-mir-129-2  |                                |                                |                             |
| CGCTGGACA  | ENSG00000207730 hsa-mir-200b   | ENSG00000207607 hsa-mir-200a   | ENSG00000198976 hsa-mir-429    |                             |
| CGCTGTTGC  | ENSG00000199065 hsa-mir-101-2  |                                |                                |                             |
| CGCTTTACG  | ENSG00000207827 hsa-mir-30a    | ENSG00000199094 hsa-mir-30c-2  |                                |                             |
| CGCTTTCCA  | ENSG00000199090 hsa-mir-326    |                                |                                |                             |
| CGCTTTCCA  | Xie:AnTTTCGnWTTCSnA            | IRF-7                          |                                |                             |
| CGCTTTCCG  | ENSG00000199032 hsa-mir-425    |                                |                                |                             |
| CGCTTTCCG  | Xie:AnTTTCGnWTTCSnA            | IRF-7                          |                                |                             |
| CGCTTTCTA  | ENSG00000199122 hsa-mir-148b   |                                |                                |                             |
| CGCTTTGCA  | ENSG00000207635 hsa-mir-499    |                                |                                |                             |
| CGGAAAAGC  | ENSG00000207713 hsa-mir-200c   | ENSG00000207708 hsa-mir-141    |                                |                             |
| CGGAAAACAG | ENSG00000199036 hsa-mir-219-1  | ENSG00000208005 hsa-mir-503    | ENSG00000207784 hsa-mir-542    |                             |
| CGGAAAACCC | ENSG00000207954 hsa-mir-138-1  |                                |                                |                             |
| CGGAAAACGC | ENSG00000207955 hsa-mir-219-2  |                                |                                |                             |
| CGGAAAGCA  | ENSG00000199089 hsa-mir-202    | ENSG00000208037 hsa-mir-320    | ENSG00000207571 hsa-mir-615    |                             |
| CGGAAATGA  | ENSG00000207777 hsa-mir-10a    |                                |                                |                             |
| TCATTTCCG  | Xie:CAntTCCS STAT1             |                                |                                |                             |
| CGGAAATGC  | ENSG00000208009 hsa-mir-130a   |                                |                                |                             |
| GCATTTCCG  | Xie:CAntTCCS STAT1             |                                |                                |                             |
| CGGAAATTC  | ENSG00000198987 hsa-mir-16-2   |                                |                                |                             |
| GAATTTCCG  | Xie:AWTTCC IY                  |                                |                                |                             |
| CGGAAATTC  | MATCH:V\$HMGYIY_Q6 HMGYIY      |                                |                                |                             |
| CGGAAGCAA  | ENSG00000199122 hsa-mir-148b   |                                |                                |                             |
| CGGAAGCAC  | ENSG00000199032 hsa-mir-425    |                                |                                |                             |
| CGGAAGGAC  | ENSG00000199157 hsa-mir-208    |                                |                                |                             |

|            |                                |                                |                               |                             |
|------------|--------------------------------|--------------------------------|-------------------------------|-----------------------------|
| CGGAAGTAC  | ENSG00000207721 hsa-mir-186    |                                |                               |                             |
| CGGAAGTGA  | Xie:MGGAWGT                    | PEA3                           |                               |                             |
| CGGAAGTGA  | ENSG00000207721 hsa-mir-186    |                                |                               |                             |
| CGGAAGTGA  | Xie:MGGAWGT                    | PEA3                           |                               |                             |
| CGGAAGTTA  | Xie:CaNTTCCS                   | STAT1                          |                               |                             |
| CGGAAGTTA  | ENSG00000207789 hsa-mir-26a-2  |                                |                               |                             |
| CGGAAGTTA  | Xie:MGGAWGT                    | PEA3                           |                               |                             |
| CGGAATCGC  | ENSG00000207752 hsa-mir-199a-1 |                                |                               |                             |
| CGGAATTGC  | ENSG00000207777 hsa-mir-10a    |                                |                               |                             |
| CGAATTCCG  | Xie:CaNTTCCS                   | STAT1                          |                               |                             |
| CGGACAAAG  | ENSG00000199032 hsa-mir-425    |                                |                               |                             |
| CGGACAGGA  | ENSG00000202641 hsa-mir-484    |                                |                               |                             |
| CGGACCGTC  | ENSG00000207811 hsa-mir-34b    | ENSG00000207562 hsa-mir-34c    |                               |                             |
| CGGACGCAG  | ENSG00000199023 hsa-mir-339    |                                |                               |                             |
| CGGACGCCA  | ENSG00000207596 hsa-mir-194-2  | ENSG00000207648 hsa-mir-192    |                               |                             |
| CGGACGTGA  | ENSG00000207611 hsa-mir-149    |                                |                               |                             |
| CGGACTACA  | ENSG00000208005 hsa-mir-503    | ENSG00000207784 hsa-mir-542    |                               |                             |
| CGGACTCGC  | ENSG00000207656 hsa-mir-489    |                                |                               |                             |
| CGGACTGAA  | ENSG00000199036 hsa-mir-219-1  |                                |                               |                             |
| CGGAGAAAC  | ENSG00000199032 hsa-mir-425    |                                |                               |                             |
| CGGAGACAC  | ENSG00000207947 hsa-mir-152    |                                |                               |                             |
| CGGAGACGC  | ENSG00000207739 hsa-mir-218-2  |                                |                               |                             |
| CGGAGCTAG  | ENSG00000207726 hsa-mir-455    |                                |                               |                             |
| CGGAGGATC  | ENSG00000207585 hsa-mir-181d   |                                |                               |                             |
| CGGAGGTCA  | ENSG00000207571 hsa-mir-615    |                                |                               |                             |
| TGACCTCCG  | Xie:TGACCT                     | ER                             |                               |                             |
| CGGAGTGAG  | ENSG00000199024 hsa-mir-103-2  | ENSG00000207731 hsa-mir-506    |                               |                             |
| CGGAGTTCC  | ENSG00000207792 hsa-mir-151    |                                |                               |                             |
| CGGATCGGA  | ENSG00000207789 hsa-mir-26a-2  |                                |                               |                             |
| CGGATCTCC  | ENSG00000207581 hsa-mir-199b   |                                |                               |                             |
| CGGATGGAC  | ENSG00000207581 hsa-mir-199b   | ENSG00000207751 hsa-mir-130b   |                               |                             |
| CGGATGGGC  | ENSG00000207955 hsa-mir-219-2  |                                |                               |                             |
| CGGATGGTC  | ENSG00000208017 hsa-mir-140    |                                |                               |                             |
| CGGATTTCC  | ENSG00000199059 hsa-mir-135b   | ENSG00000199077 hsa-mir-129-2  | ENSG00000207955 hsa-mir-219-2 | ENSG00000207797 hsa-mir-187 |
| CGGATTTCC  | Xie:AnTTTCGnWTTCSnA            | IRF-7                          |                               |                             |
| CGGATTGGA  | ENSG00000207926 hsa-mir-135a-1 |                                |                               |                             |
| CGGCAACAG  | ENSG00000207611 hsa-mir-149    |                                |                               |                             |
| CGGCAACAG  | MATCH:V\$RFX_Q6                | RFX                            |                               |                             |
| CGGCAACGC  | ENSG00000198995 hsa-mir-340    |                                |                               |                             |
| CGGCAACGC  | MATCH:V\$RFX_Q6                | RFX                            |                               |                             |
| CGGCACGTC  | ENSG00000199065 hsa-mir-101-2  |                                |                               |                             |
| CGGCAGACG  | ENSG00000199024 hsa-mir-103-2  |                                |                               |                             |
| CGGCAGCAG  | ENSG00000207954 hsa-mir-138-1  |                                |                               |                             |
| CGGCAGGAA  | ENSG00000199121 hsa-mir-26b    |                                |                               |                             |
| CGGCAGGTC  | ENSG00000207953 hsa-mir-212    |                                |                               |                             |
| CGGCATCCC  | ENSG00000207611 hsa-mir-149    |                                |                               |                             |
| CGGCATGCC  | ENSG00000199161 hsa-mir-126    | ENSG00000208009 hsa-mir-130a   |                               |                             |
| CGGCCACAA  | ENSG00000207730 hsa-mir-200b   | ENSG00000207607 hsa-mir-200a   | ENSG00000198976 hsa-mir-429   |                             |
| CGGCCAGCA  | ENSG00000199090 hsa-mir-326    | ENSG00000207739 hsa-mir-218-2  |                               |                             |
| CGGCCCATC  | ENSG00000207623 hsa-mir-205    |                                |                               |                             |
| CGGCCGAAA  | ENSG00000199104 hsa-mir-346    |                                |                               |                             |
| CGGCCTCTA  | ENSG00000207960 hsa-mir-153-2  |                                |                               |                             |
| CGGCGCCAA  | ENSG00000202641 hsa-mir-484    |                                |                               |                             |
| CGGCGGCGC  | ENSG00000207960 hsa-mir-153-2  |                                |                               |                             |
| CGGCGGTAA  | ENSG00000207935 hsa-mir-204    | ENSG00000207955 hsa-mir-219-2  |                               |                             |
| CGGCTCAG   | ENSG00000199071 hsa-mir-423    |                                |                               |                             |
| CGGCTGTGC  | ENSG00000207730 hsa-mir-200b   | ENSG00000207607 hsa-mir-200a   | ENSG00000198976 hsa-mir-429   |                             |
| CGGCTAGAG  | ENSG00000199104 hsa-mir-346    |                                |                               |                             |
| CGGCTCACC  | ENSG00000199121 hsa-mir-26b    |                                |                               |                             |
| CGGCTCCAA  | ENSG00000207635 hsa-mir-499    | ENSG00000210741 hsa-mir-196a-1 |                               |                             |
| CGGCTCCTA  | ENSG00000199017 hsa-mir-1-1    | ENSG00000207764 hsa-mir-133a-2 | ENSG00000207953 hsa-mir-212   |                             |
| CGGCTGAAG  | ENSG00000207656 hsa-mir-489    |                                |                               |                             |
| CGGCTGACA  | ENSG00000198973 hsa-mir-375    |                                |                               |                             |
| CGGCTGTCA  | ENSG00000207597 hsa-mir-490    |                                |                               |                             |
| TGACAGCCG  | Xie:TGACAG                     | MEIS1                          |                               |                             |
| CGGCTTGTC  | ENSG00000207789 hsa-mir-26a-2  |                                |                               |                             |
| CGGGAAGAAG | ENSG00000207994 hsa-mir-100    | ENSG00000207971 hsa-mir-125b-1 | ENSG00000198975 hsa-let-7a-2  |                             |
| CGGGAACA   | ENSG00000207586 hsa-mir-135a-2 |                                |                               |                             |
| CGGGAATC   | ENSG00000207695 hsa-mir-184    |                                |                               |                             |
| CGGGAACTC  | ENSG00000207792 hsa-mir-151    |                                |                               |                             |
| CGGGAATAG  | ENSG00000199085 hsa-mir-148a   |                                |                               |                             |
| CGGGAATCC  | ENSG00000207728 hsa-mir-449b   | ENSG00000207955 hsa-mir-219-2  | ENSG00000207623 hsa-mir-205   |                             |
| CGGGAATTC  | ENSG00000210741 hsa-mir-196a-1 |                                |                               |                             |
| CGGGACAAA  | ENSG00000199122 hsa-mir-148b   |                                |                               |                             |
| CGGGAGTTA  | ENSG00000199071 hsa-mir-423    |                                |                               |                             |
| CGGGATTTT  | ENSG00000199017 hsa-mir-1-1    | ENSG00000207764 hsa-mir-133a-2 |                               |                             |
| CGGGATTTT  | Xie:SGGRnTTTCC                 | C-REL                          |                               |                             |
| CGGGCACGA  | ENSG00000207585 hsa-mir-181d   |                                |                               |                             |
| CGGGCCACC  | ENSG00000208017 hsa-mir-140    | ENSG00000199071 hsa-mir-423    |                               |                             |
| CGGGCCGTA  | ENSG00000199038 hsa-mir-210    |                                |                               |                             |
| CGGGCCTAC  | ENSG00000208005 hsa-mir-503    | ENSG00000207784 hsa-mir-542    |                               |                             |
| CGGGCGAGA  | ENSG00000199104 hsa-mir-346    |                                |                               |                             |
| CGGGCGCTA  | ENSG00000207751 hsa-mir-130b   |                                |                               |                             |
| CGGGCTAGA  | ENSG00000207698 hsa-mir-32     |                                |                               |                             |
| CGGGCTCTA  | ENSG00000207713 hsa-mir-200c   | ENSG00000207708 hsa-mir-141    |                               |                             |
| CGGGGACAA  | ENSG00000199036 hsa-mir-219-1  |                                |                               |                             |
| CGGGGACAA  | ENSG00000198973 hsa-mir-375    |                                |                               |                             |
| CGGGTAAGA  | ENSG00000211590 hsa-mir-802    |                                |                               |                             |
| CGGGTAGCA  | ENSG00000199090 hsa-mir-326    |                                |                               |                             |
| CGGGTCACA  | ENSG00000199066 hsa-mir-330    |                                |                               |                             |
| CGGGTCACG  | ENSG00000208017 hsa-mir-140    |                                |                               |                             |

CGGGTGACG ENSG00000199032|hsa-mir-425 ENSG00000207617|hsa-mir-24-1  
CGGGTGACG ENSG00000207730|hsa-mir-200b ENSG00000207607|hsa-mir-200a ENSG00000198976|hsa-mir-429 ENSG00000207739|hsa-mir-218-2  
CGGGTGTGA ENSG00000199036|hsa-mir-219-1  
CGGGTTTTTC ENSG00000207695|hsa-mir-184  
CGGGTTTTTC Xie:SGGRnTTTCC C-REL  
CGGTACCA ENSG00000211517|hsa-mir-671  
CGGTCCCTCA ENSG00000208024|hsa-mir-199a-2 ENSG00000207949|hsa-mir-214  
CGGTCTCCC ENSG00000207732|hsa-mir-218-1  
CGGTCTCCG ENSG00000198984|hsa-mir-345 ENSG00000207617|hsa-mir-24-1  
CGGTGACGC ENSG00000199032|hsa-mir-425  
CGGTGACTC ENSG00000207567|hsa-mir-142 ENSG00000207585|hsa-mir-181d ENSG00000207953|hsa-mir-212  
CGGTGATGA ENSG00000207827|hsa-mir-30a ENSG00000199094|hsa-mir-30c-2  
CGGTGCGTC ENSG00000208037|hsa-mir-320  
CGGTGCTGA ENSG00000207960|hsa-mir-153-2 ENSG00000211517|hsa-mir-671  
CGGTGTGAG ENSG00000207792|hsa-mir-151  
CGGTGGGTC ENSG00000207811|hsa-mir-34b ENSG00000207562|hsa-mir-34c  
CGGTTTCAA ENSG00000207789|hsa-mir-26a-2  
CGGTTTCCA ENSG00000207789|hsa-mir-26a-2  
CGGTTTCCA Xie:AnTTTCGnWTTCSnA IRF-7  
CGGTTTTGC ENSG00000202641|hsa-mir-484  
CGTACCAAG ENSG00000207789|hsa-mir-26a-2  
CGTACCTGC ENSG00000207568|hsa-mir-203  
CGTACTCAG ENSG00000207926|hsa-mir-135a-1  
CGTAGTAGC ENSG00000199165|hsa-let-7a-1 ENSG00000199072|hsa-let-7f-1 ENSG00000199133|hsa-let-7d  
CGTATGCAA ENSG00000199038|hsa-mir-210  
CGTCAAAAA ENSG00000208024|hsa-mir-199a-2 ENSG00000207949|hsa-mir-214  
CGTCAAAGA ENSG00000207953|hsa-mir-212  
TCTTTGACG Xie:CTTTGA LEF1  
CGTCACCCA ENSG00000199077|hsa-mir-129-2  
CGTCACGGA ENSG00000199071|hsa-mir-423  
CGTCACGGC ENSG00000207953|hsa-mir-212  
CGTCACGTC ENSG00000199130|hsa-mir-365-1  
CGTCACTTC ENSG00000208037|hsa-mir-320 ENSG00000199088|hsa-mir-379 ENSG00000207749|hsa-mir-299 ENSG00000198982|hsa-mir-380 ENSG00000199069|hsa-mir-323 ENSG00000211582|hsa-mir-758 ENSG00000207761|hsa-mir-329-1  
ENSG00000194717|hsa-mir-494 ENSG00000207743|hsa-mir-495 ENSG00000199020|hsa-mir-381 ENSG00000207754|hsa-mir-487b ENSG00000202560|hsa-mir-539 ENSG00000207993|hsa-mir-134 ENSG00000207961|hsa-mir-496  
ENSG00000199015|hsa-mir-377 ENSG00000199107|hsa-mir-409 ENSG00000199012|hsa-mir-412 ENSG00000199025|hsa-mir-369 ENSG00000199092|hsa-mir-410  
CGTCAGAGC ENSG00000199104|hsa-mir-346 ENSG00000207728|hsa-mir-449b  
CGTCAGCGC ENSG00000199043|hsa-mir-335  
CGTCAGCTC ENSG00000207728|hsa-mir-449b ENSG00000207751|hsa-mir-130b ENSG00000207717|hsa-mir-551b  
CGTCAGTCC ENSG00000207819|hsa-mir-9-3  
CGTCATCCA ENSG00000207617|hsa-mir-24-1  
CGTCATCCC ENSG00000207581|hsa-mir-199b ENSG00000207752|hsa-mir-199a-1  
CGTCATTAA ENSG00000207777|hsa-mir-10a  
CGTCCAATC ENSG00000207702|hsa-mir-211  
CGTCCAGTC ENSG00000207751|hsa-mir-130b  
CGTCCCATC ENSG00000199017|hsa-mir-1-1 ENSG00000207764|hsa-mir-133a-2 ENSG00000199085|hsa-mir-148a  
CGTCCCTAG ENSG00000199161|hsa-mir-126  
CGTCCCGCA ENSG00000199077|hsa-mir-129-2  
CGTCCGCTC ENSG00000207614|hsa-mir-193a ENSG00000199187|hsa-mir-365-2  
CGTCGCCAA ENSG00000207732|hsa-mir-218-1  
CGTCGCCCC ENSG00000208037|hsa-mir-320  
CGTCGTGTA ENSG00000207614|hsa-mir-193a ENSG00000199187|hsa-mir-365-2  
CGTCTCCTA ENSG00000199130|hsa-mir-365-1  
CGTGAAGCC ENSG00000198986|hsa-let-7a-3 ENSG00000207875|hsa-let-7b  
CGTGACATC ENSG00000207611|hsa-mir-149 ENSG00000199004|hsa-mir-21  
CGTGACCGC ENSG00000208017|hsa-mir-140  
CGTGACCTC ENSG00000207732|hsa-mir-218-1  
CGTGACCTC Xie:MnTGWCCT T3R  
CGTGACCTC Xie:TGACCT ER  
CGTGACTAC ENSG00000199077|hsa-mir-129-2  
CGTGACTCC ENSG00000208036|hsa-mir-106b ENSG00000207547|hsa-mir-25 ENSG00000207757|hsa-mir-93  
CGTGACTGC ENSG00000199104|hsa-mir-346  
CGTGAGAAA ENSG00000199065|hsa-mir-101-2  
CGTGAGGAG ENSG00000199135|hsa-mir-101-1  
CGTGATCAG ENSG00000207713|hsa-mir-200c ENSG00000207708|hsa-mir-141  
CGTGATGTC ENSG00000207611|hsa-mir-149 ENSG00000207586|hsa-mir-135a-2  
CGTGCAACA ENSG00000199085|hsa-mir-148a  
CGTGACACG ENSG00000207728|hsa-mir-449b  
CGTGACAGC ENSG00000199130|hsa-mir-365-1  
CGTGCCGAG ENSG00000199032|hsa-mir-425  
CGTGCGTCA ENSG00000199036|hsa-mir-219-1  
CGTGCTCAC ENSG00000207739|hsa-mir-218-2  
CGTGCTGCC ENSG00000199023|hsa-mir-339  
CGTGAAGC ENSG00000199058|hsa-mir-302b ENSG00000199169|hsa-mir-367 ENSG00000199145|hsa-mir-302d ENSG00000199102|hsa-mir-302c  
CGTGGCCGA ENSG00000199032|hsa-mir-425 ENSG00000207614|hsa-mir-193a ENSG00000199187|hsa-mir-365-2  
CGTGGCGAG ENSG00000198986|hsa-let-7a-3 ENSG00000207875|hsa-let-7b  
CGTGGGAAA ENSG00000207568|hsa-mir-203  
CGTGGGAAA MATCH:V\$RBPJK\_Q4 RBP-Jkappa  
CGTGGTTCC ENSG00000199088|hsa-mir-379 ENSG00000207749|hsa-mir-299 ENSG00000198982|hsa-mir-380 ENSG00000199069|hsa-mir-323 ENSG00000211582|hsa-mir-758 ENSG00000207761|hsa-mir-329-1 ENSG00000194717|hsa-mir-494  
ENSG00000207743|hsa-mir-495 ENSG00000199020|hsa-mir-381 ENSG00000207754|hsa-mir-487b ENSG00000202560|hsa-mir-539 ENSG00000207993|hsa-mir-134 ENSG00000207961|hsa-mir-496 ENSG00000199015|hsa-mir-377  
ENSG00000199107|hsa-mir-409 ENSG00000199012|hsa-mir-412 ENSG00000199025|hsa-mir-369 ENSG00000199092|hsa-mir-410  
CGTGTACA ENSG00000207635|hsa-mir-499  
CGTGTACG ENSG00000198973|hsa-mir-375 ENSG00000207730|hsa-mir-200b ENSG00000207607|hsa-mir-200a ENSG00000198976|hsa-mir-429  
CGTGTCCCTC ENSG00000207960|hsa-mir-153-2 ENSG00000199122|hsa-mir-148b  
CGTGTCCCTC Xie:MnTGWCCT T3R  
CGTGTCTGC ENSG00000207953|hsa-mir-212  
CGTGTGTGA ENSG00000207726|hsa-mir-455  
CGTTAAACG ENSG00000207602|hsa-mir-106a ENSG00000207572|hsa-mir-363 ENSG00000207710|hsa-mir-20b  
CGTTACAAA ENSG00000198987|hsa-mir-16-2  
CGTTATTCA ENSG00000207955|hsa-mir-219-2  
CGTTCCCCC ENSG00000207623|hsa-mir-205  
CGTTCCGCGC ENSG00000199085|hsa-mir-148a

CGTTGCATC ENSG00000207585|hsa-mir-181d ENSG00000202609|hsa-mir-488

CGTTGCCAG ENSG00000207585|hsa-mir-181d

CGTTGCCGC ENSG00000198995|hsa-mir-340

CGTTTAAGC ENSG00000207791|hsa-mir-497 ENSG00000207929|hsa-mir-195

CGTTTACAA ENSG00000207777|hsa-mir-10a ENSG00000207797|hsa-mir-187 ENSG00000207995|hsa-mir-325

CTAAAAATA ENSG00000199017|hsa-mir-1-1 ENSG00000207764|hsa-mir-133a-2

CTAAAAATA Xie:YTAAWATAGCY MEF-2

CTAAAAGCC ENSG00000207955|hsa-mir-219-2 ENSG00000207586|hsa-mir-135a-2

CTAAACCAA ENSG00000207809|hsa-mir-139

CTAAACCCA ENSG00000207581|hsa-mir-199b

CTAAAGGTA ENSG00000207795|hsa-mir-155

CTAAATCCC ENSG00000207604|hsa-mir-206 ENSG00000199080|hsa-mir-133b

CTAAATGCC ENSG00000207623|hsa-mir-205

CTAAATTAA ENSG00000208035|hsa-mir-143 ENSG00000207721|hsa-mir-186

CTAAATTAG ENSG00000207995|hsa-mir-325

CTAAATTGC ENSG00000199085|hsa-mir-148a ENSG00000199082|hsa-mir-342 ENSG00000207745|hsa-mir-17 ENSG00000207610|hsa-mir-19a ENSG00000199149|hsa-mir-20a

CTAACCAAGC ENSG00000207618|hsa-mir-144 ENSG00000207794|hsa-mir-451

CTAACCAATA ENSG00000207827|hsa-mir-30a ENSG00000199094|hsa-mir-30c-2

TATTGTTAG Xie:ATTGTT SOX-5

CTAACAGCA ENSG00000208035|hsa-mir-143

CTAACTGCC ENSG00000199036|hsa-mir-219-1 ENSG00000199104|hsa-mir-346

CTAACTGTC ENSG00000207638|hsa-mir-99a ENSG00000207863|hsa-mir-125b-2 ENSG00000207717|hsa-mir-551b

CTAAGAGAG ENSG00000199065|hsa-mir-101-2

CTAAGCACA ENSG00000207777|hsa-mir-10a

CTAAGCCCA ENSG00000199161|hsa-mir-126 ENSG00000207695|hsa-mir-184

CTAAGGTAA ENSG00000207649|hsa-mir-138-2

CTAAGTCAA ENSG00000207935|hsa-mir-204 ENSG00000202609|hsa-mir-488

CTAATACAC ENSG00000207638|hsa-mir-99a ENSG00000207863|hsa-mir-125b-2

CTAATAGCC ENSG00000208009|hsa-mir-130a

CTAATCCAA ENSG00000208017|hsa-mir-140

CTAATCGAC ENSG00000199036|hsa-mir-219-1

CTAATCGCC ENSG00000207819|hsa-mir-9-3

CTAATCTGC ENSG00000207602|hsa-mir-106a ENSG00000207572|hsa-mir-363 ENSG00000207710|hsa-mir-20b

CTAATGAGC ENSG00000207623|hsa-mir-205

CTAATGGGC ENSG00000207597|hsa-mir-490 ENSG00000207744|hsa-mir-10b

CTAATGTAA ENSG00000211590|hsa-mir-802

CTAATGTAA Xie:CTWAWGTAAACanWG FREAC-4

CTAATTACA ENSG00000207797|hsa-mir-187

TGTAATTAG Xie:GTAAKTnG NCX

CTAATTACC ENSG00000207638|hsa-mir-99a ENSG00000207863|hsa-mir-125b-2

GGTAATTAG Xie:GTAAKTnG NCX

CTAATTATC ENSG00000199071|hsa-mir-423 ENSG00000207745|hsa-mir-17 ENSG00000207610|hsa-mir-19a ENSG00000199149|hsa-mir-20a

CTAATTATC Xie:CYAATTWT HOXA4

CTAATTGCA ENSG00000207617|hsa-mir-24-1

CTACAACCTC ENSG00000207698|hsa-mir-32

CTACACTTC ENSG00000207745|hsa-mir-17 ENSG00000207610|hsa-mir-19a ENSG00000199149|hsa-mir-20a ENSG00000207797|hsa-mir-187

CTACAGCGA ENSG00000198984|hsa-mir-345

CTACATCTC ENSG00000207585|hsa-mir-181d

CTACCAATC ENSG00000199059|hsa-mir-135b

CTACCACGC ENSG00000199065|hsa-mir-101-2

CTACCATTC ENSG00000207994|hsa-mir-100 ENSG00000207971|hsa-mir-125b-1 ENSG00000198975|hsa-let-7a-2

CTACCTACA ENSG00000199172|hsa-mir-331

CTACCTGGA ENSG00000207649|hsa-mir-138-2

CTACCTTAA ENSG00000207745|hsa-mir-17 ENSG00000207610|hsa-mir-19a ENSG00000199149|hsa-mir-20a

CTACGACTC ENSG00000207698|hsa-mir-32

CTACTCCCC ENSG00000207948|hsa-mir-328

CTACTGCCA ENSG00000207732|hsa-mir-218-1

CTACTGTAC ENSG00000207604|hsa-mir-206 ENSG00000199080|hsa-mir-133b

CTACTTAAA ENSG00000199082|hsa-mir-342

CTACTTGTC ENSG00000207795|hsa-mir-155

CTAGAAATA ENSG00000199077|hsa-mir-129-2

CTAGAAGCA ENSG00000207633|hsa-mir-505

CTAGAGCTC ENSG00000208009|hsa-mir-130a

CTAGAGGGA ENSG00000207939|hsa-mir-223

CTAGCAACA ENSG00000207790|hsa-mir-29b-2 ENSG00000207966|hsa-mir-29c

CTAGCCCGC ENSG00000207611|hsa-mir-149

CTAGCGGAA ENSG00000207617|hsa-mir-24-1 ENSG00000208009|hsa-mir-130a

CTAGGCCTC ENSG00000199023|hsa-mir-339 ENSG00000208009|hsa-mir-130a

CTAGGGCAC ENSG00000198986|hsa-let-7a-3 ENSG00000207875|hsa-let-7b

CTAGGGGTC ENSG00000207939|hsa-mir-223

CTAGGTAAA ENSG00000199088|hsa-mir-379 ENSG00000207749|hsa-mir-299 ENSG00000198982|hsa-mir-380 ENSG00000199069|hsa-mir-323 ENSG00000211582|hsa-mir-758 ENSG00000207761|hsa-mir-329-1 ENSG00000194717|hsa-mir-494

ENSG00000207743|hsa-mir-495 ENSG00000199020|hsa-mir-381 ENSG00000207754|hsa-mir-487b ENSG00000202560|hsa-mir-539 ENSG00000207993|hsa-mir-134 ENSG00000207961|hsa-mir-496 ENSG00000199015|hsa-mir-377

ENSG00000199107|hsa-mir-409 ENSG00000199012|hsa-mir-412 ENSG00000199025|hsa-mir-369 ENSG00000199092|hsa-mir-410 ENSG00000210741|hsa-mir-196a-1

CTAGGTCAA ENSG00000210741|hsa-mir-196a-1

TTGACCTAG Xie:TGACCT ER

CTAGTAAAA ENSG00000207809|hsa-mir-139 ENSG00000198987|hsa-mir-16-2 ENSG00000207827|hsa-mir-30a ENSG00000199094|hsa-mir-30c-2

CTAGTGGGA ENSG00000207732|hsa-mir-218-1

CTATAAAAAG ENSG00000207953|hsa-mir-212

CTATAAATC ENSG00000207994|hsa-mir-100 ENSG00000207971|hsa-mir-125b-1 ENSG00000198975|hsa-let-7a-2

CTATAAATC MATCH:V\$CDXA\_02 CdxA

CTATCTGTC ENSG00000199157|hsa-mir-208

CTATCTTCC ENSG00000207638|hsa-mir-99a ENSG00000207863|hsa-mir-125b-2

CTATCTTTA ENSG00000208005|hsa-mir-503 ENSG00000207784|hsa-mir-542

CTATGCAAA ENSG00000202569|hsa-mir-146b

CTATGGATA ENSG00000199172|hsa-mir-331

CTATGGTAC ENSG00000199071|hsa-mir-423

CTATGGTCC ENSG00000207782|hsa-mir-150

CTATGTACA ENSG00000202609|hsa-mir-488

CTATTCCCA ENSG00000207618|hsa-mir-144 ENSG00000207794|hsa-mir-451 ENSG00000207731|hsa-mir-506

CTATTGACA ENSG00000207695|hsa-mir-184

CTATTGGCC ENSG00000199065|hsa-mir-101-2

CTATTGTGC ENSG00000207548|hsa-mir-217  
 CTATTTAAA ENSG00000207789|hsa-mir-26a-2  
 CTATTTTTA ENSG00000199017|hsa-mir-1-1 ENSG00000207764|hsa-mir-133a-2 ENSG00000207635|hsa-mir-499 ENSG00000207548|hsa-mir-217 ENSG00000207624|hsa-mir-194-1 ENSG00000207590|hsa-mir-215  
 TAAAAATAG Xie:YTAATAWATAGCY MEF-2  
 CTCAAACCA ENSG00000199121|hsa-mir-26b ENSG00000199071|hsa-mir-423 ENSG00000199088|hsa-mir-379 ENSG00000207749|hsa-mir-299 ENSG00000198982|hsa-mir-380 ENSG00000199069|hsa-mir-323 ENSG00000211582|hsa-mir-758  
 ENSG00000207761|hsa-mir-329-1 ENSG00000194717|hsa-mir-494 ENSG00000207743|hsa-mir-495 ENSG00000199020|hsa-mir-381 ENSG00000207754|hsa-mir-487b ENSG00000202560|hsa-mir-539 ENSG00000207993|hsa-mir-134  
 ENSG00000207961|hsa-mir-496 ENSG00000199015|hsa-mir-377 ENSG00000199107|hsa-mir-409 ENSG00000199012|hsa-mir-412 ENSG00000199025|hsa-mir-369 ENSG00000199092|hsa-mir-410 ENSG00000207777|hsa-mir-10a  
 CTCAACCAA ENSG00000207623|hsa-mir-205  
 CTCAAAGTGC ENSG00000207950|hsa-mir-296  
 CTCAAAGTGC Xie:TYAAGTG NKX2-5  
 CTCACAACA ENSG00000207604|hsa-mir-206 ENSG00000199080|hsa-mir-133b ENSG00000207827|hsa-mir-30a ENSG00000199094|hsa-mir-30c-2  
 CTCACATAC ENSG00000207618|hsa-mir-144 ENSG00000207794|hsa-mir-451  
 CTCACCGGA ENSG00000208017|hsa-mir-140  
 CTCACGACC ENSG00000198981|hsa-mir-29a  
 CTCACGTGC ENSG00000207950|hsa-mir-296  
 GCACGTGAG Xie:SCACGTG MYC  
 CTCAGACAA ENSG00000207730|hsa-mir-200b ENSG00000207607|hsa-mir-200a ENSG00000198976|hsa-mir-429  
 CTCAGACGC ENSG00000207730|hsa-mir-200b ENSG00000207607|hsa-mir-200a ENSG00000198976|hsa-mir-429  
 CTCAGTAAG ENSG00000207725|hsa-mir-222 ENSG00000207870|hsa-mir-221  
 CTCAGTAGC ENSG00000199017|hsa-mir-1-1 ENSG00000207764|hsa-mir-133a-2 ENSG00000207730|hsa-mir-200b ENSG00000207607|hsa-mir-200a ENSG00000198976|hsa-mir-429  
 CTCATAAAA ENSG00000198987|hsa-mir-16-2 ENSG00000207721|hsa-mir-186  
 CTCATACAA ENSG00000207731|hsa-mir-506  
 CTCATCAGC ENSG00000207702|hsa-mir-211  
 CTCATGACA ENSG00000198995|hsa-mir-340  
 CTCATGTTC ENSG00000199122|hsa-mir-148b  
 CTCATTACC ENSG00000207980|hsa-mir-23a ENSG00000209707|hsa-mir-24-2 ENSG00000207808|hsa-mir-27a  
 CTCATTCAA ENSG00000207548|hsa-mir-217  
 CTCATTCCAC ENSG00000207739|hsa-mir-218-2  
 CTCATTCCA ENSG00000199077|hsa-mir-129-2 ENSG00000198981|hsa-mir-29a ENSG00000199043|hsa-mir-335  
 CTCCAACCA ENSG00000199135|hsa-mir-101-1 ENSG00000207695|hsa-mir-184  
 CTCACCAA ENSG00000207947|hsa-mir-152  
 CTCACCTA ENSG00000207571|hsa-mir-615 ENSG00000207721|hsa-mir-186  
 CTCATAAAA ENSG00000208017|hsa-mir-140  
 CTCACCGGAG ENSG00000207571|hsa-mir-615  
 CTCCTATA ENSG00000199122|hsa-mir-148b  
 CTCCTTAA ENSG00000198987|hsa-mir-16-2 ENSG00000207718|hsa-mir-15a ENSG00000208006|hsa-mir-16-1  
 CTCGAAAC ENSG00000199071|hsa-mir-423  
 CTCGGAACC ENSG00000199077|hsa-mir-129-2  
 CTCGCGCTC ENSG00000207698|hsa-mir-32  
 CTCGGAAA ENSG00000199017|hsa-mir-1-1 ENSG00000207764|hsa-mir-133a-2  
 CTCGGAAC ENSG00000207732|hsa-mir-218-1  
 CTCGGATC ENSG00000198974|hsa-mir-30e ENSG00000207962|hsa-mir-30c-1  
 CTCGGTGAC ENSG00000199071|hsa-mir-423  
 CTCCTAAG ENSG00000207950|hsa-mir-296  
 CTCCTAAC ENSG00000198973|hsa-mir-375  
 CTCCTAGAC ENSG00000207638|hsa-mir-99a ENSG00000207863|hsa-mir-125b-2  
 CTCCTATA ENSG00000207624|hsa-mir-194-1 ENSG00000207590|hsa-mir-215  
 CTCGAGCTC ENSG00000198974|hsa-mir-30e ENSG00000207962|hsa-mir-30c-1  
 CTCGCGACA ENSG00000208037|hsa-mir-320  
 CTCGCGACC ENSG00000207953|hsa-mir-212  
 CTCGCGAGA ENSG00000207698|hsa-mir-32  
 CTCGCGCAC ENSG00000207611|hsa-mir-149  
 CTCGCGGCA ENSG00000207728|hsa-mir-449b  
 CTCGCTGAC ENSG00000207713|hsa-mir-200c ENSG00000207708|hsa-mir-141  
 CTCGGAAC ENSG00000207955|hsa-mir-219-2  
 CTCGGAAGA ENSG00000199082|hsa-mir-342  
 CTCGGCCAA ENSG00000199121|hsa-mir-26b  
 CTCGGCTCA ENSG00000207614|hsa-mir-193a ENSG00000199187|hsa-mir-365-2 ENSG00000199058|hsa-mir-302b ENSG00000199169|hsa-mir-367 ENSG00000199145|hsa-mir-302d ENSG00000199102|hsa-mir-302c  
 CTCGGCTGA ENSG00000202569|hsa-mir-146b  
 CTCGGGGGA ENSG00000207865|hsa-mir-34a  
 CTCGGTTAC ENSG00000207614|hsa-mir-193a ENSG00000199187|hsa-mir-365-2  
 CTCGTTAAA ENSG00000199085|hsa-mir-148a  
 CTCCTAACAA ENSG00000207745|hsa-mir-17 ENSG00000207610|hsa-mir-19a ENSG00000199149|hsa-mir-20a  
 CTCCTAACCC ENSG00000207933|hsa-mir-9-1  
 CTCCTAAGTA ENSG00000207624|hsa-mir-194-1 ENSG00000207590|hsa-mir-215  
 CTCCTAATA ENSG00000199177|hsa-mir-31  
 CTCCTAATTA ENSG00000199165|hsa-let-7a-1 ENSG00000199072|hsa-let-7f-1 ENSG00000199133|hsa-let-7d  
 CTCCTACAGC ENSG00000207618|hsa-mir-144 ENSG00000207794|hsa-mir-451  
 CTCCTATAAA ENSG00000207586|hsa-mir-135a-2  
 CTCCTATCAG ENSG00000207948|hsa-mir-328 ENSG00000207827|hsa-mir-30a ENSG00000199094|hsa-mir-30c-2  
 CTCCTATTAA ENSG00000199157|hsa-mir-208  
 CTCCTATTC ENSG00000207809|hsa-mir-139  
 CTCCTCTAAC ENSG00000207933|hsa-mir-9-1  
 CTCCTGACGA ENSG00000207728|hsa-mir-449b ENSG00000207933|hsa-mir-9-1  
 CTCCTGTTTA ENSG00000207809|hsa-mir-139 ENSG00000198981|hsa-mir-29a  
 TAAACAGAG Xie:CTWAWGTAACANWG  
 CTCCTAATC ENSG00000207718|hsa-mir-15a ENSG00000208006|hsa-mir-16-1  
 CTCCTAACCC ENSG00000207721|hsa-mir-186  
 CTCCTCCGA ENSG00000199082|hsa-mir-342  
 CTCCTGCGC ENSG00000207614|hsa-mir-193a ENSG00000199187|hsa-mir-365-2  
 CTCCTGTGA ENSG00000207752|hsa-mir-199a-1  
 CTGAAACTC ENSG00000207739|hsa-mir-218-2  
 CTGAACACC ENSG00000211517|hsa-mir-671 ENSG00000207692|hsa-mir-592  
 CTGAACCAA ENSG00000199130|hsa-mir-365-1 ENSG00000207630|hsa-mir-7-3  
 CTGAACTGA ENSG00000207692|hsa-mir-592  
 CTGAAGATA ENSG00000207939|hsa-mir-223  
 CTGAATCAG ENSG00000199165|hsa-let-7a-1 ENSG00000199072|hsa-let-7f-1 ENSG00000199133|hsa-let-7d  
 CTGAATGGA ENSG00000207739|hsa-mir-218-2  
 CTGAATGGC ENSG00000207732|hsa-mir-218-1  
 CTGAATGTC ENSG00000207954|hsa-mir-138-1  
 CTGACAAGC ENSG00000199053|hsa-mir-324 ENSG00000199059|hsa-mir-135b ENSG00000199172|hsa-mir-331

CTGACAGTC ENSG00000198984|hsa-mir-345  
 CTGACAGTC Xie: TGACAG MEIS1  
 CTGACCATC ENSG00000199004|hsa-mir-21 ENSG00000207731|hsa-mir-506  
 CTGACCCCC ENSG00000208009|hsa-mir-130a  
 CTGACCTGA ENSG00000199053|hsa-mir-324 ENSG00000202609|hsa-mir-488 ENSG00000207623|hsa-mir-205  
 CTGACCTGA Xie: TGACCT ER  
 CTGACCTTC ENSG00000207585|hsa-mir-181d  
 CTGACCTTC Xie: TGACCT ER  
 CTGACGACA ENSG00000207728|hsa-mir-449b  
 CTGACGCAA ENSG00000199089|hsa-mir-202 ENSG00000207717|hsa-mir-551b  
 CTGACGCCA ENSG00000199023|hsa-mir-339  
 CTGACGCCG ENSG00000207953|hsa-mir-212  
 CTGACGCCG ENSG00000199058|hsa-mir-302b ENSG00000199169|hsa-mir-367 ENSG00000199145|hsa-mir-302d ENSG00000199102|hsa-mir-302c  
 CTGAGTAAC ENSG00000199059|hsa-mir-135b ENSG00000198981|hsa-mir-29a  
 CTGAGTAAC ENSG00000199153|hsa-mir-30d ENSG00000207582|hsa-mir-30b ENSG00000199172|hsa-mir-331  
 CTGAGTCAC ENSG00000207567|hsa-mir-142  
 CTGAGTCAC Xie: CTGASTCA AP-1  
 GTGACTCAG Xie: RTGACTCAGCA NF-E2  
 CTGATAAAG ENSG00000207651|hsa-mir-28  
 CTGATACCA ENSG00000207721|hsa-mir-186 ENSG00000207790|hsa-mir-29b-2 ENSG00000207966|hsa-mir-29c  
 CTGATAGGC ENSG00000207571|hsa-mir-615  
 CTGATCCTC ENSG00000207568|hsa-mir-203  
 CTGATCTCA ENSG00000198984|hsa-mir-345 ENSG00000199043|hsa-mir-335  
 CTGATGCAA ENSG00000207691|hsa-mir-183 ENSG00000207990|hsa-mir-182 ENSG00000199158|hsa-mir-96 ENSG00000211574|hsa-mir-770 ENSG00000208001|hsa-mir-431 ENSG00000199005|hsa-mir-370  
 CTGATGGTA ENSG00000198974|hsa-mir-30e ENSG00000207962|hsa-mir-30c-1 ENSG00000207692|hsa-mir-592  
 CTGATGTCA ENSG00000198981|hsa-mir-29a  
 CTGATGTGC ENSG00000199047|hsa-mir-378 ENSG00000207705|hsa-mir-129-1  
 CTGATTAAC ENSG00000199088|hsa-mir-379 ENSG00000207749|hsa-mir-299 ENSG00000198982|hsa-mir-380 ENSG00000199069|hsa-mir-323 ENSG00000211582|hsa-mir-758 ENSG00000207761|hsa-mir-329-1 ENSG00000194717|hsa-mir-494  
 ENSG00000207743|hsa-mir-495 ENSG00000199020|hsa-mir-381 ENSG00000207754|hsa-mir-487b ENSG00000202560|hsa-mir-539 ENSG00000207993|hsa-mir-134 ENSG00000207961|hsa-mir-496 ENSG00000199015|hsa-mir-377  
 ENSG00000199107|hsa-mir-409 ENSG00000199012|hsa-mir-412 ENSG00000199025|hsa-mir-369 ENSG00000199092|hsa-mir-410  
 CTGATTCAC ENSG00000198973|hsa-mir-375  
 CTGATTTGC ENSG00000199157|hsa-mir-208  
 CTGCAACA ENSG00000207581|hsa-mir-199b  
 CTGCAACAC ENSG00000207571|hsa-mir-615 ENSG00000207731|hsa-mir-506  
 CTGCAACTC ENSG00000199088|hsa-mir-379 ENSG00000207749|hsa-mir-299 ENSG00000198982|hsa-mir-380 ENSG00000199069|hsa-mir-323 ENSG00000211582|hsa-mir-758 ENSG00000207761|hsa-mir-329-1 ENSG00000194717|hsa-mir-494  
 ENSG00000207743|hsa-mir-495 ENSG00000199020|hsa-mir-381 ENSG00000207754|hsa-mir-487b ENSG00000202560|hsa-mir-539 ENSG00000207993|hsa-mir-134 ENSG00000207961|hsa-mir-496 ENSG00000199015|hsa-mir-377  
 ENSG00000199107|hsa-mir-409 ENSG00000199012|hsa-mir-412 ENSG00000199025|hsa-mir-369 ENSG00000199092|hsa-mir-410  
 CTGCACAAC ENSG00000199122|hsa-mir-148b  
 CTGCACGTC ENSG00000199038|hsa-mir-210  
 CTGCATGTC ENSG00000207695|hsa-mir-184  
 CTGCATTAA ENSG00000207586|hsa-mir-135a-2  
 CTGCCAACA ENSG00000198981|hsa-mir-29a  
 CTGCCCATA ENSG00000207633|hsa-mir-505  
 CTGCCGATC ENSG00000199121|hsa-mir-26b  
 CTGCCGGGC ENSG00000207752|hsa-mir-199a-1 ENSG00000207980|hsa-mir-23a ENSG00000209707|hsa-mir-24-2 ENSG00000207808|hsa-mir-27a  
 CTGCCTAAC ENSG00000207950|hsa-mir-296 ENSG00000207638|hsa-mir-99a ENSG00000207863|hsa-mir-125b-2  
 CTGCCTAGA ENSG00000207691|hsa-mir-183 ENSG00000207990|hsa-mir-182 ENSG00000199158|hsa-mir-96  
 CTGCCGAGA ENSG00000207617|hsa-mir-24-1  
 CTGCCGAGC ENSG00000199047|hsa-mir-378  
 CTGCCGATC ENSG00000207739|hsa-mir-218-2 ENSG00000207926|hsa-mir-135a-1  
 CTGCCGAAA ENSG00000199077|hsa-mir-129-2  
 CTGCCGTGAC ENSG00000207635|hsa-mir-499 ENSG00000207732|hsa-mir-218-1 ENSG00000208036|hsa-mir-106b ENSG00000207547|hsa-mir-25 ENSG00000207757|hsa-mir-93  
 CTGCTGACA ENSG00000207702|hsa-mir-211 ENSG00000208024|hsa-mir-199a-2 ENSG00000207949|hsa-mir-214  
 CTGCTTAAC ENSG00000202609|hsa-mir-488 ENSG00000208024|hsa-mir-199a-2 ENSG00000207949|hsa-mir-214  
 CTGGAACAA ENSG00000198973|hsa-mir-375 ENSG00000199082|hsa-mir-342 ENSG00000211590|hsa-mir-802  
 CTGGACCAC ENSG00000199089|hsa-mir-202  
 CTGGATGAC ENSG00000207604|hsa-mir-206 ENSG00000199080|hsa-mir-133b ENSG00000208005|hsa-mir-503 ENSG00000207784|hsa-mir-542  
 CTGGATGGC ENSG00000207604|hsa-mir-206 ENSG00000199080|hsa-mir-133b  
 CTGGCAACC ENSG00000199082|hsa-mir-342  
 CTGGCATAA ENSG00000207581|hsa-mir-199b  
 CTGGCCTGA ENSG00000208024|hsa-mir-199a-2 ENSG00000207949|hsa-mir-214  
 CTGGCGGAA ENSG00000199077|hsa-mir-129-2 ENSG00000208037|hsa-mir-320  
 CTGGCGTCA ENSG00000207581|hsa-mir-199b  
 CTGGCGTGA ENSG00000207811|hsa-mir-34b ENSG00000207562|hsa-mir-34c  
 CTGGCGTGA Xie: TnGCGTG AHR  
 CTGGCTTGA ENSG00000202569|hsa-mir-146b  
 CTGGGAATA ENSG00000207618|hsa-mir-144 ENSG00000207794|hsa-mir-451 ENSG00000207731|hsa-mir-506  
 TATTCCAG Xie: GGYATTCCAnd IK-1  
 CTGGGTAAC ENSG00000207752|hsa-mir-199a-1  
 CTGGGTACA ENSG00000207948|hsa-mir-328  
 CTGGTACCA ENSG00000207705|hsa-mir-129-1 ENSG00000208024|hsa-mir-199a-2 ENSG00000207949|hsa-mir-214  
 CTGGTCAAA ENSG00000207694|hsa-mir-1-2  
 CTGGTGATA ENSG00000198974|hsa-mir-30e ENSG00000207962|hsa-mir-30c-1  
 CTGGTGTGA ENSG00000207790|hsa-mir-29b-2 ENSG00000207966|hsa-mir-29c  
 CTGGTTAAA ENSG00000207602|hsa-mir-106a ENSG00000207572|hsa-mir-363 ENSG00000207710|hsa-mir-20b  
 CTGGTTGCC ENSG00000199023|hsa-mir-339  
 CTGGTTGGA ENSG00000199122|hsa-mir-148b ENSG00000199135|hsa-mir-101-1 ENSG00000207695|hsa-mir-184  
 CTGGTTGTC ENSG00000207726|hsa-mir-455  
 CTGGTTTAC ENSG00000207698|hsa-mir-32  
 CTGGTTTGA ENSG00000199121|hsa-mir-26b ENSG00000199071|hsa-mir-423 ENSG00000207694|hsa-mir-1-2  
 CTGTAACAG ENSG00000207702|hsa-mir-211  
 CTGTAATGA ENSG00000199165|hsa-let-7a-1 ENSG00000199072|hsa-let-7f-1 ENSG00000199133|hsa-let-7d  
 CTGTACATC ENSG00000199153|hsa-mir-30d ENSG00000207582|hsa-mir-30b ENSG00000199165|hsa-let-7a-1 ENSG00000199072|hsa-let-7f-1 ENSG00000199133|hsa-let-7d  
 CTGTAGGTA ENSG00000198974|hsa-mir-30e ENSG00000207962|hsa-mir-30c-1  
 CTGTATTGA ENSG00000208009|hsa-mir-130a  
 CTGTCAACA ENSG00000207827|hsa-mir-30a ENSG00000199094|hsa-mir-30c-2  
 TGTTGACAG Xie: TGACAG MEIS1  
 CTGTACACA ENSG00000207726|hsa-mir-455 ENSG00000208024|hsa-mir-199a-2 ENSG00000207949|hsa-mir-214  
 TGCTGACAG Xie: TGACAG MEIS1  
 CTGTACAGTA ENSG00000207950|hsa-mir-296  
 TACTGACAG Xie: TGACAG MEIS1



|           |                                        |                                |                               |                               |
|-----------|----------------------------------------|--------------------------------|-------------------------------|-------------------------------|
| CTGTCAGTC | ENSG00000207550 hsa-mir-99b            | ENSG00000198972 hsa-let-7e     | ENSG00000211517 hsa-mir-671   | ENSG00000199135 hsa-mir-101-1 |
|           | GACTGACAG    Xie: TGACAG    MEIS1      |                                |                               |                               |
| CTGTCATGC | ENSG00000207638 hsa-mir-99a            | ENSG00000207863 hsa-mir-125b-2 |                               |                               |
|           | GCATGACAG    Xie: TGACAG    MEIS1      |                                |                               |                               |
| CTGTCCAAC | ENSG00000199135 hsa-mir-101-1          |                                |                               |                               |
| CTGTCCGTC | ENSG00000207567 hsa-mir-142            |                                |                               |                               |
| CTGTGGAAG | ENSG00000198986 hsa-let-7a-3           | ENSG00000207875 hsa-let-7b     |                               |                               |
| CTGTGCGAA | ENSG00000202641 hsa-mir-484            |                                |                               |                               |
| CTGTGCGGA | ENSG00000207656 hsa-mir-489            | ENSG00000207732 hsa-mir-218-1  |                               |                               |
| CTGTCTAGA | ENSG00000207751 hsa-mir-130b           |                                |                               |                               |
| CTGTGATTA | ENSG00000199121 hsa-mir-26b            |                                |                               |                               |
| CTGTGGAAC | ENSG00000199157 hsa-mir-208            | ENSG00000207705 hsa-mir-129-1  | ENSG00000199043 hsa-mir-335   |                               |
| CTGTGGCAC | ENSG00000208024 hsa-mir-199a-2         | ENSG00000207949 hsa-mir-214    |                               |                               |
| CTGTGTAAG | ENSG00000207721 hsa-mir-186            |                                |                               |                               |
| CTGTTATTC | ENSG00000207651 hsa-mir-28             |                                |                               |                               |
| CTGTTCCAA | ENSG00000199036 hsa-mir-219-1          |                                |                               |                               |
| CTGTTGAAG | ENSG00000207597 hsa-mir-490            |                                |                               |                               |
| CTGTTGACA | ENSG00000207827 hsa-mir-30a            | ENSG00000199094 hsa-mir-30c-2  |                               |                               |
| CTGTTGACC | ENSG00000207947 hsa-mir-152            |                                |                               |                               |
| CTGTTGATC | ENSG00000199023 hsa-mir-339            |                                |                               |                               |
| CTGTTGCCG | ENSG00000199085 hsa-mir-148a           |                                |                               |                               |
|           | CTGTTGCCG    MATCH: V\$RFX_Q6    RFX   |                                |                               |                               |
| CTGTTGGCA | ENSG00000198981 hsa-mir-29a            |                                |                               |                               |
| CTGTTGTAA | ENSG00000208035 hsa-mir-143            |                                |                               |                               |
| CTGTTTAAA | ENSG00000207721 hsa-mir-186            |                                |                               |                               |
| CTGTTTACA | ENSG00000207752 hsa-mir-199a-1         |                                |                               |                               |
|           | TGTAACAG    Xie: CTWAWGTAACAnWG        | FREAC-4                        |                               |                               |
| CTGTTTGCA | ENSG00000207585 hsa-mir-181d           |                                |                               |                               |
| CTGTTTGA  | ENSG00000198987 hsa-mir-16-2           |                                |                               |                               |
| CTTAAAACC | ENSG00000199082 hsa-mir-342            |                                |                               |                               |
| CTTAAACTC | ENSG00000207694 hsa-mir-1-2            |                                |                               |                               |
| CTTAAAGAC | ENSG00000207955 hsa-mir-219-2          |                                |                               |                               |
| CTTAAACCC | ENSG00000207713 hsa-mir-200c           | ENSG00000207708 hsa-mir-141    |                               |                               |
| CTTAACTAA | ENSG00000207933 hsa-mir-9-1            |                                |                               |                               |
| CTTAATAAA | ENSG00000202641 hsa-mir-484            |                                |                               |                               |
| CTTAATCCA | ENSG00000207651 hsa-mir-28             |                                |                               |                               |
| CTTAATCCC | ENSG00000207571 hsa-mir-615            |                                |                               |                               |
| CTTAATGAA | ENSG00000208017 hsa-mir-140            |                                |                               |                               |
| CTTAATGTC | ENSG00000207624 hsa-mir-194-1          | ENSG00000207590 hsa-mir-215    |                               |                               |
| CTTAATTGA | ENSG00000211574 hsa-mir-770            | ENSG00000208001 hsa-mir-431    | ENSG00000199005 hsa-mir-370   |                               |
|           | CTTAATTGA    Xie: CWTAAATG    NKX2-5   |                                |                               |                               |
| CTTAATTGC | ENSG00000207935 hsa-mir-204            |                                |                               |                               |
|           | CTTAATTGC    Xie: CWTAAATG    NKX2-5   |                                |                               |                               |
| CTTACATAA | ENSG00000207717 hsa-mir-551b           |                                |                               |                               |
| CTTACCCAC | ENSG00000202569 hsa-mir-146b           |                                |                               |                               |
| CTTACCTGC | ENSG00000207581 hsa-mir-199b           | ENSG00000207705 hsa-mir-129-1  |                               |                               |
| CTTACTCAA | ENSG00000207694 hsa-mir-1-2            | ENSG00000211574 hsa-mir-770    | ENSG00000208001 hsa-mir-431   | ENSG00000199005 hsa-mir-370   |
| CTTACTGCA | ENSG00000199135 hsa-mir-101-1          | ENSG00000207790 hsa-mir-29b-2  | ENSG00000207966 hsa-mir-29c   | ENSG00000207954 hsa-mir-138-1 |
| CTTAGCTTA | ENSG00000199058 hsa-mir-302b           | ENSG00000199169 hsa-mir-367    | ENSG00000199145 hsa-mir-302d  | ENSG00000199102 hsa-mir-302c  |
| CTTAGGGAA | ENSG00000198987 hsa-mir-16-2           |                                |                               |                               |
| CTTAGGTAA | ENSG00000207602 hsa-mir-106a           | ENSG00000207572 hsa-mir-363    | ENSG00000207710 hsa-mir-20b   | ENSG00000207651 hsa-mir-28    |
| CTTAGTCCA | ENSG00000207739 hsa-mir-218-2          | ENSG00000198987 hsa-mir-16-2   |                               |                               |
| CTTATAGCC | ENSG00000199082 hsa-mir-342            |                                |                               |                               |
| CTTATATAC | ENSG00000199017 hsa-mir-1-1            | ENSG00000207764 hsa-mir-133a-2 |                               |                               |
| CTTATCAAC | ENSG00000207865 hsa-mir-34a            |                                |                               |                               |
| CTTATCAGC | ENSG00000207933 hsa-mir-9-1            |                                |                               |                               |
| CTTATCTGC | ENSG00000208024 hsa-mir-199a-2         | ENSG00000207949 hsa-mir-214    |                               |                               |
| CTTATTTGC | ENSG00000211590 hsa-mir-802            |                                |                               |                               |
| CTTCACACC | ENSG00000199161 hsa-mir-126            | ENSG00000207777 hsa-mir-10a    | ENSG00000207790 hsa-mir-29b-2 | ENSG00000207966 hsa-mir-29c   |
| CTTCACGTC | ENSG00000199161 hsa-mir-126            |                                |                               |                               |
| CTTCAGATC | ENSG00000207602 hsa-mir-106a           | ENSG00000207572 hsa-mir-363    | ENSG00000207710 hsa-mir-20b   |                               |
| CTTCAGCAC | ENSG00000207960 hsa-mir-153-2          |                                |                               |                               |
| CTTCAGGCC | ENSG00000208024 hsa-mir-199a-2         | ENSG00000207949 hsa-mir-214    |                               |                               |
| CTTCATCAA | ENSG00000199088 hsa-mir-379            | ENSG00000207749 hsa-mir-299    | ENSG00000198982 hsa-mir-380   | ENSG00000199069 hsa-mir-323   |
|           | ENSG00000207743 hsa-mir-495            | ENSG00000199020 hsa-mir-381    | ENSG00000207754 hsa-mir-487b  | ENSG00000202560 hsa-mir-539   |
|           | ENSG00000199107 hsa-mir-409            | ENSG00000199012 hsa-mir-412    | ENSG00000199025 hsa-mir-369   | ENSG00000199092 hsa-mir-410   |
|           | ENSG00000207752 hsa-mir-199a-1         |                                |                               | ENSG00000211582 hsa-mir-758   |
|           | ENSG00000199024 hsa-mir-103-2          |                                |                               | ENSG00000207761 hsa-mir-329-1 |
|           | ENSG00000198995 hsa-mir-340            |                                |                               | ENSG00000207961 hsa-mir-496   |
|           | ENSG00000207617 hsa-mir-24-1           |                                |                               | ENSG00000199015 hsa-mir-377   |
|           | ENSG00000198984 hsa-mir-345            |                                |                               | ENSG00000208006 hsa-mir-16-1  |
|           | ENSG00000199024 hsa-mir-103-2          |                                |                               |                               |
|           | ENSG00000199122 hsa-mir-148b           |                                |                               |                               |
|           | ENSG00000199085 hsa-mir-148a           |                                |                               |                               |
|           | ENSG00000207596 hsa-mir-194-2          | ENSG00000207648 hsa-mir-192    | ENSG00000207777 hsa-mir-10a   |                               |
|           | ENSG00000207702 hsa-mir-211            |                                |                               |                               |
|           | ENSG00000207980 hsa-mir-23a            | ENSG00000209707 hsa-mir-24-2   | ENSG00000207808 hsa-mir-27a   |                               |
|           | ENSG00000207777 hsa-mir-10a            |                                |                               |                               |
|           | ENSG00000207789 hsa-mir-26a-2          |                                |                               |                               |
|           | ENSG00000207935 hsa-mir-204            |                                |                               |                               |
|           | ENSG00000199058 hsa-mir-302b           | ENSG00000199169 hsa-mir-367    | ENSG00000199145 hsa-mir-302d  | ENSG00000199102 hsa-mir-302c  |
|           | ENSG00000210741 hsa-mir-196a-1         |                                |                               |                               |
|           | CTTGACCTA    Xie: MnTGWCCT    T3R      |                                |                               |                               |
|           | CTTGACCTA    Xie: TGACCT    ER         |                                |                               |                               |
| CTTGACGTC | ENSG00000199121 hsa-mir-26b            |                                |                               |                               |
|           | GACGTCAAG    Xie: TGACGTCARRG    ATF-1 |                                |                               |                               |
| CTTGACTCA | ENSG00000199059 hsa-mir-135b           |                                |                               |                               |
| CTTGATGAC | ENSG00000207571 hsa-mir-615            |                                |                               |                               |
| CTTGATTAA | ENSG00000211590 hsa-mir-802            |                                |                               |                               |
| CTTGCAAAC | ENSG00000207731 hsa-mir-506            |                                |                               |                               |
| CTTGATCA  | ENSG00000211574 hsa-mir-770            | ENSG00000208001 hsa-mir-431    | ENSG00000199005 hsa-mir-370   |                               |

|            |                                |                                |                               |                                |                             |                             |                             |  |
|------------|--------------------------------|--------------------------------|-------------------------------|--------------------------------|-----------------------------|-----------------------------|-----------------------------|--|
| CTTGCGTCA  | ENSG00000199089 hsa-mir-202    | ENSG00000207717 hsa-mir-551b   |                               |                                |                             |                             |                             |  |
| CTTGCTGTA  | ENSG00000207602 hsa-mir-106a   | ENSG00000207572 hsa-mir-363    | ENSG00000207710 hsa-mir-20b   | ENSG00000207695 hsa-mir-184    | ENSG00000207795 hsa-mir-155 |                             |                             |  |
| CTTGCTTAC  | ENSG00000199122 hsa-mir-148b   |                                |                               |                                |                             |                             |                             |  |
| CTTGCAAC   | ENSG00000199023 hsa-mir-339    |                                |                               |                                |                             |                             |                             |  |
| CTTGCAAC   | Xie: GTTGCWGGYAAC              | MIF-1                          |                               |                                |                             |                             |                             |  |
| CTTGCGAC   | ENSG00000207732 hsa-mir-218-1  | ENSG00000207744 hsa-mir-10b    |                               |                                |                             |                             |                             |  |
| CTTGTAAC   | ENSG00000207797 hsa-mir-187    |                                |                               |                                |                             |                             |                             |  |
| CTTGTAAG   | ENSG00000207585 hsa-mir-181d   |                                |                               |                                |                             |                             |                             |  |
| CTTGCTTA   | ENSG00000207947 hsa-mir-152    |                                |                               |                                |                             |                             |                             |  |
| CTTGAGACA  | ENSG00000207725 hsa-mir-222    | ENSG00000207870 hsa-mir-221    |                               |                                |                             |                             |                             |  |
| CTTGAGACC  | ENSG00000199059 hsa-mir-135b   |                                |                               |                                |                             |                             |                             |  |
| CTTGTTAGC  | ENSG00000207698 hsa-mir-32     |                                |                               |                                |                             |                             |                             |  |
| CTTTAAATC  | ENSG00000207656 hsa-mir-489    | ENSG00000207726 hsa-mir-455    |                               |                                |                             |                             |                             |  |
| CTTTAACAC  | ENSG00000199122 hsa-mir-148b   |                                |                               |                                |                             |                             |                             |  |
| CTTTAAGAA  | ENSG00000208037 hsa-mir-320    |                                |                               |                                |                             |                             |                             |  |
| CTTTAATCA  | ENSG00000207995 hsa-mir-325    |                                |                               |                                |                             |                             |                             |  |
| CTTTAATGC  | ENSG00000207586 hsa-mir-135a-2 |                                |                               |                                |                             |                             |                             |  |
| CTTTATAGC  | ENSG00000198995 hsa-mir-340    |                                |                               |                                |                             |                             |                             |  |
| CTTTATCAC  | ENSG00000207728 hsa-mir-449b   | ENSG00000198974 hsa-mir-30e    | ENSG00000207962 hsa-mir-30c-1 | ENSG00000207717 hsa-mir-551b   | ENSG00000207745 hsa-mir-17  | ENSG00000207610 hsa-mir-19a | ENSG00000199149 hsa-mir-20a |  |
| CTTTATGAA  | ENSG00000207617 hsa-mir-24-1   |                                |                               |                                |                             |                             |                             |  |
| CTTTATGTC  | ENSG00000207950 hsa-mir-296    |                                |                               |                                |                             |                             |                             |  |
| CTTTCACFC  | ENSG00000207698 hsa-mir-32     |                                |                               |                                |                             |                             |                             |  |
| CTTTCCCGA  | ENSG00000207792 hsa-mir-151    |                                |                               |                                |                             |                             |                             |  |
| CTTTCGCTA  | ENSG00000199032 hsa-mir-425    |                                |                               |                                |                             |                             |                             |  |
| CTTTCGGGA  | ENSG00000198974 hsa-mir-30e    | ENSG00000207962 hsa-mir-30c-1  |                               |                                |                             |                             |                             |  |
| CTTTCCTAGA | ENSG00000207980 hsa-mir-23a    | ENSG00000207907 hsa-mir-24-2   | ENSG00000207808 hsa-mir-27a   |                                |                             |                             |                             |  |
| CTTTGAGCC  | ENSG00000207797 hsa-mir-187    |                                |                               |                                |                             |                             |                             |  |
| CTTTGAGCC  | Xie: CTTTGA                    | LEF1                           |                               |                                |                             |                             |                             |  |
| CTTTGATCA  | ENSG00000207980 hsa-mir-23a    | ENSG00000207907 hsa-mir-24-2   | ENSG00000207808 hsa-mir-27a   |                                |                             |                             |                             |  |
| CTTTGATCA  | Xie: CTTTGA                    | LEF1                           |                               |                                |                             |                             |                             |  |
| CTTTGCCGC  | ENSG00000207728 hsa-mir-449b   |                                |                               |                                |                             |                             |                             |  |
| CTTTGCCTA  | ENSG00000207752 hsa-mir-199a-1 |                                |                               |                                |                             |                             |                             |  |
| CTTTGGAAC  | ENSG00000207695 hsa-mir-184    | ENSG00000207933 hsa-mir-9-1    |                               |                                |                             |                             |                             |  |
| CTTTGGACC  | ENSG00000207586 hsa-mir-135a-2 |                                |                               |                                |                             |                             |                             |  |
| CTTTGTAGC  | ENSG00000207597 hsa-mir-490    |                                |                               |                                |                             |                             |                             |  |
| CTTTGTCAA  | ENSG00000207717 hsa-mir-551b   |                                |                               |                                |                             |                             |                             |  |
| CTTTGTCA   | ENSG00000207933 hsa-mir-9-1    |                                |                               |                                |                             |                             |                             |  |
| CTTTGTGCA  | ENSG00000199090 hsa-mir-326    |                                |                               |                                |                             |                             |                             |  |
| CTTTGTATC  | ENSG00000199059 hsa-mir-135b   |                                |                               |                                |                             |                             |                             |  |
| CTTTTATGC  | ENSG00000207568 hsa-mir-203    |                                |                               |                                |                             |                             |                             |  |
| CTTTCCGC   | ENSG00000207713 hsa-mir-200c   | ENSG00000207708 hsa-mir-141    |                               |                                |                             |                             |                             |  |
| CTTTCCGAA  | ENSG00000207865 hsa-mir-34a    |                                |                               |                                |                             |                             |                             |  |
| CTTTTGACC  | ENSG00000199066 hsa-mir-330    |                                |                               |                                |                             |                             |                             |  |
| CTTTTGAC   | ENSG00000199130 hsa-mir-365-1  |                                |                               |                                |                             |                             |                             |  |
| CTTTTGGAC  | ENSG00000202641 hsa-mir-484    |                                |                               |                                |                             |                             |                             |  |
| CTTTTGTGA  | ENSG00000207994 hsa-mir-100    | ENSG00000207971 hsa-mir-125b-1 | ENSG00000198975 hsa-let-7a-2  |                                |                             |                             |                             |  |
| CTTTTGTTC  | ENSG00000207548 hsa-mir-217    |                                |                               |                                |                             |                             |                             |  |
| CTTTTGAA   | ENSG00000199036 hsa-mir-219-1  |                                |                               |                                |                             |                             |                             |  |
| CTTTTGAC   | ENSG00000208024 hsa-mir-199a-2 | ENSG00000207949 hsa-mir-214    |                               |                                |                             |                             |                             |  |
| GAAAAACAC  | ENSG00000207585 hsa-mir-181d   |                                |                               |                                |                             |                             |                             |  |
| GAAAAACTC  | ENSG00000199077 hsa-mir-129-2  |                                |                               |                                |                             |                             |                             |  |
| GAAAAATAC  | ENSG00000207635 hsa-mir-499    |                                |                               |                                |                             |                             |                             |  |
| GAAAAACCC  | ENSG00000207752 hsa-mir-199a-1 |                                |                               |                                |                             |                             |                             |  |
| GAAAAACCC  | ENSG00000199122 hsa-mir-148b   |                                |                               |                                |                             |                             |                             |  |
| GGGGTTTT   | Xie: SGGGrTTTTCC               | C-REL                          |                               |                                |                             |                             |                             |  |
| GAAAACGAA  | ENSG00000207728 hsa-mir-449b   | ENSG00000207651 hsa-mir-28     |                               |                                |                             |                             |                             |  |
| TTCGTTTT   | Xie: AnTTTCGnWTTCSnA           | IRF-7                          |                               |                                |                             |                             |                             |  |
| GAAAACCTC  | ENSG00000199121 hsa-mir-26b    |                                |                               |                                |                             |                             |                             |  |
| GAAAAGCGA  | ENSG00000207811 hsa-mir-34b    | ENSG00000207562 hsa-mir-34c    | ENSG00000207638 hsa-mir-99a   | ENSG00000207863 hsa-mir-125b-2 |                             |                             |                             |  |
| TCGCTTTT   | Xie: GGTTCRCRTTTS              | IRF-1                          |                               |                                |                             |                             |                             |  |
| GAAAAGCGC  | ENSG00000211517 hsa-mir-671    |                                |                               |                                |                             |                             |                             |  |
| GAAAAGTCA  | ENSG00000207865 hsa-mir-34a    |                                |                               |                                |                             |                             |                             |  |
| GAAAATCCC  | ENSG00000207752 hsa-mir-199a-1 |                                |                               |                                |                             |                             |                             |  |
| GGGATTTT   | Xie: SGGGrTTTTCC               | C-REL                          |                               |                                |                             |                             |                             |  |
| GAAACAAGC  | ENSG00000199122 hsa-mir-148b   | ENSG00000211590 hsa-mir-802    |                               |                                |                             |                             |                             |  |
| GAAACAAA   | ENSG00000207611 hsa-mir-149    |                                |                               |                                |                             |                             |                             |  |
| GAAACCGCC  | ENSG00000207789 hsa-mir-26a-2  |                                |                               |                                |                             |                             |                             |  |
| GGCGTTTT   | Xie: GKCRGKTT                  | TCF-1 (P)                      |                               |                                |                             |                             |                             |  |
| GAAACGCGC  | ENSG00000198995 hsa-mir-340    | ENSG00000208037 hsa-mir-320    |                               |                                |                             |                             |                             |  |
| GAAACTACA  | ENSG00000207698 hsa-mir-32     |                                |                               |                                |                             |                             |                             |  |
| TGTAGTTT   | Xie: KTWGTTT                   | SRY                            |                               |                                |                             |                             |                             |  |
| GAAACTCAC  | ENSG00000207656 hsa-mir-489    |                                |                               |                                |                             |                             |                             |  |
| GAAACTCCC  | ENSG00000199161 hsa-mir-126    |                                |                               |                                |                             |                             |                             |  |
| GGGAGTTT   | Xie: SGGGrTTTTCC               | C-REL                          |                               |                                |                             |                             |                             |  |
| GAAACTTGC  | ENSG00000211574 hsa-mir-770    | ENSG00000208001 hsa-mir-431    | ENSG00000199005 hsa-mir-370   | ENSG00000211590 hsa-mir-802    |                             |                             |                             |  |
| GAAAGACGC  | ENSG00000199157 hsa-mir-208    |                                |                               |                                |                             |                             |                             |  |
| GAAAGCGAC  | ENSG00000199032 hsa-mir-425    |                                |                               |                                |                             |                             |                             |  |
| GAAAGCGGA  | ENSG00000207691 hsa-mir-183    | ENSG00000207990 hsa-mir-182    | ENSG00000199158 hsa-mir-96    | ENSG00000207955 hsa-mir-219-2  |                             |                             |                             |  |
| GAAAGGTGA  | ENSG00000198973 hsa-mir-375    |                                |                               |                                |                             |                             |                             |  |
| GAAAGGTTT  | ENSG00000198984 hsa-mir-345    | ENSG00000211563 hsa-mir-338    | ENSG00000207995 hsa-mir-325   |                                |                             |                             |                             |  |
| GAAAGTCCA  | ENSG00000207614 hsa-mir-193a   | ENSG00000199187 hsa-mir-365-2  |                               |                                |                             |                             |                             |  |
| GAAAGTCCC  | ENSG00000207571 hsa-mir-615    |                                |                               |                                |                             |                             |                             |  |
| GGGACTTT   | Xie: SGGGrTTTTCC               | C-REL                          |                               |                                |                             |                             |                             |  |
| GAAAGTCTC  | ENSG00000207624 hsa-mir-194-1  | ENSG00000207590 hsa-mir-215    |                               |                                |                             |                             |                             |  |
| GAAAGTGAC  | ENSG00000207602 hsa-mir-106a   | ENSG00000207572 hsa-mir-363    | ENSG00000207710 hsa-mir-20b   | ENSG00000210741 hsa-mir-196a-1 |                             |                             |                             |  |
| GAAAGTGGA  | ENSG00000208017 hsa-mir-140    |                                |                               |                                |                             |                             |                             |  |
| GAAAGTTAC  | ENSG00000199085 hsa-mir-148a   |                                |                               |                                |                             |                             |                             |  |
| GAAAGTTCA  | ENSG00000207995 hsa-mir-325    |                                |                               |                                |                             |                             |                             |  |
| GAAATAGGA  | ENSG00000199077 hsa-mir-129-2  |                                |                               |                                |                             |                             |                             |  |
| GAAATCAGC  | ENSG00000207692 hsa-mir-592    |                                |                               |                                |                             |                             |                             |  |
| GAAATCTCC  | ENSG00000202569 hsa-mir-146b   |                                |                               |                                |                             |                             |                             |  |



GAATTTCCC MATCH:V\$HMGYI\_Q6 HMGYI

GAATTTGCA ENSG00000207656|hsa-mir-489

GAATTTGCC ENSG00000207635|hsa-mir-499 ENSG00000207726|hsa-mir-455

GACAAAGAA ENSG00000199053|hsa-mir-324 ENSG00000199085|hsa-mir-148a ENSG00000199157|hsa-mir-208

GACAAAGAC ENSG00000207623|hsa-mir-205 ENSG00000207933|hsa-mir-9-1

GACAAAGCC ENSG00000199053|hsa-mir-324

GACAACCGA ENSG00000199088|hsa-mir-379 ENSG00000207749|hsa-mir-299 ENSG00000198982|hsa-mir-380 ENSG00000199069|hsa-mir-323 ENSG00000211582|hsa-mir-758 ENSG00000207761|hsa-mir-329-1 ENSG00000194717|hsa-mir-494

ENSG00000207743|hsa-mir-495 ENSG00000199020|hsa-mir-381 ENSG00000207754|hsa-mir-487b ENSG00000202560|hsa-mir-539 ENSG00000207993|hsa-mir-134 ENSG00000207961|hsa-mir-496 ENSG00000199015|hsa-mir-377

ENSG00000199107|hsa-mir-409 ENSG00000199012|hsa-mir-412 ENSG00000199025|hsa-mir-369 ENSG00000199092|hsa-mir-410

GACAACCTA ENSG00000198981|hsa-mir-29a

GACAAGATA ENSG00000207623|hsa-mir-205

GACAATGAA ENSG00000199153|hsa-mir-30d ENSG00000207582|hsa-mir-30b ENSG00000207933|hsa-mir-9-1 ENSG00000208005|hsa-mir-503 ENSG00000207784|hsa-mir-542

GACAATGCA ENSG00000199088|hsa-mir-379 ENSG00000207749|hsa-mir-299 ENSG00000198982|hsa-mir-380 ENSG00000199069|hsa-mir-323 ENSG00000211582|hsa-mir-758 ENSG00000207761|hsa-mir-329-1 ENSG00000194717|hsa-mir-494

ENSG00000207743|hsa-mir-495 ENSG00000199020|hsa-mir-381 ENSG00000207754|hsa-mir-487b ENSG00000202560|hsa-mir-539 ENSG00000207993|hsa-mir-134 ENSG00000207961|hsa-mir-496 ENSG00000199015|hsa-mir-377

ENSG00000199107|hsa-mir-409 ENSG00000199012|hsa-mir-412 ENSG00000199025|hsa-mir-369 ENSG00000199092|hsa-mir-410

GACAATTAA ENSG00000207795|hsa-mir-155

GACAATTCA ENSG00000210741|hsa-mir-196a-1

GACACAAA ENSG00000207635|hsa-mir-499

GACACAATA ENSG00000207638|hsa-mir-99a ENSG00000207863|hsa-mir-125b-2

GACACACAA ENSG00000207730|hsa-mir-200b ENSG00000207607|hsa-mir-200a ENSG00000198976|hsa-mir-429

GACACACCC ENSG00000207635|hsa-mir-499

GACACATAC ENSG00000199036|hsa-mir-219-1

GACACCACA ENSG00000199122|hsa-mir-148b

GACACCGAC Xie:ACCACA AML1

GACACCGGA ENSG00000207792|hsa-mir-151 ENSG00000207819|hsa-mir-9-3

GACACCTCC ENSG00000207550|hsa-mir-99b ENSG00000198972|hsa-let-7e ENSG00000207947|hsa-mir-152

GACACCTGA ENSG00000207732|hsa-mir-218-1 ENSG00000207630|hsa-mir-7-3

TCAGGTGTC Xie:CAGGTGW AREB6

GACACGCGC ENSG00000207732|hsa-mir-218-1

GACACGTGA ENSG00000199122|hsa-mir-148b

GACACTGTC ENSG00000202641|hsa-mir-484

GACAGACAA ENSG00000207586|hsa-mir-135a-2

GACAGACTC ENSG00000207950|hsa-mir-296 ENSG00000208037|hsa-mir-320

GACAGCCAA ENSG00000207732|hsa-mir-218-1

GACAGCGGA ENSG00000207955|hsa-mir-219-2

GACAGGGCC ENSG00000207954|hsa-mir-138-1

GACAGGGGA ENSG00000199153|hsa-mir-30d ENSG00000207582|hsa-mir-30b

GACAGGTCA ENSG00000207618|hsa-mir-144 ENSG00000207794|hsa-mir-451

TGACCTGTC Xie:TGACCT ER

GACAGTTAA ENSG00000199177|hsa-mir-31

GACATACAC ENSG00000199036|hsa-mir-219-1 ENSG00000202609|hsa-mir-488

GACATCATC ENSG00000208024|hsa-mir-199a-2 ENSG00000207949|hsa-mir-214

GACATCTGC ENSG00000207635|hsa-mir-499

GACATGGCA ENSG00000207597|hsa-mir-490

GACATGTGA ENSG00000198987|hsa-mir-16-2 ENSG00000211574|hsa-mir-770 ENSG00000208001|hsa-mir-431 ENSG00000199005|hsa-mir-370

GACATTCAA ENSG00000207692|hsa-mir-592

GACATTGAA ENSG00000207586|hsa-mir-135a-2

GACATTGGC ENSG00000207604|hsa-mir-206 ENSG00000199080|hsa-mir-133b

GACATTTAA ENSG00000198995|hsa-mir-340 ENSG00000199082|hsa-mir-342

GACATTTCC ENSG00000207702|hsa-mir-211

GACATTTGC ENSG00000210741|hsa-mir-196a-1

GACCAACCA ENSG00000207939|hsa-mir-223

GACCAATCC ENSG00000207695|hsa-mir-184

GACCAATGA ENSG00000207624|hsa-mir-194-1 ENSG00000207590|hsa-mir-215

TCATTGGTC Xie:YSATTGGYY NF-Y

GACCACCCA ENSG00000208037|hsa-mir-320

GACCACCGA ENSG00000207954|hsa-mir-138-1

GACCACGCC ENSG00000199066|hsa-mir-330

GACCACCTCA ENSG00000207571|hsa-mir-615 ENSG00000207731|hsa-mir-506

GACCATACA ENSG00000199153|hsa-mir-30d ENSG00000207582|hsa-mir-30b

GACCATAGA ENSG00000211517|hsa-mir-671

GACCCCGTC ENSG00000199089|hsa-mir-202

GACCCCTTA ENSG00000198981|hsa-mir-29a

GACCCGGAA ENSG00000208017|hsa-mir-140

GACCCGCATC ENSG00000211517|hsa-mir-671

GACCCGCCA ENSG00000199032|hsa-mir-425 ENSG00000207811|hsa-mir-34b ENSG00000207562|hsa-mir-34c

GACCCGAAA ENSG00000208037|hsa-mir-320

GACCCGGAA ENSG00000199085|hsa-mir-148a ENSG00000207586|hsa-mir-135a-2

GACCGGTCC ENSG00000207732|hsa-mir-218-1

GACCTCACCC ENSG00000207571|hsa-mir-615

GACCTCATA ENSG00000207728|hsa-mir-449b ENSG00000207745|hsa-mir-17 ENSG00000207610|hsa-mir-19a ENSG00000199149|hsa-mir-20a

GACCTCATC ENSG00000199130|hsa-mir-365-1 ENSG00000207692|hsa-mir-592

GACCTGACA ENSG00000199053|hsa-mir-324

GACCTGAGC ENSG00000199122|hsa-mir-148b

GACCTGCGC ENSG00000207630|hsa-mir-7-3

GACCTGTGC ENSG00000207797|hsa-mir-187

GACCTTCAA ENSG00000207691|hsa-mir-183 ENSG00000207990|hsa-mir-182 ENSG00000199158|hsa-mir-96

GACCTTCCA ENSG00000207585|hsa-mir-181d ENSG00000207695|hsa-mir-184 ENSG00000208009|hsa-mir-130a

GACCTTGAC ENSG00000207611|hsa-mir-149 ENSG00000207635|hsa-mir-499

GACGAAGCC ENSG00000198973|hsa-mir-375 ENSG00000207614|hsa-mir-193a ENSG00000199187|hsa-mir-365-2 ENSG00000207933|hsa-mir-9-1

GACGACACC ENSG00000207728|hsa-mir-449b

GACGCAAAA ENSG00000207935|hsa-mir-204

GACGCAAGC ENSG00000199089|hsa-mir-202

GACGCAATC ENSG00000207698|hsa-mir-32

GACGCAAGC ENSG00000199038|hsa-mir-210

GACGCAATC ENSG00000199023|hsa-mir-339

GACGCGTCC ENSG00000207819|hsa-mir-9-3

GACGCGACC ENSG00000199032|hsa-mir-425

GACGCGCAC ENSG00000198984|hsa-mir-345

GACGCGGAA ENSG00000199032|hsa-mir-425







|            |                                |                                |                               |                                |                             |                             |  |  |  |
|------------|--------------------------------|--------------------------------|-------------------------------|--------------------------------|-----------------------------|-----------------------------|--|--|--|
| GCAACGCGC  | ENSG00000198995 hsa-mir-340    |                                |                               |                                |                             |                             |  |  |  |
| GCAACTGAC  | ENSG00000207630 hsa-mir-7-3    |                                |                               |                                |                             |                             |  |  |  |
| GCAACTTCC  | ENSG00000207581 hsa-mir-199b   | ENSG00000208024 hsa-mir-199a-2 | ENSG00000207949 hsa-mir-214   |                                |                             |                             |  |  |  |
| GCAAGAGGA  | ENSG00000207947 hsa-mir-152    |                                |                               |                                |                             |                             |  |  |  |
| GCAAGATGC  | ENSG00000207933 hsa-mir-9-1    |                                |                               |                                |                             |                             |  |  |  |
| GCAAGCGCA  | ENSG00000207935 hsa-mir-204    |                                |                               |                                |                             |                             |  |  |  |
| GCAAGCTCA  | ENSG00000207623 hsa-mir-205    |                                |                               |                                |                             |                             |  |  |  |
| GCAATCATA  | ENSG00000207745 hsa-mir-17     | ENSG00000207610 hsa-mir-19a    | ENSG00000199149 hsa-mir-20a   |                                |                             |                             |  |  |  |
| GCAATCCAA  | ENSG00000207692 hsa-mir-592    |                                |                               |                                |                             |                             |  |  |  |
| GCAATCCCC  | ENSG00000208009 hsa-mir-130a   |                                |                               |                                |                             |                             |  |  |  |
| GCAATCCCC  | Xie:RTGCAATMCCC                | CHOP-C/EBPALPHA                |                               |                                |                             |                             |  |  |  |
| GCAATCTCC  | ENSG00000207635 hsa-mir-499    | ENSG00000207954 hsa-mir-138-1  |                               |                                |                             |                             |  |  |  |
| GCAATGTCA  | ENSG00000199085 hsa-mir-148a   | ENSG00000199161 hsa-mir-126    | ENSG00000199024 hsa-mir-103-2 | ENSG00000207586 hsa-mir-135a-2 |                             |                             |  |  |  |
| GCAATTAAA  | ENSG00000207618 hsa-mir-144    | ENSG00000207794 hsa-mir-451    |                               |                                |                             |                             |  |  |  |
| GCAATTCCC  | ENSG00000207571 hsa-mir-615    |                                |                               |                                |                             |                             |  |  |  |
| GCAATTCCC  | Xie:CAntTCCS                   | STAT1                          |                               |                                |                             |                             |  |  |  |
| GCAATTGGA  | ENSG00000202641 hsa-mir-484    | ENSG00000207726 hsa-mir-455    | ENSG00000208005 hsa-mir-503   | ENSG00000207784 hsa-mir-542    |                             |                             |  |  |  |
| GCACAAAGA  | ENSG00000199089 hsa-mir-202    | ENSG00000199090 hsa-mir-326    |                               |                                |                             |                             |  |  |  |
| GCACAATGA  | ENSG00000211590 hsa-mir-802    |                                |                               |                                |                             |                             |  |  |  |
| GCACACCCA  | ENSG00000211563 hsa-mir-338    | ENSG00000207827 hsa-mir-30a    | ENSG00000199094 hsa-mir-30c-2 |                                |                             |                             |  |  |  |
| GCACACGCA  | ENSG00000199090 hsa-mir-326    |                                |                               |                                |                             |                             |  |  |  |
| GCACACTAA  | ENSG00000207651 hsa-mir-28     |                                |                               |                                |                             |                             |  |  |  |
| GCACAGTAC  | ENSG00000199172 hsa-mir-331    |                                |                               |                                |                             |                             |  |  |  |
| GCACATCAA  | ENSG00000207950 hsa-mir-296    |                                |                               |                                |                             |                             |  |  |  |
| GCACATGAC  | ENSG00000207926 hsa-mir-135a-1 |                                |                               |                                |                             |                             |  |  |  |
| GCACATGGC  | ENSG00000207702 hsa-mir-211    |                                |                               |                                |                             |                             |  |  |  |
| GCACATTTAA | ENSG00000207827 hsa-mir-30a    | ENSG00000199094 hsa-mir-30c-2  |                               |                                |                             |                             |  |  |  |
| GCACATTCC  | ENSG00000199157 hsa-mir-208    | ENSG00000207568 hsa-mir-203    |                               |                                |                             |                             |  |  |  |
| GCACCCGGA  | ENSG00000199077 hsa-mir-129-2  |                                |                               |                                |                             |                             |  |  |  |
| GCACCGCCA  | ENSG00000199047 hsa-mir-378    |                                |                               |                                |                             |                             |  |  |  |
| GCACCGCCC  | ENSG00000199065 hsa-mir-101-2  |                                |                               |                                |                             |                             |  |  |  |
| GCACCGGAA  | ENSG00000207789 hsa-mir-26a-2  |                                |                               |                                |                             |                             |  |  |  |
| GCACCGGCA  | ENSG00000199161 hsa-mir-126    | ENSG00000202609 hsa-mir-488    |                               |                                |                             |                             |  |  |  |
| GCACGCACC  | ENSG00000199038 hsa-mir-210    | ENSG00000207955 hsa-mir-219-2  |                               |                                |                             |                             |  |  |  |
| GCACGCGCA  | ENSG00000198974 hsa-mir-30e    | ENSG00000207962 hsa-mir-30c-1  |                               |                                |                             |                             |  |  |  |
| GCACGCGCC  | ENSG00000207617 hsa-mir-24-1   |                                |                               |                                |                             |                             |  |  |  |
| GCACGTGGA  | ENSG00000199089 hsa-mir-202    | ENSG00000207614 hsa-mir-193a   | ENSG00000199187 hsa-mir-365-2 |                                |                             |                             |  |  |  |
| GCACGTGGA  | Xie:SCACGTG                    | MYC                            |                               |                                |                             |                             |  |  |  |
| TCCACGTGC  | Xie:SCACGTG                    | MYC                            |                               |                                |                             |                             |  |  |  |
| GCACTAGAA  | ENSG00000199153 hsa-mir-30d    | ENSG00000207582 hsa-mir-30b    |                               |                                |                             |                             |  |  |  |
| GCACTCACA  | ENSG00000207597 hsa-mir-490    |                                |                               |                                |                             |                             |  |  |  |
| GCACTCCCA  | ENSG00000207739 hsa-mir-218-2  | ENSG00000199172 hsa-mir-331    |                               |                                |                             |                             |  |  |  |
| GCACFCGCA  | ENSG00000198986 hsa-let-7a-3   | ENSG00000207875 hsa-let-7b     |                               |                                |                             |                             |  |  |  |
| GCACTTAGC  | ENSG00000207705 hsa-mir-129-1  |                                |                               |                                |                             |                             |  |  |  |
| GCACTTTTA  | ENSG00000199024 hsa-mir-103-2  | ENSG00000199172 hsa-mir-331    |                               |                                |                             |                             |  |  |  |
| GCAGAAACC  | ENSG00000208017 hsa-mir-140    |                                |                               |                                |                             |                             |  |  |  |
| GCAGACCAC  | ENSG00000199066 hsa-mir-330    | ENSG00000207751 hsa-mir-130b   |                               |                                |                             |                             |  |  |  |
| GCAGACTCA  | ENSG00000199130 hsa-mir-365-1  | ENSG00000207602 hsa-mir-106a   | ENSG00000207572 hsa-mir-363   | ENSG00000207710 hsa-mir-20b    | ENSG00000207744 hsa-mir-10b |                             |  |  |  |
| GCAGATCTA  | ENSG00000207717 hsa-mir-551b   |                                |                               |                                |                             |                             |  |  |  |
| GCAGATGAC  | ENSG00000199023 hsa-mir-339    |                                |                               |                                |                             |                             |  |  |  |
| GCAGCATAA  | ENSG00000199085 hsa-mir-148a   |                                |                               |                                |                             |                             |  |  |  |
| GCAGCATGA  | ENSG00000207586 hsa-mir-135a-2 |                                |                               |                                |                             |                             |  |  |  |
| GCAGCCTTA  | ENSG00000207702 hsa-mir-211    | ENSG00000207728 hsa-mir-449b   |                               |                                |                             |                             |  |  |  |
| GCAGCGGAA  | ENSG00000211517 hsa-mir-671    | ENSG00000207744 hsa-mir-10b    |                               |                                |                             |                             |  |  |  |
| GCAGCGTCA  | ENSG00000199032 hsa-mir-425    |                                |                               |                                |                             |                             |  |  |  |
| GCAGCTAAC  | ENSG00000199085 hsa-mir-148a   |                                |                               |                                |                             |                             |  |  |  |
| GCAGCTACA  | ENSG00000207604 hsa-mir-206    | ENSG00000199080 hsa-mir-133b   |                               |                                |                             |                             |  |  |  |
| GCAGCTTGA  | ENSG00000199104 hsa-mir-346    | ENSG00000207618 hsa-mir-144    | ENSG00000207794 hsa-mir-451   |                                |                             |                             |  |  |  |
| GCAGGAAAC  | ENSG00000207698 hsa-mir-32     |                                |                               |                                |                             |                             |  |  |  |
| GCAGGCTAA  | ENSG00000207752 hsa-mir-199a-1 | ENSG00000207819 hsa-mir-9-3    |                               |                                |                             |                             |  |  |  |
| GCAGGCTCA  | ENSG00000199082 hsa-mir-342    |                                |                               |                                |                             |                             |  |  |  |
| GCAGGTAAC  | ENSG00000207614 hsa-mir-193a   | ENSG00000199187 hsa-mir-365-2  | ENSG00000207623 hsa-mir-205   |                                |                             |                             |  |  |  |
| GCAGGTAC   | ENSG00000207623 hsa-mir-205    |                                |                               |                                |                             |                             |  |  |  |
| GTGACCTGC  | Xie:TGACCT                     | ER                             |                               |                                |                             |                             |  |  |  |
| GCAGTTCA   | ENSG00000207705 hsa-mir-129-1  | ENSG00000207790 hsa-mir-29b-2  | ENSG00000207966 hsa-mir-29c   |                                |                             |                             |  |  |  |
| GCAGTTCC   | ENSG00000199130 hsa-mir-365-1  |                                |                               |                                |                             |                             |  |  |  |
| GCAGTTGGA  | ENSG00000198974 hsa-mir-30e    | ENSG00000207962 hsa-mir-30c-1  |                               |                                |                             |                             |  |  |  |
| GCAGTTTGA  | ENSG00000207705 hsa-mir-129-1  |                                |                               |                                |                             |                             |  |  |  |
| GCAGTTTTA  | ENSG00000199157 hsa-mir-208    |                                |                               |                                |                             |                             |  |  |  |
| GCATAAAAA  | ENSG00000207721 hsa-mir-186    |                                |                               |                                |                             |                             |  |  |  |
| GCATAAAAA  | ENSG00000207994 hsa-mir-100    | ENSG00000207971 hsa-mir-125b-1 | ENSG00000198975 hsa-let-7a-2  |                                |                             |                             |  |  |  |
| GCATAATCC  | ENSG00000199165 hsa-let-7a-1   | ENSG00000199072 hsa-let-7f-1   | ENSG00000199133 hsa-let-7d    | ENSG00000207745 hsa-mir-17     | ENSG00000207610 hsa-mir-19a | ENSG00000199149 hsa-mir-20a |  |  |  |
| GCATATAAC  | ENSG00000199130 hsa-mir-365-1  |                                |                               |                                |                             |                             |  |  |  |
| GCATCACCC  | ENSG00000199024 hsa-mir-103-2  |                                |                               |                                |                             |                             |  |  |  |
| GCATCATCA  | ENSG00000202609 hsa-mir-488    |                                |                               |                                |                             |                             |  |  |  |
| GCATCCACA  | ENSG00000207702 hsa-mir-211    |                                |                               |                                |                             |                             |  |  |  |
| GCATCCCAC  | ENSG00000199157 hsa-mir-208    |                                |                               |                                |                             |                             |  |  |  |
| GCATCCGGC  | ENSG00000211517 hsa-mir-671    |                                |                               |                                |                             |                             |  |  |  |
| GCATCTAAA  | ENSG00000207692 hsa-mir-592    |                                |                               |                                |                             |                             |  |  |  |
| GCATCTTCA  | ENSG00000199065 hsa-mir-101-2  |                                |                               |                                |                             |                             |  |  |  |
| GCATGATTA  | ENSG00000199135 hsa-mir-101-1  |                                |                               |                                |                             |                             |  |  |  |
| GCATGCCCA  | ENSG00000207792 hsa-mir-151    |                                |                               |                                |                             |                             |  |  |  |
| GCATGCTTA  | ENSG00000198974 hsa-mir-30e    | ENSG00000207962 hsa-mir-30c-1  |                               |                                |                             |                             |  |  |  |
| GCATGGAGA  | ENSG00000207744 hsa-mir-10b    |                                |                               |                                |                             |                             |  |  |  |
| GCATGGAGC  | ENSG00000199065 hsa-mir-101-2  | ENSG00000199161 hsa-mir-126    |                               |                                |                             |                             |  |  |  |
| GCATGTGGC  | ENSG00000211574 hsa-mir-770    | ENSG00000208001 hsa-mir-431    | ENSG00000199005 hsa-mir-370   |                                |                             |                             |  |  |  |
| GCATTAATA  | ENSG00000207624 hsa-mir-194-1  | ENSG00000207590 hsa-mir-215    |                               |                                |                             |                             |  |  |  |
| GCATTAATA  | MATCH:V\$CDXA_02               | CdxA                           |                               |                                |                             |                             |  |  |  |
| GCATTAGCA  | ENSG00000207692 hsa-mir-592    |                                |                               |                                |                             |                             |  |  |  |
| GCATTCCAA  | ENSG00000207585 hsa-mir-181d   | ENSG00000207604 hsa-mir-206    | ENSG00000199080 hsa-mir-133b  |                                |                             |                             |  |  |  |
| GCATTCCAA  | Xie:AnTTTCGnWTTCSnA            | IRF-7                          |                               |                                |                             |                             |  |  |  |



GCATTCTAA ENSG00000207692|hsa-mir-592  
 GCCAAACAC ENSG00000199122|hsa-mir-148b ENSG00000208009|hsa-mir-130a  
 GCCAAACAC ENSG00000207954|hsa-mir-138-1  
 GCCAAATAA ENSG00000208036|hsa-mir-106b ENSG00000207547|hsa-mir-25 ENSG00000207757|hsa-mir-93  
 GCCAAATAA Xie:GnCCAWATAWGGM SRF  
 GCCAAATTA ENSG00000207550|hsa-mir-99b ENSG00000198972|hsa-let-7e  
 GCCAACATA ENSG00000207571|hsa-mir-615  
 GCCAACCGA ENSG00000207935|hsa-mir-204  
 GCCAACTGA ENSG00000208024|hsa-mir-199a-2 ENSG00000207949|hsa-mir-214  
 GCCAAGTAA ENSG00000207752|hsa-mir-199a-1  
 GCCAATAGC ENSG00000199065|hsa-mir-101-2 ENSG00000207939|hsa-mir-223  
 GCCAATCCA ENSG00000199032|hsa-mir-425  
 GCCAATTTA ENSG00000199058|hsa-mir-302b ENSG00000199169|hsa-mir-367 ENSG00000199145|hsa-mir-302d ENSG00000199102|hsa-mir-302c  
 GCCACAACC ENSG00000207630|hsa-mir-7-3  
 GCCACAGTA ENSG00000207935|hsa-mir-204 ENSG00000208037|hsa-mir-320  
 GCCACATAA ENSG00000207581|hsa-mir-199b  
 GCCACCAAC ENSG00000199161|hsa-mir-126  
 GCCACCCAA ENSG00000199071|hsa-mir-423  
 GCCACCTAC ENSG00000199089|hsa-mir-202 ENSG00000207585|hsa-mir-181d  
 GCCACGCCC ENSG00000199032|hsa-mir-425 ENSG00000207789|hsa-mir-26a-2  
 GCCACGCCC MATCH:V\$CACD\_01 CACD  
 GCCACGCTA ENSG00000207567|hsa-mir-142 ENSG00000211574|hsa-mir-770 ENSG00000208001|hsa-mir-431 ENSG00000199005|hsa-mir-370  
 TAGCGTGGC Xie:TnGCGTG AHR  
 GCCACGTCA ENSG00000207581|hsa-mir-199b ENSG00000207752|hsa-mir-199a-1 ENSG00000208024|hsa-mir-199a-2 ENSG00000207949|hsa-mir-214  
 TGACGTGGC Xie:TGACGTGG ATF6  
 GCCACGTCA MATCH:V\$ATF6\_01 ATF6  
 GCCACTGGA ENSG00000208037|hsa-mir-320  
 GCCACTTAC ENSG00000202569|hsa-mir-146b  
 GTAAGTGGC Xie:GTAARTnG NCX  
 GCCACTTCA ENSG00000207702|hsa-mir-211 ENSG00000208005|hsa-mir-503 ENSG00000207784|hsa-mir-542  
 GCCAGATAA ENSG00000207635|hsa-mir-499  
 GCCAGATGA ENSG00000207611|hsa-mir-149 ENSG00000207777|hsa-mir-10a  
 GCCAGCAAA ENSG00000199088|hsa-mir-379 ENSG00000207749|hsa-mir-299 ENSG00000198982|hsa-mir-380 ENSG00000199069|hsa-mir-323 ENSG00000211582|hsa-mir-758 ENSG00000207761|hsa-mir-329-1 ENSG00000194717|hsa-mir-494  
 ENSG00000207743|hsa-mir-495 ENSG00000199020|hsa-mir-381 ENSG00000207754|hsa-mir-487b ENSG00000202560|hsa-mir-539 ENSG00000207993|hsa-mir-134 ENSG00000207961|hsa-mir-496 ENSG00000199015|hsa-mir-377  
 ENSG00000199107|hsa-mir-409 ENSG00000199012|hsa-mir-412 ENSG00000199025|hsa-mir-369 ENSG00000199092|hsa-mir-410  
 GCCAGGTAA ENSG00000207953|hsa-mir-212  
 GCCAGGTGA ENSG00000199043|hsa-mir-335  
 GCCAGGTGA Xie:CAGGTGW AREB6  
 GCCAGGTGA Xie:RnCAGGTG MYOD  
 GCCAGGTTA ENSG00000207827|hsa-mir-30a ENSG00000199094|hsa-mir-30c-2  
 GCCAGTGAA ENSG00000208009|hsa-mir-130a  
 GCCATAGAA ENSG00000199024|hsa-mir-103-2  
 GCCATAGGC ENSG00000207713|hsa-mir-200c ENSG00000207708|hsa-mir-141  
 GCCATAGGC Xie:GCCnngGC AP-2ALPHA  
 GCCTATGGC Xie:GCCnngGC AP-2ALPHA  
 GCCATCAAA ENSG00000199058|hsa-mir-302b ENSG00000199169|hsa-mir-367 ENSG00000199145|hsa-mir-302d ENSG00000199102|hsa-mir-302c  
 GCCATCTTA ENSG00000198987|hsa-mir-16-2 ENSG00000199135|hsa-mir-101-1  
 GCCATCTTA Xie:GCCATnTT YY1  
 GCCATGCAA ENSG00000207980|hsa-mir-23a ENSG00000209707|hsa-mir-24-2 ENSG00000207808|hsa-mir-27a  
 TTGCATGGC Xie:GTTGCWGGYAAC MIF-1  
 GCCATGGAC ENSG00000207960|hsa-mir-153-2  
 GCCATGGTA ENSG00000207811|hsa-mir-34b ENSG00000207562|hsa-mir-34c  
 GCCATGTCA ENSG00000199088|hsa-mir-379 ENSG00000207749|hsa-mir-299 ENSG00000198982|hsa-mir-380 ENSG00000199069|hsa-mir-323 ENSG00000211582|hsa-mir-758 ENSG00000207761|hsa-mir-329-1 ENSG00000194717|hsa-mir-494  
 ENSG00000207743|hsa-mir-495 ENSG00000199020|hsa-mir-381 ENSG00000207754|hsa-mir-487b ENSG00000202560|hsa-mir-539 ENSG00000207993|hsa-mir-134 ENSG00000207961|hsa-mir-496 ENSG00000199015|hsa-mir-377  
 ENSG00000199107|hsa-mir-409 ENSG00000199012|hsa-mir-412 ENSG00000199025|hsa-mir-369 ENSG00000199092|hsa-mir-410 ENSG00000207597|hsa-mir-490 ENSG00000207695|hsa-mir-184  
 GCCATGTCC ENSG00000207926|hsa-mir-135a-1  
 GCCATGTGA ENSG00000202569|hsa-mir-146b ENSG00000199043|hsa-mir-335  
 GCCATTAGC ENSG00000199023|hsa-mir-339  
 GCCATTCCA ENSG00000207752|hsa-mir-199a-1  
 GCCATTGGA ENSG00000207745|hsa-mir-17 ENSG00000207610|hsa-mir-19a ENSG00000199149|hsa-mir-20a  
 GCCATTGTA ENSG00000207819|hsa-mir-9-3  
 GCCATTTAC ENSG00000211590|hsa-mir-802  
 GCCATTTCA ENSG00000207819|hsa-mir-9-3 ENSG00000199043|hsa-mir-335 ENSG00000207731|hsa-mir-506  
 GCCATTTGA ENSG00000208035|hsa-mir-143 ENSG00000207933|hsa-mir-9-1  
 GCCATTTTA ENSG00000199032|hsa-mir-425 ENSG00000207585|hsa-mir-181d  
 GCCATTTTA Xie:GCCATnTT YY1  
 GCCCAACCC ENSG00000199082|hsa-mir-342  
 GCCCACACC ENSG00000207695|hsa-mir-184  
 GCCCACCTA ENSG00000208005|hsa-mir-503 ENSG00000207784|hsa-mir-542  
 GCCCAGCAA ENSG00000199135|hsa-mir-101-1  
 GCCCATACA ENSG00000207604|hsa-mir-206 ENSG00000199080|hsa-mir-133b ENSG00000207797|hsa-mir-187  
 GCCCATGCA ENSG00000207581|hsa-mir-199b  
 GCCCATTGA ENSG00000208036|hsa-mir-106b ENSG00000207547|hsa-mir-25 ENSG00000207757|hsa-mir-93  
 GCCCCACAA ENSG00000207604|hsa-mir-206 ENSG00000199080|hsa-mir-133b  
 GCCCCAGTA ENSG00000208024|hsa-mir-199a-2 ENSG00000207949|hsa-mir-214  
 GCCCCCGCA ENSG00000207567|hsa-mir-142 ENSG00000211517|hsa-mir-671  
 GCCCCCTAC ENSG00000207721|hsa-mir-186  
 GCCCCGCCC ENSG00000199032|hsa-mir-425 ENSG00000199038|hsa-mir-210  
 GGGCGGGGC Xie:GGGCGGGGC SP-1  
 GCCCCTCCC ENSG00000207777|hsa-mir-10a  
 GCCCGAACC ENSG00000199104|hsa-mir-346 ENSG00000207568|hsa-mir-203 ENSG00000207960|hsa-mir-153-2  
 GCCCGACCA ENSG00000207614|hsa-mir-193a ENSG00000199187|hsa-mir-365-2 ENSG00000207751|hsa-mir-130b  
 GCCCGCGAA ENSG00000199038|hsa-mir-210  
 GCCCGCGCC ENSG00000199065|hsa-mir-101-2  
 GCCCGTTTA ENSG00000207926|hsa-mir-135a-1  
 GCCCGTCCA ENSG00000199017|hsa-mir-1-1 ENSG00000207764|hsa-mir-133a-2 ENSG00000199157|hsa-mir-208  
 GCCCTCCGA ENSG00000207789|hsa-mir-26a-2 ENSG00000199088|hsa-mir-379 ENSG00000207749|hsa-mir-299 ENSG00000198982|hsa-mir-380 ENSG00000199069|hsa-mir-323 ENSG00000211582|hsa-mir-758 ENSG00000207761|hsa-mir-329-1  
 ENSG00000194717|hsa-mir-494 ENSG00000207743|hsa-mir-495 ENSG00000199020|hsa-mir-381 ENSG00000207754|hsa-mir-487b ENSG00000202560|hsa-mir-539 ENSG00000207993|hsa-mir-134 ENSG00000207961|hsa-mir-496  
 ENSG00000199015|hsa-mir-377 ENSG00000199107|hsa-mir-409 ENSG00000199012|hsa-mir-412 ENSG00000199025|hsa-mir-369 ENSG00000199092|hsa-mir-410  
 GCCCTCCTA ENSG00000207617|hsa-mir-24-1  
 GCCCTCTAA ENSG00000207811|hsa-mir-34b ENSG00000207562|hsa-mir-34c

|           |                               |                                |                               |                               |
|-----------|-------------------------------|--------------------------------|-------------------------------|-------------------------------|
| GCCCTTGAA | ENSG00000207935 hsa-mir-204   |                                |                               |                               |
| GCCCTTTAA | ENSG00000202609 hsa-mir-488   |                                |                               |                               |
| GCCCTTTGA | ENSG00000211590 hsa-mir-802   |                                |                               |                               |
| GCCCTTTGA | Xie:CTTTGA                    | LEF1                           |                               |                               |
| GCCGAAGGC | ENSG00000207596 hsa-mir-194-2 | ENSG00000207648 hsa-mir-192    |                               |                               |
| GCCGAAGGC | Xie:GCCnnnGGC                 | AP-2ALPHA                      |                               |                               |
| GCCTTCGGC | Xie:GCCnnnGGC                 | AP-2ALPHA                      |                               |                               |
| GCCGACGCA | ENSG00000207792 hsa-mir-151   |                                |                               |                               |
| GCCGAGTCA | ENSG00000198984 hsa-mir-345   | ENSG00000207751 hsa-mir-130b   |                               |                               |
| GCCGAGTGA | ENSG00000207811 hsa-mir-34b   | ENSG00000207562 hsa-mir-34c    |                               |                               |
| GCCGATCCC | ENSG00000207819 hsa-mir-9-3   |                                |                               |                               |
| GCCGCATGA | ENSG00000207953 hsa-mir-212   |                                |                               |                               |
| GCCGCCGTA | ENSG00000199130 hsa-mir-365-1 |                                |                               |                               |
| GCCGCGCTA | ENSG00000207568 hsa-mir-203   |                                |                               |                               |
| GCCGCGTCA | ENSG00000207732 hsa-mir-218-1 |                                |                               |                               |
| GCCGCGTGA | ENSG00000207732 hsa-mir-218-1 | ENSG00000207752 hsa-mir-199a-1 |                               |                               |
| GCCGCTCGA | ENSG00000207571 hsa-mir-615   |                                |                               |                               |
| GCCGCTCTA | ENSG00000199104 hsa-mir-346   |                                |                               |                               |
| GCCGCTTAC | ENSG00000207797 hsa-mir-187   |                                |                               |                               |
| GCCGGAAC  | ENSG00000208005 hsa-mir-503   | ENSG00000207784 hsa-mir-542    |                               |                               |
| GCCGGAACA | ENSG00000207568 hsa-mir-203   | ENSG00000207791 hsa-mir-497    | ENSG00000207929 hsa-mir-195   |                               |
| GCCGGAAGC | ENSG00000199066 hsa-mir-330   |                                |                               |                               |
| GCCGGAAGC | Xie:vCCGGAAGnGCR              | GABP                           |                               |                               |
| GCCGGCCTA | ENSG00000199038 hsa-mir-210   | ENSG00000207691 hsa-mir-183    | ENSG00000207990 hsa-mir-182   | ENSG00000199158 hsa-mir-96    |
| GCCGGCGAA | ENSG00000207571 hsa-mir-615   |                                |                               |                               |
| GCCGGGAAA | ENSG00000207695 hsa-mir-184   |                                |                               |                               |
| GCCGGGGTA | ENSG00000207617 hsa-mir-24-1  |                                |                               |                               |
| GCCGGGTCA | ENSG00000198995 hsa-mir-340   | ENSG00000207955 hsa-mir-219-2  | ENSG00000208017 hsa-mir-140   |                               |
| GCCGGGTGA | ENSG00000207617 hsa-mir-24-1  |                                |                               |                               |
| GCCGGTCAC | ENSG00000199059 hsa-mir-135b  |                                |                               |                               |
| GCCGGTGAC | ENSG00000207585 hsa-mir-181d  |                                |                               |                               |
| GCCGTACCA | ENSG00000199017 hsa-mir-1-1   | ENSG00000207764 hsa-mir-133a-2 | ENSG00000199038 hsa-mir-210   |                               |
| GCCGTGAAC | ENSG00000207819 hsa-mir-9-3   |                                |                               |                               |
| GCCGTGACC | ENSG00000199038 hsa-mir-210   |                                |                               |                               |
| GCCGTGGAA | ENSG00000207713 hsa-mir-200c  | ENSG00000207708 hsa-mir-141    |                               |                               |
| GCCGTGGGA | ENSG00000211517 hsa-mir-671   |                                |                               |                               |
| GCCTAAAGA | ENSG00000207718 hsa-mir-15a   | ENSG00000208006 hsa-mir-16-1   |                               |                               |
| GCCTAATTA | ENSG00000199071 hsa-mir-423   |                                |                               |                               |
| GCCTACTTA | ENSG00000199082 hsa-mir-342   |                                |                               |                               |
| GCCTATAAA | ENSG00000207953 hsa-mir-212   | ENSG00000207630 hsa-mir-7-3    |                               |                               |
| GCCTATTTA | ENSG00000207827 hsa-mir-30a   | ENSG00000199094 hsa-mir-30c-2  |                               |                               |
| GCCTCAGAC | ENSG00000207730 hsa-mir-200b  | ENSG00000207607 hsa-mir-200a   | ENSG00000198976 hsa-mir-429   | ENSG00000207695 hsa-mir-184   |
| GCCTCATCA | ENSG00000199053 hsa-mir-324   |                                |                               |                               |
| GCCTCTGTA | ENSG00000199017 hsa-mir-1-1   | ENSG00000207764 hsa-mir-133a-2 |                               |                               |
| GCCTCTTAA | ENSG00000207618 hsa-mir-144   | ENSG00000207794 hsa-mir-451    |                               |                               |
| GCCTGCCTA | ENSG00000199059 hsa-mir-135b  |                                |                               |                               |
| GCCTGTCAA | ENSG00000207782 hsa-mir-150   |                                |                               |                               |
| TTGACAGGC | Xie:TGACAG                    | MEIS1                          |                               |                               |
| GCCTGTTAC | ENSG00000207795 hsa-mir-155   |                                |                               |                               |
| GCCTGTTCC | ENSG00000198973 hsa-mir-375   |                                |                               |                               |
| GCCTTAACC | ENSG00000207713 hsa-mir-200c  | ENSG00000207708 hsa-mir-141    |                               |                               |
| GCCTTACAA | ENSG00000207819 hsa-mir-9-3   |                                |                               |                               |
| GCCTTATAA | ENSG00000199153 hsa-mir-30d   | ENSG00000207582 hsa-mir-30b    | ENSG00000207790 hsa-mir-29b-2 | ENSG00000207966 hsa-mir-29c   |
| GCCTTCAAC | ENSG00000207597 hsa-mir-490   |                                |                               |                               |
| GCCTTCAGA | ENSG00000199135 hsa-mir-101-1 |                                |                               |                               |
| GCCTTGAAA | ENSG00000199036 hsa-mir-219-1 |                                |                               |                               |
| GCCTTGTC  | ENSG00000207809 hsa-mir-139   |                                |                               |                               |
| GCCTTTACC | ENSG00000207713 hsa-mir-200c  | ENSG00000207708 hsa-mir-141    |                               |                               |
| GCCTTTATA | ENSG00000207624 hsa-mir-194-1 | ENSG00000207590 hsa-mir-215    |                               |                               |
| GCCTTTTAA | ENSG00000207789 hsa-mir-26a-2 | ENSG00000207791 hsa-mir-497    | ENSG00000207929 hsa-mir-195   | ENSG00000199135 hsa-mir-101-1 |
| GCCTTTTAC | ENSG00000199058 hsa-mir-302b  | ENSG00000199169 hsa-mir-367    | ENSG00000199145 hsa-mir-302d  | ENSG00000199102 hsa-mir-302c  |
| GCCTTTTTA | ENSG00000208017 hsa-mir-140   |                                |                               |                               |
| GCGAAATTA | ENSG00000199043 hsa-mir-335   |                                |                               |                               |
| GCGAATCAC | ENSG00000208009 hsa-mir-130a  |                                |                               |                               |
| GCGACCACA | ENSG00000199085 hsa-mir-148a  |                                |                               |                               |
| GCGACCACA | Xie:ACCACA                    | AML1                           |                               |                               |
| GCGAGAAGA | ENSG00000199121 hsa-mir-26b   | ENSG00000207604 hsa-mir-206    | ENSG00000199080 hsa-mir-133b  |                               |
| GCGAGAGAC | ENSG00000198986 hsa-let-7a-3  | ENSG00000207875 hsa-let-7b     | ENSG00000207953 hsa-mir-212   |                               |
| GCGAGATCA | ENSG00000207809 hsa-mir-139   |                                |                               |                               |
| GCGAGCCAC | ENSG00000207614 hsa-mir-193a  | ENSG00000199187 hsa-mir-365-2  |                               |                               |
| GCGAGCCCC | ENSG00000208005 hsa-mir-503   | ENSG00000207784 hsa-mir-542    |                               |                               |
| GCGATTAGC | ENSG00000207819 hsa-mir-9-3   |                                |                               |                               |
| GCGATTCAA | ENSG00000199071 hsa-mir-423   |                                |                               |                               |
| GCGATTTAA | ENSG00000207726 hsa-mir-455   |                                |                               |                               |
| GCGCAATGA | ENSG00000198987 hsa-mir-16-2  |                                |                               |                               |
| GCGCAGAGA | ENSG00000198974 hsa-mir-30e   | ENSG00000207962 hsa-mir-30c-1  |                               |                               |
| GCGCAGGTA | ENSG00000207614 hsa-mir-193a  | ENSG00000199187 hsa-mir-365-2  |                               |                               |
| GCGCATGAA | ENSG00000207777 hsa-mir-10a   |                                |                               |                               |
| GCGCATGCC | ENSG00000199090 hsa-mir-326   | ENSG00000207792 hsa-mir-151    |                               |                               |
| GCGCATGGA | ENSG00000207623 hsa-mir-205   |                                |                               |                               |
| GCGCATTCC | ENSG00000207955 hsa-mir-219-2 | ENSG00000208035 hsa-mir-143    |                               |                               |
| GCGCCAACC | ENSG00000207935 hsa-mir-204   |                                |                               |                               |
| GCGCCAGAC | ENSG00000199047 hsa-mir-378   | ENSG00000207567 hsa-mir-142    | ENSG00000207789 hsa-mir-26a-2 |                               |
| GCGCCGCTA | ENSG00000207792 hsa-mir-151   |                                |                               |                               |
| GCGCCGTGA | ENSG00000207954 hsa-mir-138-1 |                                |                               |                               |
| GCGCCTATA | ENSG00000207953 hsa-mir-212   |                                |                               |                               |
| GCGCGACCA | ENSG00000207568 hsa-mir-203   |                                |                               |                               |
| GCGCGAGAC | ENSG00000207611 hsa-mir-149   |                                |                               |                               |
| GCGCGCAAC | ENSG00000199085 hsa-mir-148a  |                                |                               |                               |
| GCGCGCCTA | ENSG00000207953 hsa-mir-212   |                                |                               |                               |
| GCGCGCGTA | ENSG00000207953 hsa-mir-212   |                                |                               |                               |



|            |                                |                               |                               |                               |
|------------|--------------------------------|-------------------------------|-------------------------------|-------------------------------|
| GCTCCCTTA  | ENSG00000207571 hsa-mir-615    |                               |                               |                               |
| GCTCCTTAA  | ENSG00000202569 hsa-mir-146b   |                               |                               |                               |
| GCTCGCACC  | ENSG00000199090 hsa-mir-326    | ENSG00000207611 hsa-mir-149   | ENSG00000198974 hsa-mir-30e   | ENSG00000207962 hsa-mir-30c-1 |
| GCTCGGCAC  | ENSG00000199032 hsa-mir-425    |                               |                               |                               |
| GCTCGGCGA  | ENSG00000207568 hsa-mir-203    |                               |                               |                               |
| GCTCTATTA  | ENSG00000199157 hsa-mir-208    |                               |                               |                               |
| GCTCTTAAA  | ENSG00000207955 hsa-mir-219-2  | ENSG00000199177 hsa-mir-31    |                               |                               |
| GCTCTTATA  | ENSG00000198973 hsa-mir-375    |                               |                               |                               |
| GCTCTTGAA  | ENSG00000199121 hsa-mir-26b    |                               |                               |                               |
| GCTGAAAGC  | ENSG00000199172 hsa-mir-331    |                               |                               |                               |
| GCTGACCAC  | ENSG00000199066 hsa-mir-330    |                               |                               |                               |
| GCTGACCTA  | ENSG00000199053 hsa-mir-324    |                               |                               |                               |
| GCTGACCTA  | Xie: TGACCT ER                 |                               |                               |                               |
| GCTGACGCA  | ENSG00000207717 hsa-mir-551b   |                               |                               |                               |
| GCTGACGGA  | ENSG00000198984 hsa-mir-345    |                               |                               |                               |
| GCTGACTTA  | ENSG00000199082 hsa-mir-342    |                               |                               |                               |
| GCTGAGTCA  | ENSG00000207567 hsa-mir-142    |                               |                               |                               |
| GCTGAGTCA  | Xie: CTGASTCA AP-1             |                               |                               |                               |
| TGACTCAGC  | Xie: RTGACTCAGCA NF-E2         |                               |                               |                               |
| GCTGATCAC  | ENSG00000207713 hsa-mir-200c   | ENSG00000207708 hsa-mir-141   |                               |                               |
| GCTGATGGA  | ENSG00000207791 hsa-mir-497    | ENSG00000207929 hsa-mir-195   | ENSG00000207954 hsa-mir-138-1 |                               |
| GCTGATTCA  | ENSG00000207695 hsa-mir-184    |                               |                               |                               |
| GCTGATTTA  | ENSG00000199153 hsa-mir-30d    | ENSG00000207582 hsa-mir-30b   |                               |                               |
| GCTGCGGAC  | ENSG00000207953 hsa-mir-212    |                               |                               |                               |
| GCTGCGTGA  | ENSG00000199047 hsa-mir-378    |                               |                               |                               |
| GCTGCTGAC  | ENSG00000208024 hsa-mir-199a-2 | ENSG00000207949 hsa-mir-214   |                               |                               |
| GCTGCTTTA  | ENSG00000208009 hsa-mir-130a   |                               |                               |                               |
| GCTGATACC  | ENSG00000207705 hsa-mir-129-1  | ENSG00000207630 hsa-mir-7-3   |                               |                               |
| GCTGTTGAA  | ENSG00000208009 hsa-mir-130a   |                               |                               |                               |
| GCTGTTGCA  | ENSG00000211563 hsa-mir-338    |                               |                               |                               |
| GCTGTACCA  | ENSG00000199004 hsa-mir-21     |                               |                               |                               |
| GCTGTAGAA  | ENSG00000207623 hsa-mir-205    |                               |                               |                               |
| GCTGTAGAC  | ENSG00000207797 hsa-mir-187    |                               |                               |                               |
| GCTGTCCAA  | ENSG00000202641 hsa-mir-484    | ENSG00000199135 hsa-mir-101-1 |                               |                               |
| GCTGTGCAA  | ENSG00000199121 hsa-mir-26b    |                               |                               |                               |
| GCTGTGGAC  | ENSG00000199066 hsa-mir-330    | ENSG00000207698 hsa-mir-32    |                               |                               |
| GCTGTGTAA  | ENSG00000207721 hsa-mir-186    |                               |                               |                               |
| GCTGTTGAA  | ENSG00000207597 hsa-mir-490    |                               |                               |                               |
| GCTGTTGAC  | ENSG00000207827 hsa-mir-30a    | ENSG00000199094 hsa-mir-30c-2 |                               |                               |
| GCTGTTGTA  | ENSG00000208035 hsa-mir-143    |                               |                               |                               |
| GCTGTTTAC  | ENSG00000207797 hsa-mir-187    |                               |                               |                               |
| GCTGTTTGA  | ENSG00000207827 hsa-mir-30a    | ENSG00000199094 hsa-mir-30c-2 |                               |                               |
| GCTTAAATA  | ENSG00000199172 hsa-mir-331    |                               |                               |                               |
| GCTTAAATTA | ENSG00000207995 hsa-mir-325    |                               |                               |                               |
| GCTTACCAC  | ENSG00000207926 hsa-mir-135a-1 |                               |                               |                               |
| GCTTACTCA  | ENSG00000199172 hsa-mir-331    |                               |                               |                               |
| GCTTACTTA  | ENSG00000207721 hsa-mir-186    |                               |                               |                               |
| GCTTAGCAC  | ENSG00000198973 hsa-mir-375    |                               |                               |                               |
| GCTTAGGAA  | ENSG00000202609 hsa-mir-488    | ENSG00000207694 hsa-mir-1-2   |                               |                               |
| GCTTATTTA  | ENSG00000207731 hsa-mir-506    |                               |                               |                               |
| GCTTCAAAC  | ENSG00000207790 hsa-mir-29b-2  | ENSG00000207966 hsa-mir-29c   |                               |                               |
| GCTTCACCC  | ENSG00000199082 hsa-mir-342    |                               |                               |                               |
| GCTTCATCA  | ENSG00000207695 hsa-mir-184    |                               |                               |                               |
| GCTTCCAAC  | ENSG00000199090 hsa-mir-326    |                               |                               |                               |
| GCTTCTTAC  | ENSG00000207550 hsa-mir-99b    | ENSG00000198972 hsa-let-7e    | ENSG00000199024 hsa-mir-103-2 |                               |
| GCTTCTAGA  | ENSG00000207633 hsa-mir-505    | ENSG00000207694 hsa-mir-1-2   |                               |                               |
| GCTTCTCAC  | ENSG00000207702 hsa-mir-211    |                               |                               |                               |
| GCTTGATGA  | ENSG00000207571 hsa-mir-615    |                               |                               |                               |
| GCTTGATTA  | ENSG00000207548 hsa-mir-217    |                               |                               |                               |
| GCTTGATAA  | ENSG00000207797 hsa-mir-187    |                               |                               |                               |
| GCTTGTTAA  | ENSG00000207726 hsa-mir-455    |                               |                               |                               |
| GCTTGTTGA  | ENSG00000207604 hsa-mir-206    | ENSG00000199080 hsa-mir-133b  | ENSG00000207692 hsa-mir-592   |                               |
| GCTTGTTTA  | ENSG00000207585 hsa-mir-181d   | ENSG00000207618 hsa-mir-144   | ENSG00000207794 hsa-mir-451   |                               |
| GCTTTATCC  | ENSG00000207809 hsa-mir-139    |                               |                               |                               |
| GCTTTATGA  | ENSG00000207596 hsa-mir-194-2  | ENSG00000207648 hsa-mir-192   | ENSG00000198981 hsa-mir-29a   |                               |
| GCTTTGAAC  | ENSG00000199047 hsa-mir-378    | ENSG00000199161 hsa-mir-126   |                               |                               |
| GCTTTGAAC  | Xie: CTTTGA LEF1               |                               |                               |                               |
| GTTCAAAGC  | Xie: WTCAAAGS TCF-4            |                               |                               |                               |
| GCTTTGACA  | ENSG00000207597 hsa-mir-490    |                               |                               |                               |
| GCTTTGACA  | Xie: CTTTGA LEF1               |                               |                               |                               |
| GCTTTGCAC  | ENSG00000207797 hsa-mir-187    |                               |                               |                               |
| GCTTTGCTA  | ENSG00000207789 hsa-mir-26a-2  |                               |                               |                               |
| GCTTTGGCA  | ENSG00000198981 hsa-mir-29a    | ENSG00000207744 hsa-mir-10b   |                               |                               |
| GCTTTGGCC  | ENSG00000199088 hsa-mir-379    | ENSG00000207749 hsa-mir-299   | ENSG00000198982 hsa-mir-380   | ENSG00000199069 hsa-mir-323   |
| GCTTTGTCA  | ENSG00000207743 hsa-mir-495    | ENSG00000199020 hsa-mir-381   | ENSG00000207754 hsa-mir-487b  | ENSG00000202560 hsa-mir-539   |
| GCTTTGTCC  | ENSG00000199107 hsa-mir-409    | ENSG00000199012 hsa-mir-412   | ENSG00000199025 hsa-mir-369   | ENSG00000207993 hsa-mir-134   |
| GCTTTGTCC  | ENSG00000199053 hsa-mir-324    |                               |                               | ENSG00000207961 hsa-mir-496   |
| GCTTTGTCC  | ENSG00000202609 hsa-mir-488    |                               |                               | ENSG00000199015 hsa-mir-377   |
| GCTTTTATA  | ENSG00000207953 hsa-mir-212    | ENSG00000207630 hsa-mir-7-3   |                               |                               |
| GCTTTTTTA  | ENSG00000199059 hsa-mir-135b   |                               |                               |                               |
| GGAAAATTA  | ENSG00000207950 hsa-mir-296    |                               |                               |                               |
| TAATTTTCC  | Xie: AWTTC TCC IY              |                               |                               |                               |
| GGAAAGTTA  | ENSG00000199085 hsa-mir-148a   |                               |                               |                               |
| GGAAATCAC  | ENSG00000208024 hsa-mir-199a-2 | ENSG00000207949 hsa-mir-214   |                               |                               |
| GGAAATTCA  | ENSG00000207947 hsa-mir-152    |                               |                               |                               |
| TGAATTTCC  | Xie: AWTTC TCC IY              |                               |                               |                               |
| GGAAATTTCA | MATCH: V\$HMG IY_Q6 HMG IY     |                               |                               |                               |
| GGAAACAACC | ENSG00000207751 hsa-mir-130b   |                               |                               |                               |
| GGAAACAATA | ENSG00000207933 hsa-mir-9-1    |                               |                               |                               |
| TATTGTTC   | Xie: ATTGTT SOX-5              |                               |                               |                               |
| GGAACTACA  | ENSG00000207698 hsa-mir-32     |                               |                               |                               |





|            |                                           |                                |                                |                                |                               |
|------------|-------------------------------------------|--------------------------------|--------------------------------|--------------------------------|-------------------------------|
| GGGAGATAA  | ENSG00000199089 hsa-mir-202               | ENSG00000207933 hsa-mir-9-1    |                                |                                |                               |
| GGGAGGAAA  | ENSG00000199036 hsa-mir-219-1             |                                |                                |                                |                               |
| GGGAGGTAA  | ENSG00000207635 hsa-mir-499               | ENSG00000207926 hsa-mir-135a-1 |                                |                                |                               |
| GGGAGTAAA  | ENSG00000199122 hsa-mir-148b              |                                |                                |                                |                               |
| GGGAGTTCA  | ENSG00000207728 hsa-mir-449b              |                                |                                |                                |                               |
| GGGATATAA  | ENSG00000199157 hsa-mir-208               |                                |                                |                                |                               |
| GGGATCTCA  | ENSG00000207604 hsa-mir-206               | ENSG00000199080 hsa-mir-133b   |                                |                                |                               |
| GGGATGCCC  | ENSG00000207744 hsa-mir-10b               |                                |                                |                                |                               |
| GGGATGTGA  | ENSG00000207947 hsa-mir-152               |                                |                                |                                |                               |
| GGGATTGAC  | ENSG00000199038 hsa-mir-210               | ENSG00000202609 hsa-mir-488    |                                |                                |                               |
| GGGATTGCA  | ENSG00000207792 hsa-mir-151               |                                |                                |                                |                               |
|            | TGCAATCCC Xie:RTGCAATMCCC CHOP-C/EBPALPHA |                                |                                |                                |                               |
| GGGATTGGA  | ENSG00000207751 hsa-mir-130b              | ENSG00000207630 hsa-mir-7-3    |                                |                                |                               |
| GGGATTTGA  | ENSG00000207819 hsa-mir-9-3               |                                |                                |                                |                               |
| GGGCACACC  | ENSG00000199130 hsa-mir-365-1             | ENSG00000210741 hsa-mir-196a-1 |                                |                                |                               |
| GGGCACGAA  | ENSG00000207702 hsa-mir-211               |                                |                                |                                |                               |
| GGGCAGCTA  | ENSG00000207728 hsa-mir-449b              | ENSG00000207809 hsa-mir-139    | ENSG00000211574 hsa-mir-770    | ENSG00000208001 hsa-mir-431    | ENSG00000199005 hsa-mir-370   |
| GGGCCAGCA  | ENSG00000207947 hsa-mir-152               |                                |                                |                                |                               |
| GGGCCGGAA  | ENSG00000199066 hsa-mir-330               | ENSG00000207791 hsa-mir-497    | ENSG00000207929 hsa-mir-195    |                                |                               |
| GGGCCGTAC  | ENSG00000199038 hsa-mir-210               |                                |                                |                                |                               |
| GGGCCGTTA  | ENSG00000207728 hsa-mir-449b              |                                |                                |                                |                               |
| GGCCCTTAA  | ENSG00000207713 hsa-mir-200c              | ENSG00000207708 hsa-mir-141    |                                |                                |                               |
| GGCCCTTCA  | ENSG00000207691 hsa-mir-183               | ENSG00000207990 hsa-mir-182    | ENSG00000199158 hsa-mir-96     | ENSG00000207935 hsa-mir-204    | ENSG00000207954 hsa-mir-138-1 |
| GGCGGATTA  | ENSG00000207819 hsa-mir-9-3               |                                |                                |                                |                               |
| GGCGCGGAA  | ENSG00000207777 hsa-mir-10a               |                                |                                |                                |                               |
| GGCGGCTGA  | ENSG00000199122 hsa-mir-148b              |                                |                                |                                |                               |
| GGCGGGCAA  | ENSG00000199017 hsa-mir-1-1               | ENSG00000207764 hsa-mir-133a-2 |                                |                                |                               |
| GGGCTAGAA  | ENSG00000207698 hsa-mir-32                |                                |                                |                                |                               |
| GGGCTGACC  | ENSG00000202609 hsa-mir-488               |                                |                                |                                |                               |
| GGGCTTTAA  | ENSG00000207713 hsa-mir-200c              | ENSG00000207708 hsa-mir-141    | ENSG00000207548 hsa-mir-217    |                                |                               |
| GGGCTTTTA  | ENSG00000207955 hsa-mir-219-2             |                                |                                |                                |                               |
| GGGGAACAA  | ENSG00000199085 hsa-mir-148a              |                                |                                |                                |                               |
| GGGGAGATA  | ENSG00000199089 hsa-mir-202               |                                |                                |                                |                               |
| GGGGAGGGA  | ENSG00000198986 hsa-let-7a-3              | ENSG00000207875 hsa-let-7b     |                                |                                |                               |
|            | GGGGAGGGA Xie:GGGAGGG MAZ                 |                                |                                |                                |                               |
|            | GGGGAGGGA MATCH:V\$MAZ_Q6 MAZ             |                                |                                |                                |                               |
| GGGGAGTAA  | ENSG00000199047 hsa-mir-378               |                                |                                |                                |                               |
| GGGGATTAA  | ENSG00000207571 hsa-mir-615               |                                |                                |                                |                               |
|            | GGGGATTAA Xie:KGRGATTA CRX                |                                |                                |                                |                               |
| GGGGCGGAC  | ENSG00000207732 hsa-mir-218-1             |                                |                                |                                |                               |
| GGGGCTGAC  | ENSG00000202609 hsa-mir-488               |                                |                                |                                |                               |
| GGGGCTGTA  | ENSG00000207726 hsa-mir-455               |                                |                                |                                |                               |
| GGGGGCACC  | ENSG00000207948 hsa-mir-328               |                                |                                |                                |                               |
| GGGGTTTCA  | ENSG00000207568 hsa-mir-203               | ENSG00000207692 hsa-mir-592    |                                |                                |                               |
| GGGGTCCGA  | ENSG00000207811 hsa-mir-34b               | ENSG00000207562 hsa-mir-34c    |                                |                                |                               |
| GGGGTTAAA  | ENSG00000198974 hsa-mir-30e               | ENSG00000207962 hsa-mir-30c-1  | ENSG00000207790 hsa-mir-29b-2  | ENSG00000207966 hsa-mir-29c    |                               |
| GGGGTTAGA  | ENSG00000207933 hsa-mir-9-1               |                                |                                |                                |                               |
| GGGGTTGAC  | ENSG00000207732 hsa-mir-218-1             |                                |                                |                                |                               |
| GGGTAACAA  | ENSG00000199058 hsa-mir-302b              | ENSG00000199169 hsa-mir-367    | ENSG00000199145 hsa-mir-302d   | ENSG00000199102 hsa-mir-302c   |                               |
| GGGTAATGA  | ENSG00000207955 hsa-mir-219-2             |                                |                                |                                |                               |
| GGGTATATA  | ENSG00000199017 hsa-mir-1-1               | ENSG00000207764 hsa-mir-133a-2 |                                |                                |                               |
| GGGTACAAA  | ENSG00000207656 hsa-mir-489               |                                |                                |                                |                               |
| GGGTACACAC | ENSG00000199066 hsa-mir-330               |                                |                                |                                |                               |
| GGGTACATCA | ENSG00000207596 hsa-mir-194-2             | ENSG00000207648 hsa-mir-192    |                                |                                |                               |
| GGGTACATA  | ENSG00000207602 hsa-mir-106a              | ENSG00000207572 hsa-mir-363    | ENSG00000207710 hsa-mir-20b    |                                |                               |
| GGGTACGTC  | ENSG00000207585 hsa-mir-181d              |                                |                                |                                |                               |
| GGGTCTCAC  | ENSG00000199066 hsa-mir-330               |                                |                                |                                |                               |
| GGGTCTTCA  | ENSG00000199121 hsa-mir-26b               | ENSG00000207751 hsa-mir-130b   |                                |                                |                               |
| GGGTGACAC  | ENSG00000199161 hsa-mir-126               |                                |                                |                                |                               |
| GGGTGATGA  | ENSG00000199053 hsa-mir-324               |                                |                                |                                |                               |
| GGGTGCGAC  | ENSG00000199089 hsa-mir-202               |                                |                                |                                |                               |
| GGGTGTGAA  | ENSG00000199161 hsa-mir-126               | ENSG00000207777 hsa-mir-10a    |                                |                                |                               |
| GGGTGTGAC  | ENSG00000207939 hsa-mir-223               |                                |                                |                                |                               |
| GGGTTAAA   | ENSG00000198974 hsa-mir-30e               | ENSG00000207962 hsa-mir-30c-1  |                                |                                |                               |
| GGGTTAAC   | ENSG00000207827 hsa-mir-30a               | ENSG00000199094 hsa-mir-30c-2  |                                |                                |                               |
| GGGTTATCA  | ENSG00000199153 hsa-mir-30d               | ENSG00000207582 hsa-mir-30b    | ENSG00000207782 hsa-mir-150    |                                |                               |
| GGGTTCCAA  | ENSG00000207611 hsa-mir-149               | ENSG00000207811 hsa-mir-34b    | ENSG00000207562 hsa-mir-34c    | ENSG00000207926 hsa-mir-135a-1 |                               |
| GGGTTGCAA  | ENSG00000202641 hsa-mir-484               | ENSG00000207732 hsa-mir-218-1  |                                |                                |                               |
| GGGTTTATA  | ENSG00000198974 hsa-mir-30e               | ENSG00000207962 hsa-mir-30c-1  |                                |                                |                               |
| GGGTTTGTA  | ENSG00000199065 hsa-mir-101-2             |                                |                                |                                |                               |
| GGGTTTTC   | ENSG00000207752 hsa-mir-199a-1            |                                |                                |                                |                               |
| GGTAAAACC  | ENSG00000207731 hsa-mir-506               | ENSG00000210741 hsa-mir-196a-1 |                                |                                |                               |
| GGTAACAAA  | ENSG00000207725 hsa-mir-222               | ENSG00000207870 hsa-mir-221    |                                |                                |                               |
| GGTAACAGA  | ENSG00000199172 hsa-mir-331               |                                |                                |                                |                               |
| GGTAATGAA  | ENSG00000207955 hsa-mir-219-2             |                                |                                |                                |                               |
| GGTAATTTA  | ENSG00000207721 hsa-mir-186               |                                |                                |                                |                               |
| GGTAGTGAA  | ENSG00000207656 hsa-mir-489               | ENSG00000207728 hsa-mir-449b   | ENSG00000199043 hsa-mir-335    |                                |                               |
| GGTATATA   | ENSG00000199017 hsa-mir-1-1               | ENSG00000207764 hsa-mir-133a-2 |                                |                                |                               |
| GGTATTGCA  | ENSG00000207692 hsa-mir-592               |                                |                                |                                |                               |
|            | TGCAATACC Xie:RTGCAATMCCC CHOP-C/EBPALPHA |                                |                                |                                |                               |
| GGTCAACAA  | ENSG00000207692 hsa-mir-592               |                                |                                |                                |                               |
| GGTACGCA   | ENSG00000207732 hsa-mir-218-1             |                                |                                |                                |                               |
| GGTCAGACC  | ENSG00000207730 hsa-mir-200b              | ENSG00000207607 hsa-mir-200a   | ENSG00000198976 hsa-mir-429    |                                |                               |
| GGTCAGCAA  | ENSG00000207705 hsa-mir-129-1             |                                |                                |                                |                               |
| GGTCAGCGA  | ENSG00000207713 hsa-mir-200c              | ENSG00000207708 hsa-mir-141    |                                |                                |                               |
| GGTCATCAA  | ENSG00000207571 hsa-mir-615               |                                |                                |                                |                               |
| GGTCATTTA  | ENSG00000199085 hsa-mir-148a              | ENSG00000207638 hsa-mir-99a    | ENSG00000207863 hsa-mir-125b-2 |                                |                               |
|            | GGTCATTTA Xie:KGTCTTAA IPF1               |                                |                                |                                |                               |
| GGTCCATA   | ENSG00000207730 hsa-mir-200b              | ENSG00000207607 hsa-mir-200a   | ENSG00000198976 hsa-mir-429    |                                |                               |
| GGTCCCAA   | ENSG00000207739 hsa-mir-218-2             | ENSG00000207954 hsa-mir-138-1  |                                |                                |                               |
| GGTCCGCCA  | ENSG00000207656 hsa-mir-489               |                                |                                |                                |                               |

GGTCCTAAA ENSG00000208024|hsa-mir-199a-2 ENSG00000207949|hsa-mir-214  
GGTCCTCTA ENSG00000207649|hsa-mir-138-2  
GGTCGCCGA ENSG00000199085|hsa-mir-148a  
GGTCTCCAC ENSG00000210741|hsa-mir-196a-1  
GGTCTCCCA ENSG00000207777|hsa-mir-10a  
GGTCTTGGGA ENSG00000199036|hsa-mir-219-1 ENSG00000207692|hsa-mir-592  
GGTGAACCA ENSG00000199153|hsa-mir-30d ENSG00000207582|hsa-mir-30b  
GGTGAATAA ENSG00000207726|hsa-mir-455 ENSG00000208005|hsa-mir-503 ENSG00000207784|hsa-mir-542  
GGTGACAAA ENSG00000207581|hsa-mir-199b ENSG00000207933|hsa-mir-9-1  
GGTGACCAC ENSG00000207954|hsa-mir-138-1  
GGTGACGCA ENSG00000199036|hsa-mir-219-1  
GGTGAGAAA ENSG00000198987|hsa-mir-16-2  
GGTGAGAAC ENSG00000199157|hsa-mir-208  
GGTGATGAA ENSG00000207752|hsa-mir-199a-1  
GGTGATGCA ENSG00000199024|hsa-mir-103-2  
GGTGCAATA ENSG00000199172|hsa-mir-331  
GGTGCCCTA ENSG00000207819|hsa-mir-9-3  
GGTGCCGAC ENSG00000198973|hsa-mir-375  
GGTGCGCGA ENSG00000207568|hsa-mir-203 ENSG00000207611|hsa-mir-149  
GGTGCTAAA ENSG00000199023|hsa-mir-339 ENSG00000198974|hsa-mir-30e ENSG00000207962|hsa-mir-30c-1  
GGTGCTGAA ENSG00000207960|hsa-mir-153-2  
GGTGCTGAC ENSG00000199088|hsa-mir-379 ENSG00000207749|hsa-mir-299 ENSG00000198982|hsa-mir-380 ENSG00000199069|hsa-mir-323 ENSG00000211582|hsa-mir-758 ENSG00000207761|hsa-mir-329-1 ENSG00000194717|hsa-mir-494  
ENSG00000207743|hsa-mir-495 ENSG00000199020|hsa-mir-381 ENSG00000207754|hsa-mir-487b ENSG00000202560|hsa-mir-539 ENSG00000207993|hsa-mir-134 ENSG00000207961|hsa-mir-496 ENSG00000199015|hsa-mir-377  
ENSG00000199107|hsa-mir-409 ENSG00000199012|hsa-mir-412 ENSG00000199025|hsa-mir-369 ENSG00000199092|hsa-mir-410  
GGTGCGCGA ENSG00000207777|hsa-mir-10a  
GGTGGTTTA ENSG00000207694|hsa-mir-1-2  
GGGTAAACA ENSG00000207721|hsa-mir-186  
GGTGTGAGA ENSG00000207695|hsa-mir-184  
GGTGTGACA ENSG00000207939|hsa-mir-223  
GGTGTGCGA ENSG00000207571|hsa-mir-615  
GGTTAAAAC ENSG00000198974|hsa-mir-30e ENSG00000207962|hsa-mir-30c-1 ENSG00000207602|hsa-mir-106a ENSG00000207572|hsa-mir-363 ENSG00000207710|hsa-mir-20b  
GGTTAAAGA ENSG00000198981|hsa-mir-29a  
GGTTAATCA ENSG00000199088|hsa-mir-379 ENSG00000207749|hsa-mir-299 ENSG00000198982|hsa-mir-380 ENSG00000199069|hsa-mir-323 ENSG00000211582|hsa-mir-758 ENSG00000207761|hsa-mir-329-1 ENSG00000194717|hsa-mir-494  
ENSG00000207743|hsa-mir-495 ENSG00000199020|hsa-mir-381 ENSG00000207754|hsa-mir-487b ENSG00000202560|hsa-mir-539 ENSG00000207993|hsa-mir-134 ENSG00000207961|hsa-mir-496 ENSG00000199015|hsa-mir-377  
ENSG00000199107|hsa-mir-409 ENSG00000199012|hsa-mir-412 ENSG00000199025|hsa-mir-369 ENSG00000199092|hsa-mir-410  
GGTTAATCA Xie:GGTTAATnWTTAMC HNF-1  
GGTTACTAA ENSG00000199165|hsa-let-7a-1 ENSG00000199072|hsa-let-7f-1 ENSG00000199133|hsa-let-7d  
GGTTAGTGA ENSG00000207571|hsa-mir-615  
GGTTCATCA ENSG00000207649|hsa-mir-138-2  
GGTTCCAAC ENSG00000207611|hsa-mir-149  
GGTTCCGGA ENSG00000207732|hsa-mir-218-1  
GGTTCCTCA ENSG00000207819|hsa-mir-9-3 ENSG00000207777|hsa-mir-10a  
GGTTCTCAC ENSG00000198981|hsa-mir-29a ENSG00000207954|hsa-mir-138-1  
GGTTGCCAA ENSG00000199023|hsa-mir-339  
GGTTGGAAC ENSG00000207611|hsa-mir-149  
GGTTGGACA ENSG00000207581|hsa-mir-199b ENSG00000199122|hsa-mir-148b  
GGTTGGATA ENSG00000208009|hsa-mir-130a  
GGTTGTAAA ENSG00000207777|hsa-mir-10a ENSG00000207995|hsa-mir-325  
GGTTGTGCA ENSG00000199122|hsa-mir-148b  
GGTTGTTTA ENSG00000207789|hsa-mir-26a-2 ENSG00000199088|hsa-mir-379 ENSG00000207749|hsa-mir-299 ENSG00000198982|hsa-mir-380 ENSG00000199069|hsa-mir-323 ENSG00000211582|hsa-mir-758 ENSG00000207761|hsa-mir-329-1  
ENSG00000194717|hsa-mir-494 ENSG00000207743|hsa-mir-495 ENSG00000199020|hsa-mir-381 ENSG00000207754|hsa-mir-487b ENSG00000202560|hsa-mir-539 ENSG00000207993|hsa-mir-134 ENSG00000207961|hsa-mir-496 ENSG00000207961|hsa-mir-496  
ENSG00000199015|hsa-mir-377 ENSG00000199107|hsa-mir-409 ENSG00000199012|hsa-mir-412 ENSG00000199025|hsa-mir-369 ENSG00000199092|hsa-mir-410 ENSG00000207725|hsa-mir-222 ENSG00000207870|hsa-mir-221  
GGTTGTTTA Xie:KTWGTTT SRV  
GGTTTAAGA ENSG00000199077|hsa-mir-129-2 ENSG00000207602|hsa-mir-106a ENSG00000207572|hsa-mir-363 ENSG00000207710|hsa-mir-20b  
GGTTTATAA ENSG00000198974|hsa-mir-30e ENSG00000207962|hsa-mir-30c-1  
GGTTTGGCA ENSG00000207731|hsa-mir-506  
GGTTTTAAC ENSG00000207651|hsa-mir-28  
GGTTTTATA ENSG00000207717|hsa-mir-551b  
GGTTTTGAC ENSG00000207795|hsa-mir-155  
GTAAAATAA ENSG00000207635|hsa-mir-499  
GTAAACACA ENSG00000207656|hsa-mir-489  
GTAAACACA Xie:CTWAWGTAAACAnWG FREAC-4  
GTAAACAGA ENSG00000208024|hsa-mir-199a-2 ENSG00000207949|hsa-mir-214  
GTAAACAGA Xie:CTWAWGTAAACAnWG FREAC-4  
GTAAACGGA ENSG00000207777|hsa-mir-10a  
GTAAACGGA MATCH:V\$VMYB\_02 v-Myb  
GTAAACTGA ENSG00000199135|hsa-mir-101-1  
GTAAAGAGA ENSG00000199077|hsa-mir-129-2 ENSG00000207568|hsa-mir-203 ENSG00000207725|hsa-mir-222 ENSG00000207870|hsa-mir-221  
GTAAAGTAA ENSG00000207725|hsa-mir-222 ENSG00000207870|hsa-mir-221  
GTAAATAAA ENSG00000207585|hsa-mir-181d ENSG00000208037|hsa-mir-320  
TTTATTTAC Xie:TGTTTATTTAC FREAC-3  
GTAACAGGA ENSG00000207725|hsa-mir-222 ENSG00000207870|hsa-mir-221  
GTAACCTCA ENSG00000207827|hsa-mir-30a ENSG00000199094|hsa-mir-30c-2  
GTAAGAAAC ENSG00000207692|hsa-mir-592  
GTAAGCCAA ENSG00000207602|hsa-mir-106a ENSG00000207572|hsa-mir-363 ENSG00000207710|hsa-mir-20b  
GTAAGTGCA ENSG00000207618|hsa-mir-144 ENSG00000207794|hsa-mir-451  
GTAATCTTA ENSG00000207624|hsa-mir-194-1 ENSG00000207590|hsa-mir-215 ENSG00000207717|hsa-mir-551b  
GTAATGACA ENSG00000207994|hsa-mir-100 ENSG00000207971|hsa-mir-125b-1 ENSG00000198975|hsa-let-7a-2  
TGTCATTAC Xie:KGTCATTA IPF1  
GTAATGAGA ENSG00000207980|hsa-mir-23a ENSG00000209707|hsa-mir-24-2 ENSG00000207808|hsa-mir-27a  
GTAATGGGA ENSG00000207698|hsa-mir-32 ENSG00000207721|hsa-mir-186 ENSG00000207954|hsa-mir-138-1  
GTAATTAGA ENSG00000208005|hsa-mir-503 ENSG00000207784|hsa-mir-542  
GTAATTAGA Xie:GTAAKTnG NCX  
GTACACAAA ENSG00000207790|hsa-mir-29b-2 ENSG00000207966|hsa-mir-29c  
GTACCAAGA ENSG00000207705|hsa-mir-129-1  
GTACTTAAA ENSG00000208024|hsa-mir-199a-2 ENSG00000207949|hsa-mir-214  
GTAGATTAA ENSG00000208017|hsa-mir-140  
GTAGCGAAA ENSG00000199032|hsa-mir-425  
GTAGGAGGA ENSG00000207651|hsa-mir-28  
GTAGGGTTA ENSG00000202609|hsa-mir-488  
GTAGTTTGA ENSG00000207692|hsa-mir-592



GTAGTTAAC ENSG00000199122|hsa-mir-148b  
 GTAGTTCCA ENSG00000199177|hsa-mir-31  
 GTAGTTCTA ENSG00000207790|hsa-mir-29b-2 ENSG00000207966|hsa-mir-29c  
 GTAGTTTGA ENSG00000207795|hsa-mir-155  
 GTAGTTTGA Xie:KTWGT TTT SR Y  
 GTATAGGAA ENSG00000199071|hsa-mir-423  
 GTATGCAAA ENSG00000199038|hsa-mir-210  
 GTATGGTCA ENSG00000199153|hsa-mir-30d ENSG00000207582|hsa-mir-30b  
 GTATGTA AA ENSG00000211574|hsa-mir-770 ENSG00000208001|hsa-mir-431 ENSG00000199005|hsa-mir-370  
 GTATTAGAC ENSG00000199165|hsa-let-7a-1 ENSG00000199072|hsa-let-7f-1 ENSG00000199133|hsa-let-7d  
 GTATTC AAC ENSG00000207791|hsa-mir-497 ENSG00000207929|hsa-mir-195 ENSG00000207692|hsa-mir-592 ENSG00000207694|hsa-mir-1-2  
 GTC AAACAA ENSG00000207954|hsa-mir-138-1  
 GTC AAATTA ENSG00000198987|hsa-mir-16-2  
 GTC AACAAA ENSG00000207692|hsa-mir-592  
 GTC AAGTCA ENSG00000207995|hsa-mir-325  
 GTC ACACAA ENSG00000199161|hsa-mir-126  
 GTC ACCATA ENSG00000211517|hsa-mir-671  
 GTC ACCGAA ENSG00000198984|hsa-mir-345  
 GTC ACCTGA ENSG00000207702|hsa-mir-211 ENSG00000208017|hsa-mir-140  
 TCAGGTGAC Xie:CAGGTGW AREB6  
 GTCACGTGA ENSG00000208017|hsa-mir-140  
 TCACGTGAC Xie:ATCACGTGAY SREBP-1  
 GTC ACTAGA ENSG00000198995|hsa-mir-340  
 GTC ACTCCA ENSG00000207691|hsa-mir-183 ENSG00000207990|hsa-mir-182 ENSG00000199158|hsa-mir-96 ENSG00000207795|hsa-mir-155  
 GTC ACTTGA ENSG00000207633|hsa-mir-505 ENSG00000207731|hsa-mir-506  
 TCAAGTGAC Xie:TYAAGTG NKX2-5  
 GTC ACTTTA ENSG00000207586|hsa-mir-135a-2 ENSG00000207725|hsa-mir-222 ENSG00000207870|hsa-mir-221 ENSG00000207795|hsa-mir-155  
 GTC AGATGA ENSG00000199004|hsa-mir-21  
 GTC AGCGCA ENSG00000208024|hsa-mir-199a-2 ENSG00000207949|hsa-mir-214  
 GTC AGCTGA ENSG00000199172|hsa-mir-331 ENSG00000207827|hsa-mir-30a ENSG00000199094|hsa-mir-30c-2  
 GTC AGGTGA ENSG00000208017|hsa-mir-140  
 GTCAGGTGA Xie:CAGGTGW AREB6  
 GTCAGGTGA Xie:RnCAGGTG MYOD  
 GTCAGTAC ENSG00000211517|hsa-mir-671 ENSG00000199135|hsa-mir-101-1  
 GTCATATGA ENSG00000207638|hsa-mir-99a ENSG00000207863|hsa-mir-125b-2  
 GTCATCAGA ENSG00000207596|hsa-mir-194-2 ENSG00000207648|hsa-mir-192  
 GTCATCTGA ENSG00000199130|hsa-mir-365-1 ENSG00000208005|hsa-mir-503 ENSG00000207784|hsa-mir-542 ENSG00000208009|hsa-mir-130a  
 GTCATGGAA ENSG00000207705|hsa-mir-129-1  
 GTCATGGTA ENSG00000199172|hsa-mir-331  
 GTCATGTGA ENSG00000207586|hsa-mir-135a-2  
 GTCATGTGA MATCH:V\$TFE\_Q6 TFE  
 GTCATTAAC ENSG00000207692|hsa-mir-592  
 GTCATTGAA ENSG00000207633|hsa-mir-505  
 GTCATTTCA ENSG00000208037|hsa-mir-320 ENSG00000211590|hsa-mir-802  
 GTCCAAACA ENSG00000208037|hsa-mir-320  
 GTCCACCAA ENSG00000207694|hsa-mir-1-2  
 GTCCAGGTA ENSG00000207649|hsa-mir-138-2  
 GTCCATAAA ENSG00000199177|hsa-mir-31 ENSG00000207602|hsa-mir-106a ENSG00000207572|hsa-mir-363 ENSG00000207710|hsa-mir-20b  
 GTCCATATA ENSG00000207717|hsa-mir-551b ENSG00000208024|hsa-mir-199a-2 ENSG00000207949|hsa-mir-214  
 GTCCATATA Xie:GnCCAWATAWGGM SRF  
 GTCCATTCA ENSG00000202641|hsa-mir-484  
 GTCCCAAAC ENSG00000207602|hsa-mir-106a ENSG00000207572|hsa-mir-363 ENSG00000207710|hsa-mir-20b  
 GTCCCGCGA ENSG00000207568|hsa-mir-203  
 GTCCGAAAA ENSG00000211563|hsa-mir-338  
 GTCCGCTCA ENSG00000207819|hsa-mir-9-3  
 GTCCTCAAA ENSG00000199157|hsa-mir-208  
 GTCCTTGAA ENSG00000207692|hsa-mir-592 ENSG00000211590|hsa-mir-802  
 GTCGAATTA ENSG00000207960|hsa-mir-153-2  
 GTCGACTAA ENSG00000207739|hsa-mir-218-2 ENSG00000198987|hsa-mir-16-2  
 GTCGCAAAA ENSG00000198986|hsa-let-7a-3 ENSG00000207875|hsa-let-7b ENSG00000202641|hsa-mir-484  
 GTCGCCCAC ENSG00000207739|hsa-mir-218-2  
 GTCGCCGCA ENSG00000207960|hsa-mir-153-2  
 GTCGGCAGA ENSG00000199024|hsa-mir-103-2  
 GTCGGGCTA ENSG00000207698|hsa-mir-32  
 GTCGTGTAA ENSG00000207614|hsa-mir-193a ENSG00000199187|hsa-mir-365-2  
 GTCTACTGA ENSG00000207954|hsa-mir-138-1  
 GTCTCAACA ENSG00000199077|hsa-mir-129-2  
 GTCTCATTA ENSG00000207731|hsa-mir-506  
 GTCTCCACA ENSG00000207809|hsa-mir-139  
 GTCTCCGGA ENSG00000199017|hsa-mir-1-1 ENSG00000207764|hsa-mir-133a-2  
 GTCTCCTGA ENSG00000207635|hsa-mir-499 ENSG00000207960|hsa-mir-153-2  
 GTCTCTCTA ENSG00000199157|hsa-mir-208 ENSG00000198987|hsa-mir-16-2  
 GTCTGAACA ENSG00000207745|hsa-mir-17 ENSG00000207610|hsa-mir-19a ENSG00000199149|hsa-mir-20a  
 GTCTGACAA ENSG00000199053|hsa-mir-324  
 GTCTGCTTA ENSG00000199088|hsa-mir-379 ENSG00000207749|hsa-mir-299 ENSG00000198982|hsa-mir-380 ENSG00000199069|hsa-mir-323 ENSG00000211582|hsa-mir-758 ENSG00000207761|hsa-mir-329-1 ENSG00000194717|hsa-mir-494  
 ENSG00000207743|hsa-mir-495 ENSG00000199020|hsa-mir-381 ENSG00000207754|hsa-mir-487b ENSG00000202560|hsa-mir-539 ENSG00000207993|hsa-mir-134 ENSG00000207961|hsa-mir-496 ENSG00000199015|hsa-mir-377  
 ENSG00000199107|hsa-mir-409 ENSG00000199012|hsa-mir-412 ENSG00000199025|hsa-mir-369 ENSG00000199092|hsa-mir-410  
 GTCTGGCAC ENSG00000199032|hsa-mir-425  
 GTCTGTGTA ENSG00000207947|hsa-mir-152 ENSG00000208024|hsa-mir-199a-2 ENSG00000207949|hsa-mir-214  
 GTGAAAAAC ENSG00000199082|hsa-mir-342  
 GTGAAACAC ENSG00000207633|hsa-mir-505  
 GTGAAGTCA ENSG00000207586|hsa-mir-135a-2  
 GTGAATGGA ENSG00000202641|hsa-mir-484  
 GTGACAAA ENSG00000207618|hsa-mir-144 ENSG00000207794|hsa-mir-451 ENSG00000207939|hsa-mir-223 ENSG00000211574|hsa-mir-770 ENSG00000208001|hsa-mir-431 ENSG00000199005|hsa-mir-370  
 GTGACCGCA ENSG00000211517|hsa-mir-671  
 GTGACGCAC ENSG00000199036|hsa-mir-219-1 ENSG00000207827|hsa-mir-30a ENSG00000199094|hsa-mir-30c-2  
 GTGACGCCA ENSG00000199088|hsa-mir-379 ENSG00000207749|hsa-mir-299 ENSG00000198982|hsa-mir-380 ENSG00000199069|hsa-mir-323 ENSG00000211582|hsa-mir-758 ENSG00000207761|hsa-mir-329-1 ENSG00000194717|hsa-mir-494  
 ENSG00000207743|hsa-mir-495 ENSG00000199020|hsa-mir-381 ENSG00000207754|hsa-mir-487b ENSG00000202560|hsa-mir-539 ENSG00000207993|hsa-mir-134 ENSG00000207961|hsa-mir-496 ENSG00000199015|hsa-mir-377  
 ENSG00000199107|hsa-mir-409 ENSG00000199012|hsa-mir-412 ENSG00000199025|hsa-mir-369 ENSG00000199092|hsa-mir-410  
 GTGACGTTA ENSG00000208037|hsa-mir-320  
 GTGACTACA ENSG00000199077|hsa-mir-129-2 ENSG00000208009|hsa-mir-130a



|                             |                                |                                |                              |                                |                              |                               |                               |  |  |
|-----------------------------|--------------------------------|--------------------------------|------------------------------|--------------------------------|------------------------------|-------------------------------|-------------------------------|--|--|
| GTTGTTGCA                   | ENSG00000207935 hsa-mir-204    | ENSG00000207548 hsa-mir-217    |                              |                                |                              |                               |                               |  |  |
| GTTGTTTAA                   | ENSG00000207725 hsa-mir-222    | ENSG00000207870 hsa-mir-221    |                              |                                |                              |                               |                               |  |  |
| GTTGTTTAA                   | Xie:KTWGTTT SRY                |                                |                              |                                |                              |                               |                               |  |  |
| GTTTAAATA                   | ENSG00000199085 hsa-mir-148a   |                                |                              |                                |                              |                               |                               |  |  |
| GTTTAAAGCA                  | ENSG00000207718 hsa-mir-15a    | ENSG00000208006 hsa-mir-16-1   |                              |                                |                              |                               |                               |  |  |
| GTTTACAAA                   | ENSG00000207732 hsa-mir-218-1  |                                |                              |                                |                              |                               |                               |  |  |
| GTTTACTAA                   | ENSG00000207624 hsa-mir-194-1  | ENSG00000207590 hsa-mir-215    |                              |                                |                              |                               |                               |  |  |
| GTTTAGGAA                   | ENSG00000207585 hsa-mir-181d   | ENSG00000207926 hsa-mir-135a-1 |                              |                                |                              |                               |                               |  |  |
| GTTTATGTA                   | ENSG00000199122 hsa-mir-148b   |                                |                              |                                |                              |                               |                               |  |  |
| GTTTATTTA                   | ENSG00000208037 hsa-mir-320    |                                |                              |                                |                              |                               |                               |  |  |
| GTTTATTTA                   | Xie:TGTTTATTAC FREAC-3         |                                |                              |                                |                              |                               |                               |  |  |
| GTTTATTTA                   | Xie:TRTTTRYTYW HNF-3           |                                |                              |                                |                              |                               |                               |  |  |
| TAAATAAAC                   | Xie:WAAAYAAACAATM FOX          |                                |                              |                                |                              |                               |                               |  |  |
| GTTTCAAAC                   | ENSG00000207795 hsa-mir-155    |                                |                              |                                |                              |                               |                               |  |  |
| GTTTCACCA                   | ENSG00000208005 hsa-mir-503    | ENSG00000207784 hsa-mir-542    |                              |                                |                              |                               |                               |  |  |
| GTTTCCGGA                   | ENSG00000199017 hsa-mir-1-1    | ENSG00000207764 hsa-mir-133a-2 |                              |                                |                              |                               |                               |  |  |
| GTTTCTCAA                   | ENSG00000202641 hsa-mir-484    |                                |                              |                                |                              |                               |                               |  |  |
| GTTTCTTAA                   | ENSG00000208037 hsa-mir-320    |                                |                              |                                |                              |                               |                               |  |  |
| GTTTCTTTA                   | ENSG00000207960 hsa-mir-153-2  | ENSG00000208037 hsa-mir-320    |                              |                                |                              |                               |                               |  |  |
| GTTTGACAA                   | ENSG00000211574 hsa-mir-770    | ENSG00000208001 hsa-mir-431    | ENSG00000199005 hsa-mir-370  |                                |                              |                               |                               |  |  |
| GTTTGACTA                   | ENSG00000207586 hsa-mir-135a-2 |                                |                              |                                |                              |                               |                               |  |  |
| GTTTGATCA                   | ENSG00000207777 hsa-mir-10a    |                                |                              |                                |                              |                               |                               |  |  |
| GTTTGCCCTA                  | ENSG00000207795 hsa-mir-155    |                                |                              |                                |                              |                               |                               |  |  |
| GTTTGGTCA                   | ENSG00000207827 hsa-mir-30a    | ENSG00000199094 hsa-mir-30c-2  |                              |                                |                              |                               |                               |  |  |
| GTTTGTAATA                  | ENSG00000207732 hsa-mir-218-1  |                                |                              |                                |                              |                               |                               |  |  |
| GTTTTCAGA                   | ENSG00000207728 hsa-mir-449b   |                                |                              |                                |                              |                               |                               |  |  |
| TAAAATGTA                   | ENSG00000207585 hsa-mir-181d   |                                |                              |                                |                              |                               |                               |  |  |
| TAAACCTTA                   | ENSG00000207692 hsa-mir-592    |                                |                              |                                |                              |                               |                               |  |  |
| TAAACGGAA                   | ENSG00000207777 hsa-mir-10a    |                                |                              |                                |                              |                               |                               |  |  |
| TAAAGGCCA                   | ENSG00000207713 hsa-mir-200c   | ENSG00000207708 hsa-mir-141    | ENSG00000199122 hsa-mir-148b |                                |                              |                               |                               |  |  |
| TAAAGTGCA                   | ENSG00000199172 hsa-mir-331    | ENSG00000207995 hsa-mir-325    |                              |                                |                              |                               |                               |  |  |
| TAAATCCCA                   | ENSG00000207586 hsa-mir-135a-2 | ENSG00000207721 hsa-mir-186    |                              |                                |                              |                               |                               |  |  |
| TAAATGCTA                   | ENSG00000207585 hsa-mir-181d   |                                |                              |                                |                              |                               |                               |  |  |
| TAAATTTCCA                  | ENSG00000202569 hsa-mir-146b   |                                |                              |                                |                              |                               |                               |  |  |
| TAACAACCTA                  | ENSG00000207745 hsa-mir-17     | ENSG00000207610 hsa-mir-19a    | ENSG00000199149 hsa-mir-20a  |                                |                              |                               |                               |  |  |
| TAACAGCTA                   | ENSG00000199058 hsa-mir-302b   | ENSG00000199169 hsa-mir-367    | ENSG00000199145 hsa-mir-302d | ENSG00000199102 hsa-mir-302c   |                              |                               |                               |  |  |
| TAACAGGAA                   | ENSG00000207725 hsa-mir-222    | ENSG00000207870 hsa-mir-221    |                              |                                |                              |                               |                               |  |  |
| TAACATTCA                   | ENSG00000198995 hsa-mir-340    |                                |                              |                                |                              |                               |                               |  |  |
| TAACCAAGA                   | ENSG00000199043 hsa-mir-335    | ENSG00000207790 hsa-mir-29b-2  | ENSG00000207966 hsa-mir-29c  |                                |                              |                               |                               |  |  |
| TAACCTTAA                   | ENSG00000199153 hsa-mir-30d    | ENSG00000207582 hsa-mir-30b    |                              |                                |                              |                               |                               |  |  |
| TAACCTTGA                   | ENSG00000207744 hsa-mir-10b    |                                |                              |                                |                              |                               |                               |  |  |
| TAACCTATA                   | ENSG00000207718 hsa-mir-15a    | ENSG00000208006 hsa-mir-16-1   |                              |                                |                              |                               |                               |  |  |
| TAACCTTCA                   | ENSG00000207827 hsa-mir-30a    | ENSG00000199094 hsa-mir-30c-2  |                              |                                |                              |                               |                               |  |  |
| TAACCTTGA                   | ENSG00000198974 hsa-mir-30e    | ENSG00000207962 hsa-mir-30c-1  |                              |                                |                              |                               |                               |  |  |
| TAAGGGCAA                   | ENSG00000207702 hsa-mir-211    |                                |                              |                                |                              |                               |                               |  |  |
| TAAGGTGCA                   | ENSG00000202609 hsa-mir-488    |                                |                              |                                |                              |                               |                               |  |  |
| TAAGGTGGA                   | ENSG00000207955 hsa-mir-219-2  | ENSG00000199122 hsa-mir-148b   |                              |                                |                              |                               |                               |  |  |
| TAAGTAGAA                   | ENSG00000198984 hsa-mir-345    |                                |                              |                                |                              |                               |                               |  |  |
| TAATCTACA                   | ENSG00000208017 hsa-mir-140    |                                |                              |                                |                              |                               |                               |  |  |
| TAATGAGGA                   | ENSG00000199135 hsa-mir-101-1  |                                |                              |                                |                              |                               |                               |  |  |
| TAATGATCA                   | ENSG00000199153 hsa-mir-30d    | ENSG00000207582 hsa-mir-30b    |                              |                                |                              |                               |                               |  |  |
| TAATGGCAA                   | ENSG00000199023 hsa-mir-339    |                                |                              |                                |                              |                               |                               |  |  |
| TAATGGCCA                   | ENSG00000199088 hsa-mir-379    | ENSG00000207749 hsa-mir-299    | ENSG00000198982 hsa-mir-380  | ENSG00000199069 hsa-mir-323    | ENSG00000211582 hsa-mir-758  | ENSG00000207761 hsa-mir-329-1 | ENSG00000194717 hsa-mir-494   |  |  |
| ENSG00000207743 hsa-mir-495 | ENSG00000199020 hsa-mir-381    | ENSG00000207754 hsa-mir-487b   | ENSG00000202560 hsa-mir-539  | ENSG00000207993 hsa-mir-134    | ENSG00000207961 hsa-mir-496  | ENSG00000199015 hsa-mir-377   |                               |  |  |
| ENSG00000199107 hsa-mir-409 | ENSG00000199012 hsa-mir-412    | ENSG00000199025 hsa-mir-369    | ENSG00000199092 hsa-mir-410  |                                |                              |                               |                               |  |  |
| TAATGGGGA                   | ENSG00000207745 hsa-mir-17     | ENSG00000207610 hsa-mir-19a    | ENSG00000199149 hsa-mir-20a  |                                |                              |                               |                               |  |  |
| TAATGGTGA                   | ENSG00000207744 hsa-mir-10b    |                                |                              |                                |                              |                               |                               |  |  |
| TAATTGCAA                   | ENSG00000207617 hsa-mir-24-1   |                                |                              |                                |                              |                               |                               |  |  |
| TAATTGCCA                   | ENSG00000199058 hsa-mir-302b   | ENSG00000199169 hsa-mir-367    | ENSG00000199145 hsa-mir-302d | ENSG00000199102 hsa-mir-302c   |                              |                               |                               |  |  |
| TAATTTAGA                   | ENSG00000208035 hsa-mir-143    | ENSG00000207721 hsa-mir-186    |                              |                                |                              |                               |                               |  |  |
| TACAACAGA                   | ENSG00000207717 hsa-mir-551b   |                                |                              |                                |                              |                               |                               |  |  |
| TACAAGCCA                   | ENSG00000207797 hsa-mir-187    |                                |                              |                                |                              |                               |                               |  |  |
| TACAGCAAA                   | ENSG00000207702 hsa-mir-211    |                                |                              |                                |                              |                               |                               |  |  |
| TACATAAAA                   | ENSG00000207717 hsa-mir-551b   |                                |                              |                                |                              |                               |                               |  |  |
| TACATCAGA                   | ENSG00000207597 hsa-mir-490    |                                |                              |                                |                              |                               |                               |  |  |
| TACCATAGA                   | ENSG00000199071 hsa-mir-423    |                                |                              |                                |                              |                               |                               |  |  |
| TACCCACAA                   | ENSG00000199177 hsa-mir-31     |                                |                              |                                |                              |                               |                               |  |  |
| TACCCGAAA                   | ENSG00000202641 hsa-mir-484    |                                |                              |                                |                              |                               |                               |  |  |
| TACCTGTCA                   | ENSG00000207713 hsa-mir-200c   | ENSG00000207708 hsa-mir-141    | ENSG00000207994 hsa-mir-100  | ENSG00000207971 hsa-mir-125b-1 | ENSG00000198975 hsa-let-7a-2 |                               |                               |  |  |
| TGACAGGTA                   | Xie:TGACAG MEI1                |                                |                              |                                |                              |                               |                               |  |  |
| TACTAAACA                   | ENSG00000210741 hsa-mir-196a-1 |                                |                              |                                |                              |                               |                               |  |  |
| TACTCAACA                   | ENSG00000199043 hsa-mir-335    |                                |                              |                                |                              |                               |                               |  |  |
| TACTCCCA                    | ENSG00000207948 hsa-mir-328    |                                |                              |                                |                              |                               |                               |  |  |
| TACTGAGCA                   | ENSG00000207649 hsa-mir-138-2  |                                |                              |                                |                              |                               |                               |  |  |
| TACTTGTGA                   | ENSG00000199177 hsa-mir-31     | ENSG00000207790 hsa-mir-29b-2  | ENSG00000207966 hsa-mir-29c  | ENSG00000207933 hsa-mir-9-1    |                              |                               |                               |  |  |
| TAGACTCAA                   | ENSG00000207638 hsa-mir-99a    | ENSG00000207863 hsa-mir-125b-2 |                              |                                |                              |                               |                               |  |  |
| TAGACTTGA                   | ENSG00000208024 hsa-mir-199a-2 | ENSG00000207949 hsa-mir-214    |                              |                                |                              |                               |                               |  |  |
| TAGAGCTGA                   | ENSG00000199058 hsa-mir-302b   | ENSG00000199169 hsa-mir-367    | ENSG00000199145 hsa-mir-302d | ENSG00000199102 hsa-mir-302c   |                              |                               |                               |  |  |
| TAGATGATA                   | ENSG00000208017 hsa-mir-140    | ENSG00000199082 hsa-mir-342    |                              |                                |                              |                               |                               |  |  |
| TAGCATTAA                   | ENSG00000199058 hsa-mir-302b   | ENSG00000199169 hsa-mir-367    | ENSG00000199145 hsa-mir-302d | ENSG00000199102 hsa-mir-302c   | ENSG00000199153 hsa-mir-30d  | ENSG00000207582 hsa-mir-30b   | ENSG00000207624 hsa-mir-194-1 |  |  |
| ENSG00000207590 hsa-mir-215 |                                |                                |                              |                                |                              |                               |                               |  |  |
| TAGCGGAAA                   | ENSG00000208009 hsa-mir-130a   |                                |                              |                                |                              |                               |                               |  |  |
| TAGGATTAA                   | ENSG00000207624 hsa-mir-194-1  | ENSG00000207590 hsa-mir-215    | ENSG00000207721 hsa-mir-186  |                                |                              |                               |                               |  |  |
| TAGGCCTCA                   | ENSG00000208009 hsa-mir-130a   |                                |                              |                                |                              |                               |                               |  |  |
| TAGGGGTCA                   | ENSG00000207954 hsa-mir-138-1  |                                |                              |                                |                              |                               |                               |  |  |
| TAGGTGGAA                   | ENSG00000211563 hsa-mir-338    | ENSG00000207630 hsa-mir-7-3    |                              |                                |                              |                               |                               |  |  |
| TAGGTGGCA                   | ENSG00000207585 hsa-mir-181d   |                                |                              |                                |                              |                               |                               |  |  |
| TAGGTGTCA                   | ENSG00000207797 hsa-mir-187    |                                |                              |                                |                              |                               |                               |  |  |
| TAGTAAACA                   | ENSG00000208024 hsa-mir-199a-2 | ENSG00000207949 hsa-mir-214    |                              |                                |                              |                               |                               |  |  |
| TAGTAACCA                   | ENSG00000199165 hsa-let-7a-1   | ENSG00000199072 hsa-let-7f-1   | ENSG00000199133 hsa-let-7d   | ENSG00000202609 hsa-mir-488    |                              |                               |                               |  |  |
| TAGTCACAA                   | ENSG00000207995 hsa-mir-325    |                                |                              |                                |                              |                               |                               |  |  |



|           |                                |                                |                                |                              |
|-----------|--------------------------------|--------------------------------|--------------------------------|------------------------------|
| TCCCACAAA | ENSG00000207702 hsa-mir-211    |                                |                                |                              |
| TCCCAGGAA | ENSG00000208009 hsa-mir-130a   |                                |                                |                              |
| TCCCAGCAA | ENSG00000199090 hsa-mir-326    |                                |                                |                              |
| TCCCGCTCA | ENSG00000207811 hsa-mir-34b    | ENSG00000207562 hsa-mir-34c    |                                |                              |
| TCCCGCGCA | ENSG00000207695 hsa-mir-184    |                                |                                |                              |
| TCCCGGTCA | ENSG00000207933 hsa-mir-9-1    |                                |                                |                              |
| TCCCTCGGA | ENSG00000207726 hsa-mir-455    |                                |                                |                              |
| TCCCTGCGA | ENSG00000199065 hsa-mir-101-2  |                                |                                |                              |
| TCCCTTAAA | ENSG00000198987 hsa-mir-16-2   |                                |                                |                              |
| TCCGAGAAA | ENSG00000207789 hsa-mir-26a-2  |                                |                                |                              |
| TCCGAGGAA | ENSG00000198984 hsa-mir-345    |                                |                                |                              |
| TCCGCTTCA | ENSG00000207630 hsa-mir-7-3    |                                |                                |                              |
| TCCGGGTCA | ENSG00000208017 hsa-mir-140    |                                |                                |                              |
| TCCGTTTCA | ENSG00000198987 hsa-mir-16-2   |                                |                                |                              |
| TCCGTTTCA | MATCH:V\$VMB_02 v-Myb          |                                |                                |                              |
| TCCTAATAA | ENSG00000208037 hsa-mir-320    | ENSG00000199165 hsa-let-7a-1   | ENSG00000199072 hsa-let-7f-1   | ENSG00000199133 hsa-let-7d   |
| TCCTAATCA | ENSG00000207548 hsa-mir-217    |                                |                                |                              |
| TCCTGATAA | ENSG00000207651 hsa-mir-28     |                                |                                |                              |
| TCCTTAAAA | ENSG00000199032 hsa-mir-425    |                                |                                |                              |
| TCCTTAGCA | ENSG00000207728 hsa-mir-449b   |                                |                                |                              |
| TCCTTTGAA | ENSG00000207702 hsa-mir-211    |                                |                                |                              |
| TCCTTTGAA | Xie:CTTTGA LEF1                |                                |                                |                              |
| TTCAAAGGA | Xie:WTCAAAGS TCF-4             |                                |                                |                              |
| TCGAGGTCA | ENSG00000198973 hsa-mir-375    |                                |                                |                              |
| TGACCTCGA | Xie:TGACCT ER                  |                                |                                |                              |
| TCGCCCGGA | ENSG00000207792 hsa-mir-151    |                                |                                |                              |
| TCGCCTGCA | ENSG00000207953 hsa-mir-212    |                                |                                |                              |
| TCGCCTTCA | ENSG00000207726 hsa-mir-455    |                                |                                |                              |
| TCGGGAGAA | ENSG00000207698 hsa-mir-32     |                                |                                |                              |
| TCGGCGTCA | ENSG00000199071 hsa-mir-423    |                                |                                |                              |
| TCGGTCCA  | ENSG00000207635 hsa-mir-499    | ENSG00000208005 hsa-mir-503    | ENSG00000207784 hsa-mir-542    |                              |
| TCGGCTGAA | ENSG00000202569 hsa-mir-146b   |                                |                                |                              |
| TCGGGAAAA | ENSG00000207994 hsa-mir-100    | ENSG00000207971 hsa-mir-125b-1 | ENSG00000198975 hsa-let-7a-2   |                              |
| TCGGGGACA | ENSG00000199032 hsa-mir-425    |                                |                                |                              |
| TCGTCCCA  | ENSG00000207933 hsa-mir-9-1    |                                |                                |                              |
| TCGTACAA  | ENSG00000198987 hsa-mir-16-2   |                                |                                |                              |
| TCTAAACCA | ENSG00000202609 hsa-mir-488    |                                |                                |                              |
| TCTAGCCCA | ENSG00000207819 hsa-mir-9-3    |                                |                                |                              |
| TCTAGGCAA | ENSG00000199017 hsa-mir-1-1    | ENSG00000207764 hsa-mir-133a-2 | ENSG00000207752 hsa-mir-199a-1 |                              |
| TCTAGGTCA | ENSG00000210741 hsa-mir-196a-1 |                                |                                |                              |
| TGACCTAGA | Xie:TGACCT ER                  |                                |                                |                              |
| TGACCTAGA | Xie:TGACCTAnWTW RORALPHA2      |                                |                                |                              |
| TCTAGTAAA | ENSG00000202609 hsa-mir-488    |                                |                                |                              |
| TCTATCTAA | ENSG00000199165 hsa-let-7a-1   | ENSG00000199072 hsa-let-7f-1   | ENSG00000199133 hsa-let-7d     |                              |
| TCTATTTAA | ENSG00000207571 hsa-mir-615    |                                |                                |                              |
| TCTCAATAA | ENSG00000199065 hsa-mir-101-2  | ENSG00000199130 hsa-mir-365-1  |                                |                              |
| TCTCATTTA | ENSG00000198984 hsa-mir-345    | ENSG00000207548 hsa-mir-217    |                                |                              |
| TCTGCAGAA | ENSG00000199053 hsa-mir-324    |                                |                                |                              |
| TCTGCTCAA | ENSG00000199066 hsa-mir-330    |                                |                                |                              |
| TCTGTAAAA | ENSG00000199121 hsa-mir-26b    |                                |                                |                              |
| TCTTAAAGA | ENSG00000207955 hsa-mir-219-2  | ENSG00000208037 hsa-mir-320    |                                |                              |
| TCTTATCAA | ENSG00000207865 hsa-mir-34a    |                                |                                |                              |
| TCTTCATCA | ENSG00000207752 hsa-mir-199a-1 |                                |                                |                              |
| TCTTTGTCA | ENSG00000199077 hsa-mir-129-2  |                                |                                |                              |
| TGAAAACCA | ENSG00000207702 hsa-mir-211    |                                |                                |                              |
| TGAACTAAA | ENSG00000199085 hsa-mir-148a   |                                |                                |                              |
| TGAACTGCA | ENSG00000199161 hsa-mir-126    | ENSG00000207717 hsa-mir-551b   |                                |                              |
| TGAAGACA  | ENSG00000199157 hsa-mir-208    |                                |                                |                              |
| TGAAGGTCA | ENSG00000207691 hsa-mir-183    | ENSG00000207990 hsa-mir-182    | ENSG00000199158 hsa-mir-96     | ENSG00000207717 hsa-mir-551b |
| TGACCTTCA | Xie:TGACCT ER                  |                                |                                |                              |
| TGAAGTGCA | ENSG00000202641 hsa-mir-484    |                                |                                |                              |
| TGACAATCA | ENSG00000199122 hsa-mir-148b   |                                |                                |                              |
| TGACACCAA | ENSG00000207948 hsa-mir-328    |                                |                                |                              |
| TGACAGCAA | ENSG00000207618 hsa-mir-144    | ENSG00000207794 hsa-mir-451    |                                |                              |
| TGACCCAAA | ENSG00000207550 hsa-mir-99b    | ENSG00000198972 hsa-let-7e     | ENSG00000207586 hsa-mir-135a-2 |                              |
| TGACCGACA | ENSG00000199135 hsa-mir-101-1  |                                |                                |                              |
| TGACCTCAA | ENSG00000199135 hsa-mir-101-1  |                                |                                |                              |
| TGACCTCAA | Xie:TGACCT ER                  |                                |                                |                              |
| TGACGTCAA | ENSG00000207953 hsa-mir-212    |                                |                                |                              |
| TGACGTCAA | Xie:TGACGTCARRG ATF-1          |                                |                                |                              |
| TGACGTCAA | Xie:TGACGTMA CREB              |                                |                                |                              |
| TTGACGTCA | Xie:TGACGTMA CREB              |                                |                                |                              |
| TGACGTGAA | ENSG00000198995 hsa-mir-340    |                                |                                |                              |
| TGACGTGAA | MATCH:V\$ATF6_01 ATF6          |                                |                                |                              |
| TGAGCCCAA | ENSG00000207618 hsa-mir-144    | ENSG00000207794 hsa-mir-451    |                                |                              |
| TGAGCGGCA | ENSG00000199065 hsa-mir-101-2  |                                |                                |                              |
| TGAGCTAAA | ENSG00000202569 hsa-mir-146b   |                                |                                |                              |
| TGAGGACAA | ENSG00000207947 hsa-mir-152    |                                |                                |                              |
| TGAGTCCA  | ENSG00000207745 hsa-mir-17     | ENSG00000207610 hsa-mir-19a    | ENSG00000199149 hsa-mir-20a    |                              |
| TGAGTAACA | ENSG00000199059 hsa-mir-135b   | ENSG00000198974 hsa-mir-30e    | ENSG00000207962 hsa-mir-30c-1  |                              |
| TGAGTCACA | ENSG00000207752 hsa-mir-199a-1 |                                |                                |                              |
| TGAGTGGCA | ENSG00000199177 hsa-mir-31     |                                |                                |                              |
| TGATCATCA | ENSG00000207954 hsa-mir-138-1  |                                |                                |                              |
| TGATCTAAA | ENSG00000199177 hsa-mir-31     | ENSG00000207586 hsa-mir-135a-2 | ENSG00000207624 hsa-mir-194-1  | ENSG00000207590 hsa-mir-215  |
| TGATGGGCA | ENSG00000199036 hsa-mir-219-1  | ENSG00000207604 hsa-mir-206    | ENSG00000199080 hsa-mir-133b   |                              |
| TGATGTCAA | ENSG00000198995 hsa-mir-340    |                                |                                |                              |
| TGATTAACA | ENSG00000207745 hsa-mir-17     | ENSG00000207610 hsa-mir-19a    | ENSG00000199149 hsa-mir-20a    |                              |
| TGATTCACA | ENSG00000198973 hsa-mir-375    |                                |                                |                              |
| TGCAATAAA | ENSG00000207728 hsa-mir-449b   |                                |                                |                              |
| TGCAATCCA | ENSG00000207630 hsa-mir-7-3    | ENSG00000207692 hsa-mir-592    |                                |                              |
| TGCAGCGCA | ENSG00000198981 hsa-mir-29a    |                                |                                |                              |



TTTACTAAA  
TTTCCGAAA

ENSG00000207624|hsa-mir-194-1  
ENSG00000207694|hsa-mir-1-2

ENSG00000207590|hsa-mir-215
