# Supplementary material for: Genome-wide survey of microRNA–transcription factor feed-forward regulatory circuits in human
Source: PubMed Central journal article supplement — Mol Biosyst. 2009 Jun 19;5(8):854–67. doi: 10.1039/b900177h (PMC2898627; doi:10.1039/b900177h), 2009-06-19
Supplement: b900177h_add_file_5.pdf [file b900177h_add_file_5.pdf]

# Post-transcriptional regulatory network: conserved-overrepresented oligos in 3'-UTRs for  
# protein-coding genes and their association to known microRNA seeds.

# Column 0 is the overrepresented DNA oligo S labeling the set. Columns 1 ... n are the Ensembl  
# gene\_id of the protein-coding genes in whose 3'-UTRs the oligo S is overrepresented (p < 0.01).  
# Only oligos surviving the conserved-overrepresentation test (BY < 0.1) are retained. For each  
# oligos, we report also its association with known microRNA seeds (included in our study), where  
# possible. The study was performed for oligos of length 7 nt.

# At the end of each section, a validation with known miRNA binding sites is reported, if possible.

# A plain text ASCII version of this file is available at: <http://personalpages.to.infn.it/~cora/circuits/index.html>

```
AAAAACC ENSG00000008130|NADK ENSG00000008438|PGLYRP1 ENSG00000013563|DNASEL1 ENSG00000042832|TG ENSG00000060688|WDR57 ENSG00000082701|GSK3B ENSG00000100767|PAPLN ENSG00000105427|CNFN  
ENSG00000116584|ARHGFE2 ENSG00000127804|METT10D ENSG00000133392|MYH11 ENSG00000136352|TITF1 ENSG00000136695|IL1F5 ENSG00000136930|PSMB7 ENSG00000137124|ALDH1B1 ENSG00000139433|GLTP  
ENSG00000139914|NP_981947.1 ENSG00000140931|CMTM3 ENSG00000142599|RERE ENSG00000145824|CXCL14 ENSG00000157110|RBPMS ENSG00000160087|UBE2J2 ENSG00000169758|C15orf27 ENSG00000178602|OTOS  
ENSG00000185442|NP_997329.1 ENSG00000188428|TXNDC5 ENSG00000189060|H1FO ENSG00000196085|C19orf42 ENSG00000196263|ZNF471 ENSG00000008083|JARID2 ENSG00000077327|SPAG6 ENSG00000094841|UPRT  
ENSG00000100568|VTI1B ENSG00000103152|MPG ENSG00000103707|MTFMT ENSG0000011445|RFC5 ENSG00000118007|STAG1 ENSG00000124614|RPS10 ENSG00000126804|ZBTB1 ENSG00000130023|C6orf70  
ENSG00000134962|KLB ENSG00000139278|GLIPR1 ENSG00000151892|GFR1 ENSG00000153779|TGIF2LX ENSG00000163113|OTUD7B ENSG00000163249|CCNYL1 ENSG00000164163|ABCE1 ENSG00000165097|AOF1  
ENSG00000165512|ZNF22 ENSG00000165521|EML5 ENSG00000168944|CCDC100 ENSG00000170370|EMX2 ENSG00000181315|ZNF322A ENSG00000181322|TXNDC6 ENSG00000181450|ZNF678  
ENSG00000186479|RGS7BP ENSG00000197603|NP_075561.2 ENSG00000198142|ANKRD57 ENSG00000198521|ZNF43 ENSG00000204201|Q49A40_HUMAN ENSG00000205758|CRYZL1  
  
AAAAATG ENSG00000032389|TSSC1 ENSG00000084234|APLP2 ENSG00000100105|PATZ1 ENSG00000107957|SH3PXD2A ENSG00000113578|FGF1 ENSG00000115844|DLX2 ENSG00000116983|HPCAL4 ENSG00000123374|CDK2  
ENSG00000124164|VAPB ENSG00000125266|EFNB2 ENSG00000131153|GINS2 ENSG00000136026|CKAP4 ENSG00000137133|HINT2 ENSG00000137502|RAB30 ENSG00000139178|C1RL ENSG00000142973|CYP4B1  
ENSG00000143001|TMEM61 ENSG00000143032|BARHL2 ENSG00000145824|CXCL14 ENSG00000147059|SPIN2A ENSG00000162981|FAM84A ENSG00000165731|RET ENSG00000168010|ATG16L2 ENSG00000170906|NDUFA3  
ENSG00000172215|CXCR6 ENSG00000172775|NIP30_HUMAN ENSG00000173020|ADRBK1 ENSG00000174989|FBXW8 ENSG00000175329|ISX ENSG00000177363|NP_981967.1 ENSG00000179051|RCC2 ENSG00000180822|Q8N950_HUMAN  
ENSG00000183579|ZNRFB3 ENSG00000186470|BTN3A2 ENSG00000198884|Q6UXP0_HUMAN ENSG00000205159|Q6ZVC9_HUMAN ENSG00000205761|Q6ZRI7_HUMAN ENSG00000002549|LAP3 ENSG00000026751|SLAMF7 ENSG00000071539|TRIP13  
ENSG00000072319|ALG13 ENSG00000079102|RUNX1T1 ENSG00000103194|USP10 ENSG00000104755|ADAM2 ENSG00000105819|PMCB ENSG00000108176|DNAJC12 ENSG00000109475|RPL34 ENSG00000111731|KIAA0528  
ENSG00000112232|KHDRBS2 ENSG00000120262|C6orf97 ENSG00000123609|NMI ENSG00000130347|RTN4IP1 ENSG00000131127|ZNF141 ENSG00000135205|NP_065930.2 ENSG00000136044|APPL2 ENSG00000138081|FBXO11  
ENSG00000138678|NP_116106.2 ENSG00000143079|CTTNBP2NL ENSG00000144228|SPOPL_HUMAN ENSG00000145604|SKP2 ENSG00000146250|PRSS35 ENSG00000151458|ANKRD50 ENSG00000152061|RABGAP1L ENSG00000154429|C1orf96  
ENSG00000156787|WDR67 ENSG00000162545|CAMK2N1 ENSG00000164120|HPGD ENSG00000165195|PIGA ENSG00000165805|C12orf50 ENSG00000166266|CUL5 ENSG00000166532|FAM80B ENSG00000170185|USP38  
ENSG00000173083|HPSE ENSG00000177459|C8orf47 ENSG00000179981|TSHZ1 ENSG00000180882|XR_017823.1 ENSG00000182916|TCEAL7 ENSG00000186205|MOSC1 ENSG00000189056|RELN ENSG00000196616|ADH1C  
ENSG00000196867|ZFP28 ENSG00000197121|PGAP1_HUMAN ENSG00000197745|SCGB1D4 ENSG00000198839|ZNF277P ENSG00000203705|TATDN3 ENSG00000204897|KRT25  
AAAAACA ENSG000000060688|WDR57 ENSG00000075151|EIF4G3 ENSG00000082701|GSK3B ENSG00000082781|ITGB5 ENSG00000086232|EIF2AK1 ENSG00000086730|LAT2 ENSG00000100211|CBY1  
ENSG00000101290|CDS2 ENSG00000103056|SMPD3 ENSG00000110717|NDUFS8 ENSG00000116128|BCL9 ENSG00000118898|PPL ENSG00000119772|DNMT3A ENSG00000126705|AHDC1 ENSG00000130775|C1orf38  
ENSG00000131558|EXOC4 ENSG00000136352|TITF1 ENSG00000137124|ALDH1B1 ENSG00000139914|NP_981947.1 ENSG00000140688|C16orf58 ENSG00000140931|CMTM3 ENSG00000144560|VGLL4 ENSG00000149295|DRD2  
ENSG00000154096|THY1 ENSG00000157110|RBPMS ENSG00000159650|UROCI ENSG00000160712|IL6R ENSG00000162772|ATF3 ENSG00000167157|PRRX2 ENSG00000169758|C15orf27 ENSG00000170162|VGLL2  
ENSG00000170271|C5orf4 ENSG00000170906|NDUFA3 ENSG00000175824|XR_017847.1 ENSG00000178764|ZHX2 ENSG00000184602|SNR ENSG00000188816|HMX2 ENSG00000190245|Q8N7M3_HUMAN ENSG00000197448|GSTK1  
ENSG00000197965|MPZL1 ENSG00000198033|TUBA3C ENSG00000007350|TKTL1 ENSG00000049130|KITLG ENSG00000061455|PRDM6 ENSG00000104756|KCTD9 ENSG00000133110|POSTN  
ENSG00000136052|SLC41A2 ENSG00000136371|MTHFS ENSG00000154736|ADAMTS5 ENSG00000156925|ZIC3 ENSG00000163581|PLEKHA2 ENSG00000165168|CYBB ENSG00000167384|ZNF180 ENSG00000175105|ZNF654  
ENSG00000181819|Q5JSM7_HUMAN ENSG00000184007|PTP4A2 ENSG00000184368|MAP7D2 ENSG00000185015|CA13 ENSG00000196409|ZNF658B ENSG00000198416|Z658B_HUMAN ENSG00000198677|KIAA0372 ENSG00000205111|CDKL4  
  
perfect: AAAACA TGGTTTT hsa-miR-140 agTGGTTTaccctatgtag 2  
AAAACTA ENSG00000006125|AP2B1 ENSG00000072134|EPN2 ENSG00000100271|TTL1 ENSG00000103184|SEC14L5 ENSG00000105617|LENG1 ENSG00000105648|IFI30 ENSG00000106789|CORO2A ENSG00000106927|AMBP  
ENSG00000111641|NOL1 ENSG00000125810|CD93 ENSG00000133985|TTC9 ENSG00000136935|GOLGA1 ENSG00000138347|MYPN ENSG00000143061|IGSF3 ENSG00000156381|ANKRD9 ENSG00000159110|IFNAR2  
ENSG00000165948|FAM14B ENSG00000170464|DNAJC18 ENSG00000171462|EGFL9 ENSG00000173821|RNFB213 ENSG00000176454|AGPAT7 ENSG00000178110|Q8N9G9_HUMAN ENSG00000180210|F2 ENSG00000180385|Q8NAP4_HUMAN  
ENSG00000197965|MPZL1 ENSG00000198563|ATP6V1G2 ENSG00000111295|TCL19 ENSG000000033178|UBEL1L2 ENSG00000067208|EIV5 ENSG00000109471|LL2 ENSG00000109511|ANXA10  
ENSG00000113580|NR3C1 ENSG00000113594|LIFR ENSG00000115484|CCT4 ENSG00000116044|NFE2L2 ENSG00000132950|ZMYM5 ENSG00000137462|TLR2 ENSG00000140285|FGF7 ENSG00000154556|SORBS2  
ENSG00000154654|NCAM2 ENSG00000158201|ABHD3 ENSG00000162630|B3GALT2 ENSG00000164604|GPR85 ENSG00000165115|KIF27 ENSG00000167005|NUDT21 ENSG00000170312|CDC2 ENSG00000170365|SMAD1  
ENSG00000183337|BCOR ENSG00000183833|C3orf15 ENSG00000185010|F8 ENSG00000186462|NAP1L2 ENSG00000204086|RADA4 ENSG00000204832|Q6ZRU3_HUMAN  
AAAACTC ENSG00000077157|PPP1R12B ENSG00000084112|SSH1 ENSG00000088854|C20orf194 ENSG00000104679|R3HCC1 ENSG00000105193|RPS16 ENSG00000105198|LGALS13 ENSG00000106852|LHX6 ENSG00000107831|FGF8  
ENSG00000125735|TNFSF14 ENSG00000126243|LRFN3 ENSG00000126267|COX6B1 ENSG00000131944|C19orf40 ENSG00000136367|ZFH2 ENSG00000139436|GIT2 ENSG00000141552|ANAPC11 ENSG00000145824|CXCL14  
ENSG00000150477|KIAA1328 ENSG00000166136|NDUFB8 ENSG00000166220|C10orf27 ENSG00000166402|TUB ENSG00000166908|PIP5K2C ENSG00000172476|RAB40A ENSG00000178078|NP_060190.2 ENSG00000198258|UBL5  
ENSG00000205648|QZRS4_HUMAN ENSG00000065613|SLK ENSG000000068305|MEF2A ENSG00000077264|PAK3 ENSG000000094841|UPRT ENSG00000104412|TTC35 ENSG00000135249|RINT1 ENSG00000136999|NOV  
ENSG00000149050|ZNF214 ENSG00000151693|DDEF2 ENSG00000152684|PELO ENSG00000153246|PLA2R1 ENSG00000155959|VBP1 ENSG00000156928|C7orf30 ENSG00000163755|HPS3 ENSG00000164112|TMEM155  
ENSG00000165632|TAF3 ENSG00000168538|NP_068761.4 ENSG00000171877|FRMD5 ENSG00000172748|ZNF596 ENSG00000178338|ZNF354B ENSG00000186160|CYP4Z1 ENSG00000196597|ZNF782 ENSG00000197054|ZNF763  
ENSG00000204789|ZNF204  
AAAACTG ENSG000000066135|JMDJ2A ENSG000000888305|DNMT3B ENSG00000088812|ATRN ENSG00000105379|ETFB ENSG00000116237|ICMT ENSG00000119977|C10orf61 ENSG00000137133|HINT2 ENSG00000137288|C6orf125  
ENSG00000143367|TUFT1 ENSG00000145949|SGK85_HUMAN ENSG00000145979|TBC1D7 ENSG00000154096|THY1 ENSG00000156427|FGF18 ENSG00000157184|CP2T ENSG00000163933|RFT1 ENSG00000168569|NP_001073970.1  
ENSG00000170231|FABP6 ENSG00000172215|CXCR6 ENSG00000173421|CCDC36 ENSG00000174788|PCP2 ENSG00000177992|C9orf7 ENSG00000184502|GAST ENSG00000184825|HIST1H2AH ENSG00000188026|NP_847884.1  
ENSG00000198467|TPM2 ENSG00000066813|NP_001010845.1 ENSG00000078114|NEBL ENSG00000083937|CHMP2B ENSG00000109184|DCUN1D4 ENSG00000112290|WASF1 ENSG00000114948|ADAM23  
ENSG00000116741|RGS2 ENSG00000117616|C1orf63 ENSG00000120539|MASTL ENSG00000122432|SPATA1 ENSG00000135052|C9orf155 ENSG00000137103|C9orf127 ENSG00000140575|IQGAP1 ENSG00000147050|UTX  
ENSG00000147316|MGCPH1 ENSG00000150961|SEC24D ENSG00000165555|C14orf148 ENSG00000166348|USP54 ENSG00000174721|FGFBP3 ENSG00000181903|OR4C6 ENSG00000181904|C5orf24 ENSG00000183747|ACSM2  
ENSG00000185149|NPY2R ENSG00000185551|NR2F2 ENSG00000197453|NP_001001706.1 ENSG00000206120|Q0D2K5_HUMAN  
AAAAAGC ENSG000000010282|HHATL ENSG00000072135|PTPN18 ENSG00000105202|FBL ENSG00000119547|ONECUT2 ENSG00000148498|PARD3 ENSG00000157734|SNX22 ENSG00000158402|CDC25C ENSG00000160097|FNDC5  
ENSG00000160791|CCR5 ENSG00000166569|CPLX4 ENSG00000168434|COG7 ENSG00000168824|NSG1_HUMAN ENSG00000177551|NHLH2 ENSG00000178796|Q8N9Z1_HUMAN ENSG00000179082|C9orf106 ENSG00000198668|CALM1  
ENSG00000204332|Q6ZU25_HUMAN ENSG00000105880|DLX5 ENSG00000105889|Q6NZ63_HUMAN ENSG00000112232|KHDRBS2 ENSG00000113971|ACAD11 ENSG00000133639|BTG1 ENSG00000137804|NUSAP1 ENSG00000142182|DNMT3L  
ENSG00000143947|RPS27A ENSG00000144674|GOLGA4 ENSG00000145244|CORIN ENSG00000146469|VIP ENSG00000150636|CCDC102B ENSG00000152601|MBNL1 ENSG00000153558|FBXL2 ENSG00000154065|ANKRD29  
ENSG00000164975|SNAPC3 ENSG00000165959|CLMN ENSG00000170385|SLC30A1 ENSG00000172901|LAEVR_HUMAN ENSG00000173406|DAB1 ENSG00000177047|IFNW1 ENSG00000177752|YIPF7 ENSG00000187231|SESTD1  
ENSG00000189308|LIN54 ENSG00000197056|ZMYM1 ENSG00000197301|Q6ZQU9_HUMAN ENSG00000197595|NP_997323.1  
AAAAAGC ENSG00000065308|TRAM2 ENSG00000100228|RAB36 ENSG00000100307|CBX7 ENSG00000107130|FREQ ENSG00000109132|PHOX2B ENSG00000111639|MRPL51 ENSG00000122642|FKBP9 ENSG00000123143|PKN1  
ENSG00000123342|MMP19 ENSG00000126970|KIAA1166 ENSG00000138166|DUSP5 ENSG00000153060|TEKT5 ENSG00000154227|LASS3 ENSG00000160097|FNDC5 ENSG00000161610|HCRT ENSG00000162510|MATN1  
ENSG00000164012|WDR65 ENSG00000166435|XRRR1 ENSG00000166716|ZNF592 ENSG00000169057|MECP2 ENSG00000170271|C5orf4 ENSG00000170545|NM_001031628.1 ENSG00000172057|ORMDL3 ENSG00000181754|AMIGO1  
ENSG00000182289|Q9H9U3_HUMAN ENSG00000187975|NP_001003682.1 ENSG00000189180|ZNF33A ENSG00000197238|HIST1H4J ENSG00000203812|HIST2H2AAA4 ENSG00000204760|Q6ZNS8_HUMAN ENSG000002016|RAD52 ENSG0000047648|ARHGAP6  
ENSG00000048028|USP28 ENSG00000085511|MAP3K4 ENSG00000121981|NME5 ENSG00000120251|GRIA2 ENSG00000121578|B4GALT4 ENSG00000123572|NRK ENSG00000131051|RBM39 ENSG00000132855|ANGPTL3  
ENSG00000139055|ERP27 ENSG00000139323|WDR51B ENSG00000159128|IFNGR2 ENSG00000163625|WDFY3 ENSG00000166881|K0286_HUMAN ENSG00000172340|SUCLG2 ENSG00000177410|Q5QH1_HUMAN ENSG00000179941|BBS10  
ENSG00000185010|F8 ENSG00000185551|NR2F2 ENSG00000187824|NP_001004313.1 ENSG00000197375|SLC22A5  
AAAAAGG ENSG00000005102|MEOX1 ENSG00000042445|RETSAT ENSG00000065308|TRAM2 ENSG00000092607|TBX15 ENSG00000100014|SPECC1L ENSG00000100376|FAM118A ENSG00000105972|C7orf20 ENSG00000119772|DNMT3A  
ENSG00000123353|ORMDL2 ENSG00000137135|C9orf100 ENSG00000149478|NM_018652.4 ENSG00000144580|RQCD1 ENSG00000156398|SFXN2 ENSG00000167614|TTYH1 ENSG00000168000|HNRPUL2  
ENSG00000169347|GP2 ENSG00000173120|FBXL11 ENSG00000180139|Q8N9Z5_HUMAN ENSG00000181016|NP_872403.1 ENSG00000184601|NP_001008404.1 ENSG00000198471|RTP2 ENSG00000198700|IPO9 ENSG00000204366|ZBTB12  
ENSG000000011523|CEP68 ENSG00000104325|DECR1 ENSG00000108839|ALOX12 ENSG00000117036|ETV3 ENSG00000123066|THRAP2 ENSG00000129480|C14orf126 ENSG00000131023|LAT51 ENSG00000133226|SRRM1  
ENSG00000134109|EDEM1 ENSG00000138152|BTBD16 ENSG00000139969|Q9P1J0_HUMAN ENSG00000145242|EPHA5 ENSG00000146360|GPR6 ENSG00000148572|NRBF2 ENSG00000157259|GATAD1 ENSG00000157800|SLC37A3  
ENSG00000162623|TYW3 ENSG00000170522|ELOVL6 ENSG00000170734|POLH ENSG00000170948|MBD3L1 ENSG00000172340|SUCLG2 ENSG00000176177|ENTHD1 ENSG00000179104|TMT2C ENSG00000182621|PLCB1  
ENSG00000185842|Q4VXG5_HUMAN ENSG00000186900|ZDHHC17 ENSG00000188343|FAM92A1 ENSG00000188408|MAGEB5 ENSG00000205227|Q6ZWA8_HUMAN  
AAAAAGTA ENSG00000116205|C1orf83 ENSG00000116273|PHF13 ENSG00000119771|KLHL29 ENSG00000123154|MORG1_HUMAN ENSG00000127564|PKMYT1 ENSG00000132434|LANCL2 ENSG00000136925|C9orf97 ENSG00000150779|TIMM8B  
ENSG00000158220|FAM2C ENSG00000160401|C9orf117 ENSG00000163794|UCN ENSG00000164605|Q5TB10_HUMAN ENSG00000166578|IQCD ENSG00000168243|GN4 ENSG00000171314|PGAM1 ENSG00000171962|LRRC48  
ENSG00000173757|STAT5B ENSG00000182315|NP_653215.1 ENSG00000183566|LATH_HUMAN ENSG00000188176|SMTNL2 ENSG00000188312|CENPP ENSG00000196132|MYT1_HUMAN ENSG00000197041|hcg_2015269 ENSG00000197724|PHF2  
ENSG00000197900|Q8N7Q6_HUMAN ENSG00000198700|IPO9 ENSG00000198732|SMOC1 ENSG00000205718|LOC65365 ENSG00000069869|NEDD4 ENSG00000077147|TMS9F3 ENSG00000104613|INTS10 ENSG00000105750|ZNF85  
ENSG00000106809|OGN ENSG00000108506|INTS2 ENSG00000110696|P11orf58 ENSG00000111231|ATPBD1C ENSG00000113211|PCDHB6 ENSG00000114796|KLHL24 ENSG00000116161|CACYBP ENSG00000116750|UCHL5  
ENSG00000120802|TMPO ENSG00000122550|KLHL7 ENSG00000125691|RL23 ENSG00000125885|POMPE ENSG00000131721|PEPP2_HUMAN ENSG00000132963|POMP ENSG00000137822|GCP4_HUMAN ENSG00000139239|XR_017789.1
```

ENSG00000144224|UBXD2 ENSG00000145692|BHMT ENSG00000147027|TMEM47 ENSG00000147548|WHSC1L1 ENSG00000147614|ATP6V0D2 ENSG00000147676|MAL2 ENSG00000152778|IFIT5 ENSG00000162980|ARL5A ENSG00000163558|PRKCI ENSG00000164308|NP\_071745.1 ENSG00000165244|ZNF367 ENSG00000165264|NDUF6B ENSG00000165487|EFHA1 ENSG00000168228|ZCCHC4 ENSG00000169064|NM\_024687.2 ENSG00000170748|HNRGT\_HUMAN ENSG00000171204|TMEM126B ENSG00000171564|FGB ENSG00000171863|RPS7 ENSG00000171989|LDHAL6B ENSG00000176018|LYSMD3 ENSG00000178604|NP\_001034973.1 ENSG00000179387|ELMOD2 ENSG00000184402|SS18L1 ENSG00000185023|RAB6C ENSG00000185246|PRPF39 ENSG00000186103|ARGFX ENSG00000186879|NM\_178121 ENSG00000188659|NP\_001008227.1 ENSG00000198889|WDR40B ENSG00000203989|LOC727940 ENSG00000082014|SNARCD3 ENSG00000121775|TMEM39B ENSG00000121904|CSMD2 ENSG00000123201|GUCY1B2 ENSG00000124507|PACIN1 ENSG00000136653|RASSF5 ENSG00000142405|NLRP12 ENSG00000158497|HMHB1 ENSG00000161270|NFHS1 ENSG00000168003|SLC3A2 ENSG00000171855|IFNB1 ENSG00000173080|RXFP4 ENSG00000180104|EXOC3 ENSG00000181026|ISG2OL1 ENSG00000182329|Q8IVF9\_HUMAN ENSG00000186261|EMP2 ENSG00000204463|BAT3 ENSG00000205742|Q6ZTR4\_HUMAN ENSG00000100206|DMC1 ENSG00000104343|UBE2W ENSG00000105829|BET1 ENSG00000107566|CHUK ENSG00000108839|ALOX12 ENSG00000109381|ELF2 ENSG00000111049|MYF5 ENSG00000115504|EHPB1 ENSG00000117228|GBP1 ENSG00000137501|SYTL2 ENSG00000138382|METTL5 ENSG00000140319|SRP14 ENSG00000152270|PDE3B ENSG00000161594|KLHL10 ENSG00000164294|NP\_001008398.1 ENSG00000168461|RAB31 ENSG00000176055|NP\_981951.1 ENSG00000178295|NP\_872431.2 ENSG00000188162|OTOG ENSG00000197779|ZNF81 ENSG00000204595|DPRXP4 ENSG00000099194|SCD ENSG00000100296|THOC5 ENSG00000102904|TSNAXIP1 ENSG00000106133|NSUN5C ENSG00000106628|POLD2 ENSG00000116731|PRDM2 ENSG00000125726|CD70 ENSG00000126267|COX6B1 ENSG00000139574|NPPF ENSG00000141431|Q6ZMX6\_HUMAN ENSG00000149932|NP\_001077082.1 ENSG00000160685|ZBTB7B ENSG00000163993|S100P ENSG00000168268|NT5DC2 ENSG00000173126|PCP4L1 ENSG00000173253|DMRT2 ENSG00000180210|F2 ENSG00000182175|RGMA ENSG00000182667|NTR1\_HUMAN ENSG00000184216|IRAK1 ENSG00000184792|OSBP2 ENSG00000186951|PPARA ENSG00000187773|C18orf51 ENSG00000204847|FAM74A1 ENSG00000007062|PROM1 ENSG000000015568|RGPD7 ENSG000000031003|C5orf5 ENSG000000083312|TNPO1 ENSG00000107897|ACBD5 ENSG00000111713|GYS2 ENSG00000112592|TBP ENSG00000114248|LRRC31 ENSG00000115484|CCT4 ENSG00000121892|NP\_056015.1 ENSG00000123104|ITPR2 ENSG00000124198|ARFGF2 ENSG00000131620|TMEM16A ENSG00000134198|TSPAN2 ENSG00000134758|RNF138 ENSG00000134851|TMEM165 ENSG00000135018|UBQLN1 ENSG00000135932|CAB39 ENSG00000135968|GCC2 ENSG00000138115|CYP2C8 ENSG00000138678|NP\_116106.2 ENSG00000139970|RTN1 ENSG00000145425|RPS3A ENSG00000162595|DIRAS3 ENSG00000163319|MRPS18C ENSG00000164187|LMBRD2 ENSG00000169629|RGPD8 ENSG00000183054|RGPD6 ENSG00000185267|ARMETL1 ENSG00000185621|MLLN ENSG00000189134|C6orf194 ENSG00000203916|HFMI ENSG00000205174|NP\_001019778.1 ENSG000000096070|BRPF3 ENSG00000104998|IL27RA ENSG00000107341|UBE2R2 ENSG00000112782|CLIC5 ENSG00000113739|STC2 ENSG00000116198|KIAA0562 ENSG00000123171|CCDC70 ENSG00000131467|PSME3 ENSG00000135423|GLS2 ENSG00000139178|C1RL ENSG00000144134|RABL2A ENSG00000145333|TMEM18 ENSG00000159433|STARD9 ENSG00000162650|ATXN7L2 ENSG00000164151|Q6ZT40\_HUMAN ENSG00000166473|PKD1L2 ENSG00000172073|C2orf51 ENSG00000183250|C21orf67 ENSG00000196220|SRGAP3 ENSG00000204103|MAFB ENSG00000033122|LRRC7 ENSG00000034677|RNF19 ENSG00000060642|PIGV ENSG00000064313|TAF2 ENSG00000064726|BTBD1 ENSG00000069974|RAB27A ENSG00000090989|EXOC1 ENSG00000100442|FKBP3 ENSG00000101367|MAPRE1 ENSG00000104804|TLP2 ENSG00000106524|ANKMY2 ENSG00000109163|GNRHR ENSG00000111875|ASF1A ENSG00000112499|SLC22A2 ENSG00000118785|SXP1 ENSG00000123983|ACSL3 ENSG00000135018|UBQLN1 ENSG00000137561|TUPA ENSG00000140749|IGSF6 ENSG00000142166|IFNAR1 ENSG00000143942|CHAC2 ENSG00000147419|CCDC25 ENSG00000147853|AK3 ENSG00000155099|TMEM55A ENSG00000168497|SDRP ENSG00000171522|PTGER4 ENSG00000172809|RPL38 ENSG00000174574|C1orf108 ENSG00000175110|MRPS22 ENSG00000177688|SUMO4 ENSG00000177868|CCDC23 ENSG00000183801|OLFML1 ENSG00000188612|SUMO2 ENSG00000197635|DPP4 ENSG00000198738|Q5T5W8\_HUMAN ENSG00000198954|KIAA1279 ENSG00000204406|MBD5 ENSG00000007402|CACNA2D2 ENSG000000047644|WWC3 ENSG000000089057|SLC23A2 ENSG00000100100|PIK3I1 ENSG00000110328|GALNTL4 ENSG00000116983|HPCAL4 ENSG00000116984|MTR ENSG00000117461|PIK3R3 ENSG00000126259|KIRREL2 ENSG00000138083|SIX3 ENSG00000145824|CXCL14 ENSG00000145846|KCN2C ENSG00000156973|PDE6D ENSG00000157110|RBPM5 ENSG00000160345|C9orf116 ENSG00000163884|KLF15 ENSG00000164651|SP8 ENSG00000164778|EN2 ENSG00000165424|C10orf56 ENSG00000165714|LOH12CR1 ENSG00000166167|BTRC ENSG00000167434|CA4 ENSG00000169083|AR ENSG00000169184|NM\_002430.2 ENSG00000182372|C6orf61 ENSG00000182749|PAQR7 ENSG00000183087|GAS6 ENSG00000196460|Q6ZNB4\_HUMAN ENSG00000196502|SULT1A1 ENSG00000204394|VARS ENSG00000205039|Q6ZQS5\_HUMAN ENSG00000005187|ACSM3 ENSG00000006468|ETV1 ENSG00000112001|KALL1 ENSG00000064102|C12orf11 ENSG00000080200|NP\_705833.2 ENSG00000085365|SCAMP1 ENSG00000085491|SLC25A24 ENSG00000095464|PDE6C ENSG00000101574|METTL4 ENSG00000102098|SCML2 ENSG00000105851|PK3CG ENSG00000105967|TFEC ENSG00000106460|TMEM106B ENSG00000111358|GTF2H3 ENSG00000111845|PAK1IP1 ENSG00000111863|C6orf105 ENSG00000112246|SIM1 ENSG00000112761|WISP3 ENSG00000114331|CENTB2 ENSG00000114416|FXR1 ENSG00000120519|SLC10A7 ENSG00000120675|DNAJC15 ENSG00000121350|NP\_079130.2 ENSG00000129534|C14orf106 ENSG00000131127|ZNF141 ENSG00000135905|DOCK10 ENSG00000136104|RNASEH2B ENSG00000137745|MMP13 ENSG00000138293|NCOA4 ENSG00000138685|FGF2 ENSG00000145220|LYAR\_HUMAN ENSG00000146824|NP\_116231.2 ENSG00000151229|SLC2A13 ENSG00000151470|C4orf33 ENSG00000153208|MERTK ENSG00000155304|STCH ENSG00000159256|MORC3 ENSG00000164118|KIAA1712 ENSG00000164465|DCBLD1 ENSG00000164949|GEM ENSG00000164953|TMEM67 ENSG00000165525|SDCCAG1 ENSG00000165813|C10orf118 ENSG00000165983|PTER ENSG00000168152|THAP9 ENSG00000168811|LL12A ENSG00000169313|P2RY12 ENSG00000169570|DTWD2 ENSG00000172007|RAB33B ENSG00000172209|GPR22 ENSG00000172869|DMXL1 ENSG00000174125|TLR1 ENSG00000176018|LYSMD3 ENSG00000179152|C3orf23 ENSG00000185551|NR2F2 ENSG00000185985|SLITRK2 ENSG00000186439|TRDN ENSG00000187689|AMTN ENSG00000187871|GFRAL ENSG00000188610|FAM72B ENSG00000196950|SLC39A10 ENSG00000196963|PCDHB16 ENSG00000198157|NSBP1 ENSG00000203667|FAM36A ENSG00000204889|KRT40 ENSG00000205038|PKHD1L1 ENSG00000206075|SERPINB5 ENSG00000206111|SVOP ENSG00000170271|C5orf4 ENSG00000186976|DJBP\_HUMAN ENSG00000010256|UCRC1 ENSG00000078319|PMS2L1 ENSG00000120949|TNFRSF8 ENSG00000124449|IRGC ENSG00000127824|TUBA4A ENSG00000128266|GNAX ENSG00000131400|NAPSA ENSG00000136574|GATA4 ENSG00000143297|FCRL5 ENSG00000146066|HIGD2A ENSG00000148337|CIZ1 ENSG00000151692|RNF144 ENSG00000159263|SIM2 ENSG00000166111|SVOP ENSG00000170271|C5orf4 ENSG00000186976|DJBP\_HUMAN ENSG00000187021|PNL1PRP1 ENSG00000197077|Q5THZ5\_HUMAN ENSG00000198561|CTNND1 ENSG00000198632|NP\_777590.1 ENSG00000198816|ZNF358 ENSG0000013375|PGM3 ENSG00000049167|ERCC8 ENSG00000060339|CCAR1 ENSG00000081307|UBE1DC1 ENSG00000104312|RIPK2 ENSG00000109255|NMU ENSG00000113319|RASGRF2 ENSG00000115363|TMEM166 ENSG00000117153|KLHL12 ENSG00000121892|NP\_056015.1 ENSG00000129317|PUS7L ENSG00000140749|IGSF6 ENSG00000143248|RGS5 ENSG00000143522|SDHC ENSG00000146592|CREB5 ENSG00000159596|TMEM79 ENSG00000164543|STK17A ENSG00000186393|KRT26 ENSG00000205498|Q6ZRB7\_HUMAN ENSG00000205669|ACOT6 ENSG00000068650|ATP11A ENSG00000085063|CD59 ENSG00000085831|C1orf34 ENSG00000085978|ATG16L1 ENSG00000104998|IL27RA ENSG00000105373|GLTSCR2 ENSG00000105989|WNT2 ENSG00000117643|MAN1C1 ENSG00000120952|PRAMEF2 ENSG00000128482|ZNF179 ENSG00000128944|C15orf23 ENSG00000129103|SUMF2 ENSG00000129187|DCD7 ENSG00000130590|SAMD10 ENSG00000132434|LANCL2 ENSG00000132854|ANR38\_HUMAN ENSG00000136167|LCP1 ENSG00000137709|POU2F3 ENSG00000140273|SORD ENSG00000145990|GFOD1 ENSG00000153563|CDBA ENSG00000158516|CPA2 ENSG00000160789|LMNA ENSG00000162105|SHANK2 ENSG00000162763|LRRC52 ENSG00000179388|EGR3 ENSG00000184774|Q49A9Q\_HUMAN ENSG00000198034|RPS4X ENSG00000204285|Q6ZP11\_HUMAN ENSG00000204479|PRAMEF17 ENSG00000204488|PRAMEF16 ENSG00000204526|HCG27 ENSG00000204544|C6orf205 ENSG00000205485|Q6DCA4\_HUMAN ENSG00000205610|Q4G105\_HUMAN ENSG00000102391|RPL36A ENSG00000106686|C9orf68 ENSG00000110768|GTF2H1 ENSG00000111269|CREBL2 ENSG00000111339|ART4 ENSG00000115355|KIAA1212 ENSG00000119471|HSDL2 ENSG00000123080|CDKN2C ENSG00000126804|ZBTB1 ENSG00000127989|MTFRF ENSG00000128708|HAT1 ENSG00000135355|NP\_115991.1 ENSG00000137414|FAM8A1 ENSG00000144224|UBXD2 ENSG00000144668|ITGA9 ENSG00000147874|SOD1 ENSG00000148484|RSU1 ENSG00000158185|ANKRD36 ENSG00000163285|GABRG1 ENSG00000165862|PNL1PRP2 ENSG00000170180|GYPA ENSG00000171659|GPR34 ENSG00000173681|C9orf23 ENSG00000174796|THAP6 ENSG00000179387|ELMOD2 ENSG00000180138|CSNK1A1L ENSG00000182090|C14orf25 ENSG00000186280|JMJD2D ENSG00000186434|GPR34 ENSG00000188234|APLP2 ENSG00000085063|CD59 ENSG00000100280|AP1B1 ENSG00000111252|SH2B3 ENSG00000113048|MRPS27 ENSG00000115317|HTRA2 ENSG00000116205|C1orf83 ENSG00000122783|C7orf49 ENSG00000123243|TTH5 ENSG00000123374|CKDK2 ENSG00000124160|NCOA5 ENSG00000124164|VABP ENSG00000125266|EFNB2 ENSG00000125888|C20orf179 ENSG00000127946|HIP1 ENSG00000131242|RAB11FIP4 ENSG00000153563|CDBA ENSG00000160255|ITGB2 ENSG00000160844|NP\_849153.3 ENSG00000161103|Q5BK6\_HUMAN ENSG00000162981|FAM84A ENSG00000164849|GPR146 ENSG00000167207|NOD2 ENSG00000168010|ATG16L2 ENSG00000169006|NTSR2 ENSG00000177504|VWCX2 ENSG00000178206|C2orf14 ENSG00000183579|ZNRF3 ENSG00000186529|CYP4F3 ENSG00000186837|C21orf119 ENSG00000197463|CSAG3B ENSG00000197816|KIAA1529 ENSG00000198930|CSAG1 ENSG00000204301|NOTCH4 ENSG00000205434|Q6ZU34\_HUMAN ENSG00000072319|ALG13 ENSG00000073417|PDE8A ENSG00000104549|SQLE ENSG00000108242|CYP2C18 ENSG00000109475|RPL34 ENSG00000112246|SIM1 ENSG00000113905|HRG ENSG00000116703|PDC ENSG00000120784|ZFP30 ENSG00000123609|NMI ENSG00000125686|PPARBP ENSG00000134056|MRPS36 ENSG00000136111|TBC1D4 ENSG00000137948|BRDT ENSG00000138448|ITGAV ENSG00000145604|SKP2 ENSG00000150687|PRSS23 ENSG00000155875|C9orf138 ENSG00000155961|RAB39B ENSG00000156284|CLDN8 ENSG00000157181|C1orf27 ENSG00000157259|GATAD1 ENSG00000159212|CLIC6 ENSG00000163510|NP\_065994.1 ENSG00000163535|SGOL2 ENSG00000163683|C4orf34 ENSG00000165072|MAMDC2 ENSG00000165434|PGM2L1 ENSG00000165805|C12orf50 ENSG00000169905|TOR1AIP2 ENSG00000170759|KIF5B ENSG00000171204|TMEM127B ENSG00000175087|PDIK1L ENSG00000182916|TCEAL7 ENSG00000183665|TRMT12 ENSG00000185437|SH3BGR ENSG00000187010|RHD ENSG00000196885|Q9HAZ8\_HUMAN ENSG00000197522|SUZ12P ENSG00000197782|ZNF780A ENSG00000198189|HSD17B11 ENSG00000203668|CHML ENSG00000064309|CDON ENSG00000067082|KLF6 ENSG00000100342|APOL1 ENSG00000101158|TH1L ENSG00000101193|C20orf11 ENSG00000101350|KIF3B ENSG00000103353|UBFD1 ENSG00000103489|XYLT1 ENSG00000105697|HAMP ENSG00000110042|DTX4 ENSG00000110713|NUP98 ENSG00000125449|ARMC7 ENSG00000125753|VASP ENSG00000137133|HINT2 ENSG00000139178|C1RL ENSG00000141374|SECTM1 ENSG00000146232|NFKBIE ENSG00000155980|KIF5A ENSG00000166123|GPT2 ENSG00000175325|PROP1 ENSG00000175564|UCP3 ENSG00000183458|Q9NRE7\_HUMAN ENSG00000183793|NPIP ENSG00000184144|CNTN2 ENSG00000203793|Q6ZR74\_HUMAN ENSG00000204380|Q6ZTQ2\_HUMAN ENSG00000205181|QOVF22\_HUMAN ENSG00000205761|Q6ZRI7\_HUMAN ENSG00000044524|EPHA3 ENSG00000072315|TRPC5 ENSG00000085721|RRN3 ENSG00000111266|DUSP16 ENSG00000111912|NCOA7 ENSG00000112183|RBM24 ENSG00000115380|EFEMP1 ENSG00000117133|PKD5 ENSG00000118762|PKD2 ENSG000001122691|TWIST1 ENSG00000128609|NDUFA5 ENSG00000131620|TMEM16A ENSG00000137571|SLC05A1 ENSG00000138081|FBXO11 ENSG00000139133|ALG10 ENSG00000144746|ARL6IP5 ENSG00000145451|GLRA3 ENSG00000146282|RARS2 ENSG00000147003|TMEM27 ENSG00000157557|ETS2 ENSG00000163376|KBTBD8 ENSG00000163828|TDGF3 ENSG00000164122|ASB5 ENSG00000168944|CCDC100 ENSG00000169359|SLC33A1 ENSG00000171202|TMEM126A ENSG00000176009|ASCL3 ENSG00000185515|BRCC3 ENSG00000188177|ZC3H6 ENSG00000196104|SPOCK3 ENSG00000196353|CPNE4 ENSG00000204712|LOC284067 ENSG00000206559|ZCWPW2 ENSG0000006194|ZNF263 ENSG0000010165|KIAA0859 ENSG00000047056|WDR37 ENSG00000066135|JMJD2A ENSG00000105011|ASF1B ENSG00000107562|CXCL12 ENSG00000108417|KRT37 ENSG00000111405|PP11\_HUMAN ENSG00000118689|FOXO3A ENSG00000122085|MTERFD2 ENSG00000131368|MRPS25 ENSG00000132434|LANCL2 ENSG00000135801|TAF5L ENSG00000137709|POU2F3 ENSG00000138347|MYPN ENSG00000140465|CYP11A1 ENSG00000141404|GNAL ENSG00000142156|COL6A1 ENSG00000143556|S100A7 ENSG00000152137|HSPB8 ENSG00000162896|PIGR ENSG00000165025|SYK ENSG00000169598|DFFB ENSG00000170906|NDUFA3 ENSG00000171747|LGALS4 ENSG00000173244|Q9NRE4\_HUMAN ENSG00000173933|Q9NRE4\_HUMAN ENSG00000184014|RAB6IP1 ENSG00000184292|TACSTD2 ENSG00000188234|XR\_016668.1 ENSG00000188589|RBM33 ENSG00000196407|THEM5 ENSG00000198884|Q6UXP0\_HUMAN ENSG00000203697|CAPN8 ENSG00000205726|ITSN1 ENSG000000039139|DNAH5 ENSG00000075188|NUP37 ENSG00000077254|USP33 ENSG00000082153|BZW1 ENSG00000088756|ARHGAP28 ENSG00000089199|CHGB ENSG00000099721|AMELY ENSG00000101782|RIOK3 ENSG00000101843|PSMD10 ENSG00000104237|RP1 ENSG00000106443|PHF14 ENSG00000109919|MTCH2 ENSG00000112175|BMP5 ENSG00000115084|SLC35F5 ENSG00000120802|TMPO ENSG00000122912|SLC25A16 ENSG00000123179|EBPL ENSG00000125848|FLRT3 ENSG00000125864|BFSP1 ENSG00000126787|DLG7 ENSG00000126821|SGPP1 ENSG00000127324|TSPAN8 ENSG00000129173|E2F8 ENSG00000130150|MGSPD2 ENSG00000132122|SPATA6 ENSG00000134308|YWHAQ ENSG00000136521|NDUFB5 ENSG00000139218|SFRS2IP ENSG00000151414|NEK7 ENSG00000152147|GEMIN6 ENSG00000152683|SLC30A6 ENSG00000156787|WDR6 ENSG00000159212|CLIC6 ENSG00000162595|DIRAS3 ENSG00000163642|XR\_017284.1 ENSG00000164691|TAGAP ENSG00000164930|FZD6 ENSG00000168916|COPS2 ENSG00000168955|ZNF608 ENSG00000168955|TM4SF20 ENSG00000169139|UBE2V2 ENSG00000171174|RBKS ENSG00000171497|PP1D ENSG00000172650|CTGLF2 ENSG00000174194|CTGLF5 ENSG00000175065|DSG4 ENSG00000177521|YIPF7 ENSG00000180233|ZNRF2 ENSG00000180628|PCGF5 ENSG00000187094|CCK ENSG00000188641|DPYD ENSG00000196116|TDRD7 ENSG00000197008|ZNF138 ENSG00000197045|GMFB ENSG00000198780|Q9H989\_HUMAN ENSG00000204149|CTGLF3 ENSG00000204150|CTGLF4 ENSG00000204182|CTGLF1 ENSG00000204897|KRT25 ENSG000000066114|AP1GBP1 ENSG00000085063|CD59 ENSG00000089505|CMTM1 ENSG00000090447|TFAP4 ENSG00000099204|ABLIM1 ENSG00000111254|AKAP3 ENSG00000111412|C12orf49 ENSG00000114656|KIAA1257 ENSG00000122852|SFTPA1B ENSG00000122854|SFTPA2B ENSG00000129187|DLTD ENSG00000136689|IL1RN ENSG00000140403|DNAJA4 ENSG00000141034|C10orf39 ENSG00000143614|GATAD2B ENSG00000143940|Q6ZMW3\_HUMAN ENSG00000146285|SCML4 ENSG00000151692|RNF144 ENSG00000154025|SLC5A10 ENSG00000159023|EPB41 ENSG00000161132|Q9BYA7\_HUMAN ENSG00000162105|SHANK2 ENSG00000162377|C1orf163 ENSG00000163214|DHX57 ENSG00000163219|ARHGAP25 ENSG00000163486|SRGAP2 ENSG00000169057|MCEP2 ENSG00000170983|C8orf14 ENSG00000175906|ARL4D ENSG00000176302|FOXR1 ENSG00000178919|FOXE1 ENSG00000182314|SFTPA2 ENSG00000183242|WIT1 ENSG00000185189|NRBP2 ENSG00000185619|PCGF3 ENSG00000186470|BTN3A2 ENSG00000189068|VSTM1 ENSG00000196084|UBI3\_HUMAN ENSG00000204118|NAP1L6 ENSG00000204414|CSHL1 ENSG00000204758|Q6ZUG4\_HUMAN ENSG000000005249|PRKAR2B ENSG0000014123|KIAA0776 ENSG00000024526|DEPDC1 ENSG000000038210|PI4K2B ENSG000000051415|AMY1A ENSG00000066557|LRRC40 ENSG00000066654|THUMPD1 ENSG00000089127|OAS1 ENSG00000096264|NCR2 ENSG00000100532|CGRRF1 ENSG00000100557|C14orf105 ENSG00000101901|CXorf45 ENSG00000101955|SRPX ENSG00000101977|MCF2 ENSG00000104361|NPAL2 ENSG00000106299|WASL ENSG00000108588|CCDC47 ENSG0000010

ENSG00000118276|B4GALT6 ENSG00000118402|ELOVL4 ENSG00000123213|NLN ENSG00000126216|TUBGCP3 ENSG00000130962|PRRG1 ENSG00000131437|KIF3A ENSG00000136404|TM6SF1 ENSG00000136492|BRIP1 ENSG00000136758|YME1L1 ENSG00000138079|SLC3A1 ENSG00000139687|RB1 ENSG00000151229|SLC2A13 ENSG00000152778|IFIT5 ENSG00000152910|CNTNAP4 ENSG00000154262|ABCA6 ENSG00000162813|BPNT1 ENSG00000163249|CENYL1 ENSG00000163964|PIGX ENSG00000170381|SEMA3E ENSG00000170584|NUDC2 ENSG00000171843|MLLT3 ENSG00000175513|TSGA10IP ENSG00000177200|CHD9 ENSG00000180596|HSTH2B ENSG00000184613|NELL2 ENSG00000185261|C5orf36 ENSG00000186496|ZNF396 ENSG00000186871|NP\_001009954.1 ENSG00000189056|RELN ENSG00000197275|RAD54B ENSG00000197839|AMY2B ENSG00000198168|SVIP\_HUMAN AAAATTT ENSG00000006740|RICH2\_HUMAN ENSG00000067066|SP100 ENSG00000084207|GSTP1 ENSG00000092607|TBX15 ENSG00000103067|RBM35B ENSG00000123901|GPR83 ENSG00000134864|Q9BVM4\_HUMAN ENSG00000141179|PCTP ENSG00000145819|ARHGAP26 ENSG00000147065|MSN ENSG00000147099|HDAC8 ENSG00000147117|ZNF157 ENSG00000165731|RET ENSG00000169105|CHST14 ENSG00000170161|Q5VV11\_HUMAN ENSG00000171345|KRT19 ENSG00000171456|ASXL1 ENSG00000172977|HTATIP ENSG00000176887|SOX11 ENSG00000180209|MLRS\_HUMAN ENSG00000181852|RNF41 ENSG00000183242|WIT1 ENSG00000183255|PTTG1IP ENSG00000184677|ZBTB40 ENSG00000188089|PLA2G4E ENSG00000188976|NOC2L ENSG00000196396|PTFN1 ENSG00000197451|HNRPA3 ENSG00000205927|OLIG2 ENSG00000005436|C2orf3 ENSG000000023445|BIRC3 ENSG000000042980|ADAM28 ENSG00000071991|CDH19 ENSG00000074266|EED ENSG000000085274|MYNN ENSG000000086619|EROL1B ENSG000000091039|OSBP18 ENSG00000100852|ARHGAP5 ENSG00000104497|SNX16 ENSG00000106591|MRPL32 ENSG00000111276|CDKN1B ENSG00000111581|NUP107 ENSG00000115020|PIF5K3 ENSG00000120992|LYPLA1 ENSG00000121466|C1orf25 ENSG00000121989|ACVR2A ENSG00000132953|XPO4 ENSG00000133641|C12orf29 ENSG00000137033|IL33 ENSG00000138594|TMOD3 ENSG00000138675|PGF5 ENSG00000145794|MEGF10 ENSG00000150782|IL18 ENSG00000150782|PABPC3 ENSG00000151846|PABPC3 ENSG00000153094|BCL2L1 ENSG00000154646|PRSS7 ENSG00000156136|DCK ENSG00000156482|RPL30 ENSG00000159182|NP\_115767.1 ENSG00000162972|C2orf47 ENSG00000166012|SNORA25 ENSG00000167635|ZNF146 ENSG00000168813|ZNF507 ENSG00000169800|RBM1F ENSG00000170312|CDC2 ENSG00000171451|DSEL ENSG00000172403|SYNPO2 ENSG00000172845|SP3 ENSG00000174622|RBM1A2 ENSG00000174842|GLMN ENSG00000175374|SPESP1 ENSG00000176018|LYSMD3 ENSG00000180182|CRSP2 ENSG00000182585|EPGN ENSG00000185261|C5orf36 ENSG00000186803|IFNA10 ENSG00000187118|NP\_872329.1 ENSG00000188996|HUS1 ENSG00000189308|LINS4 ENSG00000197410|DCHS2 ENSG00000198780|Q9H989\_HUMAN ENSG00000203704|LOC648359 ENSG00000204899|NP\_001065243.1 ENSG00000206011|RBM1YJ ENSG00000206046|RBM1Y ENSG000000038382|TRIO ENSG000000049883|PTCD2 ENSG000000064419|TNPO3 ENSG000000068024|HDAC4 ENSG000000072071|LPHN1 ENSG000000090447|TFAP4 ENSG00000103061|SLC7A6OS ENSG00000109132|PHOX2B ENSG00000019772|DNMT3A ENSG00000126882|FAM78A ENSG00000130520|LSM4 ENSG00000132155|RAF1 ENSG00000138942|RNF185 ENSG00000141574|SCTM1 ENSG00000145990|GFOD1 ENSG00000148158|SNX30 ENSG00000151474|FRMD4A ENSG00000153060|TEKT5 ENSG00000154133|ROBO4 ENSG00000155922|SLA ENSG00000158887|MP2 ENSG00000164151|Q6ZT40\_HUMAN ENSG00000166272|C10orf26 ENSG00000168003|SLC3A2 ENSG00000168286|THAP11 ENSG00000175505|CLCF1 ENSG00000175866|BAIAP2 ENSG00000178235|SLITRK1 ENSG00000180198|RCC1 ENSG00000184260|HIST2H2AC ENSG00000188483|IER5L ENSG000000047621|C12orf4 ENSG00000198691|ABCA4 ENSG00000204620|Q6ZPC8\_HUMAN ENSG00000205064|Q6ZVP2\_HUMAN ENSG00000205771|CATSPER2P1 ENSG00000000460|C1orf112 ENSG000000016082|ISL1 ENSG000000040341|STAU2 ENSG000000048828|FAM120A ENSG000000089041|P2RX7 ENSG000000091127|PUS7 ENSG00000100557|C14orf105 ENSG00000105996|HOXA2 ENSG00000106355|LSM5 ENSG000001108046|C10orf92 ENSG00000109162|GNRHR ENSG00000118276|B4GALT6 ENSG00000123096|SSPN ENSG00000125246|CLYBL ENSG00000125899|C2orf187 ENSG00000129204|USP6 ENSG00000132855|ANGPTL3 ENSG00000134538|SLC01B1 ENSG00000135333|EPHA7 ENSG00000146166|GLULD1 ENSG00000150361|KLHL1 ENSG00000150471|LPHN3 ENSG00000150540|HNMT ENSG00000151461|UPF2 ENSG00000153814|JAZF1 ENSG00000155961|RAB39B ENSG00000158201|ABHD3 ENSG00000162437|RAVER2 ENSG00000163534|FCRL1 ENSG00000164941|INTS8 ENSG00000168530|MYL1 ENSG00000168679|SLC16A4 ENSG00000171202|TMEM126A ENSG00000173114|LRRN3 ENSG00000184719|C10orf59 ENSG00000185306|C12orf56 ENSG00000197967|Q86U89\_HUMAN ENSG00000198846|TOX ENSG00000205462|Q6ZWC8\_HUMAN AAACACC ENSG00000009369|MLN ENSG00000100453|GZMB ENSG00000105258|POLR2I ENSG00000105549|THEG ENSG00000112659|PARC\_HUMAN ENSG00000124762|CDKN1A ENSG00000126258|FXYP1 ENSG00000126264|HCST ENSG00000135454|B4GALNT1 ENSG00000145022|TCTA ENSG00000154229|PRKCA ENSG00000161904|LEMD2 ENSG00000169057|MECP2 ENSG00000173253|DMRT2 ENSG00000179761|PIPOX ENSG00000180424|DEFB123 ENSG00000184639|NP\_001004344.1 ENSG00000187003|ACTL7A ENSG00000187144|SPATA21 ENSG00000204305|AGER ENSG000000068489|PRR11 ENSG00000070269|C14orf101 ENSG00000097033|SH3GLB1 ENSG00000101384|JAG1 ENSG00000106034|NP\_079189.3 ENSG00000112280|COL9A1 ENSG00000118939|UCLH3 ENSG00000120696|KBTBD7 ENSG00000123096|SSPN ENSG00000125571|IL1F7 ENSG00000131171|SH3BGR1 ENSG00000155833|CYLC2 ENSG00000165071|TMEM71 ENSG00000166173|LARP6 ENSG00000169860|P2RY1 ENSG00000174899|Q8N6Q6\_HUMAN ENSG00000181544|FANCB ENSG00000183918|SH2D1A ENSG00000184474|Q96FP4\_HUMAN ENSG00000185664|SILV ENSG00000196268|ZNF493 ENSG00000198176|TFDP1 ENSG000000088812|ATRN ENSG00000100065|CARD10 ENSG00000101417|PXMP4 ENSG00000108515|ENO3 ENSG00000125999|C2orf114 ENSG000000057704|TMCC3 ENSG000000076356|PLXNA2 ENSG000000083307|GRHL2 ENSG00000151498|ACAP8 ENSG00000163263|C1orf189 ENSG00000163820|FYCO1 ENSG00000167208|NP\_878274.1 ENSG00000126432|PDLX5 ENSG00000138347|MYPN ENSG00000151148|UBE3B ENSG00000166963|MAP1A ENSG00000170271|C5orf4 ENSG00000170906|NDUFA3 ENSG00000178764|ZHX2 ENSG00000179284|DAND5 ENSG00000170390|DCLK2 ENSG00000171853|TTC15 ENSG00000174521|PCP2 ENSG00000198844|ARHGEF15 ENSG00000204599|LRM52 ENSG00000003402|CFLAR ENSG0000010017|RANBP9 ENSG00000068784|SRBD1 ENSG00000097096|SYDE2 ENSG00000105855|ITGB8 ENSG00000106688|SLC1A1 ENSG00000112379|KIAA1244 ENSG00000126777|KTN1 ENSG00000129116|PALLD ENSG00000133812|SBF2 ENSG00000134852|CLOCK ENSG00000136143|SUCLA2 ENSG00000136152|COG3 ENSG00000141497|ZMYND15 ENSG00000143499|SMYD2 ENSG00000147174|ACRC ENSG00000151150|ANK3 ENSG00000152642|GPD1L ENSG00000153922|CHD1 ENSG00000154736|ADAMT5 ENSG00000154760|SLFN13 ENSG00000163624|CDS1 ENSG00000165244|ZNF367 ENSG00000165525|SDCCAG1 ENSG00000165983|PTER ENSG00000168078|PBK ENSG00000173068|BNC2 ENSG00000177047|IFNW1 ENSG00000178295|NP\_872431.2 ENSG00000178522|AMBN ENSG00000181704|YIPF6 ENSG00000186395|KRT10 ENSG00000186468|RPS23 ENSG00000189367|C6orf174 AAACATC ENSG00000049089|COL9A2 ENSG00000100429|HDAC10 ENSG00000108375|SUPT4H1 ENSG00000112473|SLC39A7 ENSG00000112936|C7 ENSG00000115657|ABC6 ENSG00000131558|EXOC4 ENSG00000132854|ANR38\_HUMAN ENSG00000142512|STGLEC10 ENSG00000142623|PAD11 ENSG00000147059|SPIN2A ENSG00000148814|LRRC27 ENSG00000154319|C8orf13 ENSG00000164300|SERINC5 ENSG00000164334|NP\_877438.2 ENSG00000167526|RPL13 ENSG00000174502|SLC26A9 ENSG00000178006|XR\_018006.1 ENSG00000180878|C10orf4 ENSG00000183888|C1orf64 ENSG00000204157|NP\_001013664.1 ENSG00000204520|MICA ENSG00000205039|Q6ZQ85\_HUMAN ENSG00000005059|CCDC109B ENSG0000011422|PLAUR ENSG00000078674|PCM1 ENSG00000105829|BET1 ENSG00000108064|TFAM ENSG00000108443|RPS6KB1 ENSG00000108587|GOSR1 ENSG00000108839|ALOX12 ENSG00000112167|C6orf64 ENSG00000113600|C9 ENSG00000114127|XRN1 ENSG00000123570|RAB9B ENSG00000132357|CARD6 ENSG00000135069|PNAT1 ENSG00000143493|INTS7 ENSG00000146757|ZNF92 ENSG00000155833|CYLC2 ENSG00000156265|C21orf7 ENSG00000162944|RTN2 ENSG00000163046|C21orf99 ENSG00000163669|DNHD2 ENSG00000173480|ZNF417 ENSG00000179136|Q8NAV9\_HUMAN ENSG00000196262|PPIA ENSG000000098398|NP\_997199.1 ENSG00000198739|LRRTM3 ENSG00000204424|LY6G6D ENSG00000205246|NP\_001005472.1 AAACCAA ENSG00000006116|CACNG3 ENSG0000011243|AKAP8L ENSG000000086102|NFX1 ENSG00000103222|ABCC1 ENSG00000105392|CRX ENSG00000125166|GOT2 ENSG00000125844|RRBP1 ENSG00000125954|FNTB ENSG00000125977|EIF2S2 ENSG00000136697|IL1F10 ENSG00000143319|ISG20L2 ENSG00000143418|LASS2 ENSG00000147536|GINS4 ENSG00000147799|K1688\_HUMAN ENSG00000154096|THY1 ENSG00000156427|FGF18 ENSG00000157087|ATP2B2 ENSG00000163823|CCR1 ENSG00000166947|EPB42 ENSG00000166963|MAP1A ENSG00000170271|C5orf4 ENSG00000170906|NDUFA3 ENSG00000178764|ZHX2 ENSG00000179284|DAND5 ENSG00000184260|HIST2H2AC ENSG00000185811|IKZF1 ENSG00000198033|TUBA3C ENSG00000198802|PECAM1 ENSG00000204599|LRM52 ENSG00000003402|CFLAR ENSG0000010017|RANBP9 ENSG00000061455|PRDM6 ENSG00000091436|MLTK\_HUMAN ENSG00000109586|GALNT7 ENSG00000112246|SIM1 ENSG00000114374|USP9Y ENSG00000117600|NP\_056554.2 ENSG00000118473|SGIP1 ENSG00000133863|TEX15 ENSG00000136160|EDNRB ENSG00000143442|POG2 ENSG00000143507|DUSP10 ENSG00000147606|SLC26A7 ENSG00000158639|PAGE5 ENSG00000159399|HK2 ENSG00000165914|TTC7B ENSG00000167332|OR51E2 ENSG00000169035|CLK7 ENSG00000173409|ARV1 ENSG00000177688|SUMO4 ENSG00000197627|Q9UFV3\_HUMAN ENSG00000198042|RBM13 ENSG00000198398|NP\_997199.1 ENSG00000198739|LRRTM3 ENSG00000204424|LY6G6D ENSG00000205246|NP\_001005472.1 AAACCCAC ENSG00000006688|WDR57 ENSG000000082701|GSK3B ENSG00000093167|LRRFIP2 ENSG00000102898|NUTF2 ENSG00000104812|GY51 ENSG00000110717|NDUFS8 ENSG00000112715|VEGFA ENSG00000118898|PPL ENSG00000124208|RPS1 ENSG00000135953|MSK9 ENSG00000136352|ITIF1 ENSG00000139438|C12orf34 ENSG00000149021|SCGB1A1 ENSG00000158578|ALU52 ENSG00000162772|ATF3 ENSG00000172081|MOBK12A ENSG00000196262|PPIA ENSG00000182490|TSSK2 ENSG00000186951|PPARA ENSG00000205592|MUC19 ENSG00000205609|Q9BW98\_HUMAN ENSG00000041353|RAB27B ENSG00000089225|TBX5 ENSG00000101977|MCF2 ENSG00000106780|MEGF9 ENSG00000107165|TYRP1 ENSG00000108960|MMD ENSG00000114978|MOBK1B ENSG00000118267|ZNF271 ENSG00000119906|C10orf6 ENSG00000125257|ABCC4 ENSG00000125686|PPARP ENSG00000128595|CALU ENSG00000130338|TULP4 ENSG00000137757|CASP5 ENSG00000137959|IFI44L ENSG00000145362|ANK2 ENSG00000148798|INA ENSG00000154065|ANKRD29 ENSG00000158185|ANKRD36 ENSG00000164841|TMEM74 ENSG00000181211|Q8NA17\_HUMAN ENSG00000182118|FAM89A ENSG00000186073|C15orf41 ENSG00000186471|AKAP14 ENSG00000186479|RGS7BP ENSG00000188971|NP\_001013005.1 ENSG00000196639|HRH1 ENSG00000198633|Q6PDB4\_HUMAN AAACCCAG perfect: AAACCC GTGGTTT hsa-miR-140 aTGGTTTaccctatggtag 1 ENSG000000013563|DNASE1L1 ENSG000000064419|TNPO3 ENSG000000075151|EIF4G3 ENSG000000085465|OVGP1 ENSG00000101638|ST8SIA5 ENSG00000107262|BAG1 ENSG00000136699|SMPD4 ENSG00000137124|ALDH1B1 ENSG00000137313|TRIM26 ENSG00000140931|CMTM3 ENSG00000142513|ACPT ENSG00000143845|ETNK2 ENSG00000146535|GNA12 ENSG00000148158|SNX30 ENSG00000149499|EML3 ENSG00000155066|PROM2 ENSG00000159556|ISL2 ENSG00000161241|FBXO17 ENSG00000169758|C15orf27 ENSG00000205064|Q6ZVP2\_HUMAN ENSG00000205646|Q96GL5\_HUMAN ENSG00000206026|NP\_001032408.1 ENSG00000049130|KITLG ENSG00000091436|MLTK\_HUMAN ENSG00000100196|KDELR3 ENSG00000110852|CLEC2B ENSG00000119878|CR1PT ENSG00000138134|STAMBP1L ENSG00000153933|DGKE ENSG00000159873|CCDC117 ENSG00000162695|SLC30A7 ENSG00000162813|BPNT1 ENSG00000162992|NEUROD1 ENSG00000169504|CLIC4 ENSG00000176232|ZNF283 ENSG00000184500|PROS1 ENSG00000185414|MRPL30 ENSG00000185414|MRPL30 ENSG00000198218|QRICH1 ENSG00000198218|QRICH1 AAACCCAT ENSG000000013563|DNASE1L1 ENSG00000065308|TRAM2 ENSG00000086015|MAST2 ENSG00000086232|EIF2AK1 ENSG00000099204|ABLIM1 ENSG00000101265|RASSF2 ENSG00000106268|NUDT1 ENSG00000114650|SCAP ENSG00000116698|SMG7 ENSG00000130147|SH3BP4 ENSG00000130177|CDC16 ENSG00000130775|C1orf38 ENSG00000134531|EMPI ENSG00000135423|GLS2 ENSG00000139914|NP\_981947.1 ENSG00000140931|CMTM3 ENSG00000142186|SCYL1 ENSG00000149451|ADAM33 ENSG00000156587|UBE2L6 ENSG00000167461|RAB8A ENSG00000169189|SMCE1 ENSG00000184945|AQIP2A ENSG00000185744|TNT\_HUMAN ENSG00000186141|POLR3C ENSG00000203784|LELP1 ENSG00000205631|Q9H7S7\_HUMAN ENSG000000000460|C1orf112 ENSG000000007372|PAX6 ENSG000000009307|NRAS ENSG000000012048|BRCA1 ENSG00000025796|SEC63 ENSG00000104643|MTMR9 ENSG00000105372|RPS19 ENSG00000112237|CCNC ENSG00000114030|KPN1 ENSG00000114248|LRRC31 ENSG00000114686|MRPL3 ENSG00000137675|MMP27 ENSG00000143158|BRP44 ENSG00000143669|LYST ENSG00000150636|CCDC102B ENSG00000156265|C21orf7 ENSG00000161533|ACOX1 ENSG00000165555|C14orf148 ENSG00000167384|ZNF180 ENSG00000167766|ZNF83 ENSG00000169062|UPF3A ENSG00000172466|ZNF24 ENSG00000175989|C11orf69 ENSG00000176024|ZNF613 ENSG00000177954|RPS27 ENSG00000180979|LRRC57 ENSG00000183783|KCTD8 ENSG00000187268|FAM9C ENSG00000197780|TAF13 ENSG00000198252|STYX ENSG00000198677|KIAA0372 ENSG000002023705|TATDN3 ENSG00000204279|PAGE3 ENSG00000205498|Q6ZRB7\_HUMAN AAACCCGG ENSG00000004838|ZMYND10 ENSG00000064932|SBN02 ENSG00000068438|FTSJ1 ENSG00000075914|EXOSC7 ENSG00000079999|KEAP1 ENSG00000100675|SLC25A1 ENSG00000100427|MLC1 ENSG00000100918|REC8 ENSG00000103485|QPR2 ENSG00000111348|ARHGDI8 ENSG00000119574|ZBTB45 ENSG00000120053|GOT1 ENSG00000125498|KIR2DL1 ENSG00000126657|VGF ENSG00000128548|PPY2 ENSG00000129437|KLK14 ENSG00000129932|DOHH ENSG00000130520|LSM4 ENSG00000142546|NOSIP ENSG00000145945|FAM50B ENSG00000156973|PDE6D ENSG00000157191|NECAP2 ENSG00000160469|BRSK1 ENSG00000163795|ZNF513 ENSG00000164438|TLX3 ENSG00000165623|C10orf49 ENSG00000167513|CDT1 ENSG00000171813|PWWP2 ENSG00000184508|HDDC3 ENSG00000189037|DUSP21 ENSG00000204034|Q9BRQ9\_HUMAN ENSG00000204434|NP\_001017421.1 ENSG00000049247|UTS2 ENSG00000111906|HDDC2 ENSG00000111907|TPD52L1 ENSG00000115386|REGL ENSG00000121440|PDZRN3 ENSG00000128891|CCDC32 ENSG00000131007|TTY9A ENSG00000131009|TTY9A\_HUMAN ENSG00000133858|CCDC131 ENSG00000136527|SFRS10 ENSG00000137500|CCDC90B ENSG00000137501|SYTL2 ENSG00000140153|WDR20 ENSG00000140379|BCL2A1 ENSG00000142867|BCL10 ENSG00000143353|LYPLAL1 ENSG00000144597|EAF1 ENSG00000147642|SYBU\_HUMAN ENSG00000154485|MMP21 ENSG00000154493|C10orf90 ENSG00000160679|C1orf77 ENSG00000163682|RPL9 ENSG00000167766|ZNF83 ENSG00000177406|Q8N503\_HUMAN ENSG00000179041|RRS1 ENSG00000181588|RRKH1 ENSG00000182217|HIST2H4B ENSG00000183337|BCOR ENSG00000183941|HIST2H4A ENSG00000204398|QST400\_HUMAN ENSG00000204518|AADACL4 ENSG00000204882|Q6ZRU3\_HUMAN ENSG00000204889|KRT40 AAACCTC ENSG000000013275|PSMC4 ENSG000000042832|TG ENSG00000074964|ARHGEF10L ENSG00000081059|TCF7 ENSG00000102100|AVP ENSG00000102001|CACNA1F ENSG00000105672|ETV2 ENSG00000106266|SNX8 ENSG00000111641|NOL1 ENSG00000122547|NP\_085139.2 ENSG00000125888|C20orf179 ENSG00000126759|CFP ENSG00000156858|PRR14 ENSG00000161202|DVL3 ENSG00000161395|PERLD1 ENSG00000163344|PMVK ENSG00000163812|ZDHHC3 ENSG00000163833|FBXO40 ENSG00000164976|KIAA1161 ENSG00000171490|RSL1D1 ENSG00000173530|TNFRSF10D ENSG00000180513|Q8NBH1\_HUMAN ENSG00000186111|PIP5K1C ENSG000000017427|IGF1 ENSG000000043462|LPC2 ENSG00000102683|SCGC ENSG00000102743|SLC25A15 ENSG00000107937|GTBBP4 ENSG00000111432|FZD10 ENSG00000116194|ANGPTL1 ENSG00000117523|BAT2D1 ENSG00000135547|HEY2 ENSG00000137675|MMP27 ENSG00000144597|EAF1 ENSG00000145247|OCID1 ENSG00000154474|KBTBD10 ENSG00000160223|ICOSLG ENSG00000166343|ZMYND17 ENSG00000168653|NDUFS5 ENSG00000173261|PLAC8L1 ENSG00000173334|TRIB1 ENSG00000186105|Q7Z2Q7\_HUMAN ENSG00000198056|PRIM1 ENSG00000198556|ZNF789 AAACCCG ENSG000000011451|WIZ ENSG000000034053|APBA2 ENSG000000064489|MEF2B ENSG00000071553|ATP6AP1 ENSG00000089101|C20orf26 ENSG00000100347|SAMM50 ENSG00000105085|CRSP7 ENSG00000110011|DNAJC4

ENSG00000116883|Clorf113 ENSG00000126215|XRCC3 ENSG00000129455|CLK8 ENSG00000140044|NP\_569736.1 ENSG00000140750|ARHGAP17 ENSG00000146049|KAAG1 ENSG00000159173|TNNI1 ENSG00000160284|C21orf56  
ENSG00000167178|ISLR2 ENSG00000171847|FAM90A1 ENSG00000179840|NP\_001038943.1 ENSG00000182979|MTA1 ENSG00000185482|STAC3 ENSG00000205559|Q61BW5\_HUMAN ENSG00000205879|FAM90A25P ENSG00000205996|FAM90A10  
ENSG00000205998|FAM90A9 ENSG00000206000|FAM90A18 ENSG00000206002|FAM90A3 ENSG00000206005|FAM90A8 ENSG00000206008|XR\_015341.1 ENSG00000206023|FAM90A7 ENSG00000017427|IGF1 ENSG000000059758|PCTK2  
ENSG00000079102|RUNX1T1 ENSG00000105939|ZC3HAV1 ENSG00000107485|GATA3 ENSG00000115363|TMEM166 ENSG00000116251|RPL22 ENSG00000120235|IFNA6 ENSG00000121940|CLCC1 ENSG00000126733|DACH2  
ENSG00000144218|AFF3 ENSG00000166848|TERF2IP ENSG00000175556|LONRF3 ENSG00000184402|SS18L1 ENSG00000188206|Q5RI14\_HUMAN ENSG00000198176|TFDP1  
ENSG00000078967|UBE2D4 ENSG00000111218|PRMT8 ENSG00000122687|FTSJ2 ENSG00000123415|SMUG1 ENSG00000134201|GSTM5 ENSG00000134240|HMGCS2 ENSG00000136367|ZFXH2  
ENSG00000137124|ALDH1B1 ENSG00000138622|HCN4 ENSG00000153266|FEZF2 ENSG00000159556|ISL2 ENSG00000165414|Q96HD6\_HUMAN ENSG00000172215|CXCR6 ENSG00000175854|C9orf119 ENSG00000177337|NP\_001034885.1  
ENSG00000178571|NM\_203423 ENSG00000186261|EMP2 ENSG00000188290|HES4 ENSG00000188976|NOC2L ENSG00000197536|NP\_001013739.1 ENSG000000064933|PMS1 ENSG000000070756|PABPC1 ENSG000000079101|CLUL1  
ENSG00000105699|LSR ENSG00000112175|BMP5 ENSG00000119943|C10orf33 ENSG00000125482|TTF1 ENSG00000131013|PPL1A ENSG00000131791|PRKAB2 ENSG00000136932|C9orf156 ENSG00000137941|TTL7  
ENSG00000147869|CER1 ENSG00000150316|NP\_057487.2 ENSG00000154122|ANKH ENSG00000159216|RUNX1 ENSG00000163735|CXCL5 ENSG00000164162|ANAPC10 ENSG00000164172|MOC52 ENSG00000172292|LASS6  
ENSG00000172339|ALG14 ENSG00000182585|EPGN ENSG00000184349|EFNA5 ENSG00000204814|Q5VSD8\_HUMAN  
ENSG000000051596|THOC3 ENSG000000070770|CSNK2A2 ENSG000000087269|NOL14 ENSG00000100448|CTSG ENSG00000105723|GSK3A ENSG00000128713|HOXD11 ENSG00000134463|ECHDC3 ENSG00000141574|SECTM1  
ENSG00000146047|HIST1H2BA ENSG00000149503|INCNENP ENSG00000156411|C14orf2 ENSG00000157312|PDF ENSG00000162849|KIF26B ENSG00000163515|RETNLB ENSG00000166959|MS4A8B ENSG00000168476|REEP4  
ENSG00000170089|THOC3 ENSG00000171346|KRT15 ENSG00000171490|RSL1D1 ENSG00000172009|THOP1 ENSG00000172216|CEBFB ENSG00000172568|NP\_001001343.1 ENSG00000176700|SCAND2 ENSG00000177721|NP\_001014301.1  
ENSG00000183558|HIST2H2AA3 ENSG00000184566|Q9P1G6\_HUMAN ENSG00000186074|CD300LF ENSG00000196405|EVL ENSG00000203774|Q6ZUA8\_HUMAN ENSG00000047410|TPR ENSG00000068697|LAPTM4A ENSG00000100906|NFKBIA  
ENSG00000104722|NEFM ENSG00000108255|CRYBA1 ENSG000001129596|CDO1 ENSG00000145835|NP\_542387.1 ENSG00000151575|TEX9 ENSG00000160188|TSGA2 ENSG00000167552|TUBA1A ENSG00000167562|ZNF701  
ENSG00000168267|PTF1A ENSG00000170941|NP\_065895.1 ENSG00000179639|FCER1A ENSG00000197888|UGT2B17 ENSG00000204480|PRAMEF19 ENSG00000204491|PRAMEF18 ENSG00000204503|PRAMEF3  
ENSG000000026652|AGPAT4 ENSG00000072134|EPN2 ENSG00000100453|GZMB ENSG00000100997|ABHD12 ENSG00000101391|CDK5RAP1 ENSG00000106927|AMBP ENSG00000110880|CORO1C ENSG00000113273|ARSB  
ENSG00000116198|K1AA0562 ENSG00000118689|FOXO3A ENSG00000123901|PRR83 ENSG00000124449|IRGC ENSG00000125810|CD93 ENSG00000133985|TTC9 ENSG00000162543|UBXD3 ENSG00000173867|MRPL46  
ENSG00000177352|CCDC71 ENSG00000177741|Q96BN7\_HUMAN ENSG00000183793|NP1P ENSG00000186198|NP\_849190.1 ENSG00000196501|HIST1H2BN ENSG00000198563|ATP6V1G2 ENSG00000205726|ITSN1 ENSG00000206580|AP4M1  
ENSG000000011295|TTC19 ENSG00000049130|KITLG ENSG00000071073|MGAT4A ENSG00000073711|PPP2R3A ENSG00000100650|SFRS5 ENSG00000101843|PSMD10 ENSG00000102753|KPN3 ENSG00000109158|GABRA4  
ENSG00000109576|AADAT ENSG00000113851|CRBN ENSG00000115484|CCT4 ENSG00000118231|CRYGD ENSG00000126861|OMG ENSG00000127249|ATP13A4 ENSG00000128886|ELL3 ENSG00000146463|ZMYM4  
ENSG00000152092|ASTN1 ENSG00000162688|AGL ENSG00000164031|DNAJB14 ENSG00000164049|FBXW12 ENSG00000168387|ASB14 ENSG00000172575|RASGRP1 ENSG00000172717|C14orf54 ENSG00000174799|CEP135  
ENSG00000177694|NAALADL2 ENSG00000183337|BCOR ENSG00000185873|TMPRSS11B ENSG00000188158|NHS ENSG00000188649|C10orf130 ENSG00000198161|PPIAL4 ENSG00000198360|NP\_839944.1 ENSG00000198642|KLHL9  
ENSG00000198961|PA2 ENSG00000203847|XR\_016130.1  
ENSG000000057704|TMCC3 ENSG000000095015|MAP3K1 ENSG000000099194|SCL ENSG00000101193|C20orf11 ENSG00000103044|HAS3 ENSG00000105648|IFI30 ENSG00000110455|NP\_115981.1 ENSG00000111641|NOL1  
ENSG00000119535|CSF3R ENSG00000125534|C20orf149 ENSG00000129473|BDL2L2 ENSG00000132605|TNS3 ENSG00000136205|GOLG1A ENSG00000138311|ZNF365 ENSG00000146021|KLHL3  
ENSG00000157093|LYZL4 ENSG00000164574|GALNT10 ENSG00000166165|CKB ENSG00000166402|TUB ENSG00000172297|Q96RM8\_HUMAN ENSG00000172332|GOLGA2LY1 ENSG00000173821|RNF213 ENSG00000184502|GAST  
ENSG00000186288|NP\_997211.2 ENSG00000188525|NM\_207480 ENSG00000204266|NM\_001025448 ENSG00000069509|FUNDCl ENSG00000079102|RUNX1T1 ENSG00000107485|GATA3 ENSG00000112304|THEM2 ENSG00000114529|C3orf52  
ENSG00000117289|TXNIP ENSG00000125863|MKKS ENSG00000131508|UBE2D2 ENSG00000131951|LRR9 ENSG00000135842|FAM129A ENSG00000140905|GCSH ENSG00000144909|OSBP1L1 ENSG00000146842|NP\_116231.2  
ENSG00000164604|GPR85 ENSG00000166147|FBN1 ENSG00000166323|C11orf65 ENSG00000169062|UPF3A ENSG00000171877|FRMD5 ENSG00000173451|THAP2 ENSG00000174748|RPL15 ENSG00000174780|SRP72  
ENSG00000175305|CCNE2 ENSG00000175455|CCDC14 ENSG00000185010|F8 ENSG00000197347|Q6ZVE3\_HUMAN ENSG00000204178|TMEM57 ENSG00000204832|Q6ZRU3\_HUMAN  
ENSG000000013523|ANGEL1 ENSG00000076944|STXBP2 ENSG00000079462|PAFAH1B3 ENSG00000079974|RABL2B ENSG00000101082|SLA2 ENSG00000120257|KCNJ1 ENSG00000106631|MYL7 ENSG00000106852|LHX6  
ENSG00000109132|PHOX2B ENSG00000118557|PMFBP1 ENSG00000131059|C20orf71 ENSG00000133195|SLC39A11 ENSG00000136367|ZFXH2 ENSG00000144029|MRPS5 ENSG00000149600|COMMD7 ENSG00000154478|GPR26  
ENSG00000160058|BSDC1 ENSG00000160172|Q8IW37\_HUMAN ENSG00000161618|ALDH16A1 ENSG00000163081|NP\_694583.1 ENSG00000166220|C10orf27 ENSG00000166402|TUB ENSG00000168434|COG7 ENSG00000169877|ERAF  
ENSG00000171724|K1576\_HUMAN ENSG00000173530|TNFRSF10D ENSG00000175202|HIGD2BP ENSG00000178078|NP\_060190.2 ENSG00000049319|SRD5A2 ENSG00000101349|PAK7 ENSG00000104412|TTC35 ENSG00000104765|BNIP3L  
ENSG00000117600|NP\_055654.2 ENSG00000118520|ARG1 ENSG00000121057|AKAP1 ENSG00000129055|ANAPC13 ENSG00000139973|SYT16 ENSG00000143324|XPR1 ENSG00000143771|CNIH4 ENSG00000148677|ANKRD1  
ENSG00000153187|HNRPU ENSG00000155959|VBP1 ENSG00000164112|TMEM155 ENSG00000166704|ZNF606 ENSG00000168542|COL3A1 ENSG00000177494|ZBED2 ENSG00000178974|FBXO34 ENSG00000185689|Q6NXN5\_HUMAN  
ENSG00000186522|SEPT10 ENSG00000189369|GSP2 ENSG00000196704|AMZ2\_HUMAN ENSG00000197142|ACSL5 ENSG00000204478|PRAMEF20 ENSG00000204486|PRAMEF21  
ENSG00000005100|DHX3 ENSG00000055130|CUL1 ENSG00000075702|WDR62 ENSG00000103023|NP\_001073961.1 ENSG00000104946|TBC1D17 ENSG00000105379|ETFB ENSG00000105619|TFPT ENSG00000118689|FOXO3A  
ENSG00000130775|Clorf38 ENSG00000134245|WNT2B ENSG00000141854|Q96FF7\_HUMAN ENSG00000143878|RHOB ENSG00000148926|ADM ENSG00000149599|C20orf57 ENSG00000150086|GRIN2B ENSG00000154040|CABYR  
ENSG00000158006|PAFAH2 ENSG00000161572|LYZL6 ENSG00000161920|MED1 ENSG00000162676|GFI1 ENSG00000168569|NP\_001073970.1 ENSG00000170231|FABP6 ENSG00000170638|TRABD ENSG00000173812|EIF1  
ENSG00000173838|RAF190 ENSG00000174238|PITPNA ENSG00000174788|PCP2 ENSG00000177992|C9orf79 ENSG00000184502|GAST ENSG00000186676|EEF1F ENSG00000187953|NR\_002217.1 ENSG00000188026|NP\_847884.1  
ENSG00000196460|Q6ZNB4\_HUMAN ENSG00000197670|Q9H800\_HUMAN ENSG00000198467|TPM2 ENSG00000204423|C9orf33 ENSG00000050344|NFE2L3 ENSG00000078114|NEBL ENSG00000099219|K1AA1815 ENSG00000100557|C14orf105  
ENSG00000100596|SPTLC2 ENSG00000101166|SLMO2 ENSG00000110321|EIF4G2 ENSG00000111091|SLC11A2 ENSG00000111196|MGN2\_HUMAN ENSG00000112290|WASF1 ENSG00000117528|ABCD3 ENSG00000122432|SPATA1  
ENSG00000123268|ATF1 ENSG00000123575|CXorf39 ENSG00000127603|MACF1 ENSG00000130783|CCDC62 ENSG00000134982|APC ENSG00000140284|SLC27A2 ENSG00000147588|PMP2 ENSG00000149970|CNKSR2  
ENSG00000152076|CCDC74B ENSG00000152256|PDK1 ENSG00000152931|PART1\_HUMAN ENSG00000154122|ANKH ENSG00000156239|NGAMT1 ENSG00000163040|CCDC74A ENSG00000164117|FBXO8 ENSG00000164588|HCN1  
ENSG00000164746|Q8NEG2\_HUMAN ENSG00000165525|SDCCAG1 ENSG00000165650|PDZD8 ENSG00000175868|CALCB ENSG00000176657|EPS15L2 ENSG00000178459|Q8N2E2\_HUMAN ENSG00000180423|C11orf77 ENSG00000198000|NOL8  
ENSG00000198692|EIF1AY ENSG00000205981|DNAJC19 ENSG00000206131|Q6ZS21\_HUMAN  
perfect: AAACGTG TCACTTT hsa-miR-223 tgTCACTTTgtcaaatacccc 2  
AAACGTG ENSG00000006007|GDE1\_HUMAN ENSG000000049283|EPN3 ENSG00000100285|NEFH ENSG00000102870|ZNF629 ENSG00000111481|COPZ1 ENSG00000125447|GGA3 ENSG00000125816|NKX2-4 ENSG00000133316|WDR74  
ENSG00000136697|IL1F10 ENSG00000137074|APT\_X ENSG00000137288|C6orf125 ENSG00000142273|CBLX ENSG00000142484|TM4SF5 ENSG00000154096|THY1 ENSG00000160296|SIGLEC12 ENSG00000169218|RSPO1  
ENSG00000170458|CD14 ENSG00000171495|NP\_775760.2 ENSG00000177595|LRDD ENSG00000178401|NP\_079178.2 ENSG00000183847|Q9P1C0\_HUMAN ENSG00000189159|HN1 ENSG00000197435|HIST3H2BB ENSG00000205778|Q6ZMM7\_HUMAN  
ENSG000000001167|NFYA ENSG00000003393|ALS2 ENSG00000016864|GLT8D1 ENSG00000026297|RNASET2 ENSG00000049618|ARID1B ENSG00000078618|NRD1 ENSG00000085563|ABCB1 ENSG00000100473|COCH  
ENSG00000104763|ASAHL ENSG00000108590|MED31 ENSG00000109184|DCUN1D4 ENSG00000111731|K1AA0528 ENSG00000121964|GDC1 ENSG00000125571|IL1F7 ENSG00000136750|GAD2 ENSG00000142871|CYR61  
ENSG00000145354|ZCD2 ENSG00000146223|RPL7L1 ENSG00000147036|LANCL3 ENSG00000164442|CIT2D2 ENSG00000164794|KCNV1 ENSG00000165246|ILN6N4Y ENSG00000166971|AKT1P ENSG00000167910|CYP7A1  
ENSG00000171199|PROL1 ENSG00000185231|MC2R ENSG00000188612|SUMO2 ENSG00000189079|ARID2 ENSG00000197635|DPP4 ENSG00000198301|SDAD1 ENSG00000204219|TCEA3  
ENSG000000029993|HMG3 ENSG000000084070|SMAP1L ENSG00000111639|TRFL1 ENSG00000112562|SMOC2 ENSG00000116237|ICMT ENSG00000124225|TMEMPA1 ENSG00000128567|PODXL ENSG00000130479|MAP1S  
ENSG00000137133|HINT2 ENSG00000137709|POU2F3 ENSG000001433367|MUFT1 ENSG00000149428|HYO1 ENSG00000154917|RAB6B ENSG00000156466|GDF6 ENSG00000162877|NP\_689704.3 ENSG00000163913|IFT122  
ENSG00000163933|RTT1 ENSG00000165283|STOML2 ENSG00000166557|TMED3 ENSG00000173212|C1orf161 ENSG00000182013|NP\_060685.2 ENSG00000183049|CAMK1D ENSG00000184012|TMPRSS2 ENSG00000185189|NRBP2  
ENSG00000187095|LILRA2 ENSG00000188760|NP\_001005209.1 ENSG00000197063|MAFG ENSG00000005187|ACSM3 ENSG00000005483|MLL5 ENSG000000049319|SRD5A2 ENSG00000064763|MLSTD1  
ENSG00000082497|SERTAD4 ENSG00000083937|CHMP2B ENSG00000086619|EROL1B ENSG00000100503|NIN ENSG00000102290|PCDH11X ENSG00000105865|DUS4L ENSG00000107854|TNKS2 ENSG00000110841|PPF1BP1  
ENSG00000111145|ELK3 ENSG00000111328|CDK2AP1 ENSG00000115009|CCL20 ENSG00000115548|JMJ1A ENSG00000118473|SGP1 ENSG00000118804|GET1\_HUMAN ENSG00000120693|SMAD9 ENSG00000125823|CSTL1  
ENSG00000126777|KTN1 ENSG00000126860|EVI2A ENSG00000132294|EFR3\_HUMAN ENSG00000132463|GRSF1 ENSG00000137103|C9orf127 ENSG00000138593|K0256\_HUMAN ENSG00000138615|CILP ENSG00000139910|NOVA1  
ENSG00000140153|WDR20 ENSG00000147316|MCPH1 ENSG00000147642|SYBU\_HUMAN ENSG00000150961|SEC24D ENSG00000152990|GPR125 ENSG00000153574|RPIA ENSG00000155495|MAGEC1 ENSG00000155621|C9orf85  
ENSG00000155622|XAGE2 ENSG00000157445|CACNA2D3 ENSG00000157502|MUM1L1 ENSG00000166348|USP54 ENSG00000166881|K0286\_HUMAN ENSG00000167004|PDTA3 ENSG00000169629|RGPD8 ENSG00000169905|TOR1AIP2  
ENSG00000170802|FOXN2 ENSG00000171940|ZNF217 ENSG00000176842|IRX5 ENSG00000181195|PENK ENSG00000183054|RGPD6 ENSG00000185751|GAGD3\_HUMAN ENSG00000196323|ZBTB44 ENSG00000206120|Q0D2K5\_HUMAN  
AAACTTG ENSG00000001461|NPAL3 ENSG00000005073|HOXA11 ENSG00000005194|CIAPIN1 ENSG00000005238|K1AA1539 ENSG00000006007|GDE1\_HUMAN ENSG00000071626|DAZAP1 ENSG00000086062|B4GALT1 ENSG00000105392|CRX  
ENSG00000108479|GALK1 ENSG00000123136|DDX39 ENSG00000126785|RHOF ENSG00000130675|HLXB9 ENSG00000131389|SLC6A6 ENSG00000134882|UBAC2 ENSG00000141639|MAPK4 ENSG00000145819|ARHGAP26  
ENSG00000146285|SCML4 ENSG00000153786|ZDHC7 ENSG00000160305|DIP2A ENSG00000166900|STX3 ENSG00000169083|AR ENSG00000169436|COL22A1 ENSG00000171793|CTPS ENSG00000173011|Q86TJ2\_HUMAN  
ENSG00000174306|ZHX3 ENSG00000179270|NP\_001020504.1 ENSG00000182795|C1orf116 ENSG00000186654|ARHGAP8 ENSG00000196432|Q9H5F0\_HUMAN ENSG00000197976|CXorf3 ENSG00000203908|NP\_001017361.1 ENSG00000009694|ODZ1  
ENSG00000039560|RAI14 ENSG00000067048|DDX3X ENSG00000100664|EIF5 ENSG00000101132|PFDN4 ENSG00000103540|CE110\_HUMAN ENSG00000108278|ZNHT3 ENSG00000109171|SLAIN2 ENSG00000110344|UBE4A  
ENSG00000113575|PPP2CA ENSG00000118454|ANKRD13C ENSG00000118985|ELL2 ENSG00000120438|TCP1 ENSG00000129534|C14orf106 ENSG00000134762|DSC3 ENSG00000134970|TICAM2 ENSG00000137872|SEMA6D  
ENSG00000139746|RBM2C ENSG00000143753|DEGS1 ENSG00000146872|TLK2 ENSG00000148053|NTRK2 ENSG00000153187|HNRPU ENSG00000155592|ZKSCAN2 ENSG00000157343|C6orf81 ENSG00000157540|DYRK1A  
ENSG00000161970|RPL26 ENSG00000163558|PRKC1 ENSG00000165264|NDUFB6 ENSG00000165757|K1AA1462 ENSG00000170892|TSEN34 ENSG00000175305|CCNE2 ENSG00000179941|BBS10 ENSG00000182568|SATB1  
ENSG00000185652|NTF3 ENSG00000196409|ZNF658B ENSG00000198416|Z658B\_HUMAN  
AAAGAAA ENSG00000008441|NFIX ENSG00000088367|EPB41L1 ENSG00000105991|HOXA1 ENSG00000113578|FGF1 ENSG00000114648|KLHL18 ENSG00000116017|ARID3A ENSG00000118689|FOXO3A ENSG00000125755|SYMPK  
ENSG00000126785|RHOJ ENSG00000129993|CBFA2T3 ENSG00000130287|NCAN ENSG00000130675|HLXB9 ENSG00000136854|STXBP1 ENSG00000139436|GIT2 ENSG00000139644|TEGT ENSG00000140406|MESDC1  
ENSG00000143409|FAM63A ENSG00000144712|CAND2 ENSG00000144730|IL17RD ENSG00000158089|GALNT14 ENSG00000158445|KCNB1 ENSG00000159692|CTBP1 ENSG00000160791|CCR5 ENSG00000163872|YEATS2  
ENSG00000165606|NP\_001073989.1 ENSG00000167565|SERTAD3 ENSG00000170515|PA2G4 ENSG00000171671|C11orf76 ENSG00000172005|MAL ENSG00000173253|DMRT2 ENSG00000174613|KCNQ1DN ENSG00000174683|C8orf78  
ENSG00000177066|Q8NCU6\_HUMAN ENSG00000177886|Q8N819\_HUMAN ENSG00000178401|NP\_079178.2 ENSG00000181814|Q6NW39\_HUMAN ENSG00000189321|NR\_002940.1 ENSG00000196153|Q8NAB5\_HUMAN ENSG00000196834|POT14\_HUMAN  
ENSG00000198873|GRK5  
ENSG00000204304|PXB2 ENSG00000026025|VIM ENSG00000037965|HOXC8 ENSG00000005427|OPN3 ENSG00000060138|CSDA ENSG00000084674|APOB ENSG00000101745|ANKRD12 ENSG00000102038|SMARCA1  
ENSG00000104408|EIF3S6 ENSG00000111229|ARPC3 ENSG00000112308|H6orf62 ENSG00000118482|PHF3 ENSG00000125675|GRIA3 ENSG00000128609|PPARBP ENSG00000128609|NDUFA5 ENSG00000138750|NUP54  
ENSG00000139668|WDFY2 ENSG00000139679|P2RY5 ENSG00000141048|MYH4 ENSG00000147509|RGS20 ENSG00000154188|ANGPT1 ENSG00000154874|NP\_872374.3 ENSG00000160062|ZBTB8 ENSG00000164144|ARFIP1  
ENSG00000164761|TNFRSF11B ENSG00000164879|CA3 ENSG00000168542|COL3A1 ENSG00000169413|RNASE6 ENSG00000172340|SUCLG2 ENSG00000177483|NP\_001073973.1 ENSG00000179546|HTR1D ENSG00000183644|NP\_997313.1  
ENSG00000188452|CERKL ENSG00000188877|POTE8\_HUMAN ENSG00000189127|NP\_001004441.1 ENSG00000198353|HOXC4 ENSG00000198836|OPAL ENSG00000204148|C9orf27  
AAAGAA ENSG00000073792|IGF2BP2 ENSG00000082701|GSK3B ENSG00000092607|TBX15 ENSG00000103064|SLC7A6 ENSG00000105428|ZNF4 ENSG00000105997|HOXA3 ENSG00000124164|VAPB ENSG00000128228|SDF2L1  
ENSG00000134461|ANKRD16 ENSG00000136167|LCP1 ENSG00000137413|TBN ENSG00000142789|ELA3A ENSG00000148158|SNX30 ENSG000

ENSG00000205804|Q5T6R2\_HUMAN ENSG00000206528|Q6ZSMO\_HUMAN ENSG00000002745|WNT16 ENSG00000008394|MGST1 ENSG00000021574|SPAST ENSG00000064225|ST3GAL6 ENSG00000066422|ZBTB11 ENSG00000094963|FMO2  
ENSG00000095794|CREM ENSG00000100629|C14orf145 ENSG00000105750|ZNF85 ENSG00000108854|SMURF2 ENSG00000114209|PDCD10 ENSG00000115827|C2orf37 ENSG00000116690|PRG4 ENSG00000120334|CENPL  
ENSG00000135333|EPHA7 ENSG00000147202|DIAPH2 ENSG00000151718|WWC2 ENSG00000153253|SCN3A ENSG00000158691|ZSCAN12 ENSG00000162390|ACOT11 ENSG00000163110|PDLIM5  
ENSG00000166035|LIPC ENSG00000170786|NP\_620419.2 ENSG00000171466|ZNF562 ENSG00000172167|MTBP ENSG00000173452|NP\_689987.2 ENSG00000174799|CEP135 ENSG00000176840|C19orf30 ENSG00000180828|BHLHB5  
ENSG00000185057|TAF9 ENSG00000187508|Q7Z2R7\_HUMAN ENSG00000196680|Q8WZ27\_HUMAN ENSG00000196826|ZNF709 ENSG00000198464|ZNF480 ENSG00000198521|ZNF43  
ENSG00000007264|MATK ENSG00000106262|LRRC23 ENSG00000065308|TRAM2 ENSG00000087903|RFX2 ENSG00000110719|TCIRG1 ENSG00000125744|RTN2 ENSG00000129437|KLK14 ENSG00000136448|NMT1  
ENSG00000137834|SMAD6 ENSG00000148343|FAM73B ENSG00000148399|WDR85 ENSG00000161610|HCRT ENSG00000162373|C1orf165 ENSG00000162460|NP\_001013663.1 ENSG00000165623|C10orf49 ENSG00000169876|MUC17  
ENSG00000172297|Q96RM8\_HUMAN ENSG00000172332|GOLGA2LY1 ENSG00000177468|OLIG3 ENSG00000196501|HIST1H2BN ENSG00000204536|CCHCR1 ENSG00000030304|MUSK ENSG00000065978|YBX1 ENSG00000102760|C13orf15  
ENSG00000109475|RPL34 ENSG00000112494|UNC93A ENSG00000117069|STGALNAC5 ENSG00000127989|MTFRF ENSG00000131373|HACL1 ENSG00000134899|ERCC5 ENSG00000139351|SYCP3 ENSG00000143919|C2orf34  
ENSG00000147036|LANCL3 ENSG00000149968|MMP3 ENSG00000155761|SPAG17 ENSG00000155876|RRAGA ENSG00000159055|C21orf45 ENSG00000162746|FCRLB ENSG00000166926|MS4A6E ENSG00000183499|DPH3B  
ENSG00000186115|CYP4F2 ENSG00000204947|ZNF425  
AAAGACT ENSG00000102445|C13orf18 ENSG00000102962|CCL22 ENSG00000104529|EEF1D ENSG00000105202|FBL ENSG00000108821|COL1A1 ENSG00000111335|OAS2 ENSG00000113070|HBEGF  
ENSG00000123992|DNPEP ENSG00000126259|KIRREL2 ENSG00000126767|ELK1 ENSG00000139797|RNF113B ENSG00000140943|MBTPS1 ENSG00000143257|NR1I3 ENSG00000143322|ABL2 ENSG00000144681|STAC  
ENSG00000166924|NP\_775835.2 ENSG00000166998|CKMT1A ENSG00000167118|URM1 ENSG00000168434|COG7 ENSG00000168775|KCRU\_HUMAN ENSG00000169696|ASPSCR1 ENSG00000175213|ZNF408 ENSG00000182324|KCNJ14  
ENSG00000183488|AMAC1L3 ENSG00000186532|SMYD4 ENSG00000187686|XR\_016979.1 ENSG00000196465|MYL6B ENSG00000196935|SRGAP1 ENSG00000198258|UBI5 ENSG00000205592|MUC19 ENSG00000205792|A4D193\_HUMAN  
ENSG00000035499|DEPDC1B ENSG00000103254|C16orf24 ENSG00000109775|C4orf20 ENSG00000111912|NCOA7 ENSG00000113494|PRLR ENSG00000115525|ST3GAL5 ENSG00000118520|ARG1 ENSG00000119138|KLF9  
ENSG00000124479|NDP ENSG00000133808|MICALCL ENSG00000136149|XR\_017918.1 ENSG00000137801|THBS1 ENSG00000142182|DNMT3L ENSG00000144857|BOC ENSG00000145868|FBXO38 ENSG00000161547|SFRS2  
ENSG00000163518|FCRL4 ENSG00000164576|SAP30L ENSG00000169129|AFAP1L2 ENSG00000169245|CXCL10 ENSG00000170847|RPS26P10 ENSG00000171766|GATM ENSG00000173418|NAT5 ENSG00000174839|FAM116A  
ENSG00000177047|IFNWL1 ENSG00000183542|KLRC4 ENSG00000184867|ARMCX2 ENSG00000196933|RPS26L1 ENSG00000197635|DPP4 ENSG00000197728|RS26\_HUMAN ENSG00000203864|C1orf137  
AAAGAGA ENSG00000043591|ADRB1 ENSG00000057593|F7 ENSG00000065000|AP3D1 ENSG00000075151|EIF4G3 ENSG00000083444|PLOD1 ENSG00000089356|FXDY3 ENSG00000099204|ABLIM1 ENSG00000100908|C14orf122  
ENSG00000103966|EHD4 ENSG00000105270|CLIP3 ENSG00000108883|EFTUD2 ENSG00000110092|CCND1 ENSG00000113196|HAND1 ENSG00000116983|HPCAL4 ENSG00000117640|FAM54B ENSG00000121671|CRY2  
ENSG00000125485|DDX31 ENSG00000126856|Q9NQW5-2 ENSG00000129467|MDCY4 ENSG00000130803|ZNF317 ENSG00000140718|FTO ENSG00000143382|ADAMTSL4 ENSG00000145819|ARHGAP26  
ENSG00000148296|SURF6 ENSG00000148704|VAX1 ENSG00000161574|CCL14 ENSG00000163482|STK36 ENSG00000163545|NUAK2 ENSG00000163933|RFT1 ENSG00000166833|NAV2 ENSG00000169241|RAG1AP1  
ENSG00000169884|WNT10B ENSG00000174992|ZG16\_HUMAN ENSG00000180758|GPR157 ENSG00000184560|C17orf74 ENSG00000185905|C16orf54 ENSG00000186466|AQP7P2 ENSG00000187608|ISG15 ENSG00000203867|RBM20  
ENSG00000188869|ZNF582 ENSG000000047410|TPR ENSG00000064218|DMRT3 ENSG00000085276|EVI1 ENSG00000101230|C20orf82 ENSG00000101938|CHRD1L ENSG00000104907|TRMT1 ENSG000001105467|SYNGR4  
ENSG00000106688|SLC1A1 ENSG00000112541|PDE10A ENSG00000114861|FOXP1 ENSG00000115109|EPB41L5 ENSG00000116539|ASHL1 ENSG00000118197|DDX59 ENSG00000118785|SPP1 ENSG00000127328|RAB31P  
ENSG00000132467|SAS10\_HUMAN ENSG00000132541|HRSP12 ENSG00000134758|RNF138 ENSG00000134851|TMEM165 ENSG00000137033|IL33 ENSG00000137269|LRRC1 ENSG00000143970|ASXL2 ENSG00000147044|CASK  
ENSG00000147571|CRH ENSG00000156140|ADAMTS3 ENSG00000163734|CXCL3 ENSG00000164093|PITX2 ENSG00000164175|SLC45A2 ENSG00000173200|PARP15 ENSG00000177483|NP\_001073973.1 ENSG00000180882|XR\_017823.1  
ENSG00000204315|FKBPL ENSG00000205057|CLU10S  
AAAGAGT ENSG00000007237|GAS7 ENSG00000007341|ST7L ENSG00000102265|TIMP1 ENSG00000115129|TP53I3 ENSG00000118655|DCLRE1B ENSG00000119946|CNM1 ENSG00000128408|RIBC2 ENSG00000128645|HOXD1  
ENSG00000132716|WDR42A ENSG00000135622|SEMA4F ENSG00000139433|GLTP ENSG00000149609|C20orf144 ENSG00000159797|C9orf144 ENSG00000163913|IFT122 ENSG00000165695|C9orf98 ENSG00000166435|XRR1  
ENSG00000167941|SOST ENSG00000169083|AR ENSG00000185615|PDIA2 ENSG00000188086|NP\_954652.1 ENSG00000196085|C19orf42 ENSG00000197838|CYP2A13 ENSG00000198570|RD3 ENSG00000203812|HIST2H2AA4  
ENSG00000206193|Q5HYA3\_HUMAN ENSG000000058063|ATP11B ENSG000000065600|C1orf75 ENSG000000071991|CDH19 ENSG00000076685|NT5C2 ENSG00000102053|ZC3H12B ENSG00000105550|FGF21 ENSG00000110696|C11orf58  
ENSG00000111701|APOBEC1 ENSG00000124479|NDP ENSG00000124767|GLO1 ENSG00000137691|C11orf70 ENSG00000145681|HAPLN1 ENSG00000150760|DOCK1 ENSG00000152582|NP\_653323.1 ENSG00000163939|PBRM1  
ENSG00000165899|C12orf64 ENSG00000169047|IRS1 ENSG00000169895|SYAP1 ENSG00000174032|SLC25A30 ENSG00000175676|GOLGA8F ENSG00000183324|NP\_001035826.1 ENSG00000196350|ZNF492 ENSG00000197601|MLSTD2  
ENSG00000203909|DPPA5 ENSG00000204469|BAT2 ENSG00000205133|Q629K1\_HUMAN ENSG00000205544|C17orf61  
AAAGATA ENSG00000008256|PSCD3 ENSG00000073584|SMARCE1 ENSG00000090512|FETUB ENSG00000103888|KIAA1199 ENSG00000107960|OBFC1 ENSG00000109758|HGFC ENSG00000118707|TGIF2 ENSG00000120451|SNX19  
ENSG00000122359|ANXA11 ENSG00000125818|PSMF1 ENSG00000133422|MORC2 ENSG00000137310|TCF19 ENSG00000140263|SORB ENSG00000163481|RNF25 ENSG00000170876|TMEM43 ENSG00000171711|DEFB4  
ENSG00000177257|BD02\_HUMAN ENSG00000178159|Q8N8A0\_HUMAN ENSG00000179141|Q8N642\_HUMAN ENSG00000180846|C19orf34 ENSG00000183495|EP400 ENSG00000186350|RXRA ENSG00000188935|Q6ZU24\_HUMAN ENSG00000198535|NP\_997205.1  
ENSG00000198756|GLT25D2 ENSG00000204385|CTL4\_HUMAN ENSG00000204444|APOM ENSG00000204759|Q6ZRY0\_HUMAN ENSG00000206550|LOC285346 ENSG00000067334|DNTTIP2 ENSG00000101935|AMMECR1 ENSG00000106013|ANKRD7  
ENSG00000116833|NR5A2 ENSG00000132122|SPATA6 ENSG00000139168|ZCRB1 ENSG00000143190|POUF21 ENSG00000149534|MS4A2 ENSG00000152977|ZIC1 ENSG00000163093|BBS5 ENSG00000163535|SGOL2  
ENSG00000166752|TMEM83 ENSG00000166803|KIAA0101 ENSG00000174123|TLR10 ENSG00000184497|FAM70B ENSG00000186666|BCDIN3D ENSG00000188958|UTS2D ENSG00000198865|Q4G0S7\_HUMAN ENSG00000203788|Q6ZMM1\_HUMAN  
ENSG00000205208|NP\_001008394.1 ENSG00000211446|SEPP1  
AAAGATT ENSG00000054965|KIAA0280 ENSG00000055163|CYFP2 ENSG00000104872|PIH1D1 ENSG00000113070|HBEGF ENSG00000115841|FAM82A ENSG00000117682|DHDD3 ENSG00000124766|SOX4 ENSG00000128918|ALDH1A2  
ENSG00000130203|APOE ENSG00000130643|DRD1IP ENSG00000132434|LANCL2 ENSG00000140488|BRUNOL6 ENSG00000143257|NR1I3 ENSG00000146950|SHROOM2 ENSG00000148400|NOTCH1 ENSG00000151474|FRMD4A  
ENSG00000152086|TUBA3E ENSG00000154227|LASS3 ENSG00000164778|EN2 ENSG00000169083|AR ENSG00000171490|RS1L1D1 ENSG00000177721|NP\_001014301.1 ENSG00000180878|C11orf42 ENSG00000182158|CREB3L2  
ENSG00000184619|KRBA2 ENSG00000196154|S100A4 ENSG00000197530|MTB2 ENSG00000198053|SIRPA ENSG00000144123|KIAA0776 ENSG00000202922|HRE11A ENSG0000021574|SPAST ENSG000002026103|FAS  
ENSG00000054267|ARID4B ENSG00000057663|ATG5 ENSG00000064787|BCAS1 ENSG00000074803|SLC12A1 ENSG00000080618|CPB2 ENSG00000083937|CHMP2B ENSG00000105855|ITGB8 ENSG00000111049|MYF5  
ENSG00000111328|CDK2AP1 ENSG00000114391|RPL24 ENSG00000114942|EEF1B2 ENSG00000116406|EDEM3 ENSG00000118482|PHF3 ENSG00000121406|ZNF549 ENSG00000122299|ZC3H7A ENSG00000133739|LRRCC1  
ENSG00000136897|MRPL50 ENSG00000139343|SNRPF ENSG00000140043|ZADH1 ENSG00000143199|NP\_060887.1 ENSG00000145416|MARCH1 ENSG00000145741|BTF3 ENSG00000156802|ATAD2 ENSG00000158185|ANKRD36  
ENSG00000163377|FAM19A4 ENSG00000164187|LMBRD2 ENSG00000164608|NP\_071373.2 ENSG00000165105|RAEF ENSG00000174013|FBX045 ENSG00000185849|Q9P194\_HUMAN ENSG00000196104|SPOCK3 ENSG00000196912|AN36B\_HUMAN  
ENSG00000198887|SMC5 ENSG00000204352|C9orf129  
AAAGCAC ENSG00000067829|IDH3G ENSG00000070886|EPHA8 ENSG00000071127|WDR1 ENSG00000112139|MDGA1 ENSG00000122254|HS3ST2 ENSG00000122733|KIAA1045 ENSG00000125170|DOK4 ENSG00000136942|RPL35  
ENSG00000157020|SEC13 ENSG00000158578|ALAS2 ENSG00000162191|SAKS1\_HUMAN ENSG00000168412|MTNRIA ENSG00000168792|NP\_937790.1 ENSG00000170890|PLA2G1B ENSG00000173039|RELA ENSG00000175505|CLCF1  
ENSG00000178772|CPN2 ENSG00000187736|SLC23A3 ENSG00000189409|MM2P3A ENSG00000196465|MYL6B ENSG00000203867|RBM20 ENSG00000047621|C12orf4 ENSG00000053747|LAMA3 ENSG00000060709|RIMBP2  
ENSG00000070269|C14orf101 ENSG00000072422|RHOBTB1 ENSG00000100503|NIN ENSG00000102128|RH40L\_HUMAN ENSG00000102786|INTS6 ENSG00000104043|ATP8B4 ENSG00000106261|ZKSCAN1  
ENSG00000129235|TXNL5 ENSG00000139910|NOVA1 ENSG00000140525|KIAA1794 ENSG00000143469|SYT14 ENSG00000144401|FAM119A ENSG00000145685|LHFP2L ENSG00000147509|RGS20 ENSG00000148291|SURF2  
ENSG00000151422|FER ENSG00000152520|PAN3 ENSG00000154122|ANKH ENSG00000157625|MAP3K7P3 ENSG00000161048|NP\_945341.2 ENSG00000161131|OTUD7B ENSG00000163918|RFC4 ENSG00000169967|MAP3K2  
ENSG00000175105|ZNF654 ENSG00000182977|Q9P1I1\_HUMAN ENSG00000183831|ANKRD45 ENSG00000183990|Q8WZA8\_HUMAN ENSG00000196433|ASMT ENSG00000198872|PEG10  
AAAGCCA ENSG00000006831|ADIPOR2 ENSG00000095752|IL11 ENSG00000100350|FOXRED2 ENSG00000102181|CD99L2 ENSG00000103005|C16orf57 ENSG00000103067|RBM35B ENSG00000103591|P34\_HUMAN ENSG00000107816|LZTS2  
ENSG00000121770|KHDRB3 ENSG00000122012|SV2C ENSG00000122176|FMOD ENSG00000130589|PR285\_HUMAN ENSG00000132434|LANCL2 ENSG00000138622|HCN4 ENSG00000143418|LASS2 ENSG00000164935|TM7SF4  
ENSG00000167700|MFSD3 ENSG00000167861|C17orf28 ENSG00000168539|CHRM1 ENSG00000179772|FKHL18 ENSG00000182109|Q8N214\_HUMAN ENSG00000183856|IQGAP3 ENSG00000184654|YV006\_HUMAN ENSG00000184774|Q49AQ9\_HUMAN  
ENSG00000185436|IL28RA ENSG00000185736|ADARB2 ENSG00000188100|FAM25\_HUMAN ENSG00000197291|Q8WV75\_HUMAN ENSG00000198246|SLC29A3 ENSG00000205085|NP\_001012457.1 ENSG00000030304|MUSK ENSG00000053254|CHES1  
ENSG00000113494|PRLR ENSG00000115137|NP\_057628.1 ENSG00000118322|ATP10B ENSG00000122778|Q9HCM3\_HUMAN ENSG00000125827|TXNCD13 ENSG00000125931|CTED1 ENSG00000135452|TSPAN31 ENSG00000135842|FAM129A  
ENSG00000138185|ENTPD1 ENSG00000149806|FAU ENSG00000151623|NR3C2 ENSG00000159140|SON ENSG00000162419|GMEB1 ENSG00000162694|EXTL2 ENSG00000163074|NM\_024534 ENSG00000171931|FBXW10  
ENSG00000172748|ZNF596 ENSG00000173464|RNASE11 ENSG00000176049|JAKMIP2 ENSG00000196387|ZNF140 ENSG00000196678|EXOD1 ENSG00000197851|NP\_997386.1 ENSG00000198429|ZNF69  
perfect: AAAGCCA TGGCTTT hsa-miR-135b taTGGCTTTtattcctatgtg 2  
perfect: AAAGCCA TGGCTTT hsa-miR-135a taTGGCTTTtattcctatgtga 2  
AAAGCCT ENSG00000010610|CD4 ENSG00000019144|PHLDB1 ENSG00000076662|ICAM3 ENSG00000081059|TCF7 ENSG00000086062|B4GALT1 ENSG00000086506|HBQ1 ENSG00000099795|NDUF7B ENSG00000105989|WNT2  
ENSG00000106628|POLD2 ENSG00000110801|PSMD9 ENSG00000114767|RRP9 ENSG00000122223|CD244 ENSG00000130544|ZNF557 ENSG00000132259|CNGA4 ENSG00000134075|C3orf10 ENSG00000135436|C12orf25  
ENSG00000136877|PPG3 ENSG00000136908|DPM2 ENSG00000137310|TCF19 ENSG00000140718|FTO ENSG00000141096|DPEP3 ENSG00000150477|KIAA1328 ENSG00000158019|BRE ENSG00000159461|AMFR  
ENSG00000165556|CDX2 ENSG00000166540|ZNF407 ENSG00000167106|FAM102A ENSG00000167110|GOLGA2 ENSG00000167941|SOST ENSG00000170100|Q96M06-2 ENSG00000170835|CEL ENSG00000176754|C1orf157  
ENSG00000178104|PDE4DIP ENSG00000179271|GADD45GIP1 ENSG00000181016|NP\_872403.1 ENSG00000182450|KCNK4 ENSG00000184361|C17orf46 ENSG00000185614|C3orf54 ENSG00000185896|LAMP1 ENSG00000188783|PRELP  
ENSG00000189311|PPME1 ENSG00000197968|Q8N231\_HUMAN ENSG00000198131|ZNF544 ENSG00000204058|C10orf41 ENSG00000205441|KRTAP10-7 ENSG00000205730|NP\_001030013.1 ENSG00000004961|HCC5 ENSG00000081665|ZNF253  
ENSG000000087074|PPP1R15A ENSG000000089335|ZNF302 ENSG00000115271|GCA ENSG00000135413|LACTR1 ENSG00000136813|KIAA0368 ENSG00000142065|ZFP14 ENSG00000144136|SLC20A1 ENSG00000147121|ZNF673  
ENSG00000160336|ZNF761 ENSG00000160352|ZNF714 ENSG00000167785|ZNF558 ENSG00000168411|RFWD3 ENSG00000169860|P2RY1 ENSG00000170624|SGCD ENSG00000174628|IQCK ENSG00000176222|ZNF404  
ENSG00000177600|RPLP2 ENSG00000178150|ZNF114 ENSG00000178604|NP\_001034973.1 ENSG00000180777|ANKRD30B ENSG00000181588|RKHD1 ENSG00000183952|Q9H5Q9\_HUMAN ENSG00000184613|NELL2 ENSG00000186001|LRCH3  
ENSG00000188868|ZNF563 ENSG00000196705|ZNF431 ENSG00000197054|ZNF763 ENSG00000197619|ZNF615 ENSG00000204789|ZNF204 ENSG00000206560|ANKRD28  
ENSG00000048707|VPS13D ENSG00000063180|CA11 ENSG00000068971|PPP2R5B ENSG00000081277|PKP1 ENSG00000088882|CPXM1 ENSG00000092109|OSGEP ENSG00000103064|SLC7A6 ENSG00000106268|NUDT1  
ENSG00000111877|MC99 ENSG00000113739|STC2 ENSG00000116237|ICMT ENSG00000132792|CTNBL1 ENSG00000139767|KIAA1853 ENSG00000147118|ZNF182 ENSG00000150574|CPT2 ENSG00000157184|CPT2 ENSG00000162804|SNED1  
ENSG00000167191|GPRC5B ENSG00000180697|C3orf22 ENSG00000183579|ZNRF3 ENSG00000189129|PLAC9 ENSG00000205223|Q6ZUG9\_HUMAN ENSG00000206053|HN1L ENSG00000100564|PIGH ENSG00000105176|C19orf2  
ENSG00000113597|NP\_079217.1 ENSG00000113851|CRBN ENSG00000118520|ARG1 ENSG00000121031|PRKDC ENSG00000124749|COL21A1 ENSG00000131264|CDX4 ENSG00000134200|TSHB ENSG00000135241|PNPLA10P  
ENSG00000140743|CDR2 ENSG00000143753|DEGS1 ENSG00000147507|LYN ENSG00000148834|GSTO1 ENSG00000149089|AP1P ENSG00000152078|TMEM56 ENSG00000152932|RAB3C ENSG00000155640|C10orf12  
ENSG00000155959|VBP1 ENSG00000158467|SAH3\_HUMAN ENSG00000163738|MTFH2D2 ENSG00000164411|GJB7 ENSG00000164794|KCNV1 ENSG00000164932|CTHRC1 ENSG00000167220|HDHD2 ENSG00000168955|TM4SF20  
ENSG00000170509|HSD17B13 ENSG00000180329|CCDC43 ENSG00000198042|RBM13 ENSG00000198353|HOXC4  
AAAGCTG ENSG00000004838|ZMYND10 ENSG00000022277|C20orf43 ENSG00000101152|DNAJC5 ENSG00000111110|PPM1H ENSG00000114841|DNAH1 ENSG00000134107|BHLHB2 ENSG00000143418|LASS2 ENSG00000147383|NSDHL  
ENSG00000148296|SURF6 ENSG00000148841|KIAA1754 ENSG00000160917|CPSF4 ENSG00000161265|U2AF1L4 ENSG00000163961|RNF168 ENSG00000167962|ZNF598 ENSG00000169247|SH3TC2 ENSG00000174348|PODN  
ENSG00000176095|IHPK1 ENSG00000177744|NP\_775923.1 ENSG00000185507|IRF7 ENSG00000197291|Q8WV75\_HUMAN ENSG00000198663|C6orf89 ENSG00000198805|NP ENSG00000204640|NMS ENSG00000205031|Q6XYE2\_HUMAN  
ENSG00000111961|SAH1 ENSG00000120688|WBP4 ENSG00000128039|NP\_078868.1 ENSG00000137818|RPLP1 ENSG00000143149|ALDH9A1 ENSG00000147573|TRIM55 ENSG00000151623|NR3C2 ENSG00000156052|GNAQ  
ENSG00000157540|DYRK1A ENSG00000170242|USP47 ENSG00000171109|MFN1 ENSG00000171566|PLRG

AAAGCTT ENSG0000023902|PLEKHO1 ENSG00000026036|TNFRSF6B ENSG00000065057|NTHL1 ENSG00000066382|MPPED2 ENSG00000073008|PVR ENSG00000075290|WNT8B ENSG00000092068|SLC7A8 ENSG00000104419|NDRG1 ENSG00000108849|PPY ENSG00000119333|WDR34 ENSG00000128191|DGCGR8 ENSG00000132205|EMILIN2 ENSG00000134905|CAR52 ENSG00000141034|C17orf39 ENSG00000149305|HTR3B ENSG00000152291|TGNL2 ENSG00000159352|PSMD4 ENSG00000164621|DAMS\_HUMAN ENSG00000165699|TSC1 ENSG00000166526|ZNF3 ENSG00000167740|CYB5D2 ENSG00000169020|ATP5I ENSG00000172155|LCE1D ENSG00000172568|NP\_001001343.1 ENSG00000182853|VMO1 ENSG00000183018|SPNS2 ENSG00000185567|AHNAK2 ENSG00000185963|BICD2 ENSG00000186226|LCE1E ENSG00000187681|ORM1 ENSG00000189171|S100A13 ENSG00000198131|ZNF544 ENSG00000198901|PRC1 ENSG00000204154|ORM2 ENSG00000050130|C14orf100 ENSG00000065154|OAT ENSG00000065665|SEC61A2 ENSG00000069849|ATP1B3 ENSG00000077585|GPR137B ENSG00000080503|SMARCA2 ENSG00000100557|C14orf105 ENSG00000115310|RTN4 ENSG00000117525|F13 ENSG00000117592|PRDX6 ENSG00000120210|INSL6 ENSG00000122644|ARL4A ENSG00000131068|DEFB118 ENSG00000131737|KRT34 ENSG00000132825|PPP1R3D ENSG00000139133|ALG10 ENSG00000144445|NP\_689732.2 ENSG00000145908|ZNF300 ENSG00000150593|PDCD4 ENSG00000153832|FBXO36 ENSG00000157429|ZNF19 ENSG00000162595|DIRAS3 ENSG00000164386|NP\_997378.2 ENSG00000164548|TRA2A\_HUMAN ENSG00000168310|IRF2 ENSG00000171862|PTENP1 ENSG00000173145|NOC3L ENSG00000176834|NP\_061959.2 ENSG00000180332|KCTD4 ENSG00000183508|FAM46C ENSG00000196110|ZNF699 AAAGGAT ENSG00000000461|NPAL3 ENSG000000006638|TBXA2R ENSG00000072501|SMC1A ENSG00000089091|C20orf12 ENSG00000103061|SLC7A6OS ENSG00000119681|LTBP2 ENSG00000120087|HOXB7 ENSG00000125409|TEKT3 ENSG00000125449|ARMC7 ENSG00000130598|TNNT2 ENSG00000141316|SPACA3 ENSG00000143614|GATAD2B ENSG00000148468|C10orf38 ENSG00000149483|TMEM138 ENSG00000149646|C20orf152 ENSG00000150477|KIAA1328 ENSG00000159723|AGRP ENSG00000160584|QSK\_HUMAN ENSG00000163531|NFASC ENSG00000170876|UTF1 ENSG00000175564|UCP3 ENSG00000176595|KBTBD11 ENSG00000179452|Q8TDK1\_HUMAN ENSG00000181029|TRAPP5C ENSG00000182631|RXFP3 ENSG00000186318|BACE1 ENSG00000187516|CXorf27 ENSG00000205159|Q6ZVC9\_HUMAN ENSG00000205485|Q6DCA4\_HUMAN ENSG00000016602|CLCA4 ENSG00000050030|KIAA2022 ENSG00000081189|MEF2C ENSG00000090686|USP48 ENSG00000104312|RIPK2 ENSG00000108733|PEX12 ENSG00000109046|WSB1 ENSG00000112406|HECA ENSG00000118513|MYB ENSG00000120211|INSL4 ENSG00000120215|MLANA ENSG00000121057|AKAP1 ENSG00000121578|B4GALT4 ENSG00000125823|CSTL1 ENSG00000131795|RBM8A ENSG00000133997|MED6 ENSG00000137393|IBRDC2 ENSG00000143507|DUSP10 ENSG00000146038|DCDC2 ENSG00000155324|GRAMD3 ENSG00000156026|CCDC109A ENSG00000156171|TMEM77 ENSG00000158185|ANKRD36 ENSG00000166250|NP\_079045.1 ENSG00000169330|K1024\_HUMAN ENSG00000171478|SPACA5B ENSG00000171681|ATF7IP ENSG00000171943|SRGAP2P1 ENSG00000174796|THAP6 ENSG00000179873|NLRP11 ENSG00000183423|NP\_940908.1 ENSG00000185551|NRF2F2 ENSG00000187267|NP\_001017417.1 ENSG00000188725|NP\_001041714.1 ENSG00000196912|AN36B\_HUMAN ENSG00000197345|MRPL21 ENSG00000197958|RPL12 ENSG00000198121|EDG2 ENSG00000198203|SULT1C2 ENSG00000203946|NP\_001017438.1 ENSG00000204469|BAT2 AAAGGGC ENSG00000099899|HTF9C\_HUMAN ENSG00000100376|FAM118A ENSG00000101890|GUCY2F ENSG00000108788|MLX ENSG00000112254|H3S22 ENSG00000130723|KIAA0515 ENSG00000134686|PHC2 ENSG00000135097|MSI1 ENSG00000137880|GCHFR ENSG00000142224|IL19 ENSG00000158796|DEDD ENSG00000159176|CSR1P ENSG00000160408|ST6GALNAC6 ENSG00000165795|NDRG2 ENSG00000171711|DEFB4 ENSG00000174370|C11orf45 ENSG00000177257|BD02\_HUMAN ENSG00000180035|ZNF553 ENSG00000184557|SOCS3 ENSG00000185294|NP\_787078.1 ENSG00000186326|RGS9BP ENSG00000203662|OR2M1P ENSG00000204673|AKT1S1 ENSG00000205531|NAP1L4 ENSG00000206069|NP\_001001663.1 ENSG00000067334|DNMT1P2 ENSG00000079387|SEN1 ENSG00000084093|REST ENSG00000103152|MPG ENSG00000103540|CE110\_HUMAN ENSG00000117036|ETV3 ENSG00000121964|GTD1 ENSG00000129675|ARHGFE6 ENSG00000133019|CHRM3 ENSG00000139684|ESD ENSG00000141371|C17orf64 ENSG00000141655|TNFRSF11A ENSG00000152229|PSTP1P2 ENSG00000152931|PART1\_HUMAN ENSG00000154122|ANKH ENSG00000154511|FAM69A ENSG00000156052|GNAQ ENSG00000163412|EIF4E3 ENSG00000163947|ARHGFE3 ENSG00000166527|CLEC4D ENSG00000167077|NP\_689726.3 ENSG00000170522|ELOVL6 ENSG00000181264|TMEM136 ENSG00000186665|C17orf58 ENSG00000186684|NP\_001001665.2 ENSG00000187742|SECSBP2 AAAGGGT ENSG00000000347|ICA1 ENSG000000082641|NFE2L1 ENSG00000086232|EIF2AK1 ENSG00000092607|TBX15 ENSG00000112149|CD83 ENSG00000113555|PCD3 ENSG00000114349|GNAT1 ENSG00000117481|NSUN4 ENSG00000119772|DNMT3A ENSG00000128594|LRRC4 ENSG00000130950|FAM22F ENSG00000137764|MAP2K5 ENSG00000143126|CELSR2 ENSG00000143450|OAZ3 ENSG00000145494|NDUFS6 ENSG00000148308|GTF3C5 ENSG00000159352|PSMD4 ENSG00000161013|MGAT4B ENSG00000180929|GPR62 ENSG00000185567|AHNAK2 ENSG00000185801|YV007\_HUMAN ENSG00000198471|RTP2 ENSG00000204366|ZBTB12 ENSG00000204439|C6orf47 ENSG00000011523|CEP68 ENSG00000078114|NEBL ENSG00000087448|KLHD5 ENSG00000092203|TOX4 ENSG00000104408|EIF3S6 ENSG00000106648|GALNTL5 ENSG00000112031|MTRF1L ENSG00000118193|KIF14 ENSG00000118518|RNF146 ENSG00000120149|MSX2 ENSG00000128059|HPAT ENSG00000132973|MBNL2 ENSG00000141161|UNC45B ENSG00000141161|MBNL2 ENSG00000151239|TW1 ENSG00000162623|TYW3 ENSG00000170289|CNGB3 ENSG00000183308|C17orf60 ENSG00000183631|Q5JQE8\_HUMAN ENSG00000183833|C3orf15 ENSG00000184005|ST6GALNAC3 ENSG00000186496|ZNF396 ENSG00000188343|FAM92A1 ENSG00000196199|MPP8\_HUMAN ENSG00000198556|ZNF789 AAAGTCC ENSG000000034063|UHRF1 ENSG00000102145|GATA1 ENSG00000105705|SF4 ENSG00000108516|TNFRSF13B ENSG00000118263|KLF7 ENSG00000123171|CCDC70 ENSG00000126243|LRFN3 ENSG00000130518|KIAA1683 ENSG00000131059|C20orf71 ENSG00000134216|CHIA ENSG00000142405|NLRP12 ENSG00000146112|KIAA1949 ENSG00000154222|CC2D1B ENSG00000161270|NPHS1 ENSG00000162267|ITIH3 ENSG00000162456|NP\_872322.1 ENSG00000170262|MRAP ENSG00000172247|C1QTNF4 ENSG00000178919|FOXE1 ENSG00000179562|GCC1 ENSG00000185187|SIGIRR ENSG00000188901|NP\_055226.1 ENSG00000197766|CFD ENSG00000204386|NEU1 ENSG00000205485|Q6DCA4\_HUMAN ENSG00000205742|Q6ZTR4\_HUMAN ENSG00000205980|Q6ZU05\_HUMAN ENSG0000017427|IGF1 ENSG00000066405|CLDN18 ENSG00000070669|ASNS ENSG00000100387|RBX1 ENSG00000108839|ALOX12 ENSG00000111846|GCNT2 ENSG00000112367|KIAA0274 ENSG00000121848|ZNF364 ENSG00000122068|FYTTD1 ENSG00000143457|GOLPH3L ENSG00000145495|MARCH6 ENSG00000151239|TW1 ENSG00000155744|FAM126B ENSG00000164822|DEFA6 ENSG00000166527|CLEC4D ENSG00000166575|TMEM135 ENSG00000174442|ZWILCH ENSG00000179195|ZFP64 ENSG00000180787|TEAD1 ENSG00000188162|OTOG ENSG00000188193|C6orf155 ENSG00000197123|ZNF679 AAAGTCG ENSG000000053438|NNAT ENSG00000070371|CLTCL1 ENSG00000073584|SMARCE1 ENSG00000076108|BAZ2A ENSG00000101187|SLCO4A1 ENSG00000105131|AHB9 ENSG00000116148|CCNL2 ENSG00000117419|PRNP1P ENSG00000125503|PPP1R12C ENSG00000125775|SDCBP2 ENSG00000126067|PSMB2 ENSG00000135245|HIG2\_HUMAN ENSG00000140577|CRT3 ENSG00000142751|ATPBD1B ENSG00000143093|FAM40A ENSG00000149499|EML3 ENSG00000160310|PRMT2 ENSG00000162396|PARS2 ENSG00000165125|TRPV6 ENSG00000167965|NM\_022372.3 ENSG00000168101|NUDT16L1 ENSG00000168785|TSPAN5 ENSG00000170214|ADRA1B ENSG00000173575|CHD2 ENSG00000179528|LXB2 ENSG00000185049|WHSC2 ENSG00000186090|HTR3D ENSG00000204463|BAT3 ENSG00000050748|MAPK9 ENSG00000109606|DHX13 ENSG00000110768|GTF2H1 ENSG00000111266|DUSP16 ENSG00000120436|GPR31 ENSG00000137501|SYTL2 ENSG00000137975|CLCA2 ENSG00000138382|METTL5 ENSG00000151413|NUBPL ENSG00000152782|PANK1 ENSG00000154646|PRSS7 ENSG00000164683|HEY1 ENSG00000168032|ENTPD3 ENSG00000168348|INSM2 ENSG00000170681|NP\_001018126.1 ENSG00000174899|Q8N6Q6\_HUMAN ENSG00000178295|NP\_872431.2 ENSG00000185915|KLHL34 ENSG00000189299|FOXR2 ENSG00000204148|C9orf27 ENSG00000204267|TAP2 AAAGTGC ENSG000000006530|AGK ENSG00000102034|ELF4 ENSG00000103197|TSC2 ENSG00000104332|SFRP1 ENSG00000105613|MAST1 ENSG00000112619|PRPH2 ENSG00000125633|CCDC93 ENSG00000128591|FLNC ENSG00000131187|F12 ENSG00000134815|DHX34 ENSG00000135365|PHF21A ENSG00000136950|ARPC5L ENSG00000140403|DNAJA4 ENSG00000140464|PML ENSG00000140950|KIAA1609 ENSG00000145198|Q9BVH8\_HUMAN ENSG00000147570|DNAJC5B ENSG00000147799|K1688\_HUMAN ENSG00000148158|SNX30 ENSG00000162650|ATXN7L2 ENSG00000163526|TUBA4B ENSG00000164077|MON1A ENSG00000166912|MTMR10 ENSG00000168274|HIST1H2AE ENSG00000176136|MC5R ENSG00000178235|SLITRKR1 ENSG00000184916|JAG2 ENSG00000185442|NP\_997329.1 ENSG00000188828|GLRA4 ENSG00000197116|Q9UDD8\_HUMAN ENSG00000204241|Q6ZU08\_HUMAN ENSG00000050030|KIAA2022 ENSG00000188089|NANS ENSG00000102837|OLFML4 ENSG00000129353|SLC44A2 ENSG00000132781|MUTYH ENSG00000133800|XLRD1 ENSG00000135945|REV1 ENSG00000137393|IBRDC2 ENSG00000139597|NP\_438169.2 ENSG00000141579|ZNF750 ENSG00000145425|RPS3A ENSG00000157542|KCNJ6 ENSG00000157554|ERG ENSG00000162992|NEUROD1 ENSG00000163072|NOSTRIN ENSG00000166439|RNF169 ENSG00000168280|KIF5C ENSG00000168685|IL7R ENSG00000169248|CXCL11 ENSG00000171121|KCNMB3 ENSG00000179915|NRX1B\_HUMAN ENSG00000185264|C22orf33 ENSG00000196350|ZNF492 ENSG00000196371|FUT4 ENSG00000197024|ZNF398 ENSG00000197501|Q9H3B5\_HUMAN ENSG00000198203|SULT1C2 ENSG00000205773|LOC652517 AAAGTTG ENSG000000076662|ICAM3 ENSG00000100077|ADRBK2 ENSG00000100330|MTMR3 ENSG00000104365|IKKBK ENSG00000104872|PIH1D ENSG00000104880|ARHGFE18 ENSG00000117016|RIMS3 ENSG000001124374|PAIP2B ENSG00000125652|ALKBH7 ENSG00000131944|C19orf40 ENSG00000137460|NP\_203751.2 ENSG00000140950|KIAA1609 ENSG00000144063|MALL ENSG00000156574|NODAL ENSG00000163815|CLEC3B ENSG00000166317|SYNPO2L ENSG00000169181|GSG1L ENSG00000169926|KLF13 ENSG00000176678|FOXL1 ENSG00000184924|NP\_001013685.1 ENSG00000186788|NP\_001001670.1 ENSG00000189201|COX19 ENSG00000189357|XR\_015253.1 ENSG00000204094|Q6ZU93\_HUMAN ENSG00000204120|TNRP10 ENSG00000205609|Q9BV98\_HUMAN ENSG00000205703|NP\_001010910.1 ENSG00000000460|C1orf112 ENSG00000075089|ACTR6 ENSG00000077458|FAM76B ENSG00000077721|UBE2A ENSG00000100519|PSMC6 ENSG00000103194|USPC15 ENSG00000106799|TGFBRL1 ENSG00000109689|ST1M2 ENSG00000110756|HPS5 ENSG00000112499|SLC22A2 ENSG00000123562|MORF4L2 ENSG00000131725|WDR44 ENSG00000132283|DNHD1 ENSG00000133639|BTG1 ENSG00000133872|TMEM66 ENSG00000143420|ENSA ENSG00000150991|UBTQ\_HUMAN ENSG00000152904|GGPS1 ENSG00000154545|MAGED4 ENSG00000163463|KRTCAP2 ENSG00000164347|GFM2 ENSG00000170677|SOCS6 ENSG00000170854|MINA ENSG00000187243|MAGED4B ENSG00000187790|FANCM ENSG00000197846|HIST1H2BF ENSG00000198830|HMGN2 ENSG00000204147|ASHA2B AAAGTTT ENSG000000011243|AKAP8L ENSG00000068024|HDAC4 ENSG00000072832|CRMP1 ENSG00000076248|UNG ENSG00000076356|PLXNA2 ENSG00000089248|ERP29 ENSG00000091704|CPA1 ENSG00000101161|PRPF6 ENSG00000105193|RPS16 ENSG00000105376|ICAM5 ENSG00000110395|CBL ENSG00000113430|TRX4 ENSG00000125149|C16orf70 ENSG00000127150|C14orf153 ENSG00000131652|THOC6 ENSG00000135451|TROAP ENSG00000142512|SIGLEC10 ENSG00000142528|ZNF473 ENSG00000144355|DLX1 ENSG00000156858|PRR14 ENSG00000159461|AMFR ENSG00000161016|RPL8 ENSG00000168621|GDNF ENSG00000168824|NSG1\_HUMAN ENSG00000169122|FAM110B ENSG00000174705|SH3PX2B ENSG00000174804|FZD4 ENSG00000176980|PRR10 ENSG00000177822|XR\_017723.1 ENSG00000178035|IMPDH2 ENSG00000180849|C15orf37 ENSG00000184787|UBE2G2 ENSG00000188089|PLA2G4E ENSG00000196526|AFAP1 ENSG00000197724|PHF2 ENSG00000204013|Q6XYD6\_HUMAN ENSG00000204410|MSH5 ENSG00000204765|XR\_017851.1 ENSG00000205318|TXNDC4 ENSG00000075643|MOCOS ENSG00000082153|BZW1 ENSG00000085832|EPS15 ENSG00000100209|HSCB ENSG00000111875|ASF1A ENSG00000116194|ANGPTL1 ENSG00000120688|WBP4 ENSG00000122550|KLHL7 ENSG00000125952|MAX ENSG00000129173|E2F8 ENSG00000132423|COQ3 ENSG00000137831|UACA ENSG00000138119|FER1L3 ENSG00000138794|CASP6 ENSG00000139793|MBNL2 ENSG00000144354|CDCA7 ENSG00000148541|FAM13C1 ENSG00000149201|CCDC81 ENSG00000151704|KCNJ1 ENSG00000153107|ANAPC1 ENSG00000153790|C7orf31 ENSG00000153802|TMPRSS11D ENSG00000154001|PPP2R5E ENSG00000154639|CXADR ENSG00000156304|SFRS15 ENSG00000156384|C10orf78 ENSG00000159596|TMEM69 ENSG00000163669|DNHD2 ENSG00000163735|CXCL5 ENSG00000170775|GPR37 ENSG00000177735|NP\_775916.1 ENSG00000189195|BTBD8 ENSG00000196104|SPOCK3 ENSG00000196865|NHLRC2 ENSG00000204923|NP\_001019851.1 AAATAAA ENSG00000076944|STXBP2 ENSG00000101850|GPR143 ENSG00000105552|BCAT2 ENSG00000107175|CREB3 ENSG00000107618|RBP3 ENSG00000108294|PSMB3 ENSG00000112511|PHF1 ENSG00000113739|STC2 ENSG00000121073|SLC35B1 ENSG00000121310|ECHDC2 ENSG00000124587|PEX6 ENSG00000139914|NP\_981947.1 ENSG00000165140|FBP1 ENSG00000166228|PCBD1 ENSG00000167194|Q96LL3\_HUMAN ENSG00000168824|NSG1\_HUMAN ENSG00000169919|GUSB ENSG00000171495|NP\_775760.2 ENSG00000175262|C1orf127 ENSG00000179580|RNF151 ENSG00000179715|FAM113B ENSG00000188373|C10orf99 ENSG00000188931|C1orf192 ENSG00000204197|KIFC1 ENSG00000204581|Q6ZU44\_HUMAN ENSG000000011465|DCN ENSG000000016490|CLCA1 ENSG000000023909|GCLM ENSG000000039600|SOX30 ENSG000000091136|LAMB1 ENSG000000095380|NANS ENSG00000105792|Q8IY89\_HUMAN ENSG00000109390|NDUFC1 ENSG00000113845|C3orf1 ENSG00000114520|SNX4 ENSG00000116747|TROVE2 ENSG00000120328|PCDH12 ENSG00000122691|TWIST1 ENSG00000122912|SLC25A16 ENSG00000126804|ZBTB1 ENSG00000132554|RGS22 ENSG00000135972|MRPS9 ENSG00000138162|TACC2 ENSG00000148090|AUH ENSG00000151131|C12orf45 ENSG00000153982|GDPD1 ENSG00000154548|SRR35\_HUMAN ENSG00000154723|ATP5J ENSG00000157212|PAX1P1 ENSG00000158185|ANKRD36 ENSG00000162994|NP\_689598.1 ENSG00000163629|PTPN13 ENSG00000163714|SR140\_HUMAN ENSG00000163737|PF4 ENSG00000164039|BDH2 ENSG00000164758|THRAP6 ENSG00000165629|ATP5C1 ENSG00000165983|PTER ENSG00000166130|NP\_710154.1 ENSG00000170381|SEMA3E ENSG00000170561|IRX2 ENSG00000171681|ATF7IP ENSG00000174842|GLMN ENSG00000176623|FAM82B ENSG00000179175|C9orf38 ENSG00000180777|ANKRD30B ENSG00000181544|FANCB ENSG00000183644|NP\_997313.1 ENSG00000184661|CDCA2 ENSG00000187889|C1orf168 ENSG00000197299|BLM ENSG00000197817|Q9UHS9\_HUMAN ENSG00000198964|SGMS1 ENSG00000205403|CFI AAATAAG ENSG00000006831|ADIPOR2 ENSG00000054523|KIF1B ENSG00000082014|SMARCD3 ENSG00000099889|ARVCF ENSG00000105251|SHD ENSG00000110446|SLC15A3 ENSG00000125753|VASP ENSG00000130340|SNX9 ENSG00000135365|PHF21A ENSG00000136854|STXBP1 ENSG00000144355|DLX1 ENSG00000144730|LL17RD ENSG00000160293|VAV2 ENSG00000162408|NOL9 ENSG00000163686|ABHD6 ENSG00000165949|IFI27 ENSG00000170876|TMEM43 ENSG00000179240|Q3ZCU0\_HUMAN ENSG00000181918|Q8N9J9\_HUMAN ENSG00000185684|EP400NL ENSG00000188396|NP\_001013654.1 ENSG00000198884|Q6UXP0\_HUMAN ENSG00000204523|HLA-B ENSG00000205231|Q6ZQQ1\_HUMAN ENSG00000205770|Q8N847\_HUMAN ENSG00000072571|HMMR ENSG00000081087|OSTM1 ENSG00000094914|AAAS ENSG00000100380|ST13 ENSG00000105398|SULT2A1 ENSG00000106780|MEGF9 ENSG00000107937|GTPBP4 ENSG00000114200|BCHC ENSG00000114487|MORC1 ENSG00000115290|GRB14 ENSG00000115295|CLTP4 ENSG00000115665|SLC5A7 ENSG00000132199|ENOSF1 ENSG00000137992|DBT ENSG00000138686|BBS7 ENSG00000139168|ZCRB1 ENSG00000140749|IGSF6 ENSG00000145365|NP\_443096.1 ENSG00000158201|ABHD3 ENSG00000158604|TMED4 ENSG00000160218|TMEM1 ENSG00000163964|PIGX ENSG00000170348|TMED10 ENSG00000170540|ARL6IP1 ENSG00000179933|C14orf119 AAATAAT ENSG00000092529|CAPN3 ENSG00000092607|TBX15 ENSG00000102977|ACD ENSG00000112164|GLP1R ENSG00000114786|ACY1 ENSG00000115297|TLX2 ENSG00000116667|C1orf21 ENSG00000130032|PRRG3 ENSG00000131196|NFATC1 ENSG00000134864|Q9BVM4\_HUMAN ENSG00000139433|GLTP ENSG00000139890|REM2 ENSG00000140090|SLC24A4 ENSG00000141034|C17orf39 ENSG00000141744|PNMT ENSG00000160752|FDP5

ENSG00000169084|ZBED1 ENSG00000169436|COL22A1 ENSG00000170613|FAM71B ENSG00000172568|NP\_001001343.1 ENSG00000172936|MYD88 ENSG00000175155|YPEL2 ENSG00000175779|NP\_997327.1 ENSG00000185379|RAD51L3  
ENSG00000186029|QNSZ8\_HUMAN ENSG00000187979|Q6ZPC6\_HUMAN ENSG00000189223|Q7Z3M5\_HUMAN ENSG00000006576|PHTF2 ENSG00000010404|IDS ENSG00000020426|MNAT1 ENSG00000067533|RRP15 ENSG00000078018|MAP2  
ENSG00000086300|SNX10 ENSG00000089048|ESF1 ENSG00000090127|PUS7 ENSG000000101842|VIGI1 ENSG000000104290|FZD3 ENSG000000115271|GCA ENSG00000115590|IL1R2 ENSG00000115665|SLC5A7  
ENSG00000117010|ZNF684 ENSG00000117791|MOSC2 ENSG00000120539|MASTL ENSG00000121005|CRISPLD1 ENSG00000121335|PRB4 ENSG00000121570|DPFA4 ENSG00000124532|MRS2L ENSG00000127720|C12orf26  
ENSG00000128585|MKLN1 ENSG00000129116|PALLD ENSG00000132855|ANGPTL3 ENSG00000133640|LRR1Q1 ENSG00000133742|CA1 ENSG00000134294|SLC38A2 ENSG00000137338|PGBD1 ENSG00000148303|SNORD36A  
ENSG00000148483|FAM23A ENSG00000149761|NUDT22 ENSG00000155011|DKK2 ENSG00000155962|CLIC2 ENSG00000163110|PLDIM5 ENSG00000164327|NP\_689969.2 ENSG00000164794|KCNV1  
ENSG00000168769|KIAA1546 ENSG00000168916|ZNF608 ENSG00000169379|ARL13B ENSG00000169519|METT5D1 ENSG00000172466|ZNF24 ENSG00000174792|C4orf26 ENSG00000176623|FAM82B ENSG00000179097|HTRF1F  
ENSG00000180008|SOCS4 ENSG00000180116|C12orf40 ENSG00000182836|PLCCXD3 ENSG00000184040|FAM23B ENSG00000186908|ZDHHC17 ENSG00000187118|NP\_872329.1 ENSG00000187889|C1orf168 ENSG00000197810|Q9P160\_HUMAN  
ENSG00000197894|ADH5 ENSG00000198015|MRPL42 ENSG00000203910|C1orf146 ENSG00000203963|C1orf141 ENSG00000203965|NP\_115813.1 ENSG00000205707|LYRM5  
AAATACA ENSG00000075151|EIF4G3 ENSG00000079616|KIF22 ENSG00000089737|DDX24 ENSG00000102981|PARD6A ENSG00000103168|TAF1C ENSG00000104998|IL27RA ENSG00000105427|CNFN ENSG00000105705|SF4  
ENSG00000108669|PSCD1 ENSG00000113552|GNPDA1 ENSG00000114656|KIAA1257 ENSG00000117394|SLC2A1 ENSG00000122694|C9orf19 ENSG00000123171|CCDC70 ENSG00000125388|GRK4 ENSG00000133250|ZNF414  
ENSG00000136193|SCRN1 ENSG00000136883|KIF12 ENSG00000140678|ITGAX ENSG00000143502|SUSD4 ENSG00000149294|NCAM1 ENSG00000158525|CPA5 ENSG00000164151|Q6ZT40\_HUMAN ENSG00000164519|Q96MZ3\_HUMAN  
ENSG00000167483|FAM129C ENSG00000183250|C21orf67 ENSG00000183255|PTTG1IP ENSG00000183530|C22orf30 ENSG00000183643|C15orf32 ENSG00000185619|PCGF3 ENSG00000187912|NP\_997273.2 ENSG00000188487|Q1MX18-4  
ENSG00000196407|THEM5 ENSG00000203690|TCP10 ENSG00000204410|MSH5 ENSG00000204511|NM\_00101700.1 ENSG00000204613|TRIM10 ENSG00000204681|GABBR1 ENSG00000205015|Q6ZNV2\_HUMAN ENSG00000205153|YAF2  
ENSG00000050438|SLC4A8 ENSG00000060642|PIGV ENSG00000065923|SLC9A7 ENSG00000075336|C18orf55 ENSG00000085365|SLZP1 ENSG00000102786|INTS6 ENSG00000106524|ANKMY2 ENSG00000111875|ASF1A  
ENSG00000113845|C3orf1 ENSG00000114744|COMM2 ENSG00000115355|KIAA1212 ENSG00000116194|ANGPTL1 ENSG00000117475|BLCF1 ENSG00000123124|WNP1 ENSG00000125124|BBS2 ENSG00000139329|LUM  
ENSG00000143942|CHAC2 ENSG00000145708|CRHBP ENSG00000148688|RFP30 ENSG00000153976|HS3ST3A1 ENSG00000155099|TMEM55A ENSG00000166704|ZNF606 ENSG00000166748|CXCL11 ENSG00000171320|ESCO2  
ENSG00000175110|MRPS22 ENSG00000182150|C9orf102 ENSG00000204406|MBD5 ENSG00000204595|DPRXP4  
AAATACC ENSG00000100228|RAB36 ENSG00000100453|GZMB ENSG00000100897|WDR23 ENSG00000112782|CLIC5 ENSG00000113070|HBEGF ENSG00000124593|C6orf49 ENSG00000126594|DNASE1  
ENSG00000128322|IGLL1 ENSG00000131467|PSME3 ENSG00000132698|RAB25 ENSG00000138085|C2orf28 ENSG00000143198|MGST3 ENSG00000143365|RORC ENSG00000144134|RABL2A ENSG00000144791|LIMD1  
ENSG00000145864|GABRB2 ENSG00000162650|ATXN7L2 ENSG00000169393|ELSPBP1 ENSG00000169894|MUC3A ENSG00000172073|C2orf51 ENSG00000172382|PRSS27 ENSG00000174175|SELP ENSG00000179361|ARID3B  
ENSG00000197582|GXP1 ENSG00000198213|NM\_207501 ENSG00000204103|MAFB ENSG00000204303|Q6ZVW4\_HUMAN ENSG000002042317|SPATA7 ENSG00000067533|RRP15 ENSG00000067715|SYT1 ENSG00000077809|GTF2I  
ENSG00000096696|DSP ENSG00000104435|TMN2 ENSG00000104756|KCTD9 ENSG00000104804|TULP2 ENSG00000120129|DUSP1 ENSG00000132541|HRSP12 ENSG00000134323|MYCN ENSG00000134874|DZ1P1  
ENSG00000135413|LACRT ENSG00000138071|ACTR2 ENSG00000138315|OIT3 ENSG00000148572|NRBF2 ENSG00000157510|AFAP1L1 ENSG00000163584|RPL22L1 ENSG00000172260|NEGR1 ENSG00000179144|GIMAP7  
ENSG00000180787|ZFP3 ENSG00000181819|Q5JSM7\_HUMAN ENSG00000185551|NR2F2 ENSG00000188921|PTPLAD2  
AAATAGA ENSG00000005100|DHX33 ENSG00000006114|AP1GBP1 ENSG00000011677|GABRA3 ENSG00000013275|PSMC4 ENSG00000044446|PHKA2 ENSG00000085063|CD59 ENSG00000101144|BMP7 ENSG00000104889|RNASEH2A  
ENSG00000105723|GSK3A ENSG00000112715|VEGFA ENSG00000113889|KNG1 ENSG00000116032|GRIN3B ENSG00000118257|NRP2 ENSG00000118257|CSMD2 ENSG00000121315|MORGL\_HUMAN ENSG00000131233|GJA10  
ENSG00000133424|LARGE ENSG00000146005|PSD2 ENSG00000152192|POU4F1 ENSG00000158987|RAPGEF6 ENSG00000162191|SAKS1\_HUMAN ENSG00000162736|NCSTN ENSG00000168610|STAT3 ENSG00000178028|DMAP1  
ENSG00000183488|AMAC1L3 ENSG00000196132|MYT1\_HUMAN ENSG00000198213|NM\_207501 ENSG00000014123|KIAA0776 ENSG00000039139|DNAH5 ENSG00000071991|CDH19 ENSG00000077147|TM9SF3  
ENSG00000085832|EPS15 ENSG00000090382|LYZ ENSG00000095564|BTAF1 ENSG00000101888|NXT2 ENSG00000104133|NP\_079413.3 ENSG00000109861|CTSC ENSG00000113595|TRIM23 ENSG00000117868|FAM62B  
ENSG00000119396|RAB14 ENSG00000137269|LRRC1 ENSG00000140043|ZADH1 ENSG00000150938|CRIM1 ENSG00000152022|LIX1L ENSG00000154736|ADAMTS5 ENSG00000155970|EFHA2 ENSG00000156162|DPY19L4  
ENSG00000164823|OSGIN2 ENSG00000165533|TTC8 ENSG00000166734|CASC4 ENSG00000169429|IL8 ENSG00000174371|EXO1 ENSG00000176009|ASCL3 ENSG00000180113|TDRD6 ENSG00000184647|NP\_940866.2  
ENSG00000196352|CD55 ENSG00000204010|IFIT1L  
AAATAGT ENSG00000006831|GNL3P2 ENSG00000055130|CULL1 ENSG00000074054|CLASP1 ENSG00000088038|CNOT3 ENSG00000096088|PGC ENSG00000101144|BMP7 ENSG00000115266|APC2 ENSG00000116273|PHF13  
ENSG00000130119|ADIPOR2 ENSG00000130119|GDL3L ENSG00000132846|ZBED3 ENSG00000135956|TMEM127 ENSG00000143761|ARF1 ENSG00000152669|CCNU ENSG00000157103|SLC6A1 ENSG00000162337|LRP5  
ENSG00000164742|ADCY1 ENSG00000182158|CREB3L2 ENSG00000183826|BTBD9 ENSG00000184988|TMEM106A ENSG00000033178|UBELL2 ENSG00000051341|POLQ ENSG00000051825|MPHOSPH9 ENSG00000061987|MON2  
ENSG00000079215|SLC1A3 ENSG00000096872|ITFT74 ENSG00000102893|PHKB ENSG00000106688|SLC1A1 ENSG00000108932|SLC16A6 ENSG00000112530|PACRG ENSG00000117724|CENPF ENSG00000121957|GPSM2  
ENSG00000125351|UPF3B ENSG00000125703|ATG4C ENSG00000132199|ENOSF1 ENSG00000133863|TEX15 ENSG00000140153|WDR20 ENSG00000143507|DUSP10 ENSG00000145425|RPS3A ENSG00000145777|NP\_149024.1  
ENSG00000151304|SRFBF1 ENSG00000151572|TMEM16D ENSG00000152253|SPC25 ENSG00000156802|ATAD2 ENSG00000157107|FCHO2 ENSG00000163297|ANTXR2 ENSG00000163577|EIF5A2 ENSG00000164291|ARSK  
ENSG00000164463|NP\_705835.1 ENSG00000165443|PHYHIP1 ENSG00000167283|ATP5L ENSG00000170854|MINA ENSG00000174343|CHRNA9 ENSG00000180458|Q8N3U1\_HUMAN ENSG00000182498|RPS18 ENSG00000189292|NP\_001002919.1  
ENSG00000198301|SDAD1 ENSG00000203963|C1orf141 ENSG00000204189|Q587I5\_HUMAN ENSG00000204406|MBD5  
AAATATG ENSG00000033100|CHGUT\_HUMAN ENSG00000100422|CERK1 ENSG00000103091|WDR59 ENSG00000103510|MYST1 ENSG00000112062|MAPK14 ENSG00000115204|MPV17 ENSG00000119227|PIGZ ENSG00000121904|CSMD2  
ENSG00000125820|NXX2-2 ENSG00000132434|LANCL2 ENSG00000132854|ANR38\_HUMAN ENSG00000136816|TOR1B ENSG00000136816|TOR1B ENSG00000160791|CCR5 ENSG00000162337|LRP5 ENSG00000162426|SLC45A1  
ENSG00000165714|LOH12CR1 ENSG00000167434|CA4 ENSG00000169184|NM\_002430.2 ENSG00000169548|SUHW1 ENSG00000188385|C10orf39 ENSG00000188589|RBM33 ENSG00000196432|Q9H5F0\_HUMAN ENSG00000196502|SULT1A1  
ENSG00000197616|MYH6 ENSG00000204304|PBX2 ENSG00000205670|C21orf51 ENSG00000205770|Q8N847\_HUMAN ENSG000000080572|CXorf41 ENSG00000095464|PDE6C ENSG00000100554|ATP6V1D ENSG00000105825|TFPI2  
ENSG00000113638|TTC33 ENSG00000118113|MMP8 ENSG00000120251|GRIA2 ENSG00000120685|C13orf23 ENSG00000131437|KIF3A ENSG00000134765|DSC1 ENSG00000137821|LRRRC4 ENSG00000137941|TTLL7  
ENSG00000149507|PLACL1 ENSG00000153208|MERTK ENSG00000154582|TCEB1 ENSG00000163386|KIAA1245 ENSG00000165244|ZNF367 ENSG00000166477|LEO1 ENSG00000170270|C14orf142 ENSG00000171201|SMR3B  
ENSG00000171202|TMEM126A ENSG00000178127|NDUFV2 ENSG00000178457|C21orf94 ENSG00000185477|GPRIN3 ENSG00000188467|SLC24A5 ENSG00000196885|Q9HAZ8\_HUMAN ENSG00000198087|CD2AP ENSG00000198161|PPIAL4  
ENSG00000198360|NP\_839944.1 ENSG00000198936|NP\_839944.1  
AAATATT ENSG00000004764|WWC3 ENSG00000066136|NFYC ENSG00000066838|INFP5A ENSG00000105617|LENG1 ENSG00000108788|MLX ENSG00000110328|KALNTL4 ENSG00000111012|CYP27B1 ENSG00000112679|DUSP22  
ENSG00000112941|POLS ENSG00000116983|HPCAL4 ENSG00000126259|KIRREL2 ENSG00000128510|CPA4 ENSG00000130032|PRRG3 ENSG00000131149|KIAA0182 ENSG00000136811|ODF2 ENSG00000139178|C1RL  
ENSG00000145626|UGT3A1 ENSG00000160712|IL6R ENSG00000162772|ATF3 ENSG00000164778|EN2 ENSG00000166167|BTRC ENSG00000170515|PA2G4 ENSG00000173585|CCR9 ENSG00000174989|FBXW8  
ENSG00000176595|KBTBD11 ENSG00000177468|OLIG3 ENSG00000178796|Q8N9Z1\_HUMAN ENSG00000179165|PXT1 ENSG00000204103|MAFB ENSG00000204394|VARS ENSG00000205033|Q96DJ9\_HUMAN  
ENSG00000023287|RB1CC1 ENSG00000066813|NP\_001010845.1 ENSG00000066836|ACSL4 ENSG00000083097|DOPEY1 ENSG00000085365|SCAMP1 ENSG00000089006|SNX5 ENSG00000101574|METTL4  
ENSG00000101624|CEP76 ENSG00000106809|OGN ENSG00000109471|IL2 ENSG00000111358|GTF2H3 ENSG00000111863|C6orf105 ENSG00000112029|FBXO5 ENSG00000112701|SENP6 ENSG00000115808|STRN  
ENSG00000117906|RCN2 ENSG00000118492|C6orf103 ENSG00000121022|COPF5 ENSG00000121451|TBX22 ENSG00000122958|VPS26A ENSG00000130224|LRCH2 ENSG00000135218|CD36  
ENSG00000139973|SYT16 ENSG00000145332|KLHL8 ENSG00000145365|NP\_443096.1 ENSG00000147082|CCNB3 ENSG00000151748|SAV1 ENSG00000154727|GABPA ENSG00000154760|SLFN13 ENSG00000155380|SLC16A1  
ENSG00000157214|STEAP2 ENSG00000159256|MORC3 ENSG00000165443|PHYHIP1 ENSG00000165525|SDCCAG1 ENSG00000165630|PRPF18 ENSG00000167306|MYO5B ENSG00000167910|CYP7A1 ENSG00000168497|SDPR  
ENSG00000168811|IL12A ENSG00000169313|P2RY12 ENSG00000169570|DTHWD2 ENSG00000172209|GPR22 ENSG00000174004|LRRRC33 ENSG00000176635|HORMAD2 ENSG00000179119|SPTY2D1 ENSG00000180828|BHLHB5  
ENSG00000181458|TMEM45A ENSG00000185920|PTCH1 ENSG00000189127|NP\_001004441.1 ENSG00000196705|ZNF431 ENSG00000197776|KLHDC1 ENSG00000198099|ADH4 ENSG00000198157|NSBP1 ENSG00000198162|MAN1A2  
ENSG00000204217|BMPR2  
AAATACG ENSG000000067365|C16orf68 ENSG00000088305|DNMT3B ENSG00000100767|PAPLN ENSG00000118894|FAM86A ENSG00000119682|KIAA0317 ENSG00000119772|DNMT3A ENSG00000120457|KCNJ5 ENSG00000120915|EPHX2  
ENSG00000124212|PTGIS ENSG00000124766|SOX4 ENSG00000130147|SH3BP4 ENSG00000133460|SLC2A11 ENSG00000134216|CHTA ENSG00000134864|Q9BVM4\_HUMAN ENSG00000135622|SEMA4F ENSG00000136828|RALGPS1  
ENSG00000145002|FAM86B1 ENSG00000146453|PNLDC1 ENSG00000154468|CHDC3 ENSG00000158483|FAM86C ENSG00000160172|Q8TW37\_HUMAN ENSG00000163612|XR\_017899.1 ENSG00000171084|LOC645332 ENSG00000181852|RNF41  
ENSG00000182053|XR\_016180.1 ENSG00000185294|NP\_787078.1 ENSG00000186523|NR\_003494.1 ENSG00000197680|INE1 ENSG00000198624|CCDC69 ENSG00000203931|LOC729078 ENSG00000206457|ADAT1 ENSG00000102021|LUZP4  
ENSG00000102760|C13orf15 ENSG00000111911|HINT3 ENSG00000112365|ZBTB24 ENSG00000113805|CNTN3 ENSG00000115828|QPCT ENSG00000119508|NR4A3 ENSG00000135766|EGLN1 ENSG00000151715|TMEM45B  
ENSG00000152244|G6PC2 ENSG00000153132|CLGN ENSG00000153310|FAM49B ENSG00000155319|NP\_001004299.1 ENSG00000158417|EIF5B ENSG00000164125|C4orf18 ENSG00000168807|SNTB2 ENSG00000170502|NUDT9  
ENSG00000174749|C4orf32 ENSG00000178665|ZNF713 ENSG00000186314|PRELID2 ENSG00000198586|TLK1 ENSG00000198898|CAPZA2 ENSG00000203808|Q5T552\_HUMAN ENSG00000203932|LOC728660  
AAATCCC ENSG00000008056|SYN1 ENSG000000087250|MT3 ENSG00000110195|FOLR1 ENSG00000110628|SLC22A18 ENSG00000112079|STK38 ENSG00000121152|NCAPH ENSG00000128011|LRFN1 ENSG00000131113|PSG1  
ENSG00000134531|EMP1 ENSG00000143842|SOX13 ENSG00000162227|TAF6L ENSG00000164266|SPINK1 ENSG00000166136|NDUFB8 ENSG00000166743|ACSM1 ENSG00000178235|SLITRK1 ENSG00000186577|C6orf1  
ENSG00000189001|SBSN ENSG00000198082|H2AFB1 ENSG00000205039|Q6ZQS5\_HUMAN ENSG00000017427|IGF1 ENSG000000077514|POLD3 ENSG00000115183|TANC1 ENSG00000116874|WARS2 ENSG00000129521|EGLN3  
ENSG00000138613|AFB1 ENSG00000139163|ETNK1 ENSG00000147883|CDKN2B ENSG00000152936|IFLTD1 ENSG00000159596|TMEM69 ENSG00000164171|ITGA2 ENSG00000168386|FILLPL1 ENSG00000169679|BUB1  
ENSG00000170289|CNGB3 ENSG00000170748|HNRGT\_HUMAN ENSG00000174038|C9orf131 ENSG00000179021|C3orf38 ENSG00000181092|ADIPOQ ENSG00000186834|HEXIM1 ENSG00000196562|SULF2 ENSG00000197969|VPS13A  
ENSG00000198382|UVRAG ENSG00000198478|SH3BGR1L2  
AAATCTT ENSG000000057704|TMCC3 ENSG00000068650|ATP11A ENSG00000092607|TBX15 ENSG00000102050|PRAF2 ENSG00000105642|KCNN1 ENSG00000128510|CPA4 ENSG00000129187|DCTD ENSG00000134463|ECHDC3  
ENSG00000137707|BTG4 ENSG00000141639|MAPK4 ENSG00000141699|NP\_835227.1 ENSG00000142583|SLC2A5 ENSG00000145990|GFOD1 ENSG00000147394|ZNF185 ENSG00000149243|NP\_001034637.1 ENSG00000157330|C1orf158  
ENSG00000160789|LMNA ENSG00000162676|GFI1 ENSG00000165406|MARCH8 ENSG00000171649|ZIK1 ENSG00000172155|LCE1D ENSG00000175182|FAM131A ENSG00000178235|SLITRK1 ENSG00000178919|FOXE1  
ENSG00000180861|C12orf36 ENSG00000185860|C1orf110 ENSG00000186788|NP\_001001670.1 ENSG00000188822|CNR2 ENSG00000189357|XR\_015253.1 ENSG00000204526|HCG27 ENSG00000206205|VIM ENSG00000049618|ARID1B  
ENSG00000066455|GOLGA5 ENSG00000074935|TUBE1 ENSG00000097096|SYDE2 ENSG00000100380|ST13 ENSG00000100941|PNN ENSG00000102391|RPL36A ENSG00000102580|DNAJC3 ENSG00000106829|TLE4  
ENSG00000111247|RAD51AP1 ENSG00000111339|ART4 ENSG00000113494|RPLR2 ENSG00000113790|EHHADH ENSG00000119471|HSD1L2 ENSG00000123975|CKS2 ENSG00000124253|PCK1  
ENSG00000125037|TMEM111 ENSG00000127483|HP1BP3 ENSG00000127507|EMR2 ENSG00000131808|FSHB ENSG00000134109|EDEM1 ENSG00000135355|NP\_115991.1 ENSG00000138592|USP8 ENSG00000143355|LHX9  
ENSG00000144401|FAM119A ENSG00000144668|ITGA9 ENSG00000145216|F1P1L1 ENSG00000145309|C4orf35 ENSG00000153976|HS3ST3A1 ENSG00000163626|COX18 ENSG00000164211|STARD4 ENSG00000165338|HECTD2  
ENSG00000165862|PNLIPRP2 ENSG00000171311|EXOS1 ENSG00000171659|GPR34 ENSG00000174013|FBXO45 ENSG00000186615|Q6ZSY8\_HUMAN ENSG00000186767|NP\_001012986.1 ENSG00000197566|ZNF624  
ENSG00000197791|Q6ZUR4\_HUMAN ENSG000000198780|Q9H989\_HUMAN ENSG00000198818|SFT2D1 ENSG00000204171|Q6STG2\_HUMAN  
AAATGAA ENSG00000010319|SEMA3G ENSG00000054118|THRAP3 ENSG00000085063|CD59 ENSG00000092850|TEKT2 ENSG00000100351|GRAP2 ENSG00000106070|GRB10 ENSG00000113578|FGF1 ENSG00000116205|C1orf83  
ENSG00000116983|HPCAL4 ENSG00000119333|WDR34 ENSG00000119688|ABCD4 ENSG00000123201|GUCY1B2 ENSG00000124160|NCOA5 ENSG00000128262|Q9NTU6\_HUMAN ENSG00000128645|HOXD1 ENSG00000131242|RAB11FIP4  
ENSG00000132130|LHX1 ENSG00000132164|SLC6A11 ENSG00000140598|EFTUD1 ENSG00000140950|KIAA1609 ENSG00000147099|HDAC8 ENSG00000147224|PRPS1 ENSG00000153563|CD8A ENSG00000160949|NFKB1L2  
ENSG00000161103|Q5BKY6\_HUMAN ENSG00000176762|Q8N1N1\_HUMAN ENSG00000177468|OLIG3 ENSG00000177504|VCX2 ENSG00000178206|C2orf14 ENSG00000182378|PLCXD1 ENSG00000184012|TMPRSS2 ENSG00000185811|IKZF1  
ENSG00000186474|KLK12 ENSG00000204301|NOTCH4 ENSG00000204309|Q6ZSQ3\_HUMAN ENSG00000204343|C9orf118 ENSG00000001629|ANKIB1 ENSG000000062194|GPPB1 ENSG00000072319|ALG13 ENSG00000093000|NUP50  
ENSG00000102699|PARP4 ENSG00000104549|SQLE ENSG00000109083|IFT20

ENSG00000135045|C9orf40 ENSG00000138138|ATAD1 ENSG00000139323|WDR51B ENSG00000143278|F13B ENSG00000144228|SPOPL\_HUMAN ENSG00000145703|IQGAP2 ENSG00000149089|APIP ENSG00000149313|AASDHPPT  
ENSG00000151414|NEK7 ENSG00000151792|CTSO ENSG00000152266|PTH ENSG00000153207|AHCFT1 ENSG00000154429|C1orf96 ENSG00000156284|CLDN8 ENSG00000163535|SGOL2 ENSG00000164308|NP\_071745.1  
ENSG00000164484|KIAA1913 ENSG00000165525|SDCCAG1 ENSG00000165832|TRUB1 ENSG00000169756|LIMS1 ENSG00000171051|FPR1 ENSG00000171204|TMEM126B ENSG00000174840|NP\_808881.2 ENSG00000182916|TCEAL7  
ENSG00000185233|MC2R ENSG00000185295|USP51 ENSG00000187010|RHD ENSG00000188725|NP\_001041714.1 ENSG00000197522|SUZ12P  
AAATGAG ENSG00000007341|ST7L ENSG00000048471|NP\_001073999.1 ENSG00000080815|PSEN1 ENSG000000100335|SMCR7L ENSG00000112164|GLP1R ENSG00000113048|MRPS27 ENSG00000115317|HTRA2 ENSG00000119547|ONECUT2  
ENSG00000123243|ITIH5 ENSG00000127946|HIP1 ENSG00000129244|ATP1B2 ENSG00000139197|PEX5 ENSG00000143196|DPT ENSG00000143318|CASQ1 ENSG00000144843|ADPRH ENSG00000148719|DNAJB12  
ENSG00000150086|GRIN2B ENSG00000159650|UROC1 ENSG00000160844|NP\_849153.3 ENSG00000166963|MAP1A ENSG00000167705|RILP ENSG00000183196|CHST6 ENSG00000184209|NP\_008951.1 ENSG00000197435|HIST3H2BB  
ENSG00000197565|COL4A6 ENSG00000197858|GPAA1 ENSG00000203804|C1orf138 ENSG00000204423|C9orf33 ENSG00000205562|Q86U27\_HUMAN ENSG00000049167|ERCC8 ENSG00000066294|CD84 ENSG00000071794|HLTF  
ENSG00000093183|SEC22C ENSG00000106399|RPA3 ENSG00000108187|PBLD ENSG00000109919|MTCH2 ENSG00000116754|SFRS11 ENSG00000117500|TMED5 ENSG00000119509|INVS ENSG00000124429|POF1B  
ENSG00000127249|ATP13A4 ENSG00000134538|SLCO1B1 ENSG00000135535|CD164 ENSG00000136160|EDNRB ENSG00000137959|IFT44L ENSG00000139180|NDUFA9 ENSG00000145604|SKP2 ENSG00000157343|C6orf81  
ENSG00000163393|SLC22A15 ENSG00000163608|C3orf17 ENSG00000165868|HSPA12A ENSG00000169435|RASSF6 ENSG00000171408|PDE7B ENSG00000173598|NUDT4 ENSG00000175449|RFESD ENSG00000176971|NP\_976249.1  
ENSG00000178562|CD28 ENSG00000181023|OR56B1 ENSG00000183665|TRMT12 ENSG00000186432|KPNA4 ENSG00000187824|NP\_001004313.1 ENSG00000198040|ZNF84 ENSG00000198584|ZNF506 ENSG00000203668|CHML  
ENSG00000204683|C10orf113  
AAATGCC ENSG00000106086|PLEKHA8 ENSG00000109089|CDR2L ENSG00000113578|FGF1 ENSG00000115211|EIF2B4 ENSG00000119777|NP\_060197.4 ENSG00000130283|GDF1 ENSG00000143001|TMEM61 ENSG00000143140|GJA5  
ENSG00000151348|EXT2 ENSG00000158470|B4GALT5 ENSG00000163357|DCST1 ENSG00000166548|TK2 ENSG00000167525|NP\_689678.1 ENSG00000167977|KCTD5 ENSG00000173404|INSM1 ENSG00000182346|DAOA  
ENSG00000203690|TCP10 ENSG00000205181|QOVFZ2\_HUMAN ENSG00000206123|Q5BLP8\_HUMAN ENSG0000005700|IBTK ENSG00000048991|R3HDM1 ENSG00000091128|LAMB4 ENSG00000091428|RAPGEF4 ENSG00000108946|PRKARIA  
ENSG00000134001|EIF2P1 ENSG00000134258|VTCN1 ENSG00000134419|RPS15A ENSG00000137168|PPI1L ENSG00000141447|OSBPL1A ENSG00000150051|MKX ENSG00000156650|MYST4 ENSG00000157429|ZNF19  
ENSG00000162545|CAMK2N1 ENSG00000163684|RPP14 ENSG00000166752|TMEM83 ENSG00000174718|C12orf35 ENSG00000175857|C5orf29 ENSG00000176256|HMBG4 ENSG00000176797|DEFB103B ENSG00000177243|DEFB103A  
ENSG00000177324|CxorF20 ENSG00000179387|ELMOD2 ENSG00000197716|Q9UHV1\_HUMAN ENSG00000198838|RYSR3 ENSG00000204518|AADACL4  
AAATGCC ENSG00000064300|NGFR ENSG00000078319|PMS2L1 ENSG00000083814|ZNF671 ENSG00000092067|CEBPE ENSG00000101193|C2orf11 ENSG00000102879|CORO1A ENSG00000104415|WISP1 ENSG00000105697|HAMP  
ENSG00000108829|LRRC59 ENSG00000111110|PPM1H ENSG00000115884|SDC1 ENSG00000146232|NFKBIE ENSG00000160256|C2orf70 ENSG00000163083|INHBB ENSG00000167080|B4GALNT2 ENSG00000175315|CST6  
ENSG00000179776|CDH5 ENSG00000183196|CHST6 ENSG00000186470|BTN3A2 ENSG00000203708|Q6ZU99\_HUMAN ENSG00000206190|ATP10A ENSG00000042317|SPATA7 ENSG00000072315|TRPC5 ENSG00000095139|ARCN1  
ENSG00000101977|MCF2 ENSG00000102678|FGF9 ENSG00000109339|MAPK10 ENSG00000112081|SFRS3 ENSG00000115271|GCA ENSG00000146282|RARS2 ENSG00000147471|PROSC ENSG00000155621|C9orf85  
ENSG00000162843|WDR64 ENSG00000164746|Q8NEG2\_HUMAN ENSG00000170903|KIAA1826 ENSG00000183291|SEP15\_HUMAN ENSG00000187626|ZKSCAN4 ENSG00000197279|ZNF165  
AAATGGG ENSG000000021300|PLEKHB1 ENSG00000084234|APLP2 ENSG00000092051|AP1G2 ENSG00000099812|C19orf21 ENSG00000100320|RBM9 ENSG00000102287|GABRE ENSG00000103489|XYLT1 ENSG00000123349|PFDN5  
ENSG00000123353|ARMD12 ENSG00000125449|ARMC7 ENSG00000125753|VASP ENSG00000133392|MYH11 ENSG00000136297|MM2D ENSG00000142512|SIGLEC10 ENSG00000144580|RQCD1 ENSG00000157617|C2orf25  
ENSG00000166025|OMTL1 ENSG00000166963|MAP1A ENSG00000169598|DFBF1 ENSG00000175325|PRO1 ENSG00000176979|TRIM60 ENSG00000179428|Q8N6X1\_HUMAN ENSG00000187147|C1orf164 ENSG00000197864|WBSR23  
ENSG00000198668|CALM1 ENSG00000198711|C1orf191 ENSG00000203793|Q6ZR74\_HUMAN ENSG00000065600|C1orf75 ENSG00000078795|PKD2L2 ENSG00000087502|ERGIC2 ENSG00000103194|USP10 ENSG00000120616|EPC1  
ENSG00000122299|ZC3H7A ENSG00000137871|SUHW4 ENSG00000142871|CYR61 ENSG00000143970|ASXL2 ENSG00000157551|KCNJ15 ENSG00000166509|CLEC3A ENSG00000173848|NET1 ENSG00000176009|ASCL3  
ENSG00000181656|GRB8 ENSG00000184344|GDF3 ENSG00000185515|BRCC3 ENSG00000188740|NBP5 ENSG00000196549|MME ENSG00000197388|NET1 ENSG00000176009|ASCL3  
AAATGGT ENSG00000064490|RFKXANK ENSG00000068985|PAGE1 ENSG00000101405|OXT ENSG00000110446|SLC15A3 ENSG00000110801|PSMD9 ENSG00000121289|CCDC123 ENSG00000124444|ZNF576 ENSG00000128045|RASL11B  
ENSG00000131233|GJA10 ENSG00000132604|TERF2 ENSG00000138942|RNF185 ENSG00000142528|ZNF473 ENSG00000158769|F11R ENSG00000164519|Q96MZ3\_HUMAN ENSG00000165699|TSC1 ENSG00000169118|CSNK1G1  
ENSG00000171533|MAP6 ENSG00000174697|LEP ENSG00000181123|Q8N7N0\_HUMAN ENSG00000183059|XR\_017784.1 ENSG00000197037|ZNF498 ENSG00000198632|NP\_777590.1 ENSG00000204103|MAFB ENSG00000204344|STK19  
ENSG00000204539|CDSN ENSG00000071243|ING3 ENSG00000072041|SLC6A15 ENSG00000090054|SPTLC1 ENSG00000108021|C10orf18 ENSG00000108306|FBXL20 ENSG00000110218|PANX1 ENSG00000111913|C6orf32  
ENSG00000112309|B3GAT2 ENSG00000112996|MRPS30 ENSG00000120868|ALFA1 ENSG00000122566|HNRPA2B1 ENSG00000122870|BICCC1 ENSG00000125675|GR1A3 ENSG00000127980|MAX ENSG00000129801|PEX1  
ENSG00000131725|WDR44 ENSG00000145975|C6orf146 ENSG00000151135|C12orf23 ENSG00000161547|SFRS2 ENSG00000164291|ARSK ENSG00000164603|NP\_689769.2 ENSG00000166801|FAM111A ENSG00000171202|TMEM126A  
AAATGTA ENSG00000181392|C19orf46 ENSG00000182944|EWSR1 ENSG00000186222|CNO ENSG00000189277|NP\_997365.2 ENSG00000196930|XR\_015267.1 ENSG00000205246|NP\_001005472.1 ENSG00000206559|ZCWPW2  
ENSG00000202993|HMBG3 ENSG00000047056|WDR37 ENSG00000065621|IXL ENSG00000065621|GSTO2 ENSG00000101004|NLP\_HUMAN ENSG00000102076|OPN1LW ENSG00000112562|SMOC2 ENSG00000116984|MTR  
ENSG00000119280|C1orf198 ENSG00000119487|MAPKAP1 ENSG00000119782|FKBP1B ENSG00000121152|NCAHP ENSG00000123643|SLC36A1 ENSG00000125354|SEPT6 ENSG00000125409|TEKT3 ENSG00000128045|RASL11B  
ENSG00000131504|DIAPH1 ENSG00000140479|PCSK6 ENSG00000142611|PRDM16 ENSG00000147380|OPN1MW ENSG00000155984|TMEM185A ENSG00000163814|CDCP1 ENSG00000164266|SPINK1 ENSG00000164309|CMTA5  
ENSG00000166160|OPN1MW2 ENSG00000168824|NSG1\_HUMAN ENSG00000170682|Q96NU5\_HUMAN ENSG00000174564|IL2ORB ENSG00000177663|ILL17RA ENSG00000180447|GAS1 ENSG00000180992|MRPL14 ENSG00000182013|NP\_060685.2  
ENSG00000182372|C8orf61 ENSG00000186163|Q4G0S1\_HUMAN ENSG00000188076|SCGB1C1 ENSG00000203934|Q6ZUQ1\_HUMAN ENSG00000203945|Q5JPQ1\_HUMAN ENSG00000000419|DPM1 ENSG00000001631|KRIT1 ENSG0000006704|GTF2IRD1  
ENSG0000016490|CALCA1 ENSG00000038295|TLL1 ENSG00000054598|FOXC1 ENSG00000062370|ZNF228 ENSG00000066777|ARFGF1 ENSG00000068305|MEF2A ENSG00000071991|CDH19 ENSG00000081138|CDH7  
ENSG00000091039|OSBP18 ENSG00000102189|EEA1 ENSG00000104205|SGK3 ENSG00000107164|FUBP3 ENSG00000109255|NMU ENSG00000112852|PCDH2 ENSG00000114354|TFG ENSG00000115750|TAF1B  
ENSG00000115840|SLC25A12 ENSG00000116815|CD58 ENSG00000120235|IFNA6 ENSG00000126787|DLG7 ENSG00000134058|CDK7 ENSG00000134698|EIF2C4 ENSG00000135951|TSGA10 ENSG00000137575|SDCBP  
ENSG00000143337|TOR1AIP1 ENSG00000143742|SRP9 ENSG00000152147|GEMIN6 ENSG00000152266|PTH ENSG00000154556|SORBS2 ENSG00000158615|PPP1R15B ENSG00000164691|TAGAP ENSG00000166260|COX11  
ENSG00000166896|XRCC6BP1 ENSG00000168348|INSM2 ENSG00000169087|HSBPAB1 ENSG00000169248|CXCL11 ENSG00000170584|NUDC2 ENSG00000172466|ZNF24 ENSG00000173041|ZNF680 ENSG00000173083|HPSE  
ENSG00000174405|LIG4 ENSG00000174437|ATP2A2 ENSG00000185037|XR\_016629.1 ENSG00000185177|ZNF479 ENSG00000185238|PRMT3 ENSG00000188868|ZNF563 ENSG00000196646|ZNF136 ENSG00000196826|ZNF709  
AAATGTC ENSG00000197601|MLSTD2 ENSG00000197990|XR\_016643.1 ENSG00000198185|ZNF334 ENSG00000198521|ZNF43 ENSG00000205057|CLLUL10S  
ENSG00000008130|NADK ENSG00000036828|CASR ENSG00000099204|ABLIM1 ENSG00000101144|BMP7 ENSG00000103485|QPRT ENSG00000103855|CD276 ENSG00000107551|RASSF4 ENSG00000116584|ARHGEF2  
ENSG00000120889|TNFRSF10B ENSG00000132773|TOE1 ENSG00000135824|RGS8 ENSG00000143566|S100A7 ENSG00000147889|GFOD1 ENSG00000147889|CKN2A ENSG00000168539|CHRM1 ENSG00000171747|LGALS4  
ENSG00000175130|MARCKSL1 ENSG00000179082|C9orf106 ENSG00000186951|PPARA ENSG00000197261|C6orf141 ENSG00000197417|CARXL ENSG00000204957|Q6ZVQ6\_HUMAN ENSG00000205159|Q6ZVC9\_HUMAN ENSG00000068912|C2orf30  
ENSG00000069248|NUP133 ENSG00000089195|TRM6\_HUMAN ENSG00000096746|HNRPH3 ENSG00000109919|MTCH2 ENSG00000112077|RHAG ENSG00000113384|GOLPH3 ENSG00000114487|MORC1  
ENSG00000118454|ANKRD13C ENSG00000118518|RNF146 ENSG00000120327|PCDH14 ENSG00000123739|PLA2G12A ENSG00000125257|ABCC4 ENSG00000130234|ACE2 ENSG00000144812|LIPT1 ENSG00000146039|SLC17A4  
ENSG00000146282|RARS2 ENSG00000147010|SH3KBP1 ENSG00000148450|MSRB2 ENSG00000160336|ZNF761 ENSG00000163827|LRRC2 ENSG00000168301|KCTD6 ENSG00000170634|ACYP2 ENSG00000174437|ATP2A2  
ENSG00000174485|DENND4A ENSG00000175395|ZNF25 ENSG00000185984|NR\_002593.1 ENSG00000188158|NHS ENSG00000189190|ZNF600 ENSG00000198482|ZNF808  
AAATGTT ENSG00000011376|LARS2 ENSG00000058799|YIPF1 ENSG00000103196|CRISPLD2 ENSG00000105011|ASF1B ENSG00000106333|PCOLCE ENSG00000116698|SMG7 ENSG00000118689|FOXO3A ENSG00000122642|FKBP9  
ENSG00000122694|C9orf19 ENSG00000123364|HOXC13 ENSG00000124785|NRN1 ENSG00000129680|MAP7D3 ENSG00000131943|C19orf12 ENSG00000134107|BHLHE23 ENSG00000141034|C17orf39 ENSG00000141098|GFOD2  
ENSG00000147059|SPIN2A ENSG00000148158|SNX30 ENSG00000152137|IFPB8 ENSG00000154227|LASS3 ENSG00000157312|PDF ENSG00000162174|ASRGL1 ENSG00000165507|C10orf10  
ENSG00000169885|CALML6 ENSG00000170498|KISS1 ENSG00000170983|C8orf14 ENSG00000172432|GTPBP2 ENSG00000173093|CCDC63 ENSG00000178409|KIAA1553 ENSG00000180259|PRNT ENSG00000181918|Q8N9J9\_HUMAN  
ENSG00000182646|TMEM29 ENSG00000185112|FAM43A ENSG00000185730|ZNF696 ENSG00000188554|NBR1 ENSG00000198797|FAM5B ENSG00000005812|FBXL3 ENSG00000052126|PLEKHA5 ENSG00000085788|DDHD2  
ENSG00000089199|CHGB ENSG00000104517|EDD1 ENSG00000105971|CANV2 ENSG00000106443|PHF14 ENSG00000108055|SMC3 ENSG00000109189|USP46 ENSG00000110422|HIPK3 ENSG00000115084|SLC35F5  
ENSG00000128694|OSGEPL1 ENSG00000136982|NP\_076999.1 ENSG00000137673|MMP7 ENSG00000143337|TOR1AIP1 ENSG00000143621|ILF2 ENSG00000146592|CREB5 ENSG00000147573|TRIM55 ENSG00000151414|NEK7  
ENSG00000162636|FAM102B ENSG00000163293|NPAL1 ENSG00000164386|NP\_997378.2 ENSG00000165097|AO1 ENSG00000165156|ZHX1 ENSG00000166839|LRFN5 ENSG00000166839|ANKDD1A ENSG00000167380|ZNF226  
ENSG00000169895|SYAP1 ENSG00000170185|USP38 ENSG00000176083|ZNF683 ENSG00000176165|FOXG1B ENSG00000176774|MAGEB18 ENSG00000177602|GSG2 ENSG00000179331|RAB39 ENSG00000180116|C12orf40  
ENSG00000180336|NP\_001028831.1 ENSG00000182944|EWSR1 ENSG00000185869|NP\_001032309.2 ENSG00000187094|CCK ENSG00000188021|UBQLN2 ENSG00000189127|NP\_001004441.1 ENSG00000196290|NTF3L1 ENSG00000197008|ZNF138  
ENSG00000197223|NP\_006324.1 ENSG00000198015|MRPL42 ENSG00000198646|NCOA6 ENSG00000198826|ARHGAP11A ENSG00000198919|DZIP3\_HUMAN  
AAATTA ENSG00000009335|UBE3C ENSG00000062485|CS ENSG00000099204|ABLIM1 ENSG00000100395|L3MBTL2 ENSG00000102924|CBLN1 ENSG00000104490|NCALD ENSG00000108788|MLX ENSG00000112715|VEGFA  
ENSG00000132792|CTNNB1 ENSG00000134243|SORT1 ENSG00000151948|GLT1D1 ENSG00000154917|RAB6B ENSG00000164778|EN2 ENSG00000166578|IQCD ENSG00000167522|ANKRD11 ENSG00000170983|C8orf14  
ENSG00000171711|DEFB4 ENSG00000175003|SLC22A1 ENSG00000175772|Q8N952\_HUMAN ENSG00000177257|BD02\_HUMAN ENSG00000183686|MAGEA5 ENSG00000186470|BTN3A2 ENSG00000189068|VSTM1 ENSG00000197448|GSTK1  
ENSG00000198768|APCD1L ENSG00000204414|CSHL1 ENSG00000004948|CALCR ENSG00000007933|FMO3 ENSG000000013392|RDWD2 ENSG00000033178|UBE1L2 ENSG00000051415|AMY1A ENSG00000053747|LAMA3  
ENSG00000060718|COL11A1 ENSG00000073417|PDE8A ENSG00000086991|NOX4 ENSG00000101624|CEP76 ENSG00000106511|MEOX2 ENSG00000106540|C7orf36 ENSG00000109163|GNRHR ENSG00000110975|SYT10  
ENSG00000112237|CCNC ENSG00000112245|PTP4A1 ENSG00000112874|NUDT12 ENSG00000113790|EHHADH ENSG00000115825|PRKD3 ENSG00000117500|TMED5 ENSG00000118246|FASTKD2 ENSG00000122068|FYT1D1  
ENSG00000122862|SRGN ENSG00000123268|ATP1 ENSG00000133866|BBS7 ENSG00000140043|ZADH1 ENSG00000142065|ZFP14 ENSG00000143631|FLG ENSG00000146757|ZNF92 ENSG00000151806|GUF1  
ENSG00000152684|PELO ENSG00000157214|STEAP2 ENSG00000159086|C21orf66 ENSG00000165997|ARL5B ENSG00000169379|ARL13B ENSG00000174876|AMY1B ENSG00000175513|TSGA10IP ENSG00000175604|Q96M66\_HUMAN  
ENSG00000184530|C6orf58 ENSG00000185056|Q569G3\_HUMAN ENSG00000186879|NM\_178121 ENSG00000188641|DPYD ENSG00000188732|C7orf46 ENSG00000196318|AMY2A ENSG00000197008|ZNF138 ENSG00000197839|AMY2B  
ENSG00000197991|PCDH20 ENSG00000204219|TCEA3  
AAATTAG ENSG00000085063|CD59 ENSG00000089505|CMTM1 ENSG00000140950|KIAA1609 ENSG00000141034|C17orf39 ENSG00000141337|ARSG ENSG00000154025|SLC5A10 ENSG00000154319|C8orf13 ENSG00000157837|PS1A\_HUMAN  
ENSG00000158864|NDUF52 ENSG00000162377|C1orf163 ENSG00000164062|APEH ENSG00000172476|RAB40A ENSG00000173826|KCNH6 ENSG00000175077|RTP1 ENSG00000182968|SOX1 ENSG00000186788|NP\_001001670.1  
ENSG00000189357|XR\_015253.1 ENSG00000203685|C1orf95 ENSG000000005469|CROT ENSG00000047346|KIAA1370 ENSG00000054654|SYNE2 ENSG00000062650|WAPAL ENSG00000064989|CALCRL ENSG00000072657|TRHD  
ENSG00000083223|ZCCHC6 ENSG00000100557|C14orf105 ENSG00000100580|TMED8 ENSG00000101955|SRPX ENSG00000102010|BMX ENSG00000103540|CE110\_HUMAN ENSG00000110344|UBE4A ENSG00000111885|MAN1A1  
ENSG00000116171|SCP2 ENSG00000127083|OMD ENSG00000128845|CCPG1 ENSG00000135316|SYNCRIP ENSG00000136897|MRPL50 ENSG00000139330|KERA ENSG00000139330|KERA ENSG00000144136|SLC20A1 ENSG00000150471|LPHN3  
ENSG00000151366|NDUFC2 ENSG00000152487|NSUN6 ENSG00000154813|DPH3 ENSG00000166415|WDR72 ENSG00000166478|ZNF143 ENSG00000183634|NP\_001011539.1 ENSG00000188519|Q7Z4Q0\_HUMAN  
ENSG00000196233|LCOR ENSG00000197860|SGTB ENSG00000198205|ZXD4 ENSG00000204370|SDHD ENSG00000211446|SEPP1  
AAATTA ENSG00000048342|Q9H8A7\_HUMAN ENSG000000068650|ATP11A ENSG00000073849|STG6ALL1 ENSG000000087088|BAX ENSG00000100266|PACIN2 ENSG00000101493|ZNF516 ENSG00000105738|SIPA1L3  
ENSG00000106789|CORO2A ENSG00000108106|UBE2S ENSG00000111412|C12orf49 ENSG00000114656|KIAA1257 ENSG00000114999|TTL ENSG00000115844|DLX2 ENSG00000116698|SMG7 ENSG00000132749|MTL5  
ENSG00000136827|TOR1A ENSG00000138942|RNF185 ENSG00000143816|WNT9A ENSG00000143940|Q6ZMW3\_HUMAN ENSG00000148826|NKX6-2 ENSG00000150556|NP\_808879.2 ENSG00000153298|C6orf54 ENSG00000157349|DDX19B  
ENSG00000157693|C9orf91 ENSG00000158805|ZNF276 ENSG00000160714|ARHGAP25 ENSG00000169627|BOA2B ENSG00000170779|CDCA4 ENSG00000175077|RTP1 ENSG00000175564|UC



ENSG00000136758|YME1L1 ENSG00000143185|XCL2 ENSG00000145817|YIPF5 ENSG00000148943|LIN7C ENSG00000151131|C12orf45 ENSG00000152484|USP12 ENSG00000154727|GABPA ENSG00000157005|SST  
ENSG00000157214|STEAP2 ENSG00000162813|BPNT1 ENSG00000163328|GPR155 ENSG00000163510|NP\_065994.1 ENSG00000163964|PIGX ENSG00000164244|PRRC1 ENSG00000164761|TNFRSF11B ENSG00000164841|TMEM74  
ENSG00000165476|REEP3 ENSG00000171502|COL24A1 ENSG00000172461|FUT9 ENSG00000176165|FOXG1B ENSG00000184434|LRRC19 ENSG00000185523|NP\_001019772.1 ENSG00000185652|NTF3 ENSG00000185737|NRG3  
ENSG00000186160|CYP4Z1 ENSG00000188313|PLSCR1 ENSG00000196705|ZNF431 ENSG00000196865|NHLRC2  
ENSG00000158404|CAMK2B ENSG00000089250|NOS1 ENSG000000942820|VIL2 ENSG00000104998|IL27RA ENSG00000116819|TFAP2E ENSG00000121060|TRIM25 ENSG00000124208|UBE2V1 ENSG00000136112|UTP14C  
ENSG00000139514|SLC7A1 ENSG00000148411|BTBD14A ENSG00000152478|GPR26 ENSG00000157765|SLC34A2 ENSG00000164742|ADCY1 ENSG00000167749|KLK4 ENSG00000169059|VCX3A ENSG00000173210|ABLIM3  
ENSG00000176383|B3GNT4 ENSG00000177504|VCX2 ENSG00000178381|ZFAND2A ENSG00000182583|VCX ENSG00000182872|RBM10 ENSG00000182950|ODF3L1 ENSG00000183978|CCDC56 ENSG00000184451|CCR10  
ENSG00000185651|UBE2L3 ENSG00000186868|MAPT ENSG00000188167|NP\_001034859.1 ENSG00000196263|ZNF471 ENSG00000204482|LST1 ENSG00000204487|LTB ENSG00000008988|RPS20 ENSG00000065548|ZC3H15  
ENSG00000066422|ZBTB11 ENSG00000080345|RIF1 ENSG00000084093|REST ENSG00000088451|TGDS ENSG00000091986|CCDC80 ENSG00000123213|NLN ENSG00000123219|CENPK ENSG00000123728|RAF2C  
ENSG00000124172|ATP5E ENSG00000124253|PCK1 ENSG00000133110|POSTN ENSG00000134444|KIAA1468 ENSG00000135776|ABCB10 ENSG00000140057|AK7 ENSG00000143401|ANP32E ENSG00000154589|LY96  
ENSG00000169224|C1orf150 ENSG00000169550|MUC15 ENSG00000174840|NP\_808881.2 ENSG00000176988|FMR1NB ENSG00000177675|CD163L1 ENSG00000178053|MLF1 ENSG00000180389|NR\_002162.1 ENSG00000185267|ARMETL1  
ENSG00000188107|EGFL11 ENSG00000204800|Q96HX1\_HUMAN ENSG00000204812|Q96HX1\_HUMAN ENSG00000205056|CLU1  
ENSG00000072954|TMEM38A ENSG00000108671|PSMD11 ENSG00000127080|IPPK ENSG00000130332|LSM7 ENSG00000138085|C2orf28 ENSG00000148200|NR6A1 ENSG00000151779|NP\_056993.2 ENSG00000157087|ATP2B2  
ENSG00000158479|HMBB1 ENSG00000165271|NOL6 ENSG00000169169|CPT1C ENSG00000170322|NFRKB ENSG00000170925|TEX13B ENSG00000182352|C17orf77 ENSG00000198216|CACNA1E ENSG00000198614|C4orf12  
ENSG00000204248|COL11A2 ENSG00000038210|PI4K2B ENSG00000047410|TPR ENSG00000054598|FOXO1 ENSG00000071082|RPL31 ENSG00000088298|EDEM2 ENSG00000105372|RPS19 ENSG00000111906|HDDC2  
ENSG00000112078|KCTD20 ENSG00000123124|WWP1 ENSG00000124217|MOCB3 ENSG00000124875|CXCL6 ENSG00000125257|ABCC4 ENSG00000137831|UACA ENSG00000143224|PPOX ENSG00000146151|HMGCLL1  
ENSG00000152465|NMT2 ENSG00000152601|MBNL1 ENSG00000154710|KCTD7 ENSG00000154813|DPH3 ENSG00000155096|AZIN1 ENSG00000155319|NP\_001004299.1 ENSG00000158691|ZSCAN12 ENSG00000162702|ZNF281  
ENSG00000164221|CCDC112 ENSG00000164754|RAD21 ENSG00000165655|ZNF503 ENSG00000171431|KRT20 ENSG00000172086|KRCC1 ENSG00000178460|C8orf45 ENSG00000179222|MAGED1 ENSG00000180458|Q8N3U1\_HUMAN  
ENSG00000184860|NP\_660151.2 ENSG00000188243|COMMD6 ENSG00000189241|TSPYL1 ENSG00000189290|XR\_018254.1  
ENSG0000015676|NUDCD3 ENSG00000044446|PHKA2 ENSG00000102572|STK24 ENSG00000105612|DNASE2 ENSG00000106070|GRB10 ENSG00000106631|MYL7 ENSG00000107954|NEURL ENSG00000111087|GLI1  
ENSG00000115275|GCS1\_HUMAN ENSG00000116809|ZBTB17 ENSG00000129473|BCL2L2 ENSG00000129925|TMEM8 ENSG00000130508|PXDN ENSG00000130635|COL5A1 ENSG00000134668|SPOCD1 ENSG00000136930|PSMB7  
ENSG00000144504|ANKMY1 ENSG00000144681|STAC ENSG00000150401|DCUN1D2 ENSG00000150455|TIRAP ENSG00000158866|NDUF52 ENSG00000159217|IGFBP1 ENSG00000160182|TFF1  
ENSG00000164885|CDK5 ENSG00000166086|JAM3 ENSG00000166900|STX3 ENSG00000169217|CD2BP2 ENSG00000173821|RNF213 ENSG00000177156|TALDO1 ENSG00000181215|NP\_997288.1 ENSG00000184677|ZBTB40  
ENSG00000205610|Q4G105\_HUMAN ENSG00000008405|CRY1 ENSG000000058056|USP13 ENSG00000008822|CLDND1 ENSG00000088448|ANKRD10 ENSG00000104131|EIF3S1 ENSG00000107937|GTPBP4 ENSG00000112996|MRPS30  
ENSG00000117335|CD46 ENSG00000120705|ETF1 ENSG00000121542|SEC22A ENSG00000122565|CBX3 ENSG00000132670|PTPRA ENSG00000138336|CXCC6 ENSG00000138382|METTL5 ENSG00000144229|THSD7B  
ENSG00000146278|PNRC1 ENSG00000148925|BTBD10 ENSG00000161652|C19orf41 ENSG00000164615|CAMLG ENSG00000166295|C10orf104 ENSG00000168374|ARF4 ENSG00000168566|C6orf151 ENSG00000174607|UGT8  
ENSG00000178177|LORCL ENSG00000189252|SPANX3 ENSG00000196459|SEDLP ENSG00000198081|ZFP161 ENSG00000203924|SPANX2 ENSG00000203943|SAMD13 ENSG00000204464|Q5TG92\_HUMAN  
ENSG00000056345|ITGB3 ENSG00000067066|SP100 ENSG00000087460|GNAS ENSG00000103067|RBM35B ENSG00000111641|NOL1 ENSG00000113739|STC2 ENSG00000124164|VAPB ENSG00000126254|NP\_077297.2  
ENSG00000126594|DNASE1 ENSG00000126602|TRAP1 ENSG00000139874|SSTR1 ENSG00000140478|NM\_018652.4 ENSG00000141179|PCTP ENSG00000142700|DMRTA2 ENSG00000159224|GIP ENSG00000166136|NDUFB8  
ENSG00000171345|KRT19 ENSG00000175550|DRAP1 ENSG00000176887|SOX11 ENSG00000180209|MLRS\_HUMAN ENSG00000182968|SOX1 ENSG00000185651|UBE2L3 ENSG00000197451|HNRPAB  
ENSG00000205927|OLIG2 ENSG00000001561|ENPP4 ENSG00000006451|RALA ENSG00000033122|LRRC7 ENSG00000039319|ZFVVE16 ENSG00000067064|IDI1 ENSG00000079950|STX7 ENSG00000091483|FH  
ENSG00000100934|SEC23A ENSG00000115232|ITGA4 ENSG00000118418|HMGN3 ENSG00000120690|ELF1 ENSG00000124486|USP9X ENSG00000128609|NDUFA5 ENSG00000132855|ANGPTL3 ENSG00000134539|KLRD1  
ENSG00000136709|WDR33 ENSG00000139826|ABHD13 ENSG00000144061|NHPH1 ENSG00000145780|FEM1C ENSG00000151012|SLC7A11 ENSG00000151151|IPMK ENSG00000152078|TMEM56 ENSG00000156735|BAG4  
ENSG00000162687|KCNT2 ENSG00000163116|NP\_777612.1 ENSG00000163322|CCDC98 ENSG00000163669|DNHD2 ENSG00000165259|CXorf43 ENSG00000165899|C12orf64 ENSG00000166803|KIAA0101 ENSG00000170312|CDC2  
ENSG00000173930|SLCO4C1 ENSG00000180182|CRSP2 ENSG00000186231|KHLH32 ENSG00000186834|HEXIM1 ENSG00000187231|SESTD1 ENSG00000197888|UGT2B17 ENSG00000198872|PEG10  
ENSG00000064419|TNPO3 ENSG00000071564|TCF3 ENSG00000079739|PGM1 ENSG00000084636|COL16A1 ENSG00000090447|TFAP4 ENSG00000105323|HNRPUL1 ENSG00000108551|RASD1 ENSG00000119682|KIAA0317  
ENSG00000119772|DNMT3A ENSG00000124449|TRGC ENSG00000127616|SMARCA4 ENSG00000127804|METT10D ENSG00000135744|AGT ENSG00000136895|GARNL3 ENSG00000140479|PCSK6 ENSG00000141753|IGFBP4  
ENSG00000143772|ITPKB ENSG00000145990|GFOD1 ENSG00000149294|NCAM1 ENSG00000151692|LASS3 ENSG00000154330|PGM5P1 ENSG00000159692|CTBP1 ENSG00000166569|CPLX4  
ENSG00000166831|RBPMS2 ENSG00000178235|SLITRK1 ENSG00000184144|CNTN2 ENSG00000184302|STX6 ENSG00000198012|XR\_017841.1 ENSG00000204059|NP\_001013718.1 ENSG00000204620|Q6ZPC8\_HUMAN ENSG0000016082|ISL1  
ENSG00000047249|ATP6V1H ENSG00000049247|UTS2 ENSG000000096006|CRISP3 ENSG00000100418|NP\_056519.1 ENSG00000108046|C10orf92 ENSG00000118407|FILIP1 ENSG00000124209|RAB22A ENSG00000125899|C2orf187  
ENSG00000129204|USP6 ENSG00000130449|ZSWIM6 ENSG00000132541|HRSPI2 ENSG00000132842|AP3B1 ENSG00000134001|EIF2S1 ENSG00000136938|ANP32B ENSG00000139323|WDR51B ENSG00000140285|FGF7  
ENSG00000143228|NUF2 ENSG00000147488|ST18 ENSG00000150681|RGS18 ENSG00000151461|UPF2 ENSG00000154269|ENPP3 ENSG00000162374|ELAVL4 ENSG00000162595|DIRAS3 ENSG00000164209|SLC25A46  
ENSG00000165169|DYNLT3 ENSG00000166233|ARIH1 ENSG00000167679|SLC16A4 ENSG00000170185|USP38 ENSG00000171202|TMEM126A ENSG00000172671|ANUB1L ENSG00000173228|C1orf100 ENSG00000174298|NP\_694572.1  
ENSG00000175582|RAB6A ENSG00000176256|HMGB4 ENSG00000183990|Q8WZA8\_HUMAN ENSG00000188877|POTE8\_HUMAN ENSG00000198252|STYX ENSG00000198648|STK39 ENSG00000203667|FAM36A ENSG00000205413|SAMD9

ENSG00000143333|RGS16 ENSG00000163263|Clorf189 ENSG00000167182|SP2 ENSG00000170430|MGMT ENSG00000173227|SYT12 ENSG00000176986|SEC24C ENSG00000179817|MRGPRX4 ENSG00000185674|LYG2\_HUMAN  
ENSG00000196724|ZNF418 ENSG00000198844|ARHGEP15 ENSG00000204380|Q62TQ2\_HUMAN ENSG00000204580|DDR1 ENSG00000100554|ATP6V1D ENSG00000105699|LSR ENSG00000109084|TMEM97 ENSG00000120733|JMJD1B  
ENSG00000128655|PDE11A ENSG00000129116|PALLD ENSG00000130021|HDHD1A ENSG00000136536|MARCH7 ENSG00000145681|HAPLN1 ENSG00000146729|GBAS ENSG00000148481|Clorf97 ENSG00000154736|ADAMTS5  
ENSG00000161813|LARP4 ENSG00000163599|CTLA4 ENSG00000163660|CCNL1 ENSG00000163754|GYH1 ENSG00000166913|YWHAB ENSG00000173083|HPSE ENSG00000183542|KLRC4 ENSG00000186468|RPS23  
ENSG00000206198|NR\_001535.1  
perfect: AACACTG CAGTGT hsa-miR-199b ccCAGTGTtagactatctgttc 2  
perfect: AACACTG CAGTGT hsa-miR-199a ccCAGTGTtcagactactcttc 2  
AACACTT ENSG00000018625|ATP1A2 ENSG00000057757|Clorf128 ENSG00000062598|ELMO2 ENSG00000068078|FGFR3 ENSG00000092964|DPYSL2 ENSG00000101849|TBL1X ENSG00000102901|CENPT ENSG00000106682|EIF4H  
ENSG00000107796|ACTA2 ENSG00000116198|KIAA0562 ENSG00000122733|KLIAA1045 ENSG00000125651|GTF2F1 ENSG00000125999|C2orf114 ENSG00000126432|PRDX5 ENSG00000126709|IFI6 ENSG00000135801|TAF5L  
ENSG00000138347|MYPN ENSG00000151498|ACAD8 ENSG00000161958|FGF11 ENSG00000163814|CDCP1 ENSG00000166220|C1orf27 ENSG00000167208|NP\_878274.1 ENSG00000167658|EEF2 ENSG00000170390|DCLK2  
ENSG00000171853|TTC15 ENSG00000173914|RBM4B ENSG00000174521|TTC9B ENSG00000174788|PCP2 ENSG00000175329|ISX ENSG00000180083|WFDCC11 ENSG000001817164|KIAA1598 ENSG00000196361|ELAVL3  
ENSG00000197430|TMEM10 ENSG00000198700|IPO9 ENSG00000205929|C2orf62 ENSG00000068784|SRBD1 ENSG00000104112|SCG3 ENSG00000105855|ITGB8 ENSG00000106346|USP42 ENSG00000114742|WDR48  
ENSG00000115414|FN1 ENSG00000115504|EHPB1 ENSG00000132780|NASP ENSG00000136636|KCTD3 ENSG00000145734|BDP1 ENSG00000147174|ACRC ENSG00000153922|CHD1 ENSG00000156875|HAT1  
ENSG00000163625|WDFY3 ENSG00000168589|DYNLRB2 ENSG00000175029|CTBP2 ENSG00000178295|NP\_872431.2 ENSG00000180979|LRRC57 ENSG00000184735|DDX53 ENSG00000187772|LIN28B ENSG00000197501|Q9H3B5\_HUMAN  
ENSG00000198511|Q8N9A9\_HUMAN ENSG00000204478|PRAMEF20 ENSG00000204486|PRAMEF21 ENSG00000204923|NP\_001019851.1  
AACAGGA ENSG00000036565|SLC18A1 ENSG00000075826|SEC31B ENSG00000092607|TBX15 ENSG00000100055|PSCD4 ENSG00000102050|PRAF2 ENSG00000103047|TMC07 ENSG00000108556|CHRNE ENSG00000108947|EFNB3  
ENSG00000134014|ELP3 ENSG00000138107|ACTR1A ENSG00000140479|PCSK6 ENSG00000160213|CSTB ENSG00000170889|RPS9 ENSG00000172061|LRRC15 ENSG00000175697|GPR156 ENSG00000175894|C2orf29  
ENSG00000177875|NP\_001013657.2 ENSG00000182459|NP\_997342.1 ENSG00000189140|Q6ZU77\_HUMAN ENSG00000189149|Q6ZNY8\_HUMAN ENSG00000204312|Q6ZNY8\_HUMAN ENSG00000204410|MSH5 ENSG00000011422|PLAUR ENSG00000036257|CUL3  
ENSG00000081870|Clorf41 ENSG00000095787|WAC ENSG00000139350|NEDD1 ENSG00000143520|NP\_001014364.1 ENSG00000147145|GPR23 ENSG00000150753|CC75 ENSG00000162601|MYSM1 ENSG00000164411|GJB7  
ENSG00000166411|IDH3A ENSG00000168955|TM4SF20 ENSG00000169604|ANTXR1 ENSG00000175352|NRIP3 ENSG00000179059|ZFP42 ENSG00000179455|MKRN3 ENSG00000183513|NP\_001008216.1 ENSG00000183542|KLRC4  
ENSG00000183634|NP\_001011539.1  
AACAGGG ENSG000000013374|NUB1 ENSG000000023171|GRAMD1B ENSG00000070886|EPAH8 ENSG00000085644|ZNF213 ENSG00000105997|HOXA3 ENSG00000119771|KLHL29 ENSG00000140465|CYP1A1 ENSG00000149599|C2orf57  
ENSG00000160993|ALKBH4 ENSG00000161267|BDH1 ENSG00000162728|KCNJ9 ENSG00000163481|RNF25 ENSG00000171992|SYNPO ENSG00000173805|HAP1 ENSG00000174945|AMZ1\_HUMAN ENSG00000183611|RPL32P3  
ENSG00000198165|Q9H960\_HUMAN ENSG00000020219|NP\_001025037.1 ENSG00000046774|MAGEC2 ENSG00000073614|JARID1A ENSG00000081770|NAIP ENSG00000089163|SIRT4 ENSG00000102710|FAM48A ENSG00000109189|USP46  
ENSG00000111490|Q9Y219\_HUMAN ENSG00000112305|SMAP1 ENSG00000123636|BAZ2B ENSG00000125900|SIRPD ENSG00000133103|COG6 ENSG00000136897|MRPL50 ENSG00000141076|CIRH1A ENSG00000148942|SLC5A12  
ENSG00000150048|CLEC1A ENSG00000163558|PRKCI ENSG00000170009|Q9NTHO\_HUMAN ENSG00000174749|C4orf32 ENSG00000175874|CREG2 ENSG00000179978|Q59GI6\_HUMAN ENSG00000180785|OR51E1 ENSG00000186265|BTLA  
ENSG00000187446|CHP1\_HUMAN ENSG00000198018|ENTPD7 ENSG00000204426|LOC286238 ENSG00000204757|Q6ZTL5\_HUMAN  
AACAGTC ENSG00000068724|TTC7A ENSG00000104332|SFRP1 ENSG00000108244|KRT23 ENSG00000111644|ACRBP ENSG00000115685|PPP1R7 ENSG00000130119|GNL3L ENSG00000131236|CAP1 ENSG00000138031|ADCY3  
ENSG00000144741|SLC25A26 ENSG00000147100|SLC16A2 ENSG00000149179|C11orf49 ENSG00000149262|INTS4 ENSG00000151079|KCNAB6 ENSG00000160401|C9orf117 ENSG00000162511|LAPTM5 ENSG00000167094|TTC16  
ENSG00000167139|TBC1D21 ENSG00000172992|DCAKD ENSG00000174370|C11orf45 ENSG00000175283|DOLK ENSG00000176715|NP\_777577.1 ENSG00000181763|APR2\_HUMAN ENSG00000204221|WDR46 ENSG00000204323|Q71RC9\_HUMAN  
ENSG00000204561|FAM75B ENSG00000096063|SRPK1 ENSG00000104763|ASAHI1 ENSG00000111615|KRR1 ENSG00000132912|DCTN4 ENSG00000138363|ATIC ENSG00000141325|CCDC45 ENSG00000143520|NP\_001014364.1  
ENSG00000143924|EML4 ENSG00000157625|MAP3K7IP3 ENSG00000162614|NEHN ENSG00000164823|OSGIN2 ENSG00000164975|SNAPC3 ENSG00000174130|TLR6 ENSG00000186439|TRDN  
AACAGTG ENSG00000073584|SMARCE1 ENSG00000114745|GORASP1 ENSG00000122711|SPINK4 ENSG00000125447|GGA3 ENSG00000125977|EIF2S2 ENSG00000134905|CAR52 ENSG00000135709|KIAA0513 ENSG00000142686|NP\_689587.1  
ENSG00000147118|ZNF182 ENSG00000153786|ZDHC7 ENSG00000176754|Clorf157 ENSG00000181577|NP\_694978.2 ENSG00000183134|GPR44 ENSG00000186163|Q4G0S1\_HUMAN ENSG00000188249|XR\_019050.1 ENSG00000203931|LOC729078  
ENSG00000204569|PPP1R12 ENSG00000204632|HLA-G ENSG00000205307|Q8TEE9\_HUMAN ENSG00000003989|SLC7A2 ENSG00000100722|Clorf124 ENSG00000050130|Clorf100 ENSG00000066777|ARFGEF1 ENSG00000092108|SCFD1  
ENSG00000099940|SNAP29 ENSG00000102531|FNDC3A ENSG00000112081|SFRS3 ENSG00000116288|PARK7 ENSG00000116991|SIPAL1L2 ENSG00000119878|CRIPT ENSG00000125384|PTGER2 ENSG00000127314|RAP1B  
ENSG00000129824|RPS4Y1 ENSG00000132825|PPP1R3D ENSG00000137871|SUHW4 ENSG00000148672|GLUDP5 ENSG00000162618|ELTD1 ENSG00000165525|SDCCAG1 ENSG00000166200|COPS2 ENSG00000173681|CXorf23  
ENSG00000177981|ASB8 ENSG00000180398|MCFP2 ENSG00000184984|CHRM5 ENSG00000187672|ERC2 ENSG00000197501|Q9H3B5\_HUMAN ENSG00000198492|YTHDF2  
AACATAT ENSG00000020577|SAMDA4 ENSG00000063241|ZSOC2 ENSG00000103021|CCDC113 ENSG00000103222|ABCC1 ENSG00000103274|NUBP1 ENSG00000104490|NCALD ENSG00000123329|ARHGAP9 ENSG00000126562|WNK4  
ENSG00000143294|PRCC ENSG00000143502|SUSD4 ENSG00000146021|KLHL3 ENSG00000154198|Q8N1L4\_HUMAN ENSG00000158497|HMBB1 ENSG00000159797|C9orf144 ENSG00000176809|LRRC37A3 ENSG00000176986|SEC24C  
ENSG00000177741|Q96BN7\_HUMAN ENSG00000177807|KCNJ10 ENSG00000183087|GAS6 ENSG00000204418|CLIC1 ENSG00000001561|ENPP4 ENSG00000005810|MYCBP2 ENSG00000007062|PROM1 ENSG00000023445|BIRC3  
ENSG00000026103|FAS ENSG00000080503|SMARCA2 ENSG00000081189|MEF2C ENSG00000104177|MYEF2 ENSG00000113600|C9 ENSG00000114248|LRRC3X ENSG00000115665|SLC5A7 ENSG00000124429|POF1B  
ENSG00000127995|CASD1 ENSG00000135222|CSN2 ENSG00000136636|KCTD3 ENSG00000139793|MBNL2 ENSG00000139865|TTC6 ENSG00000151093|OXSM ENSG00000157680|DGKI ENSG00000162944|RFTN2  
ENSG00000164893|SLC7A13 ENSG00000164949|GEM ENSG00000171657|GPR82 ENSG00000171885|AQP4 ENSG00000172340|SUCLG2 ENSG00000177853|ZNF518 ENSG00000181211|Q8NA17\_HUMAN ENSG00000183813|CCR4  
ENSG00000187229|Q86YR2\_HUMAN ENSG00000189290|XR\_018254.1 ENSG00000205269|Q5T4T1\_HUMAN ENSG00000205299|CKLF  
AACATGC ENSG00000102181|CD99L2 ENSG00000102854|MSLN ENSG00000117013|KCNQ4 ENSG00000125388|GRK4 ENSG00000131196|NFATC1 ENSG00000138311|ZNF365 ENSG00000160323|ADAMTS13 ENSG00000163263|Clorf189  
ENSG00000168014|NP\_056346.2 ENSG00000173862|Q9NWP0\_HUMAN ENSG00000174365|NR\_003239.1 ENSG00000177122|Q8N6V7\_HUMAN ENSG00000185608|MRPL40 ENSG00000198854|Clorf68 ENSG00000204681|GABBR1 ENSG00000204758|Q6ZUG4\_HUMAN  
ENSG00000205801|Q6ZT15\_HUMAN ENSG00000018869|ZNF582 ENSG00000078401|EDN1 ENSG00000117226|GBP3 ENSG00000120265|PCMT1 ENSG00000130449|ZSWIM6 ENSG00000136451|VEZF1 ENSG00000144635|DYNCL1L1  
ENSG00000146223|RPL7L1 ENSG00000147684|NDUFB9 ENSG00000153802|TMPRSS11D ENSG00000155545|MIER3 ENSG00000159763|PIP ENSG00000163611|CCDC52 ENSG00000164418|GRIK2 ENSG00000165195|PIGA  
ENSG00000169031|COL4A3 ENSG00000173200|PARP1 ENSG00000175746|NP\_997328.1 ENSG00000176635|HORMAD2 ENSG00000183308|C17orf60 ENSG00000184752|NDUFA12  
AACATTT ENSG00000029993|HMGB3 ENSG00000055163|CYFP2 ENSG00000065618|COL17A1 ENSG00000071894|CPSF1 ENSG00000075856|ALG9 ENSG00000086848|ALG9 ENSG00000108788|MLX ENSG00000114019|AMOTL2  
ENSG00000124374|PAIP2B ENSG00000125354|SEPT6 ENSG00000138617|PARP16 ENSG00000139436|GIT2 ENSG00000141580|WDR45L ENSG00000153298|C6orf54 ENSG00000154767|XPC ENSG00000161132|Q9BYA7\_HUMAN  
ENSG00000162849|KIF26B ENSG00000164091|TMEM113 ENSG00000172020|GAP43 ENSG00000179165|PXT1 ENSG00000179348|GATA2 ENSG00000182325|FBXL6 ENSG00000184221|OLIG1 ENSG00000184557|SOCS3  
ENSG00000186335|SLC36A2 ENSG00000188508|U467\_HUMAN ENSG00000189140|Q6ZU77\_HUMAN ENSG00000196118|NP\_001014979.1 ENSG00000196220|SRGAP3 ENSG00000205064|Q6ZVP2\_HUMAN ENSG00000015153|YAF2 ENSG00000061455|PRDM6  
ENSG00000077097|TOP2B ENSG00000080345|RIF1 ENSG00000109182|NP\_079363.1 ENSG00000109381|ELF2 ENSG00000110318|KIAA1377 ENSG00000111696|NTSDC3 ENSG00000113712|CSNK1A1 ENSG00000118007|STAG1  
ENSG00000182600|CREB1 ENSG00000129003|VPS13C ENSG00000145241|CENPC1 ENSG00000146757|ZNF92 ENSG00000152256|PDK1 ENSG00000154263|ABCA10 ENSG00000159596|TMEM69 ENSG00000163041|H3F3A  
ENSG00000163428|LRRC58 ENSG00000164116|GUCY1A3 ENSG00000164118|KIAA1712 ENSG00000164746|Q8NEG2\_HUMAN ENSG00000168303|C7orf11 ENSG00000170085|C5orf25 ENSG00000174749|C4orf32 ENSG00000178075|GRAMD1C  
ENSG00000179520|SLC17A8 ENSG00000181425|DSCR10 ENSG00000189046|ALKBH2 ENSG00000197343|ZNF655 ENSG00000197782|ZNF780A ENSG00000199786|ZNF780A  
AACCAAC ENSG000000066116|CACNG3 ENSG00000078804|TP53INP2 ENSG00000096070|BRPF3 ENSG00000103056|SMPD3 ENSG00000115306|PTBN1 ENSG00000119686|C14orf58 ENSG00000122966|CIT ENSG00000125844|RRBP1  
ENSG00000128918|ALDH1A2 ENSG00000134905|CAR52 ENSG00000135749|PCNXL2 ENSG00000140650|PMM2 ENSG00000142530|NP\_612420.1 ENSG00000142733|MAP3K6 ENSG00000158480|SPATA2 ENSG00000165171|WBSR27  
ENSG00000167674|NP\_001001520.1 ENSG00000170145|SNF1LK2 ENSG00000170271|C5orf4 ENSG00000170906|NDUFA3 ENSG00000178951|ZBTB7A ENSG00000184221|OLIG1 ENSG00000185522|C11orf35 ENSG00000198053|SIRPA  
ENSG00000205917|Q6ZTF1\_HUMAN ENSG00000205920|Q6ZTF1\_HUMAN ENSG00000047662|Q9ULE4\_HUMAN ENSG00000050405|LIMA1 ENSG00000060762|BRP44L ENSG00000077713|SLC25A43 ENSG00000078081|LAMP3 ENSG00000084110|HAL  
ENSG00000087053|MTMR2 ENSG00000089157|RPLP0 ENSG00000099246|RAB18 ENSG00000100902|PSMA6 ENSG00000110484|SCGB2A2 ENSG00000132872|SYT4 ENSG00000135903|PAX3 ENSG00000139278|GLIPL1  
ENSG00000147421|HMBOX1 ENSG00000150471|LPHN3 ENSG00000165914|TTC7B ENSG00000166532|FAM80B ENSG00000170516|COX7B2 ENSG00000170748|HNRGT\_HUMAN ENSG00000170788|DYDC1 ENSG00000171055|FEZ2  
ENSG00000179152|C3orf23 ENSG00000185272|RBM11 ENSG00000206120|Q0D2K5\_HUMAN  
AACCAAT ENSG00000008086|CDKL5 ENSG00000026950|BTN3A1 ENSG00000066440|REFXANK ENSG00000066521|GSTO2 ENSG00000087903|RFX2 ENSG00000100448|CTSG ENSG00000101443|WFDCC2 ENSG00000105538|RASIP1  
ENSG00000108370|RGS9 ENSG00000108774|RAB5C ENSG00000125954|FN1B ENSG00000126456|IRF3 ENSG00000126882|FAM78A ENSG00000130656|HBZ ENSG00000131149|KIAA0182 ENSG00000135749|PCNXL2  
ENSG00000136193|SCRN1 ENSG00000147536|GINS4 ENSG00000149397|HMBS ENSG00000150477|KIAA1328 ENSG00000159189|C1QC ENSG00000159224|GIP ENSG00000167815|PRDX2 ENSG00000168259|DNAJC7  
ENSG00000176515|Q8NAX6\_HUMAN ENSG00000179168|GGN ENSG00000180210|P2 ENSG00000184361|C17orf46 ENSG00000189058|APOD ENSG00000198802|PECAM1 ENSG00000204870|Q6ZW03\_HUMAN ENSG00000047457|CP  
ENSG00000101935|AMMECR1 ENSG00000109163|GNRHR ENSG00000112406|HECA ENSG00000113638|TTC33 ENSG00000118473|SGIP1 ENSG00000119913|TECTB ENSG00000123178|C13orf1 ENSG00000123575|CXorf39  
ENSG00000139278|GLIPL1 ENSG00000140836|ATFB1 ENSG00000147649|MTDH ENSG00000149084|HSD17B12 ENSG00000155816|FMN2 ENSG00000156239|N6AMT1 ENSG00000166971|AKTIP ENSG00000177888|ZBTB41  
AACCCACA ENSG00000100767|PAPLN ENSG00000110042|DTX4 ENSG00000118898|PPL ENSG00000129680|MAP7D3 ENSG00000139540|SLC39A5 ENSG00000144231|POLR2D ENSG00000149021|SCGB1A1 ENSG00000149269|PAK1  
ENSG00000149798|CDC42EP2 ENSG00000157833|FAM59B ENSG00000158483|FAM86C ENSG00000158578|ALAS2 ENSG00000161835|GRASP ENSG00000162772|ATF3 ENSG00000163612|XR\_017899.1 ENSG00000164707|SLC13A4  
ENSG00000170619|COMMD5 ENSG00000173818|NP\_775898.2 ENSG00000178554|Q8N8D4\_HUMAN ENSG00000178589|Q9BT26\_HUMAN ENSG00000183762|KREMEN1 ENSG00000184602|SNN ENSG00000188636|LDOC1L ENSG00000203674|Q6ZT24\_HUMAN  
ENSG00000205609|Q9BW98\_HUMAN ENSG00000005302|MSL3L1 ENSG000000011566|MAP4K3 ENSG000000018869|ZNF582 ENSG00000008035|SLC4A4 ENSG00000008803|ALG6 ENSG00000095794|CREM ENSG00000101384|JAG1  
ENSG00000101977|MCF2 ENSG00000104863|LIN7B ENSG00000112249|ASCC3 ENSG00000118267|ZNF271 ENSG00000119636|C14orf45 ENSG0000019729|RHOQ ENSG00000124491|F13A1 ENSG00000125257|ABCC4  
ENSG00000137420|NOL7 ENSG00000137757|CASP5 ENSG00000146592|CREB5 ENSG00000153363|C1orf97 ENSG00000164841|TMEM74 ENSG00000167216|KATNAL2 ENSG00000170791|CHCHD7 ENSG00000171428|NAT1  
ENSG00000175336|APOF ENSG00000186471|AKAP14 ENSG00000186479|G97BP ENSG00000196563|Q9H375\_HUMAN ENSG00000196639|HRH1 ENSG0000000198056|PRIM1 ENSG00000198633|Q6PDB4\_HUMAN  
AACCCAGA ENSG00000004776|HSPB6 ENSG00000007923|DNAJC11 ENSG00000013563|DNASE1L1 ENSG00000062441|NPO3 ENSG00000072135|PTN18 ENSG00000075151|EIF4G3 ENSG00000078872|NFS1 ENSG00000088833|NSFL1C  
ENSG00000105426|PTPRS ENSG00000112763|BTN2A1 ENSG00000112855|HARS2 ENSG00000116996|ZP4 ENSG00000122085|MTERFD2 ENSG00000124508|BTN2A2 ENSG00000134825|C11orf10 ENSG00000143845|ETNK2  
ENSG00000145882|PCYOX1L ENSG00000148297|SURF5 ENSG00000149499|EML3 ENSG00000156599|ZDHC5 ENSG00000160951|PTGER1 ENSG00000164309|CMYA5 ENSG00000181563|Clorf211  
ENSG00000188818|ZDHC11 ENSG00000204423|C9orf33 ENSG00000204483|Q8N925\_HUMAN ENSG00000204537|Q6ZTQ9\_HUMAN ENSG00000048028|USP28 ENSG00000074527|NTN4 ENSG00000083168|MYST3 ENSG00000101327|PDYN  
ENSG00000119878|CRIPT ENSG00000129484|PARP2 ENSG00000132196|HSD17B7 ENSG00000133606|MKRN1 ENSG00000134644|PUM1 ENSG00000138134|STAMPEL1 ENSG00000140941|MAP1L3C3B ENSG00000143337|TOR1AIP1  
ENSG00000145632|PLK2 ENSG00000148019|CEP78 ENSG00000158185|ANKRD36 ENSG00000162695|SLC30A7 ENSG00000162813|BPNT1 ENSG00000166250|NP\_079045.1 ENSG00000171867|PRNP ENSG00000177800|TMEM78  
ENSG00000189377|NP\_940879.1 ENSG00000197497|ZNF665 ENSG00000197639|MKRNPF5  
AACCCAGC ENSG00000068976|PYGM ENSG00000101236|RNF24 ENSG00000112562|SMOC2 ENSG00000129965|INS ENSG00000130701|C2orf151 ENSG00000131591|Clorf159 ENSG00000132376|SKIP\_HUMAN ENSG00000143845|ETNK2  
ENSG00000144579|CTDSP1 ENSG00000144648|CCBP2 ENSG00000144741|SLC25A26 ENSG00000164733|CTSB ENSG00000169758|C15orf27 ENSG00000171855|IFNB1 ENSG00000179253|Q5VZ43\_HUMAN ENSG00000186910|SERPINA11  
ENSG00000196808|Q96NJ4\_HUMAN ENSG00000198797|FAM5B ENSG00000198913|Q9H5S2\_HUMAN ENSG00000204013|Q6XYD6\_HUMAN ENSG00000205126|NP\_001027025.1 ENSG00000205929|C21orf62 ENSG00000206026|NP\_001032408.1  
ENSG00000005189|NP\_112203.1  
ENSG00000041982|TNC ENSG00000085999|RAD54L ENSG00000106031|HOXA13 ENSG00000114742|WDR48 ENSG00000117118|SDHB ENSG00000118181|RPS25 ENSG00000138604|GLCE ENSG00000138613|APH1B

|                                |                                |                              |                              |                              |                                |                                |                                |
|--------------------------------|--------------------------------|------------------------------|------------------------------|------------------------------|--------------------------------|--------------------------------|--------------------------------|
| ENSG00000144566 RAB5A          | ENSG00000148175 STOM           | ENSG00000153933 DGKE         | ENSG00000156928 C7orf30      | ENSG00000158185 ANKRD36      | ENSG00000162688 AGL            | ENSG00000162992 NEUROD1        | ENSG00000162994 NP_689598.1    |
| ENSG00000165338 HECTD2         | ENSG00000165609 NUDTS2         | ENSG00000166889 NP_689929.1  | ENSG00000171843 MLLT3        | ENSG00000179933 C14orf119    | ENSG00000180964 TCEAL8         | ENSG00000196912 AN36B_HUMAN    |                                |
| AACCATG                        | ENSG00000105219 CNTD2          | ENSG00000107554 DNMBP        | ENSG00000108622 ICAM2        | ENSG00000111012 CYP27B1      | ENSG00000113194 UBXD8          | ENSG00000116698 SMG7           | ENSG00000116990 MYCL1          |
| ENSG00000122223 CD244          | ENSG00000124164 VAPB           | ENSG00000125618 PAX8         | ENSG00000140931 CMTM3        | ENSG00000141316 SPACA3       | ENSG00000142186 SCYL1          | ENSG00000146859 TMEM140        | ENSG00000154229 PRKCA          |
| ENSG00000169118 CSNK1G1        | ENSG00000171060 C8orf74        | ENSG00000171161 ZNF672       | ENSG00000173218 VANGL1       | ENSG00000177553 C1orf167     | ENSG00000179914 ITLN1          | ENSG00000182606 TRAK1          | ENSG00000183578 TNFAIP8L3      |
| ENSG00000203784 LELPL1         | ENSG00000204319 C4A            | ENSG00000204362 C4B          | ENSG00000204362 Q6ZS05_HUMAN | ENSG00000205742 Q6ZTR4_HUMAN | ENSG00000205801 Q6ZTT5_HUMAN   | ENSG00000205804 Q5T6R2_HUMAN   | ENSG00000007372 PAX6           |
| ENSG00000076641 PAG1           | ENSG00000079246 XRCC5          | ENSG00000080839 RBL1         | ENSG00000081052 COL4A4       | ENSG00000102471 NDFIP2       | ENSG00000105372 RPS19          | ENSG00000105825 TFPI2          | ENSG00000107779 BMPRIA         |
| ENSG00000112308 C6orf62        | ENSG00000113812 ACTR8          | ENSG00000131711 MAP1B        | ENSG00000143643 TTC13        | ENSG00000145555 MYO10        | ENSG00000156265 C21orf7        | ENSG00000168383 HLA-DPB1       | ENSG00000178075 GRAMD1C        |
| ENSG00000182670 TTC3           | ENSG00000203681 XR_017762.1    | ENSG00000203995 ZYG11A       | ENSG00000204022 LIPJ         | ENSG00000205830 NP_997373.1  |                                |                                |                                |
| AACCCAT                        | ENSG00000005100 DHX33          | ENSG00000008056 SYN1         | ENSG000000089250 NOS1        | ENSG00000102962 CCL22        | ENSG00000107807 TLX1           | ENSG00000127533 F2RL3          | ENSG00000139540 SLC39A5        |
| ENSG00000142528 ZNF473         | ENSG00000142619 PADI3          | ENSG00000144579 CTDSP1       | ENSG00000150779 TIMM8B       | ENSG00000155087 ODF1         | ENSG00000157876 ITLN2          | ENSG00000167749 KLK4           | ENSG00000168925 CTRB1          |
| ENSG00000169777 TAS2R1         | ENSG00000170776 AKAP13         | ENSG00000171060 C8orf74      | ENSG00000173436 C1orf151     | ENSG00000182376 NP_872411.1  | ENSG00000183154 Q8NB20_HUMAN   | ENSG00000183751 TBL3           | ENSG00000186919 LGICZ1         |
| ENSG00000196338 NLGN3          | ENSG00000198959 TGM2           | ENSG00000203930 Q5JPA2_HUMAN | ENSG00000204080 Q6ZRQ9_HUMAN | ENSG00000205452 Q6ZQQ9_HUMAN | ENSG00000202745 WNT16          | ENSG00000202745 WNT16          | ENSG00000202745 WNT16          |
| ENSG00000057663 ATG5           | ENSG000001108559 NUP88         | ENSG00000114547 ROFN1B       | ENSG00000117399 CDC20        | ENSG00000117597 C1orf107     | ENSG00000122786 CALD1          | ENSG00000129292 PHF20L1        | ENSG00000136542 GALNT5         |
| ENSG00000147437 GNRH1          | ENSG00000163618 CADPS          | ENSG00000164100 NDST3        | ENSG00000164163 ABCE1        | ENSG00000175984 DENND2C      | ENSG00000180347 CCDC129        | ENSG00000198060 MARCH5         | ENSG00000198142 ANKRD57        |
| ENSG00000204889 KRT40          |                                |                              |                              |                              |                                |                                |                                |
| AACCCCTA                       | ENSG000000059377 TXAS1         | ENSG00000092853 CLSPN        | ENSG00000100221 JOSD1        | ENSG00000101350 KIF3B        | ENSG00000102870 ZNF629         | ENSG00000105227 PRX            | ENSG00000116663 FBXO6          |
| ENSG00000134369 NAV1           | ENSG00000135441 BLOC1S1        | ENSG00000136193 SCRN1        | ENSG00000136250 AOAH         | ENSG00000146197 SCUBE3       | ENSG00000161911 TREM1          | ENSG00000167757 KLK11          | ENSG00000169717 ACTR2          |
| ENSG00000188690 UROS           | ENSG00000197901 SLC22A6        | ENSG00000075239 ACAT1        | ENSG00000091483 FH           | ENSG00000100095 SEZ16        | ENSG00000100418 NP_056519.1    | ENSG00000104825 NFKB1B         | ENSG00000110436 SLC1A2         |
| ENSG00000112096 SOD2           | ENSG00000115386 REG1           | ENSG00000116668 C1orf26      | ENSG00000121440 PDZRN3       | ENSG00000138160 KIF11        | ENSG00000139800 ZTC5           | ENSG00000149050 ZNF214         | ENSG00000160352 ZNF714         |
| ENSG00000166323 C11orf65       | ENSG00000167383 ZNF229         | ENSG00000174748 RPL15        | ENSG00000177465 ACOT4        | ENSG00000187268 FAM9C        | ENSG00000188868 ZNF563         | ENSG00000196826 ZNF709         | ENSG00000197054 ZNF763         |
| ENSG00000198429 ZNF69          | ENSG00000204201 Q49A40_HUMAN   | ENSG00000204979 MS4A13       |                              |                              |                                |                                |                                |
| AACCCGCA                       | ENSG00000089558 KCNH4          | ENSG00000102967 DHODH        | ENSG00000105464 GRIN2D       | ENSG00000116017 ARID3A       | ENSG00000134461 ANKRD16        | ENSG00000138083 SIX3           | ENSG00000159217 IGF2BP1        |
| ENSG00000172155 LCE1D          | ENSG00000172216 CEBPB          | ENSG00000172757 CFL1         | ENSG00000177374 HIC1         | ENSG00000185522 C11orf35     | ENSG00000186837 C21orf119      | ENSG00000189171 S100A13        | ENSG00000197261 C6orf141       |
| ENSG00000197847 SLC22A20       | ENSG00000204103 MAFB           | ENSG00000204474 Q5JQD4_HUMAN | ENSG00000204682 C10orf114    | ENSG00000205015 Q6ZNV2_HUMAN | ENSG00000222267 FHL1           | ENSG00000222267 FHL1           | ENSG00000222267 FHL1           |
| ENSG00000107164 FUBP3          | ENSG00000108395 TRIM37         | ENSG00000109220 CHIC2        | ENSG00000115568 ZNF142       | ENSG00000121871 SLITRK3      | ENSG00000121964 GTDCC1         | ENSG00000128050 PAICS          | ENSG00000131951 LRRC9          |
| ENSG00000138433 C1R_HUMAN      | ENSG00000138613 APH1B          | ENSG00000143341 HMCN1        | ENSG00000162746 FCRLB        | ENSG00000164451 FAM26D       | ENSG00000165392 WRN            | ENSG00000169567 HINT1          | ENSG00000173515 C9orf53        |
| ENSG00000176871 WSB2           | ENSG00000180787 ZFP3           | ENSG00000183696 UPP1         | ENSG00000183735 TBK1         | ENSG00000185278 ZBTB37       | ENSG00000185742 NP_997528.1    | ENSG00000204600 NP_001004349.1 |                                |
| AACCCGGA                       | ENSG00000004838 ZMYND10        | ENSG00000068438 FTSJ1        | ENSG00000077350 LLGL2        | ENSG00000100075 SLC25A1      | ENSG00000103485 QPRT           | ENSG00000108679 LGALS3BP       | ENSG00000108771 LGP2_HUMAN     |
| ENSG00000122133 PAEP           | ENSG00000126231 PROZ           | ENSG00000127226 NP_116072.2  | ENSG00000128564 VGF          | ENSG00000131044 TTLL9        | ENSG00000127507 EMR2           | ENSG00000128699 ORMDL1         | ENSG00000128891 CCDC32         |
| ENSG00000141431 Q6ZMX6_HUMAN   | ENSG00000141527 CARD14         | ENSG00000148288 GBGT1        | ENSG00000165272 AQP3         | ENSG00000166987 MBD6         | ENSG00000185049 WHSC2          | ENSG00000189037 DUSP21         | ENSG00000196421 PRR17          |
| ENSG00000204434 NP_001017421.1 | ENSG00000204443 Q562T6_HUMAN   | ENSG00000205918 Q6A1A2_HUMAN | ENSG0000037241 RPL26L1       | ENSG0000049247 UTS2          | ENSG0000070540 WIP1            | ENSG00000100483 C14orf138      | ENSG00000106355 LSM5           |
| ENSG00000112761 WSP3           | ENSG00000113811 SELK_HUMAN     | ENSG00000115386 REG1         | ENSG00000118363 SPCS2        | ENSG00000127507 EMR2         | ENSG00000128699 ORMDL1         | ENSG00000128891 CCDC32         | ENSG00000133805 AMPD3          |
| ENSG00000133858 CCDC131        | ENSG00000135374 ELF5           | ENSG00000139597 NP_438169.2  | ENSG00000147507 LYN          | ENSG00000147535 PPAPDC1B     | ENSG00000147642 SYBU_HUMAN     | ENSG00000154485 MMP21          | ENSG00000160868 CYP3A4         |
| ENSG00000163673 DCLK3          | ENSG00000167766 ZNF83          | ENSG00000176896 TFSM1_HUMAN  | ENSG00000177406 Q8N503_HUMAN | ENSG00000181588 RKHD1        | ENSG00000183337 BCOR           | ENSG00000184284 Q96NI1_HUMAN   | ENSG00000204889 KRT40          |
| AACCTAC                        | ENSG00000097021 ACOT7          | ENSG00000105697 HAMP         | ENSG00000108784 CUEDC2       | ENSG00000112799 LY86         | ENSG00000116039 ATP6V1B1       | ENSG00000130177 CDC16          | ENSG00000147804 SLC39A4        |
| ENSG00000160401 C9orf117       | ENSG00000161381 PLXDC1         | ENSG00000163017 ACTG2        | ENSG00000165623 C10orf49     | ENSG00000168026 TTC21A       | ENSG00000169918 OTUD7A         | ENSG00000170043 TRAPPC1        | ENSG00000170545 NM_001031628.1 |
| ENSG00000172053 QARS           | ENSG00000175063 UBE2C          | ENSG00000177764 ZCCHC3       | ENSG00000183273 CCDC60       | ENSG00000184470 TXNRD2       | ENSG00000188508 U467_HUMAN     | ENSG00000188554 NBR1           | ENSG00000197273 GUCA2A         |
| ENSG00000197461 PDGFA          | ENSG00000197582 GPX1           | ENSG00000203782 LOR          | ENSG00000009790 TRAF3IP3     | ENSG00000052723 NP_079349.1  | ENSG00000079156 OSBPL6         | ENSG00000109586 GALNT7         | ENSG00000116539 ASH1L          |
| ENSG00000116957 TBCE           | ENSG00000117281 CD160          | ENSG00000125675 GRIA3        | ENSG00000125732 RAB31P       | ENSG00000135211 TMEM60       | ENSG00000137269 LRRC1          | ENSG00000138435 CHRNA1         | ENSG00000149506 ZP1            |
| ENSG00000152382 TADA1L         | ENSG00000153107 ANAPC1         | ENSG00000157540 DYRK1A       | ENSG00000166352 C11orf74     | ENSG00000168118 RAB4A        | ENSG00000172172 MRPL13         | ENSG00000175374 SPESP1         | ENSG00000183155 RAB1F          |
| ENSG00000184661 CDCA2          | ENSG00000198670 LPA            |                              |                              |                              |                                |                                |                                |
| AACCTAT                        | ENSG00000028528 SNX1           | ENSG00000088038 CNOT3        | ENSG00000100141 PISD         | ENSG00000110203 FOLR3        | ENSG00000122121 XPNPEP2        | ENSG00000132470 ITGB4          | ENSG00000137767 SQRLD          |
| ENSG00000138698 RAP1GDS1       | ENSG00000138780 GSTCD          | ENSG00000167550 RHEBL1       | ENSG00000171246 NPTX1        | ENSG00000182372 C8orf61      | ENSG00000184857 TMEM186        | ENSG00000186844 LCE1A          | ENSG000002066739 C14orf103     |
| ENSG00000107036 KIAA1432       | ENSG00000110002 LOH11CR2A      | ENSG00000111912 NCOA7        | ENSG00000113269 RNF130       | ENSG00000123843 C4BPP        | ENSG00000125207 PIWIL1         | ENSG00000125531 C20orf195      | ENSG00000138382 METTL5         |
| ENSG00000152443 ZNF776         | ENSG00000153832 FBXO36         | ENSG00000162755 NP_689579.3  | ENSG00000163328 GPR155       | ENSG00000163818 LZTFL1       | ENSG00000164116 GUCY1A3        | ENSG00000164134 NARG1          | ENSG00000168283 BMI1           |
| ENSG00000169299 PGM2           | ENSG00000170965 PLAC1          | ENSG00000182992 Q8TZMO_HUMAN | ENSG00000184226 PCDH9        | ENSG00000187193 MTX1         | ENSG00000198964 SGMS1          |                                |                                |
| AACCTCT                        | ENSG00000106266 SNX8           | ENSG00000107819 SFXN3        | ENSG00000108106 UBE2S        | ENSG00000111641 NOL1         | ENSG00000111674 ENO2           | ENSG00000125815 CST8           | ENSG00000128346 C22orf23       |
| ENSG00000137313 TRIM26         | ENSG00000143365 RORC           | ENSG00000143761 ARF1         | ENSG00000155287 SLC25A28     | ENSG00000156575 PRG3         | ENSG00000163344 PMVK           | ENSG00000164976 KIAA1161       | ENSG00000186470 BTN3A2         |
| ENSG00000188185 Q6ZP8_HUMAN    | ENSG00000188778 ADRB3          | ENSG00000189182 KRT77        | ENSG00000206150 RNASEL3      | ENSG00000049245 VAMP3        | ENSG00000063046 EIF4B          | ENSG00000073969 NSF            | ENSG00000077809 GTF2I          |
| ENSG00000078369 GNB1           | ENSG00000089127 OAS1           | ENSG00000109618 UGTAP_HUMAN  | ENSG00000110318 KIAA1377     | ENSG00000112339 HBS1L        | ENSG00000118217 ATP6           | ENSG00000135164 DMTF1          | ENSG00000138755 CXCL9          |
| ENSG00000145247 OCIAD2         | ENSG00000148584 ACF_HUMAN      | ENSG00000150593 PCDC4        | ENSG00000151611 MMAA         | ENSG00000152254 G6PC2        | ENSG00000156140 ADAMTS3        | ENSG00000160223 ICOSLG         | ENSG00000164287 CDC20B         |
| ENSG00000169967 MAP3K2         | ENSG00000170074 NP_775934.3    | ENSG00000170629 NP_872440.2  | ENSG00000173261 PLAC8L1      | ENSG00000177324 CXorf20      | ENSG00000182090 C14orf25       | ENSG00000185414 MRPL30         | ENSG00000198522 ZNF512         |
| ENSG00000198556 ZNF789         | ENSG00000203925 LOC647839      |                              |                              |                              |                                |                                |                                |
| AACCTGT                        | ENSG00000006125 AP2B1          | ENSG00000010256 UQCRC1       | ENSG00000083845 RPS5         | ENSG00000099330 OCELL1       | ENSG00000101144 BMP7           | ENSG00000131143 COX4I1         | ENSG00000141068 KSR1           |
| ENSG00000142528 ZNF473         | ENSG00000144677 CTDSP1         | ENSG00000164530 PI16         | ENSG00000165699 TSC1         | ENSG00000166473 PKD1L2       | ENSG00000169057 MECP2          | ENSG00000169242 EFNA1          | ENSG00000178786 Q8N2B6_HUMAN   |
| ENSG00000179755 NM_017798.1    | ENSG00000180595 Q8N8C9_HUMAN   | ENSG00000182981 C9orf56      | ENSG00000184047 DIABLO       | ENSG00000196581 AJAP1        | ENSG00000197616 MYH6           | ENSG00000198700 IPO9           | ENSG00000198951 NAGA           |
| ENSG00000115233 CEP68          | ENSG00000040341 STAU2          | ENSG00000080644 CHRNA3       | ENSG00000112322 KHDRBS2      | ENSG00000114374 USP9Y        | ENSG00000131351 NP_219485.1    | ENSG00000138829 FBN2           | ENSG00000139537 CCDC65         |
| ENSG00000144891 AGTR1          | ENSG00000146963 LUC7L2         | ENSG00000153779 TGIF2LX      | ENSG00000163607 GTPBP8       | ENSG00000170365 SMAD1        | ENSG00000170961 HAS2           | ENSG00000172000 ZNF556         | ENSG00000204189 Q587I5_HUMAN   |
| AACCTTG                        | ENSG00000107223 EDF1           | ENSG00000107554 DNMBP        | ENSG00000119457 SLC46A2      | ENSG00000124226 ZNF313       | ENSG00000127564 PKMYT1         | ENSG00000128313 APOL5          | ENSG00000130711 PRDM12         |
| ENSG00000155428 TRIM74         | ENSG00000163909 HEYL           | ENSG00000164048 ZNF589       | ENSG00000164363 SLC6A18      | ENSG00000167208 NP_878274.1  | ENSG00000168569 NP_001073970.1 | ENSG00000168610 STAT3          | ENSG00000178809 TRIM73         |
| ENSG00000180035 ZNF553         | ENSG00000184454 C1orf130       | ENSG00000186638 C9orf48      | ENSG00000198213 NM_207501    | ENSG00000205609 Q9BW98_HUMAN | ENSG00000223516 AKAP11         | ENSG000002047365 CENTD1        | ENSG00000274695 LMAN1          |
| ENSG00000081803 CADPS2         | ENSG00000087095 NLK            | ENSG00000102055 PPP1R2P9     | ENSG00000102974 CTCF         | ENSG00000106258 CYP3A5       | ENSG00000124818 OPN5           | ENSG00000125037 TMEM111        | ENSG00000127152 BCL11B         |
| ENSG00000133704 IPO8           | ENSG00000134321 RSAD2          | ENSG00000134744 ZCCHC11      | ENSG00000137976 DNASE2B      | ENSG00000139173 TBEM117      | ENSG00000141380 SS18           | ENSG00000144026 ZNF514         | ENSG00000145685 LHFP12         |
| ENSG00000155380 SLC16A1        | ENSG00000161800 RACGAP1        | ENSG00000164983 PIPM65       | ENSG00000164985 PSIP1        | ENSG00000172915 NBEA         | ENSG00000186868 SLC4A5         | ENSG00000196406 SPANXE         | ENSG00000196812 ZSCAN16        |
| ENSG00000198021 SPANXA2        | ENSG00000198573 SPANXC         | ENSG00000203926 SPANXA1      |                              |                              |                                |                                |                                |
| AACGACC                        | ENSG00000011451 WIZ            | ENSG00000012171 SEMA3B       | ENSG00000099937 SERPIND1     | ENSG00000105066 FIZ1         | ENSG00000120457 KCNJ5          | ENSG00000125872 C20orf75       | ENSG00000143466 IKBKE          |
| ENSG00000155052 CNTNAP5        | ENSG00000165801 NP_060541.3    | ENSG00000166816 LDHD         | HIST1H2BI                    | ENSG00000168393 DTYMK        | ENSG00000168993 NM_006651.3    | ENSG00000168994 C6orf145       | ENSG00000174837 EMR1           |
| ENSG00000177363 NP_981967.1    | ENSG00000179840 NP_001038943.1 | ENSG00000185504 C17orf70     | ENSG00000188523 NP_997300.1  | ENSG00000198518 HIST1H4E     | ENSG00000198546 ZNF511         | ENSG00000198746 GPATCH3        | ENSG00000204682 C10orf114      |
| ENSG00000205266 Q6ZRU5_HUMAN   | ENSG00000205336 GPRF5          | ENSG00000016082 ISL1         |                              |                              |                                |                                |                                |



ENSG00000205057|CLLULOS ENSG00000205156|Q6UXQ8\_HUMAN  
AACTCTC ENSG00000008735|MAPK8IP2 ENSG00000079462|PAFAH1B3 ENSG00000079974|RABL2B ENSG00000113761|ZNF346 ENSG00000131389|SLC6A6 ENSG00000134460|IL2RA ENSG00000138629|UBL7 ENSG00000144134|RABL2A  
ENSG00000152953|STK32B ENSG00000159247|LOC643224 ENSG00000160172|Q8IW37\_HUMAN ENSG00000160691|SHC1 ENSG00000161618|ALDH16A1 ENSG00000168904|LRRC28 ENSG00000172932|ANKRD13D ENSG00000173210|ABLIM3  
ENSG00000182346|DAOA ENSG00000197757|HOXC6 ENSG00000205501|Q6ZU01\_HUMAN ENSG00000007908|SELE ENSG00000011114|BTBD7 ENSG00000047621|C12orf4 ENSG00000087510|TFAP2C ENSG00000094841|UPRT  
ENSG00000116285|ERRF1 ENSG00000118972|PGF23 ENSG00000119013|NDUFB3 ENSG00000119446|RBML8 ENSG00000120860|CCDC53 ENSG00000124177|CHD6 ENSG00000124209|RAB22A ENSG00000127463|KIAA0090  
ENSG00000129422|MTUS1 ENSG00000131730|CKMT2 ENSG00000132549|VPS13B ENSG00000143224|PPOX ENSG00000143324|XPRL ENSG00000146409|C6orf192 ENSG00000147121|ZNF673 ENSG00000150867|PIF5K2A  
ENSG00000153790|C7orf31 ENSG00000154548|SRR35\_HUMAN ENSG00000158077|NLRP14 ENSG00000164512|ANKRD55 ENSG00000173876|NP\_817124.1 ENSG00000187806|NP\_001073931.1 ENSG00000196350|ZNF492 ENSG00000198526|PABPCP2  
  
ENSG00000005100|DHX33 ENSG00000006282|SPATA20 ENSG00000064490|RFXANK ENSG00000075702|WDR62 ENSG00000104946|TBC1D17 ENSG00000105379|ETFB ENSG00000105619|TFPT ENSG00000119403|PHF19  
ENSG00000121281|ADCY7 ENSG00000129465|RIPK3 ENSG00000133460|SLC2A11 ENSG00000143575|HAX1 ENSG00000143878|RHOB ENSG00000152217|SETBP1 ENSG00000157927|K1849\_HUMAN ENSG00000173585|CCR9  
ENSG00000174238|PITPNA ENSG00000186951|PPARA ENSG00000187726|DNAJB13 ENSG00000188026|NP\_847884.1 ENSG00000198019|FCGR1B ENSG00000198326|C20orf141 ENSG00000198870|C9orf96 ENSG00000203784|LELP1  
ENSG00000204564|C6orf136 ENSG00000046604|DSG2 ENSG00000081189|MEF2C ENSG00000088756|ARHGAP28 ENSG00000091136|LAMB1 ENSG00000101166|SLMO2 ENSG00000109670|FBXW7 ENSG00000112299|VNN1  
ENSG00000114346|ECT2 ENSG00000115267|FIH1 ENSG00000131002|CYorf15B ENSG00000134982|APC ENSG00000143507|DUSP10 ENSG00000150907|FOXO1A ENSG00000151849|CENPJ ENSG00000163364|Q96D13\_HUMAN  
ENSG00000164985|PSP1 ENSG00000167306|MYO5B ENSG00000168385|SEPT2 ENSG00000172179|PRL ENSG00000174990|CASA ENSG00000179630|C13orf31  
perfect: AACTGAC GTCAGTT hsa-miR-223 tGTCAGTTgtgcaataacccc 1  
AACTGCA ENSG00000127388|NM\_198455.2 ENSG00000129450|SIGLEC9 ENSG00000134317|GRHL1 ENSG00000140044|NP\_569736.1 ENSG00000141956|PRDM15 ENSG00000143196|DPT ENSG00000154096|THY1 ENSG00000155087|ODF1  
ENSG00000156298|TSPAN7 ENSG00000157870|C1orf93 ENSG00000160296|SIGLEC12 ENSG00000169427|KCNK9 ENSG00000174243|DDX23 ENSG00000177595|LRDD ENSG00000182660|NP\_001013698.1 ENSG00000188004|VSI68  
ENSG00000188807|NP\_001010866.1 ENSG00000196422|KIAA0649 ENSG00000198219|Q96N05\_HUMAN ENSG00000001167|NFYA ENSG00000003393|ALS2 ENSG000000026297|RNASET2 ENSG00000071054|MAP4K4 ENSG00000078618|NRD1  
ENSG00000089195|TRM6\_HUMAN ENSG00000101856|PGRMC1 ENSG00000102753|KPNA3 ENSG00000114805|PLCH1 ENSG00000115289|PCGF1 ENSG00000117174|C1orf181 ENSG00000118495|PLAGL1 ENSG00000122034|GTF3A  
ENSG00000126858|RHOT1 ENSG00000129007|CALML4 ENSG00000136897|MRPL50 ENSG00000140836|ATBF1 ENSG00000144642|RBMS3 ENSG00000151693|DDEF2 ENSG00000155438|MKI67IP ENSG00000157551|KCNJ15  
ENSG00000164106|SCRG1\_HUMAN ENSG00000164794|KCNV1 ENSG00000169604|ANTXR1 ENSG00000170852|KBTBD2 ENSG00000177606|JUN ENSG00000196532|HIST1H3C ENSG00000197453|NP\_001001706.1 ENSG00000198838|RYR3  
ENSG00000203681|XR\_017762.1 ENSG00000204219|TCEA3  
AACTGCC ENSG00000048471|NP\_001073999.1 ENSG00000075826|SEC31B ENSG00000099812|C19orf21 ENSG00000125826|RBCK1 ENSG00000125977|EIF2S2 ENSG00000134014|ELP3 ENSG00000137288|C6orf125 ENSG00000142273|CBLC  
ENSG00000155363|MOV10 ENSG00000162666|KIAA0040 ENSG00000163879|DNALI1 ENSG00000163931|TKT ENSG00000168255|Q8IZ67\_HUMAN ENSG00000170458|CD14 ENSG00000172543|CTSW ENSG00000173898|SPTBN2  
ENSG00000174292|TNK1 ENSG00000183579|ZNRF3 ENSG00000183847|Q9P1C0\_HUMAN ENSG00000186190|C20orf185 ENSG00000187045|TMPRSS6 ENSG00000189159|HNI ENSG00000197417|CARL ENSG00000197697|HIST1H2BE  
ENSG00000204141|Q6ZVW5\_HUMAN ENSG00000206064|Q6ZU89\_HUMAN ENSG00000069849|ATP1B3 ENSG00000107159|CA9 ENSG00000112695|COX7A2 ENSG00000114857|NKTR ENSG00000125571|LLIF7 ENSG00000134330|Q6PCA9\_HUMAN  
ENSG00000144460|Q96NL2\_HUMAN ENSG00000147606|SLC26A7 ENSG00000153814|JAZF1 ENSG00000164253|WDR41 ENSG00000165660|KIAA0157 ENSG00000165732|DDX21 ENSG00000168175|C14orf32 ENSG00000177410|Q5QHF1\_HUMAN  
ENSG00000180044|Q8N5S4\_HUMAN ENSG00000184007|PTP4A2 ENSG00000186104|CYP2R1 ENSG00000198846|TOX ENSG00000206131|Q6ZS21\_HUMAN  
AACTGGA ENSG000000075151|EIF4G3 ENSG00000075618|FSCN1 ENSG00000103647|CORO2B ENSG00000119703|C14orf140 ENSG00000120889|TNFRSF10B ENSG00000123064|DDX54 ENSG00000132205|EMILIN2 ENSG00000134575|ACP2  
ENSG00000138769|CDKL2 ENSG00000142684|ZNF593 ENSG00000149599|C20orf57 ENSG00000158764|ITLN2 ENSG00000161381|PLXDC1 ENSG00000163486|SRGAP2 ENSG00000166257|SCN3B ENSG00000168014|NP\_056346.2  
ENSG00000169635|HTC2 ENSG00000172073|C2orf51 ENSG00000172548|ICHN\_HUMAN ENSG00000176887|SOX11 ENSG00000178919|FOXE1 ENSG00000181938|GINS3 ENSG00000184825|HIST1H2AH ENSG00000185215|TNFAIP2  
ENSG00000196209|Q5JXA8\_HUMAN ENSG00000196935|SRGAP1 ENSG00000204842|ATXN2 ENSG00000067798|NAV3 ENSG00000095574|IKZF5 ENSG00000108590|MED31 ENSG00000123977|WDR69 ENSG00000131016|AKAP12  
ENSG00000136379|FAM108C1 ENSG00000136531|SCN2A ENSG00000140043|ZADH1 ENSG00000144746|ARL6IP5 ENSG00000145996|CDKAL1 ENSG00000152804|HHEX ENSG00000155903|RASA2 ENSG00000162692|VCAM1  
ENSG00000164163|ABCE1 ENSG00000166747|AP1G1 ENSG00000171405|XAGE5 ENSG00000175348|TMEM9B ENSG00000188386|PPP3R2 ENSG00000188959|C9orf152 ENSG00000198161|PPIAL4 ENSG00000198360|NP\_839944.1  
ENSG00000198936|NP\_839944.1 ENSG00000203847|XR\_016130.1 ENSG00000205337|Q6ZVR2\_HUMAN  
AACTGGC ENSG00000075461|CACNG4 ENSG00000088854|C20orf194 ENSG00000106927|AMPB ENSG00000113578|FGF1 ENSG00000121152|NCAPH ENSG00000157978|LDLRAP1 ENSG00000158158|CNNM4 ENSG00000158714|SLAMF8  
ENSG00000162543|UBXD3 ENSG00000169704|GP9 ENSG00000170743|SYT9 ENSG00000171388|APLN ENSG00000183873|SCN5A ENSG00000185052|SLC24A3 ENSG00000198570|RD3 ENSG00000203708|Q6ZU99\_HUMAN  
ENSG00000206197|NP\_001013723.1 ENSG00000206561|COLQ ENSG00000001084|GCLC ENSG00000070961|ATP2B1 ENSG00000144026|ZNF514 ENSG00000146026|SPAG5 ENSG000000093009|CDC45L ENSG00000121552|CSTA  
ENSG00000124098|C20orf108 ENSG00000137992|DBT ENSG00000138640|FAM13A1 ENSG00000139505|MTMR6 ENSG00000145362|ANK2 ENSG00000156697|UTP14A ENSG00000162643|WDR63 ENSG00000166573|GALR1  
ENSG00000170624|SGCD ENSG00000171772|SYCE1 ENSG00000174721|FGFBP3 ENSG00000175348|TMEM9B ENSG00000180964|TCEAL8 ENSG00000189376|C8orf76 ENSG00000198865|Q4G0S7\_HUMAN ENSG00000203947|NP\_001007552.1  
ENSG00000204597|ZNF818  
AACTGGG ENSG00000068354|TBC1D25 ENSG00000088808|PPP1R13B ENSG00000099326|MZF1 ENSG00000102050|PRAF2 ENSG00000118960|HS1BP3 ENSG00000119714|GPR68 ENSG00000122223|CD244 ENSG00000129654|FOXJ1  
ENSG00000130706|ADRM1 ENSG00000135077|HAVCR2 ENSG00000135740|SLC9A5 ENSG00000137310|TCF19 ENSG00000142449|FBN3 ENSG00000148965|SAA4 ENSG00000157184|CPT2 ENSG00000160766|GBAP  
ENSG00000165782|TMEM55B ENSG00000168994|C6orf145 ENSG00000177628|GBA ENSG00000179148|ALOXE3 ENSG00000179270|NP\_001025054.1 ENSG00000204934|NP\_001008745.1 ENSG00000205879|FAM90A25P ENSG00000205996|FAM90A10  
ENSG00000205998|FAM90A9 ENSG00000206000|FAM90A18 ENSG00000206002|FAM90A3 ENSG00000206005|FAM90A8 ENSG00000206008|XR\_015341.1 ENSG00000206023|FAM90A7 ENSG00000086696|HSD17B2 ENSG00000101892|ATP1B4  
ENSG00000134962|KLB ENSG00000135847|ACBD6 ENSG00000141371|C17orf64 ENSG00000143952|VPS54 ENSG00000144214|LYG1\_HUMAN ENSG00000145982|FARS2 ENSG00000148730|EIF4EBP2  
ENSG00000168386|FTLIP1L ENSG00000170629|NP\_872440.2 ENSG00000171135|JAGN1 ENSG00000171365|CLCN5 ENSG00000171885|AQP4 ENSG00000173559|OBFC2A ENSG00000173598|NUDT4 ENSG00000178107|Q8N1B8\_HUMAN  
ENSG00000189212|DPPY1L2P1 ENSG00000196270|Q6ZWE7\_HUMAN ENSG00000204691|NR\_002819.1 ENSG00000205442|C9orf134  
AACTGGT ENSG00000052835|ZNF785 ENSG00000080603|NP\_006653.1 ENSG00000100985|MMP9 ENSG00000101311|C20orf42 ENSG00000110092|CCND1 ENSG00000114982|NP\_060461.3 ENSG00000122085|MTERFD2 ENSG00000124678|TCP11  
ENSG00000126456|IRF3 ENSG00000130997|POLN ENSG00000136935|GOLGA1 ENSG00000162408|NOL9 ENSG00000166426|CRABP1 ENSG00000167011|NP\_940973.1 ENSG00000167625|ZNF526 ENSG00000169169|CPTIC  
ENSG00000176979|TRIM60 ENSG00000196431|CRYBA4 ENSG00000196970|INXF4 ENSG00000198369|SPRED2 ENSG00000205878|Q6ZSV2\_HUMAN ENSG00000054803|CBLN4 ENSG00000080704|PPP1R15A ENSG00000092345|DAZL  
ENSG00000112182|BACH2 ENSG00000114547|ROPN1B ENSG00000115520|COQ10B ENSG00000118690|ARMC2 ENSG00000119048|UBE2E ENSG00000121210|KIAA0922 ENSG00000121594|CD80 ENSG00000131508|UBE2D2  
ENSG00000132680|KIAA0907 ENSG00000134444|KIAA1468 ENSG00000134899|ERCC5 ENSG00000136709|WDR33 ENSG00000141279|NPEPPS ENSG00000142864|ZEBP1 ENSG00000144224|UBXD2 ENSG00000144713|RPL32  
ENSG00000146426|TTAM2 ENSG00000151704|KCNJ1 ENSG00000152348|ATG10 ENSG00000152795|HNRPDL ENSG00000154144|TBRG1 ENSG00000155329|SRCHC10 ENSG00000162913|C1orf145 ENSG00000168876|ANKRD49  
ENSG00000177125|ZBTB34 ENSG00000179933|C14orf119 ENSG00000188379|IFNA2 ENSG00000197958|RPL12  
AACTGTG ENSG00000030110|BAK1 ENSG00000088854|C20orf194 ENSG00000107796|ACTA2 ENSG00000112159|MDN1 ENSG00000124191|TOX2 ENSG00000130479|MAP1S ENSG00000137726|FXYP6 ENSG00000137843|PAK6  
ENSG00000140534|C15orf42 ENSG00000142611|PRDM16 ENSG00000162877|NP\_689704.3 ENSG00000163468|CCT3 ENSG00000163933|RFT1 ENSG00000166557|TMED3 ENSG00000169598|DFFB ENSG00000173212|C1orf161  
ENSG00000175130|MARCKSL1 ENSG00000178006|XR\_018006.1 ENSG00000183955|SETD8 ENSG00000185905|C16orf54 ENSG00000197586|ENTPD6 ENSG00000198909|MAP3K3 ENSG00000094133|REV3L ENSG0000018510|AGPS  
ENSG00000076003|MCM6 ENSG00000079134|THOC1 ENSG00000090104|RGSI ENSG00000102468|HTRA2 ENSG00000109586|GALNT7 ENSG00000115239|ASB3 ENSG00000118804|GET1\_HUMAN ENSG00000126860|EVI2A  
ENSG00000130962|PRRG1 ENSG00000138759|FRAS1 ENSG00000139910|NOVA1 ENSG00000145632|PLK2 ENSG00000151490|PTPPO ENSG00000152254|G6PC2 ENSG00000153037|SRP19 ENSG00000157445|CACNA2D3  
ENSG00000157625|MAP3K7IP3 ENSG00000163518|FCRL4 ENSG00000163618|CADPS ENSG00000164463|NP\_705835.1 ENSG00000165891|E2F7 ENSG00000168916|ZNF608 ENSG00000180458|Q8N3U1\_HUMAN ENSG00000183475|ASB7  
ENSG00000184005|ST6GALNAC3 ENSG00000185551|NR2F2 ENSG00000198739|LRRTM3 ENSG00000203756|C6orf191  
AACTTGA ENSG00000080602|B4GALNT1 ENSG00000100077|ADRBK2 ENSG00000100246|DNAL4 ENSG00000100376|FAM118A ENSG00000101311|C20orf42 ENSG00000110405|OXT ENSG00000102870|ZNF629 ENSG00000104228|TRIM35  
ENSG00000105323|HNRPUL1 ENSG00000110244|APOA4 ENSG00000111725|PRKAB1 ENSG00000119686|C14orf58 ENSG00000124593|C6orf49 ENSG00000127800|IPPK ENSG00000130287|NCAN ENSG00000130675|HLXB9  
ENSG00000135953|MFSD9 ENSG00000145819|ARHGAP26 ENSG00000158161|EYA3 ENSG00000158828|PINK1 ENSG00000160305|DIP2A ENSG00000166689|PLEKHA7 ENSG00000166900|STX3 ENSG00000169436|COL22A1  
ENSG00000173011|Q86TJ2\_HUMAN ENSG00000175824|XR\_017847.1 ENSG00000176428|VPS37D ENSG00000185085|INTS5 ENSG00000186788|NP\_001001670.1 ENSG00000189001|SBSN ENSG00000189357|XR\_015253.1 ENSG00000196739|COL27A1  
ENSG00000203908|NP\_001017361.1 ENSG00000038002|AGA ENSG00000047188|YTHDC2 ENSG00000067048|DDX3X ENSG00000104714|ERICH1 ENSG00000107669|ATEL1 ENSG00000110344|UBE4A ENSG00000115474|KCNJ13  
ENSG00000115616|SLC9A2 ENSG00000115866|DARS ENSG00000116030|SUMO1P3 ENSG00000119953|SMNDC1 ENSG00000122218|COPA ENSG00000134001|EIF251 ENSG00000134758|RNFI38 ENSG00000138336|CXXC6  
ENSG00000146872|TLK2 ENSG00000151461|UPF2 ENSG00000154845|PPP4R1 ENSG00000157343|C6orf81 ENSG00000157540|DYRK1A ENSG00000160588|U2966\_HUMAN ENSG00000161970|RPL26 ENSG00000164938|TP53INP1  
ENSG00000177138|FAM9B ENSG00000182308|WDR21B ENSG00000183304|FAM9A ENSG00000187268|FAM9C ENSG00000189043|NDUFA4 ENSG00000196305|IARS ENSG00000198887|SMC5  
AACTTGT ENSG00000023902|PLEKHO1 ENSG00000051009|C11orf56 ENSG00000068438|FTSJ1 ENSG00000100084|HIRA ENSG00000102904|TNSNAXIP1 ENSG00000103061|SLC7A6OS ENSG00000108479|GALK1 ENSG000001115107|STEAP3  
ENSG00000122359|ANXA11 ENSG00000123136|DDX39 ENSG00000140263|SORL ENSG00000158987|RAPGEF6 ENSG00000162599|NFTA ENSG00000163331|NP\_001017920.1 ENSG00000165025|SYK ENSG00000166069|TMC05  
ENSG00000168061|SAC3D1 ENSG00000169375|SIN3A ENSG00000178401|NP\_079178.2 ENSG00000182022|ST4S6\_HUMAN ENSG00000184923|FAM22A ENSG00000187239|FNBP1 ENSG00000189058|APOD ENSG00000197162|ZNF688  
ENSG00000198369|SPRED2 ENSG00000204564|C6orf136 ENSG00000008405|CRY1 ENSG000000087916|SLC6A14 ENSG00000100425|BRD1 ENSG00000106537|TSPAN13 ENSG00000107099|DOCK8 ENSG00000113575|PPP2CA  
ENSG00000122507|BBS9 ENSG00000130023|C6orf70 ENSG00000135333|EPHA7 ENSG00000137872|SEMA6D ENSG00000138722|MMRN1 ENSG00000139973|SYT16 ENSG00000143184|XCL1 ENSG00000143507|DUSP10  
ENSG00000146678|IGFBP1 ENSG00000150276|XR\_017783.1 ENSG00000153339|KIAA1012 ENSG00000155011|DKK2 ENSG00000155592|ZKSCAN2 ENSG00000157869|RAB28 ENSG00000165704|HPRT1 ENSG00000168214|RBPJ  
ENSG00000170006|TMEM154 ENSG00000173166|RAPH1 ENSG00000185652|NTPF3 ENSG00000196409|ZNF658B ENSG00000198416|Z658B\_HUMAN ENSG00000205523|Q6ZP97\_HUMAN  
AACTTTA ENSG00000086102|NFX1 ENSG00000100014|SPECC1L ENSG00000100604|CHGA ENSG00000101391|CDK5RAP1 ENSG00000104823|ECH1 ENSG00000105808|RASA4 ENSG00000116667|C1orf21 ENSG00000131059|C20orf71  
ENSG00000148408|CACNA1B ENSG00000152192|POU4F1 ENSG00000157240|FDL1 ENSG00000162650|ATXN7L2 ENSG00000162761|LMX1A ENSG00000163521|GLB1L ENSG00000164048|ZNF589 ENSG00000170099|SERPINA6  
ENSG00000173530|TNFRSF10D ENSG00000176095|IHPK1 ENSG00000175501|NLH2 ENSG00000179604|CDC42EP4 ENSG00000184785|Q96HG1\_HUMAN ENSG00000205434|Q6ZU34\_HUMAN ENSG00000205698|LOC648426 ENSG00000000457|SCYL3  
ENSG00000023445|BIRC3 ENSG00000048544|MRPS10 ENSG00000055732|MCOLN3 ENSG00000071794|HLTF ENSG00000082269|KIAA1411 ENSG00000083844|ZNF264 ENSG00000105865|DUS4L ENSG00000117862|TXNDC12  
ENSG00000118181|RPS25 ENSG00000120784|ZFP30 ENSG00000121931|C1orf103 ENSG00000131979|GCHI ENSG00000134480|CCNH ENSG00000134982|APC ENSG00000137818|RPLP1 ENSG00000138448|ITGAV  
ENSG00000143753|DEGS1 ENSG00000145794|MEGF10 ENSG00000164118|KIAA1712 ENSG00000165118|C9orf64 ENSG00000165646|SLC18A2 ENSG00000166233|ARIH1 ENSG00000166927|MS4A7  
ENSG00000173064|C12orf51 ENSG00000173681|CXorf23 ENSG00000178997|EUDL1 ENSG00000180182|CRSP2 ENSG00000197223|NP\_006324.1 ENSG00000205174|NP\_001019778.1  
AACTTTG ENSG00000054118|THRAPP3 ENSG00000058085|LAMC2 ENSG00000092201|XPT16H ENSG00000102924|CBLN1 ENSG00000110906|KCTD10 ENSG00000118160|SLC8A2 ENSG00000119522|DENND1A ENSG00000122122|CXorf9  
ENSG00000126709|IFI6 ENSG00000141431|Q6ZMX6\_HUMAN ENSG00000148337|CIZ1 ENSG00000152475|Q96EG3\_HUMAN ENSG00000162337|LRP5 ENSG00000163515|RETNLB ENSG00000164038|NP\_849155.2 ENSG00000164651|SP8  
ENSG00000166900|STX3 ENSG00000167011|NP\_940973.1 ENSG00000168792|NP\_937790.1 ENSG00000174804|PZD4 ENSG00000184785|Q96HG1\_HUMAN ENSG00000204103|MAFB ENSG00000008405|CRY1 ENSG00000087510|TFAP2C  
ENSG00000096006|CRISP3 ENSG00000101557|USP14 ENSG00000102098|SCML2 ENSG00000106560|GIMAP2 ENSG00000108001|EBF3 ENSG00000117598|NP\_001010861.1 ENSG00000119865|C2orf32 ENSG00000120533|ENY2  
ENSG00000126246|TMEM149 ENSG00000132842|AP3B1 ENSG00000139842|CUL4A ENSG00000144057|ST6GAL2 ENSG00000153339|KIAA1012 ENSG00000155096|AZIN1 ENSG00000162814|SPATA17 ENSG00000163586|FABP1  
ENSG00000168811|IL12A ENSG00000169508|EBI2 ENSG00000179796|LRR3B ENSG00000180228|PRKRA ENSG00000184898|RBM43 ENSG00000

AAGAAGC ENSG00000075151|EIF4G3 ENSG00000081059|TCF7 ENSG00000085978|ATG16L1 ENSG00000088854|C20orf194 ENSG00000100351|GRAP2 ENSG00000101342|C20orf118 ENSG00000112149|CD83 ENSG00000128944|C15orf23  
ENSG00000130270|ATP8B3 ENSG00000130950|FAM22F ENSG00000132854|ANR38\_HUMAN ENSG00000137094|DNAJB5 ENSG00000144231|POLR2D ENSG00000147123|NDUFB1 ENSG00000154478|GPR26 ENSG00000160296|SIGLEC12  
ENSG00000160818|GPATCH4 ENSG00000161281|COX7A1 ENSG00000171711|DEFB4 ENSG00000176302|FOXRI ENSG00000177257|BD02\_HUMAN ENSG00000177302|TOP3A ENSG00000181585|TMIE ENSG00000197308|NP\_997306.1  
ENSG00000203811|HIST2H3A ENSG00000203813|HIST2H3C ENSG00000205631|Q9H7S7\_HUMAN ENSG00000205683|DPF3 ENSG00000047410|TPR ENSG00000058056|USP13 ENSG00000112276|BVES ENSG00000121388|Q9H521\_HUMAN  
ENSG00000122203|KIAA1191 ENSG00000125531|C20orf195 ENSG00000138795|LEF1 ENSG00000140937|CDH11 ENSG00000143344|RGL1 ENSG00000161714|PLCD3 ENSG00000162976|PQLC3 ENSG00000165359|DDX26B  
ENSG00000167842|MIS12 ENSG00000168852|SUGT1L1 ENSG00000170471|KIAA1219 ENSG00000174132|TMEM157 ENSG00000176635|HORMAD2 ENSG00000180370|PAK2 ENSG00000181541|MAB21L2 ENSG00000183023|SLC8A1  
ENSG00000196406|SPANXE ENSG00000198021|SPANXA2 ENSG00000198092|TMPRSS11F ENSG00000198573|SPANXC ENSG00000198820|SPANXF1 ENSG00000203926|SPANXA1 ENSG00000203929|SPANXB1  
AAGAAGT ENSG00000003756|RBM5 ENSG00000072501|SMC1A ENSG00000077080|ACTL6B ENSG00000081059|TCF7 ENSG00000111405|PP11\_HUMAN ENSG00000115641|FHL2 ENSG00000137491|SLCO2B1 ENSG00000140750|ARHGAP17  
ENSG00000155858|LSM11 ENSG00000158571|PFKFB1 ENSG00000163206|SMCP ENSG00000173210|ABLIM3 ENSG00000183049|CAMK1D ENSG00000184068|Q8N8F0\_HUMAN ENSG00000186318|BACE1 ENSG00000189321|NR\_002940.1  
ENSG00000197353|LYPD2 ENSG00000198663|C6orf89 ENSG00000205864|KRTAP5-6 ENSG00000047410|TPR ENSG00000048392|RRM2B ENSG00000054938|CHRD12 ENSG00000101000|PROCR ENSG00000107669|ATE1  
ENSG00000110002|LOH11CR2A ENSG00000111046|MYF6 ENSG00000112335|SNX3 ENSG00000115825|PRKD3 ENSG00000118260|CREB1 ENSG00000119139|TJPC ENSG00000125845|BMP2 ENSG00000134318|ROCK2  
ENSG00000135775|COG2 ENSG00000136643|RPS6KC1 ENSG00000141040|ZNF287 ENSG00000141682|MAIP1 ENSG00000151704|KCNJ1 ENSG00000153015|SDCCAG10 ENSG00000162437|RAVER2 ENSG00000164182|NDUFA12L  
ENSG00000166295|C10orf104 ENSG00000167842|MIS12 ENSG00000168036|CTNNB1 ENSG00000168383|HLA-DPB1 ENSG00000168385|SEPT2 ENSG00000169224|C1orf150 ENSG00000169495|HTRA4 ENSG00000178700|DHFR1L  
ENSG00000189367|C6orf174  
AAGAATA ENSG00000082701|GSK3B ENSG00000100342|APOL1 ENSG00000101350|KIF3B ENSG00000105428|ZNRF4 ENSG00000112941|POLS ENSG00000116586|MAPIP\_HUMAN ENSG00000124212|PTGIS ENSG00000128313|APOL5  
ENSG00000128335|APOL2 ENSG00000130340|SNX9 ENSG00000130956|HABP4 ENSG00000132824|SERINC3 ENSG00000134107|BHLHB2 ENSG00000137522|RNF121 ENSG00000137707|BTG4 ENSG00000142789|ELA3A  
ENSG00000149798|CDC42EP2 ENSG00000162076|NP\_612448.1 ENSG00000164300|SERINC5 ENSG00000165238|WNK2 ENSG00000173093|CCDC63 ENSG00000174788|PCP2 ENSG00000176515|Q8NAX6\_HUMAN ENSG00000178252|WDR6  
ENSG00000181625|GYLD2 ENSG00000185811|IKZF1 ENSG00000187650|NP\_001017921.1 ENSG00000196502|SULT1A1 ENSG00000197061|HIST1H4C ENSG00000197465|GYPE ENSG00000198785|GRIN3A ENSG00000204197|KIFC1  
ENSG00000211454|ARK74\_HUMAN ENSG00000001561|ENPP4 ENSG00000023839|ABCC2 ENSG00000064218|DMRT3 ENSG00000064313|TAF2 ENSG00000072201|LNK1 ENSG00000086991|NOX4 ENSG00000092148|HECTD1  
ENSG00000095794|CREM ENSG00000101751|POLI ENSG00000102054|RBBP7 ENSG00000103740|ACSBG1 ENSG00000106462|EZH2 ENSG00000106993|CDC37L1 ENSG00000111885|MAN1A1 ENSG00000112234|FBXL4  
ENSG00000115947|ORC4L ENSG00000117625|RCOR3 ENSG000001122778|Q9HMC3\_HUMAN ENSG00000135914|HTR2B ENSG00000135976|Q53S06\_HUMAN ENSG00000136158|SPRY2 ENSG00000145416|MARCH1 ENSG00000151718|WWC2  
ENSG00000151790|TDO2 ENSG00000155970|EPHA2 ENSG00000156920|GPR112 ENSG00000165474|GJB2 ENSG00000166035|LIPC ENSG00000166192|SENPA8 ENSG00000168666|ZNF30  
ENSG00000169953|HSFY2 ENSG00000170946|DPH4 ENSG00000171126|KCNQ3 ENSG00000172468|HSFY1 ENSG00000172575|RASGRP1 ENSG00000174799|CEP135 ENSG00000176840|C19orf30 ENSG00000176927|EFCAB5  
ENSG00000181481|RNF135 ENSG00000185057|TAF9 ENSG00000187998|KIAA1641 ENSG00000196597|ZNF782 ENSG00000196900|NP\_997291.1 ENSG00000197576|HOXA4 ENSG00000198162|MAN1A2 ENSG00000205056|CLLU1  
AAGAATG ENSG00000055130|CUL1 ENSG00000069188|SDK2 ENSG00000101265|RASSF2 ENSG00000102755|FLT1 ENSG00000106100|NOD1 ENSG00000122359|ANXA11 ENSG00000125818|PSMF1 ENSG00000128228|SDF2L1  
ENSG00000133466|C1QTNF6 ENSG00000140474|ULK3 ENSG00000145819|ARHGAP26 ENSG00000148396|KIAA0310 ENSG00000156298|TSPAN7 ENSG00000160789|LMNA ENSG00000162873|KLHDC8A ENSG00000169006|NTR2  
ENSG00000171903|CYP4F11 ENSG00000178093|TSSK6 ENSG00000178795|GDPD4 ENSG00000182013|NP\_060685.2 ENSG00000198219|Q96N05\_HUMAN ENSG00000198411|NM\_207443 ENSG00000204084|INPP5B ENSG00000204304|PBX2  
ENSG00000004897|CDC27 ENSG00000005020|SKAP2 ENSG000000018869|ZNF582 ENSG000000049167|ERCC8 ENSG00000050438|SLC4A8 ENSG00000092345|DAZL ENSG00000099389|C20orf191 ENSG00000102409|BEXL1  
ENSG00000107897|ACBD5 ENSG00000109787|KLF3 ENSG00000110848|CD69 ENSG00000120675|DNAJC15 ENSG00000124205|EDN3 ENSG00000134108|ARL8B ENSG00000124205|ABC5 ENSG00000138075|ABCG5 ENSG00000138433|CTR\_HUMAN  
ENSG00000154310|TNIK ENSG00000155850|SLC26A2 ENSG00000160352|ZNF714 ENSG00000168509|HFE2 ENSG00000184613|NELL2 ENSG00000187185|Q86VG7\_HUMAN ENSG00000187508|Q7Z2R7\_HUMAN ENSG00000187994|NP\_940847.1  
ENSG00000196172|ZNF681 ENSG00000198521|ZNF43 ENSG00000204276|HLA-DQA2 ENSG00000205024|Q6ZVP5\_HUMAN  
AAGACAA ENSG00000100767|PAPLN ENSG00000116604|MEF2D ENSG00000119699|TGFEB3 ENSG00000123353|ORMDL2 ENSG00000124222|NPEPL1 ENSG00000129816|NR\_001538.1 ENSG00000129845|O14605\_HUMAN ENSG00000133026|MYH10  
ENSG00000141316|SPACA3 ENSG00000157064|NMNAT2 ENSG00000157823|AP3S2 ENSG00000158796|DEDD ENSG00000160097|FNDC5 ENSG00000160844|NP\_849153.3 ENSG00000163515|RETNLB ENSG00000167798|NP\_001013662.1  
ENSG00000168784|BPESAC1 ENSG00000171649|ZIK1 ENSG00000172543|CTSS ENSG00000177551|NHLH2 ENSG00000178796|Q8N9Z1\_HUMAN ENSG00000180598|NP\_057296.1 ENSG00000183461|XAGE1C ENSG00000186638|C9orf48  
ENSG00000187942|LDLRAD2 ENSG00000188523|NP\_997300.1 ENSG00000188822|CNR2 ENSG00000198208|RPS6KL1 ENSG00000204375|XAGE1E ENSG00000204376|XAGE1D ENSG00000204379|XAGE1B ENSG00000204382|XAGE1  
ENSG00000205039|Q6ZQ55\_HUMAN ENSG00000205106|Q6N098\_HUMAN ENSG00000205522|LOC255411 ENSG00000066654|THUMPDI ENSG00000091436|MLTK\_HUMAN ENSG00000101951|PAGE4 ENSG00000102391|RPL36A ENSG00000103540|CE110\_HUMAN  
ENSG00000107771|KIAA1128 ENSG00000112232|KHDRBS2 ENSG000001119041|GTF3C3 ENSG00000119950|MXI1 ENSG00000129197|RPAIN ENSG00000135185|C7orf23 ENSG00000135842|FAM129A ENSG00000143119|CD53  
ENSG00000145592|RPL37 ENSG00000147488|ST18 ENSG00000151914|DST ENSG00000158639|PAGE5 ENSG00000163145|C1QTNF7 ENSG00000165092|ALDH1A1 ENSG00000172717|C14orf54 ENSG00000172901|LAEVR\_HUMAN  
ENSG00000177620|Q9BSL4\_HUMAN ENSG00000180815|MAP3K15 ENSG00000185849|Q9P194\_HUMAN ENSG00000204164|Q6P095\_HUMAN ENSG00000204177|Q6P095\_HUMAN ENSG00000204279|PAGE3 ENSG00000204334|ALL162\_HUMAN  
AAGACGC ENSG00000106266|LRRC23 ENSG00000077009|ITGB1BP3 ENSG00000099769|IGFALS ENSG00000123965|NP\_777590.1 ENSG00000130427|EPO ENSG00000134905|CARS2 ENSG00000137834|SMAD6 ENSG00000148334|PTGES2  
ENSG00000148399|WDR85 ENSG00000158292|GPR153 ENSG00000160183|TMPRSS3 ENSG00000161055|SCGB3A1 ENSG00000165623|C10orf49 ENSG00000167513|CDT1 ENSG00000169876|MUC17 ENSG00000170909|NP\_573398.1  
ENSG00000172297|Q96RM8\_HUMAN ENSG00000172332|GOLGA2L1 ENSG00000177202|SPACA4 ENSG00000177548|RABEP2 ENSG00000182378|PLCXD1 ENSG00000182375|MXRA5 ENSG00000182375|MXRA5 ENSG00000182692|LOC728350  
ENSG00000131373|HACL1 ENSG00000134258|VTCN1 ENSG00000136141|LRCH1 ENSG00000136874|STX17 ENSG00000138650|PCDH10 ENSG00000145868|FBXO38 ENSG00000146833|TRIM4 ENSG00000150636|CCDC102B  
ENSG00000150753|CCT5 ENSG00000151490|PTPPO ENSG00000154864|FAM38B ENSG00000156136|DCK ENSG00000160629|C17orf32 ENSG00000164828|UNC84A ENSG00000166455|C16orf46 ENSG00000167785|ZNF558  
ENSG00000168542|COL3A1 ENSG00000168916|ZNF608 ENSG00000170903|KIAA1826 ENSG00000174298|NP\_694572.1 ENSG00000180233|ZNRF2 ENSG00000180730|TMEM46 ENSG00000186115|CYP4F2 ENSG00000189320|NP\_995327.1  
ENSG00000197359|C15orf34 ENSG00000197943|PLCG2 ENSG00000203706|C1orf133  
AAGACTT ENSG00000010282|HHATL ENSG00000062485|CS2 ENSG00000101082|SLA2 ENSG00000101670|LIPG ENSG00000123992|DNPEP ENSG00000126258|FXYP1 ENSG00000134222|PSRC1 ENSG00000135624|CCT7  
ENSG00000140025|C14orf143 ENSG00000142511|GPR32 ENSG00000142687|KIAA0319L ENSG00000149532|CPSF7\_HUMAN ENSG00000158169|FANCC ENSG00000166833|NAV2 ENSG00000167595|C19orf55 ENSG00000168434|COG7  
ENSG00000169666|ASPSCR1 ENSG00000170049|KCNAB3 ENSG00000173349|SPTD23 ENSG00000185681|C9orf18 ENSG00000186532|SMYD4 ENSG00000189060|H1FO ENSG00000196935|SRGAP1 ENSG00000198258|UBL5  
ENSG00000205105|PSENE1 ENSG00000007001|UPP2 ENSG000000013375|PGM3 ENSG000000035499|DEPDC18 ENSG00000087303|NID2 ENSG00000095574|IKZF5 ENSG00000100201|DDX17 ENSG00000108239|TBC1D12  
ENSG00000110934|BTN2 ENSG00000118200|CAMSAP1L1 ENSG00000118520|ARG1 ENSG00000119508|NR4A3 ENSG00000122507|BBS9 ENSG00000134987|WDR36 ENSG00000136527|SFRS10 ENSG00000138823|MTTP  
ENSG00000142182|DNMT3L ENSG00000144021|CIAO1 ENSG00000145868|FBXO38 ENSG00000161547|SFRS2 ENSG00000162645|GBP7 ENSG00000165338|HECTD2 ENSG00000165929|MTAC2D1 ENSG00000167325|RRM1  
ENSG00000169239|CA5B ENSG00000171126|KCNQ3 ENSG00000171766|GATM ENSG00000173418|NAT5 ENSG00000175387|SMAD2 ENSG00000176601|YXK4 ENSG00000181104|F2R  
ENSG00000184258|CDR1 ENSG00000184867|ARMCX2 ENSG00000198677|KIAA0372  
AAGAGAA ENSG00000047617|TMEM16B ENSG00000071626|DZAP1 ENSG00000075151|EIF4G3 ENSG00000082805|ERC1 ENSG00000103343|ZNF174 ENSG00000103966|EHD4 ENSG00000112079|STK38 ENSG00000113196|HAND1  
ENSG00000114648|KLHL18 ENSG00000115297|TLX2 ENSG00000112268|FTSJ2 ENSG00000125485|DDX31 ENSG00000125726|CD70 ENSG00000130340|SNX9 ENSG00000135248|NP\_115988.1 ENSG00000143772|ITPKB  
ENSG00000145882|PCYOX1 ENSG00000150086|GRIN2B ENSG00000156510|HKDC1 ENSG00000163545|NUAK2 ENSG00000169213|RAB3B ENSG00000175697|GPR156 ENSG00000177762|C5orf27  
ENSG00000179840|NP\_001038943.1 ENSG00000182500|TMEM142A ENSG00000184390|Q6ICM0\_HUMAN ENSG00000184560|C17orf74 ENSG00000186466|AQ7P2 ENSG00000187033|SAMD7 ENSG00000187186|CCL27 ENSG00000187608|ISG15  
ENSG00000196844|C11orf38 ENSG00000203702|C6orf59 ENSG00000064115|TM7SF3 ENSG00000081842|PCDHA10 ENSG00000106688|SLC1A1 ENSG00000112530|PACRG ENSG00000118785|SFP1 ENSG00000128683|GAD1  
ENSG00000133706|LARS ENSG00000135333|EPHA7 ENSG00000135775|COG2 ENSG00000135905|DOCK10 ENSG00000137968|SLC44A5 ENSG00000140450|ARRDC4 ENSG00000143162|CREG1 ENSG00000147571|CRH  
ENSG00000149534|MS4A2 ENSG00000153415|PFP1R3A ENSG00000155319|NP\_001004299.1 ENSG00000157510|AFAP1L1 ENSG00000157654|PALM2 ENSG00000163171|CDC42EP3 ENSG00000163734|CXCL3  
ENSG00000164494|PDSS2 ENSG00000171517|EDG7 ENSG00000174496|C21orf34 ENSG00000180370|PAK2 ENSG00000181472|ZBTB2 ENSG00000185037|XR\_016629.1 ENSG00000185177|ZNF479 ENSG00000187889|C1orf168  
ENSG00000197990|XR\_016643.1 ENSG00000198669|XKR9 ENSG00000205057|CLLU10S  
AAGAGAC ENSG00000057593|F7 ENSG00000100908|C14orf122 ENSG00000101337|TM9SF4 ENSG00000101473|ACOT8 ENSG00000122783|C7orf49 ENSG00000129467|ADCY4 ENSG00000133026|MYH10 ENSG00000133195|SLC39A11  
ENSG00000140718|FTO ENSG00000143127|ITGA10 ENSG00000153666|XR\_017721.1 ENSG00000155052|CNTNAP5 ENSG00000158014|SLC30A2 ENSG00000169241|RAG1AP1 ENSG00000170310|STX8 ENSG00000173227|SYT12  
ENSG00000174576|NPAS4 ENSG00000178081|LOC653075 ENSG00000178206|C2orf14 ENSG00000184677|ZBTB40 ENSG00000187686|XR\_016979.1 ENSG00000188532|LOC653125 ENSG00000188626|LOC653720 ENSG00000189180|ZNF33A  
ENSG00000198844|ARHGEP15 ENSG00000205037|Q6ZT72\_HUMAN ENSG00000100578|KIAA0586 ENSG00000101230|C20orf82 ENSG00000109208|SMR3A ENSG00000118260|CREB1 ENSG00000123496|IL13RA2 ENSG00000137770|CTDSPL2  
ENSG00000143119|CD53 ENSG00000145782|ATG12 ENSG00000162699|Q96RF1\_HUMAN ENSG00000164175|SLC45A2 ENSG00000165588|OTX2 ENSG00000171478|SPACA5B ENSG00000178722|NP\_775938.1 ENSG00000184083|FAM120C  
ENSG00000184474|Q96FP4\_HUMAN ENSG00000185591|SP1 ENSG00000205777|GAGE4  
AAGAGCC ENSG00000103888|KIAA1199 ENSG00000119599|WDR21A ENSG00000126756|UXT ENSG00000158156|XKR8 ENSG00000158166|CPA2 ENSG00000164742|ADCY1 ENSG00000168148|HIST3H3 ENSG00000168242|HIST1H2BI  
ENSG00000168754|NP\_057574.2 ENSG00000174502|SLC26A9 ENSG00000179085|DPM3 ENSG00000184163|FAM132A ENSG00000184566|Q9P1G6\_HUMAN ENSG00000188783|PRELP ENSG00000196743|GM2A ENSG00000198864|KRTAP5-9  
ENSG00000205559|Q6IBW5\_HUMAN ENSG00000205974|Q6ZVY3\_HUMAN ENSG0000011260|UTP18 ENSG00000100580|TMED8 ENSG00000110955|ATP5B ENSG0000011237|VPS29 ENSG00000116747|TROVE2 ENSG00000118276|B4GALT6  
ENSG00000129521|EGLN3 ENSG00000136146|MED4 ENSG00000139160|NP\_776163.1 ENSG00000144645|OSBP110 ENSG00000157540|DYRK1A ENSG00000161970|RPL26 ENSG00000164327|NP\_689969.2  
ENSG00000164619|BMPER ENSG00000168807|SNTB2 ENSG00000169439|SDC2 ENSG00000178446|C21orf100 ENSG00000186354|EDG3 ENSG00000197024|ZNF398 ENSG00000198056|PRIM1  
AAGAGCG ENSG00000040608|RTN4R ENSG00000054179|ENTPD2 ENSG00000088836|SLC4A11 ENSG00000100285|NEFH ENSG00000105374|NKG7 ENSG00000105717|PBX4 ENSG00000108759|KRT32 ENSG00000112699|GMD5  
ENSG00000120784|FGD3 ENSG00000141873|SLC39A3 ENSG00000153266|FEZF2 ENSG00000161013|MGAT4B ENSG00000161914|ZNF653 ENSG00000167969|DCI ENSG00000170550|Q8WVU8\_HUMAN ENSG00000173267|SNCG  
ENSG00000185085|INTS5 ENSG00000186322|Q8N824\_HUMAN ENSG00000187166|H1FNT ENSG00000203971|Q6ZRT1\_HUMAN ENSG0000038274|MAT2B ENSG00000100357|ADSL ENSG00000106714|CNTNAP3 ENSG00000111247|RAD51AP1  
ENSG00000112367|KIAA0274 ENSG00000119537|FVT1 ENSG00000122376|XR\_015353.1 ENSG00000135870|RC3H1 ENSG00000163635|ATXN7 ENSG00000164265|SCGB3A2 ENSG00000165874|FAM35A ENSG00000169032|MAP2K1  
ENSG00000169906|SI00G ENSG00000169953|HSFY2 ENSG00000170537|TMC7 ENSG00000172468|HSFY1 ENSG00000184992|BR13BP ENSG00000186205|MOSC1 ENSG00000189377|NP\_940879.1 ENSG00000205279|CTXN3  
AAGAGCT ENSG00000100565|C14orf166B ENSG00000110917|KIAA0152 ENSG00000137522|RNF121 ENSG00000141750|STAC2 ENSG00000159023|EPB41 ENSG00000159388|BTG2 ENSG00000162144|CYBASC3 ENSG00000167107|NP\_079425.2  
ENSG00000167613|LAIR1 ENSG00000169955|ZNF747 ENSG00000171124|FUT3 ENSG00000177133|Q6ZV91\_HUMAN ENSG00000180358|Q8N1X6\_HUMAN ENSG00000180861|C12orf36 ENSG00000185130|HIST1H2BL ENSG00000186318|BACE1  
ENSG00000187033|SAMD7 ENSG00000187595|NP\_001013646.1 ENSG00000187678|SPRY4 ENSG00000204241|Q6ZU8\_HUMAN ENSG00000205658|Q6ZU6\_HUMAN ENSG00000205703|NP\_001010910.1 ENSG00000206081|Q6ZVK3\_HUMAN ENSG0000004961|HCCS  
ENSG00000064012|CASP8 ENSG00000106511|MEOX2 ENSG00000115091|ACTR3 ENSG00000116251|RPL22 ENSG00000120885|CLU ENSG00000128845|CCPG1 ENSG00000134278|SP1RE1 ENSG00000137040|RANBP6  
ENSG00000137642|SORL1 ENSG00000150760|DOCK1 ENSG00000153914|SFRS12 ENSG00000166439|RNF169 ENSG00000173480|ZNF417 ENSG00000176659|C20orf197 ENSG00000177981|ASB8 ENSG00000179833|SERTAD2  
ENSG00000189367|C6orf174 ENSG00000197585|Q5JV89\_HUMAN ENSG00000205524|Q68D70\_HUMAN  
AAGAGGA ENSG00000068323|TEF3 ENSG00000075151|EIF4G3 ENSG00000092098|ISGF3G ENSG00000117697|NSL1 ENSG00000132382|MYBBP1A ENSG00000133028|SC01 ENSG00000136827|TOR1A ENSG00000139832|RAB20  
ENSG00000140598|EFTUD1 ENSG00000141480|ARRB2 ENSG00000143032|BARHL2 ENSG00000154957|ZNF18 ENSG00000160285|LSS ENSG00000160818|GPATCH4 ENSG00000166145|SPINT1 ENSG00000166908|PIP5K2C  
ENSG00000168062|BATF2 ENSG00000168569|NP\_001073970.1 ENSG00000173511|VEGFB ENSG00000175264|CHST1 ENSG000001

ENSG00000100281|HMG2L1 ENSG00000101752|MIB1 ENSG00000103037|SETD6 ENSG00000118292|C1orf54 ENSG00000121388|Q9H521\_HUMAN ENSG00000130045|C9orf121 ENSG00000130348|QRSL1 ENSG00000138669|PRKG2 ENSG00000143162|CREG1 ENSG00000143324|XPRI ENSG00000147010|SH3BP1 ENSG00000150637|CD226 ENSG00000152977|ZIC1 ENSG00000153187|HNRPU ENSG00000155319|NP\_001004299.1 ENSG00000155760|EPZD7 ENSG00000157510|AFAP1L1 ENSG00000163421|PROK2 ENSG00000167528|ZNF641 ENSG00000183747|ACSM2 ENSG00000187123|LYPD6 ENSG00000187667|Q1A5X8\_HUMAN ENSG00000188402|NP\_995324.1 ENSG00000188463|XR\_015229.1 ENSG00000189367|C6orf174 ENSG00000197347|Q6ZVE3\_HUMAN ENSG00000198398|NP\_997199.1 ENSG00000198874|TYW1 ENSG00000205544|C17orf61 ENSG00000205721|Q6ZJW2\_HUMAN ENSG00000211452|DIO1 ENSG00000069812|HES2 ENSG00000074054|CLASP1 ENSG00000086232|EIF2AK1 ENSG00000101193|C20orf11 ENSG00000107618|RBP3 ENSG00000107960|OBFC1 ENSG00000113657|DPYSL3 ENSG00000115841|FAM82A ENSG00000118707|TGIF2 ENSG00000125977|EIF2S2 ENSG00000134072|C2MK1 ENSG00000136695|ILLF5 ENSG00000142512|SIGLEC10 ENSG00000169059|VCX3A ENSG00000170876|TMEM43 ENSG00000171960|PPIH ENSG00000173826|KCNH6 ENSG00000177504|VCX2 ENSG00000182117|NOLA3 ENSG00000182583|VCX ENSG00000183495|EP400 ENSG00000188935|Q6ZU24\_HUMAN ENSG00000198756|GLT25D2 ENSG00000204380|Q6ZTQ2\_HUMAN ENSG00000204444|APOM ENSG00000204759|Q6ZRY0\_HUMAN ENSG00000005436|C2orf3 ENSG00000073756|PTGS2 ENSG00000103540|CE110\_HUMAN ENSG000001106013|ANKRD7 ENSG00000111981|ULBP1 ENSG00000115221|ITGB6 ENSG00000115875|SFRS7 ENSG00000121691|CAT ENSG00000131127|ZNF141 ENSG00000131264|CDX4 ENSG00000132122|SPATA6 ENSG00000135766|EGLN1 ENSG00000136143|SUCLA2 ENSG00000138772|ANXA3 ENSG00000139517|LNX2 ENSG00000155622|XAGE2 ENSG00000156802|ATAD2 ENSG00000163071|SPATA18 ENSG00000163535|SGOL2 ENSG00000165675|ENOX2 ENSG00000166803|KIAA101 ENSG00000171492|LRRC8D ENSG00000177047|IFNW1 ENSG00000177683|THAP5 ENSG00000177738|Q8N4J7\_HUMAN ENSG00000184497|FAM70B ENSG00000185751|GAGD3\_HUMAN ENSG00000188958|UTS2D ENSG00000198798|MAGEB3 ENSG00000198818|SFT2D1 ENSG00000203668|CHML ENSG00000203788|Q6ZMM1\_HUMAN ENSG00000205721|Q6ZJW2\_HUMAN ENSG00000205758|CRYZL1 ENSG00000065054|SLC9A3R2 ENSG00000065675|PRKCQ ENSG00000073584|SMARCE1 ENSG00000088325|TPX2 ENSG00000092295|TGM1 ENSG00000100647|KIAA0247 ENSG00000105329|TGFB1 ENSG00000108786|HSD17B1 ENSG00000125975|C20orf173 ENSG00000139579|OBFC2B ENSG00000148840|PPRC1 ENSG00000159884|CCDC107 ENSG00000160396|HIPK4 ENSG00000169856|ONECUT1 ENSG00000172264|C20orf133 ENSG00000176120|Q9BSY8\_HUMAN ENSG00000179766|Q4G129\_HUMAN ENSG00000184935|Q6AI01\_HUMAN ENSG00000186318|BACE1 ENSG00000205658|Q6ZUU6\_HUMAN ENSG00000047410|TPR ENSG00000065534|MYLK ENSG00000078114|NEBL ENSG00000086300|SNX10 ENSG00000100722|ZC3H14 ENSG00000106688|SLC1A1 ENSG00000114062|UBE3A ENSG00000120526|NUDCD1 ENSG00000123545|C6orf66 ENSG00000136738|STAM ENSG00000137642|SORL1 ENSG00000137714|FDX1 ENSG00000139330|KERA ENSG00000144771|LRTM1 ENSG00000146039|SLC17A4 ENSG00000151327|C14orf24 ENSG00000152076|CCDC74B ENSG00000153006|NP\_776190.1 ENSG00000157502|MUM1L1 ENSG00000159377|PSMB4 ENSG00000162699|Q96RF1\_HUMAN ENSG00000164609|SLU7 ENSG00000165186|PTCHD1 ENSG00000166796|LDHC ENSG00000168204|Q95O14\_HUMAN ENSG00000170948|MBD3L1 ENSG00000174123|TLR10 ENSG00000174298|NP\_694572.1 ENSG00000177889|UBE2N ENSG00000179144|GIMAP7 ENSG00000182197|EXT1 ENSG00000183878|UTY ENSG00000188800|TMC02 ENSG00000198908|BHLHB9 ENSG00000073792|IGF2BP2 ENSG00000075388|PGF4 ENSG00000100077|ADRBK2 ENSG00000101336|HCK ENSG00000103888|KIAA1199 ENSG00000109758|HGFAC ENSG00000116198|KIAA0562 ENSG00000130813|NP\_060851.1 ENSG00000138696|BMPR1B ENSG00000144580|RQCD1 ENSG00000146374|RSPO3 ENSG00000157103|SLC6A1 ENSG00000158445|KCNB1 ENSG00000163481|RNF25 ENSG00000163686|ABHD6 ENSG00000164151|Q6ZT40\_HUMAN ENSG00000165140|FBP1 ENSG00000177627|C12orf54 ENSG00000181097|QBNDL7\_HUMAN ENSG00000182712|MTCP1 ENSG00000188822|CNR2 ENSG00000188828|GLRA4 ENSG00000198535|NP\_997205.1 ENSG00000198756|GLT25D2 ENSG00000204385|CTL4\_HUMAN ENSG00000205522|LOC255411 ENSG00000007372|PAX6 ENSG00000011523|CEP68 ENSG00000069509|FUNDCl ENSG00000090402|SI ENSG00000100483|C14orf138 ENSG00000102128|RB40L\_HUMAN ENSG00000108239|TBC1D12 ENSG00000113658|SMAD5 ENSG00000116833|NR5A2 ENSG00000136155|SCEL ENSG00000139168|ZCRB1 ENSG00000156265|C21orf7 ENSG00000156313|RPGR ENSG00000164386|NP\_997378.2 ENSG00000165682|CLEC1B ENSG00000166752|TMEM83 ENSG00000170495|Q6ZNE6\_HUMAN ENSG00000171560|FGA ENSG00000172340|SUCLG2 ENSG00000174792|C4orf26 ENSG00000176654|NANOGP1 ENSG00000177800|TMEM78 ENSG00000185621|LMLN ENSG00000013275|PSMC4 ENSG00000022840|RNF10 ENSG00000036672|USP2 ENSG00000089280|FUS ENSG00000092096|SLC22A17 ENSG00000101470|TNNC2 ENSG00000103197|TSC2 ENSG00000105058|FAM32A ENSG00000111684|MBOAT5 ENSG00000115155|OTOF ENSG00000118557|PMFBP1 ENSG00000119688|ABCD4 ENSG00000130309|GLT25D1 ENSG00000130414|NDUFA10 ENSG00000142539|SPIB ENSG00000163081|NP\_694583.1 ENSG00000169856|ONECUT1 ENSG00000171903|CYP4F11 ENSG00000172270|BSG ENSG00000179428|Q8N6X1\_HUMAN ENSG00000180818|HOXC10 ENSG00000184210|DGAT2L6 ENSG00000185262|FAM100B ENSG00000185905|C16orf54 ENSG00000186810|CXCR3 ENSG00000187456|RDM1 ENSG00000196923|PDLIM7 ENSG00000203762|Q6ZTJ3\_HUMAN ENSG00000204682|C10orf114 ENSG00000205937|RNPS1 ENSG000000000003|TSPAN6 ENSG00000005483|MLL5 ENSG00000025156|HSF2 ENSG00000033170|FUT8 ENSG00000055332|EIF2AK2 ENSG00000065183|WDR3 ENSG00000077809|GTF2I ENSG00000100557|C14orf105 ENSG00000108848|CROP\_HUMAN ENSG00000109118|PHF12 ENSG00000116030|SUMO1P3 ENSG00000116874|WARS2 ENSG00000118680|NP\_291024.1 ENSG00000121858|TNFSF10 ENSG00000131931|THAP1 ENSG00000136527|SFRS10 ENSG00000137804|NUSAP1 ENSG00000145982|FARS2 ENSG00000154217|PITPNCl ENSG00000155816|FMN2 ENSG00000170748|HNRGT\_HUMAN ENSG00000171291|ZNF439 ENSG00000198900|TOP1 ENSG00000205111|CDKL4 ENSG00000088889|K0552\_HUMAN ENSG00000099995|SF3A1 ENSG00000100410|PHF5A ENSG00000101321|C20orf159 ENSG00000110583|NAT11 ENSG00000122304|Q6ZMM0\_HUMAN ENSG00000133315|LRP16\_HUMAN ENSG00000138942|RNF185 ENSG00000142789|ELA3A ENSG00000164309|CMTA5 ENSG00000169213|RAB3B ENSG00000172647|PGA5 ENSG00000174989|FBXW8 ENSG00000179393|Q9NRE4\_HUMAN ENSG00000179452|Q8TDK1\_HUMAN ENSG00000180860|PGA3 ENSG00000180878|C11orf42 ENSG00000186141|POLR3C ENSG00000186423|Q8N9S5\_HUMAN ENSG00000187726|DNAJB13 ENSG00000197653|DNAH10 ENSG00000203662|OR2M1P ENSG00000204633|ACTN3 ENSG00000204973|PGA4 ENSG00000205801|Q6ZTI5\_HUMAN ENSG00000206193|Q5HYA3\_HUMAN ENSG00000073969|NSF ENSG00000078369|GNB1 ENSG00000119723|COQ6 ENSG00000125629|INSIG2 ENSG00000131238|PPT1 ENSG00000131473|ACLY ENSG00000134070|IRAK2 ENSG00000134748|PRPF38A ENSG00000141161|UNC45B ENSG00000144407|PTHR2 ENSG00000147535|PPAPDC1B ENSG00000148481|C10orf97 ENSG00000152601|MBNL1 ENSG00000163535|SGOL2 ENSG00000164879|CA3 ENSG00000165120|C7orf45 ENSG00000178033|FAM26E ENSG00000185985|SLITRK2 ENSG00000204022|LIPJ ENSG00000206144|CASP2 ENSG00000108349|CASC3 ENSG00000115112|TFCP2L1 ENSG00000116667|C1orf21 ENSG00000122490|PQLC1 ENSG00000125266|EFNB2 ENSG00000125449|ARM7 ENSG00000125755|SYMPK ENSG00000130270|ATPFB83 ENSG00000132405|TBC1D14 ENSG00000142686|NP\_689587.1 ENSG00000145022|TCTA ENSG00000145949|SGK85\_HUMAN ENSG00000154040|CABYR ENSG00000158402|CDC25C ENSG00000163885|CCDC37 ENSG00000169169|CPT1C ENSG00000170858|LILRA4 ENSG00000172073|C2orf51 ENSG00000172346|CSDC2 ENSG00000183421|RIPK4 ENSG00000183798|EMILIN3 ENSG00000187764|SEMA4D ENSG00000204666|NP\_001001687.1 ENSG00000205103|HPR ENSG00000017260|ATP2C1 ENSG00000089063|C20orf30 ENSG00000101132|PPDN4 ENSG00000102910|LONP2 ENSG00000105851|PIK3CG ENSG00000112232|KHDRBS2 ENSG00000119514|GALNT12 ENSG00000120256|LRP11 ENSG00000121621|KIF18A ENSG00000125703|ATG4C ENSG00000144847|IGSF11 ENSG00000156467|UQCRCB ENSG00000159167|STC1 ENSG00000159399|HK2 ENSG00000162521|RBBP4 ENSG00000163541|SUCLG1 ENSG00000164983|TMEM65 ENSG00000166575|TMEM135 ENSG00000166928|NP\_115986.3 ENSG00000166930|MS4A5 ENSG00000171634|BPTF ENSG00000177047|IFNW1 ENSG00000178982|EIF3S12 ENSG00000198719|DLL1 ENSG00000099998|GGTLA1 ENSG00000100982|C20orf67 ENSG00000104894|CD37 ENSG00000110395|CBL ENSG00000115457|IGFBP2 ENSG00000118257|NRP2 ENSG00000126067|PSMB2 ENSG00000132434|LANCL2 ENSG00000135637|NP\_116168.2 ENSG00000157349|DDX19B ENSG00000157617|C21orf25 ENSG00000158402|CDC25C ENSG00000159708|LRRC36 ENSG00000161640|SIGLEC11 ENSG00000171401|KRT13 ENSG00000174567|GOLT1A ENSG00000175634|RPS6KB2 ENSG00000179421|Q8NBA4\_HUMAN ENSG00000182117|NOLA3 ENSG00000182968|SOX1 ENSG00000184659|FOXD4L4 ENSG00000186431|FCAR ENSG00000196878|LAMB3 ENSG00000197296|C20orf142 ENSG00000197471|SPN ENSG00000198106|RUNDC2B ENSG00000203854|XR\_017700.1 ENSG00000204828|FX4L4\_HUMAN ENSG00000205979|Q6XYA8\_HUMAN ENSG00000105855|ITGB8 ENSG00000106823|ECM2 ENSG00000112761|WSP3 ENSG00000114942|EEF1B2 ENSG00000116745|RPE65 ENSG00000121031|PRKDC ENSG00000131263|RNF12 ENSG00000133739|LRRC11 ENSG00000133858|CCDC131 ENSG00000137500|CCDC90B ENSG00000143158|BRP44 ENSG00000144191|CNGA3 ENSG00000146072|TNFRSF21 ENSG00000146839|ZAN ENSG00000152495|CAMK4 ENSG00000154608|CEP170L ENSG00000156206|C15orf26 ENSG00000158125|XDH ENSG00000164292|RHOBTB3 ENSG00000164758|THRAP6 ENSG00000172340|SUCLG2 ENSG00000173674|EIF1AP1 ENSG00000189050|NP\_057209.3 ENSG00000198015|MRPL42 ENSG00000082458|DLG3 ENSG00000099984|GSTT2 ENSG00000114656|KIAA1257 ENSG00000115129|TP53I3 ENSG00000124782|RREB1 ENSG00000130203|APOE ENSG00000133433|GSTT2\_HUMAN ENSG00000135480|KRT7 ENSG00000146950|SHROOM2 ENSG00000148400|NOTCH1 ENSG00000150086|GRIN2B ENSG00000152086|TUBA3E ENSG00000155254|MARVELD1 ENSG00000165006|UBAP1 ENSG00000166998|CKMT1A ENSG00000167654|ATCAY ENSG00000168775|KCRU1\_HUMAN ENSG00000177455|CD19 ENSG00000177721|NP\_001014301.1 ENSG00000178796|Q8N9Z1\_HUMAN ENSG00000198053|SIRPA ENSG00000198618|LILRB4 ENSG00000188559|C20orf74 ENSG00000196154|S100A4 ENSG00000196501|HIST1H2BN ENSG00000197162|ZNF688 ENSG00000197373|NP\_001015884.1 ENSG00000197530|MIB2 ENSG00000204120|TNRC15 ENSG00000204845|Q6ZUC3\_HUMAN ENSG00000206550|LOC285346 ENSG00000084623|EIF3K82 ENSG00000112115|IL17A ENSG00000115267|IFIH1 ENSG00000115295|CLIP4 ENSG00000120256|LRP11 ENSG00000128039|NP\_078868.1 ENSG00000140563|MCTP2 ENSG00000150457|LATS2 ENSG00000158185|ANKRD36 ENSG00000163607|GTFP8 ENSG00000164816|DEFA5 ENSG00000167601|AXL ENSG00000171488|LRRC18 ENSG00000180370|PAK2 ENSG00000181065|Q9P161\_HUMAN ENSG00000182670|TTC3 ENSG00000184735|DDX53 ENSG00000185849|Q9P194\_HUMAN ENSG00000196104|SPOCK3 ENSG00000196912|AN36B\_HUMAN ENSG00000198477|SUHW2 ENSG00000205003|CNTF ENSG00000006114|AP1GBP1 ENSG00000090920|FCGBP ENSG00000101670|LIPG ENSG00000104872|PIH1D1 ENSG00000110395|CBL ENSG00000111748|NSUN4 ENSG00000119408|NEK6 ENSG00000121310|ECHDC2 ENSG00000123364|HOXC13 ENSG00000144791|LIMD1 ENSG00000148842|CNM22 ENSG00000154227|LASS3 ENSG00000155026|NM\_173565.2 ENSG00000157240|FZD1 ENSG00000164038|NP\_849155.2 ENSG00000164151|Q6ZT40\_HUMAN ENSG00000166167|BTRC ENSG00000168928|CTRB2 ENSG00000169083|AR ENSG00000169402|NP\_775836.2 ENSG00000171490|RSL1D1 ENSG00000174851|YIF1A ENSG00000176357|C10orf55 ENSG00000179082|C9orf106 ENSG00000179452|Q8TDK1\_HUMAN ENSG00000181885|CLDN7 ENSG00000182158|CREB3L2 ENSG00000182950|ODF3L1 ENSG00000185650|ZFP36L1 ENSG00000197933|KEL ENSG00000198053|SIRPA ENSG00000198641|SYS1 ENSG00000205103|HPR ENSG0000012048|BRCA1 ENSG00000064199|SPA17 ENSG00000077943|ITGA8 ENSG00000080618|CPB2 ENSG00000083642|APRIN ENSG00000101558|VAPA ENSG00000105971|CAV2 ENSG00000109762|SNX25 ENSG00000115414|FN1 ENSG00000116199|FAM20B ENSG00000119013|NDUFB3 ENSG00000123200|ZC3H13 ENSG00000124486|USP9X ENSG00000129204|USP6 ENSG00000133703|KRAS ENSG00000134897|BIVM ENSG00000136997|MYC ENSG00000137720|C11orf1 ENSG00000138435|CHRNA1 ENSG00000140003|ZADH1 ENSG00000143033|MTPF2 ENSG00000143199|NP\_060887.1 ENSG000001444824|PLCXD2 ENSG00000145833|DDX46 ENSG00000155545|MIER3 ENSG00000156508|EEF1A1 ENSG00000163293|NPAL1 ENSG00000163377|FAM19A4 ENSG00000165389|C14orf147 ENSG00000165757|KIAA1462 ENSG00000170381|SEMA3E ENSG00000170832|USP32 ENSG00000171566|PLRG1 ENSG00000180917|NP\_060818.3 ENSG00000188933|NM\_145809.1 ENSG00000196867|ZFP28 ENSG00000092054|MYH7 ENSG00000100031|GGT1 ENSG00000100121|CYP2D6 ENSG00000100362|PVALB ENSG00000102547|CAB39L ENSG00000117016|RIMS3 ENSG000001124208|UBE2V1 ENSG00000125815|CST8 ENSG00000130830|MPP1 ENSG00000132383|RPA1 ENSG00000132446|PTH1L7 ENSG00000133475|GGT2 ENSG00000141699|NP\_835227.1 ENSG00000143257|NR1I3 ENSG00000149435|GGTLA4 ENSG00000163191|S100A11 ENSG00000163812|ZDHHC3 ENSG00000166152|C16orf78 ENSG00000166741|NNMT ENSG00000168268|NT5DC2 ENSG00000168481|LGI3 ENSG00000169548|SUHW1 ENSG00000169598|DFFB ENSG00000173812|EIF1 ENSG00000180822|Q8N950\_HUMAN ENSG00000183038|LOC728226 ENSG00000183929|DUSP5P ENSG00000204423|C9orf33 ENSG00000205702|CYP2D7P1 ENSG00000047410|TPR ENSG00000078618|NRD1 ENSG00000087510|TFAP2C ENSG00000101752|MIB1 ENSG00000102349|KLF8 ENSG00000102683|SGGC ENSG00000104375|STK3 ENSG00000109445|ZNF330 ENSG00000110700|RPS13 ENSG00000111701|APOBEC1 ENSG00000115361|ACADL ENSG00000118514|ALDH8A1 ENSG00000118922|KLF12 ENSG00000125772|GDEE5\_HUMAN ENSG00000133116|KL ENSG00000135045|C9orf40 ENSG00000135678|CPM ENSG00000137674|MMP20 ENSG00000143341|HMCN1 ENSG00000144362|KLHL23 ENSG00000152700|SAR1B ENSG00000159140|SON ENSG00000161594|KLHL10 ENSG00000162526|TSSK3 ENSG00000164296|TTGD6 ENSG00000165757|KIAA1462 ENSG00000168594|ADAM29 ENSG00000169813|HNRFP ENSG00000171291|ZNF439 ENSG00000174876|AMY1B ENSG00000176399|DMRTA1 ENSG00000179387|ELMOD2 ENSG00000183753|BPY2C ENSG00000183795|VCY2\_HUMAN ENSG00000185760|KCNQ5 ENSG00000185894|VCY2\_HUMAN ENSG00000196482|ESRRG ENSG00000196646|ZNF136 ENSG00000197054|ZNF763 ENSG00000197603|NP\_075561.2 ENSG00000197926|Q8NAT6\_HUMAN AAGCACA ENSG00000002834|LASP1 ENSG00000003249|DBNDD1 ENSG00000085978|ATG16L1 ENSG00000108828|VAT1 ENSG00000113048|MRPS27 ENSG00000119688|ABCD4 ENSG00000122733|KIAA1045 ENSG00000130287|NCAN ENSG00000132259|CNGA4 ENSG00000136942|RPL35 ENSG00000154978|NM\_030796.3 ENSG00000156574|NODAL ENSG00000166402|TUB ENSG00000166689|PLEKHA7 ENSG00000175505|CLCF1 ENSG00000176357|C10orf55 ENSG00000188428|TXNDC5 ENSG00000188935|Q6ZU24\_HUMAN ENSG00000189321|NR\_002940.1 ENSG00000196189|SEMA4A ENSG00000203930|Q5JPA2\_HUMAN ENSG00000204241|Q6ZUU8\_HUMAN ENSG00000076554|TPD52 ENSG00000101928|MOSPD1 ENSG00000110436|SLC1A2 ENSG00000112144|ICK ENSG00000112214|FHL5 ENSG00000120333|MRPS14 ENSG00000138346|DNA2L ENSG00000138604|GLCE ENSG00000140525|KIAA1794 ENSG00000140987|ZNF434 ENSG00000145423|SFRP2 ENSG00000147400|CETN2 ENSG00000148291|SURF2 ENSG00000152207|CYSLTR2 ENSG00000152409|NP\_689618.2 ENSG00000161048|NP\_945341.2 ENSG00000162601|MYSM1 ENSG00000169435|RASSF6 ENSG00000177272|KCNA3 ENSG00000178177|LCORL ENSG00000183722|LHF1 ENSG00000185053|SGC2 ENSG00000185689|Q6NXX5\_HUMAN ENSG00000196433|ASMT AAGCACT ENSG00000068354|TBC125 ENSG00000100647|KIAA0247 ENSG00000114853|ZBTB47 ENSG00000118058|MLL ENSG00000132514|CLEC10A ENSG00000135124|P2RX4 ENSG00000136811|ODF2 ENSG00000141431|Q6ZMX6\_HUMAN ENSG00000142541|RPL13A ENSG00000144711|IQSEC1 ENSG00000149182|ZNF289 ENSG00000162191|SAK51\_HUMAN ENSG00000164711|LPAL2 ENSG00000165606|NP\_001073989.1 ENSG00000172053|QARS ENSG00000172818|OVOL1 ENSG00000173039|RELA ENSG00000180471|C9orf31 ENSG00000182195|LDOC1 ENSG00000182687|GALR2 ENSG00000183134|GPR44 ENSG00000183172|C22orf32 ENSG00000185744|TNT\_HUMAN ENSG00000189357|XR\_015253.1 ENSG00000189409|MMP23A ENSG00000204231|RXRB ENSG00000204319|C4A ENSG00000204342|C4B ENSG00000001167|NFYA ENSG00000005469|CROT ENSG00000032219|ARID4A ENSG00000053747|LAMA3 ENSG00000090054|SPTLC1 ENSG00000091039|OSBPL8 ENSG00000100503|NIN ENSG00000101247|C20orf7 ENSG000001016261|ZKSCAN1 ENSG00000111478|R18C8 ENSG00000

ENSG00000117724|CENPF ENSG00000135604|STX11 ENSG00000139910|NOVA1 ENSG00000141140|MYOHD1 ENSG00000143199|NP\_060887.1 ENSG00000143469|SYT14 ENSG00000144354|CDCA7 ENSG00000162434|JAK1  
ENSG00000162636|FAM102B ENSG00000163131|CTSS ENSG00000163138|C4orf28 ENSG00000165097|AOF1 ENSG00000173627|APOBEC4 ENSG00000174899|Q8N6Q6\_HUMAN ENSG00000175105|ZNF654 ENSG00000177954|RPS27  
ENSG00000178074|NP\_710156.2 ENSG00000183831|ANKRD45 ENSG00000188800|TMCO2 ENSG00000204937|Q6ZSSO\_HUMAN  
perfect: AAGCACT AGTGCTT hsa-miR-302d taAGTGCTTccatgtttgagtg 2  
perfect: AAGCACT AGTGCTT hsa-miR-302c taAGTGCTTccatgtttcagtg 2  
perfect: AAGCACT AGTGCTT hsa-miR-302b taAGTGCTTccatgttttagtag 2  
AAGCAGG ENSG00000027644|INSRR ENSG00000112640|PPP2R5D ENSG00000115461|IGFBP5 ENSG00000120875|DUSP4 ENSG00000126882|FAM78A ENSG00000135912|TTLL4 ENSG00000139269|INHBE ENSG00000160741|CRTC2  
ENSG00000163081|NP\_694583.1 ENSG00000164325|TMEM174 ENSG00000164574|GALNT10 ENSG00000165688|PMPCA ENSG00000166104|NP\_776166.1 ENSG00000167747|C19orf48 ENSG00000180525|C10orf108 ENSG00000181754|AMIGO1  
ENSG00000186564|FOXD2 ENSG00000187045|TMPRSS6 ENSG00000203865|Q5TC04\_HUMAN ENSG00000204949|Q6XRZO\_HUMAN ENSG00000205653|Q6ZUF2\_HUMAN ENSG0000000460|C1orf112 ENSG00000012660|ELOVL5 ENSG00000066294|CD84  
ENSG00000077522|ACTN2 ENSG00000100580|TMED8 ENSG00000101247|C20orf7 ENSG00000108599|AKAP10 ENSG00000117335|CD46 ENSG00000120686|UFM1 ENSG00000128699|ORMDL1 ENSG00000137098|SPAG8  
ENSG00000139908|TSSK4 ENSG00000141298|SSH2 ENSG00000156508|EEF1A1 ENSG00000162836|ACP6 ENSG00000163400|FSTL1 ENSG00000163877|SNIP1 ENSG00000164989|C9orf93 ENSG00000168509|HFE2  
ENSG00000174482|LINGO2 ENSG00000174944|P2RY14 ENSG00000177694|NAALADL2 ENSG00000183475|ASB7 ENSG00000186031|Q6ZSY1\_HUMAN ENSG00000187806|NP\_001073931.1 ENSG00000196677|C8orf77 ENSG00000198646|NCOA6  
AAGCAGT ENSG00000026652|AGPAT4 ENSG00000041988|THAP3 ENSG00000053438|NNAAT ENSG00000100101|NOL12 ENSG00000121152|NCAPH ENSG00000125445|MRPS7 ENSG00000130956|HABP4 ENSG00000131097|HIGD1B  
ENSG00000132376|SKIP\_HUMAN ENSG00000145029|NICN1 ENSG00000151948|GLT1D1 ENSG00000154781|C3orf19 ENSG00000160584|QSK\_HUMAN ENSG00000163872|YEATS2 ENSG00000166793|YPEL4 ENSG00000175538|KCNE3  
ENSG00000175779|NP\_997327.1 ENSG00000182324|KCNJ14 ENSG00000196106|Q8WZ26\_HUMAN ENSG00000196123|NP\_001035805.1 ENSG00000197417|CARKL ENSG00000198079|XR\_017925.1 ENSG00000205653|Q6ZUF2\_HUMAN ENSG00000079246|XRCC5  
ENSG00000102409|BEXL1 ENSG00000103310|ZP2 ENSG00000113597|NP\_079217.1 ENSG00000113615|SEC24A ENSG00000113845|C3orf1 ENSG00000119729|RHQO ENSG00000121989|ACVR2A ENSG00000124380|SNUT3\_HUMAN  
ENSG00000128245|YWHAH ENSG00000134852|CLOCK ENSG00000136146|MED4 ENSG00000136758|YMEI1L1 ENSG00000137040|RANBP6 ENSG00000140262|TCF12 ENSG00000145439|CBR4 ENSG00000146729|GBAS  
ENSG00000151422|FER ENSG00000165972|CCDC38 ENSG00000168152|THAP9 ENSG00000169045|HNRPH1 ENSG00000170365|SMAD1 ENSG00000176542|KIAA2018 ENSG00000184428|TOP1MT ENSG00000197639|MKNRP5  
AAGCATG ENSG00000004866|ST7 ENSG000000010327|STAB1 ENSG000000082458|DLG3 ENSG000000096395|MLN ENSG00000103064|SLC7A6 ENSG00000117016|RIMS3 ENSG00000123901|GPR83 ENSG00000130035|GALNT8  
ENSG00000130731|NP\_001035251.1 ENSG00000132383|RPA1 ENSG00000136504|MYST2 ENSG00000145824|CXCL14 ENSG00000148606|POLR3A ENSG00000154928|P54762-3 ENSG00000159461|AMFR ENSG00000165948|FAM14B  
ENSG00000168014|NP\_056346.2 ENSG00000170858|LILRA4 ENSG00000177951|BET1L ENSG00000196209|Q5JXA8\_HUMAN ENSG00000204275|HLA-DQB2 ENSG00000052795|Q9H994\_HUMAN ENSG00000066697|TMEFF1 ENSG00000089094|FBXL10  
ENSG00000101040|ZMYND8 ENSG00000101558|VAPA ENSG00000115414|FN1 ENSG00000122033|MTIF3 ENSG00000128655|PDE11A ENSG00000154153|NP\_001030022.1 ENSG00000162623|TYW3 ENSG00000162630|B3GALT2  
ENSG00000162699|Q9BRF1\_HUMAN ENSG00000163378|C3orf64 ENSG00000165240|ATP7A ENSG00000167842|MIS12 ENSG00000171522|PTGER4 ENSG00000180332|KCTD4 ENSG00000180998|GPR137C ENSG00000183726|TMEM50A  
ENSG00000105010|F8 ENSG00000185158|LRRCS37B ENSG00000187231|SESTD1 ENSG00000187372|PCDH13 ENSG00000198092|TMPRSS11F ENSG00000198898|CAPZA2  
AAGCATT ENSG00000091181|IL5RA ENSG00000108179|PF1F ENSG00000108829|LRRCS9 ENSG00000129103|SUMF2 ENSG00000130323|LSM7 ENSG00000144730|IL17RD ENSG00000155926|SLA ENSG00000157978|LDLRAP1  
ENSG00000168014|NP\_056346.2 ENSG00000168610|STAT3 ENSG00000171540|OTP ENSG00000171855|IFNB1 ENSG00000176532|PRR15 ENSG00000179240|Q3ZCUO\_HUMAN ENSG00000183562|Q9P1L5\_HUMAN ENSG00000187764|SEMA4D  
ENSG00000188229|TUBB2C ENSG00000189180|ZNF33A ENSG00000101818|HIVEP2 ENSG00000141233|KIAA0776 ENSG00000160822|ISL1 ENSG00000090989|EXOC1 ENSG00000099260|PALMD ENSG00000105894|PTN  
ENSG00000107560|RAB11FIP2 ENSG00000109272|PF4V1 ENSG00000111328|CDK2AP1 ENSG00000112964|GHR ENSG00000115145|STAT2 ENSG00000121031|PRKDC ENSG00000121207|LRAT ENSG00000132963|POMP  
ENSG00000134324|LPIN1 ENSG00000138079|SLC3A1 ENSG00000138663|COP54 ENSG00000138794|CASP6 ENSG00000147892|ADAMTSL1 ENSG00000153975|C6orf113 ENSG00000155897|ADCY8 ENSG00000160336|ZNF761  
ENSG00000164611|PTTG1 ENSG00000166265|CYR1 ENSG00000169551|Cxorf48 ENSG00000170345|FOS ENSG00000171291|ZNF439 ENSG00000173041|ZNF680 ENSG00000177425|PAWR ENSG00000182986|NP\_997216.2  
ENSG00000185015|CA13 ENSG00000196172|ZNF681 ENSG00000198887|SMC5  
AAGCCAC ENSG00000006607|FARP2 ENSG0000011376|LARS2 ENSG00000037637|FBXO42 ENSG00000053108|FSTL4 ENSG00000071655|MBD3 ENSG00000099904|ZDHHC8 ENSG00000100439|ABHD4 ENSG00000131584|CENTB5  
ENSG00000144355|DLX1 ENSG00000146216|TTBK1 ENSG00000163803|PXB01 ENSG00000167700|MFSD3 ENSG00000168062|BATF2 ENSG00000174640|SLC20A1 ENSG00000184674|GSTT1 ENSG00000186810|CXCR3  
ENSG00000186868|MAPT ENSG00000188277|LOC643338 ENSG00000198664|Q9BTR0\_HUMAN ENSG00000049319|SRD5A2 ENSG00000052795|Q9H994\_HUMAN ENSG00000074706|NP\_056368.1 ENSG00000096063|SRPK1 ENSG00000100612|DHRS7  
ENSG00000103569|AQP9 ENSG00000104047|DTWD1 ENSG00000114446|IFT57 ENSG00000117533|VAMP4 ENSG00000125931|CITED1 ENSG00000132842|AP3B1 ENSG00000135108|FBXO21 ENSG00000136842|TMOD1  
ENSG00000139146|FAM60A ENSG00000139687|RB1 ENSG00000143162|CREG1 ENSG00000143882|ATP6V1C2 ENSG00000144452|ABCA12 ENSG00000146648|EGFR ENSG00000149806|FAU ENSG00000154217|PITPNC1  
ENSG00000156697|UTP14A ENSG00000159140|SON ENSG00000166349|RAG1 ENSG00000168385|SEPT2 ENSG00000169605|GKN1 ENSG00000172006|ZNF554 ENSG00000172673|C6orf190 ENSG00000172955|ADH6  
ENSG00000174839|FAM116A ENSG00000186073|C15orf41 ENSG00000186086|NBPF4 ENSG00000187554|TLR5 ENSG00000188216|Q5JST9\_HUMAN ENSG00000196735|HLA-DQA1 ENSG00000196954|CASP4 ENSG00000198814|GK  
ENSG00000205227|Q6ZWA8\_HUMAN  
AAGCCAT ENSG000000061337|LTS1 ENSG000000072501|SMC1A ENSG000000073792|IGF2BP2 ENSG00000099822|HCN2 ENSG00000117448|AKR1A1 ENSG00000122012|SV2C ENSG00000122711|SPINK4 ENSG00000124194|GDAP1L1  
ENSG00000136811|ODF2 ENSG00000136867|SLC31A2 ENSG00000137310|TGF19 ENSG00000141965|FEM1A ENSG00000143479|DYRK3 ENSG00000145920|CPLX2 ENSG00000160951|PTGER1 ENSG00000163719|MTMR14  
ENSG00000164061|BSN ENSG00000168026|TTC21A ENSG00000168676|KCTD19 ENSG00000171314|PGAM1 ENSG00000173153|ESRRA ENSG00000180424|DEFB123 ENSG00000185294|NP\_787078.1 ENSG00000185736|ADARB2  
ENSG00000188100|FAM25\_HUMAN ENSG00000196943|LTB4R ENSG00000197041|hCG\_2015269 ENSG00000198576|ARC ENSG00000198853|RUSC2 ENSG00000198959|TGM2 ENSG00000053254|CHES1 ENSG00000058056|USP13  
ENSG00000091879|ANGPT2 ENSG00000095787|WAC ENSG00000106483|SRFP4 ENSG00000114480|GBE1 ENSG00000122787|AKR1D1 ENSG00000135070|ISCA1 ENSG00000135486|HNRPA1 ENSG00000137090|DMRT1  
ENSG00000139946|PELI2 ENSG00000143771|CNIH4 ENSG00000147654|EBAG9 ENSG00000162419|GMEB1 ENSG00000163638|ADAMT59 ENSG00000165502|RPL36AL ENSG00000172748|ZNF596 ENSG00000172845|SP3  
ENSG00000188610|FAM72B ENSG00000196550|FAM72A ENSG00000196678|EXOD1 ENSG00000197415|VEPH1 ENSG00000198018|ENTPD7 ENSG00000203727|SAMD5 ENSG00000204397|NP\_001017534.1  
perfect: AAGCCAT ATGGCTT hsa-miR-135b tATGGCTTttcattcctatgtg 1  
perfect: AAGCCAT ATGGCTT hsa-miR-135a tATGGCTTtttattcctatgtga 1  
AAGCCGC ENSG00000060491|OGFR ENSG00000103175|WFDCL1 ENSG00000104883|PEX11G ENSG00000107130|FREQ ENSG00000109625|CPZ ENSG00000112320|SOBP ENSG00000115042|FAHD2A ENSG00000130810|PPAN  
ENSG00000136003|ISCU ENSG00000141524|TMC6 ENSG00000142611|PRDM16 ENSG00000144199|FAHD2B ENSG00000167791|CABP2 ENSG00000167930|ITFG3 ENSG00000172663|TMEM134 ENSG00000172724|CCL19  
ENSG00000179528|LBX2 ENSG00000182156|ENPP7 ENSG00000205439|KRTAP10-10 ENSG00000040731|CDH10 ENSG00000100473|COCH ENSG000001001230|C20orf82 ENSG00000116161|CACYBP ENSG00000119707|RBM25  
ENSG00000119844|AFTPH ENSG00000157259|GATAD1 ENSG00000174373|GARNL1 ENSG00000175745|NR2F1 ENSG00000182287|AP1S2 ENSG00000183283|DAZAP2 ENSG00000185418|TARSL2  
ENSG00000197203|Q8NAJ9\_HUMAN ENSG00000197321|SVIL ENSG00000205976|Q6ZVT4\_HUMAN ENSG00000206029|Q0P633\_HUMAN ENSG00000206075|SERPINB5  
AAGCCTC ENSG00000007968|EFZ2 ENSG00000020633|RUNX3 ENSG00000076706|MCAM ENSG0000008081853|PCDHGA12 ENSG00000086062|B4GALT1 ENSG00000086506|HEQ1 ENSG00000099203|TMED1 ENSG00000114767|RRP9  
ENSG00000129270|MMP28 ENSG00000130635|COL5A1 ENSG00000134184|GSTM1 ENSG00000134516|DOCK2 ENSG00000135441|BLOC1S1 ENSG00000142765|SYTL1 ENSG00000154096|THY1 ENSG00000162551|ALPL  
ENSG00000167895|TMC8 ENSG00000169887|Q9UKN1\_HUMAN ENSG00000177807|KCNJ10 ENSG00000179564|C3orf45 ENSG00000184361|C17orf46 ENSG00000185896|LAMP1 ENSG00000203772|SPRN ENSG00000204005|Q6ZP22\_HUMAN  
ENSG00000057663|ATG5 ENSG00000066405|CLDN18 ENSG00000102886|GDPD3 ENSG00000106686|C9orf68 ENSG00000111450|STX2 ENSG00000135476|ESPL1 ENSG00000138468|SENP7 ENSG00000138653|NDST4  
ENSG00000143252|SDHC ENSG00000150750|C11orf53 ENSG00000162755|NP\_689579.3 ENSG00000164099|PRSS12 ENSG00000169340|NP\_777584.1 ENSG00000170417|TMEM182 ENSG00000170917|NUDT6 ENSG00000172348|DSCR1L1  
ENSG00000175087|PDIK1L ENSG00000180440|NP\_982276.1 ENSG00000183952|Q9H5Q9\_HUMAN ENSG00000185010|F8 ENSG00000187446|CHP1\_HUMAN ENSG00000197851|NP\_997386.1  
AAGCCTT ENSG00000048342|Q9H8A7\_HUMAN ENSG000000076662|ICAM3 ENSG00000084628|FAM77C ENSG00000099795|NDUFB7 ENSG00000103111|MON1B ENSG00000104969|SGTA ENSG00000119333|WDR34 ENSG00000130544|ZNF557  
ENSG00000130723|KIAA0515 ENSG00000135441|BLOC1S1 ENSG00000136444|RSAD1 ENSG00000136877|PFGS ENSG00000139200|C12orf53 ENSG00000143140|GJA5 ENSG00000143450|OAZ3 ENSG00000155363|MOV10  
ENSG00000163017|ACTG2 ENSG00000163833|FBXO40 ENSG00000164048|F5B2 ENSG00000167207|NOD2 ENSG00000167964|RAB26 ENSG00000168906|MAT2A ENSG00000171649|ZIK1 ENSG00000180185|FAHD1  
ENSG00000181830|SLC35C1 ENSG00000185614|C3orf54 ENSG00000197417|CARKL ENSG00000198131|ZNF544 ENSG00000198959|TGM2 ENSG00000204446|NP\_001001709.1 ENSG00000205730|NP\_001030013.1 ENSG00000007944|MYLIP  
ENSG00000067113|PPAP2A ENSG00000067208|EVI5 ENSG00000077264|PAK3 ENSG0000008087074|PPP1R15A ENSG00000089335|ZNF302 ENSG00000105708|ZNF14 ENSG00000108064|TFAM ENSG00000108298|RPL19  
ENSG00000135413|LACRT ENSG00000136813|KIAA0368 ENSG00000138771|SHROOM3 ENSG00000142065|ZFP14 ENSG00000143952|VPS54 ENSG00000144597|EAF1 ENSG00000145908|ZNF300 ENSG00000147121|ZNF673  
ENSG00000147535|PPAPDC1B ENSG00000150076|C10orf68 ENSG00000151320|AKAP6 ENSG00000160336|ZNF761 ENSG00000160352|ZNF714 ENSG00000163074|NM\_024534 ENSG00000164898|NP\_932068.1 ENSG00000167766|ZNF83  
ENSG00000167785|ZNF558 ENSG00000168411|RFWD3 ENSG00000173612|GPRC6A ENSG00000176222|ZNF404 ENSG00000177600|RPLP2 ENSG00000178150|ZNF114 ENSG00000178175|ZNF366 ENSG00000180777|ANKRD30B  
ENSG00000183649|Q8NFX8\_HUMAN ENSG00000185037|XR\_016629.1 ENSG00000185177|ZNF479 ENSG00000186001|LRCH3 ENSG00000188868|ZNF563 ENSG00000189299|FOXR2 ENSG00000196357|ZNF565 ENSG00000196705|ZNF431  
ENSG00000196946|ZNF705A ENSG00000197054|ZNF763 ENSG00000197619|ZNF615 ENSG00000197928|ZNF677 ENSG00000197990|XR\_016643.1 ENSG00000198040|ZNF84 ENSG00000204789|ZNF204  
ENSG00000070770|CSNK2A2 ENSG00000071564|TCF3 ENSG00000075702|WDR62 ENSG00000101331|C20orf160 ENSG00000104870|FCGRT ENSG00000105649|RAB3A ENSG00000111319|SCNN1A ENSG00000130768|SMPDL3B  
ENSG00000140538|NTRK3 ENSG00000142677|IL22RA1 ENSG00000147099|HDAC8 ENSG00000152475|Q9BEG3\_HUMAN ENSG00000153266|FEZF2 ENSG00000157778|C7orf48 ENSG00000162849|KIF26B ENSG00000168140|VASN  
ENSG00000168754|NP\_057574.2 ENSG00000168826|ZNF509 ENSG00000169509|CRCT1 ENSG00000169925|BRD3 ENSG00000171302|CANT1 ENSG00000170330|DEAF1 ENSG00000180914|OXTR ENSG00000181778|C9orf71  
ENSG00000187116|LILRA5 ENSG00000188910|GJB3 ENSG00000197444|OGDHL ENSG00000205973|LOC644949 ENSG00000042429|CRSP6 ENSG00000077264|PAK3 ENSG00000140557|C14orf105  
ENSG00000104044|OCA2 ENSG00000116793|PHTF1 ENSG00000117091|CD48 ENSG00000134812|GIF ENSG00000136938|ANP32B ENSG00000143228|NUF2 ENSG00000153064|BANK1 ENSG00000162701|DENND1B  
ENSG00000166523|CLEC4E ENSG00000167916|KRT24 ENSG00000172594|SMPDL3A ENSG00000173077|DEC1 ENSG00000173141|MRP63 ENSG00000187155|CU085\_HUMAN ENSG00000197172|MAGEA3 ENSG00000198380|GFPT1  
AAGCGAC ENSG00000068120|COASY ENSG00000070770|CSNK2A2 ENSG00000100410|GHF5A ENSG00000101220|C20orf27 ENSG00000108405|P2RX1 ENSG00000111199|TRPV4 ENSG00000115257|PCSK4 ENSG00000129152|MYO1  
ENSG00000134463|ECHDC3 ENSG00000139192|TAPBP1 ENSG00000141404|PINAL ENSG00000141736|ERBB2 ENSG00000143603|KCNN3 ENSG00000162461|SLC25A34 ENSG00000162551|ALPL ENSG00000165621|DAMS\_HUMAN  
ENSG00000167302|C17orf56 ENSG00000176136|MC5R ENSG00000182108|MYLE\_HUMAN ENSG00000184709|LRRC26 ENSG00000185633|NDUFA4L2 ENSG00000186493|C5orf38 ENSG00000190245|Q8N7M3\_HUMAN ENSG00000197798|FAM118B  
ENSG00000197900|Q8N7Q6\_HUMAN ENSG00000203865|Q5TC04\_HUMAN ENSG00000203900|Q6ZSD3\_HUMAN ENSG000000616082|ISL1 ENSG00000067064|IDI1 ENSG00000069974|RAB27A ENSG00000075884|ARHGAP15 ENSG00000084073|ZMPSTE24  
ENSG00000104472|CHRA12 ENSG00000111785|RIC8B ENSG00000113575|PPP2CA ENSG00000114698|PLSCR4 ENSG00000116106|EPHA4 ENSG00000119922|IFIT2 ENSG00000144118|RALB ENSG00000145986|CDKAL1  
ENSG00000148484|RSU1 ENSG00000156976|EIF4A2 ENSG00000162441|LZIC ENSG00000168282|MGAT2 ENSG00000168497|SDPR ENSG00000168589|DYNLRB2 ENSG00000169016|E2F6 ENSG00000169224|C1orf150  
ENSG00000170370|EMX2 ENSG00000170629|NP\_872440.2 ENSG00000170634|ACYP2 ENSG00000175606|TMEM70 ENSG00000177068|Q8N269\_HUMAN ENSG00000181234|TMEM132C ENSG00000181449|SOX2 ENSG00000181541|MAB21L2  
ENSG00000189212|DPY19L2P1 ENSG00000196268|ZNF493 ENSG00000196826|ZNF709  
AAGCGCA ENSG000000013288|MAN2B2 ENSG00000029534|ANK1 ENSG00000077800|FKBP6 ENSG00000105131|ABHD9 ENSG00000111676|ATN1 ENSG00000116863|ADPHL2 ENSG00000131400|NAPSA ENSG00000140986|RPL3L  
ENSG00000147889|CDKN2A ENSG00000158545|NP\_653205.2 ENSG00000159556|ISL2 ENSG00000163132|MSX1 ENSG00000165863|C10orf62 ENSG00000177030|DEAF1 ENSG00000183528|Q0VAF8\_HUMAN  
ENSG00000187288|C1DEC ENSG00000198010|DLGAP2 ENSG00000198208|RPS6KL1 ENSG00000204511|NM\_001011700.1 ENSG00000205436|C14orf73 ENSG00000005955|ZNF403 ENSG00000160821|ISL1 ENSG00000062370|ZNF228  
ENSG00000090104|RGS1 ENSG00000100796|SMEK1 ENSG00000118849|RARRES1 ENSG00000122550|KLHL7 ENSG00000140299|BNIP2 ENSG00000147896|IFNK ENSG00000149345|U2D3L\_HUMAN ENSG00000154845|PPP4R1  
ENSG00000162747|FCGR3B ENSG00000166501|PRKCB1 ENSG00000170370|EMX2 ENSG00000172677|ZMAT3 ENSG00000174748|RPL15 ENSG00000179299|PITPNB ENSG00000186665|C17orf58





ENSG00000132478|UNK ENSG00000133935|C14orf1 ENSG00000134686|PHC2 ENSG00000151498|ACAD8 ENSG00000159176|CSR1 ENSG00000167972|ABCA3 ENSG00000172830|SSH3 ENSG00000180249|Q8N872\_HUMAN  
ENSG00000184811|TUSC5 ENSG00000186029|Q9NSZ8\_HUMAN ENSG00000197561|ELA2 ENSG00000203685|C1orf59 ENSG00000203702|C6orf59 ENSG00000248392|RRM2B ENSG00000267334|DNMTTIP2 ENSG000002103540|CE110\_HUMAN  
ENSG00000112130|RNFB ENSG00000128641|MYO1B ENSG00000132199|ENOSF1 ENSG00000136436|CALCO2 ENSG00000139684|ESD ENSG00000144026|ZNF514 ENSG00000148426|C10orf47 ENSG00000148484|RSU1  
ENSG00000153832|FBXO36 ENSG00000163171|CDC42EP3 ENSG00000164929|BAALC ENSG00000165682|CLEC10B ENSG00000166173|LARP6 ENSG00000167383|ZNF229 ENSG00000172673|C6orf190 ENSG00000181264|TMEM136  
ENSG00000186684|NP\_001001665.2 ENSG00000204524|ZNF805  
AAGGTAT ENSG00000100335|SMCR7L ENSG00000101251|SELL12 ENSG00000105538|RASIP1 ENSG00000106070|GRB10 ENSG00000110455|NP\_115981.1 ENSG00000126602|TRAP1 ENSG00000130649|CYP2E1  
ENSG00000130749|C19orf7 ENSG00000131910|NR0B2 ENSG00000136378|ADAMTS7 ENSG00000164334|NP\_877438.2 ENSG00000171224|C10orf35 ENSG00000174804|FZD4 ENSG00000182022|ST4S6\_HUMAN ENSG00000182584|C20orf134  
ENSG00000188038|NRN1L ENSG00000204759|Q6ZRYO\_HUMAN ENSG00000033122|LRRC7 ENSG00000082153|BZW1 ENSG00000096401|CDC5L ENSG00000102452|NALCN ENSG00000104043|ATP8B4 ENSG00000107372|ZFAND5  
ENSG00000137261|K1AA0319 ENSG00000144354|CDCA7 ENSG00000144909|OSBP1L1 ENSG00000147145|GPR23 ENSG00000148110|HIATL1 ENSG00000152795|HNRPLD ENSG00000153495|C13orf16 ENSG00000154175|ABI3BP  
ENSG00000159216|RUNX1 ENSG00000164002|C1orf176 ENSG00000166012|SNORA25 ENSG00000169989|TIGD4 ENSG00000171522|PTGER4 ENSG00000177189|RPS6KA3 ENSG00000186231|KLHL32 ENSG00000186448|ZNF197  
ENSG00000188921|PTPLAD2 ENSG00000196371|FUT4 ENSG00000196963|PCDHB16 ENSG00000198885|NP\_848590.3 ENSG00000203963|C1orf141 ENSG00000206535|ALA4G5\_HUMAN  
AAGGTGT ENSG00000112062|MAPK14 ENSG00000115561|VPS24 ENSG00000121068|TBX2 ENSG00000128159|TUBGCP6 ENSG00000131188|PRR7 ENSG00000132446|FTHL17 ENSG00000148358|GPR107  
ENSG00000156885|COX6A2 ENSG00000167617|CDC42EP5 ENSG00000170484|KRT74 ENSG00000173163|COMMD1 ENSG00000175283|DOLK ENSG00000179837|RBM15B ENSG00000185744|TNT\_HUMAN ENSG00000196372|ASB13  
ENSG00000196526|AFAP1 ENSG00000197226|TBC1D9B ENSG00000198933|TBKBP1 ENSG00000205609|Q9BW98\_HUMAN ENSG00000053770|C14orf108 ENSG00000070087|PFN2 ENSG00000100196|KDEL3 ENSG00000123444|KBTBD4  
ENSG00000127588|GNL3 ENSG00000129204|USP6 ENSG00000134077|THUMP3 ENSG00000136937|NCBP1 ENSG00000137434|C6orf52 ENSG00000138767|CNOT6L ENSG00000142937|RPS8 ENSG00000157542|KCNJ6  
ENSG00000164600|NEUROD6 ENSG00000168852|SUGT1L1 ENSG00000170340|B3GNT2 ENSG00000170647|TMEM133 ENSG00000171135|JAGN1 ENSG00000172869|DMXL1 ENSG00000186395|KRT10 ENSG00000187790|FANCM  
AAGGTTT ENSG00000197024|ZNF398 ENSG00000197501|Q9H3B5\_HUMAN ENSG00000204026|Q6ZSD2\_HUMAN ENSG00000206131|Q6ZS21\_HUMAN  
ENSG00000012232|EXTL3 ENSG00000068079|IFI35 ENSG00000075886|TUBA3D ENSG00000089169|RPH3A ENSG00000114853|ZBTB74 ENSG00000116273|PHF13 ENSG00000130167|TSPAN16 ENSG00000131355|EMR3  
ENSG00000132323|ILKAP ENSG00000147113|C1orf36 ENSG00000154342|WNT3A ENSG00000162078|U773\_HUMAN ENSG00000162888|C1orf147 ENSG00000163499|CRYBA2 ENSG00000168621|GNDF ENSG00000169057|MECP2  
ENSG00000170743|SYT9 ENSG00000177951|BET1L ENSG00000182342|DSCR9 ENSG00000183044|ABAT ENSG00000183535|C21orf123 ENSG00000198033|TUBA3C ENSG00000204526|DEPDC1 ENSG00000204764|ARHGAP6  
ENSG00000055044|NOP5\_HUMAN ENSG00000089163|SIRT4 ENSG00000110975|SYT10 ENSG00000116675|DNAJC6 ENSG00000125245|GPR18 ENSG00000128833|MYO5C ENSG00000129235|TXNL5 ENSG00000131779|PEX11B  
ENSG00000136381|IREB2 ENSG00000139239|XR\_017789.1 ENSG00000141325|CCDC45 ENSG00000151065|DCP1B ENSG00000152234|ATP5A1 ENSG00000154710|KCTD7 ENSG00000163946|C3orf63 ENSG00000164542|NP\_056129.1  
ENSG00000164741|DLC1 ENSG00000167601|AXL ENSG00000177613|CSTF2T ENSG00000186480|INSIG1 ENSG00000186834|HEXIM1 ENSG00000188463|XR\_015229.1 ENSG00000188846|RPL14 ENSG00000198814|GK  
ENSG00000198874|TYW1 ENSG00000205812|Q6ZSM7\_HUMAN  
AAGGTTT ENSG00000048707|VPS13D ENSG00000065000|AP3D1 ENSG00000065675|PRKCQ ENSG00000068078|FGFR3 ENSG00000102981|PARD6A ENSG00000103067|RBM35B ENSG00000104332|SFRP1 ENSG00000118058|MLL  
ENSG00000123171|CCDC70 ENSG00000123901|GPR83 ENSG00000126003|PLAGL2 ENSG00000132323|ILKAP ENSG00000135709|KIAA0513 ENSG00000147457|CHMP7 ENSG00000148156|ACTL7B ENSG00000148344|PTGES  
ENSG00000149657|LSM14B ENSG00000149932|NP\_001077082.1 ENSG00000151062|CACNA2D4 ENSG00000163933|RET1 IER5 ENSG00000164038|NP\_849155.2 ENSG00000164266|SPINK1 ENSG00000177764|ZCCHC3  
ENSG00000183955|SETD8 ENSG00000198471|RTF2 ENSG00000204385|CTL4\_HUMAN ENSG00000036549|ZZZ3 ENSG00000109158|GABRA4 ENSG00000113300|CNOT6 ENSG00000115761|NOL10 ENSG00000116132|PRRX1  
ENSG00000116141|MARK1 ENSG00000118267|ZNF271 ENSG00000120696|KBTBD7 ENSG00000121440|PDZRN3 ENSG00000132823|C20orf111 ENSG00000134697|GNL2 ENSG00000141499|WDR79 ENSG00000150991|UBIQ\_HUMAN  
ENSG00000155897|ADCY8 ENSG00000164463|NP\_705835.1 ENSG00000170509|HSD17B13 ENSG00000177613|CSTF2T ENSG00000186255|KATNAL1 ENSG00000196646|ZNF136 ENSG00000197484|Q6ZRH8\_HUMAN ENSG00000198730|CTTR9  
ENSG00000198783|CCDC16 ENSG00000205072|Q6ZR34\_HUMAN  
AAGTAAA ENSG00000083842|ZNF8 ENSG00000101311|C20orf42 ENSG00000112062|MAPK14 ENSG00000112320|SOBP ENSG00000115841|FAM82A ENSG00000130005|GAMT ENSG00000130054|TMEM28 ENSG00000130643|DRD1P  
ENSG00000138780|GSTCD ENSG00000146047|HIST1H2BA ENSG00000150779|TIMM8B ENSG00000153060|TEK75 ENSG00000158220|FAM62C ENSG00000165837|Q5W0A0\_HUMAN ENSG00000166398|K1AA0355 ENSG00000167612|ANKRD33  
ENSG00000170684|ZNF342 ENSG00000170983|C8orf14 ENSG00000180259|PRNT ENSG00000182175|RGMA ENSG00000184654|YV006\_HUMAN ENSG00000185522|C11orf35 ENSG00000188312|CENPF ENSG00000190245|Q8N7M3\_HUMAN  
ENSG00000196090|PTPRT ENSG00000196186|Q71RF5\_HUMAN ENSG00000197296|C20orf142 ENSG00000197430|TMEM10 ENSG00000196602|CLCA4 ENSG00000047365|CENTD1 ENSG00000064225|ST3GAL6  
ENSG00000074696|PTPLAD1 ENSG00000077616|NAALAD2 ENSG00000087303|NID2 ENSG00000092140|K1AA1333 ENSG00000101574|METTL4 ENSG00000101972|STAG2 ENSG00000104205|SGK3 ENSG00000111231|ATPBD1C  
ENSG00000113211|PCDHB6 ENSG00000113361|CDH6 ENSG00000116161|CACYPBP ENSG00000118849|RARRES1 ENSG00000126821|SGP11 ENSG00000128609|NDUFAC1 ENSG00000134538|SLC01B1 ENSG00000136813|K1AA0368  
ENSG00000137996|RCD1 ENSG00000147274|RBMX ENSG00000155380|SLC16A1 ENSG00000155495|MARGEC1 ENSG00000155729|KCTD18 ENSG00000164744|SUNC1 ENSG00000165807|C14orf50 ENSG00000167196|FBXO22  
ENSG00000168843|FRTL5 ENSG00000171497|PP1D ENSG00000172315|TP53RK ENSG00000173141|MRP63 ENSG00000179387|ELMOD2 ENSG00000180228|PRKRA ENSG00000180817|PPA1 ENSG00000196350|ZNF492  
ENSG00000198860|C1orf19 ENSG00000198863|RUNDC1  
AAGTAGT ENSG00000013455|ARPC1A ENSG00000101850|GPR143 ENSG00000103175|WFD1 ENSG00000107745|CBARA1 ENSG00000124191|TOX2 ENSG00000127540|UQCR ENSG00000129657|SEC14L1 ENSG00000134531|EMP1  
ENSG00000138642|HERC6 ENSG00000142675|CNKSR1 ENSG00000147536|GINS4 ENSG00000160117|ANKRD41 ENSG00000164871|SPAG11B ENSG00000169972|PUSL1 ENSG00000171490|RSL1D1 ENSG00000176679|TGIF2LY  
ENSG00000176887|SOX11 ENSG00000178287|SPAG11A ENSG00000180184|Q8NFB7\_HUMAN ENSG00000181817|LSM10 ENSG00000189060|H1FO ENSG00000204499|Q6P6C6\_HUMAN ENSG0000038219|FAM44A ENSG00000083520|DIS3  
ENSG00000102218|RP2 ENSG00000111247|RAD51AP1 ENSG00000113441|LNPEP ENSG00000113790|EHHADH ENSG00000118873|RAB3GAP2 ENSG00000123119|EFCB1P ENSG00000126773|C14orf135 ENSG00000131016|AKAP12  
ENSG00000136888|ATP6V1G1 ENSG00000137168|PIL1L ENSG00000148943|LIN7C ENSG00000150459|SAP18 ENSG00000152795|HNRPLD ENSG00000153779|TGIF2LX ENSG00000159167|STC1 ENSG00000164548|TRA2A\_HUMAN  
ENSG00000165169|DYNLT3 ENSG00000176390|CRLF3 ENSG00000177613|CSTF2T ENSG00000198767|YY2 ENSG00000203727|SAMD5  
AAGTCCG ENSG00000013275|CD6 ENSG00000057757|C1orf128 ENSG00000066336|SP11 ENSG00000101331|C20orf160 ENSG00000105737|GRK5 ENSG00000117697|NSL1 ENSG00000118156|ZNF541 ENSG00000119574|ZBTB45  
ENSG00000122687|FTSJ2 ENSG00000123388|HOXC11 ENSG00000126464|PRR12 ENSG00000134245|WNT2B ENSG00000134470|ILL15RA ENSG00000136717|BIN1 ENSG00000144712|CAND2 ENSG00000147099|HDAC8  
ENSG00000166646|Q96D66\_HUMAN ENSG00000167646|C19orf51 ENSG00000170122|FOXD4L1 ENSG00000177239|MAN1B1 ENSG00000178307|TMEM11 ENSG00000178932|Q8N811\_HUMAN ENSG00000178977|C17orf44 ENSG00000179526|SHARPIN  
ENSG00000183160|TMEM119 ENSG00000198802|PECAM1 ENSG00000198960|ARMCX6 ENSG00000205426|KRT81 ENSG00000205761|Q6ZRI7\_HUMAN ENSG00000205761|BID ENSG00000100557|C14orf105 ENSG00000101138|CSTF1  
ENSG00000115254|XAB1 ENSG00000115934|PIL3 ENSG00000131873|CHSY1 ENSG00000144191|CNGA3 ENSG00000154143|PANX3 ENSG00000154217|PITPNCL1 ENSG00000161573|CCL16 ENSG00000166971|AKTIP  
ENSG00000171759|PAH ENSG00000180730|TMEM46 ENSG00000185278|ZBTB37 ENSG00000196208|NP\_683701.2 ENSG00000198492|YTHDF2 ENSG00000198900|TOP1  
AAGTCGT ENSG00000105607|GCDH ENSG00000116147|TNR ENSG00000116148|CCNL2 ENSG00000125503|PPP1R12C ENSG00000129347|NP\_075384.3 ENSG00000130775|C1orf38 ENSG00000135245|HIG2\_HUMAN ENSG00000136811|ODF2  
ENSG00000140577|CRTC3 ENSG00000154920|EME1 ENSG00000158623|TSGA13 ENSG00000161973|CCDC42 ENSG00000163081|NP\_694583.1 ENSG00000165125|TRPV6 ENSG00000165388|ZNF488 ENSG00000167992|VWCE  
ENSG00000168785|TSPAN5 ENSG00000169100|SLC25A6 ENSG00000173575|CHD2 ENSG00000174943|KCTD13 ENSG00000182508|LHFP1L1 ENSG00000185567|AHNAK2 ENSG00000186431|FCAR ENSG00000204210|ZBTB22  
ENSG00000205033|Q96DJ9\_HUMAN ENSG00000049167|ERCC8 ENSG00000086885|IFT80 ENSG00000086065|CHMP5 ENSG00000115806|GORASP2 ENSG00000137776|SLTM ENSG00000138382|METTL5 ENSG00000146426|TIAM2  
ENSG00000164683|HEY1 ENSG00000168291|PDHB ENSG00000171560|FGA ENSG00000178295|NP\_872431.2 ENSG00000187601|MAGEH1 ENSG00000204267|TAP2  
AAGTGAA ENSG00000082458|DLG3 ENSG00000108179|PP1F ENSG00000108861|DUSP3 ENSG00000126856|Q9NQW5-2 ENSG00000131400|NAPSA ENSG00000133424|LARGE ENSG00000134460|IL2RA ENSG00000149932|NP\_001077082.1  
ENSG00000158796|DEDD ENSG00000165283|STOML2 ENSG00000166664|CHRNF7A ENSG00000181215|NP\_997288.1 ENSG00000182379|NXP4 ENSG00000184209|NP\_008951.1 ENSG00000187699|Q8NBX4\_HUMAN ENSG00000198785|GRIN3A  
ENSG00000204526|HCG27 ENSG00000204847|FAM74A1 ENSG00000205501|Q6ZU01\_HUMAN ENSG0000004468|CD38 ENSG00000107537|PHYH ENSG00000115665|SLC5A7 ENSG00000120948|TARDBP ENSG00000121380|BCL2L14  
ENSG00000126945|HNRPH2 ENSG00000132122|SPATA6 ENSG00000132406|TMEM128 ENSG00000136048|NP\_06840.2 ENSG00000137752|CASP1 ENSG00000140988|RPS2 ENSG00000144118|RALB ENSG00000146282|RARS2  
ENSG00000156469|MTFRFD1 ENSG00000163364|Q96D13\_HUMAN ENSG00000163535|SGOL2 ENSG00000163586|FABP1 ENSG00000163751|CPA3 ENSG00000166263|STXBPA ENSG00000168421|RHOB ENSG00000169045|HNRPH1  
ENSG00000177461|Q8NA31\_HUMAN ENSG00000180667|YD11 ENSG00000187083|Q8NEQ1\_HUMAN ENSG00000187155|CU085\_HUMAN ENSG00000196247|ZNF588 ENSG00000197149|XR\_019565.1 ENSG00000203916|HFMI ENSG00000205056|CLLU1  
ENSG00000205174|NP\_001019778.1 ENSG00000205981|DNAJC19  
AAGTGAT ENSG00000003147|ICA1 ENSG00000059377|TBXAS1 ENSG00000110011|DNAJC4 ENSG00000114115|RBP1 ENSG00000124422|USP22 ENSG00000135480|KRT7 ENSG00000160685|ZBTB7B ENSG00000161103|Q5BKY6\_HUMAN  
ENSG00000166317|SYNP02L ENSG00000167985|C1orf77 ENSG00000170983|C8orf14 ENSG00000181867|FTMT ENSG00000182346|DAOA ENSG00000187186|CCL27 ENSG00000197622|CDC42SE1 ENSG00000198756|GLT25D2  
ENSG00000204125|Q53S21\_HUMAN ENSG00000206193|Q5HYA3\_HUMAN ENSG00000206550|LOC285346 ENSG00000100372|SLC25A17 ENSG00000115091|ACTR3 ENSG00000124767|GLO1 ENSG00000130764|LRRC47 ENSG00000131263|RNFB12  
ENSG00000132639|SNAP25 ENSG00000136539|CD302 ENSG00000140280|LYSMD2 ENSG00000148123|NP\_060223.2 ENSG00000155906|RMND1 ENSG00000157107|FCHO2 ENSG00000158185|ANKRD36 ENSG00000164099|PRSS12  
ENSG00000169432|SCN9A ENSG00000176597|B3GNT5 ENSG00000177570|SAMD12 ENSG00000196387|ZNF140 ENSG00000196505|GDAP2 ENSG00000204147|ASAH2B  
AAGTGCC ENSG00000013619|CXorf6 ENSG000001095777|MYO3A ENSG000001100364|C22orf9 ENSG00000104881|PPP1R13L ENSG00000108639|SYNGR2 ENSG00000113070|HBEGF ENSG00000121653|MAPK8IP1 ENSG00000128228|SDF2L1  
ENSG00000134815|DHX34 ENSG00000136327|NKX2-8 ENSG00000136859|ANGPTL2 ENSG00000136950|ARPC5L ENSG00000144579|CTDSP1 ENSG00000145198|Q9BVH8\_HUMAN ENSG00000148468|C10orf38 ENSG00000151650|VENTX  
ENSG00000156860|FBR5 ENSG00000157833|FAM59B ENSG00000159166|LAD1 ENSG00000162650|ATXN7L2 ENSG00000164733|CTSBP ENSG00000171388|APLN ENSG00000175147|C1orf126 ENSG00000177441|Q8N4T9\_HUMAN  
ENSG00000180735|Q6PJW0\_HUMAN ENSG00000184012|TMPRSS2 ENSG00000184916|JAG2 ENSG00000188242|Q71RB1\_HUMAN ENSG00000196218|RYR1 ENSG00000196407|THEM5 ENSG00000196987|NP\_001034857.2 ENSG00000197353|LYPD2  
ENSG00000205191|NP\_001070148.1 ENSG00000206508|CD44 ENSG000000995380|NANS ENSG00000106799|TGFBRI1 ENSG00000114520|SNX4 ENSG00000129353|SLC44A2 ENSG00000145675|PIK3R1 ENSG00000157554|ERG  
ENSG00000163257|C4orf30 ENSG00000166265|CYR1 ENSG00000169439|SDC2 ENSG00000175066|GK5 ENSG00000178904|DPY19L3 ENSG00000197375|SLC22A5 ENSG00000198420|NP\_055534.1 ENSG00000198838|RYR3  
AAGTGTC ENSG00000004455|AK2 ENSG00000102901|CENPT ENSG00000108829|LRRC59 ENSG00000115523|GNLY ENSG00000122711|SPINK4 ENSG00000130052|STARDB ENSG00000134438|RAX ENSG00000134825|C11orf10  
ENSG00000139574|NPFF ENSG00000143502|SUSD4 ENSG00000155886|SLC24A2 ENSG00000161281|COX7A1 ENSG00000166716|ZNF592 ENSG00000169217|CD2BP2 ENSG00000170858|LILRA4 ENSG00000171853|TTC15  
ENSG00000172653|C17orf66 ENSG00000176387|HSD11B2 ENSG00000188396|NP\_001013654.1 ENSG00000188660|C21orf125 ENSG00000196084|UBIQ\_HUMAN ENSG00000197296|C20orf142 ENSG00000204313|NP\_001028830.1 ENSG00000206076|Q6ZQR8\_HUMAN  
ENSG00000050393|CCDC90A ENSG00000091527|CDV3 ENSG00000100426|ZBED4 ENSG00000100722|ZC3H14 ENSG00000106305|MCA2\_HUMAN ENSG00000117280|RAB7L1 ENSG00000119185|ITGB1BP1 ENSG00000123165|ACTRT1  
ENSG00000124795|DEK ENSG00000125931|CITED1 ENSG00000131174|COX7B ENSG00000137509|PRCP ENSG00000139973|SYT16 ENSG00000143621|ILF2 ENSG00000144749|LRIG1 ENSG00000152454|ZNF256  
ENSG00000152952|PLOC2 ENSG00000155906|RMND1 ENSG00000158185|ANKRD36 ENSG00000166762|CATSPER2 ENSG00000173209|AHSA2 ENSG00000175322|ZNF519 ENSG00000198815|FOXJ3  
AAGTGT ENSG00000064309|CDON ENSG00000085063|CD59 ENSG00000102078|SLC25A14 ENSG00000102904|TSNAXIP1 ENSG00000106133|NSUN5C ENSG00000110660|SLC35F2  
ENSG00000120068|HOXB8 ENSG00000136827|TOR1A ENSG00000137177|KIF13A ENSG00000143319|TSG20L2 ENSG00000143398|PIP5K1A ENSG00000148200|NR6A1 ENSG00000149305|HTR3B ENSG00000163283|ALPPL2  
ENSG00000163993|S100P ENSG00000166540|ZNF407 ENSG00000168016|Q8N8K0\_HUMAN ENSG00000172269|DPAGT1 ENSG00000184639|NP\_001004344.1 ENSG00000197724|PHF2 ENSG00000204125|Q53S21\_HUMAN  
ENSG00000046653|GPM6B ENSG00000065154|OAT ENSG00000080824|HSP90AA1 ENSG00000100129|EIF3S6TP ENSG00000112592|TBP ENSG00000116497|S100PBP ENSG00000117632|STMN1 ENSG00000123091|RNFB1  
ENSG00000125355|FAM70A ENSG00000126860|EVI2A ENSG00000134146|ATPBD4 ENSG00000134363|FST ENSG00000135945|REV1 ENSG00000144559|C3orf31 ENSG00000144747|TMF1 ENSG00000147246|HTR2C  
ENSG00000155085|C6orf199 ENSG00000159256|MORC3 ENSG00000164136|IL15 ENSG00000165055|METTL2B ENSG00000168811|IL12A ENSG00000174501|NP\_079466.2 ENSG00000175097|RAG2  
ENSG00000196900|NP\_997291.1 ENSG00000197841|ZNF181 ENSG00000204178|TMEM57  
AAGTCTT ENSG00000025800|KPN6B ENSG00000062822|POLD1 ENSG00000104901|DKKL1 ENSG00000106246|PTCD1 ENSG00000119638|NEK9 ENSG00000120332|TRN1 ENSG000001210952|PRAMEF2 ENSG00000123992|DNPEP  
ENSG00000133313|CNDP2 ENSG00000137486|ARRB1 ENSG00000148400|NOTCH1 ENSG00000153298|C6orf54 ENSG00000158423|RIBC1 ENSG000

ENSG00000081665|ZNF253 ENSG00000082269|KIAA1411 ENSG000000100209|HSCB ENSG000000108256|NUFIP2 ENSG000000111962|UST ENSG000000116001|TIA1 ENSG000000116721|PRAMEF1 ENSG000000117713|ARID1A  
ENSG000000123066|THRAP2 ENSG000000123131|PRDX4 ENSG000000123728|RAF2P2 ENSG000000132153|DHX30 ENSG000000141048|MYH4 ENSG000000142065|ZFP14 ENSG000000152193|C13orf7 ENSG000000155906|RMND1  
ENSG000000162909|CAPN2 ENSG000000163069|SCGB ENSG000000165527|ARF6 ENSG000000167601|AXL ENSG000000168116|KIAA1586 ENSG000000168952|STXBP6 ENSG000000170961|HAS2 ENSG000000175877|C5orf29  
ENSG000000178604|NP\_001034973.1 ENSG000000182831|C16orf72 ENSG000000183648|NDUFB1 ENSG000000188153|COL4A5 ENSG000000197716|QSUHV1\_HUMAN ENSG000000204481|PRAMEF14 ENSG000000204495|PRAMEF13  
ENSG00000029993|HMGB3 ENSG000000100077|ADRBK2 ENSG000000104872|PTH1D1 ENSG000000104880|ARHGFB1 ENSG000000106070|GRB10 ENSG000000108947|EFNB3 ENSG000000131944|C19orf40 ENSG000000140718|FTO  
ENSG000000147394|ZNF185 ENSG000000148842|CNM2 ENSG000000149262|INTS4 ENSG000000166317|SYNPO2L ENSG000000169442|CDS2 ENSG000000173436|C1orf151 ENSG000000182660|NP\_001013698.1 ENSG000000189058|APOD  
ENSG000000205703|NP\_001010910.1 ENSG00000000460|C1orf112 ENSG000000080819|CPOX ENSG000000081307|UBE1DC1 ENSG000000091879|ANGPT2 ENSG000000113597|NP\_079217.1 ENSG000000113810|SMC4 ENSG000000115520|COQ10B  
ENSG000000121621|KIF18A ENSG000000121749|TBC1D15 ENSG000000122068|FYTTD1 ENSG000000123575|CXorf39 ENSG000000124103|C20orf107 ENSG000000124802|EEF1E1 ENSG000000125384|PTGER2 ENSG000000139977|NAT12  
ENSG000000145908|ZNF300 ENSG000000151746|BICD1 ENSG000000163463|KRTCAP2 ENSG000000164056|SPRY1 ENSG000000170677|SOCS6 ENSG000000173376|C4orf31 ENSG000000175073|VCP1P1 ENSG000000180008|SOCS4  
ENSG000000181744|C3orf58 ENSG000000186416|NKRF ENSG000000187601|MAGEH1 ENSG000000188653|NR\_002807.1 ENSG000000196963|PCDHB16 ENSG000000204147|ASAH2B ENSG000000204291|COL15A1  
AAGTTGC ENSG00000005961|ITGA2B ENSG000000068394|GPKOW ENSG000000070729|CNGB1 ENSG000000090659|CD209 ENSG000000105122|NP\_075055.1 ENSG000000106078|COBL ENSG000000115594|IL1R1 ENSG000000130508|PXDN  
ENSG000000132840|BHMT2 ENSG000000135631|RAB11FIP5 ENSG000000138629|UBL7 ENSG000000138942|RNF185 ENSG000000147394|ZNF185 ENSG000000162599|NFIA ENSG000000163083|INHBB ENSG000000169189|NSMCE1  
ENSG000000172500|FIBP ENSG000000178409|KIAA1553 ENSG000000189162|CSH1 ENSG000000196186|Q7IRF5\_HUMAN ENSG000000204103|MAFB ENSG000000050165|DKK3 ENSG000000054938|CHRDL2 ENSG000000067167|TRAM1  
ENSG000000072210|ALDH3A2 ENSG000000077943|ITGA8 ENSG000000092531|SNAP23 ENSG000000110466|MYP4 ENSG000000111196|MGN2\_HUMAN ENSG000000114346|ECT2 ENSG000000114698|PLSCR4  
ENSG00000019335|SET ENSG000000136982|NP\_076999.1 ENSG000000143420|ENSA ENSG000000143799|PARP1 ENSG000000145687|SSBP2 ENSG000000145839|IL9 ENSG000000151929|BAG3 ENSG000000152022|LIX1L  
ENSG000000154545|MAGED4 ENSG000000159377|PSMB4 ENSG000000167236|CCL23 ENSG000000171522|PTGER4 ENSG000000172399|MYOZ2 ENSG000000183283|DAZAP2 ENSG000000186340|THBS2 ENSG000000187243|MAGED4B  
ENSG000000196323|ZBTB44  
AAGTTGT ENSG000000074211|PPP2R2C ENSG000000075886|TUBA3D ENSG000000086062|B4GALT1 ENSG000000088926|F11 ENSG000000106290|TAF6 ENSG000000117016|RIMS3 ENSG000000117481|NSUN4 ENSG000000131378|RFTN1  
ENSG000000138942|RNF185 ENSG000000144063|MALL ENSG000000145819|ARHGAP26 ENSG000000148200|NR6A1 ENSG000000148339|SLC25A25 ENSG000000152086|TUBA3E ENSG000000155367|PPM1J ENSG000000158109|FAM79A  
ENSG000000167641|PPP1R14A ENSG000000168026|TTC21A ENSG000000176678|FOXL1 ENSG000000182329|Q8IVF9\_HUMAN ENSG000000182660|NP\_001013698.1 ENSG000000184619|KRBA2 ENSG000000184924|NP\_001013685.1 ENSG000000198816|ZNF358  
ENSG000000198909|MAP3K3 ENSG000000204414|CSHL1 ENSG000000205609|Q9BW98\_HUMAN ENSG000000092345|DAZL ENSG000000107864|CPEB3 ENSG000000108666|C17orf75 ENSG000000112378|PERP ENSG000000116001|TIA1  
ENSG00000018523|CTGF ENSG000000123091|RNF11 ENSG000000131437|KIF3A ENSG000000132283|DNHD1 ENSG000000133639|BTG1 ENSG000000135604|STX11 ENSG000000146731|CCT6A  
ENSG000000150991|UBIQ\_HUMAN ENSG000000152484|USP12 ENSG000000153208|MERTK ENSG000000154645|CHODL ENSG000000162775|MKL1 ENSG000000163918|RFC4 ENSG000000168564|CDKN2AIP ENSG000000168582|CRYGA  
ENSG000000171940|ZNF217 ENSG000000173614|NMNAT1 ENSG000000189056|RELN ENSG000000197846|HIST1H2BF ENSG000000198783|CCDC16 ENSG000000198830|HMGN2 ENSG000000203916|HFM1  
ENSG000000063854|HAGH ENSG000000068024|HDAC4 ENSG000000072609|CHFR ENSG000000099995|SF3A1 ENSG000000108387|SYT4 ENSG000000112619|PRPH2 ENSG000000113430|IRX4 ENSG000000116198|KIAA0562  
ENSG000000129473|BCL2L2 ENSG000000129862|VCY ENSG000000129864|VCY1B ENSG000000132716|WDR42A ENSG000000133056|PIK3C2B ENSG000000133422|MORC2 ENSG000000138869|C22orf16 ENSG000000143811|PYCR2  
ENSG000000144029|MRPS5 ENSG000000157017|GHRL ENSG000000159224|G1 ENSG000000159261|CLDN14 ENSG000000167207|NOD2 ENSG000000167972|ACA3 ENSG000000198618|PP1A\_HUMAN ENSG000000204013|Q6XYD6\_HUMAN  
ENSG000000204564|C6orf136 ENSG000000205528|Q6ZRE2\_HUMAN ENSG000000205726|ITSN1 ENSG000000206190|ATP10A ENSG000000100209|HSCB ENSG000000104497|SNX16 ENSG000000107105|ELAVL2 ENSG000000115761|NOL10  
ENSG000000116678|LEPR ENSG000000119969|HELLS ENSG000000121621|KIF18A ENSG000000123473|STIL ENSG000000129173|E2F8 ENSG000000138794|CASP6 ENSG000000144354|CDCA7 ENSG000000148541|FAM13C1  
ENSG000000153790|C7orf31 ENSG000000156384|C10orf78 ENSG000000164188|RANBP3L ENSG000000164219|PGGT1B ENSG000000164548|TRA2A\_HUMAN ENSG000000165650|PDZD8 ENSG000000169252|ADRB2 ENSG000000154856|APCDD1  
ENSG000000176842|IRX5 ENSG000000186222|CNO ENSG000000186439|TRDN ENSG000000189195|BTBD8 ENSG000000196083|IL1RAP ENSG000000196865|NHLRC2 ENSG000000203668|CHML ENSG000000204628|GNB2L1  
ENSG000000205542|TMSL1  
AAGTTTC ENSG000000075461|CACNG4 ENSG000000076356|PLXNA2 ENSG000000101443|WFGD2 ENSG000000104611|SH2D4A ENSG000000105193|RPS16 ENSG000000111405|PP11\_HUMAN ENSG000000119411|BSPRY ENSG000000127511|SIN3B  
ENSG000000130203|APOE ENSG000000131652|THOC6 ENSG000000133065|SLC41A1 ENSG000000135451|TROPAP ENSG000000142512|SIGLEC10 ENSG000000143006|DMRT1 ENSG000000143409|FAM63A ENSG000000146666|Q96IP2\_HUMAN  
ENSG000000159110|AFNAR2 ENSG000000163873|GRIK3 ENSG000000166444|SLT5 ENSG000000166833|NAV2 ENSG000000169662|NP\_997357.1 ENSG000000170464|DNAJC18 ENSG000000173545|ZNF622 ENSG000000183778|B3GALT5  
ENSG000000184787|UBE2G2 ENSG000000186716|BCR ENSG000000189068|VSTM1 ENSG000000196420|S100A5 ENSG000000196567|NP\_942123.1 ENSG00000013364|MVP ENSG000000075643|MOCOS ENSG00000079246|XRCC5  
ENSG000000088386|SLC15A1 ENSG000000095587|TLL2 ENSG000000109819|PPARGC1A ENSG000000115254|XAB1 ENSG000000117592|PRDX6 ENSG000000118322|ATP10B ENSG000000118507|AKAP7 ENSG000000125952|MAX  
ENSG000000131725|WDR44 ENSG000000135940|COX5B ENSG000000138061|CYP11B1 ENSG000000143552|NUP210L ENSG000000148291|SURF2 ENSG000000151704|KCNJ1 ENSG000000154380|ENAH ENSG000000154856|APCDD1  
ENSG000000162813|BPNT1 ENSG000000164167|LSM6 ENSG000000165973|NELL1 ENSG000000170312|CDC2 ENSG000000171204|TMEM126B ENSG000000172086|KRCC1 ENSG000000176563|CNTD1 ENSG000000177200|CHD9  
ENSG000000180182|CRSP2 ENSG000000188162|OTOG  
AAGTTTT ENSG000000011243|AKAP8L ENSG000000028528|SNX1 ENSG000000072832|CRMP1 ENSG000000092201|SUPT16H ENSG000000101161|PRPF6 ENSG000000105376|ICAM5 ENSG000000105997|HOXA3 ENSG000000115956|PLEK  
ENSG000000119688|ABCD4 ENSG000000128567|PODXL ENSG000000134107|BHLHB2 ENSG000000134243|SORT1 ENSG000000142959|BEST4 ENSG000000156858|PRR14 ENSG000000157617|C21orf25 ENSG000000157693|C9orf91  
ENSG000000164733|CTSB ENSG000000169231|THBS3 ENSG000000170689|HOXB9 ENSG000000170876|TMEM43 ENSG000000171960|PPH1 ENSG000000174804|FZD4 ENSG000000189140|Q6ZU77\_HUMAN ENSG000000196154|S100A4  
ENSG000000198837|DENND4B ENSG000000204226|Q6ZNS0\_HUMAN ENSG00000034971|MYOC ENSG000000073282|TP73L ENSG000000087095|NLK ENSG000000094914|AAAS ENSG000000095110|FAM55A ENSG000000100478|AP451  
ENSG000000108587|GOSR1 ENSG000000108848|CROP\_HUMAN ENSG000000116717|GADD45A ENSG000000124429|POF1B ENSG000000132423|COQ3 ENSG000000139505|MTMR6 ENSG000000146587|RBAK ENSG000000153107|ANAPC1  
ENSG000000162630|B3GALT2 ENSG000000162745|OLFML2B ENSG000000162891|IL20 ENSG000000163605|PPP4R2 ENSG000000163611|CCDC52 ENSG000000164253|WDR41 ENSG000000169599|NFU1 ENSG000000171488|LRRC8C  
ENSG000000177485|ZBTB33 ENSG000000181467|RAP2B ENSG000000187118|NP\_872329.1 ENSG000000187761|PAGE2B ENSG000000198838|RYR3  
AATAAAC ENSG000000039650|ENKBP1 ENSG000000071282|LMCD1 ENSG000000074582|BCS1L ENSG000000076944|STXBP2 ENSG000000083845|RPS5 ENSG000000089692|LAG3 ENSG000000101200|AVP ENSG000000102001|CACNA1F  
ENSG000000105258|POLR2I ENSG000000105619|TFPT ENSG000000105640|RPL18A ENSG000000106631|MYL7 ENSG000000110628|SLC22A18 ENSG000000116148|CCNL2 ENSG000000118137|APOA1 ENSG000000127578|WFIKKN1  
ENSG000000133316|WDR74 ENSG000000142546|NOS1P ENSG000000158793|NTT1 ENSG000000160075|SSU72 ENSG000000160688|FLAD1 ENSG0000000161281|COX7A1 ENSG000000162438|CTRC ENSG000000163060|TEKT4  
ENSG000000164047|CAMP ENSG000000166869|CHP2\_HUMAN ENSG000000169676|DRD5 ENSG000000170889|RPS9 ENSG000000171495|NP\_775760.2 ENSG000000173821|RNF213 ENSG000000174938|SEZ6L2 ENSG000000178537|SLC25A20  
ENSG000000178589|Q9BT26\_HUMAN ENSG000000180879|SSR4 ENSG000000188931|C1orf192 ENSG000000197816|KIAA1529 ENSG000000204859|ZBTB48 ENSG000000206177|HBM ENSG000000039600|SOX30 ENSG000000082482|KCNK2  
ENSG000000083782|EPYC ENSG000000101278|Q9NQ39\_HUMAN ENSG000000104763|ASAH1 ENSG000000106588|PSMA2 ENSG000000111145|ELK3 ENSG000000116717|GADD45A ENSG000000117475|BLZF1 ENSG000000120555|Q5W161\_HUMAN  
ENSG000000124614|RPS10 ENSG000000127483|HP1BP3 ENSG000000129083|COPB1 ENSG000000133710|SPINK5 ENSG000000134504|KCTD11 ENSG000000134996|OSTF1 ENSG000000138777|PPA2 ENSG000000140280|LYSMD2  
ENSG000000141579|ZNF750 ENSG000000143036|SLC44A3 ENSG000000144445|NP\_689732.2 ENSG000000149506|ZP1 ENSG000000149761|NUDT22 ENSG000000164040|PGRMC2 ENSG000000164941|INTS8 ENSG000000165061|ZMAT4  
ENSG000000165264|NDUF86 ENSG000000169224|C1orf150 ENSG000000170289|CNGB3 ENSG000000170892|TSEN34 ENSG000000171806|C1orf156 ENSG000000171931|FBXW10 ENSG000000176840|C19orf30 ENSG000000176842|IRX5  
ENSG000000177954|RPS27 ENSG000000179363|TMEM31 ENSG000000181544|FANCB ENSG000000182916|TCEAL7 ENSG000000184983|NDUFA6 ENSG000000188820|FAM26F ENSG000000197345|MRPL21 ENSG000000205220|PSMB10  
AATAAAG ENSG000000087191|PSMC5 ENSG000000099821|POLRMT ENSG000000100097|LGALS1 ENSG000000110169|HPX ENSG000000115268|RPS15 ENSG000000128159|TUBGCP6 ENSG000000130255|RPL36 ENSG000000132600|PRMT7  
ENSG000000136942|RPL35 ENSG000000142789|ELA3A ENSG000000144671|SLC22A14 ENSG000000149609|C20orf144 ENSG000000153446|NP\_689672.2 ENSG000000155352|FAM39B ENSG000000156885|COX6A2 ENSG000000160318|CLDND2  
ENSG000000161016|RPL8 ENSG000000164708|PGAM2 ENSG000000164729|AMACL1 ENSG000000165863|C10orf82 ENSG000000167700|MFSB3 ENSG000000169583|CLIC3 ENSG000000171722|C1orf111 ENSG000000182600|NP\_996778.1  
ENSG000000184361|C17orf46 ENSG000000196118|NP\_001014979.1 ENSG000000204197|KIFC1 ENSG000000204313|NP\_001028830.1 ENSG000000205744|DENND1C ENSG00000071082|RPL31 ENSG000000090686|USP48  
ENSG000000095380|NANS ENSG000000100209|HSCB ENSG000000102038|SMARCA1 ENSG000000103310|ZP2 ENSG000000104371|DKK4 ENSG000000104808|DHDH ENSG000000104907|TRMT1 ENSG000000107537|PHYH  
ENSG000000109332|UBE2D3 ENSG000000109854|HTATIP2 ENSG000000113520|IL4 ENSG000000113532|ST8S1A4 ENSG000000115165|PSDCBP ENSG000000119392|GLE1L ENSG000000119705|C14orf156 ENSG000000122033|MTIF3  
ENSG000000125868|DSTN ENSG000000125931|CITED1 ENSG000000126246|TMEM149 ENSG000000129158|SERGEF ENSG000000129353|SLC44A2 ENSG000000132283|DNHD1 ENSG000000132554|RGS22 ENSG000000132646|PCNA  
ENSG000000135317|SNX14 ENSG000000136149|XR\_017918.1 ENSG000000140386|ZNF291 ENSG000000140988|RPS2 ENSG000000149345|U2D3L\_HUMAN ENSG000000155099|TMEM55A ENSG000000155313|USP25 ENSG000000157551|KCNJ15  
ENSG000000158185|ANKRD36 ENSG000000159197|KCNJ2 ENSG000000159363|ATP13A2 ENSG000000163463|KRTCAP2 ENSG000000164175|SLC45A2 ENSG000000164347|GFM2 ENSG000000166037|CEP57 ENSG000000166452|C11orf17  
ENSG000000166478|ZNF143 ENSG000000166930|MS4A5 ENSG000000168591|TMUB2 ENSG000000173401|GLIPR1L1 ENSG000000176927|EFCAB5 ENSG000000177600|RPLP2 ENSG000000178982|EIF3S12 ENSG000000180777|ANKRD30B  
ENSG000000183644|NP\_997313.1 ENSG000000186019|ZNF224 ENSG000000187257|RSBN1L ENSG000000196680|Q8WZ27\_HUMAN ENSG000000196912|AN36B\_HUMAN ENSG000000197149|XR\_019565.1 ENSG000000203907|NP\_001073976.1  
ENSG000000206198|NR\_001535.1  
ENSG000000206535|A1A4G5\_HUMAN  
AATAACG ENSG000000079337|RAPGEF3 ENSG000000090372|STRN4 ENSG000000101474|C20orf3 ENSG000000120875|DUSP4 ENSG000000121769|FABP3 ENSG000000129757|CDKN1C ENSG000000133398|MED10 ENSG000000136463|CCDC44  
ENSG000000142319|SLC6A3 ENSG000000153298|C6orf54 ENSG000000161179|NP\_001017964.1 ENSG000000163793|DNAJC5G ENSG000000165131|C7orf34 ENSG000000167741|GGT6 ENSG000000168065|SLC22A11 ENSG000000168818|STX18  
ENSG000000172647|PGA5 ENSG000000173039|RELA ENSG000000175781|Q9H5L9\_HUMAN ENSG000000176444|CLK2 ENSG000000177398|UMODL1 ENSG000000177764|ZCCHC3 ENSG000000179820|MYADM ENSG000000180860|PGA3  
ENSG000000181218|HIST3H2A ENSG000000182362|C21orf57 ENSG000000183657|QBWWY5\_HUMAN ENSG000000196517|SLC6A9 ENSG000000197900|Q8N7Q6\_HUMAN ENSG000000203945|Q5JJP1\_HUMAN ENSG000000203988|Q6ZU49\_HUMAN ENSG000000204059|NP\_001013718.1  
ENSG000000204973|PGA4 ENSG000000205033|Q96DJ9\_HUMAN ENSG000000205354|Q6ZN60\_HUMAN ENSG00000075413|MARK3 ENSG000000101751|POLI ENSG000000108846|ABCC3 ENSG000000118434|SPACA1 ENSG000000120729|MYOT  
ENSG000000126261|SAE2 ENSG000000137142|IGFBPL1 ENSG000000140905|GCARH ENSG000000146038|DCDC2 ENSG000000153485|C14orf109 ENSG000000156256|USP16 ENSG000000159917|ZNF235 ENSG000000162702|ZNF281  
ENSG000000166803|KIAA0101 ENSG000000174325|DIRC1 ENSG000000176274|MCAT6 ENSG000000185013|NT5C1B ENSG000000185231|MC2R ENSG000000189108|IL1RAPL2 ENSG000000198646|NCOA6 ENSG000000198765|SYCP1  
ENSG000000204365|C10orf126 ENSG000000205111|CDKL4  
AATAAGA ENSG000000067566|ARSD ENSG000000006831|ADIPOR2 ENSG000000028528|SNX1 ENSG000000074054|CLASP1 ENSG000000100027|YPEL1 ENSG000000103260|METRN ENSG000000108375|SUPT4H1 ENSG000000115657|ABC6  
ENSG000000125753|VASP ENSG000000138698|RAP1GDS1 ENSG000000141504|SAT2 ENSG000000161381|PLXDC1 ENSG000000163374|YY1AP1 ENSG000000165949|IFI27 ENSG000000166261|ZNF202 ENSG000000166340|TPP1  
ENSG000000167757|KLK11 ENSG000000170876|TMEM43 ENSG000000204498|NFKBIL1 ENSG000000026508|CD44 ENSG000000028203|VEZT ENSG000000054938|CHRDL2 ENSG000000086288|TXNDC3 ENSG000000105398|SULT2A1  
ENSG000000111196|MGN2\_HUMAN ENSG000000111728|ST8S1A1 ENSG000000112175|BMP5 ENSG000000113522|RAD50 ENSG000000113645|WWC1 ENSG000000114487|MORC1 ENSG000000116979|CRY2 ENSG000000116991|CRYZ ENSG000000142871|CYR61  
ENSG000000155011|DKK2 ENSG000000159113|LL10RB ENSG000000161594|KLHL10 ENSG000000163285|GABRG1 ENSG000000163328|GPR155 ENSG000000163964|PIGX ENSG000000164176|EDIL3 ENSG000000165120|C7orf45  
ENSG000000179399|GPC5 ENSG000000180773|SLC36A4 ENSG000000187889|C1orf168 ENSG000000197672|NP\_997331.1 ENSG000000197860|SGTB  
AATAAGG ENSG000000090857|NP\_060460.3 ENSG000000110446|SLC15A3 ENSG000000128918|ALDH1A2 ENSG000000129968|FAM108A1 ENSG000000157856|C2orf39 ENSG000000162408|NOL9 ENSG000000166257|SCN3B ENSG000000169169|CPT1C  
ENSG000000170955|PRKCDPB ENSG000000172301|C17orf79 ENSG000000188385|C10orf39 ENSG000000197174|O14606\_HUMAN ENSG000000197285|NR\_001

AATAATA ENSG0000001497|LAS1L ENSG00000012061|ERCC1 ENSG00000072778|ACADVL ENSG00000087077|TRIP6 ENSG00000092607|TBX15 ENSG00000096088|PGC ENSG00000101452|DHX35 ENSG00000102007|PLP2 ENSG00000105549|THEG ENSG00000116788|C12orf57 ENSG00000114650|SQAP ENSG00000114786|ACY1 ENSG00000116205|C1orf83 ENSG00000121281|ADCY7 ENSG00000122965|RBM19 ENSG00000125743|SNRPD2 ENSG00000131196|FATC1 ENSG00000132824|SERINC3 ENSG00000137767|SCRDL ENSG00000141744|PNMT ENSG00000143546|S100A8 ENSG00000147119|CHST7 ENSG00000149305|HTR3B ENSG00000157240|FZD1 ENSG00000162426|SLC45A1 ENSG00000165046|LETM2 ENSG00000170420|APOL6 ENSG00000170613|FAM71B ENSG00000171115|GIMAP8 ENSG00000172936|MYD88 ENSG00000173545|ZNF622 ENSG00000174231|PRPF8 ENSG00000177885|GRB2 ENSG00000180595|Q8N8C9\_HUMAN ENSG00000185684|EP400L ENSG00000037965|HOXC8 ENSG000001103540|CE110\_HUMAN ENSG00000114757|PEX5L ENSG00000117594|HSD11B1 ENSG00000118733|OLFM3 ENSG00000120992|LYPLA1 ENSG00000124429|POF1B ENSG00000127334|DYRK2 ENSG00000129691|ASH2L ENSG00000130045|C9orf121 ENSG00000134853|PDGFRA ENSG00000137338|PGBD1 ENSG00000139800|ZIC5 ENSG00000144130|NT5DC4 ENSG00000149761|NUDT22 ENSG00000151304|SRFBP1 ENSG00000151413|NUPBL ENSG00000152495|CAMK4 ENSG00000153802|TMPRSS11D ENSG00000163110|PDLIM5 ENSG00000164187|LMBRD2 ENSG00000164291|ARSK ENSG00000165338|HECTD2 ENSG00000169684|CHRNA5 ENSG00000171262|FAM98B ENSG00000173083|HPSE ENSG00000174236|NP\_001025045.1 ENSG00000175818|HS3ST5 ENSG00000176009|ASCL3 ENSG00000176927|EFCAB5 ENSG00000177888|ZBTB41 ENSG00000177932|ZNF354C ENSG00000180776|ZDHC20 ENSG00000182621|PLCB1 ENSG00000186297|GABRA5 ENSG00000196636|ACN9 ENSG00000196900|NP\_997291.1 ENSG00000197737|Q9H393\_HUMAN ENSG00000197822|OCLN ENSG00000198161|PP1A4 ENSG00000198360|NP\_839944.1 ENSG00000203847|XR\_016130.1 ENSG00000204990|NP\_001008742.1 ENSG00000204990|NP\_001008742.1 AATAATG ENSG00000034510|TMSB10 ENSG00000059378|PARP1 ENSG00000074054|CLASP1 ENSG00000074410|CA12 ENSG00000103111|MON1B ENSG00000125734|NM\_001080452.1 ENSG00000134864|Q9BVM4\_HUMAN ENSG00000154025|SLC5A10 ENSG00000161911|TREM1 ENSG00000162981|FAM84A ENSG00000165275|RG9MTD3 ENSG00000167744|NTF5 ENSG00000167862|ICT1 ENSG00000170458|CD14 ENSG00000170616|SCRT1 ENSG00000174683|C8orf78 ENSG00000175779|NP\_997327.1 ENSG00000177408|PLAC2 ENSG00000183128|FAM26A ENSG00000189001|SBSN ENSG00000197696|NMB ENSG00000198012|XR\_017841.1 ENSG00000198785|GRIN3A ENSG00000204248|COL11A2 ENSG00000205658|Q6ZUU6\_HUMAN ENSG00000008869|HEATR5B ENSG00000009780|FAM76A ENSG000000077585|GPR137B ENSG000000088451|TGDS ENSG00000100191|SLC5A4 ENSG00000115355|KIAA1212 ENSG00000119698|KIAA1622 ENSG00000121879|PIK3CA ENSG00000128585|MKLN1 ENSG00000134717|BTFL3L4 ENSG00000141646|SMAD4 ENSG00000150867|PIP5K2A ENSG00000155545|MIER3 ENSG00000155755|ALS2CR4 ENSG00000168916|ZNF608 ENSG00000169016|E2F6 ENSG00000171858|RPS21 ENSG00000172466|ZNF24 ENSG00000176728|CYO14\_HUMAN ENSG00000178997|EXDL1 ENSG00000184378|ARPM1\_HUMAN ENSG00000186017|ZNF566 ENSG00000187510|NP\_001004330.1 ENSG00000197860|SGTB ENSG00000205808|PPAPDC2 perfect: AATAATG CATTATT hsa-miR-126\* CATTATTacttttggtaacgg 0 AATAATT ENSG00000003147|ICA1 ENSG00000019102|VSI2G ENSG00000055118|KCNH2 ENSG00000092964|DFYSL2 ENSG00000099194|SCD ENSG00000100030|MAPK1 ENSG00000108439|PNPO ENSG00000115073|ACTR1B ENSG00000116667|C1orf21 ENSG00000119946|CNNM1 ENSG00000125046|C3orf32 ENSG00000130032|PRRG3 ENSG00000130687|ALKBH6 ENSG00000135801|TAF5L ENSG00000139718|SETD1B ENSG00000139890|REM2 ENSG00000143167|GPA33 ENSG00000143319|ISG20L2 ENSG00000163814|CDCP1 ENSG00000164889|SLC4A2 ENSG00000165606|NP\_001073989.1 ENSG00000166569|CPLX4 ENSG00000169410|PTPN9 ENSG00000172183|ISG20 ENSG00000172568|NP\_001001343.1 ENSG00000189060|H1FO ENSG00000189069|NP\_001013732.1 ENSG00000197077|Q5THZ5\_HUMAN ENSG00000197471|SPN ENSG00000198471|RTP2 ENSG00000198879|SFMBT2 ENSG00000203793|Q6ZR74\_HUMAN ENSG00000204369|Q6ZUPO\_HUMAN ENSG00000205396|Q6ZRG2\_HUMAN ENSG00000205778|Q6ZMM7\_HUMAN ENSG00000206193|Q5HYA3\_HUMAN ENSG00000006576|PHF2 ENSG000000013375|PGM3 ENSG000000020426|MNAT1 ENSG000000023909|GCLM ENSG00000067646|ZFY ENSG00000077458|FAM76B ENSG00000080644|CHRNA3 ENSG00000081320|STK17B ENSG00000081479|LRP2 ENSG00000082269|KIAA1411 ENSG00000100191|SLC5A4 ENSG00000101190|TCFL5 ENSG00000104290|FZD3 ENSG00000105967|TFEC ENSG00000109618|UGTAP\_HUMAN ENSG00000115590|IL1R2 ENSG00000116191|RALGPS2 ENSG00000117598|NP\_001010861.1 ENSG00000117620|SLC35A3 ENSG00000122435|CCDC76 ENSG00000123096|SSPN ENSG00000126804|ZBTB1 ENSG00000127318|IL22 ENSG00000132855|ANGPTL3 ENSG00000133302|ANKRD32 ENSG00000133742|CA1 ENSG00000135999|EPC2 ENSG00000139324|TMTC3 ENSG00000145451|GLRA3 ENSG00000151229|SLC2A13 ENSG00000151789|ZNF659 ENSG00000156172|C8orf37 ENSG00000160124|CCDC58 ENSG00000164307|ARTS1\_HUMAN ENSG00000164323|KIAA1430 ENSG00000167014|C15orf43 ENSG00000171204|TMEM126B ENSG00000172673|C6orf190 ENSG00000179097|HTR1F ENSG00000180370|PAK2 ENSG00000180479|ZNF571 ENSG00000182977|Q9P111\_HUMAN ENSG00000183340|JRK1 ENSG00000186481|NP\_001025170.1 ENSG00000186908|ZDHC17 ENSG00000187118|NP\_872329.1 ENSG00000196247|ZNF588 ENSG00000196428|TSC22D2 ENSG00000197479|PCDHH1 ENSG00000198015|MRPL42 ENSG00000198533|Q9P1D0\_HUMAN ENSG00000067082|KLF6 ENSG00000102981|PARDA1 ENSG00000106700|GRB10 ENSG00000122735|DNAA1 ENSG00000128973|CLN6 ENSG00000132155|RAF1 ENSG00000133250|ZNF414 ENSG00000141294|LRRC46 ENSG00000156711|MAPK13 ENSG00000162735|PEX19 ENSG00000164300|SERINC5 ENSG00000171724|K1576\_HUMAN ENSG00000172543|CTSW ENSG00000173585|CCR9 ENSG00000183250|C21orf67 ENSG00000186847|KRT14 ENSG00000196407|THEM5 ENSG000000041515|MYO16 ENSG00000007536|C18orf55 ENSG00000078795|PKD2L2 ENSG000000095637|SORBS1 ENSG00000106524|ANKMY2 ENSG00000107863|ARHGAP21 ENSG00000114480|GEB1 ENSG00000124882|EREG ENSG00000132912|DCTN4 ENSG00000137831|UACA ENSG00000143924|EML4 ENSG00000144182|LIPT1 ENSG00000149124|GLYAT ENSG00000153832|FBXO36 ENSG00000157230|LOC728132 ENSG00000164308|NP\_071745.1 ENSG00000164830|OXR1 ENSG00000165029|ABCA1 ENSG00000168264|IRF2BP2 ENSG00000179455|MKRN3 ENSG00000185220|PGBD2 ENSG00000187118|NP\_872329.1 ENSG00000187229|Q86YR2\_HUMAN ENSG00000196605|Q8AG5\_HUMAN ENSG00000205220|PSMB10 ENSG00000206198|NR\_001535.1 AATAACAT ENSG00000005100|DHX33 ENSG00000023171|GRAMD1B ENSG00000037757|NP\_115661.1 ENSG00000068724|TTC7A ENSG00000104870|FCGRT ENSG00000104998|IL27RA ENSG00000105516|DBP ENSG00000105705|SF4 ENSG00000114656|KIAA1257 ENSG00000116984|MTR ENSG00000123329|ARHGAP9 ENSG00000125388|GRK4 ENSG00000136883|KIF12 ENSG00000143502|SUSD4 ENSG00000153298|C6orf54 ENSG00000155087|ODF1 ENSG00000158055|GRHL3 ENSG00000159189|C1QC ENSG00000167483|FAM129C ENSG00000169083|AR ENSG00000169803|AR ENSG00000176809|LRRC37A3 ENSG00000177156|TALDO1 ENSG00000183530|C22orf30 ENSG00000183826|BTBD9 ENSG00000188487|Q1MX18-4 ENSG00000196859|KTR39 ENSG00000198754|OXCT2 ENSG00000198915|RASGEF1A ENSG00000204059|NP\_001013718.1 ENSG00000204681|GABBR1 ENSG000000047230|CTPS2 ENSG00000057019|DCBLD2 ENSG00000074803|SLC12A1 ENSG00000089048|ESF1 ENSG00000091664|SLC17A6 ENSG00000110975|SYT10 ENSG00000112499|SLC22A2 ENSG00000114744|COMMD2 ENSG00000115233|PSMD14 ENSG00000120210|INSL6 ENSG00000120328|PCDHH12 ENSG00000120696|KBTBD7 ENSG00000124217|MOCOS3 ENSG00000128833|MYO5C ENSG00000134419|RPS15A ENSG00000134900|TPP2 ENSG00000139329|LUM ENSG00000144674|GOLGA4 ENSG00000157502|MUM1L1 ENSG00000164604|GPR85 ENSG00000168283|BM1 ENSG00000171291|ZNF439 ENSG00000175110|MRPS22 ENSG00000176399|DMRTA1 ENSG00000177425|PAWR ENSG00000196597|ZNF782 ENSG00000196636|ACN9 ENSG00000197123|ZNF679 ENSG00000197347|Q6ZVE3\_HUMAN ENSG00000197535|MYO5A ENSG00000205293|Q76B50\_HUMAN AATAACCT ENSG00000058799|YIPF1 ENSG00000100453|GZMB ENSG00000126594|DNASE1 ENSG00000131467|PSME3 ENSG00000132698|RAB25 ENSG00000143546|S100A8 ENSG00000144791|LIMD1 ENSG00000145864|GABRB2 ENSG00000152767|FARP1 ENSG00000155846|PPARGC1B ENSG00000160219|GAB3 ENSG00000162104|ADCY9 ENSG00000162650|ATXN7L2 ENSG00000164061|BSN ENSG00000167531|LALBA ENSG00000170525|PFKFB3 ENSG00000172073|C2orf51 ENSG00000179361|ARID3B ENSG00000179837|RBM15B ENSG00000196313|NP\_742017.1 ENSG00000197622|CDC42SE1 ENSG000002006045|LOC64484 ENSG00000042317|SPATA7 ENSG00000064787|BCAS1 ENSG00000088205|DDX18 ENSG00000112305|SMAP1 ENSG00000112319|EYA4 ENSG00000116717|GADD45A ENSG00000122042|UBL3 ENSG00000122862|SRGN ENSG00000134323|MYCN ENSG00000138778|CENPE ENSG00000139263|LRIG3 ENSG00000141428|C18orf21 ENSG00000146085|MUT ENSG00000163584|RPL22L1 ENSG00000165669|C10orf84 ENSG00000168615|ADAM9 ENSG00000171488|LRRC8C ENSG00000173083|HPSE ENSG00000177058|NP\_775785.1 ENSG00000179144|GIMAP7 ENSG00000184500|PROS1 ENSG00000196270|Q6ZWE7\_HUMAN ENSG00000198221|NP\_001035973.1 AATAACTA ENSG00000004487|AOF2 ENSG00000006042|TMEM98 ENSG00000018280|SLC11A1 ENSG0000018625|ATP1A2 ENSG00000063127|SLC6A16 ENSG0000014738|MCM4 ENSG00000120087|HOXB7 ENSG00000134775|FHOD3 ENSG00000155428|TRIM74 ENSG00000162105|SHANK2 ENSG00000163526|TUBA4B ENSG00000166473|PKDL12 ENSG00000167131|CCDC103 ENSG00000176444|CLK2 ENSG00000178809|TRIM73 ENSG00000180066|C10orf91 ENSG00000197173|NP\_001013689.1 ENSG00000197261|C6orf141 ENSG00000141213|KIAA0776 ENSG00000023608|SNAPC1 ENSG00000006709|RIMBP2 ENSG00000078674|PCM1 ENSG00000081181|ARG2 ENSG00000099290|NP\_001005751.1 ENSG00000107242|PIP5K1B ENSG00000115993|TRAK2 ENSG00000122435|CCDC76 ENSG00000132855|ANGPTL3 ENSG00000135905|DOCK10 ENSG00000136122|C13orf34 ENSG00000136160|EDNRB ENSG00000137691|C21orf70 ENSG00000139168|ZCRB1 ENSG00000145451|GLRA3 ENSG00000152726|Q5SNT8\_HUMAN ENSG00000152760|TCTEX1D1 ENSG00000154175|ABI3BP ENSG00000159256|MORC3 ENSG00000163746|PLSCR2 ENSG00000164307|ARTS1\_HUMAN ENSG00000164631|ZNF12 ENSG00000166669|ATF7IP2 ENSG00000166685|COG1 ENSG00000172661|FAM21B ENSG00000174196|FAM21D ENSG00000183801|OLFM11 ENSG00000186448|ZNF197 ENSG00000187185|Q86VG7\_HUMAN ENSG00000189050|NP\_057209.3 ENSG00000197930|ERO1L ENSG00000204987|Q6ZN80\_HUMAN AATAAGAG ENSG000000004975|DVLT2 ENSG00000074590|NUAK1 ENSG00000078902|TOLLIP ENSG00000092607|TBX15 ENSG00000101098|RIMS4 ENSG000001102230|PCYT1B ENSG00000103196|CRISPLD2 ENSG00000108759|KRT32 ENSG00000113889|KNG1 ENSG00000116983|HPCAL4 ENSG00000118257|NRP2 ENSG00000119771|KLHL29 ENSG00000126231|PROX ENSG00000135517|JARID1B ENSG00000152291|TGNL2 ENSG00000157617|C21orf25 ENSG00000157881|PANK4 ENSG00000176595|KBTBD11 ENSG00000178028|DMAP1 ENSG00000183488|AMAC1L3 ENSG00000198213|NM\_207501 ENSG00000198585|NUDT16 ENSG00000096746|HNRPH3 ENSG00000099940|SNAP29 ENSG00000120289|MAGEB4 ENSG00000122787|AKR1D1 ENSG00000125144|MT1G ENSG00000130349|C6orf203 ENSG00000131375|CAPN7 ENSG00000152213|ARL11 ENSG00000155792|DEPDC6 ENSG00000165312|OTUD1 ENSG00000165512|ZNF22 ENSG00000169688|MT1B ENSG00000172493|AFF1 ENSG00000184647|NP\_940866.2 ENSG00000187193|MT1X ENSG00000197147|LRRC8B ENSG00000198304|ZNF528 ENSG00000203742|NP\_001032308.1 AATAAGAT ENSG00000013275|PSMC4 ENSG00000048342|Q9H8A7\_HUMAN ENSG00000072501|SMC1A ENSG00000077984|CST7 ENSG00000088812|ATRN ENSG00000100290|BIK ENSG00000102385|DRP2 ENSG00000116667|C1orf21 ENSG00000123999|INHA ENSG00000139874|SSTR1 ENSG00000148358|GPR107 ENSG00000151465|CDC123 ENSG00000158869|FCER1G ENSG00000168070|NP\_001032302.1 ENSG00000169857|AVEN ENSG00000174804|FZD4 ENSG00000182173|TSEN54 ENSG00000197162|ZNF688 ENSG00000197174|O14606\_HUMAN ENSG00000197285|NR\_001536.1 ENSG00000197446|CYP2F1 ENSG00000198715|C1orf85 ENSG00000203814|HIST2H2BF ENSG00000204568|MRPS18B ENSG00000205658|Q6ZUU6\_HUMAN ENSG00000066697|TMEFF1 ENSG00000084453|SLC01A2 ENSG00000101846|STS ENSG00000104133|NP\_079413.3 ENSG00000108443|RPS6KB1 ENSG00000109861|CTSC ENSG00000112077|RHAG ENSG00000116191|RALGPS2 ENSG00000118518|RNF146 ENSG00000131171|SH3BGLR ENSG00000135678|CPM ENSG00000138768|VDP\_HUMAN ENSG00000140285|FGF7 ENSG00000140367|UBE2Q2 ENSG00000152022|LIX1L ENSG00000154736|ADAMTS5 ENSG00000166986|MARS ENSG00000169299|PGM2 ENSG00000170802|FOXN2 ENSG00000172403|SYNP02 ENSG00000179902|C1orf194 ENSG00000180370|PAK2 ENSG00000183675|PTPN20B ENSG00000183753|BYP2C ENSG00000183795|VCY2\_HUMAN ENSG00000185894|VCY2\_HUMAN ENSG00000188921|PTPLA2 ENSG00000196428|TSC22D2 ENSG00000198815|FOXJ3 ENSG00000204179|PTPN20A ENSG00000205144|Q6ZV43\_HUMAN AATAAGGG ENSG00000002834|LASP1 ENSG00000010318|PHF7 ENSG00000037637|FBXO42 ENSG00000072501|SMC1A ENSG00000090857|NP\_060460.3 ENSG00000092621|PHGDH ENSG00000101193|C20orf11 ENSG00000105370|LIM2 ENSG00000107185|KIAA0258 ENSG00000110328|GALNTL4 ENSG00000117242|DDOST ENSG00000120029|C10orf76 ENSG00000134247|PTGFRN ENSG00000138642|HERC6 ENSG00000157823|AP3S2 ENSG00000168003|SLC3A2 ENSG00000169442|CD52 ENSG00000170616|SCRT1 ENSG00000173436|C1orf151 ENSG00000181789|COG8 ENSG00000204392|LSM2 ENSG000000012817|JARID1D ENSG00000100889|PCK2 ENSG00000105974|CAV1 ENSG00000112972|HMGC51 ENSG00000113615|SEC24A ENSG000001127951|FLG2 ENSG00000129696|C8orf41 ENSG00000133134|BEX2 ENSG00000134758|RNF138 ENSG00000137547|MRPL15 ENSG00000139364|TMEM132B ENSG00000144566|RAB5A ENSG00000146918|NCAIPG2 ENSG00000150712|MTMR12 ENSG00000155629|PIK3AP1 ENSG00000161048|NP\_945341.2 ENSG00000162521|RBBP4 ENSG00000164675|IQUB ENSG00000174796|THAP6 ENSG00000176623|FAM82B ENSG00000180458|Q8N3U1\_HUMAN ENSG00000186480|INSIG1 ENSG00000188342|GTF2F2 ENSG00000189067|LITAF ENSG00000196715|VKORC1L1 ENSG00000197585|Q5JV89\_HUMAN ENSG00000197956|S100A6 ENSG00000198339|HIST1H4I AATAAGGT ENSG000000048342|Q9H8A7\_HUMAN ENSG00000108671|PSMD11 ENSG00000114439|BBX ENSG00000125266|EFNB2 ENSG00000162543|UBXD3 ENSG00000164078|MST1R ENSG00000166199|ALKBH3 ENSG00000166863|TAC3 ENSG00000173335|CST9 ENSG00000179604|CDC42EP4 ENSG00000188901|NP\_055226.1 ENSG00000203836|NP\_899228.3 ENSG00000105825|TFPI2 ENSG00000111911|HINT3 ENSG00000120253|NUP43 ENSG00000133019|CHRM3 ENSG00000134986|C5orf13 ENSG00000138376|BARD1 ENSG00000138756|BMP2K ENSG00000140043|ZADH1 ENSG00000141161|UNC45B ENSG00000144597|EAF1 ENSG00000144840|RABL3 ENSG00000145592|RPL37 ENSG00000146070|PLA2G7 ENSG00000153560|UBP1 ENSG00000155100|OTUD6B ENSG00000157193|LRP8 ENSG00000163535|SGOL2 ENSG00000167383|ZNF229 ENSG00000169224|C1orf150 ENSG00000172086|KRCC1 ENSG00000196511|TPK1 ENSG00000098729|PPP1R14C AATATAA ENSG00000070444|MNNT ENSG00000085063|CD59 ENSG00000095383|TBC1D2 ENSG00000102904|TSNAXIP1 ENSG00000104870|FCGRT ENSG00000112514|CUTA ENSG00000121281|ADCY7 ENSG00000124226|ZNF313 ENSG00000124766|SOX4 ENSG00000131914|LIN28 ENSG00000133028|POLR1E ENSG00000137054|POLR1E ENSG00000140990|NUF1B10 ENSG00000142207|URB1 ENSG00000143641|GALNT2 ENSG00000145882|PCYOX1L ENSG00000151353|TMEM18 ENSG00000151376|ME3 ENSG00000155980|KIF5A ENSG00000157110|RBPMS ENSG00000167139|TBC1D21 ENSG00000174231|PRPF8 ENSG00000179388|EGR3 ENSG00000183621|ZNF438 ENSG00000185379|RAD51L3 ENSG00000186474|KLK12 ENSG00000186594|NP\_116284.2 ENSG00000205452|Q6ZQQ9\_HUMAN ENSG00000206550|LOC285346 ENSG00000067646|ZFY ENSG00000091664|SLC17A6 ENSG00000100883|SRP54 ENSG00000107164|FUBP3 ENSG000001109158|GABRA4 ENSG00000112200|ZNF451 ENSG00000115361|ACADL ENSG00000118620|ZNF430 ENSG00000122008|POLK ENSG00000126249|PDCD2L ENSG00000131127|ZNF141 ENSG00000136810|TXN ENSG00000138035|PNPT1 ENSG00000138182|MPHOSPH1 ENSG00000138685|FGF2 ENSG00000138772|ANXA3 ENSG00000147874|FAM29A ENSG00000147894|C9orf72 ENSG00000151229|SLC2A13 ENSG00000156076|WIF1 ENSG00000156110|ADK ENSG00000164024|METAP1 ENSG00000164418|GRIK2 ENSG00000164794|KCNV1 ENSG00000165617|DACT1 ENSG00000168229|PTGDR ENSG00000170270|C14orf142 ENSG00000172260|NEGR1 ENSG00000172399|MYO22 ENSG00000174501|NP\_079466.2 ENSG00000176055|NP\_981951.1 ENSG00000176399|DMRTA1 ENSG00000178338|ZNF354B ENSG00000179097|HTR1F ENSG00000180479|ZNF571

ENSG00000183814|LIN9 ENSG00000185057|TAF9 ENSG00000186439|TRDN ENSG00000186649|NM\_182631 ENSG00000196705|ZNF431 ENSG00000198526|PABPCP2 ENSG00000198843|SELT\_HUMAN ENSG00000198889|WDR40B  
AATATAG ENSG00000204201|Q49A40\_HUMAN ENSG00000204987|Q6ZN80\_HUMAN ENSG00000205038|PKHDL11 ENSG00000114439|BBX ENSG00000124713|GNMT ENSG00000125409|TEKT3 ENSG00000137207|YIPF3  
ENSG00000139083|ETV6 ENSG00000139644|TEGT ENSG00000148335|C9orf32 ENSG00000152104|PTPN14 ENSG00000159352|PSMD4 ENSG00000160396|H1PK4 ENSG00000169876|MUC17 ENSG00000187451|Q9NWC8\_HUMAN  
ENSG000000080007|DDX43 ENSG00000102010|BMX ENSG00000107611|CUBN ENSG00000109184|DCUN1D4 ENSG00000109381|ELF2 ENSG00000117593|DARS2 ENSG00000120370|SCYL1BP1 ENSG00000127083|OMD  
ENSG00000131127|CNNA1 ENSG00000134056|MRPS36 ENSG00000134884|NP\_060481.3 ENSG00000137420|NOL7 ENSG00000138380|ALS2CR8 ENSG00000139344|AMDH1 ENSG00000143970|ASXL2  
ENSG00000147145|GPR23 ENSG00000151327|C14orf24 ENSG00000155833|CYLC2 ENSG00000158185|ANKRD36 ENSG00000159873|CCDC117 ENSG00000164746|Q8NEG2\_HUMAN ENSG00000183423|NP\_940908.1 ENSG00000183634|NP\_001011539.1  
AATATAT ENSG00000186103|ARGFX ENSG00000187325|TAF9B ENSG00000188596|C12orf63 ENSG00000189079|ARID2 ENSG00000196912|AN36B\_HUMAN ENSG00000197860|SGTB  
ENSG00000006638|TBXA2R ENSG00000073792|IGF2BP2 ENSG00000084234|ALPL2 ENSG00000086015|MAST2 ENSG00000101187|SLC04A1 ENSG00000101193|C20orf11 ENSG00000108375|SUPT4H1  
ENSG00000116984|MTR ENSG00000123358|NR4A1 ENSG00000124145|SDCA ENSG00000124313|IQSEC2 ENSG00000128604|IRF5 ENSG00000145824|CXCL14 ENSG00000159263|SIM2 ENSG00000164651|SP8  
ENSG00000164778|EN2 ENSG00000166398|KIAA0355 ENSG00000167286|CD3D ENSG00000171053|NP\_612151.1 ENSG00000174460|ZCCHC12 ENSG00000176887|SOX11 ENSG00000177614|PGBD5 ENSG00000178209|PLEC1  
ENSG00000179388|EGR3 ENSG00000180846|C19orf34 ENSG00000197296|C20orf142 ENSG000002021776|AQR ENSG00000069869|NEDD4 ENSG00000072041|SLC6A15 ENSG00000076258|FMO4 ENSG00000081479|LRP2  
ENSG00000100644|H1F1A ENSG00000111537|IFNG ENSG00000111700|SLCO1B3 ENSG00000112214|PHL5 ENSG00000119698|KIAA1622 ENSG00000120129|DUSP1 ENSG00000120729|MYOT ENSG00000121988|ZNRANB3  
ENSG00000124875|CXCL6 ENSG00000127074|RGS13 ENSG00000137558|PI15 ENSG00000137745|MMP13 ENSG00000138160|KIF11 ENSG00000138658|C4orf21 ENSG00000139116|KIF21A ENSG00000142197|DOPEY2  
ENSG00000145220|LYAR\_HUMAN ENSG00000147885|IFNA16 ENSG00000149231|CCDC82 ENSG00000153253|SCN3A ENSG00000154269|ENPP3 ENSG00000155090|KLF10 ENSG00000156076|WIF1 ENSG00000157214|STEAP2  
ENSG00000162769|FLVC1\_HUMAN ENSG00000163735|CXCL5 ENSG00000164100|NDST3 ENSG00000164129|NPY5R ENSG00000165997|ARL5B ENSG00000166347|CYB5A ENSG00000168917|TMEM22 ENSG00000169239|CA5B  
ENSG00000174749|C4orf32 ENSG00000175455|CCDC14 ENSG00000175487|NP\_076428.2 ENSG00000175895|PLEKH2 ENSG00000179476|C14orf28 ENSG00000181690|PLAG1 ENSG00000186803|IFNA10 ENSG00000186809|IFNA17  
AATATCA ENSG00000003249|DBND1 ENSG00000019102|VSI62 ENSG00000068438|FTSJ1 ENSG000000204133|FAM33B ENSG00000104415|WISP1 ENSG00000105355|M6PRBP1 ENSG00000112079|STK38 ENSG00000124233|SEMG1  
ENSG00000127419|TMEM175 ENSG00000128596|NP\_073579.3 ENSG00000138938|Q5TGJ8\_HUMAN ENSG00000143258|USP21 ENSG00000149575|SCN2B ENSG00000153298|C6orf54 ENSG00000158445|KCNB1 ENSG00000165424|C10orf56  
ENSG00000165733|BMS1 ENSG00000170420|APOE6 ENSG00000170858|LILRA4 ENSG00000173867|MRPL46 ENSG00000175003|SLC22A1 ENSG00000185955|NP\_001004323.1 ENSG00000197116|Q9UDD8\_HUMAN ENSG00000198931|APRT  
ENSG000000042781|USH2A ENSG00000053254|CHES1 ENSG00000101752|MIB1 ENSG00000102401|PPF1BP1 ENSG00000110841|PPF1BP1 ENSG00000117475|BLZF1 ENSG00000123240|OPTN  
ENSG00000129028|THAP10 ENSG00000134046|MBD2 ENSG00000136156|ITM2B ENSG00000138779|Q9HCM6\_HUMAN ENSG00000138792|ENPEP ENSG00000143994|ABHD1 ENSG00000152942|RAD17 ENSG00000164093|PITX2  
ENSG00000164604|GPR85 ENSG00000164951|PPM2C ENSG00000165996|PTPLA ENSG00000173452|NP\_689987.2 ENSG00000176009|ASCL3 ENSG00000178562|CD28 ENSG00000182518|FAM104B ENSG00000183675|PTFN20B  
AATATGG ENSG00000188107|EGFL11 ENSG00000188958|UTS2D ENSG00000197713|RPE ENSG00000198189|HSD17B11 ENSG00000203701|C1orf140 ENSG00000204179|PTPN20A  
ENSG00000006831|ADIPOR2 ENSG00000108264|TADA2L ENSG00000122863|CHST3 ENSG00000130544|ZNF557 ENSG00000134438|RAX ENSG00000136485|WDR68 ENSG00000139193|CD27 ENSG00000146192|FGD2  
ENSG00000158786|PLA2G2F ENSG00000158869|FCER1G ENSG00000165714|LH2CR1 ENSG00000166763|STRC ENSG00000167434|CA4 ENSG00000168738|WDR12 ENSG00000173040|EVC2 ENSG00000175824|XR\_017847.1  
ENSG00000178776|NP\_996849.2 ENSG00000181852|RNF41 ENSG00000183087|GAS6 ENSG00000196979|NP\_997392.1 ENSG00000204228|HSD17B8 ENSG00000205878|Q6ZSV2\_HUMAN ENSG00000085871|MGST2 ENSG00000086289|EPDR1  
ENSG00000112081|SFRS3 ENSG00000112246|SIM1 ENSG00000113205|PCDH83 ENSG00000113580|NR3C1 ENSG00000114416|FXR1 ENSG00000116161|KACYBP ENSG00000135409|AMHR2 ENSG00000143458|NP\_653219.1  
ENSG00000145681|HAPLN1 ENSG00000146587|RBKX ENSG00000146757|ZNF92 ENSG00000163683|C4orf34 ENSG00000165244|ZNF367 ENSG00000170471|K11A1219 ENSG00000170632|ARMC10 ENSG00000178127|NDUFV2  
AATATTA ENSG00000003137|CYP26B1 ENSG00000004142|POLDIP2 ENSG00000068383|INPP5A ENSG00000100403|ZC3H7B ENSG00000103061|SLC7A6OS ENSG00000107957|SH3PXD2A ENSG00000108349|CASC3 ENSG00000114650|SCAP  
ENSG00000114656|K1AA1257 ENSG00000115602|LILRL1 ENSG00000117461|PTK3R3 ENSG00000124782|RREB1 ENSG00000131149|KIAA0182 ENSG00000136925|C9orf97 ENSG00000150401|DCUN1D2 ENSG00000157103|SLC6A1  
ENSG00000160712|IL6R ENSG00000166426|CRABP1 ENSG00000170379|NP\_775949.1 ENSG00000171462|EGFL9 ENSG00000174483|BBS1 ENSG00000185475|NP\_955369.1 ENSG00000204103|MAFB ENSG00000205658|Q6ZUU6\_HUMAN  
ENSG00000206539|Q6ZTN9\_HUMAN ENSG00000013561|RNF14 ENSG00000016402|IL20RA ENSG00000060718|COL11A1 ENSG00000066855|MTFR1 ENSG00000072133|RP56KA6 ENSG00000085382|HACE1 ENSG00000101842|VSI61  
ENSG00000104290|FZD3 ENSG00000106066|CPVL ENSG00000112290|WASF1 ENSG00000113805|CNTN3 ENSG00000118434|SPACA1 ENSG00000120265|PCMT1 ENSG00000126804|ZBTB1 ENSG00000129636|ITFG1  
ENSG00000135218|CD36 ENSG00000143631|FLG ENSG00000145365|NP\_443096.1 ENSG00000147180|ZNF711 ENSG00000147873|IFNA5 ENSG00000149743|TRPT1 ENSG00000151151|IPMK ENSG00000155329|ZCCHC10  
ENSG00000155903|RASA2 ENSG00000163131|CTSS ENSG00000164120|HPGD ENSG00000164930|FZD6 ENSG00000165169|DYNLT3 ENSG00000165630|PRPF18 ENSG00000169684|CHRNA5 ENSG00000170180|GYPA  
ENSG00000173542|MOBK1A ENSG00000183789|Q96MJ2\_HUMAN ENSG00000183878|UTY ENSG00000189127|NP\_001004441.1 ENSG00000189184|PCDH18 ENSG00000196177|ACADSB ENSG00000196477|Q9UHU4\_HUMAN ENSG00000198860|C1orf19  
ENSG00000205325|NP\_001001684.1  
AATATTT ENSG00000005073|HOXA11 ENSG00000009830|POMT2 ENSG00000047644|WWC3 ENSG00000066136|NFYC ENSG00000092847|EIF2C1 ENSG00000105127|AKAP8 ENSG00000105617|LENG1 ENSG00000106078|COBL  
ENSG00000106366|SERPINE1 ENSG00000110906|KCTD10 ENSG00000112941|POLS ENSG00000114745|GORASP1 ENSG00000131470|PSMC3P1 ENSG00000136811|ODF2 ENSG00000137331|IER3 ENSG00000137709|POU2F3  
ENSG00000141034|C17orf39 ENSG00000145626|UGT3A1 ENSG00000158715|SLC45A3 ENSG00000158828|PINK1 ENSG00000160271|RALGDS ENSG00000160712|IL6R ENSG00000166398|KIAA0355 ENSG00000173585|CCR9  
ENSG00000176532|PRR15 ENSG00000176769|TCERG1L ENSG00000177468|OLIG3 ENSG00000178796|Q8N9Z1\_HUMAN ENSG00000180198|RCC1 ENSG00000180875|GREM2 ENSG00000188185|Q6ZQP8\_HUMAN ENSG00000204394|VARS  
ENSG000000015171|ZMYND11 ENSG00000054796|SPO11 ENSG00000064102|C12orf11 ENSG000000664313|TAF2 ENSG00000066697|TMEFF1 ENSG00000074935|TUBE1 ENSG00000075884|ARHGAP15 ENSG00000081237|PTPRC  
ENSG000000084463|WBP11 ENSG00000095585|BLNK ENSG00000100262|ARFGAP3 ENSG00000106031|HOXA13 ENSG00000107611|CUBN ENSG00000107679|PLEKHA1 ENSG00000110321|EIF4G2 ENSG00000111863|C6orf105  
ENSG00000112029|SPRY5 ENSG00000115808|STRN ENSG00000118492|C6orf103 ENSG00000119650|C14orf179 ENSG00000123570|RAB9B ENSG00000130224|LRCH2 ENSG00000131023|LATS1 ENSG00000135905|DOCK10  
ENSG00000136158|FXR2 ENSG00000136698|CFC1 ENSG00000139746|RBM26 ENSG00000144366|GULP1 ENSG00000146530|Q9G6SQ3\_HUMAN ENSG00000146587|RBKX ENSG00000148541|FAM13C1 ENSG00000152093|NP\_001072998.1  
ENSG00000152527|PLEKHH2 ENSG00000152684|PELO ENSG00000152952|PLOC2 ENSG00000154727|GABPA ENSG00000154760|SLFN13 ENSG00000155099|TMEM55A ENSG00000155307|SAMSN1 ENSG00000156968|MPV17L  
ENSG00000159256|MORC3 ENSG00000161980|POLR3K ENSG00000164543|STK17A ENSG00000165813|C10orf118 ENSG00000167306|MYO5B ENSG00000168811|IL12A ENSG00000169621|C2orf13 ENSG00000172007|RAB33B  
ENSG00000172716|SLFN11 ENSG00000172869|TMXL1 ENSG00000174004|LRRCS3 ENSG00000178202|KDEL2 ENSG00000181449|SOX2 ENSG00000181458|TMEM45A ENSG00000189050|NP\_057209.3 ENSG00000198105|ZNF248  
ENSG00000203726|C1orf99  
AATCAAA ENSG00000008307|GRHL2 ENSG00000099282|TSPAN15 ENSG00000108018|SORCS1 ENSG00000108244|KRT23 ENSG00000121904|CSMD2 ENSG00000123901|GPR83 ENSG00000132383|RPA1 ENSG00000136895|GARNL3  
ENSG00000148408|CACNA1B ENSG00000148702|HABP2 ENSG00000161558|TMEM143 ENSG00000163719|MYR14 ENSG00000167748|KLL1 ENSG00000173039|RELA ENSG00000174370|C11orf45 ENSG00000175697|GPR156  
ENSG00000176515|Q8NAX6\_HUMAN ENSG00000181938|GINS3 ENSG00000183955|SETD8 ENSG00000196502|SULT1A1 ENSG00000196758|NM\_207483 ENSG00000203985|LIDLAD1 ENSG00000204285|Q6ZP11\_HUMAN ENSG00000204252|HLA-DOA  
ENSG00000079691|LRRCL16 ENSG00000112796|ENPP5 ENSG00000117222|RBBP5 ENSG00000124171|PAR6B ENSG00000126010|GRPR ENSG00000127074|RGS13 ENSG00000138135|CH25H ENSG00000139330|KERA  
ENSG00000145860|RNF145 ENSG00000151229|SLC2A13 ENSG00000155906|RMND1 ENSG00000157107|FCHO2 ENSG00000162702|ZNF281 ENSG00000163069|SGCB ENSG00000163535|SGOL2 ENSG00000165029|ABCA1  
ENSG00000165072|MAMD2 ENSG00000165527|ARF6 ENSG00000176974|SHMT1 ENSG00000177640|CAS2 ENSG00000183783|KCTD8 ENSG00000184845|DRD1 ENSG00000188916|NP\_001034851.1 ENSG00000189320|NP\_995327.1  
ENSG00000196597|ZNF782  
AATCAAG ENSG00000004455|AK2 ENSG00000087077|TRIP6 ENSG00000103047|TMCO7 ENSG00000105492|SIGLEC6 ENSG00000114779|ABHD14B ENSG00000114812|VIPR1 ENSG00000114988|LMAN2L ENSG00000115556|PLCD4  
ENSG00000118894|FAM86A ENSG00000119408|NEK6 ENSG00000135902|CHRD ENSG00000140557|ST8SIA2 ENSG00000153885|KCTD15 ENSG00000155846|PPARGC1B ENSG00000159263|SIM2 ENSG00000167202|TBC1D2B  
ENSG00000169213|RAB3B ENSG00000177627|C12orf54 ENSG00000179335|CLK3 ENSG00000183908|LRRCS5 ENSG00000184935|Q6AI01\_HUMAN ENSG00000197296|C20orf142 ENSG00000203793|Q6ZRF4\_HUMAN ENSG00000204252|HLA-DOA  
ENSG00000000003|TSPAN6 ENSG0000021355|SERPINB1 ENSG00000079482|OPHN1 ENSG00000102893|PHK6 ENSG00000111237|VPS29 ENSG00000112234|FBXL4 ENSG00000120160|C9orf11 ENSG00000137168|PP1L1  
ENSG00000144354|CDA7 ENSG00000164109|MAD2L1 ENSG00000164117|FBXO8 ENSG00000171723|GPHN ENSG00000175105|ZNF654 ENSG00000187009|Q8NFD4\_HUMAN ENSG00000188659|NP\_001008227.1 ENSG00000189252|SPANXN3  
ENSG00000197203|Q8NAJ9\_HUMAN ENSG00000203706|C1orf133 ENSG00000203924|SPANXN2 ENSG00000204837|Q2TVT3\_HUMAN  
AATCACC ENSG000000088086|CDKL5 ENSG00000115661|STK16 ENSG00000122543|ONCO\_HUMAN ENSG00000124731|TREM1 ENSG00000131849|ZNF132 ENSG00000135175|OCM ENSG00000135749|PCNXL2 ENSG00000135824|RGS8  
ENSG00000137166|FOX4 ENSG00000149929|HIRIP3 ENSG00000154114|TBCEL ENSG00000167862|ICT1 ENSG00000171467|ZNF318 ENSG00000173918|C1QTNF1 ENSG00000177673|NP\_689827.1 ENSG00000179028|NP\_001013709.1  
ENSG00000180176|TH ENSG00000180229|NP\_001019853.1 ENSG00000181867|FTMT ENSG00000182776|NP\_001013709.1 ENSG00000197296|C20orf142 ENSG00000197965|MPZL1 ENSG00000204847|FAM74A1 ENSG0000020219|NP\_001025037.1  
ENSG00000115364|MRPL19 ENSG00000116977|LGALS8 ENSG00000117595|IRF6 ENSG00000138798|EGF ENSG00000139684|ESD ENSG00000143771|CNIH4 ENSG00000150628|SPATA4 ENSG00000156261|CT8  
ENSG00000167193|CRK ENSG00000171657|GPR82 ENSG00000171763|SPATA5L1 ENSG00000172059|KLF11 ENSG00000173705|SUSD5 ENSG00000186354|EDG3 ENSG00000188644|XR\_016028.1 ENSG00000189403|HMGB1  
ENSG00000197053|FAM74A4 ENSG00000197889|MEIG1 ENSG00000204611|ZNF616 ENSG00000204766|Q6ZUH0\_HUMAN ENSG00000204841|FAM74A2 ENSG00000204844|FAM74A3 ENSG00000204904|CXorf31  
AATCACT ENSG00000053108|FSTL4 ENSG00000124782|RREB1 ENSG00000134240|HMGC2 ENSG00000134369|NAV1 ENSG00000135114|OASL ENSG00000135363|LMO2 ENSG00000139874|SSTR1  
ENSG00000154319|C8orf13 ENSG00000162910|MRPL55 ENSG00000167085|PHB ENSG00000174282|ZBTB4 ENSG00000179168|GGN ENSG00000182712|MTCP1 ENSG00000197465|GYPE ENSG00000198182|ZNF607  
ENSG00000198374|HIST1H2AL ENSG00000205023|Q6ZSF1\_HUMAN ENSG00000001084|GCLC ENSG00000007168|PAPAH1B1 ENSG00000050165|DKK3 ENSG00000070061|IKBKAP ENSG00000082438|COBLL1 ENSG00000088035|ALG6  
ENSG000000088387|DOCK9 ENSG00000099725|PRKY ENSG00000108590|MED31 ENSG00000109919|MTCH2 ENSG000001223178|C13orf1 ENSG00000133703|KRAS ENSG00000135374|ELF5 ENSG00000138735|PDE5A  
ENSG00000141452|C18orf8 ENSG00000144362|KHLH23 ENSG00000144381|HSPD1 ENSG00000148377|DI2 ENSG00000155115|C6orf51 ENSG00000170571|EMB ENSG00000172172|MRPL13 ENSG00000178346|C6orf61  
ENSG00000183943|PRKX ENSG00000187871|GFRAL ENSG00000197935|ZNF311 ENSG00000198815|FOXJ3 ENSG00000204884|Q6ZV12\_HUMAN  
AATCAGA ENSG00000005102|MEOX1 ENSG00000027644|INSRR ENSG00000067365|C16orf68 ENSG00000070031|SOX2 ENSG00000075340|ADD2 ENSG00000092094|QSGEP ENSG00000109956|B3GAT1 ENSG00000128591|FLNC  
ENSG00000134864|Q9BVM4\_HUMAN ENSG00000142186|SCYL1 ENSG00000142949|PTPRF ENSG00000146005|PSD2 ENSG00000154478|GPR26 ENSG00000154978|NP\_030796.3 ENSG00000163820|FYCO1 ENSG00000171084|LOC645332  
ENSG00000171160|C10orf83 ENSG00000178158|Q8N7D3\_HUMAN ENSG00000181852|RNF41 ENSG00000182053|XR\_016180.1 ENSG00000183562|Q9P1L5\_HUMAN ENSG00000186788|NP\_001001670.1 ENSG00000189357|XR\_015253.1 ENSG00000197993|KEL  
ENSG00000198624|CCDC69 ENSG00000204059|NP\_001013718.1 ENSG00000005059|CCDC109B ENSG00000070367|EXOC5 ENSG00000081386|ZNF510 ENSG00000085224|ATRX ENSG00000102021|LUZP4 ENSG00000106536|POU6F2  
ENSG00000113163|COL4A3BP ENSG00000114744|COMMD2 ENSG00000117281|CD160 ENSG00000123352|SPATS2 ENSG00000124459|ZNF45 ENSG00000132000|PODNL1 ENSG00000137960|GIPC2 ENSG00000138061|CYP11B  
ENSG00000138315|OIT3 ENSG00000139973|SYT16 ENSG00000148730|EIF4EBP2 ENSG00000155097|ATP6V1C1 ENSG00000155319|NP\_001004299.1 ENSG00000159082|SYNJ1 ENSG00000164398|ACSL6 ENSG00000164949|GEM  
ENSG00000168807|SNTB2 ENSG00000172197|MBOAT1 ENSG00000174437|ATP2A2 ENSG00000178665|ZNF713 ENSG00000180257|ZNF321 ENSG00000184005|ST6GALNAC3 ENSG00000187009|Q8NFD4\_HUMAN ENSG00000187054|TMPRSS11A  
ENSG00000196141|NP\_056350.1 ENSG00000197312|RSC1A1 ENSG00000198393|ZNF26 ENSG00000198815|FOXJ3  
AATCAGC ENSG00000065717|TLE2 ENSG00000087245|MMP2 ENSG00000093072|CECR1 ENSG00000100097|LGALS1 ENSG00000100330|MTMR3 ENSG00000104332|SFRP1 ENSG00000114115|RBP1 ENSG00000119280|C1orf198  
ENSG00000124766|SOX4 ENSG00000134216|CHIA ENSG00000134569|LRP4 ENSG00000136828|RALGPS1 ENSG00000137502|RAB30 ENSG00000138938|Q5TGJ8\_HUMAN ENSG00000141639|MAPK4 ENSG00000152953|STK32B  
ENSG00000154227|LASS3 ENSG00000167800|TBX10 ENSG00000169309|ELSPBP1 ENSG00000170004|CHD3 ENSG00000172061|LRRCL15 ENSG00000203931|LOC729078 ENSG000000011258|MBTD1  
ENSG00000031003|C5orf5 ENSG00000067955|CBFB ENSG00000090060|PAPOLA ENSG00000102218|RF2 ENSG00000102760|C13orf15 ENSG00000109686|NP\_001009555.2 ENSG00000112541|PDE10A ENSG00000112706|IMPG1  
ENSG00000119018|RAD23B ENSG00000119698|KIAA1622 ENSG00000120279|MYCT1 ENSG00000120733|JMJD1B ENSG00000121335|PRB4 ENSG00000124767|GLO1 ENSG00000133019|CHRM3 ENSG00000141425|NP\_060640.2  
ENSG00000150051|MRX1 ENSG00000150938|CRIM1 ENSG00000153822|KCNJ16 ENSG00000157315|TMED6 ENSG00000172465|TMCLAL1 ENSG00000172551|MUCL\_HUMAN ENSG00000175553|K1210\_HUMAN ENSG0000017

AATCAGG ENSG00000184307|ZDHC23 ENSG00000203932|LOC728660 ENSG00000204711|C9orf135 ENSG00000000510099|C11orf56 ENSG00000100116|GCAT ENSG00000102385|DRP2 ENSG00000108375|SUPT4H1 ENSG00000112658|SRF ENSG00000123353|ORMDL2 ENSG00000124212|PTGIS ENSG00000137460|NP\_203751.2 ENSG00000141150|RASL10B ENSG00000141965|FEMIA ENSG00000143409|FAM63A ENSG00000143450|OAZ3 ENSG00000143858|SYT2 ENSG00000158483|FAM86C ENSG00000160408|ST6GALNAC6 ENSG00000163220|S100A9 ENSG00000166924|NP\_775835.2 ENSG00000167612|ANKRD33 ENSG00000167740|CYB5D2 ENSG00000185294|NP\_787078.1 ENSG00000185608|MRPL40 ENSG00000186118|Q6PEX7\_HUMAN ENSG00000188743|Q9P169\_HUMAN ENSG00000198722|UNC13B ENSG00000198920|K1AA0753 ENSG00000204054|Q6ZNS9\_HUMAN ENSG00000001084|GCLC ENSG000000006704|GTF2IRD1 ENSG000000073712|PLEKHC1 ENSG000000078401|EDN1 ENSG00000107518|ATRN1L ENSG00000112237|CCNC ENSG00000124120|C20orf121 ENSG00000128739|SNRPN ENSG00000149742|SLC22A9 ENSG00000151715|TMEM45B ENSG00000152749|GPR180 ENSG00000170153|RNF150 ENSG00000175105|ZNF654 ENSG00000175646|PRM1 ENSG00000181481|RNF135 ENSG00000185305|ARL15 ENSG00000196693|ZNF33B ENSG00000198948|MFAP3L ENSG00000112062|MAPK14 ENSG00000114770|ABCC5 ENSG00000119772|DNMT3A ENSG00000120451|SNX19 ENSG00000133460|SLC2A11 ENSG00000134780|DAGLA ENSG00000146453|PNLDC1 ENSG00000164045|FOXP1 ENSG00000165699|TSC1 ENSG00000172939|OXSR1 ENSG00000176595|KBTBD11 ENSG00000186910|SERPINA11 ENSG00000197680|INE1 ENSG00000005421|PON1 ENSG00000006565|SEC61A2 ENSG00000105866|SP4 ENSG00000106511|MEOX2 ENSG00000109270|MAP2K1IP1 ENSG00000112992|NNT ENSG00000118267|ZNF271 ENSG00000125037|TMEM111 ENSG00000135387|CAPRN1 ENSG00000137269|LRRC1 ENSG00000138604|GLCE ENSG00000139508|SLC46A3 ENSG00000143727|ACF1 ENSG00000144909|OSBPL11 ENSG00000146729|GBAS ENSG00000147684|NDUFB9 ENSG00000153132|CLGN ENSG00000153339|K1AA1012 ENSG00000164099|PRSS12 ENSG00000164604|GPR85 ENSG00000167306|MYO5B ENSG00000168594|ADAM29 ENSG00000170502|NUDT9 ENSG00000180251|SLC9A4 ENSG00000182919|C11orf54 ENSG00000184831|APOO ENSG00000185637|EEF1AL3 ENSG00000188641|DPYD ENSG00000196409|ZNF658B ENSG00000198416|Z658B\_HUMAN AATCATG ENSG000000011600|TYROBP ENSG00000066382|MPPEP2 ENSG00000083307|GRHL2 ENSG00000095015|MAP3K1 ENSG00000125656|CLPP ENSG00000126267|COX6B1 ENSG00000127377|CRYGN ENSG00000127526|SLC35E1 ENSG00000131845|ZNF304 ENSG00000134207|SYT6 ENSG00000151498|ACAD8 ENSG00000152192|POU4F1 ENSG00000157350|ST3GAL2 ENSG00000158296|SLC13A3 ENSG00000159685|CHCHD6 ENSG00000164270|HTR4 ENSG00000164520|RAET1E ENSG00000174306|ZHX3 ENSG00000175634|RPS6KB2 ENSG00000176340|COX8A ENSG00000182372|C8orf61 ENSG00000185674|LYG2\_HUMAN ENSG00000189069|NP\_001013732.1 ENSG00000023228|NDUFB1 ENSG00000101844|ATG4A ENSG00000107020|C9orf46 ENSG00000109814|UGDH ENSG00000110756|HPS5 ENSG00000116266|STXB3 ENSG00000122335|SERAC1 ENSG00000122545|SEPT7 ENSG00000123106|CDCFS1 ENSG00000124812|CRISP1 ENSG00000128245|YWHAH ENSG00000135333|EPHA7 ENSG00000141076|C1R1H1A ENSG00000146416|ATG1 ENSG00000147133|TAF1 ENSG00000153162|BMP6 ENSG00000153485|C14orf109 ENSG00000156256|USP16 ENSG00000156531|PHF6 ENSG00000162998|FRZB ENSG00000175483|O94914\_HUMAN ENSG00000176641|RNF152 ENSG00000179295|PTPN11 ENSG00000187009|Q8NFD4\_HUMAN ENSG00000196459|SEDLF ENSG00000204330|NP\_064592.1 AATCATT ENSG000000008128|CDC2L1 ENSG00000023191|RNH1 ENSG00000047056|WDR37 ENSG00000107338|SHB ENSG00000107796|ACTA2 ENSG00000119408|NEK6 ENSG00000123243|ITIH5 ENSG00000128908|INOC1 ENSG00000133561|GMAPP6 ENSG00000136112|UTP14C ENSG00000138316|ADAMTS14 ENSG00000142748|FCN3 ENSG00000150401|DCUN1D2 ENSG00000150477|K1AA1328 ENSG00000166189|HPS6 ENSG00000166435|XRRAL ENSG00000169006|NTRC2 ENSG00000172020|GAP43 ENSG00000177294|FBXO39 ENSG00000182698|NM\_001007089 ENSG00000183495|EP400 ENSG00000185619|PCGF3 ENSG00000196411|EPHB4 ENSG00000205061|Q6ZUP2\_HUMAN ENSG00000206550|LOC285346 ENSG00000005020|SKAP2 ENSG000000007933|FMO3 ENSG00000065518|NDUFB4 ENSG00000079215|SLC1A3 ENSG00000086666|ZFAND6 ENSG00000092140|K1AA1333 ENSG00000109320|NFKB1 ENSG00000112893|MAN2A1 ENSG00000113282|CLINT1 ENSG00000115808|STRN ENSG00000123572|NRK ENSG00000124343|XG ENSG00000124831|LRRFP1P ENSG00000134851|TMEM165 ENSG00000135108|FBXO21 ENSG00000135533|CD164 ENSG00000136143|SUCLA2 ENSG00000136381|IREB2 ENSG00000149506|ZP1 ENSG00000150787|PTS ENSG00000155130|MARCKS ENSG00000162999|DUSP19 ENSG00000163631|ALB ENSG00000165389|C14orf147 ENSG00000168301|KCTD6 ENSG00000173611|C9orf126 ENSG00000175604|Q96M66\_HUMAN ENSG00000196511|TPK1 ENSG00000197748|C10orf79 ENSG00000197977|ELOVL2 ENSG00000204019|NP\_001017978.1 AATCCAA ENSG00000081059|TCF7 ENSG00000104490|NCALD ENSG00000120952|PRAMEF2 ENSG00000124449|IRGC ENSG00000124782|RREB1 ENSG00000129993|CBFA2T3 ENSG00000131044|TTLL9 ENSG00000135637|NP\_116168.2 ENSG00000135966|TGFBRAP1 ENSG00000140470|ADAMTS17 ENSG00000144580|RQCD1 ENSG00000148180|GSN ENSG00000148337|CI21 ENSG00000156599|ZDHC5 ENSG00000162738|VANGL2 ENSG00000163486|SRGAP2 ENSG00000164778|EN2 ENSG00000169436|COL22A1 ENSG00000171960|PPIH ENSG00000179241|LDLRAD3 ENSG00000179855|GIPC3 ENSG00000185811|IKZF1 ENSG00000205064|Q6ZVP2\_HUMAN ENSG00000057294|PKP2 ENSG00000076321|KLHL20 ENSG00000109133|TMEM33 ENSG00000110436|SLC1A2 ENSG00000113319|RASGRF2 ENSG00000129682|FGF13 ENSG00000133627|ACTR3B ENSG00000136436|CALCOCO2 ENSG00000137941|TTLL7 ENSG00000140743|CDR2 ENSG00000140749|IGSF6 ENSG00000146587|RBAK ENSG00000146856|AGBL3 ENSG00000154001|PPP2R5E ENSG00000155393|HEATR3 ENSG00000155833|CYLC2 ENSG00000156958|GALK2 ENSG00000158125|XDH ENSG00000164418|GRIK2 ENSG00000173627|APOBEC4 ENSG00000179046|NP\_775824.1 ENSG00000183960|KCNH8 ENSG00000196966|HIST1H3E ENSG00000204022|LIPJ ENSG00000205269|Q5T4T1\_HUMAN AATCCCG ENSG00000102302|FGD1 ENSG00000103154|EFCBP2 ENSG00000105507|CABP5 ENSG00000112514|CUTA ENSG00000115216|NRBP1 ENSG00000116148|CCNL2 ENSG00000116544|DLGAP3 ENSG00000124237|C20orf85 ENSG00000132681|ATP1A4 ENSG00000132688|NES ENSG00000138670|RASGEF1B ENSG00000142910|TINAGL1 ENSG00000148219|ASTN2 ENSG00000158773|USF1 ENSG00000162227|TAF6L ENSG00000165414|Q96HD6\_HUMAN ENSG00000167578|MTA ENSG00000169180|XPO6 ENSG00000170439|METTL7B ENSG00000178531|CTXN1 ENSG00000179593|ALOX15B ENSG00000179823|XR\_017713.1 ENSG00000180210|F2 ENSG00000180644|PRF1 ENSG00000186162|Q86XG0\_HUMAN ENSG00000197308|NP\_997306.1 ENSG00000198034|RPS4X ENSG00000203971|Q6ZRT1\_HUMAN ENSG00000204168|Q6ZRI1\_HUMAN ENSG00000010017|RANBP9 ENSG0000015479|MATR3 ENSG0000050438|SLC4A8 ENSG00000070540|WPI1 ENSG00000096696|DSP ENSG00000100934|SEC23A ENSG00000101266|CSNK2A1P ENSG00000104133|NP\_079413.3 ENSG00000108854|SMURF2 ENSG00000110218|PANX1 ENSG00000111907|TPD52L1 ENSG00000113594|LIFR ENSG00000128833|MYO5C ENSG00000140968|IRF8 ENSG00000146587|RBAK ENSG00000148572|NRBF2 ENSG00000156219|ART3 ENSG00000164035|EMCN ENSG00000166839|ANKDD1A ENSG00000167720|SRR ENSG00000175643|C16orf75 ENSG00000182489|KRXR ENSG00000184492|FOXD4 ENSG00000187054|TMPRSS11A ENSG00000187231|SESTD1 ENSG00000196141|NP\_056350.1 ENSG00000196639|HRH1 ENSG00000197595|NP\_997323.1 AATCCCG ENSG00000020129|NCDN ENSG00000099622|CIRBP ENSG00000100938|NM\_001002000.1 ENSG00000103313|MEFV ENSG00000104818|CGB2 ENSG00000104826|LHB ENSG00000104827|CGB ENSG00000108639|SYNGR2 ENSG00000116147|TNR ENSG00000117305|HMGCL ENSG00000117834|SLC5A9 ENSG00000120075|HOXB5 ENSG00000121413|ZSCAN18 ENSG00000122687|FTSJ2 ENSG00000126856|Q9NQW5-2 ENSG00000130270|ATP8B3 ENSG00000132155|RAF1 ENSG00000136026|CKAP4 ENSG00000141505|ASGR1 ENSG00000142453|CARM1 ENSG00000144834|TAGLN3 ENSG00000160211|G6PD ENSG00000160401|C9orf117 ENSG00000164620|C5orf16 ENSG00000167522|ANKRD11 ENSG00000179743|Q8N9F6\_HUMAN ENSG00000182378|PLCXD1 ENSG00000183684|THOC4 ENSG00000196337|CGB7 ENSG00000198079|XR\_017925.1 ENSG00000204748|CGB1 ENSG00000008277|ADAM22 ENSG00000051415|AMY1A ENSG00000074266|EED ENSG00000079691|LRRC16 ENSG00000083857|FAT ENSG00000083896|YTHDC1 ENSG00000113212|PCDHB7 ENSG00000116991|SIPAL12 ENSG00000122707|RECK ENSG00000128714|HOXD13 ENSG00000132464|ENAM ENSG00000141644|MBD1 ENSG00000144554|FANCD2 ENSG00000144867|SRPB ENSG00000147488|ST18 ENSG00000148516|ZEB1 ENSG00000153046|CDYL ENSG00000173124|C10orf129 ENSG00000174876|AMY1B ENSG00000185020|Q4VXF0\_HUMAN ENSG00000198477|SUHW2 AATCTCG ENSG00000072062|PRKACA ENSG00000099953|MMP11 ENSG00000103522|IL21R ENSG00000111652|COPS7A ENSG00000135605|TEC ENSG00000143340|C10orf76 ENSG00000145063|NM\_182586 ENSG00000153786|ZDHC7 ENSG00000157240|FZD1 ENSG00000157837|PSL4\_HUMAN ENSG00000167065|DUSP18 ENSG00000167378|IRGQ ENSG00000169837|ATG4B ENSG00000169188|APEX2 ENSG00000172508|Q8N467\_HUMAN ENSG00000173366|TLR9 ENSG00000180385|Q8NAP4\_HUMAN ENSG00000182013|NP\_060685.2 ENSG00000184945|AQPL2A ENSG00000185860|C10orf110 ENSG00000196085|C19orf42 ENSG00000196209|Q5JXA8\_HUMAN ENSG00000077721|UBE2A ENSG00000103381|NP\_060810.1 ENSG00000106105|GARS ENSG00000119121|TRMP6 ENSG00000125831|CST11 ENSG00000126950|TMEM35 ENSG00000127603|MACF1 ENSG00000130939|UBE4B ENSG00000131016|AKAP12 ENSG00000132781|MUTYH ENSG00000143514|TP53BP2 ENSG00000147364|FBXO25 ENSG00000151422|FER ENSG00000153823|PID1 ENSG00000164303|ENPP6 ENSG00000164830|OXR1 ENSG00000169129|AFAP1L2 ENSG00000172845|SP3 ENSG00000173610|UGT2A1 ENSG00000182457|NR\_002323.1 ENSG00000187823|ZCCHC16 ENSG00000197779|ZNF81 ENSG00000205099|A4D0Y5\_HUMAN AATCGAA ENSG00000090857|NP\_060460.3 ENSG00000099769|IGFALS ENSG00000101440|ASIP ENSG00000104490|NCALD ENSG00000117394|SLC2A1 ENSG00000120087|HOXB7 ENSG00000125975|C20orf173 ENSG00000126368|NR1D1 ENSG00000130309|GLT2SD1 ENSG00000130640|TUBGCP2 ENSG00000130827|PLXNA3 ENSG00000132840|BHM21 ENSG00000143590|EFNA3 ENSG00000149294|NCAM1 ENSG00000152217|SETBP1 ENSG00000153179|RASSF3 ENSG00000157884|NP\_001025052.1 ENSG00000159348|CYB5R1 ENSG00000179523|Q8TAS2\_HUMAN ENSG00000183600|Q66K37\_HUMAN ENSG00000185624|P4HB ENSG00000197615|C8orf49 ENSG00000197694|SPTAN1 ENSG00000204673|AKT1S1 ENSG00000205771|CATSPER2P1 ENSG00000206150|RNASEL3 ENSG00000009694|ODZ1 ENSG00000064218|DMRT3 ENSG000000099219|K1AA1815 ENSG00000106540|C7orf36 ENSG00000108187|PBLD ENSG00000110871|COQ5 ENSG00000113658|SMAD5 ENSG00000116299|K1AA1324 ENSG00000120656|TAF12 ENSG00000120662|MTRF1 ENSG00000128585|MKLN1 ENSG00000131023|LATS1 ENSG00000131110|POSTN ENSG00000134504|KCTD1 ENSG00000135838|NPL ENSG00000145782|ATG12 ENSG00000147606|SLC26A7 ENSG00000152154|TMEM178 ENSG00000156162|DPY19L4 ENSG00000162390|ACOT11 ENSG00000163661|PTX3 ENSG00000170500|LONRF2 ENSG00000197442|MAP3K5 AATCGAG ENSG00000070182|SPTB ENSG00000072195|SPEG ENSG00000079974|RABL2B ENSG00000100239|SAPS2 ENSG00000112473|SLC39A7 ENSG00000115641|FHL2 ENSG00000120055|C10orf95 ENSG00000124785|NRN1 ENSG00000136695|IL1F5 ENSG00000138303|ASCC1 ENSG00000160179|ABCG1 ENSG00000167604|NP\_640332.1 ENSG00000167613|LAIR1 ENSG00000170145|SNF1LK2 ENSG00000171916|NP\_001035167.2 ENSG0000017212|XR\_017939.1 ENSG00000174374|WBSR16 ENSG00000187699|Q8NBX4\_HUMAN ENSG00000203814|HIST2H2BF ENSG00000204733|Q6ZSH7\_HUMAN ENSG00000066654|THUMP1D ENSG00000071991|CDH19 ENSG00000113205|PCDHB3 ENSG00000116703|PDC ENSG00000131007|TTY9A ENSG00000131009|TTY9A\_HUMAN ENSG00000133115|STOML3 ENSG00000134590|FAM127A ENSG00000141325|CCDC45 ENSG00000143727|ACP1 ENSG00000151247|EIF4E ENSG00000153896|ZNF599 ENSG00000161010|NP\_001017987.1 ENSG00000164746|Q8NEG2\_HUMAN ENSG00000173917|HOXB2 ENSG00000178397|NP\_001032240.1 ENSG00000196233|LCOR ENSG00000198074|AKR1B10 ENSG00000160558|GNA15 ENSG00000103197|TSC2 ENSG00000105662|CRTCL ENSG00000109132|PHOX2B ENSG00000112561|TFEB ENSG00000128908|INOC1 ENSG00000131196|NFATC1 ENSG00000165879|FRAT1 ENSG00000167723|TRPV3 ENSG00000179403|VWA1 ENSG00000181274|FRAT2 ENSG00000189060|H1FO ENSG00000198219|Q96N05\_HUMAN ENSG00000040341|STAU2 ENSG00000113369|ARRDC3 ENSG00000118922|KLF12 ENSG00000169504|CLIC4 AATCGCT ENSG00000089505|CMTM1 ENSG00000104886|PLEKHJ1 ENSG00000105131|ABHD9 ENSG00000105369|CD79A ENSG00000105722|ERF ENSG00000108602|ALDH3A1 ENSG00000111335|OAS2 ENSG00000118298|CA14 ENSG00000119242|CCDC92 ENSG00000126243|LRFN3 ENSG00000134595|SOX3 ENSG00000140031|P1768\_HUMAN ENSG00000144230|GPR17 ENSG00000153902|LG14 ENSG00000157306|THPTA ENSG00000157601|MX1 ENSG00000165511|C10orf25 ENSG00000166199|ALKBH3 ENSG00000169474|SPRR1A ENSG00000171729|TMEM51 ENSG00000172216|CEBPB ENSG00000172476|RAB40A ENSG00000173457|PPP1R14B ENSG00000173631|HES3 ENSG00000177886|Q8N819\_HUMAN ENSG00000178498|DTPX3 ENSG00000180806|HOXC9 ENSG00000181814|Q6N39\_HUMAN ENSG00000203702|C6orf59 ENSG00000204231|RXRB ENSG00000102128|RB40L\_HUMAN ENSG00000106853|LTB4DH ENSG00000107863|ARHGAP21 ENSG00000112695|COX7A2 ENSG00000113360|RNASEN ENSG00000131781|FMO5 ENSG00000135205|NP\_065930.2 ENSG00000139970|RTN1 ENSG00000155962|CLIC2 ENSG00000176171|BNIP3 ENSG00000177738|Q8N4J7\_HUMAN ENSG00000182220|ATP6AP2 ENSG00000183308|C17orf60 ENSG00000183813|CCR4 ENSG00000183844|FAM3B ENSG00000187944|NP\_998773.1 ENSG00000197822|OCLN AATCGGC ENSG00000006530|AGK ENSG000000077454|LRCH4 ENSG00000085872|CHERP ENSG00000103126|AXIN1 ENSG00000113070|HBBGF ENSG00000117020|AKT3 ENSG00000121769|FABP3 ENSG00000127098|ANKRD19 ENSG00000130600|H19 ENSG00000138100|TRIM54 ENSG00000138166|DUSP5 ENSG00000140025|C14orf143 ENSG00000147223|Q5JRB8\_HUMAN ENSG00000149600|COMMD7 ENSG00000154928|P54762-3 ENSG00000157483|MYO1E ENSG00000161570|CCL5 ENSG00000164978|NUDT7 ENSG00000167861|C17orf28 ENSG00000168676|KCTD19 ENSG00000179840|NP\_001038943.1 ENSG00000182472|CAPN12 ENSG00000197879|MYO1C ENSG00000205680|NR\_002931.1 ENSG00000084090|STARD7 ENSG00000091844|RGS17 ENSG00000092470|WDR76 ENSG00000096401|CDC5L ENSG00000107104|ANKRD15 ENSG00000107485|GATA3 ENSG00000109861|CTSC ENSG00000110911|SLC11A2 ENSG00000115514|TXNDC9 ENSG00000125384|PTGER2 ENSG00000137551|TPR1 ENSG00000134452|ABCA12 ENSG00000152518|ZFP3612 ENSG00000154217|PITPNC1 ENSG00000155959|VBP1 ENSG00000156500|FAM122C ENSG00000158185|ANKRD36 ENSG00000164848|K1AA1913 ENSG00000168646|AXIN2 ENSG00000172197|MBOAT1 ENSG00000173334|TRTB1 ENSG00000186188|GPR120 ENSG00000196912|AN36B\_HUMAN ENSG00000196912|AN36B\_HUMAN ENSG00000111412|C12orf49 ENSG00000115461|IGFBP5 ENSG00000117461|PIK3R3 ENSG00000163515|RETNLB ENSG00000165006|UBAP1 ENSG00000166947|EPB42 ENSG00000168329|CX3CR1 ENSG00000169857|AVEN ENSG00000171533|MAP6 ENSG00000172732|MUS81 ENSG00000181328|FAM26A ENSG00000184566|Q9P1G6\_HUMAN ENSG00000184787|UBE2G2 ENSG00000111201|KAL1 ENSG000000091436|MLTK\_HUMAN ENSG00000100852|ARHGAP5 ENSG00000111058|NP\_078836.1 ENSG00000113532|ST8SIA4 ENSG00000116830|TTF2 ENSG00000123352|SPATS2 ENSG00000135164|DMTF1 ENSG00000136866|ZFP37 ENSG00000137806|NDUFAF1 ENSG00000139908|TSSK4 ENSG00000154175|ABI3BP ENSG00000154736|ADAMTS5 ENSG00000156875|HTAT1 ENSG00000160131|NP\_001017980.1 ENSG00000168280|KIF5C ENSG00000172007|RAB33B ENSG00000173258|ZNF483 ENSG00000173452|NP\_689987.2 ENSG00000182187|CRYGB ENSG00000196693|ZNF33B ENSG00000197442|MAP3K5 ENSG00000204869|IGFL4 AATCTAC ENSG000000008838|THRPA4 ENSG00000025800|KPN4 ENSG00000085662|AKR1B1 ENSG00000100290|BIK ENSG00000120952|PRAMEF2 ENSG00000129187|DCTD ENSG00000132846|ZBED3 ENSG00000135406|PRPH

ENSG00000143110|C1orf162 ENSG00000146374|RSPO3 ENSG00000151882|CCL28 ENSG00000163848|SLC12A8 ENSG00000166073|GPR176 ENSG00000166140|ZFYVE19 ENSG00000179593|ALOX15B ENSG00000181625|GIYD2 ENSG00000182352|C17orf77 ENSG00000185640|NP\_787028.1 ENSG00000186431|FCAR ENSG00000186427|USH2A ENSG000001102290|PCDH11X ENSG00000107625|DDX50 ENSG000001112742|TTK ENSG00000121031|PRKDC ENSG00000130779|CLIP1 ENSG00000132207|SULT1A3 ENSG00000134874|DZ1P1 ENSG00000141447|OSBPL1A ENSG00000148948|LRRCA4 ENSG00000155380|SLC16A1 ENSG00000157450|RNF111 ENSG00000157680|DGKI ENSG00000165983|PTFR ENSG00000168004|HRASLS5 ENSG00000170044|ZPLD1 ENSG00000172260|NEGR1 ENSG00000172465|TCBALL ENSG00000178127|NDUFV2 ENSG00000185275|CD24 ENSG00000186272|ZNF17 ENSG00000188580|TCBA1 ENSG00000196865|NHLRC2 ENSG00000197953|AADACL2 ENSG00000198770|Q9H396\_HUMAN ENSG00000203727|SAMD5 ENSG00000204524|ZNF805 ENSG00000205810|KLRC3 ENSG000002063169|GLTSCR1 ENSG00000278808|SDF4 ENSG00000279974|RABL2B ENSG00000100362|PVALB ENSG00000100565|C14orf166B ENSG00000102226|USP11 ENSG00000102226|USP11 ENSG00000105357|MYH14 ENSG00000108342|CSF3 ENSG00000129535|NRL ENSG00000133874|RNF122 ENSG00000137124|ALDH1B1 ENSG00000139219|COL2A1 ENSG00000161031|PGLYRP2 ENSG00000167874|TMEM88 ENSG00000175711|B3GNTL1 ENSG00000180818|HOXC10 ENSG00000182902|SLC25A18 ENSG00000186316|Q96NA9\_HUMAN ENSG00000187013|C17orf82 ENSG00000196367|TRRAP ENSG00000196421|PRR17 ENSG00000197152|Q96NB7\_HUMAN ENSG00000198796|ALPK2 ENSG00000100811|YY1 ENSG00000106004|HOXA5 ENSG00000107186|MPD2 ENSG00000111300|CDH9 ENSG00000115361|ACADL ENSG00000117791|MOSC2 ENSG00000117859|OSBPL9 ENSG00000133131|MORC4 ENSG00000133639|BTG1 ENSG00000135905|DOCK10 ENSG00000139055|ERP27 ENSG00000140181|HERC2P2 ENSG00000143183|TMCO1 ENSG00000151461|UPF2 ENSG00000154845|PPP4R1 ENSG00000163584|RPL22L1 ENSG00000164039|BDH2 ENSG00000164326|CARTPT ENSG00000168032|ENTPD3 ENSG00000168681|Q9H762\_HUMAN ENSG00000183649|Q8NFX8\_HUMAN ENSG00000186665|C17orf58 ENSG00000187267|NP\_001017417.1 ENSG00000189056|RELN ENSG00000198838|RYR3 ENSG00000203946|NP\_001017438.1 ENSG00000203948|NP\_001017435.1 AATCTCT ENSG00000085465|OVGP1 ENSG00000085831|C1orf34 ENSG00000104888|SLC17A7 ENSG00000105373|GLTSCR2 ENSG00000112715|VEGFA ENSG00000116852|KIF21B ENSG00000123427|FAM119B ENSG00000125485|DDX31 ENSG00000132749|MTL5 ENSG00000135436|C12orf25 ENSG00000144681|STAC ENSG00000151468|CCDC3 ENSG00000153563|CD8A ENSG00000158516|CPA2 ENSG00000161896|IHPK3 ENSG00000162105|SHANK2 ENSG00000162761|LXM1A ENSG00000162763|LRRCS2 ENSG00000166435|XRRA1 ENSG00000169057|MECP2 ENSG00000169213|RAB3B ENSG00000169306|IL1RAPL1 ENSG00000173404|INSM1 ENSG00000174804|FZD4 ENSG00000181852|RNF41 ENSG00000183578|TNFAIP8L3 ENSG00000185811|IKZF1 ENSG00000188706|ZDHHC9 ENSG00000189337|NP\_001018000.1 ENSG00000197077|Q5THZ5\_HUMAN ENSG00000197116|Q9UDD8\_HUMAN ENSG00000203786|KPRP ENSG00000204092|NP\_001001705.1 ENSG00000205726|ITSN1 ENSG000002042088|TDP1 ENSG00000206686|C9orf68 ENSG00000129055|ANAPC13 ENSG00000153233|PTPRR ENSG00000164039|BDH2 ENSG00000164056|SPRY1 ENSG00000164451|FAM26D ENSG00000166927|MS4A7 ENSG00000166986|MARS ENSG00000170647|TMEM133 ENSG00000170927|PKHD1 ENSG00000181192|DHTKD1 ENSG00000181626|DKFZp779B1634 ENSG00000184227|ACOT1 ENSG00000196900|NP\_997291.1 ENSG00000198203|SULT1C2 ENSG00000204155|PARG ENSG00000204370|SDHD AATCTGC ENSG00000013563|DNASE1L1 ENSG00000063978|RNF4 ENSG00000074410|CA12 ENSG00000100053|CRYBB3 ENSG00000105486|LIG1 ENSG00000105523|FAM83E ENSG00000120029|C10orf76 ENSG00000121289|CCDC123 ENSG00000134864|Q9BVM4\_HUMAN ENSG00000143217|PVRL4 ENSG000001055087|ODF1 ENSG00000161677|JOSD2 ENSG00000162511|LAPTM5 ENSG00000164108|Q9HAJ2\_HUMAN ENSG00000166435|XRRA1 ENSG00000166787|SAA3P ENSG00000167612|ANKRD33 ENSG00000168079|SCARA5 ENSG00000171533|MAP6 ENSG00000173120|FBXL11 ENSG00000184923|FAM22A ENSG00000186226|LCE1E ENSG00000196476|C20orf96 ENSG00000203987|Q6Z86\_HUMAN ENSG00000204332|Q6ZU25\_HUMAN ENSG00000206088|Q6ZT13\_HUMAN ENSG00000053770|C14orf108 ENSG00000076382|SPAG5 ENSG00000104356|POP1 ENSG00000108298|RPL19 ENSG00000115970|THADA ENSG00000141665|FBXO15 ENSG00000143476|DTL ENSG00000144191|CNGA3 ENSG00000144362|KLHL23 ENSG00000160633|SAFB ENSG00000163840|DTX3L ENSG00000164308|NP\_071745.1 ENSG00000168843|FSTL5 ENSG00000169679|BUB1 ENSG00000205647|CSN1S2A ENSG00000205647|CSN1S2A AATCTTG ENSG00000002586|CD99 ENSG000000013588|GPRC5A ENSG00000070601|FRMPD1 ENSG00000078900|TP73 ENSG00000092051|AP1G2 ENSG00000100023|PPII2 ENSG00000100422|CERK ENSG00000101337|TM9SF4 ENSG00000102050|PRAF2 ENSG00000105122|NP\_075055.1 ENSG00000105642|KCNN1 ENSG00000107562|CXCL12 ENSG00000111252|SH2B3 ENSG00000116133|DHCRC24 ENSG00000132002|DNAJB1 ENSG00000135314|C6orf148 ENSG00000136695|IL1F5 ENSG00000138780|GSTCD ENSG00000138942|RNF185 ENSG00000142583|SLC2A5 ENSG00000147140|NONO ENSG00000147394|ZNF185 ENSG00000149243|NP\_001034637.1 ENSG00000165383|LRRC18 ENSG00000168792|NP\_937790.1 ENSG00000177156|TALDO1 ENSG00000177352|CCDC71 ENSG00000177947|ODF3 ENSG00000186788|NP\_00101670.1 ENSG00000189357|XR\_015253.1 ENSG00000189363|Q6ZSP4\_HUMAN ENSG00000193007|NRAS ENSG0000012504|NR1H4 ENSG00000079931|MOXD1 ENSG00000086598|TMED2 ENSG00000102391|RPL36A ENSG00000111339|ART4 ENSG00000113615|SEC24A ENSG00000113790|EHHADH ENSG00000113810|SMC4 ENSG00000117713|ARID1A ENSG00000123636|BAZ2B ENSG00000132570|PCBD2 ENSG00000139168|ZCRB1 ENSG00000139517|LNX2 ENSG00000143079|CTNBP2NL ENSG00000145216|FIP1L1 ENSG00000147421|HMBOX1 ENSG00000151553|KIAA1600 ENSG00000151715|TMEM45B ENSG00000153976|HS3ST3A1 ENSG00000160679|C1orf77 ENSG00000162374|ELAVL4 ENSG00000164442|CITED2 ENSG00000172493|AFF1 ENSG00000181704|YIPF6 ENSG00000054118|THRAP3 ENSG00000075151|EIF4G3 ENSG00000082781|ITGB5 ENSG00000100234|TIMP3 ENSG00000100453|GZMB ENSG00000106447|KIAA0247 ENSG00000101144|BMP7 ENSG00000102265|TIMP1 ENSG00000108244|KRT23 ENSG00000113389|NPR3 ENSG00000116205|C1orf83 ENSG00000119688|ABCD4 ENSG00000122729|AC01 ENSG00000124160|NCOA5 ENSG00000125266|EFNB2 ENSG00000131233|GJA10 ENSG00000131558|EXOC4 ENSG00000132517|GPR172B ENSG00000140090|SLC24A4 ENSG00000140598|EFTUD1 ENSG00000142534|RPS11 ENSG00000143322|ABL2 ENSG00000147099|HDAC8 ENSG00000148468|C10orf38 ENSG00000155511|GRIA1 ENSG00000155849|ELMO1 ENSG00000164011|ZNF691 ENSG00000166136|NDUFB8 ENSG00000169184|NM\_002430.2 ENSG00000177744|NP\_775923.1 ENSG00000177807|KCNJ10 ENSG00000178206|C2orf14 ENSG00000179165|PXT1 ENSG00000180875|GREM2 ENSG00000183260|C20orf135 ENSG00000184659|FOXDL4L4 ENSG00000204828|FX4L4\_HUMAN ENSG00000205159|Q6ZVC9\_HUMAN ENSG000000011201|KALL1 ENSG000000072319|ALG13 ENSG00000078401|EDN1 ENSG00000079785|DDX1 ENSG00000102699|PARP4 ENSG00000109475|RPL34 ENSG00000113441|LNPEP ENSG00000115484|CCT4 ENSG00000115590|LLR2 ENSG00000129625|REEP5 ENSG00000134294|SLC38A2 ENSG00000134982|APC ENSG00000135249|RINT1 ENSG00000135914|HTR2B ENSG00000143353|LYPLAL1 ENSG00000149089|APIP ENSG00000155816|FMN2 ENSG00000164466|SFXN1 ENSG00000164608|NP\_071373.2 ENSG00000164951|PPM2C ENSG00000169764|UGP2 ENSG00000175087|PDK1L ENSG00000180370|PAK2 ENSG00000182070|ORS2A1 ENSG00000182916|TCEAL7 ENSG00000198934|MAGEE1 ENSG00000204495|PRAMEF13 AATGAAC ENSG00000053108|FSTL4 ENSG00000105609|LILRB5 ENSG00000116273|PHF13 ENSG00000120664|LOC646871 ENSG00000130656|HBZ ENSG00000131042|LILRB2 ENSG00000132130|LHX1 ENSG00000135801|TAF5L ENSG00000147224|PRPS1 ENSG00000159110|IFNAR2 ENSG00000169006|NTSR2 ENSG00000182362|C21orf55 ENSG00000186198|NP\_849190.1 ENSG00000189321|NR\_002940.1 ENSG00000198019|FCGR1B ENSG00000204309|Q6ZSQ3\_HUMAN ENSG00000205209|NP\_001020762.1 ENSG00000205770|Q8N847\_HUMAN ENSG00000206053|HN1L ENSG000000035687|ADSS ENSG00000103319|EEF2K ENSG00000108296|CCDC49 ENSG00000110344|UBE4A ENSG00000113575|PPP2CA ENSG00000115137|NP\_057628.1 ENSG00000115289|PCGF1 ENSG00000127311|HELB ENSG00000132388|UBE2G1 ENSG00000133636|NTS ENSG00000133858|CCDC131 ENSG00000134900|TPP2 ENSG00000136379|FAM108C1 ENSG00000138448|ITGAV ENSG00000141655|TNFRSF11A ENSG00000144452|ABCA12 ENSG00000146729|GBAS ENSG00000148019|CEP78 ENSG00000150768|DLAT ENSG00000158125|XDH ENSG00000163646|CLRN1 ENSG00000164418|GRIK2 ENSG00000165525|SDCCAG1 ENSG00000165659|DACH1 ENSG00000170422|USP47 ENSG00000172318|B3GALT1 ENSG00000172466|ZNF24 ENSG00000174840|NP\_808881.2 ENSG00000178462|TUBAL3 ENSG00000184378|ARPM1\_HUMAN ENSG00000185015|CA13 ENSG00000185551|NR2F2 ENSG00000187010|RHD ENSG00000187187|ZNF546 ENSG00000187533|NP\_999876.1 ENSG00000187955|COL14A1 ENSG00000048342|Q9H8A7\_HUMAN ENSG00000080960|SLC24A6 ENSG00000095713|CRTAC1 ENSG00000102104|RS1 ENSG00000103647|CORO2B ENSG00000105705|SF4 ENSG00000106336|FBXO24 ENSG00000108784|NAGLU ENSG00000110395|CBL ENSG00000116586|MAP1P\_HUMAN ENSG00000131143|COX4I1 ENSG00000142530|NP\_612420.1 ENSG00000145016|Q96CK5\_HUMAN ENSG00000146221|NP\_872345.1 ENSG00000147140|NONO ENSG00000163083|INHBB ENSG00000164270|HTR4 ENSG00000168569|NP\_001073970.1 ENSG00000169006|NTSR2 ENSG00000170525|PFFKB3 ENSG00000173137|ADCK5 ENSG00000185608|MRPL40 ENSG00000186529|CYP4F3 ENSG00000188086|NP\_954652.1 ENSG00000189430|NCR1 ENSG00000196859|KRT39 ENSG00000198641|SYS1 ENSG00000204369|Q6ZUP0\_HUMAN ENSG000000066697|TMEFF1 ENSG000000088782|DEFB127 ENSG00000089818|NECAP1 ENSG00000093009|KDC45L ENSG00000099250|NRP1 ENSG00000111913|C6orf32 ENSG00000112304|THEM2 ENSG00000112425|EPM2A ENSG00000115128|PM14\_HUMAN ENSG00000121486|C1orf25 ENSG00000143882|ATP6V1C2 ENSG00000144362|KLHL23 ENSG00000147437|GNRH1 ENSG00000153495|C13orf16 ENSG00000163918|RNF4 ENSG00000164175|SLC45A2 ENSG00000165156|ZHX1 ENSG00000170180|GYPA ENSG00000178562|CD28 ENSG00000183542|KLRC4 ENSG00000198087|C2D2AP ENSG00000198173|FAM47C ENSG00000198304|ZNF528 ENSG00000204262|COL5A2 ENSG00000204276|HLA-DQA2 ENSG00000204472|ATF1 ENSG00000205036|NP\_001001682.1 AATGACC ENSG00000053438|NNAT ENSG00000070371|CLTCL1 ENSG00000103200|NME4 ENSG00000106123|EPHB6 ENSG00000125514|C20orf51 ENSG00000125816|NKX2-4 ENSG00000125888|C20orf179 ENSG00000128713|HOXD11 ENSG00000131459|GPFT2 ENSG00000139436|GIT2 ENSG000001422290|FYFD7 ENSG00000147119|CHST7 ENSG00000154040|CABYR ENSG00000156345|CCRK ENSG00000156453|PCDH1 ENSG00000158887|MPZ ENSG00000160753|RUSC1 ENSG00000163064|EN1 ENSG00000172771|C3orf25 ENSG00000175048|ZDHHC14 ENSG00000176194|CIDEA ENSG00000181045|SLC26A11 ENSG00000183072|NKX2-5 ENSG00000184363|PKP3 ENSG00000185155|MXL1 ENSG00000185896|LAMP1 ENSG00000186510|CLCNKA ENSG00000197757|HOXC6 ENSG00000197818|SLC9A8 ENSG00000198802|PECAM1 ENSG00000205236|NP\_663165.2 ENSG000002029639|TFB1M ENSG00000083896|YTHDC1 ENSG00000101132|PFDN4 ENSG00000101134|DOK5 ENSG00000106278|PTPRZ1 ENSG00000107362|FAM108B1 ENSG00000109674|NEIL3 ENSG00000115548|JMJD1A ENSG00000120784|ZFP30 ENSG00000123594|ANXA1 ENSG00000152433|ZNF547 ENSG00000163138|C4orf28 ENSG00000164695|CHMP4C ENSG00000164825|DEFB1 ENSG00000168263|KCNV2 ENSG00000169302|STK32A ENSG00000174099|MSRB3 ENSG00000175604|Q96M66\_HUMAN ENSG00000177707|PVRL3 ENSG00000180408|Q8N5G0\_HUMAN ENSG00000185203|Q96S36\_HUMAN ENSG00000188585|Q6ZU45\_HUMAN ENSG00000197801|Q8TEB0\_HUMAN ENSG00000205822|Q49A35\_HUMAN AATGAGG ENSG00000005073|HOXA11 ENSG000000011376|LARS2 ENSG000000076356|PLXNA2 ENSG00000088543|C3orf18 ENSG00000101019|C20orf44 ENSG00000103591|P34 ENSG00000105428|ZNRF4 ENSG00000117448|AKR1A1 ENSG00000119547|ONECUT2 ENSG00000124508|BTN2A2 ENSG00000129244|ATP1B2 ENSG00000140263|SORD ENSG00000143614|GATAD2B ENSG00000163221|S100A12 ENSG00000163914|RHO ENSG00000167705|RILP ENSG00000171427|NM\_145293 ENSG00000179058|C9orf50 ENSG00000179284|DAND5 ENSG00000188089|PLA2G4E ENSG00000204118|NAP1L6 ENSG00000205181|QOVFZ2\_HUMAN ENSG00000205814|Q6ZRCO\_HUMAN ENSG00000048828|FAM120A ENSG00000049449|RCN1 ENSG00000066294|CD84 ENSG00000082196|C1QTNF3 ENSG00000093183|SEC22C ENSG00000102401|ARMCX3 ENSG00000105483|CARD8 ENSG00000110079|MS4A4A ENSG00000113441|LNPEP ENSG00000115137|NP\_057628.1 ENSG00000116106|EPHA4 ENSG00000122477|LRRC39 ENSG00000125812|GZF1 ENSG00000133789|SWP70\_HUMAN ENSG00000136158|SPRY2 ENSG00000163608|C3orf17 ENSG00000169251|NMD3 ENSG00000170385|SLC30A1 ENSG00000186094|AGBL4 ENSG00000186834|HEXIM1 ENSG00000198040|ZNF84 ENSG00000198046|ZNF667 ENSG00000198770|Q9H396\_HUMAN ENSG00000204220|PFDN6 ENSG00000189280|FUS ENSG00000114999|TTL ENSG00000116984|MLH3 ENSG00000119771|KLHL27 ENSG00000127080|IPPK ENSG00000128313|APOL5 ENSG00000131446|MGAT1 ENSG00000136485|WDR68 ENSG00000143614|GATAD2B ENSG00000146453|PNLDC1 ENSG00000159884|CCDC107 ENSG00000160691|SHC1 ENSG00000163207|IVL ENSG00000165282|PIGO ENSG00000167393|PPP2R3B ENSG00000168010|ATG16L2 ENSG00000172349|IL16 ENSG00000184144|CNTN2 ENSG00000197816|KIAA1529 ENSG00000205633|NP\_001010902.1 ENSG00000205633|NP\_001010902.1 ENSG00000205633|NP\_001010902.1 ENSG00000118610|CXorf56 ENSG00000033867|SLC4A7 ENSG00000072657|TRHDE ENSG00000090382|LYZ ENSG00000100629|C14orf145 ENSG00000116898|MRP51 ENSG00000122376|XR\_015353.1 ENSG00000126858|RHOT1 ENSG00000132000|PODNL1 ENSG00000135269|TES ENSG00000137996|RTCD1 ENSG00000139151|PLC21 ENSG00000140416|TPM1 ENSG00000144959|AADACL1 ENSG00000145908|ZNF300 ENSG00000146469|VIP ENSG00000147027|TMEM47 ENSG00000147133|TAF1 ENSG00000147145|GPR23 ENSG00000148572|NRBF2 ENSG00000156395|SORCS3 ENSG00000164237|CMBL ENSG00000164331|ANKRA2 ENSG00000165874|FAM35A ENSG00000165874|FAM35A ENSG00000175390|EIF3S5 ENSG00000178460|C8orf45 ENSG00000184374|COLEC10 ENSG00000187185|Q86VG7\_HUMAN ENSG00000188877|POTE8\_HUMAN ENSG00000196867|ZFP28 ENSG00000197601|MLSTD2 ENSG00000198001|IRAK4 ENSG00000203722|RAET1G ENSG00000065882|TBC1D1 ENSG00000073008|PVR ENSG00000095303|PTGS3 ENSG00000100342|APOL1 ENSG00000101361|NOL5A ENSG00000124140|SLC12A5 ENSG00000125618|PAX8 ENSG00000128313|APOL5 ENSG00000131914|LIN28 ENSG00000165238|WNK2 ENSG00000169006|NTSR2 ENSG00000176678|FOXL1 ENSG00000184785|Q96HG1\_HUMAN ENSG00000188167|NP\_001034859.1 ENSG00000196166|NP\_997295.1 ENSG00000203931|LOC729078 ENSG00000205658|Q6ZU06\_HUMAN ENSG00000005469|CROT ENSG000000019549|SNAI2 ENSG00000038102|NP\_001073948.1 ENSG00000051415|AMY1A ENSG00000060749|Q6ZU30\_HUMAN ENSG00000073969|NSF ENSG00000103544|NP\_064710.3 ENSG00000108256|NUP12P ENSG00000117791|MOSC2 ENSG00000132485|ZRANB2 ENSG00000135720|DYNC1L12 ENSG00000144827|ABHD10 ENSG00000154864|FAM38B ENSG00000156671|SAMD8 ENSG00000164418|GRIK2 ENSG00000165805|C1orf50 ENSG00000168143|FAM83B ENSG00000171241|SNCBP1 ENSG00000174876|AMY1B ENSG00000197989|C1orf79 ENSG00000198142|ANKRD57 ENSG00000203932|LOC728660 ENSG00000205791|LOH12CR2 AATGCAC ENSG00000007306|CEACAM7 ENSG00000089685|BIRC5 ENSG00000100335|SMCR7L ENSG00000105755|ETHE1 ENSG00000114650|SCAP ENSG00000116218|NPHS2 ENSG00000124357|NAGK ENSG00000127377|CRYGN ENSG00000136935|GOLGA1 ENSG00000141052|MYOCD ENSG00000143322|ABL2 ENSG00000155719|OTOA ENSG00000176248|ANAPC2 ENSG00000176515|Q8NAX6\_HUMAN ENSG00000183691|NOG ENSG00000185811|IKZF1 ENSG00000187116|LTLR5 ENSG00000187140|FOXD3 ENSG00000198854|C1orf68 ENSG00000205002|NP\_001020528.1 ENSG00000009307|NRAS ENSG00000049249|TNFRSF9 ENSG00000060709|RTMBP2 ENSG00000069956|MAPK6 ENSG00000087470|LNM1L ENSG00000088035|ALG6 ENSG00000094755|GABRP ENSG00000107186|MPDZ ENSG00000109061|MYH1 ENSG00000109790|KLHL5 ENSG00000116704|SLC35D1 ENSG00000125531|C20orf195 ENSG00000125676|THOC2 ENSG00000127325|BEST3 ENSG00000129204|USP6 ENSG00000134391|CFHR2 ENSG00000135541|AH11 ENSG00000141048|MYH4 ENSG00000141458|NPC1 ENSG00000144566|RAB5A ENSG00000144619|CNTN4 ENSG00000153822|KCNJ16 ENSG00000163606|CD200R1 ENSG00000165862|PNLIPRP2 ENSG00000167618|LAIR2 ENSG00000168615|ADAM9 ENSG00000174106|LEMD3 ENSG00000178722|NP\_775938.1 ENSG00000179476|C14orf28 ENSG00000187611|Q6ZTR6\_HUMAN ENSG00000188992|LIP1 ENSG00000203756|C6orf191 ENSG00000205442|C9orf134

AATGCCA ENSG00000011376|LARS2 ENSG00000101082|SLA2 ENSG00000101883|PEPP1\_HUMAN ENSG0000011249|CUTL2 ENSG00000112619|PRPH2 ENSG00000115211|EIF2B4 ENSG00000123349|PFDN5 ENSG00000130830|MPP1  
ENSG00000133250|ZNF414 ENSG00000141664|ZCCHC2 ENSG00000144583|MARCH4 ENSG00000146670|CDCAS2 ENSG00000156515|HK1 ENSG00000157211|CDCP2 ENSG00000165633|C10orf72 ENSG00000166736|HTR3A  
ENSG00000167525|NP\_689678.1 ENSG00000171219|CDC42BPG ENSG00000182346|DAOA ENSG00000186470|BTN3A2 ENSG00000197322|NP\_997337.1 ENSG00000203689|NP\_001018859.1 ENSG00000203690|TCP10 ENSG00000205424|Q6ZW00\_HUMAN  
ENSG00000048991|R3HDM1 ENSG00000055147|C5orf6 ENSG00000079819|EPB41L2 ENSG00000091128|LAMB4 ENSG00000091428|RAPGEF4 ENSG00000096968|JAK2 ENSG00000108946|PRKAR1A ENSG00000111701|APOBEC1  
ENSG00000113494|PRLR ENSG00000119906|C10orf6 ENSG00000134070|IRAK2 ENSG00000139291|TMEM19 ENSG00000139597|NP\_438169.2 ENSG00000145692|BHMT ENSG00000146856|AGBL3 ENSG00000150051|MKX  
ENSG00000157429|ZNF19 ENSG00000163053|SLC16A14 ENSG00000170961|HAS2 ENSG00000176256|HMGCB4 ENSG00000176788|BASP1 ENSG00000196593|NM\_207439 ENSG00000196664|TLR7  
ENSG00000197716|Q9UHV1\_HUMAN ENSG00000197977|ELOVL2 ENSG00000198301|SDAD1 ENSG00000204019|NP\_001017978.1 ENSG00000206560|ANKRD28  
AATGCCCT ENSG00000006062|MAP3K14 ENSG00000104415|WISP1 ENSG00000106086|PLEKHA8 ENSG00000109089|CDR2L ENSG00000113732|ATP6V0E1 ENSG00000116983|HPCAL4 ENSG00000119777|NP\_060197.4 ENSG00000126756|UXT  
ENSG00000139428|MMAB ENSG00000140031|P1768\_HUMAN ENSG00000145936|KCNMB1 ENSG00000147113|CXorf36 ENSG00000165478|HEPACAM ENSG00000166548|TK2 ENSG00000167977|KCTD5 ENSG00000173404|INSM1  
ENSG00000174206|NP\_689653.3 ENSG00000176532|PRR15 ENSG00000178971|C17orf68 ENSG00000182158|CREB3L2 ENSG00000183117|CSMD1 ENSG00000188004|VSI8 ENSG00000196209|Q5JXA8\_HUMAN ENSG00000197226|TBC1D9B  
ENSG00000197353|LYPD2 ENSG00000204071|TCEAL6 ENSG00000203734|STRAP ENSG00000203169|CENPQ ENSG000002048991|R3HDM1 ENSG00000207312|PLEKHC1 ENSG00000209686|USP48 ENSG000002100568|VTI1B  
ENSG00000100697|DICER1 ENSG00000102053|ZC3H12B ENSG00000108094|CUL2 ENSG00000119147|C2orf40 ENSG00000134419|RPS15A ENSG00000134717|BTFF3L4 ENSG00000136536|MARCH7 ENSG00000138709|LARP2  
ENSG00000139117|CPNE8 ENSG00000151715|TMEM45B ENSG00000156650|MYO14 ENSG00000165071|TMEM71 ENSG00000165312|OTUD1 ENSG00000165410|CFL2 ENSG00000173744|HRB ENSG00000175857|C5orf29  
ENSG00000176797|DEFB103B ENSG00000177243|DEFB103A ENSG00000177324|CXorf20 ENSG00000177917|ARL6IP6 ENSG00000179136|Q8NAV9\_HUMAN ENSG00000188039|NWD1 ENSG00000196360|NR\_002168.1 ENSG00000196387|ZNF140  
ENSG00000197646|PDCD1LG2 ENSG00000198838|RYR3  
AATGCCGG ENSG000000027869|SH2D2A ENSG000000072818|CENTB1 ENSG00000100105|PATZ1 ENSG00000100577|GSTZ1 ENSG00000103150|MLYCD ENSG00000131668|BARX1 ENSG00000135744|AGT ENSG00000140750|ARHGAP17  
ENSG00000141101|NOB1 ENSG00000148341|SH3GLB2 ENSG00000149091|DGKZ ENSG00000161328|LRRC56 ENSG00000167302|C17orf56 ENSG00000168904|LRRC28 ENSG00000169393|ELSPBP1 ENSG00000174166|Q9BTX9\_HUMAN  
ENSG00000177045|SIX5 ENSG00000180767|CHST13 ENSG00000182087|C19orf6 ENSG00000183528|QOVAF8\_HUMAN ENSG00000184697|CLDN6 ENSG00000187695|Q6ZUG5\_HUMAN ENSG00000188763|FZD9 ENSG00000196421|PRR17  
ENSG00000198842|DUSP27 ENSG000000023287|RB1CC1 ENSG000000035681|NSMAF ENSG000000037965|HOXC8 ENSG00000078399|HOXA9 ENSG00000104435|STMN2 ENSG00000104763|ASAH1 ENSG00000115840|SLC25A12  
ENSG00000121440|PDZRN3 ENSG00000138668|HNRPD ENSG00000151514|SALL3 ENSG00000153064|BANK1 ENSG00000162885|B3GALNT2 ENSG00000164099|PRSS12 ENSG00000166148|AVPR1A ENSG00000167562|ZNF701  
ENSG00000167785|ZNF558 ENSG00000168036|CTNNB1 ENSG00000170370|EMX2 ENSG00000170584|NUDCD2 ENSG00000185984|NR\_002593.1 ENSG00000188295|ZNF669 ENSG00000196285|H33\_HUMAN ENSG00000198040|ZNF84  
ENSG00000198382|UVRAG ENSG00000205156|Q6UXQ8\_HUMAN ENSG00000205608|Q6ZQP9\_HUMAN  
AATGCCA ENSG00000072858|SDT1 ENSG00000092067|CEBPE ENSG00000110713|NUP98 ENSG00000115685|PPP1R7 ENSG00000124160|NCOA5 ENSG00000125815|CST8 ENSG00000127388|NM\_198455.2 ENSG00000129214|SHBG  
ENSG00000132254|ARFIP2 ENSG00000134864|Q9BVM4\_HUMAN ENSG00000140031|P1768\_HUMAN ENSG00000146232|NFKBIE ENSG00000172828|CES3 ENSG00000178401|NP\_079178.2 ENSG00000179913|B3GNT3 ENSG00000179914|ITLN1  
ENSG00000186951|PPARA ENSG00000196118|NP\_001014979.1 ENSG00000197088|NM\_207488 ENSG00000198690|MTMR15 ENSG00000203985|LDLRAD1 ENSG0000021602|KLRA1 ENSG000002036257|CUL3 ENSG000002058063|ATP11B  
ENSG00000062716|TMEM49 ENSG00000091651|ORC6L ENSG00000106692|FCMD ENSG00000107249|GLI3 ENSG00000109339|MAPK10 ENSG00000112115|IL17A ENSG00000112902|SEMA5A ENSG00000115271|GCA  
ENSG00000125484|GTF3C4 ENSG00000136539|CD302 ENSG00000137806|NDUFAF1 ENSG00000137876|C15orf15 ENSG00000138745|ADAM10 ENSG00000157193|LRP8 ENSG00000162526|TSSK3  
ENSG00000163755|HPS3 ENSG00000166752|TMEM83 ENSG00000168916|ZNF608 ENSG00000180869|C1orf180 ENSG00000182287|AP1S2 ENSG00000185201|IFITM2 ENSG00000188216|Q5JST9\_HUMAN ENSG00000188467|SLC24A5  
ENSG00000197279|ZNF165  
AATGCCC ENSG000000010319|SEMA3G ENSG00000093072|CECR1 ENSG00000100647|KIAA0247 ENSG00000104059|K0574\_HUMAN ENSG00000111110|PPM1H ENSG00000130054|TMEM28 ENSG00000132635|FAM113A ENSG00000136718|IMP4  
ENSG00000151376|ME3 ENSG00000158006|PAFAH2 ENSG00000161653|NAGS ENSG00000167968|DNASE1L2 ENSG00000169921|Q7SL30\_HUMAN ENSG00000170420|APOL6 ENSG00000174407|C20orf166 ENSG00000175315|CST6  
ENSG00000205106|Q6N098\_HUMAN ENSG000000042317|SPATA7 ENSG00000112796|ENPP5 ENSG00000120860|CCDC53 ENSG00000121005|CRISPLD1 ENSG00000125482|TTF1 ENSG00000129007|CALML4 ENSG00000136842|TMD01  
ENSG00000136897|MRPL50 ENSG00000137770|CTDSPL2 ENSG00000139726|DENR ENSG00000150054|PPP7 ENSG00000164284|GREPL2 ENSG00000165516|KLHDC2 ENSG00000165832|TRUB1 ENSG00000166783|KIAA0430  
ENSG00000167618|LAIR2 ENSG00000169435|RASSF6 ENSG00000171446|KRT27 ENSG00000176201|GBA3 ENSG00000177181|FAM80A ENSG00000183035|CYLC1 ENSG00000185658|BRWD1 ENSG00000187626|ZKSCAN4  
ENSG00000188419|CHM ENSG00000198682|PAPSS2  
AATGCCGA ENSG00000100320|RBM9 ENSG00000100342|APOL1 ENSG00000101890|GUCY2F ENSG00000103489|XYLT1 ENSG00000112212|BZRP1L1 ENSG00000116984|MTR ENSG00000119686|C14orf58 ENSG00000131368|MRPS25  
ENSG00000134595|SOX3 ENSG00000139445|FOXN4 ENSG00000140464|PML ENSG00000143786|CNIH3 ENSG00000144043|TEX261 ENSG00000145063|NM\_182586 ENSG00000146007|ZMAT2 ENSG00000166963|MAP1A  
ENSG00000171475|WIPF2 ENSG00000175376|NP\_115701.2 ENSG00000180104|EXOC3 ENSG00000180849|C15orf37 ENSG00000182330|PRAMEF8 ENSG00000185404|Q4ZG65\_HUMAN ENSG00000187147|C1orf164 ENSG00000204444|APOM  
ENSG00000204485|LOC729516 ENSG000000204510|PRAMEF7 ENSG000000202675|SLAMF7 ENSG00000038295|TLL1 ENSG00000065600|C1orf75 ENSG00000078795|PKD2L2 ENSG00000100354|TNRC6B ENSG00000101846|STS  
ENSG00000102606|ARHGEF7 ENSG00000111785|RIC8B ENSG00000112319|EYA4 ENSG00000112773|FAM46A ENSG00000119335|SET ENSG00000119537|FVT1 ENSG00000120533|ENY2 ENSG00000126945|HNRPH2  
ENSG00000135413|LACRT ENSG00000135999|EPC2 ENSG00000136875|PPRF4 ENSG00000137871|SUHW4 ENSG00000145451|GLRA3 ENSG00000146109|ABT1 ENSG00000196945|HNRPH1 ENSG00000171241|SHCB1  
ENSG00000180398|MCFD2 ENSG00000184344|GDF3 ENSG00000185915|KLHL34 ENSG00000188206|Q5R114\_HUMAN  
AATGGTA ENSG000000062582|MRPS24 ENSG00000119655|NPC2 ENSG00000138942|RNF185 ENSG00000144045|DQX1 ENSG00000162399|BSND ENSG00000166257|SCN3B ENSG00000167311|ART5 ENSG00000171224|C10orf35  
ENSG00000177663|IL17RA ENSG00000182319|SG223\_HUMAN ENSG00000184566|Q9P1G6\_HUMAN ENSG00000198483|ANKRD35 ENSG00000204058|C10orf41 ENSG00000206528|Q6ZSMO\_HUMAN ENSG00000206163|KRIT1 ENSG00000044574|HSPA5  
ENSG00000072041|SLC6A15 ENSG00000081154|PCNP ENSG00000101888|NXT2 ENSG00000104831|ASPA ENSG00000116962|NID1 ENSG00000120616|EPC1 ENSG00000133104|SPG20 ENSG00000136682|CBWD2  
ENSG00000138660|C4orf16 ENSG00000146587|RBAK ENSG00000147996|CBWD1 ENSG00000149218|ENDOD1 ENSG00000153923|CLCA3 ENSG00000155959|VBP1 ENSG00000156958|GALK2 ENSG00000161547|SFRS2  
ENSG00000163428|LRRC58 ENSG00000163611|CCDC52 ENSG00000165474|GJB2 ENSG00000172785|CBWD5 ENSG00000172845|SP3 ENSG00000180773|SLC36A4 ENSG00000186222|CNO ENSG00000196873|CBWD3  
ENSG00000197756|RPL37A ENSG00000197776|KLHDC1 ENSG00000204790|CBWD6  
AATGTAA ENSG00000090776|EFNB1 ENSG00000102076|OPN1LW ENSG00000103423|DNAJA3 ENSG00000112562|SMOC2 ENSG00000115594|IL1R1 ENSG00000119681|LTBP2 ENSG00000127241|MASP1 ENSG00000135624|CCT7  
ENSG00000141002|TCF25 ENSG00000147081|AKAP4 ENSG00000147380|OPN1MW ENSG00000153786|ZDHHC7 ENSG00000157240|FZD1 ENSG00000160785|SLC25A4 ENSG00000162426|SLC45A1 ENSG00000163521|GLB1L  
ENSG00000166160|OPN1MW2 ENSG00000170100|Q96MU6-2 ENSG00000174898|TMEM146 ENSG00000177699|Q8N849\_HUMAN ENSG00000178235|SLITRK1 ENSG00000196263|ZNF471 ENSG00000196313|NP\_742017.1 ENSG00000198174|Q8N9P1\_HUMAN  
ENSG00000203934|Q6ZUQ1\_HUMAN ENSG00000204157|NP\_001013664.1 ENSG00000049130|KITLG ENSG00000074803|SLC12A1 ENSG00000078140|HIP2 ENSG00000100744|C14orf129 ENSG00000105708|ZNF14 ENSG00000105982|RNF32  
ENSG00000108187|PBLD ENSG00000111647|NP\_001006948.1 ENSG00000116194|ANGPTL1 ENSG00000116741|RGS2 ENSG00000116815|CD58 ENSG00000126777|KTN1 ENSG00000128052|KDR  
ENSG00000132640|BTBD3 ENSG00000135336|ORC3L ENSG00000136997|MYC ENSG00000137285|TUBB2B ENSG00000138802|SEC24B ENSG00000142856|ITGB3BP ENSG00000151790|TDO2 ENSG00000152147|GEMIN6  
ENSG00000152266|PTH ENSG00000153684|NP\_001012455.1 ENSG00000158615|PPP1R15B ENSG00000161298|ZNF382 ENSG00000164144|ARFIP1 ENSG00000164485|IL22RA2 ENSG00000165264|NDUFB6 ENSG00000166896|XRCC6BP1  
ENSG00000167766|ZNF83 ENSG00000171291|ZNF439 ENSG00000171295|ZNF440 ENSG00000173041|ZNF680 ENSG00000174325|DIRC1 ENSG00000175676|GOLGA8F ENSG00000176018|LYSMD3  
ENSG00000177189|RPS6KA3 ENSG00000180611|C3orf59 ENSG00000180616|SSTR2 ENSG00000183629|GOLGA8G ENSG00000185037|XR\_016629.1 ENSG00000185177|ZNF479 ENSG00000186496|ZNF396 ENSG00000186834|HEXIM1  
ENSG00000188647|PTAR1 ENSG00000188868|ZNF563 ENSG00000196268|ZNF493 ENSG00000196826|ZNF709 ENSG00000198028|ZNF560 ENSG00000198185|ZNF334 ENSG00000198521|ZNF43 ENSG00000204201|Q49A40\_HUMAN  
AATGTAC ENSG00000076201|PTPN23 ENSG00000086548|CEACAM6 ENSG00000100197|CYP2D6 ENSG00000107175|CREB3 ENSG00000125409|TEXT3 ENSG00000135956|TMEM127 ENSG00000140848|CPNE2 ENSG00000159388|BTG2  
ENSG00000163814|CDCP1 ENSG00000171855|IFNB1 ENSG00000177731|FLII ENSG00000180447|GAS1 ENSG00000182372|C8orf61 ENSG00000183579|ZNRF3 ENSG00000196367|TRRAP ENSG00000205702|CYP2D7P1  
ENSG00000094133|REV3L ENSG00000031081|NP\_065805.1 ENSG00000049618|ARID1B ENSG00000081138|CDH7 ENSG00000102024|PLS3 ENSG00000102189|EEA1 ENSG00000109118|PHF12 ENSG00000109255|NMTU  
ENSG00000109458|GAB1 ENSG00000132964|CDK8 ENSG00000135052|C9orf155 ENSG00000135409|AMHR2 ENSG00000144566|RAB5A ENSG00000149970|CNKSR2 ENSG00000154719|MRPL39 ENSG00000163743|RCHY1  
ENSG00000166337|TAF10 ENSG00000166986|MARS ENSG00000177494|ZBED2 ENSG0000018882|XR\_017823.1 ENSG00000196360|NR\_002168.1 ENSG00000197702|PARVA ENSG00000204706|Q6ZVS9\_HUMAN  
AATGTAT ENSG00000043822|NP\_060895.1 ENSG00000099954|CECR2 ENSG00000100234|TIMP3 ENSG00000101670|LIPG ENSG00000105991|HOXA1 ENSG00000121152|NCAPH ENSG00000122367|LDB3 ENSG00000122861|PLAU  
ENSG00000122966|CIT ENSG00000124164|VAPB ENSG00000129757|CDKN1C ENSG00000131504|DIAPH1 ENSG00000132434|LANCL2 ENSG00000137460|NP\_203751.2 ENSG00000143816|WNT9A ENSG00000148408|CACNA1B  
ENSG00000155926|SLA ENSG00000156515|HK1 ENSG00000160714|UBE2Q1 ENSG00000164266|SPINK1 ENSG00000166900|STX3 ENSG00000166949|SMAD3 ENSG00000167524|SG494\_HUMAN ENSG00000169213|RAB3B  
ENSG00000170682|Q96NU5\_HUMAN ENSG00000174564|IL20RB ENSG00000178235|SLITRK1 ENSG00000180447|GAS1 ENSG00000182606|TRAK1 ENSG00000185065|NP\_776154.2 ENSG00000188076|SCGB1C1 ENSG00000198920|KIAA0753  
ENSG0000016490|CLCA1 ENSG00000080819|CPOX ENSG00000096092|TMEM14A ENSG00000101843|PSMD10 ENSG00000111049|MYF5 ENSG00000111450|STX2 ENSG00000113441|LNPEP  
ENSG00000115750|TAF1B ENSG00000120235|IFNA6 ENSG00000135951|TSGA10 ENSG00000136810|TXN1D ENSG00000138385|SSB ENSG00000140600|SH3GL3 ENSG00000145495|MARCH6 ENSG00000155755|ALS2CR4  
ENSG00000164691|TAGAP ENSG00000165120|C7orf45 ENSG00000165732|DDX21 ENSG00000166670|MMP10 ENSG00000170293|CMTM8 ENSG00000173083|HPSE ENSG00000174799|CEP135 ENSG00000184886|PTGW  
ENSG00000197601|MLSTD2 ENSG00000198889|WDR40B ENSG00000204804|FAM27D1  
AATGTGC ENSG00000006453|BAIAP2L1 ENSG00000008118|CAMK1G ENSG00000008735|MAPK8IP2 ENSG00000070731|ST6GALNAC2 ENSG00000116584|ARHGFE2 ENSG00000124225|TMPEAI ENSG00000125459|MSTO1 ENSG00000125492|BARHL1  
ENSG00000125820|NKK2-2 ENSG00000125875|TBC1D20 ENSG00000141295|SCRN2 ENSG00000141556|TBCD ENSG00000143891|GALM ENSG00000153468|TCP10\_HUMAN ENSG00000161277|THAP8 ENSG00000163867|ZMYM6  
ENSG00000165688|PMPCA ENSG00000167302|C17orf56 ENSG00000168621|GDNF ENSG00000173673|HES3 ENSG00000174684|B3GNT1 ENSG00000175130|MARCKSL1 ENSG00000175854|C9orf119 ENSG00000175892|Q8NAT4\_HUMAN  
ENSG00000182335|Q8TE90\_HUMAN ENSG000001833570|PCBP3 ENSG00000189001|SBSN ENSG00000203934|Q6ZUQ1\_HUMAN ENSG00000204117|Q6ZVS8\_HUMAN ENSG00000005059|CCDC109B ENSG000000013503|POLR3B ENSG00000014641|MDH1  
ENSG0000016082|ISL1 ENSG000000038427|VCAN ENSG00000111816|FRK ENSG00000120694|HSPH1 ENSG00000120833|SOCS2 ENSG00000121931|C1orf103 ENSG00000127989|MTERF ENSG00000132631|C20orf79  
ENSG00000134146|ATPBD4 ENSG00000141759|TXNL4A ENSG00000145242|EPHA5 ENSG00000147535|PPAPDC1B ENSG00000154889|MPPE1 ENSG00000155876|RRAGA ENSG00000164442|CITED2 ENSG00000169032|MAP2K1  
ENSG00000170855|TRIAF1 ENSG00000174343|CHRNA9 ENSG00000179029|TMEM107 ENSG00000179299|NSUN7 ENSG00000180745|CLRN3 ENSG00000187054|TMPRSS11A ENSG00000196072|BLOC182 ENSG00000197579|TOPORS  
ENSG00000198838|RYR3 ENSG00000203875|SNHG5  
AATGTGA ENSG00000105053|VRK3 ENSG00000108179|PPIF ENSG00000110497|NP\_060219.2 ENSG00000112619|PRPH2 ENSG00000132471|WBP2 ENSG00000135824|RGS8 ENSG00000140623|SEPT12 ENSG00000142156|COL6A1  
ENSG00000144711|IQSEC1 ENSG00000148200|NR6A1 ENSG00000148411|BTBD14A ENSG00000158470|B4GALT5 ENSG00000163961|RNF168 ENSG00000166619|BLCAP ENSG00000167774|NDUFA7 ENSG00000168016|Q8N8K0\_HUMAN  
ENSG00000170906|NDUFA3 ENSG00000182013|NP\_060685.2 ENSG00000183686|MAGEA5 ENSG00000183955|SETD8 ENSG00000185896|LAMP1 ENSG00000196391|ZNF774 ENSG00000204033|LRRC22 ENSG00000204446|NP\_001001709.1  
ENSG00000204622|HLA-J ENSG00000205592|MUC19 ENSG00000024862|CCDC28A ENSG00000081665|ZNF253 ENSG00000113905|HRG ENSG00000120279|MYCT1 ENSG00000120586|MRC1 ENSG00000120868|APAF1  
ENSG00000124406|ATP8A1 ENSG00000127328|RAB31P ENSG00000128710|HXLD10 ENSG00000131002|Cyor15B ENSG00000131127|ZNF141 ENSG00000133636|INTS ENSG00000137872|SEMA6D ENSG00000141048|MYH4  
ENSG00000146809|ASB15 ENSG00000148090|AUH ENSG00000150045|KORF1 ENSG00000151615|POU4F2 ENSG00000156162|DPY19L4 ENSG00000163125|KIAA0460 ENSG00000163491|NEK10 ENSG00000163781|TOPBP1  
ENSG00000164066|INTU ENSG00000166922|SCG5 ENSG00000168661|ZNF30 ENSG00000173041|ZNF680 ENSG00000178074|NP\_710156.2 ENSG00000180257|ZNF321 ENSG00000182004|SNRPE ENSG00000183748|MRC1L1  
ENSG00000184588|PDE4B ENSG00000185220|PGBD2 ENSG00000185686|PRAME ENSG00000188938|FAM120AOS ENSG00000189266|PNRC2 ENSG00000196172|ZNF681 ENSG00000197020|ZNF100 ENSG00000204026|Q6ZSD2\_HUMAN  
ENSG00000204829|CBWD7  
perfect: AATGTGA TCACATT hsa-miR-23a atTCACATTgccagggtatttc 1  
AATGTGC ENSG00000067066|SP100 ENSG00000100918|REC8 ENSG00000107731|UNC5B ENSG00000115297|TLX2 ENSG00000123349|PFDN5 ENSG00000125815|CST8 ENSG00000131504|DIAPH1 ENSG00000135437|RDH5



ENSG00000135622|SEMA4F ENSG00000138347|MYPN ENSG00000138869|C2orf16 ENSG00000163884|KLF15 ENSG00000164976|KIAA1161 ENSG00000167748|KLK1 ENSG00000172426|C6orf206 ENSG00000177350|Q6NVV1\_HUMAN  
ENSG00000179407|DNAJ88 ENSG00000182158|CREB3L2 ENSG00000185262|FAM100B ENSG00000188997|KCTD21 ENSG00000197043|ANXA6 ENSG00000204657|OR2H2 ENSG00000204902|Q6UXW7\_HUMAN ENSG0000035681|NSMAF  
ENSG0000049192|ADAMTS6 ENSG0000052126|PLEKHA5 ENSG00000100218|RTDR1 ENSG00000104375|STK3 ENSG00000105186|ANKRD27 ENSG00000107164|FUBP3 ENSG00000111364|DDX55 ENSG00000112234|FBXL4  
ENSG00000112246|SIM1 ENSG00000119729|RHOQ ENSG00000122692|SMU1 ENSG00000126016|AMOT ENSG00000128272|ATF4 ENSG00000132639|SNAP25 ENSG00000134200|TSHB ENSG00000135940|COX5B  
ENSG00000142676|RPL11 ENSG00000151458|ANKRD50 ENSG00000156110|ADK ENSG00000157800|SLC37A3 ENSG00000162989|KCNJ3 ENSG00000164645|NP\_689919.1 ENSG00000167332|OR51E2 ENSG00000171862|PTENP1  
ENSG00000172197|MBOAT1 ENSG00000184040|FAM23B ENSG00000185760|KCNQ5 ENSG00000188659|NF\_001008227.1 ENSG00000196639|HRH1 ENSG00000197635|DPP4 ENSG00000198015|MRPL42 ENSG00000198515|CNGA1  
ENSG00000198799|LRIG2  
perfect: AATGTGC GCACATT hsa-miR-323 GCACATTacacgggtcgacacctt 0  
AATGTGT ENSG00000025770|NCAAPH2 ENSG00000047056|WDR37 ENSG00000101146|RAE1 ENSG00000106078|COBL ENSG00000106366|SERPINE1 ENSG00000108852|MPP2 ENSG00000109132|PHOX2B ENSG00000110076|NRXN2  
ENSG00000113273|ARSB ENSG00000129862|VCY ENSG00000129864|VCY1B ENSG00000134882|UBAC2 ENSG00000143502|SUSD4 ENSG00000145920|CPLX2 ENSG00000160087|UBE2J2 ENSG00000162981|FAM84A  
ENSG00000166664|CHRFA7A ENSG00000168824|NSG1\_HUMAN ENSG00000169410|PTPN9 ENSG00000177504|VCX2 ENSG00000179036|VAMP2 ENSG00000182053|XR\_016180.1 ENSG00000185674|LYG2\_HUMAN ENSG00000188112|FLJ90086  
ENSG00000198920|KIAA0753 ENSG00000053254|CHES1 ENSG00000057294|PKP2 ENSG00000065413|ANKRD44 ENSG00000078618|NRD1 ENSG00000083937|CHMP2B ENSG00000111912|NCOA7 ENSG00000118785|SPP1  
ENSG00000118946|PCDH17 ENSG00000119888|TACSTD1 ENSG00000120586|MRC1 ENSG00000122707|RECK ENSG00000124486|USP9X ENSG00000126773|C14orf135 ENSG00000129071|MBD4 ENSG00000131115|ZNF227  
ENSG00000132952|USPL1 ENSG00000134152|C15orf29 ENSG00000136688|IL1F9 ENSG00000139496|NUPL1 ENSG00000145365|NP\_443096.1 ENSG00000147853|AK3 ENSG00000148737|TCF7L2 ENSG00000152433|ZNF547  
ENSG00000159873|CCDC117 ENSG00000162999|DUSP19 ENSG00000164093|PITX2 ENSG00000164283|ESM1 ENSG00000172318|B3GALT1 ENSG00000174720|LARP7 ENSG00000179933|C14orf119 ENSG00000180998|GPR137C  
ENSG00000183726|TMEM50A ENSG00000183748|MRC1L1 ENSG00000186017|ZNF566 ENSG00000196305|IARS ENSG00000196646|ZNF136 ENSG00000197584|KCNMB2 ENSG00000203743|Q5J7V3\_HUMAN  
ENSG0000011021|CLCN6 ENSG0000012963|C14orf130 ENSG00000033100|CHGUT\_HUMAN ENSG00000074211|PPP2R2C ENSG00000086062|B4GALT1 ENSG00000100347|SAMM50 ENSG00000105501|SIGLEC5 ENSG00000106852|LHX6  
ENSG00000111665|CDA3 ENSG00000118894|FAM86A ENSG00000124785|NRN1 ENSG00000141034|C17orf39 ENSG00000142700|DMRTA2 ENSG00000148158|SNX3 ENSG00000156466|GDF6 ENSG00000160172|Q8IWI37\_HUMAN  
ENSG00000161973|CCDC42 ENSG00000162522|KIAA1522 ENSG00000162735|PXE19 ENSG00000164742|ADCY1 ENSG00000169184|NM\_002430.2 ENSG00000170233|Q96AM0\_HUMAN ENSG00000170983|C8orf14 ENSG00000171084|LOC645332  
ENSG00000173812|EIF1 ENSG00000176595|KBTBD11 ENSG00000179914|ITLN1 ENSG00000184923|FAM22A ENSG00000185198|PRSS1 ENSG00000185730|ZNF696 ENSG00000205205|C17orf51 ENSG0000005302|MSL3L1  
ENSG00000005436|C2orf3 ENSG00000055813|CCDC85A ENSG00000065615|CYB5R4 ENSG00000066654|THUMPD1 ENSG00000091039|OSBPL8 ENSG00000109606|DHX15 ENSG00000109790|KLHL5 ENSG00000112029|FBXO5  
ENSG00000118260|CREB1 ENSG00000118762|PKD2 ENSG00000125772|GDE5\_HUMAN ENSG00000126261|SAE2 ENSG00000128694|OSGEP1 ENSG00000129170|CSRFP3 ENSG00000134709|HOOK1 ENSG00000139209|SLC38A4  
ENSG00000141141|DDX52 ENSG00000152683|SLC30A6 ENSG00000153879|CEBPG ENSG00000154864|FAM38B ENSG00000155307|SAMS1 ENSG00000161298|ZNF382 ENSG00000163319|MRPS18C ENSG00000164111|ANXA5  
ENSG00000164386|NP\_997378.2 ENSG00000164985|PSIP1 ENSG00000171951|SCG2 ENSG00000185306|C12orf56 ENSG00000197008|ZNF138 ENSG00000198015|MRPL42 ENSG00000204007|GLT6D1  
AATGTTC ENSG00000004866|ST7 ENSG00000077157|PPP1R12B ENSG00000101470|TNMC2 ENSG00000103196|CRISPLD2 ENSG00000105705|SF4 ENSG00000106636|YKT6 ENSG00000112159|MDN1 ENSG00000115306|SPTBN1  
ENSG00000116698|SMG7 ENSG00000131788|PIAS3 ENSG00000136925|C9orf97 ENSG00000137094|DNAJB5 ENSG00000137309|HMGAL1 ENSG00000141639|MAPK4 ENSG00000144730|ILL17RD ENSG00000148396|KIAA0310  
ENSG00000157017|GHR1 ENSG00000158014|SLC30A2 ENSG00000165233|C9orf89 ENSG00000169189|NSMCE1 ENSG00000169885|CALML6 ENSG00000182040|USH1 ENSG00000184330|S100A7A ENSG00000185198|PRSS1  
ENSG00000206567|NP\_001008737.1 ENSG0000005483|MLL5 ENSG00000058804|TMEM48 ENSG00000080007|DDX43 ENSG00000083896|YTHDC1 ENSG00000091157|WDR7 ENSG00000104517|EDD1 ENSG00000109255|NMMU  
ENSG00000111711|GOLT1B ENSG00000116675|DNAJC6 ENSG00000117601|SERPINC1 ENSG00000119514|GALNT12 ENSG00000132664|POLR3F ENSG00000134001|EIF2S1 ENSG00000136161|RCBTB2 ENSG00000145087|STXB5L  
ENSG00000148935|GAS2 ENSG00000151414|NEK7 ENSG00000155906|RNDM1 ENSG00000156076|WIF1 ENSG00000163643|KRTCAP2 ENSG00000170345|F5H ENSG00000177485|ZBTB33 ENSG00000180116|C12orf40  
ENSG00000183648|NDUFB1 ENSG00000185686|PRAME ENSG00000196290|NIF3L1 ENSG00000197223|NP\_006324.1  
AATGTTC ENSG00000104499|GML ENSG00000116857|TMEM9 ENSG00000119946|CNM1 ENSG00000122642|FKBP9 ENSG00000126432|PRDX5 ENSG00000128228|SDF2L1 ENSG00000133026|MYH10 ENSG00000139832|RAB20  
ENSG00000147059|SPIN2A ENSG00000148200|NR6A1 ENSG00000152192|POU4F1 ENSG00000154227|LASS3 ENSG00000155980|KIF5A ENSG00000158445|KCNB1 ENSG00000158517|NCF1 ENSG00000159231|CBR3  
ENSG00000164651|SP8 ENSG00000165178|LOC648998 ENSG00000170498|KISS1 ENSG00000170983|C8orf14 ENSG00000177455|CD19 ENSG00000181918|Q8N9J9\_HUMAN ENSG00000182487|NCF1C ENSG00000184507|NP\_786883.1  
ENSG00000185112|FAM43A ENSG00000186174|BCL9L ENSG00000204285|Q6ZP11\_HUMAN ENSG00000205352|Q9NZ81-2 ENSG00000205726|ITSN1 ENSG0000000469|CROT ENSG00000047346|KIAA1370 ENSG00000062370|ZNF228  
ENSG00000068366|ACSL4 ENSG00000080986|NDC80 ENSG00000083750|RRAGB ENSG00000107290|SETX ENSG00000110422|HIPK3 ENSG00000111817|DSE ENSG00000112237|CCNC ENSG00000115993|TRAK2  
ENSG00000128513|POT1 ENSG00000129173|E2F8 ENSG00000134255|CEPT1 ENSG00000137573|SULF1 ENSG00000143164|IQWD1 ENSG00000156253|C21orf6 ENSG00000163359|COL6A3 ENSG00000167380|ZNF226  
ENSG00000168564|CDKN2AIP ENSG00000173409|ARV1 ENSG00000177879|AP3S1 ENSG00000178457|C12orf94 ENSG00000182628|FAM33A ENSG00000196350|NCF1 ENSG00000198646|NCOA6 ENSG00000198961|PJA2  
AATGTTT ENSG00000005100|DHX33 ENSG00000037637|FBXO42 ENSG00000062485|CS ENSG00000067082|KLF6 ENSG00000088812|ATRN ENSG00000089154|GCN1L1 ENSG00000100422|CERK ENSG00000104228|TRIM35  
ENSG00000105011|ASF1B ENSG00000105428|ZNRF4 ENSG00000106333|PCOLCE ENSG00000110395|CBL ENSG00000120075|HOXB5 ENSG00000122952|ZWINT ENSG00000129680|MAP7D3 ENSG00000130340|SNX9  
ENSG00000131943|C19orf12 ENSG00000139574|NPF7 ENSG00000144321|HDGF ENSG00000150477|KIAA1328 ENSG00000151360|ALLC ENSG00000158163|DZIP1L ENSG00000160789|LMNA ENSG00000161896|IHPK3  
ENSG00000162804|SNED1 ENSG00000165507|C10orf10 ENSG00000166831|RBFMS2 ENSG00000167202|TBC1D2B ENSG00000168395|ING5 ENSG00000169118|CSNK1G1 ENSG00000172432|GTBPB2 ENSG00000173093|CCDC63  
ENSG00000178199|Q6ZRW2\_HUMAN ENSG00000178409|KIAA1553 ENSG00000184014|RAB6IP1 ENSG00000185722|ANKFY1 ENSG00000198307|H2AFB2 ENSG00000198920|KIAA0753 ENSG000002194|GPBP1 ENSG00000066697|TMEFF1  
ENSG00000073756|PTGS2 ENSG00000077458|FAM76B ENSG00000085382|HACE1 ENSG00000089199|CHGB ENSG00000092140|KIAA1333 ENSG00000096264|NCR2 ENSG00000101349|PAK7 ENSG00000105398|SULT2A1  
ENSG00000109118|PHF12 ENSG00000109189|USP46 ENSG00000111145|ELK3 ENSG00000115084|SLC35F5 ENSG00000118496|FBXO30 ENSG00000127329|PTPRB ENSG00000133636|NTS ENSG00000134539|KLRD1  
ENSG00000137449|CEPB2 ENSG00000137968|SLC44A5 ENSG00000138468|SENP7 ENSG00000139746|RBM26 ENSG00000144935|TRPC1 ENSG00000145284|SCD5 ENSG00000150526|MIA2 ENSG00000151065|DCP1B  
ENSG00000151240|DTP2C ENSG00000158234|FAIM ENSG00000158636|C10orf30 ENSG00000160218|TMEM1 ENSG00000162701|ZNF281 ENSG00000163629|PTPN13 ENSG00000165097|AOF1 ENSG00000165379|LRFN5  
ENSG00000165490|NP\_659455.2 ENSG00000168303|C7orf11 ENSG00000169126|ARMC4 ENSG00000170293|CMT8 ENSG00000171492|LRRC8D ENSG00000171766|GATM ENSG00000176083|ZNF683 ENSG00000182944|EWSR1  
ENSG00000185869|NP\_001032309.2 ENSG00000198919|DZIP3\_HUMAN  
AATTTAA ENSG000000019102|VSIIG2 ENSG00000069696|DRD4 ENSG00000071127|WDR1 ENSG00000075886|TUBA3D ENSG00000087460|GNAS ENSG00000089737|DDX24 ENSG00000100234|TIMP3 ENSG00000101082|SLA2  
ENSG00000103742|NP\_066013.1 ENSG00000111254|AKAP3 ENSG00000135404|CD63 ENSG00000147123|NDUFB1 ENSG00000152086|TUBA3E ENSG00000156973|PDE6B ENSG00000157954|WIP1 ENSG00000166741|NNMT  
ENSG00000167094|TTC16 ENSG00000167461|RAB8A ENSG00000169083|AR ENSG00000170545|NM\_001031628.1 ENSG00000171711|DEFB4 ENSG00000175772|Q8N952\_HUMAN ENSG00000177257|BD02\_HUMAN ENSG00000178796|Q8N9Z1\_HUMAN  
ENSG00000178803|Q8NAW6\_HUMAN ENSG00000180735|Q6PJW0\_HUMAN ENSG00000182366|FA87B\_HUMAN ENSG00000183686|MAGEA5 ENSG00000186790|FOXE3 ENSG00000198033|TUBA3C ENSG00000198768|APCDD1L ENSG00000204359|CFB  
ENSG00000205039|Q6ZQS5\_HUMAN ENSG00000024862|CCDC28A ENSG00000051415|AMY1A ENSG00000053747|LAMA3 ENSG00000073417|PDE8A ENSG00000075413|MARK3 ENSG00000086991|NOX4 ENSG00000089009|RPL6  
ENSG00000097096|SYDE2 ENSG00000100852|ARHGAP5 ENSG00000103381|NP\_060810.1 ENSG00000104537|ANXA13 ENSG00000106511|MEOX2 ENSG00000112339|HBS1L ENSG00000112874|NUDT12 ENSG00000114200|BCHE  
ENSG00000116906|GNPAT ENSG00000117009|KMO ENSG00000118402|ELOVL4 ENSG00000121486|C1orf25 ENSG00000122068|FYT1D1 ENSG00000123268|ATF1 ENSG00000126860|EVI2A ENSG00000129518|EAPP  
ENSG00000132963|POMP ENSG00000137364|TPMT ENSG00000139160|NP\_776163.1 ENSG00000144057|STGAL2 ENSG00000145736|GTF2H2 ENSG00000156136|DCK ENSG00000161547|SFRS2 ENSG00000164167|LSM6  
ENSG00000164983|TMEM65 ENSG00000168916|ZNF608 ENSG00000169379|ARL13B ENSG00000169756|LIMS1 ENSG00000170180|GYPA ENSG00000170293|CMT8 ENSG00000173041|ZNF680 ENSG00000173890|GPR160  
ENSG00000174876|AMY1B ENSG00000175513|TSGA10IP ENSG00000180113|TDRD6 ENSG00000182898|TCHHL1 ENSG00000184530|C6orf58 ENSG00000185304|NP\_001071638.1 ENSG00000187627|RGPD1 ENSG00000187919|GSTA1  
ENSG00000188732|C7orf46 ENSG00000196318|AMY2A ENSG00000197111|PCBP2 ENSG00000197839|AMY2B ENSG00000197991|PCDH20 ENSG00000204272|Q63Z42\_HUMAN  
AATTTAA ENSG00000008086|CDKL5 ENSG00000068831|RASGRP2 ENSG00000081277|PKP1 ENSG00000100867|DHR2 ENSG00000105443|PCSD2 ENSG00000106268|NUDT1 ENSG000001129450|SIGLEC9  
ENSG00000132846|ZBED3 ENSG00000133460|SLC2A11 ENSG00000137124|ALDH1B1 ENSG00000160296|SIGLEC12 ENSG00000160803|UBQLN4 ENSG00000160916|ATP5F2 ENSG00000161132|Q9BYA7\_HUMAN ENSG00000183605|SFXN4  
ENSG00000186470|BTN3A2 ENSG00000187492|NP\_001007541.1 ENSG0000000196821|C6orf106 ENSG0000000197261|C6orf141 ENSG000000010818|HIVEP2 ENSG000000080371|RAB21 ENSG00000082213|C5orf22 ENSG00000083168|MYST3  
ENSG00000090530|LEPREL1 ENSG00000101856|PGRMC1 ENSG00000106540|C7orf36 ENSG00000116199|FAM20B ENSG00000117528|ABCD3 ENSG00000134278|SPIRE1 ENSG00000134899|ERCC5 ENSG00000143653|SCCPDH  
ENSG00000143742|SRP9 ENSG00000157625|MAP3K7IP3 ENSG00000164794|KCNV1 ENSG00000171147|NP\_001001317.1 ENSG00000180938|ZNF572 ENSG00000182977|Q9P1I1\_HUMAN ENSG00000182992|Q8T2M0\_HUMAN ENSG00000186879|NM\_178121  
ENSG00000196350|ZNF492 ENSG00000198339|HIST1H41  
AATTTAA ENSG000000010310|GIPR ENSG000000018625|ATP1A2 ENSG00000057704|TMCC3 ENSG00000062485|CS ENSG00000100034|PPM1F ENSG00000108786|HSD17B1 ENSG00000111252|SH2B3 ENSG00000119682|KIAA0317  
ENSG00000130294|KIF1A ENSG00000133937|GSC ENSG00000135365|PHF21A ENSG00000157064|NMNAT2 ENSG00000158497|HMH1 ENSG00000162723|SLAMPF9 ENSG00000163331|NP\_001071920.1 ENSG00000165606|NP\_001073989.1  
ENSG00000166900|STX3 ENSG00000168610|STAT3 ENSG00000169598|DFPB ENSG00000175063|UBE2C ENSG00000185065|NP\_776154.2 ENSG00000188589|RBM33 ENSG00000189068|VSTM1 ENSG00000197182|NM\_207477  
ENSG00000197448|GSTK1 ENSG00000204414|CSHL1 ENSG00000206026|NP\_001032408.1 ENSG00000007001|UPP2 ENSG00000053254|CHES1 ENSG00000064787|BCAS1 ENSG00000077943|ITGA8 ENSG00000101624|CEP76  
ENSG00000112146|FBXO9 ENSG00000112414|GPR126 ENSG00000115464|USP34 ENSG00000116791|CRYZ ENSG00000117151|CTBS ENSG00000119392|GLE1L ENSG00000140988|RPS2 ENSG00000142192|APP  
ENSG00000149534|MS4A2 ENSG00000151806|GUF1 ENSG00000152684|PELO ENSG00000154265|ABCA5 ENSG00000156234|CXCL13 ENSG00000157343|C6orf81 ENSG00000159086|C21orf66 ENSG00000163001|CCDC104  
ENSG00000164604|GPR85 ENSG00000165899|C12orf64 ENSG00000166321|NUDT13 ENSG00000168538|NP\_068761.4 ENSG00000175483|Q94914\_HUMAN ENSG00000177888|ZBTB41 ENSG00000187866|FAM122A ENSG00000196865|NHLRC2  
ENSG00000197149|XR\_019565.1 ENSG00000197580|BCDO2 ENSG00000197822|OCLN  
AATTTAA ENSG00000007402|CACNA2D2 ENSG00000062822|POLD1 ENSG00000066382|MPPE2D ENSG00000092529|CAPN3 ENSG00000101670|LIPG ENSG00000103269|RHBDL1 ENSG00000104852|SNRP70 ENSG00000110987|BCL7A  
ENSG00000116198|KIAA0562 ENSG00000123154|MORG1\_HUMAN ENSG00000124164|VAPB ENSG00000130985|UBE1 ENSG00000132383|RPA1 ENSG00000136950|ARPC5L ENSG00000140557|ST8SIA2 ENSG00000142405|NLRP12  
ENSG00000151948|GLT1D1 ENSG00000153298|C6orf54 ENSG00000162543|UBXD3 ENSG00000162735|PEX19 ENSG00000163914|RHO ENSG00000170983|C8orf14 ENSG00000174939|ASPHD1 ENSG00000175003|SLC22A1  
ENSG00000178235|SLIT1R1 ENSG00000179091|CYC1 ENSG00000180259|PRNT ENSG00000188706|ZDHC9 ENSG00000004948|CALCR ENSG00000023516|AKAP11 ENSG00000039139|DNAH5 ENSG00000042980|ADAM28  
ENSG00000066651|TRMT11 ENSG00000104343|UBE2W ENSG00000112245|CCNC ENSG00000112697|TMEM30A ENSG00000112697|TMEM30A ENSG00000120159|C9orf82 ENSG00000120533|ENY2 ENSG00000120662|MTFR1  
ENSG00000128059|PPAT ENSG00000137996|RTCD1 ENSG00000143631|FLG ENSG00000150625|GPM6A ENSG00000152818|UTRN ENSG00000154153|NP\_001030022.1 ENSG00000156136|DCK ENSG00000163964|PIGX  
ENSG00000165185|KIAA1958 ENSG00000166889|NP\_689929.1 ENSG00000167914|GSDM1 ENSG00000168772|CXXC4 ENSG00000169826|CGAT2\_HUMAN ENSG00000171310|CHST11 ENSG00000173046|NM\_207376 ENSG00000173889|PHC3  
ENSG00000174738|NR1D2 ENSG00000174928|C3orf33 ENSG00000174953|DHX36 ENSG00000180458|Q8N3U1\_HUMAN ENSG00000180481|GLIPR1L2 ENSG00000182552|RWDD4A ENSG00000183385|TTY8\_HUMAN ENSG00000185700|TTY8\_HUMAN  
ENSG00000186086|NBPF4 ENSG00000186452|TMPRSS12 ENSG00000197008|ZNF138 ENSG00000198669|XKR9 ENSG00000198924|DCLRE1A ENSG00000205156|Q6UXQ8\_HUMAN  
AATTTAA ENSG00000006740|RICH2\_HUMAN ENSG00000068078|FGFR3 ENSG00000072832|CRMP1 ENSG00000078967|UBE2D4 ENSG00000088881|COE4\_HUMAN ENSG00000090447|TFAP4 ENSG00000092529|CAPN3 ENSG00000092820|VIL2  
ENSG00000113732|ATP6V0E1 ENSG00000116148|CCNL2 ENSG00000125968|ID1 ENSG00000128389|NM\_032262 ENSG00000130766|SESN2 ENSG00000132361|KIAA0664 ENSG00000133424|LARGE ENSG00000137313|TRIM26  
ENSG00000140323|DUSP2 ENSG00000143418|LASS2 ENSG00000161558|TMEM143 ENSG00000162302|RPS6KA4 ENSG00000163156|SCNM1 ENSG00000163884|KLF15 ENSG00000164108|Q9HAJ2\_HUMAN ENSG00000167881|SRP68  
ENSG00000196204|QSNUR6\_HUMAN ENSG00000196652|ZKSCAN5 ENSG00000198853|RUSC2 ENSG00000206028|Q6ZVA3\_HUMAN ENSG00000030419|IKZF2 ENSG00000055044|NOP5\_HUMAN ENSG00000078589|P2RY10 ENSG00000101977|MCF2  
ENSG00000106648|GALNTL5 ENSG00000107938|C10orf137 ENSG00000120647|CCDC77 ENSG00000130045|C9orf121 ENSG00000152942|RAD17 ENSG00000154518|ATP5G3 ENSG00000155833|CYLC2 ENSG00000164035|EMCN  
ENSG00000166153|DEPDC4 ENSG00000167528|ZNF6

AATTAGC ENSG00000115234|SNX17 ENSG00000115350|POLE4 ENSG00000121281|ADCY7 ENSG00000127124|HIVEP3 ENSG00000158864|NDUFS2 ENSG00000162377|C1orf163 ENSG00000162511|LAPTM5 ENSG00000168016|Q8N8K0\_HUMAN ENSG00000168995|STGLEC7 ENSG00000169213|RAB3B ENSG00000169469|SPRR1B ENSG00000173826|KCNH6 ENSG00000188257|PLA2G2A ENSG00000205742|Q6ZTR4\_HUMAN ENSG00000006652|IFRD1 ENSG000000040933|INPP4A ENSG00000046604|DSG2 ENSG00000064989|CALCRL ENSG000000089127|OAS1 ENSG00000100522|GNPNAT1 ENSG00000113638|TTC33 ENSG00000115145|STAM2 ENSG00000118507|AKAP7 ENSG00000123594|ATXN3L ENSG00000123595|RAB9A ENSG00000124098|C2orf108 ENSG00000131808|FSHB ENSG00000136267|DGKB ENSG00000137478|FCHSD2 ENSG00000163785|RYK ENSG00000164040|PGRMC2 ENSG00000170289|CNGB3 ENSG00000173273|TNKS ENSG00000178074|NP\_710156.2 ENSG00000180667|YOD1 ENSG00000183844|FAM3B ENSG00000189007|DEADC1 ENSG00000196233|LCOR ENSG00000197110|IL28B ENSG00000204201|Q49A40\_HUMAN

AATTATA ENSG00000008256|PSCD3 ENSG00000048342|Q9H8A7\_HUMAN ENSG000000087269|NOL14 ENSG00000107618|RBP3 ENSG00000108702|CCL1 ENSG00000114737|CISH ENSG00000114999|TTL ENSG00000115107|STEAP3 ENSG00000118526|TCF21 ENSG00000127080|IPPK ENSG00000128242|BAL3ST1 ENSG00000129194|SOX15 ENSG00000138175|ARL3 ENSG00000147394|ZNF185 ENSG00000158864|NDUFS2 ENSG00000160994|CCDC105 ENSG00000162444|RBP7 ENSG00000169436|COL22A1 ENSG00000169627|GOLA2B ENSG00000174989|FBXW8 ENSG00000175077|RTP1 ENSG00000179270|NP\_001025054.1 ENSG00000180875|GREM2 ENSG00000181938|GINS3 ENSG00000182968|SOX1 ENSG00000185219|ZNF445 ENSG00000186854|Q86V40\_HUMAN ENSG00000197386|HD ENSG00000198400|NTRK1 ENSG00000204335|SP5 ENSG000000054796|SPO11 ENSG000000055917|PUM2 ENSG00000064102|C12orf11 ENSG00000065615|CYB5R4 ENSG00000067533|RRP15 ENSG00000069966|GNB5 ENSG00000077616|NAALAD2 ENSG00000083937|CHMP2B ENSG00000085491|SLC25A2 ENSG00000095739|BAMBI ENSG00000101938|CHRD1L ENSG00000102554|KLF5 ENSG00000106034|NP\_079189.3 ENSG00000112246|SIM1 ENSG00000112984|KIF20A ENSG00000112996|MRPS30 ENSG00000114331|CENTB2 ENSG00000115425|PECR ENSG00000118193|KIF14 ENSG00000126790|C14orf149 ENSG00000126804|ZBTB1 ENSG00000127989|MTFRF ENSG00000129566|TEP1 ENSG00000131174|COX7B ENSG00000133636|NTS ENSG00000134697|GNL2 ENSG00000137955|RABGGTB ENSG00000138315|OIT3 ENSG00000150627|WDR17 ENSG00000151304|SRFBP1 ENSG00000152484|USP12 ENSG00000152527|PLEKHH2 ENSG00000153896|ZNF599 ENSG00000157214|STEAP2 ENSG00000164430|C6orf150 ENSG00000165471|MBL2 ENSG00000165476|REEP3 ENSG00000171502|COL24A1 ENSG00000172167|MTBP ENSG00000178053|MLF1 ENSG00000184434|LRRC19 ENSG00000185010|F8 ENSG00000186105|Q7Z2Q7\_HUMAN ENSG00000187676|B3GALT1 ENSG00000188153|COL4A5 ENSG00000196477|Q9UHU4\_HUMAN ENSG00000196705|ZNF431 ENSG00000198088|NUP62CL ENSG00000206559|ZCWPW2 ENSG00000018280|SLC11A1 ENSG00000055118|KCNH2 ENSG00000077454|LRCH4 ENSG00000101096|NFATC2 ENSG00000105409|ATP1A3 ENSG00000108417|KRT37 ENSG00000108442|FAM18B2 ENSG00000112053|SLC26A8 ENSG00000020093|HOCXB3 ENSG00000132681|ATP1A4 ENSG00000133985|TTC9 ENSG00000153298|C6orf54 ENSG00000155366|RHOC ENSG00000162398|C1orf177 ENSG00000163820|FYCO1 ENSG00000164012|WDR65 ENSG00000164051|CXDC51 ENSG00000164399|IL3 ENSG00000170233|Q96AM0\_HUMAN ENSG00000171747|LGALS4 ENSG00000183838|Q96NM2\_HUMAN ENSG00000197769|MAP1LC3C ENSG00000034713|GABARAPL2 ENSG00000042980|ADAM28 ENSG00000096264|NCR2 ENSG00000101166|SLMO2 ENSG00000103707|MTFMT ENSG00000104313|EYAL1 ENSG00000104325|DECR1 ENSG00000104723|TUSC3 ENSG00000106066|CPVL ENSG00000106299|WASL ENSG00000109171|SLAIN2 ENSG00000122787|AKR1D1 ENSG00000123119|EFCBP1 ENSG00000126550|HTN1 ENSG00000137147|P11388-2 ENSG00000137434|C6orf52 ENSG00000137558|PI15 ENSG00000140525|KIAA1794 ENSG00000145817|YIPF5 ENSG00000147687|TATDN1 ENSG00000151131|C2orf45 ENSG00000157502|MUM1L1 ENSG00000162607|USP1 ENSG00000165621|OXGR1 ENSG00000172164|SNTB1 ENSG00000172403|SYNPO2 ENSG00000197672|NP\_997331.1 ENSG00000205649|HTN3

AATTATG ENSG00000003147|ICA1 ENSG000000073849|ST6GAL1 ENSG000000086062|B4GALT1 ENSG000000087088|BAX ENSG00000095015|MAP3K1 ENSG00000100266|PACSIN2 ENSG00000100285|NEFH ENSG00000103353|UBFD1 ENSG00000107796|ACTA2 ENSG00000108106|UBE2S ENSG00000116014|KITSS1R ENSG00000125266|EFNB2 ENSG00000131697|NPHP4 ENSG00000132388|RPA1 ENSG00000132958|TPTE2 ENSG00000136193|SCRN1 ENSG00000136827|TOR1A ENSG00000157064|NMNAT2 ENSG00000157349|DDB19B ENSG00000160219|GAB3 ENSG00000164674|SYTL3 ENSG00000165606|NP\_001073989.1 ENSG00000166261|ZNF202 ENSG00000168314|MOBP ENSG00000168872|DDX19A ENSG00000188042|ARL4C ENSG00000190831|ESR1 ENSG00000105865|DUS4L ENSG00000110079|MS4A4A ENSG00000112893|MAN2A1 ENSG00000116783|FPGT ENSG00000122557|HERPUD2 ENSG00000131023|LATS1 ENSG00000136144|RCBTB1 ENSG00000145734|BDP1 ENSG00000151834|GABRA2 ENSG00000155393|HEATR3 ENSG00000156049|GNA14 ENSG00000156110|ADK ENSG00000157005|SST ENSG00000157212|PAX1P1 ENSG00000162378|ZYGI1B ENSG00000164902|RNUXA ENSG00000165392|WRN ENSG00000166575|TMEM135 ENSG00000174373|GARNL1 ENSG00000178346|C6orf61 ENSG00000186458|DB132\_HUMAN ENSG00000187772|LIN28B ENSG00000197579|TOPORS ENSG00000197989|DNM3 ENSG00000197989|C1orf79 ENSG00000198924|DCLRE1A ENSG00000206850|ATP11A ENSG00000075388|PGF4 ENSG00000100122|CRYBB1 ENSG00000106789|CORO2A ENSG00000111412|C12orf49 ENSG00000124762|CDKN1A ENSG00000126856|Q9NQW5-2 ENSG00000128918|ALDH1A2 ENSG00000132749|MTL5 ENSG00000143816|WNT9A ENSG00000144063|QALLT ENSG00000148826|NKX6-2 ENSG00000154928|P54762-3 ENSG00000155849|ELMO1 ENSG00000163993|S100P ENSG00000165714|LOH12CR1 ENSG00000167858|TEKT1 ENSG00000173349|SFT2D3 ENSG00000175170|MTT319\_HUMAN ENSG00000176753|NP\_001034994.1 ENSG00000180210|F2 ENSG00000182950|ODF3L1 ENSG00000196132|MYT1\_HUMAN ENSG00000196526|AFAP1 ENSG00000011246|ANLN ENSG00000057252|SOAT1 ENSG00000067018|COL11A1 ENSG00000067798|NAV3 ENSG00000104689|TNFRSF10A ENSG00000105967|TFEC ENSG00000106460|TMEM106B ENSG00000112144|ICK ENSG00000113327|GABRG2 ENSG00000117479|SLC19A2 ENSG00000121552|CSTA ENSG00000129128|SPC3 ENSG00000136696|ILLF8 ENSG00000138036|DYNC2L1 ENSG00000140374|ETFA ENSG00000143185|XCL2 ENSG00000144566|RAB5A ENSG00000151881|C5orf28 ENSG00000151883|PARP8 ENSG00000160868|CYP3A4 ENSG00000162695|SLC30A7 ENSG00000163510|NP\_065994.1 ENSG00000163964|PIGX ENSG00000166839|ANKDD1A ENSG00000167004|PDIA3 ENSG00000170356|NR\_002157.1 ENSG00000171714|TMEM16E ENSG00000173542|MOBK1A ENSG00000177182|NP\_775790.1 ENSG00000184898|RBM43 ENSG00000185056|Q569G3\_HUMAN ENSG00000185523|NP\_001019772.1 ENSG00000185737|NRG3 ENSG00000189127|NP\_001004441.1

AATTCTA ENSG00000006125|AP2B1 ENSG000000011177|INMT ENSG00000048707|VPS13D ENSG00000101849|TBL1X ENSG00000120451|SNX19 ENSG00000125746|EML2 ENSG00000131149|KIAA0182 ENSG00000137106|GRHRP ENSG00000142186|SCYL1 ENSG00000143418|LASS2 ENSG00000156030|C14orf43 ENSG00000158764|ITLN2 ENSG00000166965|RCCD1 ENSG00000174370|C11orf45 ENSG00000175155|YPEL2 ENSG00000183128|FAM26A ENSG00000185811|IKZF1 ENSG00000186051|TAL2 ENSG00000187239|FNBP1 ENSG00000188242|Q71RB1\_HUMAN ENSG00000188901|NP\_055226.1 ENSG00000198518|HST1H4E ENSG0000017427|IGF1 ENSG00000047188|YTHDC2 ENSG00000092377|TBL1Y ENSG00000115361|ACADL ENSG00000118473|SG1P1 ENSG00000121858|TNFSF10 ENSG00000122417|ODF2L ENSG00000127993|NP\_115496.2 ENSG00000130224|LRCH2 ENSG00000131068|DEFB118 ENSG00000132872|SYT4 ENSG00000134597|RBMX2 ENSG00000137501|SYTL2 ENSG00000138035|PNP1 ENSG00000144048|DUSP11 ENSG00000152592|DMP1 ENSG00000157107|FCHO2 ENSG00000162654|GBP4 ENSG00000163828|TDGF3 ENSG00000164049|FBXW12 ENSG00000164118|KIAA1712 ENSG00000166363|OR10A5 ENSG00000168283|BMI1 ENSG00000168310|IRF2 ENSG00000171055|FEZ2 ENSG00000172239|PAIP1 ENSG00000184005|ST6GALNAC3 ENSG00000198755|RPL10A ENSG00000204466|DGKK

AATTGAT ENSG000000089250|NOS1 ENSG00000092853|CLSPN ENSG00000116685|KIAA2013 ENSG00000121775|TMEM39B ENSG00000124208|UBE2V1 ENSG00000131368|MRPS25 ENSG00000139112|GABARAPL1 ENSG00000146192|FGD2 ENSG00000146374|RSPO3 ENSG00000147155|EBP ENSG00000147256|RHGX\_HUMAN ENSG00000148411|BTBD14A ENSG00000149262|INTS4 ENSG00000152082|FAM128B ENSG00000156299|TIAM1 ENSG00000166833|NAV2 ENSG00000176383|B3GN74 ENSG00000184451|CCR10 ENSG00000204269|Q6ZVM2\_HUMAN ENSG00000204482|LST1 ENSG00000204487|LTB ENSG00000204626|Q6ZSR2\_HUMAN ENSG00000006625|C7orf24 ENSG00000008988|RPS20 ENSG00000042980|ADAM28 ENSG00000070756|PABPC1 ENSG00000088451|TGDS ENSG00000105856|HBP1 ENSG00000106603|C7orf44 ENSG00000107560|RAB11FIP2 ENSG00000116350|SFRS4 ENSG00000116791|CRYZ ENSG00000128739|SNRPN ENSG00000132541|HRSP12 ENSG00000132963|POMP ENSG00000137871|SUHW4 ENSG00000138346|DNA2L ENSG00000139116|KTF21A ENSG00000143452|HORMAD1 ENSG00000148943|LIN7C ENSG00000151846|PABPC3 ENSG00000163738|MTHFD2L ENSG00000165309|ARMC3 ENSG00000169519|METT5D1 ENSG00000170185|USP38 ENSG00000182898|TCHL1 ENSG00000185267|ARMTL1 ENSG00000188107|EGFL11 ENSG00000198081|ZFP161 ENSG00000198843|SELT\_HUMAN

AATTGCA ENSG000000056487|PHF21B ENSG00000072954|TMEM38A ENSG00000110801|PSMD9 ENSG00000116983|HPCAL4 ENSG00000130332|LSM7 ENSG00000134247|PTGFRN ENSG00000135637|NP\_116168.2 ENSG00000138085|C2orf28 ENSG00000143772|ITPKB ENSG00000151779|NP\_056993.2 ENSG00000153468|TCP10\_HUMAN ENSG00000159455|LCE2B ENSG00000166398|KIAA0355 ENSG00000167505|Q96NK6\_HUMAN ENSG00000170322|NFRKB ENSG00000187180|LCE2C ENSG00000196085|C19orf42 ENSG00000198614|C4orf12 ENSG00000203690|TCP10 ENSG00000203744|ALL170\_HUMAN ENSG00000203908|NP\_001017361.1 ENSG00000205268|PDE7A ENSG00000085719|CPNE3 ENSG00000091664|SLC17A6 ENSG00000104361|NAL2 ENSG00000105865|DUS4L ENSG00000116001|TIAL1 ENSG00000116717|GADD45A ENSG00000122376|XR\_015353.1 ENSG00000123200|ZC3H13 ENSG00000125257|ABCC4 ENSG00000141642|ELAC1 ENSG00000146151|HMGCLL1 ENSG00000153187|HNRPU ENSG00000154380|ENAH ENSG00000154813|DPH3 ENSG00000165874|FAM35A ENSG00000166509|CLEC3A ENSG00000171431|KRT20 ENSG00000179222|MAGED1 ENSG00000180458|Q8N3U1\_HUMAN ENSG00000185760|KCNQ5 ENSG00000188463|XR\_015229.1 ENSG00000198482|ZNF808

AATTGCG ENSG000000066114|AP1GBP1 ENSG00000105085|CRSP7 ENSG00000120332|TNN ENSG00000123360|PDE1B ENSG00000126856|Q9NQW5-2 ENSG00000136026|CKAP4 ENSG00000139515|PDX1 ENSG00000143093|FAM40A ENSG00000152315|KCNK13 ENSG00000163083|INHBE ENSG00000166974|MAPRE2 ENSG00000167798|NP\_001013662.1 ENSG00000173914|RBM4B ENSG00000174400|Q8TB00\_HUMAN ENSG00000176014|TUBB6 ENSG00000177105|RHOG ENSG00000196242|OR2C3 ENSG00000198925|ATG9A ENSG00000205673|Q6ZRX0\_HUMAN ENSG00000205761|Q6ZRI7\_HUMAN ENSG0000010270|STARD3NL ENSG0000019186|CYP24A1 ENSG0000023572|GLRX2 ENSG00000087995|METTL2A ENSG00000102683|SCGC ENSG00000111046|MYF1P ENSG000001114541|FRMD4B ENSG00000119878|CRIPT ENSG00000124490|CRISP2 ENSG00000136099|PCDH8 ENSG00000138669|PRKG2 ENSG00000140391|TSPAN3 ENSG00000143226|FCGR2A ENSG00000145416|MARCH1 ENSG00000147145|GPR23 ENSG00000163386|KIAA1245 ENSG00000163950|SLBP ENSG00000164073|MFSD8 ENSG00000165055|METTL2B ENSG00000167220|HDHD2 ENSG00000168152|THAP9 ENSG00000173141|MRP63 ENSG00000179520|SLC17A8 ENSG00000180882|XR\_017823.1 ENSG00000184899|Q9P181\_HUMAN ENSG00000185414|MRPL30 ENSG00000197487|GALP\_HUMAN ENSG00000198176|TFDP1 ENSG00000198874|TYW1

AATTGCT ENSG00000007237|GAS7 ENSG00000108671|PSMD11 ENSG00000113070|HBEFG ENSG00000120451|SNX19 ENSG00000120875|DUSP4 ENSG00000127526|SLC35E1 ENSG00000128311|TST ENSG00000128594|LRRC4 ENSG00000144711|IQSEC1 ENSG00000147394|ZNF185 ENSG00000151692|HNF144 ENSG00000158497|MHMB1 ENSG00000158710|TAGLN2 ENSG00000160791|CCR5 ENSG00000162666|KIAA0040 ENSG00000165731|RET ENSG00000170925|TEX13B ENSG00000171855|IFNB1 ENSG00000173826|KCNH6 ENSG00000181666|HKR1 ENSG00000182459|NP\_997342.1 ENSG00000184454|C1orf30 ENSG00000198216|CACNA1E ENSG00000206539|Q6ZTN9\_HUMAN ENSG00000051108|HERPUD1 ENSG00000067048|DDX3X ENSG00000101868|POLA1 ENSG00000101868|POLA1 ENSG00000111906|HDCC2 ENSG00000112078|KCTD20 ENSG00000112530|PACRG ENSG00000125484|GTF3C4 ENSG00000133226|SRRM1 ENSG00000138115|CYP2C8 ENSG00000139977|NAT12 ENSG00000143224|PPOX ENSG00000145293|ENPH1 ENSG00000146373|IBRD1 ENSG00000152601|MBNL1 ENSG00000153317|DDEF1 ENSG00000158691|ZSCAN12 ENSG00000162702|ZNF281 ENSG00000163131|CTSS ENSG00000164221|CCDC112 ENSG00000164506|STXBP5 ENSG00000165023|DIRAS2 ENSG00000165891|E2F7 ENSG00000172086|KRCC1 ENSG00000177938|CAPZA3 ENSG00000178460|C8orf45 ENSG00000188243|COMMD6

AATTGGG ENSG00000107954|NEURL ENSG00000111087|GLI1 ENSG00000126464|PRR12 ENSG00000134668|SPOCD1 ENSG00000136930|PSMB7 ENSG00000144648|CCBP2 ENSG00000163348|PYGO2 ENSG00000163481|RNF25 ENSG00000166900|STX3 ENSG00000175197|DDIT3 ENSG00000178226|PRSS36 ENSG00000182872|RBM10 ENSG00000186815|TPCN1 ENSG00000198216|CACNA1E ENSG00000198471|RTP2 ENSG00000205138|NP\_001036096.1 ENSG00000055813|CDC85A ENSG00000080822|CLDN1D1 ENSG00000104205|SGK3 ENSG00000117335|CD46 ENSG00000120256|LRP11 ENSG00000134294|SLC38A2 ENSG00000139291|TMEM19 ENSG00000147364|FBXO25 ENSG00000173302|GPR148 ENSG00000181751|C5orf30 ENSG00000184280|ZNF285B ENSG00000185448|FAM47A ENSG00000188996|HUS1 ENSG00000189132|FAM47B ENSG00000189241|TSPYL1 ENSG00000196459|SEDLP ENSG00000198173|FAM47C

AATTGGT ENSG000000012779|ALOX5 ENSG000000013455|ARPC1A ENSG00000074590|NUAK1 ENSG00000105612|DNASE2 ENSG00000130508|PXDN ENSG00000148660|CAMK2G ENSG00000150401|DCUN1D2 ENSG00000163486|SRGAP2 ENSG00000171102|OBP2B ENSG00000173567|GPR113 ENSG00000183666|LOC728411 ENSG00000185352|HS6ST3 ENSG00000185619|PCFG3 ENSG00000196084|UBIQ\_HUMAN ENSG00000197696|NMB ENSG00000198237|GUSL1\_HUMAN ENSG0000007168|PFAFH1B1 ENSG00000080405|CRY1 ENSG00000091490|NP\_056002.1 ENSG00000092978|GPATCH2 ENSG00000100528|CN1H ENSG00000107186|MPDZ ENSG00000113597|NP\_079217.1 ENSG00000121058|COIL ENSG00000123545|C6orf66 ENSG00000124486|USP9X ENSG00000129474|JUB ENSG00000138382|METTL5 ENSG00000139350|NEDD1 ENSG00000144893|MED12L ENSG00000146278|PNRC1 ENSG00000161652|C19orf41 ENSG00000166750|SLFN5 ENSG00000174607|UTG8 ENSG00000184083|FAM120C ENSG00000186687|LYRM7 ENSG00000197860|SGTB ENSG00000203943|SAMD13 ENSG00000006075|CCL3 ENSG00000008710|PKD1 ENSG00000056345|IGFBP3 ENSG00000067066|SP100 ENSG00000099968|BCL2L13 ENSG00000102076|OPN1LW ENSG00000103512|NOMO1\_HUMAN ENSG00000106236|NPTX2 ENSG00000107185|KIAA0258 ENSG00000107807|TLX1 ENSG00000113070|HBEFG ENSG00000115306|SPBN1 ENSG00000122687|FTSJ2 ENSG00000132510|JMJD3 ENSG00000137275|RIPK1 ENSG00000143376|SNX27 ENSG00000144655|AXUD1 ENSG00000147380|OPN1MW ENSG00000155252|C10orf65 ENSG00000157240|F2D1 ENSG00000159224|GIP ENSG00000165462|PHOX2A ENSG00000166160|OPN1MW2 ENSG00000167774|NDUFA7 ENSG00000167977|KCTD5 ENSG00000168610|STAT3 ENSG00000172932|ANKRD13D ENSG00000173349|SFT2D3 ENSG00000175550|DRAP1 ENSG00000180447|ZAS1 ENSG00000183596|TIM16\_HUMAN ENSG00000184787|UBE2G2 ENSG00000185164|NOMO3 ENSG00000185860|C1orf110 ENSG00000198355|PIM3 ENSG00000203879|GDI1 ENSG000000033122|LRRC7 ENSG00000039319|GFY1 ENSG00000082269|KIAA1411 ENSG00000104689|TNFRSF10A ENSG00000106278|PTPRZ1 ENSG00000109083|IFIT2 ENSG00000111300|C12orf30 ENSG00000114346|ECT2 ENSG00000115896|PLCL1 ENSG00000115946|PNO1 ENSG00000116194|ANGPTL1 ENSG00000119787|ARL6IP2 ENSG00000120327|PCDH14 ENSG00000120519|SLC10A7 ENSG00000127980|PEX1 ENSG00000128609|NDUFA5 ENSG00000134056|MRPS36 ENSG00000136169|SETDB2 ENSG00000136244|IL6 ENSG00000141655|TNFRSF11A ENSG00000145088|EAF2 ENSG00000145734|BDP1 ENSG00000151012|SLC7A11 ENSG00000151229|SLC2A13 ENSG00000152749|GPR180 ENSG00000154736|ADAMTS5 ENSG00000162654|GBP4 ENSG00000163116|NP\_777612.1 ENSG00000163322|CCDC98 ENSG00000163669|DNHD2 ENSG00000164125|C4orf18

ENSG00000164129|NPFY5R ENSG00000164440|TXLNB ENSG00000164736|SOX17 ENSG00000167098|SPAG4L ENSG00000168438|CDC40 ENSG00000173041|ZNF680 ENSG00000173930|SLC04C1 ENSG00000175893|ZDHC21 ENSG00000178425|NT5DC1 ENSG00000187508|Q7Z2R7\_HUMAN ENSG00000196705|ZNF431 ENSG00000196711|NP\_997296.1 ENSG00000197734|C14orf178 ENSG00000197888|UGT2B17 ENSG00000198780|Q9H989\_HUMAN ENSG00000205334|Q6ZVL0\_HUMAN

AATTTGC ENSG00000048342|Q9H8A7\_HUMAN ENSG00000095059|DHPS ENSG00000110092|CCND1 ENSG00000125656|CLPP ENSG00000136205|TNS3 ENSG00000136878|USP20 ENSG00000137100|DCTN3 ENSG00000137707|BTG4 ENSG00000143940|Q6ZMW3\_HUMAN ENSG00000144791|LMD1 ENSG00000145526|CDH18 ENSG00000158764|ITLN2 ENSG00000158987|RAPGEF6 ENSG00000159625|CCDC135 ENSG00000178449|C12orf62 ENSG00000182397|C15orf51 ENSG00000185082|LHB ENSG00000185085|INTS5 ENSG00000198700|IPO9 ENSG00000203782|LOR ENSG00000000003|TSPAN6 ENSG00000058056|USP13 ENSG00000069702|TGFB3 ENSG00000089775|ZBTB25 ENSG00000095637|SORBS1 ENSG00000101746|NOL4 ENSG00000102893|PHKB ENSG00000107949|BCC1P ENSG00000111530|CAND1 ENSG00000115020|PIP5K3 ENSG00000118482|PHF3 ENSG00000121440|PDZRN3 ENSG00000128845|CCPG1 ENSG00000133083|DCLK1 ENSG00000134874|DZIP1 ENSG00000135905|DOCK10 ENSG00000143184|XCL1 ENSG00000145649|GZMA ENSG00000147488|ST18 ENSG00000156482|RPL30 ENSG00000162378|ZYG11B ENSG00000162664|ZNF326 ENSG00000165028|NIPSNAP3B ENSG00000165071|TMEM71 ENSG00000167186|COQ7 ENSG00000168502|KIAA0802 ENSG00000169905|TOR1AIP2 ENSG00000173598|NUDT4 ENSG00000185774|KCNIP4 ENSG00000186480|INSG1 ENSG00000187155|CU085\_HUMAN ENSG00000205769|Q6ZUR9\_HUMAN

AATTTGT ENSG00000102077|TCF20 ENSG00000105991|HXA1 ENSG00000124782|RREB1 ENSG00000134864|Q9BVM4\_HUMAN ENSG00000136040|PLXNC1 ENSG00000136485|WDR68 ENSG00000136925|C9orf97 ENSG00000137124|ALDH1B1 ENSG00000139178|C1RL ENSG00000139644|TEGT ENSG00000144560|VGLL4 ENSG00000147059|SPIN2A ENSG00000148158|SNX30 ENSG00000162493|PDPN ENSG00000167723|TRPV3 ENSG00000169436|COL22A1 ENSG00000177885|GRB2 ENSG00000182199|SHMT2 ENSG00000185052|SLC24A3 ENSG00000185065|NP\_776154.2 ENSG00000198500|Q96C21\_HUMAN ENSG00000204120|TNRC15 ENSG00000004948|CALCR ENSG000000015153|YAF2 ENSG00000006978|YBX1 ENSG00000074935|TUBE1 ENSG00000075292|ZNF638 ENSG00000081818|PCDHB4 ENSG00000082153|BZW1 ENSG00000082293|COL19A1 ENSG00000092470|WDR76 ENSG00000099783|HNRPM ENSG00000106013|ANKRD7 ENSG00000106853|LTB4DH ENSG00000112232|KHDRBS2 ENSG00000112664|NUDT3 ENSG00000113575|PPP2CA ENSG00000115993|TRAK2 ENSG00000132646|PCNA ENSG00000135525|MAP7 ENSG00000136052|SLC41A2 ENSG00000144366|GULP1 ENSG00000145375|SPATA5 ENSG00000151093|OXSM ENSG00000154415|PPP1R3A ENSG00000156876|SASS6 ENSG00000156970|BUB1B ENSG00000161547|SFRS2 ENSG00000163507|KIAA1524 ENSG00000164181|ELOVL7 ENSG00000168172|HOOK3 ENSG00000169252|ADRB2 ENSG00000170836|PPM1D ENSG00000171032|ZNF350 ENSG00000171056|SOX7 ENSG00000172594|SMPDL3A ENSG00000172673|C6orf190 ENSG00000174016|FAM46D ENSG00000181472|ZBTB2 ENSG00000182827|ACBD3 ENSG00000185873|TMPRSS11B ENSG00000185984|NR\_002593.1 ENSG00000187498|COL4A1 ENSG00000205038|PKHD1L1

AATTTTC ENSG00000063978|RNF4 ENSG00000087274|ADD1 ENSG00000089057|SLC23A2 ENSG00000092054|MYH7 ENSG00000102104|RS1 ENSG00000104738|MCM4 ENSG00000107262|BAG1 ENSG00000114841|DNAH1 ENSG00000119686|C14orf58 ENSG00000120071|KIAA1267 ENSG00000140992|PDPK1 ENSG00000142156|COL6A1 ENSG00000158769|F11R ENSG00000159110|IFNAR2 ENSG00000164385|C6orf195 ENSG00000169991|Q5TF58\_HUMAN ENSG00000170684|ZNF342 ENSG00000171786|NHLH1 ENSG00000174080|CTSF ENSG00000175048|ZDHC14 ENSG00000176515|Q8NAX6\_HUMAN ENSG00000178802|MPI ENSG00000164385|C6orf195 ENSG00000180824|Q8NAH5\_HUMAN ENSG00000185811|IKZF1 ENSG00000186407|CD300E ENSG00000186788|NP\_001001670.1 ENSG00000187140|FOXO3 ENSG00000188554|NBR1 ENSG00000189357|XR\_015253.1 ENSG00000204094|Q6ZU93\_HUMAN ENSG00000204423|C9orf33 ENSG00000004700|RECQL7 ENSG000000025796|SEC6 ENSG00000056277|SUH7 ENSG00000065613|SLK ENSG00000078177|N4BP2\_HUMAN ENSG00000084733|RAB10 ENSG00000090989|EXOC1 ENSG000000095139|ARCN1 ENSG00000100934|SEC23A ENSG00000101132|PFDN4 ENSG00000107186|MPDZ ENSG00000111581|NUP107 ENSG00000113966|ARL6 ENSG00000116703|PDC ENSG00000116761|CTH ENSG00000122481|RWDD3 ENSG00000128609|NDUF5A ENSG00000131115|ZNF227 ENSG00000132842|AP3B1 ENSG00000133641|C12orf29 ENSG00000134489|HRH4 ENSG00000144224|UBXD2 ENSG00000150961|SEC24D ENSG00000151012|SLC7A11 ENSG00000154646|PRSS7 ENSG00000163743|RCHY1 ENSG00000164796|CSMD3 ENSG00000165672|PRDX3 ENSG00000166479|TXNDC10 ENSG00000171564|FGB ENSG00000181798|C2orf52 ENSG00000184575|XPOT ENSG00000185068|GTF2H5 ENSG00000186468|RPS23 ENSG00000188419|CHM ENSG00000205150|FAM92A3 ENSG00000205524|Q68D70\_HUMAN

ACAAAAA ENSG000000013563|DNASE1L1 ENSG00000043591|ADRB1 ENSG00000103723|AP3B2 ENSG00000107562|CXCL12 ENSG00000119772|DNMT3A ENSG00000124357|NAGK ENSG00000134864|Q9BVM4\_HUMAN ENSG00000135744|AGT ENSG00000136867|SLC31A2 ENSG00000136930|PSMB7 ENSG00000137193|P1M1 ENSG00000143001|TMEM61 ENSG00000146215|CRIP3 ENSG00000157617|C21orf25 ENSG00000160013|PTGIR ENSG00000164151|Q6ZT40\_HUMAN ENSG00000167182|SP2 ENSG00000178235|SLITRK1 ENSG00000188778|ADRB3 ENSG00000188843|NM\_207504 ENSG00000196810|NP\_443093.2 ENSG00000204059|NP\_001013718.1 ENSG00000001629|ANKIB1 ENSG00000032219|ARID4A ENSG000000039537|C6 ENSG00000064726|BTBD1 ENSG00000081320|STK17B ENSG00000099120|NP\_001005751.1 ENSG00000101333|PLCB4 ENSG00000103657|HERC1 ENSG00000113597|NP\_079217.1 ENSG00000114062|UBE3A ENSG00000116044|NFE2L2 ENSG00000120519|SLC10A7 ENSG00000122026|RPL21 ENSG00000132199|ENOSF1 ENSG00000132953|XPO4 ENSG00000134198|TSPAN2 ENSG00000134697|GNL2 ENSG00000136099|PCDH8 ENSG00000136243|NUP12 ENSG00000136810|TXN ENSG00000139323|WDR51B ENSG00000152601|MBNL1 ENSG00000152726|Q5SNT8\_HUMAN ENSG00000158417|EIF5B ENSG00000171202|TMEM126A ENSG00000171735|CAMTA1 ENSG00000171863|RPS7 ENSG00000172661|FAM21B ENSG00000173077|DEC1 ENSG00000174196|FAM21D ENSG00000174298|NP\_694572.1 ENSG00000176697|BDNF ENSG00000180613|GSH2\_HUMAN ENSG00000196885|Q9HAZ8\_HUMAN ENSG00000198780|Q9H989\_HUMAN ENSG00000198947|DMD ENSG00000204595|DPRXP4 ENSG00000205740|Q6ZNRQ2\_HUMAN ENSG00000205822|Q49A35\_HUMAN

ACAAAAG ENSG000000018625|ATP1A2 ENSG00000033327|GAB2 ENSG00000073792|IGF2BP2 ENSG00000100221|JOSD1 ENSG00000104228|TRIM35 ENSG00000106852|LHX6 ENSG00000108788|MLX ENSG00000114738|MAPKAPK3 ENSG00000124191|TOX2 ENSG00000133980|C14orf115 ENSG00000135436|C12orf25 ENSG00000142082|SIRT3 ENSG00000151612|NP\_849157.2 ENSG00000162194|C11orf48 ENSG00000163820|FYCO1 ENSG00000164012|WDR65 ENSG00000170271|C5orf4 ENSG00000170426|NP\_683695.1 ENSG00000170767|C6orf208 ENSG00000184117|NIPSNAP1 ENSG00000198012|XR\_017841.1 ENSG00000204312|Q6ZNY8\_HUMAN ENSG00000204847|FAM74A1 ENSG00000205354|Q6ZN60\_HUMAN ENSG000000081913|PHLPP ENSG00000100564|PIGH ENSG00000102221|PHF16 ENSG00000104177|MYEF2 ENSG00000111241|FGF6 ENSG00000111432|FZD10 ENSG00000111799|COL12A1 ENSG00000112335|SNX3 ENSG00000112531|QKI ENSG00000112541|PDE10A ENSG00000113851|CRBN ENSG00000116539|ASH1L ENSG00000118482|PHF3 ENSG00000122481|RWDD3 ENSG00000131203|PDE1 ENSG00000133872|TMEM66 ENSG00000136044|APPL2 ENSG00000136750|GAD2 ENSG00000138382|METTL5 ENSG00000139910|NOVA1 ENSG00000150540|HMNT ENSG00000152465|NMT2 ENSG00000152582|NP\_653323.1 ENSG00000154269|ENPP3 ENSG00000154874|NP\_872374.3 ENSG00000156140|ADAMTS3 ENSG00000163535|SGOL2 ENSG00000165338|HECTD2 ENSG00000166783|KIAA0430 ENSG00000168679|SLC16A4 ENSG00000170584|NUDC2 ENSG00000172671|ANUB1L1 ENSG00000177888|ZBTB41 ENSG00000180777|ANKRD30B ENSG00000181541|MAB21L2 ENSG00000184500|PROS1 ENSG00000184575|XPOT ENSG00000184999|SLC22A10 ENSG00000185849|Q9P194\_HUMAN ENSG0000000186409|NP\_001074319.1 ENSG000000197345|MRPL21 ENSG000000203837|PNL1PRP3

ACAAAAT ENSG000000075151|EIF4G3 ENSG00000079739|PGM1 ENSG00000090447|TFAP4 ENSG00000101079|NDRG3 ENSG00000104419|NDRG1 ENSG00000105664|COMP ENSG00000118655|DCLRE1B ENSG00000120889|TNFRSF10B ENSG00000124449|IRGC ENSG00000125818|PSMF1 ENSG00000133985|TTC9 ENSG00000140479|PCSK6 ENSG00000143940|Q6ZMW3\_HUMAN ENSG00000145819|ARHGAP26 ENSG00000147160|DGAT2L4 ENSG00000151692|RNF144 ENSG00000157240|FZD1 ENSG00000157312|PDF ENSG00000162493|PDPN ENSG00000163686|ABHD6 ENSG00000171552|BCL2L1 ENSG00000173821|RNF213 ENSG00000175564|UCP3 ENSG00000178409|KIAA1553 ENSG00000178951|ZBTB7A ENSG00000184787|UBE2G2 ENSG00000185189|NRBP2 ENSG00000188234|XR\_016668.1 ENSG00000188242|Q71RB1\_HUMAN ENSG00000189357|XR\_015253.1 ENSG00000204562|Q6ZU75\_HUMAN ENSG00000205223|Q6ZUG9\_HUMAN ENSG00000205778|Q6ZMM7\_HUMAN ENSG00000023287|RB1CC1 ENSG00000067715|SYT1 ENSG00000068793|CYFIP1 ENSG00000070950|RAD18 ENSG00000090402|SI ENSG00000096006|CRISP3 ENSG00000105967|TFEC ENSG00000109738|GLRB ENSG00000112305|SMAP1 ENSG00000118407|FLIPL1 ENSG00000119906|C10orf6 ENSG00000204141|Q6ZVW5\_HUMAN ENSG00000204333|Q6ZTP0\_HUMAN ENSG00000204574|ABCF1 ENSG000002127074|RGS13 ENSG000002127083|OMD ENSG00000130449|ZSWIM6 ENSG00000133111|RFAXP ENSG00000135549|PKIB ENSG00000136819|C9orf78 ENSG00000136937|NCPB1 ENSG00000137414|FAM8A1 ENSG00000138741|TRPC3 ENSG00000145451|GLRA3 ENSG00000150045|KLRF1 ENSG00000151229|SLC2A13 ENSG00000151303|Q8TF27\_HUMAN ENSG00000153132|CLGN ENSG00000163491|NEK10 ENSG00000164941|INTS8 ENSG00000166197|NOLC1 ENSG00000166411|IDH3A ENSG00000172497|ACOT12 ENSG00000172650|CTGLF2 ENSG00000172673|C6orf190 ENSG00000173085|COQ2 ENSG00000173728|C1orf100 ENSG00000174194|CTGLF5 ENSG00000175040|CHST2 ENSG00000176009|ASCL3 ENSG00000176256|HMGB4 ENSG00000181915|C10orf22 ENSG00000186297|GABRA5 ENSG00000187009|Q8NFD4\_HUMAN ENSG00000189127|NP\_001004441.1 ENSG00000196104|SPOCK3 ENSG00000198001|TRAK4 ENSG00000204149|CTGLF3 ENSG00000204150|CTGLF4 ENSG00000204182|CTGLF1 ENSG00000204406|MBD5

ACAAAACA ENSG000000010256|UQCRC1 ENSG00000021300|PLEKHB1 ENSG00000072121|ZFYVE26 ENSG00000100558|PLEK2 ENSG00000102313|ITIH5L ENSG00000116032|GRIN3B ENSG00000120664|LOC646871 ENSG00000124357|NAGK ENSG00000131236|CASP1 ENSG00000132155|RAF1 ENSG00000134864|Q9BVM4\_HUMAN ENSG00000136828|RALGPS1 ENSG00000141569|TRIM65 ENSG00000149179|C11orf49 ENSG00000165424|C10orf56 ENSG00000166272|C10orf26 ENSG00000169174|PCSK9 ENSG00000174945|AMZ1\_HUMAN ENSG00000184260|HIST2H2AC ENSG00000204141|Q6ZVW5\_HUMAN ENSG00000204333|Q6ZTP0\_HUMAN ENSG00000204574|ABCF1 ENSG00000204626|Q6ZSR2\_HUMAN ENSG00000205064|Q6ZVP2\_HUMAN ENSG00000080503|SMARCA2 ENSG00000106355|LSM5 ENSG00000107201|DDX58 ENSG00000108046|C10orf92 ENSG00000112299|VNN1 ENSG00000118961|C2orf473 ENSG00000120008|BRWD2 ENSG00000121440|PDZRN3 ENSG00000122435|CCDC7 ENSG00000125868|DSTN ENSG00000137501|SYTL2 ENSG00000139970|RTN1 ENSG00000144445|NP\_689732.2 ENSG00000147274|RBMX ENSG00000147588|PMP2 ENSG00000152558|TMEM123 ENSG00000155961|ZNF39B ENSG00000162437|RAVER2 ENSG00000168530|MYL1 ENSG00000178177|LCORL ENSG00000180815|MAP3K15 ENSG00000182919|C11orf54 ENSG00000183542|KLCRC4 ENSG00000184845|DRD1 ENSG00000187533|NP\_999876.1 ENSG00000187672|ERC2 ENSG00000196387|ZNF140 ENSG00000197054|ZNF763 ENSG00000198252|STYX ENSG00000198741|Q8N9C2\_HUMAN ENSG00000204397|NP\_001017534.1 ENSG00000006831|ADIPOR2 ENSG0000017797|RALBP1 ENSG00000073792|IGF2BP2 ENSG000000993167|LRRFIP2 ENSG00000100221|JOSD1 ENSG00000112118|MCM3 ENSG00000112118|MCM3 ENSG00000115685|PPP1R7 ENSG00000119431|HDH3 ENSG00000125888|C2orf179 ENSG00000127241|MASP1 ENSG00000131378|RFTN1 ENSG00000141574|SECTM1 ENSG00000142186|SCYL1 ENSG00000147804|SLC39A4 ENSG00000158578|ALAS2 ENSG00000168621|GDNF ENSG00000170231|FABP6 ENSG00000171060|C8orf74 ENSG00000175318|GRAMD2 ENSG00000183873|SCN5A ENSG00000184260|HIST2H2AC ENSG00000186638|C9orf48 ENSG00000189058|APOD ENSG00000189410|SH2D5 ENSG00000196378|Q9BSZ0\_HUMAN ENSG00000197565|COL4A6 ENSG00000081665|ZNF253 ENSG00000089041|P2RX7 ENSG00000101191|DIDO1 ENSG00000102055|PPP1R2P9 ENSG00000105186|ANKRD27 ENSG00000105372|RPS19 ENSG00000108960|MMD ENSG00000112706|IMPG1 ENSG00000125148|MT2A ENSG00000125257|ABCC4 ENSG00000134077|THUMP3 ENSG00000140836|ATBF1 ENSG00000142192|APP ENSG00000143337|TOR1AIP1 ENSG00000165588|CTX2 ENSG00000166509|CLEC3A ENSG00000168653|NDUF55 ENSG00000181690|FLAG1 ENSG00000186166|CCDC84 ENSG00000196966|HIST1H3E ENSG00000198417|MT1F ENSG00000204296|C6orf10

ACAAAAT ENSG000000058085|LAMC2 ENSG00000088926|F11 ENSG00000090863|GLG1 ENSG00000100985|MMP9 ENSG00000109132|PHOX2B ENSG00000116667|C1orf21 ENSG00000124449|IRGC ENSG00000129465|RIPK3 ENSG00000135439|CENTG1 ENSG00000136367|ZFXH2 ENSG00000147081|AKAP4 ENSG00000151208|DLG5 ENSG00000160293|VAV2 ENSG00000163515|RETNLB ENSG00000165887|ANKRD2 ENSG00000166794|PP1B ENSG00000169083|AR ENSG00000167106|FAM102A ENSG00000168003|SLC3A2 ENSG00000170445|HARS ENSG00000174238|PITPNA ENSG00000182578|CSF1R ENSG00000184716|SERINC4 ENSG00000187664|TM6SF2 ENSG00000196432|Q9H5F0\_HUMAN ENSG00000197905|TEAD4 ENSG00000203908|NP\_001017361.1 ENSG00000206297|RNASET2 ENSG00000117114|LPHN2 ENSG00000117601|SERPINC1 ENSG00000118473|SGIP1 ENSG00000120693|SMAD9 ENSG00000123892|RAB38 ENSG00000124103|C20orf107 ENSG00000126016|AMOT ENSG00000137869|CYP19A1 ENSG00000138442|WDR12 ENSG00000138750|NUP54 ENSG00000139352|ASCL1 ENSG00000143507|DUSP10 ENSG00000149311|ATM ENSG00000150361|KLHL1 ENSG00000152700|SAR1B ENSG00000155622|XAGE2 ENSG00000156500|FAM122C ENSG00000165512|ZNF22 ENSG00000168214|RBPJ ENSG00000168438|CDC40 ENSG00000169299|PGM2 ENSG00000172717|C14orf54 ENSG00000175348|TMEM9B ENSG00000175746|NP\_997328.1 ENSG00000175893|ZDHC21 ENSG00000183308|C17orf60 ENSG00000184384|MAML2 ENSG00000185689|Q6NXN5\_HUMAN ENSG00000185751|GAGD3\_HUMAN ENSG00000188158|NHS ENSG00000188452|CERKL ENSG00000189403|HMGBl ENSG00000189403|HMGBl

ACAAAAGA ENSG000000066382|MPPE2D ENSG00000073792|IGF2BP2 ENSG00000101265|RASSF2 ENSG00000107960|OBFC1 ENSG00000112149|CD83 ENSG00000113070|HBEGF ENSG00000119681|LTBP2 ENSG00000126561|STAT5A ENSG00000134014|ELP3 ENSG00000135596|MICAL1 ENSG00000143940|Q6ZMW3\_HUMAN ENSG00000146859|TMEM140 ENSG00000151474|FRMD4A ENSG00000154096|THY1 ENSG00000167751|KLK2 ENSG00000169083|AR ENSG00000174804|FZD4 ENSG00000178796|Q8N9Z1\_HUMAN ENSG00000180471|C9orf31 ENSG00000185442|NP\_997329.1 ENSG00000197838|CYP2A13 ENSG00000197971|MBP ENSG00000204333|Q6ZTP0\_HUMAN ENSG00000204544|C6orf205 ENSG00000205917|Q6ZTF1\_HUMAN ENSG00000205920|Q6ZTF1\_HUMAN ENSG00000070010|UFD1L ENSG00000071967|CYBRD1 ENSG00000115165|PSCDBP ENSG00000115760|BTRC6 ENSG00000120333|MRPS14 ENSG00000125931|CITED1 ENSG00000131473|ACLY ENSG00000145868|FBXO38 ENSG00000146856|AGBL3 ENSG00000151704|KCNJ1 ENSG00000152422|XRCC4 ENSG00000161970|RPL26 ENSG00000167555|ZNF534 ENSG00000177683|THAP5 ENSG00000183513|NP\_001008216.1 ENSG00000183990|Q8WZ8\_HUMAN ENSG00000187611|Q6ZTR6\_HUMAN ENSG00000189127|NP\_001004441.1 ENSG00000196648|NP\_937824.1 ENSG00000197978|NP\_937824.1 ENSG00000199797|NP\_937824.1 ENSG000002047056|WDR37 ENSG00000064489|MEF2B ENSG00000102981|PARD6A ENSG00000103876|FAH ENSG00000104637|P1NX1\_HUMAN ENSG00000105655|NP\_057452.1 ENSG000001115468|EFHD1 ENSG00000132698|RAB25 ENSG00000138085|C2orf28 ENSG00000142528|ZNF473 ENSG00000143127|ITGA10 ENSG00000148773|MKI67 ENSG00000149646|C2orf152 ENSG00000159685|CHCHD6 ENSG00000162244|RPL29 ENSG00000163156|SCNM1 ENSG00000165828|PRAP1 ENSG00000167621|DPEP2 ENSG00000167774|NDUFA7 ENSG00000168792|NP\_937790.1 ENSG00000168824|NSG1\_HUMAN ENSG00000170549|IRX1 ENSG00000174238|PITPNA ENSG00000174483|BBS1 ENSG00000176595|KBTBD11 ENSG00000179058|C9orf50 ENSG00000180083|WFDCL1 ENSG00000183103|LYPD4 ENSG00000184774|Q49AQ9\_HUMAN ENSG00000185684|EP400NL ENSG00000186951|PPARA ENSG00000196432|Q9H5F0\_HUMAN ENSG000000076770|MBNL3 ENSG00000100557|C14orf105 ENSG00000101310|SEC23B ENSG00000102081|FMR1 ENSG00000102239|BR33 ENSG00000115221|ITGB6 ENSG00000115808|STRN ENSG00000116560|SFPQ ENSG00000116701|NCF2 ENSG00000121903|ZSCAN20 ENSG00000124244|PPP4R1L ENS

ENSG00000155011|DKK2 ENSG00000163328|GPR155 ENSG00000164253|WDR41 ENSG00000169429|IL8 ENSG00000170381|SEMA3E ENSG00000171202|TMEM126A ENSG00000180190|C8orf42 ENSG00000183423|NP\_940908.1  
ACAAATG ENSG00000186300|ZNF554 ENSG00000186879|NM\_178121 ENSG00000196350|ZNF492 ENSG00000196477|Q9UHU4\_HUMAN ENSG00000196515|EIF4G3 ENSG00000196515|EIF4G3 ENSG00000196515|EIF4G3 ENSG00000196515|EIF4G3 ENSG00000196515|EIF4G3 ENSG00000196515|EIF4G3 ENSG00000196515|EIF4G3 ENSG00000196515|EIF4G3  
ENSG00000113272|THG1L ENSG00000133250|ZNF414 ENSG00000141556|TBCD ENSG00000163083|INHBB ENSG00000174282|ZBTB4 ENSG00000186163|Q4G0S1\_HUMAN ENSG00000198632|NP\_777590.1 ENSG00000198641|SYS1  
ENSG00000204581|Q6ZU44\_HUMAN ENSG00000204603|Q69YW3\_HUMAN ENSG00000205810|MYCBP2 ENSG00000205810|MYCBP2 ENSG00000205810|MYCBP2 ENSG00000205810|MYCBP2 ENSG00000205810|MYCBP2 ENSG00000205810|MYCBP2 ENSG00000205810|MYCBP2 ENSG00000205810|MYCBP2  
ENSG00000117533|VAMP4 ENSG00000117594|HSD11B1 ENSG00000126249|PDCD2L ENSG00000128656|CHN1 ENSG00000131051|RBM39 ENSG00000131127|ZNF141 ENSG00000131127|ZNF141 ENSG00000131127|ZNF141 ENSG00000131127|ZNF141 ENSG00000131127|ZNF141  
ENSG00000139133|ALG10 ENSG00000147488|ST18 ENSG00000155099|TMEM55A ENSG00000160336|ZNF761 ENSG00000160654|CD3G ENSG00000163788|SNRK ENSG00000164093|PITX2 ENSG00000164099|PRSS12 ENSG00000164099|PRSS12  
ENSG00000164129|NPY5R ENSG00000166240|Q14DG7-2 ENSG00000167562|ZNF701 ENSG00000167766|ZNF83 ENSG00000181450|ZNF678 ENSG00000185686|PRAME ENSG00000189190|ZNF600 ENSG00000196214|ZNF766  
ACAACAG ENSG00000196867|ZFP28 ENSG00000198464|ZNF480 ENSG00000198538|ZNF28 ENSG00000198538|ZNF28 ENSG00000198538|ZNF28 ENSG00000198538|ZNF28 ENSG00000198538|ZNF28 ENSG00000198538|ZNF28  
ENSG0000011052|NME1 ENSG00000073584|SMARCE1 ENSG00000092051|AP1G2 ENSG00000095303|PTGS1 ENSG00000110442|COMMD9 ENSG00000119547|ONECUT2 ENSG00000124222|NPEPL1 ENSG00000126522|CRCP\_HUMAN  
ENSG00000126883|NUP214 ENSG00000128802|GDF2 ENSG00000134531|EMP1 ENSG00000141540|TTYH2 ENSG00000144730|IL17R9 ENSG00000148602|LRRC21 ENSG00000152192|POU4F1 ENSG00000158006|PAFAH2  
ENSG00000162706|DARC ENSG00000180083|WFDC11 ENSG00000182707|FXYP8 ENSG00000185896|LAMP1 ENSG00000187621|TCL1B ENSG00000196090|PTPRT ENSG00000204842|ATXN2 ENSG00000206551|Q6ZT99\_HUMAN  
ENSG00000002746|HECW1 ENSG000000027075|PRKC1 ENSG00000047410|TPR ENSG00000114742|WDR48 ENSG00000118507|AKAP7 ENSG00000119725|ZNF410 ENSG000001129474|JUB ENSG00000135968|GCC2  
ENSG00000147649|MTDH ENSG00000154451|GBP5 ENSG00000158435|C2orf29 ENSG00000161571|Q5YRG5\_HUMAN ENSG00000162407|PPAP2B ENSG00000166265|CYR1 ENSG00000170448|NFXL1 ENSG00000172840|PDP2\_HUMAN  
ENSG00000172900|XR\_017872.1 ENSG00000176681|LRRC37A2 ENSG00000186340|THBS2 ENSG00000197989|C1orf79  
ACAACGA ENSG00000006712|PAF1 ENSG000000089289|IGBP1 ENSG00000009937|SERPIND1 ENSG00000100068|LRP5 ENSG00000108557|RAI1 ENSG00000130590|SAMD10 ENSG00000141391|SLMO1 ENSG00000157514|TSC22D3  
ENSG00000158545|NP\_653205.2 ENSG00000166526|ZNF3 ENSG00000168081|PNOX ENSG00000168101|NUDT16L1 ENSG00000170549|IRX1 ENSG00000174915|PTDSS2 ENSG00000179823|XR\_017713.1 ENSG00000183092|BEGIN\_HUMAN  
ENSG00000183785|PEX26 ENSG00000185269|NOTUM ENSG00000185917|SETD4 ENSG00000186322|Q8N824\_HUMAN ENSG00000187638|NM\_207367 ENSG00000188364|TMSL4 ENSG00000197789|Q8NA00\_HUMAN ENSG00000198802|PECAM1  
ENSG00000205193|Q6ZTC6\_HUMAN ENSG00000205560|CHKB ENSG00000202267|PHL1 ENSG00000203697|DERA ENSG0000049618|ARID1B ENSG00000492531|SNAP23 ENSG00000100483|C14orf138 ENSG0000013597|NP\_07217.1  
ENSG00000117593|DARS2 ENSG00000119421|NDUFA8 ENSG00000122787|AKR1D1 ENSG00000131007|TTY9A ENSG00000131009|TTY9A\_HUMAN ENSG00000138798|EGF ENSG00000140743|CDR2 ENSG00000143341|HMCN1  
ENSG00000144476|CXCR7 ENSG00000150760|DOCK1 ENSG00000154814|OXNAD1 ENSG00000164251|P2RL1 ENSG00000177461|Q8NA31\_HUMAN ENSG00000179300|ZCCHC5 ENSG00000182217|HIST2H4B ENSG00000183941|HIST2H4A  
ENSG00000185304|NP\_001071638.1 ENSG00000187627|RGPD1 ENSG00000188959|C9orf152 ENSG00000205542|TMSL1  
ACAACGG ENSG00000003400|CASP10 ENSG00000029534|ANK1 ENSG00000064419|TNPO3 ENSG00000068120|COA5Y ENSG00000099385|BCL7C ENSG00000099994|SUSD2 ENSG00000100385|IL2RB ENSG00000105131|ABHD9  
ENSG00000105248|CCDC94 ENSG00000117298|ECE1 ENSG00000122863|CHST3 ENSG00000137877|SPTBN5 ENSG00000142347|MYO1F ENSG00000148362|C9orf142 ENSG00000153266|FEZF2 ENSG00000163202|LCE3D  
ENSG00000168878|SFTPB ENSG00000169026|MFSB7 ENSG00000177238|TRIM72 ENSG00000177558|TMEM162 ENSG00000183528|Q0VAF8\_HUMAN ENSG00000183847|Q9P1C0\_HUMAN ENSG00000184709|LRRC26 ENSG00000185966|LCE3E  
ENSG00000196196|NP\_001034881.1 ENSG00000196666|Q6P0A1\_HUMAN ENSG00000204677|NP\_001072995.1 ENSG00000205620|Q6ZRB6\_HUMAN ENSG00000206082|ISL1 ENSG000000033800|PIAS1 ENSG000000035141|NP\_116211.1 ENSG00000047648|ARHGAP6  
ENSG00000065609|SNAP91 ENSG00000080371|RAB21 ENSG000000808551|MAP3K4 ENSG00000093183|SEC22C ENSG00000109099|PMP22 ENSG00000117228|GBP1 ENSG00000117632|STMN1 ENSG00000122376|XR\_015353.1  
ENSG00000124479|NDP ENSG00000133858|CCDC131 ENSG00000134375|TIMM17A ENSG00000137691|C11orf70 ENSG00000147400|CETN2 ENSG00000151726|ACSL1 ENSG00000155319|NP\_001004299.1 ENSG00000156500|FAM122C  
ENSG00000165874|FAM35A ENSG00000167916|KRT24 ENSG00000170370|EMX2 ENSG00000174748|RPL15 ENSG00000175606|TMEM70 ENSG00000180251|SLC9A4 ENSG00000184182|UBE2F ENSG00000204406|MBD5  
ENSG00000204937|Q6ZSS0\_HUMAN  
ACAATAA ENSG00000006015|C19orf60 ENSG00000010327|STAB1 ENSG00000039650|PNKP ENSG00000065675|PRKCQ ENSG00000077274|CAPN6 ENSG00000087250|MT3 ENSG00000100197|CYP2D6 ENSG00000101200|AVP  
ENSG00000104518|GSDMDC1 ENSG00000104826|LHB ENSG00000105427|CNFN ENSG00000105549|THEG ENSG00000106665|CLIP2 ENSG00000109758|HGFAC ENSG00000110799|VWF ENSG00000111678|C12orf57  
ENSG00000125818|PSMD1 ENSG00000128159|TUBGCP6 ENSG00000129862|VCY ENSG00000129864|VCY1B ENSG00000130283|GLP1 ENSG00000131059|C20orf71 ENSG00000131652|THOC6 ENSG00000136631|VPS45  
ENSG00000140798|ABCC12 ENSG00000141994|DUS3L ENSG00000143479|DYRK3 ENSG00000143556|S100A7 ENSG00000150401|DCUN1D2 ENSG00000154096|THY1 ENSG00000156885|COX6A2 ENSG00000158874|APOA2  
ENSG00000164405|UQCRC2 ENSG00000166016|ABTB2 ENSG00000167792|NDUFV1 ENSG00000175315|CST6 ENSG00000177553|C1orf167 ENSG00000177741|Q96BN7\_HUMAN ENSG00000178537|SLC25A20  
ENSG00000179914|ITLN1 ENSG00000180595|Q8N8C9\_HUMAN ENSG00000184163|FAM132A ENSG00000185614|C3orf54 ENSG00000186831|KRT17 ENSG00000196396|PTPN1 ENSG00000197364|S100A7L2 ENSG00000197561|ELA2  
ENSG00000198471|RTP2 ENSG00000198881|ASB12 ENSG00000204748|CGB1 ENSG00000205307|Q8TEE9\_HUMAN ENSG00000205702|CYP2D7P1 ENSG000000011465|DCN ENSG00000078795|PKD2L2 ENSG00000079134|THOC1  
ENSG000000085449|WDFY1 ENSG000000101134|DOK5 ENSG00000102391|RPL36A ENSG00000105967|TFEC ENSG00000119508|NR4A3 ENSG00000124831|LRRFIP1 ENSG00000137996|RTCD1  
ENSG00000138675|FGF5 ENSG00000139155|SLC01C1 ENSG00000139343|SNRPF ENSG00000147854|UHRF2 ENSG00000148516|ZEB1 ENSG00000159182|NP\_115767.1 ENSG00000159186|ATP5O ENSG00000162687|KCNT2  
ENSG00000162692|VCAM1 ENSG00000165264|NDUFB6 ENSG00000165682|CLEC1B ENSG00000166240|Q14DG7-2 ENSG00000167332|OR51E2 ENSG00000171200|NETO2 ENSG00000171931|FBXW10 ENSG00000174405|LIG4  
ENSG00000179097|HTR1F ENSG00000184886|PIGW ENSG00000186416|NKRFP ENSG00000187611|Q6ZTR6\_HUMAN ENSG00000189252|SPANX3 ENSG00000196406|SPANXE ENSG00000197062|ZNF187 ENSG00000203924|SPANXN2  
ENSG00000204683|C10orf113 ENSG00000204832|Q6ZRU3\_HUMAN ENSG00000206075|SERPINB5  
ACAATCA ENSG000000018625|ATP1A2 ENSG00000043822|NP\_060895.1 ENSG00000051009|C11orf56 ENSG00000074054|CLASP1 ENSG00000095066|HOOK2 ENSG00000108702|CCL1 ENSG00000115661|STK16 ENSG00000133511|PIK4CA  
ENSG00000135480|KRT7 ENSG00000136695|IL1F5 ENSG00000140848|CPNE2 ENSG00000170485|NPAS2 ENSG00000177627|C12orf54 ENSG00000183506|NP\_955377.2 ENSG00000185133|PIB5PA ENSG00000186187|ZNRF1  
ENSG00000186281|NP\_997211.2 ENSG00000189325|NP\_001010903.2 ENSG00000196092|PAX5 ENSG00000196684|HSH2D ENSG00000197555|SIPAL1L ENSG00000202019|NP\_001025037.1 ENSG00000049247|UTS2 ENSG00000049860|HEXB  
ENSG000000099725|PRKY ENSG00000111371|SLC38A1 ENSG00000112183|RBM24 ENSG00000112246|SIM1 ENSG00000113302|IL12B ENSG00000113643|RARS ENSG000001129003|VPS13C ENSG00000133961|NUMB  
ENSG00000135535|CD164 ENSG00000139508|SLC46A3 ENSG00000140416|TPM1 ENSG00000149506|ZP1 ENSG00000149742|SLC22A9 ENSG00000154274|C4orf19 ENSG00000154451|GBP5 ENSG00000155906|RMND1  
ENSG00000161533|ACOX1 ENSG00000170264|NP\_115556.1 ENSG00000179456|ZNF238 ENSG00000179869|ABCA13 ENSG00000180882|XR\_017823.1 ENSG00000187871|GFRAL ENSG00000189212|DPY19L2P1 ENSG00000204138|PHACTR4  
ENSG00000204829|CBWD7  
ACAATCG perfect: ACAATCA TGATTGT hsa-miR-219 TGATTGTccaacgcgaattct 0  
ENSG00000062038|CDH3 ENSG00000079974|RABL2B ENSG0000008089091|C20orf12 ENSG00000105722|ERF ENSG00000122641|INHBA ENSG00000126767|ELK1 ENSG00000127220|ABHD8 ENSG00000128645|HOXD1  
ENSG00000132024|CC2D1A ENSG00000143365|RORC ENSG00000149571|KIRREL3 ENSG00000153303|FRMD1 ENSG00000153468|TCP10\_HUMAN ENSG00000156097|GPR61 ENSG00000157087|ATP2B2 ENSG00000167178|ISLR2  
ENSG00000167613|LAIR1 ENSG00000167861|C17orf28 ENSG00000173457|PPP1R14B ENSG00000175764|TTLL1 ENSG00000175806|MSRA ENSG00000179428|Q8N6X1\_HUMAN ENSG00000180824|Q8NAH5\_HUMAN ENSG00000185624|P4HB  
ENSG00000188427|XR\_017855.1 ENSG00000197021|CXorf40B ENSG00000205670|C21orf51 ENSG000000749661|TXK ENSG000000077721|UBE2A ENSG00000095794|CREM ENSG00000104361|NPAL2 ENSG00000106540|C7orf36  
ENSG00000111196|MGN2\_HUMAN ENSG00000116703|PDC ENSG00000102538|PTGER2 ENSG00000131171|SH3BGLR ENSG00000136044|APPL2 ENSG00000142188|TMEM50B ENSG00000154845|PPP4R1 ENSG00000157554|ERG  
ENSG00000158185|ANKRD36 ENSG00000159212|CLIC6 ENSG00000164484|KIAA1913 ENSG00000165156|ZHX1 ENSG00000166478|ZNF143 ENSG00000168118|RAB4A ENSG00000170088|NP\_689894.1 ENSG00000177889|UBE2N  
ENSG00000180233|ZNRF2 ENSG00000182670|TTC3 ENSG00000184895|SRY ENSG00000185742|NP\_997528.1 ENSG00000188001|FAM79B ENSG00000189367|C6orf174 ENSG00000196319|Q9H353\_HUMAN ENSG00000196912|AN36B\_HUMAN  
ACAATGA ENSG00000073584|SMARCE1 ENSG00000101346|POFUT1 ENSG00000102265|TIMP1 ENSG00000104823|ECH1 ENSG00000116035|VAX2 ENSG00000133026|MYH10 ENSG00000135114|OASL ENSG00000142534|RPS11  
ENSG00000151224|MAT1A ENSG00000158158|CNM4 ENSG00000159797|C9orf144 ENSG00000163382|APOA1BP ENSG00000164270|HTRA ENSG00000167798|NP\_001013662.1 ENSG00000169118|CSNK1G1 ENSG00000176515|Q8NAX6\_HUMAN  
ENSG00000180139|Q8N9Z5\_HUMAN ENSG00000185897|FFAR3 ENSG00000186198|NP\_849190.1 ENSG00000186335|SLC36A2 ENSG00000189159|HNI ENSG00000197948|FCHSD1 ENSG00000204280|NP\_001032647.2 ENSG00000204305|AGER  
ENSG00000204715|Q4G0Q5\_HUMAN ENSG000000041353|RAB27B ENSG00000066583|ISOC1 ENSG00000101846|STS ENSG00000106733|C9orf95 ENSG00000112304|THEM2 ENSG00000119787|ARL6IP2  
ENSG00000123572|NRK ENSG00000137806|NDUFAF1 ENSG00000140937|CDH11 ENSG00000143995|MEI1 ENSG00000163293|NPAL1 ENSG00000164175|SLC45A2 ENSG00000166573|GALR1 ENSG00000172900|XR\_017872.1  
ENSG00000173614|NMNAT1 ENSG00000178462|TUBAL3 ENSG00000182621|PLCB1 ENSG00000184752|NDUFA12 ENSG00000184984|CHRM5 ENSG00000185070|FLRT2 ENSG00000187151|ANGPTL5 ENSG00000189367|C6orf174  
ACAATGC ENSG00000048342|Q9H8A7\_HUMAN ENSG00000064393|HIPK2 ENSG00000103365|GGA2 ENSG00000106565|TMEM176B ENSG00000107738|C10orf54 ENSG00000111886|GABRR2 ENSG00000130147|SH3BP4  
ENSG00000136059|VILL ENSG00000136828|RALGAP1 ENSG00000149653|WFDC6 ENSG00000151117|TMEM86A ENSG00000159217|IGF2BP1 ENSG00000175854|C9orf119 ENSG00000181097|Q8NDL7\_HUMAN ENSG00000183633|C14orf132  
ENSG00000187095|LILRA2 ENSG00000187116|LILRA5 ENSG00000119042|SATB2 ENSG00000127951|PGL2 ENSG00000139800|ZIC5 ENSG00000151320|AKAP6 ENSG00000153317|DDEF1 ENSG00000154007|ASB17  
ENSG00000164307|ARTS1\_HUMAN ENSG00000169224|C1orf150 ENSG00000171478|SPACA5B ENSG00000175646|PRM1 ENSG00000188992|LIPI ENSG00000196458|ZNF605 ENSG00000204272|Q63Z42\_HUMAN  
ACAATGG ENSG000000012232|EXTL3 ENSG00000068137|PLEKHH3 ENSG000000992421|SEMA6A ENSG00000109066|TMEM104 ENSG00000116586|MAP1P\_HUMAN ENSG00000121904|CSMD2 ENSG00000133985|TTC9 ENSG00000139874|SSTR1  
ENSG00000144230|GPR17 ENSG00000154330|PGM5P1 ENSG00000158445|KCNB1 ENSG00000161132|Q9BYA7\_HUMAN ENSG00000161929|NP\_996986.1 ENSG00000163879|DNAL1 ENSG00000169921|Q75L30\_HUMAN ENSG00000170420|APOL6  
ENSG00000173432|SAA1 ENSG00000184785|Q96HG1\_HUMAN ENSG00000196070|Q6ZVY7\_HUMAN ENSG00000204444|APOM ENSG000000013364|MVP ENSG00000069345|DNAJA2 ENSG00000078401|EDN1 ENSG00000083099|LYRM2  
ENSG00000092148|HECTD1 ENSG00000106034|NP\_079189.3 ENSG00000112486|CCR6 ENSG00000113456|RAD1 ENSG00000115540|PREI3 ENSG00000116918|TSNAX ENSG00000118432|CNR1 ENSG00000135052|C9orf155  
ENSG00000137976|DNASE2B ENSG00000138669|PRKG2 ENSG00000141141|DDX52 ENSG00000143344|RGL1 ENSG00000145362|ANK2 ENSG00000146729|GBAS ENSG00000150687|PRSS23 ENSG00000154734|ADAMTS1  
ENSG00000166783|KIAA0430 ENSG00000168229|PTGDR ENSG00000183649|Q8NFX8\_HUMAN ENSG00000185201|IFTTM2 ENSG00000188193|C6orf155 ENSG00000196885|Q9HAZ8\_HUMAN ENSG00000197203|Q8NAJ9\_HUMAN ENSG00000203743|Q5J7V3\_HUMAN  
ACACACC ENSG00000055609|MLL3 ENSG00000077274|CAPN6 ENSG00000078804|TP53INP2 ENSG00000083444|PLOD1 ENSG00000105131|ABHD9 ENSG00000108405|P2RX1 ENSG00000108753|TCF2 ENSG00000120071|KIAA1267  
ENSG00000128408|RIBC2 ENSG00000130201|EXOC3L2 ENSG00000132744|ACY3 ENSG00000138622|HCN4 ENSG00000143369|ECM1 ENSG00000147481|SNTG1 ENSG00000166159|LRTM2 ENSG00000169738|DCXR  
ENSG00000171368|P25A\_HUMAN ENSG00000175223|Q8TTC8\_HUMAN ENSG00000178078|NP\_060190.2 ENSG00000178248|Q8NA402\_HUMAN ENSG00000178802|MPI ENSG00000197291|Q8WV75\_HUMAN ENSG00000133020|MYH8 ENSG00000134769|DTNA  
ENSG00000138829|FBN2 ENSG00000140563|MCTP2 ENSG00000151655|ITI12 ENSG00000155495|MAGEC1 ENSG00000158477|CD1A ENSG00000163565|IFI16 ENSG00000177463|NR2C2 ENSG00000197301|Q6ZQU9\_HUMAN  
ENSG00000198042|RBM13  
ACACAGT ENSG00000065882|TBC1D1 ENSG00000078295|ADCY2 ENSG00000101079|NDRG3 ENSG00000105655|NP\_057452.1 ENSG00000112619|PRPH2 ENSG00000125266|EFNB2 ENSG00000126003|PLAGL2 ENSG00000130881|LRP3  
ENSG00000147117|ZNF157 ENSG00000151631|Q9P2A3\_HUMAN ENSG00000164010|ERMAP ENSG00000167977|KCTD5 ENSG00000171246|NPTX1 ENSG00000172568|NP\_001001343.1 ENSG00000176261|ZBTB80S ENSG00000178786|Q8N2B6\_HUMAN  
ENSG00000179057|IGSF22 ENSG00000179284|DAND5 ENSG00000179909|ZNF154 ENSG00000189430|NCR1 ENSG00000197322|NP\_997337.1 ENSG00000198089|SFI1 ENSG00000204332|Q6ZU25\_HUMAN ENSG00000206064|Q6ZU89\_HUMAN  
ENSG00000091009|RBM27 ENSG00000100564|PIGH ENSG00000102554|KLF5 ENSG00000104044|OCA2 ENSG00000106714|CNTNAP3 ENSG00000107104|ANKRD15 ENSG00000117625|RCOR3 ENSG00000122862|SRGN  
ENSG00000123610|TFMFAIP6 ENSG00000124205|EDN3 ENSG00000129007|CALML4 ENSG00000131941|RHPN2 ENSG00000135324|C6orf117 ENSG00000137573|SULF1 ENSG00000137720|C11orf1 ENSG00000139973|SYT16  
ENSG00000144810|COL8A1 ENSG00000155961|RAB39B ENSG00000165338|HECTD2 ENSG00000170495|Q6ZNE6\_HUMAN ENSG00000170836|PPM1D ENSG00000172766|NARG1L ENSG00000183960|KCNH8 ENSG00000185264|C2orf33  
ENSG00000198205|ZXA  
ACACCAA ENSG00000004776|HSPB6 ENSG00000008086|CDKL5 ENSG00000099875|MKNK2 ENSG00000100233|PPII2 ENSG00000103067|RBM35B ENSG00000106665|CLIP2 ENSG00000124678|TCP11 ENSG00000143297|FCRL5  
ENSG00000159263|SIM2 ENSG00000161618|ALDH16A1 ENSG00000162761|LMX1A ENSG00000167139|TBC1D21 ENSG00000171533|MAP6 ENSG00000181350|C17orf76 ENSG00000182109|Q8N214\_HUMAN ENSG00000182606|TRAK1  
ENSG00000182950|ODF3L1 ENSG00000187144|SPATA21 ENSG00000196189|SEMA4A ENSG00000196109|Q5JXA8\_HUMAN ENSG00000205485|Q6DCA4\_HUMAN ENSG00000206026|NP\_001032408.1 ENSG00000206193|Q5HYA3\_HUMAN ENSG0000000460|C1orf112



|         |                                |                              |                                |                              |                              |                              |                                |                              |                         |
|---------|--------------------------------|------------------------------|--------------------------------|------------------------------|------------------------------|------------------------------|--------------------------------|------------------------------|-------------------------|
|         | ENSG00000129007 CALML4         | ENSG00000132669 RIN2         | ENSG00000137976 DNASE2B        | ENSG00000140945 CDH13        | ENSG00000144285 SCN1A        | ENSG00000151025 GPR158       | ENSG00000156172 C8orf37        | ENSG00000158615 PPP1R15B     |                         |
|         | ENSG00000159279 NYP6R          | ENSG00000165194 PCDH19       | ENSG00000165434 PGM2L1         | ENSG00000168283 BMI1         | ENSG00000184786 TCTE3        | ENSG00000186300 ZNF555       | ENSG00000187325 TAF9B          | ENSG00000196428 TSC2D2       |                         |
| ACAGTAA | ENSG00000205838 NP_653326.3    | ENSG00000206538 VGLL3        | ENSG00000048342 Q9H8A7_HUMAN   | ENSG00000068079 IFI35        | ENSG00000085063 CD59         | ENSG00000088926 F11          | ENSG00000107874 CUEDC2         | ENSG00000121577 POPDC2       | ENSG00000122085 MTERFD2 |
|         | ENSG0000011132 APBA3           | ENSG00000141577 AZI1         | ENSG00000143851 PTFP           | ENSG00000144355 DLX1         | ENSG00000159217 IGF2BP1      | ENSG00000163515 RETNLB       | ENSG00000167112 TRUB2          | ENSG00000177807 KCNJ10       |                         |
|         | ENSG00000136710 CDC115         | ENSG00000198003 NP_659482.3  | ENSG00000203709 C1orf132       | ENSG00000204540 PSORS1C1     | ENSG00000205522 LOC255411    | ENSG00000077232 DNAJC10      | ENSG00000078795 PKD2L2         | ENSG00000085433 WDR47        |                         |
|         | ENSG00000186190 C20orf185      | ENSG00000090266 NDUFB2       | ENSG00000108510 THRAP1         | ENSG00000112339 HBS1L        | ENSG00000123572 NRK          | ENSG00000134533 RERG         | ENSG00000134962 KLB            | ENSG00000136158 SPRY2        |                         |
|         | ENSG00000089123 TASP1          | ENSG00000145451 GLRA3        | ENSG00000149289 ZC3H12C        | ENSG00000156650 MYST4        | ENSG00000163642 XR_017284.1  | ENSG00000166321 NUDT13       | ENSG00000166986 MARS           | ENSG00000183520 UTP11L       |                         |
|         | ENSG00000137860 SLC28A2        | ENSG000001189320 NP_999876.1 | ENSG00000146197 SCUBE3         | ENSG00000198825 INPP5F       | ENSG00000206532 Q1RNO0_HUMAN |                              |                                |                              |                         |
| ACAGTAC | ENSG00000187533 NP_999876.1    | ENSG00000068654 POLR1A       | ENSG00000081377 CDC14C         | ENSG00000101280 ANGPT4       | ENSG00000103855 CD276        | ENSG00000106635 BCL7B        | ENSG00000115461 IGFBP5         | ENSG00000117385 LEPRE1       |                         |
|         | ENSG00000122735 DNAI1          | ENSG00000123643 SLC36A1      | ENSG00000125266 EFNB2          | ENSG00000132275 KIAA0409     | ENSG00000133937 GSC          | ENSG00000134243 SORT1        | ENSG00000138696 BMPR1B         | ENSG00000143222 UFC1         |                         |
|         | ENSG00000145050 ARMET          | ENSG00000145526 CDH18        | ENSG00000146197 SCUBE3         | ENSG00000157600 TMEM164      | ENSG00000158220 FAM62C       | ENSG00000159110 IFNAR2       | ENSG00000162734 PEA15          | ENSG00000174951 FUT1         |                         |
|         | ENSG00000205414 Q6ZVL8_HUMAN   | ENSG000000015153 YAF2        | ENSG000000073711 PPP2R3A       | ENSG00000081026 MAGI3        | ENSG00000091409 ITGA6        | ENSG000001227074 RGS13       | ENSG00000127688 GAN            | ENSG00000136451 VEZF1        |                         |
|         | ENSG00000147604 RPL7           | ENSG00000156671 SAMD8        | ENSG00000168297 PKX            | ENSG00000171617 ENC1         | ENSG00000176697 BDNF         | ENSG00000182263 FIGN         | ENSG00000184402 SS18L1         |                              |                         |
| ACAGTGA | ENSG0000027847 B4GALT7         | ENSG00000054965 KIAA0280     | ENSG00000092820 VIL2           | ENSG00000100077 ADRBK2       | ENSG00000100395 L3MBTL2      | ENSG00000105323 HNRPUL1      | ENSG00000114933 NP_060229.2    | ENSG00000130477 UNC13A       |                         |
|         | ENSG00000131558 EXOC4          | ENSG00000134490 C1orf45      | ENSG00000140931 CMTM3          | ENSG00000148346 LCN2         | ENSG00000160991 TMEM142B     | ENSG00000179057 IGSF22       | ENSG00000182749 PAQR7          | ENSG00000183134 GPR44        |                         |
|         | ENSG00000184216 IRAK1          | ENSG00000188660 C21orf125    | ENSG00000203793 Q6ZR74_HUMAN   | ENSG00000204054 Q6ZNS9_HUMAN | ENSG00000204602 Q6ZU19_HUMAN | ENSG00000204792 Q6ZU62_HUMAN | ENSG00000205856 NP_001010859.1 | ENSG0000022267 FHL1          |                         |
|         | ENSG00000038002 AGA            | ENSG00000095587 TLL2         | ENSG00000106261 ZKSCAN1        | ENSG0000019185 ITGB1BP1      | ENSG00000129824 RPS4Y1       | ENSG00000134375 TIMM17A      | ENSG00000135185 C7orf23        | ENSG00000139973 SYT16        |                         |
|         | ENSG00000143942 CHAC2          | ENSG00000165502 RPL36AL      | ENSG00000165525 SDCCAG1        | ENSG00000168724 DNJA5_HUMAN  | ENSG00000171241 SHCBP1       | ENSG00000197203 Q8NAJ9_HUMAN |                                |                              |                         |
| ACAGTGC | ENSG00000101945 SUV39H1        | ENSG00000104980 TIMM44       | ENSG00000125447 GGA3           | ENSG00000126883 NUP214       | ENSG00000130713 EXOSC2       | ENSG00000136854 STXBP1       | ENSG00000137193 PIM1           | ENSG00000162512 SDC3         |                         |
|         | ENSG00000167798 NP_001013662.1 | ENSG00000168818 STX18        | ENSG00000168824 NSG1_HUMAN     | ENSG00000183535 C21orf123    | ENSG00000185619 PCGF3        | ENSG00000188626 LOC653720    | ENSG00000188827 BTBD12         | ENSG00000188859 FAM78B       |                         |
|         | ENSG00000197106 SLC6A17        | ENSG00000204586 Q6PJP7_HUMAN | ENSG00000044574 HSPA5          | ENSG00000049245 VAMP3        | ENSG0000005719 CPNE3         | ENSG00000099940 SNAP29       | ENSG00000101882 NKAP_HUMAN     | ENSG00000109756 RAPGEF2      |                         |
|         | ENSG00000111432 FZD10          | ENSG00000127314 RAP1B        | ENSG00000129675 ARHGFB6        | ENSG00000131263 RNF12        | ENSG00000135127 CCDC64       | ENSG00000135823 STX6         | ENSG00000143153 ATP1B1         | ENSG00000145349 CAMK2D       |                         |
|         | ENSG00000145476 CYP4V2         | ENSG00000148175 STOM         | ENSG00000166200 COPS2          | ENSG00000166801 FAM111A      | ENSG00000177640 CASC2        | ENSG00000178395 C1orf65      | ENSG00000187079 TEAD1          |                              |                         |
| ACAGTGG | ENSG00000055950 MRPL43         | ENSG00000086548 CEACAM6      | ENSG00000100036 SLC35E4        | ENSG00000103091 WDR59        | ENSG00000105048 TNNT1        | ENSG00000105197 TIMM50       | ENSG00000106003 LFNG           | ENSG00000106683 LIMK1        |                         |
|         | ENSG00000122711 SPINK4         | ENSG00000123454 DBH          | ENSG00000126215 XRCC3          | ENSG00000130414 HMDFA10      | ENSG00000149488 TMC2         | ENSG00000152127 MGAT5        | ENSG00000154370 TRIM11         | ENSG00000163873 GRIK3        |                         |
|         | ENSG00000165271 NOL6           | ENSG00000166351 ANKRD21      | ENSG00000177225 PDDC1          | ENSG00000180448 HMHFA1       | ENSG00000183206 POT15_HUMAN  | ENSG00000185105 XR_015885.1  | ENSG00000198012 XR_017841.1    | ENSG00000204569 PPP1R10      |                         |
|         | ENSG0000003989 SLC7A2          | ENSG0000010072 C1orf124      | ENSG00000069275 NUCKS1         | ENSG00000082482 KCNK2        | ENSG00000105810 CDK6         | ENSG00000106771 C9orf5       | ENSG00000111785 RIC8B          | ENSG00000112249 ASCC3        |                         |
|         | ENSG00000115361 ACADL          | ENSG00000116906 GNPAT        | ENSG00000120162 MOBKLB2B       | ENSG00000124333 SYBL1        | ENSG00000127423 C1orf135     | ENSG00000131951 LRRC9        | ENSG00000132680 KIAA0907       | ENSG00000136478 TEX2         |                         |
|         | ENSG00000143363 PRUNE          | ENSG00000147465 STAR         | ENSG00000148429 USP6L1         | ENSG00000155545 MIER3        | ENSG00000170967 DD11         | ENSG00000178033 FAM26E       | ENSG00000181481 RNF135         | ENSG00000182670 TTC3         |                         |
|         | ENSG00000189056 RELN           |                              |                                |                              |                              |                              |                                |                              |                         |
| ACAGTGT | ENSG00000003137 CYP26B1        | ENSG00000006740 RICH2_HUMAN  | ENSG00000010295 NP_542768.1    | ENSG00000097021 ACOT7        | ENSG00000099194 SCD          | ENSG00000100448 CTSG         | ENSG00000102265 TIMP1          | ENSG00000103647 CORO2B       |                         |
|         | ENSG00000107554 DNMBP          | ENSG00000111725 PRKAB1       | ENSG00000111877 MCM9           | ENSG00000126970 KIAA1166     | ENSG00000132793 LPIN3        | ENSG00000135472 FAIM2        | ENSG00000147117 ZNF157         | ENSG00000148704 VAX1         |                         |
|         | ENSG00000170049 KCNAB3         | ENSG00000179253 Q5VZ43_HUMAN | ENSG00000180935 Q8NB3_HUMAN    | ENSG00000186951 PPARA        | ENSG00000198915 RASGEF1A     | ENSG00000203888 Q6ZRP6_HUMAN | ENSG00000203931 LOC729078      | ENSG00000205017 CCL3L1       |                         |
|         | ENSG00000205021 CCL3L3         | ENSG00000205307 Q8TEE9_HUMAN | ENSG00000205745 Q71MF4_HUMAN   | ENSG00000028839 TBP1L        | ENSG00000066739 C14orf103    | ENSG00000072274 TFRC         | ENSG00000082515 MRPL22         | ENSG00000087263 OGFOD1       |                         |
|         | ENSG00000091409 ITGA6          | ENSG00000102781 KATNAL1      | ENSG00000104671 DCTN6          | ENSG00000112078 KCTD20       | ENSG00000118200 CAMSAP1L1    | ENSG00000119787 ARL6IP2      | ENSG00000119878 CRIPT          | ENSG00000123240 OPTN         |                         |
|         | ENSG00000123610 TNFATP6        | ENSG00000138434 SSFA2        | ENSG00000146360 GPR6           | ENSG00000148516 ZEB1         | ENSG00000150054 MP7          | ENSG00000158185 ANKRD36      | ENSG00000162433 AK3L2          | ENSG00000162631 NTNG1        |                         |
|         | ENSG00000163072 NOSTRIN        | ENSG00000172115 CYCS         | ENSG00000177981 ASB8           | ENSG00000182621 PLCB1        | ENSG00000186310 NAP1L3       | ENSG00000189403 HMGB1        | ENSG00000196912 AN36B_HUMAN    | ENSG00000205269 Q5T4T1_HUMAN |                         |
|         | perfect: ACAGTGT ACAGTGT       | hsa-miR-200a                 | taACACTGTcttggttaacgatgt       | 2                            |                              |                              |                                |                              |                         |
|         | perfect: ACAGTGT ACAGTGT       | hsa-miR-141                  | taACACTGTcttggttaaaagatgg      | 2                            |                              |                              |                                |                              |                         |
| ACATAAT | ENSG00000090238 YPEL3          | ENSG00000099977 DDT          | ENSG00000100591 AHS1A          | ENSG00000106565 TMEM176B     | ENSG00000123329 ARHGAP9      | ENSG00000133460 SLC2A11      | ENSG00000142186 SCYL1          | ENSG00000149292 TTC12        |                         |
|         | ENSG00000151465 SALL2          | ENSG00000163207 IVL          | ENSG00000176444 CLK2           | ENSG00000176718 C5orf26      | ENSG00000178057 C3orf60      | ENSG00000183399 Q7L8T7_HUMAN | ENSG00000185475 NP_955369.1    | ENSG00000187726 DNAJB13      |                         |
|         | ENSG00000198610 AKR1C4         | ENSG00000203805 PPAPDC1A     | ENSG00000204131 NP_001013649.1 | ENSG00000205790 Q6ZTZO_HUMAN | ENSG00000205801 Q6ZTI5_HUMAN | ENSG00000040933 INPP4A       | ENSG00000042813 ZPBP           | ENSG00000049249 TNFRSF9      |                         |
|         | ENSG00000052795 Q9H994_HUMAN   | ENSG000000100523 DDHD1       | ENSG000000104112 SCG3          | ENSG00000106484 MEST         | ENSG00000106823 ECM2         | ENSG00000114021 NIT2         | ENSG00000122435 CCDC76         | ENSG00000123739 PLA2G12A     |                         |
|         | ENSG00000135272 MDF19          | ENSG00000135974 C2orf49      | ENSG00000142065 ZFP14          | ENSG00000145734 BDP1         | ENSG00000154553 PDLIM3       | ENSG00000164002 C1orf176     | ENSG00000165973 NELL1          | ENSG00000166669 ATF7IP2      |                         |
|         | ENSG00000167306 MYO5B          | ENSG00000168582 CRYGA        | ENSG00000170558 CDH2           | ENSG00000180233 ZNRF2        | ENSG00000182050 MGAT4C       | ENSG00000196433 ASMT         | ENSG00000203943 SAMD13         | ENSG00000204804 FAM27D1      |                         |
| ACATACT | ENSG0000003400 CASP10          | ENSG00000065357 DGKA         | ENSG00000080815 PSEN1          | ENSG00000102466 FGF14        | ENSG00000103528 SYT17        | ENSG00000105705 SF4          | ENSG00000105732 ZNF574         | ENSG00000112715 VEGFA        |                         |
|         | ENSG00000116983 HPCAL4         | ENSG00000125733 TRIP10       | ENSG00000130558 OLFM1          | ENSG00000130598 TNNT2        | ENSG00000142528 ZNF473       | ENSG00000146066 HIGD2A       | ENSG00000147127 RAB41          | ENSG00000160791 CCR5         |                         |
|         | ENSG00000162490 SALL2          | ENSG00000163207 IVL          | ENSG00000164711 LPAL2          | ENSG00000175463 TBC1D10C     | ENSG00000183528 QOVAF8_HUMAN | ENSG00000196767 POU3F4       | ENSG00000203930 Q5JPA2_HUMAN   | ENSG00000205155 PSENEN       |                         |
|         | ENSG0000005889 ZFX             | ENSG00000048392 RRM2B        | ENSG00000078674 PCM1           | ENSG00000100567 PMSA3        | ENSG00000108298 RPL19        | ENSG00000114446 IFT57        | ENSG00000116266 STXBP3         | ENSG00000118564 FBXL5        |                         |
|         | ENSG00000118596 SLC16A7        | ENSG00000120333 MRPS14       | ENSG00000120533 ENY2           | ENSG00000134644 PUM1         | ENSG00000137845 ADAM10       | ENSG00000138684 IL21         | ENSG00000139354 GAS2L3         | ENSG00000141682 PMAIP1       |                         |
|         | ENSG00000144026 ZNF514         | ENSG00000151458 ANKRD50      | ENSG00000156675 RAB11FIP1      | ENSG00000163072 NOSTRIN      | ENSG00000163577 EIF5A2       | ENSG00000164128 NPY1R        | ENSG00000164221 CCDC112        | ENSG00000164830 OXR1         |                         |
|         | ENSG00000169251 NMD3           | ENSG00000170381 SEMA3E       | ENSG00000179902 C1orf194       | ENSG00000181634 TNFSF15      | ENSG00000182400 TRAAPP6B     | ENSG00000196418 ZNF124       |                                |                              |                         |
| ACATAGG | ENSG00000055163 CYFIP2         | ENSG00000105697 HAMP         | ENSG00000107738 C10orf54       | ENSG00000115042 FAHD2A       | ENSG00000117480 FAAH         | ENSG00000124920 C11orf9      | ENSG00000125895 C20orf46       | ENSG00000130477 UNC13A       |                         |
|         | ENSG00000136040 PLXNC1         | ENSG00000138085 C2orf28      | ENSG00000142082 SIRT3          | ENSG00000144199 FAHD2B       | ENSG00000148158 SNX30        | ENSG00000151465 CDC123       | ENSG00000157064 NMNAT2         | ENSG00000165275 RGMTD3       |                         |
|         | ENSG00000165821 SALL2          | ENSG00000169093 ASMTL        | ENSG00000175697 SPTX156        | ENSG00000197175 Q8TBR1_HUMAN | ENSG00000204312 Q6ZNY8_HUMAN | ENSG00000204603 Q69YW3_HUMAN | ENSG00000205804 Q5T6R2_HUMAN   | ENSG0000003393 ALS2          |                         |
|         | ENSG00000053900 ANAPC4         | ENSG00000106025 TSPAN12      | ENSG00000107443 CCN1           | ENSG00000118322 ATP10B       | ENSG00000120137 PANK3        | ENSG00000124201 ZNFX1        | ENSG00000134444 KIAA1468       |                              |                         |
|         | ENSG00000145495 MARCB6         | ENSG00000145782 ATG12        | ENSG00000152454 ZNF256         | ENSG00000155329 ZCCHC10      | ENSG00000162631 NTNG1        | ENSG00000171928 FAM18B       | ENSG00000180233 ZNRF2          | ENSG00000182393 IL29         |                         |
|         | ENSG00000187098 MITF           | ENSG00000187866 FAM122A      | ENSG00000197312 RSC1A1         | ENSG00000197594 ENPP1        | ENSG00000204604 ZNF468       | ENSG00000204866 IGFL2        |                                |                              |                         |
| ACATATA | ENSG00000007520 C16orf42       | ENSG00000063241 ISOC2        | ENSG00000099194 SCD            | ENSG00000100591 AHS1A        | ENSG00000103213 ITIH5L       | ENSG00000103274 NUPB1        | ENSG00000103811 CTSH           | ENSG00000105613 MAST1        |                         |
|         | ENSG00000115107 STEAP3         | ENSG00000128849 CGNL1        | ENSG00000132517 GPR172B        | ENSG00000136859 ANGPTL2      | ENSG00000139629 GALNT6       | ENSG00000139874 SSTR1        | ENSG00000143222 UFC1           | ENSG00000143376 SNX27        |                         |
|         | ENSG00000153266 FEZF2          | ENSG00000155980 KIF5A        | ENSG00000162774 PEA15          | ENSG00000168546 GFRA2        | ENSG00000177807 KCNJ10       | ENSG00000178235 SLITRK1      | ENSG00000179388 EGR3           | ENSG00000187605 K0401_HUMAN  |                         |
|         | ENSG00000057019 DCBLD2         | ENSG00000117724 CENPF        | ENSG00000123124 WWP1           | ENSG00000130939 UBE4B        | ENSG00000131437 KIF3A        | ENSG00000134419 RPS15A       | ENSG00000136155 SCEL           | ENSG00000137691 C11orf70     |                         |
|         | ENSG00000137975 CLA2C          | ENSG00000139160 NP_776163.1  | ENSG000000146360 GPR6          | ENSG00000147655 RSP02        | ENSG00000147                 |                              |                                |                              |                         |

ENSG00000135409|AMHR2 ENSG00000137098|SPAG8 ENSG00000148291|SURF2 ENSG00000163029|SMC6 ENSG00000163075|NP\_001025167.1 ENSG00000165195|PIGA ENSG00000166454|K0431\_HUMAN ENSG00000170624|SGCD
ACATGCT ENSG00000172403|SYNP02 ENSG00000173928|C19orf39 ENSG00000182793|GSTA5 ENSG00000183604|NR\_002453.4 ENSG00000188580|TCBA1 ENSG00000138867|C22orf13 ENSG00000141560|KT3K\_HUMAN ENSG00000143450|OAZ3 ENSG00000149295|DRD2
ENSG00000149600|COMM07 ENSG00000159871|LYPD5 ENSG00000166159|LRTM2 ENSG00000173862|Q9NWP0\_HUMAN ENSG00000182053|XR\_016180.1 ENSG00000185608|MRPL40 ENSG00000187609|NP\_060290.3 ENSG00000198466|ZNF587
ENSG00000203793|Q6ZRT74\_HUMAN ENSG00000203961|Q6ZRB1\_HUMAN ENSG00000204681|GABBR1 ENSG00000205801|Q6ZTI5\_HUMAN ENSG00000007001|UPP2 ENSG000000061656|SPAG4 ENSG00000109332|UBE2D3 ENSG00000113369|ARRDC3 ENSG00000113658|SMAD5 ENSG00000120696|KBTBD7 ENSG00000130449|ZSWIM6 ENSG00000135698|MPHOSPH6 ENSG00000136108|CKAP2 ENSG00000136379|FAM108C1 ENSG00000136709|WDR33 ENSG00000113161|HMGCR
ENSG00000138180|CEP55 ENSG00000149345|U2D3L\_HUMAN ENSG00000152684|PELO ENSG00000152894|PTRPK ENSG00000153339|KIAA1012 ENSG00000154645|CHODL ENSG00000156508|EEF1A1 ENSG00000156531|PHF6 ENSG00000159763|PIP ENSG00000163611|CCDC52 ENSG00000164329|PAPD4 ENSG00000165355|FBXO33 ENSG00000166321|NUDT13 ENSG00000167332|OR51E2 ENSG00000169031|COL4A3 ENSG00000175061|C17orf45
ENSG00000175066|GK5 ENSG00000187994|NP\_940847.1 ENSG00000205777|GAGE4 ENSG00000180198|RCC1 ENSG00000183196|CHST6 ENSG00000183785|PEX26 ENSG00000188076|SCGB1C1 ENSG00000189847|DMD ENSG00000205808|PPAPDC2 ENSG00000205808|PPAPDC2
ACATGTA ENSG00000023171|GRAMD1B ENSG00000048707|VPS13D ENSG00000068650|ATP11A ENSG00000092421|SEMA6A ENSG00000099330|OCEL1 ENSG00000101493|ZNF516 ENSG00000106290|TAF6 ENSG00000107731|UNC5B ENSG00000110906|KCTD10 ENSG00000115718|PROC ENSG00000123358|NR4A1 ENSG00000127377|CRYGN ENSG00000135423|GLS2 ENSG00000142513|ACPT ENSG00000143546|S100A8 ENSG00000146666|Q96IP2\_HUMAN
ENSG00000149929|HTRIP3 ENSG00000154930|ACSS1 ENSG00000162666|KIAA0040 ENSG00000164334|NP\_877438.2 ENSG00000171533|MAP6 ENSG00000171711|DEFB4 ENSG00000173638|SLC19A1 ENSG00000177257|BD02\_HUMAN ENSG00000183864|TOB2 ENSG00000185684|EP400NL ENSG00000189058|APOD ENSG00000198668|CALM1 ENSG00000204080|Q6ZRQ9\_HUMAN ENSG00000205980|Q6ZU05\_HUMAN ENSG00000223228|NDUFS1 ENSG00000083097|DOPEY1
ENSG00000088448|ANKRD10 ENSG00000105819|PMPCB ENSG00000109458|GAB1 ENSG00000112531|QKI ENSG00000115828|QPCT ENSG00000116001|TIA1 ENSG00000118407|FLIIP1 ENSG00000119812|FAM98A ENSG00000120802|TMPO ENSG00000121644|C1orf121 ENSG00000122692|SMU1 ENSG00000127074|RGS13 ENSG00000131844|MCCC2 ENSG00000132570|PCBD2 ENSG00000134900|TPP2 ENSG00000136888|ATP6V1G1 ENSG00000138722|MMRN1 ENSG00000144821|MYH15 ENSG00000153896|ZNF599 ENSG00000165023|DIRAS2 ENSG00000165288|BRWD3 ENSG00000168454|TXNDC2 ENSG00000173258|ZNF483
ENSG00000196433|ASMT ENSG00000198824|C13orf8 ENSG00000203797|DDO ENSG00000100422|CERK ENSG00000100997|ABHD12 ENSG00000101425|BPI ENSG00000103034|NDRG4 ENSG00000105383|CD33 ENSG00000107593|PKD2L1 ENSG00000111254|AKAP3 ENSG000001125816|NKX2-4 ENSG00000125835|SNRPB ENSG00000132434|LANCL2 ENSG00000143409|FAM63A ENSG00000151474|FRMD4A ENSG00000161277|THAP8 ENSG00000162779|C1orf125 ENSG00000172046|USP19 ENSG00000172943|PHF8 ENSG00000184056|VPS33B ENSG00000184678|HIST2H2BE ENSG00000187095|LILRA2 ENSG00000187251|C1orf213 ENSG00000190245|Q8N7M3\_HUMAN ENSG00000196126|HLA-DRB1 ENSG00000198077|CYP2A7 ENSG00000198483|ANKRD35 ENSG00000205313|FAM106A ENSG00000206528|Q6ZSM0\_HUMAN ENSG000000057468|MSH4 ENSG000000075142|SRI ENSG000000077943|ITGA8 ENSG000000078579|FEG20 ENSG00000080822|CLDN1 ENSG00000091428|RAPGEF4 ENSG00000109163|GNRH1 ENSG00000112379|KIAA1244 ENSG00000114331|CENTB2 ENSG00000116703|PDC ENSG00000132274|TRIM22 ENSG00000138246|DNAJ13 ENSG00000138468|SENP7 ENSG00000138669|PRKG2 ENSG00000140015|KCNH5 ENSG00000143033|MTF2 ENSG00000144802|NFKBIZ ENSG00000149100|PCID1 ENSG00000151514|SALL3 ENSG00000152433|ZNF547 ENSG00000162976|PQLC3 ENSG00000163293|NPAL1 ENSG00000164985|PSP1 ENSG00000166503|HDGR3\_HUMAN ENSG00000166685|COG1 ENSG00000168228|ZCCHC4 ENSG00000171564|FGB ENSG00000172175|MALT1 ENSG00000178988|MRFAPL1 ENSG00000179008|C14orf39 ENSG00000180776|PDHHC20 ENSG00000196648|NP\_937824.1 ENSG00000197978|NP\_937824.1 ENSG00000203681|XR\_017762.1 ENSG00000204147|ASHA2B ENSG00000204147|ASHA2B
ACATTTCC ENSG00000002834|LASP1 ENSG00000007038|PRSS21 ENSG00000104880|ARHGFB18 ENSG00000117643|MAN1C1 ENSG00000125695|STRAD\_HUMAN ENSG00000125788|DEFB126 ENSG00000130590|SAMD10 ENSG00000131097|HIGD1B ENSG00000136297|MMD2 ENSG00000143125|PROK1 ENSG00000155849|ELMO1 ENSG00000158402|CDC25C ENSG00000160211|G6PD ENSG00000162105|SHANK2 ENSG00000168000|HNRPUL2 ENSG00000176476|CCDC101 ENSG00000177076|ASAH3L ENSG00000179036|VAMP2 ENSG00000197417|CARKL ENSG00000204423|C9orf33 ENSG00000065154|OAT ENSG000000074696|PTPLAD1 ENSG00000094755|GABRP ENSG00000094841|UPRT ENSG00000095139|ARCN1 ENSG00000102452|NALCN ENSG00000106034|NP\_079189.3 ENSG00000107854|TNKS2 ENSG00000111962|UST ENSG00000125144|MTIG ENSG00000131269|ABCB7 ENSG00000131873|CHSY1 ENSG00000135903|PAX3 ENSG00000137364|TPMT ENSG00000137819|PAQR5 ENSG00000152661|GJA1 ENSG00000163673|DCLK3 ENSG00000165807|C14orf50 ENSG00000166747|AP1G1 ENSG00000169299|PGM2 ENSG00000173612|GPRC6A ENSG00000188959|C9orf152 ENSG00000198417|MT1F ENSG00000204596|RPP21 ENSG00000205358|MT1H ENSG00000205707|LYRM5
ACATTTG perfect: ACATTTCC GGAATGT hsa-miR-1 tGGAATGTaaagaagtatgta 1 perfect: ACATTTCC GGAATGT hsa-miR-206 tGGAATGTaaagaagtgtggtg 1 ENSG00000099995|SF3A1 ENSG00000131378|RFTN1 ENSG00000137106|GRHPR ENSG00000142207|URB1 ENSG00000143839|REN ENSG00000148120|C9orf3 ENSG00000151148|UBE3B ENSG00000160678|S100A1 ENSG00000174264|Q4TT42\_HUMAN ENSG00000204542|C6orf15 ENSG00000206551|Q6ZT99\_HUMAN ENSG00000065135|GNAI3 ENSG00000105856|HBP1 ENSG00000112499|SLC22A2 ENSG00000116062|MSH6 ENSG00000117505|DR1 ENSG00000120526|NUDCD1 ENSG00000121210|KIAA0922 ENSG00000121335|PRB4 ENSG00000122644|ARL4A ENSG00000132466|ANKRD17 ENSG00000135250|SRPK2 ENSG00000139684|ESD ENSG00000144161|ZC3H8 ENSG00000150048|CLEC1A ENSG00000153066|TXNDC11 ENSG00000156804|FBXO32 ENSG00000163661|PTX3 ENSG00000173889|PHC3 ENSG00000180785|OR51E1 ENSG00000184258|CDR1 ENSG00000184895|SRY ENSG00000187105|HEATR4 ENSG00000205838|NP\_653326.3
ACATTTT ENSG00000068650|ATP11A ENSG00000095539|SEMA4G ENSG00000100376|FAM118A ENSG00000101350|KIF3B ENSG00000101361|NOL5A ENSG00000110777|POU2AF1 ENSG00000113070|HBEGF ENSG00000119487|MAPKAP1 ENSG00000119699|TGFB3 ENSG00000125347|IRF1 ENSG00000125354|SEPT6 ENSG00000125810|CD93 ENSG00000132932|ATP8A2 ENSG00000133216|EPHB2 ENSG00000135114|OASL ENSG00000138617|PARP16 ENSG00000143322|ABL2 ENSG00000144560|VGLL4 ENSG00000145824|CXCL14 ENSG00000147383|NSDHL ENSG00000165478|HEPACAM ENSG00000167941|SOST ENSG00000168824|NSG1\_HUMAN ENSG00000172818|OVOL1 ENSG00000173456|RNF26 ENSG00000188483|IER5L ENSG00000197724|PHF2 ENSG00000041982|TNC ENSG00000072041|SLC6A15 ENSG00000075651|PLD1 ENSG00000090266|NDUFB2 ENSG00000104824|HNRPL ENSG00000131381|ZFYVE20 ENSG00000138802|SEC24B ENSG00000143621|ILF2 ENSG00000145241|CENPC1 ENSG00000149443|CCDC102B ENSG00000150636|CCDC102B ENSG00000153575|TUBGCP5 ENSG00000162702|ZNF281 ENSG00000163041|H3F3A ENSG00000163828|TDGF3 ENSG00000165152|C9orf125 ENSG00000173046|NM\_207376 ENSG00000173698|GPR64 ENSG00000176728|CY014\_HUMAN ENSG00000178075|GRAMD1C ENSG00000185002|RFXDC1 ENSG00000188687|SLC4A5 ENSG00000197701|ZNF595 ENSG00000197958|RPL12
ACATTTT perfect: ACATTTCC GGAATGT hsa-miR-203 gtGAAATGTTtaggaccactag 2 ENSG00000029993|HMGB3 ENSG00000034063|UHRF1 ENSG00000071894|CPSF1 ENSG00000077942|FBLN1 ENSG00000100216|TOMM22 ENSG00000101265|RASSF2 ENSG00000102802|C13orf33 ENSG00000104332|SFRP1 ENSG00000107833|NPM3 ENSG00000122642|FKBP9 ENSG00000122986|HVCN1 ENSG00000124216|SNAI1 ENSG00000124374|PAIP2 ENSG00000124782|REB1 ENSG00000126785|RHOJ ENSG00000130227|XPO7 ENSG00000134075|C3orf10 ENSG00000136867|SLC31A2 ENSG00000140534|C15orf42 ENSG00000145819|ARHGAP26 ENSG00000147140|NONO ENSG00000150477|KIAA1328 ENSG00000151692|RNF144 ENSG00000153298|C6orf54 ENSG00000154767|XPC ENSG00000166398|KIAA0355 ENSG00000169084|ZBED1 ENSG00000170545|NM\_001031628.1 ENSG00000173421|CCDC36 ENSG00000176887|SOX11 ENSG00000183530|C22orf30 ENSG00000187531|SIRT7 ENSG00000196070|Q6ZV7\_HUMAN ENSG00000196118|NP\_001014979.1 ENSG00000196242|OR2C3 ENSG00000198293|Q96HM8\_HUMAN ENSG00000198293|Q96HM8\_HUMAN ENSG00000203793|Q6ZRT74\_HUMAN ENSG00000205064|Q6ZVP2\_HUMAN ENSG00000013297|CLDN11 ENSG00000071073|MGAT4A ENSG00000077097|TOP2B ENSG00000080345|RIF1 ENSG00000083642|APRIN ENSG00000091136|LAMB1 ENSG00000104067|TJP1 ENSG00000105971|CAV2 ENSG00000108001|EBF3 ENSG00000115163|CENPA ENSG00000115504|EHPB1 ENSG00000124333|SYBL1 ENSG00000126787|DLG7 ENSG00000131013|PPL4 ENSG00000133687|TMTC1 ENSG00000135900|MRPL44 ENSG00000136539|CD302 ENSG00000139921|TXNDC1 ENSG00000143355|LHX9 ENSG00000143368|SF3B4 ENSG00000143815|LBR ENSG00000151475|SLC25A31 ENSG00000152495|CAMK4 ENSG00000153064|BANK1 ENSG00000156171|TMEM77 ENSG00000162654|GBP4 ENSG00000164118|KIAA1712 ENSG00000164188|RANBP3L ENSG00000164190|NIPBL ENSG00000164329|PAPD4 ENSG00000165288|BRWD3 ENSG00000165972|CCDC38 ENSG00000166349|RAG1 ENSG00000168303|C7orf11 ENSG00000169379|ARL13B ENSG00000170917|NUDT6 ENSG00000171862|PTENP1 ENSG00000172171|C17orf42 ENSG00000173046|NM\_207376 ENSG00000173681|CXorf23 ENSG00000176208|ATAD5 ENSG00000180346|ITGD2 ENSG00000182957|SPATA13 ENSG00000188674|LOC389073 ENSG00000189046|ALKBH2 ENSG00000189136|NM\_207382 ENSG00000196344|ADH7 ENSG00000197343|ZNF655 ENSG00000198521|ZNF43 ENSG00000205885|Q6UWM6\_HUMAN
ACCAAAA ENSG00000072121|ZFYVE26 ENSG00000103222|ABCC1 ENSG00000108821|COL1A1 ENSG00000119547|ONECUT2 ENSG00000131196|NFATC1 ENSG00000134460|IL2RA ENSG00000136383|ALPK3 ENSG00000142528|ZNF473 ENSG00000145214|DGKQ ENSG00000151612|NP\_849157.2 ENSG00000157978|LDLRAP1 ENSG00000158402|CDC25C ENSG00000163221|S100A12 ENSG00000183908|LRRC55 ENSG00000003402|CFLAR ENSG00000030066|NUP160 ENSG00000031003|C5orf5 ENSG000000889157|RPLP0 ENSG00000102409|BEXL1 ENSG00000106823|ECM2 ENSG00000118473|SGIP1 ENSG00000120833|SOCS2 ENSG00000123106|CCDC91 ENSG00000132283|DNHD1 ENSG00000143033|MTF2 ENSG00000151914|DST ENSG00000155111|CDC2L6 ENSG00000163291|PAQR3 ENSG00000164234|JAK1 ENSG00000165290|XR\_017284.1 ENSG00000163918|RFC4 ENSG00000164023|SGMS2 ENSG00000164100|NDST3 ENSG00000165525|SDCCAG1 ENSG00000166192|SENP8 ENSG00000168967|PMCHL1 ENSG00000169040|PMCHL2 ENSG00000171806|C1orf156 ENSG00000176635|HORMAD2 ENSG00000180138|CSNK1A1L ENSG00000185950|IRS2 ENSG00000188408|MAGEB5
ACCAAAG ENSG00000006607|FARP2 ENSG00000064195|DLX3 ENSG00000067365|C16orf68 ENSG00000108604|SMARCD2 ENSG00000110881|ACCN2 ENSG00000118894|FAM86A ENSG00000136867|SLC31A2 ENSG00000137709|POU2F3 ENSG00000149499|EML3 ENSG00000156398|SF2X2 ENSG00000157978|LDLRAP1 ENSG00000159797|C9orf144 ENSG00000169083|AR ENSG00000169241|RAG1AP1 ENSG00000173212|C1orf161 ENSG00000175463|TBC1D10C ENSG00000182022|ST4S6\_HUMAN ENSG00000182324|KCNJ14 ENSG00000182450|KCNK4 ENSG00000184260|HIST2H2AC ENSG00000188935|Q6ZU24\_HUMAN ENSG00000196176|HIST1H4A ENSG00000205703|NP\_001010910.1 ENSG00000041982|TNC ENSG00000044115|CTNNA1 ENSG00000060138|CSDA ENSG00000061455|PRDM6 ENSG00000065911|MTHFD2 ENSG00000070159|PTPN3 ENSG00000091436|MLTK\_HUMAN ENSG00000100596|SPTLC2 ENSG00000107614|TRDMT1 ENSG00000107651|SEC23IP ENSG00000109061|MYH1 ENSG00000109654|TRIM2 ENSG00000110696|C11orf58 ENSG00000110756|HPS5 ENSG00000117281|CD160 ENSG00000120215|MLANA ENSG00000124198|ARFGEF2 ENSG00000133800|XLKD1 ENSG00000137965|TF144 ENSG00000138792|ENPEP ENSG00000141048|MYH4 ENSG00000143190|POU2F1 ENSG00000152904|GGPS1 ENSG00000155850|SLC26A2 ENSG00000155906|RMND1 ENSG00000162631|NTNG1 ENSG00000166147|FBN1 ENSG00000182983|ZNF662 ENSG00000183508|FAM46C ENSG00000183542|KLRC4 ENSG00000183784|C9orf66
ACCAAAT perfect: ACCAAAG CTTTGGT hsa-miR-9 tCTTTGGTtatctagctgtatgta 1 ENSG00000004142|POLDIP2 ENSG00000011007|TCEB3 ENSG000000087077|TRIP6 ENSG00000091704|CPA1 ENSG00000092445|TYRO3 ENSG00000103326|SOLH ENSG00000103490|PYCARD ENSG00000108861|DUSP3 ENSG00000126243|LRFN3 ENSG00000130508|PXDN ENSG00000136930|PMSB7 ENSG00000142546|NOS1P ENSG00000144648|CCBP2 ENSG00000148842|CNNM2 ENSG00000157570|TSPAN18 ENSG00000158457|TSPAN33 ENSG00000165837|Q5W0A0\_HUMAN ENSG00000165949|IFI27 ENSG00000168795|ZBTB5 ENSG00000171711|DEFB4 ENSG00000175155|YPEL2 ENSG00000177257|BD02\_HUMAN ENSG00000182606|TRAK1 ENSG00000182950|ODF3L1 ENSG00000188086|NP\_954652.1 ENSG00000189180|ZNF33A ENSG00000197465|GYPE ENSG00000198369|SPRED2 ENSG00000205730|NP\_001030013.1 ENSG00000070269|C14orf101 ENSG00000095627|TDRD1 ENSG00000100196|KDELR3 ENSG00000106049|HTBADH ENSG00000107614|TRDMT1 ENSG00000111799|COL12A1 ENSG00000115355|KIAA1212 ENSG00000116717|GADD45A ENSG00000120772|PAIP2 ENSG00000123684|LPGAT1 ENSG00000124831|LRRFIP1 ENSG00000129586|ZBED5 ENSG00000138190|EXOC6 ENSG00000139318|DUSP6 ENSG00000140743|CDR2 ENSG00000144366|GULP1 ENSG00000145491|ROPN1L ENSG00000147145|GPR23 ENSG00000148572|NRBF2 ENSG00000162086|ZNF75A ENSG00000164327|NP\_689969.2 ENSG00000166147|FBN1 ENSG00000168542|COL3A1 ENSG00000170871|K0232\_HUMAN ENSG00000171940|ZNF217 ENSG00000172469|MANEA ENSG00000176927|EFCAB5 ENSG00000183943|PRKX ENSG00000189252|SPANXN3 ENSG00000197716|Q9UHV1\_HUMAN ENSG00000198936|NP\_839944.1 ENSG00000198947|DMD ENSG00000203847|XR\_016130.1 ENSG00000203924|SPANXN2
ACCAACC ENSG00000006116|CACNG3 ENSG000000025800|KPNA6 ENSG000000072135|PTPN18 ENSG00000103495|MAZ ENSG00000105705|SF4 ENSG00000113761|ZNF346 ENSG00000119242|CCDC92 ENSG00000119686|C14orf58 ENSG00000122966|CIT ENSG00000133424|LARGE ENSG00000134461|ANKRD16 ENSG00000135749|PCNXL2 ENSG00000158480|SPATA2 ENSG00000161618|ALDH16A1 ENSG00000162076|NP\_612448.1 ENSG00000162804|SNED1 ENSG00000165171|WBSR27 ENSG00000165548|TMEM63C ENSG00000170906|NDUFA3 ENSG00000182195|LDOC1 ENSG00000183785|PEX26 ENSG00000187024|PTRH1 ENSG00000198053|SIRPA ENSG00000198883|PNMA5 ENSG00000047662|Q9ULE4\_HUMAN ENSG00000060709|RIMBP2 ENSG00000101842|VSI1 ENSG00000106299|WASL ENSG00000108924|HLF ENSG00000112531|QKI ENSG00000113296|THBS4 ENSG00000113492|AGXT2 ENSG00000117399|CDC20 ENSG00000122126|OCRL ENSG00000129071|MBD4 ENSG00000138193|PLCE1 ENSG00000139278|GLT1P1 ENSG00000140455|USP3 ENSG00000144909|OSBPL11 ENSG00000147421|HMBOX1

ENSG00000152076|CCDC74B ENSG00000163040|CCDC74A ENSG00000165914|TTC7B ENSG00000170788|DYDC1 ENSG00000171199|PROL1 ENSG00000179387|ELMOD2 ENSG00000185037|XR\_016629.1 ENSG00000185177|ZNF479

ENSG00000197990|XR\_016643.1

ACCAATA ENSG00000005884|ITGA3 ENSG00000010256|UQCRC1 ENSG00000010438|PRSS3 ENSG00000064490|RFXANK ENSG00000070031|SCT ENSG00000076662|ICAM3 ENSG00000084207|GSTP1 ENSG00000087903|RFX2 ENSG00000101210|EEF1A2 ENSG00000101443|WFDC2 ENSG00000104129|DNAJC17 ENSG00000105538|RASP1 ENSG00000108370|RGS9 ENSG00000108602|ALDH3A1 ENSG00000113430|IRX4 ENSG00000124157|SEMG2 ENSG00000124233|SEMG1 ENSG00000126456|TRF3 ENSG00000130429|ARPC1B ENSG00000132635|FAM113A ENSG00000133027|PEMT ENSG00000135749|PCNLX2 ENSG00000136193|SCRN1 ENSG00000140403|DNAJA4 ENSG00000143575|HAX1 ENSG00000152669|CCNU ENSG00000159224|GIP ENSG00000160323|ADAMTS13 ENSG00000160838|C1orf92 ENSG00000162078|U773\_HUMAN ENSG00000163879|DNALI1 ENSG00000166426|CRABP1 ENSG00000167815|PRDX2 ENSG00000169393|ELSPBP1 ENSG00000169887|Q9UKN1\_HUMAN ENSG00000170231|FABP6 ENSG00000170525|PFKFB3 ENSG00000171724|K1576\_HUMAN ENSG00000172647|PGA5 ENSG00000172724|CCL19 ENSG00000173636|PRSS1 ENSG00000180860|PGA3 ENSG00000184361|C17orf46 ENSG00000185963|BICD2 ENSG00000187144|SPATA21 ENSG00000197540|GZMM ENSG00000197696|NMB ENSG00000204973|PGA4 ENSG00000204982|PRSS2 ENSG00000205744|DENND1C ENSG00000205929|C21orf62 ENSG00000015479|MATR3 ENSG00000027315|TRPC5 ENSG00000085721|RRN3 ENSG00000092140|KIAA1333 ENSG00000099721|AMELY ENSG00000102290|PCDH11X ENSG00000104907|TRMT1 ENSG00000111215|PRR4 ENSG00000112146|FBXO9 ENSG00000112246|SIM1 ENSG00000113638|TTC33 ENSG00000114374|USP9Y ENSG00000121335|PRB4 ENSG00000126804|ZBTB1 ENSG00000131002|CYorf15B ENSG00000139278|GLIPR1 ENSG00000146038|DCDC2 ENSG00000148950|IMPP1L ENSG00000156735|BAG4 ENSG00000163293|NPAL1 ENSG00000171428|NAT1 ENSG00000172554|SNTG2 ENSG00000174016|FAM46D ENSG00000179175|GSTA3 ENSG00000184254|ALDH1A3 ENSG00000187054|TMPRSS11A ENSG00000203932|LOC728660 ENSG00000063978|RNF4 ENSG00000065621|GSTO2 ENSG00000104490|NCALD ENSG00000108774|RAB5C ENSG00000125734|NM\_001080452.1 ENSG00000125971|DYNLRB1 ENSG00000130173|NP\_061157.2 ENSG00000130702|LAMA5 ENSG00000131152|Q9H693\_HUMAN ENSG00000132275|KIAA0409 ENSG00000134287|ARF3 ENSG00000149397|HMBS ENSG00000149735|GPHA2 ENSG00000155352|FAM39B ENSG00000157350|ST3GAL2 ENSG00000159685|CHCHD6 ENSG00000165671|NSD1 ENSG00000170322|NFRKB ENSG00000176876|PXPMP2 ENSG00000179168|GGN ENSG00000180210|F2 ENSG00000181763|APR2\_HUMAN ENSG00000182484|FAM39DP ENSG00000186431|FCAR ENSG000000188869|TMC3 ENSG00000189058|APOD ENSG00000198326|C20orf141 ENSG00000212131|PDXP ENSG00000008018|PSMB1 ENSG00000095110|FAM55A ENSG00000103534|TMC5 ENSG00000104613|INTS10 ENSG00000107020|C9orf46 ENSG00000113269|RNF130 ENSG00000137693|YAP1 ENSG00000137948|BRDT ENSG00000142875|PRKACB ENSG00000143368|SF3B4 ENSG00000144677|SLC22A3 ENSG00000153363|C1orf97 ENSG00000153904|DDAH1 ENSG00000156113|KCNMA1 ENSG00000156239|NGAMT1 ENSG00000169035|KLK7 ENSG00000169800|RBMY1F ENSG00000170873|MTSS1 ENSG00000174622|RBMY1A2 ENSG00000175065|DSG4 ENSG00000177735|NP\_775916.1 ENSG00000178591|DEFB125 ENSG00000185013|NT5C1B ENSG00000206011|RBYM1J ENSG00000206046|RBYM1C

ACCACAA ENSG00000010256|UQCRC1 ENSG00000058404|CAMK2B ENSG00000068650|ATP11A ENSG00000083842|ZNF8 ENSG00000125618|PAX8 ENSG00000129680|MAP7D3 ENSG00000130724|CHMP2A ENSG00000135749|PCNLX2 ENSG00000138869|C22orf16 ENSG00000143340|C1orf76 ENSG00000149021|SCGB1A1 ENSG00000162723|SLAMF9 ENSG00000165887|ANKRD2 ENSG00000170162|VGLL2 ENSG00000170619|COMMD5 ENSG00000179058|C9orf50 ENSG00000179335|CLK3 ENSG00000184163|FAM132A ENSG00000185187|SGIIR ENSG00000204603|Q69YW3\_HUMAN ENSG000000025796|SEC63 ENSG000000087263|OGFOD1 ENSG000000092345|DAZL ENSG000000095203|EPB41L4B ENSG00000100201|DDX17 ENSG00000109771|LRP2BP ENSG00000113361|CDH6 ENSG00000118922|KLF12 ENSG00000124406|ATP8A1 ENSG00000129292|PHF20L1 ENSG00000148848|ADAM12 ENSG00000151553|KIAA1600 ENSG00000163689|NP\_940865.1 ENSG00000168615|ADAM9 ENSG00000171509|RXFP1 ENSG00000172059|KLF11 ENSG00000174500|GCET2 ENSG00000178217|SH2D4B ENSG00000182992|Q8IZM0\_HUMAN ENSG00000189376|C8orf76 ENSG00000196660|SLC30A10 ENSG00000197580|BCD02 ENSG00000204669|C9orf57 ENSG00000204848|FAM75A2 ENSG00000204849|FAM75A1 ENSG00000205073|HOXA11 ENSG00000007541|PIGQ ENSG00000072135|PTFN18 ENSG00000090975|PITPNM2 ENSG00000103963|CENTA1 ENSG00000113763|UNC5A ENSG00000119772|DNMT3A ENSG00000127098|ANKRD19 ENSG00000127533|ZFR13 ENSG00000130201|EXOC3L2 ENSG00000136367|PFHX2 ENSG00000138622|HCN4 ENSG00000141485|SLC13A5 ENSG00000142549|LOC402665 ENSG00000164711|LPAL2 ENSG00000168309|FAM107A ENSG00000168434|COG7 ENSG00000203930|Q5JPA2\_HUMAN ENSG00000203987|Q6ZR86\_HUMAN ENSG00000204936|Q8NQ3-3 ENSG00000205609|Q9BW98\_HUMAN ENSG00000211445|GPX3 ENSG00000069869|NEDD4 ENSG00000106392|C1GALT1 ENSG00000110484|SCGB2A2 ENSG00000116957|TBCE ENSG00000118267|ZNF271 ENSG00000125257|ABCC4 ENSG00000136152|COG3 ENSG00000136999|NOV ENSG00000137713|PPP2R1B ENSG00000138363|ATIC ENSG00000147676|MAL2 ENSG00000154127|STS1\_HUMAN ENSG00000154813|DPH3 ENSG00000164983|TMEM65 ENSG00000168710|AHCYL1 ENSG00000169899|TIGD4 ENSG00000171428|NAT1 ENSG00000177463|NR2C2 ENSG00000188644|XR\_016028.1 ENSG00000198633|Q6PDB4\_HUMAN ENSG00000198947|DMD ENSG00000204138|PHACTR4

ACCAGAC ENSG00000004776|HSPB6 ENSG00000056487|PHF21B ENSG00000068976|PYGM ENSG00000100124|ANKRD54 ENSG00000103489|XYLT1 ENSG00000105642|KCNN1 ENSG00000110195|FOLR1 ENSG00000112799|LY86 ENSG00000118898|PPL ENSG00000122136|OBP2A ENSG00000125954|FNTB ENSG00000131196|NFATC1 ENSG00000137133|HINT2 ENSG00000159556|ISL2 ENSG00000166145|SPINT1 ENSG000000166224|SGPL1 ENSG00000173486|FKBP2 ENSG00000178796|QBN92L\_HUMAN ENSG00000183729|NPBWR1 ENSG00000184436|THAP7 ENSG000000185640|NP\_787028.1 ENSG00000204550|LOC388564 ENSG00000009694|ODZ1 ENSG00000058668|ATP2B4 ENSG00000103534|TMC5 ENSG00000104613|INTS10 ENSG00000123600|METTL8 ENSG00000127993|NP\_115496.2 ENSG00000147166|ITGB1P2 ENSG00000148459|PDS1 ENSG00000151729|SLC25A4 ENSG00000159251|ACTC1 ENSG00000165868|HSPA12A ENSG00000170941|NP\_065895.1 ENSG00000172809|RPL38 ENSG00000174007|C3orf34 ENSG00000175646|PRM1 ENSG00000177613|CSTF2T ENSG00000108483|APOO ENSG00000185295|USP51 ENSG00000189377|NP\_940879.1 ENSG00000197024|ZNF398 ENSG00000203788|Q6ZMM1\_HUMAN ENSG00000204524|ZNF805 ENSG00000184441|NFIX ENSG00000020181|GPNR124 ENSG00000071894|CP5F1 ENSG00000112576|CCND3 ENSG00000122861|PLAU ENSG00000125498|KIR2DL1 ENSG00000130270|ATP8B3 ENSG00000130701|C20orf151 ENSG00000132749|MTL5 ENSG00000143845|ETNK2 ENSG00000146540|NP\_115726.1 ENSG00000158711|ELK4 ENSG00000161103|Q5BKV6\_HUMAN ENSG00000161847|RAVER1 ENSG00000164053|TREX1 ENSG00000164711|LPAL2 ENSG00000168781|HISPPD2A ENSG00000169020|ATP5I ENSG00000171984|C20orf196 ENSG00000173548|SH3PX3 ENSG00000176108|CHMP6 ENSG00000187608|ISG15 ENSG00000196576|PLXNB2 ENSG00000204792|Q6ZU62\_HUMAN ENSG00000205126|NP\_001027025.1 ENSG00000031081|NP\_065805.1 ENSG00000073614|JARID1A ENSG00000092148|HECTD1 ENSG00000096401|CDC5L ENSG00000106605|BLVRA ENSG00000113369|ARRDC3 ENSG00000116750|UCHL5 ENSG00000118922|KLF12 ENSG00000124568|SLC17A1 ENSG00000138613|APH1B ENSG00000143324|XPR1 ENSG00000150048|CLEC1A ENSG00000150753|CCT5 ENSG00000152931|PART1\_HUMAN ENSG00000153832|FBXO36 ENSG00000162992|NEUROD1 ENSG00000164305|CASP3 ENSG00000165338|HECTD2 ENSG00000168283|BMT1 ENSG00000169914|OTUD3 ENSG00000171723|GPHN ENSG00000175183|CSRP2 ENSG00000181192|DHTKD1 ENSG00000183814|LIN9 ENSG00000187083|Q8NEQ1\_HUMAN ENSG00000188938|FAM120A OS ENSG00000189320|NP\_995327.1 ENSG00000196562|SULF2 ENSG00000204271|SPIN3 ENSG00000100280|AP1B1 ENSG00000101076|HNF4A ENSG00000101194|C20orf59 ENSG00000105738|SIPAL13 ENSG00000111452|GPR133 ENSG000001125804|C20orf91 ENSG00000130787|HIP1R ENSG00000161904|LEMD2 ENSG00000162951|LRRTM1 ENSG00000167505|Q96NK6\_HUMAN ENSG00000171604|CXXC5 ENSG00000178028|DMAPI1 ENSG00000182218|KIAA1822 ENSG00000182376|NP\_872411.1 ENSG00000189203|TMEM179 ENSG00000197119|SLC25A29 ENSG00000204283|NP\_001001685.1 ENSG00000205923|CEMP1 ENSG00000011198|ABHD5 ENSG00000046889|DEPDC2 ENSG000000049192|ADAMTS6 ENSG00000050165|DKK3 ENSG00000084623|EIF3S2 ENSG00000090269|CLEC5A ENSG00000090581|GNPTG ENSG00000100823|APEX1 ENSG00000107249|GLIS3 ENSG00000113643|RARS ENSG00000121807|CCR2 ENSG00000127688|GAN ENSG00000133142|TCEAL4 ENSG00000136147|PHF11 ENSG00000137869|CYP19A1 ENSG00000140181|HERC2P2 ENSG00000152611|CAPSL ENSG00000158185|ANKRD36 ENSG00000160062|ZBTB8 ENSG00000163938|GNL3 ENSG00000164306|CCDC111 ENSG00000169621|C2orf13 ENSG00000170153|RNF150 ENSG00000171634|BPTF ENSG00000173681|CXorf23 ENSG00000173726|TOMM20 ENSG00000182077|PTCHD3 ENSG00000184368|MAP7D2 ENSG00000204189|Q587I5\_HUMAN ENSG00000204403|CASP12

ACCAGTA ENSG00000008226|DLEC1 ENSG00000068394|GPKOW ENSG00000115275|GCS1\_HUMAN ENSG00000118194|TNNT2 ENSG00000136718|IMP4 ENSG00000139644|TEGT ENSG00000141084|RANBP10 ENSG00000147576|ADHFE1 ENSG00000156711|MAPK13 ENSG00000162728|KCNJ9 ENSG00000166025|AMOTL1 ENSG00000166069|TMC05 ENSG00000168026|TTC21A ENSG00000168785|TSPAN5 ENSG00000177791|MYOZ1 ENSG00000180083|WFDC11 ENSG00000182912|C21orf90 ENSG00000184634|MED12 ENSG00000186063|C1orf80 ENSG00000198106|RUND0C2B ENSG00000205726|ITSN1 ENSG00000206528|Q6ZSM0\_HUMAN ENSG00000101343|CRNKL1 ENSG00000104447|TRPS1 ENSG00000107643|MAPK8 ENSG00000112695|COX7A2 ENSG00000113384|GOLPH3 ENSG00000137757|CASP5 ENSG00000143751|C1orf55 ENSG00000152939|MARVELD2 ENSG00000162434|JAK1 ENSG00000163285|GABRG1 ENSG00000164543|STK17A ENSG00000168967|PMCHL1 ENSG00000169040|PMLCH2 ENSG00000169688|MT1B ENSG00000174221|EF CAB3 ENSG00000173387|Q9P07\_HUMAN ENSG00000182836|PLCXD3 ENSG00000189266|PNRC2 ENSG00000197343|ZNF655 ENSG00000197959|DNM3 ENSG00000203933|NP\_001013421.1 ENSG00000204279|PAGE3 ENSG00000204866|IGFL2 ENSG00000205208|NP\_001008394.1

ACCAGTG ENSG00000005206|PSL1\_HUMAN ENSG000000015592|STMN4 ENSG00000100181|CSNK1E ENSG00000100299|ARSA ENSG00000103647|CORO2B ENSG00000104524|PYCRL ENSG00000112599|GUCA1B ENSG00000114786|ACY1 ENSG00000125347|IRF1 ENSG00000130724|CHMP2A ENSG00000141052|MYOCD ENSG00000153404|NP\_443141.2 ENSG00000154040|CABYR ENSG00000158805|ZNF276 ENSG00000168269|FOXI1 ENSG00000168452|EGFL8 ENSG00000169877|ERAF ENSG00000170703|TTL6 ENSG00000171314|PGAM1 ENSG00000175223|Q8TCI8\_HUMAN ENSG00000177764|ZCCHC3 ENSG00000197041|hCG\_2015269 ENSG00000204013|Q6XYD6\_HUMAN ENSG00000205864|KRTAP5-6 ENSG00000006630|DBF4 ENSG0000010219|DYRK4 ENSG00000065135|GNAI3 ENSG00000072042|RDH11 ENSG00000086475|SEPHS1 ENSG00000091039|OSBPL8 ENSG00000100353|EIF3S7 ENSG00000100384|ST13 ENSG00000100526|CDKN3 ENSG00000116161|CACYPB ENSG00000123165|ACTRT1 ENSG00000141446|ESCO1 ENSG00000167315|ACAA2 ENSG00000168229|PTGDR ENSG00000171262|FAM98B ENSG00000173627|APOBEC4 ENSG00000185015|CA13 ENSG00000185774|KCNIP4 ENSG00000197641|SERPINB13 ENSG00000197641|SERPINB13 ENSG00000111249|CUTL2 ENSG00000112578|BYSL ENSG00000114650|SCAP ENSG00000115234|SNX17 ENSG00000036828|CASR ENSG00000068394|GPKOW ENSG00000095713|CRTRAC1 ENSG00000104901|DKKL1 ENSG00000111249|CUTL2 ENSG00000112578|BYSL ENSG00000114650|SCAP ENSG00000115234|SNX17 ENSG00000129295|LRR6 ENSG00000130054|TMEM28 ENSG00000135709|KIAA0513 ENSG00000139436|GIT2 ENSG00000143512|KIAA1822L ENSG00000153789|FAM92B ENSG00000154124|FAM105B ENSG00000165233|C9orf89 ENSG00000165283|STOML2 ENSG00000166851|PLK1 ENSG00000169118|CSNK1G1 ENSG00000170054|SERPINA9 ENSG00000176531|PHLDB3 ENSG00000176534|RL41\_HUMAN ENSG00000186038|HTR3E ENSG00000205631|Q9H7S7\_HUMAN ENSG00000135033|POLR3B ENSG00000061987|MON2 ENSG00000102158|IAG2\_HUMAN ENSG00000113296|THBS4 ENSG00000113575|PPP2CA ENSG00000122126|OCRL ENSG00000131238|PPT1 ENSG00000137033|IL33 ENSG00000138829|FBN2 ENSG00000144285|SCN1A ENSG00000147853|AK3 ENSG00000151687|ANKAR ENSG00000163257|C4orf30 ENSG00000164308|NP\_071745.1 ENSG00000168843|FSTL5 ENSG00000170088|NP\_689894.1 ENSG00000171147|NP\_001001317.1 ENSG00000172748|ZNF596 ENSG00000174799|CEP135 ENSG00000176024|ZNF613 ENSG00000181192|DHTKD1 ENSG00000182359|KBTBD3 ENSG00000182752|PAPPA ENSG00000204683|C10orf113 ENSG00000204909|SPINK9

ACCACCG ENSG00000007080|CCDC124 ENSG00000039987|BEST2 ENSG00000072958|AP1M1 ENSG00000099964|MIF ENSG00000100429|HDAC10 ENSG00000104894|CD37 ENSG00000124731|TREM1 ENSG00000128262|Q9NTU6\_HUMAN ENSG00000131746|TNS4 ENSG00000155849|ELMO1 ENSG00000162413|KLHL21 ENSG00000178110|Q8N9G9\_HUMAN ENSG00000178241|Q9PD04\_HUMAN ENSG00000178287|SPAG11A ENSG00000178922|HYI ENSG00000182852|C21orf121 ENSG00000186474|KLK12 ENSG00000188636|LDOC1L ENSG00000189430|NCR1 ENSG00000203812|HIST2H2AA4 ENSG00000204603|Q69YW3\_HUMAN ENSG00000004468|CD38 ENSG00000079691|LRRC16 ENSG00000100601|ALKBH1 ENSG00000106069|CHN2 ENSG00000107371|EXOSC3 ENSG00000111266|DUSP16 ENSG00000115525|PT3GAL5 ENSG00000124788|ATXN1 ENSG00000131016|AKAP12 ENSG00000136688|IL1F9 ENSG00000140948|ZCCHC14 ENSG00000143919|C2orf34 ENSG00000147434|CHRNA6 ENSG00000150995|ITPR1 ENSG00000154553|PDLIM3 ENSG00000154553|LRGUK ENSG00000162545|CAMK2N1 ENSG00000163386|KIAA1245 ENSG00000165120|C7orf45 ENSG00000170270|C14orf142 ENSG00000177707|PVTL3 ENSG00000188610|FAM72B ENSG00000196550|FAM72A ENSG00000198604|BA21A ENSG00000204832|Q6ZRU3\_HUMAN ENSG00000206075|SERPINC5 ENSG00000067840|PDZD4 ENSG00000103187|COLL1 ENSG00000103415|HMOX2 ENSG00000106089|STX1A ENSG00000108518|PFN1 ENSG000001129244|ATP1B2 ENSG00000131584|CENTB5 ENSG00000132821|C20orf102 ENSG00000141503|MINK1 ENSG00000143590|EFNA2 ENSG00000147144|CCDC120 ENSG00000153443|FAM100A ENSG00000162191|SAKS1\_HUMAN ENSG00000166104|NP\_776166.1 ENSG00000167588|GPD1 ENSG00000170004|CHD3 ENSG00000170779|CDCA4 ENSG00000172819|RARG ENSG00000174898|TMEM146 ENSG00000182053|XR\_016180.1 ENSG00000183741|CBX6 ENSG00000183864|TOB2 ENSG00000196567|NP\_942123.1 ENSG00000198242|RPL23A ENSG00000198910|L1CAM ENSG00000005189|NP\_112203.1 ENSG00000006377|DLX6 ENSG000000087369|GNB1 ENSG00000092871|RFFL ENSG00000112319|EYA4 ENSG00000118733|OLF1 ENSG00000120948|TARDBP ENSG00000121716|Q9UKJ0-3 ENSG00000125144|MT1G ENSG00000138185|ENTPDI1 ENSG00000143155|TIPRL ENSG00000147010|SH3KBP1 ENSG00000150244|TRIM48 ENSG00000155016|CYP2U1 ENSG00000165124|SVEP1 ENSG00000165168|CYBB ENSG00000204453|XR\_019357.1 ENSG00000204691|NR\_002819.1

ACCCTGA ENSG00000002919|SNX11 ENSG00000004399|PLXND1 ENSG00000034053|APBA2 ENSG00000092201|SUPT16B ENSG000000095752|IL11 ENSG00000099377|HSD3B7 ENSG00000100246|DNAL4 ENSG00000100298|APOBEC3H ENSG00000105552|BCAT2 ENSG00000116031|CD207 ENSG00000116544|DLGAP3 ENSG00000125503|PPP1R12C ENSG00000131944|C19orf40 ENSG00000138100|TRIM54 ENSG00000142002|DPP9 ENSG00000146090|RASGEF1C ENSG00000151348|EXT2 ENSG00000159496|RGDSR\_HUMAN ENSG00000160211|G6PD ENSG00000164325|TMEM174 ENSG00000165462|PHOX2A ENSG00000167619|TMEM145 ENSG00000174683|C8orf78 ENSG00000175894|C21orf29 ENSG00000183072|NKX2-5 ENSG00000188931|C1orf192 ENSG00000197465|GYPE ENSG00000204538|PSORS1C2 ENSG00000113916|BCL6 ENSG00000125144|MT1G ENSG00000126261|SAE2 ENSG00000128731|HERC2 ENSG00000131238|PPT1 ENSG00000132664|POLR3J ENSG00000140284|SLC27A2 ENSG00000143514|TP53BP2 ENSG00000144566|RAB5A ENSG00000144713|RPL32 ENSG00000146872|TLK2 ENSG00000150433|NP\_001074015.1 ENSG00000153214|TMEM87B ENSG000001585742|LMSL2 ENSG000001597528.1 ENSG00000204600|NP\_001004349.1

ACCCTCA ENSG00000006016|CRLF1 ENSG00000008853|RHOBTB2 ENSG00000088320|REM1 ENSG00000105325|PZR1 ENSG00000107731|UNC5B ENSG00000115211|EIF2B4 ENSG00000118689|FOXO3A ENSG00000130950|FAM22F ENSG00000132698|RAB25 ENSG00000140678|ITGAX ENSG00000143595|AQP10 ENSG00000146083|RNF44 ENSG00000159409|TNRC4 ENSG00000160949|NFKBIL2 ENSG00000161999|NP\_001005920.2 ENSG00000164108|Q9HAJ2\_HUMAN ENSG00000164638|SLC29A4 ENSG00000164740|NR



|         |                              |                                |                              |                                |                                |                                |                               |                                |
|---------|------------------------------|--------------------------------|------------------------------|--------------------------------|--------------------------------|--------------------------------|-------------------------------|--------------------------------|
|         | ENSG00000182379 NXP4         | ENSG00000187045 TMPRSS6        | ENSG00000197226 TBC1D9B      | ENSG00000204314 PRRT1          | ENSG00000204585 Q8N8T0_HUMAN   | ENSG00000204715 Q4G0Q5_HUMAN   | ENSG0000020219 NP_001025037.1 | ENSG0000054938 CHRD12          |
|         | ENSG00000100889 PKC2         | ENSG00000104863 LIN7B          | ENSG00000110925 FAM130A1     | ENSG0000011300 C12orf30        | ENSG00000121552 CSTA           | ENSG00000126088 UFOD           | ENSG00000132334 PTPRE         | ENSG00000133678 CJ057_HUMAN    |
|         | ENSG00000134215 VAV3         | ENSG00000136100 VPS36          | ENSG00000136709 WDR33        | ENSG00000143185 XCL2           | ENSG00000151092 NGLY1          | ENSG00000152778 ITRO5          | ENSG00000163069 SGCB          | ENSG00000163625 WDFY3          |
|         | ENSG00000170627 FAM112B      | ENSG00000170965 PLACL1         | ENSG00000172955 ADH6         | ENSG00000185037 XR_016629.1    | ENSG00000185177 ZNF479         | ENSG00000187145 MRPS21         | ENSG00000196208 NP_683701.2   | ENSG00000196967 ZNF585A        |
|         | ENSG00000197990 XR_016643.1  | ENSG00000198185 ZNF334         | ENSG00000089159 PXN          | ENSG00000100364 C22orf9        | ENSG00000103222 ABCC1          | ENSG00000115461 IGFBP5         | ENSG00000126890 CTAG2         | ENSG00000130881 LRP3           |
| ACCGCCA | ENSG00000042022 ABHD14A      | ENSG00000089116 LHX5           | ENSG00000142694 C1orf78      | ENSG00000143537 ADAM15         | ENSG00000157856 C2orf39        | ENSG00000171798 KND1           | ENSG00000181378 CCDC108       | ENSG00000069974 RAB27A         |
|         | ENSG00000131143 COX411       | ENSG00000107672 NSMCE4A        | ENSG00000107937 GTPBP4       | ENSG00000111052 LIN7A          | ENSG00000115761 NOL10          | ENSG00000148110 HIATL1         | ENSG00000160654 CD3G          | ENSG00000080839 RBL1           |
|         | ENSG00000100505 TRIM9        | ENSG00000170502 NUDT9          | ENSG00000177283 FZD8         | ENSG00000181908 Q8N9J4_HUMAN   | ENSG00000198648 STK39          | ENSG00000204262 COL5A2         | ENSG00000106263 EIF3S9        | ENSG00000112493 TAPBP          |
| ACCGCCG | ENSG00000165985 C1QL3        | ENSG00000074800 ENO1           | ENSG00000079435 LIFE         | ENSG00000095777 MYO3A          | ENSG00000104853 CLPTM1         | ENSG00000105559 PLEKHA4        | ENSG00000130675 HLXB9         | ENSG00000137825 ITPKA          |
|         | ENSG00000114353 GNAI2        | ENSG00000125844 RRBP1          | ENSG00000130201 EXOC3L2      | ENSG00000130382 MLL1           | ENSG00000130675 HLXB9          | ENSG00000132702 HAPLN2         | ENSG00000164897 TMUB1         | ENSG00000138136 LBX1           |
|         | ENSG00000140544 MGEB8        | ENSG00000142484 TM4SF5         | ENSG00000156711 MAPK13       | ENSG00000158292 GPR153         | ENSG00000158825 CDA            | ENSG00000163064 EN1            | ENSG00000182968 SOX1          | ENSG00000164897 WDR88          |
|         | ENSG00000167619 TMEM145      | ENSG00000169682 LAT            | ENSG00000171450 CDK5R2       | ENSG00000173156 RHOD           | ENSG00000177156 TALDO1         | ENSG00000182968 SOX1           | ENSG00000183734 ASCL2         | ENSG00000184324 CSAG2          |
|         | ENSG00000185883 ATP6V0C      | ENSG00000186197 ENO1P          | ENSG00000187479 Q7Z7L8_HUMAN | ENSG00000197463 CSAG3B         | ENSG00000198598 MMP17          | ENSG00000205646 Q96GL5_HUMAN   | ENSG0000011523 CEP68          | ENSG00000100425 BRD1           |
|         | ENSG00000120885 CLU          | ENSG00000123700 KCNJ2          | ENSG00000138829 FBN2         | ENSG00000165185 KIAA1958       | ENSG00000204884 Q6ZVI2_HUMAN   | ENSG00000127554 GFER           | ENSG00000130332 LSM7          | ENSG00000132773 TOE1           |
| ACCGCCT | ENSG00000036530 CYP46A1      | ENSG00000078900 TP73           | ENSG00000097007 ABL1         | ENSG00000105516 DBP            | ENSG00000111245 MYL2           | ENSG00000167645 YIF1B          | ENSG00000183691 NOG           | ENSG00000198664 Q9BTR0_HUMAN   |
|         | ENSG00000140798 ABCC12       | ENSG00000147123 NDUFB11        | ENSG00000160953 MUM1         | ENSG00000163016 NP_660343.1    | ENSG00000164674 SYTL3          | ENSG00000167645 YIF1B          | ENSG00000126070 EIF2C3        | ENSG00000126261 SAE2           |
|         | ENSG00000205972 Q8N8T0_HUMAN | ENSG00000103342 GSPT1          | ENSG00000104537 ANXA13       | ENSG00000109805 NCAPG          | ENSG00000112333 NR2E1          | ENSG00000114948 ADAM23         | ENSG00000163104 SMARCA1       | ENSG00000163630 SYNPR          |
|         | ENSG00000128656 CHN1         | ENSG00000129084 PSMA1          | ENSG00000138041 SMEK2        | ENSG00000144481 TRPM8          | ENSG00000151514 SALL3          | ENSG00000158458 NRG2           | ENSG00000198824 C13orf8       | ENSG00000205227 Q6ZWA8_HUMAN   |
|         | ENSG00000164933 SLC25A32     | ENSG00000165071 TMEM71         | ENSG00000175104 TRAF6        | ENSG00000181013 C17orf47       | ENSG00000183735 TBK1           | ENSG00000198889 WDR40B         | ENSG0000011523 CEP68          | ENSG00000100425 BRD1           |
| ACCGCGC | ENSG00000020577 SAMD4A       | ENSG00000059915 PSD            | ENSG00000069011 PITX1        | ENSG00000099910 SCARF2         | ENSG00000104957 CCDC130        | ENSG00000107859 PITX3          | ENSG00000112041 TULP1         | ENSG00000115844 DLX2           |
|         | ENSG00000128591 FLNC         | ENSG00000129535 NRL            | ENSG00000132471 WBP2         | ENSG00000138080 EMILIN1        | ENSG00000142552 RCN3           | ENSG00000163888 CAMK2N2        | ENSG00000167543 TP53I13       | ENSG00000168826 ZNF509         |
|         | ENSG00000168993 NM_006651.3  | ENSG00000170577 SIX2           | ENSG00000170909 NP_573398.1  | ENSG00000187140 FOXD3          | ENSG00000187164 KIAA1598       | ENSG00000187288 CIDEC          | ENSG00000196408 NOXO1         | ENSG00000198113 C9orf167       |
|         | ENSG00000183600 Q66K37_HUMAN | ENSG00000185361 TNFAIP8L       | ENSG00000185669 SNAI3        | ENSG00000134986 C5orf13        | ENSG00000153923 CLCA3          | ENSG00000163684 RFP14          | ENSG00000165632 TAF3          | ENSG00000180869 C1orf180       |
|         | ENSG00000059728 MXD1         | ENSG00000112592 TBP            | ENSG00000113391 C5orf21      | ENSG00000134986 C5orf13        | ENSG00000153923 CLCA3          | ENSG00000163684 RFP14          | ENSG00000165632 TAF3          | ENSG00000180869 C1orf180       |
|         | ENSG00000181467 RAP2B        | ENSG00000198221 NP_001035973.1 | ENSG00000099999 RNF215       | ENSG00000101412 E2F1           | ENSG00000103647 CORO2B         | ENSG00000125434 SLC25A35       | ENSG00000125741 OPA3          | ENSG00000134690 CDCA8          |
| ACCGCTA | ENSG00000068323 TFE3         | ENSG00000076344 RGS11          | ENSG00000149926 FAM57B       | ENSG00000161544 CYBG           | ENSG00000161574 CC114          | ENSG00000164108 Q9HAJ2_HUMAN   | ENSG00000173126 PCP4L1        | ENSG00000173812 EIF1           |
|         | ENSG00000135100 TCF1         | ENSG00000143595 AQP10          | ENSG00000149926 FAM57B       | ENSG00000161544 CYBG           | ENSG00000161574 CC114          | ENSG00000164108 Q9HAJ2_HUMAN   | ENSG00000173126 PCP4L1        | ENSG00000173812 EIF1           |
|         | ENSG00000176534 RL41_HUMAN   | ENSG00000178977 C17orf44       | ENSG00000181110 RGAG1        | ENSG00000182199 SHMT2          | ENSG00000182851 NP_835466.1    | ENSG00000185739 SRL            | ENSG00000186326 RGS9BP        | ENSG00000204576 PRR3           |
|         | ENSG00000204914 NP_940843.1  | ENSG00000204916 NP_940843.1    | ENSG00000204917 NP_940843.1  | ENSG00000204918 NP_940843.1    | ENSG00000204919 NP_940843.1    | ENSG00000204919 NP_940843.1    | ENSG00000205711 Q6ZV92_HUMAN  | ENSG0000020922 MRE11A          |
|         | ENSG00000060138 CSDA         | ENSG00000087053 TMTR2          | ENSG00000101892 ATP1B4       | ENSG00000108932 SLC16A6        | ENSG00000111605 CPSF6          | ENSG00000112964 GHR            | ENSG00000115875 SFRS7         | ENSG00000138336 CXXC6          |
|         | ENSG00000067445 TRO          | ENSG00000142875 PRKACB         | ENSG00000143493 INTS7        | ENSG00000144224 UBXD2          | ENSG00000145996 CDKAL1         | ENSG00000148828 NP_001074467.1 | ENSG00000157540 DYRK1A        | ENSG00000163694 NP_061900.1    |
|         | ENSG00000138755 CXCL9        | ENSG00000171877 FRMD5          | ENSG00000172969 LOC285299    | ENSG00000173744 HRB            | ENSG00000185009 AP3M1          | ENSG00000198793 FRAP1          | ENSG00000198963 RORB          | ENSG00000205097 NP_001005217.1 |
| ACCGGAG | ENSG00000073350 LLGL2        | ENSG00000108679 LGALS3BP       | ENSG00000108771 LGP2_HUMAN   | ENSG00000122133 PAEP           | ENSG00000129437 KLK14          | ENSG00000130810 PPAN           | ENSG00000136861 CDK5RAP2      | ENSG00000142552 RCN3           |
|         | ENSG00000142606 MMEL1        | ENSG00000148671 C10orf116      | ENSG00000164871 SPAG11B      | ENSG00000166987 MBD6           | ENSG00000173264 GPR137         | ENSG00000176945 MUC20          | ENSG00000178287 SPAG11A       | ENSG00000187051 RPS19BP1       |
|         | ENSG00000198026 ZNF335       | ENSG00000198371 Q8NAS2_HUMAN   | ENSG00000204005 Q6ZP22_HUMAN | ENSG00000205559 Q6IBW5_HUMAN   | ENSG00000205994 Q6ZN58_HUMAN   | ENSG0000037241 RPL26L1         | ENSG00000099942 CRKL          | ENSG00000101166 SLMO2          |
|         | ENSG00000102221 PHF16        | ENSG00000112297 AIM1           | ENSG00000117614 SYF2         | ENSG00000122877 EGR2           | ENSG00000124098 C20orf108      | ENSG00000137492 PKRIR          | ENSG00000139597 NP_438169.2   | ENSG00000147121 ZNF673         |
|         | ENSG00000147642 SYBU_HUMAN   | ENSG00000160868 CYP3A4         | ENSG00000163535 SGOL2        | ENSG00000168594 ADAM29         | ENSG00000172201 ID4            | ENSG00000176896 TFSM1_HUMAN    | ENSG00000177077 PVRL3         | ENSG00000181315 ZNF322A        |
| ACCGGAT | ENSG00000181588 RKHD1        | ENSG00000188474 ZNF788         | ENSG00000188801 ZNF322B      | ENSG00000196449 YRDC           | ENSG00000197619 ZNF615         | ENSG00000198105 ZNF248         | ENSG00000205921 C21orf54      | ENSG00000120314 WDR55          |
|         | ENSG00000034063 UHRF1        | ENSG00000064270 ATP2C2         | ENSG00000079999 KEAP1        | ENSG00000103075 SLC25A1        | ENSG00000103175 WFDPC1         | ENSG00000113734 BNIP1          | ENSG00000119547 ONECUT2       | ENSG00000120314 WDR55          |
|         | ENSG00000120457 KCNJ5        | ENSG00000126005 ITGB4BP        | ENSG00000126460 PRRG2        | ENSG00000130827 PLXNA3         | ENSG00000132321 IQCA           | ENSG00000134571 MYBPC3         | ENSG00000163141 BNIP1         | ENSG00000167741 GGT6           |
|         | ENSG00000169306 IL1RAPL1     | ENSG00000169375 SIN3A          | ENSG00000169894 MUC3A        | ENSG00000173456 RNF26          | ENSG00000175718 CXorf55        | ENSG00000184292 TACSD2         | ENSG00000185049 WHSC2         | ENSG00000187650 NP_001017921.1 |
|         | ENSG00000189037 DUSP21       | ENSG00000196421 PRR17          | ENSG00000196476 C20orf96     | ENSG00000196747 HIST1H3B       | ENSG00000198693 Q6ZW86_HUMAN   | ENSG00000083937 CHMP2B         | ENSG00000100483 C14orf138     | ENSG0000012769 LAMA4           |
|         | ENSG00000113140 SPARC        | ENSG00000114166 PCAF           | ENSG00000118363 SPCS2        | ENSG00000120279 MYC11          | ENSG00000133805 AMPD3          | ENSG00000133808 MITCALCL       | ENSG00000136709 WDR33         | ENSG00000137509 PRCP           |
|         | ENSG00000141458 NP1C         | ENSG00000147507 LYN            | ENSG00000151490 PTPST        | ENSG00000154485 MMP21          | ENSG00000156113 KCNMA1         | ENSG00000165566 FAM123A        | ENSG00000166170 BAG5          | ENSG00000166454 K0431_HUMAN    |
|         | ENSG00000169062 UPF3A        | ENSG00000177150 C18orf19       | ENSG00000182400 TRAPPC6B     | ENSG00000183337 BCOR           | ENSG00000198304 ZNF528         | ENSG00000198408 MGEA5          | ENSG00000198795 ZNF521        | ENSG00000198898 CAPZA2         |
| ACCGGCA | ENSG00000105419 Q99687-2     | ENSG00000112511 PHF1           | ENSG00000114923 SLC4A3       | ENSG00000115457 IGFBP2         | ENSG00000115596 WNT6           | ENSG00000116039 ATP6V1B1       | ENSG00000124159 MATN4         | ENSG00000127415 IDUA           |
|         | ENSG00000129437 KLK14        | ENSG00000130305 NSUN5          | ENSG00000132017 NP_612362.2  | ENSG00000141150 RASL10B        | ENSG00000156381 ANKRD9         | ENSG00000162004 CCDC78         | ENSG00000167468 GPX4          | ENSG00000167754 KLK5           |
|         | ENSG00000170296 GABARAP      | ENSG00000173599 PC             | ENSG00000173673 HES3         | ENSG00000186827 TNFRSF4        | ENSG00000204585 Q8N8T0_HUMAN   | ENSG00000204946 ZNF783         | ENSG00000205852 Q6ZWI3_HUMAN  | ENSG00000068796 KIF2A          |
|         | ENSG00000072210 ALDH3A2      | ENSG00000099260 PALMD          | ENSG00000100380 SLT13        | ENSG00000101349 PAK7           | ENSG00000105483 CARD8          | ENSG00000107679 PLEKHA1        | ENSG00000108278 ZNHIT3        | ENSG00000109339 MAPK10         |
|         | ENSG00000120549 KIAA1217     | ENSG00000121440 PDZRN3         | ENSG00000129422 MTUS1        | ENSG00000138614 C15orf44       | ENSG00000144476 CXCR7          | ENSG00000148426 C10orf47       | ENSG00000151690 NP_060164.3   | ENSG00000164171 ITGA2          |
|         | ENSG00000165071 TMEM71       | ENSG00000165389 C14orf147      | ENSG00000180332 KCTD4        | ENSG00000183833 C3orf15        | ENSG00000187054 TMPRSS11A      | ENSG00000187229 Q86YR2_HUMAN   | ENSG00000198783 CCDC16        | ENSG00000198799 LRIG2          |
|         | ENSG00000204352 C9orf129     | ENSG00000204987 Q6ZN80_HUMAN   | ENSG00000205413 SAMD9        | ENSG00000100599 RIN3           | ENSG00000101200 AVP            | ENSG00000106785 TRIM14         | ENSG00000109705 BAPX1         | ENSG00000123201 GUCY1B2        |
| ACCGCGC | ENSG00000111451 WIZ          | ENSG00000060558 GNA15          | ENSG00000079689 SCGN         | ENSG00000131188 PRR7           | ENSG00000140623 SEPT12         | ENSG00000151640 DPYSL4         | ENSG00000158623 TSGA13        | ENSG00000158717 RNF166         |
|         | ENSG00000125968 IDL1         | ENSG00000129757 CDKN1C         | ENSG00000130600 HLI9         | ENSG00000167046 Q5JT57_HUMAN   | ENSG00000173011 Q86TJ2_HUMAN   | ENSG00000176078 Q8NAN4_HUMAN   | ENSG00000177133 Q6ZV91_HUMAN  | ENSG00000178951 ZBTB7A         |
|         | ENSG00000160959 LRRC14       | ENSG00000161682 Q8NOU1_HUMAN   | ENSG00000164438 TLX3         | ENSG00000187479 Q7Z7L8_HUMAN   | ENSG00000187650 NP_001017921.1 | ENSG00000196293 DUX4           | ENSG00000203762 Q6ZTJ3_HUMAN  | ENSG0000053254 CHES1           |
|         | ENSG00000182378 PLCXD1       | ENSG00000187017 ESPN           | ENSG00000187479 Q7Z7L8_HUMAN | ENSG00000187650 NP_001017921.1 | ENSG00000196293 DUX4           | ENSG00000203762 Q6ZTJ3_HUMAN   | ENSG0000053254 CHES1          | ENSG0000011799 COL12A1         |
|         | ENSG00000112294 ALDH5A1      | ENSG00000113441 LNPEP          | ENSG00000129422 MTUS1        | ENSG00000145358 DDIT4L         | ENSG00000151572 TMEM16D        | ENSG00000163161 ERCC3          | ENSG00000167383 ZNF229        | ENSG00000186086 NBPF4          |
|         | ENSG00000204884 Q6ZVI2_HUMAN | ENSG00000076984 O14733-2       | ENSG00000125409 TEKT3        | ENSG00000125498 KIR2DL1        | ENSG00000125910 EDG6           | ENSG00000127528 KLF2           | ENSG00000129932 DOHH          | ENSG00000137825 ITPKA          |
| ACCGGGT | ENSG00000139549 DHH          | ENSG00000142290 FXYP7          | ENSG00000167799 NUDT8        | ENSG00000167800 TBX10          | ENSG00000173227 SYT12          | ENSG00000175718 CXorf55        | ENSG00000180104 EXOC3         | ENSG00000184185 KCNJ12         |
|         | ENSG00000184986 TMEM121      | ENSG00000197472 ZNF695         | ENSG00000198754 OXCT2        | ENSG00000204528 Q6HLK9_HUMAN   | ENSG000000087995 METTL2A       | ENSG00000092470 WDR76          | ENSG00000109572 CLCN3         | ENSG00000111799 COL12A1        |
|         | ENSG00000113522 RAD50        | ENSG00000117153 KLHL12         | ENSG00000129816 PALLD        | ENSG00000134318 ROCK2          | ENSG00000136527 SFRS10         | ENSG00000139800 ZIC5           | ENSG00000145545 SRD5A1        | ENSG00000146151 HMGCLL1        |
|         | ENSG00000147180 ZNF711       | ENSG00000155792 DEPDC6         | ENSG00000160181 TFE3         | ENSG00000168385 SEPT2          | ENSG00000175352 NRIP3          | ENSG00000198589 LRBA           | ENSG00000204178 TMEM57        | ENSG00000204518 AADACL4        |
| ACCGTGA | ENSG00000108106 UBE2S        | ENSG00000135439 CENTG1         | ENSG00000136205 TNS3         | ENSG00000153266 FEZF2          | ENSG00000161583 TBC1D3G        | ENSG00000166220 C10orf27       | ENSG00000169683 LRRC45        | ENSG00000174115 TBCD3_HUMAN    |
|         | ENSG00000178363 CALML3</     |                                |                              |                                |                                |                                |                               |                                |

ENSG00000072315|TRPC5 ENSG00000089009|RPL6 ENSG00000091583|APOH ENSG00000091664|SLC17A6 ENSG00000100387|RBX1 ENSG00000101938|CHRD1 ENSG00000113441|LNPEP ENSG00000117500|TMED5  
ENSG00000119913|TECTB ENSG00000120210|INSL6 ENSG00000122008|POLK ENSG00000124783|SSR1 ENSG00000126804|ZBTB1 ENSG00000129521|EGLN3 ENSG00000131828|PDHA1 ENSG00000133103|COG6  
ENSG00000133104|SPG20 ENSG00000133703|KRAS ENSG00000135932|CBX39 ENSG00000143157|POGK ENSG00000145833|DDX46 ENSG00000145996|CDKAL1 ENSG00000152133|CCDC75 ENSG00000154719|MRPL39  
ENSG00000156218|ADAMTSL3 ENSG00000157230|LOC728132 ENSG00000163254|CRYGC ENSG00000170873|MTSS1 ENSG00000171121|KCNMB3 ENSG00000172469|MANEA ENSG00000183784|C9orf66 ENSG00000185448|FAM47A  
ACCTAGT ENSG00000186834|HEXIM1 ENSG00000188659|NP\_001008227.1 ENSG00000196511|TPK1 ENSG00000197716|Q9UHV1\_HUMAN ENSG00000198473|FAM47C ENSG00000198498|NP\_060822.1 ENSG00000205189|ZBTB10  
ENSG00000078804|TP53|NP2 ENSG000000084734|GCKR ENSG00000085552|IGSF9 ENSG00000100197|CYP2D6 ENSG00000116521|SCAMP3 ENSG00000129657|SEC14L1 ENSG00000130948|HSD17B3 ENSG00000131368|MRPS25  
ENSG00000143614|GATAD2B ENSG00000148200|NR6A1 ENSG00000166484|MAPK7 ENSG00000177807|KCNJ10 ENSG00000183569|SERHL ENSG00000183914|DNAH2 ENSG00000196218|RYR1 ENSG00000196220|SRGAP3  
ENSG00000198937|C6orf129 ENSG00000204805|FAM27E3 ENSG00000204807|FAM27E2 ENSG00000205702|CYP2D7P1 ENSG00000088782|DEFB127 ENSG00000111832|RWDD1 ENSG00000114520|SNX4 ENSG00000116688|MFN2  
ENSG00000135299|ANKRD6 ENSG00000144962|SPATA16 ENSG00000150628|SPATA4 ENSG00000151575|TEP9 ENSG00000151575|TEP9 ENSG00000151575|TEP9 ENSG00000151575|TEP9 ENSG00000151575|TEP9 ENSG00000151575|TEP9  
ENSG00000166984|TCP10L ENSG00000167346|MMP26 ENSG00000169607|CKAP2L ENSG00000170417|TMEM182 ENSG00000170915|PAQR8 ENSG00000178125|NP\_001013648.1 ENSG00000184515|NGFRAP1L1 ENSG00000188916|NP\_001034851.1  
ENSG00000197053|FAM74A4 ENSG00000198408|MGEA5 ENSG00000198855|NP\_009007.2  
ACCTATT ENSG00000028528|SNX1 ENSG00000070404|FSTL3 ENSG00000073350|LLGL2 ENSG00000088038|CNOT3 ENSG00000090006|LTBP4 ENSG00000108523|RNF167 ENSG00000110203|FOLR3 ENSG00000115598|IL1RL2  
ENSG00000130429|ARPC1B ENSG00000132470|ITGB4 ENSG00000136193|SCRN1 ENSG00000137074|APTX ENSG00000138780|GSTCD ENSG00000145020|AMT ENSG00000149927|DOC2A ENSG00000164967|C9orf23  
ENSG00000166224|SGPL1 ENSG00000167483|FAM129C ENSG00000174015|SPERT ENSG00000179115|FARSA ENSG00000180875|GREM2 ENSG00000182372|C8orf61 ENSG00000183530|C22orf30 ENSG00000185928|C16orf53  
ENSG00000196465|MYL6B ENSG00000198758|EFS8L3 ENSG00000070087|PFN2 ENSG00000078140|HIP2 ENSG00000085365|SCAMP1 ENSG00000089818|NECAP1 ENSG00000091136|LAMB1 ENSG00000100852|ARHGAP5  
ENSG00000111666|CHPT1 ENSG00000111912|NCOA7 ENSG00000113269|RNF130 ENSG00000125531|C20orf195 ENSG00000132950|ZMY5 ENSG00000133103|BEX2 ENSG00000133134|BEX2 ENSG00000133134|BEX2  
ENSG00000138399|FASTKD1 ENSG00000143226|FCGR2A ENSG00000146276|GABRR1 ENSG00000152518|UTRN ENSG00000162630|B3GALT2 ENSG00000162661|DEY30\_HUMAN ENSG00000167220|DHD2 ENSG00000171885|AQP4  
ENSG00000182754|RPL9P7 ENSG00000184226|PCDH9 ENSG00000204560|DHX16  
ACCTCAA ENSG00000023902|PLEKH01 ENSG00000106631|MYL7 ENSG00000117834|SLC5A9 ENSG00000122711|SPINK4 ENSG00000126456|IRF3 ENSG00000126759|CFP ENSG00000129467|ADCY4 ENSG00000130175|PRKCSH  
ENSG00000148773|MKI67 ENSG00000155846|PPARGC1B ENSG00000162650|ATXN7L2 ENSG00000163833|FBXO40 ENSG00000164778|EN2 ENSG00000166473|PKD1L2 ENSG00000166741|NNMT ENSG00000167664|TMIGD2  
ENSG00000168569|NP\_001073970.1 ENSG00000169213|RAB3B ENSG00000169738|DCXR ENSG00000169877|ERAF ENSG00000171490|RSLLD1 ENSG00000175894|C21orf29 ENSG00000178796|Q8N9Z1\_HUMAN ENSG00000180305|WFDC10A  
ENSG00000183255|PTTG1IP ENSG00000186951|PPARA ENSG00000188368|NP\_954979.2 ENSG00000196218|RYR1 ENSG00000206152|Q6ZV52\_HUMAN ENSG00000206193|Q5HYA3\_HUMAN ENSG0000023330|ALAS1 ENSG00000042317|SPATA7  
ENSG00000058056|USP13 ENSG00000070019|GUCY2C ENSG00000102543|CDADC1 ENSG00000113597|NP\_079217.1 ENSG00000119899|SLC17A5 ENSG00000123612|ACVR1C ENSG00000134077|THUMPD3 ENSG00000134259|NGFB  
ENSG00000136770|DNAJC1 ENSG00000136875|PRPF4 ENSG00000137675|MMP27 ENSG00000143815|LBR ENSG00000145782|ATG12 ENSG00000152455|SUV39H2 ENSG00000158125|XDH ENSG00000162909|CAPN2  
ENSG00000164308|NP\_071745.1 ENSG00000165443|PHYH1PL ENSG00000173302|GPR148 ENSG00000176177|ENTHD1 ENSG00000179859|LOC284023 ENSG00000182263|FIGN ENSG00000183952|Q9HS99\_HUMAN ENSG00000197372|ZNF675  
ENSG00000198056|PRIM1 ENSG00000198734|F5 ENSG00000198770|Q9H396\_HUMAN ENSG00000203925|LOC647839  
ACCTCAG ENSG00000005238|KIAA1539 ENSG00000006194|ZNF263 ENSG00000010803|SCMH1 ENSG00000047056|WDR37 ENSG00000112763|BTN2A1 ENSG00000113273|ARSB ENSG00000115318|LOXL3 ENSG00000116584|ARHGFE2  
ENSG00000128242|GAL3ST1 ENSG00000129270|MMP28 ENSG00000137073|UBAP2 ENSG00000137135|C9orf100 ENSG00000143851|PTNP7 ENSG00000151651|ADAM8 ENSG00000169194|IL13 ENSG00000169635|HIC2  
ENSG00000171700|RGS19 ENSG00000176782|DEFB104A ENSG00000177023|DEFB104B ENSG00000177192|PUS1 ENSG00000179361|ARID3B ENSG00000182796|Q6UW11\_HUMAN ENSG00000186862|PDZD7 ENSG00000187605|K0401\_HUMAN  
ENSG00000189433|GJB4 ENSG00000059804|GTR3\_HUMAN ENSG00000080200|NP\_705833.2 ENSG00000092531|SNAP23 ENSG00000114861|FOXP1 ENSG00000117399|CDC20 ENSG00000119965|C10orf88 ENSG00000121989|ACVR2A  
ENSG00000124532|MRS2L2 ENSG00000141429|GALNT1 ENSG00000143155|TIPRL ENSG00000150510|FAM124A ENSG00000161571|Q5YKGS\_HUMAN ENSG00000164175|SLC45A2 ENSG00000164494|PDS2 ENSG00000164654|NP\_061878.3  
ENSG00000165097|AOF1 ENSG00000170009|Q9NTH0\_HUMAN ENSG00000173262|SLC2A3 ENSG00000176681|LRRC37A2 ENSG00000181322|TXNDC6 ENSG00000182263|FIGN  
ENSG0000013275|PSMC4 ENSG00000033100|CHGUT\_HUMAN ENSG00000068976|PYGM ENSG00000107960|OBFC1 ENSG00000125888|C20orf179 ENSG00000130508|PXDN ENSG00000130517|PGPEP1 ENSG00000133149|TEX13A  
ENSG00000137809|ITGA11 ENSG00000161031|PGLYRP2 ENSG00000169006|NTR2 ENSG00000170653|ATF7 ENSG00000172053|QARS ENSG00000181977|PYX2 ENSG00000182698|NM\_001007089 ENSG00000197721|CR1L  
ENSG00000070501|POLB ENSG00000085719|CPNE3 ENSG00000101557|USP14 ENSG00000101624|CEP76 ENSG00000105146|AUAKC ENSG000001128059|PPAT ENSG00000136869|TLR4  
ENSG00000138829|FBN2 ENSG00000139278|GLIPR1 ENSG00000147684|NDUF9B ENSG00000163071|SPATA18 ENSG00000166343|ZMYND17 ENSG00000173334|TRIB1 ENSG00000173915|USMG5 ENSG00000174579|MSL2L1  
ENSG00000185842|Q4VXG5\_HUMAN ENSG00000186340|THBS2 ENSG00000187772|LIN28B ENSG00000204201|Q49A40\_HUMAN  
ACCTCCA ENSG00000008513|ST3GAL1 ENSG00000072163|LIMS2 ENSG00000079263|SP140 ENSG00000084731|KIF3C ENSG00000087266|SH3BP2 ENSG00000100311|PDGFB ENSG00000104964|AES ENSG00000106367|AP1S1  
ENSG00000125084|WNT1 ENSG00000133065|SLC41A1 ENSG00000139531|SUOX ENSG00000143473|KCNH1 ENSG00000144231|POLR2D ENSG00000151948|GLT1D1 ENSG00000158163|DZIF1L ENSG00000161642|ZNF385  
ENSG00000163286|PPBN\_HUMAN ENSG00000167114|SLC27A4 ENSG00000167613|LAIR1 ENSG00000168079|SCARA5 ENSG00000170906|NDUFA3 ENSG00000171773|TXNL6 ENSG00000172943|PHF8 ENSG00000176108|CHMP6  
ENSG00000179889|PDXDC1 ENSG00000182566|CLEC4G ENSG00000187942|LDDRAD2 ENSG00000198500|Q96C21\_HUMAN ENSG00000204660|NP\_001013740.1 ENSG00000204661|LOC729569 ENSG00000205745|Q7IMF4\_HUMAN ENSG0000011114|BTBD7  
ENSG00000100281|HMG2L1 ENSG00000102743|SLC25A15 ENSG00000109182|NP\_079363.1 ENSG00000133101|CCNA1 ENSG00000135476|ESPL1 ENSG00000136933|RABEPK ENSG00000145362|ANK2 ENSG00000150712|MTMR12  
ENSG00000152268|SPON1 ENSG00000158966|CACHD1 ENSG00000168229|PTGDR ENSG00000182457|NR\_002323.1 ENSG00000185038|Q8IUR1\_HUMAN ENSG00000196270|Q6ZWE7\_HUMAN ENSG00000196433|ASMT ENSG00000198855|NP\_009007.2

ACCTTGA ENSG00000105655|NP\_057452.1 ENSG00000125818|PSMF1 ENSG00000128313|APOL5 ENSG00000131067|GGTL3 ENSG00000132915|PDE6A ENSG00000135709|KIAA0513 ENSG00000157152|SYN2 ENSG00000159461|AMFR  
ENSG00000164363|SLC6A18 ENSG00000165795|NDRG2 ENSG00000172803|NP\_689973.2 ENSG00000172936|MYD88 ENSG00000181773|GPR3 ENSG00000197838|CYP2A13 ENSG00000198213|NM\_207501 ENSG00000205609|Q9BW98\_HUMAN  
ENSG00000169764|PLA2G10 ENSG00000106258|CYP3A5 ENSG00000108389|MTMR4 ENSG00000110429|FBX3 ENSG00000119922|IFIT2 ENSG00000128655|PDE11A ENSG00000144481|TRPM6  
ENSG00000145391|SETD7 ENSG00000146242|TPBG ENSG00000151893|C10orf46 ENSG00000165868|HSPA12A ENSG00000167842|MIS12 ENSG00000168778|C12orf38 ENSG00000171334|TRIB1 ENSG00000181322|TXNDC6  
ACCTTGG ENSG00000187185|Q86V67\_HUMAN ENSG00000188687|SLC4A5 ENSG00000196812|ZSCAN16 ENSG00000198417|MT1F ENSG00000204829|CBWD7  
ENSG00000044446|PHKA2 ENSG00000072163|LIMS2 ENSG00000100012|SEC14L3 ENSG00000130775|C1orf38 ENSG00000137221|TJAP1 ENSG00000155428|TRIM74 ENSG00000163909|HEYL ENSG00000164048|ZNF589  
ENSG00000168569|NP\_001073970.1 ENSG00000169682|LAT ENSG00000178809|TRIM73 ENSG00000184489|PTP4A3 ENSG00000080818|PSMB1 ENSG00000032742|IFP88 ENSG00000073711|PPP2R3A ENSG00000079385|CEACAM1  
ENSG00000086598|TMED2 ENSG00000100578|KIAA0586 ENSG00000101367|MAPRE1 ENSG00000113163|COL4A3BP ENSG00000120742|RAMP4\_HUMAN ENSG00000124564|SLC17A3 ENSG00000124818|OPN5 ENSG00000133704|IPO8  
ENSG00000136813|KIAA0368 ENSG00000156206|C15orf26 ENSG00000159399|HK2 ENSG00000163170|BOLA3 ENSG00000165675|ENOX2 ENSG00000166913|YWHAB ENSG00000166986|MARS  
ENSG00000170873|MTSS1 ENSG00000196406|SPANXE ENSG00000198021|SPANXA2 ENSG00000198573|SPANXC ENSG00000203926|SPANXA1  
ACGACAT ENSG0000006283|CACNA1G ENSG00000055957|ITIH1 ENSG00000108771|LGP2\_HUMAN ENSG00000111245|MYL2 ENSG00000111653|ING4 ENSG00000115641|FHL2 ENSG00000123201|GUCY1B2 ENSG00000123965|NP\_777590.1  
ENSG00000134014|ELP3 ENSG00000140807|NKD1 ENSG00000154478|GPR26 ENSG00000155034|FBXL18 ENSG00000167600|CYP2S1 ENSG00000167740|CYB5D2 ENSG00000173156|RHOD ENSG00000177469|PTRF  
ENSG00000179823|XR\_017713.1 ENSG00000180438|TPRXL ENSG00000183963|SMTN ENSG00000185736|ADARB2 ENSG00000185990|F8A3 ENSG00000197932|F8A2 ENSG00000198444|F8A1 ENSG00000198520|NP\_001004307.1  
ENSG00000198610|AKR1C4 ENSG00000204268|Q6ZVY1\_HUMAN ENSG00000204368|SSX7 ENSG00000049249|TNFRSF9 ENSG00000106080|FKBP14 ENSG00000120149|MSX2 ENSG00000121797|CCRL2 ENSG00000132603|NIP7  
ENSG00000142871|CYR61 ENSG00000144407|PTHR2 ENSG00000147509|RGS20 ENSG00000149050|ZNF214 ENSG00000149658|YTHDF1 ENSG00000156284|CLDN8 ENSG00000156384|C10orf78 ENSG00000168538|NP\_068761.4  
ENSG00000169062|UPF3A ENSG00000170745|KCNS3 ENSG00000176714|CCDC121 ENSG00000182217|HIST2H4B ENSG00000182952|HMGNA4 ENSG00000183941|HIST2H4A ENSG00000186017|ZNF566 ENSG00000187155|CU085\_HUMAN  
ENSG00000198398|NP\_997199.1  
ACGACGT ENSG00000033050|ABCF2 ENSG00000040608|RTN4R ENSG00000064655|EYA2 ENSG00000088305|DNMT3B ENSG00000101236|RNF24 ENSG00000108557|RAI1 ENSG00000112751|SIN3B ENSG00000130300|PLVAP  
ENSG00000131871|SELS\_HUMAN ENSG00000134075|C3orf10 ENSG00000134864|Q9BVM4\_HUMAN ENSG00000142319|SLC6A3 ENSG00000142634|EFHD2 ENSG00000160161|CLIP2 ENSG00000164216|TSSK1B ENSG00000170549|IRX1  
ENSG00000173581|CCDC106 ENSG00000177370|TIMM22 ENSG00000179743|Q8N9F6\_HUMAN ENSG00000181977|PYY2 ENSG00000185739|SRL ENSG00000186301|Q49A61\_HUMAN ENSG00000188234|XR\_016668.1 ENSG00000189385|Q8N814\_HUMAN  
ENSG00000196460|Q6ZNB4\_HUMAN ENSG00000198182|ZNF607 ENSG000000011523|CEP68 ENSG00000053254|CHES1 ENSG000000054267|ARID4B ENSG00000101384|JAG1 ENSG00000112238|PRDM13 ENSG00000125675|GRIA3  
ENSG00000138640|FAM13A1 ENSG00000139155|SLC01C1 ENSG00000150347|ARID5B ENSG00000154122|ANKH ENSG00000169762|TAPT1 ENSG00000169914|OTUD3 ENSG00000186487|MYT1L ENSG00000187079|TEAD1  
ACGAGCT ENSG00000022567|SLC45A4 ENSG00000102030|ARD1A ENSG00000130528|HRC ENSG00000131477|RAMP2 ENSG00000136425|CIB2 ENSG00000163795|ZNF513 ENSG00000164318|EGFLAM ENSG00000171595|DNAI2  
ENSG00000172638|EFEMP2 ENSG00000172889|EGFL7 ENSG00000172987|HPSE2 ENSG00000175121|WFD5 ENSG00000181867|FTMT ENSG00000182472|CAPN12 ENSG00000185619|PCGF3 ENSG00000196805|SPRR2A  
ENSG00000204048|Q6ZUG3\_HUMAN ENSG000000047634|SCML1 ENSG000000082196|C1QTNF3 ENSG000000099256|PRTFDC1 ENSG00000102837|OLFM4 ENSG00000106034|NP\_079189.3 ENSG00000106541|AGR2 ENSG00000107938|C10orf137  
ENSG00000110079|MS4A4A ENSG00000112077|RHAG ENSG00000115963|RND3 ENSG00000125037|TMEM111 ENSG00000125879|OTOR ENSG00000148737|TCF7L2 ENSG00000163466|ARPC2 ENSG00000163617|K1AAL1407  
ENSG00000169071|ROD2 ENSG00000170542|SERPINB9 ENSG00000176834|NP\_061959.2 ENSG00000178974|FBXO34 ENSG00000180777|ANKRD30B ENSG00000181072|CHRM2 ENSG00000181631|P2RY13 ENSG00000185915|KLHL34  
ENSG00000197487|GALP\_HUMAN ENSG00000205024|Q6ZVP5\_HUMAN ENSG00000205498|Q6ZRB7\_HUMAN  
ACGAGTA ENSG00000035664|DAPK2 ENSG00000055483|USP36 ENSG00000070495|JMJD6 ENSG00000078808|SDF4 ENSG00000087460|GNAS ENSG00000110801|PSMD9 ENSG00000116237|ICMT ENSG00000117682|DHDDS  
ENSG00000131584|CENTB5 ENSG00000132142|ACACA ENSG00000141664|ZCCHC2 ENSG00000148803|C10orf125 ENSG00000157950|SSX2\_HUMAN ENSG00000161082|BRUNOL5 ENSG00000165478|HEPACAM ENSG00000167323|STIM1  
ENSG00000169194|IL13 ENSG00000177963|RIC8A ENSG00000180924|Q9BVQ6\_HUMAN ENSG00000205396|Q6ZRG2\_HUMAN ENSG0000016402|IL20RA ENSG00000100354|TNRC6B ENSG00000102897|LYRM1 ENSG00000104231|ZFAND1  
ENSG00000111897|SERINC1 ENSG00000113522|RAD50 ENSG00000113583|C5orf15 ENSG00000118523|CTGF ENSG00000127314|RAP1B ENSG00000128590|DNAJB9 ENSG00000137038|C9orf123 ENSG00000138709|LARP2  
ENSG00000139218|SFRS2IP ENSG00000139973|SYT16 ENSG00000141469|SLC14A1 ENSG00000144354|CDCA7 ENSG00000144746|ARL6IP5 ENSG00000148935|GAS2 ENSG00000161405|IKZF3 ENSG00000167996|FTH1  
ENSG00000170954|ZNF415 ENSG00000176276|hCG\_1757335 ENSG00000183067|IGSF5 ENSG00000186812|ZNF397 ENSG00000187824|NP\_001004313.1 ENSG00000188610|FAM72B ENSG00000196550|FAM72A ENSG00000196705|ZNF431  
ENSG00000197851|NP\_997386.1 ENSG00000203875|SNHG5  
ACGATCC ENSG00000080511|RDH8 ENSG00000101438|SLC32A1 ENSG00000102007|PLP2 ENSG00000114316|USP4 ENSG00000123454|DBH ENSG00000127528|KLF2 ENSG00000130300|PLVAP ENSG00000131037|EPS8L1  
ENSG00000134882|UBAC2 ENSG00000142009|Q9BSM8\_HUMAN ENSG00000142290|FYXD7 ENSG00000158856|EPB49 ENSG00000160050|CCDC28B ENSG00000163898|LIPIH ENSG00000164776|PHKG1 ENSG00000165272|AQP3  
ENSG00000169676|DRD5 ENSG00000169899|Q96MA9\_HUMAN ENSG00000176078|Q8NAN4\_HUMAN ENSG00000176387|HSD11B2 ENSG00000180198|RCC1 ENSG00000182108|MYLE\_HUMAN ENSG00000183072|NKX2-5 ENSG00000184743|NP\_056274.3  
ENSG00000189152|Q8TC17\_HUMAN ENSG00000196935|SRGAP1 ENSG00000198518|HIST1H4E ENSG00000203927|Q6ZNY1\_HUMAN ENSG00000205485|Q6DCA4\_HUMAN ENSG00000049618|ARID1B ENSG00000076716|GPC4 ENSG00000085433|WDR47  
ENSG00000102760|C13orf15 ENSG00000108100|CCNY ENSG00000117528|ABCD3 ENSG00000139842|CUL4A ENSG00000147138|GPR174 ENSG00000148444|COMMD3 ENSG00000154305|MIA3 ENSG00000162702|ZNF281  
ENSG00000163762|TM4SF18 ENSG00000164828|UNC84A ENSG00000167230|C17orf78 ENSG00000168387|ASB14 ENSG00000170647|TMEM133 ENSG00000177707|PVRL3 ENSG00000179299|NSUN7 ENSG00000189237|NAP5\_HUMAN  
ENSG00000198393|ZNF26 ENSG00000198533|Q9P1D0\_HUMAN ENSG00000198625|MDM4 ENSG00000205056|CLLU1  
ACGCAAC ENSG00000088367|EPB41L1 ENSG00000105127|AKAP8 ENSG00000115507|OTX1 ENSG00000122859|NEUROG3 ENSG00000130711|PRDM12 ENSG00000132622|HSPA12B ENSG00000135966|TGFBRAP1 ENSG00000136488|CSH2  
ENSG00000136699|SMPD4 ENSG00000140406|MESDC1 ENSG00000140526|ABHD2 ENSG00000141905|NFIC ENSG00000155511|GRIA1 ENSG00000158526|TSR2 ENSG00000162599|NFIA ENSG00000163468|CCT3  
ENSG00000163701|IL17RE ENSG00000166401|SERPINB8 ENSG00000172216|CEBPB ENSG00000174400|Q8TB00\_HUMAN ENSG00000177337|NP\_001034885.1 ENSG00000178977|C17orf44 ENSG00000198411|NM\_207443 ENSG00000203993|C9orf37  
ENSG00000204914|NP\_940843.1 ENSG00000204916|NP\_940843.1 ENSG00000204917|NP\_940843.1 ENSG00000204918|NP\_940843.1 ENSG00000204919|NP\_940843.1 ENSG00000205396|Q6ZRG2\_HUMAN ENSG0000009307|NRAS  
ENSG00000065911|MTHFD2  
ENSG00000066855|MTFR1 ENSG00000101546|C18orf22 ENSG00000112706|IMPG1 ENSG00000115806|GORASP2 ENSG00000120658|ENOX1 ENSG00000121594|CD80 ENSG00000129226|CD68 ENSG00000132437|DDC  
ENSG00000134025|NM\_022659.2 ENSG00000135917|SLC19A3 ENSG00000137038|C9orf123 ENSG00000143363|PRUNE ENSG00000144824|PLCXD2 ENSG00000146469|VIP ENSG00000147400|CETN2  
ENSG00000164741|DLCL1 ENSG00000164929|BAALC ENSG00000166928|NP\_115986.3 ENSG00000170854|MINA ENSG00000179933|C14orf119 ENSG00000180318|CART1 ENSG00000205111|CDKL4  
ACGCAAT ENSG00000004848|ARX ENSG00000121271|SEMA3B ENSG00000207847|B4GALT7 ENSG00000064666|CNN2 ENSG00000067066|SP100 ENSG00000068078|FCFR3 ENSG00000070371|CLTCL1 ENSG00000099822|HCN2  
ENSG00000104299|INT9\_HUMAN ENSG00000104964|AES ENSG00000105066|FIZ1 ENSG00000105972|C7orf20 ENSG00000120087|HOXB7 ENSG00000132321|IQCA ENSG00000137177|KIF13A ENSG00000140263|SORD  
ENSG00000158793|NIT1 ENSG00000164108|Q9HAJ2\_HUMAN ENSG00000167491|GATAD2A ENSG00000175164|ABO ENSG00000175170|Q5T319\_HUMAN ENSG00000180824|Q8NAH5\_HUMAN ENSG00000184009|ACTG1 ENSG00000185527|PDE6G  
ENSG00000189060|H1FO ENSG00000203814|HIST2H2BF ENSG00000204842|ATXN2 ENSG00000205680|NR\_002931.1 ENSG00000019549|SNAI2 ENSG00000075785|RAB7A ENSG00000089094|FBXL10 ENSG00000102554|KLF5  
ENSG00000106031|HOXA13 ENSG00000112167|C6orf64 ENSG00000112238|PRDM13 ENSG00000112769|LAMA4 ENSG00000115486|GGCX ENSG00000116459|ATP5F1 ENSG00000123500|COL10A1 ENSG00000124214|STAU1  
ENSG00000141433|ADCYAP1 ENSG00000148481|C10orf97 ENSG00000154065|ANKRD29 ENSG00000157193|LRP8 ENSG00000164458|T ENSG00000165078|CPA6 ENSG00000166803|KIAA0101 ENSG00000169045|HNRPH1  
ENSG00000170903|KIAA1826 ENSG00000179774|ATOH7 ENSG00000185306|C12orf56 ENSG00000185787|MORF4L1 ENSG00000186205|MOSC1 ENSG00000196104|SPOCK3 ENSG00000204155|PARG  
ENSG0000010361|FUZ ENSG00000090909|PCBP4 ENSG00000099326|MEF1 ENSG00000100462|PRMT5 ENSG00000125514|C20orf51 ENSG00000127533|F2RL3 ENSG00000127578|WFKKN1 ENSG00000129968|FAM108A1  
ENSG00000130176|CNN1 ENSG00000131096|PYY ENSG00000131634|C16orf30 ENSG00000137834|SMAD6 ENSG00000144355|DLX1 ENSG00000159247|LOC643224 ENSG00000160185|UBASH3A ENSG00000160220|PWP2  
ENSG00000166743|ACSM1 ENSG00000171223|JUNB ENSG00000182378|PLCXD1 ENSG00000198658|NP\_001073891.1 ENSG00000203835|FAM108A2 ENSG00000205414|Q6ZVL8\_HUMAN ENSG00000205994|Q6ZNS8\_HUMAN ENSG00000212130|TWF2  
ENSG00000059728|MXD1 ENSG00000070831|CDC42 ENSG00000075142|SRI ENSG00000100749|VRK1 ENSG00000111445|RFC5 ENSG00000115935|WTFP1 ENSG00000122194|PLG ENSG00000130254|SAFB2  
ENSG00000139508|SLC46A3 ENSG00000144229|THSD7B ENSG00000154265|ABCA5 ENSG00000156136|DCK ENSG00000157551|KCNJ15 ENSG00000159228|CBR1 ENSG00000159450|TCHH ENSG00000163964|PTGX  
ENSG00000164506|STXBP5 ENSG00000167785|ZNF558 ENSG00000185551|NR2F2 ENSG00000185787|MORF4L1 ENSG00000186481|NP\_001025170.1  
ACGCAATG ENSG00000029534|ANK1 ENSG00000090097|PCBP4 ENSG00000090238|YPEL3 ENSG00000100577|GSTZ1 ENSG00000103154|EFCBP2 ENSG00000108370|RGS9 ENSG00000131398|KCNC3 ENSG00000132323|ILKAP  
ENSG00000137054|POLR1E ENSG00000154124|FAM105B ENSG00000165623|C10orf49 ENSG00000166819|PLIN ENSG00000166869|CHP2\_HUMAN ENSG00000168140|VASN ENSG00000168439|STIP1 ENSG00000172538|C10orf73  
ENSG00000173950|C3orf21 ENSG00000185966|LCE3E ENSG00000189321|NR\_002940.1 ENSG00000198131|ZNF544 ENSG00000203961|Q6ZRE1\_HUMAN ENSG00000205793|Q6ZT42\_HUMAN ENSG00000040341|STAU2 ENSG00000074527|NTN4  
ENSG00000112706|IMPG1 ENSG00000117791|MOSC2 ENSG00000117862|TXNDC12 ENSG00000119231|SENP5 ENSG00000128655|PDE11A ENSG00000133808|MICALCL ENSG00000133816|MICAL2 ENSG00000137871|SUHW4  
ENSG00000144306|SCRN3 ENSG00000144668|ITGA9 ENSG00000147364|FBXO25 ENSG00000153495|C13orf16 ENSG00000154845|PPP4R1 ENSG00000162702|ZNF216 ENSG00000168542|COL3A1 ENSG00000170345|FOS  
ENSG00000175018|C10orf122 ENSG00000177283|FZD8 ENSG00000182986|NP\_997216.2 ENSG00000185061|NP\_001072996.1 ENSG00000204133|FAM33B ENSG00000204365|C10orf126  
ACGCCAA ENSG00000013455|ARPC1A ENSG00000047644|WWC3 ENSG00000078061|ARAF ENSG00000100220|C22orf28 ENSG00000102900|NUP93 ENSG00000102967|DHODH ENSG00000105393|NP\_001028721.1 ENSG00000106038|EVX1  
ENSG00000107185|KIAA0258 ENSG00000110492|MDK ENSG00000112584|RRBP1 ENSG00000125910|EDG6 ENSG00000126457|PRMT1 ENSG00000133477|FAM83F ENSG00000138083|SIX3  
ENSG00000139044|B4GALNT3 ENSG00000141552|ANAPC11 ENSG00000162881|OXER1 ENSG00000165125|TRPV6 ENSG00000168065|SLC22A11 ENSG00000170054|SERPINA9 ENSG00000198286|CARD11 ENSG00000083844|ZNF264  
ENSG00000100354|TNRC6B ENSG00000101842|VSI01 ENSG00000101843|PSMD10 ENSG00000102128|RB40L\_HUMAN ENSG00000102974|CTCF ENSG00000109911|ELP4 ENSG00000109944|C11orf63 ENSG00000110768|GTF2H1  
ENSG00000111731|KIAA0528 ENSG00000115604|LL18R1 ENSG00000116977|L GALS8 ENSG00000122194|PLG ENSG00000136141|LRCH1 ENSG00000143995|MEIS1 ENSG00000158966|CACHD1 ENSG00000163875|RYK  
ENSG00000164253|WDR41 ENSG00000164338|UTP15 ENSG00000174429|ABRA ENSG00000180233|ZNR2 ENSG00000180613|GSH2\_HUMAN ENSG00000184575|XPOT  
ACGCCGT ENSG00000006007|GDE1\_HUMAN ENSG00000060069|CTDP1 ENSG00000077549|CAPZB ENSG00000100678|SLC8A3 ENSG00000101489|BRUNOL4 ENSG00000106012|IQCE ENSG00000113196|HAND1 ENSG00000119919|NKX2-3  
ENSG00000120068|HOXB8 ENSG00000125386|C4orf8 ENSG00000125820|NKX2-2 ENSG00000130600|H19 ENSG00000135363|LMO2 ENSG00000146285|SCML4 ENSG00000163702|IL17RC ENSG00000165238|WNK2  
ENSG00000166823|MESP1 ENSG00000175602|CCDC85B ENSG00000181027|FKRP ENSG00000182289|Q9H9U3\_HUMAN ENSG00000182578|CSF1R ENSG00000183248|Q9H6K5\_HUMAN ENSG00000183506|NP\_955377.2 ENSG00000184990|SIVA1  
ENSG00000206152|Q6ZV52\_HUMAN ENSG00000065328|PKP2 ENSG00000065328|MCM10 ENSG00000116016|EPAS1 ENSG00000129048|CCRL1 ENSG00000134138|MEIS2  
ENSG00000151090|THRB ENSG00000152078|TMEM56 ENSG00000154548|SRR35\_HUMAN ENSG00000160049|DFFA ENSG00000173726|TOMM20 ENSG00000179083|FAM133A ENSG00000179930|ZNF648 ENSG00000180440|NP\_982276.1  
ACGCGAT ENSG00000075891|PAX2 ENSG00000087903|RFX2 ENSG00000103489|XYLT1 ENSG00000105085|CRSP7 ENSG00000115561|VPS24 ENSG00000134287|ARF3 ENSG00000167994|RAB3IL1 ENSG00000170909|NP\_573398.1  
ENSG00000188176|SMTNL2 ENSG00000188338|SLC38A3 ENSG00000196526|AFAP1 ENSG00000197723|HSPB9 ENSG00000205231|Q6ZQQ1\_HUMAN ENSG00000205485|Q6DCA4\_HUMAN ENSG00000078269|SYNJ2 ENSG00000107485|GATA3  
ENSG00000162944|RTTN2 ENSG00000163625|WDFY3 ENSG00000175556|LONRF3  
ACGCTAC ENSG00000006210|CX3CL1 ENSG00000064655|EYA2 ENSG00000087586|AURKA ENSG00000092445|TYRO3 ENSG00000099910|SCARF2 ENSG00000099937|SERPIND1 ENSG00000103942|HOMER2 ENSG00000104774|MAN2B1  
ENSG00000108309|NP\_006686.1 ENSG00000115758|ODC1 ENSG00000119242|CCDC92 ENSG00000213965|NP\_777590.1 ENSG00000127957|PMS2L3 ENSG00000135625|EGR4 ENSG00000138834|MAPK8IP3 ENSG00000140553|UNC45A  
ENSG00000141401|IMPA2 ENSG00000167780|SOAT2 ENSG00000171540|OTP ENSG00000172155|LCE1D ENSG00000172893|DHCR7 ENSG00000174576|NPAS4 ENSG00000177551|NHLH2 ENSG00000179253|Q5VZ43\_HUMAN  
ENSG00000187796|CARD9 ENSG00000204332|Q6ZUZ5\_HUMAN ENSG00000204425|Q6ZP74\_HUMAN ENSG00000204842|ATXN2 ENSG00000205711|Q6ZV92\_HUMAN ENSG00000048544|MRPS10 ENSG00000089225|TBX5 ENSG00000109805|NCAPG  
ENSG00000112031|MTRF1L ENSG00000114062|UBE3A ENSG00000115170|ACVR1 ENSG00000116161|CACYBP ENSG00000125848|FLRT3 ENSG00000129204|USP6 ENSG00000133393|C16orf63 ENSG00000134313|NP\_065789.1  
ENSG00000136267|DKKB ENSG00000143158|BRP44 ENSG00000147679|C8orf53 ENSG00000148677|ANKRD1 ENSG00000148737|TCF7L2 ENSG00000152207|CYSLTR2 ENSG00000154175|ABI3BP ENSG00000163826|LUZPP1

|                       |                                                                                                                                                                                                                                                                                                                                                                                                                                                                                       |                                                                                                                                                                                                                                                                                                                                                                                                                                                                                                                                       |                                                                                                                                                                                                                                                                                                                                                                                                                                                                                                                                                           |                                                                                                                                                                                                                                                                                                                                                                                                                                                                                                                                                                                                                                                                                                                                                                                                                                                                                                                                            |                                                                                                                                                                                                                                                                                                                                                                                                                                                                                                                                                                                                                                                                                                                                                                                                                                                                                                                                  |                                                                                                                                                                                                                                                                                                                                                                                                                                                                                                                 |                                                                                                                                                                                                                                                                                               |                                                                                                                                                                                                                                                                                                    |
|-----------------------|---------------------------------------------------------------------------------------------------------------------------------------------------------------------------------------------------------------------------------------------------------------------------------------------------------------------------------------------------------------------------------------------------------------------------------------------------------------------------------------|---------------------------------------------------------------------------------------------------------------------------------------------------------------------------------------------------------------------------------------------------------------------------------------------------------------------------------------------------------------------------------------------------------------------------------------------------------------------------------------------------------------------------------------|-----------------------------------------------------------------------------------------------------------------------------------------------------------------------------------------------------------------------------------------------------------------------------------------------------------------------------------------------------------------------------------------------------------------------------------------------------------------------------------------------------------------------------------------------------------|--------------------------------------------------------------------------------------------------------------------------------------------------------------------------------------------------------------------------------------------------------------------------------------------------------------------------------------------------------------------------------------------------------------------------------------------------------------------------------------------------------------------------------------------------------------------------------------------------------------------------------------------------------------------------------------------------------------------------------------------------------------------------------------------------------------------------------------------------------------------------------------------------------------------------------------------|----------------------------------------------------------------------------------------------------------------------------------------------------------------------------------------------------------------------------------------------------------------------------------------------------------------------------------------------------------------------------------------------------------------------------------------------------------------------------------------------------------------------------------------------------------------------------------------------------------------------------------------------------------------------------------------------------------------------------------------------------------------------------------------------------------------------------------------------------------------------------------------------------------------------------------|-----------------------------------------------------------------------------------------------------------------------------------------------------------------------------------------------------------------------------------------------------------------------------------------------------------------------------------------------------------------------------------------------------------------------------------------------------------------------------------------------------------------|-----------------------------------------------------------------------------------------------------------------------------------------------------------------------------------------------------------------------------------------------------------------------------------------------|----------------------------------------------------------------------------------------------------------------------------------------------------------------------------------------------------------------------------------------------------------------------------------------------------|
| ENSG00000166200 COPS2 | ENSG00000167346 MMP26                                                                                                                                                                                                                                                                                                                                                                                                                                                                 | ENSG00000178988 MRFAP1L1                                                                                                                                                                                                                                                                                                                                                                                                                                                                                                              | ENSG00000179456 ZNF238                                                                                                                                                                                                                                                                                                                                                                                                                                                                                                                                    | ENSG00000180815 MAP3K15                                                                                                                                                                                                                                                                                                                                                                                                                                                                                                                                                                                                                                                                                                                                                                                                                                                                                                                    | ENSG00000188877 POTE8_HUMAN                                                                                                                                                                                                                                                                                                                                                                                                                                                                                                                                                                                                                                                                                                                                                                                                                                                                                                      | ENSG00000189190 ZNF600                                                                                                                                                                                                                                                                                                                                                                                                                                                                                          | ENSG00000196730 DAPK1                                                                                                                                                                                                                                                                         |                                                                                                                                                                                                                                                                                                    |
| ACGCTCA               | ENSG00000023191 RNH1<br>ENSG00000140848 CPNE2<br>ENSG00000179057 IGSF22<br>ENSG00000090376 IRAK3<br>ENSG00000143184 XCL1<br>ENSG00000169607 CKAP2L<br>ENSG00000198515 CNGA1                                                                                                                                                                                                                                                                                                           | ENSG00000063438 AHRH<br>ENSG00000142484 TM4SF5<br>ENSG00000179528 LBX2<br>ENSG00000100614 PPM1A<br>ENSG00000145860 RNF145<br>ENSG00000172901 LAEVR_HUMAN<br>ENSG00000198908 BHLHB9                                                                                                                                                                                                                                                                                                                                                    | ENSG00000099972 MICAL3<br>ENSG00000143819 EPHX1<br>ENSG00000180155 LYNX1<br>ENSG00000104904 OAZ1<br>ENSG00000147465 STAR<br>ENSG00000173905 GOLPH4<br>ENSG00000198936 NP_839944.1                                                                                                                                                                                                                                                                                                                                                                         | ENSG00000101210 EEF1A2<br>ENSG00000146049 KAAG1<br>ENSG00000183077 AFMD1<br>ENSG00000111266 DUSP16<br>ENSG00000154655 L3MBTL4<br>ENSG00000184402 SS18L1<br>ENSG00000203847 XR_016130.1                                                                                                                                                                                                                                                                                                                                                                                                                                                                                                                                                                                                                                                                                                                                                     | ENSG00000101213 PTK6<br>ENSG00000146215 CRIP3<br>ENSG00000107044 HFE<br>ENSG00000112666 CSNK1A1<br>ENSG00000159450 TCHH<br>ENSG00000187010 RHD<br>ENSG00000188672 RHCE<br>ENSG00000184524 CEND1<br>ENSG00000061455 PRDM6<br>ENSG00000118804 GET1_HUMAN<br>ENSG00000178403 NEUROG2                                                                                                                                                                                                                                                                                                                                                                                                                                                                                                                                                                                                                                                | ENSG00000120915 EPHX2<br>ENSG00000147378 FATE1<br>ENSG00000015475 BID<br>ENSG00000113712 WARS2<br>ENSG00000162999 DUSP19<br>ENSG00000158786 PLA2G2F<br>ENSG00000160446 ZDHHC12<br>ENSG00000185436 IL28RA<br>ENSG00000065600 C1orf75<br>ENSG00000126226 PCID2<br>ENSG00000197595 NP_997323.1                                                                                                                                                                                                                     | ENSG00000130517 PGPEP1<br>ENSG00000149488 TMC2<br>ENSG00000071991 CDH19<br>ENSG00000121964 GTDCL1<br>ENSG00000164070 HSPA4L<br>ENSG00000198161 PPIAL4<br>ENSG00000160446 ZDHHC12<br>ENSG00000185436 IL28RA<br>ENSG00000065600 C1orf75<br>ENSG00000126226 PCID2<br>ENSG00000198856 NP_067050.1 | ENSG00000132517 GPR172B<br>ENSG00000178602 OTOS<br>ENSG00000078081 LAMP3<br>ENSG00000125868 DSTN<br>ENSG00000166396 SERPINF7<br>ENSG00000198360 NP_839944.1<br>ENSG00000162650 ATXN7L2<br>ENSG00000187796 CARD9<br>ENSG00000075785 RAB7A<br>ENSG00000165523 CLEC4E<br>ENSG00000203897 Q6W4Z2_HUMAN |
| ACGGGAC               | ENSG00000068650 ATP11A<br>ENSG00000166199 ALKBH3<br>ENSG00000204490 TNF<br>ENSG00000102974 CTCF<br>ENSG00000168204 O95014_HUMAN<br>ENSG00000204706 Q6ZV59_HUMAN                                                                                                                                                                                                                                                                                                                       | ENSG00000088256 GNA11<br>ENSG00000167202 TBC1D2B<br>ENSG00000008196 TFAP2B<br>ENSG00000107938 C1orf137<br>ENSG00000173141 MRP63                                                                                                                                                                                                                                                                                                                                                                                                       | ENSG00000099956 SMARCB1<br>ENSG00000176619 LMNB2<br>ENSG00000182645 TACC3<br>ENSG00000111780 15E2_HUMAN<br>ENSG00000175390 EIF3S5                                                                                                                                                                                                                                                                                                                                                                                                                         | ENSG00000105443 PSCD2<br>ENSG00000179304 TMM29_HUMAN<br>ENSG0000015475 BID<br>ENSG00000114948 ADAM23<br>ENSG00000177143 CETN1                                                                                                                                                                                                                                                                                                                                                                                                                                                                                                                                                                                                                                                                                                                                                                                                              | ENSG00000135723 FHOD1<br>ENSG00000179403 VWA1<br>ENSG00000049449 RCN1<br>ENSG0000015475 BID<br>ENSG00000118804 GET1_HUMAN<br>ENSG00000178403 NEUROG2                                                                                                                                                                                                                                                                                                                                                                                                                                                                                                                                                                                                                                                                                                                                                                             | ENSG00000158786 PLA2G2F<br>ENSG00000160446 ZDHHC12<br>ENSG00000185436 IL28RA<br>ENSG00000065600 C1orf75<br>ENSG00000126226 PCID2<br>ENSG00000197595 NP_997323.1                                                                                                                                                                                                                                                                                                                                                 | ENSG00000162650 ATXN7L2<br>ENSG00000187796 CARD9<br>ENSG00000075785 RAB7A<br>ENSG00000165523 CLEC4E<br>ENSG00000203897 Q6W4Z2_HUMAN                                                                                                                                                           |                                                                                                                                                                                                                                                                                                    |
| ACGGGATC              | ENSG00000069399 BCL3<br>ENSG00000132361 K1AA0664<br>ENSG00000175611 C9orf130<br>ENSG00000197162 ZNF688<br>ENSG00000110075 SAPS3<br>ENSG00000137142 IGFBP1<br>ENSG00000173515 C9orf53                                                                                                                                                                                                                                                                                                  | ENSG00000090238 YPEL3<br>ENSG00000147119 CHST7<br>ENSG00000175781 Q9H5L9_HUMAN<br>ENSG00000204157 NP_001013664.1<br>ENSG00000113140 SPARC<br>ENSG00000147488 ST18<br>ENSG00000181656 GPR88                                                                                                                                                                                                                                                                                                                                            | ENSG00000110536 NDUFS3<br>ENSG00000148356 LRSAM1<br>ENSG00000177762 C5orf27<br>ENSG00000204157 NP_001013664.1<br>ENSG00000113645 WWC1<br>ENSG00000152760 TCTEX1D1<br>ENSG00000182645 C10orf96                                                                                                                                                                                                                                                                                                                                                             | ENSG00000152666 APC2<br>ENSG00000153446 NP_689672.2<br>ENSG00000178796 Q8N9Z1_HUMAN<br>ENSG000000047365 CENTD1<br>ENSG00000113916 BCL6<br>ENSG00000156976 EIF4A2<br>ENSG00000182645 C10orf96                                                                                                                                                                                                                                                                                                                                                                                                                                                                                                                                                                                                                                                                                                                                               | ENSG00000125898 FAM110A<br>ENSG00000155275 C4orf23<br>ENSG00000178796 Q8N9Z1_HUMAN<br>ENSG000000047365 CENTD1<br>ENSG00000120158 RCL1<br>ENSG00000156976 EIF4A2<br>ENSG00000182645 C10orf96                                                                                                                                                                                                                                                                                                                                                                                                                                                                                                                                                                                                                                                                                                                                      | ENSG00000130222 GADD45G<br>ENSG00000163239 TDRD10<br>ENSG00000183117 CSMD1<br>ENSG000000047365 CENTD1<br>ENSG00000120158 RCL1<br>ENSG00000156976 EIF4A2<br>ENSG00000182645 C10orf96                                                                                                                                                                                                                                                                                                                             | ENSG00000130520 LSM4<br>ENSG00000164438 TLX3<br>ENSG00000183117 CSMD1<br>ENSG000000047365 CENTD1<br>ENSG00000120158 RCL1<br>ENSG00000156976 EIF4A2<br>ENSG00000182645 C10orf96                                                                                                                | ENSG00000132286 FXC1<br>ENSG00000164711 LPAL2<br>ENSG00000186564 FOXD2<br>ENSG00000196331 HIST1H2BO<br>ENSG00000102144 PGK1<br>ENSG00000134443 GRP<br>ENSG00000171469 ZNF561                                                                                                                       |
| ACGGGGG               | ENSG00000006638 TBXA2R<br>ENSG00000141580 WDR45L<br>ENSG00000205875 LOC197350<br>ENSG00000120438 TCP1<br>ENSG00000157557 ETS2<br>ENSG00000198223 CSF2RA                                                                                                                                                                                                                                                                                                                               | ENSG00000084774 CAD<br>ENSG00000142549 LOC402665<br>ENSG00000026751 SLAMF7<br>ENSG00000120885 CLU<br>ENSG00000165566 FAM123A<br>ENSG00000198874 TYW1                                                                                                                                                                                                                                                                                                                                                                                  | ENSG00000105376 ICAM5<br>ENSG00000148805 NR_002934.2<br>ENSG00000079950 STX7<br>ENSG00000121067 SPOP<br>ENSG00000181450 ZNF678                                                                                                                                                                                                                                                                                                                                                                                                                            | ENSG00000105609 LILRB5<br>ENSG00000150086 GRIN2B<br>ENSG00000087510 TFAP2C<br>ENSG00000135392 DNAJC14<br>ENSG00000185418 TARSL2                                                                                                                                                                                                                                                                                                                                                                                                                                                                                                                                                                                                                                                                                                                                                                                                            | ENSG00000106631 MYL7<br>ENSG00000162104 ADCY9<br>ENSG00000102780 DGKH<br>ENSG00000135392 DNAJC14<br>ENSG00000187510 NP_001004330.1                                                                                                                                                                                                                                                                                                                                                                                                                                                                                                                                                                                                                                                                                                                                                                                               | ENSG00000126934 MAP2K2<br>ENSG00000164916 FOXK1<br>ENSG00000111785 RICB8<br>ENSG00000147588 PMP2<br>ENSG00000188463 XR_015229.1                                                                                                                                                                                                                                                                                                                                                                                 | ENSG00000130119 GNL3L<br>ENSG00000166823 MESP1<br>ENSG00000114948 ADAM23<br>ENSG00000148541 FAM13C1<br>ENSG00000196639 HRH1                                                                                                                                                                   | ENSG00000130768 SMPDL3B<br>ENSG00000174177 NP_001012780.1<br>ENSG00000115310 RTN4<br>ENSG00000152782 PANK1<br>ENSG00000198018 ENTPD7                                                                                                                                                               |
| ACGGTAA               | ENSG000000007174 DNAH9<br>ENSG00000145192 AHSB<br>ENSG00000173641 HSPB7<br>ENSG000000007952 NOX1<br>ENSG00000133142 TECAL4<br>ENSG00000162976 PQLC3                                                                                                                                                                                                                                                                                                                                   | ENSG00000090776 EFNB1<br>ENSG00000154783 FGD5<br>ENSG00000178826 TMEM139<br>ENSG00000089335 ZNF302<br>ENSG00000136875 PRPF4<br>ENSG00000177047 IFNW1                                                                                                                                                                                                                                                                                                                                                                                  | ENSG00000092847 EIF2C1<br>ENSG00000156269 ARD1B<br>ENSG00000179165 PXT1<br>ENSG00000102893 PHKB<br>ENSG00000137420 NOL7<br>ENSG00000181315 ZNF322A                                                                                                                                                                                                                                                                                                                                                                                                        | ENSG00000100280 AP1B1<br>ENSG00000161682 Q8NOU1_HUMAN<br>ENSG00000181938 GINS3<br>ENSG00000113645 WWC1<br>ENSG00000137509 PRCP<br>ENSG00000188801 ZNF322B                                                                                                                                                                                                                                                                                                                                                                                                                                                                                                                                                                                                                                                                                                                                                                                  | ENSG00000104524 PYRCL<br>ENSG00000164711 LPAL2<br>ENSG00000182205 Q6ZUTO_HUMAN<br>ENSG00000115806 GORASP2<br>ENSG00000138795 LEF1<br>ENSG00000198739 LRRTM3                                                                                                                                                                                                                                                                                                                                                                                                                                                                                                                                                                                                                                                                                                                                                                      | ENSG00000105997 HOXA3<br>ENSG00000165280 VCP<br>ENSG00000182742 HOXB4<br>ENSG00000129157 GPM2<br>ENSG00000140525 K1AA1794<br>ENSG00000204789 ZNF204                                                                                                                                                                                                                                                                                                                                                             | ENSG00000114439 BBX<br>ENSG00000166394 CYB5R2<br>ENSG00000187638 NM_207367<br>ENSG00000122299 ZC3H7A<br>ENSG00000143420 ENSA<br>ENSG00000205111 CDKL4                                                                                                                                         | ENSG00000133392 MYH11<br>ENSG00000173404 INSM1<br>ENSG00000197968 Q8N231_HUMAN<br>ENSG00000130741 EIF2S3<br>ENSG00000159259 CHAF1B<br>ENSG00000211451 GNRHR2                                                                                                                                       |
| ACGGTAC               | ENSG00000062598 ELMO2<br>ENSG00000123146 CD97<br>ENSG00000147889 CDKN2A<br>ENSG00000197932 F8A2<br>ENSG00000120659 TNFSF11<br>ENSG00000159200 DSCR1<br>ENSG00000188402 NP_995324.1                                                                                                                                                                                                                                                                                                    | ENSG00000101421 CHMP4B<br>ENSG00000124191 TOX2<br>ENSG00000160282 FTCD<br>ENSG00000198444 F8A1<br>ENSG00000137364 TPMT<br>ENSG00000163638 ADAMTS9<br>ENSG00000198963 ROBB                                                                                                                                                                                                                                                                                                                                                             | ENSG00000101997 CCDC22<br>ENSG00000125741 OPA3<br>ENSG00000168703 WFDC12<br>ENSG00000203930 Q5JPA2_HUMAN<br>ENSG00000137571 SLCO5A1<br>ENSG00000164039 BDH2                                                                                                                                                                                                                                                                                                                                                                                               | ENSG00000103489 XYLT1<br>ENSG00000128805 ARHGAP22<br>ENSG00000176315 WDR19_HUMAN<br>ENSG00000003056 M6PR<br>ENSG00000143514 TP53BP2<br>ENSG00000164163 ABCE1                                                                                                                                                                                                                                                                                                                                                                                                                                                                                                                                                                                                                                                                                                                                                                               | ENSG00000105072 C19orf44<br>ENSG00000130690 Q96I54_HUMAN<br>ENSG00000176315 WDR19_HUMAN<br>ENSG00000100796 SMEK1<br>ENSG00000145675 PIK3R1<br>ENSG00000165209 STRBP                                                                                                                                                                                                                                                                                                                                                                                                                                                                                                                                                                                                                                                                                                                                                              | ENSG00000105647 PIK3R2<br>ENSG00000130827 PLXNA3<br>ENSG00000185504 C17orf70<br>ENSG00000107099 DOCK8<br>ENSG00000146648 EGFR<br>ENSG00000182217 HIST2H4B                                                                                                                                                                                                                                                                                                                                                       | ENSG00000115758 ODC1<br>ENSG00000141527 CARD14<br>ENSG00000185567 AHNAK2<br>ENSG00000107362 FAM108B1<br>ENSG00000146833 TRIM4<br>ENSG00000183941 HIST2H4A                                                                                                                                     | ENSG00000116096 SPR<br>ENSG00000147789 ZNF7<br>ENSG00000185990 F8A3<br>ENSG00000109832 DDX25<br>ENSG00000155090 KLF10<br>ENSG00000183941 HIST2H4A                                                                                                                                                  |
| ACGGTAT               | perfect: ACGGTAC GTACCGT<br>ENSG00000001460 C1orf201<br>ENSG00000141576 RNF157<br>ENSG00000182289 Q9H9U3_HUMAN<br>ENSG00000106609 C7orf42<br>ENSG00000163646 CLRN1<br>ENSG00000180332 KCTD4<br>ENSG00000205403 CFI                                                                                                                                                                                                                                                                    | perfect: hsa-miR-126<br>ENSG00000066136 NFYC<br>ENSG00000154040 CABYR<br>ENSG00000185236 RAB11B<br>ENSG00000108021 C10orf18<br>ENSG00000163714 SR140_HUMAN<br>ENSG00000182986 NP_997216.2<br>ENSG00000211452 DIO1                                                                                                                                                                                                                                                                                                                     | perfect: tcGTACCGTgagtaataatgc 2<br>ENSG00000071626 DAZAP1<br>ENSG00000165376 CLDN2<br>ENSG0000000844459 C9orf39<br>ENSG00000114346 ECT2<br>ENSG00000164484 K1AA1913<br>ENSG00000183475 ASB7                                                                                                                                                                                                                                                                                                                                                              | ENSG00000105698 USF2<br>ENSG00000168067 MAP4K2<br>ENSG000000075413 MARK3<br>ENSG00000167411 RGS2<br>ENSG00000164761 TNFRSF11B<br>ENSG00000185477 GPRIN3                                                                                                                                                                                                                                                                                                                                                                                                                                                                                                                                                                                                                                                                                                                                                                                    | ENSG00000110721 CHKA<br>ENSG00000170100 Q96MU6-2<br>ENSG000000091651 ORC6L<br>ENSG00000141279 NPEPES<br>ENSG00000165264 NDUFB6<br>ENSG00000186075 ZPBP2                                                                                                                                                                                                                                                                                                                                                                                                                                                                                                                                                                                                                                                                                                                                                                          | ENSG00000105647 PIK3R2<br>ENSG00000130827 PLXNA3<br>ENSG00000185504 C17orf70<br>ENSG00000107099 DOCK8<br>ENSG00000146648 EGFR<br>ENSG00000182217 HIST2H4B                                                                                                                                                                                                                                                                                                                                                       | ENSG00000113716 SMF_HUMAN<br>ENSG00000175781 Q9H5L9_HUMAN<br>ENSG00000099256 PRTFDC1<br>ENSG00000153107 ANAPC1<br>ENSG00000159251 ACTC1<br>ENSG00000170561 IRX2<br>ENSG00000197579 TOPORS                                                                                                     | ENSG000001124785 NRN1<br>ENSG00000181877 Q8NAZ9_HUMAN<br>ENSG00000100262 ARFGAP3<br>ENSG00000162976 PQLC3<br>ENSG00000159259 CHAF1B<br>ENSG00000175105 ZNF654<br>ENSG00000198741 Q8N9C2_HUMAN                                                                                                      |
| ACGGTTC               | ENSG00000005844 ITGAL<br>ENSG00000129355 CDKN2D<br>ENSG00000165724 ZMYND19<br>ENSG00000177673 NP_689827.1<br>ENSG000000041515 MYO16<br>ENSG00000135999 EPC2<br>ENSG00000173915 USMG5                                                                                                                                                                                                                                                                                                  | ENSG00000070182 SPTB<br>ENSG00000131061 ZNF341<br>ENSG00000165782 TMEM55B<br>ENSG00000181763 APR2_HUMAN<br>ENSG00000064787 BCAS1<br>ENSG00000138035 PNPT1<br>ENSG00000180116 C12orf40                                                                                                                                                                                                                                                                                                                                                 | ENSG00000099992 TBC1D10A<br>ENSG00000139613 SMARCC2<br>ENSG00000165863 C10orf82<br>ENSG00000181763 APR2_HUMAN<br>ENSG00000083896 YTHDC1<br>ENSG00000147535 PPAPDC1B<br>ENSG00000185061 NP_001072996.1                                                                                                                                                                                                                                                                                                                                                     | ENSG00000104884 ERCC2<br>ENSG00000144152 NP_694946.1<br>ENSG00000168065 SLC22A11<br>ENSG0000000184390 Q6ICMO_HUMAN<br>ENSG00000100987 VXS1<br>ENSG00000153162 BMP6<br>ENSG00000196387 ZNF140                                                                                                                                                                                                                                                                                                                                                                                                                                                                                                                                                                                                                                                                                                                                               | ENSG00000104938 CLEC4M<br>ENSG00000145911 N4BP3_HUMAN<br>ENSG00000168137 SETD5<br>ENSG00000197864 WBSCR23<br>ENSG00000106524 ANKMY2<br>ENSG00000156642 NPNT<br>ENSG00000198767 YY2                                                                                                                                                                                                                                                                                                                                                                                                                                                                                                                                                                                                                                                                                                                                               | ENSG00000105568 PPP2R1A<br>ENSG00000091879 ANGPT2<br>ENSG00000153107 ANAPC1<br>ENSG00000165985 C1QL3<br>ENSG00000146648 EGFR<br>ENSG00000182217 HIST2H4B                                                                                                                                                                                                                                                                                                                                                        | ENSG00000108511 HOXB6<br>ENSG00000099256 PRTFDC1<br>ENSG00000159251 ACTC1<br>ENSG00000170561 IRX2<br>ENSG00000197579 TOPORS                                                                                                                                                                   | ENSG00000123395 C12orf44<br>ENSG00000158545 NP_653205.2<br>ENSG00000176946 THAP4<br>ENSG00000204616 TRIM31<br>ENSG00000005302 MSL3L1                                                                                                                                                               |
| ACGGTTT               | ENSG00000009964 MIF<br>ENSG00000152767 FARP1<br>ENSG00000182809 CRIP2<br>ENSG00000078237 C12orf5<br>ENSG00000126010 GRPR<br>ENSG00000169062 UPF3A<br>perfect: ACGGTTT AACCGT<br>ENSG0000006453 BAIAP2L1<br>ENSG00000139613 SMARCC2<br>ENSG00000161013 MGAT4B<br>ENSG00000187979 Q6ZPC6_HUMAN<br>ENSG00000123485 NP_060880.3                                                                                                                                                           | perfect: hsa-miR-451<br>ENSG00000047617 TMEM16B<br>ENSG00000145040 UCN2<br>ENSG00000164403 SHROOM1<br>ENSG00000203903 Q6ZMP7_HUMAN<br>ENSG00000126860 EVI2A<br>ENSG00000164451 FAM26D<br>ENSG00000197054 ZNF763<br>ENSG00000072858 SIDT1<br>ENSG00000156097 GPR61<br>ENSG00000175824 XR_017847.1<br>ENSG00000198034 RPS4X<br>ENSG00000119042 SATB2<br>ENSG00000164237 CMBL<br>ENSG00000007264 MATK<br>ENSG00000104899 RNASEH2A<br>ENSG00000160310 PRMT2<br>ENSG00000184210 DGAT2L6<br>ENSG00000115415 STAT1<br>ENSG00000173905 GOLPH4 | perfect: AACCGTtaccattactgagttt 0<br>ENSG00000070778 PTPN21<br>ENSG00000145040 UCN2<br>ENSG00000164403 SHROOM1<br>ENSG00000203903 Q6ZMP7_HUMAN<br>ENSG00000126860 EVI2A<br>ENSG00000166192 SENP8<br>ENSG00000197990 XR_016643.1<br>ENSG00000072858 SIDT1<br>ENSG00000162377 C1orf163<br>ENSG00000175866 BAIAP2<br>ENSG00000205742 Q6ZTR4_HUMAN<br>ENSG00000124786 SLC35B3<br>ENSG00000164406 LEAP2<br>ENSG000000071007 TCEB3<br>ENSG00000114353 GNAI2<br>ENSG00000163795 ZNF513<br>ENSG00000185896 LAMP1<br>ENSG00000117114 LPHN2<br>ENSG00000180233 ZNF2 | ENSG00000099992 TBC1D10A<br>ENSG00000139613 SMARCC2<br>ENSG00000165863 C10orf82<br>ENSG0000000184390 Q6ICMO_HUMAN<br>ENSG00000100987 VXS1<br>ENSG00000153162 BMP6<br>ENSG00000196387 ZNF140<br>ENSG00000198767 YY2<br>ENSG00000113555 PCDH12<br>ENSG00000157191 NECAP2<br>ENSG00000197173 NP_001013689.1<br>ENSG00000093183 SEC22C<br>ENSG00000130764 LRRC47<br>ENSG00000176746 MAGEB6<br>ENSG00000178996 SNAG1<br>ENSG00000070778 PTPN21<br>ENSG00000148358 GPR107<br>ENSG00000165526 ZNF3<br>ENSG00000204343 C9orf118<br>ENSG00000130844 ZNF331<br>ENSG00000166192 SENP8<br>ENSG00000197990 XR_016643.1<br>ENSG00000087460 GNAS<br>ENSG00000162377 C1orf163<br>ENSG00000175866 BAIAP2<br>ENSG000000023697 DERA<br>ENSG00000134899 ERCC5<br>ENSG00000166253 NP_001034861.1<br>ENSG00000022277 C20orf43<br>ENSG00000120318 CENTD3<br>ENSG00000163795 ZNF513<br>ENSG00000196576 PLXNB2<br>ENSG00000117262 TPR89A<br>ENSG00000182107 TMEM30B | ENSG00000104884 ERCC2<br>ENSG00000144152 NP_694946.1<br>ENSG00000168065 SLC22A11<br>ENSG0000000184390 Q6ICMO_HUMAN<br>ENSG00000100987 VXS1<br>ENSG00000153162 BMP6<br>ENSG00000196387 ZNF140<br>ENSG00000198767 YY2<br>ENSG00000120907 ADRA1A<br>ENSG00000160075 SSU72<br>ENSG00000035681 NSMAF<br>ENSG00000109684 NP_443196.1<br>ENSG00000132463 GRSF1<br>ENSG00000178996 SNAG1<br>ENSG00000073008 PVR<br>ENSG00000149547 EI24<br>ENSG00000167112 TRUB2<br>ENSG000000037241 RPL26L1<br>ENSG00000123131 PRDX4<br>ENSG00000134324 LPIIN1<br>ENSG00000186009 ATP4B<br>ENSG00000073008 PVR<br>ENSG00000149547 EI24<br>ENSG00000167112 TRUB2<br>ENSG000000037241 RPL26L1<br>ENSG00000123131 PRDX4<br>ENSG00000134324 LPIIN1<br>ENSG00000186009 ATP4B<br>ENSG00000073008 PVR<br>ENSG00000149547 EI24<br>ENSG00000167112 TRUB2<br>ENSG000000037241 RPL26L1<br>ENSG00000123131 PRDX4<br>ENSG00000134324 LPIIN1<br>ENSG00000186009 ATP4B | ENSG00000105698 USF2<br>ENSG00000168067 MAP4K2<br>ENSG000000075413 MARK3<br>ENSG00000167411 RGS2<br>ENSG00000164761 TNFRSF11B<br>ENSG00000185477 GPRIN3<br>ENSG00000110721 CHKA<br>ENSG00000170100 Q96MU6-2<br>ENSG000000091651 ORC6L<br>ENSG00000141279 NPEPES<br>ENSG00000165264 NDUFB6<br>ENSG00000186075 ZPBP2<br>ENSG00000113716 SMF_HUMAN<br>ENSG00000175781 Q9H5L9_HUMAN<br>ENSG00000099256 PRTFDC1<br>ENSG00000153107 ANAPC1<br>ENSG00000159251 ACTC1<br>ENSG00000170561 IRX2<br>ENSG00000197579 TOPORS | ENSG000001124785 NRN1<br>ENSG00000181877 Q8NAZ9_HUMAN<br>ENSG00000100262 ARFGAP3<br>ENSG00000162976 PQLC3<br>ENSG00000159259 CHAF1B<br>ENSG00000175105 ZNF654<br>ENSG00000198741 Q8N9C2_HUMAN                                                                                                 |                                                                                                                                                                                                                                                                                                    |
| ACGTAAG               | ENSG00000139613 SMARCC2<br>ENSG00000161013 MGAT4B<br>ENSG00000187979 Q6ZPC6_HUMAN<br>ENSG00000123485 NP_060880.3<br>ENSG00000155495 MAGEC1<br>ENSG00000188848 CCDC4<br>ENSG00000005073 HOXA11<br>ENSG00000137331 IER3<br>ENSG00000174680 C21orf9<br>ENSG00000198034 RPS4X<br>ENSG00000119042 SATB2<br>ENSG00000164237 CMBL<br>ENSG00000007264 MATK<br>ENSG00000104899 RNASEH2A<br>ENSG00000160310 PRMT2<br>ENSG00000184210 DGAT2L6<br>ENSG00000115415 STAT1<br>ENSG00000173905 GOLPH4 | ENSG00000047617 TMEM16B<br>ENSG00000145040 UCN2<br>ENSG00000164403 SHROOM1<br>ENSG00000203903 Q6ZMP7_HUMAN<br>ENSG00000126860 EVI2A<br>ENSG00                                                                                                                                                                                                                                                                                                                                                                                         |                                                                                                                                                                                                                                                                                                                                                                                                                                                                                                                                                           |                                                                                                                                                                                                                                                                                                                                                                                                                                                                                                                                                                                                                                                                                                                                                                                                                                                                                                                                            |                                                                                                                                                                                                                                                                                                                                                                                                                                                                                                                                                                                                                                                                                                                                                                                                                                                                                                                                  |                                                                                                                                                                                                                                                                                                                                                                                                                                                                                                                 |                                                                                                                                                                                                                                                                                               |                                                                                                                                                                                                                                                                                                    |

ENSG00000149716|ORA0V1 ENSG00000160460|SPTBN4 ENSG00000176769|TCERGL1 ENSG00000177234|C10orf85 ENSG00000179348|GATA2 ENSG00000179361|ARID3B ENSG00000184302|SIX6 ENSG00000187953|NR\_002217.1  
ENSG00000196810|NP\_443093.2 ENSG00000197406|DIO3 ENSG00000198690|MTMR15 ENSG00000204589|Q6ZWG6\_HUMAN ENSG00000085276|EV11 ENSG00000092148|HECTD1 ENSG00000095794|CREM ENSG00000107937|GTFBP4  
ENSG00000122417|ODF2L ENSG00000137168|PFIL1 ENSG00000140873|ADAMTS18 ENSG00000146592|CREB5 ENSG00000148053|NTRK2 ENSG00000148908|RGS10 ENSG00000152977|ZIC1 ENSG00000160131|NP\_001017980.1  
ENSG00000166913|YWHAB ENSG00000171791|BCL2 ENSG00000175553|K1210\_HUMAN ENSG00000188613|NANOS1 ENSG00000198221|NP\_001035973.1  
ENSG00000076706|MCAM ENSG00000103056|SMPD3 ENSG00000107731|UNC5B ENSG00000123136|DDX39 ENSG00000130429|ARPC1B ENSG00000133027|PEMT ENSG00000136295|TTYH3 ENSG00000141034|C17orf39  
ENSG00000167393|PP2R3B ENSG00000168936|TMEM129 ENSG00000170322|NFRKB ENSG00000178922|HYI ENSG00000181638|GLT4 ENSG00000183421|RIPK4 ENSG00000049245|VAMP3 ENSG00000106524|ANKMY2  
ENSG00000106689|LHX2 ENSG00000110871|COQ5 ENSG00000120705|ETF1 ENSG00000132704|FCRL2 ENSG00000138029|HADHB ENSG00000143153|ATP1B1 ENSG00000144476|CXCR7 ENSG00000146147|C6orf142  
ENSG00000151914|DST ENSG00000164815|ORC5L ENSG00000172967|KXR3 ENSG00000177272|KCNA3 ENSG00000181915|C10orf22 ENSG00000184492|FOXD4 ENSG00000184500|PROS1 ENSG00000186458|DB132\_HUMAN  
ENSG00000197943|PLCG2 ENSG00000204947|ZNF425  
ACGTGTA ENSG00000003400|CASP10 ENSG00000036448|MYO2 ENSG00000064419|TNPO3 ENSG00000068650|ATP11A ENSG00000101335|MYL9 ENSG00000104955|TLE6 ENSG00000111412|C12orf49 ENSG00000116649|SRM  
ENSG00000125633|CCDC93 ENSG00000131183|SLC34A1 ENSG00000142186|SCYL1 ENSG00000143632|ACTA1 ENSG00000149557|FEZ1 ENSG00000160255|ITGB2 ENSG00000160299|PCNT ENSG00000164438|TLX3  
ENSG00000166888|STAT6 ENSG00000170430|MGMT ENSG00000171631|P2RY6 ENSG00000172216|CEBPB ENSG00000173662|TAS1R1 ENSG00000181368|NM\_032947.3 ENSG00000198131|ZNF544 ENSG00000198535|NP\_997205.1  
ENSG00000204273|HLA-DOB ENSG00000205020|CCL4L1 ENSG00000205085|NP\_001012457.1 ENSG00000207697|IFNGR1 ENSG00000091039|OSBP18 ENSG00000101000|PROCR ENSG00000102781|KATNAL1 ENSG00000106052|TAX1BP1  
ENSG00000114200|BCHE ENSG00000115850|LCT ENSG00000128581|RABL5 ENSG00000128710|HOXD10 ENSG00000134996|OSTF1 ENSG00000137692|DCUN1D5 ENSG00000137936|BCAR3 ENSG00000138036|DYNCL11  
ENSG00000143179|UCK2 ENSG00000152583|SPARCL1 ENSG00000155636|DRBP1\_HUMAN ENSG00000162745|OLFML2B ENSG00000164985|PSIP1 ENSG00000166529|ZSCAN21 ENSG00000166922|SCG5 ENSG00000170279|C7orf33  
ENSG00000180346|TIGD2 ENSG00000186031|Q6ZSY1\_HUMAN ENSG00000186591|UBE2H ENSG00000189292|NP\_001002919.1 ENSG00000198924|DCLRE1A  
ACGTGTT ENSG00000008441|NFXP6 ENSG00000033050|ABCF2 ENSG00000077800|FKBP6 ENSG00000102663|RHBD3 ENSG00000101187|SLCO4A1 ENSG00000139436|GIT2 ENSG00000140612|SEC11A ENSG00000141401|IMPA2  
ENSG00000149716|ORA0V1 ENSG00000154309|DISP1 ENSG00000154917|RAB6B ENSG00000158517|NCF1 ENSG00000159685|CHCHD6 ENSG00000161082|BRUNOL1 ENSG00000165178|LOC648998 ENSG00000169918|OTUD7A  
ENSG00000170423|KRT78 ENSG00000172530|BANP ENSG00000177030|DEAF1 ENSG00000181396|NP\_078924.1 ENSG00000182487|NCF1C ENSG00000184056|VPS33B ENSG00000203784|LELP1 ENSG00000204183|GDF5OS  
ENSG0000005436|C2orf3 ENSG0000017427|IGF1 ENSG00000104213|PDGFRL ENSG00000113621|C5orf14 ENSG00000124151|NCOA3 ENSG00000134716|CYP2J2 ENSG00000135108|FBXO21 ENSG00000135829|DHX9  
ENSG00000136999|NOV ENSG00000138435|CHRNA1 ENSG00000147873|IFNA5 ENSG00000152642|GPD1L ENSG00000155111|CDC2L6 ENSG00000156219|ART3 ENSG00000187969|ZCCHC13 ENSG00000198918|RPL39  
ACGTTGG ENSG00000101442|ACTR5 ENSG00000104522|TSTA3 ENSG00000110057|UNC93B1 ENSG00000125844|RRBP1 ENSG00000130222|GADD45G ENSG00000132517|GPR172B ENSG00000137842|TMEM62 ENSG00000138780|GSTCD  
ENSG00000141867|BRD4 ENSG00000154229|PRKCA ENSG00000168096|ANKS3 ENSG00000169180|XPO6 ENSG00000174775|HRAS ENSG00000186818|LILRB4 ENSG00000187140|FOXO3 ENSG00000204099|NEU4  
ENSG0000008196|TFAP2B ENSG00000025293|PHF20 ENSG00000075673|ATP12A ENSG00000078579|FGF20 ENSG00000078618|NRD1 ENSG00000084110|HAL ENSG00000101115|SALL4 ENSG00000107951|PAPD1  
ENSG00000109606|DXH15 ENSG00000109667|SLC2A9 ENSG00000118855|MFSD1 ENSG00000124659|TBCC ENSG00000129173|E2F8 ENSG00000133101|CCNA1 ENSG00000133627|ACTR3B ENSG00000133808|MICALCL  
ENSG00000136141|LRCH1 ENSG00000138668|HNRPD ENSG00000141642|ELACL1 ENSG00000143324|XPR1 ENSG00000153339|KIAA1012 ENSG00000154620|TM5B4Y ENSG00000155982|ZNF230 ENSG00000161040|FBXL13  
ENSG00000170323|FABP4 ENSG00000175745|NR2F1 ENSG00000176834|NP\_061959.2 ENSG00000178996|SNAG1 ENSG00000184378|ARPM1\_HUMAN ENSG00000187257|RSBN1L ENSG00000196553|NP\_001004331.1 ENSG00000196968|FUT11  
ENSG00000198173|FAM47C ENSG00000198918|RPL39  
ACGTTTA ENSG00000006465|EYA2 ENSG00000090316|MAEA ENSG00000113758|DBN1 ENSG00000122121|XPNPEP2 ENSG00000123415|SMUG1 ENSG00000129152|MYOD1 ENSG00000143547|Q5VUQ9\_HUMAN ENSG00000149927|DOC2A  
ENSG00000156411|C14orf2 ENSG00000160013|PTGR1 ENSG00000162444|RBP7 ENSG00000162783|TER5 ENSG00000171223|JUNB ENSG00000180448|HMHA1 ENSG00000184232|OAF ENSG00000184292|TACSTD2  
ENSG00000187650|NP\_001017921.1 ENSG00000197996|PADI6 ENSG00000198746|GPATCH3 ENSG00000205566|Q8TB02\_HUMAN ENSG00000205923|CEMP1 ENSG00000056050|C4orf27 ENSG00000056277|SUHW3 ENSG00000112337|SLC17A2  
ENSG00000123728|RAP2C ENSG00000133020|MYH8 ENSG00000134375|TIMM17A ENSG00000134480|CCNH ENSG00000139505|MTMR6 ENSG00000141946|ZIM3 ENSG00000146410|FAM54A ENSG00000147650|LRP12  
ENSG00000151135|C12orf23 ENSG00000153044|CENPH ENSG00000162614|NEXN ENSG00000166268|C12orf28 ENSG00000175198|PCCA ENSG00000182521|TBPL2 ENSG00000185630|PBX1  
ENSG0000005513|SOX8 ENSG00000124782|RREB1 ENSG00000131697|NPHP4 ENSG00000138630|HLX1 ENSG00000138080|EMILIN1 ENSG00000138303|ASCC1 ENSG00000141293|SKAP1 ENSG00000142156|COL6A1  
ENSG00000143369|ECM1 ENSG00000145990|GFOD1 ENSG00000161217|PCYT1A ENSG00000162231|NXF1 ENSG00000168427|KLHL30 ENSG00000177340|QOVFX0\_HUMAN ENSG00000067048|DDX3X ENSG00000087095|NLK  
ENSG00000100934|SEC23A ENSG00000106536|POU6F2 ENSG00000108046|C10orf92 ENSG00000112651|MRPL2 ENSG00000115806|GORASP2 ENSG00000118193|KIF14 ENSG000001128059|PPAT ENSG00000133138|TBC1D8B  
ENSG00000137714|FDX1 ENSG00000150051|MKX ENSG00000150540|HNMT ENSG00000154305|MIA3 ENSG00000164031|DNAJB14 ENSG00000165525|SDCCAG1 ENSG00000169446|TMEM32 ENSG00000170419|VSTM2  
ENSG00000171142|ATP6V1E2 ENSG00000175183|CSRP2 ENSG00000175348|TMEM9B ENSG00000181744|C3orf58 ENSG00000186787|SPIN2B ENSG00000197347|Q6ZV3B\_HUMAN  
ACTAAG ENSG00000063587|ZNF275 ENSG00000100104|SRR1L\_HUMAN ENSG00000118689|FOXO3A ENSG00000129451|KLK10 ENSG00000136854|STXBP1 ENSG00000143257|NRI3 ENSG00000145912|NOLA2 ENSG00000158716|DUSP23  
ENSG00000161381|PLXDC1 ENSG00000163521|GLB1L ENSG00000166974|MAPRE2 ENSG00000167515|TRAPP2L ENSG00000169919|GUSB ENSG00000172771|C3orf25 ENSG00000173281|PPP1R3B ENSG00000173402|DAG1  
ENSG00000174306|ZHX3 ENSG00000178467|EGLX\_HUMAN ENSG00000179335|CLK3 ENSG00000179393|Q9NRE4\_HUMAN ENSG00000179598|NP\_849158.1 ENSG00000184110|EIF3S8 ENSG00000184935|Q6AI01\_HUMAN ENSG00000187166|H1FNT  
ENSG00000189068|VSTM1 ENSG00000204222|B3GALT4 ENSG00000205609|Q9BW98\_HUMAN ENSG00000049130|KITLG ENSG00000066084|DIP2B ENSG00000077585|GPR137B ENSG00000104447|TRPS1 ENSG00000111701|APOBEC1  
ENSG00000115935|WIPF1 ENSG00000118997|DNAH7 ENSG00000123106|CCDC91 ENSG00000134769|DTNA ENSG00000135750|CKNK1 ENSG00000139330|KERA ENSG00000139668|WDFY2 ENSG00000140416|TPM1  
ENSG00000157554|ERG ENSG00000159873|CCDC117 ENSG00000164117|FBXO8 ENSG00000171135|JAGN1 ENSG00000173464|RNASE11 ENSG00000175305|CCNE2 ENSG00000179869|ABCA13 ENSG00000183542|KLRC4  
ENSG00000184943|NP\_443103.1 ENSG00000185278|ZBTB37 ENSG00000186665|C17orf58 ENSG00000188158|NHS  
ACTAACA ENSG00000006659|LGALS14 ENSG00000105290|APLP1 ENSG00000107140|TESK1 ENSG00000108518|PFN1 ENSG00000111252|SH2B3 ENSG00000117480|FAAH ENSG00000125810|CD93 ENSG00000133317|LGALS12  
ENSG00000140931|CTM3 ENSG00000148362|C9orf142 ENSG00000154229|PRKCA ENSG00000155287|SLC25A28 ENSG00000163795|ZNF513 ENSG00000165478|HEPACAM ENSG00000166257|SCN3B ENSG00000167880|EVLPL  
ENSG00000171443|ZNF524 ENSG00000172009|THOP1 ENSG00000182578|CSF1R ENSG00000184935|Q6AI01\_HUMAN ENSG00000188056|TREM1 ENSG00000204168|Q6ZRI1\_HUMAN ENSG00000206528|Q6ZSMO\_HUMAN ENSG0000011422|PLAUR  
ENSG00000022267|FHL1 ENSG00000047662|Q9ULE4\_HUMAN ENSG00000091409|ITGA6 ENSG00000101842|VSI1 ENSG00000102543|CDADC1 ENSG00000116679|IVNS1ABP ENSG00000130770|ATP1F1 ENSG00000135119|TMEM118  
ENSG00000136231|IGF2BP3 ENSG00000143947|RPS27A ENSG00000147044|CASK ENSG00000147437|GNRH1 ENSG00000163636|PSMD6 ENSG00000164049|FBXW12 ENSG00000166595|FAM96B ENSG00000177640|CASC2  
ENSG00000180113|TDRD6 ENSG00000185634|SHC4 ENSG00000196757|ZNF700  
ACTAACC ENSG00000042022|ABHD14A ENSG00000065675|PRKCQ ENSG00000072501|SMC1A ENSG00000088812|ATRN ENSG00000100450|GZMH ENSG00000100997|ABHD12 ENSG00000105227|PRX ENSG00000114993|RTKN  
ENSG00000115657|ABCB6 ENSG00000119431|HDHD3 ENSG00000136295|TTYH3 ENSG00000159023|EPB41 ENSG00000161202|DVL1 ENSG00000162734|PEA15 ENSG00000163191|S100A11 ENSG00000165424|C10orf56  
ENSG00000169231|THBS3 ENSG00000178209|PLEC1 ENSG00000179965|ZNF771 ENSG00000183666|LOC728411 ENSG00000186118|Q6PEX7\_HUMAN ENSG00000197694|SPTAN1 ENSG00000198237|GUSL1\_HUMAN ENSG00000205439|KRTAP10-10  
ENSG00000111404|NP\_079006.1 ENSG000001122512|PMS2 ENSG00000137277|ARHGAP20 ENSG00000147257|GPC3 ENSG00000158290|CUL4B ENSG00000163171|CDC42EP3 ENSG00000164221|CCDC112 ENSG00000168385|SEPT2  
ENSG00000168813|ZNF507 ENSG00000169688|MT1B ENSG00000170915|PAQR8 ENSG00000175073|VCP1P1 ENSG00000177453|NIM1\_HUMAN ENSG00000179046|NP\_775824.1 ENSG00000183508|FAM46C ENSG00000184831|APOO  
ENSG00000185295|USP91 ENSG00000187098|MITF ENSG00000198223|CSF2RA ENSG00000204116|CHIC1  
ACTAACC ENSG00000067082|KLF6 ENSG00000068097|NP\_071353.4 ENSG00000085662|AKR1B1 ENSG00000111653|ING4 ENSG00000113068|PFDN1 ENSG00000116213|WDR8 ENSG00000122861|PLAU  
ENSG00000128284|APOL3 ENSG00000134201|GSTM5 ENSG00000163795|ZNF513 ENSG00000163915|C3orf65 ENSG00000168993|NM\_006651.3 ENSG00000168994|C6orf145 ENSG00000170484|KRT74 ENSG00000174353|NP\_061864.2  
ENSG00000179364|PACS2 ENSG00000181274|FRAT2 ENSG00000181991|MRPS11 ENSG00000185085|INTS5 ENSG00000185189|NRBP2 ENSG00000196338|NLGN3 ENSG00000197401|Q6ZTC5\_HUMAN ENSG00000056736|IL17RB  
ENSG00000087842|PIR ENSG00000088970|C2orf19 ENSG00000105497|ZNF175 ENSG00000114638|UPK1B ENSG00000136169|SETDB2 ENSG00000138669|PRKG2 ENSG00000144407|PTHR2 ENSG00000146147|C6orf142  
ENSG00000149231|CCDC82 ENSG00000150527|CTAGE5 ENSG00000153130|FAM49B ENSG00000154144|TBRG1 ENSG00000166704|ZNF606 ENSG00000170854|MINA ENSG00000170917|NUDT6 ENSG00000182899|RPL35A  
ENSG00000185238|PRMT3 ENSG00000188085|NP\_997320.1 ENSG00000196433|ASMT ENSG00000204970|PCDH11  
ACTAACT ENSG00000013455|ARPC1A ENSG00000088826|SMOX ENSG00000089351|GRAMD1A ENSG00000100997|ABHD12 ENSG00000104979|C19orf53 ENSG00000108018|SORCS1 ENSG00000116521|SCAMP3 ENSG00000133055|MYBPH  
ENSG00000146926|ASB10 ENSG00000147168|IL2RG ENSG00000158480|SPATA2 ENSG00000161267|BDH1 ENSG00000165006|UBAP1 ENSG00000169427|CKNK9 ENSG00000170743|SYT9 ENSG00000180900|SCRIB  
ENSG00000184454|C1orf130 ENSG00000184785|Q96HG1\_HUMAN ENSG00000196209|Q5JXA8\_HUMAN ENSG00000204957|Q6ZVQ6\_HUMAN ENSG00000206096|ACRNF ENSG00000065150|RANBP5 ENSG00000101981|F9 ENSG00000108946|PRKAR1A  
ENSG00000111670|GNPTAB ENSG00000118939|UCLH3 ENSG00000124939|SCGB2A1 ENSG00000125245|GPR18 ENSG00000125675|GRIA3 ENSG00000129422|MTUS1 ENSG00000135002|RFK ENSG00000135048|TMEM2  
ENSG00000137942|FNBPI1L ENSG00000138640|FAM13A1 ENSG00000140836|ATBF1 ENSG00000147180|ZNF711 ENSG00000161036|NP\_690852.1 ENSG00000162994|NP\_689598.1 ENSG00000164743|C8orf48 ENSG00000165259|CXorf43  
ENSG00000169621|C2orf13 ENSG00000170962|PDGFD ENSG00000172007|RAB33B ENSG00000173302|GPR148 ENSG00000204904|CXorf31 ENSG00000206027|Q6ZUT4\_HUMAN ENSG00000206131|Q6ZS21\_HUMAN  
ENSG00000082266|DLEC1 ENSG00000087086|FTL ENSG00000101350|KIF3B ENSG00000104774|MAN2B1 ENSG00000105648|IFI30 ENSG00000110492|MDK ENSG000001122188|LAX1 ENSG00000157778|C7orf48  
ENSG00000162300|ZFPL1 ENSG00000163699|Q9HTY4\_HUMAN ENSG00000166261|ZNF202 ENSG00000167107|NP\_079425.2 ENSG00000167755|KLRK6 ENSG00000169180|XPO6 ENSG00000173846|PLK3 ENSG00000175602|CCDC85B  
ENSG00000178307|TMEM11 ENSG00000186431|FCAR ENSG00000188775|Q6YL47\_HUMAN ENSG00000189401|OTUD6A ENSG00000196878|LAMB3 ENSG00000206580|AP4M1 ENSG00000011566|MAP4K3 ENSG00000053900|ANAPC4  
ENSG00000054219|LY75 ENSG00000101935|AMMECR1 ENSG00000104435|STMN2 ENSG00000109586|GALNT7 ENSG00000134982|APC ENSG00000136643|RPS6KC1 ENSG00000144810|COL8A1 ENSG00000146909|NOM1  
ENSG00000147853|AK3 ENSG00000147905|ZCCHC7 ENSG00000164743|C8orf48 ENSG00000168385|SEPT2 ENSG00000173598|NUDT4 ENSG00000184434|LRRCL19 ENSG00000187185|Q86VG7\_HUMAN  
ENSG00000205227|Q6ZWA8\_HUMAN  
ACTAATC ENSG00000067066|SP100 ENSG00000087008|ACOX3 ENSG00000099282|TSPAN15 ENSG00000105397|TYK2 ENSG00000115556|PLCD4 ENSG00000117425|PTCH2 ENSG00000119986|AVPI1 ENSG00000124374|PAIP2B  
ENSG00000137842|TMEM62 ENSG00000143171|RXRG ENSG00000149357|C11orf59 ENSG00000150175|PDZD5B ENSG00000161179|NP\_001017964.1 ENSG00000161960|EIF4A1 ENSG00000163220|S100A9 ENSG00000166394|CYB5R2  
ENSG00000166866|MYO1A ENSG00000169006|NTR2 ENSG00000170324|FRMPD2 ENSG00000179141|Q8NE42\_HUMAN ENSG00000182858|ALG12 ENSG00000185043|CIB1 ENSG00000197308|NP\_997306.1 ENSG00000197704|PDZD5A  
ENSG00000198805|NP ENSG00000008197|TFAP2D ENSG00000070718|AP3M2 ENSG00000072849|DERL2 ENSG00000073754|CD5L ENSG00000101333|PLCB4 ENSG00000109667|SLC2A9 ENSG00000110315|RNF141  
ENSG00000117009|KMO ENSG00000129422|MTUS1 ENSG00000134480|CCNH ENSG00000137727|ARHGAP20 ENSG00000137806|NDUFAF1 ENSG00000140285|FGF7 ENSG00000143368|SF3B4 ENSG00000163145|C1QTNF7  
ENSG00000164904|ALDH7A1 ENSG00000165118|C9orf64 ENSG00000166479|TXNDC10 ENSG00000166532|FAM80B ENSG00000167196|FBXO22 ENSG00000168615|ADAM9 ENSG00000169313|P2RY12 ENSG00000170915|PAQR8  
ENSG00000172717|C14orf54 ENSG00000181007|ZNF545 ENSG00000181425|DSCR10 ENSG00000196151|WDSUB1  
ACTAATT ENSG00000067444|ELAC2 ENSG00000101407|KIAA0406 ENSG00000103200|NME4 ENSG00000128242|GAL3ST1 ENSG00000134460|IL2RA ENSG00000136828|RALGPS1 ENSG00000139626|ITGB7 ENSG00000149557|FEZ1  
ENSG00000161911|TREM1L ENSG00000162968|Q96MQ0\_HUMAN ENSG00000166398|KIAA0355 ENSG00000178235|SLITRK1 ENSG00000183605|SFXN4 ENSG00000184602|SNN ENSG00000187239|FNBP1 ENSG00000196501|HIST1H2BN  
ENSG00000204343|C9orf118 ENSG00000082497|SERTAD1 ENSG00000087053|MTMR2 ENSG00000087263|OGFOD1 ENSG00000100650|SFRS5 ENSG00000106025|TSPAN12 ENSG00000115137|NP\_057628.1 ENSG00000122435|CCDC76  
ENSG00000125571|IL1F7 ENSG00000135540|NHS1L ENSG00000136160|EDNRB ENSG00000137449|CPEB2 ENSG00000144566|RAB5A ENSG00000148672|GLUDP5 ENSG00000150907|FOXO1A  
ENSG00000155816|FNM2 ENSG00000170584|NUDC2 ENSG00000172007|RAB33B ENSG00000174501|NP\_079466.2 ENSG00000175305|CCNE2 ENSG00000179902|C1orf194 ENSG00000196360|NP\_002168.1 ENSG00000197045|GMFB  
ENSG00000198142|ANKRD57  
ACTACCG ENSG00000024422|EHD2 ENSG00000042286|AIFM3 ENSG00000054118|THRAP3 ENSG00000078967|UBE2D4 ENSG00000080815|PSEN1 ENSG00000100239|SAPS2 ENSG00000101224|CDC25B ENSG00000101986|ABCD1  
ENSG00000102796|DHR812 ENSG00000120318|CENTD3 ENSG00000126091|SP3GAL3 ENSG00000128284|APOL3 ENSG00000128335|APOL2 ENSG00000130829|DUSP9 ENSG00000137648|TMPRSS4 ENSG00000137699|TRIM29

|         |                              |                                |                                |                              |                              |                              |                              |                                |
|---------|------------------------------|--------------------------------|--------------------------------|------------------------------|------------------------------|------------------------------|------------------------------|--------------------------------|
|         | ENSG00000141485 SLC13A5      | ENSG00000142655 PEX14          | ENSG00000147889 CDKN2A         | ENSG00000160307 S100B        | ENSG00000163812 ZDHH3        | ENSG00000165863 C10orf82     | ENSG00000174348 PODN         | ENSG00000183600 Q66K37_HUMAN   |
|         | ENSG00000185215 TNFAIP2      | ENSG00000188447 XR_016015.1    | ENSG00000188559 C20orf74       | ENSG00000197565 COL4A6       | ENSG00000003436 TFPI         | ENSG00000030066 NUP160       | ENSG00000044574 HSPA5        | ENSG00000054654 SYNE2          |
|         | ENSG00000173969 NSF          | ENSG00000090266 NDUFB2         | ENSG00000114948 ADAM23         | ENSG00000125384 PTGER2       | ENSG00000125871 C20orf72     | ENSG00000126070 EIF2C3       | ENSG00000127359 KIAA1147     | ENSG00000129699 NP_067644.2    |
|         | ENSG00000131351 NP_219485.1  | ENSG00000140941 MAP1LC3B       | ENSG00000140945 CDH13          | ENSG00000147905 ZCCHC7       | ENSG00000150048 CLEC1A       | ENSG00000150275 PCDH15       | ENSG00000155816 FMN2         | ENSG00000155833 CYLC2          |
|         | ENSG00000158290 CUL4B        | ENSG00000165124 SVEP1          | ENSG00000165985 C1QL3          | ENSG00000175104 TRAF6        | ENSG00000179873 NLRP11       | ENSG00000188612 SUMO2        | ENSG00000189050 NP_057209.3  | ENSG00000205195 Q6ZTB1_HUMAN   |
|         | ENSG00000205707 LYRM5        |                                |                                |                              |                              |                              |                              |                                |
| ACTACTG | ENSG00000005884 ITGA3        | ENSG00000073331 ALPK1          | ENSG00000105329 TGFB1          | ENSG00000110721 CHKA         | ENSG00000113108 SRA1         | ENSG00000117360 PRPF3        | ENSG00000122188 LAX1         | ENSG00000130669 PAK4           |
|         | ENSG00000140403 DNAJA4       | ENSG00000140598 EFTUD1         | ENSG00000142687 KIAA0319L      | ENSG00000143126 CELSR2       | ENSG00000146021 KHLH3        | ENSG00000158769 F11R         | ENSG00000159224 GIP          | ENSG00000164711 LPAL2          |
|         | ENSG00000168002 POLR2G       | ENSG00000180205 WFDCA9         | ENSG00000182712 MTCP1          | ENSG00000188384 Q6ZUQ5_HUMAN | ENSG00000196814 FAM125B      | ENSG00000198563 ATP6V1G2     | ENSG00000198901 PRC1         | ENSG00000205271 Q6ZUQ5_HUMAN   |
|         | ENSG00000205275 Q6ZUQ5_HUMAN | ENSG000000013561 RNFL4         | ENSG000000049245 VAMP3         | ENSG00000059758 PCTK2        | ENSG000000085511 MAP3K4      | ENSG000000105855 ITGB8       | ENSG00000105967 TFEC         | ENSG00000109208 SMR3A          |
|         | ENSG00000111860 C6orf204     | ENSG00000118600 TMEM5          | ENSG00000134152 C15orf29       | ENSG00000135919 SERPINE2     | ENSG00000137936 BCAR3        | ENSG00000139973 CYT16        | ENSG00000145354 ZCD2         | ENSG00000156239 N6AMT1         |
|         | ENSG00000165156 ZHX1         | ENSG00000175535 PNLIP          | ENSG00000179456 ZNF238         | ENSG00000180398 MCFD2        | ENSG00000183960 KCNH8        | ENSG00000188153 SOL4A5       | ENSG00000204937 Q6ZSS0_HUMAN | ENSG00000204987 Q6ZN80_HUMAN   |
|         |                              |                                |                                |                              |                              |                              |                              |                                |
| ACTAGAT | perfect: ACTACTG CAGTAGT     | hsa-miR-199a*                  | taCAGTAGTctgcacattggtt         | 2                            |                              |                              |                              |                                |
|         | ENSG00000004487 AOF2         | ENSG00000085063 CD59           | ENSG00000092847 EIF2C1         | ENSG00000095319 NUP188       | ENSG00000105507 CABP5        | ENSG00000105609 LILRB5       | ENSG00000143545 RAB13        | ENSG00000145864 GABRB2         |
|         | ENSG00000148200 NR6A1        | ENSG00000154767 XPC            | ENSG00000169118 CSNK1G1        | ENSG00000185721 DRG1         | ENSG00000196391 ZNF774       | ENSG00000204303 Q6ZVW4_HUMAN | ENSG00000013810 TACC3        | ENSG00000034533 ASTE1          |
|         | ENSG00000066422 ZBTB11       | ENSG00000072401 UBE2D1         | ENSG00000083123 BCKDHB         | ENSG0000011196 MGAT3B_HUMAN  | ENSG0000011196 MGAT3B_HUMAN  | ENSG00000112367 KIAA0274     | ENSG00000124171 PARD5B       | ENSG00000132703 APCS           |
|         | ENSG00000134962 KLB          | ENSG00000137960 GIPC2          | ENSG00000139610 ELA1           | ENSG00000141428 C18orf21     | ENSG00000141458 NPC1         | ENSG00000144218 AFF3         | ENSG00000145721 LIX1         | ENSG00000157181 C1orf27        |
|         | ENSG00000164022 SCYE1        | ENSG00000164284 GRPEL2         | ENSG00000165152 C9orf125       | ENSG00000165409 TSHR         | ENSG00000167910 CYP7A1       | ENSG00000174482 LINGO2       | ENSG00000186130 ZBTB6        | ENSG00000186487 MYT1L          |
|         | ENSG00000205810 KLRC3        | ENSG00000206560 ANKRD28        |                                |                              |                              |                              |                              |                                |
| ACTAGGG | ENSG00000100413 POLR3H       | ENSG00000102870 ZNF629         | ENSG00000104059 K0574_HUMAN    | ENSG00000104386 XR_017860.1  | ENSG00000107562 CXCL12       | ENSG00000107738 C10orf54     | ENSG00000124374 PAIP2B       | ENSG00000126778 SIX1           |
|         | ENSG00000129473 BCL2L1       | ENSG00000130598 TNNT1          | ENSG00000163516 ANKZF1         | ENSG00000166165 CKB          | ENSG00000176438 C14orf49     | ENSG00000183010 PYCR1        | ENSG00000187862 TTC24        | ENSG00000188186 NP_001008396.1 |
|         | ENSG00000198585 NUDT16       | ENSG00000198722 UNC13B         | ENSG00000080618 CPB2           | ENSG00000096060 FKBP5        | ENSG00000115364 MRPL19       | ENSG00000116539 ASH1L        | ENSG00000123689 GOS2         | ENSG00000135226 UGT2B28        |
|         | ENSG00000139146 FAM60A       | ENSG00000142698 C1orf94        | ENSG00000152147 GEMIN6         | ENSG00000153107 ANAPC1       | ENSG00000162402 USP24        | ENSG00000177565 TBL1XR1      | ENSG00000182197 EXT1         | ENSG00000183023 SLC8A1         |
|         | ENSG00000203727 SAMD5        |                                |                                |                              |                              |                              |                              |                                |
| ACTAGTG | ENSG00000071127 WDR1         | ENSG00000077454 LRCH4          | ENSG00000088833 NSFL1C         | ENSG00000095015 MAP3K1       | ENSG00000101493 ZNF516       | ENSG00000130175 PCKSH        | ENSG00000130309 GLT25D1      | ENSG00000132017 NP_612362.2    |
|         | ENSG00000134668 SPOCD1       | ENSG00000141294 LRRC46         | ENSG00000141738 GRB7           | ENSG00000149115 TNKS1BP1     | ENSG00000160051 IQCC         | ENSG00000162020 PRW2         | ENSG00000163866 C1orf212     | ENSG00000164627 KIF6           |
|         | ENSG00000166086 JAM3         | ENSG00000172336 POP7           | ENSG00000172939 OXSR1          | ENSG00000175197 DDIT3        | ENSG00000178110 Q8N9G9_HUMAN | ENSG00000180900 SCRIB        | ENSG00000186603 HPDL         | ENSG00000187024 PTRH1          |
|         | ENSG00000196843 ARID5A       | ENSG00000005175 NP_078880.1    | ENSG000000048540 LMO3          | ENSG000000089818 NECAP1      | ENSG000000091164 TXNL1       | ENSG000000101544 ZNF508      | ENSG00000107077 JMJ2C        | ENSG00000107968 MAP3K8         |
|         | ENSG00000109846 CRYAB        | ENSG00000111530 CAND1          | ENSG00000112996 MRPS30         | ENSG00000114529 C3orf52      | ENSG00000121210 KIAA0922     | ENSG00000129003 VPS13C       | ENSG00000130224 LRCH2        | ENSG00000132972 RNFL17         |
|         | ENSG00000135119 TMEM118      | ENSG00000137270 GCM1           | ENSG00000138036 DYNCL11        | ENSG00000138495 COX17        | ENSG00000140941 MAP1LC3B     | ENSG00000159082 SYNJ1        | ENSG00000163530 DPPA2        | ENSG00000165029 ABCA1          |
|         | ENSG00000166747 AP1G         | ENSG00000167981 ZNF597         | ENSG00000170365 SMAD1          | ENSG00000174780 SRP72        | ENSG00000177343 PBOV1        | ENSG00000196151 WDSUB1       | ENSG00000205105 Q5W0Q5_HUMAN |                                |
| ACTAGTT | ENSG00000182800 SLC11A1      | ENSG00000102898 NUTF2          | ENSG00000105648 IFI30          | ENSG00000114439 BBX          | ENSG00000119535 CSF3R        | ENSG00000127837 AAMP         | ENSG00000130830 MPP1         | ENSG00000132142 ACACA          |
|         | ENSG00000132911 NMUR2        | ENSG00000157093 LYZL4          | ENSG00000162711 NLRP3          | ENSG00000165388 ZNF488       | ENSG00000167194 Q96LL3_HUMAN | ENSG00000168242 HIST1H2BI    | ENSG00000180871 IL8RB        | ENSG00000184502 GAST           |
|         | ENSG00000196388 NP_998891.1  | ENSG00000196407 THEM5          | ENSG00000204677 NP_001072995.1 | ENSG00000068796 KIF2A        | ENSG00000070718 AP3M2        | ENSG00000103540 CE110_HUMAN  | ENSG00000109445 ZNF330       | ENSG00000111911 HINT3          |
|         | ENSG00000113141 IK           | ENSG00000113356 POLR3G         | ENSG00000113558 SKP1A          | ENSG00000124532 MRS2L        | ENSG00000132485 ZNRAN2       | ENSG00000133103 COG6         | ENSG00000133657 ATP13A3      | ENSG00000134146 ATPBD4         |
|         | ENSG00000134265 NAPG         | ENSG00000134352 IL6ST          | ENSG00000147854 UHRF2          | ENSG00000150459 SAP18        | ENSG00000150625 GPM6A        | ENSG00000154310 TNIK         | ENSG00000157800 SLC37A3      | ENSG00000159131 GART           |
|         | ENSG00000163389 KTELC1       | ENSG00000169224 C1orf150       | ENSG00000169249 ZRSR1          | ENSG00000169291 SHE          | ENSG00000169605 GKN1         | ENSG00000172554 SNTG2        | ENSG00000174738 NR1D2        | ENSG00000179476 C14orf28       |
|         | ENSG00000180458 Q8N3U1_HUMAN | ENSG00000180694 TMEM64         | ENSG00000196812 ZSCAN16        | ENSG00000198105 ZNF248       | ENSG00000198173 FAM47C       | ENSG00000203724 C1orf53      |                              |                                |
| ACTATGC | ENSG0000008226 DLEC1         | ENSG00000103023 NP_001073961.1 | ENSG00000104738 MCM4           | ENSG00000109736 NP_001111.2  | ENSG00000117971 CHRN4        | ENSG00000126903 SLC10A3      | ENSG00000130429 ARPC1B       | ENSG00000142233 NP_665806.1    |
|         | ENSG00000144834 TAGLN3       | ENSG00000145949 SGK85_HUMAN    | ENSG00000148840 PPRC1          | ENSG00000185554 NXP2         | ENSG00000185945 NKF2_HUMAN   | ENSG00000188364 TMSL4        | ENSG00000188822 CNR2         | ENSG0000007908 SELE            |
|         | ENSG00000023228 NDUFB1       | ENSG00000079156 OSBP1          | ENSG00000081721 DUSP12         | ENSG00000083223 ZCCHC6       | ENSG00000086300 SNX10        | ENSG00000096093 EFHC1        | ENSG00000109586 GALNT7       | ENSG00000109680 TBC1D19        |
|         | ENSG00000118217 ATF6         | ENSG00000120324 PCDH10         | ENSG00000131876 SNRPA1         | ENSG00000138613 APH1B        | ENSG00000142615 ELA2A_HUMAN  | ENSG00000145414 NP_612395.1  | ENSG00000150712 MTMR12       | ENSG00000156017 C9orf41        |
|         | ENSG00000162688 AGL          | ENSG00000164743 C8orf48        | ENSG00000168556 ING2           | ENSG00000176007 C9orf51      | ENSG00000198252 STYX         |                              |                              |                                |
|         | perfect: ACTATGC GCATAGT     | hsa-miR-153                    | ttGCATAGTcacaagaagtga          | 2                            |                              |                              |                              |                                |
| ACTATTC | ENSG00000004866 ST7          | ENSG00000005961 ITGA2B         | ENSG000000039523 FAM65A        | ENSG00000068354 TBC1D25      | ENSG00000105329 TGFB1        | ENSG00000119986 AVP11        | ENSG00000121152 NCAPI        | ENSG00000123338 NCKAP1L        |
|         | ENSG00000123411 IKZF4        | ENSG00000125975 C20orf173      | ENSG00000131686 CA6            | ENSG00000136828 RALGAP5      | ENSG00000149654 CDH22        | ENSG00000154764 WNT7A        | ENSG00000157150 TIMP4        | ENSG00000163061 Q9BSF9_HUMAN   |
|         | ENSG00000172548 ICHN_HUMAN   | ENSG00000176444 CLK2           | ENSG00000181867 PTMT           | ENSG00000196976 LAGE3        | ENSG0000013561 RNFL4         | ENSG00000071537 SELLL        | ENSG00000089050 RBBP9        | ENSG00000100522 GNPNAT1        |
|         | ENSG00000100852 ARHGAP5      | ENSG00000106025 TSPAN12        | ENSG00000116679 IVNS1ABP       | ENSG00000117114 LPHN2        | ENSG00000124103 C20orf107    | ENSG00000149742 SLC22A9      | ENSG00000150637 CD226        | ENSG00000154415 PPP1R3A        |
|         | ENSG00000168383 HLA-DPB1     | ENSG00000168497 SDPR           | ENSG00000172551 MUCL_HUMAN     | ENSG00000183230 CTNNA3       | ENSG00000185737 NRG3         | ENSG00000187611 Q62TR6_HUMAN | ENSG00000189184 PCDH18       | ENSG00000189350 NP_954974.2    |
|         | ENSG00000204524 ZNF805       |                                |                                |                              |                              |                              |                              |                                |
| ACTATTT | ENSG0000017797 RALBP1        | ENSG00000065882 TBC1D1         | ENSG00000100403 ZC3H7B         | ENSG00000103742 NP_066013.1  | ENSG00000105617 LENG1        | ENSG00000107957 SH3PXD2A     | ENSG00000110195 FOLR1        | ENSG00000110395 CBL            |
|         | ENSG00000117154 IGSF21       | ENSG00000127150 C14orf153      | ENSG00000131400 NAPSA          | ENSG00000131462 TUBG1        | ENSG00000132478 UNK          | ENSG00000136950 ARPC5L       | ENSG00000137221 TJAP1        | ENSG00000141696 NO55_HUMAN     |
|         | ENSG00000143398 PIP5K1A      | ENSG00000143554 SLC27A3        | ENSG00000152953 STPK2B         | ENSG00000154227 LASS3        | ENSG00000156381 ANKRD9       | ENSG00000163431 LMOD1        | ENSG00000163794 UCN          | ENSG00000165948 FAM14B         |
|         | ENSG00000168000 HNRPUL2      | ENSG00000176454 AGPAT7         | ENSG00000179344 HB25_HUMAN     | ENSG00000179477 ALOX12B      | ENSG00000182318 ZSCAN22      | ENSG00000196070 Q6ZVY7_HUMAN | ENSG00000196132 MYT1_HUMAN   | ENSG00000196152 ZNF79          |
|         | ENSG00000196361 ELAVL3       | ENSG00000004961 HCCS           | ENSG00000008988 RPS20          | ENSG00000011258 MBTD1        | ENSG00000019549 SNAI2        | ENSG00000025423 HSD17B6      | ENSG00000035115 SH3YL1       | ENSG00000051825 MPHOSPH9       |
|         | ENSG0000068793 CYFIP1        | ENSG00000083642 APRIN          | ENSG00000100711 ZFYVE21        | ENSG00000101166 SLMO2        | ENSG00000102290 PCDH11X      | ENSG00000107938 C10orf137    | ENSG00000111049 MYF5         | ENSG00000111875 ASF1A          |
|         | ENSG00000118113 MMP8         | ENSG00000134597 RBMX2          | ENSG00000134755 DSC2           | ENSG00000136141 LRCH1        | ENSG00000139687 RB1          | ENSG00000148541 FAM13C1      | ENSG00000155975 VPS37A       | ENSG00000157654 PALM2          |
|         | ENSG00000163694 NP_061900.1  | ENSG00000166455 C16orf46       | ENSG00000171365 CLCN5          | ENSG00000172869 DMXL1        | ENSG00000173046 NM_207376    | ENSG00000185628 FAM33A       | ENSG00000185432 METTL7A      | ENSG00000187151 ANGPTL5        |
|         | ENSG00000206560 ANKRD28      |                                |                                |                              |                              |                              |                              |                                |
| ACTCAGC | ENSG00000001617 SEMA3F       | ENSG00000004848 ARX            | ENSG0000011009 LYPLA2          | ENSG00000057935 MTA3         | ENSG00000082701 GSK3B        | ENSG00000101350 KIF3B        | ENSG00000103202 DECR2        | ENSG00000104637 PINX1_HUMAN    |
|         | ENSG00000114251 WNT5A        | ENSG00000114349 GNAT1          | ENSG00000130479 MAP1S          | ENSG00000132471 WBP2         | ENSG00000134575 ACF2         | ENSG00000136710 CCDC115      | ENSG00000136848 DAB2IP       | ENSG00000144230 GPR17          |
|         | ENSG00000145194 ECE2         | ENSG00000148341 SH3GLB2        | ENSG00000156521 TYSND1         | ENSG00000159166 LAD1         | ENSG00000163820 FYCO1        | ENSG00000167693 NXXN         | ENSG00000167895 TMC8         | ENSG00000171813 PWWP2          |
|         | ENSG00000175756 AURKAIP1     | ENSG00000186111 PIP5K1C        | ENSG00000186831 KRT11          | ENSG00000196503 ARL9         | ENSG00000196559 C1orf55      | ENSG00000198933 TKBP1        | ENSG00000203919 Q6ZN51_HUMAN | ENSG00000009790 TRAF3IP3       |
|         | ENSG00000099256 PRTFDC1      | ENSG00000106477 TSGA14         | ENSG00000113569 NUP155         | ENSG00000124120 C20orf121    | ENSG00000124491 F13A1        | ENSG00000129810 SGOL1        | ENSG00000163617 KIAA1407     | ENSG00000168374 ARF4           |
|         | ENSG00000176142 TMEM39A      | ENSG00000178217 SH2D4B         | ENSG00000                      |                              |                              |                              |                              |                                |

ENSG00000182208|MOB2\_HUMAN ENSG00000184787|UBE2G2 ENSG00000185024|BRF1 ENSG00000204280|NP\_001032647.2 ENSG00000204569|PPP1R10 ENSG00000004897|CDC27 ENSG00000077327|SPAG6 ENSG00000089177|C20orf23  
ENSG00000108599|AKAP10 ENSG00000109458|GAB1 ENSG00000114200|BCHE ENSG00000118515|SGK ENSG00000124788|ATXN1 ENSG00000131115|ZNF227 ENSG00000131174|COX7B ENSG00000133574|GMAP4  
ENSG00000143933|CALM2 ENSG00000150527|CTAGE5 ENSG00000151304|SRFBP1 ENSG00000153246|PLA2R1 ENSG00000161800|RACGAP1 ENSG00000163749|NP\_001036249.1 ENSG00000169752|NRG4 ENSG00000175183|CSRP2  
ENSG00000176624|RKHD2 ENSG00000180869|C1orf180 ENSG00000196459|SEDL1 ENSG00000205612|Q71JB2\_HUMAN  
ACTCGTT ENSG00000033050|ABCF2 ENSG00000077549|NCK2 ENSG00000093072|CECR1 ENSG00000099917|PCQAP ENSG00000100104|SRR1L\_HUMAN ENSG00000105393|NP\_001028721.1 ENSG00000105438|KDELRL1  
ENSG00000107796|ACTA2 ENSG00000118017|AAGMT ENSG00000119655|CAPZ2 ENSG00000131435|PDL1M4 ENSG00000134563|FUT6 ENSG00000156413|FUT6 ENSG00000158828|PINK1 ENSG00000160183|TMPRSS3  
ENSG00000162910|MRPL55 ENSG00000171105|INSR ENSG00000175772|Q8N952\_HUMAN ENSG00000177441|Q8N4T9\_HUMAN ENSG00000178571|NM\_203423 ENSG00000182108|MYLE\_HUMAN ENSG00000182208|MOB2\_HUMAN ENSG00000182902|SLC25A18  
ENSG00000183929|DUSP5P ENSG00000184060|CENTA2 ENSG00000185090|MANEAL ENSG00000185339|TCN2 ENSG00000205087|NP\_001020628.1 ENSG0000018236|CNTN1 ENSG00000094804|CDC6 ENSG00000105982|RNF32  
ENSG00000112357|PEX7 ENSG00000136141|LRCH1 ENSG00000145919|FAM44B ENSG00000150667|FSI1 ENSG00000164808|KIAA0146 ENSG00000167995|BEST1 ENSG00000169313|P2RY12 ENSG00000185267|ARMTL1  
ENSG00000188295|ZNF669 ENSG00000197498|BXDC1 ENSG00000198492|YTHDF2 ENSG00000204588|Q68DL6\_HUMAN ENSG00000205036|NP\_001001682.1 ENSG00000205057|CLLULOS ENSG00000205156|Q6UXQ8\_HUMAN  
ACTCTAA ENSG00000007341|ST7L ENSG00000048471|NP\_001073999.1 ENSG000000075218|GTSE1 ENSG00000078699|CBFA2T2 ENSG00000087076|HSD17B14 ENSG00000101104|C20orf119 ENSG00000102230|PCYT1B ENSG00000115204|MPV17  
ENSG00000130702|LAMA5 ENSG00000132205|EMILIN2 ENSG00000141084|RANBP10 ENSG00000143028|SYPL2 ENSG00000143376|SNX27 ENSG00000146066|HIGD2A ENSG00000147155|EBP ENSG00000172264|C20orf133  
ENSG00000176876|PXMP2 ENSG00000183530|C22orf30 ENSG00000204228|HSD17B8 ENSG00000054803|CBLN4 ENSG00000055211|C6orf72 ENSG00000060718|COL11A1 ENSG00000072315|TRPC5 ENSG00000084623|EIF3S2  
ENSG000000087301|KIAA1344 ENSG00000106341|C7orf16 ENSG00000112651|MRPL2 ENSG00000116473|RAP1A ENSG00000130024|PHF10 ENSG00000138684|IL21 ENSG00000152683|SLC30A6 ENSG00000154269|ENPP3  
ENSG00000164032|H2AF2 ENSG00000165685|C12orf59 ENSG00000169193|CCDC126 ENSG00000175606|TMEM70 ENSG00000177707|PVRL3 ENSG00000178974|FBXO34 ENSG00000204262|COL5A2 ENSG00000205252|Q4G0M6\_HUMAN  
ENSG00000205442|C9orf134  
ACTCTCC ENSG00000079462|PAFAH1B3 ENSG00000089336|KIAA0841 ENSG00000090615|GOLGA3 ENSG00000126583|PRKCG ENSG00000128271|ADORA2A ENSG00000136193|SCRN1 ENSG00000137166|FOXp4 ENSG00000164048|ZNF589  
ENSG00000164501|Q96M41\_HUMAN ENSG00000166947|EPB42 ENSG00000167641|PPP1R14A ENSG00000170890|PLA2G1B ENSG00000172867|KRT2 ENSG00000174151|CYB561D1 ENSG00000179841|AKAP5 ENSG00000184654|YV006\_HUMAN  
ENSG00000197283|SYNGAP1 ENSG00000197561|ELA2 ENSG00000198574|SH2D1B ENSG00000203393|Q5JPA2\_HUMAN ENSG00000204420|C6orf25 ENSG00000205501|Q6ZU01\_HUMAN ENSG00000206083|ZNF409  
ENSG0000007908|SELE ENSG00000011114|BTBD7 ENSG00000047621|C12orf4 ENSG00000065534|MYLK ENSG00000066294|CD84 ENSG00000118972|FGF23 ENSG00000119013|NDUFB3 ENSG00000120733|JMJD1B  
ENSG00000125945|ZNF436 ENSG00000131730|CKMT2 ENSG00000134259|NGFB ENSG00000150867|PIPSK2A ENSG00000156395|SORCS3 ENSG00000158481|CD1C ENSG00000165660|KIAA0157 ENSG00000166326|TRIM44  
ENSG00000168291|PDHB ENSG00000173876|NP\_817124.1 ENSG0000000181847|VSI9 ENSG00000183649|Q8NFX8\_HUMAN ENSG00000186297|GABRA5 ENSG00000187806|NP\_001073931.1 ENSG00000198625|MDMA ENSG00000204600|NP\_001004349.1  
ENSG00000205227|Q6ZWA8\_HUMAN  
ACTCTGT ENSG00000025772|TOMM34 ENSG00000100395|L3MBTL2 ENSG00000100439|ABHD4 ENSG00000103260|METRN ENSG00000103723|AP3B2 ENSG00000106631|MYL7 ENSG00000132846|ZBED3 ENSG00000137275|RIPK1  
ENSG00000151062|CACNA2D4 ENSG00000156398|SFXN2 ENSG00000158014|SLC30A2 ENSG00000163017|ACTG2 ENSG00000163793|DNAJC5G ENSG00000164151|Q6ZT40\_HUMAN ENSG00000167011|NP\_940973.1 ENSG00000167693|NXN  
ENSG00000169692|AGPAT2 ENSG00000175203|DCTN2 ENSG00000176532|PRR15 ENSG00000179393|Q9NRE4\_HUMAN ENSG00000186654|ARHGAP8 ENSG00000189143|CLDN4 ENSG00000189334|S100A14 ENSG0000007944|MYLIP  
ENSG00000050130|C14orf100 ENSG00000078674|PCM1 ENSG00000082512|TRAF5 ENSG00000103254|C16orf24 ENSG00000108587|GOSR1 ENSG00000111276|CDKN1B ENSG00000117069|ST6GALNAC5 ENSG00000119048|UBE2B  
ENSG00000120685|C13orf23 ENSG00000123607|TTC21B ENSG00000125246|CLYBL ENSG00000131238|PPT1 ENSG00000134954|ETS1 ENSG00000135069|PSAT1 ENSG00000149313|AASDHPPT ENSG00000153904|DDAH1  
ENSG00000154127|STS1\_HUMAN ENSG00000158865|SLC5A11 ENSG00000163826|LUZPP1 ENSG00000169594|BNC1 ENSG00000169612|FAM103A1 ENSG00000177738|Q8N4J7\_HUMAN ENSG00000181322|TXNDC6 ENSG00000185875|THNSL1  
ENSG00000187772|LIN28B ENSG00000205325|NP\_001001684.1  
ACTGAAC ENSG00000005100|DHX33 ENSG00000105246|EBI3 ENSG00000107872|FBXL15 ENSG00000110324|IL10RA ENSG00000114650|SCAP ENSG00000120094|HOXB1 ENSG00000121289|CCDC123 ENSG00000128313|APOL5  
ENSG00000131196|NFATC1 ENSG00000142186|SCYL1 ENSG00000147481|SNTG1 ENSG00000148411|BTBD14A ENSG00000155026|NM\_173565.2 ENSG00000168569|NP\_001073970.1 ENSG00000169402|NP\_775836.2 ENSG00000172053|QARS  
ENSG00000174171|Q8TCB4\_HUMAN ENSG00000176473|WDR25 ENSG00000177553|C1orf167 ENSG00000184990|SIVA1 ENSG00000186676|EEF1G ENSG00000186818|LILRB4 ENSG00000189037|DUSP21 ENSG00000204226|Q6ZNS0\_HUMAN  
ENSG00000204934|NP\_001008745.1 ENSG00000008083|JARID2 ENSG00000099901|RANBP1 ENSG00000113595|TRIM23 ENSG00000123595|RAB9A ENSG00000136842|TMOD1 ENSG00000143033|MTF2 ENSG00000143363|PRUNE  
ENSG00000143442|POGZ ENSG00000152229|PSTPIP2 ENSG00000152254|G6PC2 ENSG00000154898|Q8YIA2\_HUMAN ENSG00000164329|PAPD4 ENSG00000165525|SDCCAG1 ENSG00000166913|YWHAB  
ENSG00000168273|Q8WV10\_HUMAN ENSG00000169255|B3GALNT1 ENSG00000169862|CTNND2 ENSG00000179300|ZCCHC5 ENSG00000181126|Q86V94\_HUMAN ENSG00000185104|FAF1 ENSG00000197989|C1orf79 ENSG00000198042|RBM13  
ENSG00000203742|NP\_001032308.1 ENSG00000205808|PPAPDC2  
ACTGAA ENSG000000088832|FKBP1A ENSG00000100453|GZMB ENSG00000104998|IL27RA ENSG00000111640|GAPDH ENSG00000114013|CD86 ENSG00000130810|PPAN ENSG00000155087|ODF1 ENSG00000158714|SLAMF8  
ENSG00000158828|PINK1 ENSG00000160791|CCR5 ENSG00000162889|MAPKAPK2 ENSG00000169083|AR ENSG00000169093|ASMTL ENSG00000169213|RAB3B ENSG00000177408|PLAC2 ENSG00000177732|SOX12  
ENSG00000179921|GPBAR1 ENSG00000182718|ANXA2P1 ENSG00000187800|NP\_001073940.1 ENSG00000198225|Q5VVH2\_HUMAN ENSG00000205531|NAP1L4 ENSG00000205974|Q6ZVY3\_HUMAN ENSG00000207265|TRHDE ENSG00000085514|PILRA  
ENSG00000104388|RAB2A ENSG00000104432|IL7 ENSG00000108590|MED31 ENSG00000109458|GAB1 ENSG00000110321|EIF4G2 ENSG00000111885|MAN1A1 ENSG00000112290|WASF1 ENSG00000115760|BIRC6  
ENSG00000127022|CANX ENSG00000127863|TNFRSF19 ENSG00000133636|NTS ENSG00000144057|ST6GAL2 ENSG00000155970|EFAH2 ENSG00000156035|PRUNE2 ENSG00000156467|UQCRLB ENSG00000163104|SMARCAD1  
ENSG00000163610|Q9NUUO\_HUMAN ENSG00000164303|ENPP6 ENSG00000164466|SFXN1 ENSG00000164506|STXBP5 ENSG00000165322|ARHGAP12 ENSG00000165416|SUGT1 ENSG00000171492|LRRCS8 ENSG00000176657|EPLS1L2  
ENSG00000178690|C18orf26 ENSG00000181450|ZNF678 ENSG00000197977|ELOVL2 ENSG00000205498|Q6ZRB7\_HUMAN  
ACTGACA ENSG00000004455|AK2 ENSG00000075702|WDR62 ENSG00000078246|TULP3 ENSG00000080815|PSEN1 ENSG00000096070|BRPF3 ENSG00000101883|PEPP1\_HUMAN ENSG00000103429|BFAR ENSG00000104946|TBC1D17  
ENSG00000105341|NP\_060505.1 ENSG00000107130|FREX ENSG00000115598|IL1RL2 ENSG00000117154|IGSF21 ENSG00000126602|TRAP1 ENSG00000133460|SLC2A11 ENSG00000145014|TMEM44 ENSG00000151148|UBE3B  
ENSG00000152217|SETDB1 ENSG00000162191|SAKS1\_HUMAN ENSG00000163468|CCT3 ENSG00000170906|NDUFA3 ENSG00000177238|TRIM72 ENSG00000197968|Q8N231\_HUMAN ENSG00000203784|LELP1 ENSG00000204423|C9orf33  
ENSG00000205502|NP\_001007596.1 ENSG00000022267|FHL1 ENSG00000064652|SNX24 ENSG00000083168|MYST3 ENSG00000109670|FBXW7 ENSG00000115267|IFTH1 ENSG00000115415|STAT1 ENSG00000121964|GTD1C  
ENSG00000124201|ZNF1 ENSG00000133116|KL ENSG00000135374|ELF5 ENSG00000145860|RNF145 ENSG00000163624|CDS1 ENSG00000167306|MYO5B ENSG00000167720|SRR ENSG00000187823|ZCCHC16  
ENSG00000198420|NP\_055534.1 ENSG00000204397|NP\_001017534.1 ENSG00000205608|Q6ZQP9\_HUMAN  
ACTGAC perfect: ACTGACA TGTCAGT hsa-miR-223 TGTCAGTtgcataatcccc 0  
ENSG00000095319|NUP188 ENSG00000099822|HCN2 ENSG00000115607|IL18RAP ENSG00000115685|PPP1R7 ENSG00000125844|RRBP1 ENSG00000129214|SHBG ENSG00000145912|NOLA2 ENSG00000157601|MX1  
ENSG00000166823|MESP1 ENSG00000167536|DHRS13 ENSG00000167772|ANGPTL4 ENSG00000172216|CEBPB ENSG00000173821|RNF213 ENSG00000174567|GOLT1A ENSG00000175548|RABEP2 ENSG00000186063|C1orf80  
ENSG00000188493|C19orf54 ENSG00000197162|ZNF688 ENSG00000198598|MMP17 ENSG00000204759|Q6ZRY0\_HUMAN ENSG00000205061|Q6ZUP2\_HUMAN ENSG00000006377|DLX6 ENSG00000064995|TAF11 ENSG00000081913|PHLPP  
ENSG00000125879|OTOR ENSG00000134900|TPP2 ENSG00000139835|GRTP1 ENSG00000143119|CD53 ENSG00000164458|T ENSG00000164975|SNAPC3 ENSG00000169313|P2RY12 ENSG00000172288|CDY1\_HUMAN  
ENSG00000172352|CDY1 ENSG00000175279|CORT ENSG00000175857|C5orf29 ENSG00000178459|Q8N2E2\_HUMAN ENSG00000196449|YRDC ENSG00000196593|NM\_207439 ENSG00000196867|ZFP28 ENSG00000196912|AN36B\_HUMAN  
ENSG00000198818|SFT2D1 ENSG00000205221|VIT  
ACTGACT ENSG000000088808|PPP1R13B ENSG00000089057|SLC23A2 ENSG00000093167|LRRFP2 ENSG00000105379|ETFB ENSG00000133056|PIK3C2B ENSG00000139445|FOXN4 ENSG00000146285|SCML4 ENSG00000159461|AMFR  
ENSG00000160791|CCR5 ENSG00000165376|CLDN2 ENSG00000170515|PA2G4 ENSG00000171060|C8orf74 ENSG00000173171|MTX1 ENSG00000175224|K0AA0652 ENSG00000178038|ALS2CL ENSG00000178401|NP\_079178.2  
ENSG00000179921|GPBAR1 ENSG00000183458|Q9NRE7\_HUMAN ENSG00000183793|NPIP ENSG00000184144|CNTN2 ENSG00000197037|ZNF498 ENSG00000204483|Q8N925\_HUMAN ENSG00000204876|Q6ZVM9\_HUMAN ENSG00000015568|RGPD7  
ENSG00000039139|DNAH5 ENSG00000077713|SLC25A43 ENSG00000102931|ARL2BP ENSG00000105948|TTC26 ENSG00000109046|WSD1 ENSG00000114346|ECT2 ENSG00000116062|MSH6 ENSG00000120705|ETF1  
ENSG00000120805|ARL1 ENSG00000135052|C9orf155 ENSG00000136141|LRCH1 ENSG00000150347|ARLD5B ENSG00000155970|EFAH2 ENSG00000164258|NDUFS4 ENSG00000168385|SEPT2  
ENSG00000169629|RGPD8 ENSG00000173559|QBFC2A ENSG00000173947|C1orf88 ENSG00000174792|C4orf26 ENSG00000174990|CASA ENSG00000175348|TMEM9B ENSG00000178075|GRAMD1C ENSG00000183054|RGPD6  
ACTGAGA ENSG00000013563|DNASE1L1 ENSG00000025434|NR1H3 ENSG00000073861|TBX21 ENSG00000081277|PKP1 ENSG00000093217|XYLB ENSG00000104529|EEF1D ENSG00000106384|MOGAT3 ENSG00000109101|FOXN1  
ENSG00000113194|UBXD8 ENSG00000122733|KIAA1045 ENSG00000144579|CTDSP1 ENSG00000151062|CACNA2D4 ENSG00000161944|ASGR2 ENSG00000163482|STK36 ENSG00000166948|TGM6 ENSG00000168884|TNIP2  
ENSG00000168907|PACTA2 ENSG00000171385|KCND3 ENSG00000185830|C22orf37 ENSG00000204423|C9orf33 ENSG00000206026|NP\_001032408.1 ENSG00000004948|CALCR ENSG00000071539|TRIP13 ENSG00000076382|SPAG5  
ENSG00000088035|ALG6 ENSG00000105483|CARD8 ENSG00000108588|CCDC47 ENSG00000119927|GPAM ENSG00000133800|XLRD1 ENSG00000139508|SLC46A3 ENSG00000140873|ADAMTS18 ENSG00000144481|TRPM8  
ENSG00000146463|ZMYM4 ENSG00000152454|ZNF256 ENSG00000153310|FAM49B ENSG00000153936|HS2ST1 ENSG00000164588|HCN1 ENSG00000165669|C10orf84 ENSG00000168772|CXXC4 ENSG00000170848|PSG6  
ENSG00000171819|ANGPTL7 ENSG00000183542|KLRC4 ENSG00000183668|PSG9 ENSG00000204937|Q6ZSS0\_HUMAN  
ACTGAGG ENSG00000025770|NCAPH2 ENSG00000075290|WNT8B ENSG00000088827|STGLEC1 ENSG00000101216|GMEB2 ENSG00000105323|SNRPUL1 ENSG00000122678|POLM ENSG00000136295|TTYH3 ENSG00000147955|OPRS1  
ENSG00000148187|MRFR ENSG00000149926|FAM57B ENSG00000154133|ROBO4 ENSG00000156587|UBE2L6 ENSG00000157933|SKI ENSG00000164151|Q6ZT40\_HUMAN ENSG00000168096|ANKS3 ENSG00000168477|TNXB  
ENSG00000169951|ZNF764 ENSG00000174264|Q4TT42\_HUMAN ENSG00000175329|ISX ENSG00000175873|Q9H7M1\_HUMAN ENSG00000179218|CALR ENSG00000205023|Q6ZSF1\_HUMAN ENSG00000205136|Q3KRG0\_HUMAN ENSG00000205266|Q6ZRU5\_HUMAN  
ENSG00000206088|Q6ZT13\_HUMAN ENSG00000101049|SGK2 ENSG00000105974|CAV1 ENSG00000113300|CNOT6 ENSG00000127603|MACP1 ENSG00000129460|NGDN ENSG00000131495|NDUFA2 ENSG00000140795|MYLK3\_HUMAN  
ENSG00000143776|CDC42BPA ENSG00000145088|EAF2 ENSG00000146433|TMEM181 ENSG00000163864|NMNAT3 ENSG00000165650|PDD28 ENSG00000170881|RNF139 ENSG00000171121|KCNMB3 ENSG00000172572|PDE3A  
ENSG00000181092|ADIPQO ENSG00000186974|Q8N6X9\_HUMAN ENSG00000204209|DAXX  
ACTGATT ENSG00000001461|NPAL3 ENSG00000004455|AK2 ENSG00000073849|ST6GAL1 ENSG00000090924|PLEKHG2 ENSG00000100266|PACSLN2 ENSG00000100764|PSMC1 ENSG00000106078|COBL ENSG00000110148|CCKBR  
ENSG00000112212|BZRP1L1 ENSG00000115844|DLX2 ENSG00000124164|VAPB ENSG00000130706|ADRM1 ENSG00000137133|HINT2 ENSG00000143502|SUSD4 ENSG00000148926|ADM ENSG00000160219|GAB3  
ENSG00000160296|STGLEC12 ENSG00000164053|TREM1 ENSG00000171388|APLN ENSG00000176753|NP\_001034994.1 ENSG00000184743|NP\_056274.3 ENSG00000188042|ARL4C ENSG00000188525|NM\_207480 ENSG00000197965|MPZL1  
ENSG00000198756|GLT2SD2 ENSG00000006652|LFRD1 ENSG00000009307|NRAS ENSG00000073712|PLEKHCl ENSG00000080007|DDX43 ENSG00000083896|YTHDC1 ENSG00000111701|APOBEC1  
ENSG00000114062|UBE3A ENSG00000116473|RAP1A ENSG00000121749|TBC1D15 ENSG00000124789|NUP153 ENSG00000137819|PAQR5 ENSG00000151093|OXSM ENSG00000153162|BMP6 ENSG00000163637|PRICKLE2  
ENSG00000166971|ARTIP ENSG00000169752|NRG4 ENSG00000170540|ARL6IP1 ENSG00000172071|EIF2AK3 ENSG00000172809|RPL38 ENSG00000173674|EIF1AP1 ENSG00000175029|CTBP2 ENSG00000176714|CCDC121  
ENSG00000180573|HIST1H2AC ENSG00000185068|GTF2H5 ENSG00000186369|YN002\_HUMAN ENSG00000196214|ZNF766 ENSG00000196442|ZNF432 ENSG00000198815|FOXJ3  
ENSG00000073792|IGF2BP2 ENSG00000075151|EIF4G3 ENSG00000078295|ADCY2 ENSG00000088305|DNMT3B ENSG00000108829|LRRCS5 ENSG00000111752|PHC1 ENSG00000116032|GRIN3B ENSG00000131233|GJA10  
ENSG00000141404|GNAL ENSG00000143196|DPT ENSG00000145920|CPLX2 ENSG00000146666|Q96IP2\_HUMAN ENSG00000155087|ODF1 ENSG00000159199|ATP5G1 ENSG00000160094|ZNF362 ENSG00000162650|ATXN7L2  
ENSG00000164711|LPAL2 ENSG00000175781|Q9H5L9\_HUMAN ENSG00000176383|B3GNT4 ENSG00000179776|CDH5 ENSG00000182667|NTRI\_HUMAN ENSG00000184730|NP\_061160.2 ENSG00000188157|AGRN ENSG0000011566|MAP4K3  
ENSG00000065923|SLC9A7 ENSG00000100722|ZC3H14 ENSG00000106809|OGN ENSG00000109208|SMR3A ENSG00000111897|SERINC1 ENSG00000129317|PUS7L ENSG00000134318|ROCK2 ENSG00000136381|IREB2  
ENSG00000138293|NCOA4 ENSG00000140836|ATBF1 ENSG00000145244|CORIN ENSG00000149084|HSD17B12 ENSG00000151690|NP\_060164.3 ENSG00000151789|ZNF659 ENSG00000155906|RMND1 ENSG00000164466|SFXN1  
ENSG00000165685|C12orf59 ENSG00000182463|TSHZ2  
ACTGCAC ENSG000000066114|AP1GBP1 ENSG00000047056|WDR37 ENSG00000100099|HPS4 ENSG00000100842|EFS ENSG00000105738|SIPA1L3 ENSG00000105755|ETHE1 ENSG00000116852|KIF21B ENSG00000117899|MESDC2  
ENSG00000121769|FABP3 ENSG00000147789|ZNF7 ENSG00000154096|THY1 ENSG00000157606|EFSPTS1 ENSG00000159263|SIM2 ENSG00000166743|ACSM1 ENSG00000167522|ANKRD11 ENSG00000167774|NDUFA7

ENSG00000169427|KCNK9 ENSG00000177595|LRDD ENSG00000182446|NPLOC4 ENSG00000187003|ACTL7A ENSG00000204385|CTL4\_HUMAN ENSG0000030419|IKZF2 ENSG00000106052|TAX1BP1 ENSG00000106392|C1GALT1  
ENSG00000117009|KMO ENSG00000122034|GTF3A ENSG00000138463|DIRC2 ENSG00000138604|GLCE ENSG00000147162|OGT ENSG00000152518|ZFP36L2 ENSG00000154813|DPH3 ENSG00000161647|MPP3  
ENSG00000162374|ELAVL4 ENSG00000162618|ELTD1 ENSG00000164106|SCRGI\_HUMAN ENSG00000165244|ZNF367 ENSG00000169826|CGAT2\_HUMAN ENSG00000170852|KBTBD2 ENSG00000171116|NP\_057237.1 ENSG00000171129|HSFX1  
ENSG00000172765|TMCC1 ENSG00000173542|MOBK1A ENSG00000182752|PAPPA ENSG00000196482|ESRRG ENSG00000198682|PAPSS2 ENSG00000205036|NP\_001001682.1  
ENSG00000053918|KCNQ1 ENSG00000106089|STX1A ENSG00000110442|COMMD9 ENSG00000111678|C12orf57 ENSG00000121671|CRY2 ENSG00000122783|C7orf49 ENSG00000124196|FAM112A ENSG00000126458|RRAS  
ENSG00000127084|FGD3 ENSG00000142319|SLC6A3 ENSG00000143630|HCN3 ENSG00000149575|SCN2B ENSG00000154319|C8orf13 ENSG00000154920|EME1 ENSG00000166448|TMEM130 ENSG00000166828|SCNN1G  
ENSG00000168994|C6orf145 ENSG00000171596|NMUR1 ENSG00000175592|FOSL1 ENSG00000181652|ATG9B ENSG00000182749|PAQR7 ENSG00000183655|KLHL25 ENSG00000187045|TMPRSS6 ENSG00000198033|TUBA3C  
ENSG00000204619|PPP1R11 ENSG00000205592|MUC19 ENSG000000009780|FAM76A ENSG00000072042|RDH11 ENSG00000096717|SIRT1 ENSG00000107159|CA9 ENSG00000122707|RECK ENSG00000133740|E2F5  
ENSG00000137265|IRF4 ENSG00000144713|RPL32 ENSG00000145348|TBCK\_HUMAN ENSG00000145348|TBCK\_HUMAN ENSG00000150593|PDCD4 ENSG00000166275|AS3MT ENSG00000166971|AKTIP ENSG00000179175|C9orf38 ENSG00000183542|KLRC4  
ENSG00000197579|TOPORS ENSG00000198625|MDM4 ENSG00000198860|C1orf19  
perfect: ACTGCCA TGGCAGT hsa-miR-34a TGGCAGTgtcttagctggtttt 0  
ACTGCCT ENSG0000007541|PIGQ ENSG00000020129|NCDN ENSG00000075234|NP\_060401.2 ENSG00000092421|SEMA6A ENSG00000105323|HNRPUL1 ENSG00000107282|APBA1 ENSG00000108797|CNTNAP1 ENSG00000109956|B3GAT1  
ENSG00000112478|VPS52 ENSG00000112759|SLC29A1 ENSG00000119782|FKBP1B ENSG00000120708|TGFB1 ENSG00000132911|NMUR2 ENSG00000143466|IKBKE ENSG00000143850|PLEKHA6 ENSG00000146216|TTBK1  
ENSG00000148296|SURF6 ENSG00000156515|HK1 ENSG00000158571|PFKFB1 ENSG00000162302|RPS6KA4 ENSG00000163833|FBXO40 ENSG00000167965|NM\_022372.3 ENSG00000168334|CMYA1 ENSG00000171314|PGAM1  
ENSG00000172689|MS4A10 ENSG00000177303|CASKIN2 ENSG00000179909|ZNF154 ENSG00000182329|Q8IVF9\_HUMAN ENSG00000186190|C20orf185 ENSG00000189159|HNF1 ENSG00000197041|hCG\_2015269 ENSG00000197616|MYH6  
ENSG00000197697|HIST1H2BE ENSG00000198816|ZNF358 ENSG00000205610|Q4G105\_HUMAN ENSG000000009694|ODZ1 ENSG00000034239|EFCAB1 ENSG00000048740|CUGBP2 ENSG00000069849|ATP1B3 ENSG00000085563|ABCB1  
ENSG00000110675|ELMOD1 ENSG00000113328|CCNG1 ENSG00000116704|SLC35D1 ENSG00000118513|MYB ENSG00000120215|MLANA ENSG00000131951|LRRC9 ENSG00000134070|IRAK2 ENSG00000136247|ZDHHC4  
ENSG00000164616|FBXL21 ENSG00000168175|C14orf32 ENSG00000168502|K1AA0802 ENSG00000177410|Q5QHF1\_HUMAN ENSG00000186104|CYP2R1 ENSG00000198586|TLK1 ENSG00000198719|DLL1  
perfect: ACTGCCT AGGCAGT hsa-miR-34b tAGGCAGTgtcattagctgattg 1  
perfect: ACTGCCT AGGCAGT hsa-miR-34c AGGCAGTgttagttagctgattgc 0  
perfect: ACTGCCT AGGCAGT hsa-miR-449b AGGCAGTgtattgttagctggc 0  
ACTGCTC ENSG00000053918|KCNQ1 ENSG00000102001|CACNA1F ENSG00000120899|PTK2B ENSG00000122122|CXorf9 ENSG00000124191|TOX2 ENSG00000125695|STRAD\_HUMAN ENSG00000132563|REEP2 ENSG00000137496|I18BP\_HUMAN  
ENSG00000143466|IKBKE ENSG00000144063|MALL ENSG00000149021|SCGB1A1 ENSG00000163263|C1orf189 ENSG00000169375|SIN3A ENSG00000178589|Q9BT26\_HUMAN ENSG00000180901|KCTD2 ENSG00000183018|SPNS2  
ENSG00000197435|HIST3H2BB ENSG00000198870|C9orf96 ENSG00000203674|Q6ZT24\_HUMAN ENSG00000076513|ANKRD13A ENSG00000108587|GOSR1 ENSG00000110344|UBE4A ENSG00000112667|C6orf108 ENSG00000131791|PRKAB2  
ENSG00000134532|SOX5 ENSG00000137948|BRDT ENSG00000147507|LYN ENSG00000152804|HHEX ENSG00000153207|AHCTF1 ENSG00000163131|CTSS ENSG00000163235|TGFA ENSG00000164112|TMEM155  
ENSG00000167117|C17orf73 ENSG00000170959|DCDC5 ENSG00000174227|PTGG ENSG00000176137|CSTF2T ENSG00000196860|NP\_997260.1 ENSG00000198642|KLHL9 ENSG00000204403|CASP12  
ACTGCTG ENSG00000074054|CLASP1 ENSG00000080960|SLC24A6 ENSG00000100385|IL2RB ENSG00000101220|C20orf27 ENSG00000106636|YKT6 ENSG00000113716|SMF\_HUMAN ENSG00000116521|SCAMP3  
ENSG00000119522|DENND1A ENSG00000121680|PEX16 ENSG00000133316|WDR74 ENSG00000136448|NMT1 ENSG00000136830|FAM129B ENSG00000141560|KT3K\_HUMAN ENSG00000146232|NFKBIE ENSG00000147119|CHST7  
ENSG00000149451|ADAM33 ENSG00000157211|CDCP2 ENSG00000162461|SLC25A34 ENSG00000169972|PUS1L ENSG00000171495|NP\_775760.2 ENSG00000182912|C21orf90 ENSG00000183734|ASCL2 ENSG00000185043|CIB1  
ENSG00000187609|NP\_060290.3 ENSG00000196204|Q6NUR6\_HUMAN ENSG00000196498|NCOR2 ENSG00000197818|SLC9A8 ENSG00000080546|SESN1 ENSG00000092531|SNAP23 ENSG00000095787|WAC ENSG00000110048|OSBP  
ENSG00000114120|SLC25A36 ENSG00000136872|ALDOB ENSG00000138669|PRKG2 ENSG00000143882|ATP6V1C2 ENSG00000145681|HAPLN1 ENSG00000158092|NCK1 ENSG00000173928|C19orf39 ENSG00000180011|ZADH2  
ENSG00000181322|TXNDC6 ENSG00000183814|LIN9 ENSG00000204672|Q8NI72\_HUMAN  
ENSG00000075618|FSCN1 ENSG00000100767|PAPLN ENSG00000103647|CORO2B ENSG00000122783|C7orf49 ENSG00000135074|ADAM19 ENSG00000142082|SIRT3 ENSG00000143140|GJA5  
ENSG00000159871|LYPD5 ENSG00000163486|SRGAP2 ENSG00000163814|CDCP1 ENSG00000168014|NP\_056346.2 ENSG00000173327|MAP3K11 ENSG00000174527|MYO1H ENSG00000175093|SPSB4 ENSG00000177728|K1AA0195  
ENSG00000188508|U467\_HUMAN ENSG00000204380|Q6ZTQ2\_HUMAN ENSG00000204842|ATXN2 ENSG00000206550|LOC285346 ENSG00000206561|COLQ ENSG00000108001|EBF3 ENSG00000110958|PTGES3 ENSG00000112297|AIM1  
ENSG00000113282|CLINT1 ENSG00000120370|SCYL1BP1 ENSG00000122643|NT5C3 ENSG00000123977|WDR69 ENSG00000133112|TPT1 ENSG00000136379|FAM108C1 ENSG00000140043|ZADH1 ENSG00000155903|RSA2  
ENSG00000160352|ZNF714 ENSG00000164930|FZD6 ENSG00000166275|AS3MT ENSG00000170915|PAQR8 ENSG00000171943|SRGAP2P1 ENSG00000173744|HRB ENSG00000175348|TMEM9B ENSG00000181894|ZNF329  
ACTGGAG ENSG00000048342|Q9H8A7\_HUMAN ENSG00000120057|SFRP5 ENSG00000124920|C11orf9 ENSG00000128335|APOL2 ENSG00000128389|NM\_032262 ENSG00000136807|CDK9 ENSG00000137074|APTX ENSG00000138107|ACTR1A  
ENSG00000138835|RGS3 ENSG00000151650|VENTX ENSG00000164087|WDR51A ENSG00000169375|SIN3A ENSG00000174804|FZD4 ENSG00000177427|SMCR7 ENSG00000178537|SLC25A20 ENSG00000189069|NP\_001013732.1  
ENSG00000189263|Q6ZS22\_HUMAN ENSG00000196084|UBI1\_HUMAN ENSG00000197746|PAPB ENSG00000198131|ZNF544 ENSG00000204655|MOG ENSG00000005436|C2orf3 ENSG00000067955|CBFB ENSG00000070718|AP3M2  
ENSG00000089335|ZNF302 ENSG00000106701|FSD1L ENSG00000111519|GPD2 ENSG00000116793|PHTF1 ENSG00000120279|MYCT1 ENSG00000122335|SERAC1 ENSG00000131016|AKAP12 ENSG00000133704|IPO8  
ENSG00000134594|RAB33A ENSG00000136842|TMD1 ENSG00000138653|NDST4 ENSG00000144785|TMEM4 ENSG00000158458|NRG2 ENSG00000160336|ZNF761 ENSG00000162692|VCAM1 ENSG00000165868|HSPA12A  
ENSG00000167766|ZNF83 ENSG00000169255|B3GALNT1 ENSG00000170009|Q9NTHO\_HUMAN ENSG00000180257|ZNF321 ENSG00000183631|Q5JQE8\_HUMAN ENSG00000188868|ZNF563 ENSG00000196705|ZNF431 ENSG00000197054|ZNF763  
ENSG00000198538|ZNF28 ENSG00000204597|ZNF818 ENSG00000204604|ZNF468 ENSG00000204789|ZNF204 ENSG00000205413|SAMD9  
ACTGTAA ENSG00000060071|ABCC8 ENSG00000077157|PPP1R12B ENSG00000085465|OVGP1 ENSG00000100109|TFIP11 ENSG00000101290|CDS2 ENSG00000102547|CAB39L ENSG00000108557|RAI1  
ENSG00000108753|TCF2 ENSG00000108947|EFNB3 ENSG00000111412|C12orf49 ENSG00000114650|SCAP ENSG00000116871|MAP7D1 ENSG00000120949|TNFRSF8 ENSG00000128311|TST ENSG00000130635|COL5A1  
ENSG00000130711|PRDM12 ENSG00000131845|ZNF304 ENSG00000132142|ACACA ENSG00000135503|ACVR1B ENSG00000144711|IQSE1 ENSG00000165633|C10orf72 ENSG00000168575|SLC20A2 ENSG00000171960|PPIH  
ENSG00000184012|TMPRSS2 ENSG00000184602|SNN ENSG00000187860|NP\_001017437.1 ENSG00000196758|NM\_207483 ENSG00000204380|Q6ZTQ2\_HUMAN ENSG00000205015|Q6ZNV2\_HUMAN ENSG00000091844|RGS17 ENSG00000116141|MARK1  
ENSG00000123609|NMI ENSG00000125823|CSTL1 ENSG00000127152|BCL11B ENSG00000129596|CDO1 ENSG00000132963|POMP ENSG00000133116|KL ENSG00000135269|TES ENSG00000135999|EPC2  
ENSG00000138180|CEP55 ENSG00000138779|Q9HCM6\_HUMAN ENSG00000151914|DST ENSG00000157680|DGKI ENSG00000166147|FBN1 ENSG00000168214|RBPJ ENSG00000170561|IRX2 ENSG00000172243|CLEC7A  
ENSG00000176165|FOXG1B ENSG00000178127|NDUFV2 ENSG00000184284|Q96N11\_HUMAN ENSG00000185290|XR\_016379.1 ENSG00000185634|SHC4  
ACTGTAC ENSG00000038532|K1AA0350 ENSG00000111639|MRPL51 ENSG00000130158|DOCK6 ENSG00000142549|LOC402665 ENSG00000160972|PPP1R16A ENSG00000166224|SGPL1 ENSG00000167286|CD3D ENSG00000167701|GPT  
ENSG00000170890|PPIA2G1B ENSG00000171119|NRTN ENSG00000179421|Q8NBA4\_HUMAN ENSG00000181666|HKR1 ENSG00000185818|NAT8L ENSG00000198821|CD247 ENSG00000203867|RBM20 ENSG00000008018|PSMB1  
ENSG00000102144|PGK1 ENSG00000104064|GABPB2 ENSG00000113971|ACAD11 ENSG00000115548|JMJD1A ENSG00000117114|LPHN2 ENSG00000121690|DEPDC7 ENSG00000121851|POLR3GL ENSG00000125848|FLRT3  
ENSG00000126814|TRMT5 ENSG00000129484|PARP2 ENSG00000134313|NP\_065789.1 ENSG00000138081|FBXO11 ENSG00000141433|ADCYAP1 ENSG00000145495|MARCH6 ENSG00000145730|PAM ENSG00000147654|EBAG9  
ENSG00000157542|KCNJ6 ENSG00000163131|CTSS ENSG00000163877|SNIP1 ENSG00000164035|EMCN ENSG00000166348|USP54 ENSG00000171791|BCL2 ENSG00000175336|APOF ENSG00000175556|LONRF3  
ENSG00000176244|ACBD7 ENSG00000183283|DAZAP2 ENSG00000187105|HEATR4 ENSG00000197991|PCDH20 ENSG00000198826|ARHGAP11A ENSG00000198841|KTI12  
ACTGTAT ENSG00000029993|HMGB3 ENSG00000100181|CSNK1E ENSG00000121083|DYNLL2 ENSG00000121281|ADCY7 ENSG00000127616|SMRCA4 ENSG00000130830|MPP1 ENSG00000131914|LIN28  
ENSG00000147081|AKAP4 ENSG00000151779|NP\_056993.2 ENSG00000156574|NODAL ENSG00000159423|ALDH4A1 ENSG00000166398|K1AA0355 ENSG00000168314|MOBP ENSG00000170145|SNF1LK2 ENSG00000170801|HTRA3  
ENSG00000187095|LILRA2 ENSG00000196700|ZNF512B ENSG00000197175|Q8TBR1\_HUMAN ENSG00000035928|RFC1 ENSG00000061676|NCKAP1 ENSG00000064989|CALCRL ENSG00000083642|APRIN ENSG00000093221|ULK4  
ENSG00000113851|CRBN ENSG00000117632|STMN1 ENSG00000120278|PLEKHG1 ENSG00000132356|PRKAA1 ENSG00000137752|CASP1 ENSG00000145715|RSA1 ENSG00000150347|ARID5B ENSG00000159873|CCDC117  
ENSG00000164219|PGGT1B ENSG00000165525|SDCCAG1 ENSG00000166902|MRPL16 ENSG00000167117|C17orf73 ENSG00000172809|RPL38 ENSG00000175183|CSR2 ENSG00000180263|FGD6 ENSG00000181192|DHTKD1  
ENSG00000198718|K1AA0423 ENSG00000205647|CSNLS2A  
ACTGTCT ENSG00000008438|PGLYRP1 ENSG00000111186|WNT5B ENSG00000114388|TUSC4 ENSG00000125804|C20orf91 ENSG00000127226|NP\_116072.2 ENSG00000140986|RPL3L ENSG00000143851|PTPN7 ENSG00000144231|POLR2D  
ENSG00000167400|MIDN ENSG00000170484|KRT74 ENSG00000174951|FUT1 ENSG00000180735|Q6PJW0\_HUMAN ENSG00000183018|SPNS2 ENSG00000184709|LRRC26 ENSG00000189311|PPME1 ENSG00000204842|ATXN2  
ENSG00000206028|Q6ZVA3\_HUMAN ENSG00000009413|REV3L ENSG00000031691|CENPQ ENSG00000064995|TAF11 ENSG00000009200|PPP2R3C ENSG00000101911|PRPS2 ENSG00000104472|CHRA1  
ENSG00000111266|DUSP16 ENSG00000119866|BCL11A ENSG00000122203|K1AA1191 ENSG00000125037|TMEM111 ENSG00000127249|ATP13A4 ENSG00000127603|MACF1 ENSG00000129625|REEP5 ENSG00000132464|ENAM  
ENSG00000141076|CIRH1A ENSG00000147650|LRP12 ENSG00000152413|HOMER1 ENSG00000153130|SCOC ENSG00000156136|DCK ENSG00000167553|TUBA1C ENSG00000178695|KCTD12 ENSG00000185774|KCNIP4  
ENSG00000196877|NP\_001018132.2 ENSG00000198156|NP\_001018132.2 ENSG00000204683|C10orf113  
ACTGTGA ENSG000000066114|AP1GBP1 ENSG00000041880|PARP3 ENSG00000050426|LETMD1 ENSG00000054967|TNFRSF19L ENSG00000055070|C1orf144 ENSG00000088854|C20orf194 ENSG00000089159|PXN ENSG00000100348|TXN2  
ENSG00000130479|MAP1S ENSG00000131759|PARRA ENSG00000140534|C15orf42 ENSG00000142549|ATPBD3 ENSG00000142549|LOC402665 ENSG00000145194|ECE2 ENSG00000156398|SFXN2 ENSG00000157103|SLC6A1  
ENSG00000161929|NP\_996986.1 ENSG00000162877|NP\_689704.3 ENSG00000167723|TRPV3 ENSG00000170608|FOXA3 ENSG00000173585|CCR9 ENSG00000175611|C9orf130 ENSG00000182841|Q9NSQ0\_HUMAN ENSG00000185905|C16orf54  
ENSG00000185917|SETD4 ENSG00000187595|NP\_001013646.1 ENSG00000188091|C9orf164 ENSG00000065559|MAP2K4 ENSG00000079134|THOC1 ENSG00000099725|PRKY ENSG00000100629|C14orf145 ENSG00000101958|GLRA2  
ENSG00000106346|USP42 ENSG00000119927|GPAM ENSG00000121542|SEC22A ENSG00000129675|ARHGEP6 ENSG00000136542|GALNT5 ENSG00000140181|HERC2P2 ENSG00000140743|CDR2 ENSG00000142182|DNMT3L  
ENSG00000145632|PLK2 ENSG00000148153|C9orf80 ENSG00000152409|NP\_689618.2 ENSG00000166930|MS4A5 ENSG00000167220|HDHD2 ENSG00000169291|SHE ENSG00000174574|C1orf108 ENSG00000179144|GIMAP7  
ENSG00000180458|Q8N3U1\_HUMAN ENSG00000183943|PRKX ENSG00000184005|ST6GALNAC3  
perfect: ACTGTGA TCACAGT hsa-miR-27a TTCACAGTggctaaagtccgc 1  
ACTGTGC ENSG00000005884|ITGA3 ENSG00000078295|ADCY2 ENSG00000078902|TOLLIP ENSG00000105011|ASF1B ENSG00000109113|RAB3A ENSG00000110042|DTX4 ENSG00000114554|PLXNA1 ENSG00000122783|C7orf49  
ENSG00000126215|XRCC3 ENSG00000127415|IDUA ENSG00000128510|CPA4 ENSG00000142611|PRDM16 ENSG00000147402|GABRQ ENSG00000152042|NBPF8 ENSG00000156521|TYSND1 ENSG00000157306|THTPA  
ENSG00000168614|NBPF16 ENSG00000173212|C1orf161 ENSG00000173404|INSM1 ENSG00000173821|RNF213 ENSG00000174403|NP\_689970.1 ENSG00000179571|NP\_001034792.1 ENSG00000179801|C8orf30A ENSG00000181873|C1orf69  
ENSG00000183798|EMILIN3 ENSG00000185602|ARHGAP27 ENSG00000186275|Q5TB04\_HUMAN ENSG00000186979|Q96BK8\_HUMAN ENSG00000188249|XR\_019050.1 ENSG00000188901|NP\_055226.1 ENSG00000196407|THEM5 ENSG00000198012|XR\_017841.1  
ENSG00000204576|PRR3 ENSG000000009413|REV3L ENSG00000054983|GALC ENSG00000079819|EPB41L2 ENSG00000094916|CBX5 ENSG00000107669|ATE1 ENSG00000114062|UBE3A ENSG00000119203|CPF3  
ENSG00000120699|EXOSC8 ENSG00000122545|SEPT7 ENSG00000135999|EPC2 ENSG00000138613|APH1B ENSG00000156463|SH3RF2 ENSG00000168280|KIF5C ENSG00000169905|TOR1AIP2 ENSG00000173542|MOBK1A  
ENSG00000175553|K1210\_HUMAN ENSG00000203827|XR\_015220.1 ENSG00000203832|NBPF20  
ACTTAGC ENSG00000092529|CAPN3 ENSG00000116521|SCAMP3 ENSG00000121274|PAPD5 ENSG00000159224|GIP ENSG00000160606|TLCD1 ENSG00000162543|UBXD3 ENSG00000164270|HTR4 ENSG00000168314|MOBP  
ENSG00000174992|ZG16\_HUMAN ENSG00000177553|C1orf167 ENSG00000178235|SLITRK1 ENSG00000182687|GALR2 ENSG00000185838|GNB1L ENSG00000196070|Q6ZVY7\_HUMAN ENSG00000006757|PNPLA4 ENSG00000051341|POLQ  
ENSG00000072415|MPF5 ENSG00000089157|RPLP0 ENSG00000099721|AMELY ENSG00000116711|PLA2G4A ENSG00000125363|AMELX ENSG00000135686|C16orf44 ENSG00000136146|MED4 ENSG00000144460|Q96NL2\_HUMAN  
ENSG00000145808|ADAMTS19 ENSG00000172469|MANEA ENSG00000176788|BASP1 ENSG00000182793|GSTA5 ENSG00000196511|TPK1 ENSG00000204716|ANKRD20B  
ACTTCAC ENSG00000035403|VCL ENSG00000047617|TMEM16B ENSG00000102981|PARD6A ENSG00000106078|COBL ENSG00000119946|CNNM1 ENSG00000126583|PRKCQ ENSG00000126709|IFI6 ENSG00000152475|Q96EG3\_HUMAN  
ENSG00000155886|SLC24A2 ENSG00000162873|KLHDC8A ENSG00000164711|PAL2 ENSG00000165238|WNK2 ENSG00000173821|RNF213 ENSG00000180834|MAP6D1 ENSG00000186847|KRT14 ENSG00000188505|NP\_001001414.1



|         |                              |                               |                               |                              |                              |                              |                                |                                |
|---------|------------------------------|-------------------------------|-------------------------------|------------------------------|------------------------------|------------------------------|--------------------------------|--------------------------------|
|         | ENSG00000188783 PRELP        | ENSG00000003987 TMTR7         | ENSG00000009790 TRAF3IP3      | ENSG00000078114 NEBL         | ENSG00000104067 TJP1         | ENSG00000107372 ZFAND5       | ENSG00000107518 ATRLN1         | ENSG00000120262 C6orf97        |
|         | ENSG00000120705 ETF1         | ENSG00000120805 ARL1          | ENSG00000125245 GPR18         | ENSG00000132256 TRIM5        | ENSG00000133101 CCNA1        | ENSG00000135766 EGLN1        | ENSG00000136100 VPS36          | ENSG00000136108 CKAP2          |
|         | ENSG00000139370 SLC15A4      | ENSG00000143669 LYST          | ENSG00000145982 FARS2         | ENSG00000146592 CREB5        | ENSG00000153832 FXO36        | ENSG00000156927 UTP14A       | ENSG00000158077 NLRP14         | ENSG00000163412 EIF4E3         |
|         | ENSG00000163636 PSMD6        | ENSG00000165732 DDX21         | ENSG00000180694 TMEM64        | ENSG00000185950 IR2S2        | ENSG00000186272 ZNF17        | ENSG00000188243 COMM6D       | ENSG00000189212 DPY19L2P1      | ENSG00000197147 LRRC8B         |
| ACTTCGA | ENSG00000203801 QSR3E8_HUMAN | ENSG00000204279 PAGE3         | ENSG00000204692 OR12D3        | ENSG00000111405 PP11_HUMAN   | ENSG00000116138 DNAJC16      | ENSG00000117394 SLC2A1       | ENSG00000135116 HRK            | ENSG00000140548 ZNF710         |
|         | ENSG00000084754 HADHA        | ENSG00000092010 PSME1         | ENSG00000105392 CRX           | ENSG00000114405 PP11_HUMAN   | ENSG00000116138 DNAJC16      | ENSG00000117394 SLC2A1       | ENSG00000135116 HRK            | ENSG00000140548 ZNF710         |
|         | ENSG00000143547 QSVUQ9_HUMAN | ENSG00000158457 TSPAN33       | ENSG00000160226 C21orf2       | ENSG00000162931 TRIM17       | ENSG00000166387 PFF1B2       | ENSG00000169194 IL13         | ENSG00000174576 NPAS4          | ENSG00000180448 HMHA1          |
|         | ENSG00000182704 TSKU         | ENSG00000183862 CNGA2         | ENSG00000184274 C21orf93      | ENSG00000184500 HDDC3        | ENSG00000186837 C21orf119    | ENSG00000187953 NR_002217.1  | ENSG00000196153 Q8NAB5_HUMAN   | ENSG00000197912 SPG7           |
|         | ENSG00000198500 Q96C21_HUMAN | ENSG00000198520 NP_01004307.1 | ENSG00000204443 Q562T6_HUMAN  | ENSG00000204443 Q562T6_HUMAN | ENSG00000204490 TNF          | ENSG00000204654 SYNE2        | ENSG00000205769 GNGL1          | ENSG000002061794 MRPS35        |
|         | ENSG00000074266 EED          | ENSG00000109475 RPL34         | ENSG00000110079 MS4A4A        | ENSG00000120242 IFNA8        | ENSG00000122432 SPATA1       | ENSG00000134900 TPP2         | ENSG00000138600 PSL2_HUMAN     | ENSG00000141542 RAB40B         |
|         | ENSG00000149313 AASDHPPT     | ENSG00000150787 PTS           | ENSG00000154493 C10orf90      | ENSG00000164442 CITED2       | ENSG00000178690 C18orf26     | ENSG00000197961 ZNF121       | ENSG00000198799 LRIG2          | ENSG00000203705 TATDN3         |
| ACTTGAA | ENSG00000099364 FBXL19       | ENSG00000100376 FAM118A       | ENSG00000105323 HNRPUL1       | ENSG00000114648 KLHL18       | ENSG00000129250 KIF1C        | ENSG00000130675 HLXB9        | ENSG00000145819 ARHGAP26       | ENSG00000155846 PPARGC1B       |
|         | ENSG00000156427 FGF18        | ENSG00000158161 EYA3          | ENSG00000161281 COX7A1        | ENSG00000164574 GALNT10      | ENSG00000166689 PLEKHA7      | ENSG00000177169 ULK1         | ENSG00000177822 XR_017723.1    | ENSG00000183929 DUSP5P         |
|         | ENSG00000183955 SETD8        | ENSG00000069764 PLA2G10       | ENSG00000082146 ALS2CR2       | ENSG00000087095 NLK          | ENSG00000101974 ATP11C       | ENSG00000107443 CCNJ         | ENSG00000107938 C10orf137      | ENSG00000110172 CHORDC1        |
|         | ENSG00000113845 C3orf1       | ENSG00000118482 PHF3          | ENSG00000118620 ZNF430        | ENSG00000128714 HOXD13       | ENSG00000133858 CCDC131      | ENSG00000134001 EIF2S1       | ENSG00000138336 CXCC6          | ENSG00000138779 Q9HCM6_HUMAN   |
|         | ENSG00000151962 NF_659416.1  | ENSG00000153989 NUS1          | ENSG00000156735 BAG4          | ENSG00000157343 C6orf81      | ENSG00000161970 RPL26        | ENSG00000163785 RYK          | ENSG00000164163 ABCE1          | ENSG00000176597 B3GNT5         |
|         | ENSG00000180660 MAB2L1L      | ENSG00000184867 ARMCX2        | ENSG00000186205 MOSC1         | ENSG00000197810 Q9P160_HUMAN | ENSG00000198648 STK39        | ENSG00000198838 RYR3         |                                |                                |
|         | perfect: ACTTGAA TTCAAGT     | hsa-miR-26b                   | TTCACGTAatccaggataggt         | 0                            |                              |                              |                                |                                |
|         | perfect: ACTTGAA TTCAAGT     | hsa-miR-26a                   | TTCACGTAatccaggataggc         | 0                            |                              |                              |                                |                                |
| ACTTGCC | ENSG00000043143 PHF15        | ENSG00000072121 ZFYVE26       | ENSG00000074370 ATP2A3        | ENSG00000100109 TFIP11       | ENSG00000102243 VGLL1        | ENSG00000104490 NCALD        | ENSG00000105219 CNTD2          | ENSG00000106636 YKT6           |
|         | ENSG00000106991 CNK5         | ENSG00000125999 C20orf114     | ENSG00000126091 ST3GAL3       | ENSG00000145020 AMT          | ENSG00000148400 NOTCH1       | ENSG00000162367 TAL1         | ENSG00000170390 DCLK2          | ENSG00000175003 SLC22A1        |
|         | ENSG00000177096 FAM109B      | ENSG00000182534 MXRA7         | ENSG00000186788 NP_01001670.1 | ENSG00000203822 Q6ZVI0_HUMAN | ENSG00000203930 Q5JPA2_HUMAN | ENSG00000205631 Q9H7S7_HUMAN | ENSG00000205631 Q9H7S7_HUMAN   | ENSG00000071462 WBSR22         |
|         | ENSG00000079385 CEACAM1      | ENSG00000094975 C1orf9        | ENSG00000107643 MAPK8         | ENSG00000129116 PALLD        | ENSG00000129472 RAB2B        | ENSG00000133872 SEMA6D       | ENSG00000139800 ZIC5           | ENSG00000140660 RUNDC2A        |
|         | ENSG00000146592 CREB5        | ENSG00000147684 NDUFB9        | ENSG00000152932 RAB3C         | ENSG00000162613 FUBP1        | ENSG00000164744 SUNC1        | ENSG00000165732 DDX21        | ENSG00000165757 KIAA1462       | ENSG00000166801 FAM111A        |
|         | ENSG00000167117 C17orf73     | ENSG00000168515 SCGB1D1       | ENSG00000170927 PKHD1         | ENSG00000171763 SPATA5L1     | ENSG00000174579 MSL2L1       | ENSG00000178172 SPINK6       | ENSG00000197745 SCGB1D4        | ENSG00000197860 SGTB           |
| ACTTGTA | ENSG00000087087 ARS2_HUMAN   | ENSG00000100084 HIRA          | ENSG00000102230 PCYT1B        | ENSG00000103061 SLC7A6OS     | ENSG00000105193 RPS16        | ENSG00000111775 COX6A1       | ENSG00000114268 PFKFB4         | ENSG00000114554 PLXNA1         |
|         | ENSG00000119280 C1orf198     | ENSG00000125804 C20orf91      | ENSG00000126778 SIX1          | ENSG00000126882 FAM78A       | ENSG00000136689 ILIRN        | ENSG00000136935 GOLGA1       | ENSG00000140403 DNAJA4         | ENSG00000141527 CARD14         |
|         | ENSG00000151465 CDC123       | ENSG00000156411 C14orf2       | ENSG00000162599 NFIA          | ENSG00000164605 Q5TB10_HUMAN | ENSG00000164877 MICALL2      | ENSG00000168795 ZBTB5        | ENSG00000181274 FRAT2          | ENSG00000181666 HKR1           |
|         | ENSG00000184164 CRELD2       | ENSG00000186654 ARHGAP8       | ENSG00000188554 NBR1          | ENSG00000197162 ZNF688       | ENSG00000204304 PBX2         | ENSG00000204564 C6orf136     | ENSG00000205792 A4D193_HUMAN   | ENSG00000082397 EPB41L3        |
|         | ENSG00000083642 APRIN        | ENSG00000092470 WDR76         | ENSG00000096717 SIRT1         | ENSG00000102158 IAG2_HUMAN   | ENSG00000113088 GZMK         | ENSG00000130023 C6orf70      | ENSG00000133302 ANKRD32        | ENSG00000134138 MEIS2          |
|         | ENSG00000134644 PUM1         | ENSG00000135269 TES           | ENSG00000137872 SEMA6D        | ENSG00000143727 ACPI         | ENSG00000146678 IGFBP1       | ENSG00000151572 TMEM16D      | ENSG00000153714 C9orf150       | ENSG00000159873 CCDC117        |
|         | ENSG00000162607 USP1         | ENSG00000163950 SLBP          | ENSG00000166509 CLEC3A        | ENSG00000167193 CRK          | ENSG00000173166 RAPH1        | ENSG00000173674 EIF1AP1      | ENSG00000175746 NP_997328.1    | ENSG00000186684 NP_001001665.2 |
|         | ENSG00000204804 FAM27D1      |                               |                               |                              |                              |                              |                                |                                |
| ACTTTAT | ENSG00000023191 RNH1         | ENSG00000092853 CLSPN         | ENSG00000104823 ECH1          | ENSG00000105808 RASA4        | ENSG00000124357 NAGK         | ENSG00000125815 CST8         | ENSG00000135631 RAB11FIP5      | ENSG00000136816 TOR1B          |
|         | ENSG00000143314 MRPL24       | ENSG00000144560 VGLL4         | ENSG00000144659 SLC25A38      | ENSG00000156381 ANKRD9       | ENSG00000162302 RP56KA4      | ENSG00000162650 ATXN7L2      | ENSG00000162761 LMX1A          | ENSG00000163521 GLB1L          |
|         | ENSG00000164885 CNK5         | ENSG00000167065 DUSP18        | ENSG00000168621 GDNF          | ENSG00000169230 PRELID1      | ENSG00000177169 ULK1         | ENSG00000205434 Q6ZU34_HUMAN | ENSG00000205698 LOC648426      | ENSG00000054803 CBLN4          |
|         | ENSG00000055211 C6orf72      | ENSG00000067533 RRP15         | ENSG00000079257 LXN           | ENSG00000112739 PRPF4B       | ENSG00000118181 RP525        | ENSG00000123124 WWP1         | ENSG00000127588 GNG13          | ENSG00000129675 ARHGFE6        |
|         | ENSG00000133997 MED6         | ENSG00000134480 CCNH          | ENSG00000134533 RERG          | ENSG00000134758 RNF138       | ENSG00000135298 BAI3         | ENSG00000135747 ZNF670       | ENSG00000136111 TBC1D4         | ENSG00000138231 DBR1           |
|         | ENSG00000138448 ITGAV        | ENSG00000145794 MEGF10        | ENSG00000149761 NUDT22        | ENSG00000152133 CCDC75       | ENSG00000152503 TRIM36       | ENSG00000162384 C1orf123     | ENSG00000163328 GPR155         | ENSG00000165118 C9orf64        |
|         | ENSG00000165632 TAF3         | ENSG00000165832 TRUB1         | ENSG00000171928 FAM18B        | ENSG00000175066 GK5          | ENSG00000187151 ANGPTL5      | ENSG00000196793 ZNF239       | ENSG00000197006 METTL9         | ENSG00000197223 NP_006324.1    |
|         | ENSG00000198689 SLC9A6       |                               |                               |                              |                              |                              |                                |                                |
|         | perfect: ACTTTAT ATAAGT      | hsa-miR-142-5p                | cATAAAGTagaagcaactac          | 1                            |                              |                              |                                |                                |
| ACTTTGG | ENSG00000100395 L3MBTL2      | ENSG00000125266 EFNB2         | ENSG00000127511 SIN3B         | ENSG00000128335 APOL2        | ENSG00000136327 NKX2-8       | ENSG00000138166 DUSP5        | ENSG00000142961 MOBKLC2        | ENSG00000146007 ZMAT2          |
|         | ENSG00000146090 RASGEF1C     | ENSG00000153294 GPR115        | ENSG00000157184 CPT2          | ENSG00000160781 PAQR6        | ENSG00000164325 TMEM174      | ENSG00000164896 FASTK        | ENSG00000165879 FRAT1          | ENSG00000166828 SCNN1G         |
|         | ENSG00000170390 DCLK2        | ENSG00000170846 Q8WU25_HUMAN  | ENSG00000182667 NTRI_HUMAN    | ENSG00000186854 Q8V640_HUMAN | ENSG00000197106 SLC6A17      | ENSG00000200460 C1orf112     | ENSG00000200460 C1orf112       | ENSG00000073754 CD5L           |
|         | ENSG00000090530 LEPREL1      | ENSG00000100425 BRD1          | ENSG00000103018 CYB5B         | ENSG00000104325 NAT13        | ENSG00000121579 NAT13        | ENSG00000144668 ITGA9        | ENSG00000145632 PLK2           | ENSG00000145860 RNF145         |
|         | ENSG00000147905 ZCCHC7       | ENSG00000151025 GPR158        | ENSG00000151553 KIAA1600      | ENSG00000154654 NCAM2        | ENSG00000154889 MPPE1        | ENSG00000155096 AZIN1        | ENSG00000161800 RACGAP1        | ENSG00000164327 NP_689969.2    |
|         | ENSG00000165502 RPL36AL      | ENSG00000170113 NIPAL1        | ENSG00000171408 PDE7B         | ENSG00000179295 PTPN11       | ENSG00000181744 C3orf58      | ENSG00000185278 ZBTB37       | ENSG00000187742 SECSBP2        | ENSG00000198382 UVRAG          |
|         | ENSG00000204669 C9orf57      |                               |                               |                              |                              |                              |                                |                                |
| ACTTTGT | ENSG00000008256 PSCD3        | ENSG00000054523 KIF1B         | ENSG00000068024 HDAC4         | ENSG00000074054 CLASP1       | ENSG00000102924 CBLN1        | ENSG00000107341 UBE2R2       | ENSG00000112562 SMOC2          | ENSG00000131845 ZNF304         |
|         | ENSG00000133316 WDR74        | ENSG00000135801 TAF5L         | ENSG00000136485 WDR68         | ENSG00000140950 KIAA1609     | ENSG00000146021 KLHL3        | ENSG00000149657 LSM14B       | ENSG00000152475 Q96EG3_HUMAN   | ENSG00000166833 NAV2           |
|         | ENSG00000167780 SOAT2        | ENSG00000178252 WDR6          | ENSG00000183778 B3GALT5       | ENSG00000184785 Q96HG1_HUMAN | ENSG00000196526 AFAP1        | ENSG00000033178 UBE1L2       | ENSG00000075568 TMEM131        | ENSG00000081154 PCNP           |
|         | ENSG00000100208 SNRPP3       | ENSG00000101384 JAG1          | ENSG00000109586 GALNT7        | ENSG00000116299 KIAA1324     | ENSG00000120253 NUP43        | ENSG00000130396 MLLT4        | ENSG00000134215 VAV3           | ENSG00000137702 AOPJW7_HUMAN   |
|         | ENSG00000138095 LRPPRC       | ENSG00000138663 COPS4         | ENSG00000145569 FAM105A       | ENSG00000162374 ELAVL4       | ENSG00000164209 SLC25A46     | ENSG00000164543 STK17A       | ENSG00000164597 COG5           | ENSG00000167555 ZNF534         |
|         | ENSG00000169255 B3GALNT1     | ENSG00000170190 SLC16A5       | ENSG00000180228 PRKRA         | ENSG00000184226 PCDH9        | ENSG00000185985 SLITRK2      | ENSG00000186432 KPNA4        | ENSG00000188732 C7orf46        | ENSG00000188895 Q68DK7_HUMAN   |
| ACTTTTC | ENSG00000102822 HHATL        | ENSG00000066735 Q96GK3_HUMAN  | ENSG00000099954 CECR2         | ENSG00000103021 CCDC113      | ENSG00000103489 XYLT1        | ENSG00000111725 PRKAB1       | ENSG00000119280 C1orf198       | ENSG00000132155 RAF1           |
|         | ENSG00000133056 PIK3C2B      | ENSG00000136859 ANGPTL2       | ENSG00000143862 ARL8A         | ENSG00000144655 AXUD1        | ENSG00000157617 C21orf25     | ENSG00000170458 CD14         | ENSG00000182315 NP_653215.1    | ENSG00000188368 NP_954979.2    |
|         | ENSG00000196220 SRGAP3       | ENSG00000198182 ZNF607        | ENSG00000205718 LOC653656     | ENSG00000205761 Q6ZRI7_HUMAN | ENSG00000205937 RNPS1        | ENSG00000206528 Q6ZSMO_HUMAN | ENSG00000010244 ZNF207         | ENSG00000025293 PHF20          |
|         | ENSG00000051128 HERPUD1      | ENSG00000070667 REMS2         | ENSG00000095209 TMEM38B       | ENSG00000111145 ELK3         | ENSG00000112333 NR2E1        | ENSG00000114331 CENTB2       | ENSG00000116785 CFHR3          | ENSG00000122786 CALD1          |
|         | ENSG00000133606 MKRN1        | ENSG00000142182 DNMT3L        | ENSG00000148484 RSU1          | ENSG00000156970 BUB1B        | ENSG00000163659 TIPARP       | ENSG00000167384 ZNF180       | ENSG00000172239 PAIP1          | ENSG00000177613 CSTF2T         |
|         | ENSG00000181588 RKHD1        | ENSG00000183671 GPR1          |                               |                              |                              |                              |                                |                                |
| ACTTTTT | ENSG00000011105 TSPAN9       | ENSG00000011451 WIZ           | ENSG00000013374 NUB1          | ENSG00000062282 DGAT2        | ENSG00000067082 KLF6         | ENSG00000076108 BAZ2A        | ENSG00000085063 CD59           | ENSG00000095059 DHPS           |
|         | ENSG00000102230 PCYT1B       | ENSG00000108604 SMARCD2       | ENSG00000108774 RAB5C         | ENSG00000119599 WDR21A       | ENSG00000121281 ADCY7        | ENSG00000124374 PAIP2B       | ENSG00000125347 IRF1           | ENSG00000126767 ELK1           |
|         | ENSG00000130340 SNX9         | ENSG00000131148 COX4NB        | ENSG00000131788 PTAS3         | ENSG00000132405 TBC1D14      | ENSG00000132478 UNK          | ENSG00000136807 CDK9         | ENSG00000148158 SNX30          | ENSG00000153563 CD8A           |
|         | ENSG00000162736 NCSTN        | ENSG00000169105 CHST14        | ENSG00000169174 PCSK9         | ENSG00000169662 NP_997357.1  | ENSG00000170162 VGLL2        | ENSG00000177551 NHLH2        | ENSG00000180447 GAS1           | ENSG00000183530 C22orf30       |
|         | ENSG00000185049 WHSC2        | ENSG00000186951 PPARA         | ENSG00000188589 RBM33         | ENSG00000196535 MYO18A       | ENSG00000197965 MPZL1        | ENSG00000203988 Q6ZU49_HUMAN | ENSG00000206026 NP_001032408.1 | ENSG00000048740 CUGBP2         |
|         | ENSG00000054219 LY75         | ENSG00000059588 TARBP1        | ENSG00000062716 TMEM49        | ENSG00000077254 USP33        | ENSG00000082293 COL19A1      | ENSG00000104313 EYA1         | ENSG00000104517 EDD1           | ENSG00000105880 DLX5           |
|         | ENSG00000106588 PSMA2        | ENSG00000113569 NUP155        | ENSG00000115145 STAM2         | ENSG00000115993 TRAK2        | ENSG00000119812 FAM98A       | ENSG00000133983 SYNJ2BP      | ENSG00000135378 PRRG4          | ENSG00000136014 USP44          |
|         | ENSG00000136810 TXN          | ENSG00000140299 BNIP2         |                               |                              |                              |                              |                                |                                |

ENSG00000042980|ADAM28 ENSG00000087338|GMCL1 ENSG00000096696|DSP ENSG00000101557|USP14 ENSG00000105483|CARD8 ENSG00000106025|TSPAN12 ENSG00000112249|ASCC3 ENSG00000112902|SEMA5A ENSG00000114487|MORC1 ENSG00000119927|GPAM ENSG00000129534|C14orf106 ENSG00000138675|PGF5 ENSG00000163507|KIAA1524 ENSG00000164761|TNFRSF11B ENSG00000169288|MRPL1 ENSG00000171735|CAMTA1 ENSG00000172139|SLC9A10 ENSG00000172466|ZNF24 ENSG00000174417|TRHR ENSG00000177692|C21orf55 ENSG00000178852|C17orf57 ENSG00000179097|HTRF1 ENSG00000180882|XR\_017823.1 ENSG00000182836|PLCXD3 ENSG00000186697|Q86T06\_HUMAN ENSG00000196247|ZNF588 ENSG00000196268|ZNF493 ENSG00000196418|ZNF124 ENSG00000196591|HDAC2 ENSG00000196946|ZNF705A ENSG00000198252|STYX ENSG00000198702|Q8NBL2\_HUMAN ENSG00000204104|TRAF3IP1 ENSG00000205099|A4D0Y5\_HUMAN ENSG00000069188|SDK2 ENSG00000102870|ZNF629 ENSG00000114982|NP\_060461.3 ENSG00000129195|FAM64A ENSG00000129951|NP\_079164.1 ENSG00000135973|GPR45 ENSG00000008056|SYN1 ENSG00000064419|TNPO3 ENSG000000205592|MUC19 ENSG00000114266|ANLN ENSG00000075407|ZNF37A ENSG000000088970|C20orf19 ENSG00000089335|ZNF302 ENSG00000142513|ACPT ENSG00000158813|EDA ENSG00000164976|KIAA1161 ENSG00000168062|BATF2 ENSG00000169347|GP2 ENSG00000169509|CRCT1 ENSG00000169676|DRD5 ENSG00000170100|Q96MU6-2 ENSG00000173153|ESRRA ENSG00000180822|Q8N950\_HUMAN ENSG00000181773|GPR3 ENSG00000181789|COPG ENSG00000181814|Q6NW39\_HUMAN ENSG00000182205|Q6ZU70\_HUMAN ENSG00000196739|COL27A1 ENSG00000198722|UNC13B ENSG00000198802|PECAM1 ENSG00000204049|Q6ZUH9\_HUMAN ENSG00000205592|MUC19 ENSG00000114266|ANLN ENSG00000075407|ZNF37A ENSG000000088970|C20orf19 ENSG00000089335|ZNF302 ENSG00000097033|SH3GLB1 ENSG00000104205|SGK3 ENSG00000111432|FZD10 ENSG00000112304|THEM2 ENSG00000115935|WIPF1 ENSG00000116678|LEPR ENSG00000124818|OPN5 ENSG00000125538|IL1B ENSG00000126016|AMOT ENSG00000134308|YWHAQ ENSG00000136634|IL10 ENSG00000144026|ZNF514 ENSG00000147121|ZNF673 ENSG00000154760|SLFN13 ENSG00000158185|ANKRD36 ENSG00000159346|ADIPOR1 ENSG00000160336|ZNF761 ENSG00000163635|ATXN7 ENSG00000163642|XR\_017284.1 ENSG00000167383|ZNF229 ENSG00000167785|ZNF558 ENSG00000171429|ZNF439 ENSG00000171408|PDE7B ENSG00000173698|GPR64 ENSG00000174652|ZNF266 ENSG00000176232|ZNF283 ENSG00000177917|ARL6IP6 ENSG00000183814|LIN9 ENSG00000189190|ZNF600 ENSG00000189252|SPANX3 ENSG00000197054|ZNF763 ENSG00000198482|ZNF808 ENSG00000198538|ZNF28 ENSG00000203924|SPANX2 ENSG00000204201|Q49A40\_HUMAN ENSG00000204597|ZNF818 ENSG00000204604|ZNF468 ENSG00000092847|EIF2C1 ENSG00000108375|SUPT4H1 ENSG00000108556|CHRNE ENSG00000108753|TCF2 ENSG00000110583|NAT11 ENSG00000111110|PPM1H ENSG00000134686|PHC2 ENSG00000136112|UTP14C ENSG00000148702|HABP2 ENSG00000158747|NBL1 ENSG00000160307|S100B ENSG00000163898|LIPH ENSG00000165556|CDX2 ENSG00000175084|DES ENSG00000175697|GPR156 ENSG00000180595|Q8N8C9\_HUMAN ENSG00000180924|Q9BVQ6\_HUMAN ENSG00000183172|C22orf32 ENSG00000184334|Q71RG6\_HUMAN ENSG00000185507|IRF7 ENSG00000187186|CCL27 ENSG00000188743|Q9P169\_HUMAN ENSG00000189319|FAM53B ENSG00000198131|ZNF544 ENSG00000198291|Q6ZTP9\_HUMAN ENSG00000203747|FCGR3A ENSG00000204640|NMS ENSG00000100580|TMED8 ENSG00000105176|C19orf2 ENSG00000105810|CDK6 ENSG00000108443|RPS6KB1 ENSG00000109099|PMP22 ENSG00000118515|SGK ENSG00000119979|FAM45A ENSG00000131264|CDX4 ENSG00000142065|ZFP14 ENSG00000143149|ALDH9A1 ENSG00000144635|DYNC1L1 ENSG00000147121|ZNF673 ENSG00000147573|TRIM55 ENSG00000162526|TSSK3 ENSG00000164180|TMEM161B ENSG00000167785|ZNF558 ENSG00000171931|FBXW10 ENSG00000178150|ZNF114 ENSG00000180329|CCDC43 ENSG00000182118|FAM89A ENSG00000187569|DPPA3 ENSG00000188372|ZP3 ENSG00000188831|XR\_017793.1 ENSG00000196387|ZNF140 ENSG00000197498|BXDC1 ENSG00000118526|TCF21 ENSG00000125995|C20orf52 ENSG00000127124|HIVEP3 ENSG00000133874|RNF122 ENSG00000102962|CCL22 ENSG00000112782|CLIC5 ENSG00000116667|C1orf21 ENSG00000118526|TCF21 ENSG00000125995|C20orf52 ENSG00000127124|HIVEP3 ENSG00000133874|RNF122 ENSG00000102962|CCL22 ENSG00000112782|CLIC5 ENSG00000116667|C1orf21 ENSG00000118526|TCF21 ENSG00000125995|C20orf52 ENSG00000127124|HIVEP3 ENSG00000133874|RNF122 ENSG00000135605|TEC ENSG00000140105|WARS ENSG00000143107|FNDCF7 ENSG00000144468|RHBDD1 ENSG00000147118|ZNF182 ENSG00000154478|GPR26 ENSG00000157064|NMNAT2 ENSG00000161381|PLXDC1 ENSG00000162174|ASRGL1 ENSG00000162650|ATXN7L2 ENSG00000166152|C16orf78 ENSG00000167112|TRUB2 ENSG00000169181|GSG1L ENSG00000170689|HOXB9 ENSG00000179393|Q9NRE4\_HUMAN ENSG00000186788|NP\_001001670.1 ENSG00000198756|GLT25D2 ENSG0000010270|STAR3NL ENSG00000079335|CDC14A ENSG000000081842|PCDHA10 ENSG000000087053|MTMR2 ENSG000000088451|TGDS ENSG00000101972|STAG2 ENSG00000105136|ZNF419 ENSG00000115866|DARS ENSG00000115977|AAK1 ENSG00000134253|TRIM45 ENSG00000139793|MBNL2 ENSG00000140265|ZSCAN29 ENSG00000143384|MCL1 ENSG00000147905|ZCCHC7 ENSG00000152749|GPR180 ENSG00000155495|MAGEC1 ENSG00000164684|ZNF704 ENSG00000166986|MARS ENSG00000169062|UPF3A ENSG00000170348|TMED10 ENSG00000175104|TRAF6 ENSG00000181656|GPR88 ENSG00000182093|WRB ENSG00000182518|FAM104B ENSG00000185689|Q6NKN5\_HUMAN ENSG00000187123|LYPD6 ENSG00000197024|ZNF398 ENSG00000198872|PEG10 ENSG00000005100|DHX33 ENSG00000044090|CUL7 ENSG000000068383|INPP5A ENSG00000073792|IGF2BP2 ENSG00000076944|STXBP2 ENSG00000078872|NFS1 ENSG00000084734|GCKR ENSG00000100105|PATZ1 ENSG00000102230|PCTY1B ENSG00000104415|WISP1 ENSG00000106133|INSUNC ENSG00000109016|PHR57B ENSG00000111752|PCH1 ENSG00000117643|MAN1C1 ENSG00000118526|TCF21 ENSG00000118655|DCLRE1B ENSG00000125755|SYMPK ENSG00000130479|MAP1S ENSG00000139914|NP\_981947.1 ENSG00000141744|PNMT ENSG00000142541|RPL13A ENSG00000142583|SLC2A5 ENSG00000144712|CAND2 ENSG00000155428|TRIM74 ENSG00000155858|LSM11 ENSG00000162391|C1orf179 ENSG00000163872|YEATS2 ENSG00000164047|CAMP ENSG00000165140|FBP1 ENSG00000169393|ELSPBP1 ENSG00000171495|NP\_775760.2 ENSG00000172155|LCE1D ENSG00000174996|KLC2 ENSG00000176515|Q8NAX6\_HUMAN ENSG00000177398|UMODL1 ENSG00000178796|Q8N921\_HUMAN ENSG00000178809|TRIM73 ENSG00000182534|MKR47 ENSG00000183458|Q9NRE7\_HUMAN ENSG00000183793|NPIP ENSG00000184232|OAF ENSG00000184481|MLLT7 ENSG00000186163|Q4G0S1\_HUMAN ENSG00000186226|LCE1E ENSG00000188487|Q1MX18-4 ENSG00000188816|HMX2 ENSG00000197435|HIST3H2BB ENSG00000198198|KIAA0467 ENSG00000198700|IPO9 ENSG00000204463|BAT3 ENSG00000204584|Q6ZSH9\_HUMAN ENSG00000205631|Q9H7S7\_HUMAN ENSG00000060138|CSDA ENSG000000091664|SLC17A6 ENSG00000102290|PCDH1X ENSG00000105398|SULT2A1 ENSG00000106278|PTPRZ1 ENSG00000108932|SLC16A6 ENSG00000112306|RPS12 ENSG00000114487|MORC1 ENSG00000116721|PRAMEF1 ENSG00000122787|AKR1D1 ENSG00000129235|TXNL5 ENSG00000131171|SH3BGR1 ENSG00000132541|HRSP12 ENSG00000135164|DMTF1 ENSG00000143631|FLG ENSG00000146250|PRSS35 ENSG00000154874|NP\_872374.3 ENSG00000156017|C9orf41 ENSG00000158185|ANKRD36 ENSG00000163535|SGOL2 ENSG00000163584|RPL22L1 ENSG00000164172|MCCS2 ENSG00000164176|EDIL3 ENSG00000169967|MAP3K2 ENSG00000173988|Q5TBN0\_HUMAN ENSG00000174607|UGT8 ENSG00000175449|RFESD ENSG00000178538|CA8 ENSG00000181458|TMEM45A ENSG00000182504|LRR1Q2 ENSG00000183644|NP\_997313.1 ENSG00000188647|PTAR1 ENSG00000196711|NP\_997296.1 ENSG00000196885|Q9HAZ8\_HUMAN ENSG00000196912|AN36B\_HUMAN ENSG00000197632|SERPINB2 ENSG00000197713|RPE ENSG00000198298|ZNF485 ENSG00000198856|NP\_067050.1 ENSG00000204406|MBD5 ENSG00000204448|PRAMEF14 ENSG00000204495|PRAMEF13 ENSG000000015592|STMN4 ENSG00000075151|EIF4G3 ENSG00000079308|TNS1 ENSG00000085978|ATG16L1 ENSG00000101350|KIF3B ENSG00000111639|MRPL51 ENSG00000126709|IFI6 ENSG00000140297|GCNT3 ENSG00000146859|TMEM140 ENSG00000157837|PSL4\_HUMAN ENSG00000162337|LRP5 ENSG00000164729|AMAC1L1 ENSG00000167011|NP\_940973.1 ENSG00000169921|Q75L30\_HUMAN ENSG00000172061|LRRCL5 ENSG00000176022|B3GALT6 ENSG00000183488|AMAC1L3 ENSG00000184117|NIPSNAP1 ENSG00000184923|FAM22A ENSG00000185684|EP400L1 ENSG00000186301|Q49A61\_HUMAN ENSG00000196787|HIST1H4C ENSG00000197061|HIST1H4C ENSG00000197753|LHFP15 ENSG00000205980|Q6ZU05\_HUMAN ENSG00000206189|NR\_001550.1 ENSG0000006576|PHTF2 ENSG00000047410|TPR ENSG00000075407|ZNF37A ENSG00000100442|FKBP3 ENSG00000110841|PPF1B1 ENSG00000116005|PCYOX1 ENSG00000117054|ACADM ENSG00000117592|PRDX6 ENSG00000112624|TMEM149 ENSG00000131003|RBMYP2 ENSG00000132388|UBE2G1 ENSG00000132631|C20orf79 ENSG00000135577|NMBR ENSG00000136888|ATP6V1G1 ENSG00000137269|LRRCL1 ENSG00000138614|C15orf44 ENSG00000140349|VASH2 ENSG00000151893|C10orf46 ENSG00000154359|LONRF1 ENSG00000162647|C1orf119 ENSG00000165660|KIAA0157 ENSG00000166157|TPTE ENSG00000170946|DPH4 ENSG00000173681|XCORF23 ENSG00000179119|SPTYP2D1 ENSG00000180370|PAK2 ENSG00000182963|GJA7 ENSG00000205072|Q6ZR3A\_HUMAN ENSG00000205081|XR\_017999.1 ENSG00000001461|NPAL3 ENSG00000072609|CHFR ENSG00000090889|KIF4A ENSG00000090860|GADD45B ENSG00000106123|EPHB6 ENSG00000108292|MLLT2 ENSG00000110203|FOLR3 ENSG000001114841|DNAH1 ENSG00000116205|C1orf83 ENSG00000119919|NKX2-3 ENSG00000120055|C10orf95 ENSG00000121904|CSMD2 ENSG00000127191|TRAF2 ENSG00000130762|ARHGEF16 ENSG00000133874|RNF122 ENSG00000135424|ITGA7 ENSG00000142449|FBN3 ENSG00000150977|NP\_659495.1 ENSG00000158715|SLC45A3 ENSG00000158717|RNF166 ENSG00000160055|C1orf91 ENSG00000160117|ANKRD41 ENSG00000164591|MYO23 ENSG00000166069|TMC05 ENSG00000181563|C1orf211 ENSG00000184345|IQCF2 ENSG00000185252|ZNF74 ENSG00000197900|Q8N7Q6\_HUMAN ENSG00000204283|NP\_001001685.1 ENSG0000020219|NP\_001025037.1 ENSG00000335141|NP\_116211.1 ENSG00000058600|POLR3E ENSG00000076321|KLHL20 ENSG00000078725|DBC1 ENSG00000083720|OXCT1 ENSG00000084090|STAR7D ENSG00000090269|CLEC5A ENSG00000104320|NBN ENSG00000105467|SYNGR4 ENSG00000108984|MAF2K6 ENSG00000109689|STIM2 ENSG00000117153|KLHL12 ENSG00000117595|IRF6 ENSG00000117751|PPP1R8 ENSG00000154473|BUB3 ENSG00000168811|IL12A ENSG00000169018|FEM1B ENSG00000170915|PAQR8 ENSG00000171476|HOP\_HUMAN ENSG00000181472|ZBTB2 ENSG00000197945|Q6ZRE3\_HUMAN ENSG00000205524|Q68D70\_HUMAN ENSG00000003147|ICAI ENSG000000012223|LTF ENSG00000053108|FSTL4 ENSG00000063587|ZNF275 ENSG00000076248|UNG ENSG00000078295|ADCY2 ENSG00000080707|TRIP6 ENSG00000104059|K0574\_HUMAN ENSG00000119686|C14orf58 ENSG00000131233|GJA10 ENSG00000132915|PDE6A ENSG00000134864|Q9BVM4\_HUMAN ENSG00000136485|WDR68 ENSG00000141955|NP\_631913.2 ENSG00000141985|SH3GL1 ENSG00000151117|TMEM86A ENSG00000157911|PEX10 ENSG00000169548|SUHW1 ENSG00000171608|PIK3CD ENSG00000173126|PCP4L1 ENSG00000180104|EXOC3 ENSG00000186318|BACE1 ENSG00000204231|RXRB ENSG00000204540|PSORS1C1 ENSG00000110675|ELMOD1 ENSG00000112249|ASCC3 ENSG00000117601|SERPIN1 ENSG00000121022|COP5 ENSG00000123607|TTC21B ENSG00000125871|C20orf72 ENSG00000133393|C16orf63 ENSG00000137038|C9orf123 ENSG00000141045|ZNF287 ENSG00000149313|AADHPPT ENSG00000154874|NP\_872374.3 ENSG00000159082|SYNJ1 ENSG00000182518|FAM104B ENSG00000182977|Q9P1I1\_HUMAN ENSG00000189367|C6orf174 ENSG00000198304|ZNF528 AGAATAA ENSG00000006659|LGALS14 ENSG0000010282|HHATL ENSG00000067829|IDH3G ENSG00000092054|MYH7 ENSG00000099834|MUPCDH ENSG00000099899|HTF9C\_HUMAN ENSG00000105198|LGALS13 ENSG00000105428|ZNRF4 ENSG00000113578|FGF1 ENSG00000116809|ZBTB17 ENSG00000118137|APOA1 ENSG00000123136|DDX39 ENSG00000125743|SNRPD2 ENSG00000128274|A4GALT ENSG00000130813|NP\_060851.1 ENSG00000133026|MYH10 ENSG00000134107|BHLHB2 ENSG00000136878|USP20 ENSG00000139714|MORC3 ENSG00000140263|SORD ENSG00000141096|DPEP3 ENSG00000141977|CTB3 ENSG00000142484|TM4SF5 ENSG00000142789|ELA3A ENSG00000143167|GPA33 ENSG00000143546|S100A8 ENSG00000149798|CADC2EP2 ENSG00000160318|CLDN2 ENSG00000163374|YY1AP1 ENSG00000163912|IT122 ENSG00000166317|SYNPO2L ENSG00000167525|NP\_689678.1 ENSG00000169704|GP9 ENSG00000170458|CD14 ENSG00000173093|CCDC63 ENSG00000173171|MTX1 ENSG00000174788|PCP2 ENSG00000177553|C1orf167 ENSG00000178896|EXOSC4 ENSG00000181026|ISG20L1 ENSG00000181625|GYLD ENSG00000196502|SULT1A1 ENSG00000198785|GRIN3A ENSG00000203793|Q6ZR74\_HUMAN ENSG00000205502|NP\_00107596.1 ENSG00000205592|MUC19 ENSG000000023839|ABCC2 ENSG00000069345|DNAJA2 ENSG00000172319|ALG13 ENSG00000100191|SLC5A4 ENSG00000101234|FBXL4 ENSG00000112234|ST8SIA4 ENSG00000115352|ST8SIA4 ENSG00000115866|DARS ENSG00000120656|TAF12 ENSG00000128383|APOBEC3A ENSG00000128394|APOBEC3G ENSG00000131732|ZCCHC9 ENSG00000134255|CEPT1 ENSG00000139971|C14orf37 ENSG00000141198|TOML1 ENSG00000143355|LHX9 ENSG00000143669|LYST ENSG00000144824|PLCXD2 ENSG00000151233|Q8IXV1\_HUMAN ENSG00000154640|BTG3 ENSG00000156920|GPR112 ENSG00000162819|C1orf58 ENSG00000163110|PDLIM5 ENSG00000163285|GABRG1 ENSG00000165996|PTPLA ENSG00000166035|LIPC ENSG00000166930|MSA5 ENSG00000167306|MYO5B ENSG00000169762|TAPT1 ENSG00000169953|HSFY2 ENSG00000170571|EMB ENSG00000172468|HSFY1 ENSG00000173612|GPRC6A ENSG00000176840|C19orf30 ENSG00000180245|RRH ENSG00000180773|SLC36A4 ENSG00000196900|NP\_997291.1 ENSG00000198887|SMC5 ENSG00000203897|Q6W4Z2\_HUMAN ENSG00000205835|LOC647309 ENSG00000206355|A1A4G5\_HUMAN ENSG00000008056|SYN1 ENSG00000035403|VCL ENSG00000048471|NP\_001073999.1 ENSG00000082458|DLG3 ENSG00000090554|FLT3LG ENSG00000100450|GZMH ENSG00000107282|APBA1 ENSG00000126709|IFI6 ENSG00000130803|ZNF317 ENSG00000140470|ADAMTS17 ENSG00000148826|NKX6-2 ENSG00000149633|NP\_001025035.1 ENSG00000157823|AP3S2 ENSG00000161103|Q5BKY6\_HUMAN ENSG00000164318|EGFLAM ENSG00000164501|Q96M41\_HUMAN ENSG00000165025|SYK ENSG00000175772|Q8N952\_HUMAN ENSG00000178222|XR\_017723.1 ENSG00000179036|VAMP2 ENSG00000188743|Q9P169\_HUMAN ENSG00000196358|NTNG2 ENSG00000198258|UBL5 ENSG00000205061|Q6ZUP2\_HUMAN ENSG00000206028|Q6ZVA3\_HUMAN ENSG00000033178|UBE1L2 ENSG000000086205|FOLH1 ENSG00000092345|DAZL ENSG00000104371|DKK4 ENSG00000105467|SYNGR4 ENSG00000120686|UFM1 ENSG00000121903|ZSCAN20 ENSG00000125831|CST11 ENSG00000132781|MUTYH ENSG00000134330|Q6PCA9\_HUMAN ENSG00000141219|C17orf80 ENSG00000144026|ZNF514 ENSG00000148798|INA ENSG00000157557|ETS2 ENSG00000165168|CYBB ENSG00000165819|METTL3 ENSG00000173598|NUDT4 ENSG00000183960|KCNH8 ENSG00000187191|DAZ3 ENSG00000188120|DAZ1 ENSG00000188725|NP\_001041714.1 ENSG00000198482|ZNF808 ENSG00000198538|ZNF28 ENSG00000204588|Q68DL6\_HUMAN ENSG00000204604|ZNF468 ENSG00000204923|NP\_001019851.1 ENSG00000205916|DAZ4 ENSG00000205944|DAZ2 ENSG00000062485|CS ENSG00000079308|TNS1 ENSG00000095303|PTGS1 ENSG00000103855|CD276 ENSG00000107554|DNMBP ENSG00000120049|KCNIP2 ENSG00000124134|KCN51 ENSG00000128645|HOXD1 ENSG00000136279|LMM2 ENSG00000160014|CALM\_HUMAN ENSG00000166104|NP\_776166.1 ENSG00000168792|NP\_937790.1 ENSG00000171115|GMAP8 ENSG00000204523|HLA-B ENSG00000206190|ATP10A ENSG0000020745|WNT16 ENSG00000082068|WDR70 ENSG00000087510|TFAP2C ENSG00000101310|SEC23B ENSG00000101413|C20orf77 ENSG00000107669|ATE1 ENSG00000111701|APOBEC1 ENSG00000112406|HECA ENSG00000113520|IL4 ENSG00000113916|BCL6 ENSG00000117586|TNFSF4 ENSG00000117600|NP\_055654.2 ENSG00000125814|NAPB ENSG00000129158|SERGEF ENSG00000133639|BTG1 ENSG00000138029|HADHB ENSG00000138152|BTBD16 ENSG00000142507|PSMB6 ENSG00000158691|ZSCAN12 ENSG00000162607|USP1 ENSG00000165868|HSPA12A ENSG00000170624|SGCD ENSG00000170941|NP\_065895.1 ENSG00000173480|ZNF417 ENSG00000183648|NDUFB1 ENSG00000183696|UPP1 ENSG00000188021|UBQLN2 ENSG00000189367|C6orf174 ENSG00000198523|PLN ENSG00000204869|IGFL4 ENSG000000088876|ZNF343 ENSG00000100216|TOMM22 ENSG00000100647|KIAA0247 ENSG00000102003|SYP ENSG00000107957|SH3PXD2\_HUMAN ENSG00000116032|GRIN3B ENSG000001021774|KHDRBS1 ENSG00000137275|RIPK1 ENSG00000137843|PAK6 ENSG00000141431|Q6ZMX6\_HUMAN ENSG00000142149|HUNK ENSG00000142973|CYP4B1 ENSG00000143196|DPT ENSG00000158813|EDA ENSG00000162666|KIAA0040 ENSG00000176753|NP\_001034994.1 ENSG00000182851|NP\_835466.1 ENSG00000186163|Q4G0S1\_HUMAN ENSG00000196118|NP\_00101

ENSG00000129450|SIGLEC9 ENSG00000130751|NPAS1 ENSG00000130985|UBE1 ENSG00000132958|TPTE2 ENSG00000135801|TAF5L ENSG00000141504|SAT2 ENSG00000143641|GALNT2 ENSG00000160296|SIGLEC12 ENSG00000160994|CCDC105 ENSG00000162592|CCDC27 ENSG00000163820|FYCO1 ENSG00000164012|WDR65 ENSG00000167723|TRPV3 ENSG00000168995|SIGLEC7 ENSG00000171747|LGALS4 ENSG00000171798|KNDC1 ENSG00000177762|C5orf27 ENSG00000180210|F2 ENSG00000183258|DDX41 ENSG00000183908|LRRCS55 ENSG00000188042|ARL4C ENSG00000189037|DUSP2 ENSG00000203747|FCGR3A ENSG00000204369|QZUP0\_HUMAN ENSG00000204845|Q6ZUC3\_HUMAN ENSG00000206528|Q6ZSMO\_HUMAN ENSG0000035720|STAP1\_HUMAN ENSG00000054983|GALC ENSG00000067704|IARS2 ENSG00000082146|ALS2CR2 ENSG00000085563|ABCB1 ENSG00000094963|FMO2 ENSG00000101752|MTB1 ENSG00000102908|NFAT5 ENSG00000107758|PPP3CB ENSG00000116752|BCAS2 ENSG00000120696|KBTD7 ENSG00000122068|FYTTD1 ENSG00000123178|C13orf1 ENSG00000125304|TM9SF2 ENSG00000128617|OPN1SW ENSG00000132464|ENAM ENSG00000137558|PI15 ENSG00000139687|RB1 ENSG00000140391|TSPAN3 ENSG00000144935|TRPC1 ENSG00000151247|EIF4E ENSG00000154642|C21orf91 ENSG00000156958|GALK2 ENSG00000161594|KLHL10 ENSG00000162813|BPNT1 ENSG00000164284|GRPEL2 ENSG00000164308|NP\_071745.1 ENSG00000165899|C12orf64 ENSG00000170866|LILRA3 ENSG00000171310|CHST11 ENSG00000175745|NR2F1 ENSG00000180777|ANKRD30B ENSG00000184203|PPP1R2 ENSG00000188153|COL4A5 ENSG00000189149|FLJ41766 ENSG00000196323|ZBTB44 ENSG00000196680|Q8WZ27\_HUMAN ENSG00000198046|ZNF667 ENSG00000198315|ZNF192 ENSG00000198420|NP\_055534.1 ENSG00000198963|RORB ENSG00000203808|Q5T552\_HUMAN AGACATT ENSG00000058262|SEC61A1 ENSG00000070759|TESK2 ENSG00000093217|XYLB ENSG00000110786|PTPN5 ENSG00000114770|ABCC5 ENSG00000115112|TFCP2L1 ENSG00000126756|UXT ENSG00000136807|CDK9 ENSG00000139266|MARCH9 ENSG00000145819|ARHGAP26 ENSG00000147394|ZNF185 ENSG00000150401|DCUN1D2 ENSG00000160179|ABCG1 ENSG00000167207|NOD2 ENSG00000167858|TEKT1 ENSG00000168824|NSG1\_HUMAN ENSG00000180861|C12orf36 ENSG00000182667|NTR1\_HUMAN ENSG000000009413|REV3L ENSG00000021574|SPAST ENSG00000069956|MAPK6 ENSG00000081320|STK17B ENSG00000104517|EDD1 ENSG00000112414|GPR126 ENSG00000120129|DUSP1 ENSG00000122548|K0087\_HUMAN ENSG00000131979|GCH1 ENSG00000134830|GPR77 ENSG00000137338|PGBD1 ENSG00000138741|TRPC3 ENSG00000144057|ST6GAL2 ENSG00000150636|CCDC102B ENSG00000155380|SLC16A1 ENSG00000162702|ZNF281 ENSG00000165972|CCDC38 ENSG00000168333|C8orf22 ENSG00000169248|CXCL11 ENSG00000177752|YIPF7 ENSG00000179869|ABCA13 ENSG00000184258|CDR1 ENSG00000189136|NM\_207382 ENSG00000196447|XR\_017870.1 ENSG00000197576|HOXA4 ENSG00000198482|ZNF808 AGACCAA ENSG000000087460|GNAS ENSG00000088726|TMEM40 ENSG00000110514|MADD ENSG00000114013|CD86 ENSG00000128389|NM\_032262 ENSG00000130164|LDLR ENSG00000131389|SLC6A6 ENSG00000136352|TITF1 ENSG00000141052|MYOCD ENSG00000142546|NOSIP ENSG00000149179|C11orf49 ENSG00000155849|ELMO1 ENSG00000160838|C10orf92 ENSG00000180035|ZNF553 ENSG00000181867|FTMT ENSG00000182040|USH1G ENSG00000183785|PEX26 ENSG00000183837|PNMA3 ENSG00000184108|TRIML1 ENSG00000184260|HIST2H2AC ENSG00000187686|XR\_016979.1 ENSG00000188055|Q6ZVX1\_HUMAN ENSG00000196242|OR2C3 ENSG00000196411|EPHB4 ENSG00000204305|AGER ENSG00000206140|LOC728229 ENSG00000076382|SPAC5 ENSG00000088035|ALG6 ENSG00000089472|HEFH ENSG00000106541|AGR2 ENSG00000107679|PLEKHA1 ENSG00000112309|B3GAT2 ENSG00000114861|FOXP1 ENSG00000117399|CDC20 ENSG00000120341|LZTR2 ENSG00000122034|GTF3A ENSG00000137965|IFI44 ENSG00000141371|C17orf64 ENSG00000141668|CBLN2 ENSG00000146109|ABT1 ENSG00000146223|RPL7L1 ENSG00000149970|CNKSR2 ENSG00000151687|ANKR ENSG00000165186|PTCHD1 ENSG00000166147|FBN1 ENSG00000166275|AS3MT ENSG00000170540|ARL6IP1 ENSG00000170786|NP\_620419.2 ENSG00000171466|ZNF562 ENSG00000177343|PBOV1 ENSG00000158600|ENSG00000187010|RHD ENSG00000188740|NBPF5 ENSG00000198903|Q6ZV72\_HUMAN ENSG00000203925|LOC647839 ENSG00000205056|CLLUI AGACCCA ENSG00000075461|CACNG4 ENSG00000100207|TCF20 ENSG00000100312|ACR ENSG00000103227|TMEM112 ENSG00000108515|ENO3 ENSG00000129152|MYO1 ENSG00000130270|ATP8B3 ENSG00000131668|BARX1 ENSG00000141753|IGFBP4 ENSG00000144230|GPR17 ENSG00000161999|NP\_001005920.2 ENSG00000163810|TMG4 ENSG00000164107|HAND2 ENSG00000164587|RPS14 ENSG00000166862|CACNG2 ENSG00000171790|SLFNL1 ENSG00000171872|KLF17 ENSG00000175544|CABP4 ENSG00000177468|OLIG3 ENSG00000185640|NP\_787028.1 ENSG00000186529|CYP4F3 ENSG00000187595|NP\_001013646.1 ENSG00000197539|Q6ZSY7\_HUMAN ENSG00000198371|Q8NAS2\_HUMAN ENSG00000205680|NR\_002931.1 ENSG00000008405|CRY1 ENSG00000081842|PCDHA10 ENSG00000083457|ITGAE ENSG00000108389|MTM4 ENSG00000113263|ITK ENSG00000116675|DNAJC6 ENSG00000119900|GFRFL1 ENSG00000122126|OCRL ENSG00000134330|Q6PCA9\_HUMAN ENSG00000142875|PRKACB ENSG00000153094|BCL2L11 ENSG00000156042|TTC18 ENSG00000163069|SGCB ENSG00000166035|LIPC ENSG00000167552|TUBA1A AGACCCG ENSG000000010626|LRRCC23 ENSG00000011600|TYROBP ENSG00000067606|PRKCZ ENSG00000089558|KCNH4 ENSG00000101222|C20orf28 ENSG00000104853|CLPTM1 ENSG00000104957|CCDC130 ENSG00000105610|KLF1 ENSG00000107831|FGF8 ENSG00000107859|PITX3 ENSG00000112493|TAPBP ENSG00000125385|RPS29 ENSG00000125434|SLC25A35 ENSG00000125743|SNRPD2 ENSG00000132514|CLEC10A ENSG00000132746|ALDH3B2 ENSG00000137311|FXDY2 ENSG00000137825|ITPKA ENSG00000138100|TRIM54 ENSG00000152117|Q6ZWB7\_HUMAN ENSG00000159713|CG38\_HUMAN ENSG00000159840|ZYX ENSG00000159958|TNFRSF13C ENSG00000166862|CACNG2 ENSG00000177464|GPR4 ENSG00000179526|SHARPIN ENSG00000180066|C10orf91 ENSG00000181444|ZNF467 ENSG00000182612|TSPAN10 ENSG00000184302|SIX6 ENSG00000184324|CSAG2 ENSG00000197463|CSAG3B ENSG00000198569|SLC34A3 ENSG000001090104|RGS1 ENSG00000101384|JAG1 ENSG00000101892|ATP1B4 ENSG00000108560|INTS2 ENSG00000108733|PEX12 ENSG00000110075|SAPS3 ENSG00000118482|PHF3 ENSG00000131791|PRKAB2 ENSG00000131828|PDHA1 ENSG00000136875|PRPF4 ENSG00000141433|ADCYAP1 ENSG00000145293|ENOPH1 ENSG00000148828|NP\_001074467.1 ENSG00000150471|LPHN3 ENSG00000153904|DDAH1 ENSG00000158458|NRG2 ENSG00000163684|RPP14 ENSG00000164283|ESM1 ENSG00000164430|C6orf150 ENSG00000165071|TMEM71 ENSG00000172969|LOC285299 ENSG00000179981|TSHZ1 ENSG00000180828|BHLHB5 ENSG00000182512|GLRX5 ENSG00000187667|Q1A5X8\_HUMAN ENSG00000188463|XR\_015229.1 ENSG00000198874|TYW1 ENSG00000205097|NP\_001005211.1 AGACCTA ENSG000000018625|ATP1A2 ENSG00000074054|CLASP1 ENSG00000085552|IGSF9 ENSG00000104490|NCALD ENSG00000119946|CNNM1 ENSG00000149923|PPP4C ENSG00000157693|C9orf91 ENSG00000162733|DDR2 ENSG00000164972|C9orf24 ENSG00000166484|MAPK7 ENSG00000167654|ATCAY ENSG00000171443|ZNF524 ENSG00000183093|MRPL12 ENSG00000183691|NROG ENSG00000185596|Q9NSV7\_HUMAN ENSG00000083937|CHMP2B ENSG00000133083|DCLK1 ENSG00000135541|AHI1 ENSG00000137675|MMP27 ENSG00000156787|WDR67 ENSG00000163682|RPL9 ENSG00000164244|PRRC1 ENSG00000166253|NP\_001034861.1 ENSG00000166984|TCP10L ENSG00000169129|AFAP1L2 ENSG00000169299|PGM2 ENSG00000173406|DAB1 ENSG00000179813|C13orf30 ENSG00000179988|PSTK ENSG00000182754|RPL9P7 ENSG00000184895|SRV ENSG00000203925|LOC647839 AGACGCA ENSG00000006016|CRLF1 ENSG00000029534|ANK1 ENSG00000089685|BIRC5 ENSG00000099769|IGFALS ENSG00000113196|HAND1 ENSG00000123965|NP\_777590.1 ENSG00000124593|C6orf49 ENSG00000130173|NP\_061157.2 ENSG00000134905|CARS2 ENSG00000136295|TTYH3 ENSG00000136630|HLX1 ENSG00000136918|NP\_001038941.1 ENSG00000137198|GMPTR ENSG00000137834|SMAD6 ENSG00000141012|GALNS ENSG00000141905|NFIC ENSG00000154124|FAM105B ENSG00000157881|PANK4 ENSG00000157911|PEX10 ENSG00000165623|C10orf40 ENSG00000167799|NUDT8 ENSG00000168828|OR13J1 ENSG00000172297|Q96RM8\_HUMAN ENSG00000172332|GOLGA2L1 ENSG00000177202|SPACA4 ENSG00000187609|NP\_060290.3 ENSG00000206146|Q96S24\_HUMAN ENSG00000008196|TFAP2B ENSG00000061455|PRDM6 ENSG00000075142|SRI ENSG000000886189|DIMT1L ENSG00000101190|TCFL5 ENSG00000101825|MXRA5 ENSG00000115486|GGCX ENSG00000130254|SABP2 ENSG00000136141|LRCH1 ENSG00000148377|IDT2 ENSG00000153495|C13orf16 ENSG00000154217|PITPNC1 ENSG00000167785|ZNF558 ENSG00000168542|COL3A1 ENSG00000168916|ZNF608 ENSG00000169045|HNRPH1 ENSG00000175643|C16orf75 ENSG00000180882|XR\_017823.1 ENSG00000185787|MORF4L1 ENSG00000186974|Q8N6X9\_HUMAN ENSG00000196628|TCF4 ENSG00000196683|TOMM7 ENSG00000198081|ZFP161 ENSG00000203706|C10orf133 ENSG00000203710|CR1 AGACTCT ENSG000000004776|HSPB6 ENSG00000005238|KIAA1539 ENSG00000015532|XYLT2 ENSG00000023902|PLEKH01 ENSG00000070526|ST6GALNAC1 ENSG00000080511|RDH8 ENSG00000104774|MAN2B1 ENSG00000109065|NAT9 ENSG00000112715|VGFBA ENSG00000124160|NCOA5 ENSG00000129467|ADCY4 ENSG00000130956|HABP4 ENSG00000134014|ELP3 ENSG00000136848|DAB2IP ENSG00000136878|USP20 ENSG00000137133|HINT2 ENSG00000149294|NCAM1 ENSG00000169247|SH3TC2 ENSG00000173918|C1QTNF1 ENSG00000182698|NM\_001007089 ENSG00000183103|LYPD4 ENSG00000188185|Q6ZQP8\_HUMAN ENSG00000203930|Q5JPA2\_HUMAN ENSG00000205136|Q3KRG0\_HUMAN ENSG00000205396|Q6ZRG2\_HUMAN ENSG00000070831|CDC42 ENSG000000801923|ATP8B1 ENSG00000102144|PGK1 ENSG00000102974|CTCF ENSG00000103254|C16orf24 ENSG00000105889|Q6NZ63\_HUMAN ENSG00000110911|SLC11A2 ENSG00000117152|RGS4 ENSG00000119725|ZNF410 ENSG00000125207|PWI1L1 ENSG00000141198|TOM1L1 ENSG00000143486|LGTN ENSG00000143498|TAF1A ENSG00000159377|PSMB4 ENSG00000163072|NOSTRIN ENSG00000163171|CDC42EP3 ENSG00000168078|PBK ENSG00000169085|C8orf46 ENSG00000178175|ZNF366 ENSG00000180777|ANKRD30B ENSG00000184845|DRD1 ENSG00000187191|DAZ3 ENSG00000188120|DAZ1 ENSG00000196319|Q9H353\_HUMAN ENSG00000196553|NP\_001004331.1 ENSG00000204262|COL5A2 ENSG00000205003|CNTF ENSG00000205916|DAZ4 ENSG00000205944|DAZ2 AGACTGT ENSG00000101445|PPP1R16B ENSG00000102996|MMP15 ENSG00000109132|PHOX2B ENSG00000122687|FTSJ2 ENSG00000125954|FNTB ENSG00000130032|PRRG3 ENSG00000131653|TRAF7 ENSG00000134882|UBAC2 ENSG00000135605|TEC ENSG00000155858|LSM11 ENSG00000160767|C10orf2 ENSG00000160882|CYP11B1 ENSG00000164007|CLDN19 ENSG00000167136|ENDOG ENSG00000167613|LAIR1 ENSG00000167858|TEKT1 ENSG00000170689|HOXB9 ENSG00000178537|SLC25A20 ENSG00000185744|TNT\_HUMAN ENSG00000188290|HES4 ENSG00000196644|LOC728932 ENSG00000198911|SREBF2 ENSG00000199644|HEXB ENSG000000049860|HEX3 ENSG00000055732|MCOLN3 ENSG00000061676|NCKAP1 ENSG00000092020|PPP2R3C ENSG00000100578|KIAA0586 ENSG00000110768|GTF2H1 ENSG00000112339|HBS1L ENSG00000117262|GPR89A ENSG00000117632|STMN1 ENSG00000119514|GALNT12 ENSG00000121316|NP\_079105.4 ENSG00000121858|TNFSF10 ENSG00000124491|F13A1 ENSG00000130699|TAF4 ENSG00000134049|IER3IP1 ENSG00000134744|ZCCHC11 ENSG00000136149|XR\_017918.1 ENSG00000137757|CASP5 ENSG00000138433|CTR\_HUMAN ENSG00000139726|DENR ENSG00000140560|MCTP2 ENSG00000142188|TMEM50B ENSG00000145715|RASA1 ENSG00000145782|ATG12 ENSG00000151617|EDNRA ENSG00000154065|ANKRD29 ENSG00000166750|SLFN5 ENSG00000168348|INSM2 ENSG00000170791|IGCHD7 ENSG00000172409|CLP1 ENSG00000173848|NET1 ENSG00000182077|PTCHD3 ENSG00000183542|KLR4C ENSG00000188092|GPR89B ENSG00000196505|GDAP2 ENSG00000203864|C10orf137 AGACTTT perfect: AGACTGT ACAGTCT hsa-miR-212 taACAGTCTccagtcacggccc 2 ENSG00000008256|PSCD3 ENSG00000010282|HHATL ENSG00000054523|KIF1B ENSG00000062485|CS ENSG00000077274|CAPN6 ENSG00000103489|XYLT1 ENSG00000103591|P34\_HUMAN ENSG00000114999|TTL ENSG00000124593|C6orf49 ENSG00000125457|MIF4G ENSG00000128228|SDF2L1 ENSG00000136816|TOR1B ENSG00000140835|CHST4 ENSG00000143171|RXRG ENSG00000143801|PSEN2 ENSG00000147383|NSDHL ENSG00000158161|EYA3 ENSG00000166619|BLCAP ENSG00000166716|ZNF592 ENSG00000167523|C16orf55 ENSG00000172534|HCFC1 ENSG00000174804|FZD4 ENSG00000176022|B3GALT6 ENSG00000177595|LRDD ENSG00000180598|NP\_057296.1 ENSG00000183632|NP\_057296.1 ENSG00000186051|TAL2 ENSG00000187764|SEMA4D ENSG00000197174|O14606\_HUMAN ENSG00000197285|NR\_001536.1 ENSG00000203930|Q5JPA2\_HUMAN ENSG00000204792|Q6ZU62\_HUMAN ENSG00000205452|Q6ZQQ9\_HUMAN ENSG00000205456|NP\_057296.1 ENSG00000205457|NP\_057296.1 ENSG00000055211|C6orf72 ENSG00000106588|PSMA2 ENSG00000108001|EBF3 ENSG00000115271|GCA ENSG00000115738|ID2 ENSG00000119508|NR4A3 ENSG00000121807|CCR2 ENSG00000122779|TRIM24 ENSG00000129472|RAB2B ENSG00000134758|RNF138 ENSG00000136527|SFRS10 ENSG00000140543|DET1 ENSG00000142182|DNMT3L ENSG00000145244|CORIN ENSG00000145451|GLRA3 ENSG00000151164|RAD9B ENSG00000153820|NP\_085126.1 ENSG00000160629|C17orf32 ENSG00000163818|LZTF1L ENSG00000165533|TTC8 ENSG00000173905|GOLPH4 ENSG00000175928|LRRN1 ENSG00000176601|YSK4 ENSG00000198218|QRICH1 ENSG00000198689|SLC9A6 ENSG00000198689|SKIP\_HUMAN ENSG00000136848|DAB2IP ENSG00000140650|PMM2 ENSG00000156510|HKDC1 ENSG00000114013|CD86 ENSG00000115556|PLCD4 ENSG00000123360|PDE1B ENSG00000124571|XPO5 ENSG00000132376|SKIP\_HUMAN ENSG00000136848|DAB2IP ENSG00000140650|PMM2 ENSG00000156510|HKDC1 ENSG00000160190|SLC37A1 ENSG00000163545|NUAK2 ENSG00000182022|ST4S6\_HUMAN ENSG00000183562|Q9P1L5\_HUMAN ENSG00000185860|C10orf110 ENSG00000186163|Q4G0S1\_HUMAN ENSG00000197417|CARXL ENSG00000033800|PIAS1 ENSG000000047410|TPR ENSG00000049319|SRD5A2 ENSG00000065060|C6orf107 ENSG00000079102|RUNK1T1 ENSG00000089225|TBX5 ENSG00000106609|C7orf42 ENSG00000111780|15E2\_HUMAN ENSG00000112297|AIM1 ENSG00000117597|C10orf107 ENSG00000135577|NMBR ENSG00000136982|NP\_076999.1 ENSG00000137040|RANBP6 ENSG00000145431|PDGFC ENSG00000149345|U2D3L\_HUMAN ENSG00000149548|CCDC15 ENSG00000152689|RASGRP3 ENSG00000164220|F2RL2 ENSG00000164985|PSIP1 ENSG00000166405|RIC3 ENSG00000173655|Q5T909\_HUMAN ENSG00000178446|C21orf100 ENSG00000180777|ANKRD30B ENSG00000180815|MAP3K15 ENSG00000188800|TMCO2 ENSG0000000189079|ARID2 ENSG000000204201|Q49A40\_HUMAN AGAGAAG ENSG000000066756|ARSD ENSG000000028310|BRD9 ENSG00000100979|PLTP ENSG00000129816|NR\_001538.1 ENSG00000129845|O14605\_HUMAN ENSG00000135248|NP\_115988.1 ENSG00000135365|PHF21A ENSG00000135709|KIAA0513 ENSG00000142959|BEST4 ENSG00000149380|P4HA3 ENSG00000160200|CBS ENSG00000163214|DHX57 ENSG00000165804|ZNF219 ENSG00000168906|MAT2A ENSG00000174697|LEP ENSG00000186466|AQF7P2 ENSG00000188937|NYX ENSG00000197291|Q8WV75\_HUMAN ENSG00000198561|CTNND1 ENSG00000204443|Q562T6\_HUMAN ENSG00000205452|Q6ZQQ9\_HUMAN ENSG000000011201|KAL1 ENSG00000065809|FAM107B ENSG00000080166|DCT ENSG00000101938|CHRD1L ENSG00000103994|ZFP106 ENSG00000106049|HIBADH ENSG00000109572|CLCN3 ENSG00000112343|TRIM38 ENSG00000112530|PACRG ENSG00000114638|UPK1B ENSG00000120656|TAF12 ENSG00000122432|SPATA1 ENSG00000136758|YME1L1 ENSG00000137038|C9orf123 ENSG00000144381|HSPD1 ENSG00000147202|DIAPH2 ENSG00000149548|CCDC15 ENSG00000162814|SPATA17 ENSG00000163518|FCRL4 ENSG00000169435|RASSF6 ENSG00000170561|IRX2 ENSG00000177077|PVRL3 ENSG00000182957|SPATA13 ENSG00000204136|GGTA1 ENSG00000205057|CLLUI0S AGAGCTA ENSG000000001461|NPAL3 ENSG000000013016|EHD3 ENSG000000065308|TRAM2 ENSG00000082458|DLG3 ENSG00000084207|GSTP1 ENSG00000100918|REC8 ENSG00000124102|PI3 ENSG00000129244|ATP1B2 ENSG00000136003|ISCU ENSG00000137522|RNF121 ENSG00000159388|BTMG ENSG00000168049|LRRCC8 ENSG00000172458|ILL17D ENSG00000180198|RCC1 ENSG00000180471|C9orf31 ENSG00000183049|CAMK1D ENSG00000184743|NP\_056274.3 ENSG00000197150|ABC8 ENSG0000000197173|NP\_001013689.1 ENSG00000204312|Q6ZYN8\_HUMAN ENSG00000205703|NP\_001010910.1 ENSG00000206550|LOC285346 ENSG00000082212|ME2 ENSG00000112964|GHR ENSG00000116704|SLC35D1 ENSG00000128595|CALU ENSG00000133106|EPSTI1 ENSG00000135413|LACRT ENSG00000137033|IL33 ENSG00000141325|CCDC45 ENSG00000152969|JAKMIP1 ENSG00000162755|NP\_689579.3 ENSG00000164485|IL22RA2 ENSG00000165819|METTL3 ENSG00000169862|CTNND2 ENSG00000176160|HSF5 ENSG00000178175|ZNF366 ENSG00000185918|DEFA3 ENSG00000196937|FAM3C ENSG00000206047|DEFT1P



ENSG00000144115|NP\_060741.2 ENSG00000156471|PTDSS1 ENSG00000161973|CCDC42 ENSG00000163207|IVL ENSG00000165138|ANKS6 ENSG00000167194|Q96LL3\_HUMAN ENSG00000168056|LTBP3 ENSG00000171105|INSR  
ENSG00000171903|CYP4F11 ENSG00000182378|PLCXD1 ENSG00000183566|LATH\_HUMAN ENSG00000183605|SFXN4 ENSG00000184210|DGAT2L6 ENSG00000185527|PDE6G ENSG00000185681|C9orf18 ENSG00000186810|CXCR3  
ENSG00000100003|TSPAN6 ENSG00000009413|REV3L ENSG000000055332|EIF2AK2 ENSG00000100557|C14orf105 ENSG00000110321|EIF4G2 ENSG00000114120|SLC25A36 ENSG00000115310|RTN4 ENSG00000116783|FPGT  
ENSG00000131779|PEX11B ENSG00000135845|PIGC ENSG00000137804|NUSAP1 ENSG00000143633|C1orf131 ENSG00000156049|GNA14 ENSG00000160188|TSG2 ENSG00000162702|ZNF281 ENSG00000170681|NP\_001018126.1  
AGATGAA ENSG00000170748|HNRGT\_HUMAN ENSG00000171291|ZNF439 ENSG00000171819|ANGPTL7 ENSG00000188647|PTAR1 ENSG00000189136|NM\_207382 ENSG00000205111|CDKL4  
ENSG000000041988|THAP3 ENSG00000074842|C19orf10 ENSG00000100320|RBM9 ENSG00000100441|KIAA0323 ENSG00000101489|BRUNOL4 ENSG00000103723|AP3B2 ENSG00000109906|ZBTB16 ENSG00000112053|SLC26A8  
ENSG00000122641|INHBA ENSG00000124226|ZNF313 ENSG00000125843|C20orf29 ENSG00000157184|CPT2 ENSG00000158526|TSR2 ENSG00000162105|SHANK2 ENSG00000163050|CABC1 ENSG00000163081|NP\_694583.1  
ENSG00000166682|TMPRSS5 ENSG00000180424|DEFB123 ENSG00000182795|C1orf116 ENSG00000183793|NPIP ENSG00000187953|NR\_002217.1 ENSG00000196460|Q6ZNB4\_HUMAN ENSG00000203690|TCP10 ENSG00000204423|C9orf33  
ENSG00000205658|Q6ZU06\_HUMAN ENSG00000205881|Q6UXR8\_HUMAN ENSG00000206026|NP\_001032408.1 ENSG00000111058|NP\_078836.1 ENSG00000113811|SELK\_HUMAN ENSG00000115008|LLIA ENSG00000116991|SIPAL12 ENSG00000122882|ECD  
ENSG00000129586|ZBED5 ENSG00000137269|LRRC1 ENSG00000140543|DET1 ENSG00000144559|C3orf31 ENSG00000144668|ITGA9 ENSG00000151834|GABRA2 ENSG00000163145|C1QTNF7 ENSG00000163535|SGOL2  
ENSG00000170242|USP47 ENSG00000170948|MBD3L1 ENSG00000171316|CHD7 ENSG00000174343|CHRNA9 ENSG00000185304|NP\_001071638.1 ENSG00000185515|BRCC3 ENSG00000187627|RGPD1 ENSG00000203797|DDO  
AGATGCT ENSG00000100014|SPECC1L ENSG00000122140|MRPS2 ENSG00000128908|INOC1 ENSG00000129535|NRL ENSG00000133561|GIMAP6 ENSG00000140254|DUOX1A ENSG00000148832|PAOX ENSG00000157020|SEC13  
ENSG00000160233|LRRC3 ENSG00000166257|SCN3B ENSG00000166780|C16orf45 ENSG00000169347|GP2 ENSG00000170290|SLN ENSG00000175764|TTLL11 ENSG00000180185|FAHD1 ENSG00000181826|Q8IUW5\_HUMAN  
ENSG00000188384|Q6ZUQ5\_HUMAN ENSG00000189120|SP6 ENSG00000189319|FAM53B ENSG00000197496|SLC2A10 ENSG00000197536|NP\_001013739.1 ENSG00000204660|NP\_001013740.1 ENSG00000204661|LOC729569 ENSG00000205271|Q6ZUQ5\_HUMAN  
ENSG00000205275|Q6ZUQ5\_HUMAN ENSG000000006747|SCIN ENSG000000013297|CLDN11 ENSG000000059573|ALDH18A1 ENSG00000073614|JARID1A ENSG00000100811|YY1 ENSG00000111445|RFC5 ENSG00000113302|IL12B  
ENSG00000116750|UCHL5 ENSG00000116830|TTF2 ENSG00000117632|STMN1 ENSG00000119953|SMNDC1 ENSG00000132669|RIN2 ENSG00000147044|CASK ENSG00000158691|ZSCAN12 ENSG00000163617|KIAA1407  
ENSG00000164933|SLC25A32 ENSG00000167601|AXL ENSG00000172239|PAIP1 ENSG00000174792|C4orf26 ENSG00000176641|RNF152 ENSG00000180370|PAK2 ENSG00000181019|NQO1 ENSG00000182457|NR\_002323.1  
ENSG00000185149|NYP2R ENSG00000185278|ZBTB37 ENSG00000205830|NP\_997373.1 ENSG00000206535|A1A4G5\_HUMAN  
AGATGTA ENSG00000008438|PGLYRP1 ENSG00000065882|TBC1D1 ENSG00000079393|DUSP13 ENSG00000101079|NDRG3 ENSG00000111249|CUTL2 ENSG00000114999|TTL ENSG00000132405|TBC1D14 ENSG00000134775|FHOD3  
ENSG00000134825|C11orf10 ENSG00000135414|GDF11 ENSG00000141570|CBX8 ENSG00000142186|SCYL1 ENSG00000147206|NFX3 ENSG00000166900|STX3 ENSG00000168014|NP\_056346.2 ENSG00000172647|PGA5  
ENSG00000175106|CDRT4 ENSG00000180860|PGA3 ENSG00000186577|C6orf1 ENSG00000187686|XR\_016979.1 ENSG00000196460|Q6ZNB4\_HUMAN ENSG00000204483|Q8N925\_HUMAN ENSG00000204973|PGA4 ENSG00000000003|TSPAN6  
ENSG00000006459|JHDM1D ENSG00000054983|GALC ENSG00000066777|ARFGF1 ENSG00000102021|LUZP4 ENSG00000104756|KCTD9 ENSG00000107897|ACBD5 ENSG00000109099|PMP22 ENSG00000119514|GALNT12  
ENSG00000121621|KIF18A ENSG00000123843|C4BPB ENSG00000126945|HNRPH2 ENSG00000132356|PRKAA1 ENSG00000135914|HTR2B ENSG00000139826|ABHD13 ENSG00000147419|CCDC25 ENSG00000154217|PITPNC1  
ENSG00000157242|CLDN12 ENSG00000165119|HNRPK ENSG00000172748|ZNF596 ENSG00000173542|MOBK1A ENSG00000181819|Q5JSM7\_HUMAN ENSG00000182768|FAM9C  
AGATTAA ENSG000000077984|CST7 ENSG000000089280|FUS ENSG000000099998|GYTL1 ENSG00000100116|GCAT ENSG00000102970|CCL17 ENSG00000103550|NP\_001013009.2 ENSG00000115457|IGFBP2 ENSG00000122188|LAX1  
ENSG00000126067|PMB2 ENSG00000132434|LANCL2 ENSG00000134207|SITV6 ENSG00000138642|HERC6 ENSG00000149503|INCEP1 ENSG00000156574|NODAL ENSG00000157617|C21orf25 ENSG00000159433|STARD9  
ENSG00000159708|LRRC36 ENSG00000161914|ZNF653 ENSG00000168795|ZBTB5 ENSG00000174567|GOLT1A ENSG00000175634|RPS6KB2 ENSG00000176248|ANAPC2 ENSG00000178026|C22orf36 ENSG00000197471|SPN  
ENSG00000198171|C20orf116 ENSG00000198535|NP\_997205.1 ENSG000002005979|Q6XYA8\_HUMAN ENSG00000069869|NEDD4 ENSG00000083520|DI3 ENSG00000106823|ECM2 ENSG00000112761|WISP3 ENSG00000116745|RPE65  
ENSG00000125630|POLR1B ENSG00000128683|GAD1 ENSG00000132872|SYT4 ENSG00000134709|HOOK1 ENSG00000136897|MRPL50 ENSG00000137420|NOL7 ENSG00000137558|PI15 ENSG00000137693|YAP1  
ENSG00000146839|ZAN ENSG00000147180|ZNF711 ENSG00000147592|LACTB2 ENSG00000150681|RGS18 ENSG00000151414|NEK7 ENSG00000154760|SLFN13 ENSG00000155313|USP25 ENSG00000162654|GBP4  
ENSG00000163449|TMEM169 ENSG00000164187|LMBRD2 ENSG00000165322|ARHGAP12 ENSG00000165732|DDX21 ENSG00000171055|FEZ2 ENSG00000179041|RRS1 ENSG00000189050|NP\_057209.3 ENSG00000196344|ADH7  
AGATTAC ENSG000000089280|FUS ENSG00000100558|PLEK2 ENSG00000118257|NRP2 ENSG00000119321|FKBP15 ENSG00000119685|TTLL5\_HUMAN ENSG00000127884|ECHS1 ENSG00000135446|CDK4 ENSG00000135457|TFPC2  
ENSG00000142684|ZNF593 ENSG00000158825|CDA ENSG00000164366|CCDC127 ENSG00000166402|TUB ENSG00000171861|RNMTL1 ENSG00000178057|C3orf60 ENSG00000180638|NP\_690872.2 ENSG00000182968|SOX1  
ENSG00000183528|QOVAF8\_HUMAN ENSG00000196878|LAMB3 ENSG00000198106|RUNC2B ENSG00000202936|BCLAF1 ENSG00000308945|MSR1 ENSG00000100522|GNPNAT1 ENSG00000114573|ATP6V1A ENSG00000117598|NP\_001010861.1  
ENSG00000119723|COQ6 ENSG00000123165|ACTRT1 ENSG00000125482|TTF1 ENSG00000150625|GPM6A ENSG00000152240|CCDC5 ENSG00000156414|TDRD9 ENSG00000157540|DYRK1A ENSG00000162971|NP\_001034782.1  
ENSG00000164512|ANKRD55 ENSG00000165105|RASEF ENSG00000169016|E2F6 ENSG00000170419|VSTM2 ENSG00000186908|ZDHHC17 ENSG00000206131|Q6ZS21\_HUMAN  
AGATTCT ENSG000000011677|GABRA3 ENSG00000034063|UHRF1 ENSG00000047849|MAP4 ENSG00000068650|ATP11A ENSG00000085872|CHERP ENSG00000113389|NPR3 ENSG00000114656|KIAA1257 ENSG00000116604|MEF2D  
ENSG00000134955|SLC37A2 ENSG00000136574|GATA4 ENSG00000137275|PIPK1 ENSG00000141506|PIK3R5 ENSG00000143398|PIP5K1A ENSG00000148120|C9orf3 ENSG00000149596|JPH2 ENSG00000150086|GRIN2B  
ENSG00000152086|TUBA3E ENSG00000158710|TAGLN2 ENSG00000163823|CCR1 ENSG00000172426|C6orf206 ENSG00000174992|ZG16\_HUMAN ENSG00000175077|RTP1 ENSG00000177721|NP\_001014301.1 ENSG00000178078|NP\_060190.2  
ENSG00000180385|Q8NAP4\_HUMAN ENSG00000184988|TMEM106A ENSG00000188822|CNR2 ENSG00000196154|S100A4 ENSG00000196970|NFX4 ENSG00000197373|NP\_001015884.1 ENSG00000197530|MIB2 ENSG00000202375|Q6ZVU5\_HUMAN  
ENSG00000203934|Q6ZUQ1\_HUMAN ENSG00000204120|TNRC18 ENSG00000101353|Q9H579-2 ENSG00000101966|BIRC4 ENSG00000105968|H2AFV ENSG00000112874|NUDT12 ENSG00000113810|SMC4 ENSG00000119396|RAB14  
ENSG00000122335|SERAC1 ENSG00000128951|DUT ENSG00000133858|CCDC131 ENSG00000138346|DNA2L ENSG00000151422|FER ENSG00000154874|NP\_872374.3 ENSG00000158185|ANKRD36 ENSG00000159322|ADPGK  
ENSG00000163145|C1QTNF7 ENSG00000163162|RNF149 ENSG00000166479|TXNDC10 ENSG00000167601|AXL ENSG00000170248|PDCC6P1 ENSG00000170941|NP\_065895.1 ENSG00000173041|ZNF680 ENSG00000173464|RNASE11  
ENSG00000176907|C8orf4 ENSG00000179813|C13orf30 ENSG00000182831|C16orf72 ENSG00000186912|AN36B\_HUMAN ENSG00000197487|GALP\_HUMAN ENSG00000198511|Q8N9A9\_HUMAN  
ENSG000000087237|CETP ENSG00000100365|NCF4 ENSG00000101577|LPIN2 ENSG00000107187|LHX3 ENSG00000115841|FAM82A ENSG00000123411|IKZF4 ENSG00000125817|CENPB ENSG00000130810|PPAN  
ENSG00000132254|ARFIP2 ENSG00000132514|CLEC10A ENSG00000141720|PIP5K2B ENSG00000143125|PROK1 ENSG00000143257|NR1J3 ENSG00000160219|GAB3 ENSG00000161381|PLXDC1 ENSG00000163872|YEATS2  
ENSG00000163914|RHO ENSG00000168434|COG7 ENSG00000174502|SLC26A9 ENSG00000174640|SLCO2A1 ENSG00000177021|LRRC24 ENSG00000177885|GRB2 ENSG00000179766|Q4G129\_HUMAN ENSG00000187764|SEMA4D  
ENSG00000196878|LAMB3 ENSG00000197653|DNAH10 ENSG00000198668|CALM1 ENSG00000203709|C1orf132 ENSG00000204434|NP\_001017421.1 ENSG00000204599|TRIM39 ENSG00000204619|PPP1R11 ENSG00000047634|SCML1  
ENSG00000074803|SLC12A1 ENSG00000075407|ZNF37A ENSG00000102098|SCML2 ENSG00000113594|LIFR ENSG00000114391|RPL2A ENSG00000119922|IFIT2 ENSG00000121207|LRAT ENSG00000129625|REEP5  
ENSG00000132432|SEC61G ENSG00000136936|XPA ENSG00000144445|NP\_689732.2 ENSG00000150712|MTMR12 ENSG00000155011|DKK2 ENSG00000155903|RAS2 ENSG00000158315|RHBDL2 ENSG00000158467|SAHH3\_HUMAN  
ENSG00000162374|ELAVL4 ENSG00000163635|ATXN7 ENSG00000164128|NYP1R ENSG00000166913|YWHAB ENSG00000168116|KIAA1586 ENSG00000168566|C6orf151 ENSG00000170558|CDH2 ENSG00000179010|MRFAP1  
AGCAAAC ENSG00000179331|RAB39 ENSG00000198707|CEP290 ENSG00000205524|Q68D70\_HUMAN  
ENSG00000056558|TRAF1 ENSG00000100453|GZMB ENSG00000104419|NDRG1 ENSG00000108375|SUPT4H1 ENSG00000114349|GNAT1 ENSG00000114745|GORASP1 ENSG00000115129|TP53I3 ENSG00000122733|KIAA1045  
ENSG00000124160|NCOA5 ENSG00000129250|KIF1C ENSG00000133026|MYH10 ENSG00000136928|GABBR2 ENSG00000137074|APTX ENSG00000153786|ZDHHC7 ENSG00000169184|NM\_002430.2 ENSG00000170122|FOXD4L1  
ENSG00000173530|TNFRSF10D ENSG00000173867|MRPL46 ENSG00000176678|FOXL1 ENSG00000177757|FAM87B ENSG00000179407|DNAJB8 ENSG00000180083|WFDCC11 ENSG00000182366|FA87B\_HUMAN ENSG00000187559|FOXD4L3  
ENSG00000197119|SLC25A29 ENSG00000197245|GRRP1 ENSG00000198758|EPS8L3 ENSG00000204793|FOXD4L6 ENSG00000048544|MRPS10 ENSG00000049319|SRD5A2 ENSG00000069275|NUCKS1 ENSG00000091879|ANGPT2  
ENSG00000104313|EYA1 ENSG00000119812|FAM98A ENSG00000125531|C20orf195 ENSG00000135776|ABCB10 ENSG00000137449|CPBE2 ENSG00000138459|SLC35A5 ENSG00000144285|SCN1A ENSG00000147041|SYTL5  
ENSG00000155508|CNOT8 ENSG00000160062|ZBTB8 ENSG00000162526|TSSK3 ENSG00000170289|CNGB3 ENSG00000173627|APOBEC4 ENSG00000178338|ZNF354B ENSG00000184492|FOXD4  
AGCAATA ENSG00000088876|ZNF343 ENSG00000092094|OSGEP ENSG0000010092621|PHGD3 ENSG00000100362|PVALB ENSG00000110463|C20orf39 ENSG00000112079|STK38 ENSG00000114999|TTL ENSG00000125089|SH3TC1  
ENSG00000131398|KCNC3 ENSG00000132446|FTHL17 ENSG00000132600|PRMT7 ENSG00000132854|ANR38\_HUMAN ENSG00000139540|SLC39A5 ENSG00000141699|NP\_835227.1 ENSG00000143257|NR1J3 ENSG00000146950|SHROOM2  
ENSG00000160097|FND5 ENSG00000162438|CTRC ENSG00000163814|CDCP1 ENSG00000164972|C9orf24 ENSG00000166069|TMC05 ENSG00000168268|NT5DC2 ENSG00000170616|SCRT1 ENSG00000171315|ESRRA  
ENSG00000173812|EIF1 ENSG00000188167|NP\_001034859.1 ENSG00000196182|STK40 ENSG00000197174|O14606\_HUMAN ENSG00000197285|NR\_001536.1 ENSG00000197879|MYO1C ENSG00000204313|NP\_001028830.1 ENSG00000204394|VARS  
ENSG00000021488|SLC7A9 ENSG00000031081|NP\_065805.1 ENSG00000100629|C14orf145 ENSG00000104375|STK3 ENSG00000110700|RPS13 ENSG00000116874|WARS2 ENSG00000117226|GBP3 ENSG00000119917|IFIT3  
ENSG00000122877|EGR2 ENSG00000128951|DUT ENSG00000130349|C6orf203 ENSG00000134698|EIF2C4 ENSG00000135333|EPHA7 ENSG00000136044|APPL2 ENSG00000142676|RPL11 ENSG00000148834|GSTO1  
ENSG00000151292|CSNK1G3 ENSG00000154188|ANGPT1 ENSG00000154553|PDLIM3 ENSG00000157654|PALM2 ENSG00000161594|KLHL10 ENSG00000168939|SPRY3 ENSG00000170788|DYDC1 ENSG00000174876|AMY1B  
ENSG00000176399|DMRTA1 ENSG00000183753|BPY2C ENSG00000183795|VCY2\_HUMAN ENSG00000185894|VCY2\_HUMAN ENSG00000187098|MITF ENSG00000188419|CHM ENSG00000189237|NAP5\_HUMAN ENSG00000196482|ESRRG  
ENSG00000204699|LOC129870 ENSG00000204705|LOC129870 ENSG00000205874|Q6SA06\_HUMAN ENSG00000206198|NP\_001535.1  
AGCAATC ENSG00000100031|GGT1 ENSG00000100121|GGTL4 ENSG00000105366|SIGLEC8 ENSG00000105663|WBP7\_HUMAN ENSG00000105997|HOXA3 ENSG00000111252|SH2B3 ENSG00000126562|WNK4  
ENSG00000133475|GGT2 ENSG00000135314|C6orf148 ENSG00000136463|CCDC44 ENSG00000141431|Q6ZMX6\_HUMAN ENSG00000149435|GGTLA4 ENSG00000165623|C10orf49 ENSG00000166152|C16orf78 ENSG00000170819|BFS2  
ENSG00000173545|ZNF622 ENSG00000176595|KBTBD11 ENSG00000183038|LOC728226 ENSG00000184371|CSF1 ENSG00000187095|LILRA2 ENSG00000197421|NP\_003267.1 ENSG00000047936|ROSL ENSG00000049860|HEXB  
ENSG00000089472|HEPH ENSG00000100612|DHRS7 ENSG00000101844|ATG4A ENSG00000112242|E2F3 ENSG00000112695|COX7A2 ENSG00000113296|THBS4 ENSG00000113368|LMNB1 ENSG00000132000|PODNL1  
ENSG00000134042|MRO ENSG00000135127|CCDC64 ENSG00000140432|KLHL23 ENSG00000146281|ACY1L2 ENSG00000154822|PLCL2 ENSG00000157540|DYRK1A ENSG00000164941|INTS8 ENSG00000165105|RASEF  
ENSG00000165516|KLHDC2 ENSG00000176242|USP47 ENSG00000184860|NP\_660151.2 ENSG00000196565|HBE1 ENSG00000196865|NHLRC2 ENSG00000197301|Q6ZQU9\_HUMAN ENSG00000198648|STK39  
ENSG00000203897|Q6W422\_HUMAN  
AGCAATG ENSG00000092295|TGM1 ENSG00000100197|CYP2D6 ENSG00000116985|BMP8B ENSG00000125815|CST8 ENSG00000128313|APOL5 ENSG00000139767|KIAA1853 ENSG00000141639|MAPK4 ENSG00000145526|CDH18  
ENSG00000156398|SFXN2 ENSG00000158987|RAPGEF6 ENSG00000163191|S100A11 ENSG00000163221|S100A12 ENSG00000163531|NFASC ENSG00000163909|HEYL ENSG00000166025|AMOTL1 ENSG00000166257|SCN3B  
ENSG00000169548|SUHW1 ENSG00000172548|ICHN\_HUMAN ENSG00000177455|CD19 ENSG00000183908|LRRC55 ENSG00000197766|CFD ENSG00000200423|C9orf33 ENSG00000205702|CYP2D7P1 ENSG00000206550|LOC285346  
ENSG00000077809|GTF2I ENSG00000078618|NRD1 ENSG00000101162|TUBB1 ENSG00000107758|PPP3CB ENSG00000111701|APOBEC1 ENSG00000115361|ACADL ENSG00000120656|TAF12 ENSG00000127152|BCL11B  
ENSG00000131747|P11388-2 ENSG00000137674|MMP20 ENSG00000139163|ETNK1 ENSG00000152503|TRIM36 ENSG00000156500|FAM122C ENSG00000162526|TSSK3 ENSG00000163659|TIPARP ENSG00000164485|IL22RA2  
ENSG00000165246|NLGN4Y ENSG00000166762|CATSPER2 ENSG00000166801|FAM111A ENSG00000176528|ZNF641 ENSG00000167720|SRR ENSG00000169551|CXorf48 ENSG00000171291|ZNF439 ENSG00000175171|EDG7  
ENSG00000171877|FRMD5 ENSG00000179363|TMEM31 ENSG00000180251|SLC9A4 ENSG00000185231|MC2R ENSG00000197054|JNRP7 ENSG00000197561.2 ENSG00000198963|RORB ENSG00000203837|PNLIPRP3  
ENSG00000204706|Q6ZV59\_HUMAN  
AGCAATT ENSG00000037637|FBXO42 ENSG00000084731|KIF3F ENSG00000089116|LHX2 ENSG00000092054|MYH7 ENSG00000102547|CAB39L ENSG00000105287|PRKD2 ENSG00000124208|UBE2V1 ENSG00000132383|RPA1  
ENSG00000134247|PTGFRN ENSG00000136167|LCP1 ENSG00000137124|ALDH1B1 ENSG00000163812|ZDHHC3 ENSG00000164047|CAMP ENSG00000164379|FOXQ1 ENSG00000166741|NNMT ENSG00000167094|TTC16  
ENSG00000170876|TMEM43 ENSG00000178235|SLITRK1 ENSG00000179636|C14orf8 ENSG00000182950|ODF3L1 ENSG00000196432|Q9H5F0\_HUMAN ENSG00000198216|CACNA1E ENSG00000198400|NTRK1 ENSG00000198574|SH2D1B  
ENSG00000079691|LRRC16 ENSG00000102349|KLF8 ENSG00000105887|MTFN ENSG00000112701|SENP6 ENSG00000116918|TSNAX ENSG00000121741|ZMYM2 ENSG00000122406|RPL5  
ENSG00000135960|EDAR ENSG00000143341|HMCN1 ENSG00000145244|CORIN ENSG00000147649|MTDH ENSG00000150093|ITGB1 ENSG00000155438|MKI67IP ENSG00000162520|SYNC1 ENSG00000164398|ACSL6  
ENSG00000169813|HNRPF ENSG00000188393|CLEC2A ENSG00000198625|MD

|         |                                |                                |                              |                              |                              |                                |                                |                                |
|---------|--------------------------------|--------------------------------|------------------------------|------------------------------|------------------------------|--------------------------------|--------------------------------|--------------------------------|
|         | ENSG00000135916 ITM2C          | ENSG00000149571 KIRREL3        | ENSG00000157014 TATDN2       | ENSG00000158578 ALAS2        | ENSG00000166402 TUB          | ENSG00000171540 OTP            | ENSG00000174775 HRAS           | ENSG00000181852 RNF41          |
|         | ENSG00000182533 CAV3           | ENSG00000182931 WFDC10B        | ENSG00000185504 C17orf70     | ENSG00000185933 FAM26C       | ENSG00000197106 SLC6A17      | ENSG00000203931 LOC729078      | ENSG00000205052 Q6ZSS1_HUMAN   | ENSG00000206069 NP_001001663.1 |
|         | ENSG00000191928 MOSPD1         | ENSG00000120333 MRPS14         | ENSG00000120727 PAIP2        | ENSG00000137075 RNF38        | ENSG00000138604 GLCE         | ENSG00000138829 FBN2           | ENSG00000164120 HPGD           | ENSG00000165359 DDX26B         |
|         | ENSG00000169891 REPS2          | ENSG00000170516 COX7B2         | ENSG00000180354 C7orf41      | ENSG00000183726 TMEM50A      | ENSG00000183807 C6orf189     | ENSG00000184434 LRRC19         | ENSG00000187068 NP_001020437.1 | ENSG00000198589 LRBA           |
|         | ENSG00000203932 LOC728660      |                                |                              |                              |                              |                                |                                |                                |
| AGCACCT | perfect: AGCACAA TTGTGCT       | hsa-miR-218                    | TTGTGCTgtgactaacatgtg        | 0                            |                              |                                |                                |                                |
|         | ENSG00000001460 C1orf201       | ENSG00000007866 TEAD3          | ENSG00000033011 ALG1         | ENSG000000081377 CDC14C      | ENSG00000099282 TSPAN15      | ENSG00000100994 PYGB           | ENSG00000103148 C16orf35       | ENSG00000104783 KCNN4          |
|         | ENSG00000104901 DKKL1          | ENSG00000110104 CCDC86         | ENSG00000122711 SPINK4       | ENSG00000131236 CAP1         | ENSG00000138867 C22orf13     | ENSG00000139083 ETV6           | ENSG00000159202 UBE2Z          | ENSG00000162496 DHRS3          |
|         | ENSG00000163286 PPBN_HUMAN     | ENSG00000167131 CCDC103        | ENSG00000170890 PLA2G1B      | ENSG00000172992 DCAKD        | ENSG00000173210 ABLIM3       | ENSG00000177291 NP_699199.2    | ENSG00000177762 C5orf27        | ENSG00000185519 FAM131C        |
|         | ENSG00000188486 H2AFX          | ENSG00000196935 SRGAP1         | ENSG00000204005 Q6ZP22_HUMAN | ENSG00000204369 Q6ZUP0_HUMAN | ENSG00000204528 Q6H1K9_HUMAN | ENSG00000205917 Q6ZTF1_HUMAN   | ENSG00000205920 Q6ZTF1_HUMAN   | ENSG00000068615 REEP1          |
|         | ENSG00000077713 SLC25A43       | ENSG00000079332 SARIA          | ENSG000000082196 C1QTNF3     | ENSG00000100612 DHRS7        | ENSG00000111490 Q9Y2I9_HUMAN | ENSG00000111859 NEDD9          | ENSG00000112294 ALDH5A1        | ENSG00000112818 MEP1A          |
|         | ENSG00000125355 FAM70A         | ENSG00000125903 DEFB129        | ENSG00000133019 CHRM3        | ENSG00000139910 NOVA1        | ENSG00000140575 IQGAP1       | ENSG00000143622 RIT1           | ENSG00000145431 PDGFC          | ENSG00000159593 APBP1          |
|         | ENSG00000163539 CLASP2         | ENSG00000163918 RFC4           | ENSG00000170624 SGCD         | ENSG00000178904 DPY19L3      | ENSG00000196954 CASP4        | ENSG00000198770 Q9H396_HUMAN   |                                |                                |
| AGCACGC | ENSG00000033050 ABCF2          | ENSG00000055957 TIH1           | ENSG00000070729 CNGB1        | ENSG000000089116 LHX5        | ENSG00000091073 DTX2         | ENSG00000097021 ACOT7          | ENSG00000109089 CDR2L          | ENSG00000131408 NR1H2          |
|         | ENSG00000132323 ILKAP          | ENSG00000133030 C17orf84       | ENSG00000143632 ACTA1        | ENSG00000168959 GRM5         | ENSG00000171119 NR1T         | ENSG00000174989 FBXW8          | ENSG00000176194 CIDEA          | ENSG00000177947 ODF3           |
|         | ENSG00000178381 ZFAND2A        | ENSG00000186442 KRT3           | ENSG00000188384 Q6ZUQ5_HUMAN | ENSG00000188447 XR_016015.1  | ENSG00000197150 ABC8         | ENSG00000204425 Q6ZP74_HUMAN   | ENSG00000205271 Q6ZUQ5_HUMAN   | ENSG00000205275 Q6ZUQ5_HUMAN   |
|         | ENSG00000040341 STAU2          | ENSG00000041515 MYO16          | ENSG000000061676 NCKAIP1     | ENSG000000075413 MARK3       | ENSG000000103449 SALL1       | ENSG00000104626 THEX1          | ENSG00000104728 ARHGEP10       | ENSG00000107611 CUBN           |
|         | ENSG00000111328 CDK2AP1        | ENSG00000112238 PRDM13         | ENSG00000116560 SEFQ         | ENSG00000120211 JNSL4        | ENSG00000120658 ENOX1        | ENSG00000145860 RNF145         | ENSG00000146373 IBRDC1         | ENSG00000147507 LYN            |
|         | ENSG00000150676 CCDC83         | ENSG00000151150 ANK3           | ENSG00000157429 ZNF19        | ENSG00000166928 NP_115986.3  | ENSG00000180098 TRSPAP1      | ENSG00000184992 BRI3BP         | ENSG00000196214 ZNF766         | ENSG00000198650 TAT            |
| AGCACTT | ENSG00000011454 RABGAP1        | ENSG00000037280 FLT4           | ENSG00000106628 POLD2        | ENSG00000115561 VPS24        | ENSG00000122176 FMOD         | ENSG00000127946 HIP1           | ENSG00000128604 IRF5           | ENSG00000136270 TBG4           |
|         | ENSG00000136811 ODF2           | ENSG00000142082 SIRT3          | ENSG00000143107 FINDC7       | ENSG00000143314 MRPL24       | ENSG00000151474 FRMD4A       | ENSG00000157184 CPT2           | ENSG00000161642 ZNF385         | ENSG00000163083 INHBB          |
|         | ENSG00000163820 FYCO1          | ENSG00000168000 HNRPUL2        | ENSG00000168061 SAC3D1       | ENSG00000173039 RELA         | ENSG00000176605 C14orf177    | ENSG00000180438 TRXL           | ENSG00000182687 GALR2          | ENSG00000183826 BTBD9          |
|         | ENSG00000189409 MMP23A         | ENSG00000005469 CROT           | ENSG00000106261 ZKSCAN1      | ENSG00000117289 TXNIP        | ENSG00000132975 GPR12        | ENSG00000134375 TIMM17A        | ENSG00000138449 SLC40A1        | ENSG00000145362 ANK2           |
|         | ENSG00000151025 GPR158         | ENSG00000153234 NR4A2          | ENSG00000163131 CTS5         | ENSG00000163281 GNPDA2       | ENSG00000163571 TGFBR2       | ENSG00000165244 ZNF367         | ENSG00000168078 PBK            | ENSG00000173627 APOBEC4        |
|         | ENSG00000174899 Q8N6Q6_HUMAN   | ENSG00000180667 YOD1           | ENSG00000182180 MRPS16       | ENSG00000183831 ANKRD45      |                              |                                |                                |                                |
|         | perfect: AGCACTT AAGTGC        | hsa-miR-93                     | aaAGTGCgttctgtagcaggtag      | 1                            |                              |                                |                                |                                |
|         | perfect: AGCACTT AAGTGC        | hsa-miR-20a                    | taAAGTGCttatagtagcaggtag     | 2                            |                              |                                |                                |                                |
|         | perfect: AGCACTT AAGTGC        | hsa-miR-302d                   | tAAGTGCttccatgtttgaggtg      | 1                            |                              |                                |                                |                                |
|         | perfect: AGCACTT AAGTGC        | hsa-miR-302c                   | tAAGTGCttccatgtttcaggtg      | 1                            |                              |                                |                                |                                |
|         | perfect: AGCACTT AAGTGC        | hsa-miR-106a                   | aaAAGTGCttacagtgcaggtagc     | 2                            |                              |                                |                                |                                |
|         | perfect: AGCACTT AAGTGC        | hsa-miR-106b                   | taAAGTGCtgacagtgcagat        | 2                            |                              |                                |                                |                                |
|         | perfect: AGCACTT AAGTGC        | hsa-miR-17-5p                  | caAAGTGCttacagtgcaggtag      | 2                            |                              |                                |                                |                                |
|         | perfect: AGCACTT AAGTGC        | hsa-miR-20b                    | caAAGTGCttacagtgcaggtag      | 2                            |                              |                                |                                |                                |
|         | perfect: AGCACTT AAGTGC        | hsa-miR-302b                   | tAAGTGCttccatgttttagtag      | 1                            |                              |                                |                                |                                |
| AGCAGGG | ENSG00000009950 MLXIPL         | ENSG00000100253 MIOX           | ENSG00000107882 SUFU         | ENSG00000124920 C11orf9      | ENSG00000125503 PPP1R12C     | ENSG00000128284 APOL3          | ENSG00000128342 LIF            | ENSG00000132478 UNK            |
|         | ENSG00000140995 NP_997397.1    | ENSG00000153404 NP_443141.2    | ENSG00000160741 CRTC2        | ENSG00000161091 C19orf28     | ENSG00000163531 NFASC        | ENSG00000164626 KCNK5          | ENSG00000164742 ADCY1          | ENSG00000167508 MVD            |
|         | ENSG00000167747 C19orf48       | ENSG00000169223 LMAN2          | ENSG00000169758 C15orf27     | ENSG00000169957 ZNF768       | ENSG00000175084 DES          | ENSG00000176797 CD151          | ENSG00000179632 MAF1           | ENSG00000180525 C10orf108      |
|         | ENSG00000182473 EXOC7          | ENSG00000185633 NDUFA4L2       | ENSG00000187045 TMPPS6       | ENSG00000198286 CARD11       | ENSG00000198883 PNMA5        | ENSG00000198925 ATG9A          | ENSG00000204601 Q4G0G9_HUMAN   | ENSG00000205751 MRPL23         |
|         | ENSG00000206045 LOC644844      | ENSG00000206113 Q6ZU27_HUMAN   | ENSG00000207204 RDH11        | ENSG000000089876 DHX32       | ENSG00000104356 POP1         | ENSG00000105939 ZC3HAV1        | ENSG00000112379 KIAA1244       | ENSG00000113558 SKP1A          |
|         | ENSG00000117335 CD46           | ENSG00000125255 SLC10A2        | ENSG00000131080 EDA2R        | ENSG00000134042 MRO          | ENSG00000143776 CDC42BPA     | ENSG00000154945 ANKRD40        | ENSG00000162747 FCGR3B         | ENSG00000163430 FSTL1          |
|         | ENSG00000165168 CYBB           | ENSG00000168710 AHCYL1         | ENSG00000177694 NAALADL2     | ENSG00000185104 PAF1         | ENSG00000187772 LIN28B       | ENSG00000187806 NP_001073931.1 |                                |                                |
| AGCAGTA | ENSG00000053438 NNAI           | ENSG00000106331 PAX4           | ENSG00000111602 TIMELESS     | ENSG00000111877 MCM9         | ENSG00000119703 C14orf140    | ENSG00000135622 SEMA4F         | ENSG00000135723 FHOD1          | ENSG00000137491 SLCO2B1        |
|         | ENSG00000138166 DUSP5          | ENSG00000145029 NICN1          | ENSG00000151360 ALLC         | ENSG00000163067 ZNF2         | ENSG00000166220 C10orf27     | ENSG00000169218 RSPO1          | ENSG00000172731 LRRC20         | ENSG00000180219 FAM71C         |
|         | ENSG00000183666 LOC728411      | ENSG00000189385 Q8N814_HUMAN   | ENSG00000198237 GUSL1_HUMAN  | ENSG00000205023 Q6ZSF1_HUMAN | ENSG00000205593 FAM116B      | ENSG00000035928 RFC1           | ENSG00000056097 ZFR            | ENSG00000078369 GNB1           |
|         | ENSG00000078401 EDN1           | ENSG00000101901 CXorf45        | ENSG00000105810 CDK6         | ENSG00000119314 ROD1         | ENSG00000120948 TARDBP       | ENSG00000121594 CD80           | ENSG00000124380 SNUT3_HUMAN    | ENSG00000126950 TMEM35         |
|         | ENSG00000134748 PRPF38A        | ENSG00000136146 MED4           | ENSG00000137040 RANBP6       | ENSG00000138061 CYP1B1       | ENSG00000138286 KIAA0974     | ENSG00000140367 UBE2Q2         | ENSG00000147526 TACC1          | ENSG00000148429 USP6NL         |
|         | ENSG00000156103 MMP16          | ENSG00000164542 NP_056129.1    | ENSG00000165119 HNRPK        | ENSG00000165972 CCDC38       | ENSG00000166681 NGFRAP1      | ENSG00000169862 CTNND2         | ENSG00000169967 MAP3K2         | ENSG00000173542 MOBK1A         |
|         | ENSG00000177150 C18orf19       | ENSG00000179520 SLC17A8        | ENSG00000184428 TOP1MT       | ENSG00000187155 CU085_HUMAN  | ENSG00000197639 MKNRP5       |                                |                                |                                |
| AGCAGTC | ENSG00000008444 NFIH           | ENSG000000011052 NME1          | ENSG00000100003 SEC14L2      | ENSG00000103353 UBFD1        | ENSG00000105656 ELL          | ENSG00000105737 GRIK5          | ENSG00000110446 SLC15A3        | ENSG00000111206 FOXM1          |
|         | ENSG00000130270 ATP8B3         | ENSG00000134216 CHIA           | ENSG00000140479 PCK6         | ENSG00000151948 GLT1D1       | ENSG00000162873 KLHD8CA      | ENSG00000166793 PEL4           | ENSG00000168040 FADD           | ENSG00000197116 Q9UDD8_HUMAN   |
|         | ENSG00000198198 KIAA0467       | ENSG00000198785 GRIN3A         | ENSG00000204423 C9orf33      | ENSG00000204544 C6orf205     | ENSG00000205354 Q6ZN60_HUMAN | ENSG00000046604 DSG2           | ENSG00000103310 ZP2            | ENSG00000110344 UBE4A          |
|         | ENSG00000112624 KIAA0240       | ENSG00000135974 C2orf49        | ENSG00000138757 G3BP2        | ENSG00000138798 EGF          | ENSG00000143493 INTS7        | ENSG00000154898 Q8IYA2_HUMAN   | ENSG00000155754 ALS2CR11       | ENSG00000163170 BOLA3          |
|         | ENSG00000164406 LEAP2          | ENSG00000165410 CFL2           | ENSG00000168273 Q8WV10_HUMAN | ENSG00000168385 SEPT2        | ENSG00000178184 PARD6G       | ENSG00000198556 ZNF789         |                                |                                |
| AGCAGTT | ENSG00000100077 ADRBK2         | ENSG00000100101 NOL12          | ENSG00000106682 EIF4H        | ENSG000001125445 MRPS7       | ENSG00000131097 HIGD1B       | ENSG00000136485 WDR6           | ENSG00000158352 SHROOM4        | ENSG00000160349 LCN1           |
|         | ENSG00000166886 NAB2           | ENSG00000166949 SMAD3          | ENSG00000170776 AKAP13       | ENSG00000180104 EXOC3        | ENSG00000180992 MRPL14       | ENSG00000182698 NM_001007089   | ENSG00000184639 NP_001004344.1 | ENSG00000196106 Q8W26_HUMAN    |
|         | ENSG00000196123 NP_001035805.1 | ENSG00000197942 Q6ZSS2_HUMAN   | ENSG00000198286 CARD11       | ENSG00000204168 Q6ZRI1_HUMAN | ENSG00000204842 ATXN2        | ENSG00000205126 NP_001027025.1 | ENSG00000065534 MYLK           | ENSG00000110958 PTGES3         |
|         | ENSG00000115993 TRAK2          | ENSG00000116459 ATP5F1         | ENSG00000119729 RHOQ         | ENSG00000128845 CCP6         | ENSG00000129625 REEP5        | ENSG00000133302 ANKRD32        | ENSG00000134852 CLOCK          | ENSG00000157540 DYRK1A         |
|         | ENSG00000164604 GPR85          | ENSG00000167904 TMEM68         | ENSG00000168958 C2orf33      | ENSG00000170365 SMAD1        | ENSG00000176542 KIAA2018     | ENSG00000177888 ZBTB41         | ENSG00000204711 C9orf135       |                                |
| AGCATGT | ENSG00000036448 MYOM2          | ENSG00000078246 TULP3          | ENSG00000100138 NHP2L1       | ENSG00000103426 CORO7        | ENSG00000106852 LHX6         | ENSG00000107957 SH3PXK2A       | ENSG00000106985 BMP8B          | ENSG000001125388 GRK4          |
|         | ENSG00000130035 GALNT8         | ENSG00000134243 SORT1          | ENSG00000136504 MYST2        | ENSG00000142686 NP_689587.1  | ENSG00000145824 CXCL14       | ENSG00000154928 P54762-3       | ENSG00000159461 AMFR           | ENSG00000168784 BPESC1         |
|         | ENSG00000169093 ASMTL          | ENSG00000176715 NP_777577.1    | ENSG00000177885 GRB2         | ENSG00000179837 RBM15B       | ENSG00000204792 Q6ZU62_HUMAN | ENSG00000089094 FBXL10         | ENSG00000100625 SIX4           | ENSG00000101040 ZMYND8         |
|         | ENSG00000101343 CRNKL1         | ENSG00000102221 PHF16          | ENSG00000113742 CEPB4        | ENSG00000115159 GPD2         | ENSG00000122692 SMU1         | ENSG00000125863 MKKS           | ENSG00000125945 ZNF436         | ENSG00000132676 DAP3           |
|         | ENSG00000134874 DZIP1          | ENSG00000145850 TIMD4          | ENSG00000167842 MIS12        | ENSG00000176124 DLEU1        | ENSG00000185158 LRRC37B      | ENSG00000187231 SESTD1         | ENSG00000197484 Q6ZRH8_HUMAN   | ENSG00000198092 TMPPS11F       |
|         | ENSG00000198898 CAPZA2         | ENSG00000205212 NP_001004306.1 |                              |                              |                              |                                |                                |                                |
| AGCATT  | ENSG000000015676 NUDC3         | ENSG00000103591 P34_HUMAN      | ENSG00000113578 FGF1         | ENSG00000114656 KIAA1257     | ENSG00000115598 IL1RL2       | ENSG00000122367 LDB3           | ENSG00000130544 ZNF557         | ENSG00000131236 CAP1           |
|         | ENSG00000144681 STAC           | ENSG00000147081 AKAP4          | ENSG00000159433 STAR9        | ENSG00000165731 RET          | ENSG00000171855 IFNL1        | ENSG00000183562 Q9P1L5_HUMAN   | ENSG00000189180 ZNF33A         | ENSG00000196372 ASB13          |
|         | ENSG00000203662 OR2M1P         | ENSG00000059573 ALDH18A1       | ENSG00000065923 SLC9A7       | ENSG00000074266 EED          | ENSG00000082497 SERTAD4      | ENSG00000089053 ANAPC5         | ENSG00000093222 ULK4           | ENSG00000100505 TRIM9          |
|         | ENSG00000121031 PRKDC          | ENSG00000124343 XG             | ENSG00000124406 ATP8A1       | ENSG00000124831 LRRFIP1      | ENSG00000127334 DYRK2        | ENSG00000135931 ARMC9          | ENSG00000148484 RSU1           |                                |

ENSG00000196345|ZNF167 ENSG00000198440|ZNF583
AGCCACC ENSG00000006118|TMEM132A ENSG000000071564|TCF3 ENSG000000076984|O14733-2 ENSG000000089558|KCNH4 ENSG00000100092|SH3BP1 ENSG00000107957|SH3PXD2A ENSG00000118194|TNNT2 ENSG00000121905|HPCA
ENSG00000123989|CHSS2\_HUMAN ENSG00000130600|H19 ENSG00000137049|C19orf7 ENSG00000137101|CD72 ENSG00000140044|NP\_569736.1 ENSG00000140557|ST8SIA2 ENSG00000145192|AHSX ENSG00000148671|C10orf116
ENSG00000156973|PDE6D ENSG00000160183|TMPRSS3 ENSG00000163531|NFASC ENSG00000166484|MAPK7 ENSG00000167291|TBC1D16 ENSG00000167654|ATCAY ENSG00000168242|HIST1H2BI ENSG00000168298|HIST1H1E
ENSG00000168748|CA7 ENSG00000168961|LGLALS9 ENSG00000169710|FASN ENSG00000171916|NP\_001035167.2 ENSG00000173621|LRFN4 ENSG00000175938|TMEM142C ENSG00000177732|SOX12 ENSG00000178896|EXOSC4
ENSG00000180513|Q8NBH1\_HUMAN ENSG00000182205|Q6ZUT0\_HUMAN ENSG00000184260|HIST2H2AC ENSG00000189319|FAMS3B ENSG00000196557|CACNA1H ENSG00000197177|GPR123 ENSG00000198366|HIST1H3A ENSG00000198374|HIST1H2AL
ENSG00000205745|Q71MF4\_HUMAN ENSG00000049192|ADAMTS6 ENSG00000078269|SYNJ2 ENSG00000108587|GOSR1 ENSG00000117523|BAT2D1 ENSG00000120699|EXOSC8 ENSG00000124203|C20orf174 ENSG00000125931|CITED1
ENSG00000139146|FAM60A ENSG00000141434|MEP1B ENSG00000145321|GC ENSG00000148426|C10orf47 ENSG00000154217|PITPN1 ENSG00000154721|JAM2 ENSG00000156831|NSMCE2 ENSG00000164294|NP\_001008398.1
ENSG00000167236|CCL23 ENSG00000169604|ANTXR1 ENSG00000171365|ILCN5 ENSG00000183726|TMEM50A ENSG00000185118|SVZB ENSG00000188216|Q5JST9\_HUMAN ENSG00000188613|NANOS1 ENSG00000196735|HLA-DQA1

AGCCATG ENSG00000006756|ARSD ENSG00000072501|SMC1A ENSG00000095370|SH2D3C ENSG00000102967|DHODH ENSG00000103549|RNF40 ENSG00000110324|IL10RA ENSG00000118050|C19orf24 ENSG00000122711|SPINK4
ENSG00000151612|NP\_849157.2 ENSG00000158717|RNF166 ENSG00000163719|MTMR14 ENSG00000164638|SLC29A4 ENSG00000165138|ANKS6 ENSG00000165406|MARCH8 ENSG00000172460|Q8IVY7\_HUMAN ENSG00000180424|DEFB123
ENSG00000180884|ZNF792 ENSG00000185800|DMWD ENSG00000188100|FAM25\_HUMAN ENSG00000188152|FAM22G ENSG00000204601|Q4GOG9\_HUMAN ENSG00000039560|RAI14 ENSG00000095787|WAC ENSG00000100614|PPM1A
ENSG00000104064|GABPB2 ENSG00000104320|NBN ENSG00000104635|SLC39A14 ENSG00000106541|AGR2 ENSG00000111215|PRR4 ENSG00000126016|AMOT ENSG00000145349|CAMK2D ENSG00000148848|ADAM12
ENSG00000151632|AKR1C2 ENSG00000163636|PSMD6 ENSG00000165029|ABCA1 ENSG00000165097|AOF1 ENSG00000165685|C12orf59 ENSG00000165819|METTL3 ENSG00000169062|UPF3A ENSG00000176222|ZNF404
ENSG00000177465|ACOT4 ENSG00000180917|NP\_060818.3 ENSG00000181264|TMEM136 ENSG00000183726|TMEM50A ENSG00000187134|AKR1C1 ENSG00000196785|Q8N862\_HUMAN ENSG00000197415|VEPH1 ENSG00000198440|ZNF583
ENSG00000211450|C11orf31

AGCCATT ENSG00000078967|UBE2D4 ENSG00000100558|PLEK2 ENSG00000102879|CORO1A ENSG00000107554|DNMBP ENSG00000114019|AMOTL2 ENSG00000117448|AKR1A1 ENSG00000125611|CHCHD5 ENSG00000127241|MASP1
ENSG00000127838|PNKD ENSG00000136167|LCP1 ENSG00000136867|SLC31A2 ENSG00000137709|POU2F3 ENSG00000139515|PDX1 ENSG00000141431|Q6ZMX6\_HUMAN ENSG00000141965|FEM1A ENSG00000158516|CPA2
ENSG00000160951|PTGER1 ENSG00000164976|KIAA1161 ENSG00000167286|CD3D ENSG00000168781|HISPPD2A ENSG00000169118|CSNK1G1 ENSG00000169627|BOLA2B ENSG00000171314|PGAM1 ENSG00000181215|NP\_997288.1
ENSG00000184945|AQP12A ENSG00000187860|NP\_001017437.1 ENSG00000188700|188707|C7orf29 ENSG00000196260|SFTFP ENSG00000197041|hCG\_2015269 ENSG00000007001|UPP2 ENSG00000090663|SRPK1 ENSG00000100191|SLC5A4
ENSG00000100483|C14orf138 ENSG00000108298|RPL19 ENSG00000112144|ICK ENSG00000123106|CCDC91 ENSG00000134899|ERCC5 ENSG00000135940|COX5B ENSG00000139946|PELL2 ENSG00000143390|RF5
ENSG00000148925|BTBD10 ENSG00000156253|C21orf6 ENSG00000156650|MYST4 ENSG00000163939|PBRM1 ENSG00000165259|CXorf43 ENSG00000170537|TMC7 ENSG00000175989|C11orf69 ENSG00000188610|FAM72B
ENSG00000196550|FAM72A ENSG00000204397|NP\_001017534.1

AGCCCGG ENSG000000007216|SLC13A2 ENSG00000054148|PHPT1 ENSG00000066735|Q96GK3\_HUMAN ENSG00000087266|SH3BP2 ENSG00000088881|COE4\_HUMAN ENSG00000089505|CMTM1 ENSG00000102882|MAPK3 ENSG00000105404|RABAC1
ENSG00000106211|HSPBL1 ENSG00000115041|KCNIP3 ENSG00000115286|NDUF57 ENSG00000122136|OBP2A ENSG00000127663|JMD2B ENSG00000132819|RBM38 ENSG00000140564|FURIN ENSG00000142186|SCYL1
ENSG00000164729|AMAC1L1 ENSG00000168875|SOX14 ENSG00000173805|HAP1 ENSG00000182450|KCNK4 ENSG00000183488|AMAC1L3 ENSG00000185105|XR\_015885.1 ENSG00000197681|TBC1D3 ENSG00000203690|TCP10
ENSG00000203812|HIST2H2AA4 ENSG00000203987|Q6ZR86\_HUMAN ENSG00000204946|ZNF783 ENSG00000061455|PRDM6 ENSG00000104361|NPAL2 ENSG00000106686|C9orf68 ENSG00000109118|PHF12 ENSG00000111229|ARPC3
ENSG00000129277|CCL4 ENSG00000133800|XLKDI1 ENSG00000143395|MEIS1 ENSG00000144136|SLC20A1 ENSG00000148225|WDR31 ENSG00000159346|ADIPOR1 ENSG00000166478|ZNF143 ENSG00000170088|NP\_689894.1
ENSG00000181588|RHHD1 ENSG00000183508|FAM46C ENSG00000183784|C9orf66 ENSG00000184708|EIF4ENF1 ENSG00000184900|SUMO3 ENSG00000197992|CLEC9A
ENSG00000093217|XYLB ENSG00000101986|ABCD1 ENSG00000105327|BBC3 ENSG00000108557|RAI1 ENSG00000112320|SOBP ENSG00000123136|DDX39 ENSG00000127511|SIN3B ENSG00000130165|ELOF1
ENSG00000135451|TROAP ENSG00000141564|RPTOR\_HUMAN ENSG00000142002|DPP9 ENSG00000142611|PRDM16 ENSG00000161682|Q8NOU1\_HUMAN ENSG00000162650|ATXN7L2 ENSG00000167011|NP\_940973.1 ENSG00000167930|ITFG3
ENSG00000169059|VCX3A ENSG00000173137|ADCK5 ENSG00000176678|FOXJ1 ENSG00000177504|VCX2 ENSG00000182583|VCX ENSG00000185885|IFITM1 ENSG00000186831|KRT17 ENSG00000189171|SI00A13
ENSG00000196642|C9orf86 ENSG00000205485|Q6DCA4\_HUMAN ENSG00000205642|VCX3B ENSG000000009307|NRAS ENSG000000073417|PDE8A ENSG00000101191|DIDO1 ENSG00000101230|C20orf82 ENSG00000109339|MAPK10
ENSG00000116161|CACYPB ENSG00000118515|SGK ENSG00000120306|C5orf32 ENSG00000125107|CNO1R1 ENSG00000144893|MED12L ENSG00000146278|NPRC1 ENSG00000146416|AIG1 ENSG00000148057|C9orf103
ENSG00000152795|HNRPDL ENSG00000154582|TCEB1 ENSG00000159200|DSCR1 ENSG00000162441|LZIC ENSG00000168502|KIAA0802 ENSG00000176165|FOXG1B ENSG00000183283|DAZAP2 ENSG00000183475|ASB7
ENSG00000187094|CKK ENSG00000197203|Q8NAJ9\_HUMAN ENSG00000205976|Q6ZVT4\_HUMAN ENSG00000206075|SERPINB5

AGCCCGG ENSG000000049541|RFC2 ENSG00000060491|OGFR ENSG00000065054|SLC9A3R2 ENSG00000099624|ATP5D ENSG00000101445|PPP1R16B ENSG00000105641|SLC5A5 ENSG00000106263|EIF3S9 ENSG00000112041|TULP1
ENSG00000152866|NDUF57 ENSG00000122490|PQLC1 ENSG00000130182|ZSCAN10 ENSG00000136717|BIN1 ENSG00000142290|FXD7 ENSG00000142910|TINAGL1 ENSG00000148805|NR\_002934.2 ENSG00000160959|LRRC14
ENSG00000178467|EGLX\_HUMAN ENSG00000181396|NP\_078924.1 ENSG00000182156|ENPP7 ENSG00000182566|CLEC4G ENSG00000187051|RPS19BP1 ENSG00000187288|CIDEC ENSG00000197150|ABC8 ENSG00000198407|Q8NCZ5\_HUMAN
ENSG00000198535|NP\_997205.1 ENSG00000203896|LIME1 ENSG00000205502|NP\_001007596.1 ENSG00000054598|FOXJ1 ENSG000000078304|PPP2R5C ENSG00000082196|CIQTNF3 ENSG00000099725|PRKY ENSG00000111450|STX2
ENSG00000143797|MBOAT2 ENSG00000168264|TRF2BP2 ENSG00000174514|MFS4 ENSG00000175745|NR2F1 ENSG00000177125|ZBTB34 ENSG00000180044|Q8N54\_HUMAN ENSG00000182093|WRB ENSG00000196371|FUT4

AGCCGCT ENSG00000072818|CENTB1 ENSG00000106400|ZNHIT1 ENSG00000106992|AKI1 ENSG00000108639|SYNGR2 ENSG00000108641|NP\_056496.1 ENSG00000108786|HSD17B1 ENSG00000109625|CPZ ENSG00000114650|SCAP
ENSG00000116032|GRIN3B ENSG00000130731|NP\_001035251.1 ENSG00000131697|NPHP4 ENSG00000136003|ISCU ENSG00000146192|FGD2 ENSG00000149823|C11orf2 ENSG00000163882|POLR2H ENSG00000167543|TP53I13
ENSG00000168477|TNXB ENSG00000171853|TTC15 ENSG00000172081|MOBK2L2A ENSG00000172294|Q96RM9\_HUMAN ENSG00000172342|CSPG4LYP1 ENSG00000176095|IHPK1 ENSG00000176994|SMCR8 ENSG00000189339|SLC35E2
ENSG00000196924|FLNA ENSG00000198614|C4orf12 ENSG00000205698|LOC648426 ENSG00000007372|PAX6 ENSG000000013810|TACC3 ENSG00000040731|CDH10 ENSG00000065485|PDIA5 ENSG00000078053|AMPH
ENSG00000100473|COCH ENSG00000109099|PMP22 ENSG00000125351|UPF3B ENSG00000135747|ZNF670 ENSG00000137511|SLC05A1 ENSG00000145391|SETD7 ENSG00000148143|ZNF462 ENSG00000152422|XRCC4
ENSG00000162782|TDRD5 ENSG00000162998|FRZB ENSG00000172667|ZMAT3 ENSG00000179774|ATO7 ENSG00000185418|TARSL2 ENSG00000203827|XR\_015220.1 ENSG00000203832|NBPF20 ENSG00000206029|Q0P633\_HUMAN

AGCCGGC ENSG00000076984|O14733-2 ENSG00000100422|CERK ENSG00000101152|DNAJC5 ENSG00000101224|CDC25B ENSG00000105556|NP\_060020.1 ENSG00000106683|LIMK1 ENSG00000125912|NCLN ENSG00000130508|PXDN
ENSG00000134020|PEBPL\_HUMAN ENSG00000136295|TTYH3 ENSG00000143748|NVL ENSG00000144488|ESPNL ENSG00000161904|LEMD2 ENSG00000162981|FAM84A ENSG00000164363|SLC6A18 ENSG00000164916|FOXK1
ENSG00000165233|C9orf89 ENSG00000183707|Q96AT3\_HUMAN ENSG00000183729|NPBWR1 ENSG00000184602|SNN ENSG00000184990|SIVA1 ENSG00000187003|ACTL7A ENSG00000187766|KRTAP10-8 ENSG00000196924|FLNA
ENSG00000196959|CES1 ENSG00000198614|C4orf12 ENSG00000198848|NR\_003276.1 ENSG00000205927|OLIG2 ENSG000000052802|SC4MOL ENSG00000077809|GTF2I ENSG00000090487|SPG21 ENSG00000109320|NFKB1
ENSG00000116016|EPAS1 ENSG00000127334|DYRK2 ENSG00000135775|COG2 ENSG00000140153|WDR20 ENSG00000143457|GOLPH3L ENSG00000143643|TTC13 ENSG00000152348|ATG10 ENSG00000156172|C8orf37
ENSG00000157557|ETS2 ENSG00000163817|SLC6A20 ENSG00000170345|FOS ENSG00000173215|Q96HQ8\_HUMAN ENSG00000178229|ZNF543 ENSG00000178562|CD28 ENSG00000184992|BRI3BP ENSG00000185437|SH3BGR
ENSG00000198221|NP\_001035973.1

AGCCATT ENSG00000010256|UQCRC1 ENSG00000063438|AHRH ENSG00000064205|WISP2 ENSG00000100068|LRP5L ENSG00000101104|C20orf119 ENSG00000116649|SRM ENSG00000118245|TNP1 ENSG00000124107|SLPI
ENSG00000131037|EPS8L1 ENSG00000153048|CARHSP1 ENSG00000162771|FAM71A ENSG00000162981|FAM84A ENSG00000173120|FBXL11 ENSG00000174306|ZH3 ENSG00000175416|CLTB ENSG00000197175|Q8TBR1\_HUMAN
ENSG00000197565|COL4A6 ENSG00000204303|Q6ZVW4\_HUMAN ENSG00000204405|Q6ZQV3\_HUMAN ENSG00000206550|LOC285346 ENSG000000012660|ELOVL5 ENSG00000025039|RRAGD ENSG00000069974|RAB27A ENSG00000100522|GNPNAT1
ENSG00000109163|GNRHR ENSG00000111716|LDHB ENSG00000115825|PRKD3 ENSG00000119705|C14orf156 ENSG00000123200|ZC3H13 ENSG00000134007|ADAM20 ENSG00000139496|NUPL1 ENSG00000147400|CETN2
ENSG00000158985|CDC42SE2 ENSG00000161714|PLCD3 ENSG00000162290|PKP1A ENSG00000163257|C4orf30 ENSG00000163541|SUCLG1 ENSG00000164294|NP\_001008398.1 ENSG00000165410|CFL2 ENSG00000169239|CA5B
ENSG00000171757|LRRC34 ENSG00000172554|SNTG2 ENSG00000180855|ZNF443 ENSG00000188529|FUSIP1 ENSG00000196323|ZBTB44 ENSG00000196466|ZNF799 ENSG00000203743|Q5J7V3\_HUMAN ENSG00000204592|HLA-E

AGCCGTC ENSG00000028310|BRD9 ENSG00000090975|PITPNM2 ENSG00000107957|SH3PXD2A ENSG00000111335|OAS2 ENSG00000128713|HOXD11 ENSG00000130203|APOE ENSG00000130589|PR285\_HUMAN ENSG00000136908|DPM2
ENSG00000141959|PFKL ENSG00000144043|TEX226 ENSG00000149591|TAGLN ENSG00000158106|RHPN1 ENSG00000160318|CLDN22 ENSG00000161791|FMNL3 ENSG00000167614|TTYH1 ENSG00000168754|NP\_057574.2
ENSG00000168878|SFTPB ENSG00000169896|ITGAM ENSG00000172831|CES2 ENSG00000176749|CDK5R1 ENSG00000178597|PSAPL1 ENSG00000179271|GADD45G1P1 ENSG00000180089|TMEM86B ENSG00000184416|Q8IUS2\_HUMAN
ENSG00000188493|C19orf54 ENSG00000189110|Q6ZRK9\_HUMAN ENSG00000189363|Q6ZSP4\_HUMAN ENSG00000197355|UAP1L1 ENSG00000205219|Q6UXU7\_HUMAN ENSG00000083828|ZNF586 ENSG00000091409|ITGA6 ENSG00000111799|COL12A1
ENSG00000113492|AGXT2 ENSG00000134215|VAV3 ENSG00000144406|Q96SS0\_HUMAN ENSG00000147465|STAR ENSG00000151792|CTSO ENSG00000164244|PRRC1 ENSG00000166595|FAM96B ENSG00000166889|NP\_689929.1
ENSG00000166971|AKT1P ENSG00000168619|ADAM18 ENSG00000170624|SQCD ENSG00000175646|PRM1 ENSG00000179104|TMTC2 ENSG00000185023|RAB6C ENSG00000187189|TSPYL4 ENSG00000188404|SELL

AGCCGTCG ENSG00000054179|ENTPD2 ENSG00000075790|BCAP29 ENSG00000075914|EXOSC7 ENSG00000099864|PALM ENSG00000100605|ITPK1 ENSG00000100628|ASB2 ENSG00000103811|CTSH ENSG00000110171|TRIM3
ENSG00000118960|HS1BP3 ENSG00000121680|PEX1 ENSG00000125966|MMP24 ENSG00000126215|XRCC3 ENSG00000128802|GDF2 ENSG00000129990|SYT5 ENSG00000135100|TCF1 ENSG00000135637|NP\_116168.2
ENSG00000136944|LMX1B ENSG00000138316|ADAMTS14 ENSG00000141258|RUTB1 ENSG00000141696|NO55\_HUMAN ENSG00000143862|ARL8A ENSG00000144040|SFXN5 ENSG00000159792|PSKH1 ENSG00000160606|TLCD1
ENSG00000161091|C19orf28 ENSG00000162065|TBC1D24 ENSG00000167595|C19orf55 ENSG00000170631|ZNF16 ENSG00000172346|CSDC2 ENSG00000172725|PTPRCAP ENSG00000173335|CST9 ENSG00000173976|RAXL1
ENSG00000176200|BOK ENSG00000177830|CHID1 ENSG00000180066|C10orf91 ENSG00000180155|LYNX1 ENSG00000180539|C9orf139 ENSG00000182557|SPNS3 ENSG00000182768|NGRN ENSG00000183077|AFM1D
ENSG00000184792|OSBP2 ENSG00000196878|LAMB3 ENSG00000024048|UBR2 ENSG00000035928|RFC1 ENSG00000093134|VNN3 ENSG00000125851|PCSK2 ENSG00000131080|EDA2R ENSG00000134324|LPIN1
ENSG00000145675|PIK3R1 ENSG00000151135|C12orf23 ENSG00000153157|NP\_001035364.1 ENSG00000162702|ZNF281 ENSG00000163235|TGFA ENSG00000163444|TMEM183B ENSG00000163558|PRKC1 ENSG00000163600|ICOS
ENSG00000179979|CRIPAK ENSG00000186409|NP\_001074319.1 ENSG00000205003|CNTF

AGCCTTA ENSG00000008708|ARS2\_HUMAN ENSG00000100448|CTSG ENSG00000103855|CD276 ENSG00000106211|HSPB1 ENSG00000107554|DNMBP ENSG00000120451|SNX19 ENSG00000126003|PLAGL2 ENSG00000126882|FAM78A
ENSG00000131233|GJA10 ENSG00000135605|TEC ENSG00000137310|TCF19 ENSG00000155846|PPARGC1B ENSG00000156639|ZFAND3 ENSG00000157017|GHRH ENSG00000164048|ZNF589 ENSG00000166086|JAM3
ENSG00000171649|ZTK1 ENSG00000172830|SSH3 ENSG00000189037|DUSP21 ENSG00000198959|TGM2 ENSG00000206053|HNLL ENSG00000065060|C6orf107 ENSG00000072682|P4HA2 ENSG00000108298|RPL19
ENSG00000124120|C20orf121 ENSG00000127334|DYRK2 ENSG00000128052|KDR ENSG00000133808|MICALCL ENSG00000133818|RRAS2 ENSG00000135614|C3orf54 ENSG00000138646|HERC5 ENSG00000142065|ZFP14
ENSG00000145908|ZNF300 ENSG00000151023|C10orf63 ENSG00000159917|ZNF235 ENSG00000163074|NM\_024534 ENSG00000164144|ARFIP1 ENSG00000164308|NP\_071745.1 ENSG00000173612|GPRC6A ENSG00000179933|C14orf119
ENSG00000180777|ANKRD30B ENSG00000196586|MYO6

AGCCTTT ENSG00000001461|NPAL3 ENSG00000015592|STMN4 ENSG00000071626|DAZAP1 ENSG00000083817|ZNF416 ENSG00000087191|PSMC5 ENSG00000087258|GNAO1 ENSG00000099866|MADCAM1 ENSG00000100983|GSS
ENSG00000100994|PYGB ENSG00000108557|RAI1 ENSG00000142444|C19orf52 ENSG00000143127|ITGA10 ENSG00000157653|C9orf43 ENSG00000164574|GALNT10 ENSG00000165626|C10orf30 ENSG00000169184|NM\_002430.2
ENSG00000171649|ZTK1 ENSG00000173914|RBM4B ENSG00000175756|AURKAI\_P1 ENSG00000177370|TIMM20 ENSG00000185614|C3orf54 ENSG00000186970|KRTAP15-1 ENSG00000188778|ADRB3
ENSG00000197965|MPZL1 ENSG00000204775|Q4G0D9\_HUMAN ENSG000000205730|NP\_001030013.1 ENSG00000007944|MYLIP ENSG00000008869|ZNF582 ENSG00000030066|NUP160 ENSG00000089335|ZNF302 ENSG00000102383|ZDHC15
ENSG00000102805|CLN5 ENSG00000130844|ZNF331 ENSG00000133138|TBC1D8B ENSG00000134363|FST ENSG00000138293|NCOA4 ENSG00000139631|CSAD ENSG00000141198|TOML1 ENSG00000147535|PPAPDC1B
ENSG00000147862|NFIB ENSG00000150076|C10orf68 ENSG00000159167|STC1 ENSG00000160352|ZNF714 ENSG00000163697|APBB2 ENSG00000166747|AP1G1 ENSG00000167562|ZNF701 ENSG00000167766|ZNF83

|                                |                                |                              |                              |                              |                               |                                |                                |                                |
|--------------------------------|--------------------------------|------------------------------|------------------------------|------------------------------|-------------------------------|--------------------------------|--------------------------------|--------------------------------|
| ENSG00000168036 CTNNE1         | ENSG00000174628 IQCK           | ENSG00000176222 ZNF404       | ENSG00000177600 RPLP2        | ENSG00000185037 XR_016629.1  | ENSG00000185177 ZNF479        | ENSG00000196505 GDAP2          | ENSG00000197990 XR_016643.1    |                                |
| AGCGAAA                        | ENSG00000071564 TCF3           | ENSG00000075151 EIF4G3       | ENSG00000075856 SART3        | ENSG00000088881 COE4_HUMAN   | ENSG00000103522 IL21R         | ENSG00000111319 SCNN1A         | ENSG00000124785 NRN1           | ENSG00000134595 SOX3           |
| ENSG00000142677 IL22RA1        | ENSG00000146285 SCML4          | ENSG00000158828 PINK1        | ENSG00000160179 ABCG1        | ENSG00000164587 RPS14        | ENSG00000166289 PLEKHF1       | ENSG00000168269 FOXJ1          | ENSG00000175264 CHST1          | ENSG00000198500 Q96C21_HUMAN   |
| ENSG00000176678 FOXL1          | ENSG00000180875 GREM2          | ENSG00000183092 BEGIN_HUMAN  | ENSG00000185830 C22orf37     | ENSG00000197457 STMN3        | ENSG00000198049 AVPR1B        | ENSG00000198457 CP21A_HUMAN    | ENSG00000198500 Q96C21_HUMAN   | ENSG00000198500 Q96C21_HUMAN   |
| ENSG00000204498 NFKB1L1        | ENSG00000007350 TKTL1          | ENSG00000009790 TRAF3IP3     | ENSG00000069509 FUNDCl       | ENSG00000070214 SLC44A1      | ENSG00000075413 MARK3         | ENSG00000077264 PAK3           | ENSG00000083622 SOHLH2         | ENSG00000115738 ID2            |
| ENSG00000115738 ID2            | ENSG00000117091 CD48           | ENSG00000123473 STIL         | ENSG00000135604 STX11        | ENSG00000135900 MRLP44       | ENSG00000136938 ANP32B        | ENSG00000146477 SLC22A3        | ENSG00000153790 C7orf31        | ENSG00000164386 NP_997378.2    |
| AGCGGAG                        | ENSG00000066735 Q96GK3_HUMAN   | ENSG00000074370 ATP2A3       | ENSG00000100056 DGCR14       | ENSG00000103274 NUBP1        | ENSG00000107562 CXCL12        | ENSG00000126217 MCF2L          | ENSG00000130717 UCK1           | ENSG00000135175 OCM            |
| ENSG00000146453 PNLDC1         | ENSG00000164715 LMTK2          | ENSG00000165643 SOHLH1       | ENSG00000165949 IFI27        | ENSG00000169217 CD2BP2       | ENSG00000176619 LMNB2         | ENSG00000178597 PSAPL1         | ENSG00000181409 AATK           | ENSG00000183691 NOG            |
| ENSG00000183691 NOG            | ENSG00000183729 NPBWR1         | ENSG00000184825 HIST1H2AH    | ENSG00000188660 C21orf125    | ENSG00000196630 Q8NF76_HUMAN | ENSG00000196767 POU3F4        | ENSG00000196976 LAGE3          | ENSG00000198407 Q8NCZ5_HUMAN   | ENSG00000204771 Q8ND95_HUMAN   |
| ENSG00000204771 Q8ND95_HUMAN   | ENSG00000205875 LOC197350      | ENSG00000041982 TNC          | ENSG00000043355 ZIC2         | ENSG00000054654 SYNE2        | ENSG00000077327 SPAG6         | ENSG00000086666 ZFAND6         | ENSG00000099219 KIAA1815       | ENSG00000103544 NP_064710.3    |
| ENSG00000103544 NP_064710.3    | ENSG00000106689 LHX2           | ENSG00000111704 NANOG        | ENSG00000115361 ACADL        | ENSG00000115839 RAB3GAP1     | ENSG00000137285 TUBB2B        | ENSG00000139352 ASCL1          | ENSG00000141946 ZIM3           | ENSG00000155111 CDC2L6         |
| ENSG00000155111 CDC2L6         | ENSG00000159128 IFNGR2         | ENSG00000163599 CTLA4        | ENSG00000167258 CRKRS        | ENSG00000168811 ILL2A        | ENSG00000169398 PTK2          | ENSG00000170370 EMX2           | ENSG00000172058 SERF1_HUMAN    | ENSG00000176165 FOXG1B         |
| ENSG00000176165 FOXG1B         | ENSG00000182700 NP_001007190.1 | ENSG00000183780 SLC35F3      | ENSG00000186088 NP_059135.1  | ENSG00000186469 GNG2         | ENSG00000189377 NP_940879.1   | ENSG00000205572 SERF1_HUMAN    | ENSG00000205740 Q62NQ2_HUMAN   | ENSG00000010310 GIPR           |
| AGCGATA                        | ENSG000000115112 VFCP2L1       | ENSG00000117385 LEPRE1       | ENSG00000119686 C14orf58     | ENSG00000125820 NKX2-2       | ENSG00000149452 SLC22A8       | ENSG00000163121 NM_001080535.1 | ENSG00000164007 CLDN19         | ENSG00000164587 RPS14          |
| ENSG00000165280 VCP            | ENSG00000166856 ADMIR          | ENSG00000170091 NSG2_HUMAN   | ENSG00000170619 COMMD5       | ENSG00000182450 KCNK4        | ENSG00000185359 HGS           | ENSG00000196808 Q96N04_HUMAN   | ENSG00000203689 NP_001018859.1 | ENSG00000204059 NP_001013718.1 |
| ENSG00000204059 NP_001013718.1 | ENSG00000204100 Q6ZV28_HUMAN   | ENSG00000204222 B3GALT4      | ENSG00000204558 Q9BYX6_HUMAN | ENSG0000004961 HCCS          | ENSG00000061676 NCKAP1        | ENSG00000090520 DNAJB11        | ENSG00000101842 VSIQ1          | ENSG00000102524 TNFSF13B       |
| ENSG00000102524 TNFSF13B       | ENSG00000103449 SALL1          | ENSG00000104763 ASAH1        | ENSG00000108854 SMURF2       | ENSG00000114209 PDCD10       | ENSG00000119541 VPS4B         | ENSG00000129515 SNX6           | ENSG00000131174 COX7B          | ENSG00000146373 IBRDCl         |
| ENSG00000146373 IBRDCl         | ENSG00000152382 TADA1L         | ENSG00000154359 LONRF1       | ENSG00000162639 C1orf59      | ENSG00000163288 GABRB1       | ENSG00000164398 ACSL6         | ENSG00000164930 FZD6           | ENSG00000166501 PRKCB1         | ENSG00000169659 PLGLA1         |
| ENSG00000169659 PLGLA1         | ENSG00000170370 EMX2           | ENSG00000171241 SHCBP1       | ENSG00000171365 CLCN5        | ENSG00000171723 GPHN         | ENSG00000177406 Q8N503_HUMAN  | ENSG00000177917 ARL6IP6        | ENSG00000179299 NSUN7          | ENSG00000187498 COL4A1         |
| AGCGCAA                        | ENSG00000010610 CD4            | ENSG00000068120 COASY        | ENSG00000100036 SLC35E4      | ENSG00000105538 RASIP1       | ENSG00000106113 CRHR2         | ENSG000001108557 RAI1          | ENSG00000115307 AUP1           | ENSG00000116148 CCNL2          |
| ENSG00000125872 C20orf75       | ENSG00000125967 APBA2BP        | ENSG00000129103 SUMF2        | ENSG00000129657 SEC14L1      | ENSG00000130829 DUSP9        | ENSG00000131634 C16orf30      | ENSG00000134014 ELP3           | ENSG00000134240 HMGCS2         | ENSG00000143630 HCN2           |
| ENSG00000143630 HCN2           | ENSG00000152137 HSPB8          | ENSG00000171102 OBP2B        | ENSG00000171872 KLF17        | ENSG00000179755 XR_017798.1  | ENSG00000180176 TH            | ENSG00000180806 HOXC9          | ENSG00000182492 BGN            | ENSG00000183528 QOVAF8_HUMAN   |
| ENSG00000183528 QOVAF8_HUMAN   | ENSG00000184470 TXNRD2         | ENSG00000198518 HIST1H4E     | ENSG00000204443 Q562T6_HUMAN | ENSG00000204579 A2RUR5_HUMAN | ENSG0000005302 MSL3L1         | ENSG0000005955 ZNF403          | ENSG0000026025 VIM             | ENSG00000058272 PPP1R12A       |
| ENSG00000058272 PPP1R12A       | ENSG00000080371 RAB21          | ENSG00000106809 OGN          | ENSG00000112146 FBXO9        | ENSG00000115514 TXNDC9       | ENSG00000117859 OSBPL9        | ENSG00000120533 ENY2           | ENSG00000121067 SPOP           | ENSG00000140941 MAP1LC3B       |
| ENSG00000140941 MAP1LC3B       | ENSG00000152795 HNRPDL         | ENSG00000157538 DSCR3        | ENSG00000164253 WDR41        | ENSG00000164828 UNC84A       | ENSG00000165181 C9orf84       | ENSG00000170606 HSPA4          | ENSG00000172667 ZMAT3          | ENSG00000174456 NP_997318.1    |
| AGCGCCA                        | ENSG00000068383 INPP5A         | ENSG00000074755 ZZEF1        | ENSG00000099956 SMARCB1      | ENSG00000104897 SF3A2        | ENSG00000106927 AMBP          | ENSG00000108849 PPY            | ENSG00000116649 SRM            | ENSG00000126003 PLAGL2         |
| ENSG00000135605 TEC            | ENSG00000149292 TTC12          | ENSG00000154768 C17orf50     | ENSG00000160224 AIRE         | ENSG00000160959 LRRC14       | ENSG00000161618 ALDH16A1      | ENSG00000167685 ZNF444         | ENSG00000172247 C1QTNF4        | ENSG00000174791 RIN1           |
| ENSG00000174791 RIN1           | ENSG00000182871 COL18A1        | ENSG00000185744 TNT_HUMAN    | ENSG00000186575 NF2          | ENSG00000198373 WWP2         | ENSG00000203896 LIME1         | ENSG00000204028 Q6ZRR4_HUMAN   | ENSG00000204590 GNL1           | ENSG00000205335 GLYCAM1        |
| ENSG00000205335 GLYCAM1        | ENSG00000205875 LOC197350      | ENSG00000070214 SLC44A1      | ENSG00000090686 USP48        | ENSG00000095787 WAC          | ENSG00000102054 REBP7         | ENSG00000104728 ARHGEP10       | ENSG00000105948 TTC26          | ENSG00000107959 PITRM1         |
| ENSG00000107959 PITRM1         | ENSG00000119866 BCL11A         | ENSG00000121064 SCPEP1       | ENSG00000128245 YWHAH        | ENSG00000137168 PPI1         | ENSG00000140181 HERC2P2       | ENSG00000141542 RAB40B         | ENSG00000152700 SAR1B          | ENSG00000154001 PPP2R5E        |
| AGCGCGG                        | ENSG00000064419 TNPO3          | ENSG00000075891 PAX2         | ENSG00000095906 NUBP2        | ENSG00000100297 MCM5         | ENSG00000102101 EEF1A2        | ENSG00000104918 RETN           | ENSG00000107130 FREQ           | ENSG00000130222 GADD45G        |
| ENSG00000130811 EIF3S4         | ENSG00000142290 FXDY7          | ENSG00000147378 FATE1        | ENSG00000153266 PEZF2        | ENSG00000153443 FAM100A      | ENSG00000158517 NCF1          | ENSG00000158623 TSGA13         | ENSG00000163126 ANKRD23        | ENSG00000163633 C4orf36        |
| ENSG00000163633 C4orf36        | ENSG00000164038 NP_849155.2    | ENSG00000165178 LOC648998    | ENSG00000165724 ZMYND19      | ENSG00000170919 Q5SVS6_HUMAN | ENSG00000172216 CEBPP         | ENSG00000181444 ZNF467         | ENSG00000181513 ACBD4          | ENSG00000182054 IDH2           |
| ENSG00000182054 IDH2           | ENSG00000182487 NCF1C          | ENSG00000182612 TFPAN10      | ENSG00000182979 MTA1         | ENSG00000183707 Q96AT3_HUMAN | ENSG00000196767 POU3F4        | ENSG00000203945 Q5JQP1_HUMAN   | ENSG00000205031 Q6XYE2_HUMAN   | ENSG00000077809 GTF2I          |
| ENSG00000077809 GTF2I          | ENSG00000100425 BRD1           | ENSG00000113391 C5orf21      | ENSG00000125675 GRIA3        | ENSG00000140948 ZCCHC14      | ENSG00000145391 SETD7         | ENSG00000152154 TMEM178        | ENSG00000167257 RNF214         | ENSG00000181588 RKHD1          |
| ENSG00000181588 RKHD1          | ENSG00000182308 WDR21B         | ENSG00000184486 POU3F2       | ENSG00000185950 IRS2         | ENSG00000204884 Q6EVI2_HUMAN | ENSG00000108511 HOXB6         | ENSG00000111181 SLC6A12        | ENSG00000115641 FHL2           | ENSG00000040608 RTN4R          |
| AGCGGAC                        | ENSG00000040608 RTN4R          | ENSG00000088682 COQ9         | ENSG00000101096 NFATC2       | ENSG00000104522 TSTA3        | ENSG00000108511 HOXB6         | ENSG00000111181 SLC6A12        | ENSG00000115641 FHL2           | ENSG00000112140 MRPS2          |
| ENSG00000112140 MRPS2          | ENSG00000127220 ABHD8          | ENSG00000129757 CDKN1C       | ENSG00000130176 CNN1         | ENSG00000132024 CC2D1A       | ENSG00000136630 HLX1          | ENSG00000146926 ASB10          | ENSG00000149257 SERPINH1       | ENSG00000149654 CDH22          |
| ENSG00000149654 CDH22          | ENSG00000156587 UBE2L6         | ENSG00000158104 HPD          | ENSG00000160563 CRSP8        | ENSG00000160695 VPS11        | ENSG00000162391 C1orf179      | ENSG00000166794 PPIB           | ENSG00000167508 MVD            | ENSG00000169856 ONECUT1        |
| ENSG00000169856 ONECUT1        | ENSG00000173673 HES3           | ENSG00000178226 PRSS36       | ENSG00000185650 ZFP36L1      | ENSG00000186844 LCE1A        | ENSG00000188191 PKKAR1B       | ENSG00000196456 ZNF775         | ENSG00000206098 C4orf10        | ENSG00000191866 CYP24A1        |
| ENSG00000191866 CYP24A1        | ENSG00000043355 ZIC2           | ENSG00000109943 CRTAM        | ENSG00000111450 STX2         | ENSG00000111799 COL12A1      | ENSG00000118515 SGK           | ENSG00000120686 UFM1           | ENSG00000131951 LRRC9          | ENSG00000135250 SRPK2          |
| ENSG00000135250 SRPK2          | ENSG00000137478 FCHSD2         | ENSG00000137672 TRPC6        | ENSG00000138075 ABCG5        | ENSG00000147905 ZCCHC7       | ENSG00000151726 ACSL1         | ENSG00000155319 NP_001004299.1 | ENSG00000163558 PRKCI          | ENSG00000164294 NP_001008398.1 |
| ENSG00000164294 NP_001008398.1 | ENSG00000165417 GTF2A1         | ENSG00000165655 ZNF503       | ENSG00000168348 INSM2        | ENSG00000170074 NP_775934.3  | ENSG00000171860 C3AR1         | ENSG00000178403 NEUROG2        | ENSG00000196683 TOMM7          | ENSG00000196781 TLE1           |
| AGCGGAT                        | ENSG00000003400 CASP10         | ENSG00000060625 OSBPL7       | ENSG00000010327 STAB1        | ENSG00000063854 HAGH         | ENSG00000095713 CRTAC1        | ENSG00000100211 CBY1           | ENSG00000105538 RASIP1         | ENSG00000106459 NRF1           |
| ENSG00000106459 NRF1           | ENSG00000114270 COL7A1         | ENSG00000128709 HOXD9        | ENSG00000128713 HOXD11       | ENSG00000137101 CD72         | ENSG00000141150 RASL10B       | ENSG00000141401 IMPA2          | ENSG00000141526 SLC16A3        | ENSG00000142661 MYOM3          |
| ENSG00000142661 MYOM3          | ENSG00000154316 TDH            | ENSG00000161574 CCL14        | ENSG00000167508 MVD          | ENSG00000169020 ATP5I        | ENSG00000170423 KRT78         | ENSG00000174915 PTDS2          | ENSG00000177340 QOVFX0_HUMAN   | ENSG00000177539 Q6ZSY7_HUMAN   |
| ENSG00000177539 Q6ZSY7_HUMAN   | ENSG00000112685 EXOC2          | ENSG00000117586 TNFSF4       | ENSG00000129235 TXNL5        | ENSG00000130939 UBE4B        | ENSG00000143633 C1orf131      | ENSG00000163864 NMNAT3         | ENSG00000164414 SLC35A1        | ENSG00000166856 JUN            |
| ENSG00000166856 JUN            | ENSG00000183576 SETD3          | ENSG00000196677 C8orf77      | ENSG00000198060 MARCH5       | ENSG00000079393 DUSP13       | ENSG00000124159 MATN4         | ENSG00000125970 RALY           | ENSG00000130303 BST2           | ENSG00000010282 HHATL          |
| AGCGGGT                        | ENSG00000010282 HHATL          | ENSG00000049239 H6PD         | ENSG00000077984 CST7         | ENSG00000159184 HOXB13       | ENSG00000167778 SPRYD3        | ENSG00000177238 TRIM72         | ENSG00000186322 Q8N824_HUMAN   | ENSG00000137474 TMPS13         |
| ENSG00000137474 TMPS13         | ENSG00000138136 LBX1           | ENSG00000141349 G6PC3        | ENSG00000197079 KRT35        | ENSG00000204058 C10orf41     | ENSG00000207075 PRKC          | ENSG00000044574 HSPA5          | ENSG00000107077 JMD2C          | ENSG00000188511 C22orf34       |
| ENSG00000188511 C22orf34       | ENSG00000196859 KRT39          | ENSG00000114529 C3orf52      | ENSG00000140181 HERC2P2      | ENSG00000146872 TLK2         | ENSG00000151746 BTCD1         | ENSG00000152661 GJA1           | ENSG00000154274 C4orf19        | ENSG00000112685 EXOC2          |
| ENSG00000112685 EXOC2          | ENSG00000113649 TCERG1         | ENSG00000176635 HORMAD2      | ENSG00000182457 NR_002323.1  | ENSG00000184517 ZFP1         | ENSG00000196646 ZNF136        | ENSG00000197181 PIWIL2         | ENSG00000131148 COX4NB         | ENSG00000163788 RYK            |
| AGCGGTA                        | ENSG00000049755 DVL2           | ENSG00000022840 RNF10        | ENSG00000064547 EDG4         | ENSG00000100401 RANGAP1      | ENSG00000105507 CABP5         | ENSG00000124302 CHST8          | ENSG00000131148 COX4NB         | ENSG00000049755 DVL2           |
| ENSG00000049755 DVL2           | ENSG00000143547 Q5VUQ9_HUMAN   | ENSG00000145936 KCNMB1       | ENSG00000158008 EXTL1        | ENSG00000160818 GPATCH4      | ENSG00000164867 NOS3          | ENSG00000172782 FADS6          | ENSG00000180822 Q8N950_HUMAN   | ENSG00000139438 C12orf34       |
| ENSG00000139438 C12orf34       | ENSG00000196576 PLXNB2         | ENSG00000204494 Q68CW3_HUMAN | ENSG00000115661 MAP4K3       | ENSG00000092203 TOX4         | ENSG00000102317 RBM3          | ENSG00000103769 RAB11A         | ENSG00000105887 MTNP           | ENSG00000180914 OXRTR          |
| ENSG00000180914 OXRTR          | ENSG00000118762 PKD2           | ENSG00000119537 FVT1         | ENSG00000119866 BCL11A       | ENSG00000132670 PTPRA        | ENSG00000134202 GSTM3         | ENSG00000135070 ISCA1          | ENSG00000145623 OSMR           | ENSG00000107295 SH3GL2         |
| ENSG00000107295 SH3GL2         | ENSG00000146467.1              | ENSG00000152518 ZFP36L2      | ENSG00000153574 RPIA         | ENSG00000158966 CACHD1       | ENSG00000163389 KTELC1        | ENSG00000163605 PPP4R2         | ENSG00000166197 NOLC1          | ENSG00000148828 NP_001074467.1 |
| ENSG00000148828 NP_001074467.1 | ENSG00000171723 GPHN           | ENSG00000172969 LOC285299    | ENSG00000177707 PVRL3        | ENSG00000183542 KLRC4        | ENSG00000198963 RORB          | ENSG00000204171 Q6STG2_HUMAN   | ENSG00000205097 NP_001005217.1 | ENSG00000164190 NTPBL          |
| AGCGTAT                        | ENSG00000033011 ALG1           | ENSG00000064545 TMEM161A     | ENSG00000081760 AACS         | ENSG00000101222 C20orf28     | ENSG00000125734 NM_001080452. |                                |                                |                                |



ENSG00000156127|BATF ENSG00000158864|NDUFS2 ENSG00000166667|NP\_001026789.1 ENSG00000169976|SF3B5 ENSG00000178928|TPRX1 ENSG00000182953|NM\_001031.4 ENSG00000183963|SMTN ENSG00000186431|FCAR  
ENSG00000203814|HIST2H2BF ENSG00000205238|NP\_001026789.1 ENSG00000205648|Q6ZR54\_HUMAN ENSG00000088053|GP6 ENSG00000100883|SRP54 ENSG00000105136|ZNF419 ENSG00000106004|HOXA5 ENSG00000108231|LGI1  
ENSG00000111581|NUP107 ENSG00000130349|C6orf203 ENSG00000133107|TRPC4 ENSG00000134545|KLRC1 ENSG00000139618|BRCA2 ENSG00000141424|SLC39A6 ENSG00000147044|CASK ENSG00000153363|Clorf97  
ENSG00000159200|DSCR1 ENSG00000163710|PCOLCE2 ENSG00000168672|FAM84B ENSG00000171408|PDE7B ENSG00000173917|HOXB2 ENSG00000183230|CTNNA3 ENSG00000184905|TCEAL2 ENSG00000187267|NP\_001017417.1  
ENSG00000197111|PCBP2 ENSG00000198176|TFDP1 ENSG00000198584|ZNF506 ENSG00000203946|NP\_001017438.1 ENSG00000205110|Q6TKS8\_HUMAN  
ENSG00000032389|TSSC1 ENSG00000048707|VPS13D ENSG00000049541|RFCC2 ENSG00000088812|ATRN ENSG00000100068|LRP5L ENSG00000102466|FGF14 ENSG00000103064|SLC7A6 ENSG00000115268|RPS15  
ENSG00000117448|AKR1A1 ENSG00000125514|C2orf51 ENSG00000137834|SMAD6 ENSG00000147155|EBP ENSG00000157379|DHRS1 ENSG00000160862|AZGP1 ENSG00000164010|ERMAP ENSG00000164151|Q6ZT40\_HUMAN  
ENSG00000176302|FOXR1 ENSG00000177663|IL17RA ENSG00000180697|C3orf22 ENSG00000187144|SPATA21 ENSG00000196220|SRGAP3 ENSG00000197273|GUAZA2 ENSG00000205744|DENND1C ENSG00000206053|HN1L  
ENSG00000030066|NUP160 ENSG00000075651|PLD1 ENSG00000078140|HIP2 ENSG00000101745|ANKRD12 ENSG00000107560|RAB11FIP2 ENSG00000111802|TTTRAP ENSG00000115875|SFRS7 ENSG00000119471|HSDL2  
ENSG00000120256|LRP11 ENSG00000124749|COL21A1 ENSG00000128609|NDUFA5 ENSG00000134200|TSHB ENSG00000136478|TEX2 ENSG00000136522|MRPL47 ENSG00000139151|PLCZ1 ENSG00000143995|MEIS1  
ENSG00000145741|BTFF3 ENSG00000147408|CGAT1\_HUMAN ENSG00000151725|MLF1IP ENSG00000161594|KLHL10 ENSG00000164548|TRA2A\_HUMAN ENSG00000173915|USMG5 ENSG00000181690|PLAG1 ENSG00000188313|PLSCR1  
ENSG00000203956|FAM45B ENSG00000204220|PFDN6 ENSG00000205413|SAMD9  
ENSG00000068394|GPKOW ENSG00000095713|CRTAC1 ENSG00000103647|CORO2B ENSG00000104386|XR\_017860.1 ENSG00000105383|CD33 ENSG00000107185|KIAA0258 ENSG00000111877|MCM9 ENSG00000123136|DDX39  
ENSG00000123364|HOXC13 ENSG00000128918|ALDH1A2 ENSG00000135926|TMBIM1 ENSG00000153666|XR\_017721.1 ENSG00000165828|PRAP1 ENSG00000173826|KCNH6 ENSG00000178081|LOC653075 ENSG00000178952|TUFM  
ENSG00000179914|ITLN1 ENSG00000185650|ZFP36L1 ENSG00000188532|LOC653125 ENSG00000188626|LOC653720 ENSG00000197173|NP\_001013689.1 ENSG00000198610|AKR1C4 ENSG00000205770|Q8N847\_HUMAN ENSG00000071794|HLTF  
ENSG00000079385|CEACAM1 ENSG00000085832|EPS15 ENSG00000092345|DAZL ENSG00000100483|C14orf138 ENSG00000104427|C8orf70 ENSG00000128617|OPN1SW ENSG00000133665|DYDC2 ENSG00000134480|CCNH  
ENSG00000135903|PAX3 ENSG00000141325|CCDC45 ENSG00000144840|RABL3 ENSG00000151239|TWF1 ENSG00000159658|KIAA0494 ENSG00000164338|UTP15 ENSG00000164485|IL22RA2 ENSG00000168004|HRASL5  
ENSG00000174136|RGM8 ENSG00000177694|NAALADL2 ENSG00000189108|IL1RAPL2 ENSG00000198908|BHLHB9 ENSG00000205524|Q6B870\_HUMAN  
ENSG00000010282|HHATL ENSG00000053108|FSTL1 ENSG00000063180|CA11 ENSG00000067082|KLF6 ENSG00000081277|PKP1 ENSG00000100014|SPECC1L ENSG00000100918|REC8 ENSG00000105287|PRKD2  
ENSG00000116667|C1orf21 ENSG00000129543|FLJ16369 ENSG00000131355|EMR3 ENSG00000141622|C18orf23 ENSG00000143891|GALM ENSG00000149547|EI24 ENSG00000149925|ALDOA ENSG00000155367|PPM1J  
ENSG00000159388|BTG2 ENSG00000166189|HPS6 ENSG00000166979|C21orf63 ENSG00000170983|C8orf14 ENSG00000173011|Q86TJ2\_HUMAN ENSG00000173546|CSPG4 ENSG00000176092|ATM1L ENSG00000182196|ARL6IP4  
ENSG00000182240|BACE2 ENSG00000184935|Q6AI01\_HUMAN ENSG00000188589|RBM33 ENSG00000189129|PLAC9 ENSG00000196365|LONP1 ENSG00000197322|NP\_997337.1 ENSG00000050730|TNIP3 ENSG00000071575|TRIB2  
ENSG00000090104|RGS1 ENSG00000092140|KIAA1333 ENSG00000101574|METTL4 ENSG00000102218|RP2 ENSG00000102524|TNFSF13B ENSG00000109332|UBE2D3 ENSG00000113013|HSPA9 ENSG00000113597|NP\_079217.1  
ENSG00000115009|CCL20 ENSG00000121388|Q9H521\_HUMAN ENSG00000128915|NARG2 ENSG00000134533|RERG ENSG00000135413|LACRT ENSG00000135974|C2orf49 ENSG00000138650|PCDH10 ENSG00000143753|DEGS1  
ENSG00000144320|KIAA1715 ENSG00000145692|BHMT ENSG00000149345|U2D3L\_HUMAN ENSG00000151304|SRFBP1 ENSG00000152944|SURB7 ENSG00000161634|DCD ENSG00000162992|NEUROD1 ENSG00000163738|MTHFD2L  
ENSG00000164684|ZNF704 ENSG00000165862|PNLIPRP2 ENSG00000169714|CNBP ENSG00000171988|JMJD1C ENSG00000174298|NP\_694572.1 ENSG00000175305|CCNE2 ENSG00000176055|NP\_981951.1 ENSG00000176635|HORMAD2  
ENSG00000177694|NAALADL2 ENSG00000178750|STX19 ENSG00000180251|SLC9A4 ENSG00000185129|PURA ENSG00000186522|SEPT10  
ENSG00000019169|MARCO ENSG00000042445|RETSAT ENSG00000074410|CA12 ENSG00000074582|BCS1L ENSG00000089723|OTUB2 ENSG00000105991|HOXA1 ENSG00000122966|CIT ENSG00000124762|CDKN1A  
ENSG00000126594|DNASE1 ENSG00000135439|CENTG1 ENSG00000138670|RASGEF1B ENSG00000141086|CTRL ENSG00000144648|CCBP2 ENSG00000147113|CXorf36 ENSG00000147912|FBXO10 ENSG00000148606|POLR3A  
ENSG00000157110|RPBMS ENSG00000164062|APEH ENSG00000171853|TTC15 ENSG00000178977|C17orf44 ENSG00000181585|BMPE ENSG00000183682|BMP8A ENSG00000184716|SERINC4 ENSG00000186197|ENO1P  
ENSG00000189325|NP\_001010903.2 ENSG00000198854|Clorf68 ENSG000000204633|ACTN3 ENSG00000000005|TNMD ENSG00000112175|BMP5 ENSG00000122786|CALD1 ENSG00000123066|THRAP2 ENSG00000129007|CALML4  
ENSG00000136111|TBC1D4 ENSG00000138468|SENP7 ENSG00000147526|INCC1 ENSG00000152611|CAPSL ENSG00000160633|SAFB ENSG00000165983|PTER ENSG00000172201|ID4 ENSG00000172348|DSCR1L1  
ENSG00000176641|RNF152 ENSG00000185918|DEFA7 ENSG00000203933|NP\_001013421.1 ENSG00000204398|Q57400\_HUMAN ENSG00000204904|CXorf31 ENSG00000206047|DEFT1P  
ENSG00000005486|NM\_001040457.1 ENSG00000068001|HYAL2 ENSG00000078898|BP1L1 ENSG00000089505|CMTM1 ENSG00000101096|NFATC2 ENSG00000104899|AMH ENSG00000112041|TULP1 ENSG00000112320|SOBP  
ENSG00000121274|PAPD5 ENSG00000123643|SLC36A1 ENSG00000145494|NDUFS6 ENSG00000157782|CABP1 ENSG00000158195|WASF2 ENSG00000160447|PKN3 ENSG00000163975|MFI2 ENSG00000166869|CHP2 ENSG00000166869|CHP2  
ENSG00000167513|CDT1 ENSG00000170549|IRX1 ENSG00000176472|ZNF575 ENSG00000178235|SLITRK1 ENSG00000178248|Q8N402\_HUMAN ENSG00000183528|QOVAF8\_HUMAN ENSG00000184004|Q6ICL0\_HUMAN ENSG00000204771|Q8ND95\_HUMAN  
ENSG00000206031|Q6ZT66\_HUMAN ENSG000000011638|TMM159 ENSG000000037749|MFAP3 ENSG00000114450|GNB4 ENSG00000125868|DSTN ENSG00000126216|TUBGCP3 ENSG00000134873|CLDN10 ENSG00000139842|CUL4A  
ENSG00000140945|CDH13 ENSG00000147316|MCPH1 ENSG00000150403|TMCO3 ENSG00000151150|ANK3 ENSG00000154710|KCTD7 ENSG00000163002|NUP35 ENSG00000164305|CASP3 ENSG00000171056|SOX7  
ENSG00000173926|MARCB3 ENSG00000186684|NP\_001001665.2 ENSG00000196459|SEDP ENSG00000196677|C8orf77  
ENSG00000009954|BAZ1B ENSG00000089159|PXN ENSG00000090432|C1orf166 ENSG00000099821|POLRMT ENSG00000102385|DRP2 ENSG00000114853|ZBTB47 ENSG00000122515|ZMI22 ENSG00000123143|PKN1  
ENSG00000123342|MMP19 ENSG00000126353|CCR7 ENSG00000129187|DCTD ENSG00000130309|GLT25D1 ENSG00000130803|ZNF317 ENSG00000158711|ELK4 ENSG00000162408|NOL9 ENSG00000163961|RNF168  
ENSG00000165526|RPUSD4 ENSG00000166900|STX3 ENSG00000169921|Q75L30\_HUMAN ENSG00000177764|ZCCHC3 ENSG00000185130|HIST1H2L ENSG00000189091|SF3B3 ENSG00000198668|CALM1 ENSG00000204005|Q6ZP22\_HUMAN  
ENSG00000204312|Q6ZNY8\_HUMAN ENSG00000205726|ITSN1 ENSG000000014919|COX15 ENSG00000078596|ITM2A ENSG000000091831|ESR1 ENSG00000105851|PIK3CG ENSG00000119471|HSDL2 ENSG00000125107|CNOT1  
ENSG00000131747|P11388-2 ENSG00000141452|C18orf8 ENSG00000148730|EIF4BEP2 ENSG00000152760|TCTEX1D1 ENSG00000158042|MRPL17 ENSG00000164023|SGMS2 ENSG00000164933|SLC25A32 ENSG00000166012|SNORA25  
ENSG00000170113|NIPA1 ENSG00000174899|Q8N6Q6\_HUMAN ENSG00000176714|CCDC121 ENSG00000180228|PRKRA ENSG00000180408|Q8N5G0\_HUMAN ENSG00000196877|NP\_001018132.2 ENSG00000198156|NP\_001018132.2 ENSG00000198331|HYLS1  
ENSG00000205612|Q71JB2\_HUMAN ENSG00000206367|Q6ZR26\_HUMAN  
ENSG00000062582|MRPS24 ENSG00000107872|FBXL15 ENSG00000108516|TNFRSF13B ENSG00000129654|FOXJ1 ENSG00000129925|TMEM8 ENSG00000139722|VPS37B ENSG00000143515|ATP8B2 ENSG00000144580|RQCD1  
ENSG00000158769|F11R ENSG00000163686|ABHD6 ENSG00000173812|EIF1 ENSG00000180471|C9orf31 ENSG00000185963|BICD2 ENSG00000186174|BCL9L ENSG00000154751|BID ENSG00000154751|MYOC  
ENSG00000054938|CHRDL2 ENSG00000065328|MCM10 ENSG00000112761|WISP3 ENSG00000113580|NR3C1 ENSG00000118181|RPS25 ENSG00000118363|SPCS2 ENSG00000123240|OPTN ENSG00000134954|ETS1  
ENSG00000135318|NT5E ENSG00000135643|KCNMB4 ENSG00000143952|VPS54 ENSG00000152409|NP\_689618.2 ENSG00000163605|PPP4R2 ENSG00000163636|PSMD6 ENSG00000168772|CXXC4 ENSG00000170035|UBE2E4P  
ENSG00000178573|MAF ENSG00000178695|KCTD12 ENSG00000180354|C7orf41 ENSG00000196776|CD47 ENSG00000196785|Q8N862\_HUMAN  
ENSG00000008710|PKD1 ENSG00000019144|PHLDB1 ENSG00000072062|PRKACA ENSG00000072195|SPEG ENSG00000099957|P2RX1L1 ENSG00000100605|ITPK1 ENSG00000107742|SPOCK2 ENSG00000115266|APC2  
ENSG00000125826|RECK1 ENSG00000130167|TSPAN16 ENSG00000131055|SOX4I2 ENSG00000136026|CKAP4 ENSG00000141564|RPTOR\_HUMAN ENSG00000142549|LOC402665 ENSG00000162949|CAPN13 ENSG00000165507|C10orf10  
ENSG00000168490|PHYHIP ENSG00000168878|SFTPB ENSG00000169247|H3TCT2 ENSG00000173327|MAP3K11 ENSG00000198756|GLT25D2 ENSG00000205972|Q8NBC0\_HUMAN ENSG00000054392|HHAT ENSG00000077514|POLD3  
ENSG00000101126|ADNP ENSG00000106829|TLE4 ENSG00000112210|RAB23 ENSG00000120251|GRIA2 ENSG00000123104|ITPR2 ENSG00000130396|MLLT4 ENSG00000135476|ESPL1 ENSG00000137942|FNBP1L  
ENSG00000144224|UBXD2 ENSG00000146839|ZAN ENSG00000151726|ACSL1 ENSG00000158691|ZSCAN12 ENSG00000159208|C1orf51 ENSG00000165409|TSHR ENSG00000170017|ALCAM ENSG00000173890|GPR160  
ENSG00000175879|HOXD8 ENSG00000181924|CHCHD8 ENSG00000183783|KCTD8 ENSG00000185742|NP\_997528.1  
ENSG00000103365|GGA2 ENSG00000104888|SLC17A7 ENSG000001122367|LDB3 ENSG00000128652|HOXD3 ENSG00000129473|BCL2L2 ENSG00000140488|BRUNOL6 ENSG00000143575|HAX1 ENSG00000158161|EYA3  
ENSG00000159842|ABR ENSG00000163331|NP\_001017920.1 ENSG00000163914|RHO ENSG00000166351|ANKRD21 ENSG00000174374|WBSCR16 ENSG00000186174|BTRM72 ENSG00000183206|POT15\_HUMAN ENSG00000183403|DND1  
ENSG00000197322|NP\_997337.1 ENSG00000062650|WAPAL ENSG00000069966|GNB5 ENSG00000112367|KIAA0274 ENSG00000113593|PPWD1 ENSG00000119866|BCL11A ENSG00000120885|CLU ENSG00000121579|NAT13  
ENSG00000122550|KLHL7 ENSG00000129474|JUB ENSG00000133328|HRASL2 ENSG00000136897|MRPL50 ENSG00000163125|KIAA0460 ENSG00000169551|CXorf48 ENSG00000170540|ARL6IP1 ENSG00000172915|NBEA  
ENSG00000173930|SLC04C1 ENSG00000181819|Q5JSM7\_HUMAN ENSG00000188996|HUS1 ENSG00000197702|PARVA ENSG00000198988|CAP2A2  
ENSG00000075826|SEC31B ENSG00000105953|OGDH ENSG00000108829|LRRC59 ENSG00000112782|CLIC5 ENSG00000123136|DDX39 ENSG00000160213|CSTB ENSG00000169758|C15orf27 ENSG00000171105|INSR  
ENSG00000179044|EXOC3L ENSG00000179913|MAF1 ENSG00000179913|B3GNT3 ENSG00000183856|IQGAP3 ENSG00000184502|GAST ENSG00000187686|XR\_016979.1 ENSG00000203785|SPRR2E ENSG00000204161|C10orf128  
ENSG00000204394|VARS ENSG00000205037|Q6ZT72\_HUMAN ENSG00000205778|Q6ZMM7\_HUMAN ENSG0000039123|SKIV2L2 ENSG00000097033|SH3GLB1 ENSG00000101353|Q9H579-2 ENSG00000115239|ASB3 ENSG00000116016|EPAS1  
ENSG00000116704|SLC35D1 ENSG00000124795|DEK ENSG00000124827|GCM2 ENSG00000136379|FAM108C1 ENSG00000137601|NEK1 ENSG00000137714|FDX1 ENSG00000142188|TMEM50B ENSG00000154479|Q6PJP6\_HUMAN  
ENSG00000154511|FAM69A ENSG00000162992|NEUROD1 ENSG00000169129|AFAP1L2 ENSG00000172954|LYCAT ENSG00000188848|CCDC4 ENSG00000197062|PTP187 ENSG00000197312|RSC1A1 ENSG00000198894|KIAA1737  
ENSG00000204334|ALL162\_HUMAN ENSG00000204604|ZNF468  
ENSG0000013619|CXorf6 ENSG00000054967|TNFRSF19L ENSG00000100403|ZC3H7B ENSG00000101150|TPD52L2 ENSG00000101246|ARFRP1 ENSG00000110395|CBL ENSG00000111252|SH2B3 ENSG00000114982|NP\_060461.3  
ENSG00000116237|ICMT ENSG00000124785|NRN1 ENSG00000126602|TRAP1 ENSG00000132321|IQCA ENSG00000132793|LPIN3 ENSG00000134780|DAGLA ENSG00000140505|CY1A2 ENSG00000158109|FAM79A  
ENSG00000159199|ATP5G1 ENSG00000162444|RBP7 ENSG00000166104|NP\_776166.1 ENSG00000166619|BLCAP ENSG00000170876|TMEM43 ENSG00000180357|ZNF609 ENSG00000180861|C12orf36 ENSG00000186326|RGS9BP  
ENSG00000204425|Q6ZP74\_HUMAN ENSG00000206053|HN1L ENSG00000057019|DCLBL2 ENSG00000081842|PCDH410 ENSG00000104765|BNIP3L ENSG00000113163|COL4A3BP ENSG00000113300|CNOT6  
ENSG00000115289|PCGF1 ENSG00000115414|FN1 ENSG00000120289|MAGEB4 ENSG00000135324|C6orf117 ENSG00000136518|ACTL6A ENSG00000136982|NP\_076999.1 ENSG00000143622|RIT1 ENSG00000143674|M3KL4\_HUMAN  
ENSG00000150093|ITGB1 ENSG00000152556|PFKM ENSG00000156875|H1AT1 ENSG00000163110|PDLIM5 ENSG00000163281|GNPDA2 ENSG00000163607|GTFP8 ENSG00000170509|HSD17B13 ENSG00000172071|EIF2AK3  
ENSG00000172164|SNTB1 ENSG00000174442|ZWILCH ENSG00000180667|YOD1 ENSG00000186481|NP\_001025170.1 ENSG00000196482|ESRRG ENSG00000203681|XR\_017762.1 ENSG00000204147|ASAH2B ENSG00000204628|GNB2L1  
ENSG00000205036|NP\_001001682.1  
perfect: AGCTTTA TAAAGCT hsa-miR-9\* TAAAGCTagataaccgaaagt 0  
AGCTTTG ENSG0000005073|HOXA11 ENSG00000075702|WDR62 ENSG00000100034|PPM1F ENSG00000102057|KCND1 ENSG00000125520|SLC2A4RG ENSG00000128973|CLN6 ENSG00000135898|GPR55 ENSG00000144560|VGLL4  
ENSG00000146535|GNA12 ENSG00000149716|ORAOV1 ENSG00000160712|IL6R ENSG00000163251|PZD5 ENSG00000163915|C3orf65 ENSG00000167523|C16orf55 ENSG00000169717|ACTRT2 ENSG00000171873|ADRA1D  
ENSG00000175213|ZNF408 ENSG00000175826|DULLARD ENSG00000181026|ISG20L1 ENSG00000184334|Q71RG6\_HUMAN ENSG00000184334|PRC1 ENSG00000198901|PRC1 ENSG00000206053|HN1L ENSG00000065457|ADAT1  
ENSG00000092470|WDR7L ENSG00000095587|TLL2 ENSG00000108021|C10orf18 ENSG00000109083|IFT20 ENSG00000112242|E2F3 ENSG00000116062|MSH6 ENSG00000116991|SIPAL12 ENSG00000133872|TMEM66  
ENSG00000135828|RNASEL ENSG00000147400|CETN2 ENSG00000149443|C2orf78 ENSG00000154556|SORBS2 ENSG00000156011|PDS3 ENSG00000161970|RPL26 ENSG00000170802|FOXN2 ENSG00000172164|SNTB1  
ENSG00000173705|SUSD5 ENSG00000174099|MSRB3 ENSG00000175857|C5orf29 ENSG00000176834|NP\_061959.2 ENSG00000183475|ASB7 ENSG00000187098|MITF ENSG00000188519|Q7Z4Q0\_HUMAN ENSG00000189367|C6orf174  
ENSG00000197501|Q9H3B5\_HUMAN  
AGGAATA ENSG00000007341|ST7L ENSG00000079974|RABL2B ENSG00000101470|TNNC2 ENSG00000110719|TCIRG1 ENSG00000112062|MAPK14 ENSG00000115602|IL1RL1 ENSG00000121152|NCAFH ENSG00000124920|C11orf9  
ENSG00000130429|ARPC1B ENSG00000143450|QAZ3 ENSG00000155846|PPARGC1B ENSG00000162889|MAPKAPK2 ENSG00000165025|SYK ENSG00000167749|KLK4 ENSG00000169169|CPT1C ENSG00000169696|ASPSR1  
ENSG00000173402|DAG1 ENSG00000177337|NP\_001034885.1 ENSG00000180758|GPR157 ENSG00000184560|C17orf74 ENSG00000185681|C9orf18 ENSG00000187516|CXorf27 ENSG00000205792|A4D193\_HUMAN ENSG00000218261|CPS1  
ENSG00000070018|UBE1LDC1 ENSG00000081307|UBE1LDC1 ENSG00000087074|PPP1R15A ENSG00000105967|TFEC ENSG00000112242|E2F3 ENSG00000116132|PRRX1 ENSG00000119139|TJP2 ENSG00000123297|TSMF  
ENSG00000125931|C1TED1 ENSG00000134121|CHL1 ENSG00000145907|G3BP1 ENSG00000146856|AGBL3 ENSG00000151693|DDEF2 ENSG00000155959|VBP1 ENSG00000163518|FCRL4 ENSG00000163682|RPL9  
ENSG00000165169|DYNLT3 ENSG00000176244|ACBD7 ENSG00000181065|Q9P161\_HUMAN ENSG00000182518|FAM104B ENSG00000188342|GTF2F2 ENSG00000196459|SEDP ENSG00000198146|ZNF770  
AGGAATT ENSG0000005513|SOX8 ENSG00000043591|ADRB1 ENSG00000088832|FKBP1A ENSG00000108439|NPPO ENSG00000126003|PLAGL2 ENSG00000134014|ELP3 ENSG00000140992|PDEPK1 ENSG000001448

ENSG00000161958|FGF11 ENSG00000163348|PYGO2 ENSG00000165644|COMTD1 ENSG00000180861|C12orf36 ENSG00000187170|LCE4A ENSG00000196132|MYT1\_HUMAN ENSG00000198225|Q5VVH2\_HUMAN ENSG00000204496|LTA  
ENSG000002029363|BCLAF1 ENSG00000067560|RHOA ENSG00000086827|ZW10 ENSG00000089063|C20orf30 ENSG00000091428|RAPGEF4 ENSG00000091972|CD200 ENSG00000105880|DLX5 ENSG00000106278|PTPRZ1  
ENSG00000111911|HINT3 ENSG00000115170|ACVR1 ENSG00000116141|MARK1 ENSG00000117625|RCOR3 ENSG00000122884|P4HA1 ENSG00000123091|RNF11 ENSG00000124535|WRNIP1 ENSG00000144481|TRPM8  
ENSG00000153187|HNRPU ENSG00000158473|CD1D ENSG00000159086|C21orf66 ENSG00000160131|NP\_001017980.1 ENSG00000164035|EMCN ENSG00000168813|ZNF507 ENSG00000169398|PTK2 ENSG00000170584|NUDCD2  
ENSG00000177483|NP\_001073973.1 ENSG00000181819|Q5JSM7\_HUMAN ENSG00000204669|C9orf57  
AGGACAA ENSG00000008516|MMP2 ENSG00000027847|B4GALT7 ENSG00000033327|GAB2 ENSG00000068354|TBC1D25 ENSG00000076356|PLXNA2 ENSG00000086848|ALG9 ENSG00000088727|KIF9 ENSG00000095397|DFNB31  
ENSG00000103852|TTC23 ENSG00000108264|TADA2L ENSG00000119547|ONECUT2 ENSG00000138083|SIX3 ENSG00000149646|C20orf152 ENSG00000154096|THY1 ENSG00000157483|MYO1E ENSG00000159884|CCDC107  
ENSG00000161929|NP\_996986.1 ENSG00000162105|SHANK2 ENSG00000168612|ZSWIM1 ENSG00000174502|SLC26A9 ENSG00000181215|NP\_997288.1 ENSG00000185739|SRL ENSG00000187095|LILRA2 ENSG00000196814|FAM125B  
ENSG00000204277|Q6ZR66\_HUMAN ENSG00000204483|Q8N925\_HUMAN ENSG00000002746|HECW1 ENSG00000007168|PAFAH1B1 ENSG00000056972|TRAF3IP2 ENSG00000072364|AFF4 ENSG00000081307|UBE1DC1 ENSG00000099256|PRTFDC1  
ENSG00000106028|SSBP1 ENSG00000151461|UPF2 ENSG00000164265|SCGB3A2 ENSG00000165474|GJB2 ENSG00000168852|SUGT1L1 ENSG00000172575|RASGRP1 ENSG00000177453|NIM1\_HUMAN ENSG00000179813|C13orf30  
ENSG00000179933|C14orf119 ENSG00000183542|KLRC4 ENSG00000185849|Q9P194\_HUMAN ENSG00000187079|TEAD1 ENSG00000198417|MT1F ENSG00000203964|Q8NG36\_HUMAN ENSG00000204829|CBWD7 ENSG00000205072|Q6ZR34\_HUMAN  
AGGACTG ENSG00000012232|EXTL3 ENSG00000061273|HDAC7A ENSG00000066322|ELOVL1 ENSG00000106635|BCL7B ENSG00000108604|SMARCD2 ENSG00000110074|FOXRED1 ENSG00000117411|B4GALT2 ENSG00000126878|C9orf58  
ENSG00000130748|TMEM160 ENSG00000133874|RNF122 ENSG00000137221|TJAP1 ENSG00000142515|KLK3 ENSG00000143147|GPR161 ENSG00000153885|KCTD15 ENSG00000154358|OBSCN ENSG00000157020|SEC13  
ENSG00000157353|FUK ENSG00000160570|DEDD2 ENSG00000170100|Q9GMU6-2 ENSG00000175826|DULLARD ENSG00000176130|P2RY11 ENSG00000179057|IGSF22 ENSG00000185960|SHOX ENSG00000186431|FCAR  
ENSG00000197131|Q8IW43\_HUMAN ENSG00000205136|Q3KRG0\_HUMAN ENSG00000205214|Q6ZU66\_HUMAN ENSG0000014044|IDS ENSG0000011114|BTBD7 ENSG00000069666|GNB5 ENSG00000108094|CUL2 ENSG00000108839|ALOX12  
ENSG00000113456|RAD1 ENSG00000122034|GTF3A ENSG00000124491|F13A1 ENSG00000128294|TPST2 ENSG00000134897|BIVM ENSG00000136881|BAAT ENSG00000145337|PIGY ENSG00000148426|C10orf47  
ENSG00000152413|HOMER1 ENSG00000155827|RNF20 ENSG00000156011|PDS3 ENSG00000162699|Q9BRF1\_HUMAN ENSG00000163406|SLC15A2 ENSG00000164294|NP\_001008398.1 ENSG00000173209|AHS2 ENSG00000173559|OBFC2A  
ENSG00000179979|CRIPAK ENSG00000188725|NP\_001041714.1 ENSG00000196754|S100A2 ENSG00000198276|UCKL1 ENSG00000198646|NCOA6  
AGGACTT ENSG00000075702|WDR62 ENSG00000078246|TULP3 ENSG00000108528|SLC25A11 ENSG00000113194|UBXD8 ENSG00000117640|FAM54B ENSG00000128591|FLNC ENSG00000143322|ABL2 ENSG00000143365|RORC  
ENSG00000143878|RHOB ENSG00000158109|FAM79A ENSG00000160285|LSS ENSG00000161638|ITGA5 ENSG00000163481|RNF25 ENSG00000163485|ADORA1 ENSG00000170458|CD14 ENSG00000171475|WIPF2  
ENSG00000177875|NP\_001013657.2 ENSG00000188778|ADRB3 ENSG00000204141|Q6ZVW5\_HUMAN ENSG00000204850|NP\_001013695.1 ENSG00000204850|PROM1 ENSG00000054267|AR1D4B ENSG00000072319|ALG13 ENSG00000081923|ATP8B1  
ENSG00000089916|C14orf118 ENSG00000102974|CTCF ENSG00000106261|ZKSCAN1 ENSG00000107099|DOCK8 ENSG00000113593|PPWD1 ENSG00000120675|DNAJ15 ENSG00000124214|STAU1 ENSG00000124789|NUP153  
ENSG00000128050|PAICS ENSG00000134532|SOX5 ENSG00000147471|PROSC ENSG00000155629|PIK3AP1 ENSG00000162434|JAK1 ENSG00000164117|FBXO8 ENSG00000164828|UNC84A ENSG00000165525|SDCCAG1  
ENSG00000172175|MALTI1 ENSG00000180616|SSTR2 ENSG00000183675|PTPN20B ENSG00000184083|FAM120C ENSG00000185915|KLLH34 ENSG00000186487|MYT1L ENSG00000198492|YTHDF2 ENSG00000204179|PTPN20A  
ENSG00000206029|QOP633\_HUMAN  
AGGAGCG ENSG00000070031|SCT ENSG00000085741|WNT11 ENSG00000100106|TRIOBP ENSG00000105072|C19orf44 ENSG00000107147|KCNT1 ENSG00000125735|TNFSF14 ENSG00000127526|SLC35E1 ENSG00000130222|GADD45G  
ENSG00000130313|PGLS ENSG00000130700|GATA5 ENSG00000132740|IGHMBP2 ENSG00000140955|NP\_631913.2 ENSG00000145016|Q9CKK5\_HUMAN ENSG00000159184|HOXB13 ENSG00000165695|C9orf98 ENSG00000166104|NP\_776166.1  
ENSG00000168904|LRRC28 ENSG00000169093|ASMTL ENSG00000170955|PKRDBP ENSG00000174370|C11orf45 ENSG00000178226|PRSS36 ENSG00000179058|C9orf50 ENSG00000185332|TMEM105 ENSG00000186815|TPCN1  
ENSG00000188783|PRELP ENSG00000196408|NOXO1 ENSG00000196431|CRYBA4 ENSG00000206025|VIM ENSG00000082996|RNF13 ENSG00000082996|RNF13 ENSG000001103534|TMC5 ENSG00000111445|RFC5  
ENSG00000117862|TXNDC12 ENSG00000122034|GTF3A ENSG00000128272|ATF4 ENSG00000129596|CDO1 ENSG00000145781|COMMD10 ENSG00000146373|IBRD1 ENSG00000147485|PXN1 ENSG00000147679|C8orf53  
ENSG00000148677|ANKRD1 ENSG00000152942|RAD17 ENSG00000152952|PLOC2 ENSG00000162746|FCRLB ENSG00000164035|EMCN ENSG00000168348|INSM2 ENSG00000169762|TAPT1 ENSG00000176974|SHMT1  
ENSG00000188085|NP\_997320.1 ENSG00000196214|ZNF766 ENSG00000198741|Q8N9C2\_HUMAN ENSG00000205740|Q6ZVQ2\_HUMAN  
AGGAGGA ENSG00000006059|KRT33A ENSG00000075790|BCAP2B ENSG00000091536|MYO15A ENSG00000101335|MYL9 ENSG00000102003|SYP ENSG00000105370|LIM2 ENSG00000108592|FTSJ3 ENSG00000110324|IL10RA  
ENSG00000112041|TULP1 ENSG00000117640|FAM54B ENSG00000125975|C20orf173 ENSG00000128268|MGAT3 ENSG00000131095|FGF20 ENSG00000132142|ACACA ENSG00000134291|TMEM106C ENSG00000135973|GPR45  
ENSG00000139515|PDX1 ENSG00000140798|ABCC12 ENSG00000143620|EFNA4 ENSG00000143630|HCN3 ENSG00000144647|C3orf39 ENSG00000147789|ZNF7 ENSG00000158955|WNT9B ENSG00000171570|EGLN2  
ENSG00000172297|Q96RM8\_HUMAN ENSG00000172332|GOLGA2LY1 ENSG00000180385|Q8NAP4\_HUMAN ENSG00000181918|Q8N9J9\_HUMAN ENSG00000182857|Q6P168\_HUMAN ENSG00000183196|CHST6 ENSG00000183615|C1orf90 ENSG00000186897|C1QL4  
ENSG00000188549|NP\_997263.1 ENSG00000198125|MB ENSG00000198711|C1orf191 ENSG00000203923|SPANXN1 ENSG00000204048|Q6ZUG3\_HUMAN ENSG00000204308|RNF5 ENSG00000205087|NP\_001020628.1 ENSG00000205107|NP\_001001679.1  
ENSG00000205270|Q6P168\_HUMAN ENSG00000205276|Q6P168\_HUMAN ENSG00000205852|Q6ZWI3\_HUMAN ENSG000002070831|CDC42 ENSG000002079385|CEACAM1 ENSG00000106605|BLVRA ENSG00000107249|GLIS3 ENSG00000111962|UST  
ENSG00000117281|CD160 ENSG00000119866|BCL11A ENSG00000121542|SEC22A ENSG00000129566|TEP1 ENSG00000131482|G6PC ENSG00000136206|WBSCRM1 ENSG00000140391|TSPAN3 ENSG00000143384|MCL1  
ENSG00000152207|CYSLTR2 ENSG00000155621|C9orf85 ENSG00000156463|SH3RF2 ENSG00000157554|ERG ENSG00000157741|Q6ZU65\_HUMAN ENSG00000167863|ATP5H ENSG00000169714|CNBP ENSG00000170949|ZNF160  
ENSG00000172493|AFF1 ENSG00000175336|APOF ENSG00000175984|DENND2C ENSG00000181065|Q9P161\_HUMAN ENSG00000186184|POLR1D  
AGGAGTA ENSG00000067082|KLF6 ENSG00000081277|CETP ENSG00000107185|K1AA0258 ENSG00000111752|PHC1 ENSG00000112782|CLIC5 ENSG00000120029|C10orf76 ENSG00000121060|TRIM25  
ENSG00000134809|TMM10 ENSG00000141337|ARSG ENSG00000149262|INTS4 ENSG00000156486|KCN22 ENSG00000162490|C1orf187 ENSG00000167394|ZNF668 ENSG00000169900|PYDC1 ENSG00000173486|FKBP2  
ENSG00000175591|P2RY2 ENSG00000176679|TGIF2LY ENSG00000181026|ISG20L1 ENSG00000183579|ZNRF3 ENSG00000198722|UNC13B ENSG00000198951|NAGA ENSG00000204771|Q8ND95\_HUMAN ENSG00000086712|CXorf15  
ENSG00000110315|RNF141 ENSG00000119523|ALG2 ENSG00000121089|NACA3P ENSG00000123165|ACTRT1 ENSG00000130224|LRCH2 ENSG00000131795|RBM8A ENSG00000138684|IL21 ENSG00000140660|RNUDC2A  
ENSG00000151689|INPP1 ENSG00000151789|ZNF659 ENSG00000152268|SPON1 ENSG00000152527|PLEKH2 ENSG00000154059|IMPACT ENSG00000163116|NP\_777612.1 ENSG00000163444|TMEM183B ENSG00000164675|IQUB  
ENSG00000165389|C14orf147 ENSG00000171428|NAT1 ENSG00000186298|PPP1CC ENSG00000196531|NACA ENSG00000204424|LY6G6D  
AGGATAT ENSG00000057704|TMCC3 ENSG00000102385|DRP2 ENSG00000103313|MEFV ENSG00000107175|CREB3 ENSG00000122711|SPINK4 ENSG00000123329|ARHGAP9 ENSG00000136854|STXB1 ENSG00000137817|PARP6  
ENSG00000147065|MSN ENSG00000156486|KCN22 ENSG00000157617|C21orf25 ENSG00000158769|P11R ENSG00000158987|RAPGEF6 ENSG00000162415|ZSWIM5 ENSG00000163394|CCKAR ENSG00000166888|STAT6  
ENSG00000175591|P2RY2 ENSG00000177943|MAMDC4 ENSG00000180229|NP\_001019853.1 ENSG00000198700|IPO9 ENSG00000198742|SMURF1 ENSG00000204498|NFKBIL1 ENSG00000205658|Q6ZU6\_HUMAN ENSG00000081307|UBE1DC1  
ENSG00000106049|HTBADH ENSG00000106686|C9orf68 ENSG00000107864|CEPE3 ENSG00000108733|PEX12 ENSG00000113583|C5orf15 ENSG00000131951|LRRC9 ENSG00000133111|RFXAP ENSG00000134375|TMM17A  
ENSG00000139218|SFRS2IP ENSG00000140265|ZSCAN29 ENSG00000147655|RSPO2 ENSG00000155329|ZCCHC10 ENSG00000167088|SNRPD1 ENSG00000168384|HLA-DPA1 ENSG00000168938|PPIC ENSG00000173376|C4orf31  
ENSG00000173947|C1orf88 ENSG00000179941|BBS10 ENSG00000184258|CDR1 ENSG00000204250|C9orf107  
AGGATTA ENSG00000017483|SLC38A5 ENSG00000064886|CHI3L2 ENSG00000065308|TRAM2 ENSG00000103044|HAS3 ENSG00000109047|RCVRN ENSG00000125409|TEKT3 ENSG00000149489|ROM1 ENSG00000166069|TMC05  
ENSG00000166987|MBD6 ENSG00000178078|NP\_060190.2 ENSG00000178110|Q8N9G9\_HUMAN ENSG00000184566|Q9P1G6\_HUMAN ENSG00000184566|Q9P1G6\_HUMAN ENSG00000198700|IPO9 ENSG00000198700|IPO9 ENSG00000206751|SLAMF7 ENSG00000079385|CEACAM1  
ENSG00000087502|ERIGIC2 ENSG00000091137|SLC26A4 ENSG00000093134|VNN3 ENSG00000097046|CDC7 ENSG00000101278|Q9NQ39\_HUMAN ENSG00000105497|ZNF175 ENSG00000105851|PIK3CG ENSG00000113638|TTC33  
ENSG00000114062|UBE3A ENSG00000122477|LRRC39 ENSG00000123684|LPGAT1 ENSG00000135845|PIGC ENSG00000138075|ABCG5 ENSG00000139684|ESD ENSG00000145365|NP\_443096.1 ENSG00000154898|Q8IYA2\_HUMAN  
ENSG00000159256|MORC3 ENSG00000164163|ABCE1 ENSG00000175449|RFESD ENSG00000179455|MKNR3 ENSG00000182551|ADI1 ENSG00000183813|CCR4 ENSG000001185501|LCTL ENSG00000188846|RPL14  
ENSG00000196683|TOMM7 ENSG00000196693|ZNF33B ENSG00000198440|ZNF583  
AGGATTT ENSG00000090863|GLG1 ENSG00000100335|SMCR7L ENSG00000100867|DHRS2 ENSG00000101890|GUCY2F ENSG00000103591|P34\_HUMAN ENSG00000106003|LFNG ENSG00000106144|CASP2 ENSG00000107738|C10orf54  
ENSG00000113739|STC2 ENSG00000117394|SLC2A1 ENSG00000119973|PLRLR ENSG00000126062|TMEM115 ENSG00000138938|Q5TGJ8\_HUMAN ENSG00000139540|SLC39A5 ENSG00000140488|BRUNOL6 ENSG00000160219|GAB3  
ENSG00000163156|SCNM1 ENSG00000166831|RBPM22 ENSG00000167291|TLC1D16 ENSG00000167491|GATAD2A ENSG00000169213|RAB3B ENSG00000171105|INSR ENSG00000171793|CTPS ENSG00000177875|NP\_001013657.2  
ENSG00000183519|NSUN5B ENSG00000183611|RPL32P3 ENSG00000184481|MLLT7 ENSG00000184650|ODF4 ENSG00000185404|Q4ZG65\_HUMAN ENSG00000185801|YV007\_HUMAN ENSG00000186532|SMYD4 ENSG00000197818|SLC9A8  
ENSG00000205501|Q6ZU01\_HUMAN ENSG00000008277|ADAM22 ENSG00000041982|TNC ENSG00000062194|GPBP1 ENSG00000065809|FAM107B ENSG00000081087|OSTM1 ENSG00000100596|SPTLC2 ENSG00000102384|CENPI  
ENSG00000111328|CDK2AP1 ENSG00000116497|S100BP ENSG00000124490|CRISP2 ENSG00000135750|KCNK1 ENSG00000136521|NDUFB5 ENSG00000145734|BDP1 ENSG00000146477|SLC22A3 ENSG00000165525|SDCCAG1  
ENSG00000168710|AHCYL1 ENSG00000170153|RNF150 ENSG00000170385|SLC30A1 ENSG00000170961|HAS2 ENSG00000187123|LYP3 ENSG00000196072|BLOC1S2 ENSG00000198046|ZNF667  
AGGCAAT ENSG00000078295|ADCY2 ENSG00000089169|RPH3A ENSG00000099769|IGFALS ENSG00000101890|GUCY2F ENSG00000105383|CD33 ENSG00000107263|RAPGEF1 ENSG00000111412|C12orf49 ENSG00000122543|ONCO\_HUMAN  
ENSG00000129214|SHBG ENSG00000130307|USHBP1 ENSG00000135175|OCM ENSG00000138166|DUSP5 ENSG00000140398|NEIL1 ENSG00000160200|CBS ENSG00000161610|HCRT ENSG00000162490|C1orf187  
ENSG00000163481|RNF25 ENSG00000164051|CCDC51 ENSG00000164078|MST1R ENSG00000170498|KISS1 ENSG00000171467|ZNF318 ENSG00000176315|Q8N7I9\_HUMAN ENSG00000177807|KCNJ10 ENSG00000179058|C9orf50  
ENSG00000182117|NOLA3 ENSG00000183495|EP400 ENSG00000184330|S100A7A ENSG00000186994|ANKRD47 ENSG00000197191|NP\_945352.1 ENSG00000198471|RTP2 ENSG00000198483|ANKRD35  
ENSG00000198937|C6orf129 ENSG00000204257|HLA-DMA ENSG00000204323|Q7LRC9\_HUMAN ENSG000000050405|LIMA1 ENSG00000072041|SLC6A15 ENSG00000082556|OPRK1 ENSG00000110958|PTGES3  
ENSG00000112379|KIAA1244 ENSG00000120137|PANK3 ENSG00000125831|CST11 ENSG00000128739|SNRPN ENSG00000132950|ZMYM5 ENSG00000134602|MST4\_HUMAN ENSG00000138400|MDH1B ENSG00000144026|ZNF514  
ENSG00000144821|MYH15 ENSG00000145592|RPL37 ENSG00000147488|ST18 ENSG00000152133|CCDC75 ENSG00000153162|BMP6 ENSG00000154143|PANK3 ENSG00000157219|HTR5A ENSG00000163608|C3orf17  
ENSG00000164305|CASP3 ENSG00000169567|HINT1 ENSG00000172059|FLF11 ENSG00000172869|DMXL1 ENSG00000174500|GCET2 ENSG00000196350|ZNF492 ENSG00000204171|Q6STG2\_HUMAN  
AGGCATG ENSG00000084628|FAM77C ENSG00000095539|SEMA4G ENSG00000100450|GZMH ENSG00000102001|CACNA1F ENSG00000105131|ABHD9 ENSG00000131471|AOC3 ENSG00000142686|NP\_689587.1 ENSG00000143850|PLEKHA6  
ENSG00000145949|SGK85\_HUMAN ENSG00000153666|XR\_017721.1 ENSG00000159176|CSRP1 ENSG00000163431|LMOD1 ENSG00000163820|FYCO1 ENSG00000167434|CA4 ENSG00000167702|KIFC2 ENSG00000169174|PCSK9  
ENSG00000170091|NSG2\_HUMAN ENSG00000173175|ADCY5 ENSG00000173976|RAXL1 ENSG00000178081|LOC653075 ENSG00000184677|ZBTB40 ENSG00000185608|MRPL40 ENSG00000188532|LOC653125 ENSG00000188626|LOC653720  
ENSG00000198585|NUDT16 ENSG00000205354|Q6ZN60\_HUMAN ENSG00000205912|Q6ZTG5\_HUMAN ENSG00000206528|Q6ZSM0\_HUMAN ENSG00000056277|SUHW3 ENSG00000078018|MAP2 ENSG00000101966|BIRC4 ENSG00000103769|RAB11A  
ENSG00000112081|SFRS3 ENSG00000127325|BEST3 ENSG00000135776|ABCB10 ENSG00000141298|SSH2 ENSG00000147041|SYTL5 ENSG00000148677|ANKRD1 ENSG00000154099|LRRC50 ENSG00000155621|C9orf85  
ENSG00000162980|ARL5A ENSG00000174482|LINGO2 ENSG00000188529|FUSIP1  
AGGCCAG ENSG00000012779|ALOX5 ENSG00000042022|ABHD14A ENSG00000069424|KCNAB2 ENSG00000070371|CLTCL1 ENSG00000099960|SLC7A4 ENSG00000100029|PES1 ENSG00000103021|CCDC113 ENSG00000105552|BCAT2  
ENSG00000110448|CD5 ENSG00000111452|GPR133 ENSG00000112472|CPNE5 ENSG00000128335|APOL2 ENSG00000135472|FAM12 ENSG00000136802|LRRC8A ENSG00000155256|ZFYVE27 ENSG00000155659|VSI4  
ENSG00000155666|JMJD5 ENSG00000158089|GALNT14 ENSG00000158813|EDA ENSG00000160214|RRP1 ENSG00000160606|TLC1D ENSG00000161574|CCL14 ENSG00000162300|ZFP11 ENSG00000163870|GPR175  
ENSG00000166166|C14orf172 ENSG00000167685|ZNF444 ENSG00000168447|SCNN1B ENSG00000172354|GNB2 ENSG00000172889|EGFL7 ENSG00000173227|SYTL2 ENSG00000175997|PC ENSG00000181781|C19orf19  
ENSG00000184470|TXNRD2 ENSG00000185744|TNT\_HUMAN ENSG00000186910|SERPINA11 ENSG00000187122|ARHGAP19 ENSG00000198909|MAP3K3 ENSG00000204366|ZBTB12 ENSG00000205538|Q6ZVP1\_HUMAN  
ENSG00000206028|Q6ZVA3\_HUMAN ENSG00000054392|HHAT ENSG00000079482|OPHN1 ENSG00000084623|EIF3S2 ENSG00000100564|PIGH ENSG000001011049|SGK2 ENSG00000101126|ADNP ENSG00000106305|MCA2\_HUMAN  
ENSG00000185077|AKAP7 ENSG00000124818|OPN5 ENSG00000129474|JUB ENSG00000131620|TMEM16A ENSG00000137478|FCHSD2 ENSG00000140795|MYLK3\_HUMAN ENSG00000144771|LRTM1 ENSG00000155754|ALS2CR11  
ENSG00000156026|CCDC109A ENSG00000164308|NP\_071745.1 ENSG00000166405|RIC3 ENSG00000168675|C18orf1 ENSG00000171365|CLCN5 ENSG00000188215|DCUN1D3 ENSG00000197603|NP\_075561.2  
perfect: AGGCCAG CTGGCCT hsa-miR-193a aaCTGGCCTacaaagtcccag 2  
AGGCCAT ENSG00000033327|GAB2 ENSG00000101236|RNF274 ENSG0000

|         |                                |                                |                                |                              |                                |                              |                                |                              |
|---------|--------------------------------|--------------------------------|--------------------------------|------------------------------|--------------------------------|------------------------------|--------------------------------|------------------------------|
|         | ENSG00000139200 C12orf53       | ENSG00000148719 DNAJB12        | ENSG00000149575 SCN2B          | ENSG00000168286 THAP11       | ENSG00000172590 MRPL52         | ENSG00000175315 CST6         | ENSG00000175318 GRAMD2         | ENSG00000179909 ZNF154       |
|         | ENSG00000198576 ARC            | ENSG00000203786 KPRP           | ENSG00000204049 Q6ZUH9_HUMAN   | ENSG00000005302 MSL3L1       | ENSG00000023330 ALAS1          | ENSG000000089472 HEPH        | ENSG00000114166 PCAF           | ENSG00000114742 WDR48        |
|         | ENSG00000127083 OMD            | ENSG00000133142 TCEAL4         | ENSG00000136891 TEX10          | ENSG00000136986 DERL1        | ENSG00000140382 HMG20A         | ENSG00000150093 ITGB1        | ENSG00000152443 ZNF776         | ENSG00000152642 GPD1L        |
|         | ENSG00000164744 SUNC1          | ENSG00000168556 TNG2           | ENSG00000170949 ZNF160         | ENSG00000171864 PRND         | ENSG00000173744 HRB            | ENSG00000184007 PTP4A2       | ENSG00000184905 TCEAL2         | ENSG00000204947 ZNF425       |
| AGGCCCA | ENSG00000007866 TEAD3          | ENSG00000011347 SYT7           | ENSG00000037280 FLT4           | ENSG000000050555 LAMC3       | ENSG00000069011 PITX1          | ENSG00000100083 GGA1         | ENSG00000105135 ILVBL          | ENSG00000106636 YKT6         |
|         | ENSG00000119614 CHX10          | ENSG00000125458 NT5C           | ENSG00000126091 ST3GAL3        | ENSG00000126698 DNAJC8       | ENSG00000127511 SIN3B          | ENSG00000129282 MRM1         | ENSG00000132254 ARFIP2         | ENSG00000133878 DUSP26       |
|         | ENSG00000137491 SLCO2B1        | ENSG00000137877 SPTBN5         | ENSG00000140548 ZNF710         | ENSG00000142634 EFHD2        | ENSG00000143515 ATP8B2         | ENSG00000148187 MRRF         | ENSG00000159797 C9orf144       | ENSG00000161940 BCL6B        |
|         | ENSG00000164970 C9orf25        | ENSG00000168096 ANKS3          | ENSG00000168334 CMYA1          | ENSG00000169221 Q75L30_HUMAN | ENSG00000173227 SYT12          | ENSG00000174264 Q4TT42_HUMAN | ENSG00000175970 NP_001074002.1 | ENSG00000180438 TPRXL        |
|         | ENSG00000181790 BAI1           | ENSG00000186193 C9orf140       | ENSG00000186543 Q6ZWCO_HUMAN   | ENSG00000188185 Q6ZQP8_HUMAN | ENSG00000196361 ELAVL3         | ENSG00000198208 RPS6KL1      | ENSG00000203993 C9orf37        | ENSG00000204048 Q6ZUG3_HUMAN |
|         | ENSG00000204316 MRPL38         | ENSG00000205424 Q6ZW00_HUMAN   | ENSG00000206064 Q6ZU89_HUMAN   | ENSG00000062096 ARSF         | ENSG00000069966 GNB5           | ENSG00000076003 MCM6         | ENSG00000100714 MTHFD1         | ENSG00000109846 CRYAB        |
|         | ENSG00000129007 CALML4         | ENSG00000132825 PPP1R3D        | ENSG00000134202 GSTM3          | ENSG00000135828 RNASEL       | ENSG00000137098 SPAG8          | ENSG00000139132 FGD4         | ENSG00000143157 POGK           | ENSG00000152076 CCDC74B      |
|         | ENSG00000163040 CCDC74A        | ENSG00000163749 NP_001036249.1 | ENSG00000167077 NP_689726.3    | ENSG00000174136 RGMB         | ENSG00000176732 PFN4           | ENSG00000177842 ZNF620       | ENSG00000180347 CCDC129        | ENSG00000197933 ZF36_HUMAN   |
|         | ENSG00000204567 Q6ZTG9_HUMAN   |                                |                                |                              |                                |                              |                                |                              |
| AGGCCCC | ENSG00000004059 ARF5           | ENSG00000006059 KRT33A         | ENSG00000068323 TFE3           | ENSG00000079999 KEAP1        | ENSG00000084693 AGBL5          | ENSG00000099864 PALM         | ENSG00000100258 TMEM112B       | ENSG00000100302 RASD2        |
|         | ENSG00000100413 POLR3H         | ENSG00000101216 GMEB2          | ENSG00000102870 ZNF629         | ENSG00000105771 C19orf61     | ENSG00000107338 SHB            | ENSG00000111199 TRPV4        | ENSG00000114853 ZBTB47         | ENSG00000116353 MECR         |
|         | ENSG00000123146 CD97           | ENSG00000125122 LRRRC29        | ENSG00000125804 C20orf91       | ENSG00000125817 CENPB        | ENSG00000127220 ABHD8          | ENSG00000136295 TYH3         | ENSG00000138107 ACTR1A         | ENSG00000140488 BRUNOL6      |
|         | ENSG00000144040 SFXN5          | ENSG00000151006 Q6ZKN7_HUMAN   | ENSG00000154342 WNT3A          | ENSG00000159069 FBXW5        | ENSG00000160683 BLR1           | ENSG00000162383 SLC1A7       | ENSG00000163395 NP_840059.1    | ENSG00000164620 C5orf16      |
|         | ENSG00000165886 UBTD1          | ENSG00000166341 DCHS1          | ENSG00000166546 Q3B7T3_HUMAN   | ENSG00000167604 NP_640332.1  | ENSG00000167656 LY6D           | ENSG00000167770 OTUB1        | ENSG00000167807 NP_001026904.1 | ENSG00000169692 AGPAT2       |
|         | ENSG00000170619 COMMD5         | ENSG00000173762 CD7            | ENSG00000174744 BRMS1          | ENSG00000177542 SLC25A22     | ENSG00000178773 CPNE7          | ENSG00000179632 MAF1         | ENSG00000184792 OSBP2          | ENSG00000185024 BRF1         |
|         | ENSG00000186143 C2orf53        | ENSG00000188322 SBK1           | ENSG00000196182 STK40          | ENSG00000196260 SFTFP        | ENSG00000204313 NP_001028830.1 | ENSG00000205019 Q6ZTG5_HUMAN | ENSG00000017427 IGF1           | ENSG00000023839 ABCC2        |
|         | ENSG00000079156 OSBP16         | ENSG00000105877 DNAH11         | ENSG00000110680 CALCA          | ENSG00000116539 ASHL1        | ENSG00000120868 APAF1          | ENSG00000120885 CLU          | ENSG00000121297 TSHZ3          | ENSG00000130338 TULP4        |
|         | ENSG00000134443 GRP            | ENSG00000143543 JTB            | ENSG00000168939 SPRY3          | ENSG00000169756 LIMS1        | ENSG00000170175 CHRN1          | ENSG00000177189 RPS6KA3      | ENSG00000178033 FAM26E         | ENSG00000180354 C7orf41      |
|         | ENSG00000181195 PENK           | ENSG00000184719 C10orf59       | ENSG00000196091 MYBPC1         | ENSG00000198553 KCNRG        | ENSG00000204390 HSPA1L         |                              |                                |                              |
| AGGCCCG | ENSG00000009964 MTF            | ENSG00000101222 C20orf28       | ENSG00000106948 AKNA           | ENSG00000109906 ZBTB16       | ENSG00000130751 NPAS1          | ENSG00000138834 MAPK8IP3     | ENSG00000158428 NP_940961.1    | ENSG00000160392 C19orf47     |
|         | ENSG00000160691 SHC1           | ENSG00000166578 IQCD           | ENSG00000167657 DAPK3          | ENSG00000170231 FABP6        | ENSG00000170262 MRAP           | ENSG00000182351 CRIP1        | ENSG00000183255 PTTG1IP        | ENSG00000184811 TUSC5        |
|         | ENSG00000188185 Q6ZQP8_HUMAN   | ENSG00000203896 LIME1          | ENSG00000206177 HBM            | ENSG00000080371 RAB21        | ENSG00000101040 ZMYND8         | ENSG00000119938 PPL1R3C      | ENSG00000120051 C10orf80       | ENSG00000120333 MRPS14       |
|         | ENSG00000122691 TWIST1         | ENSG00000131620 TMEM16A        | ENSG00000131732 ZCCHC9         | ENSG00000133808 MICALCL      | ENSG00000147231 CXorf57        | ENSG00000160194 NDUFV3       | ENSG00000162704 ARPC5          | ENSG00000162819 C1orf58      |
|         | ENSG00000163093 BBS5           | ENSG00000166411 IDH3A          | ENSG00000168502 KTAOA0802      | ENSG00000169744 LDB2         | ENSG00000170522 ELOVL6         | ENSG00000170786 NP_620419.2  | ENSG00000197771 C10orf119      | ENSG00000198795 ZNF521       |
|         | ENSG00000204680 Q5VYG3_HUMAN   | ENSG00000204757 Q6ZTL5_HUMAN   | ENSG00000205003 CNTF           |                              |                                |                              |                                |                              |
| AGGCCGG | ENSG00000008283 CYB561         | ENSG00000011304 PTBP1          | ENSG00000078902 TOLLIP         | ENSG00000095917 TPSD1        | ENSG00000103326 SOLH           | ENSG00000104524 PYCRL        | ENSG00000105085 CRSP7          | ENSG00000105229 PIAS4        |
|         | ENSG00000117682 DHDS           | ENSG00000119333 WDR34          | ENSG00000120875 DUSP4          | ENSG00000124006 OBSL1        | ENSG00000129152 MUD1           | ENSG00000139540 SLC39A5      | ENSG00000140564 FURIN          | ENSG00000141622 C18orf23     |
|         | ENSG00000142279 WTIP           | ENSG00000154342 WNT3A          | ENSG00000157916 RER1           | ENSG00000158747 NBL1         | ENSG00000160953 MUM1           | ENSG00000160991 TMEM142B     | ENSG00000165886 UBTD1          | ENSG00000176136 MC5R         |
|         | ENSG00000178934 LEG7_HUMAN     | ENSG00000180806 HOXC9          | ENSG00000180924 Q9BVQ6_HUMAN   | ENSG00000182351 CRIP1        | ENSG00000183700 Q96AT3_HUMAN   | ENSG00000185504 C17orf70     | ENSG00000196987 NP_001034857.2 | ENSG00000204860 C9orf122     |
|         | ENSG00000205076 LGALS7         | ENSG00000007062 PROM1          | ENSG00000039068 CDH1           | ENSG00000069535 MAOB         | ENSG00000107077 JMJD2C         | ENSG00000107201 DDX58        | ENSG00000116874 WARS2          | ENSG00000119596 YLFM1        |
|         | ENSG00000125352 RNFL13A        | ENSG00000125675 GRIA3          | ENSG00000128731 HERC2          | ENSG00000132669 RIN2         | ENSG00000135111 TBX3           | ENSG00000136235 GPNMB        | ENSG00000136842 TMOD1          | ENSG00000141219 C17orf80     |
|         | ENSG00000144713 RPL32          | ENSG00000145555 MYO10          | ENSG00000154175 ABI3BP         | ENSG00000165061 ZMAT4        | ENSG00000170777 TPD52L3        | ENSG00000182963 GJA7         | ENSG00000183474 NP_001035955.1 | ENSG00000184254 ALDH1A3      |
|         | ENSG00000184474 Q96FP4_HUMAN   | ENSG00000185973 TMLHE          |                                |                              |                                |                              |                                |                              |
| AGGCTTT | ENSG00000137255 CD6            | ENSG00000070915 SLC12A3        | ENSG00000088876 ZNF343         | ENSG00000105011 ASF1B        | ENSG00000110721 CHKA           | ENSG00000116237 ICMT         | ENSG00000122965 RBM19          | ENSG00000123364 HOXC13       |
|         | ENSG00000125166 GOT2           | ENSG00000125695 STRAD_HUMAN    | ENSG00000128973 CLN6           | ENSG00000131652 THOC6        | ENSG00000133466 CIQTNF6        | ENSG00000135436 C12orf25     | ENSG00000141994 DUS3L          | ENSG00000144655 AXUD1        |
|         | ENSG00000152705 CATSPER3       | ENSG00000154783 FGD5           | ENSG00000162456 NP_872322.1    | ENSG00000164048 ZNF589       | ENSG00000166340 TPP1           | ENSG00000166526 ZNF3         | ENSG00000169921 Q75L30_HUMAN   | ENSG00000170271 C5orf4       |
|         | ENSG00000175182 FAM131A        | ENSG00000177721 NP_001014301.1 | ENSG00000183853 KIRREL         | ENSG00000184481 MLLT7        | ENSG000000034677 RNFL9         | ENSG00000065413 ANKRD44      | ENSG00000066027 PPP2R5A        | ENSG00000101871 MID1         |
|         | ENSG00000104435 STMN2          | ENSG00000106524 ANKMY2         | ENSG00000112078 KCTD20         | ENSG00000114030 KPNAL1       | ENSG00000131725 WDR44          | ENSG00000135272 MDMFC        | ENSG00000162433 AK3L2          | ENSG00000164761 TNFRSF11B    |
|         | ENSG00000165246 NLGN4Y         | ENSG00000166037 CEP57          | ENSG00000168204 O95014_HUMAN   | ENSG00000168967 PMCHL1       | ENSG00000169040 PMCHL2         | ENSG00000170537 TMC7         | ENSG00000170558 CDH2           | ENSG00000175175 PPM1E        |
|         | ENSG00000175513 TSGA10IP       | ENSG00000178459 Q8N2E2_HUMAN   | ENSG00000178700 DHFRL1         | ENSG00000183718 TRIM52       | ENSG00000186017 ZNF566         | ENSG00000188039 NWD1         | ENSG00000196262 PPIA           | ENSG00000196565 HBE1         |
|         | ENSG00000197054 HSP763         | ENSG00000198189 HSD17B11       | ENSG00000198301 SDAD1          | ENSG00000198650 TAT          |                                |                              |                                |                              |
| AGGGGAA | ENSG00000075043 KCNC2          | ENSG00000105989 WNT2           | ENSG00000107957 SH3PXD2A       | ENSG00000125977 EIF2S2       | ENSG00000130881 LRP3           | ENSG00000132716 WDR42A       | ENSG00000134317 GRHL1          | ENSG00000137522 RNFL21       |
|         | ENSG00000149633 NP_001025035.1 | ENSG00000151468 CCDC3          | ENSG00000160803 UBQLN4         | ENSG00000163481 RNF25        | ENSG00000166402 TUB            | ENSG00000169181 GSG1L        | ENSG00000178199 Q6ZRW2_HUMAN   | ENSG00000181754 AMIGO1       |
|         | ENSG00000184945 AQP12A         | ENSG00000198624 CCDC69         | ENSG00000206045 LOC644844      | ENSG00000206551 Q6ZT99_HUMAN | ENSG00000065183 WDR3           | ENSG00000101230 C20orf82     | ENSG00000104325 DECR1          | ENSG00000104517 EDD1         |
|         | ENSG00000109618 UGTAP_HUMAN    | ENSG00000112343 TRIM38         | ENSG00000112902 SEMA5A         | ENSG00000116954 RRAGC        | ENSG00000126016 AMOT           | ENSG00000132313 MRPL35       | ENSG00000133083 DCLK1          | ENSG00000136159 NUDT15       |
|         | ENSG00000138758 SEPT11         | ENSG00000141380 SS18           | ENSG00000144644 GADL1          | ENSG00000151690 NP_060164.3  | ENSG00000155755 ALS2CR4        | ENSG00000163257 C4orf30      | ENSG00000164494 PDSS2          | ENSG00000165434 PGM2L1       |
| AGGGACC | ENSG00000166295 C10orf104      | ENSG00000172572 PDE3A          | ENSG00000181019 NQO1           | ENSG00000185918 DEFA3        | ENSG00000188215 DCUN1D3        | ENSG00000197128 ZNF772       | ENSG00000206047 DEFT1P         |                              |
|         | ENSG00000002834 LASP1          | ENSG00000027644 INSRR          | ENSG00000068024 HDAC4          | ENSG00000086730 LAT2         | ENSG00000087152 ATXN7L3        | ENSG00000100124 ANKRD54      | ENSG00000100403 ZC3H7B         | ENSG00000103257 SLC7A5       |
|         | ENSG00000105137 SYDE1          | ENSG00000105808 RASA4          | ENSG00000131462 TUBG1          | ENSG00000131797 C16orf67     | ENSG00000134287 ARF3           | ENSG00000137808 NOX5         | ENSG00000140939 NOL3           | ENSG00000141098 FGOD2        |
|         | ENSG00000142453 CARM1          | ENSG00000142552 RCN3           | ENSG00000143867 OSR1           | ENSG00000146205 TMEM16G      | ENSG00000153885 KCTD15         | ENSG00000160055 C1orf91      | ENSG00000162129 CLPB           | ENSG00000162571 TTLL5        |
|         | ENSG00000163013 FBXO41         | ENSG00000163295 ALPI           | ENSG00000169635 HIC2           | ENSG00000170667 RASL2_HUMAN  | ENSG00000174233 ADCY6          | ENSG00000176130 P2RY11       | ENSG00000177303 CASKIN2        | ENSG00000178789 CD300LB      |
|         | ENSG00000197457 STMN3          | ENSG00000205106 Q6N098_HUMAN   | ENSG00000205126 NP_001027025.1 | ENSG00000205698 LOC648426    | ENSG00000070756 PABPC1         | ENSG00000090581 GNPTG        | ENSG00000106105 GARS           | ENSG00000106692 FCMD         |
|         | ENSG00000113441 LNPEP          | ENSG00000115233 PSMD14         | ENSG00000124120 C20orf121      | ENSG00000124568 SLC17A1      | ENSG00000125255 SLC10A2        | ENSG00000136100 VPS36        | ENSG00000153721 MAG11          | ENSG00000170734 POLH         |
|         | ENSG00000171877 FRMD5          | ENSG00000179833 SERTAD2        | ENSG00000185070 FLRT2          | ENSG00000186265 BTLA         | ENSG00000197024 TRF398         | ENSG00000197594 ENPPP1       | ENSG00000204904 CXorf31        |                              |
| AGGGCAA | ENSG000000020129 NCDN          | ENSG00000066135 JMJD2A         | ENSG00000072501 SMC1A          | ENSG00000100167 SEPT3        | ENSG00000130811 EIF3S4         | ENSG00000132478 UNK          | ENSG00000137310 TCF19          | ENSG00000142549 LOC402665    |
|         | ENSG00000143107 FNDC7          | ENSG00000143367 TUFT1          | ENSG00000151773 CCDC122        | ENSG00000166949 SMAD3        | ENSG00000171596 NMUR1          | ENSG00000172819 RARG         | ENSG00000173546 CSPG4          | ENSG00000173641 HSPB7        |
|         | ENSG00000185594 SPATA8         | ENSG00000189385 Q8N814_HUMAN   | ENSG00000196642 C9orf86        | ENSG00000196943 LTB4R        | ENSG00000197448 GSTK1          | ENSG00000198326 C20orf141    | ENSG00000203662 OR2M1P         | ENSG00000204241 Q6ZU8_HUMAN  |
|         | ENSG00000205103 HPR            | ENSG00000205223 Q6ZUG9_HUMAN   | ENSG000000049247 UTS2          | ENSG000000094880 CDC23       | ENSG00000100505 TRIM9          | ENSG00000109689 STM12        | ENSG00000125247 TMTC4          | ENSG00000127951 FGL2         |
|         | ENSG00000134762 DSC3           | ENSG00000140873 ADAMTS18       | ENSG00000141433 ADCYAP1        | ENSG00000143190 POU2F1       | ENSG00000143457 GOLPH3L        | ENSG00000147677 EIF3S3       | ENSG00000150093 ITGB1          | ENSG00000154473 BUB3         |
|         | ENSG00000155016 CYP2U1         | ENSG00000160145 KALRN          | ENSG00000168710 AHCYL1         | ENSG00000169740 ZNF32        | ENSG00000176593 Q8N9G5_HUMAN   | ENSG00000180964 TCEAL8       | ENSG00000204136 GGTA1          | ENSG00000205777 GAGE4        |
| AGGGCAT | ENSG00000007038 PRSS21         | ENSG00000042445 RETSAT         | ENSG00000088543 C3orf18        | ENSG00000100461 RBM23        | ENSG00000106992 AK1            | ENSG00000109062 SLC9A3R1     | ENSG00000127362 TAS2R3         | ENSG00000139266 MARCH9       |
|         | ENSG00000140548 ZNF710         | ENSG00000161103 Q5BKY6_HUMAN   | ENSG00000162413 KLHL21         | ENSG00000165752 STK32C       | ENSG00000172073 C2orf51        | ENSG00000172828 CES3         | ENSG00000178078 NP_060190.2    | ENSG00000184560 C17orf74     |
|         | ENSG00000184574 GPR92          | ENSG00000185294 NP_7           |                                |                              |                                |                              |                                |                              |



|                                |                              |                              |                              |                              |                              |                              |                              |                              |                       |
|--------------------------------|------------------------------|------------------------------|------------------------------|------------------------------|------------------------------|------------------------------|------------------------------|------------------------------|-----------------------|
| ENSG00000122359 ANXA11         | ENSG00000129451 KLK10        | ENSG00000145949 SGK85_HUMAN  | ENSG00000148156 ACTL7B       | ENSG00000148660 CAMK2G       | ENSG00000160791 CCR5         | ENSG00000168621 GDNF         | ENSG00000171443 ZNF524       |                              |                       |
| ENSG00000184144 CNTN2          | ENSG00000184788 SATL1        | ENSG00000185043 C1B1         | ENSG00000196859 KRT39        | ENSG00000033030 ZCCHC8       | ENSG00000071054 MAP4K4       | ENSG00000075413 MARK3        | ENSG00000092470 WDR76        |                              |                       |
| ENSG00000094880 CDC23          | ENSG00000112769 LAMA4        | ENSG00000112851 ERBB2IP      | ENSG00000112996 MRPS30       | ENSG00000115761 NL010        | ENSG00000116560 SFPQ         | ENSG00000117139 JARID1B      | ENSG00000117751 PPP1R8       |                              |                       |
| ENSG00000118432 CNR1           | ENSG00000124333 SYBL1        | ENSG00000136108 CKAP2        | ENSG00000138767 CNO76L       | ENSG00000145439 CBLR4        | ENSG00000150593 PCDD4        | ENSG00000151655 ITIH2        | ENSG00000152270 PDE3B        |                              |                       |
| ENSG00000153574 RPIA           | ENSG00000155897 ADCY8        | ENSG00000164144 ARFI1        | ENSG00000165061 ZMAT4        | ENSG00000175449 RFESD        | ENSG00000180233 ZNR2         | ENSG00000180828 BHLHB5       | ENSG00000182504 LRR1Q2       |                              |                       |
| ENSG00000189266 PNRC2          | ENSG00000203727 SAMD5        |                              |                              |                              |                              |                              |                              |                              |                       |
| AGGTTTC                        | ENSG00000070748 CHAT         | ENSG00000105576 TNPO2        | ENSG00000105738 SIPAL13      | ENSG00000111801 BTN3A3       | ENSG00000130612 Q6ZSU1_HUMAN | ENSG00000132323 ILKAP        | ENSG00000135709 KIAA0513     | ENSG00000142623 PADI1        | ENSG00000065328 MCMI0 |
| ENSG00000161021 LTC4S          | ENSG00000163431 LMOD1        | ENSG00000168061 SAC3D1       | ENSG00000203744 ALL170_HUMAN | ENSG00000205522 LOC255411    | ENSG00000015475 BID          | ENSG00000036549 ZZZ3         |                              |                              |                       |
| ENSG00000069329 VPS35          | ENSG00000076003 MCM6         | ENSG00000105186 ANKRD27      | ENSG00000109158 GABRA4       | ENSG00000115474 KCNJ13       | ENSG00000124935 SCGB1D2      | ENSG00000125337 KIF25        | ENSG00000131981 LGALS3       |                              |                       |
| ENSG00000132386 SERPINF1       | ENSG00000138336 CXXC6        | ENSG00000143970 ASXL2        | ENSG00000150991 UBIQ_HUMAN   | ENSG00000155011 DKK2         | ENSG00000155090 KLF10        | ENSG00000163864 NMNAT3       | ENSG00000164796 CSMD3        |                              |                       |
| ENSG00000165669 C10orf84       | ENSG00000168515 SCGB1D1      | ENSG00000169895 SYAP1        | ENSG00000181264 TMEM136      | ENSG00000186579 DEFB106B     | ENSG00000187082 D106A_HUMAN  | ENSG00000197707 Q9H363_HUMAN | ENSG00000197745 SCGB1D4      |                              |                       |
| AGGTTTT                        | ENSG00000004848 ARX          | ENSG00000101405 OXT          | ENSG00000103064 SLC7A6       | ENSG00000104332 SFRP1        | ENSG00000117148 ACTL8        | ENSG00000132510 JMJ3         | ENSG00000134287 ARF3         | ENSG00000135404 CD63         |                       |
| ENSG00000136485 WDR68          | ENSG00000137094 DNAJB5       | ENSG00000147457 CHMP7        | ENSG00000149547 EI24         | ENSG00000159023 EPB41        | ENSG00000161202 DVL3         | ENSG00000164266 SPINK1       | ENSG00000166860 ZBTB39       |                              |                       |
| ENSG00000170100 Q96MU6-2       | ENSG00000172543 CTSW         | ENSG00000173575 CHD2         | ENSG00000175130 MARCKSL1     | ENSG00000183955 SETD8        | ENSG00000187678 SPRY4        | ENSG00000196372 ASB13        | ENSG00000197506 SLC28A3      |                              |                       |
| ENSG00000197879 MYO1C          | ENSG00000198471 RTP2         | ENSG00000206528 Q6ZSM0_HUMAN | ENSG000000051180 RAD51       | ENSG000000074935 TUBE1       | ENSG000000083857 FAT         | ENSG00000099246 RAB18        | ENSG00000112029 FBX05        |                              |                       |
| ENSG00000119725 ZNF410         | ENSG00000120324 PCDH10       | ENSG00000120868 APAF1        | ENSG00000125257 ABCC4        | ENSG00000128791 TWSG1        | ENSG00000132963 POMP         | ENSG00000133739 LRRCC1       | ENSG00000134697 GNL2         |                              |                       |
| ENSG00000141499 WDR79          | ENSG00000142188 TMEM50B      | ENSG00000143653 SCCPDH       | ENSG00000146070 PLAZG7       | ENSG00000153832 FBXO36       | ENSG00000157212 PAXIP1       | ENSG00000164327 NP_689969.2  | ENSG00000164983 TMEM65       |                              |                       |
| ENSG00000166734 CASC4          | ENSG00000167699 GLOD4        | ENSG00000169550 MUC15        | ENSG00000174371 EXO1         | ENSG00000177800 TMEM78       | ENSG00000197484 Q6ZRH8_HUMAN | ENSG00000197822 OCLN         | ENSG00000205072 Q6ZR34_HUMAN |                              |                       |
| AGTAAAA                        | ENSG00000067365 C16orf68     | ENSG00000068079 IFI35        | ENSG00000078295 ADCY2        | ENSG00000083842 ZNF8         | ENSG00000103429 BFAR         | ENSG00000105122 NP_075055.1  | ENSG00000106078 COBL         | ENSG00000112062 MAPK14       |                       |
| ENSG00000115841 FAM82A         | ENSG00000120314 WDR5         | ENSG00000130119 GNL3L        | ENSG00000131149 KIAA0182     | ENSG00000131400 NAPSA        | ENSG00000136059 VILL         | ENSG00000139767 KIAA1853     | ENSG00000142156 COL6A1       |                              |                       |
| ENSG00000143032 BARHL2         | ENSG00000150779 TIMM8B       | ENSG00000151692 RNFI44       | ENSG00000153060 TEKT5        | ENSG00000158497 HMBH1        | ENSG00000162763 LRRCS2       | ENSG00000166340 TFP1         | ENSG00000167748 KLK1         |                              |                       |
| ENSG00000170983 C8orf14        | ENSG00000179393 Q9NRE4_HUMAN | ENSG00000180104 EXOC3        | ENSG00000181378 CCDC108      | ENSG00000183250 C21orf67     | ENSG00000185198 PRSS1        | ENSG00000185436 IL28RA       | ENSG00000187953 NR_002217.1  |                              |                       |
| ENSG00000188312 CENPF          | ENSG00000196787 HIST1H2AG    | ENSG00000197724 PHF2         | ENSG00000198816 ZNF358       | ENSG00000204482 LST1         | ENSG00000064703 DDX20        | ENSG00000071991 CDH19        | ENSG00000077616 NAALAD2      |                              |                       |
| ENSG00000079482 OPHN1          | ENSG00000090382 LYZ          | ENSG00000106809 OGN          | ENSG00000109158 GABRA4       | ENSG00000110079 MS4A4A       | ENSG00000111231 ATPBD1C      | ENSG00000111846 GCNT2        | ENSG00000114487 MORC1        |                              |                       |
| ENSG00000118849 RRRES1         | ENSG00000136518 ACTL6A       | ENSG00000139719 VPS3A        | ENSG00000147274 RBMX         | ENSG00000149100 PCID1        | ENSG00000156103 PCDD4        | ENSG00000156394 MMP16        | ENSG00000163694 NP_061900.1  |                              |                       |
| ENSG00000164209 SLC25A46       | ENSG00000170160 Q6ZU57_HUMAN | ENSG00000170279 C7orf33      | ENSG00000173141 MRP63        | ENSG00000173614 NMNAT1       | ENSG00000179941 BBS10        | ENSG00000180228 PRKRA        | ENSG00000184497 FAM70B       |                              |                       |
| ENSG00000185009 AP3M1          | ENSG00000198798 MAGEB3       | ENSG00000198860 C10orf19     |                              |                              |                              |                              |                              |                              |                       |
| AGTAAAC                        | ENSG00000004142 POLDDIP2     | ENSG00000077009 ITGB1BP3     | ENSG00000090857 NP_060460.3  | ENSG00000096384 HSP90AB1     | ENSG00000100429 HDAC10       | ENSG00000100918 REC8         | ENSG00000101457 DNTTIP1      | ENSG00000102854 MSLN         |                       |
| ENSG00000103023 NP_001073961.1 | ENSG00000105549 THEG         | ENSG00000107902 NP_071409.2  | ENSG00000121083 DYNLL2       | ENSG00000125633 CCDC93       | ENSG00000128322 IGLL1        | ENSG00000130005 GAMT         | ENSG00000146047 HIST1H2BA    |                              |                       |
| ENSG00000160284 C21orf56       | ENSG00000160799 CCDC12       | ENSG00000163820 FYCO1        | ENSG00000165837 Q5W0A0_HUMAN | ENSG00000167112 TRUB2        | ENSG00000168925 CTRB1        | ENSG00000178952 TUFM         | ENSG00000182351 CRIP1        |                              |                       |
| ENSG00000185522 C11orf35       | ENSG00000197697 HIST1H2BE    | ENSG00000198931 APRT         | ENSG00000203784 LELP1        | ENSG00000203945 Q5JPQ1_HUMAN | ENSG00000205434 Q6ZU34_HUMAN | ENSG00000205522 LOC255411    | ENSG00000205878 Q6ZSV2_HUMAN |                              |                       |
| ENSG00000206066 IGLL3          | ENSG00000066739 C14orf103    | ENSG00000104177 MYEF2        | ENSG00000105677 TMEM147      | ENSG00000106591 MRPL32       | ENSG00000125037 TMEM111      | ENSG00000127995 CASD1        | ENSG00000128699 ORMDL1       |                              |                       |
| ENSG00000131351 NP_219485.1    | ENSG00000134198 TSPAN2       | ENSG00000136542 GALNT5       | ENSG00000137831 UACA         | ENSG00000145451 GLRA3        | ENSG00000164308 NP_071745.1  | ENSG00000165449 SLC16A9      | ENSG00000165527 ARF6         |                              |                       |
| ENSG00000165807 C14orf50       | ENSG00000169435 RASSF6       | ENSG00000169714 CNBP         | ENSG00000174106 LEMD3        | ENSG00000176624 RKHD2        | ENSG00000177343 PBOV1        | ENSG00000179476 C14orf28     | ENSG00000183520 UTP11L       |                              |                       |
| ENSG00000187155 CU085_HUMAN    | ENSG00000206532 Q1RNO0_HUMAN |                              |                              |                              |                              |                              |                              |                              |                       |
| AGTAAAT                        | ENSG000000048707 VPS13D      | ENSG00000070495 JMJ3         | ENSG00000126970 KIAA1166     | ENSG00000130147 SH3BP4       | ENSG00000130997 POLN         | ENSG00000159461 AMFR         | ENSG00000166435 XRR1         | ENSG00000167612 ANKRD33      |                       |
| ENSG00000170684 ZNF342         | ENSG00000170925 TEX13B       | ENSG00000173757 STAT5B       | ENSG00000181396 NP_078924.1  | ENSG00000182013 NP_060685.2  | ENSG00000198003 NP_659482.3  | ENSG00000204385 CTL4_HUMAN   | ENSG00000206066 IGLL3        |                              |                       |
| ENSG00000036549 ZZZ3           | ENSG00000087299 L2HGDH       | ENSG00000090686 USP48        | ENSG00000105971 CAV2         | ENSG00000107105 ELAVL2       | ENSG00000107186 MPDZ         | ENSG00000111726 CMAS         | ENSG00000117600 NP_055654.2  |                              |                       |
| ENSG00000122644 ARL4A          | ENSG00000131023 LATS1        | ENSG00000135537 LACE1        | ENSG00000140367 UBE2Q2       | ENSG00000151239 TWFL1        | ENSG00000152463 OLAH         | ENSG00000152977 ZIC1         | ENSG00000164744 SUNCI        |                              |                       |
| ENSG00000165097 AOF1           | ENSG00000165338 HECTD2       | ENSG00000169429 IL8          | ENSG00000170748 HNRGT_HUMAN  | ENSG00000170873 MTSS1        | ENSG00000170899 GSTA4        | ENSG00000171759 PAH          | ENSG00000178177 LCORL        |                              |                       |
| ENSG00000182359 KFTBDB3        | ENSG00000183878 UTY          | ENSG00000189308 LINS4        | ENSG00000197279 ZNF165       | ENSG00000198533 Q9P1D0_HUMAN |                              |                              |                              |                              |                       |
| AGTAACA                        | ENSG00000088926 F11          | ENSG00000089169 RPH3A        | ENSG00000099956 SMARCB1      | ENSG00000100335 SMCR7L       | ENSG00000119772 DNMT3A       | ENSG00000123243 ITIH5        | ENSG00000124678 TCP11        | ENSG00000127362 TAS2R3       |                       |
| ENSG00000133460 SLC2A11        | ENSG00000151376 ME3          | ENSG00000163394 CKAR         | ENSG00000166763 STRC         | ENSG00000167394 ZNF668       | ENSG00000173786 CNP          | ENSG00000177791 MYO21        | ENSG00000182372 C8orf61      |                              |                       |
| ENSG00000186318 BACE1          | ENSG00000196186 Q71RF5_HUMAN | ENSG00000196374 HIST1H2BM    | ENSG00000197296 C20orf142    | ENSG00000204274 Q6ZSG4_HUMAN | ENSG00000204540 PSORS1C1     | ENSG00000011201 KAL1         | ENSG00000074696 PTPLAD1      |                              |                       |
| ENSG00000088213 C5orf22        | ENSG00000085514 PILRA        | ENSG00000107789 MINP1        | ENSG00000112146 FBXO9        | ENSG00000115183 TANC1        | ENSG00000117602 DSRCL2       | ENSG00000121361 KCNJ8        | ENSG00000127603 MACF1        |                              |                       |
| ENSG00000129208 THAP10         | ENSG00000133103 COG6         | ENSG00000133805 CEP11        | ENSG00000134255 CEP11        | ENSG00000134330 Q6PCA9_HUMAN | ENSG00000136122 C13orf34     | ENSG00000139977 NAT12        | ENSG00000144619 CNTN4        |                              |                       |
| ENSG00000164128 NPY1R          | ENSG00000164283 ESM1         | ENSG00000168036 CTNNB1       | ENSG00000176018 LYSMD3       | ENSG00000182107 TMEM30B      | ENSG00000183145 DSCR6        | ENSG00000196115 XR_017859.1  | ENSG00000197646 PCDD1LG2     |                              |                       |
| AGTAACG                        | ENSG00000006740 RICH2_HUMAN  | ENSG00000012171 SEMA3B       | ENSG00000084754 HADHA        | ENSG00000101474 C20orf3      | ENSG00000105278 KIAA1086     | ENSG00000116584 ARHGEF2      | ENSG00000123338 NCKAP1L      | ENSG00000127616 SMARCA4      |                       |
| ENSG00000131435 PDLIM4         | ENSG00000133980 C14orf115    | ENSG00000135148 TRAFD1       | ENSG00000136878 USP20        | ENSG00000140443 IGF1R        | ENSG00000141854 Q96FF7_HUMAN | ENSG00000145014 TMEM44       | ENSG00000148288 GBGT1        |                              |                       |
| ENSG00000153956 CACNA2D1       | ENSG00000160326 SLC2A6       | ENSG00000163545 NUAK2        | ENSG00000168137 SETD5        | ENSG00000174576 NPAS4        | ENSG00000177066 Q8NCU6_HUMAN | ENSG00000178789 CD300LB      | ENSG00000179240 Q3ZCU0_HUMAN |                              |                       |
| ENSG00000183506 NP_955377.2    | ENSG00000185379 RAD51L3      | ENSG00000185917 SETD4        | ENSG00000186837 C21orf119    | ENSG00000196557 CACNA1H      | ENSG00000197136 PCNXL3       | ENSG00000203746 FCGR2C       | ENSG00000204308 RNF5         |                              |                       |
| ENSG00000205452 Q6ZQ09_HUMAN   | ENSG00000206152 Q6ZV52_HUMAN | ENSG00000207697 IFNGR1       | ENSG00000079102 RUNX1T1      | ENSG00000079785 DDX11        | ENSG00000104537 ANXA13       | ENSG00000104763 ASAH1        | ENSG00000107623 GDF10        |                              |                       |
| ENSG00000109519 GRPEL1         | ENSG00000123594 ATXN3L       | ENSG00000124209 RAB22A       | ENSG00000137691 C11orf70     | ENSG00000143226 FCGR2A       | ENSG00000165494 PCF11        | ENSG00000170266 GLB1         | ENSG00000182217 HIST2H4B     |                              |                       |
| ENSG00000183475 ASB7           | ENSG00000183941 HIST2H4A     | ENSG00000189190 ZNF600       | ENSG00000196563 Q9H375_HUMAN | ENSG00000198040 ZNF84        | ENSG00000205758 CRYZL1       |                              |                              |                              |                       |
| ENSG00000004059 ARF5           | ENSG00000101346 POFUT1       | ENSG00000116698 SMY7         | ENSG00000118194 TNNT2        | ENSG00000119720 C14orf102    | ENSG00000123411 IKZF4        | ENSG00000125746 EML2         | ENSG00000135414 GDF11        |                              |                       |
| ENSG00000143171 RXRG           | ENSG00000152104 PTPN14       | ENSG00000163155 LYSMD1       | ENSG00000163191 S100A11      | ENSG00000165275 RGMTD3       | ENSG00000166024 C10orf28     | ENSG00000167100 SAMD14       | ENSG00000172578 KLHL6        |                              |                       |
| ENSG00000175756 AURKAIP1       | ENSG00000185043 CIB1         | ENSG00000203709 C1orf132     | ENSG00000204168 Q6ZRI1_HUMAN | ENSG00000204392 LSM2         | ENSG00000204418 CLIC1        | ENSG00000057019 DCBLD2       | ENSG00000089123 TASP1        |                              |                       |
| ENSG00000101190 TCFL5          | ENSG00000102189 EEA1         | ENSG00000105866 SP4          | ENSG00000106392 C1GALT1      | ENSG00000109738 GLRB         | ENSG00000113595 TRIM23       | ENSG00000128534 LSM8         | ENSG00000136936 XPA          |                              |                       |
| ENSG00000139168 ZCRB1          | ENSG00000139239 XR_017789.1  | ENSG00000150681 RGS18        | ENSG00000151116 UEVLD        | ENSG00000153914 SFRS12       | ENSG00000154144 TBRG1        | ENSG00000157869 RAB28        | ENSG00000164022 SCYE1        |                              |                       |
| ENSG00000166986 MARS           | ENSG00000173451 THAP2        | ENSG00000175455 CCDC14       | ENSG00000177425 PAWR         | ENSG00000182986 NP_997216.2  | ENSG00000186468 RPS23        | ENSG00000189149 FLJ41766     | ENSG00000197601 MLSTD2       |                              |                       |
| ENSG00000197860 SGTB           | ENSG00000197930 ERO1L        | ENSG00000198015 MRPL42       | ENSG00000198304 ZNF528       |                              |                              |                              |                              |                              |                       |
| AGTACCA                        | ENSG00000006831 ADIPOR2      | ENSG00000111877 MCM9         | ENSG00000169093 ASMTL        | ENSG00000169469 SPRR1B       | ENSG00000169972 PUSL1        | ENSG00000170743 SYT9         | ENSG00000183260 C20orf135    | ENSG00000183399 Q7L8T7_HUMAN |                       |
| ENSG00000183666 LOC728411      | ENSG00000186038 HTR3E        | ENSG00000196396 PTPN11       | ENSG00000197136 PCNXL3       | ENSG00000197816 KIAA1529     | ENSG00000198237 GUSL1_HUMAN  | ENSG00000206083 ZNF409       | ENSG00000018510 AGPS         |                              |                       |
| ENSG000000081026 MAGI3         | ENSG00000081386 ZNF510       | ENSG00000092470 WDR76        | ENSG00000095139 ARCN1        | ENSG00000103479 RBL2         | ENSG00000103479 RBL2         | ENSG00000104497 SNX16        | ENSG00000112667 C6orf108     |                              |                       |
| ENSG00000123165 ACTR11         | ENSG00000125363 AMELX        | ENSG00000126088 UROD         | ENSG00000127311 HELB         | ENSG00000127328 RAB3IP       | ENSG00000129007 CALML4       | ENSG00000132122 SPATA6       | ENSG00000139970 RTN1         |                              |                       |
| ENSG0                          |                              |                              |                              |                              |                              |                              |                              |                              |                       |

AGTATGC ENSG00000138336|CXXC6 ENSG00000163297|ANTXR2 ENSG00000168564|CDKN2AIP ENSG00000169621|C2orf13 ENSG00000170852|KBTBD2 ENSG00000197601|MLSTD2 ENSG00000198162|MAN1A2 ENSG00000141294|LRRC46  
AGTATGC ENSG000000003147|ICA1 ENSG000000048471|NP\_001073999.1 ENSG000000087589|C2orf32 ENSG00000095015|MAP3K1 ENSG00000096384|HSP90AB1 ENSG00000104738|MCM4 ENSG00000105695|MAG ENSG00000178057|C3orf60  
AGTATGC ENSG00000142920|ADC ENSG00000153468|TCF10\_HUMAN ENSG00000159685|CHCHD6 ENSG00000165138|ANKS6 ENSG00000165863|C10orf82 ENSG00000169814|BTD ENSG00000170473|WIBG ENSG00000178921|PFAS  
AGTATGC ENSG00000180638|NP\_690872.2 ENSG00000180644|PRF1 ENSG00000197043|ANXA6 ENSG00000197838|CYP2A13 ENSG00000204771|Q8ND95\_HUMAN ENSG00000005187|ACSM3 ENSG00000055208|MAP3K7IP2 ENSG00000070950|RAD18  
AGTATGC ENSG000000091527|CDV3 ENSG00000102024|PLS3 ENSG00000109390|NDUFC1 ENSG00000125675|GRIA3 ENSG00000135968|GCC2 ENSG00000138379|GDF8 ENSG00000138767|CNOT6L ENSG00000142507|PSMB6  
AGTATGC ENSG00000143742|SRP9 ENSG00000152939|MARVELD2 ENSG00000154059|IMPACT ENSG00000162688|AGL ENSG00000163960|UBXD7 ENSG00000172361|CCDC11 ENSG00000173876|NP\_817124.1 ENSG00000179399|GPC5  
AGTATGC ENSG00000182077|PTCHD3 ENSG00000184517|ZFP1 ENSG00000189277|NP\_997365.2 ENSG00000198105|ZNF248 ENSG00000125746|EML2 ENSG00000147117|ZNF157 ENSG00000147536|GINS4 ENSG00000148773|MKI67  
AGTATGC ENSG00000073050|XRCC1 ENSG00000095015|MAP3K1 ENSG00000103550|NP\_001013009.2 ENSG00000110536|NDUFS3 ENSG00000166140|ZFYVE19 ENSG00000168002|POLR2G ENSG00000176749|CDK5R1 ENSG00000178057|C3orf60  
AGTATGC ENSG00000149262|INTS4 ENSG00000149397|HMBS ENSG00000152291|TGOLN2 ENSG00000158055|GRHL3 ENSG00000166140|ZFYVE19 ENSG00000168002|POLR2G ENSG00000176749|CDK5R1 ENSG00000178057|C3orf60  
AGTATGC ENSG00000182054|IDH2 ENSG00000198831|Q8IYX2\_HUMAN ENSG00000204248|COL11A2 ENSG00000205742|Q6ZTR4\_HUMAN ENSG00000049247|UTS2 ENSG00000052723|NP\_079349.1 ENSG00000067208|EVI5 ENSG00000076003|MCM6  
AGTATGC ENSG00000106644|HIF1A ENSG00000107651|SEC23IP ENSG00000107938|C10orf137 ENSG00000107968|MAP3K8 ENSG00000110429|FBXO3 ENSG00000112697|TMEM30A ENSG00000120727|PAIP2  
AGTATGC ENSG00000123124|WWP1 ENSG00000123240|OPTN ENSG00000136155|SCEL ENSG00000136161|RCBTB2 ENSG00000140015|KCNH5 ENSG00000145384|FABP2 ENSG00000146278|PNRC1 ENSG00000148143|ZNF462  
AGTATGC ENSG00000160131|NP\_001017980.1 ENSG00000162701|DENND1B ENSG00000163738|MTHFD2L ENSG00000165338|HECTD2 ENSG00000165572|KBTBD6 ENSG00000171877|FRMD5 ENSG00000174579|MSL2L1 ENSG00000175087|PDIK1L  
AGTATGC ENSG00000182977|Q9P111\_HUMAN ENSG00000189290|XR\_018254.1 ENSG00000197959|DNM3 ENSG00000102100|SLC35A2 ENSG00000102385|DRP2 ENSG00000125954|FNTB ENSG00000129194|SOX15 ENSG00000131378|RFTN1  
AGTATGC ENSG00000008256|PSCD3 ENSG00000035862|TIMP2 ENSG00000099954|CECR2 ENSG00000102100|SLC35A2 ENSG00000102385|DRP2 ENSG00000125954|FNTB ENSG00000129194|SOX15 ENSG00000131378|RFTN1  
AGTATGC ENSG00000132275|KIAA0409 ENSG00000132846|ZBED3 ENSG00000135723|FHOD1 ENSG00000137076|TLN1 ENSG00000141562|NARF ENSG00000147065|MSN ENSG00000158716|DUSP23 ENSG00000160716|CHRN2  
AGTATGC ENSG00000163930|BAP1 ENSG00000164091|TMEM113 ENSG00000165046|LBTM2 ENSG00000167815|PRDX2 ENSG00000168421|RIPK4 ENSG00000183691|NOG  
AGTATGC ENSG00000183873|SCN5A ENSG00000184108|TRIML1 ENSG000002021461|CYP3A43 ENSG00000034677|RNFI9 ENSG00000080822|CLDN1 ENSG00000086666|ZFAND6 ENSG00000105793|GTPBP10  
AGTATGC ENSG00000106701|PDL1L ENSG00000107560|RAB11FIP2 ENSG00000108443|RPS6KB1 ENSG00000110576|HPS5 ENSG00000112531|QKI ENSG00000112851|ERBB2IP ENSG00000115084|SLC35F5  
AGTATGC ENSG00000122008|POLK ENSG00000122417|ODF2L ENSG00000127947|PTPN12 ENSG00000134371|CDC73 ENSG00000134389|CFHR5 ENSG00000143494|VASH2 ENSG00000148516|ZEB1 ENSG00000150625|GPM6A  
AGTATGC ENSG00000153933|DGKE ENSG00000155008|APOOL ENSG00000162980|ARL5A ENSG00000165072|MAMDC2 ENSG00000165410|CFI2 ENSG00000168282|MGAT2 ENSG00000168952|STXBP6 ENSG00000169554|ZEB2  
AGTATGC ENSG00000172243|CLEC7A ENSG00000173451|THAP2 ENSG00000173705|SUSD5 ENSG00000176165|FOXG1B ENSG00000182831|C16orf72 ENSG00000183878|UTY ENSG00000198498|NP\_060822.1 ENSG00000205299|CKLF  
perfect: AGTATTA TAATACT hsa-miR-200b TAATACTgccttggaatgatgac 0  
perfect: AGTATTA TAATACT hsa-miR-429 TAATACTgtctggtaaaaccgt 0  
perfect: AGTATTA TAATACT hsa-miR-200c TAATACTgccgggtaaatgatgg 0  
AGTATTC ENSG00000064309|CDON ENSG00000070601|FRMPD1 ENSG00000078295|ADCY2 ENSG00000087086|FTL ENSG00000101276|C2orf54 ENSG00000110245|APOC3 ENSG00000112763|BTN2A1 ENSG00000116604|MEF2D  
AGTATTC ENSG00000127511|SIN3B ENSG00000129559|NEDD8 ENSG00000147255|IGSF1 ENSG00000158445|KCNB1 ENSG00000164403|SHROOM1 ENSG00000186191|C2orf186 ENSG00000186577|C6orf1 ENSG00000196767|POU3F4  
AGTATTC ENSG00000197194|Q6VEP3\_HUMAN ENSG00000198397|A2A3T8\_HUMAN ENSG00000204323|Q71RC9\_HUMAN ENSG00000205726|ITSN1 ENSG00000047634|SML1 ENSG00000055147|C5orf3 ENSG00000100249|C2orf31 ENSG00000120756|PLS1  
AGTATTC ENSG00000131791|PRKAB2 ENSG00000134873|CLDN10 ENSG00000137040|RANBP6 ENSG00000137414|FAM8A1 ENSG00000138346|DNA2L ENSG00000138468|SENP7 ENSG00000138483|CCDC54  
AGTATTC ENSG00000138801|PAPSS1 ENSG00000144118|RALB ENSG00000144306|SCRN3 ENSG00000146376|ARHGAP18 ENSG00000146802|TMEM168 ENSG00000152022|LTX1L ENSG00000152749|GPR180 ENSG00000163638|ADAMTS9  
AGTATTC ENSG00000165525|SDCCAG1 ENSG00000165650|PDZD8 ENSG00000174405|LIG4 ENSG00000188921|PTPLAD2 ENSG00000197707|Q9H363\_HUMAN ENSG00000197991|PCDH20 ENSG00000198964|SGMS1  
AGTATTC ENSG000000011021|CLCN6 ENSG00000071246|VASH1 ENSG00000088812|ATRN ENSG00000114735|HEM1 ENSG00000119535|CSF3R ENSG00000140848|CPNE2 ENSG00000141504|SAT2 ENSG00000144233|AMMECR1L  
AGTATTC ENSG00000144677|CTDSP1 ENSG00000145819|ARHGAP26 ENSG00000154319|C8orf13 ENSG00000157379|DHR51 ENSG00000157514|TSC22D3 ENSG00000159189|C1QC ENSG00000167112|TRUB2 ENSG00000169635|HTC2  
AGTATTC ENSG00000173027|WBP1 ENSG00000178828|RNFI86 ENSG00000187122|ARHGAP19 ENSG00000197461|PDGFA ENSG00000206193|Q5HYA3\_HUMAN ENSG00000049323|LTBP1 ENSG00000100568|VTI1B ENSG00000114541|FRMD4B  
AGTATTC ENSG00000116285|ERRFI1 ENSG00000116729|GPR177 ENSG00000120526|NUDCD1 ENSG00000127483|HP1BP3 ENSG00000132639|SNAP25 ENSG00000133393|C16orf63 ENSG00000135763|KIAA0133 ENSG00000156469|MTERFD1  
AGTATTC ENSG00000159216|RUNX1 ENSG00000176105|YES1 ENSG00000182004|SNRPE ENSG00000182983|ZNF662 ENSG00000183098|GPC6 ENSG00000183324|NP\_001035826.1 ENSG00000184735|DDX53 ENSG00000188647|PTAR1  
AGTATTT ENSG00000017797|RALBP1 ENSG00000040531|CTNS ENSG00000085185|BCORL1 ENSG00000088305|DNMT3B ENSG00000100109|TFIP11 ENSG00000100335|SMCR7L ENSG00000112562|SMOC2 ENSG00000136802|LRRC8A  
AGTATTT ENSG00000140632|NP\_115958.2 ENSG00000141084|RANBP10 ENSG00000143127|ITGA10 ENSG00000143614|GATAD2B ENSG00000144712|CAND2 ENSG00000148358|GPR107 ENSG00000153060|TEKT5 ENSG00000155984|TMEM185A  
AGTATTT ENSG00000166578|IQCD ENSG00000170653|ATF7 ENSG00000170876|TMEM43 ENSG00000182315|NP\_653215.1 ENSG00000182712|MTCP1 ENSG00000189196|Q6ZUD9\_HUMAN ENSG00000189339|SLC35E2 ENSG00000196132|MYT1\_HUMAN  
AGTATTT ENSG00000204463|BAT3 ENSG00000205718|LOC653656 ENSG00000212983|MAP4K5 ENSG00000080200|NP\_705833.2 ENSG00000102781|KATNAL1 ENSG00000104951|NUP62 ENSG00000107105|ELAVL2 ENSG00000113525|IL5  
AGTATTT ENSG00000115414|FNI1 ENSG00000116830|TTF2 ENSG00000118513|MYB ENSG00000132424|C6orf111 ENSG00000138434|SSF4 ENSG00000143033|MTF2 ENSG00000143631|FLG ENSG00000146242|TPBG  
AGTATTT ENSG00000147601|TERF1 ENSG00000152942|RAD17 ENSG00000154589|LY96 ENSG00000154642|C21orf91 ENSG00000155893|ACPL2 ENSG00000162664|ZNF326 ENSG00000164283|ESM1 ENSG00000164930|FZD6  
AGTATTT ENSG00000165338|HECTD2 ENSG00000170786|NP\_620419.2 ENSG00000180398|MCFD2 ENSG00000183496|RKHD3 ENSG00000183844|FAM3B ENSG00000184886|PIGW ENSG00000185261|C5orf36 ENSG00000188177|ZC3H6  
AGTATTT ENSG00000196792|STRN3 ENSG00000196792|STRN3  
AGTCAAT ENSG000000089116|LHX5 ENSG00000103353|UBFD1 ENSG00000116726|PRAMEF12 ENSG00000129465|RIPK3 ENSG00000130032|PRR3 ENSG00000138294|MSMB ENSG00000142583|SLC2A5 ENSG00000142675|CNKSR1  
AGTCAAT ENSG00000142765|SYTL1 ENSG00000157093|LYZL4 ENSG00000160408|ST6GALNAC6 ENSG00000160862|AZGP1 ENSG00000167178|ISLR2 ENSG00000168924|LETM1 ENSG00000169217|CD2BP2 ENSG00000175309|AGXT2L2  
AGTCAAT ENSG00000176261|ZBTB80S ENSG00000177791|MYOZ1 ENSG00000183077|AFMID ENSG00000198520|NP\_001004307.1 ENSG00000203782|LOR ENSG00000205972|Q8NBCO\_HUMAN ENSG00000004948|CALCR ENSG00000062096|ARSF  
AGTCAAT ENSG00000067955|CFBF ENSG00000070501|POLB ENSG00000101938|CHRDL1 ENSG00000106258|CYP3A5 ENSG00000107566|CHUK ENSG00000110367|DDX6 ENSG00000125675|GRIA3 ENSG00000133731|IMPA1  
AGTCAAT ENSG00000134962|KLB ENSG00000137757|CASP5 ENSG00000138068|STGB1\_HUMAN ENSG00000145284|SCD5 ENSG00000145794|MEGF10 ENSG00000148848|ADAM12 ENSG00000154645|CHODL ENSG00000163328|GPR155  
AGTCAAT ENSG00000166927|MS4A7 ENSG00000168273|Q8WV10\_HUMAN ENSG00000168566|C6orf151 ENSG00000171843|MLLT3 ENSG00000178965|C1orf173 ENSG00000187533|NP\_999876.1 ENSG00000203667|FAM36A  
AGTCAAT ENSG00000008516|MMP25 ENSG0000013573|DDX11 ENSG00000059378|PARP12 ENSG00000100030|MAPK1 ENSG00000100439|ABHD4 ENSG00000100968|NFATC4 ENSG00000107954|NEURL ENSG00000125409|TEKT3  
AGTCAAT ENSG00000136827|TOR1A ENSG00000136830|FAM129B ENSG00000140830|TXNL4B ENSG00000141699|NP\_835227.1 ENSG00000141977|CTIB3 ENSG00000144741|SLC25A26 ENSG00000148396|KIAA0310 ENSG00000154957|ZNF18  
AGTCAAT ENSG00000164108|Q9HAF2\_HUMAN ENSG00000168569|NP\_001073970.1 ENSG00000172803|NP\_689973.2 ENSG00000181625|GIYD2 ENSG00000184012|TMPRSS2 ENSG00000184261|KCNK12 ENSG00000187953|NR\_002217.1 ENSG00000189430|NCR1  
AGTCAAT ENSG00000196230|TUBB ENSG00000196502|SULT1A1 ENSG00000196652|ZKSCAN5 ENSG00000205609|Q9BW98\_HUMAN ENSG00000205795|CYS1 ENSG00000206126|Q6ZV82\_HUMAN ENSG00000054219|LY75 ENSG00000057019|DCBLD2  
AGTCAAT ENSG00000100596|SPTLC2 ENSG00000111897|SERINC1 ENSG00000115541|HSPE1 ENSG00000117751|PPP1R8 ENSG00000132207|SULT1A3 ENSG00000135052|C9orf155 ENSG00000142182|DNMT3L ENSG00000151470|C4orf33  
AGTCAAT ENSG00000166206|GABRB3 ENSG00000166986|MARS ENSG00000169255|B3GALNT1 ENSG00000171109|MFN1 ENSG00000172296|SPTLC3 ENSG00000196199|MPP8\_HUMAN ENSG00000196611|MMP1 ENSG00000198855|NP\_009007.2  
AGTCCGG ENSG00000054611|TBC1D22A ENSG00000088256|GNA11 ENSG00000100075|SLC25A1 ENSG00000103197|TSC2 ENSG00000105063|SAPS1 ENSG00000105618|PRPF31 ENSG00000106336|FBXO24 ENSG00000134470|IL15RA  
AGTCCGG ENSG00000136717|BIN1 ENSG00000140511|HAPLN3 ENSG00000152049|KCNE4 ENSG00000153551|CMT7 ENSG00000160117|ANKRD41 ENSG00000160200|CBS ENSG00000160796|NBEAL2 ENSG00000167658|EEF2  
AGTCCGG ENSG00000169876|MUC17 ENSG00000170442|KRT86 ENSG00000172460|Q8IVY7\_HUMAN ENSG00000174527|MYO1H ENSG00000185825|BCAP31 ENSG00000204847|FAM74A1 ENSG00000154755|BID ENSG00000091527|CDV3  
AGTCCGG ENSG00000099260|PALMD ENSG00000106809|OGN ENSG00000107485|GATA3 ENSG00000110048|OSBP ENSG00000128294|TPST2 ENSG00000134762|DSC3 ENSG00000151617|EDNRA ENSG00000154447|SH3RF1  
AGTCCGG ENSG00000157540|DYRK1A ENSG00000161573|CCL12 ENSG00000165512|ZNF22 ENSG000001066971|AKT1P ENSG00000170044|ZPLD1 ENSG00000175643|C16orf75 ENSG00000182090|C14orf25 ENSG00000185304|NP\_001071638.1  
AGTCCCTA ENSG00000185915|KLHL34 ENSG00000187627|RGPD1 ENSG00000197170|PSMD12 ENSG00000198121|EDG2 ENSG00000205612|Q71JB2\_HUMAN  
AGTCCCTA ENSG00000077274|CAPN6 ENSG00000078814|MYH7B ENSG00000092094|OSGEP ENSG00000118257|NRP2 ENSG00000121775|TMEM39B ENSG00000126244|SLFN3 ENSG00000130653|PNPLA7 ENSG00000134287|ARF3  
AGTCCCTA ENSG00000157992|KRTCAP3 ENSG00000158874|APOA2 ENSG00000163026|C2orf44 ENSG00000163833|FBXO40 ENSG00000166199|ALKBH3 ENSG00000175003|SLC22A1 ENSG00000178764|ZHX2 ENSG00000179335|CLK3  
AGTCCCTA ENSG00000184110|EIF3S8 ENSG00000197322|NP\_997337.1 ENSG00000205609|Q9BW98\_HUMAN ENSG00000009780|FAM76A ENSG00000066405|CLDN18 ENSG00000070669|ASNS ENSG00000094755|GABRP ENSG00000104320|NBN  
AGTCCCTA ENSG00000112146|FBXO9 ENSG00000113249|HAVCR1 ENSG00000114279|FGF12 ENSG00000116962|NID1 ENSG00000120217|CD274 ENSG00000127831|VIL1 ENSG00000128253|RFPL2 ENSG00000134853|PDGFRA  
AGTCCCTA ENSG00000137960|GPCP2 ENSG00000151575|TEX9 ENSG00000163217|BMP10 ENSG00000167193|CRK ENSG00000170962|PDGFD ENSG00000173610|UGT2A1 ENSG00000177189|RPS6KA3 ENSG00000185306|C12orf56  
AGTCCCTC ENSG00000105251|SHD ENSG00000115255|REEP6 ENSG00000115592|PRKAG3 ENSG00000119487|MAPKAP1 ENSG00000130518|KIAA1683 ENSG00000143434|SEMA6C ENSG00000167139|TBC1D21 ENSG00000173818|NP\_775898.2  
AGTCCCTC ENSG00000174640|SLCO2A1 ENSG00000177542|SLC25A22 ENSG00000183160|TMEM119 ENSG00000185499|MUC1 ENSG00000205673|Q6ZRXO\_HUMAN ENSG00000205745|Q71MF4\_HUMAN ENSG00000206323|Q6ZRN5\_HUMAN ENSG00000066405|CLDN18  
AGTCCCTC ENSG00000093000|NUP50 ENSG00000114030|KPNA1 ENSG00000117281|CD160 ENSG00000132825|PPP1R3D ENSG00000135052|C9orf155 ENSG00000136379|FAM108C1 ENSG00000143552|NUP210L ENSG00000146109|ABT1  
AGTCCCTC ENSG00000157456|CENB2 ENSG00000159658|KIAA0494 ENSG00000165185|KIAA1958 ENSG00000171877|FRMD5 ENSG00000177189|RPS6KA3 ENSG00000176715|VKORC1L1 ENSG00000205637|Q6ZSL6\_HUMAN  
AGTCCCTC ENSG00000002330|BAD ENSG00000004142|POLDIP2 ENSG00000064607|SFRS14 ENSG00000070182|SPTB ENSG00000101335|MYL9 ENSG00000105137|SYDE1 ENSG00000112562|SMOC2 ENSG00000129455|KLK8  
AGTCCCTC ENSG00000135365|PHF21A ENSG00000142252|GEMIN7 ENSG00000148926|ADM ENSG00000147387|RNFI166 ENSG00000159650|UROC1 ENSG00000160307|S100B ENSG00000167182|SP2  
AGTCCCTC ENSG00000169900|PYDC1 ENSG00000173020|ADRBK1 ENSG00000173546|CSPG4 ENSG00000177380|PPFIA3 ENSG00000178554|Q8ND84\_HUMAN ENSG00000185112|FAM43A ENSG00000186185|NP\_001073912.1 ENSG00000187796|CARD9  
AGTCCCTC ENSG00000188677|PARVB ENSG00000188986|NELFB\_HUMAN ENSG00000206197|NP\_001013723.1 ENSG00000185033|TNFAIP3 ENSG00000120833|SOCS2 ENSG00000131724|IL13RA1 ENSG00000137101|RDX ENSG00000147044|CASK  
AGTCCCTC ENSG00000155189|AGPAT5 ENSG00000157554|ERG ENSG00000164144|ARFIP1 ENSG00000166206|GABRB3 ENSG00000168348|INSM2 ENSG00000170871|K0232\_HUMAN ENSG00000185915|KLHL34 ENSG00000196677|C8orf77  
AGTCCGGT ENSG00000070371|CLTCL1 ENSG00000075624|ACTB ENSG00000115207|GTF3C2 ENSG00000117154|IGSF21 ENSG00000134030|KIAA0427 ENSG00000135930|EIF4E2 ENSG00000139880|CDH24 ENSG00000140107|C14orf68  
AGTCCGGT ENSG00000141096|DPEP3 ENSG00000143093|FAM40A ENSG00000160310|PRMT2 ENSG00000171720|HDAC3 ENSG00000183486|MX2 ENSG00000184716|SERINC4 ENSG00000186918|FBXO16 ENSG00000188486|H2AFX  
AGTCCGGT ENSG00000204434|NP\_001017421.1 ENSG00000204443|Q562T6\_HUMAN ENSG00000202976|C14orf131 ENSG00000059758|PCTK2 ENSG00000075413|MARK3 ENSG00000079950|STX7 ENSG00000083750|RRAGB ENSG00000104497|SNX16  
AGTCCGGT ENSG00000108854|SMURF2 ENSG00000120868|APAF1 ENSG00000123096|SSPN ENSG00000124535|WRNIP1 ENSG00000137869|CYP19A1 ENSG00000141448|GATA6 ENSG00000143727|ACPI1 ENSG00000151413|NUPBL ENSG00000154133|NUPBL  
AGTCCGGT ENSG00000164485|IL22RA2 ENSG00000166573|GALR1 ENSG00000167720|SRR ENSG00000172331|BPGM ENSG00000175029|CTBP2 ENSG00000176896|TFSM1\_HUMAN ENSG00000177143|CETN1 ENSG00000198597|ZNF536  
AGTCCGGT ENSG00000204287|HLA-DRA ENSG00000205057|CLU10S ENSG00000205144|Q6ZV43\_HUMAN ENSG00000205595|AREG ENSG00000085063|CD59 ENSG00000087008|ACOX3 ENSG00000101997|CCDC22 ENSG00000115234|SNX17  
AGTCCGGT ENSG00000006042|TMEM98 ENSG00000013306|SLC25A39 ENSG00000027869|SH2D2A ENSG00000085063|CD59 ENSG00000087008|ACOX3 ENSG00000101997|CCDC22 ENSG00000115234|SNX17  
AGTCCGGT ENSG00000115596|WNT6 ENSG00000130612|Q6ZSU1\_HUMAN ENSG00000131389|SLC6A6 ENSG00000132405|TBC1D14 ENSG00000136854|STXBP1 ENSG00000139579|OBFC2B ENSG00000151468|CCDC3 ENSG00000154277|UCHL1  
AGTCCGGT ENSG00000159797|C9orf144 ENSG00000163866|C1orf212 ENSG00000163902|RPN1 ENSG00000164334|NP\_877438.2 ENSG00000165699|TSC1 ENSG00000166582|PRR6 ENSG00000167749|KLK4 ENSG00000169098|CXorf2  
AGTCCGGT ENSG00000172113|NME6 ENSG00000173126|PCP4L1 ENSG00000175520|UOQLN3 ENSG00000176809|LRRC37A3 ENSG00000184209|NP\_008951.1 ENSG00000184788|SATL1 ENSG00000184935|Q6AIG1\_H

|                             |                                |                                |                              |                                |                             |                                |                                |                         |
|-----------------------------|--------------------------------|--------------------------------|------------------------------|--------------------------------|-----------------------------|--------------------------------|--------------------------------|-------------------------|
| ENSG00000186526 CYP4F8      | ENSG00000198930 CSAG1          | ENSG00000067533 RRP15          | ENSG00000072364 AFF4         | ENSG00000075651 PLD1           | ENSG00000088782 DEFB127     | ENSG00000094975 C1orf9         | ENSG00000104325 DECR1          |                         |
| ENSG00000105699 LSR         | ENSG00000105829 BET1           | ENSG00000108854 SMURF2         | ENSG00000111911 HINT3        | ENSG00000115421 PAPOLG         | ENSG00000119285 HEATR1      | ENSG00000123836 PFKFB2         | ENSG00000124209 RAB22A         |                         |
| ENSG00000141325 CCDC45      | ENSG00000147548 WHSC1L1        | ENSG00000152382 TADA1L         | ENSG00000155850 SLC26A2      | ENSG00000156508 EEF1A1         | ENSG00000157680 DGKI        | ENSG00000160049 DFFA           | ENSG00000161594 KLHL10         |                         |
| ENSG00000164252 AGGF1       | ENSG00000167637 ZNF345         | ENSG00000185634 SHC4           | ENSG00000198876 WDR40A       |                                |                             |                                |                                |                         |
| AGTCTAG                     | ENSG00000082805 ERC1           | ENSG00000101082 SLA2           | ENSG00000104081 BMF          | ENSG00000108349 CAS3           | ENSG00000111752 PHC1        | ENSG00000116667 C1orf21        | ENSG00000122188 LAX1           | ENSG00000128567 PODXL   |
| ENSG00000132681 ATP1A4      | ENSG00000135605 TEC            | ENSG00000136193 SCRN1          | ENSG00000145949 SGK85_HUMAN  | ENSG00000147155 EBP            | ENSG00000160401 C9orf117    | ENSG00000179151 EDC3           | ENSG00000182324 KCNJ14         |                         |
| ENSG00000186207 LCE5A       | ENSG00000186638 C9orf48        | ENSG00000189325 NP_001010903.2 | ENSG00000204561 FAM75B       | ENSG00000083720 OXCT1          | ENSG00000100889 PKC2        | ENSG00000102271 KLHL4          | ENSG00000103037 SETD6          |                         |
| ENSG00000110925 FAM130A1    | ENSG00000117598 NP_001010861.1 | ENSG00000131002 Cyorf15B       | ENSG00000134897 BIVM         | ENSG00000136940 PDCL           | ENSG00000147202 DIAPH2      | ENSG00000147869 CER1           | ENSG00000148154 UGCG           |                         |
| ENSG00000154143 PANX3       | ENSG00000163608 C3orf17        | ENSG00000166260 COX11          | ENSG00000167601 AXL          | ENSG00000169836 TACR3          | ENSG00000170873 MTSS1       | ENSG00000173064 C12orf51       | ENSG00000173473 SMARCC1        |                         |
| ENSG00000183023 SLC8A1      | ENSG00000196511 TPK1           |                                |                              |                                |                             |                                |                                |                         |
| AGTCTCA                     | perfect: AGTCTAG CTAGACT       | hsa-miR-151                    | aTAGACTgaagctccttgagg        | 1                              |                             |                                |                                |                         |
| ENSG00000047617 TMEM16B     | ENSG00000074410 CA12           | ENSG00000086102 NFX1           | ENSG00000104848 KCNA7        | ENSG00000106089 STX1A          | ENSG00000110090 CPT1A       | ENSG00000127952 STYXL1         | ENSG00000136802 LRRC8A         |                         |
| ENSG00000143409 FAM63A      | ENSG00000144230 GPR17          | ENSG00000161958 FGF11          | ENSG00000165916 PSMC3        | ENSG00000173456 RNF26          | ENSG00000182541 LIMK2       | ENSG00000183929 DUSP5P         | ENSG00000186261 EMP2           |                         |
| ENSG00000188100 FAM25_HUMAN | ENSG00000197680 INE1           | ENSG00000068878 PSME4          | ENSG00000106028 SSBP1        | ENSG00000113494 PRLR           | ENSG00000121486 C1orf25     | ENSG00000123496 IL13RA2        | ENSG00000131795 RBM8A          |                         |
| ENSG00000133657 ATP13A3     | ENSG00000134489 HRH4           | ENSG00000143390 RF5            | ENSG00000148426 C10orf47     | ENSG00000153246 PLA2R1         | ENSG00000170892 TSEN34      | ENSG00000180917 NP_060818.3    | ENSG00000189067 LITAF          |                         |
| AGTCTGC                     | ENSG00000025800 KPNA6          | ENSG00000088305 DNMT3B         | ENSG00000102996 MMP15        | ENSG00000105221 AKT2           | ENSG00000120471 NP_071395.1 | ENSG00000125485 DDX31          | ENSG00000126856 Q9NQW5-2       | ENSG00000142961 MOBK12C |
| ENSG00000148337 CIZ1        | ENSG00000157978 LDLRAP1        | ENSG00000159352 PSMD4          | ENSG00000172731 LRRC20       | ENSG00000173545 ZNF622         | ENSG00000175294 CATSPER1    | ENSG00000178206 C2orf14        | ENSG00000182953 NM_001031.4    |                         |
| ENSG00000185479 KRT6B       | ENSG00000185608 MRPL40         | ENSG00000196085 C19orf42       | ENSG00000198355 PIM3         | ENSG00000205792 A2D193_HUMAN   | ENSG00000108408 WWTR1       | ENSG00000100890 K1AA0391       | ENSG00000111711 GOLT1B         |                         |
| ENSG00000124098 C2orf108    | ENSG00000132326 PER2           | ENSG00000137098 SPAG8          | ENSG00000143190 POU2F1       | ENSG00000145555 MYO10          | ENSG00000146433 TMEM181     | ENSG00000147874 FAM29A         | ENSG00000156017 C9orf41        |                         |
| ENSG00000157315 TMED6       | ENSG00000163254 CRYGC          | ENSG00000163586 FABP1          | ENSG00000164841 TMEM74       | ENSG00000167383 ZNF229         | ENSG00000170006 TMEM154     | ENSG00000174227 PIGG           | ENSG00000176274 MCART6         |                         |
| ENSG00000187446 CHP1_HUMAN  | ENSG00000197889 MEIG1          | ENSG00000198042 RBM13          |                              |                                |                             |                                |                                |                         |
| AGTCTGT                     | ENSG00000019102 VSI2           | ENSG00000068976 PYGM           | ENSG00000090971 NAT14        | ENSG00000107745 CBARA1         | ENSG00000115112 TFPC2L1     | ENSG00000122254 HS3ST2         | ENSG00000125386 C4orf8         | ENSG00000139779 RNF113B |
| ENSG00000144852 NRI2        | ENSG00000146090 RASGEF1C       | ENSG00000149716 ORAOV1         | ENSG00000155269 GPR78        | ENSG00000163995 ABLIM2         | ENSG00000164010 ERMAP       | ENSG00000174992 ZG16_HUMAN     | ENSG00000176261 ZBTB80S        |                         |
| ENSG00000178015 GPR150      | ENSG00000182040 USH1G          | ENSG00000184009 ACTG1          | ENSG00000198034 RPS4X        | ENSG00000198624 CCDC69         | ENSG00000204210 ZBTB22      | ENSG00000204544 C6orf205       | ENSG00000206189 NR_001550.1    |                         |
| ENSG00000078399 HOXA9       | ENSG00000094975 C1orf9         | ENSG00000095139 ARCN1          | ENSG00000107518 ATRNL1       | ENSG00000109919 MTCH2          | ENSG00000119471 HSDL2       | ENSG00000125863 MKKS           | ENSG00000127588 GNG13          |                         |
| ENSG00000129515 SNX6        | ENSG00000131174 COX7B          | ENSG00000135541 AH11           | ENSG00000138796 HADH         | ENSG00000153037 SRP19          | ENSG00000158301 GPRASP2     | ENSG00000163818 LZTFL1         | ENSG00000184863 PRR8           |                         |
| ENSG00000197584 KCNMB2      | ENSG00000198160 MIER1          | ENSG00000204397 NP_001017534.1 |                              |                                |                             |                                |                                |                         |
| ENSG00000076344 RGS11       | ENSG00000092295 TGM1           | ENSG00000107262 BAG1           | ENSG00000110497 NP_060219.2  | ENSG00000128313 APOL5          | ENSG00000132744 ACY3        | ENSG00000132958 TPTE2          | ENSG00000136485 WDR68          |                         |
| ENSG00000137275 RIPK1       | ENSG00000151360 ALLC           | ENSG00000158006 PFAH2          | ENSG00000158747 NBL1         | ENSG00000162873 KLHDC8A        | ENSG00000169474 SPRR1A      | ENSG00000172350 ABCG4          | ENSG00000177992 C9orf79        |                         |
| ENSG00000180834 MAP6D1      | ENSG00000182450 KCNK4          | ENSG00000183955 SETD8          | ENSG00000205658 Q6ZU6_HUMAN  | ENSG00000003393 ALS2           | ENSG00000072042 RDH11       | ENSG00000082213 C5orf22        | ENSG00000119865 C2orf32        |                         |
| ENSG00000119912 IDE         | ENSG00000120697 ALG5           | ENSG00000125703 ATG4C          | ENSG00000134333 LDHA         | ENSG00000138785 INTS12         | ENSG00000141161 UNC45B      | ENSG00000152779 SLC16A12       | ENSG00000155508 CNOT8          |                         |
| ENSG00000168386 FILIP1L     | ENSG00000169594 BNC1           | ENSG00000183035 CYLC1          | ENSG00000185664 SILV         | ENSG00000186019 ZNF224         | ENSG00000198824 C13orf8     |                                |                                |                         |
| AGTCTTG                     | perfect: AGTCTTC GAAGACT       | hsa-miR-7                      | tgGGAAGACTagtgatgtttgtg      | 2                              |                             |                                |                                |                         |
| ENSG00000016391 CHDH        | ENSG00000077044 DGKD           | ENSG00000108010 TXNL2          | ENSG00000113889 KNG1         | ENSG00000117154 IGSF21         | ENSG00000124570 SERPINB6    | ENSG00000132376 SKIP_HUMAN     | ENSG00000137288 C6orf125       |                         |
| ENSG00000145040 UCN2        | ENSG00000146666 Q96IP2_HUMAN   | ENSG00000147065 MSN            | ENSG00000147570 DNAJC5B      | ENSG00000166436 TRIM66         | ENSG00000170473 WIBG        | ENSG00000171533 MAP6           | ENSG00000183421 RIPK4          |                         |
| ENSG00000183828 NUDT14      | ENSG00000185978 H2AFB3         | ENSG00000188428 TXNDC5         | ENSG00000198082 H2AFB2       | ENSG00000198307 H2AFB2         | ENSG00000204574 ABCF1       | ENSG00000008197 TFAP2D         | ENSG00000058673 ZC3H11A        |                         |
| ENSG00000062716 TMEM49      | ENSG00000086696 HSD17B2        | ENSG00000100652 SLC10A1        | ENSG00000101353 Q9H579-2     | ENSG00000109846 CRVAB          | ENSG00000114450 GNB4        | ENSG00000117758 STX12          | ENSG00000131238 PPT1           |                         |
| ENSG00000137478 FCHSD2      | ENSG00000138757 G3BP2          | ENSG00000151743 AMN1           | ENSG00000152268 SPON1        | ENSG00000152683 SLC30A6        | ENSG00000155850 SLC26A2     | ENSG00000158042 MRPL17         | ENSG00000164924 YWHAZ          |                         |
| ENSG00000165555 C14orf148   | ENSG00000165995 CACNB2         | ENSG00000168778 C12orf38       | ENSG00000179456 ZNF238       | ENSG00000179930 ZNF648         | ENSG00000184863 PRR8        | ENSG00000196345 ZNF167         | ENSG00000205717 MBD3L2         |                         |
| AGTGCAA                     | ENSG00000110721 CHKA           | ENSG00000113552 GNPDA1         | ENSG00000117481 NSUN4        | ENSG00000126353 CCR7           | ENSG00000134490 C18orf45    | ENSG00000142512 SIGLEC10       | ENSG00000143450 OAZ3           | ENSG00000153789 FAM92B  |
| ENSG00000163050 CABC1       | ENSG00000196821 C6orf106       | ENSG00000197174 OL14606_HUMAN  | ENSG00000097285 NR_001536.1  | ENSG00000206083 ZNF409         | ENSG00000005810 MYCBP2      | ENSG00000091664 SLC17A6        | ENSG00000092148 HECTD1         |                         |
| ENSG00000120211 INSL4       | ENSG00000132153 DHX30          | ENSG00000137440 FGFBP1         | ENSG00000138413 DHD1         | ENSG00000140525 K1AA1794       | ENSG00000141448 GATA6       | ENSG00000143164 IQWD1          | ENSG00000153832 FBXO36         |                         |
| ENSG00000164816 DEFA5       | ENSG00000170009 Q9NTH0_HUMAN   | ENSG00000175676 GOLGA8F        | ENSG00000176853 FAM91A1      | ENSG00000186697 Q86T06_HUMAN   | ENSG00000187372 PCDHB13     | ENSG00000197453 NP_001001706.1 | ENSG00000204961 PCDHA9         |                         |
| ENSG00000205773 LOC652517   |                                |                                |                              |                                |                             |                                |                                |                         |
| AGTGCAT                     | perfect: AGTGCAA TTGCAC        | hsa-miR-367                    | aaTTGCACtttagcaatggtgga      | 2                              |                             |                                |                                |                         |
| ENSG00000067561 ARSD        | ENSG00000055070 C1orf144       | ENSG00000073670 ADAM11         | ENSG00000090615 GOLGA3       | ENSG00000119682 K1AA0317       | ENSG00000123999 INHA        | ENSG00000135077 HAVCR2         | ENSG00000151502 VPS26B         |                         |
| ENSG00000155888 LSM11       | ENSG00000159110 IFNAR2         | ENSG00000166152 C16orf78       | ENSG00000182218 K1AA1822     | ENSG00000196263 ZNF471         | ENSG00000197253 TRYA1_HUMAN | ENSG00000059758 PCTK2          | ENSG00000062096 ARSF           |                         |
| ENSG000000087301 K1AA1344   | ENSG00000088782 DEFB127        | ENSG00000101333 PLCB4          | ENSG00000116176 TPSG1        | ENSG00000118434 SPACAL1        | ENSG00000134258 VTCN1       | ENSG00000135547 HEY2           | ENSG00000145349 CAMK2G         |                         |
| ENSG00000154473 BUB3        | ENSG00000154734 ADAMTS1        | ENSG00000185523 NP_001019772.1 | ENSG00000185634 SHC4         | ENSG00000198203 SULT1C2        | ENSG00000198380 GFPT1       | ENSG00000205773 LOC652517      |                                |                         |
| AGTGCCA                     | ENSG00000026036 TNFRSF6B       | ENSG00000055070 C1orf144       | ENSG00000067836 ROGDI        | ENSG00000076351 SLC46A1        | ENSG00000078967 UBE2D4      | ENSG00000085063 CD59           | ENSG00000087250 MT3            | ENSG00000101189 C2orf20 |
| ENSG00000104365 LRKBK       | ENSG00000113070 HBEFG          | ENSG00000114786 ACY1           | ENSG00000118160 SLC8A2       | ENSG00000121653 MAPK8IP1       | ENSG00000128271 ADORA2A     | ENSG00000135454 B4GALNT1       | ENSG00000148468 C10orf38       |                         |
| ENSG00000154096 THY1        | ENSG00000160271 RALGDS         | ENSG00000162298 SVYV1          | ENSG00000166924 NP_775835.2  | ENSG00000169241 RAGLAP1        | ENSG00000174365 NR_003239.1 | ENSG00000178764 ZHX2           | ENSG00000183044 ABAT           |                         |
| ENSG00000185499 MUC1        | ENSG00000185633 NDUFA4L2       | ENSG00000186501 C1orf160       | ENSG00000196588 MKL1_HUMAN   | ENSG00000196987 NP_001034857.2 | ENSG00000197616 MYH6        | ENSG00000204131 NP_00103649.1  | ENSG00000204333 Q6ZTP0_HUMAN   |                         |
| ENSG00000072042 RDH11       | ENSG00000074527 NTN4           | ENSG00000095380 NANS           | ENSG00000105497 ZNF175       | ENSG00000106799 TGFBR1         | ENSG00000124275 MTRR        | ENSG00000132388 UBE2G1         | ENSG00000133703 KRAS           |                         |
| ENSG00000134532 SOX5        | ENSG00000139910 NOVA1          | ENSG00000144749 LRIG1          | ENSG00000145675 PIK3R1       | ENSG00000151418 ATP6V1G3       | ENSG00000152413 HOMER1      | ENSG00000162755 NP_689579.3    | ENSG00000164418 GRIK2          |                         |
| ENSG00000166265 CYR1        | ENSG00000173598 NUDT4          | ENSG00000186105 Q7Z2Q7_HUMAN   | ENSG00000188215 DCUN1D3      | ENSG00000197962 Q8NA16_HUMAN   | ENSG00000198826 ARHGAP11A   |                                |                                |                         |
| AGTGCCG                     | perfect: AGTGCCA TGGCACT       | hsa-miR-183                    | taTGGCACTggttagaattcactg     | 2                              |                             |                                |                                |                         |
| ENSG00000049751 DVL2        | ENSG00000034152 MAP2K3         | ENSG00000039523 FAM65A         | ENSG00000104881 PPP1R13L     | ENSG00000105722 ERF            | ENSG00000108639 SYNGR2      | ENSG00000119403 PHF19          | ENSG00000125826 RBCK1          |                         |
| ENSG00000126952 NXF5        | ENSG00000136327 NKX2-8         | ENSG00000142009 Q9BSM8_HUMAN   | ENSG00000144579 CTDSP1       | ENSG00000145198 Q9BVH8_HUMAN   | ENSG00000159166 LAD1        | ENSG00000162512 SDC3           | ENSG00000173120 FBXL11         |                         |
| ENSG00000176387 K1AA11B2    | ENSG00000177728 K1AA0195       | ENSG00000180935 Q8N8B3_HUMAN   | ENSG00000182796 Q6UW11_HUMAN | ENSG00000196331 HIST1H2B       | ENSG00000196970 NXF4        | ENSG00000197892 KIF13B         | ENSG00000205191 NP_001070148.1 |                         |
| ENSG00000026508 CD44        | ENSG00000038945 MSR1           | ENSG00000039068 CDH1           | ENSG00000066294 CD84         | ENSG00000089177 C2orf23        | ENSG00000104497 SNX16       | ENSG00000117868 FAM62B         | ENSG00000118729 CASQ2          |                         |
| ENSG00000129235 TXNL5       | ENSG00000129353 SLC44A2        | ENSG00000133678 CJ057_HUMAN    | ENSG00000135535 CD164        | ENSG00000137693 YAP1           | ENSG00000145476 CYPA4V2     | ENSG00000175104 TRAF6          | ENSG00000175556 LONRF3         |                         |
| AGTGCTG                     | ENSG00000072182 ACCN4          | ENSG00000075234 NP_060401.2    | ENSG00000100290 BIK          | ENSG00000131018 C6orf98        | ENSG00000133398 MED10       | ENSG00000134575 ACP2           | ENSG00000142789 ELA3A          | ENSG00000149792 MRPL49  |
| ENSG00000160781 PAQR6       | ENSG00000163395 NP_840059.1    | ENSG00000167173 C15orf39       | ENSG00000167476 JSRP1        | ENSG00000167792 NDUFV1         | ENSG00000171649 ZIK1        | ENSG00000172678 OR13A1         | ENSG00000172867 KRT2           |                         |
| ENSG00000175048 ZDHHC14     | ENSG00000176782 DEFB104A       | ENSG00000177023 DEFB104B       | ENSG00000184361 C17orf46     | ENSG00000185000 DGAT1          | ENSG00000198792 C22orf5     | ENSG00000205643 NP_997210.3    | ENSG00000015475 BID            |                         |
| ENSG00000044574 HSPA5       | ENSG00000049319 SRD5A2         | ENSG00000070269 C14orf101      | ENSG00000079385 CEACAM1      | ENSG00000080493 SLC4A4         | ENSG00000128272 ATF4        | ENSG00000134852 CLOCK          | ENSG00000140299 BNIP2          |                         |
| ENSG00000143815 LBR         | ENSG00000144476 CXCR7          | ENSG00000144847 IGSF11         | ENSG00000145555 MYO10        | ENSG00000156011 PSD3           | ENSG00000159212 CLIC6       | ENSG00000165973 NELL1          | ENSG00000171121 KCNMB3         |                         |
| ENSG00000172954 LYCAT       | ENSG00000181847 VSI9           | ENSG00000182551 ADI1           | ENSG00000182774 RS17_HUMAN   | ENSG00000184779 RPS17          | ENSG00000196914 ARHGEF12    | ENSG00000197412 Q8N8G3_HUMAN   | ENSG00000198604 BAZ1A          |                         |
| AGTGCTT                     | ENSG00000066117 SMARCD1        | ENSG00000100056 DGCR14         | ENSG00000101665 SMAD7        | ENSG00000107554 DNMBP          | ENSG00000115641 FHL2        | ENSG00000120071 K1AA1267       | ENSG00000120457 KCNJ5          | ENSG00000124422 USP22   |
| ENSG00000125447 GGA3        | ENSG0000                       |                                |                              |                                |                             |                                |                                |                         |

ENSG00000113971|ACAD11 ENSG00000124783|SSR1 ENSG00000129158|SERGEF ENSG00000133116|KL ENSG00000133121|STARD13 ENSG00000135677|GNS ENSG00000137478|FCHSD2 ENSG00000138795|LEF1  
ENSG00000147465|STAR ENSG00000153292|GPR110 ENSG00000162669|NP\_001017975.3 ENSG00000165525|SDCCAG1 ENSG00000170009|Q9NTHO\_HUMAN ENSG00000171862|PTENP1 ENSG00000172493|AFF1 ENSG00000179933|C14orf119  
ENSG00000185842|Q4VXG5\_HUMAN ENSG00000187123|LYPD6  
AGTGGTC ENSG00000177312|SNRPA ENSG000001886548|CEACAM6 ENSG00000187088|BAX ENSG00000100227|POLDIP3 ENSG00000100721|TCL1A ENSG00000103742|NP\_066013.1 ENSG00000116133|DHC24 ENSG00000128849|CGNL1  
ENSG00000130177|CDC16 ENSG00000131355|EMR3 ENSG00000137726|FYXD6 ENSG00000140459|CYP11A1 ENSG00000151360|ALLC ENSG00000166152|C16orf78 ENSG00000167700|MFS3 ENSG00000168268|NT5DC2  
ENSG00000171462|EGFL9 ENSG00000177741|Q96BN7\_HUMAN ENSG00000179950|NP\_055096.2 ENSG00000182490|TSSK2 ENSG00000188743|Q9P169\_HUMAN ENSG00000203709|C1orf132 ENSG00000204028|Q6ZRR4\_HUMAN ENSG00000205629|LCMT1  
ENSG00000152723|NP\_079349.1 ENSG00000176716|GPC4 ENSG00000187206|UIMC1 ENSG00000112697|TMEM30A ENSG00000120251|GRIA2 ENSG00000122566|HNPA2B1 ENSG00000124496|TRERF1 ENSG00000125846|ZNF133  
ENSG00000138813|C4orf17 ENSG00000153066|TXNDC11 ENSG00000153487|ING1 ENSG00000158077|NLRP14 ENSG00000164346|TIF1\_HUMAN ENSG00000166153|DEPDC4 ENSG00000166881|K0286\_HUMAN ENSG00000175581|MRPL48  
ENSG00000179930|ZNF648 ENSG00000196850|PPTC7  
AGTGGTT ENSG00000155070|C1orf144 ENSG00000172134|EPN2 ENSG00000177157|PPP1R12B ENSG00000191513|TF ENSG00000106628|POLD2 ENSG00000114933|NP\_060229.2 ENSG00000116396|KCNC4 ENSG00000120913|PDLIM2  
ENSG000001188167|NP\_001034859.1 ENSG00000204423|C9orf33 ENSG00000204820|Q96NT9\_HUMAN ENSG00000205015|Q6ZNV2\_HUMAN ENSG00000143257|NRII3 ENSG00000160392|C19orf47 ENSG00000175206|NPPA  
ENSG00000129003|VPS13C ENSG00000129460|NGDN ENSG00000146648|EGFR ENSG00000153283|CD96 ENSG00000154639|CXADR ENSG00000159322|ADPGK ENSG00000160145|KALRN ENSG00000163319|MRPS18C  
ENSG00000169239|CA5B ENSG00000176697|BDNF ENSG00000177324|CXorf20 ENSG00000183508|FAM46C ENSG00000186188|GPR120 ENSG00000198894|KIAA1737 ENSG00000203668|CHML ENSG00000203668|CHML  
AGTGTAA ENSG00000120611|ERCC1 ENSG0000019485|PRDM11 ENSG00000185063|CD59 ENSG00000187269|NOL14 ENSG00000105258|POLR2I ENSG00000122861|PLAU ENSG00000127946|HIP1 ENSG00000129744|ART1  
ENSG00000151631|Q9P2A3\_HUMAN ENSG00000164778|EN2 ENSG00000168785|TSPAN5 ENSG00000174989|FBXW8 ENSG00000178026|C22orf36 ENSG00000183666|LOC72841 ENSG00000185585|OLFML2A ENSG00000186185|NP\_001073912.1  
ENSG00000187095|LILRA2 ENSG00000204356|RDBP ENSG00000205023|Q6ZSF1\_HUMAN ENSG00000205726|ITSN1 ENSG0000019991|HGF ENSG0000017537|SELI1 ENSG00000176321|KLHL20 ENSG00000177254|USP33  
ENSG00000180298|RFK3 ENSG00000193000|NUP50 ENSG00000109819|PPARGC1A ENSG00000119729|RHOQ ENSG00000121621|KIF18A ENSG00000124193|SFRS5 ENSG00000125531|C20orf195 ENSG00000126950|TMEM35  
ENSG00000128845|CCPG1 ENSG00000134294|SLC38A2 ENSG00000135316|SYNCRIP ENSG00000136379|FAM108C1 ENSG00000135642|GALNT5 ENSG00000138190|EXOC6 ENSG00000138271|GPR87 ENSG00000138439|ALS2CR13  
ENSG00000139163|ETNK1 ENSG00000139597|NP\_438169.2 ENSG00000145736|GTF2H2 ENSG00000150361|KLHL1 ENSG00000152894|PTPRK ENSG00000166035|LIPC ENSG00000170948|MBD3L1 ENSG00000172845|SP3  
ENSG00000181904|C5orf24 ENSG00000183474|NP\_001035955.1 ENSG00000185515|BRCC3 ENSG00000188021|UBQLN2 ENSG00000189292|NP\_001002919.1 ENSG00000196357|ZNF565 ENSG00000196865|NHLRC2 ENSG00000197054|ZNF763  
ENSG00000198538|ZNF28  
AGTGTAC ENSG00000188842|ZNF8 ENSG00000191704|CPA1 ENSG000001101365|IDH3B ENSG00000113048|MRPS27 ENSG00000125386|C4orf8 ENSG00000125388|GRK4 ENSG00000125726|CD70 ENSG00000130159|ECSIT  
ENSG00000133937|GSC ENSG00000134243|SORT1 ENSG00000137699|TRIM29 ENSG00000142606|MMEL1 ENSG00000152669|CCNU ENSG00000162897|FCAMR ENSG00000164008|C1orf50 ENSG00000164048|ZNF589  
ENSG00000164707|SLC13A4 ENSG00000164978|NUDT2 ENSG00000166167|BTRC ENSG00000167967|E4F1 ENSG00000175309|AGXT2L2 ENSG00000185888|NP\_898885.1 ENSG00000152795|Q9H994\_HUMAN ENSG00000167177|PHKA1  
ENSG00000191106|NLRCA4 ENSG00000108384|RAD51C ENSG00000114374|USP9Y ENSG00000116560|SFPQ ENSG00000117226|GBP3 ENSG00000125675|GRIA3 ENSG00000125831|CST11 ENSG00000126945|HNRPH2  
ENSG00000131711|MAP1B ENSG00000134313|NP\_065789.1 ENSG00000137547|MRPL15 ENSG00000145247|OCTAD2 ENSG00000147231|CXorf57 ENSG00000148053|NTRK2 ENSG00000151611|MMAA ENSG00000154305|MIA3  
ENSG00000154654|NCAM2 ENSG00000156052|GNAQ ENSG00000164951|PPM2C ENSG00000170965|PLAC1 ENSG00000188014|NP\_619643.2 ENSG00000196632|WNK3 ENSG00000198455|ZKXDB  
AGTGTAT ENSG000001667365|C16orf68 ENSG00000168745|IHPK2 ENSG00000178900|TP73 ENSG00000100077|ADRBK2 ENSG00000116984|MTR ENSG00000116996|ZP4 ENSG00000124155|PIGT ENSG00000130287|NCAN  
ENSG00000136193|SCRN1 ENSG00000139874|SSTR1 ENSG00000154114|TBCEL ENSG00000159797|C9orf144 ENSG00000164778|EN2 ENSG00000169371|SNUPN ENSG00000173638|SLC19A1 ENSG00000174370|C11orf45  
ENSG00000177732|SOX12 ENSG00000196739|COL27A1 ENSG00000204228|HSD17B8 ENSG000002026103|FAS ENSG00000167560|RHOA ENSG00000182515|MRPL22 ENSG00000183312|TNPO1 ENSG00000192439|TRPM7  
ENSG00000112541|PDE10A ENSG00000118200|CAMSAP1L1 ENSG00000123124|WWP1 ENSG00000127314|RAP1B ENSG00000129514|FOXA1 ENSG00000131171|SH3BGL ENSG00000136247|ZDHHC4 ENSG00000136273|HUS1\_HUMAN  
ENSG00000140299|BNIP2 ENSG00000148828|NP\_001074467.1 ENSG00000152253|SPC25 ENSG00000152382|TAD1L ENSG00000159256|MORC3 ENSG00000165392|WRN ENSG00000166510|CCDC68 ENSG00000171502|COL24A1  
ENSG00000172292|LASS6 ENSG00000172969|LOC285299 ENSG00000176276|hCG\_1757335 ENSG00000179399|GPC5 ENSG00000185201|IFITM2 ENSG00000185787|MORF4L1 ENSG00000189290|XR\_018254.1 ENSG00000205097|NP\_001005217.1  
AGTGTCT ENSG00000105073|HOXA11 ENSG000001100181|CSNK1E ENSG000001106100|NOD1 ENSG00000110046|NP\_055919.1 ENSG00000112139|MDGA1 ENSG00000114739|ACVR2B ENSG00000125347|IRF1 ENSG00000125354|SEPT6  
ENSG00000128016|ZFP36 ENSG00000129680|MAP7D3 ENSG00000130052|STARD8 ENSG00000135744|AGT ENSG00000139725|RHOV ENSG00000148343|FAM73B ENSG00000160208|RRP1B ENSG00000164610|RP9  
ENSG00000166272|C10orf26 ENSG00000166716|ZNF592 ENSG00000171368|P25A\_HUMAN ENSG00000175550|DRAP1 ENSG00000175779|NP\_997327.1 ENSG00000176715|NP\_777577.1 ENSG00000179755|XR\_017798.1 ENSG00000188396|NP\_001013654.1  
ENSG00000188427|XR\_017855.1 ENSG00000197858|GPAAL1 ENSG00000203971|Q6ZRT1\_HUMAN ENSG00000204313|NP\_001028830.1 ENSG000002050393|CCDC90A ENSG000002065923|SLC9A7 ENSG000002070087|PFN2 ENSG00000207369|NSF  
ENSG00000178304|PPP2R5C ENSG000001105851|PIK3CG ENSG00000110848|CD69 ENSG00000114529|C3orf52 ENSG00000116922|C1orf109 ENSG00000120217|CD274 ENSG00000130449|ZSWIM6 ENSG00000133059|RIPK5  
ENSG00000139971|C14orf37 ENSG00000144749|LRIG1 ENSG00000144771|LRTM1 ENSG00000145293|ENOPH1 ENSG00000153250|RMS1 ENSG00000158185|ANKRD36 ENSG00000164340|FSTL1 ENSG00000171843|MLLT3  
ENSG00000181467|RAP2B ENSG00000196586|MYO6 ENSG00000196912|AN3B4\_HUMAN ENSG00000197817|Q9UHS9\_HUMAN ENSG00000198898|CAPZA2  
AGTGTGC ENSG00000165000|AP3D1 ENSG00000102178|L2L1R ENSG00000103522|IL21R ENSG00000106089|STX1A ENSG00000124570|SERPINB6 ENSG00000126752|SSX1 ENSG00000129282|MRM1  
ENSG00000141699|NP\_835227.1 ENSG00000142686|NP\_689587.1 ENSG00000145063|NM\_182586 ENSG00000145920|CPLX2 ENSG00000147117|ZNF157 ENSG00000148297|SURF5 ENSG00000160953|MUM1 ENSG00000165583|SSX5  
ENSG00000165821|SALL2 ENSG00000166716|ZNF592 ENSG00000171169|C9orf90 ENSG00000171483|SSX6 ENSG00000171984|C20orf196 ENSG00000176248|ANAPC2 ENSG00000181625|GIYD2 ENSG00000181918|Q8N9J9\_HUMAN  
ENSG00000186474|KIK12 ENSG00000186910|SERPINA11 ENSG00000189227|LOC145853 ENSG00000196242|OR2C3 ENSG00000196502|SULT1A1 ENSG00000198946|SSX4B ENSG00000204645|SSX4 ENSG00000204648|SSX9  
ENSG00000126600|ELOVL5 ENSG000001094755|GABRP ENSG00000104043|ATP8B4 ENSG00000109805|NCAPG ENSG00000113456|RAD1 ENSG00000125398|SOX9 ENSG00000131016|AKAP12 ENSG00000132207|SULT1A3  
ENSG00000148053|NTRK2 ENSG00000150687|PRSS23 ENSG00000164118|KIAA1712 ENSG00000165646|SLC18A2 ENSG00000169435|RASSF6 ENSG00000184280|ZNF285B ENSG00000197989|C1orf79  
AGTGTGG ENSG00000106555|TTC22 ENSG00000169998|CECR5 ENSG000001101017|CD40 ENSG00000115194|SLC30A3 ENSG00000116698|SMG7 ENSG00000118017|LA4GNT ENSG00000125459|MSTO1 ENSG00000126215|XRCC3  
ENSG00000126856|Q9NQW5-2 ENSG00000132793|LPIN3 ENSG00000134014|ELF3 ENSG00000140297|GCNT3 ENSG00000142327|RNPEPL1 ENSG00000143333|RGS16 ENSG00000164048|ZNF589 ENSG00000166526|ZNF3  
ENSG00000167513|CDT1 ENSG00000167625|ZNF526 ENSG00000168350|DEGS2 ENSG00000169557|ZNF747 ENSG00000174527|MYO1EH ENSG00000175866|BAIAP2 ENSG00000177045|SIX5 ENSG00000179253|Q5VZ43\_HUMAN  
ENSG00000182575|NXPH3 ENSG00000188191|PRKAR1B ENSG00000188487|Q1MX18-4 ENSG00000196526|AFAP1 ENSG00000197586|ENTPDE ENSG00000204439|C6orf47 ENSG00000205201|Q6ZV81\_HUMAN ENSG00000207908|SELE  
ENSG00000139139|DNAH5 ENSG00000187074|PPP1R15A ENSG00000189335|ZNF302 ENSG00000101972|STAG2 ENSG00000112651|MRPL2 ENSG00000117289|TXNIP ENSG00000125246|CLYBL ENSG00000127366|TAS2R5  
ENSG00000144026|CPO ENSG00000163072|NOSTRIN ENSG00000164654|NP\_061878.3 ENSG00000165097|AOF1 ENSG00000167383|ZNF229 ENSG00000167785|ZNF558 ENSG00000176797|DEFB103B  
ENSG00000177243|DEFB103A ENSG00000196505|GDAP2 ENSG00000197140|ADAM32 ENSG00000198300|PEG3 ENSG00000198538|ZNF28 ENSG00000204604|ZNF468  
AGTGTGA ENSG00000164309|CDON ENSG00000103091|WDR59 ENSG00000103742|NP\_066013.1 ENSG00000107562|CXCL12 ENSG000001107874|CUEDC2 ENSG00000108861|DUSP3 ENSG00000124422|USP22 ENSG00000130294|KIF1A  
ENSG00000133026|MYH10 ENSG00000135314|C6orf148 ENSG00000146666|Q96TP2\_HUMAN ENSG00000156466|GDF6 ENSG00000165424|C10orf56 ENSG00000169184|NM\_002430.2 ENSG00000184639|NP\_001004344.1 ENSG00000188589|RBM33  
ENSG00000198909|MAP3K3 ENSG00000203814|HIST2H2BF ENSG000002004961|HCCS ENSG00000223287|RB1CC1 ENSG00000246653|GPM6B ENSG00000265150|RANBP5 ENSG00000273910|FRY ENSG00000282996|RNF13  
ENSG00000105967|TEFC ENSG000001108064|TFAM ENSG00000108187|PBLD ENSG00000116497|S100PBP ENSG00000125355|FAM70A ENSG00000131773|KHDRBS3 ENSG00000133124|IRS4 ENSG00000137040|RANBP6  
ENSG00000144136|SLC20A1 ENSG00000152382|TADA1L ENSG00000154545|MAGED4 ENSG00000169554|ZEB2 ENSG00000170385|SLC30A1 ENSG00000171150|SOCS5 ENSG00000171819|ANGPTL7 ENSG00000185880|TRIM69  
ENSG00000186462|NAP1L2 ENSG00000187243|MAGED4B ENSG00000188467|SLC24A5 ENSG00000197641|SERPINB13 ENSG00000198105|ZNF248  
perfect: AGTGTGA TAACACT hsa-miR-200a TAACACTgtctggttaacgatgt 0  
perfect: AGTGTGA TAACACT hsa-miR-141 TAACACTgtctggttaagaatggt 0  
AGTTAAT ENSG00000109335|UBE3C ENSG00000173849|ST6GAL1 ENSG00000174054|CLASP1 ENSG00000104386|XR\_017860.1 ENSG00000104879|CKM ENSG00000106852|LHX6 ENSG00000117448|AKR1A1 ENSG00000123643|SLC36A1  
ENSG00000124641|TRFP ENSG00000124731|TREM1 ENSG00000131236|CAP1 ENSG00000134207|SYT6 ENSG00000136193|SCRN1 ENSG00000142530|NP\_612420.1 ENSG00000147059|SPIN2A ENSG00000152291|TGOLN2  
ENSG00000162105|SHANK2 ENSG00000163221|S100A12 ENSG00000165275|RG9MTD3 ENSG00000165695|C9orf98 ENSG00000171724|K1576\_HUMAN ENSG00000173567|GPR113 ENSG00000179241|LDLRAD3 ENSG00000186910|SERPINA11  
ENSG00000205106|Q6N098\_HUMAN ENSG000002007372|PAX6 ENSG0000020009413|REV3L ENSG000002033178|UBE1L2 ENSG000002067646|ZFY ENSG000002071967|CYBRD1 ENSG000002078399|HOXA9 ENSG0000020106153|CHCHD2  
ENSG00000111711|GOLT1B ENSG00000113205|PCDHB3 ENSG00000113460|BXDC2 ENSG00000115484|CCT4 ENSG00000117586|TNFSF4 ENSG00000123584|MAGEA9B ENSG00000130783|CCDC62 ENSG00000132823|C20orf111  
ENSG00000137504|CREBZF ENSG00000141452|C18orf8 ENSG00000141646|SMAD4 ENSG00000143947|RPS27A ENSG00000146457|WTAP ENSG00000154007|ASB1 ENSG00000156017|C9orf41 ENSG00000165028|NIPSNAP3B  
ENSG00000166008|MAGEA9 ENSG00000166575|TMEM135 ENSG00000170584|NUDC2 ENSG00000171819|ANGPTL7 ENSG00000171928|FAM18B ENSG00000178966|RMI1 ENSG00000180537|RNF182 ENSG00000185344|ATP6V0A2  
ENSG00000185686|PRAME ENSG00000187210|GCNT1 ENSG00000197345|MRPL21 ENSG00000206120|Q0D2K5\_HUMAN  
AGTTACA ENSG00000164309|CDON ENSG00000101336|HCK ENSG00000101473|ACOT8 ENSG00000129351|ILF3 ENSG00000141720|PIP5K2B ENSG00000142149|HUNK ENSG00000144677|CTDSPL ENSG00000148832|PAOX  
ENSG00000154252|GAL3ST2 ENSG00000155926|SLA ENSG00000158987|RAPGEF6 ENSG00000162599|NFIA ENSG00000164045|CDC25A ENSG00000171611|PTCRA ENSG00000179241|LDLRAD3 ENSG00000182372|C8orf61  
ENSG00000184209|NP\_008951.1 ENSG00000198561|CTNND1 ENSG00000204759|Q6ZRYO\_HUMAN ENSG000002083312|TNPO1 ENSG000002084676|NCOA1 ENSG000002100811|YY1 ENSG000002107643|MAPK8 ENSG000002110888|CAPRIN2  
ENSG00000112624|KIAA0240 ENSG00000116704|SLC35D1 ENSG00000118495|PLAGL1 ENSG00000131941|RHPN2 ENSG00000133703|KRAS ENSG00000138798|EGF ENSG00000139517|LNX2 ENSG00000141682|PMAI1  
ENSG00000145451|GLRA3 ENSG00000152457|DCLRE1C ENSG00000153130|SCOC ENSG00000153132|CLGN ENSG00000156076|WIF1 ENSG00000157230|LOC728132 ENSG00000164985|PSIP1 ENSG00000165105|RASEF  
ENSG00000167383|ZNF229 ENSG00000173890|GPR160 ENSG00000184434|LRRIC19 ENSG00000197359|C15orf34 ENSG00000198682|PAPSS2  
AGTTATG ENSG00000105238|KIAA1539 ENSG00000154282|SDCCAG8 ENSG00000172778|ACCADVL ENSG00000192036|C14orf94 ENSG00000132773|TOB1 ENSG00000143858|SYT2 ENSG00000154930|ACSS1 ENSG00000158525|CPA5  
ENSG00000158987|RAPGEF6 ENSG00000169371|SNUPN ENSG00000173567|GPR113 ENSG00000186163|Q4GOS1\_HUMAN ENSG00000186207|LCE5A ENSG00000197471|SPN ENSG00000204364|C2 ENSG00000205994|Q6ZN58\_HUMAN  
ENSG00000169248|NUP133 ENSG000001106346|USP42 ENSG00000117500|TMED5 ENSG00000119913|TECTB ENSG00000121089|NACA3P ENSG00000123131|PRDX4 ENSG00000125356|NDUFA1 ENSG00000131508|UBE2D2  
ENSG00000134899|ERCC5 ENSG00000136100|VPS36 ENSG00000136436|CALCOCO2 ENSG00000138483|CCDC54 ENSG00000139263|LRIG3 ENSG00000141456|Q8ZIL8-2 ENSG00000141542|RAB40B ENSG00000143520|NP\_001014364.1  
ENSG00000144935|TRPC1 ENSG00000146433|TMEM181 ENSG00000165194|PCDH19 ENSG00000168282|MGAT2 ENSG00000170348|TMED10 ENSG00000173597|SULT1B1 ENSG00000174840|NP\_808881.2 ENSG00000177613|CSTF2T  
ENSG00000196531|NACA  
AGTTATT ENSG00000101493|ZNF516 ENSG00000104957|CCDC130 ENSG00000105251|SHD ENSG00000108106|UBE2S ENSG00000129295|LRR6C ENSG00000132142|ACACA ENSG00000142534|RPS11 ENSG00000144031|ANKRD53  
ENSG00000148468|C10orf38 ENSG00000159556|ISL2 ENSG00000176749|CDK5R1 ENSG00000179241|LDLRAD3 ENSG00000185052|SLC24A3 ENSG00000188869|TMC3 ENSG00000202581|Q6ZVY8\_HUMAN ENSG00000203793|Q6ZR74\_HUMAN  
ENSG00000203822|Q6ZV10\_HUMAN ENSG00000204876|Q6ZVM9\_HUMAN ENSG000002047346|KIAA1370 ENSG00000207523|SEMA3C ENSG000002077380|DYNCL12 ENSG000002077458|FAM76B ENSG000002084463|WBP11 ENSG000002100316|RPL3  
ENSG00000102753|KPN3 ENSG000001104497|SNX16 ENSG00000109220|CHIC2 ENSG00000109805|NCAPG ENSG00000116717|GAD45A ENSG00000121351|IAPP ENSG00000123473|STIL ENSG00000136099|PCDH8  
ENSG00000136141|LRCH1 ENSG00000136783|NIPSNAP3A ENSG00000138078|PREPL ENSG00000141424|SLC39A6 ENSG00000146426|TIAM2 ENSG00000152428|MARS2 ENSG00000154640|BTG3 ENSG00000157341|Q8ND77\_HUMAN  
ENSG00000162630|B3GALT2 ENSG00000165525|SDCCAG1 ENSG00000170571|EMB ENSG00000170802|FOXN2 ENSG00000171004|HS6ST2 ENSG00000171488|LRR8C ENSG00000172469|MANEA ENSG00000180488|FAM73A  
ENSG00000183671|GPR1 ENSG00000185710|Q8ND77\_HUMAN ENSG00000197579|TOPORS ENSG00000198270|TMEM116 ENSG00000203667|FAM36A  
AGTTCCT ENSG000002064607|SFRS14 ENSG00000275234|NP\_060401.2 ENSG000002078319|PMS2L1 ENSG000002099377|HSD3B7 ENSG000002100558|PLEK2 ENSG000002101997|CCDC22 ENSG000002103197|TSC2 ENSG000002113048|MRPS27



ENSG00000131067|GGTL3 ENSG00000135454|B4GALNT1 ENSG00000138073|PREB ENSG00000160305|DIP2A ENSG00000164091|TMEM113 ENSG00000164896|FASTK ENSG00000167798|NP\_001013662.1 ENSG00000168298|HIST1H1E  
ENSG00000178206|C2orf14 ENSG00000186788|NP\_001001670.1 ENSG00000188559|C2orf74 ENSG00000198466|ZNF587 ENSG00000198632|NP\_777590.1 ENSG00000204314|PRRT1 ENSG0000001630|CYP51A1 ENSG00000076003|MCM6  
ENSG00000100354|TNRC61 ENSG00000102144|PGK1 ENSG00000102362|SYTL4 ENSG00000107518|ATRLN1 ENSG00000112425|EPM2A ENSG00000113742|CPEB4 ENSG00000114416|FXR1 ENSG00000115183|TANC1  
ENSG00000120549|KIAA1217 ENSG00000125903|DEFB129 ENSG00000131171|SH3BGR1 ENSG00000136044|APPL2 ENSG00000139842|CUL4A ENSG00000140987|ZNF434 ENSG00000143337|TOR1AIP1 ENSG00000154007|ASB17  
ENSG00000164112|TMEM155 ENSG00000165449|SLC16A9 ENSG00000165675|ENOX2 ENSG00000170681|NP\_001018126.1 ENSG00000173334|TRIB1 ENSG00000197054|ZNF763 ENSG00000204469|BAT2 ENSG00000205777|GAGE4

AGTTCCG ENSG00000089597|GANAB ENSG00000108592|FTSJ3 ENSG00000119655|NPC2 ENSG00000121766|ZCCHC17 ENSG00000128652|HOXD3 ENSG00000139219|COL2A1 ENSG00000159650|UROC1 ENSG00000167395|ZNF646  
ENSG00000168255|Q8IZ67\_HUMAN ENSG00000171671|C11orf76 ENSG00000172159|FRMD3 ENSG00000172663|TMEM134 ENSG00000180818|HOXC10 ENSG00000180924|Q9BVQ6\_HUMAN ENSG00000182378|PLCXD1 ENSG00000186891|TNFRSF18  
ENSG00000196700|ZNF512B ENSG00000197131|Q8IW43\_HUMAN ENSG00000205266|Q6ZRU5\_HUMAN ENSG00000007350|TKTL1 ENSG000000037965|HOXC8 ENSG00000081803|CADPS2 ENSG00000105880|DLX5 ENSG00000121871|SLITRK3  
ENSG00000134138|MEIS2 ENSG00000134323|MYCN ENSG00000134440|NARS ENSG00000139352|ASCL1 ENSG00000145919|FAM44B ENSG00000150361|KLHL1 ENSG00000164764|NP\_694957.2 ENSG00000168564|CDKN2A1P  
ENSG00000169040|PMCHL2 ENSG00000180098|TRSPAP1 ENSG00000185013|NT5C1B ENSG00000186814|Q86W11\_HUMAN ENSG00000187009|Q8NFD4\_HUMAN ENSG00000196877|KIAA0372  
AGTTCTC ENSG00000120952|PRAMEF2 ENSG00000123992|DNPEP ENSG00000126254|NP\_077297.2 ENSG00000135390|ATP5G2 ENSG00000135622|SEMA4F ENSG00000161526|SAP30BP ENSG00000163362|C1orf106 ENSG00000170271|C5orf4  
ENSG00000172061|LRRCL5 ENSG00000189201|COX19 ENSG00000211445|GPX3 ENSG000000081665|ZNF253 ENSG00000100380|ST13 ENSG00000106688|SLC1A1 ENSG00000109475|RPL34 ENSG00000123095|BHLHB3  
ENSG00000123131|PRDX4 ENSG00000123684|LPGAT1 ENSG00000124193|SFRS6 ENSG00000128655|PDE11A ENSG00000130349|C6orf203 ENSG00000135917|SLC19A3 ENSG00000143469|SYT14 ENSG00000144161|ZC3H8  
ENSG00000144867|SRPRB ENSG00000147894|C9orf72 ENSG00000151694|ADAM17 ENSG00000160145|KALRN ENSG00000164292|RHOBTB3 ENSG00000168405|CMAH ENSG00000169129|AFAP1L2 ENSG00000175104|TRAF6  
ENSG00000177111|XR\_016777.1 ENSG00000177990|DPY19L2 ENSG00000178184|PARD6G ENSG00000178604|NP\_001034973.1 ENSG00000180233|ZNRF2 ENSG00000181472|ZBTB2 ENSG00000188938|FAM120AOS ENSG00000197967|Q86U89\_HUMAN

perfect: AGTTCTC GAGAACT hsa-miR-146b tGAGAAGtaattccatagct 1  
AGTTGAC ENSG00000110375|UPK2 ENSG00000116604|MEF2D ENSG00000124233|SEMG1 ENSG00000131845|ZNF304 ENSG00000142149|HUNK ENSG00000142528|ZNF473 ENSG00000151502|VPS26B ENSG00000167208|NP\_878274.1  
ENSG00000169442|CD52 ENSG00000174015|SPERT ENSG00000175567|UCP2 ENSG00000180900|SCRIB ENSG00000184639|NP\_001004344.1 ENSG00000186051|TAL2 ENSG00000186451|SPATA12 ENSG00000189058|APOD  
ENSG00000058729|RIOK2 ENSG00000096872|TFT74 ENSG00000106605|BLVRA ENSG00000108733|PEX12 ENSG00000109534|NO1A1 ENSG00000114450|GNB4 ENSG00000116062|MSH6 ENSG00000117569|PTBP2  
ENSG00000123472|ATPAF1 ENSG00000125864|BFSF1 ENSG00000132326|PER2 ENSG00000132207|CYSLTR2 ENSG00000136508|EEF1A1 ENSG00000162687|KCNT2 ENSG00000164506|STXB5 ENSG00000170941|NP\_065895.1  
ENSG00000179456|ZNF238 ENSG00000185664|SILV ENSG00000185873|TMPRSS11B ENSG00000196946|ZNF705A ENSG00000204904|CXorf31  
AGTTGCA ENSG00000035862|TIMP2 ENSG00000070729|CNGB1 ENSG00000090659|CD209 ENSG00000103023|NP\_001073961.1 ENSG00000103365|GGA2 ENSG00000103723|AP3B2 ENSG00000130147|SH3BP4 ENSG00000138629|UBL7  
ENSG00000142207|URB1 ENSG00000143537|ADAM15 ENSG00000143858|SYT2 ENSG00000151474|FRMD4A ENSG00000157093|LYLZ4 ENSG00000162599|NFIA ENSG00000163083|INHBB ENSG00000179284|DAND5  
ENSG00000180385|Q8NAP4\_HUMAN ENSG00000196186|Q71RF5\_HUMAN ENSG00000197182|NM\_207477|ENSG00000197555|SIPAL1 ENSG00000197582|GPX1 ENSG00000204103|MAFB ENSG00000009307|NRAS ENSG00000050165|DKK3  
ENSG00000054938|QRHDL2 ENSG00000072210|ALDH3A2 ENSG00000109253|SNAP23 ENSG00000108510|THRAP1 ENSG00000125962|ARMCX5 ENSG00000134318|ROCK2 ENSG00000136940|PDLCL ENSG00000137642|SORL1  
ENSG00000147162|OGT ENSG00000154545|MAGED4 ENSG00000155096|AZIN1 ENSG00000165219|GAPVD1 ENSG00000171522|PTGER4 ENSG00000183283|DAZAP2 ENSG00000187243|MAGED4B ENSG00000204038|Q6ZRL6\_HUMAN

AGTTGTA ENSG00000069020|MAST4 ENSG00000072954|TMEM38A ENSG00000099954|CECR2 ENSG00000099968|BCL2L13 ENSG00000101670|LIPG ENSG00000105538|RASIP1 ENSG00000106290|TAF6 ENSG00000110328|GALNTL4  
ENSG00000113194|UBXD8 ENSG00000120451|SNX19 ENSG00000131143|COX4I1 ENSG00000145864|GABRR2 ENSG00000146374|RSPO3 ENSG00000167641|PPP1R14A ENSG00000177352|CCDC71 ENSG00000182329|Q8IVF9\_HUMAN  
ENSG00000183579|ZNRF3 ENSG00000184619|KRBA2 ENSG00000185082|LBH ENSG00000185955|NP\_001004323.1 ENSG00000186854|Q86V40\_HUMAN ENSG00000204414|CSHL1 ENSG00000204498|NFKBIL1 ENSG000000011295|TTC19  
ENSG00000089335|ZNF302 ENSG00000102221|PHF16 ENSG00000111700|SLCO1B3 ENSG00000118985|ELL2 ENSG00000125249|RAP2A ENSG00000131437|KIF3A ENSG00000132283|DNHD1 ENSG00000133961|NUMB  
ENSG00000140455|USP3 ENSG00000143933|CALM2 ENSG00000163918|RFC4 ENSG00000164209|SLC25A46 ENSG00000168564|CDKN2A1P ENSG00000173848|NET1 ENSG00000184517|ZFP1 ENSG00000184735|DDX53  
ENSG00000189056|RELN ENSG00000197846|HIST1H2BF ENSG00000198945|L3MBTL3

AGTTTAA ENSG00000006740|RICH2\_HUMAN ENSG00000008256|PSCD3 ENSG00000048342|Q9H8A7\_HUMAN ENSG00000063854|HAGH ENSG00000074054|CLASP1 ENSG00000105648|IFI30 ENSG00000107738|C10orf54 ENSG00000108387|SEPT4  
ENSG00000108861|DUSP3 ENSG00000109072|VTN ENSG00000121289|CCDC123 ENSG00000128849|CGNL1 ENSG00000130203|APOE ENSG00000133246|PRAM1 ENSG00000144029|MRPS5 ENSG00000160209|PDXK  
ENSG00000173281|PPP1R3B ENSG00000188364|TMSL4 ENSG00000204013|Q6XYD6\_HUMAN ENSG00000204564|C6orf136 ENSG000000015171|ZMYND11 ENSG00000036257|CUL3 ENSG00000057468|MSH4 ENSG00000067167|TRAM1  
ENSG00000085563|ABCB1 ENSG00000086065|CHMP5 ENSG00000087303|NID2 ENSG00000100209|HSCB ENSG00000104825|NFKBIB ENSG00000106701|FSD1L ENSG00000114127|XRN1 ENSG00000120438|TCP1  
ENSG00000123473|STIL ENSG00000125355|FAM70A ENSG00000130844|ZNF331 ENSG00000133858|CCDC131 ENSG00000134748|PRPF38A ENSG00000134851|TMEM165 ENSG00000134962|KLB ENSG00000138449|SLC40A1  
ENSG00000138792|ENPEP ENSG00000155903|RASA2 ENSG00000156035|PRUNE2 ENSG00000162923|WDR26 ENSG00000162980|ARL5A ENSG00000163655|GMP5 ENSG00000164190|NIPBL ENSG00000164951|PPM2C  
ENSG00000165244|ZNF367 ENSG00000165410|CFL2 ENSG00000165471|MBL2 ENSG00000169045|HNRPH1 ENSG00000169813|HNRPF ENSG00000175265|GOLGA8A ENSG00000176597|B3GNT5 ENSG00000182359|KBTBD3  
ENSG00000188672|RHCE ENSG00000203668|CHML ENSG00000205252|Q4G0M6\_HUMAN ENSG00000205542|TMSL1

AGTTTAC ENSG00000100364|C22orf9 ENSG00000110025|SNX15 ENSG00000113430|IRX4 ENSG00000117461|PIK3R3 ENSG00000124155|PIGT ENSG00000128342|LIF ENSG00000131143|COX4I1 ENSG00000155363|MOV10  
ENSG00000155506|LARP1 ENSG00000156486|KCNS2 ENSG00000157617|C21orf25 ENSG00000166860|ZBTB39 ENSG00000170421|KRT8 ENSG00000175894|C21orf29 ENSG00000180849|C15orf37 ENSG00000188042|ARL4C  
ENSG00000026025|VIM ENSG00000085449|WDFY1 ENSG00000100934|SEC23A ENSG00000105136|ZNF419 ENSG00000120063|GNA13 ENSG00000121578|B4GALT4 ENSG00000123975|CKK2 ENSG00000129514|FOXA1  
ENSG00000137968|SLC44A5 ENSG00000151327|C14orf24 ENSG00000153790|C7orf31 ENSG00000165891|E2F7 ENSG00000170365|SMAD1 ENSG00000176624|RKHD2 ENSG00000179152|C3orf23 ENSG00000183780|SLC35F3  
ENSG00000198468|Q8TAF5\_HUMAN ENSG00000203742|NP\_001032308.1 ENSG00000204596|RPP21 ENSG00000205337|Q6ZVR2\_HUMAN

AGTTTAG ENSG00000029993|HMGB3 ENSG00000104679|R3HCC1 ENSG00000113552|GNPDA1 ENSG00000115844|DLX2 ENSG00000116205|C1orf83 ENSG00000129473|BCL2L2 ENSG00000129862|VCY ENSG00000129864|VCY1B  
ENSG00000132773|TOE1 ENSG00000134780|DAGLA ENSG00000141034|C17orf39 ENSG00000151692|RNFI44 ENSG00000156639|ZFAND3 ENSG00000157017|GHR1 ENSG00000162298|SYVN1 ENSG00000165714|LOH12CR1  
ENSG00000166402|TUB ENSG00000185619|PCGF3 ENSG00000204309|Q6ZSQ3\_HUMAN ENSG00000204558|Q9BYX6\_HUMAN ENSG00000205434|Q6ZU34\_HUMAN ENSG00000095574|IKZF5 ENSG00000102805|CLN5 ENSG00000114098|ARMC8  
ENSG00000119048|UBE2B ENSG00000119787|ARL6IP2 ENSG00000119969|HELLS ENSG00000123838|C4BPA ENSG00000130347|RTN4IP1 ENSG00000138160|KIF11 ENSG00000143337|TOR1AIP1 ENSG00000146250|PRSS35  
ENSG00000151718|WWC2 ENSG00000163444|TMEM183B ENSG00000165194|PCDH19 ENSG00000166509|CLEC3A ENSG00000170537|TMC7 ENSG00000182093|WRB ENSG00000204262|COL5A2 ENSG00000205269|Q5T4T1\_HUMAN

AGTTTAT ENSG00000055070|C1orf144 ENSG00000068024|HDAC4 ENSG00000068650|ATP11A ENSG00000103034|NDRG4 ENSG00000104823|ECH1 ENSG00000113194|UBXD8 ENSG00000116032|GRIN3B ENSG00000116273|PHF13  
ENSG00000124422|USP22 ENSG00000133422|MORC2 ENSG00000138869|C22orf16 ENSG00000150401|CUNL1D2 ENSG00000159224|GIP ENSG00000166165|CKB ENSG00000167094|TTC16 ENSG00000170262|MRAP  
ENSG00000171246|NPTX1 ENSG00000176515|Q8NAX6\_HUMAN ENSG00000179085|DPM3 ENSG00000179562|GCC1 ENSG00000179766|Q4G129\_HUMAN ENSG00000182022|ST4S6\_HUMAN ENSG00000185651|UBE2L3 ENSG00000185885|IFITM1  
ENSG00000198618|PPIA\_HUMAN ENSG00000204252|HLA-DOA ENSG00000079335|CDC14A ENSG00000101745|ANKRD12 ENSG00000102391|RPL36A ENSG00000104723|TUSC3 ENSG00000110066|SUV420H1 ENSG00000121542|SEC22A  
ENSG00000124224|PPP4R1L ENSG00000128039|NP\_078868.1 ENSG00000135409|AMHR2 ENSG00000139324|TMTC3 ENSG00000156011|PSD3 ENSG00000162624|LHX8 ENSG00000164548|TRA2A\_HUMAN ENSG00000166396|SERPINB7  
ENSG00000168675|C18orf1 ENSG00000169239|CA5B ENSG00000174010|KLHL15 ENSG00000176635|HORMAD2 ENSG00000176842|IRX5 ENSG00000179476|C14orf28 ENSG00000182107|TMEM30B ENSG00000182498|RPS18  
ENSG00000185842|Q4VXG5\_HUMAN ENSG00000186480|INSIG1 ENSG00000188725|NP\_001041714.1 ENSG00000189195|BTBD8 ENSG00000196083|ILLRAP ENSG00000196233|LCOR ENSG00000196409|ZNF658B ENSG00000196447|XR\_017870.1  
ENSG00000197579|TOPORS ENSG00000197935|ZNF311 ENSG00000198060|MARCH5 ENSG00000198416|Z658B\_HUMAN ENSG00000204628|GNB2L1  
AGTTTCC ENSG00000100139|MICALL1 ENSG00000101251|SELLL2 ENSG00000102104|RS1 ENSG00000103423|DNAJA3 ENSG00000111405|PPI1\_HUMAN ENSG00000119411|BSRPY ENSG00000124557|BTN1A1 ENSG00000131233|GJA10  
ENSG00000137288|C6orf125 ENSG00000138938|Q5TGJ8\_HUMAN ENSG00000142512|SIGLEC10 ENSG00000146950|SHROOM2 ENSG00000163914|RHRO ENSG00000163975|MFY2 ENSG00000166167|BTRC ENSG00000166448|TMEM130  
ENSG00000169662|NP\_997357.1 ENSG00000174576|NPAS4 ENSG00000175779|NP\_997327.1 ENSG00000182314|SFTPA2 ENSG00000184502|GAST ENSG00000185905|C16orf54 ENSG00000187792|ZNF70 ENSG00000196567|NP\_942123.1  
ENSG00000197174|O14606\_HUMAN ENSG00000197285|NR\_001536.1 ENSG00000204682|C10orf114 ENSG00000023843|ACCN5 ENSG00000030304|MUSK ENSG00000081154|PCNP ENSG00000106355|LSM5 ENSG00000110077|MS4A6A  
ENSG00000110696|C11orf58 ENSG00000122548|K0087\_HUMAN ENSG00000123496|IL13RA2 ENSG00000138152|BTBD16 ENSG00000143337|TOR1AIP1 ENSG00000152229|PSTPIP2 ENSG00000162601|MYSM1 ENSG00000165973|NELL1  
ENSG00000167553|TUBA1C ENSG00000168036|CTNNB1 ENSG00000168515|SCGB1D1 ENSG00000174016|FAM46D ENSG00000179869|ABCA13 ENSG00000180611|C3orf59 ENSG00000181322|TXNDC6 ENSG00000182836|PLCXD3  
ENSG00000186628|FSD2 ENSG00000188162|OTOG ENSG00000189320|NP\_995327.1 ENSG00000196963|PCDH16 ENSG00000198771|RCSD1 ENSG00000203742|NP\_001032308.1

AGTTTCC ENSG00000026652|AGPAT4 ENSG00000032389|TSSC1 ENSG00000050327|ARHGEF5 ENSG00000107282|APBA1 ENSG00000116014|KISS1R ENSG00000116786|PLEKHM2 ENSG00000141524|TMC6 ENSG00000156564|LRFN2  
ENSG00000160746|TMEM16K ENSG00000163064|EN1 ENSG00000166444|ST5 ENSG00000167771|RCOR2 ENSG00000168259|DNAJC7 ENSG00000180902|D2HGDH ENSG00000181444|ZNF467 ENSG00000196155|PLEKHG4  
ENSG00000204335|SP5 ENSG00000206005|FAM90A8 ENSG00000101191|DID1 ENSG00000107949|ECC1P ENSG00000108846|ABCC3 ENSG00000111328|CDK2AP1 ENSG00000118515|SGK ENSG00000118515|SGK ENSG00000121031|PRKDC  
ENSG00000126088|UROD ENSG00000136044|APPL2 ENSG00000138395|ALS2CR7 ENSG00000140319|SRP14 ENSG00000141542|RAB40B ENSG00000148291|SURF2 ENSG00000154856|APCDD1 ENSG00000164167|LSM6  
ENSG00000170312|CDC2 ENSG00000170509|HSD17B13 ENSG00000175768|C9orf105 ENSG00000177620|Q9BSL4\_HUMAN ENSG00000179010|MRFAP1 ENSG00000186697|Q86T06\_HUMAN ENSG00000189290|XR\_018254.1  
AGTTTGA ENSG00000022840|RNFI0 ENSG00000044090|CUL7 ENSG00000054965|KIAA0280 ENSG00000056558|TRAF1 ENSG00000063978|RNFA4 ENSG00000091704|CPA1 ENSG00000102034|ELF4 ENSG00000102755|FLT1  
ENSG00000106789|CORO2A ENSG00000115602|IL1RL1 ENSG00000125633|CCDC93 ENSG00000134438|RAX ENSG00000136488|CSH2 ENSG00000158525|CPA5 ENSG00000161640|SIGLEC11 ENSG00000169118|CSNK1G1  
ENSG00000171456|ASXL1 ENSG00000171724|K1576\_HUMAN ENSG00000173894|CBX2 ENSG00000174697|LEP ENSG00000176515|Q8NAX6\_HUMAN ENSG00000185082|LBH ENSG00000196526|AFAP1 ENSG00000197174|O14606\_HUMAN  
ENSG00000197285|NR\_001536.1 ENSG00000197670|Q9H800\_HUMAN ENSG00000198089|SF11 ENSG00000204657|OR2H2 ENSG00000082516|GEMIN5 ENSG00000092140|KIAA1333 ENSG00000102048|ASB9 ENSG00000109270|MAP2K1IP1  
ENSG00000112237|CCNC ENSG00000115944|COX7A2L ENSG00000117569|PTBP2 ENSG00000118518|RNFI46 ENSG00000121350|NP\_079130.2 ENSG00000126814|TRMT5 ENSG00000130939|UBE4B ENSG00000131966|ACTR10  
ENSG00000137145|DENND4C ENSG00000138604|GLCE ENSG00000138779|Q9HCM6\_HUMAN ENSG00000138795|LEP1 ENSG00000139364|TMEM132B ENSG00000151718|WWC2 ENSG00000151746|BICD1 ENSG00000152270|PDE3B  
ENSG00000155495|MAGEC1 ENSG00000163131|CTSS ENSG00000164841|TMEM74 ENSG00000167721|TSR1 ENSG00000172167|MTBP ENSG00000172262|ZNF131 ENSG00000176256|HMGB4 ENSG00000177143|CETN1  
ENSG00000196406|SPANXE ENSG00000198021|SPANXA2 ENSG00000198160|MIER1 ENSG00000198573|SPANXC ENSG00000198820|SPANXF1 ENSG00000198830|HMGN2 ENSG00000203924|SPANXN2 ENSG00000203926|SPANXA1  
ENSG00000203929|SPANXB1 ENSG00000205299|CKLF

AGTTTGT ENSG00000006432|MAP3K9 ENSG00000008441|NFIX ENSG00000028310|BRD9 ENSG00000087903|RFX2 ENSG00000088812|ATNF ENSG00000101457|DNMT1P1 ENSG00000103066|LYPLA3 ENSG00000103942|HOMER2  
ENSG00000112562|SMOC2 ENSG00000114302|PRKAR2A ENSG00000115884|SDC1 ENSG00000132932|ZNF473 ENSG00000142528|ZNF473 ENSG00000147099|HDAC8 ENSG00000157514|TSC22D3 ENSG00000160209|PDXK  
ENSG00000161016|RPL8 ENSG00000166847|DCTN5 ENSG00000169347|GP2 ENSG00000175093|SPSB4 ENSG00000176022|B3GALT6 ENSG00000176754|C1orf157 ENSG00000177084|POLE ENSG00000181873|C1orf69  
ENSG00000205742|Q6ZTR4\_HUMAN ENSG00000106692|FCMD ENSG00000113580|NR3C1 ENSG00000123472|ATPAF1 ENSG00000134504|KCTD1 ENSG00000136709|WDR33 ENSG00000151135|C12orf23 ENSG00000155085|C6orf199  
ENSG00000160336|ZNF761 ENSG00000161654|LSM12 ENSG00000164187|LMBRD2 ENSG00000164611|PTTG1 ENSG00000164645|NP\_689919.1 ENSG00000170677|SOCS6 ENSG00000175928|LRRN1 ENSG00000184182|UBE2F  
ENSG00000185038|Q8IUR1\_HUMAN ENSG00000186714|CCDC73 ENSG0000000187123|LYPD6 ENSG00000196167|NP\_997312.1 ENSG00000198612|COPS8

AGTTTTA ENSG00000066044|ELAVL1 ENSG00000068078|FGFR3 ENSG00000077157|PPP1R12B ENSG00000092607|TBX15 ENSG00000092820|VIL2 ENSG00000108786|HSD17B1 ENSG00000108947|EFNB3  
ENSG00000112941|POL5 ENSG00000124766|SOX4 ENSG00000126883|NUPF214 ENSG00000132446|PTH1L7 ENSG00000135114|OASL ENSG00000137313|TRIM26 ENSG00000143940|Q6ZMW3\_HUMAN ENSG00000152192|POU4F1

ENSG00000162337|LRP5 ENSG00000164733|CTSB ENSG00000165644|COMTD1 ENSG00000165699|TSC1 ENSG00000167774|NDUFA7 ENSG00000174804|FZD4 ENSG00000180447|GAS1 ENSG00000182013|NP\_060685.2  
ENSG00000182749|PAQR7 ENSG00000183134|GPR44 ENSG00000184988|TMEM106A ENSG00000185674|LYGG2\_HUMAN ENSG00000189223|Q7Z3M5\_HUMAN ENSG00000196367|TRRAP ENSG00000198089|SF11 ENSG00000198752|CDC42BPB  
ENSG00000204103|MAFB ENSG00000204423|C9orf33 ENSG00000204581|Q6ZU44\_HUMAN ENSG00000206069|NP\_001001663.1 ENSG00000236257|CUL3 ENSG00000243462|LCP2 ENSG00000265883|CDC2L5 ENSG00000267646|ZFY  
ENSG00000068796|KIF2A ENSG00000077063|CTTNBP2 ENSG00000079335|QDC14A ENSG00000081019|RSBN1 ENSG00000100478|AP4S1 ENSG00000101109|STK4 ENSG00000110911|SLC11A2 ENSG00000111247|RAD51AP1  
ENSG00000118482|PHF3 ENSG00000124209|RAB22A ENSG00000134698|EIF2C4 ENSG00000138041|SMEK2 ENSG00000148482|SLC39A12 ENSG00000148483|FAM23A ENSG00000150316|NP\_057487.2 ENSG00000151151|IPMK  
ENSG00000156384|C10orf78 ENSG00000162745|OLFML2B ENSG00000163285|GABRG1 ENSG00000167088|SNRPD1 ENSG00000167325|RRM1 ENSG00000172671|ANUBL1 ENSG00000176018|LYSMD3 ENSG00000176774|MAGEB18  
ENSG00000177853|ZNF518 ENSG00000178445|GLDC ENSG00000179387|ELMOD2 ENSG00000183496|RKHD3 ENSG00000189507|SLC23A2 ENSG00000199875|MKNK2 ENSG00000101161|PRPF6 ENSG00000102977|ACD  
AGTTTTT ENSG00000028528|SNX1 ENSG00000059378|PARP12 ENSG00000073350|LLGL2 ENSG00000079616|KIF22 ENSG00000089057|KDELRL1 ENSG00000107833|NPM3 ENSG00000108821|COL1A1 ENSG00000110395|CBL  
ENSG00000103241|FOXF1 ENSG00000103723|AP3B2 ENSG00000105376|ICAM5 ENSG00000123349|PKN1 ENSG00000123349|PKN1 ENSG00000125611|CHCHD5 ENSG00000125753|VASP ENSG00000136731|UGCG1  
ENSG00000137460|NP\_203751.2 ENSG00000142319|SLC6A3 ENSG00000142959|BEST4 ENSG00000144843|ADPRH ENSG00000145626|UGT3A1 ENSG00000148498|PARD3 ENSG00000158169|FANCC ENSG00000162105|SHANK2  
ENSG00000163933|RFT1 ENSG00000163995|ABLIM2 ENSG00000167941|SOST ENSG00000168824|NSG1\_HUMAN ENSG00000172771|C3orf25 ENSG00000174851|YIF1A ENSG00000175115|PACS1 ENSG00000177076|ASAH3L  
ENSG00000180758|GPR157 ENSG00000183549|NP\_060358.2 ENSG00000185262|FAM100B ENSG00000186318|BACE1 ENSG00000188176|SMTNL2 ENSG00000189325|NP\_001010903.2 ENSG00000197965|MPZL1 ENSG00000248740|CUGBP2  
ENSG000000087502|ERGIC2 ENSG00000101773|RBBP8 ENSG00000104549|SQLE ENSG00000105825|TFPI2 ENSG00000115339|GALNT3 ENSG00000117569|PTBP2 ENSG00000124486|USP9X ENSG00000125879|OTOR  
ENSG00000130816|DNMT1 ENSG00000134202|GSTM3 ENSG00000134748|PRPF38A ENSG00000136231|IGF2BP3 ENSG00000136267|DGKB ENSG00000141027|NCOR1 ENSG00000143458|NP\_653219.1 ENSG00000144642|RBMS3  
ENSG00000144935|TRPC1 ENSG00000145545|SRD5A1 ENSG00000145734|BDP1 ENSG00000146457|WTAP ENSG00000151422|FER ENSG00000151694|ADAM17 ENSG00000152894|PTPRK ENSG00000156313|RPGR  
ENSG00000158636|C11orf30 ENSG00000162630|B3GALT2 ENSG00000163605|PPP4R2 ENSG00000163644|PPMLK ENSG00000165113|GKAP1 ENSG00000169599|NFU1 ENSG00000171928|FAM18B ENSG00000176399|DMRTA1  
ENSG00000185238|PRMT3 ENSG00000186231|KLHL32 ENSG00000187533|NP\_999876.1 ENSG00000189403|HMGCB1 ENSG00000198780|Q9H989\_HUMAN ENSG00000204271|SPIN3 ENSG00000205857|Q7Z5D8\_HUMAN  
ATAAAAA ENSG00000071564|TCF3 ENSG00000104738|MCM4 ENSG00000105373|GLTSCR2 ENSG00000131153|GINS2 ENSG00000133511|PIK4CA ENSG00000138617|PARP16 ENSG00000139914|NP\_981947.1 ENSG00000143107|FNDC7  
ENSG00000157483|MYO1E ENSG00000160951|PTGER1 ENSG00000163879|DNALI1 ENSG00000164438|TLX3 ENSG00000166900|STX3 ENSG00000168569|NP\_001073970.1 ENSG00000170906|NDUFA3 ENSG00000181885|CLDN7  
ENSG00000183506|NP\_955377.2 ENSG00000188100|FAM25\_HUMAN ENSG00000188176|SMTNL2 ENSG00000197448|GSTK1 ENSG00000197530|MI2B ENSG00000198399|ITSN2 ENSG00000204059|NP\_001013718.1 ENSG00000204682|C10orf114  
ENSG00000205039|Q6ZQ55\_HUMAN ENSG00000005022|SLC25A5 ENSG00000075142|SRI ENSG00000079257|LXN ENSG00000080007|DDX43 ENSG00000091127|PUS7 ENSG00000091879|ANGPT2 ENSG00000096401|CDC5L  
ENSG00000100519|PSMC6 ENSG00000100532|CGRRF1 ENSG00000100749|VRK1 ENSG00000104517|EDD1 ENSG00000105819|PMPCB ENSG00000109182|NP\_079363.1 ENSG00000109390|NDUFC1 ENSG00000111700|SLC01B3  
ENSG00000118680|NP\_291024.1 ENSG00000121350|NP\_079130.2 ENSG00000123570|RAB9 ENSG00000128791|TWSG1 ENSG00000130347|RTN4IP1 ENSG00000132423|COQ3 ENSG00000133835|HSD17B4 ENSG00000134058|CDK7  
ENSG00000136155|SCEL ENSG00000138433|CIR\_HUMAN ENSG00000143669|LYST ENSG00000144161|ZC3H8 ENSG00000145088|EAF2 ENSG00000145604|SKP2 ENSG00000146469|VIP ENSG00000150722|PPP1R1C  
ENSG00000152818|UTRN ENSG00000154548|SRR35\_HUMAN ENSG00000155959|VBP1 ENSG00000156374|PCGF6 ENSG00000156787|WDR67 ENSG00000158315|RHBDL2 ENSG00000164252|AGGF1 ENSG00000164944|KIAA1429  
ENSG00000165805|C12orf50 ENSG00000167995|BEST1 ENSG00000172339|ALG14 ENSG00000174842|GLMN ENSG00000175374|SPSP1 ENSG00000176209|C8orf40 ENSG00000177459|C8orf47 ENSG00000177990|DPY19L2  
ENSG00000180228|PRKRA ENSG00000183150|GPR19 ENSG00000186009|ATP4B ENSG00000186416|NKRF ENSG00000187676|B3GALT1 ENSG00000197410|DCHS2 ENSG00000203668|CHML  
ENSG00000044090|CUL7 ENSG00000075886|TUBA3E ENSG00000107699|BFA2T2 ENSG00000081791|KIAA0141 ENSG00000103067|RBM35B ENSG00000105379|ETFB ENSG00000105617|LENG1 ENSG00000105722|ERF  
ENSG00000105997|HOXA3 ENSG000001108788|MLX ENSG00000110717|NDUFS8 ENSG00000111481|COP12 ENSG00000111481|COP12 ENSG00000123353|ORMDL2 ENSG00000125388|GRK4 ENSG00000126258|FXD1  
ENSG00000126264|HCST ENSG00000127554|GFER ENSG00000135441|BLOC1S1 ENSG00000137133|HINT2 ENSG00000137288|C6orf125 ENSG00000142227|EMP3 ENSG00000142583|SLC2A5 ENSG00000149257|SERPINH1  
ENSG00000152086|TUBA3E ENSG00000154096|THY1 ENSG00000166136|NDUFB8 ENSG00000166908|PIP5K2C ENSG00000167139|TBC1D21 ENSG00000168612|ZSWIM1 ENSG00000170231|FABP6 ENSG00000172073|C2orf51  
ENSG00000174788|PCP2 ENSG00000177992|C9orf79 ENSG00000178896|EXOSC4 ENSG00000182325|FBX16 ENSG00000184209|NP\_008951.1 ENSG00000186318|BACE1 ENSG00000188508|U467\_HUMAN ENSG00000198033|TUBA3C  
ENSG00000198467|TPM2 ENSG00000205307|Q8TEE9\_HUMAN ENSG000000021355|SERPINB1 ENSG00000033178|UBBL2 ENSG00000035499|DEPDC1B ENSG00000065413|ANKRD44 ENSG00000081026|MAGI3 ENSG00000088930|XRN2  
ENSG00000101746|NOLA4 ENSG00000112077|RHAG ENSG00000112796|ENPP5 ENSG00000113595|TRIM23 ENSG00000118181|RP25 ENSG00000120324|PCDH10 ENSG00000120549|KIAA1217 ENSG00000129003|VPS13C  
ENSG00000134115|CNTN6 ENSG00000134538|SLC01B1 ENSG00000136560|TANK ENSG00000138430|GTPBP9 ENSG00000139329|LUM ENSG00000139637|C12orf10 ENSG00000152700|SAR1B ENSG00000155975|VPS37A  
ENSG00000160223|ICOSL2 ENSG00000163114|PDHA2 ENSG00000163659|TIPARP ENSG00000163669|DNHD2 ENSG00000165555|C14orf148 ENSG00000165934|CPSF2 ENSG00000174749|C4orf32 ENSG00000180071|ANKRD18A  
ENSG00000182552|WDD4A ENSG00000186522|SEPT10 ENSG00000187790|FANCM ENSG00000198521|ZNF43 ENSG00000204351|SKIV2L ENSG00000205174|NP\_001019778.1 ENSG00000206120|QDD2K5\_HUMAN  
ATAAAG ENSG00000010282|HHATL ENSG00000092820|VIL2 ENSG00000099785|MARCH2 ENSG00000099795|NDUFB7 ENSG00000100345|MYH9 ENSG00000102547|CAB39L ENSG00000102904|TSNAXIP1 ENSG00000103241|FOXF1  
ENSG00000103710|RASL12 ENSG00000104872|PIH1D1 ENSG00000106384|MOGAT3 ENSG00000113194|UBXD8 ENSG00000122711|SPINK4 ENSG00000124785|NRN1 ENSG00000125266|EFNB2 ENSG00000125755|SYMPK  
ENSG00000125878|TCF15 ENSG00000125995|C20orf52 ENSG00000130813|NP\_060851.1 ENSG00000130813|DHX34 ENSG00000140522|RLBP1 ENSG00000144468|RHBDL1 ENSG00000148498|PARD3  
ENSG00000151650|VENTX ENSG00000157734|SNX22 ENSG00000161270|NPHS1 ENSG00000162736|NCSTN ENSG00000163157|TMD04 ENSG00000163833|FBX040 ENSG00000165916|PSMC3 ENSG00000166716|ZNF592  
ENSG00000168061|SAC3D1 ENSG00000168268|NT5DC2 ENSG00000170485|NPAS2 ENSG00000170703|TLL6 ENSG00000171649|KISS1 ENSG00000171788|PCP2 ENSG00000174788|PCP2 ENSG00000175564|UCP3  
ENSG00000175697|GPR156 ENSG00000176887|SOX11 ENSG00000178035|IMPDH2 ENSG00000178243|C9orf62 ENSG00000179580|RNF151 ENSG00000180210|F2 ENSG00000182871|COL18A1 ENSG00000185614|C3orf54  
ENSG00000188935|Q6ZU24\_HUMAN ENSG00000197238|HIST1H4J ENSG00000204463|BAT3 ENSG00000010278|CD9 ENSG000000028839|TBPL1 ENSG00000079332|SAR1A ENSG00000101230|C20orf82 ENSG00000103599|IQCH  
ENSG00000103740|ACSBG1 ENSG00000105750|ZNF85 ENSG00000105971|CAV2 ENSG00000107897|ACB5 ENSG00000110723|EXPH5 ENSG00000114942|EEF1B2 ENSG00000115484|CCT4 ENSG00000126861|OMG  
ENSG00000135452|TSPAN31 ENSG00000136099|PCDH8 ENSG00000136872|ALDOB ENSG00000138152|BTBD16 ENSG00000143947|RPS27A ENSG00000144196|Q9BX22\_HUMAN ENSG00000144619|CNTN4 ENSG00000147614|ATP6VD02  
ENSG00000150627|WDR17 ENSG00000156467|UQCRB ENSG00000162836|ACPF6 ENSG00000163152|AZI2 ENSG00000164933|SLC25A32 ENSG00000165972|CCDC38 ENSG00000166006|KCNC2 ENSG00000166562|SEC11C  
ENSG00000166984|TCP10L ENSG00000173960|UBXD4 ENSG00000176124|DLEU1 ENSG00000177461|Q8NA31\_HUMAN ENSG00000180245|RRH ENSG00000181450|ZNF678 ENSG00000182504|LRR1Q2 ENSG00000186675|MAGEE2  
ATAAAAT ENSG00000196319|Q9H353\_HUMAN ENSG00000205337|Q6ZVR2\_HUMAN ENSG00000206535|AIAA45\_HUMAN  
ENSG00000074211|PPP2R2C ENSG00000084207|GSTP1 ENSG00000102977|ACD ENSG00000106615|RHBE ENSG00000108294|PSMB3 ENSG00000122085|MTERFD2 ENSG00000125266|EFNB2 ENSG00000143556|S100A7  
ENSG00000151353|TMEM18 ENSG00000151498|ACAD8 ENSG00000153298|C6orf54 ENSG00000162543|UBXD3 ENSG00000163571|DCST1 ENSG00000165131|C7orf34 ENSG00000165282|PIGO ENSG00000182534|MXRA7  
ENSG00000183103|LYPD4 ENSG00000183579|ZNRF3 ENSG00000186976|DJBP\_HUMAN ENSG00000187021|PNLIPRP1 ENSG00000196502|SULT1A1 ENSG00000197448|GSTK1 ENSG00000203931|LOC729078 ENSG00000204394|VARS  
ENSG00000204526|HCG27 ENSG00000205912|Q6ZTG5\_HUMAN ENSG00000000419|DPM1 ENSG00000164900|CLCA1 ENSG00000020426|MNAT1 ENSG000000047188|YTHDC2 ENSG00000069943|PIGB ENSG00000072657|TRHDE  
ENSG00000077616|NAALAD2 ENSG00000080986|NDC80 ENSG00000096264|NCR2 ENSG00000102471|NDPFP2 ENSG00000106460|TMEM106B ENSG00000109270|MAP2K1IP1 ENSG00000110347|MMP12 ENSG00000112246|SIM1  
ENSG00000112761|WISP3 ENSG00000118492|C6orf103 ENSG00000121892|NP\_056015.1 ENSG00000123119|EFCBP1 ENSG00000124564|SLC17A3 ENSG00000126653|CCDC55 ENSG00000127074|RGS13 ENSG00000134539|KLRD1  
ENSG00000135052|C9orf155 ENSG00000138162|TACC2 ENSG00000140285|FGF7 ENSG00000143341|HMCN1 ENSG00000143742|SRP9 ENSG00000144061|NPHP1 ENSG00000145220|LYAR\_HUMAN ENSG00000145781|COMMD10  
ENSG00000152147|GEMIN6 ENSG00000154079|C6orf57 ENSG00000155970|ARF2 ENSG00000156650|MYST4 ENSG00000159182|NP\_115767.1 ENSG00000161652|C19orf41 ENSG00000163012|ZSWIM2 ENSG00000163510|NP\_065994.1  
ENSG00000163563|MNDA ENSG00000163584|RPL22L1 ENSG00000164291|EPHA2 ENSG00000165028|NIPSNAP3B ENSG00000165443|PHYHIP1 ENSG00000169019|COMMD8 ENSG00000170881|RNF139 ENSG00000171522|PTGER4  
ENSG00000173198|CYSLTR1 ENSG00000174776|WDR49 ENSG00000175513|TSGA10IP ENSG00000184434|LRRC19 ENSG00000184647|NP\_940866.2 ENSG00000185203|Q96S36\_HUMAN ENSG00000185238|PRMT3 ENSG00000185261|C5orf36  
ATAAACA ENSG00000198087|CD2AP ENSG00000198142|ANKRD57 ENSG00000203933|NP\_001013421.1 ENSG00000204464|Q5TG92\_HUMAN  
ENSG0000007038|PRSS21 ENSG00000071282|LMCP1 ENSG00000074582|BCS1L ENSG00000100109|TFPI1 ENSG00000101665|SMAD7 ENSG00000102901|CENPT ENSG00000105258|POLR2I  
ENSG00000107745|CBARA1 ENSG00000108175|ZMI21 ENSG00000108515|ENO3 ENSG00000116148|CCNL2 ENSG00000125999|C20orf114 ENSG00000126432|PRDX5 ENSG00000129295|LRRC6 ENSG00000139540|SLC39A5  
ENSG00000141096|DEP3 ENSG00000141977|CIB3 ENSG00000144120|TMEM177 ENSG00000157606|SPATS1 ENSG00000158793|NIT1 ENSG00000163060|TKT4 ENSG00000167139|TBC1D21 ENSG00000170889|RPS9  
ENSG00000172458|IL17D ENSG00000172653|C17orf66 ENSG00000178589|Q9BT26\_HUMAN ENSG00000178817|Q8N9W7\_HUMAN ENSG00000180424|DEFB123 ENSG00000180878|C11orf42 ENSG00000180879|SSR4 ENSG00000184639|NP\_001004344.1  
ENSG00000187796|CARD9 ENSG00000188681|Q8TEH8\_HUMAN ENSG00000196645|Q8N9W7\_HUMAN ENSG00000197445|C16orf47 ENSG00000197561|ELA2 ENSG00000197816|KIAA1529 ENSG00000203793|Q6ZR74\_HUMAN ENSG00000203941|Q5JVP7\_HUMAN  
ENSG00000205742|Q6ZTR4\_HUMAN ENSG00000206177|HEM ENSG00000004897|CDC27 ENSG00000039600|SOX30 ENSG00000047936|ROSL ENSG00000091129|NRCAM ENSG00000096063|SRPK1 ENSG00000104763|ASAH1  
ENSG00000104825|NFKB1B ENSG00000106034|NP\_079189.3 ENSG00000109158|GABRA4 ENSG00000115946|PNO1 ENSG000001185477|GPR1N3 ENSG00000134873|CLDN10 ENSG00000136273|HUS1\_HUMAN ENSG00000136521|NDUFB5  
ENSG00000136643|RPS6KC1 ENSG00000140987|ZNF434 ENSG00000149506|ZP1 ENSG00000150540|HNMT ENSG00000151012|SLC7A11 ENSG00000153832|FBXO36 ENSG00000163491|NEK10 ENSG00000163568|AIM2  
ENSG00000164002|C1orf176 ENSG00000165061|ZMAT4 ENSG00000165443|PHYHIP1 ENSG00000166734|CASC4 ENSG00000171806|C1orf156 ENSG00000171931|FBXW10 ENSG00000172167|MTBP  
ATAAAC ENSG00000173452|NP\_689987.2 ENSG00000177954|RPS27 ENSG00000179363|TMEM31 ENSG00000181544|FANCB ENSG00000185477|GPR1N3 ENSG00000188820|FAM26F  
ENSG00000064490|RFANK ENSG00000065882|TBC1D1 ENSG00000083845|RPS5 ENSG00000087088|BAX ENSG00000100842|EFS ENSG00000101200|AVP ENSG00000102001|CACNA1F ENSG00000104918|RETN  
ENSG00000110195|FOLR1 ENSG00000125804|C20orf91 ENSG00000130656|HBZ ENSG00000136286|MYO1G ENSG00000136718|IMP4 ENSG00000142544|ATPBD3 ENSG00000142546|NOSIP ENSG00000148158|SNX30  
ENSG00000149021|SCGB1A1 ENSG00000149499|EML3 ENSG00000157093|LYZL4 ENSG00000160688|FLAD1 ENSG00000161981|C16orf33 ENSG00000162244|RPL29 ENSG00000165828|PRAP1 ENSG00000169189|NSMCE1  
ENSG00000169738|DCXR ENSG00000170049|KCNAB3 ENSG00000172543|CTSW ENSG00000179766|Q4G129\_HUMAN ENSG00000179889|PDXDC1 ENSG00000180305|WFDC10A ENSG00000182404|LYRM4 ENSG00000182685|C16orf79  
ENSG00000182931|WFDC10B ENSG00000184945|AQP12A ENSG00000184990|SIVA1 ENSG00000186919|LGIC21 ENSG00000198569|SLC34A3 ENSG00000204859|ZBTB48 ENSG00000205631|Q9H7S7\_HUMAN ENSG00000078018|MAP2  
ENSG00000083782|EPYC ENSG00000090054|SPTLC1 ENSG00000104412|TTC35 ENSG00000109184|DCUN1D4 ENSG00000123843|C4BPB ENSG00000129440|PARP2 ENSG00000137038|C9orf123 ENSG00000137675|MM27  
ENSG00000143036|SLC44A3 ENSG00000143158|BRP44 ENSG00000145623|OSMR ENSG00000147905|ZCCH7 ENSG00000166352|C11orf74 ENSG00000173409|ARV1 ENSG00000176840|C19orf30 ENSG00000186073|C15orf41  
ATAAACT ENSG000000187193|MT1X ENSG00000198556|ZNF789 ENSG00000205220|PSMB10  
ENSG00000070601|FRMPD1 ENSG00000075702|IMPL1 ENSG00000076944|STXB2P2 ENSG00000078246|TULP3 ENSG00000089692|LAG3 ENSG00000092295|TGM1 ENSG00000103275|UBE2I ENSG00000105619|TFPT  
ENSG00000105640|RPL18A ENSG00000106631|MYL7 ENSG00000107960|OBFC1 ENSG00000108479|GALK1 ENSG00000110628|SLC22A18 ENSG00000116586|MAPIP\_HUMAN ENSG00000118689|FOXO3A ENSG00000123136|DDX39  
ENSG00000126456|IRF3 ENSG00000131059|C20orf71 ENSG00000133116|WDR74 ENSG00000140538|NTRK3 ENSG00000142273|CBLR ENSG00000142484|TM4SF5 ENSG00000145819|ARHGAP26  
ENSG00000161618|ALDH16A1 ENSG00000162337|LRP5 ENSG00000162438|CTRC ENSG00000164047|CAMP ENSG00000167393|PPP2R3B ENSG00000168000|HNRNPUL2 ENSG00000169704|GP9 ENSG00000171495|NP\_775760.2  
ENSG00000173862|Q9NWP0\_HUMAN ENSG00000178602|OTOS ENSG00000178919|FOXE1 ENSG00000180358|Q8N1X6\_HUMAN ENSG00000184108|TRML1 ENSG00000184502|GAST ENSG00000187764|SEMA4D ENSG00000189001|SBSN  
ENSG00000197549|Q6ZN90\_HUMAN ENSG00000206140|LOC72829 ENSG0000010932|FMO1 ENSG00000105568|RGPD7 ENSG00000040275|CCDC99 ENSG00000066279|ASPM ENSG00000068912|C2orf30 ENSG00000077147|TM9SF3  
ENSG00000078618|NRD1 ENSG00000093134|VNN3 ENSG00000100883|SRP54 ENSG00000100890|KIAA0391 ENSG00000101278|Q9NQ39\_HUMAN ENSG00000102384|CENPI ENSG00000114416|FXR1 ENSG00000117594|HSD11B1  
ENSG00000118520|ARG1 ENSG00000122406|RPL5 ENSG00000122566|HNRPA2B1 ENSG00000124614|RPS10 ENSG00000125863|MKKS ENSG00000125870|SNRPB2 ENSG00000131068|DEFB118 ENSG00000134962|KLB  
ENSG00000135540|NHSL1 ENSG00000135968|GCC2 ENSG00000137821|LRRC49 ENS



ENSG00000136193|SCRN1 ENSG00000139714|MORN3 ENSG00000149798|CDC42EP2 ENSG00000162367|TAL1 ENSG00000162888|C1orf147 ENSG00000164733|CTSB ENSG00000165457|FOLR2 ENSG00000168621|GDNF
ENSG00000169393|ELSPBP1 ENSG00000171060|C8orf74 ENSG00000174483|BBS1 ENSG00000177807|KCNJ10 ENSG00000179168|GGN ENSG00000197430|TMEM10 ENSG00000198131|ZNF544 ENSG00000198785|GRIN3A
ENSG00000205929|C21orf62 ENSG00000038210|PI4K2B ENSG00000048991|R3HDM1 ENSG00000050030|KIAA2022 ENSG00000080493|SLC4A4 ENSG00000082397|EPB41L3 ENSG00000084110|HAL ENSG00000085382|HACE1
ENSG00000115421|PAPOLG ENSG00000117500|TMED5 ENSG00000118407|FILIP1 ENSG00000120162|MOBK12B ENSG00000129586|ZBED5 ENSG00000148459|PDS1 ENSG00000155438|MKI67IP ENSG00000155906|RMND1
ENSG00000158185|ANKRD36 ENSG00000160049|DFFA ENSG00000163377|FAM19A4 ENSG00000164983|TMEM65 ENSG00000166037|CEP57 ENSG00000166148|AVPR1A ENSG00000169248|CXCL11 ENSG00000171428|NAT1
ENSG00000173542|MOBK11A ENSG00000178722|NP\_775938.1 ENSG00000179152|C3orf23 ENSG00000179933|C14orf119 ENSG00000182077|PTCHD3 ENSG00000196660|SLC30A10 ENSG00000196693|ZNF33B ENSG00000197312|RSC1A1
ENSG00000198440|ZNF583 ENSG00000206120|QOD2K5\_HUMAN
ATAACGC ENSG00000004848|ARX ENSG00000028137|TNFRSF1B ENSG00000100167|SEPT3 ENSG00000105972|C7orf20 ENSG00000105997|HOXA3 ENSG00000106683|LIMK1 ENSG00000114316|USP4 ENSG00000122180|MYOG
ENSG00000125872|C20orf75 ENSG00000136305|CIDEB ENSG00000142549|LOC402665 ENSG00000160445|ZER1 ENSG00000160993|ALKBH4 ENSG00000163793|DNAJC5G ENSG00000164638|SLC29A4 ENSG00000164778|EN2
ENSG00000171540|OTP ENSG00000173039|RELA ENSG00000181218|HIST3H2A ENSG00000187483|SERPINA13 ENSG00000203674|Q6ZT24\_HUMAN ENSG00000203945|Q5JFQ1\_HUMAN ENSG00000204277|Q6ZR66\_HUMAN ENSG00000205354|Q6ZN60\_HUMAN
ENSG00000205771|CATSPER2P1 ENSG000000083168|MYST3 ENSG000000084092|C4orf14 ENSG00000103569|AQP9 ENSG00000111785|RIC8B ENSG00000120215|MLANA ENSG00000134590|FAM127A ENSG00000134760|DSG1
ENSG00000138463|DIRC2 ENSG00000138496|PARP9 ENSG00000140905|GCSH ENSG00000143995|MEIS1 ENSG00000144645|OSBPL10 ENSG00000147364|FBXO25 ENSG00000154734|ADAMT11 ENSG00000159140|SON
ENSG00000160629|C17orf32 ENSG00000162702|ZNF281 ENSG00000170949|ZNF160 ENSG00000172667|ZMAT3 ENSG00000180660|MAB21L1 ENSG00000183735|TBK1 ENSG00000185013|NT5C1B ENSG00000185742|NP\_997528.1
ENSG00000189043|NDUFA4 ENSG00000204954|Q69YU5\_HUMAN
ATAACGC ENSG00000090372|STRN4 ENSG00000100060|MFNG ENSG00000100221|JOSD1 ENSG00000101181|GTPBP5 ENSG00000102034|ELF4 ENSG00000106078|COBL ENSG00000111481|COP21 ENSG00000120875|DUSP4
ENSG00000121769|FABP3 ENSG00000130592|LSP1 ENSG00000136463|CCDC44 ENSG00000140092|FBLN5 ENSG00000140443|IGF1R ENSG00000148498|PARD3 ENSG00000155666|JMJ5 ENSG00000159461|AMFR
ENSG00000173126|PCP4L1 ENSG00000175781|Q9H5L9\_HUMAN ENSG00000183657|Q8WYW5\_HUMAN ENSG00000196517|SLC6A9 ENSG00000197506|SLC28A3 ENSG00000198407|Q8NCZ5\_HUMAN ENSG00000204758|Q6ZUG4\_HUMAN ENSG0000060140|STYK1
ENSG00000069509|FUNDCl ENSG00000101751|POLI ENSG00000102974|CTCF ENSG00000116874|WARS2 ENSG00000121297|TSHZ3 ENSG00000131370|SH3BP5 ENSG00000131831|RAI2 ENSG00000132463|GRSF1
ENSG00000137142|IGFBP1 ENSG00000140265|ZSCAN29 ENSG00000145907|G3BP1 ENSG00000150361|KLHL1 ENSG00000156976|EIF4A2 ENSG00000161547|SFRS2 ENSG00000162927|NP\_653310.1 ENSG00000167765|Q96NP5\_HUMAN
ENSG00000168291|PDHB ENSG00000172071|EIF2AK3 ENSG00000172201|ID4 ENSG00000176624|RKHD2 ENSG00000180917|NP\_060818.3 ENSG00000186020|ZNF529 ENSG00000204884|Q6ZVI2\_HUMAN ENSG00000204899|NP\_001065243.1
ENSG00000205111|CDKL4
ATAACT ENSG000000072501|SMC1A ENSG000000088727|KIF9 ENSG00000100931|CHMP4A ENSG00000104823|ECH1 ENSG00000111775|COX6A1 ENSG00000116667|C1orf21 ENSG00000119946|CNNM1 ENSG00000126457|PRMT1
ENSG00000135503|ACVR1B ENSG00000135624|CCT7 ENSG00000146197|SCUBE3 ENSG00000146950|SHROOM2 ENSG00000148704|VAX1 ENSG00000162344|FGF19 ENSG00000162650|ATXN7L2 ENSG00000173757|STAT5B
ENSG00000180901|KCTD2 ENSG00000187144|SPATA21 ENSG00000189401|OTUD6A ENSG00000094975|C1orf9 ENSG00000115866|DARS ENSG00000120160|C9orf11 ENSG00000133119|RFC3 ENSG00000134371|CDC73
ENSG00000135870|RC3H1 ENSG00000137824|FAM82C ENSG00000138079|SLC3A1 ENSG00000138587|MNS1 ENSG00000140043|ZADH1 ENSG00000146186|IGFBP1 ENSG00000157576|XR\_018454.1 ENSG00000160588|U2966\_HUMAN
ENSG00000165209|STRBP ENSG00000168379|Q8WM95\_HUMAN ENSG00000168811|IL12A ENSG00000173046|NM\_207376 ENSG00000179083|FAM133A ENSG00000179456|ZNF238 ENSG00000188177|ZC3H6 ENSG00000188193|C6orf155
ENSG00000189127|NP\_001004441.1 ENSG00000196072|BLOC1S2 ENSG00000198081|ZFP161 ENSG00000205581|HMGN1
ATAAGAC ENSG00000006611|USH1C ENSG0000010379|SLC6A13 ENSG00000107593|PKD2L1 ENSG00000108961|NP\_057576.2 ENSG00000125462|C1orf61 ENSG00000137177|KIF13A ENSG00000137808|NOX5 ENSG00000137877|SPTBN5
ENSG00000141622|C18orf23 ENSG00000145002|FAM86B1 ENSG00000147432|CHRN3B ENSG00000153944|MSI2 ENSG00000162771|FAM71A ENSG00000165046|LETM2 ENSG00000186051|TAL2 ENSG00000186523|NR\_003494.1
ENSG00000197694|SPTAN1 ENSG00000204498|NFKB1L1 ENSG00000019186|CYP24A1 ENSG00000044524|EPHA3 ENSG00000112379|KIAA1244 ENSG00000131269|ABCB7 ENSG00000132424|C6orf111
ENSG00000144285|SCN1A ENSG00000148584|ACF\_HUMAN ENSG00000166240|Q14DG7-2 ENSG00000166266|CUL5 ENSG00000168216|LMBRD1 ENSG00000168556|ING2 ENSG00000172059|KLF11 ENSG00000185038|Q8IUR1\_HUMAN
ENSG00000196628|TCF4
ATAAGCG ENSG000000042753|AP2S1 ENSG000000072864|NDE1 ENSG000000099308|MAST3 ENSG00000119487|MAPKAP1 ENSG00000122254|HS3ST2 ENSG00000139197|PEX5 ENSG00000140650|PMM2 ENSG00000143878|RHOB
ENSG00000143940|Q6ZMW3\_HUMAN ENSG00000145824|CXCL14 ENSG00000160888|TER2 ENSG00000161642|ZNF385 ENSG00000163995|ABLIM2 ENSG00000164621|DAMS\_HUMAN ENSG00000165175|MID1IP1 ENSG00000168269|FOXI1
ENSG00000169641|LUZP1 ENSG00000171467|ZNF318 ENSG00000173548|SH3PX3 ENSG00000179219|TMEM148 ENSG00000185475|NP\_955369.1 ENSG00000197435|HIST3H2B ENSG00000198012|XR\_017841.1 ENSG00000198182|ZNF607
ENSG00000205452|Q6ZQQ9\_HUMAN ENSG00000064787|BCAS1 ENSG00000076770|MBNL3 ENSG00000090520|DNAJB11 ENSG00000092203|TOX4 ENSG00000101266|CSNK2A1P ENSG00000101825|MXRA5 ENSG00000102362|SYTL4
ENSG00000108231|LGI1 ENSG00000115738|ID2 ENSG00000117322|CR2 ENSG00000124789|NUP153 ENSG00000125247|TMTC4 ENSG00000125848|FLRT3 ENSG00000127314|RAP1B ENSG00000138160|KIF11
ENSG00000147231|CXorf57 ENSG00000155324|GRAMD3 ENSG00000166501|PRKCB1 ENSG00000168374|ARF4 ENSG00000174514|MFSD4 ENSG00000175746|NP\_997328.1 ENSG00000175809|ZNF645 ENSG00000176201|GBA3
ENSG00000176276|hCG\_1757335 ENSG00000183918|SH2D1A ENSG00000187010|RHD ENSG00000189266|PNRC2
ATAAGCT ENSG000000035403|VCL ENSG000000037757|NP\_115661.1 ENSG000000052850|ALX4 ENSG00000075826|SEC31B ENSG00000086730|LAT2 ENSG00000087269|NOL14 ENSG00000100234|TIMP3 ENSG00000100300|TSPO
ENSG00000101391|CDK5RAP1 ENSG00000104946|TBC1D17 ENSG00000105053|VRK3 ENSG00000108702|CCL1 ENSG00000114982|NP\_060461.3 ENSG00000135314|C6orf148 ENSG00000135637|NP\_116168.2 ENSG00000143575|HAX1
ENSG00000158109|FAM79A ENSG00000166860|ZBTB39 ENSG00000168610|STAT3 ENSG00000176092|AIML1 ENSG00000177807|KCNJ10 ENSG00000179855|GTPC3 ENSG00000183621|ZNF438 ENSG00000001631|KRIT1
ENSG00000052795|Q9H994\_HUMAN ENSG00000102090|SCML2 ENSG00000112309|B3GAT2 ENSG00000112394|SLC16A10 ENSG00000114670|NEK11 ENSG00000118507|AKAP7 ENSG00000145675|PK3R1 ENSG00000155622|XAGE2
ENSG00000165244|ZNF367 ENSG00000173698|GPR64 ENSG00000175066|GK5 ENSG00000180667|YOD1 ENSG00000181690|PLAG1 ENSG00000185751|GAGD3\_HUMAN ENSG00000196459|SEDLP ENSG00000196660|SLC30A10
ENSG00000196677|C8orf77 ENSG00000198162|MAN1A2 ENSG00000205413|SAMD9
perfect: ATAAGCT AGCTTAT hsa-miR-21 tAGCTTATcagaactgatgttga 1
ATAAGGG ENSG00000110446|SLC15A3 ENSG00000113722|CDX1 ENSG00000124374|PAIP2B ENSG00000130544|ZNF557 ENSG00000149735|GPHA2 ENSG00000157653|C9orf43 ENSG00000159202|UBE2Z ENSG00000164967|C9orf23
ENSG00000169169|CPT1C ENSG00000172349|IL16 ENSG00000174151|PAIB51D1 ENSG00000179241|LDLRAD3 ENSG00000186063|C1orf80 ENSG00000197506|SLC28A3 ENSG00000198326|C20orf141 ENSG0000068366|ACSL4
ENSG00000100625|SIX4 ENSG00000102218|RP2 ENSG00000103534|TMC5 ENSG00000112305|SMAP1 ENSG00000115290|GRB14 ENSG00000118322|ATP10B ENSG00000125430|HS3ST3B1 ENSG00000127324|TSPAN8
ENSG00000127366|TAS2R5 ENSG00000134709|HOOK1 ENSG00000143190|POU2F1 ENSG00000156374|PCGF6 ENSG00000157654|PALM2 ENSG00000160201|UZAF1 ENSG00000163074|NM\_024534 ENSG00000163217|BMP10
ENSG00000164924|YWHAZ ENSG00000165682|CLEC1B ENSG00000168952|SFXBP6 ENSG00000171446|KRT27 ENSG00000173258|ZNF483 ENSG00000204909|SPINK9
ATAAGTG ENSG000000054523|KIF1B ENSG00000085063|CD59 ENSG00000107175|CREB3 ENSG00000112514|CUTA ENSG00000113552|GNPDA1 ENSG00000115350|POLE4 ENSG00000132514|CLEC10A ENSG00000134571|MYBPC3
ENSG00000141552|ANAPC11 ENSG00000141965|FEM1A ENSG00000155229|MMS19L ENSG00000169371|SNUPN ENSG00000170379|NP\_775949.1 ENSG00000183196|CHST6 ENSG00000188396|NP\_001013654.1 ENSG00000188554|NBR1
ENSG00000188707|C7orf29 ENSG00000188784|PLA2G2E ENSG00000047457|CP ENSG00000056097|ZFR ENSG00000103479|RBL2 ENSG00000106664|EIF5 ENSG00000118292|C1orf54 ENSG00000118495|PLAGL1
ENSG00000134363|FST ENSG00000134548|C12orf39 ENSG00000139800|ZIC5 ENSG00000144354|CDCA7 ENSG00000150768|DLAT ENSG00000152620|C5orf33 ENSG00000153207|AHCTF1 ENSG00000155959|VBP1
ENSG00000155961|RAB39B ENSG00000162819|C1orf58 ENSG00000164283|EM1 ENSG00000171928|FAM18B ENSG00000173473|SMARCC1 ENSG00000179915|NRX1B\_HUMAN ENSG00000187118|NP\_872329.1 ENSG00000196867|ZFP28
ENSG00000198092|TMPRSS11F ENSG00000198420|NP\_055534.1 ENSG00000204147|ASAH2B
ATAATA ENSG000000012061|ERCC1 ENSG000000055118|KCNH2 ENSG00000102879|CORO1A ENSG00000106538|RARRES2 ENSG00000110169|HPX ENSG00000111678|C12orf57 ENSG00000114737|CISH ENSG00000114786|ACY1
ENSG00000120875|DUSP4 ENSG00000125743|SNRPD2 ENSG00000131188|PRR7 ENSG00000134825|C11orf10 ENSG00000143546|S100A8 ENSG00000143842|SOX13 ENSG00000151465|CDC123 ENSG00000153298|C6orf54
ENSG00000154370|TRIM11 ENSG00000163823|CCR1 ENSG00000169059|VCX3A ENSG00000170613|FAM71B ENSG00000171115|GIMAP8 ENSG00000177504|VCX2 ENSG00000177885|GRB2 ENSG00000182583|VCX
ENSG00000184436|THAP7 ENSG00000204444|APOM ENSG00000204446|NP\_001001709.1 ENSG00000205011|NP\_001007547.1 ENSG00000205642|VCX3B ENSG00000037965|HOXC8 ENSG00000050130|C14orf100 ENSG00000086288|TXNDC3
ENSG00000088298|EDEM2 ENSG00000103540|CEL10\_HUMAN ENSG00000107611|CUBN ENSG00000115165|PSCDBP ENSG00000116141|MARK1 ENSG00000117594|HSD11B1 ENSG00000124532|MRS2L
ENSG00000127334|DYRK2 ENSG00000129048|CCRL1 ENSG00000133116|KUL ENSG00000136480|POLG2 ENSG00000136682|CBWD2 ENSG00000137674|MMP20 ENSG00000138688|KIAA1109 ENSG00000138814|PPP3CA
ENSG00000139800|ZTC5 ENSG00000147996|CBWD1 ENSG00000149761|NDU22 ENSG00000150540|HNMT ENSG00000150628|SPATA4 ENSG00000152078|TMEM56 ENSG00000156172|C8orf37 ENSG00000165959|CLMN
ENSG00000167912|Q9QE0\_HUMAN ENSG00000168679|SLC16A4 ENSG00000169297|NR0B1 ENSG00000169684|CHRNA5 ENSG00000172197|MBOAT1 ENSG00000172785|CBWD5 ENSG00000174236|NP\_001025045.1 ENSG00000176274|MCART6
ENSG00000176890|TYMS ENSG00000176927|EFCAB5 ENSG00000177888|ZBTB41 ENSG00000177932|ZNF354C ENSG00000183814|LIN9 ENSG00000196873|CBWD3 ENSG00000196900|NP\_997291.1 ENSG00000197410|DCHS2
ENSG00000197484|Q6ZRH8\_HUMAN ENSG00000197737|Q9H393\_HUMAN ENSG00000197822|OCLN ENSG00000204272|Q63242\_HUMAN ENSG00000204790|CBWD6 ENSG00000204990|NP\_001008742.1
ATAATAC ENSG000000010361|FUZ ENSG00000092607|TBX15 ENSG00000100253|MIOX ENSG00000102007|PLP2 ENSG00000105173|CCNE1 ENSG00000123329|ARHGAP9 ENSG00000137767|SQRLD ENSG00000138642|HERC6
ENSG00000141744|PNMT ENSG00000143373|ZNF687 ENSG00000145861|C1QTNF2 ENSG00000149476|DAK ENSG00000156931|VPS8 ENSG00000161653|NAGS ENSG00000163214|DHX57 ENSG00000163848|SLC12A8
ENSG00000176444|CLK2 ENSG00000183399|Q7L8T7\_HUMAN ENSG00000198805|NP ENSG00000204837|Q2TVT3\_HUMAN ENSG00000205087|NP\_001020628.1 ENSG00000205352|Q9NZ81-2 ENSG00000062725|APBP2 ENSG00000096968|JAK2
ENSG00000102218|RP2 ENSG00000107984|DKK1 ENSG00000111049|MYF5 ENSG00000128585|MKLN1 ENSG00000128833|MYO5C ENSG00000129028|THAP10 ENSG00000129317|PUS7L ENSG00000138160|KIF11
ENSG00000142188|TMEM50B ENSG00000148303|SNORD36A ENSG00000148483|FAM23A ENSG00000163131|CTSS ENSG00000163714|SR140\_HUMAN ENSG00000164022|SCYE1 ENSG00000164188|RANBP3L ENSG00000166170|BAG5
ENSG00000170915|PAQR8 ENSG00000179520|SLC17A8 ENSG00000184040|FAM23B ENSG00000185742|NP\_997528.1 ENSG00000186446|ZNF501 ENSG00000186448|ZNF197 ENSG00000187185|Q86VG7\_HUMAN ENSG00000188452|CERKL
ENSG00000196511|TPK1 ENSG00000197123|ZNF679 ENSG00000197930|ERO1L ENSG00000198092|TMPRSS11F ENSG00000198161|PPTAL4 ENSG00000198168|SVIP\_HUMAN ENSG00000198360|NP\_839944.1 ENSG00000198936|NP\_839944.1
ENSG00000203847|XR\_016130.1
ATAATCA ENSG000000005073|HOXA11 ENSG000000023191|RNH1 ENSG000000042062|C20orf175 ENSG00000100979|PLTP ENSG00000113719|ERGC1 ENSG00000115138|POMC ENSG00000122543|ONCO\_HUMAN ENSG00000122854|SFTPA2B
ENSG00000125975|C20orf173 ENSG00000130649|CYP2E1 ENSG00000135175|BTM ENSG00000142186|SCYL1 ENSG00000143333|RGS16 ENSG00000147168|IL2RG ENSG00000159184|HOXB13 ENSG00000160710|ADAR
ENSG00000160862|AZGP1 ENSG00000164008|C1orf50 ENSG00000166167|OCRC ENSG00000167744|NTF5 ENSG00000168621|GDNF ENSG00000175262|C1orf127 ENSG00000181754|AMIGO1 ENSG00000182314|SFTPA2
ENSG00000186281|NP\_997211.2 ENSG00000188042|ARL4C ENSG00000197653|DNAH10 ENSG00000203228|NDUFS1 ENSG00000203287|RB1CC1 ENSG00000204768|ARHGAP6 ENSG00000071539|TRIP13 ENSG00000105889|Q6NZ63\_HUMAN
ENSG00000106536|POU6F2 ENSG00000108395|TRIM37 ENSG00000114021|NIT2 ENSG00000136636|KCTD3 ENSG00000139233|C12orf31 ENSG00000146729|GBAS ENSG00000150656|CNDP1 ENSG00000153707|PTPRD
ENSG00000156171|TMEM77 ENSG00000157578|C21orf13 ENSG00000164221|CCDC112 ENSG00000165997|ARL5B ENSG00000173451|THAP2 ENSG00000177640|CASC2 ENSG00000178107|Q8N1B8\_HUMAN ENSG00000178346|C6orf61
ENSG00000180329|CCDC43 ENSG00000182836|PLCXD3 ENSG00000183022|NR\_003148.2 ENSG00000187009|Q8NFD4\_HUMAN ENSG00000188971|NP\_001013005.1 ENSG00000196141|NP\_056350.1 ENSG00000197121|PGAP1\_HUMAN ENSG00000197782|ZNF780A
ENSG00000198833|UBE2J1 ENSG00000198900|TOP1 ENSG00000204837|Q2TVT3\_HUMAN
ATAATCG ENSG000000011009|LYPLA2 ENSG00000047578|KIAA0556 ENSG00000056998|GYG2 ENSG00000081791|KIAA0141 ENSG00000092098|ISGF3G ENSG00000102225|PCTK1 ENSG00000115297|TLX2 ENSG00000128045|RASL11B
ENSG00000132840|BHMT2 ENSG00000142949|PTPRF ENSG00000143624|INTS3 ENSG00000152953|STK32B ENSG00000159348|CYB5R1 ENSG00000160752|FDP5 ENSG00000161944|ASGR2 ENSG00000163468|CT3
ENSG00000167130|DOLPP1 ENSG00000169474|SPRR1A ENSG00000177133|Q6ZV91\_HUMAN ENSG00000183686|MAGEA5 ENSG00000189263|Q6ZS22\_HUMAN ENSG00000197976|CXorf3 ENSG00000198920|KIAA0753 ENSG00000068697|LAPTM4A
ENSG00000072319|ALG13 ENSG00000087338|GMCL1 ENSG00000089006|SNX5 ENSG00000102935|ZNF423 ENSG00000107623|GDF10 ENSG00000108055|SMC3 ENSG00000131007|TTY9A ENSG00000131009|TTY9A\_HUMAN
ENSG00000133101|CCNA1 ENSG00000143919|C2orf34 ENSG00000147606|SLC26A7 ENSG00000153896|ZNF599 ENSG00000160194|NDUFB3 ENSG00000163661|PTX3 ENSG00000169756|LIMS1
ENSG00000176623|FAM82B ENSG00000188611|ASAH2C ENSG00000204219|TCEA3 ENSG00000204947|ZNF425
ATAATTA ENSG000000003147|ICA1 ENSG00000009335|UBE3C ENSG00000019102|VSI2 ENSG00000052835|ZNF785 ENSG00000055118|KCNH2 ENSG00000087008|ACO3 ENSG00000103269|RHBDL1 ENSG00000123243|ITI5
ENSG00000130032|PRR3 ENSG00000130340|SNX9 ENSG00000133460|SLC2A11 ENSG00000142002|DDP9 ENSG00000155719|OTOA ENSG00000160994|CCDC105 ENSG00000164400|CSF2 ENSG00000182022|ST4S6\_HUMAN

ENSG00000183399|Q7L8T7\_HUMAN ENSG00000189069|NP\_001013732.1 ENSG00000204335|SP5 ENSG00000023228|NDUFS1 ENSG00000033867|SLC4A7 ENSG00000057657|PRDM1 ENSG00000081479|LRP2 ENSG00000083937|CHMP2B  
ENSG00000101190|TCFL5 ENSG00000105967|TFEC ENSG00000111647|NP\_001006948.1 ENSG00000112077|RHAG ENSG00000117010|ZNF684 ENSG00000126804|ZBTB1 ENSG00000129566|TEP1 ENSG00000133731|IMPA1  
ENSG00000138688|KIAA1109 ENSG00000138750|NUP54 ENSG00000162971|NP\_001034782.1 ENSG00000164167|LSM6 ENSG00000164291|ARSK ENSG00000166192|SENPF8 ENSG00000166260|COX11 ENSG00000166960|C18orf34  
ENSG00000169684|CHRNA5 ENSG00000171659|GPR34 ENSG00000172673|C6orf190 ENSG00000174606|ANGEL2 ENSG00000182898|TCHHL1 ENSG00000188107|EGFL1 ENSG00000188343|FAM92A1 ENSG00000188659|NP\_001008227.1  
ENSG00000197672|NP\_997331.1 ENSG00000204884|Q6ZV12\_HUMAN ENSG00000211448|DIO2  
ATAAATTC ENSG00000006047|YBX2 ENSG00000099968|BCL2L13 ENSG00000137070|IL11RA ENSG00000137106|GRHPR ENSG00000137834|SMAD6 ENSG00000158296|SLC13A3 ENSG00000165281|FANCG ENSG00000165282|PIGO  
ENSG00000165424|C10orf56 ENSG00000180861|C12orf36 ENSG00000183087|GAS6 ENSG00000186038|HTR3B ENSG00000188525|NM\_207480 ENSG00000189069|NP\_001013732.1 ENSG00000198879|SMBT2 ENSG00000206193|Q5HYA3\_HUMAN  
ENSG00000151513|YAF2 ENSG00000053770|C14orf108 ENSG00000081665|ZNF253 ENSG00000083520|DIS3 ENSG00000089177|C20orf23 ENSG00000100191|SLC5A4 ENSG00000104290|FZD3 ENSG00000115590|IL1R2  
ENSG00000124812|CRISP1 ENSG00000131127|ZNF141 ENSG00000134440|NARS ENSG00000135960|EDAR ENSG00000147465|STAR ENSG00000150054|MPF7 ENSG00000156500|FAM122C ENSG00000157077|ZFYVE9  
ENSG00000164308|NP\_071745.1 ENSG00000164600|NEUROD6 ENSG00000170448|NFXL1 ENSG00000174226|NP\_689841.2 ENSG00000176018|LYSMD3 ENSG00000178604|NP\_001034973.1 ENSG00000179097|HTR1F ENSG00000183145|DSCR6  
ENSG00000186017|ZNF566 ENSG00000186297|GABRA5 ENSG00000197707|Q9H363\_HUMAN ENSG00000198533|Q9P1D0\_HUMAN ENSG00000204611|ZNF616 ENSG00000204837|Q2TVT3\_HUMAN ENSG00000205227|Q6ZWA8\_HUMAN ENSG00000205403|CFI  
ATAAATG ENSG00000006756|ARSD ENSG00000065054|SLC9A3R2 ENSG00000078246|TULP3 ENSG00000088854|C20orf194 ENSG00000099960|SLC7A4 ENSG00000100298|APOBEC3H ENSG00000101074|R3HDML ENSG00000110887|DAO  
ENSG00000120332|TNN ENSG00000121775|TMEM39B ENSG00000123965|NP\_777590.1 ENSG00000125835|SNRPB ENSG00000131368|MRPS25 ENSG00000134531|EMP1 ENSG00000137656|BUD13 ENSG00000140612|SEC11A  
ENSG00000146950|SHROOM2 ENSG00000158710|TAGLN2 ENSG00000166833|NAV2 ENSG00000166974|MAPRE2 ENSG00000173436|C1orf151 ENSG00000197471|SPN ENSG00000198471|RTP2 ENSG00000203908|NP\_001017361.1  
ENSG00000204499|Q6P6C6\_HUMAN ENSG00000054938|CHRDL2 ENSG00000065183|WDR3 ENSG00000080644|CHRNA3 ENSG00000091879|ANGPT2 ENSG00000101745|ANKRD12 ENSG00000108666|C17orf75 ENSG0000011554|MDM1  
ENSG00000111802|TTRAP ENSG00000115165|PSCDBP ENSG00000115828|QPCT ENSG00000123091|RNF18 ENSG00000123200|ZC3H13 ENSG00000133119|RFC3 ENSG00000133302|ANKRD32 ENSG00000137038|C9orf123  
ENSG00000138002|IFT172 ENSG00000145687|SSBP2 ENSG00000146001|PCDHB18 ENSG00000147526|TACC1 ENSG00000148303|SNORD36A ENSG00000149289|ZC3H12C ENSG00000150054|MPF7 ENSG00000155307|SAMS1  
ENSG00000156026|CCDC109A ENSG00000166855|CLPX ENSG00000167186|COQ7 ENSG00000170044|ZPLD1 ENSG00000174013|FBXO45 ENSG00000176274|MCART6 ENSG00000177888|ZBTB41 ENSG00000185973|TMLHE  
ATACAAA ENSG000000011677|GABRA3 ENSG00000015285|WAS ENSG00000100985|MMP9 ENSG00000103067|RBM35B ENSG00000107618|RBP3 ENSG00000116032|GRIN3B ENSG00000134072|CAMK1 ENSG00000134339|SAA2  
ENSG00000141569|TRIM65 ENSG00000148411|BTBD14A ENSG00000149179|C11orf49 ENSG00000163067|ZNF2 ENSG00000169213|RAB3B ENSG00000173821|RNF213 ENSG00000174989|FBXW8  
ENSG00000180229|NP\_001019853.1 ENSG00000182749|PAQR7 ENSG00000182968|SOX1 ENSG00000187024|PTRH1 ENSG00000187607|ZNF286A ENSG00000188859|FAM78B ENSG00000188931|C1orf192 ENSG00000197116|Q9UDD8\_HUMAN  
ENSG00000204228|HSD17B8 ENSG00000205562|Q86U27\_HUMAN ENSG00000206152|Q6ZV52\_HUMAN ENSG00000213375|PGM3 ENSG00000105708|ZNF14 ENSG00000105967|TFEC ENSG00000112238|PRDM13 ENSG00000115355|KIAA1212  
ENSG00000123119|EFCBP1 ENSG00000123444|KBTBD4 ENSG00000133302|ANKRD32 ENSG00000134697|GNL2 ENSG00000136824|SMC2 ENSG00000137869|CYP19A1 ENSG00000137947|GTF2B ENSG00000138442|WDR12  
ENSG00000140836|ATBF1 ENSG00000144130|NT5DC4 ENSG00000145708|CRHPB ENSG00000145868|FBXO38 ENSG00000148303|SNORD36A ENSG00000151718|WWC2 ENSG00000152253|SPC25 ENSG00000155833|CYLC2  
ENSG00000164124|TMEM144 ENSG00000168152|THAP9 ENSG00000168917|TMEM22 ENSG00000171943|SRGAP2P1 ENSG00000173588|CCDC41 ENSG00000183155|RAB1F ENSG00000185880|TRIM69 ENSG00000198865|Q4G0S7\_HUMAN  
ENSG00000204595|DPRXP4 ENSG00000204800|Q96HX1\_HUMAN ENSG00000204812|Q96HX1\_HUMAN ENSG00000204952|FBX47\_HUMAN  
ATACAAT ENSG00000006068|WDR57 ENSG00000063127|SLC6A16 ENSG00000095319|NUP188 ENSG00000101342|C20orf118 ENSG00000101440|ASIP ENSG00000105131|ABHD9 ENSG00000108602|ALDH3A1 ENSG00000108702|CCL1  
ENSG00000112562|SMOC2 ENSG00000118004|COLEC1 ENSG00000129194|SUX15 ENSG00000130175|PRKCSH ENSG00000133317|LGLALS12 ENSG00000139262|ITGB7 ENSG00000140263|SORD ENSG00000143171|RXRG  
ENSG00000147127|RAB41 ENSG00000150401|DCUN1D2 ENSG00000151778|C13orf21 ENSG00000169750|RAC3 ENSG00000170420|APOL6 ENSG00000174171|Q8TCB4\_HUMAN ENSG00000174680|C21orf9 ENSG00000186198|NP\_849190.1  
ENSG00000196747|HIST1H3H ENSG00000203883|SOX18 ENSG00000204511|NM\_001011700.1 ENSG00000205015|Q6ZNV2\_HUMAN ENSG0000013364|MVP ENSG0000013375|PGM3 ENSG00000151513|YAF2 ENSG00000035720|STAP1\_HUMAN  
ENSG00000064225|ST3GAL6 ENSG00000068885|IFT80 ENSG00000087128|TMFRS11E ENSG00000096087|GSTA2 ENSG00000100483|C14orf138 ENSG00000105849|TWISTNB ENSG00000111371|SLC38A1 ENSG00000112541|PDE10A  
ENSG00000115415|STAT1 ENSG00000140937|CDH11 ENSG00000146278|PNRC1 ENSG00000157111|TMEM171 ENSG00000159182|NP\_115767.1 ENSG00000168564|CDKN2AIP ENSG00000173487|LOC729884 ENSG00000174373|GARNL1  
ENSG00000186700|Q8N6F3\_HUMAN ENSG00000187919|GSTA1 ENSG00000204683|C10orf113 ENSG00000204790|CBWD6  
ATACACC ENSG00000055483|USP36 ENSG00000069399|BCL3 ENSG00000080511|RDH8 ENSG00000087589|C20orf32 ENSG00000101407|KIAA0406 ENSG00000101439|CST3 ENSG00000105427|CNFN ENSG00000105552|BCAT2  
ENSG00000108523|RNF167 ENSG00000127452|FBXL12 ENSG00000130734|ATG4D ENSG00000134809|TMM10 ENSG00000157881|PANK4 ENSG00000158869|FCER1G ENSG00000161249|DMKN ENSG00000162365|CYP4A22  
ENSG00000164363|SLC6A18 ENSG00000170523|KRT83 ENSG00000173933|RBM4 ENSG00000184602|SNN ENSG00000187048|CYP4A11 ENSG00000188086|NP\_954652.1 ENSG00000188881|HMX2 ENSG00000196186|Q71RF5\_HUMAN  
ENSG00000205236|NP\_663165.2 ENSG00000008311|AASS ENSG00000091664|SLC17A6 ENSG00000096093|EFHC1 ENSG00000105887|MTFN ENSG00000107959|PITRM1 ENSG00000108443|RPS6KB1 ENSG00000110060|PUS3  
ENSG00000111880|RNGT7 ENSG00000115415|STAT1 ENSG00000121716|CYUJK0-3 ENSG00000134001|EIF2S1 ENSG00000145349|CAMK2D ENSG00000151135|C12orf23 ENSG00000154721|JAM2  
ENSG00000162923|WDR26 ENSG00000164951|PPM2C ENSG00000172115|Q9CSQ ENSG00000172348|DSCR1L1 ENSG00000181013|C17orf47 ENSG00000181704|YTPF6 ENSG00000188580|TCBA1 ENSG00000196876|SCN8A  
ATACACT ENSG000000057704|TMCC3 ENSG00000073169|SELO\_HUMAN ENSG00000100027|YPEL1 ENSG00000103023|NP\_001073961.1 ENSG00000103168|TAF1C ENSG00000117298|ECE1 ENSG00000123685|NP\_061134.1 ENSG00000125633|CCDC93  
ENSG00000132481|TRIM47 ENSG00000136935|GOLGA1 ENSG00000140992|PDPK1 ENSG00000142149|HUNK ENSG00000143257|NRI13 ENSG00000143545|RAB13 ENSG00000145864|GABRB2 ENSG00000147081|AKAP4  
ENSG00000160593|AMICA1 ENSG00000164048|ZNF589 ENSG00000166167|BTRC ENSG00000173757|STAT5B ENSG00000178057|C3orf60 ENSG00000183093|MRPL12 ENSG00000188493|C19orf54 ENSG00000189001|SBSN  
ENSG00000197038|NR\_001547.1 ENSG00000204851|Q6ZVD1\_HUMAN ENSG00000205015|Q6ZNV2\_HUMAN ENSG00000006757|PNPLA4 ENSG00000008282|SYPL1 ENSG00000115666|MAP4K3 ENSG00000091831|ESR1 ENSG00000112309|B3GAT2  
ENSG00000115339|GALNT3 ENSG00000116729|GPR177 ENSG00000118733|OLEFM3 ENSG00000118939|UCHL3 ENSG00000119125|GDA ENSG00000123178|C13orf1 ENSG00000138785|INTS12 ENSG00000139323|WDR51B  
ENSG00000152413|HOMER1 ENSG00000153989|NUS1 ENSG00000161010|NP\_001017987.1 ENSG00000162909|CAPN2 ENSG00000167306|MYO5B ENSG00000173598|NUDT4 ENSG00000173698|GPR64 ENSG00000181847|VSI69  
ENSG00000189184|PCDH18 ENSG00000203729|C1orf120  
ATACAGA ENSG000000011600|TYROBP ENSG00000062598|ELMO2 ENSG00000092607|TBC15 ENSG00000112715|VEGFA ENSG00000119718|EIF2B2 ENSG00000124571|XPO5 ENSG00000134020|PEBPL\_HUMAN ENSG00000140025|C14orf143  
ENSG00000141294|LRRC46 ENSG00000160055|C1orf91 ENSG00000163814|CXCLP1 ENSG00000164091|TMEM113 ENSG00000166888|STAT2 ENSG00000170525|PFKFB3 ENSG00000175294|CATSPER1 ENSG00000181029|TRAPPC5  
ENSG00000204013|Q6XYD6\_HUMAN ENSG00000204120|TNRC15 ENSG00000003096|KHLHL13 ENSG00000129833|MAP4K5 ENSG00000071794|HLTF ENSG00000097046|CDC7 ENSG00000113328|CCNG1 ENSG00000120616|EPC1  
ENSG00000122870|BICC1 ENSG00000147124|ZNF41 ENSG00000149534|MS4A2 ENSG00000163626|COX18 ENSG00000164308|NP\_071745.1 ENSG00000164675|IQUB ENSG00000165029|ABCA1 ENSG00000165678|GHITM  
ENSG00000166704|KIF606 ENSG00000167014|C15orf43 ENSG00000168264|IRF2BP2 ENSG00000169062|UPF3A ENSG00000171320|ESCO2 ENSG00000171451|DSEL ENSG00000171843|MLLT3 ENSG00000179455|MKRN3  
ENSG00000183878|UTY ENSG00000187229|Q86YR2\_HUMAN ENSG00000196605|Q08AG5\_HUMAN ENSG00000196876|SCN8A ENSG00000198315|ZNF192  
ATACAGT ENSG00000079616|KIF22 ENSG00000102104|RS1 ENSG00000102981|PAR6A ENSG00000104979|C19orf53 ENSG00000122085|MTERFD2 ENSG00000122735|DNAI1 ENSG00000125458|NT5C ENSG00000126259|KIRREL2  
ENSG00000144681|STAC ENSG00000151376|ME3 ENSG00000154537|FAM27C ENSG00000162600|OMA1 ENSG00000166667|NP\_001026789.1 ENSG00000169213|RAB3B ENSG00000170215|FAM27B ENSG00000170846|Q8WU25\_HUMAN  
ENSG00000176438|C14orf49 ENSG00000179950|NP\_055096.2 ENSG00000179994|NP\_001030016.1 ENSG00000182368|FAM27A ENSG00000184164|CRELD2 ENSG00000188901|NP\_055226.1 ENSG00000203888|Q6ZRP6\_HUMAN ENSG00000205238|NP\_001026789.1  
ENSG00000050438|SLC4A8 ENSG00000078795|PKD2L2 ENSG00000088387|DOCK9 ENSG00000089123|TASP1 ENSG00000101614|MARK1 ENSG00000106346|USP42 ENSG00000107863|ARHGAP21 ENSG00000108389|MTMR4  
ENSG00000119965|C10orf88 ENSG00000124429|POF1B ENSG00000134709|HOOK1 ENSG00000137831|UACA ENSG00000143942|CHAC2 ENSG00000144182|LIPT1 ENSG00000146457|WTAP ENSG00000150681|RGS18  
ENSG00000163072|NOSTRIN ENSG00000164187|LMBRD2 ENSG00000165899|C12orf64 ENSG00000166432|ZMAT1 ENSG00000167863|ATP5H ENSG00000168421|RHOH ENSG00000170836|PPM1D ENSG00000205220|PSMB10  
ATACAG ENSG00000006125|AP2B1 ENSG00000007545|CRAMP1L ENSG00000073849|ST6GAL1 ENSG00000089250|NOS1 ENSG00000107562|CXCL12 ENSG00000111602|TIMELESS ENSG00000115275|GCS1\_HUMAN ENSG00000120049|KCNP2  
ENSG00000126391|NP\_114110.1 ENSG00000130119|GNL3L ENSG00000132518|GUCY2D ENSG00000133250|ZNF414 ENSG00000138085|C2orf28 ENSG00000143554|SLC27A3 ENSG00000149292|TTC12 ENSG00000163820|FYCO1  
ENSG00000167131|CCDC103 ENSG00000185117|NR\_002733.1 ENSG00000188554|NBR1 ENSG00000188636|LDOC1L ENSG00000198336|MYL4 ENSG00000204222|B3GALT4 ENSG00000204536|CCHCR1 ENSG00000101557|USP14  
ENSG00000109381|ELF2 ENSG00000110841|PPF1BP1 ENSG00000111846|GCNT2 ENSG00000114573|ATP6V1A ENSG00000116141|MARK1 ENSG00000124564|SLC17A3 ENSG00000127995|CASD1 ENSG00000138376|BARD1  
ENSG00000140093|SERPINA10 ENSG00000141446|ESCO1 ENSG00000146276|GABRR1 ENSG00000150471|LPHN3 ENSG00000151461|UPF2 ENSG00000152234|ATP5A1 ENSG00000154188|ANGPT1 ENSG00000156671|SAMD8  
ENSG00000157510|AFAP1L1 ENSG00000164221|CCDC112 ENSG00000166004|KIAA1731 ENSG00000166415|WDR72 ENSG00000166454|K0431\_HUMAN ENSG00000169340|NP\_777584.1 ENSG00000187083|Q8NEQ1\_HUMAN ENSG00000204155|PARG  
ENSG00000205003|CNTF  
ATACCTC ENSG00000077274|CAPN6 ENSG00000110583|NAT11 ENSG00000122176|FMOD ENSG00000130508|PXDN ENSG00000132698|RAB25 ENSG00000135390|ATP5G2 ENSG00000140950|KIAA1609 ENSG00000143473|KCNH1  
ENSG00000143546|S100A8 ENSG00000155846|PPARGC1B ENSG00000156398|SPXN2 ENSG00000162104|ADCY9 ENSG00000162650|ATXN7L2 ENSG00000166171|NP\_056263.1 ENSG00000179361|ARID3B ENSG00000186827|TNFRSF4  
ENSG00000196814|FAM125B ENSG00000198535|NP\_997205.1 ENSG00000204681|GABBR1 ENSG00000205610|Q4G105\_HUMAN ENSG00000042317|SPATA7 ENSG00000072657|TRHDE ENSG00000087263|OGFOD1 ENSG00000104660|LEPROTL1  
ENSG00000112305|SMAP1 ENSG00000112394|SLC16A10 ENSG00000112964|GHR ENSG00000133121|STARD13 ENSG00000134323|MYCN ENSG00000135297|MTO1 ENSG00000136933|RABEPK ENSG00000138315|OIT3  
ENSG00000141428|C18orf21 ENSG00000150712|MTMR12 ENSG00000153006|NP\_776190.1 ENSG00000163743|RCHY1 ENSG00000164654|NP\_061878.3 ENSG00000164825|DEFB1 ENSG00000171970|ZNF57 ENSG00000173930|SLCO4C1  
ENSG00000177058|NP\_775785.1 ENSG00000179144|G1MAP7 ENSG00000185306|C12orf56 ENSG00000196270|Q6ZWE7\_HUMAN  
perfect: ATACCTC GAGGTAT hsa-miR-202 aGAGGTAtagggcatgggaaaa 1  
ATACCTT ENSG00000011478|QPCTL ENSG00000100591|AHSAL ENSG00000106330|MOSPD3 ENSG00000114656|KIAA1257 ENSG00000114737|CISH ENSG00000124237|C20orf85 ENSG00000126351|THRA ENSG00000126594|DNASE1  
ENSG00000131389|SLC6A6 ENSG00000131467|PSME3 ENSG00000141034|C17orf39 ENSG00000143376|SNX27 ENSG00000145864|GABRB2 ENSG00000158470|B4GALT5 ENSG00000162714|ZNF496 ENSG00000172073|C2orf51  
ENSG00000177112|Q8N6V7\_HUMAN ENSG00000177352|CCDC71 ENSG00000204071|TCEAL6 ENSG00000204323|Q71RC9\_HUMAN ENSG00000004961|HCSS ENSG00000079482|OPHN1 ENSG00000106609|C7orf42 ENSG00000112893|MAN2A1  
ENSG00000113810|SMC4 ENSG00000114638|UPK1B ENSG00000116199|FAM20B ENSG00000121931|C1orf103 ENSG00000136381|IREB2 ENSG00000138778|CENPE ENSG00000141448|GATA6 ENSG00000148655|C10orf11  
ENSG00000156374|PCGF6 ENSG00000163577|EIF5A2 ENSG00000163584|RPL22L1 ENSG00000167230|C17orf78 ENSG00000170088|NP\_689894.1 ENSG00000170848|PSG6 ENSG00000173083|HPSE ENSG00000178202|KDEL2  
ENSG00000183668|PSG9 ENSG00000186047|DLEU7 ENSG00000198908|BHLHB9 ENSG00000204592|HLA-E ENSG00000205765|NP\_787117.3  
ATACGGG ENSG00000040608|RTN4R ENSG00000085831|C1orf34 ENSG00000116017|ARID3A ENSG00000116017|ARID3A ENSG00000131116|ZNF428 ENSG00000132510|JMJD3 ENSG00000144712|CAND2  
ENSG00000146090|RASGEF1C ENSG00000158022|TRIM63 ENSG00000158717|RNF166 ENSG00000161921|CXCL16 ENSG00000169598|DFFB ENSG00000169660|HEXDC ENSG00000170473|WIBG ENSG00000171954|NP\_775754.1  
ENSG00000174938|SEZ6L2 ENSG00000178363|CALML3 ENSG00000180735|Q6PJW0\_HUMAN ENSG00000185627|PSMD13 ENSG00000197019|SERTAD1 ENSG00000204366|ZBTB12 ENSG00000041515|MYO16 ENSG00000079387|SENP1  
ENSG00000089094|FBXL10 ENSG00000103569|AQP9 ENSG00000115310|RTN4 ENSG00000116641|DOCK7 ENSG00000123908|EIF2C2 ENSG00000126814|TRMT5 ENSG00000126945|HNRPH2 ENSG00000127314|RAP1B  
ENSG00000135392|DNAJC14 ENSG00000138660|C4orf16 ENSG00000145451|GLRA3 ENSG00000145871|YIPF5 ENSG00000152689|RASGRP3 ENSG00000162437|RAVER2 ENSG00000162630|B3GALT2 ENSG00000163626|COX18  
ENSG00000164220|F2RL2 ENSG00000165072|MAMDC2 ENSG00000171517|EDR7 ENSG00000175606|TMEM70 ENSG00000176142|TMEM39A ENSG00000177283|FZD8 ENSG00000177406|Q8N503\_HUMAN ENSG00000179041|RRS1  
ENSG00000188641|DPYD ENSG00000198018|ENTPD7 ENSG00000198739|FRAP1 ENSG00000198799|LRIG2 ENSG00000206029|Q0P633\_HUMAN  
ATACTAA ENSG000000011177|INMT ENSG000000018625|ATP1A2 ENSG00000100288|CPT1B ENSG00000132591|ERAL1 ENSG00000138080|EMILIN1 ENSG00000163154|TNFAIP8L2 ENSG00000163344|PMVK ENSG00000175718|CXorf55  
ENSG00000176438|C14orf49 ENSG00000179388|EGR3 ENSG00000180066|C10orf91 ENSG00000197173|NP\_001013689.1 ENSG000000015475|BID ENSG000000016490|CLCA1 ENSG000000023608|SNAPC1 ENSG00000034677|RNF19

ENSG0000059758|PCKT2 ENSG00000078674|PCM1 ENSG00000085224|ATRX ENSG00000108187|PBLD ENSG00000108381|ASPA ENSG00000112335|SNX3 ENSG00000118193|KIF14 ENSG00000120699|EXOSC8  
ENSG00000121579|NAT13 ENSG00000122435|CCDC76 ENSG00000122482|ZNF644 ENSG00000136108|CKAP2 ENSG00000136436|CALCOCO2 ENSG00000137691|C11orf70 ENSG00000137975|CLCA2 ENSG00000152760|TCTEX1D1  
ENSG00000155085|C6orf199 ENSG00000155393|HEATR3 ENSG00000155589|ADCY8 ENSG00000158528|PPP1R9A ENSG00000164221|CCDC112 ENSG00000166211|SPIC ENSG00000171659|GPR34 ENSG00000174405|LIG4  
ATAC TAG ENSG00000187185|Q66V67\_HUMAN ENSG00000198304|ZNF528 ENSG00000198523|PLN ENSG00000198780|Q9H989\_HUMAN ENSG00000198948|MFAP3L ENSG00000205299|CKLF  
ENSG00000004487|AOF2 ENSG000000018280|SLC11A1 ENSG000000063127|SLC6A16 ENSG000000095319|NUP188 ENSG000000099937|SERPIND1 ENSG00000103591|P34\_HUMAN ENSG0000000114316|USP4 ENSG00000121905|HPCA  
ENSG00000122859|NEUROG3 ENSG00000124664|SPDEF ENSG00000127837|AAMP ENSG00000130598|TNNI2 ENSG00000132801|ZSWIM3 ENSG00000140031|P1768\_HUMAN ENSG00000141738|GRB7  
ENSG00000145819|ARHGAP26 ENSG00000147383|NSDHL ENSG00000152669|CCNU ENSG00000155428|TRIM74 ENSG00000156853|ZNF689 ENSG00000159884|CCDC107 ENSG00000163526|TUBA4B ENSG00000163833|FBXO40  
ENSG00000171403|KRT9 ENSG00000178809|TRIM73 ENSG00000183019|C19orf59 ENSG00000183597|C22orf25 ENSG00000184788|SATL1 ENSG00000187682|ERAS ENSG00000187912|NP\_997273.2 ENSG00000204333|Q6ZTP0\_HUMAN  
ENSG0000018510|AGPS ENSG000001021574|SPAST ENSG000001073067|XKOC5 ENSG00000113356|POLR3G ENSG00000113369|ARRDC3 ENSG00000113558|SKP1A ENSG00000115474|KCNJ13 ENSG00000117477|C1orf114  
ENSG00000123570|RAB9B ENSG00000132703|APCS ENSG00000134313|NP\_065789.1 ENSG00000136051|KIAA1033 ENSG00000136888|ATP6V1G1 ENSG00000144026|ZNF514 ENSG00000146109|ABT1 ENSG00000158458|NRG2  
ENSG00000163746|PLSCR2 ENSG00000164073|MFSD8 ENSG00000168724|DNJA5\_HUMAN ENSG00000174038|C9orf131 ENSG00000177150|C18orf19 ENSG00000179476|C14orf28 ENSG00000180957|PITPNB ENSG00000186448|ZNF197  
ENSG00000186908|ZDHC17 ENSG00000196937|FAM3C  
ATACTCA ENSG00000006282|SPATA20 ENSG00000079337|RAPGEF3 ENSG00000100031|GGT1 ENSG00000100121|GGTL4 ENSG00000105053|VRK3 ENSG00000105131|ABHD9 ENSG00000105609|LILRB5 ENSG00000125733|TRIP10  
ENSG00000130758|MAP3K10 ENSG00000133475|GGT2 ENSG00000140263|SORD ENSG00000147168|IL2RG ENSG00000149435|GGTLA4 ENSG00000159797|C9orf144 ENSG00000162408|NOL9 ENSG00000163362|C1orf106  
ENSG00000166340|TPP1 ENSG00000169247|SH3TC2 ENSG00000171490|RSL1D1 ENSG00000182173|TSEN54 ENSG00000183038|LOC72826 ENSG00000183838|Q96NM2\_HUMAN ENSG00000186526|CYP4F8 ENSG00000197421|NR\_003267.1  
ENSG00000198326|C20orf141 ENSG00000204558|Q9BYX6\_HUMAN ENSG000002021488|SLC7A9 ENSG00000078674|PCM1 ENSG00000106829|TLE4 ENSG00000119913|TECTB ENSG00000137033|IL33 ENSG00000137845|ADAM10  
ENSG00000139354|GAS2L3 ENSG00000143924|EML4 ENSG00000147124|ZNF41 ENSG00000150681|RGS18 ENSG00000152689|RASGRP3 ENSG00000163347|CLDN1 ENSG00000164176|EDLL3 ENSG00000185664|STLV  
ATACTCT ENSG000000011132|APBA3 ENSG000000011600|TYROBP ENSG00000101203|COL20A1 ENSG00000101350|KIF3B ENSG00000103353|UBFD1 ENSG00000103742|NP\_066013.1 ENSG00000104490|NCALD ENSG00000104611|SH2D4A  
ENSG00000108175|ZMIZ1 ENSG00000116983|HPCAL4 ENSG00000117481|NSUN4 ENSG00000124212|PTGIS ENSG00000132514|CLEC10A ENSG00000140538|NTRK3 ENSG00000147576|ADHFE1 ENSG00000152192|POU4F1  
ENSG00000160505|NLRP4 ENSG00000160712|IL6R ENSG00000161904|LEMD2 ENSG00000163958|ZDHC19 ENSG00000165282|PIGO ENSG00000168701|NM\_014187.2 ENSG00000180357|ZNF609 ENSG00000180509|KCNE1  
ENSG00000182117|NOLA3 ENSG00000183528|QOVAF8\_HUMAN ENSG00000184923|FAM22A ENSG00000187180|LCE2C ENSG00000203930|Q5JPA2\_HUMAN ENSG0000021826|CPS1 ENSG00000049449|RCN1 ENSG00000082212|ME2  
ENSG00000099256|PRTFDC1 ENSG00000100987|VXS1 ENSG00000106028|SSBP1 ENSG00000106034|NP\_079189.3 ENSG00000112972|HMGC51 ENSG00000119314|ROD1 ENSG00000130699|TAF4 ENSG00000138381|ASNSD1  
ENSG00000136884|IL21 ENSG00000139278|GLIPR1 ENSG00000149089|APIP ENSG00000152778|IFIT5 ENSG00000157764|BRAF ENSG00000161010|NP\_001017987.1 ENSG00000163257|C4orf30 ENSG00000164588|HCN1  
ENSG00000172752|NF\_694996.3 ENSG00000177125|ZBTB34 ENSG00000181065|Q9P161\_HUMAN ENSG00000181631|P2RY13 ENSG00000183347|GBP6 ENSG00000185088|RPS27L ENSG00000185275|CD24 ENSG00000186017|ZNF566  
ATACTGA ENSG00000008874|ZNF788 ENSG00000189195|BTBD8 ENSG00000196917|GPR81 ENSG00000204990|NP\_001008742.1 ENSG00000205769|Q6ZUR9\_HUMAN  
ENSG00000007968|EFZ2 ENSG00000064393|HIPK2 ENSG00000068323|TFE3 ENSG00000009024|PLEKHG2 ENSG00000111665|CDCA3 ENSG00000124145|SDC4 ENSG00000147481|SNTG1 ENSG00000164400|CSF2  
ENSG00000166856|ADMR ENSG00000169393|ELSPBP1 ENSG00000170485|NPAS2 ENSG00000173120|FBXL11 ENSG00000173210|ABLIM3 ENSG00000177238|TRIM72 ENSG00000182852|C21orf121 ENSG00000185722|ANKFY1  
ENSG00000186318|BACE1 ENSG00000186788|NP\_001001670.1 ENSG00000188312|CENPF ENSG00000189357|XR\_015253.1 ENSG00000198756|GLT25D2 ENSG00000048392|RRM2B ENSG00000064652|SNX24 ENSG00000108590|MED31  
ENSG00000115254|XAB1 ENSG00000115919|KYNU ENSG00000118620|ZNF430 ENSG00000132388|UBE2G1 ENSG00000124201|ZNFX1 IMPA1 ENSG00000149812|SESN3 ENSG00000151093|OXSM ENSG00000156535|CD109  
ENSG00000157214|STEAP2 ENSG00000165322|ARHGAP12 ENSG00000166747|AP1G1 ENSG00000172164|SNTB1 ENSG00000177917|ARL6IP6 ENSG00000178636|Q8N7N2\_HUMAN ENSG00000181450|ZNF678 ENSG00000196247|ZNF588  
ATACTGT ENSG00000197008|ZNF138 ENSG00000197712|FAM114A1  
ENSG00000008256|PSCD3 ENSG00000038382|TRIO ENSG00000092421|SEMA6A ENSG00000102547|CAB39L ENSG00000105202|FBL ENSG00000105732|ZNF574 ENSG00000108602|ALDH3A1 ENSG00000112320|SOBP  
ENSG00000114388|TUSC4 ENSG00000126749|EMG1 ENSG00000136205|TNS3 ENSG00000140931|CMTM3 ENSG00000153633|CDBA ENSG00000166189|HPS6 ENSG00000166436|TRIM66 ENSG00000167800|TBX10  
ENSG00000168575|SLC20A2 ENSG00000169220|RGS14 ENSG00000175147|C1orf126 ENSG00000181852|RNFA1 ENSG00000188042|ARL4C ENSG00000188428|TXND5 ENSG00000189068|VSTM1 ENSG00000196419|XRCC6  
ENSG00000205711|Q6ZV92\_HUMAN ENSG00000205156|HSF2 ENSG00000060140|STYK1 ENSG00000064651|SLC12A2 ENSG00000083312|TNPO1 ENSG00000091317|CMTM6 ENSG00000091844|RGS17 ENSG00000101190|TCFL5  
ENSG00000102038|SMARCA1 ENSG00000102531|FNDC3A ENSG00000104177|MYEF2 ENSG00000104388|RAB2A ENSG00000105216|LSM14A ENSG00000106346|USP42 ENSG00000107968|MAP3K8 ENSG00000110321|EIF4G2  
ENSG00000113851|CRBN ENSG00000116044|NFE2L2 ENSG00000122884|P4HA1 ENSG00000123473|STIL ENSG00000124201|ZNFX1 ENSG00000124224|PPP4R1L ENSG00000131437|KIF3A ENSG00000132669|RIN2  
ENSG00000136542|GALNT5 ENSG00000137872|SEMA6D ENSG00000141380|SS18 ENSG00000142182|DNMT3L ENSG00000143514|TP53BP2 ENSG00000153914|SFRS12 ENSG00000165029|ABCA1 ENSG00000165899|C12orf64  
ENSG00000169446|TMEM32 ENSG00000177683|THAP5 ENSG00000180263|FGD6 ENSG00000183952|Q9H5Q9\_HUMAN ENSG00000189079|ARID2 ENSG00000189149|FLJ41766 ENSG00000197062|ZNF187 ENSG00000198298|ZNF485  
ENSG00000198843|SELT\_HUMAN ENSG00000204220|PFND6 ENSG00000204987|Q6ZN80\_HUMAN  
ATACTTC perfect: ATACTCT ACGATAT hsa-miR-144 tACAGTATagatgatgtactag 1  
ENSG00000003400|CASP10 ENSG000000013588|GPRC5A ENSG00000063180|CA11 ENSG00000068831|RASGRP2 ENSG00000102466|FGF14 ENSG00000108417|KRT37 ENSG00000112164|GLP1R ENSG00000112514|CUTA  
ENSG00000129038|LOXL1 ENSG00000130768|SMPDL3B ENSG00000137203|TFAP2A ENSG00000140287|HDC ENSG00000141873|SLC39A3 ENSG00000143578|CREB3L4 ENSG00000143940|Q6ZMW3\_HUMAN ENSG00000145022|TCTA  
ENSG00000146066|HIGD2A ENSG00000147127|RAB41 ENSG00000148600|PCDH21 ENSG00000156299|TIAM1 ENSG00000161920|MED11 ENSG00000162723|SLAMF9 ENSG00000164403|SHROOM1 ENSG00000164711|LPAL2  
ENSG00000184330|S100A7A ENSG00000197818|SLC9A8 ENSG00000198832|SELM\_HUMAN ENSG00000204530|Q6ZS29\_HUMAN ENSG00000204568|MRPS18B ENSG00000206193|Q5HYA3\_HUMAN ENSG00000010219|DYRK4 ENSG00000048828|FAM120A  
ENSG00000074695|LMAN1 ENSG00000078140|HIP2 ENSG00000101746|NOLA1 ENSG00000110848|CD69 ENSG00000112335|SNX3 ENSG00000113240|CLK4 ENSG00000119820|YIPF4 ENSG00000123131|PRDX4  
ENSG00000131375|CANP7 ENSG00000136146|MED4 ENSG00000137745|MMP13 ENSG00000145147|SLIT2 ENSG00000145247|OCTAD2 ENSG00000150637|CD226 ENSG00000155629|PIK3AP1 ENSG00000163554|SPTA1  
ENSG00000164128|NPY1R ENSG00000164933|SLC25A32 ENSG00000165694|FRMD7 ENSG00000170495|Q6ZNE6\_HUMAN ENSG00000178295|NP\_872431.2 ENSG00000179059|ZFP42 ENSG00000186297|GABRA5 ENSG00000203801|Q5R3E8\_HUMAN  
ATACTTG ENSG00000020417|Q6STG2\_HUMAN  
ENSG000000013016|EHD3 ENSG000000087087|ARS2\_HUMAN ENSG00000095970|TREM2 ENSG00000099994|SUSD2 ENSG00000101104|C20orf119 ENSG00000125976|RBM12 ENSG00000133149|TEX13A ENSG00000136003|ISCU  
ENSG00000137193|PIM1 ENSG00000153786|ZDHC7 ENSG00000154309|DISP1 ENSG00000164048|ZNF589 ENSG00000164574|GALNT10 ENSG00000166133|RPUSD2 ENSG00000166860|ZBTB39 ENSG00000167094|TTC16  
ENSG00000167671|UBXD1 ENSG00000171722|C1orf111 ENSG00000174791|RIN1 ENSG00000175003|SLC22A1 ENSG00000175854|C9orf119 ENSG00000177169|ULK1 ENSG00000178409|KIAA1553 ENSG00000187678|SPRY4  
ENSG00000188428|TXND5 ENSG00000203867|RBM20 ENSG00000205352|Q9NZB1-2 ENSG000000082146|ALS2CR2 ENSG00000092020|PPP2R3C ENSG00000108443|RPS6KB1 ENSG00000110321|EIF4G2 ENSG00000112245|PTP4A1  
ENSG00000115091|ACTR3 ENSG00000119139|TJP2 ENSG00000119203|CPSF3 ENSG00000119414|PPP6C ENSG00000121964|GTCDC1 ENSG00000123500|COL10A1 ENSG00000124193|SFRS6 ENSG00000129235|TXNL5  
ENSG00000136783|NIPSNAP3A ENSG00000139508|SLC46A3 ENSG00000140455|USP3 ENSG00000141446|ESCO1 ENSG00000144182|LIPT1 ENSG00000144228|SPOPL\_HUMAN ENSG00000148730|EIF4EBP2  
ENSG00000162757|C1orf74 ENSG00000163285|GABRG1 ENSG00000164463|NP\_705835.1 ENSG00000165476|REEP3 ENSG00000170365|SMAD1 ENSG00000170855|TRIAP1 ENSG00000174718|C12orf35 ENSG00000178425|NT5DC1  
ENSG00000197123|ZNF679 ENSG00000197415|VEPFI1 ENSG00000198478|SH3BGR2 ENSG00000204334|ALL162\_HUMAN ENSG00000204869|IGFL4  
ATAAGACA ENSG00000102313|ITIH5L ENSG00000105383|CD33 ENSG00000108474|PIGL ENSG00000110203|POLR3 ENSG00000111886|GABRR2 ENSG00000114113|RBP2 ENSG00000115129|TP53I3 ENSG00000120907|ADRA1A  
ENSG00000135314|C6orf148 ENSG00000136718|IMP4 ENSG00000162761|LXM1A ENSG00000166398|KIAA0355 ENSG00000189069|NP\_001013732.1 ENSG00000204531|POU5F1P1 ENSG00000074706|NP\_056368.1 ENSG00000106346|USP42  
ENSG00000114857|NKTR ENSG00000116406|EDEM3 ENSG00000120686|UFMI ENSG00000124205|EDN3 ENSG00000124721|DNÄH8 ENSG00000126838|PZP ENSG00000132603|NIP7 ENSG00000137806|NDUFAF1  
ENSG00000144161|ZC3H8 ENSG00000148053|NTRK2 ENSG00000153046|CYLD ENSG00000163319|MRPS18C ENSG00000163347|CLDN1 ENSG00000163512|AZI2 ENSG00000164144|ARFIP1 ENSG00000165417|GTF2A1  
ENSG00000168685|IL7R ENSG00000169679|BUB1 ENSG00000170017|ALCAM ENSG00000173626|BET3L ENSG00000176641|RNFI52 ENSG00000184307|ZHDHC23 ENSG00000205195|Q6ZTB1\_HUMAN  
ENSG00000027266|ABP1 ENSG00000023171|GRAMD1B ENSG00000078898|BPTL1 ENSG00000090924|PLEKHG2 ENSG00000090926|CEBP6 ENSG00000090924|HDAC6 ENSG00000101441|CST4 ENSG00000102230|PCYT1B  
ENSG00000103510|MYST1 ENSG00000120057|SFRP5 ENSG00000125999|C20orf114 ENSG00000145819|ARHGAP26 ENSG00000157693|C9orf91 ENSG00000162191|SAKS1\_HUMAN ENSG00000162496|DHRS3 ENSG00000170523|KRT83  
ENSG00000170925|TEX13B ENSG00000174171|Q8TCB4\_HUMAN ENSG00000179766|Q4GI29\_HUMAN ENSG00000180697|C3orf22 ENSG00000203942|C10orf62 ENSG00000070756|PABPC1 ENSG00000100889|PCK2 ENSG00000101974|ATP11C  
ENSG00000103740|ACSBG1 ENSG00000105983|LMBR1 ENSG00000107679|PLEKHA1 ENSG00000112303|VNN2 ENSG00000121933|ADORA3 ENSG00000134108|ARL8B ENSG00000137675|MMP27 ENSG00000145835|NP\_542387.1  
ENSG00000163069|SCGB ENSG00000163285|GABRG1 ENSG00000165417|GTF2A1 ENSG00000166046|TCP1L2 ENSG00000166984|TCP1L0 ENSG00000168032|ENTPD3 ENSG00000171421|MRPL36 ENSG00000172974|LOC729317  
ENSG00000180855|ZNF443 ENSG00000196466|ZNF799 ENSG00000197299|BLM ENSG00000197933|ZF36\_HUMAN ENSG00000206221|Q6ZVX8\_HUMAN  
ATAAGAC ENSG000000011052|NME1 ENSG000000044446|PHKA2 ENSG00000107562|CXCL12 ENSG00000107815|PEO1 ENSG00000108759|KRT32 ENSG00000114735|HEMK1 ENSG00000115306|SPTBN1 ENSG00000127666|TICAM1  
ENSG00000136828|RALGPS1 ENSG00000146950|SHROOM2 ENSG00000158517|NCF1 ENSG00000159708|LRRC36 ENSG00000165178|LOC648998 ENSG00000165731|RET ENSG00000172548|ICHN\_HUMAN ENSG00000178028|DMPA1  
ENSG00000182487|NCF1C ENSG00000186994|ANKRD47 ENSG00000204499|Q6P6C6\_HUMAN ENSG00000206528|Q6ZSM0\_HUMAN ENSG0000047597|XK ENSG00000071967|CYBRD1 ENSG00000072041|SLC6A15 ENSG00000076382|SPAG5  
ENSG00000092439|TRPM7 ENSG00000100625|SIX4 ENSG00000113263|ITK ENSG00000123575|CXorf39 ENSG00000125249|RAP2A ENSG00000130349|C6orf203 ENSG00000146410|FAM54A ENSG00000146433|TMEM181  
ENSG00000156463|SH3RF2 ENSG00000164106|SCRG1\_HUMAN ENSG00000164169|NP\_612373.2 ENSG00000169688|MT1B ENSG00000175105|ZNF654 ENSG00000177694|NAALADL2 ENSG00000179387|ELMOD2 ENSG00000185513|L3MBTL  
ENSG00000187193|MT1X ENSG00000187257|RSBN1L ENSG00000197301|Q6ZQU9\_HUMAN ENSG00000198001|IRAK4  
ATAAGATT ENSG000000012779|ALOX5 ENSG000000064886|CHI3L2 ENSG00000070778|PTPN21 ENSG00000078804|TP53INP2 ENSG00000100290|BIK ENSG00000129657|SEC14L1 ENSG00000132275|KIAA0409 ENSG00000143294|PRCC  
ENSG00000146021|KLHL3 ENSG00000160505|NLRP4 ENSG00000161204|ABCF3 ENSG00000168070|NP\_001032302.1 ENSG00000169857|AVEN ENSG00000172689|MS4A10 ENSG00000176591|KBTBD11 ENSG00000177156|TALDO1  
ENSG00000178409|KIAA1553 ENSG00000182173|TSEN54 ENSG00000186951|PPARA ENSG00000197162|ZNF688 ENSG00000197446|CYP2F1 ENSG00000198171|C20orf116 ENSG00000198715|C1orf85 ENSG00000066697|TMEFF1  
ENSG00000079134|THOC1 ENSG00000101846|STS ENSG00000104133|NP\_079413.3 ENSG00000107581|EIF3S10 ENSG000001108946|PRKAR1A ENSG00000113369|ARRDC3 ENSG00000116678|LEPR ENSG00000123297|TSFM  
ENSG00000125450|NUP85 ENSG00000131171|SH3BGR1 ENSG00000134198|TSPAN2 ENSG00000138448|ITGAV ENSG00000143194|MABL ENSG00000152022|LXL1L ENSG00000154639|CXADR ENSG00000164483|SAMD3  
ENSG00000169299|PGM2 ENSG00000170802|FOXN2 ENSG00000171103|NP\_060380.2 ENSG00000171451|DSEL ENSG00000172403|SYNPO2 ENSG00000179902|C1orf194 ENSG00000180772|AGTR2 ENSG00000198815|FOXJ3  
ATAAGCTA ENSG00000203756|C6orf191 ENSG00000204469|BAT2 ENSG00000205212|NP\_001004306.1  
ENSG00000066056|TIE1 ENSG000000099954|CECR2 ENSG00000100253|MIOX ENSG00000109107|ALDOC ENSG00000123243|ITIH5 ENSG00000126003|PLAGL2 ENSG00000136485|WDR68 ENSG00000137880|GCHFR  
ENSG00000143340|C1orf76 ENSG00000159840|ZYX ENSG00000164151|Q6ZT40\_HUMAN ENSG00000170290|SLN ENSG00000178828|RNFL86 ENSG00000182795|C1orf116 ENSG00000188901|NP\_055226.1 ENSG00000198746|GPATCH3  
ENSG00000047662|Q9ULE4\_HUMAN ENSG000000050030|KIAA2022 ENSG00000062650|WAPAL ENSG00000111713|GYS2 ENSG00000112365|ZBTB24 ENSG00000113667|KIAA0274 ENSG00000116161|CACYPB ENSG00000116497|S100PBP  
ENSG00000120742|RAMP4\_HUMAN ENSG00000128590|DNAJB9 ENSG00000129003|VPS13C ENSG00000134602|MST4\_HUMAN ENSG00000135269|TES ENSG00000136206|WBSR19 ENSG00000141255|SPATA22 ENSG00000145451|GLRA3  
ENSG00000145730|PAM ENSG00000148154|UGCC ENSG00000151611|MMAA ENSG00000154415|PPP1R3A ENSG00000156239|N6AMT1 ENSG00000163539|CLASP2 ENSG00000165650|PDZD8 ENSG00000166415|WDR72  
ENSG00000171142|ATP6V1E2 ENSG00000171509|RXFP1 ENSG00000172201|ID4 ENSG00000173366|APOF ENSG00000181472|ZBTB2 ENSG00000185231|MC2R ENSG00000205505|NP\_001027561.1  
ENSG00000205506|NP\_001027561.1 ENSG00000205508|NP\_001018856.1 ENSG00000205509|NP\_001027561.1 ENSG00000205580|NP\_001027561.1  
ATAAGCTT ENSG00000103021|CCDC113 ENSG00000116990|MYCL1 ENSG000001124145|SDC4 ENSG00000124920|C11orf9 ENSG00000130702|LAMA5 ENSG00000135480|KRT7 ENSG00000140403|DNAJA4 ENSG00000142149|HUNK  
ENSG00000146021|KLHL3 ENSG00000148660|CAMK2G ENSG00000169083|AR ENSG00000174238|PITPNA ENSG00000183596|TIM16\_HUMAN ENSG00000186825|Q580R0-2 ENSG00000189325|NP\_001010903.1 ENSG00000203814|

ENSG00000204323|Q71RC9\_HUMAN ENSG00000039068|CDH1 ENSG00000100426|ZBED4 ENSG00000102189|EEA1 ENSG00000102471|NDFIP2 ENSG00000104112|SCG3 ENSG00000111860|C6orf204 ENSG00000112237|CCNC  
ENSG00000117262|GPR89A ENSG00000118363|SPCS2 ENSG00000128590|DNAJB9 ENSG00000130363|RSHL2 ENSG00000130638|ATXN10 ENSG00000133794|ARNTL ENSG00000136160|EDNRB ENSG00000139946|PELI2  
ENSG00000143355|LHX9 ENSG00000163254|CRYGC ENSG00000167230|C17orf78 ENSG00000168356|SCN11A ENSG00000172292|LASS6 ENSG00000187611|Q6ZTR6\_HUMAN ENSG00000188092|GPR89B ENSG00000198252|STYX  
ENSG00000198843|SELT\_HUMAN ENSG00000204387|C6orf48  
ATAGTAGT ENSG000000090615|GOLGA3 ENSG00000112837|TBX18 ENSG000001115042|FAHD2A ENSG00000118058|MLL ENSG00000118526|TCF21 ENSG00000122188|LAX1 ENSG00000125834|STK35 ENSG00000132915|PDE6A  
ENSG00000139540|SLC39A5 ENSG00000140287|HDC ENSG00000142515|KHK3 ENSG00000143198|MGST3 ENSG00000144199|FAHD2B ENSG00000150477|KIAA1328 ENSG00000161956|SENF3 ENSG00000174705|SH3PKD2B  
ENSG00000176120|Q9BSY8\_HUMAN ENSG00000178571|NM\_203423 ENSG00000183684|THOC4 ENSG00000091137|SLC26A4 ENSG00000108064|TFAM ENSG00000111701|APOBEC1 ENSG00000118762|PKD2 ENSG00000122873|ZCD1  
ENSG00000127125|PPCS ENSG00000136783|NIPSNAP3A ENSG00000138686|BBS7 ENSG00000139209|SLC38A4 ENSG00000144771|LRTM1 ENSG00000147894|C9orf72 ENSG00000154734|ADAMTS1 ENSG00000164122|ASB5  
ENSG00000165252|SDCCAG1 ENSG00000166265|CYR1 ENSG00000167088|SNRPD1 ENSG00000172007|RAB33B ENSG00000174298|NP\_694572.1 ENSG00000180957|PITPNB ENSG00000196693|ZNF33B ENSG00000205721|Q6ZJW2\_HUMAN  
ATAGCGG ENSG00000010803|SCMH1 ENSG00000066322|ELOVL1 ENSG00000084112|SNR1 ENSG00000099917|PCQAP ENSG00000101407|KIAA0406 ENSG00000104969|SGTA ENSG00000108292|MLLT6 ENSG00000116468|KLHL18  
ENSG00000127452|FBXL12 ENSG00000131746|TNS4 ENSG00000136112|UTP14C ENSG00000145113|MUC4 ENSG00000145861|C1QTNF2 ENSG00000151224|MAT1A ENSG00000152217|SETBP1 ENSG00000155858|LSM11  
ENSG00000162511|LAPTM5 ENSG00000163331|NP\_001017920.1 ENSG00000163914|RHO ENSG00000165804|ZNF219 ENSG00000167523|C16orf55 ENSG00000170846|Q8WU25\_HUMAN ENSG00000173812|EIF1 ENSG00000175901|XR\_017883.1  
ENSG00000182289|Q9H9U3\_HUMAN ENSG00000182379|NXP4 ENSG00000203697|CAPN8 ENSG00000205703|NP\_001010910.1 ENSG00000005108|THSD7A ENSG00000023697|DERA ENSG00000083123|BCKDHB ENSG00000105856|HBF1  
ENSG00000110315|RNF141 ENSG00000120647|CCDC77 ENSG00000123200|ZC3H13 ENSG00000135821|GLUL ENSG00000148700|ADD3 ENSG00000150760|DOCK1 ENSG00000155090|KLF10 ENSG00000156976|EIF4A2  
ENSG00000173705|SUSD5 ENSG00000173852|DPY19L1 ENSG00000174721|FGFBP3 ENSG00000183918|SH2D1A  
ATAGGTT ENSG00000118004|COLEC11 ENSG00000125266|EFNB2 ENSG00000125970|RALY ENSG00000130332|LSM7 ENSG00000132382|MYBBP1A ENSG00000136040|PLXNC1 ENSG00000136167|LCP1 ENSG00000162543|UBXD3  
ENSG00000166272|C10orf26 ENSG00000175792|RUVBL1 ENSG00000203836|NP\_899228.3 ENSG00000205973|LOC644949 ENSG00000037749|MFAP3 ENSG00000101782|RIOK3 ENSG00000110848|CD69 ENSG00000113643|RARS  
ENSG00000115540|PREI3 ENSG00000116459|ATP5F1 ENSG00000118777|NUP43 ENSG00000120253|NUP43 ENSG00000120742|RAMP4\_HUMAN ENSG00000133020|ANKRD32 ENSG00000134884|NP\_060481.3 ENSG00000135374|ELF5  
ENSG00000140043|ZADH1 ENSG00000141161|UNC45B ENSG00000143190|POU2F1 ENSG00000146070|PLA2G7 ENSG00000147162|OGT ENSG00000147592|LACTB2 ENSG00000154122|ANKH ENSG00000155329|ZCCHC10  
ENSG00000157193|LRP8 ENSG00000164741|DLC1 ENSG00000166575|TMEM135 ENSG00000167383|ZNF229 ENSG00000175449|RFESD ENSG00000181904|C5orf24 ENSG00000184280|ZNF285B ENSG00000186715|Q13209\_HUMAN  
ENSG00000196459|SMDLP ENSG00000198304|ZNF528 ENSG00000198521|ZNF43  
ATAGTAT ENSG00000006744|ELAC2 ENSG00000064309|CDON ENSG00000086717|PEEF1 ENSG00000104738|MCM4 ENSG00000119684|MLH3 ENSG00000120889|TNFRSF10B ENSG00000123358|NR4A1 ENSG00000125633|CCDC93  
ENSG00000134207|SYT6 ENSG00000135404|CD63 ENSG00000153944|MSI2 ENSG00000161960|EIF4A1 ENSG00000168826|ZNF509 ENSG00000177479|ARIH2 ENSG00000182352|C17orf77  
ENSG00000186577|C6orf1 ENSG00000187605|K0401\_HUMAN ENSG00000188554|NBR1 ENSG00000203876|Q5T6G7\_HUMAN ENSG0000010072|C1orf124 ENSG00000038274|MAT2B ENSG00000051341|POLQ ENSG00000077254|USP33  
ENSG00000080819|CPOX ENSG00000081770|NAIP ENSG00000105793|GTFPB10 ENSG00000105954|NPVF ENSG00000110321|EIF4G2 ENSG00000112186|CAP2 ENSG00000117505|DR1 ENSG00000120688|WBP4  
ENSG00000125247|TMTC4 ENSG00000126804|ZBTB1 ENSG00000135999|EPC2 ENSG00000136750|GAD2 ENSG00000139324|TMTC3 ENSG00000144320|KIAA1715 ENSG00000145833|DDX46 ENSG00000150337|FCGR1A  
ENSG00000151012|SLC7A11 ENSG00000152904|GGPS1 ENSG00000156735|BAG4 ENSG00000158201|ABHD3 ENSG00000163875|C1orf149 ENSG00000164975|SNAPC3 ENSG00000171243|SOSTDC1 ENSG00000173083|HPSE  
ENSG00000174405|LIG4 ENSG00000174695|TMEM167 ENSG00000175893|ZDHHC21 ENSG00000179978|Q59G16\_HUMAN ENSG00000182220|ATP6AP2 ENSG00000185057|TAF9 ENSG00000196236|XPNPEP3 ENSG00000197657|ZNF323  
ENSG00000205212|NP\_001004306.1 ENSG00000205981|DNAJC19  
ATAGTGC ENSG00000050327|ARHGFE5 ENSG00000067836|ROGDI ENSG00000071553|ATP6AP1 ENSG00000085662|AKR1B1 ENSG00000087250|MT3 ENSG00000100290|BIK ENSG00000100726|TELO2 ENSG00000106086|PLEKHA8  
ENSG00000110721|CHKA ENSG00000115317|HTRA2 ENSG00000116984|MTR ENSG00000117419|PRNP1P ENSG00000133398|MED10 ENSG00000135482|ZC3H10 ENSG00000139547|RDH16 ENSG00000154096|THY1  
ENSG00000165275|RG9MTD3 ENSG00000166507|NDST2 ENSG00000176387|HSD11B2 ENSG00000179837|RBM15B ENSG00000183506|NP\_955377.2 ENSG00000186652|PRG2 ENSG00000069493|CLEC2D ENSG00000111796|KLRB1  
ENSG00000119950|MXI1 ENSG00000135407|AVIL ENSG00000139684|ESD ENSG00000145491|ROPNL1 ENSG00000158077|NLRP14 ENSG00000162755|NP\_689579.3 ENSG00000164106|SCRGI\_HUMAN ENSG00000164402|SEPT8  
ENSG00000168852|SUGTLL1 ENSG00000169155|ZBTB43 ENSG00000170948|MBD3L1 ENSG00000171877|FRMD5 ENSG00000178177|LCORL ENSG00000198682|PAPSS2  
ATAGTGT ENSG00000064309|CDON ENSG00000069020|MAST4 ENSG00000083842|ZNF8 ENSG00000089101|C20orf26 ENSG00000096384|HSP90AB1 ENSG00000100234|TIMP3 ENSG00000107874|CUEDC2 ENSG00000114013|CD86  
ENSG00000115661|STK16 ENSG00000122642|FKBP9 ENSG00000131914|LIN28 ENSG00000132514|CLEC10A ENSG00000133937|GSC ENSG00000152669|CCNU ENSG00000158445|KCNB1 ENSG00000164091|TMEM113  
ENSG00000166949|SMAD3 ENSG00000183495|EP400 ENSG00000187091|PLCD1 ENSG0000012660|ELOVL5 ENSG00000105967|TFEC ENSG00000106648|GALNTL5 ENSG000001108091|CCDC6 ENSG00000110848|CD69  
ENSG00000112394|SLC16A10 ENSG00000112530|PACRG ENSG00000120324|PCDH10 ENSG00000131941|RHPN2 ENSG00000134644|PUM1 ENSG00000135018|UBQLN1 ENSG00000137766|UNC13C ENSG00000137942|FNBP1L  
ENSG00000138759|FRAS1 ENSG00000144771|LRTM1 ENSG00000152207|CYSLTR2 ENSG00000152253|SPC25 ENSG00000152382|TADA1L ENSG00000153207|AHCTF1 ENSG00000168497|SDPR ENSG00000188467|SLC24A5  
ENSG00000198612|COPS8 ENSG00000203932|LOC728660  
ATAGTTA ENSG000000088325|TPX2 ENSG00000090238|YPEL3 ENSG00000092010|PSME1 ENSG00000101850|GPR143 ENSG00000103313|MEFV ENSG00000103343|ZNF174 ENSG00000123243|ITIH5 ENSG00000130177|CDC16  
ENSG00000132938|KIAA0774 ENSG00000133937|GSC ENSG00000133985|TTC9 ENSG00000138698|RAPLGD51 ENSG00000140522|RLBP1 ENSG00000144834|TALGN3 ENSG00000147724|NP\_056996.2 ENSG00000149483|TMEM138  
ENSG00000153956|CACNA2D1 ENSG00000157303|SUSD3 ENSG00000160396|HIPK4 ENSG00000162399|BSND ENSG00000168903|BTNL3 ENSG00000168959|GRM5 ENSG00000182158|CREB3L2 ENSG00000184144|CNTN2  
ENSG00000188554|NBR1 ENSG00000197361|FBXL22 ENSG00000205973|LOC644949 ENSG00000206528|Q6ZSM0\_HUMAN ENSG00000065833|ME1 ENSG000000069535|MAOB ENSG00000082497|SERTAD4 ENSG00000102290|PCDH11X  
ENSG00000107372|ZFAND5 ENSG00000137714|FDX1 ENSG00000151327|C14orf24 ENSG00000154429|C1orf96 ENSG00000154734|ADAMTS1 ENSG00000162630|B3GALT2 ENSG00000165105|RASEF ENSG00000171819|ANGPTL7  
ATATAAA ENSG00000006453|BAIAP2L1 ENSG00000011454|IRBAGP1 ENSG00000035403|VCL ENSG00000055163|CYFFP2 ENSG00000084234|APLP2 ENSG00000090554|FLT3LG ENSG00000102904|TSNAXIP1 ENSG00000105613|MAST1  
ENSG00000105617|LENG1 ENSG00000108349|CASC3 ENSG00000110711|AIP ENSG00000111186|WNT5B ENSG00000112149|CD83 ENSG00000115112|TFCP2L1 ENSG00000116478|HDAC1 ENSG00000122642|FKBP9  
ENSG00000124225|TMEMPAI ENSG00000124766|SOX4 ENSG00000140403|DNAJA4 ENSG00000140488|BRUNOL6 ENSG00000140538|NTRK3 ENSG00000140990|NDUFB10 ENSG00000149269|PAK1 ENSG00000151353|TMEM18  
ENSG00000151376|ME3 ENSG00000151692|RNF144 ENSG00000162738|VANGL2 ENSG00000166398|KIAA0355 ENSG00000167139|TBC1D21 ENSG00000170485|NPFAS2 ENSG00000171724|K1576\_HUMAN ENSG00000179241|LDLRAD3  
ENSG00000182158|CREB3L2 ENSG00000185379|RAD51L3 ENSG00000186474|KLK12 ENSG00000197587|DMBX1 ENSG00000206193|Q5HYA3\_HUMAN ENSG00000005810|MYCBP2 ENSG00000008405|CRY1 ENSG00000011201|KAL1  
ENSG00000052723|NP\_079349.1 ENSG00000067646|ZFY ENSG00000092140|KIAA1333 ENSG00000099256|PRTFDC1 ENSG00000104412|TTC35 ENSG00000104671|DCTN6 ENSG00000107897|ACBD5 ENSG00000110315|RNF141  
ENSG00000111906|HDDC2 ENSG00000112200|ZNF451 ENSG00000113441|LNPEP ENSG00000114248|LRRC31 ENSG00000119787|ARL6IP2 ENSG00000121350|NP\_079130.2 ENSG00000126790|C14orf149 ENSG00000134318|ROCK2  
ENSG00000136536|MARCH7 ENSG00000137558|PI15 ENSG00000138182|MPHOSPH1 ENSG00000138381|ASNSD1 ENSG00000138772|ANXA3 ENSG00000138777|PPA2 ENSG00000144306|SCRN3 ENSG00000148154|UGCG  
ENSG00000152219|C11orf46 ENSG00000159596|TMEM69 ENSG00000162616|DNAJB4 ENSG00000162687|KCNT2 ENSG00000163012|ZSWIM2 ENSG00000165434|PGM2L1 ENSG00000171885|AQP4  
ENSG00000173198|CYSLTR1 ENSG00000174501|NP\_079466.2 ENSG00000176055|NP\_981951.1 ENSG00000178665|ZNF713 ENSG00000179813|C13orf30 ENSG00000182919|C11orf54 ENSG00000185129|PURA ENSG00000185652|NTF3  
ENSG00000185873|TPRSS11B ENSG00000186439|TRDN ENSG00000187824|NP\_001004313.1 ENSG00000196344|ADH7 ENSG00000198087|CD2AP ENSG00000205038|PKHD11L1 ENSG00000205337|Q6ZVR2\_HUMAN  
ATATAAC ENSG00000068903|SMT3 ENSG00000085063|CN59 ENSG00000099992|TBC1D10A ENSG00000104870|FCGR2 ENSG00000107438|PDLIM1 ENSG000001121281|ADCY7 ENSG00000126458|RRAS  
ENSG00000130684|ZNF337 ENSG00000131389|SLC6A6 ENSG00000140287|HDC ENSG00000149564|ESAM ENSG00000153266|FEZF2 ENSG00000153944|MSI2 ENSG00000173757|STAT5B ENSG00000174680|C21orf9  
ENSG00000178828|RNF186 ENSG00000184979|USP18 ENSG00000197769|MAP1LC3C ENSG00000198019|FCGR1B ENSG00000205193|Q6ZTC6\_HUMAN ENSG00000055147|C5orf3 ENSG00000064652|SNX24 ENSG00000083223|ZCCHC6  
ENSG00000084092|C4orf14 ENSG00000101782|RIOK3 ENSG00000105825|TFPI2 ENSG00000133731|IMP1A ENSG00000136754|PIL1 ENSG00000137055|PLAA ENSG00000138688|KIAA1109 ENSG00000140265|ZSCAN29  
ENSG00000154144|TBG1 ENSG00000156671|SAMD8 ENSG00000158185|ANKRD36 ENSG00000162636|FAM102B ENSG00000165071|TMEM71 ENSG00000165312|OTUD1 ENSG00000165255|SDCCAG1 ENSG00000172399|MYOZ2  
ENSG00000183324|NP\_001035826.1 ENSG00000188408|MAGEB5 ENSG00000196270|Q6ZWE7\_HUMAN ENSG00000198521|ZNF43 ENSG00000204987|Q6ZN80\_HUMAN ENSG00000205156|Q6UXQ8\_HUMAN ENSG00000205195|Q6ZTB1\_HUMAN  
ATATAAT ENSG00000047056|WDR37 ENSG00000092036|C14orf94 ENSG00000101670|LIPG ENSG00000121281|ADCY7 ENSG00000127080|IPPK ENSG00000131914|LIN28 ENSG00000134339|SAA2 ENSG00000137198|GMPR  
ENSG00000155980|KIF5A ENSG00000165046|LETM2 ENSG00000165281|FANCG ENSG00000174231|PRPF8 ENSG00000176534|RL41\_HUMAN ENSG00000185379|RAD51L3 ENSG00000186281|NP\_997211.2 ENSG00000186594|NP\_116284.2  
ENSG00000024526|DEPDC1 ENSG00000033122|LRRC7 ENSG00000071539|TRIP13 ENSG00000082482|KCNK2 ENSG00000084453|SLCO1A2 ENSG00000095564|BTAF1 ENSG00000101966|BIRC4 ENSG00000104427|C8orf70  
ENSG00000104691|UBXD6 ENSG00000106701|FSD1L ENSG00000109205|ODAM ENSG00000116406|EDEM3 ENSG00000126773|C14orf135 ENSG00000127329|PTPRB ENSG00000136099|PCDH8 ENSG00000136682|CBWD2  
ENSG00000137714|FDX1 ENSG00000138035|PNPT1 ENSG00000140905|GCSH ENSG00000144196|Q9BXZ2\_HUMAN ENSG00000145808|ADAMTS19 ENSG00000147894|C9orf72 ENSG00000147996|CBWD1 ENSG00000150275|PCDH15  
ENSG00000151093|OXSM ENSG00000151690|NP\_060164.3 ENSG00000154654|NCAM2 ENSG00000155755|ALS2CR4 ENSG00000156035|PRUNE2 ENSG00000156076|WIF1 ENSG00000157578|C21orf13 ENSG00000164024|METAP1  
ENSG00000164188|RANBP3L ENSG00000164983|TMEM65 ENSG00000166192|SENP8 ENSG00000168710|AHCYL1 ENSG00000169193|CCDC126 ENSG00000169330|K1024\_HUMAN ENSG00000169684|CHRNA5 ENSG00000172785|CBWD5  
ENSG00000176018|LYSMD3 ENSG00000178338|ZNF354B ENSG00000178974|FBXO34 ENSG00000159596|TMEM69 ENSG00000162616|DNAJB4 ENSG00000162687|KCNT2 ENSG00000163012|ZSWIM2 ENSG00000165434|PGM2L1 ENSG00000171885|AQP4  
ENSG00000196611|MMP1 ENSG00000196873|CBWD3 ENSG00000197415|VEPH1 ENSG00000204201|Q49A40\_HUMAN ENSG00000107618|RBP3 ENSG00000118298|CA14 ENSG00000125746|EML2 ENSG00000127452|FBXL12 ENSG00000138629|UBL7  
ENSG00000083454|P2RX5 ENSG00000100150|DEPDC5 ENSG00000100591|AHS1A ENSG00000107618|RBP3 ENSG00000118298|CA14 ENSG00000125746|EML2 ENSG00000127452|FBXL12 ENSG00000138629|UBL7  
ENSG00000141505|ASGR1 ENSG00000154277|UCHL1 ENSG00000165949|IFI27 ENSG00000166689|CHP2\_HUMAN ENSG00000167625|ZNF526 ENSG00000176444|CLK2 ENSG00000185338|SOCS1 ENSG00000185966|LCE3E  
ENSG00000198326|C20orf141 ENSG00000198574|SH2D1B ENSG00000203883|SOX18 ENSG00000064703|DDX20 ENSG00000073921|PICALM ENSG00000075188|NUP37 ENSG00000100206|DMC1 ENSG00000107362|FAM108B1  
ENSG00000108506|INTS2 ENSG00000114547|ROPN1B ENSG00000115221|ITGB6 ENSG00000118496|FBXO30 ENSG00000118777|ABCG2 ENSG00000121335|PRB4 ENSG00000134183|GNAT2 ENSG00000164253|WDR41  
ENSG00000164930|FZD6 ENSG00000165288|BRWD3 ENSG00000170961|HAS2 ENSG00000175895|PLEKHF2 ENSG00000180287|PLD5 ENSG00000182498|RPS18 ENSG00000198298|ZNF485  
ATATAGA ENSG00000020488|FAM75A2 ENSG00000204849|FAM75A1  
ENSG00000007129|CEACAM21 ENSG00000020256|ZFP64 ENSG00000040608|RTN4R ENSG00000070601|FRMPD1 ENSG00000102080|TEX28P2 ENSG00000103811|CTSH ENSG00000103932|RPAP1 ENSG00000114439|BBX  
ENSG00000137207|YIPF3 ENSG00000141552|ANAPC11 ENSG00000149489|ROM1 ENSG00000160396|HIPK4 ENSG00000166398|KIAA0355 ENSG00000170549|IRX1 ENSG00000175197|DDIT3 ENSG00000175575|WDR71  
ENSG00000180861|C12orf36 ENSG00000182242|TEX28\_HUMAN ENSG00000184634|MED12 ENSG00000185254|TEX28P1 ENSG00000187605|K0401\_HUMAN ENSG00000011422|PLAUR ENSG00000067533|RRP15 ENSG00000092140|KIAA1333  
ENSG00000100473|COCH ENSG00000102010|BMX ENSG00000102317|RBM3 ENSG00000104331|IMPAD1 ENSG00000104432|IL7 ENSG00000109184|DCUN1D4 ENSG00000112280|COL9A1 ENSG00000113520|IL4  
ENSG00000120370|SCYL1BP1 ENSG00000122406|RPL5 ENSG00000122873|ZCD1 ENSG00000125450|NUP85 ENSG00000137806|NDUFAF1 ENSG00000137959|IFI44L ENSG00000138650|PCDH10 ENSG00000141447|OSBPL1A  
ENSG00000147145|GPR23 ENSG00000163939|PBRM1 ENSG00000165443|PHYHIPL ENSG00000165525|SDCCAG1 ENSG00000165730|STOX1 ENSG00000166128|RAB8B ENSG00000170017|ALCAM ENSG00000172575|RASGRP1  
ENSG00000175395|ZNF25 ENSG00000176907|C8orf4 ENSG00000197791|Q6ZUR4\_HUMAN ENSG00000204469|BAT2  
ATATAGT ENSG000000042062|C20orf175 ENSG00000092010|PSME1 ENSG00000103343|ZNF174 ENSG00000105355|M6PRBP1 ENSG00000107960|OBFC1 ENSG00000115461|IGFBP5 ENSG00000119682|KIAA0317  
ENSG00000119684|MLH3 ENSG00000125248|KLF2 ENSG00000127528|SOB1 ENSG00000127528|KLF2 ENSG00000132423|ABT1 ENSG00000139644|TEGT ENSG00000142224|IL19 ENSG00000143222|UFC1  
ENSG00000144468|RHBD1 ENSG00000152104|PTPN14 ENSG00000166135|HIF1AN ENSG00000166997|NP\_689968.1 ENSG00000168792|NP\_937790.1 ENSG00000001631|KRIT1 ENSG0000014824|SLC30A9 ENSG00000039319|ZFYVE16  
ENSG00000077327|SPAG6 ENSG00000104164|PLDN ENSG00000104343|UBE2W ENSG00000110975|SYT10 ENSG000001125249|RAP2A ENSG00000131482|G6PC ENSG00000132424|C6orf111  
ENSG00000133302|GALNTD3 ENSG00000136542|GALNT5 ENSG00000136881|BAE2 ENSG00000137804|NUSAP1 ENSG00000138138|ATAD1 ENSG00000138380|ALS2CR8 ENSG00000138684|IL21 ENSG00000138709|LARP2

ENSG00000144057|ST6GAL2 ENSG00000144320|KIAA1715 ENSG00000151229|SLC2A13 ENSG00000151327|C14orf24 ENSG00000151834|GABRA2 ENSG00000155090|KLF10 ENSG00000156103|MMP16 ENSG00000156875|HIAT1  
ATATATG ENSG00000165533|TTC8 ENSG00000166801|FAM111A ENSG00000170802|FOXN2 ENSG00000185774|KCNP4 ENSG00000186298|PPP1CC ENSG00000188452|CERKL ENSG00000188452|CERKL ENSG00000188452|CERKL  
ENSG00000119720|C14orf102 ENSG00000124782|RRB1 ENSG00000126067|PSMB2 ENSG00000126464|PRR12 ENSG00000128567|PODXL ENSG00000137106|GRHPR ENSG00000143850|PLEKHA6 ENSG00000158220|FAM62C  
ENSG00000163873|GRIK3 ENSG00000164091|TMEM113 ENSG00000166398|KIAA0355 ENSG00000166831|RBPM52 ENSG00000173210|ABLM3 ENSG00000174460|ZCCHC12 ENSG00000178104|PDE4DIP ENSG00000181754|AMIGO1  
ENSG00000186951|PPARA ENSG00000187140|FOXD3 ENSG00000187466|CCDC132 ENSG00000187683|BIRC3 ENSG00000190473|CDH10 ENSG00000190718|COL11A1 ENSG00000190813|STK17B ENSG00000190813|STK17B ENSG00000190813|STK17B  
ENSG00000197096|SYDE2 ENSG000001104432|IL7 ENSG00000111537|IFNG ENSG00000112144|ICK ENSG00000112541|PDE10A ENSG00000113532|ST8S1A4 ENSG00000117543|DPH5 ENSG00000119541|VPS4B  
ENSG00000121621|KIF18A ENSG00000128534|LSM8 ENSG00000128683|GAD1 ENSG00000131023|LATS1 ENSG00000132953|XP04 ENSG00000135905|DOCK10 ENSG00000144559|C3orf31 ENSG00000145375|SPATA5  
ENSG00000149970|CNKSR2 ENSG00000151617|EDNRA ENSG00000154727|GABPA ENSG00000155329|ZCCHC10 ENSG00000155469|MTREFD1 ENSG00000162687|KCNT2 ENSG00000162813|BPNT1 ENSG00000167283|ATP5L  
ENSG00000167380|ZNF226 ENSG00000171208|NETO2 ENSG00000171989|LDHAL6B ENSG00000175487|NP\_076428.2 ENSG00000177150|C18orf19 ENSG00000178338|ZNF354B ENSG00000180440|NP\_982276.1 ENSG00000182916|TCEAL7  
ENSG00000186222|CNO ENSG00000197632|SERPINB2 ENSG00000198105|ZNF248 ENSG00000203668|CHML ENSG00000203916|HFM1 ENSG00000204133|FAM33B  
ATATATTT ENSG00000113374|NUB1 ENSG00000049769|PPP1R3F ENSG00000062598|ELMO2 ENSG00000077782|FGFR1 ENSG00000101187|SLCO4A1 ENSG00000106615|RHEB ENSG00000108797|CNTNAP1 ENSG00000119771|KLHL29  
ENSG00000123358|NR4A1 ENSG00000124145|SDC4 ENSG00000125266|EFNB2 ENSG00000128604|IRF5 ENSG00000132716|WDR42A ENSG00000136859|ANGPTL2 ENSG00000145824|CXCL14 ENSG00000147140|NONO  
ENSG00000156381|ANKRD9 ENSG00000160685|ZBTB7B ENSG00000164651|SP8 ENSG00000164778|EN2 ENSG00000173253|DMRT2 ENSG00000176911|Q9HAM1\_HUMAN ENSG00000177468|OLIG3 ENSG00000185811|IKZF1  
ENSG00000186577|C6orf1 ENSG00000197077|Q5THZ5\_HUMAN ENSG00000197296|C20orf142 ENSG00000198561|CTNND1 ENSG00000056291|NPFPR2 ENSG00000069702|TGFBFR3 ENSG00000070761|C16orf80 ENSG00000072041|SLC6A15  
ENSG00000074706|NP\_056368.1 ENSG00000081479|LRP2 ENSG00000082438|COBLL1 ENSG00000101639|CEP192 ENSG00000102021|LUZP4 ENSG00000104497|SNX16 ENSG00000112175|BMP5 ENSG00000112742|TTK  
ENSG00000115183|TANC1 ENSG00000120756|PLS1 ENSG00000122545|SEPT7 ENSG00000122787|AKR1D1 ENSG00000124875|CXCL6 ENSG00000125378|BMP4 ENSG00000135218|CD36 ENSG00000135317|SNX14  
ENSG00000137878|GRIN1L1A ENSG00000138231|DBR1 ENSG00000139116|KIF21A ENSG00000142892|PIGK ENSG00000143401|ANP32E ENSG00000145220|LYAR\_HUMAN ENSG00000145349|CAMK2D ENSG00000147003|TMEM27  
ENSG00000149231|CCDC82 ENSG00000152402|GUCY1A2 ENSG00000152503|TRIM36 ENSG00000156076|WIF1 ENSG00000157214|STPA2 ENSG00000158615|PPP1R15B ENSG00000162769|FLVCL1\_HUMAN ENSG00000164163|ABCE1  
ENSG00000164167|LSM6 ENSG00000164304|CAGE1 ENSG00000165476|REEP3 ENSG00000165646|SLC18A2 ENSG00000165983|PTER ENSG00000171863|RPS7 ENSG00000173452|NP\_689987.2 ENSG00000173542|MOBK1A  
ENSG00000174749|C4orf32 ENSG00000174799|CEP135 ENSG00000176624|RKHD2 ENSG00000177461|Q8NA31\_HUMAN ENSG00000180488|FAM73A ENSG00000188419|CHM ENSG00000188921|PTPLAD2 ENSG00000196071|OR2L13  
ENSG00000197991|PCDH20 ENSG00000198554|WDHD1  
ATATCAA ENSG00000019102|VSI2 ENSG00000073792|IGZF2P2 ENSG00000095383|TBC1D2 ENSG00000099204|ABLM1 ENSG00000105610|KLF1 ENSG00000110328|GALNTL4 ENSG00000115350|POLE4 ENSG00000115685|PPP1R7  
ENSG00000122085|MTERFD2 ENSG00000124233|SEMG1 ENSG00000128596|NP\_073579.3 ENSG00000131019|ULBP3 ENSG00000134864|Q9BVM4\_HUMAN ENSG00000141431|Q6ZMX6\_HUMAN ENSG00000145192|AHSG  
ENSG00000150477|KIAA1328 ENSG00000170858|LILRA4 ENSG00000173867|MRPL46 ENSG00000181039|ANKRD34 ENSG00000185252|ZNF74 ENSG00000189068|VSTM1 ENSG00000114222|PLAUR  
ENSG00000174270|IGF1 ENSG00000027075|PRKCH ENSG00000091127|PUS7 ENSG00000097046|CDC7 ENSG00000103935|AMMECR1 ENSG00000105497|TANF175 ENSG00000112304|THM2 ENSG00000112902|SEMA5A  
ENSG00000117620|SLC35A3 ENSG00000123739|PLA2G12A ENSG00000131966|ACTR10 ENSG00000136051|KIAA1033 ENSG00000136527|SFRS10 ENSG00000136560|ZNF1 ENSG00000141048|MYH4 ENSG00000143994|ABHD1  
ENSG00000149507|PLACL1 ENSG00000152942|RAD17 ENSG00000154027|AK5 ENSG00000162409|PRKAA2 ENSG00000165929|MTAC2D1 ENSG00000166509|CLEC3A ENSG00000174808|BTC ENSG00000181072|CHRM2  
ENSG00000182070|OR52A1 ENSG00000182986|NP\_997216.2 ENSG00000185250|PPII6 ENSG00000186700|Q8N6F3\_HUMAN ENSG00000188107|EGFL11 ENSG00000197657|ZNF323 ENSG00000204478|PRAMEF20 ENSG00000204486|PRAMEF21  
ENSG00000205072|Q6ZR34\_HUMAN  
ATATCAT ENSG00000061936|SFRS8 ENSG00000068438|FTSJ1 ENSG00000094631|HDAC6 ENSG00000094796|KRT31 ENSG00000097021|ACOT7 ENSG00000114650|SCAP ENSG00000115594|IL1R1 ENSG00000127419|TMEM175  
ENSG00000128203|ASPH2 ENSG00000133026|MYH10 ENSG00000137834|SMAD6 ENSG00000153029|MR1 ENSG00000158445|KCNB1 ENSG00000165733|BMS1 ENSG00000168781|HISPPD2A ENSG00000169991|Q5TF58\_HUMAN  
ENSG00000177202|SPACA4 ENSG00000183273|CCDC60 ENSG00000183444|NR\_002822.2 ENSG00000186912|P2RY4 ENSG00000187605|K0401\_HUMAN ENSG00000196684|HSH2D1 ENSG00000197116|Q9UDD8\_HUMAN ENSG0000018510|AGPS  
ENSG00000080503|SMARCA2 ENSG00000101966|BIRC4 ENSG00000106853|LTB4DH ENSG00000112299|VNN1 ENSG00000114686|MRPL3 ENSG00000117475|BLZF1 ENSG00000118432|CNR1 ENSG00000130234|ACE2  
ENSG00000134333|LDHA ENSG00000138768|VDP\_HUMAN ENSG00000138779|Q9HGM6\_HUMAN ENSG00000138792|ENPEP ENSG00000139151|PLCZ1 ENSG00000143753|DEGS1 ENSG00000154188|ANGPT1  
ENSG00000156171|TMEM77 ENSG00000162909|CAPN2 ENSG00000173452|NP\_689987.2 ENSG00000180138|CSNK1A1L ENSG00000185760|KCNQ5 ENSG00000198189|HSD17B11 ENSG00000204969|PCDHA2  
ATATCGG ENSG00000004848|ARK ENSG000000015532|XYLT2 ENSG00000040608|RTN4R ENSG00000062282|DGAT2 ENSG00000087087|ARSD\_HUMAN ENSG00000100410|PHF5A ENSG00000124237|C20orf85 ENSG00000125820|NKX2-2  
ENSG00000147144|CCDC120 ENSG00000155034|FBXL18 ENSG00000158747|NBL1 ENSG00000171169|C9orf90 ENSG00000177830|CHD1L ENSG00000181368|NM\_032947.3 ENSG00000184207|NP\_001035830.1 ENSG00000185800|DMWD  
ENSG00000205664|Q6PJD4\_HUMAN ENSG00000008196|TFAP2B ENSG000000034677|RNF19 ENSG00000078369|GNB1 ENSG00000081177|EXDL2 ENSG00000104472|CHRA1 ENSG00000107863|ARHGAP21 ENSG00000111875|ASF1A  
ENSG00000112664|NUDT3 ENSG00000120549|KIAA1217 ENSG00000120616|EPC1 ENSG00000132498|ANKRD20A1 ENSG00000136872|ALDOB ENSG00000141668|CBLN2 ENSG00000150636|CCDC102B ENSG00000153132|CLGN  
ENSG00000154001|PPP2R5E ENSG00000163257|C4orf30 ENSG00000164253|WDR41 ENSG00000165474|GJB2 ENSG00000165512|ZNF22 ENSG00000166275|AS3MT ENSG00000169040|PMCHL2 ENSG00000178295|NP\_872431.2  
ENSG00000183148|ANKRD20A2 ENSG00000196774|ANKRD20A3  
ATATGAT ENSG00000048342|Q9H8A7\_HUMAN ENSG00000054282|SDCCAG8 ENSG00000057704|TMCC3 ENSG00000065308|TRAM2 ENSG00000084234|APLP2 ENSG00000103742|NP\_066013.1 ENSG00000117360|PRPF3 ENSG00000132911|NMUR2  
ENSG00000133985|TTC9 ENSG00000137077|CCL21 ENSG00000138696|BMPR1B ENSG00000143379|SETDB1 ENSG00000147117|ZNF157 ENSG00000156486|KCN22 ENSG00000158445|KCNB1 ENSG00000160505|NLRP4  
ENSG00000160791|CCR5 ENSG00000162399|BSND ENSG00000164620|C5orf16 ENSG00000185269|NOTUM ENSG00000187726|DNAJB13 ENSG00000188152|FAM22G ENSG00000197063|MAFG ENSG00000198535|NP\_997205.1  
ENSG00000030066|NUP160 ENSG00000044524|EPHA3 ENSG00000067208|EVF1 ENSG00000087502|ERGC2 ENSG00000091436|MLTK\_HUMAN ENSG00000193183|SEC22C ENSG00000104375|STK3 ENSG00000106537|TSPAN13  
ENSG00000112249|ASCC3 ENSG00000114021|NIT2 ENSG00000120675|DNAJC15 ENSG00000122378|C10orf58 ENSG00000124275|MTFR ENSG00000125823|CSTL1 ENSG00000132855|ANGPTL3 ENSG00000138468|SENP7  
ENSG00000143355|LHX9 ENSG00000147180|ZNF711 ENSG00000147592|LACTB2 ENSG00000149177|PTPRJ ENSG00000151470|C4orf33 ENSG00000155720|KCTD18 ENSG00000157230|LOC728132 ENSG00000167315|ACAA2  
ENSG00000169570|DTWD2 ENSG00000171843|MLLT3 ENSG00000174132|TMEM157 ENSG00000177576|NP\_001030177.1 ENSG00000196482|ESRRG ENSG00000197641|SERPINB13  
ATATGCA ENSG000000013619|CXorf6 ENSG00000068650|ATP11A ENSG00000072121|ZFYVE26 ENSG00000088727|KIF9 ENSG00000107562|CXCL12 ENSG00000117013|KCNQ4 ENSG00000122085|MTERFD2 ENSG00000122367|LDB3  
ENSG00000129295|LRR6 ENSG00000132854|ANR38\_HUMAN ENSG00000138092|CENPO ENSG00000149575|SCN2B ENSG00000149927|DOCA2 ENSG00000154227|LASS3 ENSG00000156466|GDF6 ENSG00000160691|SHC1  
ENSG00000173210|ABLM3 ENSG00000178243|C9orf62 ENSG00000179388|EGR3 ENSG00000180229|NP\_001019853.1 ENSG00000189069|NP\_001013732.1 ENSG00000197766|CFD ENSG00000082293|COL19A1 ENSG00000104756|KCTD9  
ENSG00000105928|DFNA5 ENSG00000106355|LSM5 ENSG00000116106|EPHA4 ENSG00000130021|HDHD1A ENSG00000130024|PHF10 ENSG00000135272|MDFIC ENSG00000135387|CAPRIN1 ENSG00000135409|AMHR2  
ENSG00000136750|GAD2 ENSG00000137449|CPBE2 ENSG00000138411|HECW2 ENSG00000140299|BNIP2 ENSG00000143494|VASH2 ENSG00000152583|SPARCL1 ENSG00000157111|TMEM171 ENSG00000159086|C21orf66  
ENSG00000165617|DACT1 ENSG00000169435|RASSF6 ENSG00000170927|PKHD1 ENSG00000171791|BCL2 ENSG00000171943|SRGAP2P1 ENSG00000172239|PAIP1 ENSG00000172466|ZNF24 ENSG00000180251|SLC9A4  
ENSG00000180787|ZFP3 ENSG00000181819|Q5JSM7\_HUMAN ENSG00000183722|LHFP ENSG00000196071|OR2L13 ENSG00000204838|Q8WUP8\_HUMAN ENSG00000205542|TMSL1  
ATATGCC ENSG00000010318|PHF7 ENSG00000054282|SDCCAG8 ENSG00000054523|KIF1B ENSG00000073146|MOV10L1 ENSG00000090339|ICAM1 ENSG00000096384|HSP90AB1 ENSG00000103222|ABCC1 ENSG00000107731|UNC5B  
ENSG00000116726|PRAMEF12 ENSG00000122543|ONCO\_HUMAN ENSG00000135175|OCM ENSG00000148602|LRR21 ENSG00000158497|HMHB1 ENSG00000158669|FCER1G ENSG00000159685|CHCHD6 ENSG00000182372|C8orf61  
ENSG00000184157|C1orf210 ENSG00000187003|ACTL7A ENSG00000204356|RBPB ENSG00000001626|CFTR ENSG00000006451|RALA ENSG00000084110|HAL ENSG00000107443|CCN7 ENSG00000119013|NDUFB3  
ENSG00000127951|FGL2 ENSG00000144224|UBXD2 ENSG00000152518|ZFP36L2 ENSG00000163576|EFHB ENSG00000165417|GTF2A1 ENSG00000166510|CCDC68 ENSG00000169224|C1orf150 ENSG00000173214|KIAA1919  
ENSG00000181544|FANCB ENSG00000186468|RPS23 ENSG00000188133|NP\_997723.1 ENSG00000196083|IL1RAP  
ATATGCT ENSG000000020181|GPR124 ENSG000000053108|FSTL4 ENSG000000086015|MAST2 ENSG00000099204|ABLM1 ENSG00000100591|AHSA1 ENSG00000103064|SLC7A6 ENSG00000108344|PSMD3 ENSG00000112578|BYSL  
ENSG00000126562|WNK4 ENSG00000127418|FGFR1L ENSG00000133056|PK3C2B ENSG00000139546|TARBP2 ENSG00000141096|DMP3 ENSG00000158816|QSTIE3\_HUMAN ENSG00000160712|IL6R ENSG00000162772|ATF3  
ENSG00000164400|CSF2 ENSG00000166167|BTRC ENSG00000174837|EMR1 ENSG00000176809|LRR337A3 ENSG00000177943|MAMDC4 ENSG00000182511|FES ENSG00000182712|MTCF1 ENSG00000185404|Q4ZG65\_HUMAN  
ENSG00000204479|PRAMEF17 ENSG00000204488|PRAMEF16 ENSG00000205670|C21orf51 ENSG00000205726|ITSN1 ENSG00000081181|ARG2 ENSG00000086061|DNAJA1 ENSG00000099290|NP\_001005751.1 ENSG00000100697|DICER1  
ENSG00000108242|CYP2C18 ENSG00000112706|TMGP1 ENSG00000115484|CC74 ENSG00000137575|SDCBP ENSG00000139117|CPNE8 ENSG00000144821|MYH15 ENSG00000146376|ARHGAP18 ENSG00000152726|Q5SNT8\_HUMAN  
ENSG00000164746|Q8NEG2\_HUMAN ENSG00000169599|NFU1 ENSG00000170088|NP\_689894.1 ENSG00000171989|LDHAL6B ENSG00000172661|FAM21B ENSG00000174196|FAM21D ENSG00000176049|JAKMIP2 ENSG00000182139|Q9GFU4\_HUMAN  
ENSG00000204271|SPIN3  
ATATGGA ENSG00000085552|IGSF9 ENSG00000100099|HPS4 ENSG00000104901|DKK1 ENSG00000110090|CPT1A ENSG00000114302|PRKAR2A ENSG00000156611|STK16 ENSG00000115758|ODC1 ENSG00000121060|TRIM25  
ENSG00000124107|SLP1 ENSG00000143772|ITPKB ENSG00000152291|TGOLN2 ENSG00000153789|FAM92B ENSG00000160606|TLCD1 ENSG00000164151|Q6ZT40\_HUMAN ENSG00000164574|GALNT10 ENSG00000167434|CA4  
ENSG00000168703|WFDC12 ENSG00000177791|MYO21 ENSG00000182768|NGRN ENSG00000184935|Q6AI01\_HUMAN ENSG00000188931|C1orf192 ENSG00000204248|COL11A2 ENSG00000205434|Q6ZU34\_HUMAN ENSG00000205878|Q6ZSV2\_HUMAN  
ENSG0000013561|RNF14 ENSG00000060140|STYK1 ENSG00000081665|ZNF253 ENSG00000082269|KIAA1411 ENSG00000086289|EPDR1 ENSG00000087916|SLC6A14 ENSG00000104432|IL7 ENSG00000112081|SFRS3  
ENSG00000115840|SLC25A12 ENSG00000117000|RLF ENSG00000117543|DPH5 ENSG00000125531|C20orf195 ENSG00000137845|ADAM10 ENSG00000146757|ZNF92 ENSG00000148828|NP\_001074467.1 ENSG00000149084|HSD17B12  
ENSG00000163807|KIAA1143 ENSG00000163875|C1orf149 ENSG00000164183|SLC25A32 ENSG00000164933|SLC25A32 ENSG00000164933|SLC25A32 ENSG00000164933|SLC25A32 ENSG00000164933|SLC25A32  
ENSG00000182621|PLCB1 ENSG00000184752|NDUFAL2 ENSG00000188404|SELL ENSG00000196270|Q6ZWE7\_HUMAN ENSG00000196531|NACA ENSG00000204829|CBWD7 ENSG00000205097|NP\_00105217.1  
ATATGTA ENSG00000005379|BZRAP1 ENSG00000051009|C11orf56 ENSG00000103510|MYST1 ENSG00000105613|MAST1 ENSG00000108175|ZMIZ1 ENSG00000126464|PRR12 ENSG00000130340|SNX9 ENSG00000133985|TTC9  
ENSG00000137106|GRHPR ENSG00000137817|PARP6 ENSG00000144034|C17orf39 ENSG00000144036|EXOC6B ENSG00000158220|FAM62C ENSG00000162968|Q96MQ0\_HUMAN ENSG00000166965|RCDD1 ENSG00000188706|ZDHC9  
ENSG00000196460|Q6ZNB4\_HUMAN ENSG00000197965|MPZL1 ENSG00000198369|SPRED2 ENSG00000004766|CCDC132 ENSG00000008277|ADAM22 ENSG00000060718|COL11A1 ENSG00000068912|C2orf30 ENSG00000083750|RRAGB  
ENSG00000089177|C20orf23 ENSG0000009564|BTAF1 ENSG00000104313|EYF1 ENSG00000107201|DDX58 ENSG00000107518|ATRNLL1 ENSG00000111231|ATPBD1C ENSG00000111554|MDM1 ENSG00000111790|FGFR10P2  
ENSG00000112541|PDE10A ENSG00000114166|PCAF ENSG00000115380|EFEMP1 ENSG00000129084|PSMA1 ENSG00000131725|WDR44 ENSG00000135679|MDM2 ENSG00000139211|AMIGO2 ENSG00000139508|SLC46A3  
ENSG00000141579|ZNF750 ENSG00000145293|ENOPH1 ENSG00000148429|USP6NL ENSG00000149289|ZC3H12C ENSG00000149634|C20orf165 ENSG00000151229|SLC2A13 ENSG00000162616|DNAJB4 ENSG00000165164|CXorf22  
ENSG00000168566|C6orf151 ENSG00000171202|TMEM126A ENSG00000172175|MALT1 ENSG00000175104|TRAF6 ENSG00000175104|TRAF6 ENSG00000175104|TRAF6 ENSG00000175104|TRAF6  
ENSG00000188596|C12orf63 ENSG00000197223|NP\_006324.1 ENSG00000197321|SVIL ENSG00000198093|ZNF649  
ATATGTT ENSG00000068745|IHPK2 ENSG00000101265|RASSF2 ENSG00000102890|ELMO3 ENSG00000108557|RAI1 ENSG00000112062|MAPPK14 ENSG00000116198|KIAA0562 ENSG00000118245|TNP1 ENSG00000130429|ARPC1B  
ENSG00000134207|SYT6 ENSG00000141570|CBX58 ENSG00000145920|CLPX2 ENSG00000145920|CLPX2 ENSG00000153298|C6orf54 ENSG00000155846|PPARGC1B ENSG00000156858|PRR14 ENSG00000163394|CKAR ENSG00000165275|RG9MTD3  
ENSG00000165724|ZMYND19 ENSG00000169548|SUHW1 ENSG00000176490|DIRAS1 ENSG00000177663|IL17RA ENSG00000204842|ATXN2 ENSG00000004809|SLC22A16 ENSG00000005812|FBXL3 ENSG00000008405|CRY1  
ENSG000000015568|RGPD1 ENSG000000058729|RIK2 ENSG000000064313|TAF2 ENSG00000006897|LAPTM4A ENSG00000069509|FUNDCl ENSG00000078403|MLLT10 ENSG00000080572|CXorf41 ENSG00000082175|PGR  
ENSG000000085382|HACE1 ENSG00000100625|SIX4 ENSG00000102043|PMTR8 ENSG00000110435|PDHX ENSG00000114480|GBE1 ENSG00000118113|MMP8 ENSG00000120756|PLS1 ENSG00000120784|ZFP30  
ENSG00000125257|ABCC4 ENSG00000128641|MYO1B ENSG00000128654|MTX2 ENSG00000129317|PUS7 ENSG00000133138|TBC1D8B ENSG00000134365|CFHR4 ENSG00000135968|GCC2 ENSG00000136897|MRPL50  
ENSG00000137996|RTCD1 ENSG00000150051|MKX ENSG00000150773|PIH1D2 ENSG00000153976|HS3ST3A1 ENSG00000154556|SORBS2 ENSG00000155329|ZCCHC10 ENSG000001





|         |                                |                                |                                |                                |                              |                                |                              |                                |
|---------|--------------------------------|--------------------------------|--------------------------------|--------------------------------|------------------------------|--------------------------------|------------------------------|--------------------------------|
|         | ENSG00000170145 SNF1LK2        | ENSG00000170835 CEL            | ENSG00000171495 NP_775760.2    | ENSG00000171960 PPIH           | ENSG00000174576 NPAS4        | ENSG00000178795 GDPD4          | ENSG00000185744 TNT_HUMAN    | ENSG00000196943 LTB4R          |
|         | ENSG00000198561 CTNND1         | ENSG00000198690 MTMR15         | ENSG000002023793 Q6ZR74_HUMAN  | ENSG00000000003 TSPAN6         | ENSG00000016082 ISL1         | ENSG00000053328 Q5T253_HUMAN   | ENSG00000075142 SRI          | ENSG00000079482 OPHN1          |
|         | ENSG00000100625 SIX4           | ENSG00000106511 MEOX2          | ENSG00000122741 WDR32          | ENSG00000123496 IL13RA2        | ENSG00000151164 RAD9B        | ENSG00000152380 NP_991111.1    | ENSG00000152413 HOMER1       | ENSG00000156958 GALK2          |
|         | ENSG00000159200 DSCR1          | ENSG00000170949 ZNF160         | ENSG00000171208 NETO2          | ENSG00000173960 UBXD4          | ENSG00000176601 YSR4         | ENSG00000183496 RRKD3          | ENSG00000186395 KRT10        | ENSG00000196141 NP_056350.1    |
| ATCAAGG | ENSG00000198889 WDR40B         | ENSG00000198944 ANKRD43        | ENSG00000204026 Q6ZSD2_HUMAN   |                                |                              |                                |                              |                                |
|         | ENSG00000168831 RASGRP2        | ENSG00000101210 EEF1A2         | ENSG00000103197 TSC2           | ENSG00000106852 LHX6           | ENSG00000111801 BTN3A3       | ENSG00000122085 MTERFD2        | ENSG00000124233 SEMG1        | ENSG00000125818 PSMF1          |
|         | ENSG00000140598 EFTUD1         | ENSG00000162968 Q96MQ0_HUMAN   | ENSG00000166171 NP_056263.1    | ENSG00000170858 LILRA4         | ENSG00000179335 CLK3         | ENSG00000180846 C19orf34       | ENSG00000185811 IKZF1        | ENSG00000187608 ISG15          |
|         | ENSG00000027001 MIPPEP         | ENSG00000065427 KARS           | ENSG00000113456 RAD1           | ENSG00000115966 ATF2           | ENSG00000120160 C9orf11      | ENSG00000121236 TRIM34         | ENSG00000132763 MMACHC       | ENSG00000134762 DSC3           |
|         | ENSG00000141048 MYH4           | ENSG00000144354 CDCA7          | ENSG00000151092 NGLY1          | ENSG00000170248 PDCD6IP        | ENSG00000171263 GPHN         | ENSG00000176485 HRASL3         | ENSG00000177613 CMT2T        | ENSG00000180182 CRSP2          |
|         | ENSG00000185737 NRG3           | ENSG00000196236 XPNPPEP3       | ENSG00000196586 MYO6           | ENSG00000203706 C1orf133       |                              |                                |                              |                                |
| ATCAATA | ENSG00000077348 EXOSC5         | ENSG00000077348 EXOSC5         | ENSG00000092621 PHGDH          | ENSG00000095383 TBC1D2         | ENSG00000101883 PEPP1_HUMAN  | ENSG00000102547 CAB39L         | ENSG00000102901 CENPT        | ENSG00000102962 CCL22          |
|         | ENSG00000103260 METRN          | ENSG00000104921 FCER2          | ENSG00000105732 ZNF574         | ENSG00000107593 PKD2L1         | ENSG00000111640 GAPDH        | ENSG00000117691 NENF           | ENSG00000125999 C20orf114    | ENSG00000133321 RARRES3        |
|         | ENSG00000140105 WARS           | ENSG00000143546 S100A8         | ENSG00000144589 STK11IP        | ENSG00000148826 NKX6-2         | ENSG00000159189 C1QC         | ENSG00000170955 PRKCDPB        | ENSG00000172531 PPP1CA       | ENSG00000173567 GPR113         |
|         | ENSG00000173862 Q9NWP0_HUMAN   | ENSG00000180424 DEFB123        | ENSG00000180875 GREM2          | ENSG00000182484 FAM39DP        | ENSG00000186847 KRT14        | ENSG00000187095 LILRA2         | ENSG00000187681 ORM1         | ENSG00000188076 SCGB1C1        |
|         | ENSG00000189068 VSTM1          | ENSG00000197238 HIST1H4J       | ENSG00000204154 ORM2           | ENSG00000073921 PICCALM        | ENSG00000080947 Q8IVE0_HUMAN | ENSG00000082497 SERTAD4        | ENSG00000105467 SYNGR4       | ENSG00000106554 CHCHD3         |
|         | ENSG00000107611 CUBN           | ENSG00000113100 CDH9           | ENSG00000115355 KIAA1212       | ENSG00000123500 COL10A1        | ENSG00000124214 STAU1        | ENSG00000129235 TXNL5          | ENSG00000135525 MAP7         | ENSG00000139357 SLC5A8         |
|         | ENSG00000143183 TMC01          | ENSG00000150961 SEC24D         | ENSG00000151553 KIAA1600       | ENSG00000157578 C21orf13       | ENSG00000167785 ZNF558       | ENSG00000169604 ANTXR1         | ENSG00000169891 REPS2        | ENSG00000171243 SOSTDC1        |
|         | ENSG00000174298 NP_694572.1    | ENSG00000178107 Q9N1B8_HUMAN   | ENSG00000179300 ZCCHC5         | ENSG00000181072 CHRM2          | ENSG00000181903 OR4C6        | ENSG00000182899 RPL35A         | ENSG00000185250 PPL16        | ENSG00000188659 NP_001008227.1 |
|         | ENSG00000188800 TMC02          | ENSG00000196270 Q6ZWE7_HUMAN   | ENSG00000196459 SEDLP          | ENSG00000196946 ZNF705A        | ENSG00000203963 C1orf141     |                                |                              |                                |
| ATCAATG | ENSG00000065675 PRKCQ          | ENSG00000093072 CECR1          | ENSG00000097021 ACOT7          | ENSG00000100221 JOSD1          | ENSG00000100767 PAPLN        | ENSG00000110887 DAO            | ENSG00000113389 NPR3         | ENSG00000130159 ECSIT          |
|         | ENSG00000133511 PTK4CA         | ENSG00000136167 LCPI1          | ENSG00000145990 GFOD1          | ENSG00000157350 ST3GAL2        | ENSG00000160783 BGLAP        | ENSG00000162105 SHANK2         | ENSG00000162666 KIAA0040     | ENSG00000163900 TMEM41A        |
|         | ENSG00000165671 NSD4           | ENSG00000178084 HTR3C          | ENSG00000204364 C2             | ENSG00000205414 Q6ZVL8_HUMAN   | ENSG00000005469 CROT         | ENSG00000119549 SNAI2          | ENSG00000106341 C7orf16      | ENSG00000108384 RAD51C         |
|         | ENSG00000109686 NP_001009555.2 | ENSG00000109771 LRP2BP         | ENSG00000117519 CNN3           | ENSG00000120705 ETF1           | ENSG00000122008 POLK         | ENSG00000134391 CFHR2          | ENSG00000135409 AMHR2        | ENSG00000135655 USP15          |
|         | ENSG00000136527 SFRS10         | ENSG00000141469 SLC14A1        | ENSG00000145817 YIPF5          | ENSG00000148848 ADAM12         | ENSG00000149742 SLC22A9      | ENSG00000159216 RUNX1          | ENSG00000162630 B3GALT2      | ENSG00000165449 SLC16A9        |
|         | ENSG00000165675 ENX02          | ENSG00000171262 FAM98B         | ENSG00000176201 GBA3           | ENSG00000182367 SNRPEL1        | ENSG00000186104 CY2ER1       | ENSG00000196442 XNF432         | ENSG00000205413 SAMD9        | ENSG00000205838 NP_653326.3    |
| ATCAGCG | ENSG00000121244 CD22           | ENSG00000064419 TNPO3          | ENSG00000099840 C19orf36       | ENSG00000100678 SLC8A3         | ENSG00000106624 AEBP1        | ENSG00000115641 FHL2           | ENSG00000124237 C20orf85     | ENSG00000131100 ATP6V1E1       |
|         | ENSG00000132024 CC2D1A         | ENSG00000135744 AGT            | ENSG00000139174 PRICKLE1       | ENSG00000140859 KIFC3          | ENSG00000157950 SSX2_HUMAN   | ENSG00000162599 NFIA           | ENSG00000163956 LRPAP1       | ENSG00000170889 RPS9           |
|         | ENSG00000180884 ZNF792         | ENSG00000183010 PYCR1          | ENSG00000085511 MAP3K4         | ENSG000000087301 KIAA1344      | ENSG00000100262 ARFGAP3      | ENSG00000100483 C14orf138      | ENSG00000108406 DHX40        | ENSG00000111581 NUP107         |
|         | ENSG00000111704 NANOG          | ENSG00000117851 RIC8B          | ENSG00000112706 IMPG1          | ENSG00000119514 GALNT12        | ENSG00000124275 MTFR1        | ENSG00000154620 TMSB4Y         | ENSG00000159086 C21orf66     | ENSG00000163444 PPM1K          |
|         | ENSG00000163734 CXCL3          | ENSG00000170871 K0232_HUMAN    | ENSG00000179299 NSUN7          | ENSG00000179532 C11orf47       | ENSG00000182919 C11orf54     | ENSG00000196683 TOMM7          | ENSG00000198795 ZNF521       |                                |
| ATCAGGC | ENSG00000068323 TFE3           | ENSG00000100116 GCAT           | ENSG00000102900 NUP93          | ENSG00000105383 CD33           | ENSG00000110987 BCL7A        | ENSG00000111077 TENC1          | ENSG00000117154 IGSF21       | ENSG00000124212 PTGIS          |
|         | ENSG00000125804 C20orf91       | ENSG00000147081 AKAP4          | ENSG00000150779 TIMMB8         | ENSG00000164054 NP_057563.3    | ENSG00000166340 TPP1         | ENSG00000167588 GPD1           | ENSG00000167612 ANKRD33      | ENSG00000167702 KIFC2          |
|         | ENSG00000171608 PK3CD          | ENSG00000185585 OLFML2A        | ENSG00000185608 MRPL40         | ENSG00000075292 ZNF638         | ENSG00000109471 IL2          | ENSG00000111696 NT5DC3         | ENSG00000112365 ZBTB24       | ENSG00000125378 BMP4           |
|         | ENSG00000136147 PHF11          | ENSG00000145332 KLHL8          | ENSG00000152078 TMEM56         | ENSG00000165813 C10orf118      | ENSG00000198650 TAT          |                                |                              |                                |
| ATCAGTG | ENSG0000006062 MAP3K14         | ENSG00000077157 PPP1R12B       | ENSG00000104880 ARHGEF18       | ENSG00000107223 EDF1           | ENSG00000125485 DDX31        | ENSG00000136930 PSMB7          | ENSG00000137522 RNF121       | ENSG00000152672 CLEC4F         |
|         | ENSG00000162817 C1orf115       | ENSG00000164045 CDC25A         | ENSG00000165699 TSC1           | ENSG00000173020 ADRBK1         | ENSG00000182575 NXPH3        | ENSG00000183798 EMILIN3        | ENSG00000185744 TNT_HUMAN    | ENSG00000186910 SERPINA11      |
|         | ENSG00000188384 Q6ZUQ5_HUMAN   | ENSG00000197077 Q5TH25_HUMAN   | ENSG00000198624 CCDC69         | ENSG00000198917 C9orf114       | ENSG00000205271 Q6ZUQ5_HUMAN | ENSG00000205275 Q6ZUQ5_HUMAN   | ENSG00000038945 MSR1         | ENSG00000048540 LMO3           |
|         | ENSG00000076685 NT5C2          | ENSG00000079246 XRCC5          | ENSG00000086598 TMED2          | ENSG00000105866 SP4            | ENSG00000108039 XPNPPEP1     | ENSG00000118267 ZNF271         | ENSG00000122550 KLHL7        | ENSG00000125037 TMEM111        |
|         | ENSG00000132963 POMP           | ENSG00000132964 CDK8           | ENSG00000135220 UGT2A3         | ENSG00000136267 DGKB           | ENSG00000139508 SLC46A3      | ENSG00000146223 RPL7L1         | ENSG00000147684 NDUF9B       | ENSG00000148690 C10orf4        |
|         | ENSG00000154545 MAGED4         | ENSG00000154645 CHODL          | ENSG00000159186 ATP5O          | ENSG00000164099 PRSS12         | ENSG00000164543 STRK17A      | ENSG00000165997 ARL5B          | ENSG00000167785 ZNF558       | ENSG00000170009 Q9NTH0_HUMAN   |
|         | ENSG00000179387 ELMOD2         | ENSG00000185774 KCNIP4         | ENSG00000187243 MAGE4B         | ENSG00000187667 Q1A5X8_HUMAN   | ENSG00000189237 NAP5_HUMAN   | ENSG00000196886 Q8NAW3_HUMAN   | ENSG00000197195 CHURC1       | ENSG00000198944 ANKRD43        |
| ATCATAG | ENSG00000083323 PLEKHG6        | ENSG00000064886 CHI3L2         | ENSG00000089101 C20orf26       | ENSG00000101417 PKMP4          | ENSG00000119689 DLST         | ENSG00000125731 SH2D3A         | ENSG00000142733 MAP3K6       | ENSG00000158748 HTR6           |
|         | ENSG00000163206 SMCP           | ENSG00000163699 Q9HY74_HUMAN   | ENSG00000166340 TPP1           | ENSG00000169385 RNASE2         | ENSG00000169397 RNASE3       | ENSG00000173545 ZNF622         | ENSG00000177156 TALD01       | ENSG00000180697 C3orf22        |
|         | ENSG00000185187 SIGIRR         | ENSG00000186063 C1orf80        | ENSG00000186190 C20orf185      | ENSG00000186788 NP_001001670.1 | ENSG00000189357 XR_015253.1  | ENSG00000198901 PRC1           | ENSG00000057663 ATG5         | ENSG00000110321 EIF4G2         |
|         | ENSG00000114742 WDR48          | ENSG00000115020 PIP5K3         | ENSG00000119013 INDUFB3        | ENSG00000120051 C10orf80       | ENSG00000120686 UFM1         | ENSG00000121335 PRB4           | ENSG00000125384 PTGER2       | ENSG00000125676 THOC2          |
|         | ENSG00000134077 THUMP3         | ENSG00000138615 CILP           | ENSG00000139209 SLC38A4        | ENSG00000140043 ZADH1          | ENSG00000145907 G3BP1        | ENSG00000149100 PCID1          | ENSG00000150687 PRSS23       | ENSG00000151917 C6orf65        |
|         | ENSG00000153237 NP_620158.2    | ENSG00000155893 ACPL2          | ENSG00000159904 ZNF225         | ENSG00000162374 ELAVL4         | ENSG00000164418 GRIK2        | ENSG00000175885 ZNF611         | ENSG00000178202 KDELC2       | ENSG00000198878 Q9PIL8_HUMAN   |
| ATCATCA | ENSG0000006071 ABCC8           | ENSG00000077157 PPP1R12B       | ENSG00000078687 TNRC6C         | ENSG00000104386 XR_017860.1    | ENSG00000108702 CCL1         | ENSG00000108829 LRRC59         | ENSG00000113272 THG1L        | ENSG00000114650 SCAP           |
|         | ENSG00000123999 INHA           | ENSG00000140598 EFTUD1         | ENSG00000143502 SUSD4          | ENSG00000148826 NKX6-2         | ENSG00000153666 XR_017721.1  | ENSG00000163879 DNALI1         | ENSG00000164270 HTR4         | ENSG00000169385 RNASE2         |
|         | ENSG00000169397 RNASE3         | ENSG00000172738 C6orf128       | ENSG00000172890 NADSYN1        | ENSG00000175147 C1orf126       | ENSG00000178081 LOC653075    | ENSG00000182022 ST4S6_HUMAN    | ENSG00000182931 WFD10B       | ENSG00000188532 LOC653125      |
|         | ENSG00000188554 NBR1           | ENSG00000188626 LOC653720      | ENSG00000197194 Q6VEP3_HUMAN   | ENSG00000197555 SIPAL1L        | ENSG00000198397 AZA3T8_HUMAN | ENSG00000204446 NP_001001709.1 | ENSG00000204482 LST1         | ENSG00000206069 NP_001001663.1 |
|         | ENSG00000206076 Q6ZQR8_HUMAN   | ENSG00000003987 MTMR7          | ENSG000000057149 SERPINB4      | ENSG00000102021 LUZP4          | ENSG00000102401 ARMCX3       | ENSG00000109771 LRP2BP         | ENSG00000109814 UGDH         | ENSG00000112701 SENP6          |
|         | ENSG00000116106 EHPA4          | ENSG00000126549 STATH          | ENSG00000128739 SNRPN          | ENSG00000132466 ANKRD17        | ENSG00000134152 C15orf29     | ENSG00000134375 TIMM17A        | ENSG00000135999 EPC2         | ENSG00000136824 SMC2           |
|         | ENSG00000138587 MNS1           | ENSG00000163114 PDHA2          | ENSG00000163638 ADAMTS9        | ENSG00000166004 KIAA1731       | ENSG00000169291 SHE          | ENSG00000169895 SYAP1          | ENSG00000170946 DPH4         | ENSG00000173200 PARP15         |
|         | ENSG00000186017 ZNF566         | ENSG00000186184 POLR1D         | ENSG00000186432 KPNA4          | ENSG00000188001 FAM79B         | ENSG00000189252 SPANXN3      | ENSG00000196442 ZNF432         | ENSG00000203963 C1orf141     | ENSG00000206073 SERPINB3       |
| ATCATGA | ENSG00000011600 TYROBP         | ENSG00000033050 ABCF2          | ENSG00000033627 ATP6V0A1       | ENSG00000072501 SMC1A          | ENSG00000095015 MAP3K1       | ENSG00000100234 TIMP3          | ENSG00000112079 STK38        | ENSG00000112514 CUTA           |
|         | ENSG00000119638 NEK9           | ENSG00000121274 PAPD5          | ENSG00000126267 COX6B1         | ENSG00000129816 NR_001538.1    | ENSG00000129845 O14605_HUMAN | ENSG00000131845 ZNF304         | ENSG00000138698 RAP1GDS1     | ENSG00000155926 SLA            |
|         | ENSG00000157103 SLC6A1         | ENSG00000159189 C1QC           | ENSG00000166948 TGM6           | ENSG00000176340 COX8A          | ENSG00000179393 Q9NRE4_HUMAN | ENSG00000183444 NR_002822.2    | ENSG00000183562 Q9PIL5_HUMAN | ENSG00000197116 Q9UDD8_HUMAN   |
|         | ENSG00000198291 Q6ZTP9_HUMAN   | ENSG00000204362 Q6ZS05_HUMAN   | ENSG00000206193 Q5HYA3_HUMAN   | ENSG00000101084 GCCLC          | ENSG00000073712 PLEKHK1      | ENSG00000101844 ATG4A          | ENSG00000104442 ARMC1        | ENSG00000122550 KLHL7          |
|         | ENSG00000127483 HP1BP3         | ENSG00000133997 MED6           | ENSG00000138061 CYP11B1        | ENSG00000154556 SORBS2         | ENSG00000156876 SASS6        | ENSG00000164209 SLC25A46       | ENSG00000169398 PTK2         | ENSG00000180773 SLC36A4        |
|         | ENSG00000185272 RBM11          | ENSG00000186417 GLDN           | ENSG00000187231 SESTD1         | ENSG00000188868 ZNF563         | ENSG00000197620 CX04A_HUMAN  | ENSG00000197967 Q86U89_HUMAN   |                              |                                |
| ATCATGT | ENSG00000090920 FCGBP          | ENSG00000103365 GGA2           | ENSG00000119408 NEK6           | ENSG00000125656 CLPP           | ENSG00000130307 USHBP1       | ENSG00000132405 TBC1D14        | ENSG00000133026 MYH10        | ENSG00000148290 SURF1          |
|         | ENSG00000148842 CNNM2          | ENSG00000151631 Q9P2A3_HUMAN   | ENSG00000161558 TMEM143        | ENSG00000162490 C1orf187       | ENSG00000165731 RET          | ENSG00000168002 POLR2G         | ENSG00000173436 C1orf151     | ENSG00000176340 COX8A          |
|         | ENSG00000182372 C8orf61        | ENSG00000184924 NP_001013685.1 | ENSG00000189069 NP_001013732.1 | ENSG00000206069 NP_001001663.1 | ENSG00000206550 LOC285346    | ENSG00000008869 HEATR5B        | ENSG00000102701 STARD3NL     | ENSG00000073712 PLEKHK1        |
|         | ENSG00000080986 NDC80          | ENSG00000115159 GPD2           | ENSG00000120616 EPC1           | ENSG00000134028 ADAMDEC1       | ENSG00000138119 FERL13       | ENSG00000140299 BNIP2          | ENSG0000014286               |                                |

ENSG00000189419|NP\_997266.2 ENSG00000196843|ARID5A ENSG00000204681|GABBR1 ENSG00000077458|FAM76B ENSG00000085832|EPS15 ENSG00000103740|ACSBG1 ENSG00000104205|SGK3 ENSG00000109133|TMEM33  
ENSG00000113319|RASGRF2 ENSG00000119636|C14orf45 ENSG00000121690|DEPDC7 ENSG00000128513|POT1 ENSG00000132631|C20orf79 ENSG00000147649|MTDH ENSG00000149534|MS4A2 ENSG00000162385|MAGOH  
ENSG00000162616|DNAJB4 ENSG00000164603|NF\_689769.2 ENSG00000168004|HRASLS5 ENSG00000175646|PRM1 ENSG00000185149|NPFY2R ENSG00000185513|L3MBTL ENSG00000186479|RGS7BP ENSG00000198533|Q9P1D0\_HUMAN  
ENSG00000204022|L1PJ ENSG00000205523|Q6ZP97\_HUMAN  
ATCCACA ENSG00000064489|MEF2B ENSG00000081692|JMJD3 ENSG00000100427|MLC1 ENSG00000100626|GALNTL1 ENSG00000101079|NDRG3 ENSG00000105339|DENND3 ENSG00000105383|CD33 ENSG00000105429|MEGF8  
ENSG00000109101|FOXN1 ENSG00000110203|FOLR3 ENSG00000112763|BTN2A1 ENSG00000122176|FMOD ENSG00000123810|NP\_085055.1 ENSG00000135454|B4GALNT1 ENSG00000157837|PSL4\_HUMAN ENSG00000158186|MRAS  
ENSG00000158714|SLAMF8 ENSG00000160844|NF\_849153.3 ENSG00000168014|NP\_056346.2 ENSG00000177963|RTC8A ENSG00000180139|Q8N9Z5\_HUMAN ENSG00000196378|Q9BSZ0\_HUMAN ENSG00000205501|Q6ZU01\_HUMAN ENSG00000205864|KRTAP5-6  
ENSG00000068489|PRR1 ENSG00000104371|DKK4 ENSG00000107242|PIP5K1B ENSG00000108255|CRYBA1 ENSG00000117152|RGS4 ENSG00000117758|STX12 ENSG00000120820|GLT8D2 ENSG00000131473|ACLY  
ENSG00000148429|USP6NL ENSG00000151116|UEVLD ENSG00000155097|ATF6V1C1 ENSG00000166206|GABRB3 ENSG00000168556|INGB2 ENSG00000169860|P2RY1 ENSG00000170967|DDI1 ENSG00000172748|ZNF596  
ENSG00000179915|NRX1B\_HUMAN ENSG00000181019|NQO1 ENSG00000183036|PCP4 ENSG00000188687|SLC4A5 ENSG00000196860|NP\_997260.1 ENSG00000197969|VPS13A ENSG00000198526|PABPCP2 ENSG00000204138|PHACTR4  
ATCCAGG ENSG00000004139|SARM1 ENSG00000091704|CPA1 ENSG00000101445|PPP1R16B ENSG00000103355|PRSS33 ENSG00000103710|RASL12 ENSG00000105438|KDELRL1 ENSG00000124557|BTN1A1 ENSG00000131584|CENTB5  
ENSG00000142599|RERE ENSG00000147789|ZNF7 ENSG00000154229|PRKCA ENSG00000161031|PGLYRP2 ENSG00000161638|ITGA5 ENSG00000167881|SRP68 ENSG00000173702|MUC13 ENSG00000174903|RAB1B  
ENSG00000174951|FUT1 ENSG00000185215|TNFAIP2 ENSG00000188277|LOC643338 ENSG00000189433|GJB4 ENSG00000203961|Q6ZRE1\_HUMAN ENSG00000205354|Q6ZN60\_HUMAN ENSG00000205632|Q6ZVF7\_HUMAN ENSG00000205912|Q6ZTG5\_HUMAN  
ENSG00000004948|CALCR ENSG00000056277|SUHW3 ENSG00000060718|COL11A1 ENSG00000101109|STK4 ENSG00000102317|RBM3 ENSG00000104112|SCG3 ENSG00000113302|LL12B ENSG00000116497|S100BPB  
ENSG00000121940|CLCC1 ENSG00000125144|MT1G ENSG00000127325|BEST3 ENSG00000133812|SBF2 ENSG00000134748|PRPF38A ENSG00000135870|RC3H1 ENSG00000157538|DSCR3 ENSG00000163113|OTUD7B  
ENSG00000164037|NF\_631912.2 ENSG00000164440|TXLNB ENSG00000164675|IQUB ENSG00000170074|NP\_775934.3 ENSG00000175336|APOF ENSG00000178636|Q8N7N2\_HUMAN ENSG00000182983|ZNF662 ENSG00000198440|ZNF583  
ENSG00000205358|MT1H  
ATCCAGT ENSG00000006831|ADIPOR2 ENSG0000007545|CRAMP1L ENSG00000103042|NP\_060701.1 ENSG00000104419|NDRG1 ENSG00000112562|SMOC2 ENSG00000128918|ALDH1A2 ENSG00000143297|FCRL5 ENSG00000157606|SPATS1  
ENSG00000166847|DCTN5 ENSG00000181754|AMIGO1 ENSG00000182685|C16orf79 ENSG00000184221|OLIG1 ENSG00000186638|C9orf48 ENSG00000188447|XR\_016015.1 ENSG00000188778|ADRB3 ENSG00000196465|MYL6B  
ENSG00000197077|Q5THZ5\_HUMAN ENSG00000203923|SPANXN1 ENSG000000088756|ARHGAP28 ENSG00000101266|CSNK2A1P ENSG00000105974|CAV1 ENSG00000109756|RAPGEF2 ENSG00000111615|KRR1 ENSG00000118702|GHRH  
ENSG00000125351|UPF3B ENSG00000133703|KRAS ENSG00000144909|OSBP1L1 ENSG00000151881|C5orf28 ENSG00000166046|TCR11L2 ENSG00000168118|RAB4A ENSG00000170714|FAM19A5 ENSG00000176256|HMGB4  
ENSG00000177150|C18orf19 ENSG00000178966|RMI1 ENSG00000182983|ZNF662 ENSG00000184517|ZFP1 ENSG00000185515|BRCC3 ENSG00000188408|MAGEB5 ENSG00000197956|S100A6 ENSG00000204363|SPANXN5  
ATCCCTC ENSG00000006659|LGALS14 ENSG00000049540|ELN ENSG00000072195|SPEG ENSG00000088543|C3orf18 ENSG00000103415|HMOX2 ENSG00000103852|TTC23 ENSG00000106976|DNM1 ENSG00000110628|SLC22A18  
ENSG00000124920|C11orf9 ENSG00000125815|CST8 ENSG00000125999|C20orf114 ENSG00000133466|C1QTNF6 ENSG00000134201|GSTM5 ENSG00000135441|BLOC1S1 ENSG00000140506|LMAN1L ENSG00000141576|RNF157  
ENSG00000142961|MOBK12C ENSG00000144120|ETNK2 ENSG00000144120|TMEM177 ENSG00000147160|DGA72L4 ENSG00000167114|SLC27A4 ENSG00000169696|ASPSR1 ENSG00000169738|DCXR ENSG00000172155|LCE1D  
ENSG00000174521|TTC9B ENSG00000177340|QOVFX0\_HUMAN ENSG00000180206|C22orf27 ENSG00000183160|TMEM119 ENSG00000183862|CNGA2 ENSG00000186226|LCE1E ENSG00000197446|CYP2F1 ENSG00000197816|KIAA1529  
ENSG00000204092|NP\_001001705.1 ENSG000000000003|TSPAN6 ENSG00000103375|PGM3 ENSG00000106952|TNFSF8 ENSG00000118972|FGF23 ENSG00000119446|RBM18 ENSG00000120215|MLANA ENSG00000123545|C6orf66  
ENSG00000131981|LGALS3 ENSG00000133142|TCEAL4 ENSG00000156463|SH3RF2 ENSG00000157005|SST ENSG00000162419|GMEB1 ENSG00000163749|NP\_001036249.1 ENSG00000165832|TRUB1 ENSG00000197056|ZMYM1  
ENSG00000198820|SPANXF1 ENSG00000203929|SPANXB1 ENSG00000204164|Q6P095\_HUMAN ENSG00000204177|Q6P095\_HUMAN  
ATCCGAA ENSG00000060566|CREB3L3 ENSG00000081692|JMJD4 ENSG00000089289|IGBP1 ENSG00000102796|DHRS12 ENSG00000106992|AK1 ENSG00000116584|ARHGEF2 ENSG00000121068|TBX2  
ENSG00000123815|ADCK4 ENSG00000126215|XRCC3 ENSG00000132694|ARHGEF11 ENSG00000137331|IER3 ENSG00000147224|PRP51 ENSG00000148356|LRSAM1 ENSG00000171574|ZNF584 ENSG00000172878|NP\_954697.1  
ENSG00000175892|Q8NAT4\_HUMAN ENSG00000176984|Q8N8C5\_HUMAN ENSG00000177045|SIX5 ENSG00000178932|Q8N811\_HUMAN ENSG00000180305|WFDC10A ENSG00000182931|WFDC10B ENSG00000183566|LATH\_HUMAN ENSG00000184774|Q49AQ9\_HUMAN  
ENSG00000188976|NOC2L ENSG00000196581|AJAP1 ENSG00000198371|Q8NAS2\_HUMAN ENSG00000204763|Q6ZMK1\_HUMAN ENSG00000204847|FAM74A1 ENSG00000254277|OPN3 ENSG00000100987|VSL1 ENSG00000106049|HIBADH  
ENSG00000115705|TPO ENSG00000116793|PHTF1 ENSG00000118579|MED28 ENSG00000122218|COPA ENSG00000149651|SPINT4 ENSG00000151792|CTSO ENSG00000158122|C9orf21 ENSG00000169429|IL8  
ENSG00000174628|IQCK ENSG00000176201|GBA3 ENSG00000176635|HORMAD2 ENSG00000178690|C18orf26 ENSG00000179833|SERTAD2 ENSG00000183308|C17orf60 ENSG00000183499|DPH3B ENSG00000186625|KATNAL1  
ENSG00000197053|FAM74A4 ENSG00000204841|FAM74A2 ENSG00000204844|FAM74A3  
ATCCGCA ENSG00000008438|PGLYRP1 ENSG00000037280|FLT4 ENSG00000084734|GCKR ENSG00000090932|DLL3 ENSG00000101438|SLC32A1 ENSG00000104818|CGB2 ENSG00000104826|LHB ENSG00000106565|TMEM176B  
ENSG00000117834|SLC5A9 ENSG00000128254|C22orf24 ENSG00000129195|FAM64A ENSG00000133063|CHIT1 ENSG00000141098|DUOX2 ENSG00000141098|FD02 ENSG00000150873|C2orf50 ENSG00000152128|TMEM163  
ENSG00000160211|G6PD ENSG00000160401|C9orf117 ENSG00000164849|GPR146 ENSG00000166033|HTRAI1 ENSG00000166507|NDST2 ENSG00000170122|FOXDL1 ENSG00000175518|UBQLNL ENSG00000176424|NP\_001013742.1  
ENSG00000177340|QOVFX0\_HUMAN ENSG00000181763|APR2\_HUMAN ENSG00000187013|C17orf82 ENSG00000204748|CGB1 ENSG00000208277|ADAM22 ENSG00000216402|IL20RA ENSG00000215415|AMY1A ENSG00000279691|LRRC16  
ENSG00000109339|MAPK10 ENSG00000114030|KPN1A1 ENSG00000116991|SIPAL12 ENSG00000118513|MYB ENSG00000132464|ENAM ENSG00000134086|VHL ENSG00000134249|ADAM30 ENSG00000134255|CEPT1  
ENSG00000139977|NAT12 ENSG00000156395|SORCS3 ENSG00000164430|C6orf150 ENSG00000168967|PMCHL1 ENSG00000173124|C10orf129 ENSG00000174876|AMY1B ENSG00000178184|PARD6G ENSG00000179029|TMEM107  
ENSG00000179300|ZCCHC5 ENSG00000180573|HIST1H2AC ENSG00000182090|C14orf25 ENSG00000182670|TTC3 ENSG00000183671|GPR1 ENSG00000183747|ACSM2 ENSG00000189043|NDUFA4 ENSG00000204480|PRAMEF19  
ENSG00000204491|PRAMEF18  
ATCCGCT ENSG00000008838|HTRAP4 ENSG00000023191|RNH1 ENSG00000033011|ALG1 ENSG00000073009|IKBKG ENSG00000085117|CD82 ENSG00000099622|CIRBP ENSG00000100577|GSTZ1 ENSG00000100938|NM\_001002000.1  
ENSG00000104522|TSTA3 ENSG00000105726|ATP13A1 ENSG00000107140|TESK1 ENSG00000116147|TNR ENSG00000121413|ZSCAN18 ENSG00000125872|C20orf75 ENSG00000130592|LSP1 ENSG00000143382|ADAMTSL4  
ENSG00000154768|C17orf50 ENSG00000164620|C5orf16 ENSG00000174166|Q9BTX9\_HUMAN ENSG00000180549|FUT7 ENSG00000180818|HOXC10 ENSG00000182378|PLCXD1 ENSG00000183888|C1orf64 ENSG00000184113|CLDN5  
ENSG00000204117|Q6ZV8\_HUMAN ENSG00000031003|C5orf5 ENSG000000409249|TNFRSF9 ENSG00000074266|EED ENSG00000100505|TRIM9 ENSG00000106819|ASP1 ENSG00000122778|Q9HGM3\_HUMAN ENSG00000125851|PCSK2  
ENSG00000129235|TXNL5 ENSG00000141458|NPC1 ENSG00000141644|MBD1 ENSG00000144554|FANCD2 ENSG00000148516|ZEB1 ENSG00000153046|CDYL ENSG00000154655|L3MBTL4 ENSG00000156304|SFRS15  
ENSG00000165660|KIAA0157 ENSG00000169564|PCBP1 ENSG00000172955|ADH6 ENSG00000173473|SMARCC1 ENSG00000178184|PARD6G ENSG00000181631|P2RY13 ENSG00000183496|RKHD3 ENSG00000185020|Q4VXF0\_HUMAN  
ENSG00000185149|NPFY2R ENSG00000196885|Q9HAZ8\_HUMAN ENSG00000197926|Q8NAI6\_HUMAN ENSG00000198526|PABPCP2  
ATCCGTC ENSG00000007312|CD79B ENSG00000090971|NAT14 ENSG00000100412|ACO2 ENSG00000105202|FBL ENSG00000105698|USF2 ENSG00000132768|DPH2 ENSG00000138780|GSTCD  
ENSG00000139546|TARB2 ENSG00000142290|FXDY7 ENSG00000149090|NP\_001001991.1 ENSG00000157613|CREB3L1 ENSG00000165462|PHOX2A ENSG00000166169|POLL ENSG00000168274|HIST1H2AE ENSG00000169098|CXorf2  
ENSG00000169635|HTC2 ENSG00000172828|CES3 ENSG00000176078|Q8NAN4\_HUMAN ENSG00000179921|GPBAR1 ENSG00000185352|HS6ST3 ENSG00000188677|PARVB ENSG00000196139|AKR1C3  
ENSG00000197019|SERTAD1 ENSG00000198293|Q96HM8\_HUMAN ENSG00000205087|NP\_001020628.1 ENSG0000033030|ZCCHC8 ENSG0000076067|RBMS2 ENSG00000104388|RAB2A ENSG00000109046|WSB1 ENSG00000112343|TRIM38  
ENSG00000115053|NCL ENSG00000122339|C6orf35 ENSG00000125246|CLYBL ENSG00000131781|PMO5 ENSG00000138356|AOX1 ENSG00000139508|SLC46A3 ENSG00000143155|TIPRL ENSG00000147655|RSPO2  
ENSG00000152229|PSTPIP2 ENSG00000154710|KCTD7 ENSG00000157470|FAM81A ENSG00000158270|COLEC12 ENSG00000163697|APBB2 ENSG00000167081|PXB3 ENSG00000171476|HOP\_HUMAN ENSG00000173556|LONRF3  
ENSG00000176563|CNTD1 ENSG00000189067|LITAF ENSG00000205524|Q68D70\_HUMAN  
ATCCATA ENSG000000087152|ATXN7L3 ENSG00000087237|CETP ENSG00000126267|COX6B1 ENSG00000129437|CLK14 ENSG00000130985|UBE1 ENSG00000133661|SFTPD ENSG00000160683|BLR1 ENSG00000160916|ATP5J2  
ENSG00000168894|NP\_057578.1 ENSG00000172116|C8orf69 ENSG00000184990|SIVA1 ENSG00000186198|NP\_849190.1 ENSG00000189069|NP\_001013732.1 ENSG00000198668|CALM1 ENSG00000204175|GPRIN2  
ENSG00000080493|SLC4A4 ENSG00000101310|SEC23B ENSG00000112667|C6orf108 ENSG00000113088|GZMK ENSG00000117226|GBP3 ENSG00000121690|DEPDC7 ENSG00000127955|GNAI1 ENSG00000131482|G6PC  
ENSG00000133962|C14orf161 ENSG00000136206|WBCSCR19 ENSG00000141642|ELAC1 ENSG00000156172|C8orf37 ENSG00000157578|C21orf13 ENSG00000166157|TPE ENSG00000167601|AXL ENSG00000169031|COL4A3  
ENSG00000169967|MAP3K2 ENSG00000172954|LYCAT ENSG00000176971|NP\_976249.1 ENSG00000180479|ZNF571 ENSG00000186001|LRCH3 ENSG00000198625|MDM4 ENSG00000204757|Q6ZTL5\_HUMAN ENSG00000205508|NP\_001018856.1  
ATCGAAA ENSG00000101187|SLC04A1 ENSG00000101440|ASIP ENSG00000119227|PIGZ ENSG00000121454|LHX4 ENSG00000125843|C20orf29 ENSG00000131043|C20orf4 ENSG00000140254|DUOX1A1 ENSG00000143761|ARF1  
ENSG00000145526|CDH18 ENSG00000152217|SETBP1 ENSG00000153179|RASSF3 ENSG00000153266|FEZ2 ENSG00000154783|FGD5 ENSG00000159348|CYB5R1 ENSG00000163064|EN1 ENSG00000163081|NP\_694583.1  
ENSG00000166448|TMEM130 ENSG00000173253|DMRT2 ENSG00000178932|Q8N811\_HUMAN ENSG00000180340|FZD2 ENSG00000183600|Q66K37\_HUMAN ENSG00000183707|Q96AT3\_HUMAN ENSG00000185896|LAMP1 ENSG00000196422|KIAA0649  
ENSG00000197408|CYP2B6 ENSG00000197615|C8orf49 ENSG00000198012|XR\_017841.1 ENSG00000204499|Q6P6C6\_HUMAN ENSG00000205771|CATSPER2P1 ENSG00000208277|ADAM22 ENSG00000264218|DMRT3 ENSG00000268793|CYFP1  
ENSG00000090402|SI ENSG00000106540|C7orf36 ENSG00000108187|PBLD ENSG00000115514|TXNDC9 ENSG00000119139|TJP2 ENSG00000120656|TAF12 ENSG00000121542|SEC22A ENSG00000131023|LATS1  
ENSG00000137804|NUSAP1 ENSG00000139344|AMDHD1 ENSG00000145868|FBXO38 ENSG00000147606|SLC26A7 ENSG00000147873|IFNA5 ENSG00000152154|TMEM178 ENSG00000156232|WHDC1 ENSG00000162702|ZNF281  
ENSG00000164093|PITX2 ENSG00000164442|CITED2 ENSG00000171402|XAGE3 ENSG00000174482|LINGO2 ENSG00000177689|MAGEB10 ENSG00000184344|GDF3 ENSG00000197522|SUZ12P ENSG00000198162|MAN1A2  
ATCGAAC ENSG00000099622|CIRBP ENSG00000108753|TCF2 ENSG00000111412|C12orf49 ENSG00000117394|SLC2A1 ENSG00000125741|OPA3 ENSG00000125872|C20orf75 ENSG00000126368|NR1D1 ENSG00000130827|PLXNA3  
ENSG00000132840|BHMT2 ENSG00000137204|SLC22A7 ENSG00000157884|NP\_001025052.1 ENSG00000166619|BLCAP ENSG00000167600|CYP251 ENSG00000169856|ONECUT1 ENSG00000172081|MOBK12A ENSG00000173281|PPP1R3B  
ENSG00000175873|Q9H7M1\_HUMAN ENSG00000181035|SLC25A4 ENSG00000206028|Q6ZVA3\_HUMAN ENSG00000206150|RNAE13 ENSG00000206163|CYP51A1 ENSG00000254598|FOXC1 ENSG00000271909|MYO3B ENSG00000273905|VDAC1  
ENSG00000096696|DSP ENSG00000099940|SNAP29 ENSG00000105851|PIK3CG ENSG00000110871|COQ5 ENSG00000112183|RBM24 ENSG00000112214|PHL5 ENSG00000123612|ACVR1C ENSG00000123908|EIF2C2  
ENSG00000135604|STX11 ENSG00000137975|CLCA2 ENSG00000138041|SMEK2 ENSG00000140945|CDH13 ENSG00000143437|ARNT ENSG00000155629|PIK3AP1 ENSG00000162407|PPAP2B ENSG00000163697|APBB2  
ENSG00000169550|MUC15 ENSG00000179933|C14orf119 ENSG00000185275|CD24 ENSG00000198538|ZNF28 ENSG00000198814|GK ENSG00000205524|Q68D70\_HUMAN  
ATCGACA ENSG00000065000|AP3D1 ENSG00000088992|TESC ENSG00000102050|PRAF2 ENSG00000106608|NP\_060390.3 ENSG00000113272|THG1L ENSG00000114737|CISH ENSG00000127098|ANKRD19 ENSG00000134240|HMGS2  
ENSG00000155034|FBXL18 ENSG00000156603|MED19 ENSG00000159761|NM\_001012984.2 ENSG00000160539|PPAPDC3 ENSG00000161671|NP\_996261.1 ENSG00000162975|KCNF1 ENSG00000166961|NP\_689930.1 ENSG00000168334|CMYA1  
ENSG00000175892|Q8NAT4\_HUMAN ENSG00000180595|Q8N8C9\_HUMAN ENSG00000182205|Q6ZU0\_HUMAN ENSG00000184108|TRMLL1 ENSG00000185739|SRL ENSG00000189182|KRT77 ENSG00000196588|MKL1\_HUMAN ENSG00000254803|CBLN4  
ENSG00000081803|CADPS2 ENSG00000089094|FBXL10 ENSG00000089916|C14orf118 ENSG00000102974|CTCF ENSG00000108848|CROP\_HUMAN ENSG00000115896|PLCL1 ENSG00000120594|PLXDC2 ENSG00000126216|TUBGCP3  
ENSG00000132855|ANGPTL3 ENSG00000133114|KIAA1704 ENSG00000133983|SYNJ2BP ENSG00000136273|HUS1\_HUMAN ENSG00000150045|KLRF1 ENSG00000154845|PPP4R1 ENSG00000157219|HTR5A ENSG00000157423|Q4GFP3-5  
ENSG00000159445|THEM4 ENSG00000163646|CLRN1 ENSG00000165685|C12orf59 ENSG00000166342|NETO1 ENSG00000168958|C2orf33 ENSG00000182986|NP\_997216.2 ENSG00000185304|NP\_001071638.1 ENSG00000187627|RGPD1  
ENSG00000197085|Q6EKK1\_HUMAN ENSG00000205189|ZBTB10  
ATCGAGA ENSG000000070182|SPTB ENSG00000100239|SAPS2 ENSG00000103942|HOMER2 ENSG00000108244|KRT23 ENSG00000116580|GON4L ENSG00000124785|NRN1 ENSG00000138303|ASCC1 ENSG00000140943|MBTPS1  
ENSG00000152128|TMEM163 ENSG00000158887|MPZ ENSG00000166024|C10orf28 ENSG00000169314|C22orf15 ENSG00000169814|BTD ENSG00000171916|NP\_001035167.2 ENSG00000174680|C21orf9 ENSG00000175892|Q8NAT4\_HUMAN  
ENSG00000184545|DUSP8 ENSG00000185739|SRL ENSG00000188976|NOC2L ENSG00000203814|HIST2H2BF ENSG00000271991|CDH19 ENSG00000107863|ARHGAP21 ENSG00000110079|MS4A4A ENSG00000113205|PCDHB3  
ENSG00000115239|ASB1 ENSG00000121988|ZRANB3 ENSG00000128694|OSCEPL1 ENSG00000133115|STOML3 ENSG00000138075|ABC5 ENSG00000151247|EIF4E ENSG00000151846|PABPC3 ENSG00000161010|NP\_001017987.1

|                     |                              |                                |                                |                              |                              |                                |                                |                              |                       |
|---------------------|------------------------------|--------------------------------|--------------------------------|------------------------------|------------------------------|--------------------------------|--------------------------------|------------------------------|-----------------------|
| ENSG00000161647 MP3 | ENSG00000181449 SOX2         | ENSG00000182952 HMGN4          | ENSG00000183831 ANKRD45        | ENSG00000185418 TARSL2       | ENSG00000187871 GFRAL        | ENSG00000196214 ZNF766         | ENSG00000197140 ADAM32         |                              |                       |
| ATCGATG             | ENSG00000011451 WIZ          | ENSG00000067596 DHX8           | ENSG00000089280 FUS            | ENSG00000099622 CIRBP        | ENSG00000111684 MBOAT5       | ENSG00000121104 FAM117A        | ENSG00000138623 SEMA7A         | ENSG00000147382 FAM58A       |                       |
|                     | ENSG00000160271 RALGDS       | ENSG00000160539 PPAPDC3        | ENSG00000160917 CPSF4          | ENSG00000166526 ZNF3         | ENSG00000169026 MFSB7        | ENSG00000172232 AZU1           | ENSG00000182108 MYLE_HUMAN     | ENSG00000182205 Q6ZUT0_HUMAN |                       |
|                     | ENSG00000182240 BACE2        | ENSG00000006704 GTF2IRD1       | ENSG00000059573 ALDH18A1       | ENSG00000076067 RBMS2        | ENSG00000104722 NEFM         | ENSG00000112280 COL9A1         | ENSG00000114423 CBLB           | ENSG00000116120 FARSB        |                       |
|                     | ENSG00000119711 ALDH6A1      | ENSG00000120370 SCYL1BP1       | ENSG00000123240 OPTN           | ENSG00000127249 ATP13A4      | ENSG00000133627 ACTR3B       | ENSG00000136531 SCN2A          | ENSG00000138463 DIRC2          | ENSG00000138496 PARP9        |                       |
|                     | ENSG00000138592 USP8         | ENSG00000142192 APP            | ENSG00000143153 ATP1B1         | ENSG00000144668 ITGA9        | ENSG00000166173 LARP6        | ENSG00000167216 KATNAL2        | ENSG00000168502 KIAA0802       | ENSG00000169245 CXCL10       |                       |
|                     | ENSG00000169359 SLC33A1      | ENSG00000173013 CCDC96         | ENSG00000173464 RNASE11        | ENSG00000198841 KTI12        | ENSG00000204398 Q5T400_HUMAN |                                |                                |                              |                       |
| ATCGATT             | ENSG00000022556 NLRP2        | ENSG00000054118 THRAP3         | ENSG00000081059 TCF7           | ENSG00000099985 OSM          | ENSG00000101407 KIAA0406     | ENSG00000124194 GDAP1L1        | ENSG00000126856 Q9NQW5-2       | ENSG00000127412 TRPV5        |                       |
|                     | ENSG00000130433 CACNG6       | ENSG00000131943 C19orf12       | ENSG00000138347 MYFN           | ENSG00000149792 MRPL49       | ENSG00000150455 TIRAP        | ENSG00000167178 ISLR2          | ENSG00000167244 IGF2           | ENSG00000167642 SPINT2       |                       |
|                     | ENSG00000170653 ATF7         | ENSG00000177303 CASKIN2        | ENSG00000179178 TMEM125        | ENSG00000182841 Q9NS00_HUMAN | ENSG00000186431 FCAR         | ENSG00000198012 XR_017841.1    | ENSG00000203971 Q6ZRT1_HUMAN   | ENSG00000204957 Q6ZVQ6_HUMAN |                       |
|                     | ENSG00000205664 Q6PJD4_HUMAN | ENSG00000049247 UTS2           | ENSG00000065883 CDC2L5         | ENSG00000075089 ACTR6        | ENSG00000101138 CSTF1        | ENSG00000120251 GRIA2          | ENSG00000121350 NP_079130.2    | ENSG00000137210 TMEM14B      |                       |
|                     | ENSG00000150630 VEGFC        | ENSG00000154429 C1orf96        | ENSG00000155330 NP_001001436.1 | ENSG00000156795 C8orf32      | ENSG00000162869 CCDC128      | ENSG00000165672 PRDX3          | ENSG00000166477 LEO1           | ENSG00000166529 ZSCAN21      |                       |
|                     | ENSG00000174226 NP_689841.2  | ENSG00000178397 NP_001032240.1 | ENSG00000183067 IGSF5          | ENSG00000183990 Q8WZA8_HUMAN | ENSG00000198012 XR_017841.1  | ENSG00000198012 XR_017841.1    | ENSG00000198012 XR_017841.1    | ENSG00000198012 XR_017841.1  |                       |
|                     | ENSG00000198824 C13orf8      | ENSG00000198838 RYR3           |                                |                              |                              |                                |                                |                              |                       |
| ATCGCAC             | ENSG000000007171 NOS2A       | ENSG00000049883 PTCD2          | ENSG00000027864 NDE1           | ENSG00000100243 CYB5R3       | ENSG00000104953 TLE6         | ENSG00000108774 RAB5C          | ENSG00000110442 COMMD9         | ENSG00000113196 HAND1        |                       |
|                     | ENSG00000113732 ATP6V0E1     | ENSG00000125166 GOT2           | ENSG00000125505 LENG4          | ENSG00000130177 CDC13        | ENSG00000142549 LOC402665    | ENSG00000142661 MYOM3          | ENSG00000143761 ARF1           | ENSG00000145861 CIQTNF2      |                       |
|                     | ENSG00000151650 VENTX        | ENSG00000161692 DBF4B          | ENSG00000164935 TM7SF4         | ENSG00000166979 C21orf63     | ENSG00000171298 GAA          | ENSG00000175538 KCNE3          | ENSG00000178241 Q9P0D4_HUMAN   | ENSG00000181250 MYADML       |                       |
|                     | ENSG00000185262 FAM100B      | ENSG00000187513 GJA4           | ENSG00000197451 HNRPAB         | ENSG00000198910 LLCAM        | ENSG00000205927 OLTG2        | ENSG00000041515 MYO16          | ENSG00000048544 MRPS10         | ENSG00000083844 ZNF264       |                       |
|                     | ENSG00000085721 RRN3         | ENSG00000106034 NP_079189.3    | ENSG00000114416 FXR1           | ENSG00000123636 BAZ2B        | ENSG00000126858 RHOT1        | ENSG00000129521 EGLN3          | ENSG00000135452 TSPAN31        | ENSG00000135549 PKIB         |                       |
|                     | ENSG00000139352 ASCL1        | ENSG00000145675 PIK3R1         | ENSG00000146001 PCDHB18        | ENSG00000151690 NP_060164.3  | ENSG00000157510 AFAP1L1      | ENSG00000159200 DSCR1          | ENSG00000163162 RNF149         | ENSG00000165521 EML5         |                       |
|                     | ENSG00000170629 NP_872440.2  | ENSG00000171988 JMJDC1         | ENSG00000173334 TRIB1          | ENSG00000178184 PARD6G       | ENSG00000183305 LHFP         | ENSG00000205325 NP_001001684.1 |                                |                              |                       |
| ATCGCCA             | ENSG00000073605 GSDML        | ENSG00000088727 KIF9           | ENSG00000100156 SLC16A8        | ENSG00000105668 UPK1A        | ENSG00000105717 PBX4         | ENSG00000124074 C16orf48       | ENSG00000137731 FXD2           | ENSG00000155660 PDIA4        |                       |
|                     | ENSG00000159069 FBXW5        | ENSG00000166998 CKMT1A         | ENSG00000168487 BMP1           | ENSG00000168775 KCRU_HUMAN   | ENSG00000169189 NSMCE1       | ENSG00000169418 NPR1           | ENSG00000171861 RNMTL1         | ENSG00000172345 STARD5       |                       |
|                     | ENSG00000174938 SEZ6L2       | ENSG00000178307 TMEM11         | ENSG00000179168 GGN            | ENSG00000197548 ATG7         | ENSG00000204117 Q6ZV8_HUMAN  | ENSG00000205414 Q6ZV8_HUMAN    | ENSG00000005810 MYCBP2         | ENSG00000014919 COX15        |                       |
|                     | ENSG00000064652 SNX24        | ENSG00000101911 PRPS2          | ENSG00000114416 FXR1           | ENSG00000128294 TPST2        | ENSG00000129515 SNX6         | ENSG00000131951 LRRC9          | ENSG00000139352 ASCL1          | ENSG00000149124 GLYAT        |                       |
|                     | ENSG00000152193 C13orf7      | ENSG00000163359 COL6A3         | ENSG00000165527 ARF6           | ENSG00000165704 HPR1         | ENSG00000167765 Q9GNP5_HUMAN | ENSG00000167912 Q9QE0_HUMAN    | ENSG00000176623 FAM82B         | ENSG00000177324 CXorf20      |                       |
|                     | ENSG00000182287 AP1S2        | ENSG00000182747 SLC35D3        | ENSG00000184992 BRI3BP         | ENSG00000196730 DAPK1        | ENSG00000196735 HLA-DQA1     |                                |                                |                              |                       |
| ATCGCGT             | ENSG00000101438 SLC32A1      | ENSG00000101470 TNNC2          | ENSG00000105738 STPAIL3        | ENSG00000105997 HOXA3        | ENSG00000108786 HSD17B1      | ENSG00000112562 SMOC2          | ENSG00000114770 ABCC5          | ENSG00000124140 SLC12A5      |                       |
|                     | ENSG00000131196 NFATC3       | ENSG00000135898 GPR55          | ENSG00000160087 UBE2J2         | ENSG00000166473 PKDL12       | ENSG00000170616 SCRT1        | ENSG00000178159 Q8N8A0_HUMAN   | ENSG00000189410 SH2D5          | ENSG00000196810 NP_443093.2  |                       |
|                     | ENSG00000197421 NR_003267.1  | ENSG00000198407 Q8NCZ5_HUMAN   | ENSG00000205485 Q6DCA4_HUMAN   |                              | ENSG00000112902 SEMA5A       | ENSG00000113369 ARRDC3         | ENSG00000114529 C3orf52        | ENSG00000137273 FOXF2        | ENSG00000169504 CLIC4 |
|                     | ENSG00000171488 LRRC8C       | ENSG00000198168 SVIP_HUMAN     |                                |                              |                              |                                |                                |                              |                       |
| ATCGCTA             | ENSG00000076864 RAP1GAP      | ENSG00000099954 CECR2          | ENSG00000102755 FLT1           | ENSG00000115297 TLX2         | ENSG00000127412 TRPV5        | ENSG00000127838 PNKD           | ENSG00000130956 HABP4          | ENSG00000131148 COX4NB       |                       |
|                     | ENSG00000134864 Q9BVM4_HUMAN | ENSG00000143940 Q6ZMW3_HUMAN   | ENSG00000162430 SEPN1          | ENSG00000166199 ALKBH3       | ENSG00000166997 NP_689968.1  | ENSG00000169122 FAM110B        | ENSG00000170545 NM_001031628.1 | ENSG00000171388 APLN         |                       |
|                     | ENSG00000171903 CYP4F11      | ENSG00000172183 ISG20          | ENSG00000180806 HOXC9          | ENSG00000181350 C17orf76     | ENSG00000185739 SRL          | ENSG00000188305 C19orf35       | ENSG00000197565 COL4A6         | ENSG00000197573 NP_001278.1  |                       |
|                     | ENSG00000197586 ENTPD6       | ENSG00000198198 KIAA0467       | ENSG00000204301 NOTCH4         | ENSG00000206561 COLQ         | ENSG00000078081 LAMP3        | ENSG00000109118 PHF12          | ENSG00000110429 FBXO3          | ENSG00000111981 ULBP1        |                       |
|                     | ENSG00000113360 RNASEN       | ENSG00000116977 LGALS8         | ENSG00000122674 C7orf28A       | ENSG00000126216 TUBGCP3      | ENSG00000130638 ATXN10       | ENSG00000134375 TMM17A         | ENSG00000135070 ISCA1          | ENSG00000138821 SLC39A8      |                       |
|                     | ENSG00000144642 RNAS3        | ENSG00000145284 SCD5           | ENSG00000146574 C7orf28B       | ENSG00000147180 ZNF711       | ENSG00000155816 FMN2         | ENSG00000155962 CLIC2          | ENSG00000161533 ACOX1          | ENSG00000164985 PSIP1        |                       |
|                     | ENSG00000165118 C9orf64      | ENSG00000167910 CYP7A1         | ENSG00000176171 BNIP3          | ENSG00000180332 KCTD4        | ENSG00000182004 SNRPE        | ENSG00000183813 CCR4           | ENSG00000183878 UTY            | ENSG00000197756 RPL37A       |                       |
|                     |                              |                                |                                |                              |                              |                                |                                |                              |                       |
| ATCGGAC             | ENSG00000006607 FARP2        | ENSG00000034510 TMSB10         | ENSG00000037280 FLT4           | ENSG00000040608 RTN4R        | ENSG00000044012 GUCA2B       | ENSG00000063854 HAGH           | ENSG00000069188 SDK2           | ENSG00000110442 COMMD9       |                       |
|                     | ENSG00000120332 TNN          | ENSG00000124785 NRN1           | ENSG00000125861 GFRAL          | ENSG00000128652 HOXD3        | ENSG00000131591 C1orf159     | ENSG00000137310 TCF19          | ENSG00000158292 GPR153         | ENSG00000161955 TNFSF13      |                       |
|                     | ENSG00000164318 EGFLAM       | ENSG00000169218 RSP01          | ENSG00000172775 NIP30_HUMAN    | ENSG00000178248 Q8N402_HUMAN | ENSG00000179526 SHARPIN      | ENSG00000184601 NP_001008404.1 | ENSG00000185361 TNFAIP8L1      | ENSG00000188883 KLRG2        |                       |
|                     | ENSG00000196331 H1ST1H2B0    | ENSG00000197912 SPG7           | ENSG00000205664 Q6PJD4_HUMAN   | ENSG00000070718 AP3M2        | ENSG00000099250 NRP1         | ENSG00000140262 TCF12          | ENSG00000143179 UCK2           | ENSG00000146587 RBAK         |                       |
|                     | ENSG00000121380 BCL2L14      | ENSG00000125675 GRIA3          | ENSG00000128294 TPST2          | ENSG00000129515 SNX6         | ENSG00000164424 TMEM144      | ENSG00000164741 DLCL1          | ENSG00000164975 SNAPC3         | ENSG00000171132 PRKCE        |                       |
|                     | ENSG00000148688 RPP30        | ENSG00000155100 OTUD6B         | ENSG00000159200 DSCR1          |                              |                              |                                |                                |                              |                       |
|                     | ENSG00000172059 KLF11        | ENSG00000184254 ALDH1A3        | ENSG00000187268 FAM9C          |                              |                              |                                |                                |                              |                       |
| ATCGGAT             | ENSG00000006075 CCL3         | ENSG00000104974 LILRA1         | ENSG00000108821 COL1A1         | ENSG00000128973 CLN6         | ENSG00000140939 NOL3         | ENSG00000141485 SLC13A5        | ENSG00000158747 NBL1           | ENSG00000161202 DVL3         |                       |
|                     | ENSG00000161929 NP_996986.1  | ENSG00000164535 DAGLB          | ENSG00000170430 MGMT           | ENSG00000171603 CLSTN1       | ENSG00000177045 SIX5         | ENSG00000181977 PYY2           | ENSG00000189196 Q6ZUD9_HUMAN   | ENSG00000198929 NOS1AP       |                       |
|                     | ENSG00000204332 Q6ZU25_HUMAN | ENSG00000204620 Q6ZPC8_HUMAN   | ENSG00000205485 Q6DCA4_HUMAN   | ENSG00000205592 MUC19        | ENSG00000048828 FAM120A      | ENSG00000086289 EPDR1          | ENSG00000107863 ARHGAP21       | ENSG00000109674 NEIL3        |                       |
|                     | ENSG00000111783 RFK4         | ENSG00000112378 PERP           | ENSG00000121797 CRL2           | ENSG00000132669 RIN2         | ENSG00000136273 HUS1_HUMAN   | ENSG00000136634 IL10           | ENSG00000139116 KIF21A         | ENSG00000141668 CBLN2        |                       |
|                     | ENSG00000153132 CLGN         | ENSG00000154001 PPP2R5E        | ENSG00000168955 TM4SF20        | ENSG00000175029 CTBP2        | ENSG00000176148 TCP1L1       | ENSG00000188463 XR_015229.1    | ENSG00000189266 PNRC2          | ENSG00000196937 FAM3C        |                       |
|                     | ENSG00000198945 L3MBTL3      |                                |                                |                              |                              |                                |                                |                              |                       |
| ATCGGGA             | ENSG00000022567 SLC45A4      | ENSG00000087087 ARS2_HUMAN     | ENSG00000087269 NOL14          | ENSG00000092096 SLC22A17     | ENSG00000099365 STX1B2       | ENSG00000135083 CCNJL          | ENSG00000135248 NP_115988.1    | ENSG00000135722 FBXL8        |                       |
|                     | ENSG00000136856 SLC2A8       | ENSG00000137413 TBN            | ENSG00000140400 MAN2C1         | ENSG00000143436 MRP19        | ENSG00000164535 DAGLB        | ENSG00000166484 MAPK7          | ENSG00000167123 CEECAM1        | ENSG00000167513 CDT1         |                       |
|                     | ENSG00000169899 Q96MA9_HUMAN | ENSG00000175711 B3GNTL1        | ENSG00000181368 NM_032947.3    | ENSG00000183643 C15orf32     | ENSG00000185298 Q6PK04_HUMAN | ENSG00000187730 GABRD          | ENSG00000188690 UROS           | ENSG00000189429 RNF207       |                       |
|                     | ENSG00000198013 PNMA6A       | ENSG00000203902 PNMA6B         | ENSG00000204222 B3GALT4        | ENSG00000204392 LSM2         | ENSG00000205335 GLYCAM1      | ENSG0000002746 HECW1           | ENSG00000005483 MLL5           | ENSG00000066651 TRMT11       |                       |
|                     | ENSG00000072274 TFRC         | ENSG00000074935 TUBE1          | ENSG00000101040 ZMYND8         | ENSG00000111785 RICB8        | ENSG00000117724 CENPF        | ENSG00000120549 KIAA1217       | ENSG00000127774 TMEM93         | ENSG00000129566 TEP1         |                       |
|                     | ENSG00000130021 HFDH1A       | ENSG00000131873 CHSY1          | ENSG00000143995 MEIS1          | ENSG00000153802 TMPRSS1D     | ENSG00000154001 PPP2R5E      | ENSG00000154144 TBGR1          | ENSG00000162992 NEUROD1        | ENSG00000170561 IRX2         |                       |
|                     | ENSG00000179136 Q9NAV9_HUMAN | ENSG00000185760 KCNQ5          | ENSG00000186047 DLEU7          | ENSG00000188542 DUSP28       | ENSG00000205112 Q6UXR9_HUMAN |                                |                                |                              |                       |
|                     | ENSG00000101318 PHF7         | ENSG00000077782 FGFR1          | ENSG00000099956 SMARCB1        | ENSG00000105618 PRPF31       | ENSG00000126583 PRKCG        | ENSG00000129816 NP_001538.1    | ENSG00000129845 O14605_HUMAN   | ENSG00000130940 CASZ1        |                       |
|                     | ENSG00000131018 C6orf98      | ENSG00000133105 RXFP2          | ENSG00000134595 SOX3           | ENSG00000148985 NP_055304.1  | ENSG00000151498 ACAD8        | ENSG00000155052 CNTNAP5        | ENSG00000156097 GPR61          | ENSG00000162373 C1orf165     |                       |
|                     | ENSG00000162711 NLRP3        | ENSG00000166446 CDYL2          | ENSG00000166828 SCNN1G         | ENSG00000170549 IRX1         | ENSG00000179862 CITED4       | ENSG00000180767 CHST13         | ENSG00000180846 C19orf34       | ENSG00000181513 ACBD4        |                       |
|                     | ENSG00000181713 Q9NAF7_HUMAN | ENSG00000184207 NP_001035830.1 | ENSG00000196576 PLKXNB2        | ENSG00000197157 SND1         | ENSG00000197653 DNAH10       | ENSG00000204197 KIFC1          | ENSG00000205191 NP_001070148.1 | ENSG00000035681 NSMAF        |                       |
|                     | ENSG00000077809 GTF2I        | ENSG00000101084 C20orf24       | ENSG00000107077 JMJD2C         | ENSG00000120616 EPC1         | ENSG00000125845 BMP2         | ENSG00000136868 SLC31A1        | ENSG00000136872 ALDOB          | ENSG00000151962 NP_659416.1  |                       |
|                     | ENSG00000153292 GPR110       | ENSG00000174326 SLC16A11       | ENSG00000176542 KIAA2018       | ENSG00000178295 NP_872431.2  | ENSG00000183722 LHFP         | ENSG00000184895 SRY            | ENSG00000185247 MAGEA11        | ENSG00000187626 ZKSCAN4      |                       |
|                     | ENSG00000204426 LOC286238    |                                |                                |                              |                              |                                |                                |                              |                       |
| ATCTAAA             | ENSG00000103061 SLC7A6OS     | ENSG00000104081 BMF            | ENSG00000110395 CBL            | ENSG00000111331 OAS3         | ENSG00000113739 STC2         | ENSG00000116198 KIAA0562       | ENSG00000120853 GOLGA2L1       | ENSG00000124641 TRFP         |                       |
|                     | ENSG00000125388 GRK4         | ENSG00000141570 CBX8           | ENSG00000158161 EYA3           | ENSG00000165006 UBAP1        | ENSG00000166104 NP_776166.1  | ENSG00000166167 BTRC           | ENSG00000166947 EPB42          | ENSG00000167094 TTC16        |                       |
|                     | ENSG00000176595 KBTBD11      | ENSG00000176887 SOX11          | ENSG00000182584 C20orf134      | ENSG00000183495              |                              |                                |                                |                              |                       |

|         |                              |                              |                              |                                |                                |                              |                                |                                |
|---------|------------------------------|------------------------------|------------------------------|--------------------------------|--------------------------------|------------------------------|--------------------------------|--------------------------------|
| ATCTGAC | ENSG00000189056 RELN         | ENSG00000196360 NR_002168.1  | ENSG00000198121 EDG2         | ENSG000001125740 FOSB          | ENSG00000129816 NR_001538.1    | ENSG00000129845 O14605_HUMAN | ENSG00000141150 RASL10B        | ENSG00000163331 NP_001017920.1 |
|         | ENSG0000011177 INMT          | ENSG00000102898 NUTF2        | ENSG00000111252 SH2B3        | ENSG00000177156 TALDO1         | ENSG00000179335 CLK3           | ENSG00000182968 SOX1         | ENSG00000184507 NP_786883.1    | ENSG00000198437 Q8N0T2_HUMAN   |
|         | ENSG00000165714 LOH12CR1     | ENSG00000169241 RAG1AP1      | ENSG00000172458 IL17D        | ENSG00000177156 TALDO1         | ENSG00000179335 CLK3           | ENSG00000182968 SOX1         | ENSG00000184507 NP_786883.1    | ENSG00000198437 Q8N0T2_HUMAN   |
|         | ENSG00000205214 Q6ZU66_HUMAN | ENSG00000049130 KITLG        | ENSG00000066279 ASPM         | ENSG00000081842 PCDH10         | ENSG00000104369 JPH1           | ENSG00000108953 YWHAE        | ENSG00000109133 TMEM33         | ENSG00000118663 C6orf105       |
|         | ENSG00000118113 MMP8         | ENSG00000131381 ZYFYVE20     | ENSG00000132141 CCT6B        | ENSG00000132170 PPARG          | ENSG00000132718 SYT11          | ENSG00000138160 KIF11        | ENSG00000164125 C4orf18        | ENSG00000167528 ZNF641         |
|         | ENSG00000168778 C12orf38     | ENSG00000170006 TMEM154      | ENSG00000170561 IRX2         | ENSG00000170917 NUDT6          | ENSG00000174298 NP_694572.1    | ENSG00000177889 UBE2N        | ENSG00000180957 PTPNB          | ENSG00000189144 ZNF573         |
|         | ENSG00000196648 NP_937824.1  | ENSG00000197299 BLM          | ENSG00000197978 NP_937824.1  | ENSG00000198648 STK39          |                                |                              |                                |                                |
| ATCTGCA | ENSG00000100167 SEPT7        | ENSG00000106635 ECL7B        | ENSG00000111186 WNT5B        | ENSG00000122176 FMOD           | ENSG00000130787 HIP1R          | ENSG00000140650 PMM2         | ENSG00000157152 SYN2           | ENSG00000162244 RPL29          |
|         | ENSG00000163026 C2orf44      | ENSG00000167600 CYP2S1       | ENSG00000168079 SCARA5       | ENSG00000169627 BOLA2B         | ENSG00000181123 Q8N7N0_HUMAN   | ENSG00000183856 IQGAP3       | ENSG00000185744 TNT_HUMAN      | ENSG00000188843 NM_207504      |
|         | ENSG00000057294 PKP2         | ENSG00000069122 GPR116       | ENSG00000070882 OSBPL3       | ENSG00000100354 TNRC6B         | ENSG00000101138 CSTF1          | ENSG00000114416 FXR1         | ENSG00000115970 THADA          | ENSG00000121871 SLITRK3        |
|         | ENSG00000134970 TICAM2       | ENSG00000141665 FBXO15       | ENSG00000143363 PRUNE        | ENSG00000144362 KLHL23         | ENSG00000147036 LANCL3         | ENSG00000149658 YTHDF1       | ENSG00000151917 C6orf65        | ENSG00000152457 DCLRE1C        |
|         | ENSG00000163646 CLRN1        | ENSG00000165072 MAMDC2       | ENSG00000165300 SLITRK5      | ENSG00000165685 C12orf59       | ENSG00000165868 HSPA12A        | ENSG00000166752 TMEM83       | ENSG00000170647 TMEM133        | ENSG00000173334 TRIB1          |
|         | ENSG00000179021 C3orf38      | ENSG00000180346 TIGD2        | ENSG00000186160 CYP4Z1       | ENSG00000196664 TLR7           |                                |                              |                                |                                |
| ATCTGCC | ENSG0000013374 NUB1          | ENSG00000066117 SMARCD1      | ENSG00000087258 GNAO1        | ENSG00000100605 ITPK1          | ENSG00000103187 COTL1          | ENSG00000105438 KDELRL1      | ENSG00000105520 NP_073574.1    |                                |
|         | ENSG00000121764 HCRTR1       | ENSG00000132846 ZBED3        | ENSG00000149418 ST14         | ENSG00000170890 PLA2G1B        | ENSG00000175877 WSCR28         | ENSG00000178645 C10orf53     | ENSG00000181350 C17orf76       | ENSG00000181638 GLT4           |
|         | ENSG00000184923 FAM22A       | ENSG00000196220 SRGAP3       | ENSG00000197858 GPA1         | ENSG00000198225 Q5VVH2_HUMAN   | ENSG00000205771 CATSPER2P1     | ENSG00000050628 PTGER3       | ENSG00000053254 CHES1          | ENSG00000054598 FOXC1          |
|         | ENSG00000102753 KPN3         | ENSG00000108946 PRKARIA      | ENSG00000109061 MYH1         | ENSG00000111780 15E2_HUMAN     | ENSG00000112685 EXOC2          | ENSG00000117479 SLC19A2      | ENSG00000119673 ACOT2          | ENSG00000124193 SFRS6          |
|         | ENSG00000124333 SYBL1        | ENSG00000129675 ARHGEF6      | ENSG00000134077 THUMP3       | ENSG00000138386 NAB1           | ENSG00000142856 ITGB3BP        | ENSG00000143476 DTL          | ENSG00000150048 CLEC1A         | ENSG00000150681 RGS18          |
|         | ENSG00000164308 NP_071745.1  | ENSG00000164953 TMEM67       | ENSG00000170647 TMEM133      | ENSG00000170714 FAM19A5        | ENSG00000183807 C6orf189       | ENSG00000184227 ACOT1        | ENSG00000188216 Q5JST9_HUMAN   | ENSG00000196757 ZNF700         |
|         | ENSG00000198791 CNOT7        |                              |                              |                                |                                |                              |                                |                                |
| ATCTGCC | ENSG00000005001 PRSS22       | ENSG00000079435 LIPE         | ENSG00000100422 CERK         | ENSG00000104679 R3HCC1         | ENSG00000112699 GMD5           | ENSG00000115216 NRBP1        | ENSG00000121289 CCDC123        | ENSG00000138100 TRIM54         |
|         | ENSG00000139546 TARBP2       | ENSG00000141526 SLC16A3      | ENSG00000146192 FGD2         | ENSG00000146755 TRIM50         | ENSG00000147382 FAM58A         | ENSG00000157350 ST3GAL2      | ENSG00000160345 C9orf116       | ENSG00000164674 SYTL3          |
|         | ENSG00000165733 BMS1         | ENSG00000166126 AMN          | ENSG00000171425 ZNF580       | ENSG00000176058 C9orf75        | ENSG00000184516 Q8IVR1_HUMAN   | ENSG00000184922 FMNL1        | ENSG00000186594 NP_116284.2    | ENSG00000197308 NP_997306.1    |
|         | ENSG00000205881 Q6UXR8_HUMAN | ENSG00000205918 Q6A1A2_HUMAN | ENSG00000006377 DLX6         | ENSG00000102543 CDADC1         | ENSG00000104043 ATP8B4         | ENSG00000106346 USP42        | ENSG00000115392 FANCL          | ENSG00000126814 TRMT5          |
|         | ENSG00000133116 KL           | ENSG00000136810 TXN          | ENSG00000137822 GCP4_HUMAN   | ENSG00000138641 HERC3          | ENSG00000138795 LEF1           | ENSG00000141446 ESCO1        | ENSG00000148798 INA            | ENSG00000151748 SAV1           |
|         | ENSG00000157470 FAM81A       | ENSG00000158373 HIST2H2BA    | ENSG00000163828 TDGF3        | ENSG00000171055 FEZ2           | ENSG00000182308 WDR21B         | ENSG00000183780 SLC35F3      | ENSG00000185414 MRPL30         | ENSG00000196091 MYBPC1         |
|         | ENSG00000203780 FANK1        |                              |                              |                                |                                |                              |                                |                                |
| ATCTGGT | ENSG00000006831 ADIPOR2      | ENSG00000083454 P2RX5        | ENSG00000101311 C2orf42      | ENSG00000101443 WFDC2          | ENSG00000101849 TBL1X          | ENSG00000114982 NP_060461.3  | ENSG00000117016 RIMS3          | ENSG00000120664 LOC646871      |
|         | ENSG00000124102 PI3          | ENSG00000125170 DOK4         | ENSG00000131188 PRR7         | ENSG00000132446 FTHL17         | ENSG00000134684 YARS           | ENSG00000137507 LRRC32       | ENSG00000149823 C11orf2        | ENSG00000159164 SV2A           |
|         | ENSG00000162817 C1orf115     | ENSG00000165025 SYK          | ENSG00000166794 PIPB         | ENSG00000169026 MFSB7          | ENSG00000180205 WFD9           | ENSG00000196976 LAGE3        | ENSG00000197182 NM_207477      | ENSG00000197766 CFD            |
|         | ENSG00000205214 Q6ZU66_HUMAN | ENSG00000006576 PHTF2        | ENSG00000024048 UBR2         | ENSG00000065060 C6orf107       | ENSG00000082397 EPB41L3        | ENSG00000120262 C6orf97      | ENSG00000132703 APCS           | ENSG00000133116 KL             |
|         | ENSG00000134308 YWHAQ        | ENSG00000137561 TPPA         | ENSG00000147535 PPAPDC1B     | ENSG00000150459 SAP18          | ENSG00000154723 ATP5J          | ENSG00000158528 PPP1R9A      | ENSG00000162520 SYN1           | ENSG00000165169 DYNLT3         |
|         | ENSG00000165240 ATP7A        | ENSG00000183508 FAM46C       | ENSG00000184344 GDF3         | ENSG00000203778 NP_001028736.1 |                                |                              |                                |                                |
| ATCTGTA | ENSG000000003147 ICAL1       | ENSG000000095015 MAP3K1      | ENSG00000099284 H2AFY2       | ENSG00000100266 PACSIN2        | ENSG00000102547 CAB39L         | ENSG00000105732 ZNF574       | ENSG00000108387 SEPT4          | ENSG00000108671 PSMD11         |
|         | ENSG00000112941 POLS         | ENSG00000114999 TTL          | ENSG00000121281 ADCY7        | ENSG00000124731 TREM1          | ENSG00000125459 MSTO1          | ENSG00000136504 MYST2        | ENSG00000136895 GARNL3         | ENSG00000140274 DUOX2A         |
|         | ENSG00000140320 BAHD1        | ENSG00000159352 PSMD4        | ENSG00000162367 TAL1         | ENSG00000166448 TMEM130        | ENSG00000171456 ASXL1          | ENSG00000172294 Q96RM9_HUMAN | ENSG00000172342 CSPG4LYP1      | ENSG00000186825 Q580R0-2       |
|         | ENSG00000188997 KCTD21       | ENSG00000204197 KIFC1        | ENSG00000026508 CD44         | ENSG00000038002 AGA            | ENSG00000075420 FNDC3B         | ENSG00000083520 DIS3         | ENSG00000089818 NECAP1         | ENSG00000102468 HTR2A          |
|         | ENSG00000104432 IL7          | ENSG00000113851 CRBN         | ENSG00000116209 TMEM59       | ENSG00000131203 INDO           | ENSG00000131203 INDO           | ENSG00000133742 CA1          | ENSG00000135333 EPHA7          | ENSG00000137420 NOL7           |
|         | ENSG00000139969 Q9P1J0_HUMAN | ENSG00000143079 CTTNBP2NL    | ENSG00000144366 GULP1        | ENSG00000145391 SETD7          | ENSG00000149289 ZC3H12C        | ENSG00000161800 RACGAP1      | ENSG00000163960 UBXD7          | ENSG00000164761 TNFRSF11B      |
|         | ENSG00000165525 SDCCAG1      | ENSG00000166170 BAG5         | ENSG00000167785 ZNF558       | ENSG00000171150 SOCS5          | ENSG00000171634 BPTF           | ENSG00000173200 PARP15       | ENSG00000183831 ANKRD45        | ENSG00000188085 NP_997320.1    |
|         | ENSG00000198380 GFPT1        |                              |                              |                                |                                |                              |                                |                                |
| ATCTGTC | ENSG00000029534 ANK1         | ENSG000000071127 WDR1        | ENSG00000073331 ALFK1        | ENSG00000074317 SNCB           | ENSG00000081059 TCF7           | ENSG00000096088 PGC          | ENSG00000097007 ABL1           | ENSG00000100439 ABHD4          |
|         | ENSG00000107960 OBFC1        | ENSG00000116399 MRPL51       | ENSG00000120889 TNFRSF10B    | ENSG00000125995 C2orf52        | ENSG00000128510 CPA4           | ENSG00000141258 RUBTCL1      | ENSG00000162877 NP_689704.3    | ENSG00000162951 LRRMT1         |
|         | ENSG00000163157 TMOD4        | ENSG00000175315 CST6         | ENSG00000177384 Q9NT46_HUMAN | ENSG00000178015 GPR150         | ENSG00000178817 Q8N9W7_HUMAN   | ENSG00000183444 NR_002822.2  | ENSG00000188249 XR_019050.1    | ENSG00000189433 GJB4           |
|         | ENSG00000196645 Q8N9W7_HUMAN | ENSG00000205742 Q6ZTR4_HUMAN | ENSG00000067798 NAV3         | ENSG00000075142 SRI            | ENSG00000111783 RFX4           | ENSG00000114166 PCAF         | ENSG00000117595 IRF6           | ENSG00000121481 RNF2           |
|         | ENSG00000121851 POLR3GL      | ENSG00000122435 CCDC76       | ENSG00000130638 ATXN10       | ENSG00000131730 CKMT2          | ENSG00000132639 SNAP25         | ENSG00000135018 UBQLN1       | ENSG00000153233 PTPRR          | ENSG00000163947 ARHGEF3        |
| ATCTGTT | ENSG00000166337 TAF10        | ENSG00000166685 COG1         | ENSG00000172380 GNG12        | ENSG00000178965 C1orf173       | ENSG00000180660 MAB21L1        | ENSG00000197128 ZNF772       | ENSG00000197323 TRIM33         |                                |
|         | ENSG00000087245 MMP2         | ENSG00000092529 CAPN3        | ENSG00000099954 CECR2        | ENSG00000104998 IL27RA         | ENSG00000117984 CTSD           | ENSG00000118971 CND2         | ENSG00000119487 MAPKAP1        | ENSG00000124557 BTN1A1         |
|         | ENSG00000136167 LCP1         | ENSG00000136485 WDR68        | ENSG00000142082 SIRT3        | ENSG00000156858 PRR14          | ENSG00000157045 NTAN1          | ENSG00000158158 CNNM4        | ENSG00000162511 LAPTM5         | ENSG00000167323 STIM1          |
|         | ENSG00000168928 CTRB2        | ENSG00000169213 RAB3B        | ENSG00000196747 HIST1H3H     | ENSG00000197116 Q9UDD8_HUMAN   | ENSG000000007372 PAX6          | ENSG000000044524 EPHA3       | ENSG00000106278 PTPR21         | ENSG00000112029 FBXO5          |
|         | ENSG00000123119 EFCB1        | ENSG00000133059 IRPK5        | ENSG00000134248 HBX1P        | ENSG00000138182 MPHOSPH1       | ENSG00000141642 ELAC1          | ENSG00000148481 C10orf97     | ENSG00000151693 DDEF2          | ENSG00000162433 AK3L2          |
|         | ENSG00000163558 PRKC1        | ENSG00000163629 PTPN13       | ENSG00000166913 YWHAB        | ENSG00000170892 TSEN34         | ENSG00000198523 PLN            | ENSG00000203864 C1orf137     |                                |                                |
| ATCTTGC | ENSG0000013588 GPRC5A        | ENSG00000088833 NSFL1C       | ENSG00000101337 TM9SF4       | ENSG00000110799 VWF            | ENSG00000131059 C2orf71        | ENSG00000136271 DDX56        | ENSG00000155719 OTOA           | ENSG00000155886 SLC24A2        |
|         | ENSG00000156716 MAPK13       | ENSG00000164012 WDR65        | ENSG00000167930 ITFG3        | ENSG00000177156 TALDO1         | ENSG00000179270 NP_001025054.1 | ENSG00000188199 FAM22B       | ENSG00000189037 DUSP21         | ENSG00000204043 FAM22C         |
|         | ENSG00000204305 AGER         | ENSG00000073969 NSF          | ENSG00000086666 ZFAND6       | ENSG00000100380 ST13           | ENSG00000100612 DHR57          | ENSG00000100625 SIX4         | ENSG00000102471 NDFIP2         | ENSG00000106483 SFRP4          |
|         | ENSG00000107854 TNKS2        | ENSG00000112541 PDE10A       | ENSG00000115963 RND3         | ENSG00000117152 RGS4           | ENSG00000151715 TMEM45B        | ENSG00000153814 JAZF1        | ENSG00000162520 SYN1           | ENSG00000162913 C1orf145       |
|         | ENSG00000198939 SPRY3        | ENSG00000170624 SGCD         | ENSG00000178904 DPY19L3      |                                |                                |                              |                                |                                |
|         | perfect: ATCTTGC GCAAGAT     | hsa-miR-31                   | gGCAAGATgctggcatagctg        | 1                              |                                |                              |                                |                                |
| ATCTTTG | ENSG00000035862 TIMP2        | ENSG00000065361 ERBB3        | ENSG00000101474 C2orf3       | ENSG00000102076 OPN1LW         | ENSG00000105808 RASA4          | ENSG00000106244 PDAP1        | ENSG00000106636 YKT6           | ENSG00000120071 KIAA1267       |
|         | ENSG00000132932 ATP8A2       | ENSG00000143376 SNX27        | ENSG00000147099 HDAC8        | ENSG00000147380 OPN1MW         | ENSG00000151533 TMEM18         | ENSG00000152082 FAM128B      | ENSG00000156097 GPR61          | ENSG00000156298 TSPAN7         |
|         | ENSG00000157064 NMNAT2       | ENSG00000157330 C1orf158     | ENSG00000162191 SAKS1_HUMAN  | ENSG00000166160 OPN1MW2        | ENSG00000169583 CLIC3          | ENSG00000173218 VANGL1       | ENSG00000173272 FAM128A        | ENSG00000176101 SSNA1          |
|         | ENSG00000180209 MLRS_HUMAN   | ENSG00000182013 NP_060685.2  | ENSG00000188997 KCTD21       | ENSG00000198182 ZNF607         | ENSG00000198879 SFBMT2         | ENSG00000204576 PRR3         | ENSG00000205633 NP_001010902.1 | ENSG00000092871 RFFL           |
|         | ENSG00000101557 USP14        | ENSG00000105821 Q99543-2     | ENSG00000107014 RLN2         | ENSG00000108506 INTS2          | ENSG00000112200 ZNF451         | ENSG00000112306 RPS12        | ENSG00000114686 MRPL3          | ENSG00000115808 STRN           |
|         | ENSG00000125630 POLR1B       | ENSG00000128534 LSM8         | ENSG00000131051 RBM39        | ENSG00000132313 MRPL35         | ENSG00000138293 NCOA4          | ENSG00000144445 NP_689732.2  | ENSG00000150627 WDR17          | ENSG00000152433 ZNF547         |
|         | ENSG00000168421 RHOH         | ENSG00000168876 ANKRD49      | ENSG00000169607 CKAP2L       | ENSG00000170629 NP_872440.2    | ENSG00000170748 HNRGT_HUMAN    | ENSG00000173334 TRIB1        | ENSG00000183023 SLC8A1         | ENSG00000184307 ZDHHC23        |
|         | ENSG00000198912 C1orf174     |                              |                              |                                |                                |                              |                                |                                |
| ATGAAAT | ENSG00000047056 WDR37        | ENSG00000065675 PRKCQ        | ENSG00000066136 NFYC         | ENSG00000082781 ITGB5          | ENSG00000090554 FLT3LG         | ENSG00000090615 GOLGA3       | ENSG00000093072 CECR1          | ENSG00000101193 C2orf11        |
|         | ENSG00000102265 TIMP1        | ENSG00000110446 SLC15A3      | ENSG00000111641 NOL1         | ENSG00000116205 C1orf83        | ENSG00000122711 SPINK4         | ENSG00000124762 CDKN1A       | ENSG00000128567 PODXL          | ENSG00000128918 ALDH1A2        |
|         | ENSG00000136883 KIF12        | ENSG00000139514 SLC7A1       | ENSG00000142534 RPS11        | ENSG00000145626 UGT3A1         | ENSG00000146005 PSD2           | ENSG00000150556 NP_808879.2  | ENSG00000157765 SLC34A2        | EN                             |

ENSG00000196090|PTPRT ENSG00000197472|ZNF695 ENSG00000198854|C1orf68 ENSG00000205726|ITSN1 ENSG00000005812|FBXL3 ENSG00000072041|SLC6A15 ENSG00000100191|SLC5A4 ENSG00000102935|ZNF423  
ENSG00000109270|MAP2K1IP1 ENSG00000109762|SNX25 ENSG00000111537|IFNG ENSG00000118518|RNFL46 ENSG00000120160|C9orf11 ENSG00000123843|C4BPB ENSG00000134108|ARL8B ENSG00000134343|TMEM16C  
ENSG00000134602|MST4\_HUMAN ENSG00000134900|TPP2 ENSG00000136758|YMEI1L1 ENSG00000138382|METTL5 ENSG00000138813|C4orf17 ENSG00000144559|C3orf31 ENSG00000149534|MS4A2 ENSG00000152749|GPR180  
ENSG00000156469|MTERFD1 ENSG00000162595|DIRAS3 ENSG00000163012|ZSWIM2 ENSG00000163386|KIAA1245 ENSG00000163544|Q96BL6\_HUMAN ENSG00000165120|C7orf45 ENSG00000168280|KIF5C ENSG00000176009|ASCL3  
ENSG00000176407|KCMF1 ENSG00000183098|GPC6 ENSG00000185808|PIGP ENSG00000197147|LRRC8B ENSG00000197348|EXOSC5 ENSG00000087269|NOL14 ENSG00000102385|DRP2 ENSG00000158874|APOA2  
ENSG00000005100|DHX33 ENSG00000008086|CDKL5 ENSG00000009830|POMT2 ENSG00000035403|VCLL ENSG00000077348|EXOSC5 ENSG00000087269|NOL14 ENSG00000102385|DRP2 ENSG00000158874|APOA2  
ENSG00000163882|POLR2H ENSG00000171206|TRIM8 ENSG00000177156|TALDO1 ENSG00000178343|NP\_001073974.1 ENSG00000179165|PXT1 ENSG00000188089|PLA2G4E ENSG00000188427|XR\_017855.1 ENSG00000198933|TBKBP1  
ENSG00000081770|NAIP ENSG00000108091|CCDC6 ENSG00000111796|KLRB1 ENSG00000113558|SKP1A ENSG00000134453|RBM17 ENSG00000137055|PLAA ENSG00000139973|SYT16 ENSG00000144214|LYG1\_HUMAN  
ENSG00000147535|PPAPDC1B ENSG00000150636|CCDC102B ENSG00000152778|IFIT5 ENSG00000162642|C1orf52 ENSG00000163558|PRKCI ENSG00000166035|LIPC ENSG00000166477|LEO1 ENSG00000166734|CASC4  
ENSG00000169679|BUB1 ENSG00000174840|NP\_808881.2 ENSG00000178695|KCTD12 ENSG00000179978|Q59GI6\_HUMAN ENSG00000181126|Q86V94\_HUMAN ENSG00000186496|ZNF396  
ATGACCA ENSG0000016391|CHDH ENSG00000062485|CS ENSG00000088812|ATRN ENSG00000095713|CRTAC1 ENSG00000100227|POLDIP3 ENSG00000101350|KIF3B ENSG00000102104|RS1 ENSG00000105705|SF4  
ENSG00000108018|SORCS1 ENSG00000116586|MAP1P\_HUMAN ENSG00000125170|DOK4 ENSG00000131143|COX411 ENSG00000142530|NP\_612420.1 ENSG00000169006|NTR2 ENSG00000171984|C2orf196 ENSG00000172725|PTPRCASP  
ENSG00000173137|ADCK5 ENSG00000175699|C14orf48 ENSG00000180184|Q8NF75\_HUMAN ENSG00000180205|WFDC9 ENSG00000183562|Q9P1L5\_HUMAN ENSG00000183908|LRRC55 ENSG00000185608|MRPL40 ENSG00000189430|NCR1  
ENSG00000196810|NP\_443093.2 ENSG00000203804|C1orf138 ENSG00000204530|Q6ZS29\_HUMAN ENSG00000008988|RPS20 ENSG00000066697|TMEFF1 ENSG00000100526|CDKN3 ENSG00000106648|GALNTL5 ENSG00000113569|NUP155  
ENSG00000116183|PAPPA2 ENSG00000133808|MICALCL ENSG00000134548|C12orf39 ENSG00000143882|ATP6V1C2 ENSG00000144362|KLHL23 ENSG00000145675|PIK3R1 ENSG00000153495|C13orf16 ENSG00000154654|NCAM2  
ENSG00000158290|CUL4B ENSG00000163347|CLDN1 ENSG00000163918|RFC4 ENSG00000165156|ZHX1 ENSG00000167720|SRR ENSG00000173258|ZNF483 ENSG00000174016|FAM46D ENSG00000183542|KLRC4  
ENSG00000184344|COL5 ENSG00000184984|CHRM5 ENSG00000187079|TEAD1 ENSG00000196967|ZNF585A ENSG00000204262|COL5A2 ENSG00000205036|NP\_001001682.1  
ATGACGC ENSG00000100599|RIN3 ENSG00000100842|EFS ENSG00000103200|NME4 ENSG00000103811|CTSH ENSG00000106038|EVX1 ENSG00000111652|COPST7A ENSG00000111676|ATN1 ENSG00000119242|CCDC92  
ENSG00000125816|NKX2-4 ENSG00000125888|C2orf179 ENSG00000130600|H19 ENSG00000131094|C1QL1 ENSG00000136488|CSH2 ENSG00000154040|CABYR ENSG00000164535|DAGLB ENSG00000167634|NLRP7  
ENSG00000167751|KIK2 ENSG00000170484|KRT74 ENSG00000171847|FAM90A1 ENSG00000177337|NP\_001034885.1 ENSG00000183077|AFMID ENSG00000187483|SERPINA13 ENSG00000204048|Q6ZUG3\_HUMAN ENSG00000204582|Q6ZR28\_HUMAN  
ENSG00000205031|Q6XYE2\_HUMAN ENSG000000007350|TKTL1 ENSG000000039537|C6 ENSG000000073734|ABC11 ENSG000000089876|DHX32 ENSG00000102683|SGCG ENSG00000113209|PCDH5 ENSG00000115548|JMJ1A  
ENSG00000130037|KCNAS5 ENSG00000132603|NIP7 ENSG00000133742|CA1 ENSG00000134323|MYCN ENSG00000144306|SCRN3 ENSG00000144476|CXCR7 ENSG00000164825|DEFB1 ENSG00000170866|LILRA3  
ENSG00000196930|XR\_015267.1 ENSG00000196967|ZNF585A ENSG00000197620|CX04A\_HUMAN ENSG00000205721|Q6ZJW2\_HUMAN  
ATGAGAC ENSG00000008128|CDC2L1 ENSG00000028310|BRD9 ENSG00000068323|TFE3 ENSG00000072501|SMC1A ENSG00000103365|GGA2 ENSG00000108244|KRT23 ENSG00000118898|PPL  
ENSG00000121900|TMEM54 ENSG00000129816|NR\_001538.1 ENSG00000129845|O14605\_HUMAN ENSG00000131462|TUBG1 ENSG00000153885|KCTD15 ENSG00000163026|C2orf44 ENSG00000164509|IL31RA ENSG00000165699|TSC1  
ENSG00000168818|STX18 ENSG00000175970|NP\_001074002.1 ENSG00000179082|C9orf106 ENSG00000179766|Q4G129\_HUMAN ENSG00000181666|HKR1 ENSG00000185933|FAM26C ENSG00000189430|NCR1 ENSG00000196090|PTPRT  
ENSG00000006652|IFRD1 ENSG00000067533|RRP15 ENSG00000080166|DCT ENSG00000099721|AMELY ENSG00000108255|CRYBA1 ENSG00000122585|NPFY ENSG00000124795|DEK ENSG00000127720|C12orf26  
ENSG00000135535|CD164 ENSG00000135720|DYNC1L1 ENSG00000139946|PELI2 ENSG00000145692|BHMT ENSG00000155100|OTUD6B ENSG00000164929|BAALC ENSG00000165389|C14orf147 ENSG00000167077|NP\_689726.3  
ENSG00000169435|RASSF6 ENSG00000186103|ARGFX ENSG00000205812|Q6ZSM7\_HUMAN  
ATGAGAG ENSG00000006534|ALDH3B1 ENSG00000103066|LYPLA3 ENSG00000104611|SH2D4A ENSG00000139797|RNFL13B ENSG00000141485|SLC13A5 ENSG00000147724|NP\_056996.2 ENSG00000153029|MR1  
ENSG00000162174|ASRGL1 ENSG00000164047|CAMP ENSG00000165406|MARCB8 ENSG00000176473|WDR25 ENSG00000178796|Q8N9Z1\_HUMAN ENSG00000197417|CARKL ENSG00000197838|CYP2A13 ENSG00000198399|ITSN2  
ENSG00000198732|SMOC1 ENSG00000204599|TRIM39 ENSG00000205620|Q6ZRB6\_HUMAN ENSG00000205726|ITSN1 ENSG00000070669|ASNS ENSG00000087299|L2HGDH ENSG00000100528|CNIH ENSG00000114127|XRN1  
ENSG00000115963|RND3 ENSG00000128052|KDR ENSG00000130449|ZSWIM6 ENSG00000154813|DPH3 ENSG00000158691|ZSCAN12 ENSG00000163644|PPM1K ENSG00000166006|KCN2C ENSG00000170113|NIPA1  
ENSG00000172728|FUT10 ENSG00000174721|FGFBP3 ENSG00000177189|RPS6KA3 ENSG00000177465|ACOT4 ENSG00000181322|TXNDC6 ENSG00000183722|LHFP ENSG00000184863|PRR8 ENSG00000185972|CCIN  
ENSG00000196268|ZNF493 ENSG00000206185|LOC152118  
ATGAGGC ENSG00000068323|TFE3 ENSG00000072501|SMC1A ENSG00000100320|RBM9 ENSG00000102230|PCYT1B ENSG00000112977|DAP ENSG00000114745|GORASP1 ENSG00000114853|ZBTB47 ENSG00000115598|IL1RL2  
ENSG00000119681|LTBP2 ENSG00000124508|BTN2A2 ENSG00000130720|FIBCD1 ENSG00000131944|C19orf40 ENSG00000134339|SAA2 ENSG00000151062|CACNA2D4 ENSG00000154342|WNT3A ENSG00000158828|PINK1  
ENSG00000166188|ZNF319 ENSG00000171427|NM\_145293 ENSG00000177234|C10orf85 ENSG00000182660|NP\_001013698.1 ENSG00000182704|TSKU ENSG00000189339|SLC35E2 ENSG00000198219|Q96N05\_HUMAN ENSG00000204048|Q6ZUG3\_HUMAN  
ENSG00000204325|Q9H614\_HUMAN ENSG00000000005|TNMD ENSG00000106299|WASL ENSG00000110079|MS4A4A ENSG00000122477|LRRC39 ENSG00000135974|C2orf49 ENSG00000158023|WDR66 ENSG00000163749|NP\_001036249.1  
ENSG00000181065|Q9P161\_HUMAN ENSG00000185950|IRS2 ENSG00000186166|CCDC84 ENSG00000198042|RBM13 ENSG00000204220|PFDN6  
ATGATCG ENSG00000007264|MATK ENSG00000054118|THRAP3 ENSG00000078808|SDF4 ENSG00000090971|NAT14 ENSG00000101665|SMAD7 ENSG00000110237|ARHGEF17 ENSG00000116525|TRIM62 ENSG00000119242|CCDC92  
ENSG00000120075|HOXB5 ENSG00000127452|FBXL12 ENSG00000131148|COX4NB ENSG00000143167|GPA33 ENSG00000145262|CDH18 ENSG00000145936|KCNMB1 ENSG00000161241|FBXO17 ENSG00000161904|LEMD2  
ENSG00000163866|C1orf212 ENSG00000171222|SCAND1 ENSG00000171595|DNAI2 ENSG00000175873|Q9H7M1\_HUMAN ENSG00000177822|XR\_017723.1 ENSG00000178645|C10orf53 ENSG00000185831|NR\_003081.1 ENSG00000188843|NM\_207504  
ENSG00000189196|Q6ZUD9\_HUMAN ENSG00000198131|ZNF544 ENSG00000206028|Q6ZVA3\_HUMAN ENSG00000204862|CCDC28A ENSG00000035681|NSMAF ENSG00000102043|MTMR8 ENSG00000109606|DHX15 ENSG00000112343|TRIM38  
ENSG00000123594|ATXN3L ENSG00000127993|NP\_115496.2 ENSG00000136870|ZNF189 ENSG00000141338|ABCA8 ENSG00000142192|APP ENSG00000150656|CNDP1 ENSG00000151090|THR3 ENSG00000163714|SR140\_HUMAN  
ENSG00000164675|IQUB ENSG00000165118|C9orf64 ENSG00000165304|MELK ENSG00000166342|NETO1 ENSG00000167904|TMEM68 ENSG00000169744|LDB2 ENSG00000172260|NEGR1 ENSG00000197595|NP\_997323.1  
ENSG00000197641|SERPINB13 ENSG00000197672|NP\_997331.1 ENSG00000206073|SERPINB3  
ATGATTC ENSG000000022556|NLRP2 ENSG00000057704|TMCC3 ENSG00000100141|PISD ENSG00000121671|CRY2 ENSG00000130803|ZNF317 ENSG00000134207|SYT6 ENSG00000134369|NAV1 ENSG00000146066|HIGD2A  
ENSG00000148408|CACNA1B ENSG00000155858|LSM11 ENSG00000161958|FGF11 ENSG00000163820|FYCO1 ENSG00000165406|MARCH8 ENSG00000169230|PRELID1 ENSG00000169777|TAS2R1 ENSG00000173267|SNCG  
ENSG00000177757|FAM87B ENSG00000184012|TMPRSS2 ENSG00000197174|O14606\_HUMAN ENSG00000197285|NR\_001536.1 ENSG00000197996|PADI6 ENSG00000198471|RTP2 ENSG00000198535|NP\_997205.1 ENSG000002026103|FAS  
ENSG000000033867|SLC4A7 ENSG000000047457|CP ENSG00000080546|SESN1 ENSG00000082213|C5orf22 ENSG00000101574|METTL4 ENSG00000106028|SSBP1 ENSG00000111701|APOBEC1 ENSG00000114021|NIT2  
ENSG00000120256|LRP11 ENSG00000133124|IRS4 ENSG00000144909|OSBP1L1 ENSG00000148798|INA ENSG00000152503|TRIM36 ENSG00000157060|C1orf14 ENSG00000164683|HEY1 ENSG00000167910|CYP7A1  
ENSG00000180998|GPR137C ENSG00000182139|Q96FU4\_HUMAN ENSG00000185088|RPS27L ENSG00000188474|ZNF788 ENSG00000197323|TRIM33 ENSG00000198252|STYX ENSG00000198612|COPS8 ENSG00000204296|C6orf10  
ENSG00000204596|RPP21  
ATGATTT ENSG000000054282|SDCCAG8 ENSG00000100600|LGMN ENSG00000101493|ZNF516 ENSG00000109062|SLC9A3R1 ENSG00000113578|FGF1 ENSG00000113719|ERGI1 ENSG00000119280|C1orf198 ENSG00000122642|FKBP9  
ENSG00000134531|EMCP1 ENSG00000136827|TOR1A ENSG00000144355|DLX1 ENSG00000150401|DCUN1D2 ENSG00000158296|SLC13A3 ENSG00000164896|FASTK ENSG00000169777|TAS2R1 ENSG00000170464|DNAJC18  
ENSG00000170703|TTLL6 ENSG00000178235|SLITRK1 ENSG00000181625|GIYD2 ENSG00000186868|MAPT ENSG00000198561|CTNND1 ENSG00000204231|RXRB ENSG00000205778|Q6ZMM7\_HUMAN ENSG0000020745|WNT16  
ENSG000000065613|SLK ENSG000000081320|STK17B ENSG000000084073|ZMPSTE24 ENSG00000108666|C17orf75 ENSG00000111907|TPD52L1 ENSG00000112406|HECA ENSG00000114948|ADAM23 ENSG00000116191|RALGPS2  
ENSG00000128578|FAM40E ENSG00000128590|DNAJB9 ENSG00000132207|SULT1A3 ENSG00000134330|Q6PCA9\_HUMAN ENSG00000135269|TES ENSG00000136267|DGKB ENSG00000137628|NP\_060101.2 ENSG00000138660|C4orf16  
ENSG00000143476|DTL ENSG00000147654|EBAG9 ENSG00000152428|MARS2 ENSG00000163319|MRPS18C ENSG00000168267|PTF1A ENSG00000169271|HSPB3 ENSG00000169379|ARL13B ENSG00000174106|LEMD3  
ENSG00000174928|C3orf33 ENSG00000176236|C10orf111 ENSG00000178904|DPY19L3 ENSG00000179869|ABCA13 ENSG00000179934|CCR8 ENSG00000184005|ST6GALNAC3 ENSG00000186075|ZPBP2  
ATGCAAA ENSG000000073849|ST6GAL1 ENSG00000100342|APOL1 ENSG00000101361|NOL5A ENSG00000101665|SMAD7 ENSG00000102057|KCMND1 ENSG00000148339|SLC25A25 ENSG00000149927|DOC2A ENSG00000157933|SKI  
ENSG00000162761|LPMX1A ENSG00000163346|PBXIP1 ENSG00000169926|KLF13 ENSG00000175329|ISX ENSG00000177411|Q96BN7\_HUMAN ENSG00000180824|Q8NAH5\_HUMAN ENSG00000180861|C12orf36 ENSG00000181938|GINS3  
ENSG00000185198|PRSS1L ENSG00000185567|AHNAK2 ENSG00000187686|XR\_016979.1 ENSG00000188091|C9orf164 ENSG00000188167|NP\_001034859.1 ENSG00000205592|MUC19 ENSG00000205658|Q6ZUU6\_HUMAN ENSG00000003989|SLC7A2  
ENSG0000017427|IGF1 ENSG00000043093|DCUN1D1 ENSG00000051415|AMY1A ENSG00000058600|POLR3E ENSG00000082175|PGR ENSG00000100749|VRK1 ENSG00000113302|IL12B ENSG00000114166|PCAF  
ENSG00000126803|HSPA2 ENSG00000134812|GIF ENSG00000137941|TTLL7 ENSG00000153936|HS2ST1 ENSG00000154188|ANGPT1 ENSG00000155792|DEPDC6 ENSG00000162594|IL23R ENSG00000165805|C12orf50  
ENSG00000168143|FAM83B ENSG00000171291|ZNF439 ENSG00000174792|C4orf26 ENSG00000174876|AMY1B ENSG00000175553|K1210\_HUMAN ENSG00000180481|GLIPR1L2 ENSG00000180694|TMEM64  
ENSG00000188958|UTS2D ENSG00000197584|KCNMB2 ENSG00000197989|C1orf79 ENSG00000198142|ANKRD57 ENSG00000198542|ITGBL1 ENSG00000205542|TMSL1 ENSG00000205721|Q6ZJW2\_HUMAN ENSG00000205791|LOH12CR2  
ATGCAAG ENSG000000015413|DPEP1 ENSG000000059377|TBXAS1 ENSG00000074211|PPP2R2C ENSG00000090020|SLC9A1 ENSG00000102755|FLT1 ENSG00000115306|SPTBN1 ENSG00000117013|KCNQ4 ENSG00000118960|HS1BP3  
ENSG00000127526|SLC35E1 ENSG00000128313|APOL5 ENSG00000133561|GIMAP6 ENSG00000136003|ISCU ENSG00000139574|NPF7 ENSG00000154040|CABYR ENSG00000165238|WNK2 ENSG00000169006|NTR2  
ENSG00000170310|STX8 ENSG00000175106|CDRT4 ENSG00000182175|RGMMA ENSG00000197175|Q8TBR1\_HUMAN ENSG00000206053|HN1L ENSG00000005339|CREBBP ENSG0000021852|C8B ENSG00000038102|NP\_001073948.1  
ENSG00000047634|SCML1 ENSG00000101846|STS ENSG00000117791|MOSC2 ENSG00000120837|NFYB ENSG00000127995|CASD1 ENSG00000131711|MAP1B ENSG00000132485|ZNRAN2 ENSG00000133962|C14orf161  
ENSG00000136874|STX17 ENSG00000140873|ADAMTS18 ENSG00000142892|PIGK ENSG00000163605|PPP4R2 ENSG00000170561|IRX2 ENSG00000171234|UGT2B7 ENSG00000172955|ADH6 ENSG00000173273|TNKS  
ENSG00000177182|NP\_775790.1 ENSG00000179981|TSHZ1 ENSG00000186432|KPN4 ENSG00000196285|H33\_HUMAN  
ATGCACG ENSG000000007306|CEACAM7 ENSG00000057593|E7 ENSG00000064419|TNPO3 ENSG00000075043|KCN2C ENSG00000088992|TESC ENSG00000089505|CMTM1 ENSG00000095319|NUP188 ENSG00000103043|VAC14  
ENSG00000127418|HGFRL1 ENSG00000127540|UQCRR ENSG00000130635|COL5A1 ENSG00000140848|CFNE2 ENSG00000146374|RSP3 ENSG00000169526|AFAP1 ENSG00000204999|LOC388588  
ENSG00000025293|PHF20 ENSG00000102683|SGCG ENSG00000102780|DGKH ENSG00000105928|DFNA5 ENSG00000106609|C7orf42 ENSG00000111328|CDK2AP1 ENSG00000113946|CLDN16 ENSG00000123562|MORF4L2  
ENSG00000130921|C12orf65 ENSG00000132199|ENOSF1 ENSG00000133110|POSTN ENSG00000134028|ADAMDEC1 ENSG00000136243|NUP2L ENSG00000137273|FOXF2 ENSG00000141048|MYH4 ENSG00000145996|CDKAL1  
ENSG00000164386|NP\_997378.2 ENSG00000164694|FNDC1 ENSG00000172058|SERF1\_HUMAN ENSG00000174106|LEMD3 ENSG00000175768|C9orf105 ENSG00000176399|DMRTA1 ENSG00000184983|NDUFA6 ENSG00000185787|MORF4L1  
ENSG00000205572|SERF1\_HUMAN  
ATGCACCT ENSG000000015592|STMN4 ENSG00000089685|BIRC5 ENSG00000105755|ETHE1 ENSG00000107282|APBA1 ENSG00000114650|SCAP ENSG00000118263|KLF7 ENSG00000124313|IQSEC2 ENSG00000124357|NAGK  
ENSG00000126903|SLC10A3 ENSG00000140090|SLC24A4 ENSG00000156466|GDF6 ENSG00000158796|DEDD ENSG00000176248|ANAPC2 ENSG00000176749|CDK5R1 ENSG00000196972|Q86V52\_HUMAN ENSG00000198854|C1orf68  
ENSG00000204274|Q6ZSG4\_HUMAN ENSG00000205653|Q6ZUF2\_HUMAN ENSG00000206193|Q5HYA3\_HUMAN ENSG00000069956|MAPK6 ENSG00000087470|DNM1L ENSG00000100483|C14orf138 ENSG00000109790|KLHL5 ENSG00000110756|HPS5  
ENSG00000117226|GBP3 ENSG00000125676|THOC2 ENSG00000131711|MAP1B ENSG00000133812|SBF2 ENSG00000137642|SORL1 ENSG00000147684|NDUFB9 ENSG00000157470|FAM81A ENSG00000160961|ZNF333  
ENSG00000164933|SLC25A32 ENSG00000165862|PNLIPRP2 ENSG00000179476|C14orf28 ENSG00000188992|LIPI ENSG00000198964|SGMS1  
perfect: ATGCACCT AGTGCAT hsa-miR-152 tCAGTGCATgcacagaacttggg 2  
perfect: ATGCACCT AGTGCAT hsa-miR-148b tCAGTGCATcacagaactttgt 2  
ATGCACG ENSG00000007038|PRSS21 ENSG00000051523|CYBA ENSG00000090339|ICAM1 ENSG00000110442|COMMD9 ENSG00000112149|CD83 ENSG00000118050|C19orf24 ENSG00000123136|DDX39 ENSG00000128482|ZNF179  
ENSG00000130167|TSPAN16 ENSG00000130300|PLVAP ENSG00000131849|ZNF132 ENSG00000150165|ANXA8L1 ENSG00000161671|NP\_996261.1 ENSG00000164061|BSN ENSG00000167987|VPS37C ENSG00000170100|Q96MU6-2  
ENSG00000180739|EDG8 ENSG00000188242|Q71RB1\_HUMAN ENSG00000197417|CARL1 ENSG00000198198|KIAA0467 ENSG00000205974|Q6ZVY3\_HUMAN ENSG00000074657|ZNF532 ENSG00000095794|CREM ENSG00000115963|RND3

ENSG00000119950|MXI1 ENSG00000120278|PLEKHG1 ENSG00000122068|FYTTD1 ENSG00000122585|NPY ENSG00000134318|ROCK2 ENSG00000134698|EIF2C4 ENSG00000139352|ASCL1 ENSG00000144214|LYG1\_HUMAN  
ENSG00000146872|TLK2 ENSG00000152455|SUV39H2 ENSG00000157219|HTR5A ENSG00000164609|SLU7 ENSG00000173302|GPR148 ENSG00000175874|CREG2 ENSG00000198440|ZNF583 ENSG00000198814|GK  
ENSG00000204866|IGFL2  
ATGCAGT ENSG00000001461|NPAL3 ENSG000000084731|KIF3C ENSG00000100030|MAPK1 ENSG00000106089|STX1A ENSG00000122490|PQLC1 ENSG00000130540|SULT4A1 ENSG00000135736|CCDC102A ENSG00000136828|RALGPS1  
ENSG00000148290|SURF1 ENSG00000149474|CSR2BP ENSG00000166033|HTRA1 ENSG00000177076|ASAH3L ENSG00000185831|NR\_003081.1 ENSG00000204934|NP\_001008745.1 ENSG000000011426|ANLN ENSG000000078579|FGF20  
ENSG00000101974|ATP11C ENSG00000106069|CHN2 ENSG00000106462|EZH2 ENSG00000108599|AKAP10 ENSG00000112414|GPR126 ENSG00000121749|TBC1D15 ENSG00000124406|ATP8A1 ENSG00000130347|RTN4IP1  
ENSG00000133703|KRAS ENSG00000134343|TMEM16C ENSG00000135409|AMHR2 ENSG00000135763|KIAA0133 ENSG00000138079|SLC3A1 ENSG00000138386|NAB1 ENSG00000143153|ATP1B1 ENSG00000143815|LBR  
ENSG00000146757|ZNF92 ENSG00000146872|TLK2 ENSG00000147121|ZNF673 ENSG00000156469|MTERFD1 ENSG00000163755|HPS3 ENSG00000164458|T ENSG00000166752|TMEM83 ENSG00000171877|FRMD5  
ENSG00000172497|ACOT12 ENSG00000173041|ZNF680 ENSG00000182141|ZNF708 ENSG00000197989|C1orf79 ENSG00000204279|PAGE3 ENSG00000205413|SAMD9  
perfect: ATGCAT ACTGCAT hsa-miR-217 tACTGCATcaggaactgattggtat 1  
ATGCATG ENSG00000006007|GDE1\_HUMAN ENSG00000006432|MAP3K9 ENSG000000099330|OCEL1 ENSG00000104972|LILRB1 ENSG00000106290|TAF6 ENSG00000115353|TACR1 ENSG00000124772|CPNE5 ENSG00000125815|CST8  
ENSG00000143816|WNT9A ENSG00000148343|FAM73B ENSG00000148660|CAMK2G ENSG00000168676|KCTD19 ENSG00000173093|CCDC63 ENSG00000173638|SLC19A1 ENSG00000177468|OLIG3 ENSG00000178243|C9orf62  
ENSG00000179388|EGR3 ENSG00000179766|Q4G129\_HUMAN ENSG00000181666|HKR1 ENSG00000185052|SLC24A3 ENSG00000185294|NP\_787078.1 ENSG00000185818|NAT8L ENSG00000197386|HD ENSG00000204946|ZNF783  
ENSG000000083312|TNPO1 ENSG00000104331|IMPAD1 ENSG00000104722|NEFM ENSG00000107560|RAB11FIP2 ENSG00000107758|PPP3CB ENSG00000116194|ANGPTL1 ENSG00000119927|GPAM ENSG00000125772|GDE5\_HUMAN  
ENSG00000127954|Q8WWB0\_HUMAN ENSG00000127990|SGCE ENSG00000134900|PPP2 ENSG00000140563|MCTP2 ENSG00000144810|COL8A1 ENSG00000154027|AK5 ENSG00000156642|NPTN ENSG00000163519|TRAT1  
ENSG00000164283|ESM1 ENSG00000165685|C12orf59 ENSG00000170745|KCNS3 ENSG00000171100|MTM1 ENSG00000188133|NP\_997723.1 ENSG00000196318|AMY2A ENSG00000196350|ZNF492 ENSG00000197563|PIGN  
ENSG00000198815|FOXJ3  
ATGCCAA ENSG000000085831|C1orf34 ENSG00000092068|SLC7A8 ENSG00000112977|DAP ENSG00000123349|PFDN5 ENSG00000124615|MOCS1 ENSG00000130830|MPP1 ENSG00000131143|COX4I1 ENSG00000140688|C16orf58  
ENSG00000143314|MRPL24 ENSG00000151348|EXT2 ENSG00000166924|NP\_775835.2 ENSG00000167105|TMEM92 ENSG00000172803|NP\_689973.2 ENSG00000174640|SLC2A1 ENSG00000176261|ZBTB805 ENSG00000176383|B3GNT4  
ENSG00000179168|GGN ENSG00000181918|Q8N9J9\_HUMAN ENSG00000186788|NP\_001001670.1 ENSG00000189357|XR\_015253.1 ENSG00000203690|TCP10 ENSG00000205528|Q6ZRE2\_HUMAN ENSG00000003989|SLC7A2 ENSG00000042813|ZPBP  
ENSG000000086598|TMED2 ENSG00000090266|NDUF2 ENSG00000113269|RNFL30 ENSG00000116251|RPL22 ENSG00000130024|PHF10 ENSG00000135409|AMHR2 ENSG00000135547|HEY2 ENSG00000137766|UNC13C  
ENSG00000144867|SRPRB ENSG00000150045|KLRFL1 ENSG00000150051|MKX ENSG00000156110|ADK ENSG00000163377|FAM19A4 ENSG00000164543|STK17A ENSG00000165566|FAM123A ENSG00000166275|AS3MT  
ENSG00000168333|C8orf22 ENSG00000170647|TMEM133 ENSG00000170961|HAS2 ENSG00000173915|USMG5 ENSG00000181234|TMEM132C ENSG00000187372|PCDHB13 ENSG00000188133|NP\_997723.1 ENSG00000196593|NM\_207439  
ENSG00000196664|TLR7 ENSG00000204757|Q6ZTL5\_HUMAN  
ATGCCAC ENSG000000013563|DNASE1L1 ENSG00000072195|SPEG ENSG00000077080|ACTL6B ENSG00000100146|SOX10 ENSG00000102225|PCTK1 ENSG00000102981|PARD6A ENSG00000106633|GCK  
ENSG00000133250|ZNF414 ENSG00000135248|NP\_115988.1 ENSG00000141664|ZCCHC2 ENSG00000142798|HSPG2 ENSG00000161638|ITGA5 ENSG00000161999|NP\_001005920.2 ENSG00000163930|BAP1 ENSG00000167680|SEMA6B  
ENSG00000174407|C20orf166 ENSG00000175048|ZDHHC14 ENSG00000183242|WIT1 ENSG00000183535|C12orf123 ENSG00000197993|KEL ENSG00000198641|SYS1 ENSG00000198768|APCDDL1 ENSG00000198879|SFBMT2  
ENSG00000203689|NP\_001018859.1 ENSG00000204573|Q6ZV05\_HUMAN ENSG00000006451|RALA ENSG00000091128|LAMB4 ENSG00000100578|KIAA0586 ENSG00000100902|PSMA6 ENSG00000107159|CA9 ENSG00000109854|HTATIP2  
ENSG00000113269|RNFL30 ENSG00000114861|FOXFP1 ENSG00000118322|ATP10B ENSG00000118496|FBXO30 ENSG00000120217|CD274 ENSG00000122043|Q5TAE0\_HUMAN ENSG00000123977|WDR69 ENSG00000135119|TMEM118  
ENSG00000152894|TPPRK ENSG00000159140|SON ENSG00000164308|NP\_071745.1 ENSG00000171208|NETO2 ENSG00000173612|GPRC6A ENSG00000175646|PRM1 ENSG00000181072|CHR2 ENSG00000181495|C5orf23  
ENSG00000185231|MC2R ENSG00000198903|Q6ZV72\_HUMAN ENSG00000198947|DMD ENSG00000204897|KRT25 ENSG00000204909|SPINK9 ENSG00000204987|Q6ZNR0\_HUMAN  
ATGCCCG ENSG000000003147|IC1A1 ENSG000000064393|HIPK2 ENSG00000101883|PEPP1\_HUMAN ENSG00000104957|CCDC130 ENSG00000105048|TNNT1 ENSG00000105509|HAS1 ENSG00000113734|BNIP1  
ENSG00000114867|EIF4G1 ENSG00000115649|C2orf24 ENSG00000116670|MAD2L2 ENSG00000120725|SIL1 ENSG00000125458|NTSC ENSG00000130283|GDF1 ENSG00000136918|NP\_001038941.1 ENSG00000142544|ATPBD3  
ENSG00000147889|CKDN2A ENSG00000160185|UBASH3A ENSG00000161798|AQP5 ENSG00000167087|NFAM1 ENSG00000180305|WDFC10A ENSG00000181378|CCDC108 ENSG00000183128|FAM26A ENSG00000183615|C1orf90  
ENSG00000197386|HD ENSG00000197996|PADI6 ENSG00000204601|Q4G0G9\_HUMAN ENSG00000102038|SMARCA1 ENSG00000119514|GALNT12 ENSG00000120458|C1orf61 ENSG00000129515|SNX6 ENSG00000137441|FGFBP2  
ENSG00000146477|SLC22A3 ENSG00000153820|NP\_085126.1 ENSG00000154175|ABI3BP ENSG00000156650|MYST4 ENSG00000157341|Q8ND77\_HUMAN ENSG00000164418|GRIK2 ENSG00000164659|KIAA1324L ENSG00000165685|C12orf59  
ENSG00000166710|B2M ENSG00000169251|NMD3 ENSG00000169862|CTNND2 ENSG00000174446|SNAPC5 ENSG00000175646|PRM1 ENSG00000176165|FOXG1B ENSG00000182090|C14orf25 ENSG00000182551|ADI1  
ENSG00000183625|CCR3 ENSG00000185710|Q8END7\_HUMAN ENSG00000198176|TFDP1 ENSG00000205150|FAM92A3  
ATGCCCG ENSG00000043822|NP\_060895.1 ENSG00000105373|GLTSCR2 ENSG00000108387|SEPT4 ENSG00000115350|POLE4 ENSG000001128309|MPST ENSG00000137825|ITPKA ENSG00000141577|AZI1 ENSG00000144591|GMPPA  
ENSG00000156564|LRFN2 ENSG00000158246|FAM46B ENSG00000162881|OXER1 ENSG00000163009|C2orf48 ENSG00000164935|TM7SF4 ENSG00000166917|SMPD1 ENSG00000169717|ACTRT2 ENSG00000175463|TBC1D10C  
ENSG00000176605|C14orf177 ENSG00000177192|PUS1 ENSG00000183729|NPBW1 ENSG00000185730|ZNF696 ENSG00000196139|AKR1C3 ENSG00000197191|NP\_945352.1 ENSG00000203691|Q9UI51\_HUMAN ENSG00000205994|Q6ZN58\_HUMAN  
ENSG000000010704|HFE ENSG000000065978|YBX1 ENSG000000087995|METTL2A ENSG00000104432|IL7 ENSG00000111850|C6orf162 ENSG00000112592|TBP ENSG00000113812|ACTR8 ENSG00000126733|DACH2  
ENSG00000130449|ZSWIM6 ENSG00000136842|TMOD1 ENSG00000155959|VBP1 ENSG00000160207|HSF2BP ENSG00000160551|TAOK1 ENSG00000162692|VCAM1 ENSG00000162775|MKL1 ENSG00000165055|METTL2B  
ENSG00000165757|KIAA1462 ENSG00000171819|ANGPTL7 ENSG00000173376|C4orf31 ENSG00000184226|PCDH9 ENSG00000184575|XPOT ENSG00000189127|NP\_001004441.1 ENSG00000196199|MPP8\_HUMAN ENSG00000203827|XR\_015220.1  
ENSG00000203832|NBPF20  
ATGCCCTA ENSG000000071246|VASH1 ENSG00000076356|PLXNA2 ENSG00000089057|SLC23A2 ENSG00000103064|SLC7A6 ENSG00000103355|PRSS33 ENSG00000114113|RBP2 ENSG00000116983|HPCAL4 ENSG00000126768|TIMM17B  
ENSG00000130173|NP\_061157.2 ENSG00000131143|COX4I1 ENSG00000132824|SERINC3 ENSG00000138092|CENPO ENSG00000151117|TMEM86A ENSG00000162733|DDR2 ENSG00000162779|C1orf125 ENSG00000172732|MUS81  
ENSG00000175520|UBQLN3 ENSG00000177992|C9orf79 ENSG00000180229|NP\_00109853.1 ENSG00000198618|PPTA\_HUMAN ENSG00000198668|CALM1 ENSG00000198758|EPS8L3 ENSG00000005189|NP\_112203.1 ENSG00000035687|ADSS  
ENSG00000046653|GPM6B ENSG00000075884|ARHGAP15 ENSG00000106305|MC2A\_HUMAN ENSG00000115825|PRK3 ENSG00000116005|PCYOX1 ENSG00000116141|MARK1 ENSG00000117595|IRF6 ENSG00000120337|TNFSF18  
ENSG00000123739|PLA2G12A ENSG00000129173|E2F8 ENSG00000133121|STAR1D3 ENSG00000134897|BIVM ENSG00000136536|MARCH7 ENSG00000138646|HERC5 ENSG00000148154|UGCG ENSG00000163606|CD200R1  
ENSG00000165516|KLHDC2 ENSG00000165813|C10orf118 ENSG00000167618|LAIR2 ENSG00000168300|PCMTD1 ENSG00000184203|PPP1R2 ENSG00000189266|PNRC2 ENSG00000119630|NR\_002168.1 ENSG00000198887|SMC5  
ENSG00000205976|Q6ZVT4\_HUMAN  
ATGCCCTC ENSG00000005513|SOX8 ENSG00000026652|AGPAT4 ENSG00000090432|C1orf166 ENSG00000100058|CRYBB2 ENSG00000100395|L3MBTL2 ENSG00000102996|MMP15 ENSG00000106086|PLEKHA8 ENSG00000106384|MOGAT3  
ENSG00000111110|PPM1H ENSG00000119777|NP\_060197.4 ENSG00000122694|C9orf19 ENSG00000100550|ARM7 ENSG000001135144|DTX1 ENSG00000159423|ALDH4A1 ENSG00000163531|NFASC ENSG00000169921|Q75L30\_HUMAN  
ENSG00000170445|HARS ENSG00000170983|C8orf14 ENSG00000172602|RND1 ENSG00000176454|AGPAT7 ENSG00000197465|GYPE ENSG00000022267|FHL1 ENSG00000048991|R3HDM1 ENSG00000075884|ARHGAP15  
ENSG00000110367|DDX6 ENSG00000113790|EHHADH ENSG00000123892|RAB38 ENSG00000124333|SYBL1 ENSG00000134419|RPS15A ENSG00000136238|RAC1 ENSG00000152455|SUV39H2 ENSG00000164609|SLU7  
ENSG00000165410|CFL2 ENSG00000167785|ZNF558 ENSG00000173744|HRB ENSG00000175857|C5orf29 ENSG00000181544|FANCB ENSG00000183155|RAB1F ENSG00000184368|MAP7D2 ENSG00000204287|HLA-DRA  
ATGCCCTT ENSG00000007038|PRSS21 ENSG00000020181|GPR124 ENSG00000100350|FOXRED2 ENSG00000107796|ACTA2 ENSG00000109107|ALDOC ENSG00000113732|ATP6V0E1 ENSG00000125388|GRK4 ENSG00000126756|UXT  
ENSG00000132321|IQCA ENSG00000144681|STAC ENSG00000145936|KCNMB1 ENSG00000154198|Q8N1L4\_HUMAN ENSG00000155984|TMEM185A ENSG00000158710|TAGLN2 ENSG00000166289|PLEKHF1 ENSG00000167139|TBC1D21  
ENSG00000173404|INSM1 ENSG00000178814|OPLAH ENSG00000184709|LRRC26 ENSG00000188004|VSI8 ENSG00000197226|TBC1D9B ENSG00000197353|LYPD2 ENSG00000204071|TCEAL6 ENSG00000205770|Q8N847\_HUMAN  
ENSG000000033122|LRRC7 ENSG000000084110|HAL ENSG000000091127|PUS7 ENSG00000101745|ANKRD12 ENSG00000108091|CCDC6 ENSG00000117000|SLCO1B3 ENSG00000112276|BVES ENSG00000119147|C2orf40  
ENSG00000119725|ZNF410 ENSG00000119913|TECTB ENSG00000145907|G3BP1 ENSG00000152518|ZFP36L2 ENSG00000157625|MAP3K7IP3 ENSG00000162688|AGL ENSG00000162701|DENND1B ENSG00000162998|FRZB  
ENSG00000163029|SMC6 ENSG00000165071|TMEM71 ENSG00000165240|ATP7A ENSG00000165410|CFL2 ENSG00000176797|DEFB103B ENSG00000177243|DEFB103A ENSG00000186369|YN002\_HUMAN ENSG00000196387|ZNF140  
ENSG00000197646|PDCD1LG2 ENSG00000205083|Q6P5W2\_HUMAN  
ATGCCGGC ENSG000000073009|IKBK3 ENSG00000100422|CERK ENSG00000102977|ACD ENSG00000105507|CABP5 ENSG00000108442|FAM18B2 ENSG000001127445|PIN1 ENSG00000130723|KIAA0515 ENSG00000131037|EPS8L1  
ENSG00000135124|P2RX4 ENSG00000135519|KCNH3 ENSG00000141101|NOB1 ENSG00000142657|PGD ENSG00000148805|NR\_002934.2 ENSG00000169393|ELSPBP1 ENSG00000173267|SNCG ENSG00000178372|CALML5  
ENSG00000197353|LYPD2 ENSG00000205852|Q6ZW13\_HUMAN ENSG000000035681|NSMAF ENSG00000079246|XRCC5 ENSG000000081923|ATP8B1 ENSG00000100426|ZBED4 ENSG00000101938|CHRDL1 ENSG00000104763|ASAH1  
ENSG00000117281|CD160 ENSG00000121440|PDZRN3 ENSG00000130764|LRRC47 ENSG00000135048|TMEM2 ENSG00000136379|FAM108C1 ENSG00000136478|TEX2 ENSG00000138668|HNRPD ENSG00000163328|GPR155  
ENSG00000166148|AVPR1A ENSG00000170370|EMX2 ENSG00000174721|FGFBP3 ENSG00000175265|GOLGA8A ENSG00000179476|C14orf28 ENSG00000180044|Q8N54\_HUMAN ENSG00000183283|DAZAP2 ENSG00000183918|SH2D1A  
ENSG00000185345|PARK2 ENSG00000198382|UVRAG  
ATGCCGGT ENSG000000042832|TG ENSG000000049541|RFC2 ENSG00000067606|PRKCZ ENSG00000108442|FAM18B2 ENSG00000134917|Q5FWF1\_HUMAN ENSG00000158793|NIT1 ENSG00000158869|FCER1G ENSG00000161328|LRRC56  
ENSG00000162585|C1orf86 ENSG00000165462|PHOX2A ENSG00000166444|ST5 ENSG00000170426|NP\_683695.1 ENSG00000172336|POP7 ENSG00000177045|SIX5 ENSG00000180767|CHST13 ENSG00000183528|Q0VAF8\_HUMAN  
ENSG000000005810|MYCBP2 ENSG00000037965|HOXC8 ENSG000000064995|TAF11 ENSG000000065609|SNAP91 ENSG00000067560|RHOA ENSG00000104433|STMN2 ENSG00000115840|SLC25A12 ENSG00000118733|OLFM3  
ENSG00000119421|NDUF8A ENSG00000137672|TRPC6 ENSG00000153064|BANK1 ENSG00000156642|NFTN ENSG00000162885|B3GALNT2 ENSG00000164099|PRSS12 ENSG00000167562|ZNF701 ENSG00000168036|CTNNB1  
ENSG00000173876|NP\_817124.1 ENSG00000179299|NSUN7 ENSG00000185984|NR\_002593.1 ENSG00000188295|ZNF669 ENSG00000196532|HIST1H3C ENSG00000204261|PSMB9  
ATGCCGTA ENSG00000005238|KIAA1539 ENSG000000011105|TSPAN9 ENSG00000073067|CYP2W1 ENSG00000109006|LTBP4 ENSG00000116128|BCL9 ENSG00000121410|ALBG ENSG00000140105|WARS  
ENSG00000141295|SCRN2 ENSG00000163898|LIPIH ENSG00000166033|HTRA1 ENSG00000166646|Q96D66\_HUMAN ENSG00000169218|RSP01 ENSG00000173662|TA81R1 ENSG00000174175|SELP ENSG00000174348|PODN  
ENSG00000178104|PDE4DI ENSG00000184009|ACTG1 ENSG00000184060|CENTA2 ENSG00000196498|NCR2 ENSG00000198009|Q8IZW4\_HUMAN ENSG00000198500|Q96C21\_HUMAN ENSG00000204333|Q6ZTP0\_HUMAN ENSG00000002212|ME2 ENSG0000000117724|CENPF  
ENSG00000068885|IFT80 ENSG000000086061|DNAJA1 ENSG000000087338|GMCCL1 ENSG00000108296|CCDC49 ENSG00000112539|G6orf118 ENSG00000119314|ROD1 ENSG00000119725|ZNF410 ENSG00000119969|HELLS  
ENSG00000123352|SPATS2 ENSG00000131773|KHDRBS3 ENSG00000137273|FOXF2 ENSG00000144357|ZNF650 ENSG00000148377|IDI2 ENSG00000156076|WIF1 ENSG00000163453|IGFBP7 ENSG00000164066|INTU  
ENSG00000166946|CCNDBP1 ENSG00000175643|C16orf75 ENSG00000178665|ZNF713 ENSG00000181211|Q8NA17\_HUMAN ENSG00000184182|UBE2F ENSG00000196876|SCN8A ENSG00000197442|MAP3K5 ENSG00000204712|LOC284067  
ENSG00000205003|CNTF  
ATGCCGTC ENSG00000004939|SLC4A1 ENSG000000013288|MAN2B2 ENSG00000061938|TNK2 ENSG00000063438|AHRR ENSG00000065526|SPEN ENSG00000103512|NOMO1\_HUMAN ENSG00000125434|SLC25A35 ENSG00000126752|SSX1  
ENSG00000144199|FAHD2B ENSG00000160220|PWP2 ENSG00000162592|CCDC27 ENSG00000165592|RRAD ENSG00000167578|MIA ENSG00000167992|VWCE ENSG00000170439|METTL7B  
ENSG00000172137|CALB2 ENSG00000174996|KLC2 ENSG00000184584|TMEM173 ENSG00000185164|NOMO3 ENSG00000185801|YV007\_HUMAN ENSG00000186150|UBL4B ENSG00000187754|SSX2 ENSG00000189429|RNFB207  
ENSG00000196834|POT14\_HUMAN ENSG00000197789|Q8NA00\_HUMAN ENSG00000203774|Q6ZUA8\_HUMAN ENSG00000204648|SSX9 ENSG00000005059|CCDC109B ENSG00000066427|ATXN3 ENSG00000082212|ME2 ENSG0000000117724|CENPF  
ENSG00000118777|ABCG2 ENSG00000122043|Q5TAE0\_HUMAN ENSG00000123689|GOS2 ENSG00000135048|TMEM2 ENSG00000156642|COG2 ENSG00000112539|G6orf118 ENSG00000119314|ROD1 ENSG00000119725|ZNF410 ENSG00000119969|HELLS  
ENSG00000147416|ATP6V1B2 ENSG00000153802|TMPRSS11D ENSG00000160551|TAOK1 ENSG00000163682|RPL9 ENSG00000168522|FNFT ENSG00000171865|RNASEH1 ENSG00000175065|DSG4 ENSG00000177494|ZBED2  
ENSG00000179300|ZCCHC5 ENSG00000180287|PLD5 ENSG00000185477|GPRIN3 ENSG00000185518|SV2B ENSG00000198382|UVRAG ENSG00000198464|ZNF480 ENSG00000198770|Q9H396\_HUMAN  
ATGCTAA ENSG000000077549|CAPZB ENSG000000089057|SLC23A2 ENSG00000092295|TGM1 ENSG00000099194|SCD2 ENSG00000100003|SEC14I2 ENSG00000105091|ANFA1 ENSG000001125409|TEKT3 ENSG00000130244|Q17RN3-2

ENSG00000135454|B4GALNT1 ENSG00000137133|HINT2 ENSG00000143575|HAX1 ENSG00000145912|NOLA2 ENSG00000149925|ALDOA ENSG00000156466|GDF6 ENSG00000157617|C21orf25 ENSG00000158169|FANCC ENSG00000159224|GIP ENSG00000162600|OMA1 ENSG00000165406|MARCH8 ENSG00000166667|NP\_001026789.1 ENSG00000167604|NP\_640332.1 ENSG00000175206|NPPA ENSG00000179994|NP\_001030016.1 ENSG00000196152|ZNF79 ENSG00000203865|Q5TC04\_HUMAN ENSG00000203945|Q5JPQ1\_HUMAN ENSG00000204759|Q6ZRYO\_HUMAN ENSG00000204842|ATXN2 ENSG00000205238|NP\_001026789.1 ENSG00000206528|Q6ZSMO\_HUMAN ENSG0000049247|UTS2 ENSG00000066651|TRMT11 ENSG00000082996|RNF13 ENSG00000100095|SEZ6L ENSG00000106025|TSPAN12 ENSG00000115183|TANC1 ENSG00000128590|DNAJB9 ENSG00000133872|TMEM66 ENSG00000152684|PELO ENSG00000153187|HNRPU ENSG00000160679|C1orf77 ENSG00000164329|PAPD4 ENSG00000165525|SDCCAG1 ENSG00000166441|RPL27A ENSG00000168497|SDPR ENSG00000170312|CDC2 ENSG00000185278|ZBTB37 ENSG00000187994|NP\_940847.1 ENSG00000188647|PTAR1 ENSG00000197989|C1orf79 ENSG00000204597|ZNF818 ENSG00000100931|CHMP4A ENSG00000101365|IDH3B ENSG00000113555|PCDH12 ENSG00000125457|MIF4GD ENSG00000125744|RTN2 ENSG00000133937|GSC ENSG00000139193|CD27 ENSG00000149292|TTC12 ENSG00000149929|HIRIP3 ENSG00000163873|GRIK3 ENSG00000172724|CCL19 ENSG00000175309|AGXT2L2 ENSG00000176534|RL41\_HUMAN ENSG00000179766|Q4G129\_HUMAN ENSG00000196460|Q6ZNB4\_HUMAN ENSG00000197838|CYP2A13 ENSG00000203782|LOR ENSG00000204303|Q6ZVW4\_HUMAN ENSG00000205023|Q6ZSF1\_HUMAN ENSG0000027001|MIPPEP ENSG00000073282|TP73L ENSG00000106299|WASL ENSG00000108001|EBF3 ENSG00000113805|CNTN3 ENSG00000115267|IFIH1 ENSG00000118267|ZNF271 ENSG00000124172|ATP5E ENSG00000127951|FGL2 ENSG00000131437|KIF3A ENSG00000132703|APCS ENSG00000138185|ENTPD1 ENSG00000138760|SCARB2 ENSG00000138813|C4orf17 ENSG00000144840|RABL3 ENSG00000147488|ST18 ENSG00000164307|ARTS1\_HUMAN ENSG00000165195|PIGA ENSG00000171451|DSEL ENSG00000177483|NP\_001073973.1 ENSG00000185149|NPY2R ENSG00000198042|RBM13 ENSG00000203965|NP\_115813.1 ENSG00000204961|PCDHA9 ENSG00000103932|RPAP1 ENSG00000124212|PTGIS ENSG00000130244|Q17RN3-2 ENSG00000131368|MRPS25 ENSG00000135116|HRK ENSG00000137198|GMPR ENSG00000143110|C1orf162 ENSG00000146755|TRIM50 ENSG00000152291|TGOLN2 ENSG00000158445|KCNB1 ENSG00000160051|IQCC ENSG00000174837|EMR1 ENSG00000177947|ODF3 ENSG00000180185|FAHD1 ENSG00000181757|SLC22A18AS ENSG00000182968|SOX1 ENSG00000186118|Q6PEX7\_HUMAN ENSG00000198077|CYP2A7 ENSG00000204325|Q9H614\_HUMAN ENSG00000204681|GABBR1 ENSG00000252723|NP\_079349.1 ENSG00000076382|SPAG5 ENSG00000094880|CDC23 ENSG00000105849|TWISTNB ENSG00000107372|ZFAND5 ENSG00000112183|RBM24 ENSG00000119541|VPS4B ENSG00000123612|ACVRC1 ENSG00000124875|CXCL6 ENSG00000126821|SGPP1 ENSG00000131171|SH3BGR1 ENSG00000136536|MARCH7 ENSG00000138779|Q9HCM6\_HUMAN ENSG00000139352|ASCL1 ENSG00000154889|MPPE1 ENSG00000162521|RBBP4 ENSG00000164930|FZD6 ENSG00000171988|JMJD1C ENSG00000176049|JAKMIP2 ENSG00000176766|THBD ENSG00000182139|Q9FPU4\_HUMAN ENSG00000198770|Q9H396\_HUMAN ENSG00000203668|CHML ENSG00000203864|C1orf137 ENSG00000204706|Q6ZVS9\_HUMAN ENSG00000004660|CAMKK1 ENSG00000075790|BCAP29 ENSG00000100228|RAB36 ENSG00000106144|CASP2 ENSG00000106330|MOSPD3 ENSG00000107554|DNMBP ENSG00000116151|MORN1 ENSG000001122304|Q6ZMM0\_HUMAN ENSG00000129951|NP\_079164.1 ENSG00000134569|LRP4 ENSG00000134955|SLC37A2 ENSG00000135245|HIG2\_HUMAN ENSG00000136653|RASSF5 ENSG00000142513|ACPT ENSG00000143257|NR1I3 ENSG00000160957|RECQL4 ENSG00000164711|LPAL2 ENSG00000171169|C9orf90 ENSG00000176994|SMCR8 ENSG00000178796|Q8N921\_HUMAN ENSG00000183785|PEX26 ENSG00000184076|NP\_001003684.1 ENSG00000186407|CD300E ENSG00000196979|NP\_997392.1 ENSG00000204820|Q96NT9\_HUMAN ENSG000000066294|CD84 ENSG0000010072571|HMMR ENSG00000102804|WDR70 ENSG00000112280|TSC22D1 ENSG00000154359|LONRF1 ENSG00000116332|UBE2D3 ENSG00000116161|CACYPB ENSG00000122482|ZNF644 ENSG00000124343|XG ENSG00000131375|CAPN7 ENSG00000132639|SNAP25 ENSG00000133805|AMPD3 ENSG00000136929|HEMGN ENSG00000143476|DTL ENSG00000149345|U2D3L\_HUMAN ENSG00000152133|CCDC75 ENSG00000153292|GPR110 ENSG00000163762|TM4SF18 ENSG00000165806|CASP7 ENSG00000170037|CNTROB ENSG00000197020|ZNF100 ENSG00000197745|SCGB1D4 ENSG00000204271|SPIN3



ATGGCCT ENSG00000100395|L3MBTL2 ENSG00000101193|C20orf11 ENSG00000105251|SHD ENSG00000126467|TSKS\_HUMAN ENSG00000151445|C14orf133 ENSG00000163526|TUBA4B ENSG00000163930|BAP1 ENSG00000166340|TPP1 ENSG00000169921|Q75L30\_HUMAN ENSG00000174282|ZBTB4 ENSG00000180598|NP\_057296.1 ENSG00000181577|NP\_694978.2 ENSG00000183955|SETD8 ENSG00000188277|LOC643338 ENSG00000204266|NM\_001025448 ENSG00000205452|Q6ZQQ9\_HUMAN ENSG00000171575|TRIB2 ENSG00000106804|C5 ENSG00000112796|ENPP5 ENSG00000115839|RAB3GAP1 ENSG00000123096|SSPN ENSG00000123952|RAB38 ENSG00000128039|NP\_078868.1 ENSG00000128739|SNRPN ENSG00000136897|MRPL50 ENSG00000137819|PAQR5 ENSG00000139726|DENR ENSG00000153002|CPB1 ENSG00000154945|ANKRD40 ENSG00000156006|NAT2 ENSG00000162814|SPATA17 ENSG00000165516|KLHDC2 ENSG00000167618|LAIR2 ENSG00000169435|RASSF6 ENSG00000173068|BNC2 ENSG00000175105|ZNF654 ENSG00000176201|GBA3 ENSG00000183035|CYLC1 ENSG00000185158|LRRC37B ENSG00000187626|ZKSCAN4 ENSG00000197312|RSC1A1

ATGGCTT ENSG00000008283|CYB561 ENSG00000063660|GPC1 ENSG00000100605|ITPK1 ENSG00000102879|CORO1A ENSG00000111737|RAB35 ENSG00000114383|TUSC2 ENSG00000117461|PIK3R3 ENSG00000117899|MESDC2 ENSG00000130035|GALNT8 ENSG00000134825|C11orf10 ENSG00000135423|GLS2 ENSG00000139725|RHOF ENSG00000154957|ZNF18 ENSG00000155926|SLA ENSG00000157514|TSC22D3 ENSG00000158863|RAI16 ENSG00000165046|LETM2 ENSG00000166261|ZNF202 ENSG00000170485|NPAS2 ENSG00000172375|TMEM24 ENSG00000175077|RTP1 ENSG00000177885|GRB2 ENSG00000181274|FRAT2 ENSG00000181938|GINS3 ENSG00000065609|SNAP91 ENSG00000077254|USP33 ENSG00000077279|DCX ENSG00000082556|OPRK1 ENSG00000104043|ATP8B4 ENSG00000106028|SSBP1 ENSG00000115944|COX7A2L ENSG00000121089|NACA3P ENSG00000121594|CD80 ENSG00000137561|TPPA ENSG00000138190|EXOC6 ENSG00000139352|ASCL1 ENSG00000142875|PRKACB ENSG00000146282|RARS2 ENSG00000147471|PROSC ENSG00000148225|WDR31 ENSG00000148225|WDR31 ENSG00000173848|NET1 ENSG00000177324|CXorf20 ENSG00000153930|ANKFN1 ENSG00000154007|ASB17 ENSG00000158042|MRPL17 ENSG00000162699|Q96RF1\_HUMAN ENSG00000169330|K1024\_HUMAN ENSG00000170748|HNRGT\_HUMAN ENSG00000196323|ZBTB44 ENSG00000198673|FAM19A2 ENSG00000198825|INPP5F ENSG000000008382|MPND ENSG00000011454|RABGAP1 ENSG00000033327|GAB2 ENSG00000050426|LETMD1 ENSG00000068354|TBC1D25 ENSG00000102057|KCND1 ENSG00000103089|FA2H ENSG00000119383|PPP2R4 ENSG00000134882|UBAC2 ENSG00000136807|CDK9 ENSG00000144580|RQCD1 ENSG00000160094|ZNF362 ENSG00000166133|RPUSD2 ENSG00000172426|C6orf206 ENSG00000172965|Q96C48\_HUMAN ENSG00000174586|ZNF497 ENSG00000181585|TMTHFR ENSG00000181585|TMIE ENSG00000196810|GIYD2 ENSG00000196810|NP\_443093.2 ENSG00000205052|Q6ZSS1\_HUMAN ENSG00000069275|NUCKS1 ENSG00000094755|GABRP ENSG00000103310|ZP2 ENSG00000105132|ZNF550 ENSG00000106258|CYP3A5 ENSG00000111490|Q9Y2I9\_HUMAN ENSG00000120948|TARDBP ENSG00000123472|ATPAF1 ENSG00000132207|SULT1A3 ENSG00000133138|TBC1D8B ENSG00000134755|DSC2 ENSG00000139318|DUSP6 ENSG00000143384|MCL1 ENSG00000165156|ZHX1 ENSG00000169605|GKN1 ENSG00000178741|COX5A ENSG00000184943|NP\_443103.1 ENSG00000198339|HIST1H4I

ATGGGGA ENSG00000001461|NPAL3 ENSG00000005381|MPO ENSG00000027644|INSRR ENSG00000072071|LPHN1 ENSG00000112599|GUCA1B ENSG00000131471|AOC3 ENSG00000137486|ARRB1 ENSG00000139112|GABARAPL1 ENSG00000144596|GRIP2 ENSG00000150477|KIAA1328 ENSG00000160886|LY6K ENSG00000163898|LIPH ENSG00000166924|NP\_775835.2 ENSG00000167508|MVD ENSG00000169084|ZBED1 ENSG00000179388|EGR3 ENSG00000182492|BGN ENSG00000185359|HGS ENSG00000188743|Q9P169\_HUMAN ENSG00000198369|SPRED2 ENSG00000204252|HLA-DOA ENSG00000204394|VARS ENSG00000204658|MOG ENSG00000069122|GPR116 ENSG00000070669|ASNS ENSG00000083168|MYST3 ENSG00000109686|NP\_001009555.2 ENSG00000111785|RIC8B ENSG00000113231|PDE8B ENSG00000115368|WDR75 ENSG00000120616|EPC1 ENSG00000133083|DCLK1 ENSG00000144460|Q96NL2\_HUMAN ENSG00000144821|MYH15 ENSG00000146038|CDCC2 ENSG00000153012|LGI2 ENSG00000153823|PID1 ENSG00000154474|KBTBD10 ENSG00000163600|ICOS ENSG00000164265|SCGB3A2 ENSG00000166479|TXNDC10 ENSG00000167618|LAIR2 ENSG00000168916|ZNF608 ENSG00000169271|HSPB3 ENSG00000181924|CHCHD8 ENSG00000185515|BRCC3 ENSG00000186272|ZNF17 ENSG00000186879|NM\_178121 ENSG00000196785|Q8N862\_HUMAN ENSG00000198018|ENTPD7

ATGGTAC ENSG00000101265|RASSF2 ENSG00000101441|CST4 ENSG00000105492|SIGLEC6 ENSG00000114554|PLXNA1 ENSG00000114993|RTKN ENSG00000122863|CHST3 ENSG00000128342|LIF ENSG00000130734|ATG4D ENSG00000138172|FAM26B ENSG00000141699|NP\_835227.1 ENSG00000146067|Q9NW00\_HUMAN ENSG00000157881|PANK4 ENSG00000160117|ANKRD41 ENSG00000162078|U773\_HUMAN ENSG00000162367|TAL1 ENSG00000163932|PRKCD ENSG00000166333|ILK ENSG00000169371|SNUPN ENSG00000170369|CST2 ENSG00000170373|CST1 ENSG00000178188|SH2B1 ENSG00000180229|NP\_001019853.1 ENSG00000182319|SG223\_HUMAN ENSG00000182372|C8orf61 ENSG00000183519|NSUN5B ENSG00000197600|MYBPHL ENSG00000198879|SFBMT2 ENSG00000061987|MON2 ENSG00000067646|ZFY ENSG000000081386|ZNF510 ENSG000001100425|BRD1 ENSG00000112651|MRPL2 ENSG00000120948|TARDBP ENSG00000124228|DDX27 ENSG00000151292|CSNK1G3 ENSG00000153495|C13orf16 ENSG00000153923|CLCA3 ENSG00000166971|AKTIP ENSG00000186222|CNO ENSG00000196860|NP\_997260.1

ATGGTCA ENSG00000002919|SNX11 ENSG00000042832|TG ENSG00000064490|RFYXK ENSG00000070759|TESK2 ENSG00000075035|WSDC2 ENSG00000108852|MPP2 ENSG00000119408|NEK6 ENSG00000130612|Q6ZSU1\_HUMAN ENSG00000131746|TNS4 ENSG00000134668|SPOCD1 ENSG00000135436|C12orf25 ENSG00000138629|UBL7 ENSG00000160219|GAB3 ENSG00000162599|NFIA ENSG00000166473|PKDL12 ENSG00000166716|ZNF592 ENSG00000183633|C14orf132 ENSG00000188828|GLRA4 ENSG00000072042|RDH11 ENSG00000100744|C14orf129 ENSG00000111790|FGFR10P2 ENSG00000122958|VPS26A ENSG00000124203|C20orf174 ENSG00000129514|FOXA1 ENSG00000129699|NP\_067644.2 ENSG00000130338|TULP4 ENSG00000133124|IRS4 ENSG00000140262|TCF12 ENSG00000149289|ZC3H12C ENSG00000149970|CNKSR2 ENSG00000150347|ARID5B ENSG00000150756|NP\_954584.1 ENSG00000151490|PTPRO ENSG00000153721|MAG11 ENSG00000155100|OTUD6B ENSG00000163114|PDHA2 ENSG00000164169|NP\_612373.2 ENSG00000164182|NDUFA12L ENSG00000164308|NP\_071745.1 ENSG00000166573|GALR1 ENSG0000016927|MS4A7 ENSG00000174839|FAM116A ENSG00000175419|RFESD ENSG00000180044|Q8NS84\_HUMAN ENSG00000185129|PURA ENSG00000187806|NP\_001073931.1 ENSG00000189323|ZNF510 ENSG0000006118|TMEM132A ENSG00000102226|USP11 ENSG00000104142|VPS18 ENSG00000107317|PTGDS ENSG00000110195|FOLR1 ENSG00000124444|ZNF576 ENSG00000125285|SOX21 ENSG00000127452|FBXL12 ENSG00000131061|ZNF341 ENSG00000142252|GEMIN7 ENSG00000146063|TRIM41 ENSG00000147382|FAM58A ENSG00000147570|DNAJC5B ENSG00000149798|CDC42EP2 ENSG00000155660|PDIA4 ENSG00000159335|PTMS ENSG00000160471|COX6B2 ENSG00000161642|ZNF385 ENSG00000171303|KCNK3 ENSG00000177234|C10orf85 ENSG00000204494|Q68CW3\_HUMAN ENSG00000044459|C9orf39 ENSG00000071539|TRIP13 ENSG00000101981|F9 ENSG00000104067|TJP1 ENSG00000113140|SPARC ENSG00000126010|GRPR ENSG00000127603|MACF1 ENSG00000134644|PUM1 ENSG00000135045|C9orf40 ENSG00000139117|CPNE8 ENSG00000152689|RASGRP3 ENSG00000154999|MRPS17 ENSG00000160062|ZBTB8 ENSG00000164494|PDSS2 ENSG00000164616|FBXL21 ENSG00000166927|MS4A7 ENSG00000169607|CKAP2L ENSG00000174298|NP\_694572.1 ENSG00000196072|BLOC1S2 ENSG00000197928|ZNF677 ENSG00000205769|Q6ZUR9\_HUMAN

ATGGTGC ENSG00000058085|LAMC2 ENSG00000101188|NTRS1 ENSG00000130032|PRRG3 ENSG00000130035|GALNT8 ENSG00000131153|GINS2 ENSG00000132142|ACACA ENSG00000134369|NAV1 ENSG00000147065|MSN ENSG00000169918|OTUD7A ENSG00000173175|ADCY5 ENSG00000176658|MYO1D ENSG00000181350|C17orf76 ENSG00000183059|XR\_017784.1 ENSG00000204118|NAP1L6 ENSG00000204344|STK19 ENSG00000204633|ACTN3 ENSG00000205814|Q6ZRCO\_HUMAN ENSG00000095203|EPB41L4B ENSG00000106305|MCA2\_HUMAN ENSG00000109099|PMP22 ENSG00000132313|MRPL35 ENSG00000137267|TUBB2A ENSG00000137558|PI15 ENSG00000138336|CXCC6 ENSG00000139372|TDG ENSG00000143341|HMCN1 ENSG00000148229|POLE3 ENSG0000010517827|FMNL2 ENSG00000163449|TMEM169 ENSG00000163600|ICOS ENSG00000168542|COL3A1 ENSG00000181004|BBS12 ENSG00000182197|EXT1 ENSG00000186019|ZNF224 ENSG00000189043|NDUFA4 ENSG00000198872|PEG10

perfect: ATGGTGC GCACCAT hsa-miR-29c taGCACCATttgaaatcggt 2  
perfect: ATGGTGC GCACCAT hsa-miR-29b taGCACCATttgaaatcagtgtt 2  
perfect: ATGGTGC GCACCAT hsa-miR-29a taGCACCATtctgaaatcggtt 2

ATGGTTC ENSG00000007968|E2F2 ENSG00000056345|ITGB3 ENSG00000068985|PAGE1 ENSG00000110446|SLC15A3 ENSG00000114982|NP\_060461.3 ENSG00000125618|PAX8 ENSG00000126067|PSMB2 ENSG00000148337|CI21 ENSG00000151779|NP\_056993.2 ENSG00000158769|F11R ENSG00000164574|GALNT10 ENSG00000167311|ART5 ENSG00000167641|PPP1R14A ENSG00000180210|F2 ENSG00000182329|Q8IVF9\_HUMAN ENSG00000198632|NP\_777590.1 ENSG00000204228|HSD17B8 ENSG00000079931|MOXD1 ENSG00000096060|FKBP5 ENSG00000106772|KIAA0367 ENSG00000111913|C6orf32 ENSG00000112624|KIAA0240 ENSG00000115963|RND3 ENSG00000116285|ERRF11 ENSG00000124172|ATP5E ENSG00000130770|ATPIF1 ENSG00000134042|MRO ENSG00000134242|PTPN22 ENSG00000134982|APC ENSG00000139610|ELA1 ENSG00000169271|HSPB3 ENSG00000170759|KIF5B ENSG00000172000|ZNF556 ENSG00000180389|NR\_002162.1

ATGGTTG ENSG000000025772|TOMM34 ENSG00000100764|PSMC1 ENSG00000111641|NOL1 ENSG00000111669|TPI1 ENSG00000125995|C20orf52 ENSG00000126457|PRMT1 ENSG00000132323|ILKAP ENSG00000141084|RANBP10 ENSG00000141316|SPACA3 ENSG00000147100|SLC16A2 ENSG00000158161|EYA3 ENSG00000158769|F11R ENSG00000165138|ANKS6 ENSG00000171722|C1orf111 ENSG00000184209|NP\_008951.1 ENSG00000185744|TNT\_HUMAN ENSG00000186301|Q49A61\_HUMAN ENSG00000198467|TFM2 ENSG00000203908|NP\_001017361.1 ENSG00000205011|NP\_001007547.1 ENSG00000065613|SLK ENSG00000069974|RAB27A ENSG00000104331|TMPAD1 ENSG00000107518|ATRN1 ENSG00000112182|BACH2 ENSG00000115232|ITGA4 ENSG00000119042|SATB2 ENSG00000123104|ITPR2 ENSG00000129699|NP\_067644.2 ENSG00000141446|ESCO1 ENSG00000143442|POGZ ENSG00000144410|CPO ENSG00000150048|CLEC1A ENSG00000174792|C4orf26 ENSG00000180138|CSNK1A1L ENSG00000182944|EWSR1 ENSG00000196955|PIK3R4 ENSG00000205246|NP\_001005472.1 ENSG00000205604|Q6ZUP5\_HUMAN

ATGTAAA ENSG00000088812|ATRN ENSG00000090776|EFNB1 ENSG00000095383|TBC1D2 ENSG00000103423|DNAJA3 ENSG00000110660|SLC35F2 ENSG00000112562|SMOC2 ENSG00000112941|POLS ENSG00000127377|CRYGN ENSG00000128645|HOXD1 ENSG00000132164|SLC6A11 ENSG00000137460|NP\_203751.2 ENSG00000139718|SETD1B ENSG00000141002|TCF25 ENSG00000143502|SUSD4 ENSG00000157240|FZD1 ENSG00000162426|SLC45A1 ENSG00000162591|MEGFP1 ENSG00000167526|RPL13 ENSG00000170100|Q96MU6-2 ENSG00000170779|CDC4A ENSG00000171603|CLSTN1 ENSG00000171711|DEFB4 ENSG00000173281|PPP1R3B ENSG00000177257|BD02\_HUMAN ENSG00000178028|DMAP1 ENSG00000178235|SLITRK1 ENSG00000179523|Q8TAS2\_HUMAN ENSG00000181555|SETD2 ENSG00000187516|CXorf27 ENSG00000196263|ZNF471 ENSG00000198182|ZNF607 ENSG0000012660|ELOVL5 ENSG00000049130|KITLG ENSG00000066777|ARFGEF1 ENSG00000068912|C2orf30 ENSG00000078081|LAMP3 ENSG00000083097|DOPEY1 ENSG00000101191|DIDO1 ENSG00000101745|ANKRD12 ENSG00000105708|ZNF14 ENSG00000110435|PDHX ENSG00000112486|CCR6 ENSG00000113384|GOLPH3 ENSG00000113742|CPEB4 ENSG00000115380|EFEMP1 ENSG00000116194|ANGPTL1 ENSG00000117616|C1orf63 ENSG00000120251|GRIA2 ENSG00000121207|LRAT ENSG00000121957|GPM2 ENSG00000124205|EDN3 ENSG00000124935|SCGB1D2 ENSG00000127314|RAP1B ENSG00000128951|DUT ENSG00000130699|TAF4 ENSG00000134058|CDK7 ENSG00000136997|MYC ENSG00000137871|SUHW4 ENSG00000139505|MTMR6 ENSG00000144635|DYNC1L1 ENSG00000145703|IQGAP2 ENSG00000153790|C7orf31 ENSG00000162086|ZNF75A ENSG00000164171|ITGA2 ENSG00000165525|SDCCAG1 ENSG00000166598|HSP90B1 ENSG00000166896|RXCC6BP1 ENSG00000168267|PTF1A ENSG00000168515|SCGB1D1 ENSG00000171202|TMEM126A ENSG00000172594|SMPDL3A ENSG00000173588|CCDC41 ENSG00000175054|ATR ENSG00000176276|hCG\_1757335 ENSG00000177932|ZNF354C ENSG00000185246|PRPF39 ENSG00000188014|NP\_619643.2 ENSG00000188868|ZNF563 ENSG00000196826|ZNF709 ENSG00000198087|CD2AP ENSG00000198301|SDAD1 ENSG00000198521|ZNF43 ENSG00000204351|SKIV2L ENSG00000204789|ZNF204 ENSG00000205325|NP\_001001684.1

ATGTAAT ENSG00000069812|HES2 ENSG00000101265|RASSF2 ENSG00000102076|OPN1LW ENSG00000108671|PSMD11 ENSG00000112159|MDN1 ENSG00000121904|CSMD2 ENSG00000127241|MASP1 ENSG00000129473|BCL2L2 ENSG00000130182|ZSCAN10 ENSG00000142583|SLC2A5 ENSG00000147380|OPN1MW ENSG00000160785|SLC25A44 ENSG00000165238|WNK2 ENSG00000166160|OPN1MW2 ENSG00000169006|NTRR2 ENSG00000174370|C11orf45 ENSG00000179314|WSCD1 ENSG00000198174|Q8N9P1\_HUMAN ENSG00000033867|SLC4A7 ENSG00000057252|SOAT1 ENSG00000067113|PPAP2A ENSG00000074803|SLC12A1 ENSG00000077147|TM9SF3 ENSG00000082153|BZW1 ENSG00000102290|PCDH11X ENSG00000109133|TMEM33 ENSG00000109163|GNRHR ENSG00000109854|HTATIP2 ENSG00000111142|METAP2 ENSG00000112851|ERBB2IP ENSG00000115464|USP34 ENSG00000116741|RGS2 ENSG00000120658|ENOX1 ENSG00000126777|KTN1 ENSG00000127980|PEX1 ENSG00000129480|C14orf126 ENSG00000134419|RPS15A ENSG00000134539|KLRD1 ENSG00000136099|PCDH8 ENSG00000136897|MRPL50 ENSG00000137509|PRCP ENSG00000140153|WDR20 ENSG00000146757|ZNF92 ENSG00000151657|KIN ENSG00000152266|PTH ENSG00000156136|DKR ENSG00000159128|IFNGR2 ENSG00000161298|ZNF382 ENSG00000162616|DNAJB4 ENSG00000165119|HNRPK ENSG00000165650|PDZD8 ENSG00000167766|ZNF83 ENSG00000168246|UBTD2 ENSG00000169131|ZNF354A ENSG00000175104|TRAF6 ENSG00000177189|RPS6KA3 ENSG00000180611|C3orf59 ENSG00000183735|TBK1 ENSG00000186700|Q8N6F3\_HUMAN ENSG00000188596|C12orf63 ENSG00000188647|PTAR1 ENSG00000189157|Q6ZV65\_HUMAN ENSG00000196247|ZNF588 ENSG00000197484|Q6ZRH8\_HUMAN ENSG00000204201|Q49A40\_HUMAN ENSG00000204789|ZNF204 ENSG00000205325|NP\_001001684.1

perfect: ATGTAAT ATTACATGccaatctc 0

ATGTACA ENSG00000006740|RICH2\_HUMAN ENSG00000023171|GRAMD1B ENSG00000068650|ATP11A ENSG00000086548|CEACAM6 ENSG00000100197|CYP2D6 ENSG00000105613|MAST1 ENSG00000106290|TAF6 ENSG00000119487|MAPKAP1 ENSG00000121152|NCAPH ENSG00000128045|RASL11B ENSG00000131355|EMR3 ENSG00000131944|C19orf40 ENSG00000139797|RNF113B ENSG00000140992|PDPK1 ENSG00000143217|PVRL4 ENSG00000143258|USP21 ENSG00000143549|TPM3 ENSG00000143590|EFNA3 ENSG00000158480|SPATA2 ENSG00000158864|NDUFS2 ENSG00000159388|BTG2 ENSG00000166444|ST5 ENSG00000167207|NOD2 ENSG00000169375|SIN3A ENSG00000171533|MAP6 ENSG00000171603|CLSTN1 ENSG00000173218|VANGL1 ENSG00000180447|GAS1 ENSG00000197506|SLC28A3 ENSG00000198561|CTNND1 ENSG00000203784|LELP1 ENSG00000205702|CYP2D7P1 ENSG00000005810|MYCBP2 ENSG0000010818|HIVEP2 ENSG00000066697|TMEFF1 ENSG00000072657|TRHD ENSG00000075391|RASAL2 ENSG00000102189|EEA1 ENSG00000105793|GTBP10 ENSG00000108296|CCDC49 ENSG00000108510|THRAP1 ENSG00000109118|PHF12 ENSG00000115008|IL1A ENSG00000121440|PDZRN3 ENSG00000121892|NP\_056015.1 ENSG00000122877|EGR2 ENSG00000126858|RHOT1 ENSG00000127993|NP\_115496.2 ENSG00000132842|AP3B1 ENSG00000135409|AMHR2 ENSG00000138138|ATAD1 ENSG00000138271|GPR87 ENSG00000138779|Q9HCM6\_HUMAN ENSG00000139793|MBNL2 ENSG00000144837|PLA1A ENSG00000146678|IGFBP1

|         |                              |                                |                                |                                |                             |                                |                              |                              |
|---------|------------------------------|--------------------------------|--------------------------------|--------------------------------|-----------------------------|--------------------------------|------------------------------|------------------------------|
|         | ENSG00000148303 SNORD36A     | ENSG00000149218 ENDOD1         | ENSG00000151834 GABRA2         | ENSG00000152910 CNTNAP4        | ENSG00000153896 ZNF599      | ENSG00000165659 DACH1          | ENSG00000166986 MARS         | ENSG00000168348 INSM2        |
|         | ENSG00000170558 CDH2         | ENSG00000173258 ZNF483         | ENSG00000173376 C4orf31        | ENSG00000174437 ATP2A2         | ENSG00000179833 SERTAD2     | ENSG00000180138 CSNK1A1L       | ENSG00000183337 BCOR         | ENSG00000186297 GABRA5       |
| ATGTACG | ENSG00000187672 ERC2         | ENSG00000197302 Q7Z2F6_HUMAN   | ENSG00000099800 TIMM13         | ENSG00000100665 CARD10         | ENSG00000110844 PRPF40B     | ENSG00000119919 NKX2-3         | ENSG00000122854 SFTPA2B      | ENSG00000126768 TIMM17B      |
|         | ENSG00000130714 POMT1        | ENSG00000130803 ZNF317         | ENSG00000132911 NMUR2          | ENSG00000135801 TAF5L          | ENSG00000137331 IER3        | ENSG00000141985 SH3GL1         | ENSG00000142541 RPL13A       | ENSG00000155066 PROM2        |
|         | ENSG00000157330 C1orf158     | ENSG00000157483 MYO1E          | ENSG00000159348 CYB5R1         | ENSG00000163016 NP_660343.1    | ENSG00000165125 TRPV6       | ENSG00000165802 NELF           | ENSG00000167895 TMC8         | ENSG00000168394 TAP1         |
|         | ENSG00000170100 Q9GMU6-2     | ENSG00000170653 ATF7           | ENSG00000179886 TIGD5          | ENSG00000181016 NP_872403.1    | ENSG00000182314 SFTPA2      | ENSG00000185736 ADARB2         | ENSG00000196367 TRRAP        | ENSG00000197461 PDGFA        |
|         | ENSG0000012817 JARID1D       | ENSG00000061455 PRDM6          | ENSG00000105398 SULT2A1        | ENSG00000114784 EIF1B          | ENSG00000115761 NOL10       | ENSG00000119865 C2orf32        | ENSG00000120539 MASTL        | ENSG00000127928 GNMT1        |
|         | ENSG00000140395 WDR61        | ENSG00000143971 ETAA1          | ENSG00000147251 DOCK11         | ENSG00000154518 ATP5G3         | ENSG00000154856 APCDD1      | ENSG00000159267 HLC2           | ENSG00000164406 LEAP2        | ENSG00000164944 KIAA1429     |
|         | ENSG00000165494 PCF11        | ENSG00000165985 C1QL3          | ENSG00000167384 ZNF180         | ENSG00000185306 C12orf56       | ENSG00000187155 CU085_HUMAN | ENSG00000188295 ZNF669         | ENSG00000204116 CHIC1        | ENSG00000206221 Q6ZVX8_HUMAN |
| ATGTATA | ENSG00000051009 C11orf56     | ENSG00000055483 USP36          | ENSG00000070495 JMJ6           | ENSG00000099204 ABLIM1         | ENSG00000100302 RASD2       | ENSG00000101670 LIPG           | ENSG00000103510 MYST1        | ENSG00000111087 GLI1         |
|         | ENSG00000118245 TNPI1        | ENSG00000121152 NCAPH          | ENSG00000125285 SOX21          | ENSG00000126464 PRR12          | ENSG00000130147 SH3BP4      | ENSG00000133149 TEX13A         | ENSG00000134825 C11orf10     | ENSG00000142686 NP_689587.1  |
|         | ENSG00000145949 SGK85_HUMAN  | ENSG00000146666 Q96IP2_HUMAN   | ENSG00000155926 SLA            | ENSG00000157933 SKI            | ENSG00000158220 FAM62C      | ENSG00000163882 POLR2H         | ENSG00000164778 EN2          | ENSG00000166436 TRIM66       |
|         | ENSG00000166965 RCDD1        | ENSG00000179240 Q3ZCU0_HUMAN   | ENSG00000180447 GAS1           | ENSG00000183691 NOG            | ENSG00000184675 FAM123B     | ENSG00000186577 C6orf1         | ENSG00000204425 Q6ZP74_HUMAN | ENSG00000205015 Q6ZNV2_HUMAN |
|         | ENSG00000205434 Q6ZU34_HUMAN | ENSG00000205851 Q4G0H1_HUMAN   | ENSG00000093183 SEC22C         | ENSG00000100206 DMC1           | ENSG00000100483 C14orf138   | ENSG00000100625 SIX4           | ENSG00000106066 CPVL         | ENSG00000113441 LNPEP        |
|         | ENSG00000114354 TFG          | ENSG00000115425 PECR           | ENSG000001115750 TAF1B         | ENSG00000117335 CD46           | ENSG00000117614 SYF2        | ENSG00000117906 RCN2           | ENSG00000123562 MORF4L2      | ENSG00000132356 PRKAA1       |
|         | ENSG00000134765 DSC1         | ENSG00000136243 NUPL2          | ENSG00000137273 FOXF2          | ENSG00000137807 KIF23          | ENSG00000138138 ATAD1       | ENSG00000138182 MPHOSPH1       | ENSG00000138660 C4orf16      | ENSG00000139233 C12orf31     |
|         | ENSG00000139826 ABHD13       | ENSG00000145687 SSBP2          | ENSG00000151834 GABRA2         | ENSG00000152254 G6PC2          | ENSG00000162630 B3GALT2     | ENSG00000162695 SLC30A7        | ENSG00000164109 MAD2L1       | ENSG00000165355 FBXO33       |
| ATGTATG | ENSG00000165813 C10orf118    | ENSG00000173418 NAT5           | ENSG00000174500 GCET2          | ENSG00000197601 MLSTD2         | ENSG00000204804 FAM27D1     | ENSG00000134809 TIMM10         | ENSG00000136444 RSAD1        | ENSG00000137054 POLR1E       |
|         | ENSG0000013523 ANGEL1        | ENSG00000047056 WDR37          | ENSG00000100078 PLA2G3         | ENSG00000106331 PAX4           | ENSG00000112514 CUYA        | ENSG00000170276 HSPB2          | ENSG00000173163 COMMD1       | ENSG00000173638 SLC19A1      |
|         | ENSG00000142513 ACPT         | ENSG00000146083 RNPA4          | ENSG00000166189 HPS6           | ENSG00000166398 KIAA0355       | ENSG00000167778 SPRYD3      | ENSG00000097800 FAM76A         | ENSG00000065911 MTHFD2       | ENSG00000067113 PPAP2A       |
|         | ENSG00000174564 IL20RB       | ENSG00000176749 CDK5R1         | ENSG00000179388 EGR3           | ENSG00000182318 ZSCAN22        | ENSG00000204657 OR2H2       | ENSG00000112541 PDE10A         | ENSG00000113441 LNPEP        | ENSG00000114480 GBE1         |
|         | ENSG00000072364 AFF4         | ENSG00000083223 ZCCHC6         | ENSG00000102910 LONP2          | ENSG00000106341 C7orf16        | ENSG00000111231 ATPBD1C     | ENSG00000132570 PCBD2          | ENSG00000134874 DZIP1        | ENSG00000140563 MCTP2        |
|         | ENSG00000116266 STXBP3       | ENSG00000118518 RNFI46         | ENSG00000125814 INAPB          | ENSG00000127947 PTPN12         | ENSG00000130021 HDHD1A      | ENSG00000153233 PTPRR          | ENSG00000154127 STS1_HUMAN   | ENSG00000156049 GNA14        |
|         | ENSG00000141646 SMAD4        | ENSG00000146250 PRSS35         | ENSG00000147509 RGSR2          | ENSG00000148835 TAF5           | ENSG00000151292 CSNK1G3     | ENSG00000162621 PLRG1          | ENSG00000171566 RAPH1        | ENSG00000173464 LRNASE11     |
|         | ENSG00000156469 MTERFD1      | ENSG00000162701 DENND1B        | ENSG00000165621 OXGR1          | ENSG00000165682 CLEC1B         | ENSG00000169510 CCDC68      | ENSG00000198824 C13orf8        | ENSG00000198836 OPA1         | ENSG00000203797 DDO          |
|         | ENSG00000176890 TYMS         | ENSG00000184719 C10orf59       | ENSG00000186377 CYP4X1         | ENSG00000197343 ZNF655         | ENSG00000198824 C13orf8     | ENSG00000198836 OPA1           | ENSG00000203797 DDO          |                              |
| ATGTATT | ENSG00000034063 UHRF1        | ENSG00000067191 CACNB1         | ENSG00000072840 EVC            | ENSG00000077942 FBLN1          | ENSG00000099330 OCEL1       | ENSG00000099954 CECR2          | ENSG00000099995 SF3A1        | ENSG00000102962 CCL22        |
|         | ENSG00000114999 TTL          | ENSG00000128594 LRRC4          | ENSG00000129757 CDKN1C         | ENSG00000133985 TTC9           | ENSG00000137460 NP_203751.2 | ENSG00000142186 SCYL1          | ENSG00000143178 TBX19        | ENSG00000143816 WNT9A        |
|         | ENSG00000144036 EXOC6B       | ENSG00000144711 IQSEC1         | ENSG00000148985 NP_055304.1    | ENSG00000148985 NP_055304.1    | ENSG00000160714 UBE2Q1      | ENSG00000166900 STX3           | ENSG00000171456 ASXL1        | ENSG00000175781 Q9H5L9_HUMAN |
|         | ENSG00000178235 SLITRK1      | ENSG00000182606 TRAK1          | ENSG00000185955 NP_001004323.1 | ENSG00000185955 NP_001004323.1 | ENSG00000198160 MIER1       | ENSG00000203788 Q6ZMM1_HUMAN   | ENSG00000204390 HSPA1L       | ENSG00000204390 HSPA1L       |
|         | ENSG00000104671 DCTN6        | ENSG00000107566 CHUK           | ENSG00000111834 RSHL3          | ENSG00000112115 IL17A          | ENSG00000116688 MFN2        | ENSG00000118197 DDX59          | ENSG00000119917 IFIT3        | ENSG00000120937 NPPB         |
|         | ENSG00000123178 C13orf1      | ENSG00000127720 C12orf26       | ENSG00000136810 TXN3           | ENSG00000138385 SSB            | ENSG00000140600 SH3GL3      | ENSG00000142621 FHAD1          | ENSG00000144048 DUSP11       | ENSG00000144820 GPR128       |
|         | ENSG00000145740 SLC30A5      | ENSG00000153714 C9orf150       | ENSG00000162891 IL20           | ENSG00000165120 C7orf45        | ENSG00000166411 IDH3A       | ENSG00000166670 MMP10          | ENSG00000166889 NP_689929.1  | ENSG00000168454 TXNDC2       |
|         | ENSG00000168679 SLC16A4      | ENSG00000168876 ANKRD49        | ENSG00000168952 STXBP6         | ENSG00000172139 SLC9A10        | ENSG00000174799 CEP135      | ENSG00000177879 AP3S1          | ENSG00000178403 NEUROG2      | ENSG00000182400 TRAPP6B      |
| ATGTCAA | ENSG00000183960 KCNH8        | ENSG00000187569 DPPA3          | ENSG00000188831 XR_017793.1    | ENSG00000198160 MIER1          | ENSG00000198646 NCOA6       | ENSG00000203788 Q6ZMM1_HUMAN   | ENSG00000204390 HSPA1L       | ENSG00000204390 HSPA1L       |
|         | ENSG00000100422 CERK         | ENSG00000119715 ESRRB          | ENSG00000120875 DUSP4          | ENSG00000130803 ZNF317         | ENSG00000132854 ANR38_HUMAN | ENSG00000162344 FGF19          | ENSG00000163220 S100A9       | ENSG00000164509 IL31RA       |
|         | ENSG00000164626 CKNK5        | ENSG00000166257 SCN3B          | ENSG00000167654 ATCAY          | ENSG00000170420 APOL6          | ENSG00000172053 QRS         | ENSG00000182329 Q8IVF9_HUMAN   | ENSG00000183128 FAM26A       | ENSG00000187686 XR_016979.1  |
|         | ENSG00000030966 KLHL13       | ENSG00000030966 KLHL13         | ENSG00000030966 KLHL13         | ENSG00000030966 KLHL13         | ENSG00000030966 KLHL13      | ENSG00000030966 KLHL13         | ENSG00000030966 KLHL13       | ENSG00000030966 KLHL13       |
|         | ENSG00000137962 ARHGAP29     | ENSG00000139117 CPNE8          | ENSG00000141542 RAB40B         | ENSG00000143199 NP_060887.1    | ENSG00000143952 VPS54       | ENSG00000144895 EIF2A          | ENSG00000145491 ROPN1L       | ENSG00000146282 RARS2        |
|         | ENSG00000146352 C6orf213     | ENSG00000164327 NP_689969.2    | ENSG00000170370 EMX2           | ENSG00000180882 XR_017823.1    | ENSG00000184258 CDR1        | ENSG00000186231 KLHL32         | ENSG00000187889 C1orf168     | ENSG00000198739 LRRTM3       |
| ATGTGAT | ENSG00000055163 CYFIP2       | ENSG00000083842 ZNF8           | ENSG00000092094 OSGEP          | ENSG00000103742 NP_066013.1    | ENSG00000116237 ICMT        | ENSG00000120889 TNFRSF10B      | ENSG00000130307 USHBP1       | ENSG00000130635 COL5A1       |
|         | ENSG00000132434 LANCL2       | ENSG00000133561 GIMAP6         | ENSG00000139574 NPF7           | ENSG00000143816 WNT9A          | ENSG00000148408 CACNA1B     | ENSG00000154917 RAB6B          | ENSG00000158470 B4GALT5      | ENSG00000164091 TMEM113      |
|         | ENSG00000168904 LRRC28       | ENSG00000169548 SUHW1          | ENSG00000170049 KCNAB3         | ENSG00000170099 SERPINA6       | ENSG00000170779 CDC4A       | ENSG00000175147 C1orf126       | ENSG00000183207 RUVBL2       | ENSG00000186118 Q6PEX7_HUMAN |
|         | ENSG00000189231 PSG3         | ENSG0000011465 DCN             | ENSG00000052723 NP_079349.1    | ENSG00000096746 HNRPH3         | ENSG00000101752 MTB1        | ENSG00000108176 DNAJC12        | ENSG00000110344 UBE4A        | ENSG00000112697 TMEM30A      |
|         | ENSG00000118564 FBXL5        | ENSG00000133112 TPT1           | ENSG00000135250 SRPK2          | ENSG00000141338 ABCA8          | ENSG00000147588 PMP2        | ENSG00000151552 QDPR           | ENSG00000154305 MIA3         | ENSG00000156802 ATAD2        |
|         | ENSG00000160336 ZNF761       | ENSG00000163625 WDFY3          | ENSG00000165030 NFIL3          | ENSG00000175818 HS3ST5         | ENSG00000178691 SUZ12       | ENSG00000179387 ELMOD2         | ENSG00000185272 RBM11        | ENSG00000196428 TSC22D2      |
|         | ENSG00000197203 Q8NAJ9_HUMAN | ENSG00000197415 VEPH1          | ENSG00000198482 ZNF808         | ENSG00000198538 ZNF28          | ENSG00000203857 HSD3B1      | ENSG00000203859 HSD3B2         | ENSG00000204201 Q49A40_HUMAN | ENSG00000204604 ZNF468       |
| ATGTGCT | ENSG00000090006 LTBP4        | ENSG00000100239 SAPS2          | ENSG00000115694 STK25          | ENSG00000123815 ADCK4          | ENSG00000125820 NKX2-2      | ENSG00000125875 TBC1D20        | ENSG00000132109 TRIM21       | ENSG00000139437 TCHP         |
|         | ENSG00000140092 FBLN5        | ENSG00000143891 GALM           | ENSG00000149600 COMM7          | ENSG00000153468 TCP10_HUMAN    | ENSG00000156453 PCDH1       | ENSG00000159495 TGM7           | ENSG00000159871 LYPD5        | ENSG00000160339 FCN2         |
|         | ENSG00000164385 C6orf195     | ENSG00000170608 FOXA3          | ENSG00000172893 DHC9           | ENSG00000175003 SLC22A1        | ENSG00000175130 MARCKSL1    | ENSG00000175892 Q8NAT4_HUMAN   | ENSG00000177370 TMEM22       | ENSG00000177468 OLIG3        |
|         | ENSG00000182566 CLEC4G       | ENSG00000183570 PCBP3          | ENSG0000013503 POLR3B          | ENSG0000014641 MDH1            | ENSG00000107242 PIP5K1B     | ENSG00000115705 TPO            | ENSG00000121931 C1orf103     | ENSG00000133119 RFC3         |
|         | ENSG00000137440 FGFBP1       | ENSG00000141759 TXNL4A         | ENSG00000154079 C6orf57        | ENSG00000154640 BTG3           | ENSG00000155876 RRAGA       | ENSG00000164442 CITED2         | ENSG00000174343 CHRNA9       | ENSG00000196597 ZNF782       |
| ATGTCTT | ENSG00000197579 TOPORS       | ENSG00000198088 NUP62CL        | ENSG00000198795 ZNF521         | ENSG00000033100 CHGUT_HUMAN    | ENSG00000042445 RETSAT      | ENSG00000100077 ADRBK2         | ENSG00000132749 MTL5         | ENSG00000132773 TOE1         |
|         | ENSG00000025800 KPNAB6       | ENSG00000149633 NP_001025035.1 | ENSG00000058445 KCNB1          | ENSG00000170876 TMEM43         | ENSG00000171388 APLN        | ENSG00000182866 LCK            | ENSG00000188428 TXNDC5       | ENSG00000197785 ATAD3A       |
|         | ENSG00000198951 NAGA         | ENSG00000035499 DEPDC1B        | ENSG00000079257 LXN            | ENSG00000082212 ME2            | ENSG00000089009 RPL6        | ENSG00000101974 ATP11C         | ENSG00000107643 MAPK8        | ENSG00000118276 B4GALT6      |
|         | ENSG00000119844 ATTPH        | ENSG00000122591 FAM126A        | ENSG00000130363 SHHL2          | ENSG00000132274 TRIM22         | ENSG00000138792 USP37       | ENSG00000138792 ENPEP          | ENSG00000139926 FRMD6        | ENSG00000148429 USP6NL       |
| ATGTGAC | ENSG00000166881 K0286_HUMAN  | ENSG00000169019 COMM8          | ENSG00000177511 ST8IA3         | ENSG00000177752 YIPF7          | ENSG00000204133 FAM33B      | ENSG00000205581 HMGN1          | ENSG00000144711 IQSEC1       | ENSG00000157606 SPATS1       |
|         | ENSG00000072134 EPN2         | ENSG00000089505 CMTM1          | ENSG00000103034 NDRG4          | ENSG00000109079 TNFAIP1        | ENSG00000112195 TREML2      | ENSG00000138942 RNF185         | ENSG00000183617 MRPL54       | ENSG00000185650 ZFP36L1      |
|         | ENSG00000158470 B4GALT5      | ENSG00000162063 CCNF           | ENSG00000164610 RP9            | ENSG00000165699 TSC1           | ENSG00000167774 NDUFA7      | ENSG00000174697 LEP            | ENSG00000183617 MRPL54       | ENSG00000185650 ZFP36L1      |
|         | ENSG00000198471 RTP2         | ENSG00000204602 Q6ZU19_HUMAN   | ENSG00000204862 CCDC28A        | ENSG00000153468 TCP10_HUMAN    | ENSG00000156453 PCDH1       | ENSG00000159495 TGM7           | ENSG00000159871 LYPD5        | ENSG00000160339 FCN2         |
|         | ENSG00000109063 MYH3         | ENSG00000110429 FBXO3          | ENSG00000112038 OPRM1          | ENSG00000112972 HMGC31         | ENSG00000113812 ACTR8       | ENSG00000118620 ZNF430         | ENSG00000120156 TEK          | ENSG00000123240 OPTN         |
|         | ENSG00000124406 ATP8A1       | ENSG00000128710 HOXD10         | ENSG00000136937 NCBP1          | ENSG00000138439 ALS2CR13       | ENSG00000139173 TMEM117     | ENSG00000141048 MYH4           | ENSG00000144224 UBXD2        | ENSG00000152382 TADA1L       |
|         | ENSG00000152684 PELO         | ENSG00000163781 TOPBP1         | ENSG00000163788 SNRK           | ENSG00000164182 NDUFA12L       | ENSG00000168813 ZNF507      | ENSG00000178604 NP_001034973.1 | ENSG00000196350 ZNF492       | ENSG00000196653 ZNF502       |
| ATGTGAT | ENSG00000196917 GPR81        | ENSG00000204604 ZNF468         | ENSG00000204829 CBWD7          | ENSG00000058400 CAMK2B         | ENSG00000088899 K0552_HUMAN | ENSG00000095015 MAP3K1         | ENSG00                       |                              |

ENSG00000170233|Q96AM0\_HUMAN ENSG00000170983|C8orf14 ENSG00000177741|Q96BN7\_HUMAN ENSG00000179914|ITLN1 ENSG00000183421|RIPK4 ENSG00000184923|FAM22A ENSG00000185198|PRSSL1 ENSG00000186951|PPARA  
ENSG00000196242|OR2C3 ENSG00000204380|Q6ZTQ2\_HUMAN ENSG00000205726|ITSN1 ENSG00000215479|MATR3 ENSG00000206428|DMRT3 ENSG000002073282|TPY3L ENSG000002081320|STK17B ENSG000002097033|SH3GLB1  
ENSG00000102893|PHKB ENSG00000124177|CHD6 ENSG00000124343|XG ENSG00000125772|GDE5\_HUMAN ENSG00000135185|C7orf23 ENSG00000135316|SYNCRIP ENSG00000136521|NDUFBF5 ENSG00000139209|SLC38A4  
ENSG00000140386|ZNF291 ENSG00000147614|ATP6V0D2 ENSG00000150961|SEC24D ENSG00000156469|MTERFD1 ENSG00000156976|EIF4A2 ENSG00000157224|CLDN12 ENSG00000158301|GPRASP2 ENSG00000164985|PSIP1  
ENSG00000168228|ZCCHC4 ENSG00000174799|CEP135 ENSG00000175040|CHST2 ENSG00000182504|LRRIQ2 ENSG00000183814|LIN9 ENSG00000185306|C12orf56 ENSG00000185344|ATP6V0A2  
perfect: ATGTTAA TAAACAT hsa-miR-302c\* tTAAACATgggggtacctgctg 1  
ATGTTAG ENSG00000066044|ELAVL1 ENSG00000099968|BCL2L13 ENSG00000103591|P34\_HUMAN ENSG00000118245|TNF1 ENSG00000142623|PADI1 ENSG00000147576|ADHFE1 ENSG00000156639|ZFAND3 ENSG00000164867|NOS3  
ENSG00000196668|NP\_997319.1 ENSG00000203985|LDRAD1 ENSG00000204252|HLA-DOA ENSG00000102974|CTCF ENSG00000111247|RAD51A1 ENSG00000112029|FBXO5 ENSG00000112486|CCR6 ENSG00000117868|FAM62B  
ENSG00000134709|HOOK1 ENSG00000138604|GLCE ENSG00000140285|FGF7 ENSG00000145725|HISPPD1 ENSG00000145850|TIMD4 ENSG00000153130|SCOC ENSG00000156671|SAMDB ENSG00000161813|LARP4  
ENSG00000171195|MUC7 ENSG00000174010|KLHL15 ENSG00000175073|VCFIP1 ENSG00000185418|TARSL2 ENSG00000187009|Q8NFD4\_HUMAN ENSG00000204164|Q6P095\_HUMAN ENSG00000204177|Q6P095\_HUMAN ENSG00000204837|Q2TVT3\_HUMAN  
ATGTTAT ENSG00000002933|TMEM176A ENSG00000033100|CHGUT\_HUMAN ENSG00000100234|TIMP3 ENSG00000100362|PVALB ENSG00000101883|PEPP1\_HUMAN ENSG00000124782|RREB1 ENSG00000127526|SLC35E1 ENSG00000130956|HABP4  
ENSG00000141570|CBX8 ENSG00000142700|DMRTA2 ENSG00000143375|CGN ENSG00000143878|RHOB ENSG00000144677|CTDSPL ENSG00000158161|EYA3 ENSG00000159455|LCE2B ENSG00000161572|LYZL6  
ENSG00000161973|CCDC42 ENSG00000164972|C9orf24 ENSG00000169184|NM\_002430.2 ENSG00000173281|PPP1R3B ENSG00000175166|PSMD2 ENSG00000176595|KBTBD11 ENSG00000178467|EGLX\_HUMAN ENSG00000183049|CAMK1D  
ENSG00000185730|ZNF696 ENSG00000187180|LCE2C ENSG00000204438|BAT4 ENSG00000005302|MSL3L1 ENSG00000005812|FBXL3 ENSG0000019991|HGF ENSG00000036549|ZZZ3 ENSG00000101574|METTL4  
ENSG00000102189|EEA1 ENSG00000106080|FKBP14 ENSG00000109790|KLHL5 ENSG00000110422|HIPK3 ENSG00000110435|PDHX ENSG00000110436|SLC1A2 ENSG00000112531|QKI ENSG00000133110|POSTN  
ENSG00000133138|TBC1D8B ENSG00000134389|CFHR5 ENSG00000136155|SECL ENSG00000138095|LRPPRC ENSG00000140015|KCNH5 ENSG00000144559|C3orf31 ENSG00000146281|ACY1L2 ENSG00000148483|FAM23A  
ENSG00000154263|ABCA10 ENSG00000155307|SAMSN1 ENSG00000158966|CACHD1 ENSG00000162813|BPNT1 ENSG00000165646|SLC18A2 ENSG00000165669|C10orf84 ENSG00000171951|SCG2 ENSG00000172469|MANEA  
ENSG00000174123|TLR10 ENSG00000174442|ZWILCH ENSG00000183844|FAM3B ENSG00000185950|IRS2 ENSG00000187667|Q1A5X8\_HUMAN ENSG00000187866|FAM122A ENSG00000196632|WNK3 ENSG00000198718|KIAA0423  
ATGTTGA ENSG00000077274|CAPN6 ENSG00000087087|ARS2\_HUMAN ENSG00000100221|JOSD1 ENSG00000102547|CAB39L ENSG00000102890|ELMO3 ENSG00000125611|CHCHD5 ENSG00000129862|VCY ENSG00000129864|VCY1B  
ENSG00000132405|TBC1D14 ENSG00000133026|MYH10 ENSG00000136925|C9orf97 ENSG00000139445|FOXN4 ENSG00000144730|ILL17RD ENSG00000157600|TMEM164 ENSG00000160584|QSK\_HUMAN ENSG00000160710|ADAR  
ENSG00000168795|ZBTB5 ENSG00000169118|CSNK1G1 ENSG00000197296|C20orf142 ENSG00000005469|CROT ENSG00000047346|KIAA1370 ENSG00000080986|NDC80 ENSG00000084093|REST ENSG00000094916|CBX5  
ENSG00000100744|C14orf129 ENSG00000101843|PSMD10 ENSG00000102081|FMR1 ENSG00000111817|DSE ENSG00000112237|CCMC ENSG00000120526|NUDCD1 ENSG00000132570|PCBD2 ENSG00000134884|NP\_060481.3  
ENSG00000145632|PLK2 ENSG00000149554|CHEK1 ENSG00000150361|KLHL1 ENSG00000169085|C8orf46 ENSG00000170471|TMEM182 ENSG00000172239|PAIP1 ENSG00000176731|C8orf59 ENSG00000178457|C2Lorf94  
ENSG00000181894|ZNF329 ENSG00000203964|Q8NG36\_HUMAN  
ATGTTTA ENSG00000065882|TBC1D1 ENSG00000070601|FRMPD1 ENSG00000087903|RFK2 ENSG00000100099|HPS4 ENSG00000105501|SIGLEC5 ENSG00000105991|HOXA1 ENSG00000115112|TFPC2L1 ENSG00000119686|C14orf58  
ENSG00000125804|C20orf91 ENSG00000134460|IL2RA ENSG00000134531|EMP1 ENSG00000137491|SLCO2B1 ENSG00000143786|CNIH3 ENSG00000155846|PPARGC1B ENSG00000158715|SLC45A3 ENSG00000161896|IHPK3  
ENSG00000162490|C1orf187 ENSG00000167778|SPRYD3 ENSG00000173530|TNFRSF10D ENSG00000186594|NP\_116284.2 ENSG00000188822|CNR2 ENSG00000196460|Q6ZNB4\_HUMAN ENSG00000001084|GCLC ENSG00000005339|CREBBP  
ENSG00000033867|SLC4A7 ENSG00000071054|MAP4K4 ENSG00000080839|RBL1 ENSG00000083635|NUFIP1 ENSG00000104290|FZD3 ENSG00000112486|CCR6 ENSG00000113966|ARL6 ENSG00000115239|ASB3  
ENSG00000120334|CENPL ENSG00000124193|SFRS6 ENSG00000124784|RIOK1 ENSG00000126249|PDCD2L ENSG00000127329|PTRPB ENSG00000128606|LRRC17 ENSG00000133627|ACTR3B ENSG00000133997|MED6  
ENSG00000135387|CAPRN1 ENSG00000135698|MPHOSPH6 ENSG00000138069|RAB1A ENSG00000138675|FGF5 ENSG00000144935|TRPC1 ENSG00000145725|HISPPD1 ENSG00000145782|ATG12 ENSG00000148541|FAM13C1  
ENSG00000149970|CNKSR2 ENSG00000156735|BAG4 ENSG00000157741|Q6ZU65\_HUMAN ENSG00000162976|PQLC3 ENSG00000163288|GABRR1 ENSG00000163558|PRKCI ENSG00000163738|MTHFD2L ENSG00000163964|PIGX  
ENSG00000168229|PTGDR ENSG00000171320|ESCO2 ENSG00000174899|Q8N6Q6\_HUMAN ENSG00000180574|Q5I0X0\_HUMAN ENSG00000187790|FANCM ENSG00000189298|ZKSCAN3 ENSG00000196937|FAM3C ENSG00000197121|PGAP1\_HUMAN  
ENSG00000198826|ARHGAP11A ENSG00000205269|Q5T4T1\_HUMAN  
perfect: ATGTTTA TAAACAT hsa-miR-30a-5p tgTAAACATcctcgactggaag 2  
perfect: ATGTTTA TAAACAT hsa-miR-30b tgTAAACATcctacactcagct 2  
perfect: ATGTTTA TAAACAT hsa-miR-30d tgTAAACATccccgactggaag 2  
perfect: ATGTTTA TAAACAT hsa-miR-30e-5p tgTAAACATccttgactggaag 2  
perfect: ATGTTTA TAAACAT hsa-miR-30c tgTAAACATcctacactcctcagc 2  
ATGTTTC ENSG00000075856|SART3 ENSG00000077080|ACTL6B ENSG00000102898|NUTF2 ENSG00000104969|SGTA ENSG00000105428|ZNF4 ENSG00000106333|PCOLCE ENSG00000109132|PHOX2B ENSG00000110237|ARHGEF17  
ENSG00000116218|NPHS2 ENSG00000122863|CHST3 ENSG00000135213|POM121 ENSG00000135596|MICAL1 ENSG00000141639|MAPK4 ENSG00000141664|ZCCHC2 ENSG00000143196|DPT ENSG00000149269|PAK1  
ENSG00000149575|SCN2B ENSG00000155087|ODF1 ENSG00000156858|PRR14 ENSG00000157110|RBPMS ENSG00000157693|C9orf91 ENSG00000158445|KCNH1 ENSG00000170091|NSG2\_HUMAN ENSG00000173914|RBM4B  
ENSG00000183530|C22orf30 ENSG00000183798|EMILIN3 ENSG00000198307|H2AFB2 ENSG00000007944|MYLIP ENSG00000068697|LAPTM4A ENSG00000109452|INPP4B ENSG00000115415|STAT1 ENSG00000118432|CNR1  
ENSG00000120324|PCDH10 ENSG00000120696|KBTBD7 ENSG00000131725|WDR44 ENSG00000135697|BCMO1 ENSG00000138135|CH25H ENSG00000138138|ATAD1 ENSG00000138271|GPR87 ENSG00000145868|FBXO38  
ENSG00000151065|DCP1B ENSG00000162598|C1orf87 ENSG00000164093|PITX2 ENSG00000167475|SCAMP4 ENSG00000173612|GPRC6A ENSG00000174130|TLR6 ENSG00000176083|ZNF683  
ENSG00000184378|ARPM1\_HUMAN ENSG00000184434|LRRC19 ENSG00000185862|EVI2B ENSG00000186297|GABRA5 ENSG00000186960|Q86U37\_HUMAN ENSG00000197484|Q6ZRH8\_HUMAN ENSG00000197791|Q6ZUR4\_HUMAN ENSG00000198155|Q49A33\_HUMAN  
ENSG00000198780|Q9H989\_HUMAN ENSG00000198919|DZIP3\_HUMAN ENSG00000198948|MFAP3L  
perfect: ATGTTTC GAAACAT hsa-miR-494 tGAAACATcacagggaaacctctt 1  
ATGTTTT ENSG000000011105|TSPAN9 ENSG000000061273|HDAC7A ENSG000000064309|CDON ENSG00000075218|GTSE1 ENSG00000088812|ATRN ENSG00000088854|C20orf194 ENSG00000099968|BCL2L13 ENSG00000103241|FOXF1  
ENSG00000104332|SFRP1 ENSG00000108439|PNPO ENSG00000112149|CB83 ENSG00000112535|SEPT6 ENSG00000125633|CCDC93 ENSG00000130340|SNX9 ENSG00000131043|C20orf4 ENSG00000132002|DNAJB1  
ENSG00000134207|SXT6 ENSG00000136319|TTC5 ENSG00000140718|FTO ENSG00000141034|C17orf39 ENSG00000148200|NR6A1 ENSG00000148719|DNAJB12 ENSG00000152291|TGOLN2 ENSG00000155666|JMD5  
ENSG00000162676|GFI1 ENSG00000162738|VANGL2 ENSG00000163848|SLC12A8 ENSG00000166831|RBPMS2 ENSG00000168066|SF1 ENSG00000168140|VASN ENSG00000168795|ZBTB5 ENSG00000170779|CDCA4  
ENSG00000172432|GTPBP2 ENSG00000173093|CCDC63 ENSG00000182054|IDH2 ENSG00000183421|RIPK4 ENSG00000184614|RAB6IP1 ENSG00000184675|FAM123B ENSG00000185619|PCGF3 ENSG00000186654|ARHGAP8  
ENSG00000197506|SLC28A3 ENSG00000198585|NUDT16 ENSG00000198920|KIAA0753 ENSG00000204490|TNF ENSG00000062194|GPBP1 ENSG00000066697|TMEFF1 ENSG00000071575|TRIB2 ENSG00000075420|FNDC3B  
ENSG00000085382|HACE1 ENSG00000092140|KIAA1333 ENSG00000100625|ITXA4 ENSG00000102081|FMR1 ENSG00000102798|LIPA ENSG00000107798|LIPA ENSG00000107968|MAP3K8 ENSG00000108691|CCL2  
ENSG00000109118|PHF12 ENSG00000111817|DSE ENSG00000116745|RPE65 ENSG00000118496|FBXO30 ENSG00000120802|TMPO ENSG00000125247|TMTC4 ENSG00000127928|GNMT1 ENSG00000129084|PSMA1  
ENSG00000131437|KIF3A ENSG00000132432|SEC61G ENSG00000132485|ZFRANB2 ENSG00000132965|ALOX5AP ENSG00000138180|CEP55 ENSG00000138468|SENP7 ENSG00000140030|GPR65 ENSG00000143622|RTT1  
ENSG00000144935|TRPC1 ENSG00000145241|CENPC1 ENSG00000147885|IFNA16 ENSG00000152256|PDK1 ENSG00000152520|PAN3 ENSG00000156017|C9orf41 ENSG00000157212|PAXIP1 ENSG00000158234|FAIM  
ENSG00000159113|IL10RB ENSG00000163510|NP\_065994.1 ENSG00000163624|CDS1 ENSG00000164109|MAD2L1 ENSG00000165097|AOF1 ENSG00000165115|KIF27 ENSG00000165443|PHYHIP1 ENSG00000168303|C7orf11  
ENSG00000169018|FEM1B ENSG00000169126|ARMC4 ENSG00000169248|CXCL11 ENSG00000171735|CAMTA1 ENSG00000173542|MOBK1A ENSG00000175455|CCDC14 ENSG00000183150|GPR19 ENSG00000187676|B3GALT1  
ENSG00000197006|METTL9 ENSG00000197619|ZNF615  
ATTA AAC ENSG00000033100|CHGUT\_HUMAN ENSG00000069696|DRD4 ENSG00000079462|PAFAH1B3 ENSG00000100448|CTSG ENSG00000104897|SF3A2 ENSG00000104946|TBC1D17 ENSG00000114650|SCAP ENSG00000124226|ZNF313  
ENSG00000124782|RREB1 ENSG00000127445|PIN1 ENSG00000129194|SOX15 ENSG00000130748|TMEM160 ENSG00000130751|NPAS1 ENSG00000132824|SERINC3 ENSG00000135404|CD63 ENSG00000141639|MAPK4  
ENSG00000149547|EI24 ENSG00000150201|FXYP4 ENSG00000152475|Q96EG3\_HUMAN ENSG00000152705|CATSPER3 ENSG00000159199|ATP5G1 ENSG00000160953|MUM1 ENSG00000162592|CCDC27 ENSG00000167644|C19orf33  
ENSG00000170858|LILRA4 ENSG00000171711|DEFB4 ENSG00000176476|CCDC101 ENSG00000177257|BD02\_HUMAN ENSG00000178796|Q8N921\_HUMAN ENSG00000182154|MRPL41 ENSG00000183011|LSMD1 ENSG00000184743|NP\_056274.3  
ENSG00000187003|ACTL7A ENSG00000196378|Q9BSZ0\_HUMAN ENSG00000197430|TMEM10 ENSG00000204309|AGER ENSG00000206053|HN1L ENSG00000206149|NP\_950246.1 ENSG00000206549|TSP50\_HUMAN  
ENSG00000061987|MON2 ENSG00000101868|POLA1 ENSG00000108946|PRKARIA ENSG00000109814|UGDH ENSG00000111237|VPS29 ENSG00000111404|NP\_079006.1 ENSG00000115290|GRB14 ENSG00000125823|CSTL1  
ENSG00000136404|TM6SF1 ENSG00000137434|C6orf52 ENSG00000138413|IDH1 ENSG00000147121|ZNF673 ENSG00000147892|ADAMTSL1 ENSG00000155016|CYP2A1 ENSG00000164506|STXBP5 ENSG00000168374|ARF4  
ENSG00000171988|JMJD1C ENSG00000174792|C4orf26 ENSG00000180190|C8orf42 ENSG00000180245|RRH ENSG00000182898|TCHHL1 ENSG00000196569|LAMA2 ENSG00000196867|ZFP28 ENSG00000198818|SFT2D1  
ENSG00000204267|TAP2 ENSG00000205299|CKLF  
ATTA AAG ENSG00000063180|CA11 ENSG00000075886|TUBA3D ENSG00000088882|CPXM1 ENSG00000102981|PARD6A ENSG00000104529|EEF1D ENSG00000111752|PHC1 ENSG00000112715|VEGFA  
ENSG00000114841|DNAH1 ENSG00000115602|IL1RL1 ENSG00000115718|PROC ENSG00000123992|DNPEP ENSG00000125409|TEKT3 ENSG00000125788|DEFB126 ENSG00000126067|PSMB2 ENSG00000126756|UXT  
ENSG00000128228|SDF2L1 ENSG00000132792|CTNBNB1 ENSG00000134905|CARS2 ENSG00000137133|HINT2 ENSG00000141562|NARF ENSG00000147123|NDUFB11 ENSG00000148468|C10orf38 ENSG00000152086|TUBA3E  
ENSG00000160789|LMNA ENSG00000163866|C1orf212 ENSG00000164053|TREX1 ENSG00000164896|FASK ENSG00000166741|NMFT ENSG00000167136|ENDOG ENSG00000170430|MGMT ENSG00000176248|ANAPC2  
ENSG00000176595|KBTBD11 ENSG00000178922|HYI ENSG00000179085|DPM3 ENSG00000182698|NM\_001007089 ENSG00000182853|VMO1 ENSG00000184345|IQCF2 ENSG00000184988|TMEM106A ENSG00000186676|EEF1G  
ENSG00000187516|Cxorf27 ENSG00000188038|NRN1L ENSG00000197249|SERPINA1 ENSG00000198033|TUBA3C ENSG00000204319|C4A ENSG00000204342|C4B ENSG00000204385|CTL4\_HUMAN  
ENSG0000024862|CCDC28A ENSG00000057252|SOAT1 ENSG00000069974|RAB27A ENSG00000075413|MARK3 ENSG00000085563|ABCB1 ENSG00000087303|NID2 ENSG00000100557|C14orf105 ENSG00000106399|RPA3  
ENSG00000107949|BCCIP ENSG00000110060|PUS3 ENSG00000113790|EHHADH ENSG00000116906|GNPAT ENSG00000118946|PCDH17 ENSG00000120805|ARL1 ENSG00000122376|XR\_015353.1 ENSG00000131174|COX7B  
ENSG00000138002|IFT172 ENSG00000152484|USP12 ENSG00000154473|BUB3 ENSG00000159596|TMEM69 ENSG00000163655|GMP5 ENSG00000163964|PTGX ENSG00000165874|FAM35A ENSG00000166415|WDR72  
ENSG00000168509|HFE2 ENSG00000171155|C1GALT1C1 ENSG00000173376|C4orf31 ENSG00000175513|TSGA10IP ENSG00000175874|CREG2 ENSG00000177494|ZBED2 ENSG00000181061|HIGD1A ENSG00000185880|TRIM69  
ENSG00000186288|RBM32A ENSG00000198162|MAN1A2 ENSG00000198757|Q96NB8\_HUMAN ENSG00000204019|NP\_001017978.1  
ATTA AAT ENSG000000085465|OVGP1 ENSG00000101079|NDRG3 ENSG00000108788|MLX ENSG00000112977|DAP ENSG00000116032|GRIN3B ENSG000001124731|TREM1 ENSG00000140623|SEPT12  
ENSG00000145819|ARHGAP26 ENSG00000147119|CHST7 ENSG00000157837|PSL4\_HUMAN ENSG00000164651|SP8 ENSG00000164778|EN2 ENSG00000168575|SLC20A2 ENSG00000168928|CTRB2 ENSG00000169627|BOLA2B  
ENSG00000173163|COMMD1 ENSG00000174370|C11orf45 ENSG00000184451|CCR10 ENSG00000197116|Q9UDD8\_HUMAN ENSG00000197000|SFI1 ENSG00000204092|NP\_001001705.1 ENSG00000205620|Q6ZRB6\_HUMAN ENSG00000000971|CFH  
ENSG00000005436|C2orf3 ENSG0000014123|KIAA0776 ENSG00000021826|JCP1 ENSG00000051415|AMY1A ENSG00000053747|LAMA3 ENSG00000067064|IDI1 ENSG00000072133|RPS6KA6 ENSG00000080644|CHRNA3  
ENSG00000089099|RPL6 ENSG00000103381|NP\_060810.1 ENSG00000104447|TRPS1 ENSG00000106511|MEOX2 ENSG00000108278|ZNFHIT3 ENSG00000112996|MRPS30 ENSG00000113583|C5orf15 ENSG00000114200|BCHE  
ENSG00000114346|ECT2 ENSG00000119508|NR4A3 ENSG00000120675|DNAJC15 ENSG00000131941|RHPN2 ENSG00000132855|ANGPTL3 ENSG00000133835|HSD17B4 ENSG00000134697|GNL2 ENSG00000135090|TAOK3  
ENSG00000136636|KCTD3 ENSG00000137561|TTPA ENSG00000137601|NEK1 ENSG00000144747|TMF1 ENSG00000145431|PDGFC ENSG00000145736|GTF2H2 ENSG00000146038|DCDC2 ENSG00000151093|OXSM  
ENSG00000152749|GPR180 ENSG00000156414|TDRD9 ENSG00000161048|NP\_945341.2 ENSG00000166573|GALR1 ENSG00000168930|TRIM49 ENSG00000173041|ZNF680 ENSG00000173827|AOAVR7\_HUMAN ENSG00000174876|AMY1B  
ENSG00000178301|AQP11 ENSG00000179299|NSUN7 ENSG00000183474|NP\_001035955.1 ENSG00000183520|UTP11L ENSG00000188313|PLSCR1 ENSG00000188921|PTPLAD2 ENSG00000196318|AMY2A ENSG00000197839|AMY2B

ENSG00000198060|MARCH5 ENSG00000203760|C6orf173 ENSG00000211451|GNRHR2  
ATTAACC ENSG00000054793|ATP9A ENSG00000066044|ELAVL1 ENSG00000066336|SP1 ENSG00000068831|RASGRP2 ENSG00000099204|ABLIM1 ENSG00000102119|EMD ENSG00000123329|ARHGAP9 ENSG00000130997|POLN  
ENSG00000132329|RAMP1 ENSG00000132846|ZBED3 ENSG00000138083|SIX3 ENSG00000140557|ST8SIA2 ENSG00000154124|FAMI05B ENSG00000158714|SLAMP8 ENSG00000160255|ITGB2 ENSG00000160916|ATP5J2  
ENSG00000166069|TMC05 ENSG00000168795|ZBTB5 ENSG00000168894|INX ENSG00000168894|INX.1 ENSG00000170054|SERPINA9 ENSG00000185722|ANKFY1 ENSG00000186407|CD300E ENSG00000186470|BTN3A2 ENSG00000187492|NP\_001007541.1  
ENSG00000197653|DNAH10 ENSG00000204070|DBNDD2 ENSG00000042781|USH2A ENSG00000066427|ATXN3 ENSG000000124802|EEF1E1 ENSG000000134962|KLB ENSG000000137948|BRDT ENSG00000153930|ANKFN1  
ENSG00000163428|LRRCS58 ENSG00000166532|FAM80B ENSG00000189221|MAOA ENSG00000198865|Q4G0S7\_HUMAN  
ATTAACG ENSG00000046647|GEMIN8 ENSG00000053702|NRIP2 ENSG00000085978|ATG16L1 ENSG00000099331|MYO9B ENSG00000100065|CARD10 ENSG00000100216|TOMM22 ENSG00000100416|TRMU ENSG00000106078|COBL  
ENSG00000106404|CLDN15 ENSG00000123374|CDK2 ENSG00000127585|FBXL16 ENSG00000134460|IL2RA ENSG00000137076|TLN1 ENSG00000142700|DMRTA2 ENSG00000143196|DPT ENSG00000143434|SEMA6C  
ENSG00000162783|IER5 ENSG00000163914|RHO ENSG00000167182|SP2 ENSG00000173641|HSPB7 ENSG00000184385|C21orf128 ENSG00000185052|SLC24A3 ENSG00000196106|Q8WZ26\_HUMAN  
ENSG00000196559|C11orf55 ENSG00000196743|GM2A ENSG00000198174|Q8N9P1\_HUMAN ENSG00000203934|Q6ZUQ1\_HUMAN ENSG00000205974|Q6ZVY3\_HUMAN ENSG00000109272|PF4V1 ENSG00000110888|CAPRN2 ENSG00000112893|MAN2A1  
ENSG00000122557|HERPUD2 ENSG00000126790|C14orf149 ENSG00000134389|CFHR5 ENSG00000136158|SPRY2 ENSG00000137285|TUBB2B ENSG00000138135|CH25H ENSG00000147174|ACRC  
ENSG00000153107|ANAPC1 ENSG00000166253|NP\_001034861.1 ENSG00000168769|KIAA1546 ENSG00000171612|SLC25A3 ENSG00000176165|FOXG1B ENSG00000179709|NLRP8 ENSG00000182463|TSHZ2 ENSG00000187969|ZCCHC13  
ENSG00000196071|OR2L13 ENSG00000197208|SLC22A4  
ATTAACG ENSG000000007384|RHBDP1 ENSG00000063587|ZNF275 ENSG00000064886|CHI3L2 ENSG00000100077|ADRBK2 ENSG00000105501|SIGLEC5 ENSG00000106268|NUDT1 ENSG00000133275|CSNK1G2 ENSG00000133460|SLC2A11  
ENSG00000137124|ALDH1B1 ENSG00000143632|ACTA1 ENSG00000148468|C10orf38 ENSG00000162396|PARS2 ENSG00000164651|SP8 ENSG00000169213|RAB3B ENSG00000171475|WIPF2 ENSG00000175155|YPEL2  
ENSG00000197296|C20orf142 ENSG00000198535|NP\_997205.1 ENSG00000205878|Q6ZSV2\_HUMAN ENSG00000074201|CLNS1A ENSG00000077063|CTTNBP2 ENSG00000082213|C5orf22 ENSG00000087074|PPP1R15A ENSG00000111716|LDHB  
ENSG00000113240|CLK4 ENSG00000113597|NP\_079217.1 ENSG00000114107|CEP70 ENSG00000118985|ELL2 ENSG00000121749|TBC1D15 ENSG00000126953|TIMM8A ENSG00000134215|VAV3 ENSG00000134853|PDGFRA  
ENSG00000139116|KIF21A ENSG00000149507|PLAC1L ENSG00000153310|FAM49B ENSG00000154059|IMPACT ENSG00000154359|LONRF1 ENSG00000163826|LUZPP1 ENSG00000167216|KATNAL2 ENSG00000169251|NMD3  
ENSG00000169302|STK32A ENSG00000169313|P2RY12 ENSG00000171147|NP\_001001317.1 ENSG00000180138|CSNK1A1L ENSG00000198339|HIST1H4I ENSG00000198523|PLN  
ATTAAGA ENSG00000055163|CYFIP2 ENSG00000062485|CS ENSG00000100116|GCAT ENSG00000108786|HSD17B1 ENSG00000110328|GALNTL4 ENSG00000113272|THG1L ENSG00000126067|PSMB2 ENSG00000128524|ATP6V1F  
ENSG00000130294|KIF1A ENSG00000142530|NP\_612420.1 ENSG00000143127|ITGA10 ENSG00000143258|USP21 ENSG00000145949|SGK85\_HUMAN ENSG00000161583|TBC1D3G ENSG00000174115|TBCD3\_HUMAN ENSG00000176678|FOXL1  
ENSG00000176986|SEC24C ENSG00000182240|BACE2 ENSG00000184108|TRIML1 ENSG00000185128|LOC729873 ENSG00000188849|LOC729837 ENSG00000189309|TBC1D3B ENSG00000197182|NM\_207477 ENSG00000204282|Q6YL35\_HUMAN  
ENSG00000204405|Q6ZQV3\_HUMAN ENSG00000205019|TBC1D3C ENSG00000081087|OSTM1 ENSG00000082497|SERTAD4 ENSG00000096968|JAK2 ENSG00000100528|CNTH ENSG00000101871|MID1 ENSG00000106823|ECM2  
ENSG00000110318|KIAA1377 ENSG00000112414|GPR126 ENSG00000117151|CTBS ENSG00000128050|PAICS ENSG00000132475|H3F3B ENSG00000136143|SUCLA2 ENSG00000145781|COMMD10 ENSG00000155959|VBP1  
ENSG00000163001|CCDC104 ENSG00000170855|TRIAAP1 ENSG00000181634|TNFSF15 ENSG00000181784|ANG ENSG00000196344|ADH7 ENSG00000197716|Q9UHV1\_HUMAN  
ATTAATC ENSG000000007237|GAS7 ENSG00000025800|KPNA6 ENSG00000100445|C14orf124 ENSG00000102302|PGD1 ENSG00000108773|GCN5L2 ENSG00000110074|FYXRED1 ENSG00000117408|IPO13 ENSG00000117450|PRDX1  
ENSG00000119402|FBXW2 ENSG00000132383|RPA1 ENSG00000133067|LGR6 ENSG00000143811|PYCR2 ENSG00000144647|C3orf39 ENSG00000163820|FOXC01 ENSG00000169083|AR ENSG00000174460|ZCCHC12  
ENSG00000175155|YPEL2 ENSG00000183495|EP400 ENSG00000183566|LATH\_HUMAN ENSG00000198125|MB ENSG00000204273|HLA-DOB ENSG00000012983|MAP4K5 ENSG00000059769|GNG10 ENSG00000065518|NDUFB4  
ENSG00000069275|NUCKS1 ENSG00000101842|VSI61 ENSG00000102239|BR53 ENSG00000105835|PBEF1 ENSG00000110077|MS4A6A ENSG00000112237|CCNC ENSG00000113140|SPARC ENSG00000118777|ABCG2  
ENSG00000123219|CENPK ENSG00000143631|FLG ENSG00000148572|TRIP11 ENSG00000158079|PTPDC1 ENSG00000161010|NP\_001017987.1 ENSG00000162669|NP\_001017975.3 ENSG00000168172|HOOK3 ENSG00000168681|Q9H762\_HUMAN  
ENSG00000169224|C1orf150 ENSG00000177497|CXorf42 ENSG00000180251|SLC9A4 ENSG00000184040|FAM23B ENSG00000188687|SLC4A5 ENSG00000198533|Q9P1D0\_HUMAN  
ATTAATG ENSG000000007402|CACNA2D2 ENSG00000052835|ZNF785 ENSG00000172080|ACTL6B ENSG00000090924|PLEKHG2 ENSG00000100441|KIAA0323 ENSG00000105755|ETHE1 ENSG00000106070|GRB10 ENSG00000108219|TSPAN14  
ENSG00000116128|BCL9 ENSG00000116882|HAO2 ENSG00000112416|VAPB ENSG00000131378|RFTN1 ENSG00000132960|CASP9 ENSG00000138642|HERC6 ENSG00000142405|NLRP12 ENSG00000151474|FRMD4A  
ENSG00000162735|PEX19 ENSG00000163914|RHO ENSG00000166167|BTRC ENSG00000167723|TRPV3 ENSG00000170983|C8orf14 ENSG00000176595|KBTBD11 ENSG00000184108|TRIML1 ENSG00000188706|ZDHHC9  
ENSG00000196998|WDR45 ENSG00000205878|Q6ZSV2\_HUMAN ENSG00000023228|NDUFS1 ENSG00000066422|ZBTB11 ENSG00000011539|TRIP13 ENSG000000101977|MCF2 ENSG00000104343|UBE2W ENSG00000117131|GYS2  
ENSG00000112335|SNX3 ENSG00000120868|APAF1 ENSG00000131051|RBM39 ENSG00000140043|ZADH1 ENSG00000145087|STXBPL ENSG00000145248|SLC10A4 ENSG00000150627|WDR17 ENSG00000152583|SPARCL1  
ENSG00000154889|MPPE1 ENSG00000163586|FABP1 ENSG00000165659|DACH1 ENSG00000170293|CMTM8 ENSG00000172969|LOC285299 ENSG00000176160|HSF5 ENSG00000184530|C6orf58 ENSG00000186468|RPS23  
ENSG00000188725|NP\_001041714.1 ENSG00000198060|MARCH5  
ATTACAA ENSG00000030582|GRN ENSG00000089169|RPH3A ENSG00000100558|PLEK2 ENSG00000108861|DUSP3 ENSG00000111254|AKAP3 ENSG00000134452|FBXO18 ENSG00000163866|C1orf212 ENSG00000166167|BTRC  
ENSG00000169026|MFSD7 ENSG00000171467|ZNF318 ENSG00000177479|ARIH2 ENSG00000187741|FANCA ENSG00000185100|AGPS ENSG00000069869|NEDD4 ENSG00000102738|MRPS31 ENSG00000107614|TRDMT1  
ENSG00000109686|NP\_001009555.2 ENSG00000111269|CREBL2 ENSG00000112290|WASF1 ENSG00000112309|B3GAT2 ENSG00000116106|EPA4 ENSG00000121903|ZSCAN20 ENSG00000122378|C10orf58 ENSG00000123595|RAB9A  
ENSG00000125863|MKKS ENSG00000132963|POMP ENSG00000133742|CA1 ENSG00000136999|NOV ENSG00000138379|GDF8 ENSG00000146250|PRSS35 ENSG00000146360|GPR6 ENSG00000157576|XR\_018454.1  
ENSG00000157890|MEGFL11 ENSG00000166509|CLEC3A ENSG00000166783|KIAA0430 ENSG00000170967|DDI1 ENSG00000171931|FBXW10 ENSG00000180815|MAP3K15 ENSG00000189252|SPANXN3 ENSG00000203924|SPANXN2  
ATTAACAC ENSG00000088854|C20orf194 ENSG00000100558|PLEK2 ENSG00000110025|SNX15 ENSG00000113303|BTNL8 ENSG00000117877|CD3EAP ENSG00000127884|ECHS1 ENSG00000136319|TTC5 ENSG00000143369|ECM1  
ENSG00000144233|AMMECR1L ENSG00000147432|CHRN3 ENSG00000158825|CDA ENSG00000160285|LSS ENSG00000161911|TREML1 ENSG00000164740|NR\_003034.1 ENSG00000167634|NLRP7 ENSG00000168329|CX3CR1  
ENSG00000171574|ZNF584 ENSG00000172476|RAB40A ENSG00000175520|UBQLN3 ENSG00000175711|B3GNTL1 ENSG00000176261|ZBTB80S ENSG00000176749|CDK5R1 ENSG00000176920|EUT2 ENSG00000178248|Q8N402\_HUMAN  
ENSG00000178307|TMEM11 ENSG00000178828|RNF186 ENSG00000180638|NP\_690872.2 ENSG00000180992|MRPL14 ENSG00000186603|HPDL ENSG00000198931|APRT ENSG00000065485|PDIA5 ENSG00000088035|ALG6  
ENSG00000102543|CDADC1 ENSG00000106025|TSPAN12 ENSG00000109771|LRF2BP ENSG00000117597|C1orf107 ENSG00000117791|MOSC2 ENSG00000121361|KCNJ8 ENSG00000125355|FAM70A ENSG00000136539|CD302  
ENSG00000137976|DNASE2B ENSG00000138658|C4orf21 ENSG00000143341|HMCN1 ENSG00000151923|TIAL1 ENSG00000164440|TXLNB ENSG00000167863|ATP5F ENSG00000172340|SUCLG2 ENSG00000174298|NP\_694572.1  
ENSG00000181264|TMEM136 ENSG00000182367|SNRPB1 ENSG00000184040|FAM23B ENSG00000187118|NP\_872329.1 ENSG00000197510|C21orf116 ENSG00000198178|CLEC4C  
ATTAACC ENSG00000017483|SLC38A5 ENSG00000089280|FUS ENSG00000108518|PFN1 ENSG00000115216|NRBP1 ENSG00000122735|DNAI1 ENSG00000124299|PEPD ENSG00000132142|ACACA ENSG00000134184|GSTM1  
ENSG00000147168|IL2RG ENSG00000149397|HMBS ENSG00000160075|SSU72 ENSG00000162666|KIAA0040 ENSG00000167272|POP5 ENSG00000176302|FOXR1 ENSG00000182718|ANXA2P1 ENSG00000186918|FBXO16  
ENSG00000196878|LAMB3 ENSG00000197982|C1orf122 ENSG00000198570|RD3 ENSG00000054938|CHRDL2 ENSG00000065243|PKN2 ENSG00000131203|INDO ENSG00000138336|CXXC6 ENSG00000147036|LANCL3  
ENSG00000155530|LRGUK ENSG00000164181|ELOVL7 ENSG00000166343|ZMYND17 ENSG00000168004|HRASLS5 ENSG00000169271|HSPB3 ENSG00000172244|C5orf34 ENSG00000178502|KLHL11 ENSG00000185849|Q9P194\_HUMAN  
ENSG00000203726|C1orf99 ENSG00000204472|AIF1  
ATTACCG ENSG00000009335|UBE3C ENSG0000011454|RABGAP1 ENSG00000068078|FGFR3 ENSG00000078967|UBE2D4 ENSG00000088881|COE4\_HUMAN ENSG00000092820|VIL2 ENSG00000105443|PSCD2 ENSG00000105695|MAG  
ENSG00000119599|WDR21A ENSG00000125954|FNTB ENSG00000128389|NM\_032262 ENSG00000132321|IQCA ENSG00000132361|KIAA0664 ENSG00000138166|DUSP5 ENSG00000140323|DISP2 ENSG00000143418|LASS2  
ENSG00000147454|SLC25A37 ENSG00000161558|TMEM143 ENSG00000164108|Q9HAJ2\_HUMAN ENSG00000167881|SRP68 ENSG00000169951|ZNF764 ENSG00000175505|CLCF1 ENSG00000176615|LOC652153 ENSG00000179913|B3GNT3  
ENSG00000196391|ZNF774 ENSG00000196432|Q9H5F0\_HUMAN ENSG00000110046|PECAM1 ENSG0000007062|PROM1 ENSG00000071575|TRIB2 ENSG00000087995|METTL2A ENSG00000101977|MCF2 ENSG00000102780|DGKH  
ENSG00000107938|C10orf137 ENSG00000108932|SLC16A6 ENSG00000111046|MYF6 ENSG00000133169|BEX1 ENSG00000137876|C15orf15 ENSG00000138109|CYP2C9 ENSG00000139970|RTN1 ENSG00000148450|MSRB2  
ENSG00000154518|ATP5G3 ENSG00000169062|UPF3A ENSG00000169429|IL8 ENSG00000172752|NP\_694996.3 ENSG00000180336|NP\_001028831.1 ENSG00000186496|ZNF396 ENSG00000196677|C8orf77 ENSG00000204954|Q69YU5\_HUMAN  
ATTAATG ENSG00000065882|TBC1D1 ENSG00000083454|P2RX5 ENSG00000105576|TNPO2 ENSG00000110395|CBL ENSG00000124249|CKNKB1 ENSG00000132824|SERINC3 ENSG00000137411|GTF2H4 ENSG00000144233|AMMECR1L  
ENSG00000144560|VGLL4 ENSG00000153789|FAM92B ENSG00000163206|SMCP ENSG00000164038|NP\_849155.2 ENSG00000165282|PIGO ENSG00000166224|SGPL1 ENSG00000173867|MRPL46 ENSG00000175197|DDIT3  
ENSG00000183258|DDX41 ENSG00000185475|NP\_955369.1 ENSG00000197175|Q8TBR1\_HUMAN ENSG00000197696|NMB ENSG00000198089|SFI1 ENSG00000198106|RUNDC2B ENSG00000206026|NP\_001032408.1 ENSG00000206549|TSP50\_HUMAN  
ENSG00000065243|PKN2 ENSG00000082269|KIAA1411 ENSG00000109445|ZNF330 ENSG00000111615|KRR1 ENSG00000114062|UBE3A ENSG00000120137|PANK3 ENSG00000122034|GTF3A ENSG00000137478|FCHSD2  
ENSG00000141579|ZNF750 ENSG00000147862|NFIB ENSG00000157500|APPL1 ENSG00000163606|CD200R1 ENSG00000164647|STEAP1 ENSG00000165246|NLGN4Y ENSG00000167785|ZNF558 ENSG00000171988|JMJDC1  
ENSG00000180573|HIST1H2AC ENSG00000188921|PTPLAD2 ENSG00000205544|C17orf61  
ATTAGAA ENSG000000012963|C14orf130 ENSG00000029364|SLC39A9 ENSG00000054118|THRAP3 ENSG00000105127|AKAP8 ENSG00000105246|EBI3 ENSG00000107957|SH3PXD2A ENSG00000112320|SOBP ENSG00000116667|C1orf21  
ENSG00000124422|USP22 ENSG00000134779|C18orf10 ENSG00000144741|SLC25A26 ENSG00000146192|FGD2 ENSG00000157617|C21orf25 ENSG00000158169|FANCC ENSG00000166140|ZFYVE19 ENSG00000171115|GIMAP8  
ENSG00000173436|C1orf151 ENSG00000188859|FAM78B ENSG00000204266|NM\_001025448 ENSG000000205434|Q6ZU34\_HUMAN ENSG0000004468|CD38 ENSG00000036257|CUL3 ENSG00000100191|SLC5A4 ENSG00000102021|LUZP4  
ENSG00000120802|TMPO ENSG00000123119|EFCBP1 ENSG00000127083|OMD ENSG00000135747|ZNF670 ENSG00000137674|MMP20 ENSG00000139163|ETNK1 ENSG00000139687|RB1 ENSG00000144182|LIPT1  
ENSG00000145692|BHMT ENSG00000149289|ZC3H12C ENSG00000150667|FSLP1 ENSG00000154813|DPH3 ENSG00000155893|ACPL2 ENSG00000158092|NCK1 ENSG00000163596|ICALL ENSG00000163683|C4orf34  
ENSG00000166415|WDR72 ENSG00000167306|MYO5B ENSG00000173905|GOLPH4 ENSG00000173930|SLC04C1 ENSG00000173930|SLC04C1 ENSG00000175893|ZDHHC21 ENSG00000181704|YIPF6 ENSG00000198542|ITGBL1  
ATTAGAC ENSG00000099330|OCEL1 ENSG00000104938|CLEC4M ENSG00000132275|KIAA0409 ENSG00000133398|MED10 ENSG00000138938|Q5TGJ8\_HUMAN ENSG00000143811|PYCR2 ENSG00000148158|SNX30 ENSG00000166377|ATP9B  
ENSG00000168781|HISPPD2A ENSG00000174498|PUNC ENSG00000175309|AGXT2L2 ENSG00000178589|Q9BT26\_HUMAN ENSG00000180644|PRF1 ENSG00000184489|PTP4A3 ENSG00000186197|ENO1P ENSG00000196209|Q5JXA8\_HUMAN  
ENSG00000196405|EVL ENSG00000196526|AFAP1 ENSG00000197162|ZNF688 ENSG00000198010|DLGAP2 ENSG00000198700|IPO9 ENSG00000203685|C1orf95 ENSG00000204562|Q6ZU75\_HUMAN ENSG0000020922|MRE11A  
ENSG00000049860|HEXB ENSG00000103018|CYB5B ENSG00000103254|C16orf24 ENSG00000111711|GOLT1B ENSG00000116977|LGLALS8 ENSG00000118523|CTGF ENSG00000125864|BFSF1 ENSG00000130962|PRRG1  
ENSG00000134001|EIF2S1 ENSG00000138640|FAM13A1 ENSG00000140832|MARVELD3 ENSG00000147586|MRPS28 ENSG00000163818|LZTFLL1 ENSG00000166130|NP\_710154.1 ENSG00000166734|CASC4 ENSG00000169906|S100G  
ENSG00000184203|PPP1R2 ENSG00000186974|Q8N6X9\_HUMAN ENSG00000196360|NR\_002168.1 ENSG00000198947|DMD ENSG00000203910|C1orf146  
ATTAGCC ENSG00000070495|JMJDC1 ENSG00000105053|VRK3 ENSG00000117016|RIMS3 ENSG00000135723|FHOD1 ENSG00000138780|GSTCD ENSG00000144134|RABL2A ENSG00000149131|SERPING1 ENSG00000158864|NDUFS2  
ENSG00000165671|NSD1 ENSG00000173826|KCNH6 ENSG00000175901|XR\_017883.1 ENSG00000186603|HPDL ENSG00000187778|MCRS1 ENSG00000205742|Q6ZTR4\_HUMAN ENSG0000020922|NCAPD2 ENSG00000071794|HLTF  
ENSG00000087301|KIAA1344 ENSG00000093134|VNN3 ENSG00000129071|MBD4 ENSG00000131808|F5HB ENSG00000138678|NP\_116106.2 ENSG00000138785|INTS12 ENSG00000139800|ZIC5 ENSG00000143155|TIPRL  
ENSG00000149218|ENDOD1 ENSG00000153283|CD96 ENSG00000183607|GKN2 ENSG00000184007|PTP4A2 ENSG00000185290|XR\_016379.1 ENSG00000197110|IL28B  
ATTAGCG ENSG00000006530|AGK ENSG000000085185|BCORL1 ENSG00000101004|NLP\_HUMAN ENSG00000101189|C20orf20 ENSG00000109132|PHOX2B ENSG00000116819|TFAP2E ENSG00000125084|WNT1  
ENSG00000131899|LLGL1 ENSG00000132376|SKIP\_HUMAN ENSG00000132604|TERF2 ENSG00000157950|SSX2\_HUMAN ENSG00000160539|PPPAPDC3 ENSG00000165583|SSX5 ENSG00000165844|SSX3 ENSG00000166974|MAPRE2  
ENSG00000167194|Q9LEL3\_HUMAN ENSG00000167895|TMC8 ENSG00000173253|DMRT2 ENSG00000173702|MUC13 ENSG00000179036|VAMP2 ENSG00000185189|NRBP2 ENSG00000198518|HIST1H4E ENSG00000198946|SSX4B  
ENSG00000204368|SSX7 ENSG00000204645|SSX4 ENSG00000008083|JARID2 ENSG00000026103|FAS ENSG00000090470|PDCD7 ENSG00000101751|POLI ENSG00000103449|SALL1 ENSG00000104904|OAZ2  
ENSG00000106004|HOXA5 ENSG00000106853|LTB4DH ENSG00000111726|CMAS ENSG00000116922|C1orf109 ENSG00000117859|OSBPL9 ENSG000001122435|CCDC76 ENSG00000123473|STIL ENSG00000123595|RAB9A  
ENSG00000128655|PDE11A ENSG00000145919|SYTL2 ENSG00000147180|ZNF719 ENSG00000162694|EXTL2 ENSG00000165694|FRMD7 ENSG00000173917|HOXB2 ENSG00000174

ATTATAC ENSG00000183813|CCR4 ENSG00000186481|NP\_001025170.1 ENSG00000197714|ZNF460 ENSG00000198825|INPP5F ENSG00000203730|TEDDM1 ENSG00000205195|Q6ZTB1\_HUMAN ENSG00000143040|RHBD1 ENSG0000004257|ACPF ENSG000000087157|PGS1 ENSG00000092529|CAPN3 ENSG00000103742|NP\_066013.1 ENSG00000108702|CCL1 ENSG00000114737|CISH ENSG00000128242|GAL3ST1 ENSG00000143499|FAM63A ENSG00000161277|THAP8 ENSG00000161640|SIGLEC11 ENSG00000164438|TLX3 ENSG00000167094|TTC16 ENSG00000168505|GBX2 ENSG00000168903|BTNL3 ENSG00000169319|SG223\_HUMAN ENSG00000183691|NOG ENSG00000184566|Q9P1G6\_HUMAN ENSG00000184979|USP18 ENSG00000186318|BACE1 ENSG00000188859|FAM78B ENSG00000100567|PSMA3 ENSG00000112339|HBS1L ENSG00000115919|KYNU ENSG00000116406|EDEM3 ENSG00000116473|RAP1A ENSG00000125772|GDE5\_HUMAN ENSG00000126790|C14orf149 ENSG00000130741|EIF2S3 ENSG00000133138|TBC1D8B ENSG00000134697|GNL2 ENSG00000138376|BAR1 ENSG00000143995|MEIS1 ENSG00000145808|ADAMTS19 ENSG00000154127|STTS1\_HUMAN ENSG00000154188|ANGPT1 ENSG00000154582|TCEB1 ENSG00000157214|STEAP2 ENSG00000157426|NP\_861522.2 ENSG00000167306|MYO5B ENSG00000167637|ZNF345 ENSG00000167863|ATP5H ENSG00000169248|CXCL11 ENSG00000174444|RPL4 ENSG00000178996|SNAG1 ENSG00000185880|TRIM69 ENSG00000196705|ZNF431 ENSG00000198088|NUP62CL ENSG00000198908|BHLHB9 ENSG00000204171|Q6STG2\_HUMAN ENSG00000204869|IGFL4 ENSG00000206559|ZCWPW2 ENSG00000134510|TMSB10 ENSG00000070047|K1542\_HUMAN ENSG00000072110|ACTN1 ENSG00000100170|SLC5A1 ENSG00000101096|NFATC2 ENSG00000103313|MEFV ENSG00000119703|C14orf140 ENSG00000121073|SLC35B1 ENSG00000126562|WNK4 ENSG00000136485|WDR68 ENSG00000140464|PML ENSG00000143061|IGSF3 ENSG00000143569|UBAPL2 ENSG00000145990|GFOD1 ENSG00000146197|SCUBE3 ENSG00000157837|PSL4\_HUMAN ENSG00000158987|RAPGEF6 ENSG00000164151|Q6ZT40\_HUMAN ENSG00000169093|ASMTL ENSG00000169118|CSNK1G1 ENSG00000180822|Q8N950\_HUMAN ENSG00000180875|GREM2 ENSG00000181938|GINS3 ENSG00000182013|NP\_060685.2 ENSG00000205089|NP\_001034869.1 ENSG00000024526|DEPDC1 ENSG00000048991|R3HDM1 ENSG00000068912|C2orf30 ENSG00000077232|DNAJC10 ENSG00000077616|NAALAD2 ENSG00000080371|RAB21 ENSG00000109158|GABRA4 ENSG00000112761|WISP3 ENSG00000120784|ZFP30 ENSG00000121207|LRAT ENSG00000122644|ARL4A ENSG00000128253|RFPL2 ENSG00000128989|ARP19\_HUMAN ENSG00000132122|SPATA6 ENSG00000132639|SNAP25 ENSG00000138315|OIT3 ENSG00000145780|FEM1C ENSG00000151304|SRFBP1 ENSG00000151475|SLC25A31 ENSG00000152601|MBNL1 ENSG00000153132|CLGN ENSG00000155085|C6orf199 ENSG00000162623|TYW3 ENSG00000162909|CAPN2 ENSG00000164484|KIAA1913 ENSG00000173145|NOC3L ENSG00000173258|ZNF483 ENSG00000179387|ELMOD2 ENSG00000179902|C1orf194 ENSG00000180370|PAK2 ENSG00000185088|RPS27L ENSG00000197301|Q6ZQU9\_HUMAN ENSG00000204706|Q6ZVS9\_HUMAN ENSG00000205293|Q76B50\_HUMAN ENSG000000087269|NOL14 ENSG00000104941|RSHL1 ENSG00000107618|RBP3 ENSG00000118526|TCF21 ENSG00000119720|C14orf102 ENSG00000125740|FOSB ENSG00000129194|SOX15 ENSG00000143028|SYPL2 ENSG00000162444|RBP7 ENSG00000170166|HOXD4 ENSG00000171219|CDC42BPG ENSG00000177551|NHLH2 ENSG00000179965|ZNF771 ENSG00000180875|GREM2 ENSG00000182968|SOX1 ENSG00000184110|EIF388 ENSG00000185475|NP\_955369.1 ENSG00000185963|BICD2 ENSG00000188706|ZDHHC9 ENSG00000198400|NTRK1 ENSG0000002745|WNT16 ENSG00000047188|YTHDC2 ENSG00000054796|SPO11 ENSG00000081154|PCNP ENSG00000087916|SLC6A14 ENSG00000100483|C14orf138 ENSG00000100934|SEC23A ENSG00000101134|DOK5 ENSG00000106034|NP\_079189.3 ENSG00000110841|PPF1BP1 ENSG00000112144|ICK ENSG00000113575|PPP2CA ENSG00000114698|PLSCR4 ENSG00000115009|CCL20 ENSG00000118690|ARMC2 ENSG00000122707|RECK ENSG00000127955|GNAI1 ENSG00000127989|MTFRF ENSG00000130449|ZSWIM6 ENSG00000138231|DBR1 ENSG00000138675|FGF5 ENSG00000139263|LRIG3 ENSG00000144306|SCRN3 ENSG00000146276|GABRR1 ENSG00000150054|MPF7 ENSG00000151881|C5orf28 ENSG00000155304|STCH ENSG00000155304|STCH ENSG00000158092|NCK1 ENSG00000160654|CD3G ENSG00000162753|SLC9A11 ENSG00000162971|NP\_001034782.1 ENSG00000164484|KIAA1913 ENSG00000164616|FBXL21 ENSG00000165471|MBL2 ENSG00000169193|CCDC126 ENSG00000169905|TOR1AIP2 ENSG00000172262|ZNF131 ENSG00000172594|SMPDL3A ENSG00000172809|RPL38 ENSG00000173376|C4orf31 ENSG00000176055|NP\_981951.1 ENSG00000182621|PLCB1 ENSG00000183918|SH2D1A ENSG00000185129|PURA ENSG00000185873|TMPRSS11B ENSG00000186105|Q7Z2Q7\_HUMAN ENSG00000187676|B3GALT1 ENSG00000188731|EIF4G3 ENSG000000089737|DDX24 ENSG00000099204|ABLIM1 ENSG00000100298|APOBEC3H ENSG00000101096|NFATC2 ENSG00000103200|NME4 ENSG00000105409|ATP1A3 ENSG00000108375|SUPT4H1 ENSG00000108474|PIGL ENSG00000134531|EMP1 ENSG00000164051|CCDC51 ENSG00000174306|ZHX3 ENSG00000175416|CLTB ENSG00000183633|C14orf132 ENSG00000186470|BTN3A2 ENSG00000187715|KLHDC6 ENSG00000197769|MAP1LC3C ENSG00000204516|MICB ENSG00000204558|Q9BYX6\_HUMAN ENSG00000092140|KIAA1333 ENSG00000108306|FBXL20 ENSG00000108561|C1QBP ENSG00000109586|GALNT7 ENSG00000111817|DSE ENSG00000112319|EYA4 ENSG00000114209|PDCC10 ENSG00000115520|COQ10B ENSG00000122787|AKR1D1 ENSG00000126550|HTN1 ENSG00000132466|ANKRD17 ENSG00000134602|MST4\_HUMAN ENSG00000136160|EDNRB ENSG00000137434|C6orf52 ENSG00000145687|SSBP2 ENSG00000148516|ZEB1 ENSG00000154642|PDC21orf91 ENSG00000172048|PDC61P ENSG00000171033|PKI5 ENSG00000172403|SYNPO2 ENSG00000178988|MRFAP1L1 ENSG00000196442|ZNF432 ENSG00000205649|HTN3 ENSG00000065357|DGKA ENSG00000088836|SLC4A11 ENSG00000099977|DDT ENSG00000111206|FOXM1 ENSG00000132749|MTL5 ENSG00000136935|GOLGA1 ENSG00000144045|DQX1 ENSG00000155366|RHOH ENSG00000160844|NP\_849153.3 ENSG00000161267|BDH1 ENSG00000162398|C1orf177 ENSG00000162897|FCAMR ENSG00000171747|LGALS4 ENSG00000176078|Q8NAN4\_HUMAN ENSG00000182397|C15orf51 ENSG00000183838|Q96NM2\_HUMAN ENSG00000185352|HS6ST3 ENSG00000188396|NP\_001013654.1 ENSG00000188493|C19orf54 ENSG00000196378|TFBSZ0\_HUMAN ENSG00000196979|NP\_997392.1 ENSG00000197386|HD ENSG00000198400|NTRK1 ENSG00000198881|ASB12 ENSG00000204091|Q3Y452\_HUMAN ENSG00000205972|Q8NBC0\_HUMAN ENSG00000072571|HMRR ENSG00000106066|CEVL ENSG00000109689|STM2 ENSG00000116016|EPAS1 ENSG00000118454|ANKRD13C ENSG00000119042|SATB2 ENSG00000125848|FLRT3 ENSG00000133019|CHRM3 ENSG00000135297|MT01 ENSG00000137252|HCRTR2 ENSG00000152931|PART1\_HUMAN ENSG00000153495|C13orf16 ENSG00000154305|MTA3 ENSG00000157470|FAM81A ENSG00000159377|PSMB4 ENSG00000160188|TSGA2 ENSG00000166004|KIAA1731 ENSG00000168710|AHCYLL ENSG00000174606|ANGEL2 ENSG00000178403|NEUROG2 ENSG00000182333|LPPF ENSG00000183324|NP\_001035826.1 ENSG00000203667|FAM36A ENSG00000204010|IFIT1L ENSG00000114855|PPP5C ENSG000000012211|LMO6 ENSG00000013619|CXorf6 ENSG00000101849|TBL1X ENSG00000106244|PDAP1 ENSG00000129187|DCTD ENSG00000135248|NP\_115988.1 ENSG00000135443|KRT85 ENSG00000137275|RIPK1 ENSG00000151062|CACNA2D4 ENSG00000163050|CABC1 ENSG00000165606|NP\_001073989.1 ENSG00000166007|LOC399940 ENSG00000167595|C19orf55 ENSG00000170161|Q5VV11\_HUMAN ENSG00000170549|IRX1 ENSG00000173120|FBXL11 ENSG00000173801|JUP ENSG00000175781|Q9H5L9\_HUMAN ENSG00000177885|GRB2 ENSG00000182912|C21orf90 ENSG00000186074|CD300LF ENSG00000197408|CYP2B6 ENSG00000197417|CARLK ENSG00000204455|XR\_015868.1 ENSG00000206062|Q4G0T4\_HUMAN ENSG00000072274|TFRC ENSG00000074935|TUBE1 ENSG00000080819|CPOX ENSG00000107581|EIF310 ENSG00000108091|CCDC6 ENSG00000109606|DHX15 ENSG00000110218|PANX1 ENSG00000111581|NUP107 ENSG00000114686|MRPL3 ENSG00000135392|DNAJC14 ENSG00000137975|CLCA2 ENSG00000140299|BNIP2 ENSG00000142192|APP ENSG00000143753|DEGS1 ENSG00000145287|PLAC8 ENSG00000165527|ARF6 ENSG00000165621|OXGR1 ENSG00000167216|KATNAL2 ENSG00000169860|P2RY1 ENSG00000172497|ACOT12 ENSG00000178397|NP\_001032240.1 ENSG00000181784|ANG ENSG00000183648|NDUF81 ENSG00000183722|LHFP ENSG00000198088|NUP62CL ENSG00000073849|ST6GAL1 ENSG00000101425|BPI ENSG00000108344|PSMD3 ENSG00000116014|KISS1R ENSG00000125266|EFNB2 ENSG00000136378|ADAMTS7 ENSG00000140839|NP\_001011880.1 ENSG00000143614|GATAD2B ENSG00000157322|NP\_872425.1 ENSG00000157335|NP\_775890.2 ENSG00000157856|C2orf39 ENSG00000164008|C1orf50 ENSG00000168003|SLC3A2 ENSG00000168781|HISPPD2A ENSG00000170379|NP\_775949.1 ENSG00000178307|TMEM11 ENSG00000180683|Q8N7A4\_HUMAN ENSG00000183399|Q7L8T7\_HUMAN ENSG00000188842|ARL4C ENSG00000188869|TMC3 ENSG00000198171|C20orf116 ENSG00000198326|C20orf141 ENSG00000005421|PON1 ENSG00000077063|CTTNBP2 ENSG00000078177|N4BP2\_HUMAN ENSG00000086065|CHMP5 ENSG00000102391|RPL36A ENSG00000111816|FRK ENSG00000112343|TRIM38 ENSG00000116062|MSH6 ENSG00000120662|MTRF1 ENSG00000122417|ODF2L ENSG00000122912|SLC25A16 ENSG00000124789|NUP153 ENSG00000128245|YWHAB ENSG00000128791|TWSG1 ENSG00000133739|LRRC1C ENSG00000136098|NEK3 ENSG00000143674|M3KL4\_HUMAN ENSG00000144306|SCRN3 ENSG00000145439|CBR4 ENSG00000148634|HERC4 ENSG00000151834|GABRA2 ENSG00000153951|OR4D2 ENSG00000155755|ALRS2CR4 ENSG00000156017|C9orf41 ENSG00000163599|CTLA4 ENSG00000163646|CLRN1 ENSG00000163714|SR140\_HUMAN ENSG00000164176|EDIL3 ENSG00000165476|REEP3 ENSG00000167910|CYP7A1 ENSG00000171657|GPR82 ENSG00000172175|MALT1 ENSG00000188343|FAM92A1 ENSG00000188610|FAM72B ENSG00000196550|FAM72A ENSG00000196865|NHLRC2 ENSG00000197147|LRRC8B ENSG00000197641|SERPINB13 ENSG00000197817|Q9UHS9\_HUMAN ENSG00000205604|Q6ZUP5\_HUMAN ENSG000000013455|APCIA ENSG00000028528|SNX1 ENSG00000087088|BAX ENSG00000100141|PISD ENSG00000100982|C20orf67 ENSG00000102230|PCYT1B ENSG00000108106|UBE2S ENSG00000108861|DUSP3 ENSG00000121313|DDX39 ENSG00000127526|SLC35E1 ENSG00000129543|PLJ16369 ENSG00000144031|ANKRD53 ENSG00000162444|RBP7 ENSG00000162599|NFIA ENSG00000166261|ZNF202 ENSG00000168395|ING5 ENSG00000169919|GUSB ENSG00000170445|HARS1 ENSG00000175287|PHYHD1 ENSG00000179141|Q8N642\_HUMAN ENSG00000181817|LSM10 ENSG00000188783|PRELP ENSG00000198483|ANKRD35 ENSG00000204613|TRIM10 ENSG00000206528|Q6ZSM0\_HUMAN ENSG00000053900|ANAPC4 ENSG00000056972|TRAF3IP2 ENSG00000070061|IKBKAP ENSG00000070087|PFN2 ENSG00000102174|PHEX ENSG00000104497|SNX16 ENSG00000109163|GNRHR ENSG00000109689|STM2 ENSG00000112996|MRPS30 ENSG00000119927|GPAM ENSG00000121031|PRDC ENSG00000131177|SH3BGLR ENSG00000136824|SMC2 ENSG00000144909|OSBP1L1 ENSG00000148680|HTR7 ENSG00000164182|NDUFAL2L ENSG00000176018|LYSMD3 ENSG00000181264|TMEM136 ENSG00000186522|TEPT10 ENSG00000187572|LIN28B ENSG00000188659|NP\_001008227.1 ENSG00000198589|LRBA ENSG00000205413|SAMD9 ENSG00000205769|Q6ZUR9\_HUMAN ATTATGT ENSG00000065491|TBC1D22B ENSG00000068438|FTSJ1 ENSG00000078246|TULP3 ENSG00000102080|TEX28P2 ENSG00000105383|CD33 ENSG00000130768|SMPDL3B ENSG00000132383|RPA1 ENSG00000132958|TPE2 ENSG00000136827|TOR1A ENSG00000157064|NMNAT2 ENSG00000157349|DDX19B ENSG00000160219|GAB3 ENSG00000164674|SYTL3 ENSG00000164871|SPAG11B ENSG00000166224|SGPL1 ENSG00000171724|K1576\_HUMAN ENSG00000178287|SPAG11A ENSG00000182242|TEX28\_HUMAN ENSG00000185254|TEX28P1 ENSG00000197696|NMB ENSG00000006576|PHTF2 ENSG000000024526|DEPDC1 ENSG00000039319|ZFYVE16 ENSG00000075785|RAB7A ENSG00000090686|USP48 ENSG00000105132|ZNF550 ENSG00000112893|MAN2A1 ENSG00000114200|BCHC ENSG00000116711|PLA2G4A ENSG00000116783|EPGT ENSG00000122008|POLK ENSG00000124151|NCOA3 ENSG00000129170|CSRP3 ENSG00000132406|TMEM128 ENSG00000134851|TMEM165 ENSG00000135338|C6orf152 ENSG00000135698|MPHOSPH6 ENSG00000137845|ADAM10 ENSG00000138071|ACTR2 ENSG00000145414|NP\_612395.1 ENSG00000145734|BDP1 ENSG00000150907|FOXO1A ENSG00000152495|CAMK4 ENSG00000152778|IFIT5 ENSG00000154620|TMSB4Y ENSG00000155393|HEATR3 ENSG00000156049|GNA14 ENSG00000162769|FLVCL1\_HUMAN ENSG00000163104|SMARCAD1 ENSG00000163788|SNRK ENSG00000164751|PXMP3 ENSG00000165392|WRN ENSG00000165985|C1QL3 ENSG00000171865|RNASEH1 ENSG00000172869|DMXL1 ENSG00000176273|TMEM20 ENSG00000198822|GRM3 ENSG00000205423|TMEM188 ATTATTA ENSG00000091513|TF ENSG00000102287|GABRE ENSG00000113194|UBXD8 ENSG00000121900|TMEM54 ENSG00000123992|DNPEP ENSG00000129187|DCTD ENSG00000130706|ADRM1 ENSG00000137106|GRHR ENSG00000142798|HSPG2 ENSG00000143614|GATAD2B ENSG00000143816|WNT9A ENSG00000145990|GFOD1 ENSG00000147065|MSN ENSG00000153789|FAM92B ENSG00000155719|OTOA ENSG00000156466|GDF6 ENSG00000158402|CDC25C ENSG00000171703|TCEA2 ENSG00000172724|CCL19 ENSG00000175170|Q5T319\_HUMAN ENSG00000179270|NP\_001025054.1 ENSG00000184014|RAB6IP1 ENSG00000184743|NP\_056274.3 ENSG00000204103|MAFB ENSG00000001084|GLCL ENSG00000096968|JAK2 ENSG00000096968|JAK2 ENSG00000102471|NDF1P ENSG00000108848|CROP\_HUMAN ENSG00000115239|ASB3 ENSG00000120137|PANK3 ENSG00000122378|C10orf58 ENSG00000122787|AKR1D1 ENSG00000123689|GOS2 ENSG00000129472|RAB2B ENSG00000132274|TRIM22 ENSG00000136819|C9orf78 ENSG00000136929|HEMGN ENSG00000137714|FDX1 ENSG00000138109|CYP2C9 ENSG00000138658|C4orf21 ENSG00000139572|GPR84 ENSG00000140563|MCTP2 ENSG00000144320|KIAA1715 ENSG00000147231|CXorf57 ENSG00000153832|FBXO36 ENSG00000154727|GABPA ENSG00000165841|CYP2C19 ENSG00000169906|S100G ENSG00000170264|NP\_115556.1 ENSG00000172244|C5orf34 ENSG00000173890|GPR160 ENSG00000183347|GBP6 ENSG00000183675|PTPN20B ENSG00000184898|RBM43 ENSG00000185246|PRPF39 ENSG00000188001|FAM79B ENSG00000188467|SLC22A5 ENSG00000189042|ZNF567 ENSG00000197323|TRIM33 ENSG00000197467|COL13A1 ENSG00000198157|NSBP1 ENSG00000204179|PTPN20A ENSG00000204766|Q6ZUHO\_HUMAN ENSG00000205506|NP\_001027561.1 ENSG00000205508|NP\_001018856.1 ENSG00000205509|NP\_001027561.1 ENSG00000205580|NP\_001027561.1 ATTATTT ENSG00000075388|FGF4 ENSG00000100122|CRYBB1 ENSG00000100364|C22orf9 ENSG00000101665|SMAD7 ENSG00000104415|WISP1 ENSG00000105443|PSCD2 ENSG00000106789|CORO2A ENSG00000107957|SH3PXD2A ENSG00000110801|PSMD9 ENSG00000111412|C12orf49 ENSG00000116809|ZBTB17 ENSG00000119771|KLHL29 ENSG00000120889|TNFRSF10B ENSG00000124164|VAPB ENSG00000124762|CDKN1A ENSG00000128652|HOXD3 ENSG00000135404|CD63 ENSG00000157020|SECL3 ENSG00000158163|ZDIP1L ENSG00000165269|AQP7 ENSG00000172568|NP\_001001343.1 ENSG00000173702|MUC13 ENSG00000174943|KCTD13 ENSG00000175093|SPSB4 ENSG00000178235|SLITRKK1 ENSG00000179082|C9orf106 ENSG00000180210|F2 ENSG00000180758|GPR157 ENSG00000181773|GPR3 ENSG00000181856|SLC2A4 ENSG00000185155|MIXL1 ENSG00000185684|EP400NL ENSG00000186466|AQP7P2 ENSG00000190245|Q8N7M3\_HUMAN ENSG00000196739|COL27A1 ENSG00000205434|Q6ZU34\_HUMAN ENSG00000005020|SKAP2 ENSG000000047634|SCML1 ENSG00000057252|SOAT1 ENSG00000060718|COL11A1 ENSG00000070367|EXOC5 ENSG00000110944|LL23A ENSG00000112701|SENP6 ENSG00000113805|CNTN3 ENSG00000121621|KIF18A ENSG00000124177|CHD6 ENSG00000126821|SGPP1 ENSG00000134259|NGFB ENSG00000134343|TMEM16C ENSG00000136866|ZFP37 ENSG00000139510|NEDD1 ENSG00000139517|LNX2 ENSG00000140284|SLC27A2 ENSG00000144566|RAB5A ENSG00000144827|ABHD10 ENSG00000145839|IL9 ENSG00000152332|UHMK1 ENSG00000153064|BANK1 ENSG00000161326|DUSP14 ENSG00000163510|NP\_065994.1 ENSG00000165732|DDX21 ENSG00000166839|ANKDD1A ENSG00000169429|IL8 ENSG00000171310|CHST11 ENSG00000171466|ZNF562 ENSG00000177182|NP\_775790.1 ENSG00000177735|NP\_775916.1 ENSG00000179008|C14orf39 ENSG00000183091|NEB ENSG00000185056|Q569G3\_HUMAN ENSG00000197121|PGAP1\_HUMAN ENSG00000197658|NP\_775857.1 ENSG00000198677|KIAA0372 ENSG00000198702|Q8NBL2\_HUMAN ENSG00000204560|DHX16 ENSG00000110244|APOA4 ENSG00000110328|GALNTL4 ENSG00000124237|C20orf85 ENSG00000125976|RBM12 ENSG00000130544|ZNF557 ENSG00000144671|SLC22A14 ENSG00000154768|C17orf50 ENSG00000162408|NOL9 ENSG00000169777|TAS2R1 ENSG00000170421|KRT8 ENSG00000171401|KRT13 ENSG00000176340|COX8A ENSG00000176749|CDK5R1 ENSG00000177984|NP\_976222.1 ENSG00000184454|C1orf130 ENSG00000185885|IFITM1 ENSG00000197435|HIST3H2BB ENSG00000198668|CALM1 ENSG00000000003|TSPAN6 ENSG00000012983|MAP4K5 ENSG00000007279|DCX ENSG00000119042|SATB2 ENSG00000121335|PRB4 ENSG00000125845|BMP2 ENSG00000130348|QRSL1 ENSG00000138190|EXOC6 ENSG00000145451|GLRA3 ENSG00000146856|AGBL3 ENSG00000149570|PLACL1 ENSG00000150667|FS

ENSG00000152785|BMP3 ENSG00000154263|ABCA10 ENSG00000163492|NP\_775919.2 ENSG00000164466|SFXN1 ENSG00000164600|NEUROD6 ENSG00000170385|SLC30A1 ENSG00000170584|NUDC2 ENSG00000171204|TMEM126B  
ENSG00000178460|C8orf45 ENSG00000180998|GPR137C ENSG00000182139|Q96FU4\_HUMAN ENSG00000183783|KCTD8 ENSG00000185201|IFITM2 ENSG00000185272|RBML1 ENSG00000189144|ZNF573 ENSG00000198898|CAP2A2  
ENSG00000205133|Q629K1\_HUMAN  
ATTCACC ENSG00000063587|ZNF275 ENSG00000088899|K0552\_HUMAN ENSG00000092841|MYL6 ENSG00000103023|NP\_001073961.1 ENSG00000104386|XR\_017860.1 ENSG00000105443|PSCD2 ENSG00000105649|RAB3A ENSG00000106400|ZNHT1  
ENSG00000107960|OBFC1 ENSG00000116198|KIAA0562 ENSG00000118898|PPL ENSG00000130203|APOE ENSG00000133027|PEMT ENSG00000140090|SLC24A4 ENSG00000157152|SYN2 ENSG00000164012|WDR65  
ENSG00000182459|NP\_997342.1 ENSG00000183444|NR\_002822.2 ENSG00000197175|Q8TBR1\_HUMAN ENSG00000198400|NTRK1 ENSG00000064692|SNCAIP ENSG00000065060|C6orf107 ENSG00000066855|MTFR1 ENSG00000100218|RTDR1  
ENSG00000102387|TAF7L ENSG00000109390|NDUFC1 ENSG00000117505|DR1 ENSG00000121406|ZNF549 ENSG00000124098|C2orf108 ENSG00000124171|PARD6B ENSG00000136536|MARCH7 ENSG00000137872|SEMA6D  
ENSG00000138650|PCDH10 ENSG00000139364|TMEM132B ENSG00000144893|MED12L ENSG00000151689|INP1 ENSG00000160062|ZBTB8 ENSG00000165525|SDCCAG1 ENSG00000166562|SEC11C ENSG00000167383|ZNF229  
ENSG00000172901|LAEVR\_HUMAN ENSG00000173681|CXorf23 ENSG00000181751|C5orf30 ENSG00000184254|ALDH1A3 ENSG00000184900|SUMO3 ENSG00000186479|RG57BP ENSG00000196511|TPK1 ENSG00000197714|ZNF460  
ENSG00000204596|RPP21  
ATTCACT ENSG00000012223|LTF ENSG00000013016|EHD3 ENSG00000047644|WWC3 ENSG00000084234|APLP2 ENSG00000099949|LZTR1 ENSG00000105254|TBCB ENSG00000121671|CRY2 ENSG00000122852|SFTPA1B  
ENSG00000122854|SFTPA2B ENSG00000125804|C2orf91 ENSG00000134287|ARF3 ENSG00000136504|MYST2 ENSG00000144730|ILL17RD ENSG00000145819|ARHGAP26 ENSG00000155886|SLC24A2 ENSG00000157353|FUK  
ENSG00000164385|C6orf195 ENSG00000166847|DCTN5 ENSG00000166974|MAPRE2 ENSG00000181031|RPH3AL ENSG00000182314|SFTPA2 ENSG00000182606|TRAK1 ENSG00000185303|SFTPA1 ENSG00000188229|TUBB2C  
ENSG00000203811|HIST2H3A ENSG00000203813|HIST2H3C ENSG00000204438|BAT4 ENSG00000206551|Q6ZT99\_HUMAN ENSG00000019186|CYP24A1 ENSG00000033170|FUT8 ENSG00000061676|NCKAP1 ENSG00000081177|EXDL2  
ENSG00000086598|TMED2 ENSG00000106031|HOXA13 ENSG00000106346|USP42 ENSG00000119636|C14orf45 ENSG00000131781|FMO5 ENSG00000132640|BTBD3 ENSG00000134308|YWHAQ ENSG00000135164|DMTF1  
ENSG00000138413|IDH1 ENSG00000148450|MSRB2 ENSG00000148935|GAS2 ENSG00000154007|ASB1 ENSG00000154945|ANKRD40 ENSG00000164331|ANKRA2 ENSG00000164543|STK17A ENSG00000165309|ARMC3  
ENSG00000168502|KIAA0802 ENSG00000169953|HSFY2 ENSG00000170417|TMEM182 ENSG00000170500|LONRF2 ENSG00000171806|C1orf156 ENSG00000172468|HSFY1 ENSG00000177058|NP\_775785.1 ENSG00000178229|ZNF543  
ENSG00000178346|C6orf61 ENSG00000196344|ADH7 ENSG00000198160|MIER1  
ATTCAGC ENSG00000030110|BAK1 ENSG00000096088|PGC ENSG00000106682|EIF4H ENSG00000110395|CBL ENSG00000130479|MAP1S ENSG00000141664|ZCCHC2 ENSG00000144730|ILL17RD ENSG00000152672|CLEC4F  
ENSG00000159958|TNFRSF13C ENSG00000162511|LAPTM5 ENSG00000162706|DARC ENSG00000168398|BDKRB2 ENSG00000171724|K1576\_HUMAN ENSG00000174231|PRPF8 ENSG00000180385|Q8NAP4\_HUMAN ENSG00000180758|GPR157  
ENSG00000183044|ABAT ENSG00000184678|HIST2H2BE ENSG00000187251|C1orf213 ENSG00000206539|Q6ZTN9\_HUMAN ENSG00000066697|TMEFF1 ENSG00000082996|RNF13 ENSG00000095564|BTAF1 ENSG00000106415|GLCC11  
ENSG00000108064|TFAM ENSG00000112299|VNN1 ENSG00000112695|COX7A2 ENSG00000113532|ST8SIA4 ENSG00000116679|IVNS1ABP ENSG00000117598|NP\_001010861.1 ENSG00000124749|COL21A1 ENSG00000130338|TULP4  
ENSG00000135297|MTO1 ENSG00000135932|CAB39 ENSG00000138068|ST6B1\_HUMAN ENSG00000145358|DDIT4L ENSG00000161036|NP\_690852.1 ENSG00000165259|CXorf43 ENSG00000166971|AKTIP ENSG00000169291|SHE  
ENSG00000170222|C17orf48 ENSG00000178033|FAM26E ENSG00000182457|NR\_002323.1  
ATTCCCG ENSG00000007255|TRAPPC6A ENSG00000053524|MCF2L2 ENSG00000064601|CTSA ENSG00000104332|SFRP1 ENSG00000105672|ETV2 ENSG00000116691|ANKRD38 ENSG00000125872|C2orf75 ENSG00000130176|CNN1  
ENSG00000130762|ARHGEF16 ENSG00000132522|GPS2 ENSG00000162711|NLRP3 ENSG00000167178|ISLR2 ENSG00000169676|DRD5 ENSG00000172867|KRT2 ENSG00000173581|CCDC106 ENSG00000175334|BANF1  
ENSG00000176046|NUPR1\_HUMAN ENSG00000180884|ZNF792 ENSG00000182557|SPNS3 ENSG00000184324|CSAG2 ENSG00000197463|CSAG3B ENSG00000154791|MATR3 ENSG00000049323|LTBP1 ENSG00000067560|RHOA  
ENSG00000102384|CENPF ENSG00000104413|RBM35A ENSG00000104859|SFRS16 ENSG00000108468|CBX1 ENSG00000109790|KHLH5 ENSG00000112666|DUSP16 ENSG00000120129|DUSP1 ENSG00000135069|PSAT1  
ENSG00000137547|MRPL15 ENSG00000138678|NP\_116106.2 ENSG00000142676|RPL11 ENSG00000146963|LUC7L2 ENSG00000147381|MAGEA4 ENSG00000153132|CLGN ENSG00000158488|CD1E ENSG00000163322|CCDC98  
ENSG00000168681|Q9H762\_HUMAN ENSG00000170852|KBTBD2 ENSG00000171109|MFN1 ENSG00000178538|CA8 ENSG00000181798|C2orf52 ENSG00000184937|WT1 ENSG00000185742|NP\_997528.1 ENSG00000189149|FLJ41766  
ENSG00000196563|Q9H375\_HUMAN ENSG00000198382|UVRAG  
perfect: ATTCCCG CGGGAAT hsa-miR-425-3p atCGGGAAAtgtcgtgccgc 2  
ATTCGCA ENSG00000004866|ST7 ENSG00000011009|LYPLA2 ENSG00000071282|LMCD1 ENSG00000077782|FGFR1 ENSG00000100220|C2orf28 ENSG00000100290|BIK ENSG00000101400|SNTA1 ENSG00000104870|FCGRT  
ENSG00000115461|IGFBP5 ENSG00000127616|SMARCA4 ENSG00000136488|CSH2 ENSG00000142611|PRDM16 ENSG00000166049|PASD1 ENSG00000170382|LRRN2 ENSG00000171303|KCNK3 ENSG00000172893|DHCR7  
ENSG00000173933|RBM4 ENSG00000174576|NPAS4 ENSG00000174680|C21orf9 ENSG00000175611|C9orf130 ENSG00000175901|XR\_017883.1 ENSG00000182979|MTA1 ENSG00000186106|ANKRD46 ENSG00000187514|PTMA  
ENSG00000197681|TBC1D3 ENSG00000197694|SPTAN1 ENSG00000198805|NP ENSG00000205106|Q6N098\_HUMAN ENSG00000205313|FAM106A ENSG00000005421|PON1 ENSG00000048028|USP28 ENSG00000048649|RSF1  
ENSG00000100372|SLC25A17 ENSG00000102128|RB40L\_HUMAN ENSG00000106346|USP42 ENSG00000107077|JMJD2C ENSG00000108932|SLC16A6 ENSG00000110756|HP85 ENSG00000133115|STOML3 ENSG00000133687|TMT1  
ENSG00000145723|ZH2C2 ENSG00000148572|NRBF2 ENSG00000152404|CWF19L2 ENSG00000156162|DPY19L4 ENSG00000163528|CHCHD4 ENSG00000163554|SPTA1 ENSG00000163642|XR\_017284.1 ENSG00000163710|PCOLCE2  
ENSG00000166157|TPE ENSG00000171989|LDHAL6B ENSG00000173391|OLR1 ENSG00000180316|PNPLA1 ENSG00000182118|FAM89A ENSG00000182512|GLRX5 ENSG00000182551|ADI1 ENSG00000183695|MRGPRX2  
ENSG00000185002|REXDC1 ENSG00000185061|NP\_001072996.1 ENSG00000187191|DAZ3 ENSG00000196683|TOMM7 ENSG00000205916|DAZ4 ENSG00000205944|DAZ2  
ATTCGCG ENSG00000011590|ZBTB32 ENSG00000049656|CLPTM1L ENSG00000076662|ICAM3 ENSG00000103415|HMOX2 ENSG00000108639|SYNR2 ENSG00000126005|ITGB4BP ENSG00000127220|ABHD8 ENSG00000130520|LSM4  
ENSG00000131187|F12 ENSG00000137502|RAB30 ENSG00000142224|IL19 ENSG00000153060|TEKT5 ENSG00000160469|BRSK1 ENSG00000160650|Q96H20\_HUMAN ENSG00000164707|SLC13A4 ENSG00000166145|SPINT1  
ENSG00000172789|HOXC5 ENSG00000177469|PTRF ENSG00000180849|C15orf37 ENSG00000183072|NKX2-5 ENSG00000183862|C22A2|WIT1 ENSG00000183862|C22A2|WIT1 ENSG00000184566|Q9PLG6\_HUMAN ENSG00000185101|TMEM16J  
ENSG00000186635|STARD10 ENSG00000069974|RAB27A ENSG00000070761|C16orf80 ENSG00000085433|WDR47 ENSG00000101333|PLCB4 ENSG00000110321|EIF4G2 ENSG00000113205|PCDH3 ENSG00000116176|TPSG1  
ENSG00000117525|F3 ENSG00000127603|MACF1 ENSG00000129515|SNX6 ENSG00000133800|XMKD1 ENSG00000136938|ANP32B ENSG00000137561|TTPA ENSG00000157077|ZFYVE9 ENSG00000160551|TAOK1  
ENSG00000161533|ACOX1 ENSG00000162959|MEMO1 ENSG00000164902|RNUXA ENSG00000165061|ZMAT4 ENSG00000179408|MEMO1P ENSG00000180138|CSNK1A1L ENSG00000180815|MAP3K15 ENSG00000182901|RGS7  
ENSG00000196387|ZNF140 ENSG00000197584|KCNMB2 ENSG00000204261|PSMB9  
ATTCCTG ENSG00000012822|CALCOO1 ENSG00000061273|HDAC7A ENSG00000080031|PTPRH ENSG00000084774|CAD ENSG00000099917|PCQAP ENSG00000100036|SLC35E4 ENSG00000100341|PNPLA5 ENSG00000104881|PPP1R13L  
ENSG00000110237|ARHGEF17 ENSG00000110583|NAT11 ENSG00000121060|TRIM25 ENSG00000121766|ZCCHC17 ENSG00000125810|CD93 ENSG00000136488|CSH2 ENSG00000146859|TMEM140 ENSG00000147144|CCDC120  
ENSG00000155052|CNTNAP5 ENSG00000160460|SPTBN4 ENSG00000162951|LRRTM1 ENSG00000165782|TMEM55B ENSG00000165953|SERPINA12 ENSG00000167483|FAM129C ENSG00000168101|NUDT16L1 ENSG00000169184|NM\_002430.2  
ENSG00000171747|LAL5A ENSG00000179085|DPM3 ENSG00000198844|ARHGEF5A ENSG00000205821|NP\_001020630.1 ENSG00000032514|PGBD3 ENSG00000065518|NDUFB4 ENSG00000069329|VPS35  
ENSG00000072274|TFRC ENSG00000074696|PTPLAD1 ENSG00000101310|SEC23B ENSG00000118777|ABCG2 ENSG00000119917|IFTT3 ENSG00000124120|C2orf121 ENSG00000124333|SYBL1 ENSG00000131873|CHSY1  
ENSG00000132256|TRIM5 ENSG00000133858|CCDC131 ENSG00000134086|VHL ENSG00000144136|SLC20A1 ENSG00000144452|ABCA12 ENSG00000147416|ATP6V1B2 ENSG00000149231|CCDC82 ENSG00000164756|SLC30A8  
ENSG00000168672|FAM84B ENSG00000171320|ESCO2 ENSG00000177600|RPLP2 ENSG00000186628|FSD2 ENSG00000198221|NP\_002168.1 ENSG00000198221|NP\_002168.1 ENSG00000205885|Q6UWM6\_HUMAN  
ENSG00000055609|MLL3 ENSG00000068308|OTUD5 ENSG00000069696|DRD4 ENSG00000074181|NOTCH3 ENSG00000083871|ZNF416 ENSG00000092529|CAPN3 ENSG00000101445|PPP1R16B ENSG00000102057|KCND1  
ENSG00000108829|LRRCS9 ENSG00000119689|DLST ENSG00000120457|KCNJ5 ENSG00000130813|NP\_060851.1 ENSG00000139625|MAP3K12 ENSG00000140488|BRUNOL6 ENSG00000145911|N4BP3\_HUMAN ENSG00000160087|UBE2J2  
ENSG00000160296|SIGLEC12 ENSG00000166741|NNMT ENSG00000169894|MUC3A ENSG00000170653|ATF7 ENSG00000180861|C12orf36 ENSG00000185917|SETD4 ENSG00000070756|PABPC1 ENSG00000075651|PLD1  
ENSG000000883750|RRAB6 ENSG00000101935|AMMECR1 ENSG00000107789|MINP1 ENSG00000114487|MORC1 ENSG00000115484|CCT4 ENSG00000120519|SLC10A7 ENSG00000129472|RAB2B ENSG00000132274|TRIM22  
ENSG00000132341|RAN ENSG00000134308|YWHAQ ENSG00000136045|PWP1 ENSG00000140481|CCDC33 ENSG00000147471|PROSC ENSG00000154162|CDH12 ENSG00000164144|ARFIP1 ENSG00000164188|RANBP3L  
ENSG00000166348|USP54 ENSG00000166839|ANKDD1A ENSG00000167258|CRKRS ENSG00000167996|PTH1 ENSG00000171208|NETO2 ENSG00000176274|MCART6 ENSG00000177879|AP3S1 ENSG00000180667|YOD1  
ENSG00000183527|DSCR2 ENSG00000197937|ZNF347 ENSG00000198677|KIAA0372 ENSG00000204524|ZNF805  
ATTCGCT ENSG00000003756|RBM5 ENSG00000006453|BAIAP2L1 ENSG00000010361|FUZ ENSG000000066923|STAG3 ENSG00000070614|NDST1 ENSG00000073605|GSDML ENSG00000101542|CDH20 ENSG00000102030|ARD1A  
ENSG00000103275|UBE2I ENSG00000103811|CTSH ENSG00000108511|HOXB5 ENSG00000120075|HOXB5 ENSG00000127226|NP\_116072.2 ENSG00000128652|HOXD3 ENSG00000129951|NP\_079164.1 ENSG00000140939|NOL3  
ENSG00000163686|ABHD6 ENSG00000167930|ITFG3 ENSG00000169668|NP\_997357.1 ENSG00000170054|SERPINA9 ENSG00000172016|REG3A ENSG00000175806|MSRA ENSG00000184076|NP\_001003684.1 ENSG00000187638|NM\_207367  
ENSG00000187808|ANKRD58 ENSG00000197361|FBXL22 ENSG00000198796|ALPK2 ENSG00000100483|C14orf138 ENSG00000101608|MLRM\_HUMAN ENSG00000106733|C9orf95 ENSG00000107165|TYR1P ENSG00000109519|GRPEL1  
ENSG00000121361|KCNJ8 ENSG00000121895|TMEM156 ENSG00000122538|IL1B ENSG00000127774|TMEM93 ENSG00000147606|SLC26A7 ENSG00000148677|ANKRD1 ENSG00000153721|MAGI1  
ENSG00000155307|SAMS1 ENSG00000163116|NP\_777612.1 ENSG00000163646|CLRN1 ENSG00000164548|TRA2A\_HUMAN ENSG00000172900|XR\_017872.1 ENSG00000173198|CYSLTR1 ENSG00000177508|IRX3 ENSG00000179163|FUCA1  
ENSG00000180354|C7orf41 ENSG00000187919|GSTA1 ENSG00000196141|NP\_056350.1 ENSG00000196392|Q8IHW4\_HUMAN ENSG00000198900|TOP1 ENSG00000205649|HTN3  
ATTCGGT ENSG00000049283|EPN3 ENSG00000059378|PARP1 ENSG00000073111|MCM2 ENSG00000101074|R3HDM1 ENSG00000101442|ACTR5 ENSG00000110171|TRIM3 ENSG00000123374|CDK2 ENSG00000124232|RBPJL  
ENSG00000124233|SEMG1 ENSG00000130309|GLT25D1 ENSG00000132205|EMILIN2 ENSG00000134684|YARS ENSG00000136715|SAP130 ENSG00000151348|EXT2 ENSG00000160055|C1orf91 ENSG00000170049|KCNAB3  
ENSG00000173244|Q8N8D0\_HUMAN ENSG00000176986|SEC24C ENSG00000180358|Q8N1X6\_HUMAN ENSG00000187642|C1orf170 ENSG00000196260|SFTPG ENSG00000205711|Q6ZV92\_HUMAN ENSG00000201602|KLRA1 ENSG000000081051|AFP  
ENSG00000106823|ECM2 ENSG00000107938|C10orf137 ENSG00000116906|GNPAT ENSG00000117475|BLZF1 ENSG00000128714|HOXD13 ENSG00000132837|DMGDH ENSG00000138413|IDH1 ENSG00000141040|ZNF287  
ENSG00000142871|CYR61 ENSG00000143452|HORMAD1 ENSG00000145919|FAM44B ENSG00000153012|LGI2 ENSG00000158560|DYNC1I1 ENSG00000160199|PKNOX1 ENSG00000165359|DDX26B ENSG00000166192|SENP8  
ENSG00000172733|PURG ENSG00000174004|LRRCS3 ENSG00000181374|CCL13 ENSG00000182118|FAM89A ENSG00000187998|KIAA1641 ENSG00000196532|HIST1H3C ENSG00000204133|FAM33B ENSG00000204852|Q2MV58-6  
ENSG00000205981|DNAJC19  
ATTCGTC ENSG00000007541|PIGQ ENSG00000022567|SLC45A4 ENSG00000102466|FGF14 ENSG00000113272|THGL1 ENSG00000115042|FAHD2A ENSG00000148120|C9orf3 ENSG00000152284|TCF7L1 ENSG00000154328|NEIL2  
ENSG00000157312|PDF ENSG00000159123|DMRT3\_HUMAN ENSG00000160211|G6PD ENSG00000160345|C9orf116 ENSG00000161914|ZNF653 ENSG00000166979|C21orf63 ENSG00000175203|DCTN2 ENSG00000182490|TSSK2  
ENSG00000183160|TMEM119 ENSG00000184911|CXorf50 ENSG00000186316|Q96NA9\_HUMAN ENSG00000186838|SELV\_HUMAN ENSG00000187953|NR\_002217.1 ENSG00000196405|EVL ENSG00000196581|AJAP1 ENSG00000203805|PPAPDC1A  
ENSG00000022976|C14orf131 ENSG00000064763|MLSTD1 ENSG00000069535|MAOB ENSG00000072042|RDH11 ENSG00000072571|HMMR ENSG00000122778|Q9HCM3\_HUMAN ENSG00000130021|HDHD1A ENSG00000130741|EIF2S3  
ENSG00000136159|NUDT15 ENSG00000136738|STAM ENSG00000142871|CYR61 ENSG00000156500|FAM122C ENSG00000163518|FTRL4 ENSG00000164458|T ENSG00000172201|ID4  
ENSG00000172766|NARG1L ENSG00000178403|NEUROG2 ENSG00000183695|MRGPRX2 ENSG00000184517|ZFP1 ENSG00000186009|ATP4B ENSG00000186458|DB132\_HUMAN  
ENSG00000074755|ZZEF1 ENSG00000084652|TXLNA ENSG00000100647|KIAA0247 ENSG00000101489|BRUNOL4 ENSG00000116032|GRIN3B ENSG00000117360|PRPF3 ENSG00000125746|EML2 ENSG00000137106|GRHR  
ENSG00000142186|SCYL1 ENSG00000147255|IGSF1 ENSG00000152192|POU4F1 ENSG00000162666|KIAA0040 ENSG00000164038|NP\_849155.2 ENSG00000165175|MID1IP1 ENSG00000165282|PIGO ENSG00000166965|RCDD1  
ENSG00000171224|C10orf35 ENSG00000175155|YPEL2 ENSG00000177384|Q9NT46\_HUMAN ENSG00000180205|WDFC9 ENSG00000185619|PCGF3 ENSG00000186638|C9orf48 ENSG00000188554|NBR1 ENSG00000198574|SH2D1B  
ENSG00000204657|OR2H2 ENSG00000005059|CCDC109B ENSG00000017427|IGF1 ENSG00000093853|CEACAM1 ENSG00000104327|CALB1 ENSG00000105928|DFNA5 ENSG00000111358|GTF2H3  
ENSG00000113013|HSPA9 ENSG00000115947|ORC4L ENSG00000133872|TMEM66 ENSG00000136541|KIAA1189 ENSG00000136872|ALDOB ENSG00000138757|G3BP2 ENSG00000146411|SLC2A12 ENSG00000152592|DMP1  
ENSG00000162614|NEXN ENSG00000163162|RNF149 ENSG00000164049|FBXW12 ENSG00000164089|AGXT2L1 ENSG00000166363|OR10A5 ENSG00000166479|TXNDC10 ENSG00000168283|BMI1 ENSG00000168589|DYNLRB2  
ENSG00000169018|FEM1B ENSG00000170584|NUDC2L1 ENSG00000179859|LOC284023 ENSG00000194800|ST6GALNAC3 ENSG00000196482|ESRRG ENSG00000198755|RPL10A  
ATTCCTC ENSG00000082458|DLG3 ENSG00000100376|FAM118A ENSG00000101079|NDRG3 ENSG00000101361|NOL5A ENSG00000115468|EFHD1 ENSG00000122729|ACO1 ENSG00000124785|NRN1 ENSG00000125869|C2orf103  
ENSG00000136297|MM2 ENSG00000136867|SLC31A2 ENSG00000137106|GRHP2 ENSG00000139178|C1RL ENSG00000139200|C12orf53 ENSG00000141404|GNAL ENSG00000141622|C18orf23 ENSG00000143479|DYRK3  
ENSG00000144063|MALL ENSG00000152291|TGOLN2 ENSG00000163067|ZNF8 ENSG00000168631|UPDC1 ENSG00000168671|UGT3A2 ENSG00000173244|Q8N8D0\_HUMAN ENSG00000179335|CLK3 ENSG00000188042|ARL4C

ENSG00000197561|ELA2 ENSG00000205917|Q6ZTF1\_HUMAN ENSG00000205920|Q6ZTF1\_HUMAN ENSG00000017260|ATP2C1 ENSG00000035681|NSMAF ENSG00000044115|CTNNA1 ENSG00000066294|CD84 ENSG00000081019|RSBN1  
 ENSG000000087448|KLHDC5 ENSG00000095380|NANS ENSG000000100249|C22orf31 ENSG000000105866|SP4 ENSG000000110696|C11orf58 ENSG000000111341|MGF ENSG000000119335|SET ENSG000000120438|TCP1  
 ENSG000000134056|MRPS36 ENSG000000138162|TACC2 ENSG000000147027|TMEM47 ENSG000000162545|CAMK2N1 ENSG000000163145|C1QTFP7 ENSG000000163946|C3orf63 ENSG000000166200|COPS2 ENSG000000167601|AXL  
 ENSG000000170847|RPS26P10 ENSG000000177409|SAMD9L ENSG000000179331|RAB39 ENSG000000180616|SSTR2 ENSG000000181092|ADINPOQ ENSG000000184735|DDX53 ENSG000000185753|CXorf38 ENSG000000196586|MYO6  
 ENSG000000196933|RPS26L1 ENSG000000197203|Q8NAJ9\_HUMAN ENSG000000197707|Q9H363\_HUMAN ENSG000000197728|RS26\_HUMAN ENSG000000203756|C6orf191 ENSG000000204276|HLA-DQA2  
 ENSG00000028528|SNX1 ENSG000000053438|NNAT ENSG000000080815|PSEN1 ENSG000000102096|PIM2 ENSG000000105549|THEG ENSG000000105997|HOXA3 ENSG000000108883|EFTUD2 ENSG000000112715|VEGFA  
 ENSG000000124839|RAB17 ENSG000000136731|UGCGL1 ENSG000000140505|CYP1A2 ENSG000000141965|FEM1A ENSG000000145949|SGK85\_HUMAN ENSG000000147123|NDUFB1 ENSG000000163812|ZDHHC3 ENSG000000165633|C10orf72  
 ENSG000000165731|RET ENSG000000168016|Q8N8K0\_HUMAN ENSG000000169059|VCX3A ENSG000000170619|COMMD5 ENSG000000171596|NMUR1 ENSG000000173867|MRPL46 ENSG000000177504|VCX2 ENSG000000179240|Q3ZCU0\_HUMAN  
 ENSG000000182583|VCX ENSG000000182667|NTRI\_HUMAN ENSG000000197448|GSTK1 ENSG000000198785|GRIN3A ENSG000000205642|VCX3B ENSG000000205573|MCOLN3 ENSG000000206629|CD84 ENSG000000207257|HMMR  
 ENSG00000088970|C20orf19 ENSG000000092345|DAZL ENSG000000106799|TGFBR1 ENSG000000108091|CCDC6 ENSG000000113638|TTC33 ENSG000000115020|PIP5K3 ENSG000000115419|GLS ENSG000000116106|EPAH4  
 ENSG000000116922|C1orf109 ENSG000000121933|ADORA3 ENSG000000122884|P4HA1 ENSG000000124523|SIRT5 ENSG000000134533|RERG ENSG000000137955|RABGGTB ENSG000000153989|NUS1 ENSG000000154874|NP\_872374.3  
 ENSG000000164294|NP\_001008398.1 ENSG000000165156|ZHX1 ENSG000000166510|CCDC68 ENSG000000169914|OTUD3 ENSG000000172171|C17orf42 ENSG000000172594|SMPLD3A ENSG000000173145|NOC3L ENSG000000173542|MOBK11A  
 ENSG000000177738|Q8N4J7\_HUMAN ENSG000000178695|KCTD12 ENSG000000187123|LYPD6 ENSG000000198642|KLHL9  
 ENSG00000007038|PRSS21 ENSG000000080815|PSEN1 ENSG000000085872|CHERP ENSG000000087086|FTL ENSG000000090659|CD209 ENSG000000092201|SUPT16H ENSG000000103047|TMCO7 ENSG000000108349|CASC3  
 ENSG000000111203|ITFG2 ENSG000000124126|PREX1\_HUMAN ENSG000000133065|SLC41A1 ENSG000000134864|Q9BVM4\_HUMAN ENSG000000144036|EXOC6B ENSG000000152953|STK32B ENSG000000154227|LASS3 ENSG000000159247|LOC643224  
 ENSG000000165006|UBAP1 ENSG000000168026|TTC21A ENSG000000171649|ZIK1 ENSG000000171855|IFNB1 ENSG000000175003|SLC22A1 ENSG000000181867|FTMT ENSG000000196970|NXF4 ENSG000000197373|NP\_001015884.1  
 ENSG000000059728|MXD1 ENSG000000066027|PPP2R5A ENSG000000078668|VDAC3 ENSG000000095574|IKZF5 ENSG000000108381|ASPA ENSG000000110344|UBE4A ENSG000000113971|ACAD11 ENSG000000131381|ZF1VE20  
 ENSG000000133858|CCDC131 ENSG000000134371|CDC73 ENSG000000135604|STX11 ENSG000000136161|RCBTB2 ENSG000000136480|POLG2 ENSG000000141434|MFP1B ENSG000000144229|THSD7B ENSG000000153684|NP\_001012455.1  
 ENSG000000166004|K1AA1731 ENSG000000172575|RASGRP1 ENSG000000175676|GOLGA8F ENSG000000183629|GOLGA8G ENSG000000188610|FAM72B ENSG000000197172|MAGEA3 ENSG000000197734|C14orf178 ENSG000000198681|MAGEA1  
 ENSG000000205299|CKLF  
 ENSG000000103550|NP\_001013009.2 ENSG000000117020|AKT3 ENSG000000118971|CCND2 ENSG000000130810|PPAN ENSG000000136112|UTP14C ENSG000000158246|FAM46B ENSG000000160323|ADAMTS13 ENSG000000167311|ART5  
 ENSG000000168081|PNOC ENSG000000168903|BTNL3 ENSG000000176887|SOX11 ENSG000000177493|C1orf215 ENSG000000183273|CCDC60 ENSG000000184110|EIF358 ENSG000000185522|C11orf35 ENSG000000185928|C16orf53  
 ENSG000000197471|SPN ENSG000000205633|NP\_001010902.1 ENSG000000009844|VTA1 ENSG000000038945|MSR1 ENSG000000078114|NEBL ENSG000000084092|C4orf14 ENSG000000100739|BDKR1 ENSG000000114279|FGF12  
 ENSG000000114861|FOXP1 ENSG000000115808|STRN ENSG000000125571|IL1F7 ENSG000000129292|PHF20L1 ENSG000000135316|SYNCRIP ENSG000000150907|FOXO1A ENSG000000153207|AHCTF1 ENSG000000168615|ADAM9  
 ENSG000000172901|LAEVR\_HUMAN ENSG000000178127|NDUFV2 ENSG000000178395|C1orf65 ENSG000000185417|CXorf1 ENSG000000197657|ZNF323 ENSG000000198673|FAM19A2  
 ENSG000000011052|NME1 ENSG000000105366|SIGLEC8 ENSG000000116237|ICMT ENSG000000122188|LAX1 ENSG000000129543|FLJ16369 ENSG000000132323|ILKAP ENSG000000158769|F11R ENSG000000160182|TFF1  
 ENSG000000165281|FANCG ENSG000000166949|SMAD3 ENSG000000167107|NP\_079425.2 ENSG000000168314|MOBP ENSG000000168824|NSG1\_HUMAN ENSG000000173457|PPP1R14B ENSG000000174989|FBXW8 ENSG000000179914|ITLN1  
 ENSG000000185352|HS6ST3 ENSG00000042088|TDP1 ENSG00000048828|FAM120A ENSG00000064787|BCAS1 ENSG000000116459|ATP5F1 ENSG000000116704|SLC35D1 ENSG000000122378|C10orf58 ENSG000000123496|IL13RA2  
 ENSG000000135931|ARMC9 ENSG000000150722|PPP1R1C ENSG000000152683|SLC30A6 ENSG000000153684|NP\_001012455.1 ENSG000000155111|CDC2L6 ENSG000000160336|ZNF761 ENSG000000162739|SLAMP6 ENSG000000163877|SNIP1  
 ENSG000000165525|SDCCAG1 ENSG000000175535|PNLIP ENSG000000175676|GOLGA8F ENSG000000183629|GOLGA8G ENSG000000188419|CHM ENSG000000198176|TFDP1  
 ENSG000000133744|NUB1 ENSG000000103274|NUBP1 ENSG000000104848|KCNA7 ENSG000000104967|NOVA2 ENSG000000105538|RASIP1 ENSG000000106268|NUDT1 ENSG000000107562|CXCL12 ENSG000000110536|NDUFS3  
 ENSG000000122188|LAX1 ENSG000000128849|CGNL1 ENSG000000133149|TEX13A ENSG000000138942|RNF185 ENSG000000143376|SNX27 ENSG000000144120|TMEM177 ENSG000000144233|AMMECR1L ENSG000000173218|VANGL1  
 ENSG000000179761|PIPOX ENSG000000186141|POLR3C ENSG000000188242|Q71RB1\_HUMAN ENSG000000204759|Q6ZRY0\_HUMAN ENSG000000115421|PAPOLG ENSG000000116721|PRAMEF1 ENSG000000118733|OLFPM3 ENSG000000119927|GPAM  
 ENSG000000121579|NAT13 ENSG000000125823|CSTL1 ENSG000000128250|RFPL1 ENSG000000128276|RFPL3 ENSG000000128590|DNAJB9 ENSG000000134049|IER31P1 ENSG000000137714|FDX1 ENSG000000139977|NAT12  
 ENSG000000154589|LY96 ENSG000000163347|CLDN1 ENSG000000167863|ATP5H ENSG000000173041|ZNF680 ENSG000000175885|ZNF611 ENSG000000178459|Q8N2E2\_HUMAN ENSG000000178460|C8orf45 ENSG000000184517|ZFP1  
 ENSG000000186471|AKAP14 ENSG000000197121|PGAP1\_HUMAN ENSG000000197140|ADAM32 ENSG000000198757|Q96NB8\_HUMAN ENSG000000204481|PRAMEF14 ENSG000000204495|PRAMEF13  
 ENSG00000048342|Q9H8A7\_HUMAN ENSG000000067842|ATP2B3 ENSG000000075151|EIF4G3 ENSG000000092853|CLSPN ENSG000000103550|NP\_001013009.2 ENSG000000116685|K1AA2013 ENSG000000121775|TMEM39B ENSG000000125733|TRIP10  
 ENSG000000168081|PNOC ENSG000000129467|ADCY4 ENSG000000148411|BTBD14A ENSG000000149262|INTS4 ENSG000000162066|AMDHD2 ENSG000000169592|CCDC95 ENSG000000171246|NPTX1 ENSG000000172401|Q8IVY7\_HUMAN  
 ENSG000000176383|B3GNT4 ENSG000000176679|TGIF2LY ENSG000000179393|Q9NRE4\_HUMAN ENSG000000180875|GREM2 ENSG000000183864|TOB2 ENSG000000196844|C11orf38 ENSG00000008988|RPS20 ENSG000000016402|IL20RA  
 ENSG000000086289|EPDR1 ENSG000000102468|HTR2A ENSG000000105677|TMEM147 ENSG000000108384|RAD51C ENSG000000115232|ITGA4 ENSG000000119698|K1AA1622 ENSG000000120160|C9orf11 ENSG000000125356|NDUFA1  
 ENSG000000132541|HMRP12 ENSG000000138293|NCOA4 ENSG000000141642|ELAC1 ENSG000000145794|MEG10 ENSG000000154175|AB13BP ENSG000000161542|PRPSAP1 ENSG000000162631|NTNG1 ENSG000000162944|RFTN2  
 ENSG000000165312|OTUD1 ENSG000000169714|CNBP ENSG000000180828|BHLHB5 ENSG000000181798|C2orf52 ENSG000000197926|Q8NAI6\_HUMAN  
 ENSG000000034053|APBA2 ENSG000000055483|USP36 ENSG000000085998|POMGNT1 ENSG000000086848|ALG9 ENSG000000088854|C20orf194 ENSG000000091513|TF ENSG000000105254|TBCB ENSG000000121060|TRIM25  
 ENSG000000124782|RREB1 ENSG000000125485|DDX31 ENSG000000125991|ERGIC3 ENSG000000129925|TMEM8 ENSG000000157306|THTPA ENSG000000164087|WDR51A ENSG000000165025|SYK ENSG000000166833|NAV2  
 ENSG000000167723|TRPV3 ENSG000000169083|AR ENSG000000169676|DRD5 ENSG000000186163|Q4G0S1\_HUMAN ENSG000000204487|LTB ENSG000000206162|Q6ZVH1\_HUMAN ENSG000000206193|Q5HYA3\_HUMAN ENSG00000042980|ADAM28  
 ENSG000000044115|CTNNA1 ENSG000000072041|SLC6A15 ENSG000000080166|DCT ENSG000000083642|APRN ENSG000000091039|OSBPL8 ENSG000000101871|MDM1 ENSG000000102241|HTATSF1 ENSG000000102401|ARMCX3  
 ENSG000000102678|FGF9 ENSG000000107443|CCNJ ENSG000000109762|SNX25 ENSG000000112144|JCK ENSG000000128534|LSM8 ENSG000000132963|POMP ENSG000000138709|LARP2 ENSG000000139733|SYT16  
 ENSG000000143452|HORMAD1 ENSG000000144034|TPRKB ENSG000000145332|KLHL8 ENSG000000148688|RFP30 ENSG000000163544|Q96BL6\_HUMAN ENSG000000164022|SCYE1 ENSG000000164483|SAMD3 ENSG000000167635|ZNF146  
 ENSG000000170270|C14orf142 ENSG000000173276|ZNF295 ENSG000000175097|RAG2 ENSG000000175352|NRIP3 ENSG000000175455|CCDC14 ENSG000000179195|ZNF664 ENSG000000187753|C9orf153 ENSG000000196083|IL1RAP  
 ENSG000000198157|NSBP1 ENSG000000198650|TAT ENSG000000198947|DMD  
 ENSG000000048707|VPS13D ENSG000000063180|CAL1 ENSG000000077312|SNRPA ENSG000000123395|C12orf44 ENSG000000124557|BTN1A1 ENSG000000129467|ADCY4 ENSG000000138085|C2orf28 ENSG000000140403|DNAJA4  
 ENSG000000146521|C6orf123 ENSG000000152291|TGOLN2 ENSG000000166689|PLEKHA7 ENSG000000169509|CRCT1 ENSG000000171703|TCEA2 ENSG000000177807|KCNJ10 ENSG000000185022|MAFF ENSG000000188242|Q71RB1\_HUMAN  
 ENSG000000189069|NP\_001013732.1 ENSG000000189401|OTUD6A ENSG000000055813|CCDC85A ENSG000000100784|RPS6KA5 ENSG000000114374|USP9Y ENSG000000120696|KBTBD7 ENSG000000139173|TMEM17 ENSG000000147488|ST18  
 ENSG000000148700|ADD3 ENSG000000150991|UBIQ\_HUMAN ENSG000000152256|PDK1 ENSG000000162613|FUBP1 ENSG000000162998|FRZB ENSG000000164307|ARTS1\_HUMAN ENSG000000168619|ADAM18 ENSG000000172006|ZNF554  
 ENSG000000177453|NIM1\_HUMAN ENSG000000181690|PLAG1 ENSG000000181751|C5orf30 ENSG000000203925|LOC647839  
 perfect: ATTGCAC GTGCAAT hsa-miR-130b caGTGCAATgtgaaggagc 2  
 perfect: ATTGCAC GTGCAAT hsa-miR-130a caGTGCAATgttaaaaggc 2  
 ENSG000000072954|TMEM38A ENSG000000100591|AHS1 ENSG000000104967|NOVA2 ENSG000000135637|NP\_116168.2 ENSG000000138175|ARL3 ENSG000000161940|BCL6B ENSG000000166398|K1AA0355 ENSG000000169393|ELSPBP1  
 ENSG000000173436|C1orf151 ENSG000000177192|PUS1 ENSG000000177947|ODF3 ENSG000000203685|C1orf95 ENSG000000203908|NP\_001017361.1 ENSG00000047932|GOPC ENSG000000067955|CBFB ENSG000000081770|NAIP  
 ENSG000000107485|GATA3 ENSG000000110768|GTF2H1 ENSG000000120051|C10orf80 ENSG000000125257|ABCC4 ENSG000000135940|COX5B ENSG000000138685|FGF2 ENSG000000141452|C18orf8 ENSG000000146416|ATG1  
 ENSG000000151458|ANKRD50 ENSG000000162616|DNAJB4 ENSG000000164070|HSPA4L ENSG000000164320|PAPD4 ENSG000000166509|CLEC3A ENSG000000172954|LYCAT ENSG000000173451|THAP2 ENSG000000174446|SNAPC5  
 ENSG000000177570|SAMD12 ENSG000000179978|Q59G16\_HUMAN ENSG000000184515|NGFRAP1L1L ENSG000000204884|Q6ZV12\_HUMAN  
 ENSG000000038358|EDC4 ENSG000000059378|PARP12 ENSG000000099822|HCN2 ENSG000000125386|C4orf8 ENSG000000137392|CLPS ENSG000000137709|POU2F3 ENSG000000157326|DHRS4 ENSG000000165568|AKR1CL2  
 ENSG000000175699|C14orf48 ENSG000000177105|RHOG ENSG000000178093|TSSK6 ENSG000000181652|ATG9B ENSG000000184574|GPR92 ENSG000000187630|DHRS4L2 ENSG000000198925|ATG9A ENSG000000204655|MOG  
 ENSG000000206026|NP\_001032408.1 ENSG00000049246|PER3 ENSG000000081041|CXCL2 ENSG000000101972|STAG2 ENSG000000108733|PEX12 ENSG000000111196|MGN2\_HUMAN ENSG000000114315|HES1 ENSG000000115604|IL18R1  
 ENSG000000128710|HOXD10 ENSG000000133193|FAM104A ENSG000000136044|APPL2 ENSG000000137478|FCHSD2 ENSG000000143226|FCGR2A ENSG000000144118|RALB ENSG000000144354|CDCA7 ENSG000000144909|OSBPL11  
 ENSG000000145725|HISPPD1 ENSG000000149177|PTPRJ ENSG000000154556|SORBS2 ENSG000000162545|CAMK2N1 ENSG000000163386|K1AA1245 ENSG000000164466|SFXN1 ENSG000000168152|THAP9 ENSG000000169045|HNRPL  
 ENSG000000175556|LONRF3 ENSG000000177640|CASC2 ENSG000000184899|Q9P181\_HUMAN ENSG000000185345|PARK2  
 ENSG00000072840|EVC ENSG000000101849|TBLX1 ENSG000000116698|SMG7 ENSG000000135749|PCNXL2 ENSG000000144468|RHBD1 ENSG000000166436|TRIM66 ENSG0000001681856|SLC2A4 ENSG000000183853|KIRREL  
 ENSG000000198437|Q8N0T2\_HUMAN ENSG000000205136|Q3KRG0\_HUMAN ENSG00000065559|MAP2K4 ENSG000000081026|MAG13 ENSG000000094963|FMO2 ENSG000000105855|ITGB8 ENSG000000113594|LIFR ENSG000000116688|MFN2  
 ENSG000000124205|EDN3 ENSG000000133678|CJ057\_HUMAN ENSG000000137252|HCRTR2 ENSG000000137819|PAQR5 ENSG000000138413|IDH1 ENSG000000153923|CLCA3 ENSG000000161405|IKZF3 ENSG000000166509|CLEC3A  
 ENSG000000168653|NDUF55 ENSG000000169019|COMMD8 ENSG000000169031|COL4A3 ENSG000000177938|CAPZA3 ENSG000000188848|CCDC4 ENSG000000189241|TSPYL1  
 ENSG000000088888|MAVS\_HUMAN ENSG000000100167|SEPT3 ENSG000000112273|HDGFL1 ENSG000000114388|TUSC4 ENSG000000124257|NEURL2 ENSG000000124557|BTN1A1 ENSG000000125888|C20orf179 ENSG000000137193|PIMI  
 ENSG000000139428|MMAB ENSG000000143398|PIP5K1A ENSG000000154040|CABYR ENSG000000158470|B4GALT5 ENSG000000158710|TAGLN2 ENSG000000161896|IHPK3 ENSG000000169710|FASN ENSG000000182459|NP\_997342.1  
 ENSG000000182575|NXPH3 ENSG000000184677|ZBTB40 ENSG000000184787|UBE2G2 ENSG000000188026|NP\_847884.1 ENSG000000188101|ALOX12P2 ENSG000000038945|MSR1 ENSG000000077721|UBE2A ENSG000000102468|HTR2A  
 ENSG000000102805|CLN5 ENSG000000104343|UBE2W ENSG000000105132|ZNF550 ENSG000000107164|FUBP3 ENSG000000107651|SEC23P1 ENSG000000109320|NFKB1 ENSG000000111816|FRK ENSG000000111906|HDDC2  
 ENSG000000113971|ACAD11 ENSG000000119865|C2orf32 ENSG000000120341|LZTR2 ENSG000000122339|C6orf35 ENSG000000125871|C2Oorf72 ENSG000000132498|ANKRD20A1 ENSG000000138115|CYP2C8 ENSG000000143224|PPOX  
 ENSG000000145362|ANK2 ENSG000000146072|TNFRSF21 ENSG000000147416|ATP6V1B2 ENSG000000156970|BUB1B ENSG000000158560|DYNC11 ENSG000000162814|SPATA17 ENSG000000163254|CRYGC ENSG000000164616|FBXL21  
 ENSG000000165259|CXorf43 ENSG000000171004|HS6ST2 ENSG000000171109|MFN1 ENSG000000171502|COL24A1 ENSG000000182405|PGBD4 ENSG000000183148|ANKRD20A2 ENSG000000184900|SUMO3 ENSG000000187267|NP\_001017417.1  
 ENSG000000196774|ANKRD20A3 ENSG000000197641|SERPINB13 ENSG000000203946|NP\_001017438.1 ENSG000000203947|NP\_001007552.1 ENSG000000203948|NP\_001017435.1  
 ENSG00000007341|ST7L ENSG00000010327|STAB1 ENSG000000063587|ZNF275 ENSG000000100888|CHD8 ENSG000000106290|TAF6 ENSG000000110169|HPX ENSG000000119383|PPP2R4 ENSG000000119638|NEK9  
 ENSG000000120875|DUSP4 ENSG000000138867|C22orf13 ENSG000000143217|PVRL4 ENSG000000147394|ZNF15 ENSG000000157693|C9orf91 ENSG000000160445|ZER1 ENSG000000171855|IFNB1 ENSG000000175329|ISX  
 ENSG000000198216|CACNA1E ENSG000000198785|GRIN3A ENSG000000205609|Q9BW98\_HUMAN ENSG000000206539|Q6ZTN9\_HUMAN ENSG00000078596|ITM2A ENSG000000087302|C14orf166 ENSG000000091164|TXNL1 ENSG000000101109|STK4  
 ENSG000000104432|IL7 ENSG000000107854|TNKS2 ENSG000000111961|SASH1 ENSG000000113456|RAD1 ENSG000000130234|ACE2 ENSG000000136146|MED4 ENSG000000139977|NAT12 ENSG000000144821|MYH15  
 ENSG000000145423|SFRP2 ENSG000000146281|ACY1L2 ENSG000000149231|CCDC82 ENSG000000154620|TMSB4Y ENSG000000163950|SLBP ENSG000000165028|NIPSNAP3B ENSG000000165525|SDCCAG1 ENSG000000167088|SNRPD1  
 ENSG000000170191|NANP ENSG000000172086|KRCC1 ENSG000000188820|FAM26F

ENSG00000117174|Clorf181 ENSG00000121542|SEC22A ENSG00000123219|CENPK ENSG00000134533|REERG ENSG00000141433|ADCYAP1 ENSG00000145476|CYP4V2 ENSG00000146476|C6orf211 ENSG00000153132|CLGN ENSG00000154305|MTA3 ENSG00000155319|NP\_001004299.1 ENSG00000163661|PTX3 ENSG00000164615|CAMLG ENSG00000166439|RNFL169 ENSG00000168944|CCDC100 ENSG00000170558|CDH2 ENSG00000172243|CLEC7A ENSG00000172809|RPL38 ENSG00000176788|BASP1 ENSG00000179300|ZCCHC5 ENSG00000182489|XKRX ENSG00000184258|CDR1 ENSG00000186416|NKRF ENSG00000197301|Q6ZQU9\_HUMAN ENSG00000204464|Q5TG92\_HUMAN

ATTGGGA ENSG00000083814|ZNF671 ENSG00000099995|SF3A1 ENSG00000100949|RABGGTA ENSG00000107954|NEURL ENSG00000111110|PPM1H ENSG00000123411|IKZF4 ENSG00000125695|STRAD\_HUMAN ENSG00000132254|ARFIP2 ENSG00000134668|SPOCD1 ENSG00000136193|SCRN1 ENSG00000140598|EFTUD1 ENSG00000141431|Q6ZMX6\_HUMAN ENSG00000149532|CPSF7\_HUMAN ENSG00000167664|TMIGD2 ENSG00000168621|GDNF ENSG00000169118|CSNK1G1 ENSG00000177441|Q8N4T9\_HUMAN ENSG00000180359|C11orf36 ENSG00000183686|MAGEA5 ENSG00000185955|NP\_001004323.1 ENSG00000188056|TREML4 ENSG00000203709|Clorf132 ENSG00000204542|C6orf15 ENSG00000204660|NP\_001013740.1 ENSG00000204661|LOC729569 ENSG00000056277|SUHW3 ENSG00000062716|TMEM49 ENSG00000069275|NUCKS1 ENSG00000073921|PICALM ENSG00000079385|CEACAM1 ENSG00000080822|CLDND1 ENSG00000110851|PRDM4 ENSG00000113838|CRYG ENSG00000114757|PEX5L ENSG00000115970|THADA ENSG00000120262|C6orf97 ENSG00000135338|C6orf152 ENSG00000148541|FAM13C1 ENSG00000150048|CLEC1A ENSG00000150712|MTMR12 ENSG00000151835|SACS ENSG00000152207|CYSLTR2 ENSG00000152778|IFIT5 ENSG00000153066|TXNDC11 ENSG00000163681|SLMAP ENSG00000164949|GEM ENSG00000166669|ATF7IP2 ENSG00000169891|REPS2 ENSG00000170949|ZNF160 ENSG00000184258|CDR1 ENSG00000184378|ARPM1\_HUMAN ENSG00000196459|SEDLF ENSG00000198681|MAGEA1 ENSG00000204661|LOC729569 ENSG00000056277|SUHW3 ENSG00000062716|TMEM49 ENSG00000069275|NUCKS1 ENSG00000073921|PICALM ENSG00000079385|CEACAM1 ENSG00000080822|CLDND1 ENSG00000110851|PRDM4 ENSG00000113838|CRYG ENSG00000114757|PEX5L ENSG00000115970|THADA ENSG00000120262|C6orf97 ENSG00000135338|C6orf152 ENSG00000148541|FAM13C1 ENSG00000150048|CLEC1A ENSG00000150712|MTMR12 ENSG00000151835|SACS ENSG00000152207|CYSLTR2 ENSG00000152778|IFIT5 ENSG00000153066|TXNDC11 ENSG00000163681|SLMAP ENSG00000164949|GEM ENSG00000166669|ATF7IP2 ENSG00000169891|REPS2

ATTGGGG ENSG00000087088|BAX ENSG00000088888|MAVS\_HUMAN ENSG00000100342|APOL1 ENSG00000100968|NFATC4 ENSG00000110042|DTX4 ENSG00000130810|PPAN ENSG00000158717|RNFL166 ENSG00000160685|ZBTB7B ENSG00000160957|RECQL4 ENSG00000163481|RNFL25 ENSG00000167941|SOST ENSG00000173210|ABLIM3 ENSG00000183114|FAM43B ENSG00000197245|GRRP1 ENSG00000198471|RTP2 ENSG00000204487|LTB ENSG00000205138|NP\_001036096.1 ENSG00000080608|KIAA0020 ENSG00000095637|SORBS1 ENSG00000110063|DCPS ENSG00000111785|RIC8B ENSG00000114062|UBE3A ENSG00000114861|FOXP1 ENSG00000118985|ELL2 ENSG00000127688|GAN ENSG00000155561|NUP205 ENSG00000171791|BCL2 ENSG00000174606|ANGEL2 ENSG00000176485|HRASL3 ENSG00000185760|KCNQ5 ENSG00000206560|ANKRD28 ENSG00000086717|PPEF1 ENSG00000100938|NM\_001002000.1 ENSG00000102078|SLC25A14 ENSG00000104738|MCM4 ENSG00000110829|LRRC59 ENSG00000110328|GALNTL4 ENSG00000121577|POPDC2 ENSG00000133561|GIMAP6 ENSG00000136319|TTC5 ENSG00000158089|GALNT14 ENSG00000163866|Clorf212 ENSG00000163902|RPN1 ENSG00000164674|SYTL3 ENSG00000166589|CDH16 ENSG00000167264|DUS2L ENSG00000168067|MAP4K2 ENSG00000170423|KRT78 ENSG00000173163|COMMD1 ENSG00000177202|SPACA4 ENSG00000178817|Q8N9W7\_HUMAN ENSG00000185963|BICD2 ENSG00000196204|Q6NUR6\_HUMAN ENSG00000196645|Q8N9W7\_HUMAN ENSG00000204516|MICB ENSG00000084005|CRY1 ENSG00000086205|FOLH1 ENSG00000086300|SNX10 ENSG00000105971|CAV2 ENSG00000115109|EPB41L5 ENSG00000119121|TRPM6 ENSG00000128641|MYO1B ENSG00000134255|CEFT1 ENSG00000135541|AHI1 ENSG00000139211|AMIGO2 ENSG00000144161|ZC3H8 ENSG00000152503|TRIM36 ENSG00000156876|SASS6 ENSG00000162694|EXTL2 ENSG00000166323|C11orf65 ENSG00000196963|PCDHB16 ENSG00000198380|GFPT1 ENSG000000074590|NUAK1 ENSG00000089737|DDX24 ENSG00000095383|TBC1D2 ENSG00000100441|KIAA0323 ENSG00000101849|TBL1X ENSG00000119402|FBXW2 ENSG00000122966|CIT ENSG00000131050|C20orf70 ENSG00000133065|SLC41A1 ENSG00000133195|SLC39A11 ENSG00000134291|TMEM106C ENSG00000151882|CCL28 ENSG00000163394|CCKAR ENSG00000175106|CDRT4 ENSG00000176753|NP\_001034994.1 ENSG00000187180|LCE2C ENSG00000205683|DPF3 ENSG00000007168|PACFAH1B ENSG0000016082|ISL1 ENSG00000043093|DCUN1D1 ENSG00000067560|RHOA ENSG00000092531|SNAP23 ENSG00000100372|SLC25A17 ENSG00000107186|MPDZ ENSG00000109814|UGDH ENSG00000113597|NP\_079217.1 ENSG00000124784|RIOK1 ENSG00000128656|CHN1 ENSG00000134318|ROCK2 ENSG00000136152|COG3 ENSG00000136206|WBSR19 ENSG00000138382|METTL5 ENSG00000152409|NP\_689618.2 ENSG00000153989|NUS1 ENSG00000155324|GRAMD3 ENSG00000155903|RAS2 ENSG00000157456|CCNB2 ENSG00000164056|SPRY1 ENSG00000165588|OTX2 ENSG00000169744|LDB2 ENSG00000174607|UGT8 ENSG00000185158|LRRC37B ENSG00000198477|SUHW2 ENSG00000198612|COPS8 ENSG00000205057|CLLUL10S ENSG00000205505|NP\_001027561.1 ENSG00000205506|NP\_001027561.1 ENSG00000205508|NP\_001018856.1 ENSG00000205509|NP\_001027561.1 ENSG00000205580|NP\_001027561.1

ATTGTAA ENSG00000103064|SLC7A6 ENSG00000106628|POLD2 ENSG00000106927|AMBP ENSG00000112159|MDN1 ENSG00000123901|GPR83 ENSG00000125388|GRK4 ENSG00000126264|HCST ENSG00000127080|IPPK ENSG00000132405|TBC1D14 ENSG00000140025|C14orf143 ENSG00000146535|GALN2 ENSG00000157992|KRTCAP3 ENSG00000160588|QSK\_HUMAN ENSG00000162738|VANGL2 ENSG00000170983|C8orf14 ENSG00000180861|C12orf36 ENSG00000197471|SPN ENSG00000006128|TAC1 ENSG00000064726|BTBD1 ENSG00000078399|HOXA9 ENSG00000091164|TXNL1 ENSG00000106399|RPA3 ENSG00000106443|PHF14 ENSG00000111880|RNGT ENSG00000113282|CLINT1 ENSG00000120586|MRC1 ENSG00000127870|RNFB ENSG00000131508|UBE2D2 ENSG00000133739|LRRC1 ENSG00000134644|PUM1 ENSG00000135655|USP15 ENSG00000136938|ARGX ENSG00000138069|RAB1A ENSG00000138779|Q9HCM6\_HUMAN ENSG00000139351|SYCP3 ENSG00000144935|TRPC1 ENSG00000146457|WTAP ENSG00000154760|SLFN13 ENSG00000156469|MTERFD1 ENSG00000157540|DYRK1A ENSG00000157625|MAP3K7IP3 ENSG00000164161|HHP1 ENSG00000165055|METTL2B ENSG00000169047|IRS1 ENSG00000173376|C4orf31 ENSG00000174606|ANGEL2 ENSG00000178996|SNAG1 ENSG00000183748|MRC1L1 ENSG00000198146|ZNF770 ENSG00000198759|EGFL6 ENSG00000105663|WBP7\_HUMAN ENSG00000106290|TAF6 ENSG00000108352|RAPGEF1 ENSG00000129657|SEC14L1 ENSG00000134247|PTGFRN ENSG00000138869|C22orf16 ENSG00000140398|NEIL1 ENSG00000142186|SCYL1 ENSG00000166851|PLK1 ENSG00000167065|DUSP1 ENSG00000169230|PRELID1 ENSG00000171385|KCNDB3 ENSG00000171551|ECEL1 ENSG00000172531|PPP1CA ENSG00000175197|DDIT3 ENSG00000198668|CALM1 ENSG00000204227|RING1 ENSG00000204434|NP\_001017421.1 ENSG00000204499|Q6P6C6\_HUMAN ENSG00000205881|Q6UXR8\_HUMAN ENSG00000010219|DYRK4 ENSG00000010818|HIVEP2 ENSG00000054267|ARID4B ENSG00000100811|YY1 ENSG00000102743|SLC25A15 ENSG00000103194|USP10 ENSG00000103657|HERC1 ENSG00000105176|C19orf2 ENSG00000105793|GTPBP10 ENSG00000105835|PBEF1 ENSG00000105856|HBP1 ENSG00000107372|ZFAND5 ENSG00000110894|CUL2 ENSG00000111783|RFX4 ENSG00000115840|SLC25A12 ENSG00000123213|NLN ENSG00000124789|NUP153 ENSG00000127870|RNFB ENSG00000131437|KIF3A ENSG00000136999|NOV ENSG00000139350|NEDD1 ENSG00000148828|NP\_001074467.1 ENSG00000151789|ZNF659 ENSG00000163312|NP\_598375.2 ENSG00000165682|CLEC1B ENSG00000170847|RPS26P10 ENSG00000172969|LOC285299 ENSG00000173041|ZNF680 ENSG00000175073|VCP1P1 ENSG00000175857|C5orf29 ENSG00000182141|ZNF708 ENSG00000188419|CHM ENSG00000196693|ZNF33B ENSG00000196933|RPS26L1 ENSG00000197728|RS26\_HUMAN ENSG00000197956|S100A6 ENSG00000198702|Q8NBL2\_HUMAN ENSG00000204406|MBD5 ENSG00000205097|NP\_00105217.1

ATTGTAT ENSG00000006125|AP2B1 ENSG00000067082|KLF6 ENSG00000090554|FLT3LG ENSG00000096088|PGC ENSG00000099995|SF3A1 ENSG00000102547|CAB39L ENSG00000110092|CCND1 ENSG00000114770|ABCC5 ENSG00000123136|DDX39 ENSG00000126705|AHDC1 ENSG00000127528|KLF2 ENSG00000130749|C19orf7 ENSG00000131113|PSG1 ENSG00000158470|B4GALT5 ENSG00000182346|DAOA ENSG00000198792|C22orf5 ENSG00000205804|QST6R2\_HUMAN ENSG00000004468|CD38 ENSG000000047365|CENTD1 ENSG00000050344|NFE2L3 ENSG00000067955|CBFB ENSG00000070540|WIP1 ENSG00000085382|HACE1 ENSG00000101901|CXorf45 ENSG00000102053|ZC3H12B ENSG00000104722|NEFM ENSG00000107560|RAB1FIP2 ENSG00000110075|SAPS3 ENSG00000111269|CREBL2 ENSG00000115750|TAF1B ENSG00000116830|TTF2 ENSG00000119965|C10orf88 ENSG00000120458|C11orf61 ENSG00000121848|ZNF364 ENSG00000125944|HNRPR ENSG00000131437|KIF3A ENSG00000133794|ARNTL ENSG00000134758|RNFL138 ENSG00000135409|AMHR2 ENSG00000155313|USP25 ENSG00000155975|VPS37A ENSG00000156976|EIF4A2 ENSG00000163611|CCDC52 ENSG00000164122|ASB5 ENSG00000164823|OSGIN2 ENSG00000169504|CLIC4 ENSG00000171195|MUC7 ENSG00000177047|IFNW1 ENSG00000180815|MAP3K15 ENSG00000186714|CCDC73 ENSG00000198757|Q9GNB8\_HUMAN ENSG00000198934|MAGEE1 ENSG00000205083|Q6P5W2\_HUMAN ENSG00000199548|SMA3G ENSG00000029993|HMG3 ENSG00000037757|NP\_115661.1 ENSG00000055163|CYFIP2 ENSG00000111641|NOL1 ENSG00000118058|MLL ENSG00000123992|DNPEP ENSG00000127080|IPPK ENSG00000131389|SLC6A6 ENSG00000136942|RPL35 ENSG00000137106|GRHPR ENSG00000150779|TIMM8B ENSG00000154917|RAB6B ENSG00000165025|SYK ENSG00000166473|PKD1L2 ENSG00000168002|POLR2G ENSG00000169548|SUHW1 ENSG00000182315|NP\_653215.1 ENSG00000196739|COL27A1 ENSG00000204865|Q6ZSD6\_HUMAN ENSG00000205528|Q6ZRE2\_HUMAN ENSG00000205718|LOC653656 ENSG00000008282|SYPL1 ENSG00000035928|RFC1 ENSG00000080819|CPOX ENSG00000109171|SLAIN2 ENSG00000131795|RBMA8 ENSG00000135387|CAPRIN1 ENSG00000139168|ZCRB1 ENSG00000151151|IPMK ENSG00000157800|SLC37A3 ENSG00000164039|BDH2 ENSG00000164128|NYP1R ENSG00000164588|HCN1 ENSG00000170142|UBE2E1 ENSG00000171867|PRNP ENSG00000174899|Q8N6Q6\_HUMAN ENSG00000175895|PLEKHF2 ENSG00000197110|IL28B ENSG00000204178|TMEM57 ENSG00000205905|Q6ZWC6\_HUMAN

ATTGTCT ENSG00000037637|FBXO42 ENSG00000100445|C14orf124 ENSG00000113552|GNPDA1 ENSG00000135114|OASL ENSG00000135605|TEC ENSG00000139574|NFFF ENSG00000148180|GSN ENSG00000154319|C8orf13 ENSG00000158874|APOA2 ENSG00000158987|RAPGEF6 ENSG00000163016|NP\_660343.1 ENSG00000168268|NT5DC2 ENSG00000169118|CSNK1G1 ENSG00000169213|RAB3B ENSG00000169598|DFFB ENSG00000169951|ZNF764 ENSG00000169955|RPS7 ENSG00000179051|RC2 ENSG00000184209|NP\_008951.1 ENSG00000205593|FAM116B ENSG00000049449|RCN1 ENSG000000080986|NDC80 ENSG00000108510|THRAP1 ENSG00000109920|FBNP4 ENSG00000114166|PCAF ENSG00000115145|STAM2 ENSG00000116729|GPR177 ENSG00000117543|DPH5 ENSG00000118432|CNR1 ENSG00000119541|VPS4B ENSG00000133124|IRS4 ENSG00000151247|EIF4E ENSG00000152242|C18orf25 ENSG00000159873|CCDC117 ENSG00000163001|CCDC104 ENSG00000163492|NP\_775919.2 ENSG00000163755|HPS3 ENSG00000168724|DNJA5\_HUMAN ENSG00000175483|O94914\_HUMAN

ATTGTGA ENSG00000074211|PPP2R2C ENSG00000074410|CA12 ENSG00000104490|NICALD ENSG00000113273|ARSB ENSG00000114648|KLHL18 ENSG00000124422|USP22 ENSG00000125991|ERGIC3 ENSG00000127419|TMEM175 ENSG00000128389|NM\_032262 ENSG00000132275|KIAA0409 ENSG00000142599|REERE ENSG00000147753|TTY7\_HUMAN ENSG00000147761|TTY7\_HUMAN ENSG00000156591|C6orf70 ENSG00000159224|GIP ENSG00000160584|QSK\_HUMAN ENSG00000163521|GLB1L ENSG00000172724|CCL19 ENSG00000174282|ZBTB4 ENSG00000185615|PDIA2 ENSG00000189321|NR\_002940.1 ENSG00000196970|NXP4 ENSG00000204576|PRR3 ENSG00000204590|GNL1 ENSG00000204820|Q96NT9\_HUMAN ENSG00000205023|Q6ZSF1\_HUMAN ENSG000000026751|SLAMF7 ENSG00000032219|ARID4A ENSG00000081803|CADPS2 ENSG00000085224|ATRX ENSG00000091664|SLC17A6 ENSG00000100852|ARHGAP5 ENSG00000107864|CPEB3 ENSG00000115310|RTN4 ENSG00000115363|TMEM166 ENSG00000120279|MYCT1 ENSG00000120694|HSPH1 ENSG00000133636|NTS ENSG00000134709|HOOK1 ENSG00000137575|SDCBP ENSG00000144821|MYH15 ENSG00000146729|GBAS ENSG00000148948|LRRC4C ENSG00000149534|MS4A2 ENSG00000164603|NP\_689769.2 ENSG00000165694|FRMD7 ENSG00000166337|TAF10 ENSG00000166503|HDGR3\_HUMAN ENSG00000166669|ATF7IP2 ENSG00000172175|MALT1 ENSG00000187994|NP\_940847.1 ENSG00000188021|UBQLN2 ENSG00000197172|MAGEA3 ENSG00000198046|ZNF667 ENSG00000004848|ARX ENSG00000054523|KIF1B ENSG00000072501|SMC1A ENSG00000089685|BIRC5 ENSG00000101079|NDRG3 ENSG00000131149|KIAA0182 ENSG00000132275|KIAA0409 ENSG00000132446|FTHL17 ENSG00000149292|TTC12 ENSG00000154227|LASS3 ENSG00000159556|ISL2 ENSG00000160410|SHKBP1 ENSG00000160584|QSK\_HUMAN ENSG00000162735|PEX19 ENSG00000164091|TMEM113 ENSG00000196085|C19orf42 ENSG00000203855|Q8TDP9\_HUMAN ENSG00000001561|ENPP4 ENSG000000049323|LTBP1 ENSG00000053747|LAMA3 ENSG00000076258|FMO4 ENSG00000080839|RBL1 ENSG00000095209|TMEM38B ENSG00000100357|ADSL ENSG00000101695|RNFL125 ENSG00000102908|NFAT5 ENSG00000104825|NFKB1B ENSG00000107863|ARHGAP21 ENSG00000108688|CCL7 ENSG00000112038|OPRM1 ENSG00000119950|MXI1 ENSG00000126261|SAE2 ENSG00000134028|ADAMDEC1 ENSG00000135747|ZNF670 ENSG00000136051|KIAA1033 ENSG00000138180|CEP55 ENSG00000140463|BBS4 ENSG00000155085|C6orf199 ENSG00000164066|INTU ENSG00000169621|C2orf13 ENSG00000172403|SYNP02 ENSG00000176055|NP\_981951.1 ENSG00000176597|B3GNT5 ENSG00000185477|GPRIN3 ENSG00000196177|ACADSB ENSG00000099954|BAZ1B ENSG00000029993|HMG3 ENSG00000037637|FBXO42 ENSG00000075388|PGF4 ENSG00000108342|CSF3 ENSG00000116984|MTR ENSG00000118058|MLL ENSG00000119772|DNMT3A ENSG00000119973|PRLHR ENSG00000121068|TBX2 ENSG00000124762|CDKN1A ENSG00000125657|TNFSF9 ENSG00000126602|TRAP1 ENSG00000130956|HABP4 ENSG00000134247|PTGFRN ENSG00000140025|C14orf143 ENSG00000141569|TRIM65 ENSG00000147099|HDAC8 ENSG00000151348|EXT2 ENSG00000151353|TMEM18 ENSG00000152284|TCF7L1 ENSG00000157933|SKI ENSG00000162511|LAPTM5 ENSG00000167182|SP2 ENSG00000169194|IL13 ENSG00000173812|EIF1 ENSG00000182968|SOX1 ENSG00000183579|ZNF33 ENSG00000185619|PCGF3 ENSG00000185684|EP400NL ENSG00000186564|FOXD2 ENSG00000188554|NBR1 ENSG00000197448|GSTK1 ENSG00000197451|HNRPAB ENSG00000205434|Q6ZU34\_HUMAN ENSG000000014123|KIAA0776 ENSG00000050393|CCDC90A ENSG00000064703|DDX20 ENSG00000083097|DOPEY1 ENSG00000085433|WDR47 ENSG00000086619|ERO1LB ENSG00000102098|SCML2 ENSG00000102524|TNFSF13B ENSG00000102595|UGCG2L2 ENSG00000104695|PPP2CB ENSG00000105825|TFPI2 ENSG00000107165|TYRP1 ENSG00000109471|IL2 ENSG00000109971|HSPA8 ENSG00000115514|TXNDC9 ENSG00000116266|STXBP3 ENSG00000117620|SLC35A3 ENSG00000118473|SGIP1 ENSG00000122145|TBX22 ENSG00000123178|C13orf1 ENSG00000124831|LRRFIP1 ENSG00000132463|GRSF1 ENSG00000134121|CHL1 ENSG00000134444|KIAA1468 ENSG00000134744|ZCCHC11 ENSG00000138071|ACTR2 ENSG00000138709|LARP2 ENSG00000139323|WDR51B ENSG00000145391|SETD7 ENSG00000145839|IL9 ENSG00000148943|LNH7C ENSG00000151151|IPMK ENSG00000161813|LARP4 ENSG00000162687|KCNT2 ENSG00000164342|TLR3 ENSG00000165832|TRUB1 ENSG00000166902|MRPL16 ENSG00000168282|MGAT2 ENSG00000168421|RHOF ENSG00000172115|CYCS ENSG00000174236|NP\_001025045.1 ENSG00000175279|CORT ENSG00000180336|NP\_001028831.1 ENSG00000180458|Q8N3U1\_HUMAN ENSG00000180660|MAB21L1 ENSG00000181744|C3orf58 ENSG00000183833|C3orf15 ENSG00000183918|SH2D1A ENSG00000186687|LYRM7 ENSG00000188732|C7orf46 ENSG00000196104|SPOCK3 ENSG00000197919|IFNA1 ENSG00000197967|Q86U89\_HUMAN ENSG00000203704|LOC648359

ATTATAAC ENSG000000007306|CEACAM7 ENSG000000063854|HAGH ENSG000000067082|KLF6 ENSG00000068650|ATP11A ENSG00000074211|PPP2R2C ENSG00000087365|SF3B2 ENSG00000092421|SEMA6A ENSG00000099994|SUSD2 ENSG00000099995|SF3A1 ENSG00000105383|CD33 ENSG00000105443|PSCD2 ENSG00000117461|PIK3R3 ENSG00000124164|VAPB ENSG00000128242|GAL3ST1 ENSG00000128313|APOL5 ENSG00000135503|ACVR1B ENSG00000142528|ZNF473 ENSG00000143816|WNT9A ENSG00000147255|IGSF1 ENSG00000148826|NKX6-2 ENSG00000151882|CCL28 ENSG00000157881|PANK4 ENS



ENSG00000205994|Q6ZN58\_HUMAN ENSG00000066455|GOLGA5 ENSG00000105835|PBEF1 ENSG00000107566|CHUK ENSG00000111049|MYF5 ENSG00000113525|IL5 ENSG00000114026|OGG1 ENSG00000114125|RNF7  
ENSG00000115540|PREI3 ENSG00000115808|STRN ENSG00000121989|ACVR2A ENSG00000137055|PLAA ENSG00000140450|ARRDC4 ENSG00000141198|TOM1L1 ENSG00000149507|PLAC1L5 ENSG00000150276|XR\_017783.1  
ENSG00000152642|GPD1L ENSG00000157827|FMNL2 ENSG00000163001|CCDC104 ENSG00000164823|OSGIN2 ENSG00000171004|HS6ST2 ENSG00000185985|SLITRK2 ENSG00000187151|ANGPTL5 ENSG00000189320|NP\_995327.1

ATTTAAG ENSG00000007047|MARK4 ENSG00000100027|YPEL1 ENSG00000100335|SMCR7L ENSG00000100422|CERK ENSG00000114767|RRP9 ENSG00000116809|ZBTB17 ENSG00000125166|GOT2 ENSG00000148396|KIAA0310  
ENSG00000150779|TMMMBB ENSG00000163814|CDCP1 ENSG00000164889|SLC4A2 ENSG00000166398|KIAA0355 ENSG00000166435|XRRA1 ENSG00000171724|K1576\_HUMAN ENSG00000174238|PITPNA  
ENSG00000176887|SOX11 ENSG00000180861|C12orf36 ENSG00000182660|NP\_001013698.1 ENSG00000183154|Q8NB20\_HUMAN ENSG00000184221|OLIG1 ENSG00000185049|WHSC2 ENSG00000204463|BAT3 ENSG00000203228|NDUFS1  
ENSG00000039319|ZYFVE16 ENSG00000062725|APPPB2 ENSG00000083223|ZCCHC6 ENSG00000083312|TNPO1 ENSG00000090402|SI ENSG00000106299|WASL ENSG00000107758|PPP3CB ENSG00000108654|DDX5  
ENSG00000108666|C14orf75 ENSG00000110435|PDHX ENSG00000111237|VPS29 ENSG00000113441|LNPEP ENSG00000114480|GBE1 ENSG00000120324|PCDH10 ENSG00000120705|ETF1 ENSG00000126653|CCDC55  
ENSG00000128294|TPST2 ENSG00000135002|RFK ENSG00000146426|TIAM2 ENSG00000152749|GPR180 ENSG00000152977|ZIC1 ENSG00000155975|VPS37A ENSG00000162702|ZNF281 ENSG00000163577|EIF5A2  
ENSG00000170345|FOS ENSG00000171522|PTGER4 ENSG00000173200|PARP15 ENSG00000176244|ACBD7 ENSG00000180458|Q8N3U1\_HUMAN ENSG00000186487|MYT1L ENSG00000189056|RELN ENSG00000198846|TOX  
ENSG00000204217|BMPR2

ATTTAAT ENSG00000026652|AGPAT4 ENSG00000110080|ST3GAL4 ENSG00000111641|NOL1 ENSG00000112715|VEGFA ENSG00000119684|MLH3 ENSG00000130803|ZNF317 ENSG00000131470|PSMC3IP ENSG00000134864|Q9BVM4\_HUMAN  
ENSG00000136950|ARPC5L ENSG00000140830|TXNL4B ENSG00000141580|WDR45L ENSG00000147256|RHGXX\_HUMAN ENSG00000151360|ALLC ENSG00000152315|KCNK13 ENSG00000154920|EME1 ENSG00000162511|LAPTM5  
ENSG00000165495|PKNOX2 ENSG00000166578|IQCD ENSG00000167641|PPP1R14A ENSG00000171533|MAP6 ENSG00000183154|Q8NB20\_HUMAN ENSG00000196132|MYT1\_HUMAN ENSG00000205620|Q6ZRB6\_HUMAN ENSG00000205881|Q6UXR8\_HUMAN  
ENSG00000011201|KAL1 ENSG00000036257|CUL3 ENSG00000057149|SERPINB4 ENSG00000078403|MLLT10 ENSG00000090402|SI ENSG00000100852|ARHGAP5 ENSG00000101977|MCF7 ENSG00000103037|SETD6  
ENSG00000104290|FDZ3 ENSG00000112494|UNC93A ENSG00000112539|C6orf118 ENSG00000112874|NUDT12 ENSG00000117620|SLC35A3 ENSG00000118518|RNF146 ENSG00000118777|ABCG2 ENSG00000130150|MOSPD2  
ENSG00000130224|LRCH2 ENSG00000130363|RSHL2 ENSG00000133641|C12orf29 ENSG00000134539|KLRD1 ENSG00000137710|ADK ENSG00000138593|K0256\_HUMAN ENSG00000139800|ZIC5 ENSG00000141140|MYOHD1  
ENSG00000145439|CBR4 ENSG00000154263|ABCA10 ENSG00000154359|LONRF1 ENSG00000155875|C9orf138 ENSG00000156110|RDXX ENSG00000156162|DPY19L4 ENSG00000161652|C19orf4 ENSG00000162687|KCNT2  
ENSG00000162961|DPY30\_HUMAN ENSG00000163217|BMP10 ENSG00000163611|CCDC52 ENSG00000168438|CDC40 ENSG00000169508|EBI2 ENSG00000172497|ACOT12 ENSG00000173988|Q5TBN0\_HUMAN ENSG00000176842|IRX5  
ENSG00000178425|NT5DC1 ENSG00000180182|CRSP2 ENSG00000186130|ZBTB6 ENSG00000187753|C9orf153 ENSG00000188687|SLC4A5 ENSG00000196963|PCDH16 ENSG00000205595|AREG  
ENSG00000023902|PLEKH01 ENSG000000068394|GPKOW ENSG000000109689|FLT1M2 ENSG00000101391|CDK5RAP1 ENSG00000102921|N4BP1\_HUMAN ENSG00000108474|PIGL ENSG00000113272|THG1L ENSG00000126602|TRAP1  
ENSG00000133561|GMAPP6 ENSG00000157349|DDX19B ENSG00000166402|TUB ENSG00000169777|TAS2R1 ENSG00000177875|NP\_001013657.2 ENSG00000180083|WFDC11 ENSG00000197174|O14606\_HUMAN ENSG00000197285|NR\_001536.1  
ENSG00000198561|CTNND1 ENSG00000204091|Q3Y452\_HUMAN ENSG000000079950|STX7 ENSG000000090266|NDUFB2 ENSG000000091039|OSBPL8 ENSG00000113269|RNF130 ENSG00000117543|DPH5 ENSG00000123268|ATF1  
ENSG00000132664|PNLR3F ENSG00000135049|AGTPBP1 ENSG00000136159|NUDT15 ENSG00000137672|TRPC6 ENSG00000137757|CASP5 ENSG00000150593|PCDC4 ENSG00000152348|ATG10 ENSG00000163625|WDFY3  
ENSG00000163697|APBB2 ENSG00000168303|C7orf11 ENSG00000174343|CHRNA9 ENSG00000178460|C8orf45 ENSG00000183695|MRGPRX2 ENSG00000198963|ROBB ENSG00000206125|Q68DA7\_HUMAN  
ENSG00000106101|CD4 ENSG000000011021|CLCN7 ENSG000000099937|SERPINI1 ENSG00000108439|PNO ENSG00000114988|LMAN2L ENSG00000126254|NP\_077297.2 ENSG00000126457|PRMT1  
ENSG00000128266|GNAZ ENSG00000131871|SELS\_HUMAN ENSG00000148814|LRRC27 ENSG00000160305|DIP2A ENSG00000164674|SYTL3 ENSG00000167977|KCTD5 ENSG00000168824|NSG1\_HUMAN ENSG00000170324|FRMPD2  
ENSG00000175538|KCNE3 ENSG00000177769|TSPAN4 ENSG00000179165|PXT1 ENSG00000180525|C10orf108 ENSG00000184009|ACTG1 ENSG00000184047|DIABLO ENSG00000184778|UBE2G2 ENSG00000184887|BTBD6  
ENSG00000185236|RAB11B ENSG00000185404|Q4ZG65\_HUMAN ENSG00000196581|AJAP1 ENSG00000111911|CDK5RAP1 ENSG00000123951|WDR45 ENSG00000198294|Q495C9\_HUMAN ENSG00000198768|APCDD1L ENSG00000204673|AKT1S1 ENSG00000091140|DLDD  
ENSG00000114209|PDCD10 ENSG00000114771|AADAC ENSG00000121380|BCL2L14 ENSG00000122432|SPATA1 ENSG00000124207|CSE1L ENSG00000136929|HEMGN ENSG00000152463|OLAH ENSG00000153147|SMARCA5  
ENSG00000158473|CD1D ENSG00000166268|C12orf28 ENSG00000169507|NP\_775783.1 ENSG00000175054|ATR ENSG00000182187|CRYGB ENSG00000185477|GPRIN3 ENSG00000187257|RSBN1L ENSG00000198155|Q49A33\_HUMAN  
ENSG00000204814|Q5VSD8\_HUMAN

ATTTACT ENSG00000004455|AK2 ENSG00000100320|RBM9 ENSG00000100888|CHD8 ENSG00000102034|ELF4 ENSG00000113194|UBXD8 ENSG00000113739|STC2 ENSG00000131116|ZNF428 ENSG00000131143|COX4I1  
ENSG00000131462|TUBG1 ENSG00000143416|SELENBP1 ENSG00000165917|RAPSN ENSG00000176930|ITFG3 ENSG00000170262|MRAP ENSG00000174989|FBXW8 ENSG00000179772|FKHL18 ENSG00000183579|ZNF93  
ENSG00000183691|NOG ENSG00000196476|C20orf96 ENSG00000197430|TMEM10 ENSG00000197506|SLC28A3 ENSG00000198216|CACNA1E ENSG00000198664|Q9BTRO\_HUMAN ENSG00000198831|Q8IYX2\_HUMAN ENSG00000204269|Q6ZVM2\_HUMAN  
ENSG00000010818|HIVEP2 ENSG00000050405|LIMA1 ENSG00000068796|KIF2A ENSG00000078596|ITM2A ENSG00000082212|ME2 ENSG00000085832|EPS15 ENSG00000086189|DITM1L ENSG00000093144|ECHDC1  
ENSG00000099246|RAB18 ENSG00000106701|FSD1L ENSG00000109689|FLT1M2 ENSG00000111911|HINT3 ENSG00000124831|LRRFIP1 ENSG00000128578|FAM40B ENSG00000132170|PPARG  
ENSG00000135338|C6orf152 ENSG00000135960|EDAR ENSG00000137500|CCDC90B ENSG00000138231|DBR1 ENSG00000139910|NOVA1 ENSG00000141447|OSBPL1A ENSG00000144848|C10orf97 ENSG00000148925|BTBD10  
ENSG00000150712|MTMR12 ENSG00000153064|BANK1 ENSG00000153714|C9orf150 ENSG00000157107|FCHO2 ENSG00000162746|FCRLB ENSG00000163818|LZTFL1L ENSG00000168843|FSTL5 ENSG00000169379|ARL13B  
ENSG00000169621|C2orf13 ENSG00000179934|CCR8 ENSG00000181744|C3orf58 ENSG00000182973|CNOT10 ENSG00000183690|EFHC2 ENSG00000197935|ZNF311 ENSG00000198155|Q49A33\_HUMAN  
ENSG00000082641|NFE2L1 ENSG00000106125|AQP1 ENSG00000126882|FAM78A ENSG00000133065|SLC41A1 ENSG00000134864|Q9BVM4\_HUMAN ENSG00000140090|SLC24A4 ENSG00000148795|CYP17A1 ENSG00000149021|SCGB1A1  
ENSG00000153789|FAM92B ENSG00000157734|SNX22 ENSG00000162408|NOL9 ENSG00000162738|VANGL2 ENSG00000164080|RAD54L2 ENSG00000166446|CDYL2 ENSG00000171456|ASXL1 ENSG00000171724|K1576\_HUMAN  
ENSG00000174282|ZBTB4 ENSG00000178409|KIAA1553 ENSG00000183862|CNGA2 ENSG00000186638|C9orf48 ENSG00000211454|ARK74\_HUMAN ENSG000000074266|EED ENSG00000095209|TMEM38B ENSG00000101624|CEP76  
ENSG00000102010|BMX ENSG00000107566|CHUK ENSG00000112280|COL9A1 ENSG00000112964|GHR ENSG00000116678|LEPR ENSG00000120063|GNAI3 ENSG00000122068|FYTTD1 ENSG00000129566|TEP1  
ENSG00000131979|GCH1 ENSG00000135750|KCNK1 ENSG00000139826|ABHD13 ENSG00000139910|NOVA1 ENSG00000141198|TOM1L1 ENSG00000148835|TAF5 ENSG00000155850|SLC26A2 ENSG00000157450|RNF111  
ENSG00000162852|C1orf71 ENSG00000164944|KIAA1429 ENSG00000165194|PCDH19 ENSG00000165985|C1QL3 ENSG00000170677|SOC6 ENSG00000173588|CCDC41 ENSG00000176244|ACBD7 ENSG00000177738|Q8N4U7\_HUMAN  
ENSG00000181819|Q5JSM7\_HUMAN ENSG00000186334|SLC36A3 ENSG00000196083|IL1RAP ENSG00000197632|SERPINB2

ATTTAGC ENSG00000095970|TREM2 ENSG00000121060|TRIM25 ENSG00000125266|EFNB2 ENSG00000132915|PDE6A ENSG00000134243|SORT1 ENSG00000139629|GALNT6 ENSG00000147536|GINS4 ENSG00000149503|INCENP  
ENSG00000160282|FTCD ENSG00000164048|ZNF589 ENSG00000164151|Q6ZT40\_HUMAN ENSG00000166569|CDPLX4 ENSG00000172578|KLHL6 ENSG00000173757|STAT5B ENSG00000182054|IDH2 ENSG00000182372|C8orf61  
ENSG00000196361|ELAVL3 ENSG00000205878|Q6ZSV2\_HUMAN ENSG000000022267|PHL1 ENSG00000030068|CDH1 ENSG000000076554|TPD52 ENSG00000077943|ITGA8 ENSG00000078018|MAP2 ENSG00000100567|PSMA3  
ENSG00000100814|CCNB1IP1 ENSG00000101911|PRPS2 ENSG00000116729|GPR177 ENSG00000118946|PCDH17 ENSG00000124201|ZNFX1 ENSG00000124429|POF1B ENSG00000124486|USP9X ENSG00000128513|POT1  
ENSG00000128872|TMOD2 ENSG00000135250|SRPK2 ENSG00000144619|CNTV4 ENSG00000145687|SSBP2 ENSG00000148848|ADAM12 ENSG00000155755|ALS2CR4 ENSG00000161594|KLHL10 ENSG00000165092|ALDH1A1  
ENSG00000165300|SLITRK5 ENSG00000166128|RAB8B ENSG00000167306|MYO5B ENSG00000180182|CRSP2 ENSG00000182187|CRYGB ENSG00000186272|ZNF17 ENSG00000198898|CAPZA2 ENSG00000205212|NP\_001004306.1  
ENSG00000205981|DNAJC19

ATTTAGG ENSG00000064309|CDON ENSG00000068394|GPKOW ENSG00000072182|ACCN4 ENSG00000100335|SMCR7L ENSG00000116667|C1orf21 ENSG00000117461|PIK3R3 ENSG00000126594|DNASE1 ENSG00000130147|SH3BP4  
ENSG00000130287|NCAN ENSG00000134864|Q9BVM4\_HUMAN ENSG00000136883|KIF12 ENSG00000143319|ISG20L2 ENSG00000147065|MSN ENSG00000149646|C20orf152 ENSG00000159217|IGF2BP1 ENSG00000160097|FNDC5  
ENSG00000171475|WTFP2 ENSG00000171611|PTCR4 ENSG00000174483|BBS1 ENSG00000176723|Q8N446\_HUMAN ENSG00000186326|RGS9BP ENSG00000110539|ZNF200 ENSG00000048028|USP28 ENSG00000065328|MCM10  
ENSG00000079335|CDC14A ENSG00000087502|ERGC2 ENSG00000115020|PIP5K3 ENSG00000116750|UCHL5 ENSG00000127954|Q8WBW0\_HUMAN ENSG00000135333|EPHA7 ENSG00000143458|NP\_653219.1 ENSG00000152952|PLOD2  
ENSG00000158488|CD1E ENSG00000162813|BPNT1 ENSG00000163449|TMEM169 ENSG00000164808|KIAA0146 ENSG00000165794|SLC39A2 ENSG00000169155|ZBTB43 ENSG00000179532|C11orf47 ENSG00000186579|DEFB106B  
ENSG00000187082|D106A\_HUMAN ENSG00000198015|MRPL42 ENSG00000198398|NP\_997199.1 ENSG00000203668|CHML ENSG00000205072|Q6ZR34\_HUMAN

ATTTATA ENSG00000011304|PTBP1 ENSG00000035403|VCL ENSG000000066315|JMJD2A ENSG00000092529|CAPN3 ENSG00000104368|PLAT ENSG00000105997|HOXA3  
ENSG00000115306|SPTBN1 ENSG00000119771|KLHL29 ENSG00000123358|NR4A1 ENSG00000124145|SDCA ENSG00000124216|SNAI1 ENSG00000125740|FOSB ENSG00000128918|ALDH1A2 ENSG00000134864|Q9BVM4\_HUMAN  
ENSG00000137275|RTPK1 ENSG00000140403|DNAJA4 ENSG00000152953|STRK32B ENSG00000162337|LRP5 ENSG00000163362|C1orf106 ENSG00000167977|KCTD5 ENSG00000172936|MYD88 ENSG00000179766|Q4G129\_HUMAN  
ENSG00000183596|TIM16\_HUMAN ENSG00000184557|SOCS3 ENSG00000188038|NRN1L ENSG00000188176|SMTNL2 ENSG00000197724|PHF2 ENSG00000203934|Q6ZUQ1\_HUMAN ENSG00000204266|MNAT1 ENSG0000033867|SLC4A7  
ENSG00000043093|DCUN1D1 ENSG00000048392|RRM2B ENSG00000073756|PTGS2 ENSG00000075420|FNDC3B ENSG00000082438|COBLL1 ENSG00000085382|HACE1 ENSG00000087303|NID2 ENSG00000094963|FMO2  
ENSG00000100629|C14orf145 ENSG00000101773|RBBP8 ENSG00000103479|RBL2 ENSG00000104671|DCTN6 ENSG00000106278|PTRPZ1 ENSG00000109586|GALNT7 ENSG00000109689|STM2 ENSG00000111537|IFNG  
ENSG00000112276|BVES ENSG00000115540|PREI3 ENSG00000115946|PNO1 ENSG00000116044|NFE2L2 ENSG00000116641|DOCK7 ENSG00000117118|SDHB ENSG00000128683|GAD1 ENSG00000129636|ITFG1  
ENSG00000132475|H3F3B ENSG00000135776|ABCB10 ENSG00000136014|USP4 ENSG00000137992|DBT ENSG00000144228|SPOPL\_HUMAN ENSG00000144749|LRIG1 ENSG00000145794|MEGF10 ENSG00000145808|ADAMTS19  
ENSG00000146757|ZNF92 ENSG00000151012|SLC7A11 ENSG00000151229|SLC2A13 ENSG00000151327|C14orf24 ENSG00000153140|CETN3 ENSG00000154608|CEP170L ENSG00000154640|BTG3 ENSG00000156284|CLDN8  
ENSG00000156735|BAG4 ENSG00000162980|ARL5A ENSG00000163069|SCPB ENSG00000163669|DNHD2 ENSG00000163710|PCOLCE2 ENSG00000164111|ANXA5 ENSG00000165028|NIPSNAP3B ENSG00000168661|ZNF30  
ENSG00000168811|IL12A ENSG00000169018|FEM1B ENSG00000173041|ZNF680 ENSG00000173542|MOBK1A ENSG00000176896|FTSM1\_HUMAN ENSG00000182944|EWSR1 ENSG00000183340|JRK1 ENSG00000187257|RSBN1L  
ENSG00000187987|ZSCAN23 ENSG00000189308|LIN54 ENSG00000196151|WDSUB1 ENSG00000196268|ZNF493 ENSG00000196705|ZNF431 ENSG00000196711|NP\_997296.1 ENSG00000197930|ERO1L ENSG00000198780|Q9H989\_HUMAN  
ENSG00000198814|GK ENSG00000204814|Q5VSD8\_HUMAN ENSG00000204899|NP\_001065243.1 ENSG00000205604|Q6ZUP5\_HUMAN

ATTTATC ENSG00000067066|SP100 ENSG00000099968|BCL2L13 ENSG00000100036|SLC35E4 ENSG00000102076|OPN1LW ENSG00000103997|HOXA3 ENSG00000106211|HSPB1 ENSG00000110711|AIP ENSG00000125746|EML2  
ENSG00000128652|HOXD3 ENSG00000130032|PRRG3 ENSG00000130711|PRDM12 ENSG00000131462|TUBG1 ENSG00000132846|ZBED3 ENSG00000141084|RANBP10 ENSG00000142686|NP\_689587.1 ENSG00000147380|OPN1MW  
ENSG00000154222|CC2D1B ENSG00000155252|C10orf65 ENSG00000157240|FZD1 ENSG00000159176|CSRP1 ENSG00000160710|ADAR ENSG00000163823|CCR1 ENSG00000166160|OPN1MW2 ENSG00000178977|C17orf44  
ENSG00000179335|CLK3 ENSG00000182968|SOX1 ENSG00000183019|C19orf59 ENSG00000198219|Q96N05\_HUMAN ENSG00000011201|KAL1 ENSG00000067064|ID11 ENSG00000072657|TRHDE ENSG00000073712|PLEKH01  
ENSG00000095574|IKZF5 ENSG00000105866|SP4 ENSG00000109819|PPARGC1A ENSG00000110436|SLC1A2 ENSG00000115091|ACTR3 ENSG00000115365|LANCL1 ENSG00000115946|PNO1 ENSG00000121741|ZMYM2  
ENSG00000123106|CCDC91 ENSG00000132153|DHX30 ENSG00000154175|AB13BP ENSG00000156500|FAM122C ENSG00000157423|Q4G0P3-5 ENSG00000159882|ZNF230 ENSG00000164188|RANBP3L ENSG00000171135|JAGN1  
ENSG00000174437|ATP2A2 ENSG00000178935|ZNF552 ENSG00000182264|IZUMO1 ENSG00000185873|TMPRSS11B ENSG00000197585|Q5JV89\_HUMAN ENSG00000197658|NP\_775857.1 ENSG00000198157|NSBP1 ENSG00000198498|NP\_060822.1

ATTTATG ENSG00000056345|ITGB3 ENSG00000056998|GYG2 ENSG00000057704|TMCC3 ENSG00000102755|FLT1 ENSG00000103168|TAF1C ENSG00000104499|GML ENSG00000107807|TLX1 ENSG00000110237|ARHGEF17  
ENSG00000116983|HPCAL4 ENSG00000120889|TNFRSF10B ENSG00000122223|CD244 ENSG00000125798|FOXA2 ENSG00000134531|EMP1 ENSG00000140090|SLC24A4 ENSG00000143575|HAX1 ENSG00000162344|FGF19  
ENSG00000162591|MEGF6 ENSG00000163833|FBXO40 ENSG00000166398|KIAA0355 ENSG00000167774|NDUFA7 ENSG00000171345|KRT19 ENSG00000171872|KLF17 ENSG00000182606|TRAK1 ENSG00000188559|C20orf74  
ENSG00000188735|NP\_001074294.1 ENSG00000204496|LTA ENSG00000002016|RAD52 ENSG00000012660|ELOVL5 ENSG00000048544|MRPS10 ENSG00000064651|SLC12A2 ENSG00000086666|ZFAND6 ENSG00000087470|DNM1L  
ENSG00000103160|HSDL1 ENSG00000111713|GYS2 ENSG00000112144|ICK ENSG00000113300|CNOT6 ENSG00000114346|ECT2 ENSG00000115289|PCGF1 ENSG00000115738|ID2 ENSG00000120279|MYCT1  
ENSG00000120992|LYPLA1 ENSG00000122870|BICC1 ENSG00000124380|SNUT3\_HUMAN ENSG00000124802|EEF1E1 ENSG00000124882|EREG ENSG00000134758|RNF138 ENSG00000136560|TANK ENSG00000139323|WDR51B  
ENSG00000139372|TDG ENSG00000142892|PIGK ENSG00000147655|RSPO2 ENSG00000152977|ZIC1 ENSG00000156313|RPGC ENSG00000159216|RUNX1 ENSG00000164031|DNAJB14 ENSG00000164129|NPY5R  
ENSG00000167904|TMEM68 ENSG00000169744|LDB2 ENSG00000171659|GPR34 ENSG00000173198|CYSLTR1 ENSG00000173930|SLCO4C1 ENSG00000175893|ZDHHC21 ENSG00000178222|RNF212 ENSG00000179119|SPTY2D1  
ENSG00000180116|C12orf40 ENSG00000180730|TMEM46 ENSG00000

ATTTATT ENSG00000001617|SEMA3F ENSG00000005001|PRSS22 ENSG00000006075|CCL3 ENSG00000006327|TNFRSF12A ENSG00000010165|KIAA0859 ENSG00000049769|PPP1R3F ENSG00000058866|DGKG ENSG00000068971|PPP2R5B ENSG00000072195|SPEG ENSG000000075426|FOSL2 ENSG000000076604|TRAF4 ENSG000000084764|MAPRE3 ENSG000000095752|IL11 ENSG000000102245|CD40LG ENSG00000103512|NOMO1\_HUMAN ENSG00000105341|NP\_060505.1 ENSG00000105509|HAS1 ENSG000000105649|RAB3A ENSG000000107404|DVL1 ENSG000000113070|HBEFG ENSG000000117407|ARTN ENSG000000124067|LCAT ENSG000000125967|APBA2BP ENSG00000128342|LIF ENSG000000130164|LDLR ENSG000000130513|GDF15 ENSG000000132535|DLG4 ENSG000000133069|TMCC2 ENSG000000133317|LGALS12 ENSG000000137331|IER3 ENSG000000138031|ADCY3 ENSG000000139445|FOXN4 ENSG000000139718|SETD1B ENSG000000143006|DMRTB1 ENSG000000144655|AXUD1 ENSG000000149926|FAMS7B ENSG000000154764|WNT7A ENSG000000158859|ADAMTS4 ENSG000000161835|GRASP ENSG000000163155|LYSMD1 ENSG000000163814|CDCP1 ENSG000000165462|PHOX2A ENSG000000166886|NAB2 ENSG000000166924|NP\_775835.2 ENSG00000168621|GDNF ENSG000000169194|IL13 ENSG000000170682|Q96NU5\_HUMAN ENSG00000172375|TMEM24 ENSG000000173421|CCDC36 ENSG000000175505|CLCF1 ENSG000000182606|TRAK1 ENSG000000184787|UBE2G2 ENSG000000185164|NOMO3 ENSG000000185619|PCGF3 ENSG000000185668|POU3F1 ENSG000000187479|Q7Z7L8\_HUMAN ENSG000000187559|FOXD4L3 ENSG000000196361|ELAVL3 ENSG000000197272|IL27 ENSG000000198355|PIM3 ENSG000000203879|GDI1 ENSG000000204793|FOXD4L6 ENSG000000204820|Q96NT9\_HUMAN ENSG00000031691|CENPQ ENSG00000033867|SLC4A7 ENSG00000036257|CUL3 ENSG00000061987|MON2 ENSG00000080298|RF3X ENSG0000008081041|CXCL2 ENSG00000082293|COL19A1 ENSG00000087074|PPP1R15A ENSG00000104177|MYEF2 ENSG00000104689|TNFRSF10A ENSG00000109471|IL2 ENSG000000110944|IL23A ENSG000000111404|NP\_079006.1 ENSG000000112175|BMP5 ENSG000000112183|RBM24 ENSG000000119231|SENP5 ENSG000000120242|IFNA8 ENSG000000120327|PCDH14 ENSG000000120910|PPP3CC ENSG000000125538|IL1B ENSG000000136634|IL10 ENSG000000139800|ZIC5 ENSG000000147488|ST18 ENSG000000147650|LRP12 ENSG000000148950|IMMP1L ENSG000000162624|LHX8 ENSG000000163611|CCDC52 ENSG000000165105|RASEF ENSG000000166510|CCDC68 ENSG000000167098|SPAG4 ENSG000000167637|ZNF345 ENSG000000168288|C2orf25 ENSG000000168438|CDC40 ENSG000000169429|IL8 ENSG000000173559|OBFC2A ENSG000000177047|IFNW1 ENSG000000181904|C5orf24 ENSG000000182118|FAM89A ENSG000000182400|TRAPP6B ENSG000000186487|MYT1L ENSG000000196352|CD55 ENSG000000197734|C14orf178 ENSG000000205595|AREG ENSG000000110987|BCL7A ENSG000000116984|MTR ENSG000000119685|TLL5\_HUMAN ENSG000000122176|FMOD ENSG000000128266|GNAZ ENSG000000148290|SURF1 ENSG000000150477|KIAA1328 ENSG000000151468|CCDC3 ENSG000000162892|IL24 ENSG000000162981|FAM84A ENSG000000167470|MIDN ENSG000000169218|RSPO1 ENSG000000172548|ICHN\_HUMAN ENSG000000174576|NPAS4 ENSG000000179766|Q4G129\_HUMAN ENSG000000182013|NP\_060685.2 ENSG000000183242|WIT1 ENSG000000185811|IKZF1 ENSG000000187164|KIAA1598 ENSG000000188242|Q71RB1\_HUMAN ENSG000000197081|IGF2R ENSG000000197122|SRC ENSG000000198089|SF11 ENSG000000198574|SH2D1B ENSG000000204496|LTA ENSG000000209266|NDUFB2 ENSG00000091879|ANGPT2 ENSG000000104371|DKK4 ENSG000000105216|LSM14A ENSG000000105879|CBLL1 ENSG000000113205|PCDH3 ENSG000000114405|C3orf14 ENSG000000115339|GALNT3 ENSG000000118307|CASC1 ENSG000000118985|ELL2 ENSG000000124092|CTCF\_L ENSG000000124802|EEF1E1 ENSG000000135222|CSN2 ENSG000000136099|PCDH8 ENSG000000138315|OIT3 ENSG000000144406|Q96SS0\_HUMAN ENSG000000149311|ATM ENSG0000000149443|C2orf78 ENSG000000149506|ZP1 ENSG000000155542|C5orf35 ENSG000000162702|ZNF281 ENSG000000165929|MTAC2D1 ENSG000000170066|TMEM154 ENSG000000170788|DYDC1 ENSG000000174839|FAM116A ENSG000000176597|B3GNT5 ENSG000000176774|MAGEB18 ENSG000000178965|C1orf173 ENSG000000185437|SH3BGR ENSG000000197054|ZNF763 ENSG000000197958|RPL12 ENSG000000198780|Q9H989\_HUMAN ENSG000000206213|PLSCR5 ENSG000000104228|TRIM35 ENSG000000106144|CASP2 ENSG000000106615|RHEB ENSG000000037637|FBXO42 ENSG000000085872|CHERP ENSG000000100099|HPS4 ENSG000000101463|C2orf39 ENSG000000102978|POLR2C ENSG000000104228|TRIM35 ENSG000000106144|CASP2 ENSG000000106615|RHEB ENSG000000110723|CHKA ENSG000000110777|POU2AF1 ENSG000000116984|MTR ENSG000000126461|NP\_067051.1 ENSG000000128918|ALDH1A2 ENSG000000134531|EMP1 ENSG000000140406|MESDC1 ENSG000000144677|CTDSPL ENSG000000147383|NSDHL ENSG000000151208|DLG5 ENSG000000164038|NP\_849155.2 ENSG000000166540|ZNF407 ENSG000000172379|ARNT2 ENSG000000185294|NP\_787078.1 ENSG000000186594|NP\_116284.2 ENSG000000203674|Q6ZT24\_HUMAN ENSG000000204120|NTRC15 ENSG000000205726|ITSN1 ENSG000000003509|NP\_653337.1 ENSG000000008952|TLOC1 ENSG000000102817|JARID1D ENSG000000119991|HGF ENSG0000000049192|ADAMTS6 ENSG000000104324|NP\_057218.1 ENSG000000110318|KIAA1377 ENSG000000111885|MAN1A1 ENSG000000112394|SLC16A10 ENSG000000118733|OLFM3 ENSG000000134897|BIVM ENSG000000135776|ABCB10 ENSG000000137819|PAQR5 ENSG000000142875|PRKACB ENSG000000143494|VASH2 ENSG000000145725|HISPPD1 ENSG000000148655|C10orf11 ENSG000000148828|NP\_001074467.1 ENSG000000150782|LL18 ENSG0000000156096|UGT2B4 ENSG000000157551|KCNJ15 ENSG000000158528|PPP1R9A ENSG000000163041|H3F3A ENSG000000167014|C15orf43 ENSG000000169047|IRS1 ENSG000000170495|Q6ZNE6\_HUMAN ENSG000000171208|NETO2 ENSG000000172969|LOC285299 ENSG000000173046|NM\_207376 ENSG000000174891|RSRC1 ENSG000000176563|CNTD1 ENSG000000178102|DNAHLL ENSG000000183385|TTY8\_HUMAN ENSG000000185220|PGBD2 ENSG000000185700|TTY8\_HUMAN ENSG000000186687|LYRM7 ENSG000000197069|Q9H399\_HUMAN ENSG000000198740|ZNF652 ENSG000000204954|Q69YU5\_HUMAN ENSG000000205097|NP\_001005217.1 ENSG000000206163 ENSG0000000006116|CACNG3 ENSG000000052749|RRP12 ENSG000000105426|PTPRS ENSG000000105426|EIF3S9 ENSG000000123329|ARHGAP9 ENSG000000132522|GPS2 ENSG000000143412|ANXA9 ENSG000000144834|TAGLN3 ENSG000000145494|NDUFB5 ENSG000000159335|PTMS ENSG000000163956|LRP2A1 ENSG000000166428|PLD4 ENSG000000168056|LTBP3 ENSG000000171483|SSX6 ENSG000000181722|ZBTB20 ENSG000000184979|USP18 ENSG000000186526|CYP4F8 ENSG000000196644|LOC728932 ENSG000000198457|CP21A\_HUMAN ENSG000000198946|SSX4B ENSG000000203908|NP\_001017361.1 ENSG000000204368|SSX7 ENSG000000204645|SSX4 ENSG000000204648|SSX9 ENSG000000205918|Q6A1A2\_HUMAN ENSG000000074935|TUBE1 ENSG000000075303|SLC25A40 ENSG000000100564|PIGH ENSG000000114023|C3orf28 ENSG000000117262|GPR89A ENSG000000132429|POPCD3 ENSG000000136805|C9orf4 ENSG000000137571|SLC05A1 ENSG000000137959|IF144L ENSG000000143621|ILF2 ENSG000000145348|TBC1\_HUMAN ENSG000000148835|TAF5 ENSG000000154240|CCDC46 ENSG000000165525|SDCCAG1 ENSG000000170175|CHRN1 ENSG000000188092|GPR89B ENSG000000196290|NIF3L1 ENSG000000074590|NUAK1 ENSG000000086062|B4GALT1 ENSG000000100558|PLEK2 ENSG000000125445|MRPS7 ENSG000000126522|CRCP\_HUMAN ENSG000000130787|HIP1R ENSG000000131236|CAP1 ENSG000000142230|SAE1 ENSG000000143891|GALM ENSG000000145029|NICN1 ENSG000000151692|RNF144 ENSG000000159842|ABR ENSG000000163814|CDCP1 ENSG000000165606|NP\_001073989.1 ENSG000000169188|APEX2 ENSG000000172183|ISG20 ENSG000000173011|Q86TJ2\_HUMAN ENSG000000174851|YIF1A ENSG000000177764|ZCCHC3 ENSG000000180358|Q8N1X6\_HUMAN ENSG000000181250|MYADML ENSG000000183154|Q8NB20\_HUMAN ENSG000000183686|MAGEA5 ENSG000000186844|LCE1A ENSG000000205599|Q6ZUY4\_HUMAN ENSG000000205793|Q6ZT42\_HUMAN ENSG000000010704|HFE ENSG000000065548|ZC3H15 ENSG000000067533|RRP15 ENSG000000087301|KIAA1344 ENSG000000103569|AQP9 ENSG000000104375|STK1 ENSG000000113368|LMNB1 ENSG000000114978|MOBK1B ENSG000000124224|PPP4R1L ENSG000000126249|PDCD2L ENSG000000129691|ASH2L ENSG000000134717|BTFF3L4 ENSG000000135249|RINT1 ENSG000000135540|NHSL1 ENSG000000138081|FBXO11 ENSG000000139055|ERP27 ENSG000000143942|CHAC2 ENSG000000143971|ETAA1 ENSG000000145246|ATP10D ENSG000000152380|NP\_991111.1 ENSG000000164187|LMBRD2 ENSG000000164830|OXR1 ENSG000000164938|TP53INP1 ENSG000000165533|TTTC8 ENSG000000170191|WANP ENSG000000178105|DDX10 ENSG000000186700|Q8NF63\_HUMAN ENSG000000197969|VPS13A ENSG000000198648|STK39 ENSG000000204389|HSPA1A ENSG000000202277|C2orf43 ENSG000000050327|ARHGEF5 ENSG000000063169|GLTSCR1 ENSG000000089116|LHX5 ENSG000000095777|MYO3A ENSG000000106236|NPTX2 ENSG000000115526|CHST10 ENSG000000134014|ELP3 ENSG000000143761|ARF1 ENSG000000163810|TGM4 ENSG000000165175|MID1IP1 ENSG000000167491|GATAD2A ENSG000000168487|BMP1 ENSG000000182154|SLC20A2 ENSG000000171540|OTP ENSG000000175938|TMEM142C ENSG000000179523|Q8TAS2\_HUMAN ENSG000000184221|OLIG1 ENSG000000184545|DUSP8 ENSG000000185155|MIXL1 ENSG000000185669|SNAI3 ENSG000000186654|ARHGAP8 ENSG000000196743|GM2A ENSG000000203774|Q6ZUA8\_HUMAN ENSG000000204118|NAP1L6 ENSG000000204226|Q6ZNS0\_HUMAN ENSG000000204860|C9orf122 ENSG000000205064|Q6ZVP2\_HUMAN ENSG00000048462|TNFRSF17 ENSG000000075673|ATP12A ENSG000000105880|DLX5 ENSG000000115850|LCT ENSG000000122674|C7orf28A ENSG000000135597|REPS1 ENSG000000139133|ALG10 ENSG000000140280|LYSMD2 ENSG000000144401|FAM119A ENSG000000146574|C7orf28B ENSG000000158164|TMSL8 ENSG000000161573|CCL16 ENSG000000172244|C5orf34 ENSG000000178105|DDX10 ENSG000000185792|NLRP9 ENSG000000186625|KATNAL1 ENSG000000197054|ZNF763 ENSG000000198918|RPL39 ENSG000000198918|RPL39 ENSG000000124839|RAB17 ENSG000000125820|NKX2-2 ENSG000000129946|SHC2 ENSG000000172183|ISG20 ENSG000000173011|Q86TJ2\_HUMAN ENSG000000174851|YIF1A ENSG000000177764|ZCCHC3 ENSG000000180358|Q8N1X6\_HUMAN ENSG000000181250|MYADML ENSG000000183154|Q8NB20\_HUMAN ENSG000000183686|MAGEA5 ENSG000000186844|LCE1A ENSG000000205599|Q6ZUY4\_HUMAN ENSG000000205793|Q6ZT42\_HUMAN ENSG00000010704|HFE ENSG000000065548|ZC3H15 ENSG000000067533|RRP15 ENSG000000087301|KIAA1344 ENSG000000103569|AQP9 ENSG000000104375|STK1 ENSG000000113368|LMNB1 ENSG000000114978|MOBK1B ENSG000000124224|PPP4R1L ENSG000000126249|PDCD2L ENSG000000129691|ASH2L ENSG000000134717|BTFF3L4 ENSG000000135249|RINT1 ENSG000000135540|NHSL1 ENSG000000138081|FBXO11 ENSG000000139055|ERP27 ENSG000000143942|CHAC2 ENSG000000143971|ETAA1 ENSG000000145246|ATP10D ENSG000000152380|NP\_991111.1 ENSG000000164187|LMBRD2 ENSG000000164830|OXR1 ENSG000000164938|TP53INP1 ENSG000000165533|TTTC8 ENSG000000170191|WANP ENSG000000178105|DDX10 ENSG000000186700|Q8NF63\_HUMAN ENSG000000197969|VPS13A ENSG000000198648|STK39 ENSG000000204389|HSPA1A ENSG000000202277|C2orf43 ENSG000000050327|ARHGEF5 ENSG000000063169|GLTSCR1 ENSG000000089116|LHX5 ENSG000000095777|MYO3A ENSG000000106236|NPTX2 ENSG000000115526|CHST10 ENSG000000134014|ELP3 ENSG000000143761|ARF1 ENSG000000163810|TGM4 ENSG000000165175|MID1IP1 ENSG000000167491|GATAD2A ENSG000000168487|BMP1 ENSG000000182154|SLC20A2 ENSG000000171540|OTP ENSG000000175938|TMEM142C ENSG000000179523|Q8TAS2\_HUMAN ENSG000000184221|OLIG1 ENSG000000184545|DUSP8 ENSG000000185155|MIXL1 ENSG000000185669|SNAI3 ENSG000000186654|ARHGAP8 ENSG000000196743|GM2A ENSG000000203774|Q6ZUA8\_HUMAN ENSG000000204118|NAP1L6 ENSG000000204226|Q6ZNS0\_HUMAN ENSG000000204860|C9orf122 ENSG000000205064|Q6ZVP2\_HUMAN ENSG00000048462|TNFRSF17 ENSG000000075673|ATP12A ENSG000000105880|DLX5 ENSG000000115850|LCT ENSG000000122674|C7orf28A ENSG000000135597|REPS1 ENSG000000139133|ALG10 ENSG000000140280|LYSMD2 ENSG000000144401|FAM119A ENSG000000146574|C7orf28B ENSG000000158164|TMSL8 ENSG000000161573|CCL16 ENSG000000172244|C5orf34 ENSG000000178105|DDX10 ENSG000000185792|NLRP9 ENSG000000186625|KATNAL1 ENSG000000197054|ZNF763 ENSG000000198918|RPL39 ENSG000000198918|RPL39 ENSG000000124839|RAB17 ENSG000000125820|NKX2-2 ENSG000000129946|SHC2 ENSG000000172183|ISG20 ENSG000000173011|Q86TJ2\_HUMAN ENSG000000174851|YIF1A ENSG000000177764|ZCCHC3 ENSG000000180358|Q8N1X6\_HUMAN ENSG000000181250|MYADML ENSG000000183154|Q8NB20\_HUMAN ENSG000000183686|MAGEA5 ENSG000000186844|LCE1A ENSG000000205599|Q6ZUY4\_HUMAN ENSG000000205793|Q6ZT42\_HUMAN ENSG00000010704|HFE ENSG000000065548|ZC3H15 ENSG000000067533|RRP15 ENSG000000087301|KIAA1344 ENSG000000103569|AQP9 ENSG000000104375|STK1 ENSG000000113368|LMNB1 ENSG000000114978|MOBK1B ENSG000000124224|PPP4R1L ENSG000000126249|PDCD2L ENSG000000129691|ASH2L ENSG000000134717|BTFF3L4 ENSG000000135249|RINT1 ENSG000000135540|NHSL1 ENSG000000138081|FBXO11 ENSG000000139055|ERP27 ENSG000000143942|CHAC2 ENSG000000143971|ETAA1 ENSG000000145246|ATP10D ENSG000000152380|NP\_991111.1 ENSG000000164187|LMBRD2 ENSG000000164830|OXR1 ENSG000000164938|TP53INP1 ENSG000000165533|TTTC8 ENSG000000170191|WANP ENSG000000178105|DDX10 ENSG000000186700|Q8NF63\_HUMAN ENSG000000197969|VPS13A ENSG000000198648|STK39 ENSG000000204389|HSPA1A ENSG000000202277|C2orf43 ENSG000000050327|ARHGEF5 ENSG000000063169|GLTSCR1 ENSG000000089116|LHX5 ENSG000000095777|MYO3A ENSG000000106236|NPTX2 ENSG000000115526|CHST10 ENSG000000134014|ELP3 ENSG000000143761|ARF1 ENSG000000163810|TGM4 ENSG000000165175|MID1IP1 ENSG000000167491|GATAD2A ENSG000000168487|BMP1 ENSG000000182154|SLC20A2 ENSG000000171540|OTP ENSG000000175938|TMEM142C ENSG000000179523|Q8TAS2\_HUMAN ENSG000000184221|OLIG1 ENSG000000184545|DUSP8 ENSG000000185155|MIXL1 ENSG000000185669|SNAI3 ENSG000000186654|ARHGAP8 ENSG000000196743|GM2A ENSG000000203774|Q6ZUA8\_HUMAN ENSG000000204118|NAP1L6 ENSG000000204226|Q6ZNS0\_HUMAN ENSG000000204860|C9orf122 ENSG000000205064|Q6ZVP2\_HUMAN ENSG00000048462|TNFRSF17 ENSG000000075673|ATP12A ENSG000000105880|DLX5 ENSG000000115850|LCT ENSG000000122674|C7orf28A ENSG000000135597|REPS1 ENSG000000139133|ALG10 ENSG000000140280|LYSMD2 ENSG000000144401|FAM119A ENSG000000146574|C7orf28B ENSG000000158164|TMSL8 ENSG000000161573|CCL16 ENSG000000172244|C5orf34 ENSG000000178105|DDX10 ENSG000000185792|NLRP9 ENSG000000186625|KATNAL1 ENSG000000197054|ZNF763 ENSG000000198918|RPL39 ENSG000000198918|RPL39 ENSG000000124839|RAB17 ENSG000000125820|NKX2-2 ENSG000000129946|SHC2 ENSG000000172183|ISG20 ENSG000000173011|Q86TJ2\_HUMAN ENSG000000174851|YIF1A ENSG000000177764|ZCCHC3 ENSG000000180358|Q8N1X6\_HUMAN ENSG000000181250|MYADML ENSG000000183154|Q8NB20\_HUMAN ENSG000000183686|MAGEA5 ENSG000000186844|LCE1A ENSG000000205599|Q6ZUY4\_HUMAN ENSG000000205793|Q6ZT42\_HUMAN ENSG00000010704|HFE ENSG000000065548|ZC3H15 ENSG000000067533|RRP15 ENSG000000087301|KIAA1344 ENSG000000103569|AQP9 ENSG000000104375|STK1 ENSG000000113368|LMNB1 ENSG000000114978|MOBK1B ENSG000000124224|PPP4R1L ENSG000000126249|PDCD2L ENSG000000129691|ASH2L ENSG000000134717|BTFF3L4 ENSG000000135249|RINT1 ENSG000000135540|NHSL1 ENSG000000138081|FBXO11 ENSG000000139055|ERP27 ENSG000000143942|CHAC2 ENSG000000143971|ETAA1 ENSG000000145246|ATP10D ENSG000000152380|NP\_991111.1 ENSG000000164187|LMBRD2 ENSG000000164830|OXR1 ENSG000000164938|TP53INP1 ENSG000000165533|TTTC8 ENSG000000170191|WANP ENSG000000178105|DDX10 ENSG000000186700|Q8NF63\_HUMAN ENSG000000197969|VPS13A ENSG000000198648|STK39 ENSG000000204389|HSPA1A ENSG000000202277|C2orf43 ENSG000000050327|ARHGEF5 ENSG000000063169|GLTSCR1 ENSG000000089116|LHX5 ENSG000000095777|MYO3A ENSG000000106236|NPTX2 ENSG000000115526|CHST10 ENSG000000134014|ELP3 ENSG000000143761|ARF1 ENSG000000163810|TGM4 ENSG000000165175|MID1IP1 ENSG000000167491|GATAD2A ENSG000000168487|BMP1 ENSG000000182154|SLC20A2 ENSG000000171540|OTP ENSG000000175938|TMEM142C ENSG000000179523|Q8TAS2\_HUMAN ENSG000000184221|OLIG1 ENSG000000184545|DUSP8 ENSG000000185155|MIXL1 ENSG000000185669|SNAI3 ENSG000000186654|ARHGAP8 ENSG000000196743|GM2A ENSG000000203774|Q6ZUA8\_HUMAN ENSG000000204118|NAP1L6 ENSG000000204226|Q6ZNS0\_HUMAN ENSG000000204860|C9orf122 ENSG000000205064|Q6ZVP2\_HUMAN ENSG00000048462|TNFRSF17 ENSG000000075673|ATP12A ENSG000000105880|DLX5 ENSG000000115850|LCT ENSG000000122674|C7orf28A ENSG000000135597|REPS1 ENSG000000139133|ALG10 ENSG00000



ATTTTTT ENSG0000006453|BAIAP2L1 ENSG00000063169|GLTSCR1 ENSG00000075240|NP\_055939.1 ENSG00000077942|FBLN1 ENSG00000087586|AURKA ENSG00000088305|DNMT3B ENSG00000088812|ATRNL ENSG00000100099|HPS4  
ENSG00000102547|CAB39L ENSG00000106459|NRF1 ENSG00000113273|ARSB ENSG00000120875|DUSP4 ENSG00000124766|SOX4 ENSG00000130147|SH3BP4 ENSG00000130635|COL5A1 ENSG00000132535|DLG4  
ENSG00000137275|RIPK1 ENSG00000139433|GLTP ENSG00000139718|SETD1B ENSG00000140678|ITGAX ENSG00000142599|RERE ENSG00000145050|ARMET ENSG00000146950|SHROOM2 ENSG00000153395|AYTL2  
ENSG00000153786|ZDHHCH7 ENSG00000154978|NM\_030796.3 ENSG00000158859|ADAMTS4 ENSG00000162981|FAM84A ENSG00000166900|STX3 ENSG00000170515|PAZG4 ENSG00000173402|DAG1 ENSG00000176463|SLC03A1  
ENSG00000176887|SOX11 ENSG00000179388|EGR3 ENSG00000179421|Q8NBA4\_HUMAN ENSG00000179912|R3HDM2 ENSG00000185436|IL2BRA ENSG00000196396|PTPN11 ENSG00000205352|Q9NZ81-2 ENSG00000010818|HIVEP2  
ENSG00000055917|PUM2 ENSG00000067955|CBFB ENSG00000070831|CDC42 ENSG00000096092|TMEM14A ENSG00000105793|GTPBP10 ENSG00000107014|RLN2 ENSG00000107864|CPEB3 ENSG00000109814|UGDH  
ENSG00000110048|OSBP ENSG00000112242|E2F3 ENSG00000112303|VNN2 ENSG00000112964|GHR ENSG00000113583|C5orf15 ENSG00000115504|EHBP1 ENSG00000127152|BCL11B ENSG00000130699|TAF4  
ENSG00000135090|TAOK3 ENSG00000135318|NT5E ENSG00000136111|TBC1D4 ENSG00000136156|ITM2B ENSG00000136240|KDEL2R ENSG00000136243|NUPL2 ENSG00000143256|PFDN2 ENSG00000143442|POGZ  
ENSG00000147905|ZCCHC7 ENSG00000148482|SLC39A12 ENSG00000148700|ADD3 ENSG00000151470|C4orf33 ENSG00000152620|C5orf33 ENSG00000152620|NP\_115767.1 ENSG00000162624|LHX8  
ENSG00000163006|NP\_659415.1 ENSG00000164161|HHIP ENSG00000164252|AGGF1 ENSG00000165813|C10orf118 ENSG00000166349|RAG1 ENSG00000175928|LRRN1 ENSG00000177853|ZNF518 ENSG00000186522|SEPT10  
ENSG00000198168|SVIP\_HUMAN ENSG00000204389|HSPA1A ENSG00000206527|PTPLB  
CAAAAAT ENSG00000082014|SMARCD3 ENSG00000113578|FGF1 ENSG00000121152|NCAPH ENSG00000132478|UNK ENSG00000138083|SIX3 ENSG00000142583|SLC2A5 ENSG00000143001|TMEM61 ENSG00000148180|GSN  
ENSG00000157216|SSBP3 ENSG00000160789|LMNA ENSG00000167182|SP2 ENSG00000169118|CSNK1G1 ENSG00000176762|Q8N1N1\_HUMAN ENSG00000180385|Q8NAP4\_HUMAN ENSG00000182533|CAV3 ENSG00000183154|Q8NB20\_HUMAN  
ENSG00000183579|ZNRF3 ENSG00000184502|GAST ENSG00000187516|CxorF27 ENSG00000197993|KEL ENSG00000198884|Q6UXP0\_HUMAN ENSG00000203783|PRR9 ENSG00000039537|C6  
ENSG00000064102|C12orf11 ENSG00000091157|WDR7 ENSG00000095464|PDE6C ENSG00000101333|PLCB4 ENSG00000108061|SHOC2 ENSG00000112175|BMP5 ENSG00000114200|BCHE ENSG00000114857|NKTR  
ENSG00000115355|KIAA1212 ENSG00000116703|PDC ENSG00000117791|MOSC2 ENSG00000121621|KIF18A ENSG00000122378|C10orf58 ENSG00000123219|ENOSF1 ENSG00000136810|TXN ENSG00000140836|ATBF1  
ENSG00000145817|YIPF5 ENSG00000149212|SESN3 ENSG00000154727|GABPA ENSG00000155130|MARCKS ENSG00000159279|NPY6R ENSG00000162618|ELTD1 ENSG00000163535|SGOL2 ENSG00000163673|DCLK3  
ENSG00000164168|TMEM34 ENSG00000165029|ABCA1 ENSG00000168967|PMCHL1 ENSG00000169040|PMCHL2 ENSG00000171202|TMEM126A ENSG00000171243|SOSTDC1 ENSG00000171863|RPS7 ENSG00000172845|SP3  
ENSG00000175449|RFESD ENSG00000182150|C9orf102 ENSG00000187498|COL4A1 ENSG00000189134|C6orf194 ENSG00000196104|SPOCK3  
CAAAACC ENSG0000013275|PSMC4 ENSG00000081059|TCF7 ENSG00000100311|PDGFB ENSG00000102076|OPN1LW ENSG00000103056|SMPD3 ENSG00000103067|RBM35B ENSG00000108557|RAI1 ENSG00000119772|DNMT3A  
ENSG00000126254|NP\_077297.2 ENSG00000127585|FBXL16 ENSG00000136828|RALGPS1 ENSG00000140688|C16orf58 ENSG00000141568|FOXK2 ENSG00000143940|Q6ZMW3\_HUMAN ENSG00000156860|FBR3 ENSG00000157954|WIP12  
ENSG00000162490|C1orf187 ENSG00000163221|S100A12 ENSG00000166160|OPN1MW2 ENSG00000166317|SYNPO2L ENSG00000167798|NP\_001013662.1 ENSG00000170310|STX8 ENSG00000177076|ASAHL3 ENSG00000179452|Q8TDK1\_HUMAN  
ENSG00000183798|EMILIN3 ENSG00000189223|Q7Z3M5\_HUMAN ENSG00000204314|PRRT1 ENSG00000205477|Q6ZR94\_HUMAN ENSG00000205592|MUC19 ENSG00000205620|Q6ZRB6\_HUMAN ENSG00000007350|TKTL1 ENSG00000063046|EIF4B  
ENSG00000069329|VPS35 ENSG00000072042|RDH11 ENSG00000104131|EIF3S1 ENSG00000104447|TRPS1 ENSG00000112304|THEM2 ENSG00000114948|ADAM23 ENSG00000121406|ZNF549  
ENSG00000135070|ISCA1 ENSG00000135917|SLC19A3 ENSG00000136160|EDNRB ENSG00000148229|POLE3 ENSG00000151881|C5orf28 ENSG00000151893|C10orf46 ENSG00000153253|SCN3A ENSG00000153790|C7orf31  
ENSG00000156650|MYST4 ENSG00000163602|RYBP ENSG00000165655|ZNF503 ENSG00000171195|MUC7 ENSG00000176871|WSB2 ENSG00000179136|Q8NAV9\_HUMAN ENSG00000185414|MRPL30 ENSG00000186666|BCDIN3D  
ENSG00000206532|Q1RN00\_HUMAN  
CAAAACT ENSG00000068383|INPP5A ENSG00000074219|TEAD2 ENSG00000100271|TTL1 ENSG00000105193|RPS16 ENSG00000106789|CORO2A ENSG00000108551|RASD1 ENSG00000117115|PADI2 ENSG00000118655|DCLRE1B  
ENSG00000119771|KHLH29 ENSG00000154222|CC2D1B ENSG00000156381|ANKRD9 ENSG00000158769|F11R ENSG00000164151|Q6ZT40\_HUMAN ENSG00000165948|FAM14B ENSG00000166402|TUB ENSG00000169083|AR  
ENSG00000174502|SLC26A9 ENSG00000177595|LRWD1 ENSG00000179837|RMR15B ENSG00000187607|ZNF286A ENSG00000196263|ZNF471 ENSG00000037474|NSUN2 ENSG00000043093|DCUN1D1 ENSG00000075420|FNDC3B  
ENSG00000081665|ZNF253 ENSG00000083782|EPYC ENSG00000089195|TRM6\_HUMAN ENSG00000112290|WASF1 ENSG00000115165|PSCDBP ENSG00000116044|NFE2L2 ENSG00000130234|ACE2 ENSG00000132953|XPO4  
ENSG00000134077|THUMPD3 ENSG00000137103|C9orf127 ENSG00000137947|GTF2B ENSG00000138246|DNAJC13 ENSG00000139117|CPNE8 ENSG00000141425|NP\_060640.2 ENSG00000145348|TBCK\_HUMAN ENSG00000147316|MCPH1  
ENSG00000151693|DDEF2 ENSG00000154511|FAM69A ENSG00000156928|C7orf30 ENSG00000162695|SLC30A7 ENSG00000162701|DENND1B ENSG00000164112|TMEM155 ENSG00000165588|OTX2 ENSG00000167912|Q96QE0\_HUMAN  
ENSG00000182952|HMGN4 ENSG00000184203|PPP1R2 ENSG00000185127|C6orf120 ENSG00000186458|DB132\_HUMAN ENSG00000187189|TSPYL4 ENSG00000187823|ZCCHC16  
CAAAATA ENSG00000011677|GABRA3 ENSG00000075151|EIF4G3 ENSG00000105664|COMP ENSG00000107618|RLBP3 ENSG00000112782|CLIC8 ENSG00000134490|C18orf45 ENSG00000150165|ANXA8L1  
ENSG00000150401|DCUN1D2 ENSG00000152291|TGOLN2 ENSG00000152953|STK32B ENSG00000162493|PDPN ENSG00000163686|ABHD6 ENSG00000166401|SERPINB8 ENSG00000166831|RBPM25 ENSG00000166888|STAT6  
ENSG00000183506|NP\_955377.2 ENSG00000185955|NP\_001004323.1 ENSG00000186141|POLR3C ENSG00000189223|Q7Z3M5\_HUMAN ENSG00000196465|MYL6B ENSG00000204059|NP\_001013718.1 ENSG00000204581|Q6ZU44\_HUMAN  
ENSG00000206152|Q6ZV52\_HUMAN  
ENSG00000015475|BD ENSG000000070950|RAD18 ENSG00000080561|MID2 ENSG00000080839|RBL1 ENSG00000095464|PDE6C ENSG00000104327|CALB1 ENSG00000104371|DKK4 ENSG00000109738|GLRB  
ENSG00000116194|ANGPTL1 ENSG00000119041|GTF3C3 ENSG00000122417|ODF2L ENSG00000122696|MCART1 ENSG00000136451|VEZF1 ENSG00000136937|NCBP1 ENSG00000137269|LRRC1  
ENSG00000138180|CEP55 ENSG00000140285|FGF7 ENSG00000151229|SLC2A13 ENSG00000151792|CTS0 ENSG00000152558|TMEM123 ENSG00000162971|NP\_001034782.1 ENSG00000163491|NEK10 ENSG00000164941|INTS8  
ENSG00000165983|PTER ENSG00000166200|COPS2 ENSG00000167325|RRM1 ENSG00000169439|SDC2 ENSG00000171659|GPR34 ENSG00000173728|C1orf100 ENSG00000174718|C12orf35 ENSG00000175040|CHST2  
ENSG00000176105|YES1 ENSG00000176641|RNFI52 ENSG00000176912|C18orf56 ENSG00000178726|THBD ENSG00000198912|C1orf174 ENSG00000202421|BMPR2 ENSG00000205072|Q6ZR34\_HUMAN  
ENSG00000067066|SP100 ENSG00000086062|B4GALT1 ENSG00000105374|NKG7 ENSG00000105648|IFI30 ENSG00000106631|MYI7 ENSG00000119682|KIAA0317 ENSG00000124074|C16orf48 ENSG00000125818|PSMF1  
ENSG00000133985|TTC9 ENSG00000143614|GATAD2B ENSG00000145819|ARHGAP26 ENSG00000147256|RHGX\_HUMAN ENSG00000148180|GSN ENSG00000155367|PPM1J ENSG00000156466|GDF6 ENSG00000157734|SNX22  
ENSG00000160182|TFP1 ENSG00000162105|SHANK2 ENSG00000162666|KIAA0040 ENSG00000163214|DHX57 ENSG00000163219|ARHGAP25 ENSG00000167094|TTC16 ENSG00000167615|LENG8 ENSG00000167858|TEKT1  
ENSG00000170515|PA2G4 ENSG00000174282|ZBTB4 ENSG00000180999|C1orf105 ENSG00000183242|WIT1 ENSG00000185189|NRBP2 ENSG00000188396|NP\_001013654.1 ENSG00000196090|PTPRT ENSG00000204715|Q4G05\_HUMAN  
ENSG00000204845|Q6ZUC3\_HUMAN ENSG00000005955|ZNF403 ENSG000000056277|SUHW3 ENSG00000064313|TAF2 ENSG000000881800|SLC13A1 ENSG00000090989|EXOC1 ENSG00000091039|OSBP18 ENSG00000110841|PPFBP1  
ENSG00000112531|QKI ENSG00000112739|PRPF4B ENSG00000118762|PKD2 ENSG00000118985|ELL2 ENSG00000119401|TRIM32 ENSG00000122873|ZCD1 ENSG00000124406|ATP8A1 ENSG00000133641|C12orf29  
ENSG00000137414|FAM8A1 ENSG00000139687|RB1 ENSG00000143469|SYT14 ENSG00000148737|TCF7L2 ENSG00000150045|KLRF1 ENSG00000150540|HMNT ENSG00000156464|PRSS7 ENSG00000156482|RPL30  
ENSG00000160868|CYP3A4 ENSG00000163249|CCNYL1 ENSG00000163554|SPTA1 ENSG00000163697|APBB2 ENSG00000163964|PIGX ENSG00000164176|EDIL3 ENSG00000164485|IL22RA2 ENSG00000164604|GPR85  
ENSG00000184182|UBE2F ENSG00000184613|NELL2 ENSG00000186086|NBPF4 ENSG00000197056|ZMYM1 ENSG00000203963|C1orf141 ENSG00000204406|MBD5 ENSG00000204837|Q2TVT3\_HUMAN ENSG00000205252|Q4G0M6\_HUMAN  
CAAAACA ENSG00000013563|DNASE1L1 ENSG00000047578|KIAA0556 ENSG00000068976|PYGM ENSG00000073792|IGF2BP2 ENSG00000086544|ITPKC ENSG00000100207|TCF20 ENSG00000104415|WISP1 ENSG00000110104|CCDC86  
ENSG00000119946|SNRM1 ENSG00000131378|RFTN1 ENSG00000136697|IL1FL10 ENSG00000143845|ETNK2 ENSG00000158578|ALAS2 ENSG00000162761|LXMX1A ENSG00000167461|RAB8A ENSG00000167695|FAM57A  
ENSG00000170054|CERNIPNA9 ENSG00000171105|INSR ENSG00000179284|DAND5 ENSG00000180549|FUT7 ENSG00000182704|TSKU ENSG00000184260|H1ST2H2AC ENSG00000185933|FAM26C ENSG00000187514|PTMA  
ENSG00000198700|IPO9 ENSG00000204599|TRIM39 ENSG00000083168|MYST3 ENSG00000091436|MLTK\_HUMAN ENSG00000100196|KDEL3 ENSG00000105186|ANKRD27 ENSG00000105372|RPS19 ENSG00000108960|MMD  
ENSG00000109670|FBXW7 ENSG00000114757|PEX5L ENSG00000116745|RPE65 ENSG00000122527|ABCC4 ENSG00000129514|FOXA1 ENSG00000132326|PER2 ENSG00000134001|EIF2S1 ENSG00000136842|TMOD1  
ENSG00000140836|ATBF1 ENSG00000143337|TOR1AIP1 ENSG00000147669|POLR2K ENSG00000153933|DGKE ENSG00000154856|APCDD1 ENSG00000160201|UZAF1 ENSG00000163319|MRPS18C ENSG00000165588|OTX2  
ENSG00000166927|MS4A7 ENSG00000174038|C9orf131 ENSG00000182118|FAM89A ENSG00000183783|KCTD8 ENSG00000186471|AKAP14 ENSG00000187772|LIN28B ENSG00000198056|PRIM1 ENSG00000204680|Q5VYG3\_HUMAN  
CAAAACT ENSG00000076662|ICAM3 ENSG00000084754|HADHA ENSG00000087076|HSD17B14 ENSG00000107341|UBE2R2 ENSG00000109132|PHOX2B ENSG00000126243|LRFN3 ENSG00000143297|FCRL5 ENSG00000144730|IL17RD  
ENSG00000156711|MAPK13 ENSG00000172731|LRRRC20 ENSG00000173530|TNFRSF10D ENSG00000181991|MRPS11 ENSG00000182578|CSF1R ENSG00000188055|Q6ZVX1\_HUMAN ENSG00000196263|ZNF471 ENSG00000196743|GM2A  
ENSG00000198219|Q96N05\_HUMAN ENSG00000204117|Q6ZV8\_HUMAN ENSG00000205155|PSENIEN ENSG00000049319|SRD5A2 ENSG00000090266|NDUFB2 ENSG00000101349|PAK7 ENSG00000117114|LPHN2 ENSG00000152700|SAR1B  
ENSG00000154188|ANGPT1 ENSG00000158865|SLC5A11 ENSG00000162433|AK3L2 ENSG00000164040|PGRMC2 ENSG00000168939|SPRY3 ENSG00000173674|EIF1AP1 ENSG00000175646|PRM1 ENSG00000179542|SLITRK4  
ENSG00000184368|MAP7D2 ENSG00000184384|MAML2 ENSG00000185689|Q6NXXN\_HUMAN ENSG00000185973|TMLHE ENSG00000204478|PRAMEF20 ENSG00000204486|PRAMEF21  
ENSG00000027869|SH2D2A ENSG00000043822|NP\_060895.1 ENSG00000066382|MPPE2 ENSG00000073792|IGF2BP2 ENSG00000075426|FOSL2 ENSG00000081059|TCF7 ENSG00000101342|C20orf118 ENSG00000103005|C16orf57  
ENSG00000112149|CD83 ENSG00000113578|FGF1 ENSG00000116985|BMP8B ENSG00000130813|NP\_060851.1 ENSG00000134864|Q9BVM4\_HUMAN ENSG00000136112|UTP14C ENSG00000140025|C14orf143 ENSG00000144712|CAND2  
ENSG00000147059|SPIN2A ENSG00000151474|FRMD4A ENSG00000154096|THY1 ENSG00000160296|SIGLEC12 ENSG00000161082|BRUNOL5 ENSG00000168802|NP\_001039690.2 ENSG00000175697|GPR156 ENSG00000178796|Q8N9Z1\_HUMAN  
ENSG00000185674|LYG2\_HUMAN ENSG00000188242|Q71R1\_HUMAN ENSG00000196092|PAX5 ENSG00000196166|NP\_997295.1 ENSG00000198960|ARMCX6 ENSG00000204847|FAM74A1 ENSG00000205631|Q9H757\_HUMAN ENSG00000206026|NP\_001032408.1  
ENSG00000206528|Q6ZSM0\_HUMAN ENSG00000018869|ZNF582 ENSG00000060138|CSDA ENSG00000080200|NP\_705833.2 ENSG00000087053|MTMR2 ENSG00000092978|GPATCH2 ENSG00000099250|NRP1 ENSG00000100564|PIGH  
ENSG00000112339|HBS1L ENSG00000122432|SPATA1 ENSG00000123213|NLN ENSG00000138674|SEC31A ENSG00000139133|ALG10 ENSG00000143199|NP\_060887.1 ENSG00000143199|NP\_060887.1 ENSG00000152785|BMP3 ENSG00000158270|COLEC12  
ENSG00000158691|ZSCAN12 ENSG00000166405|RIC3 ENSG00000167555|ZNF534 ENSG00000171517|EDG7 ENSG00000175548|ALG10B ENSG00000176840|C19orf30 ENSG00000177707|PVRL3 ENSG00000187994|NP\_940847.1  
ENSG00000189127|NP\_001004441.1 ENSG00000196597|ZNF782 ENSG00000196812|ZSCAN16 ENSG00000197535|MYO5A ENSG00000197580|BCDO2 ENSG00000198155|Q49A33\_HUMAN ENSG00000198464|ZNF480  
ENSG00000007341|ST7L ENSG00000043591|ADRB1 ENSG00000057593|F7 ENSG00000083444|PLOD1 ENSG00000103966|EHD4 ENSG000001125788|DEFB126 ENSG00000130305|NSUN5  
ENSG00000130649|CYP2E1 ENSG00000147394|ZNF185 ENSG00000154319|C8orf13 ENSG00000169241|RAG1AP1 ENSG00000172771|C3orf25 ENSG00000176371|ZSCAN2 ENSG00000176911|Q9HAM1\_HUMAN ENSG00000182871|COL18A1  
ENSG00000183519|NSUN5B ENSG00000183707|Q96AT3\_HUMAN ENSG00000183856|IQGAP3 ENSG00000184935|Q6AI01\_HUMAN ENSG00000185294|NP\_787078.1 ENSG00000185905|C16orf54 ENSG00000197122|SRC ENSG00000203772|SPRN  
ENSG00000204071|TCEAL6 ENSG00000066427|ATXN3 ENSG00000080947|Q8IVE0\_HUMAN ENSG00000091436|MLTK\_HUMAN ENSG00000119541|VPS4B ENSG00000124343|XG ENSG00000125931|CITED1 ENSG00000133983|SYNJ2BP  
ENSG00000136379|FAM108C1 ENSG00000137757|CASP5 ENSG00000145675|PIK3R1 ENSG00000145681|HAPLN1 ENSG00000153820|NP\_085126.1 ENSG00000156463|SH3RF2 ENSG00000161970|RPL26 ENSG00000165682|CLEC1B  
ENSG00000170949|ZNF160 ENSG00000173200|PARP15 ENSG00000187955|COL14A1 ENSG00000188162|OTOG ENSG00000205227|Q6ZWA8\_HUMAN ENSG00000206029|Q0P633\_HUMAN ENSG00000206532|Q1RN00\_HUMAN  
CAAAAGC ENSG00000006327|TNFRSF12A ENSG00000079999|KEAP1 ENSG00000104879|CKM ENSG00000107223|EDF1 ENSG00000142733|MAP3K6 ENSG00000145936|KCNMB1 ENSG00000154025|SLC5A10 ENSG00000157653|C9orf43  
ENSG00000161082|BRUNOL5 ENSG00000166002|C10orf75 ENSG00000173432|SAA1 ENSG00000173673|HES3 ENSG00000173838|RNF190 ENSG00000174460|ZCCHC12 ENSG00000174562|KLIK15 ENSG00000176136|MC5R  
ENSG00000178605|GTPBP6 ENSG00000188199|FAM22B ENSG00000189337|NP\_001018000.1 ENSG00000204043|FAM22C ENSG00000204325|Q9H614\_HUMAN ENSG00000204511|NP\_001011700.1 ENSG00000042429|CRSP6 ENSG00000060749|Q6ZU30\_HUMAN  
ENSG00000078399|HOXA9 ENSG00000101751|POLI ENSG00000116793|PHTF1 ENSG00000127318|IL22 ENSG00000134146|ATPBD4 ENSG00000138380|ALS2CR8 ENSG00000141542|RAB40B ENSG00000143149|ALDH9A1  
ENSG00000152154|TMEM178 ENSG00000156976|EIF4A2 ENSG00000164683|HEY1 ENSG00000169602|UPF3A ENSG00000169313|P2RY12 ENSG00000183742|NP\_877439.2 ENSG00000187267|NP\_001017417.1 ENSG00000188342|GTF2F2  
ENSG00000197580|BCDO2 ENSG00000198538|ZNF28 ENSG00000198584|ZNF506 ENSG00000203946|NP\_001017438.1 ENSG00000204604|ZNF468  
CAAAAGT ENSG00000063180|CA11 ENSG00000068078|FGFR3 ENSG00000103667|RBM35B ENSG00000107796|ACTA2 ENSG00000119333|WDR34 ENSG00000143418|LASS2 ENSG00000146197|SCUBE3  
ENSG00000150477|KIAA1328 ENSG00000170310|STX8 ENSG00000173786|CNP ENSG00000179023|KLHD7A ENSG00000183018|SPNS2 ENSG00000185567|HNFBAK2 ENSG00000185674|LYG2\_HUMAN ENSG00000188101|ALOX12P2  
ENSG00000204765|XR\_017851.1 ENSG00000205653|Q6ZUF2\_HUMAN ENSG00000206053|HN1L ENSG00000077943|ITGA8 ENSG00000103381|NP\_060810.1 ENSG00000115310|RTNAQ ENSG00000115797|C1orf107 ENSG00000119523|ALG2  
ENSG00000136478|TEX2 ENSG00000140743|CDR2 ENSG00000140836|ATBF1 ENSG00000145495|MARCH6 ENSG0000

CAAAGGC ENSG00000092445|TYRO3 ENSG00000100012|SEC14L3 ENSG00000109991|P2RX3 ENSG00000110881|ACCN2 ENSG00000114349|GNAT1 ENSG00000120068|HOXB8 ENSG00000129535|NRL ENSG00000137699|TRIM29  
ENSG00000140986|RPL3L ENSG00000146047|HIST1H2BA ENSG00000152082|FAM128B ENSG00000159842|ABR ENSG00000160570|DEDD2 ENSG00000161791|FMNL3 ENSG00000166111|SVOP ENSG00000166246|C16orf71  
ENSG00000168148|HIST3H3 ENSG00000168242|HIST1H2BI ENSG00000168298|HIST1H1E ENSG00000172432|GTPBP2 ENSG00000172943|PHF8 ENSG00000173272|FAM128A ENSG00000184260|HIST2H2AC ENSG00000185130|HIST1H2BL  
ENSG00000188935|Q6ZU24\_HUMAN ENSG00000196176|HIST1H4A ENSG00000197697|HIST1H2BE ENSG00000198366|HIST1H3A ENSG00000205930|C21orf49 ENSG00000101040|ZMYND8 ENSG00000117281|CD160 ENSG00000119636|C14orf45  
ENSG00000121316|NP\_079105.4 ENSG00000131620|TMEM16A ENSG00000133107|TRPC4 ENSG00000134042|MRO ENSG00000134533|RERG ENSG00000142182|DNMT3L ENSG00000147862|NFIB ENSG00000158458|NRG2  
ENSG00000163646|CLRN1 ENSG00000167383|ZNF229 ENSG00000170417|TMEM182 ENSG00000170522|ELOVL6 ENSG00000178522|AMBN ENSG00000179869|ABCA13 ENSG00000182457|NR\_002323.1 ENSG00000196966|HIST1H3E  
ENSG00000197930|ERO1L ENSG00000198855|NP\_009007.2 ENSG00000204941|PSG5

CAAAGTA ENSG000000087086|FTL ENSG00000112062|MAPK14 ENSG00000112837|TBX18 ENSG00000116604|MEF2D ENSG00000130812|ANGPTL6 ENSG00000135454|B4GALNT1 ENSG00000141034|C17orf39 ENSG00000142233|NP\_665806.1  
ENSG00000142530|NP\_612420.1 ENSG00000144677|CTDSP1 ENSG00000147117|ZNF157 ENSG00000153060|TEKT5 ENSG00000158715|SLC45A3 ENSG00000159685|CHCHD6 ENSG00000162413|KLHL21 ENSG00000162968|Q96MQ0\_HUMAN  
ENSG00000164574|GALNT10 ENSG00000168010|ATG16L2 ENSG00000168621|GDNF ENSG00000173436|C1orf151 ENSG00000185522|C11orf35 ENSG00000198400|NTRK1 ENSG00000005302|MSL3L1 ENSG00000042813|ZPBP  
ENSG000000089094|FBXL10 ENSG00000104067|TJP1 ENSG00000127022|CANX ENSG00000127311|HELB ENSG00000127463|KIAA0090 ENSG00000133636|NTS ENSG00000136144|RCBTB1 ENSG00000136750|GAD2  
ENSG00000150093|ITGB1 ENSG00000154719|MRPL39 ENSG00000157869|RAB28 ENSG00000165338|HECTD2 ENSG00000174643|PHYHIP1 ENSG00000165929|MTAC2D1 ENSG00000168772|CXXC4 ENSG00000177494|ZBED2  
ENSG00000180329|CCDC43 ENSG00000183234|NP\_001035826.1 ENSG00000188641|DPYD ENSG00000189290|XR\_018254.1 ENSG00000197810|Q9P160\_HUMAN ENSG00000198860|C1orf19 ENSG00000206532|Q1RN00\_HUMAN  
ENSG000000006530|AGK ENSG000000009335|UBE3C ENSG00000065308|TRAM2 ENSG00000008882|CPXM1 ENSG00000103852|TTC23 ENSG00000105085|CRSP7 ENSG00000108375|SUPT4H1 ENSG00000110090|CPT1A  
ENSG00000118137|APOA1 ENSG00000140279|DUOX2 ENSG00000140403|DNAJA4 ENSG00000140519|RHCQ ENSG00000140798|ABCC12 ENSG00000141540|TTYH2 ENSG00000160447|PKN3 ENSG00000166847|DCTN5  
ENSG00000169926|KLF13 ENSG00000176136|MC5R ENSG00000177744|NP\_775923.1 ENSG00000183134|GPR44 ENSG00000184209|NP\_008951.1 ENSG00000187686|XR\_016979.1 ENSG00000198663|C6orf89 ENSG00000198951|NAGA  
ENSG00000203867|RBM20 ENSG00000205089|NP\_001034869.1 ENSG00000205103|HPR ENSG00000205927|OLIG2 ENSG00000108582|CPD ENSG00000123560|PLP1 ENSG00000124767|GLO1 ENSG00000132549|VPS13B  
ENSG00000133059|RPK5 ENSG00000133794|ARNTL ENSG00000133800|XLKDK1 ENSG00000138271|GPR87 ENSG00000155906|RMND1 ENSG00000159256|MORC3 ENSG00000164398|ACSL6 ENSG00000179222|MAGED1  
ENSG00000179915|NRX1B\_HUMAN ENSG00000180917|NP\_060818.3 ENSG00000182141|ZNF708 ENSG00000186184|POLR1D ENSG00000187054|TMPRSS11A ENSG00000196387|ZNF140

CAAAGTT ENSG00000076662|ICAM3 ENSG00000105559|PLEKHA4 ENSG00000120451|SNX19 ENSG00000120952|PRAMEF2 ENSG00000124140|SLC12A5 ENSG00000125149|C16orf70 ENSG00000126903|SLC10A3 ENSG00000128918|ALDH1A2  
ENSG00000134339|SAA2 ENSG00000136040|PLXNC1 ENSG00000136367|ZFXH2 ENSG00000141068|KSR1 ENSG00000142512|SIGLEC10 ENSG00000142794|NBPFF3 ENSG00000166024|C10orf28 ENSG00000167261|DPEP2  
ENSG00000169347|GP2 ENSG00000170846|Q8WU25\_HUMAN ENSG00000177822|XR\_017723.1 ENSG00000179241|LDLRAD3 ENSG00000179571|NP\_001034792.1 ENSG00000182022|ST4S6\_HUMAN ENSG00000197724|PHF2 ENSG00000049618|ARID1B  
ENSG00000050030|KIAA2022 ENSG00000057657|PRDM1 ENSG00000103037|SETD6 ENSG00000108100|CCNY ENSG00000108423|TUBD1 ENSG00000110756|HPS5 ENSG00000111860|C6orf204 ENSG00000119953|SMNDC1  
ENSG00000123240|OPTN ENSG00000123576|ESX1 ENSG00000125107|CNOT1 ENSG00000127955|GNAI1 ENSG00000141452|C18orf8 ENSG00000144642|ZBMS3 ENSG00000154997|NP\_997249.1 ENSG00000163554|SPTA1  
ENSG00000164171|ITGA2 ENSG00000165113|GKAP1 ENSG00000171617|ENC1 ENSG00000172086|KRCC1 ENSG00000176201|GBA3 ENSG00000198538|RNF28 ENSG00000204604|ZNF468 ENSG00000206120|QOD2K5\_HUMAN  
ENSG00000206559|ZCWPW2

CAAATAA ENSG00000064489|MEF2B ENSG00000089692|LAG3 ENSG00000091704|CPA1 ENSG00000099795|NDUFB7 ENSG00000100122|CRYBB1 ENSG00000102007|PLP2 ENSG00000105640|RPL18A ENSG00000105655|NP\_057452.1  
ENSG00000106211|HSPB1 ENSG00000106333|PCOLCE ENSG00000106927|AMBP ENSG00000114786|ACY1 ENSG00000134240|HMGCS2 ENSG00000136286|MYO1G ENSG00000139574|NPPF ENSG00000141034|C17orf39  
ENSG00000142546|NOS1P ENSG00000149646|C20orf152 ENSG00000162244|RPL29 ENSG00000163060|TEKT4 ENSG00000163156|SCNM1 ENSG00000174898|C16orf15|CLEC3B ENSG00000165828|PRAP1 ENSG00000167858|TEKT1  
ENSG00000168824|NSG1\_HUMAN ENSG00000170613|FAM71B ENSG00000170889|RPS9 ENSG00000173862|Q9NWP0\_HUMAN ENSG00000174898|TMEM146 ENSG00000177992|C9orf79 ENSG00000178934|LEG7\_HUMAN ENSG00000179058|C9orf50  
ENSG00000183103|LYPD4 ENSG00000185684|EP400NL ENSG00000189171|S100A13 ENSG00000203812|HIST2H2AA4 ENSG00000205076|LGALS7 ENSG00000205770|Q8N847\_HUMAN ENSG0000021461|CYP3A43 ENSG00000071082|RPL31  
ENSG00000072694|FCGR2B ENSG00000082482|KCNK2 ENSG00000101310|SEC23B ENSG00000105971|CAV2 ENSG00000107897|ACBD5 ENSG00000119041|GTF3C ENSG00000119042|SATB2 ENSG00000122420|PTGFR  
ENSG00000123728|RAP2C ENSG00000126261|SAE2 ENSG00000129151|BBOX1 ENSG00000129317|PUS7L ENSG00000129422|MTUS1 ENSG00000133863|TBX13 ENSG00000135333|EPHA7 ENSG00000135336|ORC3L  
ENSG00000141579|ZNF750 ENSG00000148450|MSRB2 ENSG00000151131|C12orf45 ENSG00000151718|WWC2 ENSG00000151746|BICD1 ENSG00000151806|GUF1 ENSG00000151883|PARP8 ENSG00000155011|DKK2  
ENSG00000156502|SUPV3L1 ENSG00000158234|FAIM ENSG00000159363|ATP13A2 ENSG00000163611|CCDC52 ENSG00000164176|EDLL3 ENSG00000164548|TRA2A\_HUMAN ENSG00000172461|FUT9 ENSG00000174792|C4orf26  
ENSG00000177600|RPLP2 ENSG00000179175|C9orf38 ENSG00000180777|ANKRD30B ENSG00000183230|CTNNA3 ENSG00000185264|C22orf33 ENSG00000186879|NM\_178121 ENSG00000196328|Q9P1I9\_HUMAN ENSG00000197701|ZNF595  
ENSG00000204889|KRT40

CAAATAC ENSG00000026652|AGPAT4 ENSG00000092421|SEMA6A ENSG00000102981|PARD6A ENSG00000113194|UBXD8 ENSG00000116670|MAD2L2 ENSG00000116984|MTR ENSG00000132698|RAB25 ENSG00000134775|FHOD3  
ENSG00000136935|GOLGA1 ENSG00000138085|C2orf28 ENSG00000143502|SUSD4 ENSG00000143816|WNT9A ENSG00000148773|MK167 ENSG00000149294|NCAM1 ENSG00000162592|CCDC27 ENSG00000167749|KLK4  
ENSG00000167774|NDUFA7 ENSG00000172382|PRSS27 ENSG00000181350|C17orf76 ENSG00000182795|C1orf116 ENSG00000183530|C22orf30 ENSG00000188493|C19orf54 ENSG00000111201|KAL1 ENSG00000042429|CRSP6  
ENSG00000050438|SLC4A8 ENSG00000068489|PRR11 ENSG00000101846|STS ENSG00000110436|SLCIA2 ENSG00000116729|GPR177 ENSG00000121005|CRISPLD1 ENSG00000137766|UNC13C ENSG00000140455|USP3  
ENSG00000145491|ROPN1L ENSG00000155097|ATP6V1C1 ENSG00000156650|MYST4 ENSG00000157426|NP\_861522.2 ENSG00000162520|SYNC1 ENSG00000163827|LRRC2 ENSG00000167912|Q9QE00\_HUMAN ENSG00000168542|COL3A1  
ENSG00000172466|ZNF214 ENSG00000180190|C8orf42 ENSG00000188921|PTPLAD2 ENSG00000196247|ZNF588 ENSG00000196605|Q08AG5\_HUMAN ENSG00000204987|Q6ZN80\_HUMAN ENSG00000205227|Q6ZWA8\_HUMAN  
CAAATAG ENSG00000055130|CUL1 ENSG00000092607|TBX15 ENSG00000125089|SH3TC1 ENSG00000141431|Q6MXK6\_HUMAN ENSG00000152192|POU4F1 ENSG00000168003|SLC3A2 ENSG00000168824|NSG1\_HUMAN ENSG00000174238|PITPNA  
ENSG00000184774|Q49A09\_HUMAN ENSG00000189339|SLC35E2 ENSG00000203902|PNMA6B ENSG00000104375|STK3 ENSG00000113812|ACTR8 ENSG00000116157|GPX7 ENSG00000124406|ATP8A1 ENSG00000124831|LRRF1P1  
ENSG00000138061|CYP1B1 ENSG00000138376|BARD1 ENSG00000144771|LRTM1 ENSG00000145425|RPS3A ENSG00000145675|PIK3R1 ENSG00000145777|NP\_149024.1 ENSG00000146038|DCDC2 ENSG00000148110|HIATL1  
ENSG00000151789|ZNF659 ENSG00000152253|SPC25 ENSG00000154080|CHST9 ENSG00000155307|SAMSN1 ENSG00000165494|PCF11 ENSG00000166845|C18orf54 ENSG00000168813|ZNF507 ENSG00000169429|IL8  
ENSG00000169967|MAP3K2 ENSG00000171843|MLLT3 ENSG00000176009|ASCL3 ENSG00000176293|ZNF135 ENSG00000185272|RBM11 ENSG00000197712|FAM114A1 ENSG00000203742|NP\_001032308.1 ENSG00000204923|NP\_001019851.1

CAAATAT ENSG00000012963|C14orf130 ENSG00000047056|WDR37 ENSG00000132854|ANR38\_HUMAN ENSG00000143061|IGSF3 ENSG00000158158|CNM4 ENSG00000159164|SV2A ENSG00000165949|IFI27 ENSG00000167261|DPEP2  
ENSG00000169213|RAB3B ENSG00000170549|IRX1 ENSG00000180846|C19orf34 ENSG00000184004|Q6ICL0\_HUMAN ENSG00000186951|PPARA ENSG00000189180|ZNF33A ENSG00000205033|Q96DJ9\_HUMAN ENSG00000205653|Q6ZUF2\_HUMAN  
ENSG00000206550|LOC285346 ENSG0000006576|PHTF2 ENSG00000034693|PEX3 ENSG00000044459|C9orf39 ENSG00000058056|USP13 ENSG00000066629|EML1 ENSG00000087128|TMPRSS11E ENSG00000102349|KLF8  
ENSG00000102780|DGKH ENSG00000109814|UGDH ENSG00000110841|PPF1BP1 ENSG00000111011|RSRC2 ENSG00000111832|RWDH1 ENSG00000112701|STENP6 ENSG00000115808|STRN ENSG00000116791|CRYZ  
ENSG00000116833|NR5A2 ENSG00000125355|FAM70A ENSG00000131023|LAT51 ENSG00000133106|EPP11 ENSG00000139344|AMDHD1 ENSG00000145087|STXB5P5L ENSG00000154642|C21orf91 ENSG00000162819|C1orf58  
ENSG00000163104|SMARCAD1 ENSG00000164253|WDR41 ENSG00000164346|TTP1\_HUMAN ENSG00000165259|C9orf43 ENSG00000165338|HECTD2 ENSG00000167306|MYO5B ENSG00000170270|C14orf142 ENSG00000171202|TMEM126A  
ENSG00000172469|MANEA ENSG00000173487|LOC729884 ENSG00000175895|PLEKHF2 ENSG00000184434|LRRC19 ENSG00000196477|Q9UHU4\_HUMAN ENSG00000196705|ZNF431 ENSG00000196885|Q9HAZ8\_HUMAN ENSG00000197121|PGAP1\_HUMAN  
ENSG00000198046|ZNF667 ENSG00000198526|PABPCP2 ENSG00000204699|LOC129870

CAAATCT ENSG00000102050|PRAF2 ENSG00000103047|TMC07 ENSG00000104888|SLC17A7 ENSG00000105523|FAM83E ENSG00000111249|CUTL2 ENSG00000116990|MYCL1 ENSG00000120029|C10orf76 ENSG00000120664|LOC646871  
ENSG00000135454|B4GALNT1 ENSG00000139718|SETD1B ENSG00000147100|SLC16A2 ENSG00000155849|ELMO1 ENSG00000157330|C1orf158 ENSG00000173210|ABLIM3 ENSG00000177076|ASAH3 ENSG00000178401|NP\_079178.2  
ENSG00000183633|C14orf132 ENSG00000186788|NP\_001001670.1 ENSG0000000187024|PTRH1 ENSG00000189180|ZNF33A ENSG00000189357|XR\_015253.1 ENSG00000203793|Q6ZRT74\_HUMAN ENSG00000204562|Q6ZU75\_HUMAN ENSG00000204870|Q6ZW03\_HUMAN  
ENSG00000008294|SPAG9 ENSG00000019995|ZRNAN1 ENSG00000044524|EPAH3 ENSG00000058668|ATP2B4 ENSG00000091127|PUS7 ENSG00000100503|NIN ENSG00000101557|USP14 ENSG00000102786|INTS6  
ENSG00000102910|LONP2 ENSG00000107771|KIAA1128 ENSG00000109158|GABRA4 ENSG00000115361|ACADL ENSG00000116194|ANGPTL1 ENSG00000116209|TMEM59 ENSG00000123975|CK2 ENSG00000135318|NT5E  
ENSG00000141665|FBXO15 ENSG00000143653|SCCPDH ENSG00000152782|PANK1 ENSG00000154217|PITPNC1 ENSG00000155130|MARCKS ENSG00000164182|NDUFA12L ENSG00000168214|RBPJ ENSG00000169032|MAP2K1  
ENSG00000181192|DHTKD1 ENSG00000181819|Q5JSM7\_HUMAN ENSG00000187185|Q86VG7\_HUMAN

CAAATG ENSG00000074590|NUAK1 ENSG00000087152|ATXN7L3 ENSG00000100216|TOMM22 ENSG00000110906|KCTD10 ENSG00000112699|GMD5 ENSG00000125266|EFNB2 ENSG00000128652|HOXD3 ENSG00000129473|BCL2L2  
ENSG00000136930|PSMB7 ENSG00000149428|HYOU1 ENSG00000151779|NP\_056993.2 ENSG00000157992|KRTCAP3 ENSG00000158470|B4GALT5 ENSG00000158497|HMBH1 ENSG00000159217|IGF2BP1 ENSG00000169059|VCX3A  
ENSG00000177156|TALD01 ENSG00000177504|VCX2 ENSG00000182583|VCX ENSG00000182872|RBM10 ENSG00000182950|ODF3L1 ENSG00000185963|BICD2 ENSG00000204482|LST1 ENSG00000008405|CRY1  
ENSG00000010017|RANBP9 ENSG00000050405|LIMA1 ENSG00000106341|C7orf16 ENSG00000120063|GNAI3 ENSG00000127311|HELB ENSG00000136750|GAD2 ENSG00000139133|ALG10 ENSG00000145439|CBR4  
ENSG00000146587|RBAC ENSG00000147145|GPR23 ENSG00000147604|RPL7 ENSG00000157500|APPL1 ENSG00000162702|ZNF281 ENSG00000163001|CCDC104 ENSG00000163376|KBTBD8 ENSG00000163646|CLRN1  
ENSG00000164221|CCDC112 ENSG00000165309|ARMC3 ENSG00000184860|NP\_660151.2 ENSG00000186369|YN002\_HUMAN ENSG00000189252|SPANX3 ENSG00000197576|HOXA4 ENSG00000203924|SPANX2 ENSG00000204800|Q96HX1\_HUMAN  
ENSG00000204812|Q96HX1\_HUMAN

CAACAAT ENSG00000015285|WAS ENSG00000067082|KLF6 ENSG00000107833|NPM3 ENSG00000112837|TBX18 ENSG00000119682|KIAA0317 ENSG00000126001|CEP250 ENSG00000130283|GDF1 ENSG00000131368|MRPS25  
ENSG00000144711|IQSEC1 ENSG00000154978|NM\_030796.3 ENSG00000159797|C9orf144 ENSG00000162511|LAPTM5 ENSG00000175866|BAIAP2 ENSG00000176046|NUPR1\_HUMAN ENSG00000177741|Q96BN7\_HUMAN ENSG00000187173|LCE2A  
ENSG00000196684|HSH2D ENSG00000197555|SIPA1L1 ENSG00000203805|PPADPC1A ENSG00000205485|Q6DCA4\_HUMAN ENSG000002021461|CYP3A43 ENSG00000078747|ITCH ENSG00000095587|TLL2 ENSG00000096087|GSTA2  
ENSG00000112304|THEM2 ENSG00000116729|GPR177 ENSG00000124449|NDP ENSG00000127325|BEST3 ENSG00000132639|SNAP25 ENSG00000134318|ROCK2 ENSG00000138379|GDF8 ENSG00000139597|NP\_438169.2  
ENSG00000143507|DUSP10 ENSG00000143995|MEIS1 ENSG00000144357|ZNF650 ENSG00000144909|OSBP1L1 ENSG00000153132|CLGN ENSG00000159186|ATP50 ENSG00000163072|NOSTRIN ENSG00000163131|CTSS  
ENSG00000184005|ST6GALNAC3 ENSG00000184007|PTP4A2 ENSG00000185774|KCNIP4 ENSG00000196345|ZNF167

CAACCAG ENSG00000004776|HSPB6 ENSG0000006059|KRT33A ENSG00000072135|PTPN18 ENSG00000099864|PALM ENSG00000104879|CKM ENSG00000106012|IQCE ENSG00000106789|CORO2A ENSG00000111452|GPR133  
ENSG00000114786|ACY1 ENSG00000128322|TGLL1 ENSG00000130701|C20orf151 ENSG00000134825|C11orf10 ENSG00000145882|PCYOX1L ENSG00000148297|SURF5 ENSG00000157014|TATDN2 ENSG00000160058|B5DC1  
ENSG00000160951|PTGER1 ENSG00000164591|MYOZ3 ENSG00000171855|IFNB1 ENSG00000172548|ICHN\_HUMAN ENSG00000176888|NP\_001001670.1 ENSG00000196630|HBMF76\_HUMAN ENSG00000197753|LHFPL5 ENSG00000204305|AGER  
ENSG00000204949|Q6XR20\_HUMAN ENSG00000205126|NP\_001027025.1 ENSG00000206028|Q6ZVA3\_HUMAN ENSG00000206066|IGLL3 ENSG0000005189|NP\_112203.1 ENSG00000076513|ANKRD13A ENSG00000084623|EIF3S2 ENSG00000105829|BET1  
ENSG00000106031|HOXA13 ENSG00000113141|IK ENSG00000113643|RARS ENSG00000118181|RPS25 ENSG00000125398|SOX9 ENSG00000129204|USP6 ENSG00000131644|PUM1 ENSG00000137269|LRRC1  
ENSG00000143119|CD53 ENSG00000158185|ANKRD36 ENSG00000169688|MT1B ENSG00000173273|TNKS ENSG00000177613|CSTF2T ENSG00000180964|TEAL8 ENSG00000181847|VSI1G9 ENSG00000184083|FAM120C  
ENSG00000184999|SLC22A10 ENSG00000188739|RBM34 ENSG00000198770|Q9H396\_HUMAN ENSG00000205413|SAMD9

CAACGGC ENSG00000002726|ABP1 ENSG00000003147|TLE2 ENSG00000006016|CRLF1 ENSG00000006571|TLE2 ENSG00000070601|FRMPD1 ENSG00000088256|GNA11 ENSG00000103175|WFDL1 ENSG00000105662|CRTC1  
ENSG00000111667|USP5 ENSG00000131668|BARX1 ENSG00000133105|RXFP2 ENSG00000139832|RAB20 ENSG00000143545|RAB13 ENSG00000149654|CDH22 ENSG00000157349|DDX19B ENSG00000172531|PPP1CA  
ENSG00000172889|EGFL7 ENSG00000174171|Q8TCB4\_HUMAN ENSG00000176809|LRRC37A3 ENSG00000177340|QOVFX0\_HUMAN ENSG00000178057|C3orf60 ENSG00000184185|KCNJ12 ENSG00000185838|GNBL1 ENSG00000188312|CENPP  
ENSG00000196834|POT14\_HUMAN ENSG00000196979|NP\_997392.1 ENSG00000198374|HIST1H2AL ENSG00000007062|PROM1 ENSG00000041982|TNC ENSG00000064787|BCAS1 ENSG00000072401|UBE2D1 ENSG00000100796|SMEK1  
ENSG00000105954|NPVF ENSG00000114805|PLCH1 ENSG00000121933|ADORA3 ENSG00000133818|RRAS2 ENSG00000137441|FGFBP2 ENSG00000146872|TLK2 ENSG00000151090|THRB ENSG00000151687|ANKAR  
ENSG00000154710|

|         |                                                                                                                                                                                                                |                                                                                                                                                                                                             |                                                                                                                                                                                                           |                                                                                                                                                                                                                   |                                                                                                                                                                                                                  |                                                                                                                                                                                                                                                                                                  |                                                                                                                                                                                                                                                                                                                          |                                                                                                                                                                                                                                                                                                                                                       |                                                                                                                                                                                          |
|---------|----------------------------------------------------------------------------------------------------------------------------------------------------------------------------------------------------------------|-------------------------------------------------------------------------------------------------------------------------------------------------------------------------------------------------------------|-----------------------------------------------------------------------------------------------------------------------------------------------------------------------------------------------------------|-------------------------------------------------------------------------------------------------------------------------------------------------------------------------------------------------------------------|------------------------------------------------------------------------------------------------------------------------------------------------------------------------------------------------------------------|--------------------------------------------------------------------------------------------------------------------------------------------------------------------------------------------------------------------------------------------------------------------------------------------------|--------------------------------------------------------------------------------------------------------------------------------------------------------------------------------------------------------------------------------------------------------------------------------------------------------------------------|-------------------------------------------------------------------------------------------------------------------------------------------------------------------------------------------------------------------------------------------------------------------------------------------------------------------------------------------------------|------------------------------------------------------------------------------------------------------------------------------------------------------------------------------------------|
| CAACGGT | ENSG00000009950 MLXIPL<br>ENSG00000124075 NRN1<br>ENSG00000160075 SYU72<br>ENSG00000197600 MYBPHL<br>ENSG00000116308 TMEM159<br>ENSG00000115604 IL18R1<br>ENSG00000136982 NP_076999.1<br>ENSG00000165672 PRDX3 | ENSG00000063015 SEZ6<br>ENSG00000126752 SSX1<br>ENSG00000164062 APEH<br>ENSG00000198013 PNMA6A<br>ENSG00000054803 CBLN4<br>ENSG00000116741 RGS2<br>ENSG00000138035 PNFT1<br>ENSG00000166971 AKTIP           | ENSG00000070413 DGCR2<br>ENSG00000128346 C22orf23<br>ENSG00000176946 ZHP4<br>ENSG00000198131 THAF544<br>ENSG00000059769 GNL10<br>ENSG00000116954 RACG<br>ENSG00000138379 GDF8<br>ENSG00000181634 TNFSF15  | ENSG00000082684 SEMA5B<br>ENSG00000135632 SMYD5<br>ENSG00000177963 RIC8A<br>ENSG00000203930 Q5JPA2_HUMAN<br>ENSG00000078237 C12orf5<br>ENSG00000117153 KLHL12<br>ENSG00000139173 TMEM117<br>ENSG00000186009 ATP4B | ENSG00000100997 ABHD12<br>ENSG00000137404 NRM<br>ENSG00000178149 DALRD3<br>ENSG00000204579 AZRUR5_HUMAN<br>ENSG00000082516 GEMIN5<br>ENSG00000120659 TNFSF11<br>ENSG00000139173 TMEM117<br>ENSG00000186094 AGBL4 | ENSG00000103042 NP_060701.1<br>ENSG00000141985 SH3GL1<br>ENSG00000182205 Q6ZUTO_HUMAN<br>ENSG00000204850 NP_001013695.1<br>ENSG00000083720 OXCT1<br>ENSG00000125630 POLR1B<br>ENSG00000157796 WDR19<br>ENSG00000196115 XR_017859.1                                                               | ENSG00000107521 HPS1<br>ENSG00000145824 CXCL14<br>ENSG00000184584 TMEM173<br>ENSG00000204850 NP_001013695.1<br>ENSG00000101310 SEC23B<br>ENSG00000130856 ZNF236<br>ENSG00000158636 C11orf30<br>ENSG00000198492 YTHDF2                                                                                                    | ENSG00000111325 OGFOD2<br>ENSG00000148671 C10orf116<br>ENSG00000186493 C5orf38<br>ENSG0000005059 CCDC109B<br>ENSG00000111802 TTRAP<br>ENSG00000136238 RAC1<br>ENSG00000164402 SEPT8<br>ENSG00000204363 SPANXN5                                                                                                                                        |                                                                                                                                                                                          |
| CAACTAA | ENSG00000071282 LMCD1<br>ENSG00000129864 VCY1B<br>ENSG00000166033 HTRA1<br>ENSG00000077279 DCX<br>ENSG00000131238 PPT1<br>ENSG00000170323 FABP4                                                                | ENSG00000101605 MYOM1<br>ENSG00000137842 TMEM62<br>ENSG00000167515 TRAPPC2L<br>ENSG00000100522 GNPNAT1<br>ENSG00000133101 CCNA1<br>ENSG00000171155 C1GALT1C1                                                | ENSG00000111252 SH2B3<br>ENSG00000137875 BCL2L10<br>ENSG00000170043 TRAPPC1<br>ENSG00000101981 F9<br>ENSG00000137364 TPMT<br>ENSG00000171714 TMEM16E                                                      | ENSG00000115556 PLCD4<br>ENSG00000143418 LASS2<br>ENSG00000185963 BICD2<br>ENSG00000102738 MRPS31<br>ENSG00000162819 C1orf58<br>ENSG00000172572 PDE3A                                                             | ENSG00000117480 FAAH<br>ENSG00000154229 PRKCA<br>ENSG00000187678 SPRY4<br>ENSG00000102974 CTCF<br>ENSG00000164122 ASB5<br>ENSG00000176160 HSF5                                                                   | ENSG00000124299 PEPD<br>ENSG00000161082 BRUNOL5<br>ENSG00000189401 OTUD6A<br>ENSG00000112343 TRIM38<br>ENSG00000164134 NARG1<br>ENSG00000183607 GKN2                                                                                                                                             | ENSG00000127412 TRPV5<br>ENSG00000161570 CCL5<br>ENSG00000205979 Q6XYA8_HUMAN<br>ENSG00000118939 UCHL3<br>ENSG00000166068 SPRED1<br>ENSG00000186105 Q7Z2Q7_HUMAN                                                                                                                                                         | ENSG00000129862 VCY<br>ENSG00000161572 LYZL6<br>ENSG00000070718 AP3M2<br>ENSG00000120885 CLU<br>ENSG00000166260 COX11<br>ENSG00000134369 NAVI<br>ENSG00000167470 MDN<br>ENSG00000206083 ZNF409                                                                                                                                                        |                                                                                                                                                                                          |
| CAACTCC | ENSG00000072062 PRKACA<br>ENSG00000141485 SLC13A5<br>ENSG00000170613 FAM71B<br>ENSG00000001626 CFTR<br>ENSG00000112685 EXOC2<br>ENSG00000144840 RABL3<br>ENSG00000000507 MEOX1<br>ENSG00000125977 EIF2S2       | ENSG00000092068 SLC7A8<br>ENSG00000142549 LOC402665<br>ENSG00000171786 NHLH1<br>ENSG000000019505 SYT13<br>ENSG00000114021 NIT2<br>ENSG00000147044 CASK<br>ENSG00000005507 C1orf144<br>ENSG00000127743 IL17B | ENSG00000105376 ICAM5<br>ENSG00000147804 SLC39A4<br>ENSG00000175077 RTP1<br>ENSG000000044524 EPAH3<br>ENSG00000116016 EPAS1<br>ENSG00000171056 SOX7<br>ENSG000000065882 TBC1D1<br>ENSG00000131043 C20orf4 | ENSG00000107819 SFXN3<br>ENSG00000157303 SUS3<br>ENSG00000179057 IGSF22<br>ENSG000000047110 TPR<br>ENSG00000116977 LGALS8<br>ENSG00000181425 DSCR10<br>ENSG000000017157 PPP1R12B<br>ENSG00000141576 RNF157        | ENSG00000123342 MMP19<br>ENSG00000159199 ATP5G1<br>ENSG00000183250 C21orf67<br>ENSG000000070010 UFU1L<br>ENSG00000136628 EPRS<br>ENSG00000184307 ZDHHC23<br>ENSG000000018760 AACSB<br>ENSG00000154928 P54762-3   | ENSG00000161882 BRUNOL5<br>ENSG00000187678 SPRY4<br>ENSG00000102974 CTCF<br>ENSG00000164122 ASB5<br>ENSG00000183607 GKN2<br>ENSG00000130300 PLVAP<br>ENSG00000164519 Q96M23_HUMAN<br>ENSG00000196810 NP_443093.2<br>ENSG000000099749 CYorf15A<br>ENSG00000137504 CREBZF<br>ENSG00000122550 KHLH7 | ENSG00000127412 TRPV5<br>ENSG00000161570 CCL5<br>ENSG00000205979 Q6XYA8_HUMAN<br>ENSG00000118939 UCHL3<br>ENSG00000166068 SPRED1<br>ENSG00000186105 Q7Z2Q7_HUMAN<br>ENSG00000131097 HIGD1B<br>ENSG00000167470 MDN<br>ENSG00000198785 GRIN3A<br>ENSG00000104435 STMN2<br>ENSG00000137944 CCBL2<br>ENSG00000110660 SLC35F2 | ENSG00000129862 VCY<br>ENSG00000161572 LYZL6<br>ENSG00000070718 AP3M2<br>ENSG00000120885 CLU<br>ENSG00000166260 COX11<br>ENSG00000134369 NAVI<br>ENSG00000167470 MDN<br>ENSG00000206083 ZNF409<br>ENSG00000105483 CARD8<br>ENSG00000139537 CCDC65<br>ENSG00000167470 MDN<br>ENSG00000206083 ZNF409<br>ENSG00000105483 CARD8<br>ENSG00000139537 CCDC65 |                                                                                                                                                                                          |
| CAAGAAA | ENSG00000000507 MEOX1<br>ENSG00000125977 EIF2S2<br>ENSG00000178796 Q8N9Z1_HUMAN<br>ENSG00000205703 NP_001010910.1<br>ENSG00000206152 Q6ZV52_HUMAN<br>ENSG00000125899 C20orf187                                 | ENSG000000447634 SCML1<br>ENSG00000132000 PODNL1<br>ENSG00000145348 TBCK_HUMAN<br>ENSG00000108882 XR_017823.1<br>ENSG00000197149 XR_019565.1<br>ENSG0000015532 XYLT2                                        | ENSG00000132000 PODNL1<br>ENSG00000145348 TBCK_HUMAN<br>ENSG00000180882 XR_017823.1<br>ENSG00000197329 PELL1<br>ENSG00000101473 ACOT8<br>ENSG00000141696 NO55_HUMAN                                       | ENSG00000134255 CEPT1<br>ENSG00000145826 LECT2<br>ENSG00000182090 C14orf25<br>ENSG00000189863 RORB<br>ENSG00000101473 ACOT8<br>ENSG00000141956 PRDM15                                                             | ENSG00000057294 PKP2<br>ENSG00000145826 LECT2<br>ENSG00000182090 C14orf25<br>ENSG00000189863 RORB<br>ENSG00000101473 ACOT8<br>ENSG00000141956 PRDM15                                                             | ENSG00000064726 BTBD1<br>ENSG00000153814 JAZF1<br>ENSG00000182090 C14orf25<br>ENSG00000185267 ARMTL1<br>ENSG00000123427 FAM119B<br>ENSG00000141956 PRDM15                                                                                                                                        | ENSG00000111275 ALDH2<br>ENSG00000135299 ANKRD6<br>ENSG00000185267 ARMTL1<br>ENSG00000120696 KBTBD7<br>ENSG00000147649 MTDH<br>ENSG00000131081 NP_065805.1                                                                                                                                                               | ENSG00000116678 LEPR<br>ENSG00000139168 ZCRB1<br>ENSG00000185408 OR5K1<br>ENSG00000186395 KRT10<br>ENSG00000154229 PRKCA<br>ENSG00000163067 ZNF2<br>ENSG00000164042 NP_055803.1                                                                                                                                                                       | ENSG00000117262 GPR89A<br>ENSG00000140988 RPS2<br>ENSG00000155319 NP_001004299.1<br>ENSG00000186938 FAM120AOS<br>ENSG00000135365 PHF21A<br>ENSG00000175564 UCP3<br>ENSG00000100555 PSCD4 |
| CAAGAAC | ENSG00000140332 TLE3<br>ENSG00000186594 NP_116284.2<br>ENSG00000113361 CDH6<br>ENSG00000134028 ADAMDEC1<br>ENSG00000198081 ZFP161<br>ENSG00000061273 HDAC7A                                                    | ENSG00000141696 NO55_HUMAN<br>ENSG00000206189 NR_001550.1<br>ENSG00000114054 PCCB<br>ENSG00000138653 NDST4<br>ENSG00000203970 DEFB111<br>ENSG00000073861 TBX21                                              | ENSG00000116489 CAPZA1<br>ENSG00000141448 GATA6<br>ENSG00000141956 PRDM15<br>ENSG000000031081 NP_065805.1<br>ENSG00000119714 GPR68<br>ENSG00000161281 COX7A1                                              | ENSG00000057294 PKP2<br>ENSG00000145826 LECT2<br>ENSG00000182090 C14orf25<br>ENSG00000189863 RORB<br>ENSG00000101473 ACOT8<br>ENSG00000141956 PRDM15                                                              | ENSG00000064726 BTBD1<br>ENSG00000153814 JAZF1<br>ENSG00000182090 C14orf25<br>ENSG00000185267 ARMTL1<br>ENSG00000123427 FAM119B<br>ENSG00000141956 PRDM15                                                        | ENSG00000111275 ALDH2<br>ENSG00000135299 ANKRD6<br>ENSG00000185267 ARMTL1<br>ENSG00000120696 KBTBD7<br>ENSG00000147649 MTDH<br>ENSG00000131081 NP_065805.1                                                                                                                                       | ENSG00000116678 LEPR<br>ENSG00000139168 ZCRB1<br>ENSG00000185408 OR5K1<br>ENSG00000186395 KRT10<br>ENSG00000154229 PRKCA<br>ENSG00000163067 ZNF2<br>ENSG00000164042 NP_055803.1                                                                                                                                          | ENSG00000117262 GPR89A<br>ENSG00000140988 RPS2<br>ENSG00000155319 NP_001004299.1<br>ENSG00000186938 FAM120AOS<br>ENSG00000135365 PHF21A<br>ENSG00000175564 UCP3<br>ENSG00000100555 PSCD4                                                                                                                                                              |                                                                                                                                                                                          |
| CAAGAAG | ENSG00000113361 CDH6<br>ENSG00000134028 ADAMDEC1<br>ENSG00000198081 ZFP161<br>ENSG00000061273 HDAC7A<br>ENSG00000114353 GNAI2<br>ENSG00000157833 FAM59B                                                        | ENSG00000114054 PCCB<br>ENSG00000138653 NDST4<br>ENSG00000203970 DEFB111<br>ENSG00000073861 TBX21<br>ENSG00000118971 CCND2<br>ENSG00000160460 SPTBN4                                                        | ENSG00000116489 CAPZA1<br>ENSG00000141448 GATA6<br>ENSG00000141956 PRDM15<br>ENSG000000031081 NP_065805.1<br>ENSG00000119714 GPR68<br>ENSG00000161281 COX7A1                                              | ENSG00000057294 PKP2<br>ENSG00000145826 LECT2<br>ENSG00000182090 C14orf25<br>ENSG00000189863 RORB<br>ENSG00000101473 ACOT8<br>ENSG00000141956 PRDM15                                                              | ENSG00000064726 BTBD1<br>ENSG00000153814 JAZF1<br>ENSG00000182090 C14orf25<br>ENSG00000185267 ARMTL1<br>ENSG00000123427 FAM119B<br>ENSG00000141956 PRDM15                                                        | ENSG00000111275 ALDH2<br>ENSG00000135299 ANKRD6<br>ENSG00000185267 ARMTL1<br>ENSG00000120696 KBTBD7<br>ENSG00000147649 MTDH<br>ENSG00000131081 NP_065805.1                                                                                                                                       | ENSG00000116678 LEPR<br>ENSG00000139168 ZCRB1<br>ENSG00000185408 OR5K1<br>ENSG00000186395 KRT10<br>ENSG00000154229 PRKCA<br>ENSG00000163067 ZNF2<br>ENSG00000164042 NP_055803.1                                                                                                                                          | ENSG00000117262 GPR89A<br>ENSG00000140988 RPS2<br>ENSG00000155319 NP_001004299.1<br>ENSG00000186938 FAM120AOS<br>ENSG00000135365 PHF21A<br>ENSG00000175564 UCP3<br>ENSG00000100555 PSCD4                                                                                                                                                              |                                                                                                                                                                                          |
| CAAGAAH | ENSG00000180886 NP_954652.1<br>ENSG00000068305 MEF2A<br>ENSG00000140181 HERC2P2<br>ENSG00000196406 SPANXE<br>ENSG00000205647 CSN1S2A                                                                           | ENSG00000083720 OXCT1<br>ENSG00000146477 SLC22A3<br>ENSG00000196593 NM_207439<br>ENSG00000206384 Q69YT0_HUMAN                                                                                               | ENSG00000112115 IL17A<br>ENSG00000146839 ZAN<br>ENSG00000196785 Q8N862_HUMAN<br>ENSG00000100450 GZMH                                                                                                      | ENSG00000083720 OXCT1<br>ENSG00000146477 SLC22A3<br>ENSG00000196593 NM_207439<br>ENSG00000206384 Q69YT0_HUMAN                                                                                                     | ENSG00000196642 C9orf86<br>ENSG00000121677 C6orf64<br>ENSG00000153923 CLCA3<br>ENSG00000198021 SPANXA2                                                                                                           | ENSG00000196821 C6orf106<br>ENSG00000121677 C6orf64<br>ENSG00000153923 CLCA3<br>ENSG00000198021 SPANXA2                                                                                                                                                                                          | ENSG00000196923 PDLIM7<br>ENSG00000196943 LTB4R<br>ENSG00000121388 Q9H521_HUMAN<br>ENSG00000198162 MAN1A2<br>ENSG00000065054 SLC9A3R2                                                                                                                                                                                    | ENSG00000111275 ALDH2<br>ENSG00000139168 ZCRB1<br>ENSG00000185408 OR5K1<br>ENSG00000186395 KRT10<br>ENSG00000154229 PRKCA<br>ENSG00000163067 ZNF2<br>ENSG00000164042 NP_055803.1                                                                                                                                                                      | ENSG00000117262 GPR89A<br>ENSG00000140988 RPS2<br>ENSG00000155319 NP_001004299.1<br>ENSG00000186938 FAM120AOS<br>ENSG00000135365 PHF21A<br>ENSG00000175564 UCP3<br>ENSG00000100555 PSCD4 |
| CAAGAAI | ENSG00000125818 PSMF1<br>ENSG00000165238 WNK2<br>ENSG00000204084 INP5B<br>ENSG00000113205 PCDHB3<br>ENSG00000164332 UBLCP1<br>ENSG00000183308 C17orf60                                                         | ENSG00000140470 ADAMTS17<br>ENSG00000169006 NTR2R1<br>ENSG00000204438 BAT4<br>ENSG00000120279 MYCT1<br>ENSG00000168405 CMAH<br>ENSG00000183308 C17orf60                                                     | ENSG00000142319 SLC6A3<br>ENSG00000178795 GDDPD4<br>ENSG00000204564 C6orf136<br>ENSG00000127249 ATP13A4<br>ENSG00000169429 IL8<br>ENSG00000185760 KCNQ5                                                   | ENSG00000101945 SUV39H1<br>ENSG00000143409 FAM63A<br>ENSG00000181625 GIYD2<br>ENSG000000091879 ANGPT2<br>ENSG00000134548 C12orf39<br>ENSG00000169429 IL8                                                          | ENSG00000143409 FAM63A<br>ENSG00000181625 GIYD2<br>ENSG000000091879 ANGPT2<br>ENSG00000134548 C12orf39<br>ENSG00000169429 IL8<br>ENSG00000185760 KCNQ5                                                           | ENSG00000196642 C9orf86<br>ENSG00000121677 C6orf64<br>ENSG00000153923 CLCA3<br>ENSG00000198021 SPANXA2                                                                                                                                                                                           | ENSG00000196821 C6orf106<br>ENSG00000121677 C6orf64<br>ENSG00000153923 CLCA3<br>ENSG00000198021 SPANXA2                                                                                                                                                                                                                  | ENSG00000196923 PDLIM7<br>ENSG00000196943 LTB4R<br>ENSG00000121388 Q9H521_HUMAN<br>ENSG00000198162 MAN1A2<br>ENSG00000065054 SLC9A3R2                                                                                                                                                                                                                 | ENSG00000117262 GPR89A<br>ENSG00000140988 RPS2<br>ENSG00000155319 NP_001004299.1<br>ENSG00000186938 FAM120AOS<br>ENSG00000135365 PHF21A<br>ENSG00000175564 UCP3<br>ENSG00000100555 PSCD4 |
| CAAGAAA | ENSG00000139579 OBFC2B<br>ENSG00000197421 NR_003267.1<br>ENSG00000121964 GTDCC1<br>ENSG00000152076 CCDC74B<br>ENSG000000013016 HED3                                                                            | ENSG00000163686 ABHD6<br>ENSG00000197548 ATG7<br>ENSG00000127603 MACF1<br>ENSG00000170180 GYPA<br>ENSG000000056558 TRAF1                                                                                    | ENSG00000169856 ONCUT1<br>ENSG00000020444 APOM<br>ENSG00000134594 RAB33A<br>ENSG00000170495 Q6ZNE6_HUMAN<br>ENSG000000056558 TRAF1                                                                        | ENSG00000169856 ONCUT1<br>ENSG00000020444 APOM<br>ENSG00000134594 RAB33A<br>ENSG00000170495 Q6ZNE6_HUMAN<br>ENSG000000056558 TRAF1                                                                                | ENSG00000196642 C9orf86<br>ENSG00000121677 C6orf64<br>ENSG00000153923 CLCA3<br>ENSG00000198021 SPANXA2                                                                                                           | ENSG00000196821 C6orf106<br>ENSG00000121677 C6orf64<br>ENSG00000153923 CLCA3<br>ENSG00000198021 SPANXA2                                                                                                                                                                                          | ENSG00000196923 PDLIM7<br>ENSG00000196943 LTB4R<br>ENSG00000121388 Q9H521_HUMAN<br>ENSG00000198162 MAN1A2<br>ENSG00000065054 SLC9A3R2                                                                                                                                                                                    | ENSG00000117262 GPR89A<br>ENSG00000140988 RPS2<br>ENSG00000155319 NP_001004299.1<br>ENSG00000186938 FAM120AOS<br>ENSG00000135365 PHF21A<br>ENSG00000175564 UCP3<br>ENSG00000100555 PSCD4                                                                                                                                                              |                                                                                                                                                                                          |
| CAAGCAA | ENSG00000131113 PSG1<br>ENSG00000162511 LAPTMS<br>ENSG00000198366 HIST1H3A<br>ENSG00000110700 RPS13<br>ENSG00000144362 KLHL23                                                                                  | ENSG00000133475 GGT2<br>ENSG00000163219 ARHGAP25<br>ENSG00000205801 Q6ZTI5_HUMAN<br>ENSG00000111701 APOBEC1<br>ENSG00000145309 C4orf35                                                                      | ENSG00000139767 K1AA1853<br>ENSG00000163531 NFASC<br>ENSG00000206190 ATP10A<br>ENSG00000116745 RPE65<br>ENSG00000145723 ZH2C2                                                                             | ENSG00000149435 GGTLA4<br>ENSG00000168268 NT5DC2<br>ENSG0000000206551 Q6ZT99_HUMAN<br>ENSG00000118922 KLFL12<br>ENSG00000154027 AK5                                                                               | ENSG00000149435 GGTLA4<br>ENSG00000168268 NT5DC2<br>ENSG0000000206551 Q6ZT99_HUMAN<br>ENSG00000118922 KLFL12<br>ENSG00000154027 AK5                                                                              | ENSG00000196642 C9orf86<br>ENSG00000121677 C6orf64<br>ENSG00000153923 CLCA3<br>ENSG00000198021 SPANXA2                                                                                                                                                                                           | ENSG00000196821 C6orf106<br>ENSG00000121677 C6orf64<br>ENSG00000153923 CLCA3<br>ENSG00000198021 SPANXA2                                                                                                                                                                                                                  | ENSG00000196923 PDLIM7<br>ENSG00000196943 LTB4R<br>ENSG00000121388 Q9H521_HUMAN<br>ENSG00000198162 MAN1A2<br>ENSG00000065054 SLC9A3R2                                                                                                                                                                                                                 | ENSG00000117262 GPR89A<br>ENSG00000140988 RPS2<br>ENSG00000155319 NP_001004299.1<br>ENSG00000186938 FAM120AOS<br>ENSG00000135365 PHF21A<br>ENSG00000175564 UCP3<br>ENSG00000100555 PSCD4 |
| CAAGCGC | ENSG00000171451 DSEL<br>ENSG00000029534 ANK1<br>ENSG00000139044 B4GALNT3<br>ENSG00000173581 CCDC106<br>ENSG00000047188 YTHDC2                                                                                  | ENSG00000171451 DSEL<br>ENSG00000064419 TNPO3<br>ENSG00000148358 GPR107<br>ENSG00000173715 C11orf80<br>ENSG00000080371 RAB21                                                                                | ENSG00000179331 RAB39<br>ENSG00000099994 SUSD2<br>ENSG00000148358 GPR107<br>ENSG00000173715 C11orf80<br>ENSG00000080371 RAB21                                                                             | ENSG00000187761 PAGE2B<br>ENSG00000100325 ASCC2<br>ENSG00000160180 TFF3<br>ENSG00000183528 Q0VAF8_HUMAN<br>ENSG00000093183 SEC22C                                                                                 | ENSG00000187761 PAGE2B<br>ENSG00000100325 ASCC2<br>ENSG00000160180 TFF3<br>ENSG00000183528 Q0VAF8_HUMAN<br>ENSG00000093183 SEC22C                                                                                | ENSG00000196642 C9orf86<br>ENSG00000121677 C6orf64<br>ENSG00000153923 CLCA3<br>ENSG00000198021 SPANXA2                                                                                                                                                                                           | ENSG00000196821 C6orf106<br>ENSG00000121677 C6orf64<br>ENSG00000153923 CLCA3<br>ENSG00000198021 SPANXA2                                                                                                                                                                                                                  | ENSG00000196923 PDLIM7<br>ENSG00000196943 LTB4R<br>ENSG00000121388 Q9H521_HUMAN<br>ENSG00000198162 MAN1A2<br>ENSG00000065054 SLC9A3R2                                                                                                                                                                                                                 | ENSG00000117262 GPR89A<br>ENSG00000140988 RPS2<br>ENSG00000155319 NP_001004299.1<br>ENSG00000186938 FAM120AOS<br>ENSG00000135365 PHF21A<br>ENSG00000175564 UCP3<br>ENSG00000100555 PSCD4 |
| CAAGGAA | ENSG00000161671 NP_996261.1<br>ENSG00000203662 OR2M1P<br>ENSG00000109084 TMEM97<br>ENSG00000136826 KLF4<br>ENSG00000164120 HPGD                                                                                | ENSG00000163121 NM_001080535.1<br>ENSG00000203804 C1orf138<br>ENSG00000111276 CDKN1B<br>ENSG00000136869 TLR4<br>ENSG00000164764 NP_694957.2                                                                 | ENSG00000136352 TIT                                                                                                                                                                                       |                                                                                                                                                                                                                   |                                                                                                                                                                                                                  |                                                                                                                                                                                                                                                                                                  |                                                                                                                                                                                                                                                                                                                          |                                                                                                                                                                                                                                                                                                                                                       |                                                                                                                                                                                          |

CAAGGCA ENSG0000023171|GRAMD1B ENSG00000048471|NP\_001073999.1 ENSG00000060971|ACAA1 ENSG00000100938|NM\_001002000.1 ENSG00000105325|FZR1 ENSG00000105963|CENTA1 ENSG00000106384|MOGAT3 ENSG00000114737|CISH  
ENSG00000128346|C2orf23 ENSG00000137310|TCF1F ENSG00000165280|VCP ENSG00000172803|NP\_689973.2 ENSG00000176754|Clorf157 ENSG00000178971|C1orf68 ENSG00000182109|Q8N214\_HUMAN ENSG00000183637|C2orf30  
ENSG00000204141|Q6ZVW5\_HUMAN ENSG00000204410|MSH5 ENSG00000204586|Q6PJP7\_HUMAN ENSG00000205414|Q6ZVL8\_HUMAN ENSG00000205852|Q6ZW13\_HUMAN ENSG00000247597|XK ENSG00000279385|CEACAM1 ENSG00000281307|UBE1DC1  
ENSG00000100357|ADSL ENSG00000101353|Q9H579-2 ENSG00000102010|BMX ENSG00000104112|SCG3 ENSG00000125384|PTGER2 ENSG00000135999|EPC2 ENSG00000138400|MDH1B ENSG00000138795|LEF1  
ENSG00000144481|TRPM8 ENSG00000153714|C9orf150 ENSG00000156050|C14orf44 ENSG00000168204|O95014\_HUMAN ENSG00000170191|NANP ENSG00000170522|ELOVL6 ENSG00000175746|NP\_997328.1 ENSG00000183813|CCR4  
ENSG00000203801|Q5R3E8\_HUMAN  
CAAGGCC ENSG00000008710|PKD1 ENSG00000060491|OGFR ENSG00000061938|TNK2 ENSG00000069424|KCNAB2 ENSG00000081853|PCDHGA12 ENSG00000089060|SLC24A6 ENSG00000095397|DFNB31 ENSG00000100033|PRODH  
ENSG00000104140|RHOV ENSG00000120057|SFRP5 ENSG00000121410|ALBG ENSG00000128438|Q9H7M0\_HUMAN ENSG00000131788|PIAS3 ENSG00000135740|SLC9A5 ENSG00000139438|C1orf34 ENSG00000141905|NFIC  
ENSG00000142789|ELA3A ENSG00000143466|IKBKE ENSG00000156345|CCRK ENSG00000157895|C12orf43 ENSG00000160233|LRRC3 ENSG00000162877|NP\_689704.3 ENSG00000162877|NP\_689704.3 ENSG00000167595|C19orf55 ENSG00000168784|BPESC1  
ENSG00000168874|ATOH8 ENSG00000169562|GJB1 ENSG00000169955|ZNF747 ENSG00000177084|POLE ENSG00000179262|RAD23A ENSG00000185370|Q8WZ02\_HUMAN ENSG00000185594|SPATA8 ENSG00000187642|C1orf170  
ENSG00000198802|PECAM1 ENSG0000006704|GTF2IRD1 ENSG00000079156|OSBPL6 ENSG00000135407|AVIL ENSG00000141497|ZMYND15 ENSG00000143256|PFND2 ENSG00000151065|DCP1B ENSG00000160194|NDUFV3  
ENSG00000163510|NP\_065994.1 ENSG00000164411|GJB7 ENSG00000173276|ZNF295 ENSG00000184307|ZDHHC23 ENSG00000188672|RHCE ENSG00000197748|C1orf79 ENSG00000203897|Q6W422\_HUMAN ENSG00000204398|Q5T400\_HUMAN  
ENSG00000204804|FAM27D1 ENSG00000205976|Q6ZVT4\_HUMAN  
CAAGGGG ENSG00000100368|CSF2RB ENSG00000105401|CDC37 ENSG00000105613|MAST1 ENSG00000107331|ABCA2 ENSG00000109991|P2RX3 ENSG00000115073|ACTR1B ENSG00000116604|MEF2D ENSG00000132622|HSPA12B  
ENSG00000135916|ITM2C ENSG00000137817|PARP6 ENSG00000139531|SUOX ENSG00000143590|EFNA3 ENSG00000161642|ZNF385 ENSG00000161847|RAVER1 ENSG00000162877|NP\_689704.3 ENSG00000166359|WDR88  
ENSG00000166646|Q96D66\_HUMAN ENSG00000168452|EGFL8 ENSG00000173212|C1orf161 ENSG00000173653|RCE1 ENSG00000178795|GDPD4 ENSG00000180066|C1orf91 ENSG00000183484|GPR132 ENSG00000184601|NP\_001008404.1  
ENSG00000187840|EIF4EBP1 ENSG00000204058|C10orf41 ENSG00000204362|Q6ZS05\_HUMAN ENSG00000205970|FOXJ2 ENSG00000181317|CMT6 ENSG00000115232|ITGA4 ENSG00000120937|NPPB ENSG00000128881|TTBK2  
ENSG00000133083|DCLK1 ENSG00000138395|ALS2CR7 ENSG00000159267|HLCS ENSG00000174500|GCET2 ENSG00000176485|HRASLS3 ENSG00000204398|Q5T400\_HUMAN ENSG00000205220|PSMB10  
CAAGTAT ENSG00000042062|C2orf175 ENSG00000063854|HAGH ENSG00000115841|FAM82A ENSG00000119638|NEK9 ENSG00000138326|RPS24 ENSG00000139626|ITGB7 ENSG00000141504|SAT2 ENSG00000144671|SLC22A14  
ENSG00000153048|CARHSP1 ENSG00000155846|PPARGC1B ENSG00000159189|C1QC ENSG00000162076|NP\_612448.1 ENSG00000185955|NP\_001004323.1 ENSG00000197461|PDGFA ENSG00000197816|KIAA1529 ENSG00000206528|Q6ZSM0\_HUMAN  
ENSG00000077232|DNAJC10 ENSG00000080819|CPOX ENSG00000101558|VAPA ENSG00000105855|ITGB8 ENSG00000112304|THEM2 ENSG00000113240|CLK4 ENSG00000124429|POF1B ENSG00000133805|AMPD3  
ENSG00000134330|Q6PCA9\_HUMAN ENSG00000136870|ZNF189 ENSG00000136999|NOV ENSG00000138483|CCDC54 ENSG00000146151|HMGCLL1 ENSG00000151553|KIAA1600 ENSG00000152457|DCLRE1C ENSG00000153234|NR4A2  
ENSG00000162664|ZNF326 ENSG00000164124|TMEM144 ENSG00000165525|SDCCAG1 ENSG00000172461|FUT9 ENSG00000174695|TMEM167 ENSG00000175352|NRIP3 ENSG00000175664|C13orf26 ENSG00000186665|C17orf58  
ENSG00000198523|PLN ENSG00000204387|C6orf48  
CAAGTGC ENSG00000072121|ZFYVE26 ENSG00000082458|DLG3 ENSG00000100030|MAPK1 ENSG00000103489|XYLT1 ENSG00000104783|KCNN4 ENSG00000107554|DNMBP ENSG00000108639|SYNGR2 ENSG00000113070|HBEGF  
ENSG00000128228|SDF2L1 ENSG00000136327|NKX2-8 ENSG00000140505|CYP1A2 ENSG00000143375|CGN ENSG00000144043|TEX261 ENSG00000148468|C10orf38 ENSG00000151650|VENTX ENSG00000159166|LAD1  
ENSG00000159713|CG38\_HUMAN ENSG00000187516|CXorf27 ENSG00000196218|RYR1 ENSG000002044524|EPHA3 ENSG00000205477|SEPHS1 ENSG00000100722|ZC3H14 ENSG00000101115|SALL4 ENSG00000107937|GTPBP4  
ENSG00000116176|TPSG1 ENSG00000118816|CCNI ENSG00000122644|ARL4A ENSG00000129116|PALLD ENSG00000138286|KIAA0974 ENSG00000152642|GPD1L ENSG00000155850|SLC26A2 ENSG00000162526|TSSK3  
ENSG00000164123|NP\_689756.2 ENSG00000164211|STARDA4 ENSG00000166783|KIAA0430 ENSG00000166913|YWHAB ENSG00000169064|NM\_024687.2 ENSG00000169085|C8orf46 ENSG00000176049|JAKMIP2 ENSG00000181690|PLAG1  
ENSG00000189007|DEADC1  
CAAGTTT ENSG00000028528|SNX1 ENSG00000081853|PCDHGA12 ENSG00000100422|CERK ENSG00000102034|ELF4 ENSG00000108788|MLX ENSG00000115902|SLC1A4 ENSG00000116990|MYCL1 ENSG00000128567|PODXL  
ENSG00000130203|APOE ENSG00000138131|LOXL4 ENSG00000141337|ARSG ENSG00000142444|C19orf52 ENSG00000151208|DLG5 ENSG00000158525|CPA5 ENSG00000164733|CTSB ENSG00000167972|ABCA3  
ENSG00000173545|ZNF622 ENSG00000181852|RNF41 ENSG00000182013|NP\_060685.2 ENSG00000183778|B3GALT5 ENSG00000183862|CNGA2 ENSG00000198114|C2orf46 ENSG00000205106|Q6N098\_HUMAN ENSG00000205528|Q6ZRE2\_HUMAN  
ENSG00000026297|NRASBET2 ENSG00000034971|MYOC ENSG00000077327|SPAG6 ENSG00000089063|C2orf62 ENSG00000136155|SCEL ENSG00000138779|Q9HCM6\_HUMAN ENSG00000154359|LONRR1 ENSG00000162630|B3GALT2  
ENSG00000163947|RHGEF3 ENSG00000164219|PGGT1B ENSG00000165071|TMEM71 ENSG00000166240|Q14DG7-2 ENSG00000168348|INSM2 ENSG00000168843|PTL5 ENSG00000170242|USP47 ENSG00000170854|MINA  
ENSG00000179222|MAGED1 ENSG00000188162|OTOG ENSG00000189252|SPANXN3 ENSG00000196980|NR\_002827.1 ENSG00000198838|RYR3 ENSG00000203924|SPANXN2  
CAATAAA ENSG00000004478|FKBP4 ENSG00000010438|PRSS3 ENSG000000339650|PNKP ENSG00000065675|PRKQ ENSG00000074582|BCS1L ENSG00000083845|RPS5 ENSG00000087191|PSMC5 ENSG00000088320|REMI  
ENSG00000100908|C14orf122 ENSG00000103415|HMOX2 ENSG00000104129|DNAJC17 ENSG00000105373|GLTSCR2 ENSG00000105619|PFPT ENSG00000110628|SLC22A18 ENSG00000110717|NDUFS8  
ENSG00000125459|MSTO1 ENSG00000126759|CFP ENSG00000128159|TUBGCP6 ENSG00000128346|C2orf23 ENSG00000130283|GDF1 ENSG00000130635|COL5A1 ENSG00000132600|PRMT7 ENSG00000135617|C2orf7  
ENSG00000136942|RPL35 ENSG00000144671|SLC22A14 ENSG00000149609|C20orf144 ENSG00000156885|COX6A2 ENSG00000161016|RPL8 ENSG00000161270|NPHS1 ENSG00000162542|TMC04 ENSG00000163382|APOA1BP  
ENSG00000164405|UQCRCQ ENSG00000164708|PGAM2 ENSG00000167413|BR13 ENSG00000167700|MFXS3 ENSG00000169583|CLIC3 ENSG00000173636|PRSS1 ENSG00000178035|IMPDH2 ENSG00000178814|OPLAH  
ENSG00000179271|GADD45G1P1 ENSG00000180879|SSR4 ENSG00000184361|C17orf46 ENSG00000184481|MLLT7 ENSG00000185614|C3orf54 ENSG00000188100|FAM25\_HUMAN ENSG00000196118|NP\_001014979.1 ENSG00000197238|HIST1H4J  
ENSG00000203931|LOC729078 ENSG00000204313|NP\_001028830.1 ENSG00000204982|PRSS2 ENSG00000205477|Q6ZR94\_HUMAN ENSG00000205736|IL17RB ENSG00000102391|RPL36A ENSG00000104722|NEFM  
ENSG00000104804|TULP2 ENSG00000104907|TRMT1 ENSG00000108654|DDX5 ENSG00000109680|TBC1D19 ENSG00000110700|RPS13 ENSG00000110888|CAPRN2 ENSG00000111647|NP\_001006948.1 ENSG00000112530|PACRG  
ENSG00000117505|DR1 ENSG00000119917|IFIT3 ENSG00000126246|TMEM149 ENSG00000128694|OSGEPL1 ENSG00000129170|CSRP3 ENSG00000129235|TXNL5 ENSG00000135903|PAX3 ENSG00000136149|XR\_017918.1  
ENSG00000137818|RPLP1 ENSG00000138801|PAPSS1 ENSG00000139160|NP\_776163.1 ENSG00000141456|Q8IZL8-2 ENSG00000149506|ZP1 ENSG00000152402|GUCY1A2 ENSG00000157343|C6orf81 ENSG00000159182|NP\_115767.1  
ENSG00000160223|ICOSIG ENSG00000162384|C1orf123 ENSG00000162670|FAM5C ENSG00000163646|KRTCAP2 ENSG00000164120|HPGD ENSG00000164175|SLC45A2 ENSG00000164944|KIAA1429 ENSG00000168273|Q8WV10\_HUMAN  
ENSG00000168356|SCN11A ENSG00000168530|MYL1 ENSG00000170788|DYDC1 ENSG00000171204|C19orf53 ENSG00000174132|TMEM157 ENSG00000174326|SLC16A1 ENSG00000174373|GARNL1  
ENSG00000175646|PRM1 ENSG00000177606|JUN ENSG00000179363|TMEM31 ENSG00000182774|RS17\_HUMAN ENSG00000184779|RPS17 ENSG00000184886|PIGW ENSG00000186019|ZNF224 ENSG00000187758|ADH1A  
ENSG00000189237|NAP5\_HUMAN ENSG00000197958|RPL12  
CAATAAC ENSG00000069812|HES2 ENSG00000092621|PHGDH ENSG00000099204|ABLIM1 ENSG00000100024|UPB1 ENSG00000100604|CHGA ENSG00000104637|PINX1\_HUMAN ENSG00000110107|PRPF19 ENSG00000116882|HAO2  
ENSG00000130544|ZNF557 ENSG00000143376|SNX27 ENSG00000160838|C1orf92 ENSG00000168065|SLC22A11 ENSG00000168067|MAP4K2 ENSG00000170054|SERPINA9 ENSG00000172349|IL16 ENSG00000172647|PGA5  
ENSG00000173153|ESRRA ENSG00000180279|Q8N4W5\_HUMAN ENSG00000180860|PGA3 ENSG00000186162|Q86XG0\_HUMAN ENSG00000187144|SPATA21 ENSG00000187695|Q6ZUG5\_HUMAN ENSG00000204973|PGA4 ENSG00000205929|C2orf62  
ENSG00000038945|MSR1 ENSG00000077279|DCX ENSG00000101888|NXT2 ENSG00000105939|ZC3HAV1 ENSG00000109586|GALNT7 ENSG00000117598|NP\_00110861.1 ENSG00000131586|MRPL20 ENSG00000133059|RIPK5  
ENSG00000135250|SRPK2 ENSG00000135766|EGLN1 ENSG00000137098|SPAG8 ENSG00000137996|RTCD1 ENSG00000138675|FGF5 ENSG00000139278|GLIPLR1 ENSG00000149443|C2orf78 ENSG00000165501|PPIL5  
ENSG00000166240|Q14DG7-2 ENSG00000167637|ZNF345 ENSG00000178217|SH2D4B ENSG00000181004|BBS12 ENSG00000205874|Q6SA06\_HUMAN  
CAATACA ENSG00000010671|BTX ENSG00000023171|GRAMD1B ENSG00000037757|NP\_115661.1 ENSG00000101213|PTK6 ENSG00000110074|FOXRED1 ENSG00000123685|NP\_061134.1 ENSG00000127124|HIVEP3 ENSG00000130175|PRKCSH  
ENSG00000135414|GDF11 ENSG00000137834|SMAD6 ENSG00000142751|ATPBD1B ENSG00000144791|LIMD1 ENSG00000147081|AKAP4 ENSG00000147127|RAB41 ENSG00000147382|FAM58A ENSG00000149179|C1orf49  
ENSG00000153298|C6orf54 ENSG00000159189|SLC6 ENSG00000160593|AMICAL1 ENSG00000164670|SLC13A4 ENSG00000167483|FAM129C ENSG00000167780|SOAT2 ENSG00000172543|CTSW  
ENSG00000173421|CCDC36 ENSG00000175155|YPEL2 ENSG00000184634|MED12 ENSG00000184788|SATL1 ENSG00000186847|KRT14 ENSG00000189419|NP\_997266.2 ENSG00000196859|KRT39 ENSG00000198374|HIST1H2AL  
ENSG00000203691|Q9UI51\_HUMAN ENSG00000092140|KIAA1333 ENSG00000100522|TOX4 ENSG00000106034|GNPNAT1 ENSG00000110075|SAP3 ENSG00000118454|ANKRD13C ENSG00000118965|WDR35  
ENSG00000119922|IFIT2 ENSG00000120137|PANK3 ENSG00000120696|KBTBD7 ENSG00000136897|MRPL50 ENSG00000144674|GOLGA4 ENSG00000148541|FAM13C1 ENSG00000150636|CCDC102B  
ENSG00000152254|G6PC2 ENSG00000156735|BAG4 ENSG00000160633|SAFB ENSG00000162613|FUBP1 ENSG00000162695|SLC30A7 ENSG00000163072|NOSTRIN ENSG00000176399|DMRTA1 ENSG00000185053|SGCZ  
ENSG00000186471|AKAP14 ENSG00000206198|NR\_001535.1  
CAATACT ENSG00000004487|AOF2 ENSG00000011600|TYROBP ENSG00000063127|SLC6A16 ENSG00000088826|SMOX ENSG00000089116|LHX5 ENSG00000101542|CDH20 ENSG00000104611|SH2D4A ENSG00000110880|CORO1C  
ENSG00000136003|ISCU ENSG00000140553|UNC45A ENSG00000145050|ARMET ENSG00000166189|HPS6 ENSG00000171722|C1orf111 ENSG00000173933|RBM4 ENSG00000182177|ASB18 ENSG00000182852|C2orf121  
ENSG00000186603|HPDL ENSG00000188042|ARL4C ENSG00000189180|ZNF33A ENSG00000196644|LOC728932 ENSG00000204392|LSM2 ENSG00000206013|IFITM5 ENSG00000206062|Q4GOT4\_HUMAN ENSG00000206494|CALCR  
ENSG00000010219|DYRK4 ENSG00000056277|SUHW3 ENSG00000072803|FBXW11 ENSG00000078674|PCM1 ENSG00000081181|ARG2 ENSG00000102218|RP2 ENSG00000102221|PHF16 ENSG00000107854|TNKS2  
ENSG00000110848|CD69 ENSG00000113638|TTC33 ENSG00000128578|FAM40B ENSG00000129514|FOXA1 ENSG00000137473|TTC29 ENSG00000137872|SEMA6D ENSG00000138161|FAM24B ENSG00000139278|GLIPLR1  
ENSG00000147488|ST18 ENSG00000157890|MEGF11 ENSG00000169045|HNRPH1 ENSG00000171502|COL24A1 ENSG00000183475|ASB7 ENSG00000198648|STK39 ENSG00000204334|AL1L162\_HUMAN  
CAATAGC ENSG00000085063|CD59 ENSG00000100253|MIOX ENSG00000110074|FOXRED1 ENSG00000124157|SEMG2 ENSG00000129657|SEC14L1 ENSG00000131037|EPS8L ENSG00000140854|KATNB1 ENSG00000142347|MYO1F  
ENSG00000146021|KLHL3 ENSG00000160695|VPS11 ENSG00000163479|SSR2 ENSG00000164051|CCDC51 ENSG00000164620|C5orf36 ENSG00000168081|PNC1 ENSG00000172531|PPP1CA ENSG00000172531|PPP1CA ENSG00000197798|FAM118B  
ENSG00000204323|Q71RC9\_HUMAN ENSG00000204626|Q6ZSR2\_HUMAN ENSG00000205085|NP\_001012457.1 ENSG00000049192|ADAMTS6 ENSG00000064835|POU1F1 ENSG00000089041|P2RX7 ENSG00000091972|CD200 ENSG00000101843|PSMD10  
ENSG00000101844|ATG4A ENSG00000101892|ATP1B4 ENSG00000111860|C6orf204 ENSG00000115808|STRN ENSG00000119616|FCF1 ENSG00000122145|TBX22 ENSG00000127870|RNF6 ENSG00000135218|CD36  
ENSG00000141425|NP\_060640.2 ENSG00000152495|CAMK4 ENSG00000157111|TMEM171 ENSG00000163513|TGFB2 ENSG00000165650|PDZD8 ENSG00000165819|METTL3 ENSG00000177463|NR2C2 ENSG00000179083|FAM133A  
ENSG00000188585|Q6ZU45\_HUMAN ENSG00000196660|SLC30A10 ENSG00000206530|WDR52  
CAATAGG ENSG00000010318|PHF7 ENSG00000092621|PHGDH ENSG00000100319|ZMAT5 ENSG00000101193|C2orf11 ENSG00000107185|KIAA0258 ENSG00000108439|PNPO ENSG00000108671|PSMD11 ENSG00000112837|TBX18  
ENSG00000116726|PRAMEF12 ENSG00000132677|RHBG ENSG00000139540|SLC39A5 ENSG00000139714|MORN3 ENSG00000140287|HDC ENSG00000154330|PGM5P1 ENSG00000161956|SENP3 ENSG00000164078|MST1R  
ENSG00000170100|Q9GMU6-2 ENSG00000170616|SCRT1 ENSG00000174683|C8orf78 ENSG00000177807|KCNJ10 ENSG00000198937|C6orf129 ENSG00000203836|NP\_899228.3 ENSG00000205073|NP\_00103808.1 ENSG00000205249|PRKAR2B  
ENSG00000070501|POLB ENSG00000085719|CPNE3 ENSG00000106571|GLI3 ENSG00000118705|RPKAG2 ENSG00000139364|TMEM132B ENSG00000140043|ZADH1 ENSG00000150457|LATS2  
ENSG00000155850|SLC26A2 ENSG00000163624|CDS1 ENSG00000166670|MMP10 ENSG00000169224|C1orf150 ENSG00000172172|MRPL13 ENSG00000177675|CD163L1 ENSG00000196470|SIAH1 ENSG00000205038|PKHD1L1  
CAATATA ENSG00000084234|APLP2 ENSG00000087157|PGS1 ENSG00000095383|TBC1D2 ENSG00000101440|ASIP ENSG00000103490|PYCARD ENSG00000116824|CD2 ENSG00000118004|COLEC11 ENSG00000118298|CA14  
ENSG00000124713|GNMT ENSG00000128567|PODXL ENSG00000132938|KIAA0774 ENSG00000138629|UBL7 ENSG00000139083|ETV6 ENSG00000151376|MEB3 ENSG00000154124|FAM105B ENSG00000160396|HIPK4  
ENSG00000162706|DARC ENSG00000166869|CHP2\_HUMAN ENSG00000167139|TBC1D21 ENSG00000167759|KLK13 ENSG00000170238|XR\_017738.1 ENSG00000173567|GPR113 ENSG00000173950|C3orf21 ENSG00000174460|ZCCHC12  
ENSG00000176887|SOX11 ENSG00000181036|FCRL6 ENSG00000184330|S100A7A ENSG00000196220|SRGAP3 ENSG00000198500|Q96C21\_HUMAN ENSG00000203883|SOX18 ENSG0000008282|SYPL1 ENSG00000076321|KLHL20  
ENSG00000081870|C1orf41 ENSG00000087303|NID2 ENSG00000100644|HIF1A ENSG00000111913|C6orf32 ENSG00000122339|C6orf35 ENSG00000134851|TMEM165 ENSG00000138381|ASNSD1 ENSG00000138644|IL21  
ENSG00000145041|Q8TBD9\_HUMAN ENSG00000155313|USP25 ENSG00000156076|WIF1 ENSG00000165997|ARL5B ENSG00000171885|AQP4 ENSG00000174738|NR1D2 ENSG00000180182|CRSP2 ENSG00000186803|IFNA10  
ENSG00000186809|IFNA17 ENSG00000196104|SPOCK3 ENSG00000205604|Q6ZUP5\_HUMAN  
CAATATG ENSG00000051009|C11orf56 ENSG00000054523|KIF1B ENSG00000102230|PCYT1B ENSG00000108264|TADA2L ENSG00000118526|TCF21 ENSG00000120907|ADRA1A ENSG00000124299|PEPD ENSG00000130544|ZNF557  
ENSG00000135457|TFPC2 ENSG00000143379|SETDB1 ENSG00000155846|PPARGC1B ENSG00000158816|Q5TTE3\_HUMAN ENSG00000166073|GPR176 ENSG00000166167|BTRC ENSG00000167513|CDT1 ENSG0000

|         |                              |                              |                                |                              |                                |                              |                              |                              |  |
|---------|------------------------------|------------------------------|--------------------------------|------------------------------|--------------------------------|------------------------------|------------------------------|------------------------------|--|
|         | ENSG00000174547 MRPL11       | ENSG00000186090 HTR3D        | ENSG00000188364 TMSL4          | ENSG00000205268 PDE7A        | ENSG00000006128 TAC1           | ENSG00000078403 MLLT10       | ENSG00000123496 IL13RA2      | ENSG00000137642 SORL1        |  |
|         | ENSG00000145833 DDX46        | ENSG00000150961 SEC24D       | ENSG00000163492 NP_775919.2    | ENSG00000163683 C4orf34      | ENSG00000164024 METAP1         | ENSG00000168273 Q8WVIO_HUMAN | ENSG00000169688 MT1B         | ENSG00000182139 Q96FU4_HUMAN |  |
| CAATCAG | ENSG00000197279 ZNF165       | ENSG00000197321 SVIL         | ENSG00000198380 GFPT1          | ENSG00000198770 Q9H396_HUMAN | ENSG00000204271 SPIN3          |                              |                              |                              |  |
|         | ENSG00000038382 TRIO         | ENSG00000051009 C11orf56     | ENSG00000055070 C1orf144       | ENSG00000100385 IL2RB        | ENSG00000119715 ESRRB          | ENSG00000158715 SLC45A3      | ENSG00000160408 ST6GALNAC6   | ENSG00000169393 ELSPBP1      |  |
|         | ENSG00000170485 NPAS2        | ENSG00000182667 NTRI_HUMAN   | ENSG00000183562 Q9P1L5_HUMAN   | ENSG00000196092 PAX5         | ENSG00000204323 Q71RC9_HUMAN   | ENSG00000008018 PSMB1        | ENSG00000113302 IL12B        | ENSG00000122691 TWIST1       |  |
|         | ENSG00000125255 SLC10A2      | ENSG00000128739 SNRPN        | ENSG00000132000 PODNL1         | ENSG00000136231 JGF2BP3      | ENSG00000139508 SLC46A3        | ENSG00000140262 TCF12        | ENSG00000140416 TPM1         | ENSG00000146281 ACY1L2       |  |
|         | ENSG00000149742 SLC22A9      | ENSG00000168175 C14orf32     | ENSG00000168594 ADAM29         | ENSG00000170153 RNF150       | ENSG00000172465 TCEAL1         | ENSG00000181481 RNF135       | ENSG00000188992 LIP1         | ENSG00000189132 FAM47B       |  |
| CAATCAT | ENSG00000041880 PARP3        | ENSG00000065882 TBC1D1       | ENSG00000070610 GBA2           | ENSG00000070778 PTPN21       | ENSG00000107954 NEURL          | ENSG00000108702 CCL1         | ENSG00000110492 MDK          | ENSG00000115661 STK16        |  |
|         | ENSG00000125971 DYNLRB1      | ENSG00000130173 NP_061157.2  | ENSG00000130702 LAMA5          | ENSG00000133511 PIK4CA       | ENSG00000140848 CFNE2          | ENSG00000157350 ST3GAL2      | ENSG00000159685 CHCHD6       | ENSG00000169385 RNASE2       |  |
|         | ENSG00000169397 RNASE3       | ENSG00000169814 BTD          | ENSG00000171467 ZNF318         | ENSG00000173545 ZNF622       | ENSG00000176340 CX8A           | ENSG00000178409 KIAA1553     | ENSG00000182117 NOLA3        | ENSG00000183506 NP_955377.2  |  |
|         | ENSG00000189325 NP_001010    | ENSG00000196684 HSH2D        | ENSG00000197555 SIPALL1        | ENSG00000197694 SPTAN1       | ENSG00000198369 SPRED2         | ENSG00000206550 LOC285346    | ENSG000000007372 PAX6        | ENSG00000073969 NSF          |  |
|         | ENSG00000101182 PSMA7        | ENSG00000101844 ATG4A        | ENSG00000104313 EYA1           | ENSG00000107758 PPP3CB       | ENSG00000109686 NP_001009555.2 | ENSG00000111371 SLC38A1      | ENSG00000113269 RNF130       | ENSG00000113643 RARS         |  |
|         | ENSG00000114054 PCCB         | ENSG00000115540 PREI3        | ENSG00000116898 MRPS15         | ENSG00000118007 TAG1         | ENSG00000120162 MOBKLB2        | ENSG00000120742 RAMP4_HUMAN  | ENSG00000120992 LYPLA1       | ENSG00000131951 LRRC9        |  |
|         | ENSG00000133961 NUMB         | ENSG00000135535 CD164        | ENSG00000136381 IREB2          | ENSG00000137968 SLC44A5      | ENSG00000139209 SLC38A4        | ENSG00000139239 XR_017789.1  | ENSG00000140043 ZADH1        | ENSG00000145982 FARS2        |  |
|         | ENSG00000147894 C9orf72      | ENSG00000149506 ZP1          | ENSG00000161010 NP_001017987.1 | ENSG00000170786 NP_620419.2  | ENSG00000173275 ZNF449         | ENSG00000185448 FAM47A       | ENSG00000188846 RPL14        | ENSG00000198440 ZNF583       |  |
| CAATCGT | ENSG000000204138 PHACTR4     | ENSG00000065618 COL17A1      | ENSG00000079974 RABL2B         | ENSG00000103248 MTHFSD       | ENSG00000103522 IL21R          | ENSG00000104637 PINX1_HUMAN  | ENSG00000104964 AES          | ENSG00000112473 SLC39A7      |  |
|         | ENSG00000112562 SMOC2        | ENSG00000115756 HPCAL1       | ENSG00000122641 INHBA          | ENSG00000125844 RRBP1        | ENSG00000140406 MESDC1         | ENSG00000152217 SETBP1       | ENSG00000153303 FRMD1        | ENSG00000153468 TCP10_HUMAN  |  |
|         | ENSG00000160185 UBASH3A      | ENSG00000160916 ATP5J2       | ENSG00000164054 NP_057563.3    | ENSG00000168329 CX3CR1       | ENSG00000173040 EVC2           | ENSG00000175806 MSRA         | ENSG00000178802 MPI          | ENSG00000183117 CSMD1        |  |
|         | ENSG00000183888 C1orf64      | ENSG00000188427 XR_017855.1  | ENSG00000197021 CXorf40B       | ENSG00000074966 TXK          | ENSG00000077721 UBE2A          | ENSG00000115446 UNC50        | ENSG00000116991 SIPALL2      | ENSG00000120690 ELF1         |  |
|         | ENSG00000131171 SH3BGR4      | ENSG00000136044 APPL2        | ENSG00000136813 KIAA0368       | ENSG00000137267 TUBB2A       | ENSG00000141127 PRPSAP2        | ENSG00000145431 PDGFC        | ENSG00000151490 PTPRO        | ENSG00000154175 ABI3BP       |  |
|         | ENSG00000163630 SYNPR        | ENSG00000165757 KIAA1462     | ENSG00000166478 ZNF143         | ENSG00000168118 RAB4A        | ENSG00000172969 LOC285299      | ENSG00000174298 NP_694572.1  | ENSG00000196319 Q9H353_HUMAN |                              |  |
| CAATCTG | ENSG00000072501 SMC1A        | ENSG00000074410 CA12         | ENSG00000102243 VGLL1          | ENSG00000107738 C10orf54     | ENSG00000129744 ART1           | ENSG00000132507 EIF5AP1      | ENSG00000134824 FADS2        | ENSG00000138085 C2orf28      |  |
|         | ENSG00000140274 DUOXA2       | ENSG00000155087 ODF1         | ENSG00000163814 CDCP1          | ENSG00000164051 CCDC51       | ENSG00000166317 SYNPO2L        | ENSG00000166435 XRRA1        | ENSG00000166787 SAA3P        | ENSG00000172294 Q96RM9_HUMAN |  |
|         | ENSG00000172342 CSPG4LYP1    | ENSG00000172940 SLC22A13     | ENSG00000173120 FBXL11         | ENSG00000184923 FAM22A       | ENSG00000185117 NR_002733.1    | ENSG00000198756 GLT25D2      | ENSG00000205214 Q6ZU66_HUMAN | ENSG000000013375 PGM3        |  |
|         | ENSG00000049860 HEXB         | ENSG00000054654 SYNE2        | ENSG00000072080 SPFL2          | ENSG00000106723 SPIN1        | ENSG00000113296 THBS4          | ENSG00000117586 TNFSF4       | ENSG00000120685 C13orf23     | ENSG00000121716 Q9UKJ0-3     |  |
|         | ENSG00000136213 CHST12       | ENSG00000138398 PPIG         | ENSG00000143970 ASXL2          | ENSG00000145725 HISPPD1      | ENSG00000146477 SLC22A3        | ENSG00000148053 NTRK2        | ENSG00000162755 NP_689579.3  | ENSG00000166928 NP_115986.3  |  |
|         | ENSG00000178965 C1orf173     | ENSG00000181065 Q9P161_HUMAN | ENSG00000182923 CEP63          | ENSG00000185010 F8           | ENSG00000185345 PARK2          | ENSG00000186416 NKRF         | ENSG00000186480 INSIG1       | ENSG00000189403 HMGB1        |  |
|         | ENSG00000196886 Q8NAW3_HUMAN |                              |                                |                              |                                |                              |                              |                              |  |
| CAATGAC | ENSG00000011478 QPCTL        | ENSG00000104979 C19orf53     | ENSG00000105755 ETHE1          | ENSG00000106336 FBXO24       | ENSG00000116035 VAX2           | ENSG00000145526 CDH18        | ENSG00000146374 RSP03        | ENSG00000146521 C6orf123     |  |
|         | ENSG00000149782 PLCB3        | ENSG00000160200 CBS          | ENSG00000161381 PLXDC1         | ENSG00000162490 C1orf187     | ENSG00000164061 BSN            | ENSG00000164270 HTRA         | ENSG00000165025 SYK          | ENSG00000165131 C7orf34      |  |
|         | ENSG00000170310 STX8         | ENSG00000176194 CIDEA        | ENSG00000176515 Q8NAX6_HUMAN   | ENSG00000185155 MIXL1        | ENSG00000186818 LILRB4         | ENSG00000203854 XR_017700.1  | ENSG00000049759 NEDD4L       | ENSG00000101958 GLRA2        |  |
|         | ENSG00000107362 FAM108B1     | ENSG00000120555 Q5W161_HUMAN | ENSG00000121335 PRB4           | ENSG00000124935 SCGB1D2      | ENSG00000132196 HSD17B7        | ENSG00000138660 C4orf16      | ENSG00000144057 ST6GAL2      | ENSG00000145321 GC           |  |
|         | ENSG00000153310 FAM49B       | ENSG00000156642 NPTN         | ENSG00000163053 SLC16A14       | ENSG00000164175 SLC45A2      | ENSG00000172900 XR_017872.1    | ENSG00000173113 TR112_HUMAN  | ENSG00000173334 TRIB1        | ENSG00000196406 SPANXE       |  |
| CAATGCA | ENSG000000197937 ZNF347      | ENSG00000198964 SGMS1        | ENSG00000203964 Q8NG36_HUMAN   | ENSG00000204262 COL5A2       |                                |                              |                              |                              |  |
|         | ENSG000000553108 FSTL4       | ENSG00000064393 HIPK2        | ENSG00000074211 PPP2R2C        | ENSG00000084731 KIF3C        | ENSG00000100767 PAPLN          | ENSG00000106400 ZNHIT1       | ENSG00000111665 CDCA3        | ENSG00000111886 GABRR2       |  |
|         | ENSG00000114650 SCAP         | ENSG00000126778 SIX1         | ENSG00000141052 MYOCD          | ENSG00000141985 SH3GL1       | ENSG00000148660 CAMK2G         | ENSG00000166856 ADM1         | ENSG00000179766 Q4G129_HUMAN | ENSG00000183633 C14orf132    |  |
|         | ENSG00000186063 C1orf80      | ENSG00000187095 LILRA2       | ENSG00000187116 LILRA5         | ENSG00000205658 Q6ZUU6_HUMAN | ENSG00000005469 CROT           | ENSG00000065923 SLC9A7       | ENSG00000078674 PCM1         | ENSG00000120211 INSL4        |  |
|         | ENSG00000132386 SERPINF1     | ENSG00000155380 SLC16A1      | ENSG00000158604 TMED4          | ENSG00000159200 DSCR1        | ENSG00000162630 B3GALT2        | ENSG00000163249 CCNYL1       | ENSG00000165029 ABCA1        | ENSG00000168619 ADAM18       |  |
|         | ENSG00000169224 C1orf150     | ENSG00000184040 FAM23B       | ENSG00000188992 LIP1           | ENSG00000196442 ZNF432       | ENSG00000196876 SCN8A          | ENSG00000205133 Q6Z9R1_HUMAN | ENSG00000205252 Q4G0M6_HUMAN | ENSG00000205442 C9orf134     |  |
| CAATGCC | ENSG00000008086 CDKL5        | ENSG00000020181 GPR124       | ENSG00000089169 RPH3A          | ENSG00000105523 FAM83E       | ENSG00000116983 HPCAL4         | ENSG00000119714 GPR68        | ENSG00000144583 MARCH4       | ENSG00000145936 KCNMB1       |  |
|         | ENSG00000148795 CYP17A1      | ENSG00000156515 HK1          | ENSG00000167105 TMEM92         | ENSG00000169717 ACTRT2       | ENSG00000183908 LRRC55         | ENSG00000188305 C19orf35     | ENSG00000197226 TBC1D9B      | ENSG00000204049 Q6ZUH9_HUMAN |  |
|         | ENSG00000006576 PITF2        | ENSG00000033170 FUT8         | ENSG00000069943 PIGB           | ENSG00000085719 CPNE3        | ENSG00000089127 OAS1           | ENSG00000112319 EYA4         | ENSG00000113494 PRLR         | ENSG00000123728 RAP2C        |  |
|         | ENSG00000139800 ZIC5         | ENSG00000144785 TMEM4        | ENSG00000144962 SPATA16        | ENSG00000151014 CCRN4L       | ENSG00000155368 DBI            | ENSG00000162946 C1orf136     | ENSG00000166153 DEPDC4       | ENSG00000169116 PARM1_HUMAN  |  |
|         | ENSG00000169604 ANTXR1       | ENSG00000171132 PRKCE        | ENSG00000175646 PRM1           | ENSG00000183607 GKN2         | ENSG00000185127 C6orf120       | ENSG00000186086 NBPF4        | ENSG00000197945 Q6ZRE3_HUMAN | ENSG00000204026 Q6ZSD2_HUMAN |  |
| CAATGCG | ENSG00000068971 PPP2R5B      | ENSG00000086758 HUWE1        | ENSG00000100105 PATZ1          | ENSG00000100350 FOXRED2      | ENSG00000117318 ID3            | ENSG00000125434 SLC25A35     | ENSG00000128438 Q9H7M0_HUMAN | ENSG00000130762 ARHGFE16     |  |
|         | ENSG00000143811 PYCR2        | ENSG00000146054 TRIM7        | ENSG00000148926 ADM            | ENSG00000149091 DGKX         | ENSG00000151364 KCTD14         | ENSG00000166033 HTRA1        | ENSG00000166359 WDR88        | ENSG00000168904 LRRC28       |  |
|         | ENSG00000174564 IL2ORB       | ENSG00000180767 CHST13       | ENSG00000180818 HOXC10         | ENSG00000181763 APR2_HUMAN   | ENSG00000183528 QOVAR8_HUMAN   | ENSG00000183611 RPL32P3      | ENSG00000184060 CENTA7       | ENSG00000187695 Q6ZUG5_HUMAN |  |
|         | ENSG00000196588 MKL1_HUMAN   | ENSG00000198500 Q96C21_HUMAN | ENSG00000066427 ATXN3          | ENSG00000077809 GTF2I        | ENSG00000101911 PRPS2          | ENSG00000104435 STMN2        | ENSG00000109654 TRIM2        | ENSG00000112238 PRDM13       |  |
|         | ENSG00000120586 MRC1         | ENSG00000121440 PDZRN3       | ENSG00000129055 ANAPC13        | ENSG00000129170 CSRP3        | ENSG00000136436 CALCOCO2       | ENSG00000139352 ASCL1        | ENSG00000141441 FAM59A       | ENSG00000144357 ZNF650       |  |
|         | ENSG00000152592 DMP1         | ENSG00000153246 PLA2R1       | ENSG00000162885 B3GALNT2       | ENSG00000165071 TMEM71       | ENSG00000172845 SP3            | ENSG00000175643 C16orf75     | ENSG00000177494 ZBED2        | ENSG00000178665 ZNF713       |  |
| CAATGGA | ENSG00000183748 MRC1L1       | ENSG00000183801 OLFM1        | ENSG00000188153 COL4A5         | ENSG00000196876 SCN8A        | ENSG00000203916 HFMI           |                              |                              |                              |  |
|         | ENSG00000092850 TEKT2        | ENSG00000113552 GNPDA1       | ENSG00000115718 PROC           | ENSG00000121900 TMEM54       | ENSG00000126259 KIRREL2        | ENSG00000131355 EMR3         | ENSG00000133392 MYH11        | ENSG00000141052 MYOCD        |  |
|         | ENSG00000162666 KIAA0040     | ENSG00000163879 DNALI1       | ENSG00000174502 SLC26A9        | ENSG00000179523 Q8TAS2_HUMAN | ENSG00000196431 CRYBA4         | ENSG00000196739 COL27A1      | ENSG00000205064 Q6ZVP2_HUMAN | ENSG0000013364 MVP           |  |
|         | ENSG00000072080 SPP2         | ENSG00000083099 LYRM2        | ENSG00000085514 PYLRA          | ENSG00000086696 HSD17B2      | ENSG00000092148 HECTD1         | ENSG00000092208 SIP1         | ENSG00000112541 PDE10A       | ENSG00000117289 TXNIP        |  |
|         | ENSG00000125245 GPR18        | ENSG00000139910 NOVA1        | ENSG00000141141 DDX52          | ENSG00000143344 RGL1         | ENSG00000144619 CNTN4          | ENSG00000146938 NLGN4X       | ENSG00000147124 ZNF41        | ENSG00000157111 TMEM171      |  |
|         | ENSG00000163114 PDHA2        | ENSG00000163449 TMEM169      | ENSG00000166669 ATF7IP2        | ENSG00000166762 CATSPER2     | ENSG00000168461 RAB31          | ENSG00000171262 FAM98B       | ENSG00000183649 Q8NFX8_HUMAN | ENSG00000188193 C6orf155     |  |
|         | ENSG00000196345 ZNF167       | ENSG00000196447 XR_017870.1  | ENSG00000197614 MFAP5          | ENSG00000198872 PEG10        | ENSG00000204711 C9orf135       |                              |                              |                              |  |
| CAATGGC | ENSG00000026652 AGPAT4       | ENSG00000093072 CECR1        | ENSG00000105605 CACNG7         | ENSG00000115685 PPP1R7       | ENSG00000121083 DYNLL2         | ENSG00000125815 CST8         | ENSG00000129214 SHBG         | ENSG00000132254 ARFIP2       |  |
|         | ENSG00000132635 FAM113A      | ENSG00000135902 CHRD         | ENSG00000141756 FKBP10         | ENSG00000143847 PPTFA4       | ENSG00000161682 Q8N0U1_HUMAN   | ENSG00000168398 BDKRB2       | ENSG00000169921 Q75L30_HUMAN | ENSG00000170420 APOL6        |  |
|         | ENSG00000174407 C20orf166    | ENSG00000179044 EXOC3L       | ENSG00000182912 C21orf90       | ENSG00000198690 MTMR15       | ENSG00000005189 NP_112203.1    | ENSG00000033122 LRCC7        | ENSG00000090269 CLEC5A       | ENSG00000105976 MET          |  |
|         | ENSG0000010918               |                              |                                |                              |                                |                              |                              |                              |  |



ENSG00000117868|FAM62B ENSG00000127314|RAP1B ENSG00000129514|FOXA1 ENSG00000135541|AHI1 ENSG00000136144|RCBTB1 ENSG00000139746|RBM26 ENSG00000141447|OSBPL1A ENSG00000152894|PTPRK ENSG00000163694|NP\_061900.1 ENSG00000164176|EDIL3 ENSG00000164933|SLC25A32 ENSG00000169508|EBI2 ENSG00000171931|FBXW10 ENSG00000176276|hCG\_1757335 ENSG00000183783|KCTD8 ENSG00000196305|IARS

CAATTAA ENSG00000008086|CDKL5 ENSG00000075886|TUBA3D ENSG000000099769|IGFALS ENSG00000101441|CST4 ENSG00000101457|DNTTIP1 ENSG00000104332|SFRP1 ENSG00000105287|PRKD2 ENSG00000111254|AKAP3 ENSG00000116032|GRIN3B ENSG00000119682|KIAA0317 ENSG00000121281|ADCY7 ENSG00000121774|KHDRBS1 ENSG00000127445|PIN1 ENSG00000130294|KIF1A ENSG00000130707|ASS1 ENSG00000132383|RPA1 ENSG00000135404|CD63 ENSG00000135596|MICAL1 ENSG00000137392|CLPS ENSG00000138869|C22orf16 ENSG00000138869|C22orf16 ENSG00000152086|TUBA3E ENSG00000164051|CCDC51 ENSG00000166224|SGPL1 ENSG00000166741|NNMT ENSG00000167094|TTC16 ENSG00000170367|CST5 ENSG00000170369|CST2 ENSG00000170373|CST1 ENSG00000174939|ASPHD1 ENSG00000175892|Q8NAT4\_HUMAN ENSG00000176809|LRRC37A3 ENSG00000178235|SLITRK1 ENSG00000198033|TUBA3C ENSG00000198089|SFI1 ENSG00000204248|COL11A2 ENSG00000206549|TSP50\_HUMAN ENSG000000066651|TRMT11 ENSG00000006885|IFT80 ENSG00000079950|STX7 ENSG000000883168|MYST3 ENSG00000118596|SLC16A7 ENSG00000120251|GRIA2 ENSG00000121486|C1orf25 ENSG00000124235|CCDC76 ENSG00000126814|TRMT5 ENSG00000127074|RGS13 ENSG00000132963|POMP ENSG00000137558|PT15 ENSG00000138821|SLC39A8 ENSG00000152413|HOMER1 ENSG00000152977|ZIC1 ENSG00000154274|C4orf19 ENSG00000155438|MKI67IP ENSG00000163449|TMEM169 ENSG00000164691|TAGAP ENSG00000164695|CHMP4C ENSG00000164794|KCNV1 ENSG00000169813|HNRPF ENSG00000180458|Q8N3U1\_HUMAN ENSG00000185149|NPY2R ENSG00000188039|NWD1 ENSG00000196605|Q08AG5\_HUMAN ENSG00000196914|ARHGFE12 ENSG000000037897|METTL1 ENSG00000100558|PLEK2 ENSG00000100979|PLTP ENSG00000101098|RIMS4 ENSG00000104386|XR\_017860.1 ENSG00000116205|C1orf83 ENSG00000122641|INHBA ENSG00000122986|HVCN1 ENSG00000129354|AP1M2 ENSG00000151365|THRSF ENSG00000153956|CACNA2D1 ENSG00000159337|PLA2G4D ENSG00000160714|UBE2Q1 ENSG00000162236|STX5 ENSG00000164740|NR\_003034.1 ENSG00000166819|PLIN ENSG00000175520|UBQLN3 ENSG00000176615|LOC652153 ENSG00000178817|Q8N9W7\_HUMAN ENSG00000180891|CUEDC1 ENSG00000188816|HMX2 ENSG00000196645|Q8N9W7\_HUMAN ENSG00000198931|APRT ENSG00000204573|Q6ZV05\_HUMAN ENSG00000205559|Q6IBW5\_HUMAN ENSG00000206528|Q6ZSM0\_HUMAN ENSG00000056277|SUHW3 ENSG00000056736|LL17RB ENSG00000109686|NP\_001009555.2 ENSG00000111799|COL12A1 ENSG00000111863|C6orf105 ENSG00000134852|CLOCK ENSG00000135776|ABCB10 ENSG00000136875|PRPF4 ENSG00000167034|NKX3-1 ENSG00000168004|HRASL5 ENSG00000171634|BPTF ENSG00000172023|REG1B ENSG00000174796|THAP6 ENSG00000198721|PECT1 ENSG00000204990|NF\_001008742.1 ENSG00000205835|LOC647309

CAATTAT ENSG000000087269|NOL14 ENSG000000095015|MAP3K1 ENSG00000100122|CRYBB1 ENSG00000103353|UBFD1 ENSG00000105409|ATP1A3 ENSG00000107140|TESK1 ENSG00000108417|KRT37 ENSG00000112053|SLC26A8 ENSG00000115107|STEAR3 ENSG00000120993|HXB3 ENSG00000129194|SOX15 ENSG00000148200|NR6A1 ENSG00000162398|C1orf177 ENSG00000163993|S100P ENSG00000164674|SYTL3 ENSG00000175170|Q5T319\_HUMAN ENSG00000177479|ARIH2 ENSG00000180683|Q8N7A4\_HUMAN ENSG00000198400|NTRK1 ENSG00000205664|Q6PJD4\_HUMAN ENSG00000090621|PABPC4 ENSG00000091831|ESR1 ENSG00000109046|WSB1 ENSG00000112761|WISP3 ENSG00000116120|FARSB ENSG00000122557|HERPUD2 ENSG00000137434|C6orf52 ENSG00000137992|DBT ENSG00000143756|FBXO28 ENSG00000145354|ZNF22 ENSG00000152760|TCTEX1D1 ENSG00000157502|MUM1L1 ENSG00000162909|CAPN2 ENSG00000166006|KCNC2 ENSG00000166927|MS4A7 ENSG00000185873|TMPRSS11B ENSG00000188452|CERKL ENSG00000196381|ZCF781 ENSG00000196664|TLR7 ENSG00000205707|LYRM5

CAATTGG ENSG000000011478|QPCTL ENSG00000064419|TNPO3 ENSG00000079689|SCGN ENSG00000126432|PRDX5 ENSG00000143171|RXRG ENSG00000144648|CCBP2 ENSG00000148803|C1orf125 ENSG00000155363|MOV10 ENSG00000160285|LSS ENSG00000163866|C1orf212 ENSG00000165238|WNK2 ENSG00000168137|SETD5 ENSG00000169118|CSNK1G1 ENSG00000175197|DDIT3 ENSG00000180891|CUEDC1 ENSG00000182768|NGRN ENSG00000183049|CAMK1D ENSG00000184330|S100A7A ENSG00000185352|HS6ST3 ENSG00000204233|Q7LRC9\_HUMAN ENSG00000204511|NM\_001011700.1 ENSG00000070961|ATP2B1 ENSG00000104205|SGK3 ENSG00000111605|CPSF6 ENSG00000120705|ETF1 ENSG00000131080|EDA2R ENSG00000133328|HRASL52 ENSG00000134294|SLC38A2 ENSG00000134769|DTNA ENSG00000136604|STX11 ENSG00000136240|KDEL2R ENSG00000139291|TMEM19 ENSG00000144278|GALNT13 ENSG00000148516|ZEB1 ENSG00000151458|ANKRD50 ENSG00000152939|MARVELD2 ENSG00000162946|C1orf136 ENSG00000163530|DPPA2 ENSG00000167380|ZNF226 ENSG00000169744|LDB2 ENSG00000172551|MUCL\_HUMAN ENSG00000179930|ZNF648 ENSG00000185448|FAM47A ENSG00000196371|FUT4

CAATTTG ENSG000000003137|CYP26B1 ENSG00000048342|Q9H8A7\_HUMAN ENSG00000103067|RBM35B ENSG00000123643|SLC36A1 ENSG00000130707|ASS1 ENSG00000134247|PTGFRN ENSG00000136925|C9orf97 ENSG00000137100|DCTN3 ENSG00000146666|Q96IP2\_HUMAN ENSG00000149575|SCN2B ENSG00000158764|ITLN2 ENSG00000171724|K1576\_HUMAN ENSG00000173349|SFT2D3 ENSG00000177791|MYOZ1 ENSG00000179241|LDLRAD3 ENSG00000179855|GIPC3 ENSG00000182950|ODF3L1 ENSG00000185052|SLC24A3 ENSG00000185988|PLK5\_HUMAN ENSG00000198182|ZNF607 ENSG00000198668|CALM1 ENSG00000198785|GRIN3A ENSG00000205039|Q6ZQS5\_HUMAN ENSG00000006634|DBF4 ENSG00000095637|SORB1 ENSG00000112115|LL17A ENSG00000116918|TSNAX ENSG00000133574|GIMAP4 ENSG00000134200|TSHB ENSG00000134698|EIF2C4 ENSG00000135045|C9orf40 ENSG00000138668|HNRPD ENSG00000143184|XCL1 ENSG00000145649|GZMA ENSG00000155090|KLF10 ENSG00000162433|AK3L2 ENSG00000162909|CAPN2 ENSG00000162992|NEUROD1 ENSG00000166928|NP\_115986.3 ENSG00000170044|ZPLD1 ENSG00000170558|CDH2 ENSG00000173674|EIF1AP1 ENSG00000175305|CCNE2 ENSG00000178222|RNF212 ENSG00000186700|Q8N6F3\_HUMAN ENSG00000187155|CU085\_HUMAN ENSG00000197085|Q6EKK1\_HUMAN ENSG00000197714|ZNF460 ENSG00000205269|Q5T4T1\_HUMAN

CAATTTT ENSG000000011677|GABRA3 ENSG00000026652|AGPAT4 ENSG00000034063|UHRF1 ENSG00000092054|MYH7 ENSG00000100422|CERK ENSG00000102547|CAB39L ENSG00000114999|TTL ENSG00000116032|GRIN3B ENSG00000116237|ICMT ENSG00000117154|IGSF21 ENSG00000102341|IKZF4 ENSG00000102947|BCL2L2 ENSG00000141337|ARSG ENSG00000160208|RRP1B ENSG00000176515|Q8NAX6\_HUMAN ENSG00000176678|FOXL1 ENSG00000178764|ZHX2 ENSG00000179421|Q8NBA4\_HUMAN ENSG00000180999|C1orf105 ENSG00000189069|NP\_001013732.1 ENSG00000205087|NP\_001020628.1 ENSG00000205434|Q6ZU34\_HUMAN ENSG000002021461|CYP3A43 ENSG00000078596|ITM2A ENSG00000090402|SI ENSG00000100393|EP300 ENSG00000112029|FBXO5 ENSG00000112183|RBM24 ENSG00000113812|ACTR8 ENSG00000113966|ARL6 ENSG00000114547|ROPN1B ENSG00000117000|RLF ENSG00000119537|FVT1 ENSG00000127314|RAP1B ENSG00000131015|ULBP2 ENSG00000131264|CDX4 ENSG00000134489|HRH4 ENSG00000135747|ZNF670 ENSG00000137674|MMP20 ENSG00000138823|MTTP ENSG00000145681|HAPLN1 ENSG00000145907|G3BP1 ENSG00000150961|SEC24D ENSG00000151151|IPMK ENSG00000157625|MAP3K7IP3 ENSG00000162813|BPNT1 ENSG00000163554|SPTA1 ENSG00000166509|CLEC3A ENSG00000169224|C1orf150 ENSG00000170074|NP\_775934.3 ENSG00000176276|hCG\_1757335 ENSG00000176732|PFN4 ENSG00000179859|LOC284023 ENSG00000183735|TBK1 ENSG00000188649|C1orf130 ENSG00000198677|KIAA0372 ENSG00000198818|SFT2D1 ENSG00000203995|ZYGL1A

CACAAGG ENSG00000066117|SMARCD1 ENSG00000092445|TYRO3 ENSG00000103489|XYLT1 ENSG00000109991|P2RX3 ENSG00000110448|CD5 ENSG00000113070|HBEGF ENSG00000125505|LENG4 ENSG00000126500|FLRT1 ENSG00000136352|TITF1 ENSG00000136859|ANGPTL2 ENSG00000138092|CENPO ENSG00000140992|PDP1 ENSG00000141013|GA88 ENSG00000141096|DPEP3 ENSG00000147059|SPIN2A ENSG00000151360|ALLC ENSG00000157020|SEC13 ENSG00000167261|DPEP2 ENSG00000168575|SLC20A2 ENSG00000170145|SNF1LK2 ENSG00000176136|MC5R ENSG00000178796|Q8N921\_HUMAN ENSG00000180249|Q8N872\_HUMAN ENSG00000188559|C2orf74 ENSG00000204241|Q6ZU08\_HUMAN ENSG00000204269|Q6ZVM2\_HUMAN ENSG00000206069|NP\_001001663.1 ENSG00000000460|C1orf112 ENSG000000001167|NFYA ENSG000000003096|KLHL13 ENSG0000000010404|IDS ENSG000000011566|MAP4K3 ENSG00000047648|ARHGAP6 ENSG00000060140|STYK1 ENSG00000071967|CYBRD1 ENSG00000072042|RDH11 ENSG00000081923|ATP8B1 ENSG00000109943|CRTAM ENSG00000112081|SFRS3 ENSG00000114279|FGF12 ENSG00000120333|MRPS14 ENSG00000124343|XG ENSG00000127359|KIAA1147 ENSG00000131473|ACLY ENSG00000134202|GSTM3 ENSG00000146872|TLK2 ENSG00000147050|UTX ENSG00000151704|KCNJ1 ENSG00000152061|RABGAP1L ENSG00000153930|ANKFN1 ENSG00000162322|CCDC98 ENSG00000166275|AS3MT ENSG00000167216|KTNAL2 ENSG00000168263|KCNV2 ENSG00000183513|NP\_001008216.1 ENSG00000196562|SULF2 ENSG00000197958|RPL12

CACAAGT ENSG000000011007|TCEB3 ENSG00000064489|MEF2B ENSG00000068383|INPP5A ENSG00000074211|PPP2R2C ENSG00000078319|PMS2L1 ENSG00000105655|NP\_057452.1 ENSG00000108375|SUPT4H1 ENSG00000124226|ZNF313 ENSG00000133250|ZNF414 ENSG00000138869|C22orf16 ENSG00000141556|TBDC ENSG00000142528|ZNF473 ENSG00000143375|CGN ENSG00000162968|Q96MQ0\_HUMAN ENSG00000163156|SCNML ENSG00000164733|CTSB ENSG00000165457|FOLR2 ENSG00000166025|AMOTL1 ENSG00000167261|DPEP2 ENSG00000179058|C9orf50 ENSG00000185736|ADARB2 ENSG00000186577|C6orf1 ENSG00000196432|Q9H5F0\_HUMAN ENSG00000198326|C2orf141 ENSG00000198632|NP\_777590.1 ENSG00000198641|SYS1 ENSG000000442781|USH2A ENSG00000044459|C9orf39 ENSG00000066697|TMEM49 ENSG00000067715|SYT1 ENSG00000067723|DNAJC10 ENSG00000091127|PUS7 ENSG00000099725|PRKY ENSG00000111713|GYS2 ENSG00000114805|PLCH1 ENSG00000116001|TIA1 ENSG00000118922|KLF12 ENSG00000125703|ATG4C ENSG00000129824|RPS4Y1 ENSG00000141076|CTRHI4 ENSG00000145649|GZMA ENSG00000145777|NP\_149024.1 ENSG00000148948|LRRC4C ENSG00000151962|NP\_659416.1 ENSG00000163518|FCRL4 ENSG00000163738|MTHFD2L ENSG00000179532|C11orf47 ENSG00000183423|NP\_940908.1 ENSG00000197501|Q9H3B5\_HUMAN ENSG00000198360|NP\_839944.1 ENSG00000198523|PLN ENSG00000198936|NP\_839944.1 ENSG00000204884|Q6ZV12\_HUMAN ENSG00000053108|FSTL4 ENSG00000053702|NRIP2 ENSG00000096070|BRFP3 ENSG00000100604|CHGA ENSG00000107796|ACTA2 ENSG00000112936|C7 ENSG00000132792|CTNBL1 ENSG00000136490|LIMD2 ENSG00000138131|LOXL4 ENSG00000140398|NEIL1 ENSG00000140538|NTRK3 ENSG00000147081|AKAP4 ENSG00000160256|C21orf70 ENSG00000164270|HTRA ENSG00000178343|NP\_001073974.1 ENSG00000184108|TRIML1 ENSG00000186301|Q49A61\_HUMAN ENSG00000188428|TXNDC5 ENSG00000204405|Q6ZQV3\_HUMAN ENSG00000205929|C21orf62 ENSG00000056277|SUHW3 ENSG00000100249|C22orf31 ENSG00000114742|WDR48 ENSG00000137860|SLC28A2 ENSG00000138613|APH1B ENSG00000147606|SLC26A7 ENSG00000151023|C10orf63 ENSG00000154736|ADAMTS5 ENSG00000154823|DPH3 ENSG00000154822|PLCL2 ENSG00000155961|RAB39B ENSG00000156395|SORCS3 ENSG00000172551|MUCL\_HUMAN ENSG00000173215|Q96HQ8\_HUMAN ENSG00000175449|RFESD ENSG00000176160|HSF5 ENSG00000178722|NP\_775938.1 ENSG00000185448|FAM47A ENSG00000185634|SHC4 ENSG00000196664|TLR7 ENSG00000204941|PSG5 ENSG00000205812|Q6ZSM7\_HUMAN

CACAAGC ENSG00000100647|KIAA0247 ENSG00000100968|NFATC4 ENSG000001124225|TMEPAI ENSG00000126107|HECTD3 ENSG00000131113|PSG1 ENSG00000135441|BLOC1S1 ENSG00000137313|TRIM26 ENSG00000141096|DPEP3 ENSG00000149021|SCGB1A1 ENSG00000157017|GHRL ENSG00000166689|PLEKHA7 ENSG00000167600|CYP2S1 ENSG00000168453|HR ENSG00000174775|HRAS ENSG00000177558|TMEM162 ENSG00000178971|C17orf68 ENSG00000182397|C15orf51 ENSG00000182852|C21orf121 ENSG00000185602|ARHGAP27 ENSG00000188076|SCGB1C1 ENSG00000196187|TMEM63A ENSG00000197891|SLC22A12 ENSG00000204098|Q6ZUI5\_HUMAN ENSG00000205620|Q6ZRB6\_HUMAN ENSG00000093183|SEC22C ENSG00000099721|AMELY ENSG00000102606|ARHGEP7 ENSG00000113269|RNF130 ENSG00000113643|RARS ENSG00000127325|BEST3 ENSG00000138069|RAB1A ENSG00000143079|CTTNBP2NL ENSG00000147400|GECTL2 ENSG00000148426|C10orf47 ENSG00000156239|IN6AMT1 ENSG00000162704|ARPC5 ENSG00000162992|NEUROD1 ENSG00000163959|NP\_689885.3 ENSG00000167916|KRT24 ENSG00000168004|HRASL5 ENSG00000173930|SLC04C1 ENSG00000176890|TYMS ENSG00000177694|NAAALADL2 ENSG00000179454|KLHL28 ENSG00000185127|C6orf120 ENSG00000196954|CASP4 ENSG00000203970|DEFB11

CACAAGT ENSG000000013619|CXorf6 ENSG00000073670|ADAM11 ENSG00000078902|TOLLIP ENSG00000083842|ZNF8 ENSG00000088926|F11 ENSG00000100234|TIMP3 ENSG00000105492|SIGLEC6 ENSG00000108375|SUPT4H1 ENSG00000115956|PLEK ENSG00000116685|KIAA2013 ENSG00000119547|ONCUT2 ENSG00000125618|PAX8 ENSG00000128594|LRRC4 ENSG00000131477|RAMP2 ENSG00000132840|BHMT2 ENSG00000138867|C22orf13 ENSG00000141977|CTB3 ENSG00000143819|EPHX1 ENSG00000164972|C9orf24 ENSG00000167468|GPX4 ENSG00000170876|TMEM43 ENSG00000181284|TMEM102 ENSG00000184639|NP\_001004344.1 ENSG00000196432|Q9H5F0\_HUMAN ENSG00000085840|ORC1L ENSG00000108984|MAP2K6 ENSG00000114520|SNX4 ENSG00000115415|STAF1 ENSG00000120549|KIAA1217 ENSG00000124092|CTCF1 ENSG00000128609|NDUFA5 ENSG00000137845|ADAM10 ENSG00000151553|KIAA1600 ENSG00000153234|NR4A2 ENSG00000154447|SH3RF1 ENSG00000154556|SORBS2 ENSG00000156508|EEF1A1 ENSG00000160551|TAOK1 ENSG00000162913|C1orf145 ENSG00000164123|NP\_689756.2 ENSG00000167236|CCL23 ENSG00000169297|NR0B1 ENSG00000175497|DPP10 ENSG00000177324|CXorf20 ENSG00000186432|KPNA4 ENSG00000198770|Q9H396\_HUMAN ENSG00000006015|C19orf60 ENSG0000010318|PHF7 ENSG000000039650|PNKP ENSG00000042022|ABHD14A ENSG00000054523|KIF1B ENSG00000077274|CAPN6 ENSG00000092010|PSME1 ENSG00000100031|GGT1 ENSG00000100121|GECTL4 ENSG00000100319|ZMAT5 ENSG00000102109|PKSKIN ENSG00000102119|EMD ENSG00000103490|PYCARD ENSG00000104518|GSDMDC1 ENSG00000104826|LHB ENSG00000105427|CNFN ENSG00000105663|WBP7\_HUMAN ENSG00000110799|VWF ENSG00000115129|TP53I3 ENSG00000128159|TUBGCP6 ENSG00000130544|ZNF557 ENSG00000136003|ISCU ENSG00000140287|HDC ENSG00000140798|ABCC12 ENSG00000142186|SCYL1 ENSG00000147081|AKAP4 ENSG00000147206|NFX3 ENSG00000149262|INTS4 ENSG00000149435|GGT1A4 ENSG00000151376|ME3 ENSG00000154096|THY1 ENSG00000156885|COX6A2 ENSG00000161572|LYZL6 ENSG00000162105|SHANK2 ENSG00000162735|PEX19 ENSG00000163516|ANKZF1 ENSG00000165275|RG9MTD3 ENSG00000166333|ILK ENSG00000167862|ICT1 ENSG00000175315|CST6 ENSG00000176876|PXMP2 ENSG00000180155|LYNX1 ENSG00000180176|TH ENSG00000180279|Q8N4W5\_HUMAN ENSG00000183160|TMEM119 ENSG00000184163|FAM132A ENSG00000186827|TNFRSF4 ENSG00000197555|SIPA1L1 ENSG00000197561|ELA2 ENSG00000198881|ASB12 ENSG00000204568|MRPS18B ENSG00000204748|CGB1 ENSG00000205560|CHKB ENSG00000007908|SELE ENSG00000103740|ACSBG1 ENSG00000104691|UBXD6 ENSG00000106809|OGN ENSG00000108255|CRYBA1 ENSG00000115339|GALNT3 ENSG00000119801|YPEL5 ENSG00000132141|CCT6B ENSG00000132664|POLR3F ENSG00000138615|CILP ENSG00000140043|ZADH1 ENSG00000148935|GAS2 ENSG00000153339|KIAA1012 ENSG00000160049|DFFA ENSG00000168681|Q9H762\_HUMAN ENSG00000173302|GPR148 ENSG00000185775|FAM75A6 ENSG00000189184|PCDH18 ENSG00000197279|ZNF165 ENSG00000197614|GTFAP5 ENSG00000198160|MIER1

CACAATG ENSG00000105991|HOXA1 ENSG00000106565|TMEM176B ENSG00000107738|C10orf54 ENSG00000107831|PGF8 ENSG00000142534|RPS11 ENSG00000155926|SLA ENSG00000158220|FAM62C ENSG00000158773|USF1 ENSG00000161132|Q9BYA7\_HUMAN ENSG00000164270|HTRA4 ENSG00000164742|ADCY1 ENSG00000164935|TM7SF4 ENSG00000170276|HSPB2 ENSG00000173404|EVC2 ENSG00000173432|SAA1 ENSG00000179270|NP\_001025054.1 ENSG00000203931|LOC729078 ENSG00000204305|AGER ENSG00000204626|Q6ZSR2\_HUMAN ENSG0000041353|RAB27B ENSG00000048828|FAM120A ENSG00000109771|LR2BP ENSG00000113456|RAD1 ENSG00000115540|PREI3

|                              |                              |                                |                              |                                |                                |                              |                                |
|------------------------------|------------------------------|--------------------------------|------------------------------|--------------------------------|--------------------------------|------------------------------|--------------------------------|
| ENSG00000125363 AMELX        | ENSG00000125629 INSIG2       | ENSG00000138381 ASNSD1         | ENSG00000138755 CXCL9        | ENSG00000154027 AK5            | ENSG00000159140 SON            | ENSG00000162368 CMPK         | ENSG00000163636 PSMD6          |
| ENSG00000164307 ARTS1_HUMAN  | ENSG00000164411 GUB7         | ENSG00000166595 FAM96B         | ENSG00000171033 PKIA         | ENSG00000174990 CA5A           | ENSG00000179136 Q8NAV9_HUMAN   | ENSG00000179813 C13orf30     | ENSG00000183807 C6orf189       |
| ENSG00000186231 KLHL32       | ENSG00000188133 NF_997723.1  | ENSG00000196937 FAM3C          | ENSG00000197203 Q8NAJ9_HUMAN | ENSG00000203743 Q5J7V3_HUMAN   | ENSG00000203932 LOC728660      | ENSG00000205024 Q6ZVP5_HUMAN |                                |
| ENSG00000004142 POLDIP2      | ENSG00000067066 SP100        | ENSG00000103550 NP_001013009.2 | ENSG00000116032 GRIN3B       | ENSG00000119682 K1AA0317       | ENSG00000125498 K1R2DL1        | ENSG00000137392 CLPS         | ENSG00000141012 GALNS          |
| ENSG00000158109 FAM79A       | ENSG00000162104 ADCY9        | ENSG00000163879 DNAL11         | ENSG00000164674 SYTL3        | ENSG00000165238 WNK2           | ENSG00000166847 DCTN5          | ENSG00000167744 NTF5         | ENSG00000172458 IL17D          |
| ENSG00000179036 VAMP2        | ENSG00000180999 C1orf105     | ENSG00000182858 ALG12          | ENSG00000184566 Q9PLG6_HUMAN | ENSG00000189013 K1R2DL4        | ENSG00000205673 Q6ZR XO_HUMAN  | ENSG00000049618 ARID1B       | ENSG00000057468 MSH4           |
| ENSG00000075711 DLG1         | ENSG00000089225 TBX5         | ENSG00000117569 PTBP2          | ENSG00000122435 CCDC76       | ENSG00000134330 Q6PCA9_HUMAN   | ENSG00000136541 K1AA1189       | ENSG00000136842 TMOD1        | ENSG00000140941 MAP1LC3B       |
| ENSG00000162992 NEUROD1      | ENSG00000163738 MTHFD2L      | ENSG00000165181 C9orf84        | ENSG00000165555 C14orf148    | ENSG00000183801 OLFM11         | ENSG00000184752 NDUFA12        | ENSG00000186628 FSD2         | ENSG00000186767 NP_001012986.2 |
| ENSG00000188021 UBQLN2       | ENSG00000196563 Q9H375_HUMAN | ENSG00000198533 Q9P1D0_HUMAN   | ENSG00000198780 Q9H989_HUMAN |                                |                                |                              |                                |
| ENSG00000026652 AGPAT4       | ENSG00000049768 FOXP3        | ENSG00000073792 IGF2BP2        | ENSG00000100234 TIMP3        | ENSG00000103067 RBM35B         | ENSG00000103489 XYLT1          | ENSG00000107796 ACTA2        | ENSG00000121152 NCAPH          |
| ENSG00000130287 NCAN         | ENSG00000148602 LRRC21       | ENSG00000151360 ALLC           | ENSG00000159164 SV2A         | ENSG00000161958 FGF11          | ENSG00000166401 SERPINB8       | ENSG00000168314 MOBP         | ENSG00000169083 AR             |
| ENSG00000178243 C9orf62      | ENSG00000178752 FAM132B      | ENSG00000184385 C21orf128      | ENSG00000185602 ARHGAP27     | ENSG00000186919 LGC1Z1         | ENSG00000187792 ZNF70          | ENSG00000188076 SCGB1C1      | ENSG00000188559 C20orf74       |
| ENSG00000203930 Q5JPA2_HUMAN | ENSG000000014123 K1AA0776    | ENSG000000091583 APOH          | ENSG00000113269 RNF130       | ENSG00000134215 VAV3           | ENSG00000135540 NHSL1          | ENSG00000145495 MARCH6       | ENSG00000146411 SLC2A12        |
| ENSG00000148848 ADAM12       | ENSG00000164463 NP_705835.1  | ENSG00000181541 MAB21L2        | ENSG00000186471 AKAP14       | ENSG00000196433 ASMT           | ENSG00000196646 ZNF136         |                              |                                |
| ENSG00000049768 FOXP3        | ENSG00000060566 CREB3L3      | ENSG00000065357 DGKA           | ENSG00000100433 KCNK10       | ENSG00000105131 ABHD9          | ENSG00000107807 TLX1           | ENSG00000108405 P2RX1        | ENSG00000113763 UNC5A          |
| ENSG00000114349 GNAT1        | ENSG00000114378 HYAL1        | ENSG00000117984 CTSD           | ENSG00000125810 CD93         | ENSG00000127098 ANKRD19        | ENSG00000127418 FGFR1L         | ENSG00000130956 HABP4        | ENSG00000132535 DLG4           |
| ENSG00000136367 PHX2         | ENSG00000138622 HCN4         | ENSG00000140506 LMAN1L         | ENSG00000142039 CCDC97       | ENSG00000142039 DEDD2          | ENSG00000161999 NP_001005920.2 | ENSG00000164048 ZNF589       | ENSG00000166394 CYB5R2         |
| ENSG00000172137 CALB2        | ENSG00000174348 PODN         | ENSG00000174886 INDUFA11       | ENSG00000177106 EFSBL2       | ENSG00000185669 SNAI3          | ENSG00000185761 ADAMTSL5       | ENSG00000186226 LCE1E        | ENSG00000197291 QBWW75_HUMAN   |
| ENSG00000198242 RPL23A       | ENSG00000077713 SLC25A43     | ENSG00000078140 HIP2           | ENSG000000083168 MYST3       | ENSG00000111785 RIC8B          | ENSG00000112208 BAG2           | ENSG00000123213 NLN          | ENSG00000125257 ABCC4          |
| ENSG00000135269 TES          | ENSG00000138363 ATIC         | ENSG00000140563 MCTP2          | ENSG00000153094 BCL2L11      | ENSG00000170522 ELOVL6         | ENSG00000175989 C11orf69       | ENSG00000180957 PITPNB       | ENSG00000182287 AP1S2          |
| ENSG00000183036 PCP4         | ENSG00000186288 RBM32A       | ENSG00000186628 FSD2           | ENSG00000197147 LRRC8B       |                                |                                |                              |                                |
| ENSG00000011143 MKS1         | ENSG000000013288 MAN2B2      | ENSG000000015676 NUDCD3        | ENSG000000065308 FRAM2       | ENSG00000066382 MPPE2          | ENSG00000081985 IL12RB2        | ENSG00000088367 EPB41L1      | ENSG00000108774 RAB5C          |
| ENSG00000112655 PTK7         | ENSG00000116237 TCMT         | ENSG00000120314 WDR55          | ENSG00000128271 ADORA2A      | ENSG00000128928 IVD            | ENSG00000131697 PNHP4          | ENSG00000134864 Q9BVM4_HUMAN | ENSG00000135148 TRAFD1         |
| ENSG00000138867 C22orf13     | ENSG00000148331 ASB6         | ENSG00000164493 C6orf122       | ENSG00000168890 TMEM150      | ENSG00000171206 TRIM8          | ENSG00000173020 ADRBK1         | ENSG00000173638 SLC19A1      | ENSG00000180929 GPR62          |
| ENSG00000181026 ISG20L1      | ENSG00000182871 COL18A1      | ENSG00000183847 Q9P1C0_HUMAN   | ENSG00000188660 C21orf125    | ENSG00000203930 Q5JPA2_HUMAN   | ENSG00000204511 NM_001011700.1 | ENSG00000205033 Q96DJ9_HUMAN | ENSG00000205501 Q6ZU01_HUMAN   |
| ENSG00000205770 Q8N847_HUMAN | ENSG000000049860 HEXB        | ENSG000000073464 CLCN4         | ENSG00000082293 COL19A1      | ENSG00000108381 ASPA           | ENSG00000111860 C6orf204       | ENSG00000112818 MEP1A        | ENSG00000113532 ST8SIA4        |
| ENSG00000120586 MRC1         | ENSG00000133812 SBF2         | ENSG00000155816 FMN2           | ENSG00000160551 TAOK1        | ENSG00000168118 IRX2           | ENSG00000170561 IRX2           | ENSG00000171988 JMJD1C       | ENSG00000172000 ZNF556         |
| ENSG00000183748 MRC1L1       | ENSG00000183833 C3orf15      | ENSG00000186104 CYP2R1         | ENSG00000186416 NKRF         | ENSG00000196677 C8orf77        | ENSG00000196967 ZNF585A        | ENSG00000197635 DPP4         | ENSG00000198739 LRRTM3         |
| ENSG00000205150 FAM92A3      |                              |                                |                              |                                |                                |                              |                                |
| ENSG000000007520 C16orf42    | ENSG00000067082 KLF6         | ENSG00000069812 HES2           | ENSG00000099972 MICAL3       | ENSG00000100591 AHS1           | ENSG00000102313 ITIHL5         | ENSG00000102901 CENPT        | ENSG00000105613 MAST1          |
| ENSG00000115107 STEAP3       | ENSG00000116604 MEF2D        | ENSG00000116885 C1orf102       | ENSG00000130300 PLVAP        | ENSG00000136859 ANGPTL2        | ENSG00000143196 DPT            | ENSG00000143198 MGST3        | ENSG00000144550 CPNE9          |
| ENSG00000147955 OPRS1        | ENSG00000169314 C22orf15     | ENSG00000171533 MAP6           | ENSG00000174483 BBS1         | ENSG00000178235 SLITRK1        | ENSG00000179335 CLK3           | ENSG00000179388 EGR3         | ENSG00000182866 LCK            |
| ENSG000000026751 SLAMF7      | ENSG00000106025 TSPAN12      | ENSG00000112701 SENP6          | ENSG00000114030 KPN1A        | ENSG00000125531 C20orf195      | ENSG00000133059 RIPK5          | ENSG00000136381 IREB2        | ENSG00000137558 PT15           |
| ENSG00000137713 PPP2R1B      | ENSG00000138346 DNA2L        | ENSG00000139278 ILG1PR1        | ENSG00000164163 ABCE1        | ENSG00000165246 NLGN4Y         | ENSG00000166432 ZMAT1          | ENSG00000182287 AP1S2        | ENSG00000188365 MRGPRX2        |
| ENSG00000185127 C6orf120     | ENSG00000185261 C5orf36      | ENSG00000185737 NLRG3          | ENSG00000187325 TAF9B        | ENSG00000188107 EGFL11         | ENSG00000186180 FAM72B         | ENSG00000198478 SH3BGR2L     |                                |
| ENSG00000004776 HSPB6        | ENSG00000044446 PHKA2        | ENSG00000067365 C16orf68       | ENSG00000072121 ZFYVE26      | ENSG00000101452 DHX35          | ENSG00000103490 PYCARD         | ENSG00000105447 GRWD1        | ENSG00000113070 HBEGF          |
| ENSG00000113552 GNPDA1       | ENSG00000114349 GNAT1        | ENSG00000138347 MYFN           | ENSG00000141485 SLC13A5      | ENSG00000142156 COL6A1         | ENSG00000149295 DRD2           | ENSG00000158402 CDC25C       | ENSG00000163221 S100A12        |
| ENSG00000167139 TBC1D21      | ENSG00000168748 CA7          | ENSG00000175223 Q8TC18_HUMAN   | ENSG00000187170 LCE4A        | ENSG00000187686 XR_016979.1    | ENSG00000188086 NP_954652.1    | ENSG00000089157 RPLP0        | ENSG00000102763 NP_001009814.1 |
| ENSG00000116194 ANGPTL1      | ENSG00000125571 IL1F7        | ENSG00000135604 STX11          | ENSG00000136111 TBC1D4       | ENSG00000140945 CDH13          | ENSG00000145491 ROPN1L         | ENSG00000147145 GPR23        | ENSG00000159167 STC1           |
| ENSG00000162390 ACOT11       | ENSG00000164023 SGMS2        | ENSG00000164828 UNC84A         | ENSG00000165525 SDCCAG1      | ENSG00000170871 K0232_HUMAN    | ENSG00000171824 EXOSC10        | ENSG00000184898 RBM43        | ENSG00000188408 MAGEB5         |
| ENSG00000204977 TRIM13       |                              |                                |                              |                                |                                |                              |                                |
| ENSG00000006210 CX3CL1       | ENSG00000068079 IFI35        | ENSG00000103495 MAZ            | ENSG00000108292 MLLT6        | ENSG00000122122 CXorf9         | ENSG00000123154 MORG1_HUMAN    | ENSG00000125971 DYNLRB1      | ENSG00000130640 TUBGCP2        |
| ENSG00000141150 RASL10B      | ENSG00000142549 LOC402665    | ENSG00000143125 PROK1          | ENSG00000152475 Q9BEG3_HUMAN | ENSG00000157152 SYN2           | ENSG00000159496 RGDSR_HUMAN    | ENSG00000162896 PIGR         | ENSG00000164711 LPAL2          |
| ENSG00000166482 MFAP4        | ENSG00000168269 FOX11        | ENSG00000171916 NP_001035167.2 | ENSG00000184677 ZBTB40       | ENSG00000187024 PTRH1          | ENSG00000197757 HOXC6          | ENSG00000204842 ATXN2        | ENSG00000047662 Q9ULE4_HUMAN   |
| ENSG00000129675 ARHGFE6      | ENSG00000132313 MRPL35       | ENSG00000135960 EDAR           | ENSG00000137819 PAQR5        | ENSG00000137872 SMA6D          | ENSG00000140455 USP3           | ENSG00000143157 POGK         | ENSG00000147003 TMEM27         |
| ENSG00000154654 NCAM2        | ENSG00000154743 TSEN2        | ENSG00000164647 STEAP1         | ENSG00000165023 DIRAS2       | ENSG00000167236 CCLA2          | ENSG00000171612 SLC25A33       | ENSG00000172171 C17orf42     | ENSG00000186974 Q8N6X9_HUMAN   |
| ENSG00000187073 Q86TS2_HUMAN | ENSG00000204363 SPANXN5      |                                |                              |                                |                                |                              |                                |
| ENSG00000008841 NFIX         | ENSG00000043143 PHF15        | ENSG00000044012 GUCA2B         | ENSG00000078808 SDF4         | ENSG00000100304 TTL12          | ENSG00000100307 CBX7           | ENSG00000100314 CABP7        | ENSG00000104522 TSTA3          |
| ENSG00000105953 OGDH         | ENSG00000108352 RAPGEFL1     | ENSG00000119681 LTBP2          | ENSG00000123810 NP_085055.1  | ENSG00000125386 C4orf8         | ENSG00000125741 OPA3           | ENSG00000125888 C20orf179    | ENSG00000143473 KCNH1          |
| ENSG00000145020 AMT          | ENSG00000148356 LRSAM1       | ENSG00000160471 COX6B2         | ENSG00000161031 PGLYRP2      | ENSG00000163703 CRELD1         | ENSG00000164385 C6orf195       | ENSG00000168398 BDKRB2       | ENSG00000172137 CALB2          |
| ENSG00000174669 SLC29A2      | ENSG00000175115 PACS1        | ENSG00000183010 PYCR1          | ENSG00000185813 PCYT2        | ENSG00000193244 LRP10          | ENSG00000197324 LRP10          | ENSG00000198013 PNMA6A       | ENSG00000198366 HIST1H3A       |
| ENSG00000204048 Q6ZUG3_HUMAN | ENSG00000204386 NEU1         | ENSG00000204443 Q562T6_HUMAN   | ENSG00000105186 ANKRD27      | ENSG00000108559 NUP88          | ENSG00000109208 SMR3A          | ENSG00000131080 EDA2R        | ENSG00000143995 MEIS1          |
| ENSG00000162482 AKR7A3       | ENSG00000181544 FANCB        | ENSG00000183035 CYLC1          | ENSG00000185231 MC2R         | ENSG00000187672 ERC2           | ENSG00000198276 UCKL1          | ENSG00000198833 UBE2J1       | ENSG00000204363 SPANXN5        |
| ENSG00000007171 NOS2A        | ENSG00000011376 LARS2        | ENSG00000064547 EDG4           | ENSG00000100075 SLC25A1      | ENSG00000111331 OAS3           | ENSG00000135454 B4GALNT1       | ENSG00000140750 ARHGAP17     | ENSG00000141449 K1AA1772       |
| ENSG00000147144 CDC2120      | ENSG00000157211 CDCP2        | ENSG00000159423 ALDH4A1        | ENSG00000160271 RALGDS       | ENSG00000162063 CCNF           | ENSG00000164033 TREM1          | ENSG00000164711 LPAL2        | ENSG00000165507 C10orf10       |
| ENSG00000166228 PCBD1        | ENSG00000166401 SERPINB8     | ENSG00000166947 EPB42          | ENSG00000166974 MAPRE2       | ENSG00000167702 KIFC2          | ENSG00000168453 HR             | ENSG00000175170 Q5T319_HUMAN | ENSG00000175697 GPR156         |
| ENSG00000196517 SLC6A9       | ENSG00000197283 SYNGAP1      | ENSG00000198488 B3GNT6         | ENSG00000203708 Q6ZU99_HUMAN | ENSG00000201003 G1NS1          | ENSG0000020105971 CAV2         | ENSG00000134198 TSPAN2       | ENSG00000134760 DSG1           |
| ENSG00000135127 CDCE64       | ENSG00000138614 C15orf44     | ENSG00000140941 MAP1LC3B       | ENSG00000141200 K1F2B        | ENSG00000145982 FARS2          | ENSG00000152518 ZFP36L2        | ENSG00000160551 TAOK1        | ENSG00000163923 RPL39L         |
| ENSG00000164684 ZNF704       | ENSG00000169989 TIGD4        | ENSG00000189252 SPANXN3        | ENSG00000196914 ARHGFE12     | ENSG00000197702 PARVA          | ENSG00000198918 RPL39          | ENSG00000203780 FANK1        | ENSG00000204904 CXorf31        |
| ENSG00000205838 NP_653326.3  |                              |                                |                              |                                |                                |                              |                                |
| ENSG00000008844 NFIX         | ENSG00000020181 GPR124       | ENSG00000095777 MYO3A          | ENSG00000099904 ZDHHC8       | ENSG00000114812 VIPR1          | ENSG00000124126 PREX1_HUMAN    | ENSG00000129219 PLD2         | ENSG00000131669 NINJ1          |
| ENSG00000131759 RARA         | ENSG00000132164 SLC6A11      | ENSG00000136488 CSH2           | ENSG00000137077 CCL21        | ENSG00000137166 FOXP4          | ENSG00000146540 NP_115726.1    | ENSG00000151948 GLT1D1       | ENSG00000157927 K1849_HUMAN    |
| ENSG00000159871 LYPD5        | ENSG00000161249 DMKN         | ENSG00000162493 PDPN           | ENSG00000162542 TMC04        | ENSG00000163521 LENEP          | ENSG00000170523 KRT83          | ENSG00000170703 TTL6         | ENSG00000171861 RNMTL1         |
| ENSG00000174403 NP_689970.1  | ENSG00000182912 C21orf90     | ENSG00000185269 NOTUM          | ENSG00000187840 EIF4EBP1     | ENSG00000188760 NP_001005209.1 | ENSG00000196092 PAX5           | ENSG00000196576 PLXNB2       | ENSG00000204362 Q6ZS05_HUMAN   |
| ENSG000000012174 MBTFP2      | ENSG00000054598 FOXC1        | ENSG00000086712 CXorf15        | ENSG00000092148 HECTD1       | ENSG00000106605 BLVRA          | ENSG00000111241 FGF6           | ENSG00000113263 ITK          | ENSG00000115616 SLC9A2         |
| ENSG00000117586 TNFSF4       | ENSG00000118322 ATP10B       | ENSG00000119508 NR4A3          | ENSG00000120217 CD274        | ENSG00000123472 ATPAF1         | ENSG00000145431 PDGFC          | ENSG00000145431 LPHN3        | ENSG00000151461 UPF2           |
| ENSG00000153561 RMND5A       | ENSG00000158185 ANKRD36      | ENSG00000159079 C21orf59       | ENSG00000164684 ZNF704       | ENSG00000166337 TAF10          | ENSG00000167721 TSR1           | ENSG00000171056 SOX7         | ENSG00000172572 PDB3A          |
| ENSG00000177182 NP_75790.1   | ENSG00000183542 KLRC4        | ENSG00000188386 PPP3R2         | ENSG00000204560 DHX16        |                                |                                |                              |                                |
| perfect: CACCGC GCTGGTG      | hsa-miR-138                  | aGCTGGTgtgtgaatc               | 1                            |                                |                                |                              |                                |
| ENSG00000063169 GLTSCR1      | ENSG00000065526 SPEN         | ENSG00000085733 CTTN           | ENSG00000099365 STX1B2       | ENSG00000100228 RAB36          | ENSG00000102076 OPN1LW         | ENSG000001125409 TEKT3       | ENSG0000012624                 |

|         |                               |                                 |                                 |                               |                               |                                 |                                 |                               |
|---------|-------------------------------|---------------------------------|---------------------------------|-------------------------------|-------------------------------|---------------------------------|---------------------------------|-------------------------------|
| CACCTGC | ENSG00000028137 TNFRSF1B      | ENSG00000057593 F7              | ENSG000000101945 SUV39H1        | ENSG000000102080 TEX28P2      | ENSG000000103264 FBXO31       | ENSG000000103522 IL21R          | ENSG000000104059 K0574_HUMAN    | ENSG000000108309 NP_006686.1  |
|         | ENSG00000011424 VDR           | ENSG000000117245 KIF17          | ENSG000000122304 Q6ZMMO_HUMAN   | ENSG000000134256 IGSF2        | ENSG000000141012 GALNS        | ENSG000000158856 EPB49          | ENSG000000161999 NP_001005920.2 | ENSG000000162365 CYP4A22      |
|         | ENSG000000162461 SLC25A34     | ENSG000000165548 TMEM63C        | ENSG000000166819 PLIN           | ENSG000000169026 MFSD7        | ENSG000000173156 RHOD         | ENSG000000178605 GTPBP6         | ENSG000000181123 Q8N7NO_HUMAN   | ENSG000000182205 Q6ZUTO_HUMAN |
|         | ENSG000000182242 TEX28_HUMAN  | ENSG000000182809 CRIP2          | ENSG000000183655 KLHL25         | ENSG000000185133 PIB5PA       | ENSG000000185254 TEX28P1      | ENSG000000187048 CYP4A11        | ENSG000000203883 SOX18          | ENSG000000205041 Q6UXV6_HUMAN |
|         | ENSG000000065150 RANBP5       | ENSG000000065559 MAP2K4         | ENSG000000078124 PHCA           | ENSG000000090686 USP48        | ENSG000000104369 JPH1         | ENSG000000117280 RAB7L1         | ENSG000000125812 GZF1           | ENSG000000133020 MYH8         |
|         | ENSG000000134594 RAB35A       | ENSG000000135940 COX5B          | ENSG000000144599 AADACL1        | ENSG000000154566 SORBS2       | ENSG000000156482 RPL30        | ENSG000000170017 ALCAM          | ENSG000000177463 NR2C2          | ENSG000000197672 NP_997331.1  |
| CACCTTA | ENSG000000088882 CPXM1        | ENSG000000092847 EIF2C1         | ENSG000000122188 LAX1           | ENSG000000122735 DNAI1        | ENSG000000124733 MEAL         | ENSG000000134247 PTGFRN         | ENSG000000136003 ISCU           | ENSG000000139436 GIT2         |
|         | ENSG000000165140 FBP1         | ENSG000000165233 C9orf89        | ENSG000000169241 RAG1           | ENSG000000184988 TMEM106A     | ENSG000000186919 LGIC21       | ENSG000000198258 UBL5           | ENSG000000204540 PSORS1C1       | ENSG000000199955 ZNRANB1      |
|         | ENSG000000109738 GLRB         | ENSG000000112972 HMGCS1         | ENSG000000118454 ANKRD13C       | ENSG000000119801 YPEL5        | ENSG000000120278 PLEKHG1      | ENSG000000131263 RNF12          | ENSG000000137473 TTC29          | ENSG000000159593 APBP1        |
|         | ENSG000000161048 NP_945341.2  | ENSG000000162613 FUBP1          | ENSG000000162994 NP_689598.1    | ENSG000000164654 NP_061878.3  | ENSG000000164929 BAALC        | ENSG000000165185 KIAA1958       | ENSG000000165186 PTCHD1         | ENSG000000171763 SPATA5L1     |
|         | ENSG000000171864 PRND         | ENSG000000182393 IL29           | ENSG000000204699 LOC129870      | ENSG000000204705 LOC129870    |                               |                                 |                                 |                               |
| CACCTTG | ENSG00000010295 NP_542768.1   | ENSG000000037637 FBXO42         | ENSG000000055950 MRPL43         | ENSG000000089723 OTUB2        | ENSG000000099812 C19orf21     | ENSG000000101076 HNF4A          | ENSG000000111725 PRKAB1         | ENSG000000123364 HOXC13       |
|         | ENSG000000144655 AXUD1        | ENSG000000159527 PGLYRP3        | ENSG000000166961 NP_689930.1    | ENSG000000169221 TBC1D10B     | ENSG000000170890 PLA2G1B      | ENSG000000171671 C11orf76       | ENSG000000176884 GRIN1          | ENSG000000184659 FOXDL4L4     |
|         | ENSG000000188042 ARL4C        | ENSG000000188636 LDOC1L         | ENSG000000197088 NM_207488      | ENSG000000204312 Q6ZNY8_HUMAN | ENSG000000204779 FOXDL4L5     | ENSG000000204828 FXAL4_HUMAN    | ENSG000000086598 TMED2          | ENSG000000100889 PCK2         |
|         | ENSG000000102401 ARMCX3       | ENSG000000108389 TMTR4          | ENSG000000111224 PARP11         | ENSG000000124564 SLC17A3      | ENSG000000150403 TMCO3        | ENSG000000159399 HK2            | ENSG000000164303 ENPP6          | ENSG000000166913 YWHAB        |
|         | ENSG000000169085 C8orf46      | ENSG000000171004 HS6ST2         | ENSG000000185104 FAF1           | ENSG000000188687 SLC4A5       | ENSG000000198300 PEG3         | ENSG000000198417 MT1F           | ENSG000000204604 ZNF468         |                               |
| CACGAGA | ENSG000000008444 NFX1         | ENSG000000009724 MASP2          | ENSG000000055483 USP36          | ENSG000000100364 C2orf9       | ENSG000000104059 K0574_HUMAN  | ENSG000000115523 GNLY           | ENSG000000124731 TREM1          | ENSG000000133317 LGALS12      |
|         | ENSG000000135175 OCM          | ENSG000000145911 N4BP3_HUMAN    | ENSG000000153048 CARHSP1        | ENSG000000157350 ST3GAL2      | ENSG000000158792 SPATA2L      | ENSG000000160185 UBASH3A        | ENSG000000162975 KCNF1          | ENSG000000163872 YEATS2       |
|         | ENSG000000166272 C10orf26     | ENSG000000168016 Q8N8K0_HUMAN   | ENSG000000168959 GRM5           | ENSG000000171060 C8orf74      | ENSG000000179219 TMEM148      | ENSG000000186081 KRT5           | ENSG000000186442 KRT3           | ENSG00000040341 STAU2         |
|         | ENSG000000043462 LCP2         | ENSG000000093000 NUP50          | ENSG000000101825 MKRA5          | ENSG000000106069 CHN2         | ENSG000000114315 HES1         | ENSG000000117632 TMN1           | ENSG000000120727 PAIP2          | ENSG000000121297 TSHZ3        |
|         | ENSG000000123908 EIF2C2       | ENSG000000125351 UPF3B          | ENSG000000134153 C15orf24       | ENSG000000137804 NUSAP1       | ENSG000000138246 DNAJC13      | ENSG000000144821 MYH15          | ENSG000000145348 TBCK_HUMAN     | ENSG000000146731 CCT6A        |
|         | ENSG000000154240 CCDC46       | ENSG000000154553 PDLIM3         | ENSG000000163610 Q9NUUO_HUMAN   | ENSG000000163754 GYG1         | ENSG000000166523 CLEC4E       | ENSG000000166928 NP_115986.3    | ENSG000000168522 FNNTA          | ENSG000000170500 LONRF2       |
|         | ENSG000000177707 PVRL3        | ENSG000000179046 NP_775824.1    | ENSG000000182093 WRB            | ENSG000000183735 TBK1         | ENSG000000184374 COLEC10      | ENSG000000185306 C12orf56       | ENSG000000203827 XR_015220.1    |                               |
| CACGATC | ENSG000000080511 RDH8         | ENSG000000100565 C14orf166B     | ENSG000000101194 C20orf59       | ENSG000000101438 SLC32A1      | ENSG000000102007 PLP2         | ENSG000000103042 NP_060701.1    | ENSG000000104953 TLE6           | ENSG000000114316 USP4         |
|         | ENSG000000127528 KLF2         | ENSG000000129347 NP_075384.3    | ENSG000000130300 PLVAP          | ENSG000000131152 Q9H693_HUMAN | ENSG000000148602 LRRRC21      | ENSG000000160050 CCDC28B        | ENSG000000161179 NP_001017964.1 | ENSG000000164776 PHKG1        |
|         | ENSG000000165272 AQP3         | ENSG000000167861 C17orf28       | ENSG000000170682 Q9GNUS_HUMAN   | ENSG000000171403 KRT9         | ENSG000000176078 Q8NAN4_HUMAN | ENSG000000182108 MYLE_HUMAN     | ENSG000000183838 Q9GNM2_HUMAN   | ENSG000000197864 WBCSR23      |
|         | ENSG00000042088 TDP1          | ENSG000000055208 MAP3K7IP2      | ENSG000000082397 EPB41L3        | ENSG000000085433 WDR47        | ENSG000000088205 DDX18        | ENSG000000101191 DIDO1          | ENSG000000104442 ARMC1          | ENSG000000112096 SOD2         |
|         | ENSG000000121871 SLITRK3      | ENSG000000127507 EMR2           | ENSG000000135220 UGT2A3         | ENSG000000139209 SLC38A4      | ENSG000000152931 PART1_HUMAN  | ENSG000000153560 UBP1           | ENSG000000162607 USP1           | ENSG000000162702 ZNF281       |
|         | ENSG000000163682 RPL9         | ENSG000000163923 RPL39L         | ENSG000000174442 ZML1CH         | ENSG000000179152 C3orf23      | ENSG000000179299 NSUN7        | ENSG000000180745 CLRN3          | ENSG000000198533 Q9P1D0_HUMAN   | ENSG000000198918 RPL39        |
|         | ENSG000000204712 LOC284067    |                                 |                                 |                               |                               |                                 |                                 |                               |
| CACGATT | ENSG000000066248 NGEF         | ENSG000000089248 ERP29          | ENSG000000089351 GRAMD1A        | ENSG000000099194 SCD          | ENSG000000100075 SLC25A1      | ENSG000000104529 EEF1D          | ENSG000000110057 UNC93B1        | ENSG000000119973 PRLHR        |
|         | ENSG000000123358 NR4A1        | ENSG000000128713 HOXD11         | ENSG000000140939 NOL3           | ENSG000000142657 PGD          | ENSG000000150401 DCUN1D2      | ENSG000000155660 PDIA4          | ENSG000000163956 LRPAP1         | ENSG000000175325 PROP1        |
|         | ENSG000000177239 MAN1B1       | ENSG000000178980 SEPW1          | ENSG000000185669 SNAI3          | ENSG000000197245 GRRP1        | ENSG000000205431 Q6WUF5_HUMAN | ENSG000000206013 IFITM5         | ENSG000000086666 ZFAND6         | ENSG000000099260 PALMD        |
|         | ENSG000000101115 SALL4        | ENSG000000130921 C12orf65       | ENSG000000134757 DSG3           | ENSG000000136999 NOV          | ENSG000000139163 ETNK1        | ENSG000000147138 GPR174         | ENSG000000165943 MOAP1          | ENSG000000172243 CLEC7A       |
|         | ENSG000000178459 Q8N2E2_HUMAN | ENSG000000178974 FBXO34         | ENSG000000180660 MAB21L1        | ENSG000000182223 ZARI         | ENSG000000185420 SMYD3        | ENSG000000185972 CCIN           | ENSG000000187951 FAM7A2         | ENSG000000188379 IFNA2        |
|         | ENSG000000198604 BAZ1A        |                                 |                                 |                               |                               |                                 |                                 |                               |
| CACGCAA | ENSG000000072121 ZFYVE26      | ENSG000000099822 HCN2           | ENSG000000104879 CKM            | ENSG000000121680 PEX16        | ENSG000000122859 NEUROG3      | ENSG000000127452 FBXL12         | ENSG000000140406 MESDC1         | ENSG000000140939 NOL3         |
|         | ENSG000000145192 AHSG         | ENSG000000145861 C1QTNF2        | ENSG000000149243 NP_001034637.1 | ENSG000000153443 FAM100A      | ENSG000000156427 FGF18        | ENSG000000157978 LDLRAP1        | ENSG000000169509 CRCT1          | ENSG000000169676 DRD5         |
|         | ENSG000000172927 MYEOV        | ENSG000000175164 ABO            | ENSG000000176014 TUBB6          | ENSG000000178110 Q8N9G9_HUMAN | ENSG000000186493 C5orf38      | ENSG000000188681 Q8TEH8_HUMAN   | ENSG000000198518 HIST1H4E       | ENSG000000198693 Q6ZWR6_HUMAN |
|         | ENSG000000204616 TRIM31       | ENSG000000205002 NP_001020528.1 | ENSG000000205374 NSUN2          | ENSG000000207805 AMPH         | ENSG000000101546 C18orf22     | ENSG000000101977 MCF2           | ENSG000000112238 PRDM13         | ENSG00000012769 LAMA4         |
|         | ENSG000000115806 GORASP2      | ENSG000000120658 ENOX1          | ENSG000000129128 SPCS3          | ENSG000000129226 CD68         | ENSG000000132437 DDC          | ENSG000000133110 POSTN          | ENSG000000134138 MEIS2          | ENSG000000137168 PPI1         |
|         | ENSG000000145416 MARCH1       | ENSG000000153933 DGKE           | ENSG000000165078 CPA6           | ENSG000000166157 TPTE         | ENSG000000166928 NP_115986.3  | ENSG000000170854 MINA           | ENSG000000175279 CORT           | ENSG000000180318 CART1        |
| CACGGTA | ENSG000000181061 HTGD1A       | ENSG000000181449 SOX2           | ENSG000000185630 PBX1           | ENSG000000185915 KLHL34       | ENSG000000189369 GSP2T        | ENSG000000197085 Q6EKK1_HUMAN   | ENSG000000204007 GLT6D1         |                               |
|         | ENSG000000063244 U2AF2        | ENSG000000113716 SMF_HUMAN      | ENSG000000123146 CD97           | ENSG000000124191 TOX2         | ENSG000000130690 Q9E154_HUMAN | ENSG000000130827 PLXNA3         | ENSG000000133392 MYH11          | ENSG000000141576 RNF157       |
|         | ENSG000000142208 AKT1         | ENSG000000146232 FKBP1E         | ENSG000000147789 ZNF7           | ENSG000000147889 CDKN2A       | ENSG000000160282 ITFC         | ENSG000000164711 LPAL2          | ENSG000000166394 CYB5R2         | ENSG000000168067 MAP4K2       |
|         | ENSG000000168826 ZNF509       | ENSG000000172232 AZU1           | ENSG000000174996 KLC2           | ENSG000000175781 Q9H5L9_HUMAN | ENSG000000178826 TMEM139      | ENSG000000181877 Q8NAZ9_HUMAN   | ENSG000000182742 HOBX4          | ENSG000000185236 RAB11B       |
|         | ENSG000000185504 C17orf70     | ENSG000000185567 AHNAK2         | ENSG000000185990 F8A3           | ENSG000000197932 F8A2         | ENSG000000198444 F8A1         | ENSG000000044459 C9orf39        | ENSG000000048649 RSF1           | ENSG000000071537 SELLL        |
|         | ENSG000000089335 ZNF302       | ENSG000000104643 TMTR5          | ENSG000000107099 DOCK8          | ENSG000000109832 DDX25        | ENSG000000113319 RASGRF2      | ENSG000000121957 GPM2           | ENSG000000137420 NOL7           | ENSG000000162976 PQLC3        |
|         | ENSG000000163012 ZSWIM2       | ENSG000000163638 ADAMTS9        | ENSG000000164163 ABCE1          | ENSG000000170561 TRX2         | ENSG000000180287 PLD5         | ENSG000000182217 HIST2H4B       | ENSG000000183475 ASB7           | ENSG000000183941 HIST2H4A     |
|         | ENSG000000196639 HRH1         |                                 |                                 |                               |                               |                                 |                                 |                               |
| CACGGTT | ENSG000000099992 TBC1D10A     | ENSG000000103496 STX4           | ENSG000000105568 PPP2R1A        | ENSG000000110171 TRIM3        | ENSG000000120907 ADRA1A       | ENSG000000130303 BST2           | ENSG000000142959 BEST4          | ENSG000000148396 KIAA0310     |
|         | ENSG000000156299 TIAM1        | ENSG000000157191 NECAP2         | ENSG000000166426 CRABP1         | ENSG000000168350 DEGS2        | ENSG000000181763 APR2_HUMAN   | ENSG000000187954 CYHR1          | ENSG000000197173 NP_001013689.1 | ENSG00000037241 RPL26L1       |
|         | ENSG000000040341 STAU2        | ENSG000000040933 INPP4A         | ENSG000000061455 PRDM6          | ENSG000000064787 BCAS1        | ENSG000000079459 FDETT1       | ENSG000000083896 YTHDC1         | ENSG000000106080 FKBP14         | ENSG000000109684 NP_443196.1  |
|         | ENSG000000118785 SPP1         | ENSG000000123131 PRDX4          | ENSG000000123562 MORF4L2        | ENSG000000124207 CSEEL1       | ENSG000000137571 SLCO5A1      | ENSG000000138376 BARD1          | ENSG000000146731 CCT6A          | ENSG000000154122 ANKH         |
|         | ENSG000000162086 ZNF75A       | ENSG000000165120 C7orf45        | ENSG000000166455 C16orf46       | ENSG000000170270 C14orf142    | ENSG000000180116 C12orf40     | ENSG000000185061 NP_001072996.1 |                                 |                               |
| CACGTAA | ENSG00000006453 BAIAP2L1      | ENSG00000008853 RHOTB2          | ENSG00000013288 MAN2B2          | ENSG000000047617 TMEM16B      | ENSG000000100285 NEFH         | ENSG000000113430 IRX4           | ENSG000000124508 BTN2A2         | ENSG000000128165 ADM2         |
|         | ENSG000000145040 UCN2         | ENSG000000148358 GPR107         | ENSG000000150873 C2orf50        | ENSG000000160113 NR2P6        | ENSG000000161013 MGAT4B       | ENSG000000161998 Q8N221_HUMAN   | ENSG000000164403 SHROOM1        | ENSG000000165731 RET          |
|         | ENSG000000165816 VWA2         | ENSG000000166526 ZNF3           | ENSG000000168140 VASN           | ENSG000000174680 C21orf9      | ENSG000000175482 POLD4        | ENSG000000182490 TSK2           | ENSG000000183558 HIST2H2AA3     | ENSG000000185896 LAMP1        |
|         | ENSG000000186162 Q86XG0_HUMAN | ENSG000000203903 QZMP7_HUMAN    | ENSG000000047410 TPR            | ENSG000000095464 PDE6C        | ENSG000000103319 EEF2K        | ENSG000000116906 GNPAT          | ENSG000000119285 HEATR1         | ENSG000000126860 EVI2A        |
|         | ENSG000000131781 FMO5         | ENSG000000136492 BRIP1          | ENSG000000137513 NARS2          | ENSG000000137965 IFI44        | ENSG000000139187 KLRG1        | ENSG000000143643 TTC13          | ENSG000000151665 PIGF           | ENSG000000169045 HNRPH1       |
|         | ENSG000000171204 TMEM126B     | ENSG000000173614 NMNAT1         |                                 |                               |                               |                                 |                                 |                               |

ENSG00000104331|IMPAD1 ENSG00000104723|TUSC3 ENSG00000108599|AKAP10 ENSG00000109189|USP46 ENSG00000120800|UTP20 ENSG00000122786|CALD1 ENSG00000124875|CXCL6 ENSG00000130150|MOSPD2  
ENSG00000136240|KDELRL2 ENSG00000139969|Q9P1J0\_HUMAN ENSG00000142182|DNMT3L ENSG00000147180|ZNF711 ENSG00000148483|FAM23A ENSG00000166750|SLFN5 ENSG00000170315|UBIQ\_HUMAN ENSG00000172469|MANEA  
ENSG00000173876|NP\_817124.1 ENSG00000184752|NDUFA12 ENSG00000189251|Q8WYN8\_HUMAN ENSG00000204138|PHACTR4 ENSG00000204923|NP\_001019851.1 ENSG00000205812|Q6ZSM7\_HUMAN  
CACTCCA ENSG00000065491|TBC1D22B ENSG00000085831|C1orf34 ENSG00000090539|CHRD ENSG00000101251|SELL2 ENSG00000102796|DHRS12 ENSG00000103257|SLC7A5 ENSG00000104812|GYS1 ENSG00000105245|NUMBL  
ENSG00000106089|STX1A ENSG00000107742|SPOCK2 ENSG00000108262|GIT1 ENSG00000116213|WDR8 ENSG00000128973|CLNB ENSG00000141738|GRB7 ENSG00000159176|CSRFP ENSG00000160211|G6PD  
ENSG00000161847|RAVER1 ENSG00000164649|CDCA7L ENSG00000167106|FAM102A ENSG00000175189|INHBC ENSG00000175826|DULLARD ENSG00000179270|NP\_001025054.1 ENSG00000182218|KIAA1822 ENSG00000183847|Q9P1C0\_HUMAN  
ENSG00000185499|MUC1 ENSG00000196084|UBIQ\_HUMAN ENSG00000198294|Q495C9\_HUMAN ENSG00000204310|AGPAT1 ENSG00000206069|NP\_001001663.1 ENSG00000206076|Q6ZQR8\_HUMAN ENSG00000206146|Q96S24\_HUMAN  
ENSG00000031081|NP\_065805.1  
ENSG00000054392|HHAT ENSG00000068489|PRR11 ENSG00000074657|ZNF532 ENSG00000084092|C4orf14 ENSG00000085433|WDR47 ENSG00000105677|TMEM147 ENSG00000109061|MYH1 ENSG00000115568|ZNF142  
ENSG00000135108|FBXO21 ENSG00000136213|CHST12 ENSG00000136643|RPS6KC1 ENSG00000137960|GIPC2 ENSG00000140379|BCL2L1 ENSG00000141448|GATA6 ENSG00000145439|CBR4 ENSG00000145850|TIMD4  
CACTCCC ENSG00000148053|NTRK2 ENSG00000150510|FAM124A ENSG00000164304|CAGE1 ENSG00000183726|TMEM50A ENSG00000197006|METTL9 ENSG00000198315|ZNF192  
ENSG00000007402|CACNA2D2 ENSG00000050555|LAMC3 ENSG00000084764|MAPRE3 ENSG00000087152|ATXN7L3 ENSG00000100012|SEC14L3 ENSG00000100065|CARD10 ENSG00000103326|SOLH ENSG00000103355|PRSS33  
ENSG00000116017|ARID3A ENSG00000117682|DHDDS ENSG00000125492|BARHL1 ENSG00000125740|POSB ENSG00000127578|WFIKKN1 ENSG00000133247|SUV420H2 ENSG00000137404|NRM ENSG00000143466|IKBKE  
ENSG00000157851|DPYSL5 ENSG00000159164|SV2A ENSG00000162302|RPS6KA4 ENSG00000162430|SEPN1 ENSG00000164366|CCDC127 ENSG00000167323|STIM1 ENSG00000169242|EFNA1 ENSG00000172270|BSG  
ENSG00000184381|PLA2G6 ENSG00000188176|SMTNL2 ENSG00000197043|ANXA6 ENSG00000203959|PIN1L ENSG00000204308|RNF5 ENSG00000205039|Q6ZQ55\_HUMAN ENSG00000205648|Q6ZR54\_HUMAN ENSG00000205923|CEMP1  
ENSG00000049319|SRD5A2 ENSG00000091157|WDR7 ENSG00000112812|PRSS16 ENSG00000124818|OPN5 ENSG00000136242|Q9NXD8\_HUMAN ENSG00000145147|SLIT2 ENSG00000150394|CDH8 ENSG00000153989|NUS1  
ENSG00000158079|PTPDC1 ENSG00000164411|GJB7 ENSG00000164741|DLCL1 ENSG00000178163|NP\_444270.2 ENSG00000181552|FAM12B ENSG00000181915|C10orf22 ENSG00000182752|PAPPA ENSG00000198221|NP\_001035973.1  
ENSG00000206027|Q6ZUT4\_HUMAN  
CACTCTG ENSG00000005194|CIAPIN1 ENSG00000058262|SEC61A1 ENSG00000075856|SART3 ENSG00000087586|AURKA ENSG00000089220|PEBP1 ENSG00000101199|ARFGAP1 ENSG00000102977|ACD ENSG00000106397|PLOD3  
ENSG00000109065|NAT9 ENSG00000126759|CFP ENSG00000130589|PR285\_HUMAN ENSG00000136352|TITF1 ENSG00000156574|NODAL ENSG00000166341|DCHS1 ENSG00000167723|TRPV3 ENSG00000168062|BATF2  
ENSG00000169926|KLF13 ENSG00000174348|PODN ENSG00000176087|SLC35A4 ENSG00000176986|SEC24C ENSG00000182902|SLC25A18 ENSG00000183117|PCMD1 ENSG00000186529|CYP4F3 ENSG00000186654|ARHGAP8  
ENSG00000189143|CLDN4 ENSG00000196230|TUBB ENSG00000196576|PLXNB2 ENSG00000151515|MYO16 ENSG00000154690|PLEKHH1 ENSG00000181842|PCDH1A10 ENSG00000186696|HSD17B2 ENSG00000107937|GTPBP4  
ENSG00000129003|VPS13C ENSG00000130818|ZNF426 ENSG00000132196|HSD17B7 ENSG00000134548|C12orf39 ENSG00000154127|STS1\_HUMAN ENSG00000154162|CDH12 ENSG00000163412|EIF4E3 ENSG00000164172|MOC52  
ENSG00000177954|RPS27 ENSG00000188958|UTS2D ENSG00000197054|ZNF763  
CACTGAC ENSG000000080815|PSEN1 ENSG00000110148|CKBR ENSG00000127533|F2RL3 ENSG00000130052|STARD8 ENSG00000130717|UCK1 ENSG00000131797|C16orf67 ENSG00000136274|NACAD ENSG00000142484|TM4SF5  
ENSG00000145014|TMEM44 ENSG00000162191|SAKS1\_HUMAN ENSG00000162552|WNT4 ENSG00000163468|CCT3 ENSG00000166341|DCHS1 ENSG00000166448|TMEM130 ENSG00000170906|NDUFA3 ENSG00000172379|ARNT2  
ENSG00000173163|COMMD1 ENSG00000181885|CLDN7 ENSG00000184144|CNTN2 ENSG00000205502|NP\_001007596.1 ENSG00000206451|RALA ENSG00000207426|EED ENSG000002099749|Cyorf15a ENSG00000102743|SLC25A15  
ENSG00000111670|GNPTAB ENSG00000117523|BAT2D1 ENSG00000122126|OCRL ENSG00000123104|ITPR2 ENSG00000125900|SIRPD ENSG00000136738|STAM ENSG00000143771|CNIH4 ENSG00000148429|USP6NL  
ENSG00000152430|BOLL ENSG00000156218|ADAMTSL3 ENSG00000164125|C4orf18 ENSG00000164258|NDUF54 ENSG00000164919|COX6C ENSG00000184307|ZDHHC23 ENSG00000186566|GPATCH8 ENSG00000188996|HUS1  
ENSG00000204397|NP\_001017534.1  
CACTGAG ENSG000000070731|ST6GALNAC2 ENSG000000071246|VASH1 ENSG000000073536|NLE1 ENSG00000091947|TMEM101 ENSG00000100284|TOM1 ENSG00000105366|SIGLEC8 ENSG00000113430|IRX4 ENSG00000114378|HYAL1  
ENSG00000116035|VAX2 ENSG00000117016|RIMS3 ENSG00000120913|PDLIM2 ENSG00000122678|POLM ENSG00000122965|RBM19 ENSG00000126705|AHCDC1 ENSG00000130717|UCK1 ENSG00000135622|SEMA4F  
ENSG00000142515|KLK3 ENSG00000142623|PAD11 ENSG00000143570|SLC39A1 ENSG00000151079|KCNAB6 ENSG00000154133|RCBO4 ENSG00000158220|FAM62C ENSG00000164151|Q6ZT40\_HUMAN ENSG00000166246|C16orf71  
ENSG00000166664|CHRFAM7A ENSG00000168907|PLA2G4F ENSG00000171385|KCNDB3 ENSG00000174851|YIF1A ENSG00000175873|Q9H7M1\_HUMAN ENSG00000179218|CALR ENSG00000203772|SPRN ENSG00000203905|Q6ZRC6\_HUMAN  
ENSG00000204017|Q6ZVB9\_HUMAN ENSG00000205266|Q6ZRU5\_HUMAN ENSG000002054983|GALC ENSG00000209300|NUP50 ENSG00000101182|PSMA7 ENSG00000126950|TMEM35 ENSG00000131495|NDUFA2 ENSG00000134152|C15orf29  
ENSG00000136842|TMOD1 ENSG00000139508|SLC46A3 ENSG00000143457|GOLPH3L ENSG00000143882|ATP6V1C2 ENSG00000146729|GBAS ENSG00000147041|SYTL5 ENSG00000150510|FAM124A ENSG00000169715|MT1JP  
ENSG00000170848|PSG6 ENSG00000171806|C1orf156 ENSG00000182090|C14orf25 ENSG00000183668|PSG9 ENSG00000205838|NP\_653326.3 ENSG00000206198|NR\_001535.1  
CACTGAT ENSG00000088854|C20orf194 ENSG00000100266|PACSIN2 ENSG00000104897|SF3A2 ENSG00000112273|HDGF1 ENSG00000123706|ADRM1 ENSG00000134569|LRP4 ENSG00000145911|N4BP3\_HUMAN  
ENSG00000160219|GAB3 ENSG00000166526|ZNF3 ENSG00000172294|Q96RM9\_HUMAN ENSG00000172342|CSPG4LYP1 ENSG00000176884|GRIN1 ENSG00000182852|C21orf121 ENSG00000183778|B3GALT5 ENSG00000184246|Q96PW8\_HUMAN  
ENSG00000185052|SLC24A3 ENSG00000185404|Q4ZG65\_HUMAN ENSG00000196189|SEMA4A ENSG000002020385|LDLRAD1 ENSG00000205821|NP\_001020630.1 ENSG00000206193|Q5HYA3\_HUMAN ENSG00000206492|SNCAIP ENSG000002081870|C1orf41  
ENSG00000105699|LSR ENSG00000106484|MEST ENSG00000107798|L1PA ENSG00000109919|MTCB2 ENSG00000112200|ZNF451 ENSG00000115421|PAPOLG ENSG00000127334|DYRK2 ENSG00000130844|ZNF331  
ENSG00000132670|PTPRA ENSG00000134001|EIF2S1 ENSG00000139211|AMIGO2 ENSG00000144668|ITGA9 ENSG00000154451|GBP5 ENSG00000164163|ABCE1 ENSG00000164209|SLC25A46 ENSG00000165209|STRBP  
ENSG00000165494|PCF11 ENSG00000168405|CMAH ENSG00000172809|RPL38 ENSG00000176293|ZNF135 ENSG00000176714|CCDC121 ENSG00000177889|UBE2N ENSG00000180667|YOD1 ENSG00000185849|Q9P194\_HUMAN  
ENSG00000189252|SPANXN3  
CACTGGA ENSG00000006607|FARP2 ENSG00000078319|PMS2L1 ENSG00000100461|RBM23 ENSG00000110851|ENO3 ENSG00000111331|OAS3 ENSG00000122386|ZNF205 ENSG00000124920|C11orf9 ENSG00000135074|ADAM19  
ENSG00000136807|CDK9 ENSG00000141503|MINK1 ENSG00000142513|ACPT ENSG00000143787|LETTY1 ENSG00000154016|GRAP ENSG00000164048|ZNF589 ENSG00000164649|CDCA7L ENSG00000165138|ANKS6  
ENSG00000170100|Q96MU6-2 ENSG00000173327|MAP3K11 ENSG00000174292|TNK1 ENSG00000174804|PZD4 ENSG00000177427|SMCR7 ENSG00000178244|BCAM ENSG00000204405|Q6ZQV3\_HUMAN ENSG00000204580|DDR1  
ENSG00000204585|Q8N8T0\_HUMAN ENSG00000205033|Q96DJ9\_HUMAN ENSG000003056|M6PR ENSG00000087095|NLK ENSG00000088298|EDEM2 ENSG00000094975|C1orf9 ENSG00000105136|ZNF419 ENSG00000108061|SHOC2  
ENSG00000113845|C3orf1 ENSG00000118267|ZNF271 ENSG00000121057|AKAP1 ENSG00000121691|CAT ENSG00000133116|KL ENSG00000134594|RAB33A ENSG00000136379|FAM108C1 ENSG00000138653|NDST4  
ENSG00000144785|TMEM4 ENSG00000147573|TRIM55 ENSG00000148943|LIN7C ENSG00000152433|ZNF547 ENSG00000152443|ZNF776 ENSG00000156508|EEF1A1 ENSG00000157538|DSCR3 ENSG00000160336|ZNF761  
ENSG00000163694|NP\_061900.1 ENSG00000164794|KCNV1 ENSG00000165185|KIAA1958 ENSG00000165868|HSPA12A ENSG00000165995|CACNB2 ENSG00000167785|ZNF558 ENSG00000178459|Q8N2E2\_HUMAN ENSG00000188868|ZNF563  
ENSG00000197054|ZNF763 ENSG00000204597|ZNF818 ENSG00000204604|ZNF468 ENSG00000204789|ZNF204  
CACTTAT ENSG00000009335|UBE3C ENSG00000070610|GBA2 ENSG00000101883|PEPP1\_HUMAN ENSG00000117360|PRPF3 ENSG00000117461|PIK3R3 ENSG00000125409|TEKT3 ENSG00000142611|PRDM16 ENSG00000145016|Q96CK5\_HUMAN  
ENSG00000151474|FRMD4A ENSG00000160678|S100A1 ENSG00000162408|NOL9 ENSG00000163207|IVL ENSG00000168002|POLR2G ENSG00000172336|POP7 ENSG00000173120|FBXL11 ENSG00000173267|SNCG  
ENSG00000175416|CLTB ENSG00000178057|C3orf60 ENSG00000178084|HTR3C ENSG00000178110|Q8N9G9\_HUMAN ENSG00000185052|SLC24A3 ENSG00000198920|KIAA0753 ENSG00000204052|C6orf154 ENSG00000204511|NM\_00101700.1  
ENSG00000204542|C6orf15 ENSG000000048991|R3HDM1 ENSG000000493|SLC44A ENSG00000081770|NATP ENSG00000080493|SLC44A4 ENSG00000091664|SLC17A6 ENSG00000104047|DTWD1 ENSG00000106460|TMEM106B  
ENSG00000115183|TANC1 ENSG00000115474|KCNJ13 ENSG00000117322|CR2 ENSG00000121570|DPPA4 ENSG00000137033|IL33 ENSG00000138182|MPHOSPH1 ENSG00000139970|RTN1 ENSG00000142892|PIGK  
ENSG00000143643|TTC13 ENSG00000147507|LYN ENSG00000150457|LATS2 ENSG00000151883|PARP8 ENSG00000155629|PIK3AP1 ENSG00000163512|AZI2 ENSG00000163659|TIARP ENSG00000179978|Q59G16\_HUMAN  
ENSG00000181264|TMEM136 ENSG00000184254|ALDH1A3  
CACTTCA ENSG00000009954|BAZ1B ENSG000000011454|RABGAP1 ENSG00000054148|PHPT1 ENSG00000101890|GUCY2F ENSG00000103005|C16orf57 ENSG00000122854|SFTPA2B ENSG00000124222|NPEPL1 ENSG00000151468|CCDC3  
ENSG00000155886|SLC24A2 ENSG00000162873|KLHDC8A ENSG00000163515|PNTNLB ENSG00000167483|FAM129C ENSG00000173212|C1orf161 ENSG00000175315|CST6 ENSG00000182108|MYLE\_HUMAN ENSG00000182314|SFTPA2  
ENSG00000182712|MTCP1 ENSG00000183049|CAMK1D ENSG00000183255|PTTG1IP ENSG00000188783|PRELP1 ENSG00000188935|Q6ZU24\_HUMAN ENSG00000196526|AFAP1 ENSG000002070061|IKBKAP ENSG00000208248|COBLL1  
ENSG00000094880|CDC23 ENSG00000101966|BIRC4 ENSG00000105205|CLC ENSG00000112246|FBXO9 ENSG00000113460|BXDC2 ENSG00000117139|JARID1B ENSG00000120215|MLANA ENSG00000120328|PCDHB12  
ENSG00000124177|CHD6 ENSG00000124203|C20orf174 ENSG00000131951|LRR9C ENSG00000135960|EDAR ENSG00000146250|PRSS35 ENSG00000146276|GABRR1 ENSG00000147231|CXorf57 ENSG00000152583|SPARCL1  
ENSG00000154007|ASB17 ENSG00000156804|FBXO32 ENSG00000162755|NP\_689579.3 ENSG00000165813|C10orf118 ENSG00000166415|WDR72 ENSG00000166432|ZMAT1 ENSG00000171056|SOX7 ENSG00000177410|Q5QHF1\_HUMAN  
ENSG00000178690|C18orf26 ENSG00000181690|PLAG1 ENSG00000182977|Q9P111\_HUMAN ENSG00000185518|SV2B ENSG00000187118|NP\_872329.1 ENSG00000188653|NR\_002807.1 ENSG00000196705|ZNF431 ENSG00000197714|ZNF460  
ENSG00000198533|Q9P1DD\_HUMAN ENSG00000204387|C6orf48 ENSG00000204692|OR12D3 ENSG00000205707|LYRM5  
CACTTGA ENSG00000006659|LGALS14 ENSG00000053371|AKR7A2 ENSG00000102034|ELF4 ENSG00000104852|SNRP70 ENSG00000112977|DAP ENSG00000125651|GTF2F1 ENSG00000130803|ZNF317 ENSG00000131042|LILRB2  
ENSG00000138769|CDKL2 ENSG00000147081|AKAP4 ENSG00000157184|CPT2 ENSG00000165699|TSC1 ENSG00000168209|DDIT4 ENSG00000172568|NP\_001001343.1 ENSG00000180083|WFDC11 ENSG00000184334|Q71RG6\_HUMAN  
ENSG00000185024|BRF1 ENSG00000206528|Q6ZSM0\_HUMAN ENSG000000003096|KLHL13 ENSG000000006625|C7orf24 ENSG00000078795|PKD2L2 ENSG00000079482|OPHN1 ENSG00000111907|TPD52L1 ENSG00000115267|IFIH1  
ENSG00000124092|CTCF1 ENSG00000133858|CCDC131 ENSG00000134375|TMM17A ENSG00000134970|TICAM2 ENSG00000135655|USP15 ENSG00000145685|LHFP12 ENSG00000145692|BHMT ENSG00000148229|POLE3  
ENSG00000154429|C1orf96 ENSG00000155875|C9orf138 ENSG00000157538|DSCR3 ENSG00000163785|RYK ENSG00000165359|DDX26B ENSG00000173276|ZNF295 ENSG00000179195|ZNF664  
ENSG00000182217|HIST2H4B ENSG00000183941|HIST2H4A ENSG00000196664|TLR7 ENSG00000198169|ZNF251 ENSG00000198838|RYR3 ENSG00000204478|PRAMEF20 ENSG00000204486|PRAMEF21 ENSG00000205212|NP\_001004306.1  
CACTTGC ENSG00000009950|MLXIPL ENSG00000043143|PHF15 ENSG00000092295|TGM1 ENSG00000105501|SIGLEC5 ENSG00000106628|POLD2 ENSG00000110090|CPT1A ENSG00000115507|OTX1 ENSG00000122367|LDB3  
ENSG00000125999|C20orf114 ENSG00000135148|TRAFD1 ENSG00000135824|RGS8 ENSG00000136811|ODF2 ENSG00000155252|C10orf65 ENSG00000161904|LEMD2 ENSG00000162894|FAM3 ENSG00000162896|PIGR  
ENSG00000163083|INHBB ENSG00000166220|C10orf27 ENSG00000187681|ORM2 ENSG000002004154|ORM2 ENSG00000204850|NP\_001013695.1 ENSG00000205126|NP\_001027025.1 ENSG0000021462|WBSR22 ENSG000002071537|SEL1L  
ENSG00000088782|DEFB127 ENSG00000111666|CHPT1 ENSG00000112367|KIAA0274 ENSG00000114790|NP\_056410.2 ENSG00000124935|SCGB1D2 ENSG00000133020|MYH8 ENSG00000137845|ADAM10 ENSG00000138078|PREPL  
ENSG00000141452|C18orf8 ENSG00000147684|NDUFB9 ENSG00000152954|NRSN1 ENSG00000159140|SON ENSG00000162613|FUBP1 ENSG00000162913|C1orf34 ENSG00000163513|TGFB2 ENSG00000165732|DDX21  
ENSG00000168515|SCGB1D1 ENSG00000170153|RNFI50 ENSG00000182180|MRPS16 ENSG00000188992|L1PI ENSG00000197745|SCGB1D4 ENSG00000205524|Q68D70\_HUMAN  
CACTTTA ENSG00000011007|TCEB3 ENSG000000072121|ZFYVE26 ENSG00000099875|MKNK2 ENSG00000099985|OSM ENSG00000100030|MAPK1 ENSG00000104946|TBC1D17 ENSG00000123411|IKZF4  
ENSG00000124357|NAGK ENSG00000130948|HSD17B3 ENSG00000135709|KIAA0513 ENSG00000136935|GOLGA1 ENSG00000140090|SLC24A4 ENSG00000141664|ZCCHC2 ENSG00000141699|NP\_835227.1 ENSG00000143314|MRPL24  
ENSG00000145819|ARHGAP26 ENSG00000154783|FGD5 ENSG00000156381|ANKRD9 ENSG00000157617|C21orf25 ENSG00000158445|KCNB1 ENSG00000160401|C9orf117 ENSG00000162302|RPS6KA4 ENSG00000166743|ACSM1  
ENSG00000172647|PGA5 ENSG00000175155|PEL2 ENSG00000177169|ULK1 ENSG00000180860|PGA3 ENSG00000189159|HNI1 ENSG00000196090|PTPRT ENSG00000198009|Q8IZW4\_HUMAN ENSG00000204973|PGA4  
ENSG00000054803|BCLN4 ENSG000000084093|REST ENSG00000100629|C14orf145 ENSG00000100987|V5X1 ENSG00000102908|NFAT5 ENSG00000105855|ITGB8 ENSG00000110911|SLC11A2 ENSG00000115232|ITGA4  
ENSG00000122870|BICC1 ENSG00000134352|IL6ST ENSG00000135842|FAM129A ENSG00000137414|FAM8A1 ENSG00000143507|DUSP10 ENSG00000144285|SCN1A ENSG00000146360|GPR6 ENSG00000161048|NP\_945341.2  
ENSG00000166986|MARS ENSG00000177692|C21orf55 ENSG00000186487|MYT1L ENSG00000198815|FOXJ3 ENSG00000204923|NP\_001019851.1 ENSG00000205212|NP\_001004306.1  
CACTTTC ENSG00000004939|SLC4A1 ENSG000000011105|TXRPA9 ENSG00000073861|TBX21 ENSG00000075290|WNT8B ENSG00000100285|NEFH ENSG00000119638|NEK9 ENSG00000124557|BTN1A1 ENSG00000132589|FLOT2  
ENSG00000160305|DTP2A ENSG00000166435|XRRAN1 ENSG00000168000|HNRPUL2 ENSG00000170485|NPAS2 ENSG00000175077|RTP1 ENSG00000175115|PACS1 ENSG00000175170|Q5T319\_HUMAN ENSG00000182352|C17orf77

ENSG00000186191|C2orf186|ENSG00000186453|NP\_001035800.1|ENSG00000186862|PDZD7|ENSG00000188643|S100A16|ENSG00000189069|NP\_001013732.1|ENSG00000189409|MMP23A|ENSG00000198374|HIST1H2AL|ENSG00000205703|NP\_001010910.1|ENSG00000080839|RBL1|ENSG00000100196|KDELR3|ENSG00000101040|ZMYND8|ENSG00000101574|METTL4|ENSG00000108932|SLC16A6|ENSG00000112667|C6orf108|ENSG00000112902|SEMA5A|ENSG00000115520|CQO10B|ENSG00000118965|WDR35|ENSG00000121316|NP\_079105.4|ENSG00000132334|PTPRE|ENSG00000138449|SLC40A1|ENSG00000141579|ZNF750|ENSG00000143344|RGL1|ENSG00000147687|TATDN1|ENSG00000150991|UBIQ\_HUMAN|ENSG00000156886|ITGAD|ENSG00000156958|GALK2|ENSG00000162976|PQLC3|ENSG00000163684|RPLP1|ENSG00000164442|CITFD2|ENSG00000168282|MGAT2|ENSG00000171056|SOX7|ENSG00000188243|COMMD6|ENSG00000197991|PCDH20|ENSG000000001617|SEMA3F|ENSG00000106683|LIMK1|ENSG00000107130|FREQ|ENSG00000112561|TFEB|ENSG00000114302|PRKAR2A|ENSG00000124762|CDKN1A|ENSG00000125266|EFNB2|ENSG00000127511|SIN3B|ENSG00000131584|CENTB5|ENSG00000133316|WDR74|ENSG00000135801|TAF5L|ENSG00000146700|SRCRB4D|ENSG00000157184|CPT2|ENSG00000159387|IRX6|ENSG00000162571|TTL5|ENSG00000162949|CAPN13|ENSG00000164896|FASTK|ENSG00000165801|NP\_060541.3|ENSG00000166828|SCNN1G|ENSG00000169509|CRCT1|ENSG00000170390|DCLK2|ENSG00000177807|KCNJ10|ENSG00000187678|SPRY4|ENSG00000187699|Q8NBX4\_HUMAN|ENSG00000203793|Q6ZR74\_HUMAN|ENSG00000057019|DCBLD2|ENSG00000070087|PFN2|ENSG00000100644|HIF1A|ENSG00000104325|DECR1|ENSG00000108298|RPL19|ENSG00000110218|PANX1|ENSG00000119125|GDA|ENSG00000121749|TBC1D15|ENSG00000130413|STK33|ENSG00000134323|MYCN|ENSG00000137996|RTCD1|ENSG00000139508|SLC46A3|ENSG00000143622|RIT1|ENSG00000143727|ACP1|ENSG00000144645|OSBPL10|ENSG00000155729|KCTD18|ENSG00000161800|RACGAP1|ENSG00000162624|LHX8|ENSG00000164597|COG5|ENSG00000165806|CASP7|ENSG00000168078|PBK|ENSG00000174796|THAP6|ENSG00000174899|Q8N6Q6\_HUMAN|ENSG00000186354|EDG3|ENSG00000198633|Q6PDB4\_HUMAN|ENSG00000198825|INPP5F|ENSG00000204019|NP\_001017978.1|perfect: CACTTTG CAAAGTG|hsa-miR-17-5p|CAAAGTGcttacagtcgaggtag|0|perfect: CACTTTG CAAAGTG|hsa-miR-20b|CAAAGTGctcatagtcgaggtag|0|CACTTTT|ENSG0000007968|E2F2|ENSG00000062282|DGAT2|ENSG00000105402|NAPA|ENSG00000114770|ABCC5|ENSG00000120509|PDZD11|ENSG00000127080|IPPK|ENSG00000131368|MRPS25|ENSG00000134574|DDB2|ENSG00000137094|DNAJB5|ENSG00000142583|SLC2A5|ENSG00000147536|GINS4|ENSG00000163497|FEV|ENSG00000164108|Q9HAJ2\_HUMAN|ENSG00000169662|NP\_997357.1|ENSG00000170525|PFKFB3|ENSG00000183530|C2orf30|ENSG00000185722|ANKFY1|ENSG00000186792|IFRD2|ENSG00000186951|PPARA|ENSG00000204118|NAP1L6|ENSG00000205937|RNPS1|ENSG00000206189|NR\_001550.1|ENSG00000207697|IFNGR1|ENSG00000048740|CUGBP2|ENSG000000081320|STK17B|ENSG00000083896|YTHDC1|ENSG00000100749|VRR1|ENSG00000104517|EDD1|ENSG00000115159|GPD2|ENSG00000115652|UXS1|ENSG00000135298|BAI3|ENSG00000136810|TXN|ENSG00000137960|GIPC2|ENSG00000148481|C10orf97|ENSG00000152266|PTH|ENSG00000153922|CHD1|ENSG00000163281|GNPDA2|ENSG00000164796|CSMD3|ENSG00000170160|Q6ZU57\_HUMAN|ENSG00000171885|AQP4|ENSG00000172239|PAIP1|ENSG00000181481|RNF135|ENSG00000184384|MAML2|ENSG00000186103|ARGFX|ENSG00000186960|Q86U37\_HUMAN|ENSG00000188177|ZC3H6|perfect: CACTTTT AAAAGTG|hsa-miR-106a|AAAAGTGcttacagtcgaggtag|0|CAGAAAA|ENSG00000064309|CDON|ENSG00000065618|COL17A1|ENSG00000102870|ZNF629|ENSG00000110887|DAO|ENSG00000114302|PRKAR2A|ENSG00000116819|TFAP2E|ENSG00000126903|SLC10A3|ENSG00000128266|GNAZ|ENSG00000131845|ZNF304|ENSG00000132321|TQCA|ENSG00000134369|NAV1|ENSG00000138622|HCN4|ENSG00000142789|ELA3A|ENSG00000157216|SSBP3|ENSG00000164711|LPAL2|ENSG00000166548|TK2|ENSG00000176700|SCAND2|ENSG00000178796|Q8N9Z1\_HUMAN|ENSG00000179562|GCC1|ENSG00000179593|ALOX15B|ENSG00000179841|AKAP5|ENSG00000183666|LOC72841|ENSG00000186532|SMYD4|ENSG00000198237|GUSL1\_HUMAN|ENSG00000013583|HEBP1|ENSG00000072201|LNXI|ENSG0000008083799|CYLD|ENSG00000087338|GMCL1|ENSG00000095464|PDE6C|ENSG00000106025|TSPAN12|ENSG00000107537|PHYH|ENSG00000109762|SNX25|ENSG00000112144|ICK|ENSG00000112246|SIM1|ENSG00000117054|ACADM|ENSG00000119927|GPAM|ENSG00000125952|MAX|ENSG00000126653|CCDC55|ENSG00000134533|RERG|ENSG00000134996|OSTF1|ENSG00000135249|RINT1|ENSG00000141644|MBD1|ENSG00000145782|ATG12|ENSG00000153976|HS3ST3A1|ENSG00000157193|LRP8|ENSG00000157538|SCR3|ENSG00000161533|ACOX1|ENSG00000162992|NEUROD1|ENSG00000163624|CDS1|ENSG00000164283|ESM1|ENSG00000168661|ZNF30|ENSG00000172139|SLC9A10|ENSG00000172243|CLEC7A|ENSG00000174776|WDR49|ENSG00000175105|ZNF654|ENSG00000182568|SATB1|ENSG00000186432|KFN4|ENSG00000187210|GCNT1|ENSG00000188343|FAM92A1|ENSG00000188467|SLC24A5|ENSG00000196268|ZNF493|ENSG00000196357|ZNF565|ENSG00000196387|ZNF140|ENSG00000196597|ZNF782|ENSG00000198161|PIIAL4|ENSG00000198360|NP\_839944.1|ENSG00000198521|ZNF43|ENSG00000198936|NP\_839944.1|ENSG00000203847|XR\_016130.1|ENSG00000204201|Q49A40\_HUMAN|ENSG00000206198|NR\_001535.1|ENSG00000053524|MCF2L2|ENSG00000101542|CDH20|ENSG00000103047|TMC07|ENSG00000106246|PTCD1|ENSG00000108556|CHRNA|ENSG00000110931|CAMKK2|ENSG00000116017|ARID3A|ENSG00000143107|FNDC7|ENSG00000148604|RGR|ENSG00000149599|C2orf57|ENSG00000157064|NMNAT2|ENSG00000160818|GPATCH3|ENSG00000167112|TRUB2|ENSG00000171303|CKNK3|ENSG00000171790|SLFNL1|ENSG00000171861|RNMTL1|ENSG00000189410|SH2D5|ENSG00000196893|Q8N2W8\_HUMAN|ENSG00000198691|ABCA4|ENSG00000179393|Q9NRE4\_HUMAN|ENSG00000183172|C2orf32|ENSG00000185507|IRF7|ENSG00000187650|NP\_001017921.1|ENSG00000189321|NR\_002940.1|ENSG00000189410|SLND2|ENSG00000196893|Q8N2W8\_HUMAN|ENSG00000198691|ABCA4|ENSG00000198746|GPATCH3|ENSG00000198842|DUSP27|ENSG00000147410|TPR|ENSG00000100811|YY1|ENSG00000101413|C2orf77|ENSG00000105136|ZNF419|ENSG00000121388|Q9H521\_HUMAN|ENSG00000121444|PDZRN3|ENSG00000123560|PLP1|ENSG00000125538|LL1B|ENSG00000144857|BOC|ENSG00000147027|TMEM47|ENSG00000147145|GPR23|ENSG00000147573|TRIM55|ENSG00000153246|PLA2R1|ENSG00000154736|ADAMTS5|ENSG00000160629|C17orf32|ENSG00000162647|C1orf119|ENSG00000163751|CPA3|ENSG00000164168|TMEM34|ENSG00000164588|HCN1|ENSG00000165359|DDX26B|ENSG00000166004|KIAA1731|ENSG00000167117|C17orf73|ENSG00000168036|CTNNB1|ENSG00000171931|FBXW10|ENSG00000172175|MALT1|ENSG00000180882|XR\_017823.1|ENSG00000183145|DSCR6|ENSG00000197024|ZNF398|ENSG00000197716|Q9UHV1\_HUMAN|ENSG00000198203|SULT1C2|ENSG00000198872|PEG10|ENSG00000204189|Q587I5\_HUMAN|ENSG00000006659|LGALS14|ENSG00000060688|WDR57|ENSG00000063180|CA11|ENSG00000067829|IDH3G|ENSG00000083807|SLC27A5|ENSG00000085465|OVGP1|ENSG00000089685|BIRC5|ENSG00000092054|MYH7|ENSG00000099834|MUPCDH|ENSG00000099899|HTF9C\_HUMAN|ENSG00000105198|LGALS13|ENSG00000106290|TAF6|ENSG00000108641|NP\_056496.1|ENSG00000108961|NP\_057576.2|ENSG00000118137|APOA1|ENSG00000126709|IFI6|ENSG00000127511|SIN3B|ENSG00000130731|NP\_001035251.1|ENSG00000135480|KRT7|ENSG00000136878|USP20|ENSG00000143546|S100A8|ENSG00000155858|LSM11|ENSG00000157093|IY2L4|ENSG00000159224|GTP|ENSG00000160213|CSTB|ENSG00000160318|CLDN2|ENSG00000160957|RECQL4|ENSG00000167525|NP\_689678.1|ENSG00000169704|GP9|ENSG00000170458|CD14|ENSG00000173171|MTX1|ENSG00000174989|FBXW8|ENSG00000177238|TRIM72|ENSG00000178896|EXOSC4|ENSG00000181856|SLC2A4|ENSG00000203793|Q6ZR74\_HUMAN|ENSG00000204003|LCN6|ENSG00000205502|NP\_001007596.1|ENSG0000001561|ENPP4|ENSG00000007001|UPP2|ENSG00000101974|ATP11C|ENSG00000113615|SEC24A|ENSG00000114021|NIT2|ENSG00000125868|DSTN|ENSG00000128383|APOBEC3A|ENSG00000132341|RAN|ENSG00000134255|CEPT1|ENSG00000139719|VPS33A|ENSG00000150361|KLHL1|ENSG00000164746|Q8NEG2\_HUMAN|ENSG00000165097|AOF1|ENSG00000169762|TAPT1|ENSG00000170502|NUDT9|ENSG00000170571|EMB|ENSG00000171055|FEZ2|ENSG00000171116|NP\_057237.1|ENSG00000171129|HSFX1|ENSG00000171488|LRR8C|ENSG00000172115|CYCS|ENSG00000117361|GPRC6A|ENSG00000174007|C3orf34|ENSG00000179750|APOBEC3B|ENSG00000180979|LRR8C57|ENSG00000198162|MAN1A2|ENSG00000203943|VAMD13|ENSG00000204597|ZNF818|ENSG000000035403|SCL|ENSG00000088833|NSFL1C|ENSG00000090554|FLT3LG|ENSG00000105251|SHD|ENSG00000105392|CRX|ENSG00000105520|NP\_073574.1|ENSG00000108829|LRR8C59|ENSG00000126368|NR1D1|ENSG00000131634|C16orf30|ENSG00000132589|FLOT2|ENSG00000135605|TEC|ENSG00000147799|K1688\_HUMAN|ENSG00000148702|HABP2|ENSG00000148826|NKX6-2|ENSG00000157823|AP3S2|ENSG00000158793|NIT1|ENSG00000170545|NM\_001031628.1|ENSG00000171700|RGS19|ENSG00000180818|HOXC10|ENSG00000185608|MRPL40|ENSG00000196624|NP\_997381.1|ENSG00000205061|Q6ZUP2\_HUMAN|ENSG00000206028|Q6ZVA3\_HUMAN|ENSG00000008197|TFAP2D|ENSG00000060718|COL11A1|ENSG00000076382|SPAG5|ENSG00000081177|EXDL2|ENSG00000110841|PPF1B1|ENSG00000121903|ZSCAN20|ENSG00000121903|ZSCAN20|ENSG00000134330|Q6PCA9\_HUMAN|ENSG00000137364|TPMT|ENSG00000138029|HADHB|ENSG00000143256|PFDN2|ENSG00000147905|ZCCHC7|ENSG00000175989|C11orf69|ENSG00000196072|BLOC1S2|ENSG00000197181|PIWIL2|ENSG00000197969|VPS13A|ENSG00000198523|PLN|ENSG00000056998|GYG2|ENSG00000065621|GSTO2|ENSG00000101342|C2orf118|ENSG00000105520|NP\_073574.1|ENSG00000119703|C14orf140|ENSG00000125818|PSMF1|ENSG00000128594|LRR8C4|ENSG00000131446|MGAT1|ENSG00000133895|MEN1|ENSG00000137275|RIPK1|ENSG00000143376|SNX27|ENSG00000144711|QSOX1|ENSG00000148156|ACTL7B|ENSG00000157823|AP3S2|ENSG00000160179|ABCG1|ENSG00000162592|CCDC27|ENSG00000163026|C2orf44|ENSG00000167723|TRPV3|ENSG00000171552|BCL2L1|ENSG00000171747|LGALS4|ENSG00000171786|NHLH1|ENSG00000172081|MOBK2A|ENSG00000177762|C5orf27|ENSG00000185963|BICD2|ENSG00000196526|AFAP1|ENSG00000080166|DCT|ENSG00000082146|ALS2CR2|ENSG00000085563|ABCB1|ENSG00000085719|CPNE3|ENSG00000087128|TMPRSS11E|ENSG00000104723|TUSC3|ENSG00000109472|CPE|ENSG00000113163|COL4A3BP|ENSG00000113594|LIFR|ENSG00000118007|STAG1|ENSG00000119314|ROD1|ENSG00000136381|IREB2|ENSG00000138798|EGF|ENSG00000152332|UHMK1|ENSG00000173487|LOC729884|ENSG00000180667|YOD1|ENSG00000184845|DRD1|ENSG00000196381|ZNF781|ENSG00000197580|BCDO2|ENSG00000198846|TOX|ENSG00000060566|CREB3L3|ENSG00000063244|UZAF2|ENSG00000078804|TP53INP2|ENSG00000104059|K0574\_HUMAN|ENSG00000104637|PINX1\_HUMAN|ENSG00000106012|IQCE|ENSG00000108244|KRT23|ENSG00000110628|SLC22A18|ENSG00000121281|ADCY7|ENSG00000125652|ALKBH7|ENSG00000127418|FGFR1L|ENSG00000128591|FLNC|ENSG00000131398|KCNC3|ENSG00000133392|MYH11|ENSG00000136367|ZFHX2|ENSG00000136490|LIMD2|ENSG00000140506|LMAN1L|ENSG00000142515|KLK3|ENSG00000157613|CREB3L1|ENSG00000160094|ZNF362|ENSG00000160917|CPSF4|ENSG00000161638|ITGA5|ENSG00000162241|SLC25A45|ENSG00000163435|ELF3|ENSG00000163499|CRYBA2|ENSG00000164048|ZNF589|ENSG00000165714|LOH12CR1|ENSG00000166104|NP\_776166.1|ENSG00000167526|RPL13|ENSG00000171425|ZNF580|ENSG00000174348|PODN|ENSG00000175093|SPSB4|ENSG00000179314|WSCD1|ENSG00000182492|BGN|ENSG00000197444|OGDHL|ENSG00000197696|NMB|ENSG00000203930|Q5JPA2\_HUMAN|ENSG00000204240|Q6ZVKO\_HUMAN|ENSG00000046604|DSG2|ENSG00000065135|GNAI3|ENSG00000070501|POLB|ENSG00000081913|PHLPP|ENSG00000092871|RFFL|ENSG00000101126|ADNP|ENSG00000106993|CDC37L1|ENSG00000112667|C6orf108|ENSG00000113916|BCL6|ENSG00000119866|BCL11A|ENSG00000136158|SPRY2|ENSG00000138185|ENTPD1|ENSG00000148053|NTRK2|ENSG00000151572|TMEM16D|ENSG00000151731|C8A|ENSG00000162631|NTNG1|ENSG00000162814|SPATA17|ENSG00000170871|K0232\_HUMAN|ENSG00000172809|RPL38|ENSG00000173930|SLC04C1|ENSG00000177182|NP\_775790.1|ENSG00000181104|F2R|ENSG00000186031|Q6ZSY1\_HUMAN|ENSG00000186579|DEFB106B|ENSG00000187082|D106A\_HUMAN|ENSG00000188477|Q6UXS0\_HUMAN|ENSG00000189377|NP\_940879.1|ENSG00000204524|ZNF805|ENSG000000065989|PDE4A|ENSG00000072163|LIMS2|ENSG00000086015|MAST2|ENSG00000100058|CRYBB2|ENSG00000100124|ANKRD54|ENSG00000100461|RBM23|ENSG00000103051|COG4|ENSG00000103174|NAGPA|ENSG00000108515|ENO3|ENSG00000110719|TCIRG1|ENSG00000117834|SLC5A9|ENSG00000130288|NDUFA13|ENSG00000136448|NM1T1|ENSG00000136488|CSH2|ENSG00000149260|CAPN5|ENSG00000149930|TAOK2|ENSG00000153885|KCTD15|ENSG00000167046|Q5JT57\_HUMAN|ENSG00000175223|Q8TC18\_HUMAN|ENSG00000177225|PDDC1|ENSG00000183431|SF3A3|ENSG00000205620|Q6ZRB6\_HUMAN|ENSG00000008018|PSMB1|ENSG00000083937|CHMP2B|ENSG00000100354|TNRC6B|ENSG00000125398|SOX9|ENSG00000129810|SGOL1|ENSG00000143457|GOLPH3L|ENSG00000157005|SST|ENSG00000162613|FUBP1|ENSG00000162613|FUBP1|ENSG00000163071|SPATA18|ENSG00000164024|METAP1|ENSG00000166275|AS3MT|ENSG00000166839|ANKDD1A|ENSG00000167528|ZNF641|ENSG00000179979|CRIPAK|ENSG00000196262|PPIA|ENSG00000197123|ZNF679|ENSG000000204789|ZNF204|ENSG00000004776|HSPB6|ENSG00000005238|KIAA1539|ENSG00000023902|PLEKH01|ENSG00000065526|SPEN|ENSG00000072135|PTPN18|ENSG00000080511|RDH8|ENSG00000108604|SMARCD2|ENSG00000109065|NAT9|ENSG00000110660|SLC35F2|ENSG00000112799|LY86|ENSG00000113108|SRAL1|ENSG00000114739|ACVR2B|ENSG00000118160|SLC8A2|ENSG00000119457|SLC46A2|ENSG00000125449|ARMC7|ENSG00000135632|SMYD5|ENSG00000137133|HINT2|ENSG00000137709|POU2F3|ENSG00000147130|ZMYM3|ENSG00000160271|RALGDS|ENSG00000161638|ITGA5|ENSG00000161664|ASB16|ENSG00000165406|MARCH8|ENSG00000168000|HNRPUL2|ENSG00000169247|SH3TC2|ENSG00000173011|Q86TJ2\_HUMAN|ENSG00000176476|CCDC101|ENSG00000181856|SLC2A4|ENSG00000182257|C2orf26|ENSG00000183103|LYPD4|ENSG00000188185|Q6ZQP8\_HUMAN|ENSG00000188338|SLC38A3|ENSG00000196432|Q9H5F0\_HUMAN|ENSG00000198324|FAM109A|ENSG00000203930|Q5JPA2\_HUMAN|ENSG00000206150|RNASE1|ENSG00000066629|EMIL1|ENSG00000082515|MRPL22|ENSG00000091483|FH|ENSG00000102974|CTCF|ENSG00000104756|KCTD9|ENSG00000120686|UFM1|ENSG00000127252|HRASLS|ENSG00000128791|TWSG1|ENSG00000143486|LGTN|ENSG00000146842|NP\_116231.2|ENSG00000150510|FAM124A|ENSG00000155890|TRIM42|ENSG00000165934|CPSF2|ENSG00000184280|ZNF285B|ENSG00000185305|ARL15|ENSG00000188014|NP\_619643.2|ENSG00000198740|ZNF652|ENSG00000204164|Q6P095\_HUMAN|ENSG00000204177|Q6P095\_HUMAN|ENSG00000204699|LOC129870|ENSG000000073008|PVR|ENSG00000073008|PVR|ENSG00000073008|PVR|ENSG00000100979|PLTP|ENSG00000102385|DRP2|ENSG00000116514|IBRDC3|ENSG00000129816|NR\_001538.1|ENSG00000129845|O14605\_HUMAN|ENSG00000130164|LDLR|ENSG00000130684|ZNF337|ENSG00000134461|ANKRD16|ENSG00000135124|P2RX4|ENSG00000139192|TAPPBL|ENSG00000153531|ADPRHL1|ENSG00000157693|C9orf91|ENSG00000159797|C9orf144|ENSG00000160190|SLC37A1|ENSG00000162968|Q96MQ0\_HUMAN|ENSG00000168906|MAT2A|ENSG00000175832|ETV4|ENSG00000176605|C14orf177|ENSG00000177807|KCNJ10|ENSG00000179593|ALOX15B|ENSG00000179889|PDXDC1|ENSG00000182022|ST4S6\_HUMAN|ENSG00000186163|Q4G0S1\_HUMAN|ENSG00000204094|Q6ZU93\_HUMAN|ENSG00000065809|FAM107B|ENSG00000077943|ITGA8|ENSG00000081386|ZNF510|ENSG00000090581|GNPTG|ENSG00000107242|PTP5K1B|ENSG00000108587|GOSR1|ENSG00000112343|TRIM38|ENSG00000120656|TAF12|ENSG00000127249|ATP13A4|ENSG00000134376|CRB1|ENSG00000138640|FAM13A1|ENSG00000143882|ATP6V1C2|ENSG00000147121|ZNF673|ENSG00000153012|LGI2|ENSG00000158185|ANKRD36|ENSG00000163125|KIAA0460|ENSG00000164485|IL22RA2|ENSG00000166148|AVPR1A|ENSG00000180777|ANKRD30B|ENSG00000196381|ZNF781|ENSG00000196597|ZNF782|ENSG00000196912|AN36B\_HUMAN|ENSG00000197619|ZNF615|ENSG00000198538|ZNF28|ENSG00000204133|FAM33B|ENSG00000204201|Q49A40\_HUMAN|CAGAGAC|ENSG00000008513|ST3GAL1|ENSG00000072609|CHFR|ENSG00000073067|CYP2B1|ENSG00



ENSG00000184416|Q8IUS2\_HUMAN ENSG00000196810|NP\_443093.2 ENSG00000198844|ARHGEF15 ENSG00000039139|DNAH5 ENSG00000053770|C14orf108 ENSG00000101278|Q9NQ39\_HUMAN ENSG00000115963|RND3 ENSG00000124614|RPS10  
ENSG00000129474|JUB ENSG00000133962|C14orf161 ENSG00000134121|CHL1 ENSG00000139151|PLC21 ENSG00000140367|UBE2Q2 ENSG00000143437|ARNT ENSG00000149218|ENDOD1 ENSG00000161654|LSM12  
ENSG00000163600|ICOS ENSG00000165259|CXorf43 ENSG00000169519|METT5D1 ENSG00000170222|C17orf48 ENSG00000170456|NP\_659410.3 ENSG00000174496|C21orf34 ENSG00000188215|DCUN1D3  
ENSG00000090975|PITPNM2 ENSG00000100216|TOMM23 ENSG00000100558|PLEK2 ENSG00000104129|DNAJC17 ENSG00000109066|TMEM104 ENSG00000118050|C19orf24 ENSG00000124493|GRM4 ENSG00000125834|STK35  
ENSG00000126106|TMEM53 ENSG00000132164|SLC6A11 ENSG00000151612|NP\_849157.2 ENSG00000158352|SHROOM4 ENSG00000161999|NP\_001005920.2 ENSG00000167286|CD3D ENSG00000169627|BOLA2B ENSG00000169926|KLF13  
ENSG00000174292|TNK1 ENSG00000176615|LOC652153 ENSG00000187860|NP\_001017437.1 ENSG00000188859|FAM78B ENSG00000198909|MAP3K3 ENSG00000205136|Q3KRGO\_HUMAN ENSG00000205181|QOVFZ2\_HUMAN ENSG00000039560|RAI14  
ENSG00000064726|BTBD1 ENSG00000104635|SLC39A14 ENSG00000105856|HBF1 ENSG00000108298|RPL19 ENSG00000112183|RBM24 ENSG00000117543|DPH5 ENSG00000134899|ERCC5 ENSG00000138069|RAB1A  
ENSG00000138138|ATAD1 ENSG00000144909|OSBPL11 ENSG00000145907|G3BP1 ENSG00000156253|C21orf6 ENSG00000157230|LOC728132 ENSG00000159658|KIAA0494 ENSG00000162642|C1orf52 ENSG00000181264|TMEM136  
ENSG00000182457|NR\_002323.1 ENSG00000198440|ZNF583 ENSG00000204757|Q6ZTL5\_HUMAN ENSG00000205808|PPAPDC2  
ENSG00000089820|ARHGAP4 ENSG00000100029|PES1 ENSG00000100307|CBX7 ENSG00000100348|TXN2 ENSG00000101188|NTSR1 ENSG00000103249|CLCN7 ENSG00000103489|XYLT1 ENSG00000105321|CCDC9  
ENSG00000105397|TYK2 ENSG00000105669|COPE ENSG00000114779|ABHD14B ENSG00000115307|AUP1 ENSG00000116685|KIAA2013 ENSG00000122515|ZMIZ2 ENSG00000123454|DBH ENSG00000124313|IQSEC2  
ENSG00000130584|ZBTB46 ENSG00000130701|C20orf151 ENSG00000131584|CENTB5 ENSG00000131759|RARA ENSG00000140044|NP\_569736.1 ENSG00000140279|DUOX2 ENSG00000142784|WDTCT1 ENSG00000143839|REN  
ENSG00000158106|RHPN1 ENSG00000158825|CDA ENSG00000159720|ATP6V0D1 ENSG00000162706|DARC ENSG00000163126|ANKRD23 ENSG00000166166|C14orf172 ENSG00000166860|ZBTB39 ENSG00000167775|CD320  
ENSG00000167994|RAB3IL1 ENSG00000168060|NAALADL1 ENSG00000168309|FAM107A ENSG00000169894|MUC3A ENSG00000172350|ABCG4 ENSG00000172613|RAD9A ENSG00000179361|ARID3B ENSG00000185838|GNB1L  
ENSG00000187091|PLCD1 ENSG00000187862|TTC24 ENSG00000204949|Q6XR20\_HUMAN ENSG0000067560|RHOA ENSG00000085514|PILRA ENSG00000107249|GLTS3 ENSG00000109063|MYH3 ENSG00000111432|FZD10  
ENSG00000112167|C6orf64 ENSG00000124783|SSR1 ENSG00000125144|MT1G ENSG00000136048|NP\_060840.2 ENSG00000136436|CALCOCO2 ENSG00000137757|CASP5 ENSG00000138641|HERC3 ENSG00000145687|SSBP2  
ENSG00000145982|FARS2 ENSG00000151422|FER ENSG00000154845|PPP4R1 ENSG00000155760|FZD7 ENSG00000168387|ASB14 ENSG00000169594|BNC1 ENSG00000180869|C1orf180 ENSG00000182393|IL29  
ENSG00000182457|NR\_002323.1 ENSG00000184895|SRYS ENSG00000185201|IFITM2 ENSG00000196954|CASP4 ENSG00000198468|Q8TAF5\_HUMAN ENSG00000205358|MT1H  
ENSG00000055483|USP36 ENSG00000068654|POLR1A ENSG00000078900|TP73 ENSG00000087086|FTL ENSG00000100144|SPECC1L ENSG00000101210|EEF1A2 ENSG00000101445|PPP1R16B ENSG00000103145|HCFR1R1  
ENSG00000116663|FBXO6 ENSG00000124762|CDKN1A ENSG00000126778|SIX1 ENSG00000131697|NPHP4 ENSG00000135097|MSI1 ENSG00000137073|UBAP2 ENSG00000140497|SCAMP2 ENSG00000159455|LCE2B  
ENSG00000164363|SLC6A18 ENSG00000164715|LMTK2 ENSG00000167755|KLK6 ENSG00000169059|VCX3A ENSG00000172366|C16orf14 ENSG00000180739|EDG8 ENSG00000182583|VCX ENSG00000186716|BCR  
ENSG00000187003|ACTL7A ENSG00000196361|ELAVL3 ENSG00000196998|WDR45 ENSG00000204168|Q6ZRI1\_HUMAN ENSG00000205485|Q6DCA4\_HUMAN ENSG00000205642|VCX3B ENSG00000070019|GUCY2C ENSG00000074657|ZNF532  
ENSG00000078668|VDAC3 ENSG00000085377|PREP ENSG00000091436|MLTK\_HUMAN ENSG00000107485|GATA3 ENSG00000128394|APOBEC3G ENSG00000136842|TMOD1 ENSG00000138795|LEF1 ENSG00000141161|UNC45B  
ENSG00000143514|TP53BP2 ENSG00000146376|ARHGAP18 ENSG00000155792|DEPDC6 ENSG00000156650|MYST4 ENSG00000163093|BBS5 ENSG00000165655|ZNF503 ENSG00000167081|PBX3 ENSG00000170006|TMEM154  
ENSG00000170419|VSTM2 ENSG00000175928|LRRN1 ENSG00000178852|C17orf57 ENSG00000180882|XR\_017823.1 ENSG00000197069|Q9H399\_HUMAN ENSG00000197329|PELI1 ENSG00000206131|Q6ZS21\_HUMAN  
ENSG00000064419|TNPO3 ENSG00000075891|PAX2 ENSG00000099937|SERPIND1 ENSG00000104918|RETN ENSG00000128596|NP\_073579.3 ENSG00000130643|DRD1IP ENSG00000131094|C1QL1 ENSG00000132702|HAPLN2  
ENSG00000147378|FATE1 ENSG00000158517|NCF1 ENSG00000162188|GN3 ENSG00000163060|TEK74 ENSG00000164438|TLX3 ENSG00000165178|LOC648998 ENSG00000169683|LRRC45 ENSG00000171621|SPSB1  
ENSG00000172216|CEBPB ENSG00000178171|NP\_689911.1 ENSG00000181444|ZNF467 ENSG00000181638|GLI4 ENSG00000182487|NCF1C ENSG00000184986|TMEM121 ENSG00000196767|POU3F4 ENSG00000198576|ARC  
ENSG00000202309|PNMA6 ENSG00000205559|Q6IBW5\_HUMAN ENSG00000205562|Q86U27\_HUMAN ENSG00000077809|GTF2I ENSG00000078304|PPP2R5C ENSG00000078369|GNB1 ENSG00000100425|BRD1 ENSG00000109819|PPARGC1A  
ENSG00000115806|GORASP2 ENSG00000125675|GRIA3 ENSG00000132326|PER2 ENSG00000140948|ZCCHC4 ENSG00000145284|SCD5 ENSG00000145362|ANK2 ENSG00000152154|TMEM178 ENSG00000163093|BBS5  
ENSG00000172728|FUT10 ENSG00000179029|TMEM107 ENSG00000182308|WDR21B ENSG00000183508|FAM46C ENSG00000204272|Q6Z342\_HUMAN ENSG00000204524|ZNF805  
ENSG00000001132|APBA3 ENSG00000090565|RAB11FIP3 ENSG00000100373|UPK3A ENSG00000105287|PRKD2 ENSG00000111679|PTN6 ENSG00000114554|PLXNA1 ENSG00000126067|PSMB2 ENSG00000126895|AVPR2  
ENSG00000134438|RAX ENSG00000162981|FAM84A ENSG00000177663|IL17RA ENSG00000178927|C17orf62 ENSG00000179743|Q8N9F6\_HUMAN ENSG00000185198|PRSSL1 ENSG00000189306|ZG14\_HUMAN ENSG00000198198|KIAA0467  
ENSG00000204610|TRIM15 ENSG00000010539|ZNF200 ENSG00000088970|C20orf19 ENSG00000102317|RBM3 ENSG00000102805|CLN5 ENSG00000106689|LHX2 ENSG00000109118|PHF12 ENSG00000115942|ORC2L  
ENSG00000120885|CIU ENSG00000124535|WRNIP1 ENSG00000132341|RAN ENSG00000137265|IRF4 ENSG00000140043|ZADH1 ENSG00000147905|ZCCHC7 ENSG00000149972|CNTN5 ENSG00000152954|NRSN1  
ENSG00000153561|RMND5A ENSG00000158604|TMED4 ENSG00000163755|HPS3 ENSG00000171135|JAGN1 ENSG00000171723|GPHN ENSG00000179299|NSUN7 ENSG00000183542|KLRC4 ENSG00000196285|H33\_HUMAN  
ENSG00000203722|RAET1G  
ENSG000000011451|WIZ ENSG00000067066|SP100 ENSG00000102898|NUTF2 ENSG00000103061|SLC7A60S ENSG00000103647|CORO2B ENSG00000103888|KIAA1199 ENSG00000104386|XR\_017860.1 ENSG00000105383|CD33  
ENSG00000114349|GNAT1 ENSG00000123933|MXD4 ENSG00000140650|PMM2 ENSG00000143028|SYPL2 ENSG00000158517|NCF1 ENSG00000163431|LMOD1 ENSG00000165178|LOC648998 ENSG00000165828|PRAP1  
ENSG00000169230|PRELID1 ENSG00000178952|TUFM ENSG00000182487|NCF1C ENSG00000188185|Q6ZQP8\_HUMAN ENSG00000196624|NP\_997381.1 ENSG00000198610|AKR1C4 ENSG00000204581|Q6ZU44\_HUMAN ENSG0000016864|GLT8D1  
ENSG00000195051|SYT13 ENSG00000058804|TMEM48 ENSG00000104427|C8orf70 ENSG00000108946|PRKAR1A ENSG00000128617|OPN1SW ENSG00000143252|SDHC ENSG00000163788|SNRK ENSG00000164756|SLC30A8  
ENSG00000165349|SLC7A3 ENSG00000168004|HRASLS5 ENSG00000168769|KIAA1546 ENSG00000171503|ETFDH ENSG00000173214|KIAA1919 ENSG00000189108|IL1RAPL2 ENSG00000205905|Q6ZWC6\_HUMAN  
ENSG00000110077|TCEB3 ENSG00000110968|NFATC4 ENSG00000113657|DPYSL3 ENSG00000143178|TBX19 ENSG00000154096|THY1 ENSG00000154222|CC2D1B ENSG00000159023|EPB41 ENSG00000159842|ABR  
ENSG00000160712|IL6R ENSG00000163331|NP\_001017920.1 ENSG00000166631|ANKRD21 ENSG00000178381|ZFAND2A ENSG00000183206|POT15\_HUMAN ENSG00000183403|DND1 ENSG00000205452|Q6ZQ9\_HUMAN ENSG00000062650|WAPAL  
ENSG00000075239|ACAT1 ENSG00000100722|ZC3H14 ENSG00000105792|Q8YI89\_HUMAN ENSG00000105810|CDK6 ENSG00000106443|PHF14 ENSG00000110958|PTGES3 ENSG00000115947|ORC4L ENSG00000128699|ORMDL1  
ENSG00000129534|C14orf106 ENSG00000130413|STK33 ENSG00000156140|ADAMT3 ENSG00000162775|MKL1 ENSG00000164213|NP\_689756.2 ENSG00000166503|HDCR3\_HUMAN ENSG00000172465|TCEAL1 ENSG00000188971|NP\_001013005.1  
ENSG00000188996|HUS1  
ENSG00000105248|CCDC94 ENSG00000112195|TREM2 ENSG00000113068|PFDN1 ENSG00000116031|CD207 ENSG00000127527|EP515L1 ENSG00000132275|KIAA0409 ENSG00000141503|MINK1 ENSG00000148343|FAM73B  
ENSG00000149929|HIRIP3 ENSG00000168903|BTNL3 ENSG00000171671|C11orf76 ENSG00000173801|JUP ENSG00000175356|SCUBE2 ENSG00000179632|MAF1 ENSG00000182397|C15orf51 ENSG00000183566|LATH\_HUMAN  
ENSG00000197106|SLC6A17 ENSG00000203783|PRR9 ENSG00000203785|SPRR2E ENSG0000003096|KLHL13 ENSG00000066739|C14orf103 ENSG00000089775|ZBTB25 ENSG00000092148|HECTD1 ENSG00000101353|Q9H579-2  
ENSG00000115254|XAB1 ENSG00000119943|C10orf133 ENSG00000120256|LRP11 ENSG00000133169|BEX1 ENSG00000135048|TMEM2 ENSG00000135048|TMEM2 ENSG00000136379|FAM108C1 ENSG00000138734|SEC31A  
ENSG00000170967|DDI1 ENSG00000174444|RPL4 ENSG00000178229|ZNF543 ENSG00000183060|LYSMD4 ENSG00000185414|MRPL30 ENSG00000188938|FAM120AOS ENSG00000198894|KIAA1737  
ENSG000000011347|SYT7 ENSG00000066322|ELOVL1 ENSG00000072182|ACCN4 ENSG00000107021|TBC1D13 ENSG00000115661|STK16 ENSG00000119919|FKX2-3 ENSG00000122733|KIAA1045 ENSG00000130545|CRB3  
ENSG00000137760|ALKBH8 ENSG00000142798|HSPG2 ENSG00000143028|SYPL2 ENSG00000143851|PTPN7 ENSG00000146859|TMEM140 ENSG00000157353|NFK ENSG00000158555|GDPD5 ENSG00000161638|ITGA5  
ENSG00000164107|HAND2 ENSG00000167522|ANKRD11 ENSG00000172789|HOXC5 ENSG00000177408|PLAC2 ENSG00000177614|PGBD5 ENSG00000177732|SOX12 ENSG00000180992|MRPL14 ENSG00000184330|S100A7A  
ENSG00000186431|FCAR ENSG00000196503|ARL9 ENSG00000198165|Q9H960\_HUMAN ENSG00000202581|Q6ZVY8\_HUMAN ENSG00000204922|U655\_HUMAN ENSG00000205356|NP\_056210.1 ENSG00000054267|ARID4B ENSG00000081923|ATP8B1  
ENSG00000089916|C14orf118 ENSG00000102383|ZDHC15 ENSG00000117139|JARID1B ENSG00000123983|ACSL3 ENSG00000124491|F13A1 ENSG00000128294|TPST2 ENSG00000134897|BIVM ENSG00000135318|NT5E  
ENSG00000138640|FAM13A1 ENSG00000143815|LBR ENSG00000149742|SLC22A9 ENSG00000164181|ELOVL7 ENSG00000167077|NP\_689726.3 ENSG00000168229|PTGDR ENSG00000171004|HS6S2 ENSG00000178974|FBXO34  
ENSG00000179979|CRIPAK ENSG00000196754|S100A2 ENSG00000198276|UCKL1 ENSG00000198646|NCOA6  
ENSG00000064607|SFRS14 ENSG00000095539|SEMA4G ENSG00000101452|DHX35 ENSG00000102001|CACNA17 ENSG00000107957|SH3PXD2A ENSG00000120049|KCNIP2 ENSG00000122490|PQLC1 ENSG00000124232|RBPJL  
ENSG00000130813|NP\_060851.1 ENSG00000131471|AOC3 ENSG00000167202|TBC1D2B ENSG00000167702|KIFC2 ENSG00000169174|PCSK9 ENSG00000169242|EFNA1 ENSG00000174600|CMKLR1 ENSG00000174903|RAB1B  
ENSG00000175901|XR\_017883.1 ENSG00000179913|B3GNT3 ENSG00000189203|TMEM179 ENSG00000198732|SMOC1 ENSG00000205912|Q6ZTG5\_HUMAN ENSG00000056277|SUHW3 ENSG00000066294|CD84 ENSG00000101162|TUBB1  
ENSG00000116977|LGALS8 ENSG00000127325|BEST3 ENSG00000137098|SPAG8 ENSG00000143252|SDHC ENSG00000150938|CRIM1 ENSG00000153832|FBXO36 ENSG00000155319|NP\_001004299.1 ENSG00000165186|PTCHD1  
ENSG00000165609|NUDT5 ENSG00000166752|TMEM83 ENSG00000172197|MBOAT1 ENSG00000172575|RASGRP1 ENSG00000175643|C16orf75 ENSG00000179104|TMTC2 ENSG00000182077|PTCHD3 ENSG00000184434|LRRC19  
ENSG00000188001|FAM79B ENSG00000205003|CNTF  
ENSG000000011376|LARS2 ENSG000000014164|ZC3H3 ENSG000000065268|WDR18 ENSG000000070182|SPTB ENSG00000073060|SCARB1 ENSG00000079805|DNM2 ENSG00000099814|KIAA0284 ENSG00000099991|CABIN\_HUMAN  
ENSG00000101255|TRIB3 ENSG00000103043|VAC14 ENSG00000105011|ASF1B ENSG00000116852|KIF21B ENSG00000132677|RHBG ENSG00000133055|MYBPH ENSG00000135740|SLC9A5 ENSG00000136802|LRRC8A  
ENSG00000141258|RUTBC1 ENSG00000142185|TRPM2 ENSG00000142290|FYXD7 ENSG00000146216|TTBK1 ENSG00000146755|TRIM50 ENSG00000159337|PLA2G4D ENSG00000159713|CG38\_HUMAN ENSG00000160113|NR2F6  
ENSG00000164061|BSN ENSG00000166359|WDR88 ENSG00000166482|MFAP4 ENSG00000167065|DUSP18 ENSG00000168539|CHRM1 ENSG00000169921|Q7S130\_HUMAN ENSG00000169964|TMEM42 ENSG00000172977|HTATIP  
ENSG00000173421|CCDC36 ENSG00000174586|ZNF497 ENSG00000177548|RABEP2 ENSG00000179091|CYC1 ENSG00000179862|CITED4 ENSG00000183018|SPNS2 ENSG00000185585|OLFML2A ENSG00000203876|Q5T6G7\_HUMAN  
ENSG00000203318|TXNDC4 ENSG00000067048|DDX3X ENSG00000085788|DHDH2 ENSG00000107854|TNKS2 ENSG00000111237|VPS29 ENSG00000112584|FAM120B ENSG00000113522|RAD50 ENSG00000115232|ITGA4  
ENSG00000116350|SFRS4 ENSG00000124205|EDN3 ENSG00000128595|CALU ENSG00000133083|DCLK1 ENSG00000134762|DSC3 ENSG00000134986|C5orf13 ENSG00000135960|EDAR ENSG00000136242|Q9NXD8\_HUMAN  
ENSG00000137727|ARHGAP20 ENSG00000138068|ST6B1\_HUMAN ENSG00000144410|CPO ENSG00000151090|THRB ENSG00000151715|TMEM45B ENSG00000159882|ZNF230 ENSG00000161571|Q5YKGS\_HUMAN ENSG00000175553|K1210\_HUMAN  
ENSG00000176681|LRRC37A2 ENSG00000196812|ZSCAN16 ENSG00000198087|CD2AP  
ENSG0000000050575|POLR2J2 ENSG000000055070|C1orf144 ENSG00000064999|ANKS1A ENSG00000070915|SLC12A3 ENSG00000073060|SCARB1 ENSG00000096433|ITPR3 ENSG00000101321|C20orf159  
ENSG00000106077|ABHD11 ENSG00000110076|NRXN2 ENSG00000115592|PRKAG3 ENSG00000131652|THOC6 ENSG00000141994|DUS3L ENSG00000142149|HUNK ENSG00000144152|NP\_694946.1 ENSG00000152705|CATSPER3  
ENSG00000161132|Q9BYA7\_HUMAN ENSG000001616328|LRRC56 ENSG00000164047|CAMP ENSG00000173546|CSPG4 ENSG00000180438|TPRXL ENSG00000182162|P2RY8 ENSG00000183386|FHL3 ENSG00000184216|IRAK1  
ENSG00000185176|AQPI2B ENSG00000002746|HECW1 ENSG000000050165|DKK3 ENSG00000072422|RHOBTB1 ENSG00000073614|JARID1A ENSG00000081386|ZNF510 ENSG00000083844|ZNF264 ENSG00000101868|POLA1  
ENSG00000101871|MTD1 ENSG00000104765|BNIP3L ENSG00000119865|C2orf32 ENSG00000123552|USP45 ENSG00000133019|CHRM3 ENSG00000150776|C11orf57 ENSG00000152661|GJA1 ENSG00000157259|GATAD1  
ENSG00000158185|ANKRD36 ENSG00000161634|DCD ENSG00000162433|AK3L2 ENSG00000166037|CEP57 ENSG00000178459|Q8N2E2\_HUMAN ENSG00000197776|KLHDC1 ENSG00000198650|TAT ENSG00000198903|Q6ZV72\_HUMAN  
ENSG00000203743|Q5J7V3\_HUMAN  
ENSG00000068724|TTC7A ENSG00000071246|VASH1 ENSG00000100330|MTMR3 ENSG00000103528|SYT17 ENSG00000119986|AVP11 ENSG00000123901|GPR83 ENSG00000124222|NPEPL1 ENSG00000142677|IL22RA1  
ENSG00000146221|NP\_872345.1 ENSG00000149091|DGKZ ENSG00000151148|UBE3B ENSG00000154198|Q8N1L4\_HUMAN ENSG00000156150|ALX3 ENSG00000163472|TMEM79 ENSG00000170925|TEX13B ENSG00000172508|Q8N467\_HUMAN  
ENSG00000173327|MAP3K11 ENSG00000174705|SH3PXD2B ENSG00000179776|CDH5 ENSG00000181563|C1orf211 ENSG00000184481|MLLT7 ENSG00000198931|APRT ENSG00000204386|NEU1 ENSG00000206045|LOC644844  
ENSG00000206551|Q6ZT99\_HUMAN ENSG00000003056|MEPR ENSG000000047230|CTPS2 ENSG00000071539|TRIP13 ENSG00000095794|CREM ENSG00000100796|SMEK1 ENSG00000109654|TRIM2 ENSG00000111962|UST  
ENSG00000117036|ETV3 ENSG00000119541|VPS4B ENSG00000130856|ZNF236 ENSG00000131620|TMEM16A ENSG00000155850|SLC26A2 ENSG00000163297|ANTXR2 ENSG00000168615|ADAM9 ENSG00000170927|PKHD1  
ENSG00000177125|ZBTB34 ENSG00000179299|NSUN7 ENSG00000179520|SLC17A8 ENSG00000181322|TXNDC6 ENSG00000184984|CHRM5  
ENSG000000013288|MAN2B2 ENSG00000053918|KCNQ1 ENSG00000063660|GPCL1 ENSG00000078900|TP73 ENSG00000087245|MMP2 ENSG00000100056|DGCR14 ENSG00000100604|CHGA ENSG00000115694|STK25  
ENSG00000120903|CHRNA2 ENSG00000121289|CCDC123 ENSG00000130940|CASZ1 ENSG00000131748|STAR3 ENSG00000132478|UNK ENSG00000136490|LIMD2 ENSG00000137868|STRA6 ENSG00000141098|GFOD2  
ENSG00000148331|ASB6 ENSG00000160326|SLC2A6 ENSG00000166135|HIF1AN ENSG00000173641|HSPB7 ENSG000

ENSG00000203903|Q6ZMP7\_HUMAN ENSG00000205703|NP\_001010910.1 ENSG00000205751|MRPL23 ENSG00000101349|PAK7 ENSG00000102081|FMR1 ENSG00000104356|POP1 ENSG00000104537|ANXA13 ENSG00000117152|RGS4  
ENSG00000117281|CD160 ENSG00000124721|DNAH8 ENSG00000141076|CLR1A1 ENSG00000143013|LMO4 ENSG00000147364|FBXO25 ENSG00000147677|EIF353 ENSG00000159208|Clorf51 ENSG00000162385|MAGO8  
ENSG00000174099|MSRB3 ENSG00000177406|Q8N503\_HUMAN ENSG00000184983|NDUFA6 ENSG00000185010|F8 ENSG00000189007|DEADC1 ENSG00000190378|Q6ZMM1\_HUMAN  
ENSG00000088543|C3orf18 ENSG00000100242|UNC84B ENSG00000100321|SYNG1 ENSG00000108292|MLL2 ENSG00000112320|SOBP ENSG00000114982|NP\_060461.3 ENSG00000136653|RASSF5 ENSG00000139269|INHBE  
ENSG00000143198|MGST3 ENSG00000144681|STAC ENSG00000147536|GINS4 ENSG00000167741|GGT6 ENSG00000171984|C2orf196 ENSG00000183853|KIRREL ENSG00000188822|CNR2 ENSG00000197622|CDC42SE1  
ENSG00000204094|Q6ZU93\_HUMAN ENSG00000204850|NP\_001013695.1 ENSG0000010292|NCAPD2 ENSG00000107227|TFRC ENSG00000160722|TP73L ENSG00000106952|TNFSF8 ENSG00000110484|SCGB2A2 ENSG00000116668|Clorf26  
ENSG00000119508|NR4A3 ENSG00000137261|KIAA0319 ENSG00000143420|ENSA ENSG00000146802|TMEM168 ENSG00000147082|CCNB3 ENSG00000162409|PRKAA2 ENSG00000163611|CCDC52 ENSG00000165891|E2F7  
ENSG00000176274|MCART6 ENSG00000178351|Q8N345\_HUMAN ENSG00000181481|RNF135 ENSG00000182263|FIGN ENSG00000196584|XRCC2 ENSG00000197585|Q5JV89\_HUMAN ENSG00000197863|ZNF790  
perfect: CAGGGTA TACCCGTG hsa-miR-10a TACCCGTGtagatccgaatttgt 0  
perfect: CAGGGTA TACCCGTG hsa-miR-10b TACCCGTGtagaacccaatttgt 0  
CAGGTTCC ENSG00000007541|PIGQ ENSG0000012822|CALCOCO1 ENSG0000017483|SLC38A5 ENSG00000073584|SMARCE1 ENSG00000100109|TFPI1 ENSG00000101216|GMEB2 ENSG00000104918|RETN ENSG00000110719|TCIRG1  
ENSG00000121104|FAM117A ENSG00000124107|SLP1 ENSG00000130309|GLT25D1 ENSG00000131408|NRIH2 ENSG00000137868|STRA6 ENSG00000143001|TMEM61 ENSG00000143847|PPFIA4 ENSG00000144355|DLX1  
ENSG00000148384|INPP5E ENSG00000152705|CATSPER3 ENSG00000156591|C9orf70 ENSG00000164088|PPM1M ENSG00000179740|C19orf290S ENSG00000180438|TPRXL ENSG00000182704|TSKU ENSG00000185262|FAM100B  
ENSG00000188223|ANTOL\_HUMAN ENSG00000189433|GJB4 ENSG00000197226|TBC1D9B ENSG00000204028|Q6ZRR4\_HUMAN ENSG00000204902|Q6UXW7\_HUMAN ENSG00000205266|Q6ZRU5\_HUMAN ENSG00000212133|RPS6KA6 ENSG00000279482|OPHN1  
ENSG00000101413|C2orf77 ENSG00000106560|GIMAP2 ENSG00000107014|RLN2 ENSG00000107018|RLN1 ENSG00000107249|GLIS3 ENSG00000112367|KIAA0274 ENSG00000113300|CNOT6 ENSG00000128609|NDUFA5  
ENSG00000134248|HBXIP ENSG00000141200|KIF2B ENSG00000146648|EGFR ENSG00000153879|CEBPG ENSG00000166523|CLEC4E ENSG00000170866|LILRA3 ENSG00000178726|THBD ENSG00000179813|C13orf30  
ENSG00000196776|CD47 ENSG00000197702|PARVA  
CAGGTGA ENSG000000081692|JMJ34 ENSG00000100997|ABHD12 ENSG00000101282|RSPO4 ENSG00000101321|C2orf159 ENSG00000109066|TMEM104 ENSG00000120903|CHRNA2 ENSG00000124444|ZNF576 ENSG00000125804|C2orf91  
ENSG00000135898|GRP55 ENSG00000136383|ALPK3 ENSG00000141391|SLMO1 ENSG00000148805|NR\_002934.2 ENSG00000149260|CAPN5 ENSG00000151224|MAT1A ENSG00000167964|RAB26 ENSG00000168081|PNOC  
ENSG00000169006|NTR2 ENSG00000170145|SNF1LK2 ENSG00000174564|IL20RB ENSG00000176428|VPS37D ENSG00000177699|Q8N849\_HUMAN ENSG00000181016|NP\_872403.1 ENSG00000184274|C2orf93 ENSG00000185024|BRF1  
ENSG00000188783|PRELP ENSG00000197435|HIST3H2BB ENSG00000197785|ATAD3A ENSG00000205634|NP\_001001693.1 ENSG00000205913|Q6ZUC4\_HUMAN ENSG00000204741|TPR ENSG00000111707|SUDS3 ENSG00000116489|CAPZA1  
ENSG00000117281|CD160 ENSG00000118217|ATF6 ENSG00000129292|PHF2O1 ENSG00000152931|PART1\_HUMAN ENSG00000159763|PIP ENSG00000162643|WDR63 ENSG00000167034|NKX3-1 ENSG00000174607|UGT8  
ENSG00000184284|Q96N11\_HUMAN ENSG00000186094|AGBL4 ENSG00000197756|RPL37A ENSG00000198146|ZNF770 ENSG00000205150|FAM92A3  
CAGGTGC ENSG00000006530|AGK ENSG0000011007|TCEB3 ENSG00000051523|CYBA ENSG00000076604|TRAF4 ENSG00000125434|SLC25A35 ENSG00000128165|ADM2 ENSG00000130584|ZBTB46 ENSG00000133466|C1QTNF6  
ENSG00000146021|KLHL3 ENSG00000153404|NP\_443141.2 ENSG00000157064|NMNAT2 ENSG00000160886|LY6K ENSG00000169926|KLF13 ENSG00000176101|SSNA1 ENSG00000184640|SEPT9  
ENSG00000188488|SERPINA5 ENSG00000196358|NTNG2 ENSG00000196814|FAM125B ENSG00000197539|Q6ZSY7\_HUMAN ENSG00000184088|WWTR1 ENSG00000047621|C12orf4 ENSG00000062650|WAPAL ENSG00000078725|DBC1  
ENSG00000191409|ITGA6 ENSG00000109208|SMR3A ENSG00000119950|MXI1 ENSG00000124491|F13A1 ENSG00000132970|WASF3 ENSG00000133135|RNF128 ENSG00000133704|IPO8 ENSG00000134046|MBD2  
ENSG00000134954|ETS1 ENSG00000137478|FCHSD2 ENSG00000143882|ATP6V1C2 ENSG00000146109|ABT1 ENSG00000146909|NOM1 ENSG00000153495|C13orf16 ENSG00000172456|NP\_060761.2 ENSG00000178636|Q8N7N2\_HUMAN  
ENSG00000198894|KIAA1737 ENSG00000204699|LOC129870 ENSG00000204705|LOC129870 ENSG00000206213|PLSCR5  
ENSG00000004142|POLDIP2 ENSG00000068079|IFI35 ENSG00000102854|MSLN ENSG00000103150|MLYCD ENSG00000105122|NP\_075055.1 ENSG00000105549|THEG ENSG00000107874|CUEDC2 ENSG00000107902|NP\_071409.2  
ENSG00000116663|FBXO6 ENSG00000121083|DYNLL2 ENSG00000124164|VAPB ENSG00000128322|IGLL1 ENSG00000130119|GNL3L ENSG00000130147|SH3BP4 ENSG00000130810|PPAN ENSG00000131055|COX4I2  
ENSG00000131400|NAPSA ENSG00000136059|VILL ENSG00000141577|AZI1 ENSG00000147804|SLC39A4 ENSG00000158113|LRRC43 ENSG00000164889|SLC4A2 ENSG00000166069|TMC05 ENSG00000167748|KLK1  
ENSG00000168925|CTRB1 ENSG00000170310|STX8 ENSG00000177021|LRRRC24 ENSG00000178952|TUFM ENSG00000181378|CCDC108 ENSG00000185198|PRSSL1 ENSG00000196166|NP\_997295.1 ENSG00000198535|NP\_997205.1  
ENSG00000198816|ZNF358 ENSG00000204309|Q6ZSQ3\_HUMAN ENSG00000204385|CTL4\_HUMAN ENSG00000204482|LST1 ENSG00000204653|NP\_001019827.1 ENSG00000204758|Q6ZUG4\_HUMAN ENSG00000205522|LOC255411 ENSG00000205593|FAM116B  
ENSG00000206066|IGLL3 ENSG00000000460|Clorf112 ENSG00000065150|RANBP5 ENSG00000080986|NDC80 ENSG00000114698|PLSCR4 ENSG00000127995|C8D1 ENSG00000135940|COX5B ENSG00000136872|ALDOB  
ENSG00000138604|GLCE ENSG00000140367|UBE2Q2 ENSG00000143742|SRP9 ENSG00000145780|FEM1C ENSG00000149507|PLAC1L ENSG00000150636|CCDC102B ENSG00000151806|GUF1 ENSG00000158691|ZSCAN12  
ENSG00000159882|ZNF230 ENSG00000163642|XR\_017284.1 ENSG00000165097|AOF1 ENSG00000165338|HECTD2 ENSG00000173166|RAPH1 ENSG00000183990|Q8WZ8\_HUMAN ENSG00000185009|AP3M1 ENSG00000185304|NP\_001071638.1  
ENSG00000187155|CU085\_HUMAN ENSG00000187627|RGPD1 ENSG00000197579|TOPORS ENSG00000203964|Q8NG36\_HUMAN ENSG00000204279|PAGE3  
CAGTAGG ENSG00000047056|WDR37 ENSG00000095713|CRTAC1 ENSG00000103061|SLC7A6OS ENSG00000110042|DTX4 ENSG00000114999|TTL ENSG00000130751|NPAS1 ENSG00000136718|IMP4 ENSG00000139540|SLC39A5  
ENSG00000139644|TEGT ENSG00000144681|STAC ENSG00000147065|MSN ENSG00000154229|PRKCA ENSG00000162367|TAL1 ENSG00000170430|MGMT ENSG00000179058|C9orf50 ENSG00000181350|C17orf76  
ENSG00000187122|ARHGAP19 ENSG00000204003|LCN6 ENSG000000004799|PKD4 ENSG000000035928|RFC1 ENSG00000120800|UTP20 ENSG00000131126|TEX101 ENSG00000133142|TCEAL4 ENSG00000139610|ELAI  
ENSG00000141665|FBXO15 ENSG00000146039|SLC17A4 ENSG00000152223|KIAA1632 ENSG00000163075|NP\_001025167.1 ENSG00000168152|THAP9 ENSG00000176142|TMEM39A ENSG00000176160|HSF5 ENSG00000188419|CHM  
CAGTATA ENSG00000023191|RNH1 ENSG00000070814|TCOF1 ENSG00000090512|FETUB ENSG00000090857|NP\_060460.3 ENSG00000133149|TEX13A ENSG00000134809|TIMM10 ENSG00000135636|DYSF ENSG00000147576|ADHFE1  
ENSG00000169641|LUZP1 ENSG00000170925|TEX13B ENSG00000171840|NINJ2 ENSG00000185917|SETD4 ENSG00000186577|C6orf1 ENSG00000005471|ABCBA4 ENSG00000129833|MAP4K5 ENSG00000056097|ZFR  
ENSG000000092978|GPATCH2 ENSG00000112769|LAMA4 ENSG00000113328|CCNG1 ENSG00000114127|XRN1 ENSG00000115464|USP34 ENSG00000114217|XRN1 ENSG00000113284|SUCLA2 ENSG00000136161|RCBTB2  
ENSG00000137757|CASP5 ENSG00000138336|CXCR6 ENSG00000142065|ZFP14 ENSG00000146426|TIAM2 ENSG00000147231|CXorf57 ENSG00000149311|ATM ENSG00000156035|PRUNE2 ENSG00000162636|FAM102B  
ENSG00000162923|WDR26 ENSG00000163297|ANTXR2 ENSG00000164631|ZNF12 ENSG00000165476|REEP3 ENSG00000170495|Q6ZNE6\_HUMAN ENSG00000170903|KIAA1826 ENSG00000174405|LIG4 ENSG00000176390|CRLF3  
ENSG00000184613|NELL2 ENSG00000196442|ZNF432 ENSG00000197639|MKRNP5  
CAGTATT ENSG00000008710|PKD1 ENSG00000100109|TFPI1 ENSG00000100335|SMCR7L ENSG00000105875|NP\_054868.2 ENSG00000112763|BTN2A1 ENSG00000127511|SIN3B ENSG00000136802|LRRRC8A ENSG00000141084|RANBP10  
ENSG00000143127|ITGA10 ENSG00000147065|MSN ENSG00000148290|SURF1 ENSG00000153060|TEKT5 ENSG00000156711|MAPK13 ENSG00000163930|BAP1 ENSG00000164091|TMEM113 ENSG00000173218|VANGL1  
ENSG00000182712|MTCP1 ENSG00000184108|TRIML1 ENSG00000185065|NP\_776154.2 ENSG00000196204|Q6NUR6\_HUMAN ENSG00000198853|RUSC2 ENSG00000204323|Q71RC9\_HUMAN ENSG00000204463|BAT3 ENSG00000106278|PTPRZ1  
ENSG00000111364|DDX55 ENSG00000112379|KIAA1244 ENSG00000115145|STAM2 ENSG00000116285|ERRF1 ENSG00000117519|CNN3 ENSG00000134874|DZIP1 ENSG00000138346|DNA2L ENSG00000143494|VASH2  
ENSG00000148516|ZEB1 ENSG00000151233|Q8IXV1\_HUMAN ENSG00000153339|KIAA1012 ENSG00000156469|MTERFD1 ENSG00000165323|FAT3 ENSG00000166260|COX11 ENSG00000166734|CASC4 ENSG00000169554|ZEB2  
ENSG00000173705|SUSD5 ENSG00000180398|MCFD2 ENSG00000180730|TMEM46 ENSG00000182004|SNRPE ENSG00000183783|KCTD8 ENSG00000183844|FAM3B ENSG00000184831|APOO ENSG00000185634|SHC4  
ENSG00000185652|NTF3 ENSG00000196532|HIST1H3C ENSG00000197343|ZNF655 ENSG00000198738|Q5T5W8\_HUMAN  
perfect: CAGTATT AATACTG hsa-miR-200b tAATACTGccttgtaaatgatgac 1  
perfect: CAGTATT AATACTG hsa-miR-429 tAATACTGtcttgtaaaaccgt 1  
perfect: CAGTATT AATACTG hsa-miR-200c tAATACTGccttgtaaatgatgg 1  
CAGTCCC ENSG00000065361|ERBB3 ENSG00000072134|EPN2 ENSG00000083845|RPS5 ENSG00000100991|TRPC4AP ENSG00000102225|PCTK1 ENSG00000103429|BFAR ENSG00000104299|INT9\_HUMAN ENSG00000106948|AKNA  
ENSG00000110921|MKV ENSG00000111271|ACAD10 ENSG00000115255|REEP6 ENSG00000118156|ZNF541 ENSG00000125813|PAX1 ENSG00000127561|SYNGR3 ENSG00000132510|JMJ33 ENSG00000135736|CCDC102A  
ENSG00000137076|TLN1 ENSG00000143549|TPM3 ENSG00000145920|CLPX2 ENSG00000163060|TEKT4 ENSG00000164007|CLDN19 ENSG00000164444|ST5 ENSG00000167964|RAB26  
ENSG00000168140|VASN ENSG00000168961|LGALS9 ENSG00000177302|TOP3A ENSG00000178537|SLC25A20 ENSG00000178773|CPNPE7 ENSG00000181830|SLC35C1 ENSG00000182257|C22orf26 ENSG00000183600|Q66K37\_HUMAN  
ENSG00000186191|C2orf186 ENSG00000189120|SP6 ENSG00000189113|C9orf167 ENSG00000203987|Q6ZR86\_HUMAN ENSG00000003056|M6PR ENSG00000061455|PRDM6 ENSG00000066379|ZNRD1 ENSG00000070718|AP3M2  
ENSG00000095139|ARCN1 ENSG00000095485|CWF19L1 ENSG00000103316|CRYM ENSG00000112078|KCTD20 ENSG00000119042|SATB2 ENSG00000125851|PCSK2 ENSG00000131480|AOC2 ENSG00000153779|TGIF2LX  
ENSG00000163075|NP\_001025167.1 ENSG00000165023|DIRAS2 ENSG00000185345|PARK2  
CAGTCGG ENSG00000054282|SDCCAG8 ENSG00000075624|ACTB ENSG00000090776|EPN8 ENSG00000099797|GPSN2 ENSG00000100450|GZMH ENSG00000101298|RAD21L1 ENSG00000103496|STX4 ENSG00000107130|FREQ  
ENSG00000113073|SLC4A9 ENSG00000117154|IGSF21 ENSG00000122592|HOXA7 ENSG00000125458|NT5C ENSG00000129451|KLK10 ENSG00000130005|GAMT ENSG00000130303|BST2 ENSG00000130312|MRPL34  
ENSG00000141096|DPEP3 ENSG00000143110|Clorf162 ENSG00000173535|TNFRSF10C ENSG00000174705|SH3PXD2B ENSG00000180096|SEPT1 ENSG00000180739|EDG8 ENSG00000188185|Q6ZQP8\_HUMAN ENSG00000196365|LONP1  
ENSG00000197273|GUCA2A ENSG00000003509|NP\_653337.1 ENSG00000004961|HCCS ENSG000000023608|SNAPC1 ENSG00000108839|ALOX12 ENSG000001123892|SMURF2 ENSG00000128892|RAB38 ENSG00000128655|PDE11A  
ENSG00000129226|CD68 ENSG00000134258|VTGNC1 ENSG00000141448|GATA6 ENSG00000143226|FCGR2A ENSG00000143727|ACP1 ENSG00000151150|ANK3 ENSG00000166573|GALR1 ENSG00000168930|TRIM49  
ENSG00000173827|AOAVR7\_HUMAN ENSG00000180251|SLC9A4 ENSG00000198863|RUND1 ENSG00000204947|ZNF425 ENSG00000205758|CRYZL1  
CAGTGCC ENSG00000004975|DVL2 ENSG00000026036|TNFRSF6B ENSG00000047578|KIAA0556 ENSG00000063978|RNF4 ENSG00000073111|MCM2 ENSG00000078967|UBE2D4 ENSG00000108828|VAT1 ENSG00000114735|HEMK1  
ENSG00000125826|RBCK1 ENSG00000125901|MRPS26 ENSG00000125954|FNBT ENSG00000136487|GH2 ENSG00000136488|CSH2 ENSG00000144579|CTDSP1 ENSG00000149397|HMBS ENSG00000155034|FBXL18  
ENSG00000169442|CD52 ENSG00000172780|RAB43 ENSG00000182566|CLEC4G ENSG00000186501|Clorf160 ENSG00000189110|Q6ZRK9\_HUMAN ENSG00000189162|CSH1 ENSG00000197600|MYBPHL ENSG00000198920|KIAA0753  
ENSG00000204002|Q6ZQ6\_HUMAN ENSG00000204333|Q6ZTP0\_HUMAN ENSG00000204414|CSHL1 ENSG00000204783|Q6ZU4\_HUMAN ENSG00000204825|Q6ZU4\_HUMAN ENSG00000204831|Q8N1S9\_HUMAN ENSG000002038945|MSR1 ENSG00000049245|VAMP3  
ENSG00000065135|GNAI3 ENSG00000072042|RDH11 ENSG000000805276|EVI1 ENSG00000106701|FSD1 ENSG00000118322|ATP10B ENSG00000129675|ARHGAF6 ENSG00000141298|SSH2 ENSG00000143013|LMO4  
ENSG00000145476|CYP4V2 ENSG00000147862|NFIB ENSG00000148737|TCF7L2 ENSG00000152413|HOMER1 ENSG00000163071|SPATA18 ENSG00000165669|C10orf84 ENSG00000170315|UBI1\_HUMAN ENSG00000186105|Q7Z2Q7\_HUMAN  
ENSG00000186522|SEPT10 ENSG00000189251|Q8WYN8\_HUMAN ENSG00000205608|Q6ZQP9\_HUMAN  
CAGTGGC ENSG00000106003|LFNG ENSG00000106948|AKNA ENSG00000107147|KCNT1 ENSG00000108759|KRT32 ENSG00000110047|EHD1 ENSG00000114554|PLXNA1 ENSG00000116031|CD207  
ENSG00000120913|PDLIM2 ENSG00000122140|MRPS2 ENSG00000124074|C16orf48 ENSG00000124145|SDC4 ENSG00000130829|DUSP9 ENSG00000135709|KIAA0513 ENSG00000146090|RASGEF1C ENSG00000148604|RGR ENSG00000165623|C10orf49  
ENSG00000149451|ADAM33 ENSG00000152127|MGAT5 ENSG00000156574|NODAL ENSG00000161132|Q9BYA7\_HUMAN ENSG00000161692|DBF4B ENSG00000162227|TAF6L ENSG00000162408|NOL9 ENSG00000165623|C10orf49  
ENSG00000184979|USP18 ENSG00000188338|SLC38A3 ENSG00000204585|Q8N8T0\_HUMAN ENSG00000206123|Q5BLP8\_HUMAN ENSG00000054267|ARID4B ENSG00000165970|SLC6A5 ENSG00000179950|NP\_055096.2 ENSG00000181709|Q96DH5\_HUMAN  
ENSG00000108389|MTMR4 ENSG00000111215|PRR4 ENSG00000111785|RLC8B ENSG00000112249|ASCC3 ENSG00000112294|ALDH5A1 ENSG00000135334|C6orf166 ENSG00000135917|SLC19A3 ENSG00000136240|KDEL2  
ENSG00000140948|ZCCHC14 ENSG00000144410|CPO ENSG00000152213|ARL11 ENSG00000153292|GPR110 ENSG00000155592|ZKSCAN2 ENSG00000157557|ETS2 ENSG00000162434|JAK1 ENSG00000162669|NP\_001071975.3  
ENSG00000170009|Q9NTH0\_HUMAN ENSG00000172493|AFF1 ENSG00000176273|TMEM20 ENSG00000176871|WSB2 ENSG00000178562|CD28  
CAGTGGT ENSG00000033327|GAB2 ENSG00000086548|CEACAM6 ENSG000001000721|TCL1A ENSG00000101444|AHCY ENSG00000122711|SPINK4 ENSG00000134461|ANKRD16 ENSG00000135439|CENTG1 ENSG00000136699|SMPD4  
ENSG00000137726|FXD6 ENSG00000138867|C22orf13 ENSG00000144583|PANC4 ENSG00000152117|PEF1 ENSG00000162517|PEF1 ENSG00000165970|SLC6A5 ENSG00000179950|NP\_055096.2 ENSG00000181709|Q96DH5\_HUMAN  
ENSG00000182490|TSK2 ENSG00000188743|Q9P169\_HUMAN ENSG00000000188778|ADRB3 ENSG00000189263|Q6ZS22\_HUMAN ENSG00000196187|TMEM63A ENSG00000204049|Q6ZUH9\_HUMAN ENSG00000206081|Q6ZVK3\_HUMAN ENSG00000005812|FBXL3  
ENSG00000036549|ZZZ3 ENSG00000042813|ZPNP ENSG00000076641|PAG1 ENSG00000082482|KCNC2 ENSG00000107201|DDX58 ENSG00000109670|FBXW7 ENSG00000115946|PNO1 ENSG00000121903|ZSCAN20  
ENSG00000122565|CBX3 ENSG00000135316|SYNCRIP ENSG00000141279|NPEPPS ENSG00000146648|EGFR ENSG00000148429|USP6NL ENSG00000153066|TXNDC11 ENSG00000153820|NP\_085126.1 ENSG00000154380|ENAH



ENSG00000164099|PRSS12 ENSG00000164411|GJB7 ENSG00000170967|DDI1 ENSG00000179930|ZNF648 ENSG00000181481|RNFI135 ENSG00000188800|TMCO2 ENSG00000197956|S100A6 ENSG00000198121|EDG2  
ENSG00000204019|NP\_001017978.1 ENSG00000205604|Q6ZUP5\_HUMAN  
CAGTGTA ENSG00000121281|ADCY7 ENSG00000124155|PIGT ENSG00000130177|CDC16 ENSG00000163699|Q9H7Y4\_HUMAN ENSG00000164778|EN2 ENSG00000167967|E4F1 ENSG00000174370|C11orf45  
ENSG00000181873|C1orf69 ENSG00000183666|LOC728411 ENSG00000185917|SETD4 ENSG00000196739|COL27A1 ENSG00000204228|HSD17B8 ENSG00000204356|RDBP ENSG0000034239|EFCAB1 ENSG0000075415|SLC25A3  
ENSG00000077254|USP33 ENSG00000082515|MRPL22 ENSG00000102908|NFAT5 ENSG00000114374|USP9Y ENSG00000118200|CAMSAP1L1 ENSG00000121594|CD80 ENSG00000127995|CASD1 ENSG00000133872|TMEM66  
ENSG00000135931|ARMC9 ENSG00000136273|HUS1\_HUMAN ENSG00000138829|FBN2 ENSG00000150361|KLHL1 ENSG00000166035|LIPC ENSG00000172115|CYCS ENSG00000176871|WSB2 ENSG00000185515|BRCC3  
ENSG00000188021|UBQLN2 ENSG00000197195|CHURC1  
CAGTGT ENSG00000063245|EPN1 ENSG00000089280|FUS ENSG00000092421|SEMA6A ENSG00000097021|ACOT7 ENSG00000100181|CSNK1E ENSG00000103091|WDR59 ENSG00000106351|HRBL  
ENSG00000114933|NP\_060229.2 ENSG00000117245|KIF17 ENSG00000117643|MAN1C1 ENSG00000119688|ABCD4 ENSG00000126091|ST3GAL3 ENSG00000126698|DNAJC8 ENSG00000130287|NCAN ENSG00000131378|RFTN1  
ENSG00000134207|SYT6 ENSG00000142459|EVI5L ENSG00000145990|GFOD1 ENSG00000151498|ACAD8 ENSG00000162129|CLPB ENSG00000170412|GPRC5C ENSG00000172301|C17orf79 ENSG00000174238|PITPNA  
ENSG00000196517|SLC6A9 ENSG00000196935|SRGAP1 ENSG00000198246|SLC29A3 ENSG00000203931|LOC729078 ENSG00000205307|Q8TEE9\_HUMAN ENSG00000007908|SELE ENSG00000091409|ITGA6 ENSG00000123279|KIAA1244  
ENSG00000115008|IL1A ENSG00000120217|CD274 ENSG00000124406|ATP8A1 ENSG00000125870|SNRPB2 ENSG00000134363|FST ENSG00000137040|RANBP6 ENSG00000137819|PAQR5 ENSG00000140749|IGSF6  
ENSG00000142875|PRKACB ENSG00000148516|ZEB1 ENSG00000153936|HS2ST1 ENSG00000154127|STS1\_HUMAN ENSG00000155966|AFF2 ENSG00000164823|OSGIN2 ENSG00000169554|ZEB2 ENSG00000175175|PPM1E  
ENSG00000177125|ZBTB34 ENSG00000177200|CHD9 ENSG00000196110|ZNF699 ENSG00000196776|CD47 ENSG00000205428|C9orf35  
perfect: CAGTGT AACACTG hsa-miR-200a tAACTGtctgtgaacgatgt 1  
perfect: CAGTGT AACACTG hsa-miR-141 tAACTGtctgtgaacgatgt 1  
CAGTTCG ENSG00000006555|TTC22 ENSG00000100344|PNPLA3 ENSG00000100362|PVALB ENSG00000104894|CD37 ENSG00000105717|PBX4 ENSG00000107882|SUFU ENSG00000110921|MVK ENSG00000119599|WDR21A  
ENSG00000119946|CNM1 ENSG00000128652|HOXD3 ENSG00000139219|COL2A1 ENSG00000168255|Q8IZ67\_HUMAN ENSG00000171671|C11orf76 ENSG00000174015|SPERT ENSG00000174166|Q9BTX9\_HUMAN ENSG00000179922|ZNF784  
ENSG00000180438|TPRXL ENSG00000183242|WIT1 ENSG00000186891|TNFRSF18 ENSG00000189263|Q6ZS22\_HUMAN ENSG00000191713|Q8IWA4\_HUMAN ENSG0000003056|MEPR ENSG00000081803|CADPS2 ENSG00000090581|GNPTG  
ENSG00000107779|BMPRIA ENSG00000111247|RAD51AP1 ENSG00000113845|C3orf1 ENSG00000124479|NDP ENSG00000130741|EIF2S3 ENSG00000139352|ASCL1 ENSG00000140873|ADAMTS18 ENSG00000155324|GRAMD3  
ENSG00000162607|USP1 ENSG00000163599|CTLA4 ENSG00000164287|CDC20B ENSG00000168675|C18orf1 ENSG00000169040|PMCHL2 ENSG00000170264|NF\_115556.1 ENSG00000176171|BNIP3 ENSG00000177324|CXorf20  
ENSG00000178403|NEUROG2 ENSG00000180098|TRSPAP1 ENSG00000185013|NT5C1B ENSG00000186458|DB132\_HUMAN ENSG00000186814|Q86W11\_HUMAN ENSG00000187009|Q8NFD4\_HUMAN ENSG00000188877|POTE8\_HUMAN ENSG00000197747|S100A10  
ENSG00000198908|BHLHB9 ENSG00000205133|Q6Z9K1\_HUMAN  
CAGTGC ENSG00000006638|TBXA2R ENSG00000016391|CHDH ENSG00000099814|KIAA0284 ENSG00000100101|NOL12 ENSG00000103067|RBM35B ENSG00000103723|AP3B2 ENSG00000114302|PRKAR2A ENSG00000121274|PAPD5  
ENSG00000141002|TCF25 ENSG00000147081|AKAP4 ENSG00000147123|NDUFB11 ENSG00000154928|P54762-3 ENSG00000157093|LYZL4 ENSG00000164010|ERMAP ENSG00000167778|SPRYD3 ENSG00000169213|RAB3B  
ENSG00000169921|Q75L30\_HUMAN ENSG00000196976|LAGE3 ENSG00000198569|SLC3A3 ENSG00000206126|Q6ZV82\_HUMAN ENSG00000009307|NRAS ENSG00000054938|CHRDL2 ENSG00000067533|RRP15 ENSG00000068878|PSME4  
ENSG00000075188|NUP37 ENSG00000083099|LYRM2 ENSG00000099783|HNRPB ENSG00000107249|GLI3 ENSG00000111711|GOLT1B ENSG00000112425|EPM2A ENSG00000120436|GPR31 ENSG00000125850|OVOL2  
ENSG00000134077|THUMP3 ENSG00000144867|SRPRB ENSG00000148123|NP\_060223.2 ENSG00000153814|JAZF1 ENSG00000155545|MIR3 ENSG00000158966|CACHD1 ENSG00000163626|COX18 ENSG00000163673|DCLK3  
ENSG00000166454|K0431\_HUMAN ENSG00000169291|SHE ENSG00000170516|COX7B2 ENSG00000171365|CLCN5 ENSG00000198626|RYR2  
CAGTTTA ENSG00000055070|C1orf144 ENSG00000101265|RASSF2 ENSG00000104823|ECH1 ENSG00000107738|C10orf54 ENSG00000116032|GRIN3B ENSG00000116205|C1orf83 ENSG00000124422|USP22 ENSG00000128849|CGNL1  
ENSG00000131143|COX411 ENSG00000132434|LANCL2 ENSG00000133246|PRAM1 ENSG00000168795|ZBTB5 ENSG00000179085|DPM3 ENSG00000179766|Q4G129\_HUMAN ENSG00000185885|IFITM1 ENSG00000188042|ARL4C  
ENSG00000188322|SBK1 ENSG00000198585|NUDT16 ENSG00000204118|NAP1L6 ENSG00000006468|ETV1 ENSG00000007062|PROM1 ENSG00000006339|CCAR1 ENSG00000072415|MPP5 ENSG00000095574|IKZF5  
ENSG00000100711|ZYFYE21 ENSG00000102753|KPNA3 ENSG00000104825|NFKB1B ENSG00000105983|LMBR1 ENSG00000112242|E2F3 ENSG00000112697|TMEM30A ENSG00000119965|C10orf88 ENSG00000112673|DACH2  
ENSG00000127993|NP\_115496.2 ENSG00000130347|RTN4P1 ENSG00000135409|AMHR2 ENSG00000135968|GCC2 ENSG00000138814|PPP3CA ENSG00000146242|TPBG ENSG00000148948|LRRC4C ENSG00000163655|GMPS  
ENSG00000165156|ZH1 ENSG00000169239|CA5B ENSG00000169251|NMD3 ENSG00000182093|WRB ENSG00000183675|PTPN20A ENSG00000188725|NP\_001041714.1 ENSG00000196648|NP\_937824.1 ENSG00000197978|NP\_937824.1  
ENSG00000198468|Q8TAF5\_HUMAN ENSG00000198846|TOX ENSG00000204104|TRAF3IP1 ENSG00000204179|PTPN20A  
CATAAAA ENSG00000037757|NP\_115661.1 ENSG00000078699|CBFA2T2 ENSG000000884652|TXLNA ENSG00000087076|HSD17B14 ENSG00000009805|CMTM1 ENSG00000099972|MICAL3 ENSG00000110906|KCTD10 ENSG00000116444|ACRBP  
ENSG00000112837|TBX18 ENSG00000113739|STC2 ENSG000001128944|C15orf23 ENSG00000148290|SURF1 ENSG00000152137|HSPB8 ENSG00000162004|CCDC78 ENSG00000162736|NCSTN ENSG00000163884|KLF15  
ENSG00000171724|K1576\_HUMAN ENSG00000183255|PTTG1IP ENSG00000197174|O14606\_HUMAN ENSG00000197285|NR\_001536.1 ENSG00000197549|Q6Z90\_HUMAN ENSG00000198437|Q8N0T2\_HUMAN ENSG00000204759|Q6ZRY0\_HUMAN  
ENSG00000205023|Q6ZSF1\_HUMAN  
ENSG00000031691|CENPQ ENSG00000081665|ZNF253 ENSG00000100522|GNPNAT1 ENSG00000101844|ATG4A ENSG00000105835|PBEF1 ENSG00000105894|PTN ENSG00000112077|RHAG ENSG00000112246|SIM1  
ENSG00000113520|IL4 ENSG00000114541|FRMD4B ENSG00000120586|MRC1 ENSG00000123219|CENPK ENSG00000134716|CYP2J2 ENSG00000136897|MRPL50 ENSG00000138152|BTBD16  
ENSG00000139160|NP\_776163.1 ENSG00000139239|XR\_017789.1 ENSG00000144161|ZC3H8 ENSG00000148303|SNORD36A ENSG00000151150|ANKK ENSG00000105497|ZNF175 ENSG00000152380|NP\_991111.1 ENSG00000156795|C8orf32  
ENSG00000158373|HTST2H2BA ENSG00000163012|ZSWIM2 ENSG00000164022|SCYE1 ENSG00000165832|TRUB1 ENSG00000171126|KCNQ3 ENSG00000177932|ZNF354C ENSG00000178102|DNAHL1 ENSG00000180071|ANKRD18A  
ENSG00000183748|MRC1L1 ENSG00000185203|Q96S36\_HUMAN ENSG00000186009|ATP4B ENSG00000187676|B3GALT1 ENSG00000188868|ZNF563 ENSG00000197123|ZNF679 ENSG00000197301|Q6ZQU9\_HUMAN ENSG00000204464|Q5TG92\_HUMAN  
CATAAAT ENSG00000007520|C16orf42 ENSG00000068650|ATP11A ENSG00000082805|ERC1 ENSG00000087088|BAX ENSG00000105617|LENG1 ENSG00000108474|PIGL ENSG00000110446|SLC15A3 ENSG00000116198|KIAA0562  
ENSG00000116667|C1orf21 ENSG00000116685|KIAA2013 ENSG00000120664|LOC646871 ENSG00000128262|Q9NTU6\_HUMAN ENSG00000136378|ADAMTS7 ENSG00000139874|SSFR1 ENSG00000140950|KIAA1609 ENSG00000148773|MKI67  
ENSG00000155849|ELMO1 ENSG00000156575|PRG3 ENSG00000164885|CDK5 ENSG00000166974|MAPRE2 ENSG00000168505|GBX2 ENSG00000169084|ZBED1 ENSG00000169777|TAS2R1 ENSG00000170379|NP\_775949.1  
ENSG00000171777|RASGRP4 ENSG00000174564|IL20RB ENSG00000176424|NP\_001013742.1 ENSG00000180875|GREM2 ENSG00000183741|CBX6 ENSG00000184654|YV006\_HUMAN ENSG00000184659|FOXD4L4 ENSG00000204779|FOXD4L5  
ENSG00000204828|FX4L4\_HUMAN ENSG00000205015|Q6ZNV2\_HUMAN ENSG00000206053|HN1L ENSG00000065609|SNAP91 ENSG00000101166|SLMO2 ENSG00000105497|ZNF175 ENSG00000107249|GLI3 ENSG00000109163|GNRHR  
ENSG00000114686|MRPL3 ENSG00000121350|NP\_079130.2 ENSG00000121570|DPPA4 ENSG00000135409|AMHR2 ENSG00000138286|KIAA0974 ENSG00000145730|PAM ENSG00000154099|LRRC50 ENSG00000156886|ITGAD  
ENSG00000162670|FAM5C ENSG00000164879|CA3 ENSG00000169607|CKAP2L ENSG00000171858|RPS21 ENSG00000174226|NP\_689841.2 ENSG00000174796|THAP6 ENSG00000177889|UBE2N ENSG00000186908|ZDHHC17  
ENSG00000189221|MAOA  
CATAACG ENSG00000013374|NUB1 ENSG00000100060|MFNG ENSG00000100167|SEPT3 ENSG00000101181|GTPBP5 ENSG00000105972|C7orf20 ENSG00000115641|FHL2 ENSG00000122180|MYOG ENSG00000122375|OPN4  
ENSG00000127585|FBXL16 ENSG00000131061|ZNF341 ENSG00000134291|TMEM106C ENSG00000136305|CIDB5 ENSG00000137726|PXYD6 ENSG00000140443|IGF1R ENSG00000142634|EFHD2 ENSG00000146285|SCML4  
ENSG00000155666|JMJD5 ENSG00000159461|AMFR ENSG00000160993|ALKBH4 ENSG00000164638|SLC29A4 ENSG00000168993|NM\_006651.3 ENSG00000173126|PCP4L1 ENSG00000173153|ESRRA ENSG00000179820|MYADM  
ENSG00000197506|SLC28A3 ENSG00000204622|HLA-J ENSG00000204758|Q6ZUG4\_HUMAN ENSG00000205851|Q4G0H1\_HUMAN ENSG00000206580|AP4M1 ENSG00000002016|RAD52 ENSG00000023608|SNAPC1 ENSG00000061794|MRPS35  
ENSG00000069509|FUNDCl ENSG00000069849|ATP1B3 ENSG00000078140|H1P2 ENSG00000083168|MYST3 ENSG00000096968|JAK2 ENSG00000101132|PFDN4 ENSG00000102974|CTCF ENSG00000115840|SLC25A12  
ENSG00000126733|DACH2 ENSG00000134590|FAM127A ENSG00000135521|LTV1 ENSG00000141279|NPEPPS ENSG00000143653|SCCPDH ENSG00000144645|OSBP1L0 ENSG00000145740|SLC30A5 ENSG00000150361|KLHL1  
ENSG00000153044|CENPH ENSG00000156976|EIF4A2 ENSG00000162927|NP\_653310.1 ENSG00000163751|CPA3 ENSG00000165899|C12orf64 ENSG00000166503|HDGR3\_HUMAN ENSG00000167562|ZNF701 ENSG00000168291|PDHB  
ENSG00000172667|ZMAT3 ENSG00000178636|Q8N7N2\_HUMAN  
CATAATA ENSG000000011590|ZBTB32 ENSG00000058085|LAMC2 ENSG00000090238|YPEL3 ENSG00000099960|SLC7A4 ENSG00000102879|CORO1A ENSG00000106565|TMEM176B ENSG00000107960|OBFC1 ENSG00000110169|HPX  
ENSG00000113273|ARSB ENSG00000116667|C1orf21 ENSG00000123329|INHGA9 ENSG00000133475|GGT2 ENSG00000134825|C11orf10 ENSG00000144233|AMMECR1L ENSG00000151465|CDC123 ENSG00000159266|Q69YJ1\_HUMAN  
ENSG00000162543|UBXD3 ENSG00000163207|IVL ENSG00000164062|APEH ENSG00000169509|CRCT1 ENSG00000176444|CLK2 ENSG00000177202|SPACA4 ENSG00000178057|C3orf60 ENSG00000183038|LOC728226  
ENSG00000183399|Q7L8T7\_HUMAN ENSG00000183684|THOC4 ENSG00000184436|THAP7 ENSG00000185554|NXF2 ENSG00000185945|NXF2\_HUMAN ENSG00000187726|DNAJB13 ENSG00000197421|NR\_003267.1 ENSG00000198610|AKR1C4  
ENSG00000203805|PPAPDC1A ENSG00000205801|Q6ZTI5\_HUMAN ENSG00000040933|INPP4A ENSG00000042813|ZPBP ENSG00000049249|TNFRSF9 ENSG00000052795|Q9H994\_HUMAN ENSG00000067167|TRAM1 ENSG00000086061|DNAJA1  
ENSG00000086598|TMED2 ENSG00000104112|SCG3 ENSG00000104147|OIP5 ENSG00000116688|MFN2 ENSG00000117593|DARS2 ENSG00000119866|BCL11A ENSG00000122545|SEPT7 ENSG00000123739|PLA2G12A  
ENSG00000124882|EREG ENSG00000129128|SPCS3 ENSG00000132356|PRKAA1 ENSG00000134250|NOTCH2 ENSG00000137691|C11orf70 ENSG00000142065|ZFP14 ENSG00000143756|FBXO28 ENSG00000144566|RAB5A  
ENSG00000145545|SRD5A1 ENSG00000150681|RGS18 ENSG00000154736|ADAMTS5 ENSG00000155115|C6orf51 ENSG00000164002|C1orf176 ENSG00000166337|TAF10 ENSG00000168582|CRYGA ENSG00000169047|IRS1  
ENSG00000170340|B3GNT2 ENSG00000170365|SMAD1 ENSG00000172869|DMXL1 ENSG00000183098|GPC6 ENSG00000183337|BCOR ENSG00000185129|PURA ENSG00000185880|TRIM69 ENSG00000188185|Q86VG7\_HUMAN  
ENSG00000187987|ZSCAN23 ENSG00000196433|ASMT ENSG00000197410|DCHS2 ENSG00000197930|EROL1 ENSG00000198692|EIF1AY ENSG00000198947|DMD  
CATAATC ENSG00000099977|DDT ENSG00000100979|PLTP ENSG00000102466|FGF14 ENSG00000103313|MEFV ENSG00000139083|ETV6 ENSG00000139636|LMBR1L ENSG00000142186|SCYL1 ENSG00000142751|ATPBD1B  
ENSG00000149653|WFD6 ENSG00000154319|C8orf13 ENSG00000168826|ZNF509 ENSG00000169474|SPRR1A ENSG00000170550|Q8WVU8\_HUMAN ENSG00000173673|HES3 ENSG00000176595|KBTBD11 ENSG00000179593|ALOX15B  
ENSG00000205790|Q6ZT20\_HUMAN ENSG00000205878|Q6ZSV2\_HUMAN ENSG00000005812|FBXL3 ENSG00000008803|ALG6 ENSG00000104435|STMN2 ENSG00000105793|GTPBP10 ENSG00000105974|CAV1 ENSG00000106536|POU6F2  
ENSG00000112214|FHL5 ENSG00000114021|NIT2 ENSG00000120756|PLS1 ENSG00000123096|SSPN ENSG00000125868|DSTN ENSG00000138785|INTS12 ENSG00000150656|CNDP1 ENSG00000154188|ANGPT1  
ENSG00000156875|HIAT1 ENSG00000162374|ELAVL4 ENSG00000164631|ZNF12 ENSG00000165997|ARL5B ENSG00000170959|DCDC5 ENSG00000184434|LRRC19 ENSG00000188761|C1orf178  
CATACAA ENSG00000082805|ERC1 ENSG00000105131|ABHD9 ENSG00000112562|SMOC2 ENSG00000114378|HYAL1 ENSG00000119402|FBXW2 ENSG00000125046|C3orf32 ENSG00000125975|C20orf173 ENSG00000129194|SOX15  
ENSG00000134072|CAMK1 ENSG00000135966|TGFBRAP1 ENSG00000137875|BCL2L10 ENSG00000138083|SIX3 ENSG00000140538|NTRK3 ENSG00000143171|RXRG ENSG00000163207|IVL ENSG00000164038|NP\_849155.2  
ENSG00000168970|PLA2G4B ENSG00000170420|APOL6 ENSG00000170445|HARS ENSG00000174171|Q8TCB4\_HUMAN ENSG00000176463|SLCO3A1 ENSG00000181036|FCRL6 ENSG00000187173|LCE2A ENSG00000187715|KLHDC6  
ENSG00000189013|KTR2DL4 ENSG00000197116|Q9UDD8\_HUMAN ENSG00000203871|C6orf164 ENSG00000088205|DDX18 ENSG00000096087|GSTA2 ENSG00000100796|SMEK1 ENSG00000102543|CDADCl ENSG00000107518|ATRNL1  
ENSG00000112992|NNT ENSG00000115415|STAT1 ENSG00000116161|CACYBP ENSG00000118733|OLFM3 ENSG00000129204|USP6 ENSG00000132386|SERPINF1 ENSG00000134594|RAB33A ENSG00000140416|TPM1  
ENSG00000140937|CDH11 ENSG00000146278|PNRC1 ENSG00000152213|ARL11 ENSG00000162021|U2AF1 ENSG00000163626|COXIN1 ENSG00000164796|CSMD3 ENSG00000167766|ZNF83  
ENSG00000175818|HS3ST5 ENSG00000176746|MAGEB6 ENSG00000180287|PLD5 ENSG00000185849|Q9P194\_HUMAN ENSG00000187919|GSTA1 ENSG00000197928|ZNF677 ENSG00000204800|Q96HX1\_HUMAN ENSG00000204812|Q96HX1\_HUMAN  
ENSG00000205669|ACOT6  
CATACAC ENSG00000061337|LZTS1 ENSG00000065357|DGKA ENSG00000075043|KCNQ2 ENSG00000077274|CAPN6 ENSG00000101439|CST3 ENSG00000103023|NP\_001073961.1 ENSG00000108518|PFN1 ENSG00000108523|RNFI67  
ENSG00000116885|C1orf102 ENSG00000122359|ANXA11 ENSG00000130287|NCAN ENSG00000136367|ZFX2 ENSG00000154114|TBCEL ENSG00000156973|PDE6D ENSG00000164270|HTR4 ENSG00000167600|CYP2S1  
ENSG00000173027|WBP1 ENSG00000175164|ABO ENSG00000176490|DIRA1 ENSG00000177384|Q9NT46\_HUMAN ENSG00000184602|SNN ENSG00000196186|Q71RF5\_HUMAN ENSG00000204175|GPRIN2 ENSG00000046604|DSG2  
ENSG00000087302|C14orf166 ENSG00000091664|SLC17A6 ENSG00000095564|BTAFl ENSG00000118939|UCHL3 ENSG00000121406|ZNF549 ENSG00000121716|Q9UKJ0-3 ENSG00000131873|CHSY1 ENSG00000133789|SWP70\_HUMAN  
ENSG00000139496|NUPL1 ENSG00000140043|ZADH1 ENSG00000170522|ELOVL6 ENSG00000171032|ZNF350 ENSG00000171316|CHD7 ENSG00000171757|LRRC34 ENSG00000173744|HRB ENSG00000176293|ZNF135  
ENSG00000188010|MORN2 ENSG00000188580|TCBA1 ENSG00000196876|SCN8A

|         |                                |                                |                                |                                |                              |                                |                              |                                |
|---------|--------------------------------|--------------------------------|--------------------------------|--------------------------------|------------------------------|--------------------------------|------------------------------|--------------------------------|
| CATACTA | ENSG00000005156 LIG3           | ENSG00000065618 COL17A1        | ENSG00000083817 ZNF416         | ENSG00000099937 SERPIND1       | ENSG00000101331 C20orf160    | ENSG00000103528 SYT17          | ENSG00000108511 HOXB6        | ENSG00000108578 BLMH           |
|         | ENSG00000112715 VEGFA          | ENSG00000118557 PMFBP1         | ENSG00000125970 RALY           | ENSG00000130176 CNN1           | ENSG00000130558 OLFM1        | ENSG00000130598 TNNT2          | ENSG00000132801 ZSWIM3       | ENSG00000133048 CHI3L1         |
|         | ENSG00000136877 PPGS           | ENSG00000138080 EMILIN1        | ENSG00000138303 ASCC1          | ENSG00000145819 ARHGAP26       | ENSG00000147119 CHST7        | ENSG00000149030 TAK2           | ENSG00000151498 ACAD8        | ENSG00000156853 ZNF689         |
|         | ENSG00000159884 CDCDC107       | ENSG00000163686 ABHD6          | ENSG00000166860 ZBTB39         | ENSG00000169403 PTAFR          | ENSG00000181778 C9orf71      | ENSG00000183019 C19orf59       | ENSG00000183172 C22orf32     | ENSG00000203772 SPRN           |
|         | ENSG00000203930 Q5JPA2_HUMAN   | ENSG00000204620 Q6ZPC8_HUMAN   | ENSG00000205073 NP_001003808.1 | ENSG00000083520 DI33           | ENSG00000087916 SLC6A14      | ENSG00000090989 EXOC1          | ENSG00000111796 KLRB1        | ENSG00000112394 SLC16A10       |
|         | ENSG00000113356 POLR3G         | ENSG00000115966 ATF2           | ENSG00000119401 TRIM32         | ENSG00000131013 PPI4           | ENSG00000133193 FAM104A      | ENSG00000144026 ZNF514         | ENSG00000146109 ABT1         | ENSG00000150540 HNMT           |
|         | ENSG00000156928 C7orf30        | ENSG00000163072 NOSTRIN        | ENSG00000164221 CCDC112        | ENSG00000165156 ZHX1           | ENSG00000172461 FUT9         | ENSG00000180008 SOCS4          | ENSG00000180458 Q8N3U1_HUMAN | ENSG00000198440 ZNF583         |
|         | ENSG00000198826 ARHGAP11A      | ENSG00000203795 FAM24A         | ENSG00000204789 ZNF204         | ENSG00000125266 EFNB2          | ENSG00000130948 HSD17B3      | ENSG00000140470 ADAMTS17       | ENSG00000141026 MED9         | ENSG00000148704 VAX1           |
| CATAGAA | ENSG00000105366 STGLEC8        | ENSG00000107341 UBE2R2         | ENSG00000124357 NAGK           | ENSG00000177553 C1orf167       | ENSG00000186190 C20orf185    | ENSG00000186652 PRG2           | ENSG00000196365 LONP1        | ENSG00000197555 SIPAL11        |
|         | ENSG00000152192 POU4F1         | ENSG00000162490 C1orf187       | ENSG00000176946 THAP4          | ENSG00000109674 NEIL3          | ENSG00000111731 KIAA0528     | ENSG00000113594 LIFR           | ENSG00000115520 COQ10B       | ENSG00000116752 BCAS2          |
|         | ENSG00000198374 HIST1H2AL      | ENSG00000042088 TDP1           | ENSG00000048392 ORM2           | ENSG00000134352 IL6ST          | ENSG00000135316 SYNCRIP      | ENSG00000137168 PPI1L          | ENSG00000145476 CYP4V2       | ENSG00000155962 CLIC2          |
|         | ENSG00000120693 SMAD9          | ENSG00000126010 GRPR           | ENSG00000127083 RMD            | ENSG00000161714 PLCD3          | ENSG00000164031 DNAJB14      | ENSG00000164746 Q8NEG2_HUMAN   | ENSG00000165502 RPL3GAL      | ENSG00000166986 MARS           |
|         | ENSG00000156958 GALK2          | ENSG00000161571 Q5YK5_HUMAN    | ENSG00000161714 PLCD3          | ENSG00000176681 LRRRC37A2      | ENSG00000178538 CA8          | ENSG00000184040 FAM23B         | ENSG00000184863 PRR8         | ENSG00000187010 RHG            |
|         | ENSG00000170836 PPM1D          | ENSG00000174429 ABRA           | ENSG00000176681 LRRRC37A2      | ENSG00000108108 SORCS1         | ENSG00000121289 CCDC123      | ENSG00000124574 ABCC10         | ENSG00000128536 NP_689963.2  | ENSG00000134438 RAX            |
|         | ENSG00000198221 NP_001035973.1 | ENSG00000204604 ZNF468         | ENSG00000103266 STUB1          | ENSG00000153956 CACNA2D1       | ENSG00000157211 CDCP2        | ENSG00000160339 FCN2           | ENSG00000166426 CRABP1       | ENSG00000168517 HEXIM2         |
| CATAGTT | ENSG0000011454 RABGAP1         | ENSG00000096384 HSP90AB1       | ENSG00000153956 CACNA2D1       | ENSG00000157211 CDCP2          | ENSG00000157211 CDCP2        | ENSG00000160339 FCN2           | ENSG00000166426 CRABP1       | ENSG00000168517 HEXIM2         |
|         | ENSG00000135390 ATP5G2         | ENSG00000140612 SEC11A         | ENSG00000196526 AFAP1          | ENSG000000054267 ARID4B        | ENSG000000116991 SIPAL2      | ENSG000000118733 OLFM3         | ENSG00000122482 ZNF644       | ENSG00000132964 CDK8           |
|         | ENSG00000170631 ZNF16          | ENSG00000178776 NP_996849.2    | ENSG00000136267 DGKB           | ENSG00000137878 GRINL1A        | ENSG00000138459 SLC35A5      | ENSG00000138615 CILP           | ENSG00000163377 FAM19A4      | ENSG00000163681 SLMAP          |
|         | ENSG00000134748 PRPF38A        | ENSG00000134852 CLOCK          | ENSG00000166927 MS4A7          | ENSG00000168078 PBK            | ENSG00000178538 CA8          | ENSG00000179195 ZNF664         | ENSG00000179520 SLC17A8      | ENSG00000198625 MDM4           |
|         | ENSG00000164024 METAP1         | ENSG00000166747 AP1G1          | ENSG00000204178 TMEM57         | ENSG00000116726 PRAMEF12       | ENSG00000129295 LRRRC6       | ENSG00000139436 GIT2           | ENSG00000141096 DPEP3        | ENSG00000148498 PARD3          |
| CATATGC | ENSG00000198824 C13orf8        | ENSG00000204178 TMEM57         | ENSG00000116726 PRAMEF12       | ENSG00000129295 LRRRC6         | ENSG00000139436 GIT2         | ENSG00000141096 DPEP3          | ENSG00000148498 PARD3        | ENSG00000149575 SCN2B          |
|         | ENSG00000073146 MOV10L1        | ENSG00000100591 AHS1A          | ENSG00000158869 FCER1G         | ENSG00000159685 CHCHD6         | ENSG00000166167 BTRC         | ENSG00000166949 SMAD3          | ENSG00000174705 SH3PXD2B     | ENSG00000176515 Q8NAX6_HUMAN   |
|         | ENSG00000149927 DOC2A          | ENSG00000158497 HMH1           | ENSG00000182511 FES            | ENSG00000182776 NP_001013709.1 | ENSG00000186301 Q49A61_HUMAN | ENSG00000187003 ACTL7A         | ENSG00000204356 RDBP         | ENSG00000204368 SSX7           |
|         | ENSG00000176809 LRRRC37A3      | ENSG00000179028 NP_001013709.1 | ENSG00000104756 KCTD9          | ENSG00000118271 TTR            | ENSG00000120860 CCDC53       | ENSG00000130368 MA31           | ENSG00000137819 PAQR5        | ENSG00000137819 PAQR5          |
|         | ENSG0000007001 UPP2            | ENSG00000102804 TSC22D1        | ENSG00000155100 OTUD6B         | ENSG00000158290 CUL4B          | ENSG00000163576 EFHB         | ENSG00000165338 HECTD2         | ENSG00000165417 GTF2A1       | ENSG00000181433 SAGE1          |
|         | ENSG00000139357 SLC5A8         | ENSG00000144214 LYGI_HUMAN     | ENSG00000185950 IRS2           | ENSG00000186468 RPS23          | ENSG00000197375 SLC22A5      | ENSG00000121060 TRIM25         | ENSG00000124107 SLPI         | ENSG00000163795 ZNF513         |
| CATATGG | ENSG00000181819 Q5JSM7_HUMAN   | ENSG00000185774 KCNIP4         | ENSG00000104901 DKKL1          | ENSG00000104979 C19orf53       | ENSG00000110090 CPT1A        | ENSG00000117481 NSUN4          | ENSG00000121060 TRIM25       | ENSG00000124107 SLPI           |
|         | ENSG00000085552 IGSF9          | ENSG00000104870 FCGRT          | ENSG00000135083 CCN1           | ENSG00000148296 SURF6          | ENSG00000151692 RNF144       | ENSG00000153789 FAM92B         | ENSG00000160606 TLC1D1       | ENSG00000163795 ZNF513         |
|         | ENSG00000124733 MEA1           | ENSG00000133027 PEMT           | ENSG00000177791 MYO21          | ENSG00000177919 Q9NRE4_HUMAN   | ENSG00000186038 HTR3E        | ENSG00000188249 XR_019050.1    | ENSG00000188931 C1orf192     | ENSG00000189196 Q6ZUD9_HUMAN   |
|         | ENSG00000164151 Q6ZT40_HUMAN   | ENSG00000174282 ZBTB4          | ENSG00000113456 RAD1           | ENSG00000115840 SLC25A12       | ENSG00000119397 CEP110       | ENSG00000120158 RCL1           | ENSG00000124251 C20orf10     | ENSG00000124459 ZNF45          |
|         | ENSG00000204248 COL11A2        | ENSG00000095587 TL2            | ENSG00000127125 PPCS           | ENSG00000134755 DSC2           | ENSG00000135241 PNPLA10P     | ENSG00000135298 BAI3           | ENSG00000136160 EDNRB        | ENSG00000137806 NDUFAF1        |
|         | ENSG00000125531 C20orf195      | ENSG00000127081 ZNF484         | ENSG00000139278 GLIPR1         | ENSG00000143493 INT57          | ENSG00000147121 ZNF673       | ENSG00000154548 RRR35_HUMAN    | ENSG00000160551 TAOK1        | ENSG00000162407 PPAP2B         |
|         | ENSG00000137948 BRDT           | ENSG00000138448 ITGAV          | ENSG00000102827 ACBD3          | ENSG00000186487 MYT1L          | ENSG00000196531 NACA         | ENSG00000205024 Q6ZVP5_HUMAN   | ENSG00000116984 MTR          | ENSG00000165233 C9orf89        |
| CATATTA | ENSG00000167077 NP_689726.3    | ENSG00000174799 CEP135         | ENSG00000075426 FOSL2          | ENSG00000116701 LIPG           | ENSG00000110171 TRIM3        | ENSG00000112699 GMSD           | ENSG00000116984 MTR          | ENSG00000165233 C9orf89        |
|         | ENSG00000004866 ST7            | ENSG00000006125 AP2B1          | ENSG00000123338 NCKAP1L        | ENSG00000129295 LRRRC6         | ENSG00000135637 NP_116168.2  | ENSG00000136167 LCP1           | ENSG00000146755 TRIM50       | ENSG00000204319 C4B            |
|         | ENSG00000119720 C14orf102      | ENSG00000120318 CENTD3         | ENSG00000174483 BBS1           | ENSG00000184924 NP_001013685.1 | ENSG00000196526 AFAP1        | ENSG00000197852 C1orf183       | ENSG00000204319 C4B          | ENSG00000204342 C4B            |
|         | ENSG00000169641 LUZP1          | ENSG00000170233 Q96AM0_HUMAN   | ENSG00000053770 C14orf108      | ENSG00000057252 SOAT1          | ENSG00000061987 MON2         | ENSG00000086065 CHMP5          | ENSG00000102043 MTMR8        | ENSG00000102081 FMR1           |
|         | ENSG00000204516 MC1B           | ENSG0000011426 ANLN            | ENSG00000114030 KPN1A          | ENSG00000126953 TIMM8A         | ENSG00000133083 DCLK1        | ENSG00000149507 PLACL1         | ENSG00000157450 RNF111       | ENSG00000163534 FCRL1          |
|         | ENSG00000103018 CVB5B          | ENSG00000106049 HIBADH         | ENSG00000171928 FAM18B         | ENSG00000174123 TLR10          | ENSG00000186047 DLEU7        | ENSG00000196344 ADH7           | ENSG00000197347 Q6ZVE3_HUMAN | ENSG00000203864 C1orf137       |
|         | ENSG00000163586 FABP1          | ENSG00000166801 FAM11A         | ENSG00000085465 OVGP1          | ENSG00000089220 FAM61          | ENSG00000103852 TTC23        | ENSG00000105393 NP_001028721.1 | ENSG00000111249 CUTL2        | ENSG00000116985 BMP8B          |
| CATCAAA | ENSG00000036828 CASR           | ENSG00000085465 OVGP1          | ENSG00000141293 SKAP1          | ENSG00000143409 FAM63A         | ENSG00000162896 PIGR         | ENSG00000165478 HEPACAM        | ENSG00000166007 LOC399940    | ENSG00000167744 NTF5           |
|         | ENSG00000126883 NUP214         | ENSG00000141293 SKAP1          | ENSG00000182795 C1orf116       | ENSG00000182931 WFDIC10B       | ENSG00000185294 NP_787078.1  | ENSG00000187942 LDLRAD2        | ENSG00000198574 SH2D1B       | ENSG00000198960 ARMCX6         |
|         | ENSG00000179898 PDXDC1         | ENSG00000182795 C1orf116       | ENSG00000204455 XR_015868.1    | ENSG00000204482 LST1           | ENSG000000078081 LAMP3       | ENSG00000109332 UBE2D3         | ENSG00000124900 SPRYD5       | ENSG00000129028 THAP10         |
|         | ENSG00000204034 Q9BRQ9_HUMAN   | ENSG00000204455 XR_015868.1    | ENSG00000134001 EIF2S1         | ENSG00000135220 UGT2A3         | ENSG00000137975 CLCA2        | ENSG00000140937 CDH11          | ENSG00000147905 ZCCHC7       | ENSG00000149345 U2D3L_HUMAN    |
|         | ENSG00000132429 PPODC3         | ENSG00000134001 EIF2S1         | ENSG00000165494 PCF11          | ENSG00000167766 ZNF83          | ENSG00000169744 LDB2         | ENSG00000169813 HNRFP          | ENSG00000170954 ZNF415       | ENSG00000173200 PARP15         |
|         | ENSG00000162607 USP1           | ENSG00000165494 PCF11          | ENSG00000178459 Q8N2E2_HUMAN   | ENSG00000196482 ESRRG          | ENSG00000197312 RSC1A1       | ENSG00000203859 HSD3B2         | ENSG00000203989 LOC727940    | ENSG00000204954 Q69YU5_HUMAN   |
| CATCAAT | ENSG00000176840 C19orf30       | ENSG00000178459 Q8N2E2_HUMAN   | ENSG00000102385 DRP2           | ENSG00000102901 CENPT          | ENSG00000104921 FCER2        | ENSG00000105732 ZNF574         | ENSG00000111640 GAPDH        | ENSG00000113389 NPR3           |
|         | ENSG00000099769 IGFALS         | ENSG00000102385 DRP2           | ENSG00000130035 GALNT8         | ENSG00000143564 S100A8         | ENSG00000145864 GABRB2       | ENSG00000148826 NKX6-2         | ENSG00000158764 ITLN2        | ENSG00000162666 KIAA0040       |
|         | ENSG00000125995 C20orf52       | ENSG00000130035 GALNT8         | ENSG00000185739 SRL            | ENSG00000187170 LCE4A          | ENSG00000187681 ORM1         | ENSG00000203923 SPANXN1        | ENSG00000204154 ORM2         | ENSG00000205771 CATSPER2P1     |
|         | ENSG00000170955 PKCDBP         | ENSG00000185739 SRL            | ENSG00000088766 CRLS1          | ENSG00000090402 SI             | ENSG00000102401 ARMCX3       | ENSG00000107014 RLN2           | ENSG00000109771 LRP2BP       | ENSG00000113790 EHHADH         |
|         | ENSG00000206550 LOC285346      | ENSG00000064692 SNCAIP         | ENSG00000115840 STRN           | ENSG00000115840 SLC25A12       | ENSG00000117222 RBBP5        | ENSG00000123500 COL10A1        | ENSG00000128578 FAM40B       | ENSG00000135374 ELF5           |
|         | ENSG00000115355 KIAA1212       | ENSG00000115808 STRN           | ENSG00000136539 CD302          | ENSG00000138079 SLC3A1         | ENSG00000143162 CREG1        | ENSG00000145982 FARS2          | ENSG00000150625 PME6A        | ENSG00000151917 C6orf65        |
|         | ENSG00000135409 AMHR2          | ENSG00000136539 CD302          | ENSG00000164404 GDF9           | ENSG00000164983 TMEM65         | ENSG00000165449 SLC16A9      | ENSG00000166037 CEP57          | ENSG00000166265 CYR1         | ENSG00000181481 RNF135         |
|         | ENSG00000162664 ZNF326         | ENSG00000164404 GDF9           | ENSG00000188401 FAM79B         | ENSG00000188452 CERKL          | ENSG00000189132 FAM47B       | ENSG00000203724 C1orf53        | ENSG00000203963 C1orf141     | ENSG00000204363 SPANXN5        |
|         | ENSG00000185448 FAM47A         | ENSG00000188001 FAM79B         | ENSG00000067141 NEO1           | ENSG00000082014 SMARCD3        | ENSG00000086102 NFX1         | ENSG00000108262 GIT1           | ENSG00000140479 PCSK6        | ENSG00000142156 COL6A1         |
| CATCACT | ENSG00000057593 F7             | ENSG00000067141 NEO1           | ENSG00000165828 PRAP1          | ENSG00000169006 NTRSR2         | ENSG00000172731 LRRRC20      | ENSG00000177076 ASAH3L         | ENSG00000179036 VAMP2        | ENSG00000181852 RNF41          |
|         | ENSG00000163468 CCT3           | ENSG00000165828 PRAP1          | ENSG00000205126 NP_001027025.1 | ENSG00000205209 NP_001020762.1 | ENSG00000080883 JARID2       | ENSG00000085721 RRN3           | ENSG00000100426 ZBED4        | ENSG00000102069 UBE2NL         |
|         | ENSG00000198182 ZNF607         | ENSG00000205126 NP_001027025.1 | ENSG00000119138 KLF9           | ENSG00000130021 DHHD1A         | ENSG00000136897 MRPL50       | ENSG00000137845 ADAM10         | ENSG00000137941 TTLT7        | ENSG00000143882 ATP6V1C2       |
|         | ENSG00000106415 GLCC11         | ENSG00000119138 KLF9           | ENSG00000162755 NP_689579.3    | ENSG00000164951 PPM2C          | ENSG00000178690 C18orf26     | ENSG00000184937 WT1            | ENSG00000197584 KCNMB2       | ENSG00000203742 NP_001032308.1 |
| CATCCAT | ENSG00000049540 ELN            | ENSG00000164951 PPM2C          | ENSG00000116786 PLEKHM2        | ENSG00000123360 PDE1B          | ENSG00000135372 NAT10        | ENSG00000140479 PCSK6          | ENSG00000141179 PCTP         | ENSG00000143851 PTPN7          |
|         | ENSG00000156858 PRR14          | ENSG00000116786 PLEKHM2        | ENSG00000158710 TAGLN2         | ENSG00000159202 UBE2Z          | ENSG00000163219 ARHGAP25     | ENSG00000166259 AQP7           | ENSG00000166259 AQP7         | ENSG00000179057 IGSF22         |
|         | ENSG00000183655 KLHL25         | ENSG00000158710 TAGLN2         | ENSG00000197993 KEL            | ENSG00000198369 SPRED2         | ENSG00000204305 AGER         | ENSG00000204310 AGPAT1         | ENSG00000206083 ZNF409       | ENSG00000076641 PAG1           |
|         | ENSG00000104044 OCA2           | ENSG00000197993 KEL            | ENSG00000106809 OGN            | ENSG00000107518 ATRN1L         | ENSG00000121940 CLCC1        | ENSG00000128710 HOXD10         | ENSG00000132357 CARD6        | ENSG00000145244 CORIN          |
|         | ENSG00000148730 EIF4EBP2       | ENSG00000106809 OGN            | ENSG00000172179 PRL            | ENSG00000178202 KDEL2          |                              |                                |                              |                                |

ENSG00000178817|Q8N9W7\_HUMAN ENSG00000179636|C14orf8 ENSG00000183444|NR\_002822.2 ENSG00000185105|XR\_015885.1 ENSG00000187021|PNLIPRP1 ENSG00000196645|Q8N9W7\_HUMAN ENSG00000197296|C20orf142 ENSG00000198502|HLA-DRB5

ENSG00000063601|MTMR1 ENSG00000068878|PSME4 ENSG00000100201|DDX17 ENSG00000107485|GATA3 ENSG00000111241|FGF6 ENSG00000130396|MLLT4 ENSG00000133142|TCEAL4 ENSG00000140873|ADAMTS18

ENSG00000143742|SRP9 ENSG00000151693|DDEF2 ENSG00000153201|RANBP2 ENSG00000154274|C4orf19 ENSG00000154889|MPPE1 ENSG00000165525|SDCCAG1 ENSG00000165588|OTX2 ENSG00000166685|COG1

ENSG00000168916|ZNF608 ENSG00000170892|TSEN34 ENSG00000172497|ACOT12 ENSG00000172752|NP\_694996.3 ENSG00000173200|PARP15 ENSG00000188529|FUSIP1 ENSG00000197128|ZNF772 ENSG00000197639|MKRNP5

ENSG00000198315|ZNF192 ENSG00000198523|PLN ENSG00000076108|BAZ2A ENSG00000100258|TMEM112B ENSG00000108175|ZMIZ1 ENSG00000115468|EFHD1 ENSG00000116983|HPCAL4 ENSG00000138769|CDKL2

ENSG00000008056|SYN1 ENSG00000025800|KPNA6 ENSG00000169682|LAT ENSG00000176422|SPRYD4 ENSG00000179913|B3GNT3 ENSG00000186141|POLR3C ENSG00000204792|Q6ZU62\_HUMAN ENSG0000003056|MGPR

ENSG00000155506|LARP1 ENSG00000166908|PIP5K2C ENSG00000086827|ZW10 ENSG00000091428|RAPGEF4 ENSG00000102309|PIN4 ENSG00000116455|WDR77 ENSG00000121039|RDH10 ENSG00000125945|ZNF436

ENSG00000119186|CYP24A1 ENSG00000054277|OPN3 ENSG00000135837|CEP350 ENSG00000141456|Q8IZL8-2 ENSG00000144713|RPL32 ENSG00000145615|AK5 ENSG00000154265|ABCA5 ENSG00000156463|SH3RF2

ENSG00000134533|RERG ENSG00000164049|FBXW12 ENSG00000165259|CXorf43 ENSG00000166197|NOLC1 ENSG00000166752|TMEM83 ENSG00000171408|PDE7B ENSG00000171843|MLLT3 ENSG00000173614|NMNAT1

ENSG00000158488|CD1E ENSG00000178150|ZNF114 ENSG00000181847|VSI9 ENSG00000196511|TPK1 ENSG00000197142|ACLS5 ENSG00000198218|QRICH1

ENSG00000174944|P2RY14 ENSG00000068308|OTUD5 ENSG00000085978|ATG16L1 ENSG00000101074|R3HDM1 ENSG00000101282|RSPO4 ENSG00000101350|KIF3B ENSG00000101448|SPINLW1 ENSG00000101849|TBL1X

ENSG00000062485|CS ENSG00000105137|SYDE1 ENSG00000105520|NP\_073574.1 ENSG00000111653|ING4 ENSG00000143107|FNDC7 ENSG00000144231|POLR2D ENSG00000152082|FAM128B ENSG00000152315|KCNK13

ENSG00000102265|TIMP1 ENSG00000157064|NMNAT2 ENSG00000162191|SAKS1\_HUMAN ENSG00000166340|TPP1 ENSG00000169583|CLIC3 ENSG00000170122|FOXD4L1 ENSG00000173272|FAM128A ENSG00000173585|CCR9

ENSG00000156486|KCNS2 ENSG00000157064|NMNAT2 ENSG00000162191|SAKS1\_HUMAN ENSG00000166340|TPP1 ENSG00000169583|CLIC3 ENSG00000170122|FOXD4L1 ENSG00000173272|FAM128A ENSG00000173585|CCR9

ENSG00000177066|Q8NCU6\_HUMAN ENSG00000179082|C9orf106 ENSG00000179218|CALR ENSG00000179571|NP\_001034792.1 ENSG00000181363|Q66K80-2 ENSG00000182742|HOXB4 ENSG00000184659|FOXD4L4 ENSG00000187559|FOXD4L3

ENSG00000196787|HIST1H2AG ENSG00000204765|XR\_017851.1 ENSG00000204779|FOXD4L5 ENSG00000204793|FOXD4L6 ENSG00000204828|FX4L4\_HUMAN ENSG00000205023|Q6ZSF1\_HUMAN ENSG0000005889|ZFX ENSG0000011465|DCN

ENSG00000072315|TRPC5 ENSG00000083844|ZNF264 ENSG00000099246|RAB18 ENSG00000102391|RPL36A ENSG00000106080|FKBP14 ENSG00000108984|MAP2K6 ENSG00000113328|CDK2AP1 ENSG00000112419|PHACTR2

ENSG00000146866|MRPL3 ENSG00000117597|C1orf107 ENSG00000118922|KLF12 ENSG00000120256|LRP11 ENSG00000132963|POMP ENSG00000134109|EDEM1 ENSG00000137936|BCAR3 ENSG00000139343|SNRPF

ENSG00000143384|MCFL1 ENSG00000145777|NP\_149024.1 ENSG00000147905|ZCCHC7 ENSG00000149548|CCDC15 ENSG00000156802|ATAD2 ENSG00000158615|PPP1R15B ENSG00000163513|TGFB2 ENSG00000164070|HSPA4L

ENSG00000165997|ARL5B ENSG00000173334|TRIB1 ENSG00000184492|FOXO4 ENSG00000188001|FAM79B ENSG00000198900|TOP1 ENSG00000205765|NP\_787117.3 ENSG00000206530|WDR52

ENSG00000090554|FLT3LG ENSG00000093072|CECR1 ENSG00000096395|MLN ENSG00000100565|C14orf166B ENSG00000104998|IL27RA ENSG00000110442|COMMD9 ENSG00000111641|NOL1 ENSG00000122711|SPINK4

ENSG00000125815|CST8 ENSG00000134882|UBAC2 ENSG00000140254|DUOX1A1 ENSG00000141431|Q6ZMX6\_HUMAN ENSG00000150401|DCUN1D2 ENSG00000154478|GPR26 ENSG00000157184|CPT2 ENSG00000162367|TALI

ENSG00000163017|ACTG2 ENSG00000163121|NM\_001080535.1 ENSG00000163686|ABHD6 ENSG00000165948|FAM14B ENSG00000171533|MAP6 ENSG00000171793|CTPS ENSG00000180424|DEFB123 ENSG00000186056|Q6ZRP8\_HUMAN

ENSG00000188901|NP\_055226.1 ENSG00000198182|ZNF607 ENSG00000203985|LDLRAD1 ENSG00000205703|NP\_001010910.1 ENSG00000205726|ITSN1 ENSG00000206193|Q5HYA3\_HUMAN ENSG0000022697|IFNGR1 ENSG00000072401|UBE2D1

ENSG00000074803|SLC12A1 ENSG00000080572|CXorf41 ENSG00000091129|NRCAM ENSG00000094963|FMO2 ENSG00000103657|HERC1 ENSG00000108389|MTMR4 ENSG00000113369|ARRDC3 ENSG00000113532|ST8SIA4

ENSG00000115761|NOL10 ENSG00000120262|C6orf97 ENSG00000123096|SFPN ENSG00000129480|C14orf126 ENSG00000143224|PPOX ENSG00000144285|SCN1A ENSG00000145332|KLHL8 ENSG00000154611|PSMA8

ENSG00000155833|CYLC2 ENSG00000158201|ABHD3 ENSG00000163629|PTPN13 ENSG00000170848|PSG6 ENSG00000171291|ZNF439 ENSG00000171885|AQP4 ENSG00000172785|CBWD5 ENSG00000177200|CHD9

ENSG00000179397|C1orf101 ENSG00000183668|PSG9 ENSG00000188868|ZNF563 ENSG00000196563|Q9H375\_HUMAN ENSG00000197054|ZNF763 ENSG00000197737|Q9H393\_HUMAN ENSG00000198157|NSBP1 ENSG00000198604|BAZ1A

CATCTTC ENSG00000178817|Q8N9W7\_HUMAN ENSG00000179636|C14orf8 ENSG00000183444|NR\_002822.2 ENSG00000185105|XR\_015885.1 ENSG00000187021|PNLIPRP1 ENSG00000196645|Q8N9W7\_HUMAN ENSG00000197296|C20orf142 ENSG00000198502|HLA-DRB5

CATCTTT ENSG00000062485|CS ENSG00000105137|SYDE1 ENSG00000105520|NP\_073574.1 ENSG00000111653|ING4 ENSG00000143107|FNDC7 ENSG00000144231|POLR2D ENSG00000152082|FAM128B ENSG00000152315|KCNK13

CATGAAA ENSG00000143384|MCFL1 ENSG00000145777|NP\_149024.1 ENSG00000147905|ZCCHC7 ENSG00000149548|CCDC15 ENSG00000156802|ATAD2 ENSG00000158615|PPP1R15B ENSG00000163513|TGFB2 ENSG00000164070|HSPA4L

CATGAAC ENSG00000087250|MT3 ENSG00000089356|FXDY3 ENSG00000095713|CRTAC1 ENSG00000128626|MRPS12 ENSG00000134905|CARS2 ENSG00000143365|RORC ENSG00000159692|CTBP1 ENSG00000164270|HTR4

CATGAAT ENSG00000117834|SLC5A9 ENSG00000124731|TREM1 ENSG00000130803|ZNF317 ENSG00000134207|SYT6 ENSG00000134369|NAV1 ENSG00000136883|KIF12 ENSG00000140538|NTRK3 ENSG00000155858|LSM11

CATGATT ENSG000000022556|NLRP2 ENSG00000100234|TIMP3 ENSG00000119280|C1orf198 ENSG00000130307|USHBP1 ENSG00000131845|ZNF304 ENSG00000133056|PIK3C2B ENSG00000134531|EMP1 ENSG00000136827|TOR1A

CATGCAG ENSG000000068976|PYGM ENSG00000079263|SP140 ENSG00000119632|FAM14A ENSG00000119639|TGFB3 ENSG00000126091|ST3GAL3 ENSG00000130167|TSPAN16 ENSG00000131849|ZNF132 ENSG00000134240|HMGS2

CATGCCC ENSG000000059122|FLYWCH1 ENSG00000087266|SH3BP2 ENSG00000105619|TFPT ENSG00000106012|IQCE ENSG00000117016|RIMS3 ENSG00000126247|CAPNS1 ENSG00000127377|CRYGN ENSG00000142538|TIP39\_HUMAN

CATGCCG ENSG00000003147|ICA1 ENSG00000064545|TMEM161A ENSG00000076082|KLF6 ENSG00000101883|PEPP1\_HUMAN ENSG00000101883|PEPP1\_HUMAN ENSG00000132405|TBC1D14 ENSG00000136918|NP\_001038941.1 ENSG00000137825|ITPKA

CATGCGT ENSG0000000182799|LRIG2 ENSG00000198799|LRIG2 ENSG00000198799|LRIG2 ENSG00000198799|LRIG2 ENSG00000198799|LRIG2 ENSG00000198799|LRIG2 ENSG00000198799|LRIG2 ENSG00000198799|LRIG2 ENSG00000198799|LRIG2

CATGCTC ENSG000000042493|CAPG ENSG00000075790|BCAP29 ENSG00000075826|SEC31B ENSG00000088899|K0552\_HUMAN ENSG00000101199|ARFGAP1 ENSG00000105325|FZR1 ENSG00000109101|FOXN1 ENSG00000116983|HPCAL4

CATGCTG ENSG0000000116533|ING4 ENSG00000123454|DBH ENSG00000126657|PPY2 ENSG00000127418|FGFRL1 ENSG00000141560|KT3K\_HUMAN ENSG00000149043|SYT8 ENSG00000152127|MGAT5 ENSG00000161998|Q8N221\_HUMAN

CATGCTT ENSG000000009335|UBE3C ENSG00000085978|ATG16L1 ENSG00000099204|ABLIM1 ENSG00000102900|NUP93 ENSG00000110711|AIP ENSG00000123427|FAM119B ENSG00000125869|C20orf103 ENSG00000134905|CARS2

ENSG00000143196|DPT ENSG00000143450|OAZ3 ENSG00000149021|SCGB1A1 ENSG00000154978|NM\_030796.3 ENSG00000155984|TMEM185A ENSG00000158169|FANCC ENSG00000159871|LYPD5 ENSG00000162496|DHRS3  
ENSG00000169926|KLF13 ENSG00000170464|DNAJC18 ENSG00000176762|QBN1N1\_HUMAN ENSG00000183059|XR\_017784.1 ENSG00000186831|KRT17 ENSG00000197296|C20orf142 ENSG00000205431|Q6UWF5\_HUMAN ENSG00000205680|NR\_002931.1  
ENSG00000206172|HBA1 ENSG000002082516|GEMIN5 ENSG00000101972|STAG2 ENSG00000102024|PLS3 ENSG00000104324|NP\_057218.1 ENSG00000105497|ZNF175 ENSG00000117862|TXNDC12 ENSG00000120549|KIAA1217  
ENSG00000122034|GTF3A ENSG00000130234|ACE2 ENSG00000136108|CKAP2 ENSG00000138180|CEP55 ENSG00000139323|WDR51B ENSG00000140285|FGF7 ENSG00000142188|TMEM50B ENSG00000147684|NDUFB9  
ENSG00000159763|PTP ENSG00000164329|PAPD4 ENSG00000165240|ATP7A ENSG00000167766|ZNF83 ENSG00000174944|P2RY14 ENSG00000180785|OR51E1 ENSG00000187009|Q8NFD4\_HUMAN ENSG00000196850|PPTC7  
ENSG00000198710|Q9BWW1\_HUMAN ENSG00000204171|Q6STG2\_HUMAN ENSG00000205637|Q6ZSL6\_HUMAN  
CATGGTC ENSG00000062485|CS ENSG00000068971|PPP2R5B ENSG00000106948|AKNA ENSG00000106992|AKI1 ENSG00000110195|FOLR1 ENSG00000125910|EDG6 ENSG00000127564|PKMYT1 ENSG00000130508|PXDN  
ENSG00000130612|Q6ZSU1\_HUMAN ENSG00000130649|CYP2E1 ENSG00000136720|HS6ST1 ENSG00000140534|C15orf42 ENSG00000143816|WNT9A ENSG00000148384|INPP5E ENSG00000163993|S100P ENSG00000166716|ZNF592  
ENSG00000183633|C14orf132 ENSG00000188368|NP\_954979.2 ENSG00000204482|LST1 ENSG000002067248|DHX29 ENSG000002085721|RRN3 ENSG00000101751|POLI ENSG00000117155|SSX21P ENSG00000133812|SBF2  
ENSG00000137267|TUBB2A ENSG00000140450|ARRDC4 ENSG00000163114|PDHA2 ENSG00000168692|TSPY1\_HUMAN ENSG00000168757|TSPY1 ENSG00000175175|PPM1E ENSG00000178502|KLHL11 ENSG00000183726|TMEM50A  
ENSG00000185912|TSPY1\_HUMAN ENSG00000186340|THBS2 ENSG00000188477|Q6UXS0\_HUMAN ENSG00000188656|LOC728403 ENSG00000196323|ZBTB44 ENSG00000196655|TRAPP4 ENSG00000206184|XR\_016233.1  
CATGGTT ENSG0000019144|PHLDB1 ENSG00000048471|NP\_001073999.1 ENSG00000104738|MCM4 ENSG00000125995|C20orf52 ENSG00000126243|LRFN3 ENSG00000132323|ILKAP ENSG00000136444|RSAD1 ENSG00000148337|CIZ1  
ENSG00000151779|NP\_056993.2 ENSG00000164976|KIAA1161 ENSG00000168061|SAC3D1 ENSG00000170161|Q5VV11\_HUMAN ENSG00000180822|Q8N950\_HUMAN ENSG00000198053|SIRPA ENSG00000203685|C1orf95 ENSG00000204094|Q6ZU93\_HUMAN  
ENSG00000079335|CDC14A ENSG00000091844|RGS17 ENSG00000104331|IMPAD1 ENSG00000107518|ATRN1 ENSG00000111700|SLCO1B3 ENSG00000115935|WIPF1 ENSG00000125257|ABCC4 ENSG00000129699|NP\_067644.2  
ENSG00000130770|ATPIF1 ENSG00000131351|NP\_219485.1 ENSG00000140319|SRP14 ENSG00000150637|CD226 ENSG00000171488|LRRC8C ENSG00000172000|ZNF556 ENSG00000173698|GPR64 ENSG00000174500|GCET2  
ENSG00000183807|C6orf189 ENSG00000197412|Q8N8G3\_HUMAN ENSG00000197945|Q6ZRE3\_HUMAN ENSG00000198513|SPG3A  
CATGTAC ENSG00000009954|BAZ1B ENSG00000023171|GRAMD1B ENSG00000068650|ATP11A ENSG00000099995|SF3A1 ENSG00000106290|TAF6 ENSG00000107731|UNC5B ENSG00000110092|CCND1 ENSG00000111640|GAPDH  
ENSG00000112062|MAPK14 ENSG00000114268|PFKFB4 ENSG00000125498|KIR2DL1 ENSG00000125995|C20orf52 ENSG00000131355|EMR3 ENSG00000132671|SSTR4 ENSG00000132911|NMUR2 ENSG00000135114|OASL  
ENSG00000143217|PVRL4 ENSG00000143258|USP21 ENSG00000143416|SELENBP1 ENSG00000143546|S100A8 ENSG00000149929|HIRIP3 ENSG00000156860|FBRS ENSG00000156864|NDUFS2 ENSG00000163016|NP\_660343.1  
ENSG00000163993|S100P ENSG00000164051|CCDC51 ENSG00000169397|RNASE3 ENSG00000171533|MAP6 ENSG00000197506|SLC28A3 ENSG00000203784|LELP1 ENSG00000070501|POLB ENSG00000096063|SRPK1  
ENSG00000113327|GABRG2 ENSG00000115008|IL1A ENSG00000129682|FGF13 ENSG00000135540|NHS1 ENSG000001047649|MTDH ENSG00000148541|FAM13C1 ENSG00000151834|GABRA2 ENSG00000152969|JAKM1P1  
ENSG00000153896|ZNF599 ENSG00000155760|FZD7 ENSG00000163618|CADPS ENSG00000169435|RANSF6 ENSG00000170113|NIP1A ENSG00000173258|ZNF483 ENSG00000173737|C4orf31 ENSG00000176542|KIAA2018  
ENSG00000182747|SLC35D3 ENSG00000196433|ASMT ENSG00000198417|MTIF1  
CATGTCT ENSG00000002580|KPN6 ENSG00000065491|TBC1D22B ENSG00000101452|DHX35 ENSG00000115598|IL1RL2 ENSG00000116337|BMP2 ENSG00000118050|C19orf24 ENSG00000128510|CPA4  
ENSG00000132259|CNGA4 ENSG00000135835|KIAA1614 ENSG00000136859|ANGPTL2 ENSG00000158828|PINK1 ENSG00000166548|TK2 ENSG00000168784|BPESC1 ENSG00000177992|C9orf79 ENSG00000180822|Q8N950\_HUMAN  
ENSG00000182318|ZSCAN22 ENSG00000183562|Q9PIL5\_HUMAN ENSG00000188760|NP\_001005209.1 ENSG00000189319|FAMS3B ENSG00000206149|NP\_950246.1 ENSG00000206561|COLQ ENSG00000051108|HERPUD1 ENSG000000066427|ATXN3  
ENSG00000101981|F9 ENSG00000113161|HMGCR ENSG00000117399|CDC20 ENSG00000127366|TAS2R5 ENSG00000129586|ZBED5 ENSG00000136874|STX17 ENSG00000143228|NUF2 ENSG00000144218|AFF3  
ENSG00000148798|INA ENSG00000151917|C6orf65 ENSG00000164645|NP\_689919.1 ENSG00000174748|RPL15 ENSG00000175336|APOF ENSG00000177465|ACOT4  
CATGTGC ENSG000000054967|PNFRSF19L ENSG00000088543|C3orf18 ENSG00000100036|SLC35E4 ENSG00000100433|KCNK10 ENSG00000110090|CPT1A ENSG00000110237|ARGHEF17 ENSG00000122140|MRPS2 ENSG00000126561|STAT5A  
ENSG00000126657|TFY2 ENSG00000128594|LRRC4 ENSG00000131183|SLC34A1 ENSG00000134243|SOR1 ENSG00000142515|KLC3 ENSG00000142657|PGD ENSG00000152705|CATSPER3 ENSG00000157606|SPAT1  
ENSG00000163464|IL8RA ENSG00000164530|PI16 ENSG00000166947|EPB42 ENSG00000180139|Q8N9Z5\_HUMAN ENSG00000180483|DEFB119 ENSG00000183020|AP2A2 ENSG00000196155|PLEKHG4 ENSG00000198012|XR\_017841.1  
ENSG00000198183|PLUNC ENSG00000060709|RIMBP2 ENSG00000070718|AP3M2 ENSG00000100526|CDKN3 ENSG00000102290|PCDH11X ENSG00000104313|EYA1 ENSG00000107372|ZFAND5 ENSG00000107758|PPP3CB  
ENSG00000121406|PNUF549 ENSG00000136770|DNAJC1 ENSG00000137033|IL33 ENSG00000137878|GRINL1A ENSG00000141448|GATA6 ENSG00000157554|RYA ENSG00000163947|ARGHEF3 ENSG00000165914|TTC7B  
ENSG00000172456|NP\_060761.2 ENSG00000174482|LINGO2 ENSG00000179833|SERTAD2 ENSG00000180869|C1orf180 ENSG00000198554|WDHD1 ENSG000002005133|Q629K1\_HUMAN  
CATGTGT ENSG00000022840|RNF10 ENSG00000087586|AURKA ENSG00000100138|NHP2L1 ENSG00000100461|RBM23 ENSG00000101412|E2F1 ENSG00000106948|AKNA ENSG00000126856|Q9NQW5-2 ENSG00000136205|TNS3  
ENSG00000137070|IL11RA ENSG00000140830|TXNL4B ENSG00000142686|NP\_689587.1 ENSG00000142687|KIAA0319L ENSG00000160563|CRSP8 ENSG00000162415|ZSWIM5 ENSG00000163873|GRIK3 ENSG00000166965|RCCD1  
ENSG00000169436|COL22A1 ENSG00000176953|NFATC21P ENSG00000178243|C9orf62 ENSG00000184330|S100A7A ENSG00000185386|MAPK11 ENSG00000185818|NAT8L ENSG00000188322|SBK1 ENSG00000189091|SF3B3  
ENSG00000204792|Q6ZU62\_HUMAN ENSG00000205354|Q6ZN60\_HUMAN ENSG00000005421|PON1 ENSG000000069122|GPR116 ENSG00000102221|PHF16 ENSG00000109339|MAPK10 ENSG00000113597|NP\_079217.1 ENSG00000115310|RTN4  
ENSG00000130413|STK33 ENSG00000135486|HNRPA1 ENSG00000139318|DUSP6 ENSG00000147573|TRIM55 ENSG00000151458|ANKRD50 ENSG00000164949|GEM ENSG00000182621|PLCB1 ENSG00000187123|LYPD6  
ENSG00000205462|Q6ZWC8\_HUMAN  
CATGTGA ENSG00000002933|TMEM176A ENSG00000007968|E2F2 ENSG00000047644|WWC3 ENSG00000073605|GSDML ENSG00000088876|ZNF343 ENSG00000099968|BCL2L13 ENSG00000129538|RNASE1 ENSG00000130309|GLT25D1  
ENSG00000131477|RAMP2 ENSG00000136205|TNS3 ENSG00000141096|DPEP3 ENSG00000141431|Q6ZMX6\_HUMAN ENSG00000152082|FAM128B ENSG00000159455|LCE2B ENSG00000161381|PLXDC1 ENSG00000161572|LYZL6  
ENSG00000166024|C10orf28 ENSG00000167634|NLRP7 ENSG00000173272|FAM128A ENSG00000176467|COX8A ENSG00000178467|EGLX\_HUMAN ENSG00000180884|ZNF792 ENSG00000183049|CAMK1D ENSG00000187180|LCE2C  
ENSG00000189058|APOD ENSG00000204252|HLA-DOA ENSG00000204438|BAT4 ENSG00000205801|Q6ZTI5\_HUMAN ENSG00000000003|TSPAN6 ENSG00000047932|GOPC ENSG00000073712|PLEKHG1 ENSG00000081320|STK17B  
ENSG00000103342|GSPT1 ENSG00000132334|PTPTE ENSG00000139324|TMTC3 ENSG00000144366|GULP1 ENSG00000145850|TIMD4 ENSG00000152601|MBNL1 ENSG00000176244|ACBD7 ENSG00000178163|NP\_444270.2  
ENSG00000179010|MRFA1  
CATGTTT perfect: CATGTTA TAACATG hsa-miR-302c\* ttTAACATGgggggtacctgctg 2  
ENSG0000011105|TSPAN9 ENSG00000064309|CDON ENSG00000083307|GRHL2 ENSG00000100335|SMCR7L ENSG00000107957|SH3PXD2A ENSG00000114013|CD86 ENSG00000123643|SLC36A1 ENSG00000143196|DPT  
ENSG00000146021|KLHL3 ENSG00000148200|NR6A1 ENSG00000148842|CNNM2 ENSG00000151631|Q9P2A3\_HUMAN ENSG00000152291|TGOLN2 ENSG00000162415|ZSWIM5 ENSG00000165025|SYK ENSG00000167505|Q96NK6\_HUMAN  
ENSG00000170776|AKAP13 ENSG00000170779|CDC4A ENSG00000174705|SH3PXD2B ENSG00000179837|RBM15B ENSG00000180834|MAP6D1 ENSG00000183530|C22orf30 ENSG00000196090|PTPRT ENSG00000197093|GAL3ST4  
ENSG00000204876|Q6ZVM9\_HUMAN ENSG00000006128|TAC1 ENSG000000010270|STAR3NL ENSG00000025039|RRAGD ENSG00000033030|ZCCHC8 ENSG00000082269|KIAA1411 ENSG00000100557|C14orf105 ENSG00000101333|PLCB4  
ENSG00000104635|SLC39A14 ENSG00000106588|PSMA2 ENSG00000108423|TUBD1 ENSG00000111961|SASH1 ENSG00000123609|NMI ENSG00000126581|BECN1 ENSG00000127318|LL22 ENSG00000131437|KIF3A  
ENSG00000133997|MED6 ENSG00000134121|CHL1 ENSG00000134323|MYCN ENSG00000146276|GABRR1 ENSG00000152503|TRIM36 ENSG00000153914|SFRS12 ENSG00000154258|ABCA9 ENSG00000160131|NP\_001017980.1  
ENSG00000163288|GABRB1 ENSG00000163964|PIGX ENSG00000165512|ZNF22 ENSG00000166275|AS3MT ENSG00000167475|SCAMP4 ENSG00000168229|PTGDR ENSG00000175893|ZDHHC21 ENSG00000180574|Q5I0X0\_HUMAN  
ENSG00000186469|GN2 ENSG00000197006|METTL9 ENSG00000197045|GMFB ENSG00000197791|Q6ZUR4\_HUMAN  
CATTAATA ENSG00000007968|E2F2 ENSG00000009335|UBE3C ENSG000000079462|PFAFH1B3 ENSG00000008882|CPXM1 ENSG00000090863|GLG1 ENSG00000100448|CTSG ENSG00000101161|PRPF6 ENSG00000104774|MAN2B1  
ENSG00000104946|TBC1D17 ENSG00000110660|SLC35F2 ENSG00000113048|MRPS27 ENSG00000113739|STC2 ENSG00000114841|DNAH1 ENSG00000115718|PROC ENSG00000120664|LOC646871 ENSG00000125788|DEFB126  
ENSG00000126756|UXT ENSG00000130748|TMEM160 ENSG00000131368|MRPS25 ENSG00000134905|CAR8 ENSG00000141086|CTRL ENSG00000158516|CPA2 ENSG00000159199|ATP5G1 ENSG00000160789|LMNA  
ENSG00000163017|ACTG2 ENSG00000164896|FASTK ENSG00000167644|C19orf33 ENSG00000167644|CTR2 ENSG00000169627|BOLA2B ENSG00000172965|Q96C48\_HUMAN ENSG00000176595|KBTBD11 ENSG00000178922|HYI  
ENSG00000179085|DPM3 ENSG00000180483|DEFB119 ENSG00000181215|NP\_997288.1 ENSG00000182698|NM\_001007089 ENSG00000183011|LSMD1 ENSG00000185065|NP\_776154.2 ENSG00000186676|EEF1G ENSG00000186837|C21orf119  
ENSG00000187003|ACTL7A ENSG00000188038|NRN1L ENSG00000197249|SERPINA1 ENSG00000205804|Q5T6R2\_HUMAN ENSG00000036257|CUL3 ENSG00000080644|CHRNA3 ENSG00000104447|TRPS1 ENSG00000106617|PRKAG2  
ENSG00000106780|MEGF9 ENSG00000110818|PBLD ENSG00000111196|MGN2\_HUMAN ENSG00000114686|MRPL3 ENSG00000115514|TXNDC9 ENSG00000115665|SLC5A7 ENSG00000115963|RND3 ENSG00000117262|GPR89A  
ENSG00000121207|LRAT ENSG00000136542|GALNT5 ENSG00000137434|C6orf52 ENSG00000137513|NARS2 ENSG00000145439|CBR4 ENSG00000146233|CYP39A1 ENSG00000146282|RARS2 ENSG00000147121|ZNF673  
ENSG00000147892|ADAMTSL1 ENSG00000151239|TWF1 ENSG00000151657|KIN ENSG00000153976|HS3ST3A1 ENSG00000163660|CNL1 ENSG00000164327|NP\_689969.2 ENSG00000164576|SAP30L  
ENSG00000166170|BAG5 ENSG00000166441|RPL27A ENSG00000166938|DIS3L ENSG00000169551|CXorf48 ENSG00000172716|SLFN11 ENSG00000175874|CREG2 ENSG00000180044|Q8N5S4\_HUMAN ENSG00000185477|GPRIN3  
ENSG00000188092|GPR89B ENSG00000189195|BTBD8 ENSG00000196409|ZNF658B ENSG00000198416|Z658B\_HUMAN ENSG00000205769|Q6ZUR9\_HUMAN  
ENSG00000191699|MARCO ENSG000000059691|PET112L ENSG000000077080|ACTL6B ENSG000000077157|PPP1R12B ENSG00000090924|PLEKHG2 ENSG00000099194|SCD ENSG00000100445|C14orf124 ENSG00000100884|CPNE6  
ENSG00000101074|R3HDM1 ENSG00000110395|CBL ENSG00000113719|ERIG1C1 ENSG00000116198|KIAA0562 ENSG00000116882|HAO2 ENSG00000117450|PRDX1 ENSG00000124678|TCP11 ENSG00000143575|HAX1  
ENSG00000159263|SIM2 ENSG00000164051|CCDC51 ENSG00000171115|GIMAP8 ENSG00000172159|FRMD3 ENSG00000174206|NP\_689653.3 ENSG00000175155|YPEL2 ENSG00000185978|H2AFB3 ENSG00000189321|NR\_002940.1  
ENSG00000196998|WDR45 ENSG00000198082|H2AFB1 ENSG00000198307|H2AFB2 ENSG00000203871|C6orf164 ENSG00000203871|C6orf164 ENSG000000012174|MBTPS2 ENSG00000004731|CDH10 ENSG000000067064|IDI1  
ENSG00000094841|UPRT ENSG00000101842|VSI61 ENSG00000104074|DTWD1 ENSG00000106823|ECM2 ENSG00000111358|GTF2H3 ENSG00000115008|IL1A ENSG00000135341|MAP3K7 ENSG00000139330|KERA  
ENSG00000140443|ZADH1 ENSG00000141452|C18orf8 ENSG00000145817|YIPF5 ENSG00000151247|EIF4E ENSG00000152193|C13orf7 ENSG00000160336|ZNF761 ENSG00000162928|PEX13 ENSG00000162928|PEX13  
ENSG00000172969|LOC285299 ENSG00000173655|Q5T909\_HUMAN ENSG00000174796|THAP6 ENSG00000179455|MKNR3 ENSG00000186974|Q8N6X9\_HUMAN ENSG00000197301|Q6ZQU9\_HUMAN ENSG00000197672|NP\_997331.1 ENSG00000198448|Q8N649\_HUMAN  
ENSG00000198538|ZNF28 ENSG00000204334|AL1162\_HUMAN ENSG00000204604|ZNF468 ENSG00000205144|Q6ZV43\_HUMAN ENSG00000205669|ACOT6  
CATTACA ENSG00000030582|GRN ENSG00000101019|C20orf44 ENSG00000113303|BTNL8 ENSG00000119946|CNNM1 ENSG00000143369|ECM1 ENSG00000146063|TRIM41 ENSG00000155026|NM\_173565.2 ENSG00000158470|B4GALT5  
ENSG00000159352|PSMD4 ENSG00000160208|RRP1B ENSG00000161911|TREM1L1 ENSG00000167210|LOXHD1 ENSG00000169402|NP\_775836.2 ENSG00000172476|RAB40A ENSG00000176261|ZBTB80S ENSG00000176920|FUT2  
ENSG00000181722|ZBTB20 ENSG00000184330|S100A7A ENSG00000196126|HLA-DRB1 ENSG00000198881|ASB1 ENSG00000203854|XR\_017700.1 ENSG00000204657|OR2H2 ENSG00000205856|NP\_001010859.1 ENSG00000218510|AGPS  
ENSG00000055813|CCDC85A ENSG00000065485|PDIA5 ENSG00000106809|OGN ENSG00000123297|TSFM ENSG00000134049|IER3IP1 ENSG00000134533|RERG ENSG00000146757|ZNF92 ENSG00000149443|C20orf78  
ENSG00000154127|STS1\_HUMAN ENSG00000165355|FBXO33 ENSG00000166260|COX11 ENSG00000170634|ACYP2 ENSG00000174429|ABRA ENSG00000178691|SUZ12 ENSG00000182141|ZNF708 ENSG00000183336|BOLA2  
ENSG00000184083|FAM120C ENSG00000184786|CTE3 ENSG00000198521|ZNF43 ENSG00000198533|Q9P1D0\_HUMAN ENSG00000204884|Q6ZVI2\_HUMAN  
CATTACC ENSG00000005844|ITGAL ENSG00000006016|CRLF1 ENSG000000028528|SNX1 ENSG000000033100|CHGUT\_HUMAN ENSG00000108518|PFN1 ENSG00000118526|TCF21 ENSG00000122735|DNAI1 ENSG00000131019|ULBP3  
ENSG00000137817|PARP6 ENSG00000139547|RDH16 ENSG00000140365|COMMD4 ENSG00000144843|ADPRH ENSG00000147394|ZNF185 ENSG00000161217|PCYT1A ENSG00000163202|LCE3D ENSG00000163879|DNALI1  
ENSG00000167272|POP5 ENSG00000167286|CD3D ENSG00000174705|SH3PXD2B ENSG00000180357|ZNF609 ENSG00000206550|LOC285346 ENSG00000005020|SKAP2 ENSG000000054938|CHRDL2  
ENSG00000075213|SEMA3A ENSG00000091164|TXNL1 ENSG00000111581|NUP107 ENSG00000115290|GRB14 ENSG00000115364|MRPL19 ENSG00000119396|RAB14 ENSG00000121005|CRISPLD1 ENSG00000123106|CCDC91  
ENSG00000123131|PRDX4 ENSG00000125398|SOX9 ENSG00000130150|MOSPD2 ENSG00000140932|CMTM2 ENSG00000143702|CEP170 ENSG00000154608|CEP170L ENSG00000155530|LRGUK ENSG00000172348|DSCR1L1  
ENSG00000186974|Q8N6X9\_HUMAN ENSG00000197776|KLHDC1 ENSG00000206125|Q68DA7\_HUMAN  
CATTCCC ENSG000000078804|TP53INP2 ENSG00000104221|BRF2 ENSG00000105066|FIZ1 ENSG00000107816|LZTS2 ENSG00000109758|HGFC ENSG00000111653|ING4 ENSG00000115468|EFHD1 ENSG00000131471|AOC3  
ENSG00000137809|ITGA11 ENSG00000141503|MINK1 ENSG00000146826|C7orf43 ENSG00000151176|NP\_775813.1 ENSG00000155849|ELMO1 ENSG00000156587|UBE2L6 ENSG00000160396|HIPK4 ENSG00000163545|NUAK2  
ENSG00000165269|AQP7 ENSG00000167617|CDC42EP5 ENSG00000174407|C20orf166 ENSG00000176476|CCDC101 ENSG00000203685|C1orf95 ENSG00000204576|PRR3 ENSG00000035720|STAF1\_HUMAN ENSG00000106031|HOXA13  
ENSG00000111885|MAN1A1 ENSG00000125851|PCSK2 ENSG00000131269|ABCT7 ENSG00000132378|MUTYH ENSG00000141279|NPEPPS ENSG00000146842|NP\_116231.2 ENSG00000

ENSG00000197006|METTL9  
CATTCCG ENSG00000004866|ST7 ENSG000000049656|CLPTML1 ENSG00000063245|EPN1 ENSG00000070614|NDS1 ENSG00000100220|C22orf28 ENSG00000101335|MYL9 ENSG00000101400|SNTA1 ENSG00000103550|NP\_001013009.2  
ENSG00000104870|FCGRT ENSG00000126005|ITGB4BP ENSG00000127220|ABHD8 ENSG00000141858|SAMD1 ENSG00000143320|CRABP2 ENSG00000153060|TEKT5 ENSG00000161574|CCL14 ENSG00000167619|TMEM145  
ENSG00000174886|NDUFA1 ENSG00000174943|KCTD13 ENSG00000175901|XR\_017883.1 ENSG00000177469|PTRF ENSG00000183072|NKX2-5 ENSG00000187091|PLCD1 ENSG00000197694|SPTAN1 ENSG00000198805|NP  
ENSG00000048649|RSF1 ENSG000000089195|TRM6\_HUMAN ENSG000000090382|LYZ ENSG00000101435|CST9L ENSG00000102128|RB40L\_HUMAN ENSG00000108932|SLC16A6 ENSG00000110321|EIF4G2 ENSG000001123106|CCDC91  
ENSG00000133687|TMT1 ENSG00000136938|ANP32B ENSG00000138095|LRPPRC ENSG00000138768|VDP\_HUMAN ENSG00000144868|TMEM108 ENSG00000147044|CASK ENSG00000164902|RNUXA ENSG00000165757|KIAA1462  
ENSG00000165805|C12orf50 ENSG00000166147|FBN1 ENSG00000166157|TPTE ENSG00000168509|HFE2 ENSG00000171989|LDHAL6B ENSG00000173391|OLR1 ENSG00000185002|RFXDC1 ENSG00000196387|ZNF140  
ENSG00000197085|Q6EKK1\_HUMAN ENSG000000204261|PSMB9  
CATTCCCT ENSG00000008056|SYN1 ENSG00000008438|PGLYRP1 ENSG00000054116|TRAPPC3 ENSG00000055609|MLL3 ENSG00000061273|HDAC7A ENSG00000068308|OTUD5 ENSG00000074181|NOTCH3 ENSG00000105808|RSA4  
ENSG00000106348|IMPDH1 ENSG00000108829|LRRC59 ENSG00000120913|PDLIM2 ENSG00000125780|TGM3 ENSG00000131097|HIGD1B ENSG00000131236|CAP1 ENSG00000134240|HMGC52 ENSG00000136488|CSH2  
ENSG00000136928|GABBR2 ENSG00000142669|SH3BGL3 ENSG00000142677|IL22RA1 ENSG00000143569|UBAP2L ENSG00000145979|TBC1D7 ENSG00000148297|SURF5 ENSG00000160211|G6PD ENSG00000160710|ADAR  
ENSG00000166024|C10orf28 ENSG00000169894|MUC3A ENSG00000172830|SSH3 ENSG00000179085|DPM3 ENSG00000205087|NP\_001020628.1 ENSG00000205698|LOC648426 ENSG0000005469|CROT ENSG00000007372|PAX6  
ENSG00000038219|FAM44A ENSG000000089094|FBXL10 ENSG000000094755|GABRP ENSG00000100644|HIF1A ENSG00000101842|VSTG1 ENSG00000102174|PHEX ENSG00000108306|FBXL20 ENSG000001120519|SLC10A7  
ENSG00000123595|RAB9A ENSG00000131941|RHPN2 ENSG00000134250|NOTCH2 ENSG00000134262|AP4B1 ENSG00000134874|DZIP1 ENSG00000148943|LIN7C ENSG00000163359|COL6A3 ENSG00000173376|C4orf31  
ENSG00000177879|AP3S1 ENSG00000188959|C9orf152 ENSG00000197937|ZNF347 ENSG00000198142|ANKRD57 ENSG00000204022|LIPJ ENSG00000204524|ZNF805  
CATTGAT ENSG00000031698|SARS ENSG00000055483|USP36 ENSG00000085998|POMGNT1 ENSG00000088854|C20orf194 ENSG00000089737|DDX24 ENSG00000095015|MAP3K1 ENSG00000102385|DRP2  
ENSG00000103742|NP\_066013.1 ENSG00000105254|TBCB ENSG00000110931|CAMKK2 ENSG00000116983|HPCAL4 ENSG00000121060|TRIM25 ENSG00000125733|TRIP10 ENSG00000129467|ADCY4 ENSG00000137656|BUD13  
ENSG00000157306|THTPA ENSG00000160505|NLRP4 ENSG00000166272|C10orf26 ENSG00000169083|AR ENSG00000183066|WBP2NL ENSG00000186163|Q4G0S1\_HUMAN ENSG00000188242|Q71RB1\_HUMAN ENSG00000204332|Q6ZU5\_HUMAN  
ENSG00000023228|NDUFS1 ENSG00000080166|DCT ENSG00000091039|OSBP18 ENSG00000097046|CDC7 ENSG00000107648|DKK1 ENSG00000112290|TMEM41 ENSG00000113658|SMAD5  
ENSG00000117280|RAB7L1 ENSG00000120756|PLS1 ENSG00000133794|ARNTL ENSG00000135374|ELF5 ENSG00000144034|TPRK7 ENSG00000145623|OSMR ENSG00000149084|HSD17B12 ENSG00000151892|GFRA1  
ENSG00000157259|GATAD1 ENSG00000162944|RFTN2 ENSG00000163544|Q96BL6\_HUMAN ENSG00000170270|C14orf142 ENSG00000170471|KIAA1219 ENSG00000175029|CTBP2 ENSG00000175455|CCDC14 ENSG00000181065|Q9P161\_HUMAN  
ENSG00000181798|C2orf52 ENSG00000182220|ATPGAP2 ENSG00000187533|NP\_999876.1  
CATTGCT ENSG00000100167|SEPT3 ENSG00000100888|CHD8 ENSG00000112273|HDGFL1 ENSG00000112715|VEGFA ENSG00000114388|TUSC4 ENSG00000119383|PPP2R4 ENSG00000124257|NEURL2 ENSG00000125888|C2orf179  
ENSG00000132254|ARFIP2 ENSG00000132635|FAM13A ENSG00000137193|PIM1 ENSG00000137309|HMGAI1 ENSG00000157693|C9orf91 ENSG00000158987|RAPGEF6 ENSG00000160445|ZER1 ENSG00000160584|QSK\_HUMAN  
ENSG00000162910|MRPL55 ENSG00000165376|CLDN2 ENSG00000172426|C6orf206 ENSG00000173702|MUC13 ENSG00000174951|FU1 ENSG00000179715|FAM13B ENSG00000181856|SLC2A4 ENSG00000183853|KIRREL  
ENSG00000185019|UBOX5 ENSG00000188026|NP\_847884.1 ENSG00000205061|Q6ZUP2\_HUMAN ENSG00000205159|Q6ZVC9\_HUMAN ENSG00000048392|RRM2B ENSG00000081019|RSBN1 ENSG00000083896|YTHDC1 ENSG000000086065|CHMP5  
ENSG00000109320|NFKB1 ENSG00000116688|MFN2 ENSG00000119865|C2orf32 ENSG00000130234|ACE2 ENSG00000139597|NP\_438169.2 ENSG00000141979|CALR3 ENSG00000142192|APP ENSG00000149231|CCDC82  
ENSG00000149345|U2D3L\_HUMAN ENSG00000151914|DST ENSG00000152763|WDR78 ENSG00000153132|CLGN ENSG00000163254|CRYGC ENSG00000164746|Q8NEG2\_HUMAN ENSG00000166509|CLEC3A ENSG00000183814|LIN9  
ENSG00000184900|SUMO3 ENSG00000196950|SLC39A10 ENSG00000197641|SERPINB13 ENSG00000204954|Q69YU5\_HUMAN  
CATTGGT ENSG00000100023|PIL2 ENSG00000104880|ARHGEP18 ENSG00000116586|MAPIP\_HUMAN ENSG00000123171|CCDC70 ENSG00000125743|SNRPD2 ENSG00000130287|NCAN ENSG00000137106|GRHR ENSG00000138085|C2orf28  
ENSG00000157045|NTAN1 ENSG00000160097|FNDC5 ENSG00000160714|UBE2Q1 ENSG00000162738|VANGL2 ENSG00000167889|MGAT5B ENSG00000173163|COMMD1 ENSG00000176371|ZSCAN2 ENSG00000198246|SLC29A3  
ENSG00000085788|DDHD2 ENSG00000100281|HMG2L1 ENSG00000117505|DR1 ENSG00000119121|TRPM6 ENSG00000121210|KIAA0922 ENSG00000128050|PAICS ENSG00000136875|PRPF4 ENSG00000137941|TLL7  
ENSG00000139746|RBM26 ENSG00000144161|ZC3H8 ENSG00000145996|KDKAL1 ENSG00000151422|FER ENSG00000165443|PHYHIP1 ENSG00000165588|OTX2 ENSG00000177889|UBE2N ENSG00000184258|CDR1  
ENSG00000185020|Q4VXF0\_HUMAN ENSG00000188996|HUS1 ENSG00000196632|WNK3 ENSG00000196757|ZNF700 ENSG00000198046|ZNF667 ENSG00000198105|ZNF248 ENSG00000198333|HYSL1 ENSG00000198612|COPS8  
ENSG00000211452|DIO1  
CATTTAA ENSG00000068650|ATP11A ENSG00000099994|SUSD2 ENSG00000108702|CCL1 ENSG00000113578|FGF1 ENSG00000116667|C1orf21 ENSG00000116685|KIAA2013 ENSG00000130695|CCDC21 ENSG00000130803|ZNF317  
ENSG00000140830|TXNL4B ENSG00000141569|TRIM65 ENSG00000142528|ZNF473 ENSG00000142748|FCN3 ENSG00000146083|RNF44 ENSG00000147256|RHGX\_HUMAN ENSG00000151882|CCL28 ENSG00000152217|SETBP1  
ENSG00000162511|LPMT5 ENSG00000162733|DDR2 ENSG00000164651|SP8 ENSG00000166435|XRR1A ENSG00000166813|KIF7 ENSG00000177408|PLAC2 ENSG00000177646|ACAD9 ENSG00000182660|NP\_001013698.1  
ENSG00000182968|SOX1 ENSG00000184221|OLIG1 ENSG00000184787|UBE2G2 ENSG00000186951|PPARA ENSG00000205620|Q6ZRB6\_HUMAN ENSG000000000561|ENPP4 ENSG00000082153|BZW1 ENSG00000100852|ARHGAP5  
ENSG00000101695|RNF125 ENSG00000102471|NDFIP2 ENSG00000112539|C6orf118 ENSG00000114942|EEF1B2 ENSG00000115380|NUDCD1 ENSG00000120526|MYOT ENSG00000121058|COIL  
ENSG00000121741|ZMYM2 ENSG00000123240|OPTN ENSG00000125398|SOX9 ENSG00000132406|TMEM128 ENSG00000133088|PLA2G12B ENSG00000139687|RB1 ENSG00000143452|HORMAD1 ENSG00000144747|TMF1  
ENSG00000145476|CYP4V2 ENSG00000145965|C6orf50 ENSG00000147874|FAM29A ENSG00000151151|IPMK ENSG00000152495|CAMK4 ENSG00000156876|SASS6 ENSG00000164796|CSMD3 ENSG00000166750|SLFN5  
ENSG00000168967|PMCHL1 ENSG00000170873|MTSS1 ENSG00000170891|CYTL1 ENSG00000176018|LYSMD3 ENSG00000177853|ZNF518 ENSG00000185774|KCNIP4 ENSG00000186369|YNO02\_HUMAN ENSG00000188039|NWD1  
ENSG00000196104|SPOCK3 ENSG00000197782|ZNF780A ENSG00000204217|BMPR2 ENSG00000205423|TMEM188  
CATTTAG ENSG00000048342|Q9H8A7\_HUMAN ENSG00000074054|CLASP1 ENSG00000089169|RPH3A ENSG00000104848|KCNA7 ENSG00000112273|HDGFL1 ENSG00000126882|FAM78A ENSG00000130508|PXDN ENSG00000137496|I18BP\_HUMAN  
ENSG00000147536|GINS4 ENSG00000148396|KIAA0310 ENSG00000149021|SCGB1A1 ENSG00000150086|GRIN2B ENSG00000162408|NOL9 ENSG00000171611|PTCRA ENSG00000181215|NP\_997288.1 ENSG00000183495|EP400  
ENSG00000188589|RBM33 ENSG00000197322|NP\_997337.1 ENSG00000204765|XR\_017851.1 ENSG00000205023|Q6ZSF1\_HUMAN ENSG00000205878|Q6ZSV2\_HUMAN ENSG00000048028|USP28 ENSG00000100580|TMED8 ENSG00000101266|CSNK2A1P  
ENSG00000103740|ACSBG1 ENSG00000106853|LTB4DH ENSG00000109674|NEIL3 ENSG00000116729|GPR177 ENSG00000116830|TTF2 ENSG00000122545|SEPT7 ENSG00000122882|ECD ENSG00000135750|KCNK1  
ENSG00000136636|KCTD3 ENSG00000137693|YAP1 ENSG00000143889|HNRPLL ENSG00000153896|ZNF599 ENSG00000161594|KLHL10 ENSG00000162722|TRIM58 ENSG00000165071|TMEM71 ENSG00000167306|MYO5B  
ENSG00000172572|PDE3A ENSG00000177570|SAMD12 ENSG00000180917|NP\_060818.3 ENSG00000185760|KCNQ5 ENSG00000196505|GDAP2 ENSG00000198692|EIF1AY ENSG00000205413|SAMD9  
CATTTCG ENSG00000007255|TRAPPC6A ENSG000000022277|C20orf43 ENSG00000079432|CIC ENSG00000099622|CIRBP ENSG00000111679|SEPT9 ENSG00000111679|SEPT9 ENSG00000112118|MCM3 ENSG00000115306|SPTBN1  
ENSG00000124839|RAB17 ENSG00000129946|SHC2 ENSG00000142235|LMTK3 ENSG00000156931|VPS8 ENSG00000158711|ELK4 ENSG00000158793|NIT1 ENSG00000166377|ATP9B ENSG00000168487|BMP1  
ENSG00000168517|HEXIM2 ENSG00000170089|THOC3 ENSG00000182330|PRAMEF8 ENSG00000185669|SNAI3 ENSG00000198518|HIST1H4E ENSG00000198693|Q6ZW86\_HUMAN ENSG00000203971|Q6ZRT1\_HUMAN ENSG00000204485|LOC729516  
ENSG00000204510|PRAMEF7 ENSG00000048462|TNFRSF17 ENSG00000075673|ATP12A ENSG00000104643|PTMR9 ENSG00000112541|PDE10A ENSG00000113845|C3orf1 ENSG00000114315|HES1 ENSG00000115392|PNC1  
ENSG00000121390|PSPC1 ENSG00000122674|C7orf28A ENSG00000136159|NUDT15 ENSG00000143278|PL3B ENSG00000145335|SNCA ENSG00000147121|ZNF673 ENSG00000162702|ZNF281 ENSG00000163746|PLSCR2  
ENSG00000164093|PTX2 ENSG00000164104|HMGB2 ENSG00000165091|TMD1 ENSG00000168263|KCNV2 ENSG00000176728|CYO14\_HUMAN ENSG00000197054|ZNF763  
CATTTCT ENSG00000009724|MASP2 ENSG00000086015|MAST2 ENSG00000110777|POU2AF1 ENSG00000113070|HBEGF ENSG00000114999|TTL ENSG00000120509|PDZD11 ENSG00000120875|DUSP4 ENSG00000125810|CD93  
ENSG00000126746|ZNF384 ENSG00000133065|SLC41A1 ENSG00000141699|NP\_835227.1 ENSG00000145063|NM\_182586 ENSG00000146047|HIST1H2BA ENSG00000169118|CSNK1G1 ENSG00000178971|C17orf68 ENSG00000182154|MRPL41  
ENSG00000183049|CAMK1D ENSG00000184935|Q6AI01\_HUMAN ENSG00000185522|C11orf35 ENSG00000189231|PSG3 ENSG00000196176|HIST1H4A ENSG00000197093|GAL3ST4 ENSG00000197724|PHF2 ENSG00000203804|C1orf138  
ENSG00000205313|FAM106A ENSG00000039600|SOX30 ENSG00000065809|FAM107B ENSG00000087842|PIR ENSG00000101084|C20orf24 ENSG00000110911|SLC11A2 ENSG00000115446|UNC50 ENSG00000116288|PARK7  
ENSG00000128276|RFPL3 ENSG00000131381|ZFYVE20 ENSG00000134146|ATPBD4 ENSG00000135547|HEY2 ENSG00000136045|PWP1 ENSG00000137033|IL33 ENSG00000145241|CENPC1 ENSG00000145423|SFRP2  
ENSG00000145780|FEM1C ENSG00000146938|NLGN4X ENSG00000150636|CCDC102B ENSG00000153044|CENPH ENSG00000157553|DSCR3 ENSG00000157551|KCNJ15 ENSG00000162616|DNAJB4 ENSG00000162704|ARPC5  
ENSG00000165794|SLC39A2 ENSG00000166323|C11orf65 ENSG00000169905|TOR1AIP2 ENSG00000170927|PKHD1 ENSG00000172115|CYCS ENSG00000175175|PPM1E ENSG00000178075|GRAMD1C ENSG00000184402|SS18L1  
ENSG00000196562|SULF3 ENSG00000196885|Q9HAZ8\_HUMAN ENSG00000197701|ZNF595 ENSG00000198759|EGFL6  
CCAAAAA ENSG00000008130|NADK ENSG00000008438|PGLYRP1 ENSG00000042832|TG ENSG00000082014|SMARCD3 ENSG00000089356|FXYP3 ENSG00000090447|TFAP4 ENSG00000103067|RBM35B ENSG00000105738|SIPAL13  
ENSG00000108821|COL1A1 ENSG00000126353|CCR7 ENSG00000131196|NFATC1 ENSG00000135744|AGT ENSG00000138617|PARP16 ENSG00000139651|ZNF740 ENSG00000140264|SERF2 ENSG00000142227|EMP3  
ENSG00000148400|NOTCH1 ENSG00000150086|GRIN2B ENSG00000151612|NP\_849157.2 ENSG00000156599|ZDHHC5 ENSG00000160789|LMNA ENSG00000167065|DUSP18 ENSG00000174788|PCP2 ENSG00000185960|SHOX  
ENSG00000188997|KCTD12 ENSG00000196230|TUBB ENSG00000196821|C6orf106 ENSG00000205159|Q6ZVC9\_HUMAN ENSG00000082556|OPRK1 ENSG00000089157|RPLP0 ENSG00000096746|HNRPH3 ENSG00000099260|PALMD  
ENSG00000101278|Q9NQ39\_HUMAN ENSG00000112077|RHAG ENSG00000124253|PCK1 ENSG00000124614|RPS10 ENSG00000125691|RPL23 ENSG00000144406|Q96S0\_HUMAN ENSG00000144821|MYH15 ENSG00000152582|NP\_653323.1  
ENSG00000153779|TGIF2LX ENSG00000155918|RAET1L ENSG00000156928|C7orf30 ENSG00000156958|GALK2 ENSG00000162526|TSSK3 ENSG00000166004|KIAA1731 ENSG00000166148|AVPR1A ENSG00000166170|BAG5  
ENSG00000174839|FAM116A ENSG00000180138|CSNK1A1L ENSG00000183990|Q8WZA8\_HUMAN ENSG00000189079|ARID2 ENSG00000196533|C1orf186 ENSG00000203722|RAET1G  
CCAAACG ENSG00000090097|PCBP4 ENSG00000104921|FCER2 ENSG00000105538|RASIP1 ENSG00000112493|TAPBP ENSG00000125780|TGM3 ENSG00000125901|MRPS26 ENSG00000131668|BARX1 ENSG00000142235|LMTK3  
ENSG00000143061|IGSF3 ENSG00000164438|TLX3 ENSG00000168394|TAP1 ENSG00000168476|REEP4 ENSG00000172538|C10orf73 ENSG00000173950|C3orf21 ENSG00000174837|EMR1 ENSG00000174938|SEZ6L2  
ENSG00000177721|NP\_001014301.1 ENSG00000183549|NP\_060358.2 ENSG00000183558|HIST2H2AA3 ENSG00000186837|C21orf119 ENSG00000188976|NOC2L ENSG00000204101|Q6ZU91\_HUMAN ENSG00000206580|AP4M1 ENSG00000049449|RCN1  
ENSG00000071539|TRIP13 ENSG00000101608|MLRM\_HUMAN ENSG00000101843|PSMD10 ENSG00000107537|PHYH ENSG00000110696|C11orf58 ENSG000001122779|TRIM24 ENSG00000125107|CNOT1  
ENSG00000127995|CASD1 ENSG00000134594|RAB33A ENSG00000135298|BAI3 ENSG00000136943|CTS2L ENSG00000145248|SLC10A4 ENSG00000159140|SON ENSG00000163683|C4orf34 ENSG00000177511|ST8SIA3  
ENSG00000180882|XR\_017823.1 ENSG00000183060|LYSMD4 ENSG00000183813|CCR4 ENSG00000186009|ATP4B ENSG00000186115|CYP4F2 ENSG00000196876|SCN8A  
CCAAAGA ENSG00000011451|WIZ ENSG00000073584|SMARCE1 ENSG00000100034|PPM1F ENSG00000100376|FAM118A ENSG00000101986|ABCD1 ENSG00000103966|EHD4 ENSG00000109101|FOXN1 ENSG00000109113|RAB34  
ENSG00000119227|PTGZ ENSG00000124608|AARS2 ENSG00000135482|ZC3H10 ENSG00000136717|BIN1 ENSG00000141349|G6PC3 ENSG00000154319|C8orf13 ENSG00000156398|SFXN2 ENSG00000159184|HOBX13  
ENSG00000168781|HISPPD2A ENSG00000168874|ATOH8 ENSG00000169083|AR ENSG00000169241|RAGLAP1 ENSG00000169856|ONCUC1T1 ENSG00000171954|NP\_775754.1 ENSG00000172458|IL17D ENSG00000174175|SELP  
ENSG00000174683|C8orf78 ENSG00000188888|GPR179 ENSG00000196739|COL27A1 ENSG00000203786|KPRP ENSG00000204071|TCEAL6 ENSG00000205631|Q9H757\_HUMAN ENSG00000205711|Q6ZV92\_HUMAN ENSG00000206193|Q5HYA3\_HUMAN  
ENSG00000044115|CTNNA1 ENSG00000060138|CSDA ENSG00000082516|GEMIN5 ENSG00000086699|NOX4 ENSG00000089063|C20orf30 ENSG00000092531|SNAP23 ENSG00000106541|AGR2 ENSG00000116132|PRRX1  
ENSG00000117335|CD46 ENSG00000130023|C6orf70 ENSG00000133800|XLKD1 ENSG00000136872|ALDOB ENSG00000136938|ANP32B ENSG00000138674|SEC31A ENSG00000141048|MYH4 ENSG00000143190|POU2F1  
ENSG00000144191|CNGA3 ENSG00000157554|ERG ENSG00000158270|COLEC12 ENSG00000159082|SYNJ1 ENSG00000160813|C7orf47 ENSG00000166012|SNORA25 ENSG00000169439|SDC2 ENSG00000177283|FZD8  
ENSG00000178538|CA8 ENSG00000183542|KLRK4 ENSG00000187994|NP\_940847.1 ENSG00000188162|OTOG ENSG00000197585|Q5JV89\_HUMAN  
perfect: CCAAAGA TCTTTGG hsa-miR-9 TCTTTGGttatctagctgtatga 0  
CCAAAGC ENSG00000005073|HOXA11 ENSG00000067365|C16orf68 ENSG00000070785|EIF2B3 ENSG00000095752|IL11 ENSG00000101298|RAD21L1 ENSG00000105251|SHD ENSG00000107816|LZTS2 ENSG00000110801|PSMD9  
ENSG00000115107|STEAP3 ENSG00000137343|C6orf134 ENSG00000140464|PML ENSG00000143418|LASS2 ENSG00000148841|KIAA1754 ENSG00000149300|C11orf52 ENSG00000158195|WASF2 ENSG00000162804|SNED1  
ENSG00000163156|SCNM1 ENSG00000166828|SCNM1G ENSG00000183048|SLC25A10 ENSG00000188101|ALOX12P2 ENSG00000188783|PRELP ENSG00000196517|SLC6A9 ENSG00000196734|LCE1B ENSG00000196743|GM2A  
ENSG00000205441|KRTAP10-7 ENSG00000055208|MAP3K7IP2 ENSG00000103381|NP\_060810.1 ENSG00000105205|CLC ENSG00000113269|RNF130 ENSG00000113494|PRLR ENSG00000116793|PHTF1 ENSG00000116922|C1orf109  
ENSG00000118402|ELOVL4 ENSG00000123572|NRK ENSG00000126814|TRMT5 ENSG00000133800|XLKD1 ENSG00000137601|NER1 ENSG000001388

|         |                              |                              |                              |                                |                                |                                |                                |                                |
|---------|------------------------------|------------------------------|------------------------------|--------------------------------|--------------------------------|--------------------------------|--------------------------------|--------------------------------|
|         | ENSG00000145555 MYO10        | ENSG00000146856 AGBL3        | ENSG00000151422 FER          | ENSG00000164816 DEFA5          | ENSG00000173705 SUSD5          | ENSG00000176624 RKHD2          | ENSG00000178033 FAM26E         | ENSG00000180938 ZNF572         |
| CCAAAGG | ENSG00000183508 FAM46C       | ENSG00000183784 C9orf66      | ENSG00000204829 CBWD7        | ENSG00000107816 LZTS2          | ENSG00000108797 CNTNAP1        | ENSG00000110881 ACCN2          | ENSG00000113194 UBXD8          | ENSG00000126856 Q9NQW5-2       |
|         | ENSG00000131398 KCNC3        | ENSG00000133056 PIK3C2B      | ENSG00000146047 HIST1H2BA    | ENSG00000149483 TMEM138        | ENSG00000158796 DEDD           | ENSG00000158887 MPZ            | ENSG00000168148 HIST3H3        | ENSG00000168242 HIST1H2BI      |
|         | ENSG00000168298 HIST1H1E     | ENSG00000169375 SIN3A        | ENSG00000183403 DND1         | ENSG00000183578 TNFAIP8L3      | ENSG00000184260 HIST2H2AC      | ENSG00000185130 HIST1H2BL      | ENSG00000196176 HIST1H4A       | ENSG00000197697 HIST1H2BE      |
|         | ENSG00000027276 HECW1        | ENSG00000026508 CD44         | ENSG00000111780 15E2_HUMAN   | ENSG00000113916 BCL6           | ENSG00000119401 TRIM32         | ENSG00000120137 PANK3          | ENSG00000121316 NP_079105.4    | ENSG00000124786 SLC35B3        |
|         | ENSG00000130338 TULP4        | ENSG00000133961 NUMB         | ENSG00000135374 ELF5         | ENSG00000139318 DUSP6          | ENSG00000140181 HERC2P2        | ENSG00000142188 TMEM50B        | ENSG00000146477 SLC22A3        | ENSG00000155850 SLC26A2        |
|         | ENSG00000162976 PQLC3        | ENSG00000170961 HAS2         | ENSG00000172765 TMCC1        | ENSG00000176974 SHMT1          | ENSG00000178351 Q8N345_HUMAN   | ENSG00000182217 HIST2H4B       | ENSG00000183722 LHFP           | ENSG00000183941 HIST2H4A       |
| CCAAAGT | ENSG00000196208 NP_683701.2  | ENSG00000196966 HIST1H3E     | ENSG00000009335 UBE3C        | ENSG00000011021 CLCN6          | ENSG00000065308 TRAM2          | ENSG00000100364 C22orf9        | ENSG00000106125 AQP1           | ENSG00000118137 APOA1          |
|         | ENSG00000119457 SLC46A2      | ENSG00000120053 GOT1         | ENSG00000120952 PRAEF2       | ENSG00000123360 PDE1B          | ENSG00000131746 TNS4           | ENSG00000134243 SORT1          | ENSG00000136367 ZFHX2          | ENSG00000136504 MYST2          |
|         | ENSG00000141699 NP_835227.1  | ENSG00000146112 KIAA1949     | ENSG00000149499 EML3         | ENSG00000157110 RBPMS          | ENSG00000160691 SHC1           | ENSG00000164088 PPM1M          | ENSG00000164711 LPAL2          | ENSG00000169926 KLF13          |
|         | ENSG00000179241 LDLRAD3      | ENSG00000181885 CLDN7        | ENSG00000184209 NP_008951.1  | ENSG00000198951 NAGA           | ENSG00000203691 Q9UI51_HUMAN   | ENSG0000000457 SCYL3           | ENSG00000037749 MFAP3          | ENSG00000049618 ARID1B         |
|         | ENSG00000054219 LY75         | ENSG00000066583 ISOC1        | ENSG00000075420 FNDC3B       | ENSG00000107614 TRDMT1         | ENSG00000107651 SEC23IP        | ENSG00000110756 HPS5           | ENSG00000112419 PHACTR2        | ENSG00000117713 ARID1A         |
|         | ENSG00000155906 RMND1        | ENSG00000157827 FMNL2        | ENSG00000164171 ITGA2        | ENSG00000164292 RHOBTB3        | ENSG00000164603 NP_689769.2    | ENSG00000167283 ATP5L          | ENSG00000167601 AXL            | ENSG00000172164 SNTB1          |
|         | ENSG00000196664 TLR7         | ENSG00000198382 UVRAG        | ENSG00000204171 Q6STG2_HUMAN | ENSG00000205612 Q71JB2_HUMAN   | ENSG00000206559 ZCWPW2         | ENSG00000105640 RPL18A         | ENSG00000106333 PCOLCE         | ENSG00000106927 AMBP           |
| CCAAATA | ENSG00000006695 COX10        | ENSG00000075275 CELSR1       | ENSG00000089692 LAG3         | ENSG00000091704 CPA1           | ENSG00000105610 KLF1           | ENSG00000136935 GOLGA1         | ENSG00000137312 FLOT1          | ENSG00000139574 NPF1           |
|         | ENSG00000114786 ACY1         | ENSG00000122136 OBP2A        | ENSG00000125089 SH3TC1       | ENSG00000130032 PRRG3          | ENSG00000136504 MYST2          | ENSG00000145491 ROPN1L         | ENSG00000151292 CSNK1G3        | ENSG00000151789 ZNF659         |
|         | ENSG00000142546 NOSIP        | ENSG00000160916 ATP5J2       | ENSG00000162592 CCDC27       | ENSG00000163060 TEKT4          | ENSG00000163220 S100A9         | ENSG00000165606 NP_001073989.1 | ENSG00000165949 IFI27          | ENSG00000167749 KLK4           |
|         | ENSG00000169213 RAB3B        | ENSG00000170420 APOL6        | ENSG00000170889 RPS9         | ENSG00000172548 ICHN_HUMAN     | ENSG00000182318 ZSCAN2         | ENSG00000187686 XR_016979.1    | ENSG00000189171 S100A13        | ENSG00000198883 PNMA5          |
|         | ENSG00000017427 IGF1         | ENSG00000042429 CRSP6        | ENSG00000050748 MAPK9        | ENSG00000081803 CADPS2         | ENSG00000095627 TDRD1          | ENSG00000100629 C14orf145      | ENSG00000102174 PHEX           | ENSG00000109084 TMEM97         |
|         | ENSG00000112769 LAMA4        | ENSG00000115760 BIRC6        | ENSG00000116791 CRY2         | ENSG00000124831 LRRFIP1        | ENSG00000130413 STK33          | ENSG00000145491 ROPN1L         | ENSG00000151292 CSNK1G3        | ENSG00000151789 ZNF659         |
|         | ENSG00000152240 CCDC5        | ENSG00000162390 ACOT11       | ENSG00000162944 RFTN2        | ENSG00000163608 C3orf17        | ENSG00000163827 LRRC2          | ENSG00000166147 FBN1           | ENSG00000169446 TMEM32         | ENSG00000170871 K0232_HUMAN    |
|         | ENSG00000172469 MANEA        | ENSG00000174792 C4orf26      | ENSG00000176009 ASCL3        | ENSG00000176927 EFCAB5         | ENSG00000180777 ANKRD30B       | ENSG00000184845 DRD1           | ENSG00000203963 C1orf141       | ENSG00000204596 RPP21          |
| CCAAATC | ENSG00000008056 SYN1         | ENSG00000092445 TYRO3        | ENSG00000103490 PYCARD       | ENSG00000103528 SYT17          | ENSG00000105066 FIZ1           | ENSG00000105523 FAM83E         | ENSG00000107796 ACTA2          | ENSG00000122547 NP_085139.2    |
|         | ENSG00000126243 LRFN3        | ENSG00000130287 NCAN         | ENSG00000135454 B4GALNT1     | ENSG00000147100 SLC16A2        | ENSG00000162493 PDPN           | ENSG00000165495 PKNOX2         | ENSG00000172731 LRRC20         | ENSG00000173210 ABLIM3         |
|         | ENSG00000178401 NP_079178.2  | ENSG00000187714 SLC18A3      | ENSG00000188185 Q6ZQP8_HUMAN | ENSG00000008197 TFAP2D         | ENSG00000065559 MAP2K4         | ENSG00000071794 HLTF           | ENSG00000085276 EVI1           | ENSG00000101557 USP14          |
|         | ENSG00000101981 F9           | ENSG00000102910 LONP2        | ENSG00000105467 SYNGR4       | ENSG00000107771 KIAA1128       | ENSG00000111859 NEDD9          | ENSG00000119922 IFIT2          | ENSG00000136048 NP_060840.2    | ENSG00000143457 GOLPH3L        |
|         | ENSG00000162695 SLC30A7      | ENSG00000164120 HPGD         | ENSG00000166923 GREM1        | ENSG00000168383 HLA-DPB1       | ENSG00000168386 FILIPL1        | ENSG00000171885 AQP4           | ENSG00000178184 PARD6G         | ENSG00000181023 OR56B1         |
| CCAAATG | ENSG00000085063 CD59         | ENSG00000104415 WISP1        | ENSG00000106012 IQE1         | ENSG00000106070 GRB10          | ENSG00000108788 MLX            | ENSG00000116584 ARHGFE2        | ENSG00000119333 WDR34          | ENSG00000119547 ONECUT2        |
|         | ENSG00000120664 LOC646871    | ENSG00000122694 C9orf19      | ENSG00000142512 SIGLEC10     | ENSG00000142611 PRDM16         | ENSG00000148842 CNM2           | ENSG00000149922 TBX6           | ENSG00000151062 CACNA2D4       | ENSG00000158457 TSPAN33        |
|         | ENSG00000158715 SLC45A3      | ENSG00000164711 LPAL2        | ENSG00000165280 VCP          | ENSG00000167987 VPS37C         | ENSG00000168334 CMYA1          | ENSG00000179562 GCC1           | ENSG00000180824 Q8NAH5_HUMAN   | ENSG00000196517 SLC6A9         |
|         | ENSG00000196567 NP_942123.1  | ENSG00000197417 CARXL        | ENSG00000197435 HIST3H2BB    | ENSG00000204059 NP_001013718.1 | ENSG00000205730 NP_001030013.1 | ENSG00000039600 SOX3           | ENSG00000074966 TXK            | ENSG00000104691 UBXD6          |
|         | ENSG00000105982 RNFB32       | ENSG00000111790 FGFR1OP2     | ENSG00000116678 LEPR         | ENSG00000121005 CRISPLD1       | ENSG00000121350 NP_079130.2    | ENSG00000125868 DSTN           | ENSG00000129586 ZBED5          | ENSG00000134910 STT3A          |
|         | ENSG00000138190 EXOC6        | ENSG00000144366 GULP1        | ENSG00000145391 SETD7        | ENSG00000153487 ING1           | ENSG00000163738 MTHFD2L        | ENSG00000165076 NP_001008271.1 | ENSG00000176293 ZNF135         | ENSG00000179630 C13orf31       |
| CCAACAA | ENSG00000005961 ITGA2B       | ENSG00000015285 WAS          | ENSG00000087266 SH3BP2       | ENSG00000110203 FOLR3          | ENSG00000116147 TNR            | ENSG00000119771 KLHL29         | ENSG00000126709 IFI6           | ENSG00000130283 GDF1           |
|         | ENSG00000141068 KSR1         | ENSG00000143891 GALM         | ENSG00000146083 RNF44        | ENSG00000151779 NP_056993.2    | ENSG00000170545 NM_001031628.1 | ENSG00000185811 IKZF1          | ENSG00000189321 NR_002940.1    | ENSG00000060718 COL11A1        |
|         | ENSG00000072080 SPF2         | ENSG00000100505 TRIM9        | ENSG00000100784 RPS6KA5      | ENSG00000111875 ASF1A          | ENSG00000112304 THEM2          | ENSG00000117758 STX12          | ENSG00000127325 BEST3          | ENSG00000132872 SYT4           |
|         | ENSG00000137872 SEMA6D       | ENSG00000139910 NOVA1        | ENSG00000140575 IQGAP1       | ENSG00000164116 GUCY1A3        | ENSG00000172673 C6orf190       | ENSG00000174429 ABRA           | ENSG00000187823 ZCCHC16        | ENSG00000197069 Q9H399_HUMAN   |
| CCAAAGT | ENSG00000020612 QOD2K5_HUMAN | ENSG00000100565 C14orf166B   | ENSG00000103024 NME3         | ENSG00000105668 UPK1A          | ENSG00000122140 MRPS2          | ENSG00000123810 NP_085055.1    | ENSG00000125844 RRBP1          | ENSG00000126878 C9orf58        |
|         | ENSG00000140406 MESDC1       | ENSG00000143921 ABCG8        | ENSG00000152475 Q9REG3_HUMAN | ENSG00000159723 AGRP           | ENSG00000163704 PRRT3          | ENSG00000164399 IL3            | ENSG00000166473 PKD1L2         | ENSG00000170439 METTL7B        |
|         | ENSG00000171298 GAA          | ENSG00000185522 C11orf35     | ENSG00000185554 NKF2         | ENSG00000185945 NKF2_HUMAN     | ENSG00000189337 NP_001018000.1 | ENSG00000196892 Q9P1D2_HUMAN   | ENSG00000197421 NR_003267.1    | ENSG00000197859 ADAMTSL2       |
|         | ENSG00000204117 Q6ZV8_HUMAN  | ENSG00000070018 LRP6         | ENSG00000083857 FAT          | ENSG00000105879 CBLL1          | ENSG00000113645 WWC1           | ENSG00000118515 SGK            | ENSG00000124827 GCM2           | ENSG00000137441 FGFBP2         |
|         | ENSG00000138029 HADHB        | ENSG00000138795 LEF1         | ENSG00000143179 UCK2         | ENSG00000155959 VBP1           | ENSG00000164465 DCBLD1         | ENSG00000165973 NELL1          | ENSG00000178604 NP_001034973.1 | ENSG00000196664 TLR7           |
| CCAAGAA | ENSG00000110203 FOLR3        | ENSG00000110987 BCL7A        | ENSG00000115041 KNIP3        | ENSG00000119714 GPR68          | ENSG00000119946 CNM1           | ENSG00000125503 PPP1R12C       | ENSG00000127743 IL17B          | ENSG00000128604 IRF5           |
|         | ENSG00000130950 FAM22F       | ENSG00000130956 HABP4        | ENSG00000135365 PHF21A       | ENSG00000143850 PLEKHA6        | ENSG00000154229 PRCA           | ENSG00000160460 SPTBN4         | ENSG00000161281 COX7A1         | ENSG00000163872 YEATS2         |
|         | ENSG00000171872 KLF17        | ENSG00000176302 FOXR1        | ENSG00000179141 Q8N642_HUMAN | ENSG00000179593 ALOX15B        | ENSG00000198034 RPS4X          | ENSG00000204438 BAT4           | ENSG00000205592 MUC19          | ENSG00000052802 SC4MOL         |
|         | ENSG00000083720 OXCT1        | ENSG00000091879 ANGPT2       | ENSG00000104388 RAB2A        | ENSG00000111058 NP_078836.1    | ENSG00000117262 GPR89A         | ENSG00000121388 Q9H521_HUMAN   | ENSG00000132623 ANKRD5         | ENSG00000138041 SMEK2          |
|         | ENSG00000139168 ZCRB1        | ENSG00000144645 OSBPL10      | ENSG00000152684 PELO         | ENSG00000154065 ANKRD29        | ENSG00000158639 PAGE5          | ENSG00000163528 CHCHD4         | ENSG00000164332 UBLCP1         | ENSG00000169224 C1orf150       |
|         | ENSG00000170222 C17orf48     | ENSG00000170370 EMX2         | ENSG00000176055 NP_981951.1  | ENSG00000178562 CD28           | ENSG00000182090 C14orf25       | ENSG00000183023 SLC8A1         | ENSG00000183308 C17orf60       | ENSG00000185483 ROR1           |
|         | ENSG00000186395 KRT10        | ENSG00000186628 FSD2         | ENSG00000187919 GSTA1        | ENSG00000196593 NM_207439      | ENSG00000197024 ZNF398         | ENSG00000198015 MRPL42         | ENSG00000198221 NP_001035973.1 | ENSG00000205647 CSN1S2A        |
| CCAAAGT | ENSG00000007216 SLC13A2      | ENSG00000058262 SEC61A1      | ENSG00000092445 TYRO3        | ENSG00000105514 RAB3D          | ENSG00000106852 LHX6           | ENSG00000133895 MEN1           | ENSG00000136279 DBNL           | ENSG00000136697 IL1F10         |
|         | ENSG00000136856 SLC2A8       | ENSG00000162951 LRRTM1       | ENSG00000162911 LRRTM1       | ENSG00000164711 LPAL2          | ENSG00000165633 C10orf72       | ENSG00000170801 HTRA3          | ENSG00000176371 ZSCAN2         | ENSG00000182871 COL18A1        |
|         | ENSG00000184502 GAST         | ENSG00000196106 Q8WZ26_HUMAN | ENSG00000205659 LINS2        | ENSG0000010810 FYN             | ENSG000000013561 RNF14         | ENSG00000024048 UBR2           | ENSG00000100281 HMG2L1         | ENSG00000113263 ITK            |
|         | ENSG00000115183 TANC1        | ENSG00000116016 EPAS1        | ENSG00000120860 CCDC53       | ENSG00000122786 CALD1          | ENSG00000143486 LGTN           | ENSG00000144406 Q9BSS0_HUMAN   | ENSG00000147044 CASK           | ENSG00000147419 CCDC25         |
|         | ENSG00000150510 FAM124A      | ENSG00000152932 RAB3C        | ENSG00000155621 C9orf85      | ENSG00000164687 FABP5          | ENSG00000169155 ZBTB43         | ENSG00000170323 FABP4          | ENSG00000196785 Q8N862_HUMAN   | ENSG00000197859 Q8N862_HUMAN   |
| CCAAAGT | ENSG00000004838 ZMYND10      | ENSG00000025772 TOMM34       | ENSG00000100626 GALNTL1      | ENSG00000102096 PIM2           | ENSG00000103126 AXIN1          | ENSG00000116514 IBRD3          | ENSG00000125347 IRF1           | ENSG00000128709 HOXD9          |
|         | ENSG00000131400 NAPSA        | ENSG00000148468 C10orf38     | ENSG00000159713 CG38_HUMAN   | ENSG00000162298 SYVN1          | ENSG00000162676 GFI1           | ENSG00000166540 ZNF407         | ENSG00000166888 STAT6          | ENSG00000176387 HSD11B2        |
|         | ENSG00000177302 TOP3A        | ENSG00000178589 Q9BT26_HUMAN | ENSG00000182575 NXP3         | ENSG00000183160 TMEM119        | ENSG00000189060 H1FO           | ENSG00000197291 Q8WV75_HUMAN   | ENSG00000197586 ENTPD6         | ENSG00000205085 NP_001012457.1 |
|         | ENSG00000053254 CHES1        | ENSG00000054983 GALC         | ENSG00000064652 SNX24        | ENSG00000107295 SH3GL2         | ENSG00000109814 UGDH           | ENSG00000110063 DCPS           | ENSG00000112182 BACH2          | ENSG00000115183 TANC1          |
|         | ENSG00000116176 TPSG1        | ENSG00000117036 ETV3         | ENSG00000125931 CTE1D1       | ENSG00000126858 RHOT1          | ENSG00000132475 H3F3B          | ENSG00000138684 IL21           | ENSG00000140941 MAP1LC3B       | ENSG00000155850 SLC26A2        |
|         | ENSG00000164327 NP_689969.2  | ENSG00000164989 C9orf93      | ENSG00000169064 NM_024687.2  | ENSG00000180182 CRSP2          | ENSG00000185009 AP3M1          | ENSG00000198673 FAM19A2        | ENSG00000070031 SCT            | ENSG00000076662 ICAM3          |
| CCAATAA | ENSG00000008438 PGLYRP1      | ENSG0000010256 UQCRC1        | ENSG0000010438 PRSS3         | ENSG00000100097 LGALS1         | ENSG00000100908 C14orf122      | ENSG00000101361 NOL5A          | ENSG00000101473 ACOT8          | ENSG00000102900 NUP93          |
|         | ENSG00000083845 RPS5         | ENSG00000084207 GSTP1        | ENSG00000087191 PSMC5        | ENSG00000106384 MOGAT3         | ENSG00000109072 VTN            | ENSG00000110717 NDUFS8         | ENSG00000113430 IRX4           | ENSG00000123171 CCDC70         |
|         | ENSG00000104129 DNAJC17      | ENSG00000104899 AMH          | ENSG000001205419 TFPT        | ENSG00000126566 HBZ            | ENSG00000130687 ALKBH6         | ENSG00000132635 FAM113A        | ENSG00000135436 C12orf25       | ENSG00000143314 MRPL24         |
|         | ENSG00000123349 PFDN5        | ENSG00000126258 FXD1         |                              |                                |                                |                                |                                |                                |

ENSG00000067177|PHKA1 ENSG00000101842|VSI61 ENSG00000106031|HOXA13 ENSG00000111912|NCOA7 ENSG00000112246|SIM1 ENSG00000122786|CALD1 ENSG00000124491|F13A1 ENSG00000127995|CASD1  
ENSG00000128617|OPN1S1W ENSG00000134987|WDR36 ENSG00000138386|NAB1 ENSG00000138685|PFGE2 ENSG00000145681|HAPLN1 ENSG00000156735|BAG4 ENSG00000163328|GPR155 ENSG00000168566|C6orf151  
CCAAATCA ENSG00000171862|PTENP1 ENSG00000174016|FAM466 ENSG00000178107|Q8N1B8\_HUMAN ENSG00000182367|SNRPEL1 ENSG00000198533|Q9P1D0\_HUMAN  
ENSG0000014257|ACPP ENSG000000087077|TRIP6 ENSG00000100385|IL2RB ENSG00000107954|NEURL ENSG00000119715|ESRRB ENSG00000130147|SH3BP4 ENSG00000130956|HABP4 ENSG00000134516|DOCK2  
ENSG00000137100|DCTN3 ENSG00000145990|GFOD1 ENSG00000153666|XR\_017721.1 ENSG00000157350|ST3GAL2 ENSG00000159685|CHCHD6 ENSG00000160408|ST6GALNAC6 ENSG00000161558|TMEM143 ENSG00000166833|NAV2  
ENSG00000172613|RAD9A ENSG00000175697|GPR156 ENSG00000175894|C21orf29 ENSG00000178081|LOC653075 ENSG00000178343|NP\_001073974.1 ENSG00000188532|LOC653125 ENSG00000188626|LOC653720 ENSG00000189058|APOD  
ENSG00000198722|UNC13B ENSG00000198913|Q9H5S2\_HUMAN ENSG00000008018|PSMB1 ENSG00000059758|PCTK2 ENSG00000066279|ASPM ENSG00000091317|CMTM6 ENSG00000110048|OSBP ENSG00000113269|RNFL30  
ENSG00000121690|DEPDC7 ENSG00000130363|RSHL2 ENSG00000136451|VEZF1 ENSG00000143368|SF3B4 ENSG00000153904|DDAH1 ENSG00000166170|BAG5 ENSG00000169446|TMEM32 ENSG00000176624|RKHD2  
ENSG00000179119|SPTY2D1 ENSG00000185513|L3MBTL ENSG00000198440|ZNF583 ENSG00000172294|Q96RM9\_HUMAN ENSG00000172342|CSPG4LYP1 ENSG00000172543|CTSW ENSG00000180999|C1orf105 ENSG00000191714|O14606\_HUMAN ENSG00000197285|NR\_001536.1  
CCAAATCT ENSG00000064999|ANKS1A ENSG00000072501|SMCIA ENSG00000075340|ADD2 ENSG00000085465|OVGP1 ENSG00000100362|PVALB ENSG00000102243|VGLL1 ENSG00000108828|VAT1 ENSG00000118526|TCF21  
ENSG00000119681|LTBP2 ENSG00000123374|CDK2 ENSG00000127585|FBXL16 ENSG00000140274|DUOX2 ENSG00000160094|ZNF362 ENSG00000160323|ADAMTS13 ENSG00000166317|SYNPO2L ENSG00000168329|CX3CR1  
ENSG00000170099|SERPINA6 ENSG00000170322|NFRKB ENSG00000172294|Q96RM9\_HUMAN ENSG00000172342|CSPG4LYP1 ENSG00000172543|CTSW ENSG00000180999|C1orf105 ENSG00000191714|O14606\_HUMAN ENSG00000197285|NR\_001536.1  
ENSG00000197430|TMEM10 ENSG00000198326|C20orf141 ENSG00000204681|GABBR1 ENSG000000010292|NCAPD2 ENSG00000054654|SYNE2 ENSG00000080644|CHRNA3 ENSG00000102383|ZDHC15 ENSG00000107854|TNKS2  
ENSG00000121716|Q9UKJ0-3 ENSG00000134853|PDGFRA ENSG00000137948|BRDT ENSG00000153002|CPB1 ENSG00000156239|N6AMT1 ENSG00000166928|NL\_115986.3 ENSG00000170873|MTSS1 ENSG00000178127|NDUFV2  
ENSG00000185345|PARK2 ENSG00000186479|RGSTBP ENSG00000188800|TMCO2 ENSG00000100413|POLR3H ENSG00000101144|BMP7 ENSG00000105609|LILRB5 ENSG00000112320|SOBP ENSG00000117115|PADI2  
CCAAATGA ENSG00000008086|CDKL5 ENSG00000008973|DDX24 ENSG00000132958|TPTE2 ENSG00000136928|GABBR2 ENSG00000141524|TMC6 ENSG00000161640|SIGLEC11 ENSG00000170310|STX8  
ENSG00000130656|HBZ ENSG00000131042|LILRB2 ENSG00000132254|ARFIP2 ENSG00000132958|TPTE2 ENSG00000136928|GABBR2 ENSG00000141524|TMC6 ENSG00000161640|SIGLEC11 ENSG00000170310|STX8  
ENSG00000171533|MAP6 ENSG00000172943|PHF8 ENSG00000175197|DIRT3 ENSG00000179270|NP\_001025054.1 ENSG00000180901|KCTD2 ENSG00000183684|THOC4 ENSG00000186818|LILRB4 ENSG00000198570|RD3  
ENSG00000198844|ARHGFE15 ENSG00000203747|FCGR3A ENSG00000203854|XR\_017700.1 ENSG00000205209|NP\_001020762.1 ENSG00000205335|GLYCAM1 ENSG00000206193|Q5HYA3\_HUMAN ENSG00000006704|GTF2IRD1 ENSG00000047457|CP  
ENSG00000079785|DDX1 ENSG00000107362|FAM108B1 ENSG00000119913|TECTB ENSG00000132631|C20orf79 ENSG00000134138|MEIS2 ENSG00000136539|CD302 ENSG00000148584|ACF\_HUMAN ENSG00000150510|FAM124A  
ENSG00000157502|MUM1L1 ENSG00000162747|FCGR3B ENSG00000163053|SLC16A14 ENSG00000164169|NP\_612373.2 ENSG00000164619|BMPER ENSG00000168743|NPMT ENSG00000171446|KRT27 ENSG00000172869|DMXL1  
ENSG00000173113|TR112\_HUMAN ENSG00000175535|PNLIP ENSG00000184007|PTP4A2  
CCAAATGG ENSG00000067842|ATP2B3 ENSG00000079999|KEAP1 ENSG00000103855|CD276 ENSG00000113889|KNG1 ENSG00000115685|PPP1R7 ENSG00000116698|SMG7 ENSG00000119681|LTBP2 ENSG00000120094|HOXB1  
ENSG00000121083|DYNLL2 ENSG00000126259|KIRREL2 ENSG00000132254|ARFIP2 ENSG00000132635|FAM113A ENSG00000141052|MYOCD ENSG00000143556|S100A7 ENSG00000145819|ARHGAP26 ENSG00000154342|WNT3A  
ENSG00000158748|HTR6 ENSG00000173175|ADCY5 ENSG00000174407|C20orf166 ENSG00000179452|Q8TDP1\_HUMAN ENSG00000181625|GLYD2 ENSG00000182324|KCNJ14 ENSG00000182912|C21orf90 ENSG00000185082|LBH  
ENSG00000189357|XR\_015253.1 ENSG00000198844|ARHGFE15 ENSG000000080371|RAB21 ENSG000000085514|PILRA ENSG00000105976|MET ENSG00000107443|CCNJ7 ENSG00000109787|KLF3 ENSG00000113387|SUB1  
ENSG00000129071|MBD4 ENSG00000132207|SULT1A3 ENSG00000134762|DSC3 ENSG00000135119|TMEM118 ENSG00000140795|MYLK3\_HUMAN ENSG00000141200|KIF2B ENSG00000153347|FAM81B ENSG00000154485|MMP21  
ENSG00000164440|TXLNB ENSG00000166321|NUDT13 ENSG00000166669|ATF7IP2 ENSG00000168032|ENTPD3 ENSG00000168461|RAB31 ENSG00000170153|RNFL50 ENSG00000171735|CAMTA1 ENSG00000173406|DAB1  
CCAAATTA ENSG00000183395|PMCH ENSG00000189266|PNRC2 ENSG00000196345|ZNF167 ENSG00000197102|DYNC1H1 ENSG00000197961|ZNF121 ENSG00000203924|SPANXN2 ENSG00000205227|Q6ZWA8\_HUMAN  
ENSG00000008086|CDKL5 ENSG000000011590|ZBTB32 ENSG00000090661|LASS4 ENSG00000090661|MAP3K1 ENSG00000101104|C20orf119 ENSG00000100867|DHRS2 ENSG000001107281|NPDC1 ENSG00000118058|MLL  
ENSG00000121060|TRIM25 ENSG00000127445|PIN1 ENSG00000129657|SEC14L1 ENSG00000130294|KIF1A ENSG00000133597|ADCK2 ENSG00000148200|NR6A1 ENSG00000160255|ITGB2 ENSG00000164051|CCDC51  
ENSG00000164574|GALNT10 ENSG00000164740|NR\_003034.1 ENSG00000180683|Q8N7A4\_HUMAN ENSG00000180891|CUEDC1 ENSG00000198643|FAM3D ENSG00000198931|APRT ENSG00000204084|INPP5B ENSG00000205559|Q6IBW5\_HUMAN  
ENSG00000104497|SNX16 ENSG00000106993|CDC37L1 ENSG00000111863|C6orf105 ENSG00000114573|ATP6V1A ENSG00000118520|ARG1 ENSG00000126814|TRMT5 ENSG00000135119|TMEM118 ENSG00000135686|C16orf44  
ENSG00000148584|ACF\_HUMAN ENSG00000151012|SLC7A11 ENSG00000152413|HOMER1 ENSG00000154274|C4orf19 ENSG00000162630|B3GALT2 ENSG00000163749|NP\_001036249.1 ENSG00000164265|SCGB3A2 ENSG00000167081|PBX3  
ENSG00000168004|HRASLS5 ENSG00000168374|ARF4 ENSG00000170113|NIPA1 ENSG00000171634|BPTF ENSG00000171759|PAH ENSG00000174156|GSTA3 ENSG00000183155|RAB1F ENSG00000188039|NWD1  
ENSG00000196628|TCF4 ENSG00000197702|PARVA  
CCACAAAT ENSG00000006015|C19orf60 ENSG00000039650|PNKP ENSG00000102109|PCKS1N ENSG00000104826|LHB ENSG00000105427|CNFN ENSG00000106556|TMEM176B ENSG00000107738|C10orf54 ENSG00000107831|FGF8  
ENSG00000110799|VWF ENSG00000115112|TFCEP2L1 ENSG00000130595|TNTT3 ENSG00000135480|KRT7 ENSG00000140488|BRUNOL6 ENSG00000142186|SCYL1 ENSG00000142534|RPS11  
ENSG00000149262|INTS4 ENSG00000151376|ME3 ENSG00000170276|HSPB2 ENSG00000173281|PPP1R3B ENSG00000177352|CCDC71 ENSG00000179270|NP\_001025054.1 ENSG00000180739|EDG8 ENSG00000184163|FAM132A  
ENSG00000186827|TNFRSF4 ENSG00000198881|ASB12 ENSG00000204305|AGER ENSG00000204425|Q6P74\_HUMAN ENSG00000204748|CGB1 ENSG00000057657|PRDM1 ENSG00000075111|DLG1 ENSG00000081189|MEF2C  
ENSG00000106105|GARS ENSG00000108255|CRYBA1 ENSG00000109771|LRF2BP ENSG00000120820|GLTB2 ENSG00000136541|KIAA1189 ENSG00000138615|CILP ENSG00000139508|SLC46A3 ENSG00000145721|LTX1  
ENSG00000146411|SLC2A12 ENSG00000147926|NP\_001076593.1 ENSG00000171772|SYCE1 ENSG00000179136|Q8NAV9\_HUMAN ENSG00000181631|P2RY13 ENSG00000185775|FAM75A6 ENSG00000196540|FAM75A3 ENSG00000197896|Q5VU36\_HUMAN  
CCACAGT ENSG000000204840|Q4VX67\_HUMAN ENSG00000204848|FAM75A2 ENSG00000204849|FAM75A1  
ENSG00000072832|CRMP1 ENSG00000101986|ABCD1 ENSG00000111325|OGFOD2 ENSG00000122783|C7orf49 ENSG00000125843|C20orf29 ENSG00000128652|HOXD3 ENSG00000129282|MRM1 ENSG00000162512|SDC3  
ENSG00000162772|ATF3 ENSG00000165280|VCP ENSG00000166387|PPF1BP2 ENSG00000167633|KIR3DL1 ENSG00000173020|ADRBK1 ENSG00000173706|HEG1 ENSG00000177098|SCN4B ENSG00000177731|FLII  
ENSG00000183856|IGQAP3 ENSG00000185105|XR\_015885.1 ENSG00000197106|SLC6A17 ENSG00000008952|TLOC1 ENSG000000065534|MYLK ENSG000000082515|MRPL22 ENSG00000106511|MEOX2 ENSG00000107518|ATRNL1  
ENSG00000114030|KPNA1 ENSG00000114062|UBE3A ENSG00000114757|PEX5L ENSG00000122339|C6orf35 ENSG00000138356|AOX1 ENSG00000139146|FAM60A ENSG00000153575|TUBGCP5 ENSG00000154608|CEP170L  
ENSG00000165471|MBL2 ENSG00000171606|ZNF274 ENSG00000174123|TLR10 ENSG00000183035|CYLC1 ENSG00000183726|TMEM50A ENSG00000196860|NP\_997260.1 ENSG00000197359|C15orf34 ENSG00000206532|Q1RN00\_HUMAN  
CCACATC ENSG000000092929|UNC13D ENSG00000105514|RAB3D ENSG00000116337|AMPD2 ENSG00000116396|KCNC4 ENSG00000120896|SORBS3 ENSG00000124216|SNAI1 ENSG00000130167|TSPAN16 ENSG00000130479|MAP1S  
ENSG00000131759|RARA ENSG00000135956|TMEM127 ENSG00000142789|ELA3A ENSG00000144231|POLR2D ENSG00000155275|C4orf23 ENSG00000162068|NTN2L ENSG00000164053|TREM1 ENSG00000164849|GPR146  
ENSG00000167874|TMEM88 ENSG00000185090|MANEAL ENSG00000204049|Q6ZUH9\_HUMAN ENSG0000020922|MRE11A ENSG00000068489|PRR11 ENSG00000073282|TP73L ENSG00000082212|ME2 ENSG00000114026|OGG1  
ENSG00000125945|ZNF436 ENSG00000132825|PPP1R3D ENSG00000134532|SOX5 ENSG00000139800|ZIC5 ENSG00000144026|ZNF514 ENSG00000154144|TBGRI1 ENSG00000157540|DYRK1A ENSG00000164112|TMEM155  
ENSG00000169251|NMD3 ENSG00000172179|PRL ENSG00000175646|PRM1 ENSG00000183395|PMCH ENSG00000185020|Q4VXF0\_HUMAN ENSG00000185345|PARK2 ENSG00000197053|FAM74A4 ENSG00000204841|FAM74A2  
CCACCCC ENSG000000020633|RUNX3 ENSG00000040608|RTN4R ENSG00000049540|ELN ENSG00000068308|OTUD5 ENSG00000068323|TFE3 ENSG00000070886|EPAH8 ENSG00000073067|CYP2W1 ENSG00000076928|ARHGFE1  
ENSG00000092068|SLC7A8 ENSG00000099365|STX1B2 ENSG00000099800|TIMM13 ENSG00000099814|KIAA0284 ENSG00000099875|MKMK2 ENSG00000100307|CBX7 ENSG00000100403|ZC3H7B ENSG00000101439|CST3  
ENSG00000103098|FA2H ENSG00000105223|PLD3 ENSG00000105556|NP\_060020.1 ENSG00000105953|OGDH ENSG00000108262|GIT1 ENSG00000108312|UBTF ENSG00000108557|RAI1 ENSG00000109047|RCVRN  
ENSG00000110171|TRIM3 ENSG00000112139|MDGA1 ENSG00000114383|TUSC2 ENSG00000129816|NR\_001538.1 ENSG00000129845|O14605\_HUMAN ENSG00000129990|SYT5 ENSG00000130175|PRKCSH  
ENSG00000130725|UBE2M ENSG00000132821|C20orf102 ENSG00000133247|SUV420H2 ENSG00000134780|DAGLA ENSG00000137166|FOXP4 ENSG00000137216|TMEM63B ENSG00000140406|MESDC1 ENSG00000141342|PLEKHM1  
ENSG00000149428|HYOU1 ENSG00000149922|TBX6 ENSG00000157216|SSBP3 ENSG00000159266|Q69YJ1\_HUMAN ENSG00000160460|SPTBN4 ENSG00000161277|THAP8 ENSG00000161847|RAVER1 ENSG00000166974|MAPRE2  
ENSG00000168309|FAM107A ENSG00000169221|TBC1D10B ENSG00000170367|CST5 ENSG00000170373|CST1 ENSG00000170616|SCRT1 ENSG00000171773|TXNL6 ENSG00000172137|CALB2  
ENSG00000173918|CLQTNF1 ENSG00000177984|NP\_976222.1 ENSG00000179564|C3orf45 ENSG00000181513|ACBD4 ENSG00000182257|C22orf26 ENSG00000183248|Q9H6K5\_HUMAN ENSG00000184640|SEPT9 ENSG00000185555|C5orf20  
ENSG00000196361|ELAVL3 ENSG00000198467|TPM2 ENSG00000198563|ATP6V1G2 ENSG00000204586|Q6PJP7\_HUMAN ENSG000000010810|FYN ENSG000000033800|PIAS1 ENSG000000058668|ATP2B4 ENSG00000073803|MAP3K13  
ENSG00000077279|DCX ENSG00000088053|GP6 ENSG00000092871|RFFL ENSG00000107186|MPDZ ENSG00000116539|ASH1L ENSG00000116962|NID1 ENSG00000125355|FAM70A ENSG00000128039|NP\_078868.1  
ENSG00000131711|MAP1B ENSG00000131828|PDHA1 ENSG00000132122|SPATA6 ENSG00000133983|SYNJ2BP ENSG00000152954|NRSN1 ENSG00000163257|C4orf30 ENSG00000165168|CYBB ENSG00000177283|FZD8  
ENSG00000186184|POLR1D ENSG00000198648|STK39 ENSG00000205612|Q7LJB2\_HUMAN  
CCACCCG ENSG00000072134|EPN2 ENSG00000078808|SDF4 ENSG00000079313|REXO1 ENSG00000079999|KEAP1 ENSG00000100228|RAB36 ENSG00000101200|AVP ENSG00000101986|ABCD1 ENSG00000102076|OPN1LW  
ENSG00000110717|NDUF8 ENSG00000125409|TEKT3 ENSG00000127415|IDUA ENSG00000131188|PRR7 ENSG00000139722|VPS37B ENSG00000140623|SEPT12 ENSG00000147380|OPN1MW ENSG00000157927|K1849\_HUMAN  
ENSG00000160182|TFF1 ENSG00000166160|OPN1MW2 ENSG00000167393|PPP2R3B ENSG00000167654|ATCAY ENSG00000169918|OTUD7A ENSG00000177886|Q8N819\_HUMAN ENSG00000188666|C21orf125 ENSG00000198754|OXCT2  
ENSG00000100380|ST13 ENSG00000105483|CARD8 ENSG00000107937|GTFPBP4 ENSG00000117614|SYF2 ENSG00000120341|LZTR2 ENSG00000129422|MTUS1 ENSG00000139800|ZIC5 ENSG00000139970|RTN1  
ENSG00000144452|MAP1A ENSG00000145545|SRD5A1 ENSG00000148426|C10orf47 ENSG00000150471|LPHN3 ENSG00000163714|SR140\_HUMAN ENSG00000170989|EDG1 ENSG00000172201|ID4 ENSG00000182551|ADI1  
ENSG00000184474|Q96FP4\_HUMAN ENSG00000196449|YRDC ENSG00000198081|ZFPI1 ENSG00000204271|SPIN3  
CCACCTC ENSG000000053918|KCNQ1 ENSG00000065357|DGKA ENSG00000072163|LIMS2 ENSG00000072832|CRMP1 ENSG00000104964|AES ENSG00000105323|HNRPUL1 ENSG00000105568|PPP2R1A ENSG00000110169|HPX  
ENSG00000116604|MEF2D ENSG00000125741|OPA3 ENSG00000126461|NP\_067051.1 ENSG00000129535|NRL ENSG00000133065|SLC41A1 ENSG00000139531|SUOX ENSG00000140688|C16orf58 ENSG00000142632|ARHGFE19  
ENSG00000143575|HAX1 ENSG00000149295|DRD2 ENSG00000149428|HYOU1 ENSG00000158106|RHPN1 ENSG00000161664|ASB16 ENSG00000167087|NFAM1 ENSG00000167194|Q96LL3\_HUMAN ENSG00000167461|RAB8A  
ENSG00000170367|CST5 ENSG00000170379|NP\_775949.1 ENSG00000172943|PHF8 ENSG00000175084|DES ENSG00000180513|Q8NBH1\_HUMAN ENSG00000185000|DGAT1 ENSG00000185332|TMEM105  
ENSG00000186074|CD300LF ENSG00000187017|ESPN ENSG00000188566|NDR1 ENSG00000188976|NOC2L ENSG00000197136|PCNXL3 ENSG00000197194|Q6VEP3\_HUMAN ENSG00000198397|A2A3T8\_HUMAN ENSG00000204125|Q53S21\_HUMAN  
ENSG00000050628|PTGER3 ENSG00000059804|GTR3\_HUMAN ENSG00000105146|AURKC ENSG00000112592|TBP ENSG00000122873|ZCD1 ENSG00000130699|TAF4 ENSG00000137942|FNBP1L ENSG00000141434|MEP1B  
ENSG00000156011|PSD3 ENSG00000161571|Q5YKG5\_HUMAN ENSG00000166752|TMEM83 ENSG00000173262|SLC2A3 ENSG00000176681|LRRC37A2 ENSG00000181322|TXNDC6 ENSG00000182223|ZAR1 ENSG00000185231|MC2R  
ENSG00000203925|LOC647839  
CCACTAC ENSG000000055070|C1orf144 ENSG00000073605|GSDML ENSG00000099995|SF3A1 ENSG00000105492|SIGLEC6 ENSG00000107954|NEURL ENSG00000108813|DLX4 ENSG00000111775|COX6A1 ENSG00000118160|SLC8A2  
ENSG00000128524|ATP6V1F ENSG00000134061|CD180 ENSG00000136710|CCDC115 ENSG00000151079|KCNA6 ENSG00000164605|Q578I0\_HUMAN ENSG00000165548|TMEM63C ENSG00000168003|SLC3A2 ENSG00000168452|EGFL8  
ENSG00000182712|MTCCP1 ENSG00000188076|SCGB1C1 ENSG00000023516|AKAP11 ENSG00000047410|TPR ENSG00000067248|DHX29 ENSG00000071203|MS4A12 ENSG00000076043|REXO2 ENSG00000089818|NECAP1  
ENSG00000110347|MMP12 ENSG00000112110|MRPL18 ENSG00000113905|HRG ENSG00000120860|CCDC53 ENSG00000135870|RC3H1 ENSG00000136943|CTS12 ENSG00000154447|SH3RF1 ENSG00000163923|RPL39L  
ENSG00000166889|NP\_689929.1 ENSG00000169155|ZBTB43 ENSG00000170009|Q9NTH0\_HUMAN ENSG00000172292|LASS6 ENSG00000198721|PECI  
CCACTCA ENSG00000006327|TNFRSF12A ENSG000000011009|LYPLA2 ENSG00000100350|FOXR2D ENSG00000105341|NP\_060505.1 ENSG00000114812|VIPR1 ENSG00000117013|KCNQ4 ENSG00000125354|SEPT6 ENSG00000126218|F10  
ENSG00000130479|MAP1S ENSG00000142156|COL6A1 ENSG00000147144|CXDC120 ENSG00000148814|LRRC27 ENSG00000154832|CXXC1 ENSG00000157613|CREB3L1 ENSG00000162666|KIAA0040 ENSG00000167695|FAM57A  
ENSG00000173706|HEG1 ENSG00000183828|NUDT14 ENSG00000185090|MANEAL ENSG00000185130|HIST1H2BL ENSG00000185499|MUC1 ENSG00000197106|SLC6A17 ENSG00000197697|HIST1H2BE ENSG00000198842|DUSP27  
ENSG00000204118|NAP1L6 ENSG00000204936|Q8N6Q3-3 ENSG00000026508|CD44 ENSG000000083223|ZCCHC6 ENSG00000104756|KCTD9 ENSG00000117595|IRF6 ENSG00000125675|GRIA3 ENSG00000126453|BCL2L12  
ENSG00000128039|NP\_078868.1 ENSG00000131876|SNRP1A ENSG000001

CCACTGC ENSG00000197627|Q9UFV3\_HUMAN ENSG00000203780|FANK1 ENSG00000204271|SPIN3 ENSG00000204289|C17orf86 ENSG00000100284|TOM1 ENSG00000100385|IL2RB ENSG00000107902|NP\_071409.2 ENSG00000100766|WDR37 ENSG00000064547|EDG4 ENSG00000081853|PCDHGA12 ENSG00000088726|TMEM40 ENSG00000100124|ANKRD54 ENSG00000135248|NP\_115988.1 ENSG00000139722|VPS37B ENSG00000143466|IKBKE ENSG00000146090|RASGEF1C ENSG00000146192|FGD2 ENSG00000160271|RALGDS ENSG00000168081|PNOC ENSG00000168334|CMYA1 ENSG00000171596|NMUR1 ENSG00000172977|HTATIP ENSG00000176387|HSD11B2 ENSG00000178709|CLDN9 ENSG00000178752|FAM132B ENSG00000179023|KLHDC7A ENSG00000181652|ATG9B ENSG00000182858|ALG12 ENSG00000184281|TSSC4 ENSG00000185324|CDK10 ENSG00000186792|IFRD2 ENSG00000197122|SRC ENSG00000197852|C1orf183 ENSG00000204301|NOTCH4 ENSG00000205680|NR\_002931.1 ENSG00000004948|CALCR ENSG00000034239|EFCAB1 ENSG00000087263|OGFOD1 ENSG00000101413|C20orf77 ENSG00000115137|NP\_057628.1 ENSG00000115419|GLS ENSG00000122707|RECK ENSG00000125675|GRIA3 ENSG00000125831|CSPT11 ENSG00000132170|PPARG ENSG00000132326|PER2 ENSG00000135127|CCDC64 ENSG00000136213|CHST12 ENSG00000143776|CDC42BPA ENSG00000145362|ANK2 ENSG00000151693|DDEF2 ENSG00000154945|ANKRD40 ENSG00000156709|AIFM1 ENSG00000157404|KIT ENSG00000164440|TXLNB ENSG00000164466|SFXN1 ENSG00000171530|TBCA ENSG00000176601|YSK4 ENSG00000180113|TDRD6 ENSG00000185010|FNR ENSG00000186132|NP\_001017927.1 ENSG00000187446|CHP1\_HUMAN ENSG00000188747|NOXA1 ENSG00000198860|C1orf19 ENSG00000204706|Q6ZVS9\_HUMAN

CCACTTG ENSG00000088367|EPB41L1 ENSG00000100628|ASB2 ENSG00000135824|RGS8 ENSG00000144852|NR1I2 ENSG00000145936|KCNMB1 ENSG00000149657|LSM14B ENSG00000159761|NM\_001012984.2 ENSG00000162063|CCNF ENSG00000166272|C10orf26 ENSG00000167272|POP5 ENSG00000168758|SEMA4C ENSG00000181814|Q6NW39\_HUMAN ENSG00000184117|NIPSNAP1 ENSG00000184334|Q71RG6\_HUMAN ENSG00000188185|Q6ZQP8\_HUMAN ENSG00000204304|PBX2 ENSG00000204859|ZBTB48 ENSG00000205052|Q6ZSS1\_HUMAN ENSG00000064225|ST3GAL6 ENSG00000094804|CDC6 ENSG00000099219|K1AA1815 ENSG00000111196|MGN2\_HUMAN ENSG00000111696|NT5DC3 ENSG00000111907|TPD52L1 ENSG00000115421|PAPOLG ENSG00000125398|SOX9 ENSG00000134962|KLB ENSG00000134970|TICAM2 ENSG00000141298|SSH2 ENSG00000148229|POLE3 ENSG00000152193|C13orf7 ENSG00000152818|UTRN ENSG00000157214|STEAP2 ENSG00000159140|SON ENSG00000165732|DDX21 ENSG00000196946|ZNF705A ENSG00000197110|IL2B8 ENSG00000004776|HSPB6 ENSG00000065989|PDE4A ENSG00000070748|CHAT ENSG00000088830|REM1 ENSG00000100124|ANKRD54 ENSG00000100234|TIMP3 ENSG00000101850|GPR143 ENSG00000102934|PLLP ENSG00000105662|KCNN1 ENSG00000112493|TAPBP ENSG00000126247|CFAPN1 ENSG00000128283|CDC42EP1 ENSG00000132746|ALDH3B2 ENSG00000137825|ITPKA ENSG00000140682|TGFB11 ENSG00000162572|SCNN1D ENSG00000164501|Q96M41\_HUMAN ENSG00000166862|CACNG2 ENSG00000167106|FAM102A ENSG00000169962|TAS1R3 ENSG00000182858|ALG12 ENSG00000185811|IKZF1 ENSG00000186423|Q8N9S5\_HUMAN ENSG00000186818|LILRB4 ENSG00000204494|Q68CW3\_HUMAN ENSG00000108389|MTMR4 ENSG00000120162|MOBKLB2 ENSG00000124203|C20orf174 ENSG00000130338|TULP4 ENSG00000134109|EDEM1 ENSG00000148053|NTRK2 ENSG00000159251|ACTC1 ENSG00000162613|FUBP1 ENSG00000169018|FEM1B ENSG00000169413|RNASE6 ENSG00000170624|SGCD ENSG00000170627|FAM112B ENSG00000174099|MSRB3 ENSG00000177138|FAM9B ENSG00000182793|GSTA5 ENSG00000184831|APOO ENSG00000185295|USP51 ENSG00000196715|VKORC1L1 ENSG00000198815|FOXJ3 ENSG00000203706|C1orf133 ENSG00000204390|HSPA1L ENSG0000013046|PBP1 ENSG0000013725|CD6 ENSG00000164300|NGFR ENSG00000074755|ZEEF1 ENSG00000176944|STXBP2 ENSG00000101096|NFATC2 ENSG00000103047|TMCO7 ENSG00000105379|ETFB ENSG00000111325|OGFOD2 ENSG00000112763|BTN2A1 ENSG00000120049|KCNIP2 ENSG00000125968|ID1 ENSG00000128274|A4GALT ENSG00000138621|PPCDC ENSG00000139192|TAPBP1 ENSG00000143001|TMEM61 ENSG00000143147|GPR161 ENSG00000143303|C1orf66 ENSG00000154229|PRKCA ENSG00000161638|ITGA5 ENSG00000162398|C1orf177 ENSG00000162723|SLMAP9 ENSG00000163295|ALPI ENSG00000166104|NP\_776166.1 ENSG00000174502|SLC26A9 ENSG00000179889|PDXDC1 ENSG00000182053|XR\_016180.1 ENSG00000182580|EPHB3 ENSG00000185744|TNT\_HUMAN ENSG00000197893|NRAP ENSG00000203854|XR\_017700.1 ENSG0000008197|TFAP2D ENSG00000080371|RAB21 ENSG00000084623|EIF3S2 ENSG00000105784|NP\_612147.1 ENSG00000106258|CYP3A5 ENSG00000106488|MEST ENSG00000112294|ALDH5A1 ENSG00000123297|TSFM ENSG00000124214|STAU1 ENSG00000129484|PARP2 ENSG00000133808|MICALCL ENSG00000137364|TPMT ENSG00000148798|INA ENSG00000153721|MAG11 ENSG00000157181|C1orf27 ENSG00000158185|ANKRD36 ENSG00000163637|PRICKLE2 ENSG00000164933|SLC25A32 ENSG00000170509|HSD17B13 ENSG00000174899|Q8N6Q6\_HUMAN ENSG00000181315|ZNF322A ENSG00000185523|NP\_001019772.1 ENSG00000186579|DEFB106B ENSG00000187082|D106A\_HUMAN ENSG00000188474|ZNF788 ENSG00000188801|ZNF322B ENSG00000196912|AN36B\_HUMAN ENSG00000197926|Q8NAI6\_HUMAN

CCAGATC ENSG00000103852|TTC23 ENSG00000104812|GYS1 ENSG00000120049|KCNIP2 ENSG00000132254|ARFIP2 ENSG00000137193|PIM1 ENSG00000143140|GJA5 ENSG00000148200|NR6A1 ENSG00000148337|CIZ1 ENSG00000158714|SLAMP8 ENSG00000160213|CSTB ENSG00000162650|ATXN7L2 ENSG00000164007|CLDN19 ENSG00000173976|RAXL1 ENSG00000174683|C8orf78 ENSG00000176092|AIM1L ENSG00000178015|GPR150 ENSG00000179452|Q8TDK1\_HUMAN ENSG00000181877|Q8NAZ9\_HUMAN ENSG00000182852|C21orf121 ENSG00000206028|Q6ZVA3\_HUMAN ENSG00000033800|PIAS1 ENSG00000095637|SORBS1 ENSG00000100902|PSMA6 ENSG00000119042|SATB2 ENSG00000121644|C1orf121 ENSG00000127774|TMEM93 ENSG00000134108|ARL8B ENSG00000136698|CFIC1 ENSG00000136842|TMOD1 ENSG00000145685|LHFPL2 ENSG00000152093|NP\_001072998.1 ENSG00000164418|GRIK2 ENSG00000167916|KRT24 ENSG00000168028|RPSAP15 ENSG00000169340|NP\_777584.1 ENSG00000177675|CD163L1 ENSG00000185591|SP1 ENSG00000204250|C9orf107 ENSG00000204472|AIF1 ENSG00000205523|Q6ZP97\_HUMAN

CCAGATT ENSG00000034063|UHRF1 ENSG00000089597|GANAB ENSG00000093217|XYLB ENSG00000100453|GZMB ENSG00000105258|POLR2I ENSG00000107554|DNMBP ENSG00000110777|POU2AF1 ENSG00000117115|PADI2 ENSG00000124134|KCN51 ENSG00000125652|ALKBH7 ENSG00000126432|PRDX5 ENSG00000130810|PPAN ENSG00000145901|TNP11 ENSG00000157600|TMEM164 ENSG00000157765|SLC34A2 ENSG00000165556|CDX2 ENSG00000166847|DCTN5 ENSG00000170743|SYT9 ENSG00000174282|ZBTB4 ENSG00000178078|NP\_060190.2 ENSG00000182698|NM\_001007089 ENSG00000187764|SEMA4D ENSG00000197322|NP\_997337.1 ENSG00000198373|WWP2 ENSG00000062096|ARSF ENSG00000071054|MAP4K4 ENSG00000072042|RDH11 ENSG00000076067|RBMS2 ENSG00000112238|PRDM13 ENSG00000117597|C1orf107 ENSG00000120992|LYPLA1 ENSG00000136758|YME1L1 ENSG00000137713|PPP2R1B ENSG00000145358|DDIT4L ENSG00000145919|FAM44B ENSG00000147507|LYN ENSG00000151025|GPR158 ENSG00000151917|C6orf65 ENSG00000152894|PTPRK ENSG00000158467|SAHH3\_HUMAN ENSG00000167117|C17orf73 ENSG00000178397|NP\_001032240.1 ENSG00000181065|Q9P161\_HUMAN ENSG00000181264|TMEM136 ENSG00000182197|EXT1 ENSG00000182457|NR\_002323.1 ENSG00000185238|PRMT3 ENSG00000188895|Q68DK7\_HUMAN ENSG00000196418|ZNF124

CCAGCAC ENSG00000037280|FLT4 ENSG00000041988|THAP3 ENSG00000070886|EPAH8 ENSG00000076344|RGS11 ENSG00000100033|PRODH ENSG00000100034|PPM1F ENSG00000103043|VAC14 ENSG00000103200|NME4 ENSG00000111077|TENC1 ENSG00000112033|PPARD ENSG00000114251|WNT5A ENSG00000125780|TGM3 ENSG00000125967|APBA2B ENSG00000126091|ST3GAL3 ENSG00000130948|HSD17B3 ENSG00000130703|UBAP2 ENSG00000142303|ADAMTS10 ENSG00000149577|SIDT2 ENSG00000162413|KLHL21 ENSG00000165802|NELF ENSG00000167123|CEECAM1 ENSG00000169962|TAS1R3 ENSG00000172893|DHCR7 ENSG00000173818|NP\_775898.2 ENSG00000173991|TCAP ENSG00000178035|IMPDH2 ENSG00000183678|CTAG1A ENSG00000184004|Q6ICL0\_HUMAN ENSG00000184033|CTAG1B ENSG00000196182|STK40 ENSG00000197322|NP\_997337.1 ENSG00000197916|Q8N7P5\_HUMAN ENSG00000054654|SYNE2 ENSG00000068781|STON1 ENSG00000100578|K1AA0586 ENSG00000124568|SLC17A1 ENSG00000128607|NP\_055812.1 ENSG00000134900|TPP2 ENSG00000138613|APH1B ENSG00000138795|LEF1 ENSG00000148082|SHC3 ENSG00000153094|BCL2L11 ENSG00000155893|ACPL2 ENSG00000156395|SORCS3 ENSG00000165997|ARL5B ENSG00000167034|NKX3-1 ENSG00000175018|C10orf122 ENSG00000177068|Q8N269\_HUMAN ENSG00000182521|TBPL2 ENSG00000203970|DEFB111

CCAGCCC ENSG00000004139|SARM1 ENSG00000008441|NFIX ENSG000000019144|PHLDB1 ENSG00000039987|BEST2 ENSG00000054967|TNFRSF19 ENSG00000061337|LZTS1 ENSG00000068976|PYGM ENSG00000095397|DFNB31 ENSG00000099338|C19orf15 ENSG00000100249|PES1 ENSG00000100348|TXN2 ENSG00000101945|SUV39H1 ENSG00000102050|PRAF2 ENSG00000103227|TMEM112 ENSG00000103326|SOLH ENSG00000105327|BBC3 ENSG00000105374|NRG7 ENSG00000105402|NAPA ENSG00000105662|CRTCL1 ENSG00000106009|C7orf27 ENSG00000106976|DNM1 ENSG00000107742|SPOCK2 ENSG00000111737|RAB35 ENSG00000114779|ABHD14B ENSG00000115041|KCNIP3 ENSG00000119535|CSF3R ENSG00000122375|OPN4 ENSG00000123064|DDX54 ENSG00000124067|LCAT ENSG00000124134|KCN51 ENSG00000125492|BARHL1 ENSG00000126657|PPY2 ENSG00000128322|IGLL1 ENSG00000130669|PAK4 ENSG00000132394|EFSEC ENSG00000133895|MEN1 ENSG00000136295|TTYH3 ENSG00000136908|DPM2 ENSG00000141854|Q96FF7\_HUMAN ENSG00000142655|PEX14 ENSG00000142784|WDC1 ENSG00000146216|TTBK1 ENSG00000160932|LY6E ENSG00000161692|DBF4B ENSG00000161860|SYCE2 ENSG00000163013|FBXO41 ENSG00000165171|WBSR27 ENSG00000165887|ANKRD2 ENSG00000166091|CMTM5 ENSG00000166825|ANPEP ENSG00000167210|LOXHD1 ENSG00000169258|GPR1N1 ENSG00000172725|PTPRCAP ENSG00000172828|CES3 ENSG00000175220|ARHGAP1 ENSG00000176715|NP\_777577.1 ENSG00000178209|PLEC1 ENSG00000178821|TMEM52 ENSG00000179855|GIPC3 ENSG00000182912|C21orf90 ENSG00000183092|BEGIN\_HUMAN ENSG00000184489|PTP4A3 ENSG00000184792|OSBP2 ENSG00000185585|OLFML2A ENSG00000185633|NDUFA4L2 ENSG00000188493|C19orf54 ENSG00000189309|TBC1D3B ENSG00000197681|TBC1D3 ENSG00000203879|GDI1 ENSG00000204715|Q4G0Q5\_HUMAN ENSG00000205019|TBC1D3C ENSG00000205664|Q6PJD4\_HUMAN ENSG00000206066|IGLL3 ENSG00000053254|CHES1 ENSG00000057294|PKP2 ENSG00000079387|SENP1 ENSG00000102931|ARL2BP ENSG00000103018|CYB5B ENSG00000109063|MYH3 ENSG00000114742|WDR48 ENSG00000135960|EDAR ENSG00000137075|RNF38 ENSG00000137269|LRRC1 ENSG00000137757|CASP5 ENSG00000140382|HMG20A ENSG00000144566|RAB5A ENSG00000168387|ASB14 ENSG00000169435|RASSF6 ENSG00000170537|TMC7 ENSG00000171056|SOX7 ENSG00000196954|CASP4

CCAGCTA ENSG00000007306|CEACAM7 ENSG000000011451|WIZ ENSG000000072135|PTPN18 ENSG00000089250|NOS1 ENSG00000103647|CORO2B ENSG00000104081|BMF ENSG00000105738|SIPA1L3 ENSG00000106948|AKNA ENSG00000114349|GNAT1 ENSG00000124615|MOC51 ENSG00000124762|CDKN1A ENSG00000133460|SLC2A11 ENSG00000158517|NCF1 ENSG00000162148|C11orf66 ENSG00000163431|LMOD1 ENSG00000165178|LOC648998 ENSG00000165828|PRAP1 ENSG00000165887|ANKRD2 ENSG00000166317|SYNPO2L ENSG00000167588|GPD1 ENSG00000169059|VCCX3A ENSG00000172803|NP\_689973.2 ENSG00000176302|FOXR1 ENSG00000181035|SLC25A42 ENSG00000182154|MRPL41 ENSG00000183059|XR\_017784.1 ENSG00000188185|Q6ZQP8\_HUMAN ENSG00000205821|NP\_001020630.1 ENSG00000206193|Q5HYA3\_HUMAN ENSG00000058804|TMEM48 ENSG00000084676|NCOA1 ENSG00000105205|CLC ENSG00000109255|NMO ENSG00000113391|C5orf21 ENSG00000114529|C3orf52 ENSG00000122194|PLG ENSG00000138472|GUCA1C ENSG00000141434|MEP1B ENSG00000149084|HSD17B12 ENSG00000155368|DBI ENSG00000168004|HRASL5 ENSG00000172239|PAIP1 ENSG00000178446|C21orf100 ENSG00000181004|BBS12 ENSG000001882752|PAPPA ENSG00000188386|PPP3R2 ENSG00000197312|RSC1A1 ENSG00000197460|Q8WYX1\_HUMAN ENSG00000198670|LPA ENSG00000198890|PRMT6 ENSG00000204104|TRAF3IP1

CCAGGCC ENSG00000001617|SEMA3F ENSG000000007516|BAIAP3 ENSG000000014164|ZC3H3 ENSG00000064999|ANKS1A ENSG00000065268|WDR18 ENSG00000070182|SPTB ENSG00000073060|SCARB1 ENSG00000073598|FNDC8 ENSG00000099953|MMP11 ENSG00000101255|TRIB3 ENSG00000101363|MANBAL ENSG00000111452|GPR133 ENSG00000115041|KCNIP3 ENSG00000117013|KCNQ4 ENSG00000121900|TMEM54 ENSG00000124574|ABCC10 ENSG00000125804|C20orf91 ENSG00000126603|GLIS2 ENSG00000133055|MYBPB ENSG00000137809|ITGA11 ENSG00000142327|RNPEPL1 ENSG00000142684|ZNF593 ENSG00000144488|ESFNL ENSG00000144671|SLC22A14 ENSG00000146216|TTBK1 ENSG00000155256|ZFYVE27 ENSG00000159176|CSR1 ENSG00000161940|BCL6 ENSG00000162551|ALPL ENSG00000164907|LMO1 ENSG00000168309|FAM107A ENSG00000169704|GP9 ENSG00000169921|Q75L30\_HUMAN ENSG00000172482|AGXT ENSG00000172725|PTPRCAP ENSG00000172824|Q6P2E5\_HUMAN ENSG00000172830|SSH3 ENSG00000172992|DCAKD ENSG00000173227|SYT12 ENSG00000173638|SLC19A1 ENSG00000174307|PHLDA3 ENSG00000176533|GNM7 ENSG00000177000|MTHFR ENSG00000177084|POLE ENSG00000180438|TPRX1 ENSG00000181781|C19orf19 ENSG00000184381|PLA2G6 ENSG00000184545|DUSP8 ENSG00000184640|SEPT9 ENSG00000186998|EMD1 ENSG00000188185|Q6ZQP8\_HUMAN ENSG00000188486|H2AFX ENSG00000188660|C21orf125 ENSG00000189152|Q8TC17\_HUMAN ENSG00000198576|ARC ENSG00000198933|TBKBP1 ENSG00000204511|NM\_001011700.1 ENSG000000023318|TXNDC4 ENSG00000023330|ALAS1 ENSG00000069966|PIAS1 ENSG00000082196|C1QTNF3 ENSG00000084623|EIF3S2 ENSG00000092377|TBL1Y ENSG00000111237|VPS29 ENSG00000119139|TJP2 ENSG00000120885|CLU ENSG00000124205|EDN3 ENSG00000124818|OPN5 ENSG00000127688|GAN ENSG00000128595|CALU ENSG00000131238|PPT1 ENSG00000131791|PRKAB2 ENSG00000133142|TCEAL4 ENSG00000144410|CPO ENSG00000152611|CAPSL ENSG00000152822|GRM1 ENSG00000156395|SORCS3 ENSG00000160629|C17orf32 ENSG00000164220|ZFR2L2 ENSG00000165609|NUDT5 ENSG00000177613|CSTFT2 ENSG00000204757|Q6ZTL5\_HUMAN

CCAGGTG ENSG00000066248|NGEF ENSG00000090776|EFNB1 ENSG00000100034|PPM1F ENSG00000100060|MFNG ENSG00000100101|NOL12 ENSG00000101197|BIRC7 ENSG00000104524|PYCRL ENSG00000104880|ARHGEF18 ENSG00000105519|CAPS ENSG00000105808|RSA4 ENSG00000120903|CHRNA2 ENSG00000125804|C20orf91 ENSG00000126391|NP\_114110.1 ENSG00000137225|CAPN11 ENSG00000138621|PPCDC ENSG00000146122|DAAM2 ENSG00000157064|NMNAT2 ENSG00000159423|ALDH4A1 ENSG00000161203|AP2M1 ENSG00000163803|PLB1 ENSG00000167508|MVD ENSG00000168071|CDC88 ENSG00000173976|RAXL1 ENSG00000185933|FAM26C ENSG00000188783|PRELP ENSG00000197539|Q6ZSY7\_HUMAN ENSG00000197785|ATAD3A ENSG00000205751|MRPL23 ENSG00000101938|CHRDL1 ENSG00000102024|PLS3 ENSG00000117222|RBP5 ENSG00000132554|RGS22 ENSG00000133135|RNF128 ENSG00000134326|NP\_997198.2 ENSG00000152661|GJA1 ENSG00000153317|DDEF1 ENSG00000159763|PIP ENSG00000173473|SMARCC1 ENSG00000174607|UGT8 ENSG00000177640|CASC2 ENSG00000178636|Q8N7N2\_HUMAN ENSG00000179930|ZNF648 ENSG00000186094|AGBL4 ENSG00000197756|RPL37A

CCAGTAA ENSG00000078804|TP53INP2 ENSG00000105122|NP\_075055.1 ENSG00000105549|THEG ENSG00000110395|CBL ENSG00000115275|GCS1\_HUMAN ENSG00000118194|TNNT2 ENSG00000128322|IGLL1 ENSG00000130119|GNL3L ENSG00000130810|PPAN ENSG00000131055|COX4I2 ENSG00000131400|NAPSA ENSG00000135436|C12orf25 ENSG00000136930|PSMB7 ENSG00000141294|LRRC46 ENSG00000146666|Q961P2\_HUMAN ENSG00000147804|SLC39A4 ENSG00000163013|FBXO41 ENSG00000165821|SALL2 ENSG00000166069|TMCO5 ENSG00000167448|KCLK1 ENSG00000176472|ZNF575 ENSG00000181378|CCDC108 ENSG00000185198|PRSSL1 ENSG00000188549|NP\_997263.1 ENSG00000198106|RUND2B ENSG000000198535|NP\_997205.1 ENSG00000203709|C1orf132 ENSG00000204482|LST1 ENSG00000204865|Q6ZSD6\_HUMAN ENSG00000205778|Q6ZMM7\_HUMAN ENSG00000206066|IGLL3 ENSG00000038945|MSR1 ENSG00000066294|CD84 ENSG00000067955|CBFB ENSG00000101343|CRNKL1 ENSG00000110851|PRDM4 ENSG00000112695|COX7A2 ENSG00000114279|FGF12 ENSG00000114698|PLSCR4 ENSG00000119541|VPS4B ENSG00000124721|DNAH8 ENSG00000135940|COX5B ENSG00000136937|NCBP1 ENSG00000159592|GPPBP1L1 ENSG00000162695|SLC30A7 ENSG00000164691|TAGAP ENSG00000172421|EFCAB3



ENSG00000173387|Q9P007\_HUMAN ENSG00000173705|SUSD5 ENSG00000182836|PLCXD3 ENSG00000203964|Q8NG36\_HUMAN ENSG00000204279|PAGE3  
CCAGTGC ENSG00000034152|MAP2K3 ENSG00000087266|SH3BP2 ENSG00000101189|C2orf20 ENSG00000103197|TSC2 ENSG00000109501|WFS1 ENSG00000119321|FKBP15 ENSG00000128965|CHAC1 ENSG00000136487|GH2  
ENSG00000136488|CSH2 ENSG00000141052|MYOC ENSG00000141342|PLEKHM1 ENSG00000147402|GABRQ ENSG00000149451|ADAM33 ENSG00000159266|Q69YJ1\_HUMAN ENSG00000164917|K0415\_HUMAN ENSG00000166444|ST5  
ENSG00000182500|TMEM142A ENSG00000182566|CLEC4G ENSG00000184361|C17orf46 ENSG00000186501|C1orf160 ENSG00000189162|CSH1 ENSG00000198216|CACNA1E ENSG00000204002|Q6ZQN6\_HUMAN ENSG00000204414|CSHL1  
ENSG00000204783|Q6ZUA7\_HUMAN ENSG00000204825|Q6ZUA7\_HUMAN ENSG00000204831|Q8N1S9\_HUMAN ENSG00000204946|ZNF783 ENSG00000102221|PHF16 ENSG00000132334|PTPRE ENSG00000135338|C6orf152 ENSG00000145391|SETD7  
ENSG00000153832|FBXO36 ENSG00000163071|SPATA18 ENSG00000163947|ARHGEF3 ENSG00000179295|PTPN11 ENSG00000185104|FAF1 ENSG00000185950|IRS2 ENSG00000187372|PCDHB13 ENSG00000206027|Q6ZUT4\_HUMAN

CCAGTTT ENSG00000022840|RNF10 ENSG00000062282|DGAT2 ENSG00000101448|SPINLW1 ENSG00000104823|ECH1 ENSG00000105085|CRSP7 ENSG00000106459|NRF1 ENSG00000116604|MEF2D ENSG00000118900|UBN1  
ENSG00000124782|RREB1 ENSG00000132254|ARFIP2 ENSG00000134516|DOCK2 ENSG00000137288|C6orf125 ENSG00000140263|SORD ENSG00000149575|SCN2B ENSG00000157514|TSC22D3 ENSG00000163914|RHO  
ENSG00000165458|INPPL1 ENSG00000166402|TUB ENSG00000171649|ZIK1 ENSG00000174576|NPAS4 ENSG00000176076|KCNE1L ENSG00000177042|TMEM80 ENSG00000178006|XR\_018006.1 ENSG00000179085|DPM3  
ENSG00000181085|MAPK15 ENSG00000187621|TCL1B ENSG00000198909|MAP3K3 ENSG00000204310|AGPAT1 ENSG00000204758|Q6ZUG4\_HUMAN ENSG00000204048|UBR2 ENSG000002072415|MPP5 ENSG00000089157|RPLP0  
ENSG00000100711|ZFYVE21 ENSG00000102753|KPNA3 ENSG00000104825|NFKB1B ENSG00000106692|FCMD ENSG00000109133|TMEM33 ENSG00000109756|RAPGEF2 ENSG00000109920|FNBPF4 ENSG00000126733|DACH2  
ENSG00000150316|NP\_057487.2 ENSG00000155085|C6orf199 ENSG00000165525|SDCCAG1 ENSG00000169607|CKAP2L ENSG00000170222|C17orf48 ENSG00000176256|HMGB4 ENSG00000178177|LCORL ENSG00000182093|WRB  
ENSG00000182118|FAM89A ENSG00000188725|NP\_001041714.1 ENSG00000196715|VKORC1L1 ENSG00000204217|BMPR2

CCATAAT ENSG00000011590|ZBTB32 ENSG00000072501|SMC1A ENSG00000089250|NOS1 ENSG00000099960|SLC7A4 ENSG00000100979|PLTP ENSG00000102225|PCTK1 ENSG00000102466|FGF14 ENSG00000113119|TMC06  
ENSG00000131116|ZNF428 ENSG00000139083|ETV6 ENSG00000158710|TAGLN2 ENSG00000160959|LRRC14 ENSG00000162877|NP\_689704.3 ENSG00000163866|C1orf212 ENSG00000165140|FBP1 ENSG00000166167|BTRC  
ENSG00000167987|VPS37C ENSG00000183684|THOC4 ENSG00000184436|THAP7 ENSG00000187638|NM\_207367 ENSG00000188859|FAM78B ENSG00000130181|NP\_065805.1 ENSG00000158272|PPP1R12A ENSG00000172274|TFRC  
ENSG00000106536|POU6F2 ENSG00000110172|CHORDC1 ENSG00000111530|CAND1 ENSG00000113328|CCNG1 ENSG00000113441|LNPEP ENSG00000114062|UBR3A ENSG00000122545|SEPT7 ENSG00000125352|RNF113A  
ENSG00000134028|ADAMDEC1 ENSG00000150628|SPATA4 ENSG00000151687|ANKAR ENSG00000152234|ATP5A1 ENSG00000154263|ABCA10 ENSG00000159256|MORC3 ENSG00000164743|C8orf48 ENSG00000168724|DNJA5\_HUMAN  
ENSG00000170852|KBTBD2 ENSG00000170959|DCDC5 ENSG00000177853|ZNF518 ENSG00000180869|C1orf180 ENSG00000185088|RPS27L ENSG00000187185|Q86VG7\_HUMAN ENSG00000196693|ZNF33B ENSG00000197410|DCHS2  
ENSG00000198252|STYX ENSG00000198440|ZNF583

CCATACA ENSG00000092201|SUPT16H ENSG00000103275|UBE2I ENSG00000105131|ABHD9 ENSG00000108518|PFN1 ENSG00000125975|C2orf173 ENSG00000130734|ATG4D ENSG00000134072|CAMK1 ENSG00000143774|GUK1  
ENSG00000162365|CYP4A22 ENSG00000162413|KLHL21 ENSG00000164270|HTR4 ENSG00000172578|KLHL6 ENSG00000178409|KIAA1553 ENSG00000184194|GPR173 ENSG00000187048|CYP4A11 ENSG00000205205|C17orf51  
ENSG00000083457|ITGAE ENSG00000083642|APRIN ENSG00000087302|C14orf166 ENSG00000099725|PRKY ENSG00000106952|TNFSF8 ENSG00000115816|CEBPZ ENSG00000117281|CD160 ENSG00000118939|UCHL3  
ENSG00000121716|Q9UKJ0-3 ENSG00000126838|PZP ENSG00000134594|RAB33A ENSG00000136539|CD302 ENSG00000138346|DNAI2 ENSG00000143324|XPR1 ENSG00000147316|CHD7 ENSG00000181007|ZNF545  
ENSG00000188501|LCTL ENSG00000188580|TCBA1 ENSG00000196860|NP\_997260.1 ENSG00000198315|ZNF192 ENSG00000204279|PAGE3 ENSG00000204800|Q96HX1\_HUMAN ENSG00000204812|Q96HX1\_HUMAN  
CCATATC ENSG00000006831|ADIPOR2 ENSG00000061337|LZT51 ENSG00000095713|CRTAC1 ENSG00000108479|GALK1 ENSG00000110851|PFN1 ENSG00000114650|SCAP ENSG00000115350|POLE4 ENSG00000125462|C1orf61  
ENSG00000130054|TMEM28 ENSG00000155886|SLC24A2 ENSG00000166763|STRC ENSG00000175520|UBQLN3 ENSG00000176438|C14orf49 ENSG00000178826|TMEM139 ENSG00000185189|NRBP2 ENSG00000185955|NP\_001004323.1  
ENSG00000187048|CYP4A11 ENSG00000189068|VSTM1 ENSG00000196684|HSH2D ENSG00000198879|SFBMT2 ENSG000002005187|ACSM3 ENSG000002057019|DCBLD2 ENSG00000121211|MND1 ENSG00000122126|OCRL  
ENSG00000123496|IL13RA2 ENSG00000123700|KCNJ2 ENSG00000124356|PTAMPB ENSG00000124813|RUNX2 ENSG00000126088|URUD ENSG00000127507|RUNX2 ENSG00000132356|PRKAA1 ENSG00000133101|CCNA1  
ENSG00000138757|G3BP2 ENSG00000141946|ZIM3 ENSG00000157005|SST ENSG00000161057|PSMC2 ENSG00000165807|C14orf50 ENSG00000171451|DSEL ENSG00000182585|EPGN ENSG00000189127|NP\_001004441.1  
ENSG00000197479|PCDHB11 ENSG00000198918|RPL39 ENSG00000203933|NP\_001013421.1

CCATCGA ENSG00000025866|CD99 ENSG00000099622|CIRBP ENSG00000100429|HDAC10 ENSG00000102050|PRAF2 ENSG00000106351|HRBL ENSG00000131061|ZNF341 ENSG00000136068|FLNB ENSG00000143787|LEFTY1  
ENSG00000146504|NP\_115726.1 ENSG00000149927|DOC2A ENSG00000152128|TMEM163 ENSG00000167461|RAB8A ENSG00000175625|NP\_689678.1 ENSG00000172212|XR\_017939.1 ENSG00000173950|C3orf21 ENSG00000187531|SIRT7  
ENSG00000189037|DUSP21 ENSG00000197043|ANXA6 ENSG00000197653|DNAH10 ENSG00000198019|FCGR1B ENSG00000198693|Q6ZW86\_HUMAN ENSG00000204439|C6orf47 ENSG00000008405|CRY1 ENSG00000070718|AP3M2  
ENSG00000071539|TRIP13 ENSG00000102974|CTCF ENSG00000103599|IQCH ENSG00000105976|MET ENSG00000119514|GALNT12 ENSG00000120658|ENOX1 ENSG00000123584|MAGEA9B ENSG00000138496|PARP9  
ENSG00000139508|SLC46A3 ENSG00000143153|ATP1B1 ENSG00000150337|FCGR1A ENSG00000155330|NP\_001001436.1 ENSG00000161547|SFRS2 ENSG00000165655|ZNF503 ENSG00000165685|C12orf59 ENSG00000166008|MAGEA9  
ENSG00000171135|JAGN1 ENSG00000174482|LINGO2 ENSG00000176714|CCDC121 ENSG00000176890|TYMS ENSG00000178459|Q8N2E2\_HUMAN ENSG00000181425|DSCR10 ENSG00000182271|TMIGD1  
CCATCTG ENSG00000022840|RNF10 ENSG00000083814|ZNF671 ENSG00000092929|UNC13D ENSG00000100227|POLDI3 ENSG00000100439|ABHD4 ENSG00000100647|KIAA0247 ENSG00000104299|INT9\_HUMAN ENSG00000105402|NAPA  
ENSG00000130270|ATP8B3 ENSG00000130529|TRPM4 ENSG00000131018|C6orf98 ENSG00000132164|SLC6A11 ENSG00000136720|HS6ST1 ENSG00000139636|LMBR1L ENSG00000145022|TCTA ENSG00000146232|NFKBIE  
ENSG00000147955|OPRS1 ENSG00000156453|PCDH1 ENSG00000158014|SLC30A2 ENSG00000160183|TMPRSS3 ENSG00000162576|MXRA8 ENSG00000166448|TMEM130 ENSG00000166589|CDH16 ENSG00000168748|CA7  
ENSG00000172345|STAR5 ENSG00000173811|CCDC13 ENSG00000175877|WBSR28 ENSG00000183444|NR\_002822.2 ENSG00000185442|NP\_997329.1 ENSG00000185744|TNT\_HUMAN ENSG00000187116|LILRA5 ENSG00000188976|NOC2L  
ENSG00000196498|NCOR2 ENSG00000204934|NP\_001008745.1 ENSG00000205856|NP\_001010859.1 ENSG00000206177|HBM ENSG000000068878|PSME4 ENSG00000099940|SNAP29 ENSG00000119865|C2orf32  
ENSG00000121089|NACA3P ENSG00000124721|DNAH8 ENSG00000128607|NP\_055812.1 ENSG00000134077|THUMP3 ENSG00000136478|TEX2 ENSG00000140873|ADAMTS18 ENSG00000146223|RPL7L1 ENSG00000147471|PROSC  
ENSG00000154639|CXADR ENSG00000166913|YWHAB ENSG00000167383|ZNF229 ENSG00000177343|PBOV1 ENSG00000183155|RAB1F ENSG00000188216|Q5JST9\_HUMAN ENSG00000197128|ZNF772 ENSG00000205057|CLLU10S

CCATGAA ENSG00000072501|SMC1A ENSG00000087250|MT3 ENSG00000090554|FLT3LG ENSG00000093072|CECR1 ENSG00000104888|SLC17A7 ENSG00000111641|NOL1 ENSG00000116990|MYCL1 ENSG00000122711|SPINK4  
ENSG00000125815|CST8 ENSG00000134779|C18orf10 ENSG00000134905|CAR52 ENSG00000140718|FTO ENSG00000141342|PLEKHM1 ENSG00000144468|RHBD1 ENSG00000154011|DCUN1D2 ENSG00000163686|ABHD6  
ENSG00000172426|C6orf206 ENSG00000174600|CMKLR1 ENSG00000178409|KIAA1553 ENSG00000180424|DEFB123 ENSG00000183044|ABAT ENSG00000186141|POLR3C ENSG00000198797|FAM5B ENSG00000203784|LELP1  
ENSG00000204319|C4A ENSG00000204342|C4B ENSG00000082213|C5orf22 ENSG00000085871|MGST2 ENSG00000091490|NP\_056002.1 ENSG00000107651|SEC23P1 ENSG00000110318|KTA1377 ENSG00000112406|HECA  
ENSG00000114279|FGF12 ENSG00000116977|LGLA5 ENSG00000118193|KIF14 ENSG00000128050|PAICS ENSG00000132952|USP14 ENSG00000133401|PDZD2 ENSG00000147471|PROSC ENSG00000160551|TAOK1  
ENSG00000162645|GBP7 ENSG00000163544|Q96BL6\_HUMAN ENSG00000164485|IL22RA2 ENSG00000168502|KIAA0802 ENSG00000180667|YOD1 ENSG00000181072|CHRM2 ENSG00000182457|NR\_002323.1 ENSG00000182670|TTC3  
ENSG00000196247|ZNF588 ENSG00000196563|Q9H375\_HUMAN ENSG00000197646|PDCD1LG2 ENSG00000198556|ZNF789

CCATGGA ENSG00000050426|LETMD1 ENSG00000058799|YIPF1 ENSG00000105875|NP\_054868.2 ENSG00000134369|NAV1 ENSG00000137193|PIM1 ENSG00000137522|RNF121 ENSG00000141431|Q6ZMX6\_HUMAN ENSG00000158457|TSPAN33  
ENSG00000159348|CYB5R1 ENSG00000172460|Q8IVY7\_HUMAN ENSG00000175206|NPPA ENSG00000175463|TBC1D10C ENSG00000175662|TOML12 ENSG00000185800|DMWD ENSG00000187664|TM6SF2 ENSG00000197174|014606\_HUMAN  
ENSG00000197285|NR\_001536.1 ENSG00000197364|S100A7L2 ENSG00000198951|NAGA ENSG00000206193|AGPAT1 ENSG00000206193|Q5HYA3\_HUMAN ENSG00000070718|AP3M2 ENSG00000102239|BRS3 ENSG00000102738|MRPS31  
ENSG00000106346|USP42 ENSG00000111196|MGN2\_HUMAN ENSG00000113407|TARS ENSG00000113441|LNPEP ENSG00000115421|PAPOLG ENSG00000124120|C2orf121 ENSG00000125414|MYH2 ENSG00000132718|SYT11  
ENSG00000136381|IREB2 ENSG00000139537|CCDC65 ENSG00000155189|AGPAT5 ENSG00000158125|XDH ENSG00000163378|C3orf64 ENSG00000165076|NP\_001008271.1 ENSG00000169679|BUB1 ENSG00000174156|GSTA3  
ENSG00000181092|ADIPQO ENSG00000186105|Q7Z2Q7\_HUMAN ENSG00000196754|S100A2

CCATGGC ENSG00000006007|GDE1\_HUMAN ENSG00000008438|PGLYRP1 ENSG00000008735|MAPK8IP2 ENSG00000083444|PLOD1 ENSG00000092820|VIL2 ENSG00000099282|TSPAN15 ENSG00000099953|MMP11 ENSG00000100083|GGA1  
ENSG00000100097|LGLA51 ENSG00000101306|MYLK2 ENSG00000102802|C13orf33 ENSG00000105438|KDEL1R ENSG00000105953|OGD8 ENSG00000110104|CCDC86 ENSG00000120913|PDLIM2 ENSG00000127418|FGFR1L  
ENSG00000130766|SESN2 ENSG00000136295|TYH3 ENSG00000141084|RANBP10 ENSG00000159792|PSKH1 ENSG00000167653|PSCA ENSG00000183873|SCN5A ENSG00000185370|Q8WZ02\_HUMAN ENSG00000188101|ALOX12P2  
ENSG00000196684|HSH2D ENSG00000197335|LYPD2 ENSG00000203793|Q6ZRW74\_HUMAN ENSG00000049192|ADAMTS6 ENSG000000080947|Q8IVE0\_HUMAN ENSG00000105968|H2AFV ENSG00000116132|PRRX1 ENSG00000127125|PPCS  
ENSG00000131795|RBM8A ENSG00000134453|RBM17 ENSG00000154975|CA10 ENSG00000155592|ZKSCAN2 ENSG00000158604|TMED4 ENSG00000164244|PRRC2 ENSG00000164418|GRIK2 ENSG00000165819|METTL3  
ENSG00000176222|ZNF404 ENSG00000177324|CXorf20 ENSG00000181126|Q86V94\_HUMAN ENSG00000196950|SLC39A10 ENSG00000197641|SERPINB13 ENSG00000204022|LIPJ

CCATGTA ENSG00000031698|SARS ENSG00000100302|RASD2 ENSG00000100985|MMP9 ENSG00000111640|GAPDH ENSG00000113578|FGF1 ENSG00000125995|C2orf52 ENSG00000131914|LIN28 ENSG00000132671|SSTR4  
ENSG00000135114|OASL ENSG00000143258|USP21 ENSG00000156860|FBR5 ENSG00000164007|CLDN19 ENSG00000167615|LENG8 ENSG00000169397|RNASE3 ENSG00000170091|NSG2\_HUMAN ENSG00000172922|RNASEH2C  
ENSG00000174521|TTC9B ENSG00000185955|NP\_001004323.1 ENSG00000196090|PTPRT ENSG00000197430|TMEM10 ENSG00000203784|LELP1 ENSG00000204758|Q6ZUG4\_HUMAN ENSG00000206528|Q6ZSM0\_HUMAN ENSG0000021355|SERPINB1  
ENSG00000111897|SERINC1 ENSG00000115977|AAK1 ENSG00000122912|SLC25A16 ENSG00000125384|PTGER2 ENSG00000130818|ZNF426 ENSG00000136048|NP\_060840.2 ENSG00000136426|ZNF426 ENSG00000136048|NP\_060840.2 ENSG00000136426|ZNF426  
ENSG00000152910|CNTNAP4 ENSG00000153233|PTPRR ENSG00000154734|ADAMTS18 ENSG00000163635|PSMD6 ENSG00000163950|SLBP ENSG00000164258|NDUF54 ENSG00000164924|YWHAZ ENSG00000169432|SCN9A  
ENSG00000181192|DHTKD1 ENSG00000182197|EXT1 ENSG00000198382|UVRAG ENSG00000204351|SKIV2L ENSG00000211448|DIO2

CCATTAA ENSG00000008086|CDKL5 ENSG00000019169|MARCO ENSG00000055957|ITIH1 ENSG00000063978|RNF4 ENSG00000081377|CDC14C ENSG00000085465|OVGP1 ENSG00000088808|PPP1R13B ENSG00000100884|CPNE6  
ENSG00000104774|MAN2B1 ENSG00000107618|RBP3 ENSG00000111674|ENO2 ENSG00000114113|RBP2 ENSG00000114841|DNAH1 ENSG00000116985|BMP8B ENSG00000117020|AKT3 ENSG00000120664|LOC646871  
ENSG00000120725|SLL1 ENSG00000129214|SHBG ENSG00000141086|CTRL ENSG00000142530|NP\_612420.1 ENSG00000143575|HAX1 ENSG00000158161|CPA2 ENSG00000159199|ATP5G1 ENSG00000160282|FTCD  
ENSG00000168928|CTRB2 ENSG00000169627|BOLA2B ENSG00000170858|LILRA4 ENSG00000172159|FRMD3 ENSG00000179085|DPM3 ENSG00000179168|GGN ENSG00000183258|DDX41 ENSG00000186583|SPATC1  
ENSG00000188229|TUBB2C ENSG00000188706|ZDHHC9 ENSG00000203854|XR\_017700.1 ENSG00000203843|ACCN5 ENSG00000042980|ADAM28 ENSG00000101928|MOSPD1 ENSG00000102893|PHKB ENSG00000107581|EIF3S10  
ENSG00000108187|PBLD ENSG00000108298|RPL119 ENSG000001121486|C1orf25 ENSG00000134294|SLC38A2 ENSG00000134717|BTF3L4 ENSG00000135250|SRPK2 ENSG00000136542|GALNT5 ENSG00000136870|ZNF189  
ENSG00000138668|HNRP2 ENSG00000146282|RARS2 ENSG00000146674|IGFBP3 ENSG00000147654|EBAG9 ENSG00000154493|C1orf90 ENSG00000164220|F2RL2 ENSG00000165124|SVEP1 ENSG00000169251|NMD3  
ENSG00000171824|EXOSC10 ENSG00000173655|Q5T909\_HUMAN ENSG00000177343|PBOV1 ENSG00000179902|C1orf194 ENSG00000181192|DHTKD1 ENSG00000182463|TSHZ2 ENSG00000183718|TRIM52 ENSG00000185737|NRG3  
ENSG00000186446|ZNF501 ENSG00000189195|BTBD8 ENSG00000198018|ENTPD7 ENSG00000203667|FAM36A ENSG00000205669|ACOT6

CCATTTC ENSG00000008438|PGLYRP1 ENSG00000061273|HDAC7A ENSG00000063245|EPN1 ENSG00000100599|RIN3 ENSG00000104888|SLC17A7 ENSG00000107554|DNMBP ENSG00000109758|HGFAC ENSG00000118058|MLL  
ENSG00000123427|FAM119B ENSG00000125730|C3 ENSG00000133069|TMCC2 ENSG00000138311|ZNF365 ENSG00000143569|UBAP2L ENSG00000145990|FOD1 ENSG00000161574|CCL14 ENSG00000165269|AQP7  
ENSG00000168994|C6orf145 ENSG00000177042|TMEM80 ENSG00000179085|DPM3 ENSG00000181754|AMIGO1 ENSG00000185499|MUC1 ENSG00000047621|C12orf4 ENSG00000062096|ARSF ENSG00000101182|PSMA7  
ENSG00000107854|TNKS2 ENSG000001108306|FBXL20 ENSG00000112242|E2F3 ENSG00000112667|C6orf108 ENSG00000113522|RAD50 ENSG00000113569|NUP155 ENSG00000114054|PCCB ENSG00000115541|HSPF1  
ENSG00000117597|C1orf107 ENSG00000125851|PCSK2 ENSG00000132781|MUTYH ENSG00000134183|GNAT2 ENSG00000136478|TEX2 ENSG00000147044|CASK ENSG00000168310|IRF2 ENSG00000180537|RNF182  
ENSG00000183305|MAGEA6 ENSG00000184750|MAGEA2 ENSG00000185304|NP\_001071638.1 ENSG00000185742|NP\_997528.1 ENSG00000187109|NAP1L1 ENSG00000187627|RGPD1 ENSG00000188162|OTOG ENSG00000198161|PP1A4  
ENSG00000198360|NP\_839944.1 ENSG00000198936|NP\_839944.1 ENSG00000203847|XR\_016130.1 ENSG00000204524|ZNF805 ENSG000002011448|DIO2

CCATTTC ENSG00000004478|FKBP4 ENSG0000007402|CACNA2D2 ENSG00000086015|MAGT2 ENSG00000087258|GNAO1 ENSG00000100461|RBM23 ENSG00000100558|PLEK2 ENSG00000101236|RNF24 ENSG00000102924|CBLN1  
ENSG00000104332|SFRP1 ENSG00000105245|NUMB ENSG00000106500|FLRT1 ENSG00000106746|ZNF384 ENSG00000130787|HIP1R ENSG00000135446|CDK4 ENSG00000141568|FOXK2 ENSG00000143624|INTS3  
ENSG00000145626|FCST3A1 ENSG00000147119|CHST7 ENSG00000164574|GALNT10 ENSG00000168400|FADP ENSG00000169118|CSNK1G1 ENSG00000171450|CDK5



ENSG00000174996|KLC2 ENSG00000175662|TOM1L2 ENSG00000175785|PRIMA1 ENSG00000177303|CASKIN2 ENSG00000178685|PARP10 ENSG00000181085|MAPK15 ENSG00000184381|PLA2G6 ENSG00000186193|C9orf140  
ENSG00000188549|NP\_997263.1 ENSG00000188784|PLA2G2E ENSG00000189152|Q8TC17\_HUMAN ENSG00000204325|Q9H614\_HUMAN ENSG00000204511|NM\_001011700.1 ENSG00000205426|KRT81 ENSG00000205751|MRPL23 ENSG00000205879|FAM90A25P  
ENSG00000008311|AASS ENSG00000023330|ALAS1 ENSG00000033800|PIAS1 ENSG000000066084|DIP2B ENSG00000081923|ATP8B1 ENSG00000084676|NCOA1 ENSG00000092377|TBL1Y ENSG0000018322|ATP10B ENSG00000166889|NP\_689929.1  
ENSG00000125864|BFSP1 ENSG00000131238|PPT1 ENSG00000144410|CPO ENSG00000145879|SPINK7 ENSG00000151718|WWC2 ENSG00000157654|PALM2 ENSG00000162433|AK3L2 ENSG00000166889|NP\_689929.1  
ENSG00000174099|MSRB3 ENSG00000178502|KLHL11 ENSG00000184280|ZNF285B ENSG00000186132|NP\_001017927.1 ENSG00000198903|Q6ZV72\_HUMAN ENSG00000203897|Q6W422\_HUMAN  
ENSG00000003137|CYP26B1 ENSG00000073536|NLE1 ENSG00000073584|SMARCE1 ENSG00000100884|CPNE6 ENSG00000101203|COL20A1 ENSG00000108518|PFN1 ENSG00000114982|NP\_060461.3 ENSG00000123243|ITHI5  
ENSG00000130687|ALKBH6 ENSG00000143774|GUK1 ENSG00000149571|KIRREL3 ENSG00000157379|DHRS1 ENSG00000161944|ASGR2 ENSG00000164270|HTRA ENSG00000172379|ARNT2 ENSG00000175873|Q9H7M1\_HUMAN  
ENSG00000182584|C20orf134 ENSG00000184194|GPR173 ENSG00000204071|TCEAL6 ENSG00000204323|Q71RC9\_HUMAN ENSG00000047936|ROSL ENSG000000090581|GNPTG ENSG00000118702|GHRH ENSG00000118946|PCDH17  
ENSG00000125900|STRP ENSG00000136539|CD302 ENSG00000138433|Q8R1\_HUMAN ENSG00000148057|C9orf103 ENSG00000165841|CYP2C19 ENSG00000169087|HSPBP1 ENSG00000174136|RGM5 ENSG00000182752|PAPPA  
ENSG00000183395|PMCH ENSG00000187229|Q86YR2\_HUMAN ENSG00000204296|C6orf10  
ENSG0000011600|TYROBP ENSG00000024422|EHD2 ENSG00000088280|DDEF1L ENSG00000100097|LGALS1 ENSG00000101361|NOL5A ENSG00000104899|HSP ENSG00000106366|SERPINE1 ENSG00000117115|PADI2  
ENSG00000127445|PIN1 ENSG00000135436|C12orf25 ENSG00000138629|UBL7 ENSG00000140986|RPL3L ENSG00000142539|SP1B ENSG00000153666|XR\_017721.1 ENSG00000159792|PSKH1 ENSG00000161640|SIGLEC11  
ENSG00000163207|IVL ENSG00000164363|SLC6A18 ENSG00000165269|AQF7 ENSG00000166340|PPP1 ENSG00000169738|DCXR ENSG00000178081|LOC653075 ENSG00000179036|VAMP2  
ENSG00000182685|C16orf79 ENSG00000183828|NUDT14 ENSG00000186466|AQF7P2 ENSG00000186788|NP\_001001670.1 ENSG00000188532|LOC653125 ENSG00000188626|LOC653720 ENSG00000189429|RNF207 ENSG00000196118|NP\_001014979.1  
ENSG00000198454|Q5SQ13\_HUMAN ENSG00000198570|RD3 ENSG00000205155|PSEEN1 ENSG00000205209|NP\_001020762.1 ENSG00000067177|PHKA1 ENSG00000068366|ACSL4 ENSG00000076382|SPAG5 ENSG00000101608|MLRM\_HUMAN  
ENSG00000112116|IL17F ENSG00000115687|PASK ENSG000001124813|RUNX2 ENSG00000134853|PDGFRA ENSG00000135119|TMEM118 ENSG00000148584|ACF\_HUMAN ENSG00000163040|CCDC74A ENSG00000163393|SLC22A15  
ENSG00000168619|ADAM18 ENSG00000174326|SLC16A11 ENSG00000177694|NALADL2 ENSG00000179578|Q8NAV4\_HUMAN ENSG00000183508|FAM46C ENSG00000196104|SPOCK3 ENSG00000203724|C1orf53 ENSG00000206535|A1A4G5\_HUMAN

ENSG00000006114|AP1GBP1 ENSG00000011304|PTBP1 ENSG00000090659|CAD209 ENSG00000105655|NP\_057452.1 ENSG00000127585|FBXL16 ENSG00000129951|NP\_079164.1 ENSG00000135439|CENTG1 ENSG00000139182|CLSTN3  
ENSG00000145214|DGKQ ENSG00000153404|NP\_443141.2 ENSG00000159387|IRX6 ENSG00000166246|C16orf71 ENSG00000167393|PPP2R3B ENSG00000167487|KLHL26 ENSG00000172346|CSDC2 ENSG00000173641|HSPB7  
ENSG00000178028|DMAP1 ENSG00000178645|C10orf53 ENSG00000185176|AQF12B ENSG00000196361|ELAVL3 ENSG00000079332|SAR1A ENSG00000085377|PREP ENSG00000101138|CSTF1 ENSG00000111145|ELK3  
ENSG00000115170|ACVR1 ENSG00000115761|NOL10 ENSG00000123080|CDKN2C ENSG00000133742|CA1 ENSG00000138784|NP\_060170.1 ENSG00000147400|CETN2 ENSG00000148429|USP6NL ENSG00000165078|CPA6  
ENSG00000171823|FBXL14 ENSG00000173905|GOLPH4 ENSG00000177283|FZD8 ENSG00000177461|Q8NA31\_HUMAN ENSG00000179300|ZCCHC5 ENSG00000185304|NP\_001071638.1 ENSG00000187627|RGPD1 ENSG00000187969|ZCCHC13  
ENSG00000205334|Q6ZVL0\_HUMAN

ENSG00000005243|COPZ2 ENSG00000005379|BZRAP1 ENSG00000040487|PQLC2 ENSG00000066248|NGEF ENSG00000070886|EPAH8 ENSG00000072195|SPEG ENSG00000073067|CYP2W1 ENSG00000073598|FNDC8  
ENSG00000099899|HTF9C\_HUMAN ENSG000001000056|DCGR14 ENSG00000101198|C20orf58 ENSG00000102996|MMP15 ENSG00000105519|CAPS ENSG00000105767|CADM4 ENSG00000115138|POMC ENSG00000121104|FAM117A  
ENSG00000125804|C20orf91 ENSG00000126603|GLIS2 ENSG00000130758|MAP3K10 ENSG00000130950|FAM22F ENSG00000130997|POLN ENSG00000133466|C1QTNF6 ENSG00000136295|TTYH3 ENSG00000158352|SHROOM4  
ENSG00000160877|BTBD14B ENSG00000163283|ALPPL2 ENSG00000165548|TMEM63C ENSG00000167656|LY6D ENSG00000167770|OTUB1 ENSG00000167807|NP\_001026904.1 ENSG00000168309|FAM107A ENSG00000168487|BMP1  
ENSG00000169228|MXD3 ENSG00000170265|ZNF282 ENSG00000171798|KNDCC1 ENSG00000172482|AGXT ENSG00000172508|Q8N467\_HUMAN ENSG00000173638|SLC19A1 ENSG00000177084|POLE ENSG00000177663|IL17RA  
ENSG00000179142|CYP11B2 ENSG00000182851|NP\_835466.1 ENSG00000185332|TMEM105 ENSG00000186193|C9orf140 ENSG00000186648|C14orf121 ENSG00000186891|TNFRSF18 ENSG00000196338|NLGN3  
ENSG00000196614|NM\_207462 ENSG00000196700|ZNF512B ENSG00000198373|WWP2 ENSG00000198925|ATG9A ENSG00000203772|SPRN ENSG00000205073|NP\_001003808.1 ENSG00000205751|MRPL23 ENSG00000206013|IFITM5  
ENSG00000023330|ALAS1 ENSG00000042781|USH2A ENSG00000049192|ADAMTS6 ENSG00000050165|DKK3 ENSG00000077713|SLC25A43 ENSG00000081052|COL4A4 ENSG00000081923|ATP8B1 ENSG00000084676|NCOA1  
ENSG00000105810|CDK6 ENSG00000111432|FZD10 ENSG00000112667|C6orf108 ENSG00000114742|WDR48 ENSG00000124496|TRERF1 ENSG00000126603|LY6D ENSG00000132334|PTPRE ENSG00000138759|FRAS1  
ENSG00000144785|TMEM4 ENSG00000147133|TAF1 ENSG00000159167|STC1 ENSG00000164123|NP\_689756.2 ENSG00000165794|SLC39A2 ENSG00000168646|AXIN2 ENSG00000174099|MSRB3 ENSG00000185057|TAF9  
ENSG00000185591|SP1 ENSG00000185760|KCNQ5 ENSG00000196569|LAMA2 ENSG00000198173|FAM47C ENSG00000205323|HCC1\_HUMAN  
ENSG0000011009|LYPLA2 ENSG00000060558|GNA15 ENSG00000063660|GPC1 ENSG00000070985|TRPM5 ENSG00000073067|CYP2W1 ENSG00000074219|TEAD2 ENSG00000074317|SNCB ENSG00000090447|TFAP4  
ENSG00000099795|NDUFB7 ENSG00000104833|TUBB4 ENSG00000105426|PTPRS ENSG00000105737|GRIK5 ENSG00000105767|CADM4 ENSG00000105808|RSA4 ENSG00000108292|MLLT6 ENSG00000109101|FOXN1  
ENSG0000011540|RAB5B ENSG00000122180|MYOG ENSG00000125888|C20orf179 ENSG00000126603|GLIS2 ENSG00000126756|UXT ENSG00000127220|ABHD8 ENSG00000129245|FXR2 ENSG00000130176|CNN1  
ENSG00000130592|LSP1 ENSG00000130787|HIP1R ENSG00000131398|KCNK3 ENSG00000137216|TMEM63B ENSG00000142303|ADAMTS10 ENSG00000142449|FBN3 ENSG00000143590|EFNA3 ENSG00000158186|MRAS  
ENSG00000158747|NBL1 ENSG00000158887|MPZ ENSG00000163060|TEKT4 ENSG00000163283|ALPPL2 ENSG00000163362|C1orf106 ENSG00000171700|RGS19 ENSG00000172757|CFL1 ENSG00000174516|PELI3  
ENSG00000178947|Q86V52\_HUMAN ENSG00000178951|ZBTB7A ENSG00000182580|EPHB3 ENSG00000184697|CLDN6 ENSG00000186790|FOXE3 ENSG00000197982|KIF13B ENSG00000198013|PNMA6A ENSG00000198728|LDB1  
ENSG00000203879|GDI1 ENSG00000204280|NP\_001032647.2 ENSG00000204851|Q6ZVD1\_HUMAN ENSG00000205231|Q6ZQQ1\_HUMAN ENSG00000102021|DDX17 ENSG00000120885|CLU ENSG00000121211|MND1 ENSG00000128714|HOXD13  
ENSG00000138152|BTBD16 ENSG00000141655|TNFRSF11A ENSG00000143995|MEIS1 ENSG00000145041|Q8TBD9\_HUMAN ENSG00000147133|TAF1 ENSG00000152268|SPON1 ENSG00000153187|HNRPU ENSG00000155592|ZKSCAN2  
ENSG00000157214|STEAP2 ENSG00000168297|PKX ENSG00000179833|SERTAD2 ENSG00000182957|SPATA13 ENSG00000183726|TMEM50A ENSG00000196712|NFI1  
ENSG0000011485|PPP5C ENSG00000033627|ATP6V0A1 ENSG00000085185|BCORL1 ENSG00000087152|ATXN7L3 ENSG00000095397|DFNB13 ENSG00000102003|SYP ENSG00000103066|LYPLA3 ENSG00000108797|CNTNAP1  
ENSG00000110665|C11orf21 ENSG00000118137|APOA1 ENSG00000124449|IRGC ENSG00000126456|IRF3 ENSG00000130590|SAMD10 ENSG00000131398|KCNK3 ENSG00000132329|RAMP1 ENSG00000135097|MSI1  
ENSG00000136295|TTYH3 ENSG00000140983|RHOT2 ENSG00000141503|MINK1 ENSG00000142303|ADAMTS10 ENSG00000160460|SPTBN4 ENSG00000160570|DEDD2 ENSG00000161544|CYGB ENSG00000161671|NP\_996261.1  
ENSG00000167487|KLHL26 ENSG00000169221|TBC1D10B ENSG00000170684|ZNF342 ENSG00000175753|C11orf68 ENSG00000177542|SLC25A22 ENSG00000180483|DEFB119 ENSG00000185024|BRF1 ENSG00000188396|NP\_001013654.1  
ENSG00000204463|BAT3 ENSG0000013810|TACC3 ENSG00000070540|WIPI1 ENSG00000075785|RAB7A ENSG00000105880|DLX5 ENSG00000106462|EZH2 ENSG00000131089|ARHGEF9 ENSG00000134278|SPITRE1  
ENSG00000158023|WDR66 ENSG00000158477|CD1A ENSG00000166342|NETO1 ENSG00000170037|CNTROB ENSG00000170627|FAM112B ENSG00000173261|PLAC8L1 ENSG00000182255|KCNA4 ENSG00000187753|C9orf153  
ENSG00000196967|ZNF585A

ENSG00000004776|HSPB6 ENSG00000005884|ITGA3 ENSG00000011332|DPF1 ENSG00000011485|PPP5C ENSG00000074370|ATP2A3 ENSG00000076864|RAP1GAP ENSG00000085185|BCORL1 ENSG00000088038|CNOT3  
ENSG00000089693|MLF2 ENSG00000099864|PALM ENSG00000099869|IGF2AS ENSG00000100324|MAP3K7IP1 ENSG00000100385|IL2RB ENSG00000104853|CLPTM1 ENSG00000105204|DYRK1B ENSG00000105695|MAG  
ENSG00000105701|FKBP8 ENSG00000110057|UNC93B1 ENSG00000110080|ST3GAL4 ENSG00000112658|SRF ENSG00000125744|RTN2 ENSG00000129455|KLB8 ENSG00000131668|BARX1 ENSG00000131748|STAR3  
ENSG00000132507|EIF5AP1 ENSG00000135097|MSI1 ENSG00000136378|ADAMTS7 ENSG00000137166|FOXP4 ENSG00000140497|SCAMP2 ENSG00000140564|FURIN ENSG00000140983|RHOT2 ENSG00000142303|ADAMTS10  
ENSG00000143320|CRABP2 ENSG00000143590|EFNA3 ENSG00000149922|TBX6 ENSG00000156990|RPUSD3 ENSG00000157306|THP2A ENSG00000158062|UBXD5 ENSG00000159720|ATP6V0D1 ENSG00000160460|SPTBN4  
ENSG00000161677|JOSD2 ENSG00000166925|TSC22D4 ENSG00000167595|C19orf55 ENSG00000167680|SEMA6B ENSG00000167770|OTUB1 ENSG00000173020|ADRBK1 ENSG00000177105|RHOG ENSG00000177732|SOX12  
ENSG00000179862|CITED4 ENSG00000185176|AQF12B ENSG00000187840|EIF4EBP1 ENSG00000188037|CLCN1 ENSG00000198753|PLXNB3 ENSG00000204310|AGPAT1 ENSG00000204316|MRPL38 ENSG00000205698|LOC648426  
ENSG00000205704|Q6IC67\_HUMAN ENSG00000206060|Q6ZU89\_HUMAN ENSG00000203318|TXNDC4 ENSG00000077279|DCX ENSG00000078124|PHCA ENSG00000100823|APEX1 ENSG00000106462|EZH2 ENSG00000112186|CAP2  
ENSG00000112624|K1AA0240 ENSG00000116176|TPSG1 ENSG00000131480|AOC2 ENSG00000136628|EPRS ENSG00000144354|CDCA7 ENSG00000153094|BCL2L11 ENSG00000154174|TOMM70A ENSG00000155760|FZD7  
ENSG00000158023|WDR66 ENSG00000184868|POU3F2 ENSG00000187944|NP\_998773.1 ENSG00000125788|DEFB126 ENSG00000125912|NCLN ENSG00000130822|IGLL1 ENSG00000130402|ACTN4 ENSG00000134780|DAGLA  
ENSG0000018625|ATP1A2 ENSG00000097007|ABL1 ENSG000001125740|FOSB ENSG00000161904|LEMD2 ENSG00000165178|LOC648998 ENSG00000168754|NP\_057574.2 ENSG00000169733|RFNG ENSG00000172653|C17orf66  
ENSG00000145214|DGKQ ENSG00000152284|TCF7L1 ENSG00000158517|NCF1 ENSG00000174521|TTC9B ENSG00000182376|NP\_872411.1 ENSG00000182487|NCF1C ENSG00000182685|C16orf79 ENSG00000183207|RUVBL2 ENSG00000187796|CARD9  
ENSG00000172725|PTPRCAP ENSG00000108039|XPNPEP1 ENSG00000130779|CLIP1 ENSG00000135775|COG2 ENSG00000144118|RALB ENSG00000149177|PTPRJ ENSG00000151514|SALL3 ENSG00000151725|MLF1IP  
ENSG00000151726|ACSL1 ENSG00000152904|GGP51 ENSG00000163950|SLBP ENSG00000178700|DHFR1L1 ENSG00000180190|C8orf42 ENSG00000185053|SGC2 ENSG00000186298|PPP1CC ENSG00000196550|FAM72A  
ENSG00000205524|Q68D70\_HUMAN

ENSG00000004777|SNX26 ENSG00000005001|PRSS22 ENSG00000006025|OSBPL7 ENSG00000008516|MMP25 ENSG00000011332|DPF1 ENSG00000011485|PPP5C ENSG00000039650|PNKP ENSG00000049283|EPN3  
ENSG00000053501|USE1\_HUMAN ENSG00000060566|CREB3L3 ENSG00000064666|CNN2 ENSG00000066336|SPI1 ENSG00000072163|LIMS2 ENSG00000072818|CENTB1 ENSG00000074317|SNCB ENSG00000075275|CELSR1  
ENSG00000078061|ARAF ENSG00000080845|DLGAP4 ENSG00000099814|K1AA0284 ENSG00000099822|HCN2 ENSG00000100429|HDAC10 ENSG00000100599|RIN3 ENSG00000101438|SLC32A1  
ENSG00000101986|ABCD1 ENSG00000102109|PCSK1N ENSG00000102226|USP11 ENSG00000105369|CD79A ENSG00000105711|SCN1B ENSG00000106089|STX1A ENSG00000108669|PSCD1 ENSG00000114353|GNAI2  
ENSG00000118046|STK11 ENSG00000120896|SORBS3 ENSG00000124449|IRGC ENSG00000126583|PRKCG ENSG00000127533|F2RL3 ENSG00000127585|FBXL16 ENSG00000130311|C19orf58 ENSG00000130592|LSP1  
ENSG00000131094|C1QL1 ENSG00000136573|BLK ENSG00000141985|SH3GL1 ENSG00000142227|EMP3 ENSG00000142627|EPAH2 ENSG00000146576|C7orf26 ENSG00000148343|FAM73B ENSG00000149609|C20orf144  
ENSG00000158008|EXTL1 ENSG00000158545|NP\_653205.2 ENSG00000160650|Q96HZ0\_HUMAN ENSG00000160685|ZBTB7B ENSG00000161079|NEBAL2 ENSG00000161013|MGAT4B ENSG00000161642|ZNF385 ENSG00000161835|GRASP  
ENSG00000161914|ZNF653 ENSG00000163286|PPBN\_HUMAN ENSG00000164917|K0415\_HUMAN ENSG00000166126|AMN ENSG00000166333|ILK ENSG00000167468|GPX4 ENSG00000167702|KIFC2 ENSG00000170577|SIX2  
ENSG00000170616|SCRT1 ENSG00000171223|JUNB ENSG00000171954|NP\_775754.1 ENSG00000172232|AZU1 ENSG00000172940|SLC22A13 ENSG00000173673|HEB3 ENSG00000176658|MYO1D ENSG00000177380|PPFIA3  
ENSG00000177984|NP\_976222.1 ENSG00000179403|VWA1 ENSG00000180096|SEPT1 ENSG00000181977|PYY2 ENSG00000183248|Q9H6K5\_HUMAN ENSG00000183596|TIM16\_HUMAN ENSG00000183971|NPW ENSG00000184545|DUSP8  
ENSG00000185236|RAB11B ENSG00000186702|NP\_079360.1 ENSG00000186827|TNFRSF4 ENSG00000188011|NP\_776182.2 ENSG00000188384|Q6ZUQ5\_HUMAN ENSG00000188735|NP\_001074294.1 ENSG00000189363|Q6ZSP4\_HUMAN  
ENSG00000196972|Q86V52\_HUMAN

ENSG00000197681|TBC1D3 ENSG00000198113|C9orf167 ENSG00000203896|LIME1 ENSG00000204314|PRRT1 ENSG00000205271|Q6ZUQ5\_HUMAN ENSG00000205275|Q6ZUQ5\_HUMAN ENSG00000205745|Q71MF4\_HUMAN ENSG0000008196|TFAP2B  
ENSG0000013810|TACC3 ENSG0000021461|CYP3A43 ENSG00000083622|SOHLH2 ENSG00000105810|CDK6 ENSG00000109118|PHF12 ENSG00000115761|NOL10 ENSG00000124812|CRISP1 ENSG00000125691|RPL23  
ENSG00000130413|STK33 ENSG00000130844|ZNF331 ENSG00000138722|MMRN1 ENSG00000143919|C2orf34 ENSG00000144021|CIAO1 ENSG00000154493|C10orf90 ENSG00000157429|ZNF19 ENSG00000159055|C21orf45  
ENSG00000161326|DUSP14 ENSG00000184388|RBM32A ENSG00000186288|RBM32A ENSG00000187068|NP\_001020437.1  
ENSG00000008444|NFX1 ENSG00000065000|AP3D1 ENSG00000066230|SLC9A3 ENSG00000075240|NP\_055939.1 ENSG00000078808|SDF4 ENSG00000084628|FAM77C ENSG00000087085|ACHE ENSG00000100429|HDAC10  
ENSG00000101200|AVP ENSG00000102878|HSF4 ENSG00000105223|PLD3 ENSG00000105376|ICAM5 ENSG00000105613|MAST1 ENSG00000112514|CUTA ENSG00000114631|PODXL2 ENSG00000129968|FAM108A1  
ENSG00000130595|TNNT3 ENSG00000130675|HLXB9 ENSG00000132005|RFK1 ENSG00000137825|ITPKA ENSG00000146216|TTBK1 ENSG00000148362|C9orf142 ENSG00000160284|C21orf56 ENSG00000162981|FAM84A  
ENSG00000167476|JSRP1 ENSG00000167617|CDC42EP5 ENSG00000169583|CLIC3 ENSG00000171119|NRTN ENSG00000176108|CHMP6 ENSG00000178235|SLITRKL1 ENSG00000179044|EXOC3L ENSG00000182351|CRIP1  
ENSG00000183600|Q8BK37\_HUMAN ENSG00000183828|NUDT14 ENSG00000184068|Q8N8F0\_HUMAN ENSG00000185668|POU3F1 ENSG00000186827|TNFRSF4 ENSG00000189110|Q6ZKR9\_HUMAN ENSG00000196358|NTNG2 ENSG00000198569|SLC34A3  
ENSG00000198658|NP\_001073891.1 ENSG00000203811|H1ST2H3A ENSG00000203813|H1ST2H3C ENSG00000203835|FAM108A2 ENSG00000205209|NP\_001020762.1 ENSG00000206140|LOC728229 ENSG00000206197|NP\_001013723.1 ENSG00000092199|HNRPC  
ENSG00000104728|ARHGEF10 ENSG00000118579|MED28 ENSG00000137269|LRRC1 ENSG00000137825|TUBB2B ENSG00000154556|SORBS2 ENSG00000156304|SFRS15 ENSG00000170419|VSTM2 ENSG00000173917|HOXB2  
ENSG00000177606|JUN ENSG00000180044|Q8N5S4\_HUMAN ENSG00000183943|PRKX ENSG0000

CCCTCC ENSG0000004776|HSPB6 ENSG00000008441|NFIX ENSG00000011332|DPF1 ENSG00000011485|PPP5C ENSG00000064195|DLX3 ENSG00000072071|LPHN1 ENSG00000074370|ATP2A3 ENSG00000078687|TNRC6C ENSG00000088038|CNOT3 ENSG00000090776|EFNB1 ENSG00000096395|MLN ENSG00000099869|IGF2AS ENSG00000099875|MKMK2 ENSG00000100403|ZC3H7B ENSG00000102001|CACNA1F ENSG00000102003|SYT ENSG00000103056|SMPD3 ENSG00000104967|NOVA2 ENSG00000105647|PIK3R2 ENSG00000105663|WBP7\_HUMAN ENSG00000107819|SFXN3 ENSG00000110057|UNC93B1 ENSG00000113758|DBN1 ENSG00000116604|MEF2D ENSG00000117360|PRPF3 ENSG00000117419|PRNP1P ENSG00000119383|PTSD ENSG00000123159|GIPC1 ENSG00000123384|LRP1 ENSG00000124702|KLHDC3 ENSG00000126583|PRKCG ENSG00000129911|KLF16 ENSG00000130159|ECSIT ENSG00000130300|PLVAP ENSG00000136295|TTYH3 ENSG00000136908|DPM2 ENSG00000137166|FOXFP4 ENSG00000137841|PLCB2 ENSG00000140564|FURIN ENSG00000142303|ADAMTS10 ENSG00000142453|CARM1 ENSG00000144908|ALDH1L1 ENSG00000155363|MOV10 ENSG00000156599|ZDHHC5 ENSG00000157306|THTPA ENSG00000160683|BLR1 ENSG00000160685|ZBTB7B ENSG00000160877|BTBD14B ENSG00000161677|JOSD2 ENSG00000164889|SLC4A2 ENSG00000166851|PLK1 ENSG00000167118|URM1 ENSG00000167778|SPRYD3 ENSG00000167987|VPS37C ENSG00000168961|LGALS9 ENSG00000169899|Q96MA9\_HUMAN ENSG00000170421|KRT8 ENSG00000170579|DLGAP1 ENSG00000170616|SCRT1 ENSG00000171794|UTF1 ENSG00000171916|NP\_001035167.2 ENSG00000174938|SEZ6L2 ENSG00000175164|ABO ENSG00000175287|PHYHD1 ENSG00000176884|GRIN1 ENSG00000176909|NP\_872380.1 ENSG00000177732|SOX12 ENSG00000178531|CTNN1 ENSG00000179218|CALR ENSG00000182272|B4GALNT4 ENSG00000186442|KRT3 ENSG00000186815|TPCN1 ENSG00000186998|EMID1 ENSG00000196182|STK40 ENSG00000196361|ELAVL3 ENSG00000196961|AP2A1 ENSG00000197249|SERPINA1 ENSG00000197859|ADAMTSL2 ENSG00000198053|SIRPA ENSG00000198792|C22orf5 ENSG00000198858|C19orf22 ENSG00000204418|CLIC1 ENSG00000212131|PDXP ENSG00000210404|IDS ENSG000002048740|CUGBP2 ENSG000002080561|MID2 ENSG000002096060|FKBP5 ENSG00000105699|LSR ENSG00000114742|WDR48 ENSG00000116176|TPSG1 ENSG00000116962|NID1 ENSG00000124151|NCOA3 ENSG00000134259|NGFB ENSG00000144118|RALB ENSG00000150760|DOCK1 ENSG00000155760|FZD7 ENSG00000170989|EDG1 ENSG00000174326|SLC16A11 ENSG00000178695|KCTD12 ENSG00000181631|P2RY13 ENSG00000186031|Q6ZSY1\_HUMAN ENSG00000187994|NP\_940847.1 ENSG00000197716|Q9UHV1\_HUMAN ENSG00000198455|ZXDB ENSG00000204472|AIF1 ENSG00000205024|Q6ZVP5\_HUMAN

CCCTCT ENSG00000004478|FKBP4 ENSG00000010361|FUZ ENSG00000014216|CAPN1 ENSG00000077044|DGKD ENSG00000099203|TMED1 ENSG00000099864|PALM ENSG00000100979|PLTP ENSG00000101098|RIMS4 ENSG00000101298|RAD21L1 ENSG00000107263|RAPGEF1 ENSG00000108753|TCF2 ENSG00000110080|ST3GAL4 ENSG00000111254|AKAP3 ENSG00000115216|NRBP1 ENSG00000124762|CDKN1A ENSG00000130193|C8orf55 ENSG00000130545|CRB3 ENSG00000130598|UBE1 ENSG00000132694|ARHGEF11 ENSG00000132746|ALDH3B2 ENSG00000135097|MSI1 ENSG00000135722|FBXL8 ENSG00000136167|LCP1 ENSG00000137841|PLCB2 ENSG00000141738|GRB7 ENSG00000142046|TMEM91 ENSG00000142784|WDTC1 ENSG00000149922|TBX6 ENSG00000158715|SLC45A3 ENSG00000159266|Q69YJ1\_HUMAN ENSG00000160691|SHC1 ENSG00000160710|ADAR ENSG00000161664|ASB16 ENSG00000162896|PIGR ENSG00000166866|MYO1A ENSG00000166925|TSC22D4 ENSG00000167544|NP\_057574.2 ENSG00000169184|NM\_002430.2 ENSG00000179036|VAMP2 ENSG00000183048|SLC25A10 ENSG00000184205|TSPYL2 ENSG00000186185|NP\_001073912.1 ENSG00000198794|SCAMP5 ENSG00000204283|NP\_001001685.1 ENSG00000204310|AGPAT1 ENSG00000203318|TXNDC4 ENSG00000204048|UBR2 ENSG000002053254|CHES1 ENSG00000088053|GP6 ENSG00000089053|ANAPC5 ENSG00000099940|SNAP29 ENSG00000111224|PARP11 ENSG00000113492|AGXT2 ENSG00000117139|JARID1B ENSG00000121057|AKAP1 ENSG00000131747|P11388-2 ENSG00000137251|TINAG ENSG00000144959|AADACL1 ENSG00000154305|MIA3 ENSG00000157341|Q8ND77\_HUMAN ENSG00000158023|WDR66 ENSG00000173273|TNKS ENSG00000185710|Q8ND77\_HUMAN ENSG00000185710|Q8ND77\_HUMAN ENSG00000185710|Q8ND77\_HUMAN ENSG00000185710|Q8ND77\_HUMAN

CCCTGG ENSG000000068323|TFE3 ENSG00000090020|SLC9A1 ENSG00000099998|GGTLA1 ENSG00000100226|GTPBP1 ENSG00000101216|GMEB2 ENSG00000101460|MAP1LC3A ENSG00000103222|ABCC1 ENSG00000108342|CSF3 ENSG00000111642|CHD4 ENSG00000114867|EIF4G1 ENSG00000119383|PPP2R4 ENSG00000123360|PDE1B ENSG00000124302|CHST8 ENSG00000124782|RREB1 ENSG00000130052|STARDB ENSG00000132563|REEP2 ENSG00000132821|C22orf102 ENSG00000136878|USP20 ENSG00000139579|OBF2B2 ENSG00000141959|PFKL ENSG00000142327|RNPEPL1 ENSG00000142552|RN3 ENSG00000143590|EFNA3 ENSG00000146205|TMEM16G ENSG00000155256|ZFYVE27 ENSG00000155366|RHOC ENSG00000162065|TBC1D24 ENSG00000165886|UBTD1 ENSG00000167778|SPRYD3 ENSG00000168422|KLHL30 ENSG00000169682|LAT ENSG00000171159|C9orf16 ENSG00000171680|PLEKHG5 ENSG00000172757|CFL1 ENSG00000173153|ESRRA ENSG00000173546|CSPG4 ENSG00000175920|DOK7 ENSG00000177408|PLAC2 ENSG00000178372|CALML5 ENSG00000178821|TMEM52 ENSG00000182257|C22orf26 ENSG00000198792|C22orf5 ENSG00000198853|RUSC2 ENSG00000204586|Q6PJF7\_HUMAN ENSG00000205913|Q6ZUC4\_HUMAN ENSG00000000005|TNMD ENSG00000064042|NP\_055803.1 ENSG00000095637|SORBS1 ENSG00000106692|FCMD ENSG00000131080|EDA2R ENSG00000132825|PPP1R3D ENSG00000138185|ENTPD1 ENSG00000152213|ARL11 ENSG00000157456|CNB2 ENSG00000166405|RIC3 ENSG00000181322|TXNDC6 ENSG00000183145|DSCR6 ENSG00000197412|Q8N8G3\_HUMAN ENSG00000198478|SH3BGR12 ENSG00000198734|F5 ENSG00000204766|Q6ZUH0\_HUMAN

CCCGAAC ENSG000000032389|TSSC1 ENSG00000100068|LRP5L ENSG00000107281|NPDC1 ENSG00000116544|DLGAP3 ENSG00000117407|ARTN ENSG00000126214|KLC1 ENSG00000128254|C22orf24 ENSG00000128564|VGF ENSG00000135702|CHST5 ENSG00000147168|IL2RG ENSG00000158292|GPR153 ENSG00000165671|NLSG1 ENSG00000169951|ZNF764 ENSG00000170906|NDUFA3 ENSG00000171102|OBP2B ENSG00000173404|INSM1 ENSG00000173581|CDC106 ENSG00000177674|AGTRAP ENSG00000179364|PACS2 ENSG00000179862|CITED4 ENSG00000181763|APR2\_HUMAN ENSG00000182352|C17orf77 ENSG00000182814|NP\_001013670.3 ENSG00000184302|SIX6 ENSG00000186837|C21orf119 ENSG00000196415|PRTN3 ENSG00000204273|HLA-DOB ENSG00000205677|HBM ENSG00000206177|HBM ENSG00000206328|MCM10 ENSG00000206328|MCM10 ENSG00000100592|DAAM1 ENSG00000104331|IMPAD1 ENSG00000109099|PMP22 ENSG00000111328|CDK2AP1 ENSG00000115474|KCNJ13 ENSG00000116783|PFGT ENSG00000120262|C6orf97 ENSG00000130224|LRCH2 ENSG00000137831|UACA ENSG00000138185|ENTPD1 ENSG00000138755|CXCL9 ENSG00000152518|ZFP36L2 ENSG00000153250|RBMS1 ENSG00000162631|NTNG1 ENSG00000166411|IDH3A ENSG00000176971|NP\_976249.1 ENSG00000184588|PDE4B ENSG00000205150|FAM92A3

CCCGAAG ENSG00000004777|SNX26 ENSG00000040487|PQLC2 ENSG00000065717|TLE2 ENSG00000072778|ACADVL ENSG00000073536|NLE1 ENSG00000089159|PXN ENSG00000089327|FXDY5 ENSG00000104903|LYL1 ENSG00000108641|NP\_056496.1 ENSG00000130182|ZSCAN10 ENSG00000132671|SSTR4 ENSG00000148671|C10orf116 ENSG00000161996|WDR90 ENSG00000162231|NXF1 ENSG00000162783|IER5 ENSG00000168010|ATG16L2 ENSG00000169575|VPREB1 ENSG00000171331|Q6ZV91\_HUMAN ENSG00000177673|NP\_689827.1 ENSG00000179304|TMM2\_HUMAN ENSG00000180875|GREM2 ENSG00000184674|GSTT1 ENSG00000187664|TM6SF2 ENSG00000188011|NP\_776182.2 ENSG00000188055|Q6ZVX1\_HUMAN ENSG00000204159|NM\_133374.2 ENSG00000006459|JHDM1D ENSG00000039537|C6 ENSG00000104112|SCG3 ENSG00000111670|GNPTAB ENSG00000111906|HDDC2 ENSG00000112182|BACH2 ENSG00000121390|PSPC1 ENSG00000124224|PPP4R1L ENSG00000128050|PAICS ENSG00000136155|SCEL ENSG00000138095|LRPPRC ENSG00000143799|PARP1 ENSG00000144668|ITGA9 ENSG00000145826|LECT2 ENSG00000156968|MPV17L ENSG00000160294|MCM3AP ENSG00000168032|ENTPD3 ENSG00000177599|ZNF491 ENSG00000183022|NR\_003148.2 ENSG00000184474|Q6FP4\_HUMAN ENSG00000196963|PCDHB16 ENSG00000197510|C21orf116 ENSG00000197930|ERO1L ENSG00000198903|Q6ZV72\_HUMAN

CCCGAGG ENSG000000042832|TG ENSG00000070404|FSTL3 ENSG00000072818|CENTB1 ENSG00000089060|SLC24A6 ENSG00000099385|BCL7C ENSG00000099834|MUPCDH ENSG00000103197|TSC2 ENSG00000104899|AMH ENSG00000107187|LHX3 ENSG00000115266|APC2 ENSG00000125695|STRAD\_HUMAN ENSG00000130748|TMEM160 ENSG00000136286|MYO1G ENSG00000136830|FAM129B ENSG00000138964|PARVG ENSG00000143845|ETNK2 ENSG00000143851|PTPN7 ENSG00000160882|CYP11B1 ENSG00000162073|PQR4 ENSG00000169710|FASN ENSG00000170498|KISS1 ENSG00000170616|SCRT1 ENSG00000171608|PIK3CD ENSG00000171954|NP\_775754.1 ENSG00000175315|CST6 ENSG00000177674|AGTRAP ENSG00000178932|Q8N811\_HUMAN ENSG00000182289|Q9H9U3\_HUMAN ENSG00000183018|SPNS2 ENSG00000185176|AQF12B ENSG00000196694|Q6UXP9\_HUMAN ENSG00000205912|Q6ZTG5\_HUMAN ENSG00000206028|Q6ZVA3\_HUMAN ENSG00000050438|SLC4A8 ENSG00000126226|PCID2 ENSG00000132386|SERPINF1 ENSG00000135775|COG2 ENSG00000139117|CPNE8 ENSG00000141127|PRPSAP2 ENSG00000145041|Q8TBD9\_HUMAN ENSG00000146872|TLK2 ENSG00000147421|HMBX1 ENSG00000154493|C10orf90 ENSG00000155729|KCTD18 ENSG00000157869|RAB28 ENSG00000164398|ACSL6 ENSG00000165502|RPL36AL ENSG00000167380|ZNF226 ENSG00000168502|KIAA0802 ENSG00000171316|CHD7 ENSG00000178636|Q8N7N2\_HUMAN ENSG00000185842|Q4VXG5\_HUMAN ENSG00000196141|NP\_056350.1 ENSG00000204518|AADACL4 ENSG00000205325|NP\_001001684.1 ENSG0000033987|BEST2 ENSG00000064961|HMG20B ENSG00000076928|ARHGEF1 ENSG00000099977|DDT ENSG000000106565|TMEM176B ENSG00000116685|KIAA2013 ENSG00000123136|DDX39 ENSG00000132470|ITGB4 ENSG00000168775|KCRU\_HUMAN ENSG00000172046|USP19 ENSG00000172458|IL17D ENSG00000173163|COMMD1 ENSG00000178372|CALML5 ENSG00000183963|SMTN ENSG00000203930|Q5JPA2\_HUMAN ENSG00000204268|Q6ZVY1\_HUMAN ENSG00000204392|LSM2 ENSG00000204474|Q5JQD4\_HUMAN ENSG00000204999|LOC388588 ENSG00000094755|GABRP ENSG00000102974|CTCF ENSG00000106829|TLE4 ENSG00000112146|FBXO9 ENSG00000122778|Q9HMC3\_HUMAN ENSG00000140416|TPM1 ENSG00000140941|MAP1LC3B ENSG00000140945|CDH13 ENSG00000140968|IRF8 ENSG00000143183|TMCO1 ENSG00000146648|EGFR ENSG00000150459|SAP18 ENSG00000152076|CCDC74B ENSG00000157181|C1orf27 ENSG00000162976|PQLC3 ENSG00000163249|CCNYL1 ENSG00000175604|Q96M66\_HUMAN ENSG00000175857|C5orf29 ENSG00000177508|IRX3 ENSG00000185305|ARL15 ENSG00000185344|ATP6V0A2 ENSG00000187231|SESTD1 ENSG00000198382|UVRAG ENSG00000203995|ZYG11A

CCCGCCC ENSG00000005206|PSL1\_HUMAN ENSG00000008441|NFIX ENSG00000011332|DPF1 ENSG000000207644|INSRR ENSG000000339650|PNKP ENSG00000053501|USE1\_HUMAN ENSG00000074317|SNCB ENSG00000099817|POLR2E ENSG00000099875|MKMK2 ENSG00000100429|HDAC10 ENSG00000101986|ABCD1 ENSG00000105327|BBC3 ENSG00000105605|CACNG7 ENSG00000105662|CRTCL ENSG00000107859|PITX3 ENSG00000114631|PODXL2 ENSG00000116544|DLGAP3 ENSG00000118046|STK11 ENSG00000121653|MAPK8IP1 ENSG00000124449|IRGC ENSG00000125741|OPA3 ENSG00000127533|F2RL3 ENSG00000127585|FBXL16 ENSG00000129152|MYO1I ENSG00000130592|LSP1 ENSG00000130635|COL5A1 ENSG00000130669|PAPK ENSG00000131094|C1QL1 ENSG00000132510|JMJ3 ENSG00000136931|NR5A1 ENSG00000139722|VPS37B ENSG00000141837|CACNA1A ENSG00000141905|NFIC ENSG00000143862|ARL8A ENSG00000143867|OSR1 ENSG00000148343|FAM73B ENSG00000149609|C20orf144 ENSG00000157087|ATP2B2 ENSG00000158062|UBXD5 ENSG00000158104|HPD ENSG00000158545|NP\_653205.2 ENSG00000160216|AGPAT3 ENSG00000160650|Q96H20\_HUMAN ENSG00000160796|NBEAL2 ENSG00000161013|MGAT4B ENSG00000161642|ZNF385 ENSG00000161914|ZNF653 ENSG00000162227|TAF6L ENSG00000166831|RBPM2 ENSG00000167491|GATAD2A ENSG00000167645|YIF1B ENSG00000167985|C11orf79 ENSG00000169509|CRCT1 ENSG00000170049|KCNAB3 ENSG00000170616|SCRT1 ENSG00000171954|NP\_775754.1 ENSG00000172137|CALB2 ENSG00000172232|AZU1 ENSG00000173020|ADRBK1 ENSG00000173673|HES3 ENSG00000175662|TOM1L2 ENSG00000176658|MYO1D ENSG00000176884|GRIN1 ENSG00000177380|PPFIA3 ENSG00000178531|CTNN1 ENSG00000178685|PARP10 ENSG00000179403|VWA1 ENSG00000180096|SEPT1 ENSG00000181977|PYY2 ENSG00000183248|Q9HGK5\_HUMAN ENSG00000183971|NPW ENSG00000185236|RAB11B ENSG00000186702|NP\_079360.1 ENSG00000186897|C1QL4 ENSG00000187699|Q8NBX4\_HUMAN ENSG00000196972|Q86V52\_HUMAN ENSG00000204673|AKT1S1 ENSG00000008196|TFAP2B ENSG00000013810|TACC3 ENSG00000100425|BRD1 ENSG00000111341|MGF ENSG00000116157|GPX7 ENSG00000125691|RPL23 ENSG00000138722|MRRN1 ENSG00000153976|HS3ST3A1 ENSG00000154493|C10orf90 ENSG00000157429|ZNF19 ENSG00000159055|C21orf45 ENSG00000165566|FAM123A ENSG00000165868|HSPA12A ENSG00000183309|ZNF623

CCCGCCG ENSG000000048666|ST7 ENSG000000069011|PITX1 ENSG00000099822|HCN2 ENSG00000099664|MIF ENSG00000105664|COMP ENSG00000118137|APOA1 ENSG00000124140|SLC12A5 ENSG00000124422|USP22 ENSG00000125912|NCLN ENSG00000129965|INS ENSG00000130584|ZBTB46 ENSG00000136286|MYO1G ENSG00000136878|USP20 ENSG00000137166|FOXP4 ENSG00000141873|SLC39A3 ENSG00000142453|CARM1 ENSG00000142544|ATPBD3 ENSG00000148343|FAM73B ENSG00000155254|MARVELD1 ENSG00000160284|C21orf56 ENSG00000161013|MGAT4B ENSG00000161055|SCGB3A1 ENSG00000162068|NTN2L ENSG00000163126|ANKRD23 ENSG00000167468|GPX4 ENSG00000170616|SCRT1 ENSG00000172803|NP\_689973.2 ENSG00000176884|GRIN1 ENSG00000182351|CRIP1 ENSG00000183596|TIM16\_HUMAN ENSG00000183600|Q66K37\_HUMAN ENSG00000184068|Q8N8F0\_HUMAN ENSG00000185340|GAS2L1 ENSG00000196892|Q9P1D2\_HUMAN ENSG00000205205|C17orf51 ENSG000000037965|HOXC8 ENSG00000066926|FECH ENSG00000102931|ARL2BP ENSG00000108100|CCNY ENSG00000113391|C5orf21 ENSG00000115761|NOL10 ENSG00000121570|DPPA4 ENSG00000129007|CALML4 ENSG00000132640|BTBD3 ENSG00000136273|HUS1\_HUMAN ENSG00000140941|MAP1LC3B ENSG00000140948|ZCCHC14 ENSG00000141655|TNFRSF11A ENSG00000143384|MCL1 ENSG00000161326|DUSP14 ENSG00000167555|ZNF534 ENSG00000170871|K0232\_HUMAN ENSG00000183145|DSCR6 ENSG00000188613|NANOS1 ENSG00000204442|NP\_001073865.1

CCCGCCT ENSG00000006025|OSBP1 ENSG00000008516|MMP25 ENSG00000011332|DPF1 ENSG00000077984|CST7 ENSG00000079313|REXO1 ENSG00000090006|LTBP4 ENSG00000092929|UNC13D ENSG00000099385|BCL7C ENSG00000099797|GPSN2 ENSG00000099814|KIAA0284 ENSG00000100599|RIN3 ENSG00000101181|GTPBP5 ENSG00000101181|GTPBP5 ENSG00000103257|SLC7A5 ENSG00000105711|SCN1B ENSG00000109610|SOD3 ENSG00000115844|DLX2 ENSG00000120896|SORBS3 ENSG00000126583|PRKCG ENSG00000130311|C19orf58 ENSG00000130479|MAP1S ENSG00000130590|SAMD10 ENSG00000132510|JMJ3 ENSG00000136573|BLK ENSG00000138092|CENPO ENSG00000142227|EMP3 ENSG00000153406|NMRAL1 ENSG00000163913|IFT122 ENSG00000166333|ILK ENSG00000167705|RILP ENSG00000168763|CNM3 ENSG00000170684|ZNF342 ENSG00000172940|SLC22A13 ENSG00000182841|Q9NSQ0\_HUMAN ENSG00000183248|Q9HGK5\_HUMAN ENSG00000185730|ZNF696 ENSG00000188011|NP\_776182.2 ENSG00000196070|Q6ZVY7\_HUMAN ENSG00000198113|C9orf167 ENSG00000198355|PIM3 ENSG00000204314|PRRT1 ENSG00000204582|Q6ZR28\_HUMAN ENSG00000205138|NP\_001036096.1 ENSG00000205745|Q7LMF4\_HUMAN ENSG00000018408|WWTR1 ENSG000000037965|HOXC8 ENSG00000044335|ZIC2 ENSG00000044115|CTNNA1 ENSG00000073754|CD5L ENSG00000090686|USP48 ENSG00000103194|USP10 ENSG00000105810|CDK6 ENSG00000111432|FZD10 ENSG00000114421|CHRIS1 ENSG00000125538|IL1B ENSG00000125686|PPARBP ENSG00000125686|PPARBP ENSG00000133687|TMTC1 ENSG00000143919|C2orf34 ENSG00000144021|CIAO1 ENSG00000147381|MAGEA4 ENSG00000168502|KIAA0802 ENSG00000177283|FZD8 ENSG00000179981|TSHZ1 ENSG00000184388|RBM32B ENSG00000185278|ZBTB37 ENSG00000186288|RBM32A ENSG00000204680|Q5VYG3\_HUMAN ENSG00000100429|HDAC10 ENSG00000105376|ICAM5 ENSG00000108669|PSCD1 ENSG00000109906|ZBTB16 ENSG00000112320|SOBP ENSG00000005007|UPF1 ENSG00000065268|WDR18 ENSG00000087085|ACHE ENSG00000100429|HDAC10 ENSG00000105376|ICAM5 ENSG00000108669|PSCD1 ENSG00000130332|LSM7 ENSG00000137825|ITPKA ENSG00000142002|DPP9 ENSG0000014631|PODXL2 ENSG00000117013|KCNQ4 ENSG00000122971|ACADS ENSG00000124140|SLC12A5 ENSG00000126067|PSME2 ENSG00000130332|LSM7 ENSG00000137825|ITPKA ENSG00000142002|DPP9 ENSG00000148362|C9orf142 ENSG00000148826|NKX6-2 ENSG00000157933|AKI1 ENSG00000158008|EXTL1 ENSG00000159184|HOXB13 ENSG00000160877|BTBD14B ENSG00000164715|LMTK2 ENSG00000168925|CTRB1 ENSG00000174672|BRSK2

|         |                                                                                                                                                                                                        |                                                                                                                                                                                                            |                                                                                                                                                                                                           |                                                                                                                                                                                                                  |                                                                                                                                                                                                                                                                          |                                                                                                                                                                                                                                                                                            |                                                                                                                                                                                                                                                                                                                    |                                                                                                                                                                                                                                                                                                                  |
|---------|--------------------------------------------------------------------------------------------------------------------------------------------------------------------------------------------------------|------------------------------------------------------------------------------------------------------------------------------------------------------------------------------------------------------------|-----------------------------------------------------------------------------------------------------------------------------------------------------------------------------------------------------------|------------------------------------------------------------------------------------------------------------------------------------------------------------------------------------------------------------------|--------------------------------------------------------------------------------------------------------------------------------------------------------------------------------------------------------------------------------------------------------------------------|--------------------------------------------------------------------------------------------------------------------------------------------------------------------------------------------------------------------------------------------------------------------------------------------|--------------------------------------------------------------------------------------------------------------------------------------------------------------------------------------------------------------------------------------------------------------------------------------------------------------------|------------------------------------------------------------------------------------------------------------------------------------------------------------------------------------------------------------------------------------------------------------------------------------------------------------------|
|         | ENSG00000186526 CYP4F8<br>ENSG00000147883 CDKN2B                                                                                                                                                       | ENSG00000186827 TNFRSF4<br>ENSG00000154556 SORBS2                                                                                                                                                          | ENSG00000187796 CARD9<br>ENSG00000159216 RUNX1                                                                                                                                                            | ENSG00000198569 SLC34A3<br>ENSG00000167555 ZNF534                                                                                                                                                                | ENSG00000040341 STAU2<br>ENSG00000169604 ANTXR1                                                                                                                                                                                                                          | ENSG00000099725 PRKY<br>ENSG00000170419 VSTM2                                                                                                                                                                                                                                              | ENSG00000100426 ZBED4<br>ENSG00000183780 SLC35F3                                                                                                                                                                                                                                                                   | ENSG00000118579 MED28<br>ENSG00000183943 PRKX                                                                                                                                                                                                                                                                    |
| CCCGCGC | ENSG00000007080 CCDC124<br>ENSG00000130340 SNX9<br>ENSG00000169682 LAT<br>ENSG00000120705 ETF1<br>ENSG00000196208 NP_683701.2                                                                          | ENSG00000008441 NFIX<br>ENSG00000131188 PRR7<br>ENSG00000180096 SEPT1<br>ENSG00000127152 BCL11B                                                                                                            | ENSG00000087085 ACHE<br>ENSG000001332027 PMT<br>ENSG00000182048 XR_018915.1<br>ENSG00000147883 CDKN2B                                                                                                     | ENSG00000089505 CMTM1<br>ENSG00000133246 PRAM1<br>ENSG00000185105 XR_015885.1<br>ENSG00000153317 DDEF1                                                                                                           | ENSG00000101222 C20orf28<br>ENSG00000141968 VAV1<br>ENSG00000188185 Q6ZQP8_HUMAN<br>ENSG00000164442 CITED2                                                                                                                                                               | ENSG00000104522 TSTA3<br>ENSG00000176108 CHMP6<br>ENSG00000203908 NP_001017361.1<br>ENSG00000121067 SPOP<br>ENSG00000146842 NP_116231.2                                                                                                                                                    | ENSG00000127663 JMJD2B<br>ENSG00000168056 LTBP3<br>ENSG00000196293 DUX4<br>ENSG00000180957 PITPNB                                                                                                                                                                                                                  | ENSG00000128709 HOXD9<br>ENSG00000169592 CCDC95<br>ENSG00000091831 ESR1<br>ENSG00000181588 RKHD1                                                                                                                                                                                                                 |
| CCCGTAT | ENSG00000006744 ELAC2<br>ENSG00000127418 FGFR1L<br>ENSG00000162396 PARS2<br>ENSG00000185479 KRT6B<br>ENSG00000035681 NSMAF<br>ENSG00000132664 POLR3F<br>ENSG00000163554 SPTA1<br>ENSG00000198477 SUHW2 | ENSG000000095752 IL11<br>ENSG00000130558 OLFMT1<br>ENSG00000162591 MEGF6<br>ENSG00000188931 C1orf192<br>ENSG00000049319 SRD5A2<br>ENSG00000136098 NEK3<br>ENSG00000164287 CDC20B<br>ENSG00000198795 ZNF521 | ENSG00000100298 APOBEC3H<br>ENSG00000133937 GSC<br>ENSG00000167861 C1orf28<br>ENSG00000198013 PNMA6A<br>ENSG00000102384 CENPI<br>ENSG00000136156 ITM2B<br>ENSG00000168348 INSM2<br>ENSG00000198825 INPP5F | ENSG00000107331 ABCA2<br>ENSG00000138100 TRIM54<br>ENSG00000175356 SCUBE2<br>ENSG00000198466 ZNF587<br>ENSG00000120333 MRPS14<br>ENSG00000144713 RPL32<br>ENSG00000168681 Q9H762_HUMAN<br>ENSG00000198825 INPP5F | ENSG00000115756 HPCAL1<br>ENSG00000140365 COMMD4<br>ENSG00000176108 CHMP6<br>ENSG00000203908 NP_001017361.1<br>ENSG00000121067 SPOP<br>ENSG00000146842 NP_116231.2<br>ENSG00000172733 PURG<br>ENSG00000102120 EEF1A2                                                     | ENSG00000115758 ODC1<br>ENSG00000150990 DHX37<br>ENSG00000176718 C5orf26<br>ENSG00000204095 Q6ZV88_HUMAN<br>ENSG00000121594 CD80<br>ENSG00000146872 TLK2<br>ENSG00000172733 PURG<br>ENSG00000102119 EMD                                                                                    | ENSG00000121446 RGS1L<br>ENSG00000157950 SSX2_HUMAN<br>ENSG00000176945 MUC20<br>ENSG00000204368 SSX7<br>ENSG00000130779 CLIP1<br>ENSG00000153214 TMEM87B<br>ENSG00000176654 NANOGP1<br>ENSG00000108947 EFNB3                                                                                                       | ENSG00000125503 PPP1R12C<br>ENSG00000162174 ASRGL1<br>ENSG00000183072 NKX2-5<br>ENSG00000204648 SSX9<br>ENSG00000131238 PPT1<br>ENSG00000157551 KCNJ15<br>ENSG00000183434 TFDP3<br>ENSG00000126768 TIMM17B                                                                                                       |
| CCCGTTT | ENSG000000020577 SAMD4A<br>ENSG00000131188 PRR7<br>ENSG00000169894 MUC3A<br>ENSG00000189319 FAM53B<br>ENSG00000120563 LYZL1<br>ENSG00000178502 KLHL11                                                  | ENSG00000030582 GRN<br>ENSG00000135116 HRK<br>ENSG00000170579 DLGAP1<br>ENSG00000198535 NP_997205.1<br>ENSG00000120729 MYO7<br>ENSG00000187193 MTLX                                                        | ENSG00000084636 COL16A1<br>ENSG00000143258 USP21<br>ENSG00000171403 KPT9<br>ENSG00000006837 CDKL3<br>ENSG00000142676 RPL11                                                                                | ENSG000000084734 GCKR<br>ENSG00000146215 CRIP3<br>ENSG00000177666 PNPLA2<br>ENSG00000006837 CDKL3<br>ENSG00000151033 LYZL2                                                                                       | ENSG00000149681 VAV1<br>ENSG00000188185 Q6ZQP8_HUMAN<br>ENSG00000164442 CITED2<br>ENSG00000102120 EEF1A2<br>ENSG00000148357 HMGN2<br>ENSG00000181250 MYADM1<br>ENSG00000072803 FBXW11<br>ENSG00000151033 LYZL2                                                           | ENSG00000204095 Q6ZV88_HUMAN<br>ENSG00000121594 CD80<br>ENSG00000146872 TLK2<br>ENSG00000172733 PURG<br>ENSG00000102119 EMD<br>ENSG00000157617 C21orf25<br>ENSG00000171475 WIPF2<br>ENSG00000183186 KIAA1957<br>ENSG00000105398 SULT2A1<br>ENSG00000158775 C9orf138                        | ENSG00000168056 LTBP3<br>ENSG00000196293 DUX4<br>ENSG00000180957 PITPNB<br>ENSG00000204368 SSX7<br>ENSG00000130779 CLIP1<br>ENSG00000153214 TMEM87B<br>ENSG00000176654 NANOGP1<br>ENSG00000108947 EFNB3<br>ENSG00000166426 CRABP1<br>ENSG00000183248 Q9H6K5_HUMAN<br>ENSG00000113648 H2AFY<br>ENSG00000164347 GFM2 | ENSG00000169592 CCDC95<br>ENSG00000091831 ESR1<br>ENSG00000181588 RKHD1<br>ENSG00000204648 SSX9<br>ENSG00000131238 PPT1<br>ENSG00000157551 KCNJ15<br>ENSG00000183434 TFDP3<br>ENSG00000126768 TIMM17B<br>ENSG00000168070 NP_001032302.1<br>ENSG00000189129 PLAC9<br>ENSG00000120156 TEK<br>ENSG00000178105 DDX10 |
| CCCTAAT | ENSG00000005243 COPZ2<br>ENSG00000143614 GATAD2B<br>ENSG00000167701 GPT<br>ENSG00000188186 NP_001008396.1<br>ENSG00000112096 SOD2<br>ENSG00000157680 DGKI                                              | ENSG00000100413 POLR3H<br>ENSG00000144591 GMPPA<br>ENSG00000168703 WFDC12<br>ENSG000002023879 GDI1<br>ENSG00000118965 WDR35<br>ENSG00000166598 HSP90B1                                                     | ENSG00000102030 ARD1A<br>ENSG00000144677 CTDSPL<br>ENSG00000169910 ASL<br>ENSG00000142676 RPL11<br>ENSG00000197780 TAF13<br>ENSG00000102030 ARD1A                                                         | ENSG00000107554 DNMBP<br>ENSG00000159164 SV2A<br>ENSG00000170271 C5orf4<br>ENSG00000205126 NP_001027025.1<br>ENSG00000128655 PDE11A<br>ENSG00000169446 TMEM32                                                    | ENSG00000147883 CDKN2B<br>ENSG00000170271 C5orf4<br>ENSG00000205126 NP_001027025.1<br>ENSG00000128655 PDE11A<br>ENSG00000170006 TMEM154<br>ENSG00000090238 YPEL3<br>ENSG00000147804 SLC39A4<br>ENSG00000158869 FCER1G<br>ENSG00000166224 SGPL1<br>ENSG00000180891 CUEDC1 | ENSG00000135902 CHNRD<br>ENSG00000160949 NFKBIL2<br>ENSG00000171475 WIPF2<br>ENSG00000205335 GLYCAM1<br>ENSG00000004809 SLC22A16<br>ENSG00000172023 REG1B<br>ENSG00000102870 YPEL3<br>ENSG00000147804 SLC39A4<br>ENSG00000158869 FCER1G<br>ENSG00000166224 SGPL1<br>ENSG00000180891 CUEDC1 | ENSG00000136378 ADAMTS7<br>ENSG00000166136 NDUFB8<br>ENSG00000171475 WIPF2<br>ENSG00000205335 GLYCAM1<br>ENSG00000004809 SLC22A16<br>ENSG00000172023 REG1B<br>ENSG00000102870 YPEL3<br>ENSG00000147804 SLC39A4<br>ENSG00000158869 FCER1G<br>ENSG00000166224 SGPL1<br>ENSG00000180891 CUEDC1                        | ENSG00000138698 RAP1GDS1<br>ENSG00000166257 SCN3B<br>ENSG00000174282 ZBTB4<br>ENSG000000025293 PHF20<br>ENSG00000095574 IKZF5<br>ENSG00000157005 SST<br>ENSG00000172071 EIF2AK3<br>ENSG00000177640 CASC2                                                                                                         |
| CCCTATA | ENSG00000006282 SPATA20<br>ENSG00000107874 CUEDC2<br>ENSG00000180992 MRPL14<br>ENSG00000112096 SOD2<br>ENSG00000149050 ZNF214<br>ENSG00000187446 CHP1_HUMAN                                            | ENSG00000041880 PARP3<br>ENSG00000110171 TRIM3<br>ENSG00000187097 ENTPD5<br>ENSG00000119414 PPP6C<br>ENSG00000156869 FRS1<br>ENSG00000187446 CHP1_HUMAN                                                    | ENSG00000110375 UPK2<br>ENSG00000196668 NP_997319.1<br>ENSG00000132718 SYT11<br>ENSG00000162222 TTC9C<br>ENSG00000196597 MORN2                                                                            | ENSG00000088833 NSFL1C<br>ENSG00000134460 IL2RA<br>ENSG00000196668 NP_997319.1<br>ENSG00000132718 SYT11<br>ENSG00000162222 TTC9C<br>ENSG00000196597 MORN2                                                        | ENSG00000147883 CDKN2B<br>ENSG00000170271 C5orf4<br>ENSG00000205126 NP_001027025.1<br>ENSG00000128655 PDE11A<br>ENSG00000170006 TMEM154<br>ENSG00000090238 YPEL3<br>ENSG00000147804 SLC39A4<br>ENSG00000158869 FCER1G<br>ENSG00000166224 SGPL1<br>ENSG00000180891 CUEDC1 | ENSG00000135902 CHNRD<br>ENSG00000160949 NFKBIL2<br>ENSG00000171475 WIPF2<br>ENSG00000205335 GLYCAM1<br>ENSG00000004809 SLC22A16<br>ENSG00000172023 REG1B<br>ENSG00000102870 YPEL3<br>ENSG00000147804 SLC39A4<br>ENSG00000158869 FCER1G<br>ENSG00000166224 SGPL1<br>ENSG00000180891 CUEDC1 | ENSG00000136378 ADAMTS7<br>ENSG00000166136 NDUFB8<br>ENSG00000171475 WIPF2<br>ENSG00000205335 GLYCAM1<br>ENSG00000004809 SLC22A16<br>ENSG00000172023 REG1B<br>ENSG00000102870 YPEL3<br>ENSG00000147804 SLC39A4<br>ENSG00000158869 FCER1G<br>ENSG00000166224 SGPL1<br>ENSG00000180891 CUEDC1                        | ENSG00000138698 RAP1GDS1<br>ENSG00000166257 SCN3B<br>ENSG00000174282 ZBTB4<br>ENSG000000025293 PHF20<br>ENSG00000095574 IKZF5<br>ENSG00000157005 SST<br>ENSG00000172071 EIF2AK3<br>ENSG00000177640 CASC2                                                                                                         |
| CCCTATG | ENSG00000111412 C12orf49<br>ENSG00000138092 CENPO<br>ENSG00000188859 FAM78B<br>ENSG00000106415 GLCC11<br>ENSG00000164904 ALDH7A1<br>ENSG00000204136 GGTA1                                              | ENSG00000116254 CHD5<br>ENSG00000141622 C18orf23<br>ENSG00000196189 SEMA4A<br>ENSG00000115947 ORC4L<br>ENSG00000171311 EXOSC1<br>ENSG00000204201 Q49A40_HUMAN                                              | ENSG00000117013 KCNQ4<br>ENSG00000148795 CYP17A1<br>ENSG00000197353 LYPD2<br>ENSG00000136451 VEZF1<br>ENSG00000171465 ACOT4<br>ENSG00000205765 NP_787117.3                                                | ENSG00000173731 SNIP_HUMAN<br>ENSG00000165444 DLGAP3<br>ENSG00000140107 C14orf68<br>ENSG00000160949 NFKBIL2<br>ENSG00000176101 SSNA1                                                                             | ENSG000000067191 CACNB1<br>ENSG00000127220 ABHD8<br>ENSG00000147753 TTY7_HUMAN<br>ENSG00000161091 C19orf28<br>ENSG00000176302 FOXRI<br>ENSG00000162407 PPAP2B<br>ENSG00000177994 NP_775757.1                                                                             | ENSG00000100139 MICALL1<br>ENSG00000129816 NR_001538.1<br>ENSG00000147753 TTY7_HUMAN<br>ENSG00000161570 CC15<br>ENSG00000182809 CRIP2<br>ENSG00000163749 NP_001036249.1<br>ENSG00000178944 NP_998773.1                                                                                     | ENSG00000103266 STUB1<br>ENSG00000166224 SGPL1<br>ENSG00000180891 CUEDC1<br>ENSG00000156150 ALX3<br>ENSG00000166886 NAB2<br>ENSG00000188056 TREM1<br>ENSG00000133131 MORC4<br>ENSG00000164308 NP_071745.1                                                                                                          | ENSG00000105131 ABHD9<br>ENSG00000180891 CUEDC1<br>ENSG00000110723 EXPH5<br>ENSG00000148943 LIN7C<br>ENSG00000181433 SAGE1<br>ENSG0000011252 SH2B3<br>ENSG00000137100 DCTN3<br>ENSG00000176454 AGPAT7<br>ENSG00000101052 IFT52<br>ENSG00000157214 STEAP2<br>ENSG00000197054 ZNF763                               |
| CCCTCAC | ENSG00000105248 CCDC94<br>ENSG00000133247 SUV420H2<br>ENSG00000159164 SV2A<br>ENSG00000175344 BANF1<br>ENSG00000203997 Q6ZKR8_HUMAN                                                                    | ENSG00000105325 FZR1<br>ENSG00000139613 SMARCC2<br>ENSG00000159733 ZFYVE28<br>ENSG00000175416 CLTB<br>ENSG00000202976 C14orf133                                                                            | ENSG00000109111 SUPT6H<br>ENSG00000140107 C14orf68<br>ENSG00000160949 NFKBIL2<br>ENSG00000176101 SSNA1<br>ENSG000000022976 C14orf133                                                                      | ENSG00000173731 SNIP_HUMAN<br>ENSG00000165444 DLGAP3<br>ENSG00000140107 C14orf68<br>ENSG00000160949 NFKBIL2<br>ENSG00000176101 SSNA1<br>ENSG000000022976 C14orf133                                               | ENSG00000103496 STX4<br>ENSG00000124733 MEA1<br>ENSG00000166135 HIF1AN<br>ENSG0000030419 IKZF2<br>ENSG00000144445 NP_689732.2<br>ENSG00000177497 XCorf42                                                                                                                 | ENSG00000105641 SLC5A5<br>ENSG00000131471 AOC3<br>ENSG00000166135 HIF1AN<br>ENSG0000030419 IKZF2<br>ENSG00000144445 NP_689732.2<br>ENSG00000177497 XCorf42                                                                                                                                 | ENSG00000106331 PAX4<br>ENSG00000133983 TTC9<br>ENSG00000170100 Q96MU6-2<br>ENSG00000085449 WDFY1<br>ENSG00000152495 CAMK4<br>ENSG00000197054 ZNF763                                                                                                                                                               | ENSG00000111252 SH2B3<br>ENSG00000137100 DCTN3<br>ENSG00000176454 AGPAT7<br>ENSG00000101052 IFT52<br>ENSG00000157214 STEAP2<br>ENSG00000197054 ZNF763                                                                                                                                                            |
| CCCTCCA | ENSG00000104812 GYS1<br>ENSG00000127472 PLA2G5<br>ENSG00000142606 MMEL1<br>ENSG00000167797 CDK2AP2<br>ENSG00000197555 STPAL1L                                                                          | ENSG00000105066 FIZ1<br>ENSG00000129911 KLF16<br>ENSG00000142784 WDTCT1<br>ENSG00000169738 DCXR<br>ENSG00000205073 NP_001003808.1                                                                          | ENSG00000105281 SLC1A5<br>ENSG00000130787 HIP1R<br>ENSG00000143819 EPHX1<br>ENSG00000179168 GGN<br>ENSG000000008197 TFAP2D                                                                                | ENSG00000113070 HBBEGF<br>ENSG00000132563 REEP2<br>ENSG00000159423 ALDH4A1<br>ENSG00000181577 NP_694978.2<br>ENSG0000000086712 CXorf15                                                                           | ENSG00000103496 STX4<br>ENSG00000124733 MEA1<br>ENSG00000166135 HIF1AN<br>ENSG0000030419 IKZF2<br>ENSG00000144445 NP_689732.2<br>ENSG00000177497 XCorf42                                                                                                                 | ENSG00000106331 PAX4<br>ENSG00000133983 TTC9<br>ENSG00000170100 Q96MU6-2<br>ENSG00000085449 WDFY1<br>ENSG00000152495 CAMK4<br>ENSG00000197054 ZNF763                                                                                                                                       | ENSG00000110656 TMEM176B<br>ENSG00000136250 AOAH<br>ENSG00000170100 Q96MU6-2<br>ENSG00000085449 WDFY1<br>ENSG00000152495 CAMK4<br>ENSG00000197054 ZNF763                                                                                                                                                           | ENSG00000111252 SH2B3<br>ENSG00000137100 DCTN3<br>ENSG00000176454 AGPAT7<br>ENSG00000101052 IFT52<br>ENSG00000157214 STEAP2<br>ENSG00000197054 ZNF763                                                                                                                                                            |
| CCCTCCC | ENSG00000182287 AP1S2<br>ENSG00000008441 NFIX<br>ENSG00000099875 MKNK2<br>ENSG00000108352 RAPGEFL1<br>ENSG00000124249 KCNK15                                                                           | ENSG000001182457 NR_002323.1<br>ENSG0000011332 DPF1<br>ENSG00000101188 NTRSL<br>ENSG00000111737 RAB35<br>ENSG00000126461 NP_067051.1                                                                       | ENSG00000102001 CACNA1F<br>ENSG00000112033 PPARD<br>ENSG00000156515 HK1<br>ENSG00000167615 LENG8<br>ENSG00000175164 ABO                                                                                   | ENSG00000075461 CACNG4<br>ENSG00000104967 NOVA2<br>ENSG00000114349 GNAT1<br>ENSG00000135472 FAIM2<br>ENSG00000157300 HTPA<br>ENSG00000167680 SEMA6B                                                              | ENSG00000090372 STRN4<br>ENSG00000105204 DYRK1B<br>ENSG00000116604 MEF2D<br>ENSG00000136295 TTYH3<br>ENSG00000159423 ALDH4A1<br>ENSG00000181577 NP_694978.2                                                                                                              | ENSG00000090372 STRN4<br>ENSG00000105204 DYRK1B<br>ENSG00000116604 MEF2D<br>ENSG00000136295 TTYH3<br>ENSG00000159423 ALDH4A1<br>ENSG00000181577 NP_694978.2                                                                                                                                | ENSG00000106367 AP1S1<br>ENSG00000123384 LRP1<br>ENSG00000117984 CTSD<br>ENSG00000137166 FOXPA<br>ENSG00000160994 CCDC105<br>ENSG00000167850 VPS37C                                                                                                                                                                | ENSG00000099869 IGF2AS<br>ENSG00000108292 MLLT6<br>ENSG00000123933 MXD4<br>ENSG00000140511 HAPLN3<br>ENSG00000164889 SLC4A2<br>ENSG00000168490 PHYHIP                                                                                                                                                            |
| CCCTCCT | ENSG00000105701 FKBP8<br>ENSG00000130175 PRKCSH<br>ENSG00000139880 CDH24<br>ENSG00000165271 NOL6<br>ENSG00000174938 SEZ6L2                                                                             | ENSG00000105723 GSK3A<br>ENSG00000130723 KIAA0515<br>ENSG00000141576 RNF157<br>ENSG00000167487 KLHL26<br>ENSG00000175115 PACS1                                                                             | ENSG00000131435 PDLIM4<br>ENSG00000142798 HESPG2<br>ENSG00000167566 KIAA1602<br>ENSG00000175416 CLTB                                                                                                      | ENSG00000108509 CAMTA2<br>ENSG00000131446 MGAT1<br>ENSG00000148704 VAX1<br>ENSG00000167566 KIAA1602<br>ENSG00000175866 BAIAP2                                                                                    | ENSG00000089159 PXN<br>ENSG00000110076 NRXN2<br>ENSG00000131477 RAMP2<br>ENSG00000148814 LRRC27<br>ENSG00000157300 HTPA<br>ENSG00000167680 SEMA6B                                                                                                                        | ENSG00000090372 STRN4<br>ENSG00000105204 DYRK1B<br>ENSG00000116604 MEF2D<br>ENSG00000136295 TTYH3<br>ENSG00000159423 ALDH4A1<br>ENSG00000181577 NP_694978.2                                                                                                                                | ENSG00000106367 AP1S1<br>ENSG00000123384 LRP1<br>ENSG00000117984 CTSD<br>ENSG00000137166 FOXPA<br>ENSG00000160994 CCDC105<br>ENSG00000167850 VPS37C                                                                                                                                                                | ENSG00000099869 IGF2AS<br>ENSG00000108292 MLLT6<br>ENSG00000123933 MXD4<br>ENSG00000140511 HAPLN3<br>ENSG00000164889 SLC4A2<br>ENSG00000168490 PHYHIP                                                                                                                                                            |
| CCCTGAC | ENSG00000124334 IL9R<br>ENSG00000171790 SLFN1L<br>ENSG00000187741 FNRA2<br>ENSG00000066379 ZNRD1<br>ENSG00000125148 MT2A                                                                               | ENSG00000126012 JARID1C<br>ENSG00000172232 AZU1<br>ENSG00000196092 PAX5<br>ENSG00000067798 NAV3<br>ENSG00000132207 SULT1A3                                                                                 | ENSG00000131435 PDLIM4<br>ENSG00000142798 HESPG2<br>ENSG00000167566 KIAA1602<br>ENSG00000175416 CLTB<br>ENSG00000205073 NP_001003808.1                                                                    | ENSG00000108509 CAMTA2<br>ENSG00000131446 MGAT1<br>ENSG00000148704 VAX1<br>ENSG00000167566 KIAA1602<br>ENSG00000175866 BAIAP2                                                                                    | ENSG00000089159 PXN<br>ENSG00000110076 NRXN2<br>ENSG00000131477 RAMP2<br>ENSG00000148814 LRRC27<br>ENSG00000157300 HTPA<br>ENSG00000167680 SEMA6B                                                                                                                        | ENSG00000090372 STRN4<br>ENSG00000105204 DYRK1B<br>ENSG00000116604 MEF2D<br>ENSG00000136295 TTYH3<br>ENSG00000159423 ALDH4A1<br>ENSG00000181577 NP_694978.2                                                                                                                                | ENSG00000106367 AP1S1<br>ENSG00000123384 LRP1<br>ENSG00000117984 CTSD<br>ENSG00000137166 FOXPA<br>ENSG00000160994 CCDC105<br>ENSG00000167850 VPS37C                                                                                                                                                                | ENSG00000099869 IGF2AS<br>ENSG00000108292 MLLT6<br>ENSG00000123933 MXD4<br>ENSG00000140511 HAPLN3<br>ENSG00000164889 SLC4A2<br>ENSG00000168490 PHYHIP                                                                                                                                                            |
| CCCTGAG | ENSG00000005073 HOXA11<br>ENSG00000103507 BCKDK<br>ENSG00000141552 ANAPC11                                                                                                                             | ENSG000000044012 GUCA2B<br>ENSG00000105270 CLIP3<br>ENSG00000144031 ANKRD53                                                                                                                                | ENSG00000061337 LZTS                                                                                                                                                                                      |                                                                                                                                                                                                                  |                                                                                                                                                                                                                                                                          |                                                                                                                                                                                                                                                                                            |                                                                                                                                                                                                                                                                                                                    |                                                                                                                                                                                                                                                                                                                  |

ENSG00000163485|ADORA1 ENSG00000164638|SLC29A4 ENSG00000166387|PPFIBP2 ENSG00000171847|FAM90A1 ENSG00000175785|PRIMA1 ENSG00000178243|C9orf62 ENSG00000181830|SLC35C1 ENSG00000185069|KRT76  
ENSG00000185504|C17orf70 ENSG00000186642|PDE2A ENSG00000188807|NP\_001010866.1 ENSG00000196814|FAM125B ENSG00000204582|Q6ZR28\_HUMAN ENSG00000205223|Q6ZUG9\_HUMAN ENSG00000205996|FAM90A10 ENSG00000205998|FAM90A9  
ENSG00000206000|FAM90A18 ENSG00000206002|FAM90A3 ENSG00000206005|FAM90A8 ENSG00000206008|XR\_015341.1 ENSG00000206023|FAM90A7 ENSG00000206083|ZNF409 ENSG00000211445|GPX3 ENSG0000013375|PGM3  
ENSG00000171909|MYO3B ENSG00000101544|ZNF508 ENSG00000105968|H2AFV ENSG00000112115|IL17A ENSG00000115109|EPB41L5 ENSG00000116704|SLC35D1 ENSG00000132781|MUTYH ENSG00000133606|MKRN1  
ENSG00000135823|STX6 ENSG00000136709|WDR33 ENSG00000140265|ZSCAN29 ENSG00000140937|CDH11 ENSG00000143190|POU2F1 ENSG00000143476|DTL ENSG00000148053|NTRK2 ENSG00000163600|ICOS  
ENSG00000164122|ASB5 ENSG00000165566|FAM123A ENSG00000165891|EFZ7 ENSG00000169224|C1orf150 ENSG00000169906|S100G ENSG00000170153|RNF150 ENSG00000172901|LAEVR\_HUMAN ENSG00000177182|NP\_775790.1  
ENSG00000180354|C7orf41 ENSG00000185630|PBX1 ENSG00000185842|Q4VXG5\_HUMAN ENSG00000188996|HUS1 ENSG00000189067|LITAF  
CCCTGCC ENSG00000006118|TMEM132A ENSG00000006607|FARP2 ENSG000000061938|TNK2 ENSG000000068323|TFE3 ENSG000000068971|PPP2R5B ENSG000000087152|ATXN7L3 ENSG000000089327|FXYS5 ENSG00000009020|SLC9A1  
ENSG000000092929|UNC13D ENSG00000102100|SLC35A2 ENSG00000103089|FA2H ENSG00000103154|EFCBP2 ENSG00000103222|ABCC1 ENSG00000103249|CLCN7 ENSG00000103855|CD276 ENSG00000104833|TUBB4  
ENSG00000104886|PLEKHJ1 ENSG00000105519|CAPS ENSG00000108852|MPF2 ENSG00000110711|AIP ENSG00000115155|OTOF ENSG00000115286|NDUFS7 ENSG00000121653|MAPK8IP1 ENSG00000122515|ZMIZ2  
ENSG00000123384|LRP1 ENSG00000123989|CHSS2\_HUMAN ENSG00000126461|NP\_067051.1 ENSG00000128310|GALR3 ENSG00000130054|TMEM28 ENSG00000130731|NP\_001035251.1 ENSG00000132535|DLG4 ENSG00000132688|NES  
ENSG00000135632|SMYD5 ENSG00000138834|MAPK8IP3 ENSG00000142303|ADAMTS10 ENSG00000142453|CARM1 ENSG00000142634|EFHD2 ENSG00000143816|WNT9A ENSG00000148341|SH3GLB2 ENSG00000149131|SERPING1  
ENSG00000149452|SLC22A8 ENSG00000153956|CACNA2D1 ENSG00000159176|CSRFP1 ENSG00000159685|CHCHD6 ENSG00000160282|FTCD ENSG00000160325|C9orf7 ENSG00000160799|CCDC12 ENSG00000160877|BTBD14B  
ENSG00000160932|LY6E ENSG00000164007|CLDN19 ENSG00000164509|IL31RA ENSG00000164620|C5orf16 ENSG00000165171|WBSCR27 ENSG00000165548|TMEM63C ENSG00000165886|UBTD1 ENSG00000166341|DCHS1  
ENSG00000167965|NM\_022372.3 ENSG00000172236|TPSB2 ENSG00000173805|HAP1 ENSG00000174903|RAB1B ENSG00000177030|DEAF1 ENSG00000177045|SIX5 ENSG00000183570|PCBP3 ENSG00000184640|SEPT9  
ENSG00000185214|KLHL22 ENSG00000188660|C21orf125 ENSG00000188807|NP\_001010866.1 ENSG00000197272|IL27 ENSG00000197587|DMBX1 ENSG00000197891|SLC22A12 ENSG00000198576|ARC ENSG00000198753|PLXNB3  
ENSG00000198911|SREBF2 ENSG000000067177|PHKA1 ENSG000000072315|TRPC5 ENSG00000105677|TMEM147 ENSG00000105699|LSR ENSG00000105974|CAV1 ENSG00000106477|TSGA14 ENSG00000117222|RBBP5  
ENSG00000118007|STAG1 ENSG00000120262|C6orf97 ENSG00000134258|VTCN1 ENSG00000134259|NGFB ENSG00000141298|SSH2 ENSG00000143190|POU2F1 ENSG00000147010|SH3KBP1 ENSG00000150337|FCGR1A  
ENSG00000152213|ARL11 ENSG00000160049|DFFA ENSG00000163638|ADAMTS9 ENSG00000164265|SCGB3A2 ENSG00000171488|LRRRC8C ENSG00000172765|TMCC1 ENSG00000181562|FAM12A ENSG00000184083|FAM120C  
ENSG00000184588|PDE4B ENSG00000197969|VPS13A ENSG00000204209|DAXX  
CCCTTTG ENSG000000083845|RPS5 ENSG000000091704|CPA1 ENSG00000100083|GGA1 ENSG00000110274|CEP164 ENSG00000118900|UBN1 ENSG00000119685|TLLL5\_HUMAN ENSG00000129244|ATP1B2 ENSG00000141741|C17orf37  
ENSG00000149294|NCAM1 ENSG00000150281|CTF1 ENSG00000160190|SLC37A1 ENSG00000161395|PERLD1 ENSG00000161395|PERLD1 ENSG00000161395|PERLD1 ENSG00000161395|PERLD1 ENSG00000161395|PERLD1  
ENSG00000176303|Q8N822\_HUMAN ENSG00000186501|C1orf160 ENSG00000186642|PDE2A ENSG00000187147|C1orf164 ENSG00000188643|S100A16 ENSG00000189182|KRT77 ENSG00000198884|Q6UXP0\_HUMAN ENSG00000085276|EVI1  
ENSG00000109654|TRIM2 ENSG00000117289|TXNP1 ENSG00000120820|GLT8D2 ENSG00000122877|EGR2 ENSG00000125827|TXNDC13 ENSG00000126261|SAE2 ENSG00000128595|CALU ENSG00000135250|SRPK2  
ENSG00000135655|USP15 ENSG00000137876|C15orf15 ENSG00000138190|EXOC6 ENSG00000138615|CILP ENSG00000144674|IGFBP3 ENSG00000151792|CTSO ENSG00000152242|C18orf25 ENSG00000163389|KTELC1  
ENSG00000168672|FAM84B ENSG00000174032|SLC25A30 ENSG00000174099|MSRB3 ENSG00000178163|NP\_444270.2 ENSG00000182107|TMEM30B ENSG00000186017|ZNF566 ENSG00000205608|Q6ZQP9\_HUMAN  
CCGAAA ENSG00000115596|WNT6 ENSG00000115657|ABCB6 ENSG00000123815|ADCX4 ENSG00000129757|CDKN1C ENSG00000136717|BIN1 ENSG00000137331|IER3 ENSG00000139890|REM2 ENSG00000141002|TCF25  
ENSG00000159496|RGDSR\_HUMAN ENSG00000160867|FGFR4 ENSG00000161249|DMKN ENSG00000162931|TRIM17 ENSG00000163701|IL17RE ENSG00000167244|IGF2 ENSG00000167468|GPX4 ENSG00000167702|KIFC2  
ENSG00000167800|TBX10 ENSG00000172878|NP\_954697.1 ENSG00000175892|Q8NAT4\_HUMAN ENSG00000176387|HSD11B2 ENSG00000177757|FAM87B ENSG00000179262|RAD23A ENSG00000184709|LRRRC26 ENSG00000187140|FOXD3  
ENSG00000197847|SLC22A20 ENSG00000198881|ASB12 ENSG00000204625|HCG9 ENSG00000206062|Q4GOT4\_HUMAN ENSG00000103707|MTFMT ENSG00000106591|MRPL32 ENSG00000111046|MYF6 ENSG00000111713|GYS2  
ENSG00000128039|NP\_078868.1 ENSG00000133958|K1AA1409 ENSG00000138646|HERC5 ENSG00000139168|ZCRR1 ENSG00000139668|WDFY2 ENSG00000141127|PRPSAP2 ENSG00000154518|ATP5G3 ENSG00000156219|ART3  
ENSG00000171032|ZNF350 ENSG00000171759|PAH ENSG00000185061|NP\_001072996.1 ENSG00000187969|ZCCHC13 ENSG00000188001|FAM79B ENSG00000197580|BCDO2 ENSG00000197780|TAF13 ENSG00000198515|CNGA1  
CCGATAA ENSG00000007264|MATK ENSG000000011009|LYPLA2 ENSG000000072135|PTPN18 ENSG00000100084|HIRA ENSG00000105193|RPS16 ENSG00000108352|RAPGEFL1 ENSG00000124116|WFD3 ENSG00000124444|ZNF576  
ENSG00000128242|GAL3ST1 ENSG00000134917|Q5FWF1\_HUMAN ENSG00000135406|PRPH ENSG00000100084|HIRA ENSG00000105193|RPS16 ENSG00000108352|RAPGEFL1 ENSG00000124116|WFD3 ENSG00000124444|ZNF576  
ENSG00000162552|WNT4 ENSG00000164621|DAMS\_HUMAN ENSG00000167778|SPRYD3 ENSG00000177741|Q96BN7\_HUMAN ENSG00000185739|SRL ENSG00000185801|YV007\_HUMAN ENSG00000189385|Q8N814\_HUMAN ENSG00000196187|TMEM63A  
ENSG00000203708|Q6ZU99\_HUMAN ENSG000000204487|LTB ENSG000000005339|CREBBP ENSG000000023572|GLRX2 ENSG00000049245|VAMP3 ENSG000000065600|C1orf75 ENSG00000082397|EPB41L3 ENSG00000107099|DOCK8  
ENSG00000112299|VNN1 ENSG00000115896|PLCL1 ENSG00000123240|OPTN ENSG00000131016|AKAP12 ENSG00000133103|COG6 ENSG00000135048|TMEM2 ENSG00000135776|ABCB10 ENSG00000139132|FGD4  
ENSG00000162521|RBBP4 ENSG00000162664|ZNF326 ENSG00000165061|ZMAT4 ENSG00000170946|DPH4 ENSG00000171566|PLRG1 ENSG00000174016|FAM46D ENSG00000183722|LHFP ENSG00000204026|Q6ZSD2\_HUMAN  
ENSG00000205462|Q6ZWC8\_HUMAN  
CCGCACA ENSG000000022567|SLC45A4 ENSG00000064393|HIPK2 ENSG00000108219|TSPAN14 ENSG00000111245|MYL2 ENSG00000117242|DDOST ENSG00000129194|SOX15 ENSG00000130731|NP\_001035251.1 ENSG00000142327|RNPEPL1  
ENSG00000143537|ADAM15 ENSG00000149295|DRD2 ENSG00000154768|C17orf50 ENSG00000157881|PANK4 ENSG00000167106|FAM102A ENSG00000167815|PRDX2 ENSG00000167964|RAE26 ENSG00000171722|C1orf111  
ENSG00000172531|PMP1CA ENSG00000178922|HYI ENSG00000181284|TMEM102 ENSG00000183093|MRPL12 ENSG00000185803|GPR172A ENSG00000204269|Q6ZVM2\_HUMAN ENSG00000206152|Q6ZV52\_HUMAN ENSG00000206158|Q6ZVG4\_HUMAN  
ENSG00000062716|TMEM49 ENSG00000078399|HOXA9 ENSG00000079691|LRRRC16 ENSG00000087128|TMPRSS11E ENSG00000087510|TFAP2C ENSG00000115761|NOL10 ENSG00000123612|ACVR1C ENSG00000128050|PAICS  
ENSG00000132664|POLR3F ENSG00000134086|VHL ENSG00000136273|HUS1\_HUMAN ENSG00000153904|DDAH1 ENSG00000155792|DEPDC6 ENSG00000169902|TPST1 ENSG00000173487|LOC729884 ENSG00000174004|LRRRC33  
ENSG00000177738|Q8N4J7\_HUMAN ENSG00000180787|ZFP3 ENSG00000181588|RKHD1 ENSG00000182901|RG57 ENSG000001823067|IGSF5 ENSG00000185742|NP\_997528.1 ENSG00000189043|NDUFA4 ENSG00000196505|GDAP2  
ENSG00000198939|ZFP2  
CCGCACT ENSG00000007255|TRAPP6A ENSG00000064270|ATP2C2 ENSG00000089116|LHX5 ENSG00000106266|SNX8 ENSG00000127533|F2RL3 ENSG00000130414|NDUFA10 ENSG00000140986|RPL3L ENSG00000143126|CELSR2  
ENSG00000157782|CABP1 ENSG00000166428|PLD4 ENSG00000171853|TTC15 ENSG00000175463|TBC1D10C ENSG00000178950|GAK ENSG00000179921|GPBAR1 ENSG00000188566|NDOR1 ENSG00000189171|S100A13  
ENSG00000196767|POU3F4 ENSG00000048828|FAM120A ENSG00000113645|WMC1 ENSG00000114030|KPN1 ENSG00000117525|F3 ENSG00000119544|GALNT12 ENSG00000119844|AFTPH ENSG00000121964|GTDC1  
ENSG00000127152|BCL11B ENSG00000129515|SNX6 ENSG00000139970|RTN1 ENSG00000146425|DYNLT1 ENSG00000147588|PMP2 ENSG00000164430|C6orf150 ENSG00000165685|C12orf59 ENSG00000168234|C18orf17  
ENSG00000169554|ZEB2 ENSG00000178604|NP\_001034973.1 ENSG00000179300|ZCCHC5 ENSG00000183649|Q8NFX8\_HUMAN ENSG00000203667|FAM36A ENSG00000205608|Q6ZQP9\_HUMAN  
CCGCATC ENSG000000053108|FSTL4 ENSG00000099994|SUSD2 ENSG00000103148|C16orf35 ENSG00000104957|CCDC130 ENSG00000107130|FREQ ENSG00000109625|CPZ ENSG00000116685|K1AA2013  
ENSG00000122375|OPN4 ENSG00000138101|DTNB ENSG00000161914|ZNF653 ENSG00000161996|WDR90 ENSG00000167619|TMEM145 ENSG00000168775|KCRU\_HUMAN ENSG00000180096|SEPT1 ENSG00000189401|OTUD6A  
ENSG00000196739|COL2A1 ENSG00000204159|NM\_133374.2 ENSG000000204392|LSM2 ENSG00000204474|Q5JQD4\_HUMAN ENSG00000205015|Q6ZNV2\_HUMAN ENSG00000040341|STAU2 ENSG00000101384|JAG1 ENSG00000102974|CTCF  
ENSG00000103381|NP\_060810.1 ENSG00000106025|TSPAN12 ENSG00000106829|TLE4 ENSG00000108984|MAP2K6 ENSG00000115310|RTN4 ENSG00000118513|MYB ENSG00000126550|HTN1 ENSG00000130856|ZNF236  
ENSG00000131951|LRRRC9 ENSG00000140945|CDH13 ENSG00000140968|IRF8 ENSG00000145431|PDGFC ENSG00000152076|CCDC74B ENSG00000158966|CACHD1 ENSG00000164465|DCBLD1 ENSG00000169953|HSFY2  
ENSG00000172201|ID4 ENSG00000172468|HSFY1 ENSG00000173334|TRIB1 ENSG00000173698|GPR64 ENSG00000175604|Q96M66\_HUMAN ENSG00000182670|TTC3 ENSG00000185344|ATP6V0A2 ENSG00000196387|ZNF140  
ENSG00000197172|MAGEA3 ENSG00000204261|PSMB9 ENSG000000205649|HTN3  
CCGCATG ENSG00000039987|BEST2 ENSG00000064961|HMG20B ENSG00000065057|NTHL1 ENSG00000076928|ARHGEF1 ENSG00000087152|ATXN7L3 ENSG00000092841|MYL6 ENSG00000099977|DDT ENSG00000101152|DNAJC5  
ENSG00000101161|PRPF6 ENSG00000106565|TMEM176B ENSG00000115041|KCNIP3 ENSG00000123136|DDX39 ENSG00000131398|KCNC3 ENSG00000132470|ITGB4 ENSG00000176120|Q9BSY8\_HUMAN ENSG00000176845|METRNL  
ENSG00000181763|APR2\_HUMAN ENSG00000183963|SMTN ENSG000000204999|LOC388588 ENSG00000205414|Q6ZVL8\_HUMAN ENSG00000008277|ADAM22 ENSG00000085433|WDR47 ENSG00000100418|NP\_05619.1  
ENSG00000104904|OAZ1 ENSG00000108395|TRIM37 ENSG00000109220|CHIC2 ENSG00000109339|MAPK10 ENSG00000112146|FBXO9 ENSG00000115568|ZNF142 ENSG00000121871|SLITRK3 ENSG00000129515|SNX6  
ENSG00000137080|IFNA21 ENSG00000140416|TPM1 ENSG00000144191|CNGA3 ENSG00000146276|GABRR1 ENSG00000159753|NP\_001013860.1 ENSG00000162976|PQLC3 ENSG00000174373|GARNL1 ENSG00000176871|WSB2  
ENSG00000178741|COX5A ENSG00000183696|UPP1 ENSG00000187231|SESTD1 ENSG00000197639|MKRNP5 ENSG00000203995|ZYG11A ENSG00000205423|TMEM188  
CCGCCAG ENSG000000011347|SYT7 ENSG000000051523|CYBA ENSG00000101222|C20orf28 ENSG00000104946|TBC1D17 ENSG00000105662|CRCT1 ENSG00000109625|CPZ ENSG00000112139|MDGA1 ENSG00000115155|OTOF  
ENSG00000119703|C14orf140 ENSG00000122490|PQLC1 ENSG00000136286|MYO11 ENSG00000140995|NP\_997397.1 ENSG00000153303|FRMD1 ENSG00000162650|ATXN7L2 ENSG00000167703|SLC43A2 ENSG00000169059|VCX3A  
ENSG00000169696|ASPSCR1 ENSG00000177504|VCX2 ENSG00000178602|OTOS ENSG00000180539|C9orf139 ENSG00000181378|CCDC108 ENSG00000182583|VCX ENSG00000185669|SNAI3 ENSG00000185739|SRL  
ENSG00000188055|Q6ZVX1\_HUMAN ENSG00000196363|WDR5 ENSG00000196808|Q96NJ4\_HUMAN ENSG00000198373|WWP2 ENSG00000198598|MMP17 ENSG00000198879|SFBMT2 ENSG00000205528|Q6ZRE2\_HUMAN ENSG00000205642|VCX3B  
ENSG00000205795|CYS1 ENSG00000083622|SOHLH2 ENSG00000100425|BRD1 ENSG00000100505|TRIM9 ENSG00000107623|GDF10 ENSG00000111859|NEDD9 ENSG00000118515|SGK ENSG00000135763|K1AA0133  
ENSG00000136872|ALDOB ENSG00000141448|GATA6 ENSG00000144285|SCN1A ENSG00000148426|C10orf47 ENSG00000156395|SORCS3 ENSG00000171517|EDG7 ENSG00000173926|MARCH3 ENSG00000176165|FOXG1B  
ENSG00000179299|NSUN7 ENSG00000183283|DAZAP2 ENSG00000185056|Q569G3\_HUMAN ENSG00000197110|IL28B ENSG00000206075|SERPINB5  
CCGCCCC ENSG00000008441|NFI3 ENSG000000074317|SNCB ENSG00000085741|WNT11 ENSG00000099822|HCN2 ENSG00000100075|SLC25A1 ENSG00000101200|AVP ENSG00000101986|ABCD1  
ENSG00000105327|BBC3 ENSG00000105409|ATPIA3 ENSG00000105605|CACNG7 ENSG00000105647|PIK3R2 ENSG00000105662|CRCT1 ENSG00000105963|CENTA1 ENSG00000112320|SOBP ENSG00000114631|PODXL2  
ENSG00000115507|OTX1 ENSG00000116544|DLGAP3 ENSG00000118137|APOA1 ENSG00000120057|SFRP5 ENSG00000124449|IRGC ENSG00000127585|FBXL16 ENSG00000129455|KLB8 ENSG00000130165|ELOF1  
ENSG00000130592|LSP1 ENSG00000135097|MSI1 ENSG00000137166|FOXP4 ENSG00000139722|VPS37B ENSG00000142303|ADAMTS10 ENSG00000142327|RNPEPL1 ENSG00000142453|CARM1 ENSG00000155254|MARVELD1  
ENSG00000157306|THTPA ENSG00000157933|SKI ENSG00000158062|UBXD5 ENSG00000158545|NP\_653205.2 ENSG00000160685|ZBTB7B ENSG00000160796|NBEAL2 ENSG00000161265|U2AF1L4 ENSG00000161642|ZNF385  
ENSG00000161914|ZNF653 ENSG00000162227|TAF6L ENSG00000162981|FAM84A ENSG00000164917|K0415\_HUMAN ENSG00000167110|GOLGA2 ENSG00000167491|GATAD2A ENSG00000167645|YIF1B ENSG00000167770|OTUB1  
ENSG00000168754|NP\_057574.2 ENSG00000170616|SCTR1 ENSG00000171540|OTF ENSG00000171954|NP\_775754.1 ENSG00000172830|SSH3 ENSG00000173673|HES3 ENSG00000177380|PFF1A3 ENSG00000178531|CTNN1  
ENSG00000179755|XR\_017798.1 ENSG00000183092|BEGIN\_HUMAN ENSG00000183114|FAM43B ENSG00000183248|Q9H6K5\_HUMAN ENSG00000183734|ASCL2 ENSG00000185112|FAM43A ENSG00000185883|ATP6V0C ENSG00000186111|PIP5K1C  
ENSG00000186702|NP\_079360.1 ENSG00000186897|C1QL4 ENSG00000188486|H2AFX ENSG00000188816|HMX2 ENSG00000196153|Q8NAB5\_HUMAN ENSG00000196293|DUX4 ENSG00000196972|Q86V52\_HUMAN ENSG00000204673|AKT1S1  
ENSG0000013810|TACC3 ENSG00000044115|CTNNA1 ENSG00000111341|MPG ENSG00000116176|TPSG1 ENSG00000120149|MSX2 ENSG00000125691|RPL23 ENSG00000128714|HOXD13 ENSG00000131068|DEFB118  
ENSG00000132965|ALOX5AP ENSG00000136261|BZW2 ENSG00000138722|MMRN1 ENSG00000153976|HS3T3A1 ENSG00000154493|C10orf90 ENSG00000164736|SOX17 ENSG00000166523|CLEC4E ENSG00000206029|QOP633\_HUMAN  
CCGCCGA ENSG00000060566|CREB3L3 ENSG00000067182|TNFRSF1A ENSG00000070614|NDST1 ENSG00000072609|CHFR ENSG00000092758|COL9A3 ENSG00000099860|GADD45B ENSG00000105519|CAPS ENSG00000105717|PBX4  
ENSG00000110057|UNC93B1 ENSG00000112699|GMD5 ENSG00000114353|GNAI2 ENSG00000120055|C10orf95 ENSG00000122304|Q6ZMM0\_HUMAN ENSG00000124391|IL17C ENSG00000125844|RRBP1 ENSG00000127585|FBXL16  
ENSG00000129038|LOXL1 ENSG00000137825|ITPKA ENSG00000138136|LBX1 ENSG00000139193|CD27 ENSG00000140545|MFGE8 ENSG00000144834|TAGLN3 ENSG00000157782|CABP1 ENSG00000167508|MVD  
ENSG00000167645|YIF1B ENSG00000168056|LTBP3 ENSG00000173156|RHOD ENSG00000182351|CRP1 ENSG00000182809|CRIP2 ENSG00000183734|ASCL2 ENSG00000198454|Q5SQ13\_HUMAN  
ENSG00000115761|NOL10 ENSG00000129007|CALML4 ENSG00000143384|MCL1 ENSG00000183145|DSCR6 ENSG00000185742|NP\_997528.1 ENSG00000204884|Q6ZVI2\_HUMAN  
CCGCCGT ENSG000000005001|PRLS22 ENSG00000068024|HDAC4 ENSG00000072110|ACTN1 ENSG00000074800|ENO1 ENSG00000099822|HCN2 ENSG00000103197|TSC2 ENSG00000126231|PROZ ENSG00000130643|DRD

ENSG00000162032|SPSB3 ENSG00000163956|LRPAP1 ENSG00000166228|PCBD1 ENSG00000170579|DLGAP1 ENSG00000179304|TMM29\_HUMAN ENSG00000180089|TMEM86B ENSG00000184068|Q8N8F0\_HUMAN ENSG00000185338|SOCS1  
ENSG00000186197|ENO1P ENSG00000187514|PTMA ENSG00000196374|HIST1H2BM ENSG0000011523|CEP68 ENSG00000191157|WDR7 ENSG00000104643|MTMR9 ENSG00000106617|PRKAG2 ENSG00000113391|C5orf21  
ENSG00000120458|C11orf61 ENSG00000121570|DPPA4 ENSG00000133672|ACTR3B ENSG00000138829|FBN2 ENSG00000159216|RUNX1 ENSG00000161326|DUSP14 ENSG00000167555|ZNF534 ENSG00000169862|CTNND2  
ENSG00000182090|C14orf25 ENSG00000188613|NANOS1 ENSG00000204442|NP\_001073865.1 ENSG00000204680|Q5VY33\_HUMAN  
ENSG00000054148|PHPT1 ENSG00000079616|KIF22 ENSG00000099385|BCL7C ENSG00000105404|RABAC1 ENSG00000106236|NPXT2 ENSG00000109610|SOD3 ENSG00000127585|FBXL16 ENSG00000130177|CDC16  
ENSG00000133315|LRP16\_HUMAN ENSG00000140274|DUOXA2 ENSG00000141150|RASL10B ENSG00000142039|CCDC97 ENSG00000147123|NDUFB11 ENSG00000156466|GDPF ENSG00000163913|IFT122 ENSG00000167705|RILP  
ENSG00000170684|ZNF342 ENSG00000171490|RSL1D1 ENSG00000173011|Q86TJ2\_HUMAN ENSG00000182013|NP\_060685.2 ENSG00000185585|OLFML2A ENSG00000185674|LYG2\_HUMAN ENSG00000188011|NP\_776182.2 ENSG00000196878|LAMB3  
ENSG00000198664|Q9BTR0\_HUMAN ENSG00000204314|PRRT1 ENSG00000206031|Q6ZT66\_HUMAN ENSG00000004766|CCDC132 ENSG00000043355|ZIC2 ENSG00000044115|CTNNA1 ENSG00000078399|HOXA9 ENSG00000090686|USP48  
ENSG00000099256|PRTFDC1 ENSG00000103342|GSPT1 ENSG00000104537|ANXA13 ENSG00000106603|C7orf44 ENSG00000114948|ADAM23 ENSG00000118515|SGK ENSG00000120937|NPPB ENSG00000124812|CRISP1  
ENSG00000125686|PPARBP ENSG00000126070|EIF2C3 ENSG00000134323|MYCN ENSG00000136938|ANP32B ENSG00000137274|BPHL ENSG00000144021|CIAO1 ENSG00000147381|MAGEA4 ENSG00000148057|C9orf103  
ENSG00000151514|SALL3 ENSG00000153310|FAM49B ENSG00000172667|ZMAT3 ENSG00000174628|IQCK ENSG00000175104|TRAF6 ENSG00000176974|SHMT1 ENSG00000184388|RBM32B ENSG00000186288|RBM32A

CCGCGAT ENSG00000002330|BAD ENSG000000011600|TYROBP ENSG00000065526|SPEN ENSG00000072864|NDE1 ENSG00000090316|MAEA ENSG00000100429|HDAC10 ENSG00000104856|RELB ENSG00000105737|GRK5  
ENSG00000112514|CUTA ENSG00000135749|PCNXL2 ENSG00000137193|PIM1 ENSG00000141568|FOXK2 ENSG00000144119|C1QL2 ENSG00000148396|KIAA0310 ENSG00000165553|NGB ENSG00000166689|PLEKHA7  
ENSG00000167191|GPRC5B ENSG00000171962|LRRC48 ENSG00000178093|TSSK6 ENSG00000178467|EGLX\_HUMAN ENSG00000185504|C17orf70 ENSG00000188026|NP\_847884.1 ENSG00000188681|Q8TEH8\_HUMAN ENSG00000197435|HIST3H2BB  
ENSG00000197562|RAB40C ENSG00000206197|NP\_001013723.1 ENSG00000162384|C1orf123 ENSG00000181449|SOX2  
ENSG00000008441|NFIX ENSG00000020577|SAMD4A ENSG00000070182|SPTB ENSG00000100577|GSTZ1 ENSG00000101200|AVP ENSG00000101438|SLC32A1 ENSG00000105193|RPS16 ENSG00000105219|CNTD2  
ENSG00000105613|MAST1 ENSG00000110057|UNC93B1 ENSG00000112041|TULP1 ENSG00000116039|ATP6V1B1 ENSG00000129657|SEC14L1 ENSG00000142606|MMEL1 ENSG00000142920|ADC ENSG00000148704|VAX1  
ENSG00000149925|ALDOA ENSG00000149927|DOC2A ENSG00000153060|TEKT5 ENSG00000157778|C7orf48 ENSG00000161021|LTC4S ENSG00000169122|FAM110B ENSG00000171427|NM\_145293  
ENSG00000175634|RPS6KB2 ENSG00000176170|SPHK1 ENSG00000178786|Q8N2B6\_HUMAN ENSG00000179044|EXOC3L ENSG00000179242|CDH4 ENSG00000183128|FAM26A ENSG00000187479|Q7Z7L8\_HUMAN ENSG0000031003|C5orf5  
ENSG00000083857|FAT ENSG00000109689|STM12 ENSG00000121477|CHD6 ENSG00000134986|C5orf13 ENSG00000146477|SLC22A3 ENSG00000147416|ATP6V1B2 ENSG00000153923|CLCA3 ENSG00000163684|RPP14  
ENSG00000172201|ID4 ENSG00000173917|HOXB2 ENSG000001018177|RAP2B ENSG00000185742|NP\_997528.1 ENSG00000196371|FUT4 ENSG00000204884|Q6ZVI2\_HUMAN ENSG00000205740|Q6ZNO2\_HUMAN  
ENSG00000205835|LOC647309

CCGCGGT ENSG00000064489|MEF2B ENSG00000071889|FAM3A ENSG00000087085|ACHE ENSG00000091073|DTX2 ENSG00000105649|RAB3A ENSG00000106263|EIF3S9 ENSG00000116544|DLGAP3 ENSG00000129646|QRICH2  
ENSG00000135116|HRK ENSG00000135625|EGR4 ENSG00000136930|PSMB7 ENSG00000137825|ITPKA ENSG00000146966|DENND2A ENSG00000159674|SPON2 ENSG00000160284|C21orf56 ENSG00000166851|PLK1  
ENSG00000174365|NR\_003239.1 ENSG00000183386|FHL3 ENSG00000183734|ASCL2 ENSG00000184185|KCNJ12 ENSG00000187583|PLEKHN1 ENSG00000196923|PDLIM7 ENSG00000054598|FOXCI ENSG00000110841|PPFIBP1  
ENSG00000118579|MED28 ENSG00000153094|BCL2L11 ENSG00000165355|FBXO33 ENSG00000168310|IRF2 ENSG00000168672|FAM84B ENSG00000182552|RWDD4A ENSG00000183780|SLC35F3  
ENSG0000002330|BAD ENSG0000006075|CCL3 ENSG00000064932|SBN02 ENSG00000074317|SNCB ENSG00000108469|RECQL5 ENSG00000109610|SOD3 ENSG00000112041|TULP1 ENSG00000115257|PCSK4  
ENSG00000130294|KIF1A ENSG00000130595|TNNT3 ENSG00000131096|PYY ENSG00000131668|BARX1 ENSG00000135390|ATP5G2 ENSG00000136573|BLK ENSG00000136717|BIN1 ENSG00000141873|SLC39A3  
ENSG00000149090|NP\_001001991.1 ENSG00000160284|C21orf56 ENSG00000161204|ABCF3 ENSG00000161574|CCL14 ENSG00000165568|AKR1C2 ENSG00000169583|CLIC3 ENSG00000174943|KCTD13 ENSG00000179526|SHARPIN  
ENSG00000179740|C19orf290S ENSG00000182612|TSPAN10 ENSG00000183558|HIST2H2AA3 ENSG00000186895|FGF3 ENSG00000196839|ADA ENSG00000198517|MAFK ENSG00000203812|HIST2H2AA4 ENSG00000203883|SOX18  
ENSG00000203896|LIME1 ENSG00000078304|PPP2R5C ENSG00000084090|STAR7 ENSG00000099250|NRP1 ENSG00000111450|STX2 ENSG00000113212|PCDH7 ENSG00000116157|GPX7 ENSG00000120948|TARDBP  
ENSG00000154127|STS1\_HUMAN ENSG00000176788|BASP1 ENSG00000198681|MAGEA1 ENSG00000203722|RAET1G

CCGCTCG ENSG00000022567|SLC45A4 ENSG00000066230|SLC9A3 ENSG00000070814|TCOF1 ENSG00000114353|GNAT2 ENSG00000115596|WNT6 ENSG00000125385|RPS29 ENSG00000125733|TRIP10 ENSG00000130595|TNNT3  
ENSG00000131094|C1QL1 ENSG00000135722|FBXL8 ENSG00000136280|CCM2 ENSG00000139890|REM2 ENSG00000140682|TGFBI1 ENSG00000157306|HTT2A ENSG00000158623|TSGA13 ENSG00000161914|ZNF653  
ENSG00000161955|TNFSF13 ENSG00000169925|BRD3 ENSG00000170919|Q5SVS6\_HUMAN ENSG00000173673|HES3 ENSG00000175048|ZDHHC14 ENSG00000175662|TOM1L2 ENSG00000176078|Q8NAN4\_HUMAN ENSG00000176887|SOX11  
ENSG00000177030|DEAF1 ENSG00000178571|NM\_203423 ENSG00000184390|Q6ICM0\_HUMAN ENSG00000186897|C1QL4 ENSG00000196557|CACNA1H ENSG00000198399|ITSN2 ENSG00000198691|ABCA4 ENSG00000204048|Q6ZUG3\_HUMAN  
ENSG0000007168|PAFAH1B1 ENSG00000091157|WDR7 ENSG00000101558|VAPA ENSG00000111707|SUDS3 ENSG00000113594|LIFR ENSG00000134376|CRB1 ENSG00000134769|DTNA ENSG00000182957|SPATA13  
ENSG00000198339|HIST1H4I

CCGCTTG ENSG00000060688|WDR57 ENSG00000101210|EEF1A2 ENSG00000115241|PPM1G ENSG00000115649|C2orf24 ENSG00000117298|ECE1 ENSG00000124466|LYPD3 ENSG00000126231|PROZ ENSG00000127527|EPS15L1  
ENSG00000138696|BMPR1B ENSG00000142224|IL19 ENSG00000169991|Q5TF58\_HUMAN ENSG00000173581|CCDC106 ENSG00000180155|LYNX1 ENSG00000185482|STAC3 ENSG00000197993|KEL ENSG00000203927|Q6ZNY1\_HUMAN  
ENSG00000005421|PON1 ENSG00000030066|NUP160 ENSG00000110435|PDHX ENSG00000141371|C17orf64 ENSG00000143653|SCCPDH ENSG00000176102|CSTF3 ENSG00000181588|RKHD1 ENSG00000189237|NAP5\_HUMAN  
ENSG00000196319|Q9H353\_HUMAN ENSG00000196730|DAPK1

CCGGAGA ENSG00000065268|WDR18 ENSG00000102181|CD99L2 ENSG00000102858|MGRN1 ENSG00000105373|GLTSCR2 ENSG00000105464|GRIN2D ENSG00000105559|PLEKHA4 ENSG00000110536|NDUFS3 ENSG00000116035|VAX2  
ENSG00000125740|FOSB ENSG00000132671|SSTR4 ENSG00000165140|FBP1 ENSG00000166716|ZNF592 ENSG00000167578|MIA ENSG00000177021|LRRC24 ENSG00000181029|TRAPPC5 ENSG00000186423|Q8N9S5\_HUMAN  
ENSG00000204103|MAFB ENSG00000205879|FAM90A25P ENSG00000037241|RPL26L1 ENSG00000078401|EDN1 ENSG00000100354|TNRC6B ENSG00000102935|ZNF423 ENSG00000112167|C6orf64 ENSG00000113916|BCL6  
ENSG00000116717|GADD45A ENSG00000119938|PPP1R3C ENSG00000122691|TWIST1 ENSG00000137492|PRKRIR ENSG00000138768|VDP\_HUMAN ENSG00000147121|ZNF673 ENSG00000161405|IKZF3 ENSG00000168502|KIAA0802  
ENSG00000170345|FOS ENSG00000174899|Q8N6Q6\_HUMAN ENSG00000177981|ASB8 ENSG00000178234|GALNT11 ENSG00000178988|MRFAP1L1 ENSG00000181315|ZNF322A ENSG00000181588|RKHD1 ENSG00000183784|C9orf66  
ENSG00000188474|ZNF788 ENSG00000188801|ZNF322B ENSG00000189184|PCDH18 ENSG00000196677|C8orf77  
ENSG00000007216|SLC13A2 ENSG00000076984|Q14733-2 ENSG00000087086|FTL ENSG00000099364|FBXL19 ENSG00000101246|ARFRP1 ENSG00000104918|RETN ENSG00000107185|KIAA0258 ENSG00000121289|CCDC123  
ENSG00000124140|SLC12A5 ENSG00000124593|C6orf66 ENSG00000124766|SOX4 ENSG00000140986|BPTL3L ENSG00000161013|MGAT4B ENSG00000165887|ANKRD2 ENSG00000172247|C1QTNF4 ENSG00000173715|C11orf80  
ENSG00000177614|PGBD5 ENSG00000180849|C15orf37 ENSG00000181085|MAPK15 ENSG00000182376|NP\_872411.1 ENSG00000185668|POU3F1 ENSG00000186897|C1QL4 ENSG00000196358|NTNG2 ENSG00000196892|Q9P1D2\_HUMAN  
ENSG00000197448|GSTK1 ENSG00000198113|C9orf167 ENSG00000205485|Q6DCA4\_HUMAN ENSG00000008083|JARID2 ENSG000000081913|PHLPP ENSG00000099942|CRKL ENSG00000101191|DIDO1 ENSG00000114354|TFG  
ENSG00000116793|PHTF1 ENSG00000117614|SYF2 ENSG00000122203|KIAA1191 ENSG00000122877|EGR2 ENSG00000132664|POLR3F ENSG00000139597|NP\_438169.2 ENSG00000147642|SYBU\_HUMAN ENSG00000148572|NRBF2  
ENSG00000152402|GUCY1A2 ENSG00000157538|DSCR3 ENSG00000160551|TAOK1 ENSG00000162520|SYNCL1 ENSG00000164305|CASP3 ENSG00000166147|FBN1 ENSG00000166839|ANKDD1A ENSG00000168310|IRF2  
ENSG00000172201|ID4 ENSG00000173480|ZNF417 ENSG00000176974|SHMT1 ENSG00000185518|SV2B ENSG00000196611|MMP1 ENSG00000205462|Q6ZWC8\_HUMAN

CCGGATC ENSG00000064270|ATP2C2 ENSG00000069812|HES2 ENSG00000100075|SLC25A1 ENSG00000100099|HPS4 ENSG00000102109|PCSK1N ENSG00000104783|KCN4 ENSG00000105419|Q99687-2 ENSG00000105552|BCAT2  
ENSG00000108504|CDK3 ENSG00000112759|SLC29A1 ENSG00000123143|PKN1 ENSG00000132109|TRIM21 ENSG00000142748|FCN3 ENSG00000146013|GFRA3 ENSG00000149418|ST14 ENSG00000158545|NP\_653205.2  
ENSG00000160783|BGLAP ENSG00000161791|FMNL3 ENSG00000163141|BNIP1L ENSG00000168135|KCNJ4 ENSG00000175718|CXorf55 ENSG00000175319|PPL1CA ENSG00000175718|CXorf55 ENSG00000183597|C22orf25 ENSG00000184163|FAM132A  
ENSG00000185347|C14orf80 ENSG00000196476|C20orf96 ENSG00000198753|PLXNB3 ENSG00000064042|NP\_055803.1 ENSG00000101230|C20orf82 ENSG00000111790|FGFR10P2 ENSG00000114166|PCAF ENSG00000133808|MICALCL  
ENSG00000136709|WDR33 ENSG00000137478|FCHSD2 ENSG00000138430|GTPBP9 ENSG00000141668|CBLN2 ENSG00000146648|EGFR ENSG00000148143|ZNF462 ENSG00000151490|PTPRO ENSG00000161040|FBXL13  
ENSG00000163746|PLSCR2 ENSG00000166321|NUDT13 ENSG00000167601|AXL ENSG00000168509|HFE2 ENSG00000169933|FRMPD4 ENSG00000177150|C18orf19 ENSG00000177620|Q9BSL4\_HUMAN ENSG00000178403|NEUROG2  
ENSG00000185278|ZBTB37 ENSG00000189149|FLJ41766 ENSG00000198304|ZNF528 ENSG00000198898|CAP2A2  
ENSG0000004838|ZMYND10 ENSG00000008382|MPND ENSG000000025434|NR1H3 ENSG00000079999|KEAP1 ENSG00000100604|CHGA ENSG00000103175|WFDC1 ENSG00000105426|PTPRS ENSG00000105664|COMP  
ENSG00000106211|HSPB1 ENSG00000126005|ITGB4BP ENSG00000127540|UQCER ENSG00000129354|AP1M2 ENSG00000130653|PNPLA7 ENSG00000134571|MYBPC3 ENSG00000145506|NKD2 ENSG00000160741|CRT2  
ENSG00000164405|UQCRCQ ENSG00000167850|CD300C ENSG00000167925|GHDG ENSG00000172927|MYEOV ENSG00000172977|HTATIP ENSG00000176092|ATM1L ENSG00000188086|NP\_954652.1 ENSG00000189037|DUSP21  
ENSG00000196747|HIST1H3H ENSG00000204226|Q6ZNS0\_HUMAN ENSG00000197412|Q8N8G3\_HUMAN ENSG00000039560|RAI14 ENSG000000064012|CASP8 ENSG00000080824|HSP90AA1 ENSG00000100483|C14orf138 ENSG00000108231|LGI1  
ENSG00000113441|LNPEP ENSG00000121964|GTDC1 ENSG00000123130|ACOT9 ENSG00000129277|CCL4 ENSG00000133805|AMPD3 ENSG00000141458|NPC1 ENSG00000143493|INTS7 ENSG00000144191|CNGA3  
ENSG00000161573|CCL16 ENSG00000164093|PITX2 ENSG00000164128|NPY1R ENSG00000164465|DCBLD1 ENSG00000165304|MELK ENSG00000166848|TERF2IP ENSG00000175643|C16orf75 ENSG00000179454|KLHL28  
ENSG00000187079|TEAD1

CCGGATT ENSG00000057757|C1orf128 ENSG00000095752|IL11 ENSG00000100997|ABHD12 ENSG00000106290|TAF6 ENSG00000113758|DBN1 ENSG00000119547|ONECUT2 ENSG00000119919|NKX2-3 ENSG00000126460|PRRG2  
ENSG00000131096|PYY ENSG00000132016|C19orf57 ENSG00000133519|NP\_689722.1 ENSG00000142009|Q9BSM8\_HUMAN ENSG00000162267|ITIH3 ENSG00000167656|LY6D ENSG00000169306|ILLRAPL1 ENSG00000170122|FOXD4L1  
ENSG00000175602|CCDC85B ENSG00000180843|KIAA1618 ENSG00000181977|PYY2 ENSG00000183443|A2RU41\_HUMAN ENSG00000184292|TACSTD2 ENSG00000187513|GJA4 ENSG00000198293|Q96HM8\_HUMAN ENSG00000205106|Q6N098\_HUMAN  
ENSG00000205994|Q6ZN58\_HUMAN ENSG00000008196|TFAP2B ENSG000000040341|STAU2 ENSG00000043355|ZIC2 ENSG00000054598|FOXCI ENSG00000083937|CHMP2B ENSG00000102069|UBE2NL ENSG00000104537|ANXA13  
ENSG00000113140|SPARC ENSG00000117602|DSCR1L2 ENSG00000119698|KIAA1622 ENSG00000123609|NMI ENSG00000129474|JUB ENSG00000129515|SNX6 ENSG00000137509|PRCP ENSG00000145675|PK3R1  
ENSG00000151150|ANK3 ENSG00000154485|MMP21 ENSG00000161542|PRPSAP1 ENSG00000166170|BAG5 ENSG00000172058|SERF1\_HUMAN ENSG00000182400|TRAPPC6B ENSG00000183337|BCOR ENSG00000188542|DUSP28  
ENSG00000198408|MGEA5 ENSG00000205572|SERF1\_HUMAN

CCGGCAA ENSG0000006283|CACNA1G ENSG00000100325|ASCC2 ENSG00000105419|Q99687-2 ENSG00000119321|FKBP15 ENSG00000127054|CPSF3L ENSG00000130520|LSM4 ENSG00000136717|BIN1 ENSG00000141526|SLC16A3  
ENSG00000144119|C1QL2 ENSG00000155660|PDIA4 ENSG00000160180|TFF3 ENSG00000160783|BGLAP ENSG00000165414|Q96HD6\_HUMAN ENSG00000172977|HTATIP ENSG00000173673|HES3 ENSG00000175463|TBC1D10C  
ENSG00000176973|FAM89B ENSG00000180549|FUT7 ENSG00000183077|AFMID ENSG00000186493|C5orf38 ENSG00000186838|SELV\_HUMAN ENSG00000187244|BCAM ENSG00000111114|BTBD7 ENSG00000083799|CYLD  
ENSG00000105483|CARD8 ENSG00000109339|MAPK10 ENSG00000112972|HMGCS1 ENSG00000121057|AKAP1 ENSG00000127334|DYRK2 ENSG00000129422|MTUS1 ENSG00000134644|PUM1 ENSG00000149573|EVA1  
ENSG00000153904|DDAH1 ENSG00000165389|C14orf147 ENSG00000165512|ZNF22 ENSG00000165617|DACT1 ENSG00000170967|DD11 ENSG00000183833|C3orf15 ENSG00000186340|THBS2 ENSG00000186715|Q13209\_HUMAN  
ENSG00000187742|SECISBP2 ENSG00000196533|C1orf186 ENSG00000197412|Q8N8G3\_HUMAN ENSG00000198783|CCDC16 ENSG00000204987|Q6ZN80\_HUMAN ENSG00000205413|SAMD9  
ENSG00000007392|LUC7L ENSG000000013306|SLC25A39 ENSG00000100416|TRMU ENSG00000100721|TCL1A ENSG00000108551|RASD1 ENSG00000113196|HAND1 ENSG00000123201|GUCY1B2 ENSG00000124191|TOX2  
ENSG00000127616|SMARCA4 ENSG00000130600|H19 ENSG00000136327|NKX2-8 ENSG00000141295|SCRN2 ENSG00000149091|DGRK1 ENSG00000151640|DPYS14 ENSG00000163888|CAMK2N2 ENSG00000169976|SF3B5  
ENSG00000170846|Q8WU25\_HUMAN ENSG00000176078|Q8NAN4\_HUMAN ENSG00000177340|Q0VFX0\_HUMAN ENSG00000179523|Q8TAS2\_HUMAN ENSG00000182048|XR\_018915.1 ENSG00000182156|ENPP7 ENSG00000182612|TSPAN10  
ENSG00000187650|NP\_001017921.1  
ENSG00000187699|Q8NBX4\_HUMAN ENSG00000196405|EVL ENSG00000204059|NP\_001013718.1 ENSG00000053254|CHES1 ENSG00000104369|JPH1 ENSG00000113391|C5orf21 ENSG00000113441|LNPEP ENSG00000164442|CITED2  
ENSG00000165323|FAT3 ENSG00000167383|ZNF229

CCGGCGG ENSG00000008441|NFIX ENSG00000087085|ACHE ENSG00000103257|SLC7A5 ENSG00000131188|PRR7 ENSG00000132702|HAPLN2 ENSG00000140623|SEPT12 ENSG00000141968|VAV1 ENSG00000159714|ZDHHC1  
ENSG00000160959|LRRC14 ENSG00000161682|Q8NOU1\_HUMAN ENSG00000163633|C4orf36 ENSG00000168056|LTBP3 ENSG00000169682|LAT ENSG00000173137|ADCK5 ENSG00000176720|BOK ENSG00000178951|ZBTB7A

|                              |                                |                                |                                |                              |                              |                                |                                |                          |
|------------------------------|--------------------------------|--------------------------------|--------------------------------|------------------------------|------------------------------|--------------------------------|--------------------------------|--------------------------|
| ENSG00000182054 IDH2         | ENSG00000185105 XR_015885.1    | ENSG00000185340 GAS2L1         | ENSG00000188185 Q6ZQP8_HUMAN   | ENSG00000188486 H2AFX        | ENSG00000107485 GATA3        | ENSG00000113391 C5orf21        | ENSG00000129422 MTUS1          |                          |
| ENSG00000132970 WASF3        | ENSG00000140153 WDR20          | ENSG00000147883 CDKN2B         | ENSG00000151572 TMEM16D        | ENSG00000170624 SGCD         | ENSG00000171791 BCL2         | ENSG00000179774 ATOX7          | ENSG00000181588 RKHD1          |                          |
| CCGGGGC                      | ENSG0000013725 CD6             | ENSG00000066336 SPI1           | ENSG00000090447 TFAP4          | ENSG00000101331 C20orf160    | ENSG00000103150 MLYCD        | ENSG00000103199 ZNF500         | ENSG00000103326 SOLH           | ENSG00000104853 CLPTM1   |
| ENSG00000105438 KDELRL1      | ENSG00000105679 GAPDHS         | ENSG00000105953 OGDH           | ENSG00000106992 AK1            | ENSG00000129654 FOXJ1        | ENSG00000130283 GDF1         | ENSG00000131097 HIGD1B         | ENSG00000132821 C20orf102      |                          |
| ENSG00000142459 EVI5L        | ENSG00000147799 K1688_HUMAN    | ENSG00000148805 NR_002934.2    | ENSG00000154016 GRAP           | ENSG00000154118 JPH3         | ENSG00000157240 FZD1         | ENSG00000159069 FBXW5          | ENSG00000164897 TMUB1          |                          |
| ENSG00000166780 C16orf45     | ENSG00000167680 SEMA6B         | ENSG00000167703 SLC43A2        | ENSG00000170616 SCR1           | ENSG00000171298 GAA          | ENSG00000173020 ADRBK1       | ENSG00000175182 FAM131A        | ENSG00000175764 TTLL11         |                          |
| ENSG00000177380 PPFIA3       | ENSG00000178934 LEG7_HUMAN     | ENSG00000181638 GLI4           | ENSG00000182575 NXP3           | ENSG00000183785 PEX26        | ENSG00000185236 RAB11B       | ENSG00000186423 Q8N9S5_HUMAN   | ENSG00000187021 PNLIPRP1       |                          |
| ENSG00000188389 PDCD1        | ENSG00000188483 IERS5L         | ENSG00000189201 COX19          | ENSG00000189319 FAM53B         | ENSG00000196293 DUX4         | ENSG00000197539 Q6ZSY7_HUMAN | ENSG00000203813 HIST2H3C       | ENSG00000204401 Q8NOT0_HUMAN   |                          |
| ENSG00000204673 AKT1S1       | ENSG00000205076 LGALS7         | ENSG00000205502 NP_001007596.1 | ENSG00000008083 JARID2         | ENSG000000064652 SNX24       | ENSG00000111432 FZD10        | ENSG00000111906 HDDC2          | ENSG00000121691 CAT            |                          |
| ENSG00000123584 MAGEA9B      | ENSG00000141448 GATA6          | ENSG00000144668 ITGA9          | ENSG00000153234 NR4A2          | ENSG00000163689 NP_940865.1  | ENSG00000163864 NMNAT3       | ENSG00000164035 EMCN           | ENSG00000166008 MAGEA9         |                          |
| ENSG00000170088 NP_689894.1  | ENSG000001188463 XR_015229.1   | ENSG00000188848 CCDC4          | ENSG00000197172 MAGEA3         | ENSG00000198874 TYW1         | ENSG00000204469 BAT2         | ENSG00000206131 Q6ZS21_HUMAN   |                                |                          |
| CCGGTGT                      | ENSG00000028137 TNFRSF1B       | ENSG00000089250 NOS1           | ENSG00000101439 CST3           | ENSG00000105738 SIPA1L3      | ENSG00000119487 MAPKAP1      | ENSG00000125901 MRPS26         | ENSG00000128203 ASPHD2         | ENSG00000151360 ALLC     |
| ENSG00000161996 WDR90        | ENSG00000162592 CCDC27         | ENSG00000166526 ZNF3           | ENSG00000169926 KLF13          | ENSG00000172780 RAB43        | ENSG00000187607 ZNF286A      | ENSG00000196361 ELAVL3         | ENSG00000198113 C9orf167       |                          |
| ENSG00000108100 FYN          | ENSG00000066651 TRMT11         | ENSG00000082397 EPB41L3        | ENSG00000090487 SPG21          | ENSG00000101191 DIDO1        | ENSG00000103018 CYB5B        | ENSG00000118702 GHRH           | ENSG00000119801 YPEL5          |                          |
| ENSG00000122691 TWIST1       | ENSG00000123977 WDR69          | ENSG00000136738 STAM           | ENSG00000151689 INPP1          | ENSG00000159259 CHAF1B       | ENSG00000159579 RSPRY1       | ENSG00000160207 HSF2BP         | ENSG00000162775 MKL1           |                          |
| ENSG00000163637 PRICKLE2     | ENSG00000165757 KIAA1462       | ENSG00000166523 CLEC4E         | ENSG00000167601 AXL            | ENSG00000169016 E2F6         | ENSG00000178234 GALNT11      | ENSG00000178538 CA8            | ENSG00000181788 STAH2          |                          |
| ENSG00000185915 KLHL34       | ENSG00000188659 NP_001008227.1 | ENSG000000198945 L3MBTL3       | ENSG000000204271 SPIN3         |                              |                              |                                |                                |                          |
| CCGGTTT                      | ENSG00000008838 THRAP4         | ENSG00000034510 TMSB10         | ENSG00000070778 PTPN21         | ENSG00000106263 EIF3S9       | ENSG00000108771 LGP2_HUMAN   | ENSG00000117154 IGSF21         | ENSG00000125798 FOXA2          | ENSG00000128311 TST      |
| ENSG00000133519 NP_689722.1  | ENSG00000134775 FHOD3          | ENSG00000138092 CENPO          | ENSG00000140992 PDPK1          | ENSG00000142959 BEST4        | ENSG00000163794 UCN          | ENSG00000167513 CDT1           | ENSG00000168070 NP_001032302.1 |                          |
| ENSG00000169976 SF3B5        | ENSG00000172216 CEBPB          | ENSG00000179943 ZNF579         | ENSG00000196747 HIST1H3H       | ENSG00000204058 C10orf41     | ENSG00000204335 SP5          | ENSG00000205658 Q6ZUU6_HUMAN   | ENSG00000205937 RNPS1          |                          |
| ENSG00000205156 HSF2         | ENSG000000065978 YBX1          | ENSG000000085377 PREP          | ENSG000000097938 USP48         | ENSG00000107938 C10orf137    | ENSG00000108039 XPNPEP1      | ENSG00000111537 IFNG           | ENSG00000114784 EIF1B          |                          |
| ENSG00000115934 PPIL3        | ENSG00000120129 DUSP1          | ENSG00000120647 CCDC77         | ENSG00000130764 LRRC47         | ENSG00000136099 PCDH8        | ENSG00000143353 LYPLAL1      | ENSG00000144891 AGTR1          | ENSG00000163607 GTPBP8         |                          |
| ENSG00000169688 MT1B         | ENSG00000178974 FBXO34         | ENSG00000183520 UTP11L         | ENSG00000184388 RBM32B         | ENSG00000186288 RBM32A       | ENSG00000196290 NIF3L1       | ENSG00000196532 HIST1H3C       | ENSG00000196712 NF1            |                          |
| ENSG00000197846 HIST1H2BF    | ENSG00000198339 HIST1H4I       | ENSG00000204389 HSPF1A         |                                |                              |                              |                                |                                |                          |
| CCGTAA                       | ENSG00000033011 ALG1           | ENSG00000105066 FI21           | ENSG00000105552 BCAT2          | ENSG0000011186 WNT5B         | ENSG00000118557 PMFBP1       | ENSG00000125835 SNRPB          | ENSG00000126351 THRA           | ENSG00000128652 HOXD3    |
| ENSG00000139625 MAP3K12      | ENSG00000149294 NCAM1          | ENSG00000158796 EDD            | ENSG00000160967 CUT11          | ENSG00000165795 NDRG2        | ENSG00000166912 MTMR10       | ENSG00000167536 DHR513         | ENSG00000167657 DAPK3          |                          |
| ENSG00000169228 MXD3         | ENSG00000174206 NP_689653.3    | ENSG00000175866 BAIAP2         | ENSG00000176720 BOK            | ENSG00000181250 MYADM1       | ENSG00000181885 CLDN7        | ENSG00000182472 CAPN12         | ENSG00000183458 Q9NRE7_HUMAN   |                          |
| ENSG00000183793 NIP1         | ENSG00000189263 Q6ZSZ2_HUMAN   | ENSG00000196747 HIST1H3H       | ENSG00000203961 Q6ZRE1_HUMAN   | ENSG00000204538 PSORS1C2     | ENSG00000206113 Q6ZU27_HUMAN | ENSG00000206565 SEC61A2        | ENSG00000008022 CLDN1          |                          |
| ENSG00000101746 NOL4         | ENSG00000113302 LL12B          | ENSG00000115806 GORASP2        | ENSG00000118564 FBXL5          | ENSG00000129699 NP_067644.2  | ENSG00000136698 CFP1         | ENSG00000137492 PKRTR          | ENSG00000144891 AGTR1          |                          |
| ENSG00000145863 GABRA6       | ENSG00000145907 G3BP1          | ENSG00000151164 RAD9B          | ENSG00000152093 NP_001072998.1 | ENSG00000156467 UQCRB        | ENSG00000164402 SEPT8        | ENSG00000177800 TMEM78         | ENSG00000179029 TMEM107        |                          |
| ENSG00000182568 SATB1        | ENSG00000188153 COL4A5         | ENSG00000198492 YTHDF2         | ENSG00000198856 NP_067050.1    |                              |                              |                                |                                |                          |
| CCGTAA                       | ENSG00000070759 TESK2          | ENSG00000092529 CAPN3          | ENSG00000100445 C14orf124      | ENSG00000105711 SCN1B        | ENSG00000106125 AQP1         | ENSG00000112715 VEGFA          | ENSG00000116031 CD207          | ENSG00000120068 HOXB8    |
| ENSG00000128254 C22orf24     | ENSG00000134815 DHX34          | ENSG00000135801 TAF5L          | ENSG00000140798 ABCC12         | ENSG00000158796 DEDD         | ENSG00000164400 CSF2         | ENSG00000168255 Q8IZ67_HUMAN   | ENSG00000170577 SIX2           |                          |
| ENSG00000171169 C9orf90      | ENSG00000183242 WIT1           | ENSG00000183535 C21orf123      | ENSG00000197355 UAP1L1         | ENSG00000204613 TRIM10       | ENSG00000043355 ZIC2         | ENSG00000099260 PALMD          | ENSG00000107290 SETX           |                          |
| ENSG00000110002 LOH11CR2A    | ENSG00000110321 EIF4G2         | ENSG00000115310 RTN4           | ENSG00000118564 FBXL5          | ENSG00000125304 TM9SF2       | ENSG00000128731 HERC2        | ENSG00000139330 KERA           | ENSG00000140987 ZNF434         |                          |
| ENSG00000143158 BRP44        | ENSG00000143514 TP53BP2        | ENSG00000152766 ANKRD22        | ENSG00000153044 CENPH          | ENSG00000153130 SCOC         | ENSG00000155640 C10orf12     | ENSG00000165521 EML5           | ENSG00000168564 CDKN2AIP       |                          |
| ENSG00000170748 HNRGT_HUMAN  | ENSG00000175604 Q96M66_HUMAN   | ENSG00000176974 SMT1           | ENSG00000186481 NP_001025170.1 |                              |                              |                                |                                |                          |
| CCGTACC                      | ENSG00000004777 SNX26          | ENSG00000026950 BTN3A1         | ENSG00000123815 ADCCK4         | ENSG00000132128 LRRC41       | ENSG00000163702 ILL7RC       | ENSG00000165816 VWA2           | ENSG00000166664 CHRFAM7A       | ENSG00000167578 MIA      |
| ENSG00000169925 BRD3         | ENSG00000170291 C17orf81       | ENSG00000170579 DLGAP1         | ENSG00000170733 TTL6           | ENSG00000170733 TTL6         | ENSG00000173762 CD7          | ENSG00000175344 CHRNA7         | ENSG00000175611 C9orf130       | ENSG00000180422 C16orf81 |
| ENSG00000184381 PLA2G6       | ENSG00000185928 C16orf53       | ENSG00000186063 C1orf80        | ENSG00000187912 NP_997273.2    | ENSG00000188038 NRN1L        | ENSG00000189152 Q8TC17_HUMAN | ENSG00000198355 PIM3           | ENSG00000204095 Q6ZV88_HUMAN   |                          |
| ENSG00000066583 ISOC1        | ENSG00000082212 ME2            | ENSG00000096401 HCC5L          | ENSG00000102753 KPNA3          | ENSG00000119509 INVS         | ENSG00000123560 PLP1         | ENSG00000132670 PTPRA          | ENSG00000132842 AP3B1          |                          |
| ENSG00000134744 ZCCHC11      | ENSG00000135048 TMEM2          | ENSG00000135547 DXY2           | ENSG00000137959 IFI44L         | ENSG00000138071 ACTR2        | ENSG00000148123 NP_060223.2  | ENSG00000150433 NP_001074015.1 | ENSG00000151135 C12orf23       |                          |
| ENSG00000175449 RFESD        | ENSG00000180190 C8orf42        | ENSG00000185950 IRS2           | ENSG00000188085 NP_997320.1    | ENSG00000197580 BCDO2        | ENSG00000198018 ENTP7        | ENSG00000204669 C9orf57        | ENSG00000204814 Q5VSD8_HUMAN   |                          |
| ENSG00000205195 Q6ZTB1_HUMAN |                                |                                |                                |                              |                              |                                |                                |                          |
| CCGTACT                      | ENSG00000008710 PKD1           | ENSG00000009709 PAX7           | ENSG00000100083 GGA1           | ENSG00000105647 PIK3R2       | ENSG00000108753 TCF2         | ENSG00000116544 DLGAP3         | ENSG00000116824 CD2            | ENSG00000121104 FAM117A  |
| ENSG00000126785 RHOJ         | ENSG00000131944 C19orf40       | ENSG00000135451 TROAP          | ENSG00000136710 CCDC115        | ENSG00000141510 TP53         | ENSG00000158793 NIT1         | ENSG00000158927 C8orf58        | ENSG00000161849 KRT84          |                          |
| ENSG00000166548 TK2          | ENSG00000167619 TMEM145        | ENSG00000171223 JUNB           | ENSG00000174111 SOC7           | ENSG00000181363 Q66K80-2     | ENSG00000181863 CCL27        | ENSG00000188064 WNT7B          | ENSG00000196153 Q8NAB5_HUMAN   |                          |
| ENSG00000204308 RNF5         | ENSG00000022267 FHL1           | ENSG00000047648 ARHGAP6        | ENSG00000078369 GNB1           | ENSG00000100564 PIGH         | ENSG00000110975 SYT10        | ENSG00000134265 NAPG           | ENSG00000135838 NPL            |                          |
| ENSG00000136824 SMC2         | ENSG00000138829 FBN2           | ENSG00000143499 SMYD2          | ENSG00000144668 ITGA9          | ENSG00000158477 CD1A         | ENSG00000158636 C10orf30     | ENSG00000160062 ZBTB8          | ENSG00000168497 SDPR           |                          |
| ENSG00000168967 PMCHL1       | ENSG00000197713 RPE            | ENSG00000198533 Q9P1D0_HUMAN   | ENSG00000198612 COPS8          | ENSG00000204287 HLA-DRA      | ENSG00000204567 Q6ZTG9_HUMAN |                                |                                |                          |
| CCGTGAA                      | ENSG00000020577 SAMDA4         | ENSG00000026559 KCNG1          | ENSG00000105053 VRK3           | ENSG00000118526 TCF21        | ENSG00000125872 C20orf75     | ENSG00000126003 PLAGL2         | ENSG00000137203 TFAP2A         | ENSG00000141552 ANAPC11  |
| ENSG00000141698 NT5C3L       | ENSG00000144591 GMPPA          | ENSG00000160209 PDXK           | ENSG00000160345 C9orf116       | ENSG00000163516 ANKZF1       | ENSG00000166220 C10orf27     | ENSG00000168785 TSPAN5         | ENSG00000169683 LRRC45         |                          |
| ENSG00000170322 NFRKB        | ENSG00000172653 C17orf66       | ENSG00000172732 MUS81          | ENSG00000176919 C8G            | ENSG00000180210 F2           | ENSG00000182852 C21orf121    | ENSG00000184730 NP_061160.2    | ENSG00000185681 C9orf18        |                          |
| ENSG00000197461 PDGFA        | ENSG00000077264 PAK3           | ENSG00000100129 EIF3S6IP       | ENSG00000106066 CPVL           | ENSG00000106617 PRKAG2       | ENSG00000111341 MGFP         | ENSG00000118113 MMP8           | ENSG00000118407 FTLIP1         |                          |
| ENSG00000122577 HERPUD2      | ENSG00000122779 TRIM24         | ENSG00000130234 ACE1           | ENSG00000134504 KCTD1          | ENSG00000137959 IFI44L       | ENSG00000148123 PCDH18       | ENSG00000147381 MAGEA4         | ENSG00000148291 SURF2          |                          |
| ENSG00000152433 ZNF547       | ENSG00000154864 FAM38B         | ENSG00000164265 SCGB3A2        | ENSG00000168228 ZCCHC4         | ENSG00000170633 RNF34        | ENSG00000170775 GPR37        | ENSG00000171365 CLCN5          | ENSG00000183067 IGSF5          |                          |
| ENSG00000189132 FAM47B       | ENSG00000204442 NP_001073865.1 | ENSG00000204941 PSG5           |                                |                              |                              |                                |                                |                          |
| CCGTGTA                      | ENSG00000068831 RASGRP2        | ENSG00000172071 LPHN1          | ENSG00000105705 SF4            | ENSG00000107140 TESK1        | ENSG00000108878 CACNG1       | ENSG00000124233 SEMG1          | ENSG00000130560 UBAC1          | ENSG00000130707 ASS1     |
| ENSG00000132164 SLC6A11      | ENSG00000132938 KIAA0774       | ENSG00000142290 FXD7           | ENSG00000160183 TMPRSS3        | ENSG00000164151 Q6ZT40_HUMAN | ENSG00000169885 CALML6       | ENSG00000169918 OTUD7A         | ENSG00000172500 FIBP           |                          |
| ENSG00000173137 ADCK5        | ENSG00000186143 C2orf53        | ENSG00000189339 SLC35E2        | ENSG00000203691 Q9UI51_HUMAN   | ENSG000000066279 ASPM        | ENSG00000070540 WIP1         | ENSG00000074935 TUBE1          | ENSG00000090263 MRPS33         |                          |
| ENSG00000100564 PIGH         | ENSG00000101546 C18orf22       | ENSG00000109118 NFKB1          | ENSG00000109320 NFKB1          | ENSG00000121691 CAT          | ENSG00000122557 HERPUD2      | ENSG00000135845 PIGC           |                                |                          |
| ENSG00000137273 FOXF2        | ENSG00000143164 IQWD1          | ENSG00000148090 AUH            | ENSG00000148950 IMMP1L         | ENSG00000164597 COG5         | ENSG00000165672 PRDX3        | ENSG00000169981 ZNF35          | ENSG00000170502 NUDT9          |                          |
| ENSG00000176623 FAM82B       | ENSG00000177508 IRX3           | ENSG00000179542 LITTRK4        | ENSG00000183060 LYSMD4         | ENSG00000184898 RBM43        | ENSG00000197405 C5AR1        |                                |                                |                          |
| CCGTGTC                      | ENSG00000055957 ITI1H1         | ENSG00000068383 INPP5A         | ENSG00000071564 TCF3           | ENSG00000082014 SMARCD3      | ENSG00000095917 TPSD1        | ENSG00000099917 PCQAP          | ENSG00000106089 STX1A          | ENSG00000116151 MORN1    |
| ENSG00000127564 PKMYT1       | ENSG00000142319 SLC6A3         | ENSG00000153481 NP_060680.2    | ENSG00000160323 ADAMT13        | ENSG00000162063 CCNF         | ENSG00000175193 PARL         | ENSG00000176022 B3GALT6        | ENSG00000176248 ANAPC2         |                          |
| ENSG00000177380 PPFIA3       | ENSG00000181409 AATK           | ENSG00000185615 PDI2A          | ENSG00000186493 C5orf38        | ENSG00000190017 RANBP9       | ENSG0000017260 ATP2C1        | ENSG00000057149 SERPINB4       | ENSG00000085511 MAP3K4         |                          |
| ENSG00000106344 REM28        | ENSG00000107104 ANKRD15        | ENSG00000107938 C10orf137      | ENSG00000110422 HIPK3          | ENSG00000113648 H2AFY        | ENSG00000114480 GEE1         | ENSG00000116721 PRAMEF1        | ENSG00000120693 SMAD9          |                          |
| ENSG00000130045 C9orf121     | ENSG00000131015 ULBP2          | ENSG00000136099 PCDH8          | ENSG00000138207 RBP4           | ENSG00000144736 SHQ1         | ENSG00000145919 FAM44B       | ENSG00000146360 GPR6           | ENSG00000147642 SYBU_HUMAN     |                          |
| ENSG00000151552 QDPR         | ENSG0000015                    |                                |                                |                              |                              |                                |                                |                          |



ENSG00000166240|Q14DG7-2 ENSG00000168939|SPRY3 ENSG00000176896|TFSM1\_HUMAN ENSG00000178202|KDELC2 ENSG00000178999|AURKB ENSG00000183742|NP\_877439.2 ENSG00000187806|NP\_001073931.1 ENSG00000196812|ZSCAN16

ENSG00000197460|Q8WYX1\_HUMAN ENSG00000198028|ZNF560 ENSG00000203724|C1orf53

CCTAATA ENSG00000005243|COPZ2 ENSG00000005961|ITGA2B ENSG00000011132|APBA3 ENSG00000011243|AKAP8L ENSG00000025770|NCAPH2 ENSG00000072506|HSD17B10 ENSG00000094796|KRT31 ENSG00000102359|SRPX2

ENSG00000104870|FCGRT ENSG00000105370|LIM2 ENSG00000109956|B3GAT1 ENSG00000126895|AVPR2 ENSG00000130985|UBEL1 ENSG00000131097|HIGD1B ENSG00000131738|KRT33B ENSG00000133315|LRP16\_HUMAN

ENSG00000133661|SFTPD ENSG00000135097|MS11 ENSG00000136487|GH2 ENSG00000138698|RAP1GDS1 ENSG00000139579|OBFC2B ENSG00000141744|PNMT ENSG00000144591|GMPPA ENSG00000144834|TAGLN3

ENSG00000149823|C11orf2 ENSG00000160916|ATP5J2 ENSG00000161911|TREM1 ENSG00000162191|SAKS1\_HUMAN ENSG00000163995|ABLIM2 ENSG00000166136|NDUFB8 ENSG00000167664|TMIGD2

ENSG00000167701|GPT ENSG00000169910|ASL ENSG00000170291|C17orf81 ENSG00000170379|NP\_775949.1 ENSG00000170955|PRKCDP ENSG00000171747|LGALS4 ENSG00000173230|GOLGB1 ENSG00000173545|ZNF622

ENSG00000177156|TALDO1 ENSG00000188015|S100A3 ENSG00000188186|NP\_001008396.1 ENSG00000189162|CSH1 ENSG00000198183|PLUNC ENSG00000204228|HSD17B8 ENSG00000204498|NFKBIL1 ENSG00000206140|LOC728229

ENSG0000003989|SLC7A2 ENSG00000062725|APBP2 ENSG00000075213|SEMA3A ENSG00000089225|TBX5 ENSG00000113361|CDH6 ENSG00000113583|C5orf15 ENSG00000114978|MOBK1B ENSG000001120210|INSL6

ENSG00000122008|POLK ENSG00000122548|K0087\_HUMAN ENSG00000126804|ZBTB1 ENSG00000131828|PDHA1 ENSG00000133103|COG6 ENSG00000134265|NAPG ENSG00000138738|PRDM5 ENSG00000147684|NDUFB9

ENSG00000154719|MRPL39 ENSG00000157230|LOC728132 ENSG00000161048|NP\_945341.2 ENSG00000162482|AKR7A3 ENSG00000163254|CRYGC ENSG00000164258|NDUFS4 ENSG00000172071|EIF2AK3 ENSG00000174579|MSL2L1

ENSG00000187446|CHP1\_HUMAN ENSG00000187806|NP\_001073931.1 ENSG00000189108|ILIRAPL2 ENSG00000197181|PIWIL2 ENSG00000204832|Q6ZRU3\_HUMAN

CCTAATT ENSG00000101193|C20orf11 ENSG00000108829|LRRC59 ENSG00000110395|CBL ENSG00000113739|STC2 ENSG00000118058|MLL ENSG00000119242|CCDC92 ENSG00000122543|ONCO\_HUMAN ENSG00000132604|TERF2

ENSG00000132824|SERINC3 ENSG00000134864|Q9BVM4\_HUMAN ENSG00000135175|OCM ENSG00000140400|MAN2C1 ENSG00000147123|NDUFB11 ENSG00000149480|MTA2 ENSG00000154478|GPR26 ENSG00000166224|SGPL1

ENSG00000167674|NP\_001001520.1 ENSG00000167774|NDUFA7 ENSG00000174282|ZBTB4 ENSG00000180139|Q8N9Z5\_HUMAN ENSG00000180359|C11orf36 ENSG00000182372|C8orf61 ENSG00000182534|MXRA7 ENSG00000188901|NP\_055226.1

ENSG00000198756|GLT2D2 ENSG00000198831|Q8IYX2\_HUMAN ENSG00000203744|ALL170\_HUMAN ENSG00000203854|XR\_017700.1 ENSG00000203879|GDI1 ENSG00000046653|GPM6B ENSG00000089009|RPL6 ENSG00000100505|TRIM9

ENSG00000106692|FCMD ENSG00000107643|MAPK8 ENSG00000112246|SIM1 ENSG00000112297|AIM1 ENSG00000128655|PDE11A ENSG00000133703|KRAS ENSG00000134056|MRPS36 ENSG00000135341|MAP3K7

ENSG00000135913|USP37 ENSG00000138641|HERC3 ENSG00000139173|TMEM117 ENSG00000143157|POGK ENSG00000143995|MEIS1 ENSG00000145734|BDP1 ENSG00000152620|C5orf33 ENSG00000157800|SLC37A3

ENSG00000158411|MITD1 ENSG00000164237|CMBL ENSG00000164683|HEY1 ENSG00000165185|KIAA1958 ENSG00000171121|KCNMB3 ENSG00000175066|GK5 ENSG00000175175|PPM1E ENSG00000181562|FAM12A

ENSG00000186834|HEXIM1 ENSG00000188659|NP\_001008227.1 ENSG00000198498|NP\_060822.1

CCTACCT ENSG00000005238|KIAA1539 ENSG000000057704|TMCC3 ENSG000000072501|SMC1A ENSG00000104833|TUBB4 ENSG00000105419|Q99687-2 ENSG00000105655|NP\_057452.1 ENSG00000105697|HAMP ENSG00000106367|AP1S1

ENSG00000115234|SNX17 ENSG00000117834|SLC5A9 ENSG00000123643|SLC36A1 ENSG00000125084|WNT1 ENSG00000134216|CHIA ENSG00000135441|BLOC1S1 ENSG00000137496|I18BP\_HUMAN ENSG00000137497|NUMA1

ENSG00000143479|DYRK3 ENSG00000146700|SRCRB4D ENSG00000158006|PAFAH2 ENSG00000166448|TMEM130 ENSG00000169682|LAT ENSG00000171552|BCL2L1 ENSG00000172053|QARS ENSG00000177441|Q8N4T9\_HUMAN

ENSG00000178752|FAM132B ENSG00000185370|Q8WZ02\_HUMAN ENSG00000196242|OR2C3 ENSG00000197106|SLC6A17 ENSG00000197948|FCHSD1 ENSG00000198299|NOS1AP ENSG00000204538|PSORS1C2 ENSG00000205136|Q3KRG0\_HUMAN

ENSG00000070950|RAD18 ENSG00000071967|CYBRD1 ENSG00000077152|UBE2T ENSG00000084444|KIAA1467 ENSG00000085491|SLC25A24 ENSG00000097046|CDC7 ENSG00000110925|FAM130A1 ENSG00000118503|TNFAIP3

ENSG00000119912|IDE ENSG00000120440|TTLL2 ENSG00000126453|BCL2L12 ENSG00000134259|NGFB ENSG00000135821|GLUL ENSG00000143252|SDHC ENSG00000143458|NP\_653219.1 ENSG00000148730|EIF4EBP2

ENSG00000160218|TMEM1 ENSG00000166265|CYR1 ENSG00000168952|STXBP6 ENSG00000177410|Q5QHF1\_HUMAN ENSG00000180777|ANKRD30B ENSG00000184895|SRY

CCTACTC perfect: CCTACCT AGGTAGG hsa-let-7e tgAGGTAGGaggtgtgtatag 2

ENSG00000016391|CHDH ENSG00000043143|PHF15 ENSG00000100263|RHBDD3 ENSG00000106330|MOSPD3 ENSG00000131477|RAMP2 ENSG00000135472|FAIM2 ENSG00000137309|HMGA1 ENSG00000141258|RUTBC1

ENSG00000142784|WDTC1 ENSG00000148795|CYP17A1 ENSG00000158163|DZ1P1L ENSG00000158578|ALAS2 ENSG00000160401|C9orf117 ENSG00000162129|CLPB ENSG00000162144|CYBASC3 ENSG00000163362|C1orf106

ENSG00000165879|FRAT1 ENSG00000165948|FAM14B ENSG00000169894|MUC3A ENSG00000170581|STAT2 ENSG00000170776|AKAP13 ENSG00000172653|C17orf66 ENSG00000182315|NP\_653215.1 ENSG00000184557|SOCS3

ENSG00000196630|Q8NF76\_HUMAN ENSG00000198911|SREBF2 ENSG00000205718|LOC653656 ENSG00000041357|PSMA4 ENSG00000060317|RPL18 ENSG00000066084|DIP2B ENSG00000100201|DDX17 ENSG00000102174|PHEX

ENSG00000106153|CHCHD2 ENSG00000120162|MOBK12B ENSG00000122705|CLTA ENSG00000164411|GJB7 ENSG00000168297|PKX ENSG00000178172|SPINK6 ENSG00000182393|IL29 ENSG00000183035|CYLC1

ENSG00000183155|RAB1F ENSG00000183434|TFDP3 ENSG00000184301|LOC284428 ENSG00000186940|CHCHD9 ENSG00000197614|MFAP5 ENSG00000198420|NP\_055534.1 ENSG00000204909|SPINK9 ENSG00000205717|MBD3L2

CCTAGAA ENSG00000012963|C14orf130 ENSG00000025434|NR1H3 ENSG00000087077|TRIP6 ENSG00000092067|CEBPE ENSG00000101082|SLA2 ENSG00000101350|KIF3B ENSG00000101883|PEPP1\_HUMAN ENSG00000105251|SHD

ENSG00000111886|GABRR2 ENSG00000116586|MAP1P\_HUMAN ENSG00000120889|TNFRSF10B ENSG00000132854|ANR38\_HUMAN ENSG00000134569|LRP4 ENSG00000162552|WNT4 ENSG00000162888|C1orf147 ENSG00000163486|SRGAP2

ENSG00000166136|NDUFB8 ENSG00000167173|C15orf39 ENSG00000167964|RAB26 ENSG00000168884|TNIP2 ENSG00000170262|MRAP ENSG00000170983|C8orf14 ENSG00000184502|GAST ENSG00000196123|NP\_001035805.1

ENSG00000203747|FCGR3A ENSG00000026660|ELOVL5 ENSG00000058668|ATP2B4 ENSG00000064787|BCAS1 ENSG00000066813|NP\_001010845.1 ENSG00000074706|NP\_056368.1 ENSG00000083720|OXCT1 ENSG00000112425|EPM2A

ENSG00000115808|STRN ENSG00000117758|STX12 ENSG00000119729|RHOQ ENSG00000123570|RAB9B ENSG00000123739|PLA2G12A ENSG00000132386|FCGPI1F ENSG00000133962|C14orf161 ENSG00000138081|FBXO11

ENSG00000139946|PELI2 ENSG00000142182|DNMT3L ENSG00000144746|IAB6IP5 ENSG00000158691|ZSCAN12 ENSG00000162437|RAVER2 ENSG00000162744|FCR3B ENSG00000164822|DEFA6 ENSG00000165409|TSHR

ENSG00000178904|DPY19L3 ENSG00000188313|PLSCR1 ENSG00000188921|PTPLAD2 ENSG00000189241|TSPYL1 ENSG00000198018|ENTPD7 ENSG00000198855|NP\_009007.2

ENSG0000002726|ABP1 ENSG00000060642|TMEM98 ENSG00000066282|SPATA20 ENSG00000063127|SLC6A16 ENSG00000078804|TP53INP2 ENSG00000090238|YEPLE3 ENSG00000108375|SUPT4H1 ENSG00000115461|IGFBP5

ENSG00000124557|BTN1A1 ENSG00000131097|HIGD1B ENSG00000138698|RAP1GDS1 ENSG00000144120|TMEM177 ENSG00000147804|SLC39A4 ENSG00000162729|IGSF8 ENSG00000173826|KCNH6 ENSG00000173933|RBM4

ENSG00000180891|CUEDC1 ENSG00000186912|P2RY4 ENSG00000203836|NP\_899228.3 ENSG00000204366|ZBTB12 ENSG00000204502|PRAMEF5 ENSG00000204507|LOC729368 ENSG00000204509|PRAMEF6 ENSG00000081479|LRP2

ENSG00000091137|SLC26A4 ENSG00000120519|SLC10A7 ENSG00000123119|EFCBP1 ENSG00000128250|RFPL1 ENSG00000128253|RFPL2 ENSG00000128276|RFPL3 ENSG00000134153|C15orf24

ENSG00000152487|NSUN6 ENSG00000153560|UBP1 ENSG00000164944|KIAA1429 ENSG00000168379|Q8WM95\_HUMAN ENSG00000170965|PLAC1 ENSG00000171885|AQP4 ENSG00000172554|SNTG2 ENSG00000196323|ZBTB44

CCTATGA ENSG00000012963|C14orf130 ENSG00000078804|TP53INP2 ENSG00000087087|ARS2\_HUMAN ENSG00000088827|SIGLEC1 ENSG00000091536|MYO15A ENSG00000105991|HOXA1 ENSG00000125743|SNRPD2 ENSG00000125835|SNRNP

ENSG00000126749|EMG1 ENSG00000127743|IL17B ENSG00000135314|C6orf148 ENSG00000148362|C9orf142 ENSG00000153048|CARHSP1 ENSG00000157734|SNX22 ENSG00000165752|STK32C ENSG00000172073|C2orf51

ENSG00000172724|CCL19 ENSG00000173040|EVC2 ENSG00000176136|MCF5R ENSG00000181363|Q66K80-2 ENSG00000183862|CNGA2 ENSG00000205804|Q5T6R2\_HUMAN ENSG00000205972|Q8N8K0\_HUMAN ENSG00000000005|TNMD

ENSG00000030419|IKZF2 ENSG00000103494|NP\_056087.2 ENSG00000112531|QKI ENSG00000121579|NAT13 ENSG00000123200|ZC3H13 ENSG00000123843|C4BFB ENSG00000127252|HRASL5 ENSG00000127831|VIL1

ENSG00000127863|TNFRSF19 ENSG00000136267|DGKB ENSG00000137252|HCRTR2 ENSG00000144868|TMEM108 ENSG00000152977|ZIC1 ENSG00000162290|DCP1A ENSG00000164904|ALDH7A1 ENSG00000165516|KLHDC2

ENSG00000166454|K0431\_HUMAN ENSG00000168917|TMEM22 ENSG00000169299|PGM2 ENSG00000170027|YWHAG ENSG00000171291|ZNF439 ENSG00000180998|GPR137C ENSG00000188740|NBPF5 ENSG00000197054|ZNF763

CCTCAAC ENSG00000064300|NGFR ENSG00000087008|ACOX3 ENSG00000103067|RBM35B ENSG00000105245|NUMBL ENSG00000109132|PHOX2B ENSG00000112936|C7 ENSG00000125347|IRF1 ENSG00000126456|IRF3

ENSG00000127226|NP\_116072.2 ENSG00000127533|F2RL3 ENSG00000129450|SIGLEC9 ENSG00000135631|RAB11FIP5 ENSG00000158786|PLA2G2F ENSG00000162512|SDC3 ENSG00000168016|Q8N8K0\_HUMAN ENSG00000169921|Q75L30\_HUMAN

ENSG00000171236|LRG1 ENSG00000172738|C6orf128 ENSG00000176946|THAP4 ENSG00000190245|Q8N7M3\_HUMAN ENSG00000197249|SERPINA1 ENSG00000198219|Q96N05\_HUMAN ENSG00000198925|ATG9A ENSG00000064835|POU1F1

ENSG00000090621|PABPC4 ENSG00000100823|APEX1 ENSG00000106540|C7orf36 ENSG00000108587|GOSR1 ENSG00000109182|NP\_079363.1 ENSG00000113263|ITK ENSG00000120937|NPPB ENSG00000122705|CLTA

ENSG00000127688|GAN ENSG00000134121|CHL1 ENSG00000134259|NGFB ENSG00000137675|MMP27 ENSG00000160588|U2966\_HUMAN ENSG00000163762|TM4SF18 ENSG00000163959|NP\_689885.3 ENSG00000167236|CCL23

ENSG00000169087|HSPBAP1 ENSG00000173302|GPR148 ENSG00000173473|SMARCC1 ENSG00000174720|LARP7 ENSG00000188404|SELL ENSG00000197501|Q9H3B5\_HUMAN ENSG00000203666|EFCAB2 ENSG00000205765|NP\_787117.3

ENSG00000206027|Q6ZUT4\_HUMAN

CCTCAAG ENSG00000008056|SYN1 ENSG00000103489|XYLT1 ENSG00000104059|K0574\_HUMAN ENSG00000114019|AMOTL2 ENSG00000122711|SPINK4 ENSG00000139725|RHOF ENSG00000143375|CGN ENSG00000147256|RHGX\_HUMAN

ENSG00000151882|CCL28 ENSG00000162458|FBLN1M1 ENSG00000165861|ZFYVE1 ENSG00000168569|NP\_001073970.1 ENSG00000169738|DCXR ENSG00000174669|SLC29A2 ENSG00000174915|PTDSS2 ENSG00000176473|WDR25

ENSG00000177971|IMP3 ENSG00000178149|DALRD3 ENSG00000178796|Q8N9Z1\_HUMAN ENSG00000179922|ZNF784 ENSG00000197162|ZNF688 ENSG00000058729|RIOK2 ENSG00000092148|HECTD1 ENSG00000104643|MTMR9

ENSG00000108255|CRYBA1 ENSG00000108984|MAP2K6 ENSG00000118260|CREB1 ENSG00000126088|UROD ENSG00000136146|MED4 ENSG00000137267|TUBB2A ENSG00000137872|SEMA6D ENSG00000150656|CNDP1

ENSG00000158125|XDH ENSG00000162704|ARPC5 ENSG00000164118|KIAA1712 ENSG00000164308|NP\_071745.1 ENSG00000176988|FMR1NB ENSG00000196227|C20orf177 ENSG00000198770|Q9H396\_HUMAN ENSG00000203925|LOC647839

ENSG00000204688|OR2H1 ENSG00000206532|Q1RN00\_HUMAN

CCTCAAT ENSG00000023902|PLEKH01 ENSG00000092094|OSGEP ENSG00000105378|ICAM5 ENSG00000105523|FAM83E ENSG00000106631|MYL7 ENSG00000110245|APOC3 ENSG00000111424|VDR ENSG00000115306|SPTBN1

ENSG00000125976|RBM12 ENSG00000126759|CFP ENSG00000129467|ADCY4 ENSG00000134779|C18orf10 ENSG00000135451|TROAP ENSG00000135902|CHRND ENSG00000139436|GIT2 ENSG00000147065|MSN

ENSG00000151208|DLG5 ENSG00000155846|PPARGC1B ENSG00000158517|NCF1 ENSG00000161016|RPL8 ENSG00000161677|JOSD2 ENSG00000163221|S100A12 ENSG00000165178|LOC648998 ENSG00000166741|NNMT

ENSG00000167779|IGFBP6 ENSG00000169385|RNASE2 ENSG00000169397|RNASE3 ENSG00000169877|ERAF ENSG00000170265|ZNF282 ENSG00000171490|RSL1D1 ENSG00000172835|SLITRK1 ENSG00000182487|NCF1C

ENSG00000182852|C21orf121 ENSG00000183785|PEX2 ENSG00000184640|SEPT9 ENSG00000185291|IL3RA ENSG00000188368|NP\_954979.2 ENSG00000189077|NP\_114131.1 ENSG00000196415|PRTN3 ENSG00000204859|ZBTB48

ENSG00000020219|NP\_001025037.1 ENSG00000023330|ALAS1 ENSG00000104447|TRPS1 ENSG00000107864|CPFB3 ENSG00000120555|Q5W161\_HUMAN ENSG00000123728|RAP2C ENSG00000127863|TNFRSF19 ENSG00000131480|AOC2

ENSG00000136381|IREB2 ENSG00000136770|DNAJC1 ENSG00000144224|UBXD2 ENSG00000146477|SLC22A3 ENSG00000147166|ITGB1BP2 ENSG00000150750|C11orf53 ENSG00000179859|LOC284023 ENSG00000180787|ZFP3

ENSG00000188585|Q6ZU45\_HUMAN ENSG00000196812|ZSCAN16 ENSG00000197170|PSMD12 ENSG00000198185|ZNF334 ENSG00000204276|HLA-DQA2 ENSG00000204524|ZNF805

CCTCATT ENSG00000023030|BAD ENSG00000040487|PQLC2 ENSG00000060491|OGFR ENSG00000066117|SMARCD1 ENSG00000095906|NUBP2 ENSG00000099553|MMPL1 ENSG00000100346|CACNA1I ENSG00000100599|RIN3

ENSG00000101337|TM9SF4 ENSG00000102125|TAZ ENSG00000110274|CEP164 ENSG00000114923|SLC4A3 ENSG00000124664|SPDEF ENSG00000125844|NRN2 ENSG00000127554|GFER ENSG00000132478|UNK

ENSG00000132819|RBM38 ENSG00000137078|SIT1 ENSG00000137171|KLC4 ENSG00000138834|MAPK8IP3 ENSG00000140474|ULK3 ENSG00000140931|CMTM3 ENSG00000142185|TRPM2 ENSG00000143851|PTPN7

ENSG00000144589|STK11IP ENSG00000145214|DGKQ ENSG00000146205|TMEM16G ENSG00000148200|NR6A1 ENSG00000153404|NP\_443141.2 ENSG00000153551|CMTM7 ENSG00000156345|CCRK ENSG00000159733|ZFYVE28

ENSG00000159788|RGS12 ENSG00000162460|NP\_001013663.1 ENSG00000162888|C1orf147 ENSG00000164740|NR\_003034.1 ENSG00000165414|Q96HD6\_HUMAN ENSG00000167046|Q5JT57\_HUMAN ENSG00000170465|KRT6C ENSG00000172531|PPP1CA

ENSG00000173811|CCDC13 ENSG00000174744|BRMS1 ENSG00000179364|PACS2 ENSG00000186866|POFUT2 ENSG00000197226|TBC1D9B ENSG00000203685|C1orf95 ENSG00000204266|NM\_001025448 ENSG00000204586|Q6PJP7\_HUMAN

ENSG00000205052|Q6ZSS1\_HUMAN ENSG00000205420|KRT6A ENSG00000066084|DIP2B ENSG00000089472|HEPH ENSG00000106477|TSGA14 ENSG00000110751|SAPS3 ENSG00000132825|PPP1R3D ENSG00000134183|GNAT2

ENSG00000138613|APH1B ENSG00000146411|SLC2A12 ENSG00000159882|ZNF230 ENSG00000161571|Q5YK65\_HUMAN ENSG00000163513|TGFB2 ENSG00000165168|CYBB ENSG00000166240|Q14DG7-2 ENSG00000166415|WDR72

ENSG00000167077|NP\_689726.3 ENSG00000170965|PLAC1 ENSG00000173473|SMARCC1 ENSG00000176681|LRRC37A2 ENSG00000184992|BRI3BP ENSG00000196236|XPNPEP3 ENSG00000196639|HRH1 ENSG00000197301|Q6ZQU9\_HUMAN

CCTCATT ENSG00000088827|SIGLEC1 ENSG00000100146|SOX10 ENSG00000103723|AP3B2 ENSG00000115844|DLX2 ENSG00000125695|STRAD\_HUMAN ENSG00000125888|C20orf179 ENSG00000129680|MAP7D3 ENSG00000130377|ACSBG2

ENSG00000131914|LIN28 ENSG00000134990|CDCA8 ENSG00000138294|MSMB ENSG00000139644|TEGT ENSG00000143479|DYRK3 ENSG00000149269|PAK1 ENSG00000153060|TEKT5 ENSG00000161847|RAVER1

ENSG00000162772|ATF3 ENSG00000163793|DNAJC5G ENSG00000166136|NDUFB8 ENSG00000166961|NP\_689930.1 ENSG00000167617|CDC42EP5 ENSG00000170653|ATF7 ENSG00000172508|Q8N467\_HUMAN ENSG00000180483|DEFB119

ENSG00000182057|Q8IXR4\_HUMAN ENSG00000183114|FAM43B ENSG00000184148|SPRR4 ENSG00000204850|NP\_0010

ENSG00000119396|RAB14 ENSG00000123240|OPTN ENSG00000128590|DNAJB9 ENSG00000136758|YME1L1 ENSG00000138002|IFT172 ENSG00000138829|FBN2 ENSG00000141458|NPC1 ENSG00000150760|DOCK1  
ENSG00000153684|NP\_001012455.1 ENSG00000165029|ABCA1 ENSG00000165512|ZNF22 ENSG00000166323|C11orf65 ENSG00000174010|KLHL15 ENSG00000175676|GOLGA8F ENSG00000183629|GOLGA8G ENSG00000184863|PRR8  
CCTCCCA ENSG00000196233|LCOR ENSG00000196597|ZNF782 ENSG00000196967|ZNF585A ENSG00000197943|PLCG2 ENSG00000204201|Q49A40\_HUMAN  
ENSG00000166336|SPI1 ENSG00000069399|ECL3 ENSG00000100321|SYNGR1 ENSG00000105668|UPK1A ENSG00000114349|GNAT1 ENSG00000114654|CCDC48 ENSG00000119535|CSF3R ENSG00000121410|A1BG  
ENSG00000130207|APOC2 ENSG00000130669|PAK4 ENSG00000130720|F1BCD1 ENSG00000134780|DAGLA ENSG00000135480|KRT7 ENSG00000144908|ALDH1L1 ENSG00000149596|JPH2 ENSG00000160271|RALGDS  
ENSG00000162241|SLC25A45 ENSG00000162729|IGSF8 ENSG00000164976|KIAA1161 ENSG00000166228|PCBD1 ENSG00000172232|AZU1 ENSG00000174775|HRAS ENSG00000174996|KLC2 ENSG00000175115|PACS1  
ENSG00000175662|TOM1L2 ENSG00000176658|MYO1D ENSG00000177098|SCN4B ENSG00000180089|TMEM86B ENSG00000181031|RPH3AL ENSG00000189306|ZG14\_HUMAN ENSG00000196415|PRTN3 ENSG00000203879|GDI1  
ENSG00000204540|PSORS1C1 ENSG00000205214|Q6ZU66\_HUMAN ENSG00000205231|Q6ZQQ1\_HUMAN ENSG00000206753|RRP15 ENSG000002081181|ARG2 ENSG00000209606|FKBP5 ENSG00000101266|CSNK2A1P ENSG00000101892|ATP1B4  
ENSG00000108298|RPL19 ENSG00000112182|BACH2 ENSG00000116962|NID1 ENSG000001025398|SOX9 ENSG00000130396|MLLT4 ENSG00000135535|CD164 ENSG00000136242|Q9NXD8\_HUMAN ENSG00000137801|THBS1  
ENSG00000144118|RALB ENSG00000147507|LYN ENSG00000148848|ADAM12 ENSG00000152782|PANK1 ENSG00000152954|NRSN1 ENSG00000154310|TNIK ENSG00000180938|ZNF572 ENSG00000184349|EFNA5  
ENSG00000198468|Q8TAF5\_HUMAN ENSG00000204155|PARG  
CCTCCCC ENSG00000005206|PSL1\_HUMAN ENSG00000005884|ITGA3 ENSG00000011485|PPP5C ENSG00000030582|GRN ENSG00000068079|IFI35 ENSG00000090020|SLC9A1 ENSG00000099869|IGF2AS ENSG00000099875|MKNK2  
ENSG00000100345|MYH9 ENSG00000101188|NTSR1 ENSG00000102001|CACNA1F ENSG00000104897|SF3A2 ENSG00000104967|NOVA2 ENSG00000108344|PSMD3 ENSG00000108518|PFN1 ENSG00000108828|VAT1  
ENSG00000111664|GNB3 ENSG00000111737|RAB35 ENSG00000112164|GLP1R ENSG00000115523|GNLY ENSG00000117984|CTSD ENSG00000118160|SLC8A2 ENSG00000123144|C19orf43 ENSG00000123360|PDE1B  
ENSG00000124702|KLHDC3 ENSG00000125734|NM\_001080452.1 ENSG00000126368|NR1D1 ENSG00000126461|NP\_067051.1 ENSG00000128242|GAL3ST1 ENSG00000131398|KCNC3 ENSG00000133247|SUV420H2 ENSG00000136944|LMX1B  
ENSG00000137166|FOX P4 ENSG00000142009|Q9BSM8\_HUMAN ENSG00000142327|RNPEPL1 ENSG00000146216|TTBK1 ENSG00000158792|SPATA2L ENSG00000159784|FAM131B ENSG00000160460|SPTBN4 ENSG00000160685|ZBTB7B  
ENSG00000160877|BTBD14B ENSG00000162104|ADCY9 ENSG00000162763|LRRCS2 ENSG00000163283|ALPPL2 ENSG00000165548|TMEM63C ENSG00000166333|ILK ENSG00000166851|PLK1 ENSG00000167680|SEMA6B  
ENSG00000167778|SPRYD3 ENSG00000168490|PHYHIP ENSG00000172534|HCF1 ENSG00000174943|KCTD13 ENSG00000174996|KLC2 ENSG00000175084|DES ENSG00000175894|C21orf29 ENSG00000176884|GRIN1  
ENSG00000177380|PPF1A3 ENSG00000177666|PNPLA2 ENSG00000178531|CTXN1 ENSG00000178951|ZBTB7A ENSG00000181513|ACBD4 ENSG00000182195|LDOC1 ENSG00000182490|TSSK2 ENSG00000188191|PRKAR1B  
ENSG00000188447|XR\_016015.1 ENSG00000196361|ELAVL3 ENSG00000196411|EPHB4 ENSG00000198053|SIRPA ENSG00000198457|CP21A\_HUMAN ENSG00000198911|SREBF2 ENSG00000203900|Q6ZSD3\_HUMAN ENSG00000204286|Q6ZW78\_HUMAN  
ENSG00000104044|IDS ENSG00000043355|ZIC2 ENSG00000054690|PLEKHH1 ENSG00000064787|BCAS1 ENSG00000081913|PHLPP ENSG00000100354|TNRC6B ENSG00000100796|SMEK1 ENSG00000108039|XPNPEP1  
ENSG00000112182|BACH2 ENSG00000113140|SPARC ENSG00000118503|TNFAIP3 ENSG00000125484|GTF3C4 ENSG00000127483|HP1BP3 ENSG00000133816|MICAL2 ENSG00000155760|FZD7 ENSG00000158023|WDR66  
ENSG00000164024|METAP1 ENSG00000164451|FAM26D ENSG00000167601|AXL ENSG00000174326|SLC16A11 ENSG00000177981|ASB8 ENSG00000185742|NP\_997528.1 ENSG00000186184|POLR1D  
CCTCCTC ENSG00000004776|HSPB6 ENSG00000007376|RPUSD1 ENSG00000017483|SLC38A5 ENSG00000054179|ENTPD2 ENSG00000070182|SPTB ENSG00000102898|NUTF2 ENSG00000103042|NP\_060701.1 ENSG00000105220|GPI  
ENSG00000105605|CACNG7 ENSG00000105711|SCN1B ENSG00000107187|LHX3 ENSG00000123144|C19orf43 ENSG00000124762|CDKN1A ENSG00000126583|PRKCG ENSG00000129354|AP1M2 ENSG00000135916|ITM2C  
ENSG00000138136|LBX1 ENSG00000140497|SCAMP2 ENSG00000144579|CTDSP1 ENSG00000147443|DOK2 ENSG00000158927|C8orf58 ENSG00000161574|CCL14 ENSG00000161939|C17orf49 ENSG00000162129|CLPB  
ENSG00000163870|GPR175 ENSG00000164970|C9orf25 ENSG00000167194|Q96LL3\_HUMAN ENSG00000171532|NEUROD2 ENSG00000172350|ABCG4 ENSG00000172889|EGFL7 ENSG00000174151|CYB51D1 ENSG00000174672|BRSK2  
ENSG00000176884|GRIN1 ENSG00000178035|IMPDH2 ENSG00000179036|VAMP2 ENSG00000187714|SLC18A3 ENSG00000203902|PNMA6B ENSG00000083720|OXCT1 ENSG00000089775|ZBTB25 ENSG00000090530|LEPREL1  
ENSG00000092871|RFFL ENSG00000090660|FKBP5 ENSG00000106462|EH2H ENSG00000108094|CUL2 ENSG00000119922|IFTF2 ENSG00000133816|MICAL2 ENSG00000134109|EDEM1 ENSG00000134644|PUM1  
ENSG00000137757|CASP5 ENSG00000151090|THRB ENSG00000160049|DFFA ENSG00000170989|EDG1 ENSG00000173261|PLAC8L1 ENSG00000178999|AURKB ENSG00000181631|P2RY13 ENSG00000182107|TMEM30B  
ENSG00000185875|THNS1F ENSG00000188393|CLEC2A ENSG00000196730|DAPK1 ENSG00000198353|HOXC4 ENSG00000204472|AIF1 ENSG00000205874|Q6SA06\_HUMAN  
CCTCGTA ENSG00000007384|RHBDF1 ENSG00000020577|SAMD4A ENSG00000069011|PITX1 ENSG00000072864|NDE1 ENSG00000103126|AXIN1 ENSG00000115234|SNX17 ENSG00000120896|SORBS3 ENSG00000125445|MRP57  
ENSG00000136327|NMX2-8 ENSG00000137817|PARP6 ENSG00000139549|DHH ENSG00000149488|TM2 ENSG00000154133|ROBO4 ENSG00000159588|CCDC17 ENSG00000159884|CCDC107 ENSG00000161956|SENP3  
ENSG00000164366|CCDC127 ENSG00000171161|ZNF672 ENSG00000173457|PPP1R14B ENSG00000175567|UCP2 ENSG00000180359|C11orf36 ENSG00000185966|LCE3E ENSG00000000460|C1orf112 ENSG00000065665|SEC61A2  
ENSG00000183048|EDN1 ENSG00000100934|SEC23A ENSG00000104341|LAPTM4B ENSG00000109208|SMR3A ENSG00000112877|CEP7F ENSG00000115548|JMJD1A ENSG00000123739|PLA2G12A ENSG00000126790|C14orf149  
ENSG00000128050|PAICS ENSG00000132855|ANGPTL3 ENSG00000135324|C6orf117 ENSG00000137720|C11orf1 ENSG00000138079|SLC3A1 ENSG00000140873|ADAMTS18 ENSG00000149311|ATM ENSG00000152683|SLC30A6  
ENSG00000175746|NP\_997328.1 ENSG00000178974|FBXO34 ENSG00000178988|MRFP1L1 ENSG00000179833|SERTAD2 ENSG00000182551|ADI1 ENSG00000184474|Q96FP4\_HUMAN ENSG00000197894|ADH5  
CCTCTCC ENSG000000012822|CALCOCO1 ENSG00000063169|GLTSCR1 ENSG00000063244|U2AF2 ENSG00000072071|LPHN1 ENSG00000102287|GABRE ENSG00000108753|TCF2 ENSG00000112041|TULP1 ENSG00000112559|MDFI  
ENSG00000113763|UNC5A ENSG00000116852|KIF21B ENSG00000121753|BAI2 ENSG00000126603|GLIS2 ENSG00000132481|TRIM47 ENSG00000132692|BCAN ENSG00000135406|PRPH ENSG00000135439|CENTG1  
ENSG00000140848|CPNE2 ENSG00000141738|GRB7 ENSG00000142669|SH3BGLR3 ENSG00000143126|CELSR2 ENSG00000146871|OSR1 ENSG00000146005|PSD2 ENSG00000159792|PSKH1 ENSG00000160392|C19orf47  
ENSG00000160678|S100A1 ENSG00000161642|ZNF385 ENSG00000162510|MATN1 ENSG00000165131|C7orf34 ENSG00000166682|TMPRSS5 ENSG00000167182|SP2 ENSG00000167755|KLC6 ENSG00000167895|TM8  
ENSG00000168393|DTYMK ENSG00000168754|NP\_057574.2 ENSG00000169921|Q75L30\_HUMAN ENSG00000170486|KRT72 ENSG00000177045|SIX5 ENSG00000178951|ZBTB7A ENSG00000179036|VAMP2 ENSG00000181378|CCDC108  
ENSG00000183048|SLC25A10 ENSG00000183979|NPB ENSG00000184205|TSYPYL2 ENSG00000184557|SOC3 ENSG00000184811|TUSC5 ENSG00000188185|Q6ZQP8\_HUMAN ENSG00000197558|Q76B61\_HUMAN ENSG00000198870|C9orf96  
ENSG00000204584|Q6ZSH9\_HUMAN ENSG00000000460|C1orf112 ENSG00000080947|Q8IVE0\_HUMAN ENSG00000100505|TRIM9 ENSG00000116176|TPSG1 ENSG00000119723|COQ6 ENSG00000133678|CJ057\_HUMAN ENSG00000138002|IFT172  
ENSG00000141433|ADCYAP1 ENSG00000144118|RALB ENSG00000149124|GLYAT ENSG00000159753|NP\_001013860.1 ENSG00000164024|METAP1 ENSG00000174437|ATP2A2 ENSG00000182223|ZARI  
CCTCTCT ENSG00000006116|CACNG3 ENSG00000033627|ATPGVOA1 ENSG00000078061|ARAF ENSG00000084628|FAM77C ENSG00000093217|XYLB ENSG00000099338|C19orf15 ENSG00000099869|IGF2AS ENSG00000101057|MYBL2  
ENSG00000107021|TBC1D13 ENSG00000107954|NEURL ENSG00000108878|CACNG1 ENSG00000116871|MAP7D1 ENSG00000124334|IL9R ENSG00000124664|SPDEF ENSG00000131504|DIAPH1 ENSG00000134287|ARF3  
ENSG00000141293|SKAP1 ENSG00000142039|CCDC97 ENSG00000142687|KIAA0319L ENSG00000146197|CUBEB3 ENSG00000149357|C11orf59 ENSG00000155659|VIG4 ENSG00000159335|PTMS ENSG00000162063|CCNF  
ENSG00000162735|PEX19 ENSG00000163354|DCST2 ENSG00000164867|NOS3 ENSG00000168754|NP\_057574.2 ENSG00000168784|BPESC1 ENSG00000170214|ADRA1B ENSG00000170439|METTL7B ENSG00000172269|DPAGT1  
ENSG00000173918|C1QTNF1 ENSG00000178719|GRINA ENSG00000180353|HCLS1 ENSG00000185133|PIB5PA ENSG00000185479|KRT6B ENSG00000204619|PPP1R11 ENSG00000042088|TDP1 ENSG00000082482|KCNK2  
ENSG00000100578|KIAA0586 ENSG00000104341|LAPTM4B ENSG00000108296|CCDC49 ENSG00000112817|ATP6 ENSG00000122643|PRL3 ENSG00000122741|WDR32 ENSG00000125772|GDE5\_HUMAN  
ENSG00000135318|NT5E ENSG00000143776|CDC42BPA ENSG00000158042|MRPL17 ENSG00000159216|RUNX1 ENSG00000163125|KIAA0460 ENSG00000163377|FAM19A4 ENSG00000164112|TMEM155 ENSG00000166363|OR10A5  
ENSG00000166503|HDGR3\_HUMAN ENSG00000170037|CNTROB ENSG00000170786|NP\_620419.2 ENSG00000184227|ACOT1 ENSG00000197956|S100A6 ENSG00000198252|STYX  
CCTGATT ENSG00000036565|SLC18A1 ENSG00000054118|THRAP3 ENSG00000072840|EVC ENSG00000129450|SIGLEC9 ENSG00000135622|SEMA4F ENSG00000140320|BAHD1 ENSG00000143127|ITGA10 ENSG00000153395|AYTL2  
ENSG00000157765|SLC34A2 ENSG00000158158|CNM4 ENSG00000163515|RETNLB ENSG00000166220|C10orf27 ENSG00000166689|PLEKHK7 ENSG00000169174|PCKS9 ENSG00000169738|DCXR ENSG00000182218|KIAA1822  
ENSG00000185681|C9orf18 ENSG00000204479|PRAMEF17 ENSG00000204488|PRAMEF16 ENSG00000204845|Q6ZUC3\_HUMAN ENSG00000133664|MVP ENSG00000077258|FM04 ENSG00000077279|DCX ENSG00000087301|KIAA1344  
ENSG00000106105|GARS ENSG00000110851|PRDM4 ENSG00000113212|PCDHB7 ENSG00000116874|WARS2 ENSG00000118402|ELOVL4 ENSG00000125356|NDUFA1 ENSG00000128590|DNAJB9 ENSG00000132763|MMACHC  
ENSG00000135776|ABCB10 ENSG00000136824|SMC2 ENSG00000141367|CLTC ENSG00000150459|SAP18 ENSG00000151726|ACSL1 ENSG00000151834|GABRA2 ENSG00000163029|SMC6 ENSG00000166323|C11orf65  
ENSG00000168204|O95014\_HUMAN ENSG00000174444|RPL4 ENSG00000177599|ZNF491 ENSG00000177889|UBE2N ENSG00000180611|C3orf59 ENSG00000205773|LOC652517  
CCTGCAT ENSG00000074181|NOTCH3 ENSG00000100034|PPM1F ENSG00000101146|RAE1 ENSG00000101986|ABCD1 ENSG00000104522|TSTA3 ENSG00000108342|CSF3 ENSG00000113758|DBN1 ENSG00000119599|WDR21A  
ENSG00000130167|TSPAN16 ENSG00000145029|NICN1 ENSG00000145040|UCN2 ENSG00000146083|RNF44 ENSG00000156298|TSPAN7 ENSG00000158828|PINK1 ENSG00000160214|RRP1 ENSG00000161381|PLXDC1  
ENSG00000163545|NUAK2 ENSG00000165173|MID1IP1 ENSG00000165643|SOHLH1 ENSG00000167371|PRRT2 ENSG00000167895|TM8 ENSG00000168079|SCARA5 ENSG00000175573|C11orf68 ENSG00000178243|C9orf62  
ENSG00000181123|Q8N7N0\_HUMAN ENSG00000189143|CLDN4 ENSG00000197226|TBC1D9B ENSG00000005108|THSD7A ENSG000000081770|NAIP ENSG000000091527|CDV3 ENSG00000104313|EYA1 ENSG00000108395|TRIM37  
ENSG00000112297|ATM1 ENSG00000116120|FARSB ENSG00000118322|ATP10B ENSG00000133188|RTN3 ENSG00000134594|RAB33A ENSG00000137976|DNASE2B ENSG00000138411|HECW2 ENSG00000148516|ZEB1  
ENSG00000163328|GPR155 ENSG00000164252|AGGF1 ENSG00000165061|ZMAT4 ENSG00000166595|FAM96B ENSG00000172915|NBEA ENSG00000174343|CHRNA9 ENSG00000174456|NP\_997318.1 ENSG00000177410|Q5QHF1\_HUMAN  
ENSG00000179978|Q59G16\_HUMAN ENSG00000185010|F8 ENSG00000185201|IFITM2 ENSG00000204692|OR12D3  
CCTGCCA ENSG00000006616|CRLF1 ENSG00000095321|CRAT ENSG00000108309|NP\_006686.1 ENSG00000108852|MP22 ENSG00000113070|HBEGF ENSG00000115255|REEP6 ENSG00000121653|MAPK8IP1 ENSG00000127388|NM\_198455.2  
ENSG00000131095|GFAP ENSG00000132376|SKIP\_HUMAN ENSG00000136457|CHAD ENSG00000136840|STGALNAC4 ENSG00000137076|TLN1 ENSG00000141959|PFKL ENSG00000145626|UGT3A1 ENSG00000146221|NP\_872345.1  
ENSG00000149131|SERPING1 ENSG00000159713|CG38\_HUMAN ENSG00000161031|PGLYRP2 ENSG00000163218|PGLYRP4 ENSG00000167716|WDR81 ENSG00000173264|GPR137 ENSG00000173838|RNF190 ENSG00000175707|C1orf172  
ENSG00000181877|Q8NAZ9\_HUMAN ENSG00000183570|PCBP3 ENSG00000196588|MKL1\_HUMAN ENSG00000197088|NM\_207488 ENSG00000197539|Q6ZSY7\_HUMAN ENSG00000198752|CDC42BPB ENSG00000198753|PLXNB3 ENSG00000205793|Q6ZT42\_HUMAN  
ENSG00000072422|RHOBTB1 ENSG00000072849|DERL2 ENSG00000083828|ZNF586 ENSG00000102158|TAG2\_HUMAN ENSG00000105699|LSR ENSG00000108984|MAP2K6 ENSG00000128833|MYO5C ENSG00000140015|KCNH5  
ENSG00000141298|SSH2 ENSG00000147400|CETN2 ENSG00000165669|C10orf84 ENSG00000166405|RIC3 ENSG00000166595|FAM96B ENSG00000166889|NP\_689929.1 ENSG00000171488|LRRRC8 ENSG00000184588|PDE4B  
ENSG00000188216|Q5JST9\_HUMAN ENSG00000196754|S100A2  
CCTGCCC ENSG00000003249|DBNDD1 ENSG00000006118|TMEM132A ENSG00000011105|TSPAN9 ENSG00000012124|CD22 ENSG00000027644|INSR ENSG00000031698|SARS ENSG00000042493|CAPG ENSG00000054967|TNFRSF19L  
ENSG00000068323|TFE3 ENSG00000068971|PPP2R5B ENSG00000084764|MAPRE3 ENSG00000087152|ATXN7L3 ENSG00000090975|PITPNM2 ENSG00000099864|PALM ENSG00000100991|TRPC4AP ENSG00000105711|SCN1B  
ENSG00000107021|TBC1D13 ENSG00000112033|PPARD ENSG00000114353|GNAI2 ENSG00000122304|Q6ZMM0\_HUMAN ENSG00000122515|ZMIZ2 ENSG00000123933|MXD4 ENSG00000125834|STK35 ENSG00000126461|NP\_067051.1  
ENSG00000126934|MAP2K1 ENSG00000130513|GDF15 ENSG00000130758|MAP3K10 ENSG00000132505|DLG4 ENSG00000133422|MORC2 ENSG00000133466|C1QTNF6 ENSG00000134815|DHX34  
ENSG00000138834|MAPK8IP3 ENSG00000141012|GALNS ENSG00000141258|RUTBC1 ENSG00000142303|ADAMTS10 ENSG00000144655|AXUD1 ENSG00000149452|SLC22A8 ENSG00000156299|TIAM1 ENSG00000158859|ADAMTS4  
ENSG00000160445|ZER1 ENSG00000160932|LY6E ENSG00000163013|FBXO41 ENSG00000163932|PRKCD ENSG00000164620|C5orf16 ENSG00000164917|K0415\_HUMAN ENSG00000166341|DCHS1 ENSG00000167925|GHDC  
ENSG00000168528|SERINC2 ENSG00000169910|ASL ENSG00000170309|RELA ENSG00000173327|MAP3K11 ENSG00000173805|HAP1 ENSG00000174903|RAB1B ENSG00000175264|CHST1  
ENSG00000176884|GRIN1 ENSG00000177542|SLC25A22 ENSG00000177943|MAMDC4 ENSG00000178709|CLDN9 ENSG00000182446|NPLOC4 ENSG00000185885|IFITM1 ENSG00000186827|TNFRSF4 ENSG00000188807|NP\_001010866.1  
ENSG00000196517|SLC6A9 ENSG00000196700|ZNF512B ENSG00000196924|FLNA ENSG00000197587|DMBX1 ENSG00000197891|SLC22A12 ENSG00000205003|KIAA2022 ENSG00000072315|TRPC5 ENSG00000078304|PPP2R5C  
ENSG00000100354|TNRC6B ENSG000001103152|MPG ENSG000001112624|KIAA0240 ENSG00000119723|COQ6 ENSG00000125812|GZF1 ENSG00000126453|BCL2L12 ENSG00000133318|RTN3  
ENSG00000134259|NGFB ENSG00000145358|DDIT4L ENSG00000150337|FCGR1A ENSG00000154493|C10orf90 ENSG00000165168|CYBB ENSG00000166405|RIC3 ENSG00000168710|AHCYL1 ENSG00000185742|NP\_997528.1  
CCTGCCCT ENSG00000001617|SEMA3F ENSG00000007314|SCN4A ENSG00000008118|CAMK1G ENSG00000088826|SMOX ENSG00000099949|LZTR1 ENSG00000101152|DNAJC5 ENSG00000102080|TEX28P2 ENSG00000103355|PRSS33  
ENSG00000104142|VPS18 ENSG00000105583|C19orf56 ENSG00000105605|CACNG7 ENSG00000106348|IMPDP1 ENSG00000115155|OTOF ENSG00000118194|TNNT2 ENSG00000120899|PTK2B ENSG00000120942|UBIAD1  
ENSG00000124664|SPDEF ENSG00000131401|NAPSB ENSG00000137731|FXYP2 ENSG00000141084|RANBP10 ENSG00000141556|TBCD ENSG00000142453|CARM1 ENSG00000142660|MMEL1  
ENSG00000143382|ADAMTS14 ENSG00000143858|SYT2 ENSG00000144567|C2orf17 ENSG00000144579|CTDSP1 ENSG00000149131|SERPING1 ENSG00000149927|DOC2A ENSG00000161202|D

ENSG00000188807|NP\_001010866.1 ENSG00000197587|DMBX1 ENSG00000198832|SELM\_HUMAN ENSG00000205426|KRT81 ENSG0000065485|PDIA5 ENSG0000065518|NDUFB4 ENSG0000080947|Q8IVE0\_HUMAN ENSG0000095587|TLL2  
ENSG00000100722|ZC3H14 ENSG00000104435|STMN2 ENSG00000104447|TRPS1 ENSG00000105677|TMEM147 ENSG00000107249|GLT3S ENSG00000108924|HLF ENSG00000115944|COX7A2L ENSG00000116299|KIAA1324  
ENSG00000119899|SLC17A5 ENSG00000121440|PDZRN3 ENSG00000134258|VTCN1 ENSG00000134324|LPIN1 ENSG00000135778|C1orf57 ENSG00000141298|SSH2 ENSG00000143363|PRUNE ENSG00000143994|ABHD1  
ENSG00000147475|ERLIN2 ENSG00000153071|DAB2 ENSG00000168582|CRYGA ENSG00000172765|TMCC1 ENSG00000184083|FAM120C ENSG00000184588|PDE4B ENSG00000204478|PRAMEF20 ENSG00000204486|PRAMEF21

CCTGCGA ENSG0000007264|MATK ENSG00000071859|FAM50A ENSG00000080293|SCTR ENSG00000099994|SUSD2 ENSG00000101193|C2orf11 ENSG00000104892|KLC3 ENSG00000104946|TBC1D17 ENSG00000106246|PTCD1  
ENSG00000110245|APOC3 ENSG00000119720|C14orf102 ENSG00000123453|SARDH ENSG00000128262|Q9NTU6\_HUMAN ENSG00000130751|NPAS1 ENSG00000140986|RPL3L ENSG00000143374|TARS2 ENSG00000156591|C9orf70  
ENSG00000166428|PLD4 ENSG00000169020|ATP5I ENSG00000178372|CALML5 ENSG00000183605|SFXN4 ENSG00000183963|SMTN ENSG00000204625|HCG9 ENSG00000206580|AP4M1 ENSG00000087095|NLK  
ENSG00000109339|MAPK10 ENSG00000114098|ARMC8 ENSG00000116251|RPL22 ENSG00000120436|GPR31 ENSG00000124214|STAU1 ENSG00000125514|FOXA1 ENSG00000134389|CFHR5  
ENSG00000138784|NP\_060170.1 ENSG00000140391|TSPAN3 ENSG00000147400|CETN2 ENSG00000158042|MRPL17 ENSG00000159445|THEM4 ENSG00000168589|DYNLRB2 ENSG00000172164|SNTB1 ENSG00000180882|XR\_017823.1  
ENSG00000196826|ZNF709 ENSG00000197888|UGT2B17 ENSG00000204897|KRT25  
ENSG00000049239|H6PD ENSG00000085063|CD59 ENSG00000102904|TSNAXIP1 ENSG00000105198|LGALS13 ENSG00000105383|CD33 ENSG00000106125|AQP1 ENSG00000108352|RAPGEF1 ENSG00000114019|AMOTL2  
ENSG00000123360|PDE1B ENSG00000126267|COX6B1 ENSG00000126456|IRF3 ENSG00000131400|NAPSA ENSG00000131653|TRAF7 ENSG00000140538|NTRK3 ENSG00000142784|WDTC1 ENSG00000146047|HIST1H2BA  
ENSG00000151224|MAT1A ENSG00000153498|C13orf28 ENSG00000163263|C1orf189 ENSG00000169410|PTPN9 ENSG00000179271|GADD45GIP1 ENSG00000180483|DEFB119 ENSG00000182351|CRIP1 ENSG00000185052|SLC24A3  
ENSG00000188100|FAM25\_HUMAN ENSG00000196808|Q96N4\_HUMAN ENSG00000198466|ZNF587 ENSG00000067369|TP53BP1 ENSG00000083457|ITGAE ENSG00000100505|TRIM9 ENSG00000110484|SCGB2A2 ENSG00000122512|PMS2  
ENSG00000125356|NDUFAL1 ENSG00000132825|PPP1R3D ENSG00000135842|FAM129A ENSG00000147041|SYTL5 ENSG00000151025|GPR158 ENSG00000162643|WDR63 ENSG00000164684|ZNF704 ENSG00000166343|ZMYND17  
ENSG00000167117|C17orf73 ENSG00000170759|KIF5B ENSG00000175483|O94914\_HUMAN ENSG00000175646|PRM1 ENSG00000184905|TCEAL2 ENSG00000196589|MB3L2\_HUMAN  
ENSG00000007376|RPUSD1 ENSG00000022223|LTF ENSG00000072163|LIMS2 ENSG00000075234|NP\_060401.2 ENSG00000077782|FGFR1 ENSG00000099957|P2RXL1 ENSG00000104894|CD37 ENSG00000105583|C19orf56  
ENSG00000110328|GALNTL4 ENSG00000116649|SRM ENSG00000125170|DOK4 ENSG00000128185|DGCRL6L ENSG00000132027|PEMT ENSG00000134780|DAGLA ENSG00000137198|GMPR ENSG00000140955|NP\_631913.2  
ENSG00000141985|SH3GL1 ENSG00000155666|JMJD5 ENSG00000156413|FUT6 ENSG00000158106|RHPN1 ENSG00000160325|C9orf7 ENSG00000161682|Q8N0U1\_HUMAN ENSG00000161973|CCDC42 ENSG00000163958|ZDHHC19  
ENSG00000167173|C15orf39 ENSG00000167468|GPX4 ENSG00000167578|MIA ENSG00000171124|FUT3 ENSG00000171303|CKNKB3 ENSG00000171551|ECEL1 ENSG00000172987|HPSE2 ENSG00000173020|ADRBK1  
ENSG00000174516|PBLI3 ENSG00000182195|LDOC1 ENSG00000183628|DGCRL6 ENSG00000186801|KRT5 ENSG00000196758|NM\_207483 ENSG00000203744|ALL170\_HUMAN ENSG00000058668|ATP2B4 ENSG00000082556|OPRK1  
ENSG00000089177|C2orf23 ENSG00000095637|SORBS1 ENSG00000102595|UGCGL2 ENSG00000110851|PRDM4 ENSG00000121848|ZNF364 ENSG00000130338|TULP4 ENSG00000136750|GAD2 ENSG00000147364|FBXO25  
ENSG00000147892|ADAMTSL1 ENSG00000148229|POLE3 ENSG00000149201|CCDC81 ENSG00000153823|PID1 ENSG00000154493|C10orf90 ENSG00000161654|LSM12 ENSG00000164588|HCN1 ENSG00000171100|MTM1  
ENSG00000176049|JAKM1P2 ENSG00000182952|HMGNA4 ENSG00000182957|SPATA13 ENSG00000198042|RBM13 ENSG00000198301|SDCN1 ENSG00000205358|MT1H

CCTGTAA ENSG00000086848|ALG9 ENSG00000088356|PDRG1 ENSG00000100271|TLL1 ENSG00000101144|BMP7 ENSG00000102076|OPN1LW ENSG00000103510|MYST1 ENSG00000103888|KIAA1199 ENSG00000120889|TNFRSF10B  
ENSG00000124208|UBE2V1 ENSG00000139436|GIT2 ENSG00000142544|ATPBD3 ENSG00000147380|OPN1MW ENSG00000160844|NP\_849153.3 ENSG00000162337|LRP5 ENSG00000163157|TMOD4 ENSG00000165171|WBCSR27  
ENSG00000166160|OPN1MW2 ENSG00000172426|C6orf206 ENSG00000180471|C9orf31 ENSG00000183566|LATH\_HUMAN ENSG00000185475|NP\_955369.1 ENSG00000186594|NP\_116284.2 ENSG00000196431|CRYBA4 ENSG00000197162|ZNF688  
ENSG00000197616|MYH6 ENSG00000198668|CALM1 ENSG00000204444|APOM ENSG00000058063|ATP11B ENSG00000066294|CD84 ENSG00000058063|ATP11B ENSG00000066294|CD84 ENSG00000058063|ATP11B ENSG00000058063|ATP11B  
ENSG00000105216|LSM14A ENSG00000110436|SLC1A2 ENSG00000111530|CAND1 ENSG00000122042|UBL3 ENSG00000134602|MST4\_HUMAN ENSG00000135452|TSPAN3 ENSG00000138795|LEF1 ENSG00000143815|LBR  
ENSG00000151655|ITI12 ENSG00000152795|HNRPDL ENSG00000163046|C2orf99 ENSG00000163322|CCDC98 ENSG00000164305|CASP3 ENSG00000164754|RAD21 ENSG00000168348|INSM2 ENSG00000187611|Q6ZTR6\_HUMAN  
ENSG00000196664|TLR7

CCTGTAC ENSG00000107331|ABCA2 ENSG00000124571|XPO5 ENSG00000128322|IGLL1 ENSG00000132510|JMJ3 ENSG00000135213|POM121 ENSG00000137843|PAK6 ENSG00000142748|FCN3 ENSG00000153266|FEZF2  
ENSG00000158517|NCF1 ENSG00000160877|BTBD14B ENSG00000162736|NCSN1 ENSG00000163357|DCST1 ENSG00000165178|LOC648998 ENSG00000167798|NP\_001013662.1 ENSG00000172350|ABCG4 ENSG00000178206|C2orf14  
ENSG00000180846|C19orf34 ENSG00000189060|H1FO ENSG00000196313|NP\_742017.1 ENSG00000204550|LOC388564 ENSG00000206066|IGLL3 ENSG00000010810|FYN ENSG00000100612|DHRS7 ENSG00000104863|LIN7B  
ENSG00000109667|SLC2A9 ENSG00000112651|MRPL2 ENSG00000114023|C3orf28 ENSG00000122870|BICC1 ENSG00000133136|GB5L\_HUMAN ENSG00000134046|MBD2 ENSG00000136960|ENPP2 ENSG00000142507|PSMB6  
ENSG00000143157|POGK ENSG00000158985|CDC42SE2 ENSG00000173908|KRT28 ENSG00000175183|CBSRP2 ENSG00000185127|C6orf120 ENSG00000185918|DEFA3 ENSG00000206047|DEFT1P

CCTGTAG ENSG00000104901|DKKL1 ENSG00000124181|PLCG1 ENSG00000131899|LLGL1 ENSG00000138074|SLC5A6 ENSG00000143630|HCN3 ENSG00000148158|SNX30 ENSG00000151353|TMEM18 ENSG00000158850|B4GALT3  
ENSG00000159423|ALDH4A1 ENSG00000172057|ORMDL3 ENSG00000173126|PCP4L1 ENSG00000176087|SLC35A4 ENSG00000187003|ACTL7A ENSG00000187144|SPATA21 ENSG00000197417|CARKL ENSG00000197921|HES5  
ENSG00000204125|Q53S21\_HUMAN ENSG00000205531|NAP1L4 ENSG000000616490|CLCA1 ENSG00000054392|HHAT ENSG00000057657|PRDM1 ENSG00000079385|CEACAM1 ENSG00000081026|MAGI3 ENSG00000084444|KIAA1467  
ENSG00000102098|SCML2 ENSG00000108395|TRIM37 ENSG00000111875|ASF1A ENSG00000114204|SERPINI2 ENSG00000118702|GHR5 ENSG00000139146|FAM60A ENSG00000141367|CLTC ENSG00000151611|MMAA  
ENSG00000153317|DEF1 ENSG00000163788|SNRK ENSG00000164181|ELOVL7 ENSG00000167840|ZNF232 ENSG00000171243|SOSTDC1 ENSG00000171634|BPTF ENSG00000182993|C12orf60 ENSG00000185950|IRS2  
ENSG00000205612|Q71JB2\_HUMAN

CCTGTAT ENSG000000087076|HSD17B14 ENSG00000087077|TRIP6 ENSG00000087087|ARS2\_HUMAN ENSG00000119408|NEK6 ENSG00000133561|GIMAP6 ENSG00000135926|TMBIM1 ENSG00000137709|POU2F3 ENSG00000166398|KIAA0355  
ENSG00000168795|ZBTB5 ENSG00000169385|RNASE3 ENSG00000169397|RNASE3 ENSG00000174282|ZBTB4 ENSG00000177025|C19orf18 ENSG00000179241|LDLRAD3 ENSG00000182487|NCF1C ENSG00000196209|Q5JXA8\_HUMAN  
ENSG00000198881|ASB12 ENSG00000205313|FAM106A ENSG00000071575|TRIB2 ENSG00000082153|BZW1 ENSG00000082196|C10TNF3 ENSG00000107758|PPP3CB ENSG00000114742|SHR48 ENSG00000116688|MFN2  
ENSG00000119203|CPSF3 ENSG00000119953|SMNDC1 ENSG00000120820|GLT8D2 ENSG00000137871|SUHW4 ENSG00000141048|MYH4 ENSG00000164283|ESM1 ENSG00000171241|SHCBP1 ENSG00000196792|STRN3  
ENSG00000198589|LRBA

CCTGTCT ENSG000000067191|CACNB1 ENSG00000083845|RP55 ENSG00000104915|STX10 ENSG00000108107|RPL28 ENSG00000108294|PSMB3 ENSG00000110108|TMEM109 ENSG00000111667|USP5 ENSG00000112561|TFEB  
ENSG00000126698|DNAJC8 ENSG00000126767|ELK1 ENSG00000127129|EDN2 ENSG00000132589|FLOT2 ENSG00000140839|NP\_001011880.1 ENSG00000145911|N4BP3\_HUMAN ENSG00000146826|C7orf43 ENSG00000152767|FARP1  
ENSG00000157322|NP\_872425.1 ENSG00000158106|RHPN1 ENSG00000162365|CYP4A22 ENSG00000166025|AMOTL1 ENSG00000169057|MECP2 ENSG00000170275|CRTAP ENSG00000178719|GRINA ENSG00000178786|Q8N2B6\_HUMAN  
ENSG00000179837|RBM15B ENSG00000186174|BCL9L ENSG00000187017|ESPN ENSG00000187048|CYP4A11 ENSG00000198049|AVPR1B ENSG00000205821|NP\_001020630.1 ENSG00000011295|TTC19 ENSG00000095787|WAC  
ENSG00000101138|CSTF1 ENSG00000105146|AURKC ENSG00000105205|CLC ENSG00000111237|VPS29 ENSG00000116704|SLC35D1 ENSG00000131174|COX7B ENSG00000135108|FBXO21 ENSG00000136874|STX17  
ENSG00000138399|FASTKD1 ENSG00000139211|AMIGO2 ENSG00000140382|HMG20A ENSG00000145555|YOL10 ENSG00000156633|PIP ENSG00000160633|SAFB ENSG00000162433|AK3L2 ENSG00000166411|IDH3A  
ENSG00000166913|YWHAB ENSG00000169129|AFAP1L2 ENSG00000171121|KCNMB3 ENSG00000171360|KRT38 ENSG00000175426|PCSK1 ENSG00000179010|MRFAP1 ENSG00000180611|C3orf59 ENSG00000181656|GPR88  
ENSG00000186480|INSI6 ENSG00000197142|ACSL5 ENSG00000198876|WDR40A ENSG00000205773|LOC652517  
ENSG00000077080|ACTL6B ENSG00000087274|ADD1 ENSG00000087586|AURKA ENSG00000105255|FSD1 ENSG00000107742|SPOCK2 ENSG00000110448|CD5 ENSG00000116661|FBXO2 ENSG00000128262|Q9NTU6\_HUMAN  
ENSG00000131055|COX4I2 ENSG00000142227|EMP3 ENSG00000146374|RSPO3 ENSG00000149243|NP\_001034637.1 ENSG00000152217|SETBP1 ENSG00000155363|MOV10 ENSG00000155846|PPARGC1B ENSG00000161103|Q5BKY6\_HUMAN  
ENSG00000162522|KIAA1522 ENSG00000172663|TMEM134 ENSG00000177807|KCNJ10 ENSG00000179036|VAMP2 ENSG00000185608|MRPL40 ENSG0000017528|ABCD3 ENSG00000118816|CCNI ENSG00000130150|MOSPD2  
ENSG00000154007|ASB17 ENSG00000164821|TFEAF4 ENSG00000168229|PTGDR ENSG00000196562|SULF2 ENSG00000196628|TCF4 ENSG00000196885|Q9HA28\_HUMAN ENSG00000203667|FAM36A  
ENSG00000072778|ACADVL ENSG00000073670|ADAM11 ENSG00000100207|TCF20 ENSG00000105732|SYNF74 ENSG00000110881|ACCN2 ENSG00000111775|COX6A1 ENSG00000113048|MRPS27 ENSG00000118058|MLL  
ENSG00000119638|NEK9 ENSG00000124920|C1orf9 ENSG00000126878|C9orf58 ENSG00000126970|KIAA1166 ENSG00000130177|CDDC16 ENSG00000131059|C2orf71 ENSG00000132405|TBC1D14 ENSG00000132716|WDR42A  
ENSG00000133422|MORC2 ENSG00000134369|NAV1 ENSG00000141034|C17orf39 ENSG00000145022|TCTA ENSG00000155254|MARVELD1 ENSG00000158887|MPZ ENSG00000164605|Q5T8I0\_HUMAN ENSG00000165457|FOLR2  
ENSG00000168734|PKIG ENSG00000168928|CTRB2 ENSG00000170420|APOL6 ENSG00000170955|PRKCDBP ENSG00000178814|OPLAH ENSG00000181722|ZBTB20 ENSG00000184343|SRPK3 ENSG00000189275|Q6ZK0\_HUMAN  
ENSG00000196507|TCEAL3 ENSG00000197296|C2orf142 ENSG00000205441|KRTAP10-7 ENSG00000206053|HNL1 ENSG00000065534|MYLK ENSG00000073921|PICALM ENSG00000107779|BMP1R1A  
ENSG00000121858|TNFSF10 ENSG00000135698|MPHOSPH6 ENSG00000136536|MARCH7 ENSG00000138823|MTTP ENSG00000148516|ZEB1 ENSG00000155380|SLC16A1 ENSG00000159593|APPBP1 ENSG00000164329|PAPD4  
ENSG00000164654|NP\_061878.3 ENSG00000164929|BAALC ENSG00000165449|SLC16A9 ENSG00000165533|TTC8 ENSG00000170270|C14orf142 ENSG00000173598|NUDT4 ENSG00000187079|TEAD1 ENSG00000198648|STK39  
ENSG00000203729|C1orf120 ENSG00000204990|NP\_001008742.1

CCTTACA ENSG00000007402|CACNA2D2 ENSG00000077274|CAFNB6 ENSG00000108387|SEPT4 ENSG00000116667|C1orf21 ENSG00000117899|MESDC2 ENSG00000125844|RRBP1 ENSG00000148704|VAX1 ENSG00000149262|INTS4  
ENSG00000164048|ZNF589 ENSG00000165233|C9orf89 ENSG00000167800|TBX10 ENSG00000168993|NM\_006651.3 ENSG00000173218|VANGL1 ENSG00000183856|IQGAP3 ENSG00000197838|CYP2A13 ENSG00000197901|SLC22A6  
ENSG00000197965|MPZL1 ENSG00000198336|MYL4 ENSG00000198561|CTNND1 ENSG00000204385|CTL4\_HUMAN ENSG00000046604|DSG2 ENSG00000067955|CBFB ENSG00000071794|HLTF ENSG00000078674|PCMI  
ENSG00000101327|PDYN ENSG00000102081|FMR1 ENSG00000119013|NDUFB3 ENSG00000119912|IDE ENSG00000124429|POF1B ENSG00000131981|LGALS3 ENSG00000133961|NUMB ENSG00000143995|MEIS1  
ENSG00000147437|GNRH1 ENSG00000163001|CCDC104 ENSG00000164308|NP\_071745.1 ENSG00000165819|METTL3 ENSG00000168497|SDPR ENSG00000170949|ZNF160 ENSG00000180257|ZNF321 ENSG00000196586|MYO6  
ENSG00000197497|ZNF665 ENSG00000197953|AADACL2 ENSG00000198824|C13orf8 ENSG00000204604|ZNF468  
CCTTAGG ENSG00000116667|C1orf21 ENSG00000126970|KIAA1166 ENSG00000130477|UNC13A ENSG00000134207|SYT6 ENSG00000140478|NM\_018652.4 ENSG00000142515|KLK3 ENSG00000148339|SLC25A25 ENSG00000161270|NPHS1  
ENSG00000162188|GNG3 ENSG00000165837|Q5W0A0\_HUMAN ENSG00000169877|ERAF ENSG00000173702|MUC13 ENSG00000178363|CALML3 ENSG00000183551|RGAG4 ENSG00000186919|LGIC21 ENSG00000188004|VSI68  
ENSG00000188322|SBK1 ENSG00000204479|PRAMEF17 ENSG00000204488|PRAMEF16 ENSG00000205632|Q6ZVF7\_HUMAN ENSG00000072415|MEP5 ENSG00000086598|TMED2 ENSG00000108256|NUFIP2 ENSG00000115290|GRB14  
ENSG00000115993|TRAK2 ENSG00000128607|NP\_055812.1 ENSG00000130224|LRCH2 ENSG00000134897|BIVM ENSG00000135476|ESPL1 ENSG00000137090|DMRT1 ENSG00000152932|RAB3C ENSG00000154099|LRRC50  
ENSG00000162613|FUBP1 ENSG00000165186|PTCHD1 ENSG00000166363|OR10A5 ENSG00000173612|GPCR6A ENSG00000177283|FZD8 ENSG00000197620|CXO4A\_HUMAN  
ENSG00000100647|KIAA0247 ENSG00000106789|CORO2A ENSG00000116580|GON4L ENSG00000122188|LAX1 ENSG00000126878|C9orf58 ENSG00000130201|EXOC3L2 ENSG00000136895|GARNL3 ENSG00000136935|GOLGA1  
ENSG00000143398|PIP5K1A ENSG00000143515|ATP8B2 ENSG00000145864|GABRB2 ENSG00000158716|DUSP23 ENSG00000160877|BTBD14B ENSG00000161860|SYCE2 ENSG00000163486|SRGAP2 ENSG00000165138|ANKK6  
ENSG00000169241|RAG1AP1 ENSG00000183128|FAM26A ENSG00000183250|C2orf67 ENSG00000184678|HIST2H2BE ENSG00000196218|RYR1 ENSG00000197697|HIST1H2BE ENSG00000205015|Q6ZNV2\_HUMAN ENSG00000050030|KIAA2022  
ENSG00000065060|C6orf107 ENSG00000073614|JARID1A ENSG00000089063|MAK ENSG00000111837|MAK ENSG00000127774|TMEM93 ENSG00000136144|C2BTB1 ENSG00000137670|TUBB2A ENSG00000137267|TUBB2B  
ENSG00000138768|VDP\_HUMAN ENSG00000145242|EPHA5 ENSG00000151151|IPMK ENSG00000154144|TBRG1 ENSG00000154429|C1orf96 ENSG00000156462|C1orf91 ENSG00000155096|AZIN1 ENSG00000159882|ZNF230  
ENSG00000167995|BEST1 ENSG00000168385|SEPT2 ENSG00000172967|XKR3 ENSG00000174740|PABPC5 ENSG00000176273|TMEM20 ENSG00000186908|ZDHHC17 ENSG00000198740|ZNF652 ENSG00000203742|NP\_001032308.1

CCTTATG ENSG00000089060|SLC24A6 ENSG00000113763|UNC5A ENSG00000117360|PRFF3 ENSG00000140497|SCAMP2 ENSG00000151692|RNF144 ENSG00000154537|FAM27C ENSG00000156345|CCRK ENSG00000156711|MAPK13  
ENSG00000161929|NP\_996986.1 ENSG00000163126|ANKRD23 ENSG00000164048|ZNF589 ENSG00000167074|TEF ENSG00000170215|FAM27B ENSG00000174939|ASPHD1 ENSG00000176909|NP\_872380.1 ENSG00000177025|C19orf18  
ENSG00000177791|MYO21 ENSG00000179909|ZNF154 ENSG00000182368|FAM27A ENSG00000187173|LCE2A ENSG00000196724|ZNF454 ENSG00000198182|ZNF607 ENSG00000198753|PLXNB3

ENSG00000205159|Q6ZVC9\_HUMAN ENSG00000206083|ZNF409 ENSG0000070367|EXOC5 ENSG0000087338|GMCL1 ENSG00000104341|LAPTM4B ENSG00000117523|BAT2D1 ENSG00000120686|UFM1 ENSG00000134827|TCN1  
ENSG00000141469|SLC14A1 ENSG00000143437|ARNT ENSG00000147121|ZNF603 ENSG00000152234|ATPSA1 ENSG00000152503|TRIM36 ENSG00000153779|TGIF2LX ENSG00000160201|U2AF1 ENSG00000162994|NP\_689598.1  
ENSG00000163737|PF4 ENSG00000166704|ZNF606 ENSG00000188916|NP\_001034851.1 ENSG00000196826|ZNF709 ENSG00000198729|UGT2B17 ENSG00000198729|PPP1R14C ENSG00000204201|Q49A40\_HUMAN  
CCTTTATT ENSG00000110077|TCEB3 ENSG00000092847|EIF2C1 ENSG00000103855|CD276 ENSG00000105697|HAMP ENSG00000114767|RRP9 ENSG00000114988|LMAN2L ENSG00000117481|NSUN4 ENSG00000129816|NR\_001538.1  
ENSG00000129845|O14605\_HUMAN ENSG00000135362|NP\_079117.2 ENSG00000135451|TROAP ENSG00000136928|GABBR2 ENSG00000142949|PTPRF ENSG00000143028|SYPL2 ENSG00000143418|LASS2 ENSG00000148841|K1AA1754  
ENSG00000149646|C20orf152 ENSG00000152315|KCNK13 ENSG00000157045|NTAN1 ENSG00000158769|P11R ENSG00000162408|NOL9 ENSG00000163486|SRGAP2 ENSG00000164266|SPINK1 ENSG00000164742|ADCY1  
ENSG00000165731|RET ENSG00000166974|MAPRE2 ENSG00000173120|FBXL11 ENSG00000173210|ABLIM3 ENSG00000196218|RYR1 ENSG00000197555|STPALL1 ENSG00000198561|CTNND1 ENSG00000204092|NP\_001001705.1  
ENSG00000204540|PSORS1C1 ENSG00000212131|PDXP ENSG00000044115|CTNNA1 ENSG00000055211|C6orf72 ENSG00000073464|CLCN4 ENSG00000089335|ZNF302 ENSG00000113441|LNPEP ENSG00000119812|FAM98A  
ENSG00000120129|DUSP1 ENSG00000122877|EGR2 ENSG00000123500|COL10A1 ENSG00000134308|YWHAQ ENSG00000135537|LACE1 ENSG00000136813|K1AA0368 ENSG00000138646|HERC5 ENSG00000152022|LIX1L  
ENSG00000152952|PLOC2 ENSG00000153071|DAB2 ENSG00000154359|LONRF1 ENSG00000156642|NPTN ENSG00000161573|CCL16 ENSG00000163491|NEK10 ENSG00000163638|ADAMTS9 ENSG00000164691|TAGAP  
ENSG00000164761|TNFRSF11B ENSG00000170534|C2orf15 ENSG00000172340|SUCLG2 ENSG00000173928|C19orf39 ENSG00000183576|SETD3 ENSG00000187672|ERC2 ENSG00000197841|ZNF181 ENSG00000204709|C6orf100  
ENSG00000205523|Q6ZP97\_HUMAN  
CCTTCAG ENSG00000076984|O14733-2 ENSG00000088356|PDRG1 ENSG00000089234|BRAP ENSG00000092068|SLC7A8 ENSG00000099795|NDUFB7 ENSG00000100413|POLR3H ENSG00000102030|ARD1A ENSG00000106682|EIF4H  
ENSG00000112561|TFEB ENSG00000114383|TUSC2 ENSG00000115507|OTX1 ENSG00000116031|CD207 ENSG00000116852|KIF21B ENSG00000123201|GUCY1B2 ENSG00000123384|LRP1 ENSG00000125820|NKX2-2  
ENSG00000130032|PRRG3 ENSG00000130544|ZNF557 ENSG00000131467|PSME3 ENSG00000140092|PBLN5 ENSG00000144659|SLC25A38 ENSG00000148344|PTGES ENSG00000159792|PSKH1 ENSG00000165495|PKNOX2  
ENSG00000167968|DNASE1L2 ENSG00000168748|CA7 ENSG00000181577|NP\_694978.2 ENSG00000184246|Q96PW8\_HUMAN ENSG00000196970|NXF4 ENSG00000197982|C1orf122 ENSG00000065615|CYB5R4 ENSG00000065833|ME1  
ENSG00000083828|ZNF586 ENSG00000100196|KDELR3 ENSG00000101247|C20orf7 ENSG00000110013|SIAE ENSG00000112280|COL9A1 ENSG00000112333|NR2E1 ENSG00000114030|KPNA1 ENSG00000115233|PSMD14  
ENSG00000124767|GLO1 ENSG00000133627|ACTR3B ENSG00000139318|DUSP6 ENSG00000144026|ZNF514 ENSG00000147121|ZNF673 ENSG00000159917|ZNF235 ENSG00000167785|ZNF558 ENSG00000168032|ENTPD3  
ENSG00000168333|C8orf22 ENSG00000168386|FILIP1L ENSG00000168772|CXXC4 ENSG00000171121|KCNMB3 ENSG00000171209|CSN3 ENSG00000172115|CYCS ENSG00000180815|MAP3K15 ENSG00000188404|SELL  
ENSG00000196826|ZNF709 ENSG00000197054|ZNF763 ENSG00000197123|ZNF679 ENSG00000197140|ADAM32 ENSG00000197375|SLC22A5 ENSG00000198092|TMPRSS11F ENSG00000198468|Q8TAF5\_HUMAN ENSG00000198551|ZNF627  
ENSG00000204789|ZNF204  
CCTTCGC ENSG000000011132|APBA3 ENSG00000065621|GSTO2 ENSG00000070182|SPTB ENSG00000076928|ARHGFE1 ENSG00000078902|TOLLIP ENSG00000087085|ACHE ENSG00000107438|PDLIM1 ENSG00000119333|WDR34  
ENSG00000125534|C20orf149 ENSG00000126458|RRAS ENSG00000131019|ULBP3 ENSG00000131037|EPP8L1 ENSG00000141971|FAM125A ENSG00000149927|DOC2A ENSG00000159842|ABR ENSG00000170379|NP\_775949.1  
ENSG00000171551|ECE1 ENSG00000175223|Q8TC18\_HUMAN ENSG00000182533|CAV3 ENSG00000183562|Q9P1L5\_HUMAN ENSG00000197272|IL27 ENSG00000197530|MIB2 ENSG00000007350|TKTL1 ENSG00000037965|HOXC8  
ENSG00000048991|R3HDM1 ENSG00000061455|PRDM6 ENSG00000081177|EKDL2 ENSG00000100528|CNIH ENSG00000102524|TNFSF13B ENSG00000111145|ELK3 ENSG00000111981|ULBP1 ENSG00000119335|SET  
ENSG00000121871|SLITRK3 ENSG00000128683|GAD1 ENSG00000144749|LRIG1 ENSG00000145715|RASL1 ENSG00000157341|Q8ND77\_HUMAN ENSG00000166226|CCT2 ENSG00000166529|ZSCAN21 ENSG00000170989|EDG1  
ENSG00000180613|GSH2\_HUMAN ENSG00000184492|FOXD4 ENSG00000185710|Q8ND77\_HUMAN ENSG00000185985|SLITRK2 ENSG00000188452|CERKL ENSG00000188641|DPYD ENSG00000197510|C21orf116 ENSG00000197522|SUZ12P  
ENSG00000198741|Q8N9C2\_HUMAN ENSG00000204709|C6orf100  
CCTTCTG ENSG00000088899|K0552\_HUMAN ENSG00000100228|RAB36 ENSG00000101096|NFATC2 ENSG00000108352|RAPGEF1 ENSG00000110169|HPX ENSG00000111199|TRPV4 ENSG00000111642|CHD4  
ENSG00000114735|HEMK1 ENSG00000128918|ALDH1A2 ENSG00000129221|ATPL1 ENSG00000135213|POM121 ENSG00000140995|NP\_997397.1 ENSG00000144834|TAGLN3 ENSG00000146576|C7orf26 ENSG00000147130|ZMYM3  
ENSG00000158863|RAI16 ENSG00000160058|BSDC1 ENSG00000167644|C19orf33 ENSG00000173805|HAP1 ENSG00000173898|SPTBN2 ENSG00000174264|Q4TT42\_HUMAN ENSG00000175356|SCUBE2 ENSG00000175970|NP\_001074002.1  
ENSG00000181830|SLC35C1 ENSG00000182492|BGN ENSG00000188783|PRELP ENSG00000196313|NP\_742017.1 ENSG00000196724|ZNF418 ENSG00000203871|C6orf164 ENSG00000204527|DUXA ENSG00000222267|FHL1  
ENSG00000043355|ZIC2 ENSG00000062716|TMEM49 ENSG00000066294|CD84 ENSG00000070882|OSBPL3 ENSG00000084073|ZMPSTE24 ENSG00000108381|ASPA ENSG00000111261|MANSC1 ENSG00000119866|BCL11A  
ENSG00000123472|ATPAF1 ENSG00000125037|TMEM111 ENSG00000133740|EFZ5 ENSG00000133872|TMEM66 ENSG00000135823|STX6 ENSG00000137752|CASP1 ENSG00000140563|MCTP2 ENSG00000143458|NP\_653219.1  
ENSG00000143493|INTS7 ENSG00000187242|KRT12 ENSG00000197453|NP\_001001706.1 ENSG00000204138|PHACTR4 ENSG00000204424|LYG66D  
CCTTGAA ENSG00000036565|SLC18A1 ENSG00000073792|IGF2BP2 ENSG00000092054|MYH7 ENSG00000100441|K1AA0323 ENSG00000103489|XYLT1 ENSG00000105655|NP\_057452.1 ENSG00000129965|INS ENSG00000132854|ANR38\_HUMAN  
ENSG00000133454|MYO18B ENSG00000135441|BLOC1S1 ENSG00000139445|FOXN4 ENSG00000140522|RLBP1 ENSG00000143314|MRPL24 ENSG00000159461|AMFR ENSG00000161570|CCL5 ENSG00000166860|ZBTB39  
ENSG00000167183|ATAD4 ENSG00000167987|VPS37C ENSG00000169347|GP2 ENSG00000176022|B3GALT6 ENSG00000177721|NP\_001014301.1 ENSG00000189171|S100A13 ENSG00000197353|LYPD2 ENSG00000204584|Q6ZSH9\_HUMAN  
ENSG00000096944|ODZ1 ENSG00000073712|PLEKHC1 ENSG00000091490|NP\_056002.1 ENSG00000104131|EIF3S1 ENSG00000106258|CYP3A5 ENSG00000112280|COL9A1 ENSG00000112294|ALDH5A1 ENSG00000112796|ENPP5  
ENSG00000117289|TXNIP ENSG00000124198|ARFGF2 ENSG00000128915|NRG2 ENSG00000135842|FAM129A ENSG00000136108|CKAP2 ENSG00000141076|CIRH1A ENSG00000145592|RPL37 ENSG00000156103|MPF16  
ENSG00000158185|ANKRD36 ENSG00000166848|TERF2IP ENSG00000168411|RWF3 ENSG00000169251|NMD3 ENSG00000170385|SLC30A1 ENSG00000173387|Q9P007\_HUMAN ENSG00000185275|CD24 ENSG00000187185|Q86VG7\_HUMAN  
ENSG00000196912|AN36B\_HUMAN ENSG00000197937|ZNF347 ENSG00000204466|DGKK  
CCTTGAG ENSG00000008056|SYN1 ENSG00000048140|TSPAN17 ENSG00000099282|TSPAN15 ENSG00000101311|C20orf42 ENSG00000105700|C19orf50 ENSG00000110777|POU2AF1 ENSG00000116985|BMP8B ENSG00000124702|KLHDC3  
ENSG00000125861|GFRA4 ENSG00000126602|TRAP1 ENSG00000127362|TAS2R3 ENSG00000135709|K1AA0513 ENSG00000169174|PCKS9 ENSG00000185386|MAPK11 ENSG00000058668|ATP2B4 ENSG00000072080|SPF2  
ENSG00000079385|CEACAM1 ENSG00000080839|RBL1 ENSG00000114416|FXR1 ENSG00000116176|TPSG1 ENSG00000117152|RG84 ENSG00000122787|AKR1D1 ENSG00000123165|ACTRT1 ENSG00000123836|PFKFB2  
ENSG00000129625|REEP5 ENSG00000139173|TMEM117 ENSG00000148175|STOM ENSG00000148730|EIF4EBP2 ENSG00000151893|C10orf46 ENSG00000163608|C3orf17 ENSG00000165071|TMEM71 ENSG00000166068|SPRED1  
ENSG00000168743|NPNT ENSG00000170074|NP\_775934.3 ENSG00000172456|NP\_060761.2 ENSG00000173068|BNC2 ENSG00000185915|KLHL34 ENSG00000188687|SLC4A5 ENSG00000189067|LITAF ENSG00000196812|ZSCAN16  
ENSG00000198771|RCSD1  
CCTTGAT ENSG00000075461|CACNG4 ENSG00000076248|UNG ENSG00000111678|C12orf57 ENSG00000114013|CD86 ENSG00000117115|PADI2 ENSG00000121653|MAPK8IP1 ENSG00000128313|APOL5 ENSG00000132958|TPTE2  
ENSG00000139574|NFPF ENSG00000141179|PCTP ENSG00000151502|VPS26B ENSG00000165714|LOH12CR1 ENSG00000165837|Q5W0A0\_HUMAN ENSG00000166619|BLCAP ENSG00000184650|ODF4 ENSG00000197838|CYP2A13  
ENSG00000205633|NP\_001010902.1 ENSG00000205761|Q6ZRI7\_HUMAN ENSG00000065833|ME1 ENSG00000066422|ZBTB11 ENSG00000071537|SELLL ENSG00000105132|ZNF550 ENSG00000108389|MTMR4 ENSG00000110955|ATP5B  
ENSG00000119401|TRIM32 ENSG00000119938|PPP1R3C ENSG00000135387|CAPRN1 ENSG00000137693|YAP1 ENSG00000145391|SETD7 ENSG00000150687|PRSS23 ENSG00000162613|FUBP1 ENSG00000162692|VCAM1  
ENSG00000167842|MIS12 ENSG00000168939|SPRY3 ENSG00000178691|SUZ12 ENSG00000181322|TXNDC6 ENSG00000184588|PDE4B ENSG00000186687|LYRM7 ENSG00000196776|CD47 ENSG00000198105|ZNF248  
ENSG00000204829|CBWD7  
CCTTGCA ENSG00000062822|POLD1 ENSG00000077235|GTF3C1 ENSG00000082781|ITGB5 ENSG00000102858|MGRN1 ENSG00000107719|K1AA1274 ENSG00000108828|VAT1 ENSG00000116852|KIF21B ENSG00000119383|PPP2R4  
ENSG00000127743|IL17B ENSG00000128563|PRKRIP1 ENSG00000132793|LTPN3 ENSG00000132819|BFBX2 ENSG00000136367|C14orf152 ENSG00000140067|C14orf152 ENSG00000149577|SIDT2 ENSG00000152705|CATSPER3  
ENSG00000154370|TRIM11 ENSG00000155265|C10orf132 ENSG00000158156|KXR8 ENSG00000163815|CLEC3B ENSG00000165861|ZFYVE1 ENSG00000167941|SOST ENSG00000171552|BCL2L1 ENSG00000171793|CTPS  
ENSG00000175920|DOK7 ENSG00000179743|Q8N9F6\_HUMAN ENSG00000179820|MYADM ENSG00000184792|OSBP2 ENSG00000186007|LEM1 ENSG00000188818|ZDHHC11 ENSG00000190245|Q8N7M3\_HUMAN ENSG00000196204|Q6NUR6\_HUMAN  
ENSG00000196808|Q96NJ4\_HUMAN ENSG00000205673|Q6ZRX0\_HUMAN ENSG00000206113|Q6ZU27\_HUMAN ENSG00000064218|DMRT3 ENSG00000067369|TP53BP1 ENSG00000088387|DOCK9 ENSG00000100889|PCK2 ENSG00000102055|PPP1R2P9  
ENSG00000102081|FMR1 ENSG00000110975|SYT10 ENSG00000114757|PEX5L ENSG00000115977|AAK1 ENSG00000116747|TROVE2 ENSG00000117114|LPHN2 ENSG00000124203|C20orf174 ENSG00000132975|GPR12  
ENSG00000134049|IER3IP1 ENSG00000140660|RUNC2A ENSG00000146477|SLC22A3 ENSG00000157005|SST ENSG00000158290|CUL4B ENSG00000160336|ZNF761 ENSG00000163412|EIF4E3 ENSG00000164024|METAP1  
ENSG00000164049|FBXW12 ENSG00000166148|AVPR1A ENSG00000180257|ZNF321 ENSG00000198538|ZNF28 ENSG00000203730|TDDM1 ENSG00000204604|ZNF468 ENSG00000205024|Q6ZVP5\_HUMAN  
ENSG00000142161|CAPN1 ENSG00000078804|TP53INP2 ENSG00000089060|SLC24A6 ENSG00000090776|EFNB1 ENSG00000100078|PLA2G3 ENSG000001100146|SOX10 ENSG00000100226|GTBPB1 ENSG00000100949|RABGGTA  
ENSG00000108830|RND2 ENSG00000115592|PRKAG3 ENSG00000117360|PRPF3 ENSG00000117360|PHF19 ENSG00000124920|C11orf9 ENSG00000126003|PLAGL2 ENSG00000137312|LORF1 ENSG00000138031|ADCY3  
ENSG00000144655|AXUD1 ENSG00000147378|FATE1 ENSG00000157353|FUK ENSG00000157851|DPYSL5 ENSG00000159214|CCDC24 ENSG00000160293|VAV2 ENSG00000160404|TOR2A ENSG00000160685|ZBTB7B  
ENSG00000165424|C10orf56 ENSG00000172137|CALB2 ENSG00000177728|K1AA0195 ENSG00000183707|Q96AT3\_HUMAN ENSG00000183741|CBX6 ENSG00000187045|TMPRSS6 ENSG00000188822|CNR2 ENSG00000188986|NELFB\_HUMAN  
ENSG00000189319|FAM53B ENSG00000101892|ATP1B4 ENSG00000110955|ATP5B ENSG00000118507|AKAP7 ENSG00000131482|G6PC ENSG00000137393|IBRDC2 ENSG00000137101|RDY  
ENSG00000164056|SPRY1 ENSG00000168004|HRASLS5 ENSG00000172551|MUCL\_HUMAN ENSG00000196712|NF1 ENSG00000196917|GPR81 ENSG00000197712|FAM114A1  
CCTTGGT ENSG00000100280|AP1B1 ENSG00000103249|CLCN7 ENSG00000116198|K1AA0562 ENSG00000147130|ZMYM3 ENSG00000158109|FAM79A ENSG00000163793|DNAJC5G ENSG00000164711|LPAL2 ENSG00000167685|ZNF444  
ENSG00000168002|POLR2G ENSG00000168060|NAALADL1 ENSG00000182404|LYRM4 ENSG00000183114|FAM43B ENSG00000196366|C9orf163 ENSG00000198585|NUDT11 ENSG00000198664|Q9BTR0\_HUMAN ENSG00000205531|NAP1L4  
ENSG00000205726|ITSN1 ENSG00000206177|HBM ENSG00000050030|K1AA2022 ENSG00000079385|CEACAM1 ENSG00000087053|MTMR2 ENSG00000108389|MTMR4 ENSG00000117281|CD160 ENSG00000117595|IRF6  
ENSG00000119707|RBM25 ENSG00000124151|NCOA3 ENSG00000129116|PALLD ENSG00000147548|WHSC1L1 ENSG00000152684|PELO ENSG00000162409|PRKAA2 ENSG00000163638|ADAMTS9 ENSG00000164989|C9orf93  
ENSG00000165675|ENOX2 ENSG00000166913|YWHAB ENSG00000183607|GKN2 ENSG00000184307|ZDHHC23 ENSG00000185278|ZBTB37 ENSG00000187446|CHP1\_HUMAN ENSG00000198042|RBM13  
ENSG000000011304|PTBP1 ENSG0000019485|PRDM11 ENSG00000111540|RAB5B ENSG00000119638|NEK9 ENSG00000124140|SLC12A5 ENSG00000141720|PIP5K2B ENSG00000142453|CARM1 ENSG00000144655|AXUD1  
ENSG00000162227|TAF6L ENSG00000168481|LGI3 ENSG00000169026|MFSD7 ENSG00000169181|GSG1L ENSG00000169894|MUC3A ENSG00000178343|NP\_001073974.1 ENSG00000182149|K1AA0174 ENSG00000185052|SLC24A3  
ENSG00000196976|LAGE3 ENSG00000198909|MAP3K3 ENSG00000047365|CENTD1 ENSG00000054267|ARID4B ENSG00000089063|C20orf30 ENSG00000108061|SHOC2 ENSG00000121207|LRAT ENSG00000133639|BTG1  
ENSG00000135413|LACRT ENSG00000159140|SON ENSG00000163114|PDHA2 ENSG00000164938|TP53INP1 ENSG00000167863|ATP5H ENSG00000169085|C8orf46 ENSG00000170448|NFXL1  
ENSG00000170832|USP32 ENSG00000171469|ZNF561 ENSG00000172915|NBEA ENSG00000180257|ZNF321 ENSG00000184735|DDX53 ENSG00000188933|NM\_145809.1  
perfect: CCTTGTA TACAAGG hsa-miR-381 taTACAAGGgaagctctctgt 2  
CCTTGTG ENSG00000003756|RBM5 ENSG00000077235|GTF3C1 ENSG00000100461|RBM23 ENSG00000104872|PIH1D1 ENSG00000111678|C12orf57 ENSG00000119333|WDR34 ENSG00000129455|KLK8 ENSG00000136697|IL1F10  
ENSG00000149541|B3GAT3 ENSG00000149596|JPH2 ENSG00000153406|NMRAL1 ENSG00000158773|USF1 ENSG00000166646|Q9D666\_HUMAN ENSG00000168874|ATOX8 ENSG00000172116|CD8B ENSG00000172824|Q6P2E5\_HUMAN  
ENSG00000175376|NP\_115701.2 ENSG00000181555|SETD2 ENSG000000070087|PFN2 ENSG00000112319|EYA4 ENSG00000112319|EYA4 ENSG00000113361|CDH6 ENSG00000114861|FOXP1 ENSG00000116560|SFPQ  
ENSG00000132153|DHX30 ENSG00000137801|THBS1 ENSG00000139842|CUL4A ENSG00000152503|TRIM36 ENSG00000154545|MAGED4 ENSG00000156395|SORCS3 ENSG00000164816|DEFA5 ENSG00000165943|MOAP1  
ENSG00000170348|TMED10 ENSG00000170448|NFXL1 ENSG00000170500|LONRF2 ENSG00000170540|ARL6IP1 ENSG00000179222|MAGED1 ENSG00000182139|Q96FU4\_HUMAN ENSG00000187243|MAGED4B ENSG00000188653|NR\_002807.1  
ENSG00000196459|SEDL1 ENSG00000211450|C11orf31  
CCTTTCT ENSG00000001460|C1orf201 ENSG00000049089|COL9A2 ENSG00000056487|PHF21B ENSG00000070366|SMG6 ENSG00000102962|CCL22 ENSG00000102967|DHODH ENSG00000103353|UBFD1 ENSG00000104812|GYS1  
ENSG00000108774|RAB5C ENSG00000108821|COL1A1 ENSG00000111335|OAS2 ENSG00000112033|PPARD ENSG00000113048|MRPS27 ENSG00000114770|ABCC5 ENSG00000115112|TFPC2L1 ENSG000001124145|SDC4  
ENSG00000136631|VPS45 ENSG00000136867|SLC31A2 ENSG00000142039|CCDC97 ENSG00000142784|WDTCL1 ENSG00000143418|LASS2 ENSG00000146834|BCDIN3 ENSG00000156269|ARD1B ENSG00000158955|WNT9B  
ENSG00000160183|TMPRSS3 ENSG00000162510|MATN1 ENSG00000162738|VANGL2 ENSG00000163482|STK36 ENSG00000164010|ERMAP ENSG00000169410|PTPN9 ENSG00000170296|GABARAP ENSG00000172460|Q8IVY7\_HUMAN  
ENSG00000174804|FZD4 ENSG00000176182|NP\_001012661.1 ENSG00000182866|LCK ENSG00000197238|HIST1H4J ENSG00000205742|Q6ZTR4\_HUMAN ENSG00000005302|MSL3L1 ENSG00000065970|FOXJ2 ENSG00000091317|CMTM6  
ENSG00000094916|CBX5 ENSG00000101413|C20orf77 ENSG00000105810|CDK6 ENSG00000109572|CLCN3 ENSG00000111490|Q9Y2I9\_HUMAN ENSG00000112769|LAMA4 ENSG00000112893|MAN2A1 ENSG0000011

ENSG00000116539|ASH1L ENSG00000119335|SET ENSG00000128731|HERC2 ENSG00000132274|TRIM22 ENSG00000133818|RRAS2 ENSG00000136750|GAD2 ENSG00000137575|SDCBP ENSG00000137727|ARHGAP20  
ENSG00000138185|ENTPD1 ENSG00000138755|CXCL9 ENSG00000146469|VIP ENSG00000151023|C10orf63 ENSG00000151514|SALL3 ENSG00000152154|TMEM178 ENSG00000153560|UBP1 ENSG00000153822|KCNJ16  
CCTTTGG ENSG00000165219|GAPVD1 ENSG00000166348|USP54 ENSG00000178202|KDELCL2 ENSG00000185591|SP1 ENSG00000197111|PCBP2 ENSG00000206207|QEZUT4\_HUMAN  
ENSG0000015592|STMN4 ENSG00000073111|MCM2 ENSG00000083845|RPS5 ENSG00000105698|USF2 ENSG00000105989|WNT2 ENSG00000108604|SMARCD2 ENSG00000113119|TMCO6 ENSG00000114654|CCDC48  
ENSG00000116128|BCL9 ENSG00000116218|NPHS2 ENSG00000118257|NRP2 ENSG00000123143|PKN1 ENSG00000126391|NP\_114110.1 ENSG00000134075|C3orf10 ENSG00000135362|NP\_079117.2 ENSG00000135631|RAB11FIP5  
ENSG00000141741|C17orf37 ENSG00000150281|CTF1 ENSG00000157020|SEC13 ENSG00000167969|DCI ENSG00000168298|HIST1H1E ENSG00000168546|GFRA2 ENSG00000171169|C9orf90 ENSG00000174238|PITPNA  
ENSG00000183248|Q9H6K5\_HUMAN ENSG00000184574|GPR92 ENSG00000186970|KRTAP15-1 ENSG00000204071|TCEAL6 ENSG00000204892|NP\_001034845.1 ENSG00000205023|Q6ZSF1\_HUMAN ENSG00000109654|TRIM2 ENSG00000125037|TMEM111  
ENSG00000126016|AMOT ENSG00000128872|TMOD2 ENSG00000129472|RAB2B ENSG00000134250|NOTCH2 ENSG00000136698|CFCL1 ENSG00000152093|NP\_001072998.1 ENSG00000161800|RACGAP1 ENSG00000162992|NEUROD1  
ENSG00000163171|CDC42EP3 ENSG00000164825|DEFB1 ENSG00000173334|TRIB1 ENSG00000174456|NP\_997318.1 ENSG00000187189|STPYL4  
CCTTTGT ENSG00000005448|WDR54 ENSG00000006007|GDE1\_HUMAN ENSG000000013573|DDX11 ENSG000000081791|KIAA10141 ENSG000000087191|PSMCS5 ENSG000000087258|GNAO1 ENSG000000090339|ICAM1 ENSG00000100296|THOC5  
ENSG00000125826|RBCK1 ENSG00000127743|IL17B ENSG00000129270|MMP28 ENSG00000130713|EXOSC2 ENSG00000132254|ARFIP2 ENSG00000158190|BRE ENSG00000158470|B4GALT5 ENSG00000176303|Q8N822\_HUMAN  
ENSG00000176769|TCERG1L ENSG00000179388|EGR3 ENSG00000182712|MTCP1 ENSG00000186501|C1orf160 ENSG00000187147|C1orf164 ENSG00000196700|ZNF512B ENSG00000204235|Q6ZNQ4\_HUMAN ENSG00000004864|SLC25A13  
ENSG00000007372|PAX6 ENSG000000072849|DERL2 ENSG00000100629|C14orf145 ENSG00000101190|TCFL5 ENSG00000111834|RSHL3 ENSG00000122877|EGR2 ENSG00000129170|CSRP3 ENSG00000130449|ZSWIM6  
ENSG00000134363|FST ENSG00000139946|PELI2 ENSG00000143612|C1orf43 ENSG00000143643|TTC13 ENSG00000145777|NP\_149024.1 ENSG00000146674|IGFBP3 ENSG00000148688|RFP30 ENSG00000162695|SLC30A7  
ENSG00000167765|Q96NP5\_HUMAN ENSG00000168672|FAM84B ENSG00000170035|UBE2E4P ENSG00000170584|NUDCD2 ENSG00000171560|FGA ENSG00000179397|C1orf101 ENSG00000181704|YIPF6 ENSG00000182107|TMEM30B  
ENSG00000188529|FUSIP1 ENSG00000198689|SLC9A6 ENSG00000205212|NP\_001004306.1  
CCTTTTG ENSG000000065308|TRAM2 ENSG00000100207|TCF20 ENSG00000104938|CLEC4M ENSG00000105127|AKAP8 ENSG00000105137|SYDE1 ENSG00000112062|MAPK14 ENSG00000112159|MDN1 ENSG00000119699|TGFB3  
ENSG00000120451|SNX19 ENSG00000124920|C11orf9 ENSG00000128510|CPA4 ENSG00000132002|DNAJB1 ENSG00000157600|TMEM164 ENSG00000159023|EPB41 ENSG00000162367|TAL1 ENSG00000162396|PARS2  
ENSG00000162676|GFI1 ENSG00000169894|MUC3A ENSG00000170577|SIX2 ENSG00000173404|INSM1 ENSG00000175213|ZNF408 ENSG00000182606|TRAK1 ENSG00000184935|Q6A101\_HUMAN ENSG00000187764|SEMA4D  
ENSG00000204619|PPP1R11 ENSG00000009780|FAM76A ENSG00000030066|NUP160 ENSG00000038210|PI4K2B ENSG00000065135|GNAI3 ENSG00000065911|MTHFD2 ENSG00000072274|TFRC ENSG00000079387|SENP1  
ENSG00000089195|TRM6\_HUMAN ENSG000000094914|AAAS ENSG00000100201|DDX17 ENSG00000101958|GLRA2 ENSG00000103319|EEF2K ENSG00000109618|UGTAP\_HUMAN ENSG00000112210|RAB23 ENSG00000123200|ZC3H13  
ENSG00000124207|CSE1L ENSG00000134717|BTF3L4 ENSG00000140319|SRP14 ENSG00000154898|Q8IYA2\_HUMAN ENSG00000163528|CHCHD4 ENSG00000164118|KIAA1712 ENSG00000167460|TPM4 ENSG00000170006|TMEM154  
ENSG00000179542|SLITRK4 ENSG00000181211|Q8NA17\_HUMAN ENSG00000185591|SP1 ENSG00000188820|FAM26F ENSG00000189299|FOXK2 ENSG00000197969|VPS13A ENSG00000198625|MDM4 ENSG00000204276|HLA-DQA2  
ENSG00000205544|C17orf61  
CCTTTTT ENSG000000013523|ANGEL1 ENSG000000076984|O14733-2 ENSG00000082458|DLG3 ENSG00000111664|GNB3 ENSG00000112655|PTK7 ENSG00000120709|FAM53C ENSG00000122180|MYOG ENSG00000123411|IKZF4  
ENSG00000126107|HECTD3 ENSG00000136935|GOLGA1 ENSG00000140443|IGF1R ENSG00000143376|SNX27 ENSG00000147223|Q5JRB8\_HUMAN ENSG00000148200|NR6A1 ENSG00000150967|ABCB9 ENSG00000153531|ADPRHL1  
ENSG00000159166|LAD1 ENSG00000162415|ZSWIM5 ENSG00000164778|EN1 ENSG00000166289|PLEKHF1 ENSG00000168496|FEN1 ENSG00000171302|CANT1 ENSG00000175063|UBE2C ENSG00000175334|BANF1  
ENSG00000181814|Q6NW39\_HUMAN ENSG00000183255|PTTG1IP ENSG00000185614|C3orf54 ENSG00000186970|KRTAP15-1 ENSG00000206323|Q6ZRN5\_HUMAN ENSG00000052795|Q9H994\_HUMAN ENSG00000077279|DCX ENSG00000082146|ALS2CR2  
ENSG00000085511|MAP3K4 ENSG00000100644|HIF1A ENSG00000106799|PGFBR1 ENSG00000106829|TLE4 ENSG00000112146|FBXO9 ENSG00000113391|C5orf21 ENSG00000114541|FRMD4B ENSG00000115738|ID2  
ENSG00000116030|SUMO1P3 ENSG00000124783|SSR1 ENSG00000126226|PCID2 ENSG00000127483|HP1BP3 ENSG00000131979|GCH1 ENSG00000135070|ISCA1 ENSG00000135333|EPHA7 ENSG00000138613|APH1B  
ENSG00000138641|HERC3 ENSG00000138757|G3BP2 ENSG00000143036|SLC44A3 ENSG00000143252|SDHC ENSG00000144481|TRPM8 ENSG00000152661|GJA1 ENSG00000153976|HS3ST3A1 ENSG00000157224|CLDN12  
ENSG00000162775|MKL1 ENSG00000162999|DUSP19 ENSG00000163960|UBXD7 ENSG00000164144|ARFIP1 ENSG00000166452|C11orf17 ENSG00000168036|CTNNB1 ENSG00000168246|UBTD2 ENSG00000170509|HSD17B13  
ENSG00000177600|RPLP2 ENSG00000185658|BRWD1 ENSG00000186020|ZNF529 ENSG00000198822|GRM3  
CGAAAAA ENSG000000006744|ELAC2 ENSG00000100376|FAM118A ENSG00000110057|UNC93B1 ENSG00000116708|PRAMEF4 ENSG00000125459|MSTO1 ENSG00000134595|SOX3 ENSG00000136352|TITF1 ENSG00000139178|C1RL  
ENSG00000148158|LNX30 ENSG00000149657|LSM14B ENSG00000151348|EXT2 ENSG00000157358|PRAMEF15 ENSG00000163612|XR\_017899.1 ENSG00000164088|PPM1M ENSG00000165271|NOL6 ENSG00000165644|COMTD1  
ENSG00000167244|IGF2 ENSG00000167468|GPX4 ENSG00000168546|GFRA2 ENSG00000177398|UMODL1 ENSG00000177757|FAM87B ENSG00000181918|Q8N9J9\_HUMAN ENSG00000182841|Q9NSQ0\_HUMAN ENSG00000183600|Q66K37\_HUMAN  
ENSG00000197408|CYP2B6 ENSG00000204501|PRAMEF9 ENSG00000205592|MUC19 ENSG00000205793|Q6ZT42\_HUMAN ENSG00000206150|RNASE13 ENSG00000100357|ADSL ENSG00000103534|TMC5 ENSG00000106591|MRPL32  
ENSG00000111046|MYF6 ENSG00000111364|DDX55 ENSG000001118418|HMGN3 ENSG00000133958|KIAA1409 ENSG00000145723|ZHC2 ENSG00000147257|GPC3 ENSG00000162606|L1TD1 ENSG00000163364|Q96D13\_HUMAN  
ENSG00000164162|ANAPC10 ENSG00000164386|NP\_997378.2 ENSG00000171295|ZNF440 ENSG00000180408|Q8N5G0\_HUMAN ENSG00000185061|NP\_001072996.1 ENSG00000185070|FLRT2 ENSG00000188001|FAM79B ENSG00000197780|TAF13  
ENSG00000203668|CHML  
CGAAACC ENSG000000099834|MUPCDH ENSG00000101400|SNTA1 ENSG00000105671|DDX49 ENSG00000143436|MRPL9 ENSG00000153266|FEZF2 ENSG00000158525|CPA5 ENSG00000160282|FTCD ENSG00000163344|PMVK  
ENSG00000164533|DAGLB ENSG00000165414|Q96HD6\_HUMAN ENSG00000168658|NP\_659429.4 ENSG00000170439|METTL7B ENSG00000172663|TMEM134 ENSG00000180340|FZD2 ENSG00000185482|STAC3 ENSG00000186141|POLR3C  
ENSG00000188976|NOC2L ENSG00000205659|LINS2 ENSG00000206158|Q6ZVG4\_HUMAN ENSG00000064012|CASP8 ENSG00000064225|ST3GAL6 ENSG00000071539|TRIP13 ENSG00000079102|RUNX1T1 ENSG00000102021|LUZP4  
ENSG00000109339|MAPK10 ENSG00000113649|TCERG1 ENSG00000117174|C1orf181 ENSG00000131480|AOC2 ENSG00000144891|AGTR1 ENSG00000148688|RFP30 ENSG00000149196|C11orf73 ENSG00000153162|BMP6  
ENSG00000153561|RMND5A ENSG00000160181|TFF2 ENSG00000160352|ZNF714 ENSG00000162384|C1orf123 ENSG00000164124|TMEM144 ENSG00000164291|ARSK ENSG00000164442|CITED2 ENSG00000164975|SNAPC3  
ENSG00000166200|COPS2 ENSG00000179010|MRFPAP1 ENSG00000187145|MRPS21 ENSG00000198468|Q8TAF5\_HUMAN ENSG00000198468|Q8TAF5\_HUMAN ENSG00000125354|SEPT6 ENSG00000133392|MYH11 ENSG00000141378|PTRH2  
ENSG00000072110|ACTN1 ENSG00000089356|FYXD3 ENSG00000102245|CD40LG ENSG00000116983|HPCAL4 ENSG00000118245|TNP1 ENSG00000125354|SEPT6 ENSG00000133392|MYH11 ENSG00000141378|PTRH2  
ENSG00000142677|IL22RA1 ENSG00000153807|HOXA10 ENSG00000158856|EPB49 ENSG00000164519|Q96MZ3\_HUMAN ENSG00000165175|MID1IP1 ENSG00000166819|PLIN1 ENSG00000181240|SLC25A41 ENSG00000181585|TMIE  
ENSG00000184574|GPR92 ENSG00000185896|LAMP1 ENSG00000196923|PDLIM7 ENSG00000198910|L1CAM ENSG00000204059|NP\_001013718.1 ENSG00000204333|Q6ZTP0\_HUMAN ENSG00000204499|Q6P6C6\_HUMAN ENSG0000028116|VRK2  
ENSG00000078177|N4BP2\_HUMAN ENSG000000081138|CDH7 ENSG00000101134|DOK5 ENSG00000102128|RB40L\_HUMAN ENSG00000107537|PHYH ENSG00000120647|CCDC77 ENSG00000131023|LATS1 ENSG00000137804|NUSAP1  
ENSG00000141048|MYH4 ENSG00000141200|KIF2B ENSG00000147873|IFNA5 ENSG00000157741|Q6ZU65\_HUMAN ENSG00000162086|ZNF75A ENSG00000164093|PITX2 ENSG00000165973|NELL1 ENSG00000166253|NP\_001034861.1  
ENSG00000167699|GLOD4 ENSG00000175782|SLC35E3 ENSG00000177461|Q8NA31\_HUMAN ENSG00000177511|STR8IA3 ENSG00000177602|GSG2 ENSG00000184344|GDF3 ENSG00000186297|GABRA5  
CGAACAA ENSG00000101321|C20orf159 ENSG00000102802|C13orf33 ENSG00000103241|FOXF1 ENSG00000108551|RASD1 ENSG00000108753|TCF2 ENSG00000116786|PLEKHM2 ENSG00000119440|LCN1L1 ENSG00000119457|SLC46A2  
ENSG00000123388|HOXC11 ENSG00000128011|LRFN1 ENSG000001300227|XPF0 ENSG00000158292|GPR153 ENSG00000159556|ISL2 ENSG00000166272|C10orf26 ENSG00000170653|ATF7 ENSG00000174403|NP\_689970.1  
ENSG00000178110|Q8N9G9\_HUMAN ENSG00000180914|OXTR ENSG00000181039|ANKRD34 ENSG00000183597|C22orf25 ENSG00000184716|SERINC4 ENSG00000188135|C3orf62 ENSG00000196153|P8NAB5\_HUMAN ENSG00000204660|NP\_001013740.1  
ENSG00000204661|LOC729569 ENSG00000205566|Q8TB02\_HUMAN ENSG00000081307|UBELDC1 ENSG00000088179|PTPN4 ENSG00000100483|C14orf138 ENSG00000102780|DGKH ENSG00000114805|PLCH1 ENSG00000117000|RLF  
ENSG00000117519|CNN3 ENSG00000117791|MOSC2 ENSG00000118855|MFSD1 ENSG00000132530|NP\_954590.1 ENSG00000133119|RFC3 ENSG00000135241|PNPLA10P ENSG00000135604|STX11 ENSG00000137168|PPIL1  
ENSG00000137975|CLA2 ENSG00000138134|STAMBP1L1 ENSG00000151806|GUF1 ENSG00000152433|ZNF547 ENSG00000163642|XR\_017284.1 ENSG00000170509|HSD17B13 ENSG00000171885|AQP4 ENSG00000173728|C1orf100  
ENSG00000180332|KCTD4 ENSG00000183291|SEP15\_HUMAN ENSG00000183649|Q8NFX8\_HUMAN ENSG00000196409|ZNF658B ENSG00000198416|Z658B\_HUMAN ENSG00000198692|EIF1AY ENSG00000205612|Q71JB2\_HUMAN  
perfect: CGAACAA TTGTTCC hsa-miR-375 tTTGTTCCgttcggtcgcgctga 1  
CGAACAC ENSG00000101405|OXT ENSG00000121680|PEX16 ENSG00000123965|NP\_777590.1 ENSG00000127129|EDN2 ENSG00000128254|C22orf24 ENSG00000128487|SPECC1 ENSG00000129646|QRICH2 ENSG00000133878|DUSP26  
ENSG00000133943|C14orf159 ENSG00000136630|HLX1 ENSG00000138670|RASGEF1B ENSG00000145040|UCN2 ENSG00000147155|EBP ENSG00000150165|ANXA8L1 ENSG00000153266|FEZF2 ENSG00000160505|NLRP4  
ENSG00000161013|MGAT4B ENSG00000162849|KIF26B ENSG00000163295|ALP1 ENSG00000165671|NSD1 ENSG00000169427|KCNK9 ENSG00000171102|OBP2B ENSG00000174015|SPERT ENSG00000176984|Q8N8C5\_HUMAN  
ENSG00000186654|ARHGAP8 ENSG00000187954|CYHR1 ENSG00000188305|C19orf35 ENSG00000196415|PRTN3 ENSG00000198960|ARMCX6 ENSG00000050165|DKK3 ENSG00000064218|DMRT3 ENSG00000065328|MCM10  
ENSG00000071909|MYO3B ENSG00000104763|ASAH1 ENSG00000106346|USP42 ENSG00000111328|CDK2AP1 ENSG00000111666|CHPT1 ENSG00000111802|TTRAP ENSG00000115474|KCNJ13 ENSG00000124205|EDN3  
ENSG00000125871|C20orf72 ENSG00000134077|THUMPD3 ENSG00000135604|STX11 ENSG00000136824|SMC2 ENSG00000140817|YIPF5 ENSG00000148935|GAS2 ENSG00000155324|GRAMD3 ENSG00000159279|NPY6R  
ENSG00000164616|FBXL21 ENSG00000165309|ARMC3 ENSG00000166411|IDH3A ENSG00000171681|ATFTIP ENSG00000185616|SSTR2 ENSG00000182457|NR\_002323.1 ENSG00000186231|KLHL32  
ENSG00000196167|NP\_997312.1  
CGAACCG ENSG00000075891|PAX2 ENSG00000080845|DLGAP4 ENSG00000099622|ICRBP ENSG00000104611|SH2D4A ENSG00000107223|EDF1 ENSG00000126603|GLIS2 ENSG00000132361|KIAA0664 ENSG00000140798|ABCC12  
ENSG00000158526|TSR2 ENSG00000162510|MATN1 ENSG00000163067|ZNF2 ENSG00000166592|RRAD ENSG00000181638|GLI4 ENSG00000182397|C15orf51 ENSG00000183600|Q66K37\_HUMAN ENSG00000187456|RDM1  
ENSG00000188185|Q6ZQP8\_HUMAN ENSG00000196304|NM\_207389 ENSG000000203822|Q6ZV10\_HUMAN ENSG00000204991|SPIRE2 ENSG00000206539|Q6ZTN9\_HUMAN ENSG000000091879|ANGPT2 ENSG00000107864|CPEB3 ENSG00000112531|QKI  
ENSG00000122692|SMU1 ENSG00000140525|KIAA1794 ENSG00000151150|ANK3 ENSG00000168264|IRF2BP2 ENSG00000177606|JUN ENSG00000205423|TMEM188  
CGAAGTT ENSG00000004848|ARX ENSG00000061938|TNK2 ENSG00000067221|STOML1 ENSG00000076248|UNG ENSG00000104611|SH2D4A ENSG00000116337|AMPD2 ENSG00000124191|TOX2 ENSG00000124257|NEURL2  
ENSG00000126768|TIMM17B ENSG00000142541|RPL13A ENSG00000147753|TTY7\_HUMAN ENSG00000147761|TTY7\_HUMAN ENSG00000153944|MSI2 ENSG00000161544|CYGB ENSG00000164519|Q96MZ3\_HUMAN ENSG00000164621|DAMS\_HUMAN  
ENSG00000166033|HTRA1 ENSG00000166126|AMN ENSG00000170919|Q5SVS6\_HUMAN ENSG00000171680|PLEKHG5 ENSG00000171954|NP\_775754.1 ENSG00000172216|CEBPB ENSG00000172775|NIP30\_HUMAN ENSG00000177697|CD151  
ENSG00000177822|XR\_017723.1 ENSG00000187140|FOXD3 ENSG00000188011|NP\_776182.2 ENSG00000190245|Q8N7M3\_HUMAN ENSG00000198837|DENND4B ENSG00000198901|PRC1 ENSG00000204682|C10orf114 ENSG0000020922|MRE11A  
ENSG00000035720|STAP1\_HUMAN ENSG00000042980|ADAM28 ENSG00000100987|VSX1 ENSG00000107789|MINPP1 ENSG00000112312|GMNN ENSG00000119335|SET ENSG00000121390|PSPC1 ENSG00000123584|MAGEA9B  
ENSG00000124659|TBCC ENSG00000131264|CDX4 ENSG00000133115|STOML3 ENSG00000135108|FBXO21 ENSG00000138594|TMOD3 ENSG00000139780|NP\_001010977.1 ENSG00000145247|OCIAD2 ENSG00000162692|VCAM1  
ENSG00000166008|MAGEA9 ENSG00000168522|FNNTA ENSG00000169914|OTUD3 ENSG00000172244|C5orf34 ENSG00000177599|ZNF491 ENSG00000180882|XR\_017823.1 ENSG00000185418|TARSL2 ENSG00000186377|CYP4X1  
ENSG00000205189|ZBTB10  
CGAATAT ENSG00000012124|CD22 ENSG00000042445|RETSAT ENSG00000099953|MMP11 ENSG00000103811|CTSH ENSG00000104611|SH2D4A ENSG00000109705|BAPX1 ENSG00000112079|STK38 ENSG00000119689|DLST  
ENSG00000128284|APOL3 ENSG00000133980|C14orf115 ENSG00000141574|SECTM1 ENSG00000153294|GPR115 ENSG00000156860|FBRS ENSG00000163331|NP\_001017920.1 ENSG00000164651|SP8 ENSG00000167280|NP\_001036038.1  
ENSG00000178932|Q8N811\_HUMAN ENSG00000180924|Q9BVG6\_HUMAN ENSG00000181350|C17orf76 ENSG00000184787|UBE2G2 ENSG00000197111|Q9UDD8\_HUMAN ENSG00000197565|COL4A6 ENSG00000197757|HOXC6 ENSG00000204269|Q6ZVM2\_HUMAN  
ENSG00000204660|NP\_001013740.1 ENSG00000204661|LOC729569 ENSG00000204763|Q6ZMK1\_HUMAN ENSG00000034971|MYOC ENSG00000065457|ADAT1 ENSG00000090621|PABPC4 ENSG00000099783|HNRMF ENSG00000106603|C7orf44  
ENSG00000114405|C3orf14 ENSG00000121895|TMEM156 ENSG00000135452|TSPAN31 ENSG00000138050|THUMPD2 ENSG00000153339|KIAA1012 ENSG00000155636|DRBP1\_HUMAN ENSG00000155755|ALS2CR4 ENSG00000158185|ANKRD36  
ENSG00000161573|CCL16 ENSG00000162606|L1TD1 ENSG00000173141|MRP63 ENSG00000189067|LITAF ENSG00000196912|AN36B\_HUMAN ENSG00000204267|TAP2  
CGAATGC ENSG000000055955|MUSTN1 ENSG00000099385|BCL7C ENSG00000100285|NEFH ENSG00000102302|PGD1 ENSG00000125409|TEXT3 ENSG00000130640|TUBGCP2 ENSG00000132938|KIAA0774 ENSG00000137124|ALDH1B1  
ENSG00000147432|CHRN3 ENSG00000149090|NP\_001001991.1 ENSG00000152049|KCNE4 ENSG00000167657|DAPK3 ENSG00000168802|NM\_001039690.2 ENSG00000171604|CXCKX ENSG00000183242|WIT1 ENSG00000196304|NM\_207389  
ENSG00000196498|NCR2 ENSG00000197353|LYPD2 ENSG00000198079|XR\_017925.1 ENSG00000198131|ZNF544 ENSG00000198842|DUSP27 ENSG00000204625|HCG9 ENSG00000075413|MARK3 ENSG00000089335|ZNF302  
ENSG00000107863|ARHGAP21





|          |                                |                                |                              |                                |                                |                                   |                              |                              |
|----------|--------------------------------|--------------------------------|------------------------------|--------------------------------|--------------------------------|-----------------------------------|------------------------------|------------------------------|
|          | ENSG00000115514 TXNDC9         | ENSG00000116459 ATP5F1         | ENSG00000123500 COL10A1      | ENSG00000124214 STAU1          | ENSG00000134897 BIVM           | ENSG00000139151 PLCZ1             | ENSG00000146147 C6orf142     | ENSG00000148053 NTRK2        |
|          | ENSG00000148429 USP6NL         | ENSG00000148481 C10orf97       | ENSG00000153832 FBXO36       | ENSG00000157193 LRP8           | ENSG00000158485 CD1B           | ENSG00000164458 T                 | ENSG00000169045 HNRPH1       | ENSG00000178217 SH2D4B       |
| CGCACAC  | ENSG00000196104 SPOCK3         |                                |                              |                                |                                |                                   |                              |                              |
|          | ENSG00000057593 F7             | ENSG00000064393 HIPK2          | ENSG00000065357 DGKA         | ENSG00000067840 PDZD4          | ENSG00000079435 LIPE           | ENSG00000101150 TPD5L2            | ENSG00000103222 ABCC1        | ENSG00000103264 FBXO31       |
|          | ENSG00000103888 KIAA199        | ENSG00000127418 FGFR1          | ENSG00000130177 CDC16        | ENSG00000130703 OSBP12         | ENSG00000130731 NP_001035251.1 | ENSG00000133477 FAM83F            | ENSG00000154768 C17orf50     | ENSG00000161677 JOSD2        |
|          | ENSG00000162104 ADCY9          | ENSG00000166888 STAT6          | ENSG00000167815 PRDX2        | ENSG00000178241 Q9P0D4_HUMAN   | ENSG00000178922 HYI            | ENSG00000182362 C21orf57          | ENSG00000184787 UBE2G2       | ENSG00000185803 GPR172A      |
|          | ENSG00000187862 TTC24          | ENSG00000198576 ARC            | ENSG00000059728 MXD1         | ENSG00000109099 PMP22          | ENSG00000109920 FBNP4          | ENSG00000113013 HSPA9             | ENSG00000114125 RNF7         | ENSG00000123636 BAZ2B        |
|          | ENSG00000128050 PAICS          | ENSG00000128656 CHN1           | ENSG00000133019 CHRM3        | ENSG00000135324 C6orf117       | ENSG00000143653 SCCPCD         | ENSG00000146001 PCDHB18           | ENSG00000163746 PLSCR2       | ENSG00000164386 NP_997378.2  |
| CGCACGA  | ENSG00000166848 TERF2IP        | ENSG00000168916 KNF608         | ENSG00000172572 PDE3A        | ENSG00000174004 LRR33          | ENSG00000183067 IGSF5          | ENSG00000203710 CR1               |                              |                              |
|          | ENSG0000005007 UPF1            | ENSG00000055950 MRPL43         | ENSG00000066735 Q96GK3_HUMAN | ENSG00000077274 CAPN6          | ENSG00000099814 KIAA0284       | ENSG00000104953 TLE6              | ENSG00000119408 NEK6         | ENSG00000128645 HOXD1        |
|          | ENSG00000135625 EGR4           | ENSG00000136848 DAB2IP         | ENSG00000139722 VPS37B       | ENSG00000149927 DOC2A          | ENSG00000152192 POU4F1         | ENSG00000159263 SIM2              | ENSG00000161091 C19orf28     | ENSG00000163702 IL17RC       |
|          | ENSG00000167130 DOLPP1         | ENSG00000167515 TRAPPC2L       | ENSG00000171551 ECEL1        | ENSG00000180104 EXOC3          | ENSG00000183762 KRMEF1         | ENSG00000188427 XR_017855.1       | ENSG00000197445 C16orf47     | ENSG00000204633 ACTN3        |
|          | ENSG00000205231 Q6ZQQ1_HUMAN   | ENSG00000008196 TFAP2B         | ENSG00000102543 CDADC1       | ENSG00000104537 ANXA13         | ENSG00000123268 ATF1           | ENSG00000138180 CEP55             | ENSG00000143190 POU2F1       | ENSG00000173166 RAPH1        |
|          | ENSG00000189299 FOXR2          |                                |                              |                                |                                |                                   |                              |                              |
| CGCACTA  | ENSG00000101194 C20orf59       | ENSG00000102178 UBL14A         | ENSG00000105219 CNTD2        | ENSG00000106266 SNX8           | ENSG00000107185 KIAA0258       | ENSG00000108244 KRT23             | ENSG00000129757 CDKN1C       | ENSG00000142686 NP_689587.1  |
|          | ENSG00000148297 SURF5          | ENSG00000151948 GLT1D1         | ENSG00000152467 ZSCAN1       | ENSG00000157020 SEC13          | ENSG00000159650 UROCI          | ENSG00000165861 ZYFVE1            | ENSG00000171786 NHLH1        | ENSG00000176022 B3GALT6      |
|          | ENSG00000176678 FOX11          | ENSG00000180824 Q8NAH5_HUMAN   | ENSG00000184811 TUSC5        | ENSG00000185651 UBE2L3         | ENSG00000187288 CIDECD         | ENSG00000187796 CARD9             | ENSG00000203786 KPRP         | ENSG000002043093 DCUN1D1     |
|          | ENSG00000059804 GTR3_HUMAN     | ENSG00000070831 CDC42          | ENSG00000076321 KLHL20       | ENSG00000079335 CDC14A         | ENSG00000079950 STX7           | ENSG00000102349 KLF8              | ENSG00000106853 LTB4DH       | ENSG00000113163 COL4A3BP     |
|          | ENSG00000119844 ATP8           | ENSG00000144229 THSD7B         | ENSG00000145248 SLC10A4      | ENSG00000145349 CAMK2D         | ENSG00000164603 NP_689769.2    | ENSG00000164694 FNDC1             | ENSG00000169554 ZEB2         | ENSG00000173262 SLC2A3       |
| CGCACTT  | ENSG00000173334 TRIB1          | ENSG00000186665 C17orf58       | ENSG00000187753 C9orf153     | ENSG00000189056 RELN           |                                |                                   |                              |                              |
|          | ENSG0000010361 FUZ             | ENSG0000018280 SLC11A1         | ENSG00000049883 PTCD2        | ENSG00000070614 NDST1          | ENSG00000099284 H2AFY1         | ENSG00000100285 NEFH              | ENSG00000105711 SCN1B        | ENSG00000110057 UNC93B1      |
|          | ENSG00000115194 SLC30A3        | ENSG00000131634 C16orf30       | ENSG00000132746 ALDH3B2      | ENSG00000137834 SNB6           | ENSG00000140406 MESDC1         | ENSG00000159247 LOC643224         | ENSG00000160185 UBASH3A      | ENSG00000163497 FEV          |
|          | ENSG00000166979 C21orf63       | ENSG00000168394 TAP1           | ENSG00000171223 JUNB         | ENSG00000175463 TBC1D10C       | ENSG00000178950 GAK            | ENSG00000197859 ADAMTSL2          | ENSG00000198500 Q96C21_HUMAN | ENSG00000202130 TWF2         |
|          | ENSG00000075142 SRI            | ENSG00000100478 AP4S1          | ENSG00000100749 VRK1         | ENSG00000111445 RFC5           | ENSG00000113645 WWC1           | ENSG00000114030 KPNA1             | ENSG00000114416 FXR1         | ENSG00000115137 NP_057628.1  |
|          | ENSG00000117862 TXNDC12        | ENSG00000122691 TWIST1         | ENSG00000138435 CHRNA1       | ENSG00000139508 SLC46A3        | ENSG00000139970 RTN1           | ENSG00000147588 PMP2              | ENSG00000154265 ABCA5        | ENSG00000154553 PDLIM3       |
|          | ENSG00000159450 TCHH           | ENSG00000163002 NUP35          | ENSG00000168234 C18orf17     | ENSG00000178604 NP_001034973.1 | ENSG00000183283 DAZAP2         | ENSG00000185551 NR2F2             | ENSG00000185787 MORF4L1      | ENSG00000185985 SLITRK2      |
|          | ENSG00000186481 NP_001025170.1 | ENSG00000205325 NP_001001684.1 |                              |                                |                                |                                   |                              |                              |
| CGCATGA  | ENSG00000029534 ANK1           | ENSG00000076928 ARHGEF1        | ENSG00000090512 FETUB        | ENSG00000103154 EFCBP2         | ENSG00000108244 KRT23          | ENSG00000122783 C7orf49           | ENSG00000124493 GRM4         | ENSG00000127084 FGD3         |
|          | ENSG00000129946 SHC2           | ENSG00000131871 SELS_HUMAN     | ENSG00000137221 TJAP1        | ENSG00000146374 RSP3           | ENSG00000147255 IGSF1          | ENSG00000158900 50556 NP_808879.2 | ENSG00000152128 TMEM163      | ENSG00000157087 ATP2B2       |
|          | ENSG00000159556 ISL2           | ENSG00000165406 MARCH8         | ENSG00000168209 DDIT4        | ENSG00000177234 C10orf85       | ENSG00000180846 C19orf34       | ENSG00000185896 LAMP1             | ENSG00000186837 C21orf19     | ENSG00000203930 Q5JPA2_HUMAN |
|          | ENSG00000203934 Q6ZUQ1_HUMAN   | ENSG00000204343 C9orf18        | ENSG00000205761 Q6ZRI7_HUMAN | ENSG00000205793 Q6ZT42_HUMAN   | ENSG0000003096 KLHL13          | ENSG00000004864 SLC25A13          | ENSG00000008277 ADAM22       | ENSG00000040341 STAU2        |
|          | ENSG00000066697 TMEFF1         | ENSG00000070761 C16orf80       | ENSG00000074527 NTN4         | ENSG00000109519 GRPEL1         | ENSG00000112706 IMPG1          | ENSG00000119866 BCL11A            | ENSG00000121871 SLITRK3      | ENSG00000137080 IFNA21       |
|          | ENSG00000144191 CNGA3          | ENSG00000145965 C6orf50        | ENSG00000153495 C13orf16     | ENSG00000159753 NP_001013860.1 | ENSG00000176871 WSB2           | ENSG00000183060 LYSMD4            | ENSG00000185742 NP_997528.1  | ENSG00000196428 TSC22D2      |
| CGCATGC  | ENSG0000017483 SLC38A5         | ENSG00000064961 HMG20B         | ENSG00000087152 ATXN7L3      | ENSG00000089505 CMTM1          | ENSG00000099977 DDT            | ENSG00000103056 SMPD3             | ENSG00000105619 TFPT         | ENSG00000107404 DVL1         |
|          | ENSG00000123136 DDX39          | ENSG00000126934 MAP2K2         | ENSG00000131398 KCNK3        | ENSG00000131400 NAPSA          | ENSG00000132470 ITGB4          | ENSG00000137054 POLR1E            | ENSG00000154124 FAM105B      | ENSG00000156411 C14orf2      |
|          | ENSG00000165623 C10orf49       | ENSG00000172336 POP7           | ENSG00000176845 METRNL       | ENSG00000177021 LRRC24         | ENSG00000185818 NAT8L          | ENSG00000185966 LCE3E             | ENSG00000196431 CRYBA4       | ENSG00000204999 LOC388588    |
|          | ENSG00000195499 SNAI2          | ENSG00000065413 ANKRD44        | ENSG00000077327 SPAG6        | ENSG00000109680 TBC1D19        | ENSG00000109680 TBC1D19        | ENSG00000112685 EXOC2             | ENSG00000117862 TXNDC12      | ENSG00000118260 CREB1        |
|          | ENSG00000118849 RARRES1        | ENSG00000119231 SENP5          | ENSG00000135047 CTS1         | ENSG00000136874 STX17          | ENSG00000137364 TPMT           | ENSG00000138641 HERC3             | ENSG00000140416 TPM1         | ENSG00000140941 MAP1LC3B     |
|          | ENSG00000152932 RAB3C          | ENSG00000166006 KCNK2          | ENSG00000182628 FAM33A       | ENSG00000185061 NP_001072996.1 | ENSG00000196967 ZNF585A        | ENSG00000197639 MKRNP5            | ENSG00000203995 ZYG11A       |                              |
| CGCATGT  | ENSG00000039987 BEST2          | ENSG00000058404 CAMK2B         | ENSG00000067842 ATP2B3       | ENSG00000072818 CENTB1         | ENSG00000074266 FOSL2          | ENSG00000090238 YPEL3             | ENSG00000100577 GSTZ1        | ENSG00000101161 PRPF6        |
|          | ENSG00000101210 EEF1A2         | ENSG00000104903 LYL1           | ENSG00000106565 TMEM176B     | ENSG00000108370 RGS9           | ENSG00000131100 ATP6V1E1       | ENSG00000131398 KCNK3             | ENSG00000136717 BIN1         | ENSG00000140612 SEC11A       |
|          | ENSG00000173950 C3orf21        | ENSG00000198131 ZNF544         | ENSG00000205414 Q6ZVL8_HUMAN | ENSG00000062725 APPBP2         | ENSG00000079112 CDH17          | ENSG00000100418 NP_056519.1       | ENSG00000104093 DMXL2        | ENSG00000104904 OAZ1         |
|          | ENSG00000108423 TUBD1          | ENSG00000109220 CHIC2          | ENSG00000109339 MAPK10       | ENSG00000115568 ZNF142         | ENSG00000117791 MOSC2          | ENSG00000120833 SOCS2             | ENSG00000133816 MICAL2       | ENSG00000137040 RANBP6       |
|          | ENSG00000147364 FBXO25         | ENSG00000154845 PPP4R1         | ENSG00000156650 MYST4        | ENSG00000162976 PQLC3          | ENSG00000163738 MTHFD2L        | ENSG00000168542 COL3A1            | ENSG00000174437 ATP2A2       | ENSG00000175018 C10orf122    |
| CGCCAAA  | ENSG00000182986 NP_997216.2    | ENSG00000187231 SESTD1         | ENSG00000204133 FAM33B       |                                |                                |                                   |                              |                              |
|          | ENSG00000078061 ARAF           | ENSG00000100220 C22orf28       | ENSG00000101194 C20orf59     | ENSG00000103154 EFCBP2         | ENSG00000105610 KLF1           | ENSG00000116017 ARID3A            | ENSG00000116096 SPR          | ENSG00000119685 TTLL5_HUMAN  |
|          | ENSG00000123685 NP_061134.1    | ENSG00000125844 RRBP1          | ENSG00000125910 EDG6         | ENSG00000133315 LRP16_HUMAN    | ENSG00000137106 GRHRP          | ENSG00000157856 C2orf39           | ENSG00000166091 CMTM5        | ENSG00000169418 NPR1         |
|          | ENSG00000170238 XR_017738.1    | ENSG00000170550 Q8WVU8_HUMAN   | ENSG00000177666 PNPLA2       | ENSG00000178171 NP_689911.1    | ENSG00000179218 CALR           | ENSG00000181709 Q96DH5_HUMAN      | ENSG00000182379 NXPH4        | ENSG00000196892 Q9P1D2_HUMAN |
|          | ENSG00000149199 COX15          | ENSG00000083844 ZNF264         | ENSG00000083896 YTHDC1       | ENSG00000100354 TNRC6B         | ENSG00000101843 PSMD10         | ENSG00000120254 RBBP7             | ENSG00000102128 RB40L_HUMAN  | ENSG00000105784 NP_612147.1  |
|          | ENSG00000106278 PTPR12         | ENSG00000107959 PITRM1         | ENSG00000108911 ELP4         | ENSG00000111731 KIAA0528       | ENSG00000113088 GZMK           | ENSG000001120194 PLG              | ENSG00000128294 TPST2        | ENSG00000134146 ATPBD4       |
|          | ENSG00000136379 FAM108C1       | ENSG00000138678 NP_116106.2    | ENSG00000148942 SLCSA12      | ENSG00000153487 ING1           | ENSG00000155875 C9orf138       | ENSG00000165985 C1QL3             | ENSG00000167912 Q96QE0_HUMAN | ENSG00000177324 CXorf20      |
|          | ENSG00000177511 ST8SIA3        | ENSG00000179163 FUC1           | ENSG00000183060 LYSMD4       | ENSG00000205003 CNTF           |                                |                                   |                              |                              |
| CGCCAAC  | ENSG000000047644 WWC3          | ENSG00000070047 K1542_HUMAN    | ENSG00000095777 MYO3A        | ENSG00000100003 SEC14L2        | ENSG00000105325 FZR1           | ENSG00000105662 CRTCL             | ENSG00000113430 IRX4         | ENSG00000115286 NDUFS7       |
|          | ENSG00000126890 CTAG2          | ENSG00000133477 FAM83F         | ENSG00000134438 RAX          | ENSG00000137731 FXD2           | ENSG00000138083 SIX3           | ENSG00000164970 C9orf25           | ENSG00000168065 SLC22A11     | ENSG00000168159 RNF187       |
|          | ENSG00000170054 SERPINA9       | ENSG00000182156 ENPP7          | ENSG00000183678 CTAG1A       | ENSG00000184033 CTAG1B         | ENSG00000185838 GNB1L          | ENSG00000186350 RXORA             | ENSG00000187479 Q7Z7L8_HUMAN | ENSG00000188385 C10orf39     |
|          | ENSG0000006715 VPS41           | ENSG00000060718 COL11A1        | ENSG00000102974 CTCF         | ENSG00000106031 HOXA13         | ENSG00000109944 C11orf63       | ENSG00000110768 GTF2H1            | ENSG00000112343 TRIM38       | ENSG00000116977 LGALS8       |
|          | ENSG00000139352 ASCL1          | ENSG00000163359 COL6A3         | ENSG00000163785 RYK          | ENSG00000164338 UTP15          | ENSG00000171199 PROL1          | ENSG00000180044 Q8N5S4_HUMAN      | ENSG00000180957 PITPNB       | ENSG00000185104 FAF1         |
| CGCCAAAT | ENSG00000010671 BTK            | ENSG0000013455 ARPC1A          | ENSG00000066044 ELAVL1       | ENSG00000100350 FOXRED2        | ENSG00000101200 AVP            | ENSG00000102900 NUP93             | ENSG00000102967 DHODH        | ENSG00000118898 PPL          |
|          | ENSG00000120708 TGFB1          | ENSG00000121454 LHX4           | ENSG00000126457 PRMT1        | ENSG00000130656 HBZ            | ENSG00000134871 COL4A2         | ENSG00000136288 MYO1G             | ENSG00000157350 ST3GAL2      | ENSG00000162881 OXER1        |
|          | ENSG00000163874 ZC3H12A        | ENSG00000165462 PHOX2A         | ENSG00000167772 ANGPTL4      | ENSG00000170484 KRT74          | ENSG00000179528 LBX2           | ENSG00000179922 ZNF784            | ENSG00000180259 PRNT         | ENSG00000182335 Q8TE90_HUMAN |
|          | ENSG00000186442 KRT3           | ENSG00000187140 FOXD3          | ENSG00000188157 AGRN         | ENSG00000188364 TMSL4          | ENSG00000198488 B3GNT6         | ENSG00000205335 GLYCAM1           | ENSG00000059728 MXD1         | ENSG00000070214 SLC44A1      |
|          | ENSG00000095139 ARCN1          | ENSG00000100697 DICER1         | ENSG00000107779 BMPR1A       | ENSG00000107937 GTPBP4         | ENSG00000110911 SLC11A2        | ENSG00000116194 ANGPTL1           | ENSG00000122707 RECK         | ENSG00000136436 CALCOCO2     |
|          | ENSG00000141542 RAB40B         | ENSG00000143653 SCCPCD         | ENSG00000147853 AK3          | ENSG00000153822 KCNJ16         | ENSG00000168032 ENTPD3         | ENSG00000170852 KBTBD2            | ENSG00000177200 CHD9         | ENSG00000177570 SAMD12       |
|          | ENSG00000178200 KDEL2          | ENSG00000182287 AP1S2          | ENSG00000184575 XPOT         | ENSG00000196593 NM_207439      | ENSG00000205150 FAM92A3        | ENSG00000205542 TMSL1             |                              |                              |
| CGCCATT  | ENSG00000055130 CUL1           | ENSG00000065308 TRAM2          | ENSG00000075043 KCNQ2        | ENSG00000075426 FOSL2          | ENSG00000078061 ARAF           | ENSG00000100075 SLC25A1           | ENSG00000100401 RANGAP1      | ENSG00000103876 FAH          |
|          | ENSG00000104870 FCGR2          | ENSG00000105668 UPK1A          | ENSG00000125877 ITPA         | ENSG00000130592 LSP1           | ENSG00000131899 LLGL1          | ENSG00000133519 NP_689722.1       | ENSG00000135638 EMX1         | ENSG00000137078 SIT1         |
|          | ENSG00000138085 C2orf28        | ENSG00000141873 SLC39A3        | ENSG00000145113 MUC4         | ENSG00000148120 C9orf3         | ENSG00000148795 CYP17A1        | ENSG00000158246 FAM46B            | ENSG00000159708 LRRC36       | ENSG00000162494 LRRC38       |
|          | ENSG0                          |                                |                              |                                |                                |                                   |                              |                              |



|                        |                              |                              |                                |                                |                                |                                |                              |                                |
|------------------------|------------------------------|------------------------------|--------------------------------|--------------------------------|--------------------------------|--------------------------------|------------------------------|--------------------------------|
| ENSG00000095637 SORBS1 | ENSG00000106689 LHX2         | ENSG00000108395 TRIM37       | ENSG00000114432 FZD10          | ENSG00000159082 SYNJ1          | ENSG00000163093 BBS5           | ENSG00000184474 Q96FP4_HUMAN   | ENSG00000205024 Q6ZVP5_HUMAN |                                |
| CGCCCTT                | ENSG00000019144 PHLDB1       | ENSG00000044012 GUCA2B       | ENSG00000083307 GRHL2          | ENSG00000085185 BCORL1         | ENSG00000099272 MICAL3         | ENSG00000100429 HDAC10         | ENSG00000104853 CLPTM1       | ENSG00000105072 C19orf44       |
|                        | ENSG00000105088 OLFM2        | ENSG00000105373 GLTSCR2      | ENSG00000105374 NKG7           | ENSG00000105726 ATP13A1        | ENSG00000108786 HSD17B1        | ENSG00000109089 CDR2L          | ENSG00000111254 AKAP3        | ENSG00000118900 UBN1           |
|                        | ENSG00000119715 ESRRB        | ENSG00000124140 SLC12A5      | ENSG00000127564 PKMYT1         | ENSG00000130477 UNC13A         | ENSG00000134438 RAX            | ENSG00000160256 C21orf70       | ENSG00000160678 S100A1       | ENSG00000166426 CRABP1         |
|                        | ENSG00000167468 GNP4         | ENSG00000167617 CDC42EP5     | ENSG00000174989 FBXW8          | ENSG00000175164 ABO            | ENSG00000175756 AURKAIP1       | ENSG00000177984 NP_976222.1    | ENSG00000203822 Q6ZVI0_HUMAN | ENSG00000204058 C10orf41       |
|                        | ENSG00000075142 SRI          | ENSG00000095794 CREM         | ENSG00000100196 KDELR3         | ENSG00000123908 EIF2C2         | ENSG00000124275 MTRR           | ENSG00000125848 FLRT2          | ENSG00000131015 ULBP2        | ENSG00000134644 PUM1           |
|                        | ENSG00000138795 LEF1         | ENSG00000139352 ASCL1        | ENSG00000141668 CBLN2          | ENSG00000143919 C2orf34        | ENSG00000146072 TNFRSF21       | ENSG00000148737 TCF7L2         | ENSG00000152518 ZFP36L2      | ENSG00000153162 BMP6           |
|                        | ENSG00000155918 RAET1L       | ENSG000001210rf45            | ENSG00000164093 PITX2          | ENSG00000164386 NP_997378.2    | ENSG00000167258 CRKRS          | ENSG00000169040 PMCHL2         | ENSG00000183831 ANKRD45      | ENSG00000188404 SELL           |
|                        | ENSG00000203722 RAET1G       |                              |                                |                                |                                |                                |                              |                                |
| CGCCGAG                | ENSG00000005007 UPF1         | ENSG0000006015 C19orf60      | ENSG00000011590 ZBTB32         | ENSG00000064545 TMEM161A       | ENSG00000067606 PRKCZ          | ENSG00000074054 CLASP1         | ENSG00000089116 LHX5         | ENSG00000110057 UNC93B1        |
|                        | ENSG00000112699 GMDS         | ENSG00000122304 Q6ZMM0_HUMAN | ENSG00000124391 IL17C          | ENSG00000127585 FBXL16         | ENSG00000129038 LOXL1          | ENSG00000138136 LBX1           | ENSG00000142233 NP_665806.1  | ENSG00000144834 TAGLN3         |
|                        | ENSG00000157782 CABP1        | ENSG00000158517 NCF1         | ENSG00000164610 RP9            | ENSG00000165178 LOC648998      | ENSG00000169575 VPREB1         | ENSG00000169682 LAT            | ENSG00000174015 SPERT        | ENSG00000182487 NCF1C          |
|                        | ENSG00000183617 MRPL54       | ENSG00000186281 NP_997211.2  | ENSG00000198454 Q5SQ13_HUMAN   | ENSG00000204058 C10orf41       | ENSG00000205918 Q6A1A2_HUMAN   | ENSG00000101003 GINS1          | ENSG00000101230 C20orf82     | ENSG00000117597 C1orf107       |
|                        | ENSG00000129007 CALML4       | ENSG00000173614 NMNAT1       | ENSG00000184402 SS18L1         | ENSG00000185742 NP_997528.1    | ENSG00000187068 NP_001020437.1 | ENSG00000196715 VKORC1L1       |                              |                                |
| CGCCGCA                | ENSG00000018280 SLC11A1      | ENSG00000036672 USP2         | ENSG00000079435 LIPE           | ENSG00000090512 FETUB          | ENSG00000099284 H2AFY2         | ENSG00000099864 MIF            | ENSG00000116039 ATP6V1B1     | ENSG00000120055 C10orf95       |
|                        | ENSG00000124302 CHST8        | ENSG00000127616 SMARCA4      | ENSG00000135213 PGLS           | ENSG00000135625 EGR4           | ENSG00000135625 MYO1G          | ENSG00000138080 EMILIN1        | ENSG00000164897 TMUB1        | ENSG00000166126 AMN            |
|                        | ENSG00000166819 PLIN         | ENSG00000171223 JUNB         | ENSG00000171298 GAA            | ENSG00000171621 SPSB1          | ENSG00000176887 SOX11          | ENSG00000182612 TSPAN10        | ENSG00000184922 FMNL1        | ENSG00000185370 Q8WZ02_HUMAN   |
|                        | ENSG00000189401 OTUD6A       | ENSG00000196892 Q9P1D2_HUMAN | ENSG00000197721 CR1L           | ENSG00000198500 Q96C21_HUMAN   | ENSG00000213551 SERPINB1       | ENSG00000047410 TPR            | ENSG00000081842 PCDH10       | ENSG00000102935 ZNF423         |
|                        | ENSG00000113594 LIFR         | ENSG00000141655 TNFRSF11A    | ENSG00000173598 NUDT4          | ENSG00000176912 C18orf56       |                                |                                |                              |                                |
| CGCCCGC                | ENSG00000036672 USP2         | ENSG00000069011 PITX1        | ENSG00000101438 SLC32A1        | ENSG00000104899 AMH            | ENSG00000105737 GRIK5          | ENSG00000112493 TAPBP          | ENSG00000124140 SLC12A5      | ENSG00000124159 MATN4          |
|                        | ENSG00000129646 QRICH2       | ENSG00000142227 EMP3         | ENSG00000155254 MARVELD1       | ENSG00000156427 PGF18          | ENSG00000157350 ST3GAL2        | ENSG00000161055 SCGB3A1        | ENSG00000164897 TMUB1        | ENSG00000166819 PLIN           |
|                        | ENSG00000167393 PPP2R3B      | ENSG00000167543 TP53I13      | ENSG00000173581 CCDC106        | ENSG00000179526 SHARPIN        | ENSG00000181444 ZNF467         | ENSG00000181649 PHLDA2         | ENSG00000183087 GAS6         | ENSG00000183600 Q66K37_HUMAN   |
|                        | ENSG00000184390 Q6ICM0_HUMAN | ENSG00000197245 GRRP1        | ENSG00000197530 MIB2           | ENSG00000204058 C10orf41       | ENSG00000059728 MXD1           | ENSG00000078304 PPP2R5C        | ENSG00000111799 COL12A1      | ENSG00000140948 ZCCHC14        |
|                        | ENSG00000141448 GATA6        | ENSG00000157214 STEAP2       | ENSG00000181656 GPR88          |                                |                                |                                |                              |                                |
| CGCCGGC                | ENSG00000061936 SFRS8        | ENSG00000079435 LIPE         | ENSG00000101997 CCDC22         | ENSG00000105717 PBX4           | ENSG00000106018 VPR2           | ENSG00000106038 EVX1           | ENSG00000116670 MAD2L2       | ENSG00000126067 PSMB2          |
|                        | ENSG00000129968 FAM108A1     | ENSG00000130005 GAMT         | ENSG00000130201 EXOC3L2        | ENSG00000130751 NPA51          | ENSG00000134438 RAX            | ENSG00000139722 VPS37B         | ENSG00000141905 NFIC         | ENSG00000142156 COL6A1         |
|                        | ENSG00000148805 NR_002934.2  | ENSG00000154252 GAL3ST2      | ENSG00000156711 MAPK13         | ENSG00000160256 C21orf70       | ENSG00000160469 BRSK1          | ENSG00000160650 Q96HZ0_HUMAN   | ENSG00000160796 NBEAL2       | ENSG00000160959 LRRC14         |
|                        | ENSG00000162068 NTN2L        | ENSG00000163633 C4orf36      | ENSG00000169682 LAT            | ENSG00000171119 NRTN           | ENSG00000175223 Q8TCI8_HUMAN   | ENSG00000176194 CIDEA          | ENSG00000177156 TALD01       | ENSG00000178947 Q8V52_HUMAN    |
|                        | ENSG00000183600 Q66K37_HUMAN | ENSG00000184221 OLIG1        | ENSG00000198658 NP_001073891.1 | ENSG00000198664 Q9BTR0_HUMAN   | ENSG00000198816 ZNF358         | ENSG00000203835 FAM108A2       | ENSG00000204058 C10orf41     | ENSG00000204059 NP_001013718.1 |
|                        | ENSG00000205599 Q6ZUV4_HUMAN | ENSG00000205710 Q6ZRB5_HUMAN | ENSG00000066629 EML1           | ENSG00000104313 EYA1           | ENSG00000104660 LEPROTL1       | ENSG00000115652 UXS1           | ENSG00000159216 RUNX1        | ENSG00000165185 KIAA1958       |
|                        | ENSG00000178351 Q8N345_HUMAN | ENSG00000181467 RAP2B        | ENSG00000181588 RKHD1          | ENSG00000197069 Q9H399_HUMAN   | ENSG00000197801 Q8TEB0_HUMAN   |                                |                              |                                |
| CGCCGTC                | ENSG00000072110 ACTN1        | ENSG00000095777 MYO3A        | ENSG00000100678 SLC8A3         | ENSG00000105404 RABAC1         | ENSG00000130706 ADRM1          | ENSG00000138083 SIX3           | ENSG00000154252 GAL3ST2      | ENSG00000160200 CBS            |
|                        | ENSG00000161013 MGAT4B       | ENSG00000161570 CCL5         | ENSG00000162032 SPSB3          | ENSG00000163956 LRPAP1         | ENSG00000165238 WNK2           | ENSG00000166165 CKB            | ENSG00000166823 MESP1        | ENSG00000170442 KRT86          |
|                        | ENSG00000170579 DLGAP1       | ENSG00000175602 CCDC85B      | ENSG00000179740 C19orf290S     | ENSG00000180089 TMEM86B        | ENSG00000182631 RXFP3          | ENSG00000183072 NKX2-5         | ENSG00000183558 HIST2H2AA3   | ENSG00000184221 OLIG1          |
|                        | ENSG00000186493 C5orf38      | ENSG00000189401 OTUD6A       | ENSG00000197530 MIB2           | ENSG00000198851 CD3E           | ENSG00000199951 ZNRAN1         | ENSG00000065328 MCM10          | ENSG00000116016 EPAS1        | ENSG00000120458 C11orf61       |
|                        | ENSG00000143797 MBOAT2       | ENSG00000154548 SRR35_HUMAN  | ENSG00000154556 SORBS2         | ENSG00000159216 RUNX1          | ENSG00000161326 DUSP14         | ENSG00000182090 C14orf25       | ENSG00000183780 SLC35F3      | ENSG00000188404 SELL           |
| CGCCTAC                | ENSG00000010322 NISCH        | ENSG00000028528 SNX1         | ENSG00000067182 TNFRSF1A       | ENSG00000073146 MOV10L1        | ENSG00000090971 NAT14          | ENSG00000100324 MAP3K7IP1      | ENSG00000106991 ENG          | ENSG00000114631 PODXL2         |
|                        | ENSG00000137497 NUMA1        | ENSG00000144028 ASCC3L1      | ENSG00000145990 GFOD1          | ENSG00000155659 VSG1A          | ENSG00000161835 GRASP          | ENSG00000167900 TK1            | ENSG00000168135 KCNJ4        | ENSG00000172530 BANP           |
|                        | ENSG00000174165 ZDHC24       | ENSG00000178241 Q9P0D4_HUMAN | ENSG00000186998 EMID1          | ENSG00000187140 FOXD3          | ENSG00000196293 DUX4           | ENSG00000197152 Q96NB7_HUMAN   | ENSG00000204168 Q6ZRI1_HUMAN | ENSG00000204227 RING1          |
|                        | ENSG00000204537 Q6ZT09_HUMAN | ENSG00000205538 Q6ZVP1_HUMAN | ENSG00000007350 TKTL1          | ENSG00000071575 TRIB2          | ENSG00000111490 Q9Y2I9_HUMAN   | ENSG00000116977 LGALS8         | ENSG00000119953 SMNDC1       | ENSG00000135108 FBXO21         |
|                        | ENSG00000138041 SMEK2        | ENSG00000144445 NP_689732.2  | ENSG00000148798 INA            | ENSG00000154511 FAM69A         | ENSG00000158458 NRG2           | ENSG00000164172 MOCS2          | ENSG00000166181 API5         | ENSG00000166752 TMEM83         |
|                        | ENSG00000168283 BMI1         | ENSG00000168356 SCN11A       | ENSG00000170035 UBE2E4P        | ENSG00000172840 PDP2_HUMAN     | ENSG00000183735 TBK1           | ENSG00000188916 NP_001034851.1 | ENSG00000196705 ZNF431       | ENSG00000196850 PPTC7          |
|                        | ENSG00000196975 ANXA4        | ENSG00000197817 Q9UHS9_HUMAN | ENSG00000205227 Q6ZWA8_HUMAN   |                                |                                |                                |                              |                                |
| CGCCTTC                | ENSG00000060558 GNA15        | ENSG00000078902 TOLLIP       | ENSG00000086232 EIF2AK1        | ENSG00000104490 NCALD          | ENSG00000104957 CCDC130        | ENSG00000106236 NPTX2          | ENSG00000125888 C20orf179    | ENSG00000129467 ADCY4          |
|                        | ENSG00000130182 ZSCAN10      | ENSG00000133315 LRP16_HUMAN  | ENSG000001608800135605 TEC     | ENSG00000136274 NACAD          | ENSG00000136854 STXBP1         | ENSG00000142039 CCDC97         | ENSG00000147123 NDUFB11      | ENSG00000148343 FAM73B         |
|                        | ENSG00000149043 SYT8         | ENSG00000155984 TMEM185A     | ENSG00000160888 IER2           | ENSG00000161132 Q9BYA7_HUMAN   | ENSG00000161642 ZNF385         | ENSG00000167705 RILP           | ENSG00000170684 ZNF342       | ENSG00000174015 SPERT          |
|                        | ENSG00000175003 SLC22A1      | ENSG00000175550 DRAP1        | ENSG00000182013 NP_060685.2    | ENSG00000182968 SOX1           | ENSG00000206031 Q6ZT66_HUMAN   | ENSG00000005955 ZNF403         | ENSG0000017260 ATP2C1        | ENSG00000043355 ZIC2           |
|                        | ENSG00000078399 HOXA9        | ENSG00000100372 SLC25A17     | ENSG00000101190 TCFL5          | ENSG00000103342 GSPF1          | ENSG00000112238 PRDM13         | ENSG00000112739 PRPF4B         | ENSG00000117724 CENPF        | ENSG00000124812 CRISP1         |
|                        | ENSG00000125571 IL1F7        | ENSG00000135069 PSAT1        | ENSG00000136819 C9orf78        | ENSG00000136938 ANP32B         | ENSG00000138463 DIRC2          | ENSG00000141542 BAB40B         | ENSG00000141579 ZNF750       | ENSG00000147121 ZNF673         |
| CGCCTTG                | ENSG00000151413 NUBP1        | ENSG00000153827 TRIP12       | ENSG00000154217 PITPNC1        | ENSG00000172667 ZMAT3          | ENSG00000183695 MRGPRX2        | ENSG00000184388 RBM32B         | ENSG00000186288 RBM32A       |                                |
|                        | ENSG00000089327 FXD5         | ENSG00000099994 SUSD2        | ENSG00000105516 DBP            | ENSG00000122592 HOXA7          | ENSG00000135929 CYP27A1        | ENSG00000140274 DUOX2          | ENSG00000156466 GDF6         | ENSG00000158106 RHPN1          |
|                        | ENSG00000160284 C21orf56     | ENSG00000163913 IFT122       | ENSG00000168056 LTBP3          | ENSG00000169026 MFSB7          | ENSG00000170291 C17orf81       | ENSG00000173267 SNCG           | ENSG00000174151 CYB561D1     | ENSG00000184221 OLIG1          |
|                        | ENSG00000185585 OLFML2A      | ENSG00000198546 ZNF511       | ENSG00000198664 Q9BTR0_HUMAN   | ENSG00000204314 PRRT1          | ENSG00000004766 CCDC132        | ENSG000000013293 SLC7A14       | ENSG000000044115 CTNNA1      | ENSG00000099256 PRTFDC1        |
|                        | ENSG00000113282 CLINT8       | ENSG00000114948 ADAM25       | ENSG00000115840 SLC25A12       | ENSG00000116350 SFRS4          | ENSG00000131238 PPT1           | ENSG00000134028 ADAMDEC1       | ENSG00000134376 CRB1         | ENSG00000135870 RC3H1          |
|                        | ENSG00000139508 SLC46A3      | ENSG00000148057 C9orf103     | ENSG00000148444 COMMD3         | ENSG00000154645 CHODL          | ENSG00000158473 CD1D           | ENSG00000159086 C21orf66       | ENSG00000163162 RNFL149      | ENSG00000171819 ANGPTL7        |
|                        | ENSG00000175104 TRAF6        | ENSG00000176974 SHMT1        | ENSG00000178105 DDX10          | ENSG00000182326 C1S            | ENSG00000186700 Q8N6F3_HUMAN   | ENSG00000196353 CPNE4          | ENSG00000196781 TLE1         | ENSG00000203943 SAMD13         |
| CGCGATT                | ENSG00000087903 RFX2         | ENSG00000092820 VIL2         | ENSG00000105085 CRSP7          | ENSG00000105737 GRIK5          | ENSG00000127452 FBXL12         | ENSG00000141568 FOXK2          | ENSG00000178093 TSSK6        | ENSG00000179314 WSCD1          |
|                        | ENSG00000188176 SMTNL2       | ENSG00000188338 SLC38A3      | ENSG00000197361 FBXL22         | ENSG00000198520 NP_001004307.1 | ENSG00000204715 Q4GQ5_HUMAN    | ENSG00000205231 Q6ZQQ1_HUMAN   | ENSG00000163625 WDFY3        | ENSG00000175556 LONRF3         |
| CGCCGGC                | ENSG00000183696 UPP1         | ENSG00000204272 Q6Z42_HUMAN  |                                |                                |                                |                                |                              |                                |
|                        | ENSG00000026036 TNFRSF6B     | ENSG00000065054 SLC9A3R2     | ENSG00000067182 TNFRSF1A       | ENSG00000092758 COL9A3         | ENSG00000104899 AMH            | ENSG00000108551 RASD1          | ENSG00000115297 TLX2         | ENSG00000125533 BHLHB4         |
|                        | ENSG00000126460 PNRFG2       | ENSG00000127528 KLF2         | ENSG00000132323 ILKAP          | ENSG00000135625 EGR4           | ENSG00000135625 EMILIN1        | ENSG00000142303 ADAMTS10       | ENSG00000146049 KAAG1        | ENSG00000147889 CDKN2A         |
|                        | ENSG00000149557 FEZ1         | ENSG00000158711 ELK4         | ENSG00000164438 TLX3           | ENSG00000167543 TP53I13        | ENSG00000169683 LRRC45         | ENSG00000172878 NP_954697.1    | ENSG00000173846 PLK3         | ENSG00000173914 RBM4B          |
|                        | ENSG00000174166 Q9BTX9_HUMAN | ENSG00000175223 Q8TCI8_HUMAN | ENSG00000177021 LRRC24         | ENSG00000177398 UMODL1         | ENSG00000179823 XR_017713.1    | ENSG00000180096 SEPT1          | ENSG00000180340 FZD2         | ENSG00000181649 PHLDA2         |
|                        | ENSG00000182156 ENPP7        | ENSG00000184986 TMEM121      | ENSG00000185669 SNAI3          | ENSG00000186493 C5orf38        | ENSG00000187013 C17orf82       | ENSG00000187017 ESPN           | ENSG00000187051 RPS19BP1     | ENSG00000196293 DUX4           |
|                        | ENSG00000197921 HES5         | ENSG00000198664 Q9BTR0_HUMAN | ENSG00000204058 C10orf41       | ENSG00000204682 C10orf114      | ENSG00000078369 GNB1           | ENSG00000113391 C5orf21        | ENSG00000127152 BCL11B       | ENSG00000132825 PPP1R3D        |
|                        | ENSG00000148426 C10orf47     | ENSG00000159216 RUNX1        | ENSG00000180044 Q8NS54_HUMAN   |                                |                                |                                |                              |                                |
| CGCCGAC                | ENSG00000049283 EPN3         | ENSG00000069011 PITX1        | ENSG00000100599 RIN3           | ENSG00000101542 CDH20          | ENSG00000104899 AMH            | ENSG00000105223 PLD3           | ENSG00000107736 CDH23        |                                |

ENSG00000148399|WDR85 ENSG00000153807|HOXA10 ENSG00000160959|LRRRC14 ENSG00000164519|Q96MZ3\_HUMAN ENSG00000165688|PMPCA ENSG00000167371|PRRT2 ENSG00000180089|TMEM86B ENSG00000182533|CAV3  
ENSG00000183048|SLC25A10 ENSG00000183134|GPR44 ENSG00000183386|FHL3 ENSG00000184986|TMEM121 ENSG00000071462|WBCSR22 ENSG00000133121|STAR13 ENSG00000136267|DGKB ENSG00000182552|RWDD4A  
CGCGTCC ENSG00000070047|K1542\_HUMAN ENSG00000074317|SNCB ENSG00000099822|HCN2 ENSG00000099937|SERPIND1 ENSG00000101542|CDH20 ENSG00000104823|ECH1 ENSG00000108469|RECQL5 ENSG00000112041|TULP1  
ENSG00000112493|TAPBP ENSG00000115257|PCSK4 ENSG00000125533|BNLHB4 ENSG00000130294|KIF1A ENSG00000131668|BARX1 ENSG00000132938|KIAA0774 ENSG00000136573|BLK ENSG00000136717|BIN1  
ENSG00000141873|SLC39A3 ENSG00000142227|EMP3 ENSG00000149090|NP\_001001991.1 ENSG00000152467|ZSCAN1 ENSG00000160284|C21orf56 ENSG00000161583|TBC1D3G ENSG00000162188|GNG3 ENSG00000163701|IL17RE  
ENSG00000167395|ZNF646 ENSG00000170549|IRX1 ENSG00000172005|MAL ENSG00000172216|CEBPB ENSG00000174943|KCTD15 ENSG00000179526|SHARPIN ENSG00000179740|C19orf29OS ENSG00000182199|SHMT2  
ENSG00000182612|TSPAN10 ENSG00000189309|TBC1D3B ENSG00000196419|XRCC6 ENSG00000197421|NR\_003267.1 ENSG00000205559|Q61BW5\_HUMAN ENSG00000109819|PPARG1A ENSG00000111450|STX2 ENSG00000111707|SUDS3  
ENSG00000117152|RGS4 ENSG00000135643|KCNMB4 ENSG00000173926|MARCH3 ENSG00000198681|MAGEA1 ENSG00000203722|RAET1G  
ENSG00000010610|CD4 ENSG000000011451|WIZ ENSG00000066044|ELAVL1 ENSG00000099308|MAST3 ENSG00000125514|C20orf51 ENSG00000126460|PRRG2 ENSG00000135916|ITM2C ENSG00000136352|TITF1  
CGCGTTT ENSG00000140264|SERF2 ENSG00000141574|SECTM1 ENSG00000149418|ST14 ENSG00000149654|CDH22 ENSG00000160284|C21orf56 ENSG00000167965|NM\_022372.3 ENSG00000169683|LRRC45 ENSG00000171532|NEUROD2  
ENSG00000173404|INSM1 ENSG00000183072|NKX2-5 ENSG00000185112|FAM43A ENSG00000185830|C22orf37 ENSG00000196331|HIST1H2BO ENSG00000204268|Q6ZVY1\_HUMAN ENSG00000060709|RIMBP2 ENSG00000105983|LMBR1  
ENSG00000112992|NNT ENSG00000113369|ARRDC3 ENSG00000120833|SOCS2 ENSG00000121957|GPSM2 ENSG00000125814|NAPB ENSG00000130764|LRRC47 ENSG00000137504|CREBZF ENSG000001155189|AGPAT5  
ENSG00000157540|DYRK1A ENSG00000165476|REEP3 ENSG00000169504|SLIC4 ENSG00000197183|C20orf112 ENSG00000197585|Q5JY89\_HUMAN ENSG00000198339|HIST1H4I ENSG00000198689|SLC9A6  
CGCTAAT ENSG0000013374|NUB1 ENSG00000103852|TTC23 ENSG00000108784|NAGLU ENSG00000125434|SLC25A35 ENSG00000125744|RTN2 ENSG00000129152|MYOD1 ENSG00000130707|ASS1 ENSG00000134595|SOX3  
ENSG00000137216|TMEM63B ENSG00000142619|PADI3 ENSG00000142910|TINAGL1 ENSG00000147457|CHMP7 ENSG00000149926|FAM57B ENSG00000156603|MED19 ENSG00000162174|ASRGL1 ENSG00000167693|NXN  
ENSG00000172236|TPSB2 ENSG00000180644|PRF1 ENSG00000184221|OLIG1 ENSG00000189321|NR\_002940.1 ENSG00000197253|TRY1A\_HUMAN ENSG00000197565|COL4A6 ENSG00000204168|Q6ZRI1\_HUMAN ENSG00000049167|ERCC8  
ENSG00000067445|TRO ENSG00000067560|RHOA ENSG00000071203|MS4A12 ENSG00000077585|GPR137B ENSG00000081237|PTPC ENSG00000105982|RNF32 ENSG00000125571|LL1F7 ENSG00000138135|CH25H  
ENSG00000147485|PXDNL ENSG00000148688|RPP30 ENSG00000156136|DCK ENSG00000156650|MYST4 ENSG00000161533|ACOX1 ENSG00000165621|OXGR1 ENSG00000172817|CYP7B1 ENSG00000197943|PLCG2  
ENSG00000198270|TMEM116 ENSG00000198718|KIAA0423  
CGCTACC ENSG00000089154|GCN1L1 ENSG00000099910|SCARF2 ENSG00000099937|SERPIND1 ENSG00000105193|RPS16 ENSG00000108309|NP\_006686.1 ENSG00000111684|MBOAT5 ENSG00000123965|NP\_777590.1 ENSG00000127957|PMS2L3  
ENSG00000140553|UNC45A ENSG00000149131|SERPING1 ENSG00000155265|C10orf132 ENSG00000160209|PDXK ENSG00000160783|BGLAP ENSG00000160818|GPATCH4 ENSG00000164877|MICALL2 ENSG00000167780|SOAT2  
ENSG00000168970|PLA2G4B ENSG00000169668|NP\_997357.1 ENSG00000170667|RASL2\_HUMAN ENSG00000174166|Q9BTX9\_HUMAN ENSG00000176087|SLC35A4 ENSG00000179253|Q5VZ43\_HUMAN ENSG00000182199|SHMT2 ENSG00000196924|FLNA  
ENSG00000198854|C1orf68 ENSG00000204540|PSORS1C1 ENSG00000205761|Q6ZRI7\_HUMAN ENSG00000081087|OSTM1 ENSG00000109118|PHF12 ENSG00000109805|NCAPG ENSG00000112031|MTRF1L ENSG00000114062|UBE3A  
ENSG00000116675|DNAJC6 ENSG00000120705|ETF1 ENSG00000129204|USP6 ENSG00000132842|AP3B1 ENSG00000145996|CDKAL1 ENSG00000147010|SH3KBP1 ENSG00000165637|VDAC2 ENSG00000172974|LOC729317  
ENSG00000173744|HRB ENSG00000175553|K1210\_HUMAN ENSG00000182118|FAM9A ENSG00000183813|CCR4 ENSG00000189050|NP\_057209.3 ENSG00000196730|DAPK1 ENSG00000197756|RPL37A  
CGCTATT ENSG0000005884|ITGA3 ENSG0000007564|TCF3 ENSG00000076864|RAP1GAP ENSG00000089558|KCNH4 ENSG00000100726|TELO2 ENSG00000102796|DHRS12 ENSG00000108639|SYNGR2 ENSG00000110108|TMEM109  
ENSG00000110801|PMSD9 ENSG00000111206|FOXM1 ENSG000001124067|LCAT ENSG00000130176|CNN1 ENSG00000130312|MRPL34 ENSG00000130956|HABP4 ENSG00000137502|RAB30 ENSG00000139178|C1RL  
ENSG00000140254|DUOX1 ENSG00000143198|MGST3 ENSG00000164108|Q9HAJ2\_HUMAN ENSG00000165804|ZNF219 ENSG00000166997|NP\_689968.1 ENSG00000168539|CHRM1 ENSG00000169122|FAM110B ENSG00000173372|C1QA  
ENSG00000175309|AGXT2L2 ENSG00000177468|OLIG3 ENSG00000179219|TMEM148 ENSG00000183785|PEX26 ENSG00000184922|FMNL1 ENSG00000189203|TMEM179 ENSG00000196581|AJAP1 ENSG00000196624|NP\_997381.1  
ENSG00000197763|TXNRD3 ENSG00000198407|Q8NCZ5\_HUMAN ENSG00000198796|ALPK2 ENSG00000204092|NP\_001001705.1 ENSG00000204301|NOTCH4 ENSG00000205599|Q6ZUY4\_HUMAN ENSG00000078269|SYNJ2 ENSG00000080503|SMARCA2  
ENSG00000088366|SLC15A1 ENSG00000100644|HIF1A ENSG00000104755|ADAM2 ENSG00000106819|ASPN ENSG00000108654|DDX5 ENSG00000108932|SLC16A6 ENSG00000113360|RNASEN ENSG00000115233|PMSD14  
ENSG00000121578|B4GALT4 ENSG00000125868|DSTN ENSG00000129691|ASH2L ENSG00000137571|SLC05A1 ENSG00000152422|XRCC4 ENSG00000153339|KIAA1012 ENSG00000155876|RRAGA ENSG00000163646|CLR1N1  
ENSG00000169554|ZEB2 ENSG00000188800|TMC02  
CGCTCCG ENSG00000089220|PEBP1 ENSG00000101200|AVP ENSG00000101210|EEF1A2 ENSG00000101849|TBL1X ENSG00000105193|RPS16 ENSG00000105221|AKT2 ENSG00000106991|ENG ENSG00000118194|TNNT2  
ENSG00000121413|ZSCAN18 ENSG00000125385|RPS29 ENSG00000129152|MYOD1 ENSG00000131094|C1QL1 ENSG00000143867|OSR1 ENSG00000149480|MTA2 ENSG00000158623|TSGA13 ENSG00000160396|HIPK4  
ENSG00000170919|Q5SVS6\_HUMAN ENSG00000173673|HES3 ENSG00000177030|DEAF1 ENSG00000181790|BAI1 ENSG00000182612|TSPAN10 ENSG00000182809|CRIP2 ENSG00000186493|C5orf38 ENSG00000186897|C1QL4  
ENSG00000187479|Q7Z7L8\_HUMAN ENSG00000204048|Q6ZUG3\_HUMAN ENSG00000107623|GDF10 ENSG00000108953|YWHAE ENSG00000111707|SUDS3 ENSG00000124209|RAB22A ENSG00000128731|HERC2 ENSG00000170624|SGCD  
ENSG00000183496|RKHD3  
CGCTCGT ENSG00000022567|SLC45A4 ENSG00000062282|DGAT2 ENSG00000066230|SLC9A3 ENSG00000071051|NCK2 ENSG00000074181|NOTCH3 ENSG00000100599|RIN3 ENSG00000105671|DDX49 ENSG00000110786|PTPN5  
ENSG00000112679|DUSP22 ENSG00000125821|DTD1 ENSG00000130595|TNNT3 ENSG00000134595|SOX3 ENSG00000147144|CCDC120 ENSG00000149716|ORA0V1 ENSG00000157306|THTPA ENSG00000158793|NIT1  
ENSG00000160058|BSDC1 ENSG00000162804|SNED1 ENSG00000169925|BRD3 ENSG00000174915|PTDSS2 ENSG00000176108|CHMP6 ENSG00000176605|C14orf177 ENSG00000181577|NP\_694978.2 ENSG00000181638|GLI4  
ENSG00000187953|NR\_002217.1 ENSG00000196498|NCOR2 ENSG00000198691|ABCA4 ENSG00000041515|MYO16 ENSG00000085274|MYNN ENSG00000091157|WDR7 ENSG00000101040|ZMYND8 ENSG00000101558|VAPA  
ENSG00000102554|KLF5 ENSG00000119446|RBM18 ENSG00000131828|PDHA1 ENSG00000134769|DTNA ENSG00000135974|C2orf49 ENSG00000141433|ADCYAP1 ENSG00000151623|NR3C2 ENSG00000159210|SNF8  
ENSG00000164209|SLC25A46 ENSG00000185104|FAF1 ENSG00000186480|INSIG1 ENSG00000189134|C6orf194 ENSG00000196290|NIF3L1  
CGCTGTA ENSG00000074755|ZEEF1 ENSG00000097021|ACOF7 ENSG00000100453|GZMB ENSG00000104998|JL27RA ENSG00000105204|DYRK1B ENSG00000105613|MAST1 ENSG00000109047|RCVRN ENSG00000110455|NP\_115981.1  
ENSG00000124702|KLHDC3 ENSG00000137225|CAPN11 ENSG00000138698|RAP1GDS1 ENSG00000142920|ADC ENSG00000144589|STRK11P ENSG00000149781|URP2\_HUMAN ENSG00000157782|CABP1 ENSG00000159761|NM\_001012984.2  
ENSG00000163141|BNIPL ENSG00000163219|ARHGAP25 ENSG00000165626|C10orf30 ENSG00000168487|BMP1 ENSG00000169964|TMEM42 ENSG00000170430|MGMT ENSG00000170667|RASL2\_HUMAN ENSG00000172137|CALB2  
ENSG00000172992|DCAKD ENSG00000182646|TMEM29 ENSG00000184922|FMNL1 ENSG00000198165|Q9H960\_HUMAN ENSG00000198946|SSX4B ENSG000000204645|SSX4 ENSG000000024862|CCDC28A ENSG00000108733|PEX12  
ENSG00000110321|EIF4G2 ENSG00000119147|C2orf40 ENSG00000122335|SERAC1 ENSG00000129596|CDO1 ENSG00000151748|SAV1 ENSG00000155868|CRSP2 ENSG00000156304|SFRS15 ENSG00000159216|RUNX1  
ENSG00000163644|PPM1K ENSG00000163683|C4orf34 ENSG00000164023|SGMS2 ENSG00000168078|PBK ENSG00000168379|Q8WM95\_HUMAN ENSG00000171311|EXOSC1 ENSG00000172766|NARG1L ENSG00000182890|GLUD2  
ENSG00000188402|NP\_995324.1 ENSG00000196930|XR\_015267.1 ENSG00000198900|TOP1  
CGCTTAG ENSG00000005194|CTAPIN1 ENSG00000033011|ALG1 ENSG000000066322|ELOVL1 ENSG00000089060|SLC24A6 ENSG00000095539|SEMA4G ENSG00000099910|SCARF2 ENSG00000100412|ACO2 ENSG00000102924|CBLN1  
ENSG00000105722|ERF ENSG00000117308|GALE ENSG00000128805|ARHGAP22 ENSG00000129437|KLIK14 ENSG00000149591|TAGLN ENSG00000160867|FGFR4 ENSG00000176619|LMNB2 ENSG00000180035|ZNF553  
ENSG00000180525|C10orf108 ENSG00000183519|NSUN5B ENSG00000196498|NCOR2 ENSG00000198693|Q6ZWR6\_HUMAN ENSG00000198913|Q9H552\_HUMAN ENSG00000054654|SYNE2 ENSG00000081154|PCNP ENSG00000089123|TASP1  
ENSG00000092531|SNAP23 ENSG00000102055|PPP1R2P9 ENSG00000102804|TSC22D1 ENSG00000110696|C11orf58 ENSG00000116194|ANGPTL1 ENSG00000121350|NP\_079130.2 ENSG00000123178|C13orf1 ENSG00000128683|GAD1  
ENSG00000141219|C17orf80 ENSG00000143324|XPRI ENSG00000144354|CDC47 ENSG00000147606|SLC26A7 ENSG00000150403|TMCO3 ENSG00000155893|ACPL2 ENSG00000162782|TDRD5 ENSG00000163444|TMEM183B  
ENSG00000164398|ACSL6 ENSG00000166012|SNORA25 ENSG00000170500|LONRF2 ENSG00000172900|XR\_017872.1 ENSG00000177343|PBOV1 ENSG00000182220|ATP6PAP2 ENSG00000185553|NR2F2  
CGCTTCA ENSG00000002933|TMEM176A ENSG00000054179|ENTPD2 ENSG00000063176|SPHK2 ENSG00000065057|NTHL1 ENSG00000070814|TCOF1 ENSG00000073009|IKBK3 ENSG00000100938|NM\_001002000.1 ENSG00000101336|HCK  
ENSG00000105499|PLA2G4C ENSG00000118245|TNP1 ENSG00000128254|C22orf24 ENSG00000137203|TFAP2A ENSG00000138698|RAP1GDS1 ENSG00000139714|MORN3 ENSG00000158578|ALAS2 ENSG00000167131|CCDC103  
ENSG00000171427|NM\_145293 ENSG00000176101|SSNA1 ENSG00000178980|SEPW1 ENSG00000184324|CSAG2 ENSG00000187695|Q6ZUG5\_HUMAN ENSG00000187730|GABRD ENSG00000196456|ZNF775 ENSG00000197463|CSAG3B  
ENSG00000198930|CSAG1 ENSG00000108666|C17orf75 ENSG00000113494|PRLR ENSG00000116793|PHTF1 ENSG00000131732|ZCCHC9 ENSG00000133742|CA1 ENSG00000134389|CFHR5 ENSG00000135298|BAI3  
ENSG00000135346|CGA ENSG00000140525|KIAA1794 ENSG00000144821|MYH15 ENSG00000150337|FCGR1A ENSG00000163584|RPL22L1 ENSG00000164123|NP\_689756.2 ENSG00000164442|CITED2 ENSG00000169953|HSFY2  
ENSG00000170855|TRIAP1 ENSG00000172288|CDY1\_HUMAN ENSG00000172352|CDY1 ENSG00000172468|HSFY1 ENSG00000183475|ASB7 ENSG00000188938|FAM120AOS  
CGCTTGA ENSG00000092036|C14orf94 ENSG00000103502|CDIPT ENSG00000103653|CSK ENSG00000107821|KAZALD1 ENSG00000108551|RASD1 ENSG00000114779|ABHD14B ENSG00000122735|DNAI1 ENSG00000128965|CHAC1  
ENSG00000130303|BST2 ENSG00000137077|CCL21 ENSG00000137124|ALDH1B1 ENSG00000142224|LL19 ENSG00000155275|C4orf23 ENSG00000162383|SLC1A7 ENSG00000163295|ALP1 ENSG00000166526|ZNF3  
ENSG00000174206|NP\_689653.3 ENSG00000175806|MSRA ENSG00000184716|SERINC4 ENSG00000185361|TNFAIP8L1 ENSG00000185624|P4HB ENSG00000187451|Q9NWC8\_HUMAN ENSG00000204616|TRIM31 ENSG00000205761|Q6ZRI7\_HUMAN  
ENSG00000066651|TRMT11 ENSG00000100528|CNIH ENSG00000111046|MYF6 ENSG00000116641|DOCK7 ENSG00000129682|FGF13 ENSG00000140043|ZADH1 ENSG00000146757|ZNF92 ENSG00000153283|CD96  
ENSG00000162909|CAPN2 ENSG00000164332|UBQLCP1 ENSG00000166535|AZML1 ENSG00000172288|CDY1\_HUMAN ENSG00000172352|CDY1 ENSG00000176102|CSTF3 ENSG00000180660|MAB21L1 ENSG00000180667|YOD1  
ENSG00000182308|WDR21B ENSG00000186188|GPR120 ENSG00000189237|NAP5\_HUMAN ENSG00000196319|Q9H353\_HUMAN ENSG00000196392|Q8IWW4\_HUMAN ENSG00000196730|DAPK1  
ENSG00000067606|PRKC2 ENSG00000070778|PTPN21 ENSG00000101210|EEF1A2 ENSG00000101448|SPINLW1 ENSG00000115241|PPM1G ENSG00000119574|ZBTB45 ENSG00000127527|EPS15L1 ENSG00000130706|ADRM1  
ENSG00000136918|NP\_001038941.1 ENSG00000140553|UNC45A ENSG00000141526|SLC16A3 ENSG00000149136|SSRP1 ENSG00000157017|GHRL ENSG00000158571|PFKFB1 ENSG00000160209|PDXK ENSG00000164509|IL31RA  
ENSG00000169991|Q5TF58\_HUMAN ENSG00000175792|RUVBL1 ENSG00000185482|STAC3 ENSG00000005421|PON1 ENSG00000101868|POLA1 ENSG00000110435|PDHX ENSG00000113384|GOLPH3 ENSG00000115339|GALNT3  
ENSG00000116652|DLEU2L ENSG00000135111|TBX3 ENSG00000136478|TEX2 ENSG00000136874|STX17 ENSG00000137364|TPMT ENSG00000143653|SCCPDH ENSG00000147650|LRP12 ENSG00000148798|INA  
ENSG00000164093|PTX2 ENSG00000164815|ORC5L ENSG00000165028|NIPSNAP3B ENSG00000169507|NP\_775783.1 ENSG00000170500|LONRF2 ENSG00000172840|PDP2\_HUMAN ENSG00000181588|RKHD1 ENSG00000185737|NRG3  
ENSG00000189127|NP\_001004441.1  
CGCTTTA ENSG00000007866|TEAD3 ENSG00000071127|WDR1 ENSG00000089101|C20orf26 ENSG00000104833|TUBB4 ENSG00000105972|C7orf20 ENSG00000120055|C10orf95 ENSG00000127226|NP\_116072.2 ENSG00000129152|MYOD1  
ENSG00000131100|ATP6V1E1 ENSG00000139433|GLTP ENSG00000140943|MBTPP1 ENSG00000145861|C1QTNF2 ENSG00000148300|REXO4 ENSG00000154277|UCLH1 ENSG00000158793|NIT1 ENSG00000162105|SHANK2  
ENSG00000165511|C10orf25 ENSG00000166377|ATP9B ENSG00000170577|SLX2 ENSG00000171467|PBL318 ENSG00000173801|JUP ENSG00000175806|MSRA ENSG00000184302|SIX6 ENSG00000186189|Q9H7R1\_HUMAN  
ENSG00000187634|SAMD11 ENSG00000188525|NM\_207480 ENSG00000198079|XR\_017925.1 ENSG0000010017|RANBP9 ENSG00000105974|CAV1 ENSG00000110429|FBXO3 ENSG00000111328|CDK2AP1 ENSG00000117592|PRDX6  
ENSG00000124209|RAB22A ENSG00000133115|STOML3 ENSG00000164406|LEAP2 ENSG00000165655|ZNF503 ENSG00000166226|CCT2 ENSG00000168916|ZNF608 ENSG00000177570|SAMD12 ENSG00000183308|C17orf60  
ENSG00000185418|TARSL2 ENSG00000186803|IFNA10  
CGGAAAT ENSG00000005156|LIG3 ENSG00000063241|ISOC2 ENSG00000101407|KIAA0406 ENSG00000111671|SPSB2 ENSG00000112473|SLC39A7 ENSG00000129968|FAM108A1 ENSG00000135723|FHOD1 ENSG00000141556|TBCD  
ENSG00000148671|C10orf116 ENSG00000150455|TIRAP ENSG00000163956|LRPAP1 ENSG00000165458|INPP1L ENSG00000167536|DHRS13 ENSG00000171467|ZNF318 ENSG00000171467|ZNF318 ENSG00000178233|C6orf137  
ENSG00000185813|PCYT2 ENSG00000186207|LCE5A ENSG00000187608|ISG15 ENSG00000187912|NP\_997273.2 ENSG00000189068|VSTM1 ENSG00000189401|OTUD6A ENSG00000197265|GTF2E2 ENSG00000198658|NP\_001073891.1  
ENSG00000198753|PLKNB3 ENSG00000203835|FAM108A2 ENSG00000204957|Q6ZVQ6\_HUMAN ENSG00000205744|DENND1C ENSG00000205973|LOC644949 ENSG00000007350|TKTL1 ENSG000000051341|POLQ ENSG00000100564|PIGH  
ENSG00000106571|GLI3 ENSG00000116761|CTH ENSG00000116957|TBCE ENSG00000120242|IFNA8 ENSG00000138050|THUMP2 ENSG00000140259|FMFAP1 ENSG00000143119|CD53 ENSG00000143919|C2orf34  
ENSG00000145781|COMMD10 ENSG00000148572|NRBF2 ENSG00000151748|SAV1 ENSG00000153561|RMND5A ENSG00000153684|NP\_001012455.1 ENSG00000154864|FAM38B ENSG00000162669|NP\_001017975.3 ENSG00000165118|C9orf64  
ENSG00000166211|SPIC ENSG00000166920|C15orf48 ENSG00000170571|EMB ENSG00000178150|ZNF114 ENSG00000179454|KLHL28 ENSG00000183629|GOLGA8G ENSG00000185002|RFXDC1 ENSG00000185523|NP\_001019772.1  
ENSG00000196914|ARHGEF12 ENSG00000197967|Q86U89\_HUMAN

CGGACTG ENSG00000034510|TMSB10 ENSG00000064601|CTSA ENSG00000069011|PITX1 ENSG00000075891|PAX2 ENSG00000099998|GGTLA1 ENSG00000107859|PITX3 ENSG00000116649|SRM ENSG00000124159|MATN4  
ENSG00000133477|FAM83F ENSG00000142538|TIP39\_HUMAN ENSG00000142694|C1orf78 ENSG00000156564|LRFN2 ENSG00000160075|SSU72 ENSG00000160783|BGLAP ENSG00000166851|PLK1 ENSG00000170631|ZNF16  
ENSG00000171222|SCAND1 ENSG00000174917|NP\_991330.1 ENSG00000178602|OTOS ENSG00000182117|NOLA3 ENSG00000183452|Q86YU6\_HUMAN ENSG00000187260|WDR86 ENSG00000187796|CARD9  
ENSG00000204847|FAM74A1 ENSG00000010539|ZNF200 ENSG00000019186|CYP24A1 ENSG00000035681|NSMAF ENSG00000079385|CEACAM1 ENSG00000080007|DDX43 ENSG00000101190|TCFL5 ENSG00000106809|OGN  
ENSG00000112308|C6orf62 ENSG00000113140|SPARC ENSG00000115540|PREI3 ENSG00000122674|C7orf28A ENSG00000125675|GRIA3 ENSG00000128052|KDR ENSG00000133704|IPO8 ENSG00000146574|C7orf28B  
ENSG00000147905|ZCCHC7 ENSG00000148225|WDR31 ENSG00000148688|RPP30 ENSG00000148737|TCF7L2 ENSG00000152454|ZNF256 ENSG00000158270|COLEC12 ENSG00000162642|C1orf52 ENSG00000165124|SVEP1  
ENSG00000178403|NEUROG2 ENSG00000196937|FAM3C ENSG00000198221|NP\_001035973.1 ENSG00000205187|Q6ZSG3\_HUMAN ENSG00000206029|Q0P633\_HUMAN  
CGGACTT ENSG00000006530|AGK ENSG00000064961|HMG20B ENSG00000101280|ANGPT4 ENSG00000111886|GABRR2 ENSG00000116329|OPRD1 ENSG00000116708|PRAMEF4 ENSG00000120093|HOXB3 ENSG00000130332|LSM7  
ENSG00000130529|TRPM4 ENSG00000137078|SIT1 ENSG00000139219|COL2A1 ENSG00000143537|ADAM15 ENSG00000149480|MTA2 ENSG00000154920|EME1 ENSG00000158859|ADAMTS4  
ENSG00000160695|VPS11 ENSG00000164318|EGFLAM ENSG00000164877|MICALL2 ENSG00000169180|XPO6 ENSG00000173566|NUDT18 ENSG00000176700|SCAND2 ENSG00000177493|C1orf215 ENSG00000178828|RNF186  
ENSG00000179632|MAF1 ENSG00000179950|NP\_055096.2 ENSG00000184164|CRELD2 ENSG00000186854|Q86V40\_HUMAN ENSG00000188493|C19orf54 ENSG00000196814|FAM125B ENSG00000204501|PRAMEF9 ENSG00000077232|DNAJC10  
ENSG00000089063|C20orf30 ENSG000001104435|STMN2 ENSG00000111142|METAP2 ENSG00000114638|UPK1B ENSG00000114784|EIF1B ENSG00000120690|ELF1 ENSG00000126524|SBDS  
ENSG00000132305|IMMT ENSG00000133997|MED6 ENSG00000134375|TIMM17A ENSG00000135211|TMEM60 ENSG00000135250|SRPK2 ENSG00000136206|WBSR19 ENSG00000141542|RAB40B ENSG00000144746|ARL6IP5  
ENSG00000145907|G3BP1 ENSG00000149345|U2D3L\_HUMAN ENSG00000154845|PPP4R1 ENSG00000154975|CA10 ENSG00000159113|IL10RB ENSG00000162739|SLAMF6 ENSG00000163684|RPP14 ENSG00000165061|ZMAT4  
ENSG00000170035|UBE2E4P ENSG00000171860|C3AR1 ENSG00000176842|IRX5 ENSG00000198155|Q49A33\_HUMAN  
CGGAGAC ENSG00000065268|WDR18 ENSG00000099840|C19orf36 ENSG00000105373|GLTSCR2 ENSG00000106404|CLDN15 ENSG00000128389|NM\_032262 ENSG00000134030|KIAA0427 ENSG00000136490|LIMD2 ENSG00000141905|NFIC  
ENSG00000156575|PRG3 ENSG00000166716|ZNF592 ENSG00000169228|MKX3 ENSG00000172081|MOBK12A ENSG00000176909|NP\_872380.1 ENSG00000182117|NOLA3 ENSG00000198831|Q8IYX2\_HUMAN ENSG00000204610|TRIM15  
ENSG00000002549|LAP3 ENSG00000056972|TRAF3IP2 ENSG00000102935|ZNF423 ENSG00000102974|CTCF ENSG00000106483|SFRP4 ENSG00000112146|FBXO9 ENSG00000113916|BCL6 ENSG00000120549|KIAA1217  
ENSG00000121067|SOP ENSG00000122691|TWIST1 ENSG00000132661|NXT1 ENSG00000138449|SLC40A1 ENSG00000166197|NOLC1 ENSG00000168502|KIAA0802 ENSG00000170537|TMC7 ENSG00000181588|RKHD1  
ENSG00000185013|NT5C1B ENSG00000187753|C9orf153 ENSG00000196285|H33\_HUMAN  
CGGAGGA ENSG00000005007|UPF1 ENSG00000124602|UNC5CL ENSG00000124766|SOX4 ENSG00000131653|TRAF7 ENSG00000132405|TBC1D14 ENSG00000143061|IGSF3 ENSG00000164880|Q6ZRB0\_HUMAN ENSG00000167468|GPX4  
ENSG00000167595|C19orf55 ENSG00000173436|C1orf151 ENSG00000174374|WBSR16 ENSG00000175283|DOLK ENSG00000179855|GIPC3 ENSG00000181409|AATK ENSG00000181790|BAI1 ENSG00000183617|MRPL54  
ENSG00000188660|C21orf125 ENSG00000189430|NCR1 ENSG00000196431|CRYBA4 ENSG00000197448|GSTK1 ENSG00000006377|DLX6 ENSG00000041515|MYO16 ENSG00000079102|RUNX1T1 ENSG00000081913|PHLPP  
ENSG00000099942|CRKL ENSG00000110934|BIN2 ENSG00000111266|DUSP16 ENSG00000111790|FGFR1OP2 ENSG00000112773|FAM46A ENSG00000114354|TFG ENSG00000115525|ST3GAL5 ENSG00000116793|PHTF1  
ENSG00000117614|SYF2 ENSG00000124217|MOC53 ENSG00000132664|POLR3F ENSG00000133320|HRASLS2 ENSG00000136522|MRPL47 ENSG00000137285|TUBB2B ENSG00000146872|TLK2 ENSG00000148450|MSRB2  
ENSG00000152402|GUCY1A2 ENSG00000154175|ABI3BP ENSG00000156234|CXCL13 ENSG00000161547|SFRS2 ENSG00000163584|RPL22L1 ENSG00000163684|RPP14 ENSG00000167555|ZNF534 ENSG00000168310|IRF2  
ENSG00000174226|NP\_689841.2 ENSG00000175040|CHST2 ENSG00000176912|C18orf56 ENSG00000176974|SHMT1 ENSG00000179331|RAB39 ENSG00000184992|BRI3BP ENSG00000196611|MMP1  
CGGATCA ENSG00000006611|USH1C ENSG00000111132|APBA3 ENSG00000064270|ATP2C2 ENSG00000069399|BCL3 ENSG00000101096|NFATC2 ENSG00000101251|SEL1L2 ENSG00000101986|ABCD1 ENSG00000132286|FXC1  
ENSG00000133895|MEN1 ENSG00000137868|STRA6 ENSG00000145861|CIQTNF2 ENSG00000146540|NP\_115726.1 ENSG00000153446|NP\_689672.2 ENSG00000158545|NP\_653205.2 ENSG00000162494|LRR38 ENSG00000172738|C6orf128  
ENSG00000174600|CMKLR1 ENSG00000183597|C22orf25 ENSG00000047365|CENTD1 ENSG00000048991|R3HDM1 ENSG00000064042|NP\_055803.1 ENSG00000079246|XRCC5  
ENSG00000101162|TUBB1 ENSG00000101384|JAG1 ENSG00000101928|MOSPD1 ENSG00000102144|PGK1 ENSG00000128276|RFP13 ENSG00000133808|MICALCL ENSG00000134443|GRP ENSG00000148672|GLUDP5  
ENSG00000152760|TCTEX1D1 ENSG00000156976|EIF4A2 ENSG00000163291|PAQR3 ENSG00000166321|NUDT13 ENSG00000166455|C16orf46 ENSG00000170748|HNRGT\_HUMAN ENSG00000178403|NEUROG2 ENSG00000182901|RGS7  
ENSG00000189149|FLJ41766 ENSG00000198304|ZNF528 ENSG00000198898|CAPZA2  
CGGATGT ENSG00000004838|ZMYND10 ENSG000000010327|STAB1 ENSG000000074317|SNCB ENSG00000103175|WFDCL ENSG00000105676|ARMC6 ENSG00000106086|PLEKH8 ENSG00000107816|LZTS2 ENSG00000111017|PRPF19  
ENSG00000114270|COL7A1 ENSG00000120907|ADRA1A ENSG00000121413|ZSCAN18 ENSG00000127540|UQCR ENSG00000140859|KIFC3 ENSG00000143061|IGSF3 ENSG00000159261|CLDN14 ENSG00000160200|CBS ENSG00000166863|TAC3  
ENSG00000167508|MVD ENSG00000167536|DHRS13 ENSG00000168394|TAP1 ENSG00000172927|MYEOV ENSG00000175356|SCUBE2 ENSG00000178233|C6orf137 ENSG00000184560|C17orf74 ENSG00000188589|RBM33  
ENSG00000196365|LONP1 ENSG00000198457|CP21A\_HUMAN ENSG00000204226|Q6ZNS0\_HUMAN ENSG00000204582|Q6ZR28\_HUMAN ENSG00000086289|EPDR1 ENSG00000111783|RFX4 ENSG00000113441|LNPEP ENSG00000115163|CENPA  
ENSG00000137876|C15orf15 ENSG00000150403|TMCO3 ENSG00000154518|ATP5G3 ENSG00000165092|ALDH1A1 ENSG00000166848|TERF2IP ENSG00000170647|TMEM133 ENSG00000174899|Q8N6Q6\_HUMAN ENSG00000175643|C16orf75  
ENSG00000175745|NR2F1 ENSG00000183649|Q8NFY8\_HUMAN ENSG00000197442|MAP3K5 ENSG00000197756|RPL37A  
CGGATTG ENSG000000057757|C1orf128 ENSG00000065308|TRAM2 ENSG00000100083|GGA1 ENSG00000104368|PLAT ENSG00000110721|CHKA ENSG00000119919|NKX2-3 ENSG00000125386|C4orf8 ENSG00000147224|PRPS1  
ENSG00000149257|SERPINH1 ENSG00000149600|COMMD7 ENSG00000163633|C4orf36 ENSG00000164711|LPA12 ENSG00000170390|DCLK2 ENSG00000171954|NP\_775754.1 ENSG00000175602|CCDC85B ENSG00000178796|Q8N9Z1\_HUMAN  
ENSG00000181918|Q8N9J9\_HUMAN ENSG00000184601|NP\_001008404.1 ENSG00000187513|GJA4 ENSG00000188186|NP\_001008396.1 ENSG00000196235|SUPT5H ENSG00000043355|ZIC2 ENSG00000054598|FOXC1 ENSG00000061455|PRDM6  
ENSG00000070831|CDC42 ENSG00000083937|CHMP2B ENSG00000102069|UBE2NL ENSG00000110484|SCGB2A2 ENSG00000110841|PPF1BP1 ENSG00000114698|PLSCR4 ENSG00000115165|PISCBDB ENSG00000117602|DSCR1L2  
ENSG00000119698|KIAA1622 ENSG00000128052|KDR ENSG00000140395|WDR61 ENSG00000151150|ANK3 ENSG00000161542|PRPSAP1 ENSG00000163171|CDC42EP3 ENSG00000165704|HPRT1 ENSG00000172058|SERF1\_HUMAN  
ENSG00000172840|PDP2\_HUMAN ENSG00000180251|SLC9A4 ENSG00000183337|BCOR ENSG00000187009|Q8NFD4\_HUMAN ENSG00000188653|NR\_002807.1 ENSG00000204671|IL31 ENSG00000205187|Q6ZSG3\_HUMAN ENSG00000205572|SERF1\_HUMAN  
CGGCGTC ENSG00000060491|OGFR ENSG00000067365|C16orf68 ENSG00000100003|SEC14L2 ENSG00000100668|LRP5L ENSG00000105523|FAM83E ENSG00000105552|BCAT2 ENSG00000124159|MATN4 ENSG00000125968|ID1  
ENSG00000131096|PYY ENSG00000133937|GSC ENSG00000137731|FYXD2 ENSG00000157312|PDF ENSG00000164366|CCDC127 ENSG00000164715|LMTK2 ENSG00000172009|THOP1 ENSG00000179403|VWA1  
ENSG00000179740|C19orf290S ENSG00000180176|TH ENSG00000181781|C19orf19 ENSG00000181977|PYY2 ENSG00000184709|LRR26 ENSG00000184922|FMNL1 ENSG00000185187|SIGIRR ENSG00000188833|ENTPD8  
ENSG00000197021|CXorf40B ENSG00000197435|HIST3H2BB ENSG00000085449|WDFY1 ENSG00000105983|LMBR1 ENSG00000107798|LIPA ENSG00000111707|SDS3 ENSG00000113391|C5orf21 ENSG00000143653|SCCPDH  
ENSG00000144218|AFF3 ENSG00000147862|PDK1 ENSG00000152256|PDK1 ENSG00000164938|TFP53INP1 ENSG00000181467|RAP2B ENSG00000204884|Q6ZV12\_HUMAN  
CGGCTAA ENSG00000007923|DNAJC11 ENSG00000075618|FSCN1 ENSG00000103150|MLYCD ENSG00000106336|FBXO24 ENSG00000107736|CDH23 ENSG00000111319|SCNN1A ENSG00000111642|CHD4 ENSG00000113578|FGF1  
ENSG00000122122|CXorf9 ENSG00000124593|C6orf49 ENSG00000125798|FOXA2 ENSG00000129270|MMP28 ENSG00000129654|FOXJ1 ENSG00000132793|LPIN3 ENSG00000141577|AZ11 ENSG00000143867|OSR1  
ENSG00000144524|COP5B ENSG00000149295|DRD2 ENSG00000156983|ARPC4 ENSG00000160220|PWP2 ENSG00000162783|IER5 ENSG00000168255|Q8IZ67\_HUMAN ENSG00000169188|APEX2 ENSG00000169876|MUC17  
ENSG00000170619|COMMD5 ENSG00000178789|CD300LB ENSG00000180824|Q8NAH5\_HUMAN ENSG00000182612|TSPAN10 ENSG00000182979|MTA1 ENSG00000184207|NP\_001035830.1 ENSG00000198407|Q8NCZ5\_HUMAN ENSG00000198858|C19orf22  
ENSG00000073417|PDE8A ENSG00000077522|ACTN2 ENSG00000078401|EDN1 ENSG00000106689|LHX2 ENSG00000111880|RNGT7 ENSG00000124429|POF1B ENSG00000125255|SLC10A2 ENSG00000134028|ADAMDEC1  
ENSG00000134873|CLDN10 ENSG00000137691|C11orf70 ENSG00000150681|RGS18 ENSG00000155875|C9orf138 ENSG00000159346|ADIPOR1 ENSG00000160199|PKNOX1 ENSG00000164484|KIAA1913 ENSG00000168461|RAB31  
ENSG00000169435|RASSF6 ENSG00000174827|PDZK1 ENSG00000175265|GOLGA8A ENSG00000183649|Q8NFX8\_HUMAN ENSG00000188895|Q68DK7\_HUMAN ENSG00000197702|PARVA ENSG00000198301|SDAD1  
CGGGCCG ENSG00000008441|NFIX ENSG00000011590|ZBTB32 ENSG00000033050|ABCF2 ENSG00000041988|THAP3 ENSG00000076826|KIAA1543 ENSG00000079435|LIPE ENSG00000088256|GNA11 ENSG00000101222|C20orf28  
ENSG00000105376|ICAM5 ENSG00000105516|DBP ENSG00000107223|EDF1 ENSG00000114554|PLXNA1 ENSG00000116032|GRIN3B ENSG00000116544|DLGAP3 ENSG00000116649|SRM ENSG00000134438|RAX  
ENSG00000136295|TTYH3 ENSG00000138136|LXB1 ENSG00000141873|SLC39A3 ENSG00000154252|GAL3ST2 ENSG00000160087|UBE2J2 ENSG00000161914|LIF6 ENSG00000163888|CAMK2N2 ENSG00000167850|CD300C  
ENSG00000171450|CDK5R2 ENSG00000172247|CIQTNF4 ENSG00000172663|TMEM134 ENSG00000176753|NP\_001034994.1 ENSG00000183785|PEX2 ENSG00000204028|Q6ZRR4\_HUMAN ENSG00000204498|NFKBIL1 ENSG00000107864|CPBE3  
ENSG00000116285|ERRF1 ENSG00000122692|SMU1 ENSG00000134873|CLDN10 ENSG00000135604|STX11 ENSG00000143612|C1orf43 ENSG00000147883|CDKN2B ENSG00000159216|RUNX1 ENSG00000169862|CTNND2  
ENSG00000170009|Q9NTH0\_HUMAN ENSG00000184900|SUMO3 ENSG00000185630|PBX1  
CGGGCGA ENSG000000043039|BARX2 ENSG00000064205|WISP2 ENSG00000069020|MAST4 ENSG00000099910|SCARF2 ENSG00000103197|TSC2 ENSG00000105737|GRIK5 ENSG00000110076|NRXN2 ENSG00000115266|APC2  
ENSG00000118046|STK11 ENSG00000125285|SOX21 ENSG00000126217|MCF2L ENSG00000126934|MAP2K2 ENSG00000129152|MYO1D ENSG00000130311|C19orf58 ENSG00000130733|YIPF2 ENSG00000130958|SLC35D2  
ENSG00000139515|PDX1 ENSG00000141837|CACNA1A ENSG00000160013|PTGIR ENSG00000160796|NBEAL2 ENSG00000166823|MESP1 ENSG00000174166|Q9BTX9\_HUMAN ENSG00000180902|D2HGDH ENSG00000183093|MRPL12  
ENSG00000183707|Q96AT3\_HUMAN ENSG00000183760|NP\_001004318.1 ENSG00000184108|TRIML1 ENSG00000186189|Q9H7R1\_HUMAN ENSG00000204117|Q6ZV8\_HUMAN ENSG00000080822|CLDND1 ENSG00000151090|THRB ENSG00000170074|NP\_775934.3  
ENSG00000181915|C10orf22 ENSG00000205524|Q68D70\_HUMAN  
CGGGCGT ENSG00000002933|TMEM176A ENSG000000011304|PTBP1 ENSG00000060558|GNA15 ENSG00000074317|SNCB ENSG00000091073|DTX2 ENSG00000095917|TPSD1 ENSG00000129347|NP\_075384.3 ENSG00000130643|DRD1IP  
ENSG00000135749|PCNX1L2 ENSG00000136717|BIN1 ENSG00000139515|PDX1 ENSG00000143537|ADAM15 ENSG00000143867|OSR1 ENSG00000148805|NR\_002934.2 ENSG00000158623|TSGA13 ENSG00000160695|VPS11  
ENSG00000162849|KIF26B ENSG00000165804|ZNF219 ENSG00000166428|PLD4 ENSG00000175221|THRAPP5 ENSG00000176769|TCERG1L ENSG00000178950|GAK ENSG00000184261|KCNK12 ENSG00000184390|Q6ICM0\_HUMAN  
ENSG00000187583|PLEKHN1 ENSG00000197921|HESS5 ENSG00000203762|Q6ZTJ3\_HUMAN ENSG00000204579|A2RUR5\_HUMAN ENSG00000102606|ARHGEP7 ENSG00000112276|BVES ENSG00000125868|DSTN ENSG00000137261|KIAA0319  
ENSG00000159267|HLCS ENSG00000170385|SLC30A1 ENSG00000181541|MAB21L2  
CGGGGCA ENSG00000005007|UPF1 ENSG00000085465|OVGP1 ENSG00000100422|CERK ENSG00000104880|ARHGEP18 ENSG00000105808|RASA4 ENSG00000105953|OGDH ENSG00000108516|TNFRSF13B ENSG00000110881|ACCN2  
ENSG00000126243|LRFN3 ENSG00000129654|FOXJ1 ENSG00000134339|SAA2 ENSG00000134460|IL2RA ENSG00000141956|PRDM15 ENSG00000142459|EVI5L ENSG00000144884|KIAA1754 ENSG00000149043|SYT8  
ENSG00000154342|WNT3A ENSG00000163794|UCN ENSG00000170498|KISS1 ENSG00000176022|B3GALT6 ENSG00000182631|RXFP3 ENSG00000188843|NM\_207504 ENSG00000197558|Q76B61\_HUMAN ENSG00000204585|Q8N8T0\_HUMAN  
ENSG00000205698|LOC648426 ENSG00000069122|GPR116 ENSG00000101977|MCF2 ENSG00000111445|RFC5 ENSG00000111906|HDDC2 ENSG00000129682|FCF13 ENSG00000144026|ZNF514 ENSG00000144645|OSBP1L10  
ENSG00000146386|C6orf115 ENSG00000153234|NR4A2 ENSG00000156650|MYST4 ENSG00000163689|NP\_940865.1 ENSG00000170088|NP\_689894.1 ENSG00000172201|ID4 ENSG00000187667|Q1A5X8\_HUMAN ENSG00000188585|Q6ZU45\_HUMAN  
ENSG00000196677|C8orf77 ENSG00000198799|LRIG2 ENSG00000205649|HTN3  
CGGGGTC ENSG000000041880|PARP3 ENSG00000090565|RAB11FIP3 ENSG00000097007|ABL1 ENSG00000100304|TTLL12 ENSG00000106927|AMBP ENSG00000114854|TNNC1 ENSG00000126217|MCF2L ENSG00000130182|ZSCAN10  
ENSG00000130382|MLL1 ENSG00000130751|NPAS1 ENSG00000132110|LHX1 ENSG00000132446|PTH1L17 ENSG00000133250|ZNF414 ENSG00000140548|ZNF710 ENSG00000140632|NP\_115958.2 ENSG00000167470|MIDN  
ENSG00000167967|E4F1 ENSG00000175866|BAIAP2 ENSG00000176349|Q8N9J9\_HUMAN ENSG00000179082|C9orf106 ENSG00000179740|C19orf290S ENSG00000179965|ZNF771 ENSG00000182351|CRIP1 ENSG00000182362|C21orf57  
ENSG00000197114|ZGPAT ENSG00000204934|NP\_001008745.1 ENSG00000205011|NP\_001007547.1 ENSG0000011638|TMEM159 ENSG00000081052|COL4A4 ENSG00000091986|CCDC80 ENSG00000092470|WDR76 ENSG00000095787|WAC  
ENSG00000107937|GTPBP4 ENSG00000108306|FBXL20 ENSG00000110048|OSBP ENSG00000124836|PFKFB2 ENSG00000124491|F13A1 ENSG00000138468|SENP7 ENSG00000148053|NTRK2 ENSG00000154710|KCTD7  
ENSG00000162959|MEMO1 ENSG00000164070|HSPA4L ENSG00000164929|BAALC ENSG00000165061|ZMAT4 ENSG00000165632|TAF3 ENSG00000171643|S100Z ENSG00000184900|SUMO3 ENSG00000186009|ATP4B  
CGGGTAA ENSG00000042286|AIFM2 ENSG00000077782|FGFR1 ENSG00000079432|CIC ENSG00000079999|KEAP1 ENSG00000105369|CD79A ENSG00000105700|C19orf50 ENSG00000111319|SCNN1A ENSG00000127191|TRAF2  
ENSG00000130768|SMPDL3B ENSG00000132622|HSPA12B ENSG00000136840|ST6GALNAC4 ENSG00000139651|ZNF740 ENSG00000143434|SEMA6C ENSG00000154781|C3orf19 ENSG00000158008|EXTL1 ENSG00000158793|NIT1  
ENSG00000164325|TMEM174 ENSG00000167703|SLC43A2 ENSG00000169174|PCSK9 ENSG00000169957|ZNF768 ENSG00000175164|ABO ENSG00000177380|PPFIA3 ENSG00000181363|Q66K80-2 ENSG00000186642|PDE2A

|         |                              |                              |                               |                              |                                |                                |                              |                              |
|---------|------------------------------|------------------------------|-------------------------------|------------------------------|--------------------------------|--------------------------------|------------------------------|------------------------------|
|         | ENSG00000188483 IER5L        | ENSG00000197251 NP_997380.1  | ENSG00000203945 Q5JQP1_HUMAN  | ENSG00000205804 Q5T6R2_HUMAN | ENSG00000044574 HSPA5          | ENSG00000113649 TCERG1         | ENSG00000115705 TPO          | ENSG00000126581 BECN1        |
|         | ENSG00000136238 RAC1         | ENSG00000150527 CTAGE5       | ENSG00000151514 SALL3         | ENSG00000154258 ABCA9        | ENSG00000159592 GPBP1L1        | ENSG00000164190 NIPBL          | ENSG00000165359 DDX26B       | ENSG00000169862 CTNND2       |
| CGGGTAC | ENSG00000177711 EIF2AK3      | ENSG00000173334 TRIB1        | ENSG00000176208 ATAD5         | ENSG00000184895 SRY          | ENSG00000105245 NUMBL          | ENSG00000105605 CACNG7         | ENSG00000125968 ID1          | ENSG00000125970 RALY         |
|         | ENSG00000004776 HSPB6        | ENSG00000005238 KIAA1539     | ENSG00000008583 Clorf34       | ENSG000000089820 ARHGAP4     | ENSG00000136875 PRPF4          | ENSG00000137420 NOL7           | ENSG00000139597 NP_438169.2  | ENSG00000140987 ZNF434       |
|         | ENSG00000129195 FAM64A       | ENSG00000129221 AIP1L1       | ENSG00000140598 EFTUD1        | ENSG00000142677 IL22RA1      | ENSG00000145014 TMEM44         | ENSG00000145194 ECE2           | ENSG00000148602 LRRC21       | ENSG00000156097 GPR61        |
|         | ENSG00000156510 HKDC1        | ENSG00000160323 ADAMTS13     | ENSG00000163517 HDAC11        | ENSG00000174374 WBSR16       | ENSG00000178093 TSSK6          | ENSG00000181977 PYY2           | ENSG00000183248 Q9H6K5_HUMAN | ENSG00000186501 Clorf160     |
|         | ENSG00000188559 C2orf74      | ENSG00000198457 CP21A_HUMAN  | ENSG00000204058 C1orf41       | ENSG00000204527 DUXA         | ENSG00000047932 GOPC           | ENSG00000077721 UBE2A          | ENSG00000089195 TRM6_HUMAN   | ENSG00000101166 SLMO2        |
|         | ENSG00000111962 UST          | ENSG00000116922 Clorf109     | ENSG00000119922 IFIT2         | ENSG00000134970 TICAM2       | ENSG00000136868 SLC31A1        | ENSG00000145721 LIX1           | ENSG00000148483 FAM23A       | ENSG00000164253 WDR41        |
|         | ENSG00000166265 CYR1         | ENSG00000166575 TMEM135      | ENSG00000168283 BM1           | ENSG00000170677 SOC6         | ENSG00000173214 KIAA1919       | ENSG00000184040 FAM23B         | ENSG00000198382 UVRAG        | ENSG00000205428 C9orf35      |
| CGGTAAA | ENSG00000004838 ZMYND10      | ENSG00000069020 MAST4        | ENSG00000103241 FOXF1         | ENSG00000108528 SLC25A11     | ENSG00000127804 METT10D        | ENSG00000128389 NM_032262      | ENSG00000143434 SEMA6C       | ENSG00000166394 CYB5R2       |
|         | ENSG00000167653 PSCA         | ENSG00000170549 IRX1         | ENSG00000177096 FAM109B       | ENSG00000179165 PXT1         | ENSG00000180914 OXTR           | ENSG00000181977 PYY2           | ENSG00000182631 RXFP3        | ENSG00000183686 MAGEA5       |
|         | ENSG00000186792 IFRD2        | ENSG00000196338 NLGN3        | ENSG00000205444 Q5G014_HUMAN  | ENSG00000069943 PIGB         | ENSG00000071539 TRIP13         | ENSG00000086598 TMED2          | ENSG00000089335 ZNF302       | ENSG00000106511 MEOX2        |
|         | ENSG00000115310 RTN4         | ENSG00000115806 GORASP2      | ENSG00000119537 FVT1          | ENSG00000128250 RFPL1        | ENSG00000136875 PRPF4          | ENSG00000137420 NOL7           | ENSG00000139597 NP_438169.2  | ENSG00000140987 ZNF434       |
|         | ENSG00000143420 ENSA         | ENSG00000146223 RPL7L1       | ENSG00000147647 DPYS          | ENSG00000151310 SCOC         | ENSG00000159259 CHAF1B         | ENSG00000162976 PQLC3          | ENSG00000165359 DDX26B       | ENSG00000165685 C12orf59     |
|         | ENSG00000165929 MTAC2D1      | ENSG00000173627 APOBEC4      | ENSG00000186188 GPR120        | ENSG00000188295 ZNF669       | ENSG00000188342 GTF2F2         | ENSG00000198739 LRRTM3         | ENSG00000204287 HLA-DRA      | ENSG00000204789 ZNF204       |
| CGGTACA | ENSG000000013619 CXorf6      | ENSG00000063176 SPHK2        | ENSG00000065526 SPEN          | ENSG000000088992 TESC        | ENSG00000100221 JOSD1          | ENSG00000100417 PMM1           | ENSG00000101438 SLC32A1      | ENSG00000105058 FAM32A       |
|         | ENSG00000106665 CLIP2        | ENSG00000115155 OTOF         | ENSG00000116096 SPR           | ENSG00000120471 NP_071395.1  | ENSG00000123146 CD97           | ENSG00000126460 PRRG2          | ENSG00000134531 EMP1         | ENSG00000147789 ZNF7         |
|         | ENSG00000157020 SEC13        | ENSG00000160058 BSDC1        | ENSG00000166444 ST5           | ENSG00000166780 C16orf45     | ENSG00000167798 NP_001013662.1 | ENSG00000176315 Q8N7I9_HUMAN   | ENSG00000185803 GPR172A      | ENSG00000187764 SEMA4D       |
|         | ENSG00000198198 KIAA0467     | ENSG00000198693 Q6ZW86_HUMAN | ENSG00000203930 Q5JPA2_HUMAN  | ENSG00000206152 Q6ZV2_HUMAN  | ENSG00000100796 SMEK1          | ENSG00000107371 EXOSC3         | ENSG00000107937 GTPBP4       | ENSG00000108854 SMURF2       |
|         | ENSG00000120659 TNFSF11      | ENSG00000131779 PEX11B       | ENSG00000136044 APPL2         | ENSG00000137571 SLC05A1      | ENSG00000141380 SS18           | ENSG00000142494 NP_060712.2    | ENSG00000155090 KLF10        | ENSG00000155761 SPAG17       |
|         | ENSG00000163638 ADAMTS9      | ENSG00000164039 BDH2         | ENSG00000165355 FBXO33        | ENSG00000168310 IRF2         | ENSG00000125741 OPA3           | ENSG00000135439 CENTG1         | ENSG00000138617 PARP16       | ENSG00000138835 RGS3         |
| CGGTACG | ENSG00000064547 EDG4         | ENSG00000100417 PMM1         | ENSG00000100726 TELO2         | ENSG00000105647 PIK3R2       | ENSG00000105647 PIK3R2         | ENSG00000142494 NP_060712.2    | ENSG00000135439 CENTG1       | ENSG00000138617 PARP16       |
|         | ENSG00000139197 PEX5         | ENSG00000149043 SYT8         | ENSG00000164880 Q6ZRB0_HUMAN  | ENSG00000169410 PTPN9        | ENSG00000170049 KCNAB3         | ENSG00000172057 ORMDL3         | ENSG00000178233 C6orf137     | ENSG00000185990 F8A3         |
|         | ENSG00000187607 ZNF286A      | ENSG00000196576 PLXNB2       | ENSG00000197932 F8A2          | ENSG00000198444 F8A1         | ENSG00000118762 PKD2           | ENSG00000166173 LARP6          | ENSG00000180011 ZADH2        | ENSG00000181449 SOX2         |
| CGGTACT | perfect: CGGTACG CGTACCG     | hsa-miR-126                  | cTGTACCGtgagtaataatgc         | 1                            |                                |                                |                              |                              |
|         | ENSG00000072518 MARK2        | ENSG00000101421 CHMP4B       | ENSG00000101197 CCDC22        | ENSG00000108244 KRT23        | ENSG00000128645 HOXD1          | ENSG00000130690 Q9E154_HUMAN   | ENSG00000134917 Q5FWF1_HUMAN | ENSG00000136444 RSAD1        |
|         | ENSG00000139438 C12orf34     | ENSG00000141527 CARD14       | ENSG00000143393 PK4CB         | ENSG00000143867 OSR1         | ENSG00000160282 FTCD           | ENSG00000165175 MID1P1         | ENSG00000167771 RCOR2        | ENSG00000168703 WFDCL2       |
|         | ENSG00000171680 PLEKHG5      | ENSG00000174996 KLC2         | ENSG00000177363 NP_981967.1   | ENSG00000183778 B3GALT5      | ENSG00000185567 AHNAK2         | ENSG00000205770 Q8N847_HUMAN   | ENSG00000052126 PLEKHA5      | ENSG00000081800 SLC13A1      |
|         | ENSG00000101871 MID1         | ENSG00000104133 NP_079413.3  | ENSG00000107099 DOCK8         | ENSG00000107362 FAM108B      | ENSG00000109832 DDX25          | ENSG00000111897 SERINC1        | ENSG00000126226 PCID2        | ENSG00000133119 RFC3         |
|         | ENSG00000136682 CBWD2        | ENSG00000146648 EGFR         | ENSG00000150667 FSIP1         | ENSG00000159200 DSCR1        | ENSG00000163012 ZSWIM2         | ENSG00000166197 NOLC1          | ENSG00000182217 HIST2H4B     | ENSG00000183941 HIST2H4A     |
| CGGTAGG | ENSG00000063244 Q2AF2        | ENSG00000087586 AURKA        | ENSG00000100604 CHGA          | ENSG00000105650 PDE4C        | ENSG00000125454 SLC25A19       | ENSG00000130958 SLC35D2        | ENSG00000133246 PRAM1        | ENSG00000141959 PFKL         |
|         | ENSG00000145916 RMND5B       | ENSG00000154146 NRGN         | ENSG00000167588 GPD1          | ENSG00000169220 RGS14        | ENSG00000170426 NP_683695.1    | ENSG00000172232 AZU1           | ENSG00000172678 OR13A1       | ENSG00000180999 C1orf105     |
|         | ENSG00000183908 LRRC55       | ENSG00000188486 H2AFX        | ENSG00000188549 NP_997263.1   | ENSG00000206062 Q4G0T4_HUMAN | ENSG00000078369 GNB1           | ENSG00000102021 LUZP4          | ENSG00000112175 BMP5         | ENSG00000119922 IFIT2        |
|         | ENSG00000124177 CHD6         | ENSG00000125304 TM9SF2       | ENSG00000125945 ZNF436        | ENSG00000137942 FNB1L        | ENSG00000150637 CD226          | ENSG00000155760 FZD7           | ENSG00000157557 ETS2         | ENSG00000165660 KIAA0157     |
|         | ENSG00000171723 GPHN         | ENSG00000172915 NBEA         | ENSG00000178351 Q8N345_HUMAN  | ENSG00000179029 TMEM107      | ENSG00000180287 PLD5           | ENSG00000181449 SOX2           | ENSG00000185023 RAB6C        | ENSG00000196950 SLC39A10     |
|         | ENSG00000198767 YY2          |                              |                               |                              |                                |                                |                              |                              |
| CGGTATA | ENSG0000010295 NP_542768.1   | ENSG00000040608 RTN4R        | ENSG00000047578 KIAA0556      | ENSG00000071626 DAZAP1       | ENSG00000124785 NRN1           | ENSG00000131668 BARX1          | ENSG00000134369 NAV1         | ENSG00000141576 RNF157       |
|         | ENSG00000147955 OPR3         | ENSG00000158008 EXTL1        | ENSG00000167202 TBC1D2B       | ENSG00000173210 ABLIM3       | ENSG00000173757 STAT5B         | ENSG00000175781 Q9H5L9_HUMAN   | ENSG00000180901 KCTD2        | ENSG00000181877 Q8NAZ9_HUMAN |
|         | ENSG00000185019 UBOX5        | ENSG00000185215 TNFAIP2      | ENSG00000185436 IL28RA        | ENSG00000185567 AHNAK2       | ENSG00000204581 Q6ZU44_HUMAN   | ENSG00000100262 ARFGAP3        | ENSG00000112852 PCDHB2       | ENSG00000114346 ECT2         |
|         | ENSG00000120149 MSX2         | ENSG00000131781 FMO5         | ENSG00000133131 MORC4         | ENSG00000139357 SLC5A8       | ENSG00000144401 FAM119A        | ENSG00000148828 NP_001074467.1 | ENSG00000149516 MS4A3        | ENSG00000153107 ANAPC1       |
|         | ENSG00000163605 PPP4R2       | ENSG00000164484 KIAA1913     | ENSG00000170561 IRX2          | ENSG00000171362 PNMA2        | ENSG00000172969 LOC285299      | ENSG00000176624 RKHD2          | ENSG00000177047 IFNW1        | ENSG00000177138 FAM9B        |
|         | ENSG00000180998 GPR137C      | ENSG00000183304 FAM9A        | ENSG00000205097 NP_00105217.1 | ENSG00000205144 Q6ZV43_HUMAN | ENSG00000205403 CFI            | ENSG00000205462 Q6ZWC8_HUMAN   | ENSG00000205462 Q6ZWC8_HUMAN |                              |
| CGGTATT | ENSG00000066136 NYFC         | ENSG00000102003 SYP          | ENSG00000105137 SYDE1         | ENSG00000101651 CD81         | ENSG00000110721 CHKA           | ENSG00000115756 HPCALL1        | ENSG00000118689 FOXO3A       | ENSG00000130713 EXOSC2       |
|         | ENSG00000130723 KIAA0515     | ENSG00000142700 DMRTA2       | ENSG00000144468 RHBD1         | ENSG00000154040 CABYR        | ENSG00000167526 RPL13          | ENSG00000168067 MAP4K2         | ENSG00000171720 HDAC3        | ENSG00000174683 C8orf78      |
|         | ENSG00000176986 SEC24C       | ENSG00000185602 ARHGAP27     | ENSG00000204033 LRRC22        | ENSG00000204582 Q6ZR28_HUMAN | ENSG00000205159 Q6ZVC9_HUMAN   | ENSG00000334713 GABARAPL2      | ENSG00000080503 SMARCA2      | ENSG00000083223 ZCCHC6       |
|         | ENSG00000091651 ORC6L        | ENSG00000094916 CBX5         | ENSG00000102317 RBM3          | ENSG00000106609 C7orf42      | ENSG00000106819 ASPN           | ENSG00000107938 C1orf137       | ENSG00000108021 C1orf18      | ENSG00000113810 SMC4         |
|         | ENSG0000016741 RGS2          | ENSG00000127989 MTERF        | ENSG00000137955 NPEPFS        | ENSG00000141279 NPEPFS       | ENSG00000141424 SLC39A6        | ENSG00000142871 CYR61          | ENSG00000144883 TAF5         | ENSG00000151514 SALL3        |
|         | ENSG00000151748 SAV1         | ENSG00000152942 RAD17        | ENSG00000158301 GPRASP2       | ENSG00000159251 ACTC1        | ENSG00000162976 PQLC3          | ENSG00000164597 COG5           | ENSG00000165985 C1QL3        | ENSG00000165997 ARL5B        |
|         | ENSG00000166971 AKTIP        | ENSG00000173113 TR112_HUMAN  | ENSG00000180138 CSNK1A1L      | ENSG00000183475 ASB7         | ENSG00000185477 GPRIN3         | ENSG00000197579 TOPORS         |                              |                              |
| CGGTATC | ENSG00000049283 EPN3         | ENSG00000092758 COL9A3       | ENSG00000100997 ABHD12        | ENSG00000101444 AHCY         | ENSG00000105668 UPK1A          | ENSG00000108551 RASD1          | ENSG00000112062 MAPK14       | ENSG00000112478 VPS52        |
|         | ENSG00000123329 ARHGAP9      | ENSG00000129451 KLK10        | ENSG00000131634 C16orf30      | ENSG00000137404 NRM          | ENSG00000139192 TAPBP1         | ENSG00000158869 FCER1G         | ENSG00000160307 S100B        | ENSG00000160539 PPAPDC3      |
|         | ENSG00000162931 TRIM17       | ENSG00000173914 RBM4B        | ENSG00000174669 SLC29A2       | ENSG00000180767 CHST13       | ENSG00000180921 BARM3H         | ENSG00000182578 CSF1R          | ENSG00000197308 NP_997306.1  | ENSG00000197753 LHFPL5       |
|         | ENSG00000198831 Q8IYX2_HUMAN | ENSG00000051620 HEBP2        | ENSG00000073417 PDE8A         | ENSG00000104290 FZD3         | ENSG00000105855 ITGB8          | ENSG00000111906 HDCC2          | ENSG00000113649 TCERG1       | ENSG00000117289 TXNIP        |
|         | ENSG00000119421 NDUFA8       | ENSG00000119865 C2orf32      | ENSG00000125868 DSTN          | ENSG00000133104 SPG20        | ENSG00000138095 LRPPRC         | ENSG00000143995 MEIS1          | ENSG00000149968 MMP3         | ENSG00000159256 MORC3        |
|         | ENSG00000164128 NPF1R        | ENSG00000166147 FBN1         | ENSG00000169981 ZNF35         | ENSG00000170088 NP_689894.1  | ENSG00000171135 JAGN1          | ENSG00000189292 NP_001002919.1 | ENSG00000196532 HIST1H3C     | ENSG00000204219 TCEA3        |
| CGGTCCA | ENSG00000004838 ZMYND10      | ENSG00000036672 USP2         | ENSG00000076826 KIAA1543      | ENSG00000105519 CAPS         | ENSG00000105707 HPN            | ENSG00000124733 MEA1           | ENSG00000128203 ASPHD2       | ENSG00000129646 QRICH2       |
|         | ENSG00000135625 EGR4         | ENSG00000136319 TTC5         | ENSG00000148824 MTG1          | ENSG00000160072 ATAD3B       | ENSG00000160678 S100A1         | ENSG00000161973 CCDC42         | ENSG00000164574 GALNT10      | ENSG00000167965 NM_022372.3  |
|         | ENSG00000174898 TMEM146      | ENSG00000178110 Q8N9G9_HUMAN | ENSG00000196365 LONP1         | ENSG00000197694 SPTAN1       | ENSG00000198366 HIST1H3A       | ENSG000000002016 RAD52         | ENSG000000007372 PAX6        | ENSG00000041982 TNC          |
|         | ENSG00000069966 GNB5         | ENSG00000082482 KCNK2        | ENSG00000101892 ATP1B4        | ENSG00000110060 PUS3         | ENSG00000110723 EXPH5          | ENSG00000114125 RNF7           | ENSG00000120690 ELF1         | ENSG00000134086 VHL          |
|         | ENSG00000135070 ISCA1        | ENSG00000141448 GATA6        | ENSG00000159212 CLIC6         | ENSG00000161654 LSM12        | ENSG00000164171 ITGA2          | ENSG00000173198 CYSLTR1        | ENSG00000177981 ASB8         | ENSG00000183695 MRGPRX2      |
|         | ENSG00000183784 C9orf66      | ENSG00000184575 XPOT         | ENSG00000198339 HIST1H4I      | ENSG00000198468 Q8TAF5_HUMAN | ENSG00000204261 PSMB9          | ENSG00000204832 Q6ZRU3_HUMAN   |                              |                              |
| CGGTCCG | ENSG0000008516 MMP25         | ENSG00000074317 SNCB         | ENSG00000101194 C2orf59       | ENSG00000                    |                                |                                |                              |                              |

CGGTTTC ENSG00000005001|PRSS22 ENSG00000008838|THRPA4 ENSG00000065882|TBC1D1 ENSG00000067606|PRKCZ ENSG00000093100|MICA3\_HUMAN ENSG00000100030|MAPK1 ENSG00000106665|CLIP2 ENSG00000116329|OPRD1  
ENSG00000126457|PRMT1 ENSG00000130332|LSM7 ENSG00000130810|PPAN ENSG00000141738|GRB7 ENSG00000148334|PTGES2 ENSG00000152767|FARP1 ENSG00000153481|NP\_060680.2 ENSG00000164713|BRI3  
ENSG00000166426|CRABP1 ENSG00000167513|CDT1 ENSG00000167992|WVCE ENSG00000171603|CLSTN1 ENSG00000172965|Q96C48\_HUMAN ENSG00000175221|THRAP5 ENSG00000177121|Q8N6L5\_HUMAN ENSG00000184584|TMEM173  
ENSG00000197173|NP\_001013689.1 ENSG00000040933|INPP4A ENSG00000061455|PRDM6 ENSG00000078237|C12orf5 ENSG00000085377|PREP ENSG00000102935|ZNF423 ENSG00000120129|DUSP1 ENSG00000123131|PRDX4  
ENSG00000132463|GRSF1 ENSG00000136099|PCDH8 ENSG00000143353|LYPLAL1 ENSG00000148572|NRBF2 ENSG00000153037|SRP19 ENSG00000160194|NDUFV3 ENSG00000178974|FBXO34 ENSG00000181588|RKHD1  
ENSG00000184943|NP\_443103.1 ENSG00000185053|SGCZ ENSG00000188613|NANOS1 ENSG00000196115|XR\_017859.1 ENSG00000196371|FUT4 ENSG00000198482|ZNF808 ENSG00000204389|HSPA1A ENSG00000205905|Q6ZWC6\_HUMAN

CGGTTTG ENSG00000034510|TMSB10 ENSG00000070778|PTPN21 ENSG00000079435|LIFE ENSG00000086717|PPEF1 ENSG00000108771|LGP2\_HUMAN ENSG00000112941|POLS ENSG00000113555|PCDH12 ENSG00000126752|SSX1  
ENSG00000130176|CNN1 ENSG00000130812|ANGPTL6 ENSG00000134317|GRHL1 ENSG00000136630|HLX1 ENSG00000148334|PTGES2 ENSG00000160075|SSU72 ENSG00000161082|BRUNOL5  
ENSG00000163794|UCN ENSG00000165688|PMPCA ENSG00000167962|ZNF598 ENSG00000169976|SF3B5 ENSG00000175611|C9orf130 ENSG00000176980|PRR10 ENSG00000179943|ZNF579 ENSG00000182809|CRIP2  
ENSG00000184986|TMEM121 ENSG00000185627|PSMD13 ENSG00000196361|ELAVL3 ENSG00000204648|SSX9 ENSG00000205156|HSF2 ENSG00000035681|NSMAF ENSG00000074603|DPF8  
ENSG00000080503|SMARCA2 ENSG00000101695|RNF125 ENSG00000104361|NPAL2 ENSG00000107938|C10orf137 ENSG00000111537|IFNG ENSG00000111802|TTRAP ENSG00000114784|EIF1B ENSG00000119421|NDUFA8  
ENSG00000121440|PDZRN3 ENSG00000124207|CSE1L ENSG00000138376|BARD1 ENSG00000141127|PRPSA2 ENSG00000145868|FBXO38 ENSG00000147509|RGS2 ENSG00000151655|ITIH2 ENSG00000154611|PSMA8  
ENSG00000162086|ZNF75A ENSG00000164114|MAP9 ENSG00000169688|MT1B ENSG00000176746|MAGEB2 ENSG00000177272|CKNA3 ENSG00000183520|UTP11L ENSG00000186009|ATP4B  
ENSG00000196290|NIF3P1 ENSG00000196712|NFI1 ENSG00000198205|ZXD4 ENSG00000198205|ZXD4

CGTAAAC ENSG00000003400|CASP10 ENSG00000020577|SAMD4A ENSG00000085872|CHERP ENSG00000099308|MAST3 ENSG00000100285|NEFH ENSG00000108576|SLC6A4 ENSG00000108961|NP\_057576.2  
ENSG00000116213|WDR8 ENSG00000119574|ZBTB45 ENSG00000135517|MIF ENSG00000136367|ZFX2 ENSG00000143632|ACTA1 ENSG00000145626|UGT3A1 ENSG00000147536|GINS4 ENSG00000148120|C9orf3  
ENSG00000156471|PTDS1 ENSG00000167130|DOLPP1 ENSG00000167522|ANKRD11 ENSG00000169592|CCDC95 ENSG00000176809|LRRRC37A3 ENSG00000178038|ALS2CL ENSG00000179761|PIPOX ENSG00000180861|C12orf36  
ENSG00000182310|Q6UWG3\_HUMAN ENSG00000182490|TSK2 ENSG00000187736|SLC23A3 ENSG00000188234|XR\_016668.1 ENSG00000196209|Q5JXA8\_HUMAN ENSG00000204059|NP\_001013718.1 ENSG00000204314|PRRT1 ENSG00000052802|SC4MOL  
ENSG00000068793|CYFIP1 ENSG00000080298|RFK3 ENSG00000081148|IMPG2 ENSG00000102409|BEXL1 ENSG00000109118|PHF12 ENSG00000111046|MYF6 ENSG00000113231|PDE8B ENSG00000126803|HSPA2  
ENSG00000133134|BEX2 ENSG00000136099|PCDH8 ENSG00000151303|Q8TF27\_HUMAN ENSG00000154736|ADAMT5 ENSG00000166046|TCP11L2 ENSG00000169508|EBT2 ENSG00000172497|ACOT12 ENSG00000174194|CTGLF5  
ENSG00000175879|HOXD8 ENSG00000179873|NLRP11 ENSG00000180190|C8orf42 ENSG00000180660|MAB21L1 ENSG00000185038|Q8IURI\_HUMAN ENSG00000185787|MORF4L1 ENSG00000204149|CTGLF3 ENSG00000204150|CTGLF4  
ENSG00000204182|CTGLF1 ENSG00000204560|DHX16 ENSG000002211446|SEPP1 ENSG00000111866|WNT5B ENSG00000116128|BCL9 ENSG00000118557|PMFBP1 ENSG00000124508|BTN2A2 ENSG00000125445|MRP57 ENSG00000126351|THRA  
ENSG00000146830|PERQ1 ENSG00000150873|C2orf50 ENSG00000151348|EXT2 ENSG00000158796|DEDD ENSG00000160967|CUTL1 ENSG00000165526|RPUSD4 ENSG00000166831|RBPM52 ENSG00000167112|TRUB2  
ENSG00000167536|DHRS13 ENSG00000169900|PYDC1 ENSG00000173404|INSM1 ENSG00000175482|POLD4 ENSG00000176720|BOK ENSG00000181250|MYADM ENSG00000183458|Q9NRE7\_HUMAN ENSG00000183793|NPIP  
ENSG00000187979|Q6ZPC6\_HUMAN ENSG00000196747|HST1H3 ENSG00000204423|C9orf33 ENSG00000206113|Q6ZU27\_HUMAN ENSG00000080822|CLND1 ENSG00000087338|GMCL1 ENSG00000107566|CHUK ENSG00000115806|GORASP2  
ENSG00000119514|GALNT12 ENSG00000126860|EVI2A ENSG00000137145|DENND4C ENSG00000144891|AGTR1 ENSG00000154889|MPPE1 ENSG00000155495|MAGEC1 ENSG00000166192|SENP8 ENSG00000169432|SCN9A  
ENSG00000171204|TMEM126B ENSG00000172554|SNTG2 ENSG00000177692|C21orf55 ENSG00000179029|TMEM107 ENSG00000185037|XR\_016629.1 ENSG00000197054|ZNF763 ENSG00000197990|XR\_016643.1 ENSG00000198650|TAT

CGTAAGG ENSG00000071553|ATP6AP1 ENSG00000094796|KRT31 ENSG00000099985|OSM ENSG00000105552|BCAT2 ENSG00000125835|SNRPB ENSG00000128652|HOXD3 ENSG00000139613|SMARCC2 ENSG00000145040|UCN2  
ENSG00000149294|NCAM1 ENSG00000149547|EI24 ENSG00000153468|TCP10\_HUMAN ENSG00000165458|INPPL1 ENSG00000166526|ZNF3 ENSG00000166912|MTMR10 ENSG00000169228|MXD3 ENSG00000169474|SPRR1A  
ENSG00000174206|NP\_689653.3 ENSG00000176720|BOK ENSG00000177822|XR\_017723.1 ENSG00000178006|XR\_018006.1 ENSG00000181291|TMEM132E ENSG00000183847|Q9P1C0\_HUMAN ENSG00000184210|DGAT2L6 ENSG00000186837|C21orf119  
ENSG00000204538|PSORS1C2 ENSG00000035141|NP\_116211.1 ENSG00000081913|PHLPP ENSG00000102239|BRS3 ENSG00000104044|OCA2 ENSG00000129699|NP\_067644.2 ENSG00000130844|ZNF331 ENSG00000135845|PIGC  
ENSG00000137273|FOXF2 ENSG00000137492|PRKRIR ENSG00000137513|NARS2 ENSG00000147050|UTX ENSG00000148688|RPP30 ENSG00000151164|RAD9B ENSG00000163453|IGFBP7 ENSG00000164402|SEPT8  
ENSG00000173848|NET1 ENSG00000196290|NIF3L1 ENSG00000197756|RPL37A ENSG00000111866|WNT5B ENSG00000116128|BCL9 ENSG00000118557|PMFBP1 ENSG00000124508|BTN2A2 ENSG00000125445|MRP57 ENSG00000126351|THRA  
ENSG00000006453|BAIAP2L1 ENSG00000058085|LAMC2 ENSG00000066044|ELAVL1 ENSG00000105066|FIZ1 ENSG00000131233|GJA10 ENSG00000135801|TAF5L ENSG00000137207|YIPF3  
ENSG00000137331|IER3 ENSG00000139625|MAP3K12 ENSG00000156471|PLTDS1 ENSG00000157570|TSPAN18 ENSG00000159556|ISL2 ENSG00000161013|TGAT4B ENSG00000162888|C1orf147 ENSG00000164403|SHROOM1  
ENSG00000167657|DAPK3 ENSG00000167969|DCI1 ENSG00000168140|VASN ENSG00000168906|MAT2A ENSG00000170776|AKAP13 ENSG00000175538|KCNE3 ENSG00000181885|CLDN7 ENSG00000182472|CAPN12  
ENSG00000185917|SETD4 ENSG00000189263|Q6ZS22\_HUMAN ENSG00000189419|NP\_997266.2 ENSG00000197506|SLC28A3 ENSG00000203691|Q9UI51\_HUMAN ENSG00000204343|C9orf118 ENSG00000068885|IFT80 ENSG00000070367|EXOC5  
ENSG00000101746|NOL4 ENSG00000116771|AGMAT ENSG00000123485|NP\_060880.3 ENSG00000128276|RFP13 ENSG00000133858|CCDC131 ENSG00000137440|FGFBP1 ENSG00000143951|NP\_056994.3 ENSG00000154429|C1orf96  
ENSG00000154620|TMSB4Y ENSG00000156076|WIF1 ENSG00000156467|UQCRCB ENSG00000169045|HNRPH1 ENSG00000174130|TLR6 ENSG00000189136|NM\_207382 ENSG00000198492|YTHDF2 ENSG00000204712|LOC284067

CGTAATA ENSG00000072062|PRKACA ENSG00000100299|ARSA ENSG00000100376|FAM118A ENSG00000112715|VEGFA ENSG00000113273|ARSB ENSG00000117682|DHDDS ENSG00000120068|HOXB8 ENSG00000134815|DHX34  
ENSG00000137331|IER3 ENSG00000139874|SSTR1 ENSG00000164334|NP\_877438.2 ENSG00000164400|CSF2 ENSG00000167191|GPRC5B ENSG00000168906|MAT2A ENSG00000171169|C9orf90 ENSG00000173040|EVC2  
ENSG00000178449|C12orf62 ENSG00000182208|MOB2\_HUMAN ENSG00000183242|WIT1 ENSG00000183734|ASCL2 ENSG00000185651|UBE2L3 ENSG00000185803|GPR172A ENSG00000198246|SLC29A3 ENSG00000205742|Q6ZTR4\_HUMAN  
ENSG00000043355|ZIC2 ENSG00000079101|CLUL1 ENSG00000079459|FDF1 ENSG00000080661|DNAJA1 ENSG00000107290|SETX ENSG00000110321|EIF4G2 ENSG00000111554|MDM1 ENSG00000111726|CMAS  
ENSG00000114416|FXR1 ENSG00000118564|FBXL5 ENSG00000123297|TSFM ENSG00000124786|SLC35B3 ENSG00000134899|ERCC5 ENSG00000135697|ZNF461 ENSG00000140987|ZNF434 ENSG00000143183|TMC01  
ENSG00000143514|TP53BP2 ENSG00000153575|TUBGCP5 ENSG00000154265|ABCA5 ENSG00000161298|ZNF382 ENSG00000172399|MYOZ2 ENSG00000175348|TMEM9B ENSG00000176007|C9orf51 ENSG00000176399|DMRTA1  
ENSG00000177683|THAP5 ENSG00000188647|PTAR1 ENSG00000188647|PTAR1

CGTAATG ENSG00000005073|HOXA11 ENSG00000070759|TESK2 ENSG00000088833|NSFL1C ENSG00000092529|CAPN3 ENSG00000105711|SCN1B ENSG00000113430|IRX4 ENSG00000114656|KIAA1257 ENSG00000130656|HBZ  
ENSG00000130714|POMT1 ENSG00000134824|FADS2 ENSG00000136867|SLC31A2 ENSG00000148396|KIAA0310 ENSG00000158796|DEDD ENSG00000165716|FAM69B ENSG00000167371|PRRT2 ENSG00000168329|CX3CR1  
ENSG00000099260|PALMD ENSG00000110422|HIPK3 ENSG00000117700|POLR2L ENSG00000183535|C21orf123 ENSG00000185896|LAMP1 ENSG00000196834|POT14\_HUMAN ENSG00000054277|OPN3 ENSG00000086205|FOLH1  
ENSG00000140153|WDR20 ENSG00000148572|NRBF2 ENSG00000112742|TTK ENSG00000125676|THOC2 ENSG00000126524|SBDS ENSG00000128710|HXD10 ENSG00000128710|HERC2 ENSG00000139187|KLRG1  
ENSG00000179674|ARL14 ENSG00000197467|COL13A1 ENSG00000154265|ABCA5 ENSG00000164237|CMBL ENSG00000168564|CDKN2AIP ENSG00000170312|CDC2 ENSG00000170748|HNRGT\_HUMAN ENSG00000178295|NP\_872431.2

CGTAATT ENSG00000087460|GNAS ENSG00000100077|ADRBK2 ENSG00000114933|NP\_060229.2 ENSG00000120068|HOXB8 ENSG00000128254|C22orf24 ENSG00000132535|DLG4 ENSG00000135801|TAF5L ENSG00000159556|ISL2  
ENSG00000162377|C1orf163 ENSG00000170161|Q5VV11\_HUMAN ENSG00000170484|KRT74 ENSG00000173269|MMRN2 ENSG00000174175|SELP ENSG00000175866|BAP2A2 ENSG00000181991|MRP511 ENSG00000183643|C15orf32  
ENSG00000197355|UAP1L1 ENSG00000197536|NP\_001013739.1 ENSG00000198034|RPS4X ENSG00000204544|C6orf205 ENSG00000205866|Q6AI09\_HUMAN ENSG00000203697|DERA ENSG00000050130|C14orf100 ENSG00000070756|PABPC1  
ENSG00000085563|ABCB1 ENSG00000103319|EEF2K ENSG00000115425|PECR ENSG00000116906|GNPAT ENSG00000125304|TM9SF2 ENSG00000135299|ANKRD6 ENSG00000149089|APIP ENSG00000151665|PTGF  
ENSG00000153044|CENPH ENSG00000156304|SFRS15 ENSG00000163749|NP\_001036249.1 ENSG00000166478|ZNF143 ENSG00000166800|LDHAL6A ENSG00000175374|SPESP1 ENSG00000189369|GSPT2 ENSG00000196776|CD47  
ENSG00000197442|MAP3K5 ENSG00000198556|ZNF789 ENSG00000198556|ZNF789

CGTACCA ENSG00000099377|HSD3B7 ENSG00000123374|CDK2 ENSG00000128510|CPA4 ENSG00000137817|PARP6 ENSG00000138670|RASGEF1B ENSG00000147130|ZMYM3 ENSG00000166664|CHRFAM7A ENSG00000166831|RBPM52  
ENSG00000168890|TMEM150 ENSG00000170703|TTL6 ENSG00000171540|OTP ENSG00000173762|CD7 ENSG00000175344|CHRNA7 ENSG00000175567|UCP2 ENSG00000175611|C9orf130 ENSG00000177340|QOVFX0\_HUMAN  
ENSG00000182646|TMEM29 ENSG00000204095|Q6ZV88\_HUMAN ENSG00000205336|GPR56 ENSG00000205711|Q6ZV92\_HUMAN ENSG00000066583|ISOC1 ENSG00000082212|ME2 ENSG00000096401|CDC5L ENSG00000100711|ZFYVE21  
ENSG00000109458|GAB1 ENSG00000118193|KIF14 ENSG00000125899|C20orf187 ENSG00000132670|PTPRA ENSG00000133983|SYNJ2BP ENSG00000135547|HEY2 ENSG00000137959|IFI44L ENSG00000144746|ARL6IP5  
ENSG00000145725|HISPPD1 ENSG00000151366|NDUFC2 ENSG00000153246|PLA2R1 ENSG00000168916|ZNF608 ENSG00000175449|RFNSD ENSG00000179981|TSHZ1 ENSG00000180938|ZNF572 ENSG00000186665|C1orf58  
ENSG00000188085|NP\_997320.1 ENSG00000198838|RYR3 ENSG00000088367|EPB41L1 ENSG00000101445|PPP1R16B ENSG00000105647|PIK3R2 ENSG00000108753|TCF2 ENSG00000111181|SLC6A12 ENSG00000111653|ING4  
ENSG00000116544|DLGAP3 ENSG00000121104|FAM117A ENSG00000121775|TMEM39B ENSG00000126785|RHOJ ENSG00000130165|ELOF1 ENSG00000130734|ATG4D ENSG00000131944|C19orf40 ENSG00000139549|DHH  
ENSG00000151465|CDC123 ENSG00000154133|ROBO4 ENSG00000157601|MX1 ENSG00000158793|NIT1 ENSG00000162461|SLC25A34 ENSG00000166548|TK2 ENSG00000170919|Q5SVS6\_HUMAN ENSG00000171223|JUNB  
ENSG00000187186|CCL27 ENSG00000188816|HMX2 ENSG00000042088|TDP1 ENSG00000077097|TOP2B ENSG00000102054|RBBP7 ENSG00000116711|PLA2G4A ENSG00000119661|DNAL1 ENSG00000134333|LDHA  
ENSG00000149313|AASDHPPT ENSG00000150907|FOXO1A ENSG00000162384|C1orf123 ENSG00000166342|NETO1 ENSG00000168967|PMCHL1 ENSG00000169040|PMCHL2 ENSG00000169860|P2RY1 ENSG00000197713|RPE  
ENSG00000197779|ZNF81 ENSG00000204261|PSMB9 ENSG00000204832|Q6ZRU3\_HUMAN ENSG00000204832|Q6ZRU3\_HUMAN

CGTAGGT ENSG00000020577|SAMD4A ENSG00000099822|HCN2 ENSG00000100078|PLA2G3 ENSG00000102195|GPR50 ENSG00000104221|BRF2 ENSG00000144115|NP\_060741.2 ENSG00000154133|ROBO4  
ENSG00000161649|CD300LG ENSG00000164325|TMEM174 ENSG00000164649|CDCAL1 ENSG00000167851|CD300A ENSG00000177398|UMODL1 ENSG00000177971|IMP3 ENSG00000184210|DGAT2L6  
ENSG00000185112|FAM43A ENSG00000188833|ENTPD8 ENSG00000196576|PLXNB2 ENSG00000203755|Q6ZVU5\_HUMAN ENSG00000204091|Q3Y452\_HUMAN ENSG00000204589|Q6ZWC6\_HUMAN ENSG00000212131|PDXP ENSG00000065833|ME1  
ENSG00000077585|GPR137B ENSG00000078140|HIP2 ENSG00000088970|C20orf19 ENSG00000107518|ATRN1 ENSG00000126261|SAE2 ENSG00000135070|ISCA1 ENSG00000137285|TUBB2B ENSG00000141458|NPC1  
ENSG00000152518|ZFP36L2 ENSG00000153832|FBXO36 ENSG00000154582|TCEB1 ENSG00000164171|ITGA2 ENSG00000172461|FUT9 ENSG00000173905|GOLPH4 ENSG00000183918|SH2D1A ENSG00000185129|PURA  
ENSG00000197359|C15orf34

CGTAGTA ENSG00000100433|KCNK10 ENSG00000101276|C20orf54 ENSG00000102934|PLLP ENSG00000112715|VEGFA ENSG00000127533|F2RL3 ENSG00000130147|SH3BP4 ENSG00000133937|GSC ENSG00000150456|N6AMT2  
ENSG00000155984|TMEM185A ENSG00000164621|DAMS\_HUMAN ENSG00000166024|C10orf28 ENSG00000166049|PASD1 ENSG00000172155|LCE1D ENSG00000175756|AURKAIP1 ENSG00000175781|Q9H5L9\_HUMAN ENSG00000179743|Q8N9F6\_HUMAN  
ENSG00000180139|Q8N925\_HUMAN ENSG00000189037|DUSP21 ENSG00000197177|GPR123 ENSG00000197457|TMN3 ENSG00000197971|MBP ENSG00000203708|Q6ZU99\_HUMAN ENSG0000022267|FHL1 ENSG00000069509|FUNDCL1  
ENSG00000077380|DYNCL12 ENSG00000077721|UBE2A ENSG00000108187|PBLD ENSG00000109458|GAB1 ENSG00000135324|C6orf117 ENSG00000135763|KIAA0133 ENSG00000137821|LRRRC49 ENSG00000151461|UPF2  
ENSG00000159259|CHAF1B ENSG00000164603|NP\_689769.2 ENSG00000171502|COL24A1 ENSG00000172071|EIF2AK3 ENSG00000176165|FOXG1B ENSG00000177272|KCNA3 ENSG00000179397|C1orf101 ENSG00000186222|CNO  
ENSG00000197566|ZNF624 ENSG00000197714|ZNF460

CGTATAA ENSG00000042445|RETSAT ENSG00000043143|PHF15 ENSG00000065000|AP3D1 ENSG00000072858|SIDT1 ENSG00000085978|ATG16L1 ENSG00000087258|GNAO1 ENSG00000101222|C20orf28 ENSG00000109132|PHOX2B  
ENSG00000111725|PHC1 ENSG00000120071|KIAA1267 ENSG00000128408|RIBC2 ENSG00000138606|SHF ENSG00000146067|Q9NWO0\_HUMAN ENSG00000153128|TMEM163 ENSG00000168314|MOBP ENSG00000171161|ZNF672  
ENSG00000176303|Q8N822\_HUMAN ENSG00000176718|C5orf26 ENSG00000178786|Q8N2B6\_HUMAN ENSG00000184454|C1orf130 ENSG00000184524|CEND1 ENSG00000189401|OTUD6A ENSG00000197088|NM\_207488 ENSG00000197448|GSTK1  
ENSG00000083223|ZCCHC6 ENSG00000100528|CNIH ENSG00000104408|EIF3S6 ENSG00000105699|LSR ENSG00000107014|RLN2 ENSG00000119041|GTF3C3 ENSG00000134440|NARS ENSG00000135763|KIAA0133  
ENSG00000136156|ITM2B ENSG00000141338|ABCA8 ENSG00000149124|GLYAT ENSG00000150961|SEC24D ENSG00000153037|SRP19 ENSG00000153214|TMEM87B ENSG00000154845|PPP4R1 ENSG00000159279|NPY6R

|         |                                |                              |                                |                              |                              |                              |                              |                                |                     |
|---------|--------------------------------|------------------------------|--------------------------------|------------------------------|------------------------------|------------------------------|------------------------------|--------------------------------|---------------------|
|         | ENSG00000163406 SLC15A2        | ENSG00000172315 TP53RK       | ENSG00000179674 ARL14          | ENSG00000180190 C8orf42      | ENSG00000180613 GSH2_HUMAN   | ENSG00000185267 ARMETL1      | ENSG00000186160 CYP4Z1       | ENSG00000186628 FSD2           |                     |
| CGTATGA | ENSG00000196344 ADH7           | ENSG00000196597 ZNF782       | ENSG00000204789 ZNF204         | ENSG00000116148 CCNL2        | ENSG00000121446 RGS1         | ENSG00000139192 TAPBP1       | ENSG00000140931 CMTM3        | ENSG00000141002 TCF25          |                     |
|         | ENSG0000029364 SLC39A9         | ENSG00000066135 JMJD2A       | ENSG00000073067 CYP2W1         | ENSG00000163933 RFT1         | ENSG00000169469 SPRR1B       | ENSG00000173269 MMRN2        | ENSG00000175634 RPS6KB2      | ENSG00000176076 KCNE1L         |                     |
|         | ENSG00000148356 LRSAM1         | ENSG00000150990 DHX37        | ENSG00000156515 HK1            | ENSG00000198466 ZNF587       | ENSG00000198752 CDC42BPB     | ENSG00000205531 NAP1L4       | ENSG00000008394 MGST1        | ENSG00000035681 NSMAF          | ENSG00000036473 OTC |
|         | ENSG00000188234 XR_016668.1    | ENSG00000198079 XR_017925.1  | ENSG0000000896065 CHMP5        | ENSG00000114480 GBE1         | ENSG00000119698 KIAA1622     | ENSG00000129055 ANAPC13      | ENSG00000134323 MYCN         | ENSG00000135241 PNPLA10P       |                     |
|         | ENSG00000174266 EED            | ENSG00000137992 DBT          | ENSG00000139116 KIF21A         | ENSG00000143612 C1orf43      | ENSG00000156042 TTC18        | ENSG00000156642 NFTN         | ENSG00000163599 CTLA4        | ENSG00000164287 CDC20B         |                     |
|         | ENSG00000136098 NEK3           | ENSG00000165197 FIGF         | ENSG00000166523 CLEC4E         | ENSG00000167904 TMEM68       | ENSG00000168405 CMAH         | ENSG00000171291 ZNF439       | ENSG00000171466 ZNF562       | ENSG00000172766 NARG1L         |                     |
| CGTATGC | ENSG00000164600 NEUROD6        | ENSG00000183434 TFDP3        | ENSG00000196428 TSC22D2        | ENSG00000105556 NP_060020.1  | ENSG00000107282 APBA1        | ENSG00000124839 RAB17        | ENSG00000130675 HLXB9        | ENSG00000134240 HMGCS2         |                     |
|         | ENSG00000173926 MARCH3         | ENSG00000072832 CRMP1        | ENSG00000138347 MYFN           | ENSG00000168828 OR13J1       | ENSG00000168872 DDX19A       | ENSG00000174348 PODN         | ENSG00000178243 C9orf62      | ENSG00000183570 PCBP3          |                     |
|         | ENSG00000054282 SDCCAG8        | ENSG000001106524 ANKMY2      | ENSG00000188101 ALOX12P2       | ENSG00000137770 CTD5PL2      | ENSG00000138162 TACC2        | ENSG00000139597 NP_438169.2  | ENSG00000145431 PDGFC        | ENSG00000153310 FAM49B         |                     |
|         | ENSG00000137522 RNFL21         | ENSG00000164283 ESM1         | ENSG00000166206 GABRB3         | ENSG00000166479 TXNDC10      | ENSG00000168672 FAM84B       | ENSG00000171928 FAM18B       | ENSG00000175745 NR2F1        | ENSG00000178974 FBXO34         |                     |
|         | ENSG00000167604 NP_640332.1    | ENSG00000188379 IFNA2        | ENSG00000204897 KRT25          | ENSG00000115459 RBED1        | ENSG00000122687 FTSJ2        | ENSG00000126460 PRRG2        | ENSG00000139899 CBLN3        | ENSG00000140365 COMMD4         |                     |
| CGTATGG | ENSG00000185831 NR_003081.1    | ENSG00000188827 TNFRSF4      | ENSG00000188101 ALOX12P2       | ENSG00000172940 SLC22A13     | ENSG00000173706 HEG1         | ENSG00000183666 LOC728411    | ENSG00000185022 MAFF         | ENSG00000186126 HLA-DRB1       |                     |
|         | ENSG00000101040 ZMYND8         | ENSG000001106524 ANKMY2      | ENSG00000133983 SYNJ2BP        | ENSG00000151418 ATP6V1G3     | ENSG00000152454 ZNF256       | ENSG00000152611 CAPSL        | ENSG00000154144 TBRG1        | ENSG00000155111 CDC2L6         |                     |
|         | ENSG00000156136 DCK            | ENSG00000164283 ESM1         | ENSG00000166206 GABRB3         | ENSG00000166479 TXNDC10      | ENSG00000168672 FAM84B       | ENSG00000171928 FAM18B       | ENSG00000175745 NR2F1        | ENSG00000178974 FBXO34         |                     |
|         | ENSG00000183801 OLFML1         | ENSG00000188379 IFNA2        | ENSG00000204897 KRT25          | ENSG00000115459 RBED1        | ENSG00000122687 FTSJ2        | ENSG00000126460 PRRG2        | ENSG00000139899 CBLN3        | ENSG00000140365 COMMD4         |                     |
|         | ENSG00000049656 CLPTM1L        | ENSG00000188801 ZNF322B      | ENSG00000196141 NP_056350.1    | ENSG00000122374 STRAP        | ENSG00000083544 TDRD3        | ENSG00000086288 TXNDC3       | ENSG00000092470 WDR76        | ENSG00000107949 BCCIP          |                     |
|         | ENSG00000156603 MED19          | ENSG00000166888 STAT6        | ENSG00000167371 PRRT2          | ENSG00000122374 STRAP        | ENSG00000122524 GPR18        | ENSG00000128272 ATF4         | ENSG00000130856 ZNF236       | ENSG00000143341 HMCN1          |                     |
|         | ENSG00000198237 GUSL1_HUMAN    | ENSG00000204663 ACTN3        | ENSG00000205452 Q6ZQ9_HUMAN    | ENSG00000152904 GGPS1        | ENSG00000162434 JAK1         | ENSG00000165874 FAM35A       | ENSG00000170967 DDI1         | ENSG00000171241 SHCBP1         |                     |
|         | ENSG00000106511 MEOX2          | ENSG00000106819 ASPEN        | ENSG00000115520 COQ10B         | ENSG00000116192 CXCL16       | ENSG00000180340 FZD2         | ENSG00000180806 HOXC9        | ENSG00000183072 NKX2-5       | ENSG00000183528 Q0VAF8_HUMAN   |                     |
|         | ENSG00000145545 SRD5A1         | ENSG00000148377 IDI2         | ENSG00000164616 FBXL21         | ENSG00000165617 DACT1        | ENSG00000165985 C1QL3        | ENSG00000171530 TRCA         | ENSG00000173626 BET3L        | ENSG00000173926 MARCH3         |                     |
| CGTATTT | ENSG00000174891 SRRC1          | ENSG00000188801 ZNF322B      | ENSG00000196141 NP_056350.1    | ENSG00000122374 STRAP        | ENSG00000122524 GPR18        | ENSG00000128272 ATF4         | ENSG00000130856 ZNF236       | ENSG00000143341 HMCN1          |                     |
|         | ENSG00000089234 BRAP           | ENSG00000115457 ZGFBP2       | ENSG00000123989 CHSS2_HUMAN    | ENSG00000124766 SOX4         | ENSG00000126461 NP_067051.1  | ENSG00000127412 TRPV5        | ENSG00000129245 FXR2         | ENSG00000130560 UBAC1          |                     |
|         | ENSG00000153266 FEZF2          | ENSG00000157881 PANK4        | ENSG00000161921 CXCL16         | ENSG00000180340 FZD2         | ENSG00000180806 HOXC9        | ENSG00000183072 NKX2-5       | ENSG00000183528 Q0VAF8_HUMAN | ENSG00000187531 SIRT7          |                     |
|         | ENSG00000188290 HES4           | ENSG00000198500 Q96C21_HUMAN | ENSG00000203908 NP_00107361.1  | ENSG00000161944 ASGR2        | ENSG00000167850 CD300C       | ENSG00000168427 KLHL30       | ENSG00000170549 IRX1         | ENSG00000171045 TSNARE1        |                     |
|         | ENSG00000107625 DDX50          | ENSG00000114023 C3orf28      | ENSG00000120659 TNFSF11        | ENSG00000122435 CCDC76       | ENSG00000125482 TTF1         | ENSG00000126790 C14orf149    | ENSG00000131261 TEX101       | ENSG00000143149 ALDH9A1        |                     |
|         | ENSG00000144868 TMEM108        | ENSG00000149311 ATM          | ENSG00000151418 ATP6V1G3       | ENSG00000152454 ZNF256       | ENSG00000152611 CAPSL        | ENSG00000154144 TBRG1        | ENSG00000155111 CDC2L6       | ENSG00000159267 HLCS           |                     |
| CGTCAAT | ENSG00000160813 C7orf47        | ENSG00000163596 ICAIL        | ENSG00000174429 ABRA           | ENSG00000185808 PIGP         | ENSG00000198553 KCNRG        | ENSG00000103489 XYLT1        | ENSG00000122642 FKBP9        | ENSG00000130244 Q17RN3-2       |                     |
|         | ENSG00000038382 TRIO           | ENSG00000100253 MIOX         | ENSG00000100347 SARM50         | ENSG00000100678 SLC8A3       | ENSG00000101363 MANBAL       | ENSG00000103489 XYLT1        | ENSG00000122642 FKBP9        | ENSG00000130244 Q17RN3-2       |                     |
|         | ENSG00000130598 TNNT2          | ENSG00000130700 GATA5        | ENSG00000130812 ANGPTL6        | ENSG00000135898 GPR55        | ENSG00000137288 C6orf125     | ENSG00000141750 STAC2        | ENSG00000145657 NODAL        | ENSG00000149626 NP_001005920.2 |                     |
|         | ENSG00000162063 CCNF           | ENSG00000169188 APEX2        | ENSG00000171847 FAM90A1        | ENSG00000176078 Q8NAN4_HUMAN | ENSG00000182490 TSSK2        | ENSG00000188091 C9orf164     | ENSG00000188523 NP_997300.1  | ENSG00000198821 CD247          |                     |
|         | ENSG00000204733 Q6ZSH7_HUMAN   | ENSG00000205879 FAM90A25P    | ENSG00000205996 FAM90A10       | ENSG00000205998 FAM90A9      | ENSG00000206000 FAM90A8      | ENSG00000206002 FAM90A3      | ENSG00000206005 FAM90A8      | ENSG00000206008 XR_015341.1    |                     |
|         | ENSG00000102444 ZNF207         | ENSG00000102444 ZNF207       | ENSG00000102374 STRAP          | ENSG00000083544 TDRD3        | ENSG00000086288 TXNDC3       | ENSG00000092470 WDR76        | ENSG00000107949 BCCIP        | ENSG00000113407 TARS           |                     |
|         | ENSG00000114098 ARMC8          | ENSG00000116194 ANGPTL1      | ENSG00000122374 STRAP          | ENSG00000122524 GPR18        | ENSG00000128272 ATF4         | ENSG00000130856 ZNF236       | ENSG00000143341 HMCN1        | ENSG00000144642 RBMS3          |                     |
|         | ENSG00000145879 SPINK7         | ENSG00000152904 GGPS1        | ENSG00000162434 JAK1           | ENSG00000165874 FAM35A       | ENSG00000170967 DDI1         | ENSG00000171241 SHCBP1       | ENSG00000174456 NP_997318.1  | ENSG00000188153 COL4A5         |                     |
|         | ENSG00000196268 ZNF493         | ENSG00000197498 BXDC1        | ENSG00000197563 PIGN           | ENSG00000204267 TAP2         | ENSG00000103184 SEC14L5      | ENSG00000112941 POLS         | ENSG00000129437 KLK14        | ENSG00000142748 FCN3           |                     |
| CGTCAGC | ENSG0000009335 UBE3C           | ENSG0000009830 POMT2         | ENSG00000070413 DGCR2          | ENSG00000092841 MYL6         | ENSG00000103184 SEC14L5      | ENSG00000112941 POLS         | ENSG00000129437 KLK14        | ENSG00000142748 FCN3           |                     |
|         | ENSG00000143641 GALNT2         | ENSG00000145911 N4BP3_HUMAN  | ENSG00000161610 HCRT           | ENSG00000161944 ASGR2        | ENSG00000167850 CD300C       | ENSG00000168427 KLHL30       | ENSG00000170549 IRX1         | ENSG00000171045 TSNARE1        |                     |
|         | ENSG00000175223 Q8TCT8_HUMAN   | ENSG00000197472 ZNF695       | ENSG00000205436 C14orf73       | ENSG00000047410 TPR          | ENSG00000090487 SPG21        | ENSG00000100478 AP4S1        | ENSG00000105929 ATP6V0A4     | ENSG00000106546 AHR            |                     |
|         | ENSG00000110680 CALCA          | ENSG00000115137 NP_057628.1  | ENSG00000126777 KTN1           | ENSG00000132855 ANGPTL3      | ENSG00000143514 TP53BP2      | ENSG00000156500 FAM122C      | ENSG00000161326 DUSP14       | ENSG00000168405 CMAH           |                     |
|         | ENSG00000171943 SRGAP2P1       | ENSG00000174437 ATP2A2       | ENSG00000178459 Q8N2E2_HUMAN   | ENSG00000185053 SGCZ         | ENSG00000186417 GLDN         | ENSG00000187667 Q1A5X8_HUMAN | ENSG00000197172 MAGEA3       | ENSG00000198203 SULT1C2        |                     |
| CGTCCCG | ENSG00000070729 CNGB1          | ENSG00000070770 CSNK2A2      | ENSG00000077009 ITGB1BP3       | ENSG00000087157 PGS1         | ENSG00000104679 R3HCC1       | ENSG00000104853 CLPTM1       | ENSG00000105698 USF2         | ENSG00000126583 PRKCG          |                     |
|         | ENSG00000126934 MAP2K2         | ENSG00000127220 ABHD8        | ENSG00000128713 HOXD11         | ENSG00000130294 KIF1A        | ENSG00000133250 ZNF414       | ENSG00000136717 BIN1         | ENSG00000142660 MMEL1        | ENSG00000158623 TSGA13         |                     |
|         | ENSG00000167608 TMC4           | ENSG00000169683 LRRC45       | ENSG00000170919 Q5SVS6_HUMAN   | ENSG00000173762 CD7          | ENSG00000175567 UCP2         | ENSG00000176022 B3GALT6      | ENSG00000186895 FGF3         | ENSG00000187630 DHRS4L2        |                     |
|         | ENSG00000204620 Q6ZPC8_HUMAN   | ENSG00000007168 PFAFH1B1     | ENSG00000048740 CUGBP2         | ENSG00000100425 BRD1         | ENSG00000113645 WWC1         | ENSG00000123095 BHLHB3       | ENSG00000127152 BCL11B       | ENSG00000139946 PELI2          |                     |
|         | ENSG00000149658 YTHDF1         | ENSG00000168502 KIAA0802     | ENSG00000170419 VSTM2          | ENSG00000105640 RPL18A       | ENSG00000118046 STK11        | ENSG00000124159 MATN4        | ENSG00000130600 H19          | ENSG00000135773 CAPN9          |                     |
| CGTCCGG | ENSG00000005075 POLR2J         | ENSG0000013288 MAN2B2        | ENSG00000162032 SPSB3          | ENSG00000162341 TPCN2        | ENSG00000165458 INPPL1       | ENSG00000167178 ISLR2        | ENSG00000167862 ICT1         | ENSG00000167992 VWCE           |                     |
|         | ENSG00000139547 RDH16          | ENSG00000148926 ADM          | ENSG00000162032 SPSB3          | ENSG00000162341 TPCN2        | ENSG00000165458 INPPL1       | ENSG00000167178 ISLR2        | ENSG00000167862 ICT1         | ENSG00000167992 VWCE           |                     |
|         | ENSG00000170919 Q5SVS6_HUMAN   | ENSG00000172005 MAL          | ENSG000000177030 DEAF1         | ENSG000000177380 PPP1A3      | ENSG00000183558 HIST2H2AA3   | ENSG00000183600 Q66K37_HUMAN | ENSG00000183729 NPBWR1       | ENSG00000183734 ASCL2          |                     |
|         | ENSG00000184113 CLDN5          | ENSG00000185359 HGS          | ENSG00000196415 PRTN3          | ENSG00000203812 HIST2H2AA4   | ENSG00000008196 TFAP2B       | ENSG00000082397 EPB41L3      | ENSG00000100425 BRD1         | ENSG00000114857 NKTR           |                     |
|         | ENSG00000162378 ZYG11B         | ENSG00000163093 BBS5         | ENSG00000170242 USP47          | ENSG00000171056 SOX7         | ENSG00000174899 Q8N6Q6_HUMAN | ENSG00000179029 TMEM107      | ENSG00000187079 TEAD1        | ENSG00000204524 ZNF805         |                     |
| CGTCGAC | ENSG00000072958 AP1M1          | ENSG00000110931 CAMKK2       | ENSG00000132024 CC2D1A         | ENSG00000136653 RASSF5       | ENSG00000154118 JPH3         | ENSG00000154832 CXXC1        | ENSG00000156299 TIAM1        | ENSG00000162341 TPCN2          |                     |
|         | ENSG00000164850 GPR30          | ENSG00000166126 AMN          | ENSG00000167461 RAB8A          | ENSG00000176619 LMNB2        | ENSG00000179361 ARD1B3       | ENSG00000185024 BRF1         | ENSG00000187942 LDLRAD2      | ENSG00000197406 DIO3           |                     |
|         | ENSG00000198690 MTMR15         | ENSG00000198873 GRK5         | ENSG00000204589 Q6ZWG6_HUMAN   | ENSG00000205879 FAM90A25P    | ENSG00000146592 CREB5        | ENSG00000152977 ZIC1         | ENSG00000158481 CD1C         | ENSG00000166913 YWHAB          |                     |
|         | ENSG00000175553 K1210_HUMAN    | ENSG00000179930 ZNF648       | ENSG00000188613 NANOS1         | ENSG00000095777 MYO3A        | ENSG00000103227 TMEM112      | ENSG00000105576 TNPO2        | ENSG00000107821 KAZALD1      | ENSG00000115694 STK25          |                     |
| CGTCGGA | ENSG00000006453 BAIAP2L1       | ENSG00000069011 PITX1        | ENSG00000073792 IGF2BP2        | ENSG00000130164 LDLR         | ENSG00000130558 OLFML1       | ENSG00000137760 ALKB8        | ENSG00000138606 SHF          | ENSG00000148826 NKX6-2         |                     |
|         | ENSG00000123384 LRP1           | ENSG00000125449 ARMC7        | ENSG00000128564 VGF            | ENSG00000171680 PLEKHG5      | ENSG00000173244 Q8N8D0_HUMAN | ENSG00000173349 SF2P2D3      | ENSG00000175137 SH3BP5L      | ENSG00000175920 DOK7           |                     |
|         | ENSG00000157911 PEX10          | ENSG00000158008 EXTL1        | ENSG00000196235 SUPT5H         | ENSG00000197122 SRC          | ENSG00000197308 NP_997306.1  | ENSG00000203690 TCP10        | ENSG00000203811 HIST2H3A     | ENSG00000203813 HIST2H3C       |                     |
|         | ENSG00000181274 FRAT2          | ENSG00000183528 Q0VAF8_HUMAN | ENSG00000205064 Q6ZVP2_HUMAN   | ENSG00000128791 TWSG1        | ENSG00000141446 ESCO1        | ENSG00000141542 RAB40B       | ENSG00000169551 CXorf48      | ENSG00000170448 NFXL1          |                     |
|         | ENSG00000204666 NP_001001687.1 | ENSG00000174010 KLHL15       | ENSG00000204480 PRAMEF19       | ENSG00000204491 PRAMEF18     | ENSG00000204503 PRAMEF3      | ENSG00000135596 MICAL1       | ENSG00000148805 NR_002934.2  | ENSG00000159231 CBR3           |                     |
| CGTCTGC | ENSG00000068383 INPP5A         | ENSG00000072958 AP1M1        | ENSG00000082641 NFE2L1         | ENSG00000128228 SDF2L1       | ENSG00000139985 UBE1         | ENSG00000107541 MARK3        | ENSG00000095627 TDRD1        | ENSG00000105983 LMBR1          |                     |
|         | ENSG00000170324 FRMPD2         | ENSG00000180184 Q8NF75_HUMAN | ENSG00000205126 NP_001027025.1 | ENSG0000002016 RAD52         | ENSG00000067715 SYT1         | ENSG00000075413 MARK3        | ENSG00000095627 TDRD1        | ENSG00000105983 LMBR1          |                     |
|         | ENSG00000115363 TMEM166</      |                              |                                |                              |                              |                              |                              |                                |                     |

ENSG00000130382|MLLT1 ENSG00000133027|PEMT ENSG00000146067|Q9NW00\_HUMAN ENSG00000154316|TDH ENSG00000162572|SCNN1D ENSG00000164920|OSR2 ENSG00000166592|RRAD ENSG00000168785|TSPAN5  
ENSG00000173783|RUFY1 ENSG00000177112|Q8N6V7\_HUMAN ENSG0000010102300|179862|CITED4 ENSG00000179912|R3HDM2 ENSG00000183495|EP400 ENSG00000185883|ATP6VOC ENSG00000186081|KRT5 ENSG00000187051|RPS19BP1  
ENSG00000148908|RGS10 ENSG00000151090|THRB ENSG00000151914|DST ENSG00000152620|C5orf33 ENSG00000153879|CEBPG ENSG00000171126|KCNJ3 ENSG00000178502|KLHL11  
ENSG00000104529|EEF1D ENSG00000104894|CD37 ENSG00000106331|PAX4 ENSG00000107859|PITX3 ENSG00000146049|KAAG1 ENSG00000148805|NR\_002934.2 ENSG00000155275|C4orf23 ENSG00000160447|PKN3  
ENSG00000161996|WDRF9 ENSG00000162981|FAM84A ENSG00000163815|CLEC3B ENSG00000170214|ADRA1B ENSG00000179740|C19orf290S ENSG00000179743|Q8NF6\_HUMAN ENSG00000180843|KIAA1618 ENSG00000181649|PHLDA2  
ENSG00000185730|ZNF696 ENSG00000186493|C5orf38 ENSG00000197150|ABC8 ENSG00000198520|NP\_001004307.1 ENSG00000203903|Q6ZMP7\_HUMAN ENSG00000204763|Q6ZMK1\_HUMAN ENSG00000095587|TLL2 ENSG00000103740|ACSBG1  
ENSG00000112276|BVES ENSG00000113712|CSNK1A1 ENSG00000129675|ARHGEP6 ENSG00000134278|SPIRE1 ENSG00000138439|ALS2CR13 ENSG00000147883|CDKN2B ENSG00000162775|MKL1 ENSG00000162852|C1orf71  
ENSG00000181588|RKHD1 ENSG00000205542|TMSL1  
CGTGC GG ENSG00000063854|HAGH ENSG00000100364|C2orf9 ENSG00000103197|TSC2 ENSG00000105552|BCAT2 ENSG00000108557|RAI1 ENSG00000126460|PRRG2 ENSG00000135749|PCNXL2 ENSG00000140682|TGFB11  
ENSG00000142233|NP\_665806.1 ENSG00000148498|PARD3 ENSG00000163395|NP\_840059.1 ENSG00000164917|K0415\_HUMAN ENSG00000167543|TP53113 ENSG00000168395|ING5 ENSG00000168959|GRM5 ENSG00000169100|SLC25A6  
ENSG00000170233|Q96AM0\_HUMAN ENSG00000172663|TMEM134 ENSG00000176463|SLC03A1 ENSG00000176718|C5orf26 ENSG00000176845|METRNL ENSG00000179388|EGR3 ENSG00000182979|MTA1 ENSG00000183684|THOC4  
ENSG00000185482|STAC3 ENSG00000203774|Q6ZUA8\_HUMAN ENSG00000059728|MXD1 ENSG00000099725|PRKY ENSG00000103657|HERC1 ENSG00000137449|CPEB2 ENSG00000149658|YTHDF1 ENSG00000180957|PITPNB  
ENSG00000183943|PRKX ENSG00000188613|NANOS1 ENSG00000205156|Q6UXQ8\_HUMAN  
CGTGC GG ENSG00000054793|ATP9A ENSG00000067606|PRKCZ ENSG00000099365|STX1B2 ENSG00000104529|EEF1D ENSG00000104731|KLHDC4 ENSG00000105063|SAPS1 ENSG00000105173|CCNE1 ENSG00000108950|FAM20A  
ENSG00000114270|COL7A1 ENSG00000118263|KLF7 ENSG00000119242|CCDC92 ENSG00000126258|FYXD1 ENSG00000142655|PEX14 ENSG00000160161|CILP2 ENSG00000165688|PMPCA ENSG00000169057|MECP2  
ENSG00000171119|NRTN ENSG00000175223|Q8TC18\_HUMAN ENSG00000183172|C2orf32 ENSG00000184916|JAG2 ENSG00000185236|RAB11B ENSG00000187164|KIAA1598 ENSG00000196422|KIAA0649 ENSG00000198797|FAM5B  
ENSG00000204159|NM\_133374.2 ENSG00000204443|Q562T6\_HUMAN ENSG00000204620|Q6ZPC8\_HUMAN ENSG00000077943|ITGA8 ENSG00000078304|PPP2R5C ENSG00000081052|COL4A4 ENSG00000083896|YTHDC1 ENSG00000106511|MEOX2  
ENSG00000106723|SPIN1 ENSG00000112685|EXOC2 ENSG00000136636|KCTD3 ENSG00000140948|ZCCHC14 ENSG00000143653|SCCPDH ENSG00000159216|RUNX1 ENSG00000163113|OTUD7B ENSG00000163602|RYBP  
ENSG00000166170|BAG5 ENSG00000166451|CENPN ENSG00000166527|CLEC4D ENSG00000196980|NR\_002827.1 ENSG00000204757|Q6ZTL5\_HUMAN  
CGTGC GG ENSG00000100253|MIOX ENSG00000100410|PHF5A ENSG00000100565|C14orf166B ENSG00000105538|RASIP1 ENSG00000108379|WNT3 ENSG000001108504|CDK3 ENSG00000126460|PRRG2 ENSG00000133030|C17orf84  
ENSG00000157020|SEC13 ENSG00000173914|RBM4A ENSG00000173933|RBM4 ENSG00000175463|TBC1D10C ENSG00000176909|NP\_872380.1 ENSG00000181097|Q8NDL7\_HUMAN ENSG00000183666|LOC728411 ENSG00000185214|KLHL22  
ENSG00000198535|NP\_997205.1 ENSG00000205313|FAM106A ENSG00000205502|NP\_001007596.1 ENSG00000205646|Q96GL5\_HUMAN ENSG00000036473|OTC ENSG00000083312|TNPO1 ENSG00000115806|GORASP2 ENSG00000122376|XR\_015353.1  
ENSG00000123130|ACOT9 ENSG00000125247|TMTC4 ENSG00000142494|NP\_060712.2 ENSG00000165874|FAM35A ENSG00000165996|PTPLA ENSG00000175040|CHST2 ENSG00000178397|NP\_001032240.1 ENSG00000197933|ZF36\_HUMAN  
ENSG00000203711|C6orf99 ENSG00000204889|KRT40  
CGTGTAA ENSG00000068831|RASGRP2 ENSG00000074800|ENO1 ENSG00000075035|WSCAD2 ENSG00000075624|ACTB ENSG00000103126|AXIN1 ENSG00000104953|TLE6 ENSG00000105705|SF4 ENSG00000108878|CACNG1  
ENSG00000119242|CCDC92 ENSG00000125816|NKX2-4 ENSG00000132938|KIAA0774 ENSG00000146453|PNLDC1 ENSG00000160752|FDP5 ENSG00000162444|RBP7 ENSG00000164438|TLX3 ENSG00000165283|STOML2  
ENSG00000167393|PPP2R3B ENSG00000169885|CALML6 ENSG00000170430|MGMT ENSG00000172216|CEBPB ENSG00000173137|ADCK5 ENSG00000173662|TAS1R1 ENSG00000176078|Q8NAN4\_HUMAN ENSG00000203691|Q9UI51\_HUMAN  
ENSG00000204344|STK19 ENSG00000050130|C14orf100 ENSG00000070540|WIP1 ENSG00000074935|TUBB1 ENSG00000090263|MRPS33 ENSG00000109803|IFT20 ENSG00000109320|NFKB1 ENSG00000115828|QPCT  
ENSG00000119041|GTF3C3 ENSG00000121691|CAT ENSG00000122557|HERPUD2 ENSG00000122585|NPFY ENSG00000124209|RAB22A ENSG00000128710|HOXD10 ENSG00000130023|C6orf70 ENSG00000134966|HSTF1  
ENSG00000137936|BCAR3 ENSG00000138036|DYNC2L1 ENSG00000143179|UCK2 ENSG00000147381|MAGEA4 ENSG00000163602|RYBP ENSG00000163797|MRPL33 ENSG00000164386|NP\_997378.2 ENSG00000166922|SCG5  
ENSG00000176623|FAM82B ENSG00000179542|SLITRK4 ENSG00000180346|TIGD2 ENSG00000182890|GLUD2 ENSG00000188085|NP\_997320.1  
ENSG00000003400|CASP10 ENSG00000064419|TNPO3 ENSG00000068650|ATP11A ENSG00000072071|LPHN1 ENSG00000072585|SOX21 ENSG00000129749|CHRNA10 ENSG00000129993|CBFA2T3 ENSG00000130707|ASS1  
ENSG00000131183|SLC34A1 ENSG00000131242|RAB11FIP4 ENSG00000142186|SCYL1 ENSG00000143632|ACTA1 ENSG00000153551|CMTM7 ENSG00000160299|PCNT ENSG00000160310|PRMT2 ENSG00000168528|SERINC2  
ENSG00000169918|OTUD7A ENSG00000171631|P2RY6 ENSG00000172500|FIBP ENSG00000178498|DTX3 ENSG00000181368|NM\_032947.3 ENSG00000204273|HLA-DQB ENSG00000205085|NP\_001012457.1 ENSG00000066279|ASPM  
ENSG00000075303|SLC25A40 ENSG00000083535|C13orf24 ENSG00000091127|PUS7 ENSG00000107242|PIP5K1B ENSG00000108406|DHX40 ENSG00000109118|PHF12 ENSG00000111358|GTF2H3 ENSG00000122778|Q9HCM3\_HUMAN  
ENSG00000126733|DACH2 ENSG00000135845|PIGC ENSG00000145293|ENOPH1 ENSG00000148090|AUH ENSG00000148950|IMMP1L ENSG00000163599|CTLA4 ENSG00000170279|C7orf33 ENSG00000171657|GPR82  
ENSG00000172315|TP53RK ENSG00000183060|LYSMD4 ENSG00000196711|NP\_997296.1  
CGTGTCT ENSG00000082833|CVB5T1 ENSG00000010310|GIPR ENSG00000089505|CMTM1 ENSG00000090615|GOLGA3 ENSG00000092964|DPYSL2 ENSG00000101391|CDK5RAP1 ENSG00000102243|VGLL1 ENSG00000123933|MXD4  
ENSG00000127564|PKMY1 ENSG00000129351|ILF3 ENSG00000135063|C9orf61 ENSG00000142319|SLC6A3 ENSG00000157933|SKI ENSG00000160323|ADAMTS13 ENSG00000166426|CRABP1 ENSG00000168610|STAT3  
ENSG00000173442|EHBPL11 ENSG00000175193|PARL ENSG00000178110|Q8N9G9\_HUMAN ENSG00000205634|NP\_001001693.1 ENSG00000211445|GPX3 ENSG0000017260|ATP2C1 ENSG00000051620|HEBP2 ENSG00000057149|SERPINB4  
ENSG00000078304|PPP2R5C ENSG00000085511|MAP3K4 ENSG00000106344|RBM28 ENSG00000106609|C7orf42 ENSG00000113648|H2AFY ENSG00000116957|TBCE ENSG00000121851|POLR3GL ENSG00000122376|XR\_015353.1  
ENSG00000133318|RTN3 ENSG00000136819|C9orf78 ENSG00000144736|SHQ1 ENSG00000146678|JGFBB1 ENSG00000147434|CHRNA6 ENSG00000151746|BCD1 ENSG00000153107|ANAPC1 ENSG00000164187|LMBRD2  
ENSG00000165874|FAM35A ENSG00000165997|ARL5B ENSG00000174004|LRRC33 ENSG00000175279|CORT ENSG00000177508|IRX3 ENSG00000178234|GALNT11 ENSG00000182180|MRPS16 ENSG00000188542|DUSP28  
ENSG00000197672|NP\_997331.1 ENSG00000197737|Q9H393\_HUMAN  
CGTTAGG ENSG00000075914|EXOSC7 ENSG00000093321|CRAT ENSG00000100084|HIRA ENSG00000108830|RND2 ENSG00000111181|SLC6A12 ENSG00000122497|NBPF14 ENSG00000125869|C2orf103 ENSG00000134075|C3orf10  
ENSG00000140092|FBLN5 ENSG00000160886|LY6K ENSG00000183242|WIT1 ENSG00000187091|PLCD1 ENSG00000204303|Q6ZVW4\_HUMAN ENSG00000011114|BTBD7 ENSG00000044115|CTNNA1 ENSG00000078142|PIK3C3  
ENSG00000082397|EPB41L3 ENSG00000102763|NP\_001009814.1 ENSG00000115761|NOL10 ENSG00000116288|PARK7 ENSG00000131473|ACLY ENSG00000133627|ACTR3B ENSG00000136244|IL6 ENSG00000138794|CASP6  
ENSG00000140660|RUNDC2A ENSG00000146223|RPL7L1 ENSG00000151914|DST ENSG00000156113|KCNMA1 ENSG00000162976|PQLC3 ENSG00000165185|KIAA1958 ENSG00000165527|ARF6 ENSG00000169914|OTUD3  
ENSG00000181472|ZBTB2 ENSG00000186448|ZNF197 ENSG00000197595|NP\_997323.1 ENSG00000198155|Q49A33\_HUMAN ENSG00000203832|NBPF20  
CGTTAGT ENSG00000089057|SLC23A2 ENSG00000100012|SECL14L3 ENSG00000100429|HDAC10 ENSG00000101363|MANBAL ENSG00000105085|CRSP7 ENSG00000105369|CD79A ENSG00000111203|ITFG2 ENSG00000116514|IBRDC3  
ENSG00000117362|APH1A ENSG00000122854|SFTPA2B ENSG00000136710|CCDC115 ENSG00000143032|BARHL2 ENSG00000148296|SURF6 ENSG00000158882|TOMM40L ENSG00000162517|PEF1 ENSG00000164010|ERMAP  
ENSG00000171224|C10orf35 ENSG00000174992|ZG16\_HUMAN ENSG00000178363|CALML3 ENSG00000180139|Q8N9Z5\_HUMAN ENSG00000180471|C9orf31 ENSG00000182314|SFTPA2 ENSG00000183778|B3GALT5 ENSG00000205680|NR\_002931.1  
ENSG00000206008|Q6ZVA3\_HUMAN ENSG00000014919|COX15 ENSG00000048740|CUGBP2 ENSG00000049323|LTBP1 ENSG00000068878|PSME4 ENSG00000093134|VNN3 ENSG00000100354|TNRC6B ENSG00000100902|PSMA6  
ENSG00000101134|DOK5 ENSG00000101190|TCFL5 ENSG00000103319|EEF2K ENSG00000108848|CROP\_HUMAN ENSG00000125850|OVOL2 ENSG00000127318|IL22 ENSG00000131007|TTY9A ENSG00000131009|TTY9A\_HUMAN  
ENSG00000139971|C14orf37 ENSG00000147592|LACTB2 ENSG00000148835|TAF5 ENSG00000156976|EIF4A2 ENSG00000159917|ZNF235 ENSG00000162521|RBBP4 ENSG00000165219|GAPVD1 ENSG00000165985|C1QL3  
ENSG00000166523|CLEC4E ENSG00000167842|MIS12 ENSG00000171560|FGA ENSG00000175606|TMEM70 ENSG00000176171|BNIP3 ENSG00000184474|Q96FP4\_HUMAN ENSG00000185414|MRPL30  
CGTTCTC ENSG00000008130|NADK ENSG0000012232|EXTL3 ENSG00000068724|TTC7A ENSG00000090857|NP\_060460.3 ENSG00000102100|SLC35A2 ENSG00000105552|BCAT2 ENSG00000107223|EDF1 ENSG00000111644|ACRBP  
ENSG00000130635|COL5A1 ENSG00000132446|PTH1L7 ENSG00000133321|RARRES3 ENSG00000134452|FBXO18 ENSG00000145016|Q96CK5\_HUMAN ENSG00000146374|RSP03 ENSG00000153498|C13orf28 ENSG00000164399|IL3  
ENSG00000169899|Q96MA9\_HUMAN ENSG00000171462|EGFL9 ENSG00000176845|METRNL ENSG00000183495|EP400 ENSG00000186716|BCR ENSG00000196892|Q9P1D2\_HUMAN ENSG00000197757|HOXC6 ENSG00000205155|PSENE1  
ENSG00000043514|TRIT1 ENSG00000055332|EIF2AK2 ENSG00000089195|TRM6\_HUMAN ENSG00000109083|IFT20 ENSG00000120658|ENOX1 ENSG00000137441|FGFBP2 ENSG00000140740|UQCRC2 ENSG00000147257|GPC3  
ENSG00000152766|ANKRD22 ENSG00000175054|ATR ENSG00000181541|MAB21L2 ENSG00000188175|NP\_937794.1 ENSG00000205758|CRYZL1 ENSG00000205791|LOH12CR2  
CGTTCTT ENSG0000008256|PSCD3 ENSG00000054793|ATP9A ENSG00000093072|CECR1 ENSG00000105509|HAS1 ENSG00000107438|PDLIM1 ENSG00000113389|NPR3 ENSG00000122863|CHST3 ENSG00000127837|AAMP  
ENSG00000130511|SSBP4 ENSG00000132017|NP\_612362.2 ENSG00000161610|HCRT ENSG00000162771|FAM71A ENSG00000162910|MRPL55 ENSG00000170089|THOC3 ENSG00000171794|UTF1 ENSG00000180871|IL8RB  
ENSG00000205971|NP\_001019848.1 ENSG00000039600|SOX30 ENSG00000050030|KIAA2022 ENSG00000070269|C14orf101 ENSG00000075336|C18orf55 ENSG00000081665|ZNF253 ENSG00000101323|HAO1 ENSG00000111231|ATPBD1C  
ENSG00000113648|H2AFY ENSG00000123124|WWP1 ENSG00000133636|NTS ENSG00000134115|CNTN6 ENSG00000134183|GNAT2 ENSG00000136098|NEK3 ENSG00000138823|MTTP ENSG00000143633|C1orf131  
ENSG00000144057|ST6GAL2 ENSG00000165120|C7orf45 ENSG00000168116|KIAA1586 ENSG00000169953|HSPY2 ENSG00000172622|ZNF131 ENSG00000172468|HBSFY1 ENSG00000197065|FSBP\_HUMAN ENSG00000198743|SLC5A3

CTAAACT ENSG00000070495|JMJD6 ENSG00000100441|KIAA0323 ENSG00000101391|CDK5RAP1 ENSG00000105278|KIAA1086 ENSG00000117154|IGSF21 ENSG00000124782|RREB1 ENSG00000146535|GNA12 ENSG00000160293|VAV2  
ENSG00000162231|NXF1 ENSG00000164574|GALNT10 ENSG00000165478|HEPACAM ENSG00000171443|ZNF524 ENSG00000174015|SPERT ENSG00000181754|AMIGO1 ENSG00000185436|IL28RA ENSG00000197174|OL4606\_HUMAN  
ENSG00000197285|NR\_001536.1 ENSG00000204092|NP\_001001705.1 ENSG0000038274|MAT2B ENSG0000081307|UBE1DC1 ENSG00000088298|EDEM2 ENSG00000092345|DAZL ENSG00000106536|POU6F2 ENSG00000113916|BCL6  
ENSG00000115365|LANCL1 ENSG00000115866|DARS ENSG00000116191|RALGPS2 ENSG00000123612|ACVR1C ENSG00000127995|CASD1 ENSG00000137714|FDX1 ENSG00000143079|CTTNBP2NL ENSG00000153071|DAB2  
ENSG00000155850|SLC26A2 ENSG00000171056|SOX7 ENSG00000176915|KIAA0692 ENSG00000177683|THAP5 ENSG00000185414|MRPL30 ENSG00000186231|KLHL32 ENSG00000187191|DAZ3 ENSG00000188120|DAZ1  
ENSG00000197347|Q6ZVE3\_HUMAN ENSG00000205916|DAZ4 ENSG00000205944|DAZ2

CTAAAGG ENSG00000081377|CDC14C ENSG00000087237|CETP ENSG00000105341|NP\_060505.1 ENSG00000110777|POU2AF1 ENSG00000118689|FOXO3A ENSG00000133460|SLC2A11 ENSG00000157992|KRTCAP3 ENSG00000160818|GPATCH4  
ENSG00000163521|GLB1L ENSG00000166974|MAPRE2 ENSG00000167515|TRAPPC2L ENSG00000171163|ZNF692 ENSG00000184451|CCR10 ENSG00000184602|SNN ENSG00000189068|VSTM1 ENSG00000196152|ZNF79  
ENSG00000196943|LTB4R ENSG00000197291|Q8WV75\_HUMAN ENSG00000197901|SLC22A6 ENSG00000197965|MPZL1 ENSG00000205609|Q9BW98\_HUMAN ENSG00000206704|GTF2IRD1 ENSG00000211638|TMEM159 ENSG00000296063|SRPK1  
ENSG00000106686|C9orf68 ENSG00000113456|RAD1 ENSG00000117595|IRF6 ENSG00000125484|GTF3C4 ENSG00000129235|TXNL5 ENSG00000135931|ARMC9 ENSG00000141298|SSH2 ENSG00000159593|APPBP1  
ENSG00000163257|C4orf30 ENSG00000167720|SRR ENSG00000168619|ADAM18 ENSG00000171135|JAGN1 ENSG00000183542|KLRC4 ENSG00000186665|C17orf58

CTAAATA ENSG00000073169|SELO\_HUMAN ENSG00000086232|EIF2AK1 ENSG00000100591|AHSA1 ENSG00000101251|SELLL2 ENSG00000103365|GGA2 ENSG00000105755|ETHE1 ENSG00000107957|SH3PXD2A ENSG00000108829|LRRC59  
ENSG00000113739|STC2 ENSG00000115275|GCS1\_HUMAN ENSG00000122359|ANXA11 ENSG00000125388|GRK4 ENSG00000128322|IGLL1 ENSG00000129673|AANAT ENSG00000141570|CBX8 ENSG00000159352|PSMD4  
ENSG00000161911|TREM1L1 ENSG00000166220|C10orf27 ENSG00000168505|GBX2 ENSG00000169894|MUC3A ENSG00000181722|ZBTB20 ENSG00000181938|GINS3 ENSG00000183128|FAM26A ENSG00000183908|LRRC55  
ENSG00000185085|INTS5 ENSG00000185722|ANKFY1 ENSG00000197548|ATG7 ENSG00000197600|MYBPHL ENSG00000197996|PADI6 ENSG00000203896|LIME1 ENSG00000204536|CCHCR1 ENSG00000265518|NDUFB4  
ENSG00000081800|SLC13A1 ENSG00000082293|COL19A1 ENSG00000089195|TRM6\_HUMAN ENSG00000091986|CCDC80 ENSG00000101166|SLMO2 ENSG00000103310|ZP2 ENSG00000108055|SMC3  
ENSG00000108242|CYP2C18 ENSG00000117475|BLZF1 ENSG00000119446|RBM18 ENSG00000120549|KIAA1217 ENSG00000123268|ATP1 ENSG00000128609|NDUFA5 ENSG00000131773|KHDRB3 ENSG00000132855|ANGPTL3  
ENSG00000133773|CCDC59 ENSG00000135052|C9orf155 ENSG00000137492|PKRRI1R ENSG00000138119|FERL13 ENSG00000138413|IDH1 ENSG00000138658|C4orf21 ENSG00000143952|VPS54 ENSG00000144285|SCN1A  
ENSG00000149124|GLYAT ENSG00000149507|PLAC1L ENSG00000151151|IPMK ENSG00000155085|C6orf199 ENSG00000157107|FCHO2 ENSG00000157680|DGKI ENSG00000161048|NP\_945341.2 ENSG00000161980|POLR3K  
ENSG00000163386|KIAA1245 ENSG00000164823|OSGIN2 ENSG00000166685|COG1 ENSG00000167283|ATP5L ENSG00000170381|SEMA3E ENSG00000170606|HSPA4 ENSG00000170681|NP\_001018126.1 ENSG00000171476|HOP\_HUMAN  
ENSG00000171863|RPS7 ENSG00000171988|JMJD1C ENSG00000174371|EXO1 ENSG00000174944|P2RY14 ENSG00000175110|MRPS22 ENSG00000175487|NP\_076428.2 ENSG00000181634|TNFSF15 ENSG00000196532|HIST1H3C  
ENSG00000197372|ZNF675 ENSG00000197702|PARVA ENSG00000198205|ZKXD ENSG00000204010|IFI1L1 ENSG00000205302|SNX2 ENSG00000205707|LYRM5

CTAAATC ENSG00000057704|TMCC3 ENSG00000102575|ACP5 ENSG00000103353|UBFD1 ENSG00000105642|KCNN1 ENSG00000105663|WBP7\_HUMAN ENSG00000108417|KRT37 ENSG00000110395|CBL ENSG00000110628|SLC22A18  
ENSG00000112715|VEGFA ENSG00000116882|HAO2 ENSG00000116983|HPCAL4 ENSG00000125810|CD93 ENSG00000126267|COX6B1 ENSG00000128309|MPST ENSG00000132286|FXC1 ENSG00000141349|G6PC3  
ENSG00000157606|SPAT51 ENSG00000158764|ITLN2 ENSG00000168517|HEXIM2 ENSG00000168894|NP\_057578.1 ENSG00000170549|IRX1 ENSG00000175772|Q8N952\_HUMAN ENSG00000176876|PXM2 ENSG00000181789|COPG  
ENSG00000184056|VPS33B ENSG00000186162|Q86XG0\_HUMAN ENSG00000187166|H1FNT ENSG00000196935|SRGAP1 ENSG00000205033|Q96DJ9\_HUMAN ENSG00000205485|Q6DCA4\_HUMAN ENSG00000206083|ZNF409 ENSG0000031003|C5orf5  
ENSG00000047648|ARHGAP6 ENSG00000054598|FOXCl ENSG00000070669|ASNS ENSG00000071909|MYO3B ENSG00000108582|CPD ENSG00000113494|PRLR ENSG00000115970|THADA ENSG00000120211|INSL4  
ENSG00000124429|POF1B ENSG00000124795|DEK ENSG00000128989|ARP19\_HUMAN ENSG00000132485|ZNRAN2 ENSG00000133019|CHRM3 ENSG00000137878|GRINL1A ENSG00000138592|USP8 ENSG00000140367|UBE2Q2  
ENSG00000141429|GALNT1 ENSG00000143469|SYT11 ENSG00000145839|IL9 ENSG00000148948|LRRC4C ENSG00000149100|PCD11 ENSG00000152475|DCLRE1C ENSG00000152904|GGPS1 ENSG00000163840|DTX3L  
ENSG00000173597|SULT1B1 ENSG00000175449|RFESD ENSG00000185056|Q569G3\_HUMAN ENSG00000197755|O14513-3 ENSG00000204524|ZNF805 ENSG00000204588|Q68DL6\_HUMAN ENSG00000205508|NP\_001018856.1  
ENSG00000010256|UQCRC1 ENSG00000033100|CHGUT\_HUMAN ENSG00000100100|PIK3IP1 ENSG00000100450|GZMH ENSG00000100985|MMP9 ENSG00000102230|PCTY1B ENSG00000103549|RNF40 ENSG00000122176|FMOD  
ENSG00000124233|SEMGI ENSG00000146535|GNA12 ENSG00000158423|RIBC1 ENSG00000159023|EPB41 ENSG00000162734|PEAL5 ENSG00000163263|C1orf189 ENSG00000165795|NDRG2 ENSG00000172724|CCL19  
ENSG00000177105|RHOG ENSG00000184345|IQCF2 ENSG00000186118|Q6PEX7\_HUMAN ENSG00000189401|OTUD6A ENSG00000200274|HECW1 ENSG00000203742|IFTF8 ENSG000002047662|Q9ULE4\_HUMAN ENSG00000111404|NP\_079006.1  
ENSG00000112167|C6orf64 ENSG00000115825|PRKD3 ENSG00000120210|INSL6 ENSG00000122512|PMS2 ENSG00000131003|RBMV2EP ENSG00000133704|IPO8 ENSG00000137824|FAM82C ENSG00000139800|ZTC5  
ENSG00000145321|GC ENSG00000147027|TMEM47 ENSG00000158290|CUL4B ENSG00000159200|DSCR1 ENSG00000161057|PSMC2 ENSG00000163293|NPAL1 ENSG00000164172|MOCS2 ENSG00000164175|SLC45A2  
ENSG00000164181|ELOVL7 ENSG00000165868|HSPA12A ENSG00000169688|MT1B ENSG00000182890|GLUD2 ENSG00000187098|MITF ENSG00000189403|HMGB1  
ENSG00000005100|DHX33 ENSG00000006015|C19orf60 ENSG00000018625|ATP1A2 ENSG00000054965|KIAA0280 ENSG00000100997|ABHD12 ENSG00000114554|PLXNL1 ENSG00000119977|C10orf61 ENSG00000123243|ITIH5  
ENSG00000132259|CNGA4 ENSG00000151062|CACNA2D4 ENSG00000153531|ADPRHL1 ENSG00000157103|SLC6A1 ENSG00000165887|PNKR2 ENSG00000169427|KCNK9 ENSG00000170145|SNF1LK2 ENSG00000170743|SYT9  
ENSG00000173706|HEG1 ENSG00000177762|C5orf27 ENSG00000180900|SCRIB ENSG00000187251|C1orf213 ENSG00000196209|QJ5XA8\_HUMAN ENSG000002037749|MFAP3 ENSG00000079102|RUNX1T1 ENSG00000102384|CENPF  
ENSG00000106993|CDC37L1 ENSG00000110961|MYH1 ENSG00000111780|15E2\_HUMAN ENSG00000112365|ZBTB24 ENSG00000114127|XRN1 ENSG00000122870|BICC1 ENSG00000124939|SCGB2A1 ENSG00000125945|ZNF436  
ENSG00000127995|CASD1 ENSG00000132718|SYT11 ENSG00000139357|SLC5A8 ENSG00000140836|ATBF1 ENSG00000147180|ZNF711 ENSG00000157470|FAM81A ENSG00000163737|PF4 ENSG00000172007|RAB33B

CTAAACTT ENSG00000177410|QSHF1\_HUMAN ENSG00000178999|AURKB ENSG00000198586|TLK1 ENSG00000203724|C1orf53 ENSG00000204201|Q49A40\_HUMAN  
ENSG00000100591|AHSA1 ENSG00000101104|C2orf119 ENSG00000104979|C19orf53 ENSG00000108018|SORCS1 ENSG00000110455|NP\_115981.1 ENSG00000122735|DNAI1 ENSG00000131845|ZNF304 ENSG00000143772|ITPKB  
ENSG00000162981|FAM84A ENSG00000166165|CKB ENSG00000170099|SERPINA6 ENSG00000171812|COL8A2 ENSG00000177663|ILL7RA ENSG00000178764|ZHX2 ENSG00000184574|GPR92 ENSG00000184785|Q96HG1\_HUMAN  
ENSG00000188783|PRELP ENSG00000196152|ZNF79 ENSG00000196767|POU3F4 ENSG00000205155|PSENN2 ENSG00000205878|Q6ZSV2\_HUMAN ENSG00000205723|NP\_079349.1 ENSG00000262096|ARSF ENSG00000270669|ASNS  
ENSG00000096717|SIRT1 ENSG00000100814|CCNB1IP1 ENSG00000101544|ZNF508 ENSG00000102781|KATNAL1 ENSG00000102805|CLN5 ENSG00000114331|CENTB2 ENSG00000116679|IVNS1ABP ENSG00000118520|ARG1  
ENSG00000132386|SERPINF1 ENSG00000137968|SLC44A5 ENSG00000138684|IL21 ENSG00000144354|CDCA7 ENSG00000158201|ABHD3 ENSG00000161036|NP\_690852.1 ENSG00000162669|NP\_001017975.3 ENSG00000164122|ASB5  
ENSG00000169621|C2orf13 ENSG00000198876|WDR40A ENSG00000205707|LYRM5

CTAAGAG ENSG00000084207|GSTP1 ENSG00000087086|FTL ENSG00000100109|TFIP11 ENSG00000100321|SYNGR1 ENSG00000104490|NCALD ENSG00000105227|PRX ENSG00000109089|CDR2L ENSG00000114268|PFKFB4  
ENSG00000119686|C14orf58 ENSG00000122188|LAX1 ENSG00000148331|ASB6 ENSG00000150477|KIAA1328 ENSG00000155980|KIF5A ENSG00000167595|C19orf55 ENSG00000167749|KLK4 ENSG00000168242|HIST1H2BI  
ENSG00000184945|AQP12A ENSG00000185933|FAM26C ENSG00000187638|NM\_207367 ENSG00000197386|HD ENSG00000204759|Q6ZRY0\_HUMAN ENSG00000204793|CEACAM1 ENSG000002087916|SLC6A14  
ENSG00000103599|IQCH ENSG00000132703|APCS ENSG00000133114|KIAA1704 ENSG00000137040|RANBP6 ENSG00000137261|KIAA0319 ENSG00000139908|TSSK4 ENSG00000140941|MAP1L3C3B ENSG00000147010|SH3KBP1  
ENSG00000151611|MMAA ENSG00000151693|DDEF2 ENSG00000152763|WDR78 ENSG00000154655|L3MBTL4 ENSG00000155744|FAM126B ENSG00000162814|SPATA17 ENSG00000170788|DYDC1 ENSG00000179195|ZNF664  
ENSG00000182754|RPL9P7 ENSG00000196565|HBE1 ENSG00000204348|DOM3Z

CTAAGCA ENSG00000035862|TMP2 ENSG00000103061|SLC7A6OS ENSG00000124134|KCNK1 ENSG00000134824|FADS2 ENSG00000141577|AZI1 ENSG00000150779|TIMM8B ENSG00000157992|KRTCAP3 ENSG00000163431|LMOD1  
ENSG00000165238|WNK2 ENSG00000167693|NXN ENSG00000175356|SCUBE2 ENSG00000175992|Q9BR87\_HUMAN ENSG000002002745|WNT16 ENSG00000209256|PRTFDC1 ENSG00000100744|C14orf129 ENSG00000108255|CRYBA1  
ENSG00000122692|SMU1 ENSG00000135549|PKIB ENSG00000138660|C4orf16 ENSG00000148175|STOM ENSG00000149970|CNKSR2 ENSG00000152503|TRIM36 ENSG00000154864|FAM38B ENSG00000155016|CYP2U1  
ENSG00000156886|ITGAD ENSG00000161594|KLHL10 ENSG00000163596|ICAIL1 ENSG00000167601|AXL ENSG00000170419|VSTM2 ENSG00000171365|CLCN5 ENSG00000174227|PIGG ENSG00000177425|PAWR  
ENSG00000178522|AMBN ENSG00000180287|PLD5 ENSG00000183753|BYP2C ENSG00000183795|VCY2\_HUMAN ENSG00000185894|VCY2\_HUMAN ENSG00000187109|NAP1L1 ENSG00000188725|NP\_001041714.1  
ENSG00000004455|AK2 ENSG00000009830|POMT2 ENSG00000083842|ZNF8 ENSG00000092068|SLC7A8 ENSG00000100003|SEC14L2 ENSG00000104524|PYCLN ENSG00000105254|TBCB ENSG00000117394|SLC2A1  
ENSG00000123411|IKZF4 ENSG00000131746|TNS4 ENSG00000140950|KIAA1609 ENSG00000163521|GLB1L ENSG00000171812|COL8A2 ENSG00000183798|EMILIN3 ENSG00000185933|FAM26C ENSG00000197043|ANXA6  
ENSG00000205912|Q6ZTG5\_HUMAN ENSG00000211454|ARK74\_HUMAN ENSG000002048991|R3HDM1 ENSG000002054803|CBLN4 ENSG000002079215|SLC1A3 ENSG000002091409|ITGA6 ENSG00000106258|CYP3A5 ENSG00000116783|FPGT  
ENSG00000121903|ZSCAN20 ENSG00000123178|C13orf1 ENSG00000124789|NUP153 ENSG00000128578|FAM40B ENSG00000135373|EHF ENSG00000137261|KIAA0319 ENSG00000139537|CCDC65 ENSG00000145246|ATP10D  
ENSG00000149970|CNKSR2 ENSG00000152931|PART1\_HUMAN ENSG00000162613|FUBP1 ENSG00000163444|TMEM183B ENSG00000175646|PRM1 ENSG00000183324|NP\_001035826.1 ENSG00000184786|TCTE3 ENSG00000185009|AP3M1

CTAAGGG ENSG00000072134|EPN2 ENSG00000092051|AP1G2 ENSG00000100242|UNC84B ENSG00000100263|RHBDD3 ENSG00000105245|NUMBL ENSG00000119383|PPP2R4 ENSG00000124571|XPO5 ENSG00000124615|MOCS1  
ENSG00000126243|LRFN3 ENSG00000150401|DCUN1D2 ENSG00000159217|IGF2BP1 ENSG00000176749|CDK5R1 ENSG00000198756|Q6ZRW2\_HUMAN ENSG00000180359|C11orf36 ENSG00000184923|FAM22A ENSG0000022274|TFRC  
ENSG00000076513|ANKRD13A ENSG00000088986|DYNLL1 ENSG00000100596|SPTLC2 ENSG00000106772|KIAA0367 ENSG00000109846|CRYAB ENSG00000116977|LGALS8 ENSG00000124203|C2orf174 ENSG00000127870|RNF6  
ENSG00000135297|MTO1 ENSG00000137806|NDUFAF1 ENSG00000165572|KBTBD6 ENSG00000166439|RNF169 ENSG00000173674|EIF1AP1 ENSG00000175087|PDIK1L ENSG00000178175|ZNF366 ENSG00000181481|RNF135  
ENSG00000184402|SS18L1

CTAAGTT ENSG00000011177|INMT ENSG00000108106|UBE2S ENSG000001125409|TEKT3 ENSG00000129862|VCY ENSG00000129864|VCY1B ENSG00000148200|NR6A1 ENSG00000157017|GHRL ENSG00000160208|RRP1B  
ENSG00000169059|VCX3A ENSG00000176845|METRNL ENSG00000182583|VCX ENSG00000186197|ENO1P ENSG00000188483|IER5L ENSG00000196419|XRCC6 ENSG00000198664|Q9BTRO\_HUMAN ENSG00000204228|HSD17B8  
ENSG00000205642|VCX3B ENSG00000066422|ZBTB11 ENSG00000066855|MTFR1 ENSG00000080561|MID2 ENSG00000110768|GTF2H1 ENSG00000113161|HMGC1R ENSG00000114054|PCCB ENSG00000123473|STIL  
ENSG00000134758|RNF138 ENSG00000140941|MAP1L3C3B ENSG00000144228|SPOPL\_HUMAN ENSG00000152022|LIX1L ENSG00000152332|UHMK1 ENSG00000154007|ASB17 ENSG00000154122|ANKH  
ENSG00000154479|Q6PJF6\_HUMAN ENSG00000156384|C10orf78 ENSG00000164221|CCDC112 ENSG00000167601|AXL ENSG00000171488|LRRC8C ENSG00000172766|NARG1L ENSG00000173261|PLAC8L1 ENSG00000176971|NP\_976249.1  
ENSG00000180772|AGTR2 ENSG00000205337|Q6ZVR2\_HUMAN

CTAATAA ENSG00000005961|ITGA2B ENSG0000011243|AKAP8L ENSG00000025770|NCAPH2 ENSG00000057757|C1orf128 ENSG00000072506|HSD17B10 ENSG00000087087|ARS2\_HUMAN ENSG00000092295|TGM1 ENSG00000092621|PHGDH  
ENSG00000096088|PGC ENSG00000100985|MMP9 ENSG00000110395|CBL ENSG00000115268|RPS15 ENSG00000125995|C2orf52 ENSG00000126267|COX6B1 ENSG00000127564|PKMYT1 ENSG00000130985|UBE1  
ENSG00000131097|HTGD1B ENSG00000131143|COX4I1 ENSG00000133315|LRF16\_HUMAN ENSG00000133661|SFTPD ENSG00000134339|SAA2 ENSG00000135097|MS11 ENSG00000137073|UBAP2 ENSG00000137133|HINT2  
ENSG00000141744|PNMT ENSG00000144591|GMPPA ENSG00000149823|C11orf2 ENSG00000160949|NFKBIL2 ENSG00000162191|SAKS1\_HUMAN ENSG00000165457|FOLR2 ENSG00000166136|NDUFB8 ENSG00000166508|MCM7  
ENSG00000167664|TMIGD2 ENSG00000167701|GPT ENSG00000169910|ASL ENSG00000171533|MAP6 ENSG00000171747|LGALS4 ENSG00000172366|C16orf14 ENSG00000172678|OR13A1 ENSG00000173432|SAA1  
ENSG00000173545|ZNF622 ENSG00000180697|C3orf22 ENSG00000180878|C11orf42 ENSG00000182685|C16orf7 ENSG00000186163|Q4G0S1\_HUMAN ENSG00000186832|KRT16 ENSG00000186976|DJB1\_HUMAN ENSG00000187021|PNLIPRP1  
ENSG00000187144|SPATA21 ENSG00000189357|XR\_015253.1 ENSG00000203908|NP\_001017361.1 ENSG00000204228|HSD17B8 ENSG00000204562|Q6ZU75\_HUMAN ENSG00000206140|LOC728229 ENSG000002062725|APPBP2 ENSG000002088782|DEFB127  
ENSG00000105699|LSR ENSG00000115091|ACTR3 ENSG00000115484|CCT4 ENSG00000115935|WIP1 ENSG00000116062|MSH6 ENSG00000117399|CDC20 ENSG00000118231|CRYGD ENSG00000118762|PKD2  
ENSG00000120210|INSL6 ENSG00000120215|MLANA ENSG00000121749|ZBTB15 ENSG00000123595|RAB9A ENSG00000124103|C2orf107 ENSG00000126804|ZBTB1 ENSG00000129353|SLC44A2 ENSG00000131941|RHPN2  
ENSG00000133019|CHRM3 ENSG00000136521|NDUFB5 ENSG00000139637|C12orf10 ENSG00000143036|SLC44A3 ENSG00000147684|NDUFB9 ENSG00000149806|FBT1 ENSG00000152556|PFKKM ENSG00000155897|ADCY8  
ENSG00000159140|SON ENSG00000161594|KLHL10 ENSG00000162437|RAVER2 ENSG00000163254|CRYGC ENSG00000164022|SCYE1 ENSG00000166971|AKT1P ENSG00000168461|RAB31  
ENSG00000170962|PDGFD ENSG00000171766|GATH1 ENSG00000172469|MANEA ENSG00000173083|HPSE ENSG00000173258|ZNF483 ENSG00000174405|SLP3 ENSG00000175535|PNLIP ENSG00000177111|XR\_016777.1  
ENSG00000177990|DPY19L2 ENSG00000178346|C6orf61 ENSG00000180182|CRSP2 ENSG00000180481|GLIPR1L2 ENSG00000182187|CRYG2 ENSG00000189403|HMGB1 ENSG00000197632|SERPINB2  
ENSG00000197846|HIST1H2BF ENSG00000198092|TPPRSS1F ENSG00000202420|PFDN6

CTAATGA ENSG00000095713|CRTAC1 ENSG00000100362|PVALB ENSG00000117



|                  |                                |                              |                                |                                |                              |                              |                              |                                |
|------------------|--------------------------------|------------------------------|--------------------------------|--------------------------------|------------------------------|------------------------------|------------------------------|--------------------------------|
|                  | ENSG00000159176 CSRP1          | ENSG00000160606 TLCD1        | ENSG00000162148 C11orf66       | ENSG00000166998 CKMT1A         | ENSG00000168775 KCRU_HUMAN   | ENSG00000170743 SYT9         | ENSG00000174951 FUT1         | ENSG00000182606 TRAK1          |
|                  | ENSG00000184144 CNTN2          | ENSG00000184452 Q9UHT6_HUMAN | ENSG00000184990 SIVA1          | ENSG00000185507 IRF7           | ENSG00000189321 NR_002940.1  | ENSG00000205335 GLYCAM1      | ENSG00000205592 MUC19        | ENSG00000006715 VPS41          |
|                  | ENSG00000047365 CENTD1         | ENSG00000082556 OPRK1        | ENSG00000087095 NLK            | ENSG00000095794 CREM           | ENSG00000106809 OGN          | ENSG00000113361 CDH6         | ENSG00000113441 LNPEP        | ENSG00000115541 HSPE1          |
|                  | ENSG00000126861 OMG            | ENSG00000133124 TRS4         | ENSG00000139151 PLCZ1          | ENSG00000140905 GCSH           | ENSG00000141048 MYH4         | ENSG00000145147 SLIT2        | ENSG00000147854 UHRF2        | ENSG00000148175 STOM           |
|                  | ENSG00000155827 RNF20          | ENSG00000156671 SAMD8        | ENSG00000157470 FAM81A         | ENSG00000164252 AGGF1          | ENSG00000167332 ORS1E2       | ENSG00000168497 SDPR         | ENSG00000185056 Q569G3_HUMAN | ENSG00000196319 Q9H353_HUMAN   |
| CTAATGC          | ENSG00000204022 LTPJ           | ENSG00000204472 AIF1         | ENSG00000204692 OR12D3         | ENSG00000204711 C9orf135       | ENSG00000205413 SAMD9        |                              |                              |                                |
|                  | ENSG00000032389 TSSC1          | ENSG00000063854 HAGH         | ENSG00000066923 STAG3          | ENSG00000100931 CHMP4A         | ENSG00000102466 FGF14        | ENSG00000103888 KIAA1199     | ENSG00000107175 CREB3        | ENSG00000114378 HYAL1          |
|                  | ENSG00000124701 APOBEC2        | ENSG00000130244 Q17RN3-2     | ENSG00000130540 SULT4A1        | ENSG00000143536 CRNN           | ENSG00000144504 ANKMY1       | ENSG00000148337 CIZ1         | ENSG00000149782 PLCB3        | ENSG00000151778 C13orf21       |
|                  | ENSG00000158869 FCER1G         | ENSG00000162600 OMA1         | ENSG00000167531 LALBA          | ENSG00000168703 WFDC12         | ENSG00000170043 TRAPP1       | ENSG00000170054 SERPINA9     | ENSG00000176302 FOXR1        | ENSG00000178821 TMEM52         |
|                  | ENSG00000183579 ZNRFB3         | ENSG00000188763 FZD9         | ENSG00000205744 DENND1C        | ENSG00000004809 SLC22A16       | ENSG000000058272 PPP1R12A    | ENSG00000073712 PLEKH1       | ENSG00000100815 TRIP11       | ENSG00000103381 NP_060810.1    |
|                  | ENSG00000105866 SP4            | ENSG00000113269 RNF130       | ENSG00000116675 DNAJC6         | ENSG00000119138 KLF9           | ENSG00000120519 SLC10A7      | ENSG00000120948 TARDBP       | ENSG00000129003 VPS13C       | ENSG00000136933 RABEPK         |
|                  | ENSG00000137975 CLCA2          | ENSG00000146802 TMEM168      | ENSG00000150625 GPM6A          | ENSG00000151239 TWF1           | ENSG00000157578 C21orf13     | ENSG00000157890 MEGF11       | ENSG00000159140 SON          | ENSG00000163694 NP_061900.1    |
|                  | ENSG00000166343 ZMYND17        | ENSG00000171509 RXFP1        | ENSG00000171867 PRNP           | ENSG00000173915 USMG5          | ENSG00000183508 FAM46C       | ENSG00000187672 ERC2         | ENSG00000197977 ELOVL2       | ENSG00000197989 C1orf79        |
| CTAATTA          | ENSG00000203756 C6orf191       | ENSG00000204406 MBD5         | ENSG00000204987 Q6ZN80_HUMAN   |                                |                              |                              |                              |                                |
|                  | ENSG00000072501 SMC1A          | ENSG00000100068 LRP5L        | ENSG00000103200 NME4           | ENSG00000104332 SFRP1          | ENSG00000104637 PINX1_HUMAN  | ENSG00000108786 HSD17B1      | ENSG00000111252 SH2B3        | ENSG00000126856 Q9NQW5-2       |
|                  | ENSG00000128242 GAL3ST1        | ENSG00000132824 SERINC3      | ENSG00000137312 FLOT1          | ENSG00000147123 NDUFB11        | ENSG00000158825 CDA          | ENSG00000167543 TP53I13      | ENSG00000168389 MFS2D        | ENSG00000169122 FAM110B        |
|                  | ENSG00000176809 LRRRC37A3      | ENSG00000179335 CLK3         | ENSG00000183605 SPFN4          | ENSG00000186197 ENO1P          | ENSG00000033030 ZCCHC8       | ENSG00000040933 INPP4A       | ENSG00000087301 KIAA1344     | ENSG00000089009 RPL6           |
|                  | ENSG00000090382 LYZ            | ENSG00000100505 TRIM9        | ENSG00000109790 KHLH5          | ENSG00000111860 C6orf204       | ENSG00000112739 PRPF4B       | ENSG00000114790 NP_056410.2  | ENSG00000116005 PCYOX1       | ENSG00000122339 C6orf35        |
|                  | ENSG00000132950 ZMYM5          | ENSG00000138413 IDH1         | ENSG00000139173 TMEM117        | ENSG00000142867 BCL10          | ENSG00000143995 MEIS1        | ENSG00000144481 TRPM8        | ENSG00000144566 RAB5A        | ENSG00000154217 PITPN1         |
|                  | ENSG00000164237 CMBL           | ENSG00000165525 SDCCAG1      | ENSG00000166803 KIAA0101       | ENSG00000171121 KCNMB3         | ENSG00000179902 C1orf194     | ENSG00000186715 Q13209_HUMAN | ENSG00000188921 PTPLAD2      | ENSG00000196360 NR_002168.1    |
| CTAATTT          | ENSG00000197147 LRRRC8B        |                              |                                |                                |                              |                              |                              |                                |
|                  | ENSG000000048707 VPS13D        | ENSG00000054118 THRAP3       | ENSG00000111252 SH2B3          | ENSG00000131558 EXOC4          | ENSG00000134864 Q9BVM4_HUMAN | ENSG00000136504 MYST2        | ENSG00000137491 SLC02B1      |                                |
|                  | ENSG00000140400 MAN2C1         | ENSG00000140478 NM_018652.4  | ENSG00000162736 NCSTN          | ENSG00000167674 NP_001001520.1 | ENSG00000167774 NDUFA7       | ENSG00000171388 APLN         | ENSG00000172264 C2orf133     | ENSG00000178343 NP_001073974.1 |
|                  | ENSG00000180359 C11orf36       | ENSG00000180824 Q8NAH5_HUMAN | ENSG00000183596 TIM16_HUMAN    | ENSG00000184602 SNN            | ENSG00000196501 HIST1H2BN    | ENSG00000196747 HIST1H3H     | ENSG00000203879 GDI1         | ENSG00000204343 C9orf118       |
|                  | ENSG000000204820 Q96NT9_HUMAN  | ENSG00000211454 ARK74_HUMAN  | ENSG00000005469 CROT           | ENSG000000086619 EROL1B        | ENSG00000100852 ARHGAP5      | ENSG00000102048 ASB9         | ENSG00000102753 KPN3         | ENSG00000107537 PHYH           |
|                  | ENSG00000107643 MAPK8          | ENSG00000115009 CCL20        | ENSG00000116194 ANGPTL1        | ENSG00000117479 SLC19A2        | ENSG00000120963 ZNF706       | ENSG00000125629 INSIG2       | ENSG00000132356 PRKAA1       | ENSG00000135914 HTR2B          |
|                  | ENSG00000136522 MRPL47         | ENSG00000139324 TMT3         | ENSG00000150907 FOXO1A         | ENSG00000150961 SEC24D         | ENSG00000170381 SEMA3B       | ENSG00000172007 RAB33B       | ENSG00000174501 NP_079466.2  | ENSG00000175175 PPM1E          |
| CTACAA           | ENSG00000177576 NP_001030177.1 | ENSG00000177694 NAALADL2     | ENSG00000178053 MLF1           | ENSG00000181562 FAM12A         | ENSG00000198865 Q4G0S7_HUMAN |                              |                              |                                |
|                  | ENSG000000002726 ABP1          | ENSG000000011478 QPCTL       | ENSG000000057935 MTA3          | ENSG000000068137 PLEKH3        | ENSG00000105641 SLC5A5       | ENSG00000112699 GMD5         | ENSG00000125046 C3orf32      | ENSG00000131059 C2orf71        |
|                  | ENSG00000136059 VILL           | ENSG00000136859 ANGPTL2      | ENSG00000142751 ATPBD1B        | ENSG00000158793 NIT1           | ENSG00000158874 APOA2        | ENSG00000164061 BSN          | ENSG00000166947 EPB42        | ENSG00000167395 ZNF646         |
|                  | ENSG00000174939 ASPHD1         | ENSG00000177627 C12orf54     | ENSG00000183838 Q96NM2_HUMAN   | ENSG00000184194 GPR173         | ENSG00000184923 FAM22A       | ENSG00000185100 ADSSL1       | ENSG00000186912 P2RY4        | ENSG00000188101 ALOX12P2       |
|                  | ENSG00000204434 NP_001017421.1 | ENSG000000049860 HEXB        | ENSG000000056277 SUHW3         | ENSG00000101182 PSMA7          | ENSG00000112419 PHACTR2      | ENSG00000113141 IK           | ENSG00000113649 TCERG1       | ENSG00000125144 MT1G           |
|                  | ENSG00000129116 PALLD          | ENSG00000131781 FMO5         | ENSG00000134762 DSC3           | ENSG00000136267 DGKB           | ENSG00000137806 NDUFA1       | ENSG00000145839 IL9          | ENSG00000148516 ZEB1         | ENSG00000155906 RMND1          |
|                  | ENSG00000157500 APPL1          | ENSG00000163006 NP_659415.1  | ENSG00000165621 OXGR1          | ENSG00000168004 HRA5L5         | ENSG00000174840 NP_808881.2  | ENSG00000175395 ZNF25        | ENSG00000179152 C3orf23      | ENSG00000185201 IFITM2         |
| CTACATT          | ENSG00000186340 THBS2          | ENSG00000186834 HEXIM1       | ENSG00000187522 HSPA14         | ENSG00000188501 LCTL           | ENSG00000203711 C6orf99      |                              |                              |                                |
|                  | ENSG00000100997 ABHD12         | ENSG00000101363 MANBAL       | ENSG00000102921 N4BP1_HUMAN    | ENSG00000104332 SFRP1          | ENSG00000104386 XR_017860.1  | ENSG00000124733 MEAL         | ENSG00000130055 GDPD2        | ENSG00000131149 KIAA0182       |
|                  | ENSG00000136828 RALGAP1        | ENSG00000147117 ZNF157       | ENSG00000165025 SYK            | ENSG00000165424 C10orf56       | ENSG00000168350 DEGS2        | ENSG00000175567 UCP2         | ENSG00000179965 ZNF771       | ENSG00000180900 SCRIB          |
|                  | ENSG00000184330 S100A7A        | ENSG00000187095 LILRA2       | ENSG00000187908 DMBT1          | ENSG00000202267 PHL1           | ENSG00000072315 TRPC5        | ENSG00000082269 KIAA1411     | ENSG00000101138 CSTF1        | ENSG00000101782 R1OK3          |
|                  | ENSG00000101966 BIRC4          | ENSG00000109163 GNRHR        | ENSG00000116062 MSH6           | ENSG00000118267 ZNF271         | ENSG00000120699 EXOSC8       | ENSG00000129028 THAP10       | ENSG00000131171 SH3BGL       | ENSG00000141198 TOM1L1         |
|                  | ENSG00000147416 ATP6V1B2       | ENSG00000147679 C8orf53      | ENSG00000164985 PSIP1          | ENSG00000165525 SDCCAG1        | ENSG00000166920 C15orf48     | ENSG00000172260 NEGR1        | ENSG00000172296 SPTLC3       | ENSG00000178690 C18orf26       |
| CTACCAA          | ENSG00000180479 ZNF571         | ENSG00000185630 PBX1         | ENSG00000187533 NP_999876.1    |                                |                              |                              |                              |                                |
|                  | ENSG00000101470 TNNC2          | ENSG00000103196 CRISPLD2     | ENSG00000103495 MAZ            | ENSG00000106624 AEBP1          | ENSG00000110237 ARHGEP17     | ENSG00000111665 CDCA3        | ENSG00000131018 C6orf98      | ENSG00000146221 NP_872345.1    |
|                  | ENSG00000156711 MAPK13         | ENSG00000157617 C12orf25     | ENSG00000166426 CRABP1         | ENSG00000166794 PP1B           | ENSG00000169887 Q9UKN1_HUMAN | ENSG00000170322 NFRKB        | ENSG00000172647 PGA5         | ENSG00000172724 CCL19          |
|                  | ENSG00000175697 GPR156         | ENSG00000180860 PGA3         | ENSG00000198854 C1orf68        | ENSG00000204568 MRPS18B        | ENSG00000204973 PGA4         | ENSG00000072803 FBXW11       | ENSG00000079335 CDC14A       | ENSG00000113492 AGXT2          |
|                  | ENSG00000120860 CCDC5          | ENSG00000122585 NPY          | ENSG00000132283 DNHD1          | ENSG00000135250 SRPK2          | ENSG00000143469 SYT14        | ENSG00000152207 CYS1L2       | ENSG00000158615 PPP1R15B     | ENSG00000163006 NP_659415.1    |
|                  | ENSG00000163254 CRYGC          | ENSG00000164265 SCGB3A2      | ENSG00000169330 K1024_HUMAN    | ENSG00000170348 TMED10         | ENSG00000178591 DEFB125      | ENSG00000181495 C5orf23      | ENSG00000186166 CCDC84       | ENSG00000203924 SPANXN2        |
| CTACCAT          | ENSG00000073605 GSDML          | ENSG00000104518 GSDMDC1      | ENSG00000124233 SEMG1          | ENSG00000125733 TRIP10         | ENSG00000136378 ADAMTS7      | ENSG00000137747 TMPRSS13     | ENSG00000138698 RAP1GDS1     | ENSG00000143537 ADAM15         |
|                  | ENSG00000146122 DAAM2          | ENSG00000149292 TTC12        | ENSG00000157184 CPT2           | ENSG00000161911 TREML1         | ENSG00000162244 RPL29        | ENSG00000163206 SMCP         | ENSG00000164711 LPLAL2       | ENSG00000165281 FANCG          |
|                  | ENSG00000165507 C10orf10       | ENSG00000174111 SOCS7        | ENSG00000175202 HIGD2BP        | ENSG00000186825 Q58OR0-2       | ENSG00000188508 U467_HUMAN   | ENSG00000062096 ARSF         | ENSG000000069493 CLECD2      | ENSG000000083123 BCKDHB        |
|                  | ENSG000000866712 CXorf15       | ENSG00000111266 DUSP16       | ENSG00000133641 C12orf29       | ENSG00000136541 KIAA1189       | ENSG00000137033 IL33         | ENSG00000137710 RDY          | ENSG00000143158 BRP44        | ENSG00000143751 C1orf55        |
|                  | ENSG00000146281 ACY1L2         | ENSG00000147041 SYTL5        | ENSG00000147604 RPL7           | ENSG00000157224 CLDN12         | ENSG00000162645 GBP7         | ENSG00000164134 NARG1        | ENSG00000165832 TRUB1        | ENSG00000171448 ZBTB26         |
| CTACCTC          | ENSG00000173930 SLCO4C1        | ENSG00000186166 CCDC84       | ENSG00000205208 NP_001008394.1 |                                |                              |                              |                              |                                |
|                  | ENSG00000071894 CPSF1          | ENSG00000072501 SMC1A        | ENSG00000104833 TUBB4          | ENSG00000105419 Q99687-2       | ENSG00000106367 AP1S1        | ENSG00000117834 SLC5A9       | ENSG00000125741 OPA3         | ENSG00000135441 BLOC1S1        |
|                  | ENSG00000135912 TTL4           | ENSG00000136490 LIMD2        | ENSG00000137841 PLCB2          | ENSG00000139998 RAB15          | ENSG00000143851 PTN7         | ENSG00000144031 ANKRD53      | ENSG00000148200 NR6A1        | ENSG00000158156 XKR8           |
|                  | ENSG00000159217 IGF2BP1        | ENSG00000160094 ZNF362       | ENSG00000161558 TMEM143        | ENSG00000164045 CDC25A         | ENSG00000169635 HIC2         | ENSG00000169921 Q75L30_HUMAN | ENSG00000172053 QARS         | ENSG00000179165 PXT1           |
|                  | ENSG00000184012 TMPRSS2        | ENSG00000186654 ARHGAP8      | ENSG00000187164 KIAA1598       | ENSG00000187838 PLSCR3         | ENSG00000196700 ZNF512B      | ENSG00000204538 PSORS1C2     | ENSG00000082153 BZW1         | ENSG00000094963 FMO2           |
|                  | ENSG00000119906 C10orf6        | ENSG00000133136 GBG5L_HUMAN  | ENSG00000134259 NGFB           | ENSG00000135476 ESPL1          | ENSG00000138036 DYNC2L11     | ENSG00000143727 ACP1         | ENSG00000158615 PPP1R15B     | ENSG00000163104 SMARCAD1       |
|                  | ENSG00000168830 HTR1E          | ENSG00000178999 AURKB        | ENSG00000179476 C14orf28       | ENSG00000181322 TXNDC6         | ENSG00000183035 CYLC1        | ENSG00000187772 LIN28B       | ENSG00000196730 DAPK1        | ENSG00000198105 ZNF248         |
| perfect: CTACCTC | GAGGTAG                        | hsa-let-7e                   | tGAGGTAGgaggttggtagt           | 1                              |                              |                              |                              |                                |
| perfect: CTACCTC | GAGGTAG                        | hsa-let-7f                   | tGAGGTAGtagattgtatagtt         | 1                              |                              |                              |                              |                                |
| perfect: CTACCTC | GAGGTAG                        | hsa-let-7a                   | tGAGGTAGtaggttggtagt           | 1                              |                              |                              |                              |                                |
| perfect: CTACCTC | GAGGTAG                        | hsa-let-7b                   | tGAGGTAGtaggttggtagt           | 1                              |                              |                              |                              |                                |
| perfect: CTACCTC | GAGGTAG                        | hsa-let-7d                   | aGAGGTAGtaggttggtagt           | 1                              |                              |                              |                              |                                |
| CTACTAA          | ENSG00000006659 LGALS14        | ENSG00000057935 MTA3         | ENSG000000086717 PPEF1         | ENSG000000099341 PSMD8         | ENSG00000104774 MAN2B1       | ENSG00000105290 APLP1        | ENSG00000108518 PFN1         | ENSG00000110628 SLC22A18       |
|                  | ENSG00000119986 AVP11          | ENSG00000125954 FNTB         | ENSG00000130377 ACSBG2         | ENSG00000149357 C11orf59       | ENSG00000149397 HMBS         | ENSG00000161202 DVL3         | ENSG00000161921 CXCL16       | ENSG00000163154 TNFAIP8L2      |
|                  | ENSG00000164867 NOS3           | ENSG00000166394 CYB5R2       | ENSG00000182054 IDH2           | ENSG00000197465 GYPE           | ENSG0000014123 KIAA0         |                              |                              |                                |

CTAGAAT ENSG00000006282|SPATA20 ENSG00000095303|PTGS1 ENSG00000100014|SPECC1L ENSG00000101883|PEPP1\_HUMAN ENSG00000107554|DNMBP ENSG00000129473|BCL2L2 ENSG00000141012|GALNS ENSG00000142484|TM4SF5 ENSG00000157884|NP\_001025052.1 ENSG00000164574|GALNT10 ENSG00000173027|WBP1 ENSG00000176515|Q8NAX6\_HUMAN ENSG00000176753|NP\_001034994.1 ENSG00000179855|GIPC3 ENSG00000179914|ITLN1 ENSG00000181722|ZBTB20 ENSG00000182324|KCNJ14 ENSG00000198618|PP1A\_HUMAN ENSG00000204842|ATXN2 ENSG00000205653|Q6ZUF2\_HUMAN ENSG00000044524|EPHA3 ENSG00000054983|GALC ENSG00000104447|TRPS1 ENSG00000107518|ATRNL1 ENSG000000117592|PRDX6 ENSG000000119729|RHOQ ENSG00000128617|OPN1SW ENSG00000137824|FAM82C ENSG00000138449|SLC40A1 ENSG00000144746|ARL6IP5 ENSG00000172115|CYCS ENSG00000178175|ZNF366 ENSG00000186184|POLRLD ENSG00000204832|Q6ZRU3\_HUMAN ENSG00000204869|IGFL4

CTAGAGC ENSG00000100314|CABP7 ENSG00000111331|OAS3 ENSG00000111877|MCM9 ENSG00000112659|PARC\_HUMAN ENSG00000124232|RBPJL ENSG00000124713|GNMT ENSG00000125813|PAX1 ENSG00000135093|USP30 ENSG00000136167|LCP1 ENSG00000147065|MSN ENSG00000148411|BTBD14A ENSG00000158769|F11R ENSG00000158874|APOA2 ENSG00000160714|UBE2Q1 ENSG00000160716|CHRN2 ENSG00000172297|Q96RM8\_HUMAN ENSG00000172332|GOLGA2LY1 ENSG00000172943|PHF8 ENSG00000177408|PLAC2 ENSG00000197173|NP\_001013689.1 ENSG00000065809|FAM107B ENSG00000083457|ITGAE ENSG00000091009|RBM27 ENSG00000104427|C8orf70 ENSG00000104723|TUSC3 ENSG00000139209|SLC38A4 ENSG00000144026|ZNF514 ENSG00000158560|DYN1I1 ENSG00000167346|MMP26 ENSG00000171885|AQP4 ENSG00000172023|REG1B ENSG00000179578|Q8N4V4\_HUMAN

CTAGCTA ENSG00000006042|TMEM98 ENSG00000061936|SFRS8 ENSG00000067066|SP100 ENSG00000092758|COL9A3 ENSG00000101997|CCDC22 ENSG00000113555|PCDH12 ENSG00000115657|ABCY6 ENSG00000122367|LDB3 ENSG00000126214|KLC1 ENSG00000132591|ERAL1 ENSG00000132768|DPH2 ENSG00000133105|RXFP2 ENSG00000135423|GLS2 ENSG00000139174|PRICKLE1 ENSG00000140519|RHCG ENSG00000143379|SETDB1 ENSG00000147576|ADHFE1 ENSG00000153666|XR\_017721.1 ENSG00000155849|ELMO1 ENSG00000161940|BCL6B ENSG00000167741|GGT6 ENSG00000168081|PNOC ENSG00000171307|ZDHHC16 ENSG00000176984|Q8N8C5\_HUMAN ENSG00000178081|LOC653075 ENSG00000181722|ZBTB20 ENSG00000188532|LOC653125 ENSG00000188626|LOC653720 ENSG00000198610|AKR1C4 ENSG00000127324|TSPAN8 ENSG00000144320|KIAA1715 ENSG00000145321|GC ENSG00000151092|NGLY1 ENSG00000158458|NRG2 ENSG00000164073|MFSD8 ENSG00000164542|NP\_056129.1 ENSG00000169330|K1024\_HUMAN ENSG00000176714|CCDC121 ENSG00000196236|XPNPEP3 ENSG00000198625|MDM4

CTAGCTG ENSG000000093010|COMT ENSG00000100351|GRAP2 ENSG00000100395|L3MBTL2 ENSG00000105373|GLTSCR2 ENSG00000115602|IL1RL1 ENSG00000119547|ONECUT2 ENSG00000119681|LTBP2 ENSG00000135637|NP\_116168.2 ENSG00000156398|SFXN2 ENSG00000158161|EYA3 ENSG00000158578|ALAS2 ENSG00000166780|C16orf45 ENSG00000167208|NP\_78274.1 ENSG00000180205|WFDC9 ENSG00000183103|LYPD4 ENSG00000186676|EEF1G ENSG00000196204|Q6NUR6\_HUMAN ENSG00000050030|KIAA2022 ENSG00000107672|NSMCE4A ENSG00000109452|INPP4B ENSG00000112242|E2F3 ENSG00000135341|MAP3K7 ENSG00000135686|C16orf44 ENSG00000163565|IFI16 ENSG00000163737|PF4 ENSG00000165349|SLC7A3 ENSG00000174038|C9orf131 ENSG00000174408|Q5VZ27\_HUMAN ENSG00000182831|C16orf72 ENSG00000197102|DYNCH1 ENSG00000198770|Q9H396\_HUMAN ENSG00000067365|C16orf68 ENSG00000083817|ZNF416 ENSG00000199956|SMARCB1 ENSG00000100918|REC8 ENSG00000103044|HAS2 ENSG00000114656|KIAA1257 ENSG00000123411|IKZF4 ENSG00000124422|USP22 ENSG00000133943|C14orf159 ENSG00000145819|ARHGAP26 ENSG00000149557|FEZ1 ENSG00000152104|PTPN14 ENSG00000156858|PRR14 ENSG00000161960|EIF4A1 ENSG00000162763|LRRC52 ENSG00000163961|RNF168 ENSG00000166387|PFPIBP2 ENSG00000166998|CKMT1A ENSG00000167100|SAMD14 ENSG00000168393|DTYMK ENSG00000168775|KCRU\_HUMAN ENSG00000171236|LRG1 ENSG00000178409|KIAA1553 ENSG00000196878|LAMB3 ENSG00000198700|IPO9 ENSG00000007944|MYLIP ENSG00000108510|AGPS ENSG00000107949|BCS1P ENSG00000113456|RAD1 ENSG00000117598|NP\_001010861.1 ENSG00000119912|IDE ENSG00000133193|FAM104A ENSG00000134987|WDR36 ENSG00000138293|NCOA4 ENSG00000147036|LANCL3 ENSG00000152234|ATPSA1 ENSG00000156103|MMP16 ENSG00000163069|SCGB ENSG00000163608|C3orf17 ENSG00000164543|STK17A ENSG00000165410|CFL2 ENSG00000171517|EDG7 ENSG00000174606|ANGEL2 ENSG00000180628|PCGF5 ENSG00000182010|PLEKHK1 ENSG00000188831|XR\_017793.1 ENSG00000197121|PGAP1\_HUMAN ENSG00000197776|KLHDC1 ENSG00000205976|Q6ZVT4\_HUMAN ENSG00000206367|Q6ZR26\_HUMAN

CTAGTGC ENSG000000037757|NP\_115661.1 ENSG000000075826|SEC31B ENSG000000095015|MAP3K1 ENSG00000117481|NSUN4 ENSG00000122188|LAX1 ENSG00000125975|C2orf173 ENSG00000135722|FBXL8 ENSG00000146966|DENND2A ENSG00000149557|FEZ1 ENSG00000155858|LSM11 ENSG00000157765|SLC34A2 ENSG00000163866|C1orf212 ENSG00000164733|CTSB ENSG00000166426|CRABP1 ENSG00000175197|DDIT3 ENSG00000180357|ZNF609 ENSG00000182329|Q8IVF9\_HUMAN ENSG00000183530|C2orf30 ENSG00000183569|SERHL ENSG00000185090|MANEAL ENSG00000196517|SLC6A9 ENSG00000196843|ARID5A ENSG00000204715|Q4G0Q5\_HUMAN ENSG00000092148|HECTD1 ENSG00000102383|ZDHHC15 ENSG00000105866|SP4 ENSG00000109846|CRYAB ENSG00000111696|NT5DC3 ENSG00000114796|KLHL24 ENSG00000128989|ARP19\_HUMAN ENSG00000132972|RNF17 ENSG00000134109|EDEM1 ENSG00000138036|DYN2L11 ENSG00000140941|MAMP1LC3B ENSG00000153253|SCN3A ENSG00000168411|RFWD3 ENSG00000174010|KLHL15 ENSG00000176657|EP815L2 ENSG00000197045|GMFB ENSG00000203875|SNHG5

CTAGTTA ENSG00000074800|ENO1 ENSG00000102359|SRPX2 ENSG00000104879|CKM ENSG00000114439|BBX ENSG00000127837|AAMP ENSG00000130725|UBE2M ENSG00000136193|SCRN1 ENSG00000138083|SIX3 ENSG00000157093|LYZL4 ENSG00000165281|FANCG ENSG00000165802|NELF ENSG00000168242|HIST1H2BI ENSG00000175779|NP\_997327.1 ENSG00000176920|FUT2 ENSG00000179241|LDLRAD3 ENSG00000185252|ZNF74 ENSG00000186197|ENO1P ENSG00000186792|IFRD2 ENSG00000196220|SRGAP3 ENSG00000196407|THEM5 ENSG00000205878|Q6ZSV2\_HUMAN ENSG00000106346|USP42 ENSG00000109445|ZNF330 ENSG00000111615|KRR1 ENSG00000113141|IK ENSG00000113356|POLR3G ENSG00000133731|IMPA1 ENSG00000141542|RAB40B ENSG00000148123|NP\_060223.2 ENSG00000152689|RASGRP3 ENSG00000153790|C7orf31 ENSG00000154723|ATP5J ENSG00000159131|GART ENSG00000165169|DYNLT3 ENSG00000166321|NUDT13 ENSG00000169224|C1orf150 ENSG00000169605|GKN1 ENSG00000174501|NP\_079466.2 ENSG00000179869|ABCA13 ENSG00000180458|Q8N3U1\_HUMAN ENSG00000183060|LYSMD4 ENSG00000196812|ZSCAN16 ENSG00000198173|FAM47C

CTAGTTT ENSG00000068137|PLEKHH3 ENSG00000085552|IGSF9 ENSG00000100422|CERK ENSG00000101883|PEPP1\_HUMAN ENSG00000105393|NP\_001028721.1 ENSG00000105648|IFI30 ENSG00000116885|C1orf102 ENSG00000130203|APOE ENSG00000132792|CTNBL1 ENSG00000158480|SPATA2 ENSG00000166143|PPP1R14 ENSG00000166860|ZBTB39 ENSG00000167774|NDUFA7 ENSG00000168010|ATG16L2 ENSG00000171552|BCL2L1 ENSG00000173349|SFT2D3 ENSG00000175193|PARL ENSG00000180279|Q8N4W5\_HUMAN ENSG00000181754|AMIGO1 ENSG00000183128|FAM26A ENSG00000183826|BTBD9 ENSG00000183864|TOB2 ENSG00000184502|GAST ENSG00000063046|EIF4B ENSG00000067798|NAV3 ENSG00000070718|AP3M2 ENSG00000070831|CDC42 ENSG00000077232|DNAJC10 ENSG00000091527|CDV3 ENSG00000114790|NP\_056410.2 ENSG00000116044|NFE2L2 ENSG00000127463|KIAA0090 ENSG00000134146|ATPBD4 ENSG00000154310|TNK1 ENSG00000160131|NP\_001017980.1 ENSG00000161714|PLCD3 ENSG00000163093|BBS5 ENSG00000163513|TGFB2 ENSG00000165240|ATP7A ENSG00000165476|REEP3 ENSG00000169249|ZRSR1 ENSG00000169813|HNRFP ENSG00000175305|CCNE2 ENSG00000181061|HIGD1A ENSG00000186103|ARGFX ENSG00000198898|CAPZA2 ENSG00000204611|ZNF616

CTATAAA ENSG00000015285|WAS ENSG00000074211|PPP2R2C ENSG00000102870|ZNF629 ENSG00000103021|CCDC113 ENSG00000103196|CRISPLD2 ENSG00000106976|DNM1 ENSG00000107960|OBFC1 ENSG00000113578|FGF1 ENSG00000120451|SNX19 ENSG00000123405|NFE2 ENSG00000130707|ASS1 ENSG00000130876|SLC7A10 ENSG00000136935|GOLGA1 ENSG00000141002|TCF25 ENSG00000143740|C1orf142 ENSG00000147255|IGSF1 ENSG00000149131|SERPING1 ENSG00000153298|C6orf54 ENSG00000160208|RRP1B ENSG00000162571|TTLL5 ENSG00000167674|NP\_001001520.1 ENSG00000172927|MYEOV ENSG00000175697|GPR156 ENSG00000175792|RUVBL1 ENSG00000186281|NP\_997211.2 ENSG00000188447|XR\_016015.1 ENSG00000205726|ITSN1 ENSG00000009844|VTA1 ENSG00000054267|ARID4B ENSG00000077713|SLC25A43 ENSG00000080822|CLDN11 ENSG00000087502|ERIGC2 ENSG00000101310|SEC23B ENSG00000104517|EDD1 ENSG00000105708|ZNF14 ENSG00000106392|C1GALT1 ENSG00000109586|GALNT7 ENSG00000117906|RCN2 ENSG00000125304|TM9SF2 ENSG00000136161|RCBTB2 ENSG00000144034|TPRBK ENSG00000147145|GPR23 ENSG00000147905|ZCCCH7 ENSG00000149050|ZNF214 ENSG00000156787|WDR67 ENSG00000158315|RHBDL2 ENSG00000163249|CCNYL1 ENSG00000163328|GPM155 ENSG00000164109|MAD2L1 ENSG00000166704|ZNF606 ENSG00000169612|FAM103A1 ENSG00000174132|TMEM157 ENSG00000175175|PPM1E ENSG00000176927|EFCAB5 ENSG00000185127|C6orf120 ENSG00000185238|PRMT3 ENSG00000186310|NAP1L3 ENSG00000188868|ZNF563 ENSG00000196151|WDSUB1 ENSG00000196646|ZNF136 ENSG00000196826|ZNF709 ENSG00000197782|ZNF780A ENSG00000199203|TMED1 ENSG00000102967|DHODH ENSG00000111344|RASAL1 ENSG00000111669|TP11 ENSG00000119535|CSF3R ENSG00000135625|EGR4 ENSG00000138303|ASCC1 ENSG00000147789|ZNF7 ENSG00000148824|MTG1 ENSG00000158816|Q5TIE3\_HUMAN ENSG00000163520|FBLN2 ENSG00000164916|FOXK1 ENSG00000165388|ZNF488 ENSG00000165702|GFI1B ENSG00000167862|ICT1 ENSG00000175203|DCTN2 ENSG00000177363|NP\_981967.1 ENSG00000178817|Q8N9W7\_HUMAN ENSG00000184056|VPS33B ENSG00000185069|KRT76 ENSG00000185883|ATP6V0C ENSG00000188626|LOC653720 ENSG00000196645|Q8N9W7\_HUMAN ENSG00000197037|ZNF498 ENSG00000198106|RUND2B ENSG00000204499|Q6P6C6\_HUMAN ENSG00000025293|PHF20 ENSG00000047621|C12orf4 ENSG00000047936|ROS1 ENSG00000055044|NOP5\_HUMAN ENSG00000071909|MYO3B ENSG00000118402|ELOVL4 ENSG00000120820|GLT8D2 ENSG00000133641|C12orf29 ENSG00000134533|RERG ENSG00000136531|SCN2A ENSG00000136874|STX17 ENSG00000137364|TPMT ENSG00000137860|SLC28A2 ENSG00000147677|EIF3S3 ENSG00000147877|IFNA4 ENSG00000148737|TCF7L2 ENSG00000152932|RAB3C ENSG00000155961|RAB39B ENSG00000171970|ZNF57 ENSG00000176623|FAM82B ENSG00000178690|C18orf26 ENSG00000180772|AGTR2 ENSG00000180785|OR51E1 ENSG00000183395|PMF ENSG00000186473|KIF3C ENSG00000101493|ZNF516 ENSG00000102104|RS1 ENSG00000142961|MOBK12C ENSG00000153956|CACNA2D1 ENSG00000155984|TMEM185A ENSG00000161996|WDR90 ENSG00000163251|FZD5 ENSG00000164108|Q9HAJ2\_HUMAN ENSG00000174282|ZBTB4 ENSG00000174989|FBXW8 ENSG00000177732|SOX12 ENSG00000178363|CALML3 ENSG00000180861|C12orf36 ENSG00000182578|CSF1R ENSG00000184144|CNTN2 ENSG00000186951|PPARA ENSG00000187638|NM\_207367 ENSG00000204227|RING1 ENSG00000204580|DDR1 ENSG00000044459|C9orf39 ENSG00000082196|C1QTNF3 ENSG00000100592|DAAM1 ENSG00000108395|TRIM37 ENSG00000113231|PDE8B ENSG00000115806|GORASP2 ENSG00000122550|KLHL7 ENSG00000136267|DGKB ENSG00000145349|CAMK2D ENSG00000147231|CXorf57 ENSG00000151150|ANK3 ENSG00000151632|AKR1C2 ENSG00000153802|TMPRSS11D ENSG00000155962|CLIC2 ENSG00000162384|C1orf123 ENSG00000164112|TMEM155 ENSG00000166275|AS3MT ENSG00000167383|ZNF229 ENSG00000169826|CGAT2\_HUMAN ENSG00000173876|NP\_817124.1 ENSG00000175606|TMEM70 ENSG00000180828|BHLHB5 ENSG00000181211|Q8NA17\_HUMAN ENSG00000185149|NPY2R ENSG00000186298|PPP1CC ENSG00000187134|AKR1C1 ENSG00000188001|FAM79B ENSG00000196199|MPP8\_HUMAN

CTATAGT ENSG00000022277|C2orf43 ENSG00000064309|CDON ENSG00000090238|YPEL3 ENSG00000101335|MYL9 ENSG00000103932|RPAP1 ENSG00000119321|FKBP15 ENSG00000123146|CD97 ENSG00000138698|RAP1GDS1 ENSG00000152467|ZSCAN1 ENSG00000161031|PGLYRP2 ENSG00000165526|RPUSD4 ENSG00000168658|NP\_659429.4 ENSG00000169884|WNT10B ENSG00000173826|KCNH6 ENSG00000179909|ZNF154 ENSG00000180219|FAM71C ENSG00000196391|ZNF774 ENSG00000203836|NP\_899228.3 ENSG00000204632|HLA-G ENSG00000203330|ALAS1 ENSG000000080166|DCT ENSG000000092470|WDR76 ENSG00000102271|KLHL4 ENSG00000109158|GABRA4 ENSG00000119950|MXI1 ENSG00000120519|SLC10A7 ENSG00000136160|EDNRB ENSG00000136875|PRPF4 ENSG00000139684|ESD ENSG00000143520|NP\_001014364.1 ENSG00000144619|CNTN4 ENSG00000146592|CREB5 ENSG00000147488|ST18 ENSG00000162624|LHX8 ENSG00000163539|CLASP2 ENSG00000172554|SNTG2 ENSG00000177068|Q8N269\_HUMAN ENSG00000185345|PARK2 ENSG00000203788|Q6ZMM1\_HUMAN ENSG00000211448|DIO2

CTATATA ENSG00000070601|FRMPD1 ENSG00000070886|EPHA8 ENSG00000101489|BRUNOL4 ENSG00000110395|CBL ENSG00000116032|GRIN3B ENSG00000119684|MLH3 ENSG00000135116|HRK ENSG00000138136|LBX1 ENSG00000143940|Q6ZMW3\_HUMAN ENSG00000164778|EN2 ENSG00000165281|FANCG ENSG00000172987|HPSE2 ENSG00000176444|CLK2 ENSG00000184507|NP\_786883.1 ENSG00000187605|K0401\_HUMAN ENSG00000196419|XRCC6 ENSG00000197106|SLC6A17 ENSG00000204568|MRPS18B ENSG00000076770|MBNL3 ENSG00000106701|FSD1L ENSG00000106819|ASPN ENSG00000110172|CHORDC1 ENSG00000115839|RAB3GAP1 ENSG00000122862|SRGN ENSG00000123119|EFCBP1 ENSG00000127314|RAP1B ENSG00000129084|PSMA1 ENSG00000132294|EFR3\_HUMAN ENSG00000141447|OSBPL1A ENSG00000144857|BOC ENSG00000148828|NP\_001074467.1 ENSG00000157502|MUM1L1 ENSG00000162927|NP\_653310.1 ENSG00000163519|TRAT1 ENSG00000164691|TAGAP ENSG00000165985|C1QL3 ENSG00000166927|MS4A7 ENSG00000173588|CCDC41 ENSG00000173852|DPY19L1 ENSG00000175336|APOF ENSG00000176018|LYSMD3 ENSG00000176276|hCG\_1757335 ENSG00000183324|NP\_001035826.1 ENSG00000197121|PGAP1\_HUMAN ENSG00000198648|STK39 ENSG00000205097|NP\_001005217.1 ENSG000002069812|HES2 ENSG00000084636|COL16A1 ENSG00000103888|KIAA1199 ENSG00000112149|CD83 ENSG00000116985|BMP8B ENSG00000125804|C2orf91 ENSG00000129816|NR\_001538.1 ENSG00000129845|O14605\_HUMAN ENSG00000131113|PSG1 ENSG00000133056|PIK3C2B ENSG00000135723|FHOD1 ENSG00000137078|SIT1 ENSG00000140955|NP\_631913.2 ENSG00000142405|NLRP12 ENSG00000162894|FAIM3 ENSG00000168314|MOBP ENSG00000170890|PLA2G1B ENSG00000180739|EDG8 ENSG00000185082|LBH ENSG00000205335|GLYCAM1 ENSG00000070950|RAD18 ENSG00000079557|AFM ENSG00000100191|SLC5A4 ENSG00000106049|H1BADH ENSG00000111863|C6orf105 ENSG00000115419|GLS ENSG00000117595|IRF6 ENSG00000120337|TNFSF18 ENSG00000132703|APCS ENSG00000135686|C16orf44 ENSG00000135766|EGLN1 ENSG00000162755|NP\_689579.3 ENSG00000163312|NP\_598375.2 ENSG00000166752|TMEM83 ENSG00000170540|ARL6IP1 ENSG00000174343|CHRNA9 ENSG00000181915|C10orf22 ENSG00000184344|GDF3 ENSG00000188895|Q68DK7\_HUMAN ENSG00000197128|ZNF772 ENSG00000198099|ADH4 ENSG00000198918|RPL39 ENSG00000204205|WISP2 ENSG00000065000|AP3D1 ENSG00000100439|ABHD4 ENSG00000123353|ORMDL2 ENSG00000125968|ID1 ENSG00000130700|GATA5 ENSG00000132254|ARFIP2 ENSG00000133030|C17orf84 ENSG00000142208|ART1 ENSG00000142700|DMRTA2 ENSG00000154920|EME1 ENSG00000160392|C19orf47 ENSG00000160408|STGALNAC6 ENSG00000161103|Q5BKY6\_HUMAN ENSG00000173020|ADRBK1 ENSG00000174529|TMEM81 ENSG00000175866|BAIAP2 ENSG00000180185|FAHD1 ENSG00000196460|Q6ZNB4\_HUMAN ENSG00000197353|LYPD2 ENSG00000043514|TRIT1 ENSG00000049618|ARID1B ENSG00000075413|MARK3 ENSG00000080345|RIF1 ENSG00000088766|CRLS1 ENSG00000110429|FBXO3 ENSG00000116922|C1orf109 ENSG00000118260|CREB1 ENSG00000123095|BHLHB3 ENSG00000125779|PANK2 ENSG00000130764|LRRC47

|         |                                                                                                                                                                                                                                                                                                                                                |                                                                                                                                                                                                                                                                                                                                                                |                                                                                                                                                                                                                                                                                                                                  |                                                                                                                                                                                                                                                                                                                                                    |                                                                                                                                                                                                                                                                                                                                               |                                                                                                                                                                                                                 |                                                                                                                                                                                                                                                                                       |                                                                                                                                                                                                                                                                                                                            |                                                                                                                                                                                                                                                                                                                      |
|---------|------------------------------------------------------------------------------------------------------------------------------------------------------------------------------------------------------------------------------------------------------------------------------------------------------------------------------------------------|----------------------------------------------------------------------------------------------------------------------------------------------------------------------------------------------------------------------------------------------------------------------------------------------------------------------------------------------------------------|----------------------------------------------------------------------------------------------------------------------------------------------------------------------------------------------------------------------------------------------------------------------------------------------------------------------------------|----------------------------------------------------------------------------------------------------------------------------------------------------------------------------------------------------------------------------------------------------------------------------------------------------------------------------------------------------|-----------------------------------------------------------------------------------------------------------------------------------------------------------------------------------------------------------------------------------------------------------------------------------------------------------------------------------------------|-----------------------------------------------------------------------------------------------------------------------------------------------------------------------------------------------------------------|---------------------------------------------------------------------------------------------------------------------------------------------------------------------------------------------------------------------------------------------------------------------------------------|----------------------------------------------------------------------------------------------------------------------------------------------------------------------------------------------------------------------------------------------------------------------------------------------------------------------------|----------------------------------------------------------------------------------------------------------------------------------------------------------------------------------------------------------------------------------------------------------------------------------------------------------------------|
| CTATGGT | ENSG00000132475 H3F3B<br>ENSG00000169129 AFAP1L2<br>ENSG0000042832 TG<br>ENSG00000143641 GALNT2<br>ENSG00000172530 BANP<br>ENSG00000114698 PLSC84<br>ENSG00000139800 ZIC5<br>ENSG00000171365 CLCN5                                                                                                                                             | ENSG00000137745 MMP13<br>ENSG00000173905 GOLPH4<br>ENSG0000054965 KIAA0280<br>ENSG00000146007 ZMAT2<br>ENSG00000177257 BD02_HUMAN<br>ENSG00000117262 GPR89A<br>ENSG00000151014 CCRN4L<br>ENSG00000171446 KRT27                                                                                                                                                 | ENSG00000145495 MARCH6<br>ENSG00000178996 SNAG1<br>ENSG00000506345 ITGB3<br>ENSG00000158882 TOMM40L<br>ENSG00000121570 DPPA4<br>ENSG00000153879 CEBPG<br>ENSG00000181744 C3orf58                                                                                                                                                 | ENSG00000152778 IFIT5<br>ENSG00000180287 PLD5<br>ENSG00000505635 LAMC2<br>ENSG00000163382 APOA1BP<br>ENSG00000125945 ZNF436<br>ENSG00000154188 ANGPT1<br>ENSG00000183780 SLC35F3                                                                                                                                                                   | ENSG00000153802 TMPRSS11D<br>ENSG00000185518 SV2B<br>ENSG00000506345 HIPK2<br>ENSG00000164405 UQCRCQ<br>ENSG00000130957 FBP2<br>ENSG00000163877 SNIP1<br>ENSG00000185532 PRKG1                                                                                                                                                                | ENSG00000158042 MRPL17<br>ENSG00000197321 SVIL<br>ENSG00000506345 SPMD3<br>ENSG00000166743 ACSM1<br>ENSG00000134115 CNTN6<br>ENSG00000164118 KIAA1712<br>ENSG00000188092 GPR89B                                 | ENSG00000162441 LZIC<br>ENSG00000115657 ABCB6<br>ENSG00000167191 GPRC5B<br>ENSG00000137267 TUBB2A<br>ENSG00000169836 TACR3<br>ENSG00000196860 NP_997260.1                                                                                                                             | ENSG00000164695 CHMP4C<br>ENSG00000128596 NP_073579.3<br>ENSG00000171711 DEFB4<br>ENSG00000196644 LOC728932<br>ENSG00000198467 TPM2<br>ENSG00000139324 TMTC3<br>ENSG00000171004 HS6ST2<br>ENSG00000205024 Q6ZVP5_HUMAN                                                                                                     |                                                                                                                                                                                                                                                                                                                      |
| CTATTAA | ENSG0000047644 WWC3<br>ENSG00000140623 SEPT12<br>ENSG00000175197 DDIT3<br>ENSG00000184345 IQCF2<br>ENSG00000097033 SH3GLB1<br>ENSG00000131003 REMY2FP<br>ENSG00000161634 DCD<br>ENSG00000174944 ZRY14<br>ENSG00000003137 CYP26B1                                                                                                               | ENSG00000063180 CA11<br>ENSG00000147255 IGSF1<br>ENSG00000180875 GREM2<br>ENSG00000187516 CXorf27<br>ENSG00000106399 RPA3<br>ENSG00000134001 EIF2S1<br>ENSG00000163655 GMP5<br>ENSG00000177694 NAALADL2<br>ENSG00000025800 KPNAB6<br>ENSG00000145945 FAM50B<br>ENSG00000204227 RING1<br>ENSG00000102468 HTR2A<br>ENSG00000140743 CDR2<br>ENSG00000186393 KRT26 | ENSG00000099194 SCD<br>ENSG00000148606 POLR3A<br>ENSG00000182154 MRPL41<br>ENSG00000188004 VSI8<br>ENSG00000112996 MRPS30<br>ENSG00000134056 MRPS36<br>ENSG00000163964 PIGX<br>ENSG00000179008 C14orf39<br>ENSG00000066382 MPPE2<br>ENSG00000168621 GNDF<br>ENSG0000005020 SKAP2<br>ENSG00000122126 OCRL<br>ENSG00000153814 ZAF1 | ENSG00000105202 FBL<br>ENSG00000152705 CATSPER3<br>ENSG00000182196 ARL6IP4<br>ENSG00000204303 Q6ZVM4_HUMAN<br>ENSG00000113212 PCDHB7<br>ENSG00000135413 LACTR<br>ENSG00000168143 FAM83B<br>ENSG00000184428 TOP1MT<br>ENSG00000100320 RBM9<br>ENSG00000170054 SERPINA9<br>ENSG00000047932 GOPC<br>ENSG00000132388 UBE2G1<br>ENSG00000162852 C1orf71 | ENSG00000105755 ETHE1<br>ENSG00000165171 WBSR27<br>ENSG00000182240 BACE2<br>ENSG00000204303 Q6ZVM4_HUMAN<br>ENSG00000114021 NIT2<br>ENSG00000135549 PKIB<br>ENSG00000170381 SEMA3E<br>ENSG00000184500 PROS1<br>ENSG00000102871 TRADD<br>ENSG00000171346 KRT15<br>ENSG00000048392 RRM2B<br>ENSG00000133193 FAM104A<br>ENSG00000165862 PNL1PRP2 | ENSG00000158042 MRPL17<br>ENSG00000197321 SVIL<br>ENSG00000506345 SPMD3<br>ENSG00000166743 ACSM1<br>ENSG00000134115 CNTN6<br>ENSG00000164118 KIAA1712<br>ENSG00000188092 GPR89B                                 | ENSG00000162441 LZIC<br>ENSG00000115657 ABCB6<br>ENSG00000167191 GPRC5B<br>ENSG00000137267 TUBB2A<br>ENSG00000169836 TACR3<br>ENSG00000196860 NP_997260.1                                                                                                                             | ENSG00000164695 CHMP4C<br>ENSG00000128596 NP_073579.3<br>ENSG00000171711 DEFB4<br>ENSG00000196644 LOC728932<br>ENSG00000198467 TPM2<br>ENSG00000139324 TMTC3<br>ENSG00000171004 HS6ST2<br>ENSG00000205024 Q6ZVP5_HUMAN                                                                                                     |                                                                                                                                                                                                                                                                                                                      |
| CTATTTC | ENSG00000168383 HLA-DPB1<br>ENSG00000122322 EXTL3<br>ENSG00000131467 PSME3<br>ENSG00000181250 MYADML<br>ENSG00000102290 PCDH11X<br>ENSG00000133124 IRS4<br>ENSG00000165246 NLGN4Y<br>ENSG00000206560 ANKRD28                                                                                                                                   | ENSG00000170180 GYPA<br>ENSG00000103495 MAZ<br>ENSG00000142186 SCYL1<br>ENSG00000182310 Q6UWG3_HUMAN<br>ENSG00000104325 DECR1<br>ENSG00000135643 KCNMB4<br>ENSG00000168589 DYNLRB2                                                                                                                                                                             | ENSG00000170786 NP_620419.2<br>ENSG00000108312 UBTF<br>ENSG00000150165 ANXB8L1<br>ENSG00000182318 ZSCAN22<br>ENSG00000109572 CLCN3<br>ENSG00000143753 DEGS1<br>ENSG00000170967 DDI1                                                                                                                                              | ENSG00000114982 NP_060461.3<br>ENSG00000152953 STK32B<br>ENSG00000185065 NP_776154.2<br>ENSG00000111049 MYF5<br>ENSG00000145715 RASL1<br>ENSG00000173598 NUDT4                                                                                                                                                                                     | ENSG00000138780 GSTCD<br>ENSG00000182660 NP_001013698.1<br>ENSG00000101901 CXorf45<br>ENSG00000115947 ORC4L<br>ENSG00000139155 SLCO1C1<br>ENSG00000170786 NP_620419.2<br>ENSG00000114982 NP_060461.3<br>ENSG00000152953 STK32B<br>ENSG00000185065 NP_776154.2                                                                                 | ENSG00000122729 TOX2<br>ENSG00000143570 SLC39A1<br>ENSG00000179344 HB25_HUMAN<br>ENSG0000025243 HSD17B6<br>ENSG00000102786 INTS6<br>ENSG00000134371 CDC73<br>ENSG00000148541 FAM13C1<br>ENSG00000170385 SLC30A1 | ENSG00000124107 SLPI<br>ENSG00000124731 TREM1<br>ENSG00000131148 PTGIS<br>ENSG00000149547 ET24<br>ENSG00000179477 ALOX12B<br>ENSG00000131148 PTGIS<br>ENSG00000152217 SETBP1<br>ENSG00000152936 CDH8<br>ENSG00000150394 CPO<br>ENSG00000164123 NP_689756.2<br>ENSG00000198021 SPANXA2 | ENSG00000128626 MRPS12<br>ENSG00000166199 ALKBH3<br>ENSG00000183399 Q7L8T7_HUMAN<br>ENSG00000065518 NDUFB4<br>ENSG00000121351 IAPP<br>ENSG00000137414 FAM8A1<br>ENSG00000150782 IL18<br>ENSG00000173376 C4orf31<br>ENSG00000173372 C1QA<br>ENSG00000085449 WDFY1<br>ENSG00000137252 HCRTR2<br>ENSG00000170160 Q6ZU57_HUMAN | ENSG00000132846 ZBED3<br>ENSG00000166979 C21orf63<br>ENSG00000184108 TRIML1<br>ENSG000000084110 HAL<br>ENSG00000124802 EEF1E1<br>ENSG00000154582 TCEB1<br>ENSG00000173627 APOBEC4<br>ENSG00000128596 NP_073579.3<br>ENSG00000177807 KCNJ10<br>ENSG00000090104 RGS1<br>ENSG00000138757 G3BP2<br>ENSG00000181004 BBS12 |
| CTATTGT | ENSG00000100918 REC8<br>ENSG00000170291 C17orf81<br>ENSG00000070087 PFN2<br>ENSG00000110066 SUV420H1<br>ENSG00000131016 AKAP12<br>ENSG00000168383 HLA-DPB1<br>ENSG00000122322 EXTL3<br>ENSG00000131467 PSME3<br>ENSG00000181250 MYADML<br>ENSG00000102290 PCDH11X<br>ENSG00000133124 IRS4<br>ENSG00000165246 NLGN4Y<br>ENSG00000206560 ANKRD28 | ENSG00000111644 ACRBP<br>ENSG00000170983 C8orf14<br>ENSG00000100567 PSMA3<br>ENSG00000112308 C6orf62<br>ENSG00000135069 PSAT1<br>ENSG00000170180 GYPA<br>ENSG00000103495 MAZ<br>ENSG00000142186 SCYL1<br>ENSG00000182310 Q6UWG3_HUMAN<br>ENSG00000104325 DECR1<br>ENSG00000135643 KCNMB4<br>ENSG00000168589 DYNLRB2                                            | ENSG00000171682 DHDDS<br>ENSG00000179115 FARSA<br>ENSG00000101544 ZNF508<br>ENSG00000115339 GALNT3<br>ENSG00000138381 ASNSD1<br>ENSG00000170786 NP_620419.2<br>ENSG00000108312 UBTF<br>ENSG00000150165 ANXB8L1<br>ENSG00000182318 ZSCAN22<br>ENSG00000109572 CLCN3<br>ENSG00000143753 DEGS1<br>ENSG00000170967 DDI1              | ENSG00000132005 RFK1<br>ENSG00000122729 TOX2<br>ENSG00000143570 SLC39A1<br>ENSG00000179344 HB25_HUMAN<br>ENSG0000025243 HSD17B6<br>ENSG00000102786 INTS6<br>ENSG00000134371 CDC73<br>ENSG00000148541 FAM13C1<br>ENSG00000170385 SLC30A1                                                                                                            | ENSG00000138780 GSTCD<br>ENSG00000182660 NP_001013698.1<br>ENSG00000101901 CXorf45<br>ENSG00000115947 ORC4L<br>ENSG00000139155 SLCO1C1<br>ENSG00000170786 NP_620419.2<br>ENSG00000114982 NP_060461.3<br>ENSG00000152953 STK32B<br>ENSG00000185065 NP_776154.2                                                                                 | ENSG00000122729 TOX2<br>ENSG00000143570 SLC39A1<br>ENSG00000179344 HB25_HUMAN<br>ENSG0000025243 HSD17B6<br>ENSG00000102786 INTS6<br>ENSG00000134371 CDC73<br>ENSG00000148541 FAM13C1<br>ENSG00000170385 SLC30A1 | ENSG00000158042 MRPL17<br>ENSG00000197321 SVIL<br>ENSG00000506345 SPMD3<br>ENSG00000166743 ACSM1<br>ENSG00000134115 CNTN6<br>ENSG00000164118 KIAA1712<br>ENSG00000188092 GPR89B                                                                                                       | ENSG00000162441 LZIC<br>ENSG00000115657 ABCB6<br>ENSG00000167191 GPRC5B<br>ENSG00000137267 TUBB2A<br>ENSG00000169836 TACR3<br>ENSG00000196860 NP_997260.1                                                                                                                                                                  | ENSG00000164695 CHMP4C<br>ENSG00000128596 NP_073579.3<br>ENSG00000171711 DEFB4<br>ENSG00000196644 LOC728932<br>ENSG00000198467 TPM2<br>ENSG00000139324 TMTC3<br>ENSG00000171004 HS6ST2<br>ENSG00000205024 Q6ZVP5_HUMAN                                                                                               |
| CTATTTC | ENSG00000168383 HLA-DPB1<br>ENSG00000122322 EXTL3<br>ENSG00000131467 PSME3<br>ENSG00000181250 MYADML<br>ENSG00000102290 PCDH11X<br>ENSG00000133124 IRS4<br>ENSG00000165246 NLGN4Y<br>ENSG00000206560 ANKRD28                                                                                                                                   | ENSG00000170180 GYPA<br>ENSG00000103495 MAZ<br>ENSG00000142186 SCYL1<br>ENSG00000182310 Q6UWG3_HUMAN<br>ENSG00000104325 DECR1<br>ENSG00000135643 KCNMB4<br>ENSG00000168589 DYNLRB2                                                                                                                                                                             | ENSG00000170786 NP_620419.2<br>ENSG00000108312 UBTF<br>ENSG00000150165 ANXB8L1<br>ENSG00000182318 ZSCAN22<br>ENSG00000109572 CLCN3<br>ENSG00000143753 DEGS1<br>ENSG00000170967 DDI1                                                                                                                                              | ENSG00000114982 NP_060461.3<br>ENSG00000152953 STK32B<br>ENSG00000185065 NP_776154.2<br>ENSG00000111049 MYF5<br>ENSG00000145715 RASL1<br>ENSG00000173598 NUDT4                                                                                                                                                                                     | ENSG00000138780 GSTCD<br>ENSG00000182660 NP_001013698.1<br>ENSG00000101901 CXorf45<br>ENSG00000115947 ORC4L<br>ENSG00000139155 SLCO1C1<br>ENSG00000170786 NP_620419.2<br>ENSG00000114982 NP_060461.3<br>ENSG00000152953 STK32B<br>ENSG00000185065 NP_776154.2                                                                                 | ENSG00000122729 TOX2<br>ENSG00000143570 SLC39A1<br>ENSG00000179344 HB25_HUMAN<br>ENSG0000025243 HSD17B6<br>ENSG00000102786 INTS6<br>ENSG00000134371 CDC73<br>ENSG00000148541 FAM13C1<br>ENSG00000170385 SLC30A1 | ENSG00000158042 MRPL17<br>ENSG00000197321 SVIL<br>ENSG00000506345 SPMD3<br>ENSG00000166743 ACSM1<br>ENSG00000134115 CNTN6<br>ENSG00000164118 KIAA1712<br>ENSG00000188092 GPR89B                                                                                                       | ENSG00000162441 LZIC<br>ENSG00000115657 ABCB6<br>ENSG00000167191 GPRC5B<br>ENSG00000137267 TUBB2A<br>ENSG00000169836 TACR3<br>ENSG00000196860 NP_997260.1                                                                                                                                                                  | ENSG00000164695 CHMP4C<br>ENSG00000128596 NP_073579.3<br>ENSG00000171711 DEFB4<br>ENSG00000196644 LOC728932<br>ENSG00000198467 TPM2<br>ENSG00000139324 TMTC3<br>ENSG00000171004 HS6ST2<br>ENSG00000205024 Q6ZVP5_HUMAN                                                                                               |
| CTATTTC | ENSG00000168383 HLA-DPB1<br>ENSG00000122322 EXTL3<br>ENSG00000131467 PSME3<br>ENSG00000181250 MYADML<br>ENSG00000102290 PCDH11X<br>ENSG00000133124 IRS4<br>ENSG00000165246 NLGN4Y<br>ENSG00000206560 ANKRD28                                                                                                                                   | ENSG00000170180 GYPA<br>ENSG00000103495 MAZ<br>ENSG00000142186 SCYL1<br>ENSG00000182310 Q6UWG3_HUMAN<br>ENSG00000104325 DECR1<br>ENSG00000135643 KCNMB4<br>ENSG00000168589 DYNLRB2                                                                                                                                                                             | ENSG00000170786 NP_620419.2<br>ENSG00000108312 UBTF<br>ENSG00000150165 ANXB8L1<br>ENSG00000182318 ZSCAN22<br>ENSG00000109572 CLCN3<br>ENSG00000143753 DEGS1<br>ENSG00000170967 DDI1                                                                                                                                              | ENSG00000114982 NP_060461.3<br>ENSG00000152953 STK32B<br>ENSG00000185065 NP_776154.2<br>ENSG00000111049 MYF5<br>ENSG00000145715 RASL1<br>ENSG00000173598 NUDT4                                                                                                                                                                                     | ENSG00000138780 GSTCD<br>ENSG00000182660 NP_001013698.1<br>ENSG00000101901 CXorf45<br>ENSG00000115947 ORC4L<br>ENSG00000139155 SLCO1C1<br>ENSG00000170786 NP_620419.2<br>ENSG00000114982 NP_060461.3<br>ENSG00000152953 STK32B<br>ENSG00000185065 NP_776154.2                                                                                 | ENSG00000122729 TOX2<br>ENSG00000143570 SLC39A1<br>ENSG00000179344 HB25_HUMAN<br>ENSG0000025243 HSD17B6<br>ENSG00000102786 INTS6<br>ENSG00000134371 CDC73<br>ENSG00000148541 FAM13C1<br>ENSG00000170385 SLC30A1 | ENSG00000158042 MRPL17<br>ENSG00000197321 SVIL<br>ENSG00000506345 SPMD3<br>ENSG00000166743 ACSM1<br>ENSG00000134115 CNTN6<br>ENSG00000164118 KIAA1712<br>ENSG00000188092 GPR89B                                                                                                       | ENSG00000162441 LZIC<br>ENSG00000115657 ABCB6<br>ENSG00000167191 GPRC5B<br>ENSG00000137267 TUBB2A<br>ENSG00000169836 TACR3<br>ENSG00000196860 NP_997260.1                                                                                                                                                                  | ENSG00000164695 CHMP4C<br>ENSG00000128596 NP_073579.3<br>ENSG00000171711 DEFB4<br>ENSG00000196644 LOC728932<br>ENSG00000198467 TPM2<br>ENSG00000139324 TMTC3<br>ENSG00000171004 HS6ST2<br>ENSG00000205024 Q6ZVP5_HUMAN                                                                                               |
| CTATTTC | ENSG00000168383 HLA-DPB1<br>ENSG00000122322 EXTL3<br>ENSG00000131467 PSME3<br>ENSG00000181250 MYADML<br>ENSG00000102290 PCDH11X<br>ENSG00000133124 IRS4<br>ENSG00000165246 NLGN4Y<br>ENSG00000206560 ANKRD28                                                                                                                                   | ENSG00000170180 GYPA<br>ENSG00000103495 MAZ<br>ENSG00000142186 SCYL1<br>ENSG00000182310 Q6UWG3_HUMAN<br>ENSG00000104325 DECR1<br>ENSG00000135643 KCNMB4<br>ENSG00000168589 DYNLRB2                                                                                                                                                                             | ENSG00000170786 NP_620419.2<br>ENSG00000108312 UBTF<br>ENSG00000150165 ANXB8L1<br>ENSG00000182318 ZSCAN22<br>ENSG00000109572 CLCN3<br>ENSG00000143753 DEGS1<br>ENSG00000170967 DDI1                                                                                                                                              | ENSG00000114982 NP_060461.3<br>ENSG00000152953 STK32B<br>ENSG00000185065 NP_776154.2<br>ENSG00000111049 MYF5<br>ENSG00000145715 RASL1<br>ENSG00000173598 NUDT4                                                                                                                                                                                     | ENSG00000138780 GSTCD<br>ENSG00000182660 NP_001013698.1<br>ENSG00000101901 CXorf45<br>ENSG00000115947 ORC4L<br>ENSG00000139155 SLCO1C1<br>ENSG00000170786 NP_620419.2<br>ENSG00000114982 NP_060461.3<br>ENSG00000152953 STK32B<br>ENSG00000185065 NP_776154.2                                                                                 | ENSG00000122729 TOX2<br>ENSG00000143570 SLC39A1<br>ENSG00000179344 HB25_HUMAN<br>ENSG0000025243 HSD17B6<br>ENSG00000102786 INTS6<br>ENSG00000134371 CDC73<br>ENSG00000148541 FAM13C1<br>ENSG00000170385 SLC30A1 | ENSG00000158042 MRPL17<br>ENSG00000197321 SVIL<br>ENSG00000506345 SPMD3<br>ENSG00000166743 ACSM1<br>ENSG00000134115 CNTN6<br>ENSG00000164118 KIAA1712<br>ENSG00000188092 GPR89B                                                                                                       | ENSG00000162441 LZIC<br>ENSG00000115657 ABCB6<br>ENSG00000167191 GPRC5B<br>ENSG00000137267 TUBB2A<br>ENSG00000169836 TACR3<br>ENSG00000196860 NP_997260.1                                                                                                                                                                  | ENSG00000164695 CHMP4C<br>ENSG00000128596 NP_073579.3<br>ENSG00000171711 DEFB4<br>ENSG00000196644 LOC728932<br>ENSG00000198467 TPM2<br>ENSG00000139324 TMTC3<br>ENSG00000171004 HS6ST2<br>ENSG00000205024 Q6ZVP5_HUMAN                                                                                               |
| CTATTTC | ENSG00000168383 HLA-DPB1<br>ENSG00000122322 EXTL3<br>ENSG00000131467 PSME3<br>ENSG00000181250 MYADML<br>ENSG00000102290 PCDH11X<br>ENSG00000133124 IRS4<br>ENSG00000165246 NLGN4Y<br>ENSG00000206560 ANKRD28                                                                                                                                   | ENSG00000170180 GYPA<br>ENSG00000103495 MAZ<br>ENSG00000142186 SCYL1<br>ENSG00000182310 Q6UWG3_HUMAN<br>ENSG00000104325 DECR1<br>ENSG00000135643 KCNMB4<br>ENSG00000168589 DYNLRB2                                                                                                                                                                             | ENSG00000170786 NP_620419.2<br>ENSG00000108312 UBTF<br>ENSG00000150165 ANXB8L1<br>ENSG00000182318 ZSCAN22<br>ENSG00000109572 CLCN3<br>ENSG00000143753 DEGS1<br>ENSG00000170967 DDI1                                                                                                                                              | ENSG00000114982 NP_060461.3<br>ENSG00000152953 STK32B<br>ENSG00000185065 NP_776154.2<br>ENSG00000111049 MYF5<br>ENSG00000145715 RASL1<br>ENSG00000173598 NUDT4                                                                                                                                                                                     | ENSG00000138780 GSTCD<br>ENSG00000182660 NP_001013698.1<br>ENSG00000101901 CXorf45<br>ENSG00000115947 ORC4L<br>ENSG00000139155 SLCO1C1<br>ENSG00000170786 NP_620419.2<br>ENSG00000114982 NP_060461.3<br>ENSG00000152953 STK32B<br>ENSG00000185065 NP_776154.2                                                                                 | ENSG00000122729 TOX2<br>ENSG00000143570 SLC39A1<br>ENSG00000179344 HB25_HUMAN<br>ENSG0000025243 HSD17B6<br>ENSG00000102786 INTS6<br>ENSG00000134371 CDC73<br>ENSG00000148541 FAM13C1<br>ENSG00000170385 SLC30A1 | ENSG00000158042 MRPL17<br>ENSG00000197321 SVIL<br>ENSG00000506345 SPMD3<br>ENSG00000166743 ACSM1<br>ENSG00000134115 CNTN6<br>ENSG00000164118 KIAA1712<br>ENSG00000188092 GPR89B                                                                                                       | ENSG00000162441 LZIC<br>ENSG00000115657 ABCB6<br>ENSG00000167191 GPRC5B<br>ENSG00000137267 TUBB2A<br>ENSG00000169836 TACR3<br>ENSG00000196860 NP_997260.1                                                                                                                                                                  | ENSG00000164695 CHMP4C<br>ENSG00000128596 NP_073579.3<br>ENSG00000171711 DEFB4<br>ENSG00000196644 LOC728932<br>ENSG00000198467 TPM2<br>ENSG00000139324 TMTC3<br>ENSG00000171004 HS6ST2<br>ENSG00000205024 Q6ZVP5_HUMAN                                                                                               |
| CTATTTC | ENSG00000168383 HLA-DPB1<br>ENSG00000122322 EXTL3<br>ENSG00000131467 PSME3<br>ENSG00000181250 MYADML<br>ENSG00000102290 PCDH11X<br>ENSG00000133124 IRS4<br>ENSG00000165246 NLGN4Y<br>ENSG00000206560 ANKRD28                                                                                                                                   | ENSG00000170180 GYPA<br>ENSG00000103495 MAZ<br>ENSG00000142186 SCYL1<br>ENSG00000182310 Q6UWG3_HUMAN<br>ENSG00000104325 DECR1<br>ENSG00000135643 KCNMB4<br>ENSG00000168589 DYNLRB2                                                                                                                                                                             | ENSG00000170786 NP_620419.2<br>ENSG00000108312 UBTF<br>ENSG000001501                                                                                                                                                                                                                                                             |                                                                                                                                                                                                                                                                                                                                                    |                                                                                                                                                                                                                                                                                                                                               |                                                                                                                                                                                                                 |                                                                                                                                                                                                                                                                                       |                                                                                                                                                                                                                                                                                                                            |                                                                                                                                                                                                                                                                                                                      |

CTCAGGG ENSG00000181588|RKHD1 ENSG00000185037|XR\_016629.1 ENSG00000185177|ZNF479 ENSG00000187969|ZCCHC13 ENSG00000196812|ZSCAN16 ENSG00000197990|XR\_016643.1 ENSG00000007968|EF2 ENSG000000089558|KCNH4 ENSG000000089639|GMIP ENSG000000099953|MMP11 ENSG00000100147|CCDC134 ENSG00000100599|RIN3 ENSG00000110274|CEP164 ENSG00000123064|DDX54 ENSG00000125967|APBA2BP ENSG00000126882|FAM78A ENSG00000130427|EPO ENSG00000136383|ALPK3 ENSG00000136908|DFM2 ENSG00000137221|TJAP1 ENSG00000141506|PIK3R5 ENSG00000153885|KCTD15 ENSG00000157119|KBTB05 ENSG00000160796|NBEAL2 ENSG00000163930|BAF1 ENSG00000164880|Q6ZRB0\_HUMAN ENSG00000167302|C17orf56 ENSG00000167754|KLR5 ENSG00000169641|LUZP1 ENSG00000169758|C15orf27 ENSG00000171169|C9orf90 ENSG00000172367|PDZD3 ENSG00000172531|PPP1CA ENSG00000174744|BRM1 ENSG00000175077|RTP1 ENSG00000175489|LRRC25 ENSG00000175779|NP\_997327.1 ENSG00000179361|ARID3B ENSG00000182858|ALG12 ENSG00000184185|KCNJ12 ENSG00000186866|POFUT2 ENSG00000187840|EIF4EBP1 ENSG00000188743|Q9P169\_HUMAN ENSG00000197558|Q76B61\_HUMAN ENSG00000197681|TBC1D3 ENSG00000205205|C17orf51 ENSG00000205913|Q6ZUC4\_HUMAN ENSG00000076716|GPC4 ENSG00000106993|CDC37L1 ENSG00000110075|SAPS3 ENSG00000117586|TNFSF4 ENSG00000124721|DNAH8 ENSG00000126453|BCL2L12 ENSG00000130348|QRS1 ENSG00000134258|VTCN1 ENSG00000137860|SLC28A2 ENSG00000138613|APH1B ENSG00000166928|NP\_115986.3 ENSG00000167383|ZNF229 ENSG00000172901|LAEVR\_HUMAN ENSG00000174099|MSRB3 ENSG00000178229|ZNF543 ENSG00000184254|ALDH1A3 ENSG00000186314|PRELID2 ENSG00000196616|ADH1C perfect: CTCAGGG CCCTGAG hsa-miR-125b tCCCTGAGaccctaactgtga 1

CTCATAT ENSG00000005243|COPZ2 ENSG00000019169|MARCO ENSG00000076356|PLXNA2 ENSG00000099977|DDT ENSG00000103550|NP\_001013009.2 ENSG00000108344|PSMD3 ENSG00000111540|RAB5B ENSG00000125633|CCDC93 ENSG00000130812|ANGPTL6 ENSG00000131462|TUBG1 ENSG00000137177|KIF13A ENSG00000157856|C2orf39 ENSG00000158714|SLAMF8 ENSG00000159713|CG38\_HUMAN ENSG00000162600|OMA1 ENSG00000162733|DDR2 ENSG00000165671|NSD1 ENSG00000166592|RRAD ENSG00000167807|NP\_001026904.1 ENSG00000173530|TNFRSF10D ENSG00000180210|F2 ENSG00000182117|NOLA3 ENSG00000182511|FES ENSG00000186431|FCAR ENSG00000187003|ACTL7A ENSG00000187223|LCE2D ENSG00000198785|GRIN3A ENSG00000203709|C1orf132 ENSG00000204356|RDBP ENSG00000072315|TRPC5 ENSG000000088053|GP6 ENSG00000105132|ZNF550 ENSG00000117153|KLHL12 ENSG00000118200|CAMSAP1L1 ENSG00000122435|CCDC76 ENSG00000125823|CSTL1 ENSG00000130348|QRS1 ENSG00000133641|C12orf29 ENSG00000139133|ALG10 ENSG00000147231|CXorf57 ENSG00000174226|NP\_689841.2 ENSG00000178217|SH2D4B ENSG00000184226|PCDH9 ENSG00000185344|ATP6V0A2 ENSG00000185664|SILV ENSG00000196646|ZNF136 ENSG00000197641|SERPINB13 ENSG000000099377|HSD3B7 ENSG00000103199|ZNF500 ENSG00000103426|CORO7 ENSG00000105202|FBL ENSG00000108797|CNTNAP1 ENSG00000110042|DTX4 ENSG00000112655|PTK7 ENSG00000130517|PGPEP1 ENSG00000131471|AOC3 ENSG00000136697|IL1F10 ENSG00000142627|EPHA2 ENSG00000145911|N4BP3\_HUMAN ENSG00000152672|CLEC4F ENSG00000159712|AGPAT1 ENSG00000161031|PGLYRP2 ENSG00000169738|DCXR ENSG00000172053|QARS ENSG00000182566|CLEC4G ENSG00000182795|C1orf116 ENSG00000196972|Q86V52\_HUMAN ENSG00000197088|NM\_207488 ENSG00000204310|AGPAT1 ENSG00000204655|MOG ENSG00000205136|Q3KRG0\_HUMAN ENSG00000078018|MAP2 ENSG00000104112|SCG3 ENSG00000128039|NP\_078868.1 ENSG00000130368|MAS1 ENSG00000147010|SH3KBP1 ENSG00000147679|C8orf53 ENSG00000148110|HIATL1 ENSG00000152611|CAPSL ENSG00000153237|NP\_620158.2 ENSG00000162139|NEU3 ENSG00000164171|ITGA2 ENSG00000166263|STXBPA ENSG00000178033|FAM26E ENSG00000185009|AP3M1 ENSG00000189221|MAOA ENSG00000197069|Q9H399\_HUMAN ENSG00000197085|GEEK1\_HUMAN ENSG00000197576|HOXA4 ENSG00000203743|Q5J7V3\_HUMAN ENSG00000206047|DEFT1P ENSG00000033100|CHGUT\_HUMAN ENSG00000053702|NR1P2 ENSG00000077080|ACTL6B ENSG00000088882|CPXM1 ENSG00000104897|SF3A2 ENSG00000105808|RASA4 ENSG00000106123|EPHB6 ENSG00000114923|SLC4A3 ENSG00000124249|KCNK15 ENSG00000124615|MOCS1 ENSG00000125788|DEFB126 ENSG00000130173|NP\_061157.2 ENSG00000131019|ULBP3 ENSG00000147100|SLC16A2 ENSG00000160208|RRP1B ENSG00000160284|C21orf56 ENSG00000160712|IL6R ENSG00000164896|FASTK ENSG00000167394|ZNF668 ENSG00000167644|C19orf33 ENSG00000168894|NP\_057578.1 ENSG00000171703|TCEA2 ENSG00000172236|TPSB2 ENSG00000173027|WBP1 ENSG00000176261|ZBTB80S ENSG00000180483|DEFB119 ENSG00000188493|C19orf54 ENSG00000196378|Q9BSZ0\_HUMAN ENSG00000197253|TRYAL\_HUMAN ENSG00000203854|XR\_017700.1 ENSG00000205878|Q6ZSV2\_HUMAN ENSG00000055813|CCDC85A ENSG00000086696|HSD17B2 ENSG00000101162|TUBB1 ENSG000001012781|KATNAL1 ENSG00000105205|CLC ENSG00000105971|CAV2 ENSG00000106701|FSD1L ENSG00000107159|CA9 ENSG00000112115|IL17A ENSG00000122043|Q5TAE0\_HUMAN ENSG00000128989|ARP19\_HUMAN ENSG00000138002|IFT172 ENSG00000144802|NFKB1Z ENSG00000147465|STAR ENSG00000149573|EVAL1 ENSG00000153923|CLCA3 ENSG00000162618|ELTD1 ENSG00000169131|ZNF354A ENSG00000170037|CNTROB ENSG00000171033|PKIA ENSG00000171055|FEZ2 ENSG00000171262|FAM98B ENSG00000172156|CCL11 ENSG00000181495|C5orf23 ENSG00000184786|TCE3 ENSG00000185737|NRG3 ENSG00000196319|Q9H353\_HUMAN ENSG00000196967|ZNF585A ENSG00000197085|Q6EKK1\_HUMAN ENSG00000204201|Q49A40\_HUMAN ENSG00000205570|GUSL2\_HUMAN ENSG00000008056|SYN1 ENSG00000068024|HDAC4 ENSG00000088827|SIGLEC1 ENSG00000090857|NP\_060460.3 ENSG00000115598|IL1RL2 ENSG00000119689|DLST ENSG00000125695|STRAD\_HUMAN ENSG00000134690|CDCA8 ENSG00000138166|DUSP5 ENSG00000138294|MSMB ENSG00000139083|RTV6 ENSG00000140718|FTO ENSG00000141753|IGFBP4 ENSG00000142341|RPS11 ENSG00000143479|DYRK3 ENSG00000144468|RHBD1 ENSG00000152042|NBPFF8 ENSG00000153060|TEK7 ENSG00000160208|ERPB1 ENSG00000160208|ERPB1 ENSG00000163793|DNAJC5G ENSG00000165821|SALL2 ENSG00000166136|NDUFB8 ENSG00000167617|CDC42EP5 ENSG00000169894|MUC3A ENSG00000169921|Q7S130\_HUMAN ENSG00000172350|ABCG4 ENSG00000172508|Q8N467\_HUMAN ENSG00000174407|C20orf166 ENSG00000175115|PACS1 ENSG00000179241|LDLRAD3 ENSG00000179335|CLK3 ENSG00000180861|C12orf36 ENSG00000182057|Q8IXR4\_HUMAN ENSG00000184148|SPR4 ENSG00000185185|Q6ZQP8\_HUMAN ENSG00000204850|NP\_001013695.1 ENSG000000059728|MXD1 ENSG00000101842|VSI61 ENSG00000105136|ZNF419 ENSG00000105372|RPS19 ENSG00000106809|OGN ENSG00000110675|ELMOD1 ENSG00000112335|SNX3 ENSG00000115896|PLCL1 ENSG00000131779|PEX11B ENSG00000135250|SRPK2 ENSG00000136758|YME1L1 ENSG00000139278|GLIPR1 ENSG00000143224|PPOX ENSG00000154975|CA10 ENSG00000163518|FCRL4 ENSG00000165973|NELL1 ENSG00000166012|SNORA25 ENSG00000170027|YWHAG ENSG00000172748|ZNF596 ENSG00000183155|RAB1F ENSG00000184300|LOC284428 ENSG00000196967|ZNF585A ENSG00000197006|METT19 ENSG00000204262|COL5A2 ENSG00000205195|Q6ZTB1\_HUMAN ENSG00000205717|MBD3L2 ENSG00000075290|WNT8B ENSG00000101307|SIRPB1 ENSG00000103855|CD276 ENSG00000105066|FIZ1 ENSG00000115507|OTX1 ENSG00000136297|MMD2 ENSG00000136574|GATA4 ENSG00000137073|UBAP2 ENSG00000138964|PARV6 ENSG00000139613|SMARCC2 ENSG00000140254|DUOX1A ENSG00000142227|EMP3 ENSG00000142512|SIGLEC10 ENSG00000143845|ETNK2 ENSG00000145002|FAM86B1 ENSG00000145911|N4BP3\_HUMAN ENSG00000149300|C11orf52 ENSG00000149418|ST14 ENSG00000158483|FAM86C ENSG00000166257|SCN3B ENSG00000166908|PIP5K2C ENSG00000174348|PODN ENSG00000184675|FAM123B ENSG00000185960|SHOX ENSG00000186523|NR\_003494.1 ENSG00000188483|IER5L ENSG00000196935|SRGAP1 ENSG00000197291|Q8VW75\_HUMAN ENSG00000197435|HIST3H2B ENSG00000203708|Q6ZU99\_HUMAN ENSG00000204805|FAM27E3 ENSG00000204807|FAM27E2 ENSG00000205711|Q6ZV92\_HUMAN ENSG00000054219|LY75 ENSG00000070061|TKBKAP ENSG00000108423|TUBD1 ENSG00000125845|BMP2 ENSG00000137845|ADAM10 ENSG00000138663|COPS4 ENSG00000143669|LYST ENSG00000147654|EBAG9 ENSG00000157219|HTR5A ENSG00000159267|HLCS ENSG00000162923|WDR26 ENSG00000165076|NP\_001008271.1 ENSG00000165309|ARMC3 ENSG00000170962|PDGFD ENSG00000187498|COL4A1 ENSG000000204189|Q587I5\_HUMAN ENSG00000205612|Q71JB2\_HUMAN

CTCCAAA ENSG00000008438|PGLYRP1 ENSG00000059122|FLYWCH1 ENSG000000087077|TRIP6 ENSG00000087191|PSMC5 ENSG00000103855|CD276 ENSG00000106384|MOGAT3 ENSG00000108479|GALK1 ENSG00000121083|DYNLL2 ENSG00000136653|RASSF5 ENSG00000160323|ADAMTS13 ENSG00000163800|C2orf16 ENSG00000167791|CABP2 ENSG00000169738|DCXR ENSG00000170890|PLA2G1B ENSG00000172159|FRMD3 ENSG00000178343|NP\_001073974.1 ENSG00000181867|FTMT ENSG00000188508|U467\_HUMAN ENSG00000188681|Q8TEH8\_HUMAN ENSG00000204542|C6orf15 ENSG00000204626|Q6ZSR2\_HUMAN ENSG00000038945|MSR1 ENSG00000107943|C10orf110 ENSG0000012339|HBS1L ENSG00000116183|PAPPA2 ENSG00000119913|TECTB ENSG00000121964|GTDCC ENSG00000128578|FAM40B ENSG00000135119|TMEM118 ENSG00000140795|MYLK3\_HUMAN ENSG00000144962|SPATA16 ENSG00000152242|C18orf25 ENSG00000152495|CAMK4 ENSG00000158528|PPP1R9A ENSG00000159167|STC1 ENSG00000162526|TSSK3 ENSG00000169340|NP\_777584.1 ENSG00000170860|LSM3 ENSG00000188800|TMCO2 ENSG00000197006|METT19

CTCCAGC ENSG00000007384|RHBD1F1 ENSG00000029559|IBSP ENSG00000067596|DHX8 ENSG00000070404|FSTL3 ENSG00000092929|UNC13D ENSG00000095906|NUPB2 ENSG00000101222|C20orf28 ENSG00000103043|VAC14 ENSG00000105143|SLC1A6 ENSG00000112782|CLIC5 ENSG00000115677|HDLBP ENSG00000116883|C1orf113 ENSG00000127098|ANKRD19 ENSG00000128564|VGF ENSG00000132005|RFX1 ENSG00000140332|TLE3 ENSG00000141526|SLC16A3 ENSG00000141858|SAMD1 ENSG00000142784|WDTCT1 ENSG00000143365|RORC ENSG00000143632|ACTA1 ENSG00000148719|DNAJB12 ENSG00000157851|DPYSL5 ENSG00000158106|RHPN1 ENSG00000159173|TNN1 ENSG00000160991|TMEM142B ENSG00000161021|LTC4S ENSG00000161692|DBF4B ENSG00000161939|C17orf49 ENSG00000163354|DCST2 ENSG00000165752|STK32C ENSG00000166394|CYB5R2 ENSG00000169899|Q96MA9\_HUMAN ENSG00000173039|RELA ENSG00000175115|PACS1 ENSG00000176911|Q9HAMI\_HUMAN ENSG00000177548|RABEP2 ENSG00000181778|C9orf71 ENSG00000182397|C15orf51 ENSG00000184148|SPRR4 ENSG00000185133|PIB5PA ENSG00000185614|C3orf54 ENSG00000186442|KRT3 ENSG00000187714|SLC18A3 ENSG00000187778|MCRS1 ENSG00000198457|CP21A\_HUMAN ENSG00000078070|MCCC1 ENSG00000079387|SENP1 ENSG00000080200|NP\_705833.2 ENSG00000100567|PSMA3 ENSG00000101868|POLA1 ENSG00000108381|ASPA ENSG000001120733|JMJD1B ENSG00000134115|CNTN6 ENSG00000134762|DSC3 ENSG00000137807|KIF23 ENSG00000143185|XCL2 ENSG00000143797|MBOAT2 ENSG00000145362|ANK2 ENSG00000165609|NUDT5 ENSG00000168004|HRASL5 ENSG00000174446|KRT27 ENSG00000174099|MSRB3 ENSG00000174500|GCET2 ENSG00000182090|C14orf25 ENSG00000188386|PPP3R2 ENSG000000063761|ADCK1 ENSG00000088833|NSFL1C ENSG00000088888|MAVS\_HUMAN ENSG00000100167|SEPT3 ENSG00000101577|LPIN2 ENSG00000101638|ST8SIA5 ENSG00000103549|RNF40 ENSG00000104365|IKBKKB ENSG00000111481|COP21 ENSG00000112149|CDB3 ENSG00000119703|C14orf140 ENSG00000119986|AVP11 ENSG00000133056|PIK3C2B ENSG00000134955|SLC37A2 ENSG00000141568|FOXK2 ENSG00000161610|HCRT ENSG00000166257|SCN3B ENSG00000170581|STAT2 ENSG00000172943|PHF8 ENSG00000175106|CDRT4 ENSG00000179028|NP\_001013709.1 ENSG00000179240|Q3ZCU0\_HUMAN ENSG00000182776|NP\_001013709.1 ENSG00000204713|TRIM27 ENSG00000205610|Q4G105\_HUMAN ENSG00000205683|PDF3 ENSG00000205929|C21orf62 ENSG00000001949|SNAI2 ENSG000000086598|TMED2 ENSG00000090060|PAPOLA ENSG00000109061|MYH1 ENSG00000116161|CACYPB ENSG00000118495|PLAGL1 ENSG00000119636|C14orf45 ENSG00000131003|RBMY2FP ENSG00000133805|AMPD3 ENSG00000135108|FBXO21 ENSG00000139318|DUSP6 ENSG00000146592|CREB5 ENSG00000152944|SURB7 ENSG00000155111|CDC2L6 ENSG00000159113|IL10RB ENSG00000165152|C9orf125 ENSG00000172058|SERF1\_HUMAN ENSG00000175984|DENDN2C ENSG00000185849|Q9P194\_HUMAN ENSG00000197484|Q6ZRRH\_HUMAN ENSG00000197501|Q9H3B5\_HUMAN ENSG00000205572|JORB1\_HUMAN ENSG00000006210|CX3CL1 ENSG00000008438|PGLYRP1 ENSG00000033327|GAB2 ENSG00000036828|CASR ENSG00000074317|SNCB ENSG00000100461|RBM23 ENSG00000104964|AES ENSG00000106633|GCK ENSG00000113068|PFDN1 ENSG00000117419|PRNP1P ENSG00000136112|UTP14C ENSG00000140564|FURIN ENSG00000143125|PROK1 ENSG00000146122|DAAM2 ENSG00000162576|MXRA8 ENSG00000163154|TNFAIP8L2 ENSG00000166886|NAB2 ENSG00000168883|USP39 ENSG00000170515|PA2G4 ENSG00000175591|P2RY2 ENSG00000179085|DPM3 ENSG00000181031|RPH3AL ENSG00000181291|TMEM132E ENSG00000188338|SLC38A3 ENSG00000197444|OGDHL ENSG00000204094|Q6ZU93\_HUMAN ENSG00000204421|LY6G6C ENSG00000205923|CEMP1 ENSG00000206193|Q5HYA3\_HUMAN ENSG00000033800|PIA5I ENSG000000081842|PCDHA10 ENSG00000084092|C4orf14 ENSG00000102531|FNDC3A ENSG00000116251|RLR22 ENSG00000130396|MLLT4 ENSG00000155760|FZD7 ENSG00000171208|NETO2 ENSG00000172399|MYO22 ENSG00000172955|ADH6 ENSG00000173610|UGT2A1 ENSG00000174100|MRPL45 ENSG00000184007|PTP4A2 ENSG00000185760|KCNQ5 ENSG00000188740|NBPFF5 ENSG00000203667|FAM36A ENSG000000010610|CD4 ENSG000000012223|LTF ENSG000000049540|ELN ENSG000000066136|NFYC ENSG00000096070|BRPF3 ENSG00000101057|MYBL2 ENSG00000101306|MYLK2 ENSG00000102001|CACNA1F ENSG00000105568|PPP2R1A ENSG00000105605|CACNG7 ENSG00000108518|PPN1 ENSG00000109956|B3GAT1 ENSG00000110171|TRIM3 ENSG00000110243|APOA5 ENSG00000115155|OTOF ENSG00000125492|BARHL1 ENSG00000126446|NP\_067051.1 ENSG00000129535|NRL ENSG00000131398|KCNC3 ENSG00000133247|SUV420H2 ENSG00000134030|KIAA0427 ENSG00000136295|TTYH3 ENSG00000136425|CTB2 ENSG00000137166|FOXPA4 ENSG00000139438|CL2orf34 ENSG00000158106|RHPN1 ENSG00000159164|SV2A ENSG00000160877|BTBD14B ENSG00000161677|JOSD2 ENSG00000161860|SYCE2 ENSG00000162241|SLC25A45 ENSG00000163283|ALPPL2 ENSG00000167588|GPD1 ENSG00000171346|KRT15 ENSG00000172508|Q8N467\_HUMAN ENSG00000173039|RELA ENSG00000176182|NP\_001012661.1 ENSG00000178709|CLDN9 ENSG00000179361|ARID3B ENSG00000183386|PHL3 ENSG00000184232|OAF ENSG00000186442|KRT3 ENSG00000188191|PKRARI ENSG00000196411|EPHB4 ENSG00000198113|C9orf167 ENSG00000204371|EHMT2 ENSG00000205031|Q6XYE2\_HUMAN ENSG000000006576|PHTF2 ENSG000000009780|FAM76A ENSG000000010810|FYN ENSG000000064787|BCAS1 ENSG000000081052|COL4A4 ENSG000000081818|PCDHB4 ENSG00000104435|STMN2 ENSG00000107186|MPDZ ENSG00000107937|GTPBP4 ENSG00000108953|YWHAE ENSG00000112115|IL17A ENSG00000113141|IK ENSG00000115170|ACVR1 ENSG00000120162|MOBK12B ENSG00000124721|DNAH8 ENSG00000137364|TPMT ENSG00000152022|LIX1L ENSG00000165655|ZNF503 ENSG00000171823|FBXL14 ENSG00000173261|PLAC8L1 ENSG00000174749|C4orf32 ENSG00000180138|CSNK1A1L ENSG00000183283|DAZAP2 ENSG00000186184|POLR1D ENSG00000196632|WNK3 ENSG00000198876|WDR40A ENSG00000205612|Q71JB2\_HUMAN ENSG000000002834|LASP1 ENSG000000007545|CRAMP1L ENSG000000010295|NP\_542768.1 ENSG000000011332|DFP1 ENSG000000030110|BAK1 ENSG00000074181|NOTCH3 ENSG00000077454|LRCH4 ENSG00000008746|TULP3 ENSG000000087111|PIGS ENSG00000009910|SCARF2 ENSG00000100884|CPNE6 ENSG00000101441|CS74 ENSG00000104524|PYCRL ENSG00000104833|TUBB4 ENSG00000106089|STX1A ENSG00000109047|RCVRN ENSG00000115523|GNLY ENSG00000130303|BST2 ENSG00000131408|NR1H2 ENSG00000131467|PSME3 ENSG00000132471|WBP2 ENSG00000135439|CENTG1 ENSG00000137171|KLC4 ENSG00000143418|LASS2 ENSG00000143466|TKRKE ENSG00000144908|ALDH1L1 ENSG00000146083|RNF44 ENSG00000156990|RPU5D3 ENSG00000158747|NBL1 ENSG00000158850|B4GALT3 ENSG00000159314|NP\_777579.1 ENSG00000160994|CCDC105 ENSG00000162729|TGSF8 ENSG00000166340|TPP1 ENSG00000167015|LENG8 ENSG00000170373|CST1 ENSG00000170454|KRT75 ENSG00000171786|NHLH1 ENSG00000173566|NUDT18 ENSG00000173846|PLK3 ENSG00000182490|TSSK2 ENSG00000184117|NIPSNAP1 ENSG00000185519|FAM131C ENSG00000187840|EIF4EBP1 ENSG00000188643|S100A16 ENSG00000196230|TUBB ENSG00000197152|Q6GNB7\_HUMAN ENSG00000205704|Q6ICG7\_HUMAN ENSG00000206081|Q6ZVK3\_HUMAN ENSG00000004534|RBM6 ENSG000000035928|RFC1 ENSG000000048740|CUGBP2 ENSG000000059804|GTR3\_HUMAN ENSG00000077264|PAK3 ENSG00000100601|ALKBH1 ENSG00000105467|SYNGR4 ENSG00000107249|GLIS3 ENSG00000116016|EPAS1 ENSG00000116176|TPSG1 ENSG00000116972|FGP23 ENSG000001120149|MEX2

|         |                                |                                |                                |                                |                                |                              |                              |                                |
|---------|--------------------------------|--------------------------------|--------------------------------|--------------------------------|--------------------------------|------------------------------|------------------------------|--------------------------------|
|         | ENSG00000128581 RABL5          | ENSG00000133318 RTN3           | ENSG00000133704 IPO8           | ENSG00000134249 ADAM30         | ENSG00000135111 TBX3           | ENSG00000137869 CYP19A1      | ENSG00000138002 IFT172       | ENSG00000140945 CDH13          |
|         | ENSG00000143919 C2orf34        | ENSG00000144840 RABL3          | ENSG00000147416 ATP6V1B2       | ENSG00000156026 CCDC109A       | ENSG00000161326 DUSP14         | ENSG00000163449 TMEM169      | ENSG00000164411 GJB7         | ENSG00000165076 NP_001008271.1 |
| CTCCGGG | ENSG00000168672 FAM84B         | ENSG00000173262 SLC2A3         | ENSG00000176974 SHMT1          | ENSG00000181322 TXNDC6         | ENSG00000185010 F8             | ENSG00000186566 GPATCH8      | ENSG00000196730 DAPK1        |                                |
|         | ENSG000000081760 AACS          | ENSG00000104774 MAN2B1         | ENSG00000104805 NUCB1          | ENSG00000130402 ACTN4          | ENSG00000130656 HBZ            | ENSG00000131094 C1QL1        | ENSG00000137203 TFAP2A       | ENSG00000138834 MAPK8IP3       |
|         | ENSG00000148805 NR_002934.2    | ENSG00000149532 CPSF7_HUMAN    | ENSG00000163888 CAMK2N2        | ENSG00000164108 Q9HAJ2_HUMAN   | ENSG00000165879 FRAT1          | ENSG00000168936 TMEM129      | ENSG00000169026 MFSD7        | ENSG00000172247 C1QTNF4        |
|         | ENSG00000176022 B3GALT6        | ENSG00000176357 C10orf55       | ENSG00000178372 CALML5         | ENSG00000184557 SOC3           | ENSG00000185176 AQP12B         | ENSG00000185669 SNAI3        | ENSG00000187699 Q8NBX4_HUMAN | ENSG00000188185 Q6ZQP8_HUMAN   |
|         | ENSG00000197177 GPR123         | ENSG00000205927 OLIG2          | ENSG00000040341 STAU2          | ENSG00000064042 NP_055803.1    | ENSG00000090530 LEPREL1        | ENSG00000102452 NALCN        | ENSG00000105829 BET1         | ENSG00000108306 FBXL20         |
|         | ENSG00000117602 DSCR1L2        | ENSG00000130935 NOL11          | ENSG00000139370 SLC15A4        | ENSG00000141448 GATA6          | ENSG00000145423 SFRP2          | ENSG00000153234 NR4A2        | ENSG00000157193 LRP8         | ENSG00000158435 C2orf29        |
|         | ENSG00000159212 CLIC6          | ENSG00000163359 COL6A3         | ENSG00000164402 SECT1          | ENSG00000167555 ZNF534         | ENSG00000169862 CTNND2         | ENSG00000183155 RAB1F        | ENSG00000186469 GN2          | ENSG00000203667 FAM36A         |
|         | ENSG00000204952 FBX47_HUMAN    |                                |                                |                                |                                |                              |                              |                                |
| CTCCTGC | ENSG00000004059 ARF5           | ENSG00000097021 ACOT7          | ENSG00000100010 MTF18_HUMAN    | ENSG00000109956 B3GAT1         | ENSG00000126934 MAP2K2         | ENSG00000135709 KIAA0513     | ENSG00000137880 GCHFR        | ENSG00000142552 RCN3           |
|         | ENSG00000146192 FGD2           | ENSG00000149927 DOC2A          | ENSG00000158856 EPB49          | ENSG00000161203 AP2M1          | ENSG00000161526 SAP30BP        | ENSG00000162365 CYP4A22      | ENSG00000167775 CD320        | ENSG00000169682 LAT            |
|         | ENSG00000169921 Q75L30_HUMAN   | ENSG00000173267 SNCG           | ENSG00000173933 RBM4           | ENSG00000175224 KIAA0652       | ENSG00000175482 POLD4          | ENSG00000175866 BAIAP2       | ENSG00000179364 PACS2        | ENSG00000181826 Q8IUW5_HUMAN   |
|         | ENSG00000182162 P2RY8          | ENSG00000184113 CLDN5          | ENSG00000185176 AQP12B         | ENSG00000188185 Q6ZQP8_HUMAN   | ENSG00000196808 Q96NJ4_HUMAN   | ENSG00000039560 RAI14        | ENSG00000050030 KIAA2022     | ENSG00000095203 EPB41L4B       |
|         | ENSG00000103569 AQP9           | ENSG00000105205 CLC            | ENSG00000109118 PHF12          | ENSG00000124535 WRNIP1         | ENSG00000127081 ZNF484         | ENSG00000132313 MRPL35       | ENSG00000135048 TMEM2        | ENSG00000137872 SEMA6D         |
|         | ENSG00000147892 ADAMTSL1       | ENSG00000150867 PIP5K2A        | ENSG00000156928 C7orf30        | ENSG00000159753 NP_001013860.1 | ENSG00000161571 Q5YK5_HUMAN    | ENSG00000166595 FAM96B       | ENSG00000168675 C18orf1      | ENSG00000173215 Q96HQ8_HUMAN   |
|         | ENSG00000173876 NP_817124.1    | ENSG00000175646 PRM1           | ENSG00000176681 LRRC37A2       | ENSG00000177182 NP_775790.1    | ENSG00000182263 FIGN           | ENSG00000186340 THBS2        | ENSG00000189241 TSPYL1       | ENSG00000196776 CD47           |
|         | ENSG00000197345 MRPL21         | ENSG00000197510 C21orf116      | ENSG00000197756 RPL37A         | ENSG00000198276 UCKL1          | ENSG00000204138 PHACTR4        |                              |                              |                                |
| CTCCTGG | ENSG00000007376 RPUSD1         | ENSG00000008735 MAPK8IP2       | ENSG00000002633 RUNX3          | ENSG00000052344 PRSS8          | ENSG00000064545 TMEM161A       | ENSG00000070985 TRPM5        | ENSG00000092929 UNC13D       | ENSG00000105327 BBC3           |
|         | ENSG00000107731 UNC5B          | ENSG00000107829 FBXW4          | ENSG00000108823 SGCA           | ENSG00000110583 NAT11          | ENSG00000116786 PLEKHM2        | ENSG00000127948 POR          | ENSG00000128254 C22orf24     | ENSG00000138942 RNF185         |
|         | ENSG00000139547 RDH16          | ENSG00000141401 TMPA2          | ENSG00000144524 COPF3B         | ENSG00000145191 EIF2B5         | ENSG00000148805 NR_002934.2    | ENSG00000155876 PLA2G2F      | ENSG00000160877 BTBD14B      | ENSG00000163283 ALPPL2         |
|         | ENSG00000163909 HEYL           | ENSG00000165131 C7orf34        | ENSG00000165917 RAPSN          | ENSG00000167157 PRRX2          | ENSG00000167895 TMC8           | ENSG00000170638 TRABD        | ENSG00000171159 C9orf16      |                                |
|         | ENSG00000171786 NHLH1          | ENSG00000175287 PHYHD1         | ENSG00000175866 BAIAP2         | ENSG00000177225 PDDC1          | ENSG00000181757 SLC22A18A8     | ENSG00000182397 C15orf51     | ENSG00000183048 SLC25A10     | ENSG00000183729 NPBWR1         |
|         | ENSG00000183979 NPB            | ENSG00000184012 TMPRSS2        | ENSG00000184470 TXNRD2         | ENSG00000185818 NAT8L          | ENSG00000186790 FOXE3          | ENSG00000188384 Q6ZUQ5_HUMAN | ENSG00000188566 NDOR1        | ENSG00000196204 Q6NUR6_HUMAN   |
|         | ENSG00000198324 FAM109A        | ENSG00000205271 Q6ZUQ5_HUMAN   | ENSG00000205275 Q6ZUQ5_HUMAN   | ENSG00000205354 Q6ZN60_HUMAN   | ENSG00000000460 C1orf112       | ENSG00000004864 SLC25A13     | ENSG00000007001 UPP2         | ENSG00000101049 SGK2           |
|         | ENSG00000105146 AURKC          | ENSG00000105948 TTC26          | ENSG00000106799 TCFBR1         | ENSG00000106829 TLE4           | ENSG00000107937 GTBP4          | ENSG00000108389 SUMT1A       | ENSG00000108846 ABCC3        | ENSG000001115183 TANC1         |
|         | ENSG00000117289 TXNIP          | ENSG00000119121 TRPM6          | ENSG00000119673 ACOT2          | ENSG00000123836 PFKFB2         | ENSG00000128052 KDR            | ENSG00000132207 TM1A3        | ENSG00000134077 THUMP3       | ENSG00000134259 NGFB           |
|         | ENSG00000140932 CMTM2          | ENSG00000144867 SRPRB          | ENSG00000152022 LIX1L          | ENSG00000152954 NRSN1          | ENSG00000164616 FBXL21         | ENSG00000177465 ACOT4        | ENSG00000177938 CAPZA3       | ENSG00000182197 EXT1           |
|         | ENSG00000184227 ACOT1          | ENSG00000189350 NP_954974.2    | ENSG00000196345 ZNF167         | ENSG00000197375 SLC22A5        |                                |                              |                              |                                |
| CTCGCAT | ENSG00000020256 ZFP64          | ENSG00000031698 SARS           | ENSG00000089505 CMTM1          | ENSG00000103056 SMPD3          | ENSG00000121413 ZSCAN18        | ENSG00000126460 PRRG2        | ENSG00000131668 BARX1        | ENSG00000157312 PDF            |
|         | ENSG00000159556 ISL2           | ENSG00000162591 MEGF6          | ENSG00000166998 CKMT1A         | ENSG00000167642 SPINT2         | ENSG00000170549 IRX1           | ENSG00000173163 COMMD1       | ENSG00000179242 CDH4         | ENSG00000182566 CLEC4G         |
|         | ENSG00000204860 C9orf122       | ENSG00000212131 PDXP           | ENSG00000003096 KLHL13         | ENSG00000038219 FAM44A         | ENSG00000106819 ASPN           | ENSG00000112031 MTRF1L       | ENSG00000115091 ACTR3        | ENSG00000116711 PLA2G4A        |
|         | ENSG00000117519 CNN3           | ENSG00000120280 CXorf21        | ENSG00000130779 CLIP1          | ENSG00000132465 IGJ            | ENSG00000136122 C13orf34       | ENSG00000136379 FAM108C1     | ENSG00000137040 RANBP6       | ENSG00000141446 ESCO1          |
|         | ENSG00000145391 SETD7          | ENSG00000154864 FAM38B         | ENSG00000164305 CASP3          | ENSG00000165678 GHITM          | ENSG00000175604 Q96M66_HUMAN   | ENSG00000182901 RGS7         | ENSG00000184900 SUMO3        | ENSG00000187054 TMPRSS11A      |
|         | ENSG00000189332 Q4G197_HUMAN   | ENSG00000204026 Q6ZSD2_HUMAN   |                                |                                |                                |                              |                              |                                |
| CTCGCCA | ENSG00000063176 SPHK2          | ENSG00000067191 CACNB1         | ENSG00000069424 KCNAB2         | ENSG00000079435 LIPE           | ENSG00000100362 PVALB          | ENSG00000101210 EEF1A2       | ENSG00000105246 EBI3         | ENSG00000116039 ATP6V1B1       |
|         | ENSG00000116254 CHD5           | ENSG00000121274 PAPD5          | ENSG00000124140 SLC12A5        | ENSG00000141873 SLC39A3        | ENSG00000164715 LMTK2          | ENSG00000165917 RAPSN        | ENSG00000166152 C16orf78     | ENSG00000166398 KIAA0355       |
|         | ENSG00000166862 CACNG2         | ENSG00000167705 RILP           | ENSG00000168148 H1ST3H3        | ENSG00000172053 QARS           | ENSG00000172301 C17orf79       | ENSG00000176438 C14orf49     | ENSG00000176477 CCDC101      | ENSG00000176845 METRNL         |
|         | ENSG00000177374 HTC1           | ENSG00000179168 GGN            | ENSG00000180683 Q8N7A4_HUMAN   | ENSG00000180999 C1orf105       | ENSG00000181284 TMEM102        | ENSG00000197175 Q8TBR1_HUMAN | ENSG00000197272 LL27         | ENSG00000198546 ZNF511         |
|         | ENSG00000206539 Q6ZTN9_HUMAN   | ENSG00000088451 TGDS           | ENSG00000089225 TBX5           | ENSG00000091164 TXNL1          | ENSG00000101230 C20orf82       | ENSG00000104043 ATP8B4       | ENSG00000110934 BIN2         | ENSG00000113088 GZMK           |
|         | ENSG00000125868 DSTN           | ENSG00000151835 SACS           | ENSG00000165914 TTC7B          | ENSG00000166529 ZSCAN21        | ENSG00000168502 KIAA0802       | ENSG00000171199 PROL1        | ENSG00000175390 EIF3S5       | ENSG00000178690 C18orf26       |
|         | ENSG00000178695 KCTD12         | ENSG00000179981 TSHZ1          | ENSG00000180917 NP_060818.3    | ENSG00000184374 COLEC10        | ENSG00000185742 NP_997528.1    | ENSG00000188295 ZNF669       | ENSG00000196360 NR_002168.1  | ENSG00000197801 Q8TEB0_HUMAN   |
|         |                                |                                |                                |                                |                                |                              |                              |                                |
| CTCGCCT | ENSG00000105427 CNFN           | ENSG00000106006 HOXA6          | ENSG00000124140 SLC12A5        | ENSG00000129467 ADCY4          | ENSG00000130312 MRPL34         | ENSG00000130382 MLLT1        | ENSG00000157087 ATP2B2       | ENSG00000161642 ZNF385         |
|         | ENSG00000163882 POLR2H         | ENSG00000165802 NELF           | ENSG00000166123 GPT2           | ENSG00000171206 TRIM8          | ENSG00000173366 TLR9           | ENSG00000176015 SPERT        | ENSG00000186970 KRTAP15-1    | ENSG00000188011 NP_776182.2    |
|         | ENSG00000021355 SERPINB1       | ENSG00000049247 UTS2           | ENSG00000102683 SCGC           | ENSG00000102804 TSC22D1        | ENSG00000104904 OAZ1           | ENSG00000106689 LHX2         | ENSG00000115840 SLC25A12     | ENSG00000122778 Q9HCM3_HUMAN   |
|         | ENSG00000124784 ROK1           | ENSG00000125249 RAP2A          | ENSG00000143776 CDC42BPA       | ENSG00000155330 NP_001001436.1 | ENSG00000158473 CD1D           | ENSG00000161405 IKZF3        | ENSG00000163610 Q9NUU0_HUMAN | ENSG00000166920 C15orf48       |
|         | ENSG00000168387 ASB14          | ENSG00000168944 CCDC100        | ENSG00000170425 ADORA2B        | ENSG00000171819 ANGPTL7        | ENSG00000182118 FAM89A         | ENSG00000183434 TFDP3        | ENSG00000183649 Q8NFX8_HUMAN | ENSG00000183831 ANKRD45        |
|         | ENSG00000186481 NP_001025170.1 | ENSG00000196693 ZNF33B         |                                |                                |                                |                              |                              |                                |
| CTCGGTA | ENSG00000010295 NF_542768.1    | ENSG00000060069 CTDDP1         | ENSG00000072518 MARK2          | ENSG00000108244 KRT23          | ENSG00000115042 FAHD2A         | ENSG00000130958 SLC35D2      | ENSG00000132128 LRRC41       | ENSG00000141741 C17orf37       |
|         | ENSG00000142700 DMRTA2         | ENSG00000143393 PIK4CB         | ENSG00000144199 FAHD2B         | ENSG00000145916 RMND5B         | ENSG00000147753 TTY7_HUMAN     | ENSG00000147761 TTY7_HUMAN   | ENSG00000150175 PDZD5B       | ENSG00000154146 NRGN           |
|         | ENSG00000157020 SEC13          | ENSG00000168658 NP_659429.4    | ENSG00000172789 HOXC5          | ENSG00000174915 PTDSS2         | ENSG00000180549 FUT7           | ENSG00000188536 HBA2         | ENSG00000196338 NLGN3        | ENSG00000197704 PDZD5A         |
|         | ENSG00000204141 Q6ZVW5_HUMAN   | ENSG00000204474 Q5JQD4_HUMAN   | ENSG00000067064 IDI1           | ENSG00000107077 JMJD2C         | ENSG00000107938 C10orf137      | ENSG00000116991 SIPAL12      | ENSG00000124788 ATXN1        | ENSG00000125304 TM9SF2         |
|         | ENSG00000128250 RPPL1          | ENSG00000135547 HEY2           | ENSG00000136379 FAM108C1       | ENSG00000140299 BNIP2          | ENSG00000145860 RNF145         | ENSG00000153130 SCOC         | ENSG00000155761 SPAG17       | ENSG00000157703 SVOPL          |
|         | ENSG00000162618 ELTD1          | ENSG00000163072 NOSTRIN        | ENSG00000164117 FBXO8          | ENSG00000164326 CARTPT         | ENSG00000164484 KIAA1913       | ENSG00000165124 SVEP1        | ENSG00000167081 PBX3         | ENSG00000173113 TR112_HUMAN    |
|         | ENSG00000180138 SNK1A1L        | ENSG00000186094 AGBL4          | ENSG00000186288 RBM32A         | ENSG00000188342 GTF2F2         |                                |                              |                              |                                |
| CTCGTTA | ENSG00000072864 NDE1           | ENSG00000077549 CAPZB          | ENSG00000079313 REXO1          | ENSG00000083814 ZNF671         | ENSG00000088356 PDRG1          | ENSG00000089280 FUS          | ENSG00000099622 CIRBP        | ENSG00000100207 TCF20          |
|         | ENSG00000101306 MYLK2          | ENSG00000105357 MYH14          | ENSG00000105369 CD79A          | ENSG00000105393 NP_001028721.1 | ENSG00000107796 ACTA2          | ENSG00000110492 MDK          | ENSG00000118557 PMFBP1       | ENSG00000119919 NKX2-3         |
|         | ENSG00000125843 C20orf29       | ENSG00000132693 CRP            | ENSG00000159692 CTBP1          | ENSG00000177441 Q8N4T9_HUMAN   | ENSG00000178645 C10orf53       | ENSG00000182352 C17orf77     | ENSG00000184675 FAM123B      | ENSG00000196507 TCEAL3         |
|         | ENSG00000203762 Q6ZTJ3_HUMAN   | ENSG00000203919 Q6ZNS1_HUMAN   | ENSG00000203934 Q6ZUQ1_HUMAN   | ENSG00000204343 C9orf118       | ENSG00000205087 NP_001020628.1 | ENSG00000068878 PSME4        | ENSG00000102595 UGCGL2       | ENSG00000112357 PEX7           |
|         | ENSG00000115504 EHPB1          | ENSG00000134046 MBD2           | ENSG00000136141 LRCH1          | ENSG00000162521 RBBP4          | ENSG00000167912 Q96QE0_HUMAN   | ENSG00000169251 NMD3         | ENSG00000169313 P2RY12       | ENSG00000187267 NP_001017417.1 |
|         | ENSG00000189134 C6orf194       | ENSG00000203946 NP_001017438.1 | ENSG00000203948 NP_001017435.1 | ENSG00000205036 NP_001001682.1 |                                |                              |                              |                                |
| CTCGTTC | ENSG00000054793 ATP9A          | ENSG00000058404 CAMK2B         | ENSG00000063245 EPN1           | ENSG00000068724 TTC7A          | ENSG00000090238 YAPL3          | ENSG00000093072 CECR1        | ENSG00000099338 C19orf15     | ENSG00000102100 SLC35A2        |
|         | ENSG00000104946 TBC1D17        | ENSG00000105509 HAS1           | ENSG00000107223 EDF1           | ENSG00000124140 SLC12A5        | ENSG00000142920 ADCL           | ENSG00000147912 FBXO10       | ENSG00000160447 PKN3         | ENSG00000162910 MRPL55         |
|         | ENSG00000163216 SPRR2F         | ENSG00000164399 IL3            | ENSG00000178571 NM_203423      | ENSG00000186918 FBXO16         | ENSG00000196805 SPRR2A         | ENSG00000198691 ABCA4        | ENSG0000018236 CNTN1         | ENSG00000202267 FHL1           |
|         | ENSG00000023734 STRAP          | ENSG00000078401 EDN1           | ENSG00000087510 TFAP2C         | ENSG00000105497 ZNF175         | ENSG00000121440 PDZRN3         | ENSG00000148057 C9orf103     | ENSG00000152428 MARS2        | ENSG00000154001 PPP2R5E        |
|         | ENSG00000157510 AFAP1L1        | ENSG00000159210 SNF8           | ENSG00000162384 C1orf123       | ENSG00000162722 TRIM58         | ENSG00000168612 SNORA25        | ENSG00000168681 Q9H762_HUMAN | ENSG00000169291 SHE          | ENSG00000174456 NP_997318.1    |
|         | ENSG00000183649 Q8NFX8_HUMAN   |                                |                                |                                |                                |                              |                              |                                |

|         |                                                                                                                                                                                                                                             |                                                                                                                                                                                                                                     |                                                                                                                                                                                                                                      |                                                                                                                                                                                                                                        |                                                                                                                                                                                                                                                           |                                                                                                                                                                                                                                                                                                                                                  |                                                                                                                                                                                                                                                                                                                                                                                                                                                                                      |                                                                                                                                                                                                                                                                                                                                                                                                                                                                                                   |
|---------|---------------------------------------------------------------------------------------------------------------------------------------------------------------------------------------------------------------------------------------------|-------------------------------------------------------------------------------------------------------------------------------------------------------------------------------------------------------------------------------------|--------------------------------------------------------------------------------------------------------------------------------------------------------------------------------------------------------------------------------------|----------------------------------------------------------------------------------------------------------------------------------------------------------------------------------------------------------------------------------------|-----------------------------------------------------------------------------------------------------------------------------------------------------------------------------------------------------------------------------------------------------------|--------------------------------------------------------------------------------------------------------------------------------------------------------------------------------------------------------------------------------------------------------------------------------------------------------------------------------------------------|--------------------------------------------------------------------------------------------------------------------------------------------------------------------------------------------------------------------------------------------------------------------------------------------------------------------------------------------------------------------------------------------------------------------------------------------------------------------------------------|---------------------------------------------------------------------------------------------------------------------------------------------------------------------------------------------------------------------------------------------------------------------------------------------------------------------------------------------------------------------------------------------------------------------------------------------------------------------------------------------------|
| CTCTCTC | ENSG0000007314 SCN4A<br>ENSG00000116213 WDR8<br>ENSG00000162968 Q6MRQ0_HUMAN<br>ENSG00000175662 TOM1L2<br>ENSG00000112812 PRSS16<br>ENSG00000164287 CDC20B<br>ENSG00000179399 GPC5                                                          | ENSG00000090659 CD209<br>ENSG00000124664 SPDEF<br>ENSG000001168314 MOBP_HUMAN<br>ENSG00000178719 GRINA<br>ENSG00000115415 STAT1<br>ENSG00000165152 C9orf125<br>ENSG00000187079 TEAD1                                                | ENSG00000092068 SLC7A8<br>ENSG00000129245 FXR2<br>ENSG00000168631 DPCR1<br>ENSG00000186648 C14orf121<br>ENSG00000122643 NT5C3<br>ENSG00000165685 C12orf59                                                                            | ENSG00000095777 MYO3A<br>ENSG00000137507 LRRC32<br>ENSG00000196361 METTL7B<br>ENSG00000125538 IL1B<br>ENSG00000166439 RNFLR2                                                                                                           | ENSG00000099194 SCD<br>ENSG00000141480 ARRB2<br>ENSG00000170454 KRT75<br>ENSG00000148833 TUBB4<br>ENSG00000129103 SUMF2<br>ENSG00000165507 C10orf10<br>ENSG0000014574 ABCF1<br>ENSG00000139678 CDH1<br>ENSG00000136231 C11orf1<br>ENSG00000164756 SLC30A8 | ENSG00000105258 POLR2I<br>ENSG00000143318 CASQ1<br>ENSG00000171401 KRT13<br>ENSG00000140288 TDF1<br>ENSG00000135452 TSPAN31<br>ENSG00000168589 DYNLRB2<br>ENSG00000170037 CNTROB<br>ENSG00000110721 CHKK<br>ENSG00000141034 C17orf39<br>ENSG00000182335 QSTE90_HUMAN<br>ENSG00000100528 CNIH<br>ENSG00000138095 LRPPRC<br>ENSG00000167034 NKX3-1 | ENSG00000110881 ACCN2<br>ENSG00000143603 KCNN3<br>ENSG00000171532 NEUROD2<br>ENSG00000120244 PLS3<br>ENSG00000140455 USP3<br>ENSG00000173627 APOBEC4<br>ENSG00000113272 THGL1<br>ENSG00000143811 PYCR2<br>ENSG00000196166 NP_997295.1<br>ENSG00000104765 BNIP3L<br>ENSG00000145569 FAM105A<br>ENSG00000172586 CHCHD1<br>ENSG00000113272 THGL1<br>ENSG00000143811 PYCR2<br>ENSG00000196166 NP_997295.1<br>ENSG00000104765 BNIP3L<br>ENSG00000145569 FAM105A<br>ENSG00000172586 CHCHD1 | ENSG00000112715 VEGFA<br>ENSG00000151176 NP_775813.1<br>ENSG00000172269 DPAGT1<br>ENSG00000102804 TSC2D1<br>ENSG00000143458 NP_653219.1<br>ENSG00000177409 SAMD9L<br>ENSG00000113272 THGL1<br>ENSG00000143811 PYCR2<br>ENSG00000196166 NP_997295.1<br>ENSG00000104765 BNIP3L<br>ENSG00000145569 FAM105A<br>ENSG00000172586 CHCHD1<br>ENSG00000113272 THGL1<br>ENSG00000143811 PYCR2<br>ENSG00000196166 NP_997295.1<br>ENSG00000104765 BNIP3L<br>ENSG00000145569 FAM105A<br>ENSG00000172586 CHCHD1 |
| CTCTGAA | ENSG0000005238 KIAA1539<br>ENSG00000115317 HTRA2<br>ENSG00000161243 FBXO27<br>ENSG000001198208 RPS6KL1<br>ENSG00000112531 QKI<br>ENSG00000153233 PTPRR<br>ENSG00000183571 LOC145814                                                         | ENSG0000008056 SYN1<br>ENSG00000123374 CDK2<br>ENSG00000162551 ALPL<br>ENSG00000198736 SEPK1<br>ENSG00000115159 GPD2<br>ENSG00000163755 HPS3<br>ENSG00000184007 PTP4A2                                                              | ENSG00000072121 ZFYVE26<br>ENSG00000124194 GDAP1L1<br>ENSG00000162873 KLHDC8A<br>ENSG00000204496 LTA<br>ENSG00000132781 MUTYH<br>ENSG00000164338 UTP15<br>ENSG00000186188 GPR120                                                     | ENSG00000102878 HSF4<br>ENSG00000126353 CCR7<br>ENSG00000165507 C10orf10<br>ENSG00000204574 ABCF1<br>ENSG00000139678 CDH1<br>ENSG00000136231 C11orf1<br>ENSG00000164756 SLC30A8                                                        | ENSG00000104833 TUBB4<br>ENSG00000129103 SUMF2<br>ENSG00000172458 IL17D<br>ENSG00000204574 ABCF1<br>ENSG00000139678 CDH1<br>ENSG00000137720 C11orf1<br>ENSG00000164938 TP53INP1                                                                           | ENSG00000105700 C19orf50<br>ENSG00000129244 ATP1B2<br>ENSG00000182335 QSTE90_HUMAN<br>ENSG00000100528 CNIH<br>ENSG00000138095 LRPPRC<br>ENSG00000167034 NKX3-1                                                                                                                                                                                   | ENSG00000110721 CHKK<br>ENSG00000141034 C17orf39<br>ENSG00000182335 QSTE90_HUMAN<br>ENSG00000100528 CNIH<br>ENSG00000138095 LRPPRC<br>ENSG00000167034 NKX3-1                                                                                                                                                                                                                                                                                                                         | ENSG00000113272 THGL1<br>ENSG00000143811 PYCR2<br>ENSG00000196166 NP_997295.1<br>ENSG00000104765 BNIP3L<br>ENSG00000145569 FAM105A<br>ENSG00000172586 CHCHD1                                                                                                                                                                                                                                                                                                                                      |
| CTCTGAC | ENSG0000005238 KIAA1539<br>ENSG00000131652 THOC6<br>ENSG00000182490 TSSK2<br>ENSG00000100353 EIF3S7<br>ENSG00000163817 SLC6A20<br>ENSG00000204711 C9orf135                                                                                  | ENSG00000027847 B4GALT7<br>ENSG00000139832 RAB20<br>ENSG00000183134 GPR44<br>ENSG00000123104 ITPR2<br>ENSG00000166206 GABRB3                                                                                                        | ENSG00000092621 PHGDH<br>ENSG00000164711 LPAL2<br>ENSG00000186529 CYP4F3<br>ENSG00000134115 CNTN6<br>ENSG00000167117 C17orf73                                                                                                        | ENSG00000095303 PTGS1<br>ENSG00000167614 TTYH1<br>ENSG00000187595 NP_001013646.1<br>ENSG00000135960 EDAR<br>ENSG00000168310 IRF2                                                                                                       | ENSG00000104833 TUBB4<br>ENSG00000169247 SH3TC2<br>ENSG00000187595 NP_001013646.1<br>ENSG00000146856 AGBL3<br>ENSG00000170222 C17orf48                                                                                                                    | ENSG00000110148 CKCKBR<br>ENSG00000173548 SH3PX3<br>ENSG00000187595 NP_001013646.1<br>ENSG00000150048 CLEC1A<br>ENSG00000171262 FAM98B                                                                                                                                                                                                           | ENSG00000110237 ARHGEP17<br>ENSG00000178078 NP_060190.2<br>ENSG00000075651 PLD1<br>ENSG00000150457 LATS2<br>ENSG00000172006 ZNF554                                                                                                                                                                                                                                                                                                                                                   | ENSG000001124664 SPDEF<br>ENSG00000179057 IGSF22<br>ENSG00000085382 HACE1<br>ENSG00000163762 TM4SF18<br>ENSG00000196917 GPR81                                                                                                                                                                                                                                                                                                                                                                     |
| CTCTGAG | ENSG00000038532 KIAA0350<br>ENSG00000126062 TMEM115<br>ENSG00000163485 ADORA1<br>ENSG00000204084 INPP5B<br>ENSG00000113812 ACTR8<br>ENSG00000140873 ADAMTS18<br>ENSG00000168384 HLA-DPA1                                                    | ENSG00000048545 GUCA1A<br>ENSG00000126759 CFP<br>ENSG00000172500 FIBP<br>ENSG00000204313 NP_001028830.1<br>ENSG00000122033 MTIF3<br>ENSG00000148110 HIATL1<br>ENSG00000177954 RPS27                                                 | ENSG00000050327 ARHGEP5<br>ENSG00000127824 MUBA4<br>ENSG00000173436 C1orf151<br>ENSG00000204991 SPIRE2<br>ENSG00000124788 ATXN1<br>ENSG00000150676 CDCDC83<br>ENSG00000180772 AGTR2                                                  | ENSG00000070444 MNT<br>ENSG00000131591 C1orf159<br>ENSG00000185633 NDUFA4L2<br>ENSG00000206146 Q96S24_HUMAN<br>ENSG00000129474 JUB<br>ENSG00000150760 DOCK1<br>ENSG00000196597 ZNF782                                                  | ENSG00000072818 CENTB1<br>ENSG00000135074 ADAM19<br>ENSG00000186470 BTNA2<br>ENSG00000049449 RCN1<br>ENSG00000133812 SBF2<br>ENSG00000151746 BICD1<br>ENSG00000197956 S100A6                                                                              | ENSG00000174211 PPP2R2C<br>ENSG00000135074 ADAM19<br>ENSG00000186470 BTNA2<br>ENSG00000049449 RCN1<br>ENSG00000133812 SBF2<br>ENSG00000151746 BICD1<br>ENSG00000197956 S100A6                                                                                                                                                                    | ENSG00000107742 SPOCK2<br>ENSG00000138621 PPCDC<br>ENSG00000196630 Q8NF76_HUMAN<br>ENSG00000074695 LMAN1<br>ENSG00000134258 VTCN1<br>ENSG00000152952 PLOC2<br>ENSG00000159212 CLIC6                                                                                                                                                                                                                                                                                                  | ENSG00000117481 NSUN4<br>ENSG00000163219 ARHGAP25<br>ENSG00000198106 RUNDC2B<br>ENSG00000078018 MAP2<br>ENSG00000137364 TPMT<br>ENSG00000159212 CLIC6<br>ENSG00000166411 IDH3A                                                                                                                                                                                                                                                                                                                    |
| CTCTGCC | ENSG0000006210 CX3CL1<br>ENSG00000111331 OAS3<br>ENSG00000127564 PKMYT1<br>ENSG00000149571 KIRREL3<br>ENSG00000168754 NP_057574.2<br>ENSG00000068489 PRR11<br>ENSG00000128578 FAM40B<br>ENSG00000163637 PRICKLE2<br>ENSG00000188215 DCUN1D3 | ENSG0000007376 RPUSD1<br>ENSG00000113068 PFDDN1<br>ENSG00000129451 KLIK10<br>ENSG00000149922 TBX6<br>ENSG00000169562 GJB1<br>ENSG00000079246 XRCC5<br>ENSG00000133318 RTN3<br>ENSG00000164220 F2RL2<br>ENSG00000197085 Q6EKK1_HUMAN | ENSG00000090020 SLC9A1<br>ENSG0000013889 KNG1<br>ENSG00000131759 RARA<br>ENSG00000154252 GAL3ST2<br>ENSG00000179528 LBX2<br>ENSG00000105146 AURKC<br>ENSG00000135318 NT5E<br>ENSG00000165076 NP_001008271.1<br>ENSG00000198382 UVRAG | ENSG00000100991 TRPC4AP<br>ENSG00000115041 KCNP3<br>ENSG00000137218 FRS3<br>ENSG00000161610 HCRT<br>ENSG00000196517 SLC6A9<br>ENSG00000116977 LGALS8<br>ENSG00000136874 STX17<br>ENSG00000166363 OR10A5<br>ENSG00000203827 XR_015220.1 | ENSG00000104980 TIMM44<br>ENSG00000118096 C1orf60<br>ENSG00000138030 KHK<br>ENSG00000162576 MXR8<br>ENSG00000197070 ARRDC1<br>ENSG00000117139 JARID1B<br>ENSG00000137364 TPMT<br>ENSG00000166927 MS4A7<br>ENSG00000203832 NBPF20                          | ENSG00000107130 FREQ<br>ENSG00000122859 NEUROG3<br>ENSG00000142784 WUTC1<br>ENSG00000164967 C9orf23<br>ENSG00000197106 SLC6A17<br>ENSG00000118922 KLF12<br>ENSG00000146833 TRIM4<br>ENSG00000183022 NR_003148.2<br>ENSG00000203832 NBPF20                                                                                                        | ENSG00000110583 NAT11<br>ENSG00000124006 OBSL1<br>ENSG00000143839 REN<br>ENSG00000166444 ST5<br>ENSG00000204344 STK19<br>ENSG00000118939 UCHL3<br>ENSG00000159212 CLIC6<br>ENSG00000166411 IDH3A                                                                                                                                                                                                                                                                                     | ENSG000001124664 SPDEF<br>ENSG00000179057 IGSF22<br>ENSG00000085382 HACE1<br>ENSG00000163762 TM4SF18<br>ENSG00000196917 GPR81<br>ENSG00000078018 MAP2<br>ENSG00000137364 TPMT<br>ENSG00000159212 CLIC6<br>ENSG00000166411 IDH3A                                                                                                                                                                                                                                                                   |
| CTCTGCT | ENSG00000005075 POLR2J<br>ENSG00000111667 USP5<br>ENSG00000157379 DHRS1<br>ENSG00000183773 AIFM3<br>ENSG0000019186 CYP24A1<br>ENSG00000129699 NP_067644.2<br>ENSG00000175216 CKAP5<br>ENSG00000054967 TNFRSF19L                             | ENSG0000004138 POLA2<br>ENSG00000116151 PPM1G<br>ENSG00000158816 Q5TIE3_HUMAN<br>ENSG00000185359 HGS<br>ENSG000001100249 C22orf31<br>ENSG00000134548 C12orf39<br>ENSG00000179915 NRX1B_HUMAN<br>ENSG00000074410 CA12                | ENSG00000043822 NP_060895.1<br>ENSG00000116151 PPM1G<br>ENSG00000160325 C9orf7<br>ENSG00000185761 ADAMTSL5<br>ENSG000001103342 GSPT1<br>ENSG00000136141 LRCH1<br>ENSG00000186579 DEFB106B<br>ENSG00000089289 IGBP1                   | ENSG000000059122 FLYWCH1<br>ENSG00000120029 C10orf76<br>ENSG00000167280 NP_001036038.1<br>ENSG00000186652 PRG2<br>ENSG00000109171 SLAIN2<br>ENSG00000138381 ASNSD1<br>ENSG00000187082 D106A_HUMAN<br>ENSG00000093072 CECR1             | ENSG000000066056 TIE1<br>ENSG00000120029 C10orf76<br>ENSG00000167280 NP_001036038.1<br>ENSG00000186652 PRG2<br>ENSG00000109171 SLAIN2<br>ENSG00000138381 ASNSD1<br>ENSG00000187082 D106A_HUMAN<br>ENSG00000093072 CECR1                                   | ENSG00000100842 EFS<br>ENSG00000125319 C17orf53<br>ENSG00000173918 C1QTNF1<br>ENSG00000178928 TPRX1<br>ENSG00000198851 CD3E<br>ENSG00000111707 SUBS3<br>ENSG00000166991 STPAIL2<br>ENSG00000146477 SLC22A3<br>ENSG00000100767 PAPLN                                                                                                              | ENSG00000101282 RSPO4<br>ENSG00000127838 PNKD<br>ENSG00000178928 TPRX1<br>ENSG00000198851 CD3E<br>ENSG00000111707 SUBS3<br>ENSG00000166991 STPAIL2<br>ENSG00000146477 SLC22A3<br>ENSG00000100938 NM_001002000.1                                                                                                                                                                                                                                                                      | ENSG00000107438 PDLIM1<br>ENSG00000138111 TMEM180<br>ENSG00000179364 PACS2<br>ENSG00000183172 C22orf32<br>ENSG0000009765 IYD<br>ENSG00000112942 MTUS1<br>ENSG00000166923 GREM1<br>ENSG00000101282 RSPO4<br>ENSG00000127838 PNKD<br>ENSG00000178928 TPRX1<br>ENSG00000198851 CD3E<br>ENSG00000111707 SUBS3<br>ENSG00000166991 STPAIL2<br>ENSG00000146477 SLC22A3                                                                                                                                   |
| CTCTGTA | ENSG00000108439 PNPO<br>ENSG00000156381 ANKRD9<br>ENSG00000198722 UNC13B<br>ENSG00000134489 HRH4<br>ENSG00000141433 ADCYAP1                                                                                                                 | ENSG00000109072 VTN<br>ENSG00000157601 MX1<br>ENSG00000204092 NP_001001705.1<br>ENSG00000135324 C6orf117<br>ENSG00000157470 FAM81A                                                                                                  | ENSG00000114745 GORASP1<br>ENSG00000166111 SVOV<br>ENSG00000204092 NP_001001705.1<br>ENSG00000136240 KDELR2<br>ENSG00000171451 DSEL                                                                                                  | ENSG00000125954 FNTB<br>ENSG00000166224 SGPL1<br>ENSG0000000066027 PPP2R5A<br>ENSG00000136527 SFRS10<br>ENSG00000174827 PDZK1                                                                                                          | ENSG00000130724 CHMP2A<br>ENSG00000177303 CASKIN2<br>ENSG0000000066027 PPP2R5A<br>ENSG00000138119 FER1L3<br>ENSG00000181472 ZBTB2                                                                                                                         | ENSG00000100767 PAPLN<br>ENSG00000131100 ATP6V1E1<br>ENSG00000186654 ARHGAP8<br>ENSG00000125247 TMTC4<br>ENSG00000139160 NP_776163.1<br>ENSG00000188647 PTAR1                                                                                                                                                                                    | ENSG00000100938 NM_001002000.1<br>ENSG00000137709 POU2F3<br>ENSG00000196187 TMEM63A<br>ENSG0000010131473 ACLY<br>ENSG00000139318 DUSP6<br>ENSG00000197969 VPS13A                                                                                                                                                                                                                                                                                                                     | ENSG00000101224 CDC25B<br>ENSG00000140990 NDUFB10<br>ENSG00000197757 HOXC6<br>ENSG00000133800 XLKD1<br>ENSG00000139946 PELT2<br>ENSG00000205144 Q6ZV43_HUMAN                                                                                                                                                                                                                                                                                                                                      |
| CTCTTAG | ENSG00000010319 SEMA3G<br>ENSG00000116273 PHF13<br>ENSG00000158525 CPA5<br>ENSG00000203811 HIST2H3A<br>ENSG00000116005 PCYOX1<br>ENSG00000185737 NRG3                                                                                       | ENSG00000023892 DEF6<br>ENSG00000123143 PKN1<br>ENSG00000162408 NOL9<br>ENSG00000203813 HIST2H3C<br>ENSG00000123095 BHLHB3<br>ENSG00000196208 NP_683701.2                                                                           | ENSG00000036565 SLC18A1<br>ENSG00000123411 IKZF4<br>ENSG00000166847 DCNT5<br>ENSG00000204005 Q6ZP22_HUMAN<br>ENSG00000127125 PPCS<br>ENSG00000204397 NP_001017534.1                                                                  | ENSG00000100228 RAB36<br>ENSG00000128311 TST<br>ENSG00000166847 DCNT5<br>ENSG00000203804 Q6ZP22_HUMAN<br>ENSG00000130349 C6orf203<br>ENSG00000153041 NP_001017534.1                                                                    | ENSG00000101079 NDRG3<br>ENSG00000129673 AANAT<br>ENSG00000179151 EDC3<br>ENSG0000000070190 DAPP1<br>ENSG00000143457 GOLPH3L<br>ENSG00000115112 TFCP2L1                                                                                                   | ENSG00000105732 ZNF574<br>ENSG00000142512 STGLEC10<br>ENSG00000184330 S100A7A<br>ENSG0000000087263 OGFOD1<br>ENSG00000143457 GOLPH3L<br>ENSG00000148700 ADD3                                                                                                                                                                                     | ENSG00000112079 STK38<br>ENSG00000147140 NONO<br>ENSG00000188447 XR_016015.1<br>ENSG00000112667 C6orf108<br>ENSG00000167720 SRR<br>ENSG00000115234 SNX17                                                                                                                                                                                                                                                                                                                             | ENSG00000114388 TUSC4<br>ENSG00000151079 KCN6A<br>ENSG00000198208 RPS6KL1<br>ENSG00000113161 HMGR<br>ENSG00000178338 ZNF354B<br>ENSG00000115234 SNX17<br>ENSG00000156603 MED19<br>ENSG00000188447 XR_016015.1<br>ENSG00000112667 C6orf108<br>ENSG00000167720 SRR                                                                                                                                                                                                                                  |
| CTCTTCA | ENSG0000010803 SCMH1<br>ENSG00000132589 FLOT2<br>ENSG00000198013 PNMA6A<br>ENSG00000120129 DUSP1<br>ENSG00000158865 SLC5A11<br>ENSG00000173391 OLR1                                                                                         | ENSG00000044446 PHKA2<br>ENSG00000139083 ETV6<br>ENSG00000206162 Q6ZVH1_HUMAN<br>ENSG00000130021 HDHD1A<br>ENSG00000160223 ICOSLG<br>ENSG00000182180 MRPS16                                                                         | ENSG00000080511 RDH8<br>ENSG00000142046 TMEM91<br>ENSG000000055147 C5orf3<br>ENSG00000130638 ATXN10<br>ENSG00000161594 KLHL10                                                                                                        | ENSG00000112062 MAPK14<br>ENSG00000147481 SNTG1<br>ENSG0000000055147 C5orf3<br>ENSG00000134970 TICAM2<br>ENSG00000162441 LZIC                                                                                                          | ENSG00000115204 MPV17<br>ENSG00000158171 RNFL16<br>ENSG0000000055147 C5orf3<br>ENSG00000134970 TICAM2<br>ENSG00000162441 LZIC                                                                                                                             | ENSG00000115468 EFHD1<br>ENSG00000167083 NGT2<br>ENSG00000112167 C6orf64<br>ENSG00000148925 BTBD10<br>ENSG00000163046 C21orf99                                                                                                                                                                                                                   | ENSG00000116698 SMG7<br>ENSG00000173636 PRSS1<br>ENSG00000112486 CCR6<br>ENSG00000152207 CYSLTR2<br>ENSG00000166573 GALR1                                                                                                                                                                                                                                                                                                                                                            | ENSG00000124422 USP22<br>ENSG00000186951 PPARA<br>ENSG00000113522 RAD50<br>ENSG00000152413 HOMER1<br>ENSG00000170871 K0232_HUMAN                                                                                                                                                                                                                                                                                                                                                                  |
| CTCTTGC | ENSG00000008513 ST3GAL1<br>ENSG00000138769 CDKL2<br>ENSG00000169921 Q75L30_HUMAN<br>ENSG00000012983 MAP4K5<br>ENSG00000102786 INTS6<br>ENSG00000148690 C10orf4<br>ENSG00000178722 NP_775938.1                                               | ENSG00000088827 SIGLEC1<br>ENSG00000139899 CBLN3<br>ENSG00000179801 C8orf30A<br>ENSG00000048028 USP28<br>ENSG00000110367 DDX6<br>ENSG00000154710 KCTD7<br>ENSG00000185104 FAF1                                                      | ENSG00000105137 SYDE1<br>ENSG00000140545 MYGE8<br>ENSG00000181039 ANKRD34<br>ENSG00000080493 SLC4A4<br>ENSG00000116666 CHPT1<br>ENSG00000155816 FMN2<br>ENSG00000186579 DEFB106B                                                     | ENSG00000114302 PRKR2A<br>ENSG00000159111 MRPL10<br>ENSG00000182853 VMO1<br>ENSG00000081870 C1orf41<br>ENSG00000119414 PPP6C<br>ENSG00000163421 PROK2<br>ENSG00000187082 D106A_HUMAN                                                   | ENSG00000128652 HOXD3<br>ENSG00000159784 FAM131B<br>ENSG00000186676 EEF1G<br>ENSG00000082213 C5orf22<br>ENSG00000131773 KHDRBS3<br>ENSG00000164440 TXLNB<br>ENSG00000196785 Q8N862_HUMAN                                                                  | ENSG00000131584 CENTB5<br>ENSG00000160767 C1orf2<br>ENSG00000186806 Q86VR7_HUMAN<br>ENSG00000083828 ZNF586<br>ENSG00000133115 STOML3<br>ENSG00000171132 PRKCE<br>ENSG00000197181 PIWIL2                                                                                                                                                          | ENSG00000133028 SCO1<br>ENSG00000167641 PPP1R14A<br>ENSG00000186979 Q96BK8_HUMAN<br>ENSG00000099246 RAB18<br>ENSG00000141161 UNC45B<br>ENSG00000175646 PRM1<br>ENSG00000197181 PIWIL2                                                                                                                                                                                                                                                                                                | ENSG00000136279 DBNL<br>ENSG00000169894 MUC3A<br>ENSG00000186979 Q96BK8_HUMAN<br>ENSG00000099246 RAB18<br>ENSG00000141161 UNC45B<br>ENSG00000175646 PRM1<br>ENSG00000204469 BAT2<br>ENSG00000205227 Q6ZWA8_HUMAN                                                                                                                                                                                                                                                                                  |
| CTCTTGG | ENSG00000083444 PLOC1<br>ENSG00000136950 ARPC5L<br>ENSG00000163520 FBLN2<br>ENSG00000186635 STARD10<br>ENSG00000094880 CDC23<br>ENSG00000144057 ST6GAL2<br>ENSG00000196754 S100A2                                                           | ENSG00000089057 SLC23A2<br>ENSG00000139988 RDH12<br>ENSG00000167614 TTYH1<br>ENSG00000189159 HN1<br>ENSG00000101343 CRNKL1<br>ENSG00000153113 CAST<br>ENSG00000198121 EDG2                                                          | ENSG00000100813 ACIN1<br>ENSG00000143333 RGS16<br>ENSG00000169884 WNT10B<br>ENSG00000198794 SCAMP5<br>ENSG0000010134                                                                                                                 |                                                                                                                                                                                                                                        |                                                                                                                                                                                                                                                           |                                                                                                                                                                                                                                                                                                                                                  |                                                                                                                                                                                                                                                                                                                                                                                                                                                                                      |                                                                                                                                                                                                                                                                                                                                                                                                                                                                                                   |

ENSG00000198213|NM\_207501 ENSG00000198901|PRC1 ENSG00000204310|AGPAT1 ENSG00000204343|C9orf118 ENSG00000205205|C17orf51 ENSG0000049319|SRD5A2 ENSG0000078618|NRD1 ENSG0000093134|VNN3  
ENSG00000101951|PAGE4 ENSG00000109846|CRYAB ENSG00000114956|DGUOK ENSG00000117322|CR2 ENSG00000119596|YLPML ENSG00000123572|NRK ENSG00000131269|ABC7 ENSG00000136698|CF1  
ENSG00000140873|ADAMTS18 ENSG00000152093|NP\_001072998.1 ENSG00000163684|RPP14 ENSG00000164485|IL22RA2 ENSG00000166752|TMEM83 ENSG00000168229|PTGDR ENSG00000174038|C9orf131 ENSG00000175984|DENND2C  
ENSG00000178999|AURKB ENSG00000179676|C18orf20 ENSG00000180777|ANKRD30B ENSG00000188408|MAGEB5  
CTGAATA ENSG00000007129|CEACAM21 ENSG00000075426|FOSL2 ENSG00000077157|PPP1R12B ENSG00000092964|DPYSL2 ENSG00000100453|GZMB ENSG00000105352|CEACAM4 ENSG00000106397|PLOC3 ENSG00000112659|PARC\_HUMAN  
ENSG00000129244|ATP1B2 ENSG00000129925|TMEM8 ENSG00000132821|C20orf102 ENSG00000136718|IMP4 ENSG00000142789|ELA3A ENSG00000143512|KIAA1822L ENSG00000144730|ILL17RD ENSG00000145494|NDUF56  
ENSG00000145882|PCYOX1L ENSG00000155087|ODF1 ENSG00000155660|PDI4A ENSG00000158055|GRHL3 ENSG00000163885|CCDC37 ENSG00000164266|SPINK1 ENSG00000169093|ASMTL ENSG00000170100|Q96MU6-2  
ENSG00000170835|CEL ENSG00000172543|CTSWS ENSG00000174231|PRPF8 ENSG00000176978|DPP7 ENSG00000177764|ZCCHC3 ENSG00000179921|GPBAR1 ENSG00000188901|NP\_055226.1 ENSG00000197245|GRRP1  
ENSG00000197430|TMEM10 ENSG00000204228|HSD17B8 ENSG00000204581|Q6ZU44\_HUMAN ENSG00000005108|THSD7A ENSG00000067208|EVI5 ENSG00000071967|CYBRD1 ENSG00000106484|MEST ENSG00000108932|SLC16A6  
ENSG00000109536|FRG1 ENSG00000110321|EIF4G2 ENSG00000128845|CCPG1 ENSG00000132294|EFR3\_HUMAN ENSG00000135272|MDFIC ENSG00000143457|GOLPH3L ENSG00000146587|RBAK ENSG00000152268|SPON1  
ENSG00000152520|PAN3 ENSG00000154175|ABI3BP ENSG00000156467|UQCRR ENSG00000163110|PDLIM5 ENSG00000165416|SUGT1 ENSG00000168591|TMUB2 ENSG00000170088|NP\_689894.1 ENSG00000175548|ALG10B  
ENSG00000177485|ZBTB33 ENSG00000178636|Q8N7N2\_HUMAN ENSG00000187672|ERC2 ENSG00000205808|PPAPDC2  
CTGAATC ENSG00000100403|ZC3H7B ENSG00000101224|CDC25B ENSG00000103490|PYCARD ENSG00000108950|FAM20A ENSG00000111640|GAPDH ENSG00000112619|PRPH2 ENSG00000130167|TSPAN16  
ENSG00000143001|TMEM61 ENSG00000160213|CSTB ENSG00000160916|ATP5J2 ENSG00000162078|U773\_HUMAN ENSG00000163499|CRYBA2 ENSG00000166123|GPT2 ENSG00000170682|Q96NU5\_HUMAN ENSG00000174238|PITPNA  
ENSG00000175634|RPS6KB2 ENSG00000180358|Q8N1X6\_HUMAN ENSG00000100281|HMG2L1 ENSG00000104205|SGK3 ENSG00000105146|AURKC ENSG00000109654|TRIM2 ENSG00000109686|NP\_001009555.2 ENSG00000113327|GABRG2  
ENSG00000113494|PRLR ENSG00000115137|NP\_057628.1 ENSG00000120262|C6orf97 ENSG00000134755|DSC2 ENSG00000135387|CAPRIN1 ENSG00000140367|UBE2Q2 ENSG00000140987|ZNF434 ENSG00000145491|ROPN1L  
ENSG00000164466|SFXN1 ENSG00000166181|API5 ENSG00000166349|RAG1 ENSG00000167995|BEST1 ENSG00000170264|NP\_115556.1 ENSG00000172840|PDP2\_HUMAN ENSG00000172955|ADH6 ENSG00000175857|C5orf29  
ENSG00000178690|C18orf26 ENSG00000179930|ZNF648 ENSG00000183308|C17orf60 ENSG00000196352|CD55 ENSG00000197959|DNM3 ENSG00000205024|Q6ZVP5\_HUMAN  
CTGACCT ENSG000000066116|CACNG3 ENSG00000070814|TCOF1 ENSG00000075290|WNT8B ENSG00000090316|MAEA ENSG00000100312|ACR ENSG00000104833|TUBB4A ENSG00000108602|ALDH3A1 ENSG00000110148|CKKBR  
ENSG00000112511|PHF1 ENSG00000126759|CFP ENSG00000129816|NR\_001538.1 ENSG00000129845|O14605\_HUMAN ENSG00000131067|GGTL3 ENSG00000131686|CA6 ENSG00000137497|NUMA1 ENSG00000140718|FTO  
ENSG00000144589|STK11P ENSG00000155265|C10orf132 ENSG00000181110|RGAG1 ENSG00000182490|TSSK2 ENSG00000182768|NGRN ENSG00000184004|Q6IC10\_HUMAN ENSG00000184371|CSF1 ENSG00000186575|NF2  
ENSG00000187741|FANCA ENSG00000188086|NP\_954652.1 ENSG00000188505|NP\_001001414.1 ENSG00000197136|PCNLX3 ENSG00000198324|FAM109A ENSG00000205610|Q4G105\_HUMAN ENSG00000205837|Q6ZVL4\_HUMAN ENSG00000081842|PCDHA10  
ENSG00000105186|ANKRD27 ENSG00000115963|RND3 ENSG00000119285|HEATR1 ENSG00000120742|RAMP4\_HUMAN ENSG00000128739|SNRPN ENSG00000137033|IL33 ENSG00000152804|HHEX ENSG00000153922|CHD1  
ENSG00000158604|TMED4 ENSG00000160294|MCM3AP ENSG00000168411|RFWD3 ENSG00000179981|TSHZ1 ENSG00000187079|TEAD1 ENSG00000196917|GPR81  
CTGACGC ENSG00000104731|KLHD4 ENSG00000105223|PLD3 ENSG00000119333|WDR34 ENSG00000123989|CHSS2\_HUMAN ENSG00000125910|EDG6 ENSG00000129214|SHBG ENSG00000142910|TINAGL1 ENSG00000160182|TFF1  
ENSG00000160994|CCDC105 ENSG00000163704|PRRT3 ENSG00000166823|MESP1 ENSG00000172236|TPSB2 ENSG00000174775|HRAS ENSG00000182352|C17orf77 ENSG00000183087|GAS6 ENSG00000184144|CNTN2  
ENSG00000185966|LCE3E ENSG00000204094|Q6ZU93\_HUMAN ENSG00000204537|Q6ZTQ9\_HUMAN ENSG00000205061|Q6ZUP2\_HUMAN ENSG000002055813|CCDC85A ENSG00000206190|DAPP1 ENSG00000081052|COL4A4  
ENSG00000089225|TBX5 ENSG00000104435|STMN2 ENSG00000117114|LPHN2 ENSG00000117859|OSBPL9 ENSG00000119285|HEATR1 ENSG00000134333|LDHA ENSG00000135338|C6orf152 ENSG00000136213|CHST12  
ENSG00000138378|STAT4 ENSG00000141433|ADCYAP1 ENSG00000141469|SLC14A1 ENSG00000149658|YTHDF1 ENSG00000163347|CLDN1 ENSG00000166037|CEP57 ENSG00000169330|K1024\_HUMAN ENSG00000169554|ZEB2  
ENSG00000178403|NEUROG2 ENSG00000198221|NP\_001035973.1  
CTGACTC ENSG00000104833|TUBB4 ENSG00000105379|ETFB ENSG00000126107|HECTD3 ENSG00000133056|PIK3C2B ENSG00000135074|ADAM19 ENSG00000135362|NP\_079117.2 ENSG00000138074|SLC5A6 ENSG00000143393|PIK4CB  
ENSG00000145949|SGK85\_HUMAN ENSG00000159123|DMRTC\_HUMAN ENSG00000159648|NP\_950247.1 ENSG00000161544|CYGB ENSG00000162873|KLHDCA ENSG00000167202|TBC1D2B ENSG00000168000|HNRPUL2 ENSG00000168135|KCNJ4  
ENSG00000171219|CDC42BPB ENSG00000172269|DPAGT1 ENSG00000181291|TMEM132E ENSG00000182162|P2RY8 ENSG00000184640|SEPT9 ENSG00000184911|CXorf50 ENSG00000204308|RNF5 ENSG00000004779|NDUFAB1  
ENSG00000024048|URR2 ENSG00000049245|VAMP3 ENSG00000065534|MYLK ENSG00000072422|RHOBTB1 ENSG00000108559|NUP88 ENSG00000108946|PKARIA ENSG00000120278|PLEKHG1 ENSG00000125900|STRPD  
ENSG00000143256|PFDN2 ENSG00000143363|PRUNE ENSG00000148516|ZEB1 ENSG00000158481|CD1C ENSG00000164105|SAP30 ENSG00000166233|ARH1 ENSG00000171509|RXFP1 ENSG00000172179|PRL  
ENSG00000174136|RGM2 ENSG00000186265|BTLA ENSG00000197872|FAM49A ENSG00000198315|ZNF192 ENSG00000204699|LOC129870 ENSG00000204705|LOC129870  
CTGAGAA ENSG00000007341|ST7L ENSG00000078808|SDF4 ENSG000000801277|PKP1 ENSG00000100312|ACR ENSG00000100865|NP\_116019.1 ENSG000001105392|CRX ENSG00000111540|RAB5B ENSG00000113070|HBEGF  
ENSG00000116514|IBRD3 ENSG00000124334|IL9R ENSG00000136811|ODF2 ENSG00000142623|PAD11 ENSG00000143891|GALM ENSG00000145861|C1QTNF2 ENSG00000150401|DCUN1D2 ENSG00000164047|CAMP  
ENSG00000164318|EGFLAM ENSG00000166123|GPT2 ENSG00000170322|NFRKB ENSG00000173436|C1orf151 ENSG00000174243|DDX23 ENSG00000178932|Q8N81\_HUMAN ENSG00000181016|NP\_872403.1 ENSG00000188807|NP\_001010866.1  
ENSG00000197061|HIST1H4C ENSG00000197261|C6orf141 ENSG00000203755|Q6ZVU5\_HUMAN ENSG00000205085|NP\_001012457.1 ENSG00000205138|NP\_001036096.1 ENSG00000058804|TMEM48 ENSG00000070159|PTPN3 ENSG00000085511|MAP3K4  
ENSG00000095209|TMEM38B ENSG00000102317|RBM3 ENSG00000112343|TRIM38 ENSG00000113600|C9 ENSG00000132781|MUTYH ENSG00000136161|RCBT2 ENSG00000139370|SLC15A4 ENSG00000140259|MFAP1  
ENSG00000140987|ZNF434 ENSG00000141425|NP\_060640.2 ENSG00000144026|ZNF514 ENSG00000144481|TRPM8 ENSG00000147874|FAM29A ENSG00000152454|ZNF256 ENSG00000153310|FAM49B ENSG00000153339|KIAA1012  
ENSG00000154122|ANKH ENSG00000157429|ZNF19 ENSG00000158185|ANKRD36 ENSG00000158406|HIST1H4H ENSG00000163642|XR\_017284.1 ENSG00000164615|CAMLG ENSG00000168461|RAB31 ENSG00000170848|PSG6  
CTGAGCC ENSG00000175895|PLEKHF2 ENSG00000175989|C11orf69 ENSG00000183668|PSG9 ENSG00000185630|PXB1 ENSG00000185915|KLHL34 ENSG00000196236|XPNPEP3 ENSG00000204669|C9orf57  
ENSG00000055918|KCNQ1 ENSG00000067191|CACNB1 ENSG00000068903|SIRT2 ENSG00000100147|CCDC134 ENSG00000100897|WDR23 ENSG000001103067|RBM35B ENSG00000105219|CNTD2 ENSG00000105355|M6PRBP1  
ENSG00000106384|MQGAT3 ENSG00000124702|KLHD3C ENSG00000132563|REEP2 ENSG00000135503|ACVR1B ENSG00000135924|DNAJB2 ENSG00000136878|USP20 ENSG00000140835|CHST4 ENSG00000149043|SYT8  
ENSG00000158106|RHPN1 ENSG00000160404|TOR2A ENSG00000160867|FGFR4 ENSG00000162065|TBC1D24 ENSG00000162236|STX5 ENSG00000162458|FBLIM1 ENSG00000163485|ADORA1 ENSG00000168528|SERINC2  
ENSG00000175229|GAL3ST3 ENSG00000175611|C9orf130 ENSG00000175785|PRIMA1 ENSG00000179862|CITED4 ENSG00000180539|C9orf139 ENSG00000180871|IL8RB ENSG00000184601|NP\_001008404.1 ENSG00000184923|FAM22A  
ENSG00000186470|BTN3A2 ENSG00000187051|RPS19BP1 ENSG00000197586|ENTPD6 ENSG00000198106|RUNDC2B ENSG00000206113|Q6ZU27\_HUMAN ENSG00000004948|CALCR ENSG0000010932|FMO1 ENSG00000082482|KCNK2  
ENSG00000091527|CDV3 ENSG00000100191|SLC5A4 ENSG00000101040|ZMYND8 ENSG00000103740|ACSBG1 ENSG00000110925|FAM130A1 ENSG00000117479|SLC19A2 ENSG00000132141|CCT6B ENSG00000134042|MRO  
ENSG00000138641|HERC3 ENSG00000140199|SLC12A6 ENSG00000142188|TMEM50B ENSG00000159921|GNE ENSG00000164684|ZNF704 ENSG00000168297|PKX ENSG00000169715|MT1JP ENSG00000172840|PDP2\_HUMAN  
ENSG00000182393|IL29 ENSG00000187155|CUO85\_HUMAN ENSG00000198900|TOP1 ENSG00000205364|MT1M  
CTGAGCC perfect: CTGAGCC GGCTCAG hsa-miR-24 tgGCTCAGttcagcaggaacac 1  
ENSG00000084207|GSTP1 ENSG00000100106|TRIOBP ENSG00000101210|EEF1A2 ENSG00000102970|CCL17 ENSG00000105538|RASIP1 ENSG00000107021|TBC1D13 ENSG000001122592|HOXA7  
ENSG00000126457|PRMT1 ENSG00000140274|DUOX2 ENSG00000142599|RERE ENSG00000154309|DISP1 ENSG00000155719|OTOA ENSG00000161618|ALDH16A1 ENSG00000167967|E4F1 ENSG00000169026|MFSD7  
ENSG00000170577|STX2 ENSG00000174177|NP\_001012780.1 ENSG00000178951|ZBTB7A ENSG00000179082|C9orf106 ENSG00000179151|EDC3 ENSG00000182022|ST4S6\_HUMAN ENSG00000183059|XR\_017784.1 ENSG00000186543|Q6ZWC0\_HUMAN  
ENSG00000186866|POFUT2 ENSG00000196260|SFTPG ENSG00000196365|LONP1 ENSG00000196630|Q8NF76\_HUMAN ENSG00000205629|LCMT1 ENSG00000102021|LUZP4 ENSG00000105186|ANKRD27 ENSG00000106004|HOXA5  
ENSG00000106689|LHX2 ENSG00000109099|PMP22 ENSG00000109320|NFKB1 ENSG00000111707|SUDS3 ENSG00000113391|C5orf21 ENSG00000115977|AAK1 ENSG00000131174|COX7B ENSG00000136110|LECT1  
ENSG00000138075|ABCG5 ENSG00000161542|PRPSAP1 ENSG00000164332|UBLCLP1 ENSG00000165943|MOAP1 ENSG00000169860|P2RY1 ENSG00000170537|TMC7 ENSG00000172410|INSL5 ENSG00000173926|MARCH3  
ENSG00000175029|CTBP2 ENSG00000178974|FBXO34 ENSG00000180257|ZNF321 ENSG00000189377|NP\_940879.1  
CTGAGCT ENSG00000048545|GUCA1A ENSG00000090539|CHRD ENSG00000100346|CACNA1I ENSG00000103091|WDR59 ENSG00000105355|M6PRBP1 ENSG00000128918|ALDH1A2 ENSG00000130775|C1orf38  
ENSG00000141756|FKBP10 ENSG00000144115|NP\_060741.2 ENSG00000152291|TGOLN2 ENSG00000157653|C9orf43 ENSG00000163202|LCE3D ENSG00000166289|PLEKHF1 ENSG00000168066|SF1 ENSG00000172725|PTPRCAP  
ENSG00000175832|ETV4 ENSG00000177951|BET1L ENSG00000179148|ALOXE3 ENSG00000185966|LCE3E ENSG00000198844|ARHGEP15 ENSG00000174266|EED ENSG00000094880|CDC23 ENSG00000100711|ZFYVE21  
ENSG00000105974|CAV1 ENSG00000117758|STX12 ENSG00000119401|TRIM32 ENSG00000125246|CLYBL ENSG00000133103|COG6 ENSG00000135324|C6orf117 ENSG00000140391|TSPAN3 ENSG00000140937|CDH11  
ENSG00000152254|G6PC2 ENSG00000152944|SURB7 ENSG00000163904|SENP2 ENSG00000166170|BAG5 ENSG00000170606|HSPA4 ENSG00000175395|ZNF25 ENSG00000175746|NP\_997328.1 ENSG00000182489|XKRX  
ENSG00000198523|PLN ENSG00000203964|Q8NG36\_HUMAN  
CTGATCC ENSG00000008438|PGLYRP1 ENSG00000101321|C20orf159 ENSG00000117266|PCTK3 ENSG00000147117|ZNF157 ENSG00000155666|JMJD5 ENSG00000174945|AMZ1\_HUMAN ENSG00000179036|VAMP2 ENSG00000198570|RD3  
ENSG00000204092|NP\_001001705.1 ENSG00000204385|CTLA4\_HUMAN ENSG00000204483|Q8N925\_HUMAN ENSG00000204483|Q8N925\_HUMAN ENSG00000143106|PSMA5 ENSG00000155530|LRGUK ENSG00000157005|SST ENSG00000162923|WDR26  
ENSG00000132718|SYT11 ENSG00000133657|ATP13A3 ENSG00000135823|STX6 ENSG00000139910|NOVA1  
CTGATGC ENSG00000163106|PTGD2\_HUMAN ENSG00000164287|CDC20B ENSG00000171408|PDE7B ENSG00000171877|FRMD5 ENSG00000175018|C10orf122 ENSG00000186031|Q6ZSY1\_HUMAN ENSG00000203780|FANK1  
ENSG0000009335|UBE3C ENSG00000057757|C1orf128 ENSG00000085733|CTTN ENSG00000089169|RPH3A ENSG00000089737|DDX24 ENSG00000104974|LILRA1 ENSG00000106628|POLD2 ENSG00000140044|NP\_569736.1  
ENSG00000142544|ATPBBD3 ENSG00000144043|TEX261 ENSG00000144115|NP\_060741.2 ENSG00000158714|SLAMF8 ENSG00000160233|LRRC3 ENSG00000162430|SEPN1 ENSG00000162576|MXRA8 ENSG00000164054|NP\_057563.3  
ENSG00000167139|TBC1D21 ENSG00000170145|SNF1LK2 ENSG00000171711|DEFB4 ENSG00000171992|SYNPO ENSG00000177257|BD02\_HUMAN ENSG00000177992|C9orf79 ENSG00000178927|C17orf62 ENSG00000179837|RBM15B  
ENSG00000183186|KIAA1957 ENSG00000183578|TNFAIP8L3 ENSG00000184163|FAM132A ENSG00000185215|TNFAIP2 ENSG00000187741|FANCA ENSG00000204100|Q6ZV28\_HUMAN ENSG00000205912|Q6ZTG5\_HUMAN ENSG00000039068|CDH1  
ENSG00000085382|HACE1 ENSG00000111880|RNGT7 ENSG00000116717|GADD45A ENSG00000122034|GTF3A ENSG00000124098|C20orf108 ENSG00000125414|MYH2 ENSG00000133020|MYH8 ENSG00000138615|CLIP  
ENSG00000139597|NP\_438169.2 ENSG00000142507|PSMB6 ENSG00000150471|LPHN3 ENSG00000150712|MTMR12 ENSG00000163697|APBB2 ENSG00000165675|ENOX2 ENSG00000168385|SEPT2 ENSG00000168411|RFWD3  
ENSG00000172456|NP\_060761.2 ENSG00000184307|ZDHHC23 ENSG00000196826|ZNF709 ENSG00000198176|TFDP1 ENSG00000198682|PAPSS2 ENSG00000204979|MS4A13  
CTGATTC ENSG00000073849|ST6GAL1 ENSG00000100311|PDGFB ENSG00000102057|KCNJ1 ENSG00000105383|CD33 ENSG00000124839|RAB17 ENSG00000129450|SIGLEC9 ENSG00000135622|SEMA4F ENSG00000138074|SLC5A6  
ENSG00000146221|NP\_872345.1 ENSG00000160296|SIGLEC12 ENSG00000163515|RETNLB ENSG00000166220|C10orf27 ENSG00000168995|SIGLEC7 ENSG00000169738|DCXR ENSG00000176753|NP\_001034994.1 ENSG00000182218|KIAA1822  
ENSG00000184246|Q96PW8\_HUMAN ENSG00000188508|U467\_HUMAN ENSG00000188589|RBM33 ENSG00000196666|Q6PAA1\_HUMAN ENSG00000197893|NRAP ENSG00000000003|TSPAN6 ENSG000000049245|VAMP3 ENSG00000053254|CHES1  
ENSG00000105887|MTFN ENSG00000111701|APOBEC1 ENSG00000118523|CTGF ENSG00000120690|ELF1 ENSG00000122873|ZCD1 ENSG00000124818|OPN5 ENSG00000135052|C9orf155 ENSG00000145431|PDGFC  
ENSG00000145476|CYP4V2 ENSG00000151726|ACSL1 ENSG00000164220|F2RL2 ENSG00000172955|ADH6 ENSG00000177599|ZNF491 ENSG00000177889|UBE2N ENSG00000182107|TMEM30B ENSG00000186300|ZNF555  
CTGCAAA ENSG00000100320|RBM9 ENSG00000101104|C20orf119 ENSG00000103021|CCDC113 ENSG00000106615|RHEB ENSG00000125810|CD93 ENSG00000131233|GJA10 ENSG00000136286|MYO1G ENSG00000139083|ETV6  
ENSG00000141622|C18orf23 ENSG00000156639|ZFAND3 ENSG00000160753|RUSC1 ENSG00000162063|CCNF ENSG00000175781|Q9H5L9\_HUMAN ENSG00000182048|XR\_018915.1 ENSG00000184302|SIX6 ENSG00000188396|NP\_001013654.1  
ENSG00000197976|CXorf3 ENSG00000198690|MTMR15 ENSG0000030066|NUP160 ENSG00000065923|SLC9A7 ENSG00000073754|CD5L ENSG00000078747|ITCH ENSG00000079112|CDH17 ENSG00000089335|ZNF302  
ENSG00000106644|EIF5 ENSG00000101856|PGRMC1 ENSG00000109787|KLF3 ENSG00000110675|ELMOD1 ENSG00000112339|HBS1L ENSG00000119725|ZNF410 ENSG00000128739|SNRPN ENSG00000133107|TRPC4  
ENSG00000104166|SMAD4 ENSG00000144196|Q9BXZ2\_HUMAN ENSG00000149554|CHEK1 ENSG00000152454|ZNF256 ENSG00000156482|RPL30 ENSG00000161571|Q5YK5\_HUMAN ENSG00000164128|NP1YR ENSG00000164808|KIAA146  
ENSG00000171431|KRT20 ENSG00000174496|C21orf34 ENSG00000176681|LRRC37A2 ENSG00000177600|RPLP2 ENSG00000179542|SLITRK4 ENSG00000182463|TSHZ2 ENSG00000183952|Q9H5Q9\_HUMAN ENSG00000188158|NHS  
CTGCAAC ENSG00000004455|AK2 ENSG00000076248|UNG ENSG00000100376|FAM118A ENSG00000105523|FAM83E ENSG00000124570|SERPINB6 ENSG00000140557|ST8SIA2 ENSG00000140990|NDUFB10 ENSG00000156639|ZFAND3

ENSG00000157514|TSC22D3 ENSG00000159199|ATP5G1 ENSG00000160678|S100A1 ENSG00000161202|DVL3 ENSG00000162438|CTRC ENSG00000162650|ATXN7L2 ENSG00000163931|TKT ENSG00000164711|LPAL2  
ENSG00000172057|ORMDL3 ENSG00000176383|B3GNT4 ENSG00000179421|Q8NBA4\_HUMAN ENSG00000185442|NP\_997329.1 ENSG00000185744|TNT\_HUMAN ENSG00000196358|NTNG2 ENSG00000197697|HIST1H2BE ENSG00000198711|Clorf191  
ENSG00000203987|Q6ZR86\_HUMAN ENSG00000079156|OSBPL6 ENSG00000109208|SMR3A ENSG00000112414|GPR126 ENSG00000121236|TRIM34 ENSG00000122042|UBL3 ENSG00000134183|GNAT2 ENSG00000143494|VASH2  
ENSG00000151792|CTSF ENSG00000168175|C14orf32 ENSG00000170759|KIF5B ENSG00000171121|KCNMB3 ENSG00000171408|PDE7B ENSG00000172296|SPTLCL3 ENSG00000172403|SYNPO2 ENSG00000178690|C18orf26  
ENSG00000183668|PSG9 ENSG00000187672|ERC2 ENSG00000204300|NP\_001013765.1 ENSG00000204352|C9orf129 ENSG00000088726|TMEM40 ENSG00000100239|SAPS2 ENSG00000107745|CBARA1 ENSG00000108262|GIT1  
ENSG00000008086|CDKL5 ENSG00000023171|GRAMD1B ENSG00000041880|PARP3 ENSG00000057935|MTA3 ENSG00000088726|TMEM40 ENSG00000100239|SAPS2 ENSG00000107745|CBARA1 ENSG00000108262|GIT1  
ENSG00000110514|MADD ENSG00000114395|CYB561D2 ENSG00000125826|RBCK1 ENSG00000131797|C16orf67 ENSG00000134640|MTNR1B ENSG00000136931|NR5A1 ENSG00000140830|TXNL4B ENSG00000148805|NR\_002934.2  
ENSG00000153294|GPR115 ENSG00000155034|FBXL18 ENSG00000176261|ZBTB80S ENSG00000178589|Q9BT26\_HUMAN ENSG00000184730|NP\_061160.2 ENSG00000196923|PDLIM7 ENSG00000204626|Q6ZR26\_HUMAN ENSG00000206083|ZNF409  
ENSG0000006451|RALA ENSG00000067560|RHOA ENSG00000075131|TIPIN ENSG00000078403|MLLT10 ENSG00000090520|DNAJB11 ENSG00000118503|TNFAIP3 ENSG00000155906|RMND1 ENSG00000164303|ENPP6  
ENSG00000164694|FNDC1 ENSG00000165449|SLC16A9 ENSG00000165685|C12orf59 ENSG00000169752|NRG4 ENSG00000170482|SLC23A1 ENSG00000177414|UBE2U ENSG00000182836|PLCXD3 ENSG00000182957|SPATA13  
ENSG00000183718|TRIM52 ENSG00000188400|Q6URH7\_HUMAN ENSG00000196565|HBE1 ENSG00000198633|Q6PDB4\_HUMAN ENSG00000205428|C9orf35  
CTGCAAT ENSG00000048471|NP\_001073999.1 ENSG00000051523|CYBA ENSG00000077274|CAPN6 ENSG00000087152|ATXN7L3 ENSG00000110245|APOC3 ENSG00000116032|GRIN3B ENSG00000125999|C20orf114  
ENSG00000126432|PRDX5 ENSG00000134216|CHIITA ENSG00000135801|TAF5L ENSG00000145920|CPLX2 ENSG00000146666|Q96IP2\_HUMAN ENSG00000155087|ODF1 ENSG00000159110|IFNAR2 ENSG00000167139|TBC1D21  
ENSG00000169084|ZBED1 ENSG00000169385|RNASE2 ENSG00000169397|RNASE3 ENSG00000169662|NP\_997357.1 ENSG00000176490|DIRAS1 ENSG00000185069|KRT76 ENSG00000186716|BCR ENSG00000196431|CRYBA4  
ENSG00000197879|MYO1C ENSG00000205061|Q6ZUP2\_HUMAN ENSG00000060303|Q9NU98\_HUMAN ENSG00000076382|SPAG5 ENSG00000083799|CYLD ENSG00000084090|STAR7 ENSG00000111537|IFNG ENSG00000111911|HINT3  
ENSG00000119185|ITGB1BP1 ENSG00000125629|INSIG2 ENSG00000125831|CST11 ENSG00000132570|PCBD2 ENSG00000134321|RSAD2 ENSG00000140153|WDR20 ENSG00000140836|ATBF1 ENSG00000143815|LBR  
ENSG00000143995|MEIS1 ENSG00000144619|CNTN4 ENSG00000147894|C9orf72 ENSG00000151789|PNF659 ENSG00000152582|NP\_653323.1 ENSG00000164049|FBXW12 ENSG00000164190|NIPBL ENSG00000165156|ZHX1  
ENSG00000166927|MS4A7 ENSG00000172551|MUCL\_HUMAN ENSG00000178217|SH2D4B ENSG00000178395|Clorf65 ENSG00000181019|NQO1 ENSG00000182077|PTCHD3 ENSG00000188133|NP\_997723.1 ENSG00000197822|OCLN  
ENSG00000204334|ALL162\_HUMAN  
CTGCACC ENSG00000100302|RASD2 ENSG00000105327|BBC3 ENSG00000105738|SIPA1L3 ENSG00000108509|CAMTA2 ENSG00000109107|ALDOC ENSG00000120903|CHRNA2 ENSG00000124664|SPDEF ENSG00000127388|NM\_198455.2  
ENSG00000129657|SEC14L1 ENSG00000131669|NIN1 ENSG00000132746|ALDH3B2 ENSG00000137404|NRM ENSG00000142290|FYXD7 ENSG00000143466|IKBKE ENSG00000152127|MGAT5 ENSG00000153443|FAM100A  
ENSG00000160271|RALGDS ENSG00000163295|ALPI ENSG00000164081|TEX264 ENSG00000174080|CTSF ENSG00000175121|WFD5 ENSG00000176058|C9orf75 ENSG00000178605|GTPBP6 ENSG00000180448|HMHA1  
ENSG00000180921|FAM83H ENSG00000182208|MOB2\_HUMAN ENSG00000185000|DGAT1 ENSG00000185303|SFTPA1 ENSG00000185386|MAPK11 ENSG00000186825|Q580R-2 ENSG00000198831|Q8IYX2\_HUMAN ENSG00000204410|MSH5  
ENSG00000212131|PDXP ENSG00000084676|NCOA1 ENSG00000109680|TBC1D19 ENSG00000124198|ARFGEP2 ENSG00000132326|PER2 ENSG00000135108|FBXO21 ENSG00000140525|KIAA1794 ENSG00000141456|Q8IZL8-2  
ENSG00000149651|SPINT4 ENSG00000160199|PKNOX1 ENSG00000161647|PPP3 ENSG00000185345|PARK2 ENSG00000188215|DCUN1D3 ENSG00000188585|Q6ZU45\_HUMAN ENSG00000204138|PHACTR4  
ENSG00000013725|CD6 ENSG00000100124|ANKRD54 ENSG00000100842|EFS ENSG00000101412|E2F1 ENSG00000110987|BCL7A ENSG00000115648|MLPH ENSG00000121769|FABP3 ENSG00000128340|RAC2  
ENSG00000130600|H19 ENSG00000137073|UBAP2 ENSG00000143921|ABCG8 ENSG00000155980|KIF5A ENSG00000159650|UROCA1 ENSG00000162344|H19 ENSG00000166024|C10orf28 ENSG00000169084|ZBED1  
ENSG00000173020|ADRBK1 ENSG00000179526|SHARPIN ENSG00000180176|TH ENSG00000184371|CSF1 ENSG00000205219|Q6UXU7\_HUMAN ENSG00000205680|NR\_002931.1 ENSG00000095139|ARCN1 ENSG00000106052|TAX1BP1  
ENSG00000122034|GTF3A ENSG00000131370|SH3BP5 ENSG00000135940|COX5B ENSG00000138604|GLCE ENSG00000144285|SCN1A ENSG00000155111|CDC216 ENSG00000162437|RAVER2 ENSG00000166971|AKTIP  
ENSG00000167475|SCAMP4 ENSG00000169826|CGAT2\_HUMAN ENSG00000170852|KBTBD2 ENSG00000173542|MOBK11A ENSG00000180354|C7orf41 ENSG00000183508|FAM46C ENSG00000186340|THBS2 ENSG00000187079|TEAD1  
ENSG00000198863|RUNDC3 ENSG00000205036|NP\_001001682.1  
CTGCATG ENSG00000088876|ZNF343 ENSG00000101146|RAE1 ENSG00000105514|RAB3D ENSG00000110721|CHKA ENSG00000110799|VWF ENSG00000115073|ACTR1B ENSG00000125354|SEPT6 ENSG00000128802|GDF2  
ENSG00000130176|CNN1 ENSG00000130640|TUBGCP2 ENSG00000131398|KCNK3 ENSG00000132589|FLOT2 ENSG00000134247|PTGFRN ENSG00000139574|NPF4 ENSG00000155666|JMJ5 ENSG00000156298|TSPAN7  
ENSG00000161103|QSBKY6\_HUMAN ENSG00000165643|SOHLH1 ENSG00000167371|PRRT2 ENSG00000169094|PLEKHK1 ENSG00000178927|C17orf62 ENSG00000182814|NP\_001013670.3 ENSG00000183484|GPR132 ENSG00000009844|VTA1  
ENSG00000092020|PPP2R3C ENSG00000102048|ASB9 ENSG00000107372|ZFNAD5 ENSG00000109180|OC1AD1 ENSG00000112280|COL9A1 ENSG00000125831|CST11 ENSG00000130818|ZNF426 ENSG00000136267|DGKB  
ENSG00000157625|MAP3K7IP3 ENSG00000162757|Clorf74 ENSG00000163347|CLDN1 ENSG00000165061|ZMAT4 ENSG00000166670|MMP10 ENSG00000183960|KCNH8 ENSG00000187123|LYPD6 ENSG00000197716|Q9UHV1\_HUMAN  
ENSG00000198814|GK ENSG00000203667|FAM36A  
CTGCCCA ENSG00000088836|SLC4A11 ENSG00000088899|K0552\_HUMAN ENSG00000099991|CABIN\_HUMAN ENSG00000100321|SYNGR1 ENSG00000101337|TM9SF4 ENSG00000101460|MAP1LC3A ENSG00000103043|VAC14  
ENSG00000106636|YKT6 ENSG00000110046|NP\_055919.1 ENSG00000116444|ACRBP ENSG00000112511|PHF1 ENSG00000116525|TRIM62 ENSG00000122304|Q6ZMMO\_HUMAN ENSG00000127561|SYNGR3 ENSG00000128928|IVD  
ENSG00000136689|IL1RN ENSG00000138834|MAFK8IP3 ENSG00000138867|C22orf13 ENSG00000139880|CDH24 ENSG00000141012|GALNS ENSG00000142347|MYO1F ENSG00000143793|Clorf35 ENSG00000148814|LRR27  
ENSG00000149541|B3GAT3 ENSG00000158955|WNT9B ENSG00000159733|ZFYVE28 ENSG00000162365|CYP4A22 ENSG00000166289|PLEKHF1 ENSG00000171159|C9orf16 ENSG00000171680|PLEKHG5 ENSG00000172889|EGFL7  
ENSG00000173581|CDC106 ENSG00000174529|TMEM81 ENSG00000175544|CABP4 ENSG00000178932|Q8N811\_HUMAN ENSG00000179632|MAF1 ENSG00000185368|MAPK11 ENSG00000186193|C9orf140 ENSG00000186825|Q580R-2  
ENSG00000186847|KRT14 ENSG00000187048|CYP4A11 ENSG00000188384|Q6ZUQ5\_HUMAN ENSG00000196517|SLC6A9 ENSG00000197879|MYO1C ENSG00000203689|NP\_001018859.1 ENSG00000205271|Q6ZUQ5\_HUMAN ENSG00000205275|Q6ZUQ5\_HUMAN  
ENSG00000053254|CHES1 ENSG00000072315|TRPC5 ENSG00000103152|MPG ENSG00000114054|PCCB ENSG00000115541|HSP61 ENSG00000119723|COQ6 ENSG00000129675|ARHGEP6 ENSG00000134970|TICAM2  
ENSG00000141655|TNFRSF11A ENSG00000143190|POU2F1 ENSG00000144410|CPO ENSG00000148798|INA ENSG00000152495|CAMK4 ENSG00000157404|KIT ENSG00000164929|BAALC ENSG00000181092|ADIPOQ  
ENSG00000184083|FAM120C ENSG00000196565|HBE1 ENSG00000198276|UCKL1  
CTGCCCC ENSG000000006118|TMEM132A ENSG00000006282|SPATA20 ENSG0000007402|CACNA2D2 ENSG00000038832|TRIO ENSG00000042493|CAPG ENSG00000065054|SLC9A3R2 ENSG00000085552|IGSF9  
ENSG00000087152|ATXN7L3 ENSG00000099875|KMNK2 ENSG00000101180|HRH3 ENSG00000102882|MAPK3 ENSG00000103855|CD276 ENSG00000105520|NAP3 ENSG00000105556|NP\_060020.1  
ENSG00000105697|HAMP ENSG00000105711|SCN1B ENSG00000106348|IMPDH1 ENSG00000112033|PPARD ENSG00000115155|OTOF ENSG00000123384|LRP1 ENSG00000129654|FOXJ1 ENSG00000130598|TNNI2  
ENSG00000132589|FLOT2 ENSG00000133027|PEMT ENSG00000133895|MEN1 ENSG00000137843|PAK6 ENSG00000141664|ZCCHC2 ENSG00000143369|ECM1 ENSG00000148341|SH3GLB2 ENSG00000149575|SCN2B  
ENSG00000149925|ALDOA ENSG00000149927|DOC2A ENSG00000160445|ZER1 ENSG00000160932|LYGE ENSG00000163061|Q9BSF9\_HUMAN ENSG00000164007|CLDN19 ENSG00000165462|PHOX2A  
ENSG00000165671|NSD1 ENSG00000165695|C9orf98 ENSG00000165828|PRAP1 ENSG00000166246|C16orf71 ENSG00000167106|FAM102A ENSG00000167685|ZNF444 ENSG00000168528|SERINC2 ENSG00000168936|TMEM129  
ENSG00000169910|ASL ENSG00000171551|ECEL1 ENSG00000172236|TPSB2 ENSG00000173457|PPP1R14B ENSG00000173805|HAP1 ENSG00000175220|ARHGAP1 ENSG00000175264|CHST1 ENSG00000175505|CLCF1  
ENSG00000177542|SLC25A22 ENSG00000178498|DTX3 ENSG00000178709|CLDN9 ENSG00000180176|TH ENSG00000181085|MAPK15 ENSG00000181291|TMEM132E ENSG00000181409|AAK7 ENSG00000184923|FAM22A  
ENSG00000185000|DGAT1 ENSG00000185269|NOTUM ENSG00000185885|IFTM1 ENSG00000186827|TNFRSF4 ENSG00000187942|LDLRAD2 ENSG00000188322|SBK1 ENSG00000188763|FZD9 ENSG00000197272|IL27  
ENSG00000197355|UAP1L1 ENSG00000197587|DMXB1 ENSG00000197996|PADI6 ENSG000002003879|GDI1 ENSG00000200613|IFTM5 ENSG00000039560|RAI14 ENSG00000119285|HEATR1 ENSG00000125571|IL1F7  
ENSG00000131828|PDHA1 ENSG00000132386|SERPINF1 ENSG00000134259|NGFV ENSG00000146648|EGFR ENSG00000163513|TGFBR2 ENSG00000164253|WDR41 ENSG00000164929|BAALC ENSG00000164953|TMEM67  
ENSG00000165359|DDX26B ENSG00000169085|C8orf46 ENSG00000172955|ADH6 ENSG00000175216|CKAP5 ENSG00000181495|C5orf23 ENSG00000182621|PLCB1 ENSG00000204904|C9orf31  
ENSG0000006062|MAP3K14 ENSG0000006210|CX3CL1 ENSG0000006211|N105|TSPAN9 ENSG00000054967|TNFRSF19L ENSG00000066117|SMARCD1 ENSG00000073146|MOV10L1 ENSG00000073169|SELO\_HUMAN ENSG00000085644|ZNF213  
ENSG00000101442|ACTR5 ENSG00000105701|FKBP8 ENSG00000107021|TBC1D13 ENSG00000114735|HEMK1 ENSG00000116852|KIF21B ENSG00000126107|HECTD3 ENSG00000126603|GLIS2 ENSG00000131242|RAB1F1P4  
ENSG00000132535|DLG4 ENSG00000133477|FAM83F ENSG00000134824|FADS2 ENSG00000135406|PRPH ENSG00000137817|PARP6 ENSG00000140474|ULK3 ENSG00000142303|ADAMTS10 ENSG00000142784|WDC1  
ENSG00000158859|ADAMTS4 ENSG00000160325|C9orf7 ENSG00000162365|CYP4A22 ENSG00000163462|TRIM46 ENSG00000164088|PPM1M ENSG00000169682|LAT ENSG00000171703|TCEA2 ENSG00000172354|GNB2  
ENSG00000173267|SNCG ENSG00000173327|MAP3K11 ENSG00000173335|CST9 ENSG00000174903|RAB1B ENSG00000182446|NLPOC4 ENSG00000185681|C9orf18 ENSG00000187048|CYP4A11 ENSG00000187638|NM\_207367  
ENSG00000196420|S100A5 ENSG00000197106|SLC6A17 ENSG00000204054|Q6ZNS9\_HUMAN ENSG0000022267|FHL1 ENSG000002071967|CYBRD1 ENSG000002107295|SH3GL2 ENSG0000013361|CDH6  
ENSG00000116455|WDR77 ENSG00000119414|PPP6C ENSG00000128581|RABL5 ENSG00000129675|ARHGEP6 ENSG00000134250|NOTCH2 ENSG00000143797|MBOAT2 ENSG00000143919|C2orf34 ENSG00000144136|SLC20A1  
ENSG00000145358|DDIT4L ENSG00000146833|TRIM4 ENSG00000147041|SYTL5 ENSG00000148426|C10orf47 ENSG00000159212|CLIC6 ENSG00000161654|LSM12 ENSG00000164308|NP\_071745.1 ENSG00000170786|NP\_620419.2  
ENSG00000174136|RGM8 ENSG00000178726|THBD ENSG00000181019|NQO1  
CTGCCCG ENSG00000055130|CUL1 ENSG00000078808|SDF4 ENSG00000104419|NDRG1 ENSG00000106211|HSPB1 ENSG00000119714|GPR68 ENSG00000126258|FYXD1 ENSG00000128310|GALR3 ENSG00000128389|NM\_032262  
ENSG00000131697|NPHP4 ENSG00000132819|RBM38 ENSG00000149021|SCGB1A1 ENSG00000159733|ZFYVE28 ENSG00000161267|BDH1 ENSG00000161526|SAP30BP ENSG00000162650|ATXN7L2 ENSG00000167703|SLC43A2  
ENSG00000167889|MGAT5B ENSG00000167900|TKO ENSG00000168936|LAT ENSG00000169885|CALML6 ENSG00000170779|PCDA4 ENSG00000172426|C6orf206 ENSG00000174903|RAB1B  
ENSG00000184163|FAM132A ENSG00000186326|RGS9BP ENSG00000197122|SRC ENSG00000204277|Q6ZR66\_HUMAN ENSG00000078399|HOXA9 ENSG00000090520|DNAJB11 ENSG00000091157|WDR7 ENSG00000102595|UGCG2  
ENSG00000106278|PTPRZ1 ENSG00000114956|DGUOK ENSG00000144847|IGSF11 ENSG00000146457|WTP4 ENSG00000153310|FAM49B ENSG00000158301|GPRASP2 ENSG00000159753|NP\_001013860.1  
ENSG00000165914|TTC7B ENSG00000169604|ANTXR1 ENSG00000171492|LRR8D ENSG00000176788|BASP1 ENSG00000181588|RKHD1 ENSG00000198221|NP\_001035973.1 ENSG00000198393|ZNF26  
ENSG00000004455|AK2 ENSG00000064490|RFAXANK ENSG00000075891|PAX2 ENSG00000101470|TNNC2 ENSG00000116038|EVX1 ENSG00000124593|C6orf49 ENSG00000130731|NP\_001035251.1  
ENSG00000130751|NFAS1 ENSG00000132819|RBM38 ENSG00000134438|RAX ENSG00000151006|Q6ZKN7\_HUMAN ENSG00000154330|PGM5P1 ENSG00000156515|HK1 ENSG00000163995|ABLIM2 ENSG00000167182|SP2  
ENSG00000167614|TTYH1 ENSG00000168427|KHLH30 ENSG00000171450|CDK5R2 ENSG00000179044|EXOC3L ENSG00000181029|TRAPP5C ENSG00000184709|LRR26 ENSG00000184916|JAG2 ENSG00000202420|Q6ZVK0\_HUMAN  
ENSG00000205771|CATSPER2P1 ENSG00000054654|SYNE2 ENSG00000066027|PPP2R5A ENSG00000103319|EEF2K ENSG00000105810|CDK6 ENSG00000109458|GAB1 ENSG00000111537|IFNG ENSG00000113712|CSNK1A1  
ENSG00000124535|WRNIP1 ENSG00000127359|KIAA1147 ENSG00000130939|UBE4B ENSG00000139053|PDE6H ENSG00000147044|CASK ENSG00000155592|ZKSCAN2 ENSG00000163635|ATXN7  
ENSG00000165304|MELK ENSG00000165914|TTC7B ENSG00000166848|TERF2IP ENSG00000173207|CKS1B ENSG00000175989|Clorf69 ENSG00000176974|SHMT1 ENSG00000177494|ZBED2 ENSG00000178556|LOC652904  
ENSG00000196850|PPTC7 ENSG00000196876|SCN8A ENSG00000197142|ACSL5 ENSG00000203827|XR\_015220.1 ENSG00000203832|NBPF20  
CTGCCCT ENSG00000034053|APBA2 ENSG00000063176|SPHK2 ENSG00000070404|FSTL3 ENSG00000092929|UNC13D ENSG00000100297|MCMS5 ENSG00000101307|SIRPB1 ENSG00000103355|PRSS33 ENSG00000104142|VPS18  
ENSG00000104524|PYCRL ENSG00000105323|HNRPUL1 ENSG00000105722|ERF ENSG00000108759|KRT32 ENSG00000110583|NAT11 ENSG00000110881|ACCN2 ENSG00000112195|TREML2 ENSG00000115041|KCNIP3  
ENSG00000120942|UBIAD1 ENSG00000123965|NP\_777590.1 ENSG00000124664|SPDEF ENSG00000136689|IL1RN ENSG00000137731|FYXD2 ENSG00000142655|PEX14 ENSG00000143382|ADAMTSL4 ENSG00000147160|DGAT2L4  
ENSG00000159409|TNRC4 ENSG00000162302|RPS6KA4 ENSG00000163352|LENEP ENSG00000164050|PLXNB1 ENSG00000164871|SPAG11B ENSG00000165131|C7orf34 ENSG00000168754|NP\_057574.2 ENSG00000169921|Q75L30\_HUMAN  
ENSG00000170579|DLGAP1 ENSG00000173548|SH3PX3 ENSG00000175115|PACS1 ENSG00000176920|FUT2 ENSG00000178287|SPAG11A ENSG00000178372|CALML5 ENSG00000185133|PIB5PA ENSG00000186190|C2orf185  
ENSG00000188157|AGRN ENSG00000188185|Q6ZQP8\_HUMAN ENSG00000197063|MAFG ENSG00000205041|Q6UXV6\_HUMAN ENSG00000065485|PDIA5 ENSG00000068489|PRR11 ENSG00000070010|UFDL1 ENSG00000080546|SESN1  
ENSG00000082438|COBL1 ENSG00000101892|ATP1B4 ENSG00000105677|TMEM147 ENSG00000110675|ELMOD1 ENSG00000111707|SUDS3 ENSG00000111962|UST ENSG00000115109|EPB41L5 ENSG00000116299|KIAA1324  
ENSG00000129521|EGLN3 ENSG00000132357|CARD11 ENSG00000134249|ADAM30 ENSG00000135318|NT5E ENSG00000135324|C6orf117 ENSG00000135837|CEP350 ENSG00000143363|PRUNE1 ENSG00000159212|CLIC6  
ENSG00000162923|WDR26 ENSG00000164220|F2RL2 ENSG00000164683|HEY1 ENSG00000166363|OR10A5 ENSG00000168502|KIAA0802 ENSG00000171208|NETO2 ENSG00000176635|HORMAD2 ENSG00000183022|NR\_003148.2  
ENSG00000183305|MAGEA6 ENSG00000184750|MGEEA2 ENSG00000198642|KHLH9 ENSG00000203710|CR1 ENSG00000204209|DAXX ENSG0



|                              |                                |                                |                                |                                |                                |                                |                              |
|------------------------------|--------------------------------|--------------------------------|--------------------------------|--------------------------------|--------------------------------|--------------------------------|------------------------------|
| ENSG00000107021 TBC1D13      | ENSG00000107738 C10orf54       | ENSG00000109705 BAPX1          | ENSG00000114738 MAPKAPK3       | ENSG00000115155 OTOF           | ENSG00000120899 PTK2B          | ENSG00000123933 MXD4           | ENSG00000125826 RBCK1        |
| ENSG00000127418 FGFR1L       | ENSG00000130173 NP_061157.2    | ENSG00000130733 YIPF2          | ENSG00000131446 MGAT1          | ENSG00000134817 AGTR1L         | ENSG00000136877 FPGS           | ENSG00000141084 RANBP10        | ENSG00000141556 TBCD         |
| ENSG00000142606 MMEL1        | ENSG00000146083 RNF44          | ENSG00000148296 SURF6          | ENSG00000148337 CIZ1           | ENSG00000151006 Q6ZNK7_HUMAN   | ENSG00000159842 ABR            | ENSG00000162365 CYP4A22        | ENSG00000166664 CHRFAM7A     |
| ENSG00000167173 C15orf39     | ENSG00000167703 SLC43A2        | ENSG00000171159 C9orf16        | ENSG00000178243 C9orf62        | ENSG00000180921 FAM83H         | ENSG00000184144 CNTN2          | ENSG00000185049 WHS2           | ENSG00000187024 PTRH1        |
| ENSG00000187048 CYP4A11      | ENSG00000188389 PDCD1          | ENSG00000189143 CLDN4          | ENSG00000196419 XRCC6          | ENSG00000197587 DMBX1          | ENSG00000198373 WWP2           | ENSG00000204540 PSORS1C1       | ENSG00000205336 GPR56        |
| ENSG00000205538 Q6ZVP1_HUMAN | ENSG00000034239 EFCAB1         | ENSG00000073754 CD5L           | ENSG00000080947 Q8IIVE0_HUMAN  | ENSG00000103994 ZFP106         | ENSG00000111445 RFC5           | ENSG00000119979 FAM45A         | ENSG00000124496 TRERF1       |
| ENSG00000134070 IRAK2        | ENSG00000134250 NOTCH2         | ENSG00000134258 VTCN1          | ENSG00000136478 TEX2           | ENSG00000143919 C2orf34        | ENSG00000155966 AFF2           | ENSG00000163864 NMNAT3         | ENSG00000186104 CYP2R1       |
| ENSG00000188216 Q5JST9_HUMAN | ENSG00000196653 ZNF502         | ENSG00000197069 Q9H399_HUMAN   | ENSG00000203797 DDO            | ENSG00000203956 FAM45B         |                                |                                |                              |
| CTGCCTT                      | ENSG00000063241 ISOC2          | ENSG00000079308 TNS1           | ENSG00000079462 PAFAH1B3       | ENSG00000088826 SMOX           | ENSG00000101220 C20orf27       | ENSG00000102119 EMD            | ENSG00000103855 CD276        |
|                              | ENSG00000110046 NP_055919.1    | ENSG00000113732 ATP6V0E1       | ENSG00000135773 CAPN9          | ENSG00000141258 RUTBC1         | ENSG00000141293 SKAP1          | ENSG00000144152 NP_694946.1    | ENSG00000144579 CTDSP1       |
|                              | ENSG00000152672 CLEC4F         | ENSG00000160325 C9orf7         | ENSG00000160446 ZDHHC12        | ENSG00000162873 KLHDC8A        | ENSG00000164967 C9orf23        | ENSG00000167644 C19orf33       | ENSG00000169921 Q75L30_HUMAN |
|                              | ENSG00000170275 CRTAP          | ENSG00000170442 KRT86          | ENSG00000170525 PFKFB3         | ENSG00000178764 ZH2            | ENSG00000183597 C22orf25       | ENSG00000185909 KLHDC8B        | ENSG00000196652 ZKSCAN5      |
|                              | ENSG00000205426 KRT81          | ENSG00000060709 RIMBP2         | ENSG00000083635 NUF1P1         | ENSG00000100196 KDELRL3        | ENSG00000107669 ATE1           | ENSG00000109046 WSB1           | ENSG00000109536 FRG1         |
|                              | ENSG00000125398 SOX9           | ENSG00000134324 LPIN1          | ENSG00000136247 ZDHHC4         | ENSG00000144061 NPHP1          | ENSG00000144959 AADACL1        | ENSG00000147421 HMBOX1         | ENSG00000153162 BMP6         |
|                              | ENSG00000155792 DEPDC6         | ENSG00000160629 C17orf32       | ENSG00000162419 GMEB1          | ENSG00000162946 C1orf136       | ENSG00000167193 CRK            | ENSG00000167196 FBXO22         | ENSG00000168032 ENTPD3       |
|                              | ENSG00000178105 DDX10          | ENSG00000182139 Q96FU4_HUMAN   | ENSG00000183155 RAB1F          | ENSG00000198301 SDAD1          | ENSG00000198719 DLL1           | ENSG00000205111 CDKL4          |                              |
| CTGCCTT                      | ENSG0000006534 ALDH3B1         | ENSG0000008086 CDKL5           | ENSG00000054148 PHPT1          | ENSG00000063176 SPHK2          | ENSG00000099377 HSD3B7         | ENSG00000099814 KIAA0284       | ENSG00000101474 C20orf3      |
|                              | ENSG00000104524 PYCLL          | ENSG00000106266 SNX8           | ENSG00000106682 EIF4H          | ENSG00000130600 H19            | ENSG00000130656 HBZ            | ENSG00000139514 SLC7A1         | ENSG00000142700 DMRTA2       |
|                              | ENSG00000158863 RAI16          | ENSG00000162241 SLC25A45       | ENSG00000167476 JERF1          | ENSG00000168397 ATG4B          | ENSG00000171794 UTP1           | ENSG00000173457 PPP1R14B       | ENSG00000175223 Q8TCI8_HUMAN |
|                              | ENSG00000179044 EXOC3L         | ENSG00000180902 D2HGDH         | ENSG00000183020 AP2A2          | ENSG00000203951 A2RUP6_HUMAN   | ENSG00000204633 ACTN3          | ENSG00000000003 TSPAN6         | ENSG0000018236 CNTN1         |
|                              | ENSG00000104043 ATP8B4         | ENSG00000104131 EIF3S1         | ENSG00000109519 GRPEL1         | ENSG00000112333 NR2E1          | ENSG00000114120 SLC25A36       | ENSG00000116299 KIAA1324       | ENSG00000125831 CST11        |
|                              | ENSG00000137822 GCP4_HUMAN     | ENSG00000140153 WDR20          | ENSG00000143727 ACPI           | ENSG00000166006 KCNC2          | ENSG00000168246 UBTD2          | ENSG00000172283 FZB8           | ENSG00000179902 C1orf194     |
|                              | ENSG00000186222 CNO            | ENSG00000186645 NP_001027561.1 | ENSG00000197712 FAM114A1       | ENSG00000198218 QRICH1         | ENSG00000198305 NP_001027561.1 | ENSG00000198719 DLL1           | ENSG00000205323 HCC1_HUMAN   |
|                              | ENSG00000205506 NP_001027561.1 | ENSG00000205508 NP_001027561.1 | ENSG00000205509 NP_001027561.1 | ENSG00000205580 NP_001027561.1 |                                |                                |                              |
| CTGCCTT                      | ENSG00000005007 UPF1           | ENSG00000053702 NRIP2          | ENSG00000070444 MNT            | ENSG00000074370 ATP2A3         | ENSG00000100010 MTF18_HUMAN    | ENSG00000102921 N4BP1_HUMAN    | ENSG00000103313 MEFV         |
|                              | ENSG00000110921 MKV            | ENSG00000111252 SH2B3          | ENSG00000112195 TREM2          | ENSG00000116983 HPCAL4         | ENSG00000125813 PAX1           | ENSG00000143222 UF2C1          | ENSG00000159231 CBR3         |
|                              | ENSG00000170689 HOXB9          | ENSG00000170876 TMEM43         | ENSG00000172137 CALB2          | ENSG00000173369 C1QB           | ENSG00000177098 SCN4B          | ENSG00000182257 C22orf26       | ENSG00000182379 NXP4         |
|                              | ENSG00000185825 BCAP31         | ENSG00000206150 RNASE13        | ENSG00000001084 GCLC           | ENSG00000001630 CYP51A1        | ENSG00000018610 CXorf56        | ENSG00000094916 CBX5           | ENSG00000102055 PPP1R2P9     |
|                              | ENSG00000119318 RAD23B         | ENSG00000122557 HERPUD2        | ENSG00000125450 NUP85          | ENSG00000132153 DHX30          | ENSG00000137675 MMF27          | ENSG00000139370 SLC15A4        | ENSG00000141279 NPEPPS       |
|                              | ENSG00000144191 CNGA3          | ENSG00000149084 HSD17B12       | ENSG00000151665 PTGF           | ENSG00000152348 ATG10          | ENSG00000158467 SAH3H_HUMAN    | ENSG00000165119 HNRPK          | ENSG00000167721 TSR1         |
|                              | ENSG00000171201 SMR3B          | ENSG00000179008 C14orf39       | ENSG00000182118 FAM89A         | ENSG00000186205 MOSC1          | ENSG00000188921 PTPLAD2        | ENSG00000188938 FAM120AOS      | ENSG00000189369 GSPT2        |
|                              | ENSG00000197345 MRPL21         | ENSG00000197632 SERPINB2       | ENSG00000197712 FAM114A1       | ENSG00000204388 HSPA1B         |                                |                                |                              |
| CTGCCTT                      | ENSG00000041988 THAP3          | ENSG00000047849 MAP4           | ENSG00000049239 H6PD           | ENSG00000066430 CDON           | ENSG00000072736 NFATC3         | ENSG00000073111 MCM2           | ENSG00000112079 STK38        |
|                              | ENSG00000129250 KIF1C          | ENSG00000139641 FAM62A         | ENSG00000143178 TBX19          | ENSG00000143297 FCRL5          | ENSG00000148158 SNX30          | ENSG00000148843 PDCD11         | ENSG00000161203 AP2M1        |
|                              | ENSG00000175220 ARGHAP1        | ENSG00000176029 C11orf16       | ENSG00000180818 HOXC10         | ENSG00000198165 Q9H960_HUMAN   | ENSG00000204070 DBNDD2         | ENSG00000204103 MAFB           | ENSG00000204820 Q96NT9_HUMAN |
|                              | ENSG0000000457 SCYL3           | ENSG00000060339 CCAR1          | ENSG00000066455 GOLGA5         | ENSG00000069275 NUCKS1         | ENSG00000085224 ATRX           | ENSG00000100697 DICER1         | ENSG00000101115 SALL4        |
|                              | ENSG00000106049 H1BADH         | ENSG00000112276 EVES           | ENSG00000122203 KIAA1191       | ENSG00000125355 FAM70A         | ENSG00000131263 RNF12          | ENSG00000134852 CLOCK          | ENSG00000136111 TBC1D4       |
|                              | ENSG00000155111 CDC216         | ENSG00000155760 FZD7           | ENSG00000159398 CES7           | ENSG00000163840 DTX3L          | ENSG00000163935 SFMBT1         | ENSG00000164758 THRAP6         | ENSG00000166157 TPTE         |
|                              | ENSG00000168509 HFE2           | ENSG00000169302 STK32A         | ENSG00000174839 FAM116A        | ENSG00000176201 GBA3           | ENSG00000178722 NP_775938.1    | ENSG00000184474 Q96FP4_HUMAN   | ENSG00000198887 SMC5         |
|                              | ENSG00000205765 NP_787117.3    |                                |                                |                                |                                |                                | ENSG00000204086 RPA4         |
| CTGGAAG                      | ENSG00000067141 NEO1           | ENSG00000103647 CORO2B         | ENSG00000105370 LIM2           | ENSG00000105605 CACNG7         | ENSG00000108511 HOXB6          | ENSG00000116819 TFAP2E         | ENSG00000117411 B4GALT2      |
|                              | ENSG00000125385 RPS29          | ENSG00000133265 HPBP1_HUMAN    | ENSG00000133519 NP_689722.1    | ENSG00000135622 SEMA4F         | ENSG00000136112 UTP14C         | ENSG00000141179 PCPT           | ENSG00000141480 ARRB2        |
|                              | ENSG00000142515 KLK3           | ENSG00000156574 NODAL          | ENSG00000160224 AIRE           | ENSG00000162591 MEGF6          | ENSG00000164050 PLXNB1         | ENSG00000169992 NLGN2          | ENSG00000172818 OVOL1        |
|                              | ENSG00000177023 DEFB104B       | ENSG00000185262 FAM100B        | ENSG00000188822 CNR2           | ENSG00000196923 PDLIM7         | ENSG00000204626 Q6ZSR2_HUMAN   | ENSG00000206083 ZNF409         | ENSG00000000003 TSPAN6       |
|                              | ENSG000000081770 NAIP          | ENSG00000101343 CRNKL1         | ENSG00000109756 RARGPF2        | ENSG00000113583 C5orf15        | ENSG00000117862 TXNDC12        | ENSG00000118515 SGK            | ENSG00000137265 IRF4         |
|                              | ENSG00000160629 C17orf32       | ENSG00000165487 EFHA1          | ENSG00000165757 KIAA1462       | ENSG00000168303 C7orf11        | ENSG00000171824 EXOSC10        | ENSG00000175348 TMEM9B         | ENSG00000178107 Q8N1B8_HUMAN |
|                              | ENSG00000179978 Q59GI6_HUMAN   | ENSG00000180613 GSH2_HUMAN     | ENSG00000180998 GPR137C        | ENSG00000184258 CDR1           | ENSG00000185275 CD24           | ENSG00000189320 NP_995327.1    | ENSG00000198872 PEG10        |
|                              |                                |                                |                                |                                |                                |                                | ENSG00000204466 DGKK         |
| CTGGAAT                      | ENSG00000061337 LZTS1          | ENSG00000078061 ARAF           | ENSG00000078319 PMS2L1         | ENSG00000105371 ICAM4          | ENSG00000105643 ARRDC2         | ENSG00000122694 C9orf19        | ENSG00000143845 ETNK2        |
|                              | ENSG00000154928 P5472-3        | ENSG00000163803 PLB1           | ENSG00000163961 RNF168         | ENSG00000163975 MFI2           | ENSG00000167850 CD300C         | ENSG00000171916 NP_001035167.2 | ENSG00000175518 UBQLN1       |
|                              | ENSG00000184117 NIPSNAP1       | ENSG00000186474 KLK12          | ENSG00000188086 NP_954652.1    | ENSG00000197019 SERTAD1        | ENSG00000197283 SYNGAP1        | ENSG00000205031 Q6XYE2_HUMAN   | ENSG00000205771 CATSPER2P1   |
|                              | ENSG00000103599 IQCH           | ENSG00000113282 CLINT1         | ENSG00000138758 SEPT11         | ENSG00000139318 DUSP6          | ENSG00000139597 NP_438169.2    | ENSG00000163518 FCRL4          | ENSG00000164741 DLC1         |
|                              | ENSG00000170266 GLB1           | ENSG00000173848 NET1           | ENSG00000176386 CDC26          | ENSG00000180113 TDRD6          | ENSG00000181381 Q5H9U9_HUMAN   | ENSG00000181894 ZNF329         | ENSG00000186205 MOSC1        |
|                              | ENSG00000196639 HRH1           | ENSG00000197595 NP_997323.1    | ENSG00000204611 ZNF616         |                                |                                |                                |                              |
| CTGGACC                      | ENSG00000202319 RNH1           | ENSG00000036672 USP2           | ENSG00000076984 O14733-2       | ENSG00000100884 CPNE6          | ENSG00000101216 GMEB2          | ENSG00000103197 TSC2           | ENSG000001108511 HOXB6       |
|                              | ENSG00000118257 NRP2           | ENSG00000126461 NP_067051.1    | ENSG00000132915 PDE6A          | ENSG00000133027 PEMT           | ENSG00000141577 AZI1           | ENSG00000142484 TM4SF5         | ENSG00000148805 NR_002934.2  |
|                              | ENSG00000160191 PDE9A          | ENSG00000161681 SHANK1         | ENSG00000165178 LOC648998      | ENSG00000167476 JSRP1          | ENSG00000168427 KLHL30         | ENSG00000170776 AKAP13         | ENSG00000175223 Q8TCI8_HUMAN |
|                              | ENSG00000177673 NP_689827.1    | ENSG00000179044 EXOC3L         | ENSG00000179403 VWA1           | ENSG00000181240 SLC25A41       | ENSG00000181877 Q8NAZ9_HUMAN   | ENSG00000182487 NCF1C          | ENSG00000184811 TUSC5        |
|                              | ENSG00000188055 Q6ZVX1_HUMAN   | ENSG00000188186 NP_00108396.1  | ENSG00000049247 UTS2           | ENSG00000083857 FAT            | ENSG00000104863 LIN7B          | ENSG00000105483 CARD8          | ENSG00000107201 DDX58        |
|                              | ENSG00000111266 DUSP16         | ENSG00000116350 SFRS4          | ENSG00000117133 BXDC5          | ENSG00000119760 SUP7L          | ENSG00000119979 FAM45A         | ENSG00000123977 WDR69          | ENSG00000134046 MBD2         |
|                              | ENSG00000141458 NPC1           | ENSG00000147050 UTX            | ENSG00000149658 YTHDF1         | ENSG00000152620 C5orf33        | ENSG00000154856 APCDD1         | ENSG00000155636 DRBP1_HUMAN    | ENSG00000168530 MYL1         |
|                              | ENSG00000171989 LDHAL6B        | ENSG00000178996 SNAG1          | ENSG00000182551 AD11           | ENSG00000182551 NDUFA6         | ENSG00000203956 FAM45B         | ENSG00000205133 Q629K1_HUMAN   |                              |
| CTGGACT                      | ENSG00000007047 MARK4          | ENSG00000062822 POLD1          | ENSG00000074370 ATP2A3         | ENSG00000074964 ARHGAP10L      | ENSG00000080958 KCNH4          | ENSG00000096088 PCG            | ENSG00000106245 BUD31        |
|                              | ENSG00000125967 ABPA2BP        | ENSG00000127084 FGD3           | ENSG00000128310 GALR3          | ENSG00000132535 DLG4           | ENSG00000134222 PSRC1          | ENSG00000151498 ACAD8          | ENSG00000156603 MED19        |
|                              | ENSG00000163435 ELF3           | ENSG00000165556 CDX2           | ENSG00000168286 THAP11         | ENSG00000180206 C22orf27       | ENSG00000180448 HMHA1          | ENSG00000180914 OXTR           | ENSG00000183020 AP2A2        |
|                              | ENSG00000186702 NP_079360.1    | ENSG00000196182 STK40          | ENSG00000206551 Q6ZT99_HUMAN   | ENSG00000057294 PKP2           | ENSG000000091127 PUS7          | ENSG00000095587 TLL2           | ENSG00000115165 PSCDBP       |
|                              | ENSG00000131080 EDA2R          | ENSG00000139357 SLC5A8         | ENSG00000144476 CXCR7          | ENSG00000163029 SMC6           | ENSG00000165794 SLC39A2        | ENSG00000172955 ADH6           | ENSG00000179456 ZNF238       |
|                              | ENSG00000204841 FAM74A2        | ENSG00000204844 FAM74A3        |                                |                                |                                |                                | ENSG00000197646 PDCD1LG2     |
| CTGGAGA                      | ENSG00000053372 MRTO4          | ENSG00000080189 SLC35C2        | ENSG00000083444 PLOD1          | ENSG00000100106 TRIOBP         | ENSG00000101076 HNF4A          | ENSG00000108528 SLC25A11       | ENSG00000113761 ZNF346       |
|                              | ENSG00000125878 TCF15          | ENSG00000125998 FAM83C         | ENSG00000130701 C20orf151      | ENSG00000138606 SHF            | ENSG00000147382 FAM58A         | ENSG00000149923 PPP4C          | ENSG00000160766 GBAP         |
|                              | ENSG00000166104 NP_776166.1    | ENSG00000166394 CYB5R2         | ENSG00000167613 LAIR1          | ENSG00000175084 DES            | ENSG00000175220 ARGHAP1        | ENSG00000176130 P2RY11         | ENSG00000176371 ZSCAN2       |
|                              | ENSG00000183273 CCDC60         | ENSG00000185739 SRL            | ENSG00000197653 DNAH10         | ENSG00000198131 ZNF544         | ENSG00000198324 FAM109A        | ENSG00000204633 ACTN3          | ENSG00000206062 Q4G0T4_HUMAN |
|                              | ENSG00000089335 ZNF302         | ENSG00000100262 ARFGAP3        | ENSG00000115159 GPD2           | ENSG00000116793 PHTF1          | ENSG00000116954 RRAC           | ENSG00000119707 RBM25          | ENSG00000132530 NP_954590.1  |
|                              | ENSG00000135577 NMBR           | ENSG00000137714 FDX1           | ENSG00000138653 NDST4          | ENSG00000156675 RAB11FIP1      | ENSG00000158691 ZSCAN12        | ENSG00000160336 ZNF761         | ENSG00000161714 PLCD3        |
|                              | ENSG00000167766 ZNF83          | ENSG00000168228                |                                |                                |                                |                                |                              |

CTGGCAT ENSG00000056558|TRAF1 ENSG00000063015|SEZ6 ENSG00000064999|ANKS1A ENSG00000066382|MPPED2 ENSG00000072501|SMC1A ENSG00000104812|GYS1 ENSG00000117266|PCTK3 ENSG00000118898|PPL ENSG00000130700|GATA5 ENSG00000130950|FAM22F ENSG00000136367|ZFHX2 ENSG00000136444|RSAD1 ENSG00000162877|NP\_689704.3 ENSG00000165714|LOH12CR1 ENSG00000166831|RBPMS2 ENSG00000167985|C11orf79 ENSG00000180304|OAZ2 ENSG00000180878|C11orf42 ENSG00000180935|Q8N8B3\_HUMAN ENSG00000196700|0182472|CAPN12 ENSG00000198708|SPNS2 ENSG00000198768|APCDDL ENSG00000204758|Q6ZUG4\_HUMAN ENSG00000205804|Q5T6R2\_HUMAN ENSG00000212130|TWF2 ENSG00000066677|ARFGF1 ENSG00000076382|SPAG5 ENSG00000096717|SIRT1 ENSG00000120211|INSL4 ENSG00000129699|NP\_067644.2 ENSG00000134326|NP\_997198.2 ENSG00000135374|ELF5 ENSG00000147400|CETN2 ENSG00000150510|FAM124A ENSG00000152952|PLOB2 ENSG00000153684|NP\_001012455.1 ENSG00000162643|WDR63 ENSG00000163285|GABRG1 ENSG00000163376|KBTBD8 ENSG00000166321|NUDT13 ENSG00000169340|NP\_777584.1 ENSG00000171262|FAM98B ENSG00000174839|FAM116A ENSG00000175676|GOLGA8F ENSG00000175746|NP\_997328.1 ENSG00000180869|C1orf180 ENSG00000183629|GOLGA8G ENSG00000185061|NP\_001072996.1 ENSG00000186687|LYRM7 ENSG00000196227|C2orf177 ENSG00000196648|NP\_937824.1 ENSG00000196693|ZNF33B ENSG00000197978|NP\_937824.1 ENSG00000198088|NUP62CL ENSG00000204757|Q6ZTL5\_HUMAN

CTGGCCA ENSG00000008118|CAMK1G ENSG00000064205|WISP2 ENSG00000083807|SLC27A5 ENSG00000103174|NAGPA ENSG00000117305|HMGCL ENSG00000127561|SYNGR3 ENSG00000128165|ADM2 ENSG00000132016|C19orf57 ENSG00000132589|FLOT2 ENSG00000135638|EMX1 ENSG00000136859|ANGPTL2 ENSG00000142185|TRPM2 ENSG00000143816|WNT9A ENSG00000147113|CXorf36 ENSG00000149451|ADAM33 ENSG00000149452|SLC22A8 ENSG00000156574|NODAL ENSG00000159788|RGS12 ENSG00000160882|CYP11B1 ENSG00000161996|WDR90 ENSG00000164776|PHK3 ENSG00000165716|FAM69B ENSG00000172346|CSDC2 ENSG00000178623|GPR35 ENSG00000179142|CYP11B2 ENSG00000183597|C22orf25 ENSG00000184281|TSSC4 ENSG00000185339|TCN2 ENSG00000185504|C17orf70 ENSG00000186543|Q6ZWC0\_HUMAN ENSG00000187664|TM6SF2 ENSG00000188234|XR\_016668.1 ENSG00000188843|NM\_207504 ENSG00000189068|VSTM1 ENSG00000205646|Q96GL5\_HUMAN ENSG00000206076|Q6ZQR8\_HUMAN ENSG00000206561|COLQ ENSG00000217427|IGF1 ENSG00000247579|DTNBP1 ENSG00000100505|TRIM9 ENSG00000100890|KIAA0391 ENSG00000137831|UACA ENSG00000138760|SCARB2 ENSG00000139910|NOVA1 ENSG00000145362|ANK2 ENSG00000184368|MAP7D2 ENSG00000184943|NP\_443103.1 ENSG00000185070|FLRT2 ENSG00000197712|FAM114A1

CTGGCGT ENSG00000003137|CYP26B1 ENSG00000033050|ABCF2 ENSG00000043143|PHF15 ENSG00000111644|ACRBP ENSG00000116649|SRM ENSG00000141012|GALNS ENSG00000142599|RERE ENSG00000143816|WNT9A ENSG00000153060|TEKT5 ENSG00000158517|NCF1 ENSG00000159339|PADI4 ENSG00000160208|RRP1B ENSG00000160796|NBEAL2 ENSG00000165178|LOC648998 ENSG00000171401|KRT13 ENSG00000173011|Q86TJ2\_HUMAN ENSG00000182487|NCF1C ENSG00000184923|FAM22A ENSG00000185651|UBE2L3 ENSG00000187638|NM\_207367 ENSG00000204586|Q6ZJP7\_HUMAN ENSG00000204620|Q6ZPC8\_HUMAN ENSG00000206565|SEC61A2 ENSG00000100425|BRD1 ENSG00000106524|ANKMY2 ENSG00000109519|GRPEL1 ENSG00000119844|AFTPH ENSG00000123908|EIF2C2 ENSG00000125245|GPR18 ENSG00000125871|C22orf72 ENSG00000136982|NP\_076999.1 ENSG00000143149|ALDH9A1 ENSG00000147316|MCPH1 ENSG00000149212|SESN3 ENSG00000151572|TMEM16D ENSG00000156171|TMEM77 ENSG00000164616|FBXL21 ENSG00000166292|TMEM100 ENSG00000171311|EXOSC1 ENSG00000173464|RNASE11 ENSG00000183784|C9orf66 ENSG00000205874|Q6SA06\_HUMAN

CTGGGCC ENSG000000042753|AP2S1 ENSG00000055118|KCNH2 ENSG00000062038|CDH3 ENSG00000075618|FSCN1 ENSG00000079805|DNM2 ENSG00000086504|MRPL28 ENSG00000090020|SLC9A1 ENSG00000099624|ATP5D ENSG00000100065|CARD10 ENSG00000102858|MGRN1 ENSG00000105223|PLD3 ENSG00000105963|CENTA1 ENSG00000107738|C10orf54 ENSG00000107954|NEURL ENSG00000117013|KCNQ4 ENSG00000119383|PPP2R4 ENSG00000125656|CLPP ENSG00000127948|POR ENSG00000128973|CLN6 ENSG00000130175|PRKCSH ENSG00000130193|C8orf55 ENSG00000130529|TRPM4 ENSG00000131746|TNS4 ENSG00000131899|LLGL1 ENSG00000136485|WDR68 ENSG00000137135|C9orf100 ENSG00000137135|C9orf100 ENSG00000138834|MAPK8IP3 ENSG00000139722|VPS37B ENSG00000140859|KIFC3 ENSG00000142208|AKT1 ENSG00000142347|MYO1F ENSG00000142627|EPAH2 ENSG00000143546|S100A8 ENSG00000148343|FAM73B ENSG00000148803|C10orf125 ENSG00000157856|C2orf39 ENSG00000160325|C9orf7 ENSG00000160766|GBAP ENSG00000161847|RAVER1 ENSG00000163485|ADORA1 ENSG00000163884|KLF15 ENSG00000165171|WBSCR27 ENSG00000167087|NFAM1 ENSG00000168476|REEP4 ENSG00000171159|C9orf16 ENSG00000171443|ZNF524 ENSG00000171608|PIK3CD ENSG00000173442|EHBPI1 ENSG00000173548|SH3PX3 ENSG00000174950|CD164L2 ENSG00000176170|SPHK1 ENSG00000177169|ULK1 ENSG00000177628|GBA ENSG00000179862|CITED4 ENSG00000182109|Q8N214\_HUMAN ENSG00000182557|SPNS3 ENSG00000183569|SERHL ENSG00000184489|PTP4A3 ENSG00000186827|TNFRSF4 ENSG00000186891|TNFRSF18 ENSG00000189077|NP\_114131.1 ENSG00000196204|Q6NUR6\_HUMAN ENSG00000198728|LDB1 ENSG00000184088|WWTR1 ENSG00000087263|OGFOD1 ENSG00000103354|TNRC6B ENSG00000124967|TRERF1 ENSG00000131126|TEX101 ENSG00000134259|NGFB ENSG00000134940|ACRV1 ENSG00000143458|NP\_653219.1 ENSG00000154710|KCTD7 ENSG00000163762|TM4SF18 ENSG00000166439|RNF169 ENSG00000168672|FAM84B ENSG00000172380|GNG12 ENSG00000188463|XR\_015229.1 ENSG00000197702|PARVA ENSG00000198874|TYW1

CTGGGGC ENSG000000011451|WIZ ENSG00000042445|RETSAT ENSG00000063245|EPN1 ENSG00000064545|TMEM161A ENSG00000073331|ALPK1 ENSG00000073670|ADAM11 ENSG00000095752|IL11 ENSG00000099904|ZDHHC8 ENSG00000100842|EFS ENSG00000101298|RAD21L1 ENSG00000103227|TMEM112 ENSG00000105204|DYRK1B ENSG00000110324|ILL0RA ENSG00000110455|NP\_115981.1 ENSG00000112658|SRF ENSG00000117122|MFAP2 ENSG00000123360|PDE1B ENSG00000125804|C2orf91 ENSG00000126895|AVPR2 ENSG00000127511|SIN3B ENSG00000129910|CDH15 ENSG00000130720|FIBCD1 ENSG00000132511|JMJ3 ENSG00000132821|C2orf102 ENSG00000136295|TTYH3 ENSG00000137309|HMGAI ENSG00000139725|RHOF ENSG00000141258|RUTBC1 ENSG00000148296|SURF6 ENSG00000148334|PTGES2 ENSG00000149295|DRD2 ENSG00000151176|NP\_775813.1 ENSG00000165714|LOH12CR1 ENSG00000165795|NDRG2 ENSG00000165802|NELLF ENSG00000168453|HR ENSG00000168748|CA7 ENSG00000172531|PPP1CA ENSG00000172780|RAB43 ENSG00000174672|BRSK2 ENSG00000176428|VPS37D ENSG00000181873|C1orf69 ENSG00000182289|Q9H9U3\_HUMAN ENSG00000184824|C1QTNF5 ENSG00000185818|NAT8L ENSG00000187796|CARD9 ENSG00000196642|C9orf86 ENSG00000197070|ARRDC1 ENSG00000197859|ADAMTSL2 ENSG00000198931|APRT ENSG00000203951|A2RUP6\_HUMAN ENSG00000203997|Q6ZRK8\_HUMAN ENSG00000204325|Q9H614\_HUMAN ENSG00000204345|Q6UXZ3\_HUMAN ENSG00000205704|Q6ICG7\_HUMAN ENSG00000206076|Q6ZQR8\_HUMAN ENSG00000206113|Q6ZU27\_HUMAN ENSG0000019186|CYP24A1 ENSG00000091831|ESR1 ENSG00000113594|LIFR ENSG00000131080|EDA2R ENSG00000131381|ZFYVE20 ENSG00000132153|DHX30 ENSG00000132970|WASF3 ENSG00000136206|WBSCR19 ENSG00000137869|CYP19A1 ENSG00000144218|AFF3 ENSG00000145982|FARS2 ENSG00000147027|TMEM47 ENSG00000147419|CCDC25 ENSG00000152611|CAPSL ENSG00000157315|TMED6 ENSG00000163935|SFBMT1 ENSG00000164691|TAGAP ENSG00000185013|NT5C1B ENSG00000205428|C9orf35

CTGGTAG ENSG00000103260|METRN ENSG00000114388|TUSC4 ENSG00000116273|PHF13 ENSG00000119321|FKBP15 ENSG00000130821|SLC6A8 ENSG00000134864|Q9BVM4\_HUMAN ENSG00000137707|BTG4 ENSG00000152192|POU4F1 ENSG00000160710|ADAR ENSG00000164972|C9orf24 ENSG00000165271|NOL6 ENSG00000167208|NP\_878274.1 ENSG00000167967|EAF1 ENSG00000172460|Q8IVY7\_HUMAN ENSG00000173702|MUC13 ENSG00000175220|ARHGAP1 ENSG00000181722|ZBTB20 ENSG00000196507|TCEAL3 ENSG00000196970|NXF4 ENSG00000198794|SCAMP5 ENSG00000203744|A1L170\_HUMAN ENSG00000205602|Q6ZUQ8\_HUMAN ENSG00000000005|TNMD ENSG0000011523|CEP68 ENSG000000027001|MIPEP ENSG00000031003|C5orf5 ENSG00000049759|NEDD4L ENSG00000101892|ATP1B4 ENSG00000103769|RAB11A ENSG00000113924|HGD ENSG00000130254|SAFB2 ENSG00000159200|DSCR1 ENSG00000162433|AK3L2 ENSG00000166752|TMEM83 ENSG00000166913|YWHAB ENSG00000167034|NKX3-1 ENSG00000170345|FOS ENSG00000170456|NP\_659410.3 ENSG00000171365|CLCN5 ENSG00000173660|UQCRH ENSG00000179933|C14orf119

CTGGTGA ENSG00000100321|SYNGR1 ENSG00000104884|ERCC2 ENSG00000106133|NSUN5C ENSG00000114268|PFKFB4 ENSG00000119457|SLC46A2 ENSG00000121680|PEX16 ENSG00000127526|SLC35E1 ENSG00000127578|WFIKKN1 ENSG00000130881|LRP3 ENSG00000141556|TBCD ENSG00000143319|ISG20L2 ENSG00000146122|DAA2 ENSG00000168286|THAP11 ENSG00000173402|DAG1 ENSG00000180483|DEFB119 ENSG00000182324|KCNJ14 ENSG00000183172|C22orf32 ENSG00000185379|RAD51L3 ENSG00000203783|PRR9 ENSG0000006451|DALA ENSG00000036549|ZZ32 ENSG00000069966|GNB5 ENSG00000080200|NP\_705833.2 ENSG00000082512|TRAF5 ENSG00000110841|PPF1BP1 ENSG00000115474|KCNJ13 ENSG00000116132|PRRX1 ENSG00000117090|SLAMF1 ENSG00000144026|ZNF514 ENSG00000154945|ANKRD40 ENSG00000158023|WDR66 ENSG00000162520|SYNC1 ENSG00000162913|C1orf145 ENSG00000163349|HIPK1 ENSG00000204272|Q63Z42\_HUMAN ENSG00000205523|Q6ZP97\_HUMAN

CTGGTGC ENSG000000026036|TNFRSF6B ENSG00000102858|MGRN1 ENSG00000103034|NDRG4 ENSG00000105063|SAP1 ENSG00000105327|BBC3 ENSG00000106608|NP\_060390.3 ENSG00000116863|ADPRHL2 ENSG00000124222|NPEPL1 ENSG00000128242|GAL3ST1 ENSG00000137216|TMEM63B ENSG00000143147|GPR161 ENSG00000153902|LGI4 ENSG00000157851|DYPYLS ENSG00000167173|C15orf39 ENSG00000167965|NM\_022372.3 ENSG00000171427|NM\_145293 ENSG00000171984|C2orf196 ENSG00000177769|TSPAN4 ENSG00000184014|RAB6IP1 ENSG00000186301|Q49A61\_HUMAN ENSG00000187021|PNLIPRP1 ENSG00000187513|GJA4 ENSG00000196366|C9orf163 ENSG00000197615|C8orf49 ENSG00000049246|PER3 ENSG00000106772|KIAA0367 ENSG00000108389|MTMR4 ENSG00000112309|B3GAT2 ENSG00000116574|RHOU ENSG00000124882|EREG ENSG00000134419|RPS15A ENSG00000135052|C9orf155 ENSG00000136688|IL1F9 ENSG00000138336|CXXC6 ENSG00000138779|Q9HCM6\_HUMAN ENSG00000141141|DDX52 ENSG00000163449|TMEM169 ENSG00000170345|FOS ENSG00000171824|EXOSC10 ENSG00000179979|CRIPAK ENSG00000186409|NP\_001074319.1 ENSG00000196449|YRDC ENSG00000198642|KLHL9

CTGGTGT ENSG00000004478|FKBP4 ENSG00000084652|TXLNA ENSG00000088682|COQ9 ENSG00000099308|MAST3 ENSG00000105063|SAPS1 ENSG00000105137|SYDE1 ENSG00000105388|CEACAM5 ENSG00000115073|ACTR1B ENSG00000116857|TMEM9 ENSG00000122678|POLM ENSG00000125804|C2orf91 ENSG00000125912|NCLN ENSG00000127837|AAMP ENSG00000130711|PRDM12 ENSG00000136715|SAP130 ENSG00000140992|PDPK1 ENSG00000141756|FKBP10 ENSG00000145214|DGKQ ENSG00000148341|SH3GLB2 ENSG00000158109|FAM79A ENSG00000161955|TNFSF13 ENSG00000163517|HDAC11 ENSG00000168906|MAT2A ENSG00000171813|PWWP2 ENSG00000177239|MAN1B1 ENSG00000178947|Q86V52\_HUMAN ENSG00000180935|Q8N8B3\_HUMAN ENSG00000182257|C22orf26 ENSG00000185504|C17orf70 ENSG00000187979|Q6ZPC6\_HUMAN ENSG00000196972|Q86V52\_HUMAN ENSG00000197119|SLC25A29 ENSG00000204760|Q6ZNS8\_HUMAN ENSG00000056586|RC3H2 ENSG00000083223|ZCCHC6 ENSG00000088205|DDX18 ENSG00000111011|RSRC2 ENSG000001123505|AMD1 ENSG00000123892|RAB38 ENSG00000130826|DKC1 ENSG00000133103|COG6 ENSG00000133135|RNF128 ENSG00000134716|CYP2J2 ENSG00000144824|PLCXD2 ENSG00000147872|ADFP ENSG00000152348|ATG10 ENSG00000187611|Q6ZTR6\_HUMAN ENSG00000197935|ZNF311 ENSG00000204979|MS4A13 ENSG00000205765|NP\_787117.3

CTGGTTT ENSG00000100307|CBX7 ENSG00000103196|CRISPLD2 ENSG00000103356|EARS2 ENSG00000103742|NP\_066013.1 ENSG00000104833|TUBB4 ENSG00000105085|CRSP7 ENSG00000125835|SNRPB ENSG00000131378|RFTN1 ENSG00000132693|CRP ENSG00000140264|SERF2 ENSG00000147403|RPL10 ENSG00000148719|DNAJB12 ENSG00000153807|HOXA10 ENSG00000166261|ZNF202 ENSG00000167208|NP\_878274.1 ENSG00000173546|CSPG4 ENSG00000177963|RIC8A ENSG00000183444|NR\_002822.2 ENSG00000188167|NP\_001034859.1 ENSG00000072274|TFRC ENSG00000079134|THOC1 ENSG00000086289|EPDR1 ENSG00000091128|LAMB4 ENSG00000104859|SFRS16 ENSG00000111358|GTF2H3 ENSG00000112308|C6orf62 ENSG000001021644|C1orf121 ENSG000001025779|PANK2 ENSG000001029007|CALML4 ENSG00000131263|RNF12 ENSG00000132780|NASP ENSG00000133706|LARS ENSG00000137075|RNF38 ENSG00000147050|UTX ENSG00000150054|PPP7 ENSG00000150636|CCDC102B ENSG00000150907|FOXO1A ENSG00000151718|WWC2 ENSG00000155495|MAGEC1 ENSG00000157578|C21orf13 ENSG00000163528|CHCHD4 ENSG00000164331|ANKRA2 ENSG00000164754|RAD21 ENSG00000168282|MGAT2 ENSG00000172059|KLF1A ENSG00000176654|NANOCP1 ENSG00000177125|ZBTB34 ENSG00000178163|NP\_444270.2 ENSG00000182952|HMGN4 ENSG00000183784|C9orf66 ENSG00000186446|ZNF501

CTGTAAA ENSG000000074755|ZZEF1 ENSG000000095370|SH2D3C ENSG000000099985|OSM ENSG00000100109|TFIP11 ENSG00000100266|PACIN2 ENSG00000101144|BMP7 ENSG00000102076|OPN1LW ENSG00000103510|MYST1 ENSG00000108557|RAI1 ENSG00000108753|TCF2 ENSG00000114388|TUSC4 ENSG00000116731|PRDM2 ENSG00000118557|PMFBP1 ENSG00000123358|NR4A1 ENSG00000124593|C6orf49 ENSG00000125459|MSTO1 ENSG00000125977|EIF2S2 ENSG00000130803|ZNF317 ENSG00000131242|RAB17IP4 ENSG00000136112|UTP14C ENSG00000142544|ATPBD3 ENSG00000144355|DLX1 ENSG00000147380|OPN1MW ENSG00000151062|CACNA2D4 ENSG00000158445|KCNB1 ENSG00000162337|LRP5 ENSG00000163157|TMOD4 ENSG00000166160|OPN1MW2 ENSG00000168274|HIST1H2AE ENSG00000172426|C6orf206 ENSG00000179348|GATA2 ENSG00000180471|C9orf31 ENSG00000186029|Q9NSZ8\_HUMAN ENSG00000186111|PIP5K1C ENSG00000196526|AFAP1 ENSG00000197077|Q5THZ5\_HUMAN ENSG00000204314|PRRT1 ENSG0000016402|IL20RA ENSG00000058063|ATP11B ENSG00000104147|OIP5 ENSG00000105974|CAV1 ENSG00000113163|COL4A3BP ENSG00000121931|C1orf103 ENSG00000122068|PYTDD1 ENSG00000125823|CSTL1 ENSG00000126945|HNRK3 ENSG00000127588|GNG13 ENSG00000131115|ZNF227 ENSG00000134489|HRH4 ENSG00000138041|41027|NOCR1 ENSG00000143797|MBOAT2 ENSG00000150625|GPM6A ENSG00000151150|ANK3 ENSG00000151892|GFRAL1 ENSG00000163046|C21orf99 ENSG00000163322|CCDC98 ENSG00000168078|PBK ENSG00000168772|CXXC4 ENSG00000169439|SDC2 ENSG00000177485|ZBTB33 ENSG00000182901|RGS7 ENSG00000183337|BCOR ENSG00000184284|Q96NI1\_HUMAN ENSG00000185345|PARK2 ENSG00000185634|SHC4 ENSG00000187257|RSBN1L ENSG00000205423|TMEM188

CTGTAAAC ENSG000000057704|TMCC3 ENSG000000077009|ITGB1BP3 ENSG000000086848|ALG9 ENSG00000100422|CERK ENSG00000104998|IL27RA ENSG00000112658|SRF ENSG00000121281|ADCY7 ENSG00000128311|TST ENSG00000134882|UBAC2 ENSG00000143878|RHOB ENSG00000144446|Q9Y348\_HUMAN ENSG00000144677|CTDSPL ENSG00000148795|CYP17A1 ENSG00000159352|PSMD4 ENSG00000160844|NP\_849153.3 ENSG00000167641|PP1R14A ENSG00000169057|MECP2 ENSG00000188822|CNR2 ENSG00000196431|CRYBA4 ENSG00000204444|APOM ENSG00000111711|GOLT1B ENSG00000113140|SPARC ENSG00000125398|SOX9 ENSG00000133997|MED6 ENSG00000138795|LEF1 ENSG00000141219|C17orf80 ENSG00000144713|RPL32 ENSG00000148848|ADAM12 ENSG00000157429|ZNF19 ENSG00000159140|SON ENSG00000164039|BDH2 ENSG00000164294|NP\_001008398.1 ENSG00000164305|CASP3 ENSG00000172115|CYCS ENSG00000173947|C1orf88 ENSG00000182700|NP\_001007190.1 ENSG00000185290|XR\_016379.1 ENSG00000205707|LYRM5

CTGTAAAT ENSG00000007341|ST7L ENSG000000013619|CXorf6 ENSG000000018625|ATP1A2 ENSG00000100450|GZMH ENSG00000100453|GZMB ENSG00000102547|CAB39L ENSG00000111639|MRPL51 ENSG00000114650|SCAP ENSG00000124731|TREM1 ENSG00000130508|PXDN ENSG00000130635|COL5A1 ENSG00000130724|CHMP2A ENSG00000131477|RAMP2 ENSG00000132142|ACACA ENSG00000160208|RRP1B ENSG00000162105|SHANK2 ENSG00000163800|C2orf16 ENSG00000166069|TMCO5 ENSG00000176580|AAQP2 ENSG00000167664|TMIGD2 ENSG00000170233|Q9GAM0\_HUMAN ENSG00000179421|Q8NBA4\_HUMAN ENSG00000184602|SNN ENSG00000184743|NP\_056274.3

ENSG00000185475|NP\_955369.1 ENSG00000186594|NP\_116284.2 ENSG00000187860|NP\_001017437.1 ENSG00000188042|ARL4C ENSG00000188525|NM\_207480 ENSG00000188901|NP\_055226.1 ENSG00000197616|MYH6 ENSG00000205015|Q6ZNV2\_HUMAN  
ENSG00000066739|C14orf103 ENSG00000069535|MAOB ENSG00000089063|C20orf30 ENSG00000091844|RGS17 ENSG00000106415|GLCCI1 ENSG00000110321|EIF4G2 ENSG00000110958|PTGES3 ENSG00000116120|FARSB  
ENSG00000116141|MARK1 ENSG00000124260|MAGEA10 ENSG00000131844|MCC2 ENSG00000134371|CDC73 ENSG00000135452|TSPAN31 ENSG00000137855|INTS12 ENSG00000155380|SLC16A1 ENSG00000166147|FBN1  
ENSG00000168502|KIAA0802 ENSG00000168916|ZNF608 ENSG00000170855|TRIA1 ENSG00000171723|GPHN ENSG00000172748|ZNF596 ENSG00000178445|GLDC ENSG00000178700|DHFR1L1 ENSG00000181784|ANG  
CTGTACA ENSG00000183230|CTNNA3 ENSG00000184254|ALDH1A3 ENSG00000186684|NP\_001001665.2 ENSG00000188529|FUSI1 ENSG00000198919|DZIP3\_HUMAN  
ENSG00000001460|C1orf201 ENSG000000089289|IGBP1 ENSG00000090554|FLT3LG ENSG00000100330|MTMR3 ENSG00000105613|MAST1 ENSG00000113763|UNC5A ENSG00000130032|PRRG3 ENSG00000132478|UNK  
ENSG00000135114|OASL ENSG00000142748|FCN3 ENSG00000166448|TMEM130 ENSG00000172922|RNASEH2C ENSG00000177076|ASAH3L ENSG00000179421|Q8NBA4\_HUMAN ENSG00000182149|KIAA0174 ENSG00000182866|LCK  
ENSG00000185818|NAT8L ENSG00000189060|H1FO ENSG00000197283|SYNGAP1 ENSG00000005810|MYCBP2 ENSG00000001566|MAP4K3 ENSG00000064652|SNX24 ENSG00000066777|ARFGF1 ENSG00000068305|MEF2A  
ENSG00000104863|LIN7B ENSG00000107968|MAP3K8 ENSG00000108298|RPL19 ENSG00000110958|PTGES3 ENSG00000111783|RFK4 ENSG00000112293|GPLD1 ENSG00000112592|TBP ENSG00000113163|COL4A3BP  
ENSG00000117713|ARID1A ENSG00000118181|RPS25 ENSG00000119787|ARL6IP2 ENSG00000120215|MLANA ENSG00000124097|HMG1L1 ENSG00000127423|C1orf135 ENSG00000128708|HAT1 ENSG00000141433|ADCYAP1  
ENSG00000147654|EBAG9 ENSG00000148303|SNORD36A ENSG00000149970|CNKSR2 ENSG00000154845|PPP4R1 ENSG00000156650|MYST4 ENSG00000157542|KCNJ6 ENSG00000162851|TFB2M ENSG00000164938|TP53INP1  
ENSG00000166573|GALR1 ENSG00000171735|CAMTA1 ENSG00000173848|NET1 ENSG00000178573|MAF ENSG00000178974|FBXO34 ENSG00000186298|PPP1CC ENSG00000198682|PAPSS2  
CTGTACT ENSG000000087152|ATXN7L3 ENSG00000090659|CD209 ENSG00000111639|MRPL51 ENSG00000127124|HIVEP3 ENSG00000132716|WDR42A ENSG00000133069|TMCC2 ENSG00000136935|GOLGA1 ENSG00000144659|SLC25A38  
ENSG00000145022|TCTA ENSG00000151208|DLG5 ENSG00000157483|MYO1E ENSG00000167701|GPT ENSG00000170890|PLA2G1B ENSG00000171119|NRTN ENSG00000172294|Q96RM9\_HUMAN ENSG00000172342|CSPG4LYP1  
ENSG00000180846|C19orf34 ENSG00000183049|CAMK1D ENSG00000184988|TMEM106A ENSG00000186788|NP\_001001670.1 ENSG00000189357|XR\_015253.1 ENSG00000205087|NP\_001020628.1 ENSG00000049860|HEXB ENSG000000102931|ARL2BP  
ENSG00000112305|SMAP1 ENSG00000112651|MRPL2 ENSG00000113971|ACAD11 ENSG00000115137|NP\_057628.1 ENSG00000118260|CREB1 ENSG00000132463|GRSF1 ENSG00000134376|CRB1 ENSG00000135316|SYNCRIP  
ENSG00000135919|SPRINE2 ENSG00000138081|FBXO11 ENSG00000142507|PSMB6 ENSG00000146376|ARHGAP18 ENSG00000146457|WTAP ENSG00000147654|EBAG9 ENSG00000153922|CHD1 ENSG00000161800|RACGAP1  
ENSG00000166348|USP54 ENSG00000167553|TUBA1C ENSG00000169193|CCDC126 ENSG00000169554|ZEB2 ENSG00000175336|APOF ENSG00000182923|CEP63 ENSG00000183576|SETD3 ENSG00000188215|DCUN1D3  
ENSG00000196653|ZNF502 ENSG00000197991|PCDH20 ENSG00000198841|KTI12 ENSG00000204987|Q6ZN80\_HUMAN  
CTGTAGA ENSG0000013374|NUB1 ENSG00000087258|GNAO1 ENSG00000088826|SMOX ENSG00000142611|PRDM16 ENSG00000143479|DYRK3 ENSG00000146221|NP\_872345.1 ENSG00000159423|ALDH4A1 ENSG00000160691|SHC1  
ENSG00000164742|ADCY1 ENSG00000165507|C10orf10 ENSG00000169548|SUHW1 ENSG00000170858|LILRA4 ENSG00000179151|EDC3 ENSG00000173933|Q9NRE4\_HUMAN ENSG00000182324|KCNJ14 ENSG00000187144|SPATA21  
ENSG000000024386|NEU1 ENSG000000072401|UBE2D1 ENSG00000102098|SCML2 ENSG00000108395|TRIM37 ENSG00000115616|SLC9A2 ENSG00000117420|NOL7 ENSG000001140386|ZNF291 ENSG00000162618|ELTD1  
ENSG00000167785|ZNF558 ENSG00000170035|UBE2E4P ENSG00000175556|LONRF3 ENSG00000177606|JUN ENSG00000182992|Q8IZM0\_HUMAN ENSG00000183814|LIN9 ENSG00000184007|PTP4A2 ENSG00000188647|PTAR1  
ENSG00000196785|Q8N862\_HUMAN ENSG00000198477|SUHW2  
CTGTAGC perfect: CTGTAGA TCTACAG hsa-miR-139 TCTACAGtgcaactgtct 0  
ENSG00000062582|MRPS24 ENSG00000075826|SEC31B ENSG00000100075|SLC25A1 ENSG00000101224|CDC25B ENSG00000104901|DKKL1 ENSG00000109072|VTN ENSG00000118971|CCND2 ENSG00000125084|WNT1  
ENSG00000125818|PMF1 ENSG00000128567|PODXL ENSG00000136574|GATA4 ENSG00000143630|HCN3 ENSG00000159337|PLA2G4D ENSG00000162616|PEP2 ENSG00000168481|LGI3 ENSG00000176261|ZBTB80S  
ENSG00000182149|KIAA0174 ENSG00000184945|AQP12A ENSG00000187003|ACTL7A ENSG00000187170|LCE4A ENSG00000188290|HES4 ENSG00000083635|NUFIP1 ENSG00000100387|RBX1 ENSG00000101557|USP14  
ENSG00000110841|PFPIBP1 ENSG00000116141|MARK1 ENSG00000118702|GHRH ENSG00000119013|NDUFB3 ENSG00000128272|ATF4 ENSG00000131351|NP\_219485.1 ENSG00000134198|TSPAN2 ENSG00000136813|KIAA0368  
ENSG00000139517|LNX2 ENSG00000143190|POU2F1 ENSG00000145439|CBR4 ENSG00000153162|BMP6 ENSG00000155111|CDC2L6 ENSG00000167081|PXB3 ENSG00000168385|SEPT2 ENSG00000175556|LONRF3  
CTGTAGT ENSG0000013563|DNASE1L1 ENSG00000092621|PHGDH ENSG00000103021|CCDC113 ENSG00000112659|PARC\_HUMAN ENSG00000138074|SLC5A6 ENSG00000157851|DPYSL5 ENSG00000166794|PPIB ENSG00000168781|HISPPD2A  
ENSG00000171649|ZIK1 ENSG00000174238|PITPNA ENSG00000185681|C9orf18 ENSG00000185744|TNT\_HUMAN ENSG00000187024|PTRH1 ENSG00000197965|MPZL1 ENSG00000202228|NDUFS1 ENSG00000077232|DNAJC10  
ENSG00000094975|C1orf9 ENSG00000108395|TRIM37 ENSG00000117650|NEK2 ENSG00000128845|CCPG1 ENSG00000134748|PRPF38A ENSG00000141367|CLTC ENSG00000148541|FAM13C1 ENSG00000155893|ACPL2  
ENSG00000163946|C3orf63 ENSG00000164329|PAPD4 ENSG00000164418|GRK12 ENSG00000165525|SDCCAG1 ENSG00000167601|AXL ENSG00000173597|SULT1B1 ENSG00000177324|CXorf20 ENSG00000179021|C3orf38  
CTGTATA ENSG00000029993|HMGB3 ENSG00000075886|TUBA3D ENSG00000087085|ACHE ENSG00000090372|STRN4 ENSG00000110881|ATM2 ENSG00000110931|AMKK2 ENSG00000111087|GLI1 ENSG00000116883|C1orf113  
ENSG00000121083|DYNLL2 ENSG00000121281|ADCY7 ENSG00000121904|CSMD2 ENSG00000123342|MMP19 ENSG00000130054|TMEM28 ENSG00000134287|CAF3 ENSG00000134780|DAGLA ENSG00000142611|PRDM16  
ENSG00000152086|TUBA3E ENSG00000164091|TMEM113 ENSG00000167617|CDC42EP5 ENSG00000171053|NP\_612151.1 ENSG00000173641|HSPB7 ENSG00000182487|NCF1C ENSG00000186654|ARHGAP8 ENSG00000198033|TUBA3C  
ENSG00000198732|SMOC1 ENSG00000204303|Q6ZVW4\_HUMAN ENSG00000006149|NP\_950246.1 ENSG00000004897|CDC27 ENSG00000005700|IBTK ENSG00000005810|MYCBP2 ENSG00000009694|ODZ1 ENSG00000030066|NUP160  
ENSG00000054938|CHRD12 ENSG00000061676|NCKAP1 ENSG00000078399|HOXA9 ENSG00000101966|BIRC4 ENSG00000104763|ASAHI ENSG00000111554|MDM1 ENSG00000119203|CPSF3 ENSG00000119953|SMND1  
ENSG00000120278|PLEKHG1 ENSG00000130024|PHF10 ENSG00000131773|KHDRBS3 ENSG00000138036|DYNC2L1 ENSG00000138135|CH25H ENSG00000139318|DUSP6 ENSG00000141048|MYH4 ENSG00000143079|CTTNBP2NL  
ENSG00000145715|RASA1 ENSG00000148655|C10orf11 ENSG00000148737|TCF7L2 ENSG00000150961|SEC24D ENSG00000152601|MBNL1 ENSG00000157181|C1orf27 ENSG00000158125|XDH ENSG00000162604|TM2D1  
ENSG00000162692|VCAM1 ENSG00000165525|SDCCAG1 ENSG00000168967|PMCHL1 ENSG00000169040|PMCHL2 ENSG00000171759|PAH ENSG00000177596|Q8NA50\_HUMAN ENSG00000183145|DSCR6 ENSG00000188313|PLSCR1  
ENSG00000198252|STYX  
CTGTATC ENSG000000056345|ITGB3 ENSG00000087076|HSD17B14 ENSG00000087087|ARS2\_HUMAN ENSG00000087237|CETP ENSG00000090975|PITPNM2 ENSG00000119408|NEK6 ENSG00000119638|NEK9 ENSG00000129925|TMEM8  
ENSG00000135723|FHOD1 ENSG00000141337|ARSG ENSG00000141506|PIK3R5 ENSG00000143318|CASQ1 ENSG00000147118|ZNF152 ENSG00000155980|KIF5A ENSG00000160408|STG6ALNAC6 ENSG00000168610|STAT3  
ENSG00000169385|RNASE2 ENSG00000169397|RNASE3 ENSG00000170145|SNF1LK2 ENSG00000177025|C19orf18 ENSG00000180758|GPR187 ENSG00000186470|PBR3A2 ENSG00000196363|WDR5 ENSG00000196758|NM\_207483  
ENSG00000204544|C6orf205 ENSG00000064787|BCAS1 ENSG00000065328|MCM10 ENSG00000071537|SELL1 ENSG00000079102|RUNX1T1 ENSG00000093222|ULK4 ENSG00000109756|RAPGEF2 ENSG00000116688|MFN2  
ENSG00000171151|CTBS ENSG00000117602|DSCR1L2 ENSG00000118113|MMP8 ENSG00000138439|ALS2CR13 ENSG00000149289|ZC3H12C ENSG00000149968|MMP3 ENSG00000163421|PROK2 ENSG00000164830|OXR1  
ENSG00000167117|C17orf73 ENSG00000168594|ADAM29 ENSG00000187823|ZCCHC16 ENSG00000197045|GMFB ENSG00000204178|TMEM55  
CTGTATG ENSG00000068079|IFI35 ENSG00000087077|TRIP6 ENSG00000093072|CECR1 ENSG00000101104|C20orf119 ENSG00000116698|SMG7 ENSG00000127241|MASP1 ENSG00000129543|FLJ16369 ENSG00000130540|SULT4A1  
ENSG00000139797|RNF113B ENSG00000140990|NDUFB10 ENSG00000141506|PIK3R5 ENSG00000143842|SOX13 ENSG00000145214|DGKQ ENSG00000151779|NP\_056993.2 ENSG00000155926|SLA ENSG00000161267|BDH1  
ENSG00000162367|TAL1 ENSG00000163793|DNAJC5G ENSG00000170801|HTRA3 ENSG00000176723|Q8N446\_HUMAN ENSG00000179766|Q4G129\_HUMAN ENSG00000185963|BICD2 ENSG00000186825|Q580R0-2 ENSG00000075568|TMEM131  
ENSG00000113971|ACAD11 ENSG00000119636|C14orf45 ENSG00000120159|Q9orf82 ENSG00000120685|C13orf23 ENSG00000120837|NFYB ENSG00000124103|C20orf107 ENSG00000124831|LRRFIP1 ENSG00000137752|CASP1  
ENSG00000137807|KIF23 ENSG00000139146|FAM60A ENSG00000139969|Q9P1J0\_HUMAN ENSG00000141424|SLC39A6 ENSG00000143947|RPS27A ENSG00000148737|TCF7L2 ENSG00000150459|SAP18 ENSG00000153560|UBP1  
ENSG00000164332|UBLCP1 ENSG00000164985|PSIP1 ENSG00000168118|RAB4A ENSG00000168502|KIAA0802 ENSG00000179981|TSHZ1 ENSG00000180730|TMEM46 ENSG00000196730|DAPK1 ENSG00000198718|KIAA0423  
ENSG00000198900|TOP1  
CTGTATT ENSG00000025800|KPNA6 ENSG00000033100|CHGUT\_HUMAN ENSG00000092201|SUPT16H ENSG00000100181|CSNK1E ENSG00000100888|CHD8 ENSG00000101146|RAE1 ENSG00000108591|DRG2 ENSG00000110917|KIAA0152  
ENSG00000127452|FBXL12 ENSG00000127663|JMJD2B ENSG00000128918|ALDH1A2 ENSG00000135077|HAVCR2 ENSG00000135926|TBM1M1 ENSG00000136504|MYST2 ENSG00000139433|GLTP ENSG00000147256|RHGX\_HUMAN  
ENSG00000156521|TYSND1 ENSG00000163219|ARHGAP25 ENSG00000166398|KIAA0355 ENSG00000170430|MGMT ENSG00000175003|SLC22A1 ENSG00000182318|ZSCAN2 ENSG00000189231|PSG3 ENSG00000196209|Q5JXA8\_HUMAN  
ENSG00000197757|HOXC6 ENSG00000205313|FAM106A ENSG000000205313|FAM106A ENSG00000047249|ATP6V1H ENSG00000060303|Q9NU98\_HUMAN ENSG00000101323|HAO1 ENSG00000109339|MAPK10 ENSG00000115415|STAT1  
ENSG00000131473|ACLY ENSG00000133103|COG6 ENSG00000134744|ZCCHC11 ENSG00000135334|C6orf166 ENSG00000138182|MPHOSPH1 ENSG00000138615|CLPL ENSG00000138735|PDE5A ENSG00000145555|MYO10  
ENSG00000150347|ARID5B ENSG00000152944|SURB7 ENSG00000154001|PPP2R5E ENSG00000156414|TRDR9 ENSG00000164187|LMBRD2 ENSG00000164548|TRA2A\_HUMAN ENSG00000171241|SHCBP1 ENSG00000172809|RPL38  
ENSG00000179295|PTPN11 ENSG00000180287|PLD5 ENSG00000182565|Q8N0W1\_HUMAN ENSG00000182774|RS17\_HUMAN ENSG00000182997|Q9UHT0\_HUMAN ENSG00000184779|RPS17 ENSG00000198589|LRBA ENSG00000205299|CKLF  
CTGTACG ENSG0000008256|PSCD3 ENSG00000071127|WDR1 ENSG00000075275|CELSR1 ENSG00000080815|PSEN1 ENSG00000089692|LAG3 ENSG00000101004|NLP\_HUMAN ENSG00000102900|NUP93 ENSG00000103043|VAC14  
ENSG00000103888|KIAA1199 ENSG00000105085|CRSP7 ENSG00000105202|FBL ENSG00000117834|SLC5A9 ENSG00000123933|MXD4 ENSG00000125826|RECK1 ENSG00000141150|RASL10B ENSG00000145016|Q96CK5\_HUMAN  
ENSG00000146950|SHROOM2 ENSG00000148843|PDCD11 ENSG00000157600|TMEM164 ENSG00000166402|TUB ENSG00000166831|RBPM52 ENSG00000167110|GOLGA2 ENSG00000171302|CANT1 ENSG00000179817|MRGPRX4  
ENSG00000181555|SETD2 ENSG00000198641|SYS1 ENSG00000204013|Q6XYD6\_HUMAN ENSG00000083799|CYLD ENSG00000102743|SLC25A15 ENSG00000121989|ACVR2A ENSG00000122692|SMU1 ENSG00000132639|SNAP25  
ENSG00000133961|NUMB ENSG00000143771|CNIH4 ENSG00000145365|NP\_443096.1 ENSG00000147650|LRP12 ENSG00000150457|LATS2 ENSG00000155330|NP\_001001436.1 ENSG00000162843|WDR64 ENSG00000178988|MRFAP1L1  
ENSG00000183542|KLRC4 ENSG00000198865|Q4G0S7\_HUMAN ENSG00000204841|FAM74A2 ENSG00000204844|FAM74A3 ENSG00000205358|MT1H  
CTGTCTT ENSG00000006025|OSBP17 ENSG00000008130|NADK ENSG00000070444|MNT ENSG00000074317|SNCB ENSG00000088826|SMOX ENSG00000090539|CHRD ENSG00000100626|GALNTL1 ENSG00000110108|TMEM109  
ENSG00000115155|OTOF ENSG00000115523|GNLY ENSG00000116852|KIF21B ENSG00000124067|LCAT ENSG00000127084|FGD3 ENSG00000132589|FLOT2 ENSG00000132768|DPH2 ENSG00000134201|GSTM5  
ENSG00000134287|ARF3 ENSG00000148408|CACNA1B ENSG00000161217|PCYT1A ENSG00000167107|NP\_079425.2 ENSG00000167614|TTYH1 ENSG00000170200|GAP43 ENSG00000172137|CALB2 ENSG00000173762|CD7  
ENSG00000175063|UBE2C ENSG00000175189|INHBC ENSG00000175334|BANF1 ENSG00000178467|EGLN\_HUMAN ENSG00000180860|PGA3 ENSG00000182500|TMEM142A ENSG00000197562|RAB40C ENSG00000198805|NP  
ENSG00000204973|PGA4 ENSG00000035928|RFC1 ENSG00000078674|PCM1 ENSG00000112078|KCTD20 ENSG00000112812|PRSS16 ENSG00000118432|CNR1 ENSG00000128052|KDR ENSG00000129235|TXNL5  
ENSG00000141048|MYH4 ENSG00000145244|CORIN ENSG00000148680|HTR7 ENSG00000151422|FER ENSG00000151552|QDPR ENSG00000152207|CYSLTR2 ENSG00000152795|HNRPDL ENSG00000154359|LONRF1  
ENSG00000155850|SLC26A2 ENSG00000165914|TTC7C ENSG00000166752|TMEM83 ENSG00000166848|TERF2IP ENSG00000175879|HOXD8 ENSG00000180787|ZFP3 ENSG00000180815|MAP3K15 ENSG00000181322|TXNDC6  
ENSG00000183801|OLFML2 ENSG00000184388|RBM32B ENSG00000186288|RBM32A ENSG00000197872|FAM49A ENSG00000198673|FAM19A2 ENSG00000198855|NP\_009007.2  
CTGTCTC ENSG00000067191|CACNB1 ENSG00000068903|SIRT2 ENSG00000099953|MMP11 ENSG00000100226|GTPBP1 ENSG00000103426|CORO7 ENSG00000104915|STX10 ENSG00000107021|TBC1D13 ENSG00000115112|TFCP2L1  
ENSG00000116213|WDR8 ENSG00000126368|NR1D1 ENSG00000131475|VPS25 ENSG00000134193|REG4 ENSG00000142039|CCDC97 ENSG00000150281|CTF1 ENSG00000162365|CYP4A22 ENSG00000162736|NCSTN  
ENSG00000165886|UBTD1 ENSG00000166025|AMOTL1 ENSG00000167323|STIM1 ENSG00000167633|KIR3DL1 ENSG00000168439|STIP1 ENSG00000168674|UGT3A2 ENSG00000168754|NP\_057574.2 ENSG00000170653|ATF7  
ENSG00000171302|CANT1 ENSG00000173327|MAP3K11 ENSG00000184489|PTP4A3 ENSG00000186049|KRT73 ENSG00000187048|CYP4A11 ENSG00000196182|STK40 ENSG00000198010|DLGAP2 ENSG00000198049|AVPR1B  
ENSG00000204283|NP\_001001685.1 ENSG00000205972|Q8NBC0\_HUMAN ENSG00000037965|HOXC8 ENSG00000128891|CCDC32 ENSG00000138399|FASTKD1 ENSG00000152413|HOMER1 ENSG00000157576|XR\_018454.1  
ENSG00000162747|FCGR3B ENSG00000166685|COG1 ENSG00000168958|C2orf33 ENSG00000169116|PARN1\_HUMAN ENSG00000169248|CXCL11 ENSG00000169752|NRG4 ENSG00000170027|YWHAG ENSG00000182405|PGBD4  
ENSG00000187118|NP\_872329.1 ENSG00000204397|NP\_001017534.1 ENSG00000204442|NP\_001073865.1 ENSG00000205581|HMGN1 ENSG00000205773|LOC652517  
CTGTGAA ENSG00000006114|AP1GBP1 ENSG00000049883|PTCD2 ENSG00000092421|SEMA6A ENSG00000100348|TXN2 ENSG00000100395|L3MBTL2 ENSG00000101224|CDC25B ENSG00000103326|SOLH ENSG00000104886|PLEKHJ1  
ENSG00000114316|USP4 ENSG00000123388|HOXC11 ENSG00000129816|NR\_001538.1 ENSG00000129845|O14605\_HUMAN ENSG00000144115|NP\_060741.2 ENSG00000148339|SLC25A25 ENSG00000158850|B4GALT3 ENSG00000162377|C1orf163  
ENSG00000163686|ABHD6 ENSG00000167604|NP\_640332.1 ENSG00000168758|SEMA4C ENSG00000169118|CSNK1G1 ENSG00000171302|CANT1 ENSG00000178006|XR\_018006.1 ENSG00000178554|Q8N8D4\_HUMAN  
ENSG00000180884|ZNF792 ENSG00000205761|Q6ZRI7\_HUMAN ENSG000000054690|PLEKHH1 ENSG00000103160|HSD1L1 ENSG00000109184|DCUN1D4 ENSG00000109787|KLF3 ENSG00000115271|GCA

|         |                             |                              |                              |                              |                                |                                |                                |                              |
|---------|-----------------------------|------------------------------|------------------------------|------------------------------|--------------------------------|--------------------------------|--------------------------------|------------------------------|
|         | ENSG00000116771 AGMAT       | ENSG00000133812 SBF2         | ENSG00000134324 LPIN1        | ENSG00000135334 C6orf166     | ENSG00000136542 GALNT5         | ENSG00000138688 KIAA1109       | ENSG00000140543 DET1           | ENSG00000141458 NPC1         |
|         | ENSG00000142182 DNMT3L      | ENSG00000145632 PLK2         | ENSG00000146469 VIP          | ENSG00000153832 FBXO36       | ENSG00000156218 ADAMTSL3       | ENSG00000157625 MAP3K7IP3      | ENSG00000162972 C2orf47        | ENSG00000166326 TRIM44       |
|         | ENSG00000170500 LONRF2      | ENSG00000171032 ZNF350       | ENSG00000173221 GLRX         | ENSG00000178965 C1orf173     | ENSG00000178974 FBXO34         | ENSG00000180251 SLC9A4         | ENSG00000180458 Q8N3U1_HUMAN   | ENSG00000181894 ZNF329       |
|         | ENSG00000183783 KCTD8       | ENSG00000196632 WNK3         | ENSG00000196660 SLC30A10     |                              |                                |                                |                                |                              |
| CTGTGAT | perfect: CTGTGAA TTCACAG    | hsa-miR-27a                  | TTCACAGtggtcaagtccgc         | 0                            |                                |                                |                                |                              |
|         | ENSG00000041880 PARP3       | ENSG00000050426 LETMD1       | ENSG00000075234 NP_060401.2  | ENSG00000089091 C2orf12      | ENSG00000099954 CECR2          | ENSG00000100280 AP1B1          | ENSG00000102003 SYP            | ENSG00000111674 ENO2         |
|         | ENSG00000124126 PREX1_HUMAN | ENSG00000128563 PKRRI1       | ENSG00000130032 PRRG3        | ENSG00000137133 HINT2        | ENSG00000139644 TEGT           | ENSG00000147144 CCDC120        | ENSG00000151692 RNF144         | ENSG00000170608 FOXA3        |
|         | ENSG00000175592 FOSL1       | ENSG00000175756 AURKAIP1     | ENSG00000197746 PSAP         | ENSG00000205683 DPF3         | ENSG00000205974 Q6ZVY3_HUMAN   | ENSG00000107984 DKK1           | ENSG00000108298 RPL19          | ENSG00000109586 GALNT7       |
|         | ENSG00000086619 ERO1LB      | ENSG00000104859 SFRS16       | ENSG00000106346 USP42        | ENSG00000106477 TSGA14       | ENSG00000107864 CPEB3          | ENSG00000139116 KIF21A         | ENSG00000140157 NIPA2          | ENSG00000145703 IQGAP2       |
|         | ENSG00000110696 C11orf58    | ENSG00000113790 EHHADH       | ENSG00000121542 SEC22A       | ENSG00000130021 HDHD1A       | ENSG00000136938 ANP32B         | ENSG00000173451 THAP2          | ENSG00000176274 MCART6         | ENSG00000179144 GIMAP7       |
|         | ENSG00000150667 FSIP1       | ENSG00000165030 NFIL3        | ENSG00000165588 OTX2         | ENSG00000168916 ZNF608       | ENSG00000171135 JAGN1          |                                |                                |                              |
| CTGTGCA | ENSG00000183780 SLC35F3     | ENSG00000185068 GTF2H5       | ENSG00000198015 MRPL42       |                              |                                |                                |                                |                              |
|         | ENSG00000011007 TCEB3       | ENSG00000023171 GRAMD1B      | ENSG00000026036 TNFRSF6B     | ENSG00000091536 MYO15A       | ENSG00000100422 CERK           | ENSG00000103148 C16orf35       | ENSG00000107562 CXCL12         | ENSG00000114656 KIAA1257     |
|         | ENSG00000122642 FKBP9       | ENSG00000135148 TRAFD1       | ENSG00000159266 Q69YJ1_HUMAN | ENSG00000159348 CYB5R1       | ENSG00000165643 SOHLH1         | ENSG00000172782 FADS6          | ENSG00000175806 MSRA           | ENSG00000176911 Q9HAM1_HUMAN |
|         | ENSG00000178537 SLC25A20    | ENSG00000182871 COL18A1      | ENSG00000196187 TMEM63A      | ENSG00000196724 ZNF418       | ENSG00000197417 CARXL          | ENSG00000204991 SPIRE2         | ENSG00000205980 Q6ZU05_HUMAN   | ENSG00000020746 HECW1        |
|         | ENSG00000009413 REV3L       | ENSG00000068615 REEP1        | ENSG00000099725 PRKY         | ENSG00000101327 PDYN         | ENSG00000111962 UST            | ENSG00000113282 CLINT1         | ENSG00000115839 RAB3GAP1       | ENSG00000118418 HMG3         |
|         | ENSG00000120162 MOBK12B     | ENSG00000120699 EXOSC8       | ENSG00000124201 ZNF11        | ENSG00000134109 EDEM1        | ENSG00000135999 EPC2           | ENSG00000137968 SLC44A5        | ENSG00000138109 CYP2C9         | ENSG00000139100 NOVA1        |
|         | ENSG00000145431 PDGFC       | ENSG00000147044 CASK         | ENSG00000147364 FBXO25       | ENSG00000152229 PSTPIP2      | ENSG00000154065 ANKRD29        | ENSG00000158691 ZSCAN12        | ENSG00000162692 VCAM1          | ENSG00000164258 NDUFS4       |
|         | ENSG00000166741 AP1G1       | ENSG00000172000 ZNF556       | ENSG00000181211 Q8NA17_HUMAN | ENSG00000185002 RFKDC1       |                                |                                |                                |                              |
| CTGTGGA | ENSG00000064547 EDG4        | ENSG00000066322 ELOVL1       | ENSG00000072121 ZFYVE26      | ENSG00000075914 EXOSC7       | ENSG00000084234 APLP2          | ENSG00000100307 CBX7           | ENSG00000105072 C19orf44       | ENSG00000105173 CCNE1        |
|         | ENSG00000105197 TMM50       | ENSG00000108349 CASC3        | ENSG00000110455 NP_115981.1  | ENSG00000115112 TFPC2L1      | ENSG000001127226 NP_116072.2   | ENSG00000130589 PR285_HUMAN    | ENSG00000136828 RALGPS1        | ENSG00000141342 PLEKHM1      |
|         | ENSG00000143178 TBX19       | ENSG00000147753 TTY7_HUMAN   | ENSG00000147761 TTY7_HUMAN   | ENSG00000159266 Q69YJ1_HUMAN | ENSG00000167657 DAPK3          | ENSG00000173838 RNF190         | ENSG00000176876 PKMP2          | ENSG00000179314 WSCD1        |
|         | ENSG00000184787 UBE2G2      | ENSG00000185651 UBE2L3       | ENSG00000204048 Q6ZUG3_HUMAN | ENSG00000205205 C17orf51     | ENSG00000206031 Q6ZT66_HUMAN   | ENSG00000005700 IBTK           | ENSG00000025293 PHF20          | ENSG00000049192 ADAMT56      |
|         | ENSG000000080371 RAB21      | ENSG00000081307 UBE1DC1      | ENSG00000108091 CCDC6        | ENSG00000112078 KCTD20       | ENSG00000115020 PIP5K3         | ENSG00000116191 RALGPS2        | ENSG00000124813 RUNX2          | ENSG00000127314 RAP1B        |
|         | ENSG00000127995 CASD1       | ENSG00000129521 EGLN3        | ENSG00000131969 ABHD12B      | ENSG00000134760 DSG1         | ENSG00000138439 ALS2CR13       | ENSG00000142494 NP_060712.2    | ENSG00000145685 LHFP12         | ENSG00000147471 PROSC        |
|         | ENSG00000153561 RNMDS4      | ENSG00000154429 C1orf96      | ENSG00000166012 SNORA25      | ENSG00000168876 ANKRD49      | ENSG00000169594 BNCL1          | ENSG00000171824 EXOSC10        | ENSG00000176276 hCG_1757335    | ENSG00000180777 ANKRD30B     |
| CTGTGTA | ENSG00000184860 NP_660151.2 | ENSG00000186417 GLDN         | ENSG00000198176 TFDP1        | ENSG00000203756 C6orf191     | ENSG00000205740 Q6ZHQ2_HUMAN   | ENSG00000100897 WDR23          | ENSG00000102178 UBL4A          | ENSG00000103187 COTL1        |
|         | ENSG00000074181 NOTCH3      | ENSG00000084070 SMAP1L       | ENSG00000086015 MAST2        | ENSG00000086062 B4GALT1      | ENSG00000088876 ZNF343         | ENSG00000130811 EIF3B4         | ENSG00000140479 PCSK6          | ENSG00000141258 RUTBC1       |
|         | ENSG00000105058 FAM32A      | ENSG00000106003 LFNG         | ENSG00000109501 WFS1         | ENSG00000110711 AIP          | ENSG00000116128 BCL9           | ENSG00000169818 APEX2          | ENSG00000177337 NP_001034885.1 | ENSG00000182646 TMEM29       |
|         | ENSG00000151692 RNF144      | ENSG00000154096 THY1         | ENSG00000163026 C2orf44      | ENSG00000163026 C2orf44      | ENSG00000169188 APEX2          | ENSG00000178399 HOXA9          | ENSG00000101695 RNF125         | ENSG00000104517 EDD1         |
|         | ENSG00000204564 C6orf136    | ENSG00000211445 GPX3         | ENSG00000025796 SEC63        | ENSG00000067715 SYT1         | ENSG00000078399 HOXA9          | ENSG00000087470 DNM1L          | ENSG00000123983 ACSL3          | ENSG00000124201 ZNF1         |
|         | ENSG00000107968 MAP3K8      | ENSG00000110700 RPS13        | ENSG00000111276 CDKN1B       | ENSG00000118495 PLAGL1       | ENSG00000119541 VPS4B          | ENSG00000123983 ACSL3          | ENSG00000124201 ZNF1           | ENSG00000126860 EVI2A        |
|         | ENSG00000128731 HERC2       | ENSG00000132153 DHX30        | ENSG00000138279 ANXA7        | ENSG00000139155 SLC01C1      | ENSG00000139505 MTMR6          | ENSG00000146833 TRIM4          | ENSG00000152382 TADA1L         | ENSG00000153914 SFRS12       |
| CTGTGTT | ENSG00000162852 C1orf71     | ENSG00000164187 LMBRD2       | ENSG00000170903 KIAA1826     | ENSG00000181610 MRPS23       | ENSG00000197959 DNM3           | ENSG00000198021 SPANX2         | ENSG00000203926 SPANXA1        | ENSG00000100101 NOL12        |
|         | ENSG0000007392 LUC7L        | ENSG00000008735 MAPK8IP2     | ENSG00000035862 TIMP2        | ENSG00000068985 PAGE1        | ENSG00000088621 ZNF671         | ENSG00000086730 LAT2           | ENSG00000088675 HUWE1          | ENSG00000100101 NOL12        |
|         | ENSG00000100379 KCTD17      | ENSG00000101152 DNAJC5       | ENSG00000101421 CHMP4B       | ENSG00000131849 ZNF132       | ENSG00000132604 TERF2          | ENSG00000133030 C17orf84       | ENSG00000137460 NP_203751.2    | ENSG00000141867 BRD4         |
|         | ENSG00000146083 RNF44       | ENSG00000158553 POM121L2     | ENSG00000160326 SLC2A6       | ENSG00000162576 MKRA8        | ENSG00000162889 MAPKAPK2       | ENSG00000163879 DNAL1          | ENSG00000164318 EGFLAM         | ENSG00000165731 RET          |
|         | ENSG00000166025 AMOTL1      | ENSG00000166398 KIAA0355     | ENSG00000169020 ATP5I        | ENSG00000169221 TBC1D10B     | ENSG00000172014 CCDC29         | ENSG00000175920 DOK7           | ENSG00000178605 GTPBP6         | ENSG00000183421 RIPK4        |
|         | ENSG00000186174 BCL9L       | ENSG00000188305 C19orf35     | ENSG00000197265 GTF2E2       | ENSG00000204539 CDSN         | ENSG00000247230 CTPS2          | ENSG00000072657 TRHDE          | ENSG00000083857 FAT            | ENSG00000091831 ESR1         |
|         | ENSG00000103544 NP_064710.3 | ENSG00000106415 GLCCI1       | ENSG00000107581 EIF3S10      | ENSG00000111962 UST          | ENSG00000117289 TXNIP          | ENSG00000121207 LRAT           | ENSG00000133106 EPSTI1         | ENSG00000135643 KCNMB4       |
|         | ENSG00000135763 KIAA0133    | ENSG00000136143 SUCLA2       | ENSG00000137393 IBRD2C       | ENSG00000151883 PARP8        | ENSG00000154153 NP_001030022.1 | ENSG00000154864 FAM38B         | ENSG00000160223 ICOSLG         | ENSG00000162409 PRKAA2       |
|         | ENSG00000168214 RBPJ        | ENSG00000169429 IL8          | ENSG00000169554 ZEB2         | ENSG00000170044 ZPLD1        | ENSG00000170927 PKHD1          | ENSG00000171033 PKIA           | ENSG00000184226 PCDH9          | ENSG00000186354 EDG3         |
| CTGTTGC | ENSG00000186432 KPN4        | ENSG00000188674 LOC389073    | ENSG00000188848 CCDC4        | ENSG000001204116 CHIC1       | ENSG00000204592 HLA-E          | ENSG00000104980 TIMM44         | ENSG00000105202 FBL            | ENSG00000106236 NPTX2        |
|         | ENSG00000029993 HMGB3       | ENSG00000070770 CSNK2A2      | ENSG00000090776 EFNB1        | ENSG00000102466 PGF14        | ENSG00000104980 TIMM44         | ENSG00000140990 NDUFB10        | ENSG00000142230 SAE1           | ENSG00000145050 ARMET        |
|         | ENSG00000107338 SHB         | ENSG00000126561 STAT5A       | ENSG00000134825 C11orf10     | ENSG00000136931 NR5A1        | ENSG00000140990 NDUFB10        | ENSG00000176303 Q8N822_HUMAN   | ENSG00000180861 C12orf36       | ENSG00000182459 NP_997342.1  |
|         | ENSG00000158014 SLC30A2     | ENSG00000158715 SLC45A3      | ENSG00000159199 ATP5G1       | ENSG00000165280 VCP          | ENSG00000165280 VCP            | ENSG00000101558 VAPA           | ENSG00000107643 MAPK8          | ENSG00000115896 PLCL1        |
|         | ENSG00000205313 FAM106A     | ENSG00000012048 BRCA1        | ENSG00000050165 DKK3         | ENSG00000064042 NP_055803.1  | ENSG00000025414 MYH2           | ENSG00000136379 FAM108C1       | ENSG00000138796 HADH           | ENSG00000141076 CIRH1A       |
|         | ENSG00000117139 JARID1B     | ENSG00000118777 ABCG2        | ENSG00000121067 SPOP         | ENSG00000125414 MYH2         | ENSG00000136379 FAM108C1       | ENSG00000138796 HADH           | ENSG00000141076 CIRH1A         | ENSG00000143970 ASXL2        |
|         | ENSG00000148429 USP6NL      | ENSG00000152154 TMEM178      | ENSG00000153283 CD96         | ENSG00000156976 EIF4A2       | ENSG00000159873 CCDC117        | ENSG00000165995 CACNB2         | ENSG00000170537 TMC7           | ENSG00000174106 LEMD3        |
|         | ENSG00000177800 TMEM78      | ENSG00000184227 ACOT1        | ENSG00000197928 ZNF677       |                              |                                |                                |                                |                              |
| CTTAACC | ENSG00000077080 ACTL7B      | ENSG00000082805 ERCC1        | ENSG00000087586 AURKA        | ENSG00000088682 COQ9         | ENSG00000111252 SH2B3          | ENSG00000113272 THG1L          | ENSG00000126602 TRAP1          | ENSG00000131055 COX4I2       |
|         | ENSG00000142227 EMP3        | ENSG00000146374 RSP03        | ENSG00000152217 SETBP1       | ENSG00000155846 PPARGC1B     | ENSG00000159189 C1QC           | ENSG00000159455 LCE2B          | ENSG00000160505 NLRP4          | ENSG00000164674 SYTL3        |
|         | ENSG00000173210 ABLIM3      | ENSG00000174282 ZBTB4        | ENSG00000186261 EMP2         | ENSG00000188257 PLA2G2A      | ENSG00000197448 GSTK1          | ENSG00000198618 PPIA_HUMAN     | ENSG00000203782 LOR            | ENSG00000005108 THSD7A       |
|         | ENSG00000099790 TRAF3IP3    | ENSG00000013293 SLC7A14      | ENSG00000015171 TIPYND11     | ENSG00000023330 ALAS1        | ENSG00000070501 POLB           | ENSG00000088766 CLRS1          | ENSG00000109163 GNRHR          | ENSG00000110920 FNBP4        |
|         | ENSG00000110756 HPS5        | ENSG00000111912 NCOA7        | ENSG00000113558 SKP1A        | ENSG00000145358 DDIT4L       | ENSG00000150776 C11orf57       | ENSG00000160181 TFE2L2         | ENSG00000162994 NP_689598.1    | ENSG00000163788 SNRK         |
|         | ENSG00000165410 CFL2        | ENSG00000170180 GYPA         | ENSG00000173915 USMG5        | ENSG00000183145 DSCR6        | ENSG00000186300 ZNF555         | ENSG00000196262 PPIA           | ENSG00000196562 SULF2          | ENSG00000196628 TCF4         |
| CTTAACG | ENSG0000006744 ELAC2        | ENSG00000065526 SPEN         | ENSG00000070770 CSNK2A2      | ENSG00000089012 SIRPB2       | ENSG00000108774 RAB5C          | ENSG00000111181 SLC6A12        | ENSG00000117394 SLC2A1         | ENSG00000131037 EPS8L1       |
|         | ENSG00000148288 GBG1        | ENSG00000157020 SEC13        | ENSG00000157916 RER1         | ENSG00000159123 DMRTC_HUMAN  | ENSG00000160180 TFF3           | ENSG00000136699 SMPD4          | ENSG00000140848 CPNE2          | ENSG00000166763 STRC         |
|         | ENSG00000177398 UMODL1      | ENSG00000177427 SMCR7        | ENSG00000180598 NP_057296.1  | ENSG00000182310 Q6UWG3_HUMAN | ENSG00000183092 BEGIN_HUMAN    | ENSG00000183431 SF3A3          | ENSG00000183621 ZNF438         | ENSG00000183632 NP_057296.1  |
|         | ENSG00000184743 NP_056274.3 | ENSG00000184911 CXorf50      | ENSG00000186501 C1orf160     | ENSG00000205456 NP_057296.1  | ENSG00000205457 NP_057296.1    | ENSG0000016602 CLCA4           | ENSG00000062370 ZNF228         | ENSG00000075785 RAB7A        |
|         | ENSG00000107201 DDX58       | ENSG00000112539 C6orf118     | ENSG00000119396 RAB1A        | ENSG00000124209 RAB22A       | ENSG00000155959 VBP1           | ENSG00000162521 RBBP4          | ENSG00000163964 PIGX           | ENSG00000174899 Q8N6Q6_HUMAN |
| CTTAACG | ENSG00000176853 FAM91A1     | ENSG00000185849 Q9P194_HUMAN |                              |                              |                                |                                |                                |                              |
|         | ENSG00000053371 AKR7A2      | ENSG00000066056 TIE1         | ENSG00000078699 CBFA2T2      | ENSG00000090920 FCGBP        | ENSG00000105732 ZNF574         | ENSG00000110455 NP_115981.1    | ENSG00000111775 COX6A1         | ENSG00000121904 CSMD2        |
|         | ENSG00000132514 CLEC10A     | ENSG00000143258 USP21        | ENSG00000145022 TCTA         | ENSG00000160325 C9orf7       | ENSG00000162981 FAM84A         | ENSG00000164605 Q5T8I0_HUMAN   | ENSG00000165457 FOLR2          | ENSG00000166484 MAPK7        |
|         | ENSG00000169184 NM_002430.2 | ENSG00000169991 Q5TF58_HUMAN | ENSG00000170955 PRKCDP       | ENSG00000177191 B3GNT8       | ENSG00000180422 C16orf81       | ENSG00000182482 NP_001032755.1 | ENSG00000182981 C9orf56        | ENSG00000183443 A2RU41_HUMAN |
|         | ENSG00000183579 ZNRF3       | ENSG00000186187 ZNRF1        | ENSG00000188843 NM_207504    | ENSG00000196507 TCEAL3       | ENSG00000196934 LOC440804      | ENSG00000198785 GRIN3A         | ENSG00000021488 SLC7A9         | ENSG00000032514 PGBD3        |
|         | ENSG00000091483 FH          | ENSG00000101974 ATP11C       | ENSG00000112242 EFZ3         | ENSG00000115919 KYNU         | ENSG00000135931 ARMC9          | ENSG00000140367 UBE2Q2         | ENSG00000148516 ZEB1           | ENSG0000                     |

|         |                                |                                |                              |                              |                              |                              |                                |                                |
|---------|--------------------------------|--------------------------------|------------------------------|------------------------------|------------------------------|------------------------------|--------------------------------|--------------------------------|
| CTTAATT | ENSG00000002834 LASP1          | ENSG00000063854 HAGH           | ENSG00000068137 PLEKHH3      | ENSG00000110274 CEP164       | ENSG00000140403 DNAJA4       | ENSG00000146374 RSPO3        | ENSG00000159625 CCDC135        | ENSG00000162951 LRRTM1         |
|         | ENSG00000163633 C4orf36        | ENSG00000172016 REG3A          | ENSG00000178951 ZBTB7A       | ENSG00000184634 MED12        | ENSG000001629 ANKIB1         | ENSG0000023909 GCLM          | ENSG00000059758 PCTK2          | ENSG00000080839 RBL1           |
|         | ENSG00000081138 CDH7           | ENSG00000084453 SLC01A2        | ENSG00000087916 SLC6A14      | ENSG00000100650 SFRS5        | ENSG00000100934 SEC23A       | ENSG00000101574 METT14       | ENSG00000106460 TMEM106B       | ENSG00000112237 CCNC           |
|         | ENSG00000113368 LMNB1          | ENSG00000117174 C1orf181       | ENSG00000119004 CYP20A1      | ENSG00000125812 GZF1         | ENSG00000132963 POMP2        | ENSG00000133104 SPG20        | ENSG00000135960 EDAR           | ENSG00000144354 CDCA7          |
|         | ENSG00000144460 Q96NL2_HUMAN   | ENSG00000149231 CCDC82         | ENSG00000150961 SEC24D       | ENSG00000152785 BMP3         | ENSG00000154258 ABCA9        | ENSG00000163032 VSNL1        | ENSG00000163577 EIF5A2         | ENSG00000163950 SLBP           |
|         | ENSG00000169379 ARL13B         | ENSG00000172765 TMCC1          | ENSG00000175066 GK5          | ENSG00000182986 NP_997216.2  | ENSG00000198060 MARCH5       | ENSG00000205544 C17orf61     |                                |                                |
| CTTACTG | ENSG00000004455 AK2            | ENSG00000005100 DHX33          | ENSG00000007341 ST7L         | ENSG000000053108 FSTL4       | ENSG000000072778 ACADVL      | ENSG000000087087 ARS2_HUMAN  | ENSG00000103034 NDRG4          | ENSG00000116663 FBXO6          |
|         | ENSG00000120332 TNN            | ENSG00000128311 TST            | ENSG00000129187 DCTD         | ENSG00000131462 TUBG1        | ENSG00000132142 ACACA        | ENSG00000135624 CCT7         | ENSG00000158480 SPATA2         | ENSG00000171873 ADRA1D         |
|         | ENSG00000184209 NP_008951.1    | ENSG00000186970 KRTAP15-1      | ENSG00000187678 SPRY4        | ENSG00000189180 ZNF33A       | ENSG00000205431 Q6UWF5_HUMAN | ENSG00000205528 Q6ZRE2_HUMAN | ENSG00000069535 MAOB           | ENSG00000089335 ZNF302         |
|         | ENSG00000101266 CSNK2A1P       | ENSG00000101745 ANKRD12        | ENSG00000104472 CHRAC1       | ENSG00000105835 PBEF1        | ENSG00000105856 HBP1         | ENSG00000106603 C7orf44      | ENSG00000110958 PTGES3         | ENSG00000111707 SUDS3          |
|         | ENSG00000117620 SLC35A3        | ENSG00000119396 RAB14          | ENSG00000124205 EDN3         | ENSG00000127334 DYRK2        | ENSG00000129472 RAB2B        | ENSG00000135241 PNPLA10P     | ENSG00000135838 NPL            | ENSG00000136122 C13orf34       |
|         | ENSG00000155966 AFF2           | ENSG00000158125 XDH            | ENSG00000162722 TRIM58       | ENSG00000166971 AKT1P        | ENSG00000178105 DDX10        | ENSG00000188162 OTOG         | ENSG00000196877 NP_001018132.2 | ENSG00000198156 NP_001018132.2 |
|         | ENSG00000205523 Q6ZP97_HUMAN   |                                |                              |                              |                              |                              |                                |                                |
| CTTACTT | ENSG00000007341 ST7L           | ENSG00000008128 CDC2L1         | ENSG00000012963 C14orf130    | ENSG000000087088 BAX         | ENSG00000099984 GSTT2        | ENSG00000102096 PIM2         | ENSG00000132434 LANCL2         | ENSG00000133433 GSTT2_HUMAN    |
|         | ENSG00000143028 SYPL2          | ENSG00000158470 B4GALT5        | ENSG00000166340 TPP1         | ENSG00000166435 XRR1A        | ENSG00000170260 ZNF212       | ENSG00000171786 NHLH1        | ENSG00000176438 C14orf49       | ENSG00000176887 SOX11          |
|         | ENSG00000178235 SLITRK1        | ENSG00000179913 B3GNT3         | ENSG00000196501 HIST1H2BN    | ENSG00000204304 PBX2         | ENSG00000081770 NAIP         | ENSG000000089157 RPLP0       | ENSG00000105550 FGF21          | ENSG00000111860 C6orf204       |
|         | ENSG00000112276 BVES           | ENSG00000112706 IMP3           | ENSG00000115145 STAM2        | ENSG00000124356 STAMBP       | ENSG00000125352 RNFI13A      | ENSG00000126010 GPRP         | ENSG00000128294 TPST2          | ENSG00000144935 TRPC1          |
|         | ENSG00000147202 DIAPH2         | ENSG00000152760 TCTEX1D1       | ENSG00000163421 PROK2        | ENSG00000163624 CDS1         | ENSG00000166157 TPTP         | ENSG00000167637 ZNF345       | ENSG00000169612 FAM103A1       | ENSG00000176274 MCART6         |
|         | ENSG00000179331 RAB39          | ENSG00000179978 Q59GI6_HUMAN   | ENSG00000187987 ZSCAN23      | ENSG00000188647 PTAR1        | ENSG00000189277 NP_997365.2  | ENSG00000196387 ZNF140       | ENSG00000197195 CHURC1         | ENSG00000203995 ZYG11A         |
| CTTAGAA | ENSG00000037637 FBXO42         | ENSG00000067082 KLF6           | ENSG00000072840 EVC          | ENSG00000087245 MMP2         | ENSG00000088854 C2orf194     | ENSG00000114982 NP_060461.3  | ENSG00000120049 KCNIP2         | ENSG00000124212 PTGIS          |
|         | ENSG00000135605 TEC            | ENSG00000140488 BRUNOL6        | ENSG00000158525 CPA5         | ENSG00000166847 DCTN5        | ENSG00000168298 HIST1H1E     | ENSG00000171786 NHLH1        | ENSG00000184221 OLIG1          | ENSG00000185963 BICD2          |
|         | ENSG00000188312 CENPP          | ENSG00000188428 TXNDC5         | ENSG00000204490 TNF          | ENSG00000012660 ELOVL5       | ENSG00000043093 DCUN1D1      | ENSG00000050030 KIAA2022     | ENSG00000068366 ACSL4          | ENSG00000072756 TRNT1          |
|         | ENSG00000091317 CMTM6          | ENSG00000107014 RLN2           | ENSG00000112031 MTRF1L       | ENSG00000117713 ARIDA1       | ENSG00000120210 INSL6        | ENSG00000133938 SYNJ2BP      | ENSG00000134352 IL6ST          | ENSG00000135355 NP_115991.1    |
|         | ENSG00000138658 C4orf21        | ENSG00000145246 ATP10D         | ENSG000001465780 FEM1C       | ENSG00000150938 CRIM1        | ENSG00000153046 CDYL         | ENSG00000153064 BANK1        | ENSG00000154007 ASB17          | ENSG00000163610 Q9NUU0_HUMAN   |
|         | ENSG00000168813 ZNF507         | ENSG00000170500 LONRF2         | ENSG00000171766 GATM         | ENSG00000172292 LASS6        | ENSG00000172900 XR_017872.1  | ENSG00000180777 ANKRD30B     | ENSG00000181322 TXNDC6         | ENSG00000197817 Q9UHS9_HUMAN   |
|         | ENSG00000204397 NP_001017534.1 | ENSG00000205252 Q4G0M6_HUMAN   |                              |                              |                              |                              |                                |                                |
| CTTAGGT | ENSG00000012822 CALCOCO1       | ENSG00000018625 ATP1A2         | ENSG00000055163 CYFIP2       | ENSG00000075702 WDR62        | ENSG00000085552 IGSF9        | ENSG00000111540 RAB5B        | ENSG00000114268 PFKFB4         | ENSG00000118900 UBN1           |
|         | ENSG00000126934 MAP2K2         | ENSG00000126970 KIAA1166       | ENSG00000128311 TST          | ENSG00000128342 LIF          | ENSG00000143178 TBX19        | ENSG00000149262 INTS4        | ENSG00000156299 TIAM1          | ENSG00000160323 ADAMTS13       |
|         | ENSG00000160712 IL6R           | ENSG00000161270 NPHS1          | ENSG00000166965 RCCD1        | ENSG00000168061 SAC3D1       | ENSG00000173702 CMX13        | ENSG00000177238 TRIM72       | ENSG00000198785 GRIN3A         | ENSG00000005436 C2orf3         |
|         | ENSG00000067577 PNPLA4         | ENSG0000013810 TACC3           | ENSG00000113600 C9           | ENSG00000120519 SLC10A7      | ENSG00000125351 UPF3B        | ENSG00000127022 CANX         | ENSG00000129460 NGDN           | ENSG00000130224 LRCH2          |
|         | ENSG00000131508 UBE2D2         | ENSG00000137090 DMRT1          | ENSG00000140259 MFAP1        | ENSG00000152443 ZNF776       | ENSG00000155729 KCTD18       | ENSG00000162613 FUBP1        | ENSG00000163960 UBXD7          | ENSG00000165186 PTCHD1         |
|         | ENSG00000181264 TMEM136        | ENSG00000182197 EXT1           | ENSG00000189251 Q8WYN8_HUMAN | ENSG00000198130 HIBCH        |                              |                              |                                |                                |
| CTTAGTC | ENSG00000004487 AOF2           | ENSG000000071246 VASH1         | ENSG00000078898 BP1L1        | ENSG00000114735 HEM1         | ENSG00000116661 FBXO2        | ENSG00000117154 IGSF21       | ENSG00000130477 UNC13A         | ENSG00000134207 SYT6           |
|         | ENSG00000136816 TOR1B          | ENSG00000158161 EYA3           | ENSG00000169006 NTRSR2       | ENSG00000176438 C14orf49     | ENSG00000177098 SCN4B        | ENSG00000177192 PUS1         | ENSG00000183128 FAM26A         | ENSG00000183621 ZNF438         |
|         | ENSG00000196218 RYR1           | ENSG00000204511 NM_001011700.1 | ENSG00000106258 CYP3A5       | ENSG00000112414 GPR126       | ENSG00000114861 FOX P1       | ENSG00000116194 ANGPTL1      | ENSG00000119929 CUTC           | ENSG00000120860 CCDC53         |
|         | ENSG00000120992 LYPLA1         | ENSG00000135720 DYNC1L12       | ENSG00000145242 EPHA5        | ENSG00000151470 C4orf33      | ENSG00000152779 SLC16A12     | ENSG00000157315 TMED6        | ENSG00000158985 CDC42SE2       | ENSG00000164338 UTP15          |
|         | ENSG00000171928 FAM18B         | ENSG00000176593 Q8N9G5_HUMAN   | ENSG00000182628 FAM33A       |                              |                              |                              |                                |                                |
| CTTATAG | ENSG00000050327 ARHGFE5        | ENSG00000084636 COL16A1        | ENSG00000110880 CORO1C       | ENSG00000121060 TRIM25       | ENSG00000122224 LY9          | ENSG00000131050 C2orf70      | ENSG00000137825 ITPKA          | ENSG00000144834 TAGLN3         |
|         | ENSG00000158445 KCNB1          | ENSG00000159069 FBXW5          | ENSG00000159708 LRRC36       | ENSG00000160767 C1orf2       | ENSG00000170290 SLN          | ENSG00000184363 PKP3         | ENSG00000184677 ZBTB40         | ENSG00000198237 GUSL1_HUMAN    |
|         | ENSG00000204511 NM_001011700.1 | ENSG00000205793 Q6ZT42_HUMAN   | ENSG00000065243 PKN2         | ENSG00000087053 MTMR2        | ENSG00000111850 C6orf162     | ENSG00000112339 HBS1L        | ENSG00000114166 PCAF           | ENSG00000116754 SFRS11         |
|         | ENSG00000118855 MFSD1          | ENSG00000120742 RAMP4_HUMAN    | ENSG00000127125 PPCS         | ENSG00000132122 SPATA6       | ENSG00000132842 AP3B1        | ENSG00000133302 ANKRD32      | ENSG00000134025 NM_022659.2    | ENSG00000145476 CYP4V2         |
|         | ENSG00000145725 HISPPD1        | ENSG00000155011 DKK2           | ENSG00000168283 BMI1         | ENSG00000172575 RASGRP1      | ENSG00000173681 CXorf23      | ENSG00000186310 NAP1L3       | ENSG00000188404 SELL           | ENSG00000189144 ZNF573         |
|         | ENSG00000197712 FAM114A1       |                                |                              |                              |                              |                              |                                |                                |
| CTTATCT | ENSG00000011021 CLCN6          | ENSG00000023902 PLEKH01        | ENSG00000067066 BP100        | ENSG00000100027 YPEL1        | ENSG00000101883 PEPP1_HUMAN  | ENSG00000103061 SLC7A6OS     | ENSG00000104823 ECH1           | ENSG00000106144 CASP2          |
|         | ENSG00000107960 OBFC1          | ENSG00000110799 VWF            | ENSG00000110917 KIAA0152     | ENSG00000128262 Q9NTU6_HUMAN | ENSG00000139874 SSTR1        | ENSG00000142748 FCN3         | ENSG00000143198 MGST3          | ENSG00000158158 CNNM4          |
|         | ENSG00000161896 IHPK3          | ENSG00000165837 Q5W0A0_HUMAN   | ENSG00000166578 IQDC         | ENSG00000170876 TMEM43       | ENSG00000171724 K1576_HUMAN  | ENSG00000172016 REG3A        | ENSG00000172653 C17orf66       | ENSG00000178057 C3orf60        |
|         | ENSG00000178752 FAM132B        | ENSG00000179082 C9orf106       | ENSG00000186910 SERPIN1A1    | ENSG00000196431 CRYBA4       | ENSG00000204544 C6orf205     | ENSG00000206550 LOC285346    | ENSG00000074527 NTN4           | ENSG00000085788 DDHD2          |
|         | ENSG00000092345 DAZL           | ENSG00000102524 TNFSF13B       | ENSG00000109536 FRG1         | ENSG00000134830 GPR77        | ENSG00000143933 CALM2        | ENSG00000151229 SLC2A13      | ENSG00000154310 TNIK           | ENSG00000157538 DSCR3          |
|         | ENSG00000166337 TAF10          | ENSG00000168724 DNJA5_HUMAN    | ENSG00000171451 DSEL         | ENSG00000172296 SPTLC3       | ENSG00000172493 AFF1         | ENSG00000181472 ZBTB2        | ENSG00000182518 FAM104B        | ENSG00000185010 F8             |
|         | ENSG00000186369 YNOO2_HUMAN    | ENSG00000186496 ZNF396         | ENSG00000187554 TLR5         | ENSG00000196917 GPR81        |                              |                              |                                |                                |
| CTTATTT | ENSG00000009335 UBE3C          | ENSG00000026036 TNFRSF6B       | ENSG00000072134 EPN2         | ENSG00000086102 NFX1         | ENSG00000089685 BIRC5        | ENSG00000092201 SUPT16H      | ENSG00000095752 ILL1           | ENSG00000103855 CD276          |
|         | ENSG00000105697 HAMP           | ENSG00000114251 WNT5A          | ENSG00000114767 RRP9         | ENSG00000120451 SNX19        | ENSG00000125657 TNFSF9       | ENSG00000128346 C2orf23      | ENSG00000132801 ZSWIM3         | ENSG00000135077 HAVCR2         |
|         | ENSG00000135362 NP_079117.2    | ENSG00000135451 TROAP          | ENSG00000143850 PLEKHA6      | ENSG00000149646 C20orf152    | ENSG00000153266 FEZF2        | ENSG00000154330 PGM5P1       | ENSG00000158715 SLC45A3        | ENSG00000160785 SLC25A44       |
|         | ENSG00000163823 CCR1           | ENSG00000164379 FOXQ1          | ENSG00000164385 C6orf195     | ENSG00000164742 ADCY1        | ENSG00000167130 DOLPP1       | ENSG00000181938 GINS3        | ENSG00000093009 CDC45L         | ENSG00000100380 ST13           |
|         | ENSG00000101132 PFDN4          | ENSG00000103995 CEP152         | ENSG00000104327 CALB1        | ENSG00000108691 CCL2         | ENSG00000111231 ATPBD1C      | ENSG00000113594 LIFR         | ENSG00000115425 PECR           | ENSG00000116991 SIPAL12        |
|         | ENSG00000121848 ZNF364         | ENSG00000123106 CCDC91         | ENSG00000125772 GDE5_HUMAN   | ENSG00000126777 KTN1         | ENSG00000127483 HP1BP3       | ENSG00000133703 KRAS         | ENSG00000133773 CCDC59         | ENSG00000135222 CSN2           |
|         | ENSG00000143543 JTB            | ENSG00000151883 PARP8          | ENSG00000152332 UHMK1        | ENSG00000157426 NP_861522.2  | ENSG00000158683 PKD1L1       | ENSG00000162378 ZYG11B       | ENSG00000163319 MRPS18C        | ENSG00000163491 NEK10          |
|         | ENSG00000164983 TMEM65         | ENSG00000169905 TOR1AIP2       | ENSG00000189350 NP_954974.2  | ENSG00000198533 Q9P1D0_HUMAN |                              |                              |                                |                                |
| CTTCACC | ENSG00000010361 FUZ            | ENSG00000077782 FGFR1          | ENSG00000099385 BCL7C        | ENSG00000099812 C19orf21     | ENSG00000100439 ABHD4        | ENSG00000104833 TUBB4        | ENSG00000107742 SPOCK2         | ENSG00000110171 TRIM3          |
|         | ENSG00000117394 SLC2A1         | ENSG00000126583 PRKCG          | ENSG00000136699 SMFD4        | ENSG00000142046 TMEM91       | ENSG00000152117 Q6ZWB7_HUMAN | ENSG00000162241 SLC25A45     | ENSG00000162873 KLHDC8A        | ENSG00000164711 LPAL2          |
|         | ENSG00000166473 PKD1L2         | ENSG00000169894 MUC3A          | ENSG00000170390 DCLK2        | ENSG00000175048 ZDHHC14      | ENSG00000196166 NP_997295.1  | ENSG00000197150 ABCB8        | ENSG00000204161 C10orf128      | ENSG00000204394 VARS           |
|         | ENSG00000205710 Q6ZR85_HUMAN   | ENSG00000205923 CEMP1          | ENSG000000009790 TRAF3IP3    | ENSG00000028116 VRK2         | ENSG000000076382 SPAG5       | ENSG00000102055 PPP1R2P9     | ENSG00000107614 TRDMT1         | ENSG00000116539 ASH1L          |
|         | ENSG00000120563 LYZL1          | ENSG00000124177 CHD6           | ENSG00000133101 CCNA1        | ENSG00000142937 RPS8         | ENSG00000146072 TNFRSF21     | ENSG00000148655 C10orf11     | ENSG00000151150 ANK3           | ENSG00000151632 AKR1C2         |
|         | ENSG00000173627 APOBEC4        | ENSG00000174574 C1orf108       | ENSG00000184083 FAM120C      | ENSG00000186974 Q8N6X9_HUMAN | ENSG00000187134 AKR1C1       | ENSG00000187823 ZCCHC16      | ENSG00000198947 DMD            | ENSG00000203801 Q5R3E8_HUMAN   |
|         | ENSG00000204279 PAGE3          | ENSG00000204397 NP_001017534.1 |                              |                              |                              |                              |                                |                                |
| CTTCACG | ENSG00000036530 CYP46A1        | ENSG00000063241 ISOC2          | ENSG00000087258 GNAO1        | ENSG00000103269 RHBDL1       | ENSG00000105135 ILVBL        | ENSG00000125901 MRPS26       | ENSG00000129437 KLK14          | ENSG00000138780 GSTCD          |
|         | ENSG00000149929 HIRIP3         | ENSG00000151502 VPS26B         | ENSG00000161583 TBC1D3G      | ENSG00000165138 ANKS6        | ENSG00000165238 WNRK2        | ENSG00000189309 TBC1D3B      | ENSG00000202357 GLRX2          | ENSG00000046889 DEPDC2         |
|         | ENSG00000070010 UFD1L          | ENSG00000078114 NEBL           | ENSG00000099725 PRKY         | ENSG00000101138 CSTF1        | ENSG00000101901 CXorf45      | ENSG00000109606 DHX15        | ENSG00000131732 ZCCHC9         | ENSG0000013186                 |



|          |                                |                              |                              |                                |                              |                                |                                |                                |  |
|----------|--------------------------------|------------------------------|------------------------------|--------------------------------|------------------------------|--------------------------------|--------------------------------|--------------------------------|--|
|          | ENSG00000146433 TMEM181        | ENSG00000151090 THRB         | ENSG00000161533 ACOX1        | ENSG00000163637 PRICKLE2       | ENSG00000165119 HNRPK        | ENSG00000165186 PTCHD1         | ENSG00000170153 RNF150         | ENSG00000176624 RKHD2          |  |
| CTTGGCT  | ENSG00000177125 ZBTB34         | ENSG00000184293 NP_742001.1  | ENSG00000187446 CHP1_HUMAN   |                                |                              |                                |                                |                                |  |
|          | ENSG00000164999 ANKS1A         | ENSG00000170444 MNT          | ENSG00000108888 MAVS_HUMAN   | ENSG00000100101 NOL12          | ENSG00000107719 KIAA1274     | ENSG00000107736 CDH23          | ENSG00000116133 DHCR24         | ENSG00000117682 DHDDS          |  |
|          | ENSG00000121904 CSMD2          | ENSG00000122140 MRPS2        | ENSG00000125869 C20orf103    | ENSG00000126353 CCR7           | ENSG00000142765 SYTL1        | ENSG00000143140 GJA5           | ENSG00000144043 TEX261         | ENSG00000147443 DOK2           |  |
|          | ENSG00000163013 FBXO41         | ENSG00000174804 FZD4         | ENSG00000175707 C10orf172    | ENSG00000178934 LEG7_HUMAN     | ENSG00000180357 ZNF609       | ENSG00000181110 RGAG1          | ENSG00000182541 LTMK2          | ENSG00000184207 NP_001035830.1 |  |
|          | ENSG00000184489 PTP4A3         | ENSG00000186635 STARD10      | ENSG00000188060 RAB42        | ENSG00000197021 CXorf40B       | ENSG00000197150 ABCB8        | ENSG00000205076 LGALS7         | ENSG00000205673 Q6ZRXO_HUMAN   | ENSG0000010404 IDS             |  |
|          | ENSG00000170087 PFN2           | ENSG00000100578 KIAA0586     | ENSG00000101003 GINS1        | ENSG00000102910 LONP2          | ENSG00000123584 MAGEA9B      | ENSG00000131174 COX7B          | ENSG00000134769 DTNA           | ENSG00000135763 KIAA0133       |  |
|          | ENSG00000136875 PRPF4          | ENSG00000137265 IRF4         | ENSG00000144407 PTHR2        | ENSG00000145495 MARCH6         | ENSG00000151792 CTS0         | ENSG00000154898 Q8IYA2_HUMAN   | ENSG00000155438 MKI67IP        | ENSG00000156671 SAMD8          |  |
|          | ENSG00000159377 PSMB4          | ENSG00000159763 PIP          | ENSG00000163904 SNRP2        | ENSG00000166986 MARS           | ENSG00000168434 DYNLRB2      | ENSG00000168646 AXIN2          | ENSG00000171848 RRM2           | ENSG00000173166 RAPH1          |  |
| CTTGTGTT | ENSG00000176142 TMEM39A        | ENSG00000185070 FLRT2        | ENSG00000185591 SP1          | ENSG00000186001 LRCH3          | ENSG00000197110 IL28B        | ENSG00000197323 TRIM33         | ENSG00000198477 SUHW2          |                                |  |
|          | ENSG00000167829 IDH3G          | ENSG000001099860 GADD45B     | ENSG00000100335 SMCR7L       | ENSG00000143093 FAM40A         | ENSG00000145029 NICN1        | ENSG00000157837 PSL4_HUMAN     | ENSG00000157933 SKI            | ENSG00000160408 ST6GALNAC6     |  |
|          | ENSG00000161381 PLXDC1         | ENSG00000162458 FBLIM1       | ENSG00000166272 C10orf26     | ENSG00000166974 MAPRE2         | ENSG00000168434 COG7         | ENSG00000170075 GPR37L1        | ENSG00000185219 ZNF445         | ENSG00000185668 POU3F1         |  |
|          | ENSG00000187678 SPRY4          | ENSG00000198960 ARMCX6       | ENSG00000161676 NCKAP1       | ENSG000001086289 EPDR1         | ENSG00000104325 DECR1        | ENSG00000117650 NEK2           | ENSG00000119707 RBM25          | ENSG00000121089 NACA3P         |  |
|          | ENSG00000123843 C4BPB          | ENSG00000136146 MED4         | ENSG00000143190 POU2F1       | ENSG00000151623 NR3C2          | ENSG00000154310 TNIK         | ENSG00000164879 CA3            | ENSG00000168374 ARF4           | ENSG00000173387 Q9P007_HUMAN   |  |
|          | ENSG00000185915 KLHL34         | ENSG00000186104 CYP2R1       | ENSG00000188408 MAGEB5       | ENSG00000188917 CXorf34        | ENSG00000196531 NACA         | ENSG00000197969 VPS13A         | ENSG00000198162 MAN1A2         | ENSG00000198961 PJA2           |  |
| CTTGTAA  | ENSG00000109954 BAZ1B          | ENSG00000100167 SEPT3        | ENSG00000100365 NCF4         | ENSG00000111424 VDR            | ENSG00000111540 RAB5B        | ENSG00000113555 PCDH12         | ENSG00000124766 SOX4           | ENSG00000126882 FAM78A         |  |
|          | ENSG00000134072 CAMK1          | ENSG00000140403 DNAJA4       | ENSG00000140465 CYP1A1       | ENSG00000141527 CARD14         | ENSG00000162227 TAF6L        | ENSG00000162666 KIAA0040       | ENSG00000166689 PLEKHA7        | ENSG00000178343 NP_001073974.1 |  |
|          | ENSG00000180229 NP_001019853.1 | ENSG00000180914 OXTR         | ENSG00000197162 ZNF688       | ENSG00000204235 Q6ZNQ4_HUMAN   | ENSG00000204564 C6orf136     | ENSG00000204681 GABBR1         | ENSG00000208642 APRIN          | ENSG000002086065 CHMP5         |  |
|          | ENSG00000104343 UBE2W          | ENSG00000109738 GLRB         | ENSG00000112245 PTP4A1       | ENSG00000115446 UNC50          | ENSG00000128656 CHN1         | ENSG00000130023 C6orf70        | ENSG00000134644 PUM1           | ENSG00000134698 EIF2C4         |  |
|          | ENSG00000135999 EPC2           | ENSG00000137942 FBNP1L       | ENSG00000140262 TCF12        | ENSG00000151725 MLF1IP         | ENSG00000164024 METAP1       | ENSG00000164284 GRPEL2         | ENSG00000197453 NP_001001706.1 | ENSG00000204133 FAM33B         |  |
| CTTGTAC  | ENSG00000164877 ARS2_HUMAN     | ENSG00000132094 KIF1A        | ENSG00000132906 CASP9        | ENSG00000133246 PRAM1          | ENSG00000137288 C6orf125     | ENSG00000158716 DUSP23         | ENSG00000162599 NFIA           | ENSG00000164509 IL31RA         |  |
|          | ENSG00000164877 MICALL2        | ENSG00000169442 CD52         | ENSG00000170801 HTRA3        | ENSG00000176444 CLK2           | ENSG00000188368 NP_954979.2  | ENSG00000198785 GRIN3A         | ENSG000002077152 UBE2T         | ENSG000002078140 HIP2          |  |
|          | ENSG00000181189 MEF2C          | ENSG000001096717 SIRT1       | ENSG00000101126 ADNP         | ENSG00000106688 SLC1A1         | ENSG00000110861 TNKS2        | ENSG00000108061 SHOC2          | ENSG00000114547 ROPN1B         | ENSG00000115966 ATF2           |  |
|          | ENSG00000117523 BAT2D1         | ENSG00000124171 PARD6B       | ENSG00000127955 GNAI1        | ENSG00000128272 ATF4           | ENSG00000129474 JUB          | ENSG00000132570 PCBD2          | ENSG00000143933 CALM2          | ENSG00000151012 SLC7A11        |  |
|          | ENSG00000159140 SON            | ENSG00000162994 NP_689598.1  | ENSG00000168646 AXIN2        | ENSG00000170348 TMED10         | ENSG00000189376 C8orf76      | ENSG00000196950 SLC39A10       | ENSG00000198707 CEP290         | ENSG00000204804 FAM27D1        |  |
| CTTGTAT  | ENSG000001005100 DHX33         | ENSG00000119485 PRDM11       | ENSG00000147056 WDR37        | ENSG0000010054523 KIF1B        | ENSG00000172071 LPHN1        | ENSG000001103061 SLC7A60S      | ENSG00000105193 RPS16          | ENSG000001105641 SLC5A5        |  |
|          | ENSG00000108349 CASC3          | ENSG00000111775 COX6A1       | ENSG00000124226 ZNF313       | ENSG00000143641 GALNT2         | ENSG00000148411 BTBD14A      | ENSG00000149243 NP_001034637.1 | ENSG00000156411 C14orf2        | ENSG00000164605 Q5T8I0_HUMAN   |  |
|          | ENSG00000169181 GSG1L          | ENSG00000169894 MUC3A        | ENSG00000171160 C10orf83     | ENSG00000175197 DDIT3          | ENSG00000177951 BET1L        | ENSG00000181666 HKR1           | ENSG00000181873 C1orf69        | ENSG00000184009 ACTG1          |  |
|          | ENSG00000184164 GCLM2          | ENSG00000185052 SLC24A3      | ENSG00000186654 ARHGAP8      | ENSG00000187239 FBNP2          | ENSG00000197724 PHF2         | ENSG00000204304 PBX2           | ENSG00000205726 ITSN1          | ENSG00000205792 A4D193_HUMAN   |  |
|          | ENSG00000123909 GCELD          | ENSG000001054267 ARID4B      | ENSG000001062650 WAPAL       | ENSG00000102158 TAG2_HUMAN     | ENSG00000119414 PPP6C        | ENSG00000120156 TEK            | ENSG00000120868 APAF1          | ENSG00000131003 RBM2Y2FP       |  |
|          | ENSG00000133226 SRRM1          | ENSG00000134056 MRPS36       | ENSG00000134970 ITCAM2       | ENSG00000135269 TES            | ENSG00000137872 SEMA6D       | ENSG00000139793 MBNL2          | ENSG00000139921 TXNDC1         | ENSG00000143153 ATP1B1         |  |
|          | ENSG00000143494 VASH2          | ENSG00000143727 ACP1         | ENSG00000151458 ANKRD50      | ENSG00000151572 TMEM16D        | ENSG00000151743 AMN1         | ENSG00000156650 MYST4          | ENSG00000162607 USP1           | ENSG00000167863 ATP5H          |  |
|          | ENSG00000169908 TM4SF1         | ENSG00000171659 GPR34        | ENSG00000172915 NBEA         | ENSG00000173145 NOC3L          | ENSG00000173674 EIF1AP1      | ENSG00000174442 ZWILCH         | ENSG00000180190 C8orf42        | ENSG00000181195 PENK           |  |
|          | ENSG00000182899 RPL35A         | ENSG00000184735 DDX53        | ENSG00000185915 KLHL34       | ENSG00000198759 EGFL6          | ENSG00000198795 ZNF521       | ENSG00000204397 NP_001017534.1 |                                |                                |  |
| CTTGTCT  | perfect: CTTGTAT ATACAAG       | hsa-miR-381                  | tATACAAGggcaagctctctctg      |                                |                              |                                |                                |                                |  |
|          | ENSG00000105194 CIAPIN1        | ENSG00000172958 AP1M1        | ENSG00000181760 AACS         | ENSG00000192841 MYL6           | ENSG00000101474 C20orf3      | ENSG00000105676 ARMC6          | ENSG00000105722 ERF            | ENSG00000110243 APOA5          |  |
|          | ENSG00000110881 ACCN2          | ENSG00000128271 ADORA2A      | ENSG00000142632 ARHGEF19     | ENSG00000144524 COPS7B         | ENSG00000146197 SCUBE3       | ENSG00000147570 DNAJC5B        | ENSG00000159388 BTG2           | ENSG00000159692 CTBP1          |  |
|          | ENSG00000160991 TMEM142B       | ENSG00000161649 CD300LG      | ENSG00000162365 CYP4A22      | ENSG00000163497 FEV            | ENSG00000166961 NP_689930.1  | ENSG00000172731 LRRC20         | ENSG00000174898 TMEM146        | ENSG00000175894 C21orf29       |  |
|          | ENSG00000176076 KCNE1L         | ENSG00000180139 Q8N9Z5_HUMAN | ENSG00000187048 CYP4A11      | ENSG00000197088 NM_207488      | ENSG00000204241 Q6ZUU8_HUMAN | ENSG00000204310 AGPAT1         | ENSG00000205973 ALDH18A1       | ENSG000002073282 TP73L         |  |
|          | ENSG00000174527 NTN4           | ENSG00000101739 RSBN1        | ENSG00000181154 PCNP         | ENSG00000107372 ZFAND5         | ENSG00000107651 SEC23IP      | ENSG00000108001 EBF3           | ENSG00000134444 KIAA1468       | ENSG00000135823 STX6           |  |
|          | ENSG00000135837 CEP350         | ENSG00000143776 CDC42BPA     | ENSG00000147592 LACTB2       | ENSG00000171428 NAT1           | ENSG00000171657 GPR82        | ENSG00000182489 XKRX           | ENSG00000182498 RPS18          | ENSG00000185532 PRKG1          |  |
|          | ENSG00000196208 NP_683701.2    | ENSG00000197872 FAM49A       | ENSG00000197959 DNM3         | ENSG00000198919 DZIP3_HUMAN    |                              |                                |                                |                                |  |
| CTTGTGC  | ENSG00000113563 DNASE1L1       | ENSG00000153702 NR1P2        | ENSG00000190776 EFNB1        | ENSG00000102996 MMP15          | ENSG00000104872 PIH1D1       | ENSG00000107954 NEURL          | ENSG00000108479 GALK1          | ENSG00000111678 C12orf57       |  |
|          | ENSG00000116883 C10orf113      | ENSG00000125841 NRNS2        | ENSG00000130590 SAMD10       | ENSG00000130717 UCK1           | ENSG00000132589 FLOT2        | ENSG00000136270 TBRG4          | ENSG00000136697 LLIF10         | ENSG00000137522 RNF121         |  |
|          | ENSG00000144120 TMEM177        | ENSG00000145824 CXCL14       | ENSG00000149596 JPH2         | ENSG00000168874 ATO8           | ENSG00000169696 ASPSCR1      | ENSG00000173163 COMMD1         | ENSG00000177000 MTHFR          | ENSG00000196273 C14orf70       |  |
|          | ENSG00000167208 EVI5           | ENSG00000114098 ARMC8        | ENSG00000116560 SFPQ         | ENSG00000119396 RAB14          | ENSG00000123297 TSFM         | ENSG00000123500 COL10A1        | ENSG00000130449 ZSWIM6         | ENSG00000137801 THBS1          |  |
|          | ENSG00000166913 YWHAB          | ENSG00000171478 SPACA5B      | ENSG00000171681 ATF7IP       | ENSG00000183060 LYSMD4         | ENSG00000185417 CXorf1       | ENSG00000188501 LCTL           | ENSG00000196345 ZNF167         |                                |  |
| CTTTACA  | ENSG00000159377 TXBAS1         | ENSG0000010086102 NFX1       | ENSG00000100266 PACSLN2      | ENSG00000111252 SH2B3          | ENSG00000111644 ACRBP        | ENSG00000116685 GARNL3         | ENSG00000141337 ARG5           | ENSG00000141699 NP_835227.1    |  |
|          | ENSG00000143140 GJA5           | ENSG00000145819 ARHGAP26     | ENSG00000158987 RAPGEF6      | ENSG00000163362 C10orf106      | ENSG00000165406 MARCH8       | ENSG00000167967 EAF1           | ENSG00000184709 LRRC26         | ENSG00000206053 HN1L           |  |
|          | ENSG000001089094 FBXL10        | ENSG00000101825 MXRA5        | ENSG00000107249 GLIS3        | ENSG00000117625 RCOR3          | ENSG00000124406 ATP8A1       | ENSG00000131007 TTY9A          | ENSG00000131009 TTY9A_HUMAN    | ENSG00000131016 AKAP12         |  |
|          | ENSG00000137026 IFNWP18        | ENSG00000138792 INPEP        | ENSG00000142192 APP          | ENSG00000143184 XCL1           | ENSG00000147885 IFNA16       | ENSG00000150093 ITGB1          | ENSG00000170734 POLH           | ENSG00000172469 MANEA          |  |
|          | ENSG00000182010 PLEKHK1        | ENSG00000182220 ATP6AP2      | ENSG00000183943 PRKX         | ENSG00000186803 IFNA10         | ENSG00000186809 IFNA17       | ENSG00000187987 ZSCAN23        | ENSG00000188175 NP_937794.1    | ENSG00000197501 Q9H3B5_HUMAN   |  |
|          | ENSG00000198081 ZFP161         | ENSG00000203681 XR_017762.1  | ENSG00000204628 GNB2L1       | ENSG00000205174 NP_001019778.1 |                              |                                |                                |                                |  |
| CTTTAGA  | ENSG00000111007 TCEB3          | ENSG00000100330 MTMR3        | ENSG00000103184 SEC14L5      | ENSG00000115204 MPV17          | ENSG00000116273 PHF13        | ENSG00000119973 PRLHR          | ENSG00000125818 PSMF1          | ENSG00000136828 RALGPS1        |  |
|          | ENSG00000143028 SYPL2          | ENSG00000143198 MGST3        | ENSG00000148773 MKI67        | ENSG00000156486 KCNS2          | ENSG00000160296 SIGLEC12     | ENSG00000164048 ZNF589         | ENSG00000166152 C16orf78       | ENSG00000166963 MAP1A          |  |
|          | ENSG00000172647 PGA5           | ENSG00000180860 PGA3         | ENSG00000182329 Q8IVF9_HUMAN | ENSG00000182508 LHFPL1         | ENSG00000188997 KCTD21       | ENSG00000204973 PGA4           | ENSG00000205061 Q6ZUP2_HUMAN   | ENSG00000205421 PON1           |  |
|          | ENSG00000155732 MCOLN3         | ENSG000001082438 COBLL1      | ENSG000001082516 GEMIN5      | ENSG000001089335 ZNF302        | ENSG00000106049 HIBADH       | ENSG00000108590 MED31          | ENSG00000110768 GTF2H1         | ENSG00000135045 C9orf40        |  |
|          | ENSG00000150681 RGS18          | ENSG00000151164 RAD9B        | ENSG00000152729 Q9P136_HUMAN | ENSG00000164296 TIGD6          | ENSG00000166848 TERF2IP      | ENSG00000170881 RNF139         | ENSG00000171147 NP_001001317.1 | ENSG00000180616 SSTR2          |  |
|          | ENSG00000181904 C5orf24        | ENSG00000184517 ZFP1         | ENSG00000184860 NP_H60151.2  | ENSG00000187187 ZNF546         | ENSG00000189043 NDUPFA4      | ENSG00000198315 ZNF192         | ENSG00000204348 DOM3Z          | ENSG00000206075 SERPINB5       |  |
| CTTTAGT  | ENSG00000168724 TTC7A          | ENSG00000102547 CAB39L       | ENSG00000104679 R3HCC1       | ENSG00000105329 TGFB1          | ENSG00000107021 TBC1D13      | ENSG00000107521 HPS1           | ENSG00000118707 TGIF2          | ENSG00000142599 RERE           |  |
|          | ENSG00000143061 IGSF3          | ENSG00000149657 LSM14B       | ENSG00000155367 PPM1J        | ENSG00000166257 SCN3B          | ENSG00000166743 ACSM1        | ENSG00000166833 NAV2           | ENSG00000169217 CD2BP2         | ENSG00000170653 ATF7           |  |
|          | ENSG00000170876 TMEM43         | ENSG00000171163 ZNF692       | ENSG00000173436 C10orf151    | ENSG00000179452 Q8TDK1_HUMAN   | ENSG00000180697 C3orf22      | ENSG00000196652 ZKSCAN5        | ENSG00000197081 IGF2R          | ENSG00000204820 Q96NT9_HUMAN   |  |
|          | ENSG00000184014 RAB61P1        | ENSG000001095564 BTAF1       | ENSG000001013233 HAO1        | ENSG00000101935 AMMECR1        | ENSG00000102290 PCDH11X      | ENSG00000102580 DNAJC3         | ENSG00000103194 USP10          | ENSG00000111783 RFX4           |  |
|          | ENSG00000113248 PCDH1B5        | ENSG00000127328 RAB31P       | ENSG00000135241 PNPLA10P     | ENSG00000138435 CHRNA1         | ENSG00000153283 CD96         | ENSG00000163605 PPP4R2         | ENSG00000165650 PDZD8          | ENSG00000166669 ATF7IP2        |  |
|          | ENSG00000168938 PPIC           | ENSG00000169967 MAP3K2       | ENSG00000174032 SLC25A30     | ENSG00000183308 C17orf60       | ENSG00000185127              |                                |                                |                                |  |

ENSG00000196689|TRPV1 ENSG00000197063|MAFG ENSG00000198879|SFBMT2 ENSG00000008405|CRY1 ENSG00000015171|ZMYND11 ENSG00000048828|FAM120A ENSG00000100425|BRD1 ENSG00000112343|TRIM38  
ENSG00000116120|FARSB ENSG00000116791|CRY2 ENSG00000118523|CTGF ENSG00000121644|C1orf121 ENSG00000125879|OTOR ENSG00000129518|EAPP ENSG00000132953|XP04 ENSG00000133706|LARS  
ENSG00000136051|KIAA1033 ENSG00000139233|C12orf31 ENSG00000152778|IFIT5 ENSG00000159140|SON ENSG00000161970|RPL26 ENSG00000162782|TDRD5 ENSG00000164347|GFM2 ENSG00000166669|ATF7IP2  
ENSG00000170270|C14orf142 ENSG00000175279|CORT ENSG00000179941|BBS10 ENSG00000186416|NKRF ENSG000002050081|XR\_017999.1 ENSG00000205105|Q5W0Q5\_HUMAN ENSG00000206125|Q68DA7\_HUMAN  
ENSG000001006114|AP1GBP1 ENSG00000066136|NFYC ENSG00000100376|FAM118A ENSG00000100994|PYGB ENSG00000106003|LFNG ENSG00000107902|NP\_071409.2 ENSG00000111206|FOXM1 ENSG00000111245|MYL2  
ENSG00000124107|SLPI ENSG00000125285|SOX21 ENSG00000130711|PRM12 ENSG00000138131|LOXL4 ENSG00000141560|KT3K\_HUMAN ENSG00000150175|PDZD5B ENSG00000156486|KNS2 ENSG00000162552|WNT4  
ENSG00000163013|FBXO41 ENSG00000165388|ZNF488 ENSG00000166716|ZNF592 ENSG00000170324|FRMPD2 ENSG00000173093|CCDC63 ENSG00000174370|C11orf45 ENSG00000181754|AMIGO1 ENSG00000185963|BICD2  
ENSG00000197704|PDZD5A ENSG00000198033|TUBA3C ENSG00000198125|MB ENSG00000077721|UBE2A ENSG00000079691|LRRC16 ENSG00000088448|ANKRD10 ENSG00000088766|CRLS1 ENSG00000100249|C22orf31  
ENSG00000101109|STK4 ENSG00000108590|MED31 ENSG00000110318|KIAA1377 ENSG00000115091|ACTR3 ENSG00000115170|LRRC1 ENSG00000117598|NP\_001010861.1 ENSG00000117601|SERPINC1 ENSG00000129824|RPS4Y1  
ENSG00000132680|KIAA0907 ENSG00000134324|LPIN1 ENSG00000135837|CEP350 ENSG00000139977|NAT12 ENSG00000144191|CNGA3 ENSG00000163684|RFP14 ENSG00000164164|OTUD4 ENSG00000169239|CA5B  
ENSG00000173612|GPRC6A ENSG00000183952|Q9H5Q9\_HUMAN ENSG00000184349|EFNA5 ENSG00000186417|GLDN ENSG00000188916|NP\_001034851.1 ENSG00000196072|BLOC1S2 ENSG00000196447|XR\_017870.1 ENSG00000205612|Q71JB2\_HUMAN

CTTTGCC ENSG00000006740|RICH2\_HUMAN ENSG000000025708|ECGF1 ENSG000000084754|HADHA ENSG000000085662|AKR1B1 ENSG00000107021|TBC1D13 ENSG00000119977|C10orf61 ENSG00000120896|SORBS3 ENSG00000125755|SYMPK  
ENSG00000128487|SPECC1 ENSG00000131069|ACSS2 ENSG00000139641|FAM62A ENSG00000144567|C2orf17 ENSG00000156603|MED19 ENSG00000158014|SLC30A2 ENSG00000161395|PERLD1 ENSG00000161570|CCL5  
ENSG00000166974|MAPRE2 ENSG00000175213|ZNF408 ENSG00000180644|PRF1 ENSG00000182154|MRPL41 ENSG00000182177|ASB18 ENSG00000187699|Q8NBX4\_HUMAN ENSG00000197077|Q5THZ5\_HUMAN ENSG00000205670|C21orf51  
ENSG00000075711|DLG1 ENSG00000100644|HIF1A ENSG00000102974|CTCF ENSG00000115109|EPB41L5 ENSG00000116455|WDR77 ENSG00000120217|CD274 ENSG00000132718|SYT11 ENSG00000134109|EDEM1  
ENSG00000135913|USP37 ENSG00000143727|ACPI ENSG00000145545|SRD5A1 ENSG00000147044|CASK ENSG00000153283|CD96 ENSG00000163710|PCOLCE2 ENSG00000164220|F2RL2 ENSG00000164692|COL1A2  
ENSG00000166960|C18orf34 ENSG00000169302|STK32A ENSG00000178163|NP\_444270.2 ENSG00000179136|Q8NAV9\_HUMAN ENSG00000180611|C3orf59 ENSG00000183675|PTPN20B ENSG00000183695|MRGPRX2 ENSG00000188039|NWD1  
ENSG00000196586|MYO6 ENSG00000197147|LRRC8B ENSG00000203730|TEDDM1 ENSG00000204179|PTPN20A  
CTTTGCC ENSG00000007520|C16orf42 ENSG00000086062|B4GALT1 ENSG00000110092|CCND1 ENSG00000112699|GMD5 ENSG00000119280|C1orf198 ENSG00000128626|MRPS12 ENSG00000140983|RHOT2 ENSG00000142484|TM4SF5  
ENSG00000143536|CRNN ENSG00000147576|ADHFE1 ENSG00000149136|SSRP1 ENSG00000151364|KCTD14 ENSG00000170919|Q5VSV6\_HUMAN ENSG00000178372|CAZML5 ENSG00000178773|CPNE7 ENSG00000185761|ADAMTSL5  
ENSG00000186837|C21orf119 ENSG00000187741|FANCA ENSG00000196976|LAGE3 ENSG00000009694|ODZ1 ENSG00000051108|HEPRUD1 ENSG00000064102|C12orf11 ENSG00000112367|KIAA0274 ENSG00000116171|SCP2  
ENSG00000120784|ZFP30 ENSG00000123297|TSFM ENSG00000126226|PCID2 ENSG00000144867|SRPRB ENSG00000145337|PIGY ENSG00000154175|ABI3BP ENSG00000165527|ARF6 ENSG00000168769|KIAA1546  
ENSG00000170500|LONRF2 ENSG00000170681|NP\_001018126.1 ENSG00000183943|PRXK ENSG00000198900|TOP1  
CTTTGCT ENSG00000070731|TMP2 ENSG00000070731|ST6GALNAC2 ENSG00000075035|WSCD2 ENSG00000077782|FGFR1 ENSG00000087258|GNAO1 ENSG00000088832|FKBP1A ENSG00000101474|C2orf3 ENSG00000102034|ELF4  
ENSG00000112576|CCND3 ENSG00000116667|C1orf21 ENSG00000117834|SLC5A9 ENSG00000121060|TRIM25 ENSG00000130584|ZBTB46 ENSG00000135740|SLC9A5 ENSG00000136731|UGCG1 ENSG00000143569|UBAP2L  
ENSG00000150281|CTF1 ENSG00000162571|TTL5 ENSG00000166548|TK2 ENSG00000176615|LOC652153 ENSG00000177951|BET1L ENSG00000179761|PIPOX ENSG00000188869|TMC3 ENSG00000189159|HN1  
ENSG00000204369|Q6ZUP0\_HUMAN ENSG00000100596|SPTLC2 ENSG00000110321|EIF4G2 ENSG00000122507|BBS9 ENSG00000126246|TMEM149 ENSG00000135069|PSAT1 ENSG00000138483|CCDC54 ENSG00000145337|PIGY  
ENSG00000145715|RAA1 ENSG00000147400|CETN2 ENSG00000147586|MRPS28 ENSG00000151247|EIF4E ENSG00000153283|CD96 ENSG00000158092|NCK1 ENSG00000162368|CMPK ENSG00000169607|CKAP2L  
ENSG00000172748|ZNF596 ENSG00000204388|HSPA1B ENSG00000204873|KRTAP9-3 ENSG00000205758|CRY2L1  
CTTTGTA ENSG00000005513|SOX8 ENSG00000087258|GNAO1 ENSG00000100461|RBM23 ENSG00000101255|TRIB3 ENSG00000111653|ING4 ENSG00000112079|STK38 ENSG00000112562|SMOC2 ENSG00000114767|RRP9  
ENSG00000130881|LRP3 ENSG00000133316|WDR74 ENSG00000143367|TUFT1 ENSG00000143614|GATAD2B ENSG00000144355|DLX1 ENSG00000147224|PRPS1 ENSG00000151208|DLG5 ENSG00000157765|SLC34A2  
ENSG00000162367|TAL1 ENSG00000169921|Q75L30\_HUMAN ENSG00000172061|LRRC15 ENSG00000173218|VANGL1 ENSG00000177971|IMP3 ENSG00000185215|TNFAIP2 ENSG00000187140|FOXD3 ENSG00000187147|C1orf164  
ENSG00000188775|Q6YL47\_HUMAN ENSG00000198752|CDC42BPB ENSG00000009844|VTA1 ENSG00000060749|Q6ZU30\_HUMAN ENSG00000066185|ZMYND12 ENSG00000101384|JAG1 ENSG00000102053|ZC3H12B ENSG00000106511|MEOX2  
ENSG00000109576|AADAT ENSG00000124784|RIOK1 ENSG00000129170|CSRP3 ENSG00000133858|CCDC131 ENSG00000136560|TANK ENSG00000138771|SHROOM3 ENSG00000139168|ZCRB1 ENSG00000153140|CETN3  
ENSG00000165209|STRBP ENSG00000166348|USP54 ENSG00000168172|HOOK3 ENSG00000170035|UBE2B4P ENSG00000172915|NBEA ENSG00000174574|C1orf108 ENSG00000180228|PRKRA ENSG00000184999|SLC22A10  
ENSG00000188085|NP\_997320.1 ENSG00000188732|C7orf46 ENSG00000198168|SVIP\_HUMAN ENSG00000198673|FAM19A2 ENSG00000198759|EGFL6  
CTTTGTG ENSG00000007541|PIGQ ENSG00000008256|PSCD3 ENSG00000064655|EYA2 ENSG00000067141|NEO1 ENSG00000067842|ATP2B3 ENSG00000075426|FOSL2 ENSG00000087191|PSMC5 ENSG00000102900|NUP93  
ENSG00000102967|DHODH ENSG00000104059|K0574\_HUMAN ENSG00000106635|BCL7B ENSG00000120913|PDLIM2 ENSG00000122497|NBPF14 ENSG00000124243|BCAS4 ENSG00000127743|IL17B ENSG00000133878|DUSP26  
ENSG00000148300|REXO4 ENSG00000152042|NBPF8 ENSG00000157064|NMNAT2 ENSG00000163531|NFASC ENSG00000163961|RNF168 ENSG00000166548|TK2 ENSG00000168614|NBPF16 ENSG00000168924|LETM1  
ENSG00000169436|COL22A1 ENSG00000170382|LRN2 ENSG00000183762|KREMEN1 ENSG00000203702|C6orf59 ENSG00000204100|Q6ZV28\_HUMAN ENSG00000204934|NP\_001008745.1 ENSG00000000457|SCYL3 ENSG00000042088|TDP1  
ENSG00000048649|RSF1 ENSG00000075568|TMEM131 ENSG00000083312|TNFPO1 ENSG00000101938|CHRD1 ENSG00000104290|FZD3 ENSG00000107105|ELAVL2 ENSG00000108001|EBF3 ENSG00000108296|CCDC49  
ENSG00000108946|PKRARI1A ENSG00000111786|SFRS9 ENSG00000112242|IEZF3 ENSG00000113100|CDH9 ENSG00000119596|YLRPM1 ENSG00000115808|STRN ENSG00000116222|PCID2 ENSG00000128951|DUT  
ENSG00000131779|PEX11B ENSG00000134363|FST ENSG00000135932|CAB39 ENSG00000138293|NCOA4 ENSG00000143612|C1orf43 ENSG00000153896|ZNF599 ENSG00000156395|SORCS3 ENSG00000164031|DNAJB14  
ENSG00000167555|ZNF534 ENSG00000167765|Q96NP5\_HUMAN ENSG00000176407|KCMF1 ENSG00000188519|Q7Z4Q0\_HUMAN ENSG00000203710|CR1 ENSG00000205765|NP\_787117.3  
CTTTTAT ENSG00000004455|AK2 ENSG00000092068|SLC7A8 ENSG00000101347|SAMHD1 ENSG00000103275|UBE2I ENSG00000105323|HNRPUL1 ENSG00000106144|CASP2 ENSG00000110801|PSMD9  
ENSG00000113194|UBXD8 ENSG00000114316|USP4 ENSG00000114656|KIAA1257 ENSG00000125741|OPA3 ENSG00000136731|UGCG1 ENSG00000139514|SLC7A1 ENSG00000142002|DPP9 ENSG00000143515|ATP8B2  
ENSG00000156030|C14orf43 ENSG00000156599|ZDHHC5 ENSG00000166619|BLCAP ENSG00000170684|Q9NT46\_HUMAN ENSG00000187251|C1orf213 ENSG00000188338|SLC38A3 ENSG00000198518|HIST1H4E  
ENSG00000058272|PPP1R12A ENSG00000065883|CDC2L5 ENSG00000066583|ISOC1 ENSG00000069275|NUCKS1 ENSG00000074319|TSG101 ENSG00000080200|NP\_705833.2 ENSG00000102524|TNFSF13B ENSG00000103018|CYB5B  
ENSG00000111046|MYF6 ENSG00000111647|NP\_001006948.1 ENSG00000114331|CENTB2 ENSG00000120756|PLS1 ENSG00000133794|ARNTL ENSG00000137818|RPLP1 ENSG00000138675|FGF5 ENSG00000144320|KIAA1715  
ENSG00000147050|UTX ENSG00000147874|FAM29A ENSG00000148110|HIATL1 ENSG00000150636|CCDC102B ENSG00000153140|CETN3 ENSG00000158411|MITD1 ENSG00000160207|HSF2BP ENSG00000162695|SLC30A7  
ENSG00000163563|MNDA ENSG00000165591|FAAH2 ENSG00000169507|NP\_775783.1 ENSG00000170542|SERPINB9 ENSG00000170891|CYTL1 ENSG00000172469|MANEA ENSG00000173114|LRN3 ENSG00000174776|WDR49  
ENSG00000178338|ZNF354B ENSG00000185275|CD24 ENSG00000187118|NP\_872329.1 ENSG00000188404|SELL ENSG00000197498|BXDC1 ENSG00000198455|ZXDB ENSG00000198740|ZNF652 ENSG00000205083|Q6P5W2\_HUMAN

CTTTTGA ENSG00000006125|AP2B1 ENSG00000006740|RICH2\_HUMAN ENSG000000010165|KIAA0859 ENSG00000052835|ZNF785 ENSG00000065000|AP3D1 ENSG00000065308|TRAM2 ENSG00000068024|HDAC4 ENSG00000088280|DDEF1L  
ENSG00000099204|ABLIM1 ENSG00000105127|AKAP8 ENSG00000105251|SHD ENSG00000106144|CASP2 ENSG00000106211|HSPB1 ENSG00000108349|CASC3 ENSG00000111218|PRMT8 ENSG00000112159|MDN1  
ENSG00000120509|PDZD11 ENSG00000120664|LOC646871 ENSG00000129473|BCL2L2 ENSG00000132002|DNAJB1 ENSG00000135148|TRAFD1 ENSG00000136504|MYST2 ENSG00000136731|UGCG1 ENSG00000138175|ARL3  
ENSG00000139083|ETV6 ENSG00000143127|ITGA10 ENSG00000143376|SNX27 ENSG00000147224|PRPS1 ENSG00000162298|SYVN1 ENSG00000167941|SOST ENSG00000169894|MUC3A ENSG00000170776|AKAP13  
ENSG00000172757|CFI1 ENSG00000185722|ANKFY1 ENSG00000189196|Q6ZUD9\_HUMAN ENSG00000197077|Q5THZ5\_HUMAN ENSG00000198879|SFBMT2 ENSG00000011114|BTBD7 ENSG00000054983|GALC ENSG00000056277|SUHW3  
ENSG00000064703|DDX20 ENSG00000066405|CLDN18 ENSG00000066427|ATXN3 ENSG00000068305|MEF2A ENSG00000090487|SPG21 ENSG00000105708|ZNF14 ENSG00000110422|HIPK3 ENSG00000122873|ZCD1  
ENSG00000123200|ZC3H13 ENSG00000124217|MOC53 ENSG00000128654|MTX2 ENSG00000134644|PUM1 ENSG00000134986|C5orf13 ENSG00000151689|INPP1 ENSG00000153113|CAST ENSG00000155438|MKI67IP  
ENSG00000162598|C1orf87 ENSG00000166181|API5 ENSG00000185070|FLRT2 ENSG00000187601|MAGEH1 ENSG00000188820|FAM26F ENSG00000196912|AN36B\_HUMAN  
ENSG00000198498|NP\_060822.1 ENSG00000198625|MDM4  
CTTTTGT ENSG000000063978|RNF4 ENSG00000071626|DAZAP1 ENSG00000106100|NOD1 ENSG00000108861|DUSP3 ENSG00000111348|ARHGDI1B ENSG00000118557|PMFBP1 ENSG00000125149|C16orf70 ENSG00000125285|SOX21  
ENSG00000131470|PSMC3IP ENSG00000149480|MTA2 ENSG00000156603|MED19 ENSG00000162105|SHANK2 ENSG00000162738|VANGL2 ENSG00000163820|FYCO1 ENSG00000164048|ZNF589 ENSG00000167711|SERPINF2  
ENSG00000170484|KRT74 ENSG00000172678|OR13A1 ENSG00000181274|FRAT2 ENSG00000188042|ARL4C ENSG00000196391|ZNF774 ENSG00000198797|FAM5B ENSG00000204619|PPP1R11 ENSG00000204792|Q6ZU62\_HUMAN  
ENSG00000070087|LRF1 ENSG00000073614|JARID1A ENSG00000077097|TOP2B ENSG00000094914|AAAS ENSG00000105216|PSM1 ENSG00000107968|MAP3K8 ENSG00000112210|RAB23  
ENSG00000124406|ATP8A1 ENSG00000125355|FAM70A ENSG00000127914|AKAP9 ENSG00000129083|COPB1 ENSG00000132669|RIN2 ENSG00000135387|CAPRIN1 ENSG00000136518|ACTL6A ENSG00000137509|PRCP  
ENSG00000146425|DYNLT1 ENSG00000147606|SLC26A7 ENSG00000157470|FAM81A ENSG00000162670|FAM5C ENSG00000164244|PRRC1 ENSG00000164485|IL22RA2 ENSG00000169126|ARMC4 ENSG00000177688|SUMO4  
ENSG00000179021|C3orf38 ENSG00000179363|TMEM31 ENSG00000180712|QBNEQ2\_HUMAN ENSG00000184277|TM2D3 ENSG00000185203|Q96S36\_HUMAN ENSG00000185985|SLITRCK2 ENSG00000189195|BTBD8 ENSG00000203722|RAET1G

CTTTTGA ENSG00000011105|TSPAN9 ENSG00000013374|NUB1 ENSG00000037637|FBXO42 ENSG00000051009|C11orf56 ENSG00000059378|PARP12 ENSG00000068024|HDAC4 ENSG00000084234|APLP2 ENSG00000100167|SEPT3  
ENSG00000100290|BIK ENSG00000100433|CKNK10 ENSG00000110880|CORO1C ENSG00000111540|RAB5B ENSG00000116983|HPCAL4 ENSG00000121281|ADCY7 ENSG00000121905|HPCA ENSG00000123411|IKZF4  
ENSG00000125347|IRF1 ENSG00000130032|PRRG3 ENSG00000131148|COX4NB ENSG00000131788|PIAS3 ENSG00000132478|UNK ENSG00000132510|JMKD3 ENSG00000132846|ZBED3 ENSG00000134247|PTGFRN  
ENSG00000139436|GIT2 ENSG00000140443|IGF1R ENSG00000141569|TRIM65 ENSG00000145824|CXCL14 ENSG00000154783|FGD5 ENSG00000169174|PCSK9 ENSG00000169375|SIN3A ENSG00000169598|DFFB  
ENSG00000170390|DCLK2 ENSG00000174529|TMEM81 ENSG00000177354|C10orf71 ENSG00000184260|HIST2H2AC ENSG00000184574|GPR92 ENSG00000188315|C3orf62 ENSG00000196422|KIAA0649 ENSG00000198327|HIST1H4F  
ENSG00000043355|ZIC2 ENSG00000088451|TGDS ENSG00000100354|TNRC6B ENSG00000100380|ST13 ENSG00000100418|NP\_056519.1 ENSG00000100926|TM9SF1 ENSG00000107018|RLN1  
ENSG00000111144|LTA4H ENSG00000112146|FBXO9 ENSG00000113391|C5orf21 ENSG00000113805|CNTN3 ENSG00000119508|NR4A3 ENSG00000122035|RASL11A ENSG00000122566|HNRPA2B1 ENSG00000123689|G0S2  
ENSG00000124783|SSR1 ENSG00000124882|EREG ENSG00000128989|ARF19\_HUMAN ENSG00000129518|EAPP ENSG00000132326|PER2 ENSG00000133706|LARS ENSG00000136206|WBSR19 ENSG00000136518|ACTL6A  
ENSG00000136810|TXN ENSG00000138686|BBS7 ENSG00000139263|LRIG3 ENSG00000139835|GRTP1 ENSG00000145354|ZCD2 ENSG00000146243|IRAK1BP1 ENSG00000146281|ACY1L2  
ENSG00000153922|CHD1 ENSG00000157445|CACNA2D3 ENSG00000162769|FLVCL1\_HUMAN ENSG00000169744|LDB2 ENSG00000170264|NP\_115556.1 ENSG00000170836|PPM1D ENSG00000172671|ANUB1L1 ENSG00000178665|ZNF713  
ENSG00000185873|TMPRSS11B ENSG00000186020|ZNF529 ENSG00000186645|NP\_001027561.1 ENSG00000205505|NP\_001027561.1 ENSG00000205506|NP\_001027561.1 ENSG00000205508|NP\_001018856.1 ENSG00000205509|NP\_001027561.1  
ENSG00000205580|NP\_001027561.1

CTTTTGT ENSG00000071894|CPSF1 ENSG00000095059|DHPS ENSG00000102230|PCYT1B ENSG00000105323|HNRPUL1 ENSG00000114656|KIAA1257 ENSG00000136504|MYST2 ENSG00000148468|C10orf38 ENSG00000148704|VAX1  
ENSG00000159166|LAD1 ENSG00000162711|NLRP3 ENSG00000163815|CLEC3B ENSG00000166289|PLEKHF1 ENSG00000168395|ING5 ENSG00000173404|INSM1 ENSG00000176473|WDR25 ENSG00000177721|NP\_001014301.1  
ENSG00000179165|PXT1 ENSG00000179348|GATA2 ENSG00000185990|FBA3 ENSG00000186970|KRTAP15-1 ENSG00000188167|NP\_001034859.1 ENSG00000196422|KIAA0649 ENSG00000197446|CYP2F1 ENSG00000197932|F8A2  
ENSG00000198444|F8A1 ENSG00000205726|ITSN1 ENSG00000068697|LAPTM4A ENSG00000073921|PICALM ENSG00000080824|HSP90AA1 ENSG00000100941|PNN ENSG00000101310|SEC23B  
ENSG00000107864|CEB3 ENSG00000117289|TXNIP1 ENSG00000132842|AP3B1 ENSG00000139239|XR\_017789.1 ENSG00000143164|IQWD1 ENSG00000144840|RABL3 ENSG00000147003|TMEM27 ENSG00000147416|ATP6V1B2  
ENSG00000155329|ZCCHC10 ENSG00000166913|YWHAB ENSG00000167081|PBX3 ENSG00000168036|CTNNB1 ENSG00000174106|LEMD3 ENSG00000179476|C14orf28 ENSG00000197780|TAF13  
CTTTTGT ENSG00000011451|WIZ ENSG000000025800|KPNAB6 ENSG00000062282|DGAT2 ENSG00000067842|ATP2B3 ENSG00000071282|LIMCD1 ENSG00000099622|CIRAB ENSG00000106707|GRB10 ENSG00000107341|UBE2R2



ENSG00000120709|FAM53C ENSG00000120889|TNFRSF10B ENSG00000123243|ITIH5 ENSG00000123364|HOXC13 ENSG00000124374|PAIP2B ENSG00000124766|SOX4 ENSG00000128591|FLNC ENSG00000131652|THOC6  
ENSG00000136352|TTTF1 ENSG00000143376|SNX27 ENSG00000147439|BIN3 ENSG00000148200|NR6A1 ENSG00000157483|MYO1E ENSG00000160318|CLDND2 ENSG00000164651|SP8 ENSG00000168496|FEN1  
ENSG00000169662|NP\_997357.1 ENSG00000169668|NP\_997357.1 ENSG00000169955|ZNF747 ENSG00000170515|PA2G4 ENSG00000170608|FOXA3 ENSG00000175130|MARCKSL1 ENSG00000176393|RNPEP ENSG00000176887|SOX11  
ENSG00000177822|XR\_017723.1 ENSG00000179241|LDLRAD3 ENSG00000181885|CLDN7 ENSG00000184014|RAB6IP1 ENSG00000185614|C3orf54 ENSG00000186716|BCR ENSG00000196230|TUBB ENSG00000198700|IPO9  
ENSG00000203709|C1orf132 ENSG00000204733|Q6ZSH7\_HUMAN ENSG000000013810|TACC3 ENSG000000041357|PSMA4 ENSG000000059588|TARBP1 ENSG000000065243|PKN2 ENSG000000073614|JARID1A ENSG000000075213|SEMA3A  
ENSG00000076003|MCM6 ENSG000000089195|TRM6\_HUMAN ENSG000000099783|HNRPM ENSG00000106644|HIF1A ENSG00000104517|EDD1 ENSG00000105793|GTPBP10 ENSG00000105880|DLX5 ENSG00000109919|MTCH2  
ENSG00000110367|DDX6 ENSG00000115760|BIRC6 ENSG00000116001|TIA1 ENSG00000119812|FAM98A ENSG00000123091|RNF11 ENSG00000131013|PPI4 ENSG00000133983|SYNJ2BP ENSG00000137269|LRRCL1  
ENSG00000137878|GRINL1A ENSG00000139496|NUPL1 ENSG00000144889|TMEM108 ENSG00000145817|YIPF5 ENSG00000148943|LIN7C ENSG00000151332|MBIP ENSG00000151500|THYN1 ENSG00000152332|UHMK1  
ENSG00000153933|DCKE ENSG00000156017|C9orf41 ENSG00000162999|DUSP19 ENSG00000163577|EIF5A2 ENSG00000164327|NP\_689969.2 ENSG00000164930|FZD6 ENSG00000164983|TMEM65 ENSG00000165730|STOX1  
ENSG00000166211|SPIC ENSG00000166452|C11orf17 ENSG00000167258|CRKRS ENSG00000168264|IRF2BP2 ENSG00000173068|BNC2 ENSG00000176018|LYSMD3 ENSG00000186231|KLHL32 ENSG00000204006|C1orf185  
ENSG00000205208|NP\_001008394.1  
GAAAACC ENSG00000093167|LRRFP2 ENSG00000100211|CBY1 ENSG00000101251|SEL1L2 ENSG00000105427|CNFN ENSG00000110047|EHD1 ENSG00000111877|MCM9 ENSG00000126254|NP\_077297.2 ENSG00000126353|CCR7  
ENSG00000141562|NARF ENSG00000144659|SLC25A38 ENSG00000144791|LIMD1 ENSG00000149489|ROM1 ENSG00000152475|Q96EG3\_HUMAN ENSG00000161055|SCGB3A1 ENSG00000161649|CD300LG ENSG00000164707|SLC13A4  
ENSG00000168016|Q8N8K0\_HUMAN ENSG00000170906|NDUFA3 ENSG00000175824|XR\_017847.1 ENSG00000180875|GREM2 ENSG00000182376|NP\_872411.1 ENSG00000183751|TBL3 ENSG00000198785|GRIN3A ENSG00000205742|Q6ZTR4\_HUMAN  
ENSG00000054983|GALC ENSG00000059573|ALDH18A1 ENSG00000081665|ZNF253 ENSG00000082397|EPB41L3 ENSG00000095951|HIVEP1 ENSG00000100784|RPS6KA5 ENSG00000109586|GALNT7 ENSG00000111817|DSE  
ENSG00000114030|KPNA1 ENSG00000115761|NOL10 ENSG00000130699|TAF4 ENSG00000134153|C15orf24 ENSG00000135220|UGT2A3 ENSG00000137265|IRF4 ENSG00000143493|INTS7 ENSG00000150636|CCDC102B  
ENSG00000162607|USP1 ENSG00000168461|RAB31 ENSG00000171234|UGT2B7 ENSG00000171858|RPS21 ENSG00000172000|ZNF556 ENSG00000173273|TNKS ENSG00000175105|ZNF654 ENSG00000175606|TMEM70  
ENSG00000179833|SERTAD2 ENSG00000181315|ZNF322A ENSG00000181449|SOX2 ENSG00000186879|NM\_178121 ENSG00000187498|COL4A1 ENSG00000188801|ZNF322B ENSG00000196247|ZNF588 ENSG00000197714|ZNF460  
ENSG00000198626|RYR2 ENSG00000198677|KIAA0372 ENSG00000203909|DPPA5 ENSG00000204201|Q49A40\_HUMAN ENSG00000204832|Q6ZRU3\_HUMAN ENSG00000205112|Q6UXR9\_HUMAN  
GAAAACCT ENSG00000073008|PVR ENSG00000088305|DNMT3B ENSG00000088812|ATRN ENSG00000105198|LGALS13 ENSG00000106789|CORO2A ENSG00000106852|LHX6 ENSG00000111641|NOL1 ENSG00000125735|TNFSF14  
ENSG00000125810|CD93 ENSG00000131944|C19orf40 ENSG00000139436|GIT2 ENSG00000140798|ABCC12 ENSG00000141552|ANAPC11 ENSG00000143061|IGSF3 ENSG00000143367|TUFT1 ENSG00000145824|CXCL14  
ENSG00000146197|SCUBE3 ENSG00000154096|THY1 ENSG00000157184|CPT2 ENSG00000162873|KLHDC8A ENSG00000163081|NP\_694583.1 ENSG00000166220|C10orf27 ENSG00000169218|RSP01 ENSG00000173349|SFT2D3  
ENSG00000175170|QST319\_HUMAN ENSG00000179562|GCC1 ENSG00000181274|FRAT2 ENSG00000184117|NIPSNAP1 ENSG00000184825|HIST1H2AH ENSG00000198182|ZNF607 ENSG000002023734|STRAP ENSG00000086288|TXNDC3  
ENSG00000087338|GMCL1 ENSG00000087495|PHACTR3 ENSG00000106560|GIMAP2 ENSG00000110318|KIAA1377 ENSG00000111859|NEDD9 ENSG00000113328|CCNG1 ENSG00000113580|NR3C1 ENSG00000115514|TXNDC9  
ENSG00000117616|C1orf63 ENSG00000118972|FGF23 ENSG00000119509|INVS ENSG00000122432|SPATA1 ENSG00000123609|NMI ENSG00000135249|RINT1 ENSG00000135847|ACBD6 ENSG00000145996|CDKAL1  
ENSG00000154188|ANGPT1 ENSG00000154518|ATP5G3 ENSG00000159055|C21orf45 ENSG00000162851|TFB2M ENSG00000163002|NUP35 ENSG00000164031|DNAJB14 ENSG00000168301|KCTD6 ENSG00000170759|KIF5B  
ENSG00000172748|ZNF596 ENSG00000177694|NAALADL2 ENSG00000185053|SGCZ ENSG00000185149|NPY2R ENSG00000186432|KPNA4 ENSG00000186867|SLC4A5 ENSG00000196418|ZNF124 ENSG00000196597|ZNF782  
ENSG00000204789|ZNF204  
GAAAAGG ENSG000000042445|RETSAT ENSG00000066923|STAG3 ENSG00000072121|ZFYVE26 ENSG00000072195|SPEG ENSG00000108861|DUSP3 ENSG00000110148|CKKB ENSG00000116667|C1orf21 ENSG00000120068|HOXB8  
ENSG00000122642|FKBP9 ENSG00000124225|TMEPAI ENSG00000128645|HOXD1 ENSG00000129219|PLD2 ENSG00000136848|NES ENSG00000136848|DAB2IP ENSG00000137700|SLC37A4 ENSG00000138166|DUSP5  
ENSG00000138311|ZNF365 ENSG00000140279|DUOX2 ENSG00000153060|TEKT5 ENSG00000154928|P54762-3 ENSG00000156269|ARD1B ENSG00000160097|FNDC5 ENSG00000163348|PYGO2 ENSG00000167523|C16orf55  
ENSG00000168631|DPCR1 ENSG00000173120|FBXL11 ENSG00000181754|AMIGO1 ENSG00000181856|SLC2A4 ENSG00000188554|NBR1 ENSG00000196166|NP\_997295.1 ENSG00000196411|EPHB4 ENSG00000198700|IPO9  
ENSG00000204333|Q6ZTP0\_HUMAN ENSG00000204366|ZBTB12 ENSG00000205434|Q6ZU34\_HUMAN ENSG00000212048|BRCA1 ENSG00000223839|ABCC2 ENSG00000247410|TPR ENSG00000248028|USP28 ENSG000002087448|KLHDC5  
ENSG00000104044|OCA2 ENSG00000109472|CPE ENSG00000117560|FASLG ENSG00000123636|BAZ2B ENSG00000128915|NARG2 ENSG00000132466|ANKRD17 ENSG00000132530|NP\_954590.1 ENSG00000133872|TMEM66  
ENSG00000140743|CDR2 ENSG00000145782|ATG12 ENSG00000146476|C6orf211 ENSG00000147419|ABCC25 ENSG00000148572|NRBF2 ENSG00000149218|ENDOD1 ENSG00000151690|NP\_060164.3 ENSG00000152465|NMT2  
ENSG00000155962|CLIC2 ENSG00000163535|SGOL2 ENSG00000163785|RYK ENSG00000164035|EMCN ENSG00000166432|ZMAT1 ENSG00000167842|MIS12 ENSG00000169860|P2RY1 ENSG00000170509|HSD17B13  
ENSG00000182220|ATP6AP2 ENSG00000186908|ZDHHC17 ENSG00000198523|PLN ENSG00000200675|SERPINB5  
GAAAAGT ENSG00000101489|BRUNOL4 ENSG00000126003|PLAGL2 ENSG00000126267|COX6B1 ENSG00000127511|SIN3B ENSG00000127743|IL17B ENSG00000131149|KIAA0182 ENSG00000134569|LRP4 ENSG00000136327|NKX2-8  
ENSG00000143851|PTPN7 ENSG00000158220|FAM62C ENSG00000158497|HMBB1 ENSG00000163221|S100A12 ENSG00000164591|MYOZ3 ENSG00000165606|NP\_001073989.1 ENSG00000171847|FAM90A1 ENSG00000173080|RXFP4  
ENSG00000173126|PCP4L1 ENSG00000173801|JUP ENSG00000183566|LATH\_HUMAN ENSG00000184216|IRAK1 ENSG00000204013|Q6XYD6\_HUMAN ENSG0000009694|ODZ1 ENSG00000039068|CDH1 ENSG00000080824|HSP90AA1  
ENSG00000082153|BZW1 ENSG00000090686|JUSP48 ENSG00000109674|NEIL3 ENSG00000109689|STIM2 ENSG00000116962|NID1 ENSG00000119938|PPPIR3C ENSG00000123095|BHLHB3 ENSG00000129596|CDO1  
ENSG00000131127|ZNF141 ENSG00000131791|PRKAB2 ENSG00000132872|SYT4 ENSG00000132963|POMP ENSG00000136100|VPS36 ENSG00000139168|ZCRB1 ENSG00000147174|ACRC ENSG00000153721|MAGI1  
ENSG00000158693|ZSCAN12 ENSG00000159917|ZNF235 ENSG00000162980|ARL5A ENSG00000165264|NDUFB6 ENSG00000166704|ZNF606 ENSG00000173406|DAB1 ENSG00000178074|NP\_710156.2 ENSG00000178974|FBXO34  
ENSG00000182568|SATB1 ENSG00000185621|LMLN ENSG00000186334|SLC36A3 ENSG00000188971|NP\_001013005.1 ENSG00000196449|YRDC  
GAAAATG ENSG00000006194|ZNF263 ENSG00000064309|CDON ENSG00000101158|TH1L ENSG00000118004|COLECL1 ENSG00000118263|KLPF7 ENSG00000125354|SEPT6 ENSG00000125888|C20orf179 ENSG00000134595|SOX3  
ENSG00000136112|UTP14C ENSG00000136689|L1LRN ENSG00000140798|ABCC12 ENSG00000143322|ABL2 ENSG00000146054|TRIM7 ENSG00000152192|POU4F1 ENSG00000158470|B4GALT5 ENSG00000169083|AR  
ENSG00000169118|CSNK1G1 ENSG00000176595|KBTBD11 ENSG00000180184|Q8NF75\_HUMAN ENSG00000180424|DEFB123 ENSG00000181368|NM\_032947.3 ENSG00000183049|CAMK1D ENSG00000185481|C21orf129  
ENSG00000196935|SRGAP1 ENSG00000197445|C16orf47 ENSG00000203747|FCGR3A ENSG00000204420|C6orf25 ENSG00000205181|Q0VFZ2\_HUMAN ENSG00000205181|Q0VFZ2\_HUMAN ENSG00000205181|NP\_01073948.1 ENSG00000205181|NP\_01073948.1  
ENSG00000041353|RAB27B ENSG00000060138|CSDA ENSG00000071991|CDH19 ENSG00000080819|CPOX ENSG00000080947|Q8TVE0\_HUMAN ENSG00000082153|BZW1 ENSG00000105939|ZC3HAV1 ENSG00000106799|TGFBF1  
ENSG00000112706|IMPG1 ENSG00000115363|TMEM166 ENSG00000115380|EFEMP1 ENSG00000129173|E2F8 ENSG00000132122|SPATA6 ENSG00000136111|TBC1D4 ENSG00000136866|ZFP37 ENSG00000137571|SLCO5A1  
ENSG00000137745|MMP13 ENSG00000141380|SS18 ENSG00000143164|IQWDL1 ENSG00000152492|CCDC50 ENSG00000155749|ALIS2CR12 ENSG00000171606|ZNF274 ENSG00000172817|CYP7B1  
ENSG00000174417|TRHR ENSG00000177692|C21orf55 ENSG00000185984|NR\_002593.1 ENSG00000186432|KPNA4 ENSG00000186697|Q86T06\_HUMAN ENSG00000187611|Q6ZTR6\_HUMAN ENSG00000188419|CHM ENSG00000197008|ZNF138  
ENSG00000197195|CHURC1 ENSG00000198798|MAGEB3 ENSG00000198826|ARHGAP11A  
GAAAACAC ENSG00000085978|ATG16L1 ENSG00000099308|MAST3 ENSG00000100453|GZME ENSG00000102575|ACP5 ENSG00000109016|DHRS7B ENSG00000112659|PARC\_HUMAN ENSG00000115211|EIF2B4 ENSG00000122490|PQLC1  
ENSG00000123201|GUCY1B2 ENSG00000126264|HCST ENSG00000127533|FRL3 ENSG00000134461|ANKRD16 ENSG00000135605|TEC ENSG00000160339|FCN2 ENSG00000161904|LEMD2 ENSG00000166949|SMAD3  
ENSG00000167522|ANKRD11 ENSG00000168062|BATF2 ENSG00000168959|GRM2 ENSG00000170390|CLDK2 ENSG00000170876|TMEM43 ENSG00000171793|CPT5 ENSG00000171853|TTC15 ENSG00000174683|C8orf78  
ENSG00000175873|Q9H7M1\_HUMAN ENSG00000179766|Q4G129\_HUMAN ENSG00000181563|C1orf211 ENSG00000182718|ANXA2P1 ENSG00000186951|PPARA ENSG00000196767|POU3F4 ENSG00000198291|Q6ZTP9\_HUMAN ENSG00000205653|Q6ZUF2\_HUMAN  
ENSG00000206193|Q5HYA3\_HUMAN ENSG000002074657|ZNF532 ENSG00000208001|01191|DID01 ENSG00000206714|CNTNAP3 ENSG00000208733|PEX12 ENSG00000211785|RIC8B ENSG00000212769|LAMA4 ENSG00000213161|HMGC1  
ENSG00000118939|UCHL3 ENSG00000124203|C20orf174 ENSG00000134200|GSTM3 ENSG00000136143|SUCLA2 ENSG00000141542|RAB40B ENSG00000146729|GBAS ENSG00000154736|ADAMT5 ENSG00000158966|CACHD1  
ENSG00000164440|TXLNB ENSG00000165525|SDCCAG1 ENSG00000165527|ARF6 ENSG00000168589|DYNLRB2 ENSG00000169607|CKAP2L ENSG00000170345|FOS ENSG00000172262|ZNF131 ENSG00000172954|LYCAT  
ENSG00000173490|ARV1 ENSG00000181192|DHTKD1 ENSG00000185664|SILV ENSG00000205838|NP\_653326.3  
GAAAACAG ENSG00000091622|PITPNM3 ENSG00000105997|HOXA3 ENSG00000110108|TMEM109 ENSG00000113389|NPR3 ENSG000001125166|GOT2 ENSG000001134490|C18orf45 ENSG00000143032|BARHL2 ENSG00000154928|P54762-3  
ENSG00000160716|CHRN2 ENSG00000162951|LRRTM1 ENSG00000163154|TNFAIP8L2 ENSG00000166860|ZBTB39 ENSG00000168621|GDNF ENSG00000176595|KBTBD11 ENSG00000177807|KCNJ10 ENSG00000184560|C17orf74  
ENSG00000186642|PDE2A ENSG00000188176|SMTNL2 ENSG00000196338|NLGN3 ENSG00000198663|C6orf89 ENSG00000198785|GRIN3A ENSG00000204423|C9orf33 ENSG00000204581|Q6ZU44\_HUMAN ENSG00000205796|SEC63  
ENSG00000067334|DNMTTIP2 ENSG00000085788|DDHD2 ENSG00000099725|PRKY ENSG00000105186|ANKRD27 ENSG00000107669|ATE1 ENSG00000107789|MINPP1 ENSG00000115825|PRKD3 ENSG00000116459|ATP5F1  
ENSG00000125430|HS3ST3B1 ENSG00000136872|ALDOB ENSG00000151892|GFR1 ENSG00000153684|NP\_001012455.1 ENSG00000159113|IL10RB ENSG00000167721|TSR1 ENSG00000169599|NFU1 ENSG00000182489|XKRX  
ENSG00000198822|GRM3  
GAAAACCA ENSG00000006116|CACNG3 ENSG00000011243|AKAP8L ENSG00000076108|BAZ2A ENSG00000086015|MAST2 ENSG00000104812|GYS1 ENSG00000107829|FBXW4 ENSG00000135956|TMEM127 ENSG00000140931|CMTM3  
ENSG00000187033|SAMD7 ENSG00000196186|Q7IRF5\_HUMAN ENSG00000142319|SLC6A3 ENSG00000142513|ACPT ENSG00000156427|FGF18 ENSG00000174306|ZHX3 ENSG00000177627|C12orf54 ENSG00000181773|GPR3 ENSG00000182205|Q6ZU0\_HUMAN  
ENSG00000101977|MCF2 ENSG00000113575|PPP2CA ENSG00000126070|EIF2C3 ENSG00000138378|STAT4 ENSG00000139597|NP\_438169.2 ENSG00000145087|STXBPSL ENSG00000146038|DCDC2 ENSG00000158185|ANKRD36  
ENSG00000158639|PAGE5 ENSG00000163625|WDFY3 ENSG00000165503|HDGR3\_HUMAN ENSG00000167230|C17orf78 ENSG00000167766|ZNF83 ENSG00000171469|ZNF561 ENSG00000176232|ZNF283 ENSG00000177954|RPS27  
ENSG00000181211|Q8NA17\_HUMAN ENSG00000183813|CCR4 ENSG00000186073|C15orf41 ENSG00000189252|SPANXN3 ENSG00000197585|Q5JV89\_HUMAN ENSG00000197627|Q9UFV3\_HUMAN ENSG00000197780|TAF13 ENSG00000197928|ZNF677  
ENSG00000198042|RBM13 ENSG00000203924|SPANXN2 ENSG00000204279|PAGE3  
GAAAACCTA ENSG000000016391|CHDH ENSG00000103044|HAS3 ENSG00000108702|CCL1 ENSG00000138303|ASCC1 ENSG00000139433|GLTP ENSG00000141034|C17orf39 ENSG00000143374|TARS2 ENSG00000157349|DDX19B  
ENSG00000157933|SKI ENSG00000160216|AGPAT3 ENSG00000163820|FYCO1 ENSG00000165283|STOML2 ENSG00000166402|TUB ENSG00000172297|Q96RM8\_HUMAN ENSG00000172332|GOLGA2L1 ENSG00000177025|C19orf18  
ENSG00000177352|CCDC71 ENSG00000183579|ZNF33 ENSG00000183793|NPIP ENSG00000196501|HIST1H2BN ENSG00000205726|ITSN1 ENSG00000244459|C9orf39 ENSG00000105829|BET1 ENSG00000106536|POU6F2  
ENSG00000113851|CRBN ENSG00000115760|BIRC6 ENSG00000116688|MPN2 ENSG00000118231|CRYGD ENSG00000123119|EFCBP1 ENSG00000124783|SSR1 ENSG00000125037|TMEM111 ENSG00000127993|NP\_115496.2  
ENSG00000128644|MYO1B ENSG00000134982|APC ENSG00000136541|KIAA1189 ENSG00000137501|SYTL2 ENSG00000141428|C18orf21 ENSG00000146842|NP\_116231.2 ENSG00000147364|FBXO25 ENSG00000148835|TAF5  
ENSG00000164049|FBXW12 ENSG00000170502|NUDT9 ENSG00000183340|JRK1 ENSG00000184937|WT1 ENSG00000196886|Q8NAW3\_HUMAN ENSG00000198718|KIAA0423  
GAAAAGAA ENSG00000065675|PRKCQ ENSG00000075151|EIF4G3 ENSG00000082701|GSK3B ENSG00000099968|BCL2L13 ENSG00000103047|TMCO7 ENSG00000103591|P34\_HUMAN ENSG00000106246|PTCD1 ENSG00000109906|ZBTB16  
ENSG00000110536|NDUFP3 ENSG00000110917|KIAA0152 ENSG00000112159|MDN1 ENSG00000114648|KLHL18 ENSG00000118526|TCF21 ENSG00000118689|FOXO3A ENSG00000125735|TNFSF14 ENSG00000130287|NCAN  
ENSG00000130477|UNC13A ENSG00000135077|HAVCR2 ENSG00000139194|RBP5 ENSG00000140598|EFTUD1 ENSG00000143549|TPM3 ENSG00000147118|ZNF182 ENSG00000148296|SURF6 ENSG00000162174|ASRGL1  
ENSG00000162888|C1orf147 ENSG00000163898|LIPH ENSG00000164385|C6orf195 ENSG00000165699|TSC1 ENSG00000165799|RNASE7 ENSG00000165810|BTNL9 ENSG00000170162|VGLL2 ENSG00000172061|LRRCL15  
ENSG00000173093|CCDC63 ENSG00000179766|Q4G129\_HUMAN ENSG00000183458|Q9NRE7\_HUMAN ENSG00000187953|NR\_002217.1 ENSG00000196581|AJAP1 ENSG00000197226|TBC1D9B  
ENSG00000198013|PNMA6A ENSG00000198797|FAM5B ENSG00000203747|FCGR3A ENSG00000204118|NAP1L6 ENSG00000204496|LTA ENSG00000009694|ODZ1 ENSG00000037965|HOXC8 ENSG00000067704|IARS2  
ENSG00000082482|CNK2 ENSG00000095794|CREM ENSG00000102043|MTMR8 ENSG00000105708|ZNF14 ENSG00000106804|C5 ENSG00000111790|FGFR10P2 ENSG00000115827|C2orf37 ENSG00000118402|ELOVL4  
ENSG00000120051|C10orf80 ENSG00000122432|SPATA1 ENSG00000133019|CHRM3 ENSG00000146386|C6orf115 ENSG00000147606|SLC26A7 ENSG00000151690|NP\_060164.3 ENSG00000154874|NP\_872374.3  
ENSG00000158467|SAHH3\_HUMAN ENSG00000162390|ACOT11 ENSG00000163631|ALB ENSG00000164406|LEAP2 ENSG00000166253|NP\_001034861.1 ENSG00000168679|SLC16A4 ENSG00000176399|DMRTA1 ENSG00000178700|DHFRL1  
ENSG00000180370|PAK2 ENSG00000187098|MITF ENSG00000188295|ZNF669 ENSG00000196653|ZNF502 ENSG00000196900|NP\_997291.1 ENSG00000197967|Q86U89\_HUMAN ENSG00000198836|OPA1  
GAAAAGTG ENSG0000006

ENSG00000148158|SNX30 ENSG00000157064|NMNAT2 ENSG00000158796|DEDD ENSG00000160392|C19orf47 ENSG00000162650|ATXN7L2 ENSG00000162771|FAM71A ENSG00000166261|ZNF202 ENSG00000168026|TTC21A  
ENSG00000169188|APEX2 ENSG00000175206|NPPA ENSG00000176371|ZZCAN2 ENSG00000180735|Q6PUW0\_HUMAN ENSG00000181830|SLC35C1 ENSG00000198873|GRK5 ENSG00000057663|ATG5 ENSG00000067560|RHOA  
ENSG00000100519|PSMC6 ENSG00000103018|CYB5B ENSG00000109819|PARGC1A ENSG00000111981|ULBP1 ENSG00000112531|QKI ENSG00000114062|UBE3A ENSG00000135541|AH11 ENSG00000136244|IL6  
ENSG00000138081|FBXO11 ENSG00000139370|SLC15A4 ENSG00000145794|MEGF10 ENSG00000151458|ANKRD50 ENSG00000152413|HOMER1 ENSG00000152495|CAMK4 ENSG00000158185|ANKRD36 ENSG00000159322|ADPGK  
ENSG00000168228|ZCCHC4 ENSG00000171714|TMEM16E ENSG00000172086|KRCC1 ENSG00000174013|FBXO45 ENSG00000180660|MAB21L1 ENSG00000185742|NP\_997528.1 ENSG00000188021|UBQLN2 ENSG00000189367|C6orf174  
ENSG00000197024|ZNF398 ENSG00000203964|Q8NG36\_HUMAN ENSG00000205227|Q6ZWA8\_HUMAN  
GAAATAA ENSG00000044090|CUL7 ENSG00000076944|STXB2P2 ENSG00000080189|SLC35C2 ENSG00000104872|PIH1D1 ENSG00000104901|DKKL2 ENSG00000104918|RETN ENSG00000105048|TNNT1 ENSG00000105127|AKAP8  
ENSG00000105552|BCAT2 ENSG00000106133|NSUN5C ENSG00000108294|PSMB3 ENSG00000108515|ENO3 ENSG00000112511|PHF1 ENSG00000112131|ECHDC2 ENSG00000122254|HS3ST2 ENSG00000122711|SPINK4  
ENSG00000125753|VASP ENSG00000125755|SYMPK ENSG00000130255|RPL36 ENSG00000130479|MAP1S ENSG00000136732|GYPC ENSG00000138621|PPCDC ENSG00000139914|NP\_981947.1 ENSG00000141744|PNMT  
ENSG00000142534|RPS11 ENSG00000143578|CREB3L4 ENSG00000159261|CLDN14 ENSG00000162391|C1orf179 ENSG00000164047|CAMP ENSG00000165140|FBP1 ENSG00000167476|JSRP1 ENSG00000169436|COL22A1  
ENSG00000169919|GUSB ENSG00000171495|NP\_775760.2 ENSG00000172568|NP\_001001343.1 ENSG00000174996|KLC2 ENSG00000177398|UMODL1 ENSG00000182534|MXRA7 ENSG00000182742|HOXB4 ENSG00000185379|RAD51L3  
ENSG00000187608|ISG15 ENSG00000197435|HIST3H2BB ENSG00000197858|GPA1 ENSG00000197968|Q8N231\_HUMAN ENSG00000204584|Q6ZSH9\_HUMAN ENSG00000205159|Q6ZVC9\_HUMAN ENSG00000205631|Q9H7S7\_HUMAN ENSG00000110848|CD69  
ENSG00000112249|ASCC3 ENSG00000112306|RPS12 ENSG00000114279|FGF12 ENSG00000115414|FN1 ENSG00000115486|GGCX ENSG00000115590|IL1R2 ENSG00000120586|MRC1 ENSG00000122435|CCDC76  
ENSG00000122787|AKR1D1 ENSG00000127980|PEX1 ENSG00000132541|HRSF12 ENSG00000137090|DMRT1 ENSG00000140299|BNIP2 ENSG00000140905|GC5H ENSG00000146242|TPBG ENSG00000146678|IGFBP1  
ENSG00000147485|PXDNL ENSG00000149534|MS4A2 ENSG00000154127|ST51\_HUMAN ENSG00000154415|PPP1R3A ENSG00000158185|ANKRD36 ENSG00000163512|AZI2 ENSG00000163535|SGOL2 ENSG00000165487|EFHA1  
ENSG00000169967|MAP3K2 ENSG00000170903|KIAA1826 ENSG00000173452|NP\_689987.2 ENSG00000174607|UGT8 ENSG00000180776|ZDHHC20 ENSG00000183340|JRK1 ENSG00000183748|MRC1L1 ENSG00000196442|ZNF432  
ENSG00000196711|NP\_997296.1 ENSG00000196912|AN36B\_HUMAN ENSG00000197657|ZNF323 ENSG00000197713|RPE  
GAAATAG ENSG00000074410|CA12 ENSG00000100105|PATZ1 ENSG00000103489|XYLT1 ENSG00000110092|CCND1 ENSG00000113273|ARSB ENSG00000121904|CSMD2 ENSG00000123999|INHA ENSG00000130119|GNL3L  
ENSG00000135709|KIAA0513 ENSG00000135956|TMEM127 ENSG00000144712|CAND2 ENSG00000158987|RAPGEF6 ENSG00000163823|CCR1 ENSG00000163823|CCR1 ENSG00000176515|Q8NAX6\_HUMAN ENSG00000183044|ABAT  
ENSG00000187621|TCL1B ENSG00000038274|MAT2B ENSG00000131051|RBM39 ENSG00000132603|NIP7 ENSG00000134762|DSC3 ENSG00000135164|DMTF1 ENSG00000138069|RAB1A ENSG00000138190|EXOC6  
ENSG00000144306|SCRN3 ENSG00000146250|PRSS35 ENSG00000149634|C20orf165 ENSG00000152193|C13orf7 ENSG00000153130|SCOC ENSG00000155096|AZIN1 ENSG00000156162|DPY19L4 ENSG00000163125|KIAA0460  
ENSG00000163297|ANTXR2 ENSG00000169139|UBE2V2 ENSG00000171135|JAGN1 ENSG00000174351|THAP2 ENSG00000174343|CHRNA9 ENSG00000178538|CA8 ENSG00000180882|XR\_017823.1 ENSG00000198860|C1orf19  
ENSG00000204406|MBD5  
GAAATCA ENSG00000072840|EVC ENSG00000093072|CECR1 ENSG00000101096|NFATC2 ENSG00000105278|KIAA1086 ENSG00000130803|ZNF317 ENSG00000134460|IL2RA ENSG00000135824|RGS8 ENSG00000140105|WARS  
ENSG00000148702|HABP2 ENSG00000148805|NR\_002934.2 ENSG00000155846|PPARGC1B ENSG00000160886|LYGK ENSG00000165006|UBAP1 ENSG00000177807|KCNJ10 ENSG00000178971|C17orf68 ENSG00000185294|NP\_787078.1  
ENSG00000187686|XR\_016979.1 ENSG00000203793|Q6ZR74\_HUMAN ENSG00000204080|Q6ZRO9\_HUMAN ENSG00000204847|FAM74A1 ENSG00000205231|Q6ZQ01\_HUMAN ENSG00000206069|NP\_001001663.1 ENSG00000089050|RBPP9 ENSG00000111237|VPS29  
ENSG00000111961|SASH1 ENSG00000115084|SLC35F5 ENSG00000116209|TMEM59 ENSG00000120160|C9orf11 ENSG00000120686|UFM1 ENSG00000121350|NP\_079130.2 ENSG00000121542|SEC22A ENSG00000127074|RGS13  
ENSG00000128581|RABL5 ENSG00000139329|LUM ENSG00000145439|CBR4 ENSG00000147003|TMEM27 ENSG00000147588|PMP2 ENSG00000150054|MPP7 ENSG00000151413|NUBPL ENSG00000151715|TMEM45B  
ENSG00000156284|CLDN8 ENSG00000164099|PRSS12 ENSG00000171735|CAMTA1 ENSG00000175664|C13orf26 ENSG00000188811|NP\_001017370.1 ENSG00000196344|ADH7 ENSG00000196597|ZNF782 ENSG00000197372|ZNF675  
ENSG00000198673|FAM19A2 ENSG00000203943|SAMD13 ENSG00000204019|NP\_001017978.1  
GAAATGC ENSG00000021300|PLEKH81 ENSG00000047644|WWC3 ENSG00000075340|ADD2 ENSG00000105085|CRSP7 ENSG00000131389|SLC6A6 ENSG00000142677|IL22RA1 ENSG00000143940|Q6ZMW3\_HUMAN ENSG00000149269|PAK1  
ENSG00000154783|FGD5 ENSG00000168818|STX18 ENSG00000170486|KRT72 ENSG00000178233|C6orf137 ENSG00000203689|NP\_001018859.1 ENSG00000205002|NP\_001020528.1 ENSG00000205181|Q0VFX2\_HUMAN ENSG00000205424|Q6ZW00\_HUMAN  
ENSG00000154979|MATR3 ENSG000000047410|TPR ENSG000000048991|R3HDM1 ENSG000000069329|VPS35 ENSG00000069764|PLA2G10 ENSG00000105835|PEEF1 ENSG00000108733|PEX12 ENSG00000109536|FRG1  
ENSG00000112308|C6orf62 ENSG00000113805|CNTN3 ENSG00000116560|SFPQ ENSG00000118434|SPACA1 ENSG00000118503|TNFAIP3 ENSG00000118785|SPP1 ENSG00000120051|C10orf80 ENSG00000120137|PANK3  
ENSG00000121361|KCNJ8 ENSG00000134376|CRB1 ENSG00000136758|YME1L1 ENSG00000141048|MYH4 ENSG00000148572|NRBF2 ENSG00000153879|CEBPB ENSG00000157429|ZNF19 ENSG00000162545|CAMK2N1  
ENSG00000162616|DNAJB4 ENSG00000169604|ANTXR1 ENSG00000169891|REPS2 ENSG00000170915|PAQR8 ENSG00000176797|DEFB103B ENSG00000177243|DEFB103A ENSG00000179456|ZNF238 ENSG00000179476|C14orf28  
ENSG00000180336|NP\_001028831.1 ENSG00000186814|Q86W11\_HUMAN ENSG00000188404|SELL  
GAACAAA ENSG000000064490|RFKXANK ENSG00000075151|EIF4G3 ENSG00000075891|PAX2 ENSG00000092853|CLSPN ENSG00000101489|BRUNOL4 ENSG00000102003|SYP ENSG00000128645|HOXD1 ENSG00000133454|MYO18B  
ENSG00000140479|PCSK6 ENSG00000140992|PDPK1 ENSG00000143333|RGS16 ENSG00000143772|ITPKB ENSG00000148702|HABP2 ENSG00000150086|GRIN2B ENSG00000161896|IHPK3 ENSG00000162337|LRP5  
ENSG00000162493|PDPN ENSG00000163902|RPN1 ENSG00000165699|TSC1 ENSG00000166317|SYNPO2L ENSG00000180385|Q8NAP4\_HUMAN ENSG00000184716|SERINC4 ENSG00000196263|ZNF471 ENSG00000196338|NLGN3  
ENSG00000162817|Q86F74|FAM74A1 ENSG000000047410|TPR ENSG00000006709|R1MBP2 ENSG000000083622|SOHLH2 ENSG000000086991|NOX4 ENSG00000092140|KIAA1333 ENSG00000102349|KLF8 ENSG00000106524|ANKMY2  
ENSG00000111875|ASF1A ENSG00000111912|NCOA7 ENSG00000112531|QKI ENSG00000112541|PDE10A ENSG00000117000|RLF ENSG00000123472|ATPAF1 ENSG00000125037|TMEM111 ENSG00000129204|USP6  
ENSG00000132122|SPATA6 ENSG00000133019|CHRM3 ENSG00000134001|EIF2P1 ENSG00000139323|WDR51B ENSG00000142182|DNMT3L ENSG00000143226|FCGR2A ENSG00000151458|ANKRD50 ENSG00000154874|NP\_872374.3  
ENSG00000157404|KIT ENSG00000162374|ELAVL4 ENSG00000162595|DIRAS3 ENSG00000163467|C1orf182 ENSG00000165359|DDX26B ENSG00000166148|AVPR1A ENSG00000172733|PURG ENSG00000173728|C1orf100  
ENSG00000182090|C14orf25 ENSG00000183784|C9orf66 ENSG00000184500|PROS1 ENSG00000189079|ARID2 ENSG00000204832|Q6ZRU3\_HUMAN  
GAACAGT perfect: GAACAAA TTTGTTCTTTGTTCTTTCGCTCGCTGCTGA 0  
hsa-miR-375 TTTGTTCTTTGTTCTTTCGCTCGCTGCTGA 0  
ENSG00000068079|IFI35 ENSG00000075461|CACNG4 ENSG00000101265|RASSF2 ENSG00000102385|DRP2 ENSG00000104892|KLC3 ENSG00000122711|SPINK4 ENSG00000144560|VGLL4 ENSG00000160401|C9orf117  
ENSG00000162817|C1orf115 ENSG00000166847|DCTN5 ENSG00000174370|C11orf45 ENSG00000175283|DOLK ENSG00000180447|GAS1 ENSG00000182013|NP\_060685.2 ENSG00000185065|NP\_776154.2 ENSG00000185404|Q4ZG65\_HUMAN  
ENSG00000188249|XR\_019050.1 ENSG00000204221|WDR46 ENSG00000083937|CHMP2B ENSG00000092208|SIP1 ENSG00000092345|DAZL ENSG00000110841|PPF1BP1 ENSG00000115942|ORC2L ENSG00000117758|STX12  
ENSG00000124795|DEK ENSG00000137871|SUHW4 ENSG00000138363|AT1C ENSG00000143970|ASXL2 ENSG00000144824|PLCXD2 ENSG00000146592|CREB5 ENSG00000148672|GLUDP5 ENSG00000162670|FAM5C  
ENSG00000164548|TRA2A\_HUMAN ENSG00000164975|SNAPC3 ENSG00000165525|SDCCAG1 ENSG00000168646|AXIN2 ENSG00000171940|ZNF217 ENSG00000173334|TRIB1 ENSG00000182552|RWDD4A ENSG00000183496|RKHD3  
ENSG00000184752|NDUFA12 ENSG00000187187|ZNF546 ENSG00000198620|XR\_017846.1  
GAACCAT ENSG000000089723|OTUB2 ENSG00000101849|TBL1X ENSG00000115353|TACR1 ENSG00000119681|LTBP2 ENSG00000120457|KCNJ5 ENSG00000122642|FKBP9 ENSG00000125618|PAX8 ENSG00000138769|CDKL2  
ENSG00000141316|SPACA3 ENSG00000149923|PPP4C ENSG00000153498|C13orf28 ENSG00000160191|PDE9A ENSG00000163872|YEATS2 ENSG00000164626|KCNK5 ENSG00000165949|IFI27 ENSG00000166847|DCTN5  
ENSG00000170525|PKFB3 ENSG00000172476|RAB40A ENSG00000173545|ZNF622 ENSG00000177553|C1orf167 ENSG00000186594|NP\_116284.2 ENSG00000204319|C4A ENSG00000204342|C4B ENSG00000206177|HBM  
ENSG000000087302|C14orf166 ENSG000000088035|ALG6 ENSG00000104408|EIF3S6 ENSG00000107758|PPP3CB ENSG00000123091|RNFI1 ENSG00000138430|GTFPBP9 ENSG00000143643|TTC13 ENSG00000149218|ENDOD1  
ENSG00000150347|ARID5B ENSG00000155754|ALS2CR11 ENSG00000158435|C2orf29 ENSG00000161010|NP\_001017987.1 ENSG00000171877|FRMD5 ENSG00000174456|NP\_997318.1 ENSG00000177343|PBOV1 ENSG00000178075|GRAMD1C  
ENSG00000187185|Q86V67\_HUMAN ENSG00000188687|SLC4A5 ENSG00000196323|ZBTB44 ENSG00000203970|DEFB111 ENSG00000204022|L1PJ  
GAACCCC ENSG00000008056|SYN1 ENSG00000008516|MMP25 ENSG00000070031|SCT ENSG000000081760|AACS ENSG00000099864|PALM ENSG00000100311|PDGFB ENSG00000100565|C14orf166B ENSG00000101098|RIMS4  
ENSG00000102996|MMP15 ENSG00000109132|PHOX2B ENSG00000114383|TUSC2 ENSG00000126264|HCST ENSG00000134020|PEBPL\_HUMAN ENSG00000138629|UBI7 ENSG00000141485|SLC13A5 ENSG00000142634|EFHD2  
ENSG00000142687|KIAA0319L ENSG00000147168|IL2RG ENSG00000156510|HKDC1 ENSG00000161642|ZNF385 ENSG00000164776|PHKG1 ENSG00000165644|COMTD1 ENSG00000166104|NP\_776166.1 ENSG00000172081|MOBK2A  
ENSG00000172212|XR\_017939.1 ENSG00000174600|CMKLR1 ENSG00000181035|SLC25A42 ENSG00000182053|XR\_016180.1 ENSG00000183751|TBL3 ENSG00000184209|NP\_008951.1 ENSG00000185189|NRBP2 ENSG00000187595|NP\_001013646.1  
ENSG00000206126|Q6ZV82\_HUMAN ENSG00000018236|CNTN1 ENSG00000085276|EVII ENSG00000087510|TFAP2C ENSG00000112697|TMEM30A ENSG00000114861|FOXP1 ENSG00000115137|NP\_057628.1 ENSG00000125124|BBS2  
ENSG00000125814|NAPB ENSG00000150244|TRIM48 ENSG00000164099|PRSS12 ENSG00000172292|LASS6 ENSG00000182944|EWSR1 ENSG00000183036|PCP4 ENSG00000183508|FAM46C ENSG00000204259|Q96PQ5\_HUMAN  
ENSG00000204453|XR\_019357.1  
GAACCTA ENSG00000105991|HOXA1 ENSG00000111679|PTNP6 ENSG00000112799|LY86 ENSG00000114378|HYAL1 ENSG00000116039|ATP6V1B1 ENSG00000120094|HOXB1 ENSG00000130177|CDC16 ENSG00000137767|SQRLD  
ENSG00000138780|GSTCD ENSG00000141431|Q6ZMX6\_HUMAN ENSG00000141753|IGFBP4 ENSG00000155052|CNTNAP5 ENSG00000160401|C9orf117 ENSG00000163486|SRGAP2 ENSG00000167664|TMIGD2 ENSG00000168137|SETD5  
ENSG00000169918|OTUD7A ENSG00000172053|QARS ENSG00000184857|TMEM186 ENSG00000197461|PDGFA ENSG00000089009|RPL6 ENSG00000091583|APOH ENSG00000107036|KIAA1432 ENSG00000110002|LOH1CR2A  
ENSG00000113269|RNFI30 ENSG00000116957|TBCE ENSG00000123552|USP45 ENSG00000138435|CHRNA1 ENSG00000153107|ANAPC1 ENSG00000163254|CRYGC ENSG00000165516|KLHDC2 ENSG00000183155|RABIF  
ENSG00000184661|CDCA2 ENSG00000185295|USP51 ENSG00000198040|ZNF84 ENSG00000198689|SLC9A6  
GAACGCA ENSG00000029534|ANK1 ENSG00000090924|PLEKHG2 ENSG00000091513|TF ENSG00000103264|FBXO31 ENSG00000117318|ID3 ENSG00000125089|SH3TC1 ENSG00000130305|NSUN5 ENSG00000133275|CSNK1G2  
ENSG00000135723|FHOD1 ENSG00000137177|KIF13A ENSG00000144355|DLX1 ENSG00000166377|ATP9B ENSG00000166743|ACSM1 ENSG00000167074|TEF ENSG00000170091|NSG2\_HUMAN ENSG00000198089|SFI1  
ENSG00000198931|APRT ENSG00000212130|TWF2 ENSG00000075785|RAB7A ENSG00000089177|C20orf23 ENSG00000104728|ARHGEF10 ENSG00000107984|DKK1 ENSG00000110756|HPS5 ENSG00000111328|CDK2AP1  
ENSG00000113302|IL12B ENSG00000116741|RGS2 ENSG00000128655|PDE11A ENSG00000128891|CCDC32 ENSG00000132341|RAN ENSG00000135870|RC3H1 ENSG00000140832|MARVELD3 ENSG00000145555|MYO10  
ENSG00000154143|PANX3 ENSG00000154265|ABCA5 ENSG00000157181|C1orf27 ENSG00000181788|SIAH2 ENSG00000183283|DZAP2 ENSG00000183291|SEP15\_HUMAN ENSG00000185420|SMYD3 ENSG00000186009|ATP4B  
ENSG00000186767|NP\_001012986.2 ENSG00000198482|ZNF808 ENSG00000204291|COL15A1  
GAACCGG ENSG00000015532|XYLT2 ENSG00000074317|SNCB ENSG00000090565|RAB11FIP3 ENSG00000092621|PIGDH ENSG00000103249|CLCN7 ENSG00000108509|CAMTA2 ENSG00000108557|RAI1 ENSG00000108821|COL1A1  
ENSG00000116544|DLGAP3 ENSG00000135116|HRK ENSG00000146090|RASGEF1C ENSG00000157312|PDF ENSG00000160349|LCN1 ENSG00000164379|FOXQ1 ENSG00000166118|SPATA19 ENSG00000167291|TBC1D16  
ENSG00000170442|KRT86 ENSG00000171532|NEUROD2 ENSG00000172216|CEBPB ENSG00000172878|NP\_954697.1 ENSG00000175611|C9orf130 ENSG00000179044|EXOC3L ENSG00000180849|C15orf37 ENSG00000182351|CRIP1  
ENSG00000186442|KRT3 ENSG000001196576|PLXNB2 ENSG00000198003|NP\_659482.3 ENSG00000205485|Q6DCA4\_HUMAN ENSG00000112739|PRPF4B ENSG00000113971|ACAD11 ENSG00000118495|PLAGL1 ENSG00000124789|NUP153  
ENSG00000125148|MT2A ENSG00000133627|ACTR3B ENSG00000136267|DGKB ENSG00000143797|MBOAT2 ENSG00000144909|OSBPL11 ENSG00000151726|ACSL1 ENSG00000164124|TMEM144 ENSG00000171864|PRND  
ENSG00000182463|TSHZ2  
GAACTGT ENSG000000071205|ARHGAP10 ENSG00000107872|FBXL15 ENSG000001110047|EHD1 ENSG00000110107|PRPF19 ENSG00000110917|KIAA0152 ENSG00000130513|GDF15 ENSG00000134690|CDCA8 ENSG00000136718|IMP4  
ENSG00000143217|PVRL4 ENSG00000144231|POLR2D ENSG00000149633|NP\_001025035.1 ENSG00000159388|BTG2 ENSG00000160714|UBE2Q1 ENSG00000162337|LRP5 ENSG00000163141|BNIPL ENSG00000163468|CCT3  
ENSG00000163930|BAP1 ENSG00000165526|RPUSD4 ENSG00000165606|NP\_001073989.1 ENSG00000165861|ZFVVE1 ENSG00000173404|INSM1 ENSG00000183196|CHST6 ENSG00000183562|Q9P1L5\_HUMAN ENSG00000203900|Q6ZSD3\_HUMAN  
ENSG00000204305|AGER ENSG00000008018|PSMB1 ENSG00000009413|REV3L ENSG000000065600|C1orf75 ENSG00000076003|MCM6 ENSG00000095787|WAC ENSG00000104064|GABPB2  
ENSG00000105928|DFNA5 ENSG00000114062|UBE3A ENSG00000114857|NKTX ENSG00000119414|PPP6C ENSG00000129682|FGF13 ENSG00000134152|C15orf29 ENSG00000141076|CIRH1A ENSG00000154645|CHODL  
ENSG00000155096|AZIN1 ENSG00000161813|LARP4 ENSG00000162618|ELTD1 ENSG00000168646|AXIN2 ENSG00000168646|AXIN2 ENSG00000172809|RPL38 ENSG00000173698|GPR64 ENSG00000177683|THAP5  
ENSG00000178127|NDUFV2 ENSG00000180815|MAP3K15 ENSG00000184384|MAML2 ENSG00000185551|NR2F2 ENSG00000188647|PTAR1 ENSG00000196677|C8orf77 ENSG00000197301|Q6ZQU9\_HUMAN ENSG00000197442|MAP3K5  
ENSG00000198948|MFAP3L  
GAAGAAT ENSG000000085063|CD59 ENSG00000100116|GCAT ENSG00000100342|APOL1 ENSG00000120875|DUSP4 ENSG00000125869|C20orf103 ENSG00000126767|ELK1 ENSG00000128313|APOL5 ENSG00000130956|HABP4

ENSG00000134107|BHLHB2 ENSG00000137522|RNFL121 ENSG00000146285|SCML4 ENSG00000160593|AMICA1 ENSG00000162873|KLHDC8A ENSG00000171388|APLN ENSG00000181274|FRAT2 ENSG00000185811|IKZF1  
ENSG00000188315|C3orf62 ENSG00000197465|GYPE ENSG00000198566|ZNF658 ENSG00000204304|PBX2 ENSG00000206751|SLAMF7 ENSG00000207075|PRKCH ENSG00000205427|OPN3 ENSG00000206583|ME1  
ENSG00000279215|SLC1A3 ENSG00000208666|ZFAND6 ENSG00000200528|CN1H ENSG00000202021|LUZP4 ENSG00000206106|ALMGFE7 ENSG00000204371|DKK4 ENSG00000211241|FGF6 ENSG00000212964|GHR  
ENSG0000014857|NKTR ENSG00000116898|MRPS15 ENSG00000120647|CCDC77 ENSG00000135537|LACB1 ENSG00000138152|BTBD16 ENSG00000138685|FGF2 ENSG00000143514|TP53BP2 ENSG00000145996|CDKAL1  
ENSG00000146250|PRSS35 ENSG00000160352|ZNF714 ENSG00000164615|CAMLG ENSG00000164692|COLLA2 ENSG00000164741|DLCL1 ENSG00000165061|ZMAT4 ENSG00000168509|HFE2 ENSG00000169131|ZNF354A  
ENSG00000169953|HSPY2 ENSG00000170866|LILRA3 ENSG00000172292|LASS6 ENSG00000172468|HSFY1 ENSG00000173145|NOC3L ENSG00000174371|EXO1 ENSG00000183648|NDUFB1 ENSG00000184258|CDR1  
ENSG00000188917|CXorf34 ENSG00000189367|C6orf174 ENSG00000196172|ZNF681 ENSG00000196900|NP\_997291.1 ENSG00000198597|ZNF536 ENSG00000198793|FRAP1 ENSG00000204276|HLA-DQA2  
GAAGCAC ENSG00000085978|ATG16L1 ENSG00000089737|DDX24 ENSG00000117425|PTCH2 ENSG00000118058|MLL ENSG00000129816|NR\_001538.1 ENSG00000129845|O14605\_HUMAN ENSG00000132259|CNGA4 ENSG00000147123|NDUFB11  
ENSG00000159352|PSMD4 ENSG00000160838|C1orf92 ENSG00000165138|ANKS6 ENSG00000165606|NP\_001073989.1 ENSG00000166402|TUB ENSG00000172053|QARS ENSG00000180471|C9orf31 ENSG00000181873|C1orf69  
ENSG00000185744|TNT\_HUMAN ENSG00000188935|Q6ZU24\_HUMAN ENSG00000204319|C4A ENSG00000204342|C4B ENSG00000207210|FAM48A ENSG00000104369|JPH1 ENSG00000111859|NEDD9 ENSG00000114520|SNX4  
ENSG00000127507|EMR2 ENSG00000128578|FAM40B ENSG00000133101|CCNA1 ENSG00000133193|FAM104A ENSG00000136698|CFCA1 ENSG00000138613|APH1B ENSG00000140873|ADAMTS18 ENSG00000141219|C17orf80  
ENSG00000143344|RGL1 ENSG00000145362|ANK2 ENSG00000147044|CASK ENSG00000152093|NP\_001072998.1 ENSG00000157107|FCHO2 ENSG00000161714|PLCD3 ENSG00000171824|EXOSC10 ENSG00000183807|C6orf189  
ENSG00000185634|SHC4 ENSG00000185689|Q6NXN5\_HUMAN  
GAAGCAG ENSG00000008853|RHOBTB2 ENSG00000055163|CYFIP2 ENSG00000075151|EIF4G3 ENSG00000103264|FBXO31 ENSG00000116985|BMP8B ENSG00000120875|DUSP4 ENSG00000122733|KIAA1045 ENSG00000130950|FAM22F  
ENSG00000139269|INHBE ENSG00000158089|GALNT14 ENSG00000160818|GPATCH4 ENSG00000161395|PERLD1 ENSG00000163872|YEATS2 ENSG00000165886|UBTD1 ENSG00000167972|ABCA3 ENSG00000169964|TMEM42  
ENSG00000172757|CFL1 ENSG00000173175|ADCY5 ENSG00000180525|C10orf108 ENSG00000181790|BAI1 ENSG00000185633|NDUFA4L2 ENSG00000187147|C1orf164 ENSG00000197694|SPTAN1 ENSG00000203905|Q6ZRC6\_HUMAN  
ENSG00000205653|Q6ZUF2\_HUMAN ENSG00000061455|PRDM6 ENSG00000092148|HECTD1 ENSG00000103319|PDYN ENSG00000166326|TRIM44 ENSG00000166326|TRIM44 ENSG00000167306|MYO5B ENSG00000147892|ADAMTSL1 ENSG00000153012|LGI2  
ENSG00000123545|C6orf66 ENSG00000127507|EMR2 ENSG00000131269|ABC7 ENSG00000135750|KCNK1 ENSG00000139537|CCDC65 ENSG00000141298|SSH2 ENSG00000149124|GLYAT ENSG00000156006|NAT2  
ENSG00000163754|GYG1 ENSG00000168509|HFE2 ENSG00000170791|CHCHD7 ENSG00000173930|SLCO4C1 ENSG00000179676|C18orf20 ENSG00000185278|ZBTB37 ENSG00000186432|KPN4 ENSG00000188001|FAM79B  
ENSG00000198526|PABPCP2 ENSG00000204365|C10orf126  
GAAGCAT ENSG00000010327|STAB1 ENSG00000075790|BCAP29 ENSG00000089169|RPH3A ENSG00000103064|SLC7A6 ENSG00000119703|C14orf140 ENSG00000122547|NP\_085139.2 ENSG00000130119|GNL3L ENSG00000130332|LSM7  
ENSG00000130703|OSBP12 ENSG00000154229|PRKCA ENSG00000154928|P54762-3 ENSG00000165948|FAM14B ENSG00000168014|NP\_056346.2 ENSG00000170858|LILRA4 ENSG00000176532|PRR15  
ENSG00000186141|POLR3C ENSG00000196739|COL27A1 ENSG00000077420|APBB1IP ENSG00000080561|MID2 ENSG00000083799|CYLD ENSG00000101040|ZMYND8 ENSG00000112110|MRPL18 ENSG00000115604|IL18R1  
ENSG00000118495|PLAGL1 ENSG00000125356|NDUFA1 ENSG00000128655|PDE11A ENSG00000130856|ZNF236 ENSG00000135974|C2orf49 ENSG00000146223|RPL7L1 ENSG00000147892|ADAMTSL1 ENSG00000153012|LGI2  
ENSG00000155592|ZKSCAN2 ENSG00000157800|SLC37A3 ENSG00000158122|C9orf21 ENSG00000163939|PBRM1 ENSG00000166326|TRIM44 ENSG00000167306|MYO5B ENSG00000147892|ADAMTSL1 ENSG00000153012|LGI2  
ENSG00000186579|DEFB106B ENSG00000187082|D106A\_HUMAN ENSG00000187772|LIN28B ENSG0000000188674|LOC389073 ENSG00000189184|PCDH18 ENSG00000198092|TMPRSS11F  
GAAGCCT ENSG00000042286|A1FM2 ENSG00000084628|FAM77C ENSG00000101189|C20orf20 ENSG00000110243|APOA5 ENSG00000121680|PEX16 ENSG00000123427|FAM119B ENSG00000124920|C11orf9 ENSG00000132142|ACACA  
ENSG00000134516|DOCK2 ENSG00000146021|KLHL3 ENSG00000150455|TIRAP ENSG00000154767|XPC ENSG00000161281|COX7A1 ENSG00000164048|ZNF589 ENSG00000164591|MYOZ3 ENSG00000166682|TMPRSS5  
ENSG00000173762|CD7 ENSG00000176619|LMNB2 ENSG00000176749|CDK5R1 ENSG00000177239|MAN1B1 ENSG00000181135|ZNF707 ENSG00000183760|NP\_001004318.1 ENSG00000197131|Q8IWA3\_HUMAN ENSG00000197753|LHFP15  
ENSG00000204602|Q6ZU19\_HUMAN ENSG00000054690|PLEKH1 ENSG00000102837|OLFML4 ENSG00000102886|GDPD3 ENSG00000113328|CCNG1 ENSG00000119938|PPP1R3C ENSG00000127359|KIAA1147 ENSG00000143552|NUP210L  
ENSG00000143995|MEIS1 ENSG00000148053|NTRK2 ENSG00000151792|CTSO ENSG00000153823|PID1 ENSG00000155966|AFF2 ENSG00000162433|AK3L2 ENSG00000163359|COL6A3 ENSG00000180113|TDRD6  
ENSG00000180354|C7orf41 ENSG00000180777|ANKRD30B ENSG00000188215|DCUN1D3 ENSG00000204866|IGFL2 ENSG00000204979|MS4A13  
GAAGCTG ENSG00000100065|CARD10 ENSG00000108883|EFTUD2 ENSG00000125965|GDF5 ENSG00000131634|C16orf30 ENSG00000132570|EIF5AP1 ENSG00000134438|RAX ENSG00000136274|NACAD ENSG00000142511|GPR32  
ENSG00000147383|NSDHL ENSG00000160949|NFKBIL2 ENSG00000161021|LTC4S ENSG00000162728|KCNJ9 ENSG00000163435|ELF3 ENSG00000166090|IL25 ENSG00000167685|ZNF444 ENSG00000175267|XR\_015198.1  
ENSG00000179262|RAD23A ENSG00000180924|Q9BVQ6\_HUMAN ENSG00000182108|MYLE\_HUMAN ENSG00000189120|SP6 ENSG00000203908|NP\_001017361.1 ENSG00000207083|CDC42 ENSG000002078114|NEBL ENSG000002084623|EIF3S2  
ENSG00000085871|MGST2 ENSG00000109181|UGT2B10 ENSG00000111832|RWDD1 ENSG00000122912|SLC25A16 ENSG00000124491|F13A1 ENSG00000130818|ZNF426 ENSG00000135413|LACRT ENSG00000144857|BOC  
ENSG00000156504|FAM122B ENSG00000161634|DCD ENSG00000163673|DCLK3 ENSG00000163781|TOPBP1 ENSG00000165359|DDX26B ENSG00000165757|KIAA1462 ENSG00000166923|GREM1 ENSG00000171234|UGT2B7  
ENSG00000182457|NR\_002323.1 ENSG00000186628|FSD2 ENSG00000196406|SPANXE ENSG00000197977|ELOVL2 ENSG00000198021|SPANXA2 ENSG00000203926|SPANXA1 ENSG00000203929|SPANXB1  
ENSG00000204171|Q6STG2\_HUMAN ENSG00000205773|LOC652517  
GAAGGGA ENSG00000040487|PQLC2 ENSG00000072609|CHFR ENSG00000077800|FKBP6 ENSG00000100170|SLC5A1 ENSG00000100288|CPT1B ENSG00000101236|RNF24 ENSG00000116857|TMEM9 ENSG00000119457|SLC46A2  
ENSG00000121904|CSMD2 ENSG00000123384|LRP1 ENSG00000124702|KLHDC3 ENSG00000125618|PAX8 ENSG00000127191|TRAF2 ENSG00000128563|PRKRIP1 ENSG00000130147|SH3BP4 ENSG00000131355|EMR3  
ENSG00000138031|ADCY3 ENSG00000143624|INTS3 ENSG00000149480|MTA2 ENSG00000150977|NP\_659495.1 ENSG00000157895|C12orf43 ENSG00000159110|IFNAR2 ENSG00000163132|MSX1 ENSG00000165810|BTNL9  
ENSG00000165886|UBTD1 ENSG00000166069|TMC05 ENSG00000168389|MFS2D ENSG00000169991|Q5TF58\_HUMAN ENSG00000178498|DTX3 ENSG00000181563|C1orf211 ENSG00000184416|Q8IUS2\_HUMAN ENSG00000184811|TUSC5  
ENSG00000198837|DENND4B ENSG00000204620|Q6ZPC8\_HUMAN ENSG00000204934|NP\_001008745.1 ENSG0000020219|NP\_001025037.1 ENSG00000080947|Q8IVE0\_HUMAN ENSG00000092439|TRPM7 ENSG00000104320|NBN ENSG00000107443|CCNJ  
ENSG00000109099|PMP22 ENSG00000109689|STIM2 ENSG00000110851|PRDM4 ENSG00000111707|SUDS3 ENSG00000123545|C6orf66 ENSG00000138081|FBXO11 ENSG00000144057|ST6GAL2 ENSG00000144815|FAM55C  
ENSG00000149742|SLC22A9 ENSG00000152749|GPR180 ENSG00000157510|AFAP1L1 ENSG00000164326|CARTPT ENSG00000167230|C17orf78 ENSG00000170009|Q9NTH0\_HUMAN ENSG00000170915|PAQR8 ENSG00000171877|FRMD5  
ENSG00000178150|ZNF114 ENSG00000181019|NQO1 ENSG00000186094|AGBL4 ENSG00000188740|NBNP5 ENSG00000197069|Q9H399\_HUMAN ENSG00000198903|Q6ZV72\_HUMAN  
GAAGTGT ENSG00000048471|NP\_001073999.1 ENSG00000063587|ZNF275 ENSG00000100271|TTLL1 ENSG00000110222|C20orf28 ENSG00000112149|CD83 ENSG00000132740|IGHMBP2 ENSG00000162888|C1orf147 ENSG00000163016|NP\_660343.1  
ENSG00000174989|FBXW8 ENSG00000175564|UCP3 ENSG00000177464|GPR4 ENSG00000179913|B3GNT3 ENSG00000064726|BTBD1 ENSG00000084623|EIF3S2 ENSG00000094975|C1orf9 ENSG00000095203|EPB41L4B  
ENSG00000104313|EYA1 ENSG00000106355|LSM5 ENSG00000116141|MARK1 ENSG00000116285|ERRFI1 ENSG00000121716|Q9UKJ0-3 ENSG00000124343|XG ENSG00000125356|NDUFA1 ENSG00000128833|MYO5C  
ENSG00000141325|CCDC45 ENSG00000152213|ARL11 ENSG00000154945|ANKRD40 ENSG00000155760|FZD7 ENSG000001578185|KNAKRD36 ENSG00000176133|CSTF2T ENSG00000184083|FAM120C ENSG00000186834|HXIM1  
ENSG00000196912|AN36B\_HUMAN ENSG00000198814|GK  
GAAGTAA ENSG00000011223|LTF ENSG00000111665|CDCA3 ENSG00000119946|CNM1 ENSG00000124920|C11orf9 ENSG00000129538|RNASE1 ENSG00000130005|GAMT ENSG00000130182|ZSCAN10 ENSG00000138780|GSTCD  
ENSG00000158220|FAM62C ENSG00000165837|Q5W0A0\_HUMAN ENSG00000173349|SFT2D3 ENSG00000198610|AKR1C4 ENSG00000204540|PSORS1C1 ENSG00000001631|KRIT1 ENSG000000085276|EVI1 ENSG00000096401|CDC5L  
ENSG00000102024|PLS3 ENSG00000102743|SLC25A15 ENSG00000104763|ASAH1 ENSG00000105677|TMEM147 ENSG00000107581|EIF3S10 ENSG00000110675|ELMOD1 ENSG00000112651|MRPL2 ENSG00000117601|SERPINC1  
ENSG00000118260|CREB1 ENSG00000133393|C16orf63 ENSG00000135164|DMTF1 ENSG00000137693|YAP1 ENSG00000137996|RTCD1 ENSG00000151725|MLF1IP ENSG00000153187|HNRPU ENSG00000155729|KCTD18  
ENSG00000166363|OR10A5 ENSG00000166573|GALR1 ENSG00000167196|FBXO22 ENSG00000169302|STK32A ENSG00000170185|USP38 ENSG00000173141|MRP63 ENSG00000184500|PROS1 ENSG00000189308|LIN54  
ENSG00000189367|C6orf174  
GAAGTAC ENSG00000002330|BAD ENSG00000038532|KIAA0350 ENSG00000053108|FSTL4 ENSG00000063587|ZNF275 ENSG00000064886|CHI3L2 ENSG00000071553|ATP6AP1 ENSG00000080777|TRIP6 ENSG00000100030|MAPK1  
ENSG00000125895|C20orf46 ENSG00000131389|SLC6A6 ENSG00000134864|Q9BVM4\_HUMAN ENSG00000155087|ODF1 ENSG00000167080|B4GALNT2 ENSG00000175063|UBE2C ENSG00000181097|Q8NDL7\_HUMAN ENSG00000184056|VPS33B  
ENSG00000185627|PSMD13 ENSG00000186318|BACE1 ENSG00000204231|RXRB ENSG00000205041|Q6UXV6\_HUMAN ENSG00000206550|LOC285346 ENSG00000085840|ORC1L ENSG00000101746|NOL4 ENSG00000110852|CLEC2B  
ENSG00000120251|GRIA2 ENSG00000121022|COP55 ENSG00000122548|KO087\_HUMAN ENSG00000124496|TRERF1 ENSG00000125814|NAPB ENSG00000132640|BTBD3 ENSG00000134313|NP\_065789.1 ENSG00000134444|KIAA1468  
ENSG00000137270|GCM1 ENSG00000139505|MTMR6 ENSG00000145777|NP\_149024.1 ENSG00000146938|NLGN4X ENSG00000159082|SYNJ1 ENSG00000160049|DFFA ENSG00000166734|CASC4 ENSG00000168283|BMI1  
ENSG00000173281|PPP1R3B ENSG00000178199|Q6ZRW2\_HUMAN ENSG00000179562|GCC1 ENSG00000174799|CEP135 ENSG00000180694|TMEM64  
GAAGTTA ENSG00000010319|SEMA3G ENSG00000033327|GAB2 ENSG00000072501|SMC1A ENSG00000100104|SRR1L\_HUMAN ENSG00000103485|QPRT ENSG00000107147|KCNT1 ENSG00000114268|PFKFB4 ENSG00000122304|Q6ZMM0\_HUMAN  
ENSG00000147753|TTY7\_HUMAN ENSG00000147761|TTY7\_HUMAN ENSG00000154252|GAL3ST2 ENSG00000166123|GPT2 ENSG00000168434|COG7 ENSG00000171680|PLEKHG5 ENSG00000173011|Q86TJ2\_HUMAN ENSG00000180471|C9orf31  
ENSG00000182372|C8orf61 ENSG00000184209|NP\_008951.1 ENSG00000188706|ZDHHC9 ENSG00000205742|Q6ZTR4\_HUMAN ENSG00000057252|SOAT1 ENSG00000070367|EXOC5 ENSG00000083123|BCKDHB ENSG00000101752|MIB1  
ENSG00000123595|RAB9A ENSG00000128590|DNAJB9 ENSG00000143401|ANP32E ENSG00000150093|ITGB1 ENSG00000153132|CLGN ENSG00000154007|ASB17 ENSG00000154640|BTG3 ENSG00000162989|KCNJ3  
ENSG00000164116|GUCY1A3 ENSG00000166527|CLEC4D ENSG00000167721|TSR1 ENSG00000203667|FAM36A ENSG00000205036|NP\_001001682.1  
ENSG00000104611|SH2D4A ENSG00000108264|TADA2L ENSG00000112273|HDGFL1 ENSG00000122642|FKBP9 ENSG00000122729|AC01 ENSG00000124134|KCN51 ENSG00000124208|UBE2V1 ENSG00000134864|Q9BVM4\_HUMAN  
ENSG00000143614|GATAD2B ENSG00000144029|MRPS5 ENSG00000147454|SLC25A37 ENSG00000151640|DPYSL4 ENSG00000157617|C21orf25 ENSG00000164621|DAMS\_HUMAN ENSG00000167881|SRP68 ENSG00000169083|AR  
ENSG00000173281|PPP1R3B ENSG00000178199|Q6ZRW2\_HUMAN ENSG00000179562|GCC1 ENSG00000174799|CEP135 ENSG00000180694|TMEM64 ENSG00000186919|LGIC21 ENSG00000196154|S100A4 ENSG00000196567|NP\_942123.1 ENSG00000198837|DENND4B  
ENSG0000013364|MVP ENSG00000038945|MSR1 ENSG00000042429|CRSP6 ENSG00000043514|TRIT1 ENSG00000075142|SRI ENSG00000087095|NLK ENSG00000101843|PSMD10 ENSG00000104904|OAZ1  
ENSG00000106066|CPVL ENSG00000107105|ELAVL2 ENSG00000113460|BXDC2 ENSG00000137441|FGFBP2 ENSG00000138668|HNRPD ENSG00000139921|TXNDC1 ENSG00000143889|HNRPLL ENSG00000148291|SURF2  
ENSG00000148677|ANKRD1 ENSG00000151923|TIAL1 ENSG00000153814|JAZF1 ENSG00000156171|TMEM77 ENSG00000163113|OTUD7B ENSG00000166068|SPRED1 ENSG00000169495|HTRA4 ENSG00000170584|NUDC2  
ENSG00000175087|PDIK1L ENSG00000196950|SLC39A10  
GAATAAA ENSG00000075702|WDR61 ENSG00000078319|PMS2L1 ENSG00000099899|HJTF9C\_HUMAN ENSG00000105428|ZNRF4 ENSG00000112640|PPP2R5D ENSG00000113578|FGF1 ENSG00000113734|BNIP1 ENSG00000118137|APOA1  
ENSG00000120332|TNN ENSG00000125652|ALKBH7 ENSG00000127578|WFIKKN1 ENSG00000129965|INS ENSG00000130288|NDUFA13 ENSG00000130813|NP\_060851.1 ENSG00000142789|ELA3A ENSG00000143512|KIAA1822L  
ENSG00000153446|NP\_689672.2 ENSG00000159674|SPON2 ENSG00000159723|AGRP ENSG00000160318|CLDN2 ENSG00000161960|EIF4A1 ENSG00000164266|SPINK1 ENSG00000165698|C9orf9 ENSG00000167525|NP\_689678.1  
ENSG00000169020|ATP5I ENSG00000172018|NP\_001004341.1 ENSG00000173093|CCDC63 ENSG00000174788|PCP2 ENSG00000177337|NP\_001034885.1 ENSG00000178896|EXOSC4 ENSG00000180198|RCC1 ENSG00000182600|NP\_996778.1  
ENSG00000184560|C17orf74 ENSG00000186474|KLK12 ENSG00000197816|KIAA1529 ENSG00000198399|ITSN2 ENSG00000198632|NP\_777590.1 ENSG00000206123|Q5BLP8\_HUMAN ENSG00000206172|HBA1 ENSG00000005812|FBXL3  
ENSG0000018189|RUFY3 ENSG00000021461|CYP3A43 ENSG00000028203|VEZT ENSG00000047188|YTHDC2 ENSG00000065183|WDR3 ENSG00000069345|DNAJA2 ENSG00000069974|RAB27A ENSG00000083782|EYPC  
ENSG00000094914|AAAS ENSG00000100218|RTDR1 ENSG00000100519|PSMC6 ENSG00000101278|Q9NQ39\_HUMAN ENSG00000103599|IQCH ENSG00000104808|DHDH ENSG00000105216|LSM14A ENSG00000108039|XPNPEP1  
ENSG00000108932|SLC16A6 ENSG00000109184|DCUN1D4 ENSG00000109332|UBE2D3 ENSG00000117475|BLZF1 ENSG00000124532|MR52L ENSG00000128394|APOBEC3G ENSG00000131732|ZCCHC9 ENSG00000132429|POPCD3  
ENSG00000139233|C12orf31 ENSG00000143355|LHX9 ENSG00000151693|DDEF2 ENSG00000155875|C9orf138 ENSG00000163110|PDLIM5 ENSG00000163285|GABRG1 ENSG00000163544|Q96BL6\_HUMAN ENSG00000166035|LIPC  
ENSG00000166930|MS4A5 ENSG00000167306|MYO5B ENSG00000168591|TMUB2 ENSG00000170571|EMB ENSG00000170946|DPH4 ENSG00000176840|C19orf30 ENSG00000180245|RRH ENSG00000180773|SLC36A4  
ENSG00000182217|HIST2H4B ENSG00000183941|HIST2H4A ENSG00000196900|NP\_997291.1 ENSG00000197748|C10orf79 ENSG00000198755|RPL10A ENSG00000198887|SMC5 ENSG00000204007|GLT6D1 ENSG00000204133|FAM33B  
ENSG00000205174|NP\_001019778.1 ENSG00000206535|A1A4G5\_HUMAN  
GAATAAT ENSG00000006659|LGALS14 ENSG00000034510|TMSB10 ENSG00000055118|SNRP2 ENSG00000089057|SLC23A2 ENSG00000089101|C20orf26 ENSG00000099194|SQD ENSG00000100298|APOBEC3H ENSG00000105127|AKAP8  
ENSG00000105198|LGALS13 ENSG00000105997|HOXA3 ENSG00000105743|KCNRP2 ENSG00000132824|SERINC3 ENSG00000136193|SCRN1 ENSG000

|         |                                                                                                                                                                                                                                                                                                                                                                                                                                                                                                                                                                                                                                                                                                                                                 |                                                                                                                                                                                                                                                                                                                                                                                                                                                                                                                                                                                                                                                                                                                             |                                                                                                                                                                                                                                                                                                                                                                                                                                                                                                                                                                                                                                                                                                                                         |                                                                                                                                                                                                                                                                                                                                                                                                                                                                                                                                                                                                                                                                                                 |                                                                                                                                                                                                                                                                                                                                                                                                                                                                                                                   |                                                                                                                                                                                                                                                                                                                                                                                                                                                                                                              |                                                                                                                                                                                                                                                                                                                                                                                                                                                                                                                                                                                                                             |                                                                                                                                                                                           |                                                                                                                                                                                                                                                                                                                                                                                                                                                                                                                                                               |                                                                                                                                                                                                                                                                                                                                                                                                                                                                                                                                                                   |                                                                                                                                                                                                                                                                                                                                                                                                                                                                                                                                                                                |                                                                                                                                                                                                                                                                                                                                                                                                                                                                                                                                                                                   |                                                                                                                                                                                                                                                                                                                                                                                                                                                                                                                                                                                                                         |                                                                                                                                                                                                                                                                                                                                                                                                                                                                                                                                                                                                                    |                                                                                                                                                                                                                                                                                                                                                                                                                                                                                                                                                                                                                                   |                                                                                                                                                                                                                                                                                                                                                                                                                                                                                                                                                                                                                                                                                                                                                                                                                                                              |                                                                                                                                                                                                                                                                                                                                                                                                                                                                                                                                                                                                                            |                                                                                                                                                                                                                                                                                                                                                                                                                                                                                                                                                                                                                            |                                                                                                                                                                                                                                                                                                                                                                                                                                                                                                                                                                                                                            |                                                                                                                                                                                                                                                                                                                                                                                                                                                                                                                                                                                                                            |                                                                                                                                                                                                                                                                                                                                                                                                                                                                                                                                                                                                                            |                                                                                                                                                                                                                                                                                                                                                                                                                                                                                                                                                                                                                            |                                                                                                                                                                                                                                                                                                                                                                                                                                                                                                                                                                                                                            |                                                                                                                                                                                                                                                                                                                                                                                                                                                                                                                                                                                                                            |                                                                                                                                                                                                                                                                                                                                                                                                                                                                                                                                                                                                                            |                                                                                                                                                                                                                                                                                                                                                                                                                                                                                                                                                                                                                            |                                                                                                                                                                                                                                                           |
|---------|-------------------------------------------------------------------------------------------------------------------------------------------------------------------------------------------------------------------------------------------------------------------------------------------------------------------------------------------------------------------------------------------------------------------------------------------------------------------------------------------------------------------------------------------------------------------------------------------------------------------------------------------------------------------------------------------------------------------------------------------------|-----------------------------------------------------------------------------------------------------------------------------------------------------------------------------------------------------------------------------------------------------------------------------------------------------------------------------------------------------------------------------------------------------------------------------------------------------------------------------------------------------------------------------------------------------------------------------------------------------------------------------------------------------------------------------------------------------------------------------|-----------------------------------------------------------------------------------------------------------------------------------------------------------------------------------------------------------------------------------------------------------------------------------------------------------------------------------------------------------------------------------------------------------------------------------------------------------------------------------------------------------------------------------------------------------------------------------------------------------------------------------------------------------------------------------------------------------------------------------------|-------------------------------------------------------------------------------------------------------------------------------------------------------------------------------------------------------------------------------------------------------------------------------------------------------------------------------------------------------------------------------------------------------------------------------------------------------------------------------------------------------------------------------------------------------------------------------------------------------------------------------------------------------------------------------------------------|-------------------------------------------------------------------------------------------------------------------------------------------------------------------------------------------------------------------------------------------------------------------------------------------------------------------------------------------------------------------------------------------------------------------------------------------------------------------------------------------------------------------|--------------------------------------------------------------------------------------------------------------------------------------------------------------------------------------------------------------------------------------------------------------------------------------------------------------------------------------------------------------------------------------------------------------------------------------------------------------------------------------------------------------|-----------------------------------------------------------------------------------------------------------------------------------------------------------------------------------------------------------------------------------------------------------------------------------------------------------------------------------------------------------------------------------------------------------------------------------------------------------------------------------------------------------------------------------------------------------------------------------------------------------------------------|-------------------------------------------------------------------------------------------------------------------------------------------------------------------------------------------|---------------------------------------------------------------------------------------------------------------------------------------------------------------------------------------------------------------------------------------------------------------------------------------------------------------------------------------------------------------------------------------------------------------------------------------------------------------------------------------------------------------------------------------------------------------|-------------------------------------------------------------------------------------------------------------------------------------------------------------------------------------------------------------------------------------------------------------------------------------------------------------------------------------------------------------------------------------------------------------------------------------------------------------------------------------------------------------------------------------------------------------------|--------------------------------------------------------------------------------------------------------------------------------------------------------------------------------------------------------------------------------------------------------------------------------------------------------------------------------------------------------------------------------------------------------------------------------------------------------------------------------------------------------------------------------------------------------------------------------|-----------------------------------------------------------------------------------------------------------------------------------------------------------------------------------------------------------------------------------------------------------------------------------------------------------------------------------------------------------------------------------------------------------------------------------------------------------------------------------------------------------------------------------------------------------------------------------|-------------------------------------------------------------------------------------------------------------------------------------------------------------------------------------------------------------------------------------------------------------------------------------------------------------------------------------------------------------------------------------------------------------------------------------------------------------------------------------------------------------------------------------------------------------------------------------------------------------------------|--------------------------------------------------------------------------------------------------------------------------------------------------------------------------------------------------------------------------------------------------------------------------------------------------------------------------------------------------------------------------------------------------------------------------------------------------------------------------------------------------------------------------------------------------------------------------------------------------------------------|-----------------------------------------------------------------------------------------------------------------------------------------------------------------------------------------------------------------------------------------------------------------------------------------------------------------------------------------------------------------------------------------------------------------------------------------------------------------------------------------------------------------------------------------------------------------------------------------------------------------------------------|--------------------------------------------------------------------------------------------------------------------------------------------------------------------------------------------------------------------------------------------------------------------------------------------------------------------------------------------------------------------------------------------------------------------------------------------------------------------------------------------------------------------------------------------------------------------------------------------------------------------------------------------------------------------------------------------------------------------------------------------------------------------------------------------------------------------------------------------------------------|----------------------------------------------------------------------------------------------------------------------------------------------------------------------------------------------------------------------------------------------------------------------------------------------------------------------------------------------------------------------------------------------------------------------------------------------------------------------------------------------------------------------------------------------------------------------------------------------------------------------------|----------------------------------------------------------------------------------------------------------------------------------------------------------------------------------------------------------------------------------------------------------------------------------------------------------------------------------------------------------------------------------------------------------------------------------------------------------------------------------------------------------------------------------------------------------------------------------------------------------------------------|----------------------------------------------------------------------------------------------------------------------------------------------------------------------------------------------------------------------------------------------------------------------------------------------------------------------------------------------------------------------------------------------------------------------------------------------------------------------------------------------------------------------------------------------------------------------------------------------------------------------------|----------------------------------------------------------------------------------------------------------------------------------------------------------------------------------------------------------------------------------------------------------------------------------------------------------------------------------------------------------------------------------------------------------------------------------------------------------------------------------------------------------------------------------------------------------------------------------------------------------------------------|----------------------------------------------------------------------------------------------------------------------------------------------------------------------------------------------------------------------------------------------------------------------------------------------------------------------------------------------------------------------------------------------------------------------------------------------------------------------------------------------------------------------------------------------------------------------------------------------------------------------------|----------------------------------------------------------------------------------------------------------------------------------------------------------------------------------------------------------------------------------------------------------------------------------------------------------------------------------------------------------------------------------------------------------------------------------------------------------------------------------------------------------------------------------------------------------------------------------------------------------------------------|----------------------------------------------------------------------------------------------------------------------------------------------------------------------------------------------------------------------------------------------------------------------------------------------------------------------------------------------------------------------------------------------------------------------------------------------------------------------------------------------------------------------------------------------------------------------------------------------------------------------------|----------------------------------------------------------------------------------------------------------------------------------------------------------------------------------------------------------------------------------------------------------------------------------------------------------------------------------------------------------------------------------------------------------------------------------------------------------------------------------------------------------------------------------------------------------------------------------------------------------------------------|----------------------------------------------------------------------------------------------------------------------------------------------------------------------------------------------------------------------------------------------------------------------------------------------------------------------------------------------------------------------------------------------------------------------------------------------------------------------------------------------------------------------------------------------------------------------------------------------------------------------------|----------------------------------------------------------------------------------------------------------------------------------------------------------------------------------------------------------------------------------------------------------------------------------------------------------------------------------------------------------------------------------------------------------------------------------------------------------------------------------------------------------------------------------------------------------------------------------------------------------------------------|-----------------------------------------------------------------------------------------------------------------------------------------------------------------------------------------------------------------------------------------------------------|
| GAATACA | ENSG00000181722 ZBTB20<br>ENSG00000109158 GABRA4<br>ENSG00000148090 AUH<br>ENSG00000170191 NANP<br>ENSG00000187187 ZNF546<br>ENSG00000067082 KLF6<br>ENSG00000140798 ABCC12<br>ENSG00000158055 GRHL3<br>ENSG00000170523 KRT83<br>ENSG00000188869 TMC3<br>ENSG00000056050 C4orf27<br>ENSG00000112246 SIM1<br>ENSG00000148541 FAM13C1<br>ENSG00000188971 NP_001013005.1<br>ENSG00000063180 CA11<br>ENSG00000141349 G6PC3<br>ENSG00000167800 TBX10<br>ENSG00000204507 LOC729368<br>ENSG00000113231 PDE8B<br>ENSG00000169019 COMMD8<br>ENSG00000197062 ZNF187<br>ENSG00000013455 ARPC1A<br>ENSG00000168505 GBX2<br>ENSG00000105708 ZNF14<br>ENSG00000149177 PTPRJ<br>ENSG00000163012 ZSWIM2<br>ENSG00000185057 TAF9<br>ENSG00000197967 Q86U89_HUMAN | ENSG00000188784 PLA2G2E<br>ENSG00000129691 ASH2L<br>ENSG00000153896 ZNF599<br>ENSG00000171448 ZBTB26<br>ENSG00000189369 GSPT2<br>ENSG00000089169 RPH3A<br>ENSG00000145864 GABRB2<br>ENSG00000163704 PRRT3<br>ENSG00000171724 K1576_HUMAN<br>ENSG00000198754 OXCT2<br>ENSG00000074803 SLC12A1<br>ENSG00000112499 SLC22A2<br>ENSG00000163626 COX18<br>ENSG00000197301 Q6ZQU9_HUMAN<br>ENSG00000082929 C4orf6<br>ENSG00000145113 MUC4<br>ENSG00000170485 NPAS2<br>ENSG00000206528 Q6ZSMO_HUMAN<br>ENSG00000117650 NEK2<br>ENSG00000177888 ZBTB41<br>ENSG00000198440 ZNF583<br>ENSG00000055483 USP36<br>ENSG00000168904 LRRC28<br>ENSG00000105967 TFEC<br>ENSG00000151914 DST<br>ENSG00000163735 CXCL5<br>ENSG00000185658 BRWD1 | ENSG00000189001 SBSN<br>ENSG00000134255 CEPT1<br>ENSG00000155755 ALS2CR4<br>ENSG00000171657 GPR82<br>ENSG00000204611 ZNF616<br>ENSG00000108602 ALDH3A1<br>ENSG00000147059 SPIN2A<br>ENSG00000164151 Q6ZT40_HUMAN<br>ENSG00000175520 UBQLN3<br>ENSG00000198915 RASGEF1A<br>ENSG00000097046 CD7<br>ENSG00000117525 F3<br>ENSG00000163828 TDGF3<br>ENSG00000198157 NSBP1<br>ENSG00000100441 KIAA0323<br>ENSG00000147576 ADHFE1<br>ENSG00000177238 TRIM72<br>ENSG00000206528 Q6ZSMO_HUMAN<br>ENSG00000120833 SOCS2<br>ENSG00000178346 C6orf61<br>ENSG00000198903 Q6ZV72_HUMAN<br>ENSG00000112514 CUTA<br>ENSG00000186951 PPARA<br>ENSG00000111700 SLCO1B3<br>ENSG00000154059 IMPACT<br>ENSG00000163918 RPC4<br>ENSG00000185710 Q8ND77_HUMAN | ENSG0000009780 FAM76A<br>ENSG00000134352 IL6ST<br>ENSG00000163386 KIAA1245<br>ENSG00000176009 ASCL3<br>ENSG00000116708 PRAEF4<br>ENSG00000152291 TGOLN2<br>ENSG00000164300 SERINC5<br>ENSG00000179994 NP_001030016.1<br>ENSG00000204501 PRAEF9<br>ENSG00000097046 CD7<br>ENSG00000102554 KLF5<br>ENSG00000119125 GDA<br>ENSG00000165678 GHITM<br>ENSG00000198157 NSBP1<br>ENSG00000107562 CXCL12<br>ENSG00000147724 NP_056996.2<br>ENSG00000186318 BACE1<br>ENSG00000092470 WDR76<br>ENSG00000141141 DDX52<br>ENSG00000179476 C14orf28<br>ENSG00000132514 CLEC10A<br>ENSG00000196263 ZNF471<br>ENSG00000111885 MAN1A<br>ENSG00000154080 CHST9<br>ENSG00000165168 CYBB<br>ENSG00000186017 ZNF566 | ENSG00000015171 ZMYND11<br>ENSG00000135842 FAM129A<br>ENSG00000164323 KIAA1430<br>ENSG00000177752 YIPF7<br>ENSG00000122735 DNAI1<br>ENSG00000155087 ODF1<br>ENSG00000166667 NP_001026789.1<br>ENSG00000183826 BTBD9<br>ENSG00000204509 PRAEF6<br>ENSG00000104064 GABPB2<br>ENSG00000120616 EPC1<br>ENSG00000167460 TPM4<br>ENSG00000205423 TMEM188<br>ENSG00000116198 KIAA0562<br>ENSG00000148600 PCDH21<br>ENSG00000197465 GYPE<br>ENSG00000097046 CDC7<br>ENSG00000156876 SASS6<br>ENSG00000180712 Q8NEQ2_HUMAN | ENSG00000100191 SLC5A4<br>ENSG00000136897 MRPL50<br>ENSG00000166510 CCDC68<br>ENSG00000177888 ZBTB41<br>ENSG00000130948 HSD17B3<br>ENSG00000156711 MAPK13<br>ENSG00000166689 PLEKHA7<br>ENSG00000183864 TOB2<br>ENSG00000205238 NP_001026789.1<br>ENSG00000104432 IL7<br>ENSG00000129084 PSMA1<br>ENSG00000170852 KBTBD2<br>ENSG00000157349 DDX19B<br>ENSG00000166689 PLEKHA7<br>ENSG00000183864 TOB2<br>ENSG0000044459 C9orf39<br>ENSG00000105708 ZNF14<br>ENSG00000137492 PRKRIR<br>ENSG00000171291 ZNF439 | ENSG00000102401 ARMCX3<br>ENSG00000138279 ANXA7<br>ENSG00000167302 OR51E2<br>ENSG00000181061 HIGD1A<br>ENSG00000135956 TMEM127<br>ENSG00000157358 PRAEF15<br>ENSG00000167755 KLK6<br>ENSG00000185585 OLFML2A<br>ENSG00000188086 NP_954652.1<br>ENSG000000449319 SRD5A2<br>ENSG00000108854 SMURF2<br>ENSG00000145491 ROPNL1<br>ENSG00000181704 YIPF6<br>ENSG00000163526 TUBA4B<br>ENSG00000198832 SELM_HUMAN<br>ENSG00000102383 ZDHHC15<br>ENSG00000164506 STXBP5<br>ENSG00000185275 CD24<br>ENSG00000166167 BTRC<br>ENSG00000204502 PRAEF5<br>ENSG00000107105 ELAVL2<br>ENSG00000165410 CFL2<br>ENSG00000196860 NP_997260.1 | ENSG00000159352 PSMD4<br>ENSG00000099246 RAB18<br>ENSG00000145868 FBXO38<br>ENSG00000157341 Q8ND77_HUMAN<br>ENSG00000177425 PAWR<br>ENSG00000196418 ZNF124<br>ENSG00000196912 AN3B6_HUMAN | ENSG00000082701 GSK3B<br>ENSG00000119699 TGF3B<br>ENSG00000160271 RALGDS<br>ENSG00000186716 BCR<br>ENSG00000101132 PFDN4<br>ENSG00000131023 LATS1<br>ENSG00000163682 RPL9<br>ENSG00000174695 TMEM167<br>ENSG00000070182 SPTB<br>ENSG00000134240 HMGCS2<br>ENSG00000174374 WBSR16<br>ENSG00000048740 CUGBP2<br>ENSG00000138271 GPR87<br>ENSG00000180869 C1orf180<br>ENSG00000080189 SLC35C2<br>ENSG00000113732 ATP6V0E1<br>ENSG00000157306 THTPA<br>ENSG00000178241 Q9P0D4_HUMAN<br>ENSG00000205313 FAM106A<br>ENSG00000086827 ZNF10<br>ENSG00000148110 HIATL1 | ENSG00000087365 SF3B3<br>ENSG00000121281 ADCY7<br>ENSG00000160710 ADAR<br>ENSG00000196507 TCEAL3<br>ENSG00000102935 PTTRM1<br>ENSG00000131831 RAI2<br>ENSG00000164040 PGRMC2<br>ENSG00000174780 SRP72<br>ENSG00000072195 SPEG<br>ENSG00000136695 LL1F5<br>ENSG00000175892 Q8NAT4_HUMAN<br>ENSG00000064218 DMRT3<br>ENSG00000141325 CCDC45<br>ENSG00000180869 C1orf180<br>ENSG00000089505 CMTM1<br>ENSG00000119242 CCDC92<br>ENSG00000157601 MX1<br>ENSG00000178241 Q9P0D4_HUMAN<br>ENSG00000005810 MYCBP2<br>ENSG00000102128 RB40L_HUMAN<br>ENSG00000161533 ACOX1 | ENSG00000101150 TPD5L2<br>ENSG00000127511 SN3B<br>ENSG00000163486 SRGAP2<br>ENSG00000197496 SLC2A10<br>ENSG00000107959 PITRM1<br>ENSG00000136158 SPRY2<br>ENSG00000165168 CYBB<br>ENSG00000189184 PCDH18<br>ENSG00000076351 SLC46A1<br>ENSG00000136953 LL1F5<br>ENSG00000175892 Q8NAT4_HUMAN<br>ENSG00000064218 DMRT3<br>ENSG00000141325 CCDC45<br>ENSG00000188463 XR_015229.1<br>ENSG00000104886 PLEKHJ1<br>ENSG00000134222 PSRC1<br>ENSG00000164519 Q96M23_HUMAN<br>ENSG00000179292 TMEM151<br>ENSG00000040341 STAU2<br>ENSG00000102128 RB40L_HUMAN<br>ENSG00000161533 ACOX1 | ENSG00000105127 AKAP8<br>ENSG00000128045 HABP4<br>ENSG00000166398 KIAA0355<br>ENSG00000204487 LTB<br>ENSG00000110435 TUBD1<br>ENSG00000154654 NCAM2<br>ENSG00000165194 TTC7B<br>ENSG00000196447 XR_017870.1<br>ENSG00000112473 SLC39A7<br>ENSG00000156603 MED19<br>ENSG00000196666 Q6POA1_HUMAN<br>ENSG00000107789 MINPP1<br>ENSG00000162641 C1orf62<br>ENSG00000188463 XR_015229.1<br>ENSG00000105131 ABHD9<br>ENSG00000134222 PSRC1<br>ENSG00000164519 Q96M23_HUMAN<br>ENSG00000179292 TMEM151<br>ENSG00000068796 KIF2A<br>ENSG00000102128 RB40L_HUMAN<br>ENSG00000161533 ACOX1 | ENSG00000111412 C12orf49<br>ENSG00000130956 HABP4<br>ENSG00000166851 PLK1<br>ENSG00000206539 Q6ZTN9_HUMAN<br>ENSG00000110435 TUBD1<br>ENSG00000161573 CCLL16<br>ENSG00000165914 TTC7B<br>ENSG00000193832 UVRAG<br>ENSG00000120055 C10orf95<br>ENSG00000157884 NP_001025052.1<br>ENSG00000196666 Q6POA1_HUMAN<br>ENSG00000107789 MINPP1<br>ENSG00000162641 C1orf62<br>ENSG00000188463 XR_015229.1<br>ENSG00000105131 ABHD9<br>ENSG00000134222 PSRC1<br>ENSG00000164519 Q96M23_HUMAN<br>ENSG00000179292 TMEM151<br>ENSG00000180806 HOXC9<br>ENSG00000068796 KIF2A<br>ENSG00000102128 RB40L_HUMAN<br>ENSG00000161533 ACOX1 | ENSG00000112320 SOBP<br>ENSG00000140090 SLC24A4<br>ENSG00000166851 PLK1<br>ENSG00000206539 Q6ZTN9_HUMAN<br>ENSG00000110435 TUBD1<br>ENSG00000161573 CCLL16<br>ENSG00000165914 TTC7B<br>ENSG00000193832 UVRAG<br>ENSG00000126368 NR1D1<br>ENSG00000157884 NP_001025052.1<br>ENSG00000196666 Q6POA1_HUMAN<br>ENSG00000107789 MINPP1<br>ENSG00000162641 C1orf62<br>ENSG00000188463 XR_015229.1<br>ENSG00000105131 ABHD9<br>ENSG00000134222 PSRC1<br>ENSG00000164519 Q96M23_HUMAN<br>ENSG00000179292 TMEM151<br>ENSG00000180806 HOXC9<br>ENSG00000068796 KIF2A<br>ENSG00000102128 RB40L_HUMAN<br>ENSG00000161533 ACOX1 | ENSG00000113194 UBXD8<br>ENSG00000157884 NP_001025052.1<br>ENSG00000184678 HIST2H2BE<br>ENSG00000206539 Q6ZTN9_HUMAN<br>ENSG00000110435 TUBD1<br>ENSG00000161573 CCLL16<br>ENSG00000165914 TTC7B<br>ENSG00000193832 UVRAG<br>ENSG00000130309 GLT25D1<br>ENSG00000157884 NP_001025052.1<br>ENSG00000196666 Q6POA1_HUMAN<br>ENSG00000107789 MINPP1<br>ENSG00000162641 C1orf62<br>ENSG00000188463 XR_015229.1<br>ENSG00000105131 ABHD9<br>ENSG00000134222 PSRC1<br>ENSG00000164519 Q96M23_HUMAN<br>ENSG00000179292 TMEM151<br>ENSG00000180806 HOXC9<br>ENSG00000068796 KIF2A<br>ENSG00000102128 RB40L_HUMAN<br>ENSG00000161533 ACOX1 | ENSG000001115602 IL1RL1<br>ENSG00000158828 PINK1<br>ENSG00000185831 NR_003081.1<br>ENSG00000081052 COL4A4<br>ENSG00000123607 TTC21B<br>ENSG00000161980 POLR3K<br>ENSG00000163257 C4orf30<br>ENSG00000170248 PDCC61P<br>ENSG00000113194 UBXD8<br>ENSG00000157884 NP_001025052.1<br>ENSG00000184678 HIST2H2BE<br>ENSG00000206539 Q6ZTN9_HUMAN<br>ENSG00000110435 TUBD1<br>ENSG00000161980 POLR3K<br>ENSG00000163257 C4orf30<br>ENSG00000170248 PDCC61P<br>ENSG00000130309 GLT25D1<br>ENSG00000157884 NP_001025052.1<br>ENSG00000196666 Q6POA1_HUMAN<br>ENSG00000107789 MINPP1<br>ENSG00000162641 C1orf62<br>ENSG00000188463 XR_015229.1<br>ENSG00000105131 ABHD9<br>ENSG00000134222 PSRC1<br>ENSG00000164519 Q96M23_HUMAN<br>ENSG00000179292 TMEM151<br>ENSG00000180806 HOXC9<br>ENSG00000068796 KIF2A<br>ENSG00000102128 RB40L_HUMAN<br>ENSG00000161533 ACOX1 | ENSG00000115602 IL1RL1<br>ENSG00000158828 PINK1<br>ENSG00000185831 NR_003081.1<br>ENSG00000081052 COL4A4<br>ENSG00000123607 TTC21B<br>ENSG00000161980 POLR3K<br>ENSG00000163257 C4orf30<br>ENSG00000170248 PDCC61P<br>ENSG00000130309 GLT25D1<br>ENSG00000157884 NP_001025052.1<br>ENSG00000196666 Q6POA1_HUMAN<br>ENSG00000107789 MINPP1<br>ENSG00000162641 C1orf62<br>ENSG00000188463 XR_015229.1<br>ENSG00000105131 ABHD9<br>ENSG00000134222 PSRC1<br>ENSG00000164519 Q96M23_HUMAN<br>ENSG00000179292 TMEM151<br>ENSG00000180806 HOXC9<br>ENSG00000068796 KIF2A<br>ENSG00000102128 RB40L_HUMAN<br>ENSG00000161533 ACOX1 | ENSG00000115602 IL1RL1<br>ENSG00000158828 PINK1<br>ENSG00000185831 NR_003081.1<br>ENSG00000081052 COL4A4<br>ENSG00000123607 TTC21B<br>ENSG00000161980 POLR3K<br>ENSG00000163257 C4orf30<br>ENSG00000170248 PDCC61P<br>ENSG00000130309 GLT25D1<br>ENSG00000157884 NP_001025052.1<br>ENSG00000196666 Q6POA1_HUMAN<br>ENSG00000107789 MINPP1<br>ENSG00000162641 C1orf62<br>ENSG00000188463 XR_015229.1<br>ENSG00000105131 ABHD9<br>ENSG00000134222 PSRC1<br>ENSG00000164519 Q96M23_HUMAN<br>ENSG00000179292 TMEM151<br>ENSG00000180806 HOXC9<br>ENSG00000068796 KIF2A<br>ENSG00000102128 RB40L_HUMAN<br>ENSG00000161533 ACOX1 | ENSG00000115602 IL1RL1<br>ENSG00000158828 PINK1<br>ENSG00000185831 NR_003081.1<br>ENSG00000081052 COL4A4<br>ENSG00000123607 TTC21B<br>ENSG00000161980 POLR3K<br>ENSG00000163257 C4orf30<br>ENSG00000170248 PDCC61P<br>ENSG00000130309 GLT25D1<br>ENSG00000157884 NP_001025052.1<br>ENSG00000196666 Q6POA1_HUMAN<br>ENSG00000107789 MINPP1<br>ENSG00000162641 C1orf62<br>ENSG00000188463 XR_015229.1<br>ENSG00000105131 ABHD9<br>ENSG00000134222 PSRC1<br>ENSG00000164519 Q96M23_HUMAN<br>ENSG00000179292 TMEM151<br>ENSG00000180806 HOXC9<br>ENSG00000068796 KIF2A<br>ENSG00000102128 RB40L_HUMAN<br>ENSG00000161533 ACOX1 | ENSG00000115602 IL1RL1<br>ENSG00000158828 PINK1<br>ENSG00000185831 NR_003081.1<br>ENSG00000081052 COL4A4<br>ENSG00000123607 TTC21B<br>ENSG00000161980 POLR3K<br>ENSG00000163257 C4orf30<br>ENSG00000170248 PDCC61P<br>ENSG00000130309 GLT25D1<br>ENSG00000157884 NP_001025052.1<br>ENSG00000196666 Q6POA1_HUMAN<br>ENSG00000107789 MINPP1<br>ENSG00000162641 C1orf62<br>ENSG00000188463 XR_015229.1<br>ENSG00000105131 ABHD9<br>ENSG00000134222 PSRC1<br>ENSG00000164519 Q96M23_HUMAN<br>ENSG00000179292 TMEM151<br>ENSG00000180806 HOXC9<br>ENSG00000068796 KIF2A<br>ENSG00000102128 RB40L_HUMAN<br>ENSG00000161533 ACOX1 | ENSG00000115602 IL1RL1<br>ENSG00000158828 PINK1<br>ENSG00000185831 NR_003081.1<br>ENSG00000081052 COL4A4<br>ENSG00000123607 TTC21B<br>ENSG00000161980 POLR3K<br>ENSG00000163257 C4orf30<br>ENSG00000170248 PDCC61P<br>ENSG00000130309 GLT25D1<br>ENSG00000157884 NP_001025052.1<br>ENSG00000196666 Q6POA1_HUMAN<br>ENSG00000107789 MINPP1<br>ENSG00000162641 C1orf62<br>ENSG00000188463 XR_015229.1<br>ENSG00000105131 ABHD9<br>ENSG00000134222 PSRC1<br>ENSG00000164519 Q96M23_HUMAN<br>ENSG00000179292 TMEM151<br>ENSG00000180806 HOXC9<br>ENSG00000068796 KIF2A<br>ENSG00000102128 RB40L_HUMAN<br>ENSG00000161533 ACOX1 | ENSG00000115602 IL1RL1<br>ENSG00000158828 PINK1<br>ENSG00000185831 NR_003081.1<br>ENSG00000081052 COL4A4<br>ENSG00000123607 TTC21B<br>ENSG00000161980 POLR3K<br>ENSG00000163257 C4orf30<br>ENSG00000170248 PDCC61P<br>ENSG00000130309 GLT25D1<br>ENSG00000157884 NP_001025052.1<br>ENSG00000196666 Q6POA1_HUMAN<br>ENSG00000107789 MINPP1<br>ENSG00000162641 C1orf62<br>ENSG00000188463 XR_015229.1<br>ENSG00000105131 ABHD9<br>ENSG00000134222 PSRC1<br>ENSG00000164519 Q96M23_HUMAN<br>ENSG00000179292 TMEM151<br>ENSG00000180806 HOXC9<br>ENSG00000068796 KIF2A<br>ENSG00000102128 RB40L_HUMAN<br>ENSG00000161533 ACOX1 | ENSG00000115602 IL1RL1<br>ENSG00000158828 PINK1<br>ENSG00000185831 NR_003081.1<br>ENSG00000081052 COL4A4<br>ENSG00000123607 TTC21B<br>ENSG00000161980 POLR3K<br>ENSG00000163257 C4orf30<br>ENSG00000170248 PDCC61P<br>ENSG00000130309 GLT25D1<br>ENSG00000157884 NP_001025052.1<br>ENSG00000196666 Q6POA1_HUMAN<br>ENSG00000107789 MINPP1<br>ENSG00000162641 C1orf62<br>ENSG00000188463 XR_015229.1<br>ENSG00000105131 ABHD9<br>ENSG00000134222 PSRC1<br>ENSG00000164519 Q96M23_HUMAN<br>ENSG00000179292 TMEM151<br>ENSG00000180806 HOXC9<br>ENSG00000068796 KIF2A<br>ENSG00000102128 RB40L_HUMAN<br>ENSG00000161533 ACOX1 | ENSG00000115602 IL1RL1<br>ENSG00000158828 PINK1<br>ENSG00000185831 NR_003081.1<br>ENSG00000081052 COL4A4<br>ENSG00000123607 TTC21B<br>ENSG00000161980 POLR3K<br>ENSG00000163257 C4orf30<br>ENSG00000170248 PDCC61P<br>ENSG00000130309 GLT25D1<br>ENSG00000157884 NP_001025052.1<br>ENSG00000196666 Q6POA1_HUMAN<br>ENSG00000107789 MINPP1<br>ENSG00000162641 C1orf62<br>ENSG00000188463 XR_015229.1<br>ENSG00000105131 ABHD9<br>ENSG00000134222 PSRC1<br>ENSG00000164519 Q96M23_HUMAN<br>ENSG00000179292 TMEM151<br>ENSG00000180806 HOXC9<br>ENSG00000068796 KIF2A<br>ENSG00000102128 RB40L_HUMAN<br>ENSG00000161533 ACOX1 | ENSG00000115602 IL1RL1<br>ENSG00000158828 PINK1<br>ENSG00000185831 NR_003081.1<br>ENSG00000081052 COL4A4<br>ENSG00000123607 TTC21B<br>ENSG00000161980 POLR3K<br>ENSG00000163257 C4orf30<br>ENSG00000170248 PDCC61P<br>ENSG00000130309 GLT25D1<br>ENSG00000157884 NP_001025052.1<br>ENSG00000196666 Q6POA1_HUMAN<br>ENSG00000107789 MINPP1<br>ENSG00000162641 C1orf62<br>ENSG00000188463 XR_015229.1<br>ENSG00000105131 ABHD9<br>ENSG00000134222 PSRC1<br>ENSG00000164519 Q96M23_HUMAN<br>ENSG00000179292 TMEM151<br>ENSG00000180806 HOXC9<br>ENSG00000068796 KIF2A<br>ENSG00000102128 RB40L_HUMAN<br>ENSG00000161533 ACOX1 | ENSG00000115602 IL1RL1<br>ENSG00000158828 PINK1<br>ENSG00000185831 NR_003081.1<br>ENSG00000081052 COL4A4<br>ENSG00000123607 TTC21B<br>ENSG00000161980 POLR3K<br>ENSG00000163257 C4orf30<br>ENSG00000170248 PDCC61P<br>ENSG00000130309 GLT25D1<br>ENSG00000157884 NP_001025052.1<br>ENSG00000196666 Q6POA1_HUMAN<br>ENSG00000107789 MINPP1<br>ENSG00000162641 C1orf62<br>ENSG00000188463 XR_015229.1<br>ENSG00000105131 ABHD9<br>ENSG00000134222 PSRC1<br>ENSG00000164519 Q96M23_HUMAN<br>ENSG00000179292 TMEM151<br>ENSG00000180806 HOXC9<br>ENSG00000068796 KIF2A<br>ENSG00000102128 RB40L_HUMAN<br>ENSG00000161533 ACOX1 | ENSG00000115602 IL1RL1<br>ENSG00000158828 PINK1<br>ENSG00000185831 NR_003081.1<br>ENSG00000081052 COL4A4<br>ENSG00000123607 TTC21B<br>ENSG00000161980 POLR3K<br>ENSG00000163257 C4orf30<br>ENSG00000170248 PDCC61P<br>ENSG00000130309 GLT25D1<br>ENSG0000 |
|---------|-------------------------------------------------------------------------------------------------------------------------------------------------------------------------------------------------------------------------------------------------------------------------------------------------------------------------------------------------------------------------------------------------------------------------------------------------------------------------------------------------------------------------------------------------------------------------------------------------------------------------------------------------------------------------------------------------------------------------------------------------|-----------------------------------------------------------------------------------------------------------------------------------------------------------------------------------------------------------------------------------------------------------------------------------------------------------------------------------------------------------------------------------------------------------------------------------------------------------------------------------------------------------------------------------------------------------------------------------------------------------------------------------------------------------------------------------------------------------------------------|-----------------------------------------------------------------------------------------------------------------------------------------------------------------------------------------------------------------------------------------------------------------------------------------------------------------------------------------------------------------------------------------------------------------------------------------------------------------------------------------------------------------------------------------------------------------------------------------------------------------------------------------------------------------------------------------------------------------------------------------|-------------------------------------------------------------------------------------------------------------------------------------------------------------------------------------------------------------------------------------------------------------------------------------------------------------------------------------------------------------------------------------------------------------------------------------------------------------------------------------------------------------------------------------------------------------------------------------------------------------------------------------------------------------------------------------------------|-------------------------------------------------------------------------------------------------------------------------------------------------------------------------------------------------------------------------------------------------------------------------------------------------------------------------------------------------------------------------------------------------------------------------------------------------------------------------------------------------------------------|--------------------------------------------------------------------------------------------------------------------------------------------------------------------------------------------------------------------------------------------------------------------------------------------------------------------------------------------------------------------------------------------------------------------------------------------------------------------------------------------------------------|-----------------------------------------------------------------------------------------------------------------------------------------------------------------------------------------------------------------------------------------------------------------------------------------------------------------------------------------------------------------------------------------------------------------------------------------------------------------------------------------------------------------------------------------------------------------------------------------------------------------------------|-------------------------------------------------------------------------------------------------------------------------------------------------------------------------------------------|---------------------------------------------------------------------------------------------------------------------------------------------------------------------------------------------------------------------------------------------------------------------------------------------------------------------------------------------------------------------------------------------------------------------------------------------------------------------------------------------------------------------------------------------------------------|-------------------------------------------------------------------------------------------------------------------------------------------------------------------------------------------------------------------------------------------------------------------------------------------------------------------------------------------------------------------------------------------------------------------------------------------------------------------------------------------------------------------------------------------------------------------|--------------------------------------------------------------------------------------------------------------------------------------------------------------------------------------------------------------------------------------------------------------------------------------------------------------------------------------------------------------------------------------------------------------------------------------------------------------------------------------------------------------------------------------------------------------------------------|-----------------------------------------------------------------------------------------------------------------------------------------------------------------------------------------------------------------------------------------------------------------------------------------------------------------------------------------------------------------------------------------------------------------------------------------------------------------------------------------------------------------------------------------------------------------------------------|-------------------------------------------------------------------------------------------------------------------------------------------------------------------------------------------------------------------------------------------------------------------------------------------------------------------------------------------------------------------------------------------------------------------------------------------------------------------------------------------------------------------------------------------------------------------------------------------------------------------------|--------------------------------------------------------------------------------------------------------------------------------------------------------------------------------------------------------------------------------------------------------------------------------------------------------------------------------------------------------------------------------------------------------------------------------------------------------------------------------------------------------------------------------------------------------------------------------------------------------------------|-----------------------------------------------------------------------------------------------------------------------------------------------------------------------------------------------------------------------------------------------------------------------------------------------------------------------------------------------------------------------------------------------------------------------------------------------------------------------------------------------------------------------------------------------------------------------------------------------------------------------------------|--------------------------------------------------------------------------------------------------------------------------------------------------------------------------------------------------------------------------------------------------------------------------------------------------------------------------------------------------------------------------------------------------------------------------------------------------------------------------------------------------------------------------------------------------------------------------------------------------------------------------------------------------------------------------------------------------------------------------------------------------------------------------------------------------------------------------------------------------------------|----------------------------------------------------------------------------------------------------------------------------------------------------------------------------------------------------------------------------------------------------------------------------------------------------------------------------------------------------------------------------------------------------------------------------------------------------------------------------------------------------------------------------------------------------------------------------------------------------------------------------|----------------------------------------------------------------------------------------------------------------------------------------------------------------------------------------------------------------------------------------------------------------------------------------------------------------------------------------------------------------------------------------------------------------------------------------------------------------------------------------------------------------------------------------------------------------------------------------------------------------------------|----------------------------------------------------------------------------------------------------------------------------------------------------------------------------------------------------------------------------------------------------------------------------------------------------------------------------------------------------------------------------------------------------------------------------------------------------------------------------------------------------------------------------------------------------------------------------------------------------------------------------|----------------------------------------------------------------------------------------------------------------------------------------------------------------------------------------------------------------------------------------------------------------------------------------------------------------------------------------------------------------------------------------------------------------------------------------------------------------------------------------------------------------------------------------------------------------------------------------------------------------------------|----------------------------------------------------------------------------------------------------------------------------------------------------------------------------------------------------------------------------------------------------------------------------------------------------------------------------------------------------------------------------------------------------------------------------------------------------------------------------------------------------------------------------------------------------------------------------------------------------------------------------|----------------------------------------------------------------------------------------------------------------------------------------------------------------------------------------------------------------------------------------------------------------------------------------------------------------------------------------------------------------------------------------------------------------------------------------------------------------------------------------------------------------------------------------------------------------------------------------------------------------------------|----------------------------------------------------------------------------------------------------------------------------------------------------------------------------------------------------------------------------------------------------------------------------------------------------------------------------------------------------------------------------------------------------------------------------------------------------------------------------------------------------------------------------------------------------------------------------------------------------------------------------|----------------------------------------------------------------------------------------------------------------------------------------------------------------------------------------------------------------------------------------------------------------------------------------------------------------------------------------------------------------------------------------------------------------------------------------------------------------------------------------------------------------------------------------------------------------------------------------------------------------------------|----------------------------------------------------------------------------------------------------------------------------------------------------------------------------------------------------------------------------------------------------------------------------------------------------------------------------------------------------------------------------------------------------------------------------------------------------------------------------------------------------------------------------------------------------------------------------------------------------------------------------|----------------------------------------------------------------------------------------------------------------------------------------------------------------------------------------------------------------------------------------------------------------------------------------------------------------------------------------------------------------------------------------------------------------------------------------------------------------------------------------------------------------------------------------------------------------------------------------------------------------------------|-----------------------------------------------------------------------------------------------------------------------------------------------------------------------------------------------------------------------------------------------------------|

ENSG00000197322|NP\_997337.1 ENSG00000086696|HSD17B2 ENSG00000106692|FCMD ENSG00000106809|OGN ENSG00000116962|NID1 ENSG00000120594|PLXDC2 ENSG00000123560|PLP1 ENSG00000137752|CASP1  
ENSG00000143494|VASH2 ENSG00000153292|GPR110 ENSG00000156011|PDS3 ENSG00000170448|NFXL1 ENSG00000173480|ZNF417 ENSG00000175497|DPP10 ENSG00000177410|Q5QHF1\_HUMAN ENSG00000184863|PRR8  
GAATGTT ENSG00000196270|Q6ZWE7\_HUMAN ENSG00000198018|ENTPD7 ENSG00000204201|Q49A40\_HUMAN ENSG00000102962|CCL22 ENSG00000105428|ZNR44 ENSG00000105705|SF4  
ENSG00000057704|TMCC3 ENSG00000065882|TBC1D1 ENSG00000084652|TXLNA ENSG00000100167|SEPT3 ENSG00000100897|WDR23 ENSG00000102962|CCL22 ENSG00000105428|ZNR44 ENSG00000105705|SF4  
ENSG00000106852|LHX6 ENSG00000118894|FAM86A ENSG00000126432|PRDX5 ENSG00000128228|SDF2L1 ENSG00000144677|CTDSPL ENSG00000145819|ARHGAP26 ENSG00000146535|GNA12 ENSG00000154928|P54762-3  
ENSG00000158483|FAM86C ENSG00000160172|Q8IW37\_HUMAN ENSG00000160789|LMNA ENSG00000160844|NP\_849153.3 ENSG00000163050|CABC1 ENSG00000163612|XR\_017899.1 ENSG00000166007|LOC399940 ENSG00000171084|LOC645332  
ENSG00000173212|C1orf161 ENSG00000179914|ITLN1 ENSG00000180595|Q8N8C9\_HUMAN ENSG00000181773|GPR3 ENSG00000182040|USH1G ENSG00000189321|NR\_002940.1 ENSG00000198911|SREBF2 ENSG00000204455|XR\_015868.1  
ENSG00000206561|COLQ ENSG0000004700|RECQL ENSG00000062194|GPBP1 ENSG00000064218|DMRT3 ENSG00000073756|PTGS2 ENSG00000096264|NCR2 ENSG00000113649|TCERG1 ENSG00000114124|GRK7  
ENSG00000118276|B4GALT6 ENSG00000131969|ABHD12B ENSG00000135720|XNCL1L2 ENSG00000138735|PDE5A ENSG00000139209|SLC38A4 ENSG00000139746|RBM26 ENSG00000141141|DDX52 ENSG00000146469|VIP  
ENSG00000150712|MTMR12 ENSG00000152520|PAN3 ENSG00000159873|CCDC117 ENSG00000163463|KRTCAP2 ENSG00000171492|LRRC8D ENSG00000171766|GATM ENSG00000175426|PCSK1 ENSG00000178997|EXDL1  
ENSG00000183648|NDUFB1 ENSG00000185760|KCNQ5 ENSG00000187790|FANCM ENSG00000204952|FBX47\_HUMAN  
GAATTA hsa-miR-181d AACATTCattgttgcggtgggtt 0  
ENSG0000008128|CDC2L1 ENSG00000010310|GIPR ENSG00000062822|POLD1 ENSG00000077312|SNRPA ENSG00000103742|NP\_066013.1 ENSG00000106268|NUDT1 ENSG00000111252|SH2B3 ENSG00000122386|ZNF205  
ENSG00000124731|TREM1 ENSG00000125810|CD93 ENSG00000129450|SIGLEC9 ENSG00000130751|NPAS1 ENSG00000130985|UBE1 ENSG00000150201|FXDY4 ENSG00000160296|SIGLEC12 ENSG00000160803|UBQLN4  
ENSG00000160916|ATP5J2 ENSG00000162592|CCDC27 ENSG00000162735|PEX19 ENSG00000163820|FYCO1 ENSG00000169083|AR ENSG00000169575|VPREB1 ENSG00000182366|FA87B\_HUMAN ENSG00000183044|ABAT  
ENSG00000189037|DUSP2 ENSG00000197175|Q8TBR1\_HUMAN ENSG00000197182|NM\_207477 ENSG00000203747|FCGR3A ENSG00000204359|CFB ENSG000000017427|IGF1 ENSG00000078747|ITCH ENSG00000113595|TRIM23  
ENSG00000116752|BCAS2 ENSG00000117151|CTBS ENSG00000120280|CXorf21 ENSG00000120696|KBTBD7 ENSG00000125945|ZNF436 ENSG00000128617|OPN1SW ENSG00000130224|LRCH2 ENSG00000132356|PRKAA1  
ENSG00000134762|DSC3 ENSG00000134987|WDR33 ENSG00000135373|EHF ENSG00000136872|ALDOB ENSG00000137558|PI15 ENSG00000139160|NP\_776163.1 ENSG00000140988|RPS2 ENSG00000142871|CYR61  
ENSG00000143653|SCCPDH ENSG00000156234|CXCL13 ENSG00000161594|KHLH10 ENSG00000162664|ZNF326 ENSG00000163743|RCHY1 ENSG00000165694|FRMD7 ENSG00000165899|C12orf64 ENSG00000167785|ZNF558  
ENSG00000168387|ASB14 ENSG00000170759|KIF5B ENSG00000171147|NP\_001001317.1 ENSG00000175097|RAG2 ENSG00000177596|Q8NA50\_HUMAN ENSG00000183671|GPR1 ENSG00000189290|XR\_018254.1 ENSG00000196323|ZBTB44  
ENSG00000197149|XR\_019565.1 ENSG00000197453|NP\_001001706.1  
GAATTA ENSG00000074590|NUAK1 ENSG00000092820|VIL2 ENSG00000108861|DUSP3 ENSG00000124422|USP22 ENSG00000135773|CAPN9 ENSG00000141034|C17orf39 ENSG00000141504|SAT2 ENSG00000147168|IL2RG  
ENSG00000147576|ADHFE1 ENSG00000157045|NTAN1 ENSG00000167634|NLRP7 ENSG00000169026|MFSDF ENSG00000170054|SERPINA9 ENSG00000171346|KRT15 ENSG00000178828|RNF186 ENSG00000182177|ASB18  
ENSG00000183258|DDX41 ENSG00000184570|NP\_786883.1 ENSG00000186603|HPDL ENSG00000198089|SFI1 ENSG000000005812|FBXL3 ENSG00000038945|MSR1 ENSG00000066027|PPP2R5A  
ENSG00000102543|CDAC1 ENSG00000102781|KATNAL1 ENSG00000106648|GALNTL5 ENSG00000107758|PPP3CB ENSG00000111615|KRR1 ENSG00000112115|IL17A ENSG00000114054|PCCB ENSG00000119314|ROD1  
ENSG00000122482|ZNF644 ENSG00000132464|ENAM ENSG00000137504|CREBZF ENSG00000139496|NUPL1 ENSG00000151247|EIF4E ENSG00000156958|GALK2 ENSG00000159322|ADPGK ENSG00000163378|C3orf64  
ENSG00000164308|NP\_071745.1 ENSG00000164919|COX6C ENSG00000166006|KCN2 ENSG00000172752|NP\_694996.3 ENSG00000183513|NP\_001008216.1 ENSG00000185532|PRKG1 ENSG00000186376|ZNF75 ENSG00000186496|ZNF396  
ENSG00000189043|NDUFA4 ENSG00000189350|NP\_954974.2 ENSG00000197181|PIWIL2 ENSG00000205302|SNX2  
GAATTC ENSG00000004455|AK2 ENSG00000067082|KLF6 ENSG000001021145|GATA1 ENSG00000105997|HOXA3 ENSG00000108264|TADA2L ENSG00000115479|RBED1 ENSG00000118707|TGIF2 ENSG00000130207|APOC2  
ENSG00000130695|CCDC21 ENSG00000132002|DNAJB1 ENSG00000132716|WDR42A ENSG00000139182|CLSTN3 ENSG00000157693|C9orf91 ENSG00000158764|ITLN2 ENSG00000161847|RAVER1 ENSG00000163686|ABHD6  
ENSG00000163812|ZDHHC3 ENSG00000183044|ABAT ENSG00000185332|TMEM105 ENSG00000196844|C11orf38 ENSG00000205031|Q6XYE2\_HUMAN ENSG00000206193|Q5HYA3\_HUMAN ENSG00000006715|VPS41 ENSG00000043514|TRIT1  
ENSG00000108590|MED3 ENSG00000111554|MDM1 ENSG00000112365|ZBTB24 ENSG00000119820|YIPF4 ENSG00000122042|UBL3 ENSG00000122417|ODF2L ENSG00000129824|RPS4Y1 ENSG00000134046|MBD2  
ENSG00000138035|PNPT1 ENSG00000138138|ATAD1 ENSG00000144320|KIAA1715 ENSG00000146250|PRSS53 ENSG00000151458|ANKRD50 ENSG00000166415|WDR22 ENSG00000171055|FEZ2 ENSG00000172572|PDE3A  
ENSG00000186009|ATP4B ENSG00000186645|NP\_001027561.1 ENSG00000187257|RSBN1L ENSG00000197967|Q8U689\_HUMAN ENSG00000198523|PLN ENSG00000198633|Q6PDB4\_HUMAN ENSG00000198945|L3MBTL3 ENSG00000204466|DGKK  
GAATGA ENSG00000057935|MTA3 ENSG00000064300|NGFR ENSG00000083307|GRHL2 ENSG00000116685|KIAA2013 ENSG00000117020|AKT3 ENSG00000125266|EFNB2 ENSG00000125651|GTF2F1 ENSG00000135365|PHF21A  
ENSG00000135414|GDF11 ENSG00000139197|PEX5 ENSG00000141504|SAT2 ENSG00000143418|LASS2 ENSG00000146192|FGD2 ENSG00000148606|POLR3A ENSG00000149262|INTS4 ENSG00000156299|TIAM1  
ENSG00000158578|ALAS2 ENSG00000165644|COMTD1 ENSG00000174238|PITPNA ENSG00000178241|Q9P0D4\_HUMAN ENSG00000182953|NM\_001031.4 ENSG00000184110|EIF38 ENSG00000184935|Q6A101\_HUMAN ENSG00000188828|GLRA4  
ENSG00000196502|SULT1A1 ENSG00000198585|NUDT16 ENSG00000061656|SPAG4 ENSG00000078140|HIP2 ENSG00000104375|STK3 ENSG00000106153|CHCHD2 ENSG00000107560|RAB11FIP2 ENSG00000114279|FGF12  
ENSG00000115137|NP\_057628.1 ENSG00000119862|NP\_054900.1 ENSG00000125247|TMTC4 ENSG00000128609|NDUFA5 ENSG00000131013|PPI14 ENSG00000135698|MPHOSF6 ENSG00000135931|ARMC9 ENSG00000138346|DNA2L  
ENSG00000143457|GOLPH3L ENSG00000144642|REMS3 ENSG00000152193|C13orf7 ENSG00000152620|C5orf33 ENSG00000158473|CD1D ENSG00000166323|C11orf65 ENSG00000170185|USP38 ENSG00000172995|ARP21\_HUMAN  
ENSG00000175535|PNLIP ENSG00000177047|IFNWI1 ENSG00000180488|FAM73A ENSG00000180777|ANKRD30B ENSG00000186940|CHCHD9 ENSG00000204155|PARG ENSG00000205112|Q6UXR9\_HUMAN  
GACAAGC ENSG00000052066|PSL1\_HUMAN ENSG000000018625|ATP1A2 ENSG000000090863|GLG1 ENSG000000099385|BCL7C ENSG00000100031|GGT1 ENSG00000100121|GGTL4 ENSG00000117394|SLC2A1 ENSG00000122863|CHST3  
ENSG00000130201|EXOC3L2 ENSG00000133475|GGT2 ENSG00000134780|DAGLA ENSG00000135441|BLOC1S1 ENSG00000139445|FOXN4 ENSG00000141316|SPAC43 ENSG00000148358|GPR107 ENSG00000149435|GGTLA4  
ENSG00000149596|JPH2 ENSG00000157823|AP3S2 ENSG00000168268|NT5DC2 ENSG00000175221|THRAP5 ENSG00000177238|TRIM72 ENSG00000181599|Q8N985\_HUMAN ENSG00000183038|LOC728226 ENSG00000183103|LYPD4  
ENSG00000183117|CSMD1 ENSG00000183461|XAGE1C ENSG00000187186|CCL27 ENSG00000188822|CNR2 ENSG00000203930|Q5JPA2\_HUMAN ENSG00000204005|Q6ZP22\_HUMAN ENSG00000204375|XAGE1E ENSG00000204376|XAGE1D  
ENSG00000204379|XAGE1B ENSG00000204382|XAGE1 ENSG00000204820|Q9GN79\_HUMAN ENSG000000054267|ARID4B ENSG00000075884|ARHGAP15 ENSG00000101951|PAGE4 ENSG00000133193|FAM104A ENSG00000135960|EDAR  
ENSG00000138036|YANGC2L1 ENSG00000148513|ANKRD30A ENSG00000151726|ACS11 ENSG00000152443|SNF776 ENSG00000164989|C9orf93 ENSG00000165591|FAAH2 ENSG00000166471|TMEM41B  
ENSG00000168813|ZNF507 ENSG00000170627|FAM112B ENSG00000171402|XAGE3 ENSG00000172031|ABHD7 ENSG00000175336|APOF ENSG00000197747|S100A10 ENSG00000197926|Q8NAI6\_HUMAN ENSG00000204279|PAGE3  
GACAATA ENSG0000002726|ABP1 ENSG00000010327|STAB1 ENSG00000069812|HES2 ENSG00000087250|MT3 ENSG00000095981|KCNK16 ENSG00000100441|KIAA0323 ENSG00000101200|AVP ENSG00000105329|TGFB1  
ENSG00000105549|THEG ENSG00000108264|TADA2L ENSG00000109758|HGFA2 ENSG00000110328|GALNTL4 ENSG00000111678|C12orf57 ENSG00000112062|MAPK14 ENSG00000114982|NP\_060461.3 ENSG00000125970|RALY  
ENSG00000129437|KLK14 ENSG00000129862|VCY ENSG00000129864|VCY1B ENSG00000137100|DCTN3 ENSG00000144500|ARMT2 ENSG00000159495|TGM7 ENSG00000159720|ATP6V0D1 ENSG00000160695|VPS11  
ENSG00000161956|SNP3 ENSG00000163067|ZNF2 ENSG00000165131|C7orf34 ENSG00000167792|NDUFV1 ENSG00000168070|NP\_001032302.1 ENSG00000171722|C1orf111 ENSG00000172500|FIBP ENSG00000177553|C1orf167  
ENSG00000178226|PRSS36 ENSG00000182742|HOXB4 ENSG00000184281|TSSC4 ENSG00000185614|C3orf54 ENSG00000186831|KRT17 ENSG00000187609|NP\_060290.3 ENSG00000196139|AKR1C3 ENSG00000197364|S100A7L2  
ENSG00000198471|RTP2 ENSG00000205307|Q8TEE9\_HUMAN ENSG00000005020|SKAP2 ENSG00000078795|PKD2L2 ENSG00000081923|ATP8B1 ENSG00000099721|AMELY ENSG00000102391|RPL36A  
ENSG00000118271|TTR ENSG00000125363|AMELX ENSG00000137098|SPAG8 ENSG00000137872|SEMA6D ENSG00000139160|NP\_776163.1 ENSG00000139343|SNRPF ENSG00000141434|MEP1B ENSG00000143401|ANP32E  
ENSG00000144766|ARL6IP5 ENSG00000163608|C3orf17 ENSG00000169688|MT1B ENSG00000169715|MT1JP ENSG00000172673|C6orf190 ENSG00000172901|LAEVR\_HUMAN ENSG00000178202|KDELC2 ENSG00000179933|C14orf119  
ENSG00000181092|ADIPQO ENSG00000196406|SPANXE ENSG00000198380|GFPT1 ENSG00000204990|NP\_001008742.1 ENSG00000205364|MT1M  
GACAATC ENSG00000051009|C11orf56 ENSG00000070610|GBA2 ENSG00000108961|NP\_057576.2 ENSG00000115661|STK16 ENSG00000116604|MEF2D ENSG00000129744|ART1 ENSG00000132024|CC2D1A ENSG00000133511|PIK4CA  
ENSG00000139405|C12orf52 ENSG00000142606|MMEL1 ENSG00000142611|PRDM16 ENSG00000161031|PGLYRP2 ENSG00000165025|SYK ENSG00000165948|FAM14B ENSG00000173457|PPP1R14B ENSG00000178776|NP\_996849.2  
ENSG00000181817|PIB5PA ENSG00000185133|PIB5PA ENSG00000186281|NP\_997211.2 ENSG00000187095|LILRA2 ENSG00000197077|Q5TH25\_HUMAN ENSG00000197283|SYNGAP1 ENSG0000011114|BTBD7 ENSG00000067177|PHKA1  
ENSG00000100815|TRIP11 ENSG00000113810|SMC4 ENSG00000116690|PRG4 ENSG00000118496|FBXO30 ENSG00000124098|C20orf108 ENSG00000135535|CD164 ENSG00000138600|PSL2\_HUMAN ENSG00000151090|THRB  
ENSG00000154451|GBP5 ENSG00000163788|SNRK ENSG00000172717|C14orf54 ENSG00000173930|SLCO4C1 ENSG00000179387|ELMOD2 ENSG00000179456|ZNF238 ENSG00000180881|CAPS2 ENSG00000184530|C6orf58  
ENSG00000184895|SRY ENSG00000187073|Q86TS2\_HUMAN  
perfect: GACAATC GATTGTC hsa-miR-219 gTATTGTCcaaacgcaattct 1  
GACAATG ENSG0000013725|CD6 ENSG00000101290|CDS2 ENSG00000102265|TIMP1 ENSG00000103365|GGA2 ENSG00000104823|ECH1 ENSG00000116586|MAP1P\_HUMAN ENSG00000125810|CD93 ENSG00000133026|MYH10  
ENSG00000133985|TTC9 ENSG00000134668|SPOCD1 ENSG00000136490|LIMD2 ENSG00000143374|TARS2 ENSG00000151117|TMEM86A ENSG00000162367|TAL1 ENSG00000167105|TMEM92 ENSG00000167941|SOST  
ENSG00000170638|TRABD ENSG00000173335|CST9 ENSG00000174804|FZD4 ENSG00000176515|Q8NAX6\_HUMAN ENSG00000180139|Q8N9Z5\_HUMAN ENSG00000183018|SPNS2 ENSG00000184785|Q96HG1\_HUMAN ENSG00000187095|LILRA2  
ENSG00000197296|C20orf142 ENSG00000198917|C9orf114 ENSG000000083937|CHMP2B ENSG00000104723|TUSC3 ENSG00000112486|CCR6 ENSG00000124172|ATP5E ENSG00000132196|HSD17B7 ENSG00000137976|DNASE2B  
ENSG00000139910|NOVA1 ENSG00000140937|CDH11 ENSG00000162769|FLVCL1\_HUMAN ENSG00000163285|GABRG1 ENSG00000164175|SLC45A2 ENSG00000168685|IL7R ENSG00000169224|C1orf150 ENSG00000171365|CLCN5  
ENSG00000172465|TCEAL1 ENSG00000178457|C21orf94 ENSG00000180389|NR\_002162.1 ENSG00000184752|NDUFA12 ENSG00000196458|ZNF605 ENSG00000196605|Q08AG5\_HUMAN ENSG00000203964|Q8NG36\_HUMAN ENSG00000204262|COL5A2  
GACACAT ENSG00000054116|TRAPPC3 ENSG00000110244|APOA4 ENSG00000112164|GLP1R ENSG00000114388|TUSC4 ENSG00000143365|RORC ENSG00000143450|OAZ3 ENSG00000143845|ETNK2 ENSG00000149600|COMMD7  
ENSG00000157483|MYO1E ENSG00000160256|C21orf70 ENSG00000161132|Q9BYA7\_HUMAN ENSG00000168026|TTC21A ENSG00000169181|GSG1L ENSG00000171533|MAPE6 ENSG00000180509|KCNE1 ENSG00000186198|NP\_849190.1  
ENSG00000187715|KLHDC6 ENSG00000204305|AGER ENSG00000004779|NDUFAB1 ENSG00000046604|DSG2 ENSG00000065559|MAP2K4 ENSG00000085719|CPNE3 ENSG00000118454|ANKRD13C ENSG00000153820|NP\_085126.1  
ENSG00000162755|NP\_689579.3 ENSG00000164919|COX6C ENSG00000165023|DIRAS2 ENSG00000165443|PHYHIP1L ENSG00000172006|ZNF554 ENSG00000173406|DAB1 ENSG00000197412|Q8N8G3\_HUMAN ENSG00000198221|NP\_001035973.1  
GACACCT ENSG000000011454|RABGAP1 ENSG000000666117|SMARCD1 ENSG00000070886|EPA8 ENSG00000100010|MTF18\_HUMAN ENSG00000104969|SGTA ENSG00000107554|DNMBP ENSG00000115598|IL1RL2 ENSG00000122733|KIAA1045  
ENSG00000136488|CSH2 ENSG00000141013|GAS8 ENSG00000141720|PIP5K2B ENSG00000155858|LSML1 ENSG00000160716|CHRNB2 ENSG00000161618|ALDH16A1 ENSG00000163499|CRYBA2 ENSG00000169877|ERAF  
ENSG00000170310|STX8 ENSG00000173638|SLC19A1 ENSG00000175093|SPSB4 ENSG00000176953|NFATC2IP ENSG00000181085|MAPK15 ENSG00000181638|GLI4 ENSG00000181781|C19orf19 ENSG00000182325|FBXL6  
ENSG00000183484|GPR132 ENSG00000183914|DNAH2 ENSG00000189203|TMEM179 ENSG00000196557|CACNA1H ENSG00000195568|RGPD7 ENSG00000072364|AFF4 ENSG00000088766|CRLS1 ENSG00000101327|PDYN  
ENSG00000114279|FGF12 ENSG00000126453|PRR1 ENSG00000130962|LUSC1 ENSG00000131864|USP29 ENSG00000132170|PPARG ENSG00000134594|RAB33A ENSG00000135968|GCC2  
ENSG00000151575|TEX9 ENSG00000154721|JAM2 ENSG00000160588|U2966\_HUMAN ENSG00000166363|OR10A5 ENSG00000166984|TCP10L ENSG00000169629|RGPD8 ENSG00000171714|TMEM16E ENSG00000178125|NP\_001013648.1  
GACACTC ENSG0000011454|RABGAP1 ENSG00000064490|RFXANK ENSG00000124570|SERPINB6 ENSG00000136930|PSMB7 ENSG00000136931|NR5A1 ENSG00000147804|SLC39A4 ENSG00000162576|MXRA8 ENSG00000163499|CRYBA2  
ENSG00000164318|EGFLAM ENSG00000167775|CD320 ENSG00000170689|HOXB9 ENSG00000171368|P25A\_HUMAN ENSG00000174516|PELI3 ENSG00000175093|SPSB4 ENSG00000176261|ZBTB80S ENSG00000177384|Q9NT46\_HUMAN  
ENSG00000188888|FRK179 ENSG00000203888|BCL2L1\_HUMAN ENSG00000204312|Q6ZNY8\_HUMAN ENSG00000206152|Q6ZV52\_HUMAN ENSG00000206205|VIM ENSG00000208116|VRK2 ENSG00000099251|HSD17B7P2  
ENSG00000104613|INTS10 ENSG00000105483|CARD8 ENSG00000109911|ELP4 ENSG00000115386|REGL ENSG00000116183|PAPPA2 ENSG00000118492|C6orf103 ENSG00000125814|NABP ENSG00000127366|TAS2R5  
ENSG00000132196|HSD17B7 ENSG00000136110|LECT1 ENSG00000140379|BCL2L1 ENSG00000144218|AFF3 ENSG00000144962|SPATA16 ENSG00000145850|TIMD4 ENSG00000147526|TACC1 ENSG00000147883|CDKN2B  
ENSG00000162390|ACOT11 ENSG00000166411|DH3A ENSG00000167346|IMMP2E ENSG00000180182|CRSP2 ENSG00000180316|PNPLA1 ENSG00000183385|TTY8\_HUMAN ENSG00000185700|TTY8\_HUMAN ENSG00000196655|TRAPPC4

ENSG00000196812|ZSCAN16 ENSG00000198815|FOXJ3  
GACAGAC ENSG00000005206|PSL1\_HUMAN ENSG000000012171|SEMA3B ENSG000000023902|PLEKHO1 ENSG00000072135|PTPN18 ENSG00000092847|EIF2C1 ENSG000000108515|ENO3 ENSG000000134780|DAGLA ENSG000000154016|GRAP  
ENSG00000161798|AQP5 ENSG00000163431|LMOD1 ENSG00000167994|RAB3IL1 ENSG00000168818|STX18 ENSG00000170231|FABP6 ENSG00000173641|HSPB7 ENSG00000174171|Q8TCB4\_HUMAN ENSG00000176884|GRIN1  
ENSG00000184117|NTPSNAP1 ENSG00000187147|C1orf164 ENSG00000198291|Q6ZTP9\_HUMAN ENSG00000204579|A2RUR5\_HUMAN ENSG00000073910|FRY ENSG00000085365|SCAMP1 ENSG00000101126|ADNP ENSG00000105483|CARD8  
ENSG00000113356|POLR3G ENSG00000117281|CD160 ENSG00000123416|TUBA1B ENSG00000131730|CKMT2 ENSG00000137038|C9orf123 ENSG00000145879|SPINK7 ENSG00000152520|PAN3 ENSG00000152601|MBNL1  
ENSG00000154975|CA10 ENSG00000162437|RAVER2 ENSG00000166575|TMEM135 ENSG00000168646|AXIN2 ENSG00000169016|E2F6 ENSG00000171772|SYCE1 ENSG00000196284|SUPT3H ENSG00000198218|QRICH1  
ENSG00000204189|Q587T5\_HUMAN  
GACAGGA ENSG000000052344|PRSS8 ENSG000000072163|LIMS2 ENSG000000099999|RNF215 ENSG00000122783|C7orf49 ENSG00000128482|ZNF179 ENSG00000130427|EPO ENSG00000134882|UBAC2 ENSG00000136697|IL1F10  
ENSG00000156858|PRR14 ENSG00000158483|FAM86C ENSG00000165125|TRPV6 ENSG00000168748|CA7 ENSG00000182372|C8orf61 ENSG00000183597|C22orf25 ENSG00000185615|PDIA2 ENSG00000186866|POFUT2  
ENSG00000188385|C10orf39 ENSG00000196588|MKL1\_HUMAN ENSG0000000203811|HIST2H3A ENSG00000203813|HIST2H3C ENSG00000204094|Q6ZU93\_HUMAN ENSG00000205659|LIN52 ENSG00000204048|UBR2 ENSG00000064012|CASP8  
ENSG00000090269|CLEC5A ENSG00000101126|ADNP ENSG00000108590|MED31 ENSG00000121335|PRB4 ENSG00000136478|TEX2 ENSG00000160588|U2966\_HUMAN ENSG00000163617|KIAA1407  
ENSG00000164687|FABP5 ENSG00000165682|CLEC1B ENSG00000165959|CLMN ENSG00000166415|WDR72 ENSG00000170325|PRDM10 ENSG00000177613|CSTF2T ENSG00000188501|LCTL ENSG00000189376|C8orf76  
ENSG00000197312|RSC1A1  
GACAGTA ENSG000000068654|POLR1A ENSG000000095713|CRTAC1 ENSG00000100335|SMCR7L ENSG00000106070|GRB10 ENSG00000110245|APOC3 ENSG00000110395|CBL ENSG00000123643|SLC36A1 ENSG00000130751|NPAS1  
ENSG00000132681|ATP1A4 ENSG00000132824|SERINC3 ENSG00000133937|GSC ENSG00000134247|PTGFRN ENSG00000143127|ITGA10 ENSG00000163515|RETNLB ENSG00000167112|TRUB2 ENSG00000175193|PARL  
ENSG00000180219|FAM71C ENSG00000184108|TRIML1 ENSG00000186163|Q4G0S1\_HUMAN ENSG00000186190|C20orf185 ENSG00000196092|PAX5 ENSG0000000059804|GTR3\_HUMAN ENSG00000067048|DDX3X  
ENSG00000117595|IRF6 ENSG00000118200|CAMSAP1L1 ENSG00000121022|COPF5 ENSG00000123572|NRK ENSG00000124333|SYBL1 ENSG00000128578|FAM40B ENSG00000134343|TMEM16C ENSG00000151806|GUF1  
ENSG00000153814|JAZF1 ENSG00000161714|PLCD3 ENSG00000163606|CD200R1 ENSG00000165028|NIPSNAP3B ENSG00000166986|MARS ENSG00000173262|SLC2A3 ENSG00000178695|KCTD12 ENSG00000197343|ZNF655  
GACATCC ENSG00000043143|PHF15 ENSG000000055957|ITI1H1 ENSG00000070915|SLC12A3 ENSG00000087077|TRIP6 ENSG00000103042|NP\_060701.1 ENSG00000105609|LILRB5 ENSG00000109625|CPZ ENSG00000130208|APOC1  
ENSG00000131459|GFPT2 ENSG00000144120|TMEM177 ENSG00000162493|PDPN ENSG00000169314|C22orf15 ENSG00000172824|Q6P2E5\_HUMAN ENSG00000178589|Q9BT26\_HUMAN ENSG00000178922|HYI ENSG00000178927|C17orf62  
ENSG00000183955|SESTD8 ENSG00000187607|ZNF286A ENSG00000197150|AECB8 ENSG00000204332|Q6ZU25\_HUMAN ENSG00000205155|PSENNEN ENSG00000081189|MEF2C ENSG00000089053|ANAPC5  
ENSG00000104213|PDGFRL ENSG00000118308|LRMP ENSG00000124177|CHD6 ENSG00000134121|CHL1 ENSG00000134545|KLRCL1 ENSG00000164823|OSGIN2 ENSG00000175018|C10orf122 ENSG00000175324|LSM1  
ENSG00000186615|Q86SY8\_HUMAN ENSG00000197712|FAM114A1 ENSG00000205809|KLRCL2  
GACATTA ENSG000000081248|CACNA1S ENSG00000100445|C14orf124 ENSG00000104889|RNASEH2A ENSG00000105383|CD33 ENSG00000107185|KIAA0258 ENSG00000107593|PKD2L1 ENSG00000113303|BTNL8 ENSG00000115718|PROC  
ENSG00000124541|C6orf153 ENSG00000126756|UXT ENSG00000130748|TMEM140 ENSG00000144233|AMMECR1L ENSG00000146859|TMEM140 ENSG00000161277|THAP8 ENSG00000162779|C1orf125 ENSG00000165671|NSD1  
ENSG00000167272|PO5 ENSG00000178248|QBN402\_HUMAN ENSG00000178449|C12orf62 ENSG00000182667|NTRI\_HUMAN ENSG00000182950|ODF3L1 ENSG00000197114|ZGAP2 ENSG00000197249|SERPINA1  
ENSG00000198483|ANKRD35 ENSG00000198715|C1orf85 ENSG00000203871|C6orf164 ENSG00000042088|TDP1 ENSG00000078579|FGF20 ENSG00000110841|PFFIBP1 ENSG00000112146|FBXO9 ENSG00000112299|VNN1  
ENSG00000129521|EGLN3 ENSG00000135045|C9orf40 ENSG00000143815|LBR ENSG00000145623|OSMR ENSG00000152433|ZNF547 ENSG00000154122|ANKH ENSG00000160336|ZNF761 ENSG00000166148|AVPR1A  
ENSG00000167863|ATP5H ENSG00000174900|CA5A ENSG00000180667|YOD1 ENSG00000182141|ZNF708 ENSG00000183098|GPC6 ENSG00000196632|WNK3 ENSG00000197716|Q9UHV1\_HUMAN  
ENSG00000198169|ZNF251 ENSG00000198538|ZNF28 ENSG00000205252|Q4G0M6\_HUMAN ENSG00000205413|SAMD9  
GACATTT ENSG000000070759|TESK2 ENSG000000077942|FBLN1 ENSG000000085063|CD59 ENSG00000101361|NOL5A ENSG00000107562|CXCL12 ENSG00000110786|PTPN5 ENSG00000113272|THG1L  
ENSG00000139112|GABARAPL1 ENSG00000139514|SLC7A1 ENSG00000143375|CGN ENSG00000143878|RHOB ENSG00000156599|ZDHHC5 ENSG00000159263|SIM2 ENSG00000163219|ARHGAP25 ENSG00000166402|TUB  
ENSG00000167858|TEKT1 ENSG00000168824|NSG1\_HUMAN ENSG00000169247|SH3TC2 ENSG00000174804|FZD4 ENSG00000175699|C14orf48 ENSG00000183019|C19orf59 ENSG00000183929|DUSP5P ENSG00000187531|SIRT7  
ENSG00000204013|Q6XYD6\_HUMAN ENSG00000002016|RAD52 ENSG000000040731|CDH10 ENSG000000067533|RRP15 ENSG000000069956|MAPK6 ENSG00000070269|C14orf101 ENSG00000080493|SLC4A4 ENSG00000096087|GSTA2  
ENSG00000104343|UBE2W ENSG00000118946|PCDH17 ENSG00000120129|DUSP1 ENSG00000120156|TEK ENSG00000122218|COPA ENSG00000122548|K0087\_HUMAN ENSG00000126950|TMEM35 ENSG00000131979|GCH1  
ENSG00000134970|TICAM2 ENSG00000135900|MRPL44 ENSG00000138758|SEPT11 ENSG00000157450|RNF111 ENSG00000162702|ZNF281 ENSG00000165972|CCDC38 ENSG00000171862|PTENP1 ENSG00000176728|CY014\_HUMAN  
ENSG00000187601|MAGEH1 ENSG00000187919|GSTA1 ENSG00000189136|NM\_207382 ENSG00000196447|XR\_017870.1 ENSG00000196562|SULF2 ENSG00000197579|TOPORS  
ENSG00000006194|ZNF263 ENSG000000011304|PTBP1 ENSG000000013563|DNAHEL1L1 ENSG000000090316|MAEA ENSG00000101489|BRUNOL4 ENSG00000105383|CD33 ENSG00000120889|TNFRSF10B ENSG00000121104|FAM117A  
ENSG00000130164|LDLR ENSG00000131389|SLC6A6 ENSG00000142546|NOSIP ENSG00000143257|NR1I3 ENSG00000144688|CCBP2 ENSG00000145214|DGKQ ENSG00000147065|MSN  
ENSG00000157570|TSPAN18 ENSG00000157978|LDLRAP1 ENSG00000162426|SLC45A1 ENSG00000170271|C5orf4 ENSG00000181867|FTMT ENSG00000184260|HIST2H2AC ENSG00000186910|SERPINA1 ENSG00000187975|NP\_001003682.1  
ENSG00000196220|SRGAP3 ENSG00000204240|Q6ZVK0\_HUMAN ENSG0000000205730|NP\_001030013.1 ENSG00000008197|TFAP2D ENSG000000070269|C14orf101 ENSG00000107036|KIAA1432 ENSG00000109061|MYH1 ENSG00000110696|C11orf58  
ENSG00000124120|C20orf121 ENSG00000124831|LRRFIP1 ENSG00000134548|C12orf39 ENSG00000136709|WDR33 ENSG00000137965|IFI44 ENSG00000138829|FBN2 ENSG00000141048|MYH4 ENSG00000141668|CBLN2  
ENSG00000144909|OSBP1L1 ENSG00000158290|CUL4B ENSG00000160201|U2AF1 ENSG00000163606|CD200R1 ENSG00000163918|RFC4 ENSG00000165186|PTCHD1 ENSG00000166147|FBN1 ENSG00000171517|EDG7  
ENSG00000171806|C1orf156 ENSG00000171843|MLLT3 ENSG00000178184|PARD6G ENSG00000183542|KLRCL4 ENSG00000196812|ZSCAN16 ENSG00000205150|FAM92A3  
GACCAAT ENSG00000005884|ITGA3 ENSG000000063978|RNF4 ENSG000000084207|GSTP1 ENSG00000108084|CPNE6 ENSG00000108602|ALDH3A1 ENSG00000124157|SEM2 ENSG00000124233|SEMG1 ENSG00000125734|NM\_001080452.1  
ENSG00000130173|NP\_061157.2 ENSG00000134287|ARF3 ENSG0000000141052|MYOCD ENSG00000141337|ARSG ENSG00000141560|KT3K\_HUMAN ENSG00000143575|HAX1 ENSG00000157350|ST3GAL2 ENSG00000159685|CHCHD6  
ENSG00000160838|C1orf92 ENSG00000166446|CDYL2 ENSG00000166794|PP1B ENSG000001697117|ACTRT2 ENSG00000170458|CD14 ENSG00000170525|PKFEB3 ENSG00000171724|K1576\_HUMAN ENSG00000176515|Q8NAX6\_HUMAN  
ENSG00000181625|GIYD2 ENSG00000183838|Q96NM2\_HUMAN ENSG00000187166|HIFNT ENSG00000197540|GZMM ENSG00000212131|PDXP ENSG00000105976|MET ENSG00000106484|MEST ENSG00000109083|IFT20  
ENSG00000113387|SUB1 ENSG00000114573|ATP6V1A ENSG00000131002|Cvorf15B ENSG00000132207|SULF1A3 ENSG00000132964|CDR8 ENSG00000135018|UBQLN1 ENSG00000142875|PRKACB ENSG00000143368|SF3B4  
ENSG00000154822|PLCL2 ENSG00000163568|AIM2 ENSG00000164512|ANKRD55 ENSG00000167193|CRK ENSG00000174156|GSTA3 ENSG00000175198|PCCA1 ENSG00000182793|GSTA5  
ENSG00000188477|Q6UXS0\_HUMAN ENSG00000203932|LOC728660 ENSG00000205036|NP\_001001682.1  
GACCACT ENSG00000010327|STAB1 ENSG000000088899|K0552\_HUMAN ENSG00000100056|DGCR14 ENSG00000105429|MEGF8 ENSG00000105501|SIGLEC5 ENSG00000108018|SORCS1 ENSG00000124104|SNX21  
ENSG00000135622|SEMA4F ENSG00000154928|P54762-3 ENSG00000157613|CREB3L1 ENSG00000157870|C1orf93 ENSG00000158220|FAM62C ENSG00000160271|RALGDS ENSG00000162734|PEA15 ENSG00000162763|LRRCS2  
ENSG00000164605|QST810\_HUMAN ENSG00000169241|RAG1AP1 ENSG00000182953|NM\_001031.4 ENSG00000187638|NM\_207367 ENSG00000187664|TM6SF2 ENSG00000104325|DECR1 ENSG00000106692|FCMD ENSG00000111300|C12orf30  
ENSG00000122707|RECK ENSG00000135720|DYNCL1L2 ENSG00000138755|CXCL9 ENSG000001051466|SCLT1 ENSG00000151883|PARP8 ENSG00000152818|UTRN ENSG00000162971|NP\_001034782.1 ENSG00000164100|NDST3  
ENSG00000165732|DDX21 ENSG00000171530|TBCA ENSG00000178386|ZNF223 ENSG00000184344|GDF3 ENSG00000196628|TCF4 ENSG00000198721|PECI ENSG00000206384|Q69YT0\_HUMAN  
GACCACT ENSG00000005100|DHX33 ENSG00000005206|PSL1\_HUMAN ENSG000000062282|DGAT2 ENSG000000099795|INDUFB7 ENSG00000100181|CSNK1E ENSG00000108828|VAT1 ENSG00000109917|ZNF259 ENSG00000117481|NSUN4  
ENSG00000125347|IRF1 ENSG00000125354|SEPT6 ENSG00000126391|NP\_114110.1 ENSG00000131143|COX4I1 ENSG00000131368|MRPS25 ENSG00000152292|SH2D6 ENSG00000156711|MAPK13 ENSG00000158805|ZNF276  
ENSG00000162426|SLC45A1 ENSG00000166025|AMOTL1 ENSG00000168026|TTC21A ENSG00000169877|ERAF ENSG00000171314|PGAM1 ENSG00000173218|VANGL1 ENSG00000173545|ZNF622 ENSG00000177992|C9orf79  
ENSG00000182912|C21orf90 ENSG00000197041|hCG\_2015269 ENSG0000000205864|KRTAP5-6 ENSG00000008988|RPS20 ENSG000000035928|RFC1 ENSG000000091039|OSBPL8 ENSG00000112695|COX7A2 ENSG00000117335|CD46  
ENSG00000123179|EBPL ENSG00000134590|FAM127A ENSG00000137462|TLR2 ENSG00000137766|UNC13C ENSG00000141946|ZIM3 ENSG00000143751|C1orf55 ENSG00000151422|FER ENSG00000152133|CCDC75  
ENSG00000157456|CNB2 ENSG00000163430|FSTL1 ENSG00000166226|CCT2 ENSG00000167377|ZNF23 ENSG00000172421|EFACB3 ENSG00000189367|C6orf174 ENSG00000196715|VKORC1L1  
GACCATC ENSG000000086544|ITPKC ENSG00000100450|GZMH ENSG00000101350|KIF3B ENSG00000103184|SEC14L5 ENSG00000104499|GMR ENSG00000115902|SLC1A4 ENSG00000125999|C20orf114  
ENSG00000127743|IL17B ENSG00000130147|SH3BP4 ENSG00000133661|SFTPD ENSG00000144355|DLX1 ENSG00000148660|CAMK2G ENSG00000161677|JOSD2 ENSG00000167094|TTC16 ENSG00000171812|COL8A2  
ENSG00000180205|WFDX9 ENSG00000182575|NXPH3 ENSG00000187116|LILRA5 ENSG00000196372|ASB13 ENSG000000088053|GP6 ENSG00000100532|CGRRF1 ENSG00000107789|MINPP1 ENSG00000115386|REGL  
ENSG0000018322|ATP10B ENSG00000130935|NOL11 ENSG00000135686|C16orf44 ENSG00000146674|IGFBP3 ENSG00000147601|TERF1 ENSG00000164609|SLU7 ENSG00000166452|C11orf17  
ENSG00000169740|ZNF32 ENSG00000169836|TACR3 ENSG00000172023|REG1B ENSG00000175676|GOLGA8F ENSG00000181904|C5orf24 ENSG00000185808|PIGF ENSG00000197299|BLM ENSG00000204427|BAT5\_HUMAN  
ENSG00000205252|Q4G0M6\_HUMAN  
GACCCCT ENSG00000004939|SLC4A1 ENSG00000103227|TMEM112 ENSG00000104826|LHB ENSG00000115677|HDLBP ENSG00000125740|FOSB ENSG00000127129|EDN2 ENSG00000127220|ABHD8 ENSG00000130950|FAM22F  
ENSG00000132591|ERAL1 ENSG00000139725|RHOF ENSG00000146540|NP\_115726.1 ENSG00000160408|ST6GALNAC6 ENSG00000160471|COX6B2 ENSG00000162174|ASRGL1 ENSG00000165376|CLDN2 ENSG00000166862|CACNG2  
ENSG00000171595|DNAI2 ENSG00000172789|HOXC5 ENSG00000172828|CE53 ENSG00000173638|SLC19A1 ENSG00000184274|C21orf93 ENSG00000187045|TMPRSS6 ENSG00000104863|LIN7B ENSG00000109911|ELP4  
ENSG00000113712|CSNK1A1 ENSG00000121851|POLR3GL ENSG00000121933|ADORA3 ENSG00000134215|VAV3 ENSG00000137265|IRF4 ENSG00000139146|FAM60A ENSG00000142698|C1orf94 ENSG00000147044|CASK  
ENSG00000151090|THRB ENSG00000154174|TOMM70A ENSG00000161040|FBXL13 ENSG00000165794|SLC39A2 ENSG00000170965|PLAC1 ENSG00000181562|FAM12A ENSG00000197299|BLM ENSG00000204258|HLA-DMB  
ENSG00000204427|BAT5\_HUMAN  
GACCCGG ENSG000000010626|LRRCC23 ENSG000000020577|SAMDA4 ENSG000000059915|PSD ENSG000000078808|SDF4 ENSG00000100599|RIN3 ENSG00000104957|CCDC130 ENSG00000107859|PITX3 ENSG00000112041|TULP1  
ENSG00000126522|CRCP\_HUMAN ENSG00000126705|AHDC1 ENSG00000137486|ARRB1 ENSG00000137825|ITPKA ENSG00000138835|RGS3 ENSG00000143867|OSR1 ENSG00000159674|SPON2 ENSG00000160932|LY6E  
ENSG00000161914|ZNF653 ENSG00000163295|ALP1 ENSG00000163472|TMEM79 ENSG00000163888|CAMK2N2 ENSG00000166862|CACNG2 ENSG00000167543|TP53113 ENSG00000167992|VWCE ENSG00000168439|STIP1  
ENSG00000173673|HES3 ENSG00000174166|Q9BTX9\_HUMAN ENSG00000177340|QVFX0\_HUMAN ENSG00000177398|UMODL1 ENSG00000181977|PYY2 ENSG00000183600|Q66K37\_HUMAN ENSG00000184113|CLDN5 ENSG00000184986|TMEM121  
ENSG00000196408|NOX01 ENSG00000203883|SOX18 ENSG00000206098|C4orf10 ENSG00000101384|JAG1 ENSG00000113391|C5orf21 ENSG00000122692|SMU1 ENSG00000125675|GRIA3 ENSG00000163684|RPP14  
ENSG00000179981|TSHZ1 ENSG00000180828|BHLHB5 ENSG00000185275|CD24 ENSG00000206131|Q6ZS21\_HUMAN  
GACCCGGC ENSG000000014164|ZC3H3 ENSG000000023191|RNH1 ENSG000000089820|ARHGAP4 ENSG00000100031|GGT1 ENSG00000104529|EEF1F ENSG00000106785|TRIM14 ENSG00000107140|TESK1 ENSG00000114923|SLC4A3  
ENSG00000124159|MATN4 ENSG00000125744|OPA3 ENSG00000129990|SYT5 ENSG00000132017|NP\_612362.2 ENSG00000135636|DYSF ENSG00000149823|C11orf2 ENSG00000157350|ST3GAL2  
ENSG00000160345|C9orf116 ENSG00000162004|CCDC78 ENSG00000164400|CSF2 ENSG00000169976|SF3B5 ENSG00000172578|KHLH6 ENSG00000173581|CCDC106 ENSG00000173599|PC ENSG00000186827|TNFRSF4  
ENSG00000203903|Q6ZMP7\_HUMAN ENSG00000204663|ACTN3 ENSG00000205560|CHKB ENSG00000007001|UPP2 ENSG00000101527|CDV3 ENSG00000101349|PAK7 ENSG00000101928|MOSPD1 ENSG00000102580|DNAJC3  
ENSG00000112294|ALDH5A1 ENSG00000120549|KIAA1217 ENSG00000124214|STAU1 ENSG00000129422|MTUS1 ENSG00000132825|PPP1R3D ENSG00000137478|FCHSD2 ENSG00000138614|C15orf44 ENSG00000140153|WDR20  
ENSG00000145358|DDIT4L ENSG00000150471|LPHN3 ENSG00000152133|CCDC75 ENSG00000160588|U2966\_HUMAN ENSG00000163161|ERCC3 ENSG00000163788|SNRK ENSG00000164619|BMPER ENSG00000168538|NP\_068761.4  
ENSG00000169435|RASSF6 ENSG00000170537|TMC7 ENSG00000184007|PTP4A2 ENSG00000185950|IRS2 ENSG00000186086|NBPF4  
GACCTAG ENSG000000057935|MTA3 ENSG000000073670|ADAM11 ENSG000000075290|WNT8B ENSG00000084734|GCKR ENSG00000085552|IGSF9 ENSG00000104490|NCALD ENSG00000115841|FAM82A ENSG00000118257|NRP2  
ENSG00000130687|ALKB6 ENSG00000141316|SPACA3 ENSG0000000149091|DGKZ ENSG00000149923|PPP4C ENSG00000164048|ZNF589 ENSG00000166484|MAPK7 ENSG00000166847|DCTN5 ENSG00000167654|ATCAY  
ENSG00000183691|NOG ENSG00000196218|RYR1 ENSG00000004948|CALCR ENSG00000099251|HSD17B7P2 ENSG00000112983|BRD8 ENSG00000113360|RNASEN ENSG00000115687|PASK ENSG00000133121|STAR1D3

ENSG00000137944|CCBL2 ENSG00000143622|RIT1 ENSG00000152242|C18orf25 ENSG00000158373|HIST2H2BA ENSG00000164822|DEFA6 ENSG00000166128|RAB8B ENSG00000166984|TCP10L ENSG00000176657|EPS15L2  
ENSG00000178074|NP\_710156.2 ENSG00000184515|NGFRAP1L1 ENSG00000185920|PTCH1 ENSG00000197585|Q5JV89\_HUMAN ENSG00000205195|Q6ZTB1\_HUMAN  
GACCTCA ENSG000001009|LYPLA2 ENSG0000011009|LYPLA2 ENSG0000011481|COPZ1 ENSG00000115844|DLX2 ENSG00000120049|KCNIP2 ENSG00000121653|MAPK8IP1 ENSG00000129862|VCY  
ENSG00000129864|VCY1B ENSG00000129968|FAM108A1 ENSG00000130517|PGPEP1 ENSG00000138166|DUSP5 ENSG00000152217|SETPB1 ENSG00000158555|GDDP5 ENSG00000159176|CSRFP1 ENSG00000159784|FAM131B  
ENSG00000161031|PGLYRP2 ENSG00000162391|C10orf179 ENSG00000163873|GRK13 ENSG00000166741|NMNMT ENSG00000168569|NP\_001073970.1 ENSG00000169194|IL13 ENSG00000169635|HTC2 ENSG00000171124|FUT3  
ENSG00000176782|DEFB104A ENSG00000177023|DEFB104B ENSG00000175504|VCX2 ENSG00000180914|OXTR ENSG00000187741|FANCA ENSG00000188368|NP\_954979.2 ENSG00000198658|NP\_001073891.1  
ENSG00000203835|FAM108A2 ENSG00000205566|Q8TB02\_HUMAN ENSG00000006704|GTF2IRD1 ENSG0000023330|ALAS1 ENSG00000070019|GUCY2C ENSG00000101557|USP14 ENSG00000119042|SATE2 ENSG00000119965|C10orf88  
ENSG00000127863|TNFRSF19 ENSG00000128585|MKLN1 ENSG00000135677|GNS ENSG00000136541|KIAA1189 ENSG00000136869|TLR4 ENSG00000138286|KIAA0974 ENSG00000140153|WDR20 ENSG00000147166|ITGB1BP2  
ENSG00000147684|NDUFB9 ENSG00000165512|ZNF22 ENSG00000166240|Q14DG7-2 ENSG00000168032|ENTPD3 ENSG00000169047|IRS1 ENSG00000171634|BPTF ENSG00000173302|GPR148 ENSG00000173614|NMNAT1  
ENSG00000180011|ZADH2 ENSG00000198734|F5 ENSG00000198793|FRAP1 ENSG00000204201|Q49A40\_HUMAN  
GACGCAA ENSG00000070371|CLTCL1 ENSG00000088367|EPB41L1 ENSG00000099769|IGFALS ENSG00000103811|CTSH ENSG00000105662|CRTCL1 ENSG00000119333|WDR34 ENSG00000125798|FOXA2  
ENSG00000136918|NP\_001038941.1 ENSG00000137198|GMPR ENSG00000141905|NFIC ENSG00000142684|ZNF593 ENSG00000149295|DRD2 ENSG00000157312|PDF ENSG00000162599|NFIA ENSG00000166002|C11orf75  
ENSG00000166446|CDYL2 ENSG00000170162|VGLL2 ENSG00000172216|CEBPB ENSG00000174166|Q9BTX9\_HUMAN ENSG00000176130|P2RY11 ENSG00000177337|NP\_001034885.1 ENSG00000187017|ESPN ENSG00000198411|NM\_207443  
ENSG00000203814|HIST2H2BF ENSG000000019549|SNAI2 ENSG000000023608|SNAPC1 ENSG000000053254|CHES1 ENSG00000070190|DAPP1 ENSG00000101190|TCFL5 ENSG00000112167|C6orf64 ENSG00000112379|KIAA1244  
ENSG00000115474|KCNJ13 ENSG00000115486|GDCX ENSG00000118507|AKAP7 ENSG00000121594|CD80 ENSG00000123500|COL10A1 ENSG00000131375|CAPN7 ENSG00000139117|CPNE8 ENSG00000141433|ADCYAP1  
ENSG00000155729|KCTD18 ENSG00000162441|LZIC ENSG00000163626|COX18 ENSG00000169045|HNRPH1 ENSG00000170903|KIAA1826 ENSG00000179774|ATOH7 ENSG00000180479|ZNF571 ENSG00000180730|TMEM46  
ENSG00000180882|XR\_017823.1 ENSG00000185787|MORF4L1 ENSG00000196628|TCF4 ENSG00000204155|PARG  
GACGCAT ENSG00000029534|ANK1 ENSG00000037637|FBXO42 ENSG00000090097|PCBP4 ENSG00000090238|YPEL3 ENSG00000100151|PICK1 ENSG00000123965|NP\_777590.1 ENSG00000130997|POLN ENSG00000135363|LMO2  
ENSG00000140067|C14orf152 ENSG00000147119|CHST7 ENSG00000154124|FAM105B ENSG00000158545|NP\_653205.2 ENSG00000160781|PAQR6 ENSG00000164493|C6orf122 ENSG00000165623|C10orf49 ENSG00000166869|CHP2\_HUMAN  
ENSG00000167994|RAB31L1 ENSG00000168209|DDIT4 ENSG00000171302|CANT1 ENSG00000182205|Q6ZUT0\_HUMAN ENSG00000185298|Q6PK04\_HUMAN ENSG00000185896|LAMP1 ENSG00000185966|LCE3E ENSG00000187033|SAMD7  
ENSG00000197173|NP\_001013689.1 ENSG00000198131|ZNF544 ENSG00000204661|LOC729569 ENSG00000015475|BID ENSG000000055813|CCDC85A ENSG00000161455|PRDM6 ENSG00000101825|MXRA5 ENSG00000114473|TQCC  
ENSG00000117791|MOSC2 ENSG00000135048|TMEM2 ENSG00000136141|LRCH1 ENSG00000136874|STX17 ENSG00000137871|SUHW4 ENSG00000144306|SCRN3 ENSG00000152779|SLC16A12 ENSG00000153495|C13orf16  
ENSG00000155636|DRBP1\_HUMAN ENSG00000159200|DSCR1 ENSG00000168542|COL3A1 ENSG00000171241|SHCBP1 ENSG00000177283|FZD8 ENSG00000182077|PTCHD3 ENSG00000186974|Q8N6X9\_HUMAN ENSG00000187498|COL4A1  
ENSG00000196683|TOMM7  
GACGCGA ENSG00000004660|CAMKK1 ENSG00000020129|NCDN ENSG00000075891|PAX2 ENSG00000087903|RFX2 ENSG00000106992|AK1 ENSG00000108511|HOXB6 ENSG00000125816|NKX2-4 ENSG00000127098|ANKRD19  
ENSG00000130513|GDF15 ENSG00000132003|ZSWIM4 ENSG00000149657|LSM14B ENSG00000164519|Q96M23\_HUMAN ENSG00000170909|NP\_573398.1 ENSG00000171540|OTF ENSG00000175470|PPP2R2D ENSG00000176615|LOC652153  
ENSG00000177875|NP\_001013657.2 ENSG00000177886|Q8N819\_HUMAN ENSG00000178786|Q8N2B6\_HUMAN ENSG00000182450|KCNK4 ENSG00000188338|SLC38A3 ENSG00000197723|HSPB9 ENSG00000204922|U655\_HUMAN ENSG00000205231|Q6ZQQ1\_HUMAN  
ENSG0000019549|SNAI2 ENSG00000089876|DHX32 ENSG00000143324|XPR1 ENSG00000149273|RPS3 ENSG00000154415|PPP1R3A ENSG00000163625|WDFY3 ENSG00000176635|HORMAD2  
ENSG00000013563|DNASE1L1 ENSG00000067182|TNFRSF1A ENSG00000071626|DAZAP1 ENSG00000073792|IGFBP2 ENSG00000079689|SCGN ENSG00000089558|KCNH4 ENSG00000093010|COMT ENSG00000119242|CCDC92  
ENSG00000135625|EGR4 ENSG00000135926|TMBIM1 ENSG00000145864|GNABR2 ENSG00000147144|CCDC120 ENSG00000149657|LSM14B ENSG00000158005|DUSP2 ENSG00000163464|IL8RA ENSG00000167487|KLHL26  
ENSG00000167634|NLRP7 ENSG00000167780|SOAT2 ENSG00000167987|VPS37C ENSG00000174576|NPAS4 ENSG00000176762|Q8N1N1\_HUMAN ENSG00000179028|NP\_001013709.1 ENSG00000179253|Q5VZ43\_HUMAN ENSG00000182776|NP\_001013709.1  
ENSG00000185386|MAPK11 ENSG00000187796|CARD9 ENSG00000189203|TMEM179 ENSG00000196187|TMEM63A ENSG00000202587|HS3ST1 ENSG000000081052|COL4A4 ENSG00000112031|MTRF1L  
ENSG00000126010|GRPR ENSG00000132603|NIP7 ENSG00000134108|ARL8B ENSG00000134313|NP\_065789.1 ENSG00000144406|Q96SS0\_HUMAN ENSG00000146463|ZMYM4 ENSG00000148110|HIATL1 ENSG00000148572|NRBF2  
ENSG00000148737|TCF7L2 ENSG00000152207|CYSLTR2 ENSG00000155876|RRAA ENSG00000155959|VBP1 ENSG00000156136|DCK ENSG00000167193|CRK ENSG00000169607|CKAP2L ENSG00000171208|NMETO2  
ENSG00000173681|C10orf23 ENSG00000179029|TMEM107 ENSG00000197359|C15orf34 ENSG00000197943|PLCG2  
GACGTCG ENSG0000017621|MAGIX ENSG00000069011|PITX1 ENSG00000080845|DLGAP4 ENSG00000100628|ASB2 ENSG00000124191|TOX2 ENSG00000125878|TCF15 ENSG00000130558|OLFML1 ENSG00000131668|BARX1  
ENSG00000133519|NP\_689722.1 ENSG00000134107|BHLHB2 ENSG00000142233|NP\_665806.1 ENSG00000158292|GPR153 ENSG00000164850|GPR30 ENSG00000165804|ZNF219 ENSG00000167522|ANKRD11 ENSG00000167693|NXN  
ENSG00000168993|NM\_006651.3 ENSG00000177370|TIMM22 ENSG00000179348|GATA2 ENSG00000181274|FRAT2 ENSG00000182289|Q9H9U3\_HUMAN ENSG00000184012|TMPRSS2 ENSG00000184516|Q8IVR1\_HUMAN ENSG00000187953|NR\_002217.1  
ENSG00000197406|DI03 ENSG00000205562|Q86U27\_HUMAN ENSG00000095794|CREM ENSG00000112406|HECA ENSG00000115170|ACVR1 ENSG00000122692|SMU1 ENSG00000131007|TTY9A ENSG00000131009|TTY9A\_HUMAN  
ENSG00000133627|ACTR3B ENSG00000140153|WDR20 ENSG00000146592|CREB5 ENSG00000148053|NTRK2 ENSG00000160131|NP\_001017980.1 ENSG00000179195|ZNF664 ENSG00000183943|PRKX ENSG00000186665|C17orf58  
ENSG00000188613|NANOS1 ENSG00000198719|DLL1  
GACGTTT ENSG00000005381|MPO ENSG00000101542|CDH20 ENSG00000103942|HOMER2 ENSG00000109111|SUPT6H ENSG00000116014|KISS1R ENSG00000121075|TBX4 ENSG00000130511|SSBP4 ENSG00000136457|CHAD  
ENSG00000149735|GPHA2 ENSG00000157312|PDF ENSG00000157881|PANK4 ENSG00000157916|RER1 ENSG00000160161|CILP2 ENSG00000163870|GPR175 ENSG00000169899|Q96MA9\_HUMAN ENSG00000173933|RBM4  
ENSG00000174292|TNK1 ENSG00000176605|C14orf177 ENSG00000176845|METRNL ENSG00000196220|SRGAP3 ENSG00000196892|Q9P1D2\_HUMAN ENSG00000198003|NP\_659482.3 ENSG00000204499|Q6P6C6\_HUMAN ENSG00000008277|ADAM22  
ENSG00000010017|RANBP9 ENSG00000027075|PRKCH ENSG00000030304|MUSK ENSG00000077809|GTF2I ENSG00000078579|FGF20 ENSG00000087303|NID2 ENSG00000100714|MTHFD1 ENSG00000104863|LIN7B  
ENSG00000106484|MEST ENSG00000113649|TCERG1 ENSG00000122482|ZNF644 ENSG00000125850|VOVL2 ENSG00000133740|E2F5 ENSG00000133983|SYNJ2BP ENSG00000137571|SLCO5A1 ENSG00000144827|ABHD10  
ENSG00000150753|CCT5 ENSG00000152154|TMEM178 ENSG00000152380|NP\_991111.1 ENSG00000157341|Q8ND77\_HUMAN ENSG00000162746|FCRLB ENSG00000164961|KIAA0196 ENSG00000169953|HSFY2 ENSG00000170085|C5orf25  
ENSG00000172468|HSFY1 ENSG00000180398|CMFD2 ENSG00000181588|RKHD1 ENSG00000182308|WDR21B ENSG00000185710|Q8ND77\_HUMAN ENSG00000198382|UVRAG ENSG00000198382|UVRAG  
GACGTTG ENSG00000074842|C19orf10 ENSG00000075240|NP\_055939.1 ENSG00000079337|RAPGEF3 ENSG00000103024|NME3 ENSG00000106331|PAX4 ENSG00000121274|PAPD5 ENSG00000125844|RRBP1 ENSG00000130222|GADD45G  
ENSG00000132017|NP\_612362.2 ENSG00000132517|GPR172B ENSG00000137842|TMEM62 ENSG00000161241|FBXO17 ENSG00000161981|C16orf33 ENSG00000166987|MBD6 ENSG00000168096|ANKS3 ENSG00000169180|XPO6  
ENSG00000170458|CD14 ENSG00000177030|DEAF1 ENSG00000187583|PLEKHN1 ENSG00000197530|MI2B ENSG00000205996|FAM90A10 ENSG00000205998|FAM90A9 ENSG00000206000|FAM90A18 ENSG00000206002|FAM90A3  
ENSG00000206005|FAM90A8 ENSG00000206008|XR\_015341.1 ENSG00000206023|FAM90A7 ENSG00000004897|CDC27 ENSG00000102070|STARD3NL ENSG00000115310|RTN4 ENSG00000134153|C15orf24 ENSG00000134910|STT3A  
ENSG00000135205|NP\_065930.2 ENSG00000136758|YME1L1 ENSG00000137055|PLAA ENSG00000138668|HNRPD ENSG00000141642|ELAC1 ENSG00000148925|BTBD10 ENSG00000156096|UGT2B4 ENSG00000163093|BBS5  
ENSG00000167699|GLOD4 ENSG00000168263|KCNV2 ENSG00000168672|FAM84B ENSG00000170323|FABP4 ENSG00000171560|FGA ENSG00000178996|SNAG1 ENSG00000179097|HTR1F ENSG00000184378|ARPM1\_HUMAN  
ENSG00000196611|MMP1 ENSG00000205144|Q6ZV43\_HUMAN  
GACTAAC ENSG00000079999|KEAP1 ENSG00000096080|MRPS18A ENSG00000100359|RUTBC3 ENSG00000100450|GZMH ENSG00000101442|ACTR5 ENSG00000107140|TESK1 ENSG00000113555|PCDH12 ENSG00000115657|ABCB6  
ENSG00000120087|HOXB7 ENSG00000133055|MYBPB ENSG00000133317|LGALS12 ENSG00000145936|KCNMB1 ENSG00000148362|C9orf142 ENSG00000155287|SLC25A28 ENSG00000157782|CABP1 ENSG00000161241|FBXO17  
ENSG00000161653|NAGS ENSG00000161921|CXCL16 ENSG00000163795|ZNF513 ENSG00000165424|C10orf56 ENSG00000171443|ZNF254 ENSG00000180900|SCRIB ENSG00000183666|LOC728411 ENSG00000185085|INTS5  
ENSG00000198237|GUSL1\_HUMAN ENSG00000108587|GOSR1 ENSG00000128383|APOBEC3A ENSG00000140836|ATBF1 ENSG00000147257|GPC3 ENSG00000150995|ITPR1 ENSG00000151422|FER ENSG00000161654|LSM12  
ENSG00000164221|CCDC112 ENSG00000170917|NUDT6 ENSG00000173302|GPR148 ENSG00000178301|AQP11 ENSG00000181562|FAM12A ENSG00000204116|CHIC1 ENSG00000204904|CXorf31 ENSG00000205056|CLLU1  
GACTACT ENSG00000095970|TREM2 ENSG00000099954|CECR2 ENSG00000117360|PRPF3 ENSG00000122188|LAX1 ENSG00000125815|CST8 ENSG00000132517|GPR172B ENSG00000137073|UBAP2 ENSG00000146904|EPHA1  
ENSG00000157303|SUSD3 ENSG00000159224|GIP ENSG00000160182|TFP1 ENSG00000161241|FBXO17 ENSG00000162897|FCAMR ENSG00000163017|ACTG2 ENSG00000165383|LRRC18 ENSG00000167774|NDUFA7  
ENSG00000168090|COPS6 ENSG00000171163|ZNF692 ENSG00000170554|CABP4 ENSG00000181789|COPG ENSG00000185436|IL28RA ENSG00000186190|C20orf185 ENSG00000205610|Q4G105\_HUMAN ENSG0000035499|DEPDC1B  
ENSG00000075239|ACAT1 ENSG00000079335|CDC14A ENSG00000080298|RFX3 ENSG00000100823|APEX1 ENSG00000102606|ARHGEF7 ENSG00000111300|C12orf30 ENSG00000118600|TMEM5 ENSG00000118816|CCNI  
ENSG00000120659|TNFSF11 ENSG00000124201|ZNFX1 ENSG00000126246|TMEM149 ENSG00000132141|CCT6B ENSG00000137414|FAM8A1 ENSG00000137766|UNC13C ENSG00000146243|IRAK1BP1 ENSG00000154447|SH3RF1  
ENSG00000154721|JAM2 ENSG00000163738|MTHFD2L ENSG00000164100|NDS1 ENSG00000165660|KIAA0157 ENSG00000170385|SLC30A1 ENSG00000171234|UGT2B7 ENSG00000175535|PNLIP ENSG00000177575|CD163  
ENSG00000180336|NP\_001028831.1 ENSG00000185658|BRWD1 ENSG0000000185664|SILV ENSG00000186908|ZDHHC17 ENSG00000188761|C1orf178  
GACTAGT ENSG00000064655|EYA2 ENSG00000101493|ZNF516 ENSG00000103275|UBE2I ENSG00000106638|TBL2 ENSG00000115194|SLC30A3 ENSG00000130175|PRKCSH ENSG00000130311|C19orf58  
ENSG00000140992|PDPK1 ENSG00000143553|SNAPAP ENSG00000152049|KCNK4 ENSG00000160051|IQCC ENSG00000164318|EGFLAM ENSG00000167194|Q96LL3\_HUMAN ENSG00000168329|CX3CR1 ENSG00000170439|METTL7B  
ENSG00000171307|ZDHHC16 ENSG00000175718|CXorf55 ENSG00000175793|SFN ENSG00000177971|IMP3 ENSG00000196388|NP\_998891.1 ENSG00000197174|O14606\_HUMAN ENSG00000197285|NR\_001536.1 ENSG00000198049|AVPR1B  
ENSG00000205420|KRT6A ENSG00000056050|C4orf27 ENSG00000070718|AP3M2 ENSG00000105887|MTFN ENSG00000109445|ZNF330 ENSG00000109846|CRYAB ENSG00000134265|NAPG  
ENSG00000138036|DYNC2L1 ENSG00000147873|IFNA5 ENSG00000152670|DDX4 ENSG00000152749|GPR180 ENSG00000159131|GART ENSG00000163530|DPPA2 ENSG00000164066|INTU ENSG00000165105|RASEF  
ENSG00000165895|Q96M56\_HUMAN ENSG00000166923|GREM1 ENSG00000168772|CXXC4 ENSG00000172900|XR\_017872.1 ENSG00000176160|HSF5 ENSG00000177463|NR2C2  
GACTCAG ENSG0000000617|SEMA3F ENSG00000072182|ACCN4 ENSG00000085644|ZNF213 ENSG00000114349|GNAT1 ENSG00000114739|ACVR2B ENSG00000123374|CDK2 ENSG00000125449|ARMC7 ENSG00000144230|GPR17  
ENSG00000149091|DGKZ ENSG00000160296|SIGLEC12 ENSG00000166886|NAB2 ENSG00000167754|KLK5 ENSG00000167772|ANGPTL4 ENSG00000170653|ATF7 ENSG00000175756|AURKAIP1 ENSG00000177045|SIX5  
ENSG00000179142|CYP11B2 ENSG00000182310|Q6UWG3\_HUMAN ENSG00000186831|KRT17 ENSG00000196503|ARL9 ENSG0000020004779|NDUFAB1 ENSG000000084676|NCOA1 ENSG00000086598|TMED2  
ENSG00000124721|DNAH8 ENSG00000132334|PTPRE ENSG00000139131|YARS2 ENSG00000139800|ZIC5 ENSG00000147526|TACC1 ENSG00000154217|PITPNC1 ENSG00000164953|TMEM67 ENSG00000178502|KLHL11  
ENSG00000178982|EIF3S12 ENSG00000187372|PCDH13 ENSG00000187498|COL4A1 ENSG00000196167|NP\_997312.1 ENSG00000196653|ZNF502 ENSG00000198729|PPP1R14C ENSG00000198908|BHLHB9 ENSG00000204426|LOC286238  
ENSG00000204699|LOC129870 ENSG00000204705|LOC129870  
GACTCAT ENSG00000059122|FLYWCH1 ENSG00000068831|RASGRP2 ENSG00000080189|SLC35C2 ENSG00000095303|PTGS1 ENSG00000100297|MCM5 ENSG00000105202|FBL ENSG00000105254|TBCB ENSG00000105287|PRKD2  
ENSG00000116990|MYCL1 ENSG00000122359|ANXA11 ENSG00000125788|DEFB126 ENSG00000131187|F12 ENSG00000142405|NLRP12 ENSG00000156711|MAPK13 ENSG00000159455|LCE2B ENSG00000162733|DDR2  
ENSG00000166025|AMOTL1 ENSG00000166272|C10orf26 ENSG00000171962|LRRRC48 ENSG00000172382|PRSS27 ENSG00000174521|TTC9B ENSG00000178026|C22orf36 ENSG00000185585|OLFML2A ENSG00000187180|LCE2C  
ENSG00000187223|LCE2D ENSG00000198437|Q8NOT2\_HUMAN ENSG00000204310|AGPAT1 ENSG000000055813|CCDC85A ENSG000000066294|CD84 ENSG000000087263|OGFOD1 ENSG00000100196|KDELR3 ENSG00000118997|DNAH7  
ENSG00000120555|Q5W161\_HUMAN ENSG00000120686|UFM1 ENSG00000120937|NPPB ENSG00000134812|GIF ENSG00000145439|CBR4 ENSG00000145689|TRIM42 ENSG00000158900|TRIM42 ENSG00000158985|CDC42SE2  
ENSG00000162290|DCP1A ENSG00000163576|EFHB ENSG00000165182|CXorf58 ENSG00000166926|MS4A6E ENSG00000167380|ZNF226 ENSG00000171056|SOX7 ENSG00000188014|NP\_619643.2 ENSG00000197006|METTL9  
ENSG00000205358|MT1H  
GACTCCT ENSG000000020633|RUNX3 ENSG00000075826|SEC31B ENSG00000104826|LHB ENSG00000104884|ERCC2 ENSG00000105605|CACNG7 ENSG00000116883|C1orf113 ENSG00000119703|C14orf140 ENSG00000131097|HIGD1B  
ENSG00000131467|PSME3 ENSG00000137726|FXYP2 ENSG00000142252|GEMIN7 ENSG00000146221|NP\_872345.1 ENSG00000147130|ZMYM3 ENSG00000150165|ANXA8L1 ENSG00000163520|FBLN2 ENSG00000166863|TAC3  
ENSG00000167110|GOLGA2 ENSG00000168000|HNRPUL2 ENSG00000169118|CSNK1G1 ENSG00000169710|FASN ENSG00000171467|ZNF318 ENSG00000171747|LGALS4 ENSG00000175866|BAIAP2 ENSG00000178927|C17orf62  
ENSG00000202581|Q6ZVY8\_HUMAN ENSG00000205804|Q5T6R2\_HUMAN ENSG00000206098|C4orf10 ENSG00000100731|PCNX ENSG00000101109|STR4 ENSG00000114030|KPNA1 ENSG00000115616|SLC9A2 ENSG0000012

|         |                                 |                               |                                 |                                 |                                 |                               |                               |                                 |
|---------|---------------------------------|-------------------------------|---------------------------------|---------------------------------|---------------------------------|-------------------------------|-------------------------------|---------------------------------|
|         | ENSG00000131724 IL13RA1         | ENSG00000133958 KIAA1409      | ENSG00000136146 MED4            | ENSG00000147586 MRPS28          | ENSG00000158290 CUL4B           | ENSG00000165646 SLC18A2       | ENSG00000172179 PRL           | ENSG00000182107 TMEM30B         |
| GACTCGC | ENSG00000182836 PLCXD3          | ENSG00000186480 INSIG1        | ENSG00000197343 ZNF655          | ENSG00000204164 Q6P095_HUMAN    | ENSG00000204177 Q6P095_HUMAN    |                               |                               |                                 |
|         | ENSG00000242753 AP2S1           | ENSG00000263241 ISOC2         | ENSG00000273009 IKBKG           | ENSG000002100297 MCM5           | ENSG000002105373 GLTSCR2        | ENSG000002105610 KLF1         | ENSG000002115266 APC2         | ENSG000002124334 IL9R           |
|         | ENSG00000225084 WNT1            | ENSG00000227616 SMARCA4       | ENSG00000230175 PRKCSH          | ENSG00000236630 HLX1            | ENSG00000246755 TRIM50          | ENSG00000249927 DOC2A         | ENSG00000256564 LRFN2         | ENSG00000257570 TSPAN18         |
|         | ENSG00000260209 PDXK            | ENSG00000261204 ABCF3         | ENSG00000263882 POLR2H          | ENSG00000268393 DTYMK           | ENSG00000270549 IRX1            | ENSG00000275416 CLTB          | ENSG00000276358 TAC4          | ENSG00000276476 CCDC101         |
|         | ENSG00000296684 HSH2D           | ENSG00000297562 RAB40C        | ENSG00000298563 ATP6V1G2        | ENSG000002020559 Q6IBW5_HUMAN   | ENSG000002024862 CCDC28A        | ENSG000002066629 EML1         | ENSG000002075336 C18orf55     | ENSG00000202804 TSC22D1         |
|         | ENSG000002104763 ASAH1          | ENSG000002104904 OAZ1         | ENSG000002106689 LHX2           | ENSG000002117395 EBNA1BP2       | ENSG000002121988 ZNRANB3        | ENSG000002122203 KIAA1191     | ENSG000002125675 GRIA3        | ENSG000002128683 GAD1           |
|         | ENSG00000233106 EPSTI1          | ENSG00000237872 SEMA6D        | ENSG000002151514 SALL3          | ENSG000002164828 UNC84A         | ENSG000002166265 CYR1           | ENSG000002167165 UGT1A1       | ENSG000002168944 CCDC100      | ENSG000002170540 ARL6IP1        |
| GACTCTG | ENSG000002180440 NP_982276.1    | ENSG000002184280 ZNF285B      | ENSG000002186088 NP_059135.1    | ENSG000002186188 GPR120         | ENSG000002186188 GPR120         | ENSG000002188649 C10orf130    |                               |                                 |
|         | ENSG00000204776 HSPB6           | ENSG00000205238 KIAA1539      | ENSG000002070444 MNT            | ENSG000002072864 NDE1           | ENSG000002084207 GSTP1          | ENSG000002088881 COE4_HUMAN   | ENSG000002109111 SUPT6H       | ENSG000002118707 TGIF2          |
|         | ENSG000002123810 NP_085055.1    | ENSG000002127472 PLA2G5       | ENSG000002129467 ADCY4          | ENSG000002132522 GPS2           | ENSG000002143107 FNDC7          | ENSG000002166033 HTRA1        | ENSG000002166592 RRAD         | ENSG000002166887 VPS39          |
|         | ENSG000002167476 JSRP1          | ENSG000002169247 SH3TC2       | ENSG000002170442 KRT86          | ENSG000002170515 PA2G4          | ENSG000002171847 FAM90A1        | ENSG000002173918 C1QTNF1      | ENSG000002174233 ADCY6        | ENSG000002175832 ETV4           |
|         | ENSG000002181585 TMIE           | ENSG000002182866 LCK          | ENSG000002185813 PCYT2          | ENSG000002177327 SPAG6          | ENSG000002102931 ARL2BP         | ENSG000002103254 C16orf24     | ENSG000002119446 RBM18        | ENSG000002122126 OCRL           |
|         | ENSG000002123607 TTC21B         | ENSG000002124479 NDP          | ENSG000002134419 RPS15A         | ENSG000002144445 NP_689732.2    | ENSG000002152078 TMEM56         | ENSG000002152078 NOSTRIN      | ENSG000002163328 GPR155       | ENSG000002169085 C8orf46        |
|         | ENSG000002171509 RXFP1          | ENSG000002173334 TRIB1        | ENSG000002178175 ZNF366         | ENSG000002184845 DRD1           | ENSG000002205325 NP_001001684.1 |                               |                               |                                 |
| GACTGAA | ENSG000002001460 C1orf201       | ENSG00000217797 RALBP1        | ENSG000002088832 FKBP1A         | ENSG000002100949 RABGGTA        | ENSG000002116984 MTR            | ENSG000002124334 IL9R         | ENSG000002139178 C1RL         | ENSG000002148396 KIAA0310       |
|         | ENSG000002149305 HTR3B          | ENSG000002162951 LRRTM1       | ENSG000002166317 SYNP2L         | ENSG000002166401 SERPINB8       | ENSG000002167930 ITFG3          | ENSG000002168658 NP_659429.4  | ENSG000002169093 ASMTL        | ENSG000002174171 Q8TCB4_HUMAN   |
|         | ENSG000002175155 YPEL2          | ENSG000002175892 Q8NAT4_HUMAN | ENSG000002083488 AMAC1L3        | ENSG000002105774 NP_001073940.1 | ENSG000002197852 C1orf183       | ENSG000002203784 LELP1        | ENSG000002204581 Q6ZU44_HUMAN | ENSG000002024870 Q6ZW03_HUMAN   |
|         | ENSG000002048544 MRPS10         | ENSG000002065923 SLC9A7       | ENSG000002085514 PILRA          | ENSG000002101574 METTL4         | ENSG000002101951 PAGE4          | ENSG000002110768 GTF2H1       | ENSG000002145782 ATG12        |                                 |
|         | ENSG000002145794 MEGF10         | ENSG000002153560 UBP1         | ENSG000002158639 PAGE5          | ENSG000002164975 SNAPC3         | ENSG000002166292 TMEM100        | ENSG000002168273 Q8WV10_HUMAN | ENSG000002168852 SUGT1L       | ENSG000002169684 CHRNA5         |
|         | ENSG000002170847 RPS26P10       | ENSG000002181472 ZBT2         | ENSG000002185532 PRKG1          | ENSG000002187761 PAGE2B         | ENSG000002189007 DEADC1         | ENSG000002196360 NR_002168.1  | ENSG000002196933 RPS26L1      | ENSG000002197728 RS26_HUMAN     |
|         | perfect: GACTGAA TTCAGTC        | hsa-miR-30a-3p                | ctTTCAGTCggatgttttcgacg         | 2                               |                                 |                               |                               |                                 |
|         | perfect: GACTGAA TTCAGTC        | hsa-miR-30e-3p                | ctTTCAGTCggatgttttcgacg         | 2                               |                                 |                               |                               |                                 |
| GACTGAC | ENSG000002056558 TRAF1          | ENSG000002063660 GPC1         | ENSG000002078246 TULP3          | ENSG000002090316 MAEA           | ENSG000002093167 LRRFIP2        | ENSG000002100226 GTPBP1       | ENSG000002103429 BFAR         | ENSG000002112033 PPARD          |
|         | ENSG000002115598 IL1RL2         | ENSG000002126602 TRAP1        | ENSG000002133315 LRRP16_HUMAN   | ENSG000002136908 DPM2           | ENSG000002140931 CMTM3          | ENSG000002159461 AMFR         | ENSG000002160097 FNDC5        | ENSG000002163909 HEYL           |
|         | ENSG000002165376 CLDN2          | ENSG000002165556 CDX2         | ENSG000002165684 SNAPC4         | ENSG000002171060 C8orf74        | ENSG000002175224 KIAA0652       | ENSG000002178401 NP_079178.2  | ENSG000002183551 RGAG4        | ENSG000002184436 THAP7          |
|         | ENSG000002197653 DNAH10         | ENSG00000234533 ASTE1         | ENSG000002071575 TRIB2          | ENSG000002104447 TRPS1          | ENSG000002107864 CPEB3          | ENSG000002112130 RNF8         | ENSG000002138430 GTPBP9       | ENSG000002155636 DRBP1_HUMAN    |
|         | ENSG000002169715 MT1JP          | ENSG00000217448 ZBTB26        | ENSG000002172115 CYCS           | ENSG000002173467 AGR3           | ENSG000002198670 LPA            |                               |                               |                                 |
| GACTGAT | ENSG00000212963 C14orf130       | ENSG000002073331 ALPK1        | ENSG000002074370 ATP2A3         | ENSG000002101473 ACOT8          | ENSG000002107551 RASSF4         | ENSG000002124164 VAPB         | ENSG000002128262 Q9NTU6_HUMAN | ENSG000002128802 GDF2           |
|         | ENSG000002130119 GNL3L          | ENSG000002135314 C6orf148     | ENSG000002139625 MAP3K12        | ENSG000002147100 SLC16A2        | ENSG000002160296 SIGLEC12       | ENSG000002166908 PIP5K2C      | ENSG000002167139 TBC1D21      | ENSG000002169919 GUSB           |
|         | ENSG000002171855 IFNB1          | ENSG000002188525 NM_207480    | ENSG000002024248 COL11A2        | ENSG000002072042 RDH11          | ENSG000002080007 DDX43          | ENSG000002102908 NFAT5        | ENSG000002113269 RNF130       | ENSG000002119421 NDUFA8         |
|         | ENSG000002120399 RDH10          | ENSG000002136014 USP44        | ENSG000002136891 TEX10          | ENSG000002140379 GLB2A1         | ENSG000002147862 NFB1           | ENSG000002164134 NARG1        | ENSG000002164754 RAD21        | ENSG000002166240 Q14DG7-2       |
|         | ENSG000002169752 NRG4           | ENSG000002172348 DNCR1L1      | ENSG000002179979 CRIPAK         | ENSG000002184203 PPP1R2         | ENSG000002187761 PAGE2B         | ENSG000002196214 ZNF766       | ENSG000002204692 OR12D3       |                                 |
| GACTGCC | ENSG000002053918 KCNQ1          | ENSG000002087460 GNAS1        | ENSG000002105576 TRIP2          | ENSG000002120029 C10orf76       | ENSG000002120664 LOC646871      | ENSG000002125651 GTF2F1       | ENSG000002137496 I18BP_HUMAN  | ENSG000002140688 C16orf58       |
|         | ENSG000002141404 GNAL           | ENSG000002143140 GJA5         | ENSG000002143595 AQP10          | ENSG000002148396 KIAA0310       | ENSG000002154316 TDH            | ENSG000002159527 PGLYRP3      | ENSG000002166289 PLEKHF1      | ENSG000002181577 NP_694978.2    |
|         | ENSG000002184639 NP_001004344.1 | ENSG000002188185 Q6ZQP8_HUMAN | ENSG000002188384 Q6ZUQ5_HUMAN   | ENSG000002205271 Q6ZUQ5_HUMAN   | ENSG000002205271 Q6ZUQ5_HUMAN   | ENSG000002205275 Q6ZUQ5_HUMAN | ENSG000002205592 MUC19        | ENSG000002008083 JARID2         |
|         | ENSG000002076650 GPATCH1        | ENSG000002100418 NP_056519.1  | ENSG000002106686 C9orf68        | ENSG000002113163 COL4A3BP       | ENSG000002113492 AGXT2          | ENSG000002136100 VPS36        | ENSG000002136247 ZDHHC4       | ENSG000002137265 IRF4           |
|         | ENSG000002138193 PICE1          | ENSG000002139572 GPR84        | ENSG000002145386 CCNA2          | ENSG000002149742 SLC22A9        | ENSG000002154429 C1orf96        | ENSG000002159658 KIAA0494     | ENSG000002164465 DCBLD1       | ENSG000002166971 AKT1P          |
|         | ENSG000002171451 DSEL           | ENSG000002196116 TDRD7        | ENSG000002198872 PEG10          | ENSG000002203727 SAMD5          |                                 |                               |                               |                                 |
| GACTGTA | ENSG000002100450 GZMH           | ENSG000002101489 BRUNOL4      | ENSG000002108557 RA11           | ENSG000002114650 SCAP           | ENSG000002121083 DYNLL2         | ENSG000002142549 LOC402665    | ENSG000002172939 OXSR1        | ENSG000002176472 ZNF575         |
|         | ENSG000002180900 SCRIB          | ENSG000002181666 HKR1         | ENSG000002187024 PTRH1          | ENSG000002187095 LILRA2         | ENSG000002188290 HE3A           | ENSG000002197175 Q8TBR1_HUMAN | ENSG000002197653 DNAH10       | ENSG000002198517 MAFK           |
|         | ENSG000002057751 MRPL23         | ENSG000002085563 ABCB1        | ENSG000002112182 BACH2          | ENSG000002117632 STMN1          | ENSG000002121316 NP_079105.4    | ENSG000002136099 TAF4         | ENSG000002137757 CASP5        | ENSG000002140941 MAP1LC3B       |
|         | ENSG000002144285 SCN1A          | ENSG000002145649 GZMA         | ENSG000002145715 RASA1          | ENSG000002145782 ATG12          | ENSG000002155090 KLF10          | ENSG000002175497 DPP10        | ENSG000002185634 SHC4         | ENSG000002187109 NAP1L1         |
|         | ENSG000002196505 GDAP2          |                               |                                 |                                 |                                 |                               |                               |                                 |
| GACTTGA | ENSG000002028310 BRD9           | ENSG000002110536 NDUFS3       | ENSG000002131943 C19orf12       | ENSG000002133561 GIMAP6         | ENSG000002141506 PIK3R5         | ENSG000002143127 ITGA10       | ENSG000002155846 PPARGC1B     | ENSG000002156427 FGF18          |
|         | ENSG000002157657 ZNF618         | ENSG000002161281 COX7A1       | ENSG000002165970 SLC6A5         | ENSG000002167302 C17orf56       | ENSG000002174502 SLC22A9        | ENSG000002177744 NP_775923.1  | ENSG000002185650 ZFP36L1      | ENSG000002187975 NP_001003682.1 |
|         | ENSG000002197296 C20orf142      | ENSG000002024613 TRIM10       | ENSG000002049759 NEDD4L         | ENSG000002068964 PLA2G10        | ENSG000002079931 MOXD1          | ENSG000002106341 C7orf16      | ENSG000002113916 BCL6         | ENSG000002117528 ABCD3          |
|         | ENSG000002120616 EPC1           | ENSG000002128714 HOXD13       | ENSG000002132964 CDK8           | ENSG000002135537 LACE1          | ENSG000002138463 DIRC2          | ENSG000002148950 IMPP1L       | ENSG000002152242 C18orf25     | ENSG000002164483 SAMD3          |
|         | ENSG000002182090 C14orf25       | ENSG000002184867 ARMXC2       | ENSG000002205150 FAM92A3        | ENSG000002205364 MTM1           |                                 |                               |                               |                                 |
| GACTTGC | ENSG000002074211 PPP2R2C        | ENSG000002100109 TFIP11       | ENSG000002100299 ARSA           | ENSG000002101146 RAE1           | ENSG000002101346 POFUT1         | ENSG000002115353 TACR1        | ENSG000002115594 IL1R1        | ENSG000002115598 IL1RL2         |
|         | ENSG000002122966 CIT            | ENSG000002125912 NCLN         | ENSG000002125954 FNBT           | ENSG000002149532 CPSF7_HUMAN    | ENSG000002162367 TAL1           | ENSG000002175781 Q9H5L9_HUMAN | ENSG000002179950 NP_055096.2  | ENSG000002185082 LBH            |
|         | ENSG000002196460 Q6ZNB4_HUMAN   | ENSG000002197968 Q9N231_HUMAN | ENSG000002203930 Q5JPA2_HUMAN   | ENSG000002206815 REEP1          | ENSG000002101981 F9             | ENSG000002112394 SLC16A10     | ENSG000002113593 PPWD1        | ENSG000002119147 C2orf40        |
|         | ENSG000002122585 NPFY           | ENSG000002124562 SNRPC        | ENSG000002132581 SDF2           | ENSG000002132970 WASF3          | ENSG000002134202 GSTM3          | ENSG000002137462 TLR2         | ENSG000002138398 PPIG         | ENSG000002138472 GUCA1C         |
|         | ENSG000002139610 ELA1           | ENSG000002139800 ZIC5         | ENSG000002159251 ACTC1          | ENSG000002163364 Q9BD13_HUMAN   | ENSG000002163694 NP_061900.1    | ENSG000002168264 IRF2BP2      | ENSG000002171209 CSN3         | ENSG000002171408 PDE7B          |
|         | ENSG000002171557 FGG            | ENSG000002178172 SPINK6       | ENSG000002178184 PARP6G         | ENSG000002196371 FUT4           | ENSG000002197953 AADACL2        |                               |                               |                                 |
| GACTTTA | ENSG000002075275 CELSR1         | ENSG000002092853 CLSPN        | ENSG000002111644 ACRBP          | ENSG000002121900 TMEM54         | ENSG000002127241 MASP1          | ENSG000002131368 MRPS25       | ENSG000002132773 TOE1         | ENSG000002140090 SLC24A4        |
|         | ENSG000002143819 EPHX1          | ENSG000002159110 IFNAR2       | ENSG000002163331 NP_001017920.1 | ENSG000002164885 CDK5           | ENSG000002167434 CA4            | ENSG000002168621 GDNF         | ENSG000002169403 PTAFR        | ENSG000002175538 KCNE3          |
|         | ENSG000002177807 KCNJ10         | ENSG000002178038 ALS2CL       | ENSG000002180697 C3orf22        | ENSG000002185219 ZNF445         | ENSG000002188859 FAM78B         | ENSG000002196419 XRCC6        | ENSG000002198754 OXCT2        | ENSG000002205726 ITSN1          |
|         | ENSG000002205878 Q6ZSV2_HUMAN   | ENSG000002206193 Q5HYA3_HUMAN | ENSG000002005421 PON1           | ENSG000002019186 CYP24A1        | ENSG000002074527 NTN4           | ENSG000002079931 MOXD1        | ENSG000002102239 BR33         | ENSG000002104388 RAB2A          |
|         | ENSG00000212319 EYA4            | ENSG000002112739 PRPF4B       | ENSG000002115084 SLC35F5        | ENSG000002121579 NAT13          | ENSG000002123595 RAB9A          | ENSG000002127588 GNG13        | ENSG000002130699 TAF4         | ENSG000002133805 AMPD3          |
|         | ENSG000002134533 RERG           | ENSG000002143469 SYT11        | ENSG000002144746 ARL6IP5        | ENSG000002145451 GLRA3          | ENSG000002149761 NUDT22         | ENSG000002151929 BAG3         | ENSG000002154380 ENAH         | ENSG000002155827 RNF20          |
|         | ENSG000002157510 FAM11L1        | ENSG000002171988 JMJD1C       | ENSG000002180979 LRRCS7         | ENSG000002187667 Q1ASX8_HUMAN   | ENSG000002198176 TFDP1          | ENSG000002198189 HSD17B11     |                               |                                 |



ENSG00000179240|Q3ZCU0\_HUMAN ENSG00000184659|FOXDL4L4 ENSG00000189180|ZNF33A ENSG00000204779|FOXDL4L5 ENSG00000204828|FX4L4\_HUMAN ENSG00000205592|MUC19 ENSG00000205851|Q4G0H1\_HUMAN ENSG00000095139|ARCN1  
ENSG00000106692|FCMD ENSG00000111371|SLC38A1 ENSG00000111859|NEDD9 ENSG00000111962|UST ENSG00000112414|GPR126 ENSG00000114279|FGF12 ENSG00000115840|SLC25A12 ENSG00000117036|ETV3  
ENSG00000123165|ACTRT1 ENSG00000123496|IL13RA2 ENSG00000134313|NP\_065789.1 ENSG00000134830|GPR77 ENSG00000136681|BAAT ENSG00000163285|GABRG1 ENSG00000169248|CXCL11 ENSG00000172179|PRL  
ENSG00000177453|NIM1\_HUMAN ENSG00000182393|IL29 ENSG00000184258|CDR1 ENSG00000185591|SPI ENSG00000188848|CCDC4 ENSG00000198417|MT1F ENSG00000203742|NP\_001032308.1  
ENSG00000002919|SNX11 ENSG00000057935|MTA3 ENSG00000101098|RIMS4 ENSG00000106384|MOGAT3 ENSG00000119487|MAPKAP1 ENSG00000133067|LGR6 ENSG00000133424|LARGE ENSG00000134531|EMP1  
ENSG00000146090|Q9SGE1C ENSG00000146221|NP\_872345.1 ENSG00000148219|ASTN2 ENSG00000159166|LAD1 ENSG00000159176|CSR1P ENSG00000161265|U2AF1L4 ENSG00000169241|RAG1AP1 ENSG00000176076|KCNE1L  
ENSG00000180483|DEFB119 ENSG00000182698|NM\_001007089 ENSG00000205974|Q6ZVY3\_HUMAN ENSG00000054598|FOXCl ENSG00000056972|TRAF3IP2 ENSG00000108255|CRYBA1 ENSG00000112078|KCTD20 ENSG00000116106|EPHA4  
ENSG00000116539|ASH1L ENSG00000123570|RAB9B ENSG00000127720|Cl2orf26 ENSG00000133083|DCLL1 ENSG00000136531|SCN2A ENSG00000147684|NDUF9 ENSG00000154845|PPP4R1 ENSG00000154874|NP\_872374.3  
ENSG00000156787|WDR67 ENSG00000166796|LDHC ENSG00000167077|NP\_689726.3 ENSG00000173215|Q96HQ8\_HUMAN ENSG00000173692|PSMD1 ENSG00000176542|KIAA2018 ENSG00000179813|Cl3orf30 ENSG00000196305|IARS  
ENSG00000205637|Q6ZSL6\_HUMAN  
GAGACGC ENSG00000006016|CRLF1 ENSG00000068024|HDAC4 ENSG00000089685|BIRC5 ENSG00000110987|BCL7A ENSG00000124140|SLC12A5 ENSG00000133392|MYH11 ENSG00000141564|RPTOR\_HUMAN ENSG00000153395|AYTL2  
ENSG00000157881|PANK4 ENSG00000159797|C9orf144 ENSG00000173918|ClQTNF1 ENSG00000178241|Q9P0D4\_HUMAN ENSG00000184343|SRPK3 ENSG00000186152|LILRB3 ENSG00000187488|NP\_001025056.1 ENSG00000196961|AP2A1  
ENSG00000198816|ZNF358 ENSG00000203822|Q6ZVIO\_HUMAN ENSG00000203997|Q6ZRR8\_HUMAN ENSG00000204017|Q6ZVB9\_HUMAN ENSG00000204922|U655\_HUMAN ENSG00000205335|GLYCAM1 ENSG00000205287|HS3ST1 ENSG0000008196|TFAP2B  
ENSG00000154755|BID ENSG00000086189|DITM1L ENSG00000102935|ZNF423 ENSG00000115474|KCNJ13 ENSG00000138795|LEF1 ENSG00000139977|NAT12 ENSG00000140937|CDH11 ENSG00000145555|MYO10  
ENSG00000147316|MCPH1 ENSG00000148110|HIATL1 ENSG00000150337|FCGR1A ENSG00000151615|POU4F2 ENSG00000153495|Cl3orf16 ENSG00000153823|PID1 ENSG00000163626|COX18 ENSG00000165794|SLC39A2  
ENSG00000169040|PMCHL2 ENSG00000169045|HNRPH1 ENSG00000173947|Clorf88 ENSG00000180882|XR\_017823.1 ENSG00000182326|ClS ENSG00000184474|Q96FP4\_HUMAN ENSG00000197321|SVIL ENSG00000203710|CR1  
ENSG00000203730|TEDDM1  
GAGACTT ENSG000000086102|NFX1 ENSG00000100109|TFIP11 ENSG00000100299|ARSA ENSG00000100908|Cl4orf122 ENSG00000107719|KIAA1274 ENSG00000108622|LCM12 ENSG00000128228|SDF2L1 ENSG00000130433|CACNG6  
ENSG00000133195|SLC39A11 ENSG00000135114|OASL ENSG00000143171|RXRG ENSG00000152082|FAM128B ENSG00000161281|COX7A1 ENSG00000162816|IXM1A ENSG00000162951|LRRTM1 ENSG00000162968|Q96MQ0\_HUMAN  
ENSG00000166716|ZNF592 ENSG00000171060|C8orf74 ENSG00000173272|FAM128A ENSG00000174951|FUT1 ENSG00000175093|SPSB4 ENSG00000177441|Q8N4T9\_HUMAN ENSG00000179766|Q4G129\_HUMAN ENSG00000180249|Q8N872\_HUMAN  
ENSG00000187681|ORM1 ENSG00000204154|ORM2 ENSG00000204312|Q6ZNY8\_HUMAN ENSG00000204444|APOM ENSG000002039560|RAI14 ENSG00000065809|FAM107B ENSG00000073969|NSF ENSG00000076003|MCM6  
ENSG00000080947|Q8IVE0\_HUMAN ENSG000000807095|NLK ENSG00000101981|F9 ENSG00000105792|Q8IY89\_HUMAN ENSG00000109208|SMR3A ENSG00000111666|CHPT1 ENSG00000115942|ORC2L ENSG00000117139|JARID1B  
ENSG00000123575|CXorf39 ENSG00000136874|STX17 ENSG00000145244|CORIN ENSG00000150756|NP\_954584.1 ENSG00000153130|SCOC ENSG00000158636|Cl1orf30 ENSG00000168675|Cl8orf1 ENSG00000169021|UQCFS1  
ENSG00000174840|NP\_808881.2 ENSG00000179041|RRS1 ENSG00000185973|TMLHE ENSG00000203995|ZYG11A ENSG00000205187|Q6ZSG3\_HUMAN  
GAGAGAT ENSG00000054523|KIF1B ENSG00000065882|TBC1D1 ENSG00000072840|EVC ENSG00000078246|TULP3 ENSG00000101346|POFUT1 ENSG00000103197|TSC2 ENSG00000105202|FBL ENSG00000124615|MOCS1  
ENSG00000128482|ZNF179 ENSG00000129965|INS ENSG00000134531|EMP1 ENSG00000139797|RNFI13B ENSG00000142794|NBBF3 ENSG00000149474|CSR2P2B ENSG00000155886|SLC24A2 ENSG00000169084|ZBED1  
ENSG00000173714|WFIKN2 ENSG00000175003|SLC22A1 ENSG00000175697|GPR156 ENSG00000179421|Q8NBA4\_HUMAN ENSG00000184654|YV006\_HUMAN ENSG00000196407|TEM5 ENSG00000198641|SYS1 ENSG00000198722|UNC13B  
ENSG00000205236|NP\_663165.2 ENSG00000034239|EFCAB1 ENSG00000082397|EPB41L3 ENSG00000100354|TNRC6B ENSG00000115963|RND3 ENSG00000116898|MRPS15 ENSG00000129810|SGOL1 ENSG00000136870|ZNF189  
ENSG00000139318|DUSP6 ENSG00000144481|TRPM8 ENSG00000146039|SLC17A4 ENSG00000153896|ZNF599 ENSG00000169967|MAP3K2 ENSG00000177465|ACOT4 ENSG00000181631|P2RY13 ENSG00000182628|FAM33A  
ENSG00000188868|ZNF563 ENSG00000197928|ZNF677 ENSG000001197937|ZNF347 ENSG00000198468|Q8TAF5\_HUMAN  
GAGAGGA ENSG00000054965|KIAA0280 ENSG00000072195|SPEG ENSG00000076928|ARRHGF1 ENSG00000089248|ERP29 ENSG00000102003|SYP ENSG00000105607|GCDH ENSG00000108504|CDK3 ENSG00000144659|SLC25A38  
ENSG00000155256|ZFYVE27 ENSG00000158815|FGF17 ENSG00000159761|NM\_001012984.2 ENSG00000160752|FDPS ENSG00000163121|NM\_001080535.1 ENSG00000166963|MAP1A ENSG00000167114|SLC27A4 ENSG00000172018|NP\_001004341.1  
ENSG00000176658|MYO1D ENSG00000183066|WBP2NL ENSG00000185361|TNFAIP8L1 ENSG00000186998|EMID1 ENSG00000189334|S100A14 ENSG00000196189|SEMA4A ENSG00000205039|Q6ZQS5\_HUMAN ENSG00000010404|IDS  
ENSG00000031081|NP\_065805.1 ENSG00000059804|GTR3\_HUMAN ENSG00000101278|Q9NQ39\_HUMAN ENSG00000106483|SFRP4 ENSG00000114541|FRMD4B ENSG00000114796|KLHL24 ENSG00000120256|LRP11 ENSG00000124614|RPS10  
ENSG00000136206|WBSCLR19 ENSG00000139908|TSSK4 ENSG00000153246|PLA2R1 ENSG00000163285|GABRG1 ENSG00000163610|Q9NUU0\_HUMAN ENSG00000169744|LDB2 ENSG00000172380|GNL2 ENSG00000173262|SLC2A3  
ENSG00000180233|ZNRF2 ENSG00000181126|Q86V94\_HUMAN ENSG00000185737|NRG3 ENSG00000185972|CCIN ENSG00000204588|Q68DL6\_HUMAN ENSG00000204920|ZNF155 ENSG00000205505|NP\_001027561.1 ENSG00000205506|NP\_001027561.1  
ENSG00000205508|NP\_001018856.1 ENSG00000205509|NP\_001027561.1 ENSG00000205580|NP\_001027561.1  
GAGAGTT ENSG00000077157|PPP1R12B ENSG00000103047|TMC07 ENSG00000108264|TADA2L ENSG00000111249|CUTL2 ENSG00000135503|ACVR1B ENSG00000163915|C3orf65 ENSG00000165837|Q5W0A0\_HUMAN ENSG00000166887|VPS39  
ENSG00000167106|FAM102A ENSG00000169213|RAB3B ENSG00000171962|LRRC48 ENSG00000184811|TUSC5 ENSG00000185674|LYG2\_HUMAN ENSG00000187975|NP\_001003682.1 ENSG00000203843|ACN5 ENSG00000083828|ZNF586  
ENSG00000101981|F9 ENSG00000104442|ARMC1 ENSG00000118473|SGIP1 ENSG00000131730|CKMT2 ENSG00000135297|MT01 ENSG00000137040|RANBP1 ENSG00000140416|TPM1 ENSG00000143355|LHX9  
ENSG00000144644|GADL1 ENSG00000150093|ITGB1 ENSG00000150637|CD226 ENSG00000153560|UBP1 ENSG00000157764|BRAF ENSG00000162647|Clorf19 ENSG00000162913|Clorf145 ENSG00000163637|PRICKLE2  
ENSG00000196214|ZNF766 ENSG00000196268|ZNF493 ENSG00000198498|NP\_060822.1 ENSG00000198586|TLK1 ENSG00000198964|SGM1 ENSG00000206527|PTPLB  
ENSG00000054523|KIF1B ENSG00000077157|PPP1R12B ENSG00000101346|POFUT1 ENSG00000102445|C13orf18 ENSG00000105383|CD33 ENSG00000115107|STEAP3 ENSG00000116205|Clorf83  
ENSG00000118900|UBN1 ENSG00000122367|LDB3 ENSG00000130724|CHMP2A ENSG00000130749|C19orf7 ENSG00000133216|EPHB2 ENSG00000136925|C9orf97 ENSG00000138867|C22orf13 ENSG00000149260|CAPN5  
ENSG00000150401|DCUN1D2 ENSG00000154222|CC2D1B ENSG00000160401|C9orf117 ENSG00000161267|BDH1 ENSG00000167461|RAB8A ENSG00000169083|AR ENSG00000171720|HDAC3 ENSG00000173349|SFT2D3  
ENSG00000176887|SOX1 ENSG00000178235|SLITRK1 ENSG00000185294|NP\_787078.1 ENSG00000186453|NP\_001035800.1 ENSG00000198574|SH2D1B ENSG00000205431|Q6UWF5\_HUMAN ENSG00000001167|NFYA ENSG00000091972|CD200  
ENSG00000104432|IL7 ENSG00000108061|SHOC2 ENSG00000109181|UGT2B10 ENSG00000112996|MRPS30 ENSG00000129071|MBD4 ENSG00000130413|STK33 ENSG00000139318|DUSP6 ENSG00000151743|AMN1  
ENSG00000151806|GUF1 ENSG00000152520|PAN3 ENSG00000152782|PANK1 ENSG00000171360|KRT38 ENSG00000171877|FRMD5 ENSG00000172380|GNL2 ENSG00000172766|NARG1L ENSG00000177570|SAMD12  
ENSG00000178102|DNAHL1 ENSG00000180408|Q8N5G0\_HUMAN ENSG00000183576|SETD3 ENSG00000197110|IL28B ENSG00000205221|VIT  
GAGCACT ENSG00000066135|JMJD2A ENSG00000095383|TBC1D2 ENSG00000105137|SYDE1 ENSG00000106628|POLD2 ENSG00000110711|AIP ENSG00000123064|DDX54 ENSG00000125409|TEKT3 ENSG00000141873|SLC39A3  
ENSG00000143314|MRPL24 ENSG00000147402|GABRQ ENSG00000147912|FBXO10 ENSG00000149633|NP\_001025035.1 ENSG00000151079|KCNAG6 ENSG00000158006|PAPAH2 ENSG00000160785|SLC25A4 ENSG00000161929|NP\_996986.1  
ENSG00000163157|TMOD4 ENSG00000165125|TRPV6 ENSG00000168061|SAC3D1 ENSG00000169926|KLF13 ENSG00000170619|COMMD5 ENSG00000177294|FBXO39 ENSG00000180471|C9orf31 ENSG00000184012|TMPRSS2  
ENSG00000184557|SOCS3 ENSG00000187251|Clorf213 ENSG00000196372|ASB13 ENSG00000088205|DDX18 ENSG00000100281|HMG2L1 ENSG00000102710|FAM48A ENSG00000116016|EPAS1 ENSG00000130021|HDHD1A  
ENSG00000131351|NP\_219485.1 ENSG00000132475|H3F3B ENSG00000132703|APCS ENSG000001537265|IRF4 ENSG00000141655|TNFRSF11A ENSG00000147471|PROSC ENSG00000152518|ZFP36L2 ENSG00000164294|NP\_001008398.1  
ENSG00000168264|IRF2BP2 ENSG00000169906|S100G ENSG00000170965|PLAC1 ENSG00000171772|SYCE1 ENSG00000175582|RAB6A ENSG00000183035|CYLC1 ENSG00000185023|RAB6C ENSG00000197497|ZNF665  
ENSG00000204990|NP\_001008742.1  
GAGCATT ENSG00000005194|CTAPIN1 ENSG00000006194|ZNF263 ENSG00000066044|ELAVL1 ENSG00000086062|B4GALT1 ENSG00000090920|FCGBP ENSG00000115306|SPTBN1 ENSG00000136731|UGCG11 ENSG00000136930|PSMB7  
ENSG00000139998|RAB15 ENSG00000143614|GATAD2B ENSG00000145494|NDUF86 ENSG00000155026|NM\_173565.2 ENSG00000160791|CCR5 ENSG00000162148|Cl1orf66 ENSG00000166569|CPLX4 ENSG00000169057|MECP2  
ENSG00000169402|NP\_775836.2 ENSG00000169876|MUC17 ENSG00000177673|NP\_689827.1 ENSG00000179240|Q3ZCU0\_HUMAN ENSG00000182325|FBXL6 ENSG00000198574|SH2D1B ENSG00000198881|ASB12  
ENSG00000203662|OR2M1P ENSG00000204183|GDF5OS ENSG00000072364|AFF4 ENSG00000072422|RHOBTB1 ENSG00000101935|AMMEC1 ENSG00000123096|SSFN ENSG00000129317|PUS7L ENSG00000135318|NT5E  
ENSG00000136536|MARCH7 ENSG00000138795|LEF1 ENSG00000143486|LGTN ENSG00000143995|MEIS1 ENSG00000145246|ATP10D ENSG00000145451|GLRA3 ENSG00000147862|NFIB ENSG00000151893|Clorf46  
ENSG00000153237|NP\_620158.2 ENSG00000160145|KALRN ENSG00000162368|CMPK ENSG00000163840|DTX3L ENSG00000166250|NP\_079045.1 ENSG00000173334|TRIB1 ENSG00000180138|CSNK1A1L ENSG00000183035|CYLC1  
ENSG00000188215|DCUN1D3 ENSG00000196319|Q9H353\_HUMAN ENSG00000197646|PDCD1L2  
GAGCCAC ENSG00000034510|TMSB10 ENSG00000072163|LIMS2 ENSG00000099804|CDC34 ENSG00000100593|THSD3 ENSG00000108639|SYNRG ENSG00000110497|NP\_060219.2 ENSG00000117013|KCNQ4 ENSG00000119703|Cl4orf140  
ENSG00000120509|PDZD11 ENSG00000123989|CHSS2\_HUMAN ENSG00000145063|NM\_182586 ENSG00000146047|HIST1H2BA ENSG00000148965|SAA4 ENSG00000160613|PCSK7 ENSG00000160746|TMEM16K ENSG00000162512|SDC3  
ENSG00000165568|AKR1CL2 ENSG00000168148|HIST3H3 ENSG00000168242|HIST1H2BI ENSG00000168298|HIST1H1E ENSG00000171729|TMEM51 ENSG00000174915|PTDS2 ENSG00000181873|Clorf69 ENSG00000184210|DGAT2L6  
ENSG00000184246|Q96PW8\_HUMAN ENSG00000184260|HIST2H2AC ENSG00000184602|SNN ENSG00000185130|HIST1H2BL ENSG00000187697|SPRY4 ENSG00000182325|ENTPD6 ENSG00000197697|HIST1H2BE ENSG00000198366|HIST1H3A  
ENSG00000198374|HIST1H2AL ENSG00000203709|Clorf132 ENSG00000049192|ADAMT56 ENSG00000065150|RANBP5 ENSG00000088766|CRLS1 ENSG00000101974|ATP10C ENSG00000122705|CLTA ENSG00000130449|ZSWIM6  
ENSG00000132170|PPARG ENSG00000137692|DCUN1D5 ENSG00000145321|GC ENSG00000175885|ZNF611 ENSG00000181617|C4orf7 ENSG00000204766|Q6ZUHO\_HUMAN ENSG00000205195|Q6ZTB1\_HUMAN  
ENSG00000038532|KIAA0350 ENSG00000070614|NDST1 ENSG00000074317|SNCB ENSG00000099331|MYO9B ENSG00000100034|PPM1F ENSG00000102313|ITIHL5 ENSG00000103067|RBM35B ENSG00000109062|SLC9A3R1  
ENSG00000118655|DCLRE1B ENSG00000120457|KCNJ5 ENSG00000130270|ATP8B3 ENSG00000137868|STRA6 ENSG00000138111|TMEM180 ENSG00000145022|TCTA ENSG00000151474|FRMD4A ENSG00000157856|C2orf39  
ENSG00000162430|SEPN1 ENSG00000164061|BSN ENSG00000167994|RAB31L1 ENSG00000168101|NUDT16L1 ENSG00000168781|HISPPD2A ENSG00000169991|Q5TF58\_HUMAN ENSG00000172273|MIZF ENSG00000172780|RAB43  
ENSG00000177700|POLR2L ENSG00000179178|TMEM125 ENSG00000182199|SHMT2 ENSG00000187609|NP\_060290.3 ENSG00000188935|Q6ZU24\_HUMAN ENSG00000189363|Q6ZSP4\_HUMAN ENSG00000197444|OGDHL ENSG00000197785|ATAD3A  
ENSG00000197818|SLC9A8 ENSG00000204483|Q8N925\_HUMAN ENSG00000204946|ZNF783 ENSG00000205138|NP\_001036096.1 ENSG00000205852|Q6ZWI3\_HUMAN ENSG000000011260|UTP18 ENSG00000022976|Cl4orf131 ENSG00000059573|ALDH18A1  
ENSG00000068796|KIF2A ENSG00000118816|CCNI ENSG00000121481|RNF2 ENSG00000128731|HERC2 ENSG00000133193|FAM104A ENSG00000135960|EDAR ENSG00000140543|DET1 ENSG00000141325|CCDC45  
ENSG00000149742|SLC22A9 ENSG00000152642|GPD1L ENSG00000158966|CACHD1 ENSG00000165694|FRMD7 ENSG00000168297|PXK ENSG00000183145|DSCR6 ENSG00000183813|CCR4  
perfect: GAGCCAG CTCGGCTC hsa-miR-149 tCTGGCTCcggtgtcttcactcc 1  
GAGCCCT ENSG0000008853|RHOBT2 ENSG00000052344|PRSS8 ENSG00000100312|ACR ENSG00000100721|TCL1A ENSG00000101098|RIMS4 ENSG00000108405|P2RX1 ENSG00000108509|CAMTA2 ENSG00000112658|SRF  
ENSG00000117407|ARTN ENSG00000122678|POLM ENSG00000126952|NFX5 ENSG00000133247|SUV420H2 ENSG00000143787|LETTY1 ENSG00000147439|BIN3 ENSG00000147813|NAPRT1 ENSG00000162236|STX5  
ENSG00000164638|SLC29A4 ENSG00000169635|HIC2 ENSG00000169926|KLF13 ENSG00000170893|TRH ENSG00000175063|UBE2C ENSG00000175592|FOSL1 ENSG00000175826|DULLARD ENSG00000177112|Q8N6V7\_HUMAN  
ENSG00000177133|Q6ZV91\_HUMAN ENSG00000178719|GRINA ENSG00000183092|BEGIN\_HUMAN ENSG00000205356|NP\_056210.1 ENSG0000021852|C8B ENSG00000022976|Cl4orf131 ENSG00000093134|VNN3 ENSG00000119862|NP\_054900.1  
ENSG00000125772|GDE5\_HUMAN ENSG00000127863|TNFRSF19 ENSG00000144010|LOC653192 ENSG00000144015|TRIM43 ENSG00000152270|TMEM47 ENSG00000155961|RAB39B ENSG00000156697|UTP14A  
ENSG00000161714|PLCD3 ENSG00000163110|PDLIM5 ENSG00000169688|MT1B ENSG00000172023|REG1B ENSG00000172465|TCAL1 ENSG00000182393|IL29 ENSG00000188996|HUS1 ENSG00000204766|Q6ZUHO\_HUMAN

ENSG00000204683|C10orf113  
perfect: GAGCCTG CAGGCTC hsa-miR-484 tCAGGCTCagtcccctcccgat 1  
GAGCCTT ENSG0000034152|MAP2K3 ENSG00000083817|ZNF416 ENSG00000099821|POLRMT ENSG00000104415|WISP1 ENSG00000105953|OGDH ENSG00000115073|ACTR1B ENSG00000119333|WDR34 ENSG00000122642|FKBP9  
ENSG00000124702|KLHD3 ENSG00000127362|TAS2R3 ENSG00000131849|ZNF132 ENSG00000134207|SYT6 ENSG00000140835|CHST4 ENSG00000142444|C19orf52 ENSG00000143891|GALM ENSG00000152705|CATSPER3  
ENSG00000158156|XKR8 ENSG00000158710|TAGLN2 ENSG00000160404|TOR2A ENSG00000160951|PTGER1 ENSG00000165626|C10orf30 ENSG00000170835|CBL ENSG00000171649|ZIK1 ENSG00000175573|C11orf68  
ENSG00000176153|GPX2 ENSG00000197965|MPZL1 ENSG00000204775|Q4G0D9\_HUMAN ENSG00000205562|Q8G027\_HUMAN ENSG00000205599|Q6ZUY4\_HUMAN ENSG00000205673|Q6ZRX0\_HUMAN ENSG00000246604|DSG2 ENSG00000083168|MYST3  
ENSG00000084444|K1AA1467 ENSG00000101384|JAG1 ENSG00000102221|PHF16 ENSG00000109756|RAPGEF2 ENSG00000110955|ATP5B ENSG00000116747|TROVE2 ENSG00000123570|RAB9B ENSG00000123728|RAF2C  
ENSG00000127334|DYRK2 ENSG00000132326|PER2 ENSG00000136146|MED4 ENSG00000138678|NP\_116106.2 ENSG00000143771|CNIH4 ENSG00000144026|ZNF514 ENSG00000145246|ATP10D ENSG00000148175|STOM  
ENSG00000152952|PLOD2 ENSG00000168807|SNTB2 ENSG00000170365|SMAD1 ENSG00000172840|PDP2\_HUMAN ENSG00000173698|GPR4 ENSG00000196586|MYO6 ENSG00000198060|MARCH5  
GAGCGAA ENSG00000115738|ID2 ENSG00000115935|WIPF1 ENSG00000119514|GALNT12 ENSG00000131238|PPT1 ENSG00000135604|STX11 ENSG00000135900|MRPL44 ENSG00000129038|LOXL1 ENSG00000132004|FBXW9  
ENSG00000132507|EIF5A\_P1 ENSG00000138100|TRIM54 ENSG00000145506|NKD2 ENSG00000154102|C16orf74 ENSG00000154764|WNT7A ENSG00000165810|BTNL9 ENSG00000169026|MFSD7 ENSG00000170955|PRKCDBP  
ENSG00000172250|SERHL\_HUMAN ENSG00000177340|QOVFX0\_HUMAN ENSG00000178307|TMEM11 ENSG00000181977|PY2 ENSG00000184068|Q8N8F0\_HUMAN ENSG00000196961|AP2A1 ENSG00000197019|SERTAD1 ENSG00000198049|AVPR1B  
ENSG00000198457|CP21A\_HUMAN ENSG00000198500|Q96C21\_HUMAN ENSG00000204498|NFKB1L1 ENSG00000205881|Q6UXR8\_HUMAN ENSG00000275413|MARK3 ENSG000002091972|CD200 ENSG00000103381|NP\_060810.1 ENSG00000115091|ACTR3  
ENSG00000115738|ID2 ENSG00000115935|WIPF1 ENSG00000119514|GALNT12 ENSG00000131238|PPT1 ENSG00000135604|STX11 ENSG00000135900|MRPL44 ENSG00000129038|LOXL1 ENSG00000132004|FBXW9  
ENSG00000147124|ZNF41 ENSG00000151615|POU4F2 ENSG00000153046|CDYL ENSG00000164190|NIPBL ENSG00000169697|MAP3K2 ENSG00000171867|PRNP ENSG00000182326|C1S ENSG00000183337|BCOR  
ENSG00000186522|SEPT10 ENSG00000189067|LITAF ENSG00000196442|ZNF432 ENSG00000197172|MAGEA3 ENSG00000204116|CHIC1 ENSG00000204155|PARG  
GAGCTAA ENSG00000001461|NPAL3 ENSG00000048342|Q9H8A7\_HUMAN ENSG00000078295|ADCY2 ENSG00000082458|DLG3 ENSG00000088812|ATRN ENSG00000100931|CHMP4A ENSG00000101224|CDC25B ENSG00000103064|SLC7A6  
ENSG00000125458|NT5C ENSG00000126464|PRR12 ENSG00000151079|KCNAB2 ENSG00000157379|DHR1 ENSG00000164078|MST1R ENSG00000165795|NDRG2 ENSG00000165887|ANKRD2 ENSG00000168904|LRRRC28  
ENSG00000177663|IL17RA ENSG00000184743|NP\_056274.3 ENSG00000187144|SPATA21 ENSG00000189280|GJB5 ENSG00000197548|ATG7 ENSG00000204183|GDF50S ENSG00000248828|FAM120A ENSG00000272415|MPP5  
ENSG00000175651|PLD1 ENSG00000100418|NP\_056519.1 ENSG00000101974|ATP11C ENSG00000114902|SPCS1 ENSG00000118600|TMEM5 ENSG00000140873|ADAMTS18 ENSG00000152969|JAKMIP1 ENSG00000155890|TRIM42  
ENSG00000159082|SYNJ1 ENSG00000160124|CCDC58 ENSG00000165819|METTL3 ENSG00000176160|HSF5 ENSG00000186132|NP\_001017927.1 ENSG00000186834|HEXIM1  
GAGCTCT ENSG00000075290|WNT11 ENSG00000107816|LZTS2 ENSG00000117481|NSUN4 ENSG00000123143|PKN1 ENSG00000124641|TRFP ENSG00000129535|NRL ENSG00000138031|ADCY3  
ENSG00000151445|C14orf133 ENSG00000154016|GRAP ENSG00000165138|ANKS6 ENSG00000175106|CDRT4 ENSG00000181873|C1orf69 ENSG00000182257|C22orf26 ENSG00000184144|CNTN2 ENSG00000196630|Q8NF76\_HUMAN  
ENSG00000198165|Q9H960\_HUMAN ENSG00000203782|LOR ENSG00000203988|Q6ZU49\_HUMAN ENSG00000205266|Q6ZRUS\_HUMAN ENSG000002066405|CLDN18 ENSG00000278018|MAP2 ENSG00000295209|TMEM38B ENSG00000100650|SFRS5  
ENSG00000100890|K1AA0391 ENSG00000105146|AURKC ENSG00000107798|LIPA ENSG00000108733|PEX12 ENSG00000111716|LDHB ENSG00000112695|COX7A2 ENSG00000117595|IRF6 ENSG00000123570|RAB9B  
ENSG00000136242|Q9NXD8\_HUMAN ENSG00000138784|NP\_060170.1 ENSG00000143337|TOR1AIP1 ENSG00000148730|EIF4EBP2 ENSG00000151917|C6orf65 ENSG00000157510|AFAP1L1 ENSG00000160868|CYP3A4 ENSG00000164116|GUCY1A3  
ENSG00000165152|C9orf125 ENSG00000178965|C1orf173 ENSG00000181744|C3orf58 ENSG00000188215|DCUN1D3 ENSG00000198633|Q6PDB4\_HUMAN  
GAGCTTT ENSG00000044090|CUL7 ENSG00000075151|EIF4G3 ENSG00000090615|GOLGA3 ENSG00000090659|CD209 ENSG00000100234|TIMP3 ENSG00000100628|ASB2 ENSG00000102030|ARD1A ENSG00000110395|CBL  
ENSG00000116138|DNAJC16 ENSG00000124374|PAIP2B ENSG00000126602|TRAP1 ENSG00000132854|ANR3B\_HUMAN ENSG00000140718|FTO ENSG00000142149|HUNK ENSG00000151208|DLG5 ENSG00000155858|LSM11  
ENSG00000181016|NP\_872403.1 ENSG00000181274|FRAT2 ENSG00000107816|LZTS2 ENSG00000197724|PHF2 ENSG00000198844|ARHGEP15 ENSG00000205710|Q6ZR85\_HUMAN ENSG00000204961|HCCS ENSG00000210539|ZNF200 ENSG00000076321|KLHL20  
ENSG00000099256|PRTFDC1 ENSG00000122034|GTF3A ENSG00000125246|CLYBL ENSG00000128585|MKLN1 ENSG00000131779|PEX11B ENSG00000131873|CHSY1 ENSG00000134046|MBD2 ENSG00000140391|TSPAN3  
ENSG00000144771|LRTM1 ENSG00000149443|C2orf78 ENSG00000156875|HIAT1 ENSG00000159267|HLCS ENSG00000161800|RACGAP1 ENSG00000166573|GALR1 ENSG00000170989|EDG1 ENSG00000179833|SERTAD2  
ENSG00000184752|NDUFA12 ENSG00000188653|NR\_002807.1 ENSG00000196565|HBE1 ENSG00000204628|GNB2L1  
GAGGAAC ENSG000000011376|LARS2 ENSG00000028310|BRD9 ENSG00000063587|ZNF275 ENSG00000072501|SMC1A ENSG00000073584|SMARCE1 ENSG00000100320|RBM9 ENSG00000100410|PHF5A ENSG00000101019|C20orf44  
ENSG00000106538|RRRES2 ENSG00000117877|CD3EAP ENSG00000125651|GTF2F1 ENSG00000128408|RIBC2 ENSG00000130706|ADRM1 ENSG00000139433|GLTP ENSG00000145191|EIF2B5 ENSG00000145824|CXCL14  
ENSG00000154370|TRIM11 ENSG00000160803|UBQLN4 ENSG00000164088|PPM1M ENSG00000171873|ADRA1D ENSG00000172426|C6orf206 ENSG00000173846|PLK3 ENSG00000176473|WDR25 ENSG00000183778|B3GALT5  
ENSG00000185905|C16orf54 ENSG00000204319|C4A ENSG00000204342|C4B ENSG00000006757|PNPLA4 ENSG00000106392|C1GALT1 ENSG00000111913|C6orf32 ENSG00000113621|C5orf14 ENSG00000116675|DNAJC6  
ENSG00000117090|SLAMF1 ENSG00000128595|CALU ENSG00000132356|PKRA1 ENSG00000132718|SYT11 ENSG00000134108|RAB18 ENSG00000144410|CPO ENSG00000151090|THR3 ENSG00000163430|FSTL1

ENSG00000132600|PRMT7 ENSG00000135148|TRAFD1 ENSG00000137486|ARRB1 ENSG00000138606|SHF ENSG00000149798|CDC42EP2 ENSG00000150990|DHX37 ENSG00000156222|SLC28A1 ENSG00000158106|RHPN1  
ENSG00000160055|Clorf91 ENSG00000161939|C1orf49 ENSG00000167113|COQ4 ENSG00000167130|DOLPP1 ENSG00000168148|HIST3H3 ENSG00000168792|NP\_937790.1 ENSG00000171136|RLN3 ENSG00000171298|GAA  
ENSG00000172346|CSDC2 ENSG00000173638|SLC19A1 ENSG00000176087|SLC35A4 ENSG00000183873|SCN5A ENSG00000196338|NLGN3 ENSG00000197558|Q7B61\_HUMAN ENSG00000203685|Clorf95 ENSG00000203879|GDI1  
ENSG00000206076|Q6ZQR8\_HUMAN ENSG00000205796|SEC63 ENSG00000208666|ZFAND6 ENSG00000124939|SCGB2A1 ENSG00000134313|NP\_065789.1 ENSG00000134324|LPIN1 ENSG00000153879|CEBPG ENSG00000154743|TSEN2  
ENSG00000159398|CES7 ENSG00000160813|C7orf47 ENSG00000171877|FRMD5 ENSG00000173726|TOMM20 ENSG00000186132|NP\_001017927.1 ENSG00000187742|SECSBP2 ENSG00000187824|NP\_001004313.1 ENSG00000196980|NR\_002827.1  
ENSG00000197460|Q8WYX1\_HUMAN  
GAGGGGCG ENSG00000063660|GPC1 ENSG00000075043|KCNQ2 ENSG00000079432|CIC ENSG00000099804|CDC34 ENSG00000100083|GGA1 ENSG00000102858|MGRN1 ENSG00000105519|CAPS ENSG00000111667|USP5  
ENSG00000115325|DOK1 ENSG00000123933|MXD4 ENSG00000125656|CLPP ENSG00000125898|FAM110A ENSG00000128262|Q9NTU6\_HUMAN ENSG00000129038|LOXL1 ENSG00000129244|ATP1B2 ENSG00000130222|GADD45G  
ENSG00000130402|ACTN4 ENSG00000131165|CHMP1A ENSG00000136877|FPGS ENSG00000137834|SMAD6 ENSG00000140511|HAPLN3 ENSG00000140564|FURIN ENSG00000142552|RCN3 ENSG00000144040|SFXN5  
ENSG00000146830|PERQ1 ENSG00000156127|BATF ENSG00000156574|NODAL ENSG00000158022|TRIM63 ENSG00000160113|NR2F6 ENSG00000162267|ITIH3 ENSG00000167889|MGAT5B ENSG00000168936|TMEM129  
ENSG00000173020|ADRBK1 ENSG00000173918|C1QTNF1 ENSG00000174111|SOCS7 ENSG00000174365|NR\_003239.1 ENSG00000176046|NUPR1\_HUMAN ENSG00000179743|Q8N9F6\_HUMAN ENSG00000181781|C19orf19 ENSG00000183403|DND1  
ENSG00000183452|Q86YU6\_HUMAN ENSG00000184363|PKP3 ENSG00000185818|NAT8L ENSG00000196943|LTB4R ENSG00000196972|Q86V52\_HUMAN ENSG00000197444|OGDHL ENSG00000197859|ADAMTSL2 ENSG00000203772|SPRN  
ENSG00000205037|Q6ZT72\_HUMAN ENSG00000205913|Q6ZUC4\_HUMAN ENSG00000207018|LRP6 ENSG00000101654|RNMT ENSG00000101846|STS ENSG00000105887|MTPN ENSG00000124568|SLC17A1 ENSG00000132207|SULT1A3  
ENSG00000143252|SDHC ENSG00000161905|ALOX15 ENSG00000165617|DACT1 ENSG00000173726|TOMM20 ENSG00000177606|JUN ENSG00000178033|FAM2GE ENSG00000186469|GNG2 ENSG00000196188|CTSE  
ENSG00000196227|C20orf177 ENSG00000197522|SUZ12P ENSG00000198934|MAGEE1 ENSG00000203717|Q6ZUF4\_HUMAN  
GAGGGGGG ENSG00000027644|INSRR ENSG00000072182|ACCN4 ENSG00000080031|PTPRH ENSG00000091622|PITPNM3 ENSG00000101438|SLC32A1 ENSG00000105676|ARMC6 ENSG00000105711|SCN1B ENSG00000107185|KIAA0258  
ENSG00000112659|PARC\_HUMAN ENSG00000137216|TMEM63B ENSG00000138835|RGS3 ENSG00000139182|CLSTN3 ENSG00000141026|MED9 ENSG00000148843|PDCD11 ENSG00000149926|FAM57B ENSG00000157734|SNX22  
ENSG00000160014|CALM\_HUMAN ENSG00000160050|CCDC28B ENSG00000160781|PAQR6 ENSG00000161267|BDH1 ENSG00000161270|NPHS1 ENSG00000162510|MATN1 ENSG00000165388|ZNF488 ENSG00000166924|NP\_775835.2  
ENSG00000167614|TTYH1 ENSG00000169992|NLGN2 ENSG00000170616|SCTR1 ENSG00000173991|TCAP ENSG00000174307|PHLDA3 ENSG00000174403|NP\_689970.1 ENSG00000175223|Q8TC18\_HUMAN ENSG00000175901|XR\_017883.1  
ENSG00000177106|EPS8L2 ENSG00000178307|TMEM11 ENSG00000182902|SLC25A18 ENSG00000183196|CHST6 ENSG00000188937|NYX ENSG00000196893|Q8N2W8\_HUMAN ENSG00000197283|SYNGAP1 ENSG00000198407|Q8NCZ5\_HUMAN  
ENSG00000204309|Q6ZSQ3\_HUMAN ENSG00000063177|RPL18 ENSG00000090686|USP48 ENSG00000101868|POLA1 ENSG00000107159|CA9 ENSG00000113924|HGD ENSG00000137692|DCUN1D5 ENSG00000139908|TSSK4  
ENSG00000145675|PK3R1 ENSG00000151500|THY1 ENSG00000160294|MCM3AP ENSG00000163046|C21orf99 ENSG00000163069|SGCB ENSG00000167034|NFKX3-1 ENSG00000168692|TSPY1\_HUMAN ENSG00000168757|TSPY1  
ENSG00000168813|ZNF507 ENSG00000169116|PARM1\_HUMAN ENSG00000180828|BHLHB5 ENSG00000185912|TSPY1\_HUMAN ENSG00000188656|LOC728403 ENSG00000198353|HOXC4 ENSG00000206184|XR\_016233.1  
GAGGGTGG ENSG00000089220|PEBP1 ENSG00000101199|ARFGAP1 ENSG00000119714|GPR68 ENSG00000132677|RHBG ENSG00000138031|ADCY3 ENSG00000142784|WDTC1 ENSG00000143382|ADAMTSL4 ENSG00000145194|ECE2  
ENSG00000149923|PPP4C ENSG00000154222|CC2D1B ENSG00000160072|ATAD3B ENSG00000165804|ZNF219 ENSG00000166188|STAT6 ENSG00000166888|STAT6 ENSG00000172367|PDZD3 ENSG00000174669|SLC29A2  
ENSG00000180525|C10orf108 ENSG00000181085|MAPPK15 ENSG00000182040|USH1G ENSG00000182351|CRIP1 ENSG00000182508|LHFP1L ENSG00000183010|PYCR1 ENSG00000183186|KIAA1957 ENSG00000185897|FFAR3  
ENSG00000186350|RXRA ENSG00000197785|ATAD3A ENSG0000008197|FOXJ2 ENSG00000025796|SEC3E ENSG00000065970|FOXJ2 ENSG00000100095|SEZ6L ENSG00000100804|PSMB5 ENSG00000126016|AMOT  
ENSG00000131480|AOC2 ENSG00000132432|SEC61G ENSG00000134042|MRO ENSG00000135374|ELF5 ENSG00000150938|CRIM1 ENSG00000157540|DYRK1A ENSG00000159212|CLIC6 ENSG00000163029|SMC6  
ENSG00000166535|AZML1 ENSG00000166923|GREM1 ENSG00000173464|RNASE11 ENSG00000175874|CREG2 ENSG00000176915|KIAA0692 ENSG00000179979|CRIPAK ENSG00000187210|GCNT1 ENSG00000196730|DAPK1  
ENSG00000198223|CSF2RA ENSG00000204691|NR\_002819.1  
GAGGTCA ENSG00000106078|COBL ENSG00000119321|FKBP15 ENSG00000119689|DLST ENSG00000122971|ACADS ENSG00000123064|DDX54 ENSG00000125447|GGA3 ENSG00000130270|ATP8B3 ENSG00000130720|FIBCD1  
ENSG00000137522|RNF121 ENSG00000141096|DPEP3 ENSG00000146054|TRIM7 ENSG00000156860|FBR3 ENSG00000158987|RAPGEF6 ENSG00000162174|ASRGL1 ENSG00000180513|Q8NBH1\_HUMAN ENSG00000181437|XR\_017773.1  
ENSG00000198920|KIAA0753 ENSG00000205089|NP\_001034869.1 ENSG0000005187|ACSM3 ENSG000000508063|ATP11B ENSG00000074771|NOX3 ENSG00000114850|SSR3 ENSG00000115525|ST3GAL5 ENSG00000119900|OGFR1L  
ENSG00000125772|GDE5\_HUMAN ENSG00000137975|CLCA2 ENSG00000140285|PGF7 ENSG00000147883|CDKN2B ENSG00000149196|C11orf73 ENSG00000163069|SGCB ENSG00000164675|IQUB ENSG00000166349|RAG1  
ENSG00000168724|DNJA5\_HUMAN ENSG00000175582|RAB6A ENSG00000179104|TMC2 ENSG00000185023|RAB6C ENSG00000185420|SMYD3 ENSG00000200410|IFIT1L  
GAGGTGA ENSG0000017621|MAGIX ENSG00000065618|COL17A1 ENSG00000077463|SIRT6 ENSG00000101276|C20orf54 ENSG00000103260|METRN ENSG00000110665|C11orf21 ENSG00000120853|GOLGA2L1 ENSG00000139178|C1RL  
ENSG00000143434|SEMA6C ENSG00000143858|SYT2 ENSG00000144730|IL17RD ENSG00000159433|STARD9 ENSG00000160716|CHRN2B ENSG00000163155|LYSM1L ENSG00000164520|RAET1E ENSG00000168452|EGFL8  
ENSG00000168936|TMEM129 ENSG00000175325|PROP1 ENSG00000175564|UCP3 ENSG00000178764|ZHX2 ENSG00000181918|Q8N9J9\_HUMAN ENSG00000182631|RXFP3 ENSG00000196739|COL27A1 ENSG00000197587|DMBX1  
ENSG00000204574|ABCF1 ENSG00000091136|LAMB1 ENSG00000106341|C7orf16 ENSG00000106605|BLVR4 ENSG00000111707|SUDS3 ENSG00000114547|ROPN1B ENSG00000125851|PCSK2 ENSG00000134152|C15orf29  
ENSG00000135373|EHF ENSG00000135547|HEY2 ENSG00000145476|CYP4V2 ENSG00000153066|TXNDC11 ENSG00000168385|SEPT2 ENSG00000173947|Clorf88 ENSG00000183631|Q5JQE8\_HUMAN ENSG00000188653|NR\_002807.1  
ENSG00000196886|Q8NAW3\_HUMAN ENSG00000197443|CT47\_HUMAN ENSG00000197989|Clorf79 ENSG00000203975|CT47\_HUMAN ENSG00000203976|CT47\_HUMAN ENSG00000203977|CT47\_HUMAN ENSG00000203978|CT47\_HUMAN  
ENSG00000203979|CT47\_HUMAN  
ENSG00000203980|CT47\_HUMAN ENSG00000203981|CT47\_HUMAN ENSG00000203982|CT47\_HUMAN ENSG00000203983|LOC652679 ENSG00000206367|Q6ZR26\_HUMAN  
GAGTAAA ENSG00000070495|JMJDB2 ENSG00000074755|ZEEF1 ENSG00000086506|HBQ1 ENSG00000100104|SRR1L\_HUMAN ENSG00000103023|NP\_001073961.1 ENSG00000107262|BAG1 ENSG00000126970|KIAA1166 ENSG00000130997|POLN  
ENSG00000134107|BHLHB6 ENSG00000136193|SCRN1 ENSG00000140031|P1768\_HUMAN ENSG00000141505|ASGR1 ENSG00000142156|COL6A1 ENSG00000158497|HMHB1 ENSG00000164978|NUDT2 ENSG00000165281|FANCG  
ENSG00000166171|NP\_056263.1 ENSG00000166261|ZNF202 ENSG00000166435|XKRA1 ENSG00000168395|ING5 ENSG00000173442|EHBFP1L ENSG00000181396|NP\_078924.1 ENSG00000188931|Clorf192  
ENSG00000196408|NOCXO1 ENSG00000198937|C6orf129 ENSG00000204316|MRPL38 ENSG00000204759|Q6ZRY0\_HUMAN ENSG00000030066|NUP160 ENSG00000030304|MUSK ENSG00000087299|L2HGHD ENSG00000101752|MB1  
ENSG00000108239|TBCLD12 ENSG00000110079|MS4A4A ENSG00000111897|SERINC1 ENSG00000112077|RHAG ENSG00000112214|FHL5 ENSG00000112308|C6orf62 ENSG00000121031|PRKDC ENSG00000121570|DPPA4  
ENSG00000124205|EDN3 ENSG00000131791|PRKAB2 ENSG00000138759|FRAS1 ENSG00000148935|GAS2 ENSG00000151422|FER ENSG00000155099|TMEM55A ENSG00000165061|ZMAT4 ENSG00000167384|ZNF180  
ENSG00000168594|ADAM29 ENSG00000169714|CNBP ENSG00000171109|MPN1 ENSG00000171428|NAT1 ENSG00000179941|BBS10 ENSG00000184497|FAM70B ENSG00000188153|COL4A5  
ENSG00000006744|ELAC2 ENSG000000059691|PET112L ENSG000000068903|SIRT2 ENSG000000092758|COL9A3 ENSG00000103343|ZNF174 ENSG00000123338|NCKAP1L ENSG00000124374|PAIP2B  
ENSG00000124678|TCP11 ENSG00000128203|ASPHD2 ENSG00000130684|ZNF337 ENSG00000149541|B3GAT3 ENSG00000151376|ME3 ENSG00000153404|NP\_443141.2 ENSG00000155511|GRIA1 ENSG00000162078|U773\_HUMAN  
ENSG00000167394|ZNF668 ENSG00000175164|ABO ENSG00000188589|RBM33 ENSG00000189129|PLAC9 ENSG00000203746|FCGR2C ENSG00000184808|WWTR1 ENSG00000075213|SEMA3A  
ENSG000000091527|CDV3 ENSG00000094759|GABRP ENSG00000096401|CDC5L ENSG00000113249|HAVCR1 ENSG00000123111|HELB ENSG00000123913|YARS2 ENSG00000163378|C3orf64  
ENSG00000165868|HSPA12A ENSG00000166342|NETO1 ENSG00000168036|CTNNB1 ENSG00000170714|FAM19A5 ENSG00000171421|MRPL36 ENSG000001712059|KLF11 ENSG00000174514|MFSD4  
ENSG00000176049|JAKMIP2 ENSG00000178175|ZNF366 ENSG00000183145|DSCR6 ENSG00000196531|NACA ENSG00000197601|MLSTD2 ENSG00000203707|Q7Y529\_HUMAN  
GAGTACA ENSG00000092010|PSME1 ENSG00000105618|PRPF31 ENSG00000114378|HYAL1 ENSG00000125633|CCDC93 ENSG00000132702|HAPLN2 ENSG00000135930|EIF4E2 ENSG00000141994|DUS3L ENSG00000143222|UFC1  
ENSG00000143303|Clorf66 ENSG00000148602|LRRC21 ENSG00000157617|C21orf25 ENSG00000164012|WDR65 ENSG00000184324|CSAG2 ENSG00000197463|CSAG3 ENSG000000012174|MBTPS2 ENSG00000080493|SLC4A4  
ENSG000000086712|CXorf15 ENSG00000102743|SLC25A15 ENSG00000105983|LMBR1 ENSG00000135018|UBQLN1 ENSG00000135205|NP\_065930.2 ENSG00000138684|IL21 ENSG00000143494|VASH2 ENSG00000151726|ACSL1  
ENSG00000154174|TOMM70A ENSG00000165389|C14orf147 ENSG00000165476|REEP3 ENSG00000166170|BAG5 ENSG00000168566|C6orf151 ENSG00000169740|ZNF32 ENSG00000170959|DCDC5 ENSG00000196966|HIST1H3E  
ENSG00000198478|SH3BGR1L2  
GAGTACG ENSG000000067141|NEO1 ENSG00000087237|CETP ENSG00000088876|ZNF343 ENSG00000100243|CYB5R3 ENSG00000100764|PSMC1 ENSG00000104365|IKBK1 ENSG00000104419|NDRG1 ENSG00000105072|C19orf44  
ENSG00000105137|SYDE1 ENSG00000110660|SLC35F2 ENSG00000122642|FKBP9 ENSG00000135622|SEMA4F ENSG00000136367|ZFHX2 ENSG00000142687|KIAA0319L ENSG00000157330|Clorf158 ENSG00000165584|SSX3  
ENSG00000176679|TGIF2LY ENSG00000178554|Q8N8D4\_HUMAN ENSG00000183914|DNAH2 ENSG00000198012|XR\_017841.1 ENSG00000198915|RASGEF1A ENSG00000198930|CSAG1 ENSG00000204264|PSMB8 ENSG00000204439|C6orf47  
ENSG00000204914|NP\_940843.1 ENSG00000204916|NP\_940843.1 ENSG00000204917|NP\_940843.1 ENSG00000204918|NP\_940843.1 ENSG00000204919|NP\_940843.1 ENSG00000205020|CCL4L1 ENSG00000205841|Q6ZV47\_HUMAN  
ENSG00000040275|CCDC99  
ENSG00000042088|TDP1 ENSG00000066279|ASPM ENSG00000082153|BZW1 ENSG00000100206|DMC1 ENSG00000100711|ZFYVE21 ENSG00000104067|TJP1 ENSG00000107099|DOCK8 ENSG00000109519|GRPEL1  
ENSG00000111837|MAK ENSG00000114346|ECT2 ENSG00000115935|WIPF1 ENSG00000120688|WBP4 ENSG00000122339|C6orf35 ENSG00000125538|IL1B ENSG00000156650|MYST4 ENSG00000163618|CADPS  
ENSG00000164123|NP\_689756.2 ENSG00000168204|O95014\_HUMAN ENSG00000170989|EDG1 ENSG00000181374|CCL13 ENSG00000183789|Q96MJ2\_HUMAN ENSG00000189144|ZNF573 ENSG00000198945|L3MBTL3  
ENSG0000007392|LUC7L ENSG00000106404|CLDN15 ENSG00000111087|GLI1 ENSG00000130054|TMEM28 ENSG00000131471|AOC3 ENSG00000172939|OXSR1 ENSG00000179403|VWA1 ENSG00000181026|ISG20L1  
ENSG00000184246|Q96PW8\_HUMAN ENSG00000184451|CCR10 ENSG00000185608|MRPL40 ENSG00000186118|Q6PEX7\_HUMAN ENSG00000196700|ZNF512B ENSG00000205560|CHKK ENSG00000089163|SIRT4 ENSG00000129562|DAD1  
ENSG00000135974|C2orf49 ENSG00000144771|LRMT1 ENSG00000148426|C10orf47 ENSG00000152904|GGPS1 ENSG00000165813|C10orf118 ENSG00000175691|ZNF77 ENSG00000178562|CD28 ENSG00000179119|SPTY2D1  
ENSG00000204424|LY6G6D  
GAGTATT ENSG00000070601|FRMPD1 ENSG00000072518|MARK2 ENSG00000087086|FTL ENSG00000099194|SCD ENSG00000101144|BMP7 ENSG00000101849|TBL1X ENSG00000103274|NUBP1 ENSG00000125954|FNTB  
ENSG00000126768|TMM117B ENSG00000128849|CGNL1 ENSG00000134809|TMM10 ENSG00000137076|PLN1 ENSG00000141562|NARF ENSG00000147255|IGSF1 ENSG00000160716|CHRN2 ENSG00000164010|ERMAP  
ENSG00000166086|JAM3 ENSG00000167136|ENDOG ENSG00000180139|Q8N9Z5\_HUMAN ENSG00000189196|Q6ZUD9\_HUMAN ENSG00000205436|C14orf73 ENSG00000100249|C22orf31 ENSG00000101333|PLCB4 ENSG00000112701|SENP6  
ENSG00000116729|GPR177 ENSG00000119508|NR4A3 ENSG00000119523|ALG2 ENSG00000120526|NUCDC1 ENSG00000134077|THUMPD3 ENSG00000134700|HOOK1 ENSG00000137040|RANBP6 ENSG00000144749|LRIG1  
ENSG00000154589|LY96 ENSG00000156671|SAMD8 ENSG00000166475|IQUB ENSG00000165995|CACNB2 ENSG00000168589|DYNLRB2 ENSG00000170365|SMAD1 ENSG00000177917|ARL6IP6 ENSG00000183324|NP\_001035826.1  
GAGTCAC ENSG00000006695|COX10 ENSG00000077235|GTF3C1 ENSG00000100010|MTF18\_HUMAN ENSG00000112659|PARC\_HUMAN ENSG00000136830|FAM129B ENSG00000140950|KIAA1609 ENSG00000141342|PLEKHM1 ENSG00000141977|CIB3  
ENSG00000156591|C9orf70 ENSG00000162552|WNT4 ENSG00000169258|GPRIN1 ENSG00000179841|AKAP5 ENSG00000181625|GIYD2 ENSG00000189430|NCR1 ENSG00000196502|SULT1A1 ENSG00000196808|Q96NJ4\_HUMAN  
ENSG00000197245|GRRP1 ENSG000000011260|UTP18 ENSG00000099250|NRP1 ENSG00000109158|GABRA4 ENSG00000132207|SULT1A3 ENSG00000139631|CSAD ENSG00000142182|DNMT3L ENSG00000142731|PLK4  
ENSG00000143669|LYST ENSG00000151470|C4orf33 ENSG00000160194|INDUF3 ENSG00000162482|AKR7A3 ENSG00000165659|DACT1 ENSG00000166260|COX11 ENSG00000167346|MMP26 ENSG00000168692|TSPY1\_HUMAN  
ENSG00000168757|TSPY1 ENSG00000170289|CNGB3 ENSG00000171421|MRPL36 ENSG00000179195|ZNF664 ENSG00000182827|ACBD3 ENSG00000185912|TSPY1\_HUMAN ENSG00000188656|LOC728403 ENSG00000198689|SLC9A6  
ENSG00000203681|XR\_017762.1 ENSG00000204909|SPINK9 ENSG00000205595|AREG ENSG00000206184|XR\_016233.1  
GAGTCCA ENSG00000061337|LZTS1 ENSG00000100055|PSCD4 ENSG00000119614|CHX10 ENSG00000122863|CHST3 ENSG00000126856|Q9NQW5-2 ENSG00000127150|C14orf153 ENSG00000128191|DGCR8 ENSG00000133063|CHIT1  
ENSG00000137313|TRIM26 ENSG00000141084|RANBP10 ENSG00000141750|STAC2 ENSG00000146576|C7orf26 ENSG00000147570|DNAJC5B ENSG00000149021|SCGB1A1 ENSG00000161649|CD300LG ENSG00000163354|DCST2  
ENSG00000164591|MYO2 ENSG00000165752|STK32C ENSG00000167476|JSRP1 ENSG00000168255|Q8IZ67\_HUMAN ENSG00000172020|GAP43 ENSG00000177830|CHD1 ENSG00000182795|Clorf116 ENSG00000184560|C17orf74  
ENSG00000185744|TNT\_HUMAN ENSG00000186063|Clorf80 ENSG00000187741|FANCA ENSG00000187766|KRTAP10-8 ENSG00000188396|NP\_001013654.1 ENSG00000197971|MBP ENSG00000205864|KRTAP5-6 ENSG00000073464|CLCN4  
ENSG00000079257|LXN ENSG00000103316|CRYM ENSG00000108651|UTP6 ENSG00000111962|UST ENSG00000113282|CLINT1 ENSG00000115295|CLIP4 ENSG00000124356|STAMPB ENSG00000139610|ELA1  
ENSG00000154723|ATP5J ENSG00000165868|HSPA12A ENSG00000167383|ZNF229 ENSG00000167863|ATP5H ENSG00000173302|GPR148 ENSG00000183508|FAM46C ENSG00000196074|SYCP2

GAGTCCC ENSG00000197977|ELOVL2 ENSG00000204909|SPINK9 ENSG00000101986|ABCD1 ENSG00000121068|TBX2 ENSG00000125503|PPP1R12C ENSG00000135472|FAIM2 ENSG00000143858|SYT2  
ENSG00000070413|DGCR2 ENSG00000101945|SUV39H1 ENSG00000163914|RHO ENSG00000166016|ABTB2 ENSG00000168159|RNF187 ENSG00000175224|KIAA0652 ENSG00000178006|XR\_018006.1 ENSG00000188242|Q71RB1\_HUMAN  
ENSG00000162438|CTRC ENSG00000162576|MXRA8 ENSG00000099256|PRTFDC1 ENSG00000104824|HNRPL ENSG00000111490|Q9Y2I9\_HUMAN ENSG00000122068|FYTTD1 ENSG00000125691|RPL23 ENSG00000132305|TMMT  
ENSG00000198910|L1CAM ENSG000000085276|EV11 ENSG000000154122|ANKH ENSG00000162885|B3GALNT2 ENSG00000169914|OTUD3 ENSG00000180011|ZADH2  
GAGTCGA ENSG00000032661|NXT1 ENSG000000138078|PREPL ENSG00000069011|PITLX1 ENSG00000069011|SPTB ENSG0000001182759|SLC29A1 ENSG00000116708|PRAMEF4 ENSG00000124067|LCAT ENSG00000125820|NKX2-2  
ENSG00000049089|COL9A2 ENSG00000135744|AGT ENSG000000138083|SIX3 ENSG00000138835|RGS3 ENSG00000139832|RAB20 ENSG00000141404|GNAL ENSG00000152475|Q96EG3\_HUMAN ENSG00000153902|LGI4  
ENSG00000158927|C8orf58 ENSG00000167653|PSCA ENSG00000167780|SOAT2 ENSG00000170412|GPRC5C ENSG00000174403|NP\_689970.1 ENSG00000176424|NP\_001013742.1 ENSG00000187164|KIAA1598 ENSG00000188060|RAB42  
ENSG00000188312|CENPF ENSG00000064787|BCAS1 ENSG00000077713|SLC25A43 ENSG00000101958|GLRA2 ENSG00000111615|KRR1 ENSG00000112238|PRDM13 ENSG00000119041|GTF3C3  
ENSG00000120256|LRP11 ENSG00000126216|TUBGCP3 ENSG00000131711|MAP1B ENSG00000132842|AP3B1 ENSG00000144061|NPHP1 ENSG00000151615|POU4F2 ENSG00000151632|AKR1C2 ENSG00000165632|TAF3  
ENSG00000169744|LDB2 ENSG00000169953|HSFY2 ENSG00000172468|HSFY1 ENSG00000178445|GLDC ENSG00000186073|C15orf41 ENSG00000187134|AKR1C1 ENSG00000187187|ZNF546  
GAGTGCA ENSG00000006071|ABCC8 ENSG0000018625|ATPIA2 ENSG00000102890|ELMO3 ENSG00000104897|IRGC ENSG00000124449|IRGC ENSG00000126353|CCR7 ENSG00000134243|SORT1 ENSG00000142512|SIGLEC10  
ENSG00000168079|SCARA5 ENSG00000168398|BDKRB2 ENSG00000168490|PHYHIP ENSG00000172073|C2orf51 ENSG00000179314|WSDC1 ENSG00000182397|C15orf51 ENSG00000185187|SIGIRR ENSG00000186141|POLR3C  
ENSG00000187017|ESPN ENSG00000196630|Q8NF76\_HUMAN ENSG00000204946|ZNF783 ENSG00000205522|LOC255411 ENSG00000206026|NP\_001032408.1 ENSG00000062096|ARSF ENSG00000104728|ARHGEP10 ENSG00000113249|HAVCR1  
ENSG00000113300|CNOT6 ENSG00000116747|TROVE2 ENSG00000123570|RAB9B ENSG00000132153|DHX30 ENSG00000134042|MRO ENSG00000138758|SEPT11 ENSG00000151835|SACS ENSG00000160194|NDUFV3  
ENSG00000167383|ZNF229 ENSG00000173406|DAB1 ENSG00000175676|GOLGA8F ENSG00000180628|PCGF5 ENSG00000196482|ESRRG ENSG00000205524|Q68D70\_HUMAN  
GAGTGCT ENSG00000100290|BK1 ENSG00000107719|KIAA1274 ENSG00000110799|VWF ENSG00000114988|LMAN2L ENSG00000115353|TACR1 ENSG00000120332|TNN3 ENSG00000120457|KCNJ5 ENSG00000133398|MED10  
ENSG00000163961|RNF168 ENSG00000166166|C14orf172 ENSG00000167476|JSRP1 ENSG00000167792|NDUFV1 ENSG00000171314|PGAM1 ENSG00000171533|MAP6 ENSG00000176136|MCSR ENSG00000180471|C9orf31  
ENSG00000185674|LYG2\_HUMAN ENSG00000186163|Q4G0S1\_HUMAN ENSG00000197041|hCG\_2015269 ENSG00000204101|Q6ZU91\_HUMAN ENSG00000205643|NP\_997210.3 ENSG00000074966|TXK ENSG00000104369|JPH1 ENSG00000110693|SOX6  
ENSG00000115091|ACTR3 ENSG00000128272|ATF4 ENSG00000145604|SKP2 ENSG00000150625|GPM6A ENSG00000152620|C5orf33 ENSG00000168264|IRF2BP2 ENSG00000168917|TMEM22 ENSG00000171150|SOCS5  
ENSG00000172554|SNTG2 ENSG00000204426|LOC286238 ENSG00000206185|LOC152118  
GAGTTAT ENSG00000104951|CDC130 ENSG00000117360|PRPF3 ENSG00000118096|C11orf60 ENSG00000129295|LRR6 ENSG00000129355|CDKN2D ENSG00000135114|OASL ENSG00000137076|TLN1 ENSG00000141570|CBX8  
ENSG00000145819|ARHGAP26 ENSG00000153944|MSI2 ENSG00000164711|LPAL2 ENSG00000175003|SLC22A1 ENSG00000176029|C11orf16 ENSG00000183684|THOC4 ENSG00000186910|SERPINA11 ENSG00000188869|TMC3  
ENSG00000204938|Q6ZUS7\_HUMAN ENSG00000205994|Q6ZN58\_HUMAN ENSG00000058063|ATP11B ENSG00000079335|CDC14A ENSG00000085491|SLC25A24 ENSG00000092203|TOX4 ENSG00000092969|TGFβ2 ENSG00000108389|MTMR4  
ENSG00000120686|UFM1 ENSG00000124818|OPN5 ENSG00000126838|PZP ENSG00000133983|SYNJ2BP ENSG00000134152|C15orf29 ENSG00000136436|CALCOCO2 ENSG00000136541|KIAA1189 ENSG00000137473|TTC29  
ENSG00000140157|N1PA2 ENSG00000143337|TOR1AIP1 ENSG00000162630|B3GALT2 ENSG00000166275|AS3MT ENSG00000166477|LEO1 ENSG00000177613|CSTF2T ENSG00000185023|RAB6C ENSG00000197953|AADACL2  
ENSG00000198542|ITGB11 ENSG00000198898|CAPZA2  
GAGTTGA ENSG00000113719|ERIG1 ENSG00000116205|C1orf83 ENSG00000136816|TOR1B ENSG00000143940|Q6ZMW3\_HUMAN ENSG00000151779|NP\_056993.2 ENSG00000171456|ASXL1 ENSG00000182324|KCNJ14 ENSG00000185909|KLHDC8B  
ENSG00000197162|ZNF688 ENSG00000198951|NAGA ENSG00000006576|PHTF2 ENSG00000066405|CLDN18 ENSG00000079215|SLC1A3 ENSG00000079332|SAR1A ENSG00000106605|BLVRA ENSG00000114805|PLCH1  
ENSG00000116062|MSH6 ENSG00000122877|EGR2 ENSG00000123091|RNF11 ENSG00000138398|PP1G ENSG00000143103|LM04 ENSG00000154401|PPP2R5E ENSG00000154548|SRR35\_HUMAN ENSG00000178722|NP\_775938.1  
ENSG00000181211|Q8NA17\_HUMAN ENSG00000185664|SILV  
GAGTTTA ENSG00000047056|WDR37 ENSG00000048342|Q9H8A7\_HUMAN ENSG00000075388|FGF4 ENSG00000088305|DNMT3B ENSG00000100335|SMCR7L ENSG00000109072|VTN ENSG00000110328|GALNTL4 ENSG00000112679|DUSP22  
ENSG00000113194|UBXD8 ENSG00000113552|GNPDA1 ENSG00000124155|PIGT ENSG00000132275|KIAA0409 ENSG00000132773|TOE1 ENSG00000155363|MOV10 ENSG00000162783|IER5 ENSG00000166165|CKB  
ENSG00000167094|TTC16 ENSG00000170262|MRAP ENSG00000170421|KRT8 ENSG00000182667|NTR1\_HUMAN ENSG00000204309|Q6ZSQ3\_HUMAN ENSG00000204558|Q9BYX6\_HUMAN ENSG00000087303|NID2 ENSG00000102391|RPL36A  
ENSG00000102452|NALCN ENSG00000113583|C5orf15 ENSG00000116750|UCLH5 ENSG00000122884|P4HA1 ENSG00000130638|ATXN1 ENSG00000137090|DMRT1 ENSG00000144228|SPOPL\_HUMAN ENSG00000145794|MEGF10  
ENSG00000147145|GPR23 ENSG00000147231|CXorf57 ENSG00000152348|ATG10 ENSG00000156035|PRUNE2 ENSG00000166396|SERPINB7 ENSG00000170537|TMC7 ENSG00000173610|UGT2A1 ENSG00000176542|KIAA2018  
ENSG00000183814|LIN9 ENSG00000196350|ZNF492 ENSG00000197935|ZNF311  
GAGTTTC ENSG000000013725|CD6 ENSG000000019144|PHLDB1 ENSG00000050327|ARHGEP5 ENSG00000066044|ELAVL1 ENSG00000102104|RS1 ENSG00000105383|CD33 ENSG00000115459|RBED1 ENSG00000125818|PSMF1  
ENSG00000134686|PHC2 ENSG00000138938|Q5TGJ8\_HUMAN ENSG00000140798|ABCC12 ENSG00000146670|CDCA5 ENSG00000154222|CC2D1B ENSG00000163975|MFI2 ENSG00000166435|XRRA1 ENSG00000167858|TEKT1  
ENSG00000196630|Q8NF76\_HUMAN ENSG00000197448|GSTK1 ENSG0000007062|PROM1 ENSG00000070718|AP3M2 ENSG0000027364|AFF4 ENSG00000080947|Q8IVE0\_HUMAN ENSG00000110077|MS4A6A ENSG00000111846|GCNT2  
ENSG00000113384|GOLPH3 ENSG00000122548|K0087\_HUMAN ENSG00000133657|ATP13A3 ENSG00000151632|AKR1C2 ENSG00000151876|FBX04 ENSG00000154541|GBP5 ENSG00000160294|MCM3AP ENSG00000166349|RAG1  
ENSG00000166441|RPL27A ENSG00000178351|Q8N345\_HUMAN ENSG00000178460|C8orf45 ENSG00000179456|ZNF238 ENSG00000181634|TNFSF15 ENSG00000186496|ZNF396 ENSG00000187134|AKR1C1 ENSG00000188193|C6orf155  
ENSG00000196812|ZSCAN16 ENSG00000198498|NP\_060822.1 ENSG00000198633|Q6PDB4\_HUMAN  
GAGTTTT ENSG00000068024|HDAC4 ENSG00000068078|FGFR3 ENSG00000080845|DLGAP4 ENSG00000093167|LRRFIP2 ENSG00000102977|ACD ENSG00000106404|CLDN15 ENSG00000111218|PRMT8 ENSG00000123349|PFDN5  
ENSG00000129351|ILF3 ENSG00000153786|ZDHC7 ENSG00000165644|COMT1 ENSG00000171222|SCAND1 ENSG00000171798|KNDC1 ENSG00000174851|Y1F1A ENSG00000179914|ITLN1 ENSG00000185674|LYG2\_HUMAN  
ENSG00000188176|SMTNL2 ENSG00000204573|Q6ZV05\_HUMAN ENSG00000206069|NP\_001001663.1 ENSG00000007372|PAX6 ENSG000000034713|GABARA2L2 ENSG000000047365|CENTD1 ENSG00000050030|KIAA2022 ENSG00000104231|ZFAND1  
ENSG00000107863|ARHGAP21 ENSG00000119725|ZNF410 ENSG00000124783|SSR1 ENSG00000125879|OTOR ENSG00000134954|ETS1 ENSG00000136492|BRIP1 ENSG00000138185|ENTPD1 ENSG00000139973|SYT16  
ENSG00000140416|TPM1 ENSG00000143514|TP53BP2 ENSG00000146001|PCDH18 ENSG00000148303|SNORD36A ENSG00000159082|SYNJ1 ENSG00000163285|GABRG1 ENSG00000165757|KIAA1462 ENSG00000173542|MOBK1A  
ENSG00000183060|LYSMD4 ENSG00000185532|PRKG1 ENSG00000188610|FAM72B ENSG00000196550|FAM72A  
GATAAAG ENSG000000007264|MATK ENSG000000011021|CLCN6 ENSG00000016391|CHDF ENSG00000023902|PLEKH01 ENSG00000092964|DPYSL2 ENSG00000100156|SLC16A8 ENSG00000109079|TNFAIP1 ENSG00000112273|HDGFL1  
ENSG00000115841|FAM82A ENSG00000124116|WFD3 ENSG00000135801|TAF5L ENSG00000142252|GEMIN7 ENSG00000155367|PPM1J ENSG00000158169|FANCC ENSG00000159023|EPB41 ENSG00000160972|PPP1R16A  
ENSG00000162191|SAKS1\_HUMAN ENSG00000167723|TRPV3 ENSG00000170876|TMEM43 ENSG00000171119|NR1T1 ENSG00000173826|KCNH6 ENSG00000175193|PARL ENSG00000179141|Q8N642\_HUMAN ENSG00000179950|NP\_055096.2  
ENSG00000181029|TRAPP5 ENSG00000185291|IL3RA ENSG00000189409|MPF23A ENSG00000196909|PTPRT ENSG00000204252|HLA-DOA ENSG00000205566|Q8TB02\_HUMAN ENSG00000206149|NP\_950246.1 ENSG00000019991|HGF  
ENSG00000056277|SUHW3 ENSG00000070190|DAPP1 ENSG00000077254|USP33 ENSG00000103254|C16orf24 ENSG00000106809|OGN ENSG00000113805|CNTN3 ENSG00000114978|MOBK1B ENSG00000130021|HDHD1A  
ENSG00000137033|IL33 ENSG00000137642|SORL1 ENSG00000140181|HERC2P2 ENSG00000147124|ZNF41 ENSG00000152455|SUV39H2 ENSG00000154380|ENAH ENSG00000165060|FXN ENSG00000171488|LRR8C  
ENSG00000180777|ANKRD30B ENSG00000186272|ZNF17  
GATAAGC ENSG00000007545|CRAMP1L ENSG00000016391|CHDH ENSG00000056345|ITGB3 ENSG00000086730|LAT2 ENSG00000101193|C2orf11 ENSG00000101391|CDK5RAP1 ENSG00000103023|NP\_001073961.1 ENSG00000104946|TBC1D17  
ENSG00000105053|VRK3 ENSG00000105193|RPS16 ENSG00000105717|PBX4 ENSG00000108702|CCL1 ENSG00000115350|POLE4 ENSG00000123453|SARDH ENSG00000128536|NP\_689963.2 ENSG00000131408|NR1H2  
ENSG00000142552|RCN3 ENSG00000143436|MRPL9 ENSG00000153446|NP\_689972.2 ENSG00000155287|SLC25A28 ENSG00000163932|PRKCD ENSG00000164509|IL31RA ENSG00000176029|C11orf16 ENSG00000182768|NGRN  
ENSG00000183908|LRR6 ENSG00000198171|C2orf116 ENSG0000011114|BTBD7 ENSG00000057294|PKP2 ENSG00000075239|ACAT1 ENSG00000085788|DDHD2 ENSG00000095002|MSH2 ENSG00000100697|DICER1  
ENSG00000135541|AHI1 ENSG00000137673|MPF7 ENSG00000146243|IRAK1BP1 ENSG00000155622|XAGE2 ENSG00000156113|KCNMA1 ENSG00000163513|TGFB2 ENSG00000165410|CFL2 ENSG00000167117|C17orf73  
ENSG00000171763|SPATA5L1 ENSG00000175809|ZNF645 ENSG00000178177|LCORL ENSG00000183434|TFDP3 ENSG00000185751|GAGD3\_HUMAN ENSG00000189108|IL1RAPL2 ENSG00000196357|ZNF565 ENSG00000196677|C8orf77  
ENSG00000197747|S100A10 ENSG00000198060|MARCH5 ENSG00000198162|MAN1A2 ENSG00000203995|ZYG11A  
perfect: GATAAGC GCTTATC taGCTTATCagactgatgttga 2  
GATAATA ENSG00000002933|TMEM176A ENSG00000011021|CLCN6 ENSG00000055118|KCNH2 ENSG00000088826|SMOX ENSG00000104870|FCGRT ENSG00000105369|CD79A ENSG00000106538|RARRES2 ENSG00000111087|GLI1  
ENSG00000115204|MPV17 ENSG00000119431|HDHD3 ENSG00000123685|NP\_061134.1 ENSG00000128313|APOL5 ENSG00000130377|ACSBG2 ENSG00000131888|PRR7 ENSG00000137834|SMAD6 ENSG00000141101|NOB1  
ENSG00000143787|LEFTY1 ENSG00000146755|TRIM50 ENSG00000151465|CDC123 ENSG00000167634|NLRP7 ENSG00000169059|VCX3A ENSG00000172349|IL16 ENSG00000177504|VCX2 ENSG00000178248|Q8N402\_HUMAN  
ENSG00000182583|VCX ENSG00000184674|GSTT1 ENSG00000197769|MAP1LC3C ENSG00000204218|RGL2 ENSG00000204444|APOM ENSG00000204765|XR\_017851.1 ENSG00000205633|NP\_001010902.1 ENSG00000205642|VCX3B  
ENSG0000011201|KAL1 ENSG00000048392|RRM2B ENSG00000054803|CBLN4 ENSG00000065609|SNAP91 ENSG00000071909|MYO3B ENSG00000101558|VAPA ENSG00000103769|RAB11A  
ENSG00000104290|FZD3 ENSG00000105550|FGF21 ENSG00000110077|MS4A6A ENSG00000111011|RSRC2 ENSG00000112246|SIM1 ENSG00000116005|PCYOX1 ENSG00000119878|CRIP1 ENSG00000122406|RPL5  
ENSG00000140987|ZNF434 ENSG00000143149|ALDH9A1 ENSG00000145907|G3BP1 ENSG00000147162|OGT ENSG00000147588|PMP2 ENSG00000151883|PARP8 ENSG00000165959|CLMN ENSG00000172175|MALT1  
ENSG00000172331|BPGM ENSG00000182504|LRR1Q2 ENSG00000186448|ZNF197 ENSG00000187761|PAGE2B ENSG00000188107|EGFL11 ENSG00000188641|DPYD ENSG00000196319|Q9H353\_HUMAN ENSG00000196511|TPK1  
ENSG00000196754|S100A2 ENSG00000196865|NHLRC2 ENSG00000197045|GMFB ENSG00000204348|DOM3Z ENSG00000204921|FCER2 ENSG00000104979|C19orf53 ENSG00000112715|VEGFA ENSG00000119718|EIF2B2 ENSG00000134020|PEBPL\_HUMAN  
GATACAG ENSG000000011600|TYROBP ENSG00000072195|SPEG ENSG00000100605|ITPK1 ENSG00000104921|FCER2 ENSG00000104979|C19orf53 ENSG00000112715|VEGFA ENSG00000119718|EIF2B2 ENSG00000134020|PEBPL\_HUMAN  
ENSG00000144134|RABL2A ENSG00000163814|CDCP1 ENSG00000164400|CSF2 ENSG00000167654|ATCAY ENSG00000168621|GDNF ENSG00000171115|GIMAP8 ENSG00000175294|CATSPER1 ENSG00000179950|NP\_055096.2  
ENSG00000181029|TRAPP5 ENSG00000184164|CRELD2 ENSG00000185527|PDE6G ENSG00000185885|IFIY1 ENSG00000186063|C1orf80 ENSG00000196972|Q86V52\_HUMAN ENSG00000205792|A4D193\_HUMAN ENSG00000047410|TPR  
ENSG00000101935|AMMECR1 ENSG00000108389|MTMR4 ENSG00000113593|PPWD1 ENSG00000114547|ROPN1B ENSG00000119965|C1orf88 ENSG00000121797|CCRL2 ENSG00000123836|PFKFB2 ENSG00000125676|THOC2  
ENSG00000130368|MAS1 ENSG00000134108|ARL8B ENSG00000139517|LNX2 ENSG00000154760|SLFN13 ENSG00000156697|UTP14A ENSG00000157890|MEGF11 ENSG00000164308|NP\_071745.1 ENSG00000166432|ZMAT1  
ENSG00000182367|SNRPEL1 ENSG00000183801|OLFML2 ENSG00000205423|TMEM188  
GATAGTC ENSG00000054965|KIAA0280 ENSG00000101997|CCDC22 ENSG00000102181|CD99L2 ENSG00000105290|APLP1 ENSG00000108861|DUSP3 ENSG00000128185|DGCR6L ENSG00000131470|PSMC3IP ENSG00000139174|PRICKLE1  
ENSG00000149489|ROM1 ENSG00000151474|FRMD4A ENSG00000157601|MX1 ENSG00000163956|LRPAP1 ENSG00000168014|NP\_056346.2 ENSG00000172830|SSH3 ENSG00000174365|NR\_003239.1 ENSG00000176095|IHPK1  
ENSG00000176887|SOX11 ENSG00000179284|DAND5 ENSG00000180438|TPRXL ENSG00000183628|DGCR6 ENSG00000047315|POLR2B ENSG00000081087|OSTM1 ENSG00000111052|LIN7A ENSG00000118705|RPN2  
ENSG00000128272|ATF4 ENSG00000134758|RNF138 ENSG00000136940|DRBP1\_HUMAN ENSG00000155636|DRBP1\_HUMAN ENSG00000157259|GATAD1 ENSG00000159899|NPR2 ENSG00000165030|NFIL3 ENSG00000172260|NEGR1  
ENSG00000175664|C13orf26 ENSG00000177200|CHD9 ENSG00000178187|ZNF454 ENSG00000187689|AMTN ENSG00000188107|EGFL11 ENSG00000188811|NP\_001017370.1  
GATAGTT ENSG00000036448|MYOM2 ENSG00000068001|HYAL2 ENSG00000092094|OSGEP ENSG00000103023|NP\_001073961.1 ENSG00000103932|RPAP1 ENSG00000105499|PLA2G4C ENSG00000108344|PSMD3 ENSG00000115286|NDUFS7  
ENSG00000135956|TMEM127 ENSG00000140522|RLBP1 ENSG00000141934|PPAP2C ENSG00000142632|ARHGEP19 ENSG00000143412|ANXA9 ENSG00000149483|TMEM138 ENSG00000160396|HIPK4 ENSG00000162981|FAM84A  
ENSG00000184144|CNTN2 ENSG00000185955|NP\_001004323.1 ENSG0000012983|MAP4K5 ENSG00000077458|FAM76B ENSG00000100209|HSCB ENSG00000101935|AMMECR1 ENSG00000107758|PPP3CB ENSG00000124209|RAB22A  
ENSG00000135338|C6orf152 ENSG00000136108|CKAP2 ENSG00000136541|KIAA1189 ENSG00000137642|SORL1 ENSG00000138669|PRKG2 ENSG00000139330|KERA ENSG00000143702|CEP170 ENSG00000147687|TATDN1  
ENSG00000149534|MS4A2 ENSG00000153558|FBXL2 ENSG00000154608|CEP170L ENSG00000155893|ACPL2 ENSG00000162819|C1orf58 ENSG00000164331|ANKRA2 ENSG00000165244|ZNF367 ENSG00000174123|TLR10  
ENSG00000177613|CSTF2T ENSG00000179144|GIMAP7 ENSG00000182992|Q8IZM0\_HUMAN ENSG00000184226|PCDH9 ENSG00000188895|Q68DK7\_HUMAN ENSG00000189403|HMGB1 ENSG00000197299|BLM  
GATATAT ENSG00000049769|PPI1R3F ENSG00000114867|EIF4G1 ENSG00000117298|BCE1 ENSG00000125445|MR89 ENSG00000131914|LIN28 ENSG00000137106|GRHR ENSG00000137834|SMAD6

ENSG00000140287|HDC ENSG00000142149|HUNK ENSG00000156853|ZNF689 ENSG00000159189|C1QC ENSG00000159217|IGF2BP1 ENSG00000165140|FBP1 ENSG00000169991|Q5TF58\_HUMAN ENSG00000182330|PRAEF8  
ENSG00000185122|HSF1 ENSG00000186364|NUDT17 ENSG00000197063|MARG ENSG00000198610|AKR1C4 ENSG00000204485|LOC729516 ENSG00000204510|PRAEF7 ENSG00000205193|Q6ZTC6\_HUMAN ENSG00000005421|PONI  
ENSG00000023909|GCLM ENSG00000035141|NP\_116211.1 ENSG00000056097|ZFR ENSG00000064012|CASP8 ENSG00000069702|TGFBR3 ENSG00000083312|TNPO1 ENSG00000104432|IL7 ENSG00000105793|GTPBP10  
ENSG00000112357|PEX7 ENSG00000113441|LNPEP ENSG00000115380|EFEMP1 ENSG00000116171|SCP2 ENSG00000120156|TEK ENSG00000121579|NAT13 ENSG00000122787|AKR1D1 ENSG00000123106|CCDC91  
ENSG00000128534|LSM8 ENSG00000131003|RBMY2FP ENSG00000132437|DDC ENSG00000132963|POMP ENSG00000134897|BIVM ENSG00000137996|RTCD1 ENSG00000139116|KIF21A ENSG00000140265|ZSCAN29  
ENSG00000147145|GPR23 ENSG00000150625|GPM6A ENSG00000150938|CRIM1 ENSG00000164483|SAMD3 ENSG00000164647|STEAP1 ENSG00000165118|C9orf64 ENSG00000173376|C4orf31 ENSG00000175445|NR2F1  
ENSG00000181690|PLAG1 ENSG00000184203|PPP1R2 ENSG00000185070|FLRT2 ENSG00000186522|SEPT10 ENSG00000196360|NR\_002168.1 ENSG00000204478|PRAEF20 ENSG00000204486|PRAEF21  
GATATGC ENSG00000008256|PSCD3 ENSG00000040608|RTN4R ENSG00000070371|CLTCL1 ENSG00000103064|SLC7A6 ENSG00000104886|PLEKHJ1 ENSG00000117472|TSPAN1 ENSG00000126562|WNK4 ENSG00000127418|FGFRL1  
ENSG00000127452|FBXL12 ENSG00000148602|LRRCC21 ENSG00000153179|RASSF3 ENSG00000153179|RASSF3 ENSG00000163141|BNIP1 ENSG00000155229|MMS19L ENSG00000167772|ANGPTL4 ENSG00000177854|TMEM187 ENSG00000177943|MAMDC4  
ENSG00000180229|NP\_001019853.1 ENSG00000182566|CLEC4G ENSG00000182712|MTCPC1 ENSG00000184935|Q6AI01\_HUMAN ENSG00000186074|CD300LF ENSG00000204479|PRAEF17 ENSG00000204488|PRAEF16 ENSG00000031691|CENPQ  
ENSG00000046604|DSG2 ENSG00000047315|POLR2B ENSG00000065060|C6orf107 ENSG00000068615|REEP1 ENSG00000101115|SALL4 ENSG00000104760|FGL1 ENSG00000109063|MYH3 ENSG00000111269|CREBL2  
ENSG00000111846|GCNT2 ENSG00000113141|IK ENSG00000122707|RECK ENSG00000136451|VEZF1 ENSG00000138600|PSL2\_HUMAN ENSG00000138613|APH1B ENSG00000139910|NOVA1 ENSG00000172380|GNG12  
ENSG00000177453|NIM1\_HUMAN ENSG00000182836|PLCXD3 ENSG00000183395|PMCH ENSG00000205612|Q71JB2\_HUMAN ENSG00000206221|Q6ZVX8\_HUMAN  
GATATTA ENSG00000012963|C14orf130 ENSG00000034510|TMSB10 ENSG00000072110|ACTN1 ENSG00000095319|NUP188 ENSG00000099194|SCD ENSG00000100150|DEPDC5 ENSG00000101152|DNAJC5 ENSG00000105610|KLF1  
ENSG00000113303|BTNL8 ENSG00000119487|MAPKAP1 ENSG00000120087|HOBX7 ENSG00000130313|PGLS ENSG00000131475|VPS25 ENSG00000132911|NMUR2 ENSG00000137834|SMAD6 ENSG00000139219|COL2A1  
ENSG00000142530|NP\_612420.1 ENSG00000146966|DENND2A ENSG00000156973|PDE6D ENSG00000157617|C21orf25 ENSG00000162231|NXF1 ENSG00000164405|UQCRCQ ENSG00000165584|SSX3 ENSG00000170550|Q8WVU8\_HUMAN  
ENSG00000173653|RCE1 ENSG00000174939|ASPHD1 ENSG00000177627|C12orf54 ENSG00000177731|PLI1 ENSG00000181218|HIST3H2A ENSG00000181368|NM\_032947.3 ENSG00000184076|NP\_001003684.1 ENSG00000184148|SPRR4  
ENSG00000184979|USP18 ENSG00000185352|HS6ST3 ENSG00000187033|SAMD7 ENSG00000187288|CIDEC ENSG00000198746|GAPATCH3 ENSG00000203836|NP\_899228.3 ENSG00000049860|HEXB ENSG00000067208|EVI5  
ENSG00000069966|GNB5 ENSG00000084092|C4orf14 ENSG00000102738|MRPS31 ENSG00000112406|HECA ENSG00000114354|FTG ENSG00000116977|LGALS8 ENSG00000118200|CAMSAP1L1 ENSG00000129484|PARP2  
ENSG00000133997|MED6 ENSG00000146281|ACY1L2 ENSG00000151914|DST ENSG00000154997|NP\_997249.1 ENSG00000156531|PHF6 ENSG00000162699|Q96RF1\_HUMAN ENSG00000163449|TMEM169 ENSG00000164442|CITED2  
ENSG00000171522|PTGER4 ENSG00000181126|Q86V94\_HUMAN ENSG00000182628|FAM33A ENSG00000183324|NP\_001035826.1 ENSG00000184258|CDR1 ENSG00000188313|PLSCR1 ENSG00000196711|NP\_997296.1 ENSG00000198448|Q8N649\_HUMAN  
GATATTG ENSG00000075826|SEC31B ENSG00000089737|DDX24 ENSG00000102445|C13orf18 ENSG00000105663|WBP7\_HUMAN ENSG00000106290|TAF6 ENSG00000106565|TMEM176B ENSG00000107831|FGF8 ENSG00000116014|KISS1R  
ENSG00000140527|NP\_064597.1 ENSG00000157103|SLC6A1 ENSG00000160075|SSU72 ENSG00000164045|CDC25A ENSG00000167619|TMEM145 ENSG00000182158|CREB3L2 ENSG00000185219|ZNF445 ENSG00000185269|NOTUM  
ENSG00000198700|IPO9 ENSG00000205209|NP\_001020762.1 ENSG00000205460|NP\_001004332.1 ENSG00000206193|Q5HYA3\_HUMAN ENSG0000007168|PFAFH1B1 ENSG00000081923|ATP8B1 ENSG00000113583|C5orf15 ENSG00000116678|LEPR  
ENSG00000119523|ALG2 ENSG00000120341|LZTR2 ENSG00000123219|CENPK ENSG00000131375|CAPN7 ENSG00000132970|WASF3 ENSG00000134375|TIMM17A ENSG00000140015|KCNH5 ENSG00000153214|TMEM87B  
ENSG00000153936|HS2ST1 ENSG00000163512|AZI2 ENSG00000164663|USP49 ENSG00000170542|SERPINB9 ENSG00000177917|ARL6IP6 ENSG00000181562|FAM12A ENSG00000184258|CDR1 ENSG00000186416|NKRFP  
ENSG00000188419|CHM ENSG00000198586|TLK1 ENSG00000204262|COL5A2 ENSG00000099977|DDT ENSG00000101251|SELL2 ENSG00000103047|TMC07 ENSG00000105198|LGALS13 ENSG00000120889|TNFRSF10B  
GATCACCA ENSG00000068323|TFE3 ENSG00000077984|CST7 ENSG00000078246|TULP3 ENSG00000168894|NP\_057578.1 ENSG00000178015|GPR150 ENSG00000179241|LDLRAD3 ENSG00000180861|C12orf36 ENSG00000196972|Q86V52\_HUMAN  
ENSG00000129450|SIGLEC9 ENSG00000138092|CENPO ENSG00000163833|FBXO40 ENSG00000102349|KLF8 ENSG00000107669|ATE1 ENSG00000110852|CLEC2B ENSG00000111716|LDHB ENSG00000115540|PREI3  
ENSG00000203709|C1orf132 ENSG00000050628|PTGER3 ENSG00000065559|MAP2K4 ENSG00000102349|KLF8 ENSG00000107669|ATE1 ENSG00000110852|CLEC2B ENSG00000111716|LDHB ENSG00000115540|PREI3  
ENSG00000117592|PRDX6 ENSG00000119421|NDUFA8 ENSG00000121897|LIAS ENSG00000122126|OCRL ENSG00000134371|CDC73 ENSG00000135932|CAB39 ENSG00000136709|WDR33 ENSG00000144214|LYG1\_HUMAN  
ENSG00000148229|POLE3 ENSG00000152443|ZNF776 ENSG00000152977|Z1C1 ENSG00000158042|MRPL17 ENSG00000163568|AIM2 ENSG00000166750|CLFN5 ENSG00000188419|CHM ENSG00000188529|FUSIP1  
GATCAGG ENSG00000063660|GPC1 ENSG00000068323|TFE3 ENSG00000072858|SIDT1 ENSG00000085733|CTTN ENSG00000118707|TGIF2 ENSG00000139899|CBLN3 ENSG00000148841|KIAA1754 ENSG00000149930|TAOK2  
ENSG00000150201|FXRD4 ENSG00000184454|C1orf130 ENSG00000187681|ORM1 ENSG00000189171|S100A13 ENSG00000203903|Q6ZMP7\_HUMAN ENSG00000204154|ORM2 ENSG00000070756|PABPC1 ENSG00000112031|MTRF1L  
ENSG00000124098|C20orf108 ENSG00000125378|BMP4 ENSG00000125772|GDE5\_HUMAN ENSG00000134046|MBD2 ENSG00000134532|SOX5 ENSG00000141200|KIF2B ENSG00000142698|C1orf94 ENSG00000158234|FAIM  
ENSG00000165813|C10orf118 ENSG00000166938|DIS3L ENSG00000168710|AHCYL1 ENSG00000173215|Q96HQ8\_HUMAN ENSG00000179630|C13orf31 ENSG00000183644|NP\_997313.1 ENSG00000197747|S100A10 ENSG00000204815|TTC25  
GATCATA ENSG00000037757|NP\_115661.1 ENSG00000055118|KCNH2 ENSG00000064886|CHI3L2 ENSG00000089101|C20orf26 ENSG00000101417|PXMP4 ENSG00000112053|SLC26A8 ENSG00000113312|TTC1 ENSG00000119321|FKBP15  
ENSG00000125816|NKX2-4 ENSG00000135824|RGS8 ENSG00000147432|CHRN3 ENSG00000158748|HTR6 ENSG00000165475|CRYL1 ENSG00000166126|AMN ENSG00000173545|ZNF622 ENSG00000174521|TTC9B  
ENSG00000177156|TALD01 ENSG00000183403|DND1 ENSG00000185187|SIGIRR ENSG00000187840|EIF4EBP1 ENSG00000197324|LRP10 ENSG00000204511|NM\_001011700.1 ENSG00000204562|Q6ZU75\_HUMAN ENSG00000205352|Q9NZ81-2  
ENSG00000079931|MOXD1 ENSG00000082512|TRAF5 ENSG00000099942|CRKL ENSG00000114742|WDR48 ENSG00000114742|WDR48 ENSG00000120051|C10orf80 ENSG00000125378|BMP4 ENSG00000127081|ZNF484  
ENSG00000127483|HP1BP3 ENSG00000133962|C14orf161 ENSG00000135960|EDAR ENSG00000137806|NDUFAF1 ENSG00000138615|C1IP ENSG00000140043|ZADH1 ENSG00000148584|ACF\_HUMAN ENSG00000164123|NP\_689756.2  
ENSG00000166343|ZMYND17 ENSG00000169288|MRPL1 ENSG00000171033|PKIA ENSG00000181544|FANCB ENSG00000186432|KPNA4 ENSG00000196660|SLC30A10 ENSG00000197627|Q9UFV3\_HUMAN ENSG00000198878|Q9PIL8\_HUMAN  
GATCATG ENSG00000072501|SMC1A ENSG00000083454|P2RX5 ENSG00000105576|TNPO2 ENSG00000121270|ABCC11 ENSG00000121274|PAPD5 ENSG00000125910|EDG6 ENSG00000129816|NR\_001538.1 ENSG00000129845|O14605\_HUMAN  
ENSG00000130309|GLT25D1 ENSG00000138698|RAP1GDS1 ENSG00000148290|SURF1 ENSG00000151631|Q9P2A3\_HUMAN ENSG00000162367|TAL1 ENSG00000166948|TGM6 ENSG00000176340|COX8A ENSG00000179142|CYP11B2  
ENSG00000179393|Q9NRE4\_HUMAN ENSG00000179994|NP\_001030016.1 ENSG00000181852|RNF41 ENSG00000184144|CNTN2 ENSG00000196090|PTPRT ENSG00000198913|Q9H5S2\_HUMAN ENSG00000080986|NDC80 ENSG00000100580|TMED8  
ENSG00000101928|MOSPD1 ENSG00000113593|PPWD1 ENSG00000114942|EEF1B2 ENSG00000116005|PCYOX1 ENSG00000119673|ACOT2 ENSG00000122566|HNRPA2B1 ENSG00000123416|TUBA1B ENSG00000137478|FCHSD2  
ENSG00000139842|CUL4A ENSG00000140945|CDH13 ENSG00000148672|GLUDP5 ENSG00000151849|CENPJ ENSG00000161647|MP3 ENSG00000162051|C10orf80 ENSG00000164603|NP\_689769.2 ENSG00000165672|PRDX3  
ENSG00000170113|N1PA1 ENSG00000170584|NUDCD2 ENSG00000172197|MBOAT1 ENSG00000181104|F2R ENSG00000181690|PLAG1 ENSG00000184227|ACOT1 ENSG00000184280|ZNF285B ENSG00000185068|GTF2H5  
ENSG00000185104|FAF1 ENSG00000186417|GLDN ENSG00000197967|Q86U89\_HUMAN ENSG00000198918|RPL39 ENSG00000204815|TTC25  
GATCCAC ENSG00000036828|CASR ENSG00000090924|PLEKHG2 ENSG00000095917|TPSD1 ENSG00000105383|CD33 ENSG00000109625|CPZ ENSG00000137106|GRHR ENSG00000142619|PADI3 ENSG00000157064|NMNAT2  
ENSG00000158714|SLAMF8 ENSG00000159023|EPB41 ENSG00000160862|AZGP1 ENSG00000171611|PTCRA ENSG00000173080|RXFP4 ENSG00000183666|LOC728411 ENSG00000185801|YV007\_HUMAN ENSG00000186994|ANKRD47  
ENSG00000198237|GUSL1\_HUMAN ENSG00000066084|DIP2B ENSG00000068489|PRR11 ENSG00000073803|MAP3K13 ENSG00000091009|RBM27 ENSG00000092148|HECTD1 ENSG00000100442|FKBP3 ENSG00000112305|SMAP1  
ENSG00000120820|GLT8D2 ENSG00000147138|GPR174 ENSG00000149948|HMG2 ENSG00000152642|GPD1L ENSG00000156219|ART3 ENSG00000158691|ZSCAN12 ENSG00000166206|GABRB3 ENSG00000166326|TRIM44  
ENSG00000172955|ADH6 ENSG00000179796|LRRCC3B ENSG00000181798|C2orf52 ENSG00000186469|GNG2 ENSG00000197969|VPS13A ENSG00000198702|Q8NBL2\_HUMAN  
ENSG00000092607|TBX15 ENSG00000103852|TTC23 ENSG00000104419|NDRG1 ENSG00000110660|SLC35F2 ENSG00000132821|C20orf102 ENSG00000135454|B4GALNT1 ENSG00000135924|DNAJB2 ENSG00000149179|C11orf49  
ENSG00000154930|ACSS1 ENSG00000161031|PGLYRP2 ENSG00000161638|ITGA5 ENSG00000165801|NP\_060541.3 ENSG00000165887|ANKRD2 ENSG00000174903|RABL1B ENSG00000174951|FUT1 ENSG00000175873|Q9H7M1\_HUMAN  
ENSG00000176678|FOXL1 ENSG00000178035|IMPDH2 ENSG00000186141|POLR3C ENSG00000188277|LOC643338 ENSG00000189363|Q6ZSP4\_HUMAN ENSG00000196465|MYL6B ENSG00000204385|CTL4\_HUMAN ENSG00000204527|DUXA  
ENSG00000204633|ACTN3 ENSG00000011260|UTP18 ENSG00000104112|SCLR ENSG00000113302|IL12B ENSG00000115386|REGL ENSG00000118702|GHRH ENSG00000119862|NP\_054900.1 ENSG00000124789|NUP153  
ENSG00000133136|GBG5L\_HUMAN ENSG00000136842|TMOD1 ENSG00000137265|TRF4 ENSG00000141543|EIF4A3 ENSG00000143520|NP\_001014364.1 ENSG00000146963|LUC7L2 ENSG00000151023|C10orf63 ENSG00000154874|NP\_872374.3  
ENSG00000164675|IQUB ENSG00000164929|BAALC ENSG00000164933|SLC25A32 ENSG00000167193|CRK ENSG00000174021|GNG5 ENSG00000175018|C10orf122 ENSG00000176256|HMG4 ENSG00000179873|NLRP11  
ENSG00000197183|C20orf112  
GATCCCT ENSG00000019102|VSIQ2 ENSG00000104812|GYS1 ENSG00000130288|NDUFA13 ENSG00000143379|SETDB1 ENSG00000147394|ZNF185 ENSG00000163521|GLB1L ENSG00000172922|RNASEH2C ENSG00000173163|COMMD1  
ENSG00000175318|GRAMD2 ENSG00000177469|PTRF ENSG00000170763|NP\_689827.1 ENSG00000177728|KIAA0195 ENSG00000178363|CALML3 ENSG00000180509|KCNK1 ENSG00000188101|ALOX12P ENSG00000197162|ZNF688  
ENSG00000204092|NP\_001001705.1 ENSG00000205231|Q6ZQ01\_HUMAN ENSG00000206193|Q5HYA3\_HUMAN ENSG00000102383|ZDHHC15 ENSG00000117395|EBNA1BP2 ENSG00000119508|NR4A3 ENSG00000128595|CALU ENSG00000157005|SST  
ENSG00000160813|C7orf47 ENSG00000166405|RIC3 ENSG00000171497|PPID ENSG00000178163|NP\_444270.2 ENSG00000178999|AURKB ENSG00000179902|C1orf194 ENSG00000182107|TMEM30B ENSG00000188895|Q68DK7\_HUMAN  
ENSG00000204852|Q2MV58-6  
GATCCGG ENSG00000005075|POLR2J1 ENSG00000017621|MAGIX ENSG00000064961|HMG20B ENSG00000074842|C19orf10 ENSG00000076662|ICAM3 ENSG00000100429|HDAC10 ENSG00000108557|RAI1 ENSG00000111271|ACAD10  
ENSG00000116871|MAP7D1 ENSG00000119574|ZBTB45 ENSG00000122592|HOXA7 ENSG00000130222|GADD45G ENSG00000136630|HLX1 ENSG00000142290|FXRD7 ENSG00000160469|BRSK1 ENSG00000162650|ATXN7L2  
ENSG00000163701|IL17RE ENSG00000167775|CD320 ENSG00000169635|HIC2 ENSG00000172977|HTATIP ENSG00000173715|C11orf80 ENSG00000174775|HRAS ENSG00000179314|WSCD1 ENSG00000184986|TMEM121  
ENSG00000203945|Q5JQP1\_HUMAN ENSG00000204633|SP5 ENSG00000205439|KRTAP10-10 ENSG00000006377|DLX6 ENSG00000049618|ARID1B ENSG00000089177|C20orf23 ENSG00000091409|ITGA6  
ENSG00000107937|GTPBP4 ENSG00000117280|RAB7L1 ENSG00000118267|ZNF271 ENSG00000120129|DUSP1 ENSG00000122691|TWIST1 ENSG00000124203|C20orf174 ENSG00000132388|UBE2G1 ENSG00000143486|LGTN  
ENSG00000147655|RSPO2 ENSG00000152661|GJA1 ENSG00000166170|BAG5 ENSG00000185915|KLHL34 ENSG00000188215|DCUN1D3  
GATCGAC ENSG00000007129|CEACAM21 ENSG00000083290|ULK2 ENSG00000084112|SSH1 ENSG00000084234|APLP2 ENSG00000087460|GNAS ENSG00000088992|TCUN ENSG00000092529|CAPN3 ENSG00000104611|SH2D4A  
ENSG00000105066|FTZ1 ENSG00000106125|AQP1 ENSG00000108774|RAB5C ENSG00000114373|CISH ENSG00000130222|GADD45G ENSG00000137124|ALDH1B1 ENSG00000161671|NP\_996261.1 ENSG00000163995|ABLIM2  
ENSG00000165626|C10orf30 ENSG00000171124|FUT3 ENSG00000171450|CDK5R2 ENSG00000171595|DNAI2 ENSG00000179820|MYADM ENSG00000183643|C15orf32 ENSG00000183914|DNAH2 ENSG00000185831|NR\_003081.1  
ENSG00000186837|C21orf119 ENSG00000196923|PDLIM7 ENSG00000204048|Q6ZUG3\_HUMAN ENSG00000002745|WNT16 ENSG00000034677|RNF19 ENSG00000074266|EED ENSG00000081803|CADPS2 ENSG00000102043|MTMR8  
ENSG00000108848|CROP\_HUMAN ENSG00000112297|ATM1 ENSG00000116030|SUMO1P3 ENSG00000120594|PLXDC2 ENSG00000138286|KIAA0974 ENSG00000138379|GDF8 ENSG00000157219|HTR5A ENSG00000163539|CLASP2  
ENSG00000164796|CSMD3 ENSG00000166342|NETO1 ENSG00000169594|BNC1 ENSG00000170417|TMEM182 ENSG00000174099|MSRB3 ENSG00000178075|GRAMD1C ENSG00000178904|DPY19L3 ENSG00000187951|FAM7A2  
ENSG00000198650|TAT ENSG00000205150|FAM92A3  
GATCGAT ENSG00000005418|THRAP3 ENSG00000089280|FUS ENSG00000101407|KIAA0406 ENSG00000108774|RAB5C ENSG00000111684|MBOAT5 ENSG00000125741|OPA3 ENSG00000127452|FBXL12 ENSG00000128389|NM\_032262  
ENSG00000130433|CRANP6 ENSG00000131943|C19orf12 ENSG00000141753|IGFBP4 ENSG00000142789|ELA3A ENSG00000148218|ALAD ENSG00000149792|MRPL49 ENSG00000160182|TFPI ENSG00000163081|NP\_694583.1  
ENSG00000167565|SERTAD3 ENSG00000167642|SPINT2 ENSG00000168763|CNM3 ENSG00000172232|AZU1 ENSG00000177303|CASKIN2 ENSG00000178645|C10orf53 ENSG00000178971|C17orf68 ENSG00000179428|Q8N6X1\_HUMAN  
ENSG00000182240|BACE2 ENSG00000183691|NOG ENSG00000186431|FCAR ENSG00000197445|C16orf47 ENSG00000204141|Q6ZVW5\_HUMAN ENSG000000012048|BRCA1 ENSG000000015171|ZMYND11 ENSG00000049247|UTS2  
ENSG00000065883|CDC215 ENSG00000075089|ACTR6 ENSG00000104722|NEFM ENSG00000116870|AKAP7 ENSG00000119711|ALDH6A1 ENSG00000129170|CSRFP3 ENSG00000134202|GSTM3  
ENSG00000135069|PSAT1 ENSG00000135999|EPC2 ENSG00000137210|TMEM14B ENSG00000140941|MAPP1LC3B ENSG00000144635|DYNC1L1 ENSG00000148798|INA ENSG00000149084|HSD17B12 ENSG00000151792|CTSO  
ENSG00000165934|CPSF2 ENSG00000166889|NP\_689929.1 ENSG00000169045|HNRPH1 ENSG00000170989|EDG1 ENSG00000173013|CCDC96 ENSG00000174226|NP\_689841.2 ENSG00000184040|FAM23B  
GATCGCC ENSG00000007264|MATK ENSG00000067182|TNFRSF1A ENSG00000071553|ATP6AP1 ENSG00000078808|SDFA ENSG00000090971|NAT14 ENSG00000103356|EARS2 ENSG00000116670|MAD2L2

|                          |                                |                                |                              |                              |                              |                                |                                |                              |                        |
|--------------------------|--------------------------------|--------------------------------|------------------------------|------------------------------|------------------------------|--------------------------------|--------------------------------|------------------------------|------------------------|
| ENSG00000124074 C16orf48 | ENSG00000125533 BHLHB4         | ENSG00000137331 IER3           | ENSG00000137413 TBN          | ENSG00000145920 CPLX2        | ENSG00000158887 MPZ          | ENSG00000160650 Q96HZ0_HUMAN   | ENSG00000161031 PGLYRP2        |                              |                        |
| ENSG00000164438 TLX3     | ENSG00000167768 KRT1           | ENSG00000167900 TK1            | ENSG00000169189 NSMCE1       | ENSG00000172270 BSG          | ENSG00000176078 Q8NAN4_HUMAN | ENSG00000176534 RL41_HUMAN     | ENSG00000177133 Q6ZV91_HUMAN   |                              |                        |
| ENSG00000178307 TMEM11   | ENSG00000179168 GDN            | ENSG00000183643 C15orf32       | ENSG00000187456 RDM1         | ENSG00000198293 Q96HM8_HUMAN | FAM27E3                      | ENSG00000204807 FAM27E3        | ENSG0000026508 CD44            |                              |                        |
| ENSG00000164652 SNX24    | ENSG00000087995 METTL2A        | ENSG00000100196 KDELRL3        | ENSG00000103569 AQP9         | ENSG00000113282 CLINT1       | ENSG00000114416 FXR1         | ENSG00000116668 C1orf26        | ENSG00000145817 YIPF5          |                              |                        |
| ENSG00000150656 CNDP1    | ENSG00000152977 ZIC1           | ENSG00000155970 EPHA2          | ENSG00000156675 RAB11FIP1    | ENSG00000158164 TMSL8        | ENSG00000165660 KIAA0157     | ENSG00000169129 AFAP1L2        | ENSG00000170027 YWHAG          |                              |                        |
| ENSG00000179456 ZNF238   | ENSG00000187672 ERC2           | ENSG00000197585 Q5JV89_HUMAN   |                              |                              |                              |                                |                                |                              |                        |
| GATCGTA                  | ENSG00000116584 ARHGFE2        | ENSG00000125740 POSB           | ENSG00000131355 EMR3         | ENSG00000131467 PSME3        | ENSG00000134824 FADS2        | ENSG00000135116 HRK            | ENSG00000140090 SLC24A4        | ENSG00000143167 GPA33        |                        |
|                          | ENSG00000144115 NP_060741.2    | ENSG00000148773 MKI67          | ENSG00000149489 ROM1         | ENSG00000156471 PTDSS1       | ENSG00000164651 SP8          | ENSG00000165861 ZFYVE1         | ENSG00000166473 PKD1L2         | ENSG00000166974 MAPRE2       |                        |
|                          | ENSG00000171954 NP_775754.1    | ENSG00000175793 SFN            | ENSG00000176515 Q8NAX6_HUMAN | ENSG00000177822 XR_017723.1  | ENSG00000184210 DGAT2L6      | ENSG00000197615 C8orf49        | ENSG00000204240 Q6ZVK0_HUMAN   | ENSG00000003393 ALS2         |                        |
|                          | ENSG00000035928 RFC1           | ENSG00000066583 ISOC1          | ENSG00000112343 TRIM38       | ENSG00000125900 SIRPD        | ENSG00000130939 UBE4B        | ENSG00000134318 ROCK2          | ENSG00000135845 PIGC           | ENSG00000136870 ZNF189       |                        |
|                          | ENSG00000141338 ABCA8          | ENSG00000143951 NP_056994.3    | ENSG00000145354 ZCD2         | ENSG00000150275 PCDH15       | ENSG00000154438 ASZ1         | ENSG00000160188 TSGA2          | ENSG00000162992 NEUROD1        | ENSG00000163554 SPTA1        |                        |
|                          | ENSG00000164219 PGGT1B         | ENSG00000167904 TMEM68         | ENSG00000175040 CHST2        | ENSG00000177570 SAMD12       | ENSG00000178105 DDX10        | ENSG00000188647 PTAR1          | ENSG00000189136 NM_207382      | ENSG00000205111 CDKL4        |                        |
| GATCGTG                  | ENSG00000002726 ABP1           | ENSG00000012211 LMO6           | ENSG00000038358 EDC4         | ENSG00000099889 ARVCF        | ENSG00000100565 C14orf166B   | ENSG00000101187 SLCO4A1        | ENSG00000105771 C19orf61       | ENSG00000112493 TAPBP        |                        |
|                          | ENSG00000119242 CCDC92         | ENSG00000129221 AIP1L1         | ENSG00000147753 TTY7_HUMAN   | ENSG00000147761 TTY7_HUMAN   | ENSG00000161241 FBXO17       | ENSG00000161973 CCDC42         | ENSG00000165376 CLDN2          | ENSG00000166866 MYO1A        |                        |
|                          | ENSG00000168056 LTBP3          | ENSG00000168395 ING5           | ENSG00000173914 RBM4B        | ENSG00000175229 GAL3ST3      | ENSG00000175718 CXorf55      | ENSG00000179862 CITED4         | ENSG00000180155 LYNX1          | ENSG00000182979 MTA1         |                        |
|                          | ENSG00000183566 LATH_HUMAN     | ENSG00000185681 C9orf18        | ENSG00000189068 VSTM1        | ENSG00000000003 TSPAN6       | ENSG0000011426 ANLN          | ENSG00000087995 METTL2A        | ENSG00000106341 C7orf16        | ENSG00000107968 MAP3K8       |                        |
|                          | ENSG00000121552 CSTA           | ENSG00000131174 COX7B          | ENSG00000135486 HNRPA1       | ENSG00000136738 STAM         | ENSG00000137274 BPHL         | ENSG00000145723 ZH2C2          | ENSG00000156049 GNA14          | ENSG00000164291 ARSK         |                        |
|                          | ENSG00000165055 METTL2B        | ENSG00000170681 NP_001018126.1 | ENSG00000172315 TP53RK       | ENSG00000183722 LHFP         | ENSG00000185849 Q9P194_HUMAN | ENSG00000186031 Q6ZSY1_HUMAN   | ENSG00000197442 MAP3K5         | ENSG00000197672 NP_997331.1  |                        |
|                          | ENSG00000198597 ZNF536         | ENSG00000198900 TOP1           | ENSG00000204789 ZNF204       |                              |                              |                                |                                |                              |                        |
| GATCTCA                  | ENSG000000043143 PLVF15        | ENSG000000081059 TCF7          | ENSG000000089692 LAG3        | ENSG00000092850 TEKT2        | ENSG00000099330 OCEL1        | ENSG00000105609 LILRB5         | ENSG00000107341 UBE2R2         | ENSG00000121274 PAPD5        |                        |
|                          | ENSG00000129862 VCY            | ENSG00000129864 VCY1B          | ENSG00000130119 GNL3L        | ENSG000000204487 CCNLJ       | ENSG00000135749 PCNXL2       | ENSG00000145014 TMEM44         | ENSG00000145214 DGKQ           | ENSG00000157093 LYZL4        |                        |
|                          | ENSG00000160714 UBE2Q1         | ENSG00000160838 C1orf92        | ENSG00000164733 CTSB         | ENSG00000167302 C17orf56     | ENSG00000167588 GPD1         | ENSG00000169059 VCX3A          | ENSG00000175329 ISX            | ENSG00000177504 VCX2         |                        |
|                          | ENSG00000182583 VCX            | ENSG00000196204 Q6NUR6_HUMAN   | ENSG00000197038 NR_001547.1  | ENSG00000203662 OR2M1P       | ENSG00000205642 VCX3B        | ENSG00000100129 EIF3S6IP       | ENSG00000101049 SGK2           | ENSG00000109667 SLC2A9       |                        |
|                          | ENSG00000114638 UPK1B          | ENSG00000119913 TECTB          | ENSG00000123610 TNFAIP6      | ENSG00000124172 ATP5E        | ENSG00000130962 PRRG1        | ENSG00000131007 TTY9A          | ENSG00000131009 TTY9A_HUMAN    | ENSG00000137393 TBRDC2       |                        |
|                          | ENSG00000141161 UNC45B         | ENSG00000146587 RBAK           | ENSG00000152795 HNRPL        | ENSG00000162994 NP_689598.1  | ENSG00000163430 FSTL1        | ENSG00000180389 NR_002162.1    | ENSG00000188916 NP_001034851.1 | ENSG00000198833 UBE2J1       |                        |
|                          | ENSG00000203916 HFM1           |                                |                              |                              |                              |                                |                                |                              |                        |
| GATGAAA                  | ENSG00000038382 TRIO           | ENSG00000073861 TBX21          | ENSG00000075275 CELSR1       | ENSG00000101150 TPD52L2      | ENSG00000106078 COBL         | ENSG00000136883 KIF12          | ENSG00000140950 KIAA1609       | ENSG00000148296 SURF6        |                        |
|                          | ENSG00000150779 TMM8B          | ENSG00000157184 CPT2           | ENSG00000166473 PKD1L2       | ENSG00000168016 Q8N8K0_HUMAN | ENSG00000168255 Q8IZ67_HUMAN | ENSG00000172073 C2orf51        | ENSG00000173212 C1orf161       | ENSG00000188428 TXNDC5       |                        |
|                          | ENSG00000196220 SRGAP3         | ENSG00000196460 Q6ZNB4_HUMAN   | ENSG00000204487 LTB          | ENSG00000204657 OR2H2        | ENSG00000205159 Q6ZVC9_HUMAN | ENSG00000206026 NP_001032408.1 | ENSG00000206026 NP_001032408.1 | ENSG00000199951 ZNRAN1       | ENSG00000109158 GABRA4 |
|                          | ENSG00000111058 NP_078836.1    | ENSG00000111145 ELK3           | ENSG00000113361 CDH6         | ENSG00000117009 KMO          | ENSG00000121895 TMEM156      | ENSG00000122042 UBL3           | ENSG00000122882 ECD            | ENSG00000124201 ZNFX1        |                        |
|                          | ENSG00000129586 ZBED5          | ENSG00000132000 PODNL1         | ENSG00000134539 KLRD1        | ENSG00000135272 MDFC         | ENSG00000136636 KCTD3        | ENSG00000144668 ITGA9          | ENSG00000147642 SYBU_HUMAN     | ENSG00000148730 EIF4EBP2     |                        |
|                          | ENSG00000149634 C2orf165       | ENSG00000151233 Q8IXV1_HUMAN   | ENSG00000163964 PIGX         | ENSG00000164542 NP_056129.1  | ENSG00000169752 NRG4         | ENSG00000170279 C7orf33        | ENSG00000170948 MBD3L1         | ENSG00000177613 CSTF2T       |                        |
|                          | ENSG00000181211 Q8NA17_HUMAN   | ENSG00000185304 NP_001071638.1 | ENSG00000185515 BRCC3        | ENSG00000186115 CYP4F2       | ENSG00000187627 RGPD1        | ENSG00000196177 ACADSB         | ENSG00000196549 MME            | ENSG00000206527 PTPLB        |                        |
| GATGCAG                  | ENSG00000019144 PHLDB1         | ENSG00000086544 ITPKC          | ENSG00000088881 COE4_HUMAN   | ENSG00000100427 MLC1         | ENSG00000100647 KIAA0247     | ENSG00000102245 CD40LG         | ENSG00000106089 STX1A          | ENSG00000128482 ZNF179       |                        |
|                          | ENSG00000130300 PLVAP          | ENSG00000130775 C1orf38        | ENSG00000133980 C14orf115    | ENSG00000142684 ZNF593       | ENSG00000146670 CDCA5        | ENSG00000151631 Q9P2A3_HUMAN   | ENSG00000151692 RNF144         | ENSG00000157093 LYZL4        |                        |
|                          | ENSG00000158711 ELK4           | ENSG00000164054 NP_057563.3    | ENSG00000164107 HAND2        | ENSG00000165714 LOH12CR1     | ENSG00000169347 GP2          | ENSG00000174600 CMKLR1         | ENSG00000180184 Q8NF75_HUMAN   | ENSG00000186866 POFUT2       |                        |
|                          | ENSG00000187642 C1orf170       | ENSG00000189357 XR_015253.1    | ENSG00000001626 CFTR         | ENSG00000039068 CDH1         | ENSG00000068781 STON1        | ENSG00000068990 GAGE12G        | ENSG00000071054 MAP4K4         | ENSG00000089335 ZNF302       |                        |
|                          | ENSG00000091527 CDV3           | ENSG00000099940 SNAP29         | ENSG00000102554 KLF5         | ENSG00000115963 RND3         | ENSG00000119950 MXI1         | ENSG00000120278 PLEKHG1        | ENSG00000122034 GTF3A          | ENSG00000128872 TMO2         |                        |
|                          | ENSG00000129422 MTUS1          | ENSG00000130338 TULP4          | ENSG00000137090 DMRT1        | ENSG00000138386 NAB1         | ENSG00000146872 TLK2         | ENSG00000163074 NM_024534      | ENSG00000164458 T              | ENSG00000164609 SLU7         |                        |
|                          | ENSG00000166415 WDR72          | ENSG00000175874 CREG2          | ENSG00000183833 C3orf15      | ENSG00000187105 HEATR4       | ENSG00000189064 NM_012196.1  | ENSG00000196565 HBE1           | ENSG00000198440 ZNF583         | ENSG00000198521 ZNF43        |                        |
|                          | ENSG00000198716 GAGE3          | ENSG00000204866 IGFL2          | ENSG00000205775 GAGE12B      |                              |                              |                                |                                |                              |                        |
| GATGCTT                  | perfect: GATGCGC CTGCATC       | hsa-miR-217                    | taCTGCATCaggaactgattgat 2    |                              |                              |                                |                                |                              |                        |
|                          | ENSG00000054523 KIF1B          | ENSG00000071246 VASH1          | ENSG00000101445 PPP1R16B     | ENSG00000122490 PQLC1        | ENSG00000126562 WNK4         | ENSG00000130032 PRRG3          | ENSG00000137133 HINT2          | ENSG00000143140 GJA5         |                        |
|                          | ENSG00000147256 RHGXX_HUMAN    | ENSG00000148498 PARD3          | ENSG00000158714 SLAMF8       | ENSG00000159069 FBXW5        | ENSG00000160233 LRRC3        | ENSG00000169174 PCSK9          | ENSG00000170876 TMEM43         | ENSG00000172653 C17orf66     |                        |
|                          | ENSG00000177807 KCNJ10         | ENSG00000180185 FAHD1          | ENSG00000188775 PGYL47_HUMAN | ENSG00000189319 FAM53B       | ENSG00000197496 SLC2A10      | ENSG00000198258 UBL5           | ENSG00000206190 ATP10A         | ENSG00000059573 ALDH18A1     |                        |
|                          | ENSG00000073614 JARID1A        | ENSG00000085382 HACE1          | ENSG00000102144 PGK1         | ENSG00000106799 TGFBR1       | ENSG00000112276 BVES         | ENSG00000114423 CBLB           | ENSG00000116750 UCHL5          | ENSG00000123131 PRDX4        |                        |
|                          | ENSG00000126733 DACH2          | ENSG00000130023 C6orf70        | ENSG00000131620 TMEM16A      | ENSG00000133106 EPST11       | ENSG00000139926 FRMD6        | ENSG00000142192 APP            | ENSG00000155966 AFF2           | ENSG00000163618 CADPS        |                        |
|                          | ENSG00000163697 APBB2          | ENSG00000177596 Q8NA50_HUMAN   | ENSG00000188747 NOXA1        | ENSG00000198682 PAPSS2       | ENSG00000198948 MFAP3L       | ENSG00000205830 NP_997373.1    |                                |                              |                        |
| GATGGAC                  | ENSG00000072135 PTPN18         | ENSG00000080845 DLGAP4         | ENSG00000087266 SH3BP2       | ENSG00000102096 PIM2         | ENSG00000106244 PIM2         | ENSG00000114388 TUSC4          | ENSG00000139899 CBLN3          | ENSG00000141316 SPACA3       |                        |
|                          | ENSG00000143851 PTPN7          | ENSG00000158747 NBL1           | ENSG00000162728 KCNJ9        | ENSG00000162804 SNED1        | ENSG00000164889 SLC4A2       | ENSG00000166111 SVOP           | ENSG00000167085 PHB            | ENSG00000167985 C11orf79     |                        |
|                          | ENSG00000168412 MTNR1A         | ENSG00000169926 KLF13          | ENSG00000185340 GAS2L1       | ENSG00000185650 ZFP36L1      | ENSG00000187003 ACTL7A       | ENSG00000189321 NR_002940.1    | ENSG00000196408 NOXO1          | ENSG00000196420 S100A5       |                        |
|                          | ENSG00000205634 NP_001001693.1 | ENSG000000004779 NDUFAB1       | ENSG00000053900 ANAPC4       | ENSG00000077147 TM9SF3       | ENSG00000105983 LMBR1        | ENSG00000108587 GOSR1          | ENSG00000112378 PERP           | ENSG00000112773 FAM46A       |                        |
|                          | ENSG00000113161 HMGCR          | ENSG00000113319 RASGRF2        | ENSG00000125551 PLGLB1       | ENSG00000134025 NM_022659.2  | ENSG00000136381 IREB2        | ENSG00000144161 ZC3H8          | ENSG00000144218 AFF3           | ENSG00000150051 MKX          |                        |
|                          | ENSG00000153933 DGKE           | ENSG00000156050 C14orf44       | ENSG00000158406 HIST1H4H     | ENSG00000164303 ENPP6        | ENSG00000169659 PLGLA1       | ENSG00000170074 NP_775934.3    | ENSG00000178446 C21orf100      | ENSG00000178591 DEFB125      |                        |
|                          | ENSG00000183281 PLGB_HUMAN     | ENSG00000188800 TMC02          | ENSG00000189350 NP_954974.2  | ENSG00000196776 CD47         | ENSG00000197183 C2orf112     | ENSG00000204209 DAXX           | ENSG00000206384 Q69YT0_HUMAN   |                              |                        |
|                          | ENSG00000009954 BAZ1B          | ENSG00000101224 CDC25B         | ENSG00000102870 ZNF629       | ENSG00000115461 IGFBP5       | ENSG00000116809 ZBTB17       | ENSG00000126106 TMEM53         | ENSG00000128228 SDF2L1         | ENSG00000131914 LIN28        |                        |
|                          | ENSG00000134287 ARF3           | ENSG00000137460 NP_203751.2    | ENSG00000145882 PCYOX1L      | ENSG00000155367 PPM1J        | ENSG00000155886 SLC24A2      | ENSG00000162267 ITIH3          | ENSG00000166908 PIP5K2C        | ENSG00000167664 TMIGD2       |                        |
|                          | ENSG00000168872 DDX19A         | ENSG00000170430 MGMT           | ENSG00000172939 OXSR1        | ENSG00000175697 GPR156       | ENSG00000182852 C2orf121     | ENSG00000204479 PRAMEF17       | ENSG00000204488 PRAMEF16       | ENSG00000205396 Q6ZRG2_HUMAN |                        |
|                          | ENSG00000078043 PIAS2          | ENSG00000081052 COL4A4         | ENSG00000102738 BRPFS31      | ENSG00000103707 MTFMT        | ENSG00000106399 RPA3         | ENSG00000112299 VNN1           | ENSG00000127252 HRASL5         | ENSG00000133639 BTG1         |                        |
|                          | ENSG00000135698 MPHOSPH6       | ENSG00000136536 MARCH7         | ENSG00000138756 BMFP2K       | ENSG00000144785 TMEM4        | ENSG00000149659 YTHDF1       | ENSG00000164294 NP_001008398.1 | ENSG00000172006 ZNF554         | ENSG00000174227 PIGG         |                        |
|                          | ENSG00000189350 NP_954974.2    | ENSG00000197585 Q5JV89_HUMAN   |                              |                              |                              |                                |                                |                              |                        |
| GATGGCA                  | ENSG00000071051 NCK2           | ENSG00000100234 TIMP3          | ENSG00000100416 TRMU         | ENSG00000105379 ETFB         | ENSG00000107819 SFXN3        | ENSG00000111653 ING4           | ENSG00000116514 IBRDC3         | ENSG00000116809 ZBTB17       |                        |
|                          | ENSG00000125999 C2orf114       | ENSG00000130558 OLFML1         | ENSG00000133063 CHIT1        | ENSG00000139651 ZNF740       | ENSG00000160716 CHRN2        | ENSG00000163348 PYGO2          | ENSG00000165495 PKNOX2         | ENSG00000165633 C10orf72     |                        |
|                          | ENSG00000169174 PCSK9          | ENSG00000174851 YIF1A          | ENSG00000175764 TTLL11       | ENSG00000185744 TNT_HUMAN    | ENSG00000186029 Q9NSZ8_HUMAN | ENSG00000187621 TCL1B          | ENSG00000197789 Q8NA00_HUMAN   | ENSG00000204394 VARS         |                        |
|                          | ENSG00000205592 MUC19          | ENSG00000205599 Q6ZUY4_HUMAN   | ENSG00000205804 Q5T6R2_HUMAN | ENSG0000005302 MSL3L1        | ENSG00000047621 C12orf4      | ENSG00000085721 RRN3           | ENSG00000102897 LYRM1          | ENSG00000106605 BLVRA        |                        |
|                          | ENSG00000106799 TGFBR1         | ENSG00000110484 SCGB2A2        | ENSG00000118965 WDR35        | ENSG00000123165 ACTRT1       | ENSG00000127252 HRASL5       | ENSG00000133059 RIPK5          | ENSG00000135960 EDAR           | ENSG00000137691 C11orf70     |                        |
|                          | ENSG00000138755 CXCL9          | ENSG00000140093 SERPINA10      | ENSG00000165685 C12orf59     | ENSG00000170315 UBIQ_HUMAN   | ENSG00000174738 NR1D2        | ENSG00000176624 RKHD2          | ENSG00000182118 FAM89A         | ENSG00000182367 SNRPEL1      |                        |
|                          | EN                             |                                |                              |                              |                              |                                |                                |                              |                        |

|          |                                |                              |                              |                                |                                |                                |                                |                                |
|----------|--------------------------------|------------------------------|------------------------------|--------------------------------|--------------------------------|--------------------------------|--------------------------------|--------------------------------|
|          | ENSG00000143450 OAZ3           | ENSG00000148842 CNNM2        | ENSG00000161692 DBF4B        | ENSG00000163009 C2orf48        | ENSG00000164610 RP9            | ENSG00000170162 VGLL2          | ENSG00000175538 KCNE3          | ENSG00000181368 NM_032947.3    |
|          | ENSG00000185830 C22orf37       | ENSG00000188101 ALOX12P2     | ENSG00000198471 RTPE         | ENSG00000204602 Q6ZU19_HUMAN   | ENSG00000006837 CDKL3          | ENSG000000011422 PLAUR         | ENSG00000018869 ZNF582         | ENSG00000065135 GNAI3          |
|          | ENSG00000066651 TRMT11         | ENSG00000095787 WAC          | ENSG00000119938 PP1R3C       | ENSG00000120688 WBP4           | ENSG00000132953 XPO4           | ENSG00000134970 TICAM2         | ENSG00000139921 TXNDC1         | ENSG00000146909 NOM1           |
| GATGTGG  | ENSG00000147606 SLC26A7        | ENSG00000164182 NDUFA12L     | ENSG00000168813 ZNF507       | ENSG00000175029 CTBP2          | ENSG00000175885 ZNF611         | ENSG00000186019 ZNF224         | ENSG00000198353 HOXC4          |                                |
|          | ENSG00000013588 GPRC5A         | ENSG00000058866 DGKG         | ENSG00000072864 NDE1         | ENSG00000079739 PGM1           | ENSG00000089737 DDX24          | ENSG00000104872 PTH1D1         | ENSG00000106615 RHEB           | ENSG00000110395 CBL            |
|          | ENSG00000111676 ATN1           | ENSG00000116852 KIF21B       | ENSG00000120903 CHRNA2       | ENSG00000124444 ZNF576         | ENSG00000125449 ARMC7          | ENSG00000127150 C14orf153      | ENSG00000128342 LIF            | ENSG00000154328 NEIL2          |
|          | ENSG00000163900 TMEM41A        | ENSG00000164970 C9orf25      | ENSG00000165643 SOHLH1       | ENSG00000170545 NM_001031628.1 | ENSG00000171456 ASXL1          | ENSG00000173706 HEG1           | ENSG00000176828 Q8N9U2_HUMAN   | ENSG00000177479 ARH2           |
|          | ENSG00000184560 C17orf74       | ENSG00000184923 FAM22A       | ENSG00000185024 BRF1         | ENSG00000185386 MAPK11         | ENSG00000203908 NP_001017361.1 | ENSG00000204443 Q56T6_HUMAN    | ENSG00000205599 Q6ZUY4_HUMAN   | ENSG00000205632 Q6ZVF7_HUMAN   |
|          | ENSG00000206088 Q6ZT13_HUMAN   | ENSG000000035141 NP_116211.1 | ENSG000000073614 JARID1A     | ENSG000000089177 C2orf23       | ENSG00000100353 EIF3S7         | ENSG00000110048 OSBP           | ENSG00000115944 COX7A2L        | ENSG00000116455 WDR77          |
|          | ENSG00000117602 DSCR1L2        | ENSG00000123836 PFKFB2       | ENSG00000125430 HS3ST3B1     | ENSG00000143013 LMO4           | ENSG00000155621 C9orf85        | ENSG00000164949 GEM            | ENSG00000168175 C14orf32       | ENSG00000169193 CCDC126        |
|          | ENSG00000170629 NP_872440.2    | ENSG00000171858 RPS21        | ENSG00000173542 MOBK1A       | ENSG00000174038 C9orf131       | ENSG00000178217 SH2D4B         | ENSG00000178395 C1orf65        | ENSG00000180488 FAM73A         | ENSG00000184860 NP_660151.2    |
| GATGTTA  | ENSG00000188039 NWD1           | ENSG00000189212 DPY19L2P1    | ENSG00000204136 GGTA1        | ENSG00000206125 Q68DA7_HUMAN   | ENSG00000128524 ATP6V1F        | ENSG00000144029 MRPS5          | ENSG00000146021 KLHL3          | ENSG00000148832 PAOX           |
|          | ENSG00000068078 FGFR3          | ENSG00000101193 C20orf11     | ENSG00000118245 TNP1         | ENSG00000177741 Q96BN7_HUMAN   | ENSG00000198467 TFM2           | ENSG00000204380 Q6ZTQ2_HUMAN   | ENSG000000078140 HIP2          | ENSG00000101367 MAPRE1         |
|          | ENSG00000160796 NBEAL2         | ENSG00000169635 HIC2         | ENSG00000175166 PSMD2        | ENSG00000112739 PRPF4B         | ENSG00000112972 HMGCS1         | ENSG00000113790 EHHADH         | ENSG00000116560 SFPQ           | ENSG00000124343 XG             |
|          | ENSG00000102452 NALCN          | ENSG00000102974 CTCF         | ENSG00000112739 PRPF4B       | ENSG00000112972 HMGCS1         | ENSG00000113790 EHHADH         | ENSG00000116560 SFPQ           | ENSG00000124343 XG             | ENSG00000129699 NP_067644.2    |
|          | ENSG00000133059 RIPK5          | ENSG00000135316 SYNCRIP      | ENSG00000139842 CUL4A        | ENSG00000146223 RPL7L1         | ENSG00000148737 TCF7L2         | ENSG00000152620 C5orf33        | ENSG00000157060 C1orf14        | ENSG00000163291 PAQR3          |
|          | ENSG00000163630 SYNPR          | ENSG00000168438 CDC40        | ENSG00000179152 C3orf23      | ENSG00000186367 YIN002_HUMAN   | ENSG00000186369 YIN002_HUMAN   | ENSG00000187009 Q8NFD4_HUMAN   | ENSG00000204179 PTPN2A         | ENSG00000204837 Q2TVT3_HUMAN   |
| GATTAATA | ENSG00000057704 TMCC3          | ENSG00000064393 HIPK2        | ENSG00000078295 ADCY2        | ENSG00000082014 SMARCD3        | ENSG00000085998 POMGNT1        | ENSG00000089250 NOS1           | ENSG00000102970 CCL17          | ENSG00000103591 P34_HUMAN      |
|          | ENSG00000104529 EEF1D          | ENSG00000104892 KLC3         | ENSG00000105559 PLEKHA4      | ENSG00000108784 NAGLU          | ENSG00000122188 LAX1           | ENSG00000128228 SDF2L1         | ENSG00000134207 SYT6           | ENSG00000137133 HINT2          |
|          | ENSG00000143502 SUSD4          | ENSG00000150477 KIAA1328     | ENSG00000152475 Q96EG3_HUMAN | ENSG00000157856 C2orf39        | ENSG00000158104 HPD            | ENSG00000163521 GLB1L          | ENSG00000164053 TREX1          | ENSG00000165606 NP_001073989.1 |
|          | ENSG00000176434 CA4            | ENSG00000171060 C8orf74      | ENSG00000176248 ANAPC2       | ENSG00000176383 B3GNT4         | ENSG00000176476 CCDC101        | ENSG00000178078 NP_060190.2    | ENSG00000179270 NP_001025054.1 | ENSG00000185674 LYG2_HUMAN     |
|          | ENSG00000187024 PTRH1          | ENSG00000196365 LONP1        | ENSG00000196476 C20orf96     | ENSG00000197471 SPN            | ENSG00000204305 AGER           | ENSG00000166602 CLCA4          | ENSG00000204526 DEPDC1         | ENSG00000078124 PHCA           |
|          | ENSG00000083520 DIS3           | ENSG00000102935 ZNF423       | ENSG00000109339 MAPK10       | ENSG00000115363 TMEM166        | ENSG00000116473 RAP1A          | ENSG00000120802 TMPO           | ENSG00000132872 SYT4           | ENSG00000135090 TAOK3          |
|          | ENSG00000137561 TPPA           | ENSG00000138668 HNRPD        | ENSG00000145592 RPL37        | ENSG00000145681 HAPLN1         | ENSG00000146070 PLA2G7         | ENSG00000146839 ZAN            | ENSG00000147592 LACTB2         | ENSG00000152749 GPR180         |
|          | ENSG00000155957 TMBIM1         | ENSG00000161970 RPL26        | ENSG00000162999 DUSP19       | ENSG00000163430 FSTL1          | ENSG00000165164 CXorf22        | ENSG00000169139 UBE2V2         | ENSG00000171241 SHCBP1         | ENSG00000177576 NP_001030177.1 |
| GATTACG  | ENSG00000178403 NEUROG2        | ENSG00000180667 YOD1         | ENSG00000182899 RPL35A       | ENSG00000186615 Q86SY8_HUMAN   | ENSG00000196214 ZNF766         | ENSG00000198015 MRPL42         | ENSG00000155026 NM_173565.2    | ENSG00000157916 RER1           |
|          | ENSG00000099308 MAST3          | ENSG00000124191 TOX2         | ENSG00000125520 SLC2A4RG     | ENSG00000130695 CCDC21         | ENSG00000134460 IL2RA          | ENSG00000147160 DGAT2L4        | ENSG00000155026 NM_173565.2    | ENSG00000157916 RER1           |
|          | ENSG00000168010 ATG16L2        | ENSG00000169402 NP_775836.2  | ENSG00000169682 LAT          | ENSG00000170122 FOXDL1         | ENSG00000171861 RNMTL1         | ENSG00000176615 LOC652153      | ENSG00000176980 PRR10          | ENSG00000178977 C17orf44       |
|          | ENSG00000179913 B3GNT3         | ENSG00000182490 TSSK2        | ENSG00000183657 QBWYW5_HUMAN | ENSG00000184659 FOXDL4L        | ENSG00000185214 KLHL22         | ENSG00000187559 FOXDL4L        | ENSG00000189275 Q6ZRR0_HUMAN   | ENSG00000196432 Q9H5F0_HUMAN   |
|          | ENSG00000198407 Q8NC25_HUMAN   | ENSG00000204779 FOXDL5       | ENSG00000204793 FOXDL6       | ENSG00000204828 FX4L4_HUMAN    | ENSG0000014641 MDH1            | ENSG000000047648 ARHGAP6       | ENSG00000087995 METTL2A        | ENSG00000088451 TGDS           |
|          | ENSG00000118495 PLAGL1         | ENSG00000119723 COQ6         | ENSG00000130699 TAF4         | ENSG00000135903 PAX3           | ENSG00000138709 LARP2          | ENSG00000138771 SHROOM3        | ENSG00000141441 FAM59A         | ENSG00000144061 NPHP1          |
|          | ENSG00000146166 GLULD1         | ENSG00000148450 MSRB2        | ENSG00000150459 SAP18        | ENSG00000162434 JAK1           | ENSG00000167117 C17orf73       | ENSG00000178462 TUBAL3         | ENSG00000184492 FOXK4          | ENSG00000187824 NP_001004313.1 |
| GATTACG  | ENSG00000196214 ZNF766         | ENSG00000205740 Q6ZNQ2_HUMAN | ENSG00000085063 CD59         | ENSG00000099984 GSTT2          | ENSG00000100024 UPB1           | ENSG00000101189 C20orf20       | ENSG00000103061 SLC7A6OS       | ENSG00000105053 VRK3           |
|          | ENSG00000133433 GSTT2_HUMAN    | ENSG00000134775 FHOD3        | ENSG00000150556 NP_808879.2  | ENSG00000154917 RAB6B          | ENSG00000154957 ZNF18          | ENSG00000165804 ZNF219         | ENSG00000182199 SHMT2          | ENSG00000185481 C21orf129      |
|          | ENSG00000186918 FBXO16         | ENSG00000187778 MCRS1        | ENSG00000197131 Q8TW43_HUMAN | ENSG00000204161 C10orf128      | ENSG000000019991 HGF           | ENSG000000093134 VNN3          | ENSG00000101751 POLI           | ENSG00000104093 DMXL2          |
|          | ENSG00000111696 NT5DC3         | ENSG00000112367 KIAA0274     | ENSG00000124228 DDX27        | ENSG00000139835 GRTP1          | ENSG00000145439 CBR4           | ENSG00000152242 C18orf25       | ENSG00000159079 C21orf59       | ENSG00000183607 GN2            |
| GATTAGT  | ENSG00000100410 PHF5A          | ENSG00000111218 PRMT8        | ENSG00000120915 EPHX2        | ENSG00000131153 GINS2          | ENSG00000133048 CHI3L1         | ENSG00000139194 RBP5           | ENSG00000151778 C13orf21       | ENSG00000154316 TDH            |
|          | ENSG00000160182 TFPI           | ENSG00000166167 ETRC         | ENSG00000166257 SCN3B        | ENSG00000172269 DPAGT1         | ENSG00000175325 PROP1          | ENSG00000183248 Q9H6K5_HUMAN   | ENSG00000203854 XR_017700.1    | ENSG00000204479 PRAMEF17       |
|          | ENSG00000204488 PRAMEF16       | ENSG00000064933 PMS1         | ENSG00000095209 TMEM38B      | ENSG00000101935 AMMECR1        | ENSG00000104219 ZDHHC7         | ENSG00000106031 HOXA13         | ENSG00000116977 LGALS8         | ENSG00000123684 LPGA17         |
|          | ENSG00000127863 NFRSF19        | ENSG00000136108 CKAP2        | ENSG00000138430 GTFPB9       | ENSG00000144406 Q96SS0_HUMAN   | ENSG00000145332 KLHL8          | ENSG00000149507 PLAC1L         | ENSG00000154723 ATP5J          | ENSG00000155561 NUP205         |
|          | ENSG00000164953 TMEM67         | ENSG00000168952 STXBP6       | ENSG00000178102 DNAHL1       | ENSG00000184254 ALDH1A3        | ENSG00000189403 HMGB1          | ENSG00000196785 Q8N862_HUMAN   | ENSG00000196850 PPTC7          | ENSG00000206131 Q6ZS21_HUMAN   |
| GATTATA  | ENSG00000100462 PRMT5          | ENSG00000103313 MEFV         | ENSG00000104941 RSHL1        | ENSG00000110395 CBL            | ENSG00000121073 SLC35B1        | ENSG00000128487 SPECC1         | ENSG00000130695 CCDC21         | ENSG00000132681 ATP1A4         |
|          | ENSG00000147403 RPL10          | ENSG00000161640 SIGLEC11     | ENSG00000169223 LTMN2        | ENSG00000177551 NHLH2          | ENSG00000184110 EIF3S8         | ENSG00000186451 SPATA12        | ENSG00000188488 SERPINA5       | ENSG00000094880 CDC23          |
|          | ENSG00000100722 ZC3H14         | ENSG00000114391 RPL24        | ENSG00000115310 RNA21        | ENSG00000124217 MOC3           | ENSG00000127955 GNAI1          | ENSG00000132122 SPATA6         | ENSG00000150681 RGS18          | ENSG00000155099 TMEM55A        |
|          | ENSG00000163683 C4orf34        | ENSG00000164118 KIAA1712     | ENSG00000166845 C18orf54     | ENSG00000168681 Q9H762_HUMAN   | ENSG00000170248 PDCC6P1        | ENSG00000173258 ZNF483         | ENSG00000174444 RPL4           | ENSG00000178966 RMI1           |
| GATTCCA  | ENSG00000179387 ELMOD2         | ENSG00000187010 RHD          | ENSG00000196268 ZNF493       | ENSG00000198157 NSBP1          | ENSG00000204469 BAT2           | ENSG00000201448 DIO2           | ENSG00000126391 NP_114110.1    | ENSG00000138347 MYPN           |
|          | ENSG00000025800 KPNAB6         | ENSG00000086848 ALG9         | ENSG00000100304 TLL12        | ENSG00000105258 POLR2I         | ENSG00000119408 NEK6           | ENSG00000116490 NEK6           | ENSG00000138347 MYPN           | ENSG00000139613 SMARCC2        |
|          | ENSG00000143851 PTPN7          | ENSG00000148660 CAMK2G       | ENSG00000150401 DCUN1D2      | ENSG00000160183 TMPRSS3        | ENSG00000161103 Q5BKY6_HUMAN   | ENSG00000162493 PDPN           | ENSG00000164591 MYOZ3          | ENSG00000166998 CKMT1A         |
|          | ENSG00000168062 BATF2          | ENSG00000168995 SIGLEC7      | ENSG00000170464 DNAJC18      | ENSG00000182841 Q9NSQ0_HUMAN   | ENSG00000186532 SMYD4          | ENSG00000188559 C20orf74       | ENSG00000197177 GPR123         | ENSG00000197558 Q76B61_HUMAN   |
|          | ENSG00000026250 WAPAL          | ENSG00000076513 ANKRD13A     | ENSG00000079112 CDH17        | ENSG00000099246 RAB18          | ENSG00000105205 CLC            | ENSG00000106688 SLC1A1         | ENSG00000115816 CEBPZ          |                                |
|          | ENSG00000122787 AKR1D1         | ENSG00000128534 LSM8         | ENSG00000132283 DND1         | ENSG00000132386 SERPIN1        | ENSG00000140795 MYLK3_HUMAN    | ENSG00000141429 GALNT1         | ENSG00000146648 EGFR           | ENSG00000150867 PIP5K2A        |
| GATTCCC  | ENSG00000154065 ANKRD29        | ENSG00000155099 TMEM55A      | ENSG00000156697 UH1P4A       | ENSG00000168411 RFWD3          | ENSG00000169340 NP_777584.1    | ENSG00000176871 WSB2           | ENSG00000181065 Q9P161_HUMAN   | ENSG00000182220 ATP6AP2        |
|          | ENSG00000184007 PTP4A2         | ENSG00000184735 DDX53        | ENSG00000187079 TEAD1        | ENSG00000188611 ASAH2C         | ENSG00000205462 Q6ZWC8_HUMAN   | ENSG00000105198 LGALS13        | ENSG00000105270 CLIP3          | ENSG00000108349 CASC3          |
|          | ENSG00000006194 ZNF263         | ENSG00000006659 LGALS14      | ENSG00000067829 IDH3G        | ENSG00000101986 ABCD1          | ENSG00000134531 EMP1           | ENSG00000135480 KRT7           | ENSG00000136931 NR5A1          | ENSG00000139197 PEX5           |
|          | ENSG00000116260 QSOX1          | ENSG00000119686 C14orf58     | ENSG00000130687 ALKBH6       | ENSG00000132604 TERF2          | ENSG00000142539 SP1B           | ENSG00000166220 C10orf27       | ENSG00000168775 KCRU_HUMAN     | ENSG00000178363 CALML3         |
|          | ENSG00000139200 C12orf53       | ENSG00000141449 KIAA1772     | ENSG00000141744 PNMT         | ENSG00000198690 MTMR15         | ENSG00000204845 Q6ZUC3_HUMAN   | ENSG00000064726 BTBD1          | ENSG00000072315 TRPC5          | ENSG00000101109 STK4           |
|          | ENSG00000180424 DEFB123        | ENSG00000185668 POU3F1       | ENSG00000188549 NP_997263.1  | ENSG00000131480 AOC2           | ENSG00000146809 ASB15          | ENSG00000147166 ITGB1BP2       | ENSG00000154447 SH3RF1         | ENSG00000159216 RUNX1          |
|          | ENSG00000101126 ADNP           | ENSG00000123700 KCNJ2        | ENSG00000124356 STAMPB       | ENSG00000175198 PCCA           | ENSG00000182952 HMGN4          | ENSG00000198947 DMD            | ENSG00000203730 TEDDM1         | ENSG00000204289 C17orf86       |
| GATTCCG  | ENSG00000206384 Q69YT0_HUMAN   | ENSG00000100170 SLC5A1       | ENSG00000100290 BIK          | ENSG00000101004 NLP_HUMAN      | ENSG00000105552 BCAT2          | ENSG00000108551 RASD1          | ENSG00000115461 IGFBP5         | ENSG00000126460 PRRG2          |
|          | ENSG00000126890 CTAG2          | ENSG00000129038 LOXL1        | ENSG00000129946 BRC2         | ENSG00000130520 LSM4           | ENSG00000131187 F12            | ENSG00000134775 FHOD3          | ENSG00000137502 RAB30          | ENSG00000141741 C17orf37       |
|          | ENSG00000144488 ESPNL          | ENSG00000157312 PDF          | ENSG00000160469 BRSK1        | ENSG00000164707 SLC13A4        | ENSG00000169100 SLC25A6        | ENSG00000174680 C21orf9        | ENSG00000180878 C11orf42       | ENSG00000184210 DGAT2L6        |
|          | ENSG00000184654 YV006_HUMAN    | ENSG00000186635 STARD10      | ENSG00000186653 Q86VD6_HUMAN | ENSG00000186818 LILRB4         | ENSG00000198946 SSX4B          | ENSG00000203959 PIN1L          | ENSG00000204645 SSX4           | ENSG00000205106 Q6N098_HUMAN   |
|          | ENSG00000205107 NP_001001679.1 | ENSG00000205313 FAM106A      | ENSG00000041515 MYO16        | ENSG00000048028 USP28          | ENSG00000085491 SLC25A2A       | ENSG00000102763 NP_001009814.1 | ENSG00000102910 LONP2          | ENSG00000111701 APOBEC1        |
|          | ENSG00000124209 RAB22A         | ENSG00000129515 SNX6         | ENSG0000013                  |                                |                                |                                |                                |                                |

ENSG00000188859|FAM78B ENSG00000196154|S100A4 ENSG00000197182|NM\_207477 ENSG00000197373|NP\_001015884.1 ENSG00000198471|RTP2 ENSG00000198561|CTNND1 ENSG00000203685|Clorf95 ENSG00000091490|NP\_056002.1  
ENSG00000101574|METTL4 ENSG00000104147|OIP5 ENSG00000107581|EIF3S10 ENSG00000113810|SMC4 ENSG00000117560|FASLG ENSG00000119446|RBM1L ENSG00000120265|PCMT1 ENSG00000124614|RPS10  
ENSG00000124789|NUP153 ENSG00000133019|CHRM3 ENSG00000133858|CCDC131 ENSG00000135604|STX11 ENSG00000137563|GGH ENSG00000138426|DNA2L ENSG00000158185|ANKRD36 ENSG00000159322|ADPGK  
ENSG00000162409|PKKA2 ENSG00000163463|KRTCAP2 ENSG00000164039|BDH2 ENSG00000166479|TXNDC10 ENSG00000166779|FAM96A ENSG00000170248|PDCD6IP ENSG00000173041|ZNF680 ENSG00000176593|QBN9G5\_HUMAN  
ENSG00000180998|GPR137C ENSG00000186417|GLDN ENSG00000188243|COMMD6 ENSG00000198542|ITGBL1 ENSG00000088854|C2orf194 ENSG00000092051|AP1G2 ENSG00000100207|TCF20 ENSG00000102100|SLC35A2  
ENSG00000006638|TBXA2R ENSG00000059377|TBXAS1 ENSG00000085872|CHERP ENSG00000088682|COQ9 ENSG00000127325|Clorf116 ENSG00000184619|KRBA2 ENSG00000184935|Q6AI01\_HUMAN ENSG00000204359|CFB ENSG00000049860|HEXB  
ENSG00000110880|CORO1C ENSG00000111331|OAS3 ENSG00000130287|MCAN ENSG00000130810|PPAN ENSG00000158716|DUSP23 ENSG00000162763|LRRC52 ENSG00000164300|SERINC5 ENSG00000167311|ART5  
ENSG00000175325|PROP1 ENSG00000179772|FKHL18 ENSG00000180834|MAP6D1 ENSG00000182795|Clorf116 ENSG00000184619|KRBA2 ENSG00000184935|Q6AI01\_HUMAN ENSG00000204359|CFB ENSG00000049860|HEXB  
ENSG00000111241|FGF6 ENSG00000114942|EEF1B2 ENSG00000115267|IFIH1 ENSG00000115278|RAB31P ENSG00000131003|RBM22F ENSG00000132141|CCT6B ENSG00000139793|MBNL2 ENSG00000147586|MRPS28  
ENSG00000152931|PART1\_HUMAN ENSG00000155545|MIER3 ENSG00000157219|HTR5A ENSG00000159593|APPBP1 ENSG00000166477|LEO1 ENSG00000173597|SULT1B1 ENSG00000180398|MCFD2 ENSG00000188687|SLC4A5  
ENSG00000197782|ZNF780A ENSG00000198898|CAPZA2 ENSG00000204472|AIF1 ENSG00000100591|AHS1 ENSG00000124557|BTN1A1 ENSG00000129467|ADCY4 ENSG00000141034|C17orf39 ENSG00000141378|PTRH2  
ENSG00000048707|VPS13D ENSG00000058085|LAMC2 ENSG00000063180|CA11 ENSG00000100591|AHS1 ENSG00000124557|BTN1A1 ENSG00000129467|ADCY4 ENSG00000141034|C17orf39 ENSG00000141378|PTRH2  
ENSG00000146007|ZMAT2 ENSG00000160752|FDP5 ENSG00000164591|MYOZ3 ENSG00000165275|RG9MTD3 ENSG00000168159|RNF187 ENSG00000169314|C22orf15 ENSG00000171703|TCEA2 ENSG00000172724|CCL19  
ENSG00000173210|ABLIM3 ENSG00000177947|ODF3 ENSG00000178226|PRSS36 ENSG00000196959|CES1 ENSG00000198618|PP1A\_HUMAN ENSG00000198848|NR\_003276.1 ENSG00000010810|FYN ENSG00000081087|OSTM1  
ENSG00000120526|NUCD1 ENSG00000124532|MRS2L ENSG00000127995|CASD1 ENSG00000137860|SLC28A2 ENSG00000138386|NAB1 ENSG00000144191|CN3A3 ENSG00000150627|WDR17 ENSG00000150712|MTMR12  
ENSG00000153822|KCNJ16 ENSG00000157450|RNF111 ENSG00000157540|DYRK1A ENSG00000163840|DTX3L ENSG00000164398|ACSL6 ENSG00000164741|DLC1 ENSG00000165650|PDZD8 ENSG00000168028|RPSAP15  
ENSG00000169826|CGAT2\_HUMAN ENSG00000178053|MLF1 ENSG00000181191|PJA1 ENSG00000181690|PLAG1 ENSG00000198865|Q4G0S7\_HUMAN ENSG00000205359|SLC06A1  
ENSG00000010295|NPF\_542768.1 ENSG00000059378|PARP2 ENSG00000078699|CBFA2T2 ENSG00000100376|FAM118A ENSG00000100416|TRMU ENSG00000101146|RAB1 ENSG00000103241|FOXF1 ENSG00000105202|FBL  
ENSG00000109501|WFS1 ENSG00000130803|ZNF317 ENSG00000137218|FRS3 ENSG00000137392|CLP5 ENSG00000138326|RPS24 ENSG00000139405|C12orf52 ENSG00000146285|SCML4 ENSG00000157326|DHRS4  
ENSG00000157330|Clorf158 ENSG00000168539|CHRM1 ENSG00000169371|SNUPN ENSG00000172678|OR13A1 ENSG00000175538|KCNE3 ENSG00000177096|FAM109B ENSG00000181652|ATG9B ENSG00000184334|Q71RG6\_HUMAN  
ENSG00000187630|DHRS4L2 ENSG00000196153|Q8NAB5\_HUMAN ENSG00000203747|FCGR3A ENSG00000204655|MOG ENSG00000204851|Q6ZVD1\_HUMAN ENSG00000043355|ZIC2 ENSG00000081041|CXCL2 ENSG00000114315|HES1  
ENSG00000115604|IL18R1 ENSG00000116771|AGMAT ENSG00000135002|RFK ENSG00000136044|APPL2 ENSG00000140945|CDH13 ENSG00000141380|SS18 ENSG00000144909|OSBP1L1 ENSG00000146592|CREB5  
ENSG00000149177|PTPRJ ENSG00000158301|GPRASP2 ENSG00000163599|CTLA4 ENSG00000164466|SFXN1 ENSG00000165685|C12orf59 ENSG00000167699|GLOD4 ENSG00000170629|NP\_872440.2 ENSG00000171564|FGB  
ENSG00000171792|C12orf32 ENSG00000196285|H33\_HUMAN ENSG00000204026|Q6ZSD2\_HUMAN  
ENSG00000102890|ELMO3 ENSG00000103145|HCF1R1 ENSG00000106290|TAF6 ENSG00000110169|HPX ENSG00000121270|ABCC11 ENSG00000130294|KIF1A ENSG00000131477|RAMP2 ENSG00000131845|ZNF304  
ENSG00000134107|BHLHB2 ENSG00000143398|PIP5K1A ENSG00000160180|TF3 ENSG00000166133|RPUSD2 ENSG00000174306|ZHX3 ENSG00000175600|CCDC85B ENSG00000180999|C1orf105 ENSG00000184110|EIF388  
ENSG00000198668|CALM1 ENSG00000205136|Q3KRG0\_HUMAN ENSG00000205609|Q9BN98\_HUMAN ENSG00000205788|Q6ZSV2\_HUMAN ENSG00000115666|MAP4K3 ENSG00000115666|MAP4K3 ENSG00000054598|FOX1C1 ENSG00000140919|ITGA6 ENSG00000102543|CDADC1  
ENSG00000106799|TGFB1 ENSG00000111816|FRK ENSG00000120265|PCMT1 ENSG00000127720|C12orf26 ENSG00000129292|PHF20L1 ENSG00000130349|C6orf203 ENSG00000136146|MED4 ENSG00000136231|IGF2BP3  
ENSG00000137948|BRDT ENSG00000155011|DKK2 ENSG00000161405|IKZF3 ENSG00000163293|NPAL1 ENSG00000165525|SDCCAG1 ENSG00000168653|NDUF55 ENSG00000170791|CHCHD7 ENSG00000182405|PGBD4  
ENSG00000184005|ST6GALNAC3  
ENSG00000065029|ZNF76 ENSG00000087088|BAX ENSG00000100968|NFAT4 ENSG00000102104|RS1 ENSG00000103742|NP\_066013.1 ENSG00000111110|PPM1H ENSG00000115041|KCNIP3 ENSG00000117643|MAN1C1  
ENSG00000123388|HOXC11 ENSG00000125695|STRAD\_HUMAN ENSG00000130810|PPAN ENSG00000131398|KCNC3 ENSG00000143196|DPT ENSG00000143257|NR1H3 ENSG00000155034|FBXL18 ENSG00000159618|GPR114  
ENSG00000163914|RHO ENSG00000167664|TM1GD2 ENSG00000168434|COG7 ENSG00000179766|Q4G129\_HUMAN ENSG00000180875|GREM2 ENSG00000197245|GRFP1 ENSG00000057252|SOAT1 ENSG00000073282|TP73L  
ENSG00000089472|HEPH ENSG00000104093|DMXL2 ENSG00000110063|DCPS ENSG00000110851|PRDM4 ENSG00000115970|THADA ENSG00000144736|SHQ1 ENSG00000150712|MTMR12 ENSG00000156218|ADAMTSL3  
ENSG00000156920|GPR112 ENSG00000164128|NPY1R ENSG00000166984|TCP10L ENSG00000167721|TSR1 ENSG00000167981|ZNF597 ENSG00000179331|RAB39 ENSG00000181264|TMEM136 ENSG00000188761|Clorf178

GATTGAA  
GATTGCA  
GATTGCG  
GATTGCT  
GATTGGG  
GATTGTA  
GATTGTT  
GATTGTA  
GCAAAC  
GCAAACC  
GCAAAC  
GCAAAGT  
GCAAATA  
GCAAATC



ENSG00000187260|WDR86 ENSG00000188091|C9orf164 ENSG00000189357|XR\_015253.1 ENSG00000203782|LOR ENSG00000051415|AMY1A ENSG00000063046|EIF4B ENSG00000078795|PKD2L2 ENSG00000101349|PAK7  
ENSG00000101745|ANKRD12 ENSG00000104267|CA2 ENSG00000112294|ALDH5A1 ENSG00000120256|LRP11 ENSG00000124939|SCGB2A1 ENSG00000134115|CNTN6 ENSG00000139131|YARS2 ENSG00000141665|FBXO15  
ENSG00000142615|ELA2A\_HUMAN ENSG00000150510|FAM124A ENSG00000152455|SUV39H2 ENSG00000153814|JAZF1 ENSG00000163430|FSTL1 ENSG00000167193|CRK ENSG00000170191|NANP ENSG00000171617|ENC1  
ENSG00000174876|AMY1B ENSG00000180257|ZNF321 ENSG00000180869|Clorf180 ENSG00000181819|Q5JSM7\_HUMAN ENSG00000203963|Clorf141 ENSG00000204217|BMPR2  
GCAAATT ENSG00000074590|NUAK1 ENSG00000075234|NP\_060401.2 ENSG000000906395|MLN ENSG00000103021|CCDC113 ENSG00000104941|RSHL1 ENSG00000111252|SH2B3 ENSG00000112514|CUTA ENSG00000123154|MORG1\_HUMAN  
ENSG00000131096|PYY ENSG00000138175|ARL3 ENSG00000144791|LIMD1 ENSG00000154978|NM\_030796.3 ENSG00000155719|OTOA ENSG00000157693|C9orf91 ENSG00000169059|VCX3A ENSG00000169385|RNASE2  
ENSG00000169397|RNASE3 ENSG00000171724|K1576\_HUMAN ENSG00000177504|VCX2 ENSG00000182583|VCX ENSG00000188931|Clorf192 ENSG00000198690|MTMR15 ENSG00000204474|Q5JQD4\_HUMAN ENSG00000060642|PIG7  
ENSG00000069702|TGFB3 ENSG00000080298|RFK3 ENSG00000083642|APRN ENSG00000115084|SLC35F5 ENSG00000123219|CENPK ENSG00000135837|CEP350 ENSG00000144191|CNGA3 ENSG00000145423|SFRP2  
ENSG00000154359|LONRF1 ENSG00000155961|RAB39B ENSG00000164219|PGGT1B ENSG00000165805|C12orf50 ENSG00000167460|TPM4 ENSG00000168310|IRF2 ENSG00000171723|GPHN ENSG00000172000|ZNF556  
ENSG00000179175|C9orf38 ENSG00000181072|CHRM2 ENSG00000182463|TSHZ2 ENSG00000182919|C11orf54 ENSG00000198739|LRRTM3 ENSG00000205604|Q6ZUP5\_HUMAN  
GCAACCT ENSG00000087460|GNAS ENSG00000088888|MAVS\_HUMAN ENSG00000099338|C19orf15 ENSG00000101216|GMEB2 ENSG00000106006|HOXA6 ENSG00000106927|AMBP ENSG00000113889|KNG1  
ENSG00000115523|GNLY ENSG00000123159|GIPC1 ENSG00000131059|C20orf71 ENSG00000140990|NDUFB10 ENSG00000143847|PPF1A4 ENSG00000145526|CDH18 ENSG00000162599|NFIA ENSG00000164711|LPAL2  
ENSG00000169006|NTR2 ENSG00000169562|GJB1 ENSG00000173702|MUC13 ENSG00000178015|GPR150 ENSG00000179755|XR\_017798.1 ENSG00000183914|DNAH2 ENSG00000185885|IFITM1 ENSG00000189280|GJB5  
ENSG00000039319|ZFYVE16 ENSG00000040731|CDH10 ENSG00000100664|EIF5 ENSG00000107443|CCN3 ENSG00000123836|PFKFB2 ENSG00000133574|GIMAP4 ENSG00000150510|FAM124A ENSG00000159228|CBR1  
ENSG00000159251|ACTC1 ENSG00000163530|DPPA2 ENSG00000166206|GABRB3 ENSG00000167346|MMP26 ENSG00000169740|ZNF32 ENSG00000172296|SPTLC3 ENSG00000177425|PAWR ENSG00000187094|CCK  
ENSG00000187193|MT1X ENSG00000196980|NR\_002827.1 ENSG00000197110|IL28B ENSG00000204148|C9orf27 ENSG00000206213|PLSCR5  
GCAACGC ENSG00000067225|PKM2 ENSG00000100678|SLC8A3 ENSG00000130176|CNN1 ENSG00000130612|Q6ZSU1\_HUMAN ENSG00000131634|C16orf30 ENSG00000134595|SOX3 ENSG00000141526|SLC16A3  
ENSG00000163701|IL17RE ENSG00000164405|UQCRC1 ENSG00000168487|BMP1 ENSG00000169180|XPO6 ENSG00000169900|PYDC1 ENSG00000173369|C1QB ENSG00000175262|Clorf127 ENSG00000176533|GNG7  
ENSG00000179526|SHARPIN ENSG00000183600|Q66K37\_HUMAN ENSG00000196155|PLEKHG4 ENSG00000198711|Clorf191 ENSG00000204616|TRIM31 ENSG00000205236|NP\_663165.2 ENSG0000007062|PROM1 ENSG00000069956|MAPK6  
ENSG00000101546|C18orf22 ENSG00000115604|IL18R1 ENSG00000120563|LYZL1 ENSG00000129028|THAP10 ENSG00000134324|LPIN1 ENSG00000138802|SEC24B ENSG00000141219|C17orf80 ENSG00000143337|TOR1AIP1  
ENSG00000151033|LYZL2 ENSG00000152492|CCDC50 ENSG00000162631|NTNG1 ENSG00000162971|NP\_001034782.1 ENSG00000164167|LSM6 ENSG00000164741|DLC1 ENSG00000179930|ZNF648 ENSG00000180613|GSH2\_HUMAN  
ENSG00000186871|NP\_001009954.1 ENSG00000197635|DPP4 ENSG00000198087|CD2AP ENSG00000198642|KHLH9  
GCAACGG ENSG00000007545|CRAMP1L ENSG00000097021|ACOT7 ENSG00000103175|WFDCL1 ENSG00000106246|PTCD1 ENSG00000109610|SOD3 ENSG00000114654|CCDC48 ENSG00000128346|C22orf23 ENSG00000129455|KLK8  
ENSG00000130701|C20orf151 ENSG00000130725|UBE2M ENSG00000137699|TRIM29 ENSG00000144233|AMMECR1L ENSG00000153468|TCP10\_HUMAN ENSG00000162650|ATXN7L2 ENSG00000163701|IL17RE ENSG00000164379|FOXQ1  
ENSG00000166073|GPR176 ENSG00000167656|LY6D ENSG00000169710|FASN ENSG00000172531|PPP1A ENSG00000177963|RIC8A ENSG00000181218|HIST3H2A ENSG00000182205|Q6ZUT0\_HUMAN ENSG00000183888|Clorf64  
ENSG00000184185|KCNJ12 ENSG00000185482|STAC3 ENSG00000186493|C5orf38 ENSG00000203930|Q5JPA2\_HUMAN ENSG00000005059|CCDC109B ENSG00000007062|PROM1 ENSG00000135031|POLR3B ENSG00000059769|GNG10  
ENSG00000065833|ME1 ENSG00000091490|NP\_056002.1 ENSG00000100219|XBP1 ENSG00000100796|SMEK1 ENSG00000101310|SEC23B ENSG00000109534|NOLA1 ENSG00000116741|RGS2 ENSG00000121933|ADORA3  
ENSG00000128655|PDE11A ENSG00000130856|ZNF236 ENSG00000130939|UBE4B ENSG00000134202|GSTM3 ENSG00000137441|FGFBP2 ENSG00000138459|SLC35A5 ENSG00000151835|SACS ENSG00000154240|CCDC46  
ENSG00000164402|SEPT8 ENSG00000168955|TM4SF20 ENSG00000171723|GPHN ENSG00000185915|KHLH34 ENSG00000186009|ATP4B ENSG00000197140|ADAM32 ENSG00000198304|ZNF528 ENSG00000198492|YTHDF2

ENSG00000119121|TRPM6 ENSG00000124209|RAB22A ENSG00000131747|P11388-2 ENSG00000132950|ZMYM5 ENSG00000134313|NP\_065789.1 ENSG00000143457|GOLPH3L ENSG00000144935|TRPC1 ENSG00000145592|RPL37  
ENSG00000164265|SCGB3A2 ENSG00000164756|SLC30A8 ENSG00000165943|MOAP1 ENSG00000167720|SRR ENSG00000169567|HINT1 ENSG00000179363|TMEM31 ENSG00000180251|SLC9A4 ENSG00000180917|NP\_060818.3  
ENSG00000181751|C5orf30 ENSG00000186480|INSIG1 ENSG00000187009|Q8NFD4\_HUMAN ENSG00000196406|SPANXE ENSG00000197937|ZNF347 ENSG00000198021|SPANXA2 ENSG00000198573|SPANXC ENSG00000198820|SPANXF1  
ENSG00000198964|SGMS1 ENSG00000203926|SPANXA1 ENSG00000203929|SPANXB1 ENSG00000204026|Q6ZSD2\_HUMAN  
ENSG00000044446|PHKA2 ENSG00000076356|PLXNA2 ENSG00000092295|TGM1 ENSG00000092850|TEK72 ENSG00000101890|GUCY2F ENSG00000105383|CD33 ENSG00000115718|PROC ENSG00000121446|RGLS1  
ENSG00000124920|C11orf9 ENSG00000125815|CST8 ENSG00000127412|TRPV5 ENSG00000129214|SHBG ENSG00000161682|Q8N0U1\_HUMAN ENSG00000166569|CPLX4 ENSG00000168398|BDKRB2 ENSG00000170743|SYT9  
ENSG00000173227|SYT12 ENSG00000180358|Q8N1X6\_HUMAN ENSG00000181918|Q8N9J9\_HUMAN ENSG00000183495|EP400 ENSG00000185215|TNFAIP2 ENSG00000185619|PCGF3 ENSG00000196431|CRYBA4 ENSG00000005189|NP\_112203.1  
ENSG00000072080|SPP2 ENSG00000086696|HSD17B2 ENSG00000115361|ACADL ENSG00000125831|CST11 ENSG00000140093|SERPINA10 ENSG00000147874|FAM29A ENSG00000157111|TMEM171 ENSG00000159899|NPR2  
ENSG00000162526|TSSK3 ENSG00000163166|WTS1 ENSG00000166153|DEPDC4 ENSG00000166762|CATSPER2 ENSG00000167528|ZNF641 ENSG00000169288|MRPL1 ENSG00000171877|FRMD5 ENSG00000178177|LCORL  
ENSG00000179813|C13orf30 ENSG00000180964|TCEAL8 ENSG00000185231|MC2R ENSG00000187268|FAM9C ENSG00000204352|C9orf129 ENSG00000204711|C9orf135  
GCAATTA ENSG00000101441|CST4 ENSG00000105287|PRKD2 ENSG00000107140|TESK1 ENSG00000108417|KRT37 ENSG00000115107|STEAP3 ENSG00000116032|GRIN3B ENSG00000125266|EFNB2  
ENSG00000129354|AP1M2 ENSG00000132383|RPA1 ENSG00000138869|C22orf16 ENSG00000142669|SH3BGR1 ENSG00000146049|KAAG1 ENSG00000152086|TUBA3E ENSG00000160219|GAB3 ENSG00000163993|S100P  
ENSG00000167094|TTC16 ENSG00000167280|NP\_001036038.1 ENSG00000167775|CD320 ENSG00000169469|SPRR1B ENSG00000170367|CST5 ENSG00000170369|CST2 ENSG00000170373|CST1 ENSG00000175520|UBQLN3  
ENSG00000178928|TPRX1 ENSG00000188257|PLA2G2A ENSG00000189419|NP\_997266.2 ENSG00000198033|TUBA3C ENSG00000198089|SFI1 ENSG00000198400|NTRK1 ENSG00000203927|Q6ZNY1\_HUMAN ENSG00000204248|COL11A2  
ENSG00000100815|TRIP11 ENSG00000104064|GABPB2 ENSG00000106648|GALNTL5 ENSG00000112297|AIM1 ENSG00000135776|ABCB10 ENSG00000135913|USP37 ENSG00000137434|C6orf52 ENSG00000137831|UACA  
ENSG00000138400|MDH1B ENSG00000147586|MRPS28 ENSG00000150776|C11orf57 ENSG00000151150|ANK3 ENSG00000155382|KCNJ16 ENSG00000155438|MKI67IP ENSG00000166927|MS4A7 ENSG00000169813|HNRPF  
ENSG00000169906|S100G ENSG00000179520|SLC17A8 ENSG00000180458|Q8N3U1\_HUMAN ENSG00000189350|NP\_954974.2 ENSG00000204171|Q6STG2\_HUMAN ENSG00000205830|NP\_997373.1  
GCAATT ENSG00000077157|PPP1R12B ENSG00000089116|LHX5 ENSG00000092054|MYH7 ENSG00000100591|AHS1A ENSG00000104138|SLC32A1 ENSG00000102547|CAB39L ENSG00000129473|BCL2L2 ENSG00000137100|DCTN3  
ENSG00000146666|Q9EIF2\_HUMAN ENSG00000158161|EYA3 ENSG00000164047|CAMP ENSG00000182372|C8orf61 ENSG00000182950|ODF3L1 ENSG00000186994|ANKRD47 ENSG00000187116|LILRA5 ENSG00000198574|SH2D1B  
ENSG00000198785|GRIN3A ENSG00000204059|NP\_001013718.1 ENSG00000205664|Q6PJD4\_HUMAN ENSG00000205683|DPF3 ENSG00000006634|DBF4 ENSG00000055147|C5orf3 ENSG00000067064|IDI1 ENSG00000105793|GTPBP10  
ENSG00000116918|TSNAX ENSG00000121741|ZMYM2 ENSG00000122446|RPL5 ENSG00000122420|PTGFR ENSG00000125351|UPF3B ENSG00000134200|TSHB ENSG00000135747|ZNF670 ENSG00000143674|M3KL4\_HUMAN  
ENSG00000145244|CORIN ENSG00000150093|ITGB1 ENSG00000157827|FNNL2 ENSG00000159256|MORC3 ENSG00000166509|CLEC3A ENSG00000182033|ZNF2 ENSG00000182992|Q8IZM0\_HUMAN ENSG00000183475|ASB7  
ENSG00000184515|NGFRAP1L1  
GCACAAA ENSG00000008283|CYB561 ENSG00000043591|ADRB1 ENSG00000078319|PMS2L1 ENSG00000089685|BIRC5 ENSG00000102547|CAB39L ENSG00000106077|ABHD11 ENSG00000110448|CD5 ENSG00000115041|KCNP13  
ENSG00000117834|SLC55A9 ENSG00000119771|KLHL29 ENSG00000133250|ZNF414 ENSG00000142961|MOBK12C ENSG00000143858|SYT2 ENSG00000158578|ALAS2 ENSG00000158813|EDA ENSG00000166402|TUB  
ENSG00000167261|DPEP2 ENSG00000176136|MC5R ENSG00000178796|Q8N9Z1\_HUMAN ENSG00000179562|GCC1 ENSG00000185504|C17orf70 ENSG00000185933|FAM262 ENSG00000186577|C6orf1 ENSG00000196432|Q9H5F0\_HUMAN  
ENSG00000198632|NP\_777590.1 ENSG00000203822|Q6ZV10\_HUMAN ENSG00000204017|Q6ZVB9\_HUMAN ENSG00000204241|Q6ZUU8\_HUMAN ENSG00000206069|NP\_001001663.1 ENSG00000000460|C1orf112 ENSG000000011566|MAP4K3 ENSG00000042781|USH2A  
ENSG00000072042|RDH11 ENSG00000091664|SLC17A6 ENSG00000108091|CCDC6 ENSG00000109061|MYH1 ENSG00000109943|CRTAM ENSG00000113407|TARS ENSG00000120211|INSL4 ENSG00000120333|MRPS14  
ENSG00000120699|EXOSC8 ENSG00000124343|XG ENSG00000125414|MYH2 ENSG00000129824|RPS4Y1 ENSG00000132669|RIN2 ENSG00000136937|NCBP1 ENSG00000138483|CCDC54 ENSG00000138829|FBN2  
ENSG00000140367|UBE2Q2 ENSG00000146376|ARHGAP18 ENSG00000151164|RAD9B ENSG00000154175|ABI3BP ENSG00000171116|NP\_057237.1 ENSG00000171819|ANGPTL7 ENSG00000185689|Q6NXX5\_HUMAN ENSG00000196562|SULF2  
ENSG00000196792|STRN3 ENSG00000197646|PDCD1LG2 ENSG00000197958|RPL12 ENSG00000198360|NP\_839944.1 ENSG00000198936|NP\_839944.1  
GCACAA ENSG000000084731|KIF3C ENSG00000092010|PSME1 ENSG00000100031|GGT1 ENSG00000100121|GGTL4 ENSG00000102547|CAB39L ENSG00000105397|TYK2 ENSG00000105991|HOXA1 ENSG00000119689|DLST  
ENSG00000128159|TUBGCP6 ENSG00000136003|ISCU ENSG00000136828|RALGPS1 ENSG00000141012|GALNS ENSG00000147081|AKAP4 ENSG00000149435|GGTLA4 ENSG00000154096|THY1 ENSG00000157103|SLC6A1  
ENSG00000167858|TEKT1 ENSG00000168701|NM\_014187.2 ENSG00000180096|SEPT1 ENSG00000182858|ALG12 ENSG00000197561|ELA2 ENSG00000203931|LOC729078 ENSG00000205673|Q6ZRX0\_HUMAN ENSG00000205745|Q71MF4\_HUMAN  
ENSG00000113456|RAD1 ENSG00000114547|ROFN1B ENSG00000116001|TIA1 ENSG00000137261|K1AA0319 ENSG00000138400|MDH1B ENSG00000144406|Q9GSS0\_HUMAN ENSG00000150712|MTMR12 ENSG00000162992|NEUROD1  
ENSG00000168283|BMI1 ENSG00000170516|COX7B2 ENSG00000173302|GPR148 ENSG00000178177|LCORL ENSG00000180354|C7orf41 ENSG00000180628|PCGF5 ENSG00000183807|C6orf189 ENSG00000184434|LRRC19  
ENSG00000188400|Q6URH7\_HUMAN ENSG00000197279|ZNF165 ENSG00000198677|K1AA0372 ENSG00000203932|LOC728660 ENSG00000204990|NP\_001008742.1 ENSG00000205835|LOC647309  
GCACCAA ENSG00000006659|LGALS14 ENSG0000011677|GABRA3 ENSG00000055955|MUSTN1 ENSG00000007662|ICAM3 ENSG00000101144|BMP7 ENSG00000142156|COL6A1 ENSG00000149295|DRD2  
ENSG00000164711|LPAL2 ENSG00000166646|Q9D66\_HUMAN ENSG00000168828|OR13J1 ENSG00000169217|CD2B2P2 ENSG00000172476|RAB40A ENSG00000179766|Q4G129\_HUMAN ENSG00000187170|LCE4A ENSG00000079557|AFM  
ENSG00000101871|MID1 ENSG00000102128|RB40L\_HUMAN ENSG00000109680|TBC1D19 ENSG00000111783|RFX4 ENSG00000128789|TNFSF5IP1 ENSG00000131848|ZSCAN5 ENSG00000135837|CEP350 ENSG00000136881|BAAT  
ENSG00000138378|STAT4 ENSG00000145491|ROPN1L ENSG00000154654|NCAM2 ENSG00000157540|DYRK1A ENSG00000171612|SLC25A33 ENSG00000171824|EXOSC10 ENSG00000174500|GCET2 ENSG00000176055|NP\_981951.1  
ENSG00000185127|C6orf120 ENSG00000187554|TLR5 ENSG00000187823|ZCCHC16 ENSG00000187969|ZCCHC13 ENSG00000196850|PPCT7 ENSG00000203925|LOC647839 ENSG00000204705|LOC129870  
GCACGAT ENSG00000134555|ARPC1A ENSG00000089351|GRAMD1A ENSG00000101342|C20orf118 ENSG00000102007|PLP2 ENSG00000104953|TLE6 ENSG00000105392|CRX ENSG00000110514|MADD ENSG00000116273|PHF13  
ENSG00000131591|C1orf159 ENSG00000135973|GPR45 ENSG00000142677|IL22RA1 ENSG00000147789|ZNF7 ENSG00000160050|CCDC28B ENSG00000161179|NP\_001017964.1 ENSG00000166033|HTRA1 ENSG00000171403|KRT9  
ENSG00000173377|NP\_001034885.1 ENSG00000179044|EXOC3L ENSG00000183600|Q66K37\_HUMAN ENSG00000203772|SPRN ENSG00000204210|ZBTB22 ENSG00000204542|C6orf15 ENSG00000005108|THSD7A ENSG00000007350|TKTL1  
ENSG00000007372|PAX6 ENSG00000086666|ZFAND6 ENSG00000101132|PFDN4 ENSG00000001695|RNF125 ENSG00000104067|TJPI1 ENSG00000123268|ATF1 ENSG00000130921|C12orf65 ENSG00000135002|RFK  
ENSG00000138792|ENPEP ENSG00000139163|ETNK1 ENSG00000141668|CBLN2 ENSG00000143363|PRUNE ENSG00000154175|AB13BP ENSG00000162607|USP1 ENSG00000163697|APBB2 ENSG00000169040|PMCHL2  
ENSG00000175768|C9orf105 ENSG00000178459|Q8N2E2\_HUMAN ENSG00000178974|FBXO34 ENSG00000179195|ZNF664 ENSG00000180730|TMEM46 ENSG00000180773|SLC36A4 ENSG00000185420|SMYD3 ENSG00000198770|Q9H396\_HUMAN  
GCACGGT ENSG000000047306|CEACAM7 ENSG00000089351|GRAMD1A ENSG00000105568|PPP2R1A ENSG00000105963|CENTA1 ENSG00000106245|BUD31 ENSG00000112097|ADRA1A ENSG00000132130|LHX1 ENSG00000149654|CDH22  
ENSG00000154537|FAM27C ENSG00000160182|TFPI1 ENSG00000160209|PDXK ENSG00000160282|PTCD ENSG00000163600|TEXT4 ENSG00000166426|CABR1 ENSG00000168970|PLA2G4B ENSG00000170215|FAM27B  
ENSG00000171060|C8orf74 ENSG00000172530|BANP ENSG00000173366|TLR9 ENSG00000182368|FAM27A ENSG00000185404|Q4ZG65\_HUMAN ENSG00000187051|RPS19BP1 ENSG00000198517|MAFK ENSG00000034677|RNF19  
ENSG00000058600|POLR3E ENSG00000064787|BCAS1 ENSG00000112541|PDE10A ENSG00000124207|CSE1L ENSG00000124789|NUP153 ENSG00000131015|ULBP2 ENSG00000134899|ERCC5 ENSG00000135903|PAX3  
ENSG00000138376|BARD1 ENSG00000145675|PIK3R1 ENSG00000153721|MAGI1 ENSG00000155918|RAET1L ENSG00000156535|CD109 ENSG00000168646|AXIN2 ENSG00000169744|LDC2 ENSG00000172243|CLEC7A  
ENSG00000177283|FZD8 ENSG00000183475|ASB7 ENSG00000183726|TMEM50A ENSG00000197576|HOXA4 ENSG00000205221|VIT  
GCACGTC ENSG00000088992|TSC3 ENSG00000102519|PCSK1N ENSG00000105516|DBP ENSG00000114270|COL7A1 ENSG00000129988|LBP ENSG00000130635|COL5A1 ENSG00000144504|ANKMY1  
ENSG00000169098|CXYorf2 ENSG00000173762|CD7 ENSG00000183530|C22orf30 ENSG00000184887|BTBD6 ENSG00000185499|MUC1 ENSG00000187766|KRTAP10-8 ENSG00000197816|K1AA1529 ENSG00000081923|ATP8B1  
ENSG00000094880|CDC23 ENSG00000100425|BRD1 ENSG00000100483|C14orf138 ENSG00000104763|ASAH1 ENSG00000107651|SEC23IP ENSG00000110321|EIF4G2 ENSG00000120885|CLU ENSG00000130396|MLLT4  
ENSG00000133704|IP08 ENSG00000134152|C15orf29 ENSG00000136872|ALDOB ENSG00000145675|PIK3R1 ENSG00000163554|SPTA1 ENSG00000168502|KIFAA0802 ENSG00000169398|PTK2 ENSG00000171522|PTGER4  
ENSG00000180257|ZNF321 ENSG00000185849|Q9P194\_HUMAN ENSG00000186471|AKAP14 ENSG00000198218|QRICH1  
GCACTAA ENSG00000100298|APOBEC3H ENSG00000102934|PLP ENSG00000105227|PRX ENSG00000105397|TYK2 ENSG00000106266|SNX8 ENSG00000125347|IRF1 ENSG00000134460|IL2RA ENSG00000141622|C18orf23  
ENSG00000146926|ASB10 ENSG00000161179|NP\_001017964.1 ENSG00000164309|CMYA5 ENSG00000166578|IQCD ENSG00000166866|MYO1A ENSG00000167797|CDK2AP2 ENSG00000169231|THBS3 ENSG00000172009|THOP1  
ENSG00000176515|Q8NAX6\_HUMAN ENSG00000177807|KCNJ10 ENSG00000179965|ZNF771 ENSG00000182319|SG223\_HUMAN ENSG00000204479|PRAMEF16 ENSG00000204488|PRAMEF16 ENSG00000206152|Q6ZV52\_HUMAN ENSG00000117009|KMO  
ENSG00000122042|UBL3 ENSG00000130348|QRS1L ENSG00000133812|SBF2 ENSG00000135940|COX5B ENSG00000139496|NUP1L ENSG00000144566|RAB5A ENSG00000147471|PROSC ENSG00000151623|NR3C2  
ENSG00000163104|SMARCAD1 ENSG00000163376|KBTBD8 ENSG00000164303|ENPP6 ENSG00000165156|ZHX1 ENSG00000168118|RAB4A ENSG00000168615|ADAM9 ENSG00000173334|TRIB1 ENSG00000175374|SPESP1  
ENSG00000176732|PFN4 ENSG00000182827|ACBD3 ENSG00000197147|LRRC8B ENSG00000197585|Q5JV89\_HUMAN  
GCACTAC ENSG00000138172|FAM26B ENSG00000139193|CD27 ENSG00000142733|MAP3K6 ENSG00000143545|RAB13 ENSG00000146904|EPHA1 ENSG00000149927|DOC2A ENSG00000166833|NAV2 ENSG00000167747|C19orf48  
ENSG00000168090|COPS6 ENSG00000180471|C9orf31 ENSG00000186190|C20orf185 ENSG00000188384|Q6ZUQ5\_HUMAN ENSG00000189419|NP\_997266.2 ENSG00000198502|HLA-DRB5 ENSG00000203784|LELP1 ENSG00000203836|NP\_899228.3  
ENSG00000205271|Q6ZUQ5\_HUMAN ENSG00000205275|Q6ZUQ5\_HUMAN ENSG00000209639|TFB1M ENSG00000085832|EPS15 ENSG00000101435|CST9L ENSG00000106013|ANKRD7 ENSG00000106772|K1AA0367 ENSG00000108231|LGI1  
ENSG00000109083|IFT20 ENSG00000118985|ELL2 ENSG00000144962|SPATA16 ENSG00000149212|SESN3 ENSG00000155111|CDC2L6 ENSG00000156970|BUB1B ENSG00000157193|LRP8 ENSG00000164106|SCRG1\_HUMAN  
ENSG00000164749|HNF4G ENSG00000164933|SLC25A32 ENSG00000165434|PGM2L1 ENSG00000169554|ZEB2 ENSG00000187073|Q86TS2\_HUMAN ENSG00000187753|C9orf153 ENSG00000204567|Q6ZTG9\_HUMAN  
GCACTAG ENSG00000072501|SMC1A ENSG00000103496|STX4 ENSG00000105755|ETHE1 ENSG00000106789|CORO2A ENSG00000107738|C10orf54 ENSG00000119715|ESRRB ENSG00000124444|ZNF576 ENSG00000130309|GLT25D1  
ENSG00000145063|NM\_182586 ENSG00000149532|CPSF7\_HUMAN ENSG00000164574|GALNT10 ENSG00000172336|POP7 ENSG00000174306|ZHX3 ENSG00000178084|HTR3C ENSG00000178363|CALML3 ENSG00000181722|ZBTB20  
ENSG00000206013|IFITM5 ENSG00000106688|SLC1A1 ENSG000001122644|ARL4A ENSG00000123689|GOS2 ENSG00000128791|TWSG1 ENSG00000132972|RNF17 ENSG00000133657|ATP13A3 ENSG00000137026|IFNWP18  
ENSG00000137080|IFNA21 ENSG00000138640|FAM13A1 ENSG00000147877|IFNA4 ENSG00000162419|GMEB1 ENSG00000164209|SLC25A46 ENSG00000164898|NP\_932068.1 ENSG00000167346|MMP26  
ENSG00000175087|PDIK1L ENSG00000177453|NIM1\_HUMAN ENSG00000182463|TSH2 ENSG00000186803|IFNA10 ENSG00000186809|IFNA17 ENSG00000186871|NP\_001009954.1 ENSG00000204987|Q6ZN80\_HUMAN  
GCACTAT ENSG00000090339|ICAM1 ENSG00000100068|LRP5L ENSG00000113119|TMCO6 ENSG00000115307|AUP1 ENSG00000126903|SLC10A3 ENSG00000130429|ARPC1B ENSG00000139531|SUOX  
ENSG00000139636|LMBR1L ENSG00000143787|LETTY1 ENSG00000144550|CPNE9 ENSG00000152467|ZSCAN1 ENSG00000159958|TNFRSF13C ENSG00000160767|C1orf2 ENSG00000163795|ZNF513 ENSG00000164318|EGFLAM  
ENSG00000164742|ADCY1 ENSG00000170445|HARS ENSG00000175121|WPCD5 ENSG00000183579|ZNRF3 ENSG00000184076|NP\_001003684.1 ENSG00000197114|ZGPA1 ENSG00000204542|C6orf15 ENSG000000031003|C5orf5  
ENSG00000070950|RAD18 ENSG00000100554|ATP6V1D ENSG00000105976|MET ENSG00000108599|AKAP10 ENSG00000109511|ANXA10 ENSG00000112081|SFRS3 ENSG00000121316|NP\_079105.4  
ENSG00000124496|TRERF1 ENSG00000132170|PPARG ENSG00000135333|EPHA7 ENSG00000147180|ZNF711 ENSG00000148483|FAM23A ENSG00000163877|SNIP1 ENSG00000164603|NP\_689769.2 ENSG00000165704|HPRT1  
ENSG00000169826|CGAT2\_HUMAN ENSG00000170315|UBIQ\_HUMAN ENSG00000171195|MUC7 ENSG00000173046|NM\_207376 ENSG00000178074|NP\_710156.2 ENSG00000187109|NAP1L1 ENSG00000189251|Q8WYN8\_HUMAN ENSG00000198160|MIER1  
ENSG00000198315|ZNF192  
GCACTCA ENSG000000003147|ICAI1 ENSG00000063322|IXL ENSG000000806015|MAST2 ENSG00000100036|SLC35E4 ENSG00000108825|AARSD1 ENSG00000111886|GABRR2 ENSG00000114251|WNT5A ENSG00000127533|F2RL3  
ENSG00000130518|K1AA1683 ENSG00000138629|UBL7 ENSG00000140474|ULK3 ENSG00000148341|SH3GLB2 ENSG00000158423|RIBC1 ENSG00000160263|LRRC2 ENSG00000162415|ZSWIM5 ENSG00000168924|LETM1  
ENSG00000174400|Q8TB00\_HUMAN ENSG00000176357|C10orf55 ENSG00000176828|Q8N9U2\_HUMAN ENSG00000178589|Q9BT26\_HUMAN ENSG00000182950|ODF3L1 ENSG00000185340|GAS2L1 ENSG00000197251|NP\_997380.1 ENSG00000197916|Q8N7P5\_HUMAN  
ENSG00000203951|AZRUP6\_HUMAN ENSG00000083520|DTS3 ENSG00000085719|CPNE3 ENSG00000100664|EIF5 ENSG00000106261|ZKSCAN1 ENSG00000117586|TNFSF4 ENSG00000135862|LAMC1 ENSG00000152558|TMEM123  
ENSG00000154822|PLCL2 ENSG00000158985|CDC42SE2 ENSG00000159228|CBR1 ENSG00000163581|SLC2A2 ENSG00000165775|FUNDC2 ENSG00000177181|FAM80A ENSG00000179066|Q86VG9\_HUMAN ENSG00000183571|LOC145814  
ENSG00000198464|ZNF480  
GCACTGA ENSG00000026036|TNFRSF6B ENSG00000034063|UHRF1 ENSG00000070731|ST6GALNAC2 ENSG00000102755|FLT1 ENSG00000105366|SIGLEC8 ENSG00000106384|MOGAT3 ENSG00000110148|CKKBR ENSG00000113578|FGF1

|                           |                                      |                                |                                |                                |                              |                                |                              |
|---------------------------|--------------------------------------|--------------------------------|--------------------------------|--------------------------------|------------------------------|--------------------------------|------------------------------|
| ENSG00000174851 YIF1A     | ENSG00000189180 ZNF33A               | ENSG00000198933 TBKBP1         | ENSG00000204048 Q6ZUG3_HUMAN   | ENSG00000204101 Q6ZU91_HUMAN   | ENSG00000204423 C9orf33      | ENSG00000047621 C12orf4        | ENSG00000106511 MEOX2        |
| ENSG00000112333 NR2E1     | ENSG00000116016 EPAS1                | ENSG00000131269 ABCB7          | ENSG00000134851 TMEM165        | ENSG00000135374 ELF5           | ENSG00000135541 AH11         | ENSG00000136842 TMOD1          | ENSG00000144909 OSBP1L1      |
| ENSG00000145860 RNF145    | ENSG00000151418 ATP6V1G3             | ENSG00000151694 ADAM17         | ENSG00000151725 MLF1IP         | ENSG00000164258 NDUFS4         | ENSG00000165097 AOF1         | ENSG00000165588 OTX2           | ENSG00000171867 PRNP         |
| ENSG00000173681 CxorF23   | ENSG00000180537 RNF182               | ENSG00000182220 ATP6AP2        | ENSG00000185760 KCNQ5          | ENSG00000205036 NP_001001682.1 |                              |                                |                              |
| perfect: GCACCTGA TCAGTGC | hsa-miR-152 TCAGTGCatgacagaacttggg   | 0                              |                                |                                |                              |                                |                              |
| perfect: GCACCTGA TCAGTGC | hsa-miR-148a TCAGTGCactacagaactttgt  | 0                              |                                |                                |                              |                                |                              |
| perfect: GCACCTGA TCAGTGC | hsa-miR-148b TCAGTGCatcacagaactttgt  | 0                              |                                |                                |                              |                                |                              |
| GCACCTGT                  | ENSG00000007392 LUC7L                | ENSG000000081760 AACS          | ENSG000000088808 PPP1R13B      | ENSG00000105137 SYDE1          | ENSG00000118058 MLL          | ENSG00000127415 IDUA           | ENSG00000133105 RXFP2        |
|                           | ENSG00000135093 USP30                | ENSG00000136270 TBRG4          | ENSG00000140986 RPL3L          | ENSG00000144355 DLX1           | ENSG00000147402 GABRQ        | ENSG00000158747 NBL1           | ENSG00000162413 KLHL21       |
|                           | ENSG00000169884 WNT10B               | ENSG00000173585 CCR9           | ENSG00000182149 KIAA0174       | ENSG00000184345 IQCF2          | ENSG00000185112 FAM43A       | ENSG00000185504 C17orf70       | ENSG00000188775 Q6YL47_HUMAN |
|                           | ENSG00000085433 WDR47                | ENSG00000100784 RPS6KA5        | ENSG00000106537 TSPAN13        | ENSG00000110367 DDX6           | ENSG00000111711 GOLT1B       | ENSG00000112305 SMAP1          | ENSG00000113643 RARS         |
|                           | ENSG00000117525 F3                   | ENSG00000124406 ATP8A1         | ENSG00000131351 NP_219485.1    | ENSG00000134698 EIF2C4         | ENSG00000141076 CIRH1A       | ENSG00000141380 SS18           | ENSG00000143156 NME7         |
|                           | ENSG00000152242 C18orf25             | ENSG00000153495 C13orf16       | ENSG00000155961 RAB39B         | ENSG00000157470 FAM81A         | ENSG00000160294 MCM3AP       | ENSG00000166930 MS4A5          | ENSG00000178691 SUZ12        |
|                           | ENSG00000188800 TMCO2                | ENSG00000188992 LIPI           | ENSG00000198964 SGMS1          | ENSG00000205608 Q6ZQP9_HUMAN   |                              |                                |                              |
| GCACCTTA                  | ENSG00000072778 ACADVL               | ENSG00000086102 NFX1           | ENSG00000095383 TBC1D2         | ENSG00000101883 PEPP1_HUMAN    | ENSG00000101945 SUV39H1      | ENSG00000111249 CUTL2          | ENSG00000113739 STC2         |
|                           | ENSG00000130956 HABP4                | ENSG00000132470 ITGB4          | ENSG00000135624 CCT7           | ENSG00000149305 HTR3B          | ENSG00000163486 SRGAP2       | ENSG00000166140 ZYFVE19        | ENSG00000166508 MCM7         |
|                           | ENSG00000168795 ZBTB5                | ENSG00000173530 TNFRSF10D      | ENSG00000177337 NP_001034885.1 | ENSG00000178951 ZBTB7A         | ENSG00000182687 GALR2        | ENSG00000185436 IL28RA         | ENSG00000188636 LDOC1L       |
|                           | ENSG00000005469 CROT                 | ENSG00000010219 DYRK4          | ENSG00000030419 IKZF2          | ENSG000000054267 ARID4B        | ENSG00000067177 PHKA1        | ENSG00000076242 MLH1           | ENSG00000087253 AYTL1        |
|                           | ENSG00000108389 MTMR4                | ENSG00000120341 LZTR2          | ENSG00000125676 THOC2          | ENSG00000139970 RTN1           | ENSG00000145476 CYP4V2       | ENSG00000150457 LATS2          | ENSG00000155629 PIK3AP1      |
|                           | ENSG00000172465 TCEAL1               | ENSG00000185551 NR2F2          | ENSG00000188193 C6orf155       | ENSG00000198060 MARCH5         |                              |                                |                              |
| perfect: GCACCTTA TAAGTGC | hsa-miR-302d TAAGTGCttccatgtttgagtg  | 0                              |                                |                                |                              |                                |                              |
| perfect: GCACCTTA TAAGTGC | hsa-miR-302c TAAGTGCttccatgtttcagtg  | 0                              |                                |                                |                              |                                |                              |
| perfect: GCACCTTA TAAGTGC | hsa-miR-302b TAAGTGCttccatgttttagtg  | 0                              |                                |                                |                              |                                |                              |
| GCACCTTC                  | ENSG00000010256 UQCRC1               | ENSG00000090615 GOLGA3         | ENSG00000100271 TLL1           | ENSG00000100678 SLC8A3         | ENSG00000108947 EFNB3        | ENSG00000120889 TNFRSF10B      | ENSG00000125285 SOX21        |
|                           | ENSG00000130703 OSBP1L2              | ENSG00000130948 HSD17B3        | ENSG00000134690 CDCA8          | ENSG00000136878 USP20          | ENSG00000142082 SIRT3        | ENSG00000143314 MRPL24         | ENSG00000144655 AXUD1        |
|                           | ENSG00000167483 FAM129C              | ENSG00000167566 KIAA1602       | ENSG00000175315 CST6           | ENSG00000181016 NP_872403.1    | ENSG00000186847 KRT14        | ENSG00000187979 Q6ZPC6_HUMAN   | ENSG00000196378 Q9BSZ0_HUMAN |
|                           | ENSG00000197724 PHF2                 | ENSG00000198937 C6orf129       | ENSG00000205236 NP_663165.2    | ENSG00000052841 TTC17          | ENSG00000056291 NPFPR2       | ENSG00000106605 BLVRA          | ENSG000001116183 PAPPA2      |
|                           | ENSG00000131126 TEX101               | ENSG00000131951 LRRC9          | ENSG00000132356 PRKAA1         | ENSG00000133101 CCNA1          | ENSG00000138613 APH1B        | ENSG00000140093 SERPINA10      | ENSG00000145362 ANK2         |
|                           | ENSG00000163513 TGFB2                | ENSG00000163947 ARHGFE3        | ENSG00000164073 MFSD8          | ENSG00000165819 METTL3         | ENSG00000172115 CYCS         | ENSG00000175322 ZNF519         | ENSG00000179119 SPTY2D1      |
|                           | ENSG00000204387 C6orf48              | ENSG00000202623 PLSCR5         |                                |                                |                              |                                |                              |
| GCACCTTG                  | ENSG00000053438 NNAT                 | ENSG00000081377 CDC14C         | ENSG00000082458 DLG3           | ENSG00000088543 C3orf18        | ENSG00000100221 JOSD1        | ENSG00000106628 POLD2          | ENSG00000110711 AIP          |
|                           | ENSG00000131095 GFAP                 | ENSG00000132716 WDR42A         | ENSG00000135605 TEC            | ENSG00000136270 TBRG4          | ENSG00000138769 CDKL2        | ENSG00000147912 FBXO10         | ENSG00000148396 KIAA0310     |
|                           | ENSG00000159247 LOC643224            | ENSG00000161642 ZNF385         | ENSG00000163083 INHBB          | ENSG00000168621 GDNF           | ENSG00000170876 TMEM43       | ENSG00000175824 XR_017847.1    | ENSG00000178199 Q6ZRW2_HUMAN |
|                           | ENSG00000186654 ARHGAP8              | ENSG00000204240 Q6ZVK0_HUMAN   | ENSG00000067048 DDX3X          | ENSG00000071462 WBSR22         | ENSG00000074527 NTN4         | ENSG00000090060 PAPOLA         | ENSG00000107249 GLIS3        |
|                           | ENSG00000113088 GZMK                 | ENSG00000117289 TXNIP          | ENSG00000132703 APCS           | ENSG00000134049 TER3IP1        | ENSG00000135048 TMEM2        | ENSG00000147684 NDUFB9         | ENSG00000148377 IDI2         |
|                           | ENSG00000162613 FUBP1                | ENSG00000162913 C1orf145       | ENSG00000164743 C8orf48        | ENSG00000165244 ZNF367         | ENSG00000174038 C9orf131     | ENSG00000175449 RFESD          | ENSG00000182180 MRPS16       |
|                           | ENSG00000188992 LIPI                 | ENSG00000197991 PCDH20         |                                |                                |                              |                                |                              |
| GCACCTTT                  | ENSG00000006062 MAP3K14              | ENSG00000007968 E2F2           | ENSG00000101412 E2F1           | ENSG00000102230 PCYT1B         | ENSG00000104888 SLC17A7      | ENSG00000124762 CDKN1A         | ENSG00000142700 DMRTA2       |
|                           | ENSG00000156381 ANKRD9               | ENSG00000157184 CPT2           | ENSG00000163820 FYCO1          | ENSG00000164896 FAS3K          | ENSG00000166435 XRRA1        | ENSG00000167106 FAM102A        | ENSG00000168000 HNRPUL2      |
|                           | ENSG00000173706 HEG1                 | ENSG00000174282 ZBTB4          | ENSG00000189409 MYP23A         | ENSG00000196460 Q6ZNB4_HUMAN   | ENSG00000196700 ZNF512B      | ENSG00000205703 NP_001010910.1 | ENSG00000050405 LIMA1        |
|                           | ENSG00000008574 MYNN                 | ENSG00000100987 V5X1           | ENSG00000104517 EDD1           | ENSG00000121871 SLITRK3        | ENSG00000121903 ZSCAN20      | ENSG00000130413 STK33          | ENSG00000139508 SLC46A3      |
|                           | ENSG00000146072 TNFRSF21             | ENSG00000146360 GPR6           | ENSG00000147036 LANCL3         | ENSG00000150991 UBIQ_HUMAN     | ENSG00000154065 ANKRD29      | ENSG00000161800 RACGAP1        | ENSG00000163131 CTSS         |
|                           | ENSG00000163577 EIF5A2               | ENSG00000165806 CASP7          | ENSG00000166971 AKT1P          | ENSG00000180917 NP_060818.3    | ENSG00000186487 MYT1L        | ENSG00000197646 PDCC1L62       | ENSG00000163281 GNPDA2       |
| perfect: GCACCTTT AAAGTGC | hsa-miR-93 AAAGTGCgttctgtgcaggtag    | 0                              |                                |                                |                              |                                |                              |
| perfect: GCACCTTT AAAGTGC | hsa-miR-20a tAAAGTGCttatagtgaggtag   | 1                              |                                |                                |                              |                                |                              |
| perfect: GCACCTTT AAAGTGC | hsa-miR-106a aAAAGTGCttacagtgaggtagc | 1                              |                                |                                |                              |                                |                              |
| perfect: GCACCTTT AAAGTGC | hsa-miR-106b tAAAGTGCtgacagtgagcagat | 1                              |                                |                                |                              |                                |                              |
| perfect: GCACCTTT AAAGTGC | hsa-miR-17-5p cAAAGTGCttacagtgaggtag | 1                              |                                |                                |                              |                                |                              |
| perfect: GCACCTTT AAAGTGC | hsa-miR-20b cAAAGTGCttacagtgaggtag   | 1                              |                                |                                |                              |                                |                              |
| GCAGAAAT                  | ENSG00000063978 RNF4                 | ENSG00000092054 MYH7           | ENSG00000093217 XYLB           | ENSG00000099834 MUPCDH         | ENSG00000122367 LDB3         | ENSG00000143546 S100A8         | ENSG00000148826 NKX6-2       |
|                           | ENSG00000152217 SETB1                | ENSG00000160318 CLDN2          | ENSG00000160957 RECQL4         | ENSG00000163873 GRIK3          | ENSG00000163914 RHO          | ENSG00000164318 EGFLAM         | ENSG00000167525 NP_689678.1  |
|                           | ENSG00000186275 Q5TB04_HUMAN         | ENSG00000196209 Q5JXA8_HUMAN   | ENSG00000203793 Q6ZR74_HUMAN   | ENSG00000205205 C17orf31       | ENSG00000205792 A4D193_HUMAN | ENSG00000009307 NRAS           | ENSG00000083168 MYST3        |
|                           | ENSG00000112304 THEM2                | ENSG00000115137 NP_057628.1    | ENSG00000115183 TANC1          | ENSG00000121964 GTDC1          | ENSG00000123091 RNF11        | ENSG00000124198 ARFGF2         | ENSG00000125249 RAP2A        |
|                           | ENSG00000139597 NP_438169.2          | ENSG00000163406 SLC15A2        | ENSG00000164398 ACSL6          | ENSG00000165669 C10orf84       | ENSG00000171116 NP_057237.1  | ENSG00000171129 HSFX1          | ENSG00000173214 KIAA1919     |
|                           | ENSG00000185760 KCNQ5                | ENSG00000189320 NP_995327.1    | ENSG00000198771 RCS1           |                                |                              |                                |                              |
| GCAGAGA                   | ENSG00000049541 KFC2                 | ENSG00000071205 ARHGAP10       | ENSG00000089091 C20orf12       | ENSG00000099899 HTF9C_HUMAN    | ENSG00000102230 PCYT1B       | ENSG00000111077 TENC1          | ENSG00000115350 POLE4        |
|                           | ENSG00000133048 CHI3L1               | ENSG00000134817 AGTRL1         | ENSG00000141098 GFOD2          | ENSG00000143624 INTS3          | ENSG00000150556 NP_808879.2  | ENSG00000153443 FAM100A        | ENSG00000165269 AQP7         |
|                           | ENSG00000169926 KLF13                | ENSG00000179082 C9orf106       | ENSG00000179958 NP_077001.1    | ENSG00000180035 ZNF553         | ENSG00000182310 Q6UWG3_HUMAN | ENSG00000182472 CAPN12         | ENSG00000186466 AQP7P2       |
|                           | ENSG00000187741 FANCA                | ENSG00000197558 Q76B61_HUMAN   | ENSG00000198286 CARD11         | ENSG00000206026 NP_001032408.1 | ENSG00000111696 NT5DC3       | ENSG00000111832 RWDD1          | ENSG00000121594 CD80         |
|                           | ENSG00000164485 IL22RA2              | ENSG00000173088 Q5VUS1_HUMAN   | ENSG00000174099 MSR3           | ENSG00000183508 FAM46C         | ENSG00000184863 PRR8         | ENSG00000196442 ZNF432         | ENSG00000196562 SULF2        |
| GCAGAGT                   | ENSG00000006695 COX10                | ENSG0000022277 C20orf43        | ENSG00000084207 GSTP1          | ENSG00000088356 PDRG1          | ENSG00000100379 KCTD17       | ENSG00000100439 ABHD4          | ENSG00000101146 RAE1         |
|                           | ENSG00000114383 TUSC2                | ENSG00000125611 CHCHD5         | ENSG00000153563 CDBA           | ENSG00000163468 CCT3           | ENSG00000163468 CCT3         | ENSG00000166024 C10orf28       | ENSG00000167693 NXN          |
|                           | ENSG00000182707 FYXD9                | ENSG00000183103 LYPD4          | ENSG00000183114 FAM43B         | ENSG00000185674 LYG2_HUMAN     | ENSG00000197063 MAFG         | ENSG00000205307 Q8TEE9_HUMAN   | ENSG00000205745 Q71MF4_HUMAN |
|                           | ENSG00000206550 LOC285346            | ENSG00000058272 PPP1R12A       | ENSG00000066294 CDBA           | ENSG00000069493 CLEC2D         | ENSG00000276282 P4HA2        | ENSG00000075142 SRI            | ENSG000000889053 ANAPC5      |
|                           | ENSG00000116001 TIA1                 | ENSG00000116679 IVNS1ABP       | ENSG00000117569 PTBP2          | ENSG00000119121 TRPM6          | ENSG00000129675 ARHGEP6      | ENSG00000130037 KCN5           | ENSG00000141665 FBXO15       |
|                           | ENSG00000156006 NAT2                 | ENSG00000156026 CCDC109A       | ENSG00000162769 FLVCL1_HUMAN   | ENSG00000163694 NP_061900.1    | ENSG00000164144 ARFIP1       | ENSG00000179676 C18orf20       | ENSG00000180777 ANKRD30B     |
|                           | ENSG00000183952 Q9H5Q9_HUMAN         | ENSG00000198900 TOP1           | ENSG00000204869 IGFL4          |                                |                              |                                |                              |
| GCAGATA                   | ENSG00000082566 PSCD3                | ENSG00000079974 RABL2B         | ENSG00000092421 SEMA6A         | ENSG00000101350 KIF3B          | ENSG00000101577 LPIN2        | ENSG00000105516 DBP            | ENSG00000115138 POMC         |
|                           | ENSG00000127418 FGFR1L               | ENSG00000158987 RAPGEF6        | ENSG00000163121 NM_001080535.1 | ENSG00000168014 NP_056346.2    | ENSG00000174370 C11orf45     | ENSG00000175164 ABO            | ENSG00000186198 NP_849190.1  |
|                           | ENSG00000196090 PTPRT                | ENSG00000196263 ZNF471         | ENSG00000203867 RBM20          | ENSG00000204197 KIFC1          | ENSG00000204405 Q6ZQV3_HUMAN | ENSG00000054938 CHRD12         | ENSG00000068781 STON1        |
|                           | ENSG00000100526 CDKN3                | ENSG00000106443 PHF14          | ENSG00000136539 CB302          | ENSG00000138613 APH1B          | ENSG00000151655 ITIH2        | ENSG00000154645 CHODL          | ENSG00000157450 RNF111       |
|                           | ENSG00000163393 SLC22A15             | ENSG00000164828 UNC84A         | ENSG00000165076 NP_001008271.1 | ENSG00000188107 EGFL11         | ENSG00000196632 WNK3         | ENSG00000196886 Q8NAW3_HUMAN   | ENSG00000198889 WDR40B       |
|                           | ENSG00000204909 SPINK9               | ENSG00000204990 NP_001008742.1 |                                |                                |                              |                                |                              |
| GCAGCAA                   | ENSG000000055130 CUL1                | ENSG00000063244 U2AF2          | ENSG00000072501 SMC1A          | ENSG00000099889 ARVCF          | ENSG00000112599 GUCAL1       | ENSG00000114933 NP_060229.2    | ENSG00000119681 LTBP2        |
|                           | ENSG00000129862 VCY                  | ENSG00000129864 VCY1B          | ENSG00000140323 D1SP2          | ENSG00000141431 Q6ZMX6_HUMAN   | ENSG00000141696 NO55_HUMAN   | ENSG00000147403 RPL10          | ENSG00000157017 GHR1         |
|                           | ENSG00000158352 SHROOM4              | ENSG00000160296 SIGLEC12       | ENSG00000167208 NP_878274.1    | ENSG00000178919 FOXEL1         | ENSG00000179407 DNAJB8       | ENSG00000180358 Q8N1X6_HUMAN   | ENSG00000185065 NP_776154.2  |
|                           | ENSG00000190245 Q8N7M3_HUMAN         | ENSG00000198012 XR_017841.1    | ENSG00000204394 VARS           | ENSG00000204581 Q6ZU44_HUMAN   | ENSG000002057                |                                |                              |

ENSG00000133105|RXFP2 ENSG00000134815|DHX34 ENSG00000137207|YIPF3 ENSG00000137842|TMEM62 ENSG00000147099|HDAC8 ENSG00000148308|GTF3C5 ENSG00000158805|ZNF276 ENSG00000163126|ANKRD23 ENSG00000165275|RG9MTD3 ENSG00000165414|Q96HD6\_HUMAN ENSG00000167862|JCT1 ENSG00000167965|NM\_022372.3 ENSG00000168389|MFS2 ENSG00000175416|CLTB ENSG00000176911|Q9HAM1\_HUMAN ENSG00000183186|KIAA1957 ENSG00000183637|C21orf30 ENSG00000184068|Q8N8F0\_HUMAN ENSG00000186543|Q6ZWC0\_HUMAN ENSG00000187621|TCL1B ENSG00000197386|HD ENSG00000197694|SPTAN1 ENSG00000203905|Q6ZRC6\_HUMAN ENSG0000020426|MNAT1 ENSG00000092439|TRPM7 ENSG00000112530|PACRG ENSG00000120963|ZNF706 ENSG00000127314|RAP1B ENSG00000128739|SNRPN ENSG00000131473|ACLY ENSG00000133606|MKRN1 ENSG00000137691|C11orf70 ENSG00000151726|ACSL1 ENSG00000153832|FBXO36 ENSG00000164609|SLU7 ENSG00000165060|FXN ENSG00000168204|O95104\_HUMAN ENSG00000168653|NDUFS5 ENSG00000169116|PARM1\_HUMAN ENSG00000169914|OTUD3 ENSG00000171135|JAGN1 ENSG00000171867|PRNP ENSG00000176225|RTTN ENSG00000176276|hCG\_1757335 ENSG00000177150|C18orf19 ENSG00000181847|VSI9 ENSG00000182827|ACBD3 ENSG00000196605|Q08AG5\_HUMAN ENSG00000196632|WKK3 ENSG00000203801|Q5R3E8\_HUMAN

GCAGGCT ENSG00000064999|ANKS1A ENSG00000072736|NFATC3 ENSG00000073060|SCARB1 ENSG00000092964|DPYSL2 ENSG00000108878|CACNG1 ENSG00000122965|REB19 ENSG00000124222|NPEPL1 ENSG00000135835|KIAA1614 ENSG00000139269|INHBE ENSG00000148288|GBGT1 ENSG00000148843|PDCD11 ENSG00000160298|C21orf58 ENSG00000162591|MECG1 ENSG00000163872|YEA2S2 ENSG00000164776|PHKG1 ENSG00000166272|C10orf26 ENSG00000166592|RRAD ENSG00000166949|SMAD3 ENSG00000168924|LETM1 ENSG00000175356|SCUBE2 ENSG00000175662|TOM1L2 ENSG00000178531|CTXN1 ENSG00000178589|Q9BT26\_HUMAN ENSG00000185105|XR\_015885.1 ENSG00000185585|OLFML2A ENSG00000189410|SH2D5 ENSG00000206551|Q6ZT99\_HUMAN ENSG00000206561|COLQ ENSG00000032514|PGBD3 ENSG00000068990|GAGE12G ENSG00000069974|RAB27A ENSG00000100580|TMED8 ENSG00000119865|C2orf32 ENSG00000125814|NAPB ENSG00000138760|SCARB2 ENSG00000161634|DCD ENSG00000163430|FSTL1 ENSG00000166796|LDHC ENSG00000174780|SRP72 ENSG00000180332|KCTD4 ENSG00000183644|NP\_997313.1 ENSG00000187189|TSPYL4 ENSG00000189064|NM\_012196.1 ENSG00000196677|C8orf77 ENSG00000198178|CLEC4C ENSG00000198716|GAGE3 ENSG00000205775|GAGE12B ENSG00000205777|GAGE4

GCAGGTG ENSG00000020181|GPR124 ENSG00000064300|NGFR ENSG00000095752|IL11 ENSG00000099814|KIAA0284 ENSG00000100012|SEC14L3 ENSG00000105173|CCNE1 ENSG00000109066|TMEM104 ENSG00000123933|MXD4 ENSG00000125434|SLC25A35 ENSG00000125970|RALY ENSG00000127399|LRRRC61 ENSG00000130500|PXDND ENSG00000144199|FAHD2B ENSG00000149503|INCENP ENSG00000154102|C16orf74 ENSG00000158158|CNM4 ENSG00000160439|RDH13 ENSG00000167889|MGAT5B ENSG00000167965|NM\_022372.3 ENSG00000172893|DHCR7 ENSG00000179403|VWAL1 ENSG00000180929|GPR62 ENSG00000183018|SPNS2 ENSG00000183760|NP\_001004318.1 ENSG00000185024|BRF1 ENSG00000185332|TMEM105 ENSG00000185831|NR\_003081.1 ENSG00000186575|NF2 ENSG00000196358|NTNG2 ENSG00000197386|HD ENSG00000203685|C1orf95 ENSG00000205751|MRPL23 ENSG00000206081|Q6ZVK3\_HUMAN ENSG00000087053|MTMR2 ENSG00000108599|AKAP10 ENSG00000111707|SUDS3 ENSG00000116747|TROVE2 ENSG00000117036|ETV3 ENSG00000129292|PHF20L1 ENSG00000143384|MCL1 ENSG00000150776|C11orf57 ENSG00000153495|C13orf16 ENSG00000159873|CCDC117 ENSG00000162630|B3GALT2 ENSG00000169372|CRADD ENSG00000172456|NP\_060761.2 ENSG00000173726|TOMM20 ENSG00000185737|NRG3 ENSG00000187742|SECISBP2 ENSG00000197181|PIWIL2 ENSG00000204426|LOC286238 ENSG00000205428|C9orf35 ENSG00000048342|Q9H8A7\_HUMAN ENSG00000088876|ZNF343 ENSG000000996384|HSP90AB1 ENSG00000115902|SLC1A4 ENSG00000121083|DYNLL2 ENSG00000124422|USP22 ENSG00000136828|RALGPS1 ENSG00000151360|ALLC ENSG00000154917|RAB6B ENSG00000158113|LRRRC43 ENSG00000158828|PINK1 ENSG00000160284|C21orf56 ENSG00000164889|SLC4A2 ENSG00000166402|TUB ENSG00000170310|STX8 ENSG00000172548|ICHN\_HUMAN ENSG00000173821|RNF213 ENSG00000175792|RUVBL1 ENSG00000196166|NP\_997295.1 ENSG00000196374|HIST1H2BM ENSG00000196979|NP\_997392.1 ENSG00000197461|PDGFA ENSG00000198437|Q8N0T2\_HUMAN ENSG00000198931|APRT ENSG00000205023|Q6ZSF1\_HUMAN ENSG00000205593|FAM116B ENSG0000002745|WNT16 ENSG00000035141|NP\_116211.1 ENSG00000054983|GALC ENSG00000066651|TRMT11 ENSG00000104691|UBXD6 ENSG00000109790|KLHL5 ENSG00000110002|LOH1LCR2A ENSG00000114784|EIF1B ENSG00000115875|SFRS7 ENSG00000136824|SMC2 ENSG00000147526|TACC1 ENSG00000152661|GJA1 ENSG00000155868|CRSP9 ENSG00000163322|CCDC98 ENSG00000164542|NP\_056129.1 ENSG00000165972|CCDC38 ENSG00000174227|PIGG ENSG00000185304|NP\_001071638.1 ENSG00000187627|RSPD1 ENSG00000196715|VKORC1L1 ENSG00000196812|ZSCAN16

GCAGTAT ENSG00000006114|AP1GBP1 ENSG00000011021|CLCN6 ENSG00000078900|TP73 ENSG00000102385|DRP2 ENSG00000104972|LILRB1 ENSG00000105122|NP\_075055.1 ENSG00000114735|HEMK1 ENSG00000130159|ECSIT ENSG00000134243|SORT1 ENSG00000135723|PHOD1 ENSG00000148290|SURF1 ENSG00000162772|ATF3 ENSG00000164051|CCDC51 ENSG00000164707|SLC13A4 ENSG00000173027|WBP1 ENSG00000188493|C19orf54 ENSG00000188707|C7orf29 ENSG00000198618|PPIA\_HUMAN ENSG00000203867|RBM20 ENSG00000054277|OPN3 ENSG00000110172|CHORDC1 ENSG00000115145|STAM2 ENSG00000115963|RND3 ENSG00000117600|NP\_055654.2 ENSG00000120685|C13orf23 ENSG00000121749|TBC1D15 ENSG00000124380|SNUT3\_HUMAN ENSG00000133606|MKRN1 ENSG00000134901|KDEL1 ENSG00000137040|RANBP6 ENSG00000138061|CYP1B1 ENSG00000138346|DNA2L ENSG00000146856|AGBL3 ENSG00000148429|USP6NL ENSG00000156469|MTERFD1 ENSG00000164258|NDUFS4 ENSG00000165323|FAT3 ENSG00000169895|SYAP1 ENSG00000177150|C18orf19 ENSG00000178425|NT5DC1 ENSG00000186687|LYRM7 ENSG00000197639|MKRN1P

GCAGTCC ENSG00000083845|RPS5 ENSG00000093100|MICA3\_HUMAN ENSG00000101665|SMAD7 ENSG00000110446|SLC15A3 ENSG00000126215|XRCC3 ENSG00000130717|UCK1 ENSG00000140470|ADAMTS17 ENSG00000158805|ZNF276 ENSG00000163833|FBXO40 ENSG00000166619|BLCAP ENSG00000171596|NMUR1 ENSG00000176753|NP\_001034994.1 ENSG00000177302|TOP3A ENSG00000182315|NP\_653215.1 ENSG00000188681|Q8TEH8\_HUMAN ENSG00000196187|TMEM63A ENSG00000205718|LOC653656 ENSG0000041357|PSMA4 ENSG00000044115|CTNNA1 ENSG00000056277|SUHW3 ENSG00000095485|CWF19L1 ENSG00000100697|DICER1 ENSG00000116199|FAM20B ENSG00000125378|BMP4 ENSG00000127022|CANX ENSG00000130150|MOSPD2 ENSG00000133858|CCDC131 ENSG00000148730|EIF4EBP2 ENSG00000150347|ARID5B ENSG00000150907|FOXO1A ENSG00000163029|SMC6 ENSG00000165030|NFIL3 ENSG00000166596|WDR16 ENSG00000172974|LOC729317 ENSG00000173452|NP\_689987.2 ENSG00000196589|MB3L2\_HUMAN ENSG00000196432|C1orf166 ENSG00000100207|LIPIN2 ENSG00000101577|LPC12 ENSG00000103070|RASL12 ENSG00000106628|POLD2 ENSG00000110721|CHKA ENSG00000118017|A4GNT ENSG00000127080|IPPK ENSG00000131368|MRPS25 ENSG00000134014|ELP3 ENSG00000154781|C3orf19 ENSG00000154928|P54762-3 ENSG00000162413|KLHL21 ENSG00000163464|IL8RA ENSG00000166257|SCN3B ENSG00000166716|ZNF592 ENSG00000168066|SF1 ENSG00000169662|NP\_997357.1 ENSG00000169668|NP\_997357.1 ENSG00000171813|PWW2 ENSG00000171984|C20orf196 ENSG00000176984|Q8N8C5\_HUMAN ENSG00000180735|Q6PJW0\_HUMAN ENSG00000184330|S100A7A ENSG00000185917|SETD4 ENSG00000187715|KLHDC6 ENSG00000197586|ENTPD6 ENSG00000050165|DKK3 ENSG00000108091|CCDC6 ENSG00000116560|SFPQ ENSG00000119801|YPEL5 ENSG00000121390|PSPC1 ENSG00000122787|AKR1D1 ENSG00000129484|PARP2 ENSG00000144824|PLCXD2 ENSG00000151150|ANK3 ENSG00000155966|AFF2 ENSG00000165646|SLC18A2 ENSG00000175175|PPM1E ENSG00000176390|CRLF3 ENSG00000196442|ZNF432 ENSG00000197989|C1orf79

GCATAAT ENSG00000049283|EPN3 ENSG00000092067|CEBPE ENSG00000099204|ABLIM1 ENSG00000103313|MEFV ENSG00000117318|ID3 ENSG00000122854|SFTPA2B ENSG00000133475|GGT2 ENSG00000135457|TFCP2 ENSG00000139636|LMBRL1 ENSG00000142405|NLRP12 ENSG00000142751|BLPBD1B ENSG00000165388|ZNF488 ENSG00000171729|TMEM51 ENSG00000173511|VEGFA ENSG00000176733|HES3 ENSG00000176532|PRR15 ENSG00000177384|Q9NT46\_HUMAN ENSG00000178826|TMEM139 ENSG00000182314|SFTPA2 ENSG00000183038|LOC728226 ENSG00000197421|NR\_003267.1 ENSG00000204269|Q6ZVM2\_HUMAN ENSG00000204446|NP\_001001709.1 ENSG00000204516|MICB ENSG00000204523|HLA-B ENSG00000204525|HLA-C ENSG00000005249|PRKAR2B ENSG00000100526|CDKN3 ENSG00000102081|FMR1 ENSG00000112796|ENPP5 ENSG00000117505|DR1 ENSG00000119318|RAD23B ENSG00000132356|PRKAA1 ENSG00000134594|RAB33A ENSG00000136267|DGKB ENSG00000142065|ZFP14 ENSG00000143353|LYPLAL1 ENSG00000147364|FBXO25 ENSG00000154736|ADAMTS5 ENSG00000155111|CDC2L6 ENSG00000157450|RNF111 ENSG00000158481|CD1C ENSG00000162378|ZYGL1B ENSG00000198169|ZNF251 ENSG00000111886|GABRR2 ENSG00000114735|HEM1 ENSG00000130948|HSD17B3 ENSG00000136828|RALGPS1 ENSG00000172779|ALOX5 ENSG00000070778|PTPN21 ENSG00000080511|RDH8 ENSG00000101074|R3HDM1 ENSG00000101781|R3HDM1 ENSG00000160710|ADAR ENSG00000176946|THAP4 ENSG00000177192|PUS1 ENSG00000180901|KCTD2 ENSG00000138867|C22orf13 ENSG00000141026|MED9 ENSG00000148704|VAX1 ENSG00000157851|DPYSL5 ENSG00000160710|ADAR ENSG00000176946|THAP4 ENSG00000177192|PUS1 ENSG00000180901|KCTD2 ENSG00000182329|Q8IVF9\_HUMAN ENSG00000187492|NP\_001007541.1 ENSG00000188783|PRELP ENSG00000196365|LONP1 ENSG00000196734|LCE1B ENSG00000197916|Q8N7P5\_HUMAN ENSG00000206193|Q5HYA3\_HUMAN ENSG00000073282|TP73L ENSG00000076382|SPAG5 ENSG00000078140|HIP2 ENSG00000078399|HOXA9 ENSG00000092203|TOX4 ENSG00000101109|STR4 ENSG00000104356|POP1 ENSG00000106688|SLC1A1 ENSG00000107679|PLEKHA1 ENSG00000108064|TFAM ENSG00000114346|ECT2 ENSG00000123570|RAB9B ENSG00000132912|DCTN4 ENSG00000133115|STOML3 ENSG00000135750|KCNK1 ENSG00000136940|PDCL ENSG00000137547|MRPL15 ENSG00000153187|HNRPU ENSG00000163170|BOLA3 ENSG00000164106|SCRG1\_HUMAN ENSG00000165659|DACH1 ENSG00000170340|B3GNT2 ENSG00000174125|TLR1 ENSG00000189108|IL1RAPL2 ENSG000001461|NALP3 ENSG00000046647|GEMIN8 ENSG00000087589|C20orf32 ENSG00000102445|C13orf18 ENSG00000111481|COE2 ENSG00000112053|SLC26A8 ENSG00000121753|BAI2 ENSG00000134339|SAA2 ENSG00000136653|RASSF5 ENSG00000141552|ANAPC11 ENSG00000143578|CREB3L4 ENSG00000148297|SURF5 ENSG00000158470|B4GALT5 ENSG00000161013|MGAT4B ENSG00000164091|TMEM113 ENSG00000171236|LRG1 ENSG00000176615|LOC652153 ENSG00000179241|LDLRAD3 ENSG00000196805|SPRR2A ENSG00000197386|HD ENSG00000006451|RALA ENSG00000078674|PCM1 ENSG00000085274|MYNN ENSG00000102144|PGK1 ENSG00000102471|NDIFP2 ENSG00000111875|ASF1A ENSG00000116161|CACYBP ENSG00000120756|PLS1 ENSG00000125879|OTOR ENSG00000129472|RAB2B ENSG00000133641|C12orf29 ENSG00000134644|PUM1 ENSG00000138069|RAB1A ENSG00000139357|SLC5A8 ENSG00000146842|NP\_116231.2 ENSG00000147853|AK3 ENSG00000151881|C5orf28 ENSG00000154479|Q6PJF6\_HUMAN ENSG00000163682|RPL9 ENSG00000166326|TRIM44 ENSG00000168967|PMCHL1 ENSG00000169224|C1orf150 ENSG00000170584|NUDC2 ENSG00000171428|NAT1 ENSG00000173418|NAT5 ENSG00000187118|NP\_872329.1 ENSG00000187824|NP\_001004313.1 ENSG00000198168|SVIP\_HUMAN ENSG00000205765|NP\_787117.3

GCATCTC ENSG00000005513|SOX8 ENSG00000075618|FSCN1 ENSG00000101193|C20orf11 ENSG00000108669|PSCD1 ENSG00000134955|SLC37A2 ENSG00000137392|CLPS ENSG00000149021|SCGB1A1 ENSG00000149600|COMMD7 ENSG00000150175|PDZD5B ENSG00000154096|THY1 ENSG00000155428|TRIM74 ENSG00000160058|BSD1 ENSG00000167371|PRRT2 ENSG00000167972|ABCA3 ENSG00000170324|FRMPD2 ENSG00000174151|CYB51D1 ENSG00000178809|TRIM73 ENSG00000179598|NP\_849158.1 ENSG00000197704|PDZD5A ENSG00000198909|MAP3K3 ENSG00000065457|ADAT1 ENSG00000075711|DLG1 ENSG00000091483|FH ENSG00000102144|PGK1 ENSG00000113327|GABRG2 ENSG00000132334|PTPRE ENSG00000135862|LAMC1 ENSG00000136709|WDR33 ENSG00000140948|ZCCHC14 ENSG00000143771|CNIH4 ENSG00000158691|ZSCAN12 ENSG00000159399|HK2 ENSG00000162402|USP24 ENSG00000170248|PDCC6IP ENSG00000172575|RASGRP1 ENSG00000174136|RGM8 ENSG00000174373|GARNL1 ENSG00000176049|JAKMIP2 ENSG00000182521|TBPL2 ENSG00000185523|NP\_001019772.1 ENSG00000197926|Q8NAT16\_HUMAN ENSG00000198223|CSF2RA ENSG00000198770|Q9H396\_HUMAN ENSG00000204711|C9orf135 ENSG00000204866|IGFL2

GCATGAA ENSG00000066382|MPPE2 ENSG00000072501|SMC1A ENSG00000096395|MLN ENSG00000100138|NHP2L1 ENSG00000116133|DHCR24 ENSG000001158445|KCNB1 ENSG00000158497|HMBB1 ENSG00000160219|GAB3 ENSG00000163214|DHX57 ENSG00000164270|HTR4 ENSG00000165948|FAM14B ENSG00000166069|TMCO5 ENSG00000166317|SYNPO2L ENSG00000166831|RBPM52 ENSG00000168014|NP\_056346.2 ENSG00000168209|DDIT4 ENSG00000171533|MAP6 ENSG00000175283|DOLK ENSG00000178266|NP\_001013698.1 ENSG00000187664|TM6SF2 ENSG00000198854|C1orf68 ENSG00000205354|Q6ZNF60\_HUMAN ENSG00000205703|NP\_001010910.1 ENSG00000206193|Q5HYA3\_HUMAN ENSG00000207466|HECW1 ENSG00000005108|THSD7A ENSG00000066697|TMEFF1 ENSG00000108384|RAD51C ENSG00000109381|ELF2 ENSG00000111897|SERINC1 ENSG00000130818|ZNF426 ENSG00000131375|CAPN7 ENSG00000143457|GOLPH3L ENSG00000147041|SYTL5 ENSG00000149124|GLYAT ENSG00000153495|C13orf16 ENSG00000156103|MMP16 ENSG00000173387|Q9P007\_HUMAN ENSG00000179397|C1orf101 ENSG00000179454|KLHL28 ENSG00000186432|KPNA4 ENSG00000198815|FOXJ3

GCATGAC ENSG00000004866|ST7 ENSG00000029534|ANK1 ENSG00000108375|SUPT4H1 ENSG00000135454|B4GALNT1 ENSG00000139714|MORN3 ENSG00000146374|RSPO3 ENSG00000162600|OMA1 ENSG00000162817|C1orf115 ENSG00000163061|Q9BSF9\_HUMAN ENSG00000165140|FBP1 ENSG00000165275|RG9MTD3 ENSG00000172578|KLHL6 ENSG00000173264|GPR137 ENSG00000179776|CDH5 ENSG00000180846|C19orf34 ENSG00000182857|Q6P168\_HUMAN ENSG00000185988|PLK5\_HUMAN ENSG00000188384|Q6ZUQ5\_HUMAN ENSG00000196396|PTPN1 ENSG00000205270|Q6P168\_HUMAN ENSG00000205271|Q6ZUQ5\_HUMAN ENSG00000205275|Q6ZUQ5\_HUMAN ENSG00000205276|Q6P168\_HUMAN ENSG00000023330|ALAS1

GCATGCA ENSG00000058668|ATP2B4 ENSG00000100354|TNRC6B ENSG00000102595|UGCGL2 ENSG00000104765|BNIP3L ENSG00000111879|C6orf60 ENSG00000119950|MXI1 ENSG00000123545|C6orf66 ENSG00000133401|PDZD2 ENSG00000133812|SUF1 ENSG00000137573|SULF1 ENSG00000138823|MTPT ENSG00000145649|GZMA ENSG00000145850|TIMD4 ENSG00000148450|MSRB2 ENSG00000151575|TEX9 ENSG00000160124|CCDC58 ENSG00000163359|COL6A3 ENSG00000177182|NP\_775790.1 ENSG00000198700|Q6UXS0\_HUMAN ENSG00000198814|GK ENSG00000198944|ANKRD43 ENSG00000203933|NP\_001013421.1 ENSG000000089169|RPH3A ENSG00000097007|ABL1 ENSG00000101152|DNAJC5 ENSG00000101298|RAD21L1 ENSG00000112977|DAP ENSG00000115306|SPTBN1 ENSG00000121281|ADCY7 ENSG00000123136|DDX39 ENSG00000123171|CCDC70 ENSG00000139574|NPF1 ENSG00000154930|ACSB1 ENSG00000170616|SCRT1 ENSG00000172350|ABCG4 ENSG00000173093|CCDC63 ENSG00000177468|OLIG3 ENSG00000178243|C9orf62 ENSG00000185818|NAT8L ENSG00000185838|GNB1L ENSG00000197251|NP\_997380.1 ENSG00000198198|KIAA0467 ENSG00000204999|LOC388588 ENSG00000205974|Q6ZVY3\_HUMAN ENSG00000001986|CYP24A1 ENSG00000056277|SUHW3 ENSG00000111490|Q9Y219\_HUMAN ENSG00000119231|SENP5 ENSG00000120860|CCDC53 ENSG00000122585|NPY ENSG00000125356|NDUFA1 ENSG00000132313|MRPL35 ENSG00000132631|C20orf79 ENSG00000134255|CEPT1 ENSG00000135018|UBQLN1 ENSG00000136267|DGKB ENSG00000138640|FAM13A1 ENSG00000151623|NR3C2 ENSG00000154274|C4orf19 ENSG00000158023|WDR66 ENSG00000171943|SRGAP2P1 ENSG00000181656|GPR88 ENSG00000186094|AGBL4 ENSG00000196648|NP\_937824.1 ENSG00000197978|NP\_937824.1 ENSG00000205428|C9orf35 ENSG00000006638|TBXA2R ENSG00000066044|ELAVL1 ENSG00000066382|MPPE2 ENSG00000070785|EIF2B3 ENSG00000088926|F11 ENSG00000089505|CMTM1 ENSG00000092445|TYRO3 ENSG00000100263|RHBD3

|                             |                                |                                |                                |                                |                                |                                |                              |                             |
|-----------------------------|--------------------------------|--------------------------------|--------------------------------|--------------------------------|--------------------------------|--------------------------------|------------------------------|-----------------------------|
| ENSG00000106290 TAF6        | ENSG00000116983 HPCAL4         | ENSG00000122965 RBM19          | ENSG00000141552 ANAPC11        | ENSG00000143196 DPT            | ENSG00000150401 DCUN1D2        | ENSG00000155980 KIF5A          | ENSG00000157330 Clorf158     |                             |
| ENSG00000157765 SLC34A2     | ENSG00000158169 FANCC          | ENSG00000165457 FOLR2          | ENSG00000167900 TK1            | ENSG00000177021 LRRRC2         | ENSG00000181826 Q8IUW5_HUMAN   | ENSG00000183049 CAMK1D         | ENSG00000183785 PEX26        |                             |
| ENSG00000185608 MRPL40      | ENSG00000198792 C22orf5        | ENSG00000205431 Q6UWF5_HUMAN   | ENSG00000205795 CYS1           | ENSG00000000005 TNMD           | ENSG000000003989 SLC7A2        | ENSG000000006757 PNPL4         | ENSG00000047315 POLR2B       |                             |
| ENSG00000067048 DDX3X       | ENSG00000101558 VAPA           | ENSG00000105849 TWISTNB        | ENSG00000106546 AHR            | ENSG00000112419 PHACTR2        | ENSG00000120498 TEX11          | ENSG00000120549 KIAA1217       | ENSG00000122033 MTIF3        |                             |
| ENSG00000122034 GTF3A       | ENSG00000138078 PREPL          | ENSG00000139372 TDG            | ENSG00000139910 NOVA1          | ENSG00000144285 SCN1A          | ENSG00000151092 NGLY1          | ENSG00000162643 WDR63          | ENSG00000163519 TRAT1        |                             |
| ENSG00000171362 PNMA2       | ENSG00000185345 PARK2          | ENSG00000186094 AGBL4          | ENSG00000197989 Clorf79        |                                |                                |                                |                              |                             |
| GCATGGT                     | ENSG00000108219 TSPAN14        | ENSG00000111249 CUTL2          | ENSG00000125651 GTF2F1         | ENSG00000128908 INOC1          | ENSG00000132323 ILKAP          | ENSG00000143816 WNT9A          | ENSG00000144488 ESPNL        | ENSG00000153481 NP_060680.2 |
| ENSG00000157110 RBPMS       | ENSG00000162543 UBXD3          | ENSG00000166716 ZNF592         | ENSG00000170608 FOXA3          | ENSG00000177830 CHID1          | ENSG00000180935 Q8N8B3_HUMAN   | ENSG00000205742 Q6ZTR4_HUMAN   | ENSG00000070061 IKBKAP       |                             |
| ENSG00000083312 TNPO1       | ENSG00000104164 PLDN           | ENSG00000104331 IMPAD1         | ENSG00000118260 CREB1          | ENSG00000129699 NP_067644.2    | ENSG00000134259 NGFB           | ENSG00000137267 TUBB2A         | ENSG00000145428 RNF175       |                             |
| ENSG00000147162 OGT         | ENSG00000150687 PRSS23         | ENSG00000154511 FAM69A         | ENSG00000157625 MAP3K7IP3      | ENSG00000159131 GART           | ENSG00000165891 E2F7           | ENSG00000166263 STXBP4         | ENSG00000168692 TSPY1_HUMAN  |                             |
| ENSG00000168757 TSPY1       | ENSG00000169826 CGAT2_HUMAN    | ENSG00000170315 UBIQ_HUMAN     | ENSG00000185912 TSPY1_HUMAN    | ENSG00000186479 RGS7BP         | ENSG00000188477 Q6UXS0_HUMAN   | ENSG00000188656 LOC728403      | ENSG00000197329 PELI1        |                             |
| ENSG00000206184 XR_016233.1 |                                |                                |                                |                                |                                |                                |                              |                             |
| GCATGTA                     | ENSG00000055483 USP36          | ENSG00000074590 NUAK1          | ENSG00000095383 TBC1D2         | ENSG00000114268 PFKFB4         | ENSG00000117016 RIMS3          | ENSG00000124678 TCP11          | ENSG00000124733 MEA1         | ENSG00000133149 TEX13A      |
| ENSG00000142686 NP_689587.1 | ENSG00000142686 NP_689587.1    | ENSG00000143416 SELENBP1       | ENSG00000154978 NM_030796.3    | ENSG00000158864 NDUFS2         | ENSG00000163016 NP_660343.1    | ENSG00000164051 CCDC51         | ENSG00000177192 PUS1         | ENSG00000198901 PRC1        |
| ENSG00000204657 OR2H2       | ENSG00000205015 Q6ZNV2_HUMAN   | ENSG00000092020 PPP2R3C        | ENSG00000113384 GOLPH3         | ENSG00000117118 SDHB           | ENSG00000119787 ARL6IP2        | ENSG00000122692 SMU1           | ENSG00000122958 VPS26A       |                             |
| ENSG00000136881 BAAT        | ENSG00000137871 SUHW4          | ENSG00000144445 NP_689732.2    | ENSG00000145088 EAF2           | ENSG00000154531 RG9MTD2        | ENSG00000154511 FAM69A         | ENSG00000156697 UTP14A         | ENSG00000165312 OTUD1        |                             |
| ENSG00000165501 PPI5        | ENSG00000167842 MIS12          | ENSG00000168769 KIAA1546       | ENSG00000170745 KCN3           | ENSG00000171735 CAMTA1         | ENSG00000178395 Clorf65        | ENSG00000178965 Clorf173       | ENSG00000182400 TRAPPC6B     |                             |
| ENSG00000182747 SLC35D3     | ENSG00000197484 Q6ZRH8_HUMAN   | ENSG00000198597 ZNF536         | ENSG00000205212 NP_001004306.1 |                                |                                |                                |                              |                             |
| GCATGTC                     | ENSG00000015676 NUDCD3         | ENSG00000101210 EEF1A2         | ENSG00000101452 DHH35          | ENSG00000102178 UBL4A          | ENSG00000103522 IL21R          | ENSG00000111412 C12orf49       | ENSG00000116337 AMPD2        |                             |
| ENSG00000122497 NBPF14      | ENSG00000124571 XPO5           | ENSG00000130731 NP_001035251.1 | ENSG00000134247 PTGFRN         | ENSG00000142794 NBPF3          | ENSG00000152042 NBPF8          | ENSG00000158220 FAM62C         | ENSG00000162572 SCNN1D       |                             |
| ENSG00000168614 NBPF15      | ENSG00000171703 TCEA2          | ENSG00000176945 MUC20          | ENSG00000177992 C9orf79        | ENSG00000186788 NP_001001670.1 | ENSG00000188760 NP_001005209.1 | ENSG00000189110 Q6ZRK9_HUMAN   | ENSG00000189357 XR_015253.1  |                             |
| ENSG00000065150 RANBP5      | ENSG00000079785 DDX1           | ENSG00000105974 CAV1           | ENSG00000112115 IL17A          | ENSG00000115355 KIAA1212       | ENSG00000116539 ASH1L          | ENSG00000123416 TUBA1B         | ENSG00000124228 DDX27        |                             |
| ENSG00000129586 ZBED5       | ENSG00000137942 FNBPF1L        | ENSG00000153006 NP_776190.1    | ENSG00000156787 WDR67          | ENSG00000162704 ARPC5          | ENSG00000165417 GTF2A1         | ENSG00000187823 ZCCHC16        | ENSG00000196318 AMY2A        |                             |
| ENSG00000198721 PECI        | ENSG00000203827 XR_015220.1    | ENSG00000203832 NBPF20         |                                |                                |                                |                                |                              |                             |
| GCATGTG                     | ENSG00000036448 MYOM2          | ENSG00000078246 TULP3          | ENSG00000088876 ZNF343         | ENSG00000099957 P2RXL1         | ENSG00000100626 GALNTL1        | ENSG00000101161 PRPF6          | ENSG00000110536 NDUFS3       | ENSG00000110880 CORO1C      |
| ENSG00000131183 SLC34A1     | ENSG00000131943 C19orf12       | ENSG00000134020 PEBPL_HUMAN    | ENSG00000134243 SORT1          | ENSG00000142686 NP_689587.1    | ENSG00000142687 KIAA0319L      | ENSG00000154783 FGD5           | ENSG00000160917 CPSF4        |                             |
| ENSG00000164530 P116        | ENSG00000172073 C2orf51        | ENSG00000178243 C9orf62        | ENSG00000203855 Q8TDP9_HUMAN   | ENSG00000204792 Q6ZU62_HUMAN   | ENSG00000211445 GPX3           | ENSG00000101343 CRNKL1         | ENSG00000102221 PHF16        |                             |
| ENSG00000108468 CBX1        | ENSG00000109339 MAPK10         | ENSG00000110851 PRDM4          | ENSG00000112739 PRPF4B         | ENSG00000115159 GPD2           | ENSG00000120549 KIAA1217       | ENSG00000122591 FAM126A        | ENSG00000125675 GRIA3        |                             |
| ENSG00000125831 CST11       | ENSG00000127152 BCL11B         | ENSG00000131370 SH3BP5         | ENSG00000147573 TRIM55         | ENSG00000147874 FAM29A         | ENSG00000151458 ANKRD50        | ENSG00000155324 GRAMD3         | ENSG00000160551 TAOK1        |                             |
| ENSG00000162642 Clorf52     | ENSG00000165675 ENOX2          | ENSG00000169032 MAP2K1         | ENSG00000174482 LINGO2         | ENSG00000176711 WSB2           | ENSG00000179083 FAM133A        | ENSG00000185158 LRRRC37B       | ENSG00000187123 LYPD6        |                             |
| ENSG00000196914 ARHGEF12    | ENSG00000198791 CNOT7          | ENSG00000205777 GAGE4          |                                |                                |                                |                                |                              |                             |
| GCATGTT                     | ENSG00000077238 IL4R           | ENSG00000083307 GRHL2          | ENSG00000100221 JOSD1          | ENSG00000100364 C22orf9        | ENSG00000106852 LHX6           | ENSG00000110799 VWF            | ENSG00000132446 FTHL17       | ENSG00000136504 MYST2       |
| ENSG00000142528 ZNF473      | ENSG00000148200 NR6A1          | ENSG00000157110 RBPMS          | ENSG00000157734 SNX22          | ENSG00000158863 RAI16          | ENSG00000161395 PERLD1         | ENSG00000163239 TDRD10         | ENSG00000163362 Clorf106     |                             |
| ENSG00000167515 TRAPPC2L    | ENSG00000169083 AR             | ENSG00000169093 ASMTL          | ENSG00000174233 ADCY6          | ENSG00000204103 MAFB           | ENSG00000204542 C6orf15        | ENSG00000202267 FHL1           | ENSG00000062716 TMEM49       |                             |
| ENSG00000083312 TNPO1       | ENSG00000089094 FBXL10         | ENSG00000101966 BIRC4          | ENSG00000102931 ARL2BP         | ENSG00000104626 THEX1          | ENSG00000113140 SPARC          | ENSG00000115183 TANC1          | ENSG00000123473 STIL         |                             |
| ENSG00000123728 RAP2C       | ENSG00000125863 MKKS           | ENSG00000125945 ZNF436         | ENSG00000126945 HNRPH2         | ENSG00000134874 DZIP1          | ENSG00000144810 COL8A1         | ENSG00000145850 TIMD4          | ENSG00000148730 EIF4EBP2     |                             |
| ENSG00000152078 TMEM56      | ENSG00000152601 MBNL1          | ENSG00000154065 ANKRD29        | ENSG00000163755 HPS3           | ENSG00000169045 HNRPH1         | ENSG00000172380 GNGL2          | ENSG00000187231 SESTD1         | ENSG00000197045 GMFB         |                             |
| ENSG00000198898 CAPZA2      |                                |                                |                                |                                |                                |                                |                              |                             |
| GCATTAA                     | ENSG00000007968 E2F2           | ENSG00000078898 BP1L1          | ENSG00000087237 CETP           | ENSG00000101457 DNTTIP1        | ENSG00000105254 TBCB           | ENSG00000108219 TSPAN14        | ENSG00000114113 RBP2         | ENSG00000130758 MAP3K10     |
| ENSG00000130997 POLN        | ENSG00000131368 MRPS25         | ENSG00000132824 SERINC3        | ENSG00000133275 CSNK1G2        | ENSG00000139405 CAR2           | ENSG00000139445 FOXN4          | ENSG00000143632 ACTA1          | ENSG00000146926 ASB10        |                             |
| ENSG00000147100 SLC16A2     | ENSG00000150401 DCUN1D2        | ENSG00000153048 CARHSP1        | ENSG00000164077 MON1A          | ENSG00000177947 ODF3           | ENSG00000178922 HXY1           | ENSG00000185803 GPR172A        | ENSG00000187003 ACTL7A       |                             |
| ENSG00000196388 NP_998891.1 | ENSG00000196998 WDR45          | ENSG00000198785 GRIN3A         | ENSG00000204183 GDF50S         | ENSG00000205664 Q6ZU62_HUMAN   | ENSG00000205804 Q5T6R2_HUMAN   | ENSG00000008083 JARID2         | ENSG00000010704 HFE          |                             |
| ENSG00000080644 CHRNA3      | ENSG00000101842 VSI61          | ENSG00000107518 ATRNLL         | ENSG00000109790 KLHL5          | ENSG00000112312 GMNN           | ENSG00000112851 ERBB2IP        | ENSG00000113597 NP_079217.1    | ENSG00000114030 KPNA1        |                             |
| ENSG00000121297 TSHZ3       | ENSG00000125337 KIF25          | ENSG00000135002 RFK            | ENSG00000141452 C18orf8        | ENSG00000143079 CTTNBP2NL      | ENSG00000144034 TPRKB          | ENSG00000147892 ADAMTSL1       | ENSG00000148737 TCF7L2       |                             |
| ENSG00000160145 KALRN       | ENSG00000160336 ZNF761         | ENSG00000164327 NP_689969.2    | ENSG00000166170 BAG5           | ENSG00000169193 CCDC126        | ENSG00000172716 SLFN11         | ENSG00000187009 Q8NFD4_HUMAN   | ENSG00000198538 ZNF28        |                             |
| ENSG00000204604 ZNF468      | ENSG00000204837 Q2TVT3_HUMAN   | hsa-miR-155                    | TTAATGCTaatcgtgatagggg         | 0                              |                                |                                |                              |                             |
| GCATTCC                     | ENSG00000055609 MLL3           | ENSG00000068308 OTUD5          | ENSG00000074181 NOTCH3         | ENSG00000095303 PTGS1          | ENSG00000105755 ETHE1          | ENSG00000107185 KIAA0258       | ENSG00000120913 PDLIM2       | ENSG00000128973 CLN6        |
| ENSG00000131236 CAP1        | ENSG00000144852 NR1I2          | ENSG00000160710 ADAR           | ENSG00000167461 RAB8A          | ENSG00000170464 DNAJC18        | ENSG00000171388 APLN           | ENSG00000173171 MTX1           | ENSG00000177614 PGBD5        |                             |
| ENSG00000197818 SLC9A8      | ENSG00000198690 MTMR15         | ENSG00000092203 TOX4           | ENSG00000113384 GOLPH3         | ENSG00000116675 DNAJC6         | ENSG00000118762 PKD2           | ENSG00000124343 XG             | ENSG00000102879 TWSG1        |                             |
| ENSG00000129353 SLC44A2     | ENSG00000132294 EFR3_HUMAN     | ENSG00000134444 KIAA1468       | ENSG00000136451 VEZF1          | ENSG00000138768 VDP_HUMAN      | ENSG00000150938 CRIM1          | ENSG00000150991 UBIQ_HUMAN     | ENSG00000153707 PTPRD        |                             |
| ENSG00000155307 SAMSNI      | ENSG00000162852 Clorf71        | ENSG00000165076 NP_001008271.1 | ENSG00000168386 FILIP1L        | ENSG00000177879 AP3S1          | ENSG00000196236 XPNPEP3        | ENSG00000196628 TCF4           | ENSG00000205195 Q6ZTB1_HUMAN |                             |
| GCATTCT                     | ENSG00000002919 SNX11          | ENSG00000007038 PRSS21         | ENSG00000099797 GPSN2          | ENSG00000101079 NDRG3          | ENSG00000108264 TADA2L         | ENSG00000111481 COP21          | ENSG00000115598 IL1RL2       | ENSG00000119682 KIAA0317    |
| ENSG00000122367 LDB3        | ENSG00000143878 RHOB           | ENSG00000144036 EXOC6B         | ENSG00000160097 FNDC5          | ENSG00000171855 IFNB1          | ENSG00000184639 NP_001004344.1 | ENSG00000186261 EMP2           | ENSG00000189180 ZNF33A       |                             |
| ENSG00000019995 ZRANB1      | ENSG00000056972 TRAF3IP2       | ENSG00000075651 PLD1           | ENSG00000114757 PEX5L          | ENSG00000115008 IL1A           | ENSG00000116005 PCYOX1         | ENSG00000120162 MOBK2L2B       | ENSG00000120833 SOCS2        |                             |
| ENSG00000122691 TWIST1      | ENSG00000124406 ATP8A1         | ENSG00000134249 ADAM30         | ENSG00000156234 CXCL13         | ENSG00000157578 C21orf13       | ENSG00000162998 FRZB           | ENSG00000163630 SYNPR          | ENSG00000164611 PTTG1        |                             |
| ENSG00000164825 DEFB1       | ENSG00000165669 C10orf84       | ENSG00000166439 RNF169         | ENSG00000172296 SPTLC3         | ENSG00000176714 CCDC121        | ENSG00000183098 GPC6           | ENSG00000185010 F8             | ENSG00000185127 C6orf120     |                             |
| GCATTGA                     | ENSG00000075790 BCAP29         | ENSG00000090920 FCGBP          | ENSG00000100461 RBM23          | ENSG00000106268 NUDT1          | ENSG00000116667 Clorf21        | ENSG00000125726 CD70           | ENSG00000134247 PTGFRN       | ENSG00000136930 PSMB7       |
| ENSG00000143774 GUK1        | ENSG00000148158 SNX3           | ENSG00000156298 TSPAN7         | ENSG00000156486 KCN2S          | ENSG00000162148 C11orf66       | ENSG00000164300 SERINC5        | ENSG00000166272 C10orf26       | ENSG00000166398 KIAA0355     |                             |
| ENSG00000166619 BLCAP       | ENSG00000166743 ACSM1          | ENSG00000172273 MI2F           | ENSG00000172336 POP7           | ENSG00000177225 PDDC1          | ENSG00000179855 GPC3           | ENSG00000184634 MED12          | ENSG00000188554 NBR1         |                             |
| ENSG00000205335 GLYCAM1     | ENSG00000005700 IBTK           | ENSG00000034239 EFCAB1         | ENSG00000074696 PTPLAD1        | ENSG00000078018 MAP2           | ENSG00000085721 RRN3           | ENSG00000100739 BDKRB1         | ENSG00000104442 ARMC1        |                             |
| ENSG00000112290 WASF1       | ENSG00000122299 ZC3H7A         | ENSG00000122692 SMU1           | ENSG00000124614 RPS10          | ENSG00000136986 DERL1          | ENSG00000139496 NUP1L          | ENSG00000144802 NFKBIZ         | ENSG00000154359 LONRF1       |                             |
| ENSG00000154582 TCEB1       | ENSG00000161800 RACGAP1        | ENSG00000163393 SLC22A15       | ENSG00000174446 SNAPC5         | ENSG00000174792 C4orf26        | ENSG00000178460 C8orf45        | ENSG00000182700 NP_001007190.1 | ENSG00000185056 Q569G3_HUMAN |                             |
| ENSG00000185275 CD24        | ENSG00000188971 NP_001013005.1 | ENSG00000204869 IGFL4          |                                |                                |                                |                                |                              |                             |
| GCATTGT                     | ENSG00000077312 SNRPA          | ENSG00000079974 RABL2B         | ENSG00000096088 PGC            | ENSG00000104848 KCNA7          | ENSG00000106628 POLD2          | ENSG00000123411 IKZF4          | ENSG00000136731 UGCGL1       | ENSG00000136854 STXBP1      |
| ENSG00000136942 RPL35       | ENSG00000143061 IGSF3          | ENSG00000151353 TMEM18         | ENSG00000163882 POLR2H         | ENSG00000166473 PKD1L2         | ENSG00000169548 SUHW1          | ENSG00000172476 RAB40A         | ENSG00000172724 CCL19        |                             |
| ENSG00000172775 NIP30_HUMAN | ENSG00000185615 PDIA2          | ENSG00000196372 ASB13          | ENSG00000009413 REV3L          | ENSG000000010810 FYN           | ENSG00000124682 PCMAIP1        | ENSG00000144619 CNTN4          | ENSG00000151490 PTPRO        |                             |
| ENSG00000120675 DNAJC15     | ENSG00000123595 RAB9A          | ENSG00000132429 POPD3          | ENSG00000134765 DSC1           | ENSG00000136451 VEZF1          | ENSG00000170345 FOS            | ENSG00000171848 RRM2           | ENSG00000173930 SLC04C1      | ENSG00000183354 KIAA2026    |
| ENSG00000163577 EIF5A2      | ENSG00000163636 PSMD6          | ENSG00000163673 DCLK3          | ENSG00000166803 KIAA0101       |                                |                                |                                |                              |                             |
| ENSG00000188474 ZNF788      | ENSG00000196                   |                                |                                |                                |                                |                                |                              |                             |



|         |                             |                                |                                |                                |                              |                                |                                |                              |                              |
|---------|-----------------------------|--------------------------------|--------------------------------|--------------------------------|------------------------------|--------------------------------|--------------------------------|------------------------------|------------------------------|
| GCCATAG | ENSG00000196482 ESRRG       | ENSG00000204757 Q6ZTL5_HUMAN   | ENSG00000105127 AKAP8          | ENSG00000106636 YKT6           | ENSG00000119403 PHF19        | ENSG00000122304 Q6ZMMO_HUMAN   | ENSG00000128626 MRPS12         | ENSG00000130821 SLC6A8       | ENSG00000136811 ODF2         |
|         | ENSG00000090924 PLEKHG2     | ENSG00000105127 AKAP8          | ENSG00000105127 AKAP8          | ENSG00000106636 YKT6           | ENSG00000119403 PHF19        | ENSG00000122304 Q6ZMMO_HUMAN   | ENSG00000128626 MRPS12         | ENSG00000130821 SLC6A8       | ENSG00000136811 ODF2         |
|         | ENSG00000138074 SLC5A6      | ENSG00000143479 DYRK3          | ENSG00000151773 CCDC122        | ENSG00000158987 RAPGEF6        | ENSG00000159023 EPB41        | ENSG00000161860 SYCE2          | ENSG00000162076 NP_612448.1    | ENSG00000164077 MON1A        | ENSG00000164077 MON1A        |
|         | ENSG00000170322 NFRKB       | ENSG00000172932 ANKRD13D       | ENSG00000182795 Clorf116       | ENSG00000183250 C21orf67       | ENSG00000188076 SCGB1C1      | ENSG00000198216 CACNA1E        | ENSG00000203744 AL1L170_HUMAN  | ENSG00000071967 CYBRD1       | ENSG00000071967 CYBRD1       |
|         | ENSG00000087206 UMC1        | ENSG00000100564 PIGH           | ENSG00000100823 APEX1          | ENSG00000100889 PCK2           | ENSG00000117751 PPP1R8       | ENSG00000123700 KCNJ2          | ENSG00000125945 ZNF436         | ENSG00000126016 AMOT         | ENSG00000126016 AMOT         |
|         | ENSG00000129071 MBD4        | ENSG00000130770 ATP1F1         | ENSG00000134717 BTF3L4         | ENSG00000136891 TEX10          | ENSG00000139324 TMTC3        | ENSG00000163069 SCN3           | ENSG00000164116 GUCY1A3        | ENSG00000164904 ALDH7A1      | ENSG00000164904 ALDH7A1      |
|         | ENSG00000165502 RPL36AL     | ENSG00000170759 KIF5B          | ENSG00000177414 UBE2U          | ENSG00000178386 ZNF223         | ENSG00000182400 TRAPPC6B     | ENSG00000182973 CNOT10         | ENSG00000197045 GMFB           | ENSG00000198625 MDM4         | ENSG00000198625 MDM4         |
| GCCATGG | ENSG00000050426 LETMD1      | ENSG00000099365 STX1B2         | ENSG00000101306 MYLK2          | ENSG00000105875 NP_054868.2    | ENSG00000105953 OGDH         | ENSG00000108947 EFNB3          | ENSG00000124444 ZNF576         | ENSG00000132376 SKIP_HUMAN   | ENSG00000132376 SKIP_HUMAN   |
|         | ENSG00000135074 ADAM19      | ENSG00000139890 REM2           | ENSG00000160953 MUM1           | ENSG00000167986 DDB1           | ENSG00000172460 Q8IVY7_HUMAN | ENSG00000177951 BET1L          | ENSG00000179364 PACS2          | ENSG00000185069 KRT76        | ENSG00000185069 KRT76        |
|         | ENSG00000185800 DMWD        | ENSG00000196624 NP_997381.1    | ENSG00000198246 SLC29A3        | ENSG00000205606 C6orf107       | ENSG00000207018 AP3M2        | ENSG00000207616 GPC4           | ENSG00000207836 GNB1           | ENSG00000211196 MGN2_HUMAN   | ENSG00000211196 MGN2_HUMAN   |
|         | ENSG00000116132 PRRX1       | ENSG00000124496 TRERF1         | ENSG00000125414 MYH2           | ENSG00000129132 FGD4           | ENSG00000140543 DET1         | ENSG00000143520 NP_001014364.1 | ENSG00000150093 ITGB1          | ENSG00000153879 CEBPG        | ENSG00000153879 CEBPG        |
|         | ENSG00000155530 LRGUK       | ENSG00000165076 NP_001008271.1 | ENSG00000165097 AOF1           | ENSG00000165819 METTL3         | ENSG00000166455 C16orf46     | ENSG00000174156 GSTA3          | ENSG00000176222 ZNF404         | ENSG00000181264 TMEM136      | ENSG00000181264 TMEM136      |
|         | ENSG00000183807 C6orf189    | ENSG00000186105 Q7Z2Q7_HUMAN   | ENSG00000188916 NP_001034851.1 | ENSG00000196754 S100A2         | ENSG00000196785 Q8N862_HUMAN | ENSG00000197641 SERPINB13      | ENSG00000198815 FOXJ3          | ENSG00000198815 FOXJ3        | ENSG00000198815 FOXJ3        |
| GCCATTA | ENSG0000007384 RHBDF1       | ENSG00000019169 MARCO          | ENSG00000073792 IGF2BP2        | ENSG00000074410 CA12           | ENSG00000078319 PMS2L1       | ENSG00000100884 CPNE6          | ENSG00000104774 MAN2B1         | ENSG00000107618 RBP3         | ENSG00000107618 RBP3         |
|         | ENSG00000108518 PFN1        | ENSG00000114841 DNAH1          | ENSG00000116885 Clorf102       | ENSG00000117020 AKT3           | ENSG00000120725 SIL1         | ENSG00000137817 PARP6          | ENSG00000141431 Q6ZMX6_HUMAN   | ENSG00000146197 SCUBE3       | ENSG00000146197 SCUBE3       |
|         | ENSG00000147155 EBP         | ENSG00000158516 CPA2           | ENSG00000158869 FCER1G         | ENSG00000162408 NOL9           | ENSG00000166167 BTBC         | ENSG00000167286 CD3D           | ENSG00000168785 TSPAN5         | ENSG00000169403 PTAFR        | ENSG00000169403 PTAFR        |
|         | ENSG00000169627 BOLA2B      | ENSG00000179168 GGN            | ENSG00000182173 TSEN54         | ENSG00000183258 DDX41          | ENSG00000186583 SPATC1       | ENSG00000198632 NP_777590.1    | ENSG00000206528 Q6ZSMO_HUMAN   | ENSG00000206528 Q6ZSMO_HUMAN | ENSG00000206528 Q6ZSMO_HUMAN |
|         | ENSG0000023843 ACN25        | ENSG00000042813 ZFPB           | ENSG00000053900 ANAPC4         | ENSG00000065559 MAP2K4         | ENSG00000083937 CHMP2B       | ENSG00000100191 SLC5A4         | ENSG00000102893 PHKB           | ENSG00000108187 PBLD         | ENSG00000108187 PBLD         |
|         | ENSG00000108298 RPL19       | ENSG00000113231 PDE8B          | ENSG00000122335 SERAC1         | ENSG00000125630 POLR1B         | ENSG00000156504 FAM122B      | ENSG00000163053 SLC16A14       | ENSG00000165195 PIGA           | ENSG00000173655 Q5T909_HUMAN | ENSG00000173655 Q5T909_HUMAN |
|         | ENSG00000177343 PROV1       | ENSG00000180044 Q8NS54_HUMAN   | ENSG00000186340 THBS2          | ENSG00000189195 BTBD8          | ENSG00000204815 TTC25        | ENSG00000111249 CUTL2          | ENSG00000111641 NOL1           | ENSG00000114302 PRKAR2A      | ENSG00000114302 PRKAR2A      |
|         | ENSG00000055130 CUL1        | ENSG00000083814 ZNF671         | ENSG00000100605 ITPK1          | ENSG00000103876 FAH            | ENSG00000108828 VAT1         | ENSG0000011249 CUTL2           | ENSG00000111641 NOL1           | ENSG00000114302 PRKAR2A      | ENSG00000114302 PRKAR2A      |
|         | ENSG00000117448 AKR1A1      | ENSG00000125743 SNRPD2         | ENSG00000129295 LRR6           | ENSG00000144120 TMEM177        | ENSG00000144741 SLC25A26     | ENSG00000156591 C9orf70        | ENSG00000166401 SERPINB8       | ENSG00000168016 Q8N8K0_HUMAN | ENSG00000168016 Q8N8K0_HUMAN |
|         | ENSG00000175315 CST6        | ENSG00000187860 NP_001017437.1 | ENSG00000196260 SFTPG          | ENSG00000205633 NP_001010902.1 | ENSG00000206126 Q6ZV82_HUMAN | ENSG00000109133 TMEM33         | ENSG00000111880 RNGTT          | ENSG00000113643 RARS         | ENSG00000113643 RARS         |
|         | ENSG00000129675 ARHGEF6     | ENSG00000131473 ACLY           | ENSG00000134321 RSAD2          | ENSG00000134376 CRB1           | ENSG00000135940 COX5B        | ENSG00000137801 THBS1          | ENSG00000139610 ELAI           | ENSG00000144909 OSBP1L1      | ENSG00000144909 OSBP1L1      |
|         | ENSG00000157827 FNNL2       | ENSG00000163235 TGFA           | ENSG00000171365 CLCN5          | ENSG00000172456 NP_060761.2    | ENSG00000181092 ADIPOQ       | ENSG00000196616 ADHC1          | ENSG00000197627 Q9UFV3_HUMAN   | ENSG00000197627 Q9UFV3_HUMAN | ENSG00000197627 Q9UFV3_HUMAN |
| GCCATTT | ENSG00000004142 POLDIP2     | ENSG00000011376 LARS2          | ENSG00000072958 APL1M1         | ENSG00000086015 MAST2          | ENSG00000090776 EFNB1        | ENSG00000092201 SUPT16H        | ENSG00000100441 KIAA0323       | ENSG00000100558 PLEK2        | ENSG00000100558 PLEK2        |
|         | ENSG00000116584 ARHGEF2     | ENSG00000118257 NRP2           | ENSG00000125611 CHCHD5         | ENSG00000127241 MASP1          | ENSG00000130695 CCDC21       | ENSG00000133195 SLC39A11       | ENSG00000145949 SGK85_HUMAN    | ENSG00000151882 CCL28        | ENSG00000151882 CCL28        |
|         | ENSG00000158006 PAFAH2      | ENSG00000164976 KIAA1161       | ENSG00000165280 VCP            | ENSG00000168818 STX18          | ENSG00000169118 CSNK1G1      | ENSG00000179743 Q8N9P6_HUMAN   | ENSG00000182346 DAAO           | ENSG00000184677 ZBTB40       | ENSG00000184677 ZBTB40       |
|         | ENSG00000189311 PFME1       | ENSG00000196588 MKL1_HUMAN     | ENSG00000204842 ATXN2          | ENSG00000205562 Q86U27_HUMAN   | ENSG00000204289 C17orf86     | ENSG00000070011 UPP2           | ENSG00000011295 TTC19          | ENSG00000068878 PSME4        | ENSG00000082515 MRPL22       |
|         | ENSG00000083857 FAT         | ENSG00000101901 CXorf45        | ENSG00000102780 DGKH           | ENSG00000106853 LTB4DH         | ENSG00000118217 ATF6         | ENSG00000121417 ZNF134         | ENSG00000131873 CHSY1          | ENSG00000135090 TAOK3        | ENSG00000135090 TAOK3        |
|         | ENSG00000138674 SEC31A      | ENSG00000143815 LBR            | ENSG00000144635 DYNC1LI1       | ENSG00000147606 SLC26A7        | ENSG00000148925 BTBD10       | ENSG00000156052 GNAQ           | ENSG00000156650 MYST4          | ENSG00000162419 GMEB1        | ENSG00000162419 GMEB1        |
|         | ENSG00000162976 PQLC3       | ENSG00000163406 SLC15A2        | ENSG00000163939 PBRM1          | ENSG00000165609 NUDT5          | ENSG00000176165 FOXG1B       | ENSG00000204397 NP_001017534.1 | ENSG00000206027 Q6ZU74_HUMAN   | ENSG00000206027 Q6ZU74_HUMAN | ENSG00000206027 Q6ZU74_HUMAN |
| GCCCAAA | ENSG00000063660 GPC1        | ENSG00000082014 SMARCD3        | ENSG00000100003 SEC14L2        | ENSG00000127585 FBXL16         | ENSG00000135454 B4GALNT1     | ENSG00000151388 ADAMTS12       | ENSG00000155926 SLA            | ENSG00000165698 C9orf9       | ENSG00000165698 C9orf9       |
|         | ENSG00000168314 MOBP        | ENSG00000169704 GP9            | ENSG00000179632 MAF1           | ENSG00000187714 SLC18A3        | ENSG00000188056 TREM4L       | ENSG00000196734 LCE1B          | ENSG00000065970 FOXJ2          | ENSG00000085999 RAD54L       | ENSG00000085999 RAD54L       |
|         | ENSG00000101888 NXT2        | ENSG00000109099 PMP22          | ENSG00000109846 CRYAB          | ENSG00000114023 C3orf28        | ENSG00000116962 NID1         | ENSG00000117758 STX12          | ENSG00000121940 CLCC1          | ENSG00000128039 NP_078868.1  | ENSG00000128039 NP_078868.1  |
|         | ENSG00000134827 TCN1        | ENSG00000136750 GAD2           | ENSG00000137098 SPAG8          | ENSG00000143882 ATP6V1C2       | ENSG00000145687 SSBP2        | ENSG00000151917 C6orf65        | ENSG00000152240 CCDC5          | ENSG00000164123 NP_689756.2  | ENSG00000164123 NP_689756.2  |
|         | ENSG00000164542 NP_056129.1 | ENSG00000171150 SOCS5          | ENSG00000187889 Clorf168       | ENSG00000204289 C17orf86       | ENSG00000204289 C17orf86     | ENSG00000116514 IBRD3C3        | ENSG00000120075 HOXB5          | ENSG00000130787 HIP1R        | ENSG00000130787 HIP1R        |
| GCCCAAG | ENSG00000034152 MAP2K3      | ENSG00000080573 COL5A3         | ENSG00000100626 GALNTL1        | ENSG00000107147 KCN11          | ENSG00000110536 NDUFS3       | ENSG000001162065 TBC1D24       | ENSG00000162512 SDC3           | ENSG00000166828 SCNN1G       | ENSG00000167105 TMEM92       |
|         | ENSG00000131400 NAPS4       | ENSG00000141753 IGFBP4         | ENSG00000144712 CAND2          | ENSG00000156750 NR_002823.1    | ENSG00000162065 TBC1D24      | ENSG00000162512 SDC3           | ENSG00000166828 SCNN1G         | ENSG00000167105 TMEM92       | ENSG00000167105 TMEM92       |
|         | ENSG00000168907 PLA2G4F     | ENSG00000172215 CXCR6          | ENSG00000179564 C3orf45        | ENSG00000180184 Q8NF75_HUMAN   | ENSG00000187033 SAMD7        | ENSG00000187288 CIDEC          | ENSG00000197291 Q8WV75_HUMAN   | ENSG00000206297 RNASET2      | ENSG00000206297 RNASET2      |
|         | ENSG00000044574 HSPA5       | ENSG00000095637 SORBS1         | ENSG00000100823 APEX1          | ENSG00000103740 ACSBG1         | ENSG00000126814 TRMT5        | ENSG00000131747 P11388-2       | ENSG00000132825 PPP1R3D        | ENSG00000139572 GPR84        | ENSG00000139572 GPR84        |
|         | ENSG00000158485 CD1B        | ENSG00000162482 AKR7A3         | ENSG00000164134 NARG1          | ENSG00000165084 C8orf34        | ENSG00000166263 STXBP4       | ENSG00000173852 DPY19L1        | ENSG00000180182 CRSP2          | ENSG00000184033 FAM120C      | ENSG00000184033 FAM120C      |
|         | ENSG00000185290 XR_016379.1 | ENSG00000197343 ZNF655         | ENSG00000197702 PARVA          | ENSG00000198833 UBE2J1         | ENSG00000198833 UBE2J1       | ENSG00000110717 NDUFS8         | ENSG00000119682 KIAA0317       | ENSG00000122304 Q6ZMMO_HUMAN | ENSG00000122304 Q6ZMMO_HUMAN |
| GCCCAAT | ENSG00000007080 CCDC124     | ENSG00000083845 RPS5           | ENSG00000102104 RS1            | ENSG00000105619 TFPT           | ENSG00000109072 VTN          | ENSG00000119682 KIAA0317       | ENSG00000122304 Q6ZMMO_HUMAN   | ENSG00000122304 Q6ZMMO_HUMAN | ENSG00000122304 Q6ZMMO_HUMAN |
|         | ENSG00000126005 ITGB4BP     | ENSG00000141052 MYOCD          | ENSG00000149609 C20orf144      | ENSG00000157064 NMNAT2         | ENSG00000158882 TOMM40L      | ENSG00000159788 RGS12          | ENSG00000166589 CDH16          | ENSG00000169583 CLIC3        | ENSG00000169583 CLIC3        |
|         | ENSG00000169900 PYDC1       | ENSG00000171467 ZNF318         | ENSG00000174917 NP_991330.1    | ENSG00000175854 C9orf119       | ENSG00000180438 TPRXL        | ENSG00000182325 FBXL6          | ENSG00000183128 FAM26A         | ENSG00000186854 Q86V40_HUMAN | ENSG00000186854 Q86V40_HUMAN |
|         | ENSG00000186868 MAPT        | ENSG00000196507 TCEAL3         | ENSG00000203854 XR_017700.1    | ENSG00000204771 Q8ND95_HUMAN   | ENSG00000209578 WAC          | ENSG00000204643 MTMR9          | ENSG00000106546 AHR            | ENSG00000109944 C11orf63     | ENSG00000109944 C11orf63     |
|         | ENSG00000120211 INSL4       | ENSG00000136149 XR_017918.1    | ENSG00000138061 CYP1B1         | ENSG00000138378 STAT4          | ENSG00000149506 ZP1          | ENSG00000163630 SYNPR          | ENSG00000163749 NP_001036249.1 | ENSG00000164434 FABP7        | ENSG00000164434 FABP7        |
|         | ENSG00000166153 DEPDC4      | ENSG00000167720 SRR            | ENSG00000170356 NR_002157.1    | ENSG00000187266 EPOR           | ENSG00000187266 EPOR         | ENSG00000099814 KIAA0284       | ENSG00000100092 SH3BP1         | ENSG00000101180 HRH3         | ENSG00000101180 HRH3         |
| GCCCAAC | ENSG00000011105 TSPAN9      | ENSG00000044012 GUCA2B         | ENSG00000053501 USE1_HUMAN     | ENSG00000063660 GPC1           | ENSG00000070886 EPHA8        | ENSG00000099814 KIAA0284       | ENSG00000100092 SH3BP1         | ENSG00000101180 HRH3         | ENSG00000101180 HRH3         |
|         | ENSG00000101460 MAP1LC3A    | ENSG00000103043 VAC14          | ENSG00000104879 CKM            | ENSG00000105329 TGFB1          | ENSG00000108469 RECQL5       | ENSG00000110046 NP_055919.1    | ENSG00000117245 KIF17          | ENSG00000125895 C20orf46     | ENSG00000125895 C20orf46     |
|         | ENSG00000127533 F2RL3       | ENSG00000129911 KLF16          | ENSG00000130193 C8orf55        | ENSG00000130758 MAP3K10        | ENSG00000131094 C1QL1        | ENSG00000135097 MSI1           | ENSG00000140107 C14orf36       | ENSG00000141342 PLEKHM1      | ENSG00000141342 PLEKHM1      |
|         | ENSG00000142606 MMEL1       | ENSG00000147813 NAPRT1         | ENSG00000158104 HPD            | ENSG00000159266 Q69YJ1_HUMAN   | ENSG00000160932 LY6E         | ENSG00000162344 FGP19          | ENSG00000162396 PARS2          | ENSG00000167703 SLC43A2      | ENSG00000167703 SLC43A2      |
|         | ENSG00000167771 RCOR2       | ENSG00000169758 C15orf27       | ENSG00000172534 HCF1           | ENSG00000174516 PELL3          | ENSG00000174886 NDUFA11      | ENSG00000174903 RAB1B          | ENSG00000175544 CABP4          | ENSG00000176490 DIRA1        | ENSG00000176490 DIRA1        |
|         | ENSG00000176884 GRIN1       | ENSG00000182397 C15orf51       | ENSG00000184334 Q71R6G_HUMAN   | ENSG00000185101 TMEM16J        | ENSG00000185507 IRF7         | ENSG00000187714 SLC18A3        | ENSG00000188735 NP_001074294.1 | ENSG00000198355 PIM3         | ENSG00000198355 PIM3         |
|         | ENSG00000206083 ZNF409      | ENSG00000106536 POU6F2         | ENSG00000130939 UBE4B          | ENSG00000135960 EDAR           | ENSG00000144218 AFF3         | ENSG00000144962 SPATA16        | ENSG00000148053 NTRK2          | ENSG00000152076 CCDC74B      | ENSG00000152076 CCDC74B      |
|         | ENSG00000159167 STC1        | ENSG00000161571 Q5YKG5_HUMAN   | ENSG00000163040 CCDC           |                                |                              |                                |                                |                              |                              |

ENSG00000101220|C2orf27 ENSG00000105607|GCDH ENSG00000106992|AK1 ENSG00000116774|OLFML3 ENSG00000126214|KLC1 ENSG00000128254|C2orf24 ENSG00000128564|VGF ENSG00000130182|ZSCAN10  
ENSG00000158292|GPR153 ENSG00000164885|CDK5 ENSG00000166377|ATP9B ENSG00000168010|ATG16L2 ENSG00000168389|MFSD2 ENSG00000169575|VPREB1 ENSG00000169951|ZNF764 ENSG00000179862|CITED4  
ENSG00000181444|ZNF457 ENSG00000181763|APR2\_HUMAN ENSG00000182352|C17orf77 ENSG00000183506|NP\_955377.2 ENSG00000204273|HLA-DOB ENSG00000206062|Q4G0T4\_HUMAN ENSG00000206177|HBM ENSG00000006459|JHDM1D  
ENSG00000044574|HSPA5 ENSG00000082482|KCNK2 ENSG00000105968|H2AFV ENSG00000109099|PMP22 ENSG00000111670|GNPTAB ENSG00000138078|PREPL ENSG00000141655|TNFRSF11A ENSG00000144354|CDCA7  
ENSG00000151834|GABRA2 ENSG00000152518|ZFP36L2 ENSG00000162819|C1orf58 ENSG00000166411|IDH3A ENSG00000168646|AXIN2 ENSG00000174574|C1orf108 ENSG00000181472|ZBTB2 ENSG00000181656|GPR88  
ENSG00000183022|NR\_003148.2 ENSG00000185950|IRS2 ENSG00000188001|FAM79B ENSG00000196937|FAM3C ENSG00000197535|MYO5A ENSG00000197576|HOXA4 ENSG00000197614|MFAP5 ENSG00000198865|Q4G0S7\_HUMAN

GCCCGCC ENSG00000005206|PSL1\_HUMAN ENSG000000027644|INSRR ENSG000000041880|PARP3 ENSG000000068650|ATP11A ENSG000000085741|WNT11 ENSG000000090006|LTBP4 ENSG000000099797|GPSN2 ENSG00000099822|HCN2  
ENSG00000101200|AVP ENSG00000103187|COTL1 ENSG00000105605|CACNG7 ENSG00000105642|KCNN1 ENSG00000105662|CRTC1 ENSG00000105737|GRIK5 ENSG00000115507|OTX1 ENSG00000116544|DLGAP3  
ENSG00000118137|APOA1 ENSG00000121104|FAM117A ENSG00000130311|C19orf58 ENSG00000130479|MAP1S ENSG00000130584|ZBTB46 ENSG00000130758|MAP3K10 ENSG00000132510|JMJD3 ENSG00000141738|GRB7  
ENSG00000141837|CACNA1A ENSG00000141905|NFIC ENSG00000142453|CARM1 ENSG00000153406|NMRAL1 ENSG00000157570|TSPAN18 ENSG00000157782|CABP1 ENSG00000158793|NIT1 ENSG00000160211|G6PD  
ENSG00000160284|C21orf56 ENSG00000161013|MGAT4B ENSG00000161642|ZNF385 ENSG00000162068|NTN2L ENSG00000163083|INHBB ENSG00000163913|IFT122 ENSG00000163975|MF12 ENSG00000164626|KCNK5  
ENSG00000167491|GATAD2A ENSG00000167941|SOST ENSG00000168763|CNNM3 ENSG00000170161|SCRT1 ENSG00000170684|ZNF342 ENSG00000174672|BRSK2 ENSG00000176884|GRIN1 ENSG00000179862|CITED4  
ENSG00000182175|RGMA ENSG00000183600|Q66K37\_HUMAN ENSG00000183971|NPW ENSG00000184922|FMNL1 ENSG00000185668|POU3F1 ENSG00000198517|MAFK ENSG00000198576|ARC ENSG00000205528|Q6ZRE2\_HUMAN  
ENSG00000037965|HOXC8 ENSG00000039560|RAI14 ENSG00000109320|NFKB1 ENSG00000111432|PZD10 ENSG00000121570|DPPA4 ENSG00000125538|IL1B ENSG00000125686|PPARBP ENSG00000135111|TBX3  
ENSG00000136872|ALDOB ENSG00000141448|GATA6 ENSG00000159279|NPY6R ENSG00000168502|KIAA0802 ENSG00000169826|CGAT2\_HUMAN ENSG00000170786|NP\_620419.2 ENSG00000179981|TSHZ1 ENSG00000185278|ZBTB37  
ENSG00000197771|C10orf119 ENSG00000204442|NP\_001073865.1 ENSG00000204680|Q5VYG3\_HUMAN ENSG00000205003|CNTF  
GCCCGCC ENSG000000008710|PKD1 ENSG000000025770|NCAFP2 ENSG00000070031|SCT ENSG00000071655|MBD3 ENSG00000078808|SDF4 ENSG00000089351|GRAMD1A ENSG00000100092|SH3BP1 ENSG00000107331|ABCA2  
ENSG00000110046|NP\_055919.1 ENSG00000113763|UNC5A ENSG00000116883|C1orf113 ENSG00000118046|STRK11 ENSG00000131094|C1QL1 ENSG00000131584|CENTB5 ENSG00000131591|C1orf159 ENSG00000132510|JMJD3  
ENSG00000132622|HSPA12B ENSG00000136295|TYHX3 ENSG00000138834|MAPK8IP3 ENSG00000148842|CNNM2 ENSG00000161682|Q8N0U1\_HUMAN ENSG00000167617|CDC42EP5 ENSG00000168395|ING5 ENSG00000168875|SOX14  
ENSG00000169710|FASN ENSG00000170231|FABP6 ENSG00000170638|TRABD ENSG00000173638|SLC19A1 ENSG00000176884|GRIN1 ENSG00000178531|CTXN1 ENSG00000178789|CD300LB ENSG00000179862|CITED4  
ENSG00000181790|BAI1 ENSG00000182310|Q6UWG3\_HUMAN ENSG00000182600|NP\_996778.1 ENSG00000182612|TSPAN10 ENSG00000183637|C21orf30 ENSG00000184068|Q8N8F0\_HUMAN ENSG00000184343|SRPK3 ENSG00000185105|XR\_015885.1  
ENSG00000188185|Q6ZQP8\_HUMAN ENSG00000188660|C21orf125 ENSG00000189409|MMP23A ENSG00000196166|NP\_997295.1 ENSG00000197681|TBC1D3 ENSG00000205866|Q6AI09\_HUMAN ENSG00000205879|FAM90A25P ENSG0000003297|CLDN11  
ENSG00000090686|USP48 ENSG00000100425|BRD1 ENSG00000104361|NPAL2 ENSG00000106689|LHX2 ENSG00000107485|GATA3 ENSG00000108395|TRIM37 ENSG00000132326|PER2 ENSG00000134138|MEIS2  
ENSG00000152683|SLC30A6 ENSG00000159216|RUNX1 ENSG00000159346|ADIPOR1 ENSG00000163093|BBS5 ENSG00000170786|NP\_620419.2 ENSG00000179195|ZNF664 ENSG00000181588|RKHD1 ENSG00000183784|C9orf66  
ENSG00000187742|SECS1B2 ENSG00000196208|NP\_683701.2 ENSG0000000198719|DLL1  
GCCCTAT ENSG00000006282|SPATA20 ENSG00000007341|ST7L ENSG00000047644|IWC3 ENSG00000049541|RFC2 ENSG00000073169|SELO\_HUMAN ENSG00000100271|TTLL1 ENSG00000101224|CDC25B ENSG00000102870|ZNF629  
ENSG00000107874|CUEDC2 ENSG00000109079|TNFAIP1 ENSG00000110446|SLC15A3 ENSG00000114982|NP\_060461.3 ENSG00000115956|PLEK ENSG00000116254|CHD5 ENSG00000120094|HOXB1 ENSG00000132004|FBXW9  
ENSG00000132698|RAB25 ENSG00000136383|ALPK3 ENSG00000137100|DCTN3 ENSG00000140955|NP\_631913.2 ENSG00000143297|FCRL5 ENSG00000143376|SNX27 ENSG00000146966|DENND2A ENSG00000151006|Q6ZNK7\_HUMAN  
ENSG00000166135|HIF1AN ENSG00000166589|CDH16 ENSG00000167580|AQP2 ENSG00000167815|PRDX2 ENSG00000170100|Q96MU6-2 ENSG00000188859|FAM78B ENSG00000197353|LYPD2 ENSG000000206508|CD44  
ENSG00000078747|ITCH ENSG00000110060|PUS3 ENSG00000116560|SFPQ ENSG00000120802|TMPO ENSG00000123472|ATPAF1 ENSG00000135913|USP37 ENSG00000139800|ZIC5 ENSG00000156869|FRRS1  
ENSG00000167383|ZNF229 ENSG00000177675|CD163L1 ENSG00000186115|CYP4F2 ENSG00000197943|PLCG2 ENSG00000204261|PSMB9 ENSG00000205835|LOC647309 ENSG00000206384|Q69YT0\_HUMAN ENSG00000211448|DIO2

GCCCTGC ENSG000000026559|KCNQ1 ENSG000000043143|PHF15 ENSG000000099624|ATP5D ENSG00000100139|MICALL1 ENSG00000101180|HRH3 ENSG00000101181|GTPBP5 ENSG00000103249|CLCN7 ENSG00000105556|NP\_060020.1  
ENSG00000107738|C10orf54 ENSG00000110324|LL10RA ENSG00000115042|FAHD2A ENSG00000115286|NDUFS7 ENSG00000116852|KIF21B ENSG00000118960|HS1BP3 ENSG00000128438|Q9H7M0\_HUMAN ENSG00000130653|PNPLA7  
ENSG00000131584|CENTB5 ENSG00000133477|FAM83F ENSG00000133511|PIK4CA ENSG00000134871|COL4A2 ENSG00000136573|BLK ENSG00000140044|NP\_569736.1 ENSG00000141971|FAM125A ENSG00000142279|WTIP  
ENSG00000142303|ADAMTS10 ENSG00000148341|SH3GLB2 ENSG00000148803|C10orf125 ENSG00000149131|SERPING1 ENSG00000149295|DRD2 ENSG00000156298|TSPAN7 ENSG00000160396|HIPK4 ENSG00000160445|ZER1  
ENSG00000168006|UBAP1 ENSG00000166166|C14orf172 ENSG00000166887|VPS39 ENSG00000168140|VASN ENSG00000172725|PTPRCPA ENSG00000176108|CHMP6 ENSG00000177045|SIX5 ENSG00000177169|ULK1  
ENSG00000177673|NP\_689827.1 ENSG00000177947|ODF3 ENSG00000178233|C6orf137 ENSG00000178531|CTXN1 ENSG00000182195|LDOC1 ENSG00000183506|NP\_955377.2 ENSG00000185024|BRF1 ENSG00000185215|TNFAIP2  
ENSG00000186891|TNFRSF18 ENSG00000188157|AGRN ENSG00000188191|PRKAR1B ENSG00000033800|PIAS1 ENSG00000069966|GNB5 ENSG00000070950|RAD18 ENSG00000074706|NP\_056368.1 ENSG00000105699|LSR  
ENSG00000107249|GLIS3 ENSG00000108256|NUFIP2 ENSG00000118007|STAG1 ENSG00000123416|TUBA1B ENSG00000125144|MT1G ENSG00000132153|RHX30 ENSG00000132970|WASF3 ENSG00000135821|GLUL  
ENSG00000153094|BCL2L1 ENSG00000165609|NUDT5 ENSG00000165891|E2F7 ENSG00000166405|RIC3 ENSG00000169688|MT1B ENSG00000174456|NP\_997318.1 ENSG00000197745|SCGB1D4 ENSG00000204990|NP\_001008742.1  
ENSG00000205358|MT1H

GCCCTGT ENSG000000040487|POLC2 ENSG00000065029|ZNF76 ENSG00000071564|TCF3 ENSG00000076826|KIAA1543 ENSG00000081692|JMJD4 ENSG00000105516|DBP ENSG00000109101|FOXN1 ENSG00000110108|TMEM109  
ENSG00000111319|SCNN1A ENSG00000115841|FAM82A ENSG00000122515|ZMIZ2 ENSG00000123454|DBH ENSG00000127666|TICAM1 ENSG00000128165|ADM2 ENSG00000130827|PLXNA3 ENSG00000150281|CTF1  
ENSG00000152672|CLEC4F ENSG00000158050|DUSP2 ENSG00000163870|GMP175 ENSG00000164362|TERT ENSG00000167748|KLL1 ENSG00000172893|DCHR7 ENSG00000175505|CLCF1 ENSG00000179817|MRGPRX4  
ENSG00000179862|CITED4 ENSG00000182580|EPHB3 ENSG00000187792|ZNF70 ENSG00000205039|Q6ZQS5\_HUMAN ENSG000000065060|C6orf107 ENSG000000085999|RAD54L ENSG00000105146|AURKC ENSG00000105968|H2AFV  
ENSG00000106477|TSGA1 ENSG00000107968|MAP3K8 ENSG00000108395|TRIM37 ENSG00000123576|ESX1 ENSG00000131002|CYorf15B ENSG00000131586|MRPL20 ENSG00000135048|TMEM2 ENSG00000141219|C17orf80  
ENSG00000142507|PSMB6 ENSG00000143797|MBOAT2 ENSG00000151929|BAG3 ENSG00000159763|PIP ENSG00000160856|FCRL3 ENSG00000163444|TMEM183B ENSG00000163749|NP\_001036249.1 ENSG00000168710|AHCYL1  
ENSG00000172006|ZNF554 ENSG00000174899|Q8N6Q6\_HUMAN ENSG00000176407|KCMF1 ENSG00000206560|ANKRD28

GCCGATG ENSG00000005486|NM\_001040457.1 ENSG000000012171|SEMA3B ENSG000000034510|TMSB10 ENSG00000065717|TLE2 ENSG00000105679|GAPDHS ENSG00000116852|KIF21B ENSG00000124257|NEURL2 ENSG00000126351|THRA  
ENSG00000137825|ITPKA ENSG00000137834|SMAD6 ENSG00000140577|CRTC3 ENSG00000141552|ANAPC11 ENSG00000141696|NO55\_HUMAN ENSG00000146535|GNA12 ENSG00000167194|Q96LL3\_HUMAN ENSG00000182446|NPL0C4  
ENSG00000182953|NM\_001031.4 ENSG00000186827|TNFRSF4 ENSG00000198832|SELM\_HUMAN ENSG00000114125|RNF7 ENSG00000116157|GPX7 ENSG00000116991|SIPAL12 ENSG00000130699|TAF4 ENSG00000131370|SH3BP5  
ENSG00000136875|PRPF4 ENSG00000137090|DMRT1 ENSG00000143403|INTS7 ENSG00000143653|SCCPDH ENSG00000149177|PTPRJ ENSG00000151461|UPF2 ENSG00000153714|C9orf150 ENSG00000153904|DDAH1  
ENSG00000162598|C1orf87 ENSG00000168384|HLA-DPA1 ENSG00000169035|KLF7 ENSG00000170791|CHCHD7 ENSG00000170836|PMP1D ENSG00000185344|ATP6V0A2 ENSG00000198218|QRICH1 ENSG00000204672|Q8NI72\_HUMAN

GCCGATT ENSG00000064545|TMEM161A ENSG00000099622|CIRBP ENSG00000100721|TCL1A ENSG00000102080|TEX28P2 ENSG00000120899|PTK2B ENSG00000125775|SDCBP2 ENSG00000130402|ACTN4 ENSG00000131944|C19orf40  
ENSG00000136848|DAB2IP ENSG00000151779|NP\_056993.2 ENSG00000153531|ADPRHL1 ENSG00000159871|LYPD5 ENSG00000162877|NP\_689704.3 ENSG00000163132|MSX1 ENSG00000164742|ADCY1 ENSG00000167178|ISLR2  
ENSG00000167613|LAIR1 ENSG00000168899|VAMP5 ENSG00000169100|SLC25A6 ENSG00000170515|PA2G4 ENSG00000176845|METRNL ENSG00000177340|QOVFX0\_HUMAN ENSG00000182242|TEX28\_HUMAN ENSG00000183666|LOC728411  
ENSG00000185254|TEX28P1 ENSG00000188559|C2orf74 ENSG00000188603|CLN3 ENSG00000197912|SPG7 ENSG00000198237|GUSL1\_HUMAN ENSG00000203805|PPAPDC1A ENSG00000030066|NUP160 ENSG00000073969|NSF  
ENSG00000104722|NEFM ENSG00000115652|UXS1 ENSG00000120235|IFNA6 ENSG00000128581|RABL5 ENSG00000129048|CCRL1 ENSG00000145623|OSMR ENSG00000147677|EIF3S3 ENSG00000150768|DLAT  
ENSG00000162654|GBP4 ENSG00000162669|NP\_001071975.3 ENSG00000164144|ARFIP1 ENSG00000164411|GJB7 ENSG00000165300|SLITRK5 ENSG00000173848|NET1 ENSG00000178502|KLHL11 ENSG00000180917|NP\_060818.3  
ENSG00000196876|SCN8A ENSG00000205570|GUSL2\_HUMAN ENSG00000206075|SERPINB5

GCCGCAG ENSG00000063660|GPC1 ENSG00000099964|MIF ENSG00000106018|VIPR2 ENSG00000127220|ABHD8 ENSG00000127419|TMEM175 ENSG00000128011|LRFN1 ENSG00000135097|MSI1 ENSG00000148341|SH3GLB2  
ENSG00000153498|C13orf28 ENSG00000160953|MUM1 ENSG00000162066|AMDHD2 ENSG00000166272|C10orf26 ENSG00000169885|CALML6 ENSG00000170779|CDCA4 ENSG00000179407|DNAJB8 ENSG00000186301|Q49A61\_HUMAN  
ENSG00000198614|C4orf12 ENSG00000204240|Q6ZVK0\_HUMAN ENSG00000204277|Q6ZR66\_HUMAN ENSG00000205485|Q6DCA4\_HUMAN ENSG00000023228|NDUFS1 ENSG00000086189|DITM1L ENSG00000095794|CREM ENSG00000102935|ZNF423  
ENSG00000107295|SH3GL2 ENSG00000109943|CRTAM ENSG00000113916|BCL6 ENSG00000116922|C1orf109 ENSG00000119707|RBM25 ENSG00000123584|MAGEA9B ENSG00000130939|UBE4B ENSG00000133808|MTCALCL  
ENSG00000134504|KCTD1 ENSG00000136273|HUS1\_HUMAN ENSG00000138413|IDH1 ENSG00000143653|SCCPDH ENSG00000144191|CNGA3 ENSG00000151572|TMEM16D ENSG00000153823|PID1 ENSG00000157259|GATAD1  
ENSG00000162869|CCDC128 ENSG00000163074|NM\_024534 ENSG00000164663|USP49 ENSG00000164808|KIAA0146 ENSG00000165685|C12orf59 ENSG00000166008|MAGEA9 ENSG00000176912|C18orf56 ENSG00000186031|Q6ZSY1\_HUMAN  
ENSG00000197321|SVIL

GCCGCCA ENSG00000055130|CUL1 ENSG00000106211|HSPB1 ENSG00000107223|EDF1 ENSG00000121904|CSMD2 ENSG00000124006|OBSL1 ENSG00000126258|FXYP1 ENSG00000136286|MYO1G ENSG00000155034|FBXL18  
ENSG00000162650|ATXNL7L ENSG00000164970|C9orf25 ENSG00000166246|C16orf71 ENSG00000167608|TMC4 ENSG00000167703|SLC3A2 ENSG00000169059|VCX3A ENSG00000177504|VCX2 ENSG00000179528|LBX2  
ENSG00000182583|VCX ENSG00000183621|ZNF438 ENSG00000196642|C9orf86 ENSG00000198517|MAFK ENSG00000205642|VCX3B ENSG00000100425|BRD1 ENSG00000102931|ARL2BP ENSG00000106278|PTPRJ  
ENSG00000109911|ELP4 ENSG00000115364|MRPL19 ENSG00000118515|SGK ENSG00000128276|RFPL3 ENSG00000135604|STX11 ENSG00000135763|KIAA0133 ENSG00000136273|HUS1\_HUMAN ENSG00000141279|NPEPPS  
ENSG00000141448|GATA6 ENSG00000146278|PNRC1 ENSG00000146416|ATG1 ENSG00000150637|CD226 ENSG00000163528|TCEB1 ENSG00000163528|CHCHD4 ENSG00000166801|FAM111A ENSG00000170852|KBTBD2  
ENSG00000176165|FOXG1B ENSG00000176788|BASP1 ENSG00000183060|LYSM4D ENSG00000187094|CCK ENSG00000205542|TMSL1 ENSG00000205976|Q6ZV74\_HUMAN ENSG00000206075|SERPINB5  
GCCGCCG ENSG0000012232|EXTL3 ENSG00000066230|SLC9A3 ENSG00000074054|CLASP1 ENSG00000074755|ZZEF1 ENSG00000106038|EVX1 ENSG00000117643|MAN1C1 ENSG00000118137|APOA1  
ENSG00000120055|C10orf95 ENSG00000122304|Q6ZMM0\_HUMAN ENSG00000127585|FBXL16 ENSG00000128652|HOXD3 ENSG00000132819|RBM38 ENSG00000134438|RAX ENSG00000138834|MAPK8IP3 ENSG00000155254|MARVELD1  
ENSG00000157933|SKI ENSG00000158717|RNF166 ENSG00000161682|Q8N0U1\_HUMAN ENSG00000163888|CAMK2N2 ENSG00000167393|PPP2R3B ENSG00000167645|YIP1B ENSG00000169575|VPREB1 ENSG00000170616|SCRT1  
ENSG00000176357|C10orf55 ENSG00000176723|Q8N446\_HUMAN ENSG00000177238|TRIM72 ENSG00000179044|EXOC3L ENSG00000179304|TMM29\_HUMAN ENSG00000179388|EGR3 ENSG00000179528|LBX2 ENSG00000182853|VM01  
ENSG00000184163|FAM132A ENSG00000184261|KCNK12 ENSG00000196153|Q8NAB5\_HUMAN ENSG00000196396|PTPN1 ENSG00000198517|MAFK ENSG00000205031|Q6XYE2\_HUMAN ENSG00000205485|Q6DCA4\_HUMAN ENSG00000091157|WDR7  
ENSG00000101191|DIDO1 ENSG00000101384|JAG1 ENSG00000119139|TJP2 ENSG00000120458|C10orf61 ENSG00000133627|ACTR3B ENSG00000154556|SORBS2 ENSG00000159216|RUNX1 ENSG00000169862|CTNND2  
ENSG00000179104|TMTC2 ENSG00000180044|Q8N5S4\_HUMAN ENSG00000181915|C10orf22 ENSG00000182090|C14orf25 ENSG00000182217|H1ST2H4B ENSG00000183475|ASB7 ENSG00000183941|H1ST2H4A ENSG00000183943|PRKX  
ENSG00000188613|NANOS1 ENSG00000204680|Q5VYG3\_HUMAN ENSG00000204884|Q6ZV12\_HUMAN ENSG00000205195|Q6ZTB1\_HUMAN

GCCGCCG ENSG000000011332|DPF1 ENSG00000025708|ECGF1 ENSG00000036448|MYO2 ENSG00000060491|OGFR ENSG00000069011|PITX1 ENSG00000071626|DAZAP1 ENSG00000100429|HDAC10 ENSG00000101440|ASIP  
ENSG00000105662|CRTC1 ENSG00000105737|GRIK5 ENSG00000135362|NP\_079117.2 ENSG00000135372|NAT10 ENSG00000136573|BLK ENSG00000143867|OSR1 ENSG00000157350|ST3GAL2 ENSG00000157782|CABP1  
ENSG00000158815|FGF17 ENSG00000162585|C1orf86 ENSG00000167543|TSP5113 ENSG00000168993|NM\_006651.3 ENSG00000178467|EGLX\_HUMAN ENSG00000182156|ENPP7 ENSG00000183600|Q66K37\_HUMAN ENSG00000184302|SIX6  
ENSG00000185324|CDK1 ENSG00000187288|CIDEC ENSG00000187642|C1orf170 ENSG00000187642|PRR17 ENSG00000196557|CACNA1H ENSG00000204058|C10orf41 ENSG00000204601|Q4G0G9\_HUMAN ENSG00000205087|NP\_001020628.1  
ENSG00000082196|C1QTNF3 ENSG00000108001|EBF3 ENSG00000111799|COL12A1 ENSG00000143797|MBOAT2 ENSG00000144736|SHQ1 ENSG00000180044|Q8N5S4\_HUMAN ENSG00000181656|GPR88 ENSG00000182093|WRB

GCCGGAT ENSG00000004838|ZMYND10 ENSG00000006534|ALDH3B1 ENSG00000025434|NR1H3 ENSG00000100985|MMP9 ENSG00000100997|ABHD12 ENSG00000101400|SNTA1 ENSG00000105664|COMP ENSG00000121413|ZSCAN18



ENSG00000123143|PKN1 ENSG00000125968|ID1 ENSG00000133519|NP\_689722.1 ENSG00000149418|ST14 ENSG00000164935|TM7SF4 ENSG00000166359|WDR88 ENSG00000172531|PPP1CA ENSG00000172927|MYEOV  
ENSG00000176092|AIML1 ENSG00000183847|Q9P1C0\_HUMAN ENSG00000184163|FAM132A ENSG00000185347|C14orf80 ENSG00000185669|SNAI3 ENSG00000187513|GJA4 ENSG00000198457|CP21A\_HUMAN ENSG00000198753|PLXNB3  
ENSG00000203888|Q6ZRP6\_HUMAN ENSG00000205994|Q6ZN58\_HUMAN ENSG00000266027|PPP2R5A ENSG00000269712|KIAA1107 ENSG00000280824|HSP90AA1 ENSG000002106477|TSGA1 ENSG000002109689|STIM2 ENSG00000213263|ITK  
ENSG00000123130|ACOT9 ENSG00000134853|PDGFRA ENSG00000138430|GTFPBP9 ENSG00000143493|INTS7 ENSG00000144191|CNGA3 ENSG00000146648|EGFR ENSG00000157470|FAM81A ENSG00000164093|PITX2  
ENSG00000165304|MELK ENSG00000166848|TERF2IP ENSG00000173515|C9orf53 ENSG00000184402|SS18L1 ENSG00000185950|IRS2  
ENSG00000103257|SLC7A5 ENSG00000110987|BCL7A ENSG00000111671|SPSB2 ENSG00000130005|GAMT ENSG00000130751|NPAS1 ENSG00000134438|RAX ENSG00000137731|FXYS2  
ENSG00000143537|ADAM15 ENSG00000148805|NR\_002934.2 ENSG00000159714|ZDHHC1 ENSG00000160469|BRSK1 ENSG00000160650|Q96H20\_HUMAN ENSG00000160959|LRRC14 ENSG00000161939|C17orf49 ENSG00000163633|C4orf36  
ENSG00000164715|LMTK2 ENSG00000169918|OTUD7A ENSG00000171119|NRTN ENSG00000173137|ADCK5 ENSG00000177192|PUS1 ENSG00000179403|VWA1 ENSG00000182054|IDH2 ENSG00000183087|GAS6  
ENSG00000183707|Q96AT3\_HUMAN ENSG00000183729|NPBWR1 ENSG00000184709|LRRC26 ENSG00000187003|ACTL7A ENSG00000188486|H2AFX ENSG00000198100|DLGAP2 ENSG00000204058|C10orf41 ENSG00000205559|Q6IBW5\_HUMAN  
ENSG00000205927|OLIG2 ENSG00000113391|C5orf21 ENSG00000125851|PCSK2 ENSG00000132970|WASF3 ENSG00000135775|COG2 ENSG00000140153|WDR20 ENSG00000152931|PART1\_HUMAN ENSG00000165323|FAT3  
ENSG00000170624|SGCD ENSG00000170871|K0232\_HUMAN ENSG00000181467|RAP2B ENSG00000183784|C9orf66  
ENSG000000005001|PRSS22 ENSG00000062038|CDH3 ENSG00000065361|ERBB3 ENSG00000069399|BCL3 ENSG00000070759|TESK2 ENSG00000079974|RABL2B ENSG00000100445|C14orf124 ENSG00000105066|FIZ1  
ENSG00000105552|BCAT2 ENSG00000105711|SCN1B ENSG00000120068|HOXB8 ENSG00000128652|HOXD3 ENSG00000132677|RHBG ENSG00000139625|MAP3K12 ENSG00000139629|GALNT6 ENSG00000142319|SLC6A3  
ENSG00000157303|SUSD3 ENSG00000158796|DEDD ENSG00000159618|GPR14 ENSG00000166912|MTMR10 ENSG00000167536|DHR813 ENSG00000179862|CITED4 ENSG00000183242|WIT1 ENSG00000184009|ACTG1  
ENSG00000184068|Q8N8F0\_HUMAN ENSG00000206113|Q6ZU27\_HUMAN ENSG00000008083|JARID2 ENSG00000070761|C16orf80 ENSG00000080298|RFX3 ENSG00000106305|MCA2\_HUMAN ENSG00000110321|EIF4G2 ENSG00000121542|SEC22A  
ENSG00000137492|PRKRIR ENSG00000138688|KIAA1109 ENSG00000140660|RUNCDC2A ENSG00000152766|ANKRD22 ENSG00000162623|TYW3 ENSG00000162927|NP\_653310.1 ENSG00000164112|TMEM155 ENSG00000165934|CPSF2  
ENSG00000167553|TBA1C ENSG00000173480|ZNF417 ENSG00000176542|KIAA2018 ENSG00000181191|PJA1 ENSG00000181192|DHTKD1 ENSG00000187611|Q6ZTR6\_HUMAN  
ENSG00000005961|ITGA2B ENSG000000025770|NCAHP2 ENSG00000072506|HSD17B10 ENSG00000104637|PINX1\_HUMAN ENSG00000105370|LIM2 ENSG00000115306|SPTBN1 ENSG00000131738|KRT33B ENSG00000132517|GPR172B  
ENSG00000133315|LRP16\_HUMAN ENSG00000141854|Q96FF7\_HUMAN ENSG00000144504|ANKMY1 ENSG00000146049|KAAG1 ENSG00000149823|C11orf2 ENSG00000154781|C3orf19 ENSG00000159713|CG38\_HUMAN ENSG00000161920|MED11  
ENSG00000166823|MESP1 ENSG00000167674|NP\_001001520.1 ENSG00000168389|MFSD2 ENSG00000168785|TSPAN5 ENSG00000170043|TRAPP1 ENSG00000173230|GOLGB1 ENSG00000176679|TGIF2LY ENSG00000177156|TALDO1  
ENSG00000180359|C11orf36 ENSG00000182158|CREB3L2 ENSG00000182372|C8orf61 ENSG00000182534|MXRA7 ENSG00000187682|ERAS ENSG00000188931|C1orf192 ENSG00000198831|Q8IYX2\_HUMAN ENSG0000020206140|LOC728229  
ENSG00000000419|DPM1 ENSG000000030419|IKZF2 ENSG000000075884|ARRHGAP15 ENSG000000086300|SNX10 ENSG00000101435|CST9L ENSG00000107625|DDX50 ENSG00000110060|PUS3 ENSG00000111049|MYF5  
ENSG00000112245|PTP4A1 ENSG00000112297|AIM1 ENSG00000132703|APCS ENSG00000133401|PDZD2 ENSG00000139324|TMTC3 ENSG00000140379|BCL2A1 ENSG00000143179|UCK2 ENSG00000156920|GPR112  
ENSG00000158411|MITD1 ENSG00000159658|KIAA0494 ENSG00000166845|C18orf54 ENSG00000171241|SHCBP1 ENSG00000175426|PCSK1 ENSG00000185417|CXorf1 ENSG00000204219|TCEA3  
ENSG0000013563|DNASE1L1 ENSG000000053108|FSTL4 ENSG000000063587|ZNF275 ENSG00000077238|IL4R ENSG00000099869|IGF2AS ENSG00000100314|CABP7  
ENSG00000105251|SHD ENSG00000129925|TMEM8 ENSG00000151445|C14orf133 ENSG00000152292|SH2B6 ENSG00000154978|NM\_030796.3 ENSG00000160818|GPATC4 ENSG00000167173|C15orf39 ENSG00000170262|MRAP  
ENSG00000172943|PHF8 ENSG00000186423|Q8N9S5\_HUMAN ENSG00000186638|C9orf48 ENSG00000186716|BCR ENSG000000068305|MEF2A ENSG00000075213|SEMA3A ENSG00000101846|STS  
ENSG00000102290|PCDH11X ENSG00000117758|STX12 ENSG00000122035|RASL11A ENSG00000122126|OCRL ENSG00000123739|PLA2G12A ENSG00000132972|RNF17 ENSG00000135299|ANKRD6 ENSG00000138068|ST6B1\_HUMAN  
ENSG00000139946|PELI2 ENSG00000147475|ERLIN2 ENSG00000152443|ZNF776 ENSG00000153317|DDEF1 ENSG00000165443|PHYHIP1 ENSG00000165516|KLHD2 ENSG00000180376|CCDC66 ENSG00000183023|SLC8A1  
ENSG00000189221|MAOA ENSG00000189241|TSPYL1 ENSG00000198872|PEG10  
ENSG00000008513|ST3GAL1 ENSG00000055070|C1orf144 ENSG00000064205|WISP2 ENSG00000095319|NUP188 ENSG00000100068|LRP5L ENSG00000103222|ABCC1 ENSG00000103355|PRSS33 ENSG00000108469|RECQL5  
ENSG00000108528|SLC25A11 ENSG00000114770|ABCC5 ENSG00000116649|SRM ENSG00000119321|FKBP15 ENSG00000124574|ABCC10 ENSG00000127452|FBXL12 ENSG00000130876|SLC7A10 ENSG00000131037|EPS8L1  
ENSG00000132507|EIF5AP1 ENSG00000133398|MED10 ENSG00000134802|SLC3A3 ENSG00000138085|C2orf28 ENSG00000138303|ASCC1 ENSG00000147099|HDAC8 ENSG00000160781|PAQR6  
ENSG00000163902|RPN1 ENSG00000180871|IL8RB ENSG00000183273|CCDC60 ENSG00000011422|PLAUR ENSG00000087074|PPP1R15A ENSG00000107779|BMPRIA ENSG00000111913|C6orf32 ENSG00000135407|AVIL  
ENSG00000136531|SCN2A ENSG00000138641|HERC3 ENSG00000163257|C4orf30 ENSG00000164181|ELOVL7 ENSG00000167618|LAIR2 ENSG00000172554|SNTG2 ENSG00000188419|CHM ENSG00000196323|ZBTB44  
ENSG00000198042|RBM13  
ENSG00000004768|FOXP3 ENSG00000065054|SLC9A3R2 ENSG00000079999|KEAP1 ENSG00000091181|IL5RA ENSG00000099957|P2RXL1 ENSG00000103275|UBE2I ENSG00000108511|HOXB6 ENSG00000124541|C6orf153  
ENSG00000124702|KLHD3 ENSG00000129355|CDKN2D ENSG00000132563|EREP2 ENSG00000132801|ZSWIM3 ENSG00000138834|MAPK8IP3 ENSG00000139547|RDH16 ENSG00000141258|RUTBC1 ENSG00000144040|SFXN5  
ENSG00000148331|ASB6 ENSG00000148604|RGR ENSG00000149131|SERPINC1 ENSG00000154358|OBSCN ENSG00000162073|PAQR4 ENSG00000167508|MVD ENSG00000167962|ZNF598 ENSG00000171552|BCL2L1  
ENSG00000173327|MAP3K11 ENSG00000176454|AGPAT7 ENSG00000177105|RHOG ENSG00000181790|BAI1 ENSG00000182459|NP\_997342.1 ENSG00000184076|NP\_001003684.1 ENSG00000184185|KCNJ12 ENSG00000186190|C2orf185  
ENSG00000186998|EMID1 ENSG000000019186|CYP24A1 ENSG00000039560|RAI14 ENSG00000048740|CUGBP2 ENSG00000054392|HHA1 ENSG00000065485|PDIA5 ENSG00000066405|CLDN18 ENSG00000073756|PTGS2  
ENSG000000080166|DCT ENSG00000111224|PARP1 ENSG00000111799|COL12A1 ENSG00000114204|SERPINI2 ENSG00000120742|RAMP4\_HUMAN ENSG00000128394|APOBEC3G ENSG00000131778|CHD1L ENSG00000132313|MRPL35  
ENSG00000132825|PPP1R3D ENSG00000135018|UBQLN1 ENSG00000143223|KIAA1632 ENSG00000152223|AKR7A3 ENSG00000156675|RAB11FIP1 ENSG00000162482|AKR7A3 ENSG00000163071|SPATA18 ENSG00000166240|Q14DG7-2  
ENSG00000166415|WDR72 ENSG00000168229|PTGDR ENSG00000172348|DSCR1L1 ENSG00000173068|BNC2 ENSG00000177694|NAALADL2 ENSG00000180815|MAP3K15 ENSG00000181211|Q8NA17\_HUMAN ENSG00000181588|RKHD1  
ENSG00000183960|KCNH8  
ENSG000000052850|ALX4 ENSG000000075790|BCAP29 ENSG00000099949|LZTR1 ENSG00000103507|BCKDK ENSG00000104938|CLEC4M ENSG00000105143|SLC1A6 ENSG00000105357|MYH14 ENSG00000106785|TRIM14  
ENSG00000120029|C10orf76 ENSG00000123159|GIPC1 ENSG00000123810|NP\_085055.1 ENSG00000127129|EDN2 ENSG00000131653|TRAF7 ENSG00000136689|IL1RN ENSG00000140519|RHCG ENSG00000140557|ST8SIA2  
ENSG00000142961|MOBK12C ENSG00000143845|ETNK2 ENSG00000145214|DGK ENSG00000145911|N4BP3\_HUMAN ENSG00000147113|CXorf36 ENSG00000148702|HABP2 ENSG00000158106|RHPN1 ENSG00000160307|S100B  
ENSG00000160613|PCSK7 ENSG00000165548|TMEM63C ENSG00000171798|KNDC1 ENSG00000172346|CSDC2 ENSG00000175229|GAL3ST3 ENSG00000180438|TPRX1 ENSG00000182896|TMEM95 ENSG00000183847|Q9P1C0\_HUMAN  
ENSG00000184361|C17orf46 ENSG00000188660|C21orf125 ENSG00000189140|Q6ZU77\_HUMAN ENSG00000198728|LDB1 ENSG000002024269|Q6ZVM2\_HUMAN ENSG00000205420|KRT6A ENSG00000218408|WWTR1 ENSG00000278070|MCC1  
ENSG000000084676|NCOA1 ENSG00000108001|EBF3 ENSG00000110975|YPT10 ENSG00000111832|RWD1 ENSG00000117868|FAM62B ENSG00000120217|CD274 ENSG00000122793|NP\_115496.2 ENSG00000131495|NDUFA2  
ENSG00000156463|SH3RF2 ENSG00000159212|CLIC6 ENSG00000169836|TACR3 ENSG00000181552|FAM12B ENSG00000187145|MRPS21 ENSG00000204209|DAXX ENSG00000205637|Q6ZSL6\_HUMAN  
ENSG00000008513|ST3GAL1 ENSG000000011143|MKS1 ENSG00000048545|GUCA1A ENSG00000099864|PALM ENSG00000100243|CYB5R3 ENSG00000101347|SAMHD1 ENSG00000111110|PPM1H ENSG00000121410|ALB  
ENSG00000125122|LRRC29 ENSG00000133067|LGR6 ENSG00000140545|MGFE8 ENSG00000142511|GPR32 ENSG00000143178|TBX19 ENSG00000145198|Q9BVH8\_HUMAN ENSG00000159166|LAD1 ENSG00000169758|C15orf27  
ENSG00000169921|Q75L30\_HUMAN ENSG00000171786|NHLH1 ENSG00000179148|ALOXE3 ENSG00000185736|ADARB2 ENSG00000187122|ARHGAP19 ENSG00000188185|Q6ZQP8\_HUMAN ENSG00000197789|Q8NA00\_HUMAN ENSG00000197948|FCHSD1  
ENSG00000005108|THSD7A ENSG000000048028|USP28 ENSG000000083168|MYST3 ENSG000000083896|YTHDC1 ENSG00000137962|ARHGAP29 ENSG00000153071|DAB2 ENSG00000153130|SCOC  
ENSG00000154429|C1orf96 ENSG00000161594|KLHL10 ENSG00000162694|EXTL2 ENSG00000163444|TMEM183B ENSG00000169914|OTUD3 ENSG00000170175|CHRNB1 ENSG00000170509|HSD17B13 ENSG00000175857|C5orf29  
ENSG00000181072|CHRM2 ENSG00000181704|YIPF6 ENSG00000183022|NR\_003148.2 ENSG00000184863|PRR8 ENSG00000187987|ZSCAN23 ENSG00000198221|NP\_001035973.1 ENSG00000204271|SPIN3  
ENSG00000002919|SNX11 ENSG00000101224|CDC25B ENSG00000101282|RSP04 ENSG00000112139|MDGA1 ENSG00000116984|MTFR ENSG00000122490|PQLC1 ENSG00000122694|C9orf19  
ENSG00000124181|PLCG1 ENSG00000124772|CPNF5 ENSG00000125633|CCDC93 ENSG00000126756|UXT ENSG00000129244|ATP1B2 ENSG00000135436|C12orf25 ENSG00000143217|PVR4 ENSG00000157570|TSPAN18  
ENSG00000164591|MYO23 ENSG00000165861|ZFYVE1 ENSG00000166104|NP\_776166.1 ENSG00000168575|SLC20A2 ENSG00000172155|LCE1D ENSG00000175873|Q9H7M1\_HUMAN ENSG00000180424|DEFB123 ENSG00000180513|Q8NBH1\_HUMAN  
ENSG00000180735|Q6PJW0\_HUMAN ENSG00000181559|Q8N985\_HUMAN ENSG00000182351|CRIP1 ENSG00000186226|LCE1E ENSG00000196209|Q5JXA8\_HUMAN ENSG00000197753|LHFP15 ENSG000002039319|ZFYVE16 ENSG00000278618|NRD1  
ENSG000000081386|ZNF510 ENSG00000116898|MRPS15 ENSG00000120594|PLXDC2 ENSG00000121964|GTDC1 ENSG00000123684|LPGAT1 ENSG00000130741|EIF2S3 ENSG00000132953|XPO4 ENSG00000134200|TSHB  
ENSG00000138363|AT1C ENSG00000142937|RPS8 ENSG00000148516|ZEB1 ENSG00000154556|SORBS2 ENSG00000163444|TMEM183B ENSG00000163544|Q96BL6\_HUMAN ENSG00000164265|SCGB3A2 ENSG00000170264|NP\_115556.1

|         |                             |                              |                              |                              |                              |                              |                              |                             |
|---------|-----------------------------|------------------------------|------------------------------|------------------------------|------------------------------|------------------------------|------------------------------|-----------------------------|
|         | ENSG00000108298 RPL19       | ENSG00000118985 ELL2         | ENSG00000119285 HEATR1       | ENSG00000125257 ABCC4        | ENSG00000133808 MICALCL      | ENSG00000135413 LACRT        | ENSG00000135698 MPHOSPH6     | ENSG00000136826 KLF4        |
|         | ENSG00000140937 CDH11       | ENSG00000145555 MYO10        | ENSG00000150753 CCT5         | ENSG00000151327 C14orf24     | ENSG00000166454 K0431_HUMAN  | ENSG00000168916 ZNF608       | ENSG00000182551 ADI1         | ENSG00000182552 RWDD4A      |
| GCCTTAC | ENSG0000011177 INMT         | ENSG0000011304 PTBP1         | ENSG00000087087 ARS2_HUMAN   | ENSG00000089159 PXN          | ENSG00000100034 PPM1F        | ENSG00000108387 SEPT4        | ENSG00000110711 AIP          | ENSG00000116096 SPR         |
|         | ENSG00000119408 NEK6        | ENSG00000120915 EPHX2        | ENSG00000124782 RREB1        | ENSG00000126785 RHOJ         | ENSG00000131196 NFATC1       | ENSG00000131462 TUBG1        | ENSG00000137288 C6orf125     | ENSG00000139083 ETV6        |
|         | ENSG00000157017 GHRL        | ENSG00000160808 MYL3         | ENSG00000164048 ZNF589       | ENSG00000167800 TBX10        | ENSG00000170291 C17orf81     | ENSG00000189037 DUSP21       | ENSG00000189319 FAM53B       | ENSG00000197901 SLC22A6     |
|         | ENSG00000198794 SCAMP5      | ENSG00000204385 CTL4_HUMAN   | ENSG00000046604 DSG2         | ENSG00000054690 PLEKHH1      | ENSG00000092871 REFL         | ENSG00000102781 KATNAL1      | ENSG00000119147 C2orf40      | ENSG00000119616 FCF1        |
|         | ENSG00000124813 RUNX2       | ENSG00000127334 DYRK2        | ENSG00000137269 LRRC1        | ENSG00000152076 CCDC74B      | ENSG00000155530 LRGUK        | ENSG00000156531 PHF6         | ENSG00000163040 CCDC74A      | ENSG00000164308 NP_071745.1 |
| GCCTTAT | ENSG00000171714 TMEM16E     | ENSG00000178591 DEFB125      | ENSG00000183035 CYLC1        | ENSG00000197945 Q6ZRE3_HUMAN | ENSG00000198464 ZNF480       |                              |                              |                             |
|         | ENSG00000055070 C1orf144    | ENSG00000089060 SLC24A6      | ENSG00000103855 CD276        | ENSG00000104823 ECH1         | ENSG00000116667 C1orf21      | ENSG00000124570 SERPINB6     | ENSG00000124733 MEA1         | ENSG00000125266 EFNB2       |
|         | ENSG00000131368 MRPS25      | ENSG00000140497 SCAMP2       | ENSG00000150201 FXYP4        | ENSG00000163486 SRGAP2       | ENSG00000164048 ZNF589       | ENSG00000164266 SPINK1       | ENSG00000164742 ADCY1        | ENSG00000166171 NP_056263.1 |
|         | ENSG00000173210 ABLIM3      | ENSG00000173530 TNFRSF10D    | ENSG00000174939 ASPHD1       | ENSG00000196218 RYR1         | ENSG00000270882 OSBPL3       | ENSG00000272080 SPP2         | ENSG00000109536 FRG1         | ENSG00000114698 PLSCR4      |
|         | ENSG00000116962 NID1        | ENSG00000120337 TNFSF18      | ENSG00000121848 ZNF364       | ENSG00000124429 POF1B        | ENSG00000125398 SOX9         | ENSG00000138646 HERC5        | ENSG00000142065 ZFP14        | ENSG00000151023 C10orf63    |
| GCCTTCA | ENSG00000151881 C5orf28     | ENSG00000155850 SLC26A2      | ENSG00000162909 CAFN2        | ENSG00000173928 C19orf39     | ENSG00000175984 DENND2C      | ENSG00000184895 SRY          | ENSG00000186104 CYP2R1       |                             |
|         | ENSG0000007968 E2F2         | ENSG0000008853 RHOBTB2       | ENSG00000057704 TMCC3        | ENSG00000076662 ICAM3        | ENSG00000077454 LRCH4        | ENSG00000077782 FGFR1        | ENSG00000088826 SMOX         | ENSG00000099795 NDUF7       |
|         | ENSG00000103199 ZNF500      | ENSG00000110651 CD81         | ENSG00000115350 POLE4        | ENSG00000115592 PRKAG3       | ENSG00000116031 CD207        | ENSG00000125826 RBCK1        | ENSG00000126952 NXF5         | ENSG00000130544 ZNF557      |
|         | ENSG00000131944 C19orf40    | ENSG00000135916 TTM2C        | ENSG00000140092 FBLN5        | ENSG00000144659 SLC25A38     | ENSG00000158470 B4GALT5      | ENSG00000159792 PSKH1        | ENSG00000160285 LSS          | ENSG00000161031 PGLYRP2     |
|         | ENSG00000162241 SLC25A45    | ENSG00000165714 LOHL2CR1     | ENSG00000166272 C10orf26     | ENSG00000167770 OTUB1        | ENSG00000169955 ZNF747       | ENSG00000175573 C11orf68     | ENSG00000176153 GPX2         | ENSG00000177370 TMM22       |
|         | ENSG00000183643 C15orf32    | ENSG00000185554 NXF2         | ENSG00000185945 NXF2_HUMAN   | ENSG00000196700 C9orf86      | ENSG00000196970 NXF4         | ENSG00000196527 SUH3         | ENSG00000059769 GNG10        | ENSG00000104325 DECR1       |
|         | ENSG00000105708 ZNF14       | ENSG00000112333 NR2E1        | ENSG00000119787 ARL6IP2      | ENSG00000131127 ZNF141       | ENSG00000138286 KIAA0974     | ENSG00000144026 ZNF514       | ENSG00000147121 ZNF673       | ENSG00000148690 C10orf4     |
|         | ENSG00000158125 XDH         | ENSG00000159212 CLIC6        | ENSG00000161654 LNM12        | ENSG00000164120 HPGD         | ENSG00000167785 ZNF558       | ENSG00000168032 ENTPDP3      | ENSG00000171121 KCNMB3       | ENSG00000188215 DCUN1D3     |
|         | ENSG00000188474 ZNF788      | ENSG00000196757 ZNF700       | ENSG00000197054 ZNF763       | ENSG00000197123 ZNF679       | ENSG00000198056 PRM1         | ENSG00000198455 ZXB2         | ENSG00000198468 Q8TAF5_HUMAN | ENSG00000204789 ZNF204      |
| GCCTTGA | ENSG00000044446 PHKA2       | ENSG00000088888 MAVS_HUMAN   | ENSG00000101311 C20orf42     | ENSG00000016636 YKT6         | ENSG00000111678 C12orf57     | ENSG00000113721 PDGFRB       | ENSG00000118257 NRP2         | ENSG00000121653 MAPK8IP1    |
|         | ENSG00000124702 KLHDC3      | ENSG00000125775 SDCBP2       | ENSG00000135441 BLOC1S1      | ENSG00000143314 MRPL24       | ENSG00000143450 OAZ2         | ENSG00000149499 EML3         | ENSG00000162241 SLC25A45     | ENSG00000167987 VPS37C      |
|         | ENSG00000168792 NP_937790.1 | ENSG00000169682 LAT          | ENSG00000170049 KCNAB3       | ENSG00000183798 EMILIN3      | ENSG00000184650 ODF4         | ENSG00000185386 MAPK11       | ENSG00000187516 CXorf27      | ENSG00000197353 LYPD2       |
|         | ENSG00000198844 ARHGFE15    | ENSG00000066634 DBF4         | ENSG00000069482 GAL          | ENSG00000071537 SELL         | ENSG00000072080 SP2          | ENSG00000084733 RAB10        | ENSG00000110955 ATP5B        | ENSG00000113269 RNF130      |
|         | ENSG00000135002 RFK         | ENSG00000154760 SLFN13       | ENSG00000156103 MMP16        | ENSG00000158185 ANKRD36      | ENSG00000163818 LZTFL1       | ENSG00000165071 TMEM71       | ENSG00000166405 RIC3         | ENSG00000168807 SNB2        |
| GCAGAAA | ENSG00000184277 TM2D3       | ENSG00000196357 ZNF565       | ENSG00000196912 AN36B_HUMAN  |                              |                              |                              |                              |                             |
|         | ENSG00000069011 PITX1       | ENSG00000073584 SMARCE1      | ENSG00000100376 FAM118A      | ENSG00000105514 RAB3D        | ENSG00000108465 CDK5RAP3     | ENSG00000108753 TCF2         | ENSG00000119772 DNMT3A       | ENSG00000123453 SARDH       |
|         | ENSG00000125816 NKX2-4      | ENSG00000132932 ATP8A2       | ENSG00000134595 SOX3         | ENSG00000136352 TITF1        | ENSG00000139178 C1RL         | ENSG00000142959 BEST4        | ENSG00000160888 IER2         | ENSG00000163686 ABHD6       |
|         | ENSG00000163794 UCN         | ENSG00000165271 NOL6         | ENSG00000168546 GFRA2        | ENSG00000168874 ATO8         | ENSG00000176769 TCERGIL      | ENSG00000185830 C22orf37     | ENSG00000198049 AVPR1B       | ENSG00000204914 NP_940843.1 |
|         | ENSG00000204916 NP_940843.1 | ENSG00000204917 NP_940843.1  | ENSG00000204918 NP_940843.1  | ENSG00000204919 NP_940843.1  | ENSG00000204919 NP_940843.1  | ENSG00000205793 Q6ZT42_HUMAN | ENSG00000206150 RNASEL3      | ENSG00000006377 DLX6        |
|         | ENSG00000042429 CRSP6       | ENSG00000049618 ARID1B       | ENSG00000058056 USP13        | ENSG00000077254 USP33        | ENSG00000083622 SOHLH2       | ENSG00000106853 LTB4DH       | ENSG00000110321 EIF4G2       | ENSG00000111046 MYF6        |
|         | ENSG00000115290 GRB14       | ENSG00000115738 ID2          | ENSG00000135750 KCNK1        | ENSG00000151834 GABRA2       | ENSG00000153790 C7orf31      | ENSG00000172765 TMCC1        | ENSG00000179674 ARL14        | ENSG00000185477 GPRIN3      |
|         | ENSG00000189290 XR_018254.1 | ENSG00000198176 TFDP1        | ENSG00000198900 TOP1         | ENSG00000204086 RPA4         | ENSG00000204388 HSPA1B       |                              |                              |                             |
| GCAGACA | ENSG00000011451 WIZ         | ENSG00000069011 PITX1        | ENSG00000100060 MFNG         | ENSG00000101542 CDH20        | ENSG00000119440 LCN1L1       | ENSG00000121680 PEX16        | ENSG00000130227 XPO7         | ENSG00000135414 GDF11       |
|         | ENSG00000140538 NTRK3       | ENSG00000153266 FEZF2        | ENSG00000161013 MGAT4B       | ENSG00000162849 KIF62B       | ENSG00000163295 ALP1         | ENSG00000164519 Q96MZ3_HUMAN | ENSG00000165886 UBTD1        | ENSG00000166272 C10orf26    |
|         | ENSG00000172878 NP_954697.1 | ENSG00000177066 QNCU6_HUMAN  | ENSG00000180849 C15orf37     | ENSG00000180914 OXTR         | ENSG00000182205 Q6ZU0_HUMAN  | ENSG00000183707 Q96AT3_HUMAN | ENSG00000186654 ARHGAP8      | ENSG00000186918 FBXO16      |
|         | ENSG00000188305 C19orf35    | ENSG00000198293 Q96HM8_HUMAN | ENSG00000205793 Q6ZT42_HUMAN | ENSG00000205881 Q6UXR8_HUMAN | ENSG00000205881 Q6UXR8_HUMAN | ENSG00000203842 VCAN         | ENSG00000205165 DKK3         | ENSG00000205498 FOXC1       |
|         | ENSG00000204916 NP_940843.1 | ENSG00000204917 NP_940843.1  | ENSG00000204918 NP_940843.1  | ENSG00000204919 NP_940843.1  | ENSG00000204919 NP_940843.1  | ENSG00000206150 RNASEL3      | ENSG00000206150 RNASEL3      | ENSG00000206377 DLX6        |
|         | ENSG00000042429 CRSP6       | ENSG00000049618 ARID1B       | ENSG00000058056 USP13        | ENSG00000077254 USP33        | ENSG00000083622 SOHLH2       | ENSG00000106853 LTB4DH       | ENSG00000110321 EIF4G2       | ENSG00000111046 MYF6        |
|         | ENSG00000115290 GRB14       | ENSG00000115738 ID2          | ENSG00000135750 KCNK1        | ENSG00000151834 GABRA2       | ENSG00000153790 C7orf31      | ENSG00000172765 TMCC1        | ENSG00000179674 ARL14        | ENSG00000185477 GPRIN3      |
|         | ENSG00000189290 XR_018254.1 | ENSG00000198176 TFDP1        | ENSG00000198900 TOP1         | ENSG00000204086 RPA4         | ENSG00000204388 HSPA1B       |                              |                              |                             |
| GCAGAAA | ENSG0000011451 WIZ          | ENSG00000069011 PITX1        | ENSG00000100060 MFNG         | ENSG00000101542 CDH20        | ENSG00000119440 LCN1L1       | ENSG00000121680 PEX16        | ENSG00000130227 XPO7         | ENSG00000135414 GDF11       |
|         | ENSG00000140538 NTRK3       | ENSG00000153266 FEZF2        | ENSG00000161013 MGAT4B       | ENSG00000162849 KIF62B       | ENSG00000163295 ALP1         | ENSG00000164519 Q96MZ3_HUMAN | ENSG00000165886 UBTD1        | ENSG00000166272 C10orf26    |
|         | ENSG00000172878 NP_954697.1 | ENSG00000177066 QNCU6_HUMAN  | ENSG00000180849 C15orf37     | ENSG00000180914 OXTR         | ENSG00000182205 Q6ZU0_HUMAN  | ENSG00000183707 Q96AT3_HUMAN | ENSG00000186654 ARHGAP8      | ENSG00000186918 FBXO16      |
|         | ENSG00000188305 C19orf35    | ENSG00000198293 Q96HM8_HUMAN | ENSG00000205793 Q6ZT42_HUMAN | ENSG00000205881 Q6UXR8_HUMAN | ENSG00000205881 Q6UXR8_HUMAN | ENSG00000203842 VCAN         | ENSG00000205165 DKK3         | ENSG00000205498 FOXC1       |
|         | ENSG00000204916 NP_940843.1 | ENSG00000204917 NP_940843.1  | ENSG00000204918 NP_940843.1  | ENSG00000204919 NP_940843.1  | ENSG00000204919 NP_940843.1  | ENSG00000206150 RNASEL3      | ENSG00000206150 RNASEL3      | ENSG00000206377 DLX6        |
|         | ENSG00000042429 CRSP6       | ENSG00000049618 ARID1B       | ENSG00000058056 USP13        | ENSG00000077254 USP33        | ENSG00000083622 SOHLH2       | ENSG00000106853 LTB4DH       | ENSG00000110321 EIF4G2       | ENSG00000111046 MYF6        |
|         | ENSG00000115290 GRB14       | ENSG00000115738 ID2          | ENSG00000135750 KCNK1        | ENSG00000151834 GABRA2       | ENSG00000153790 C7orf31      | ENSG00000172765 TMCC1        | ENSG00000179674 ARL14        | ENSG00000185477 GPRIN3      |
|         | ENSG00000189290 XR_018254.1 | ENSG00000198176 TFDP1        | ENSG00000198900 TOP1         | ENSG00000204086 RPA4         | ENSG00000204388 HSPA1B       |                              |                              |                             |
| GCAGACA | ENSG00000011451 WIZ         | ENSG00000069011 PITX1        | ENSG00000100060 MFNG         | ENSG00000101542 CDH20        | ENSG00000119440 LCN1L1       | ENSG00000121680 PEX16        | ENSG00000130227 XPO7         | ENSG00000135414 GDF11       |
|         | ENSG00000140538 NTRK3       | ENSG00000153266 FEZF2        | ENSG00000161013 MGAT4B       | ENSG00000162849 KIF62B       | ENSG00000163295 ALP1         | ENSG00000164519 Q96MZ3_HUMAN | ENSG00000165886 UBTD1        | ENSG00000166272 C10orf26    |
|         | ENSG00000172878 NP_954697.1 | ENSG00000177066 QNCU6_HUMAN  | ENSG00000180849 C15orf37     | ENSG00000180914 OXTR         | ENSG00000182205 Q6ZU0_HUMAN  | ENSG00000183707 Q96AT3_HUMAN | ENSG00000186654 ARHGAP8      | ENSG00000186918 FBXO16      |
|         | ENSG00000188305 C19orf35    | ENSG00000198293 Q96HM8_HUMAN | ENSG00000205793 Q6ZT42_HUMAN | ENSG00000205881 Q6UXR8_HUMAN | ENSG00000205881 Q6UXR8_HUMAN | ENSG00000203842 VCAN         | ENSG00000205165 DKK3         | ENSG00000205498 FOXC1       |
|         | ENSG00000204916 NP_940843.1 | ENSG00000204917 NP_940843.1  | ENSG00000204918 NP_940843.1  | ENSG00000204919 NP_940843.1  | ENSG00000204919 NP_940843.1  | ENSG00000206150 RNASEL3      | ENSG00000206150 RNASEL3      | ENSG00000206377 DLX6        |
|         | ENSG00000042429 CRSP6       | ENSG00000049618 ARID1B       | ENSG00000058056 USP13        | ENSG00000077254 USP33        | ENSG00000083622 SOHLH2       | ENSG00000106853 LTB4DH       | ENSG00000110321 EIF4G2       | ENSG00000111046 MYF6        |
|         | ENSG00000115290 GRB14       | ENSG00000115738 ID2          | ENSG00000135750 KCNK1        | ENSG00000151834 GABRA2       | ENSG00000153790 C7orf31      | ENSG00000172765 TMCC1        | ENSG00000179674 ARL14        | ENSG00000185477 GPRIN3      |
|         | ENSG00000189290 XR_018254.1 | ENSG00000198176 TFDP1        | ENSG00000198900 TOP1         | ENSG00000204086 RPA4         | ENSG00000204388 HSPA1B       |                              |                              |                             |
| GCAGAAA | ENSG0000011451 WIZ          | ENSG00000069011 PITX1        | ENSG00000100060 MFNG         | ENSG00000101542 CDH20        | ENSG00000119440 LCN1L1       | ENSG00000121680 PEX16        | ENSG00000130227 XPO7         | ENSG00000135414 GDF11       |
|         | ENSG00000140538 NTRK3       | ENSG00000153266 FEZF2        | ENSG00000161013 MGAT4B       | ENSG00000162849 KIF62B       | ENSG00000163295 ALP1         | ENSG00000164519 Q96MZ3_HUMAN | ENSG00000165886 UBTD1        | ENSG00000166272 C10orf26    |
|         | ENSG00000172878 NP_954697.1 | ENSG00000177066 QNCU6_HUMAN  | ENSG00000180849 C15orf37     | ENSG00000180914 OXTR         | ENSG00000182205 Q6ZU0_HUMAN  | ENSG00000183707 Q96AT3_HUMAN | ENSG00000186654 ARHGAP8      | ENSG00000186918 FBXO16      |
|         | ENSG00000188305 C19orf35    | ENSG00000198293 Q96HM8_HUMAN | ENSG00000205793 Q6ZT42_HUMAN | ENSG00000205881 Q6UXR8_HUMAN | ENSG00000205881 Q6UXR8_HUMAN | ENSG00000203842 VCAN         | ENSG00000205165 DKK3         | ENSG00000205498 FOXC1       |
|         | ENSG00000204916 NP_940843.1 | ENSG00000204917 NP_940843.1  | ENSG00000204918 NP_940843.1  | ENSG00000204919 NP_940843.1  | ENSG00000204919 NP_940843.1  | ENSG00000206150 RNASEL3      | ENSG00000206150 RNASEL3      | ENSG00000206377 DLX6        |
|         | ENSG00000042429 CRSP6       | ENSG00000049618 ARID1B       | ENSG00000058056 USP13        | ENSG00000077254 USP33        | ENSG00000083622 SOHLH2       | ENSG00000106853 LTB4DH       | ENSG00000110321 EIF4G2       | ENSG00000111046 MYF6        |
|         | ENSG00000115290 GRB14       | ENSG00000115738 ID2          | ENSG00000135750 KCNK1        | ENSG00000151834 GABRA2       | ENSG00000153790 C7orf31      | ENSG00000172765 TMCC1        | ENSG00000179674 ARL14        | ENSG00000185477 GPRIN3      |
|         |                             |                              |                              |                              |                              |                              |                              |                             |

ENSG00000143630|HCN3 ENSG00000145824|CXCL14 ENSG00000147394|ZNF185 ENSG00000148498|PARD3 ENSG00000152137|HSPB8 ENSG00000157570|TSPAN18 ENSG00000158927|C8orf58 ENSG00000161682|Q8N0U1\_HUMAN ENSG00000163995|ABLIM2 ENSG00000165916|PSMC3 ENSG00000172354|GNB2 ENSG00000174683|C8orf78 ENSG00000178977|C17orf44 ENSG00000182205|Q6ZU70\_HUMAN ENSG00000182205|Q6ZU70\_HUMAN ENSG00000188242|Q71R1B1\_HUMAN ENSG00000188549|NP\_997263.1 ENSG00000198003|NP\_659482.3 ENSG00000204579|A2RUR5\_HUMAN ENSG00000205064|Q6ZVP2\_HUMAN ENSG00000205297|OLIG2 ENSG00000205955|ZNF403 ENSG000002101745|ANKRD12 ENSG000002104760|FGL1 ENSG00000212902|SEMA5A ENSG00000115514|TXNDC9 ENSG00000117859|OSBPL9 ENSG00000121067|SPOP ENSG00000121879|PIK3CA ENSG00000139631|CSAD ENSG00000146276|GBARR1 ENSG00000151320|AKAP6 ENSG00000153832|FBXO36 ENSG00000154188|ANGPT1 ENSG00000162545|CAMK2N1 ENSG00000163166|IWS1 ENSG00000165181|C9orf84 ENSG00000173930|SLCO4C1 ENSG00000103249|CLCN7 ENSG00000103257|SLC7A5 ENSG00000104059|K0574\_HUMAN ENSG00000105464|GRIN2D ENSG00000110987|BCL7A ENSG00000114650|SCAP ENSG00000121274|PAPD5 ENSG00000126067|PSMB2 ENSG00000126215|XRCC3 ENSG00000131187|F12 ENSG00000132522|GPS2 ENSG00000137392|CLPS ENSG00000153498|C13orf28 ENSG00000160216|AGPAT3 ENSG00000161996|WDR90 ENSG00000170498|KITSS1 ENSG00000172725|PTPRCAP ENSG00000173578|XCRI ENSG00000177374|HIC1 ENSG00000178786|Q8N2B6\_HUMAN ENSG00000181873|C1orf69 ENSG00000185684|EP400NL ENSG00000187726|DNAJB13 ENSG00000196153|Q8NAB5\_HUMAN ENSG00000198113|C9orf167 ENSG00000198517|MAFK ENSG00000203896|LIME1 ENSG00000204058|C10orf41 ENSG00000206177|LIME1 ENSG00000206197|NP\_001013723.1 ENSG00000205955|ZNF403 ENSG00000216082|ISL1 ENSG00000049245|VAMP3 ENSG00000077420|APBB1IP ENSG00000106560|GIMAP2 ENSG00000112367|KIAA0274 ENSG00000112685|EXOC2 ENSG00000119865|C2orf32 ENSG00000122507|BBS9 ENSG00000124177|CHD6 ENSG00000124205|EDN3 ENSG00000135643|KCNMB4 ENSG00000139842|CUL4A ENSG00000145495|MARCH6 ENSG00000147896|IFNK ENSG00000149177|PTPRJ ENSG00000160062|ZBTB8 ENSG00000162747|FCGR3B ENSG00000172840|PDP2\_HUMAN ENSG00000178726|THBD ENSG00000179299|NSUN7 ENSG00000182670|TTC3 ENSG00000186009|ATP4B ENSG00000187676|B3GALT1 ENSG00000205524|Q68D70\_HUMAN GCGCAGG GCGCATG GCGCCAG GCGCCCG GCGCCCG GCGCCTT GCGCCGT GCGCTAC GCGGAAA GCGGAAC GCGGACA ENSG0000017483|SLC38A5 ENSG00000110120|EEF1A2 ENSG00000104903|LYL1 ENSG00000120471|NP\_071395.1 ENSG00000126934|MAP2K2 ENSG00000129932|DOHH ENSG00000130822|PNCK ENSG00000131100|ATP6V1E1 ENSG00000131400|NAPSA ENSG00000135702|CHST5 ENSG00000140067|C14orf152 ENSG00000140612|SEC11A ENSG00000147255|IGSF1 ENSG00000156411|C14orf2 ENSG00000166866|MYO1A ENSG00000177021|LRRC24 ENSG00000180846|C19orf34 ENSG00000185818|NAT8L ENSG00000196431|CRYBA4 ENSG00000004864|SLC25A13 ENSG00000019549|SNAI2 ENSG00000070087|PFN2 ENSG00000070761|C16orf80 ENSG00000079112|CDH17 ENSG00000104093|DMXL2 ENSG000001109519|GRPEL1 ENSG00000111785|RYC8B ENSG00000114346|GRPEL1 ENSG00000118849|RARRS1 ENSG00000119866|BCL11A ENSG00000135047|CTSL1 ENSG00000138641|HERC3 ENSG00000144909|OSBP1L1 ENSG00000145965|C6orf50 ENSG00000162852|C1orf71 ENSG00000163738|MTHFD2L ENSG00000166006|KCNC2 ENSG00000168939|SPRY3 ENSG00000174437|ATP2A2 ENSG00000174748|RPL15 ENSG00000175556|LONRF3 ENSG00000180957|PITPNB ENSG00000183060|LYSMD4 ENSG00000185742|NP\_997528.1 ENSG00000196428|TSC2D2 ENSG00000198176|TFDP1 ENSG00000041988|THAP3 ENSG00000075043|KCNQ2 ENSG00000102572|STK24 ENSG00000104055|TGM5 ENSG00000104897|SF3A2 ENSG00000108849|PPY ENSG00000115255|REEP6 ENSG00000115286|NDUFS7 ENSG00000125388|GRK4 ENSG00000131187|F12 ENSG00000136378|ADAMTS7 ENSG00000139874|SSTR1 ENSG00000160959|LRRC14 ENSG00000164107|HAND2 ENSG00000167671|UBXD1 ENSG00000170919|Q5SVS6\_HUMAN ENSG00000174791|RLN1 ENSG00000176424|NP\_001013742.1 ENSG00000181396|NP\_078924.1 ENSG00000181763|APR2\_HUMAN ENSG00000182871|COL18A1 ENSG00000183570|PCBP3 ENSG00000183729|NPBWR1 ENSG00000184343|SRPK3 ENSG00000198182|ZNF607 ENSG00000203896|LIME1 ENSG00000204028|Q6ZRR4\_HUMAN ENSG0000022267|FHL1 ENSG000000086475|SEPHS1 ENSG00000095787|WAC ENSG00000100505|TRIM9 ENSG00000105948|TTC26 ENSG00000112238|PRDM3 ENSG00000129474|JUB ENSG00000135775|COG2 ENSG00000143924|EML4 ENSG00000144118|RALB ENSG00000152518|ZFP36L2 ENSG00000154001|PPP2R5E ENSG00000155508|CNOT8 ENSG00000156304|SFRS15 ENSG00000164303|ENPP6 ENSG00000164494|PDS2 ENSG00000165660|KIAA0157 ENSG00000173113|TR112\_HUMAN ENSG00000184254|ALDH1A3 ENSG00000188153|COL4A5 ENSG00000198682|PAPSS2 GCGCCCG ENSG00000070729|CNGB1 ENSG00000090006|LTBP4 ENSG00000090674|MCOLN1 ENSG00000099385|BCL7C ENSG00000100297|MCM5 ENSG00000101199|ARFGAP1 ENSG00000101200|AVP ENSG00000105464|GRIN2D ENSG00000116544|DLGAP3 ENSG00000118137|APOA1 ENSG00000124232|RBPJL ENSG00000130748|TMEM160 ENSG00000131188|PRR7 ENSG00000133246|PRAM1 ENSG00000135709|KIAA0513 ENSG00000136286|MYO1G ENSG00000141837|CACNA1A ENSG00000142459|EV15L ENSG00000155254|MARVELD1 ENSG00000157782|CABP1 ENSG00000157911|PEX10 ENSG00000160216|AGPAT3 ENSG00000160284|C21orf56 ENSG00000167645|YIF1B ENSG00000172247|CIQTNF4 ENSG00000177674|AGTRAP ENSG00000179044|EXOC3L ENSG00000179743|Q8N9F6\_HUMAN ENSG00000180359|C11orf36 ENSG00000182600|NP\_996778.1 ENSG00000182968|SOX1 ENSG00000183600|Q66K37\_HUMAN ENSG00000187855|ASCL4 ENSG00000188038|NRN1L ENSG00000196365|LONP1 ENSG00000197530|MIB2 ENSG00000198003|NP\_659482.3 ENSG00000205031|Q6XYE2\_HUMAN ENSG00000205599|Q6ZUY4\_HUMAN ENSG00000206152|Q6ZV52\_HUMAN ENSG00000099725|PRKY ENSG00000106689|LHX2 ENSG00000111432|FZD10 ENSG00000113391|C5orf21 ENSG00000129515|SNX6 ENSG00000147883|CDKN2B ENSG00000159216|RUNX1 ENSG00000181656|GPR88 ENSG00000186395|KRT10 ENSG00000072518|MARK2 ENSG00000078808|SDF4 ENSG00000090512|FETUB ENSG00000100297|MCM5 ENSG00000104899|AMH ENSG00000116039|ATP6V1B1 ENSG00000130656|HBZ ENSG00000138080|EMILIN1 ENSG00000160959|LRRC14 ENSG00000164897|TMUB1 ENSG00000167543|TP53I13 ENSG00000169683|LRRC45 ENSG00000174672|BRK2 ENSG00000175756|AURKAIP1 ENSG00000182351|CRIP1 ENSG00000182853|VMO1 ENSG00000183558|HIST2H2AA3 ENSG00000183600|Q66K37\_HUMAN ENSG00000184068|Q8N8FO\_HUMAN ENSG00000186790|FOXE3 ENSG00000188486|H2AFX ENSG00000197150|ABCB8 ENSG00000205031|Q6XYE2\_HUMAN ENSG00000205485|Q6DCA4\_HUMAN ENSG00000059728|MXD1 ENSG00000078304|PPP2R5C ENSG00000111799|COL12A1 ENSG00000122692|SMU1 ENSG00000127152|BCL11B ENSG00000133193|FAM104A ENSG00000168280|KIF5C ENSG00000169902|TPST1 ENSG00000170852|KBTBD2 ENSG00000205542|TMSL1 ENSG00000168280|KIF5C ENSG00000078902|TOLLIP ENSG00000089327|FYXD5 ENSG00000099994|SUSD2 ENSG00000104957|CCDC130 ENSG00000124233|SEMG1 ENSG00000135605|TEC ENSG00000140961|OSGIN1 ENSG00000070182|SPTB ENSG00000167733|HSD11B1L ENSG00000168056|LTBP3 ENSG00000169026|MFS7 ENSG00000173825|TIGD3 ENSG00000197622.1 ENSG00000187954|CYHR1 ENSG00000198753|PLXNB3 ENSG00000059555|ZNF403 ENSG00000009307|NRAS ENSG00000017260|ATP2C1 ENSG00000065833|ME1 ENSG00000066427|ATXN3 ENSG00000077809|GTF2I ENSG00000090060|PAPOLA ENSG00000093183|SEC22C ENSG00000112238|PRDM13 ENSG00000114315|HES1 ENSG00000114500|GNB4 ENSG00000115840|SLC25A12 ENSG00000130037|KCNMA5 ENSG00000136698|CFP1 ENSG00000137876|C15orf15 ENSG00000147416|ATP6V1B2 ENSG00000152093|NP\_001072998.1 ENSG00000152223|KIAA1632 ENSG00000154217|PITPNCL1 ENSG00000154710|KCTD7 ENSG00000164485|LL22RA2 ENSG00000164828|UNC84A ENSG00000176842|IRX5 ENSG00000178184|PARD6G ENSG00000178974|FBXO34 ENSG00000181656|GPR88 ENSG00000185437|SH3BGR ENSG00000186700|Q8N6F3\_HUMAN ENSG00000204219|TCEA3 ENSG00000126067|PSMB2 ENSG00000127585|FBXL16 ENSG00000128389|NM\_032262 ENSG00000199364|FBXL19 ENSG00000101210|EEF1A2 ENSG00000104918|RETN ENSG00000114631|PODXL2 ENSG00000125533|BHLHB4 ENSG00000144119|C1QL2 ENSG00000148805|NR\_002934.2 ENSG00000149557|FEZ1 ENSG00000130332|LSM7 ENSG00000130811|EIF3S4 ENSG00000133246|PRAM1 ENSG00000135722|FBXL8 ENSG00000142910|TINAGL1 ENSG00000144119|C1QL2 ENSG00000148805|NR\_002934.2 ENSG00000149557|FEZ1 ENSG00000160191|PDE9A ENSG00000160650|Q96HZ0\_HUMAN ENSG00000161939|C17orf49 ENSG00000164917|K0415\_HUMAN ENSG00000167543|TP53I13 ENSG00000170291|C17orf81 ENSG00000171680|PLEKHG5 ENSG00000172530|BANP ENSG00000173457|PPP1R14B ENSG00000175223|Q8TCI8\_HUMAN ENSG00000177238|TRIM72 ENSG00000178786|Q8N2B6\_HUMAN ENSG00000180096|SEPT1 ENSG00000183087|GAS6 ENSG00000183707|Q96AT3\_HUMAN ENSG00000186301|Q49A61\_HUMAN ENSG00000186493|C5orf38 ENSG00000187013|C17orf82 ENSG00000188763|FZD9 ENSG00000198664|Q9BTR0\_HUMAN ENSG00000203945|Q5JQP1\_HUMAN ENSG00000204028|Q6ZRR4\_HUMAN ENSG00000204058|C10orf41 ENSG00000204099|NEU4 ENSG00000204682|C10orf114 ENSG00000070540|WIP1 ENSG00000077809|GTF2I ENSG00000100425|BRD1 ENSG00000101040|ZMYND8 ENSG00000113391|C5orf21 ENSG00000119138|KLF9 ENSG000001125675|GRIA3 ENSG00000132825|PPP1R3D ENSG00000133627|ACTR3B ENSG00000137261|KMAA0319 ENSG00000148426|C10orf47 ENSG00000159216|RUNX1 ENSG00000165300|SLITRK5 ENSG00000167257|RNF214 ENSG00000184486|POU3F2 ENSG00000204884|Q6ZV12\_HUMAN GCGCCGT ENSG0000006555|TTC22 ENSG00000069011|PITX1 ENSG00000100297|KCM5 ENSG00000113758|DBN1 ENSG00000115297|TLX2 ENSG00000121274|PAPD5 ENSG00000124006|OBSL1 ENSG00000125820|NKX2-2 ENSG00000128709|HOXD9 ENSG00000129152|MYOD1 ENSG00000132622|HSPA12B ENSG00000156471|PTDSS1 ENSG00000165175|MID1IP1 ENSG00000166862|CANG2 ENSG00000169223|LMAN2 ENSG00000172878|NP\_954697.1 ENSG00000173914|RBM4B ENSG00000177340|QOVFX0\_HUMAN ENSG00000181977|PYY2 ENSG00000182195|LDOC1 ENSG00000184524|CEND1 ENSG00000184986|TMEM121 ENSG00000185730|ZNF696 ENSG00000196153|Q8NAB5\_HUMAN ENSG00000196293|DUX4 ENSG00000196378|Q9BSZ0\_HUMAN ENSG00000205031|Q6XYE2\_HUMAN ENSG00000073464|CLCN4 ENSG00000113391|C5orf21 ENSG00000124831|LRRFIP1 ENSG00000127603|MACF1 ENSG00000143458|NP\_653219.1 ENSG00000145391|SETD7 ENSG00000179010|MRFAP1 ENSG00000185950|IRS2 ENSG00000196693|ZNF33B ENSG00000196693|ZNF33B ENSG00000005884|ITGA3 ENSG00000060971|ACAA1 ENSG00000089154|GCN1L1 ENSG00000101189|C20orf20 ENSG00000103148|C16orf35 ENSG00000115286|NDUFS7 ENSG00000123405|NFE2 ENSG00000128389|NM\_032262 ENSG00000136732|GYPC ENSG00000141741|C17orf37 ENSG00000149131|SERPING1 ENSG00000157927|KL1849\_HUMAN ENSG00000159685|CHCHD6 ENSG00000160783|BGLAP ENSG00000160818|GPATCH4 ENSG00000162951|LRRMT1 ENSG00000164877|MICALL2 ENSG00000168970|PLA2G4B ENSG00000175866|BATA2P ENSG00000181123|Q8N7N0\_HUMAN ENSG00000182048|XR\_018915.1 ENSG00000182335|Q8TE90\_HUMAN ENSG00000184221|OLIG1 ENSG00000186326|RGS9BP ENSG00000196787|HIST1H2AG ENSG00000196976|LAGE3 ENSG00000197150|ABCB8 ENSG00000197968|Q8N231\_HUMAN ENSG00000198805|NP ENSG00000081087|OSTM1 ENSG00000116977|LGALS8 ENSG00000117523|BAT2D1 ENSG00000128595|CALU ENSG00000132842|AP3B1 ENSG00000133124|IRS4 ENSG00000135269|TES ENSG00000147655|RSPO2 ENSG00000148484|RSU1 ENSG00000152931|PART1\_HUMAN ENSG00000153879|CEBPB ENSG00000155097|ATP6V1C1 ENSG00000155621|C9orf85 ENSG00000160062|ZBTB8 ENSG00000165637|VDAC2 ENSG00000167193|CRK ENSG00000172974|LOC729317 ENSG00000175582|RAB6A ENSG00000179859|LOC284023 ENSG00000182118|FAM89A ENSG00000183990|Q8WZA8\_HUMAN ENSG00000184474|Q96FP4\_HUMAN ENSG00000205208|NP\_001008394.1 GCGCTT ENSG00000005001|PRSS22 ENSG00000048545|GUCA1A ENSG00000069696|DRD4 ENSG00000073009|IKBK1 ENSG00000075826|SEC31B ENSG00000078902|TOLLIP ENSG00000103202|DECR2 ENSG00000103248|MTHFSD ENSG00000104522|TSTA3 ENSG00000105131|ABHD9 ENSG00000110917|KIAA0152 ENSG00000132881|C1orf89 ENSG00000135625|EGRA ENSG00000141505|ASGR1 ENSG00000158428|NP\_940961.1 ENSG00000162105|SHANK2 ENSG00000165810|BTNL9 ENSG00000171467|ZNF318 ENSG00000177363|NP\_981967.1 ENSG00000178776|NP\_996849.2 ENSG00000180340|FZD2 ENSG00000182240|BACE2 ENSG00000182240|BACE2 ENSG00000184261|KCNK12 ENSG00000186174|BCL9L ENSG00000198079|XR\_017925.1 ENSG00000023697|DERA ENSG00000083844|ZNF264 ENSG00000101773|RBBP8 ENSG00000110429|FBXO3 ENSG00000117592|PRDX6 ENSG00000119820|YIPF4 ENSG00000126226|PCID2 ENSG00000136982|NP\_076999.1 ENSG00000138796|HADH ENSG00000143612|C1orf43 ENSG00000163637|PRICKLE2 ENSG00000164815|ORC5L ENSG00000165071|TMEM71 ENSG00000168916|ZNF608 ENSG00000173083|HPSE ENSG00000177570|SAMD12 ENSG00000180008|SOCS4 ENSG00000196141|NP\_056350.1 ENSG00000205791|LOHL2CR2 ENSG00000005001|PRSS22 ENSG00000049541|RFC2 ENSG00000105737|GRIK5 ENSG00000106038|EVX1 ENSG00000107185|KIAA0258 ENSG00000111671|SPSB2 ENSG00000112041|TULP1 ENSG00000125534|C20orf149 ENSG00000128203|ASPHD2 ENSG00000131668|BARX1 ENSG00000133313|CNDP2 ENSG00000141971|FAM125A ENSG00000145945|FAM50B ENSG00000151778|C13orf21 ENSG00000169344|UMOD ENSG00000170214|ADRA1B ENSG00000172247|CIQTNF4 ENSG00000198077|CYP2A7 ENSG00000203822|Q6ZV10\_HUMAN ENSG00000006128|TAC1 ENSG00000103534|TMC5 ENSG00000113212|PCDH7 ENSG00000115850|LCT ENSG00000116761|CTH ENSG00000128710|HOXD10 ENSG00000134057|CCN1 ENSG00000147883|CDKN2B ENSG00000151748|SAV1 ENSG00000154380|ENAH ENSG00000163610|Q9NUU0\_HUMAN ENSG00000166920|C15orf48 ENSG00000173209|AHS2 ENSG00000184992|BRI3BP ENSG00000185414|MRPL30 ENSG00000205227|Q6ZWA8\_HUMAN GCGGAAC ENSG00000005156|LIG3 ENSG000000070985|TRPM5 ENSG00000083444|PLOD1 ENSG00000085063|CD59 ENSG00000108774|RAB5C ENSG00000130545|CRB3 ENSG00000132017|NP\_612362.2 ENSG00000134030|KIAA0427 ENSG00000135744|AGT ENSG00000140323|DISP2 ENSG00000142233|NP\_665806.1 ENSG00000146966|DENND2A ENSG00000147118|ZNF182 ENSG00000157873|TNFRSF14 ENSG00000163050|CABC1 ENSG00000170909|NP\_573398.1 ENSG00000174292|TNK1 ENSG00000177045|SIX5 ENSG00000177769|TSPAN4 ENSG00000180921|FAM83H ENSG00000183684|THOC4 ENSG00000184922|FMNL1 ENSG00000196501|HIST1H2BN ENSG00000197283|SYNGAP1 ENSG00000205971|NP\_001019848.1 ENSG000000010810|FYN ENSG000000039068|CDH1 ENSG00000049245|VAMP3 ENSG00000058600|POLR3E ENSG00000092203|TOX4 ENSG00000103381|NP\_060810.1 ENSG00000107758|PPP3CB ENSG00000108588|CCDC47 ENSG00000108599|AKAP10 ENSG00000110675|ELMOD1 ENSG00000116991|SIPAL12 ENSG00000119801|YPEL5 ENSG00000120616|EPC1 ENSG00000125246|CLYL1 ENSG00000132341|RAN ENSG00000135643|KCNMB4 ENSG00000136206|WBSR19 ENSG00000139173|TMEM117 ENSG00000141446|ESCO1 ENSG00000159200|DSCR1 ENSG00000163599|CTLA4 ENSG00000165169|DYNLT3 ENSG00000165379|LRFN5 ENSG00000167842|MIS12 ENSG00000172197|MBOAT1 ENSG00000173221|GLRX ENSG00000179300|ZCCHC5 ENSG00000179981|TSHZ1 ENSG00000180772|AGTR2 ENSG00000183813|CCR4 ENSG00000186645|NP\_001027561.1 ENSG00000196593|NM\_207439 ENSG00000198305|NP\_001027561.1 ENSG00000203956|FAM45B ENSG00000205505|NP\_001027561.1 ENSG00000205506|NP\_001027561.1 ENSG00000205509|NP\_001027561.1 ENSG00000205580|NP\_001027561.1 GCGGACA ENSG00000040608|RTN4R ENSG00000088992|TESC ENSG00000095370|SH2D3C ENSG00000101542|CDH20 ENSG00000104976|SNAPC2 ENSG00000116035|VAX2 ENSG00000129990|SYT5 ENSG00000132024|CC2D1A ENSG00000135625|EGR4 ENSG00000136630|HLX1 ENSG00000139438|C12orf34 ENSG00000140829|DHX38 ENSG00000149435|GGTLA4 ENSG00000154252|GAL3ST2 ENSG00000161956|SENP3 ENSG00000165716|FAM69B ENSG00000167807|NP\_001026904.1 ENSG00000169856|ONECUT1 ENSG00000169951|ZNF764 ENSG00000173599|PC ENSG00000173818|NP\_775898.2 ENSG00000177030|DEAF1 ENSG00000178226|PRSS36 ENSG00000179085|DPM3 ENSG00000179943|ZNF579 ENSG00000182482|NP\_001032755.1 ENSG00000182979|MTA1 ENSG00000184516|Q81VR1\_HUMAN ENSG00000185436|IL28RA ENSG00000186322|Q8N824\_HUMAN ENSG00000186825|Q580R0-2 ENSG00000205659|LINS2 ENSG00000072274|TFRC ENSG00000108946|PRKAR1A ENSG00000111404|NP\_079006.1 ENSG00000111450|STX2 ENSG00000111799|COL12A1 ENSG00000113583|C5orf15 ENSG00000119471|HSDL2 ENSG00000131951|LRRC9 ENSG00000136238|RAC1 ENSG00000136819|C9orf78 ENSG00000137672|TRFC ENSG00000147649|MTDH ENSG00000163558|PRKCI ENSG00000164128|NYP1R ENSG00000164294|NP\_001008398.1 ENSG00000165417|GTF2A1





ENSG00000198198|KIAA0467 ENSG00000204474|Q5JQD4\_HUMAN ENSG00000047662|Q9ULE4\_HUMAN ENSG00000091527|CDV3 ENSG00000100596|SPTLC2 ENSG00000107186|MPDZ ENSG00000111696|NT5DC3 ENSG00000112167|C6orf64  
ENSG00000115053|NCL ENSG00000124882|EREG ENSG00000135336|ORC3L ENSG00000136197|C7orf25 ENSG00000136881|BAAT ENSG00000146147|C6orf142 ENSG00000156113|KCNMA1 ENSG00000166896|XRCC6BP1  
ENSG00000168214|RBPJ ENSG00000168461|RAB31 ENSG00000169116|PARM1\_HUMAN ENSG00000170113|NIPA1 ENSG00000175354|PTPN2 ENSG00000180628|PCGF5 ENSG00000181908|Q8N9J4\_HUMAN ENSG00000197614|MFAP5  
ENSG00000197959|DNM3  
GCTAACT ENSG00000099204|ABLIM1 ENSG00000100591|AHS1 ENSG00000100997|ABHD12 ENSG00000108861|DUSP3 ENSG00000111540|RAB5B ENSG00000120509|PDZD11 ENSG00000122966|CIT ENSG00000149782|PLCB3  
ENSG00000151062|CACNA2D4 ENSG00000159958|TNFRSF13C ENSG00000163061|Q9BSF9\_HUMAN ENSG00000165131|C7orf34 ENSG00000165887|ANKRD2 ENSG00000175206|NPPA ENSG00000182979|MTA1 ENSG00000204303|Q6ZVW4\_HUMAN  
ENSG00000204343|C9orf118 ENSG000000011523|CEP68 ENSG000000070669|ASNS ENSG000000079785|DDX1 ENSG00000100814|CCNB1IP1 ENSG00000106993|CDC37L1 ENSG00000107669|ATE1 ENSG00000111780|15E2\_HUMAN  
ENSG00000116106|EPHA4 ENSG00000116141|MARK1 ENSG00000118492|C6orf103 ENSG00000125945|ZNF436 ENSG00000134480|CCNH ENSG00000138758|SEPT11 ENSG00000143751|C1orf55 ENSG00000152034|MCHR2  
ENSG00000153187|HNRPU ENSG00000156050|C14orf44 ENSG00000159256|MORC3 ENSG00000161036|NP\_690852.1 ENSG00000164122|ASB5 ENSG00000166441|RPL27A ENSG00000171132|PRKCE ENSG00000174156|GSTA3  
ENSG00000175183|CSR2 ENSG00000204954|Q6YU5\_HUMAN  
GCTAAGG ENSG00000100141|PISD ENSG00000100263|RHBD3 ENSG00000105245|NUMBL ENSG00000123411|IKZF4 ENSG00000139625|MAP3K12 ENSG00000151062|CACNA2D4 ENSG00000162817|C1orf115  
ENSG00000178015|GPR150 ENSG00000179636|C14orf8 ENSG00000186187|ZNR1 ENSG00000203988|Q6ZU49\_HUMAN ENSG00000205878|Q6ZSV2\_HUMAN ENSG0000013441|CLK1 ENSG00000076513|ANKRD13A ENSG00000088986|DYNLL1  
ENSG00000104689|TNFRSF10A ENSG00000109846|CRYAB ENSG00000112378|PERP ENSG00000145685|LHFPL2 ENSG00000157315|TMED6 ENSG00000165152|C9orf125 ENSG00000167601|AXL ENSG00000168710|AHCYL1  
ENSG00000171763|SPATA5L1 ENSG00000175646|PRM1 ENSG00000183499|DPH3B ENSG00000185009|AP3M1 ENSG00000204866|IGFL2  
GCTAATA ENSG00000027869|SH2D2A ENSG00000049541|RFC2 ENSG00000087087|ARS2\_HUMAN ENSG00000092295|TGM1 ENSG00000092758|COL9A3 ENSG00000100325|ASCC2 ENSG00000103852|TTC23 ENSG00000115268|RPS15  
ENSG00000124374|PAIP2B ENSG00000125409|TEKT3 ENSG00000126267|COX6B1 ENSG00000127472|PLA2G5 ENSG00000131143|COX4I1 ENSG00000137133|HINT2 ENSG00000137656|BUD13 ENSG00000137834|SMAD6  
ENSG00000139549|DHH ENSG00000157150|TIMP4 ENSG00000157379|DHRS1 ENSG00000160862|AZGP1 ENSG00000166508|MCM7 ENSG00000172366|C16orf14 ENSG00000172663|TMEM134 ENSG00000180697|C3orf22  
ENSG00000183569|SERHL ENSG00000186832|KRT16 ENSG00000186976|DUBP\_HUMAN ENSG00000186994|ANKRD47 ENSG00000187144|SPATA21 ENSG00000197273|GUCA2A ENSG00000203945|Q5JQP1\_HUMAN ENSG00000066651|TRMT11  
ENSG00000109846|CRYAB ENSG00000129116|PALLD ENSG00000135847|TSHB ENSG00000135847|ACBP6 ENSG00000145817|YIPF5 ENSG00000161594|KHLH10 ENSG00000163576|EFHB  
ENSG00000164675|IQUB ENSG00000168566|C6orf151 ENSG00000169570|DTWD2 ENSG00000171362|PNMA2 ENSG00000173083|HPSE ENSG00000178217|SH2D4B ENSG00000181472|ZBTB2 ENSG00000184895|SRY  
ENSG00000185070|FLRT2 ENSG00000204220|PFDN6  
GCTAATG ENSG000000032389|TS5C1 ENSG00000100365|NCF4 ENSG00000102466|FGF14 ENSG00000117448|AKR1A1 ENSG00000120709|FAM53C ENSG00000124237|C20orf85 ENSG00000130244|Q17RN3-2 ENSG00000130429|ARPC1B  
ENSG00000148337|CIZ1 ENSG00000160345|C9orf116 ENSG00000162600|OMA1 ENSG00000164051|CCDC51 ENSG00000166667|NP\_001026789.1 ENSG00000167604|NP\_640332.1 ENSG00000170054|SERPINA9 ENSG00000171722|C1orf111  
ENSG00000171855|IFNB1 ENSG00000176302|FOXR1 ENSG00000177663|IL17RA ENSG00000179994|NP\_001030016.1 ENSG00000181026|ISG20L1 ENSG00000184144|CNTN2 ENSG00000184363|PKP3 ENSG00000196220|SRGAP3  
ENSG00000204028|Q6ZRR4\_HUMAN ENSG00000205238|NP\_001026789.1 ENSG00000205744|DENND1C ENSG00000206053|HN1L ENSG00000049247|UTS2 ENSG00000058272|PPP1R12A ENSG00000075651|PLD1 ENSG00000101745|ANKRD12  
ENSG00000113269|RNF130 ENSG00000113361|CDH6 ENSG00000117600|NP\_055654.2 ENSG00000123560|PLP1 ENSG00000124749|COL21A1 ENSG00000127463|KIAA0090 ENSG00000136267|DGKB ENSG00000138398|PP1G  
ENSG00000139151|PLC1 ENSG00000140575|IQGAP1 ENSG00000141434|MEP1B ENSG00000145246|ATP10D ENSG00000148700|ADD3 ENSG00000150625|GPM6A ENSG00000157538|DSCR3 ENSG00000159140|SON  
ENSG00000163032|VSNL1 ENSG00000166343|ZMYND17 ENSG00000168497|SDPR ENSG00000173915|USMG5 ENSG00000181690|PLAG1 ENSG00000182919|C11orf54 ENSG00000185056|Q569G3\_HUMAN  
ENSG00000197989|C1orf79 ENSG00000203956|FAM45B ENSG00000205428|C9orf35  
GCTAAT ENSG00000007968|E2F2 ENSG00000070526|ST6GALNA1 ENSG00000099194|SCD ENSG00000100068|LRP5L ENSG00000108784|NAGLU ENSG00000108786|HSD17B1 ENSG00000112799|LY86 ENSG00000118257|NRP2  
ENSG00000125514|C20orf51 ENSG00000130707|ASS1 ENSG00000147155|EBP ENSG00000156486|KCNS2 ENSG00000169976|SF3B5 ENSG00000178226|PRSS36 ENSG00000180824|Q8NAH5\_HUMAN ENSG00000186197|ENO1P  
ENSG00000196747|HIST1H3H ENSG000000080947|Q8IVE0\_HUMAN ENSG000000089063|C20orf30 ENSG000001005051|TRIM9 ENSG00000105146|AURKC ENSG00000106484|MEST ENSG00000106524|ANKMY2 ENSG00000107758|PPP3CB  
ENSG00000109189|USP46 ENSG00000111802|TTRAP ENSG00000114279|FGF12 ENSG00000117528|ABCD3 ENSG00000118007|STAG1 ENSG00000125571|IL1F7 ENSG00000133805|AMPD3 ENSG00000136161|RCBTB2  
ENSG00000136522|MRPL41 ENSG00000143995|MEIS1 ENSG00000151725|MLF1P1 ENSG00000151893|C10orf46 ENSG00000154188|ANGPT1 ENSG00000154620|TMSB4Y ENSG00000163006|NP\_659415.1 ENSG00000165525|SDCCAG1  
ENSG00000175893|ZDHC21 ENSG00000176624|RKHD2 ENSG00000178460|C8orf45 ENSG00000181690|PLAG1 ENSG00000182010|PLEKHK1 ENSG00000185973|TMLHE ENSG00000198393|ZNF26  
GCTACAA ENSG00000002726|ABP1 ENSG0000010318|PHF7 ENSG0000011478|QPCTL ENSG00000066382|MPPED2 ENSG00000068137|PLEKHH3 ENSG00000072501|SMC1A ENSG00000125895|C20orf46 ENSG00000135637|NP\_116168.2  
ENSG00000139193|CD27 ENSG00000151474|FRMD4A ENSG00000158874|APOA2 ENSG00000161217|PCYT1A ENSG00000162571|TTLL5 ENSG00000166104|NP\_776166.1 ENSG00000169814|BTD ENSG00000170145|SNF1LK2  
ENSG00000170231|FBP6 ENSG00000170613|KRT8 ENSG00000171603|CLSTN1 ENSG00000175147|C1orf126 ENSG00000196501|HIST1H2BN ENSG00000197600|MYBPHL ENSG00000197838|CYP2A13  
ENSG00000206083|ZNF409 ENSG00000086475|SEPHS1 ENSG00000091428|LRPGEF4 ENSG00000100796|SMEK1 ENSG00000101115|SALL4 ENSG00000121335|PRB4 ENSG00000122026|RPL21 ENSG00000123570|RAB9B  
ENSG00000125144|MT1G ENSG00000126453|BCL2L12 ENSG00000131951|RRC2 ENSG00000132429|POPCD3 ENSG00000134762|DSC3 ENSG00000137869|CYP19A1 ENSG00000138813|C4orf17 ENSG00000139146|FAM60A  
ENSG00000143882|ATP6V1C2 ENSG00000145839|IL9 ENSG00000147202|DIAPH2 ENSG00000158185|ANKRD36 ENSG00000165105|RAEF1 ENSG00000166068|SPRED1 ENSG00000169064|NM\_024687.2  
ENSG00000175395|ZNF25 ENSG00000184293|NP\_742001.1 ENSG00000184895|SRY ENSG00000186094|AGBL4 ENSG00000186834|HEX1M1 ENSG00000196912|AN3B\_HUMAN ENSG00000197585|Q5JV89\_HUMAN ENSG00000197872|FAM49A

ENSG00000140675|SLC5A2 ENSG00000141150|RASL10B ENSG00000142534|RPS11 ENSG00000145936|KCNMB1 ENSG00000159761|NM\_001012984.2 ENSG00000160202|CRYAA ENSG00000163531|NFASC ENSG00000165917|RAPSN  
ENSG00000167011|NP\_940973.1 ENSG00000167323|STIM1 ENSG00000168925|CTRB1 ENSG00000169682|LAT ENSG00000172155|LCE1D ENSG00000173369|C1QB ENSG00000181577|NP\_694978.2 ENSG00000186442|KRT3  
ENSG00000186891|TNFRSF18 ENSG00000188447|XR\_016015.1 ENSG00000188778|ADRB3 ENSG00000196182|STK40 ENSG00000198010|DLGAP2 ENSG00000198165|Q9H960\_HUMAN ENSG00000204420|C6orf25 ENSG00000204589|Q6ZWG6\_HUMAN  
ENSG00000205593|FAM116B ENSG000002050165|DKK3 ENSG000002059728|MXD1 ENSG00000213141|IK ENSG000002123080|CDKN2C ENSG000002124562|SNRPC ENSG000002131480|AOC2 ENSG000002145592|RPL37  
ENSG000002153214|TMEM87B ENSG000002153832|FBXO36 ENSG000002162614|NEXN ENSG000002163584|RPL22L1 ENSG000002168438|CDC40 ENSG000002173517|SG269\_HUMAN ENSG000002177600|RPLP2 ENSG000002198625|MDM4

GCTCTCT ENSG00000100865|NP\_116019.1 ENSG00000105650|PDE4C ENSG00000107742|SPOCK2 ENSG00000122852|SFTPA1B ENSG00000130518|KIAA1683 ENSG00000131459|GFPT2 ENSG00000134690|CDCA8 ENSG00000135956|TMEM127  
ENSG00000136319|TTC5 ENSG00000142327|RNPEPL1 ENSG00000142700|DMRTA2 ENSG00000143318|CASQ1 ENSG00000146830|PERQ1 ENSG00000159650|UROCI ENSG00000162542|TMCO4 ENSG00000182853|VMO1  
ENSG00000185303|SFTPA1 ENSG00000196808|Q96NJ4\_HUMAN ENSG000002057252|SOAT1 ENSG000002080561|MID2 ENSG000002100353|EIF3S7 ENSG000002100387|RBX1 ENSG000002112695|COX7A2 ENSG000002114030|KPNA1  
ENSG00000115816|CEBPZ ENSG00000125538|LL1B ENSG00000127366|TAS2R5 ENSG00000136231|IGF2BP3 ENSG00000136478|TEX2 ENSG00000140600|SH3GL3 ENSG00000144481|TRPM8 ENSG00000153951|OR4D2  
ENSG00000156140|ADAMTS3 ENSG00000164287|CDC20B ENSG00000165152|C9orf125 ENSG00000168589|DYNLRB2 ENSG00000174514|MFSD4 ENSG00000178184|PARD6G ENSG00000182489|XKRX ENSG00000186166|CCDC84  
ENSG00000188895|Q68DK7\_HUMAN ENSG00000198633|Q6PDB4\_HUMAN

GCTCTTA ENSG000002023892|DEF6 ENSG000002090020|SLC9A1 ENSG000002102096|PIM2 ENSG000002103365|GGA2 ENSG000002108861|DUSP3 ENSG000002107999|VWF ENSG000002110987|BCL7A ENSG000002113657|DPYSL3  
ENSG00000119638|NEK9 ENSG00000123143|PKN1 ENSG00000123643|SLC36A1 ENSG00000127419|TMEM175 ENSG00000130294|KIF1A ENSG00000146666|Q96IP2\_HUMAN ENSG00000147100|SLC16A2 ENSG00000158470|B4GALT5  
ENSG00000162408|NOL9 ENSG00000164715|LMTK2 ENSG00000169247|SH3TC2 ENSG00000179151|EDC3 ENSG00000180999|C1orf105 ENSG00000198216|CACNA1E ENSG00000204005|Q6ZF22\_HUMAN ENSG00000208018|PSMB1  
ENSG00000207805|AMPH ENSG000002085999|RAD54L ENSG000002105849|TWISTNB ENSG000002113161|HMGCR ENSG000002113594|LIFR ENSG000002119541|VPS4B ENSG000002127125|PPCS ENSG000002142166|IFNAR1  
ENSG00000145331|RGMTMD2 ENSG00000148484|RSU1 ENSG00000151623|NR3C2 ENSG00000152778|IFI5 ENSG00000156076|WIF1 ENSG00000161654|LSM12 ENSG00000163072|NOSTRIN ENSG00000168028|RPSA15  
ENSG00000198477|SUHW2 ENSG00000205246|NP\_001005472.1 ENSG00000206367|Q6ZR26\_HUMAN

GCTGAAT ENSG00000206606|CCL26 ENSG00000208240|RNF10 ENSG000002086232|EIF2AK1 ENSG000002105127|AKAP8 ENSG000002108264|TADA2L ENSG000002112659|PARC\_HUMAN ENSG000002114841|DNAH1 ENSG00000212925|TMEM8  
ENSG00000132002|DNAJB1 ENSG00000145494|NDUFS6 ENSG00000158480|SPATA2 ENSG00000158578|ALAS2 ENSG00000158874|APOA2 ENSG00000160916|ATP5J2 ENSG00000162078|U773\_HUMAN ENSG00000163067|ZNF2  
ENSG00000166111|SVOP ENSG00000171302|CANT1 ENSG00000175697|GPR156 ENSG00000176349|Q8N997\_HUMAN ENSG00000176978|DPP7 ENSG00000185404|Q4ZG65\_HUMAN ENSG00000197245|GRRP1 ENSG00000205452|Q6ZQQ9\_HUMAN  
ENSG000002021488|SLC7A9 ENSG00000204218|DMRT3 ENSG000002081800|SLC13A1 ENSG000002105792|Q8IY89\_HUMAN ENSG000002106484|MEST ENSG000002113593|PPWD1 ENSG00000212578|B4GALT4 ENSG000002124688|MAD2L1BP  
ENSG00000125848|FLRT3 ENSG00000133135|RNF128 ENSG00000136206|WBSR19 ENSG00000137440|FGFBP1 ENSG00000138413|IDH1 ENSG00000143457|GOLPH3L ENSG00000143753|DEGS1 ENSG00000166265|CYR1  
ENSG00000170088|NP\_689894.1 ENSG00000170495|Q6ZNE6\_HUMAN ENSG00000174038|C9orf131 ENSG00000176007|C9orf51 ENSG00000178397|NP\_001032240.1 ENSG00000182197|EXT1 ENSG00000185432|METTL7A ENSG00000186645|NP\_001027561.1  
ENSG00000196360|NR\_002168.1 ENSG00000198305|NP\_001027561.1 ENSG00000205505|NP\_001027561.1 ENSG00000205506|NP\_001027561.1 ENSG00000205509|NP\_001027561.1 ENSG00000205509|NP\_001027561.1 ENSG00000205580|NP\_001027561.1

GCTGAGC ENSG00000206466|CNN2 ENSG00000100106|TRIOBP ENSG00000100346|CACNA1I ENSG00000100726|TELO2 ENSG00000106018|VIPR2 ENSG00000107021|TBC1D13 ENSG00000124067|LCAT ENSG00000128965|CHAC1  
ENSG00000130640|TUBGCP2 ENSG00000132259|CNGA4 ENSG00000135100|TCF1 ENSG00000136878|USP20 ENSG00000141756|FKBP10 ENSG00000143107|FND7 ENSG00000143768|LEFTY2 ENSG00000155666|JMJD5  
ENSG00000163719|MTMR14 ENSG00000169899|Q96MA9\_HUMAN ENSG00000170577|SIX2 ENSG00000179151|EDC3 ENSG00000180539|C9orf139 ENSG00000185324|CDK10 ENSG00000186543|Q6ZWC0\_HUMAN ENSG00000197265|GTF2E2  
ENSG00000198053|STRPA ENSG00000204054|Q6ZNS9\_HUMAN ENSG000002070159|PTPN3 ENSG000002088766|CRLS1 ENSG000002101435|CST9L ENSG000002103740|ACSBG1 ENSG000002113391|C5orf21 ENSG000002119913|TECTB  
ENSG00000120217|CD274 ENSG00000122068|FYTTD1 ENSG00000123843|CABPB ENSG00000124098|C2orf108 ENSG00000134042|MRO ENSG00000138185|ENTPD1 ENSG00000138435|CHRNA1 ENSG00000138443|ABI2  
ENSG00000138795|LEF1 ENSG00000139684|ESD ENSG00000140199|SLC12A6 ENSG00000143157|POGK ENSG00000159399|HK2 ENSG00000164116|GUCY1A3 ENSG00000164305|CASP3 ENSG00000164684|ZNF704  
ENSG00000164821|DEFA4 ENSG00000168297|PKX ENSG00000168672|FAM84B ENSG00000182393|IL29 ENSG00000204990|NP\_001008742.1

GCTGCAT ENSG00000206830|OTUD5 ENSG000002070031|SCT ENSG00000207413|DGCR2 ENSG00000207413|MYH9 ENSG000002103056|SMPD3 ENSG000002105576|TNPO2 ENSG000002125354|SEPT6  
ENSG00000130414|NDUFA10 ENSG00000144580|RQCD1 ENSG00000147536|GINS4 ENSG00000153956|CACNA2D1 ENSG00000158423|RIBC1 ENSG00000170485|NFAS2 ENSG00000175772|Q8N952\_HUMAN ENSG00000180104|EXOC3  
ENSG00000182533|CAV3 ENSG00000185522|C1orf35 ENSG00000205023|Q6ZSF1\_HUMAN ENSG00000205632|Q6ZVF7\_HUMAN ENSG00000205864|KRTAP5-6 ENSG00000210704|HFE ENSG000002081026|MAG1 ENSG000002092020|PPP2R3C  
ENSG00000116704|SLC35D1 ENSG00000130818|ZNF426 ENSG00000142065|ZFP14 ENSG00000150471|LPHN3 ENSG00000152443|ZNF776 ENSG00000154898|Q8IYA2\_HUMAN ENSG00000166200|COPS2 ENSG00000169715|MT1JP  
ENSG00000179813|C13orf30 ENSG00000180389|NR\_002162.1 ENSG00000196605|Q08AG5\_HUMAN ENSG00000204178|TMEM57 ENSG00000204941|PSG5 ENSG00000205364|MTLM

GCTGCCT ENSG00000205279|RPL2 ENSG000002064205|WISP2 ENSG000002073670|ADAM11 ENSG000002090020|SLC9A1 ENSG000002092036|C14orf94 ENSG000002100297|MCM5 ENSG000002103089|FA2H ENSG000002103855|CD276  
ENSG00000104365|IKBKB ENSG00000105369|CD79A ENSG00000107815|PEO1 ENSG00000110274|CEP164 ENSG00000115234|SNX17 ENSG00000127418|FGFR1L ENSG00000127824|TUBA4A ENSG00000130590|SAMD10  
ENSG00000131165|CHMP1A ENSG00000137841|PLCB2 ENSG00000148204|CRB2 ENSG00000164078|MST1R ENSG00000164897|TMUB1 ENSG00000173327|MAP3K11 ENSG00000177548|RABEP2 ENSG00000177732|SOX12  
ENSG00000178243|C9orf62 ENSG00000182173|TSEN54 ENSG00000187024|PRRH1 ENSG00000197136|PCNLX3 ENSG00000204934|NP\_001008745.1 ENSG00000206076|Q6ZQR8\_HUMAN ENSG00000210539|ZNF200 ENSG000002073754|CD5L  
ENSG0000020091137|SLC26A4 ENSG00000105887|MTFN ENSG00000106105|GARS ENSG00000112425|EPM2A ENSG00000115109|ENPB41L5 ENSG00000123836|PFKFB2 ENSG00000125398|SOX9 ENSG00000125430|HS3ST3B1  
ENSG00000134852|CLOC2 ENSG00000143162|CREG1 ENSG00000147853|AK3 ENSG00000153832|FBXO36 ENSG00000154310|TNAK ENSG00000156218|ADAMTSL3 ENSG00000157557|ETS2 ENSG00000163737|PF4  
ENSG00000164609|SLU7 ENSG00000169116|PARM1\_HUMAN ENSG00000187446|CHP1\_HUMAN ENSG00000187689|AMTN ENSG00000198478|SH3BGL2 ENSG00000203797|DDO

GCTGCTT ENSG000002011009|LYPLA2 ENSG00000100284|TOM1 ENSG00000101216|GMEB2 ENSG00000102125|TAZ ENSG00000103852|TTC23 ENSG00000103888|KIAA1199 ENSG00000107404|DVL1 ENSG00000108797|CNTNAP1  
ENSG00000110108|TMEM109 ENSG00000125775|SDCBP2 ENSG00000149136|SSRP1 ENSG00000159231|CBR3 ENSG00000164778|EN2 ENSG00000170876|TMEM43 ENSG00000172738|C6orf128 ENSG00000173369|C1QB  
ENSG00000176909|NP\_872380.1 ENSG00000183632|NP\_057296.1 ENSG00000188091|C9orf164 ENSG00000205456|NP\_057296.1 ENSG00000205457|NP\_057296.1 ENSG00000205659|L1N52 ENSG00000201955|SRPX ENSG00000112167|C6orf64  
ENSG00000114698|PLSCR4 ENSG00000120265|PCMT1 ENSG00000121964|GTDCC1 ENSG00000122557|HERPUD2 ENSG00000125945|ZNF436 ENSG00000127152|BCL11B ENSG00000128655|PDE11A ENSG00000131263|RNF12  
ENSG00000134698|EIF2C4 ENSG00000142192|APP ENSG00000154144|TBGR1 ENSG00000159398|CES7 ENSG00000165891|E2F7 ENSG00000165985|C1QL3 ENSG00000169251|NMD3 ENSG00000172660|TAF15  
ENSG00000176697|BDNF ENSG00000184900|SUMO3 ENSG00000185915|KLHL34 ENSG00000189043|NDUFA4 ENSG00000197641|SERPINB13 ENSG00000206532|Q1RNO0\_HUMAN  
ENSG000002068078|GFGR3 ENSG000002068394|GPKOW ENSG000002073536|NLE1 ENSG000002103260|METRN ENSG00000114388|TUSC4 ENSG00000119703|C14orf140 ENSG00000134864|Q9BVM4\_HUMAN ENSG00000151348|EXT2  
ENSG00000157833|FAM59B ENSG00000158169|FANCC ENSG00000163516|ANKZF1 ENSG00000164972|C9orf24 ENSG00000166963|MAP1A ENSG00000167208|NP\_872874.1 ENSG00000180205|WFDC9 ENSG00000180999|C1orf105  
ENSG00000181722|ZBTB7B ENSG00000198570|RD3 ENSG00000202428|COL11A2 ENSG00000205023|Q6ZSF1\_HUMAN ENSG00000211523|CEP68 ENSG00000213003|C5orf5 ENSG000002082482|KCNK2 ENSG00000106688|SLC1A1  
ENSG00000107679|PLEKHA1 ENSG00000112379|KIAA1244 ENSG00000131730|CKMT2 ENSG00000138600|PSL2\_HUMAN ENSG00000143486|LGTN ENSG00000153574|RPTA ENSG00000165757|KIAA1462 ENSG00000171365|CLCN5  
ENSG00000173660|UQCRH ENSG00000174038|C9orf131 ENSG00000203729|C1orf120 ENSG00000205442|C9orf134

GCTGGTT ENSG00000100307|CBX7 ENSG00000100422|CERK1 ENSG00000100605|ITPK1 ENSG00000101945|SUV39H1 ENSG00000103197|TSC2 ENSG00000105697|HAMP ENSG00000131378|RFTN1 ENSG00000134490|C18orf45  
ENSG00000135517|MIP ENSG00000138107|ACTR1A ENSG00000140090|SLC24A4 ENSG00000140564|FURIN ENSG00000153807|HOXA10 ENSG00000157600|TMEM164 ENSG00000162706|DARC ENSG00000166860|ZBTB39  
ENSG00000169877|ERAF ENSG00000184012|TMPRSS2 ENSG00000185130|HIST1H2BL ENSG00000186163|Q4G0S1\_HUMAN ENSG00000198471|RTP2 ENSG00000205307|Q8TEE9\_HUMAN ENSG000002064042|NP\_055803.1 ENSG00000100580|TMED8  
ENSG00000104859|SFRS16 ENSG00000107186|MPDZ ENSG00000111837|MAK ENSG00000112308|C6orf62 ENSG00000112319|EYA4 ENSG00000112964|GHR ENSG00000121579|NAT13 ENSG00000128641|MYO1B  
ENSG00000132780|NASP ENSG00000134321|RSAD2 ENSG00000136231|IGF2BP3 ENSG00000143013|LMO4 ENSG00000147604|RPL7 ENSG00000160181|TFE2 ENSG00000162994|NP\_689598.1 ENSG00000175265|GOLGA8A  
ENSG00000187833|NP\_001073943.1 ENSG00000197846|HIST1H2BF

GCTGTAA ENSG000002022840|RABGAP1 ENSG000002022840|RNF10 ENSG000002072071|LPHN1 ENSG000002074755|ZZEF1 ENSG000002089723|OTUB2 ENSG000002100453|GZMB ENSG000002102547|CAB39L ENSG000002104998|IL27RA  
ENSG00000105127|AKAP8 ENSG00000123358|NR4A1 ENSG00000125266|EFNB2 ENSG00000148795|CYP17A1 ENSG00000152217|SETBP1 ENSG00000155026|NM\_173565.2 ENSG00000162104|ADCY9 ENSG00000169402|NP\_775836.2  
ENSG00000169575|VPREB1 ENSG00000176749|CDK5R1 ENSG00000186174|BCL9L ENSG00000196396|PTPN1 ENSG00000203814|HIST2H2BF ENSG00000204820|Q96NT9\_HUMAN ENSG000002064989|CALCRL ENSG00000101916|TLR8  
ENSG00000103449|SALL1 ENSG00000113140|SPARC ENSG00000120992|LYPLA1 ENSG00000124406|ATP8A1 ENSG00000129515|SNX6 ENSG00000133135|RNF128 ENSG00000133393|C16orf63 ENSG00000135940|COX5B  
ENSG00000147180|ZNF711 ENSG00000151150|ANK3 ENSG00000151917|C6orf65 ENSG00000152409|NP\_689618.2 ENSG00000153234|NR4A2 ENSG00000163697|APBB2 ENSG00000165675|ENOX2 ENSG00000168772|CXXC4  
ENSG00000168916|ZNF608 ENSG00000170516|COX7B2 ENSG00000171100|MTM1 ENSG00000172115|CYCS ENSG00000178695|KCTD12 ENSG00000179833|SERTD2 ENSG00000182890|GLUD2 ENSG00000204178|TMEM57

GCTGTAC ENSG000002055957|ITIH1 ENSG00000100346|CACNA1I ENSG00000105613|MAST1 ENSG00000105726|ATP13A1 ENSG00000113763|UNC5A ENSG00000118058|MLL ENSG00000126749|EMG1 ENSG00000130158|DOCK6  
ENSG00000139197|PEX5 ENSG00000140955|NP\_631913.2 ENSG00000141744|PNMT ENSG00000148660|CAMK2G ENSG00000157483|MYO1E ENSG00000160191|PDE9A ENSG00000164054|NP\_057563.3 ENSG00000168899|VAMP5  
ENSG00000180471|C9orf31 ENSG00000188229|TUBB2C ENSG00000188681|Q8TEH8\_HUMAN ENSG00000198585|NUDT16 ENSG000002068305|MEF2A ENSG00000207415|MPF5 ENSG00000207657|TRHDE ENSG00000102974|CTCF  
ENSG00000109193|SULT1E1 ENSG00000118181|RPS25 ENSG00000119147|C2orf40 ENSG00000132485|ZRANB2 ENSG00000138604|GLCE ENSG00000163959|NP\_689885.3 ENSG00000167553|TUBA1C ENSG00000175581|MRPL48  
ENSG00000178573|MAF ENSG00000180376|CCDC66 ENSG00000180537|RNF182 ENSG00000181847|VSI9 ENSG00000182700|NP\_001007190.1 ENSG00000196930|XR\_015267.1 ENSG00000203780|FANK1 ENSG00000204427|BAT5\_HUMAN

GCTGTAG ENSG000002062582|MRPS24 ENSG00000100294|MCAT ENSG00000103876|FAH ENSG00000105808|RSA4 ENSG00000107872|FBXL15 ENSG00000108516|TNFRSF13B ENSG00000116133|DHCR24 ENSG00000116698|SMG7  
ENSG00000126970|KIAA1166 ENSG00000136574|GATA4 ENSG00000182324|KCNJ14 ENSG00000182534|MXRA7 ENSG00000182660|NP\_001013698.1 ENSG00000185681|C9orf18 ENSG00000196630|Q8NF76\_HUMAN ENSG00000205189|NP\_112203.1  
ENSG000002058673|ZC3H11A ENSG000002072401|UBE2D1 ENSG000002072415|PCP5 ENSG000002090470|PDCD7 ENSG000002096063|SRPK1 ENSG00000114023|C3orf28 ENSG00000118816|CCNI ENSG00000128272|ATF4  
ENSG00000140093|SERPINA10 ENSG00000143190|POU2F1 ENSG00000149970|CNKSR2 ENSG00000155893|ACPL2 ENSG00000170035|UBE2E4P ENSG00000171617|ENCL1 ENSG00000181433|SAGE1 ENSG00000182263|FTGN  
ENSG00000182992|Q8IZM0\_HUMAN ENSG00000184007|PTP4A2 ENSG00000186579|DEFB106B ENSG00000187082|D106A\_HUMAN ENSG00000188761|C1orf178 ENSG00000196785|Q8N862\_HUMAN  
ENSG00000205513|SOX8 ENSG000002007516|BAIAP3 ENSG000002036565|SLC18A1 ENSG000002088325|TPX2 ENSG000002101187|SLC40A1 ENSG00000211363|MANBAL ENSG000002104886|PLEKHJ1 ENSG000002108342|CSF3  
ENSG00000109103|UNC119 ENSG00000114019|AMOTL2 ENSG00000123388|HOXC11 ENSG00000145040|UCN2 ENSG00000148805|NR\_002934.2 ENSG00000155269|GPR78 ENSG00000160953|MUM1 ENSG00000167881|SRP68  
ENSG00000175267|XR\_015198.1 ENSG00000175756|AURKAI1P ENSG00000178554|Q8N8D4\_HUMAN ENSG00000182109|Q8N214\_HUMAN ENSG00000185101|TMEM16J ENSG00000188735|NP\_001074294.1 ENSG00000205610|Q4G105\_HUMAN ENSG0000015475|BID  
ENSG000002035141|NP\_116211.1 ENSG00000102468|HTR2A ENSG00000104859|SFRS16 ENSG00000106392|C1GALT1 ENSG00000113645|WWC1 ENSG00000136938|ANP32B ENSG00000144021|CTAO1 ENSG00000164283|ESM1

GCTGTGA ENSG00000203756|RBM5 ENSG000002054523|KIF1B ENSG000002076248|UNG ENSG000002085664|SILV ENSG000002087731|SNRPA ENSG000002085872|CHERP ENSG000002092445|TYRO3 ENSG000002105404|RABAC1 ENSG000002125834|STK35  
ENSG00000132915|PDE6A ENSG00000136297|MMD2 ENSG00000138867|C22orf13 ENSG00000147536|GINS4 ENSG00000150201|FXFD4 ENSG00000150779|TIMM8B ENSG00000157306|THTPA ENSG00000158470|B4GALT5  
ENSG00000160712|IL6R ENSG00000178028|DMAP1 ENSG00000178971|C17orf68 ENSG00000180758|GPR157 ENSG00000185608|MRPL40 ENSG00000186423|Q8N955\_HUMAN ENSG00000198569|SLC34A3 ENSG000002040933|INPP4A  
ENSG000002062725|APPBP2 ENSG000002081800|SLC13A1 ENSG000002104763|ASAHI ENSG00000212862|SRGN ENSG000002125823|CSTL1 ENSG00000134769|DNNA ENSG00000135776|ABC10 ENSG00000138801|PAPSS1  
ENSG00000146842|NP\_116231.2 ENSG00000152454|ZNF256 ENSG00000152795|HNRPD1 ENSG00000153879|CEBPG ENSG00000161547|SFRS2 ENSG00000162998|FRZB ENSG00000165899|C12orf64 ENSG00000169031|COL4A3  
ENSG00000172954|LYCAT ENSG00000174628|IQCK ENSG00000175989|C11orf69 ENSG00000182093|WRB

perfect: GCTGTGA TAACAGC hsa-miR

|         |                                                                                                                                                                                                                                                                                                                                                                                                                                                                                                                                                                                                             |                                                                                                                                                                                                                                                                                                                                                                                                                                                                                                                                                                                                                                                                                                                                                                                                                                                                                                                                                                                                                                                                                                                                                                                                                                                                                                                                                                                                                                                                                                                                                                                                                                                                                                                                                                                                                                                                                        |                                                                                                                                                                                                                                                                                                                                                                                                                                                                                                                                                                                                                                                                                                                                                                                                                                                                                                                                                                                                                                                                                                                                                                                                                                                                                                                                                                                                                                                                                                                                                                                                                                                                                                                                                                                                                                                   |                                                                                                                                                                                                                                                                                                                                                                                                                                                                                                                                                                                                                                                                                                                                                                                                                                                                                                                                                                                                                                                                                                                                                                                                                                                                                                                                                                                                                                                                                                                                                                                                                                                                                                                                                                                                                                                   |                                                                                                                                                                                                                                                                                                                                                                                                                                                                                                                                                                                                                                                                                                                                                                                                                                                                                                                                                                                                                                                                                                                                                                                                                                                                                                                                                                                                                                                                                                                                                                                                                                                                                                                                                                                                                                                                                                                                                                                                                                                                                                                                                                                                                                                                                                                                                                                                                                                                                                                                                                                                                                                                                                                                                                                                                |                                                                                                                                                                                                                                                                                                                                                                                                                                                                                                                                                                                                                                                                                                                                                                                                                                                                                                                                                                                                                                                                                                                                                                                                                                                                                                                                                                                                                                                                                                                                                                                                                                                                                                                                                                                                                                                                                                                                                                                                                                                                                                                                                                                                                                                                                                                                                                                                                                                                                                                                                                                                                                                                                                                                                                                                                |                                                                                                                                                                                                                                                                                                                                                                                                                                                                                                                                                                                                                                                                                                                                                                                                                                                                                                                                                                                                                                                                                                                                                                                                                                                                                                                                                                                                                                                                                                                                                                                                                                                                                                                                                                                                                                                                                                                                                                                                                                                                                                                                                                                                                                                                                                                                                                                                                                                                                                                                                                                                                                                                                                                                                                                                                |                                                                                                                                                                                                                                                                                             |
|---------|-------------------------------------------------------------------------------------------------------------------------------------------------------------------------------------------------------------------------------------------------------------------------------------------------------------------------------------------------------------------------------------------------------------------------------------------------------------------------------------------------------------------------------------------------------------------------------------------------------------|----------------------------------------------------------------------------------------------------------------------------------------------------------------------------------------------------------------------------------------------------------------------------------------------------------------------------------------------------------------------------------------------------------------------------------------------------------------------------------------------------------------------------------------------------------------------------------------------------------------------------------------------------------------------------------------------------------------------------------------------------------------------------------------------------------------------------------------------------------------------------------------------------------------------------------------------------------------------------------------------------------------------------------------------------------------------------------------------------------------------------------------------------------------------------------------------------------------------------------------------------------------------------------------------------------------------------------------------------------------------------------------------------------------------------------------------------------------------------------------------------------------------------------------------------------------------------------------------------------------------------------------------------------------------------------------------------------------------------------------------------------------------------------------------------------------------------------------------------------------------------------------|---------------------------------------------------------------------------------------------------------------------------------------------------------------------------------------------------------------------------------------------------------------------------------------------------------------------------------------------------------------------------------------------------------------------------------------------------------------------------------------------------------------------------------------------------------------------------------------------------------------------------------------------------------------------------------------------------------------------------------------------------------------------------------------------------------------------------------------------------------------------------------------------------------------------------------------------------------------------------------------------------------------------------------------------------------------------------------------------------------------------------------------------------------------------------------------------------------------------------------------------------------------------------------------------------------------------------------------------------------------------------------------------------------------------------------------------------------------------------------------------------------------------------------------------------------------------------------------------------------------------------------------------------------------------------------------------------------------------------------------------------------------------------------------------------------------------------------------------------|---------------------------------------------------------------------------------------------------------------------------------------------------------------------------------------------------------------------------------------------------------------------------------------------------------------------------------------------------------------------------------------------------------------------------------------------------------------------------------------------------------------------------------------------------------------------------------------------------------------------------------------------------------------------------------------------------------------------------------------------------------------------------------------------------------------------------------------------------------------------------------------------------------------------------------------------------------------------------------------------------------------------------------------------------------------------------------------------------------------------------------------------------------------------------------------------------------------------------------------------------------------------------------------------------------------------------------------------------------------------------------------------------------------------------------------------------------------------------------------------------------------------------------------------------------------------------------------------------------------------------------------------------------------------------------------------------------------------------------------------------------------------------------------------------------------------------------------------------|----------------------------------------------------------------------------------------------------------------------------------------------------------------------------------------------------------------------------------------------------------------------------------------------------------------------------------------------------------------------------------------------------------------------------------------------------------------------------------------------------------------------------------------------------------------------------------------------------------------------------------------------------------------------------------------------------------------------------------------------------------------------------------------------------------------------------------------------------------------------------------------------------------------------------------------------------------------------------------------------------------------------------------------------------------------------------------------------------------------------------------------------------------------------------------------------------------------------------------------------------------------------------------------------------------------------------------------------------------------------------------------------------------------------------------------------------------------------------------------------------------------------------------------------------------------------------------------------------------------------------------------------------------------------------------------------------------------------------------------------------------------------------------------------------------------------------------------------------------------------------------------------------------------------------------------------------------------------------------------------------------------------------------------------------------------------------------------------------------------------------------------------------------------------------------------------------------------------------------------------------------------------------------------------------------------------------------------------------------------------------------------------------------------------------------------------------------------------------------------------------------------------------------------------------------------------------------------------------------------------------------------------------------------------------------------------------------------------------------------------------------------------------------------------------------------|----------------------------------------------------------------------------------------------------------------------------------------------------------------------------------------------------------------------------------------------------------------------------------------------------------------------------------------------------------------------------------------------------------------------------------------------------------------------------------------------------------------------------------------------------------------------------------------------------------------------------------------------------------------------------------------------------------------------------------------------------------------------------------------------------------------------------------------------------------------------------------------------------------------------------------------------------------------------------------------------------------------------------------------------------------------------------------------------------------------------------------------------------------------------------------------------------------------------------------------------------------------------------------------------------------------------------------------------------------------------------------------------------------------------------------------------------------------------------------------------------------------------------------------------------------------------------------------------------------------------------------------------------------------------------------------------------------------------------------------------------------------------------------------------------------------------------------------------------------------------------------------------------------------------------------------------------------------------------------------------------------------------------------------------------------------------------------------------------------------------------------------------------------------------------------------------------------------------------------------------------------------------------------------------------------------------------------------------------------------------------------------------------------------------------------------------------------------------------------------------------------------------------------------------------------------------------------------------------------------------------------------------------------------------------------------------------------------------------------------------------------------------------------------------------------------|----------------------------------------------------------------------------------------------------------------------------------------------------------------------------------------------------------------------------------------------------------------------------------------------------------------------------------------------------------------------------------------------------------------------------------------------------------------------------------------------------------------------------------------------------------------------------------------------------------------------------------------------------------------------------------------------------------------------------------------------------------------------------------------------------------------------------------------------------------------------------------------------------------------------------------------------------------------------------------------------------------------------------------------------------------------------------------------------------------------------------------------------------------------------------------------------------------------------------------------------------------------------------------------------------------------------------------------------------------------------------------------------------------------------------------------------------------------------------------------------------------------------------------------------------------------------------------------------------------------------------------------------------------------------------------------------------------------------------------------------------------------------------------------------------------------------------------------------------------------------------------------------------------------------------------------------------------------------------------------------------------------------------------------------------------------------------------------------------------------------------------------------------------------------------------------------------------------------------------------------------------------------------------------------------------------------------------------------------------------------------------------------------------------------------------------------------------------------------------------------------------------------------------------------------------------------------------------------------------------------------------------------------------------------------------------------------------------------------------------------------------------------------------------------------------------|---------------------------------------------------------------------------------------------------------------------------------------------------------------------------------------------------------------------------------------------------------------------------------------------|
| GCTTAAT | ENSG0000002834 LASP1<br>ENSG00000126778 SIX1<br>ENSG00000172016 REG3A<br>ENSG00000204657 OR2H2<br>ENSG00000117174 C1orf181<br>ENSG00000136146 MED4<br>ENSG00000175066 GK5                                                                                                                                                                                                                                                                                                                                                                                                                                   | ENSG00000008118 CAMK1G<br>ENSG00000136040 PLXNC1<br>ENSG00000172349 IL16<br>ENSG000000019186 CYP24A1<br>ENSG00000120210 INSL6<br>ENSG00000147676 MAL2<br>ENSG00000183695 MRGPRX2                                                                                                                                                                                                                                                                                                                                                                                                                                                                                                                                                                                                                                                                                                                                                                                                                                                                                                                                                                                                                                                                                                                                                                                                                                                                                                                                                                                                                                                                                                                                                                                                                                                                                                       | ENSG00000022840 RNF10<br>ENSG00000146066 HIGD2A<br>ENSG00000175202 HIGD2BP<br>ENSG000000073282 TP73L<br>ENSG00000121486 C1orf25<br>ENSG00000150961 SEC24D<br>ENSG00000184886 PIGW                                                                                                                                                                                                                                                                                                                                                                                                                                                                                                                                                                                                                                                                                                                                                                                                                                                                                                                                                                                                                                                                                                                                                                                                                                                                                                                                                                                                                                                                                                                                                                                                                                                                 | ENSG00000059377 TBXAS1<br>ENSG00000146374 RSPO3<br>ENSG00000179219 TMEM148<br>ENSG000000073969 NSF<br>ENSG00000122008 POLK<br>ENSG00000152785 BMP3<br>ENSG00000196646 ZNF136                                                                                                                                                                                                                                                                                                                                                                                                                                                                                                                                                                                                                                                                                                                                                                                                                                                                                                                                                                                                                                                                                                                                                                                                                                                                                                                                                                                                                                                                                                                                                                                                                                                                      | ENSG00000070601 FRMPD1<br>ENSG00000159231 CBR3<br>ENSG00000182329 Q8IVF9_HUMAN<br>ENSG00000101911 FRP25<br>ENSG00000125356 NDUFA1<br>ENSG00000157060 C1orf14<br>ENSG00000197110 IL28B                                                                                                                                                                                                                                                                                                                                                                                                                                                                                                                                                                                                                                                                                                                                                                                                                                                                                                                                                                                                                                                                                                                                                                                                                                                                                                                                                                                                                                                                                                                                                                                                                                                                                                                                                                                                                                                                                                                                                                                                                                                                                                                                                                                                                                                                                                                                                                                                                                                                                                                                                                                                                          | ENSG00000105671 DDX49<br>ENSG00000167378 IRGQ<br>ENSG00000186493 C5orf38<br>ENSG00000102743 SLC25A15<br>ENSG00000132631 C20orf79<br>ENSG00000157554 ERG<br>ENSG00000197329 PELI1                                                                                                                                                                                                                                                                                                                                                                                                                                                                                                                                                                                                                                                                                                                                                                                                                                                                                                                                                                                                                                                                                                                                                                                                                                                                                                                                                                                                                                                                                                                                                                                                                                                                                                                                                                                                                                                                                                                                                                                                                                                                                                                                                                                                                                                                                                                                                                                                                                                                                                                                                                                                                               | ENSG00000109113 RAB34<br>ENSG00000167755 KLRK6<br>ENSG00000196365 LONP1<br>ENSG00000106258 CYP3A5<br>ENSG00000132953 XPO4<br>ENSG00000163444 TMEM183B<br>ENSG00000203778 NP_001028736.1                                                                                                                                                                                                                                                                                                                                                                                                                                                                                                                                                                                                                                                                                                                                                                                                                                                                                                                                                                                                                                                                                                                                                                                                                                                                                                                                                                                                                                                                                                                                                                                                                                                                                                                                                                                                                                                                                                                                                                                                                                                                                                                                                                                                                                                                                                                                                                                                                                                                                                                                                                                                                        | ENSG00000112619 PRPH2<br>ENSG00000170233 Q96AM0_HUMAN<br>ENSG00000198012 XR_017841.1<br>ENSG00000106853 LTB4H<br>ENSG00000134025 NM_022659.2<br>ENSG00000165806 CASP7<br>ENSG00000205544 C17orf61                                                                                           |
| GCTTACA | ENSG00000007384 RHBD1<br>ENSG00000136271 DDX56<br>ENSG00000178381 ZFAND2A<br>ENSG000000099721 AMELY<br>ENSG00000171862 PTENP1<br>ENSG00000015413 DPEP1<br>ENSG00000132329 RAMP1<br>ENSG00000186825 Q580R0-2<br>ENSG00000108839 ALOX12<br>ENSG00000154188 ANGPT1<br>ENSG00000095303 PTGS1<br>ENSG00000131503 ANKHD1<br>ENSG00000181873 C1orf69<br>ENSG00000100353 EF387<br>ENSG00000147586 MRPS28<br>ENSG00000180011 ZADH2<br>ENSG000000023191 RNH1<br>ENSG00000136950 ARPC5L<br>ENSG00000185219 ZNF445<br>ENSG00000081307 UBE1DC1<br>ENSG00000117519 CNN3<br>ENSG00000165209 STRBP<br>ENSG00000198176 TFDP1 | ENSG00000012223 LTF<br>ENSG00000149653 WFDC6<br>ENSG00000183443 A2RU41_HUMAN<br>ENSG00000117586 TNFSF4<br>ENSG00000173681 CXorf23<br>ENSG000000040487 PQLC2<br>ENSG00000154309 DISP1<br>ENSG00000187258 NPSR1<br>ENSG00000112414 GPR126<br>ENSG00000165349 SLC7A3<br>ENSG00000100181 CSNK1E<br>ENSG00000141506 PIK3R5<br>ENSG00000183443 A2RU41_HUMAN<br>ENSG00000112773 FAM46A<br>ENSG00000151092 NGLY1<br>ENSG00000183508 FAM46C<br>ENSG000000090674 MCOLN1<br>ENSG00000142233 NP_665806.1<br>ENSG00000187003 ACTL7A<br>ENSG00000100426 ZBED4<br>ENSG00000119041 GTF3C3<br>ENSG00000165985 C1QL3<br>ENSG00000206527 PTPLB<br>ENSG00000101473 ACOF8<br>ENSG00000121281 ADCY7<br>ENSG00000163879 DNAL1<br>ENSG00000185117 NR_002733.1<br>ENSG00000119318 RAD23B<br>ENSG00000161057 PSM2<br>ENSG000000059122 FLYWCH1<br>ENSG00000123136 DDX39<br>ENSG00000176978 DPP7<br>ENSG00000204946 ZNF783<br>ENSG00000143674 M3KL4_HUMAN<br>ENSG00000174606 ANGEL2<br>ENSG00000100429 HDAC10<br>ENSG00000161583 TBC1D3G<br>ENSG00000174171 Q8TCB4_HUMAN<br>ENSG00000205019 TBC1D3C<br>ENSG00000072803 FBXW11<br>ENSG00000143622 RTI1<br>ENSG00000197646 PDCD1LG2<br>ENSG000000053524 MCF2L2<br>ENSG00000130175 PRKC5H<br>ENSG00000183621 ZNF438<br>ENSG00000140525 KIAA1794<br>ENSG00000171135 JAGN1<br>ENSG000000015676 NUDCD3<br>ENSG00000128645 HOXD1<br>ENSG00000176424 NP_001013742.1<br>ENSG00000198326 C20orf141<br>ENSG00000111716 LDHB<br>ENSG00000138600 PSL2_HUMAN<br>ENSG00000171867 PRNP<br>ENSG00000198740 ZNF652<br>ENSG000000020129 NCDN<br>ENSG00000126264 HCST<br>ENSG00000169991 Q5TF58_HUMAN<br>ENSG00000204235 Q6ZNO4_HUMAN<br>ENSG00000128656 CHN1<br>ENSG00000163734 CXCL3<br>ENSG0000000204397 NP_001017534.1<br>ENSG00000103277 STAB1<br>ENSG00000132376 SKIP_HUMAN<br>ENSG00000162365 CYP4A22<br>ENSG00000073282 TP73L<br>ENSG00000138646 HERC5<br>ENSG00000166170 BAG5 | ENSG000000092621 PHGDH<br>ENSG00000162413 KHLH21<br>ENSG00000183443 A2RU41_HUMAN<br>ENSG000001135974 C2orf49<br>ENSG00000177640 CASC2<br>ENSG00000100918 REC8<br>ENSG00000156486 KNS2<br>ENSG00000205664 Q6PJD4_HUMAN<br>ENSG000001121716 Q9UKJ0-3<br>ENSG00000198836 OPA1<br>ENSG00000108771 LGP2_HUMAN<br>ENSG00000169006 NTR2<br>ENSG00000183443 A2RU41_HUMAN<br>ENSG00000116194 ANGPTL1<br>ENSG00000155380 SLC16A1<br>ENSG00000187189 TSPYL4<br>ENSG00000108474 PTGL<br>ENSG00000197471 SPN<br>ENSG00000101132 PFDN4<br>ENSG00000119041 GTF3C3<br>ENSG00000165985 C1QL3<br>ENSG00000102901 CENPT<br>ENSG00000128438 Q9H7M0_HUMAN<br>ENSG00000166435 XRRA1<br>ENSG00000185117 NR_002733.1<br>ENSG00000125450 NUP85<br>ENSG00000166762 CATSPER2<br>ENSG000000088833 NSFL1C<br>ENSG00000125166 GOT2<br>ENSG00000178789 CD300LB<br>ENSG00000204946 ZNF783<br>ENSG00000143674 M3KL4_HUMAN<br>ENSG00000174606 ANGEL2<br>ENSG00000100429 HDAC10<br>ENSG00000161583 TBC1D3G<br>ENSG00000174171 Q8TCB4_HUMAN<br>ENSG00000205019 TBC1D3C<br>ENSG00000072803 FBXW11<br>ENSG00000143622 RTI1<br>ENSG00000197646 PDCD1LG2<br>ENSG000000053524 MCF2L2<br>ENSG00000130175 PRKC5H<br>ENSG00000183621 ZNF438<br>ENSG00000140525 KIAA1794<br>ENSG00000171135 JAGN1<br>ENSG000000015676 NUDCD3<br>ENSG00000128645 HOXD1<br>ENSG00000176424 NP_001013742.1<br>ENSG00000198326 C20orf141<br>ENSG00000111716 LDHB<br>ENSG00000138600 PSL2_HUMAN<br>ENSG00000171867 PRNP<br>ENSG00000198740 ZNF652<br>ENSG000000020129 NCDN<br>ENSG00000126264 HCST<br>ENSG00000169991 Q5TF58_HUMAN<br>ENSG00000204235 Q6ZNO4_HUMAN<br>ENSG00000128656 CHN1<br>ENSG00000163734 CXCL3<br>ENSG0000000204397 NP_001017534.1<br>ENSG00000103277 STAB1<br>ENSG00000132376 SKIP_HUMAN<br>ENSG00000162365 CYP4A22<br>ENSG00000073282 TP73L<br>ENSG00000138646 HERC5<br>ENSG00000166170 BAG5 | ENSG000000092621 PHGDH<br>ENSG00000162413 KHLH21<br>ENSG00000183443 A2RU41_HUMAN<br>ENSG000001135974 C2orf49<br>ENSG00000177640 CASC2<br>ENSG00000100918 REC8<br>ENSG00000156486 KNS2<br>ENSG00000205664 Q6PJD4_HUMAN<br>ENSG000001121716 Q9UKJ0-3<br>ENSG00000198836 OPA1<br>ENSG00000108771 LGP2_HUMAN<br>ENSG00000169006 NTR2<br>ENSG00000183443 A2RU41_HUMAN<br>ENSG00000116194 ANGPTL1<br>ENSG00000155380 SLC16A1<br>ENSG00000187189 TSPYL4<br>ENSG00000108474 PTGL<br>ENSG00000197471 SPN<br>ENSG00000101132 PFDN4<br>ENSG00000119041 GTF3C3<br>ENSG00000165985 C1QL3<br>ENSG00000102901 CENPT<br>ENSG00000128438 Q9H7M0_HUMAN<br>ENSG00000166435 XRRA1<br>ENSG00000185117 NR_002733.1<br>ENSG00000125450 NUP85<br>ENSG00000166762 CATSPER2<br>ENSG000000088833 NSFL1C<br>ENSG00000125166 GOT2<br>ENSG00000178789 CD300LB<br>ENSG00000204946 ZNF783<br>ENSG00000143674 M3KL4_HUMAN<br>ENSG00000174606 ANGEL2<br>ENSG00000100429 HDAC10<br>ENSG00000161583 TBC1D3G<br>ENSG00000174171 Q8TCB4_HUMAN<br>ENSG00000205019 TBC1D3C<br>ENSG00000072803 FBXW11<br>ENSG00000143622 RTI1<br>ENSG00000197646 PDCD1LG2<br>ENSG000000053524 MCF2L2<br>ENSG00000130175 PRKC5H<br>ENSG00000183621 ZNF438<br>ENSG00000140525 KIAA1794<br>ENSG00000171135 JAGN1<br>ENSG000000015676 NUDCD3<br>ENSG00000128645 HOXD1<br>ENSG00000176424 NP_001013742.1<br>ENSG00000198326 C20orf141<br>ENSG00000111716 LDHB<br>ENSG00000138600 PSL2_HUMAN<br>ENSG00000171867 PRNP<br>ENSG00000198740 ZNF652<br>ENSG000000020129 NCDN<br>ENSG00000126264 HCST<br>ENSG00000169991 Q5TF58_HUMAN<br>ENSG00000204235 Q6ZNO4_HUMAN<br>ENSG00000128656 CHN1<br>ENSG00000163734 CXCL3<br>ENSG0000000204397 NP_001017534.1<br>ENSG00000103277 STAB1<br>ENSG00000132376 SKIP_HUMAN<br>ENSG00000162365 CYP4A22<br>ENSG00000073282 TP73L<br>ENSG00000138646 HERC5<br>ENSG00000166170 BAG5 | ENSG00000059377 TBXAS1<br>ENSG00000146374 RSPO3<br>ENSG00000179219 TMEM148<br>ENSG000000073969 NSF<br>ENSG00000122008 POLK<br>ENSG00000152785 BMP3<br>ENSG00000196646 ZNF136<br>ENSG00000070601 FRMPD1<br>ENSG00000159231 CBR3<br>ENSG00000182329 Q8IVF9_HUMAN<br>ENSG00000101911 FRP25<br>ENSG00000125356 NDUFA1<br>ENSG00000157060 C1orf14<br>ENSG00000197110 IL28B<br>ENSG00000105671 DDX49<br>ENSG00000167378 IRGQ<br>ENSG00000186493 C5orf38<br>ENSG00000102743 SLC25A15<br>ENSG00000132631 C20orf79<br>ENSG00000157554 ERG<br>ENSG00000197329 PELI1<br>ENSG00000109113 RAB34<br>ENSG00000167755 KLRK6<br>ENSG00000196365 LONP1<br>ENSG00000106258 CYP3A5<br>ENSG00000132953 XPO4<br>ENSG00000163444 TMEM183B<br>ENSG00000203778 NP_001028736.1<br>ENSG00000112619 PRPH2<br>ENSG00000170233 Q96AM0_HUMAN<br>ENSG00000198012 XR_017841.1<br>ENSG00000106853 LTB4H<br>ENSG00000134025 NM_022659.2<br>ENSG00000165806 CASP7<br>ENSG00000205544 C17orf61<br>ENSG000000092621 PHGDH<br>ENSG00000162413 KHLH21<br>ENSG00000183443 A2RU41_HUMAN<br>ENSG000001135974 C2orf49<br>ENSG00000177640 CASC2<br>ENSG00000100918 REC8<br>ENSG00000156486 KNS2<br>ENSG00000205664 Q6PJD4_HUMAN<br>ENSG000001121716 Q9UKJ0-3<br>ENSG00000198836 OPA1<br>ENSG00000108771 LGP2_HUMAN<br>ENSG00000169006 NTR2<br>ENSG00000183443 A2RU41_HUMAN<br>ENSG00000116194 ANGPTL1<br>ENSG00000155380 SLC16A1<br>ENSG00000187189 TSPYL4<br>ENSG00000108474 PTGL<br>ENSG00000197471 SPN<br>ENSG00000101132 PFDN4<br>ENSG00000119041 GTF3C3<br>ENSG00000165985 C1QL3<br>ENSG00000102901 CENPT<br>ENSG00000128438 Q9H7M0_HUMAN<br>ENSG00000166435 XRRA1<br>ENSG00000185117 NR_002733.1<br>ENSG00000125450 NUP85<br>ENSG00000166762 CATSPER2<br>ENSG000000088833 NSFL1C<br>ENSG00000125166 GOT2<br>ENSG00000178789 CD300LB<br>ENSG00000204946 ZNF783<br>ENSG00000143674 M3KL4_HUMAN<br>ENSG00000174606 ANGEL2<br>ENSG00000100429 HDAC10<br>ENSG00000161583 TBC1D3G<br>ENSG00000174171 Q8TCB4_HUMAN<br>ENSG00000205019 TBC1D3C<br>ENSG00000072803 FBXW11<br>ENSG00000143622 RTI1<br>ENSG00000197646 PDCD1LG2<br>ENSG000000053524 MCF2L2<br>ENSG00000130175 PRKC5H<br>ENSG00000183621 ZNF438<br>ENSG00000140525 KIAA1794<br>ENSG00000171135 JAGN1<br>ENSG000000015676 NUDCD3<br>ENSG00000128645 HOXD1<br>ENSG00000176424 NP_001013742.1<br>ENSG00000198326 C20orf141<br>ENSG00000111716 LDHB<br>ENSG00000138600 PSL2_HUMAN<br>ENSG00000171867 PRNP<br>ENSG00000198740 ZNF652<br>ENSG000000020129 NCDN<br>ENSG00000126264 HCST<br>ENSG00000169991 Q5TF58_HUMAN<br>ENSG00000204235 Q6ZNO4_HUMAN<br>ENSG00000128656 CHN1<br>ENSG00000163734 CXCL3<br>ENSG0000000204397 NP_001017534.1<br>ENSG00000103277 STAB1<br>ENSG00000132376 SKIP_HUMAN<br>ENSG00000162365 CYP4A22<br>ENSG00000073282 TP73L<br>ENSG00000138646 HERC5<br>ENSG00000166170 BAG5 | ENSG00000059377 TBXAS1<br>ENSG00000146374 RSPO3<br>ENSG00000179219 TMEM148<br>ENSG000000073969 NSF<br>ENSG00000122008 POLK<br>ENSG00000152785 BMP3<br>ENSG00000196646 ZNF136<br>ENSG00000070601 FRMPD1<br>ENSG00000159231 CBR3<br>ENSG00000182329 Q8IVF9_HUMAN<br>ENSG00000101911 FRP25<br>ENSG00000125356 NDUFA1<br>ENSG00000157060 C1orf14<br>ENSG00000197110 IL28B<br>ENSG00000105671 DDX49<br>ENSG00000167378 IRGQ<br>ENSG00000186493 C5orf38<br>ENSG00000102743 SLC25A15<br>ENSG00000132631 C20orf79<br>ENSG00000157554 ERG<br>ENSG00000197329 PELI1<br>ENSG00000109113 RAB34<br>ENSG00000167755 KLRK6<br>ENSG00000196365 LONP1<br>ENSG00000106258 CYP3A5<br>ENSG00000132953 XPO4<br>ENSG00000163444 TMEM183B<br>ENSG00000203778 NP_001028736.1<br>ENSG00000112619 PRPH2<br>ENSG00000170233 Q96AM0_HUMAN<br>ENSG00000198012 XR_017841.1<br>ENSG00000106853 LTB4H<br>ENSG00000134025 NM_022659.2<br>ENSG00000165806 CASP7<br>ENSG00000205544 C17orf61<br>ENSG000000092621 PHGDH<br>ENSG00000162413 KHLH21<br>ENSG00000183443 A2RU41_HUMAN<br>ENSG000001135974 C2orf49<br>ENSG00000177640 CASC2<br>ENSG00000100918 REC8<br>ENSG00000156486 KNS2<br>ENSG00000205664 Q6PJD4_HUMAN<br>ENSG000001121716 Q9UKJ0-3<br>ENSG00000198836 OPA1<br>ENSG00000108771 LGP2_HUMAN<br>ENSG00000169006 NTR2<br>ENSG00000183443 A2RU41_HUMAN<br>ENSG00000116194 ANGPTL1<br>ENSG00000155380 SLC16A1<br>ENSG00000187189 TSPYL4<br>ENSG00000108474 PTGL<br>ENSG00000197471 SPN<br>ENSG00000101132 PFDN4<br>ENSG00000119041 GTF3C3<br>ENSG00000165985 C1QL3<br>ENSG00000102901 CENPT<br>ENSG00000128438 Q9H7M0_HUMAN<br>ENSG00000166435 XRRA1<br>ENSG00000185117 NR_002733.1<br>ENSG00000125450 NUP85<br>ENSG00000166762 CATSPER2<br>ENSG000000088833 NSFL1C<br>ENSG00000125166 GOT2<br>ENSG00000178789 CD300LB<br>ENSG00000204946 ZNF783<br>ENSG00000143674 M3KL4_HUMAN<br>ENSG00000174606 ANGEL2<br>ENSG00000100429 HDAC10<br>ENSG00000161583 TBC1D3G<br>ENSG00000174171 Q8TCB4_HUMAN<br>ENSG00000205019 TBC1D3C<br>ENSG00000072803 FBXW11<br>ENSG00000143622 RTI1<br>ENSG00000197646 PDCD1LG2<br>ENSG000000053524 MCF2L2<br>ENSG00000130175 PRKC5H<br>ENSG00000183621 ZNF438<br>ENSG00000140525 KIAA1794<br>ENSG00000171135 JAGN1<br>ENSG000000015676 NUDCD3<br>ENSG00000128645 HOXD1<br>ENSG00000176424 NP_001013742.1<br>ENSG00000198326 C20orf141<br>ENSG00000111716 LDHB<br>ENSG00000138600 PSL2_HUMAN<br>ENSG00000171867 PRNP<br>ENSG00000198740 ZNF652<br>ENSG000000020129 NCDN<br>ENSG00000126264 HCST<br>ENSG00000169991 Q5TF58_HUMAN<br>ENSG00000204235 Q6ZNO4_HUMAN<br>ENSG00000128656 CHN1<br>ENSG00000163734 CXCL3<br>ENSG0000000204397 NP_001017534.1<br>ENSG00000103277 STAB1<br>ENSG00000132376 SKIP_HUMAN<br>ENSG00000162365 CYP4A22<br>ENSG00000073282 TP73L<br>ENSG00000138646 HERC5<br>ENSG00000166170 BAG5 | ENSG00000059377 TBXAS1<br>ENSG00000146374 RSPO3<br>ENSG00000179219 TMEM148<br>ENSG000000073969 NSF<br>ENSG00000122008 POLK<br>ENSG00000152785 BMP3<br>ENSG00000196646 ZNF136<br>ENSG00000070601 FRMPD1<br>ENSG00000159231 CBR3<br>ENSG00000182329 Q8IVF9_HUMAN<br>ENSG00000101911 FRP25<br>ENSG00000125356 NDUFA1<br>ENSG00000157060 C1orf14<br>ENSG00000197110 IL28B<br>ENSG00000105671 DDX49<br>ENSG00000167378 IRGQ<br>ENSG00000186493 C5orf38<br>ENSG00000102743 SLC25A15<br>ENSG00000132631 C20orf79<br>ENSG00000157554 ERG<br>ENSG00000197329 PELI1<br>ENSG00000109113 RAB34<br>ENSG00000167755 KLRK6<br>ENSG00000196365 LONP1<br>ENSG00000106258 CYP3A5<br>ENSG00000132953 XPO4<br>ENSG00000163444 TMEM183B<br>ENSG00000203778 NP_001028736.1<br>ENSG00000112619 PRPH2<br>ENSG00000170233 Q96AM0_HUMAN<br>ENSG00000198012 XR_017841.1<br>ENSG00000106853 LTB4H<br>ENSG00000134025 NM_022659.2<br>ENSG00000165806 CASP7<br>ENSG00000205544 C17orf61<br>ENSG000000092621 PHGDH<br>ENSG00000162413 KHLH21<br>ENSG00000183443 A2RU41_HUMAN<br>ENSG000001135974 C2orf49<br>ENSG00000177640 CASC2<br>ENSG00000100918 REC8<br>ENSG00000156486 KNS2<br>ENSG00000205664 Q6PJD4_HUMAN<br>ENSG000001121716 Q9UKJ0-3<br>ENSG00000198836 OPA1<br>ENSG00000108771 LGP2_HUMAN<br>ENSG00000169006 NTR2<br>ENSG00000183443 A2RU41_HUMAN<br>ENSG00000116194 ANGPTL1<br>ENSG00000155380 SLC16A1<br>ENSG00000187189 TSPYL4<br>ENSG00000108474 PTGL<br>ENSG00000197471 SPN<br>ENSG00000101132 PFDN4<br>ENSG00000119041 GTF3C3<br>ENSG00000165985 C1QL3<br>ENSG00000102901 CENPT<br>ENSG00000128438 Q9H7M0_HUMAN<br>ENSG00000166435 XRRA1<br>ENSG00000185117 NR_002733.1<br>ENSG00000125450 NUP85<br>ENSG00000166762 CATSPER2<br>ENSG000000088833 NSFL1C<br>ENSG00000125166 GOT2<br>ENSG00000178789 CD300LB<br>ENSG00000204946 ZNF783<br>ENSG00000143674 M3KL4_HUMAN<br>ENSG00000174606 ANGEL2<br>ENSG00000100429 HDAC10<br>ENSG00000161583 TBC1D3G<br>ENSG00000174171 Q8TCB4_HUMAN<br>ENSG00000205019 TBC1D3C<br>ENSG00000072803 FBXW11<br>ENSG00000143622 RTI1<br>ENSG00000197646 PDCD1LG2<br>ENSG000000053524 MCF2L2<br>ENSG00000130175 PRKC5H<br>ENSG00000183621 ZNF438<br>ENSG00000140525 KIAA1794<br>ENSG00000171135 JAGN1<br>ENSG000000015676 NUDCD3<br>ENSG00000128645 HOXD1<br>ENSG00000176424 NP_001013742.1<br>ENSG00000198326 C20orf141<br>ENSG00000111716 LDHB<br>ENSG00000138600 PSL2_HUMAN<br>ENSG00000171867 PRNP<br>ENSG00000198740 ZNF652<br>ENSG000000020129 NCDN<br>ENSG00000126264 HCST<br>ENSG00000169991 Q5TF58_HUMAN<br>ENSG00000204235 Q6ZNO4_HUMAN<br>ENSG00000128656 CHN1<br>ENSG00000163734 CXCL3<br>ENSG0000000204397 NP_001017534.1<br>ENSG00000103277 STAB1<br>ENSG00000132376 SKIP_HUMAN<br>ENSG00000162365 CYP4A22<br>ENSG00000073282 TP73L<br>ENSG00000138646 HERC5<br>ENSG00000166170 BAG5 | ENSG00000059377 TBXAS1<br>ENSG00000146374 RSPO3<br>ENSG00000179219 TMEM148<br>ENSG000000073969 NSF<br>ENSG00000122008 POLK<br>ENSG00000152785 BMP3<br>ENSG00000196646 ZNF136<br>ENSG00000070601 FRMPD1<br>ENSG00000159231 CBR3<br>ENSG00000182329 Q8IVF9_HUMAN<br>ENSG00000101911 FRP25<br> |



ENSG00000137074|APTX ENSG00000140254|DUOX1A ENSG00000140688|C16orf58 ENSG00000142511|GPR32 ENSG00000142961|MOBKLC2 ENSG00000144120|TMEM177 ENSG00000144468|RHBD1 ENSG00000147394|ZNF185  
ENSG00000162511|LAPTM5 ENSG00000167641|PPP1R14A ENSG00000174951|FUT1 ENSG00000177098|SCN4B ENSG00000183020|AP2A2 ENSG00000185602|ARHGAP27 ENSG00000205653|Q6ZUF2\_HUMAN ENSG00000085721|RRN3  
ENSG00000090530|LEPREL1 ENSG00000104660|LEPROTL1 ENSG00000114062|UBE3A ENSG00000121210|KIAA0922 ENSG00000134001|EIF2S1 ENSG00000134255|CEPT1 ENSG00000144713|RPL32 ENSG00000151500|THYN1  
ENSG00000152457|DCLRE1C ENSG00000168710|AHCYL1 ENSG00000168743|NPNT ENSG00000172840|PDP2\_HUMAN ENSG00000177889|UBE2N ENSG00000182187|CRYGB ENSG00000184007|PTP4A2 ENSG00000184899|Q9P181\_HUMAN  
ENSG00000185417|CXorf1 ENSG00000188501|LCTL ENSG00000188992|LIP1 ENSG00000196167|NP\_997312.1 ENSG00000204560|DHX16  
ENSG00000065057|NTHL1 ENSG00000086102|NFX1 ENSG00000089101|C20orf26 ENSG00000111252|SH2B3 ENSG00000114982|NP\_060461.3 ENSG00000120949|TNFRSF8 ENSG00000159199|ATP5G1  
ENSG00000160445|ZER1 ENSG00000163866|C1orf212 ENSG00000167967|E4F1 ENSG00000173027|WBP1 ENSG00000178571|NM\_203423 ENSG00000185722|ANKFY1 ENSG00000057657|PRDM1 ENSG00000081842|PCDHA10  
ENSG00000081913|PHLPP ENSG00000101882|NKAP\_HUMAN ENSG00000110723|EXPH5 ENSG00000114900|Q9Y2I9\_HUMAN ENSG00000115414|FN1 ENSG00000134982|APC ENSG00000138381|ASNSD1 ENSG00000139372|TDG  
ENSG00000141325|CDC45 ENSG00000143033|MTF2 ENSG00000150687|PRSS23 ENSG00000150867|PIPSK2A ENSG00000153802|TMPRSS11D ENSG00000153823|PID1 ENSG00000156103|MMP16 ENSG00000161634|DCD  
ENSG00000163519|TRAT1 ENSG00000165244|ZNF367 ENSG00000170456|NP\_659410.3 ENSG00000174156|GSTA3 ENSG00000174944|P2RY14 ENSG00000179933|C14orf119 ENSG00000197343|ZNF655 ENSG00000198947|DMD  
ENSG00000203681|XR\_017762.1 ENSG00000204147|ASH2B ENSG00000204628|GNB2L1  
GCTTTAG ENSG00000026652|AGPAT4 ENSG00000100014|SPECC1L ENSG00000104679|R3HCC1 ENSG00000131018|C6orf98 ENSG00000137054|POLR1E ENSG00000140505|CYP1A2 ENSG00000142512|SIGLEC10 ENSG00000164048|ZNF589  
ENSG00000165383|LRRC18 ENSG00000173436|C1orf151 ENSG00000179452|Q8TDK1\_HUMAN ENSG00000196507|TCEAL3 ENSG00000197430|TMEM10 ENSG00000198336|MYL4 ENSG00000204332|Q6ZU25\_HUMAN ENSG00000204613|TRIM10  
ENSG00000204820|Q96NT9\_HUMAN ENSG00000205064|Q6ZVP2\_HUMAN ENSG0000034677|RNF19 ENSG00000052795|Q9H994\_HUMAN ENSG00000059804|GTR3\_HUMAN ENSG00000062725|APBP2 ENSG00000096717|SIRT1 ENSG00000101935|AMMECR1  
ENSG00000104728|ARHGEP10 ENSG00000112186|CAP2 ENSG00000120675|DNAJ15 ENSG00000145860|RNF145 ENSG00000147654|EBAG9 ENSG00000148229|POLE3 ENSG00000151150|ANK3 ENSG00000159593|APBP1  
ENSG00000163636|PSMD6 ENSG00000169507|NP\_775783.1 ENSG00000170903|KIAA1826 ENSG00000180772|AGTR2 ENSG00000183308|C17orf60 ENSG00000189043|NDUFA4 ENSG00000198276|UCKL1 ENSG00000204348|DOM3Z  
GCTTTAT ENSG00000067082|KLF6 ENSG00000074590|NUAK1 ENSG00000078902|TOLLIP ENSG00000082805|ERC1 ENSG00000102879|CORO1A ENSG00000104938|CLEC4M ENSG00000108639|SYNGR2 ENSG00000108961|NP\_057576.2  
ENSG00000112837|TBX18 ENSG00000116237|ICMT ENSG00000126602|TRAP1 ENSG00000134905|CAR52 ENSG00000140464|PML ENSG00000146666|Q9EIP2\_HUMAN ENSG00000149179|C11orf49 ENSG00000162444|RBP7  
ENSG00000164048|ZNF589 ENSG00000166398|KIAA0355 ENSG00000166473|PKD1L2 ENSG00000166619|BLCAP ENSG00000176302|FOXK1 ENSG00000183621|ZNF438 ENSG00000198216|CACNA1E ENSG00000204197|KIFC1  
ENSG00000206140|LOC728229 ENSG00000049130|KITLG ENSG00000049167|ERCC8 ENSG00000059769|GNG10 ENSG00000078124|PHCA ENSG00000105835|PREF1 ENSG00000113163|COL4A3BP ENSG00000115289|PCGF1  
ENSG0000011724|CENPF ENSG00000132676|DAP3 ENSG00000136982|NP\_076999.1 ENSG00000138685|FGF2 ENSG00000139168|ZCRB1 ENSG00000140660|RUNDCA2 ENSG00000149231|CCDC82 ENSG00000152556|PFKM  
ENSG00000155307|SAMS1 ENSG00000163281|GNPDA2 ENSG00000165682|CLEC1B ENSG00000165891|E2F7 ENSG00000170509|HSD17B13 ENSG00000172071|EIF2AK3 ENSG00000172239|PAIP1 ENSG00000174442|ZWILCH  
ENSG00000175513|TSGA10P ENSG00000182263|FIGN ENSG00000184486|POU3F2 ENSG00000186481|NP\_001025170.1 ENSG00000188820|FAM26F ENSG00000205036|NP\_001001682.1  
GCTTTCC ENSG00000089336|KIAA0841 ENSG00000090372|STRN4 ENSG00000103061|SLC7A6OS ENSG00000110917|KIAA0152 ENSG00000122966|CIT ENSG00000135824|RGS8 ENSG00000139874|SSTR1 ENSG00000141994|DUS3L  
ENSG00000151006|Q6ZNK7\_HUMAN ENSG00000158856|EPB49 ENSG00000162104|ADCY9 ENSG000000816599|TSC1 ENSG00000166526|ZNF3 ENSG00000169188|APEX2 ENSG00000184516|Q9IVR1\_HUMAN ENSG00000187595|NP\_001013646.1  
ENSG00000197466|PSAP ENSG00000024048|UBR2 ENSG00000049130|KITLG ENSG00000081177|EKDL2 ENSG00000088930|XRN2 ENSG00000101162|TUBB1 ENSG00000102021|LUZP4 ENSG00000102760|C13orf15  
ENSG00000105974|CAV1 ENSG00000108588|CCDC47 ENSG00000108839|ALOX12 ENSG00000118363|SPCS2 ENSG00000125675|GRIA3 ENSG00000126524|SBDS ENSG00000127366|TAS2R5 ENSG00000136238|RAC1  
ENSG00000136518|ACTL6A ENSG00000137642|SORL1 ENSG00000143442|POGZ ENSG00000144021|CIAO1 ENSG00000145545|SRD5A1 ENSG00000163637|PRICKLE2 ENSG00000166250|NP\_079045.1 ENSG00000167117|C17orf73  
ENSG00000169981|ZNF35 ENSG00000175066|GK5 ENSG00000176974|SHMT1 ENSG00000185518|SV2B ENSG00000198015|MRLP42  
GCTTTTG ENSG00000050426|LETMD1 ENSG00000069696|DRD4 ENSG00000071626|DAZAP1 ENSG00000108179|PP1F ENSG00000124444|ZNF576 ENSG00000124641|TRFP ENSG00000129535|NRL ENSG00000135148|TRAFD1  
ENSG00000144791|LIMD1 ENSG00000148158|SNX30 ENSG00000157617|C21orf25 ENSG00000164649|CDCA7L ENSG00000166007|LOC399940 ENSG00000166136|NDUFB8 ENSG00000166402|TUB  
ENSG00000173153|ESRRA ENSG00000174206|NP\_689653.3 ENSG00000176371|ZSCAN2 ENSG00000181274|FRAT2 ENSG00000184678|HIST2H2BE ENSG00000198879|SFMBT2 ENSG00000204455|XR\_015868.1 ENSG0000006459|JHDM1D  
ENSG00000052126|PLEKHA5 ENSG00000068793|CYFIP1 ENSG00000078114|NEBL ENSG00000084676|NCOA1 ENSG00000101977|MCF2 ENSG00000102753|KPN3 ENSG00000113812|ACTR8 ENSG00000119318|RAD23B  
ENSG00000120265|PCMT1 ENSG00000125355|FAM70A ENSG00000131791|PRKAB2 ENSG00000132294|EFR3\_HUMAN ENSG00000132718|SYT11 ENSG00000133687|TMTC1 ENSG00000143252|SDHC ENSG00000144771|LRTM1  
ENSG00000145996|CDKAL1 ENSG00000146039|SLC17A4 ENSG00000152268|SPON1 ENSG00000162670|FAM5C ENSG00000165359|DDX26B ENSG00000165566|FAM123A ENSG00000166170|BAG5 ENSG00000170962|PDGFD  
ENSG00000185985|SLITRK2 ENSG00000186666|BCD1N3D ENSG00000189277|NP\_997365.2 ENSG00000189403|HMG1 ENSG00000204691|NR\_002819.1  
GGAAAAC ENSG00000101251|SEL1L2 ENSG00000110047|EHD1 ENSG00000114013|CD8E ENSG00000131113|PSG1 ENSG00000134014|ELP3 ENSG00000137310|TCF19 ENSG00000142230|SAE1 ENSG00000144659|SLC25A38  
ENSG00000145824|CXCL14 ENSG00000152475|Q9BEG3\_HUMAN ENSG00000154328|NEIL2 ENSG00000157617|C21orf25 ENSG00000166974|MAPRE2 ENSG00000169436|COL22A1 ENSG00000171747|LGAL5A ENSG00000175824|XR\_017847.1  
ENSG00000182376|NP\_872411.1 ENSG00000183751|TBL3 ENSG00000059573|ALDH18A1 ENSG00000075785|RAB7A ENSG00000092140|KIAA1333 ENSG00000099260|PALMD ENSG00000106261|ZKSCAN1 ENSG00000109181|UGT2B10  
ENSG00000119509|INVS ENSG00000125845|BMP2 ENSG00000144597|EAF1 ENSG00000144668|ITGA9 ENSG00000146463|ZMYM4 ENSG00000150867|PIPSK2A ENSG00000152952|PLOC2 ENSG00000154493|C10orf90  
ENSG00000156096|UGT2B4 ENSG00000157404|KIT ENSG00000163029|SMC6 ENSG00000164484|KIAA1913 ENSG00000166704|ZNF606 ENSG00000167384|ZNF180 ENSG00000168291|PDHB ENSG00000172000|ZNF556  
ENSG00000183814|LIN9 ENSG00000186879|NM\_178121 ENSG00000187009|Q9NFD4\_HUMAN ENSG00000196447|XR\_017870.1 ENSG00000197958|RPL12 ENSG00000198677|KIAA0372 ENSG00000198740|ZNF652 ENSG00000203909|DPPA5  
ENSG00000204201|Q49A40\_HUMAN ENSG00000205423|TMEM188  
GGAAACA ENSG00000044446|PHKA2 ENSG00000074755|ZZEF1 ENSG00000100376|FAM118A ENSG00000101350|KIF3B ENSG00000108821|COL1A1 ENSG00000115211|EIF2B4 ENSG00000126353|CCR7 ENSG00000131871|SELS\_HUMAN  
ENSG00000132740|IGHMBP2 ENSG00000143845|ETNK2 ENSG00000147059|SPIN2A ENSG00000152217|SETBP1 ENSG00000158457|TSPAN33 ENSG00000163219|ARHGAP25 ENSG00000167085|PHB ENSG00000171115|GIMA8  
ENSG00000182459|NP\_997342.1 ENSG00000186951|PPARA ENSG00000187979|Q6ZPC6\_HUMAN ENSG00000196422|KIAA0649 ENSG00000204758|Q6ZUG4\_HUMAN ENSG00000204957|Q6ZVQ6\_HUMAN ENSG00000001167|NFYA ENSG0000008294|SPAG9  
ENSG00000025796|SEC63 ENSG00000050030|KIAA2022 ENSG00000076554|TPD52 ENSG00000082556|OPR1 ENSG00000089066|SNX5 ENSG00000090269|CLEC5A ENSG00000115761|NOL10 ENSG00000118518|RNF146  
ENSG00000121957|GSPM2 ENSG00000123500|COL10A1 ENSG00000128791|TWSG1 ENSG00000132274|TRIM22 ENSG00000144867|SRPRB ENSG00000150361|KLHL1 ENSG00000154874|NP\_872374.3 ENSG00000155975|VPS37A  
ENSG00000163041|H3F3A ENSG00000165525|SDCCAG1 ENSG00000167721|TSR1 ENSG00000182489|XKRX ENSG00000183513|NP\_001008216.1 ENSG00000183542|KLRC4 ENSG00000185408|OR5K1 ENSG00000196083|IL1RAP  
ENSG00000198203|SULT1C2 ENSG00000198739|LRR1M3  
GGAAACC ENSG00000011243|AKAP8L ENSG0000012061|ERCC1 ENSG00000086015|MAST2 ENSG00000104812|GYS1 ENSG00000107807|TLX1 ENSG00000110931|CAMKK2 ENSG00000113739|STC2 ENSG00000135439|CENTG1  
ENSG00000156858|PRR14 ENSG00000161896|IHPK3 ENSG00000164108|Q9HAJ2\_HUMAN ENSG00000176087|SLC35A4 ENSG00000177627|C12orf54 ENSG00000181757|SLC22A18AS ENSG00000197283|SYNGAP1 ENSG00000204576|PRR3  
ENSG00000004286|C1orf112 ENSG00000079385|CEACAM1 ENSG00000080822|CLDN1D ENSG00000113161|HMGCR ENSG00000113742|CPEB4 ENSG00000116750|UCHL5 ENSG00000130348|QRS1  
ENSG00000130772|MED18 ENSG00000141655|TNFRSF11A ENSG00000151690|NP\_060164.3 ENSG00000154493|C10orf90 ENSG00000163535|SGOL2 ENSG00000164308|NP\_071745.1 ENSG00000164466|SFYX1 ENSG00000171867|PRNP  
ENSG00000175395|ZNF25 ENSG00000175582|RAB6A ENSG00000177954|RPS27 ENSG00000184984|CHRM5 ENSG00000185023|RAB6C ENSG00000196826|ZNF709 ENSG00000197780|TAF13 ENSG00000205874|Q6SA06\_HUMAN  
GGAAAGT ENSG00000005102|MEOX1 ENSG00000054523|KIF1B ENSG00000085185|BCORL1 ENSG00000090863|GLG1 ENSG00000110090|CPT1A ENSG00000116133|DHCR24 ENSG00000130558|OLFM1 ENSG00000131558|EXOC4  
ENSG00000133246|PRAM1 ENSG00000140830|TXNL4B ENSG00000157388|CACNA1D ENSG00000159461|AMFR ENSG00000168026|TTC21A ENSG00000168575|SLC20A2 ENSG00000169188|APEX2 ENSG00000170545|NM\_001031628.1  
ENSG00000171649|ZTK1 ENSG00000178971|C17orf68 ENSG00000180735|Q6PJW0\_HUMAN ENSG00000183562|Q9P1L5\_HUMAN ENSG00000205424|Q6ZW00\_HUMAN ENSG00000206539|Q6ZTN9\_HUMAN ENSG00000066427|ATXN3 ENSG00000079950|STX7  
ENSG00000105677|TMEM147 ENSG00000113205|PCDH3 ENSG00000116106|EPHA4 ENSG00000116455|WDR77 ENSG00000128272|ATF4 ENSG00000131127|ZNF141 ENSG00000131941|RHPN2 ENSG00000136244|IL6  
ENSG00000142864|SERBP1 ENSG00000147883|CDKN2B ENSG00000150907|FOXO1A ENSG00000152413|HOMER1 ENSG00000152904|GGPS1 ENSG00000158185|ANKRD36 ENSG00000164402|SEPT8  
ENSG00000164506|STXBP5 ENSG00000167384|ZNF180 ENSG00000170264|NP\_115556.1 ENSG00000177981|ASB8 ENSG00000182463|TSHZ2 ENSG00000185742|NP\_997528.1 ENSG00000188021|UBQLN2  
GGAAATA ENSG00000035403|VCL ENSG00000076356|PLXNA2 ENSG00000080189|SLC35C2 ENSG00000084693|AGBL5 ENSG00000104901|DKKL1 ENSG00000104918|RETN ENSG00000105705|SF4  
ENSG00000110395|CBL ENSG00000112149|CD83 ENSG00000125753|VASP ENSG00000132692|BCAN ENSG00000133216|EPHB2 ENSG00000136732|GYPC ENSG00000139266|MARCH9 ENSG00000143614|GATAD2B  
ENSG00000144029|MRPS5 ENSG00000159261|CLDN14 ENSG00000166900|STX3 ENSG00000169919|GUSB ENSG00000171490|RS1L1D ENSG00000172568|NP\_001001343.1 ENSG00000175224|KIAA0652 ENSG00000178363|CALML3  
ENSG00000183955|SETD8 ENSG00000185404|Q4ZG65\_HUMAN ENSG00000185955|NP\_001004323.1 ENSG00000186407|CD300E ENSG00000187608|ISG15 ENSG00000188822|CNR2 ENSG00000189401|OTUD6A ENSG00000197858|GPAA1  
ENSG00000205726|ITSN1 ENSG00000035720|STAP1\_HUMAN ENSG00000069764|PLA2G10 ENSG00000080572|CXorf41 ENSG00000108506|INTS2 ENSG00000111783|RFK4 ENSG00000114491|UMPS ENSG00000129625|REEP5  
ENSG00000131263|RNF12 ENSG00000132541|HRSP12 ENSG00000134313|NP\_065789.1 ENSG00000134762|DSC3 ENSG00000148572|NRBF2 ENSG00000148571|S1881|C5orf28 ENSG00000153130|SCOC ENSG00000156162|DPY19L4  
ENSG00000159592|GPBP1L1 ENSG00000163285|GABRG1 ENSG00000163297|ANTXR2 ENSG00000165914|TTC7B ENSG00000167014|C15orf43 ENSG00000167165|UGT1A1 ENSG00000175895|PLEKHF2 ENSG00000177932|ZNF354C  
ENSG00000178074|NP\_710156.2 ENSG00000180113|TDRD6 ENSG00000187109|NAP1L1 ENSG00000197347|Q6ZVE3\_HUMAN ENSG00000197627|Q9UFV3\_HUMAN ENSG00000204814|Q5VSD8\_HUMAN  
GGAAATC ENSG00000051009|C11orf56 ENSG00000110195|FOLR1 ENSG00000119408|NEK6 ENSG00000124785|NRN1 ENSG00000133895|MEN1 ENSG00000135723|FHOD1 ENSG00000135824|RGS8 ENSG00000145990|GFOD1  
ENSG00000157103|SLC6A1 ENSG00000160844|NP\_849153.3 ENSG00000163848|SLC12A8 ENSG00000164309|CMYA5 ENSG00000166025|AMOTL1 ENSG00000170100|Q96MU6-2 ENSG00000170265|ZNF282 ENSG00000170613|FAM71B  
ENSG00000172073|C2orf51 ENSG00000175093|SPSB4 ENSG00000182450|KCNK4 ENSG00000185090|MANEAL ENSG00000187686|XR\_016979.1 ENSG00000189068|VSTM1 ENSG00000203793|Q6ZR74\_HUMAN ENSG00000204080|Q6ZRQ9\_HUMAN  
ENSG00000065534|MYLK ENSG00000082153|BZW1 ENSG00000101384|JAG1 ENSG00000107249|GLIS3 ENSG00000110218|PANX1 ENSG00000116688|MFN2 ENSG000001120733|JMJD1B  
ENSG00000124343|XG ENSG00000130021|DHDD1A ENSG00000132631|C20orf79 ENSG00000135297|MTO1 ENSG00000139969|Q9P1J0\_HUMAN ENSG00000142494|NP\_060712.2 ENSG00000150540|HNMT ENSG00000164631|ZNF12  
ENSG00000182992|Q8IZM0\_HUMAN ENSG00000197372|ZNF675 ENSG00000204019|NP\_001017978.1 ENSG00000205195|Q6ZTB1\_HUMAN  
GGAAACAT ENSG00000055163|CYFIP2 ENSG00000102854|MSLN ENSG00000102981|PAR6A ENSG00000105679|GAPDHS ENSG00000120071|KIAA1267 ENSG00000148158|SNX30 ENSG00000155926|SLA ENSG00000158497|HMH1  
ENSG00000162267|ITIHL3 ENSG00000167779|TGFBP6 ENSG00000169026|MFSD7 ENSG00000185082|LBH ENSG00000185294|NP\_787078.1 ENSG00000188312|CENPF ENSG00000196152|ZNF79 ENSG00000197549|Q6ZN90\_HUMAN  
ENSG00000022267|FHL1 ENSG00000063046|EIF4B ENSG00000065457|ADAT1 ENSG00000111696|NTSDC3 ENSG00000118777|ABCG2 ENSG00000121542|SEC22A ENSG00000123684|LPGAT1  
ENSG00000125871|C20orf72 ENSG00000132196|HSD17B7 ENSG00000132341|RAN ENSG00000134371|CDC73 ENSG00000143337|TOR1AIP1 ENSG00000143442|POGZ ENSG00000145794|MEGF10 ENSG00000150593|PCDC4  
ENSG00000163577|EIF5A2 ENSG00000164253|WDR41 ENSG00000169554|ZEB2 ENSG00000171517|EDG7 ENSG00000177889|UBE2N ENSG00000188216|Q5JST9\_HUMAN ENSG00000204560|DHX16 ENSG00000211450|C11orf31  
GGAAAGC ENSG00000041988|THAP3 ENSG00000090539|CHRD ENSG00000099624|ATP5D ENSG00000103647|CORO2B ENSG00000107021|TBC1D13 ENSG000001105421|HPS1 ENSG00000109610|SOD3 ENSG00000119714|GPR68  
ENSG00000127129|EDN2 ENSG00000130165|ELOF1 ENSG00000134516|DOCK2 ENSG00000135472|FAIM2 ENSG00000142511|GPR32 ENSG00000145211|GPR32 ENSG00000150455|TRIPAP ENSG00000166289|PLEKHF1 ENSG00000169692|AGPAT2  
ENSG00000172375|TMEM24 ENSG00000173762|CD7 ENSG00000182871|COL18A1 ENSG00000184014|RAB6IP1 ENSG00000186868|MAPT ENSG00000187736|SLC23A3 ENSG00000204405|Q6ZQV3\_HUMAN ENSG00000080883|JARID2  
ENSG00000086696|HSD17B2 ENSG00000087302|C14orf166 ENSG00000101230|C20orf82 ENSG00000119318|RAD23B ENSG00000122644|ARL4A ENSG00000123104|ITPR2 ENSG00000123200|ZC3H13 ENSG00000136709|WDR33  
ENSG00000137996|RTCD1 ENSG00000152207|CYSLTR2 ENSG00000154217|PT1PNC1 ENSG00000155966|AFF2 ENSG00000157557|ETS2 ENSG00000159200|DSCR1 ENSG00000159763|PIP ENSG00000161573|CCL16  
ENSG00000162704|ARPC5 ENSG00000163541|SUCLG1 ENSG00000163638|ADAMT9 ENSG00000163762|TM4SF18 ENSG00000187068|NP\_001020437.1 ENSG00000196954|CASP4 ENSG00000206027|Q6ZUT4\_HUMAN  
GGAAAGTC ENSG00000006071|ABCC8 ENSG00000042445|RETSAT ENSG00000067141|NEO1 ENSG00000077080|ACTL6B ENSG000001010888|CHD8 ENSG00000101193|C20orf11 ENSG00000105576|TNPO2 ENSG00000140105|WARS  
ENSG00000146221|NP\_872345.1 ENSG00000148204|CRB2 ENSG00000161570|CCL5 ENSG00000162413|KLHL21 ENSG00000162591|MEGF6 ENSG00000172350|ABCG4 ENSG00000178

ENSG00000197496|SLC2A10 ENSG00000204626|Q6ZSR2\_HUMAN ENSG00000205313|FAM106A ENSG00000077522|ACTN2 ENSG00000084444|KIAA1467 ENSG00000102595|UGCGL2 ENSG00000104369|JPH1 ENSG00000112902|SEMA5A ENSG00000120937|NPPB ENSG00000124228|DDX27 ENSG00000125352|RNF113A ENSG00000128607|NP\_055812.1 ENSG00000134533|RERG ENSG00000161647|MPP3 ENSG00000163116|NP\_777612.1 ENSG00000167380|ZNF226

GAATAA ENSG00000177675|CD163L1 ENSG00000206027|Q6ZUT4\_HUMAN ENSG00000078319|PMS2L1 ENSG00000092850|TEKT2 ENSG00000099797|GPSN2 ENSG00000101470|TNNC2 ENSG00000105127|AKAP8 ENSG00000105697|HAMP ENSG00000110719|TCIRG1 ENSG00000115657|ABCB6 ENSG00000119714|GPR68 ENSG00000122642|PKBP9 ENSG00000125954|FNTB ENSG00000128311|TST ENSG00000129965|INS ENSG00000130177|CDC16 ENSG00000130288|NDUF1A3 ENSG00000140368|PSTPIP1 ENSG00000140400|MAN2C1 ENSG00000143450|OAZ3 ENSG00000149305|HTR3B ENSG00000158428|NP\_940961.1 ENSG00000160951|PTGER1 ENSG00000167536|DHRS13 ENSG00000169169|CPTIC1 ENSG00000169189|NSMCE1 ENSG00000169696|ASPSCR1 ENSG00000177337|NP\_001034885.1 ENSG00000184560|C17orf74 ENSG00000184650|ODF4 ENSG00000185681|C9orf18 ENSG00000186474|KLK12 ENSG00000196372|ASB13 ENSG00000198053|STRPA ENSG00000198632|NP\_777590.1 ENSG00000205562|Q86U27\_HUMAN ENSG00000205792|A4D193\_HUMAN ENSG00000205927|OLIG2 ENSG00000206193|Q5HYA3\_HUMAN ENSG0000009780|FAM76A ENSG00000023287|RB1CC1 ENSG00000076321|KLHL20 ENSG00000087074|PPP1R15A ENSG00000089195|TRM6\_HUMAN ENSG00000125931|CITED1 ENSG00000136240|KDELR2 ENSG00000138758|SEPT11 ENSG00000139597|NP\_438169.2 ENSG00000141127|PRPSAP2 ENSG00000147874|FAM29A ENSG00000155755|ALS2CR4 ENSG00000165169|DYNLT3 ENSG00000167332|OR51E2 ENSG00000171320|ESCO2 ENSG00000177932|ZNF354C ENSG00000186073|C15orf41 ENSG00000188529|FUSIP1 ENSG00000196459|SEDLP ENSG00000205220|PSMB10 ENSG00000205516|CYFIP2 ENSG00000070031|SCT ENSG00000074410|CA12 ENSG00000101251|SELLL2 ENSG00000102547|CAB39L ENSG00000109956|B3GAT1 ENSG00000115594|IL1R1 ENSG00000118900|UBN1 ENSG00000128908|INOC1 ENSG00000142961|MOBKLC2 ENSG00000143127|ITGA10 ENSG00000143450|OAZ3 ENSG00000143858|SYT2 ENSG00000148702|HABP2 ENSG00000160844|NP\_849153.3 ENSG00000162676|GFI1 ENSG00000164078|WDR51A ENSG00000169213|RAB3B ENSG00000186118|Q6PEX7\_HUMAN ENSG00000188743|Q9P169\_HUMAN ENSG00000197993|KEL ENSG00000198624|CCDC69 ENSG00000203905|Q6ZRC6\_HUMAN ENSG00000205061|Q6ZUP2\_HUMAN ENSG00000206031|Q6ZT66\_HUMAN ENSG0000059758|PCTK2 ENSG0000077279|DCX ENSG0000079335|CDC14A ENSG00000110367|DDX6 ENSG00000112208|BAG2 ENSG00000128641|MYO1B ENSG00000128739|SNRNP ENSG00000133302|ANKRD32 ENSG00000133800|XLKID ENSG00000143344|RGL1 ENSG00000148450|MSRB2 ENSG00000151923|TIAL1 ENSG00000153292|GPR110 ENSG00000163257|C4orf30 ENSG00000164418|GRIK2 ENSG00000171004|HS6ST2 ENSG00000172551|MUC1L\_HUMAN ENSG00000186974|Q8N6X9\_HUMAN ENSG00000197128|ZNF772 ENSG00000198863|RUNC1 ENSG00000204597|ZNF818 ENSG00000204611|ZNF616

GAATGG ENSG00000066044|ELAVL1 ENSG00000088280|DDEF1L ENSG00000100207|TCF20 ENSG00000103168|TAF1C ENSG00000105066|FIZ1 ENSG00000107819|SFXN3 ENSG00000124160|NCOA5 ENSG00000125652|ALKBH7 ENSG00000129009|ISLR ENSG00000132716|WDR42A ENSG00000135622|SEMA4F ENSG00000144045|DQX1 ENSG00000144233|AMMECR1L ENSG00000163914|RHO ENSG00000164048|ZNF589 ENSG00000168243|GNG4 ENSG00000180422|C16orf81 ENSG00000182376|NP\_872411.1 ENSG00000183048|SLC25A10 ENSG00000183864|TOB2 ENSG00000188112|FLJ90086 ENSG00000204602|Q6ZU19\_HUMAN ENSG00000209765|IYD ENSG00000207269|C14orf101 ENSG00000177113|SLC25A43 ENSG00000107036|KIAA1432 ENSG00000120215|MLANA ENSG00000126838|PZP ENSG00000127152|BCL11B ENSG00000129699|NP\_067644.2 ENSG00000144619|CNTN4 ENSG00000154645|CHODL ENSG00000163377|FAM19A4 ENSG00000163518|FCRL4 ENSG00000164144|ARFIP1 ENSG00000164548|TRA2A\_HUMAN ENSG00000165197|FTGF ENSG00000169018|FEM1B ENSG00000170881|RNF139 ENSG00000171100|MTM1 ENSG00000187806|NP\_001073931.1 ENSG00000188659|NP\_001008227.1 ENSG00000196639|HRH1

GAATGT ENSG00000025770|NCAPH2 ENSG00000056998|GYG2 ENSG00000102385|DRP2 ENSG00000105428|ZNR4 ENSG00000112715|VEGFA ENSG00000116205|C1orf83 ENSG00000118245|TNP1 ENSG00000126432|PRDX5 ENSG00000136205|TNS3 ENSG00000154146|NRGN ENSG00000154928|PS4762-3 ENSG00000163961|RNF168 ENSG00000164007|CLDN19 ENSG00000164048|ZNF589 ENSG00000171853|TTC15 ENSG00000174903|RAB1B ENSG00000184557|SOCS3 ENSG00000188112|FLJ90086 ENSG00000188447|XR\_016015.1 ENSG00000204902|Q6UXW7\_HUMAN ENSG00000209222|MR11A ENSG00000064787|BCAS1 ENSG00000078114|NEBL ENSG00000086696|HSD17B2 ENSG00000101109|STK4 ENSG00000102362|SYTL4 ENSG00000104361|NPAL2 ENSG00000107614|TRDMT1 ENSG00000113916|BCL6 ENSG00000117036|ETV3 ENSG00000119787|ARL6IP2 ENSG00000125945|ZNF436 ENSG00000145103|ILDR1 ENSG00000145907|G3BP1 ENSG00000148153|C9orf80 ENSG00000154719|MRPL39 ENSG00000158966|CACHD1 ENSG00000170266|GLB1 ENSG00000174429|ABRA ENSG00000174652|ZNF266 ENSG00000179833|CLORF132 ENSG00000185070|FLRT2 ENSG00000196270|Q6ZWE7\_HUMAN ENSG00000197961|ZNF121

GAATTA ENSG00000056345|ITGB3 ENSG00000077312|SNRPA ENSG00000089737|DDX24 ENSG00000106268|NUDT1 ENSG00000106459|NRF1 ENSG00000107796|ACTA2 ENSG00000130477|UNC13A ENSG00000131914|LIN28 ENSG00000136383|ALPK3 ENSG00000160803|UBQLN4 ENSG00000160916|ATP5J2 ENSG00000169575|VPREB1 ENSG00000179270|NP\_001025054.1 ENSG00000184507|NP\_786883.1 ENSG00000187170|LCE4A ENSG00000198690|MTMR15 ENSG00000203709|C1orf132 ENSG00000001084|GCLC ENSG00000039139|DNAH5 ENSG00000077713|SLC25A43 ENSG00000100934|SEC23A ENSG00000103707|MTFMT ENSG00000105132|ZNF550 ENSG00000106355|LSM5 ENSG00000110756|HPS5 ENSG00000112486|CCR6 ENSG00000113328|CNG1 ENSG00000120253|NUP43 ENSG00000120280|CXorf19 ENSG00000125531|C20orf195 ENSG00000131941|RHPN2 ENSG00000136813|KIAA0368 ENSG00000144481|TRPM8 ENSG00000171262|FAM98B ENSG00000183309|ZNF623 ENSG00000185873|TMPRSS11B ENSG00000189127|NP\_001004441.1 ENSG00000196270|Q6ZWE7\_HUMAN ENSG00000205905|Q6ZWC6\_HUMAN ENSG00000064300|NGFR ENSG00000076604|TRAF4 ENSG00000101146|RAE1 ENSG00000125388|GRK4 ENSG00000126003|PLAGL2 ENSG00000134014|ELP3 ENSG00000139112|GABARAPL1 ENSG00000139197|PEX5 ENSG00000141342|PLEKHM1 ENSG00000149300|C11orf52 ENSG00000158169|FANCC ENSG00000163348|PYG02 ENSG00000163481|RNF25 ENSG00000186475|65644|COMTD1 ENSG00000175166|PSMD2 ENSG00000180861|C12orf36 ENSG00000181938|GINS3 ENSG00000182953|NM\_001031.4 ENSG00000198929|NOS1AP ENSG00000204309|Q6ZSQ3\_HUMAN ENSG00000086475|SEPHS1 ENSG00000091651|ORC6L ENSG00000101333|PLCB4 ENSG00000104375|STK3 ENSG00000106278|PTPR21 ENSG00000107295|SH3GL2 ENSG00000109920|FBNP4 ENSG00000115806|GORASP2 ENSG00000120820|GLT8D2 ENSG00000135931|ARMC9 ENSG00000136937|NCBP1 ENSG00000137776|SLTM ENSG00000137968|SLC44A5 ENSG00000143457|GOLPH3L ENSG00000143970|ASXL2 ENSG00000146587|RBAK ENSG00000163512|AZI2 ENSG00000169439|SDC2 ENSG00000170242|USP47 ENSG00000170584|NUDC2 ENSG00000172752|NP\_694996.3 ENSG00000177606|JUN ENSG00000185918|DEFA3 ENSG00000188971|NP\_001013005.1 ENSG00000197085|Q6EKK1\_HUMAN ENSG00000198478|SH3BGR2 ENSG00000206047|DEFT1P

GAATTT ENSG00000066735|Q96GK3\_HUMAN ENSG00000076248|UNG ENSG00000108439|PNPO ENSG00000135617|C2orf7 ENSG00000151948|GLT1D1 ENSG00000169188|APEX2 ENSG00000176515|Q8NAX6\_HUMAN ENSG00000183929|DUSP5P ENSG00000184787|UBE2G2 ENSG00000187855|ASCL4 ENSG00000196132|MYT1\_HUMAN ENSG00000198690|MTMR15 ENSG00000204118|NAP1L6 ENSG00000059573|ALDH18A1 ENSG00000100219|XBP1 ENSG00000101624|CEP76 ENSG00000111816|FRK ENSG00000121892|NP\_056015.1 ENSG00000122884|P4HA1 ENSG00000124214|STAU1 ENSG00000133083|DCLK1 ENSG00000133639|BTG1 ENSG00000139496|NUPL1 ENSG00000148828|NP\_001074467.1 ENSG00000152443|ZNF177 ENSG00000157500|APPL1 ENSG00000166173|LARP6 ENSG00000171940|ZNF217 ENSG00000172969|LOC285299 ENSG00000176273|TMEM20 ENSG00000181784|ANG ENSG00000186480|INSIG1 ENSG00000189079|ARID2 ENSG00000198492|YTHDF2 ENSG00000204669|C9orf57 ENSG00000205097|NP\_001005217.1 ENSG00000205524|Q68D70\_HUMAN

GGACAA ENSG00000019169|MARCO ENSG00000055163|CYFP2 ENSG000000066117|SMARCD1 ENSG00000086848|ALG9 ENSG00000102145|GATA1 ENSG00000105523|FAM83E ENSG00000108375|SUPT4H1 ENSG00000112941|POLS ENSG00000119547|ONECUT2 ENSG00000125804|C20orf91 ENSG00000130487|KLHDC7B ENSG00000130768|SMPDL3B ENSG00000133195|SLC39A11 ENSG00000136732|GYPC ENSG00000153789|FAM92B ENSG00000154229|PRKCA ENSG00000160097|FNDC5 ENSG00000160606|TLCD1 ENSG00000160683|BLR1 ENSG00000170464|DNAJC18 ENSG00000177191|B3GNTL ENSG00000177374|HIC1 ENSG00000180083|WFDCC1 ENSG00000083099|LYRM2 ENSG00000091164|TXNL1 ENSG00000104755|ADAM2 ENSG00000118946|PCDH17 ENSG00000124568|SLC17A1 ENSG00000125551|PLGLB1 ENSG00000134058|CDK7 ENSG00000134250|NOTCH2 ENSG00000135823|STX6 ENSG00000145863|GABRA6 ENSG00000146352|C6orf213 ENSG00000147874|FAM29A ENSG00000151461|UPF2 ENSG00000156531|PHF6 ENSG00000162961|DPY30\_HUMAN ENSG00000163291|PAQR3 ENSG00000165794|SLC39A2 ENSG00000169659|PLGLA1 ENSG00000171132|PRKCE ENSG00000176148|TCP1L1 ENSG00000177453|NIM1\_HUMAN ENSG00000183281|PLGB\_HUMAN ENSG00000185070|FLRT2 ENSG00000185842|Q4VXG5\_HUMAN ENSG00000197943|PLCG2 ENSG00000198417|MT1F ENSG00000204829|CBWD7

GGACAA ENSG00000047578|KIAA0556 ENSG00000051009|C11orf56 ENSG00000101200|AVP ENSG00000102265|TIMP1 ENSG00000105549|THEG ENSG00000106665|CLIP2 ENSG00000108264|TADA2L ENSG00000114982|NP\_060461.3 ENSG00000133985|TTC9 ENSG00000140678|ITGAX ENSG00000163486|SRGAP2 ENSG00000166435|XRR1 ENSG00000167792|NDUFV1 ENSG00000171855|IFN1 ENSG00000178226|PRSS36 ENSG00000180139|Q8N9Z5\_HUMAN ENSG00000183018|SPNS2 ENSG00000185614|C3orf54 ENSG00000187095|LILRA2 ENSG00000197364|S100A7L2 ENSG00000198917|C9orf114 ENSG00000203867|RBM20 ENSG00000205670|C21orf51 ENSG00000109667|SLC2A9 ENSG00000119508|NR4A3 ENSG00000120262|C6orf97 ENSG00000126088|UROD ENSG00000127334|DYRK2 ENSG00000134901|KDELC1 ENSG00000136628|EPRS ENSG00000136869|TLR4 ENSG00000143106|PSMA5 ENSG00000154451|GBP5 ENSG00000162769|FLVCL1\_HUMAN ENSG00000171557|FGG ENSG00000179933|C14orf119 ENSG00000182107|TMEM30B ENSG00000188193|C6orf155 ENSG00000196877|NP\_001018132.2 ENSG00000198156|NP\_001018132.2 ENSG00000203964|Q8NG36\_HUMAN ENSG00000205072|Q6ZR34\_HUMAN

GGACAGA perfect: GGACAA ATTGTC hsa-miR-219 tgATTGTCcaacgcaattct 2 ENSG00000058262|SEC61A1 ENSG00000073008|PVR ENSG00000075240|NP\_055939.1 ENSG00000078902|TOLLIP ENSG00000079313|REXO1 ENSG00000088682|COQ9 ENSG00000100010|MTP18\_HUMAN ENSG00000102313|ITIH5L ENSG00000105643|ARRDC2 ENSG00000106018|VIPR2 ENSG00000106366|SERPINE1 ENSG00000111110|PPM1H ENSG00000111218|PRMT8 ENSG00000111676|ATN1 ENSG00000127054|CPSF3L ENSG00000133216|EPHB2 ENSG00000142627|EPHA2 ENSG00000148300|REXO4 ENSG00000162761|LXMX1A ENSG00000162975|KCNF1 ENSG00000164711|LPAL2 ENSG00000167964|RAB26 ENSG00000167994|RAB31L1 ENSG00000169925|BRD3 ENSG00000169962|TAS1R3 ENSG00000170231|FABP6 ENSG00000173546|CSPG4 ENSG00000174171|Q8TCB4\_HUMAN ENSG00000175206|NPPA ENSG00000179636|C14orf8 ENSG00000179912|R3HDM2 ENSG00000182473|EXOC7 ENSG00000204562|Q6ZU75\_HUMAN ENSG00000024526|DEPDC1 ENSG000000073910|FRY ENSG00000083168|MYST3 ENSG00000101782|RIOK3 ENSG00000109063|MYH3 ENSG00000111850|C6orf162 ENSG00000113356|POLR3G ENSG00000124795|DEK ENSG00000127125|PPCS ENSG00000129515|SNX6 ENSG00000137038|C9orf123 ENSG00000139146|FAM60A ENSG00000144161|ZC3H8 ENSG00000150776|C11orf57 ENSG00000150867|PIP5K2A ENSG00000173391|OLR1 ENSG00000173947|C1orf88 ENSG00000174016|FAM46D ENSG00000178107|Q8N1B8\_HUMAN ENSG00000180777|ANKRD30B ENSG00000185231|MC2R ENSG00000187155|CUO85\_HUMAN ENSG00000196072|BLOC1S2 ENSG00000196553|NP\_00104331.1 ENSG00000196917|GPR81

GGACAGG ENSG00000052344|PRSS8 ENSG00000070444|MNT ENSG00000076351|SLC46A1 ENSG00000096080|MRPS18A ENSG00000099864|PALM ENSG00000100284|TOM1 ENSG00000102359|SRPX2 ENSG00000104976|SNAPC2 ENSG00000112195|TREM1L2 ENSG00000113763|UNC5A ENSG00000117419|PRNP1P ENSG00000129347|NP\_075384.3 ENSG00000139445|FOXN4 ENSG00000157353|FUK ENSG00000159337|PLA2G4D ENSG00000160326|SLC2A6 ENSG00000161526|SAP30BP ENSG00000164626|KCNK5 ENSG00000164729|AMAC1L1 ENSG00000167644|C19orf33 ENSG00000167653|PSCA ENSG00000167807|NP\_001026904.1 ENSG00000168748|CA7 ENSG00000176101|SSNA1 ENSG00000177045|SIX5 ENSG00000181790|BAI1 ENSG00000183837|PNMA3 ENSG00000185065|NP\_776154.2 ENSG00000186638|C9orf48 ENSG00000203888|Q6ZRP6\_HUMAN ENSG00000204359|CFB ENSG00000205031|Q6XYE2\_HUMAN ENSG00000205632|Q6ZVF7\_HUMAN ENSG00000206064|Q6ZU89\_HUMAN ENSG000000064012|CASP8 ENSG00000069966|GNB5 ENSG00000071967|CYBRD1 ENSG00000082068|WDR70 ENSG00000082497|SERTAD4 ENSG00000092978|GPATCH2 ENSG00000101126|ADNP ENSG00000108590|MED31 ENSG00000110075|SAPS3 ENSG00000128692|LOC728350 ENSG00000128791|TWSG1 ENSG00000136451|VEZF1 ENSG00000141497|ZMYND15 ENSG00000145685|LHFPL2 ENSG00000158467|SAH3\_HUMAN ENSG00000161010|NP\_001017987.1 ENSG00000163217|BMP10 ENSG00000164687|FABP5 ENSG00000165682|CLEC1B ENSG00000196975|ANXA4 ENSG00000197301|Q6ZQU9\_HUMAN

GGACAGT perfect: GGACAGG CCTGTCC hsa-miR-339 tcCCTGTCCcaggagctca 2 ENSG00000054523|KIF1B ENSG00000100296|THOC5 ENSG00000103091|WDR59 ENSG00000105048|TNNT1 ENSG00000116990|MYCL1 ENSG00000117148|ACTL8 ENSG00000117362|APH1A ENSG00000132793|LPIN3 ENSG00000137193|PIM1 ENSG00000138867|C22orf13 ENSG00000158747|NLB1 ENSG00000172432|GTPBP2 ENSG00000173898|SPYBN2 ENSG00000175093|SPSB4 ENSG00000176315|Q8N7I9\_HUMAN ENSG00000177302|TOP3A ENSG00000180834|MAP6D1 ENSG00000181016|NP\_872403.1 ENSG00000188091|C9orf164 ENSG00000196743|GM2A ENSG00000197586|ENTPD6 ENSG00000204439|C6orf47 ENSG00000205023|Q6ZSF1\_HUMAN ENSG0000015475|BID ENSG00000047365|CENTD1 ENSG00000078140|HIP2 ENSG00000109919|MTCH2 ENSG00000110075|SAPS3 ENSG00000111196|MGN2\_HUMAN ENSG00000112996|MRPS30 ENSG00000117523|BAT2D1 ENSG00000122691|TWIST1 ENSG00000123572|NRK ENSG00000131828|PDHA1 ENSG00000146039|SLC17A4 ENSG00000158185|ANKRD36 ENSG00000162695|SLC30A7 ENSG00000164144|ARFIP1 ENSG00000165417|GTF2A1 ENSG00000165525|SDCCAG1 ENSG00000166405|RIC3 ENSG00000166986|MARS ENSG00000172115|CYCS ENSG00000176105|YES1 ENSG00000183718|TRIM52 ENSG00000196912|AN36B\_HUMAN ENSG00000198838|RYR3 ENSG00000203742|NP\_001032308.1

GGACATT ENSG00000015592|STMN4 ENSG00000078872|NFS1 ENSG00000092295|TGM1 ENSG00000101361|NOL5A ENSG00000108622|ICAM2 ENSG00000115718|PROC ENSG00000130287|NCAN ENSG00000130748|TMEM160 ENSG00000143376|SNX27 ENSG00000145040|UNC2 ENSG00000156599|ZDHHC5 ENSG00000162910|MRPL55 ENSG00000169247|SH3TC2 ENSG00000173867|MRPL46 ENSG00000175779|NP\_997327.1 ENSG00000183019|C19orf59 ENSG00000126126|Q6ZV82\_HUMAN ENSG000000042088|TDP1 ENSG000000049130|KITLG ENSG00000102452|NALCN ENSG00000104442|ARMC1 ENSG00000110841|PPF1BP1 ENSG00000112499|SLC22A2 ENSG00000116030|SUMO1P3 ENSG00000126950|TMEM35 ENSG00000130349|C6orf203 ENSG00000130779|CLIP1 ENSG00000131620|TMEM16A ENSG00000143207|RFWD2 ENSG00000144407|PTHR2 ENSG00000151239|TWF1 ENSG00000166148|AVP1A ENSG00000167863|ATP5F ENSG00000169594|BNC1 ENSG00000171862|PTENP1 ENSG00000182400|TRAPP6B ENSG00000184258|CDR1 ENSG00000198908|BHLHB9 ENSG00000199808|NME4 ENSG00000103200|NME4 ENSG00000114631|PODXL2 ENSG00000005884|ITGA3 ENSG00000006114|AP1GBP1 ENSG00000069696|BRD4 ENSG00000084207|GSTP1 ENSG00000101489|BRUNOL4 ENSG00000102050|PRAF2 ENSG00000103200|NME4 ENSG00000114631|PODXL2

ENSG00000137507|LRR32 ENSG00000143257|NR1I3 ENSG00000143858|SYT2 ENSG00000144580|RQCD1 ENSG00000162426|SLC45A1 ENSG00000163295|ALPI ENSG00000163485|ADORA1 ENSG00000167371|PRRT2  
ENSG00000169717|ACTR2 ENSG00000178789|CD300LB ENSG00000180471|C9orf31 ENSG00000186594|NP\_116284.2 ENSG00000186910|SERPINA1 ENSG00000197540|GZMM ENSG00000212131|PDXP ENSG00000008197|TFAP2D  
ENSG00000105976|MET ENSG00000106803|SEC61B ENSG00000120437|ACAT2 ENSG00000122705|CLTA ENSG00000122870|BICC1 ENSG00000139572|GPR84 ENSG00000143256|PFDN2 ENSG00000143368|SF3B4  
ENSG00000146648|EGFR ENSG00000154822|PLCL2 ENSG00000163568|AIM2 ENSG00000171806|C1orf156 ENSG00000176635|HORMAD2 ENSG00000182983|ZNF662 ENSG00000183722|LHFP ENSG00000196812|ZSCAN16

perfect: GGACCAA TTGGTCC hsa-miR-133b TTGGTCCccttcaaccagcta 0  
perfect: GGACCAA TTGGTCC hsa-miR-133a TTGGTCCccttcaaccagctgt 0

GGACCAT ENSG00000008130|NADK ENSG00000013016|EHD3 ENSG00000093217|XYLB ENSG00000101079|NDRG3 ENSG00000103184|SEC14L5 ENSG00000105649|RAB3A ENSG00000105669|COPE ENSG00000112164|GLP1R  
ENSG00000115526|CHST10 ENSG00000120049|KCNIP2 ENSG00000120664|LOC646871 ENSG00000125618|PAX8 ENSG00000130054|TMEM28 ENSG00000130147|SH3BP4 ENSG00000147144|CCDC120 ENSG00000160256|C21orf70  
ENSG00000162065|TBC1D24 ENSG00000164605|Q5T810\_HUMAN ENSG00000179094|PER1 ENSG00000196295|Q8N867\_HUMAN ENSG00000196535|MYO18A ENSG00000203747|FCGR3A ENSG00000043093|DCUN1D1 ENSG00000065809|FAM107B  
ENSG00000075407|ZNF37A ENSG00000086712|C1orf15 ENSG00000100796|SMEK1 ENSG00000115386|REGL ENSG00000126838|PZP ENSG00000135686|C16orf44 ENSG00000138386|NAB1 ENSG00000144161|ZC3H8  
ENSG00000144810|COL8A1 ENSG00000145685|LHFP2 ENSG00000151687|ANKAR ENSG00000152222|TTC9C ENSG00000162699|Q96RF1\_HUMAN ENSG00000162747|FCGR3B ENSG00000163762|TM4SF18 ENSG00000170113|NIPAL1  
ENSG00000171147|NP\_001001317.1 ENSG00000183943|PRKX ENSG00000186265|BTLA ENSG00000186409|NP\_001074319.1 ENSG00000188215|DCUN1D3 ENSG00000198846|TOX ENSG00000204427|BAT5\_HUMAN  
GGACCTG ENSG00000051523|CYBA ENSG00000086758|HUWE1 ENSG00000089558|KCNH4 ENSG00000100151|PICK1 ENSG00000100433|KCNK10 ENSG00000102871|TRADD ENSG00000105695|MAG ENSG00000112763|BTN2A1  
ENSG00000122359|ANXA11 ENSG00000124222|NPEPL1 ENSG00000129911|KLF16 ENSG00000131475|VPS25 ENSG00000131899|LLGL1 ENSG00000132249|CCDC35 ENSG00000140939|NOL3 ENSG00000148805|NR\_002934.2  
ENSG00000157368|C16orf77 ENSG00000160326|SLC2A6 ENSG00000164048|ZNF589 ENSG00000164877|MICALL2 ENSG00000165462|PHOX2A ENSG00000168875|SOX14 ENSG00000178199|Q6ZRW2\_HUMAN ENSG00000183837|PNMA3  
ENSG00000184371|CSF1 ENSG00000186423|Q8N9S5\_HUMAN ENSG00000187607|ZNF286A ENSG00000196186|Q71RF5\_HUMAN ENSG00000197070|ARRDC1 ENSG00000197681|TBC1D3 ENSG00000049319|SRD5A2 ENSG00000077809|GTF2I  
ENSG00000101049|SGK2 ENSG00000105483|CARD8 ENSG00000111962|UST ENSG00000113971|ACAD11 ENSG00000118271|TTR ENSG00000124496|TRERF1 ENSG00000137098|SPAG8 ENSG00000146281|ACY1L2  
GGACGAC ENSG00000158985|CDC42SE2 ENSG00000166164|BRD7 ENSG00000167257|RNF214 ENSG00000175691|ZNF77 ENSG00000185290|XR\_016379.1 ENSG00000185630|PBX1 ENSG00000187105|HEATR4  
ENSG00000023191|RNH1 ENSG00000040608|RTN4R ENSG00000055957|ITIH1 ENSG00000066336|SPI1 ENSG00000090238|YPEL3 ENSG00000099284|H2AFY2 ENSG00000104783|KCNN4 ENSG00000105426|PTPRS  
ENSG00000105675|ATP4A ENSG00000107175|CREB3 ENSG00000130731|NP\_001035251.1 ENSG00000136250|AOAH ENSG00000136573|BLK ENSG00000142173|COL6A2 ENSG00000143632|ACTA1 ENSG00000145912|NOLA2  
ENSG00000158055|GRHL3 ENSG00000158292|GPR153 ENSG00000163701|ILL17RE ENSG00000170238|XR\_017738.1 ENSG00000171236|LRG1 ENSG00000179403|VWA1 ENSG00000179943|ZNF579 ENSG00000180929|GPR62  
ENSG00000181240|SLC25A41 ENSG00000182196|ARL6IP4 ENSG00000183066|WBP2NL ENSG00000183963|SMTN ENSG00000186976|DJBP\_HUMAN ENSG00000187051|RPS19BP1 ENSG00000188364|TMSL4 ENSG00000196892|Q9P1D2\_HUMAN  
ENSG00000197152|Q96NB7\_HUMAN ENSG00000198010|DLGAP2 ENSG00000115705|TPO ENSG00000116016|EPAS1 ENSG00000122870|BICC1 ENSG00000129204|USP6 ENSG00000137573|SULF1 ENSG00000138757|G3BP2  
ENSG00000145362|ANK2 ENSG00000147408|CGAT1\_HUMAN ENSG00000149658|YTHDF1 ENSG00000152795|HNRPDL ENSG00000152804|HHEX ENSG00000154556|SORBS2 ENSG00000170370|EMX2 ENSG00000170832|USP32

GGACGGG ENSG00000006432|MAP3K9 ENSG00000012171|SEMA3B ENSG00000017621|MAGIX ENSG00000066735|Q96GK3\_HUMAN ENSG00000071655|MBD3 ENSG00000086544|ITPKC ENSG00000100207|TCF20 ENSG00000105612|DNASE2  
ENSG00000107404|DVL1 ENSG00000113761|ZNF346 ENSG00000128563|PRKRIP1 ENSG00000130193|C8orf55 ENSG00000131759|RARA ENSG00000133475|GGT2 ENSG00000153481|NP\_060680.2 ENSG00000154342|WNT3A  
ENSG00000164970|C9orf25 ENSG00000167657|DAPK3 ENSG00000172264|C20orf133 ENSG00000174177|NP\_001012780.1 ENSG00000175294|CATSPER1 ENSG00000176349|Q8N997\_HUMAN ENSG00000176884|GRIN1 ENSG00000177238|TRIM72  
ENSG00000177595|LRDD ENSG00000178932|Q8N811\_HUMAN ENSG00000179044|EXOC3L ENSG00000183038|LOC728226 ENSG00000183255|PTTG1IP ENSG00000183955|SETD8 ENSG00000185198|PRSSL1 ENSG00000185236|RAB11B  
ENSG00000185681|C9orf18 ENSG00000186185|NP\_001073912.1 ENSG00000197540|GZMM ENSG00000204274|Q6ZSG4\_HUMAN ENSG00000205103|HPR ENSG00000206031|Q6ZT66\_HUMAN ENSG0000005810|MYCBP2 ENSG00000077420|APBB1IP  
ENSG00000087495|PHACTR3 ENSG00000095787|WAC ENSG00000109762|SNX25 ENSG00000119537|FVT1 ENSG00000122194|PLG ENSG00000124788|ATXN1 ENSG00000126226|PCID2 ENSG00000141458|NPC1  
ENSG00000144476|CXCR7 ENSG00000147050|UTX ENSG00000157219|RNF5A ENSG00000157557|ETS2 ENSG00000165071|TMEM71 ENSG00000165527|ARF6 ENSG00000171643|S100Z ENSG00000173013|CCDC96  
ENSG00000175928|LRRN1 ENSG00000177406|Q8N503\_HUMAN ENSG00000177606|JUN ENSG00000181704|YIPF6 ENSG00000196319|Q9H353\_HUMAN ENSG00000196344|ADH7 ENSG00000198670|LPA ENSG00000203707|Q7Z5Z9\_HUMAN

GGACTAC ENSG00000087460|GNAS ENSG00000089159|PXN ENSG00000102970|CCL17 ENSG00000103044|HAS3 ENSG00000105641|SLC5A5 ENSG00000120318|CENTD3 ENSG00000120907|ADRA1A ENSG00000125744|RTN2  
ENSG00000129194|SOX15 ENSG00000140521|POLG ENSG00000157303|SUSD3 ENSG00000157734|SNX22 ENSG00000158089|GALNT14 ENSG00000164620|C5orf16 ENSG00000167757|KLK11 ENSG00000171163|ZNF692  
ENSG00000184459|COPG ENSG00000185361|TNFAIP8L1 ENSG00000204633|ACTN3 ENSG00000105880|DLX5 ENSG00000123600|METTL8 ENSG00000131269|ABC7 ENSG00000132530|NP\_954590.1  
ENSG00000136696|IL1F8 ENSG00000147246|HTR2C ENSG00000148225|WDR31 ENSG00000153914|SFRS12 ENSG00000155761|SPAG17 ENSG00000158373|HIST2H2BA ENSG00000164346|TIP1\_HUMAN ENSG00000164815|ORC5L

GGACTGA ENSG00000005102|MEOX1 ENSG00000007866|TEAD3 ENSG00000069011|PITX1 ENSG00000078246|TULP3 ENSG00000100226|GTPBP1 ENSG00000100376|FAM118A ENSG00000100949|RABGGTA ENSG00000110148|CKBR  
ENSG0000011725|PRKAB1 ENSG00000113073|SLC4A9 ENSG00000117362|APH1A ENSG00000117411|B4GALT2 ENSG00000126602|TRAP1 ENSG00000131236|CAP1 ENSG00000132478|UNK ENSG00000132879|FBXO44  
ENSG00000139178|C1RL ENSG00000141753|IGFBP4 ENSG00000143373|ZNF687 ENSG00000149926|FAMS7B ENSG00000155980|KIF5A ENSG00000165556|CDX2 ENSG00000166401|SERPINB8 ENSG00000166948|TGM6  
ENSG00000175115|PACS1 ENSG00000183826|BTBD9 ENSG00000184014|RAB6IP1 ENSG00000196893|Q8N2W8\_HUMAN ENSG00000197496|SLC2A10 ENSG00000205136|Q3KRG0\_HUMAN ENSG00000204048|UBR2 ENSG00000034533|ASTE1  
ENSG00000072042|RDH11 ENSG00000079387|SENP1 ENSG00000131080|EDA2R ENSG00000133318|RTN3 ENSG00000143185|XCL2 ENSG00000147862|NFIB ENSG00000152454|ZNF256 ENSG00000155329|ZCCHC10  
ENSG00000157554|ERG ENSG00000164604|GPR85 ENSG00000170323|FABP4 ENSG00000171466|ZNF562 ENSG00000179979|CRIPAK ENSG00000185950|IRS2 ENSG00000186834|HEXIM1 ENSG00000188001|FAM79B

GGACTGC ENSG00000072135|PTPN18 ENSG00000092850|TEKT2 ENSG00000106348|IMPDH1 ENSG00000111752|PHC1 ENSG00000114867|EIF4G1 ENSG00000122971|ACADS ENSG00000125741|OPA3 ENSG00000131095|GFAP  
ENSG00000133398|MED10 ENSG00000136689|IL1RN ENSG00000140807|NKD1 ENSG00000142538|TIP39\_HUMAN ENSG00000143340|C1orf76 ENSG00000146232|NFKBIE ENSG00000159352|PSMD4 ENSG00000162461|SLC25A34  
ENSG00000163352|LENEP ENSG00000164711|LPAL2 ENSG00000166289|PLEKHF1 ENSG00000187796|CARD9 ENSG00000204405|Q6ZQV3\_HUMAN ENSG00000205592|MUC19 ENSG00000074319|TSG101  
ENSG00000088986|DYNLL1 ENSG00000100418|NP\_056519.1 ENSG00000101928|MOSPD1 ENSG00000114098|ARMC8 ENSG00000121897|LIAS ENSG00000122634|GTF3A ENSG00000122674|C7orf28A ENSG00000124491|F13A1  
ENSG00000124496|TRERF1 ENSG00000128294|TPST2 ENSG00000134259|NGFB ENSG00000137261|KIAA0319 ENSG00000137547|MRPL15 ENSG00000138193|PLCE1 ENSG00000143882|ATP6V1C2 ENSG00000146574|C7orf28B  
ENSG00000148426|C10orf47 ENSG00000167346|MMP26 ENSG00000184226|PCDH9 ENSG00000198276|UCKL1 ENSG00000103066|LYPLA3 ENSG00000112599|GUCA1B ENSG00000121083|DYNLL2 ENSG00000125149|C16orf70 ENSG00000132819|BMB38  
GGACTGT ENSG00000007314|SCN4A ENSG00000041880|PARP3 ENSG00000041880|PARP3 ENSG00000103066|LYPLA3 ENSG00000112599|GUCA1B ENSG00000121083|DYNLL2 ENSG00000125149|C16orf70 ENSG00000132819|BMB38  
ENSG00000135956|TMEM127 ENSG00000146221|NP\_872345.1 ENSG00000158008|EXTL1 ENSG00000162302|RPS6KA4 ENSG00000165802|NELF ENSG00000167470|MIND ENSG00000170100|Q96MU6-2 ENSG00000173991|TCAP  
ENSG00000176130|P2RY11 ENSG00000182173|TSEN54 ENSG00000183386|FHL3 ENSG00000185960|SHOX ENSG00000186318|BACE1 ENSG00000187595|NP\_001013646.1 ENSG00000198598|MMP17 ENSG00000204527|DUXA  
ENSG00000070669|ASNS ENSG00000101343|CRNKL1 ENSG00000113456|RAD1 ENSG00000119139|TJP2 ENSG00000131586|MRPL20 ENSG00000135823|STX6 ENSG00000142615|ELA2A\_HUMAN ENSG00000145337|PIGY  
ENSG00000152413|HOMER1 ENSG00000154305|MIA3 ENSG00000162613|FUBP1 ENSG00000163029|SMC6 ENSG00000163697|APBB2 ENSG00000164294|NP\_001008398.1 ENSG00000173209|AHS2 ENSG00000173705|SUSD5  
GGACTTA ENSG00000064961|HMG20B ENSG00000075702|WDR62 ENSG00000078246|TULP3 ENSG00000132716|WDR42A ENSG00000149657|LSM14B ENSG00000160606|TLCD1 ENSG00000164048|ZNF589 ENSG00000166091|CMTM5  
ENSG00000168286|THAP11 ENSG00000171490|RSL1D1 ENSG00000175202|HIGD2BP ENSG00000184164|CRELD2 ENSG00000204269|Q6ZVM2\_HUMAN ENSG00000223909|GCLM ENSG00000058673|ZC3H11A ENSG00000072319|ALG13  
ENSG00000092871|RFFL ENSG00000104064|GABPB2 ENSG00000109689|TIM2 ENSG00000111880|NGR1 ENSG00000114857|NKTR ENSG00000124214|STAU1 ENSG00000131495|NDUFA2 ENSG00000134759|ELP2  
ENSG00000135374|ELF5 ENSG00000135413|LACRT ENSG00000139132|FGD4 ENSG00000141946|ZIM3 ENSG00000151092|NGLY1 ENSG00000157426|NP\_861522.2 ENSG00000159086|C21orf66 ENSG00000159267|HLCS  
ENSG00000162434|JAK1 ENSG00000165525|SDCCAG1 ENSG00000167346|MMP26 ENSG00000170044|ZPLD1 ENSG00000171867|PRNP ENSG00000173660|UQCRLH ENSG00000180354|C7orf41 ENSG00000188644|XR\_016028.1  
ENSG00000197121|PGAP1\_HUMAN

GGAGAAA ENSG00000005379|BZRAP1 ENSG00000069188|SDK2 ENSG00000102445|C13orf18 ENSG00000111424|VDR ENSG00000113048|MRPS27 ENSG00000118707|TGIF2 ENSG00000120087|HOXB7 ENSG00000133874|RNF122  
ENSG00000135248|NP\_115988.1 ENSG00000135469|COQ10A ENSG00000138166|DUSP5 ENSG00000138347|MYPN ENSG00000143811|PYCR2 ENSG00000144231|POLR2D ENSG00000145063|NM\_182586 ENSG00000145920|CPLX2  
ENSG00000147118|ZNF182 ENSG00000148841|KIAA1754 ENSG00000160305|DIP2A ENSG00000162728|KCNJ9 ENSG00000163064|EN1 ENSG00000165810|BTNL9 ENSG00000172232|AZU1 ENSG00000175699|C14orf48  
ENSG00000178006|XR\_018006.1 ENSG00000180929|GPR62 ENSG00000181563|C1orf211 ENSG00000183172|C22orf32 ENSG00000188984|AADACL3 ENSG00000198216|CACNA1E ENSG00000203697|CAPN8 ENSG00000018869|ZNF582  
ENSG00000105939|ZC3HAV1 ENSG00000114062|UBE3A ENSG00000128891|CCDC32 ENSG00000135678|CPM ENSG00000140941|MAP1LC3B ENSG00000147121|ZNF673 ENSG00000147853|AK3 ENSG00000152443|ZNF776  
ENSG00000158185|ANKRD36 ENSG00000162526|TSSK3 ENSG00000162813|BPNT1 ENSG00000162843|WDR64 ENSG00000163424|C3orf33 ENSG00000167383|ZNF229 ENSG00000167618|LAIR2 ENSG00000168129|DHFRP1  
ENSG00000173726|TOMM20 ENSG00000187955|COL14A1 ENSG00000196912|AN36B\_HUMAN ENSG00000196946|ZNF705A ENSG00000204201|Q49A4\_HUMAN

GGAGCAA ENSG00000079782|GPX5 ENSG00000092929|UNC13D ENSG00000100167|SEPT3 ENSG00000112619|PRPH2 ENSG00000123643|SLC36A1 ENSG00000124444|ZNF576 ENSG00000128266|GNAZ ENSG00000137074|APTJ  
ENSG00000139540|SLC39A5 ENSG00000143127|ITGA10 ENSG00000149575|SCN2B ENSG00000151117|TMEM86A ENSG00000157916|RER1 ENSG00000157978|LDLRAP1 ENSG00000158773|USF1 ENSG00000162377|C1orf163  
ENSG00000164325|TMEM174 ENSG00000169184|NM\_002430.2 ENSG00000170689|HOXB9 ENSG00000179240|Q3ZCU0\_HUMAN ENSG00000196959|CES1 ENSG00000198848|NR\_003276.1 ENSG00000047410|TPR ENSG00000101115|SALL4  
ENSG00000112667|C6orf108 ENSG00000117152|RGS4 ENSG00000122778|Q9HCM3\_HUMAN ENSG00000133908|TSSK4 ENSG00000144891|AGTR1 ENSG00000144959|AADACL1 ENSG00000150637|CD226 ENSG00000151327|C14orf24  
ENSG00000154305|MIA3 ENSG00000159186|ATP50 ENSG00000162642|C1orf52 ENSG00000163430|FSTL1 ENSG00000163606|CD200R1 ENSG00000165646|SLC18A2 ENSG00000166130|NP\_710154.1 ENSG00000177414|UBE2U  
GGAGCAT ENSG00000177463|NR2C2 ENSG00000187554|TLR5 ENSG00000188580|TCBA1 ENSG00000197953|AADACL2 ENSG00000198099|ADH4 ENSG00000198826|ARHGAP11A ENSG00000205171|Q6PDB3\_HUMAN  
ENSG00000007866|TEAD3 ENSG00000025770|NCAPH2 ENSG00000028310|BRD9 ENSG00000070614|NDST1 ENSG00000088808|PPP1R13B ENSG00000100599|RIN3 ENSG00000100605|ITPK1 ENSG00000104901|DKK1  
ENSG00000117394|SLC2A1 ENSG00000122711|SPINK4 ENSG00000124232|BRPJL ENSG00000127191|TRAF2 ENSG00000129749|CHRNA10 ENSG00000132323|LKAP ENSG00000132323|LKAP ENSG00000140688|C16orf58 ENSG00000147402|GABRG1  
ENSG00000148297|SURF5 ENSG00000151079|KCNAB6 ENSG00000154133|ROBO4 ENSG00000156381|ANKRD9 ENSG00000158483|FAM86C ENSG00000160172|Q8IWI37\_HUMAN ENSG00000163157|TMOD4 ENSG00000163612|XR\_017899.1  
ENSG00000167693|NXN ENSG00000171084|LOC645332 ENSG00000172061|LRRRC15 ENSG00000176884|GRIN1 ENSG00000177000|MTHFR ENSG00000183668|MAGEA5 ENSG00000185504|C17orf70 ENSG00000196844|C11orf38  
ENSG00000204005|Q6ZP22\_HUMAN ENSG00000205646|Q96GL5\_HUMAN ENSG00000032514|PGBD3 ENSG00000114956|DGUOK ENSG00000117153|KLHL12 ENSG00000132334|PTPRF ENSG00000134709|HOOK1 ENSG00000144218|AFF3  
ENSG00000149212|SESN3 ENSG00000154655|L3MBTL4 ENSG00000171819|ANGPTL7 ENSG00000184432|COPB2 ENSG00000196954|CASP4  
GGAGCAT ENSG00000072840|EVC ENSG00000100242|UNC119B ENSG00000106665|CLIP2 ENSG00000117448|AKR1A1 ENSG00000117481|NSUN4 ENSG00000120664|LOC646871 ENSG00000122367|LDB3 ENSG00000125388|GRK4  
ENSG00000130540|SULT4A1 ENSG00000133195|SLC39A11 ENSG00000161055|SCGB3A1 ENSG00000163898|LIPH ENSG00000164651|SP8 ENSG00000168398|BDKRB2 ENSG00000170464|DNAJC18 ENSG00000176248|ANAPC2  
ENSG00000177875|NP\_001013657.2 ENSG00000182852|C21orf121 ENSG00000055044|NOP5\_HUMAN ENSG00000113263|ITK ENSG00000120705|ETP1 ENSG00000125482|TTF1 ENSG00000125812|GZF1 ENSG00000134970|TICAM2  
ENSG00000136206|WBSR19 ENSG00000137473|TTC29 ENSG00000143995|MEIS1 ENSG00000147138|GPR174 ENSG00000156709|AIFM1 ENSG00000157230|LOC728132 ENSG00000162613|FUBP1 ENSG00000164604|GPR85  
ENSG00000168692|TSPY1\_HUMAN ENSG00000168775|TSPY1 ENSG00000170113|NIPAL1 ENSG00000170606|HSPA4 ENSG00000170871|K0232\_HUMAN ENSG00000174574|C1orf108 ENSG00000176988|FMR1NB ENSG00000185912|TSPY1\_HUMAN  
ENSG00000186908|ZDHHC17 ENSG00000186656|LOC728403 ENSG00000189136|NM\_207382 ENSG00000189212|DPY19L2P1 ENSG00000205323|HCC1\_HUMAN ENSG00000205505|NP\_001027561.1 ENSG00000205506|NP\_001027561.1 ENSG00000205508|NP\_001018856.1  
ENSG00000205509|NP\_001027561.1 ENSG00000205580|NP\_001027561.1 ENSG00000206184|XR\_016233.1

GGAGCCC ENSG00000003249|DBNDD1 ENSG00000078900|TP73 ENSG00000106404|CLDN15 ENSG00000106991|ENG ENSG00000107140|TESK1 ENSG00000107147|KCNT1 ENSG00000107882|SUFU ENSG00000108292|MLLT6  
ENSG00000108405|P2RX1 ENSG00000108509|CAMTA2 ENSG00000108557|RAI1 ENSG00000109089|CDRL2 ENSG00000115266|APC2 ENSG00000123815|ADCK4 ENSG00000124602|UNC5CL ENSG00000128709|HOXD9  
ENSG00000141873|SLC39A3 ENSG00000148335|C9orf32 ENSG00000153404|NP\_443141.2 ENSG00000160783|BGLAP ENSG00000160932|LY6E ENSG00000161847|RAVER1 ENSG00000164638|SLC29A4 ENSG00000164729|AMAC1L1  
ENSG00000165424|C10orf56 ENSG00000165688|PMPCA ENSG00000167701|GPT ENSG00000168067|MAP4K2 ENSG00000172890|NADSYN1 ENSG00000173218|VANGL1 ENSG00000177133|Q6ZV91\_HUMAN ENSG00000178531|CTXN1  
ENSG00000181409|AATK ENSG00000183484|GPR132 ENSG00000183637|C21orf30 ENSG00000185340|GASL2L1 ENSG00000186635|STARD10 ENSG00000188807|NP\_001108666.1 ENSG00000205356|NP\_056210.1 ENSG000000067177|PHKA1  
ENSG00000071575|TRIB2 ENSG00000074706|NP\_056368.1 ENSG00000102595|UGCG2L ENSG00000107959|PITRMI1 ENSG00000111229|ARPC3 ENSG00000131266|HEX1 ENSG00000143776|CDC42BPA ENSG00000144010|LOC653192  
ENSG00000144015|TRIM43 ENSG00000149273|RFS3 ENSG00000150510|FAM124A ENSG00000153363|C1orf97 ENSG00000156697|UTP14A ENSG00000167315|ACAA2 ENSG00000168672|FAM84B ENSG00000170500|LONRF2  
ENSG00000187772|LIN28B ENSG00000197801|Q8TEB0\_HUMAN ENSG00000203778|NP\_001028736.1  
GGAGCCT ENSG00000004059|ARF5 ENSG00000007314|SCN4A ENSG00000011009|LYPLA2 ENSG00000074317|SNCB ENSG00000089159|PXN ENSG00000100151|PICK1 ENSG00000106991|ENG ENSG00000114853|ZBTB47  
ENSG00000125804|C20orf91 ENSG00000133619|KRBA1 ENSG00000141756|FKBP10 ENSG00000143547|Q5VUQ9\_HUMAN ENSG00000146063|TRIM41 ENSG00000154358|OBSCN ENSG00000164082|GRM2 ENSG00000169668|NP\_997357.1  
ENSG00000181763|APR2\_HUMAN ENSG00000184246|Q96PW8\_HUMAN ENSG00000196358|NTNG2 ENSG00000196893|Q8N2W8\_HUMAN ENSG00000206172|HBA1 ENSG000002081052|COL4A4 ENSG00000100902|PSMA6 ENSG00000101384|JAG1  
ENSG00000105983|LMBR1 ENSG00000111799|COL12A1 ENSG00000116497|S100BPB ENSG00000120217|CD274 ENSG00000122786|CALD1 ENSG00000131126|HXB101 ENSG00000140525|KIAA1794 ENSG00000144406|Q96S80\_HUMAN  
ENSG00000145246|ATP10D ENSG00000155329|ZCCHC10 ENSG00000158481|CD1C ENSG00000160856|FCRL3 ENSG00000174500|GCET2 ENSG00000175646|PRM1 ENSG00000196946|ZNF705A ENSG00000197817|Q9UHS9\_HUMAN  
ENSG00000198944|ANKRD43  
GGAGCGA ENSG000000011590|ZBTB32 ENSG00000093072|CECR1 ENSG00000104903|LYL1 ENSG00000115257|PCSK4 ENSG00000125618|PAX8 ENSG00000126258|FXYP1 ENSG00000129038|LOXL1 ENSG00000135116|HRK  
ENSG00000138696|BMPR1B ENSG00000140505|CYP1A2 ENSG00000142233|NP\_665806.1 ENSG00000154764|WNT7A ENSG00000165390|ANXA8 ENSG00000166856|ADMIR ENSG00000169026|MFSD7 ENSG00000170955|PRKCDDBP  
ENSG00000180758|GRP157 ENSG00000183569|SERHL ENSG00000184825|HIST1H2AH ENSG00000186807|ANXA8L2 ENSG00000187186|CCL27 ENSG00000188783|PRELP ENSG00000196976|LAGE3 ENSG00000197308|NP\_997306.1  
ENSG00000204303|Q6ZVW4\_HUMAN ENSG00000204434|NP\_001017421.1 ENSG00000204498|NFKBLL1 ENSG00000049247|UTS2 ENSG00000075413|MARK3 ENSG000000091972|CD200 ENSG00000100731|PCNX ENSG00000101230|C20orf82  
ENSG00000102931|ARL2BP ENSG00000103381|NP\_06810.1 ENSG00000111837|MAK ENSG00000115738|ID2 ENSG00000122034|GTF3A ENSG00000122741|WDR32 ENSG00000131238|PPT1 ENSG00000144935|TRPC1  
ENSG00000146373|IBRDC1 ENSG00000163599|CTLA4 ENSG00000163950|SLBP ENSG00000164190|NIPBL ENSG00000169762|TAPT1 ENSG00000169967|MAP3K2 ENSG00000170558|CDH2 ENSG00000177917|ARL6IP6  
ENSG00000180869|C1orf180 ENSG00000183337|BCOR ENSG00000184492|FOXD4 ENSG00000188085|NP\_997320.1 ENSG00000196442|ZNF432 ENSG00000205740|Q6ZVW4\_HUMAN  
ENSG00000007129|CEACAM21 ENSG00000007384|RHBD1 ENSG00000007842|ATP2B3 ENSG00000115596|WNT6 ENSG00000117691|NENF ENSG00000125735|TNFSF14 ENSG00000126351|THRA  
ENSG00000130313|PGLS ENSG00000138326|RPS24 ENSG00000140955|NP\_631913.2 ENSG00000143537|ADAM15 ENSG00000147570|DNAJC5B ENSG00000149115|TNKS1BP1 ENSG00000151006|Q6ZVW4\_HUMAN ENSG00000156411|C1orf2  
ENSG00000164713|BRI3 ENSG00000166667|NP\_001026789.1 ENSG00000168061|SAC3D1 ENSG00000169093|ASMTL ENSG00000169122|FAM110B ENSG00000171236|LRG1 ENSG00000176194|CIDEA ENSG00000178241|Q9P0D4\_HUMAN  
ENSG00000179058|C9orf50 ENSG00000204934|NP\_001008745.1 ENSG00000205238|NP\_001026789.1 ENSG00000007168|PFAFH1B1 ENSG00000050730|TNIP3 ENSG00000073578|SDHALP2 ENSG00000081177|EXDL2  
ENSG00000115738|ID2 ENSG00000115806|GORASP2 ENSG00000128272|ATF4 ENSG00000129596|CDO1 ENSG00000132970|WASF3 ENSG00000136478|TEX2 ENSG00000145781|COMMD10 ENSG00000147679|C8orf53  
ENSG00000150459|SAP18 ENSG00000152952|PLOC2 ENSG00000154640|BTG3 ENSG00000154655|L3MBTL4 ENSG00000164035|EMCN ENSG00000164828|UNC84A ENSG00000165061|ZMAT4  
ENSG00000166750|SLFN5 ENSG00000169902|TPST1 ENSG00000180138|CSNK1A1L ENSG00000185737|NRG3 ENSG00000196214|ZNF766 ENSG00000198741|Q8N9C2\_HUMAN ENSG00000204680|Q5VYG3\_HUMAN  
GGAGTGG ENSG00000008735|MAPK8IP2 ENSG00000079337|RAPGEF3 ENSG00000099364|FBXL19 ENSG00000101204|CHRNA4 ENSG00000101246|ARFRP1 ENSG00000104140|RHOF ENSG00000110514|MADD ENSG00000116133|DHCR24  
ENSG00000121671|CRY2 ENSG00000122679|RAMP3 ENSG00000111780|15E2\_HUMAN ENSG00000133056|PIK3CB2 ENSG00000134030|KIAA0427 ENSG00000141867|BRD4 ENSG00000145911|N4BP3\_HUMAN ENSG00000160094|ZNF362  
ENSG00000160226|C21orf2 ENSG00000166924|NP\_775835.2 ENSG00000167700|MFSD3 ENSG00000168890|TMEM150 ENSG00000171773|TXNL6 ENSG00000177098|SCN4B ENSG00000177951|BET1L ENSG00000182087|C19orf6  
ENSG00000183971|NFW ENSG00000186716|BCR ENSG00000196517|SLC6A9 ENSG00000204017|Q6ZVW4\_HUMAN ENSG00000205103|HPR ENSG000000067334|DNTTIP2 ENSG000000078018|MAP2 ENSG000000079215|SLC1A3  
ENSG00000100354|TNRC6B ENSG00000110063|DCPS ENSG00000118965|WDR34 ENSG00000125814|NAPB ENSG00000133238|HRASL2 ENSG00000149124|GLYAT ENSG00000154144|TBGR1 ENSG00000160199|PKNOX1  
ENSG00000164744|SUNC1 ENSG00000172340|SULCLG2 ENSG00000173473|SMARCC1 ENSG00000175874|CREG2  
GGATAAA ENSG00000023902|CHDH ENSG00000074219|TEAD2 ENSG00000092067|CEBPE ENSG00000112473|SLC39A7 ENSG00000129295|LRRC6 ENSG00000149262|INTS4 ENSG00000155367|PPM1J  
ENSG00000163833|FBXO40 ENSG00000164729|AMAC1L1 ENSG00000166143|PPP1R14D ENSG00000167112|TRUB2 ENSG00000167723|TRPV3 ENSG00000168569|NP\_001073970.1 ENSG00000178947|Q86V52\_HUMAN ENSG00000179082|C9orf106  
ENSG00000179950|NP\_055096.2 ENSG00000183488|AMAC1L3 ENSG00000188525|NM\_207480 ENSG00000196263|ZNF471 ENSG00000204550|LOC388564 ENSG0000013503|POLR3B ENSG00000078114|NEBL ENSG00000091127|PUS7  
ENSG00000105483|CARD8 ENSG00000109133|TMEM33 ENSG00000111780|15E2\_HUMAN ENSG00000113407|TARS ENSG00000114331|CENTB2 ENSG00000119048|UBE2B ENSG00000121578|B4GALT4 ENSG00000121741|ZMYM2  
ENSG00000123106|CCDC91 ENSG00000123219|CENPK ENSG00000123572|NRK ENSG00000126814|TRMT5 ENSG00000136051|KIAA1033 ENSG00000136273|HUS1\_HUMAN ENSG00000136813|KIAA0368 ENSG00000146856|AGBL3  
ENSG00000151422|FER ENSG00000152455|SUV39H2 ENSG00000160199|PKNOX1 ENSG00000180008|SOCS4 ENSG00000189127|NP\_001004441.1 ENSG00000197345|MRPL21 ENSG00000204800|Q96HX1\_HUMAN ENSG00000204812|Q96HX1\_HUMAN  
GGATAAT ENSG00000022556|NLRP2 ENSG00000055118|KCNH2 ENSG00000057935|MTA3 ENSG00000088826|SMOX ENSG00000103269|RHBDL1 ENSG00000105393|NP\_001028721.1 ENSG00000108592|FTSJ3 ENSG00000110887|DAO  
ENSG00000117242|DOST ENSG00000122543|ONCO\_HUMAN ENSG00000123338|NCKAP1L ENSG00000123685|NP\_061134.1 ENSG00000125975|C20orf173 ENSG00000131188|PRR7 ENSG00000135175|OCM ENSG00000141101|NOB1  
ENSG00000143333|RGS16 ENSG00000146755|TRIM50 ENSG00000148290|SURF1 ENSG00000161583|TBC1D3G ENSG00000163216|SPRR2F ENSG00000163239|TDRD10 ENSG00000167634|NLRP7 ENSG00000169118|CSNK1G1  
ENSG00000174115|TBCD3\_HUMAN ENSG00000176393|RNPEP ENSG00000180861|C12orf36 ENSG00000181817|LSM10 ENSG00000184674|GSTT1 ENSG00000185128|LOC729873 ENSG00000188849|LOC729837 ENSG00000189309|TBC1D3B  
ENSG00000203785|SPRR2E ENSG00000204713|TRIM27 ENSG00000205019|TBC1D3C ENSG00000083720|OXCT1 ENSG00000090376|IRAK3 ENSG00000103769|RAB11A ENSG00000111897|SERINC1 ENSG00000115504|EHHBP1  
ENSG00000120526|NUDCD1 ENSG00000132196|HSD17B7 ENSG00000135297|MT01 ENSG00000142188|TMEM50B ENSG00000152779|SLC16A12 ENSG00000153237|NP\_620158.2 ENSG00000163466|ARPC2 ENSG00000164645|NP\_689919.1  
ENSG00000165322|ARHGAP12 ENSG00000165959|CLMN ENSG00000169340|NP\_777584.1 ENSG00000170522|ELOVL6 ENSG00000170714|FAM19A5 ENSG00000171262|FAM98B ENSG00000172006|ZNF554 ENSG00000188206|Q5R14\_HUMAN  
ENSG00000198393|ZNF26  
GGATACT ENSG00000099994|SUSD2 ENSG00000099999|RNF215 ENSG00000101417|PXMP4 ENSG00000102078|SLC25A14 ENSG00000105053|VRK3 ENSG00000108759|KRT32 ENSG00000111665|CDCA3 ENSG00000115596|WNT6  
ENSG00000130758|MAP3K10 ENSG00000132004|FBXW9 ENSG00000133149|TEX13A ENSG00000142347|MYO1F ENSG00000162105|SHANK2 ENSG00000163344|PMV ENSG00000169474|SPRR1A ENSG00000175309|AGXT2L2  
ENSG00000183605|SFXN4 ENSG00000187180|LCE2C ENSG00000047662|Q9ULE4\_HUMAN ENSG00000066379|ZNRD1 ENSG00000111863|C6orf105 ENSG00000112245|PTP4A1 ENSG00000118197|DDX59 ENSG00000131351|NP\_219485.1  
ENSG00000132703|APCS ENSG00000133124|IRS4 ENSG00000145321|GC ENSG00000147853|AK3 ENSG00000149212|SESN3 ENSG00000163797|MRPL33 ENSG00000165029|ABCA1 ENSG00000165349|SLC7A3  
ENSG00000170949|ZNF160 ENSG00000172915|NBEA ENSG00000185842|Q4VXG5\_HUMAN  
GGATATG ENSG000000066125|AP2B1 ENSG000000011677|GABRA3 ENSG00000057704|TMCC3 ENSG00000068831|RASGRP2 ENSG00000102890|ELMO3 ENSG00000107175|CREB3 ENSG00000122711|SPINK4 ENSG00000137817|PARP6  
ENSG00000143575|HAX1 ENSG00000148602|LRRC21 ENSG00000156486|KCNK2 ENSG00000163394|CKCAR ENSG00000179943|MAMDC4 ENSG00000179766|Q4G129\_HUMAN ENSG00000180229|NP\_001019853.1 ENSG00000204479|PRAMEF17  
ENSG00000204488|PRAMEF16 ENSG00000204498|NFKBIL1 ENSG00000206551|Q6ZT99\_HUMAN ENSG00000006704|GTF2IRD1 ENSG00000058729|RIOK2 ENSG00000089876|DHX32 ENSG00000102024|PLS3 ENSG00000106686|C9orf68  
ENSG00000106701|FSD1L ENSG00000108733|PEX12 ENSG00000113141|IK ENSG00000113263|ITK ENSG00000115295|CLIP4 ENSG00000117477|C1orf114 ENSG00000124333|SYBL1 ENSG00000132313|MRPL35  
ENSG00000147655|RSPO2 ENSG00000170495|Q6ZNE6\_HUMAN ENSG00000173517|SG269\_HUMAN ENSG00000175885|ZNF611 ENSG00000176273|TMEM20 ENSG00000178217|SH2D4B ENSG00000179941|BBS10 ENSG00000203729|C1orf120  
GGATATT ENSG00000034510|TMSB10 ENSG00000072501|SMC1A ENSG00000086062|B4GALT1 ENSG00000108387|SEPT4 ENSG00000130147|SH3BP4 ENSG00000130313|PGLS ENSG00000142149|HUNK ENSG00000146083|RNF44  
ENSG00000153395|AYTL2 ENSG00000158987|RAPGEF6 ENSG00000162231|NKF1 ENSG00000167619|TMEM145 ENSG00000174939|ASPHD1 ENSG00000188249|XR\_019050.1 ENSG00000198668|CALM1 ENSG00000198742|SMURF1  
ENSG00000204303|Q6ZVW4\_HUMAN ENSG000000038295|TLL1 ENSG000000091409|ITGA6 ENSG00000102738|MRPS31 ENSG00000107165|TYRPI1 ENSG00000108733|PEX12 ENSG00000113583|C5orf15 ENSG00000115839|RAB3GAP1  
ENSG00000117289|TXNIP ENSG00000117528|ABCD3 ENSG00000118434|SPACA1 ENSG00000119523|ALG2 ENSG00000124092|CTCFL ENSG00000134852|CLOCK ENSG000001339970|RTN1 ENSG00000140015|KCNH5  
ENSG00000145715|RSA1 ENSG00000148942|SLC5A12 ENSG00000151883|PARP8 ENSG00000151914|DST ENSG00000164296|TIGD6 ENSG00000165502|RPL36AL ENSG00000166250|NP\_079045.1 ENSG00000168384|HLA-DPA1  
ENSG00000175928|LRRN1 ENSG00000178935|ZNF552 ENSG00000179295|PTPN11 ENSG00000180398|MCFD2 ENSG00000183423|NP\_940908.1 ENSG00000184258|CDR1 ENSG00000187474|FPRL2 ENSG00000197585|Q5JV89\_HUMAN  
ENSG00000198511|Q8N9A9\_HUMAN  
GGATCGA ENSG00000007129|CEACAM21 ENSG00000084112|SSH1 ENSG00000088992|TESC ENSG00000101222|C20orf28 ENSG00000103326|SOLH ENSG00000105066|FIZ1 ENSG00000110721|CHKA ENSG00000121454|LHX4  
ENSG00000124557|BTN1A1 ENSG00000125741|OPA3 ENSG00000125798|FOXA2 ENSG00000127528|KLF2 ENSG00000130433|CACNG6 ENSG00000132694|ARHGEF11 ENSG00000136327|NKX2-8 ENSG00000137124|ALDH1B1  
ENSG00000140092|FBLN5 ENSG00000140254|DUOXA1 ENSG00000141985|SH3GL1 ENSG00000151445|C14orf133 ENSG00000153944|MSI2 ENSG00000167565|SERTAD3 ENSG00000167664|TMIGD2 ENSG00000171124|FUT3  
ENSG00000171450|CDK5R2 ENSG00000172232|AZU1 ENSG00000179922|ZNF784 ENSG00000182240|BACE2 ENSG00000183643|C15orf32 ENSG00000198012|XR\_017841.1 ENSG00000204048|Q6ZUG3\_HUMAN ENSG00000204499|Q6P6C6\_HUMAN  
ENSG00000004948|CALCR ENSG000000012048|BRCA1 ENSG000000015171|ZMYND11 ENSG000000034677|RNF19 ENSG000000049247|UTS2 ENSG000000074266|EED ENSG00000102743|SLC25A15 ENSG00000106034|NP\_079189.3  
ENSG00000109381|ELF2 ENSG00000112297|AIM1 ENSG00000117595|IRF6 ENSG00000119636|C14orf45 ENSG00000120262|C6orf97 ENSG00000120594|PLXDC2 ENSG00000133121|STARD13 ENSG00000135999|EPC2  
ENSG00000139344|AMDHD1 ENSG00000141655|TNFRSF11A ENSG00000162702|ZNF281 ENSG00000165521|EML5 ENSG00000165934|CPSF2 ENSG00000166889|NP\_689929.1 ENSG00000168944|CCDC100 ENSG00000174226|NP\_689841.2  
ENSG00000188916|NP\_001034851.1  
GGATCGC ENSG00000074842|C19orf10 ENSG00000087008|ACOX3 ENSG00000113196|HAND1 ENSG00000116670|MAD2L2 ENSG00000119919|NKX2-3 ENSG00000124074|C16orf48 ENSG00000130177|CDC16 ENSG00000130312|MRPL34  
ENSG00000132655|HPBP1\_HUMAN ENSG00000141576|RNF157 ENSG00000145920|CPLX2 ENSG00000149599|C20orf57 ENSG00000160650|Q96H20\_HUMAN ENSG00000164438|TLX3 ENSG00000167634|NLRP7 ENSG00000176078|Q8NAN4\_HUMAN  
ENSG00000177133|Q6ZV91\_HUMAN ENSG00000177192|PUS1 ENSG00000179168|GGN ENSG00000179364|PACS2 ENSG00000183643|C15orf32 ENSG00000196972|Q86V52\_HUMAN ENSG00000198293|Q96HM8\_HUMAN ENSG00000204620|Q6ZPC8\_HUMAN  
ENSG00000204805|FAM27E3 ENSG00000204807|FAM27E2 ENSG00000205313|FAM106A ENSG00000205610|Q4G105\_HUMAN ENSG000000064652|SNX24 ENSG00000087995|METTL2A ENSG00000095794|CREM ENSG00000102935|ZNF423  
ENSG00000104369|JPH1 ENSG00000106069|CHN2 ENSG00000107201|DDX58 ENSG00000113282|CLINT1 ENSG00000114416|FXR1 ENSG00000114529|C3orf52 ENSG00000117602|DSCR1L2 ENSG00000119541|VPS4B  
ENSG00000122786|CALD1 ENSG00000123728|RAP2C ENSG00000137273|FOXF2 ENSG00000145817|YIPF5 ENSG00000146038|DCDC2 ENSG00000151552|QDPR ENSG00000151690|NP\_060164.3 ENSG00000152213|ARL11  
ENSG00000158164|TMSL8 ENSG00000165168|CYBB ENSG00000165660|KIAA0157 ENSG00000169519|METT5D1 ENSG00000188001|FAM79B  
GGATCTG ENSG00000005001|PRBP1 ENSG00000071655|MBD3 ENSG00000088832|FKBP1A ENSG00000100994|PYGB ENSG00000114739|ACVR2B ENSG00000119689|DLST ENSG00000121764|HCRTR1  
ENSG00000124194|GDAP1L1 ENSG00000131095|GFAP ENSG00000136297|CYP2S1 ENSG00000136574|GATA4 ENSG00000137216|TMEM63B ENSG00000140526|ABHD2 ENSG00000142544|ATPBD3 ENSG00000156639|ZFAND3  
ENSG00000159166|LAD1 ENSG00000164048|ZNF589 ENSG00000169627|BOLA2B ENSG00000170613|FAM71B ENSG00000177762|C5orf27 ENSG00000182575|NXP3 ENSG00000183888|C1orf64  
ENSG00000184060|CENTA2 ENSG00000185933|FAM26C ENSG00000186868|MAPT ENSG00000189430|NCR1 ENSG00000198225|Q5VVH2\_HUMAN ENSG00000204439|C6orf47 ENSG00000204640|NMS ENSG00000005483|MLL5  
ENSG00000076554|TPD52 ENSG00000119401|TRIM32 ENSG00000120337|TNFSF18 ENSG00000139160|NP\_776163.1 ENSG00000146411|SLC2A12 ENSG00000149658|YTHDF1 ENSG00000150712|MTMR12 ENSG00000154645|CHODL  
ENSG00000158125|XDH ENSG00000158985|CDC42SE2 ENSG00000180938|ZNF572 ENSG00000188215|DCUN1D3 ENSG00000189350|NP\_954974.2  
GGATGAC ENSG00000008283|CYB5F1 ENSG00000016391|CHDH ENSG00000092094|OSGEP ENSG00000095539|SEMA4G ENSG00000103485|QPRT ENSG00000105664|COMP ENSG00000107745|CBARA1 ENSG00000114982|NP\_060461.3  
ENSG00000128191|DGCR8 ENSG00000132824|SERINC3 ENSG00000143851|PTPN7 ENSG00000145016|Q96CK5\_HUMAN ENSG00000148498|PARD3 ENSG00000159897|RAPGEF6 ENSG00000165948|FAM14B ENSG00000169662|NP\_997357.1  
ENSG00000177021|LRRC24 ENSG00000182055|WDFC9 ENSG00000182698|NM\_001007089 ENSG00000186716|BCR ENSG00000197249|SERPINA1 ENSG00000203855|Q8ZDP9\_HUMAN ENSG00000203903|Q6ZMP7\_HUMAN ENSG00000204613|TRIM10

|                          |                              |                                |                                |                               |                                |                              |                                |
|--------------------------|------------------------------|--------------------------------|--------------------------------|-------------------------------|--------------------------------|------------------------------|--------------------------------|
| ENSG0000018236 CNTN1     | ENSG00000048462 TNFRSF17     | ENSG00000085276 EVI1           | ENSG00000099721 AMELY          | ENSG00000122417 ODF2L         | ENSG00000122674 C7orf28A       | ENSG00000138079 SLC3A1       | ENSG00000141979 CALR3          |
| ENSG00000146574 C7orf28B | ENSG00000159251 ACTC1        | ENSG00000166326 TRIM44         | ENSG00000166405 RIC3           | ENSG00000166510 CCDC68        | ENSG00000167077 NP_689726.3    | ENSG00000167377 ZNF23        | ENSG00000167916 KRT24          |
| ENSG00000174417 TRHR     | ENSG00000178591 DEFB125      | ENSG00000179676 C18orf20       | ENSG00000184349 EFNA5          | ENSG00000188644 XR_016028.1   | ENSG00000197460 Q8WYX1_HUMAN   | ENSG00000197658 NP_775857.1  | ENSG00000198478 SH3BGRL2       |
| ENSG00000204904 CXorf31  |                              |                                |                                |                               |                                |                              |                                |
| GGATGCT                  | ENSG00000001461 NPAL3        | ENSG00000068400 GRIPAP1        | ENSG00000071246 VASH1          | ENSG00000071564 TCF3          | ENSG00000091181 IL5RA          | ENSG00000105011 ASF1B        | ENSG00000107738 C10orf54       |
|                          | ENSG00000135632 SMYD5        | ENSG00000136827 TOR1A          | ENSG00000137133 HINT2          | ENSG00000143595 AQP10         | ENSG00000149182 ZNF289         | ENSG00000149599 C20orf57     | ENSG00000162892 IL24           |
|                          | ENSG00000164627 KIF6         | ENSG00000176371 ZSCAN2         | ENSG00000178919 FOXO1          | ENSG00000183778 B3GALT5       | ENSG00000197173 NP_001013689.1 | ENSG00000204175 GPRIN2       | ENSG00000204620 Q6ZPC8_HUMAN   |
|                          | ENSG00000055044 NOP5_HUMAN   | ENSG00000077522 ACTN2          | ENSG00000100387 RBX1           | ENSG00000106672 KIAA0367      | ENSG00000120563 LYZL1          | ENSG00000128585 MKLN1        | ENSG00000130023 C6orf70        |
|                          | ENSG00000141429 GALNT1       | ENSG00000151033 LYZL2          | ENSG00000151893 C10orf46       | ENSG00000166181 API5          | ENSG00000175497 DPP10          | ENSG00000177596 Q8NA50_HUMAN | ENSG00000178446 C21orf100      |
|                          | ENSG00000184280 ZNF285B      |                                |                                |                               |                                |                              |                                |
| GGATGGA                  | ENSG00000007237 GAS7         | ENSG00000043143 PHF15          | ENSG00000062038 CDH3           | ENSG00000072135 PTPN18        | ENSG00000075340 ADD2           | ENSG00000100100 PIK3IP1      | ENSG00000105245 NUMBL          |
|                          | ENSG00000119772 DNMT3A       | ENSG00000122687 FTSJ2          | ENSG00000127098 ANKRD19        | ENSG00000128228 SDF2L1        | ENSG00000163898 LIPIH          | ENSG00000167994 RAB3IL1      | ENSG00000168872 DDX19A         |
|                          | ENSG00000182087 C19orf6      | ENSG00000183657 Q8WYW5_HUMAN   | ENSG00000184557 SOCS3          | ENSG00000198411 NM_207443     | ENSG00000198925 ATG9A          | ENSG00000203941 Q5JVP7_HUMAN | ENSG00000204479 PFRAMEF17      |
|                          | ENSG00000066294 CD84         | ENSG00000077514 POLD3          | ENSG00000100387 RBX1           | ENSG00000105889 Q6NZ63_HUMAN  | ENSG00000111783 RFX4           | ENSG00000113263 ITK          | ENSG00000113407 TARS           |
|                          | ENSG00000124564 SLC17A3      | ENSG00000133639 BTG1           | ENSG00000143507 DUSP10         | ENSG00000150637 CD226         | ENSG00000156050 C14orf44       | ENSG00000158185 ANKRD36      | ENSG00000162482 AKR7A3         |
|                          | ENSG00000164265 SCGB3A2      | ENSG00000181433 SAGE1          | ENSG00000196912 AN36B_HUMAN    | ENSG00000204026 Q6ZSD2_HUMAN  | ENSG00000204209 DAXX           |                              |                                |
| GGATGGC                  | ENSG00000025434 NRIH3        | ENSG00000075886 TUBA3D         | ENSG00000101197 BIRC7          | ENSG00000106927 AMBP          | ENSG00000109079 TNFAIP1        | ENSG00000111653 ING4         | ENSG00000113068 PFDN1          |
|                          | ENSG00000116809 ZBTB17       | ENSG00000124126 PREX1_HUMAN    | ENSG00000125999 C20orf114      | ENSG00000130558 OLFM1         | ENSG00000137767 SQORL          | ENSG00000152086 TUBA3E       | ENSG00000158402 CDC25C         |
|                          | ENSG00000163395 NP_840059.1  | ENSG00000164896 FASTK          | ENSG00000182575 NXP3           | ENSG00000184470 TXNRD2        | ENSG00000184785 Q96HG1_HUMAN   | ENSG00000185963 BTCD2        | ENSG00000188157 AGRN           |
|                          | ENSG00000197916 Q8N7P5_HUMAN | ENSG00000197996 PADI6          | ENSG00000198768 APCDD1L        | ENSG00000198920 KIAA0753      | ENSG00000204394 VARS           | ENSG00000089876 DHX32        | ENSG00000103160 HSDL1          |
|                          | ENSG00000125430 HS3ST3B1     | ENSG00000127252 HRASL5         | ENSG00000131586 MRPL20         | ENSG00000135047 CTS1L         | ENSG00000138755 CXCL9          | ENSG00000140093 SERPINA10    | ENSG00000151689 INPP1          |
|                          | ENSG00000156006 NAT2         | ENSG00000163959 NP_689885.3    | ENSG00000164975 SNAPC3         | ENSG00000165868 HSPAL2A       | ENSG00000165895 Q96M56_HUMAN   | ENSG00000166762 CATSPER2     | ENSG00000166881 K0286_HUMAN    |
|                          | ENSG00000173744 HRB          | ENSG00000179454 KHLH28         | ENSG00000183644 NP_997313.1    | ENSG00000185158 LRR37B        | ENSG00000188895 Q68DK7_HUMAN   | ENSG00000198203 SULT1C2      | ENSG00000198702 Q8NBL2_HUMAN   |
| GGATGTG                  | ENSG00000065675 PRKCQ        | ENSG00000085978 ATG16L1        | ENSG00000089737 DDX24          | ENSG00000131355 EMR3          | ENSG00000139197 PEX5           | ENSG00000158109 FAM79A       | ENSG00000159784 FAM131B        |
|                          | ENSG00000167378 IRGQ         | ENSG00000167705 RILP           | ENSG00000172780 RAB43          | ENSG00000175470 PPP2R2D       | ENSG00000176720 BOK            | ENSG00000182459 NP_997342.1  | ENSG00000183600 Q66K37_HUMAN   |
|                          | ENSG00000185386 MAPK11       | ENSG00000187621 TCLL1B         | ENSG00000198471 RTF2           | ENSG00000198883 PNMA5         | ENSG00000204455 XR_015868.1    | ENSG00000204602 Q6ZU19_HUMAN | ENSG00000205632 Q6ZVF7_HUMAN   |
|                          | ENSG00000066651 TRMT11       | ENSG00000073614 JARID1A        | ENSG00000076242 MLH1           | ENSG00000084090 STAR7D        | ENSG00000110048 OSBP           | ENSG00000113812 ACTR8        | ENSG00000119953 SMNDC1         |
|                          | ENSG00000127423 C1orf135     | ENSG00000133111 RFKAP          | ENSG00000136842 TMOD1          | ENSG00000139921 TXNDC1        | ENSG00000145860 RNF145         | ENSG00000146463 ZMYM4        | ENSG00000162836 ACP6           |
|                          | ENSG00000168175 C14orf32     | ENSG00000174038 C9orf131       | ENSG00000180957 PITPNB         | ENSG00000187119 NAP1L1        |                                |                              |                                |
| GGATTA                   | ENSG00000064393 HIPK2        | ENSG00000064886 CHI3L2         | ENSG00000082014 SMARCD3        | ENSG00000102119 EMD           | ENSG00000105559 PLEKHA4        | ENSG00000108784 NAGLU        | ENSG00000116984 MTR            |
|                          | ENSG00000123329 ARHGAP9      | ENSG00000130635 COL5A1         | ENSG00000132517 GPR172B        | ENSG00000134243 SORT1         | ENSG00000136068 FLNB           | ENSG00000136731 UGCG1L       | ENSG00000149557 FEZ1           |
|                          | ENSG00000166069 TMC05        | ENSG00000166407 LMO1           | ENSG00000166866 MYO1A          | ENSG00000174370 C11orf45      | ENSG00000176476 CCDC101        | ENSG00000178078 NP_060190.2  | ENSG00000178110 Q8N9G9_HUMAN   |
|                          | ENSG00000184566 Q9P166_HUMAN | ENSG00000184857 TMEM186        | ENSG00000186919 LGICZ1         | ENSG00000187024 PTRH1         | ENSG00000188822 CNR2           | ENSG00000204531 POU5F1P1     | ENSG00000003987 MTMR7          |
|                          | ENSG00000083099 LYRM2        | ENSG00000097046 CDC7           | ENSG00000101557 USP14          | ENSG00000101856 PGRMC1        | ENSG00000107362 FAM108B1       | ENSG00000115363 TMEM166      | ENSG00000120158 RCL1           |
|                          | ENSG00000140932 CTMT2        | ENSG00000144010 LOC653192      | ENSG00000144015 TRIM43         | ENSG00000150457 LATS2         | ENSG00000150776 C11orf57       | ENSG00000154548 SRR35_HUMAN  | ENSG00000156136 DCK            |
|                          | ENSG00000170017 ALCAM        | ENSG00000171848 RRM2           | ENSG00000180667 YOD1           | ENSG00000182551 ADI1          | ENSG00000182899 RPL35A         | ENSG00000186094 AGBL4        | ENSG00000198440 ZNF583         |
| GGATTAG                  | ENSG00000082266 DLEC1        | ENSG00000063854 HAGH           | ENSG00000065308 TRAM2          | ENSG00000100024 UPB1          | ENSG00000101189 C20orf20       | ENSG00000103061 SLC7A60S     | ENSG00000109047 RCVRN          |
|                          | ENSG00000123411 IKZF4        | ENSG00000139083 ETV6           | ENSG00000146192 FGD2           | ENSG00000149489 ROM1          | ENSG00000173867 MRPL46         | ENSG00000176531 PHLDB3       | ENSG00000183248 Q9HGK5_HUMAN   |
|                          | ENSG00000198700 IPO9         | ENSG00000204099 NEU4           | ENSG00000087502 ERGIC2         | ENSG00000093134 VNN3          | ENSG00000100249 C22orf31       | ENSG00000101751 POLI         | ENSG00000116977 LGALS8         |
|                          | ENSG00000123684 LPGAT1       | ENSG00000125864 BFSP1          | ENSG00000135821 GLUL           | ENSG00000152242 C18orf25      | ENSG00000153989 NUS1           | ENSG00000154723 ATP5J        | ENSG00000156103 MMP16          |
|                          | ENSG00000185290 XR_016379.1  | ENSG00000198947 DMD            |                                |                               |                                |                              |                                |
| GGATTGT                  | ENSG00000092067 CEBPE        | ENSG00000118707 TGIF2          | ENSG00000123992 DNPEP          | ENSG00000126264 HCST          | ENSG00000142794 NBPF3          | ENSG00000163633 C4orf36      | ENSG00000170889 RPS9           |
|                          | ENSG00000172943 PHF8         | ENSG00000182346 DAOA           | ENSG00000183741 CBX6           | ENSG00000184209 NP_008951.1   | ENSG00000196235 SUPT5H         | ENSG00000135661 RNF14        | ENSG00000048828 FAM120A        |
|                          | ENSG00000101557 USP14        | ENSG00000109670 FBXW7          | ENSG00000111490 Q9Y2I9_HUMAN   | ENSG00000115875 SFRS7         | ENSG00000134042 MRO            | ENSG00000136754 AB11         | ENSG00000138641 HERC3          |
|                          | ENSG00000145794 MEGF10       | ENSG00000149177 PTPRJ          | ENSG00000150938 CRIM1          | ENSG00000157107 FCHO2         | ENSG00000159592 GBPPI1         | ENSG00000163683 C4orf34      | ENSG00000166250 NP_079045.1    |
|                          | ENSG00000182367 SNRPEL1      | ENSG00000184786 TCTE3          | ENSG00000186471 AKAP14         | ENSG00000197953 AADACL2       | ENSG00000203827 XR_015220.1    | ENSG00000203832 NBPF20       |                                |
| GGATTTC                  | ENSG00000068097 NP_071353.4  | ENSG00000103591 P34_HUMAN      | ENSG0000000119973 PRLHR        | ENSG0000000129816 NR_001538.1 | ENSG00000129845 O14605_HUMAN   | ENSG00000113845 ZNF304       | ENSG00000157306 THTPA          |
|                          | ENSG00000167994 RAB31L1      | ENSG00000168062 BATF2          | ENSG00000169918 OTUD7A         | ENSG00000174576 NPAS4         | ENSG00000178235 SLITRRK1       | ENSG00000180834 MAP6D1       | ENSG00000180861 C12orf36       |
|                          | ENSG00000183519 NSUN5B       | ENSG00000196767 POU3F4         | ENSG00000204520 MICA           | ENSG00000086598 TMED2         | ENSG00000105887 MTPN           | ENSG00000106258 CYP3A5       | ENSG00000108061 SHOC2          |
|                          | ENSG00000122477 LRR39        | ENSG00000124203 C20orf174      | ENSG00000127954 Q8WBB0_HUMAN   | ENSG00000132196 HSD17B7       | ENSG00000134375 TTM17A         | ENSG00000141298 SSH2         | ENSG00000141644 MBD1           |
|                          | ENSG00000154479 Q6PJF6_HUMAN | ENSG00000155111 CDC2L6         | ENSG00000156535 CD109          | ENSG00000158042 MRPL17        | ENSG00000164171 ITGA2          | ENSG00000165525 SDCCAG1      | ENSG00000181192 DHTKD1         |
|                          | ENSG00000196826 ZNF709       | ENSG00000197181 PIWIL2         | ENSG00000204899 NP_001065243.1 |                               |                                |                              |                                |
| GGATTTG                  | ENSG00000101890 GUCY2F       | ENSG00000105278 KIAA1086       | ENSG00000113552 GNPDA1         | ENSG00000116237 ICMT          | ENSG00000119699 TGFB3          | ENSG00000123143 PKN1         | ENSG00000124641 TRFP           |
|                          | ENSG00000137507 LRR32        | ENSG00000141756 FKBP10         | ENSG00000141956 PRDM15         | ENSG00000164048 ZNF589        | ENSG00000164087 WDR51A         | ENSG00000166948 TGM6         | ENSG00000176595 KBTBD11        |
|                          | ENSG00000182851 NP_835466.1  | ENSG00000185219 ZNF445         | ENSG00000186049 KRT73          | ENSG00000187144 SPATA21       | ENSG00000187979 Q6ZPC6_HUMAN   | ENSG00000189060 HLF0         | ENSG00000189325 NP_00101903.2  |
|                          | ENSG00000205501 Q6ZU01_HUMAN | ENSG00000005436 C2orf3         | ENSG00000077380 DYNCL12        | ENSG00000100664 EIF5          | ENSG00000109332 UBE2D3         | ENSG00000111790 FGFR10P2     | ENSG00000121058 COIL           |
|                          | ENSG00000137871 SUHW4        | ENSG00000143337 TOR1AIP1       | ENSG00000144635 DYNCL1L1       | ENSG00000146072 TNFRSF21      | ENSG00000146477 SLC22A3        | ENSG00000151090 THRB         | ENSG00000159216 RUNX1          |
|                          | ENSG00000182899 RPL35A       | ENSG00000188402 NP_995324.1    | ENSG00000198757 Q96NB8_HUMAN   | ENSG00000204259 Q96PQ5_HUMAN  |                                |                              |                                |
| GGATTTT                  | ENSG00000078061 ARAF         | ENSG00000100147 CCDC134        | ENSG00000106351 HRBL           | ENSG000001010777 POUZAF1      | ENSG00000116128 BCL9           | ENSG00000121060 TRIM25       | ENSG00000132383 RPA1           |
|                          | ENSG00000138938 Q5TGJ8_HUMAN | ENSG00000139112 GABARAP1L      | ENSG00000139540 SLC39A5        | ENSG00000141431 Q6ZMX6_HUMAN  | ENSG00000149547 E124           | ENSG00000156381 ANKRD9       | ENSG00000156603 MEDI9          |
|                          | ENSG00000157617 C21orf25     | ENSG00000162267 ITIH3          | ENSG00000167695 FAM57A         | ENSG00000167986 DBP1          | ENSG00000168631 DPCR1          | ENSG00000170161 Q5VV11_HUMAN | ENSG00000175826 DULLARD        |
|                          | ENSG00000182022 ST4S6_HUMAN  | ENSG00000184014 RAB61P1        | ENSG00000185668 POU3F1         | ENSG00000186532 SMYD4         | ENSG00000204463 BAT3           | ENSG000000041982 TNC         | ENSG00000085365 SCAMP1         |
|                          | ENSG00000108443 RTP6KB1      | ENSG00000116497 S100PBP        | ENSG00000120279 MYCT1          | ENSG00000122376 XR_015353.1   | ENSG00000125850 OVOL2          | ENSG00000138190 EXOC6        | ENSG00000150433 NP_001074015.1 |
|                          | ENSG00000153707 PTPRD        | ENSG00000157680 DGKI           | ENSG00000162669 NP_001017975.3 | ENSG00000164187 LMBRD2        | ENSG00000165355 FBXO33         | ENSG00000169599 NFU1         | ENSG00000170099 Q9NTHO_HUMAN   |
|                          | ENSG00000173141 MRP63        | ENSG00000174738 NR1D2          | ENSG00000182805 RFPL4B         | ENSG00000184708 EIF4ENIF1     | ENSG00000186222 CNO            | ENSG00000198947 DMD          | ENSG00000204365 C10orf126      |
|                          |                              |                                |                                |                               |                                |                              |                                |
| GGCAAAA                  | ENSG00000051009 C11orf56     | ENSG00000100221 JOSD1          | ENSG00000103966 EHD4           | ENSG00000111540 RAB5B         | ENSG00000121671 CRY2           | ENSG00000126243 LRFN3        | ENSG00000128313 APOL5          |
|                          | ENSG00000134871 COL4A2       | ENSG00000136574 GATA4          | ENSG00000143333 RGS16          | ENSG00000147100 SLC16A2       | ENSG00000147130 ZMYM3          | ENSG00000158711 ELK4         | ENSG00000159871 LYPD5          |
|                          | ENSG00000170689 HOXB9        | ENSG00000179452 Q8TDK1_HUMAN   | ENSG00000187516 CXorf27        | ENSG00000198585 NUDT16        | ENSG000000005955 ZNF403        | ENSG000000060718 COL11A1     | ENSG00000073910 FRY            |
|                          | ENSG00000081665 ZNF253       | ENSG00000094880 CDC23          | ENSG00000102897 LYRM1          | ENSG00000104112 SCG3          | ENSG00000138293 NCOA4          | ENSG00000146587 RBAK         | ENSG00000147419 CCDC25         |
|                          | ENSG00000165071 TMEM71       | ENSG00000171488 LRRRC8C        | ENSG00000171885 AQP4           | ENSG00000173610 UGT2A1        | ENSG00000175390 EIF3S5         | ENSG00000176049 JAKMIP2      | ENSG00000177485 ZBTB33         |
|                          | ENSG00000183576 SETD3        | ENSG00000183631 Q5JQE8_HUMAN   | ENSG00000185010 F8             | ENSG00000185275 CD24          | ENSG00000187823 ZCCHC16        | ENSG00000188613 NANOS1       | ENSG00000197594 ENPP1          |
| GGCAAAC                  | ENSG00000065675 PRKCQ        | ENSG00000085063 CD59           | ENSG00000100427 MLC1           | ENSG00000101017 CD40          | ENSG00000107954 NEURL          | ENSG00000127527 EPS15L1      | ENSG00000129646 QRICH2         |
|                          | ENSG00000139433 GLTP         | ENSG00000142961 MOBK2C         | ENSG00000150477 KIAA1328       | ENSG00000153807 HOXA10        | ENSG00000157884 NP_001025052.1 | ENSG00000161558 TMEM143      | ENSG00000167723 TRPV3          |
|                          | ENSG00000177627 C12orf54     | ENSG00000179270 NP_001025054.1 | ENSG00000181350 C17orf76       | ENSG00000184330 S100A7A       | ENSG00000198437 Q8NOT2_HUMAN   | ENSG00000198690 MTMR15       | ENSG00000204285 Q6ZP11_HUMAN   |
|                          | ENSG00000121486 C1orf25      | ENSG00000131                   |                                |                               |                                |                              |                                |

ENSG00000157890|MEGF11 ENSG00000166181|API5 ENSG00000171772|SYCE1 ENSG00000176274|MCART6 ENSG00000182367|SNRPB1 ENSG00000184284|Q96N11\_HUMAN ENSG00000187193|MT1X  
GGCAATG ENSG00000092850|TEKTL ENSG00000101890|GUCY2F ENSG00000105383|CD33 ENSG00000105501|SIGLEC5 ENSG00000105755|ETHE1 ENSG00000115718|PROC ENSG00000127412|TRPV5 ENSG00000128045|RASL11B  
ENSG00000128313|APOL5 ENSG00000129214|SHBG ENSG00000130307|USHBP1 ENSG00000143858|SYT2 ENSG00000148795|CYP17A1 ENSG00000151773|CCDC122 ENSG00000160219|GAB3 ENSG00000162490|Clorf187  
ENSG00000165568|AKR1CL2 ENSG00000167524|SG494\_HUMAN ENSG00000179058|C9orf50 ENSG00000180861|C12orf36 ENSG00000183785|PEX26 ENSG00000184330|S100A7A ENSG00000189337|NP\_001018000.1 ENSG00000198471|RTP2  
ENSG00000204094|Q6ZU93\_HUMAN ENSG00000205710|Q6ZR85\_HUMAN ENSG00000005189|NP\_112203.1 ENSG00000065518|NDUFB4 ENSG00000070961|ATP2B1 ENSG00000072657|TRHDE ENSG00000125450|NUP85 ENSG00000132950|ZMYM5  
ENSG00000135226|UGT2B28 ENSG00000135903|PAX3 ENSG00000144785|TMEM4 ENSG00000145592|RPL37 ENSG00000147488|STL8 ENSG00000163755|HPS3 ENSG00000169567|HINT1 ENSG00000178395|Clorf65  
ENSG00000180964|TCEAL8 ENSG00000183023|SLC8A1 ENSG00000186480|INSIG1 ENSG00000187098|MITF ENSG00000196406|SPANXE ENSG00000198021|SPANXA2 ENSG00000198573|SPANXC ENSG00000198734|F5  
GGCACAA ENSG00000198820|SPANXF1 ENSG00000203926|SPANXA1 ENSG00000203929|SPANXB1 ENSG00000108292|MLLT6 ENSG00000119547|ONECUT2 ENSG00000119689|DLST ENSG00000129214|SHBG ENSG00000131113|PSG1  
ENSG00000008283|CYB5E1 ENSG00000102547|CAB39L ENSG00000106077|ABHD11 ENSG00000133020|MYH8 ENSG00000137261|KIAA0319 ENSG00000137845|ADAM10 ENSG00000138161|FAM24B ENSG00000138483|CCDC54  
ENSG00000131477|RAMP2 ENSG00000133250|ZNF414 ENSG00000140403|DNAJA4 ENSG00000158813|EDA ENSG00000164007|CLDN19 ENSG00000167261|DPEP2 ENSG00000168329|CX3CR1 ENSG00000168453|HR  
ENSG00000173335|CST9 ENSG00000186577|C6orf1 ENSG00000187258|NPSR1 ENSG00000196187|TMEM63A ENSG00000197561|ELA2 ENSG00000204017|Q6ZVB9\_HUMAN ENSG00000065060|C6orf107 ENSG00000071054|MAP4K4  
ENSG00000109163|GNRHR ENSG00000111796|KLRB1 ENSG00000125414|MYH2 ENSG00000132020|MYH8 ENSG00000137261|KIAA0319 ENSG00000137845|ADAM10 ENSG00000138161|FAM24B ENSG00000138483|CCDC54  
ENSG00000140941|MAP1LC3B ENSG00000144354|CDC4 ENSG00000151065|DCP1B ENSG00000156239|N6AMT1 ENSG00000157181|Clorf27 ENSG00000164171|ITGA2 ENSG00000168404|MLKL ENSG00000171617|ENC1  
ENSG00000172244|C5orf34 ENSG00000175449|RFESD ENSG00000197279|ZNF165 ENSG00000198161|PPIAL4 ENSG00000198360|NP\_839944.1 ENSG00000198936|NP\_839944.1 ENSG00000203795|FAM24A  
GGCACAG ENSG00000053918|KCNQ1 ENSG00000072840|EVC ENSG00000091947|TMEM101 ENSG00000092929|UNC13D ENSG00000100314|CABP7 ENSG00000100842|EFS ENSG00000103415|HMOX2 ENSG00000120899|PTK2B  
ENSG00000136631|VPS45 ENSG00000137078|SIT1 ENSG00000138101|DTNB ENSG00000142661|MYO3 ENSG00000149633|NP\_001025035.1 ENSG00000165462|PHOX2A ENSG00000168924|LETM1 ENSG00000172009|THOP1  
ENSG00000176424|NP\_001013742.1 ENSG00000179886|TIGD5 ENSG00000181026|ISG20L1 ENSG00000182661|BA11 ENSG00000188549|NP\_997263.1 ENSG00000203905|Q6ZRC6\_HUMAN ENSG00000204094|Q6ZU93\_HUMAN ENSG00000204991|SPIRE2  
ENSG00000205620|Q6ZRB6\_HUMAN ENSG00000205646|Q96GL5\_HUMAN ENSG00000015153|YAF2 ENSG00000082482|CKNC2 ENSG00000086288|TXNDC3 ENSG00000090060|PAPOLA ENSG00000100201|DDX17 ENSG00000101333|PLCB4  
ENSG00000101413|C2orf77 ENSG00000107295|SH3GL2 ENSG00000112294|ALDH5A1 ENSG00000113387|SUB1 ENSG00000117281|CD160 ENSG00000129007|CALML4 ENSG00000157557|ETS2 ENSG00000164252|AGGF1  
ENSG00000168229|PTGDR ENSG00000168769|KIAA1546 ENSG00000170370|EMX2 ENSG00000170866|LILRA3 ENSG00000171723|GPHN ENSG00000173705|SUSD5 ENSG00000186645|NP\_001027561.1 ENSG00000196214|ZNF766  
ENSG00000198305|NP\_001027561.1 ENSG00000198894|KIAA1737 ENSG00000205361|MT1DP ENSG00000205505|NP\_001027561.1 ENSG00000205506|NP\_001027561.1 ENSG00000205508|NP\_001018856.1 ENSG00000205509|NP\_001027561.1  
ENSG00000206029|Q6P633\_HUMAN  
GGCACTG ENSG00000053372|MRTO4 ENSG00000067225|PKM2 ENSG00000070731|ST6GALNAC2 ENSG00000080293|SCTR ENSG00000100600|MFNG ENSG00000100292|HMOX1 ENSG00000101463|C2orf39 ENSG00000106638|TBL2  
ENSG00000107331|ABCA2 ENSG00000120949|TNFRSF8 ENSG00000128563|PRKRIP1 ENSG00000136689|IL1RN ENSG00000138073|PREB ENSG00000139648|KRT71 ENSG00000143006|DMRTB1 ENSG00000149474|CSRP2BP  
ENSG00000168005|NP\_612480.1 ENSG00000169682|LAT ENSG00000174080|CTS2 ENSG00000174151|CYB561D1 ENSG00000174744|BRMS1 ENSG00000174851|YIF1A ENSG00000176973|FAM89B ENSG00000179253|Q5VZ43\_HUMAN  
ENSG00000182162|P2RY8 ENSG00000184345|IQCF2 ENSG00000185761|ADAMTSL5 ENSG00000075651|PLD1 ENSG00000092148|HECTD1 ENSG00000095139|ARCN1 ENSG00000100580|TMED8 ENSG00000109189|USP46  
ENSG00000113643|RARS ENSG00000134198|TSPAN2 ENSG00000135108|FBXO21 ENSG00000135541|AHI1 ENSG00000141076|CIRH1A ENSG00000151418|ATP6V1G3 ENSG00000152332|UHMK1 ENSG00000155961|RAB39B  
ENSG00000158023|WDR66 ENSG00000164258|NDUFS4 ENSG00000164619|BMPER ENSG00000164743|C8orf48 ENSG00000165983|PTER ENSG00000171867|PRNP ENSG00000173681|CXorf23 ENSG00000196950|SLC39A10  
ENSG00000204990|NP\_001008742.1  
GGCACTT ENSG00000010803|SCMH1 ENSG00000058085|LAMC2 ENSG00000065618|COL17A1 ENSG00000072832|CRMP1 ENSG00000079999|KEAP1 ENSG00000090615|GOLGA3 ENSG00000092051|AP1G2 ENSG00000100271|TTLL1  
ENSG00000102230|PCYT1B ENSG00000104946|TBC1D17 ENSG00000106852|LHX6 ENSG00000108639|SYNR2 ENSG00000110324|IL10RA ENSG00000119522|DENND1A ENSG00000120952|PRAMEF2 ENSG00000143314|MRPL24  
ENSG00000143867|OSR1 ENSG00000149305|HTR3B ENSG00000156381|ANKRD9 ENSG00000162493|PDPN ENSG00000175315|CST6 ENSG00000178951|ZBTB7A ENSG00000196460|Q6ZNB4\_HUMAN ENSG00000197993|KEL  
ENSG00000198937|C6orf129 ENSG00000204240|Q6ZVK0\_HUMAN ENSG00000205452|Q6ZQQ9\_HUMAN ENSG00000205703|NP\_001010910.1 ENSG00000054267|ARID4B ENSG00000067048|DDX3X ENSG00000071462|WBSR22 ENSG00000087253|AYTL1  
ENSG00000104517|EDD1 ENSG00000104863|LIN7B ENSG00000109919|MTCH2 ENSG00000110013|SIAE ENSG00000117010|ZNF684 ENSG00000120341|LZTR2 ENSG00000118271|TRR ENSG00000120341|LZTR2 ENSG00000121210|KIAA0922  
ENSG00000122958|VPS26A ENSG00000134852|CLOCK ENSG00000153923|CLCA3 ENSG00000156958|GALK2 ENSG00000161010|NP\_001017987.1 ENSG00000164743|C8orf48 ENSG00000165806|CASP7 ENSG00000172465|TCEAL1  
ENSG00000204387|C6orf48  
GGCATA ENSG000000081985|IL12RB2 ENSG00000087589|C2orf32 ENSG00000089248|ERP29 ENSG00000101361|NOL5A ENSG00000103023|NP\_001073961.1 ENSG00000104518|GSDMDC1 ENSG00000115204|MPV17 ENSG00000128346|C2orf23  
ENSG00000130176|CNN1 ENSG00000131738|KRT33B ENSG00000148158|SNX3 ENSG00000151376|ME3 ENSG00000156411|C14orf2 ENSG00000170420|APOL6 ENSG00000174680|C2orf9 ENSG00000179886|TIGD5  
ENSG00000182397|C15orf51 ENSG00000185594|SPATA8 ENSG00000205352|Q9NZ81-2 ENSG00000101846|STS ENSG00000103994|ZFP106 ENSG00000105967|TFEC ENSG00000113525|IL5 ENSG00000113905|HRG  
ENSG00000125885|MCM8 ENSG00000136492|BRIP1 ENSG00000138442|WDR12 ENSG00000141946|ZIM3 ENSG00000149554|CHEK1 ENSG00000150687|PRSS23 ENSG00000152795|HNRPDL ENSG00000153684|NP\_001012455.1  
ENSG00000154548|SRR35\_HUMAN ENSG00000154999|MRPS17 ENSG00000159208|C1orf51 ENSG00000169905|TOR1AIP2 ENSG00000170820|F5HR ENSG00000174944|P2RY14 ENSG00000183629|GOLGA8G ENSG00000198553|KCNRG  
GGCATAG ENSG00000031698|SARS ENSG00000062582|MRPS24 ENSG00000064999|ANKS1A ENSG00000091622|PITPNM3 ENSG00000111886|GABRR2 ENSG00000116661|FBXO2 ENSG00000124232|RBPJL ENSG00000130948|HSD17B3  
ENSG00000134107|BHLHB2 ENSG00000135414|GDF11 ENSG00000137656|BUD13 ENSG00000141570|CBX8 ENSG00000142149|HUNK ENSG00000142207|URB1 ENSG00000147394|ZNF185 ENSG00000162728|KCNJ9  
ENSG00000167080|B4GALNT2 ENSG00000168237|NP\_660305.2 ENSG00000176946|THAP4 ENSG00000177830|CHD1 ENSG00000178952|TUFM ENSG00000180878|C11orf42 ENSG00000182329|Q8IVF9\_HUMAN ENSG00000187492|NP\_001007541.1  
ENSG00000196365|LONP1 ENSG00000196668|NP\_997319.1 ENSG00000197916|Q8N7P5\_HUMAN ENSG00000049192|ADAMTSL6 ENSG00000076382|SPAG5 ENSG00000104356|POP1 ENSG00000106560|GIMAP2 ENSG00000106688|SLC1A1  
ENSG00000112339|HBS1L ENSG00000112414|GPR126 ENSG00000120675|DNAJC15 ENSG00000129682|PGF13 ENSG00000131381|ZFVVE20 ENSG00000135870|RC3H1 ENSG00000151090|THR8 ENSG00000165659|DACH1  
ENSG00000170471|KIAA1219 ENSG00000170558|CDH2 ENSG00000172380|GNG12 ENSG00000175324|LSM1 ENSG00000184831|APOO ENSG00000198689|SLC9A6 ENSG00000204164|Q6P095\_HUMAN ENSG00000204177|Q6P095\_HUMAN  
ENSG00000206221|Q6ZVX8\_HUMAN  
GGCATGC ENSG000000070785|EIF2B3 ENSG00000071655|MBD3 ENSG00000097007|ABL1 ENSG00000141552|ANAPC11 ENSG00000151348|EXT2 ENSG00000160256|C2orf70 ENSG00000166908|PIP5K2C ENSG00000167968|DNASE1L2  
ENSG00000168016|Q8N8K0\_HUMAN ENSG00000170420|APOL6 ENSG00000181354|Q8NB20\_HUMAN ENSG00000185198|PRSSL1 ENSG00000185608|MRPL40 ENSG00000185963|BTCD2 ENSG00000186301|Q49A61\_HUMAN ENSG00000197852|C1orf183  
ENSG00000198792|C22orf5 ENSG00000204101|Q6ZU91\_HUMAN ENSG00000205653|Q6ZUF2\_HUMAN ENSG00000003989|SLC7A2 ENSG00000011523|CEP68 ENSG00000056277|SUHW3 ENSG00000100580|TMED8 ENSG00000107864|CPEB3  
ENSG00000112276|BVES ENSG00000114646|CSPG5 ENSG00000119314|ROD1 ENSG00000120256|LRP11 ENSG00000135829|DHX9 ENSG00000157445|CACNA2D3 ENSG00000162643|WDR63 ENSG00000166439|RNF169  
ENSG00000176232|ZNF283 ENSG00000205976|Q6ZVT4\_HUMAN  
GGCATA ENSG00000059691|PET112L ENSG00000087237|CETP ENSG00000088812|ATRN ENSG00000089737|DDX24 ENSG00000101457|DNMTIP1 ENSG00000102287|GABRE ENSG00000107957|SH3PXD2A ENSG00000131368|MRPS25  
ENSG00000147100|SLC16A2 ENSG00000178928|TPRX1 ENSG00000184574|GPR92 ENSG00000185803|GPR172A ENSG00000186326|RGS9BP ENSG00000188488|SERPINA5 ENSG00000196388|NP\_998891.1 ENSG00000198546|ZNF511  
ENSG00000198785|GRIN3A ENSG00000205664|Q6PJD4\_HUMAN ENSG00000205804|Q5T6R2\_HUMAN ENSG00000019186|CYP24A1 ENSG00000067955|CBFB ENSG00000072657|TRHDE ENSG00000107937|GTPBP4 ENSG00000116016|EPAS1  
ENSG00000123552|USP45 ENSG00000131174|COX7B ENSG00000134391|CFHR2 ENSG00000137819|PAQR5 ENSG00000138336|CXXC6 ENSG00000138756|BMP2K ENSG00000162989|KCNJ3 ENSG00000166575|TMEM135  
ENSG00000170315|UBIQ\_HUMAN ENSG00000173041|ZNF680 ENSG00000173209|AHS2 ENSG00000179104|TMTC2 ENSG00000180616|SSSTR2 ENSG00000183735|TBK1 ENSG00000184860|NP\_660151.2 ENSG00000186974|Q8N6X9\_HUMAN  
ENSG00000187446|CHP1\_HUMAN ENSG00000188386|PPP3R2 ENSG00000189251|Q8WY8\_HUMAN ENSG00000197860|SGTB ENSG00000204403|CASP12 ENSG00000206560|ANKRD28  
GGCATT perfect: GGCATTA TAATGCC hsa-miR-365 TAATGCCctaaataatccttat 0  
ENSG00000008853|RHOBTB2 ENSG00000074590|NUAK1 ENSG000000807088|BAX ENSG00000100410|PHF5A ENSG00000106948|AKNA ENSG00000108219|TSPAN14 ENSG00000114302|PRKAR2A ENSG00000115756|HPCAL1  
ENSG00000121774|KHDRBS1 ENSG00000124299|PEPD ENSG00000125449|ARMC7 ENSG00000127528|KLF2 ENSG00000128284|APOL3 ENSG00000130803|ZNF317 ENSG00000132725|RIPK1 ENSG00000144468|RHBD1  
ENSG00000148156|ACTL7B ENSG00000166448|TMEM130 ENSG00000167522|ANKRD11 ENSG00000174903|RAB1B ENSG00000184785|Q96HG1\_HUMAN ENSG00000184988|TMEM106A ENSG00000188827|BTBD12 ENSG00000204141|Q6ZVW5\_HUMAN  
ENSG000000011114|BTBD7 ENSG00000047621|C12orf4 ENSG00000064652|SNX24 ENSG00000089123|TASP1 ENSG00000094804|CDC6 ENSG00000106031|HOXA13 ENSG00000114248|LRRRC31 ENSG00000114942|EEF1B2  
ENSG00000115380|EFEMP1 ENSG00000114149|SLC14A1 ENSG00000143942|CHAC2 ENSG00000145041|Q8TBD9\_HUMAN ENSG00000146963|LUC7L2 ENSG00000153936|HS2ST1 ENSG00000154217|PITPNC1  
ENSG00000155393|HEATR3 ENSG00000159267|HLCS ENSG00000162694|EXTL2 ENSG00000173588|CCDC41 ENSG00000174839|FAM116A ENSG00000186075|ZBP2 ENSG00000196227|C2orf177 ENSG00000197716|Q9UHV1\_HUMAN  
ENSG00000198146|ZNF770 ENSG00000198398|NP\_997199.1 ENSG00000205003|CNTF  
GGCCAAA ENSG00000008438|PGLYRP1 ENSG00000011677|GABRA3 ENSG00000013563|DNASE1L1 ENSG00000099910|SCARF2 ENSG00000105549|THEG ENSG00000108849|PPY ENSG00000123360|PDE1B ENSG00000125089|SH3TC1  
ENSG00000127838|PNKD ENSG00000129990|SYT5 ENSG00000139767|KIAA1853 ENSG00000149596|JPH2 ENSG00000151062|CACNA2D4 ENSG00000158402|CDC25C ENSG00000158882|TOMM40L ENSG00000164038|NP\_849155.2  
ENSG00000166111|SVOP ENSG00000166159|LRTM2 ENSG00000178149|DALRD3 ENSG00000196743|GM2A ENSG00000197373|NP\_001015884.1 ENSG00000204071|TCEAL6 ENSG00000053254|CHES1  
ENSG00000053900|ANAPC4 ENSG00000114857|NKTR ENSG00000120306|C5orf32 ENSG00000123496|IL13RA2 ENSG00000136842|TMOD1 ENSG00000138134|STAMBPL1 ENSG00000138829|FBN2 ENSG00000144821|MYH15  
ENSG00000148154|UGCG ENSG00000157538|DSCR3 ENSG00000169299|PGM2 ENSG00000171121|KCNMB3 ENSG00000181092|AD1POQ ENSG00000188916|NP\_001034851.1 ENSG00000198382|UVRAG ENSG00000198863|RUNDC1  
GGCCAGA ENSG00000009950|MLXIPL ENSG00000033011|ALG1 ENSG00000077235|GTF3C1 ENSG00000082771|ITGB5 ENSG00000083444|PLOC1 ENSG00000099960|SLC7A4 ENSG00000100403|ZC3H7B ENSG00000110171|TRIM3  
ENSG00000111181|SLC6A12 ENSG00000111348|ARHGDI1 ENSG00000120049|KCNIP2 ENSG00000131899|LLGL1 ENSG00000132589|FLOT2 ENSG00000145979|TBC1D7 ENSG00000161638|ITGA5 ENSG00000166166|C14orf172  
ENSG00000175223|Q8TCT8\_HUMAN ENSG00000178623|GPR35 ENSG00000178804|H1FOO ENSG00000196118|NP\_001014979.1 ENSG00000198053|SIRPA ENSG00000204946|ZNF783 ENSG00000205191|NP\_001070148.1 ENSG00000205710|Q6ZR85\_HUMAN  
ENSG00000206083|ZNF409 ENSG00000054392|HHAT ENSG00000060709|RIMBP2 ENSG00000084090|STAR72 ENSG00000084623|EIF3S2 ENSG00000101109|STK4 ENSG00000114098|ARMC8 ENSG00000118507|AKAP7  
ENSG00000124939|SCGB2A1 ENSG00000125482|TTF1 ENSG00000132970|WASF3 ENSG00000134202|GSTM3 ENSG00000141325|CCDC45 ENSG00000144771|LRTM1 ENSG00000147437|GNRH1 ENSG00000147588|PMP2  
ENSG00000148175|STOM ENSG00000148848|ADAM12 ENSG00000162378|ZYG11B ENSG00000167528|ZNF641 ENSG00000168675|C1orf1 ENSG00000169116|PARM1\_HUMAN ENSG00000177497|CXorf42 ENSG00000188895|Q6DK7\_HUMAN  
ENSG00000205905|Q6ZWC6\_HUMAN  
GGCCAGG ENSG000000001617|SEMA3F ENSG000000027847|B4GALT7 ENSG00000070526|ST6GALNAC1 ENSG00000076984|O14733-2 ENSG00000099624|ATP5D ENSG00000100258|TMEM112B ENSG00000101204|CHRNA4  
ENSG00000102195|GPR50 ENSG00000106785|TRIM14 ENSG00000113763|UNC5A ENSG00000124181|PLCG1 ENSG00000124772|CPNE5 ENSG00000127098|ANKRD19 ENSG00000128268|MGAT3 ENSG00000129473|BCL2L2  
ENSG00000135638|EMX1 ENSG00000138172|FAM26B ENSG00000140839|NP\_001011880.1 ENSG00000141985|SH3GL1 ENSG00000142185|TRPM2 ENSG00000155256|ZFVVE27 ENSG00000157322|NP\_872425.1 ENSG00000157335|NP\_775890.2  
ENSG00000159166|LAD1 ENSG00000160214|RRP1 ENSG00000160404|TOR2A ENSG00000164061|BSN ENSG00000164082|GRM2 ENSG00000165424|C10orf56 ENSG00000167965|NM\_022372.3 ENSG00000172354|GNB2  
ENSG00000172889|EGFL7 ENSG00000173153|ESRRA ENSG00000173227|SYT12 ENSG00000173638|SLC19A1 ENSG00000173976|RAXL1 ENSG00000174672|BRSK2 ENSG00000174697|LEP ENSG00000178623|GPR35  
ENSG00000179058|C9orf50 ENSG00000183798|EMILIN3 ENSG00000184185|KCNJ12 ENSG00000184470|TXNRD2 ENSG00000186174|BCL9L ENSG00000186653|Q86VD6\_HUMAN ENSG00000187942|LDLRAD2 ENSG00000188743|Q9P169\_HUMAN  
ENSG00000196498|NCOR2 ENSG00000196517|SLC6A9 ENSG00000197539|Q6ZS7\_HUMAN ENSG00000197879|MYO1C ENSG00000204366|ZBTB12 ENSG00000205073|NP\_001003808.1 ENSG00000205646|Q96GL5\_HUMAN ENSG0000019995|ZRANB1  
ENSG00000066084|DIP2B ENSG00000079482|OPHN1 ENSG00000110354|TNRC6B ENSG00000111859|NEDD9 ENSG00000112276|BVES ENSG00000121057|AKAP1 ENSG00000139572|GPR84 ENSG00000141433|ADCYAP1  
ENSG00000143119|CD53 ENSG000001155621|C9orf85 ENSG00000158985|CDC42SE2 ENSG00000163950|SLBP ENSG00000167034|NKX3-1

GGCCAGT ENSG0000028528|SNX1 ENSG00000050820|BCAR1 ENSG00000084652|TXLNA ENSG00000101298|RAD21L1 ENSG00000137497|NUMA1 ENSG00000138617|PARP16 ENSG00000139540|SLC39A5 ENSG00000139641|FAM62A  
ENSG00000145911|NABP3\_HUMAN ENSG00000162236|STX5 ENSG00000167716|WDR81 ENSG00000168795|ZBTB5 ENSG00000172771|C3orf25 ENSG00000172965|Q96C48\_HUMAN ENSG00000177096|FAM109B ENSG00000177757|FAM87B  
ENSG00000182366|FA87B\_HUMAN ENSG00000183597|C22orf25 ENSG00000183828|NUDT14 ENSG00000185499|MUC1 ENSG00000187531|SIRT7 ENSG00000188234|XR\_016668.1 ENSG00000188447|XR\_016015.1 ENSG00000188786|MTF1  
ENSG00000196084|UBIQ\_HUMAN ENSG00000196187|TMEM63A ENSG00000198488|B3GNT6 ENSG00000198870|C9orf96 ENSG00000042317|SPATA7 ENSG00000054392|HHAT ENSG00000072364|AFF4 ENSG00000078070|MCCC1  
ENSG00000084090|STAR7 ENSG00000106305|MCA2\_HUMAN ENSG00000108100|CCNY ENSG00000108932|SLC16A6 ENSG00000119912|IDE ENSG00000129474|JUB ENSG00000140795|MYLK3\_HUMAN ENSG00000146701|MDH2  
ENSG00000156009|MAGEA8 ENSG00000156218|ADAMTSL3 ENSG00000159131|GART ENSG00000159140|SON ENSG00000174456|NP\_997318.1 ENSG00000183305|MAGEA6 ENSG00000184402|SS18L1 ENSG00000184750|MAGEA2  
ENSG00000184943|NP\_443103.1 ENSG00000185875|THNSL1 ENSG00000197172|MAGEA3 ENSG00000198681|MAGEA1 ENSG00000205428|C9orf35  
perfect: GGCCAGT ACTGGCC hsa-miR-193a aACTGGCCtacaagaatcccaag 1  
GGCCAC ENSG00000058844|ITGA3 ENSG00000060558|GNAI5 ENSG00000060566|CREB3L3 ENSG00000073861|TBX21 ENSG00000077238|IL4R ENSG00000081377|CDC14C ENSG00000085741|WNT11 ENSG00000106631|MYL7  
ENSG00000107807|TLX1 ENSG00000117013|KCNQ4 ENSG00000126562|WNK4 ENSG00000127511|SIN3B ENSG00000128604|IRF5 ENSG00000131470|PSMC3IP ENSG00000136068|FLNB ENSG00000140675|SLC5A2  
ENSG00000141342|PLEKHM1 ENSG00000141564|RPTOR\_HUMAN ENSG00000142327|RNPEPL1 ENSG00000143862|ARL8A ENSG00000158792|SPATA2L ENSG00000168269|FOXJ1 ENSG00000168334|CMYA1 ENSG00000173638|SLC19A1  
ENSG00000173894|CBX2 ENSG00000178554|Q8N8D4\_HUMAN ENSG00000182490|TSSK2 ENSG00000185481|C21orf129 ENSG00000187045|TMPRSS6 ENSG00000192639|WDR5 ENSG00000197256|ANKRD25 ENSG00000197948|FCHSD1  
ENSG00000198598|MMP17 ENSG00000062096|ARSD ENSG00000100714|MTHFD1 ENSG00000104671|DCTN6 ENSG00000116209|TMEM59 ENSG00000119421|NDUFA8 ENSG00000121933|ADORA3 ENSG00000124356|STAMPB  
ENSG00000129007|CALML4 ENSG00000129071|MBD4 ENSG00000137440|FGFBP1 ENSG00000148848|ADAM12 ENSG00000152076|CCDC74B ENSG00000157827|FMNL2 ENSG00000163040|CCDC74A ENSG00000165471|MBL2  
ENSG00000166006|KCNK2 ENSG00000173064|C12orf51 ENSG00000177842|ZNF620 ENSG00000179902|C1orf194 ENSG00000183347|GBP6 ENSG00000187068|NP\_001020437.1 ENSG00000197933|ZF36\_HUMAN ENSG00000198515|CNGA1  
GGCCAG ENSG0000006075|CCL3 ENSG0000007174|DNAH9 ENSG0000007866|TEAD3 ENSG0000011028|MRC2 ENSG00000067221|STOML1 ENSG00000072182|ACCN4 ENSG00000075891|PAX2 ENSG00000084774|CAD  
ENSG00000090565|RAB11FIP3 ENSG00000099889|ARVCF ENSG00000100417|PMM1 ENSG00000101188|NTSR1 ENSG00000101298|RAD21L1 ENSG00000101306|MYLK2 ENSG00000103024|NME3 ENSG00000103249|CLCN7  
ENSG00000105963|CENTA1 ENSG00000119383|PPP2R4 ENSG00000126091|T3GAL3 ENSG00000127824|TUBA4A ENSG00000127948|POR ENSG00000128271|ADORA2A ENSG00000132254|ARFIP2 ENSG00000132478|UNK  
ENSG00000132517|GPR172B ENSG00000140548|ZNF710 ENSG00000154016|GRAP ENSG00000157570|TSPAN18 ENSG00000161638|ITGA5 ENSG00000162551|ALPL ENSG00000163870|GPR175 ENSG00000166169|POLL  
ENSG00000168096|ANKS3 ENSG00000168539|CHRM1 ENSG00000169921|Q75L30\_HUMAN ENSG00000172638|EFEMP2 ENSG00000173456|SNF26 ENSG00000174502|SLC26A9 ENSG00000178209|PLEC1  
ENSG00000181409|AATK ENSG00000182196|ARL6IP4 ENSG00000182580|EPHB3 ENSG00000183741|CBX6 ENSG00000186543|Q6ZWC0\_HUMAN ENSG00000188015|S100A3 ENSG00000188185|Q6ZQ8\_HUMAN ENSG00000189077|NP\_114131.1  
ENSG00000196361|ELAVL3 ENSG00000196642|C9orf86 ENSG00000198794|SCAMP5 ENSG00000203959|PIN1L ENSG00000203993|C9orf37 ENSG00000204003|LCN6 ENSG00000205017|CCL3L1 ENSG00000205021|CCL3L3  
ENSG00000205336|GPR56 ENSG00000205923|CEMP1 ENSG00000006074|CCL18 ENSG00000009621|PABPC4 ENSG00000112294|ALDH5A1 ENSG00000124813|RUNX2 ENSG00000131381|ZFYVE20 ENSG00000131778|CHD1L  
ENSG00000136842|TMOD1 ENSG00000137098|SPAG8 ENSG00000143612|C1orf43 ENSG00000145685|LHFP2 ENSG00000150347|ARD5B ENSG00000166405|RIC3 ENSG00000167672|CATSPER2 ENSG00000167077|NP\_689726.3  
GGCCCT ENSG0000006016|CRLF1 ENSG00000064300|NGFR ENSG00000078902|TOLLIP ENSG00000090006|LTBP4 ENSG00000099203|TMED1 ENSG00000101216|GMEB2 ENSG00000101460|MAP1LC3A ENSG00000101986|ABCD1  
ENSG00000103249|CLCN7 ENSG00000105204|DYRK1B ENSG00000105647|PIK3R2 ENSG00000107954|NEURL ENSG00000108387|SEPT4 ENSG00000109736|NP\_001111.2 ENSG00000116337|AMPD2 ENSG00000117122|MFAP2  
ENSG00000117407|ARTN ENSG00000117984|CTSD ENSG00000125347|IRF1 ENSG00000129910|CDH15 ENSG00000130584|ZBTB46 ENSG00000130702|LAMA5 ENSG00000131061|ZNF341 ENSG00000132563|REEP2  
ENSG00000138316|ADAMTSL4 ENSG00000142677|IL22RA1 ENSG00000144579|CTDSP1 ENSG00000146205|TMEM16G ENSG00000148343|FAM73B ENSG00000154342|WNT3A ENSG00000155366|RHOC ENSG00000158863|RAI16  
ENSG00000160867|FGFR4 ENSG00000164620|C5orf16 ENSG00000166359|WDR88 ENSG00000167123|CECAM1 ENSG00000167778|SPRYD3 ENSG00000167807|NP\_001026904.1 ENSG00000169220|RGS14 ENSG00000170616|SCRT1  
ENSG00000173581|CCDC106 ENSG00000177542|SLC25A22 ENSG00000178821|TMEM52 ENSG00000179262|RAD23A ENSG00000184363|PKP3 ENSG00000188660|C21orf125 ENSG00000188976|NOC2L ENSG00000191722|SRC  
ENSG00000198792|C22orf5 ENSG00000203942|C10orf62 ENSG00000000005|TMED ENSG00000079156|OSBP16 ENSG00000121057|AKAP1 ENSG00000131080|EDA2R ENSG00000134259|NGFV ENSG00000147010|SH3KBP1  
ENSG00000151090|THRB ENSG00000152213|ARL11 ENSG00000157456|CCNB2 ENSG00000163075|NP\_001025167.1 ENSG00000164056|SPRY1 ENSG00000166938|DIS3L ENSG00000166984|TCP10L ENSG00000177189|RPS6KA3  
ENSG00000184719|C10orf59 ENSG00000196072|BLOC1S2 ENSG00000204390|HSPALL ENSG00000204709|C6orf100  
GGCCGG ENSG00000066735|Q96GK3\_HUMAN ENSG00000069011|PITX1 ENSG00000076826|KIAA1543 ENSG00000076984|O14733-2 ENSG00000090372|STRN4 ENSG00000099985|OSM ENSG00000102882|MAPK3 ENSG00000104853|CLPTM1  
ENSG00000109065|NAT9 ENSG00000109072|VTN ENSG00000115286|NDUFS7 ENSG00000126934|MAP2K2 ENSG00000128713|HODX11 ENSG00000129654|FOXJ1 ENSG00000131584|CENTB5 ENSG00000131668|BARX1  
ENSG00000132471|WBP2 ENSG00000132879|FBXO44 ENSG00000134030|KIAA0427 ENSG00000143869|GDF7 ENSG00000146540|NP\_115726.1 ENSG00000149926|FAM57B ENSG00000154252|GAL3ST2 ENSG00000159335|PTMS  
ENSG00000160214|RRP1 ENSG00000160877|BTBD14B ENSG00000160991|TMEM142B ENSG00000164855|NP\_689902.2 ENSG00000165802|NELF ENSG00000167136|INDOG ENSG00000169750|RAC3 ENSG00000171298|GAA  
ENSG00000179740|C19orf290S ENSG00000183114|FAM43B ENSG00000185236|RAB11B ENSG00000185818|NAT8L ENSG00000196456|ZNF775 ENSG00000196642|C9orf86 ENSG00000198883|PNMA5 ENSG00000203813|HIST2H3C  
ENSG0000011638|TMEM159 ENSG00000091127|PUS7 ENSG00000100652|SLC10A1 ENSG00000101191|DID1 ENSG00000117602|DSCR1L2 ENSG00000121691|CAT ENSG00000124214|STAU1 ENSG00000124788|ATXN1  
ENSG00000126950|TMEM35 ENSG00000135070|ISCA1 ENSG00000140937|CDH11 ENSG00000161654|LSML2 ENSG00000162545|CAMK2N1 ENSG00000162747|FCGR3B ENSG00000168421|RHOF ENSG00000180287|PLD5  
ENSG00000181634|TNFSF15 ENSG00000184992|BRI3BP  
GGCCTAC ENSG00000090273|NUDC ENSG00000104894|CD37 ENSG00000105122|NP\_075055.1 ENSG00000105671|DDX49 ENSG00000124155|PIGT ENSG00000125633|CCDC93 ENSG00000133055|MYBPH ENSG00000139182|CLSTN3  
ENSG00000158578|ALAS2 ENSG00000162194|C11orf48 ENSG00000163362|C1orf106 ENSG00000163704|PRRT3 ENSG00000164300|SERINC5 ENSG00000168237|NP\_660305.2 ENSG00000171159|C9orf16 ENSG00000172653|C17orf66  
ENSG00000183473|SSTR3 ENSG00000185370|Q8WZ02\_HUMAN ENSG00000185522|C11orf35 ENSG00000186051|TAL2 ENSG00000188525|NM\_207480 ENSG00000196843|ARD5A ENSG00000197136|PCNX13 ENSG00000198171|C20orf116  
ENSG00000184322|CNR1 ENSG00000138784|NP\_060170.1 ENSG00000140199|SLC12A6 ENSG00000141759|TXNL4A ENSG00000163808|KIF15 ENSG00000165078|CPA6 ENSG00000165379|LRFN5 ENSG00000180071|ANKRD18A  
ENSG00000180329|CCDC43 ENSG00000184867|ARMCX2 ENSG00000189377|NP\_940879.1 ENSG00000204804|FAM27D1 ENSG00000205112|Q6UXR9\_HUMAN ENSG00000205976|Q6ZVT4\_HUMAN  
GGCCTTA ENSG00000063978|RNF4 ENSG00000104823|ECH1 ENSG00000116661|FBXO2 ENSG00000124570|SERPINB6 ENSG00000125804|C20orf91 ENSG00000126785|RHOJ ENSG00000132021|EXOC3L2 ENSG00000137288|C6orf125  
ENSG00000143479|DYRK3 ENSG00000143850|PLEKHA6 ENSG00000146216|TTBK1 ENSG00000148180|GSN ENSG00000150201|FYXD4 ENSG00000158716|DUSP23 ENSG00000161103|Q5BKY6\_HUMAN ENSG00000164266|SPINK1  
ENSG00000164970|C9orf25 ENSG00000165171|WBSR27 ENSG00000174939|ASFPH1 ENSG00000174996|KLC2 ENSG00000181722|ZBTB20 ENSG00000182057|Q8IXR4\_HUMAN ENSG00000183044|ABAT ENSG00000185370|Q8WZ02\_HUMAN  
ENSG00000185978|H2AFB3 ENSG00000188199|FAM22B ENSG00000197901|SLC22A6 ENSG00000198082|H2AFB1 ENSG00000198518|HIST1H4E ENSG00000204043|FAM22C ENSG00000112996|MRRP3 ENSG00000124562|SNRPC  
ENSG00000128607|NP\_055812.1 ENSG00000164284|GRPEL2 ENSG00000175105|ZNF654 ENSG00000183035|CYLC1 ENSG00000183647|ZNF530 ENSG00000184895|SRY ENSG00000185037|XR\_016629.1 ENSG00000185177|ZNF479  
ENSG00000196946|LUC7L ENSG00000197990|XR\_016643.1 ENSG00000198961|PJA2  
GGCCTTC ENSG00000011009|LYPLA2 ENSG00000050327|ARHGEF5 ENSG00000075461|CACNG4 ENSG00000079805|DNM2 ENSG00000101444|AHCY ENSG00000103005|C16orf57 ENSG00000106333|PCOLCE ENSG00000110169|HPX  
ENSG00000122852|SFTPA1B ENSG00000132205|EMILIN2 ENSG00000140092|FBLN5 ENSG00000143028|SYPL2 ENSG00000148702|HABP2 ENSG00000155034|FBX18 ENSG00000160613|PCSK7 ENSG00000168309|FAM107A  
ENSG00000169955|ZNF747 ENSG00000171388|APLN ENSG00000174264|Q4TT42\_HUMAN ENSG00000175470|PPP2R2D ENSG00000176762|Q8N1N1\_HUMAN ENSG00000181250|MYADML ENSG00000185214|KLHL22 ENSG00000185303|SFTPA1  
ENSG00000185554|NXF2 ENSG00000185945|NXF2\_HUMAN ENSG00000187796|CARD9 ENSG00000188486|H2AFX ENSG00000196304|NM\_207389 ENSG00000197859|ADAMTSL2 ENSG00000204071|TCEAL6 ENSG00000206076|Q6ZQR8\_HUMAN  
ENSG00000204048|UBR2 ENSG00000075420|FNDC3B ENSG00000100804|PSMB5 ENSG00000102384|CENPF ENSG00000104325|DECR1 ENSG00000106952|TNFSF8 ENSG00000111707|SUDS3 ENSG00000112333|NR2E1  
ENSG00000113384|GOLPH3 ENSG00000119950|MXI1 ENSG00000123570|RAB9B ENSG00000125846|ZNF133 ENSG00000135960|EDAR ENSG00000150712|MTMR12 ENSG00000163625|WDFY3 ENSG00000166170|BAG5  
ENSG00000171121|KCNMB3 ENSG00000174013|FBXO45 ENSG00000179578|Q8N4V4\_HUMAN ENSG00000181656|GPR88 ENSG00000187189|TSPYL4 ENSG00000197961|ZNF121 ENSG00000198620|XR\_017846.1 ENSG00000203947|NP\_001007552.1  
ENSG00000204884|Q6ZVI2\_HUMAN  
GGCCTTG ENSG00000068971|PPP2R5B ENSG00000077235|GTF3C1 ENSG00000088356|PDRG1 ENSG00000097007|ABL1 ENSG00000099860|GADD45B ENSG00000100023|PPL2 ENSG00000101997|CCDC22 ENSG00000103415|HMOX2  
ENSG00000116852|KIF21B ENSG00000126561|STAT5A ENSG00000130054|TMEM28 ENSG00000131379|C3orf20 ENSG00000137343|C6orf134 ENSG00000154358|OR5C ENSG00000159423|ALDH4A1 ENSG00000160867|FGFR4  
ENSG00000164050|PLXNB1 ENSG00000169682|LAT ENSG00000169689|STRA13 ENSG00000177697|CD151 ENSG00000178934|LEG7\_HUMAN ENSG00000180448|HMHA1 ENSG00000182490|TSSK2 ENSG00000183020|AP2A2  
ENSG00000183707|Q96AT3\_HUMAN ENSG00000203888|Q6ZRP6\_HUMAN ENSG00000205076|LGLA5 ENSG00000206177|HBM ENSG00000005249|PRKAR2B ENSG00000055208|MAP3K7IP2 ENSG00000072080|SPP2 ENSG00000083312|TNPO1  
ENSG00000096063|SRPK1 ENSG00000108506|INTS2 ENSG00000113569|NUP155 ENSG00000114861|FOXP1 ENSG00000117868|FAM62B ENSG00000124205|EDN3 ENSG00000135002|RFK ENSG00000144749|LRIG1  
ENSG00000153002|CPB1 ENSG00000158290|CUL4B ENSG00000164989|C9orf93 ENSG00000170941|NP\_065895.1 ENSG00000182498|RPS18 ENSG00000186031|Q6ZSY1\_HUMAN ENSG00000187189|TSPYL4 ENSG00000198087|CD2AP  
ENSG00000205608|Q6ZQP9\_HUMAN  
GGCGAGA ENSG00000007392|LUC7L ENSG00000010379|SLC6A13 ENSG00000014138|POLA2 ENSG00000072518|MARK2 ENSG00000100141|PISD ENSG00000104856|RELB ENSG00000122386|ZNF205 ENSG00000128203|ASPHD2  
ENSG00000130159|ECSIT ENSG00000132702|HAPLN2 ENSG00000133027|PMT ENSG00000142910|TINAGL1 ENSG00000144589|STK11IP ENSG00000156564|LRFN2 ENSG00000157881|PANK4 ENSG00000158764|ITLN2  
ENSG00000169955|ZNF747 ENSG00000178093|TSSK6 ENSG00000180900|SCRIB ENSG00000196242|OR2C3 ENSG00000198010|DLGAP2 ENSG00000204610|TRIM15 ENSG00000204610|TRIM15 ENSG00000054598|FOXC1  
ENSG00000063601|MTMR1 ENSG00000092148|HECTD1 ENSG00000103599|IQCH ENSG00000115415|STAT1 ENSG00000116750|UCHL5 ENSG00000136238|RAC1 ENSG00000138395|ALS2CR7 ENSG00000141200|KIF2B  
ENSG00000141668|CBLN2 ENSG00000145041|Q8TBD9\_HUMAN ENSG00000145244|CORIN ENSG00000151500|THYN1 ENSG00000152620|C5orf33 ENSG00000153922|CHD1 ENSG00000162745|OLFML2B ENSG00000164338|UTP15  
ENSG00000164761|TNFRSF11B ENSG00000167383|ZNF229 ENSG00000170634|ACYP2 ENSG00000175643|C16orf75 ENSG00000180828|BHLHB5 ENSG00000181315|ZNF322A ENSG00000188801|ZNF322B ENSG00000205057|CLLUL10S  
ENSG00000205822|Q49A35\_HUMAN  
GGCGCCC ENSG00000006015|C19orf60 ENSG00000089505|CMTM1 ENSG00000099364|FBXL19 ENSG00000099385|BCL7C ENSG00000100139|MICALL1 ENSG00000100347|SAMM50 ENSG00000105679|GAPDH5 ENSG00000105737|GRIK5  
ENSG00000107317|PTGDS ENSG00000118137|APOA1 ENSG00000125492|BARHL1 ENSG00000130201|EXOC3L2 ENSG00000131188|PRR7 ENSG00000140254|DUOX1A1 ENSG00000141837|CACNA1A ENSG00000154146|NRGN  
ENSG00000157782|CABP1 ENSG00000157911|PEX10 ENSG00000160325|C9orf7 ENSG00000163702|IL17RC ENSG00000163872|YEATS2 ENSG00000166831|RBPMS2 ENSG00000168427|KLHL30 ENSG00000176887|SOX11  
ENSG00000178363|CALML3 ENSG00000179755|XR\_017798.1 ENSG00000184163|FAM132A ENSG00000187796|CARD9 ENSG00000188290|HES4 ENSG00000188735|NP\_001074294.1 ENSG00000189110|Q6ZKR9\_HUMAN ENSG00000196293|DUX4  
ENSG00000203822|Q6ZV10\_HUMAN ENSG00000205011|NP\_001007547.1 ENSG00000205599|Q6ZUY4\_HUMAN ENSG00000206197|NP\_001013723.1 ENSG00000007539|TRIP13 ENSG00000099940|SNAP29 ENSG00000104447|TRPS1 ENSG00000106686|C9orf68  
ENSG00000109099|PMP22 ENSG00000111432|FZD10 ENSG00000115934|PPL3 ENSG00000117602|DSCR1L2 ENSG00000135540|NHSL1 ENSG00000140968|IRF8 ENSG00000141759|TXNL4A ENSG00000146072|TNFRSF21  
ENSG00000147488|ST18 ENSG00000152268|SPON1 ENSG00000153162|BMP6 ENSG00000159216|RUNX1 ENSG00000164307|ARTS1\_HUMAN ENSG00000171056|SOX7 ENSG00000171291|ZNF439 ENSG00000177606|JUN  
ENSG00000181656|GPR88 ENSG00000185203|Q96S36\_HUMAN ENSG00000185345|PARK2 ENSG00000186395|KRT10 ENSG00000189367|C6orf174  
GGCGCCT ENSG00000100116|GCAT ENSG0000010427|MLC1 ENSG00000101222|C20orf28 ENSG00000101489|BRUNO14 ENSG00000102104|RS1 ENSG00000129925|TMEM8 ENSG00000153060|TEKT5 ENSG00000169918|OTUD7A  
ENSG00000176357|C10orf55 ENSG00000176884|GRIN1 ENSG00000177984|NP\_976222.1 ENSG00000182446|NPLOC4 ENSG00000183971|NPW ENSG00000184221|OLIG1 ENSG00000185187|SIGIRR ENSG00000186111|PIP5K1C  
ENSG00000206197|NP\_001013723.1 ENSG000000009307|NRAS ENSG00000072422|RHOTB1 ENSG00000078401|EDN1 ENSG00000114450|GNB4 ENSG00000115840|SLC25A12 ENSG00000118508|RAB32 ENSG00000119953|SMNDC1  
ENSG00000128641|MYO1B ENSG00000152455|SUV39H2 ENSG00000153487|ING1 ENSG00000154710|KCTD7 ENSG00000157557|ETS2 ENSG00000163513|TGFB2 ENSG00000164485|IL22RA2 ENSG00000164494|PDSS2  
ENSG00000164828|UNC84A ENSG00000165449|SLC16A9 ENSG00000165632|TAF3 ENSG00000165914|TTCB7 ENSG00000168348|INSM2 ENSG00000171824|EXOSC10 ENSG00000173334|TRIB1 ENSG00000176842|IRX5  
ENSG00000178184|PARD6A ENSG00000181588|RKHD1 ENSG00000183831|ANKRD45 ENSG00000186480|INSIG1 ENSG00000196208|NP\_683701.2 ENSG00000205325|NP\_001001684.1  
GGCGCGG ENSG000000011304|PTBP1 ENSG00000043591|ARDB1 ENSG00000067365|C16orf68 ENSG00000069011|PITX1 ENSG00000070182|SPTB ENSG00000114631|PDXL2 ENSG00000124140|SLC12A5 ENSG00000124159|MATN4

ENSG00000126067|PSMB2 ENSG00000130332|LSM7 ENSG00000133246|PRAM1 ENSG00000135454|B4GALNT1 ENSG00000135722|FBXL8 ENSG00000142910|TINAGL1 ENSG00000143748|NVL ENSG00000144119|C1QL2  
ENSG00000158623|TSGA13 ENSG00000160293|VAV2 ENSG00000160650|Q96H20\_HUMAN ENSG00000160959|LRRC14 ENSG00000161021|LTC4S ENSG00000164917|K0415\_HUMAN ENSG00000165175|MID1IP1 ENSG00000166862|CACNG2  
ENSG00000167543|C17orf13 ENSG00000171119|NRTN ENSG00000171680|PLEKHG5 ENSG00000173457|PPP1R14B ENSG00000176887|SOX1 ENSG00000177238|TRIM72 ENSG00000182351|CRIP1  
ENSG00000183087|GAS6 ENSG00000186493|C5orf38 ENSG00000186866|POFUT2 ENSG00000188763|FZD9 ENSG00000196378|Q9BSZ0\_HUMAN ENSG00000198832|SELM\_HUMAN ENSG00000204058|C10orf41 ENSG00000204099|NEU4  
ENSG00000070540|WIP1 ENSG00000073464|CLCN4 ENSG00000077809|GTF2I ENSG00000101040|ZMYND8 ENSG00000113391|C5orf21 ENSG00000119138|KLF9 ENSG00000124831|LRRFIP1 ENSG00000133627|ACTR3B  
ENSG00000143458|NP\_653219.1 ENSG00000147883|CDKN2B ENSG00000177125|ZBTB34 ENSG00000196693|ZNF33B ENSG00000198521|ZNF43 ENSG00000204884|Q6ZVI2\_HUMAN  
GGCGCGT ENSG00000070780|CCDC124 ENSG00000070047|K1542\_HUMAN ENSG00000103150|MLYCD ENSG00000105972|C7orf20 ENSG00000115297|TLX2 ENSG00000119772|DNMT3A ENSG00000130600|H19 ENSG00000132938|KIAA0774  
ENSG00000133275|CSNK1G2 ENSG00000134871|COL4A2 ENSG00000137880|GCHFR ENSG00000148805|NR\_002934.2 ENSG00000149418|ST14 ENSG00000160202|CRYAA ENSG00000165175|MID1IP1 ENSG00000167716|WDR81  
ENSG00000168993|NM\_006651.3 ENSG00000169683|LRRC45 ENSG00000176973|FAM89B ENSG00000185830|C22orf37 ENSG00000188816|HMX2 ENSG00000196293|DUX4 ENSG00000204268|Q6ZVY1\_HUMAN  
ENSG00000100354|TNRC6B ENSG00000122042|UBL3 ENSG00000134324|LPIN1 ENSG00000140948|ZCCHC14 ENSG00000151150|ANK3  
GGCGGAA ENSG00000002330|BAD ENSG00000010310|GIPR ENSG00000049541|RFC2 ENSG00000079435|LIPE ENSG00000101193|C20orf11 ENSG00000106038|EVX1 ENSG00000125901|MRPS26  
ENSG00000126233|SLURP1 ENSG00000128298|BAIAP2L2 ENSG00000131668|BARX1 ENSG00000136717|BIN1 ENSG00000137699|TRIM29 ENSG00000142910|TINAGL1 ENSG00000160796|NBEAL2 ENSG00000162600|OMAL1  
ENSG00000173442|EHPBP1L1 ENSG00000178685|PARP10 ENSG00000185730|ZNF696 ENSG00000186111|PIP5K1C ENSG00000198077|CYP2A7 ENSG00000205971|NP\_001019848.1 ENSG0000030066|NUP160 ENSG00000058600|POLR3E  
ENSG00000070540|WIP1 ENSG00000092203|TOX4 ENSG00000122958|VPS26A ENSG00000124203|C20orf174 ENSG00000126950|TMEM35 ENSG00000136206|WBSR19 ENSG00000136881|BAAT ENSG00000141542|RAB40B  
ENSG00000148484|RSU1 ENSG00000149313|AASDHPPT ENSG00000151461|UPF2 ENSG00000163610|Q9NUU0\_HUMAN ENSG00000163904|SENP2 ENSG00000165379|LRPNS ENSG00000171848|RRM2 ENSG00000179029|TMEM107  
ENSG00000180772|AGTR2 ENSG00000185414|MRPL30 ENSG00000186645|NP\_001027561.1 ENSG00000196593|NM\_207439 ENSG00000198305|NP\_001027561.1 ENSG00000205505|NP\_001027561.1 ENSG00000205506|NP\_001027561.1 ENSG00000205508|NP\_001027561.1  
GGCGTAT ENSG00000071205|ARHGAP10 ENSG00000089234|BRAP ENSG00000102050|PRAF2 ENSG00000105556|NP\_06020.1 ENSG00000115459|RBED1 ENSG00000127511|SIN3B ENSG00000129245|FXR2 ENSG00000146067|Q9NWO0\_HUMAN  
ENSG00000148468|C10orf38 ENSG00000162576|MXRA8 ENSG00000162783|IER5 ENSG00000162896|PIGR ENSG00000165861|ZFVVE1 ENSG00000174527|MYO1H ENSG00000180914|OXTR ENSG00000182378|PLCXD1  
ENSG00000183421|RIPK4 ENSG00000185022|MAFF ENSG00000185831|NR\_003081.1 ENSG00000196652|ZKSCAN5 ENSG00000204842|ATXN2 ENSG00000205653|Q6ZUF2\_HUMAN ENSG0000025156|HSF2 ENSG00000081189|MEF2C  
ENSG00000083720|OXCT1 ENSG00000099256|PRTFDC1 ENSG00000109519|GRFEL1 ENSG00000111859|NEDD9 ENSG00000112701|SENP6 ENSG00000116783|FPGT ENSG00000118496|FBXO30 ENSG00000119844|AFTPH  
ENSG00000120549|KIAA1217 ENSG00000122299|ZC3H7A ENSG00000131482|GGRF1 ENSG00000132463|GRSF1 ENSG00000134970|TICAM2 ENSG00000135763|KIAA0133 ENSG00000136539|CD302 ENSG00000137770|CTDSP12  
ENSG00000140391|TSPAN3 ENSG00000143149|ALDH9A1 ENSG00000147316|MCPH1 ENSG00000149124|GLYAT ENSG00000151792|CTS0 ENSG00000154654|NCAM2 ENSG00000163281|GNPDA2 ENSG00000166927|MS4A7  
ENSG00000172315|TP53RK ENSG00000177497|CXorf42 ENSG00000188996|HUS1 ENSG00000196072|BLOC1S2  
GGCGTCA ENSG000000066336|SPI1 ENSG00000100668|LRP5L ENSG00000100412|AC02 ENSG00000100558|PLEK2 ENSG00000101152|DNAJC5 ENSG00000105376|ICAM5 ENSG00000124159|MATN4 ENSG00000137731|FXVD2  
ENSG00000143569|UBAP2L ENSG00000143641|GALNT2 ENSG00000166925|TRC2D4 ENSG00000178821|TMEM52 ENSG00000184709|LRRC26 ENSG00000186007|LEMD1 ENSG00000204585|Q8N8T0\_HUMAN ENSG00000205538|Q6ZVP1\_HUMAN  
ENSG00000065183|WDR3 ENSG00000100425|BRD1 ENSG00000103671|TRIP4 ENSG00000104626|THEX1 ENSG00000109670|FBXW7 ENSG00000111790|FGFR1OP2 ENSG00000118495|PLAGL1 ENSG00000124380|SNUT3\_HUMAN  
ENSG00000125245|GPR18 ENSG00000126777|KTN1 ENSG00000130856|ZNF236 ENSG00000132763|MMACHC ENSG00000133812|SBF2 ENSG00000141380|SS18 ENSG00000149187|CUGBP1 ENSG00000153574|RPIA  
ENSG00000154144|TBRG1 ENSG00000154654|NCAM2 ENSG00000155324|GRAMD3 ENSG00000171033|PKIA ENSG00000174606|ANGEL2 ENSG00000181495|C5orf23 ENSG00000184492|FOXD4 ENSG00000189127|NP\_001004441.1  
ENSG00000203897|Q6W422\_HUMAN  
GGCTAAT ENSG00000027869|SH2D2A ENSG00000070526|ST6GALNAC1 ENSG00000100365|NCF4 ENSG00000101577|LPIN2 ENSG00000108786|HSD17B1 ENSG00000116273|PHF13 ENSG00000124237|C20orf85 ENSG00000124374|PAIP2B  
ENSG00000130429|ARPC16 ENSG00000139549|DHH ENSG00000166436|TRIM66 ENSG00000169976|SF3B5 ENSG00000171722|C1orf111 ENSG00000171855|IFNB1 ENSG00000172366|C16orf14 ENSG00000173862|Q9NWP0\_HUMAN  
ENSG00000174353|NP\_061864.2 ENSG00000178226|PRSS36 ENSG00000178248|Q8N402\_HUMAN ENSG00000180824|Q8NAH5\_HUMAN ENSG00000183569|SERHL ENSG00000184363|PKP3 ENSG00000184677|ZBTB40 ENSG00000186190|C20orf185  
ENSG00000186197|ENO1P ENSG00000186832|KRT16 ENSG00000186976|DUBP\_HUMAN ENSG00000187051|RPS19BP1 ENSG00000203876|Q5T6G7\_HUMAN ENSG00000080839|RBL1 ENSG00000106803|SEC6B ENSG00000111269|CREBL2  
ENSG00000112245|PTP4A1 ENSG00000114026|OGG1 ENSG00000118816|CCNI1 ENSG00000133805|AMPD3 ENSG00000134757|DSG3 ENSG00000135847|ACBD6 ENSG00000136161|RCBTB2 ENSG00000143013|LMO4  
ENSG00000145386|CCNA2 ENSG00000147873|IFNA5 ENSG00000159140|SON ENSG00000163006|NP\_659415.1 ENSG00000163285|GABRG1 ENSG00000163634|THOC7 ENSG00000165868|HSPA12A ENSG00000168769|KIAA1546  
ENSG00000171174|RBKS ENSG00000172752|NP\_694996.3 ENSG00000175265|GOLGA8A ENSG00000175893|ZDHHC21 ENSG00000176142|TMEM39A ENSG00000184895|SRY  
GGCTAGC ENSG00000003147|IC1A1 ENSG00000081248|CACNA1S ENSG00000100412|AC02 ENSG00000100758|PLEK2 ENSG00000110811|LEPREL2 ENSG00000114867|EIF4G1 ENSG00000122733|KIAA1045  
ENSG00000125657|TNFSF9 ENSG00000125877|ITPA ENSG00000138092|CENPO ENSG00000140254|DUOX1A1 ENSG00000143379|STDB1 ENSG00000143418|LASS2 ENSG00000143545|RAB13 ENSG00000149591|TAGLN  
ENSG00000154917|RAB6B ENSG00000161509|GRIN2C ENSG00000163932|PRKCD ENSG00000167100|SAMD14 ENSG00000169733|RFNG ENSG00000172732|MUS81 ENSG00000184634|MED12 ENSG00000185347|C14orf80  
ENSG00000187726|DNAJB13 ENSG00000188508|U467\_HUMAN ENSG00000196526|AFAP1 ENSG00000077616|NAALAD2 ENSG00000095627|TDRD1 ENSG00000105877|DNAH11 ENSG00000127324|TSPAN8 ENSG00000133794|ARNTL  
ENSG00000143631|FLG ENSG00000145592|RPL37 ENSG00000149218|ENDOD1 ENSG00000154553|PDLIM3 ENSG00000154814|OXNAD1 ENSG00000166451|CENPN ENSG00000173626|BET3L ENSG00000174007|C3orf34  
ENSG00000183647|ZNF530 ENSG00000185057|BFAF ENSG00000197467|COL13A1  
GGCTATA ENSG00000006283|CACNA1G ENSG00000054116|TRAPPC3 ENSG00000083817|ZNF416 ENSG00000085063|CD59 ENSG00000087085|ACHE ENSG00000101335|MYL9 ENSG00000102104|RS1 ENSG00000103043|VAC14  
ENSG00000135423|GLS2 ENSG00000135473|USP52 ENSG00000139988|RDH12 ENSG00000161179|NP\_001017964.1 ENSG00000165702|GF11B ENSG00000166133|RPUSD2 ENSG00000167740|CYB5D2 ENSG00000167799|NUDT8  
ENSG00000168748|CA7 ENSG00000169689|STRA13 ENSG00000170454|KRT75 ENSG00000173511|VEGFB ENSG00000176029|C1orf16 ENSG00000181763|APR2\_HUMAN ENSG00000186951|PPARA ENSG00000187186|CCL27  
ENSG00000189152|Q8TTC17\_HUMAN ENSG00000198171|C20orf116 ENSG00000205085|NP\_001012457.1 ENSG00000005249|PRKAR2B ENSG00000069974|RAB27A ENSG00000075407|ZNF37A ENSG00000094880|CDC23 ENSG00000104290|FZD3  
ENSG00000104427|C8orf70 ENSG00000106819|ASPN ENSG00000111863|C6orf105 ENSG00000115568|ZNF141 ENSG00000139826|ABHD13 ENSG00000146411|SLC2A12 ENSG00000147677|EIF3S3 ENSG00000147894|C9orf72  
ENSG00000159082|SYNJ1 ENSG00000163626|COX13 ENSG00000164209|SLC25A46 ENSG00000164306|CCDC111 ENSG00000165983|PTER ENSG00000166068|SPRED1 ENSG00000167383|ZNF229 ENSG00000171735|CAMTA1  
ENSG00000185127|C6orf120 ENSG00000185915|KLHL34 ENSG00000186132|NP\_001017927.1 ENSG00000188393|CLEC2A  
GGCTATG ENSG00000079805|DNM2 ENSG00000111087|GLI1 ENSG00000113048|MRPS27 ENSG00000114767|RRP9 ENSG00000120049|KCNIP2 ENSG00000134339|SAA2 ENSG00000137073|UBAP2  
ENSG00000159495|TGM7 ENSG00000164062|APEH ENSG00000175193|PARL ENSG00000181873|C1orf69 ENSG00000186575|NF2 ENSG00000188706|ZDHC9 ENSG00000198467|TPM2 ENSG00000204633|ACTN3  
ENSG00000079482|OPHN1 ENSG00000086288|TXNDC3 ENSG00000092203|TOX4 ENSG00000095110|FAM55A ENSG00000116678|LEPR ENSG00000128915|NARG2 ENSG00000134884|NP\_060481.3 ENSG00000136104|RNASEH2B  
ENSG00000137185|ZNF193 ENSG00000143248|RGS5 ENSG00000149196|C11orf73 ENSG00000157680|DGKI ENSG00000160633|SABF ENSG00000162598|C1orf87 ENSG00000173110|HSPA6 ENSG00000181908|Q8N9J4\_HUMAN  
ENSG00000188477|Q6UXS0\_HUMAN  
GGCTCCA ENSG00000015532|XYLT2 ENSG00000069424|KCNAB2 ENSG00000087266|SH3BP2 ENSG00000100146|SOX10 ENSG00000103091|WDR59 ENSG00000106633|GCK ENSG00000108509|CAMTA2 ENSG00000109103|UNC119  
ENSG00000114648|KLHL18 ENSG00000125804|C20orf91 ENSG00000137486|ARRB1 ENSG00000137507|LRRC32 ENSG00000142279|WTP1 ENSG00000143891|GALM ENSG00000145901|TNIP1 ENSG00000148341|SH3GLB2  
ENSG00000174633|NP\_001025035.1 ENSG00000155352|FAM39B ENSG00000155366|RHOC ENSG00000158555|GDPD5 ENSG00000163435|ELF3 ENSG00000169733|RFNG ENSG00000171671|C11orf76 ENSG00000174886|NDUFA11  
ENSG00000174915|PTDSS2 ENSG00000182484|FAM39DP ENSG00000184207|NP\_001035830.1 ENSG00000185370|Q8WZ02\_HUMAN ENSG00000185596|Q9NSV7\_HUMAN ENSG00000204673|AKT1S1 ENSG00000018236|CNTN1 ENSG00000026751|SLAMF7  
ENSG00000076685|NT5C2 ENSG00000112414|GPR126 ENSG00000115687|PASK ENSG00000122126|OCRL ENSG00000136698|CFCI1 ENSG00000138483|CCDC54 ENSG00000139131|YARS2 ENSG00000139946|PELI2  
ENSG00000145555|MYO10 ENSG00000145721|LIX1 ENSG00000145982|FARS2 ENSG00000152093|NP\_001072998.1 ENSG00000152611|CAPSL ENSG00000160049|DFFA ENSG00000162419|GMEB1 ENSG00000166881|K0286\_HUMAN  
ENSG00000169605|GKN1 ENSG00000182621|PLCB1 ENSG00000188611|ASAH2C ENSG00000197627|Q9UFV3\_HUMAN ENSG00000198526|PABPC2 ENSG00000206384|Q69YT0\_HUMAN  
GGCTGAG ENSG00000089693|MLF2 ENSG00000091732|ZC3HC1 ENSG00000095321|CRAT ENSG00000100243|CYBR3 ENSG00000100726|TELO2 ENSG00000102032|RENBP ENSG00000106018|VIPR2 ENSG00000106266|SNX8  
ENSG00000107954|NEURL ENSG00000110665|C11orf21 ENSG00000115041|KCNIP3 ENSG00000115325|DOK1 ENSG00000122490|PQLC1 ENSG00000124302|CHST8 ENSG00000128563|PRKRIP1 ENSG00000130640|TUBGCP2  
ENSG00000136942|RPL35 ENSG00000138623|SEMA7A ENSG00000145916|RMND5B ENSG00000149300|C11orf52 ENSG00000164362|TERT ENSG00000164855|NP\_689902.2 ENSG00000172780|RAB43 ENSG00000173227|SYT12  
ENSG00000174403|NP\_689970.1 ENSG00000177700|POLR2L ENSG00000182902|SLC25A18 ENSG00000183847|Q9P1C0\_HUMAN ENSG00000185436|IL28RA ENSG00000186635|STARD10 ENSG00000186998|EMID1 ENSG00000187492|NP\_001007541.1  
ENSG00000198293|Q96HM8\_HUMAN ENSG00000204423|C9orf33 ENSG00000204620|Q6ZPC8\_HUMAN ENSG00000204870|Q6ZW03\_HUMAN ENSG00000205356|NP\_056210.1 ENSG00000075785|RAB7A ENSG00000091136|LAMB1 ENSG00000105974|CAV1  
ENSG00000111911|HINT3 ENSG00000117000|RLF ENSG00000120217|CD274 ENSG00000134109|EDEM1 ENSG00000138185|ENTPD1 ENSG00000139908|TSSK4 ENSG00000145495|MARCH6 ENSG00000146109|ABT1  
ENSG00000151164|RAD9B ENSG00000159167|STC1 ENSG00000159399|HK2 ENSG00000173852|DPY19L1 ENSG00000177283|FZD8 ENSG00000177606|JUN ENSG00000182393|IL29 ENSG00000182489|XKRX  
ENSG00000198738|Q5T5W8\_HUMAN ENSG00000204757|Q6ZTL5\_HUMAN  
GGCTGCA ENSG00000005073|HOXA11 ENSG00000022277|C20orf43 ENSG00000023171|GRAMD1B ENSG00000064205|WISP2 ENSG00000067221|STOML1 ENSG00000073067|CYP2W1 ENSG00000079432|CIC ENSG00000100427|MLC1  
ENSG00000101198|C20orf58 ENSG00000103245|NARFL ENSG00000103528|SYT17 ENSG00000110782|SUFU ENSG00000112039|FANCE ENSG00000124074|C16orf48 ENSG00000126062|TMEM115 ENSG00000126215|XRCC3  
ENSG00000130749|C19orf7 ENSG00000135124|P2RX4 ENSG00000149926|FAM57B ENSG00000151006|Q6ZNK7\_HUMAN ENSG00000160097|FNDC5 ENSG00000160959|LRRC14 ENSG00000161798|AQP5 ENSG00000164855|NP\_689902.2  
ENSG00000167513|CDT1 ENSG00000167772|ANGPTL4 ENSG00000173762|CD7 ENSG00000180219|FAM71C ENSG00000182208|MOB2\_HUMAN ENSG00000183172|C22orf32 ENSG00000184640|SEPT9 ENSG00000186653|Q86VD6\_HUMAN  
ENSG00000187609|NP\_060290.3 ENSG00000198711|C1orf191 ENSG00000198792|C22orf5 ENSG00000198952|SMG5 ENSG00000203689|NP\_001018859.1 ENSG00000204052|C6orf154 ENSG00000204579|A2RUR5\_HUMAN ENSG00000205205|C17orf51  
ENSG00000205648|Q6ZRS4\_HUMAN ENSG00000205912|Q6ZTG5\_HUMAN ENSG00000041515|MYO16 ENSG00000042088|TDP1 ENSG00000075651|PLD1 ENSG00000076513|ANKRD13A ENSG00000085999|RAD54L ENSG00000107372|ZFAND5  
ENSG00000110955|ATP5B ENSG00000120885|CLU ENSG00000120937|NPPB ENSG00000137714|FDX1 ENSG00000145982|FARS2 ENSG00000148848|ADAM12 ENSG00000155189|AGPAT5 ENSG00000163170|BOLA3  
GGCTTAC ENSG00000007384|RHBDP1 ENSG000000015413|DPEP1 ENSG00000037637|FBXO42 ENSG00000040487|PQLC2 ENSG00000100867|DHRS2 ENSG00000102871|TRADD ENSG00000105486|LIG1 ENSG00000105583|C19orf56  
ENSG00000108671|PSMD11 ENSG00000111331|OAS3 ENSG00000126890|CTAG2 ENSG00000129351|ILF3 ENSG00000136271|DDX56 ENSG00000156486|KNS2 ENSG00000162623|C10orf49 ENSG00000168505|GBX2  
ENSG00000168610|STAT3 ENSG00000172113|NME6 ENSG00000172212|XR\_017939.1 ENSG00000186063|C1orf80 ENSG00000189013|KIR2DL4 ENSG00000189110|Q6ZRK9\_HUMAN ENSG00000197465|GYPE ENSG00000204071|TCEAL6  
ENSG00000001629|ANKIB1 ENSG00000089157|RPLP0 ENSG00000101447|FAM38D ENSG00000102383|ZDHC15 ENSG00000104824|HNRPL ENSG00000106692|FCMD ENSG00000129083|COPB1 ENSG00000136244|IL6  
ENSG00000137449|CEPB2 ENSG00000138286|KIAA0974 ENSG00000144674|GOLGA4 ENSG00000151893|C10orf46 ENSG00000178395|C1orf65 ENSG00000181544|FANCB ENSG00000186009|ATP4B ENSG00000188811|NP\_001017370.1  
GGCTTAT ENSG00000005100|DHX33 ENSG00000012232|EXTL3 ENSG00000048471|NP\_001073999.1 ENSG00000101265|RASSF2 ENSG00000107960|OBFC1 ENSG00000108379|WNT3 ENSG00000108474|PIGL ENSG00000115602|IL1RL1  
ENSG00000115657|ABCB6 ENSG00000126878|C9orf58 ENSG00000142233|NP\_665806.1 ENSG00000143839|REN ENSG00000157110|RBPMS ENSG00000165478|HEPACAM ENSG00000165671|NSD1 ENSG00000165837|Q5W0A0\_HUMAN  
ENSG00000171045|TSNARE1 ENSG00000176605|C14orf177 ENSG00000197471|SPN ENSG00000198792|C22orf5 ENSG00000205041|Q6UXV6\_HUMAN ENSG00000205629|LCMT1 ENSG00000206524|PKN2 ENSG00000094755|GABRP  
ENSG00000100890|KTA00391 ENSG00000110063|DCPS ENSG00000136144|RCBTB1 ENSG00000138785|INTS12 ENSG00000147041|SYTL5 ENSG00000154059|IMPACT ENSG00000159873|CCDC117 ENSG00000163217|BMP10  
ENSG00000163608|C3orf17 ENSG00000171862|PTENP1 ENSG00000176485|HRASLS3 ENSG00000177483|NP\_001073973.1 ENSG00000188647|PTAR1 ENSG00000197928|ZNF677  
GGCTTCA ENSG00000008710|PKD1 ENSG00000059122|FLYWCH1 ENSG00000088280|DDEF1 ENSG00000100027|YPEL1 ENSG00000106615|RHEB ENSG00000107819|SFXN3 ENSG00000120094|HOXB1  
ENSG00000128438|Q9H7M0\_HUMAN ENSG00000139644|TEGT ENSG00000140678|ITGAX ENSG00000160392|C19orf47 ENSG00000164627|KIF6 ENSG00000169188|APEX2 ENSG00000178181|PWWP2 ENSG00000183579|ZNF3



ENSG00000183785|PEX26 ENSG00000184314|Q9H9T1\_HUMAN ENSG00000187595|NP\_001013646.1 ENSG00000189325|NP\_001010903.2 ENSG00000196186|Q71RF5\_HUMAN ENSG00000198483|ANKRD35 ENSG00000204423|C9orf33 ENSG00000205771|CATSPER2P1
ENSG00000073614|JARID1A ENSG00000085840|ORCL1 ENSG00000123165|ACTR1 ENSG00000124120|C20orf121 ENSG00000132463|GRSF1 ENSG00000137801|THBS1 ENSG00000138095|LRPPRC ENSG00000138604|GLCE
ENSG00000144802|NFKBIZ ENSG00000158042|MRPL17 ENSG00000161057|PSMC2 ENSG00000166762|CATSPER2 ENSG00000167383|ZNF229 ENSG00000174695|TMEM167 ENSG00000184254|ALDH1A3 ENSG00000184500|PROS1
ENSG00000196458|ZNF605 ENSG00000197006|METTL9
GGCTTCT ENSG00000104818|CGB2 ENSG00000104827|CGB ENSG00000115592|PRKAG3 ENSG00000123454|DBH ENSG00000125967|APBA2BP ENSG00000131771|PPP1R1B ENSG00000134470|IL15RA ENSG00000142684|ZNF593
ENSG00000143595|AQP10 ENSG00000149090|NP\_001001991.1 ENSG00000151640|DPYSL4 ENSG00000154342|WNT3A ENSG00000158195|WASF2 ENSG00000159173|TNMI1 ENSG00000161849|KRT84 ENSG00000162517|PEF1
ENSG00000164047|CAMP ENSG00000166133|RFUSD2 ENSG00000166526|ZNF3 ENSG00000167977|KCTD5 ENSG00000169180|XP06 ENSG00000180035|ZNF553 ENSG00000184148|SPRR4 ENSG00000184787|UBE2G2
ENSG00000185176|AQP12B ENSG00000189052|CGB5 ENSG00000196337|CGB7 ENSG00000205205|C17orf51 ENSG00000205460|NP\_001004332.1 ENSG00000205682|TMEM159 ENSG00000084623|EIF3S2 ENSG00000100711|ZFVYE21
ENSG00000103310|ZP2 ENSG00000121089|NACA3P ENSG00000124207|CSE1L ENSG00000127152|BCL11B ENSG00000129682|FGF13 ENSG00000134258|VTCN1 ENSG00000134326|NP\_997198.2 ENSG00000137270|GCM1
ENSG00000138795|LEF1 ENSG00000141279|NPEPPS ENSG00000145649|GZMA ENSG00000153233|PTPRR ENSG00000167383|ZNF229 ENSG00000187446|CHP1\_HUMAN ENSG00000196531|NACA ENSG00000196917|GPR81
ENSG00000197024|ZNF398 ENSG00000204472|AIF1 ENSG00000205110|Q6TKS8\_HUMAN
GGCTTTA ENSG00000064195|DLX3 ENSG00000088876|ZNF343 ENSG00000100014|SPECC1L ENSG00000102879|CORO1A ENSG00000104419|NDRG1 ENSG00000104679|R3HCC1 ENSG00000106077|ABHD11
ENSG00000108669|PSCD1 ENSG00000112837|TBX18 ENSG00000132510|JMJ3 ENSG00000133466|C1QTNF6 ENSG00000133985|TTC9 ENSG00000134905|CAR52 ENSG00000141639|MAPK4 ENSG00000142512|SIGLEC10
ENSG00000142686|NP\_689587.1 ENSG00000146666|Q96IP2\_HUMAN ENSG00000149179|C11orf49 ENSG00000162408|NOL9 ENSG00000166473|PKD1L2 ENSG00000172345|STAR5 ENSG00000172375|TMEM24 ENSG00000172944|FBXO39
ENSG00000179241|LDLRAD3 ENSG00000198336|MYL4 ENSG00000206140|LOC728229 ENSG00000034677|RNF19 ENSG00000039560|RAI14 ENSG00000073464|CLCN4 ENSG00000094755|GABRP ENSG00000100664|EIF5
ENSG00000106524|ANKMY2 ENSG00000121594|CD80 ENSG00000123684|LPGAT1 ENSG00000134970|TICAM2 ENSG00000151422|FER ENSG00000161634|DGD ENSG00000163349|HIPK1 ENSG00000164506|STXBP5
ENSG00000164609|SLU7 ENSG00000165061|ZMAT4 ENSG00000165682|CLEC1B ENSG00000167910|CYP7A1 ENSG00000172388|CDH2 ENSG00000172380|GNL2 ENSG00000175513|TSGA10IP ENSG00000179930|ZNF648
ENSG00000183098|GPC6 ENSG00000187068|NP\_001020437.1 ENSG00000188158|NHS ENSG00000196262|PPIA ENSG00000196565|HBE1 ENSG00000205150|FAM92A3
GGCTTTT ENSG00000082566|PSCD3 ENSG00000088832|FKBP1A ENSG00000101144|BMP7 ENSG00000108179|PPIF ENSG00000112320|SOBP ENSG00000113273|AR5B ENSG00000123364|HOXC13 ENSG00000124444|ZNF576
ENSG00000131652|THOC6 ENSG00000135148|TRAFD1 ENSG00000136488|CSH2 ENSG00000154783|FGD5 ENSG00000156453|PCDH1 ENSG00000160318|CLDND2 ENSG00000161509|GRIN2C ENSG00000164087|WDR51A
ENSG00000166007|LOC399940 ENSG00000166136|NDUFB8 ENSG00000166224|SGPL1 ENSG00000170485|NPAS2 ENSG00000171495|NP\_775760.2 ENSG00000177721|NP\_001014301.1 ENSG00000178449|C12orf62 ENSG00000180304|OAZ2
ENSG00000198225|Q5VVH2\_HUMAN ENSG00000198327|HIST1H4F ENSG00000198668|CALM1 ENSG00000204118|NAP1L6 ENSG00000204455|XR\_015868.1 ENSG00000013503|POLR3B ENSG00000024048|UBR2 ENSG00000052802|SC4MOL
ENSG00000100418|NP\_056519.1 ENSG00000108256|NUFIP2 ENSG00000119318|RAD23B ENSG00000119844|AFTPH ENSG00000127359|KIAA1147 ENSG00000129158|SERGEF ENSG00000131791|PRKAB2 ENSG00000132466|ANKRD17
ENSG00000136521|NDUFB5 ENSG00000143033|MTF2 ENSG00000146282|RARS2 ENSG00000150403|TMCO3 ENSG00000153250|RBMS1 ENSG00000164451|FAM26D ENSG00000165359|DDX26B ENSG00000165730|STOX1
ENSG00000168204|O95014\_HUMAN ENSG00000169507|NP\_775783.1 ENSG00000175348|TMEM9B ENSG00000178700|DHRFL1 ENSG00000183718|TRIM52 ENSG00000196693|ZNF33B ENSG00000197054|ZNF763 ENSG00000204628|GNB2L1
ENSG00000205144|Q6ZV43\_HUMAN
GGGAAAT ENSG00000006194|ZNF263 ENSG00000077238|IL4R ENSG00000100351|GRAP2 ENSG00000108292|MLLT6 ENSG00000112149|CD83 ENSG00000112562|SMOC2 ENSG00000130584|ZBTB46 ENSG00000131871|SELS\_HUMAN
ENSG00000141316|SPACA3 ENSG00000141506|PIK3R5 ENSG00000144063|MALL ENSG00000148843|PDCD11 ENSG00000152291|TGOLN2 ENSG00000158882|TOMM40L ENSG00000163703|CRELD1 ENSG00000178363|CALML3
ENSG00000180824|Q8NAH5\_HUMAN ENSG00000186163|Q4G0S1\_HUMAN ENSG00000189401|OTUD6A ENSG00000196070|Q6ZVY7\_HUMAN ENSG00000196220|SRGAP3 ENSG00000197858|GPA1 ENSG00000202381|HIST2H3A ENSG00000203813|HIST2H3C
ENSG00000067064|IDI1 ENSG00000083223|ZCCHC6 ENSG00000099725|PRKY ENSG00000100796|SMEK1 ENSG00000103160|HSDL1 ENSG00000115414|FNI ENSG000001124827|GCM2 ENSG00000128039|NP\_078868.1
ENSG00000139969|Q9P1J0\_HUMAN ENSG00000143797|MBOAT2 ENSG00000147133|TAF1 ENSG00000154447|SH3RF1 ENSG00000156162|DPY19L4 ENSG00000159592|GPBP1L1 ENSG00000163113|OTUD7B ENSG00000163297|ANTXR2
ENSG00000164631|ZNF12 ENSG00000164949|GEM ENSG00000166415|WDR72 ENSG00000168264|IRF2BP2 ENSG00000169902|TPST1 ENSG00000171931|FBXW10 ENSG00000173406|DAB1 ENSG00000174579|MSL2L1
ENSG00000174808|BTC ENSG00000180745|CLRN3 ENSG00000185247|MAGEA11 ENSG00000185418|TARSL2 ENSG00000204370|SDHD
ENSG000000041988|THAP3 ENSG00000055163|CYFP12 ENSG00000099624|ATP5D ENSG00000101945|SUV39H1 ENSG00000102870|ZNF629 ENSG00000106018|VIPR2 ENSG00000113716|SMF\_HUMAN ENSG00000124920|C11orf9
ENSG00000132139|GAS2L2 ENSG00000134438|RAX ENSG00000141736|ERBB2 ENSG00000167716|WDR18 ENSG00000167972|ABCA3 ENSG00000169750|RAC3 ENSG00000170265|ZNF282 ENSG00000172375|TMEM24
ENSG00000172780|RAB43 ENSG00000175591|P2RY2 ENSG00000176349|Q8N997\_HUMAN ENSG00000185105|XR\_015885.1 ENSG00000196666|Q6P0A1\_HUMAN ENSG00000204405|Q6ZQV3\_HUMAN ENSG00000204682|C10orf114 ENSG00000205841|Q6ZV47\_HUMAN
ENSG00000109667|SLC2A9 ENSG00000110422|HIPK3 ENSG00000117595|IRF6 ENSG00000122644|ARL4A ENSG00000124532|MR52L ENSG00000128245|YWHAH ENSG00000135720|DYNC1L1 ENSG00000143384|MCL1
ENSG00000148053|NTRK2 ENSG00000149124|GLYAT ENSG00000150403|TMCO3 ENSG00000153814|JAZF1 ENSG00000156006|NAT2 ENSG00000158122|C9orf21 ENSG00000162704|ARPC5 ENSG00000170099|Q9NTHO\_HUMAN
ENSG00000173852|DPY19L1 ENSG00000173876|NP\_817124.1 ENSG00000198846|TOX ENSG00000204209|DAXX
GGGAATA ENSG00000006831|ADIPOR1 ENSG00000019102|V5IG2 ENSG00000028528|SNX1 ENSG00000115657|ABC6 ENSG00000119714|GPR68 ENSG00000130119|GNL3L ENSG00000130881|LRP3 ENSG00000131914|LIN28
ENSG00000137522|RNF121 ENSG00000138074|SLC5A6 ENSG00000140368|PSTPIP1 ENSG00000145888|GLRA1 ENSG00000148773|MK167 ENSG00000149305|HTR3B ENSG00000156521|TYSND1 ENSG00000158428|NP\_940961.1
ENSG00000160951|PTGER1 ENSG00000167468|GPX4 ENSG00000168802|NM\_001039690.2 ENSG00000170473|WIBG ENSG00000170925|TEX13B ENSG00000179091|CYC1 ENSG00000183255|PTTG1IP ENSG00000184811|TUSC5
ENSG00000188101|ALOX12P2 ENSG00000196959|CES1 ENSG00000198754|OXCT2 ENSG00000198832|SELM\_HUMAN ENSG00000198848|NR\_003276.1 ENSG00000204487|LTB ENSG00000206045|LOC644844
ENSG00000003987|MTMR7 ENSG00000023318|TXNDC4 ENSG00000058729|RIOK2 ENSG00000101752|MTB1 ENSG00000101972|STAG2 ENSG00000104325|DECR1 ENSG00000109323|MANBA ENSG00000110172|CHORDC1
ENSG00000111846|GCNT2 ENSG00000114030|KPNA1 ENSG00000117862|TXNDC12 ENSG00000121716|Q9UKJ0-3 ENSG00000126016|AMOT ENSG00000134265|NAPF ENSG00000135164|DMTF1 ENSG00000137364|TPMT
ENSG00000144644|GADL1 ENSG00000153066|TXNDC11 ENSG00000153292|TRIP10 ENSG00000153989|NUS1 ENSG00000162623|TYW3 ENSG00000177932|ZNF354C ENSG00000183765|CHEK2 ENSG00000184344|GDF3
ENSG00000196459|SEDL1 ENSG00000196826|ZNF709 ENSG00000205220|PSMB10
GGGAATC ENSG000000081059|TCF7 ENSG00000101251|SNL1L2 ENSG00000119686|C14orf58 ENSG00000124374|PAIP2B ENSG00000125695|STRAD\_HUMAN ENSG00000125834|STK35 ENSG00000128908|INOC1 ENSG00000130540|SULT4A1
ENSG00000130775|C1orf38 ENSG00000137460|NP\_203751.2 ENSG00000137709|POU2F3 ENSG00000141485|SLC13A5 ENSG00000158715|SLC4A3 ENSG00000160844|NP\_849153.3 ENSG00000165570|C10orf10 ENSG00000167046|Q5JT57\_HUMAN
ENSG00000172264|C20orf133 ENSG00000175550|DRAP1 ENSG00000184945|AQP12A ENSG00000188549|NP\_997263.1 ENSG00000205061|Q6ZUP2\_HUMAN ENSG00000100664|EIF5 ENSG00000113319|RASGRF2 ENSG00000114054|PCCB
ENSG00000132334|PTPRE ENSG00000138430|GTPBP9 ENSG00000144214|LYG1\_HUMAN ENSG00000146587|RBAK ENSG00000152061|RABGAP1L ENSG00000166295|C10orf104 ENSG00000176971|NP\_976249.1 ENSG00000180785|OR51E1
ENSG00000196715|VKORC1L1
GGGACAT ENSG00000072195|SPEG ENSG00000089356|FXYP3 ENSG00000102981|PARD6A ENSG00000108622|ICAM2 ENSG00000110536|NDUFB3 ENSG00000115718|PROC ENSG00000116584|ARHGEF2
ENSG00000125347|IRF1 ENSG00000130748|TMEM160 ENSG00000143570|SLC39A1 ENSG00000148204|CRE2 ENSG00000157833|FAM59B ENSG00000162910|MRPL55 ENSG00000167614|TTYH1 ENSG00000170545|NM\_001031628.1
ENSG00000182857|Q6P168\_HUMAN ENSG00000197119|SLC25A29 ENSG00000197191|NP\_945352.1 ENSG00000197494|NP\_079360.1 ENSG00000204256|BRD2 ENSG00000204655|MOG ENSG00000205270|Q6P168\_HUMAN ENSG00000205276|Q6P168\_HUMAN
ENSG00000047579|DTNBP1 ENSG00000070087|FPN2 ENSG00000073614|JARID1A ENSG00000084090|STAR27 ENSG00000100201|DDX17 ENSG00000100522|GNPNAT1 ENSG00000102471|NDFIP2 ENSG00000120054|CPN1
ENSG00000129472|RAB2B ENSG00000133107|TRPC4 ENSG00000138411|HECW2 ENSG00000141161|UNC45B ENSG00000143622|RIT1 ENSG00000152969|JAKMIP1 ENSG00000154822|PLCL2 ENSG00000166240|Q14DG7-2
ENSG00000170959|DCDC5
GGGACGA ENSG000000087266|SH3BP2 ENSG00000090238|YPEL3 ENSG00000090512|FETUB ENSG00000102970|CCL17 ENSG00000103044|HAS3 ENSG00000105675|ATP4A ENSG00000135916|ITM2C ENSG00000139193|CD27
ENSG00000148803|C10orf125 ENSG00000154252|GAL3ST2 ENSG00000162975|KCNF1 ENSG00000167094|TTC16 ENSG00000168096|ANKS3 ENSG00000171427|NM\_145293 ENSG00000171595|DNAI2 ENSG00000184908|CLCNKB
ENSG00000185347|C14orf80 ENSG00000186510|CLCNKA ENSG00000186976|DJBP\_HUMAN ENSG00000187051|RPS19BP1 ENSG00000187239|FBNP1 ENSG00000188364|TMSL4 ENSG00000197152|Q96NB7\_HUMAN ENSG00000203927|Q6ZNY1\_HUMAN
ENSG00000204511|NM\_001011700.1 ENSG00000204520|MTCA ENSG00000070010|UFD1L ENSG00000100906|NFKBIA ENSG00000116016|EPAS1 ENSG00000119888|TACSTD1 ENSG00000125355|FAM70A ENSG00000129204|USP6
ENSG00000131808|FSHB ENSG00000137285|TUBB2B ENSG00000138386|NAB1 ENSG00000139842|CUL4A ENSG00000152804|HHEX ENSG00000153162|BMP6 ENSG00000154556|SORBS2 ENSG00000159212|CLIC6
ENSG00000163449|TMEM169 ENSG00000163635|ATXN7 ENSG00000165914|TTC7B ENSG00000168348|INSM2 ENSG00000169908|TM4SF1 ENSG00000170832|USP32 ENSG00000184182|UBE2F ENSG00000197128|ZNF772
ENSG00000197594|ENPP1 ENSG00000197639|MKNRP5 ENSG00000197702|PARVA ENSG00000197926|Q8NAI6\_HUMAN
GGGACGG ENSG000000082566|PSCD3 ENSG00000105612|DNASE2 ENSG00000130288|NDUFA13 ENSG00000133475|GGT2 ENSG00000144488|ESPNL ENSG00000148300|REXO4 ENSG00000158786|PLA2G2F ENSG00000163913|IFT122
ENSG00000167657|DAPK3 ENSG00000175294|CATSPER1 ENSG00000177595|LRDD ENSG00000178752|FAM132B ENSG00000183038|LOC728226 ENSG00000185198|PRSSL1 ENSG00000185681|C9orf18 ENSG00000196358|NTNG2
ENSG00000204274|Q6ZSG4\_HUMAN ENSG00000204825|Q6ZUA7\_HUMAN ENSG00000204831|Q8N1S9\_HUMAN ENSG00000205031|Q6XEY2\_HUMAN ENSG00000067334|DNMTIP2 ENSG00000078369|GNB1 ENSG00000092439|TRPM7 ENSG00000095787|WAC
ENSG00000100418|NP\_056519.1 ENSG00000106415|GLCC11 ENSG00000113645|WWC1 ENSG00000119537|FVT1 ENSG00000126010|GRPR ENSG00000137055|PLAA ENSG00000137273|FOXF2 ENSG00000138041|SMEK2
ENSG00000144476|CXCR7 ENSG00000152213|ARL11 ENSG00000152782|PANK1 ENSG00000165527|ARF6 ENSG00000169551|CXorf48 ENSG00000169862|CTNND2 ENSG00000173013|CCDC96 ENSG00000177406|Q8N503\_HUMAN
ENSG00000181234|TMEM132C ENSG00000196319|Q9H353\_HUMAN ENSG00000196344|ADH7 ENSG00000203707|Q7Z5Z9\_HUMAN
GGGAGAA ENSG00000006831|ADIPOR2 ENSG00000062822|POLB1 ENSG00000069188|SDK2 ENSG00000072195|SPEG ENSG00000088876|ZNF343 ENSG00000110243|APOA5 ENSG00000124702|KLHDC3 ENSG00000125319|C17orf53
ENSG00000135213|POM121 ENSG00000135248|NP\_115988.1 ENSG00000137343|C6orf134 ENSG00000147118|ZNF182 ENSG00000160305|DIP2A ENSG00000161395|PERLD1 ENSG00000161904|LEMD2 ENSG00000163064|EN1
ENSG00000164048|ZNF589 ENSG00000166317|SYNP02L ENSG00000167851|CD300A ENSG00000181039|ANKRD34 ENSG00000189060|H1FO ENSG00000196313|NP\_742017.1 ENSG00000198049|AVPR1B ENSG00000204526|HCG27
ENSG00000050193|NP\_001070148.1 ENSG00000058063|ATP11B ENSG00000078725|DBC1 ENSG00000081177|EXDL2 ENSG00000112378|PERP ENSG00000124120|C20orf121 ENSG00000124882|EREG ENSG00000134109|EDEM1
ENSG00000135678|CFP ENSG00000136122|C13orf34 ENSG00000146109|ABT1 ENSG00000147121|ZNF673 ENSG00000162526|TSSK3 ENSG00000171051|FPR1 ENSG00000174485|DENND4A ENSG00000176165|FOXG1B
ENSG00000177570|SAMD12 ENSG00000181315|ZNF322A ENSG00000183844|FAM3B ENSG00000185414|MRPL30 ENSG00000185972|CCIN ENSG00000188801|ZNF322B ENSG00000197594|ENPP1 ENSG00000204201|Q49A40\_HUMAN
GGGAGAC ENSG000000012124|CD22 ENSG00000077463|SIRT6 ENSG00000108375|SUPT4H1 ENSG00000118058|MLL ENSG00000119772|DNMT3A ENSG00000122254|HS3ST2 ENSG00000124664|SPDEF ENSG00000141905|NFIC
ENSG00000141956|PRDM15 ENSG00000142546|NOS1P ENSG00000145824|CXCL14 ENSG00000162888|C1orf147 ENSG00000165698|C9orf9 ENSG00000166813|KIF7 ENSG00000172018|NP\_001004341.1
ENSG00000177234|C10orf85 ENSG00000177441|Q8N4T9\_HUMAN ENSG00000177992|C9orf79 ENSG00000185022|MAFF ENSG00000187488|NP\_001025056.1 ENSG00000204335|SP5 ENSG00000205136|Q3KRG0\_HUMAN ENSG00000008083|JARID2
ENSG000000058804|TMEM48 ENSG00000090263|MRPS33 ENSG00000095209|TMEM38B ENSG00000112414|GPR126 ENSG00000112531|QKI ENSG00000116183|PAPPA2 ENSG00000118513|MYB ENSG00000118922|KLF12
ENSG00000120156|TEK ENSG00000122194|PLG ENSG00000122692|SMU1 ENSG00000127081|ZNF484 ENSG00000133134|BEX2 ENSG00000139726|DENR ENSG00000140284|SLC27A2 ENSG00000141543|EIF4A3
ENSG00000143190|POU2F1 ENSG00000153094|BCL2L1 ENSG00000162627|SNX7 ENSG00000164938|TP53INP1 ENSG00000165794|SLC39A2 ENSG00000168646|AXIN2 ENSG00000170860|LSM3 ENSG00000178502|KLHL11
ENSG00000185664|SLIV ENSG00000197872|FAM49A ENSG00000198670|LPA ENSG00000198872|PEG10
GGGAGCG ENSG00000010282|HHATL ENSG00000067842|ATP2B3 ENSG00000075240|NP\_055939.1 ENSG00000101224|CDC25B ENSG00000107954|NEURL ENSG00000108551|RASD1 ENSG00000122386|ZNF205 ENSG00000123360|PDE1B
ENSG00000126351|THRA ENSG00000128389|NM\_032262 ENSG00000140505|CYP1A2 ENSG00000141150|RASL10B ENSG00000142684|ZNF593 ENSG00000143434|SEMA6C ENSG00000145920|CPLX2 ENSG00000147570|DNAJC5B
ENSG00000162438|CTRC ENSG00000165752|STK32C ENSG00000168061|SAC3D1 ENSG00000169026|MFSB7 ENSG00000177084|POLE ENSG00000177238|TRIM72 ENSG00000177374|HIC1 ENSG00000187479|Q7Z7L8\_HUMAN
ENSG00000198113|C9orf167 ENSG00000198407|Q8NCZ5\_HUMAN ENSG00000204401|Q8N0T0\_HUMAN ENSG00000206126|Q6ZV82\_HUMAN ENSG00000206197|NP\_001013723.1 ENSG00000050730|TNIP3 ENSG00000073578|SDHALP2 ENSG00000075413|MARK3
ENSG000000091972|CD200 ENSG00000100731|PCNX ENSG00000101230|C20orf82 ENSG00000106733|C9orf95 ENSG00000112146|FXO9 ENSG00000115738|ID2 ENSG00000115806|GORASP2 ENSG00000131238|PPT1
ENSG00000132970|WASF3 ENSG00000138135|CH25H ENSG00000147679|C8orf53 ENSG00000163599|CTLA4 ENSG00000164828|UNC84A ENSG00000177606|JUN ENSG00000180138|CSNK1A1L ENSG00000180869|C1orf180

ENSG00000183337|BCOR ENSG00000184492|FOX D4 ENSG00000186700|Q8N6F3\_HUMAN ENSG00000204680|Q5VYG3\_HUMAN ENSG00000205721|Q6ZWJ2\_HUMAN  
GGGAGGG ENSG00000004777|SNX26 ENSG00000020181|GPR124 ENSG00000055070|Clorf144 ENSG00000072182|ACCN4 ENSG00000075240|NP\_055939.1 ENSG00000079308|TNS1 ENSG00000099364|FBXL19 ENSG00000100665|SERPINA4  
ENSG00000101445|PPP1R16B ENSG00000102575|ACP5 ENSG00000103260|METRN ENSG00000105570|CABP5 ENSG00000108352|RAFGEFL1 ENSG00000112561|TFEB ENSG00000112658|SRF ENSG00000121753|BAI2  
ENSG00000128011|LRFN1 ENSG00000129654|FOXJ1 ENSG00000132702|HAPLN2 ENSG00000133056|PIK3C2B ENSG00000133937|GSC ENSG00000134824|FADS2 ENSG00000135439|CENTG1 ENSG00000137216|TMEM63B  
ENSG00000140632|NP\_115958.2 ENSG00000146216|TTBK1 ENSG00000149480|MTA2 ENSG00000150990|DHX37 ENSG00000158623|TSGA13 ENSG00000158859|ADAMT54 ENSG00000160460|SPTBN4 ENSG00000160469|BRSK1  
ENSG00000161021|LTC4S ENSG00000166126|AMN ENSG00000166925|TSC22D4 ENSG00000166963|MAP1A ENSG00000167470|MIDN ENSG00000172057|ORMDL3 ENSG00000173991|TCAP ENSG00000177191|B3GNT8  
ENSG00000177468|OLIG3 ENSG00000177769|TSPAN4 ENSG00000180035|ZNF553 ENSG00000180549|FUT7 ENSG00000182575|NXPB3 ENSG00000183010|PYCR1 ENSG00000183615|Clorf90 ENSG00000184481|MLLT7  
ENSG00000189143|CLDN4 ENSG00000196408|NOXO1 ENSG00000197540|GZMM ENSG00000197905|TEAD4 ENSG00000198324|FAM109A ENSG00000198892|TMEM58 ENSG00000198915|RASGEF1A ENSG00000204256|BRD2  
ENSG00000204283|NP\_001001685.1 ENSG00000205538|Q6ZVP1\_HUMAN ENSG00000205687|ADSS ENSG000002059728|MXD1 ENSG000002064787|BCAS1 ENSG000002069275|NUCKS1 ENSG000002076685|NT5C2  
ENSG00000082068|WDR70 ENSG00000090686|USP48 ENSG00000092470|WDR76 ENSG00000108306|FBXL20 ENSG00000112167|C6orf64 ENSG00000112651|MRPL2 ENSG00000113368|LMNB1 ENSG00000114861|FOX P1  
ENSG00000116285|ERRF11 ENSG00000117036|ETV3 ENSG00000133059|RIPK5 ENSG00000135111|TBX3 ENSG00000135697|BCMO1 ENSG00000139908|TSK4 ENSG00000142871|CYR61 ENSG00000143190|POU2F1  
ENSG00000145675|PIK3R1 ENSG00000148143|ZNF462 ENSG00000148225|WDR31 ENSG00000156317|CD226 ENSG00000158966|CACHD1 ENSG00000163113|OTUD7B ENSG00000163359|COL6A3 ENSG00000163602|RYBP  
ENSG00000164683|HEY1 ENSG00000165023|DIRAS2 ENSG00000167220|HDHD2 ENSG00000173464|RNASE11 ENSG00000174721|FGFBP3 ENSG00000177606|JUN ENSG00000181449|SOX2 ENSG00000188215|DCUN1D3  
ENSG00000204600|NP\_001004349.1 ENSG00000211452|DIO1  
GGGATCC ENSG00000005884|ITGA3 ENSG00000006210|CX3CL1 ENSG00000025800|KPNA6 ENSG00000076662|ICAM3 ENSG00000086506|HBQ1 ENSG00000106038|EVX1 ENSG00000109089|CDR2L ENSG00000112139|MDGA1  
ENSG00000148384|INPP5E ENSG00000158006|PAFAH2 ENSG00000167323|STIM1 ENSG00000167969|DCI ENSG00000171992|SYNPO ENSG00000172460|Q8IVY7\_HUMAN ENSG00000174903|RAB1B ENSG00000175220|ARHGAP1  
ENSG00000178035|IMPDH2 ENSG00000178081|LOC653075 ENSG00000179142|CYP11B2 ENSG00000186844|LCE1A ENSG00000198294|Q495C9\_HUMAN ENSG0000066084|DIP2B ENSG0000079156|OSBP16 ENSG00000105398|SULT2A1  
ENSG00000118985|ELL2 ENSG00000132581|SDF2 ENSG00000133083|DCLK1 ENSG00000149201|CCDC81 ENSG00000149948|HMG2A ENSG00000152487|NSUN6 ENSG00000156219|ART3 ENSG00000159398|CES7  
ENSG00000164893|SLC7A13 ENSG00000166206|GABRB3 ENSG00000169564|PCBP1 ENSG00000171943|SRGAP2P1 ENSG00000177868|CCDC23 ENSG00000178999|AURKB ENSG00000182107|TMEM30B ENSG00000183665|TRMT12  
ENSG00000184867|ARMCX2 ENSG00000187266|EPOR  
GGGATCC ENSG000000087008|ACOX3 ENSG000000087269|NOL14 ENSG000000088992|TESC ENSG000000099284|H2AFY2 ENSG00000105662|CRTC1 ENSG00000105696|TMEM59L ENSG00000105771|C19orf61 ENSG00000130487|KLHDC7B  
ENSG00000133265|HPBP1\_HUMAN ENSG00000141385|AFG3L2 ENSG00000149150|SLC43A1 ENSG00000149489|ROM1 ENSG00000153406|NMRAL1 ENSG00000158292|GPR153 ENSG00000159714|ZDHC1 ENSG00000160650|Q96HZ0\_HUMAN  
ENSG00000167565|SERTAD3 ENSG00000167634|NLRP7 ENSG00000167664|TMIGD2 ENSG00000171124|FUT3 ENSG00000176078|Q8NAN4\_HUMAN ENSG00000177192|PUS1 ENSG00000178248|Q8N402\_HUMAN ENSG00000179862|CITED4  
ENSG00000182240|BACE2 ENSG00000183605|SFXN4 ENSG00000188690|UROS ENSG00000189068|VSTM1 ENSG00000197157|SND1 ENSG00000203902|PNMA6B ENSG00000204499|Q6P6C6\_HUMAN ENSG00000004948|CALCR  
ENSG00000120488|BRCA1 ENSG00000034677|RNF19 ENSG00000064652|SNX24 ENSG00000074266|EED ENSG00000110404|ZMYND8 ENSG00000102935|ZNF423 ENSG00000106034|NP\_079189.3  
ENSG00000111605|CPSF6 ENSG00000111832|RWDD1 ENSG00000114529|C3orf52 ENSG00000120594|PLXDC2 ENSG00000123975|CKS2 ENSG00000130939|UBE4B ENSG00000138660|C4orf16 ENSG00000139344|AMDHD1  
ENSG00000148019|CEP78 ENSG00000153046|CDYL ENSG00000158164|TMSL8 ENSG00000159200|DSCR1 ENSG00000162702|ZNF281 ENSG00000166889|NP\_689929.1 ENSG00000175606|TMEM70 ENSG00000180044|Q8N5S4\_HUMAN  
ENSG00000196104|SPOCK3 ENSG00000204899|NP\_001065243.1  
GGGATCC ENSG00000006659|LGALS14 ENSG00000006695|COX10 ENSG00000068354|TBC1D25 ENSG00000088881|COE4\_HUMAN ENSG00000099364|FBXL19 ENSG00000099875|MKNK2 ENSG00000104419|NDRG1 ENSG00000105198|LGALS13  
ENSG00000105486|LTG1 ENSG00000112659|PARC\_HUMAN ENSG00000112715|VEGFA ENSG00000115602|IL1RL1 ENSG00000121671|CRY2 ENSG00000113441|LNPEP ENSG00000123171|CCDC70 ENSG00000133878|DUSP26 ENSG00000136883|KIF12  
ENSG00000142784|WDTC1 ENSG00000151502|VPS26B ENSG00000168026|TTC21A ENSG00000170638|TRABD ENSG00000171680|PLEKHG5 ENSG00000173548|SH3PX3 ENSG00000175664|UCP3 ENSG00000182712|MTCP1  
ENSG00000197548|ATG7 ENSG00000105399|ZNF200 ENSG00000078489|DERL2 ENSG00000075391|RASAL2 ENSG00000103671|TRIP4 ENSG00000105205|CLC ENSG00000117595|IRF6 ENSG00000132423|COQ3  
ENSG00000138443|ABI2 ENSG00000142507|PSMB6 ENSG00000158467|SAHH3\_HUMAN ENSG00000166240|Q14DGT-2 ENSG00000167383|ZNF229 ENSG00000168672|FAM84B ENSG00000170860|LSM3 ENSG00000186566|GPATCH8  
ENSG00000203897|Q6W422\_HUMAN  
GGGCAAT ENSG000000092850|TEKT2 ENSG00000100591|AHS A1 ENSG00000101391|CDK5RAP1 ENSG00000129473|BCL2L2 ENSG00000130811|EIF3S4 ENSG00000131355|EMR3 ENSG00000139200|C12orf53 ENSG00000143367|TUFT1  
ENSG00000149499|EML3 ENSG00000151224|MAT1A ENSG00000151773|CCDC122 ENSG00000160219|GAB3 ENSG00000164012|WDR65 ENSG00000164708|PGAM2 ENSG00000166435|XRR A1 ENSG00000169660|HEXDC  
ENSG00000177947|ODF3 ENSG00000189263|Q6ZS22\_HUMAN ENSG00000189337|NP\_001018000.1 ENSG00000197174|O14606\_HUMAN ENSG00000197285|NR\_001536.1 ENSG00000197965|MPZL1 ENSG00000198326|C20orf141 ENSG00000204094|Q6ZU93\_HUMAN  
ENSG00000204323|Q71RC9\_HUMAN ENSG00000205664|Q6PJD4\_HUMAN ENSG00000205710|Q6ZR85\_HUMAN ENSG00000106462|EZH2 ENSG00000113441|LNPEP ENSG00000117009|KMO ENSG00000119636|C14orf45 ENSG00000125831|CST11  
ENSG00000127951|FGL2 ENSG00000136243|NUP12 ENSG00000143384|MCL1 ENSG00000143970|ASXL2 ENSG00000148459|PDS1 ENSG00000150093|ITGB1 ENSG00000150637|CD226 ENSG00000159210|SNF8  
ENSG00000159899|NPR2 ENSG00000173597|SULT1B1 ENSG00000180964|TCEAL8 ENSG00000184588|PDE4B ENSG00000185737|NRG3 ENSG00000187098|MITF ENSG00000189350|NP\_954974.2 ENSG00000196406|SPANXE  
ENSG00000198021|SPANXA2 ENSG00000198573|SPANXC ENSG00000198734|F5 ENSG00000203926|SPANXA1 ENSG00000204897|KRT25 ENSG00000205038|PKHD1L1 ENSG00000205777|GAGE4  
GGGCAGG ENSG000000010310|GPR ENSG000000011009|LYPLA2 ENSG000000011083|SLC6A7 ENSG000000013306|SLC25A39 ENSG000000034053|APBA2 ENSG000000064393|HIPK2 ENSG00000068831|RASGRP2  
ENSG000000069424|KCNAB2 ENSG000000090565|RAB11FIP3 ENSG00000100101|NOL12 ENSG00000100304|TBL12 ENSG00000102307|CBX7 ENSG00000103034|NDRG4 ENSG00000103326|SOLH  
ENSG00000104883|PEX11G ENSG00000105085|CRSP7 ENSG00000105204|DYRK1B ENSG00000106113|CRHR2 ENSG00000107954|NEURL ENSG00000108344|PSMD3 ENSG00000108830|RND2 ENSG00000118960|HS1BP3  
ENSG00000127419|TMEM175 ENSG00000129351|ILF3 ENSG00000129354|AP1M2 ENSG00000130758|MAP3K10 ENSG00000131591|Clorf159 ENSG00000133477|FAM83F ENSG00000135472|FAIM2 ENSG00000135519|KCNH3  
ENSG00000136490|LMD2 ENSG00000136802|LRRCA8 ENSG00000136944|LXM1B ENSG00000141342|PLEKHM1 ENSG00000142910|TINAGL1 ENSG00000143028|SYPL2 ENSG00000144043|TEX261 ENSG00000159266|Q69YJ1\_HUMAN  
ENSG00000160072|ATAD3B ENSG00000161021|LTC4S ENSG00000161544|CYGB ENSG00000167711|SERPINF2 ENSG00000172819|RARG ENSG00000173621|LRFN4 ENSG00000173894|CBX2 ENSG00000174151|CYB51D1  
ENSG00000182196|ARL61P4 ENSG00000182289|Q9H9U3\_HUMAN ENSG00000182575|NXPB3 ENSG00000183484|GPR132 ENSG00000183655|KLHL25 ENSG00000183773|AIFM3 ENSG00000184363|PKP3 ENSG00000185818|NAT8L  
ENSG00000187942|LDLRAD2 ENSG00000188389|PDCD1 ENSG00000189410|SH2D5 ENSG00000198077|CYP2A7 ENSG00000204028|Q6ZRR4\_HUMAN ENSG00000205648|Q6ZR54\_HUMAN ENSG00000099290|NP\_001005751.1 ENSG00000109846|CRYAB  
ENSG00000112972|HMGC51 ENSG00000115942|ORC2L ENSG00000123104|ITPR2 ENSG00000124788|ATXN1 ENSG00000129292|PHF201L1 ENSG00000131381|ZYFVE20 ENSG00000131620|TMEM16A ENSG00000136160|ENRNB  
ENSG00000137752|CASP1 ENSG00000146963|LUC7L2 ENSG00000148834|GSTO1 ENSG00000151632|AKR1C2 ENSG00000152726|Q5SNT8\_HUMAN ENSG00000153094|BCL2L11 ENSG00000153879|CEBPG ENSG00000168411|RFWD3  
ENSG00000171362|PNMA2 ENSG00000172661|FAM21B ENSG00000174196|FAM21D ENSG00000178403|NEUROG2 ENSG00000184708|EIF4ENIF1 ENSG00000185591|SP1 ENSG00000187134|AKR1C1 ENSG00000198060|MARCH5  
ENSG00000203788|Q6ZMM1\_HUMAN ENSG00000204398|Q5T400\_HUMAN  
GGGCATA ENSG000000031698|SARS ENSG000000037637|FBXO42 ENSG000000060971|ACAA1 ENSG000000081277|PKP1 ENSG000000083307|GRHL2 ENSG00000101361|NOL5A ENSG00000104386|XR\_017860.1 ENSG00000111481|COP21  
ENSG00000111886|GABR2 ENSG00000128944|C15orf23 ENSG00000135414|GDF11 ENSG00000137656|BUD13 ENSG00000147117|ZNF157 ENSG00000147570|DNAJC5B ENSG00000167080|B4GALNT2 ENSG00000176595|KBTBD11  
ENSG00000177830|CHIR1 ENSG00000189401|OTUD6A ENSG00000196186|Q71RF5\_HUMAN ENSG00000197916|Q8N7P5\_HUMAN ENSG00000204319|C4A ENSG00000204342|C4B ENSG00000204613|TRIM10 ENSG00000205201|Q6ZV81\_HUMAN  
ENSG000002029363|BCLAF1 ENSG00000039319|ZYFVE16 ENSG00000085377|PREP ENSG00000101846|STS ENSG00000104356|POP1 ENSG00000111696|NT5DC3 ENSG00000114686|MRPL3 ENSG000001127863|TNFRSF19  
ENSG00000135870|RC3H1 ENSG00000140455|USP3 ENSG00000154548|SRR35\_HUMAN ENSG00000159208|Clorf51 ENSG00000160131|NP\_001017980.1 ENSG00000161647|MPP3 ENSG00000165417|GTF2A1 ENSG00000167077|NP\_689726.3  
ENSG00000168379|Q8WM95\_HUMAN ENSG00000169905|TOR1AIP2 ENSG00000170471|KIAA1219 ENSG00000175655|TBL1XR1 ENSG00000180881|CAPS2 ENSG00000182463|TSHZ2 ENSG00000196721|Q4G0J2\_HUMAN ENSG00000198553|KCNRG  
GGGCCAG ENSG00000001617|SEMA3F ENSG00000068028|RASSF1 ENSG00000068120|COASY ENSG00000076984|O14733-2 ENSG00000100258|TMEM112B ENSG00000100416|TRMU ENSG00000101204|CHRNA4 ENSG00000106785|TRIM14  
ENSG00000107021|TBC1D13 ENSG00000107954|NEURL ENSG00000110171|TRIM3 ENSG00000124181|PLCG1 ENSG00000124920|C11orf9 ENSG00000130222|GADD45G ENSG00000130402|ACTN4 ENSG00000131738|KRT33B  
ENSG00000136490|LMD2 ENSG00000139540|SLC39A5 ENSG00000140839|NP\_001011880.1 ENSG00000141258|RUTBC1 ENSG00000157322|NP\_872425.1 ENSG00000157335|NP\_778990.2 ENSG00000157873|TNFRSF14 ENSG00000161638|ITGA5  
ENSG00000161798|AQP5 ENSG00000162728|KCNJ9 ENSG00000162881|OXER1 ENSG00000166387|PFF1BP2 ENSG00000167965|NM\_022372.3 ENSG00000168096|ANKS3 ENSG00000172247|C1QTNF4 ENSG00000172771|C3orf25  
ENSG00000172780|RAB43 ENSG00000173227|SYT12 ENSG00000173327|MAP3K11 ENSG00000174576|NPAS4 ENSG00000180539|C9orf139 ENSG00000183628|DGCR6 ENSG00000184004|Q6ICL0\_HUMAN ENSG00000184185|KCNJ12  
ENSG00000188185|Q6ZQP8\_HUMAN ENSG00000197818|SLC9A8 ENSG00000197879|MYO1C ENSG00000204589|Q6ZWG6\_HUMAN ENSG00000204715|Q4G0Q5\_HUMAN ENSG00000054392|HHAT ENSG00000060709|RTMBP2 ENSG00000100625|SIX4  
ENSG00000108100|CCNY ENSG00000120458|C11orf61 ENSG00000131482|G6PC ENSG00000131795|RBM8A ENSG00000134294|SLC38A2 ENSG00000144218|AFF3 ENSG00000147437|GNRH1 ENSG00000148181|MAGEA8  
ENSG00000157404|KIT ENSG00000159131|GART ENSG00000163788|SNRK ENSG00000167034|NKX3-1 ENSG00000169116|PARG1\_HUMAN ENSG00000173692|PSMD1 ENSG00000176049|JAKMIP2 ENSG00000183305|MAGEA6  
ENSG00000184750|MAGEA2 ENSG00000185875|THNSL1 ENSG00000186031|Q6ZSY1\_HUMAN ENSG00000197172|MAGEA3  
perfect: GGGCCAG CTGGCCC hsa-miR-328 CTGGCCCctctgccccttcctg  
GGGCCCC ENSG000000011009|LYPLA2 ENSG000000011485|PPP5C ENSG000000064932|SBN02 ENSG00000068903|SIRT2 ENSG00000070182|SPTB ENSG00000073067|CYP2W1 ENSG00000073598|FNDC8  
ENSG00000089693|MLF2 ENSG00000090006|LTBP4 ENSG00000100379|KCTD17 ENSG00000103249|CLCN7 ENSG00000105204|TYRKB1B ENSG00000105711|SCN1B ENSG00000107954|NEURL  
ENSG00000108292|MLLT6 ENSG00000109066|TMEM104 ENSG00000120949|TNFRSF8 ENSG00000125347|IRF1 ENSG00000126561|STAT5A ENSG00000126603|GLIS2 ENSG00000130762|ARHGEP16 ENSG00000131061|ZNF341  
ENSG00000131759|RARA ENSG00000132024|CC2D1A ENSG00000134824|FADS2 ENSG00000137491|SLC02B1 ENSG00000140474|ULK3 ENSG00000142449|FBN3 ENSG00000156453|PCDH1 ENSG00000159674|SPON2  
ENSG00000160209|PDXK ENSG00000160216|AGPAT3 ENSG00000161996|WDR90 ENSG00000161996|WDR90 ENSG00000164638|SLC29A4 ENSG00000166446|CDYL2 ENSG00000167595|C19orf55 ENSG00000167680|SEMA6B  
ENSG00000168309|FAM107A ENSG00000169957|ZNF768 ENSG00000173548|SH3PX3 ENSG00000173581|CCDC106 ENSG00000174886|NDUFA11 ENSG00000177000|MTHFR ENSG00000177030|DEAF1 ENSG00000177169|ULK1  
ENSG00000178209|PLEC1 ENSG00000179403|VWA1 ENSG00000180539|C9orf139 ENSG00000182175|RGMA ENSG00000184113|CLDN5 ENSG00000185340|GAS2L1 ENSG00000186792|IFRD2  
ENSG00000187013|C17orf82 ENSG00000196700|ZNF512B ENSG00000204586|Q6PJP7\_HUMAN ENSG00000104413|RBM35A ENSG00000115866|DARS ENSG00000119917|IFTT3 ENSG00000131080|EDA2R ENSG00000134259|NGFB  
ENSG00000134324|LPIN1 ENSG00000159228|CBR1 ENSG00000166747|AP1G1 ENSG00000171617|BNC1 ENSG00000183305|MAGEA6 ENSG00000184750|MAGEA2 ENSG00000186487|MYT1L ENSG00000197312|RSC1A1  
ENSG00000204518|AADACL4 ENSG00000206131|Q6ZS21\_HUMAN  
GGGCCGAG ENSG00000056487|PHF21B ENSG000000087086|FTL ENSG00000109132|PHOX2B ENSG00000115266|APC2 ENSG00000116604|MEF2D ENSG00000122386|ZNF205 ENSG00000126217|MCF2L  
ENSG00000132361|K1AA0664 ENSG00000134438|RAX ENSG00000141837|CACNA1A ENSG00000141994|DUS3L ENSG00000158764|ITLN2 ENSG00000160685|ZBTB7B ENSG00000161939|C17orf49 ENSG00000164048|ZNF589  
ENSG00000164917|K0415\_HUMAN ENSG00000173992|CCS ENSG00000178093|TSSK6 ENSG00000181284|TMEM102 ENSG00000186187|ZNRF1 ENSG00000187796|CARD9  
ENSG00000188483|IER5L ENSG00000196242|ORC23 ENSG00000204283|NP\_001001685.1 ENSG00000205710|Q6ZR85\_HUMAN ENSG00000209639|TFB1M ENSG00000049247|UTS2 ENSG00000050165|DKK3 ENSG00000063601|MTMR1  
ENSG00000080822|CLDN1 ENSG00000099256|PRTFDC1 ENSG00000100796|SMEK1 ENSG00000113916|BCL6 ENSG00000119866|BCL11A ENSG00000138395|ALS2CR7 ENSG00000140463|BBS4 ENSG00000143924|EML4  
ENSG00000151500|THYN1 ENSG00000155760|FZD7 ENSG00000164124|TMEM144 ENSG00000169594|BNC1 ENSG00000172059|KLF11 ENSG00000180044|Q8N5S4\_HUMAN ENSG00000185742|NP\_997528.1 ENSG00000188400|Q6URH7\_HUMAN  
ENSG00000188933|NM\_145809.1 ENSG00000198900|TOP1  
GGGCCCC ENSG000000011332|DFP1 ENSG000000075891|PAX2 ENSG00000099364|FBXL19 ENSG00000100139|MICALL1 ENSG00000100427|MLC1 ENSG00000100599|RIN3 ENSG00000101489|BRUNOL4 ENSG00000105679|GAPDHS  
ENSG00000115596|WNT6 ENSG00000126067|PSMB2 ENSG00000130711|PRDM12 ENSG00000131188|PRR7 ENSG00000139725|RHOE ENSG00000139874|SSR1 ENSG00000142459|EVI5L ENSG00000147799|K1688\_HUMAN  
ENSG00000148805|NR\_002934.2 ENSG00000154146|NRGN ENSG00000157911|PEX10 ENSG00000160271|RALGDS ENSG00000160959|LRRC14 ENSG00000162968|Q96MQ0\_HUMAN ENSG00000163702|IL17RC ENSG00000164438|TLX3  
ENSG00000167941|SOST ENSG00000176884|GRIN1 ENSG00000177021|LRRC24 ENSG00000178947|Q86V52\_HUMAN ENSG00000181409|AATK ENSG00000182612|TSPAN10 ENSG00000184163|FAM132A ENSG00000184221|OLIG1

ENSG00000185117|NR\_002733.1 ENSG00000185187|SIGIRR ENSG00000186193|C9orf140 ENSG00000188483|IER5L ENSG00000198113|C9orf167 ENSG00000205011|NP\_001007547.1 ENSG00000205599|Q6ZUY4\_HUMAN ENSG00000066629|EML1  
ENSG00000071539|TRIP13 ENSG00000072422|RHOTB1 ENSG00000078304|PPP2R5C ENSG00000099940|SNAP29 ENSG00000106686|C9orf68 ENSG00000111432|FZD10 ENSG00000112238|PRDM13 ENSG00000115934|PPI13  
ENSG00000118508|RAB32 ENSG00000140968|IRF8 ENSG00000152268|SPON1 ENSG00000152455|SUV39H2 ENSG00000152518|ZFP36L2 ENSG00000153162|BMP6 ENSG00000154710|KCTD7 ENSG00000157551|KCNJ15  
ENSG00000164305|CASP3 ENSG00000164494|PDSS2 ENSG00000164828|UNC84A ENSG00000170852|KBTBD2 ENSG00000179930|ZNF648 ENSG00000181656|GPR88 ENSG00000184254|ALDH1A3 ENSG00000185345|PARK2  
GGGCGG ENSG00000070182|SPTB ENSG00000107185|KIAA0258 ENSG00000107317|PTGDS ENSG00000124159|MATN4 ENSG00000125514|C20orf51 ENSG00000126067|PSMB2 ENSG00000127533|F2RL3 ENSG00000127666|TICAM1  
ENSG00000130332|LSM7 ENSG00000133275|CSNK1G2 ENSG00000133937|GSC ENSG00000135722|FBXL8 ENSG00000136327|NKX2-8 ENSG00000138080|EMILIN1 ENSG00000141738|GRB7 ENSG00000144119|C1QL2  
ENSG00000146926|ASB10 ENSG00000148805|NR\_002934.2 ENSG00000148826|NKX6-2 ENSG00000160650|Q96HZ0\_HUMAN ENSG00000160959|LRRRC4 ENSG00000164917|K0415\_HUMAN ENSG00000165175|MID1IP1 ENSG00000166862|CACNG2  
ENSG00000169683|LRRRC45 ENSG00000169910|ASL ENSG00000170214|ADRA1B ENSG00000170291|C17orf81 ENSG00000172247|C10TNF4 ENSG00000176887|SOX11 ENSG00000177021|LRRRC24 ENSG00000177238|TRIM72  
ENSG00000179965|ZNF771 ENSG00000182156|ENPP7 ENSG00000182351|CRIP1 ENSG00000182631|RXFP3 ENSG00000182687|GALR2 ENSG00000183087|GAS6 ENSG00000186493|C5orf38 ENSG00000198832|SELM\_HUMAN  
ENSG00000204058|C10orf41 ENSG00000204610|TRIM15 ENSG00000204682|C10orf114 ENSG00000070540|WIPI1 ENSG00000119138|KLF9 ENSG00000123689|GOS2 ENSG00000143458|NP\_653219.1 ENSG00000147883|CDKN2B  
ENSG00000159216|RUNX1 ENSG00000205156|Q6UXQ8\_HUMAN  
GGGCGG ENSG000000011028|MRC2 ENSG000000011243|AKAP8L ENSG000000020633|RUNX3 ENSG00000002822|POLD1 ENSG00000063176|SPHK2 ENSG00000065000|AP3D1 ENSG00000075618|FSCN1 ENSG00000100379|KCTD17  
ENSG00000104884|ERCC2 ENSG00000105085|CRSP7 ENSG00000105612|DNASE2 ENSG00000106636|YKT6 ENSG00000107338|SHB ENSG00000116786|PLEKHM2 ENSG00000127220|ABHD8 ENSG00000128011|LRFN1  
ENSG00000130283|GDF1 ENSG00000131398|KCNC3 ENSG00000141150|RASL10B ENSG00000143434|SEMA6C ENSG00000143590|EFNA3 ENSG00000154342|WNT3A ENSG00000158428|NP\_940961.1 ENSG00000160752|FDP5  
ENSG00000161021|LTC4S ENSG00000161939|C17orf49 ENSG00000164363|SLC6A18 ENSG00000166924|NP\_775835.2 ENSG00000170616|SCRT1 ENSG00000177380|PPFIA3 ENSG00000178209|PLEC1  
ENSG00000179743|Q8N9F6\_HUMAN ENSG00000180849|C15orf37 ENSG00000180924|Q9BVQ6\_HUMAN ENSG00000182154|MRPL41 ENSG00000182351|CRIP1 ENSG00000183443|A2RU41\_HUMAN ENSG00000183734|ASCL2 ENSG00000185522|C11orf35  
ENSG00000187013|C17orf82 ENSG00000187796|CARD9 ENSG00000188483|IER5L ENSG00000188763|FZD9 ENSG00000188966|NELFB\_HUMAN ENSG00000196642|C9orf68 ENSG00000198407|Q8NCZ5\_HUMAN ENSG00000198754|OXCT2  
ENSG00000205031|Q6XYE2\_HUMAN ENSG00000071243|ING3 ENSG00000112238|PRDM13 ENSG00000115486|GGCX ENSG00000115652|UXS1 ENSG00000124788|ATXN1 ENSG00000137824|FAM82C ENSG00000142871|CYR61  
ENSG00000160124|CCDC58 ENSG00000163125|KIAA0460 ENSG00000163797|MRPL33 ENSG00000169340|NP\_77584.1 ENSG00000181915|C10orf22 ENSG00000185920|PTCH1 ENSG00000187601|MAGEH1 ENSG00000198339|HIST1H4I  
ENSG00000206535|A1A4G5\_HUMAN  
GGGCGTC ENSG000000002933|TMEM176A ENSG00000042493|CAPG ENSG00000066336|SPI1 ENSG00000077009|ITGB1BP3 ENSG00000105376|ICAM5 ENSG00000105972|C7orf20 ENSG00000128228|SDF2L1 ENSG00000130595|TNNT3  
ENSG00000130643|DRD1P ENSG00000143641|GALNT2 ENSG00000148400|NOTCH1 ENSG00000150456|N6GAMT2 ENSG00000157350|STGAL2 ENSG00000166428|PLD4 ENSG00000167862|ICT1 ENSG00000169660|HEXDC  
ENSG00000175221|THRAP5 ENSG00000183020|AP2A2 ENSG00000184640|SEPT9 ENSG00000197191|NP\_945352.1 ENSG00000198664|Q9BTR0\_HUMAN ENSG00000198831|Q8IYX2\_HUMAN ENSG00000198864|KRTAP5-9 ENSG00000204585|Q8N8T0\_HUMAN  
ENSG00000206580|AP4M1 ENSG00000005339|CREBBP ENSG00000040341|STAU2 ENSG00000042429|CRSP6 ENSG00000102606|ARHGEF7 ENSG00000115806|GORASP2 ENSG00000120341|LZTR2 ENSG00000130856|ZNF236  
ENSG00000131848|ZSCAN5 ENSG00000141380|SS18 ENSG00000164326|CARTPT ENSG00000166253|NP\_001034861.1 ENSG00000171033|PKIA ENSG00000174721|FGFBP3 ENSG00000184492|FOXD4 ENSG00000197062|ZNF187  
GGGCTGG ENSG000000011028|MRC2 ENSG000000054179|ENTPD2 ENSG000000054282|SDCCAG8 ENSG00000073350|LLGL2 ENSG00000073598|FNDC8 ENSG00000080031|PTRRH ENSG00000081692|JMJ4 ENSG00000090447|TFAP4  
ENSG000000090661|LSS4 ENSG000000099904|ZDHC8 ENSG00000103260|METRN ENSG00000103266|STUB1 ENSG00000107147|KCNM1 ENSG00000107187|LHX3 ENSG00000107738|C10orf54 ENSG00000108518|PFN1  
ENSG00000108639|SYNGR2 ENSG00000119574|ZBTB45 ENSG00000121753|BAI2 ENSG00000126215|XRCC3 ENSG00000126882|FAM78A ENSG00000128342|LIF ENSG00000130720|FIBCD1 ENSG00000131944|C19orf40  
ENSG00000134575|ACP2 ENSG00000136830|FAM129B ENSG00000136848|DAB2IP ENSG00000145191|EIF2B5 ENSG00000145198|Q9BVH8\_HUMAN ENSG00000149541|B3GAT3 ENSG00000149930|TACK2 ENSG00000150990|DHX37  
ENSG00000155265|C10orf132 ENSG00000161202|DVL3 ENSG00000162576|MXRA8 ENSG00000163884|KLF15 ENSG00000165802|NELF ENSG00000166166|C14orf172 ENSG00000167874|TMEM88 ENSG00000168546|GFRA2  
ENSG00000170909|NF\_573398.1 ENSG00000171136|RLN3 ENSG00000172354|GNB2 ENSG00000173805|HAP1 ENSG00000174672|BRSK2 ENSG00000175938|TMEM142C ENSG00000177084|POLE ENSG00000177239|MAN1B1  
ENSG00000179922|ZNF784 ENSG00000181585|TMIE ENSG00000181781|C19orf19 ENSG00000182272|B4GALNT4 ENSG00000184281|TSSC4 ENSG00000185818|NAT8L ENSG00000187091|PLCD1 ENSG00000187122|ARHGAP19  
ENSG00000188305|C19orf35 ENSG00000188447|XR\_016015.1 ENSG00000188690|UROS ENSG00000188976|NOC2L ENSG00000197539|Q6ZSY7\_HUMAN ENSG00000197892|KIF13B ENSG00000198324|FAM109A ENSG00000198400|NTRK1  
ENSG00000212130|TWF2 ENSG00000086619|EROLB ENSG00000110693|SOX6 ENSG00000117595|IRF6 ENSG00000119950|MXI1 ENSG00000121579|NAT13 ENSG00000122548|K0087\_HUMAN ENSG00000124209|RAB22A  
ENSG00000125814|NAPB ENSG00000134313|NP\_065789.1 ENSG00000138640|FAM13A1 ENSG00000141140|MYOHD1 ENSG00000143486|LGTM ENSG00000155629|PIK3AP1 ENSG00000157554|ERG ENSG00000160199|PKNOX1  
ENSG00000136113|OTUD7B ENSG00000171617|ENC1 ENSG00000177981|ASB8 ENSG00000178102|DNAHL1 ENSG00000184943|NP\_443103.1 ENSG00000189320|NP\_995327.1  
GGGCTGT ENSG000000067225|PKM2 ENSG000000072840|EVC ENSG000000082781|ITGB5 ENSG00000100014|SPECC1L ENSG00000100083|GGAI ENSG00000101425|BPI ENSG00000107821|KAZALD1 ENSG00000114554|PLXNA1  
ENSG00000123989|CHSS2\_HUMAN ENSG00000156222|SLC28A1 ENSG00000159784|FAM131B ENSG00000160298|C21orf58 ENSG00000160953|MUM1 ENSG00000162878|SG493\_HUMAN ENSG00000169136|ATF5 ENSG00000176058|C9orf75  
ENSG00000176349|Q8N997\_HUMAN ENSG00000185818|NAT8L ENSG00000186187|ZNRF1 ENSG00000189410|SH2D5 ENSG00000197921|HES5 ENSG00000204048|UBR2 ENSG00000094755|GABRP ENSG00000107077|JMJ2C  
ENSG00000112425|EPM2A ENSG00000115825|PRKD3 ENSG00000119801|YPEL5 ENSG00000126453|BCL2L12 ENSG00000127863|TNFRSF19 ENSG00000129007|CALML4 ENSG00000132153|DHX30 ENSG00000133019|CHRM3  
ENSG00000134324|LIN1 ENSG00000135677|GNS ENSG00000135960|EDAR ENSG00000149177|PTPRJ ENSG00000151892|GFRA1 ENSG00000152454|ZNF256 ENSG00000157680|DGKI ENSG00000166595|FAM96B  
ENSG00000168172|HOOK3 ENSG00000196177|ACADSB ENSG00000203780|FANK1 ENSG00000204469|BAT2  
GGGGAAA ENSG000000072736|NFATC3 ENSG00000102870|ZNF629 ENSG00000107341|UBE2R2 ENSG00000108671|PSMD11 ENSG00000111684|MBOAT5 ENSG00000115211|EIF2B4 ENSG00000125888|C20orf179 ENSG00000130054|TMEM28  
ENSG00000130558|OLFM1 ENSG00000131467|PSME3 ENSG00000148843|PDCD11 ENSG00000157103|SLC6A1 ENSG00000157388|CACNA1D ENSG00000164325|TMEM174 ENSG00000165810|BTNL9 ENSG00000166793|YPEL4  
ENSG00000170162|VGLL2 ENSG00000172057|ORMDL3 ENSG00000177741|Q96BN7\_HUMAN ENSG00000178803|Q8NAW6\_HUMAN ENSG00000180824|Q8NAH5\_HUMAN ENSG00000181773|GPR3 ENSG00000185112|FAM43A ENSG00000188554|NBR1  
ENSG00000039600|SODX3 ENSG000000026500|WAPAL ENSG000000068305|MEF2A ENSG00000075292|ZNF638 ENSG00000092969|FCFB2 ENSG00000099260|PALMD ENSG00000100796|SMEK1  
ENSG00000108468|CBX1 ENSG00000116183|PAPPA2 ENSG00000119938|PPP1R3C ENSG00000130772|MED18 ENSG00000133687|TMTC1 ENSG00000140743|CDR2 ENSG00000143324|XPR1 ENSG00000147133|TAF1  
ENSG00000147874|FAM29A ENSG00000152484|USP12 ENSG00000154474|KBTBD10 ENSG00000159592|GPBP1L1 ENSG00000162374|ELAVL4 ENSG00000164171|ITGA2 ENSG00000165097|AOF1 ENSG00000168743|NPNT  
ENSG00000171566|PIRGM1 ENSG00000172239|PAIP1 ENSG00000174606|ANGEL2 ENSG00000180616|SSTR2 ENSG00000185515|BRCC3 ENSG00000186879|NM\_178121  
GGGGGAA ENSG00000006125|AP2B1 ENSG0000017621|MAGX1 ENSG00000068001|HYAL2 ENSG00000082641|NFE2L1 ENSG00000089159|PXN ENSG00000100258|TMEM112B ENSG00000101276|C20orf54 ENSG00000102870|ZNF629  
ENSG00000108309|NP\_006686.1 ENSG00000110042|DTX4 ENSG00000111321|LTBR ENSG00000120853|GOLGA2L1 ENSG00000130477|UNC13A ENSG00000141750|STAC2 ENSG00000142224|IL19 ENSG00000143570|SLC39A1  
ENSG00000144579|CTDSP1 ENSG00000146834|BCDIN3 ENSG00000149480|MTA2 ENSG00000151208|DLG5 ENSG00000156750|NR\_002823.1 ENSG00000158516|CPA2 ENSG00000161513|FDXR ENSG00000164438|TLX3  
ENSG00000167986|DBD1 ENSG00000169403|PTAFR ENSG00000170858|LILRA4 ENSG00000180843|KIAA1618 ENSG00000198933|TBKBP1 ENSG00000204283|NP\_001001685.1 ENSG00000205973|LOC644949 ENSG0000013297|CLDN11  
ENSG00000091831|ESR1 ENSG00000103319|EEF2K ENSG00000103540|CEL10\_HUMAN ENSG00000108061|SHOC2 ENSG00000111276|CDKN1B ENSG000001125871|SPOP ENSG00000112881|KIF13B ENSG00000138041|SMEK2  
ENSG00000141380|SS18 ENSG00000143776|CDC42BPA ENSG00000157554|ERG ENSG00000163046|C21orf99 ENSG00000163113|OTUD7B ENSG00000163322|CCDC98 ENSG00000166321|NUDT13 ENSG00000171791|BCL2  
ENSG00000172340|SUCLG2 ENSG00000172348|DSCR1L1 ENSG00000173124|C10orf129 ENSG00000174038|C9orf131 ENSG00000177620|Q9BSL4\_HUMAN ENSG00000183576|SETD3 ENSG00000187068|NP\_001020437.1 ENSG00000198770|Q9H396\_HUMAN  
ENSG00000198890|PRMT6  
GGGGGACG ENSG00000005206|PSL1\_HUMAN ENSG00000079435|LIPE ENSG000000087088|BAX ENSG00000099875|MKNK2 ENSG00000100242|UNC84B ENSG00000101440|ASIP ENSG00000104972|LILRB1 ENSG00000105376|ICAM5  
ENSG00000105612|DNASE2 ENSG00000106018|VIPR2 ENSG00000123384|LRP1 ENSG00000128159|TUBGCP6 ENSG00000129187|DCTD ENSG00000131095|GFAP ENSG00000133475|GGT2 ENSG00000134824|FADS2  
ENSG00000135097|MSI1 ENSG00000143418|LASS2 ENSG00000158169|FANCC ENSG00000163913|IFT122 ENSG00000168993|NM\_006651.3 ENSG00000177595|LRDD ENSG00000178814|OPLAH ENSG00000183038|LOC728226  
ENSG00000183535|C21orf123 ENSG00000185681|C9orf18 ENSG00000186423|Q8N9S5\_HUMAN ENSG00000186493|C5orf38 ENSG00000196358|NTNG2 ENSG00000196808|Q96NJ4\_HUMAN ENSG00000197892|KIF13B ENSG00000198664|Q9BTR0\_HUMAN  
ENSG00000095787|WAC ENSG00000100418|NP\_056519.1 ENSG00000100906|NFKBIA ENSG00000104064|GABBP2 ENSG00000119537|FVT1 ENSG000001131808|F5HB ENSG00000138041|SMEK2  
ENSG00000140968|IRF8 ENSG00000144452|ABCA12 ENSG00000153823|PID1 ENSG00000163093|BBS5 ENSG00000163635|ATXN7 ENSG00000165527|ARF6 ENSG00000169862|CTNND2 ENSG00000169908|TM4SF1  
ENSG00000169967|MAP3K2 ENSG00000170264|NP\_115556.1 ENSG00000173848|NET1 ENSG00000175868|CALCB ENSG00000177406|Q8N503\_HUMAN ENSG00000177981|ASB8 ENSG00000184182|UBE2F ENSG00000185418|TARSL2  
ENSG00000196319|Q9H353\_HUMAN ENSG00000197639|MKRNP5  
GGGGAGA ENSG000000010310|GIPR ENSG000000027644|INSRR ENSG000000058262|SEC61A1 ENSG00000100379|KCTD17 ENSG00000101079|NDRG3 ENSG00000103495|MAZ ENSG00000104848|KCNA7 ENSG00000106125|AQP1  
ENSG00000107954|NEURL ENSG00000116205|C1orf83 ENSG00000116584|ARHGEF2 ENSG00000125319|C17orf53 ENSG00000129195|FAM64A ENSG00000132205|EMILIN2 ENSG00000143627|PKLR ENSG00000148341|SH3GLB2  
ENSG00000149136|SSRP1 ENSG00000151468|CCDC3 ENSG00000153443|FAM100A ENSG00000154767|XPC ENSG00000155666|JMJD5 ENSG00000156599|ZDHC5 ENSG00000160685|ZBTB7B ENSG00000161835|GRASP  
ENSG00000161940|BCL6 ENSG00000163016|NP\_660343.1 ENSG00000164048|ZNF589 ENSG00000164050|PLXNB1 ENSG00000165125|TRPV6 ENSG00000167711|SERPINF2 ENSG00000168040|FADD ENSG00000169660|HEXDC  
ENSG00000172018|NP\_001004341.1 ENSG00000172936|MYD88 ENSG00000182866|LCK ENSG00000184185|KCNJ12 ENSG00000184881|MLLT7 ENSG00000185897|FFAR3 ENSG00000185934|S100A14 ENSG00000203959|PIN1L  
ENSG00000044574|HSPA5 ENSG00000088387|DOCK9 ENSG00000096717|SIRT1 ENSG00000108389|MTMR4 ENSG00000112425|EPM2A ENSG00000129810|SGOL1 ENSG00000132313|MRPL35 ENSG00000136986|DERL1  
ENSG00000145555|MYO10 ENSG00000147121|ZNF673 ENSG00000154127|STS1\_HUMAN ENSG00000157450|RNF111 ENSG00000162526|TSSK3 ENSG00000162989|KCNJ3 ENSG00000165322|ARHGAP12 ENSG00000167034|NKX3-1  
ENSG00000167618|LAIR2 ENSG00000174721|FGFBP3 ENSG00000176165|FOXG1b ENSG00000178691|SUZ12 ENSG00000187510|NP\_001004330.1 ENSG00000187806|NP\_001073931.1 ENSG00000198398|NP\_997199.1 ENSG00000204201|Q49A40\_HUMAN  
ENSG00000205773|LOC652517  
GGGGAGG ENSG00000002834|LASP1 ENSG00000006327|TNFRSF12A ENSG0000010319|SEMA3G ENSG00000103611|FUZ ENSG00000201811|GPR124 ENSG00000063245|EPN1 ENSG00000068001|HYAL2 ENSG00000075240|NP\_055939.1  
ENSG00000090971|NAT14 ENSG00000100056|DGCR14 ENSG00000100665|SERPINA4 ENSG00000105392|CRX ENSG00000108509|CAMTA2 ENSG00000110881|ACCN2 ENSG00000111671|SPSB2 ENSG00000112658|SRF  
ENSG00000120903|CHRNA2 ENSG00000121753|BAI2 ENSG00000125733|VASP ENSG00000125877|ITPA ENSG00000128274|A4GALT ENSG00000128284|APOL3 ENSG00000129654|FOXJ1 ENSG00000130758|MAP3K10  
ENSG00000131323|TRAF3 ENSG00000132702|HAPLN2 ENSG00000142330|ADAMTS10 ENSG00000146828|SLC12A9 ENSG00000149480|MTA2 ENSG00000149817|NBL1 ENSG00000152747|NBL1 ENSG00000162728|KCNJ9  
ENSG00000163485|ADORA1 ENSG00000166924|NP\_775835.2 ENSG00000169635|HIC2 ENSG00000169992|NLGN2 ENSG00000172183|ISG20 ENSG00000181929|PRKAG1 ENSG00000183186|KIAA1957 ENSG00000183615|C1orf90  
ENSG00000185730|ZNF696 ENSG00000188338|SLC38A3 ENSG00000188486|H2AFX ENSG00000189143|CLDN4 ENSG00000196408|NOXO1 ENSG00000197283|SYNGAP1 ENSG00000197948|FCHSD1 ENSG00000198454|Q5SQ13\_HUMAN  
ENSG00000204256|BRD2 ENSG00000204283|NP\_001001685.1 ENSG00000204446|NP\_001001709.1 ENSG00000206088|Q6ZT13\_HUMAN ENSG00000072694|FCGR2B ENSG00000076685|NT5C2 ENSG00000089225|TBX5 ENSG00000092470|WDR76  
ENSG00000100425|BRD1 ENSG00000112167|C6orf64 ENSG00000112651|MRPL2 ENSG00000114861|FOXP1 ENSG00000115368|WDR75 ENSG00000116922|C1orf109 ENSG00000127152|BCL11B ENSG00000129474|JUB ENSG00000136302|RYBP  
ENSG00000131828|PDHA1 ENSG00000133059|RIPK5 ENSG00000135111|TBX3 ENSG00000135697|BCMO1 ENSG00000141497|ZMYND15 ENSG00000145692|BHMT ENSG00000163113|OTUD7B ENSG00000163602|RYBP  
ENSG00000165474|GJB2 ENSG00000170113|NIPAL1 ENSG00000172466|ZNF24 ENSG00000173464|RNASE11 ENSG00000174721|FGFBP3 ENSG00000177606|JUN ENSG00000179104|TMTC2 ENSG00000181449|SOX2  
ENSG00000184254|ALDH1A3 ENSG00000186834|HEXIM1 ENSG00000196653|ZNF502 ENSG00000197627|Q9UFV3\_HUMAN ENSG00000090006|LTBP4 ENSG00000090097|PCBP4 ENSG00000101246|ARFRP1 ENSG00000102225|PCTK1  
ENSG00000007866|TEAD3 ENSG000000063245|EPN1 ENSG00000075043|KCNQ2 ENSG00000196271|JMJD4 ENSG00000090006|LTBP4 ENSG00000090097|PCBP4 ENSG00000101246|ARFRP1 ENSG00000102225|PCTK1  
ENSG00000104524|PYCRL ENSG00000104783|KCNNA4 ENSG00000105204|DYRK1B ENSG00000106992|AK1 ENSG00000113763|UNC5A ENSG00000116883|C1orf113 ENSG00000123933|MXD4 ENSG00000125826|RBCK1  
ENSG00000130222|GADD45G ENSG00000130511|SSBP4 ENSG00000131165|CHMP1A ENSG00000131759|RARA ENSG00000136717|BIN1 ENSG00000137076|TLN1 ENSG00000137309|HMGA1 ENSG00000137491|SLCO2B1  
ENSG00000139515|PDX1 ENSG00000140044|NP\_569736.1 ENSG00000140511|HAPLN3 ENSG00

ENSG00000159674|SPON2 ENSG00000160685|ZBTB7B ENSG00000167680|SEMA6B ENSG00000167895|TMC8 ENSG00000169957|ZNF768 ENSG00000172232|AZU1 ENSG00000172354|GNB2 ENSG00000175901|XR\_017883.1  
ENSG00000176715|NP\_777577.1 ENSG00000177542|SLC25A2 ENSG00000178947|Q86V52\_HUMAN ENSG00000179364|PACS2 ENSG00000182175|RGMA ENSG00000184363|PKP3 ENSG00000184811|TUSC5 ENSG00000185340|GAS2L1  
ENSG00000187583|PLEKHN1 ENSG00000187796|CARD9 ENSG00000188191|PRKAR1B ENSG00000188447|XR\_016015.1 ENSG00000196700|ZNF512B ENSG00000206013|IFITM5 ENSG00000206158|Q6ZVG4\_HUMAN ENSG00000070018|LRP6  
ENSG0000016251|RPL22 ENSG00000116717|GADD45A ENSG00000119917|IFIT3 ENSG00000127774|TMEM93 ENSG00000129071|MBD4 ENSG00000138823|MTTP ENSG00000146352|C6orf213 ENSG00000163349|HIPK1  
ENSG00000170279|C7orf33 ENSG00000117191|BCL2 ENSG000001178175|ZNF366 ENSG00000186354|EDG3 ENSG00000204518|AADACL4  
perfect: GGGGCC GGGCCC hsa-miR-296 agGGCCCCcctcaatcctgt 1  
GGGGCGC ENSG00000007866|TEAD3 ENSG00000026036|TNFRSF6B ENSG00000099364|FBXL19 ENSG00000100139|MICALL1 ENSG00000101440|ASIP ENSG00000105229|PIAS4 ENSG00000106018|VIPR2 ENSG00000107263|RAPGEF1  
ENSG00000122386|ZNF205 ENSG00000126067|PSMB2 ENSG00000127533|ZFRL3 ENSG00000127585|FBXL16 ENSG00000130332|LSM7 ENSG00000131188|PRR7 ENSG00000134438|RAX ENSG00000136942|RPL35  
ENSG00000142459|EVI5L ENSG00000148805|NR\_002934.2 ENSG00000157911|PEX10 ENSG00000161021|LTC4S ENSG00000164917|K0415\_HUMAN ENSG00000176357|C10orf55 ENSG00000177238|TRIM72 ENSG00000177732|SOX12  
ENSG00000178531|CTXN1 ENSG00000179044|EXOC3L ENSG00000181638|GLI4 ENSG00000182351|CRIP1 ENSG00000184986|TMEM121 ENSG00000186493|C5orf38 ENSG00000187796|CARD9 ENSG00000188483|IER5L  
ENSG00000189120|SP6 ENSG00000189410|SH2D5 ENSG00000196614|NM\_207462 ENSG00000197063|MAFG ENSG00000198535|NP\_997205.1 ENSG00000198664|Q9BTR0\_HUMAN ENSG00000198832|SELM\_HUMAN ENSG00000204401|Q8NOT0\_HUMAN  
ENSG00000204682|C10orf114 ENSG00000205502|NP\_001007596.1 ENSG00000205875|LOC197350 ENSG00000205927|OLIG2 ENSG00000206197|NP\_001013723.1 ENSG00000078304|PPP2R5C ENSG00000099940|SNAP29 ENSG00000111432|FZD10  
ENSG00000115934|PPIL3 ENSG00000122691|TWIST1 ENSG00000123689|GKS2 ENSG00000124177|CHD6 ENSG00000133627|ACTR3B ENSG00000135960|EDAR ENSG00000152268|SPON1 ENSG00000153162|BMP6  
ENSG00000154710|KCTD7 ENSG00000157551|KCNJ15 ENSG00000159399|HK2 ENSG00000165732|DDX21 ENSG00000170852|KBTBD2 ENSG00000178403|NEUROG2 ENSG00000179930|ZNF648  
ENSG00000181656|GPR88 ENSG00000205156|Q6UXQ8\_HUMAN  
GGGGGAG ENSG00000068971|PPP2R5B ENSG00000070614|NDST1 ENSG00000072182|ACCN4 ENSG00000075240|NP\_055939.1 ENSG00000087274|ADD1 ENSG00000089597|GANAB ENSG00000092929|UNC13D ENSG00000099364|FBXL19  
ENSG00000105676|ARMC6 ENSG00000110047|EHD1 ENSG00000116883|C1orf113 ENSG00000121753|BAI2 ENSG00000122386|ZNF205 ENSG00000126705|AHD1 ENSG00000130758|MAP3K10 ENSG00000130829|DUSP9  
ENSG00000131759|RARA ENSG00000132535|DLG4 ENSG00000146700|SRCRB4D ENSG00000148297|SURF5 ENSG00000149480|MTA2 ENSG00000158747|NBL1 ENSG00000160469|BRSK1 ENSG00000161835|GRASP  
ENSG00000170667|RASL2\_HUMAN ENSG00000172757|CPL1 ENSG00000173039|RELA ENSG00000173991|TCAP ENSG00000178531|CTXN1 ENSG00000182208|MOB2\_HUMAN ENSG00000183615|C1orf90 ENSG00000185897|FFAR3  
ENSG00000188976|NOC2L ENSG00000196666|Q6POA1\_HUMAN ENSG00000197019|SERTAD1 ENSG00000197308|NP\_997306.1 ENSG00000197401|Q6ZTC5\_HUMAN ENSG00000198324|FAM109A ENSG00000198892|TMEM58 ENSG00000204256|BRD2  
ENSG00000062650|WAPAL ENSG00000065060|C6orf107 ENSG00000078269|SYNJ2 ENSG00000080730|C14orf166 ENSG00000087916|SLC6A14 ENSG00000089225|TBX5 ENSG00000100354|TNRC6B ENSG00000107159|CA9  
ENSG00000110063|DCPS ENSG00000112651|MRPL2 ENSG00000114861|FOXP1 ENSG00000120800|UTP20 ENSG00000124788|ATXN1 ENSG00000127152|BCL11B ENSG00000129810|SGOL1 ENSG00000135540|NHSL1  
ENSG00000141497|ZMYND15 ENSG00000145555|MYO10 ENSG00000152520|PAN3 ENSG00000162526|TSSK3 ENSG00000168646|AXIN2 ENSG00000170027|YWHAG ENSG00000173705|SUSD5 ENSG00000174721|FGFBP3  
ENSG00000181234|TMEM132C ENSG00000184486|POU3F2  
GGGGGAT ENSG00000033327|GAB2 ENSG00000102312|PORCN ENSG000001121764|HCRTR1 ENSG00000138030|KHK ENSG00000141699|NP\_835227.1 ENSG00000143515|ATP8B2 ENSG00000144579|CTDSP1 ENSG00000156599|ZDHC5  
ENSG00000168071|CDC88 ENSG00000170260|ZNF212 ENSG00000174576|NPAS4 ENSG00000180198|RCC1 ENSG00000182749|PAQR7 ENSG00000183637|C21orf30 ENSG00000184209|NP\_008951.1 ENSG00000189068|VSTM1  
ENSG00000196961|AP2A1 ENSG00000074706|NP\_056368.1 ENSG00000078269|SYNJ2 ENSG00000104722|NEFM ENSG00000115970|THADA ENSG00000116833|NR5A2 ENSG00000130254|SAFB2  
ENSG00000137944|CCBL2 ENSG00000143771|CNIH4 ENSG00000169398|PTK2 ENSG00000174442|ZWILCH ENSG00000179295|PTPN11 ENSG00000183571|LOC145814 ENSG00000184083|FAM120C ENSG00000185760|KCNQ5  
ENSG00000185920|PTCH1 ENSG00000186566|GPATCH8 ENSG00000186940|CHCHD9 ENSG00000188215|DCUN1D3 ENSG00000196116|TDRD7 ENSG00000196116|TDRD7 ENSG00000196116|TDRD7  
ENSG00000062822|POLD1 ENSG00000072518|MARK2 ENSG00000095906|NUBP2 ENSG00000101986|ABCD1 ENSG00000102882|MAPK3 ENSG00000105612|DNASE2 ENSG00000106682|EIF4H ENSG00000107185|KIAA0258  
ENSG00000124006|OBSL1 ENSG00000125741|OPA3 ENSG00000126067|PSMB2 ENSG00000127585|FBXL16 ENSG00000129654|FOXJ1 ENSG00000131398|KCN3 ENSG00000131435|PDLIM4 ENSG00000132361|KIAA0664  
ENSG00000142949|PTPRF ENSG00000143595|AQP10 ENSG00000148805|NR\_002934.2 ENSG00000148826|NKX6-2 ENSG00000154342|WNT3A ENSG00000158008|EXTL1 ENSG00000160408|ST6GALNAC6 ENSG00000161021|LTC4S  
ENSG00000161682|Q8N0U1\_HUMAN ENSG00000162772|ATF3 ENSG00000164917|K0415\_HUMAN ENSG00000166016|ABTB2 ENSG00000167280|NP\_001036038.1 ENSG00000168490|PHYHIP ENSG00000169026|MFSD7 ENSG00000173846|PLK3  
ENSG00000177380|PFPIA3 ENSG00000181638|GLI4 ENSG00000185340|GAS2L1 ENSG00000187796|CARD9 ENSG00000188322|SBK1 ENSG00000188483|IER5L ENSG00000196557|CACNA1H ENSG00000196614|NM\_207462  
ENSG00000196642|C9orf86 ENSG00000198407|Q8NCZ5\_HUMAN ENSG00000204058|C10orf41 ENSG00000205875|LOC197350 ENSG00000206197|NP\_001013723.1 ENSG0000016490|CLCA1 ENSG00000209639|TFB1M ENSG00000040341|STAU2  
ENSG00000051341|POLQ ENSG00000064787|BCAS1 ENSG00000071243|ING3 ENSG00000100354|TNRC6B ENSG00000115486|GCXC ENSG00000120341|LZTR2 ENSG00000121871|SLITRK3 ENSG00000133627|ACTR3B  
ENSG00000137824|FAM82C ENSG00000155158|C9orf52 ENSG00000162746|FCRLB ENSG00000163618|CADPS ENSG00000166752|TMEM83 ENSG00000172766|NARG1L ENSG00000178403|NEUROG2 ENSG00000187601|MAGEH1  
ENSG00000198353|HOXC4 ENSG00000206535|A1A4G5\_HUMAN  
GGGGGGA ENSG00000008516|MMP25 ENSG00000084207|GSTP1 ENSG00000099364|FBXL19 ENSG00000099968|BCL2L13 ENSG00000100056|DGCR14 ENSG00000104365|IKBK3 ENSG00000105281|SLC1A5 ENSG00000113739|STC2  
ENSG00000115507|OTX1 ENSG00000116584|ARHGFE2 ENSG00000116604|MEF2D ENSG00000117362|APHA1 ENSG00000120068|HXB3 ENSG00000125733|XRCC3 ENSG00000132535|DLG4 ENSG00000132694|ARHGEF11  
ENSG00000142303|ADAMTS10 ENSG00000143028|SYPL2 ENSG00000158747|NBL1 ENSG00000161574|CCL14 ENSG00000161960|EIF4A1 ENSG00000163481|RNF25 ENSG00000163526|TUBA4B ENSG00000165478|HEPACAM  
ENSG00000165556|CDX2 ENSG00000168758|SEMA4C ENSG00000169635|HIC2 ENSG00000169991|Q5TF58\_HUMAN ENSG00000173039|RELA ENSG00000175550|DRAP1 ENSG00000175906|ARL4D ENSG00000179913|B3GNT3  
ENSG00000198286|CARD11 ENSG00000020458|TMEM58 ENSG00000089225|TBX5 ENSG00000119906|C10orf6 ENSG00000120800|UTP20 ENSG00000122947|JUB ENSG00000124974|JUB ENSG00000151240|DIP2C  
ENSG00000173876|NP\_817124.1 ENSG00000182463|TSHZ2 ENSG00000182815|DCUN1D3 ENSG00000204884|Q6ZVI2\_HUMAN ENSG00000205337|Q6ZVR2\_HUMAN ENSG00000205403|CFI  
GGGGGGT ENSG00000006327|TNFRSF12A ENSG00000007392|LUC7L ENSG00000002129|NCDN ENSG000000090776|EFNB1 ENSG00000101246|ARFRP1 ENSG00000102225|PCTK1 ENSG00000103426|CORO7 ENSG00000105428|ZNRF4  
ENSG00000105576|TNPO2 ENSG00000115306|SPTBN1 ENSG00000120889|TNFRSF10B ENSG00000128973|CLN6 ENSG00000129245|FXR2 ENSG00000129993|CBFA2T3 ENSG00000131759|RARA ENSG00000133466|CIQTNF6  
ENSG00000135924|DNAJB2 ENSG00000144579|CTDSP1 ENSG00000159199|ATP5G1 ENSG00000160339|PCN2 ENSG00000161328|LRRC56 ENSG00000164896|FASTK ENSG00000169717|ACTR2 ENSG00000171603|CLSTN1  
ENSG00000177169|ULK1 ENSG00000178951|ZBTB7A ENSG00000182851|NP\_835466.1 ENSG00000186635|STARD10 ENSG00000188112|FLJ90086 ENSG00000196154|S100A4 ENSG00000198569|SLC34A3 ENSG00000198911|SREBF2  
ENSG0000010278|CD9 ENSG00000055917|PUM2 ENSG00000077147|TM9SF3 ENSG00000081189|MEF2C ENSG00000100632|ERH ENSG00000111300|C12orf30 ENSG00000143252|SDHC ENSG00000146592|CREB5  
ENSG00000152402|GUCY1A2 ENSG00000162385|MAGOH ENSG00000163507|K1AA1524 ENSG00000163918|RFC4 ENSG00000164736|SOX17 ENSG00000170534|C2orf15 ENSG00000177508|IRX3 ENSG00000185915|KLHL34  
ENSG00000197299|BLM ENSG00000206367|Q6ZR26\_HUMAN  
GGGGGTG ENSG000000010671|BTX ENSG00000066248|NGEF ENSG00000068831|RASGRP2 ENSG00000076984|O14733-2 ENSG00000085185|BCORL1 ENSG00000099814|KIAA0284 ENSG00000101098|RIMS4 ENSG00000105327|BBC3  
ENSG00000105369|CD79A ENSG00000105656|ELL ENSG00000105722|ERF ENSG00000108312|UBTF ENSG00000114626|ABTB1 ENSG00000125740|FOSB ENSG00000125753|VASP ENSG00000125968|ID1  
ENSG00000128268|MGAT3 ENSG00000129245|FXR2 ENSG00000133247|SUV420H2 ENSG00000133619|KRBA1 ENSG00000137216|TMEM63B ENSG00000140859|KIFC3 ENSG00000141150|RASL10B ENSG00000143373|ZNF687  
ENSG00000160469|BRSK1 ENSG00000160685|ZBTB7B ENSG00000161328|LRRC56 ENSG00000161956|SENP3 ENSG00000163344|PMVK ENSG00000165782|TMEM55B ENSG00000173846|PLK3 ENSG00000175634|RPS6KB2  
ENSG00000177408|PLAC2 ENSG00000178171|NP\_689911.1 ENSG00000178233|C6orf137 ENSG00000178597|PSAPL1 ENSG00000182087|C19orf6 ENSG00000185386|MAPK11 ENSG00000185818|NAT8L ENSG00000204058|C10orf41  
ENSG00000204498|NFKBIL1 ENSG00000204616|TRIM31 ENSG00000111295|TTC19 ENSG00000047597|XK ENSG00000076554|TPD52 ENSG00000079482|OPHN1 ENSG00000115616|SLC9A2 ENSG00000120616|EPC1  
ENSG00000129422|MTUS1 ENSG00000138071|ACTR2 ENSG00000143079|CTTNBP2L ENSG00000143252|SDHC ENSG00000151150|ANK3 ENSG00000156026|CCDC109A ENSG00000162385|MAGOH ENSG00000165084|C8orf34  
ENSG00000171174|RBKS ENSG00000173947|C1orf88 ENSG00000197299|BLM ENSG00000206367|Q6ZR26\_HUMAN  
GGGGGTT ENSG00000007392|LUC7L ENSG00000002129|NCDN ENSG00000071626|DAZAP1 ENSG00000099364|FBXL19 ENSG00000100299|ARSA ENSG00000104059|K0574\_HUMAN ENSG00000105576|TNPO2 ENSG00000123360|PDE1B  
ENSG00000128185|DGCR6L ENSG00000129993|CBFA2T3 ENSG00000133980|C14orf115 ENSG00000142273|CBLC ENSG00000142961|MOBK2C ENSG00000158352|SHROOM4 ENSG00000158715|SLC45A3 ENSG00000164729|AMAC1L1  
ENSG00000175182|FAM131A ENSG00000177992|C9orf79 ENSG00000179036|VAMP2 ENSG00000181291|TMEM132E ENSG00000183250|C21orf67 ENSG00000183488|AMAC1L3 ENSG00000183628|D10CR6 ENSG00000186976|DUBP\_HUMAN  
ENSG00000197615|C8orf49 ENSG00000203516|AKAP11 ENSG00000049246|PER3 ENSG00000069702|TGFB3 ENSG00000103994|ZFP106 ENSG00000111707|SUSD3 ENSG00000112282|CRSP3 ENSG00000113924|HGD  
ENSG00000116957|TBCE ENSG00000136451|VEZF1 ENSG00000163918|RFC4 ENSG00000166439|RNF169 ENSG00000183508|FAM46C ENSG00000197657|ZNF323 ENSG00000203717|Q6ZUF4\_HUMAN ENSG00000206527|PTPLB

ENSG00000173281|PPP1R3B ENSG00000173653|RCE1 ENSG00000180992|MRPL14 ENSG00000184857|TMEM186 ENSG00000187800|NP\_001073940.1 ENSG00000069712|KIAA1107 ENSG00000106591|MRPL32 ENSG00000107611|CUBN  
ENSG00000107864|CEPB3 ENSG00000108846|ABCC3 ENSG00000117133|BXDC5 ENSG00000118705|RPN2 ENSG00000121741|ZMYM2 ENSG00000127184|COX7C ENSG00000128710|HOXD10 ENSG00000129422|MTUS1  
ENSG00000135040|MAK10 ENSG00000139842|CUL4A ENSG00000141627|DYM ENSG00000147862|NFIB ENSG00000154122|ANKH ENSG00000155008|APOOL ENSG00000162641|C1orf62 ENSG00000166535|A2ML1  
ENSG00000171970|ZNF57 ENSG00000184895|SRY  
GGGTAGT perfect: GGGTACC GTTACCC hsa-miR-409-5p agGTTACCgagcaactttgca 2  
ENSG00000055070|C1orf144 ENSG00000056487|PHF21B ENSG00000088812|ATRN ENSG00000100427|MLC1 ENSG00000114388|TUSC4 ENSG00000124116|WFD3 ENSG00000127124|HIVEP3 ENSG00000135624|CCT7  
ENSG00000139083|ETV6 ENSG00000139200|C12orf53 ENSG00000143450|OAZ3 ENSG00000143515|ATP8B2 ENSG00000144677|CTDSP1 ENSG00000160219|GAB3 ENSG00000163013|FBXO41 ENSG00000169228|MXD3  
ENSG00000171385|KCNDB3 ENSG00000171984|C20orf196 ENSG00000177238|TRIM72 ENSG00000181852|RNF41 ENSG00000204303|Q6ZVW4\_HUMAN ENSG00000205972|Q8NBOC\_HUMAN ENSG0000033178|UBEL12 ENSG00000119616|FCF1  
ENSG00000122787|AKR1D1 ENSG00000125414|MYH2 ENSG00000127334|DYRK2 ENSG00000136110|LECT1 ENSG00000143970|ASXL2 ENSG00000145358|DDIT4L ENSG00000146433|TMEM181  
ENSG00000162747|FCGR3B ENSG00000163110|PDLIM5 ENSG00000164252|AGGF1 ENSG00000170074|NP\_775934.3 ENSG00000172660|TAF15 ENSG00000175581|MRPL48 ENSG00000181481|RNF135 ENSG00000196328|Q9P1I9\_HUMAN  
ENSG00000205765|NP\_787117.3  
GGGTATG ENSG00000115657|ABCB6 ENSG00000121671|CRY2 ENSG00000128849|CGNL1 ENSG00000134020|PEBPL\_HUMAN ENSG00000144852|NR1I2 ENSG00000153048|CARHSP1 ENSG00000161944|ASGR2 ENSG00000162078|U773\_HUMAN  
ENSG00000170465|KRT6C ENSG00000171794|UTF1 ENSG00000172940|SLC22A13 ENSG00000205658|Q6ZUU6\_HUMAN ENSG00000205878|Q6ZSV2\_HUMAN ENSG0000010219|DYRK4 ENSG00000081842|PCDH10 ENSG00000082068|WDR70  
ENSG00000085276|EV11 ENSG00000087302|C14orf166 ENSG00000105974|CAV1 ENSG00000110484|SCGB2A2 ENSG00000115970|THADA ENSG00000131721|PEPP2\_HUMAN ENSG00000137265|IRF4 ENSG00000143420|ENSA  
ENSG00000143970|ASXL2 ENSG00000147124|ZNF41 ENSG00000150995|ITPR1 ENSG00000154127|STS1\_HUMAN ENSG00000158528|PPP1R9A ENSG00000163376|KBTBD8 ENSG00000170820|FSHR ENSG00000174298|NP\_694572.1  
ENSG00000186439|TRDN ENSG00000188039|NWD1 ENSG00000197755|O14513-3 ENSG00000203989|LOC727940 ENSG00000205524|Q68D70\_HUMAN ENSG00000205857|Q7Z5D8\_HUMAN  
GGGTATT ENSG00000084636|COL16A1 ENSG00000105509|HAS1 ENSG00000105583|C19orf56 ENSG00000114999|TTL ENSG00000116237|ICMT ENSG00000134287|ARF3 ENSG00000135605|TEC  
ENSG00000145494|NDUF56 ENSG00000148840|PPRC1 ENSG00000154768|C17orf50 ENSG00000159202|UBE2Z ENSG00000160408|STGALNAC6 ENSG00000163382|APOA1BP ENSG00000166924|NP\_775835.2 ENSG00000167930|ITFG3  
ENSG00000168792|NP\_937790.1 ENSG00000169231|THBS3 ENSG00000171475|WIPF2 ENSG00000174151|CYB561D1 ENSG00000175376|NP\_115701.2 ENSG00000185963|BTCD2 ENSG00000197182|NM\_207477 ENSG00000203855|Q8TDP9\_HUMAN  
ENSG00000084463|WBP11 ENSG00000101349|PAK7 ENSG00000102221|PHF16 ENSG00000108100|CCNY ENSG00000109771|LRP2BP ENSG00000114026|OGG1 ENSG00000123737|EXOSC9 ENSG00000134077|THUMPD3  
ENSG00000135821|GLUL ENSG00000137033|IL33 ENSG00000145362|ANK2 ENSG00000164951|PPM2C ENSG00000169330|K1024\_HUMAN ENSG00000177182|NP\_775790.1 ENSG00000180938|ZNF572 ENSG00000185448|FAM47A  
ENSG00000189132|FAM47B ENSG00000198173|FAM47C ENSG00000204596|RPP21  
GGGTAC ENSG00000090615|GOLGA3 ENSG00000100207|TCF20 ENSG00000101282|RSP04 ENSG00000102934|PLLP ENSG00000103485|QPR2 ENSG00000106038|EVX1 ENSG00000107807|TLX1 ENSG00000130201|EXOC3L2  
ENSG00000135740|SLC9A5 ENSG00000142279|WTP1 ENSG00000145040|UCN2 ENSG00000151176|NP\_775813.1 ENSG00000159199|ATP5G1 ENSG00000162461|SLC25A34 ENSG00000162761|LMX1A ENSG00000171456|ASXL1  
ENSG00000174945|AMZ1\_HUMAN ENSG00000181378|CCDC108 ENSG00000187583|PLEKHN1 ENSG00000189196|Q6ZUD9\_HUMAN ENSG00000197561|ELA2 ENSG00000197766|CFD ENSG00000204049|Q6ZUH9\_HUMAN ENSG00000205531|NAP1L4  
ENSG00000205913|Q6ZUC4\_HUMAN ENSG00000078070|MCCC1 ENSG00000099251|HSD17B7P2 ENSG00000106617|PRKAG2 ENSG00000124120|C20orf121 ENSG00000130349|C6orf203 ENSG00000143420|ENSA ENSG00000150394|CDH8  
ENSG00000152402|GUCY1A2 ENSG00000153246|PLA2R1 ENSG00000155850|SLC26A2 ENSG00000156042|TTC18 ENSG00000162745|OLFML2B ENSG00000166598|HSP90B1 ENSG00000168813|ZNF507 ENSG00000176657|EPS15L2  
GGGTCCA ENSG00000020633|RUNX3 ENSG00000099899|HTF9C\_HUMAN ENSG00000099904|ZDHHC8 ENSG00000100014|SPECC1L ENSG00000101255|TRIB3 ENSG00000106927|AMBP ENSG00000107551|RASSF4 ENSG00000132563|REEP2  
ENSG00000137500|LRR32 ENSG00000141736|ERBB2 ENSG00000143393|PIK4CB ENSG00000157933|SKI ENSG00000166888|STAT6 ENSG00000179348|GATA2 ENSG00000185933|FAM26C ENSG00000196535|MYO18A  
ENSG00000197088|NM\_207488 ENSG00000204520|MICA ENSG00000205631|Q9H7S7\_HUMAN ENSG00000205703|NP\_001010910.1 ENSG00000206088|Q6ZT13\_HUMAN ENSG00000075292|ZNF638 ENSG00000080608|KIAA0020 ENSG00000087206|UIMC1  
ENSG00000100596|SPTLC2 ENSG00000101327|PDYN ENSG00000113088|GZMK ENSG00000124688|MAD2L1BP ENSG00000125900|SIRPD ENSG00000140795|MYLK3\_HUMAN ENSG00000150630|VEGFC  
ENSG00000156475|PPP2R2B ENSG00000158865|SLC5A11 ENSG00000163544|Q96BL6\_HUMAN ENSG00000171530|TBCA ENSG00000177620|Q9BSL4\_HUMAN ENSG00000179066|Q86VG9\_HUMAN ENSG00000181904|C5orf24 ENSG00000183385|TTY8\_HUMAN  
GGGTCCA ENSG00000053438|NNAT ENSG00000101421|CHMP4F ENSG00000107821|KAZALD1 ENSG00000124249|KCNK15 ENSG00000125798|FOXA2 ENSG00000130669|PAK4 ENSG00000133937|GSC ENSG00000141971|FAM125A  
ENSG00000142694|C1orf78 ENSG00000145861|C1QTNF2 ENSG00000152117|Q6ZWB7\_HUMAN ENSG00000158623|TSGA13 ENSG00000165643|SOHLH1 ENSG00000167772|ANGPTL4 ENSG00000171777|RASGRP4 ENSG00000171954|NP\_775754.1  
ENSG00000173662|TAS1R1 ENSG00000174516|PELLI3 ENSG00000175718|CXorf55 ENSG00000176894|PGAM5 ENSG00000183048|SLC25A10 ENSG00000183519|NSUN5B ENSG00000184990|SIVA1 ENSG00000187013|C17orf82  
ENSG00000188523|NP\_997300.1 ENSG00000204528|Q6H1K9\_HUMAN ENSG00000204616|TRIM31 ENSG00000205266|Q6ZRU5\_HUMAN ENSG00000205627|SUHW3 ENSG00000081819|MEF2C ENSG00000101544|ZNF508 ENSG00000103671|TRIP4  
ENSG00000111799|COL12A1 ENSG00000113971|ACAD11 ENSG00000125814|NAPB ENSG00000131737|KRT34 ENSG00000140743|CDR2 ENSG00000143252|SDHC ENSG00000143674|M3KL4\_HUMAN ENSG00000144191|CNGA3  
ENSG00000147162|OGT ENSG00000149218|ENDO1 ENSG00000150048|CLEC1A ENSG00000152977|ZIC1 ENSG00000164485|IL22RA2 ENSG00000167601|AXL ENSG00000168280|KIF5C ENSG00000170871|K0232\_HUMAN  
ENSG00000181191|PJA1 ENSG00000187210|GCNT1 ENSG00000204189|Q587I5\_HUMAN  
GGGTCTA ENSG000000011132|APBA3 ENSG00000073598|PNDCT1 ENSG00000099812|C19orf21 ENSG00000102755|FLT1 ENSG00000104892|KLC3 ENSG000001105370|LIM2 ENSG00000111424|VDR ENSG00000126561|STAT5A  
ENSG00000130518|KIAA1683 ENSG00000143816|WN79A ENSG00000159588|CCDC17 ENSG00000166140|ZFVYE19 ENSG00000166965|RCCD1 ENSG00000168701|NM\_014187.2 ENSG00000177098|SCN4B ENSG00000177627|C12orf54  
ENSG00000198003|NP\_659482.3 ENSG00000205878|Q6ZSV2\_HUMAN ENSG0000012504|NR1H4 ENSG0000033867|SLC4A7 ENSG00000074603|DPP8 ENSG00000079385|CEACAM1 ENSG00000109854|HTATIP2 ENSG00000137965|IFI44  
ENSG00000138777|PPA2 ENSG00000139800|ZIC5 ENSG00000144867|SRPRB ENSG00000150656|CNDP1 ENSG00000153002|CPB1 ENSG00000162745|OLFML2B ENSG00000172115|CYCS ENSG00000187229|Q86YR2\_HUMAN  
GGGTGAA ENSG00000108788|MLX ENSG00000132518|GUCY2D ENSG00000142686|NP\_689587.1 ENSG00000147113|CXorf36 ENSG00000155858|LSM11 ENSG00000162430|SEPN1 ENSG00000169169|CPT1C ENSG00000169717|ACTRT2  
ENSG00000169896|ITGAM ENSG00000173404|INSM1 ENSG00000175137|SH3BP5L ENSG00000177875|NP\_001013657.2 ENSG00000180471|C9orf31 ENSG00000185049|FUT7 ENSG00000180595|Q8N8C9\_HUMAN ENSG00000183562|Q9P1L5\_HUMAN  
ENSG00000196106|Q8WZ26\_HUMAN ENSG00000203685|C1orf95 ENSG00000205106|Q6N098\_HUMAN ENSG0000009790|TRAF3IP3 ENSG00000065970|FOXJ2 ENSG00000092203|TOX4 ENSG00000109189|USP46 ENSG00000111863|C6orf105  
ENSG00000113369|ARRDC3 ENSG00000113387|SUB1 ENSG00000113492|AGXT2 ENSG00000116141|MARK1 ENSG00000117090|SLAMF1 ENSG00000123575|CXorf39 ENSG00000127252|HRAS1 ENSG00000134812|GIF  
ENSG00000136144|RCBTB1 ENSG00000137878|GRINL1A ENSG00000138759|FRAS1 ENSG00000138813|C4orf17 ENSG00000148426|C10orf47 ENSG00000152093|NP\_001072998.1 ENSG00000158865|SLC5A11  
ENSG00000175874|CREG2 ENSG00000177565|TBL1XR1 ENSG00000188740|NBPFF5 ENSG00000198142|ANKRD57 ENSG00000206560|ANKRD28  
GGGTGGA ENSG00000005206|PSL1\_HUMAN ENSG00000091947|TMEM101 ENSG00000101098|RIMS4 ENSG00000108352|RAPGEF1L ENSG00000110243|APOA5 ENSG00000116691|ANKRD38 ENSG00000117472|TSPAN1 ENSG00000127837|AAMP  
ENSG00000130649|CYP2E1 ENSG00000130940|CAS21 ENSG00000136830|FAM129B ENSG00000141026|MED9 ENSG00000143847|PPPIA4 ENSG00000157211|CDCP2 ENSG00000165272|AQP3 ENSG00000166557|TMED3  
ENSG00000166997|NP\_689968.1 ENSG00000167136|ENDOG ENSG00000168259|DNAJC7 ENSG00000171017|LRR8E ENSG00000171773|TXNL6 ENSG00000173638|SLC19A1 ENSG00000173805|HAP1 ENSG00000183010|PYCR1  
ENSG00000186322|Q8N824\_HUMAN ENSG00000198835|GJA12 ENSG00000205790|Q6ZT70\_HUMAN ENSG00000212131|PDXP ENSG00000065809|FAM107B ENSG00000069943|PIGB ENSG00000073921|PICALM ENSG00000091527|CDV3  
ENSG00000100804|PSMB5 ENSG00000146109|ABT1 ENSG00000151718|WWC2 ENSG00000156697|UTP14A ENSG00000163923|RPL39L ENSG00000165609|NUDT5 ENSG00000169340|NP\_777584.1 ENSG00000170866|LILRA3  
ENSG00000180011|ZADH2 ENSG00000180881|CAPS2 ENSG00000182831|C16orf72 ENSG00000187446|CHP1\_HUMAN ENSG00000196704|AMZ2\_HUMAN ENSG00000203995|ZYG11A ENSG00000204478|PRAMEF20 ENSG00000204486|PRAMEF21  
ENSG00000205769|Q6ZUR9\_HUMAN  
GGGTGGG ENSG000000011105|TSPAN9 ENSG00000027644|INSRR ENSG00000072182|ACCN4 ENSG00000076984|O14733-2 ENSG00000099992|TBC1D10A ENSG00000101194|C20orf59 ENSG00000102003|SYP ENSG00000105204|DYRK1B  
ENSG00000106634|YKT6 ENSG00000107833|NPM3 ENSG00000108344|PSMD3 ENSG00000112559|MDFI ENSG00000112655|PTK7 ENSG00000115073|ACTR1B ENSG00000116260|QSOX1 ENSG00000116604|MEF2D  
ENSG00000125740|FOSB ENSG00000128218|VPREB3 ENSG00000128594|LRR4C ENSG00000128973|CLN6 ENSG00000135924|DNABJ2 ENSG00000139636|LMBR1L ENSG00000140859|KIFC3 ENSG00000141570|CBX8  
ENSG00000145020|AMT ENSG00000148826|NKX6-2 ENSG00000149503|INCE1P ENSG00000154342|WNT3A ENSG00000156564|LRFN2 ENSG00000157870|C1orf93 ENSG00000159184|HOXB13 ENSG00000162065|TBC1D24  
ENSG00000162460|NP\_001013663.1 ENSG00000163083|INHBB ENSG00000165458|INPPL1 ENSG00000167657|DAPK3 ENSG00000169758|SEMA4C ENSG00000169957|ZNF768 ENSG00000169991|Q5TF58\_HUMAN ENSG00000175309|AGXT2L2  
ENSG00000175634|RPS6KB2 ENSG00000178093|TSSK6 ENSG00000180539|C9orf139 ENSG00000182087|C19orf6 ENSG00000182575|NXP3 ENSG00000185818|NAT8L ENSG00000186193|C9orf140 ENSG00000187642|C1orf170  
ENSG00000187942|LDLRAD2 ENSG00000188112|FLJ90086 ENSG00000189203|TMEM179 ENSG00000196517|SLC6A9 ENSG00000197540|GZMM ENSG00000204498|NFKBIL1 ENSG000002044574|HSPA5 ENSG00000071054|MAP4K4  
ENSG00000100425|BRD1 ENSG00000100632|ERH ENSG00000101247|C20orf7 ENSG00000107443|CCNJ ENSG00000117751|SET ENSG00000119335|SET ENSG00000119866|BCL11A ENSG00000120256|LRP11  
ENSG00000120616|EPC1 ENSG00000134954|ETS1 ENSG00000135048|TMEM2 ENSG00000142192|APP ENSG00000144566|RAB5A ENSG00000144749|LRIG1 ENSG00000151150|ANK3 ENSG00000152213|ARL11  
ENSG00000153823|PID1 ENSG00000163659|TIPARP ENSG00000166923|GREM1 ENSG00000168036|CTNNB1 ENSG00000184083|FAM120C ENSG00000196914|ARHGEF12 ENSG00000197181|PIWIL2 ENSG00000198757|Q96NB8\_HUMAN  
ENSG00000204178|TMEM57 ENSG00000204691|NR\_002819.1 ENSG00000205462|Q6ZWC8\_HUMAN  
GGGTAT ENSG00000004139|SARM1 ENSG00000032389|TSSC1 ENSG00000105223|PLD3 ENSG00000105486|LIG1 ENSG00000117242|DDOST ENSG00000125746|EML2 ENSG00000130687|ALKBH6 ENSG00000133424|LARGE  
ENSG00000143409|FAM63A ENSG00000143512|KIAA1822L ENSG00000145526|CDH18 ENSG00000151474|FRMD4A ENSG00000153786|ZDHHC7 ENSG00000158955|WNT9B ENSG00000160220|PWP2 ENSG00000161204|ABCF3  
ENSG00000164674|SYTL3 ENSG00000169635|HIC2 ENSG00000170379|NP\_775949.1 ENSG00000170473|WIBG ENSG00000174804|FZD4 ENSG00000186854|Q86V40\_HUMAN ENSG00000197816|KIAA1529 ENSG00000205039|RRAGD  
ENSG00000079332|SAR1A ENSG00000079385|CEACAM1 ENSG00000080839|RBL1 ENSG00000118246|FASTKD2 ENSG00000122043|Q5TAE0\_HUMAN ENSG00000131080|EDA2R ENSG00000137942|FNBP1L ENSG00000138496|PARP9  
ENSG00000141298|SSH2 ENSG00000146938|NLGN4X ENSG00000168556|ING2 ENSG00000174007|C3orf34 ENSG00000186561|ARGFX ENSG00000189376|C8orf76 ENSG00000196227|C20orf177  
GGTAAAT ENSG00000089169|RPH3A ENSG00000105726|ATP13A1 ENSG00000108379|WNT3 ENSG00000115902|SLC1A4 ENSG00000117877|CD3EAP ENSG00000121270|ABCC11 ENSG00000126594|DNASE1 ENSG00000129910|CDH15  
ENSG00000131389|SLC6A6 ENSG00000144843|ADPRH ENSG00000162543|UBXD3 ENSG00000163331|NP\_001017920.1 ENSG00000164078|MST1R ENSG00000166086|JAM3 ENSG00000170549|IRX1 ENSG00000176979|TRIM60  
ENSG00000185404|Q4ZG65\_HUMAN ENSG00000196758|NM\_207483 ENSG00000204248|COL11A2 ENSG00000048544|MRPS10 ENSG00000068305|MEF2A ENSG00000070190|DAPP1 ENSG00000091039|OSBPL8 ENSG00000116062|MSH6  
ENSG00000119927|GPAM ENSG00000133983|SYNJ2BP ENSG00000135052|C9orf155 ENSG00000138439|ALS2CR13 ENSG00000143420|ENSA ENSG00000144802|NFKB1Z ENSG00000146223|RPL7L1 ENSG00000151881|C5orf28  
ENSG00000155893|ACPL2 ENSG00000164933|SLC25A32 ENSG00000165323|FAT3 ENSG00000178695|KCTD12 ENSG00000180998|GPR137C ENSG00000182010|PLEKHH1 ENSG00000182805|RFP4B ENSG00000184344|GDF3  
ENSG00000188529|FUSIP1 ENSG00000188659|NP\_001008227.1  
GGTAACA ENSG00000089057|SLC23A2 ENSG00000100296|THOC5 ENSG00000111540|RAB5B ENSG00000130529|TRPM4 ENSG00000134825|C11orf10 ENSG00000137656|BUD13 ENSG00000139083|ETV6 ENSG00000140961|OSGIN1  
ENSG00000147256|RHGXX\_HUMAN ENSG00000156030|C14orf43 ENSG00000163382|APOA1BP ENSG00000173281|PPP1R3B ENSG00000183530|C22orf30 ENSG00000184157|C1orf210 ENSG00000187664|TM6SF2 ENSG00000187682|ERAS  
ENSG00000204558|Q9BYX6\_HUMAN ENSG00000001561|ENPP4 ENSG000000039139|DNAH5 ENSG00000100902|PSMA6 ENSG00000119865|C2orf32 ENSG00000120756|PLS1 ENSG00000120948|TARDBP ENSG00000121741|ZMYM2  
ENSG00000137504|CREBZF ENSG00000137819|PAQR5 ENSG00000143437|ARNT ENSG00000148516|ZEB1 ENSG00000152454|ZNF256 ENSG00000152642|GPD1L ENSG00000170962|PDGFD  
ENSG00000183542|KLRC4 ENSG00000183807|C6orf189 ENSG00000184895|SRY ENSG00000196083|IL1RAP ENSG00000196199|MPPE\_HUMAN ENSG00000196350|ZNF492 ENSG00000196511|TPK1 ENSG00000198521|ZNF43  
ENSG00000198836|OPA1 ENSG00000205269|Q5T4T1\_HUMAN  
GGTAACC ENSG00000082929|C4orf6 ENSG00000095383|TBC1D2 ENSG00000105369|CD79A ENSG00000106538|RARRES2 ENSG00000114378|HYAL1 ENSG00000124233|SEMG1 ENSG00000129351|ILF3 ENSG00000130758|MAP3K10  
ENSG00000134317|GRHL1 ENSG00000137171|KLC4 ENSG00000139437|TCHP ENSG00000148832|PAOX ENSG00000161513|FDXR ENSG00000166813|KIF7 ENSG00000167815|PRDX2 ENSG00000176444|CLK2  
ENSG00000180205|WFGD9 ENSG00000184857|TMEM186 ENSG00000010404|IDS ENSG00000047597|XK ENSG00000102580|DNAJC3 ENSG00000103534|TMC5 ENSG00000109819|PPARGC1A ENSG00000125551|PLGLB1  
ENSG00000126787|DLFC9 ENSG00000127928|GNGT1 ENSG00000128606|LRR1C17 ENSG00000133019|CHRM3 ENSG00000135205|NP\_065930.2 ENSG00000152527|PLEKHH2 ENSG00000161298|ZNF382 ENSG00000169659|PLGLA1

ENSG00000171970|ZNF57 ENSG00000172409|CLP1 ENSG00000174928|C3orf33 ENSG00000175336|APOF ENSG00000177125|ZBTB34 ENSG00000180667|YOD1 ENSG00000180712|Q8NEQ2\_HUMAN ENSG00000183281|PLGB\_HUMAN  
ENSG00000187242|KRT12 ENSG00000198863|RUNCDC1 ENSG00000198872|PEG10  
perfect: GGTACC GTTACC hsa-miR-409-5p aGGTTACCcgagcaactttgca 1  
GGTAACCT ENSG00000229993|HMGB3 ENSG00000063854|HAGH ENSG00000101445|PPP1R16B ENSG00000110025|SNX15 ENSG00000116663|FBXO6 ENSG00000125633|CCDC93 ENSG00000136068|FLNB ENSG00000138696|BMPR1B  
ENSG00000141580|WDR45L ENSG00000143222|UFC1 ENSG00000153481|NP\_060680.2 ENSG00000159708|LRRC36 ENSG00000160712|IL6R ENSG00000164740|NR\_003034.1 ENSG00000167264|DUS2L ENSG00000167800|TBX10  
ENSG00000168658|NP\_659429.4 ENSG00000175992|Q9BR87\_HUMAN ENSG00000181396|NP\_079122.1 ENSG00000184785|Q96HG1\_HUMAN ENSG00000188706|ZDHHC9 ENSG00000198794|SCAMP5 ENSG00000204058|C10orf41 ENSG00000005889|ZFX  
ENSG0000011523|CBP68 ENSG00000107159|CA9 ENSG00000107443|CCNJ ENSG00000112367|KIAA0274 ENSG00000129422|MTUS1 ENSG00000137601|NEK1 ENSG00000139842|CUL4A ENSG00000141279|NPEPPS  
ENSG00000155096|AZIN1 ENSG00000162374|ELAVL4 ENSG00000172331|BPGM ENSG00000173852|DPY19L1 ENSG00000177938|CAPZA3 ENSG00000178741|COX5A ENSG00000188761|C1orf178 ENSG00000197937|ZNF347  
GGTAAGC ENSG00000002586|CD99 ENSG00000026652|AGPAT4 ENSG00000085063|CD59 ENSG00000100983|GSS ENSG00000105355|M6PRBP1 ENSG00000108679|LGLALS3BP ENSG00000109047|RCVRN ENSG00000143512|KIAA1822L  
ENSG00000143819|EPHX1 ENSG00000145192|AHSB ENSG00000158545|NP\_653205.2 ENSG00000171246|NPTX1 ENSG00000171467|ZNF318 ENSG00000174282|ZBTB4 ENSG00000174950|CD164L2 ENSG00000176153|GPX2  
ENSG00000178826|TMEM139 ENSG00000179270|NP\_001025054.1 ENSG00000184470|TXNRD2 ENSG00000185803|GPR172A ENSG00000197251|NP\_997380.1 ENSG00000198174|Q8N9P1\_HUMAN ENSG00000198785|GRIN3A ENSG00000204048|UBR2  
ENSG00000115993|TRAK2 ENSG00000120054|CPN1 ENSG00000121989|ACVR2A ENSG00000161048|NP\_945341.2 ENSG00000162613|FUBP1 ENSG00000165259|CXorf43 ENSG00000171311|EXOSC1 ENSG00000179066|Q86VG9\_HUMAN  
ENSG00000182963|GJA7 ENSG00000183434|TFDP3 ENSG00000198625|MDVA  
GGTAAGG ENSG00000100099|HPS4 ENSG00000100141|PISD ENSG00000107882|SUFU ENSG00000115657|ABCB6 ENSG00000123427|FAM119B ENSG00000128849|CGNL1 ENSG00000139767|KIAA1853 ENSG00000158161|EYA3  
ENSG00000159023|EPB41 ENSG00000164520|RAET1E ENSG00000175223|Q8TCI8\_HUMAN ENSG00000176120|Q9BSY8\_HUMAN ENSG00000204498|NFKBIL1 ENSG00000000419|DPM1 ENSG00000065613|SLK  
ENSG00000102554|KLF5 ENSG00000103037|SETD6 ENSG00000112996|TSGA14 ENSG000001106477|MRP30 ENSG00000128692|LOC728350 ENSG00000134884|NP\_060481.3 ENSG00000145414|NP\_612395.1 ENSG00000168830|HTR1E  
ENSG00000170791|CHCHD7 ENSG00000171617|ENCL1 ENSG00000171643|SI00Z ENSG00000176593|Q8N9G5\_HUMAN ENSG00000176731|C8orf59 ENSG00000178175|ZNF366 ENSG00000180423|C11orf77 ENSG00000198670|LPA  
GGTAATA ENSG00000007038|PRSS21 ENSG00000008382|MPND ENSG00000079999|KEAP1 ENSG00000083817|ZNF416 ENSG00000087088|BAX ENSG00000105053|VRK3 ENSG00000105397|TYK2 ENSG00000114439|BBX  
ENSG00000115112|TFPC2L1 ENSG00000116147|TNR ENSG00000118640|VAMP8 ENSG00000121310|ECHDC2 ENSG00000122971|ACADS ENSG00000125657|TNFSF9 ENSG00000125816|NKX2-4 ENSG00000130429|ARPC1B  
ENSG00000134775|FHOD3 ENSG00000135248|NP\_115988.1 ENSG00000140522|RLBP1 ENSG00000141401|IMPA2 ENSG00000141741|C17orf37 ENSG00000143171|RXRG ENSG00000143512|KIAA1822L ENSG00000158423|RIBC1  
ENSG00000163331|NP\_001017920.1 ENSG00000163515|RETNLB ENSG00000164366|CCDC127 ENSG00000165688|PMPCA ENSG00000166199|ALKBH3 ENSG00000167741|GGT6 ENSG00000167744|NTF5 ENSG00000167965|NM\_022372.3  
ENSG00000168061|SAC3D1 ENSG00000169118|CSNK1G1 ENSG00000171574|ZNF584 ENSG00000172273|MIZF ENSG00000173867|MRPL46 ENSG00000175602|CCDC85B ENSG00000177822|XR\_017723.1 ENSG00000178605|GTFBP6  
ENSG00000180739|EDG8 ENSG00000182156|ENPP7 ENSG00000183596|TM16\_HUMAN ENSG00000185338|SOCS1 ENSG00000185481|C21orf129 ENSG00000186526|CYP4F8 ENSG00000197900|Q8N7Q6\_HUMAN ENSG00000198728|LDB1  
ENSG00000204371|EHMT2 ENSG00000205193|Q6ZTC6\_HUMAN ENSG00000205979|Q6XYA8\_HUMAN ENSG00000208210|PI4K2B ENSG000002070190|DAPP1 ENSG000002084623|EIF352 ENSG000002085871|MGST2 ENSG000002085871|MGST2  
ENSG00000101049|SGK2 ENSG00000106355|LSM5 ENSG00000107864|CPEB3 ENSG00000120696|KBTBD7 ENSG00000138698|CFCL1 ENSG00000139921|TXNDC1 ENSG00000141076|C1RH1A  
ENSG00000147162|OGT ENSG00000152093|NP\_001072998.1 ENSG00000158528|PPP1R9A ENSG00000162374|ELAVL4 ENSG00000164675|IQUB ENSG00000165862|PNLIPRP2 ENSG00000169252|ADRB2 ENSG00000169621|C2orf13  
ENSG00000174038|C9orf131 ENSG00000177640|CAS2 ENSG00000180233|ZNF22 ENSG00000186439|TRDN ENSG00000187325|TAF9B ENSG00000198729|PPP1R4C ENSG00000204866|IGFL2  
GGTACCG ENSG000000065361|ERBB3 ENSG00000105559|PLEKHA4 ENSG00000114993|RTKN ENSG00000115841|FAM82A ENSG00000120068|HXB8 ENSG00000142694|C1orf78 ENSG00000162552|WNT4  
ENSG00000166924|NP\_775835.2 ENSG00000167747|C19orf48 ENSG00000169717|ACTRT2 ENSG00000170608|FOXA3 ENSG00000170684|ZNF342 ENSG00000174996|KLC2 ENSG00000176845|METRN1 ENSG00000182379|NXPH4  
ENSG00000184292|TACSTD2 ENSG00000205814|Q6ZRC0\_HUMAN ENSG00000089195|TRM6\_HUMAN ENSG00000095627|TDRD1 ENSG00000099940|SNAP29 ENSG00000115942|ORC2L ENSG00000131375|CAPN7 ENSG00000132640|BTBD3  
ENSG00000136451|VEZF1 ENSG00000138802|SEC24B ENSG00000143753|DEGS1 ENSG00000146833|TRIM4 ENSG00000158435|C2orf29 ENSG00000163630|SYNPR ENSG00000164056|SPRY1 ENSG00000164253|WDR41  
ENSG00000170085|C9orf25 ENSG00000178462|TUBAL3 ENSG00000181656|GPR88 ENSG00000183336|BOLA2 ENSG00000186834|HEXIM1 ENSG00000196980|NR\_002827.1 ENSG00000197535|MYO5A  
GGTACGA ENSG00000100284|TOM1 ENSG00000100991|TRPC4AP ENSG00000105229|PIAS4 ENSG00000110243|APOA5 ENSG00000125285|SOX2 ENSG00000129221|AIPL1 ENSG00000138617|PARP16  
ENSG00000138835|RGS3 ENSG00000165804|ZNF219 ENSG00000169598|DFFB ENSG00000170049|KCNAB3 ENSG00000172889|EGFL7 ENSG00000179922|ZNF784 ENSG00000183798|EMILIN3 ENSG00000187764|SEMA4D  
ENSG00000196576|PLXNB2 ENSG00000197721|CRIL1 ENSG00000198219|Q96N05\_HUMAN ENSG000002047365|CENTD1 ENSG000002051108|HERPUD1 ENSG000002092148|HECTD1 ENSG000002107758|PPP3CB ENSG000002108187|PBLD  
ENSG00000113384|GOLPH3 ENSG00000121578|B4GALT4 ENSG00000126947|ARMCX1 ENSG00000131730|CKMT2 ENSG00000139370|SLC15A4 ENSG00000144320|KIAA1715 ENSG00000145632|PLK2  
ENSG00000151552|QDPR ENSG00000151704|KCNJ1 ENSG00000153558|FBXL2 ENSG00000165355|FBXO33 ENSG00000168564|CDKN2AIP ENSG00000168615|ADAM9 ENSG00000168967|PMCHL1 ENSG00000169047|IRS1  
ENSG00000172262|ZNF131 ENSG00000177752|YIPF7 ENSG00000185056|Q569G3\_HUMAN ENSG00000188021|UBQLN2 ENSG00000198408|MGEA5  
GGTACGG perfect: GGTACGA TCGTACC hsa-miR-126 TCGTACCgtgagtaataatgc 0  
ENSG00000099800|TIMM13 ENSG00000099904|ZDHC8 ENSG00000100417|PMM1 ENSG00000100726|TELO2 ENSG00000105137|SYDE1 ENSG00000105605|CACNG7 ENSG00000111321|LTBR ENSG00000119772|DNMT3A  
ENSG00000130119|GNL3L ENSG00000132382|MYBBP1A ENSG00000132694|ARHGFB1 ENSG00000135439|CENTG1 ENSG00000139197|PEX5 ENSG00000154252|GAL3ST2 ENSG00000160213|CSTB ENSG00000162896|PIGR  
ENSG00000164880|Q6ZRB0\_HUMAN ENSG00000167566|KIAA1602 ENSG00000181885|CLDN7 ENSG00000185602|ARHGAP27 ENSG00000188234|XR\_016668.1 ENSG00000198165|Q9H960\_HUMAN ENSG00000198291|Q6ZTP9\_HUMAN ENSG00000198913|Q9H5S2\_HUMAN  
ENSG00000205138|NP\_001036096.1 ENSG00000205912|Q6ZTG5\_HUMAN ENSG00000206651|TRMT11 ENSG00000206654|THUMPD1 ENSG00000206926|FECH ENSG000002095203|EPB41L4B ENSG00000211490|Q9Y2I9\_HUMAN ENSG00000214638|UPK1B  
ENSG00000116455|WDR77 ENSG00000121481|RNF2 ENSG00000137261|KIAA0319 ENSG00000137872|SEMA6D ENSG00000138386|NAB1 ENSG00000148143|ZNF462 ENSG00000154217|PITPNC1 ENSG00000155760|FZD7  
ENSG00000162692|VCAM1 ENSG00000165490|NP\_659455.2 ENSG00000168685|IL17R ENSG00000179456|ZNF238 ENSG00000181449|SOX2 ENSG00000184845|DRD1 ENSG00000198176|TFDP1 ENSG00000205195|Q6ZTB1\_HUMAN  
ENSG00000211452|DI01  
GGTACGT ENSG00000006007|GDE1\_HUMAN ENSG00000019144|PHLDB1 ENSG00000079739|PGM1 ENSG00000079974|RABL2B ENSG00000100376|FAM118A ENSG00000100416|TRMU ENSG00000103932|RPAP1 ENSG00000105281|SLC1A5  
ENSG00000105647|PK3R2 ENSG00000106459|NRF1 ENSG00000127554|GFER ENSG00000131148|COX4NB ENSG00000132854|ANR38\_HUMAN ENSG00000132906|CASP9 ENSG00000145040|UCN2 ENSG00000149043|SYT8  
ENSG00000152767|FARP1 ENSG00000153294|GPR115 ENSG00000155984|TMEM185A ENSG00000157911|PEX10 ENSG00000160916|ATP5J2 ENSG00000160917|CPSF4 ENSG00000165458|INPPL1 ENSG00000176762|Q8N1N1\_HUMAN  
ENSG00000185990|F8A3 ENSG00000186090|HTR3D ENSG00000188101|ALOX12P2 ENSG00000197932|F8A2 ENSG00000198444|F8A1 ENSG00000198518|H1ST1H4E ENSG00000204282|Q6YL35\_HUMAN ENSG00000204369|Q6ZUP0\_HUMAN  
ENSG00000204713|TRIM27 ENSG00000207685|NT5C2 ENSG00000100196|KDEL3 ENSG00000101842|VSI1 ENSG00000109458|GAB1 ENSG00000115761|NOL10 ENSG00000116285|ERRFI1 ENSG00000121440|PDZRN3  
ENSG00000121594|CD80 ENSG00000122778|Q9HCM3\_HUMAN ENSG00000124228|DDX27 ENSG00000124795|DEK ENSG00000134056|MRP36 ENSG00000134873|CLDN10 ENSG00000136813|KIAA0368 ENSG00000141424|SLC39A6  
ENSG00000149177|PTPRJ ENSG00000151704|KCNJ1 ENSG00000154415|PPP1R3A ENSG00000155893|ACPL2 ENSG00000173928|C19orf39 ENSG00000184860|NP\_660151.2 ENSG00000185129|PURA ENSG00000186047|DLEU7  
ENSG00000188649|C10orf130 ENSG00000198584|ZNF506  
GGTACTT ENSG00000059122|FLYWCH1 ENSG00000070031|SCT ENSG00000102871|TRADD ENSG00000103064|SLC7A6 ENSG00000111245|MYL2 ENSG00000123427|FAM119B ENSG00000124145|SDC4 ENSG00000128342|LIF  
ENSG00000140474|ULK3 ENSG00000141699|NP\_835227.1 ENSG00000162738|VANGL2 ENSG00000168703|WFDPC12 ENSG00000179388|EGR3 ENSG00000184857|TMEM186 ENSG00000187808|ANKRD58 ENSG00000196859|KRT39  
ENSG00000202199|NP\_001025037.1 ENSG00000076641|PAG1 ENSG00000101166|SLMO2 ENSG00000107099|DOCK8 ENSG00000109586|GALNT7 ENSG00000111711|GOLT1B ENSG00000111962|UST ENSG00000113558|SKP1A  
ENSG00000116539|ASH1L ENSG00000120616|EPC1 ENSG00000129007|CALML4 ENSG00000131002|Cyorf15B ENSG00000162980|ARL5A ENSG00000164284|GRPEL2 ENSG00000170903|KIAA1826 ENSG00000181211|Q8NA17\_HUMAN  
ENSG00000181744|C3orf58 ENSG00000203730|TEDDM1  
GGTAGAC ENSG000000025800|KPNAB6 ENSG00000102100|SLC35A2 ENSG00000114648|KLHL18 ENSG00000124374|PAIP2B ENSG00000125746|EML2 ENSG00000140287|HDC ENSG00000144045|DQX1 ENSG00000160097|FNDC5  
ENSG00000163866|C1orf212 ENSG00000165733|BMS1 ENSG00000166569|CPLX4 ENSG00000167087|NFAM1 ENSG00000167646|C19orf51 ENSG00000170089|THOC3 ENSG00000170214|ADRA1B ENSG00000183617|MRPL54  
ENSG00000187954|CVHR1 ENSG00000189337|NP\_001018000.1 ENSG00000073754|CD5L ENSG00000118816|CCNI ENSG00000123213|NLN ENSG00000128253|RFPL2 ENSG00000128276|RFPL3 ENSG00000128607|NP\_055812.1  
ENSG00000140455|USP3 ENSG00000145975|C6orf146  
GGTAGGC ENSG000000049656|CLPTM1L ENSG00000100068|LRP5L ENSG00000105321|CCDC9 ENSG00000115661|STRK16 ENSG00000116786|PLEKHM2 ENSG00000119772|DNMT3A ENSG00000126217|MCF2L  
ENSG00000128268|MGAT3 ENSG00000130813|NP\_060851.1 ENSG00000132591|ERAL1 ENSG00000140297|CGNT3 ENSG00000141556|TBCD ENSG00000163472|TMEM79  
ENSG00000163888|CAMK2N2 ENSG00000166473|PKD1L2 ENSG00000180304|OAZ2 ENSG00000183506|NP\_955377.2 ENSG00000183888|C1orf64 ENSG00000184113|CLDN5 ENSG00000204494|Q68CW3\_HUMAN ENSG00000204579|A2RUR5\_HUMAN  
ENSG00000204949|Q6XR20\_HUMAN ENSG00000204957|Q6ZVQ6\_HUMAN ENSG000002062650|WAPAL ENSG000002078369|GNB1 ENSG000002112305|SMAP1 ENSG00000212796|ENPP5 ENSG000002120705|ETF1 ENSG000002125355|FAM70A  
ENSG00000131437|KIF3A ENSG00000133961|NUMB ENSG00000134057|CCNB1 ENSG00000134986|C5orf13 ENSG00000135045|C9orf40 ENSG00000137273|FOXF2 ENSG00000137693|YAP1 ENSG00000141655|TNFRSF11A  
ENSG00000141946|ZIM3 ENSG00000164398|ACSL6 ENSG00000173744|HRB ENSG00000174839|FAM116A ENSG00000178177|LCORL ENSG00000180011|ZADH2 ENSG00000184402|SS18L1 ENSG00000189221|MAOA  
ENSG00000198689|SLC9A6 ENSG00000198833|UBE2J1  
GGTAGGC ENSG00000104967|NOVA2 ENSG00000106400|ZNHIT1 ENSG00000129473|BCL2L2 ENSG00000133246|PRAM1 ENSG00000148832|PAOX ENSG00000154342|WNT3A ENSG00000160877|BTBD14B ENSG00000165138|ANKS6  
ENSG00000165281|FANCG ENSG00000168734|PKIG ENSG00000176136|MC9F ENSG00000177096|FAM109B ENSG00000183908|LRRC55 ENSG00000184194|GPR173 ENSG00000185133|PIB5PA ENSG00000186543|Q6ZWC0\_HUMAN  
ENSG00000196700|ZNF512B ENSG00000041353|RAB27B ENSG00000077097|TOP2B ENSG000000091157|WDR7 ENSG00000101695|RNF125 ENSG000001113845|C3orf1 ENSG00000118690|ARMC2  
ENSG00000150076|C10orf68 ENSG00000155592|ZKSCAN2 ENSG00000157445|CACNA2D3 ENSG00000168769|KIAA1546 ENSG00000170175|CHRN1 ENSG00000172410|INSL5 ENSG00000172817|CYP7B1 ENSG00000206538|VGLL3  
GGTAGGG ENSG00000027644|INSRR ENSG00000075790|BCAP29 ENSG00000076108|BAZ2A ENSG00000100628|ASB2 ENSG00000124602|UNC5CL ENSG00000126091|ST3GAL3 ENSG00000129932|DOHH ENSG00000139112|GABARAPL1  
ENSG00000139636|LMBRL1 ENSG00000143375|CGN ENSG00000143418|LASS2 ENSG00000159433|STARD9 ENSG00000159723|AGRP ENSG00000163812|ZDHC3 ENSG00000167208|NP\_878274.1  
ENSG00000167588|GPD1 ENSG00000172057|ORMDL3 ENSG00000184207|NP\_001035830.1 ENSG00000188816|HMX2 ENSG00000189429|RNF207 ENSG00000204071|TCEAL6 ENSG000002080608|KIAA0020 ENSG00000204324|NP\_057218.1  
ENSG00000115109|EPB41L5 ENSG00000120800|UTP20 ENSG00000122126|OCRL ENSG00000122194|PLG ENSG00000128791|TWSG1 ENSG00000136122|C13orf34 ENSG00000143252|SDHC ENSG00000153767|GTF2E1  
ENSG00000168036|CTNNB1 ENSG00000169291|SHE ENSG00000169340|NP\_777584.1 ENSG00000169740|ZNF32 ENSG00000176142|TMEM39A ENSG00000184226|PCDH9 ENSG00000188895|Q68DK7\_HUMAN  
ENSG00000038358|EDC4 ENSG00000100364|C22orf9 ENSG00000104967|NOVA2 ENSG00000114388|TUSC4 ENSG00000136631|VPS45 ENSG00000165475|CRYL1 ENSG00000169228|MXD3  
ENSG00000174943|KCTD13 ENSG00000178409|KIAA1553 ENSG00000183528|QOVAF8\_HUMAN ENSG00000183569|SERHL ENSG00000185252|ZNF74 ENSG00000196934|LOC44084 ENSG00000197401|Q6ZTC5\_HUMAN ENSG00000204273|HLA-DOB  
ENSG00000205538|Q6ZVP1\_HUMAN ENSG00000205658|Q6ZUU6\_HUMAN ENSG00000101745|ANKRD12 ENSG00000121236|TRIM34 ENSG00000121933|ADORA3 ENSG00000131013|PP1L4 ENSG00000136514|RTP4 ENSG00000144406|Q96SS0\_HUMAN  
ENSG00000150676|CCDC83 ENSG00000172845|SP3 ENSG00000174173|RG9MTD1 ENSG00000182992|Q8IZM0\_HUMAN ENSG00000183696|UPP1 ENSG00000198740|ZNF652 ENSG00000211450|C11orf31  
GGTAGTG ENSG000000056487|PHF21B ENSG00000092068|SLC7A8 ENSG00000100931|CHMP4A ENSG00000114388|TUSC4 ENSG00000121577|POPCD2 ENSG00000124116|WFD3 ENSG00000124225|TMEPAI ENSG00000139083|ETV6  
ENSG00000139200|C12orf53 ENSG00000143450|OAZ3 ENSG00000154478|GPR26 ENSG00000162714|ZNF496 ENSG00000163013|FBXO41 ENSG00000171169|C9orf90 ENSG00000171385|KCN2D3 ENSG00000173757|STAT5B  
ENSG00000177238|TRIM72 ENSG00000181722|ZBTB20 ENSG00000185988|PLK5\_HUMAN ENSG00000046774|MAGEC2 ENSG00000049759|NEDD4L ENSG00000065060|C6orf107 ENSG00000100201|DDX17 ENSG00000101892|ATP1B4  
ENSG00000104164|PLDN ENSG00000108582|CPD ENSG00000108984|MAP2K6 ENSG00000115419|GLS ENSG00000116754|SFRS11 ENSG00000132952|USPL1 ENSG00000133193|FAM104A ENSG00000135679|MDM2  
ENSG00000139780|NP\_001010977.1 ENSG00000153187|HNRPU ENSG00000163110|PDLIM5 ENSG00000169836|TACR3 ENSG00000172660|TAF15 ENSG00000177459|C8orf4 ENSG00000198945|L3MBTL3



|                              |                              |                              |                                |                              |                                |                              |                              |
|------------------------------|------------------------------|------------------------------|--------------------------------|------------------------------|--------------------------------|------------------------------|------------------------------|
| ENSG00000117335 CD46         | ENSG00000117602 DSCR1L2      | ENSG00000117713 ARID1A       | ENSG00000120658 ENOX1          | ENSG00000120885 CLU          | ENSG00000130396 MLLT4          | ENSG00000131620 TMEM16A      | ENSG00000133121 STARD13      |
| ENSG00000139352 ASCL1        | ENSG00000143344 RGL1         | ENSG00000146648 EGFR         | ENSG00000148053 NTRK2          | ENSG00000152527 PLEKHH2      | ENSG00000165660 KIAA0157       | ENSG00000180957 PITPNB       | ENSG00000181819 Q5JSM7_HUMAN |
| ENSG00000186432 KPNA4        |                              |                              |                                |                              |                                |                              |                              |
| GGTGGCT                      | ENSG00000099624 ATP5D        | ENSG00000121289 CCDC123      | ENSG00000125910 EDG6           | ENSG00000139174 PRICKLE1     | ENSG00000160255 ITGB2          | ENSG00000160396 HIPK4        | ENSG00000160972 PPP1R16A     |
| ENSG00000163520 FBLN2        | ENSG00000166949 SMAD3        | ENSG00000172020 GAP43        | ENSG00000174775 HRAS           | ENSG00000175489 LRRC25       | ENSG00000177971 IMP3           | ENSG00000198500 Q96C21_HUMAN | ENSG00000039139 DNAH5        |
| ENSG00000066427 ATXN3        | ENSG00000106829 TLE4         | ENSG00000107937 GTFBP4       | ENSG00000108061 SHOC2          | ENSG00000120549 KIAA1217     | ENSG00000144354 CDC7A          | ENSG00000147571 CRH          | ENSG00000148143 ZNF462       |
| ENSG00000155329 ZCCHC10      | ENSG00000156642 NFTN         | ENSG00000164616 FBXL21       | ENSG00000165071 TMEM71         | ENSG00000165219 GAPVD1       | ENSG00000168646 AXIN2          | ENSG00000170881 RNF139       | ENSG00000176624 RKHD2        |
| ENSG00000178999 AURKB        | ENSG00000180044 Q8NS54_HUMAN | ENSG00000198900 TOP1         |                                |                              |                                |                              |                              |
| GGTGTCTA                     | ENSG00000049540 ELN          | ENSG00000100263 RHBD3        | ENSG00000108821 COL1A1         | ENSG00000115657 ABCB6        | ENSG00000123411 IKZF4          | ENSG00000130635 COL5A1       | ENSG00000133247 SUV420H2     |
| ENSG00000136487 GH2          | ENSG00000136883 KIF12        | ENSG00000137204 SLC22A7      | ENSG00000150779 TIMM8B         | ENSG00000154227 LASS3        | ENSG00000168398 BDKRB2         | ENSG00000170265 ZNF282       | ENSG00000174502 SLC26A9      |
| ENSG00000185650 ZFP36L1      | ENSG00000198198 KIAA0467     | ENSG00000050030 KIAA2022     | ENSG00000067798 NAV3           | ENSG00000105856 HBP1         | ENSG00000113140 SPARC          | ENSG00000119950 MXI1         | ENSG00000137558 PI15         |
| ENSG00000138779 Q9HCM6_HUMAN | ENSG00000162704 ARPC5        | ENSG00000163638 ADAMTS9      | ENSG00000164692 COL1A2         | ENSG00000168172 HOOK3        | ENSG00000168542 COL3A1         | ENSG00000175322 ZNF519       | ENSG00000185591 SP1          |
| ENSG00000187498 COL4A1       | ENSG00000188153 COL4A5       | ENSG00000196569 LAMA2        | ENSG00000204262 COL5A2         |                              |                                |                              |                              |
| perfect: GGTGCTA TAGCACC     | hsa-miR-29c                  | TAGCACatttgaatcggt           | 0                              |                              |                                |                              |                              |
| perfect: GGTGCTA TAGCACC     | hsa-miR-29b                  | TAGCACatttgaatcagtgtt        | 0                              |                              |                                |                              |                              |
| perfect: GGTGCTA TAGCACC     | hsa-miR-29a                  | TAGCACatttgaatcggtt          | 0                              |                              |                                |                              |                              |
| GGTGTCTC                     | ENSG00000052066 PSL1_HUMAN   | ENSG00000088305 DNMT3B       | ENSG00000106266 SNX8           | ENSG00000118137 APOA1        | ENSG00000133466 CIQTNF6        | ENSG00000140995 NP_997397.1  | ENSG00000146021 KLHL3        |
| ENSG00000162073 PQR4         | ENSG00000167858 TEK1         | ENSG00000170390 DCLC1        | ENSG00000174586 ZNF497         | ENSG00000175894 C21orf29     | ENSG00000177769 TSPAN4         | ENSG00000183059 XR_017784.1  | ENSG00000185504 C17orf70     |
| ENSG00000188249 XR_019050.1  | ENSG00000197587 DMBX1        | ENSG00000204268 Q6ZVY1_HUMAN | ENSG00000206031 Q6ZT66_HUMAN   | ENSG00000106305 MCA2_HUMAN   | ENSG00000107020 C9orf46        | ENSG00000108395 TRIM37       | ENSG00000109220 CHIC2        |
| ENSG00000113249 HAVCR1       | ENSG00000113838 CRYGS        | ENSG00000117152 RGS4         | ENSG00000117533 VAMP4          | ENSG00000121022 COPS5        | ENSG00000131864 USP29          | ENSG00000134901 KDELC1       | ENSG00000137267 TUBB2A       |
| ENSG00000163449 TMEM169      | ENSG00000164284 GRPEL2       | ENSG00000166405 RITC3        | ENSG00000166747 AP1G1          | ENSG00000169330 K1024_HUMAN  | ENSG00000173515 C9orf53        | ENSG00000186649 NM_182631    | ENSG00000198729 PPP1R14C     |
| GGTGGAC                      | ENSG00000052066 PSL1_HUMAN   | ENSG00000028310 BRD9         | ENSG00000072135 PTPN18         | ENSG00000105072 C19orf44     | ENSG00000125804 C20orf91       | ENSG00000128191 DGC8R8       | ENSG00000131653 TRAF7        |
| ENSG00000164880 Q6ZRB0_HUMAN | ENSG00000167703 SLC43A2      | ENSG00000168490 PHYHIP       | ENSG00000174166 Q9BTX9_HUMAN   | ENSG00000175785 PRIMA1       | ENSG00000178199 Q6ZRW2_HUMAN   | ENSG00000179348 GATA2        | ENSG00000180139 Q8NZ5_HUMAN  |
| ENSG00000182324 KCNJ14       | ENSG00000183963 SMTN         | ENSG00000198291 Q6ZTP9_HUMAN | ENSG00000204100 Q6ZV28_HUMAN   | ENSG00000206140 LOC728229    | ENSG00000206561 COLQ           | ENSG00000212131 PDXP         | ENSG00000090581 GNPTG        |
| ENSG00000107371 EXOSC3       | ENSG00000110060 PUS3         | ENSG00000112367 KIAA0274     | ENSG00000114127 XRN1           | ENSG00000114405 C3orf14      | ENSG00000116747 TROVE2         | ENSG00000135047 CTSL1        | ENSG00000162222 TTC9C        |
| ENSG00000165682 CLEC1B       | ENSG00000168661 ZNF30        | ENSG00000170866 LILRA3       | ENSG00000180881 CAPS2          | ENSG00000183571 LOC145814    | ENSG00000186409 NP_001074319.1 | ENSG00000187079 TEAD1        | ENSG00000196177 ACADSB       |
| ENSG00000204388 HSPA1B       |                              |                              |                                |                              |                                |                              |                              |
| GGTGGAT                      | ENSG00000010327 STAB1        | ENSG00000076344 RGS11        | ENSG00000089685 BIRC5          | ENSG00000099985 OSM          | ENSG00000104140 RHOF           | ENSG00000107185 KIAA0258     | ENSG00000108352 RAPGEF11     |
| ENSG00000125804 C20orf91     | ENSG00000128228 SDF2L1       | ENSG00000131323 TRAF3        | ENSG00000132250 ZNF414         | ENSG00000140986 RPL3L        | ENSG00000143847 PPF1A4         | ENSG00000149646 C20orf152    | ENSG00000157184 CPT2         |
| ENSG00000164896 FASTK        | ENSG00000166948 TGM6         | ENSG00000167264 DUS2L        | ENSG00000180875 GREM2          | ENSG00000189430 NCR1         | ENSG00000197038 NR_001547.1    | ENSG00000197261 C6orf141     | ENSG00000003096 KLHL13       |
| ENSG00000033178 UBE1L2       | ENSG00000084623 EIF3S2       | ENSG00000100804 PSMB5        | ENSG00000107863 ARHGAP21       | ENSG00000111961 SASH1        | ENSG00000112031 MTRF1L         | ENSG00000117155 SSX2IP       | ENSG00000121005 CRISPLD1     |
| ENSG00000121210 KIAA0922     | ENSG00000123213 NLN          | ENSG00000126838 PZF          | ENSG00000129071 MBD4           | ENSG00000137269 LRRC1        | ENSG00000137693 YAP1           | ENSG00000143486 LGTN         | ENSG00000144481 TRPM8        |
| ENSG00000156679 UTP14A       | ENSG00000162222 TTC9C        | ENSG00000163923 RPL39L       | ENSG00000163959 NP_689885.3    | ENSG00000164265 SCGB3A2      | ENSG00000165349 SLC7A3         | ENSG00000169340 NP_777584.1  | ENSG00000178172 SPINK6       |
| ENSG00000185057 TAF9         | ENSG00000196589 MB3L2_HUMAN  | ENSG00000204478 PRAMEF20     | ENSG00000204486 PRAMEF21       |                              |                                |                              |                              |
| GGTGTGT                      | ENSG00000054118 THRAP3       | ENSG00000100221 JOSD1        | ENSG00000102003 SYP            | ENSG00000102078 SLC25A14     | ENSG00000104365 IKKB2          | ENSG00000104888 SLC17A7      | ENSG00000105221 AKT2         |
| ENSG00000106244 PDAP1        | ENSG00000135622 SEMA4F       | ENSG00000155052 CNTNAP5      | ENSG00000158423 RIBC1          | ENSG00000162066 AMDH2        | ENSG00000163872 YEATS2         | ENSG00000171388 APLN         | ENSG00000174705 SH3PXD2B     |
| ENSG00000182852 C21orf121    | ENSG00000183686 MAGEA5       | ENSG00000188038 NRN1L        | ENSG00000196209 Q5JXA8_HUMAN   | ENSG00000197838 CYP2A13      | ENSG00000091583 APOH           | ENSG00000094841 UPRT         | ENSG00000095139 ARCN1        |
| ENSG00000104067 TUP1         | ENSG00000110975 SYT10        | ENSG00000124532 MRS2L        | ENSG00000126453 BCL2L12        | ENSG00000135862 LAMC1        | ENSG00000136813 KIAA0368       | ENSG00000138071 ACTR2        | ENSG00000141655 TNFRSF11A    |
| ENSG00000148925 BTBD10       | ENSG00000159131 GART         | ENSG00000163608 C3orf17      | ENSG00000168280 KIF5C          | ENSG00000171530 TBCA         | ENSG00000178074 NP_710156.2    | ENSG00000179930 ZNF648       | ENSG00000188933 NM_145809.1  |
| GGTGTAA                      | ENSG00000070495 JMJD6        | ENSG00000075275 CELSR1       | ENSG00000075388 FGF4           | ENSG00000124766 SOX4         | ENSG00000129646 QRICH2         | ENSG00000133149 TEX13A       | ENSG00000159173 TNNI1        |
| ENSG00000170549 IRX1         | ENSG00000170925 TEX13B       | ENSG00000178226 PRSS36       | ENSG00000178266 LOC728411      | ENSG00000186918 FBXO16       | ENSG00000186918 FBXO16         | ENSG00000198237 GUSL1_HUMAN  | ENSG00000198471 RTP2         |
| ENSG00000070718 AP3M2        | ENSG00000072274 TFRC         | ENSG00000075407 ZNF37A       | ENSG00000101166 SLMO2          | ENSG00000101782 RIOK3        | ENSG00000102239 BRS3           | ENSG00000112200 ZNF451       | ENSG00000113088 GZMK         |
| ENSG00000113231 PDE8B        | ENSG00000115446 UNC50        | ENSG00000128607 NP_055812.1  | ENSG00000134758 RNF138         | ENSG00000135316 SYNCRIP      | ENSG00000137642 SORL1          | ENSG00000138767 CNOT6L       | ENSG00000156650 MYST4        |
| ENSG00000164306 CDC111       | ENSG00000172179 PRL          | ENSG00000177200 CHD9         | ENSG00000184486 POU3F2         | ENSG00000188014 NP_619643.2  | ENSG00000196632 WNK3           | ENSG00000204155 PARG         |                              |
| GGTGTAC                      | ENSG00000040599 ARF5         | ENSG00000070785 EIF2B3       | ENSG00000088992 TESC           | ENSG00000101445 PPP1R16B     | ENSG00000124422 WDR22          | ENSG00000125804 C20orf91     | ENSG00000126464 PRR12        |
| ENSG00000132824 SERINC3      | ENSG00000134809 TIMM10       | ENSG00000143554 SLC27A3      | ENSG00000145050 ARMET          | ENSG00000161996 UHR29        | ENSG00000169344 UMOD           | ENSG00000176120 Q9BSY8_HUMAN | ENSG00000178307 TMEM11       |
| ENSG00000184857 TMEM186      | ENSG00000185818 NAT8L        | ENSG00000186854 Q86V40_HUMAN | ENSG00000188636 LDOC1L         | ENSG00000198106 RUNDCC2B     | ENSG00000204938 Q6ZUS7_HUMAN   | ENSG00000002587 HS3ST1       | ENSG00000056050 C4orf27      |
| ENSG00000077809 GTF2I        | ENSG00000100906 NFKBIA       | ENSG00000105926 MPF6         | ENSG00000105967 TFEC           | ENSG00000115233 PSMD14       | ENSG00000120963 ZNF706         | ENSG00000133134 BEX2         | ENSG00000133706 LARS         |
| ENSG00000139278 GLIPR1       | ENSG00000145386 CCNA2        | ENSG00000148082 SHC3         | ENSG00000148082 INP1           | ENSG00000153201 RANBP2       | ENSG00000155749 ALS2CR12       | ENSG00000156304 SFRS15       | ENSG00000163217 BMP10        |
| ENSG00000163535 SGOL2        | ENSG00000169021 UQCRF51      | ENSG00000177301 KCNAB2       | ENSG00000183780 SLC35F3        | ENSG00000184515 NGFRAP1L1    | ENSG00000196653 ZNF502         | ENSG00000198584 ZNF506       |                              |
| GGTGTCA                      | ENSG00000044478 FKBP4        | ENSG00000050007 UPF1         | ENSG000000507545 CRAMP1L       | ENSG0000017797 RALBP1        | ENSG00000099308 MAST3          | ENSG00000104142 VPS18        | ENSG00000107807 TLX1         |
| ENSG00000122497 NBPFF14      | ENSG00000125804 C20orf91     | ENSG00000135924 DNAJB2       | ENSG00000149823 C11orf2        | ENSG00000152042 NBPFF8       | ENSG00000157870 C1orf93        | ENSG00000158764 ITLN2        | ENSG00000169598 DFFB         |
| ENSG00000169926 KLF13        | ENSG00000177417 Q96RH9_HUMAN | ENSG00000179058 C9orf50      | ENSG00000182851 NP_835466.1    | ENSG00000185386 MAPK11       | ENSG0000013810 TACC3           | ENSG00000108587 GOSR1        | ENSG00000109654 TRIM2        |
| ENSG00000112379 KIAA1244     | ENSG00000121741 ZMYM2        | ENSG00000131620 TMEM16A      | ENSG00000133106 EPSTP1         | ENSG00000134852 CLOCK        | ENSG00000149443 C20orf78       | ENSG00000154518 ATP5G3       | ENSG00000158290 CUL4B        |
| ENSG00000164134 NARG1        | ENSG00000168852 SUGT1L1      | ENSG00000170959 DCDC5        | ENSG00000186665 C17orf58       |                              |                                |                              |                              |
| GGTGTCC                      | ENSG00000005961 ITGA2B       | ENSG00000011590 ZBTB32       | ENSG00000068831 RASGRP2        | ENSG00000125089 SH3TC1       | ENSG00000125877 ITPA           | ENSG00000126243 LRFN3        | ENSG00000130005 GAMT         |
| ENSG00000140403 DNAJB2       | ENSG00000141622 C18orf23     | ENSG00000146707 POMZP3       | ENSG00000147432 CHRN3          | ENSG00000149925 ALDOA        | ENSG00000151360 ALLC           | ENSG00000160783 BGLAP        | ENSG00000161013 MGAT4B       |
| ENSG00000162729 IGSF8        | ENSG00000163956 LRPAP1       | ENSG00000166333 ILK          | ENSG00000169635 HIC2           | ENSG00000169683 LRRC45       | ENSG00000172530 BANP           | ENSG00000176014 TUBB6        | ENSG00000179051 RCC2         |
| ENSG00000183678 CTAG1A       | ENSG00000184033 CTAG1B       | ENSG00000197177 GPR123       | ENSG00000204058 C10orf41       | ENSG00000000003 TSPAN6       | ENSG00000070831 CDC42          | ENSG00000079387 SENP1        | ENSG00000101323 HAO1         |
| ENSG00000102554 KLF5         | ENSG00000111897 SERINC1      | ENSG00000121058 COIL         | ENSG00000121406 ZNF549         | ENSG00000122696 MCART1       | ENSG00000125675 GRIA3          | ENSG00000131620 TMEM16A      | ENSG00000134146 ATPBD4       |
| ENSG00000138041 SMEK2        | ENSG00000147853 AK3          | ENSG00000165379 LRFN5        | ENSG00000169062 UPF3A          | ENSG00000170289 CNGB3        | ENSG00000170989 EDG1           | ENSG00000171032 ZNF350       | ENSG00000172318 B3GALT1      |
| ENSG00000178202 KDEL2        | ENSG00000184588 PDE4B        | ENSG00000197801 Q8TEB0_HUMAN |                                |                              |                                |                              |                              |
| GGTGTGG                      | ENSG0000007545 CRAMP1L       | ENSG00000036448 MYO2         | ENSG00000078902 TOLLIP         | ENSG00000089723 OTUB2        | ENSG00000091073 DTX2           | ENSG00000100284 TOM1         | ENSG00000101220 C20orf27     |
| ENSG00000105447 GRWD1        | ENSG00000105700 C19orf50     | ENSG00000118971 CNRD2        | ENSG00000123454 DBH            | ENSG00000130303 BST2         | ENSG00000132622 HSPA12B        | ENSG00000142279 WTIP         | ENSG00000145214 DGKQ         |
| ENSG00000146112 KIAA1949     | ENSG00000148218 ALAD         | ENSG00000148805 NP_002934.2  | ENSG00000153048 CARHSP1        | ENSG00000160460 SPTBN4       | ENSG00000162591 MEGF6          | ENSG00000165970 SLC6A5       | ENSG00000166526 ZNF3         |
| ENSG00000167130 DOLPP1       | ENSG00000167657 DAPK3        | ENSG00000167861 C17orf28     | ENSG00000169682 LAT            | ENSG00000171570 EGLN2        | ENSG00000172367 PDZ3           | ENSG00000175470 PPP2R2D      | ENSG00000178028 DMAP1        |
| ENSG00000180269 GPR139       | ENSG00000184281 TSSC4        | ENSG00000184560 C17orf74     | ENSG00000196700 ZNF512B        | ENSG00000197942 Q6ZSS2_HUMAN | ENSG00000198171 C20orf116      | ENSG000000203709 C1orf132    | ENSG00000205673 Q6ZRX0_HUMAN |
| ENSG00000073969 NSF          | ENSG00000108559 NUP88        | ENSG00000111450 SXT2         | ENSG00000116251 RPL22          | ENSG00000131480 AOC2         | ENSG00000134853 PDGFRA         | ENSG00000139132 FGD4         | ENSG00000151893 C10orf46     |
| ENSG00000162385 MAGOH        | ENSG00000168675 C18orf1      | ENSG00000169435 RASSF6       | ENSG00000170871 K0232_HUMAN    | ENSG00000175809 ZNF645       | ENSG00000204979 MS4A13         |                              |                              |
| ENSG00000052835 ZNF785       | ENSG00000129559 NEDD8        | ENSG00000132275 KIAA0409     | ENSG00000133055 MYBPH          | ENSG00000136193 SCRN1        | ENSG00000155980 KIF5A          | ENSG00000160712 IL6R         | ENSG00000164711 LPAL2        |
| ENSG00000165140 FBP1         | ENSG00000170145 SNF1LK2      | ENSG00000175287 PHYHD1       | ENSG00000177875 NP_001013657.2 | ENSG00000180900 SCRIB        | ENSG00000197982 C1orf122       | ENSG00000198324 FAM109A      | ENSG00000198668 CALM1        |
| ENSG00000203941 Q5JVP7_HUMAN | ENSG00000205485 Q6DCA4_HUMAN | ENSG00000059758 PCTK2        | ENSG00000083750 RRABG          | ENSG00000111011 RSRC2        | ENSG00000119862 NP_054900.1    | ENSG00000120837 NFYB         |                              |



ENSG00000203916|HFM1 ENSG00000211446|SEPP1 ENSG00000211448|DIO2  
GGTTACA ENSG00000101311|C20orf42 ENSG00000107618|RBP3 ENSG00000126934|MAP2K2 ENSG00000132128|LRRCC41 ENSG00000141968|VAV1 ENSG00000142484|TM4SF5 ENSG00000151474|FRMD4A ENSG00000159720|ATP6V0D1  
ENSG00000166118|SPATA19 ENSG00000172476|RAB40A ENSG00000176718|C5orf26 ENSG00000176894|PGAM5 ENSG00000176258|FMO4 ENSG00000140325|DECR1 ENSG00000110852|CLEC2B ENSG00000111530|CAND1  
ENSG00000112081|SFRS3 ENSG00000118965|WDR35 ENSG00000125356|NDUFA1 ENSG00000131351|NP\_219485.1 ENSG00000135720|DYNCL1L2 ENSG00000141161|UNC45B ENSG00000144306|SCRN3 ENSG00000152527|PLEKHH2  
ENSG00000155324|GRAMD3 ENSG00000156463|SH3RF2 ENSG00000160588|U2966\_HUMAN ENSG00000163608|C3orf17 ENSG00000167447|C17orf71 ENSG00000170419|VSTM2 ENSG00000171530|TBCA ENSG00000176018|LYSMD3  
ENSG00000176774|MAGEB18 ENSG00000176853|FAM91A1 ENSG00000178175|ZNF366  
GGTTAGG ENSG00000035862|TIMP2 ENSG00000087237|CETP ENSG00000105576|TNPO2 ENSG00000107618|RBP3 ENSG00000141504|SAT2 ENSG00000152192|POU4F1 ENSG00000158423|RIBC1 ENSG00000159217|IGF2BP1  
ENSG00000173638|SLC19A1 ENSG00000173846|PLK3 ENSG00000196821|C6orf106 ENSG00000205205|C17orf51 ENSG00000205434|Q6ZU34\_HUMAN ENSG00000070882|OSBPL3 ENSG00000100902|PSMA6 ENSG00000102317|RBM3  
ENSG00000112078|KCTD20 ENSG00000131480|AOC2 ENSG00000136986|DERL1 ENSG00000152454|ZNF256 ENSG00000156218|ADAMTSL3 ENSG00000162946|C1orf136 ENSG00000165323|FAT3  
ENSG00000173473|SMARCC1 ENSG00000174808|BTC ENSG00000175175|PPM1E ENSG00000178695|KCTD12  
GGTTATT ENSG00000007545|CRAMP1L ENSG00000103061|SLC7A6OS ENSG00000104386|XR\_017860.1 ENSG00000105486|LIG1 ENSG00000106133|NSUN5C ENSG00000113657|DPYSL3 ENSG00000114812|VIPR1 ENSG00000117242|DDOST  
ENSG00000128203|ASPHD2 ENSG00000129757|CDKN1C ENSG00000130687|ALKBH6 ENSG00000140263|SORL1 ENSG00000145526|CDH18 ENSG00000153786|ZDHHC7 ENSG00000160410|SHKBP1 ENSG00000165606|NP\_001073989.1  
ENSG00000175779|NP\_997327.1 ENSG00000175792|RUVBL1 ENSG00000183862|CNGA2 ENSG00000186951|PPARA ENSG00000187260|WDR86 ENSG00000196684|HSH2D ENSG00000205927|OLIG2 ENSG0000021488|SLC7A9  
ENSG00000025039|RRAGD ENSG00000089063|C20orf30 ENSG00000101856|PGRMC1 ENSG00000107651|SEC23IP ENSG00000109654|TRIM2 ENSG00000109771|LRP2BP ENSG000001109814|UGDH ENSG00000112851|ERBB2IP  
ENSG00000115919|KYNL ENSG00000119314|ROD1 ENSG00000119906|C10orf6 ENSG00000120162|MOBK12B ENSG00000122643|NTSC3 ENSG00000131080|EDA2R ENSG00000134152|C15orf29 ENSG00000137942|FNBPL1  
ENSG00000138180|CEP55 ENSG00000147592|LACTB2 ENSG00000150361|KHLH1 ENSG00000152380|NP\_991111.1 ENSG00000153157|NP\_001035364.1 ENSG00000160145|KALRN ENSG00000163681|SLMAP ENSG00000165474|GJB2  
ENSG00000166348|USP54 ENSG00000174792|C4orf26 ENSG00000180938|ZNF572 ENSG00000186020|ZNF529 ENSG00000188215|DCUN1D3 ENSG00000188659|NP\_001008227.1 ENSG00000196563|Q9H375\_HUMAN ENSG00000198353|HOXC4  
ENSG00000198770|Q9H396\_HUMAN  
GGTTCAT ENSG00000100767|PAPLN ENSG00000122085|MTERFD2 ENSG00000127663|JMJD2B ENSG00000132323|ILKAP ENSG00000140950|KIAA1609 ENSG00000148290|SURF1 ENSG00000148337|CIZ1 ENSG00000164051|CCDC51  
ENSG00000166257|SCN3B ENSG00000175267|XR\_015198.1 ENSG00000184743|NP\_056274.3 ENSG00000196979|NP\_997392.1 ENSG00000204405|Q6ZQV3\_HUMAN ENSG00000206113|Q6ZU27\_HUMAN ENSG0000016402|IL20RA ENSG00000077152|UBE2T  
ENSG00000100281|HMG2L1 ENSG00000104313|EYA1 ENSG00000106772|KIAA0367 ENSG00000108559|NUP88 ENSG00000117758|STX12 ENSG00000128641|MYO1B ENSG00000150625|GPM6A ENSG00000151553|KIAA1600  
ENSG00000155130|MARCKS ENSG00000162688|AGL ENSG00000164744|SUNC1 ENSG00000170009|Q9NTHO\_HUMAN ENSG00000179930|ZNF648 ENSG00000196616|ADH1C  
GGTTCTG ENSG00000067182|TNFRSF1A ENSG00000071553|ATP6AP1 ENSG00000080293|SCTR ENSG00000103091|WDR59 ENSG00000103507|BCDKK ENSG00000106397|PLOC3 ENSG00000122678|POLM ENSG00000127528|KLF2  
ENSG00000132911|NMUR2 ENSG00000140511|HAPLN3 ENSG00000148335|C9orf32 ENSG00000157379|DHRS1 ENSG00000158050|DUSP2 ENSG00000161849|KRT84 ENSG00000167613|LAIR1 ENSG00000168477|TNXB  
ENSG00000175611|C9orf130 ENSG00000179912|R3HDM2 ENSG00000180806|HOXC9 ENSG00000180818|HOCX10 ENSG00000182342|DSCR9 ENSG00000184697|CLDN6 ENSG00000196892|Q9PID2\_HUMAN ENSG00000197789|Q8NA00\_HUMAN  
ENSG00000205771|CATSPER2P1 ENSG00000010244|ZNF207 ENSG00000011295|TTC19 ENSG00000012817|JARID1D ENSG000000081803|CADPS2 ENSG000000090487|SPG21 ENSG00000103194|USP10 ENSG00000106344|RBM28  
ENSG00000106541|AGR2 ENSG00000115866|DARS ENSG00000126070|EIF2C3 ENSG00000133731|IMP1A ENSG00000134242|PTNP22 ENSG00000143727|ACP1 ENSG00000147465|STAR ENSG00000155876|RRAGA  
ENSG00000170745|KCNS3 ENSG00000176171|BNIP3 ENSG00000182512|GLRX5 ENSG00000186094|AGBL4 ENSG00000198767|YY2 ENSG00000198825|INPP5F  
GGTTCTA ENSG000000073536|NLE1 ENSG00000101457|DNMT1IP1 ENSG00000104812|GYS1 ENSG00000124145|SDC4 ENSG00000140950|KIAA1609 ENSG00000157014|TATDN2 ENSG00000157916|RER1 ENSG00000158161|EYA3  
ENSG00000161277|THAP8 ENSG00000161860|SYCE2 ENSG00000167131|CCDC103 ENSG00000169918|OTUD7A ENSG00000176333|GN7 ENSG00000177992|C9orf79 ENSG00000178789|CD300LB ENSG00000183128|FAM26A  
ENSG00000183828|NUDT14 ENSG00000189058|APOD ENSG00000196767|POU3F4 ENSG00000205979|Q6XYA8\_HUMAN ENSG00000069493|CLEC2D ENSG00000088035|ALG6 ENSG00000089163|SIRT4 ENSG00000092969|TGFB2  
ENSG00000117758|STX12 ENSG00000121644|C1orf121 ENSG00000128585|MKLN1 ENSG00000136634|IL10 ENSG00000147202|DIAPH2 ENSG00000158467|SAHH3\_HUMAN ENSG00000166889|NP\_689929.1 ENSG00000167601|AXL  
ENSG00000172348|DSCR1L1 ENSG00000181544|FANCB ENSG00000188501|LCTL ENSG00000198692|EIF1AY  
GGTTCTC ENSG00000007038|PRSS21 ENSG00000008056|SYN1 ENSG00000048707|VPS13D ENSG00000075886|TUBA3D ENSG00000077800|FKBP6 ENSG00000089012|SIRPB2 ENSG00000092220|SUPT16H ENSG00000100312|ACR  
ENSG00000108840|HDAC5 ENSG00000110801|PSMD9 ENSG00000110917|KIAA0152 ENSG00000125787|GNRHD2 ENSG00000131095|GFAP ENSG00000140830|TXNL4B ENSG00000142619|PAD13 ENSG00000149571|KIRREL3  
ENSG00000152086|TUBA3E ENSG00000160349|LCN1 ENSG00000163017|ACTG2 ENSG00000164626|KCNK5 ENSG00000166135|HIF1AN ENSG00000167889|MGAT5B ENSG00000177096|FAM109B ENSG00000183929|DUSP5P  
ENSG00000187678|SPRY4 ENSG00000196209|Q5JXA8\_HUMAN ENSG00000198033|TUBA3C ENSG00000205336|GPR56 ENSG00000205751|MRPL23 ENSG00000205974|Q6ZVY3\_HUMAN ENSG00000073711|PPP2R3A ENSG00000084444|KIAA1467  
ENSG000000091317|CMTM6 ENSG00000104343|UBE2W ENSG00000112319|EYA4 ENSG00000121057|AKAP1 ENSG00000123575|CXorf39 ENSG00000133111|RFXPAP ENSG00000151514|SALL3 ENSG00000152223|KIAA1632  
ENSG00000154027|AK5 ENSG00000156642|NPTN ENSG00000164756|SLC30A8 ENSG00000165566|FAM123A ENSG00000165646|SLC18A2 ENSG00000167034|NKX3-1 ENSG00000170627|FAM112B ENSG00000170941|NP\_065895.1  
ENSG00000174721|FGFBP3 ENSG00000188477|Q6UXS0\_HUMAN  
GGTTGAA ENSG000000077080|ACTL6B ENSG00000100116|GCAT ENSG00000100593|THSD3 ENSG00000101350|KIF3B ENSG00000103489|XYLT1 ENSG00000108961|NP\_057576.2 ENSG00000111641|NOL1 ENSG00000113389|NPR3  
ENSG00000130312|MRPL34 ENSG00000130332|LSM7 ENSG00000137747|TPFRSS13 ENSG00000139436|GIT2 ENSG00000140459|CYP11A1 ENSG00000141316|SPACA3 ENSG00000142512|SIGLEC10 ENSG00000166435|XRR1  
ENSG00000167744|ABC3 ENSG00000167972|ABCA3 ENSG00000173120|FBXL11 ENSG00000177238|TRIM72 ENSG00000179523|Q8TAS2\_HUMAN ENSG00000180104|EXOC3 ENSG00000184209|NP\_008951.1 ENSG00000197373|NP\_001015884.1  
ENSG00000198756|GLT25D2 ENSG00000204377|C1orf134 ENSG00000102974|CTCF ENSG00000105849|TWISTNB ENSG00000108984|MAP2K6 ENSG00000114796|KLHL24 ENSG00000117751|PPP1R8 ENSG00000127334|DYRK2  
ENSG00000129003|VPS13C ENSG00000129197|RPAIN ENSG00000135525|MAP7 ENSG00000145782|ATG12 ENSG00000155324|GRAMD3 ENSG00000164919|COX6C ENSG00000169981|ZNF35 ENSG00000170946|DPH4  
ENSG00000177640|CASC2 ENSG00000183675|PTPN20B ENSG00000188996|HUS1 ENSG00000204179|PTPN20A  
GGTTGAT ENSG000000075043|KCNQ2 ENSG00000101096|NFATC2 ENSG00000101346|POFUT1 ENSG00000105352|CEACAM4 ENSG00000115107|STEAP3 ENSG00000125991|ERGIC3 ENSG00000143376|SNX27 ENSG00000159110|IFNAR2  
ENSG00000164896|FASTK ENSG00000169442|CD52 ENSG00000170956|CEACAM3 ENSG00000174206|NP\_689653.3 ENSG00000175779|NP\_997327.1 ENSG00000184110|EIF358 ENSG00000184164|CRELD2 ENSG00000186832|KRT16  
ENSG00000204558|Q9BYX6\_HUMAN ENSG00000205609|Q9BW98\_HUMAN ENSG00000000003|TSPAN6 ENSG00000008018|PSMB1 ENSG00000078269|SYNJ2 ENSG00000109171|SLAIN2 ENSG00000153006|NP\_776190.1 ENSG00000166130|NP\_710154.1  
ENSG00000166240|Q14D67-2 ENSG00000168028|RPSAP15 ENSG00000168646|AXIN2 ENSG00000170848|PSG6 ENSG00000172493|AFF1 ENSG00000173208|ABCD2 ENSG00000180869|C1orf18 ENSG00000186340|THBS2  
ENSG00000188243|COMMD6 ENSG00000196459|SEDLF ENSG00000197024|ZNF398 ENSG00000198315|ZNF192 ENSG00000205246|NP\_001005472.1  
GGTTGCC ENSG00000062038|CDH3 ENSG00000101161|PRPF6 ENSG00000105429|MEGF8 ENSG00000116218|NPHS2 ENSG00000124104|SNX21 ENSG00000124226|ZNF313 ENSG00000125995|C20orf52 ENSG00000139540|SLC39A5  
ENSG00000143845|ETNK2 ENSG00000160584|QSK\_HUMAN ENSG00000164080|RAD54L2 ENSG00000165644|COMTD1 ENSG00000167515|TRAPP2L ENSG00000169026|MFSD7 ENSG00000170616|SCRT1 ENSG00000172613|RAD9A  
ENSG00000173530|TNFRSF10D ENSG00000175182|FAM131A ENSG00000177238|TRIM72 ENSG00000182473|EXOC7 ENSG00000188549|NP\_997263.1 ENSG00000198467|TPM2 ENSG00000204017|Q6ZV9\_HUMAN ENSG00000204221|WDR46  
ENSG00000204536|CHCHR1 ENSG00000206140|LOC728229 ENSG00000078747|ITCH ENSG00000102606|ARHGEP7 ENSG00000113580|NR3C1 ENSG00000114857|NKTR ENSG00000118985|ELL2 ENSG00000126453|BCL2L12  
ENSG00000141946|ZIM3 ENSG00000163743|RCHY1 ENSG00000164465|DCBLD1 ENSG00000165868|HSPA12A ENSG00000184349|EFNA5  
GGTTGGG ENSG00000084207|GSTP1 ENSG00000090447|TFAP4 ENSG00000095397|DFNB31 ENSG00000100346|CACNA1I ENSG00000100764|PSMC1 ENSG00000111669|TPI1 ENSG00000120875|DUSP4 ENSG00000132003|ZSWIM4  
ENSG00000136327|NKX2-8 ENSG00000145888|GLRA1 ENSG00000149480|MTA2 ENSG00000149926|FAM57B ENSG00000159335|PTMS ENSG00000160339|FCN2 ENSG00000164729|AMAC1L1 ENSG00000164740|NR\_003034.1  
ENSG00000167685|YARS2 ENSG00000168010|ATG16L2 ENSG00000170608|FOXA3 ENSG00000172057|ORMDL3 ENSG00000173757|STAT5B ENSG00000182108|MYLE\_HUMAN ENSG00000182749|PAQR7 ENSG00000183488|AMAC1L3  
ENSG00000184840|TMED9 ENSG00000189433|GJB4 ENSG00000198732|SMOC1 ENSG00000203919|Q6ZN51\_HUMAN ENSG00000204285|Q6ZP11\_HUMAN ENSG00000204526|HCG27 ENSG00000205814|Q6ZRC0\_HUMAN ENSG0000026508|CD44  
ENSG00000102349|KLF8 ENSG00000112406|HECA ENSG00000112996|MROPS30 ENSG00000125430|HS3ST3B1 ENSG00000135821|GLUL ENSG00000140455|USP3 ENSG00000150627|WDR17  
ENSG00000152818|UTRN ENSG00000154380|ENAH ENSG00000155096|AZIN1 ENSG00000162994|NP\_689598.1 ENSG00000163113|OTUD7B ENSG00000164211|STARD4 ENSG00000170248|PDCD6IP ENSG00000171617|ENC1  
ENSG00000197053|FAM74A4 ENSG00000197102|DYNCL1H1 ENSG00000204300|NP\_001013765.1 ENSG00000204841|FAM74A2 ENSG00000204844|FAM74A3 ENSG00000205637|Q6ZSL6\_HUMAN  
GGTTGTA ENSG00000068097|NP\_071353.4 ENSG00000068831|RASGRP2 ENSG00000100226|GTPBP1 ENSG00000100362|PVLAB ENSG000001162708|PRAMEF4 ENSG000001167261|PRAMEF12 ENSG00000124733|MEA1 ENSG00000125798|FOXA2  
ENSG00000131152|Q9H693\_HUMAN ENSG00000132130|LHX1 ENSG00000132323|ILKAP ENSG00000135503|ACVR1B ENSG00000139193|CD27 ENSG00000143258|USP21 ENSG00000151882|CCL28 ENSG00000152669|CCNU  
ENSG00000157358|PRAMEF15 ENSG00000159884|CCDC107 ENSG00000168056|LTBP3 ENSG00000169442|CD52 ENSG00000174837|EMR1 ENSG00000174950|CD164L2 ENSG00000177479|ARIH2 ENSG00000182330|PRAMEF8  
ENSG00000189001|SBSN ENSG00000203805|PPAPDC1A ENSG00000204485|LOC729516 ENSG00000204499|Q6P6C6\_HUMAN ENSG00000204501|PRAMEF9 ENSG00000204502|PRAMEF5 ENSG00000204507|LOC729368 ENSG00000204509|PRAMEF6  
ENSG00000204510|PRAMEF7 ENSG00000038210|PI4K2B ENSG00000061676|NCKAP1 ENSG00000067369|TP53BP1 ENSG00000109133|TMEM33 ENSG00000117477|C1orf114 ENSG00000125846|ZNF133 ENSG00000127831|VIL1  
ENSG00000139793|MBNL2 ENSG00000140285|FGF7 ENSG00000142864|SERBP1 ENSG00000144410|CPO ENSG00000145147|SLIT2 ENSG00000151135|C12orf23 ENSG00000155890|TRIM42 ENSG00000174106|LEMD3  
ENSG00000175054|ATR ENSG00000187009|Q8NFD4\_HUMAN ENSG00000187772|LIN28B ENSG00000197223|NP\_006324.1 ENSG00000204837|Q2T73\_HUMAN ENSG00000205604|Q6ZUP5\_HUMAN  
GGTTGTC ENSG00000100373|UPK3A ENSG00000104969|SGTA ENSG00000108352|RAPGEFL1 ENSG00000112941|POLS ENSG00000125991|ERGIC3 ENSG00000130487|KLHDC7B ENSG00000133313|CNDP2 ENSG00000160710|ADAR  
ENSG00000160957|RECQL4 ENSG00000167987|VPS37C ENSG00000183914|DNAH2 ENSG00000188038|NRN1L ENSG00000188384|Q6ZUQ5\_HUMAN ENSG00000197653|DNAH10 ENSG00000205271|Q6ZUQ5\_HUMAN  
ENSG00000205275|Q6ZUQ5\_HUMAN ENSG00000081181|ARG2 ENSG00000101871|MID1 ENSG00000107672|NSMCE4A ENSG00000115159|GPD2 ENSG00000116750|UCHL5 ENSG00000120800|UTP20 ENSG00000124356|STAMPB  
ENSG00000139131|YARS2 ENSG00000143458|NP\_653219.1 ENSG00000162819|C1orf58 ENSG00000163683|C4orf34 ENSG00000165113|GKAP1 ENSG00000165775|FUNDC2 ENSG00000169359|SLC33A1 ENSG00000181610|MRPS23  
ENSG00000198522|ZNF512 ENSG00000198944|ANKRD43 ENSG00000204136|GATA1 ENSG00000205054|Q6UXP8\_HUMAN  
GGTTGTG ENSG00000066735|Q96GK3\_HUMAN ENSG00000092201|SUPT16H ENSG00000100115|TPD5L2 ENSG00000104848|KCNM7 ENSG00000114988|LMAN2L ENSG00000117971|CHRNB4 ENSG00000122547|NP\_085139.2 ENSG00000130703|OSBPL2  
ENSG00000142273|CBLC ENSG00000146005|PSD2 ENSG00000149294|NCAM1 ENSG00000154930|ACSS1 ENSG00000160226|C21orf2 ENSG00000160408|ST6GALNAC6 ENSG00000162968|Q96MQ0\_HUMAN ENSG00000163464|IL8RA  
ENSG00000175182|FAM131A ENSG00000177885|GRB2 ENSG00000182175|RGMA ENSG00000184825|HIST1H2AH ENSG00000196085|C19orf42 ENSG00000205064|Q6ZVP2\_HUMAN ENSG00000205307|Q8TE9\_HUMAN ENSG00000205742|Q6ZTR4\_HUMAN  
ENSG00000080803|JARID2 ENSG00000049246|PER3 ENSG00000101115|SALL4 ENSG00000112294|ALDH5A1 ENSG00000119508|NR4A3 ENSG00000147655|RSPO2 ENSG00000148154|UGCG ENSG00000152223|KIAA1632  
ENSG00000159593|APBP1 ENSG00000163053|SLC16A14 ENSG00000163637|PRICKLE2 ENSG00000165609|NUDT5 ENSG00000170677|SOCS6 ENSG00000171848|RRM2 ENSG00000179915|NRX1B\_HUMAN ENSG00000183631|Q5JQE8\_HUMAN  
ENSG00000198492|YTHDF2  
GGTTGTT ENSG00000006606|CCL26 ENSG00000092964|DPYSL2 ENSG00000100401|RANGAP1 ENSG00000104415|WISP1 ENSG00000104490|NCALD ENSG000001107831|FGF8 ENSG00000136271|DDX56 ENSG00000143061|IGSF3  
ENSG00000149474|SUHW1 ENSG00000169548|SUH1 ENSG00000171388|APLN ENSG00000175166|PSMD2 ENSG00000177370|TIMM22 ENSG00000204540|PSORS1C1 ENSG00000204048|UBR2 ENSG00000038945|MSR1  
ENSG00000047579|DTNBP1 ENSG00000062096|ARSF ENSG00000088766|CRLS1 ENSG00000108946|PRKAR1A ENSG00000110321|EIF4G2 ENSG00000112182|BACH2 ENSG00000112232|KHDRBS2 ENSG00000134769|DTNA  
ENSG00000137672|TRPC6 ENSG00000152213|ARL11 ENSG00000155100|OTUD6B ENSG00000162814|SPATA17 ENSG00000165650|PDZD8 ENSG00000166575|TMEM135 ENSG00000168653|NDUFS5 ENSG00000169116|PARM1\_HUMAN  
ENSG00000170927|PKHD1 ENSG00000172554|SNTG2 ENSG00000182827|ACBD3  
GGTTTAA ENSG00000029993|HMG3 ENSG00000088882|CPXM1 ENSG00000100647|KIAA0247 ENSG00000104490|NCALD ENSG00000104979|C19orf53 ENSG00000117154|IGSF21 ENSG00000120907|ADRA1A ENSG00000125354|SEPT6  
ENSG00000128567|PODXL ENSG00000130702|LAMA5 ENSG00000148660|PILRA3 ENSG00000168610|STAT3 ENSG00000171475|WIPF2 ENSG00000180900|SCRIB ENSG00000183044|ABAT ENSG00000184292|TACSTD2  
ENSG00000184788|SATL1 ENSG00000185608|MRPL40 ENSG00000196859|KRT39 ENSG00000196935|SRGAP1 ENSG00000203867|RBM20 ENSG00000007168|PFAH1B1 ENSG0000008282|SYPL1 ENSG00000082556|OPRK1  
ENSG00000105851|PIK3CG ENSG00000115183|TANC1 ENSG00000126945|HNRPH2 ENSG00000137766|SLTM ENSG00000145675|PIK3R1 ENSG00000154099|LRRCC5 ENSG00000155495|MAGEC1 ENSG00000155897|ADCY8  
ENSG00000164463|NP\_705835.1 ENSG00000164754|RAD21 ENSG00000166803|KIAA0101 ENSG00000169062|UPF3A ENSG00000170248|PDCD6IP ENSG00000170892|TSN34 ENSG00000183283|DAZAP2 ENSG00000186104|CYP2R1

ENSG00000196177|ACADSB ENSG00000198526|PABPCP2 ENSG00000204262|COL5A2  
GGTTTAC ENSG00000100345|MYH9 ENSG00000101213|PTK6 ENSG00000115648|MLPH ENSG00000123144|C19orf43 ENSG00000131389|SLC6A6 ENSG00000141034|C17orf39 ENSG00000142224|IL19 ENSG00000145113|MUC4  
ENSG00000146112|KIAA1949 ENSG00000148156|ACTL7B ENSG00000151778|C13orf21 ENSG00000159588|CCDC17 ENSG00000160208|RRP1B ENSG00000162968|Q96MQO\_HUMAN ENSG00000168621|GDNF ENSG00000182022|ST4S6\_HUMAN  
ENSG00000185739|SRL ENSG00000188935|Q6ZU24\_HUMAN ENSG00000198668|CALM1 ENSG00000204252|HLA-DOA ENSG00000047365|CENTD1 ENSG00000116957|TBCE ENSG00000119396|RAB14 ENSG00000120742|RAMP4\_HUMAN  
ENSG00000130962|PRRG1 ENSG00000131381|ZFYVE20 ENSG00000133328|HRASLS2 ENSG00000134152|C15orf29 ENSG00000135353|CD164 ENSG00000136897|MRPL50 ENSG00000136937|NCBP1 ENSG00000137261|KIAA0319  
ENSG00000138382|MTTTL5 ENSG00000148541|FAM13C1 ENSG00000152332|UHMK1 ENSG00000155545|MIER3 ENSG00000159873|CCDC117 ENSG00000166211|SPIC ENSG00000172171|C17orf42 ENSG00000183607|GKN2  
ENSG00000187068|NP\_001020437.1 ENSG00000187079|TEAD1 ENSG00000198093|ZNF649  
GGTTTCA ENSG00000070748|CHAT ENSG00000100376|FAM118A ENSG00000104888|SLC17A7 ENSG00000105738|SIPALL3 ENSG00000106268|NUDT1 ENSG00000119280|C1orf198 ENSG00000126856|Q9NQW5-2 ENSG00000131871|SELS\_HUMAN  
ENSG00000132694|ARHGFE11 ENSG00000142794|NBPFP3 ENSG00000148290|SURF1 ENSG00000174680|C21orf9 ENSG00000177121|Q8N6L5\_HUMAN ENSG00000186261|EMP2 ENSG00000197037|ZNF498 ENSG00000204274|Q6ZSG4\_HUMAN  
ENSG00000206193|Q5HYA3\_HUMAN ENSG00000067560|RHOA ENSG00000088970|C20orf19 ENSG00000103569|AQP9 ENSG00000103769|RAB11A ENSG00000105186|ANKRD27 ENSG00000107560|RAB11FIP2 ENSG00000107863|ARHGAP21  
ENSG00000109184|DCUN1D4 ENSG00000119121|TRPM6 ENSG00000119878|CRIPT ENSG00000123131|PRDX4 ENSG00000124935|SCGB1D2 ENSG00000125337|KIF25 ENSG00000128595|CALU ENSG00000131981|LGALS3  
ENSG00000132463|GRSF1 ENSG00000135903|PAX3 ENSG00000136872|ALDOB ENSG00000137575|SDCBP ENSG00000138821|SLC39A8 ENSG00000139973|SYT16 ENSG00000143970|ASXL2 ENSG00000150991|UBIQ\_HUMAN  
ENSG00000153283|CD96 ENSG00000155090|KLF10 ENSG00000157219|HTR5A ENSG00000160145|KALRN ENSG00000167383|ZNF229 ENSG00000168515|SCGB1D1 ENSG00000169062|UPF3A ENSG00000176731|C8orf59  
ENSG00000181264|TMEM136 ENSG00000183035|CYLC1 ENSG00000183784|C9orf66 ENSG00000187994|NP\_940847.1 ENSG00000196639|HRH1 ENSG00000197181|PIWIL2 ENSG00000197707|Q9H363\_HUMAN  
GGTTTCG ENSG00000058404|CAMK2B ENSG00000086504|MRPL28 ENSG00000099341|PSMD8 ENSG00000102547|CAB39L ENSG00000104299|INT9\_HUMAN ENSG00000116017|ARD13A ENSG00000119973|PRLHR ENSG00000126457|PRMT1  
ENSG00000128709|HOXD9 ENSG00000129103|SUMF2 ENSG00000130958|SLC35D2 ENSG00000135424|ITGA7 ENSG00000141560|KT3K\_HUMAN ENSG00000143793|C1orf35 ENSG00000154146|NRGN ENSG00000159674|SPON2  
ENSG00000160469|BRSK1 ENSG00000163702|LL17RC ENSG00000166359|WDR88 ENSG00000166426|CRABP1 ENSG00000168066|SF1 ENSG00000172215|CXCR6 ENSG00000172216|CEBPB ENSG00000182087|C19orf6  
ENSG00000186316|Q96NA9\_HUMAN ENSG00000187634|SAMD11 ENSG00000197021|CXorf40B ENSG00000198518|HIST1H4E ENSG00000203774|Q6ZUA8\_HUMAN ENSG00000081041|CXCL2 ENSG00000091428|RAPGEF4 ENSG00000100372|SLC25A17  
ENSG00000101981|F9 ENSG00000110984|MAP2K6 ENSG00000111371|SLC38A1 ENSG00000123352|SPATS2 ENSG00000133678|CJ057\_HUMAN ENSG00000137601|NEK1 ENSG00000137996|RTCD1 ENSG00000140043|ZADH1  
ENSG00000148541|FAM13C1 ENSG00000151366|NDUFC2 ENSG00000154511|FAM69A ENSG00000163159|VPS72 ENSG00000166292|TMEM100 ENSG00000170315|UBIQ\_HUMAN ENSG00000183665|TRMT12 ENSG00000189050|NP\_057209.3  
ENSG00000189251|Q8WYN8\_HUMAN  
GGTTTGA ENSG00000023191|RNH1 ENSG00000077044|DGKD ENSG00000089154|GCN1L1 ENSG00000099954|CECR2 ENSG00000105428|ZNF4 ENSG00000108788|MLX ENSG00000112782|CLIC5 ENSG00000112941|POLS  
ENSG00000114982|NP\_060461.3 ENSG00000120875|DUSP4 ENSG00000126561|STAT5A ENSG00000135390|ATP5G2 ENSG00000135801|TAF5L ENSG00000149269|PAK1 ENSG00000157884|NP\_001025052.1 ENSG00000158497|HMHB1  
ENSG00000158516|CPA2 ENSG00000165633|C10orf72 ENSG00000167987|VPS37C ENSG00000175206|NPPA ENSG00000179913|B3GNT3 ENSG00000184678|HIST2H2BE ENSG00000186716|BCR ENSG00000204131|NP\_001013649.1  
ENSG00000204159|NM\_133374.2 ENSG00000205103|HPR ENSG00000206088|Q6ZT13\_HUMAN ENSG00000054392|HHA1 ENSG00000096717|SIRT1 ENSG00000113643|RARS ENSG00000119048|UBE2B ENSG00000121089|NACA3P  
ENSG00000125249|RAP2A ENSG00000125484|GTF3C4 ENSG00000133731|IMPA1 ENSG00000136937|NCBP1 ENSG00000149311|ATM ENSG00000151655|ITIH2 ENSG00000156050|C14orf44 ENSG00000157578|C21orf13  
ENSG00000162695|SLC30A7 ENSG00000163322|CCDC98 ENSG00000172260|NEGR1 ENSG00000174574|C1orf108 ENSG00000186432|KPNA4 ENSG00000188158|NHS ENSG00000196531|NACA ENSG00000198908|BHLHB9  
GGTTTGG ENSG000000011332|DPF1 ENSG000000011454|RABGAP1 ENSG000000047849|MAP4 ENSG000000099284|H2AFY2 ENSG00000100234|TIMP3 ENSG00000100994|PYGB ENSG00000103723|AP3B2 ENSG00000105647|PIK3R2  
ENSG00000106628|POLD2 ENSG00000110777|POU2AF1 ENSG00000116017|ARID3A ENSG00000125354|VASP ENSG00000125753|VASP ENSG00000125895|C20orf46 ENSG00000126705|AHDC1 ENSG00000126883|NUP214  
ENSG00000127124|HIVEP3 ENSG00000128563|PRKRIP1 ENSG00000130055|GDPD2 ENSG00000131914|LIN28 ENSG00000141580|WDR45L ENSG00000149547|E124 ENSG00000164266|SPINK1 ENSG00000166111|SVOP  
ENSG00000171649|ZIK1 ENSG00000176371|ZSCAN2 ENSG00000176911|Q9HAM1\_HUMAN ENSG00000179593|ALOX15B ENSG00000186532|SMYD4 ENSG00000197081|IGF2R ENSG00000203934|Q6ZUQ1\_HUMAN ENSG00000204080|Q6ZQR9\_HUMAN  
ENSG00000204569|PPP1R10 ENSG00000205396|Q6ZRG2\_HUMAN ENSG000000051180|RAD51 ENSG00000079134|THOC1 ENSG00000105865|DUS4L ENSG00000113300|CNOT6 ENSG00000113522|RAD50 ENSG00000126010|GRPR  
ENSG00000129691|ASH2L ENSG00000134375|TIMM17A ENSG00000134760|DSG1 ENSG00000138071|ACTR2 ENSG00000139352|ASCL1 ENSG00000147419|CCDC25 ENSG00000149289|ZC3H12C ENSG00000153246|PLA2R1  
ENSG00000155130|MARCKS ENSG00000159658|KIAA0494 ENSG00000163918|RFC4 ENSG00000164032|H2AF2 ENSG00000167699|GLOD4 ENSG00000178988|MRFAP1L1 ENSG00000179008|C14orf39 ENSG00000196323|ZBTB44  
ENSG00000197085|Q6EKK1\_HUMAN ENSG00000198948|MFAP3L  
GTAAAA ENSG00000007402|CACNA2D2 ENSG00000012223|LTF ENSG000000058085|LAMC2 ENSG00000064961|HMG20B ENSG00000067365|C16orf68 ENSG00000075218|GTSE1 ENSG00000092607|TBX15 ENSG00000102076|OPN1LW  
ENSG00000102145|GATA1 ENSG00000105122|NP\_075055.1 ENSG00000111412|C12orf49 ENSG00000116198|KIAA0562 ENSG00000124226|ZNF313 ENSG00000124422|USP22 ENSG00000130182|ZSCAN10  
ENSG00000134668|SPOCD1 ENSG00000140320|BAHD1 ENSG00000141934|PPAP2C ENSG00000142156|COL6A1 ENSG00000144681|STAC ENSG00000146950|SHROOM2 ENSG00000147380|OPN1MW ENSG00000153060|TEKT5  
ENSG00000154227|LASS3 ENSG00000157103|SLC6A1 ENSG00000158497|HMHB1 ENSG00000160208|RRP1B ENSG00000162763|LRRC52 ENSG00000165171|WBSR27 ENSG00000166160|OPN1MW2 ENSG00000167748|KLK1  
ENSG00000169885|CALML6 ENSG00000170983|C8orf14 ENSG00000173372|CIQA ENSG00000177156|TALDO1 ENSG00000181991|MRPS11 ENSG00000185112|FAM43A ENSG00000185198|PRSSL1 ENSG00000186364|NUDT17  
ENSG00000196787|HIST1H2AG ENSG00000197296|C20orf142 ENSG00000198816|ZNF358 ENSG00000089048|ESF1 ENSG00000100883|SRP54 ENSG00000106443|PHF14 ENSG00000109738|GLRB ENSG00000111647|NP\_001006948.1  
ENSG00000111845|PAK11P1 ENSG00000112981|NME5 ENSG00000113532|ST8S1A4 ENSG00000119888|TACSTD1 ENSG00000120662|MTFR1 ENSG00000121989|ACVR2A ENSG00000122481|RWD3 ENSG00000123728|RAF2C  
ENSG00000126790|C14orf149 ENSG00000129317|PUS7L ENSG00000131969|ABHD12B ENSG00000133863|TEX15 ENSG00000138379|GDF8 ENSG00000144847|IGSF11 ENSG00000145331|RG9MTD2 ENSG00000146433|TMEM181  
ENSG00000147027|TMEM47 ENSG00000150636|CCDC102B ENSG00000156976|EIF4A2 ENSG00000166575|TMEM135 ENSG00000166598|HSP90B1 ENSG00000170381|SEMA3E ENSG00000173276|ZNF295 ENSG00000173451|THAP2  
ENSG00000174099|MSRB3 ENSG00000177200|CHD9 ENSG00000177879|AP3S1 ENSG00000182287|AP182 ENSG00000183305|MAGEA6 ENSG00000184750|MAGEA2 ENSG00000184899|Q9P181\_HUMAN ENSG00000186675|MAGEE2  
ENSG00000187325|TAF9B ENSG00000197748|C10orf79 ENSG00000198681|MAGEA1  
GTAAACA ENSG00000020577|SAMDA4 ENSG00000079393|DUSP13 ENSG00000085465|VGGP1 ENSG00000090659|CD209 ENSG00000095383|TBC1D2 ENSG00000100429|HDAC10 ENSG00000101457|DNMTIP1 ENSG00000105549|THEG  
ENSG00000108961|NP\_057576.2 ENSG00000114999|TTL ENSG00000121083|DYNLL2 ENSG00000124678|TCP11 ENSG00000124713|GNMT ENSG00000138311|ZNF365 ENSG00000143502|SUSD4 ENSG00000143748|NVL  
ENSG00000160224|ATRE ENSG00000164334|NP\_877438.2 ENSG00000165837|Q5WAOA\_HUMAN ENSG00000167112|TRUB2 ENSG00000167131|CCDC103 ENSG00000168398|BDKRB2 ENSG00000176809|LRRC37A3 ENSG00000178226|PRSS36  
ENSG00000180471|C9orf31 ENSG00000188152|FAM22G ENSG00000198931|APRT ENSG00000203814|HIST2H2BF ENSG00000204049|Q6ZUH9\_HUMAN ENSG00000205522|LOC255411 ENSG00000205878|Q6ZSV2\_HUMAN ENSG00000203509|NP\_653337.1  
ENSG00000010818|HIVEP2 ENSG00000027075|PRKCH ENSG00000064225|ST3GAL6 ENSG00000079134|THOC1 ENSG00000105677|TMEM147 ENSG00000105708|ZNF14 ENSG00000112486|CCR6 ENSG00000128951|DUT  
ENSG00000140043|ZADH1 ENSG00000141448|GATA6 ENSG00000154945|ANKRD40 ENSG00000163046|C21orf99 ENSG00000164402|SEPT8 ENSG00000166046|TCP11L2 ENSG00000168594|ADAM29 ENSG00000169714|CNBP  
ENSG00000171202|TMEM126A ENSG00000177932|ZNF354C ENSG00000180660|MAB21L1 ENSG00000181061|HIGD1A ENSG00000196605|Q08AG5\_HUMAN  
ENSG000000004142|POLDP2 ENSG00000068383|INPP5A ENSG00000088038|CNOT3 ENSG00000100918|REC8 ENSG00000103222|ABCC1 ENSG00000106070|GRB10 ENSG00000117408|IPO13 ENSG00000123243|ITIH5  
ENSG00000128322|IGLL1 ENSG00000130177|CDC16 ENSG00000144045|DNX1 ENSG00000160799|CCDC12 ENSG00000168925|CTRB1 ENSG00000171711|DEFB4 ENSG00000176679|TGIF2LY ENSG00000177257|BD02\_HUMAN  
ENSG00000182351|CRIP1 ENSG00000183066|WBP2NL ENSG00000184157|C1orf210 ENSG00000185522|C11orf35 ENSG00000196338|NLGN3 ENSG00000197697|HIST1H2BE ENSG00000203945|Q5JQP1\_HUMAN ENSG00000206066|IGLL3  
ENSG000000049130|KITLG ENSG00000080166|DCT ENSG00000104164|PLDN ENSG00000109667|SLC2A9 ENSG00000110435|PDHX ENSG00000116748|AMPD1 ENSG00000130150|MOSPD2 ENSG00000131351|NP\_219485.1  
ENSG00000132912|DCTN4 ENSG00000133169|BEX1 ENSG00000134152|C15orf29 ENSG00000134198|TPAN2 ENSG00000134716|CYP2J2 ENSG00000135932|CAB39 ENSG00000136542|GALNT5 ENSG00000145451|GLRA3  
ENSG00000150687|PRSS23 ENSG00000151327|C14orf24 ENSG00000153779|TGIF2LX ENSG00000164306|CCDC111 ENSG00000165443|PHYHIP ENSG00000167380|ZNF226 ENSG00000169435|RASSF6 ENSG00000175183|CSRP2  
ENSG00000180964|TCEAL8 ENSG00000196199|MPF8\_HUMAN ENSG00000196937|FAM3C ENSG00000196967|ZNF585A ENSG00000198825|INPP5F ENSG00000204352|C9orf129 ENSG00000205442|C9orf134 ENSG00000206125|Q68DA7\_HUMAN  
GTAAACT perfect: GTAAACC GGTTTAC hsa-miR-299-5p tGGTTTACcgtccaccatacat 1  
ENSG00000048707|VPS13D ENSG00000052850|ALX4 ENSG00000077009|ITGB1BP3 ENSG00000088812|ATRN ENSG00000096384|HSP90AB1 ENSG00000103023|NP\_001073961.1 ENSG00000106927|AMBP ENSG00000107902|NP\_071409.2  
ENSG00000115138|POMC ENSG00000119535|CSF3R ENSG00000125534|C20orf149 ENSG00000128567|PODXL ENSG00000136250|AOAH ENSG00000143632|ACTA1 ENSG00000161572|LYZL6 ENSG00000175164|ABO  
ENSG00000176595|KBTBD11 ENSG00000178952|TUFM ENSG00000183741|CBX6 ENSG00000186654|ARHGAP8 ENSG00000100652|SLC10A1 ENSG00000102290|PCDH11X ENSG00000102468|HTR2A ENSG00000108468|CBX1  
ENSG00000113300|CNOT6 ENSG00000113328|CCNG1 ENSG00000113580|NR3C1 ENSG00000125384|PTGER2 ENSG00000129480|ORMDL1 ENSG00000129480|C14orf126 ENSG00000132466|ANKRD17 ENSG00000137531|SULF1  
ENSG00000138722|MMRN1 ENSG00000139842|CUL4A ENSG00000164327|NP\_689969.2 ENSG00000165527|ARF6 ENSG00000165807|C14orf50 ENSG00000166411|IDH3A ENSG00000169570|DTWD2 ENSG00000179046|NP\_775824.1  
ENSG00000204330|NP\_064592.1  
GTAAAGC ENSG00000004838|ZMYND10 ENSG00000055070|C1orf144 ENSG00000086506|HBQ1 ENSG00000089327|FXD5 ENSG00000104332|SFRP1 ENSG00000107262|BAG1 ENSG00000115107|STEAP3 ENSG00000122180|MYOG  
ENSG00000128918|ALDH1A2 ENSG00000131055|COX4I2 ENSG00000138942|RNF185 ENSG00000154309|DISP1 ENSG00000159247|LOC643224 ENSG00000163961|RNF168 ENSG00000164713|BRI3 ENSG00000169509|CRCT1  
ENSG00000169991|Q5TF58\_HUMAN ENSG00000170925|TEX13B ENSG00000172724|CCL19 ENSG00000196313|NP\_742017.1 ENSG00000196408|NOX10 ENSG00000196970|NXF4 ENSG00000204564|C6orf136 ENSG00000205726|ITSN1  
ENSG00000205979|Q6XYA8\_HUMAN ENSG00000010818|HIVEP2 ENSG00000011465|DCN ENSG00000091129|NRCAM ENSG00000092020|PPP2R3C ENSG00000105792|Q8IY89\_HUMAN ENSG00000110436|SLC12A2 ENSG00000120697|ALG5  
ENSG00000121031|PRKDC ENSG00000122550|KLHL7 ENSG00000122591|FAM126A ENSG00000125484|GTF3C4 ENSG00000126821|SGPPP1 ENSG00000131747|P11388-2 ENSG00000137098|SPAG8 ENSG00000143702|CEP170  
ENSG00000143952|VPS54 ENSG00000152689|RASGRP3 ENSG00000154719|MRPL39 ENSG00000165417|GTF2A1 ENSG00000169064|NM\_024687.2 ENSG00000174156|GSTA3 ENSG00000179941|BBS10 ENSG00000196693|ZNF33B  
ENSG00000197054|ZNF763 ENSG00000197776|KLHDC1 ENSG00000198408|MGEA5 ENSG00000198961|PJA2 ENSG00000204171|Q6STG2\_HUMAN  
GTAAAGT ENSG00000039987|BEST2 ENSG00000048707|VPS13D ENSG00000070495|JMJD6 ENSG00000101457|DNMT1P1 ENSG00000141294|LRRC46 ENSG00000143858|SYT2 ENSG00000156858|PRR14  
ENSG00000164889|SLC4A2 ENSG00000166171|NP\_056263.1 ENSG00000168274|HIST1H2AE ENSG00000174564|IL20RB ENSG00000180861|C12orf36 ENSG00000185219|ZNF445 ENSG00000204235|Q6ZQN4\_HUMAN ENSG0000038219|FAM44A  
ENSG000000048740|CUGBP2 ENSG00000080986|NDC80 ENSG00000107968|FAM3P8 ENSG00000109332|UBE2D3 ENSG00000119906|C10orf6 ENSG00000120885|CLU ENSG00000132781|MUTYH ENSG00000134897|BIVM  
ENSG00000135940|COX5B ENSG00000144935|TRPC1 ENSG00000145908|ZNF300 ENSG00000148541|FAM13C1 ENSG00000149345|U2D3L\_HUMAN ENSG00000154348|ASZ1 ENSG00000155096|AZIN1 ENSG00000156469|MTERFD1  
ENSG00000156650|MYST4 ENSG00000157557|ETS2 ENSG00000159377|PSMB4 ENSG00000164402|SEPT8 ENSG00000173451|THAP2 ENSG00000176797|DEFB103B ENSG00000177243|DEFB103A ENSG00000177683|THAP5  
ENSG00000179520|SLC17A8 ENSG00000185515|BRCC3 ENSG00000196963|PCDHB16 ENSG00000206075|SERPINB5  
GTAAATA ENSG00000079616|KIF16 ENSG00000099821|POLRMT ENSG00000100109|TFIP11 ENSG00000100271|TTL1 ENSG00000103510|MYST1 ENSG00000105723|GSK3A ENSG00000105991|HOXA1  
ENSG00000106628|POLD2 ENSG00000114388|TUSC4 ENSG00000123358|NR4A1 ENSG00000125084|WNT1 ENSG00000130052|STARD8 ENSG00000130711|TRDM12 ENSG00000132323|ILKAP ENSG00000133316|WDR74  
ENSG00000142920|ADC ENSG00000143217|PVRL4 ENSG00000150594|ADRA2A ENSG00000162227|TAF6L ENSG00000162337|LRP5 ENSG00000163157|PDM4 ENSG00000163157|PDM4 ENSG00000174938|SEZ6L2 ENSG00000178028|DMAP1  
ENSG00000179580|RNF151 ENSG00000185379|RAD51L3 ENSG00000185668|POU3F1 ENSG00000186577|C6orf1 ENSG00000189196|Q6ZUD9\_HUMAN ENSG00000198369|SPRED2 ENSG00000204681|GABBR1 ENSG00000206066|IGLL3  
ENSG00000034713|GABARA1P2 ENSG00000062650|WAPAL ENSG00000075336|C18orf55 ENSG00000078589|P2RY10 ENSG000000807916|SLC6A14 ENSG00000091039|OSBPL8 ENSG00000102554|KLF5 ENSG00000102678|FGF9  
ENSG00000105216|LSM14A ENSG00000108506|INTS2 ENSG00000113384|GOLPH3 ENSG00000116166|C1orf64 ENSG00000117010|POLR684 ENSG00000117016|C1orf63 ENSG000001121621|KIF18A ENSG00000125304|TM9SF2  
ENSG00000132549|VPS13B ENSG00000133135|RNF128 ENSG00000133627|ACTR3B ENSG00000136451|VEZF1 ENSG00000136819|C9orf78 ENSG00000136997|MYC ENSG00000137936|BCAR3 ENSG00000137996|RTCD1  
ENSG00000142856|ITGB3BP ENSG00000143420|ENSA ENSG00000146376|ARHGAP18 ENSG00000152942|RAD17 ENSG00000154710|KCTD7 ENSG00000155307|SAMSN1 ENSG00000156804|FBXO32 ENSG00000162757|C1orf74  
ENSG00000164122|ASB5 ENSG00000164695|CHMP4C ENSG00000165097|AOF1 ENSG00000165675|ENOX2 ENSG00000172058|SERF1\_HUMAN ENSG00000173041|ZNF680 ENSG00000174720|LARP7 ENSG00000177301|KCNA2



GTACAAA ENSG0000004866|ST7 ENSG00000011454|RABGAP1 ENSG00000044012|GUCA2B ENSG00000065491|TBC1D22B ENSG00000071894|CPSF1 ENSG00000074755|ZZEF1 ENSG00000090554|FLT3LG ENSG00000133985|TTC9  
ENSG00000142186|SCYL1 ENSG00000143258|USP21 ENSG00000143549|TPM3 ENSG00000144040|SFXN5 ENSG00000149929|HIRIP3 ENSG00000156466|GDF6 ENSG00000162244|RPL29 ENSG00000164012|WDR65  
ENSG00000164707|SLC13A4 ENSG00000167244|IGF2 ENSG00000173011|Q86TJ2\_HUMAN ENSG00000176679|TGIF2LY ENSG00000177192|PUS1 ENSG00000178409|KIAA1553 ENSG00000179335|CLK3 ENSG00000185888|NP\_898885.1  
ENSG00000198019|FCGR1B ENSG00000198535|NP\_997205.1 ENSG00000019991|HGF ENSG00000080200|NP\_705833.2 ENSG00000107560|RAB11FIP2 ENSG00000108384|RAD51C ENSG00000111445|RFC5 ENSG00000122692|SMU1  
ENSG00000124767|GLO1 ENSG00000138271|GPR87 ENSG00000138735|PDE5A ENSG00000141452|C18orf8 ENSG00000144229|THSD7B ENSG00000144749|LRIG1 ENSG00000144810|COL8A1 ENSG00000145908|ZNF300  
ENSG00000147650|LRP12 ENSG00000152952|PLOC2 ENSG00000166509|CLEC3A ENSG00000173208|ABCD2 ENSG00000175893|ZDHHC21 ENSG00000177414|UBE2U ENSG00000186297|GABRA5 ENSG00000188641|DPYD  
ENSG00000196966|HIST1H3E ENSG00000198203|SULT1C2 ENSG00000204406|MBD5  
GTACAAAC ENSG00000001497|LAS1L ENSG00000070371|CLTCL1 ENSG00000085662|AKR1B1 ENSG00000089289|IGBP1 ENSG00000092670|TBX15 ENSG00000092758|COL9A3 ENSG00000103064|SLC7A6  
ENSG00000111667|USP5 ENSG00000130695|CCDC21 ENSG00000134571|MYBPC3 ENSG00000164051|CCDC51 ENSG00000166090|IL25 ENSG00000170445|HARS ENSG00000174613|FAM71B ENSG00000171115|GMAP8  
ENSG00000171148|TADA3L ENSG00000174939|ASPHD1 ENSG00000175203|DCTN2 ENSG00000180900|SCRIB ENSG00000184056|VPS33B ENSG00000186197|ENO1P ENSG00000188677|PARVB ENSG00000198535|NP\_997205.1  
ENSG00000203782|LOR ENSG00000203784|LELP1 ENSG00000205918|Q6A1A2\_HUMAN ENSG00000205796|SEC63 ENSG00000066279|ASPM ENSG00000066777|ARFGEF1 ENSG00000110436|SLC12A2 ENSG0000011404|NP\_079006.1  
ENSG00000111885|MAN1A1 ENSG00000114547|ROPN1B ENSG00000117009|KMO ENSG00000124198|ARFGEF2 ENSG00000125148|MT2A ENSG00000125831|CST11 ENSG00000127325|BEST3 ENSG00000129071|MBD4  
ENSG00000133131|MORC4 ENSG00000135686|C16orf44 ENSG00000137944|CCBL2 ENSG00000139793|MBNL2 ENSG00000145332|KLHL8 ENSG00000145681|HAPLN1 ENSG00000154723|ATP5J ENSG00000162994|NP\_689598.1  
ENSG00000163541|SUCLG1 ENSG00000167981|ZNF597 ENSG00000175054|ALR ENSG00000183831|ANKRD45 ENSG00000187193|MTX1 ENSG00000189132|FAM47B ENSG00000206527|PTFLB  
GTACAAAT ENSG00000064886|CHI3L2 ENSG00000087589|C20orf32 ENSG00000100036|SLC35E4 ENSG00000100197|CYP2D6 ENSG00000105618|PRPF31 ENSG00000105991|FOXA1 ENSG00000110987|BCL7A ENSG00000125657|TNFSF9  
ENSG00000125734|NM\_001080452.1 ENSG00000130707|ASS1 ENSG00000132677|RHBG ENSG00000133937|GSC ENSG00000141994|DUS3L ENSG00000144671|SLC22A14 ENSG00000150873|C2orf50 ENSG00000153885|KCTD15  
ENSG00000157103|SLC6A1 ENSG00000158445|KCNB1 ENSG00000161082|BRUNOL5 ENSG00000163207|IVL ENSG00000164713|BR13 ENSG00000165699|TSC1 ENSG00000172732|MUS81 ENSG00000177479|ARIH2  
ENSG00000181097|Q8NDL7\_HUMAN ENSG00000183978|CCDC56 ENSG00000184788|SATL1 ENSG00000204444|APOM ENSG00000205592|MUC19 ENSG00000205702|CYP2D7P1 ENSG0000006652|IFRD1 ENSG00000010219|DYRK4  
ENSG00000077713|SLC25A43 ENSG00000081237|PTPRC ENSG00000087095|NLK ENSG00000105971|CAV2 ENSG00000109270|MAP2K1IP1 ENSG00000113583|C5orf15 ENSG00000113638|TTC33 ENSG00000115183|TANC1  
ENSG00000118007|STAG1 ENSG00000137941|TTLL7 ENSG00000138684|IL21 ENSG00000140937|CDH11 ENSG00000149218|ENDD1 ENSG00000150625|GPM6A ENSG00000150961|SEC24D ENSG00000163491|NEK10  
ENSG00000163512|AZI2 ENSG00000164485|IL22RA2 ENSG00000164823|OSGIN2 ENSG00000165682|CLEC1B ENSG00000165819|METTL3 ENSG00000166986|MARS ENSG00000173406|DAB1 ENSG00000173915|USMG5  
ENSG00000186103|ARGFX ENSG00000186298|PPP1CC ENSG00000187105|HEATR4 ENSG00000197956|S100A6  
GTACACA ENSG00000068650|ATP11A ENSG00000070785|EIF2B3 ENSG00000103852|TTC23 ENSG00000105613|MAST1 ENSG00000122490|PQLC1 ENSG00000125726|CD70 ENSG00000131183|SLC34A1  
ENSG00000152767|FARP1 ENSG00000163521|GLB1L ENSG00000164012|WDR65 ENSG00000167074|TEF ENSG00000167664|TMDG2 ENSG00000167749|KIK4 ENSG00000171462|EGFL9 ENSG00000173432|SAA1  
ENSG00000198198|KIAA0467 ENSG00000069956|MAPK6 ENSG00000091127|PUS7 ENSG00000103194|USP10 ENSG00000114331|CENTB2 ENSG00000114547|ROPN1B ENSG00000116750|UCHL5 ENSG00000119938|PPP1R3C  
ENSG00000131263|RNFL2 ENSG00000132570|PCBD2 ENSG00000138246|DNAJC13 ENSG00000141298|SSH2 ENSG00000145247|OCTAD2 ENSG00000151693|DEF2 ENSG00000152760|TCTEX1D1 ENSG00000153790|C7orf31  
ENSG00000156735|BAG4 ENSG00000163596|ICAIL ENSG00000164040|PGRMC2 ENSG00000184254|ALDH1A3 ENSG00000188916|NP\_001034851.1 ENSG00000196532|HIST1H3C ENSG00000204133|FAM33B  
GTACACC ENSG00000004059|ARF5 ENSG00000046647|GEMIN8 ENSG00000071553|ATP6AP1 ENSG00000111181|SLC6A12 ENSG00000111319|SCNN1A ENSG00000119227|PTGZ ENSG00000123146|CD97 ENSG00000125386|C4orf8  
ENSG00000125869|C20orf103 ENSG00000136710|CCDC115 ENSG00000139193|CD27 ENSG00000139547|RSDH16 ENSG00000146090|RASGEF1C ENSG00000148602|LRRC21 ENSG00000161203|AP2M1 ENSG00000167881|SRP68  
ENSG00000169710|FASN ENSG00000172155|LCE1D ENSG00000172216|CEBPB ENSG00000181513|ACBD4 ENSG00000182866|LCK ENSG00000183847|Q9P1C0\_HUMAN ENSG00000184205|TSPYL2 ENSG00000185567|AHNAK2  
ENSG00000185818|NAT8L ENSG00000185896|LAMP1 ENSG00000196724|ZNF418 ENSG00000197182|NM\_207477 ENSG00000198500|Q96C21\_HUMAN ENSG00000198802|PECAM1 ENSG00000204914|NP\_940843.1 ENSG00000204916|NP\_940843.1  
ENSG00000204917|NP\_940843.1 ENSG00000204918|NP\_940843.1 ENSG00000204919|NP\_940843.1 ENSG00000204938|Q6ZUS7\_HUMAN ENSG00000085511|MAP3K4 ENSG00000101190|TCFL5 ENSG00000106355|LSM5 ENSG00000112146|FBXO9  
ENSG00000112186|CAP2 ENSG00000120659|TNFSF11 ENSG00000126226|PCID2 ENSG00000130413|STK33 ENSG00000134153|C15orf24 ENSG00000137571|SLC5A1 ENSG00000144452|ABCA12 ENSG00000146360|GPR6  
ENSG00000147869|CER1 ENSG00000153487|ING1 ENSG00000154721|JAM2 ENSG00000163466|ARPC2 ENSG00000169299|NFU1 ENSG00000169599|NFUC1 ENSG00000170647|TMEM133 ENSG00000177138|FAM9B  
ENSG00000177272|KCNA3 ENSG00000186416|NKRF ENSG00000187155|CUO85\_HUMAN ENSG00000198161|PPIAL4 ENSG00000198360|NP\_839944.1 ENSG00000198513|SPG3A ENSG00000198936|NP\_839944.1 ENSG00000203778|NP\_001028736.1  
ENSG00000203847|XR\_016130.1 ENSG00000205293|Q76B50\_HUMAN  
GTACACT ENSG00000030582|GRN ENSG00000088256|GNAI1 ENSG00000102466|FGF14 ENSG00000103200|NME4 ENSG00000103274|NUBP1 ENSG00000114378|HYAL1 ENSG00000115204|MPV17  
ENSG00000116032|GRIN3B ENSG00000125746|EML2 ENSG00000132027|XPO7 ENSG00000132002|DNAJB1 ENSG00000132321|IQCA ENSG00000136504|MYST2 ENSG00000139797|RNFI13B ENSG00000149294|NCAM1  
ENSG00000156411|C14orf2 ENSG00000158864|NDUFS2 ENSG00000159822|ABR ENSG00000174562|KLK15 ENSG00000175854|C9orf119 ENSG00000184908|CLCNKB ENSG00000185803|GPR172A ENSG00000186510|CLCNKA  
ENSG00000196843|ARID5A ENSG00000203783|PRR9 ENSG00000206539|Q6ZTN9\_HUMAN ENSG00000064651|SLC12A2 ENSG00000074771|NOX3 ENSG00000099749|CYorf15A ENSG00000100532|CGRRF1 ENSG00000101811|CSTF2  
ENSG00000116679|IVNS1ABP ENSG00000117000|RLF ENSG00000118965|WDR35 ENSG00000132141|CCT6B ENSG00000137075|RNF38 ENSG00000138161|FAM24B ENSG00000139505|MTMR6 ENSG00000139985|ADAM21  
ENSG00000141380|SS18 ENSG00000148303|SNORD36A ENSG00000154144|TBRG1 ENSG00000156140|ADAMTS3 ENSG00000164938|TP53INP1 ENSG00000165029|ABCA1 ENSG00000165309|ARMC3 ENSG00000171448|ZBTB26  
ENSG00000196885|Q9HAZ8\_HUMAN ENSG00000198142|ANKRD57  
GTACAGA ENSG00000020633|RUNX3 ENSG00000068654|POLR1A ENSG00000106030|MTMR3 ENSG00000118655|DCLRE1B ENSG00000132130|LHX1 ENSG00000136848|DAB2IP ENSG00000140992|PDPK1 ENSG00000143409|FAM63A  
ENSG00000143590|EFNA3 ENSG00000162706|DARC ENSG00000166025|AMOTL1 ENSG00000168828|OR13J1 ENSG00000168906|MAT2A ENSG00000172061|LRRC15 ENSG00000177807|KCNJ10 ENSG00000181938|GINS3  
ENSG00000184811|TUSC5 ENSG00000188229|TUBB2C ENSG00000196367|TRRAP ENSG00000197150|ABC8B ENSG00000205502|NP\_001007596.1 ENSG00000066777|ARFGEF1 ENSG00000085449|WDFY1 ENSG00000104313|EYAL1  
ENSG00000105186|ANKRD27 ENSG00000106483|SFRP4 ENSG00000107372|ZFAND5 ENSG00000112130|RNFB8 ENSG00000112651|MRPL2 ENSG00000115840|SLC25A12 ENSG00000117597|C1orf107 ENSG00000126804|ZBTB1  
ENSG00000132153|DHX30 ENSG00000142192|APP ENSG00000143970|ASXL2 ENSG00000147654|EBAG9 ENSG00000153132|CLGN ENSG00000154889|MPPE1 ENSG00000164442|CITED2 ENSG00000170365|SMAD1  
ENSG00000171723|GPHN ENSG00000171843|MLLT3 ENSG00000175449|RFESD ENSG00000182700|NP\_001007190.1 ENSG00000182752|PAPPA ENSG00000198586|TLK1  
GTACAGT ENSG00000006638|TRXAZR ENSG00000086548|CEACAM6 ENSG00000105726|ATP13A1 ENSG00000110514|MADD ENSG00000116205|C1orf83 ENSG00000124164|VAPB ENSG00000157014|TATDN2  
ENSG00000157110|RBPMS ENSG00000162337|LRP5 ENSG00000166351|ANKRD21 ENSG00000166448|TMEM130 ENSG00000171533|MAP6 ENSG00000172500|FTBP ENSG00000180198|RCC1 ENSG00000183206|POT15\_HUMAN  
ENSG00000186854|Q86V40\_HUMAN ENSG00000188554|NBR1 ENSG00000188660|C21orf125 ENSG00000198854|C1orf68 ENSG00000007062|PROM1 ENSG00000048392|RRM2B ENSG00000056050|C4orf27 ENSG00000056097|ZFR  
ENSG00000061987|MON2 ENSG00000085433|WDR47 ENSG00000089177|C20orf23 ENSG00000100744|C14orf129 ENSG00000101544|ZNF508 ENSG00000102606|ARHGEF7 ENSG00000104863|LIN7B ENSG00000106028|SSBP1  
ENSG00000108510|THRAP1 ENSG00000111837|MAK ENSG00000112667|C6orf108 ENSG00000123066|THRAP2 ENSG00000129625|REP5 ENSG00000134533|RRRG ENSG00000135018|UBQLN1 ENSG00000143153|ATP1B1  
ENSG00000146963|LUC7L2 ENSG00000148943|LIN7C ENSG00000151292|CSNK1G3 ENSG00000151834|GABRA2 ENSG00000153046|CDYL ENSG00000159917|ZNF235 ENSG00000169554|ZEB2 ENSG00000172260|NEGR1  
ENSG00000174016|FAM46D ENSG00000174437|ATP2A2 ENSG00000184613|NELL2 ENSG00000197453|NP\_001001706.1  
GTACATA ENSG00000002317|GRAMD1B ENSG00000067182|TNFRSF1A ENSG00000077044|DGKD ENSG00000084652|TXLNA ENSG00000100591|AHSAL1 ENSG00000103888|KIAA1199 ENSG00000105732|ZNF574 ENSG00000108509|CAMTA2  
ENSG00000125266|EFNB2 ENSG00000125285|SOX21 ENSG00000125492|BARHL1 ENSG00000135966|TGFBRA1 ENSG00000142186|SCYL1 ENSG00000143217|PVRL4 ENSG00000143374|TARS2 ENSG00000158517|NCF1  
ENSG00000163884|KLF15 ENSG00000165178|LOC648998 ENSG00000167967|EAF1 ENSG00000168575|SLC20A2 ENSG00000169375|SIN3A ENSG00000173821|RNF213 ENSG00000179388|EGR3 ENSG00000186185|NP\_001073912.1  
ENSG00000197506|SLC28A3 ENSG00000204274|Q6ZSG4\_HUMAN ENSG00000011566|MAP4K3 ENSG00000058272|PPP1R12A ENSG00000066509|SNAP91 ENSG00000075303|SLC25A40 ENSG00000078140|HIP2 ENSG00000081154|PCNP  
ENSG00000088387|DOCK9 ENSG00000108298|RPL19 ENSG00000109099|PMP22 ENSG00000112186|CAP2 ENSG00000113441|LNPEP ENSG00000116918|TSNAX ENSG00000119397|CEP110 ENSG00000122877|EGR2  
ENSG00000128272|ATF4 ENSG00000135750|KCNK1 ENSG00000138592|USP8 ENSG00000144749|LRIG1 ENSG00000144802|NFKBIZ ENSG00000148303|SNORD36A ENSG00000150768|DLAT ENSG00000151572|TMEM16D  
ENSG00000151835|SCAS ENSG00000152092|ASTN1 ENSG00000157542|KCNJ6 ENSG00000163029|SMC6 ENSG00000171824|EXOSC10 ENSG00000171940|ZNF217 ENSG00000173698|GPR64 ENSG00000175305|CCNE2  
ENSG00000177301|KCNA2 ENSG00000177599|ZNF491 ENSG00000188419|CHM ENSG00000188612|SUMO2 ENSG00000197714|ZNF460 ENSG00000198301|SDAD1 ENSG00000204155|PARG ENSG00000204600|NP\_001004349.1  
ENSG00000204804|FAM27D1  
GTACATC ENSG00000064601|CTSA ENSG00000065717|TLE2 ENSG00000088256|GNAI1 ENSG00000100462|PRMT5 ENSG00000102900|NUP93 ENSG00000103051|COG4 ENSG00000105197|TIMM50  
ENSG00000108018|SORCS1 ENSG00000116708|PRAMEF4 ENSG00000128298|BAIAP2L2 ENSG00000137070|IL11RA ENSG00000140612|SEC11A ENSG00000143303|C1orf66 ENSG00000146666|Q96IP2\_HUMAN ENSG00000149657|LSM14B  
ENSG00000151532|VTI1A ENSG00000157358|PRAMEF15 ENSG00000168016|Q8N8K0\_HUMAN ENSG00000170420|APOL6 ENSG00000172297|Q96RM8\_HUMAN ENSG00000172332|GOLGA2L1 ENSG00000180359|C11orf36 ENSG00000180447|GAS1  
ENSG00000204273|HLA-DOB ENSG00000204499|Q6P6C6\_HUMAN ENSG00000204501|PRAMEF9 ENSG00000204502|PRAMEF5 ENSG00000204507|LOC729368 ENSG00000204509|PRAMEF6 ENSG00000205971|NP\_001019848.1 ENSG00000064652|SNX24  
ENSG00000068781|STON1 ENSG00000088766|CRLS1 ENSG00000104313|EYAL1 ENSG00000119396|RAB14 ENSG00000137393|IBRDC2 ENSG00000138821|SLC39A8 ENSG00000139985|ADAM21 ENSG00000147138|GPR174  
ENSG00000151418|ATP6V1G3 ENSG00000152601|MBNL1 ENSG00000154719|MRPL39 ENSG00000160856|FCRL3 ENSG00000169989|TIGD4 ENSG00000174749|C4orf32 ENSG00000178974|FBXO34 ENSG00000186767|NP\_001012986.2  
ENSG00000187134|AKR1C1 ENSG00000196917|GPR81 ENSG00000197223|NP\_006324.1 ENSG00000205323|HCC1\_HUMAN  
GTACATT ENSG00000065357|DGKA ENSG00000100647|KIAA0247 ENSG00000102572|STK24 ENSG00000113739|STC2 ENSG00000119638|NEK9 ENSG00000123643|SLC36A1 ENSG00000126003|PLAGL2 ENSG00000126749|EMG1  
ENSG00000131097|HGD1B ENSG00000135114|OASL ENSG00000135503|ACVR1B ENSG00000137288|C6orf125 ENSG00000139514|SLC7A1 ENSG00000149380|P4HA3 ENSG00000151465|CDC123 ENSG00000158470|B4GALT5  
ENSG00000160233|LRRC3 ENSG00000164742|ADCY1 ENSG00000175197|DDIT3 ENSG00000181722|ZBTB20 ENSG00000183530|C22orf30 ENSG00000187095|LILRA2 ENSG00000196085|C19orf42 ENSG00000197565|COL4A6  
ENSG00000197724|PHF2 ENSG00000198831|Q8IYX2\_HUMAN ENSG00000203867|RBM20 ENSG00000204434|NP\_001017421.1 ENSG00000010818|HIVEP2 ENSG00000049618|ARID1B ENSG00000068796|KIF2A ENSG00000102908|NFAT5  
ENSG00000103657|HERC1 ENSG00000106799|TGFBRI1 ENSG00000108395|TRIM37 ENSG00000110958|PTGES3 ENSG00000115163|CENPA ENSG00000115446|UNC50 ENSG00000115760|BIRC6 ENSG00000117713|ARID1A  
ENSG00000118181|RPS25 ENSG00000124171|PARD6B ENSG00000132842|AP3B1 ENSG00000136636|KCTD3 ENSG00000144566|RAB5A ENSG00000149084|HSD17B12 ENSG00000152700|SAR1B ENSG00000156642|NPTN  
ENSG00000162607|USP1 ENSG00000163618|CADPS ENSG00000165807|C14orf50 ENSG00000166503|HDGR3\_HUMAN ENSG00000168594|ADAM29 ENSG00000182004|SNRPE ENSG00000182901|RGS7 ENSG00000184708|EIF4ENIF1  
ENSG00000185950|IRS2 ENSG00000196459|SEDFP ENSG00000198604|BAZ1A ENSG00000205133|Q629K1\_HUMAN  
GTACCAA ENSG00000017373|SNIP\_HUMAN ENSG00000087589|C20orf32 ENSG00000101464|PIGU ENSG00000104490|NCALD ENSG00000105204|DYRK1B ENSG00000128805|ARHGAP22 ENSG00000129657|SEC14L1 ENSG00000130429|ARPC1B  
ENSG00000132824|SERINC3 ENSG00000134247|PTGFRN ENSG00000151612|NP\_849157.2 ENSG00000160323|ADAMTS13 ENSG00000161179|NP\_001017964.1 ENSG00000165623|C10orf49 ENSG00000167080|B4GALNT2 ENSG00000168476|REEP4  
ENSG00000169972|PUSL1 ENSG00000175463|TBC1D10C ENSG00000185475|NP\_955369.1 ENSG00000186038|HTR3E ENSG00000197136|PCNXL3 ENSG00000104641|MDH1 ENSG00000066538|ISOC1 ENSG00000073711|PPP2R3A  
ENSG00000087053|MTMR2 ENSG00000111490|Q9Y2I9\_HUMAN ENSG00000116747|TROVE2 ENSG00000127311|HELXB ENSG00000134294|SLC38A2 ENSG00000143669|LYST ENSG00000158485|CD1B  
ENSG00000168594|ADAM29 ENSG00000171448|ZBTB26 ENSG00000178741|COX5A ENSG00000184203|PPP1R2 ENSG00000188916|NP\_001034851.1 ENSG00000203910|C1orf146 ENSG00000205099|A4D0Y5\_HUMAN  
GTACCTC ENSG00000048342|Q9H8A7\_HUMAN ENSG00000055957|ITIH1 ENSG00000105492|SIGLEC6 ENSG00000124104|SNX21 ENSG00000125458|NT5C ENSG00000127527|EP15L1 ENSG00000130528|HRC ENSG00000138698|RAP1GDS1  
ENSG00000142549|LOC402665 ENSG00000143140|GJA5 ENSG00000149428|HYOUI ENSG00000149782|PLCB3 ENSG00000155506|LARP1 ENSG00000156873|PHKG2 ENSG00000162772|ATF3 ENSG00000163515|RETNLB  
ENSG00000163993|S100P ENSG00000164970|C9orf25 ENSG00000167394|ZNF668 ENSG00000173621|LRFN4 ENSG00000187681|ORM1 ENSG00000188038|NRRN1L ENSG00000196235|SUTP5H ENSG00000204154|ORM2  
ENSG00000205778|Q6ZMM7\_HUMAN ENSG00000205972|Q9NBC0\_HUMAN ENSG00000103642|LACTB ENSG00000104756|KCTD9 ENSG00000110852|CLEC2B ENSG00000131381|ZFYVE20 ENSG00000136770|DNAJC1 ENSG00000136891|TEX10  
ENSG00000151500|THYN1 ENSG00000152214|RIT2 ENSG0000015768

|         |                                                                                                                                                                                                                                                                                                                                       |                                                                                                                                                                                                                                                                                                                                                          |                                                                                                                                                                                                                                                                                                                                                                                                                                                                                                                                                                                                                                                                                                                                                                                                                                                                                                                                                                                                                                                                                     |                                                                                                                                                                                                                                                                                                                                                                                                                                                                                                                                                                                                                                                                                                                                                                                                                                                                                                                                                                                                                                                                        |                                                                                                                                                                                                                                                                                                                                                                                                                                                                                                                                                                                                                                                                                                                                                                                                                                                                                                                                                                                                                                                                                   |                                                                                                                                                                                                                                                                                                                                                                                                                                                                                                                                                                                                                                                                                                                                                                                                                                                                                                                                                                                                                                                             |                                                                                                                                                                                                                                                                                                                                                                                                                                                                                                                                                                                                                                                                                                                                                                                                                                                                                                                                                                                                                                                                        |                                                                                                                                                                                                                                                                                                                                                                                                                                                                                                                                                                                                                                                                                                                                                                                                                                                                                                                                                                                                                                                                        |                                                                                                                                                                                                                                                                                                                                                                                                                                                                                                                                                                                                                                                                                                                                                                                                                                                                                                                                                                                                                                                                        |                                                                                                                                                                                                                                                                                                                                                                                                                                                                                                                                                                                                                                                                                                                                                                                                                                                                                                                                                                                                                                                                        |                                                                                                                                                                                                                                                                                                                                                                                                                                                                                                                                                                                                                                                                                                                                                                                                                                                                                                                                                                                                                                                                        |                                                                                                                                                                                                                                                                                                                                                                                                                                                                                                                                                                                                                                                                                                                                                                                                                                                                                                                                                                                                                                                                        |                                                                                                                                                                                                                                                    |
|---------|---------------------------------------------------------------------------------------------------------------------------------------------------------------------------------------------------------------------------------------------------------------------------------------------------------------------------------------|----------------------------------------------------------------------------------------------------------------------------------------------------------------------------------------------------------------------------------------------------------------------------------------------------------------------------------------------------------|-------------------------------------------------------------------------------------------------------------------------------------------------------------------------------------------------------------------------------------------------------------------------------------------------------------------------------------------------------------------------------------------------------------------------------------------------------------------------------------------------------------------------------------------------------------------------------------------------------------------------------------------------------------------------------------------------------------------------------------------------------------------------------------------------------------------------------------------------------------------------------------------------------------------------------------------------------------------------------------------------------------------------------------------------------------------------------------|------------------------------------------------------------------------------------------------------------------------------------------------------------------------------------------------------------------------------------------------------------------------------------------------------------------------------------------------------------------------------------------------------------------------------------------------------------------------------------------------------------------------------------------------------------------------------------------------------------------------------------------------------------------------------------------------------------------------------------------------------------------------------------------------------------------------------------------------------------------------------------------------------------------------------------------------------------------------------------------------------------------------------------------------------------------------|-----------------------------------------------------------------------------------------------------------------------------------------------------------------------------------------------------------------------------------------------------------------------------------------------------------------------------------------------------------------------------------------------------------------------------------------------------------------------------------------------------------------------------------------------------------------------------------------------------------------------------------------------------------------------------------------------------------------------------------------------------------------------------------------------------------------------------------------------------------------------------------------------------------------------------------------------------------------------------------------------------------------------------------------------------------------------------------|-------------------------------------------------------------------------------------------------------------------------------------------------------------------------------------------------------------------------------------------------------------------------------------------------------------------------------------------------------------------------------------------------------------------------------------------------------------------------------------------------------------------------------------------------------------------------------------------------------------------------------------------------------------------------------------------------------------------------------------------------------------------------------------------------------------------------------------------------------------------------------------------------------------------------------------------------------------------------------------------------------------------------------------------------------------|------------------------------------------------------------------------------------------------------------------------------------------------------------------------------------------------------------------------------------------------------------------------------------------------------------------------------------------------------------------------------------------------------------------------------------------------------------------------------------------------------------------------------------------------------------------------------------------------------------------------------------------------------------------------------------------------------------------------------------------------------------------------------------------------------------------------------------------------------------------------------------------------------------------------------------------------------------------------------------------------------------------------------------------------------------------------|------------------------------------------------------------------------------------------------------------------------------------------------------------------------------------------------------------------------------------------------------------------------------------------------------------------------------------------------------------------------------------------------------------------------------------------------------------------------------------------------------------------------------------------------------------------------------------------------------------------------------------------------------------------------------------------------------------------------------------------------------------------------------------------------------------------------------------------------------------------------------------------------------------------------------------------------------------------------------------------------------------------------------------------------------------------------|------------------------------------------------------------------------------------------------------------------------------------------------------------------------------------------------------------------------------------------------------------------------------------------------------------------------------------------------------------------------------------------------------------------------------------------------------------------------------------------------------------------------------------------------------------------------------------------------------------------------------------------------------------------------------------------------------------------------------------------------------------------------------------------------------------------------------------------------------------------------------------------------------------------------------------------------------------------------------------------------------------------------------------------------------------------------|------------------------------------------------------------------------------------------------------------------------------------------------------------------------------------------------------------------------------------------------------------------------------------------------------------------------------------------------------------------------------------------------------------------------------------------------------------------------------------------------------------------------------------------------------------------------------------------------------------------------------------------------------------------------------------------------------------------------------------------------------------------------------------------------------------------------------------------------------------------------------------------------------------------------------------------------------------------------------------------------------------------------------------------------------------------------|------------------------------------------------------------------------------------------------------------------------------------------------------------------------------------------------------------------------------------------------------------------------------------------------------------------------------------------------------------------------------------------------------------------------------------------------------------------------------------------------------------------------------------------------------------------------------------------------------------------------------------------------------------------------------------------------------------------------------------------------------------------------------------------------------------------------------------------------------------------------------------------------------------------------------------------------------------------------------------------------------------------------------------------------------------------------|------------------------------------------------------------------------------------------------------------------------------------------------------------------------------------------------------------------------------------------------------------------------------------------------------------------------------------------------------------------------------------------------------------------------------------------------------------------------------------------------------------------------------------------------------------------------------------------------------------------------------------------------------------------------------------------------------------------------------------------------------------------------------------------------------------------------------------------------------------------------------------------------------------------------------------------------------------------------------------------------------------------------------------------------------------------------|----------------------------------------------------------------------------------------------------------------------------------------------------------------------------------------------------------------------------------------------------|
| GTACGAA | ENSG00000196433 ASMT<br>ENSG00000017797 RALBEC1<br>ENSG00000124313 IQSEC2<br>ENSG00000169410 PTPN9<br>ENSG00000198457 CP21A_HUMAN<br>ENSG00000115339 GALNT3<br>ENSG00000145632 PLK2<br>ENSG00000171681 ATF7IP                                                                                                                         | ENSG00000198429 ZNF69<br>ENSG00000100284 TOM1<br>ENSG00000126768 TIMM17B<br>ENSG00000170049 KCNAB3<br>ENSG00000206561 COLQ<br>ENSG00000119514 GALNT12<br>ENSG00000147274 RBMX<br>ENSG00000172262 ZNF131                                                                                                                                                  | ENSG00000100433 KCNK10<br>ENSG00000133424 LARGE<br>ENSG00000183549 NP_060358.2<br>ENSG00000104433 ANLN<br>ENSG00000121578 B4GALT4<br>ENSG00000147650 LRP12<br>ENSG00000180855 ZNF443                                                                                                                                                                                                                                                                                                                                                                                                                                                                                                                                                                                                                                                                                                                                                                                                                                                                                                | ENSG00000101146 RAE1<br>ENSG00000139197 PEX5<br>ENSG00000183798 EMILIN3<br>ENSG00000122482 ZNF644<br>ENSG00000151704 KCNJ1<br>ENSG00000182093 WRB                                                                                                                                                                                                                                                                                                                                                                                                                                                                                                                                                                                                                                                                                                                                                                                                                                                                                                                      | ENSG00000103245 NARFL<br>ENSG00000140598 EFTUD1<br>ENSG00000196367 TRRAP<br>ENSG00000122482 ZNF644<br>ENSG00000163104 SMARCAD1<br>ENSG00000196466 ZNF799                                                                                                                                                                                                                                                                                                                                                                                                                                                                                                                                                                                                                                                                                                                                                                                                                                                                                                                          | ENSG00000103653 CSK<br>ENSG00000148187 MRFR<br>ENSG00000196934 LOC440804<br>ENSG00000105856 HBP1<br>ENSG00000164220 F2RL2<br>ENSG00000198205 ZXDA                                                                                                                                                                                                                                                                                                                                                                                                                                                                                                                                                                                                                                                                                                                                                                                                                                                                                                           | ENSG00000110243 APOA5<br>ENSG00000150086 GRIN2B<br>ENSG00000198079 XR_017925.1<br>ENSG00000107099 DOCK8<br>ENSG00000134765 DSC1<br>ENSG00000168421 RHOH<br>ENSG00000198380 GFPT1                                                                                                                                                                                                                                                                                                                                                                                                                                                                                                                                                                                                                                                                                                                                                                                                                                                                                       | ENSG00000122122 CXorf9<br>ENSG00000150556 NP_808879.2<br>ENSG00000198219 Q96N05_HUMAN<br>ENSG00000108187 PBLD<br>ENSG00000144320 KIAA1715<br>ENSG00000168615 ADAM9<br>ENSG00000205227 Q6ZWA8_HUMAN                                                                                                                                                                                                                                                                                                                                                                                                                                                                                                                                                                                                                                                                                                                                                                                                                                                                     |                                                                                                                                                                                                                                                                                                                                                                                                                                                                                                                                                                                                                                                                                                                                                                                                                                                                                                                                                                                                                                                                        |                                                                                                                                                                                                                                                                                                                                                                                                                                                                                                                                                                                                                                                                                                                                                                                                                                                                                                                                                                                                                                                                        |                                                                                                                                                                                                                                                                                                                                                                                                                                                                                                                                                                                                                                                                                                                                                                                                                                                                                                                                                                                                                                                                        |                                                                                                                                                                                                                                                                                                                                                                                                                                                                                                                                                                                                                                                                                                                                                                                                                                                                                                                                                                                                                                                                        |                                                                                                                                                                                                                                                    |
| GTACGAC | ENSG0000006283 CACNA1G<br>ENSG00000125386 C4orf8<br>ENSG00000167600 CYP2S1<br>ENSG00000100426 ZBED4<br>ENSG00000153923 CLCA3<br>ENSG00000178397 NP_001032240.1                                                                                                                                                                        | ENSG0000017621 MAGIX<br>ENSG00000131653 TRAF7<br>ENSG00000168427 KLHL30<br>ENSG00000101384 JAG1<br>ENSG00000153989 NUS1<br>ENSG00000180828 BHLHB5                                                                                                                                                                                                        | ENSG00000056487 PHF21B<br>ENSG00000142252 GEMIN7<br>ENSG00000168575 SLC20A2<br>ENSG00000107758 PPP3CB<br>ENSG00000162631 NTNG1<br>ENSG00000181104 F2R                                                                                                                                                                                                                                                                                                                                                                                                                                                                                                                                                                                                                                                                                                                                                                                                                                                                                                                               | ENSG00000057757 C1orf128<br>ENSG00000143862 ARL8A<br>ENSG00000183196 CHST6<br>ENSG0000015705 TPO<br>ENSG00000163104 SMARCAD1<br>ENSG00000198890 PRMT6                                                                                                                                                                                                                                                                                                                                                                                                                                                                                                                                                                                                                                                                                                                                                                                                                                                                                                                  | ENSG00000100077 ADRBK2<br>ENSG00000160216 AGPAT3<br>ENSG00000185736 ADARB2<br>ENSG00000120458 C11orf64<br>ENSG00000168538 NP_068761.4<br>ENSG00000198822 GRM3                                                                                                                                                                                                                                                                                                                                                                                                                                                                                                                                                                                                                                                                                                                                                                                                                                                                                                                     | ENSG00000105072 C19orf44<br>ENSG00000163083 INHBB<br>ENSG00000205980 Q6ZU05_HUMAN<br>ENSG00000129460 NGDN<br>ENSG00000169047 IRS1<br>ENSG00000169047 IRS1                                                                                                                                                                                                                                                                                                                                                                                                                                                                                                                                                                                                                                                                                                                                                                                                                                                                                                   | ENSG00000106003 LFNG<br>ENSG00000165879 FRAT1<br>ENSG00000205980 Q6ZU05_HUMAN<br>ENSG00000131730 CKMT2<br>ENSG00000169047 IRS1<br>ENSG00000169047 IRS1                                                                                                                                                                                                                                                                                                                                                                                                                                                                                                                                                                                                                                                                                                                                                                                                                                                                                                                 | ENSG00000165879 FRAT1<br>ENSG00000205980 Q6ZU05_HUMAN<br>ENSG00000131730 CKMT2<br>ENSG00000169047 IRS1<br>ENSG00000169047 IRS1                                                                                                                                                                                                                                                                                                                                                                                                                                                                                                                                                                                                                                                                                                                                                                                                                                                                                                                                         | ENSG00000165879 FRAT1<br>ENSG00000205980 Q6ZU05_HUMAN<br>ENSG00000131730 CKMT2<br>ENSG00000169047 IRS1<br>ENSG00000169047 IRS1                                                                                                                                                                                                                                                                                                                                                                                                                                                                                                                                                                                                                                                                                                                                                                                                                                                                                                                                         |                                                                                                                                                                                                                                                                                                                                                                                                                                                                                                                                                                                                                                                                                                                                                                                                                                                                                                                                                                                                                                                                        |                                                                                                                                                                                                                                                                                                                                                                                                                                                                                                                                                                                                                                                                                                                                                                                                                                                                                                                                                                                                                                                                        |                                                                                                                                                                                                                                                                                                                                                                                                                                                                                                                                                                                                                                                                                                                                                                                                                                                                                                                                                                                                                                                                        |                                                                                                                                                                                                                                                    |
| GTACGAT | ENSG000000087087 ARS2_HUMAN<br>ENSG00000144681 STAC<br>ENSG00000177741 Q96N7_HUMAN<br>ENSG00000204916 NP_940843.1<br>ENSG00000122778 Q9HMC3_HUMAN<br>ENSG00000154240 CCDC46<br>ENSG00000175676 GOLGA8F<br>perfect: GTACGAT ATCGTAC                                                                                                    | ENSG00000100764 PSMC1<br>ENSG00000151650 VENTX<br>ENSG00000182314 SFTPA2<br>ENSG00000204917 NP_940843.1<br>ENSG00000126947 ARMCX1<br>ENSG00000156650 MYST4<br>ENSG00000183629 GOLGA8G<br>hsa-miR-487b                                                                                                                                                    | ENSG00000100991 TRPC4AP<br>ENSG00000152669 CCNU<br>ENSG00000184047 DIABLO<br>ENSG00000204918 NP_940843.1<br>ENSG00000136738 STAM<br>ENSG00000165349 SLC7A3<br>ENSG00000183831 ANKRD45                                                                                                                                                                                                                                                                                                                                                                                                                                                                                                                                                                                                                                                                                                                                                                                                                                                                                               | ENSG00000165884 SSX3<br>ENSG00000185303 SFTPA1<br>ENSG00000204918 NP_940843.1<br>ENSG00000139370 SLC15A4<br>ENSG00000165494 PCF11<br>ENSG00000183831 ANKRD45<br>ENSG00000188229 ZNF669                                                                                                                                                                                                                                                                                                                                                                                                                                                                                                                                                                                                                                                                                                                                                                                                                                                                                 | ENSG00000122854 SFTPA1B<br>ENSG00000165802 NELF<br>ENSG00000187764 SEMA4D<br>ENSG00000204919 NP_940843.1<br>ENSG00000140391 TSPAN3<br>ENSG00000168564 CDKN2AIP<br>ENSG00000168296 PMCHL1<br>ENSG00000198822 GRM3                                                                                                                                                                                                                                                                                                                                                                                                                                                                                                                                                                                                                                                                                                                                                                                                                                                                  | ENSG00000124772 CPNE5<br>ENSG00000165804 ZNF219<br>ENSG00000196576 PLXNB2<br>ENSG00000204919 NP_940843.1<br>ENSG00000140391 TSPAN3<br>ENSG00000168296 PMCHL1<br>ENSG00000198822 GRM3                                                                                                                                                                                                                                                                                                                                                                                                                                                                                                                                                                                                                                                                                                                                                                                                                                                                        | ENSG00000138617 PARP16<br>ENSG00000169598 DFFB<br>ENSG00000197721 CR1L<br>ENSG00000204914 NP_940843.1<br>ENSG00000118762 PKD2<br>ENSG00000169047 IRS1<br>ENSG00000169047 IRS1                                                                                                                                                                                                                                                                                                                                                                                                                                                                                                                                                                                                                                                                                                                                                                                                                                                                                          | ENSG00000142634 EFHD2<br>ENSG00000173575 CHD2<br>ENSG00000204914 NP_940843.1<br>ENSG00000108255 CRYBA1<br>ENSG00000169047 IRS1<br>ENSG00000169047 IRS1                                                                                                                                                                                                                                                                                                                                                                                                                                                                                                                                                                                                                                                                                                                                                                                                                                                                                                                 | ENSG00000142634 EFHD2<br>ENSG00000173575 CHD2<br>ENSG00000204914 NP_940843.1<br>ENSG00000108255 CRYBA1<br>ENSG00000169047 IRS1<br>ENSG00000169047 IRS1                                                                                                                                                                                                                                                                                                                                                                                                                                                                                                                                                                                                                                                                                                                                                                                                                                                                                                                 |                                                                                                                                                                                                                                                                                                                                                                                                                                                                                                                                                                                                                                                                                                                                                                                                                                                                                                                                                                                                                                                                        |                                                                                                                                                                                                                                                                                                                                                                                                                                                                                                                                                                                                                                                                                                                                                                                                                                                                                                                                                                                                                                                                        |                                                                                                                                                                                                                                                                                                                                                                                                                                                                                                                                                                                                                                                                                                                                                                                                                                                                                                                                                                                                                                                                        |                                                                                                                                                                                                                                                    |
| GTACGCC | ENSG00000096433 ITPR3<br>ENSG00000166831 RBPMS2<br>ENSG00000182351 CRIP1<br>ENSG00000008952 TLOC1<br>ENSG00000125848 FLRT3<br>ENSG00000168280 KIF5C<br>ENSG00000066044 ELAVL1<br>ENSG00000106078 COBL<br>ENSG00000160469 BRSK1<br>ENSG00000196331 HIST1H2BO<br>ENSG00000076641 PAG1<br>ENSG00000143971 ATAA1<br>ENSG00000174500 GCET2 | ENSG00000121454 LHX4<br>ENSG00000167798 NP_001013662.1<br>ENSG00000182814 NP_001013670.3<br>ENSG00000062650 WAPAL<br>ENSG00000130449 ZSWIM6<br>ENSG00000179083 FAM133A<br>ENSG000000087237 CETP<br>ENSG00000119772 DNMT3A<br>ENSG00000162896 PIGR<br>ENSG00000196331 HIST1H2BO<br>ENSG00000076641 PAG1<br>ENSG00000143971 ATAA1<br>ENSG00000174500 GCET2 | ENSG00000130997 POLN<br>ENSG00000167889 MGAT5B<br>ENSG00000183248 Q9H6K5_HUMAN<br>ENSG00000065609 SNAP91<br>ENSG00000137364 TPMT<br>ENSG00000185009 AP3M1<br>ENSG000000088367 EPB41L1<br>ENSG00000132694 ARRHGFE11<br>ENSG00000167393 PPP2R3B<br>ENSG00000197448 GSTK1<br>ENSG00000114638 UPK1B<br>ENSG00000154639 CXADR<br>ENSG00000187155 CUO85_HUMAN<br>ENSG00000103932 RPAP1<br>ENSG00000149599 C20orf57<br>ENSG00000180471 C9orf31<br>ENSG00000059804 GTR3_HUMAN<br>ENSG00000141424 SLC39A6<br>ENSG00000177143 CBTN1<br>ENSG000000012171 SEMA3B<br>ENSG00000137312 FLOT1<br>ENSG00000163848 SLC12A8<br>ENSG00000197704 PZD5A<br>ENSG00000162980 ARL5A<br>ENSG00000183155 RAB1F<br>ENSG00000009709 PAX7<br>ENSG00000140682 TGFB11<br>ENSG00000182666 TMEM29<br>ENSG00000038945 MSR1<br>ENSG00000123200 ZC3H13<br>ENSG00000164411 GJB7<br>ENSG000000047578 KIAA0556<br>ENSG00000114999 TTL<br>ENSG00000163516 ANKZF1<br>ENSG0000000188042 ARL4C<br>ENSG00000119707 RBM25<br>ENSG00000136379 FAM108C1<br>ENSG00000159167 STC1<br>ENSG00000196233 LCOR<br>perfect: GTACTGT ACAGTAC | ENSG00000103997 POLN<br>ENSG00000167889 MGAT5B<br>ENSG00000183248 Q9H6K5_HUMAN<br>ENSG00000065609 SNAP91<br>ENSG00000137364 TPMT<br>ENSG00000185009 AP3M1<br>ENSG000000088367 EPB41L1<br>ENSG00000132694 ARRHGFE11<br>ENSG00000167393 PPP2R3B<br>ENSG00000197448 GSTK1<br>ENSG00000114638 UPK1B<br>ENSG00000154639 CXADR<br>ENSG00000187155 CUO85_HUMAN<br>ENSG00000103932 RPAP1<br>ENSG00000149599 C20orf57<br>ENSG00000180471 C9orf31<br>ENSG00000059804 GTR3_HUMAN<br>ENSG00000141424 SLC39A6<br>ENSG00000177143 CBTN1<br>ENSG000000012171 SEMA3B<br>ENSG00000137312 FLOT1<br>ENSG00000163848 SLC12A8<br>ENSG00000197704 PZD5A<br>ENSG00000162980 ARL5A<br>ENSG00000183155 RAB1F<br>ENSG00000009709 PAX7<br>ENSG00000140682 TGFB11<br>ENSG00000182666 TMEM29<br>ENSG00000038945 MSR1<br>ENSG00000123200 ZC3H13<br>ENSG00000164411 GJB7<br>ENSG000000047578 KIAA0556<br>ENSG00000114999 TTL<br>ENSG00000163516 ANKZF1<br>ENSG0000000188042 ARL4C<br>ENSG00000119707 RBM25<br>ENSG00000136379 FAM108C1<br>ENSG00000159167 STC1<br>ENSG00000196233 LCOR<br>hsa-miR-101 | ENSG00000130997 POLN<br>ENSG00000167889 MGAT5B<br>ENSG00000183248 Q9H6K5_HUMAN<br>ENSG00000065609 SNAP91<br>ENSG00000137364 TPMT<br>ENSG00000185009 AP3M1<br>ENSG000000088367 EPB41L1<br>ENSG00000132694 ARRHGFE11<br>ENSG00000167393 PPP2R3B<br>ENSG00000197448 GSTK1<br>ENSG00000114638 UPK1B<br>ENSG00000154639 CXADR<br>ENSG00000187155 CUO85_HUMAN<br>ENSG00000103932 RPAP1<br>ENSG00000149599 C20orf57<br>ENSG00000180471 C9orf31<br>ENSG00000059804 GTR3_HUMAN<br>ENSG00000141424 SLC39A6<br>ENSG00000177143 CBTN1<br>ENSG000000012171 SEMA3B<br>ENSG00000137312 FLOT1<br>ENSG00000163848 SLC12A8<br>ENSG00000197704 PZD5A<br>ENSG00000162980 ARL5A<br>ENSG00000183155 RAB1F<br>ENSG00000009709 PAX7<br>ENSG00000140682 TGFB11<br>ENSG00000182666 TMEM29<br>ENSG00000038945 MSR1<br>ENSG00000123200 ZC3H13<br>ENSG00000164411 GJB7<br>ENSG000000047578 KIAA0556<br>ENSG00000114999 TTL<br>ENSG00000163516 ANKZF1<br>ENSG0000000188042 ARL4C<br>ENSG00000119707 RBM25<br>ENSG00000136379 FAM108C1<br>ENSG00000159167 STC1<br>ENSG00000196233 LCOR<br>tACAGTACTgtgataactgaag | ENSG00000141985 SH3GL1<br>ENSG00000169258 GPRIN1<br>ENSG00000183785 PEX26<br>ENSG00000075785 RAB7A<br>ENSG00000144218 AFF3<br>ENSG00000088833 NSFL1C<br>ENSG00000100726 TELO2<br>ENSG00000140025 C14orf143<br>ENSG00000140251 TAP1<br>ENSG00000168394 HUMAN<br>ENSG00000120211 INSL4<br>ENSG00000162692 VCAM1<br>ENSG00000187155 CUO85_HUMAN<br>ENSG00000103932 RPAP1<br>ENSG00000149599 C20orf57<br>ENSG00000180471 C9orf31<br>ENSG00000059804 GTR3_HUMAN<br>ENSG00000141424 SLC39A6<br>ENSG00000177143 CBTN1<br>ENSG000000012171 SEMA3B<br>ENSG00000137312 FLOT1<br>ENSG00000163848 SLC12A8<br>ENSG00000197704 PZD5A<br>ENSG00000162980 ARL5A<br>ENSG00000183155 RAB1F<br>ENSG00000009709 PAX7<br>ENSG00000140682 TGFB11<br>ENSG00000182666 TMEM29<br>ENSG00000038945 MSR1<br>ENSG00000123200 ZC3H13<br>ENSG00000164411 GJB7<br>ENSG000000047578 KIAA0556<br>ENSG00000114999 TTL<br>ENSG00000163516 ANKZF1<br>ENSG0000000188042 ARL4C<br>ENSG00000119707 RBM25<br>ENSG00000136379 FAM108C1<br>ENSG00000159167 STC1<br>ENSG00000196233 LCOR<br>hsa-miR-101 | ENSG00000141985 SH3GL1<br>ENSG00000169258 GPRIN1<br>ENSG00000183785 PEX26<br>ENSG00000075785 RAB7A<br>ENSG00000144218 AFF3<br>ENSG00000088833 NSFL1C<br>ENSG00000100726 TELO2<br>ENSG00000140025 C14orf143<br>ENSG00000140251 TAP1<br>ENSG00000168394 HUMAN<br>ENSG00000120211 INSL4<br>ENSG00000162692 VCAM1<br>ENSG00000187155 CUO85_HUMAN<br>ENSG00000103932 RPAP1<br>ENSG00000149599 C20orf57<br>ENSG00000180471 C9orf31<br>ENSG00000059804 GTR3_HUMAN<br>ENSG00000141424 SLC39A6<br>ENSG00000177143 CBTN1<br>ENSG000000012171 SEMA3B<br>ENSG00000137312 FLOT1<br>ENSG00000163848 SLC12A8<br>ENSG00000197704 PZD5A<br>ENSG00000162980 ARL5A<br>ENSG00000183155 RAB1F<br>ENSG00000009709 PAX7<br>ENSG00000140682 TGFB11<br>ENSG00000182666 TMEM29<br>ENSG00000038945 MSR1<br>ENSG00000123200 ZC3H13<br>ENSG00000164411 GJB7<br>ENSG000000047578 KIAA0556<br>ENSG00000114999 TTL<br>ENSG00000163516 ANKZF1<br>ENSG0000000188042 ARL4C<br>ENSG00000119707 RBM25<br>ENSG00000136379 FAM108C1<br>ENSG00000159167 STC1<br>ENSG00000196233 LCOR<br>tACAGTACTgtgataactgaag | ENSG00000141985 SH3GL1<br>ENSG00000169258 GPRIN1<br>ENSG00000183785 PEX26<br>ENSG00000075785 RAB7A<br>ENSG00000144218 AFF3<br>ENSG00000088833 NSFL1C<br>ENSG00000100726 TELO2<br>ENSG00000140025 C14orf143<br>ENSG00000140251 TAP1<br>ENSG00000168394 HUMAN<br>ENSG00000120211 INSL4<br>ENSG00000162692 VCAM1<br>ENSG00000187155 CUO85_HUMAN<br>ENSG00000103932 RPAP1<br>ENSG00000149599 C20orf57<br>ENSG00000180471 C9orf31<br>ENSG00000059804 GTR3_HUMAN<br>ENSG00000141424 SLC39A6<br>ENSG00000177143 CBTN1<br>ENSG000000012171 SEMA3B<br>ENSG00000137312 FLOT1<br>ENSG00000163848 SLC12A8<br>ENSG00000197704 PZD5A<br>ENSG00000162980 ARL5A<br>ENSG00000183155 RAB1F<br>ENSG00000009709 PAX7<br>ENSG00000140682 TGFB11<br>ENSG00000182666 TMEM29<br>ENSG00000038945 MSR1<br>ENSG00000123200 ZC3H13<br>ENSG00000164411 GJB7<br>ENSG000000047578 KIAA0556<br>ENSG00000114999 TTL<br>ENSG00000163516 ANKZF1<br>ENSG0000000188042 ARL4C<br>ENSG00000119707 RBM25<br>ENSG00000136379 FAM108C1<br>ENSG00000159167 STC1<br>ENSG00000196233 LCOR<br>tACAGTACTgtgataactgaag | ENSG00000141985 SH3GL1<br>ENSG00000169258 GPRIN1<br>ENSG00000183785 PEX26<br>ENSG00000075785 RAB7A<br>ENSG00000144218 AFF3<br>ENSG00000088833 NSFL1C<br>ENSG00000100726 TELO2<br>ENSG00000140025 C14orf143<br>ENSG00000140251 TAP1<br>ENSG00000168394 HUMAN<br>ENSG00000120211 INSL4<br>ENSG00000162692 VCAM1<br>ENSG00000187155 CUO85_HUMAN<br>ENSG00000103932 RPAP1<br>ENSG00000149599 C20orf57<br>ENSG00000180471 C9orf31<br>ENSG00000059804 GTR3_HUMAN<br>ENSG00000141424 SLC39A6<br>ENSG00000177143 CBTN1<br>ENSG000000012171 SEMA3B<br>ENSG00000137312 FLOT1<br>ENSG00000163848 SLC12A8<br>ENSG00000197704 PZD5A<br>ENSG00000162980 ARL5A<br>ENSG00000183155 RAB1F<br>ENSG00000009709 PAX7<br>ENSG00000140682 TGFB11<br>ENSG00000182666 TMEM29<br>ENSG00000038945 MSR1<br>ENSG00000123200 ZC3H13<br>ENSG00000164411 GJB7<br>ENSG000000047578 KIAA0556<br>ENSG00000114999 TTL<br>ENSG00000163516 ANKZF1<br>ENSG0000000188042 ARL4C<br>ENSG00000119707 RBM25<br>ENSG00000136379 FAM108C1<br>ENSG00000159167 STC1<br>ENSG00000196233 LCOR<br>tACAGTACTgtgataactgaag | ENSG00000141985 SH3GL1<br>ENSG00000169258 GPRIN1<br>ENSG00000183785 PEX26<br>ENSG00000075785 RAB7A<br>ENSG00000144218 AFF3<br>ENSG00000088833 NSFL1C<br>ENSG00000100726 TELO2<br>ENSG00000140025 C14orf143<br>ENSG00000140251 TAP1<br>ENSG00000168394 HUMAN<br>ENSG00000120211 INSL4<br>ENSG00000162692 VCAM1<br>ENSG00000187155 CUO85_HUMAN<br>ENSG00000103932 RPAP1<br>ENSG00000149599 C20orf57<br>ENSG00000180471 C9orf31<br>ENSG00000059804 GTR3_HUMAN<br>ENSG00000141424 SLC39A6<br>ENSG00000177143 CBTN1<br>ENSG000000012171 SEMA3B<br>ENSG00000137312 FLOT1<br>ENSG00000163848 SLC12A8<br>ENSG00000197704 PZD5A<br>ENSG00000162980 ARL5A<br>ENSG00000183155 RAB1F<br>ENSG00000009709 PAX7<br>ENSG00000140682 TGFB11<br>ENSG00000182666 TMEM29<br>ENSG00000038945 MSR1<br>ENSG00000123200 ZC3H13<br>ENSG00000164411 GJB7<br>ENSG000000047578 KIAA0556<br>ENSG00000114999 TTL<br>ENSG00000163516 ANKZF1<br>ENSG0000000188042 ARL4C<br>ENSG00000119707 RBM25<br>ENSG00000136379 FAM108C1<br>ENSG00000159167 STC1<br>ENSG00000196233 LCOR<br>tACAGTACTgtgataactgaag | ENSG00000141985 SH3GL1<br>ENSG00000169258 GPRIN1<br>ENSG00000183785 PEX26<br>ENSG00000075785 RAB7A<br>ENSG00000144218 AFF3<br>ENSG00000088833 NSFL1C<br>ENSG00000100726 TELO2<br>ENSG00000140025 C14orf143<br>ENSG00000140251 TAP1<br>ENSG00000168394 HUMAN<br>ENSG00000120211 INSL4<br>ENSG00000162692 VCAM1<br>ENSG00000187155 CUO85_HUMAN<br>ENSG00000103932 RPAP1<br>ENSG00000149599 C20orf57<br>ENSG00000180471 C9orf31<br>ENSG00000059804 GTR3_HUMAN<br>ENSG00000141424 SLC39A6<br>ENSG00000177143 CBTN1<br>ENSG000000012171 SEMA3B<br>ENSG00000137312 FLOT1<br>ENSG00000163848 SLC12A8<br>ENSG00000197704 PZD5A<br>ENSG00000162980 ARL5A<br>ENSG00000183155 RAB1F<br>ENSG00000009709 PAX7<br>ENSG00000140682 TGFB11<br>ENSG00000182666 TMEM29<br>ENSG00000038945 MSR1<br>ENSG00000123200 ZC3H13<br>ENSG00000164411 GJB7<br>ENSG000000047578 KIAA0556<br>ENSG00000114999 TTL<br>ENSG00000163516 ANKZF1<br>ENSG0000000188042 ARL4C<br>ENSG00000119707 RBM25<br>ENSG00000136379 FAM108C1<br>ENSG00000159167 STC1<br>ENSG00000196233 LCOR<br>tACAGTACTgtgataactgaag | ENSG00000141985 SH3GL1<br>ENSG00000169258 GPRIN1<br>ENSG00000183785 PEX26<br>ENSG00000075785 RAB7A<br>ENSG00000144218 AFF3<br>ENSG00000088833 NSFL1C<br>ENSG00000100726 TELO2<br>ENSG00000140025 C14orf143<br>ENSG00000140251 TAP1<br>ENSG00000168394 HUMAN<br>ENSG00000120211 INSL4<br>ENSG00000162692 VCAM1<br>ENSG00000187155 CUO85_HUMAN<br>ENSG00000103932 RPAP1<br>ENSG00000149599 C20orf57<br>ENSG00000180471 C9orf31<br>ENSG00000059804 GTR3_HUMAN<br>ENSG00000141424 SLC39A6<br>ENSG00000177143 CBTN1<br>ENSG000000012171 SEMA3B<br>ENSG00000137312 FLOT1<br>ENSG00000163848 SLC12A8<br>ENSG00000197704 PZD5A<br>ENSG00000162980 ARL5A<br>ENSG00000183155 RAB1F<br>ENSG00000009709 PAX7<br>ENSG00000140682 TGFB11<br>ENSG00000182666 TMEM29<br>ENSG00000038945 MSR1<br>ENSG00000123200 ZC3H13<br>ENSG00000164411 GJB7<br>ENSG000000047578 KIAA0556<br>ENSG00000114999 TTL<br>ENSG00000163516 ANKZF1<br>ENSG0000000188042 ARL4C<br>ENSG00000119707 RBM25<br>ENSG00000136379 FAM108C1<br>ENSG00000159167 STC1<br>ENSG00000196233 LCOR<br>tACAGTACTgtgataactgaag | ENSG00000141985 SH3GL1<br>ENSG00000169258 GPRIN1<br>ENSG00000183785 PEX26<br>ENSG00000075785 RAB7A<br>ENSG00000144218 AFF3<br>ENSG00000088833 NSFL1C<br>ENSG00000100726 TELO2<br>ENSG00000140025 C14orf143<br>ENSG00000140251 TAP1<br>ENSG00000168 |

|                              |                                |                                |                               |                              |                              |                                |                                |                         |
|------------------------------|--------------------------------|--------------------------------|-------------------------------|------------------------------|------------------------------|--------------------------------|--------------------------------|-------------------------|
| ENSG00000151090 THRB         | ENSG00000164609 SLU7           | ENSG00000166432 ZMAT1          | ENSG00000181631 P2RY13        | ENSG00000183690 EFHC2        | ENSG00000185634 SHC4         | ENSG00000198963 RORB           | ENSG00000204387 C6orf48        |                         |
| ENSG00000204970 PCDH10       |                                |                                |                               |                              |                              |                                |                                |                         |
| GTAGCAT                      | ENSG0000022840 RNF10           | ENSG00000055483 USP36          | ENSG00000101203 COL20A1       | ENSG00000101439 CST3         | ENSG00000101441 CST4         | ENSG00000120875 DUSP4          | ENSG00000124164 VAPB           | ENSG00000149653 WFDC6   |
| ENSG00000168209 DDIT4        | ENSG00000168795 ZBTB5          | ENSG00000169371 SNUPN          | ENSG00000170367 CST5          | ENSG00000170369 CST2         | ENSG00000170373 CST1         | ENSG00000174238 PITPNA         | ENSG00000174945 AMZ1_HUMAN     |                         |
| ENSG00000178381 ZFAND2A      | ENSG00000183044 ABAT           | ENSG00000186063 C1orf80        | ENSG00000187003 ACTL7A        | ENSG00000188663 LDLOC1L      | ENSG00000188822 CNR2         | ENSG00000196644 LOC728932      | ENSG00000196844 C11orf38       |                         |
| ENSG00000205602 Q6ZUQ8_HUMAN | ENSG000000056586 RC3H2         | ENSG000000083312 TNPO1         | ENSG000000091140 DLD          | ENSG00000117262 GPR89A       | ENSG00000120333 MRPS14       | ENSG00000125356 NDUFA1         | ENSG00000145782 ATG12          |                         |
| ENSG00000145850 TMD4         | ENSG00000147509 RGS20          | ENSG00000148737 TCF7L2         | ENSG00000154099 LRRC50        | ENSG00000154479 Q6JPF6_HUMAN | ENSG00000154997 NP_997249.1  | ENSG00000163006 NP_659415.1    | ENSG00000165152 C9orf125       |                         |
| ENSG00000166128 RAB8B        | ENSG00000168300 PCMTD1         | ENSG00000168681 Q9H762_HUMAN   | ENSG00000172239 PAIP1         | ENSG00000188092 GPR89B       | ENSG00000189251 Q8WYN8_HUMAN | ENSG00000196104 SPOCK3         | ENSG00000197329 PELI1          |                         |
| ENSG00000204138 PHACTR4      |                                |                                |                               |                              |                              |                                |                                |                         |
| GTAGCCG                      | ENSG00000052850 ALX4           | ENSG00000058799 YIPF1          | ENSG00000099822 HCN2          | ENSG00000100433 KCNK10       | ENSG00000100836 PABPN1       | ENSG00000102924 CBLN1          | ENSG00000105341 NP_060505.1    | ENSG00000105402 NAPA    |
| ENSG00000115138 POMC         | ENSG00000130303 BST2           | ENSG00000132329 RAMP1          | ENSG00000148671 C10orf116     | ENSG00000156097 GPR61        | ENSG00000157782 CABP1        | ENSG00000164621 DAMS_HUMAN     | ENSG00000167775 CD320          |                         |
| ENSG00000173811 CCDC13       | ENSG00000182048 XR_018915.1    | ENSG00000184922 FMNL1          | ENSG00000188536 HBA2          | ENSG00000009307 NRAS         | ENSG00000090269 CLEC5A       | ENSG00000100393 EP300          | ENSG00000111328 CDK2AP1        |                         |
| ENSG00000116350 SFRS4        | ENSG00000116922 C1orf109       | ENSG00000128052 KDR            | ENSG00000143799 PARP1         | ENSG00000143870 PDIA6        | ENSG00000146856 AGBL3        | ENSG00000147162 OGT            | ENSG00000154556 SORBS2         |                         |
| ENSG00000155640 C10orf12     | ENSG00000162998 FRZB           | ENSG00000165300 SLITRK5        | ENSG00000166250 NP_079045.1   | ENSG00000166451 CENPN        | ENSG00000168522 FNNTA        | ENSG00000186479 RGS7BP         | ENSG00000196227 C20orf177      |                         |
| ENSG00000197128 ZNF772       |                                |                                |                               |                              |                              |                                |                                |                         |
| GTAGCGA                      | ENSG00000020181 GPR124         | ENSG00000075618 FSCN1          | ENSG00000100726 TELO2         | ENSG00000107821 KAZALD1      | ENSG00000116786 PLEKHM2      | ENSG00000118960 HS1BP3         | ENSG00000124299 PEPD           | ENSG00000125820 NKX2-2  |
| ENSG00000137310 TCF19        | ENSG00000143418 LASS2          | ENSG00000157514 TSC22D3        | ENSG00000162144 CYBASC3       | ENSG00000163050 CABC1        | ENSG00000163064 EN1          | ENSG00000167972 ABCA3          | ENSG00000170379 NP_775949.1    |                         |
| ENSG00000170442 KRT86        | ENSG00000172789 HOXC5          | ENSG00000182272 BAGALNT4       | ENSG00000185105 XR_015885.1   | ENSG00000185739 SRL          | ENSG00000196787 HIST1H2AG    | ENSG00000196808 Q96NJ4_HUMAN   | ENSG00000197971 MBP            |                         |
| ENSG00000204619 PPP1R11      | ENSG00000206064 Q6ZU89_HUMAN   | ENSG000000062650 WAPAL         | ENSG00000113615 SEC24A        | ENSG00000119318 RAD23B       | ENSG00000120705 ETP1         | ENSG00000132464 ENAM           | ENSG00000135903 PAX3           |                         |
| ENSG00000138801 PAPSS1       | ENSG00000141946 ZIM3           | ENSG00000145241 CENPC1         | ENSG00000146276 GABRR1        | ENSG00000147162 OGT          | ENSG00000154359 LONRF1       | ENSG00000162722 TRIM58         | ENSG00000163596 ICAIL          |                         |
| ENSG00000164398 ACSL6        | ENSG00000171634 BPTF           | ENSG00000174514 MFSD4          | ENSG00000175553 K1210_HUMAN   | ENSG00000180398 MCFD2        | ENSG00000186340 THBS2        | ENSG00000198673 FAM19A2        | ENSG00000198689 SLC9A6         |                         |
| ENSG00000198890 PRMT6        | ENSG00000205212 NP_001004306.1 |                                |                               |                              |                              |                                |                                |                         |
| GTAGCCG                      | ENSG00000013288 MAN2B2         | ENSG00000049656 CLPTM1L        | ENSG00000104142 VPS18         | ENSG00000105321 CCDC9        | ENSG00000111642 CHD4         | ENSG00000114316 USP4           | ENSG00000124493 GRM4           | ENSG00000128271 ADORA2A |
| ENSG00000128805 ARHGAP22     | ENSG00000130758 MAP3K10        | ENSG00000131379 C3orf20        | ENSG00000132591 ERAL1         | ENSG00000133511 PIK4CA       | ENSG00000134809 TIMM10       | ENSG00000136710 CCDC115        | ENSG00000138107 ACTR1A         |                         |
| ENSG00000140688 C16orf58     | ENSG00000141556 TBCD           | ENSG00000164379 FOXQ1          | ENSG00000176261 ZBTB80S       | ENSG00000180304 OAZ2         | ENSG00000183506 NP_955377.2  | ENSG00000184113 CLDN5          | ENSG00000203945 Q5JQP1_HUMAN   |                         |
| ENSG00000204314 PRRT1        | ENSG00000204579 A2RUR5_HUMAN   | ENSG0000000204957 Q6ZVQ6_HUMAN | ENSG000000205745 Q71MF4_HUMAN | ENSG00000039560 RAI14        | ENSG00000070087 PFN2         | ENSG00000086712 CXorf15        | ENSG00000112305 SMAP1          |                         |
| ENSG00000112796 ENPP5        | ENSG00000117868 FAM62B         | ENSG00000118432 CNR1           | ENSG00000125355 FAM70A        | ENSG00000136273 HUS1_HUMAN   | ENSG00000137693 YAP1         | ENSG00000141458 NPC1           | ENSG00000143612 C1orf43        |                         |
| ENSG00000154639 CXADR        | ENSG00000165659 DACH1          | ENSG00000165891 EF7            | ENSG00000174456 NP_997318.1   |                              |                              |                                |                                |                         |
| GTAGCTG                      | ENSG00000090097 PCBP4          | ENSG00000104081 BMF            | ENSG00000123154 MORG1_HUMAN   | ENSG00000131323 TRAF3        | ENSG00000132958 TPTE2        | ENSG00000134490 C18orf45       | ENSG00000135100 TCF1           | ENSG00000136935 GOLGA1  |
| ENSG00000140992 PBDP1        | ENSG00000142513 ACPT           | ENSG00000143167 GPA33          | ENSG00000157734 SNX22         | ENSG00000159337 PLA2G4D      | ENSG00000159352 PSMD4        | ENSG00000173575 CHD2           | ENSG00000174945 AMZ1_HUMAN     |                         |
| ENSG00000184945 AQPL2A       | ENSG00000185963 BICD2          | ENSG00000189339 SLC35E2        | ENSG00000198881 ASB12         | ENSG00000089876 DHX32        | ENSG00000101868 POLA1        | ENSG00000106477 TSGA14         | ENSG00000109390 NDUFC1         |                         |
| ENSG0000011796 KLRB1         | ENSG00000122126 OCRL           | ENSG00000123472 ATPAF1         | ENSG00000128272 ATF4          | ENSG00000132912 DCTN4        | ENSG00000135070 ISCA1        | ENSG00000136938 ANP32B         | ENSG00000139330 KERA           |                         |
| ENSG00000144893 MED12L       | ENSG00000146842 NP_116231.2    | ENSG00000153250 RBMS1          | ENSG00000157224 CLDN12        | ENSG00000165156 ZHX1         | ENSG00000170035 UBE2E4P      | ENSG00000171757 LRRC34         | ENSG00000173273 TNKS           |                         |
| ENSG00000178904 DPY19L3      | ENSG00000180938 ZNF572         | ENSG00000197594 ENPP1          | ENSG00000204217 BMPR2         |                              |                              |                                |                                |                         |
| GTAGGAG                      | ENSG00000043822 NP_060895.1    | ENSG00000077009 ITGB1BP3       | ENSG000000077157 PPP1R12B     | ENSG00000103260 METRN        | ENSG00000112599 GUCA1B       | ENSG00000118298 CA14           | ENSG00000123411 IKZF4          | ENSG00000131196 NFATC1  |
| ENSG00000132139 GAS2L2       | ENSG00000133056 PIK3C2B        | ENSG00000139197 PEX5           | ENSG00000139540 SLC39A5       | ENSG00000142961 MOBK2L2      | ENSG00000146666 Q96IP2_HUMAN | ENSG00000154229 PRKCA          | ENSG00000158786 PLA2G2F        |                         |
| ENSG00000168314 MOBP         | ENSG00000177744 NP_775923.1    | ENSG00000185504 C17orf70       | ENSG00000186318 BACE1         | ENSG00000186815 TPCN1        | ENSG00000189120 SP6          | ENSG00000204487 LTB            | ENSG00000006634 DBF4           |                         |
| ENSG00000055813 CCDC85A      | ENSG00000087206 UIMC1          | ENSG00000100714 MTHFD1         | ENSG00000101266 CSNK2A1P      | ENSG00000107099 DOCK8        | ENSG00000112078 KCTD20       | ENSG00000119866 BCL11A         | ENSG00000139517 LNX2           |                         |
| ENSG00000141433 ADCYAP1      | ENSG00000144597 EAF1           | ENSG00000151575 TEX9           | ENSG00000162407 PPAP2B        | ENSG00000166902 MRPL16       | ENSG00000170190 SLC16A5      | ENSG00000170348 TMED10         | ENSG00000174738 NR1D2          |                         |
| ENSG00000178562 CD28         | ENSG00000187268 FAM9C          | ENSG00000196387 ZNF140         | ENSG00000197943 PLCG2         | ENSG00000204424 LY6G6D       | ENSG00000205054 Q6UXP8_HUMAN | ENSG00000205171 Q6PDB3_HUMAN   | ENSG00000206221 Q6ZVX8_HUMAN   |                         |
| GTAGGCA                      | ENSG00000103145 HCFC1R1        | ENSG00000132434 LANCL2         | ENSG00000138294 MSMB          | ENSG00000142686 NP_689587.1  | ENSG00000144596 GRIP2        | ENSG00000155984 TMEM185A       | ENSG00000163545 NUAK2          | ENSG00000166482 MFAP4   |
| ENSG00000171467 ZNF318       | ENSG00000183864 TOB2           | ENSG00000183908 LRRC55         | ENSG00000184194 GPR173        | ENSG00000185133 PIB5PA       | ENSG00000188549 NP_997263.1  | ENSG00000196976 LAGE3          | ENSG00000205354 Q6ZM60_HUMAN   |                         |
| ENSG00000205501 Q6ZU01_HUMAN | ENSG00000005189 NP_112203.1    | ENSG00000019505 SYT13          | ENSG00000122786 CALD1         | ENSG00000125812 GZP1         | ENSG00000127125 PPCS         | ENSG00000135974 C2orf49        | ENSG00000138185 ENTPD1         |                         |
| ENSG00000147892 ADAMTSL1     | ENSG00000162419 GMEB1          | ENSG00000163558 PRKCI          | ENSG00000165124 SVEP1         | ENSG00000171617 ENC1         | ENSG00000172410 INSL5        | ENSG00000175893 ZDHHC21        | ENSG00000186579 DEFB106B       |                         |
| ENSG00000187073 Q86TS2_HUMAN | ENSG00000187082 DI06A_HUMAN    | ENSG00000196262 PP1A           |                               |                              |                              |                                |                                |                         |
| perfect: GTAGGCA             | gTGCCTAC                       | hsa-miR-189                    | gTGCCTACTgagctgatatcagt       | 1                            |                              |                                |                                |                         |
| GTAGGCC                      | ENSG00000004838 ZMYND10        | ENSG00000006555 TTC22          | ENSG000000090674 MCOLN1       | ENSG00000103876 FAH          | ENSG00000104967 NOVA2        | ENSG00000105135 ILVBL          | ENSG00000108474 PIGL           | ENSG00000112941 POLS    |
| ENSG00000117682 DHDDS        | ENSG00000128918 ALDH1A2        | ENSG00000129543 FLJ16369       | ENSG00000130751 NPAS1         | ENSG00000133055 MYBPH        | ENSG00000137392 CLPS         | ENSG00000141349 G6PC3          | ENSG00000146707 POMZP3         |                         |
| ENSG00000161204 ABCF3        | ENSG00000165281 FANCG          | ENSG00000168734 PKIG           | ENSG00000186063 C1orf80       | ENSG00000074201 CLNS1A       | ENSG00000077097 TOP2B        | ENSG00000101182 PSMA7          | ENSG00000101413 C20orf77       |                         |
| ENSG00000115392 FANCL        | ENSG00000116704 SLC35D1        | ENSG00000123576 ESX1           | ENSG00000129566 TEP1          | ENSG00000136810 TXN          | ENSG00000150076 C10orf68     | ENSG00000152492 CCDC50         | ENSG00000154079 C6orf57        |                         |
| ENSG00000155749 ALS2CR12     | ENSG00000180316 PNPLA1         | ENSG00000182498 RPS18          | ENSG00000183098 GPC6          | ENSG00000197460 Q8WYX1_HUMAN |                              |                                |                                |                         |
| GTAGGGG                      | ENSG00000075790 BCAP21         | ENSG00000099364 FBXL19         | ENSG00000100628 ASB2          | ENSG00000102104 RS1          | ENSG00000107731 UNC5B        | ENSG00000108292 MLLT6          | ENSG00000110042 DTX4           | ENSG00000124602 UNC5CL  |
| ENSG00000128228 SDF2L9       | ENSG00000132716 WDR42A         | ENSG00000143418 LASS2          | ENSG00000147570 DNAJC5B       | ENSG00000159723 AGRP         | ENSG00000165802 NELF         | ENSG00000180924 Q9BVQ6_HUMAN   | ENSG00000184207 NP_001035830.1 |                         |
| ENSG00000189280 GJB5         | ENSG00000204071 TCEAL6         | ENSG00000204101 Q6ZU91_HUMAN   | ENSG00000016490 CLCA1         | ENSG00000068615 REEP1        | ENSG00000104755 ADAM2        | ENSG00000112365 ZBTB24         | ENSG00000120800 UTP20          |                         |
| ENSG00000125864 BFSP1        | ENSG00000152487 NSUN6          | ENSG00000153560 UBP1           | ENSG00000162526 TSSK3         | ENSG00000169340 NP_777584.1  | ENSG00000175324 LSM1         | ENSG00000184349 EFNA5          | ENSG00000188895 Q6DK7_HUMAN    |                         |
| ENSG00000197755 O14513-3     |                                |                                |                               |                              |                              |                                |                                |                         |
| GTAGGTA                      | ENSG000000099822 HCN2          | ENSG00000100441 KIAA0323       | ENSG00000110025 SNX15         | ENSG00000120093 HOXB3        | ENSG00000120318 CENTD3       | ENSG00000131183 SLC34A1        | ENSG00000138698 RAP1GDS1       | ENSG00000139549 DHH     |
| ENSG00000145990 GFOD1        | ENSG00000160233 LRRC3          | ENSG00000167625 ZNF526         | ENSG00000167695 FAM57A        | ENSG00000187678 SPR14        | ENSG00000196507 TCEAL3       | ENSG00000196970 NXP4           | ENSG00000204091 Q3Y452_HUMAN   |                         |
| ENSG00000204516 MICB         | ENSG00000000005 TNMD           | ENSG00000066427 ATXN3          | ENSG00000076716 GPC4          | ENSG00000100201 DDX17        | ENSG00000112666 DUSP16       | ENSG00000112796 ENPP5          | ENSG00000113248 PCDHB15        |                         |
| ENSG00000124795 DEK          | ENSG00000130449 ZSWIM6         | ENSG00000131795 RBM8A          | ENSG00000134982 APC           | ENSG00000136100 VPS36        | ENSG00000156171 TMEM77       | ENSG00000156709 AIFM1          | ENSG00000165891 EF7            |                         |
| ENSG00000170348 TMED10       | ENSG00000170903 KIAA1826       | ENSG00000171928 RAM18B         | ENSG00000171989 LDHAL6B       | ENSG00000174125 LTP1         | ENSG00000174738 NR1D2        | ENSG00000185420 SMYD3          | ENSG00000196247 ZNF588         |                         |
| ENSG00000196350 ZNF492       | ENSG00000196930 XR_015267.1    | ENSG0000000197359 C15orf34     | ENSG000000204250 C9orf107     |                              |                              |                                |                                |                         |
| GTAGGTG                      | ENSG00000113016 EHD3           | ENSG00000102195 GPR50          | ENSG00000104852 SNRP70        | ENSG00000108387 SEPT4        | ENSG00000120952 PRAMEF2      | ENSG00000126903 SLC10A3        | ENSG00000132824 SERINC3        | ENSG00000141013 GAS8    |
| ENSG00000157184 CPT2         | ENSG00000164045 CDC25A         | ENSG00000167800 TBX10          | ENSG00000170608 FOXA3         | ENSG00000172346 CSDC2        | ENSG00000179058 C9orf50      | ENSG00000184451 CCR10          | ENSG00000198294 Q495C9_HUMAN   |                         |
| ENSG00000204483 Q8N925_HUMAN | ENSG000000074319 TSG101        | ENSG00000102221 PHF16          | ENSG00000106723 SPIN1         | ENSG00000110060 PUS3         | ENSG00000112276 BVES         | ENSG00000112339 HBS1L          | ENSG00000117595 TRF6           |                         |
| ENSG00000119927 GPAM         | ENSG00000123576 ESX1           | ENSG00000136933 RABEPK         | ENSG00000138185 ENTPD1        | ENSG00000138363 ATCC         | ENSG00000141141 DDX52        | ENSG00000141325 CCDC45         | ENSG00000141665 FBXO15         |                         |
| ENSG00000152795 HNRPDL       | ENSG00000156261 CCT8           | ENSG00000164654 NP_061878.3    | ENSG00000167005 NUDT21        | ENSG00000169340 NP_777584.1  |                              |                                |                                |                         |
| ENSG00000196549 MME          | ENSG00000197584 KCNMB2         | ENSG00000198146 ZNF770         |                               |                              |                              |                                |                                |                         |
| GTAGTGA                      | ENSG000000054523 KIF1B         | ENSG000000088812 ATRN          | ENSG00000101457 DNTTIP1       | ENSG00000109047 RCVRN        | ENSG00000114388 TUSC4        | ENSG00000124164 VAPB           | ENSG00000132840 BHMT2          |                         |
| ENSG00000139200 C12orf53     | ENSG00000143376 SNX27          | ENSG00000160117 ANKRD41        | ENSG00000162714 ZNF496        | ENSG00000164871 SPAG11B      | ENSG00000167531 LALBA        | ENSG00000168070 NP_001032302.1 | ENSG00000178287 SPAG11A        |                         |
| ENSG00000182372 C8orf61      | ENSG00000183558 HIST2H2AA3     | ENSG00000005249 PRKAR2B        | ENSG00000048540 LMO3          | ENSG00000067715 SYT1         | ENSG00000086061 DNAJA1       | ENSG00000108984 MAP2K6         | ENSG00000131238 PPT1           |                         |
| ENSG00000132283 DNHD1        | ENSG00000136539 CD302          | ENSG00000138684 IL21           | ENSG00000                     |                              |                              |                                |                                |                         |

ENSG00000137747|TMPRSS13 ENSG00000142686|NP\_689587.1 ENSG00000146666|Q96IP2\_HUMAN ENSG00000148290|SURF1 ENSG00000149243|NP\_001034637.1 ENSG00000152086|TUBA3E ENSG00000160401|C9orf117 ENSG00000162783|IER5  
ENSG00000164778|EN2 ENSG00000168002|POLR2G ENSG00000171456|ASXL1 ENSG00000174177|NP\_001012780.1 ENSG00000174231|PRPF8 ENSG00000178104|PDE4DIP ENSG00000178919|FOXE1 ENSG00000179388|EGR3  
ENSG00000183778|B3GALT5 ENSG00000186318|BACE1 ENSG00000187147|Clorf164 ENSG00000197448|GSTK1 ENSG00000198033|TUBA3C ENSG00000198920|KIAA0753 ENSG000002000419|DPM1 ENSG000002035499|DEPDC1B  
ENSG00000258804|TMEM48 ENSG00000260339|CCAR1 ENSG00000269702|ClorfB3 ENSG00000269943|PIGB ENSG00000276257|TRHDE ENSG00000293183|SEC22C ENSG000003101624|CEP76 ENSG000003102908|NFAT5  
ENSG000003106066|CPVL ENSG000003106153|CHCHD2 ENSG000003106823|ECM2 ENSG00000314354|TFGF ENSG00000316754|SFRS11 ENSG000003120265|PCMT1 ENSG000003122068|FYTTD1 ENSG000003123119|EFCB1  
ENSG000003125398|SOX9 ENSG000003126804|ZBTB1 ENSG000003132406|TMEM128 ENSG000003134202|GSTM3 ENSG000003139163|ETNK1 ENSG000003148700|ADD3 ENSG000003148737|TCF7L2 ENSG000003150540|HNMT  
ENSG000003156136|DCK ENSG000003156976|EIF4A2 ENSG000003162378|ZYG11B ENSG000003162701|DENND1B ENSG000003168564|CDKN2AIP ENSG000003170248|PDCD6IP ENSG000003177752|YIPF7 ENSG000003181690|PLAG1  
ENSG000003183789|Q96MJ2\_HUMAN ENSG000003186940|CHCHD9 ENSG000003188400|Q6URH7\_HUMAN ENSG000003188933|NM\_145809.1 ENSG000003196455|PIK3R4 ENSG000003203668|CHML  
GTATACA ENSG00000355483|USP36 ENSG000003103043|VAC14 ENSG000003105613|MAST1 ENSG000003111249|CUTL2 ENSG000003117425|PTCH2 ENSG000003120915|EPHX2 ENSG000003123685|NP\_061134.1 ENSG000003130690|Q96I54\_HUMAN  
ENSG000003134809|TIMM10 ENSG000003139626|ITGB7 ENSG000003143436|MRPL9 ENSG000003154917|RAB6B ENSG000003158445|KCNB1 ENSG000003167617|CDC42EP5 ENSG000003169122|FAM110B ENSG000003171621|SPSB1  
ENSG000003176595|KBTBD11 ENSG000003179388|EGR3 ENSG000003181713|Q8NAP7\_HUMAN ENSG000003185594|SPATA8 ENSG000003185674|LYG2\_HUMAN ENSG000003197769|MAP1LC3C ENSG00000312660|ELOWL5 ENSG000003172415|MPP5  
ENSG000003170797|ACBD5 ENSG000003114450|GNB4 ENSG000003119844|AFTPH ENSG000003120533|ENY2 ENSG000003121940|CLCC1 ENSG000003122873|ZCD1 ENSG000003130200|MYH8 ENSG000003134323|MYCN  
ENSG000003143520|NP\_001014364.1 ENSG000003149124|GLYAT ENSG000003153253|SCN3A ENSG000003164024|METAP1 ENSG000003165097|AOF1 ENSG000003172673|C6orf190 ENSG000003173452|NP\_689987.2 ENSG000003179021|C3orf38  
ENSG000003183475|ASB7 ENSG000003185261|C5orf36 ENSG000003188021|UBQLN2 ENSG000003198597|ZNF536 ENSG000003204597|ZNF818  
GTATACT ENSG000003100461|RBM23 ENSG000003111775|COX6A1 ENSG000003115607|IL18RAP ENSG000003121083|DYNLL2 ENSG000003131871|SELS\_HUMAN ENSG000003133454|MYO18B ENSG000003138083|SIX3 ENSG000003140406|MESDC1  
ENSG000003145819|ARHGAP26 ENSG000003157087|ATP2B2 ENSG000003162931|TRIM17 ENSG000003164605|Q5T8I0\_HUMAN ENSG000003168066|SF1 ENSG000003168701|NM\_014187.2 ENSG000003180875|GREM2 ENSG000003183019|C19orf59  
ENSG000003184979|USP18 ENSG000003187682|ERAS ENSG000003198369|SPRED2 ENSG000003203945|Q5JPQ1\_HUMAN ENSG000003206528|Q6ZSM0\_HUMAN ENSG000003206576|PHTF2 ENSG000003210072|C1orf124 ENSG000003214123|KIAA0776  
ENSG0000032035115|SH3YL1 ENSG0000032075188|NUP37 ENSG0000032080493|SLC4A4 ENSG0000032082482|CKNK2 ENSG0000032089335|ZNF302 ENSG0000032101574|METTL4 ENSG0000032104660|LEPROTL1 ENSG0000032113384|GOLPH3  
ENSG000003213119|EFCB1 ENSG0000032129235|TXNL5 ENSG0000032134884|NP\_060481.3 ENSG0000032136231|IGF2BP3 ENSG0000032137273|FOXF2 ENSG0000032138735|PDB5A ENSG0000032144228|SPOPL\_HUMAN ENSG0000032145147|SLIT2  
ENSG0000032152430|BOLL ENSG0000032155085|C6orf199 ENSG0000032156219|ART3 ENSG0000032164031|DNAJB14 ENSG0000032165501|PPLI5 ENSG0000032168876|ANKRD49 ENSG0000032182220|ATP6AP2 ENSG0000032182700|NP\_001007190.1  
ENSG0000032196345|ZNF167 ENSG0000032196757|ZNF700  
GTATAGA ENSG0000032070770|CSNK2A2 ENSG0000032078898|BPI1L1 ENSG0000032099992|TBC1D10A ENSG0000032103510|MYST1 ENSG0000032107438|PDLIM1 ENSG0000032122733|KIAA1045 ENSG0000032124374|PAIP2B ENSG0000032124785|NRN1  
ENSG0000032131910|NR0B2 ENSG0000032143171|RXRG ENSG0000032166090|IL25 ENSG0000032169118|CSNK1G1 ENSG0000032178772|CPN2 ENSG0000032183530|C22orf30 ENSG0000032186648|C14orf121 ENSG0000032198756|GLT2SD2  
ENSG000003204499|Q6P6C6\_HUMAN ENSG0000032065413|ANKRD44 ENSG000003206979691|LRRC16 ENSG0000032081189|MEF2C ENSG0000032101911|PRPS2 ENSG0000032120081|FMR1 ENSG0000032102910|LONP2 ENSG000003212304|THEM2  
ENSG0000032114742|WDR48 ENSG0000032115421|PAPOLG ENSG0000032116539|ASH1L ENSG0000032119285|HEATR1 ENSG0000032120820|GLT8D2 ENSG0000032124205|EDN3 ENSG0000032129028|THAP10 ENSG0000032134077|THUMPD3  
ENSG0000032134594|RAB33A ENSG0000032137992|DBT ENSG0000032143476|DTL ENSG0000032151327|C14orf24 ENSG0000032152382|TADAL1 ENSG0000032166971|AKTIP ENSG0000032170584|NUDCD2 ENSG0000032170852|KBTBD2  
ENSG0000032172201|ID4 ENSG0000032174226|NP\_689841.2 ENSG0000032179915|NRX1B\_HUMAN ENSG0000032181104|F2R ENSG0000032182827|ACBD3 ENSG0000032185634|SHC4 ENSG0000032196247|ZNF588 ENSG0000032196442|ZNF432  
ENSG0000032196705|ZNF431 ENSG0000032024711|C9orf135  
GTATAGG ENSG00000320060971|ACAA1 ENSG00000320085117|CD82 ENSG00000320099956|SMARCB1 ENSG000003211664|GNB3 ENSG0000032115649|C2orf24 ENSG0000032122176|FMO2 ENSG0000032125285|SOX21 ENSG0000032130332|LSM7  
ENSG0000032130414|NDUFA10 ENSG0000032132128|LRRC41 ENSG0000032136193|SCRN1 ENSG0000032143578|CREB3L4 ENSG0000032147516|ADHF1 ENSG0000032149452|SLC22A8 ENSG0000032160051|IQCC ENSG0000032165583|SSX5  
ENSG0000032166856|ADMR ENSG0000032175063|UBE2C ENSG0000032177493|C1orf215 ENSG0000032186063|C1orf80 ENSG0000032197152|Q9GNB7\_HUMAN ENSG000003206551|Q6ZT99\_HUMAN ENSG000003200281|HMG2L1 ENSG0000032102531|FNDC3A  
ENSG000003217091|CD48 ENSG0000032136866|ZFP37 ENSG0000032146243|IRAK1BP1 ENSG0000032146281|ACY1L2 ENSG0000032152484|USP12 ENSG0000032153317|DDEF1 ENSG0000032157343|C6orf81 ENSG0000032161813|LARP4  
ENSG0000032164684|ZNF704 ENSG0000032169018|FEM1B ENSG0000032178999|ARUKB ENSG0000032179833|SERPAD2 ENSG0000032198833|UBE2J1 ENSG0000032204977|TRIM13 ENSG0000032205608|Q6ZQP9\_HUMAN  
ENSG0000032005379|BZRAP1 ENSG0000032007314|SCN4A ENSG0000032008256|PSCD3 ENSG0000032029993|HMG3B ENSG0000032077821|FGFR1 ENSG00000320087085|ACHE ENSG0000032090554|FLT3LG ENSG0000032099954|CECR2  
ENSG0000032100242|UNC84B ENSG0000032101290|CDS2 ENSG0000032101670|LIPG ENSG0000032104332|SFRP1 ENSG0000032110711|AIP ENSG0000032116522|COP8TA ENSG0000032112152|NCAFP ENSG0000032126458|RRAS  
ENSG0000032130749|C19orf7 ENSG0000032158220|FAM62C ENSG0000032160799|CCDC12 ENSG0000032163872|YEATS2 ENSG0000032164778|EN2 ENSG0000032165633|C10orf72 ENSG0000032175197|DDIT3 ENSG0000032177885|GRB2  
ENSG0000032180444|GAS1 ENSG0000032180875|GREM2 ENSG0000032182487|NYCF1C ENSG0000032183691|NOG ENSG0000032186577|C6orf1 ENSG0000032187736|SLC23A3 ENSG0000032198019|FCGR1B ENSG0000032205878|Q6ZSV2\_HUMAN  
ENSG0000032174657|ZNF532 ENSG0000032008986|NDC80 ENSG0000032097096|BIRC4 ENSG0000032101966|BIRC4 ENSG0000032104432|IL7 ENSG000003211554|MDM1 ENSG0000032113441|LNPEP ENSG0000032113520|IL4  
ENSG000003217525|F3 ENSG000003219787|ARL6IP2 ENSG0000032120278|PLEKHG1 ENSG0000032133641|C12orf29 ENSG0000032134755|DS2C ENSG0000032136099|PCDH8 ENSG0000032136243|NUP2 ENSG0000032138182|MPHOSPH1  
ENSG0000032138231|DBR1 ENSG0000032140285|FGF7 ENSG0000032140299|BNIP2 ENSG0000032143033|MTF2 ENSG0000032146278|PNRC1 ENSG0000032146938|NLGN4X ENSG0000032151617|EDNRA ENSG0000032152253|SPC25  
ENSG0000032156035|PRUNE2 ENSG0000032156395|SORCS3 ENSG0000032162607|USP1 ENSG0000032163534|FCRL1 ENSG0000032164093|PITX2 ENSG0000032164134|NARG1 ENSG0000032165525|SDCCAG1 ENSG0000032165730|STOX1  
ENSG0000032165813|C10orf118 ENSG0000032166068|SPRED1 ENSG0000032166855|CLPF ENSG0000032167699|GLOD4 ENSG0000032169193|CCMC126 ENSG0000032170561|IRX2 ENSG0000032171204|TMEM126B ENSG0000032171863|RPS7  
ENSG0000032178974|FBXO34 ENSG0000032180957|PITPNB ENSG0000032183718|TRIM52 ENSG0000032184277|TM2D3 ENSG0000032187866|FAM122A ENSG0000032198795|ZNF521 ENSG0000032204262|COL5A2 ENSG0000032204406|MBD5  
ENSG000003204804|FAM27D1 ENSG000003204837|Q2TVT3\_HUMAN  
GTATATT ENSG0000032003756|RBM5 ENSG000003211177|TNMT ENSG000003222556|NLRP2 ENSG00000323191|RNH1 ENSG000003247056|WDR37 ENSG000003209857|NP\_060460.3 ENSG000003292820|VIL2 ENSG0000032104490|NCALD  
ENSG0000032120621|MAPK14 ENSG0000032136485|WDR68 ENSG0000032158987|RAPGEF6 ENSG0000032160791|CCR5 ENSG0000032162981|FAM84A ENSG0000032179240|Q3ZCU0\_HUMAN ENSG0000032179912|R3HDM2 ENSG0000032183579|ZNRF3  
ENSG0000032184164|AREL2 ENSG0000032186634|MED12 ENSG0000032186654|ARHGAP8 ENSG0000032187147|C1orf164 ENSG0000032198873|GRK5 ENSG0000032204759|Q6ZRY0\_HUMAN ENSG0000032205015|Q6ZNV2\_HUMAN ENSG0000032205792|A4D193\_HUMAN  
ENSG0000032005471|CRCBLD ENSG0000032059758|PCTK2 ENSG000003206629|EMH1L1 ENSG0000032082438|COBL1 ENSG0000032085365|SCAMP1 ENSG0000032086205|FOLH1 ENSG0000032100906|NFKBIA ENSG0000032107968|MAP3K8  
ENSG000003210321|EIF4G2 ENSG0000032113597|NP\_079217.1 ENSG0000032129514|FOXA1 ENSG0000032132326|PER2 ENSG0000032133706|LARS ENSG0000032134115|CNTN6 ENSG0000032134644|PUM1 ENSG0000032135048|TMEM2  
ENSG0000032135999|EPC2 ENSG000003215475|SLC25A31 ENSG0000032165416|SUGT1 ENSG0000032166200|ATAD5 ENSG0000032178604|NP\_001034973.1 ENSG0000032180116|C12orf40 ENSG0000032185742|NP\_997528.1 ENSG0000032196505|GDAP2  
ENSG0000032197860|SGTB ENSG0000032198757|Q96NB8\_HUMAN ENSG0000032024672|Q8NI72\_HUMAN ENSG0000032114488|DIO2  
GTATCAT ENSG0000032008323|PLEKHG6 ENSG0000032064309|CDON ENSG0000032087087|ARS2\_HUMAN ENSG0000032100138|NHP2L1 ENSG0000032108352|RAPGEF1L ENSG0000032119402|FBXW2 ENSG0000032119638|NEK9 ENSG0000032121310|ECHDC2  
ENSG0000032125462|C1orf61 ENSG0000032125901|MRPS26 ENSG0000032142657|PGD ENSG0000032148826|NKX6-2 ENSG0000032173230|GOLGB1 ENSG0000032182612|TSPAN1 ENSG0000032187492|NP\_001007541.1 ENSG0000032197446|CYP2F1  
ENSG000003204516|MC1B ENSG00000320206193|Q5HYA3\_HUMAN ENSG00000320808869|HEATR5B ENSG0000032066027|PPP2R5A ENSG0000032066422|ZBTB11 ENSG0000032067064|ID11 ENSG0000032082213|C5orf22 ENSG0000032085871|MGST2  
ENSG0000032102401|ARMCX3 ENSG0000032109756|RAPGEF2 ENSG0000032116688|MFN2 ENSG0000032116830|TTF2 ENSG0000032120063|GNA13 ENSG0000032120616|EPC1 ENSG0000032121417|ZNF134 ENSG0000032134453|RBM17  
ENSG0000032138785|INTS12 ENSG0000032164796|CSMD3 ENSG0000032165097|AOF1 ENSG0000032166068|SPRED1 ENSG0000032169752|NRG4 ENSG0000032170946|DPH4 ENSG0000032170949|ZNF160 ENSG0000032180730|TMEM46  
ENSG0000032184867|ARMCX2 ENSG0000032186300|ZNF555 ENSG0000032188611|ASAH2C ENSG0000032188611|SEL1L2 ENSG0000032103044|HAS3 ENSG0000032104921|FCER2 ENSG0000032105251|SHD ENSG0000032118640|VAMP8  
ENSG0000032005243|COP22 ENSG0000032073605|GSDML ENSG0000032100298|APOBEC3H ENSG0000032101251|SEL1L2 ENSG0000032103044|HAS3 ENSG0000032104921|FCER2 ENSG0000032105251|SHD ENSG0000032118640|VAMP8  
ENSG0000032120709|FAM53C ENSG0000032126067|PSMB2 ENSG0000032129351|ILF3 ENSG0000032129816|NR\_001538.1 ENSG0000032129845|O14605\_HUMAN ENSG0000032132792|CTNNB1L1 ENSG0000032135723|FHOD1 ENSG0000032135956|TMEM127  
ENSG0000032166426|CRABP1 ENSG0000032170613|FAM71B ENSG0000032173546|CSPG4 ENSG0000032175877|WBSR28 ENSG0000032177025|C19orf18 ENSG0000032186038|HTR3E ENSG0000032203867|RBM20 ENSG0000032205929|C21orf62  
ENSG0000032070087|PFN2 ENSG0000032101752|MIB1 ENSG0000032104356|POP1 ENSG0000032104808|DHDH ENSG0000032118508|RAB32 ENSG0000032129636|ITFG1 ENSG0000032139180|NDUFA9 ENSG0000032146425|DYNLT1  
ENSG0000032147601|TERF1 ENSG0000032148730|EIF4EBP2 ENSG0000032156384|C10orf78 ENSG0000032164893|SLC7A13 ENSG0000032165300|SLITTRK5 ENSG0000032169905|TOR1AIP2 ENSG000003217113|TR112\_HUMAN ENSG0000032187461|C6orf114  
ENSG0000032189403|HMGB1 ENSG0000032197453|NP\_001001706.1  
GTATCGA ENSG00000320053524|MCF2L2 ENSG0000032066248|NGEF ENSG0000032085978|ATG16L1 ENSG0000032100151|PICK1 ENSG0000032101146|RAE1 ENSG0000032106683|LIMK1 ENSG0000032108557|RAI1 ENSG0000032112195|TREM1  
ENSG000003219408|NEK6 ENSG0000032121104|FAM117A ENSG0000032123360|PDE1B ENSG0000032124126|PREX1\_HUMAN ENSG0000032129925|TMEM8 ENSG0000032136928|GABBR2 ENSG0000032137204|SLC22A7 ENSG0000032160445|ZER1  
ENSG0000032165688|MPPCA ENSG0000032165802|NELF ENSG0000032165861|ZFYVE1 ENSG0000032167536|DHR513 ENSG0000032174547|MRPL11 ENSG0000032180447|GAS1 ENSG0000032182912|C21orf90 ENSG0000032188976|NOC2L  
ENSG0000032197724|PHF2 ENSG0000032206197|NP\_001013723.1 ENSG000003220605059|CCDC109B ENSG0000032206704|GTF2IRD1 ENSG0000032206010810|FYN ENSG0000032212344|FBXL4 ENSG0000032212344|FBXL4 ENSG0000032212344|FBXL4 ENSG0000032212344|FBXL4 ENSG0000032212344|FBXL4  
ENSG000003214374|USP9Y ENSG0000032119139|TJF2 ENSG0000032121542|SEC22A ENSG0000032126261|SAE2 ENSG0000032128694|OSGEP1L ENSG0000032135269|TES ENSG0000032136213|CHST12 ENSG0000032136531|SCN2A  
ENSG0000032136888|ATP6V1G1 ENSG0000032144668|ITGA9 ENSG0000032145794|MEGF10 ENSG0000032156802|ATAD2 ENSG0000032173698|GPR64 ENSG0000032179331|RAB39 ENSG0000032181472|ZBTB2 ENSG0000032182489|KRRX  
ENSG0000032182670|TTC3 ENSG0000032196214|ZNF766 ENSG0000032196418|ZNF124 ENSG0000032197467|COL13A1 ENSG0000032205524|Q68D70\_HUMAN  
ENSG0000032079277|MKNK1 ENSG0000032090316|MAEA ENSG0000032100461|RBM23 ENSG0000032104969|SGTA ENSG0000032109132|PHOX2B ENSG0000032114812|VIPR1 ENSG0000032119280|C1orf198 ENSG0000032125695|STRAD\_HUMAN  
ENSG0000032130827|PLXNA3 ENSG0000032131746|TNS4 ENSG0000032132694|ARHGFE11 ENSG0000032135362|NP\_079117.2 ENSG0000032137726|FYD6 ENSG0000032143502|SUSD4 ENSG0000032147224|PRPS1 ENSG0000032153481|NP\_060680.2  
ENSG0000032155256|ZFYVE27 ENSG0000032160563|CRSP8 ENSG0000032161642|ZNF385 ENSG0000032161955|TNFSF13 ENSG0000032163482|STK36 ENSG0000032165583|SSX5 ENSG0000032168575|SLC20A2 ENSG0000032178927|C17orf62  
ENSG0000032180860|HOXC9 ENSG0000032182289|Q9H9U3\_HUMAN ENSG0000032184292|TACSTD2 ENSG0000032198013|PNMA6A ENSG000003211258|MBTD1 ENSG0000032200037474|NSUN2 ENSG0000032200078053|AMPH ENSG0000032200080503|SMARCA2  
ENSG0000032100523|DDHD1 ENSG0000032100811|YY1 ENSG0000032106069|CHN2 ENSG0000032107672|NSMCE4A ENSG000003210696|C1orf58 ENSG0000032112234|FBXL4 ENSG0000032116830|TTF2 ENSG0000032117751|PPP1R8  
ENSG0000032126524|SBD1 ENSG0000032131068|DEFB118 ENSG0000032136098|NEK3 ENSG0000032137992|DBT ENSG0000032143514|TP53BP2 ENSG0000032144306|SCRN3 ENSG0000032147535|PPAPDC1B ENSG0000032157869|RAB28  
ENSG0000032163359|COL6A3 ENSG0000032163642|XR\_017284.1 ENSG0000032164692|COL1A2 ENSG0000032166006|KCNK2 ENSG0000032167165|UGT1A1 ENSG0000032173692|PSMD1  
GTATCTA ENSG0000032042832|TG ENSG0000032065717|TLE2 ENSG0000032092841|MYL6 ENSG0000032101104|C2orf119 ENSG0000032106331|PAX4 ENSG0000032110455|NP\_115981.1 ENSG0000032119684|MLH3 ENSG0000032130544|ZNF557  
ENSG0000032134574|DBB2 ENSG0000032135457|TFPC2 ENSG0000032138172|FAM26B ENSG0000032142606|MMEL1 ENSG0000032143379|SETDB1 ENSG0000032155980|KIF5A ENSG0000032159708|LRRC36 ENSG0000032159720|ATP6V0D1  
ENSG0000032160323|ADAMTS13 ENSG0000032163216|SPRR2F ENSG0000032165863|C10orf82 ENSG0000032166257|SCN3B ENSG0000032167080|B4GALNT2 ENSG0000032169884|WNT10B ENSG0000032172647|PGA5  
ENSG0000032173432|SAA1 ENSG0000032174407|C2orf166 ENSG0000032180860|PGA3 ENSG0000032185482|STAC3 ENSG0000032186143|C2orf53 ENSG0000032187024|PTRH1 ENSG0000032196805|SPRR2A ENSG0000032198400|NTRK1  
ENSG0000032198563

|         |                                |                                |                                |                              |                                |                             |                                |                              |
|---------|--------------------------------|--------------------------------|--------------------------------|------------------------------|--------------------------------|-----------------------------|--------------------------------|------------------------------|
|         | ENSG00000181722 ZBTB20         | ENSG00000196263 ZNF471         | ENSG00000204304 PBX2           | ENSG00000204590 GNL1         | ENSG00000206550 LOC285346      | ENSG00000001561 ENPP4       | ENSG00000025156 HSF2           | ENSG00000079102 RUNX1T1      |
|         | ENSG00000086666 ZFANDB7        | ENSG00000107164 FUBP3          | ENSG00000108395 TRIM37         | ENSG00000116489 CAP2A1       | ENSG00000125450 NUP85          | ENSG00000126016 AMOT        | ENSG00000128654 MTX2           | ENSG00000132388 UBE2G1       |
|         | ENSG00000134830 GPR77          | ENSG00000140386 ZNF291         | ENSG00000148690 C10orf4        | ENSG00000149231 CCDC82       | ENSG00000157259 GATAD1         | ENSG00000162891 IL20        | ENSG00000163293 NPAL1          | ENSG00000164691 TAGAP        |
|         | ENSG00000169762 TAPT1          | ENSG00000175487 NP_076428.2    | ENSG00000182308 WDR21B         | ENSG00000184319 NP_982307.1  | ENSG00000185261 C5orf36        | ENSG00000196505 GDAP2       | ENSG00000204217 BMPR2          |                              |
| GTATGCA | ENSG00000130166 EHD3           | ENSG00000086062 B4GALT1        | ENSG00000088543 C3orf18        | ENSG00000095015 MAP3K1       | ENSG00000096384 HSP90AB1       | ENSG00000105641 SLC5A5      | ENSG00000111012 CYP27B1        | ENSG00000112149 CD83         |
|         | ENSG00000112514 CUTA           | ENSG00000142920 ADC            | ENSG00000143512 KIAA1822L      | ENSG00000157349 DDX19B       | ENSG00000164091 TMEM113        | ENSG00000164749 NR_003034.1 | ENSG00000166189 HPS6           | ENSG00000166819 PLIN         |
|         | ENSG00000167178 ISLR2          | ENSG00000174837 EMR1           | ENSG00000180638 NP_690872.2    | ENSG00000185818 NAT8L        | ENSG00000189152 Q8TC17_HUMAN   | ENSG00000196821 C6orf106    | ENSG00000204771 Q8ND95_HUMAN   | ENSG00000047365 CENTD1       |
|         | ENSG00000055208 MAP3K7IP2      | ENSG00000083123 BCKDHB         | ENSG00000102081 FMR1           | ENSG00000120837 NFYB         | ENSG00000122770 RECK           | ENSG00000124103 C20orf107   | ENSG00000129810 SGOL1          | ENSG00000138162 TACC2        |
|         | ENSG00000138767 CNOT6L         | ENSG00000142507 PSMB6          | ENSG00000143420 ENSA           | ENSG00000147124 ZNF41        | ENSG00000152939 MARVELD2       | ENSG00000156467 UCR2B       | ENSG00000156958 GALK2          | ENSG00000164746 Q8NEG2_HUMAN |
|         | ENSG00000165195 PIGA           | ENSG00000171928 FAM18B         | ENSG00000172164 SNTB1          | ENSG00000173930 SLC04C1      | ENSG00000176276 hCG_1757335    | ENSG00000179399 GPC5        | ENSG00000179981 TSHZ1          | ENSG00000180694 TMEM64       |
|         | ENSG00000184517 ZFP1           |                                |                                |                              |                                |                             |                                |                              |
| GTATGGG | ENSG00000072818 CENTB1         | ENSG00000100034 PPM1F          | ENSG00000105618 PRPF31         | ENSG00000108370 RGS9         | ENSG00000111087 GLI1           | ENSG00000125910 EDG6        | ENSG00000125999 C20orf114      | ENSG00000128849 CGNL1        |
|         | ENSG00000129543 FLJ16369       | ENSG00000151376 ME3            | ENSG00000153048 CARHSP1        | ENSG00000161944 ASGR2        | ENSG00000162078 U773_HUMAN     | ENSG00000167815 PRDX2       | ENSG00000167925 GHDC           | ENSG00000168010 ATG16L2      |
|         | ENSG00000173638 SLC19A1        | ENSG00000181350 C17orf76       | ENSG00000185963 BICD2          | ENSG00000197226 TBC1D9B      | ENSG00000197373 NP_001015884.1 | ENSG00000197816 KIAA1529    | ENSG00000198483 ANKRD35        | ENSG00000036473 OTC          |
|         | ENSG00000058063 ATP11B         | ENSG00000082068 WDR70          | ENSG00000082512 TRAF5          | ENSG00000085276 EVI1         | ENSG00000102053 ZC3H12B        | ENSG00000102309 PIN4        | ENSG00000112303 VNN2           | ENSG00000128609 NDUFA5       |
|         | ENSG00000129083 COPB1          | ENSG00000129084 PSMA1          | ENSG00000139675 NP_001011724.1 | ENSG00000144460 Q96NL2_HUMAN | ENSG00000147419 CCDC25         | ENSG00000152147 GEMIN6      | ENSG00000155868 CRSP9          | ENSG00000171530 TBCA         |
|         | ENSG00000174007 C3orf34        | ENSG00000180389 NR_002162.1    | ENSG00000186879 NM_178121      | ENSG00000196757 ZNF700       |                                |                             |                                |                              |
| GTATGTC | ENSG00000004660 CAMK1          | ENSG00000006432 MAP3K9         | ENSG000000092529 CAPN3         | ENSG00000103061 SLC7A60S     | ENSG00000116708 PRAMEF4        | ENSG00000116726 PRAMEF12    | ENSG00000121083 DYNLL2         | ENSG00000121671 CRY2         |
|         | ENSG00000124155 PIGT           | ENSG00000125746 EML2           | ENSG00000129559 NEDD8          | ENSG00000130035 GALNT8       | ENSG00000136485 WDR68          | ENSG00000137177 KIF13A      | ENSG00000147117 ZNF157         | ENSG00000154277 UCHL1        |
|         | ENSG00000157358 PRAMEF15       | ENSG00000157881 PANK4          | ENSG00000160172 Q8IW37_HUMAN   | ENSG00000164091 TMEM113      | ENSG00000177352 CCDC71         | ENSG00000181830 SLC35C1     | ENSG00000182866 LCK            | ENSG00000197152 Q96NB7_HUMAN |
|         | ENSG00000204501 PRAMEF9        | ENSG00000004809 SLC22A16       | ENSG00000102129 DYRK4          | ENSG00000084444 KIAA1467     | ENSG00000086205 FOLH1          | ENSG00000115919 KYNL        | ENSG00000118873 RAB3GAP2       | ENSG00000122786 CALD1        |
|         | ENSG00000130939 UBE4B          | ENSG00000132703 APCS           | ENSG00000141161 UNC45B         | ENSG00000144182 L1PT1        | ENSG00000144224 UBXD2          | ENSG00000145839 IL9         | ENSG00000146733 PSPH           | ENSG00000163788 SNRK         |
|         | ENSG00000178172 SPINK6         | ENSG00000178502 KLHL11         | ENSG00000178999 AURKB          | ENSG00000184368 MAP7D2       |                                |                             |                                |                              |
| GTATGTT | ENSG00000029993 HMGB3          | ENSG00000068079 IFI35          | ENSG00000110092 CCND1          | ENSG00000116237 ICMT         | ENSG00000116254 CHD5           | ENSG00000137054 POLR1E      | ENSG00000141568 FOXK2          | ENSG00000142686 NP_689587.1  |
|         | ENSG00000166140 ZFYVE19        | ENSG00000171794 UTF1           | ENSG00000176595 KBTBD11        | ENSG00000186654 ARHGAP8      | ENSG00000187492 NP_001007541.1 | ENSG00000204248 COL11A2     | ENSG00000206003 MCM6           | ENSG00000086061 DNAJA1       |
|         | ENSG00000100601 ALKBH1         | ENSG00000100644 HIF1A          | ENSG00000101972 STAG2          | ENSG00000104660 LEPROTL1     | ENSG00000107968 MAP3K8         | ENSG00000109445 ZNF330      | ENSG00000111269 CREBL2         | ENSG00000113240 CLK4         |
|         | ENSG00000121644 C1orf121       | ENSG00000123124 WWP1           | ENSG00000123200 ZC3H13         | ENSG00000129596 CDO1         | ENSG00000132570 PCBD2          | ENSG00000134982 APC         | ENSG00000135316 SYNCRIP        | ENSG00000136155 SCEL         |
|         | ENSG00000145907 G3BP1          | ENSG00000146842 NP_116231.2    | ENSG00000150093 ITGB1          | ENSG00000151292 CSNK1G3      | ENSG00000155329 ZCCHC10        | ENSG00000156469 MTERFD1     | ENSG00000159140 SON            | ENSG00000163074 NM_024534    |
|         | ENSG00000163738 MTHFD2L        | ENSG00000170385 SLC30A1        | ENSG00000171195 MUC7           | ENSG00000180354 C7orf41      | ENSG00000189290 XR_018254.1    | ENSG00000204388 HSPA1B      | ENSG00000204923 NP_001019851.1 |                              |
| GTATTAA | ENSG00000048707 VPS13D         | ENSG00000099954 CECR2          | ENSG00000099968 KBL2L13        | ENSG00000100105 PAT21        | ENSG00000100403 ZC3H7B         | ENSG00000101104 C20orf119   | ENSG00000106009 C7orf27        | ENSG00000113194 UBXD8        |
|         | ENSG00000114767 RRP9           | ENSG00000114999 TTL            | ENSG00000117450 PRDX1          | ENSG00000129194 SOX15        | ENSG00000131368 MRPS25         | ENSG00000131378 RFTN1       | ENSG00000132846 ZBED3          | ENSG00000141562 NARF         |
|         | ENSG00000142733 MAP3K6         | ENSG00000152767 FARP1          | ENSG00000158716 DUSP23         | ENSG00000162783 IER5         | ENSG00000165424 C10orf56       | ENSG00000167136 ENDOG       | ENSG00000170430 MGMT           | ENSG00000173163 COMMD1       |
|         | ENSG00000175505 CLCF1          | ENSG00000184108 TRIML1         | ENSG00000197472 ZNF695         | ENSG00000204221 WDR46        | ENSG00000005889 C1X            | ENSG000000023608 SNAPC1     | ENSG000000034713 GABARAPL2     | ENSG00000048028 USP28        |
|         | ENSG00000068366 ACSL4          | ENSG00000097096 SYDE2          | ENSG00000109920 FBNP4          | ENSG00000112701 SENPA6       | ENSG00000122870 BICC1          | ENSG00000123124 WWP1        | ENSG00000125870 SNRPB2         | ENSG00000132855 ANGPTL3      |
|         | ENSG00000134371 CDC73          | ENSG00000134389 CFHR5          | ENSG00000135324 C6orf117       | ENSG00000143452 HORMAD1      | ENSG00000153157 NP_001035364.1 | ENSG00000155933 DGKE        | ENSG00000160218 TMEM1          | ENSG00000164611 PTTG1        |
|         | ENSG00000165072 MAMDC2         | ENSG00000165659 DACH1          | ENSG00000168556 ING2           | ENSG00000172139 SLC9A10      | ENSG00000188613 NANOS1         | ENSG00000189290 XR_018254.1 | ENSG00000198604 BAZ1A          | ENSG00000205299 CKLF         |
|         |                                |                                |                                |                              |                                |                             |                                |                              |
| GTATTAC | ENSG0000006116 CACNG3          | ENSG00000100938 NM_001002000.1 | ENSG00000110651 CD81           | ENSG00000115216 NRBP1        | ENSG00000125046 C3orf32        | ENSG00000125954 FNTB        | ENSG00000127528 KLF2           | ENSG00000130749 C19orf7      |
|         | ENSG00000133937 GSC            | ENSG00000136319 TTC5           | ENSG00000143393 PIK4CB         | ENSG00000145936 KCNMB1       | ENSG00000147454 SLC25A37       | ENSG00000162666 KIAA0040    | ENSG00000163900 TMEM41A        | ENSG00000163930 BAP1         |
|         | ENSG00000164082 GRM2           | ENSG00000168826 ZNF509         | ENSG00000169231 THBS3          | ENSG00000176700 SCAND2       | ENSG00000177202 SPACA4         | ENSG00000183421 RIPK4       | ENSG00000204526 HCG27          | ENSG00000034677 RNF19        |
|         | ENSG00000071794 HLTF           | ENSG00000102158 TAG2_HUMAN     | ENSG00000102218 RP2            | ENSG00000106034 NP_079189.3  | ENSG00000112796 ENPP5          | ENSG00000118454 ANKRD13C    | ENSG00000119318 RAD23B         | ENSG00000125863 MKKS         |
|         | ENSG00000132872 SYT4           | ENSG00000135119 TMEM118        | ENSG00000139160 NP_776163.1    | ENSG00000144749 LRIG1        | ENSG00000145740 SLC30A5        | ENSG00000155130 MARCKS      | ENSG00000163818 L2TFF1         | ENSG00000164128 NPY1R        |
|         | ENSG00000164961 KIAA0196       | ENSG00000164989 C9orf93        | ENSG00000165572 KBTBD6         | ENSG00000166326 TRIM44       | ENSG00000167863 ATP5H          | ENSG00000169271 HSPB3       | ENSG00000172461 FUT9           | ENSG00000203956 FAM45B       |
|         |                                |                                |                                |                              |                                |                             |                                |                              |
| GTATTAG | ENSG00000051596 THOC3          | ENSG00000099330 OCEL1          | ENSG00000099995 SF3A1          | ENSG00000102100 SLC35A2      | ENSG00000111684 MBOAT5         | ENSG00000117450 PRDX1       | ENSG00000125434 SLC25A35       | ENSG00000135723 FHOD1        |
|         | ENSG00000154478 GPR26          | ENSG00000160716 CHRN2          | ENSG00000164091 TMEM113        | ENSG00000165699 TSC1         | ENSG00000166507 NDST2          | ENSG00000167815 PRDX2       | ENSG00000167862 ICT1           | ENSG00000170089 THOC3        |
|         | ENSG00000176463 SLC30A1        | ENSG00000177479 ARIH2          | ENSG00000180929 GPR62          | ENSG00000196209 Q5JXA8_HUMAN | ENSG00000205020 CCL4L1         | ENSG00000085433 WDR47       | ENSG00000088756 ARHGAP28       | ENSG00000103254 C16orf24     |
|         | ENSG00000106305 MCA2_HUMAN     | ENSG00000111615 KRR1           | ENSG00000121039 RDH10          | ENSG00000134330 Q6PCA9_HUMAN | ENSG00000139211 AMIGO2         | ENSG00000143155 TIPRL       | ENSG00000145331 RG9MTD2        | ENSG00000145692 BHMT         |
|         | ENSG00000152527 PLEKH2         | ENSG00000152931 PART1_HUMAN    | ENSG00000153046 CDYL           | ENSG00000163947 ARHGEP3      | ENSG00000167005 NUDT21         | ENSG00000174429 ABRA        | ENSG00000177111 XR_016777.1    | ENSG00000177613 CSTF2T       |
|         | ENSG00000181751 C5orf30        | ENSG00000186104 CYP2R1         | ENSG00000204600 NP_001004349.1 | ENSG00000205423 TMEM188      |                                |                             |                                |                              |
| GTATTAT | ENSG00000042062 C20orf175      | ENSG00000061936 SFRS5          | ENSG00000089351 GRAMD1A        | ENSG00000102385 DRP2         | ENSG00000102755 FLT1           | ENSG00000126003 PLAGL2      | ENSG00000129194 SOX15          | ENSG00000130768 SMPDL3B      |
|         | ENSG00000133398 MED10          | ENSG00000146021 KLHL3          | ENSG00000157103 SLC6A1         | ENSG00000162104 ADCY9        | ENSG00000162897 FCAMR          | ENSG00000164403 SHROOM1     | ENSG00000179965 ZNF771         | ENSG00000180875 GREM2        |
|         | ENSG00000183044 ABAT           | ENSG00000183691 NOG            | ENSG00000196378 Q9BSZ0_HUMAN   | ENSG00000196961 AP2A1        | ENSG00000198881 ASB12          | ENSG00000049323 LTBP1       | ENSG00000060303 Q9NU98_HUMAN   | ENSG00000066557 LRRC40       |
|         | ENSG00000087495 PHACTR3        | ENSG00000101974 ATP11C         | ENSG00000104164 PLDN           | ENSG00000107560 RAB11FIP2    | ENSG00000108510 THRAP1         | ENSG00000108960 MMD         | ENSG00000109046 WSB1           | ENSG00000109180 OCIA1D1      |
|         | ENSG00000109775 C4orf20        | ENSG00000110756 HPS5           | ENSG00000111231 ATP6B1C        | ENSG00000115084 SLC35F5      | ENSG00000115232 ITGA4          | ENSG00000120688 WBP4        | ENSG00000131381 ZFYVE20        | ENSG00000134709 HOOK1        |
|         | ENSG00000138293 NCOA4          | ENSG00000140057 AK7            | ENSG00000146250 PRSS35         | ENSG00000146278 PNRC1        | ENSG00000147183 CPXCR1         | ENSG00000148516 ZEB1        | ENSG00000151310 SCOC           | ENSG00000154188 ANGPT1       |
|         | ENSG00000154529 CNTNAP3B       | ENSG00000162980 ARL5A          | ENSG00000164930 FZD6           | ENSG00000169554 ZEB2         | ENSG00000172243 CLEC7A         | ENSG00000172809 RPL38       | ENSG00000182774 RS17_HUMAN     | ENSG00000184779 RPS17        |
|         | ENSG00000189292 NP_001002919.1 | ENSG000000198795 ZNF521        |                                |                              |                                |                             |                                |                              |
| GTATTGC | perfect: GTATTAT ATAATAC       | hsa-miR-369-3p                 | aATAATACatggtgatcttt           | 1                            |                                |                             |                                |                              |
|         | ENSG00000038358 EDC4           | ENSG00000076928 ARHGEP1        | ENSG00000116774 OLFML3         | ENSG00000127666 TICAM1       | ENSG00000131100 ATP6V1E1       | ENSG00000144468 RHBD1       | ENSG00000153468 TCP10_HUMAN    | ENSG00000155858 LSM11        |
|         | ENSG00000162777 DENND2D        | ENSG00000167311 ART5           | ENSG00000178828 RNF186         | ENSG00000180884 ZNF792       | ENSG00000183248 Q9H6K5_HUMAN   | ENSG00000185594 SPATA8      | ENSG00000186198 NP_849190.1    | ENSG00000188364 TMSL4        |
|         | ENSG00000196747 HIST1H3H       | ENSG00000204677 NP_001072995.1 | ENSG00000029363 BCLAF1         | ENSG00000074657 ZNF532       | ENSG00000101333 PLCB4          | ENSG00000107372 ZFNAD5      | ENSG00000108651 UTP6           | ENSG00000113621 C5orf14      |
|         | ENSG00000124564 SLC17A3        | ENSG00000132294 EFR3_HUMAN     | ENSG00000132498 ANKRD20A1      | ENSG00000133657 ATP13A3      | ENSG00000139684 ESD            | ENSG00000140299 BNIP2       | ENSG00000143437 ARNT           | ENSG00000143771 CNIH4        |
|         | ENSG00000144354 CDCA7          | ENSG00000153253 SCN3A          | ENSG00000170561 IRX2           | ENSG00000182223 ZAR1         | ENSG00000183148 ANKRD20A2      | ENSG00000188529 FUSIP1      | ENSG00000196774 ANKRD20A3      |                              |
| GTATTGT | ENSG00000001461 NPAL3          | ENSG00000073536 NLE1           | ENSG000                        |                              |                                |                             |                                |                              |



ENSG00000160219|GAB3 ENSG00000162817|Clorf115 ENSG00000163156|SCNM1 ENSG00000172818|OVOL1 ENSG00000174498|PUNC ENSG00000177468|OLIG3 ENSG00000182968|SOX1 ENSG00000187223|LCE2D  
ENSG00000187686|XR\_016979.1 ENSG00000188199|FAM22B ENSG00000197461|PDGFA ENSG00000198742|SMURF1 ENSG00000204043|FAM22C ENSG00000154751|BID ENSG00000048028|USP28 ENSG00000049618|ARID1B  
ENSG00000091039|OSBPL8 ENSG00000102931|ARL2BP ENSG00000103310|ZP2 ENSG00000104432|IL7 ENSG00000104859|SFRS16 ENSG00000114861|FOXP1 ENSG00000130741|EIF2S3 ENSG00000135299|ANKRD6  
ENSG00000144061|NHP1 ENSG00000145491|ROPN1L ENSG00000145850|TMD4 ENSG00000152601|MBNL1 ENSG00000153989|NUS1 ENSG00000163535|SGOL2 ENSG00000164283|ESM1 ENSG00000166349|RAG1  
ENSG00000167842|MIS12 ENSG00000170802|FOXN2 ENSG00000171241|SHCBP1 ENSG00000172748|ZNF596 ENSG00000175087|PDK1L ENSG00000180329|CCDC43 ENSG00000183833|C3orf15 ENSG00000197321|SVIL  
ENSG00000198468|QSTAF5\_HUMAN ENSG00000198526|PABPC2  
GTCAAC ENSG00000092051|AP1G2 ENSG00000103023|NF\_001073961.1 ENSG00000105672|ETV2 ENSG00000107223|EDF1 ENSG00000116708|PRAMEF4 ENSG00000125462|Clorf61 ENSG00000125954|FNTB ENSG00000128536|NF\_689963.2  
ENSG00000133055|MYBPB ENSG00000141552|ANAPC11 ENSG00000157358|PRAMEF15 ENSG00000162599|NFIA ENSG00000163206|SMCP ENSG00000163220|S100A9 ENSG00000163879|DNALI1 ENSG00000164151|Q6ZT40\_HUMAN  
ENSG00000167862|ICT1 ENSG00000169918|OTUD7A ENSG00000172771|C3orf25 ENSG00000186007|LEM01 ENSG00000196220|SRGAP3 ENSG00000204501|PRAMEF9 ENSG00000204502|PRAMEF5 ENSG00000204507|LOC729368  
ENSG00000204509|PRAMEF6 ENSG00000205559|Q6IBW5\_HUMAN ENSG00000069482|GAL ENSG00000120251|GRIA2 ENSG00000126838|PZP ENSG00000127324|TSPAN8 ENSG00000156475|PPP2R2B ENSG00000162699|Q96RF1\_HUMAN  
ENSG00000163864|NMNAT3 ENSG00000164164|OTUD4 ENSG00000166263|STXBPA ENSG00000166455|C16orf46 ENSG00000168619|ADAM18 ENSG00000168843|FSTL5 ENSG00000176597|B3GNT5 ENSG00000179639|FCER1A  
ENSG00000184368|MAP7D2 ENSG00000186471|AKAP14 ENSG00000186834|HEXIM1 ENSG00000198682|PAPSS2 ENSG00000198739|LRRTM3 ENSG00000198833|UBE2J1 ENSG00000206221|Q6ZVX8\_HUMAN  
GTCAACA ENSG00000095713|CRTAC1 ENSG00000100422|CERK ENSG00000108175|ZMIZ1 ENSG00000116014|KISS1R ENSG00000116032|GRIN3B ENSG00000128311|TST ENSG00000128626|MRPS12 ENSG00000143127|ITGA10  
ENSG00000146453|PNLDC1 ENSG00000147081|AKAP4 ENSG00000154768|C17orf50 ENSG00000157110|RBPMS ENSG00000168517|HEXIM2 ENSG00000171115|GIMAP8 ENSG00000177112|Q8N6V7\_HUMAN ENSG00000178449|C12orf62  
ENSG00000179335|CLK3 ENSG00000180104|EXOC3 ENSG00000181873|C1orf69 ENSG00000182606|TRAK1 ENSG00000184709|LRRC26 ENSG00000185722|ANKFY1 ENSG00000198831|Q8IYX2\_HUMAN ENSG00000204775|Q4G0D9\_HUMAN  
ENSG00000206539|Q6ZTN9\_HUMAN ENSG00000047188|YTHDC2 ENSG00000047315|POLR2B ENSG00000087263|OGFOD1 ENSG00000115145|STAM2 ENSG00000116729|GPR177 ENSG00000119913|TECTB  
ENSG00000120937|NPPB ENSG00000125831|CST11 ENSG00000131482|G6PC ENSG00000133401|PDZ2 ENSG00000133789|SWP70\_HUMAN ENSG00000135374|ELP5 ENSG00000136242|Q9NXD8\_HUMAN ENSG00000137757|CASP5  
ENSG00000148426|C10orf47 ENSG00000155090|KLF10 ENSG00000163762|TM4SF18 ENSG00000170017|ALCAM ENSG00000175175|PPM1E ENSG00000183604|NR\_002453.4 ENSG00000184984|CHRM5 ENSG00000186166|CCDC84  
ENSG00000196562|SULF2 ENSG00000204472|AIF1 ENSG00000205976|Q6ZVT4\_HUMAN  
GTCAATA ENSG00000019485|PRDM11 ENSG00000089116|LHX5 ENSG00000099204|ABLIM1 ENSG00000100347|SAMM50 ENSG00000108417|KRT37 ENSG00000116726|PRAMEF12 ENSG00000129465|RIPK3 ENSG00000129559|NEDD8  
ENSG00000130244|Q17RN3-2 ENSG00000130598|TNNT2 ENSG00000130812|ANGPTL6 ENSG00000131152|Q9H693\_HUMAN ENSG00000136942|RPL35 ENSG00000137288|C6orf125 ENSG00000142765|SYTL1 ENSG00000154783|FGD5  
ENSG00000157064|NMNAT2 ENSG00000161281|COX7A1 ENSG00000162627|SCN3B ENSG00000165716|FAM69B ENSG00000166257|SCN3B ENSG00000167178|ISLR2 ENSG00000167700|MFS03 ENSG00000167779|IGFBP6  
ENSG00000169442|CD52 ENSG00000171551|ECE1 ENSG00000172053|QRSR ENSG00000172476|RAB40A ENSG00000174460|ZCCHC12 ENSG00000175854|C9orf119 ENSG00000177030|DEAF1 ENSG00000177791|MYOZ1  
ENSG00000184945|AQP12A ENSG00000185000|DGAT1 ENSG00000185978|H2AFB3 ENSG00000197308|NP\_997306.1 ENSG00000198082|H2AFB1 ENSG00000198307|H2AFB2 ENSG00000203782|LOR ENSG00000205073|NP\_001003808.1  
ENSG00000206177|HEM ENSG00000000003|TSPAN6 ENSG000000004948|CALCR ENSG000000008282|SYPL1 ENSG00000062096|ARSF ENSG00000070501|POLB ENSG00000072803|FBXW11 ENSG00000086288|TXNDC3  
ENSG00000089053|ANAPCS2 ENSG00000102221|PHF16 ENSG00000106025|TSPAN12 ENSG00000106258|CYP3A5 ENSG00000106305|MCA2\_HUMAN ENSG00000118939|UCHL3 ENSG00000122339|C6orf35 ENSG00000124172|ATP5E  
ENSG00000134183|GNAT2 ENSG00000134215|VAV3 ENSG00000134330|Q6PCA9\_HUMAN ENSG00000135903|PAX3 ENSG00000135960|EDAR ENSG00000137757|CASP5 ENSG00000138185|ENTPD1 ENSG00000140285|FGF7  
ENSG00000145794|MEGF10 ENSG00000153930|ANKFN1 ENSG00000161800|RACGAP1 ENSG00000164122|ASB5 ENSG00000164175|SLC45A2 ENSG00000168273|Q8WV10\_HUMAN ENSG00000170370|EMX2 ENSG00000171116|NP\_057237.1  
ENSG00000171129|HSFX1 ENSG00000175646|PRM1 ENSG00000180389|NR\_002162.1 ENSG00000181004|BBS12 ENSG00000185518|SV2B ENSG00000196270|Q6ZWE7\_HUMAN  
GTCAACA ENSG00000070731|ST6GALNAc2 ENSG000000071894|CSPF1 ENSG000000099864|PALM ENSG00000100266|PACIN2 ENSG00000104129|DNAJC17 ENSG00000111424|VDR ENSG00000123810|NP\_085055.1 ENSG00000124208|UBE2V1  
ENSG00000125741|OPA3 ENSG00000127526|SLC35E1 ENSG00000136026|CKAP4 ENSG00000136504|MYST2 ENSG00000143473|KCNH1 ENSG00000145882|PCYOX1L ENSG00000148498|PARD3 ENSG00000158402|CDC25C  
ENSG00000160226|C21orf2 ENSG00000163803|PLB1 ENSG00000164535|DAGLB ENSG00000164916|FOXK1 ENSG00000171450|CDK5R2 ENSG00000174264|Q4TT42\_HUMAN ENSG00000176828|Q8N9U2\_HUMAN ENSG00000178802|MPI  
ENSG00000184163|FAM132A ENSG00000185090|MANEAL ENSG00000196366|C9orf163 ENSG00000197965|MPZL1 ENSG00000205214|Q6ZU66\_HUMAN ENSG00000205913|Q6ZUC4\_HUMAN ENSG00000067167|TRAM1 ENSG00000071462|WBSR22  
ENSG00000091164|TXNL1 ENSG00000091317|CMTM6 ENSG00000115919|KYNUN ENSG00000119801|YPEL5 ENSG00000121644|Clorf121 ENSG000000121892|NP\_056015.1 ENSG00000123836|PKFB2 ENSG00000124788|ATXN1  
ENSG00000135766|EGLN1 ENSG00000145982|FARS2 ENSG00000151617|INDRA ENSG00000162482|AKR7A3 ENSG00000163075|NP\_001025167.1 ENSG00000163170|BOLA3 ENSG00000163923|RPL39L ENSG00000164306|CCDC111  
ENSG00000164828|UNC84A ENSG00000165572|KBTBD6 ENSG00000178074|NP\_710156.2 ENSG00000182197|EXT1 ENSG00000196083|IL1RAP ENSG00000198918|RPL39 ENSG00000204010|IFIT1L ENSG00000204250|C9orf107  
GTGACGT ENSG00000056998|GYG2 ENSG00000095059|DHPS ENSG00000095917|TPSD1 ENSG00000101224|CDC25B ENSG00000106682|EIF4H ENSG00000108829|LRRC59 ENSG00000109101|FOXN1 ENSG00000120057|SFRP5  
ENSG00000122711|SPINK4 ENSG00000122733|KIAA1045 ENSG00000124226|ZNF313 ENSG00000130193|C8orf55 ENSG00000132688|NES ENSG00000144711|IQSEC1 ENSG00000145911|N4BP3\_HUMAN ENSG00000148204|CRB2  
ENSG00000152672|CLEC4F ENSG00000161996|WDR90 ENSG00000162585|Clorf86 ENSG00000164151|Q6ZT40\_HUMAN ENSG00000167588|GPD1 ENSG00000168000|HNRPUL2 ENSG00000171045|TSNARE1 ENSG00000179801|C8orf30A  
ENSG00000181437|XR\_017773.1 ENSG00000186979|Q96BK8\_HUMAN ENSG00000198663|C6orf89 ENSG00000198752|CDC42BPB ENSG00000204865|Q6ZSD6\_HUMAN ENSG00000168644|GLT8D1 ENSG000002021488|SLC7A9 ENSG00000075239|ACAT1  
ENSG00000078124|PHCA ENSG00000099250|NRP1 ENSG00000105792|Q8IY89\_HUMAN ENSG00000123472|ATPAF1 ENSG00000131979|GCH1 ENSG00000135960|EDAR ENSG00000137942|FNBPL1 ENSG00000144452|ABCA12  
ENSG00000148123|NP\_060223.2 ENSG00000149658|YTHDF1 ENSG00000152611|CAPSL ENSG00000163636|PSMD6 ENSG00000164258|NDUFS4 ENSG00000166865|IL7R ENSG00000177497|C9orf42 ENSG00000180347|CCDC129  
ENSG00000182752|PAPPA ENSG00000196664|TLR7 ENSG00000197062|ZNF187 ENSG00000198865|Q4G0S7\_HUMAN  
GTGACGTA ENSG00000078699|CBFA2T2 ENSG00000088671|PPEF1 ENSG00000088854|C20orf194 ENSG00000102445|C13orf18 ENSG00000102900|NUP93 ENSG00000103222|ABCC1 ENSG00000108852|MPP2 ENSG00000117691|NENF  
ENSG00000134809|TIMM10 ENSG00000136059|VILL ENSG00000147065|MSN ENSG00000177021|LRRC24 ENSG00000178952|TUFM ENSG00000182054|IDH2 ENSG00000182346|DAOA ENSG00000183066|WBP2NL  
ENSG00000183691|NOG ENSG00000198816|ZNF358 ENSG00000204323|Q7LRC9\_HUMAN ENSG00000205972|Q8NBC0\_HUMAN ENSG00000051180|RAD51 ENSG00000102710|FAM48A ENSG00000102743|SLC25A15 ENSG00000112584|FAM120B  
ENSG00000117625|RCOR3 ENSG00000129699|NP\_067644.2 ENSG000001045780|PEMLC ENSG00000154027|AK5 ENSG00000156140|ADAMTS3 ENSG00000157224|CLDN12 ENSG00000163297|ANTXR2 ENSG00000165072|MAMDC2  
ENSG00000168300|PCMTD1 ENSG00000169554|ZEB2 ENSG00000170006|TMEM154 ENSG00000174749|C4orf32 ENSG00000177068|Q8N269\_HUMAN ENSG00000177613|CSTF2 ENSG00000197756|RPL37A  
ENSG00000172195|SPEG ENSG00000087903|RFX2 ENSG00000099821|POLRMT ENSG00000112139|MDGA1 ENSG00000115318|LOXL3 ENSG00000117362|APH1A ENSG00000119714|GPR68 ENSG00000136485|WDR68  
ENSG00000146005|PSD2 ENSG00000149679|CABLES2 ENSG00000152042|NBP8 ENSG00000162277|TAF6L ENSG00000162272|ATF3 ENSG00000166444|ST5 ENSG00000168026|TTC21A  
ENSG00000168274|H1ST1H2AE ENSG00000176022|B3GALT6 ENSG00000179571|NP\_001034792.1 ENSG00000196559|C10orf55 ENSG00000204603|Q69YW3\_HUMAN ENSG00000049192|ADAMTS6 ENSG00000123983|ACSL3 ENSG00000124795|DEK  
ENSG00000134444|KIAA1468 ENSG00000141279|NPEPPS ENSG00000143514|TP53BP2 ENSG00000144285|SCN1A ENSG00000152527|PLEKHH2 ENSG00000154007|ASB17 ENSG00000163681|SLMAP ENSG00000166206|GABRB3  
ENSG00000166432|ZMAT1 ENSG00000174485|DENND4A ENSG00000174780|SRP72 ENSG00000189184|PCDH18 ENSG00000205604|Q6ZUP5\_HUMAN  
GTCCATAT ENSG00000023892|DEF6 ENSG00000095970|TREM2 ENSG00000099204|ABLIM1 ENSG00000105369|CD79A ENSG00000105617|LENG1 ENSG00000128524|ATP6V1F ENSG00000142224|IL19 ENSG00000143416|SELENBP1  
ENSG00000154478|GPR26 ENSG00000158869|FCER1G ENSG00000166171|NP\_056263.1 ENSG00000172301|C17orf79 ENSG00000175155|YPEL2 ENSG00000179598|NP\_849158.1 ENSG00000185966|LCE3E ENSG00000187908|DMBT1  
ENSG00000203836|NP\_899228.3 ENSG00000204847|FAM74A1 ENSG0000003989|SLC7A2 ENSG00000009765|IYD ENSG00000014123|KIAA0776 ENSG00000054803|CBLN4 ENSG00000072315|TRPC5 ENSG00000073969|NSF  
ENSG00000088756|ARHGAP28 ENSG00000096401|CDC5L ENSG00000101752|MTB1 ENSG00000105928|DFNA5 ENSG00000107614|TRMT1 ENSG00000119636|C14orf45 ENSG00000152954|NRSN1 ENSG00000158290|CUL4B  
ENSG00000163738|MTHFD2L ENSG00000169255|B3GALNT1 ENSG00000169299|PGM2 ENSG00000172209|GPR22 ENSG00000174343|CHRNA9 ENSG00000174417|TRHR ENSG00000174839|FAM116A ENSG00000176915|KIAA0692  
ENSG00000179930|ZNF648 ENSG00000181656|GPR88 ENSG00000181788|SIAH2 ENSG00000183283|DAZAP2 ENSG00000183340|JRK1 ENSG00000187054|TMPRSS11A ENSG00000204348|DOM3Z ENSG00000204841|FAM74A2  
ENSG00000204844|FAM74A3  
GTCCAA ENSG000000011590|ZBTB32 ENSG00000027869|SH2D2A ENSG00000090661|LASS4 ENSG00000101213|PTK6 ENSG00000103197|TSC2 ENSG00000105197|TIMM50 ENSG00000105499|PLA2G4C ENSG00000130294|KIF1A  
ENSG00000146215|CRIP3 ENSG00000151364|KCTD14 ENSG00000164051|CCDC51 ENSG00000166143|PPP1R14D ENSG00000166341|DCHS1 ENSG00000168940|LRRC28 ENSG00000170445|HARS ENSG00000175221|THRAP5  
ENSG00000180096|SEPT1 ENSG00000182968|SOX1 ENSG00000186063|Clorf80 ENSG00000187714|SLC18A3 ENSG00000188396|NP\_001013654.1 ENSG00000041357|PSMA4 ENSG00000054690|PLEKHH1 ENSG00000071537|SEL1L  
ENSG00000100567|PSMA3 ENSG00000100889|PCK2 ENSG00000105976|MET ENSG00000109475|RPL34 ENSG00000116127|ALMS1 ENSG00000118492|C6orf103 ENSG00000136824|SMC2 ENSG00000140030|GPR65  
ENSG00000156384|C10orf78 ENSG00000158985|CDC42SE2 ENSG00000165775|FUNDQ2 ENSG00000166262|C15orf33 ENSG00000170153|RNF150 ENSG00000178695|KCTD12 ENSG00000182367|SNRPEL1 ENSG00000185127|C6orf120  
ENSG00000185532|PRKG1 ENSG00000187191|DAZ3 ENSG00000187229|Q86YR2\_HUMAN ENSG00000188120|DAZ1 ENSG00000205916|DAZ4 ENSG00000205944|DAZ2  
GTCCCAA ENSG00000008086|CDKL5 ENSG00000013275|PSMC4 ENSG00000065308|TRAM2 ENSG00000100034|PPM1F ENSG00000110244|APOA4 ENSG00000113719|ERGI1 ENSG00000114745|GORASP1 ENSG00000140470|ADAMTS17  
ENSG00000140718|FTO ENSG00000143842|SOX13 ENSG00000143858|SYT2 ENSG00000147804|SLC39A4 ENSG00000159461|AMFR ENSG00000163515|RETNLB ENSG00000163931|TKT ENSG00000165828|PRAP1  
ENSG00000171786|NHLH1 ENSG00000174898|TMEM146 ENSG00000176315|Q8N7I9\_HUMAN ENSG00000178401|NP\_079178.2 ENSG00000182571|NXP3 ENSG00000196743|GM2A ENSG00000203747|FCGR3A ENSG00000204946|ZNF783  
ENSG00000206190|ATP10A ENSG00000058804|TMEM48 ENSG00000083457|ITGAE ENSG00000089876|DHX32 ENSG00000095585|BLNK ENSG00000112294|ALDH5A1 ENSG00000114861|FOXP1 ENSG00000121897|LIAS  
ENSG00000125812|GZF1 ENSG00000133328|HRASLS2 ENSG00000137942|FNBPL1 ENSG00000143226|FCGR2A ENSG00000143337|TOR1AIP1 ENSG00000150867|PIP5K2A ENSG00000152642|GPD1L ENSG00000164543|STK17A  
ENSG00000169087|HSPBAP1 ENSG00000170356|NR\_002157.1 ENSG00000171174|RBKS ENSG00000174628|IQCK ENSG00000178107|Q8N1B8\_HUMAN ENSG00000178562|CD28 ENSG00000182565|Q8NOW1\_HUMAN ENSG00000185737|NRG3  
ENSG00000187054|TMPRSS11A ENSG00000197747|S100A10 ENSG00000198738|Q5T5W8\_HUMAN ENSG00000204136|GGTA1 ENSG00000205428|C9orf35  
GTCCCCA ENSG000000007312|CD79B ENSG000000070444|MNT ENSG00000101220|C20orf27 ENSG00000105281|SLC1A5 ENSG00000106638|TBL2 ENSG00000108813|DLX4 ENSG00000125503|PPP1R12C ENSG00000137221|TJAP1  
ENSG00000142538|TIP39\_HUMAN ENSG00000145936|KCNMB1 ENSG00000154040|CABYR ENSG00000158220|FAM62C ENSG00000159712|ANKRD18B ENSG00000160209|PDXK ENSG00000162430|SEPN1 ENSG00000162496|DHR53  
ENSG00000164007|CLDN19 ENSG00000167208|NP\_878274.1 ENSG00000174516|PELI3 ENSG00000182472|CAPN12 ENSG00000185340|GAS2L1 ENSG00000188681|Q8TEH8\_HUMAN ENSG00000189429|RNF207 ENSG00000198598|MMP17  
ENSG00000203987|Q6ZR86\_HUMAN ENSG00000204323|Q7LRC9\_HUMAN ENSG00000103316|CRYM ENSG00000122194|PLG ENSG00000137478|FCHSD2 ENSG00000140379|BCL2L1 ENSG00000141497|ZMYND15 ENSG00000142166|IFNAR1  
ENSG00000143157|POGK ENSG00000147926|NP\_001076593.1 ENSG00000148584|ACF\_HUMAN ENSG00000154274|C4orf19 ENSG00000159167|STC1 ENSG00000162769|FLVC1\_HUMAN ENSG00000163166|TWS1 ENSG00000166337|TAF10  
ENSG00000171147|NP\_001001317.1 ENSG00000173406|DAB1 ENSG00000185775|FAM75A6 ENSG00000196540|FAM75A3 ENSG00000197896|Q5VU36\_HUMAN ENSG00000198276|UCKL1 ENSG00000204840|Q4VX67\_HUMAN ENSG00000204848|FAM75A2  
ENSG00000204849|FAM75A1  
GTCCCGC ENSG000000070729|CNGB1 ENSG00000075043|KCNQ2 ENSG00000077044|DGK ENSG00000099972|MICAL3 ENSG00000104823|ECH1 ENSG00000105427|CNFN ENSG00000116035|VAX2 ENSG00000126583|PRKCG  
ENSG00000126934|MAP2K2 ENSG00000129543|FLJ16369 ENSG00000132510|JMJD3 ENSG00000136878|USP20 ENSG00000138964|PARVG ENSG00000139874|SSTR1 ENSG00000142039|CCDC97 ENSG00000145494|NDUFS6  
ENSG00000148396|KIAA0310 ENSG00000158104|HPD ENSG00000160796|NEEAL2 ENSG00000167608|TMC4 ENSG00000167645|YIF1B ENSG00000168828|OR13J1 ENSG00000169683|LRRC45 ENSG00000172247|C1QTNF4  
ENSG00000173706|HEG1 ENSG00000179965|ZNF771 ENSG00000181027|FKRP ENSG00000183093|MRPL12 ENSG00000184068|Q8N8F0\_HUMAN ENSG00000186526|CYP4F8 ENSG00000198355|PIM3  
ENSG00000100425|BRD1 ENSG00000100426|ZBED4 ENSG00000109689|STIM2 ENSG00000110367|DDX6 ENSG00000113645|WWC1 ENSG00000125772|GDE5\_HUMAN ENSG00000129474|JUB ENSG00000129675|ARHGFE6  
ENSG00000135541|AHI1 ENSG00000136750|GAD2 ENSG00000139946|PELI2 ENSG00000144228|SPOPL\_HUMAN ENSG00000156206|C15orf26 ENSG00000160551|TAOK1 ENSG00000164411|GJB7 ENSG00000166783|KIAA0430  
ENSG00000185551|NR2F2 ENSG00000198771|RCSD1  
GTCCCGT ENSG00000006282|SPATA20 ENSG00000100429|HDAC10 ENSG00000108175|ZMIZ1 ENSG00000114270|COL7A1 ENSG00000130635|COL5A1 ENSG00000132394|EEFSEC ENSG00000135709|KIAA0513 ENSG00000141570|CBX8  
ENSG00000164920|OSR2 ENSG00000168395|IGS5 ENSG00000170486|CD14 ENSG00000170486|KRT72 ENSG00000175567|UCP2 ENSG00000176945|MUC20 ENSG00000178950|GAK ENSG00000184164|CRELD2  
ENSG00000185122|HSF1 ENSG000001

|         |                              |                              |                                |                                |                              |                              |                                |                              |                          |
|---------|------------------------------|------------------------------|--------------------------------|--------------------------------|------------------------------|------------------------------|--------------------------------|------------------------------|--------------------------|
|         | ENSG00000110911 SLC11A2      | ENSG00000112333 NR2E1        | ENSG00000112685 EXOC2          | ENSG00000120156 TEK            | ENSG00000120563 LYZL1        | ENSG00000123908 EIF2C2       | ENSG00000129472 RAB2B          | ENSG00000137270 GCM1         |                          |
|         | ENSG00000140945 CDH13        | ENSG00000143514 TP53BP2      | ENSG00000146842 NP_116231.2    | ENSG00000148450 MSRB2          | ENSG00000149658 YTHDF1       | ENSG00000151033 LYZL2        | ENSG00000157551 KCNJ15         | ENSG00000168502 KIAA0802     |                          |
| GTCGGGT | ENSG00000172733 PURG         | ENSG00000187919 GSTA1        | ENSG00000203730 TEDDM1         | ENSG00000084112 SSH1           | ENSG00000100075 SLC25A1      | ENSG00000100292 HMOX1        | ENSG00000105204 DYRK1B         | ENSG00000118156 ZNF541       |                          |
|         | ENSG00000059691 PET112L      | ENSG00000070778 PTPN21       | ENSG00000075043 KCNQ2          | ENSG00000128203 ASPHD2         | ENSG00000130600 H19          | ENSG00000132394 EFSEC        | ENSG00000139174 PRICKLE1       | ENSG00000139547 RDH16        |                          |
|         | ENSG00000119919 NKX2-3       | ENSG00000125817 CENPB        | ENSG00000128011 LRFN1          | ENSG00000164493 C6orf122       | ENSG00000168255 Q8TZ67_HUMAN | ENSG00000177030 DEAF1        | ENSG00000177337 NP_001034885.1 | ENSG00000177363 NP_981967.1  |                          |
|         | ENSG00000149480 MTA2         | ENSG00000153551 CMTM7        | ENSG00000160117 ANKRD41        | ENSG00000185481 C21orf129      | ENSG00000198664 Q9BTRO_HUMAN | ENSG00000198837 DENND4B      | ENSG0000008083 JARID2          | ENSG00000054796 SPO11        | ENSG00000068366 ACSL4    |
|         | ENSG00000177380 PFFIA3       | ENSG00000183600 Q66K37_HUMAN | ENSG00000126226 PCID2          | ENSG00000131979 GCHI           | ENSG00000133131 MORC4        | ENSG00000134762 DSC3         | ENSG00000138755 CXCL9          | ENSG00000150776 C11orf57     |                          |
|         | ENSG00000082397 EPB41L3      | ENSG00000107798 LIPA         | ENSG00000164542 NIPBL          | ENSG000001056129.1             | ENSG00000166971 AKT1P        | ENSG00000167601 AXL          | ENSG00000168411 RFWD3          | ENSG00000170325 PRDM10       | ENSG00000171056 SOX7     |
|         | ENSG00000157551 KCNJ15       | ENSG00000164190 NIPBL        | ENSG00000185304 NP_001071638.1 | ENSG00000185915 KLHL34         | ENSG00000187627 RGPDI        | ENSG00000205462 Q6ZWC8_HUMAN | ENSG00000205612 Q71JB2_HUMAN   |                              |                          |
| GTCGAAC | ENSG00000177508 IRX3         | ENSG00000092421 SEMA6A       | ENSG00000103852 TTC23          | ENSG00000113196 HAND1          | ENSG00000118058 MLL          | ENSG00000127098 ANKRD19      | ENSG00000133195 SLC39A11       | ENSG00000145920 CPLX2        |                          |
|         | ENSG00000157851 DPYSL5       | ENSG00000160888 IER2         | ENSG00000162894 FAIM3          | ENSG00000165698 C9orf9         | ENSG00000166126 AMN          | ENSG00000185721 DRG1         | ENSG00000197322 NP_997337.1    | ENSG00000198053 SIRPA        |                          |
|         | ENSG00000204423 C9orf33      | ENSG00000016082 ISL1         | ENSG00000038427 VCAN           | ENSG00000084093 REST           | ENSG00000104763 ASAH1        | ENSG00000118946 PCDH17       | ENSG00000125848 FLRT3          | ENSG00000134644 PUM1         |                          |
|         | ENSG00000137168 PIL1L        | ENSG00000145332 KLHL8        | ENSG00000147854 UHRF2          | ENSG00000148053 NTRK2          | ENSG00000152518 ZFP36L2      | ENSG00000154359 LONRF1       | ENSG00000168283 BMI1           | ENSG00000171940 ZNF217       |                          |
|         | ENSG00000173068 BNC2         | ENSG00000180182 CRSP2        | ENSG00000185056 Q569G3_HUMAN   | ENSG00000189403 HMG1B          | ENSG00000197801 Q8TEB0_HUMAN | ENSG00000205423 TMEM188      | ENSG00000205791 LOH12CR2       |                              |                          |
| GTCGACA | ENSG00000113041 PTBP1        | ENSG00000072958 AP1M1        | ENSG00000073584 SMARCE1        | ENSG00000093217 XYLB           | ENSG00000100077 ADRBK2       | ENSG00000106144 CASP2        | ENSG00000106236 NPTX2          | ENSG00000126561 STAT5A       |                          |
|         | ENSG00000130052 STARDB8      | ENSG00000132361 KIAA0664     | ENSG00000136574 GATAC4         | ENSG00000148204 CREB2          | ENSG00000154118 JPH3         | ENSG00000154832 CXCC1        | ENSG00000156299 TIAM1          | ENSG00000160917 CPSF4        |                          |
|         | ENSG00000162892 IL2A         | ENSG00000164519 Q96MZ3_HUMAN | ENSG00000168159 RNFI187        | ENSG00000170214 ADRA1B         | ENSG00000171427 NM_145293    | ENSG00000173898 SPTBN2       | ENSG00000175699 C14orf48       | ENSG00000183528 Q0VAF8_HUMAN |                          |
|         | ENSG00000185627 PMSD13       | ENSG00000188312 CENPF        | ENSG00000196843 ARID5A         | ENSG00000197916 Q8N7P5_HUMAN   | ENSG00000198009 Q8IZW4_HUMAN | ENSG00000204922 U655_HUMAN   | ENSG0000020720 STARDB3NL       | ENSG00000042781 USH2A        |                          |
|         | ENSG00000091428 RAPGEF4      | ENSG00000099219 KIAA1815     | ENSG00000109919 MTCH2          | ENSG00000111799 COL12A1        | ENSG00000114423 CBLB         | ENSG00000117479 SLC19A2      | ENSG00000120705 ETF1           | ENSG00000131013 PPIL4        |                          |
|         | ENSG00000133773 CDC59        | ENSG00000146909 NOM1         | ENSG00000149177 PTPRJ          | ENSG00000151615 POU4F1         | ENSG00000152455 SUV39H2      | ENSG00000152463 OLAH         | ENSG00000154721 JAM2           | ENSG00000158966 CACHD1       |                          |
|         | ENSG00000163817 SLC6A20      | ENSG00000174298 NF_694572.1  | ENSG00000174298 NF_694572.1    | ENSG00000185737 NRG3           | ENSG00000188193 C6orf155     | ENSG00000196616 ADH1C        | ENSG00000198838 RYR3           | ENSG00000198865 Q4G0S7_HUMAN |                          |
| GTCGACC | ENSG00000088543 C3orf18      | ENSG00000104969 SGTA         | ENSG00000107140 TESK1          | ENSG00000115138 POMC           | ENSG00000116584 ARHGEP2      | ENSG00000123364 HOXC13       | ENSG00000129946 SHC2           | ENSG00000132024 CC2D1A       |                          |
|         | ENSG00000141404 GNAL         | ENSG00000143630 HCN3         | ENSG00000149488 TMC2           | ENSG00000153481 NP_060680.2    | ENSG00000154783 FGD5         | ENSG00000161847 RAVER1       | ENSG00000162188 GNG3           | ENSG00000164850 GPR30        |                          |
|         | ENSG00000166126 AMN          | ENSG00000167461 RAB8A        | ENSG00000171954 NP_775754.1    | ENSG00000172824 Q6P2E5_HUMAN   | ENSG00000188428 TXNDC5       | ENSG00000204401 Q8N0T0_HUMAN | ENSG00000205879 FAM90A25P      | ENSG000000077147 TM9SF3      |                          |
|         | ENSG00000110218 PANX1        | ENSG00000131951 LRRc9        | ENSG00000138650 PCDH10         | ENSG00000138795 LEF1           | ENSG00000139970 RTN1         | ENSG00000152977 ZIC1         | ENSG00000157131 C8A            | ENSG00000164485 IL22RA2      |                          |
|         | ENSG00000165632 TAF3         | ENSG00000172243 CLEC7A       | ENSG00000175553 K1210_HUMAN    | ENSG00000175893 ZDHHC21        | ENSG00000179930 ZNF648       | ENSG00000185950 IRS2         | ENSG00000188613 NANOS1         | ENSG00000197594 ENPP1        |                          |
|         | ENSG00000198626 RYR2         |                              |                                |                                |                              |                              |                                |                              |                          |
| GTCGATA | ENSG00000103168 TAF1C        | ENSG00000107562 CXCL12       | ENSG00000131584 CENTB5         | ENSG00000157103 SLC6A1         | ENSG00000158109 FAM79A       | ENSG00000162415 ZSWIM5       | ENSG00000162493 PDPN           | ENSG00000163872 YEATS2       |                          |
|         | ENSG00000166033 HTRA1        | ENSG00000167470 MIDN         | ENSG00000169925 BRD3           | ENSG00000172183 ISG20          | ENSG00000176533 GNG7         | ENSG00000187122 ARHGAP19     | ENSG00000188428 TXNDC5         | ENSG00000203762 Q6ZTJ3_HUMAN |                          |
|         | ENSG00000081189 MEF2C        | ENSG00000101935 AMMECR1      | ENSG00000113205 PCDHB3         | ENSG00000119820 YIPF4          | ENSG00000120675 DNAJC15      | ENSG00000137364 TPMT         | ENSG00000139910 NOVA1          | ENSG00000145723 ZH2C2        |                          |
|         | ENSG00000152465 NMT2         | ENSG00000152558 TMEM123      | ENSG00000156928 C7orf30        | ENSG00000164616 FBXL21         | ENSG00000165512 ZNF22        | ENSG00000168952 STXBP6       | ENSG00000169564 PCBP1          | ENSG00000171860 C3AR1        |                          |
|         | ENSG00000174839 FAM116A      | ENSG00000178502 KLHL11       | ENSG00000180777 ANKRD30B       | ENSG00000183513 NP_001008216.1 | ENSG00000187969 ZCCHC13      | ENSG00000196616 ADH1C        |                                |                              |                          |
| GTCGATC | ENSG00000115901 ZBTB32       | ENSG00000013619 CXorf6       | ENSG00000017621 MAGIX          | ENSG00000089250 NOS1           | ENSG00000100106 TROBP        | ENSG00000118263 KLF7         | ENSG00000125813 PAX1           | ENSG00000130669 PAK4         |                          |
|         | ENSG00000131037 EPS8L1       | ENSG00000140983 RHOT2        | ENSG00000148842 CNM2           | ENSG00000160014 CALM_HUMAN     | ENSG00000160179 ABCG1        | ENSG00000160460 SPTBN4       | ENSG00000162585 C1orf86        | ENSG00000162896 PIGR         |                          |
|         | ENSG00000167302 C17orf56     | ENSG00000172922 RNAHEH2C     | ENSG00000173714 WFIKN2         | ENSG00000176769 TCERG1L        | ENSG00000178589 Q9BT26_HUMAN | ENSG00000179598 NP_849158.1  | ENSG00000187251 C1orf213       | ENSG00000188234 XR_016668.1  |                          |
|         | ENSG00000189223 Q7Z3M5_HUMAN | ENSG00000204957 Q6ZVQ6_HUMAN | ENSG00000205231 Q6ZQQ1_HUMAN   | ENSG00000205710 Q6ZR85_HUMAN   | ENSG00000205710 Q6ZR85_HUMAN | ENSG00000038295 TLL1         | ENSG00000060749 Q6ZU30_HUMAN   | ENSG00000071991 CDH19        | ENSG00000077713 SLC25A43 |
|         | ENSG00000102218 RP2          | ENSG00000109606 DHX15        | ENSG00000111816 FRK            | ENSG00000119508 NR4A3          | ENSG00000120694 HSPH1        | ENSG00000120963 ZNF706       | ENSG00000122417 ODF2L          | ENSG00000127603 MACF1        |                          |
|         | ENSG00000134954 ETS1         | ENSG00000138041 SMEK2        | ENSG00000148634 HERC4          | ENSG00000155592 ZKSCAN2        | ENSG00000157450 RNFI11       | ENSG00000163512 AZI2         | ENSG00000164823 OSGIN2         | ENSG00000166226 CCT2         |                          |
|         | ENSG00000166938 DIS3L        | ENSG00000170871 K0232_HUMAN  | ENSG00000172201 ID4            | ENSG00000172469 MANEA          |                              |                              |                                |                              |                          |
|         | perfect: GTCGATC GATCGAC     | hsa-miR-369-5p               | gATCGACcgtgttatattcgc          | 1                              |                              |                              |                                |                              |                          |
| GTCGCAT | ENSG00000038382 TRIO         | ENSG00000058404 CAMK2B       | ENSG00000106605 ITPK1          | ENSG00000105219 CNTD2          | ENSG00000105963 CENTA1       | ENSG00000108639 SYNGR2       | ENSG00000132005 RFX1           | ENSG00000135424 ITGA7        |                          |
|         | ENSG00000146576 C7orf26      | ENSG00000159712 ANKRD18B     | ENSG00000164920 OSR2           | ENSG00000166780 C16orf45       | ENSG00000170161 Q5VV11_HUMAN | ENSG00000172476 RAB40A       | ENSG00000172530 BANP           | ENSG00000177234 C10orf85     |                          |
|         | ENSG00000177340 Q0VFX0_HUMAN | ENSG00000178796 Q8N9Z1_HUMAN | ENSG00000179344 HB25_HUMAN     | ENSG00000184014 RAB6IP1        | ENSG00000186316 Q96NA9_HUMAN | ENSG00000186837 C21orf119    | ENSG00000189152 Q8TC17_HUMAN   |                              |                          |
|         | ENSG00000196106 Q8WZ26_HUMAN |                              |                                |                                |                              |                              |                                |                              |                          |
|         | ENSG00000204117 Q6ZV58_HUMAN | ENSG00000205159 Q6ZVC9_HUMAN | ENSG00000205633 NP_001010902.1 | ENSG00000205918 Q6A1A2_HUMAN   | ENSG00000206140 IL20RA       | ENSG00000104361 NPAL2        | ENSG0000010768 GTF2H1          | ENSG00000112685 EXOC2        |                          |
|         | ENSG00000114446 IFT57        | ENSG00000115806 GORASP2      | ENSG00000120526 NUDCD1         | ENSG00000120833 SOC2           | ENSG00000136436 CALCOCC2     | ENSG00000141429 GALNT1       | ENSG00000154079 C6orf57        | ENSG00000154646 PRSS7        |                          |
|         | ENSG00000165973 NELL1        | ENSG00000166822 TMEM170      | ENSG00000168843 FSTL5          | ENSG00000171243 SOSTDC1        | ENSG00000171759 PAH          | ENSG00000173917 HOXB2        | ENSG00000174574 C1orf108       | ENSG00000186017 ZNF566       |                          |
| GTCGCGA | ENSG00000002330 BAD          | ENSG00000103174 NAGPA        | ENSG00000105711 SCN1B          | ENSG00000124422 USP22          | ENSG00000136878 USP20        | ENSG00000163956 LRPAP1       | ENSG00000185668 POU3F1         | ENSG00000205927 OLIG2        |                          |
|         | ENSG00000137710 RDY          | ENSG00000147044 CASK         | ENSG00000157554 ERG            | ENSG00000196677 C8orf77        |                              |                              |                                |                              |                          |
| GTCGGAC | ENSG00000080573 COL5A3       | ENSG00000089091 C20orf12     | ENSG00000089280 FUS            | ENSG00000090674 MCOLN1         | ENSG00000103227 TMEM112      | ENSG00000103496 STX4         | ENSG00000103510 MYST1          | ENSG00000107317 PTGDS        |                          |
|         | ENSG00000107821 KAZALD1      | ENSG00000118156 ZNF541       | ENSG00000123384 LRF1           | ENSG00000140939 NOL3           | ENSG00000141098 GFOD2        | ENSG00000151360 ALLC         | ENSG00000158008 EXTL1          | ENSG00000161649 CD300LG      |                          |
|         | ENSG00000163888 CAMK2N2      | ENSG00000166507 NDST2        | ENSG00000169896 ITGAM          | ENSG00000181649 PHLDA2         | ENSG00000187840 EIF4EBP1     | ENSG00000196893 Q8N2W8_HUMAN | ENSG00000204499 Q6P6C6_HUMAN   | ENSG00000205610 Q4G105_HUMAN |                          |
|         | ENSG0000007062 PRM1          | ENSG00000070718 AP3M2        | ENSG00000088205 DXL18          | ENSG00000117758 STX12          | ENSG00000121940 CLCC1        | ENSG00000128833 MYO5C        | ENSG00000137975 CLCA2          | ENSG00000141542 RAB40B       |                          |
|         | ENSG00000168175 C14orf32     | ENSG00000172493 AFF1         | ENSG00000174010 KLHL15         | ENSG00000179041 RRS1           | ENSG00000179476 C14orf28     | ENSG00000182217 HIST2H4B     | ENSG00000183508 FAM46C         | ENSG00000183941 HIST2H4A     |                          |
|         | ENSG00000206384 Q69YT0_HUMAN |                              |                                |                                |                              |                              |                                |                              |                          |
| GTCGGAG | ENSG00000080031 PTPRH        | ENSG00000105576 TNPO2        | ENSG00000105671 DDX49          | ENSG00000110107 PRPF19         | ENSG00000116329 OPRD1        | ENSG00000137177 KIF13A       | ENSG00000141002 TCF25          | ENSG00000143110 C1orf162     |                          |
|         | ENSG00000148826 NKX6-2       | ENSG00000157601 MX1          | ENSG00000162711 NLRP3          | ENSG00000165702 GFI1B          | ENSG00000166925 TSC22D4      | ENSG00000172530 BANP         | ENSG00000173818 NP_775898.2    | ENSG00000183186 KIAA1957     |                          |
|         | ENSG00000183528 Q0VAF8_HUMAN | ENSG00000186895 FGF3         | ENSG00000187583 PLEKHN1        | ENSG00000188186 NP_001008396.1 | ENSG00000079102 RUNX1T1      | ENSG00000089094 FBXL10       | ENSG00000107937 GTPBP4         | ENSG00000109099 PMP22        |                          |
|         | ENSG00000115525 ST3GAL5      | ENSG00000120549 KIAA1217     | ENSG00000126216 TUBGCP3        | ENSG00000138075 ABCG5          | ENSG00000139508 SLC46A3      | ENSG00000151461 UPF2         | ENSG00000152931 PART1_HUMAN    | ENSG00000159917 ZNF235       |                          |
|         | ENSG00000160062 ZBTB8        | ENSG00000163584 RPL22L1      | ENSG00000169551 CXorf48        | ENSG00000170180 GYPA           | ENSG00000178184 PARD6G       | ENSG00000183067 IGSF5        | ENSG00000186496 ZNF396         | ENSG00000198890 PRMT6        |                          |
| GTCGGTA | ENSG0000009335 UBE3C         | ENSG0000011590 ZBTB32        | ENSG00000028137 TNFRSF1B       | ENSG00000048140 TSPAN17        | ENSG00000076864 RAP1GAP      | ENSG00000089060 SLC24A6      | ENSG00000103042 NP_060701.1    | ENSG00000118160 SLC8A2       |                          |
|         | ENSG00000136444 RSAD1        | ENSG00000143093 FAM40A       | ENSG00000148396 KIAA0310       | ENSG00000165175 MIDI1P1        | ENSG00000171720 HDAC3        | ENSG00000172216 CEBPB        | ENSG00000179240 Q3ZCU0_HUMAN   | ENSG00000180249 Q8N872_HUMAN |                          |
|         | ENSG00000181026 ISG20L1      | ENSG00000186792 IFRD2        | ENSG00000197976 CYXorf3        | ENSG00000198012 XR_017841.1    | ENSG00000203793 Q6ZR74_HUMAN | ENSG00000204080 Q6ZRQ9_HUMAN | ENSG00000204581 Q6ZU44_HUMAN   | ENSG00000204585 Q8N8T0_HUMAN |                          |
|         | ENSG00000204957 Q6ZVQ6_HUMAN | ENSG00000056972 TRAF3IP2     | ENSG00000057657 PRDM1          | ENSG00000071539 TRIP13         | ENSG00000074657 ZNF532       | ENSG00000089006 SNX5         | ENSG00000104497 SNX16          | ENSG00000106031 HOXA13       |                          |
|         | ENSG00000108854 SMURF2       | ENSG00000111897 SERINC1      | ENSG00000120217 CD274          | ENSG00000123096 SSP1           | ENSG00000127989 MTERF        | ENSG00000133119 RFC3         | ENSG00000138071 ACTR2          | ENSG00000140987 ZNF434       |                          |
|         | ENSG00000165195 PTGA         | ENSG00000172915 NBEA         | ENSG00000177047 IFNWI          | ENSG00000186188 GPR120         | ENSG00000196072 BLTCL1S2     | ENSG00000196247 ZNF588       | ENSG00000205144 Q6ZV43_HUMAN   | ENSG00000205195 Q6ZTB1_HUMAN |                          |
| GTCGGTT | ENSG0000022277 C20orf43      | ENSG00000070371 CLTCL1       | ENSG00000075624 ACTB           | ENSG00000077782 FGFR1          | ENSG00000079435 LIPE         |                              |                                |                              |                          |

ENSG00000204386|NEU1 ENSG00000107864|CPEB3 ENSG00000111961|SASH1 ENSG00000114771|AADAC ENSG00000134109|EDEM1 ENSG00000135346|CGA ENSG00000136940|PDCL ENSG00000137075|RNF38  
ENSG00000137462|TLR2 ENSG00000144867|SRPRB ENSG00000147869|CER1 ENSG00000148154|UGCG ENSG00000151320|AKAP6 ENSG00000164040|PGRMC2 ENSG00000166260|COX11 ENSG00000174695|TMEM167  
ENSG00000180712|Q8NEQ2\_HUMAN ENSG00000182504|LRR1Q2 ENSG00000184661|CDCA2  
perfect: GTCTAGT ACTAGAC hsa-miR-151 ACTAGACTgaagctccttgagg 0  
GTCTATT ENSG00000004660|CAMKK1 ENSG000000012779|ALOX5 ENSG00000063438|AHRH ENSG000000065308|TRAM2 ENSG00000105088|OLFM2 ENSG00000105290|APL1 ENSG00000105656|ELL ENSG00000111644|ACRBP  
ENSG00000115275|GCSI\_HUMAN ENSG00000116885|C1orf102 ENSG00000125746|EML2 ENSG00000126464|PRR12 ENSG00000130702|LAMA5 ENSG00000143258|USP21 ENSG00000143473|KCNH1 ENSG00000158445|KCNB1  
ENSG00000160396|HIPK4 ENSG00000167395|ZNF646 ENSG00000171346|KRT15 ENSG00000173867|MRPL46 ENSG00000176438|C14orf49 ENSG00000178307|TMEM11 ENSG00000180083|WFDL1 ENSG00000196220|SRGAP3  
ENSG00000197194|Q6VEP3\_HUMAN ENSG00000198397|A2A3T8\_HUMAN ENSG00000204059|NP\_001013718.1 ENSG00000050393|CCDC90A ENSG00000081923|ATP8B1 ENSG00000087053|MTMR2 ENSG00000106399|RPA3 ENSG00000114978|MOBK1B  
ENSG00000118514|ALDH8A1 ENSG00000119541|VPS4B ENSG00000129480|C14orf126 ENSG00000137992|DBT ENSG00000139687|RB1 ENSG00000143674|M3KL4\_HUMAN ENSG00000145354|ZCD2 ENSG00000146001|PCDHB18  
ENSG00000147488|ST18 ENSG00000151693|DDEF2 ENSG00000153002|CPB1 ENSG00000156017|C9orf41 ENSG00000163606|CD200R1 ENSG00000164303|ENPP6 ENSG00000165389|C14orf147 ENSG00000166750|SLFN5  
ENSG00000167553|TUBA1C ENSG00000169519|METT5D1 ENSG00000171428|NAT1 ENSG00000171757|LRRC34 ENSG00000175497|DPP10 ENSG00000198673|FAM19A2  
GTCTCAC ENSG00000043143|PHF15 ENSG00000044446|PHKA2 ENSG00000053108|FSTL4 ENSG00000056521|GSTO2 ENSG00000114737|CISH ENSG00000124731|TREM1 ENSG00000130803|ZNF317 ENSG00000131196|NFATC1  
ENSG00000140323|DISP2 ENSG00000143409|FAM63A ENSG00000143940|Q6ZMW3\_HUMAN ENSG00000152192|POU4F1 ENSG00000152953|STK32B ENSG00000165916|PSMC3 ENSG00000169427|KCNK9 ENSG00000170682|Q96NU5\_HUMAN  
ENSG00000174788|PCP2 ENSG00000178602|OTOS ENSG00000189180|ZNF33A ENSG00000108256|NUFIP2 ENSG00000115008|IL1A ENSG00000124177|CHD6 ENSG00000124356|STAMPB ENSG00000124813|RUNX2  
ENSG00000132704|FCRL2 ENSG00000134007|ADAM20 ENSG00000136100|VPS36 ENSG00000137573|SULF1 ENSG00000143486|LGTN ENSG00000154743|TSEN2 ENSG00000161654|LSM12 ENSG00000166263|STXBP4  
ENSG00000179933|C14orf119 ENSG00000196591|HDAC2 ENSG00000196980|NR\_002827.1 ENSG00000205765|NP\_787117.3  
GTCTCTA ENSG000000010165|K1AA0859 ENSG00000010438|PRSS3 ENSG00000090659|CD209 ENSG00000104415|WISP1 ENSG00000106245|BUD31 ENSG00000107796|ACTA2 ENSG00000108106|UBE2S ENSG00000116260|QSOX1  
ENSG00000136695|IL1F5 ENSG00000141294|LRRC46 ENSG00000162889|MAPKAPK2 ENSG00000166171|NP\_056263.1 ENSG00000167634|NLRP7 ENSG00000168894|NP\_057578.1 ENSG00000173636|PRSS1 ENSG00000179921|GPBAR1  
ENSG00000180878|C11orf42 ENSG00000186190|C2orf185 ENSG00000196139|AKR1C3 ENSG00000204982|PRSS2 ENSG00000204982|PRSS2 ENSG00000066405|CLDN18 ENSG00000096872|IFT74 ENSG00000105205|CLC  
ENSG00000107036|K1AA1432 ENSG00000113649|TCERG1 ENSG00000119335|SET ENSG00000126838|PZP ENSG00000128578|FAM40B ENSG00000137872|SEMA6D ENSG00000140740|UQCRC2 ENSG00000143457|GOLPH3L  
ENSG00000144868|TMEM108 ENSG00000151575|TEX9 ENSG00000154529|CNTNAP3B ENSG00000162852|C1orf71 ENSG00000163630|SYNPR ENSG00000168724|DNJA5\_HUMAN ENSG00000169291|SHE ENSG00000172023|REG1B  
ENSG00000184943|NP\_443103.1 ENSG00000196549|MME ENSG00000197299|BLM ENSG00000197594|ENFP1 ENSG00000198142|ANKRD57 ENSG00000203970|DEFB11 ENSG00000205773|LOC652517  
GTCTCTC ENSG00000057704|TMCC3 ENSG00000084710|K1AA0953 ENSG00000099337|KCNK6 ENSG00000128011|LRFN1 ENSG00000128510|CPA4 ENSG00000129187|DCTD ENSG00000131669|NINJ1 ENSG00000132394|EEFSEC  
ENSG00000132879|FBXO44 ENSG00000135372|NAT10 ENSG00000136877|PFGS ENSG00000140859|KIFC3 ENSG00000142583|SLC2A5 ENSG00000147160|DGAT2L4 ENSG00000148219|ASTN2 ENSG00000150281|CTF1  
ENSG00000159387|IRX6 ENSG00000159388|BTG2 ENSG00000159527|PGLYRP3 ENSG00000160209|PDXK ENSG00000162735|PEX19 ENSG00000166780|C16orf45 ENSG00000176303|Q8N822\_HUMAN ENSG00000179477|ALOX12B  
ENSG00000183250|C21orf67 ENSG00000198366|HIST1H3A ENSG00000220406|FYBR9\_HUMAN ENSG00000205336|GPR56 ENSG00000206126|Q6ZV82\_HUMAN ENSG0000004534|RBM6 ENSG00000010704|HFE ENSG00000076641|PAG1  
ENSG00000079332|SAR1A ENSG00000110955|ATP5B ENSG00000122068|QYTTD1 ENSG00000123560|PLP1 ENSG00000131586|MRPL20 ENSG00000134590|FAM127A ENSG00000140455|USP3 ENSG00000142188|TMEM50B  
ENSG00000143457|GOLPH3L ENSG00000148730|EIF4EBP2 ENSG00000152413|HOMER1 ENSG00000156463|SH3RF2 ENSG00000160294|MCM3AP ENSG00000163114|PDHA2 ENSG00000163818|LZTFL1 ENSG00000163947|ARHGEF3  
ENSG00000166685|COG1 ENSG00000167088|SNRPD1 ENSG00000170027|YWHAG ENSG00000171819|ANGPTL7 ENSG00000172955|ADH6 ENSG00000174099|MSRB3 ENSG00000181481|RNF135 ENSG00000187079|TEAD1  
ENSG00000198105|ZNF248  
GTCTTAA ENSG00000001461|NPAL3 ENSG00000006756|ARSD ENSG00000007314|SCN4A ENSG00000037637|FBXO42 ENSG00000108219|TSPAN14 ENSG00000124449|IRGC ENSG00000132698|RAB25 ENSG00000143537|ADAM15  
ENSG00000143768|LEFTY2 ENSG00000160180|TFP3 ENSG00000160712|IL6R ENSG00000161265|U2AF1L4 ENSG00000169189|NSMCE1 ENSG00000172965|Q6C48\_HUMAN ENSG00000173436|C1orf151 ENSG00000183530|C22orf30  
ENSG00000203782|LOR ENSG00000204414|CSHL1 ENSG00000204847|FAM74A1 ENSG00000050405|LIMA1 ENSG00000089009|RNP16 ENSG00000104154|SLC30A4 ENSG00000109920|FBNP4 ENSG00000110693|SOX6  
ENSG00000111912|NCOA7 ENSG00000126861|OMG ENSG00000137558|PT15 ENSG00000143315|PIGM ENSG00000144182|LIP1 ENSG00000147475|ERLIN2 ENSG00000154945|ANKRD40 ENSG00000156875|HIAT1  
ENSG00000163001|CCDC104 ENSG00000163788|SNRK ENSG00000169139|UBE2V2 ENSG00000181704|YIPF6 ENSG00000184943|NP\_443103.1 ENSG00000188162|OTOG ENSG00000198860|C1orf19 ENSG00000205171|Q6PDB3\_HUMAN  
perfect: GTCTTAA TTAAGAC hsa-miR-499 TTAAGACTtgagctgagtttaa 0  
GTCTTAC ENSG00000008128|CDC2L1 ENSG00000008838|THRAP4 ENSG00000012232|EXTL3 ENSG00000068438|FTSJ1 ENSG00000078295|ADCY2 ENSG00000095059|DHPS ENSG00000108861|DUSP3 ENSG00000117450|PRDX1  
ENSG00000125975|C2orf173 ENSG00000130294|KIF1A ENSG00000132142|ACACA ENSG00000138085|C2orf28 ENSG00000139626|ITGB7 ENSG00000142920|ADC ENSG00000167755|KLRK6 ENSG00000171357|C1orf190  
ENSG00000186141|POLR3C ENSG00000198909|MAP3K3 ENSG00000203836|NP\_899228.3 ENSG0000050405|LIMA1 ENSG00000067369|TP53BP1 ENSG00000069535|MAOB ENSG00000073969|NSF ENSG00000083099|LYRM2  
ENSG00000102678|FGF9 ENSG00000104320|NBN ENSG00000105866|SP4 ENSG00000106034|NP\_079189.3 ENSG00000108587|GOSR1 ENSG00000110693|SOX6 ENSG00000119965|C10orf88 ENSG00000122548|R0087\_HUMAN  
ENSG00000125352|RNF113A ENSG00000125772|GDE5\_HUMAN ENSG00000128607|NP\_055812.1 ENSG00000155970|EFHA2 ENSG00000164304|CAGE1 ENSG00000169435|RASSF6 ENSG00000181915|C10orf22 ENSG00000187105|HEATR4  
ENSG00000188010|MORN2 ENSG00000189241|TSPYL1  
GTCTTCA ENSG00000100181|CSNK1E ENSG00000100897|WDR23 ENSG00000103196|CRISPLD2 ENSG00000107262|BAG1 ENSG00000116857|TMEM9 ENSG00000119280|C1orf198 ENSG00000119946|CNNM1 ENSG00000124164|VAPB  
ENSG00000125459|MSTO1 ENSG00000131165|CHMP1A ENSG00000134222|PSRC1 ENSG00000134917|Q5FWF1\_HUMAN ENSG00000137275|RIPK1 ENSG00000141179|PCTP ENSG00000144843|ADPRH ENSG00000159247|LOC643224  
ENSG00000169899|Q96MA9\_HUMAN ENSG00000174898|TMEM146 ENSG00000184216|TRAK1 ENSG00000105539|ZNF200 ENSG00000060709|RIMBP2 ENSG00000072042|RDH11 ENSG00000072210|ALDH3A2 ENSG00000078674|PCM1  
ENSG00000082212|ME2 ENSG00000110429|FBXO3 ENSG00000125868|DSTN ENSG00000129235|TXNL5 ENSG00000134253|TRIM45 ENSG00000138785|INTS12 ENSG00000139133|ALG10 ENSG00000142192|APP  
ENSG00000142937|RPS8 ENSG00000146839|ZAN ENSG00000154645|CHODL ENSG00000156463|SH3RF2 ENSG00000160336|ZNF761 ENSG00000161634|DCL2 ENSG00000164176|EDIL3 ENSG00000167562|ZNF701  
ENSG00000168386|FTLIP1L ENSG00000169895|SYAP1 ENSG00000170191|NANP ENSG00000172765|TMCC1 ENSG00000178538|CA8 ENSG00000182463|TSHZ2 ENSG00000186019|ZNF224 ENSG00000189190|ZNF600  
ENSG00000197501|Q9H3B5\_HUMAN ENSG00000198464|ZNF480 ENSG00000198482|ZNF808 ENSG00000198498|NP\_060822.1 ENSG00000198538|ZNF28 ENSG00000198872|PEG10 ENSG00000204604|ZNF468  
GTCTTCC ENSG00000042493|CAPG ENSG00000063169|GLTSCR1 ENSG00000078967|UBE2D4 ENSG00000100647|K1AA0247 ENSG00000105556|NP\_060020.1 ENSG00000106003|LFGG ENSG00000108515|ENO3 ENSG00000115350|POLE4  
ENSG00000120899|PTK2B ENSG00000123342|MMP19 ENSG00000132155|RAF1 ENSG00000132589|FLOT2 ENSG00000132744|ACY3 ENSG00000150455|TIRAP ENSG00000158480|SPATA2 ENSG00000160202|CRYAA  
ENSG00000160226|C21orf2 ENSG00000166716|ZNF592 ENSG00000170275|CRTAP ENSG00000173039|RELA ENSG00000176303|Q8N822\_HUMAN ENSG00000178209|PLEC1 ENSG00000178980|SEPW1 ENSG00000182289|Q9H9U3\_HUMAN  
ENSG00000186575|NF2 ENSG00000196517|SLC6A9 ENSG00000197021|C1orf40B ENSG00000203744|ALL170\_HUMAN ENSG00000203747|FCGR3A ENSG00000204620|Q6ZPC8\_HUMAN ENSG00000205089|NP\_001034869.1 ENSG0000055208|MAP3K7IP2  
ENSG00000079691|LRRC16 ENSG00000082213|C5orf22 ENSG00000099940|SNAP29 ENSG00000101888|NXT2 ENSG00000102543|CDADC1 ENSG00000102743|SLC25A15 ENSG00000112706|IMPG1 ENSG00000118473|SGIP1  
ENSG00000124767|GLO1 ENSG00000133678|CJ057\_HUMAN ENSG00000136826|KLF4 ENSG00000145349|CAMK2D ENSG00000146648|EGFR ENSG00000147687|TATDN1 ENSG00000155508|CNOT8 ENSG00000162747|FCGR3B  
ENSG00000163235|TGFA ENSG00000166260|COX11 ENSG00000166913|YWHAB ENSG00000174106|LEMD3 ENSG00000183035|CYLC1 ENSG00000185591|SP1 ENSG00000185664|SILV ENSG00000186222|CNO  
ENSG00000198824|C13orf8  
GTCTTGC perfect: GTCTTCC GGAAGAC hsa-miR-7 tGGAAGACTagtgatgtttgttg 1  
ENSG00000035862|TIMP2 ENSG00000111737|RAB35 ENSG00000119973|PRLHR ENSG00000128191|DGCR8 ENSG00000144648|CCBP2 ENSG00000145040|UCN2 ENSG00000158864|NDUFS2 ENSG00000162065|TBC1D24  
ENSG00000164216|TSSK1B ENSG00000170075|GPR37L1 ENSG00000171533|MAP6 ENSG00000177408|PLAC2 ENSG00000185082|LBH ENSG00000203900|Q6ZSD3\_HUMAN ENSG00000008197|TFAP2D ENSG00000057019|DCBLD2  
ENSG00000074657|ZNF532 ENSG00000085840|ORCL1 ENSG00000091137|SLC26A4 ENSG00000102710|FAM48A ENSG00000115504|HBP1 ENSG000001190654|TRIM2 ENSG00000115504|HBP1 ENSG000001190654|TRIM2 ENSG00000115504|HBP1 ENSG000001190654|TRIM2  
ENSG00000124935|SCGB1D2 ENSG00000130957|FBP2 ENSG00000131238|PPT1 ENSG00000131876|SNRPA1 ENSG00000134215|VAV3 ENSG00000138757|G3BP2 ENSG00000139631|CSAD ENSG00000154447|SH3RF1  
ENSG00000160588|U2966\_HUMAN ENSG00000161048|NP\_945341.2 ENSG00000163541|SUCLG1 ENSG00000164123|NP\_689756.2 ENSG00000165322|ARHGAP12 ENSG00000168515|SCGB1D1 ENSG00000170820|F5HR ENSG00000189251|Q8WYN8\_HUMAN  
GTCTTGT ENSG00000007038|PRSS21 ENSG00000012963|C14orf130 ENSG00000015676|NDCD3 ENSG00000047056|WDR37 ENSG00000072110|ACTN1 ENSG00000108974|EFNB3 ENSG00000116133|DHCR24 ENSG00000117154|IGSF21  
ENSG00000123349|PFDN5 ENSG00000125485|DDX31 ENSG000000137288|C6orf125 ENSG00000142528|ARHGEF19 ENSG00000142632|ARHGEF19 ENSG00000147570|DNAJC5B ENSG00000154478|GPR26 ENSG00000160685|ZBTB7B  
ENSG00000166049|PASD1 ENSG00000167515|TRAPPC2L ENSG00000168496|FEN1 ENSG00000179837|RBM15B ENSG00000188428|TXNDC5 ENSG00000203822|Q6ZV10\_HUMAN ENSG00000057252|SOAT1 ENSG00000076321|KLHL20  
ENSG00000110675|ELMOD1 ENSG00000112297|AIM1 ENSG00000122873|ZCD1 ENSG00000125868|DSTN ENSG00000146072|TNFRSF21 ENSG00000150776|C11orf57 ENSG00000153820|NP\_085126.1 ENSG00000163257|C4orf30  
ENSG00000165323|FAT3 ENSG00000165555|C14orf148 ENSG00000165995|ACANB2 ENSG00000167618|LAIR2 ENSG00000168778|C2orf38 ENSG00000172845|SP3 ENSG00000182628|FAM33P ENSG00000184863|PRR8  
ENSG00000186300|ZNF555 ENSG00000196345|ZNF167 ENSG00000196967|ZNF585A ENSG00000204133|FAM33B  
GTCTTTC ENSG00000099310|MICA3\_HUMAN ENSG00000100342|APOL1 ENSG00000108294|PSMB3 ENSG00000117481|NSUN4 ENSG00000128284|APOL3 ENSG00000128335|APOL2 ENSG00000130032|PRRG3 ENSG00000136193|SCRN1  
ENSG00000141026|MED9 ENSG00000145949|SGK85\_HUMAN ENSG00000146197|SCUBE3 ENSG00000153563|CD8A ENSG00000166793|YPEL4 ENSG00000167505|Q96NK6\_HUMAN ENSG00000173918|C1QTNF1 ENSG00000175220|ARHGAP1  
ENSG00000182022|ST4S6\_HUMAN ENSG00000184209|NP\_008951.1 ENSG00000184792|OSBP2 ENSG00000206126|Q6ZV82\_HUMAN ENSG00000077254|USP33 ENSG00000089094|FBXL10 ENSG00000104435|STMN2 ENSG00000108389|MTMR4  
ENSG00000113583|C5orf15 ENSG00000114480|GBE1 ENSG00000120008|BRWD2 ENSG00000124935|SCGB1D2 ENSG00000129170|CSR3P ENSG00000129472|RAB2B ENSG00000130962|PRRG1 ENSG00000131791|PRKAB2  
ENSG00000134444|K1AA1468 ENSG00000143337|TOR1AIP1 ENSG00000148225|WDR31 ENSG00000149651|SPINT4 ENSG00000151806|GUF1 ENSG00000157680|DGKI ENSG00000163638|ADAMTS9 ENSG00000165868|HSPA12A  
ENSG00000166396|SERPINB7 ENSG00000166509|CLEC3A ENSG00000180370|PAK2 ENSG00000184517|ZFP1 ENSG00000197140|ADAM32 ENSG00000198331|HYLS1  
GTGAAAC ENSG00000063978|RNF4 ENSG00000064393|HIPK2 ENSG00000100373|UPK3A ENSG00000112164|GLP1R ENSG00000114268|PFFKFB4 ENSG00000122304|Q6ZMMO\_HUMAN ENSG00000123901|GPR83 ENSG00000140955|NP\_631913.2  
ENSG00000142273|CBLC ENSG00000157014|TATDN2 ENSG00000157978|LDLRAP1 ENSG00000163699|Q9HY74\_HUMAN ENSG00000166086|JAM3 ENSG00000176191|C8G ENSG00000183864|TOB2 ENSG00000198053|SIRPA  
ENSG00000198437|Q8N072\_HUMAN ENSG00000204576|PRR3 ENSG00000066583|ISOC1 ENSG000000099725|PRKY ENSG00000107372|ZFAND5 ENSG00000112078|KCTD20 ENSG00000112299|VNN1  
ENSG00000113851|CRBN ENSG00000118482|PHF3 ENSG00000120802|TMPO ENSG00000143797|MBOAT2 ENSG00000144161|ZC3H8 ENSG00000169045|HNRPH1 ENSG00000173480|ZNF417 ENSG00000177576|NP\_001030177.1  
ENSG00000179902|C1orf194 ENSG00000180828|BHLHB5 ENSG00000183943|PRKX ENSG00000187498|COL4A1 ENSG00000198863|RUMDC1 ENSG00000204271|SPIN3  
GTGAACG ENSG00000006638|TBXA2R ENSG00000103269|RHBDL1 ENSG00000112679|DUSP22 ENSG00000116726|PRAMEF12 ENSG00000117419|PRNP1P ENSG00000153446|NP\_689672.2 ENSG00000154978|NM\_030796.3  
ENSG00000160220|PWP2 ENSG00000167080|B4GALNT2 ENSG00000169683|LRRC45 ENSG00000173021|CANT1 ENSG00000171302|CANT1 ENSG00000172590|MRPL52 ENSG00000178685|PARP10 ENSG00000181781|C19orf19  
ENSG00000183452|Q86YU6\_HUMAN ENSG00000183562|Q9P1L5\_HUMAN ENSG00000189312|CENPP ENSG00000196196|NP\_001034881.1 ENSG00000088386|SLC15A1 ENSG00000116771|AGMAT ENSG00000126010|GRPR ENSG00000132305|IMMT  
ENSG00000134597|RBMX2 ENSG00000136634|IL10 ENSG00000140391|TSPAN3 ENSG00000140832|MARVELD3 ENSG00000152433|ZNF547 ENSG00000158560|DYNC1I1 ENSG00000164808|K1AA0146 ENSG00000165091|TMC1  
ENSG00000167555|ZNF534 ENSG00000169045|HNRPH1 ENSG00000171316|CHD7 ENSG00000172765|TMCC1 ENSG00000172967|XKR3 ENSG00000176165|FOXG1B ENSG00000177738|Q8N4J7\_HUMAN ENSG00000183305|MAGEA6  
ENSG00000184750|MAGEA2 ENSG00000187010|RHD ENSG00000198046|ZNF667 ENSG00000204291|COL15A1  
GTGAAGG ENSG00000093100|MICA3\_HUMAN ENSG00000102230|PCYT1B ENSG00000103154|EFCBP2 ENSG00000114383|TUSC2 ENSG00000124225|TMPEAI ENSG00000127957|PMS2L3 ENSG00000148343|FAM73B ENSG00000149716|ORAOV1  
ENSG00000156298|TSPAN7 ENSG00000163913|IFT122 ENSG00000172367|PDZ3 ENSG00000176371|ZSCAN2 ENSG00000183010|PYCR1 ENSG00000184292|TACSTD2 ENSG00000184602|SNN ENSG00000187699|Q8NBX4\_HUMAN  
ENSG00000188636|LDOC1L ENSG00000197322|NP\_997337.1 ENSG00000198457|CP21A\_HUMAN ENSG00000198920|K1AA0753 ENSG00000203805|PPPAPDC1A ENSG00000066583|ISOC1 ENSG00000100503|NIN ENSG00000111911|HINT3

|         |                              |                                |                                |                              |                              |                              |                              |                               |
|---------|------------------------------|--------------------------------|--------------------------------|------------------------------|------------------------------|------------------------------|------------------------------|-------------------------------|
|         | ENSG00000113916 BCL6         | ENSG00000117586 TNFSF4         | ENSG00000126814 TRMT5          | ENSG00000128915 NARG2        | ENSG00000136144 RCBTB1       | ENSG00000141682 PMAIP1       | ENSG00000143970 ASXL2        | ENSG00000151694 ADAM17        |
|         | ENSG00000156261 CCT8         | ENSG00000163528 CHCHD4         | ENSG00000167236 CCL23          | ENSG00000169554 ZEB2         | ENSG00000171316 CHD7         | ENSG00000173273 TNKS         | ENSG00000175390 EIF3S5       | ENSG00000178202 KDEL2         |
| GTGAATA | ENSG00000184007 PTP4A2       | ENSG00000185070 FLRT2          | ENSG00000198947 DMD            | ENSG00000205777 GAGE4        | ENSG00000205777 GAGE4        | ENSG00000205777 GAGE4        | ENSG00000205777 GAGE4        | ENSG00000205777 GAGE4         |
|         | ENSG00000068831 RASGRP2      | ENSG00000073670 ADAM11         | ENSG00000085552 IGSF9          | ENSG00000089057 SLC23A2      | ENSG00000100058 CRYBB2       | ENSG00000105227 PRX          | ENSG00000110395 CBL          | ENSG00000115138 POMC          |
|         | ENSG00000118257 NRP2         | ENSG00000125652 ALKBH7         | ENSG00000127578 WFIKK1         | ENSG00000130595 TNNT3        | ENSG00000132514 CLEC10A      | ENSG00000142544 ATPBD3       | ENSG00000143258 USP21        | ENSG00000146950 SHROOM2       |
|         | ENSG00000147059 SPIN2A       | ENSG00000151376 ME3            | ENSG00000163362 C1orf106       | ENSG00000164889 SLC4A2       | ENSG00000166847 CTN5         | ENSG00000167523 C16orf55     | ENSG00000172653 C17orf66     | ENSG00000177943 MAMDC4        |
|         | ENSG00000179965 ZNF771       | ENSG00000181722 ZBTB20         | ENSG00000185615 PDIA2          | ENSG00000188199 FAM22B       | ENSG00000189001 SBSN         | ENSG00000197471 SPN          | ENSG00000197696 NMB          | ENSG00000197965 MPZL1         |
|         | ENSG00000203793 Q6ZR74_HUMAN | ENSG00000204043 FAM22C         | ENSG00000204316 MRPL38         | ENSG00000204487 LTB          | ENSG00000204590 GNL1         | ENSG00000205878 Q6ZSV2_HUMAN | ENSG00000206123 Q5BLP8_HUMAN | ENSG0000005469 CROT           |
|         | ENSG00000021463 CYP3A43      | ENSG00000068912 C2orf30        | ENSG00000074966 TXK            | ENSG00000080986 NDC80        | ENSG00000081019 RSBN1        | ENSG00000090520 DNAJB11      | ENSG00000100218 RTDR1        | ENSG00000100483 C14orf138     |
|         | ENSG00000101966 BIRC4        | ENSG00000105708 ZNF14          | ENSG00000108395 TRIM37         | ENSG00000109775 C4orf20      | ENSG00000115946 PNO1         | ENSG00000125037 TMEM111      | ENSG00000136371 MTHFS        | ENSG00000136897 MRPL50        |
|         | ENSG00000141642 ELAC1        | ENSG00000145384 FABP2          | ENSG00000156469 MTERFD1        | ENSG00000158411 MITD1        | ENSG00000161036 NP_690852.1  | ENSG00000163605 PPP4R2       | ENSG00000163918 RFC4         | ENSG00000169019 COMMD8        |
|         | ENSG00000175390 EIF3B5       | ENSG00000179021 C3orf38        | ENSG00000182197 EXT1           | ENSG00000185875 THNSL1       | ENSG00000186017 ZNF566       | ENSG00000186496 ZNF396       | ENSG00000188740 NBP5         | ENSG00000188917 CXorf34       |
| GTGAATG | ENSG00000198646 NCOA6        | ENSG00000205174 NP_001019778.1 | ENSG00000106682 EIF4H          | ENSG00000107796 ACTA2        | ENSG00000111877 MCM9         | ENSG00000112619 PRPH2        | ENSG00000115884 SDC1         | ENSG00000116151 MORN1         |
|         | ENSG00000068028 RASSF1       | ENSG00000089685 BIRC5          | ENSG00000159433 STAR9D         | ENSG00000164077 MON1A        | ENSG00000165526 RPUSD4       | ENSG00000166402 TUB          | ENSG00000173702 MUC13        | ENSG00000178928 TPRX1         |
|         | ENSG00000133195 SLC39A11     | ENSG00000158828 PINK1          | ENSG00000182372 C8orf61        | ENSG00000183019 C19orf59     | ENSG00000185674 LYG2_HUMAN   | ENSG00000197586 ENTPD6       | ENSG0000005483 MLL5          | ENSG00000091137 SLC26A4       |
|         | ENSG00000180595 Q8N8C9_HUMAN | ENSG00000120685 C13orf23       | ENSG00000130021 HDHD1A         | ENSG00000130638 ATXN10       | ENSG00000132406 TMEM128      | ENSG00000133124 IRS4         | ENSG00000134698 EIF2C4       | ENSG00000135905 DOCK10        |
|         | ENSG00000111701 APOBEC1      | ENSG00000144026 ZNF514         | ENSG00000146469 VIP            | ENSG00000156504 FAM122B      | ENSG00000159086 C21orf66     | ENSG00000163738 MTHFD2L      | ENSG00000164024 METAP1       | ENSG00000166881 K0286_HUMAN   |
|         | ENSG00000136048 NP_060840.2  | ENSG00000184708 EIF4ENIF1      | ENSG00000188474 ZNF788         | ENSG00000196418 ZNF124       | ENSG00000196418 ZNF124       | ENSG00000196418 ZNF124       | ENSG00000196418 ZNF124       | ENSG00000196418 ZNF124        |
| GTGAATT | ENSG00000166922 SCG5         | ENSG00000101849 TBL1X          | ENSG00000104055 TGM5           | ENSG00000116685 KIAA2013     | ENSG00000124422 USP22        | ENSG00000125651 GTF2F1       | ENSG00000130997 POLN         | ENSG00000139436 GIT2          |
|         | ENSG00000100105 PATZ1        | ENSG00000148773 MKI67          | ENSG00000155886 SLC24A2        | ENSG00000158480 SPATA2       | ENSG00000172724 CC119        | ENSG00000172939 OXSR1        | ENSG00000183044 ABAT         | ENSG00000188086 NP_954652.1   |
|         | ENSG00000142230 SAE1         | ENSG00000198668 CALM1          | ENSG00000031691 CENPQ          | ENSG00000067533 RRP15        | ENSG00000100522 GNPNAT1      | ENSG00000113368 LMNB1        | ENSG00000117114 LPHN2        | ENSG00000117222 RBBP5         |
|         | ENSG00000197175 Q8TBR1_HUMAN | ENSG00000129824 RPS4Y1         | ENSG00000131831 RAI2           | ENSG00000136144 RCBTB1       | ENSG00000138061 CYP1B1       | ENSG00000138669 PRKG2        | ENSG00000138795 LEF1         | ENSG00000140988 RPS2          |
|         | ENSG00000122862 SRGN         | ENSG00000151572 TMEM16D        | ENSG00000167186 COQ7           | ENSG00000170677 SOCS5        | ENSG00000171766 GATM         | ENSG00000177738 Q8NAJ7_HUMAN | ENSG00000182220 ATP6AP2      | ENSG00000182831 C16orf72      |
|         | ENSG00000147381 MAGEA4       | ENSG00000197149 XR_019565.1    | ENSG00000198353 HOXC4          | ENSG00000204671 IL31         | ENSG00000205523 Q6ZP97_HUMAN | ENSG00000205523 Q6ZP97_HUMAN | ENSG00000205523 Q6ZP97_HUMAN | ENSG00000205523 Q6ZP97_HUMAN  |
| GTGACAG | ENSG00000003249 DBND1        | ENSG00000009954 BAZ1B          | ENSG00000068028 RASSF1         | ENSG00000086544 ITPKC        | ENSG00000090615 GOLGA3       | ENSG00000100027 YPEL1        | ENSG00000100330 MTMR3        | ENSG00000100416 TRMU          |
|         | ENSG00000106785 TRIM14       | ENSG00000111725 PRKAB1         | ENSG00000139193 CD27           | ENSG00000148814 LRRC27       | ENSG00000157927 K1849_HUMAN  | ENSG00000159247 LOC643224    | ENSG00000163933 RFT1         | ENSG00000173826 KCNH6         |
|         | ENSG00000178803 Q8NAW6_HUMAN | ENSG00000204602 Q6ZU19_HUMAN   | ENSG00000206189 NR_001550.1    | ENSG00000107518 ATRN1        | ENSG00000108296 CCDC49       | ENSG00000112038 OPRM1        | ENSG00000114374 USP9Y        | ENSG00000116704 SLC35D1       |
|         | ENSG00000118007 STAG1        | ENSG00000125352 RNF113A        | ENSG00000136231 IGF2BP3        | ENSG00000143882 ATP6V1C2     | ENSG00000144821 MYH15        | ENSG00000156239 NGM4T1       | ENSG00000156650 MYST4        | ENSG00000156671 SAMD8         |
|         | ENSG00000156697 UTP14A       | ENSG00000159921 GNE            | ENSG00000167785 ZNF558         | ENSG00000184293 NP_742001.1  | ENSG00000198523 PLN          | ENSG00000198586 TLK1         | ENSG00000198876 WDR40A       | ENSG00000204829 CBWD7         |
|         | ENSG00000205252 Q4G0M6_HUMAN | ENSG00000205604 Q6ZUP5_HUMAN   | ENSG00000008563 CD59           | ENSG00000008546 OVGP1        | ENSG00000090020 SLC9A1       | ENSG00000101189 C20orf20     | ENSG00000101361 NOL5A        | ENSG00000124116 WFDC3         |
| GTGACAT | ENSG00000040487 PQLC2        | ENSG00000055163 CYFIP2         | ENSG00000145194 ECE2           | ENSG00000147753 TTY7_HUMAN   | ENSG00000147761 TTY7_HUMAN   | ENSG00000158292 GPR153       | ENSG00000164151 Q6ZT40_HUMAN | ENSG00000168079 SCARA5        |
|         | ENSG00000130208 APOC1        | ENSG00000178922 HYI            | ENSG00000183019 C19orf59       | ENSG00000185650 ZFP36L1      | ENSG00000186150 UBL4B        | ENSG00000206193 Q5HYA3_HUMAN | ENSG00000074966 TXK          | ENSG00000120156 TEK           |
|         | ENSG00000170983 C8orf14      | ENSG00000125414 MYH2           | ENSG00000135903 PAX3           | ENSG00000138594 TMOD3        | ENSG00000151320 AKAP6        | ENSG00000152242 C18orf25     | ENSG00000152348 ATG10        | ENSG00000152382 TADA1L        |
| GTGACGA | ENSG00000121335 PRB4         | ENSG00000165449 SLC16A9        | ENSG00000166845 C18orf54       | ENSG00000197745 SCGB1D4      | ENSG00000204272 Q6Z342_HUMAN | ENSG00000204334 ALL162_HUMAN | ENSG00000204334 ALL162_HUMAN | ENSG00000204334 ALL162_HUMAN  |
|         | ENSG00000007520 C16orf42     | ENSG00000020256 ZFP64          | ENSG00000080031 PTPRH          | ENSG00000100084 HIRA         | ENSG00000101198 C20orf58     | ENSG00000118245 TNP1         | ENSG00000119227 PIGZ         | ENSG00000121680 PEX16         |
|         | ENSG00000131037 EPS8L1       | ENSG00000147155 EBP            | ENSG00000147383 NSDHL          | ENSG00000156097 GPR61        | ENSG00000158850 B4GALT3      | ENSG00000160783 BGLAP        | ENSG00000166526 ZNF3         | ENSG00000174177 NP_00102780.1 |
|         | ENSG00000174282 ZBTB4        | ENSG00000174365 NR_003239.1    | ENSG00000187456 RDM1           | ENSG00000187609 NP_060290.3  | ENSG00000196834 POT14_HUMAN  | ENSG00000197704 PDZD5A       | ENSG00000204333 Q6ZTP0_HUMAN | ENSG00000204914 NP_940843.1   |
|         | ENSG00000204916 NP_940843.1  | ENSG00000204917 NP_940843.1    | ENSG00000204918 NP_940843.1    | ENSG00000204919 NP_940843.1  | ENSG00000204919 NP_940843.1  | ENSG00000204919 NP_940843.1  | ENSG00000204919 NP_940843.1  | ENSG00000204919 NP_940843.1   |
|         | ENSG00000104237 RP1          | ENSG00000117174 C1orf181       | ENSG00000124812 CRISP1         | ENSG00000126216 TUBGCP3      | ENSG00000129226 CD68         | ENSG00000132463 GRSF1        | ENSG00000132603 NI P7        | ENSG00000135775 COG2          |
|         | ENSG00000140153 WDR20        | ENSG00000144645 OSBPL10        | ENSG00000150527 CTAGE5         | ENSG00000158185 ANKRD36      | ENSG00000163138 C4orf28      | ENSG00000163249 CCNYL1       | ENSG00000163738 MTHFD2L      | ENSG00000169967 MAP3K2        |
| GTGACTC | ENSG00000172845 SP3          | ENSG00000185875 THNSL1         | ENSG00000196072 BLOC1S2        | ENSG00000196912 AN36B_HUMAN  | ENSG00000106366 SERPINE1     | ENSG00000108622 ICAM2        | ENSG00000109265 Q6ZU35_HUMAN | ENSG00000116151 MORN1         |
|         | ENSG00000066117 SMARCD1      | ENSG00000078246 TULP3          | ENSG00000104884 ERCC2          | ENSG00000105676 ARMC6        | ENSG00000106366 SERPINE1     | ENSG00000108622 ICAM2        | ENSG00000109265 Q6ZU35_HUMAN | ENSG00000116151 MORN1         |
|         | ENSG00000117643 MAN1C1       | ENSG00000122223 CD244          | ENSG00000138316 ADAMTS14       | ENSG00000141258 RUTBC1       | ENSG00000164050 FLXN1        | ENSG00000178802 MPI          | ENSG00000180210 F2           | ENSG00000184454 C1orf130      |
|         | ENSG00000185340 GAS2L1       | ENSG00000205205 C17orf51       | ENSG00000070761 C16orf80       | ENSG00000104643 MTMR9        | ENSG00000109063 MYH3         | ENSG00000112419 PHACTR2      | ENSG00000120937 NPPB         | ENSG00000125851 PCSK2         |
|         | ENSG00000139800 ZIC5         | ENSG00000154518 ATP5G3         | ENSG00000163534 FCRL1          | ENSG00000164112 TMEM155      | ENSG00000166783 KIAA0430     | ENSG00000169862 CTNND2       | ENSG00000196653 ZNF502       | ENSG00000197181 PTWI12        |
|         | ENSG00000204987 Q6ZN80_HUMAN | ENSG00000204990 NP_001008742.1 | ENSG00000101146 RAE1           | ENSG00000102287 GABRE        | ENSG00000106976 DNM1         | ENSG00000109132 PHOX2B       | ENSG00000111678 C12orf57     | ENSG00000115641 PHL2          |
| GTGACTT | ENSG0000011454 RABGAP1       | ENSG00000065675 PRKCQ          | ENSG00000136807 CDK9           | ENSG00000140403 DNAJA4       | ENSG00000140939 NOL3         | ENSG00000154930 ACSS1        | ENSG00000157837 PSL4_HUMAN   | ENSG00000158955 WNT9B         |
|         | ENSG00000125965 GDF5         | ENSG00000135926 TMBIM1         | ENSG00000174576 INPAS4         | ENSG00000179452 Q8TDF1_HUMAN | ENSG00000179452 Q8TDF1_HUMAN | ENSG00000179452 Q8TDF1_HUMAN | ENSG00000179452 Q8TDF1_HUMAN | ENSG00000179452 Q8TDF1_HUMAN  |
|         | ENSG00000160392 C19orf47     | ENSG00000166780 C16orf45       | ENSG00000082482 KCNK2          | ENSG00000101782 RIOK3        | ENSG00000109332 UBE2D3       | ENSG00000110218 PANX1        | ENSG00000110851 PRDM4        | ENSG00000115947 ORC4L         |
|         | ENSG00000102444 ZNF207       | ENSG00000079931 MOXD1          | ENSG00000128609 INDUFA5        | ENSG00000128710 HOXD10       | ENSG00000131370 SH3BP5       | ENSG00000133805 AMPD3        | ENSG00000134046 MBD2         | ENSG00000134897 BIVM          |
|         | ENSG00000119938 PPP1R3C      | ENSG00000127588 GNG13          | ENSG00000141141 DDX52          | ENSG00000141646 SMAD4        | ENSG00000144224 UBXD2        | ENSG00000145247 OCIA2D       | ENSG00000146802 TMEM168      | ENSG00000147231 CXorf57       |
|         | ENSG00000139173 TMEM117      | ENSG00000152242 C18orf25       | ENSG00000164172 MOC52          | ENSG00000166881 K0286_HUMAN  | ENSG00000186184 POLR1D       | ENSG00000196917 GPR81        | ENSG00000198646 NCOA6        | ENSG00000198682 PAPSS2        |
|         | ENSG00000148153 C9orf80      | ENSG00000092445 TYRO3          | ENSG00000100234 TIMP3          | ENSG00000101890 GUCY2F       | ENSG00000103148 C16orf35     | ENSG00000104529 EEF1D        | ENSG00000105643 ARRDC2       | ENSG00000127418 FGFR1         |
| GTGAGGC | ENSG00000131591 C1orf159     | ENSG00000132517 GPR172B        | ENSG00000136295 TTYH3          | ENSG00000137409 MTCH1        | ENSG00000139174 PRICKLE1     | ENSG00000148408 CACNA1B      | ENSG00000165507 C10orf10     | ENSG00000178927 C17orf62      |
|         | ENSG00000185917 SETD4        | ENSG00000196614 NM_207462      | ENSG00000203993 C9orf37        | ENSG00000204175 GPRIN2       | ENSG00000204576 PRR3         | ENSG00000077279 DCX          | ENSG00000085224 ATRX         | ENSG00000089225 TBX5          |
| GTGATAG | ENSG00000121390 PSPC1        | ENSG00000124120 C20orf121      | ENSG00000131876 SNRPA1         | ENSG00000132305 TMMT         | ENSG00000153162 BMP6         | ENSG00000155754 ALS2CR11     | ENSG00000168813 ZNF507       | ENSG00000168813 ZNF507        |
|         | ENSG00000001461 NPAL3        | ENSG00000100364 C22orf9        | ENSG00000101997 CCDC22         | ENSG00000105499 PLA2G4C      | ENSG00000114113 RBP2         | ENSG00000125991 ERGIC3       | ENSG00000127884 ECHS1        | ENSG00000133985 TTC9          |
|         | ENSG00000186994 ANKRD47      | ENSG00000198930 CSAG1          | ENSG00000204434 NP_001017421.1 | ENSG000000047932 GOPC        | ENSG00000079134 THOC1        | ENSG00000083099 LYRM2        | ENSG00000084733 RAB10        | ENSG00000085832 EPS15         |
|         | ENSG00000096093 EFHC1        | ENSG00000100823 APEX1          | ENSG00000112144 ICK            | ENSG00000114573 ATP6V1A      | ENSG00000125249 RAP2A        | ENSG00000126216 TUBGCP3      | ENSG00000138078 PREPL        | ENSG00000155961 RAB39B        |
|         | ENSG00000168411 RFWD3        | ENSG00000168724 DNJA5_HUMAN    | ENSG00000172115 CYCS           | ENSG00000174607 UGT8         | ENSG00000175387 SMAD2        | ENSG00000175664 C13orf26     | ENSG00000179387 ELMOD2       | ENSG00000188529 FUSIP1        |
|         | ENSG00000197299 BLM          | ENSG00000198551 ZNF627         | ENSG00000086062 B4GALT1        | ENSG00000101193 C20orf11     | ENSG00000103021 CCDC113      | ENSG00000107341 UBE2R2       | ENSG00000114115 RBP1         | ENSG00000131188 PRR7          |
| GTGATCT | ENSG00000041880 PARP3        | ENSG00000079689 SCGN           | ENSG00000157851 DPYSL5         | ENSG00000162817 RNF168       | ENSG00000163961 RNF168       | ENSG00000166900 STX3         | ENSG00000178110 Q8N9G9_HUMAN | ENSG00000184108 TRIML1        |
|         | ENSG00000146094 DOK3         | ENSG00000151532 VTI1A          | ENSG00000198407 Q8NCZ5_HUMAN   | ENSG00000205441 KRTAP10-7    | ENSG00000005302 MSL3L1       | ENSG000000069329 VPS35       | ENSG00000077152 UBE2T        | ENSG00000102753 KPNA3         |
|         | ENSG00000197622 CDC42SE1     | ENSG00000198400                |                                |                              |                              |                              |                              |                               |

GTGCAAA ENSG0000099985|OSM ENSG0000099994|SUSD2 ENSG00000105392|CRX ENSG00000110987|BCL7A ENSG00000115107|STEAP3 ENSG00000115602|IL1RL1 ENSG00000117481|NSUN4 ENSG00000118971|CCND2  
ENSG00000120952|PRAMEF2 ENSG00000142512|SIGLEC10 ENSG00000142583|SLC2A5 ENSG00000143198|MGST3 ENSG00000144233|AMMECR1L ENSG00000152953|STK3B ENSG00000160445|ZER1 ENSG00000168016|Q8N8K0\_HUMAN  
ENSG00000168824|NSG1\_HUMAN ENSG00000171855|IFNB1 ENSG00000171873|ADRA1D ENSG00000172939|OXSR1 ENSG00000173253|DMRT2 ENSG00000177468|OLIG3 ENSG00000196263|ZNF471 ENSG00000197670|Q9H800\_HUMAN  
ENSG00000198569|SLC34A3 ENSG00000206567|NP\_001008737.1 ENSG000000003393|ALS2 ENSG000000009413|REV3L ENSG00000104131|EIF351 ENSG00000111832|RWDD1 ENSG00000112182|BACH2 ENSG00000115839|RAB3GAP1  
ENSG00000131373|HACL1 ENSG00000132153|DHX30 ENSG00000138795|LEF1 ENSG00000143507|DUSP10 ENSG00000144285|SCN1A ENSG00000145451|GLRA3 ENSG00000148634|HERC4 ENSG00000151694|ADAM17  
ENSG00000152078|TMEM56 ENSG00000153253|SCN3A ENSG00000158473|CLD1D ENSG00000160856|FCRL3 ENSG00000165632|TAF3 ENSG00000166750|SLFN5 ENSG00000172000|ZNF556 ENSG00000173258|ZNF483  
ENSG00000186184|POLR1D ENSG00000186697|Q6T06\_HUMAN ENSG00000205773|LOC652517  
GTGCAAG ENSG00000001497|LAS1L ENSG00000116985|BMP8B ENSG00000119333|WDR34 ENSG00000125089|SH3TC1 ENSG00000125166|GOT2 ENSG00000126353|CCR7 ENSG00000128311|TST ENSG00000139514|SLC7A1  
ENSG00000157765|SLC34A2 ENSG00000157954|WIP1 ENSG00000166135|HIF1AN ENSG00000166159|LRTM2 ENSG00000167580|AQP2 ENSG00000182490|TSSK2 ENSG00000188869|TMC3 ENSG00000197226|TBC1D9B  
ENSG00000198246|SLC29A3 ENSG00000198373|WWP2 ENSG00000204657|OR2H2 ENSG00000205061|Q6ZUP2\_HUMAN ENSG000000049192|ADAMTS6 ENSG000000092148|HECTD1 ENSG00000101745|ANKRD12 ENSG00000109189|USP46  
ENSG00000115665|SLC5A7 ENSG00000119943|C10orf33 ENSG00000127081|ZNF484 ENSG00000140948|ZCCHC14 ENSG00000143437|ARNT ENSG00000156140|ADAMTS3 ENSG00000164816|DEFA5 ENSG00000168404|MLKL  
ENSG00000170419|VSTM2 ENSG00000172403|SYNPO2 ENSG00000172717|C14orf54 ENSG00000173467|AGR3 ENSG00000179902|C1orf194 ENSG00000180628|PCGF5 ENSG00000184730|TMEM46 ENSG00000182457|NR\_002323.1  
ENSG00000196549|MME ENSG00000197024|ZNF398 ENSG00000204961|PCDHA9  
GTGCAAT ENSG00000023171|GRAMD1B ENSG00000069812|HES2 ENSG000000081377|CDC14C ENSG00000100346|CACNA1I ENSG00000105428|ZNF4 ENSG00000108516|TNFRSF13B ENSG00000117461|PIK3R3 ENSG00000121274|PAPD5  
ENSG00000124140|SLC12A5 ENSG00000124766|SOX4 ENSG00000135414|GDF11 ENSG00000138869|C2orf16 ENSG00000143450|OAZ3 ENSG00000144583|MARCH4 ENSG00000147119|CHST7 ENSG00000148704|VAX1  
ENSG00000153789|FAM92B ENSG00000162779|C1orf125 ENSG00000170238|XR\_017738.1 ENSG00000173040|EVC2 ENSG00000178110|Q8N9G9\_HUMAN ENSG00000180104|EXOC3 ENSG00000185885|IFITM1 ENSG00000186474|KLK12  
ENSG00000196186|Q71RF5\_HUMAN ENSG00000198106|RUNDG2B ENSG00000204323|Q71RC9\_HUMAN ENSG00000205875|LOC197350 ENSG00000091664|SLC17A6 ENSG00000109670|FBXW7 ENSG00000110848|CD9 ENSG00000112210|RAB23  
ENSG00000112893|MAN2A1 ENSG00000115020|PIP5K3 ENSG00000119922|IFIT2 ENSG00000128641|MYO1B ENSG00000136478|TEX2 ENSG00000143164|IQWD1 ENSG00000159256|MORC3 ENSG00000163694|NP\_061900.1  
ENSG00000165943|MOAP1 ENSG00000167601|AXL ENSG00000173517|SG269\_HUMAN ENSG00000176853|FAM91A1 ENSG00000186019|ZNF224 ENSG00000187372|PCDHB3 ENSG00000197147|LRR8B  
perfect: GTGCAAT ATTGCAC hsa-miR-367 aATTGCACtttagcaatggtgta 1  
perfect: GTGCAAT ATTGCAC hsa-miR-32 tATTGCACtactactaagtgttc 1  
perfect: GTGCAAT ATTGCAC hsa-miR-25 cATTGCACttgtctcggtctga 1  
perfect: GTGCAAT ATTGCAC hsa-miR-363 aATTGCACgggtatcattctgta 1  
GTGCACC ENSG00000042062|C2orf175 ENSG00000051523|CYBA ENSG000000099795|NDUF7 ENSG00000099957|P2RXL1 ENSG00000108175|ZMI2 ENSG00000123643|SLC36A1 ENSG00000124257|NEURL2 ENSG00000128191|DGCR8  
ENSG00000149043|SYT8 ENSG00000160325|C9orf7 ENSG00000172346|CSDC2 ENSG00000175170|Q5T319\_HUMAN ENSG00000182712|MTCP1 ENSG00000186141|POLR3C ENSG00000188100|FAM25\_HUMAN ENSG00000188312|CENPP  
ENSG00000188549|NP\_997263.1 ENSG00000189129|PLAC9 ENSG00000000197177|GPR123 ENSG00000204946|ZNF783 ENSG00000205037|Q6ZT72\_HUMAN ENSG00000205745|Q71MF4\_HUMAN ENSG00000018408|WWTR1 ENSG000000191831|ESR1  
ENSG00000099725|PRKY ENSG00000112182|BACH2 ENSG00000124486|USP9X ENSG00000130338|TULP4 ENSG00000140284|SLC27A2 ENSG00000144645|OSBPL10 ENSG00000149218|ENDOD1 ENSG00000155324|GRAMD3  
ENSG00000169604|ANTXR1 ENSG00000177125|ZBTB34 ENSG00000183943|PRKX ENSG00000197919|IFNA1  
GTGCATA ENSG00000008226|DLEC1 ENSG00000008323|PLEKHG6 ENSG000000070778|PTPN21 ENSG000000099204|ABL1M1 ENSG00000101439|CST3 ENSG00000111641|NOL1 ENSG00000117360|PRPF3 ENSG00000123999|INHA  
ENSG00000143198|MGST3 ENSG00000143768|LEFY2 ENSG00000148795|CYP17A1 ENSG00000158470|B4GALT5 ENSG00000165699|TSC1 ENSG00000185818|NAT8L ENSG00000191861|CYP24A1 ENSG000000085274|MYNN  
ENSG00000101162|TUBB1 ENSG00000102144|PGK1 ENSG00000104728|ARHGFB10 ENSG00000112773|FAM46A ENSG00000114446|IFT57 ENSG00000118418|HMGN3 ENSG00000120162|MOBKLB2 ENSG00000120756|PLS1  
ENSG00000120868|APAF1 ENSG00000124788|ATXN1 ENSG00000147642|SYBU\_HUMAN ENSG00000148700|ADD3 ENSG00000156140|ADAMTS3 ENSG00000170540|ARL6IP1 ENSG00000196730|DAPK1  
GTGCATC ENSG00000006756|ARSD ENSG00000001797|RALBP1 ENSG000000073670|ADAM11 ENSG00000110182|SLA2 ENSG00000113048|MRPS27 ENSG00000162892|IL2A ENSG00000166152|C16orf78 ENSG00000167748|KLK1  
ENSG00000167930|ITFG3 ENSG00000169696|ASPSR1 ENSG00000175193|PARL ENSG00000180305|WFDCL10A ENSG00000182366|FA87B\_HUMAN ENSG00000182931|WFDCL10B ENSG00000185117|NR\_002733.1 ENSG00000187021|PNL1PRP1  
ENSG00000196724|ZNF418 ENSG00000204576|PRR3 ENSG00000204625|HCG9 ENSG000000049192|ADAMTS6 ENSG00000080166|DCT ENSG00000111796|KLRB1 ENSG00000112096|SOD2 ENSG00000113269|RNF130  
ENSG00000113300|CNOT6 ENSG00000118922|KLF12 ENSG00000119523|ALG2 ENSG00000127252|HRASL5 ENSG00000133059|RIKP5 ENSG00000133111|RFXPAP ENSG00000134545|KLRC1 ENSG00000137075|RNF38  
ENSG00000137267|TUBB2A ENSG00000138036|DYNC2LI1 ENSG00000138758|SEPT11 ENSG00000151116|UEVLD ENSG00000169895|SYAP1 ENSG00000176018|LYSM3 ENSG00000185523|NP\_001019772.1 ENSG00000198642|KLHL9  
ENSG00000205773|LOC652517 ENSG00000205809|KLR2  
GTGCATG ENSG00000089169|RPH3A ENSG00000101412|E2F1 ENSG00000106089|STX1A ENSG00000111725|PRKAB1 ENSG00000121281|ADCY7 ENSG00000135622|SEMA4F ENSG00000145920|CPLX2 ENSG00000146007|ZMAT2  
ENSG00000148408|CANALB ENSG00000155858|LSM11 ENSG00000156574|NODAL ENSG00000162415|ZSWIM5 ENSG00000163902|RPN1 ENSG00000166135|HIF1AN ENSG00000166716|ZNF592 ENSG00000169926|KLF13  
ENSG00000173093|CCDC63 ENSG00000173638|SLC19A1 ENSG00000174564|IL20RB ENSG00000177875|NP\_001013657.2 ENSG00000178243|C9orf62 ENSG00000179407|DNABJ8 ENSG00000187607|ZNF286A ENSG00000197506|SLC28A3  
ENSG00000203855|Q8TDP9\_HUMAN ENSG00000205354|Q6ZNF6\_HUMAN ENSG00000211445|GPX3 ENSG00000101333|PLCB4 ENSG00000105849|TWISTNB ENSG00000111450|STX2 ENSG00000113319|RASGRF2 ENSG00000116750|UCHL5  
ENSG00000125827|TXNDC13 ENSG00000132485|ZRNAB2 ENSG00000134532|SOX5 ENSG00000135048|TMEM2 ENSG00000145349|CAMK2D ENSG00000151092|NGLY1 ENSG00000154710|KCTD7 ENSG00000158023|WDR66  
ENSG00000165501|PPI15 ENSG00000165983|PTER ENSG00000168348|INSM2 ENSG00000170417|TMEM182 ENSG00000174437|ATP2A2 ENSG00000181495|C5orf23 ENSG00000181656|GPR88 ENSG00000182223|ZAR1  
GTGCATT ENSG00000075856|SART3 ENSG00000079689|SCGN ENSG00000100918|REC8 ENSG00000103942|HOMER2 ENSG00000106006|HOXA6 ENSG00000125735|TNFSF14 ENSG00000131196|NFATC1 ENSG00000131914|LIN28  
ENSG00000137809|ITGA11 ENSG00000138964|PARVG ENSG00000144036|EXOC6B ENSG00000151353|TMEM18 ENSG00000169548|SUHW1 ENSG00000179051|RC2 ENSG00000179241|LDLRAD3 ENSG00000180595|Q8N8C9\_HUMAN  
ENSG00000184060|CNTA2 ENSG00000185615|PDIA2 ENSG00000196242|OR2C3 ENSG00000205052|QZSS1\_HUMAN ENSG00000083857|FAT ENSG0000000088179|PTPN4 ENSG000000095380|NANS ENSG00000100889|PCK2 ENSG00000106772|KIAA0367  
ENSG00000080546|SESN1 ENSG00000087301|KIAA1344 ENSG00000101958|GLRA2 ENSG00000104067|TJP1 ENSG00000117569|PTBP2 ENSG00000118434|SPACA1 ENSG00000118518|RNF146 ENSG00000124201|ZNF51  
ENSG00000136478|TEX2 ENSG00000141367|CLTC ENSG00000141682|PMAI1 ENSG00000145632|PLK2 ENSG00000162694|EXTL2 ENSG00000167220|DHHD2 ENSG00000171478|SPACA5B ENSG00000181019|NQO1  
ENSG00000198380|GFPT1  
GTGCCAA ENSG00000007402|CACNA2D2 ENSG00000058866|DGKG ENSG00000067191|CACNB1 ENSG00000083307|GRHL2 ENSG00000085978|ATG16L1 ENSG00000099814|KIAA0284 ENSG00000101670|LIPG ENSG00000101986|ABCD1  
ENSG00000108515|ENO3 ENSG00000114786|ACY1 ENSG00000126106|TMEM53 ENSG00000127511|SIN3B ENSG00000127743|IL17B ENSG00000136295|TYH3 ENSG00000140478|NM\_018652.4 ENSG00000144579|CTDSP1  
ENSG00000146054|TRIM7 ENSG00000155886|SLC24A2 ENSG00000157110|RFBP5 ENSG00000160789|LMNA ENSG00000169241|RAG1AP1 ENSG00000169992|NLGN2 ENSG00000171219|CDC42BPG ENSG00000172818|OVOL1  
ENSG00000174233|ADCY6 ENSG00000179407|DNABJ8 ENSG00000181709|Q9DHS\_HUMAN ENSG00000186910|SERPINA1 ENSG00000198925|ATG9A ENSG00000206562|METTL6 ENSG00000050030|KIAA2022 ENSG00000055211|C6orf72  
ENSG00000172042|RDH11 ENSG00000105497|ZNF175 ENSG00000105856|HBP1 ENSG00000106688|SLC1A1 ENSG00000117281|CD160 ENSG00000117595|IRF6 ENSG00000117600|NP\_05654.2 ENSG00000124275|MTRR  
ENSG00000130224|LRCH2 ENSG00000133101|CCNA1 ENSG00000134532|SOX5 ENSG00000139910|NOVA1 ENSG00000147853|AK3 ENSG00000152413|HOMER1 ENSG00000162755|NP\_689579.3 ENSG00000163762|TM4SF18  
ENSG00000164542|NP\_056129.1 ENSG00000166265|CYR1 ENSG00000169495|HTRA4 ENSG00000171217|CLDN20 ENSG00000182993|C12orf60 ENSG00000185038|Q8TUR1\_HUMAN ENSG00000185304|NP\_001071638.1 ENSG00000186369|YN002\_HUMAN  
ENSG00000187627|RGPD1  
perfect: GTGCCAA TTGGCAC hsa-miR-96 tTTGGCACtagcacattttgta 1  
GTGCCAT ENSG00000006071|ABCC8 ENSG00000078967|UBE2D4 ENSG00000099814|KIAA0284 ENSG00000102900|NUP93 ENSG00000108479|GALK1 ENSG00000108828|VAT1 ENSG00000119614|CHX10 ENSG00000144579|CTDSP1  
ENSG00000162889|MAPKAPK2 ENSG00000163026|C2orf44 ENSG00000166743|ACSM1 ENSG00000167658|EEF2 ENSG00000169084|ZBED1 ENSG00000171984|C2orf196 ENSG00000182660|NP\_001013698.1 ENSG00000184436|THAP7  
ENSG00000185499|MUC1 ENSG00000197818|SLC9A8 ENSG00000205052|QZSS1\_HUMAN ENSG00000083857|FAT ENSG0000000088179|PTPN4 ENSG000000095380|NANS ENSG00000100889|PCK2 ENSG00000106772|KIAA0367  
ENSG00000111799|COL12A1 ENSG00000115966|ATF2 ENSG00000119401|TRIM32 ENSG00000130024|PHF10 ENSG00000130770|ATP1F1 ENSG00000131016|AKAP12 ENSG00000133926|FRMD6 ENSG00000141338|ABCA8  
ENSG00000147676|MAL2 ENSG00000148737|TCF7L2 ENSG00000150093|ITGB1 ENSG00000165914|TTC7B ENSG00000172456|NP\_060761.2 ENSG00000173598|NUDT4 ENSG00000176714|CCDC121 ENSG00000183753|BYP2C  
ENSG00000183795|VCY2\_HUMAN ENSG00000185894|VCY2\_HUMAN ENSG00000186105|Q7Z2Q7\_HUMAN  
perfect: GTGCCAT ATGGCAC hsa-miR-183 tATGGCACtggtagaattcactg 1  
GTGCCCC ENSG00000013619|CXorf6 ENSG00000055483|USP36 ENSG00000070404|FSTL3 ENSG000000095906|NUPB2 ENSG00000099889|ARVCF ENSG00000105640|RPL18A ENSG00000115041|KCNIP3 ENSG00000117419|PRNP1P  
ENSG00000126461|NP\_067051.1 ENSG00000128438|Q9H7M0\_HUMAN ENSG00000133619|KRBA1 ENSG00000136697|IL1F10 ENSG00000140990|NDUFB10 ENSG00000141527|CARD14 ENSG00000145404|UCN2 ENSG00000146216|TTBK1  
ENSG00000156860|FBR5 ENSG00000158815|FGF17 ENSG00000159871|LYPD5 ENSG00000163295|ALPI ENSG00000167733|HSD11B1L ENSG00000167815|PRDX2 ENSG00000174516|PELI3 ENSG00000177291|NP\_699199.2  
ENSG00000178597|PSAPL1 ENSG00000181409|AATK ENSG00000182979|MTA1 ENSG00000183615|C1orf90 ENSG00000196411|EPHB4 ENSG00000106258|CYP3A5 ENSG00000114520|SNX4 ENSG00000121897|LIAS  
ENSG00000123570|RAB9B ENSG00000146147|C6orf142 ENSG00000149636|DSN1 ENSG00000167601|AXL ENSG00000170248|PDCD61P ENSG00000177511|ST8SIA3 ENSG00000180354|C7orf41 ENSG00000187474|FPRL2  
ENSG00000197969|VPS13A  
GTGCCCC ENSG00000005206|PSL1\_HUMAN ENSG00000041880|PARP3 ENSG00000100266|PACSN2 ENSG00000100314|CABP7 ENSG00000101180|HRH3 ENSG00000101210|EEF1A2 ENSG00000104518|GSDMDC1 ENSG00000105193|RPS16  
ENSG00000108479|GALK1 ENSG00000124772|CPNE5 ENSG00000125656|CLPP ENSG00000126217|MCF2L ENSG00000130598|TNNT2 ENSG00000135083|CCNJL ENSG00000136895|GARNL3 ENSG00000140274|DUOX2A  
ENSG00000141580|WDR45L ENSG00000158169|FANCC ENSG00000161682|Q8N0U1\_HUMAN ENSG00000167617|CDC42EP5 ENSG00000167850|CD300C ENSG00000171427|NM\_145293 ENSG0000000173163|COMMD1 ENSG00000176919|C8G  
ENSG00000177374|HC1 ENSG00000178602|OTOS ENSG00000182175|RGNMA ENSG00000185818|NAT8L ENSG00000187251|C1orf213 ENSG00000187942|LDLRAD2 ENSG00000204309|Q6ZSQ3\_HUMAN ENSG00000205648|Q6ZR54\_HUMAN  
ENSG00000103194|USP10 ENSG00000111799|COL12A1 ENSG00000120705|ETP1 ENSG00000125398|SOX9 ENSG00000139926|FRMD6 ENSG00000143344|RGL1 ENSG00000148942|SLC5A12 ENSG00000152683|SLC30A6  
ENSG00000157800|SLC37A3 ENSG00000160062|ZBTB8 ENSG00000163637|PRICKLE2 ENSG00000165119|HNRPK ENSG00000165632|TAF3 ENSG00000169554|ZEB2 ENSG00000170786|NP\_620419.2 ENSG00000205144|Q6ZV43\_HUMAN  
ENSG00000205325|NP\_001001684.1  
GTGCCGT ENSG00000013455|ARPC1A ENSG00000042753|AP2S1 ENSG00000101361|NOL5A ENSG00000102858|MGRN1 ENSG00000103274|NUPB1 ENSG00000105135|ILVBL ENSG00000105705|SF4 ENSG00000112212|BZRPL1  
ENSG00000124102|PI3 ENSG00000127418|FGFR1L ENSG00000130175|PRKCSH ENSG00000151006|Q6ZNK7\_HUMAN ENSG00000160182|TFF1 ENSG00000162373|C1orf165 ENSG00000164151|Q6ZT40\_HUMAN ENSG00000166171|NP\_056263.1  
ENSG00000169918|OTUD7A ENSG00000173264|GPR137 ENSG00000177112|Q8N6V7\_HUMAN ENSG00000183020|AP2A2 ENSG00000183495|EP400 ENSG00000196924|FLNA ENSG000000043355|ZIC2  
ENSG00000064989|CALCRL ENSG00000081386|ZNF510 ENSG00000082397|EPB41L3 ENSG00000107077|UMJD2C ENSG00000109572|CLCN3 ENSG00000120616|EPC1 ENSG00000122068|FYT2D1 ENSG00000123908|EIF2C2  
ENSG00000129277|CCL4 ENSG00000132639|SNAP25 ENSG00000136158|SPRY2 ENSG00000143514|TF53BP2 ENSG00000143514|SNAP2 ENSG00000163904|ENPN2 ENSG00000164251|F2RL1 ENSG00000164251|SEPT8 ENSG00000164506|STXBP5  
ENSG00000165973|NELL1 ENSG00000167996|FTH1 ENSG00000178425|N5SDC1 ENSG00000181191|PJA1 ENSG00000181211|Q8NA17\_HUMAN ENSG00000198646|NCOA6 ENSG00000205293|Q76B50\_HUMAN  
GTGCCCT ENSG000000014216|CAPN1 ENSG00000065361|ERBB3 ENSG00000077454|LRCH4 ENSG00000080662|B4GALT1 ENSG00000099282|TSPAN15 ENSG00000105514|RAB3D ENSG00000119403|PHF19 ENSG00000125826|RBCK1  
ENSG00000126952|NXF5 ENSG00000130827|PLXNA3 ENSG00000132321|IQCA ENSG00000136877|PFGS ENSG00000142327|RNPEPL1 ENSG00000144579|CTDSP1 ENSG00000159792|PSKH1 ENSG00000162552|WNT4  
ENSG00000166387|PPF1BP2 ENSG00000167994|RAB31L1 ENSG00000168528|SERINC2 ENSG00000172819|RARG ENSG00000177105|RHOG ENSG00000178209|PLEC1 ENSG00000184232|OAF ENSG00000205159|Q6ZVC9\_HUMAN  
ENSG0000019549|SNAI2 ENSG00000049245|VAMP3 ENSG00000055211|C6orf72 ENSG00000059588|TARBP1 ENSG00000100625|SIX4 ENSG00000111783|RFX4 ENSG00000114541|FRMD4B ENSG00000117569|PTBP2  
ENSG00000119899|SLC17A5 ENSG00000134253|TRIM45 ENSG00000134910|C2orf3 ENSG00000135862|LAMC1 ENSG00000144228|SPOPL\_HUMAN ENSG00000150093|ITGB1 ENSG00000164089|AGXT2L1 ENSG00000179833|SERTAD2

ENSG00000187498|COL4A1 ENSG00000205423|TMEM188  
perfect: GTGCCCT AAGGCAC hsa-miR-506 tAAGGCACccttctgagtaga 1  
GTGCCGG ENSG0000022567|SLC45A4 ENSG0000030582|GRN ENSG0000053524|MCF2L2 ENSG0000067182|TNFRSF1A ENSG00000102226|USP11 ENSG00000102924|CBLN1 ENSG00000104529|EEF1D ENSG00000104980|TIMM44  
ENSG00000106331|PAX4 ENSG00000107859|PITX3 ENSG00000111667|USP5 ENSG00000111676|ATN1 ENSG00000120055|C10orf95 ENSG00000125505|LENG4 ENSG00000135454|B4GALNT1 ENSG00000137331|IER3  
ENSG00000146049|KAAG1 ENSG00000153443|FAM100A ENSG00000160050|CCDC28B ENSG00000160951|PTGER1 ENSG00000164917|K0415\_HUMAN ENSG00000171608|PIK3CD ENSG00000173959|RBM14 ENSG00000180843|KIAA1618  
ENSG00000181649|PHLDA2 ENSG00000183558|HIST2H2AA3 ENSG00000184113|CLDN5 ENSG00000185481|C21orf129 ENSG00000185730|ZNF696 ENSG00000166920|C15orf48 ENSG00000167383|ZNF229 ENSG00000169224|C1orf150 ENSG00000151092|NGLY1  
ENSG00000203822|Q6ZV10\_HUMAN ENSG00000204058|C10orf41 ENSG00000204763|Q6ZMK1\_HUMAN ENSG00000205031|Q6XYE2\_HUMAN ENSG0000038002|AGA ENSG00000107864|CPEB3 ENSG00000115137|NP\_057628.1 ENSG00000128731|HERC2  
ENSG00000129675|ARHGEF6 ENSG00000134278|SPIRE1 ENSG00000135766|EGLN1 ENSG00000137261|KIAA0319 ENSG00000147883|CDKN2B ENSG00000163602|RYBP ENSG00000173852|DPY19L1 ENSG00000181588|RKHD1  
ENSG00000185737|NRG3  
GTGCCGA ENSG00000001461|NPAL3 ENSG00000068079|IFI35 ENSG00000081248|CACNA1S ENSG00000100364|C22orf9 ENSG00000101193|C20orf11 ENSG00000108602|ALDH3A1 ENSG00000125388|GRK4 ENSG00000142233|NP\_665806.1  
ENSG00000146966|DENND2A ENSG00000151532|VTI1A ENSG00000153395|AYTL2 ENSG00000167807|NP\_001026904.1 ENSG00000168959|GRM5 ENSG00000169100|SLC25A6 ENSG00000171222|SCAND1 ENSG00000172530|BANP  
ENSG00000173566|NUDT18 ENSG00000179085|DPM3 ENSG00000179950|NP\_055096.2 ENSG00000183684|THOC4 ENSG00000186322|Q8N824\_HUMAN ENSG00000203709|C1orf132 ENSG00000006451|RALA ENSG00000064102|C12orf11  
ENSG00000083123|BCKDHB ENSG00000094963|FMO2 ENSG00000112530|PACRG ENSG00000120616|EPC1 ENSG00000135111|TBX3 ENSG00000139318|DUSP6 ENSG00000142871|CYR61 ENSG00000144118|RALB  
ENSG00000144893|MED12L ENSG00000147050|UTX ENSG00000164305|CASP3 ENSG00000166471|TMEM41B ENSG00000166920|C15orf48 ENSG00000169224|C1orf150 ENSG00000175606|TMEM70  
ENSG00000176971|NP\_976249.1 ENSG00000182944|EWSR1 ENSG00000186184|POLR1D ENSG00000189067|LITAF ENSG00000197580|BCDO2 ENSG00000205835|LOC647309  
GTGCTAC ENSG00000005961|ITGA2B ENSG000000011478|QPCTL ENSG000000028528|SNX1 ENSG000000043822|NP\_060895.1 ENSG000000049540|ELN ENSG00000114999|TTL ENSG00000121083|DYNLL2 ENSG00000124155|PIGT  
ENSG00000125458|NT5C ENSG00000125895|C20orf46 ENSG00000136487|GH2 ENSG00000142694|C1orf78 ENSG00000148290|SURF1 ENSG00000163395|NP\_840059.1 ENSG00000164711|LPAL2 ENSG00000168427|KLHL30  
ENSG00000196739|COL27A1 ENSG00000205778|Q6ZMM7\_HUMAN ENSG000000101115|SALL4 ENSG000000101882|NKAP\_HUMAN ENSG00000102390|CXorf26 ENSG00000113621|C5orf14 ENSG00000118816|CCNI ENSG00000127870|RNF6  
ENSG00000130770|ATPIF1 ENSG00000134294|SLC38A2 ENSG00000139505|MTMR6 ENSG00000145879|SPINK7 ENSG00000147601|TERF1 ENSG00000154743|TSEN2 ENSG00000162704|ARPC5 ENSG00000164645|NP\_689919.1  
ENSG00000168385|SEPT2 ENSG00000169155|ZBTB43 ENSG00000174721|FGFBP3 ENSG00000184293|NP\_742001.1 ENSG00000185104|FAF1 ENSG00000185344|ATP6V0A2 ENSG00000188153|COL4A5 ENSG00000197989|C1orf79  
GTGCTAG ENSG00000039987|BEST2 ENSG00000058262|SEC61A1 ENSG00000065268|WDR18 ENSG00000111254|AKAP3 ENSG00000115657|ABCY6 ENSG00000125976|RBM12 ENSG00000143772|ITPKB ENSG00000159217|IGF2BP1  
ENSG00000162458|FBLIM1 ENSG00000162761|LXMI4 ENSG00000166947|EPB42 ENSG00000171475|WIPF2 ENSG00000173027|WBP1 ENSG00000176136|MC5R ENSG00000179855|GIPC3 ENSG00000180834|MAP6D1  
ENSG00000181097|Q8NDL7\_HUMAN ENSG00000182329|Q8IVF9\_HUMAN ENSG00000184481|MLLT7 ENSG00000005812|FBXL3 ENSG000000091483|FH ENSG000000107443|CCNJ ENSG00000111860|C6orf204  
ENSG00000112773|FAM46A ENSG00000123572|NRK ENSG00000132964|CDK8 ENSG00000138735|PDE5A ENSG00000141627|DYM ENSG00000143190|POU2F1 ENSG00000148672|GLUDP5 ENSG00000151092|NGLY1  
ENSG00000163923|RPL39L ENSG00000170456|NP\_659410.3 ENSG00000171862|PTENP1 ENSG00000171885|AQP4 ENSG00000174010|KLHL15 ENSG00000175322|ZNF519 ENSG00000177485|ZBTB33 ENSG00000198721|PECI  
ENSG00000198833|UBE2J1 ENSG00000204426|LOC286238 ENSG00000206125|Q68DA7\_HUMAN  
GTGCTAT ENSG00000073050|XRCC1 ENSG00000108821|COL1A1 ENSG00000133247|SUV420H2 ENSG00000133466|C1QTNF6 ENSG00000134240|HMGCS2 ENSG00000134369|NAV1 ENSG00000136883|KIF12 ENSG00000141052|MYOCD  
ENSG00000154319|C8orf13 ENSG00000158195|WASF2 ENSG00000162244|RPL29 ENSG00000164151|Q6ZT40\_HUMAN ENSG00000164309|CMYA5 ENSG00000167615|LENG8 ENSG00000169469|SPRR1B ENSG00000171777|RASGRP4  
ENSG00000176092|AIML1 ENSG00000177352|CCDC71 ENSG00000186187|ZNF1 ENSG00000187516|CXorf27 ENSG00000188626|LOC653720 ENSG00000188828|GLRA4 ENSG00000079112|CDH17 ENSG00000101343|CRANKL1  
ENSG00000105939|ZC3HAV1 ENSG00000111912|NCOA7 ENSG00000112280|COL9A1 ENSG00000116497|S100BPB ENSG00000119950|MX1 ENSG00000124721|DNAH8 ENSG00000133020|MYH8 ENSG00000137872|SEMA6D  
ENSG00000145425|RPS3A ENSG00000153707|PTPRD ENSG00000157680|DGKI ENSG00000163053|SLC16A1 ENSG00000163347|CLDN1 ENSG00000164168|TMEM34 ENSG00000164989|C9orf93 ENSG00000166509|CLEC3A  
ENSG00000172673|C6orf190 ENSG00000185009|AP3M1 ENSG00000198146|ZNF770 ENSG00000198526|PABPCP2  
GTGCTCA ENSG00000078699|C9orf53 ENSG00000102996|MMP15 ENSG00000107551|RASSF4 ENSG00000118137|APOA1 ENSG00000120332|TNN ENSG00000121152|NCAPH ENSG00000127388|NM\_198455.2 ENSG00000133466|C1QTNF6  
ENSG00000139200|C12orf53 ENSG00000159618|GPR114 ENSG00000168874|ATOH8 ENSG00000169738|DCXR ENSG00000183059|XR\_017784.1 ENSG00000185674|LYG2\_HUMAN ENSG00000188786|MTF1 ENSG00000198853|RUSC2  
ENSG00000203674|Q6ZT4\_HUMAN ENSG00000205634|NP\_001001693.1 ENSG00000087053|MTMR2 ENSG00000102024|PLS3 ENSG00000105810|CDK6 ENSG00000109163|GNRHR ENSG00000117152|RGS4 ENSG00000119421|NDUFA8  
ENSG00000137267|TUBB2A ENSG00000140382|HMG20A ENSG00000152254|G6PC2 ENSG00000152969|JAKMIP1 ENSG00000153317|DDEF1 ENSG00000153820|NP\_085126.1 ENSG00000163376|KBTBD8 ENSG00000166913|YWHAB  
ENSG00000173276|TOMM20 ENSG00000180376|CCDC66 ENSG00000204426|LOC286238 ENSG00000205810|KLRC3  
GTGCTGT ENSG00000007516|BAIAP3 ENSG00000063169|GLTSCR1 ENSG00000077044|DGKD ENSG00000103150|MLYCD ENSG00000111653|ING4 ENSG00000115194|SLC30A3 ENSG00000123933|MXD4 ENSG00000128262|Q9NTU6\_HUMAN  
ENSG00000130584|ZBTB46 ENSG00000134575|ACP2 ENSG00000135148|TRAFD1 ENSG00000141556|TBCD ENSG00000144028|ASCC3L1 ENSG00000147402|GABRQ ENSG00000155254|MARVELD1 ENSG00000157014|TATDN2  
ENSG00000157837|PSL4\_HUMAN ENSG00000160953|MUM1 ENSG00000169562|GJB1 ENSG00000171984|C20orf196 ENSG00000172005|MAL ENSG00000172867|KRT2 ENSG00000175130|MARCKSL1 ENSG00000178932|Q8N811\_HUMAN  
ENSG00000183506|NP\_955377.2 ENSG00000183578|TNFAIP8L3 ENSG00000189275|Q6ZRRK0\_HUMAN ENSG00000038219|FAM44A ENSG00000042088|TDP1 ENSG00000044574|HSPA5 ENSG00000079819|EPB41L2 ENSG00000114646|CSPG5  
ENSG00000117625|RCOR3 ENSG00000123240|OPTN ENSG00000128272|ATF4 ENSG00000129682|PGF13 ENSG00000130363|RSHL2 ENSG00000135940|COX5B ENSG00000135976|Q53S06\_HUMAN ENSG00000140299|BNIP2  
ENSG00000152954|NRSN1 ENSG00000154380|ENAH ENSG00000160908|ZNF394 ENSG00000165169|DYNLT3 ENSG00000167553|TUBA1C ENSG00000169062|UPF3A ENSG00000179222|MAGED1 ENSG00000182774|RS17\_HUMAN  
ENSG00000184402|SS18L1 ENSG00000184779|RPS17 ENSG00000187998|KIAA1641 ENSG00000204621|NR\_002819.1 ENSG00000205581|HMGN1  
GTGCTTG ENSG000000015676|NUDCD3 ENSG00000100385|IL2RB ENSG00000101224|CDRCF25 ENSG00000119686|C14orf58 ENSG00000125447|GGA3 ENSG00000130305|NSUN5 ENSG00000133661|SFTPD  
ENSG00000140465|CYP1A1 ENSG00000161999|NP\_001005920.2 ENSG0000000165643|SOHLH1 ENSG00000166257|SCN3B ENSG00000169094|PLEKHQ1 ENSG00000177504|VCX2 ENSG00000178015|GPR150 ENSG00000182195|LDOC1  
ENSG00000196154|S100A2 ENSG00000198911|SREBF2 ENSG00000205642|VCX3B ENSG00000205918|Q6A1A2\_HUMAN ENSG000000085832|EPLK51 ENSG00000101327|PDYN ENSG00000104356|POP1 ENSG00000128272|ATF4  
ENSG00000130368|MAS1 ENSG00000134200|TSHB ENSG00000137878|GRINL1A ENSG00000137962|ARHGAP29 ENSG00000140873|ADAMTS18 ENSG00000143344|RGL1 ENSG00000170500|LONRF2 ENSG00000181192|DHTKD1  
ENSG00000203724|C1orf53 ENSG00000205195|Q6ZTB1\_HUMAN  
GTGGACA ENSG000000087191|PSMC5 ENSG00000103248|MTHFS1 ENSG00000125804|C20orf91 ENSG00000129680|MAP7D3 ENSG00000138303|ASCC1 ENSG00000161896|IHPK3 ENSG00000162676|GFI1  
ENSG00000164048|ZNF589 ENSG00000165886|UBTD1 ENSG00000166351|ANKRD21 ENSG00000167751|KLLK2 ENSG00000168758|SEMA4C ENSG00000173638|SLC19A1 ENSG00000174166|Q9BTX9\_HUMAN ENSG00000174400|Q8TB00\_HUMAN  
ENSG00000175764|TTL11 ENSG00000175785|PRIMA1 ENSG00000175824|XR\_017847.1 ENSG00000183206|POT15\_HUMAN ENSG00000196361|ELAVL3 ENSG00000204005|Q6ZP22\_HUMAN ENSG00000204100|Q6ZV28\_HUMAN ENSG0000025293|PHF20  
ENSG00000208116|VRK2 ENSG00000112367|KIAA0274 ENSG00000113643|RARS ENSG00000114279|PGF12 ENSG00000116747|TROVE2 ENSG00000117586|TNFSF4 ENSG00000112865|PDE11A ENSG00000134324|LPIN1  
ENSG00000155324|GRAMD3 ENSG00000162385|MAGOH ENSG00000165525|SDCCAG1 ENSG00000165682|CLEC1B ENSG00000170866|LILRA3 ENSG00000170917|NUDT6 ENSG00000197817|Q9UHS9\_HUMAN ENSG00000203916|HFMI  
ENSG00000205812|Q6ZSM7\_HUMAN  
GTGGAGA ENSG00000053918|KCNQ1 ENSG00000064666|CNN2 ENSG00000072195|SPEG ENSG00000075240|NP\_055939.1 ENSG00000084710|KIAA0953 ENSG00000100341|PNPLA5 ENSG00000103061|SLC7A60S ENSG00000104872|PIH1D1  
ENSG00000105197|TIMM50 ENSG00000107738|C10orf54 ENSG00000110497|NP\_060219.2 ENSG00000113073|SLC4A9 ENSG00000118046|STK11 ENSG00000140564|FURIN ENSG00000146005|PSD2 ENSG00000149926|FAM57B  
ENSG00000162517|PEF1 ENSG00000164587|RPS14 ENSG00000165643|SOHLH1 ENSG00000168005|NP\_612480.1 ENSG00000175048|ZDHHC14 ENSG00000188037|CLCN1 ENSG00000188910|GJB3 ENSG00000203900|Q6ZSD3\_HUMAN  
ENSG00000204210|ZBTB22 ENSG00000204616|TRIM31 ENSG00000050165|DKK3 ENSG00000100629|C14orf145 ENSG00000101981|F9 ENSG00000104356|POP1 ENSG00000110218|PANX1 ENSG00000127423|C1orf135  
ENSG00000134202|GSTM3 ENSG00000135903|PAX3 ENSG00000141298|SSH2 ENSG00000152661|GJA1 ENSG00000152763|WDR78 ENSG00000153495|C13orf16 ENSG00000165300|SLITRK5 ENSG00000168229|PTGDR  
ENSG00000169826|CGAT2\_HUMAN ENSG00000171033|PKIA ENSG00000174038|C9orf131 ENSG00000177453|NIMI\_HUMAN ENSG00000181626|DKFP79B1634 ENSG00000182308|WDR21B ENSG00000184588|PDE4B ENSG00000187446|CHP1\_HUMAN  
ENSG00000203729|C1orf120 ENSG00000206125|Q68DA7\_HUMAN  
GTGGATA ENSG00000006125|AP2B1 ENSG00000136119|CXorf6 ENSG00000104892|KLC3 ENSG00000106236|NPTX2 ENSG00000125804|C20orf91 ENSG00000132518|GUCY2D ENSG00000133250|ZNF414 ENSG00000145526|CDH18  
ENSG00000163344|PMVK ENSG00000166143|PPP1R14D ENSG00000173638|SLC19A1 ENSG00000179388|EGR3 ENSG00000196396|PTPN1 ENSG00000197038|NP\_001547.1 ENSG00000033178|UBE1L2 ENSG00000069122|GPR116  
ENSG00000089163|SIRT4 ENSG00000091409|ITGA6 ENSG00000100209|HSCB ENSG00000121210|KIAA0922 ENSG00000124333|SYBL1 ENSG00000125676|THOC2 ENSG00000128595|CALU ENSG00000130368|MAS1  
ENSG00000133794|ARNTL ENSG00000136754|ABI1 ENSG00000136826|PGF2 ENSG00000138685|PLFB ENSG00000141434|MEP1B ENSG00000145730|PAM ENSG00000158290|CUL4B ENSG00000164743|C8orf48  
ENSG00000169340|NP\_777584.1 ENSG00000175809|ZNF645 ENSG00000178446|C21orf100 ENSG00000181495|C5orf23 ENSG00000185057|TAF9 ENSG00000197429|IPP ENSG00000198056|PRIM1 ENSG00000204478|PRAMEF20  
ENSG00000204486|PRAMEF21  
GTGGATT ENSG00000092067|CEBPE ENSG00000100024|UPB1 ENSG00000108375|SUPT4H1 ENSG00000110880|CORO1C ENSG00000123992|DNPEP ENSG00000129816|NP\_001538.1 ENSG00000129845|O14605\_HUMAN ENSG00000131845|ZNF304  
ENSG00000135436|C12orf25 ENSG00000146670|CDCA5 ENSG00000149646|C20orf152 ENSG00000150086|GRIN2B ENSG00000161267|BDH1 ENSG00000166948|TGM6 ENSG00000180424|DEFB123 ENSG00000180834|MAP6D1  
ENSG00000182541|L1MK2 ENSG00000185117|NP\_002733.1 ENSG00000203908|NP\_001017361.1 ENSG00000204569|PPP1R10 ENSG00000002745|WNT16 ENSG00000005108|THSD7A ENSG00000089916|C14orf118 ENSG00000109790|KLHL5  
ENSG00000112425|EPM2A ENSG00000114529|C3orf52 ENSG00000115970|THADA ENSG00000116251|RPL22 ENSG00000131951|LRRC9 ENSG00000136100|VPS36 ENSG00000139977|NAT12 ENSG00000140416|TPM1  
ENSG00000144597|EAF1 ENSG00000147586|MRPS28 ENSG00000150433|NP\_001074015.1 ENSG00000154473|BUB3 ENSG00000159592|GPBP1L1 ENSG00000172403|SYNPO2 ENSG00000182899|RPL35A ENSG00000185250|PPII6  
GTGGCCC ENSG000000014038|PRSS3 ENSG00000036672|USP2 ENSG00000063761|ADCK1 ENSG00000100324|MAP3K7IP1 ENSG00000100359|RUTBC3 ENSG00000106351|HRBL ENSG00000120949|TNFRSF8 ENSG00000122375|OPN4  
ENSG00000129455|K1K8 ENSG00000132688|NES ENSG00000134575|ADCP2 ENSG00000141401|IMPA2 ENSG00000143333|RGS16 ENSG00000146828|SLC12A9 ENSG00000146834|BCDIN3 ENSG00000152127|MGAT5  
ENSG00000162227|TAF6L ENSG00000167797|CDK2AP2 ENSG00000177769|TSPAN4 ENSG00000179262|RAD23A ENSG00000179886|TIGD5 ENSG00000180767|CHST13 ENSG00000182218|KIAA1822 ENSG00000184811|TUSC5  
ENSG00000184916|JAG2 ENSG00000185236|RAB11B ENSG00000196923|PDLIM7 ENSG00000072803|FBXW11 ENSG00000090621|PABPC4 ENSG00000091831|ESR1 ENSG00000099250|NRP1 ENSG00000111785|RTC8B  
ENSG00000119421|NDUFA8 ENSG00000119950|MXI1 ENSG00000132965|ALOX5AP ENSG00000135407|AVIL ENSG00000157456|CCNB2 ENSG00000163075|NP\_001025167.1 ENSG00000181195|PENK  
GTGGCTT ENSG00000038382|TRIO ENSG00000059122|FLYCHL1 ENSG00000071626|DAZAP1 ENSG00000089723|OTUB2 ENSG00000116863|ADPRHL2 ENSG00000131746|TNS4 ENSG00000142102|ATHL1 ENSG00000156486|KCN2S2  
ENSG00000160208|RRP1B ENSG00000168101|NUDT16L1 ENSG00000170122|FOXD4L1 ENSG00000172183|ISG20 ENSG00000177441|Q8N4T9\_HUMAN ENSG00000177764|ZCCHC3 ENSG00000180914|OXTR ENSG00000184009|ACTG1  
ENSG00000184601|NP\_001008404.1 ENSG00000187513|GJA4 ENSG00000204859|ZBTB48 ENSG000000049319|SRD5A2 ENSG00000054267|ARID4B ENSG00000056050|C4orf27 ENSG00000091127|PUS7 ENSG00000093000|NUP50  
ENSG00000094755|GABRP ENSG00000100596|SPTLC2 ENSG00000117335|CD46 ENSG00000127022|CANX ENSG00000129007|CALML4 ENSG00000129158|SERGEF ENSG00000133116|KL ENSG00000138795|LEF1  
ENSG00000145649|GZMA ENSG00000147180|ZNF711 ENSG00000165525|SDCCAG1 ENSG00000169016|E2F6 ENSG00000170949|ZNF160 ENSG00000171566|PLRG1 ENSG00000184368|MAP7D2 ENSG00000184492|FOXD4  
GTGGGAG ENSG00000091947|TMEM101 ENSG00000100150|DEPDC5 ENSG00000100246|BDAL4 ENSG00000106636|YKT6 ENSG00000108669|PSCD1 ENSG00000115649|C2orf24 ENSG00000117242|DDOST ENSG00000127191|TRAF2  
ENSG00000134470|IL15RA ENSG00000141753|IGFBP4 ENSG00000141867|NRN4 ENSG00000143845|ETNF2 ENSG00000146834|BCDIN3 ENSG00000162065|TBC1D24 ENSG00000162779|C1orf125 ENSG00000169181|GSG1L  
ENSG00000169683|LRRC45 ENSG00000175084|DES ENSG00000178241|Q9P0D4\_HUMAN ENSG00000181035|SLC25A42 ENSG00000184371|CSF1 ENSG00000187583|PLEKHN1 ENSG00000188112|FLJ90086 ENSG00000189091|SF3B3  
ENSG00000198165|Q9H960\_HUMAN ENSG0000000198407|Q8NCZ5\_HUMAN ENSG00000198517|MAFK ENSG00000204280|NP\_001032647.2 ENSG00000082068|WDR10 ENSG00000090686|USP48 ENSG00000108588|CCDC47 ENSG00000115604|IL18R1  
ENSG00000117153|KLHL12 ENSG00000123165|ACTRT1 ENSG00000136122|C13orf34 ENSG00000148225|WDR31 ENSG00000153823|PID1 ENSG00000158636|C11orf30 ENSG00000162385|MAGO8 ENSG00000163113|OTUD7B

ENSG00000165023|DIRAS2 ENSG00000166292|TMEM100 ENSG00000179859|LOC284023 ENSG00000185950|IRS2 ENSG00000185972|CCIN ENSG00000196458|ZNF605 ENSG00000196616|ADH1C ENSG00000102870|ZNF629
GTGGGGA ENSG00000011083|SLC6A7 ENSG00000017621|MAGIX ENSG00000064195|DLX3 ENSG00000073670|ADAM11 ENSG00000087088|BAX ENSG00000095015|MAP3K1 ENSG00000101204|CHRNA4 ENSG00000102870|ZNF629
ENSG00000104848|KCN7 ENSG00000105072|C19orf44 ENSG00000105650|PDE4C ENSG00000107185|KIAA0258 ENSG00000112511|PHF1 ENSG00000118960|HSLBP3 ENSG00000120853|GOLGA2L1 ENSG00000124702|KLHDC3
ENSG00000126353|CCR7 ENSG00000128805|ARHGAP22 ENSG00000130227|XPO7 ENSG00000137309|HMGAL1 ENSG00000140564|FURIN ENSG00000144681|STAC ENSG00000146216|TTBK1 ENSG00000148204|CRB2
ENSG00000160014|CALM\_HUMAN ENSG00000160781|PAQR6 ENSG00000169992|NLGN2 ENSG00000170004|CHD3 ENSG00000171700|RGS19 ENSG00000172018|NP\_001004341.1 ENSG00000176720|BOK ENSG00000177469|PTRF
ENSG00000178409|KIAA1553 ENSG00000181929|PRKAG1 ENSG00000183403|DND1 ENSG00000184481|MLL7 ENSG00000186994|ANKRD47 ENSG00000198933|TBKBP1 ENSG0000013297|CLDN11 ENSG00000067334|DNTTIP2
ENSG00000110063|DCPS ENSG00000112182|BACH2 ENSG00000112651|MRPL2 ENSG00000118402|ELOVL4 ENSG00000122877|EGR2 ENSG00000124343|XG ENSG00000136478|TEX2 ENSG00000137055|PLAA
ENSG00000137168|PP1L1 ENSG00000142192|APP ENSG00000144566|RAB5A ENSG00000151849|CENPJ ENSG00000159212|CLIC6 ENSG00000160294|MCM3AP ENSG00000163125|KIAA0460 ENSG00000165985|C1QL3
ENSG00000173473|SMARCC1 ENSG00000174038|C9orf131 ENSG00000174456|NP\_997318.1 ENSG00000174721|FGFBP3 ENSG00000184999|SLC22A10 ENSG00000185414|MRPL30 ENSG00000186974|Q8N6X9\_HUMAN ENSG00000188647|PTAR1
ENSG00000204524|ZNF805 ENSG00000205773|LOC652517 ENSG00000206131|Q6ZS21\_HUMAN
GTGGGTT ENSG00000078902|TOLLIP ENSG00000100302|RASD2 ENSG00000105428|ZNRFA ENSG00000107593|PKD2L1 ENSG00000110777|POU2AF1 ENSG00000125089|SH3TC1 ENSG00000127415|IDUA
ENSG00000149305|HTR3B ENSG00000152086|TUBA3E ENSG00000158195|WASF2 ENSG00000167105|TMEM92 ENSG00000169957|ZNF768 ENSG00000182324|KCNJ14 ENSG00000196422|KIAA0649 ENSG00000197256|ANKRD25
ENSG00000198033|TUBA3C ENSG00000087074|PPP1R15A ENSG00000097046|CDC7 ENSG00000103254|C16orf24 ENSG00000119335|SET ENSG00000132000|PODNL1 ENSG00000134313|NP\_065789.1 ENSG00000135324|C6orf117
ENSG00000143252|SDHC ENSG00000144228|SPOPL\_HUMAN ENSG00000154447|SH3RF1 ENSG00000163412|EIF4E3 ENSG00000163492|NP\_775919.2 ENSG00000164823|OSGIN2 ENSG00000164985|PSIP1 ENSG00000172006|ZNF554
ENSG00000178217|SH2D4B ENSG00000178562|CD28 ENSG00000186480|INSIG1 ENSG00000186566|GPATC8
GTGGTAA ENSG00000083842|ZNF8 ENSG00000095970|TREM2 ENSG00000100647|KIAA0247 ENSG00000106538|RARRES2 ENSG00000108379|WNT3 ENSG00000108679|LGALS3BP ENSG00000110881|ACCN2
ENSG00000115307|AUP1 ENSG00000116663|FBX06 ENSG00000132275|KIAA0409 ENSG00000137656|BUD13 ENSG00000140961|OSGIN1 ENSG00000143819|EPHX1 ENSG00000159708|LRRK36 ENSG00000167264|DUS2L
ENSG00000175992|Q9BR87\_HUMAN ENSG00000176120|Q9BSY8\_HUMAN ENSG00000176679|TGIF2LY ENSG00000179562|GCC1 ENSG00000186453|NP\_001035800.1 ENSG00000189339|SLC35E2 ENSG00000197386|HD ENSG00000198785|GRIN3A
ENSG00000204385|CTL4\_HUMAN ENSG00000023572|GLRX2 ENSG00000066027|PPP2R5A ENSG00000112796|ENPF5 ENSG00000116062|MSH6 ENSG00000118946|PCDH17 ENSG00000130349|C6orf203 ENSG00000135549|PKIB
ENSG00000138069|RAB1A ENSG00000141279|NPEPPS ENSG00000144909|OSBPL11 ENSG00000145244|CORIN ENSG00000145495|MARCH6 ENSG00000148429|USP6NL ENSG00000151292|CSNK1G3 ENSG00000153779|TGIF2LX
ENSG00000163576|EFHB ENSG00000168594|ADAM29 ENSG00000175336|APOF ENSG00000186409|NP\_001074319.1 ENSG00000196350|ZNF492 ENSG00000197054|ZNF763 ENSG00000197928|ZNF677 ENSG00000197937|ZNF347
ENSG00000203711|C6orf99
GTGGTGG ENSG00000011332|DPF1 ENSG00000090565|RAB11FIP3 ENSG00000092929|UNC13D ENSG00000101474|C20orf3 ENSG00000107742|SPOCK2 ENSG00000110107|PRPF19 ENSG00000125726|CD70 ENSG00000129187|DCTD
ENSG00000130940|CASZ1 ENSG00000132622|HSPA12B ENSG00000161091|C19orf28 ENSG00000161998|Q8N221\_HUMAN ENSG00000163395|NP\_840059.1 ENSG00000167508|MVD ENSG00000171236|LRG1 ENSG00000177133|Q6ZV91\_HUMAN
ENSG00000178950|GAK ENSG00000180902|D2HGDH ENSG00000182446|NPLOC4 ENSG00000182541|LIMK2 ENSG00000185117|NR\_002733.1 ENSG00000185324|CDK10 ENSG00000185555|C5orf20 ENSG00000185917|SETD4
ENSG00000188984|AADACL3 ENSG00000189091|SF3B3 ENSG00000189143|CLDN4 ENSG00000084444|KIAA1467 ENSG00000089050|RBBP9 ENSG00000089472|HEPH ENSG00000120341|LZTR2 ENSG00000123066|THRAP2
ENSG00000126453|BCL2L1 ENSG00000131508|UBE2D2 ENSG00000131724|IL13RA1 ENSG00000133703|KRAAS ENSG00000143486|LGTN ENSG00000164308|NP\_071745.1 ENSG00000170791|CHCHD7 ENSG00000174106|LEMD3
ENSG00000182263|FIGN ENSG00000186715|Q13209\_HUMAN ENSG00000197639|MKNRP5 ENSG00000197956|S100A6 ENSG00000204019|NP\_001017978.1
GTGTAAA ENSG000000065675|PRKQC ENSG00000075035|WSCD2 ENSG00000079616|KIF27 ENSG00000090565|RAB11FIP3 ENSG00000099821|POLRMT ENSG00000100422|CERK ENSG00000104368|PLAT ENSG00000113719|ERGIC1
ENSG00000125347|TRF1 ENSG00000128266|GNAZ ENSG00000129646|QRICH2 ENSG00000131914|LIN28 ENSG00000134243|SORT1 ENSG00000146453|PNLDC1 ENSG00000154319|C8orf13
ENSG00000160213|CSTB ENSG00000164778|EN2 ENSG00000165233|C9orf89 ENSG00000167393|PPP2R3B ENSG00000169885|CALML6 ENSG00000174206|NP\_689653.3 ENSG00000174989|FBXW8 ENSG00000186185|NP\_001073912.1
ENSG00000196970|NXF4 ENSG00000197296|C20orf142 ENSG00000198369|SPRED2 ENSG00000204564|C6orf136 ENSG0000032219|ARID4A ENSG00000060642|PIGV ENSG00000070540|WIP1 ENSG00000089048|ESF1
ENSG00000093000|NUP50 ENSG00000108733|PEX12 ENSG00000112077|RHAG ENSG00000117114|LPHN2 ENSG00000119844|AFTPH ENSG00000125384|PTGER2 ENSG00000130023|C6orf70 ENSG00000135486|HNRPA1
ENSG00000136404|TM6SF1 ENSG00000137936|BCAR3 ENSG00000138271|GPR87 ENSG00000156650|MYST4 ENSG00000159086|C21orf66 ENSG00000161547|SFRS2 ENSG00000163586|FABP1 ENSG00000163714|SR140\_HUMAN
ENSG00000163788|SNRK ENSG00000163807|KIAA1143 ENSG00000165617|DACT1 ENSG00000166035|LIPC ENSG00000169062|UPF3A ENSG00000179046|NP\_775824.1 ENSG00000179387|ELMOD2 ENSG00000185515|BRCC3
ENSG00000188611|ASAH2C ENSG00000189292|NP\_001002919.1 ENSG00000196305|IARS ENSG00000197498|BXDC1
GTGTAAc ENSG00000019485|PRDM11 ENSG00000070495|JMJD6 ENSG00000092054|MYH7 ENSG00000102243|VGLL1 ENSG00000125733|TRIP10 ENSG00000129744|ART1 ENSG00000130734|ATG4D ENSG00000133149|TEX13A
ENSG00000136378|ADAMTS7 ENSG00000146066|HIGD2A ENSG00000153956|CACNA2D1 ENSG00000160752|FDPS ENSG00000162444|RBP7 ENSG00000170430|MGMT ENSG00000171346|KRT15 ENSG00000174151|CYB561D1
ENSG00000176534|RL41\_HUMAN ENSG00000188011|NP\_776182.2 ENSG00000189339|SLC35E2 ENSG00000198183|PLUNC ENSG00000204356|RDBP ENSG00000206026|NP\_001032408.1 ENSG00000053900|ANAPC4 ENSG00000067369|TP53BP1
ENSG00000112200|ZNF451 ENSG00000121691|CAT ENSG00000123560|PLP1 ENSG00000124201|ZNFX1 ENSG00000133135|RNF128 ENSG00000136542|GALNT5 ENSG00000144909|OSBPL11
ENSG00000151632|AKR1C2 ENSG00000153162|BMP6 ENSG00000155545|MIER3 ENSG00000164989|C9orf93 ENSG00000170340|B3GNT2 ENSG00000172179|PRL ENSG00000173660|UQCRT8 ENSG00000184517|ZFP1
GTGTAAg ENSG00000006062|MAP3K14 ENSG00000057704|TMCC3 ENSG00000075388|FGF4 ENSG00000100764|PSMC1 ENSG00000103852|TTC23 ENSG00000108861|DUSP3 ENSG00000128596|NP\_073579.3 ENSG00000151631|Q9P2A3\_HUMAN
ENSG00000160685|ZBTB7B ENSG00000173662|TAS1R1 ENSG00000183666|LOC728411 ENSG00000187095|LILRA2 ENSG00000188199|FAM22B ENSG00000198237|GUSL1\_HUMAN ENSG00000204043|FAM22C ENSG00000049759|NEDD4L
ENSG00000070718|AP3M2 ENSG00000075223|SEMA3C ENSG00000080298|RFK3 ENSG00000101928|MOSPD1 ENSG00000106648|GALNTL5 ENSG00000110218|PANX1 ENSG00000114279|FGF12 ENSG00000124383|MPHOSPH10
ENSG00000132122|SPATA6 ENSG00000132912|DCTN4 ENSG00000135931|ARMC9 ENSG00000136242|Q9NXD8\_HUMAN ENSG00000137801|THBS1 ENSG00000139910|NOVA1 ENSG00000143889|HNRPLL ENSG00000145736|GTF2H2
ENSG00000165474|GJB2 ENSG00000169446|TMEM32 ENSG00000182521|TBPL2 ENSG00000183474|NP\_001035955.1 ENSG00000196357|ZNF565 ENSG00000197054|ZNF763 ENSG00000198178|CLEC4C
GTGTAAr ENSG00000004848|ARX ENSG0000012061|ERCC1 ENSG00000068831|MASRP2 ENSG00000086015|MAST2 ENSG00000087269|NOL1A ENSG00000103266|STUB1 ENSG00000104953|TLE6
ENSG00000105258|POLR2I ENSG00000105705|SF4 ENSG00000113194|UBXD8 ENSG00000130544|ZNF557 ENSG00000163900|TMEM41A ENSG00000165282|PIGO ENSG00000168970|PLA2G4B ENSG00000173137|ADCK5
ENSG00000176515|Q9NAX6\_HUMAN ENSG00000184516|Q8IVR1\_HUMAN ENSG00000185100|ADSSL1 ENSG00000185291|IL3RA ENSG00000198471|RTPE2 ENSG00000204564|C6orf136 ENSG00000205726|ITSN1 ENSG00000019991|HGF
ENSG00000071537|SEL1L ENSG00000077254|USP33 ENSG00000112232|KHDRBS2 ENSG00000119541|VPS4B ENSG00000119865|C2orf32 ENSG00000121570|DPPA4 ENSG00000121903|ZSCAN20 ENSG00000122417|ODF2L
ENSG00000126950|TMEM35 ENSG00000131003|RBMV2FP ENSG00000132952|USPL1 ENSG00000134294|SLC38A2 ENSG00000136688|IL1F9 ENSG00000147642|SYBU\_HUMAN ENSG00000159904|ZNF225 ENSG00000165533|TTC8
ENSG00000170852|KBTBD2 ENSG00000170948|MBD3L1 ENSG00000178229|ZNF543 ENSG00000180998|GPR137C ENSG00000181392|C19orf46 ENSG00000184500|PROS1 ENSG00000198252|STYX ENSG00000198538|ZNF28
ENSG00000198767|YY2
GTGTACA ENSG00000006740|RICH2\_HUMAN ENSG00000066850|ATP11A ENSG00000070785|EIF2B3 ENSG00000080845|DLGAP4 ENSG00000092607|TBX15 ENSG00000100302|RASD2 ENSG00000102572|STK24 ENSG00000121068|TBX2
ENSG00000125388|GRK4 ENSG00000125726|CD70 ENSG00000125800|C20orf91 ENSG00000131183|SLC34A1 ENSG00000142186|SCYL1 ENSG00000163545|NUAK2 ENSG00000167967|E4F1 ENSG00000172216|CEBPB
ENSG00000172500|FIBP ENSG00000185818|NAT8L ENSG00000203930|Q5JPA2\_HUMAN ENSG00000206539|Q6ZTN9\_HUMAN ENSG0000007062|PROM1 ENSG00000052126|PLEKHA5 ENSG00000052795|Q9H994\_HUMAN ENSG00000056050|C4orf27
ENSG000000067113|PPAP2A ENSG000000095787|WAC ENSG00000101558|VAPA ENSG00000105974|CAV1 ENSG00000108384|RAD51C ENSG00000111913|C6orf32 ENSG00000114374|USP9Y ENSG00000117226|GBP3
ENSG00000117322|CR2 ENSG00000119335|SET ENSG00000125831|CST11 ENSG00000131711|MAP1B ENSG00000132153|DHX30 ENSG00000141452|C18orf8 ENSG00000144749|LRIG1 ENSG00000144810|COL8A1
ENSG00000145555|MYO10 ENSG00000151247|EIF4E ENSG00000153790|C7orf31 ENSG00000163626|COX18 ENSG00000165309|ARMC3 ENSG00000165359|DDX26B ENSG00000177301|KCNA2 ENSG00000177688|SUMO4
ENSG00000181631|P2RY13 ENSG00000181690|FLAG1 ENSG00000183060|LILYMD4 ENSG00000183780|SLC35F3 ENSG00000186298|PPP1CC ENSG00000196653|ZNF502 ENSG00000197991|PCDH20
ENSG00000028310|BRD9 ENSG00000104953|TLE6 ENSG00000120725|SYLM1 ENSG00000122735|DANA11 ENSG00000129295|LRRK6 ENSG00000132405|BTCLD14 ENSG00000133085|C2orf28 ENSG00000140992|PDPK1
ENSG00000141026|MED9 ENSG00000155719|OTOA ENSG00000156299|ITAM1 ENSG00000171540|OTP ENSG00000171604|CXXC5 ENSG00000171703|TCEA2 ENSG00000173137|ADCK5 ENSG00000181873|C1orf69
ENSG00000186501|C1orf160 ENSG00000206140|LOC728229 ENSG00000202267|FHLL1 ENSG00000106829|TLE4 ENSG00000114279|FGF12 ENSG00000120549|KIAA1217 ENSG00000122566|HNRPA2B1 ENSG00000130770|ATPIF1
ENSG00000132475|H3F3B ENSG00000134644|PUM1 ENSG00000136874|STX17 ENSG00000144559|C3orf31 ENSG00000155090|KLF10 ENSG00000162374|ELAVL4 ENSG00000164294|NP\_001008398.1 ENSG00000164329|PAPD4
ENSG00000165195|PIGA ENSG00000165434|PGM2L1 ENSG00000174748|RPL15 ENSG00000185774|KCNIP4 ENSG00000196104|SPOCK3 ENSG00000196616|ADH1C
ENSG00000064489|MEF2B ENSG00000065491|TBC1D22B ENSG00000074964|ARHGEF10L ENSG00000075426|FOSL2 ENSG00000078295|ADCY2 ENSG00000101670|LIPG ENSG00000106070|GRB10
ENSG00000110711|AIP ENSG00000116984|MTR ENSG00000127952|STYXL1 ENSG00000131149|KIAA0182 ENSG00000136859|ANGPTL2 ENSG00000142686|NP\_689587.1 ENSG00000154096|THY1 ENSG00000164970|C9orf25
ENSG00000167641|PPP1R14A ENSG00000173638|SLC19A1 ENSG00000177741|Q96BN7\_HUMAN ENSG00000177885|GRB2 ENSG00000178104|PDE4DIP ENSG00000179241|LDLRAD3 ENSG00000179388|EGR3 ENSG00000183691|NOG
ENSG00000187147|C1orf164 ENSG00000035499|DEPDC1B ENSG00000082515|MRPL22 ENSG00000100262|ARFGAP3 ENSG00000106346|USP42 ENSG00000107968|MAP3K8 ENSG00000109184|DCUN1D4 ENSG00000112706|IMPG1
ENSG00000118200|CAMSAP1L1 ENSG00000124486|USP9X ENSG00000129514|FOXA1 ENSG00000130962|PRRG1 ENSG00000134644|PUM1 ENSG00000139910|NOVA1 ENSG00000142065|ZFP14 ENSG00000152253|SPC25
ENSG00000152382|TADAL1 ENSG00000154736|ADAMTS5 ENSG000001155304|STCH ENSG00000164093|PITX2 ENSG00000172175|MALT1 ENSG00000172380|GNGL2 ENSG00000172572|PDE3A
ENSG00000174485|DENND4A ENSG00000182916|TCEAL7 ENSG00000185068|GTF2H5 ENSG00000185201|IFITM2 ENSG00000185787|MORF4L1 ENSG00000204289|C17orf86
GTGTATc ENSG00000056998|GYG2 ENSG000000087191|PSMC5 ENSG00000100647|KIAA0247 ENSG00000102100|SLC35A2 ENSG00000102230|PCYT1B ENSG00000110092|CNND1 ENSG00000113303|BTNL8 ENSG00000151779|NP\_056993.2
ENSG00000162415|ZSWIM5 ENSG00000164970|C9orf25 ENSG00000169371|SUNUP ENSG00000185963|BICD2 ENSG00000186143|C2orf53 ENSG00000189077|NP\_114131.1 ENSG00000203744|ALL170\_HUMAN ENSG00000031003|C5orf5
ENSG00000065548|ZC3H15 ENSG00000076685|NT5C2 ENSG00000083312|TNPO1 ENSG00000102317|RBM3 ENSG00000107164|FUBP3 ENSG00000120616|EPC1 ENSG00000121897|LIAS ENSG00000134830|GPR77
ENSG00000135821|GLUL ENSG00000136451|VEZF1 ENSG00000137776|SLTM ENSG00000146729|GBAS ENSG00000154518|ATP5G3 ENSG00000162613|FUBP1 ENSG00000162891|IL20 ENSG00000173113|TR112\_HUMAN
ENSG00000175487|NP\_076428.2 ENSG00000184319|NP\_982307.1 ENSG00000184863|PRR8 ENSG00000185875|THNSL1 ENSG00000187672|ERC2 ENSG00000188343|FAM92A1 ENSG00000188740|NBPFF5 ENSG00000188800|TMCO2
ENSG00000198556|ZNF789 ENSG00000198824|C13orf8 ENSG00000198961|PJA2 ENSG00000205769|Q6ZUR9\_HUMAN
GTGTATg ENSG00000010295|NP\_542768.1 ENSG00000100077|ADRBK2 ENSG00000101670|LIPG ENSG00000103742|NP\_066013.1 ENSG00000105549|THEG ENSG00000110880|CORO1C ENSG00000121083|DYNLL2 ENSG00000130035|GALNT8
ENSG00000131467|PSME3 ENSG00000132164|SLC6A11 ENSG00000141258|RUTBC1 ENSG00000142686|NP\_689587.1 ENSG00000155265|C10orf132 ENSG00000159164|SV2A ENSG00000160714|UBE2Q1 ENSG00000162415|ZSWIM5
ENSG00000162783|IER5 ENSG00000162889|MAPKAPK2 ENSG00000164151|Q6ZT40\_HUMAN ENSG00000165138|ANKS6 ENSG00000165272|AQP3 ENSG00000166819|PLIN1 ENSG00000166888|STAT6 ENSG00000173218|VANGL1
ENSG00000173638|SLC19A1 ENSG00000179178|TMEM125 ENSG00000180935|Q8N8B3\_HUMAN ENSG00000181110|RGAG1 ENSG00000182013|NP\_060685.2 ENSG00000185379|RAD51L3 ENSG00000185818|NAT8L ENSG00000204568|MRFS18B
ENSG00000012983|MAP4K5 ENSG00000026103|FAS ENSG00000078053|AMPH ENSG00000099129|NRCAM ENSG00000099219|KIAA1815 ENSG00000102239|BRS3 ENSG00000117152|RGS4 ENSG00000124205|EDN3
ENSG00000135549|PKIB ENSG00000135913|USP37 ENSG00000139746|RBM26 ENSG00000141298|SSH2 ENSG00000141367|CLTC ENSG00000144452|ABCA12 ENSG00000146842|NP\_116231.2
ENSG00000147133|PAF1 ENSG00000153283|CD96 ENSG00000157193|LRP8 ENSG00000164938|TP53INP1 ENSG00000164985|PSIP1 ENSG00000166532|FAM80B ENSG00000171843|MLLT3 ENSG00000179532|C11orf47
ENSG00000184227|ACOT1 ENSG00000184344|LRRK19 ENSG00000184937|WT1 ENSG00000184937|WT1
GTGTCCA ENSG00000005486|NM\_001040457.1 ENSG000000011332|DPF1 ENSG000000064205|WISP2 ENSG00000068383|INPP5A ENSG00000101188|NTSR1 ENSG00000102265|TIMP1 ENSG00000103111|MON1B ENSG00000107282|APBA1
ENSG00000119682|KIAA0317 ENSG00000122642|FKBP9 ENSG00000125804|C20orf91 ENSG00000138617|PARP16 ENSG00000140835|CHST4 ENSG00000144596|GRIP2 ENSG00000160781|PAQR6 ENSG00000164053|TRES1
ENSG00000164362|TERT ENSG00000168395|ING5 ENSG00000172771|C3orf25 ENSG00000172893|DCHR7 ENSG00000176828|Q8N9U2\_HUMAN ENSG00000182841|Q9NSQ0\_HUMAN ENSG00000183092|BEGIN\_HUMAN ENSG00000188493|C19orf54
ENSG00000189180|ZNF33A ENSG00000196567|NP\_942123.1 ENSG00000204058|C10orf41 ENSG00000065600|C1orf75 ENSG00000070087|PFN2 ENSG00000137727|ARHGAP20 ENSG00000138779|Q9HCM6\_HUMAN ENSG00000143013|LMO4

ENSG00000151240|DIP2C ENSG00000154898|Q8IYA2\_HUMAN ENSG00000162433|AK3L2 ENSG00000165985|C1QL3 ENSG00000173302|GPR148 ENSG00000174579|MSL2L1 ENSG00000177613|CSTF2T ENSG00000180354|C7orf41
GTGTCTA ENSG00000184007|PTP4A2 ENSG00000188747|NOXA1 ENSG00000205024|Q6ZVP5\_HUMAN ENSG00000123933|MXD4 ENSG00000127564|PKMYT1 ENSG00000132434|LANCL2 ENSG00000133275|CSNK1G2 ENSG00000147140|NONO
ENSG00000148498|PARD3 ENSG00000151474|FRMD4A ENSG00000156486|KCMS2 ENSG00000166856|ADMR ENSG00000170099|SERPINA6 ENSG00000171853|TTC15 ENSG00000172350|ABCG4 ENSG00000184345|IQCF2
ENSG00000186575|NF2 ENSG000000010539|ZNF200 ENSG000000017260|ATP2C1 ENSG000000050393|CCDC90A ENSG000000075785|RAB7A ENSG000000087995|METTL2A ENSG000000096092|TMEM14A ENSG00000100353|EIF3S7
ENSG00000141458|NPC1 ENSG00000143751|C1orf55 ENSG00000147050|UTX ENSG00000147604|PRL7 ENSG00000144771|LRTM1 ENSG00000144909|OSBPL1 ENSG000001456026|CCDC109A ENSG00000165516|KLHDC2 ENSG00000166762|CATSPER2
ENSG00000172728|FUT10 ENSG00000173597|SULT1B1 ENSG00000176597|B3GNT5 ENSG00000177613|CSTF2T ENSG00000178904|DPY19L3 ENSG00000185523|NP\_001019772.1 ENSG00000198682|PAPSS2 ENSG00000204403|CASP12
GTGTCTG ENSG00000010295|NP\_542768.1 ENSG00000029993|HMGB3 ENSG00000058404|CAMK2B ENSG00000058799|YIPF1 ENSG00000092964|DPYSL2 ENSG00000099937|SERPIND1 ENSG00000100065|CARD10 ENSG00000107404|DVL1
ENSG00000109132|PHOX2B ENSG00000110046|NP\_055919.1 ENSG00000112139|MDGA1 ENSG00000114739|ACVR2B ENSG00000124422|USP22 ENSG00000128849|CGNL1 ENSG00000132693|CRP ENSG00000137842|TMEM62
ENSG00000142279|WTP1 ENSG00000142539|SPIB ENSG00000152315|KCNK13 ENSG00000157870|C1orf93 ENSG00000158050|DUSP2 ENSG00000159173|TNMI1 ENSG00000166007|LOC399940 ENSG00000168924|LETM1
ENSG00000170858|LILRA4 ENSG00000171368|P25A\_HUMAN ENSG00000172500|FIBP ENSG00000174374|WBSR16 ENSG00000175376|NP\_115701.2 ENSG00000175634|RPS6KB2 ENSG00000176490|DIRAS1 ENSG00000180935|Q8N8B3\_HUMAN
ENSG00000182809|CRIP2 ENSG00000184148|SPRR4 ENSG00000185519|FAM131C ENSG00000204455|XR\_015868.1 ENSG00000065328|MCM10 ENSG00000070269|C14orf101 ENSG00000093134|VNN3 ENSG00000101367|MAPRE1
ENSG00000107643|MAPK8 ENSG00000117868|FAM62B ENSG00000126070|EIF2C3 ENSG00000134709|HOOK1 ENSG00000144771|LRTM1 ENSG00000144909|OSBPL1 ENSG00000145247|OCIAD2 ENSG00000145365|NP\_443096.1
ENSG00000145495|MARCB6 ENSG00000153721|MAGI1 ENSG00000154027|AK5 ENSG00000163788|SNRK ENSG00000164251|F2RL1 ENSG00000165959|CLMN ENSG00000166479|TXNDC10 ENSG00000171843|MLLT3
ENSG00000187742|SECISBP2 ENSG00000205462|Q6ZWC8\_HUMAN ENSG00000068650|ATP11A ENSG00000082805|ERC1 ENSG00000088682|COQ9 ENSG00000089685|BIRC5 ENSG00000099365|STX1B2 ENSG00000100403|ZC3H7B
ENSG00000005100|DHX33 ENSG00000040487|PQLC2 ENSG00000068650|ATP11A ENSG00000082805|ERC1 ENSG00000088682|COQ9 ENSG00000089685|BIRC5 ENSG00000099365|STX1B2 ENSG00000100403|ZC3H7B
ENSG00000114982|NP\_060461.3 ENSG00000131188|PRR7 ENSG00000134243|SORT1 ENSG00000139722|VPS37B ENSG00000143294|PRCC ENSG00000169314|C22orf15 ENSG00000172476|RAB40A ENSG00000173867|MRPL46
ENSG00000174171|Q8TCB4\_HUMAN ENSG00000177614|PCBD5 ENSG00000185082|LBH ENSG00000196972|Q86V52\_HUMAN ENSG0000080947|Q8IVEO\_HUMAN ENSG0000083520|DIS3 ENSG00000100811|Y11 ENSG00000106723|SPIN1
ENSG00000121807|CCR2 ENSG00000134644|PUM1 ENSG00000135541|AH1I ENSG00000139842|CUL4A ENSG00000143190|POU2F1 ENSG00000143363|PRUNE ENSG00000152582|NP\_653323.1 ENSG00000153495|C13orf16
ENSG00000163145|C1QTNF7 ENSG00000164930|FZD6 ENSG00000181192|DHTKD1 ENSG00000196236|XPNPPE3 ENSG00000205874|Q6SA06\_HUMAN
GTGTGGC ENSG00000100401|RANGAP1 ENSG00000104687|GSR ENSG00000105447|GRWD1 ENSG00000106665|CLIP2 ENSG00000115194|SLC30A3 ENSG00000126822|PLEKHG3 ENSG00000140990|NDUFB10 ENSG00000145014|TMEM44
ENSG00000158109|FAM79A ENSG00000160209|PDXK ENSG00000168763|CNM3 ENSG00000169223|LMAN2 ENSG00000172020|GAP43 ENSG00000177045|SIX5 ENSG00000180279|Q8N4W5\_HUMAN ENSG00000183020|AP2A2
ENSG00000184009|ACTG1 ENSG00000184246|Q96PW8\_HUMAN ENSG00000185818|NAT8L ENSG00000196155|PLEKHG4 ENSG00000198171|C20orf116 ENSG00000198844|ARHGEP15 ENSG00000204859|ZBTB48 ENSG00000204946|ZNF783
ENSG00000205673|Q6ZRX0\_HUMAN ENSG00000047315|POLR2B ENSG00000049245|VAMP3 ENSG00000080819|CPOX ENSG00000102271|KLHL4 ENSG00000118816|CCNI ENSG00000123728|RAP2C ENSG00000131480|AOC2
ENSG00000133606|MKRN1 ENSG00000144410|CPO ENSG00000146938|NLGN4X ENSG00000149948|HMG2 ENSG00000155966|AFF2 ENSG00000164073|MFSDB ENSG00000167383|ZNF229 ENSG00000169895|SYAP1
ENSG00000170871|K0232\_HUMAN ENSG00000171791|BCL2 ENSG00000179295|PTPN11 ENSG00000180998|GPR137C
GTGTGTG ENSG00000005381|MPO ENSG00000070886|EPH8A ENSG00000079689|SCFN ENSG00000080845|DLGAP4 ENSG00000099204|ABLIM1 ENSG00000099365|STX1B2 ENSG00000101412|E2F1 ENSG00000105131|ABHD9
ENSG00000108379|WNT3 ENSG00000112139|MDGA1 ENSG00000116604|MGF2D ENSG00000117419|PRNP1P ENSG00000120709|FAM53C ENSG00000130584|ZBTB46 ENSG00000135365|PHF21A ENSG00000142546|NOS1P
ENSG00000142686|NP\_689587.1 ENSG00000145920|CPLX2 ENSG00000154917|RAB6B ENSG00000159164|SV2A ENSG00000163995|ABLIM2 ENSG00000164048|ZNF589 ENSG00000166135|HIF1AN ENSG00000166780|C16orf45
ENSG00000167202|TBC1D2B ENSG00000167565|SERTAD3 ENSG00000167680|SEMA6B ENSG00000171574|ZNF584 ENSG00000176490|DIRAS1 ENSG00000177663|IL17A ENSG00000177854|TMEM187 ENSG00000180935|Q8N8B3\_HUMAN
ENSG00000183020|AP2A2 ENSG00000185024|BRF1 ENSG00000185818|NAT8L ENSG00000187773|C18orf51 ENSG0000066813|NP\_001010845.1 ENSG00000075413|MARK3 ENSG00000109445|ZNF330 ENSG00000112238|PRDM13
ENSG00000112419|PHACTR2 ENSG00000117586|TNFSF4 ENSG00000117713|ARID1A ENSG00000129071|MBD4 ENSG00000137075|RNF38 ENSG00000143190|POU2F1 ENSG00000146278|PNRC1 ENSG00000151617|EDNRA
ENSG00000155876|RAGA ENSG00000158023|WDR66 ENSG00000159882|ZNF230 ENSG00000163113|OTUD7B ENSG00000164283|ESM1 ENSG00000167383|ZNF229 ENSG00000173928|C19orf39 ENSG00000177932|ZNF354C
ENSG00000179397|C1orf101 ENSG00000183747|ACSM2 ENSG00000196236|XPNPPE3 ENSG00000198646|NCOA6
GTGTGTT ENSG00000005381|MPO ENSG00000006756|ARSD ENSG00000072832|CRMP1 ENSG00000105202|FBL ENSG00000106078|COBL ENSG00000110786|PTPN5 ENSG00000114770|ABCC5 ENSG00000134247|PTGFRN
ENSG00000139624|LASS5 ENSG00000145911|N4BP3\_HUMAN ENSG00000146535|GNA12 ENSG00000151651|ADAM8 ENSG00000156471|PTDSS1 ENSG00000166526|ZNF3 ENSG00000166619|BLCAP ENSG00000168758|SEMA4C
ENSG00000169194|IL13 ENSG00000169992|NLGN2 ENSG00000170779|CDC4A ENSG00000178752|FAM132B ENSG00000183117|CSMD1 ENSG00000183495|EP400 ENSG00000183864|TOB2 ENSG00000188937|NYX
ENSG00000189060|H1F0 ENSG00000197177|GPR123 ENSG00000198816|ZNF358 ENSG00000204098|Q6ZUI5\_HUMAN ENSG00000083896|YTHDC1 ENSG00000102781|KATNAL1 ENSG00000118231|CRYGD ENSG00000137814|CEP27
ENSG00000138399|FASTKD1 ENSG00000138678|NP\_116106.2 ENSG00000143507|DUSP10 ENSG00000153896|ZNF599 ENSG00000158528|PP1R9A ENSG00000164116|GUCY1A3 ENSG00000164736|SOX17 ENSG00000165288|BRWD3
ENSG00000169139|UBE2V2 ENSG00000169744|LDB2 ENSG00000171155|C1GALT1C1 ENSG00000171951|SCG2 ENSG00000179456|ZNF238 ENSG00000180938|ZNF572 ENSG00000181788|SIAH2 ENSG00000184428|TOP1MT
ENSG00000189195|BTBD8 ENSG00000189212|DPY19L2P1 ENSG00000198393|ZNF26 ENSG00000204022|LIPJ ENSG00000205992|Q8N4X1\_HUMAN
GTGTATA perfect: GTGTGTT AACACAC hsa-miR-329 AACACACctggttaacctctt 0
ENSG00000056345|ITGB3 ENSG00000074211|PPP2R2C ENSG00000100034|PPM1F ENSG00000103550|NP\_001013009.2 ENSG00000104848|KCNA7 ENSG00000107341|UBE2R2 ENSG00000107562|CXCL12 ENSG00000107874|CUEDC2
ENSG00000108861|DUSP3 ENSG00000122729|ACO1 ENSG00000124422|USP22 ENSG00000130287|NCAN ENSG00000148158|SNX30 ENSG00000159199|ATP5A2 ENSG00000165140|FBP1 ENSG00000170145|SNF1LK2
ENSG00000171222|SCAND1 ENSG00000181396|NP\_078924.1 ENSG00000184639|NP\_001004344.1 ENSG00000188186|NP\_001008396.1 ENSG00000188589|RBM33 ENSG00000196132|MYT1\_HUMAN ENSG00000198668|CALM1 ENSG00000004961|HCCS
ENSG00000005108|STD7A ENSG00000052723|NP\_079349.1 ENSG00000069702|TGFB3 ENSG00000092969|TGFB2 ENSG00000111554|MDM1 ENSG00000112592|TBP ENSG00000131773|KHDRBS3
ENSG00000136143|SUCLA2 ENSG00000146469|VIP ENSG00000147274|RBMX ENSG00000160813|C7orf47 ENSG00000161813|LARP4 ENSG00000163673|DCLK3 ENSG00000163877|SNIP1 ENSG00000169554|ZEB2
ENSG00000169744|LDB2 ENSG00000173848|NET1 ENSG00000178988|MRFAP1L1 ENSG00000185985|SLITRK2 ENSG00000187109|NAP1L1 ENSG00000196505|GDAP2 ENSG00000204923|NP\_001019851.1 ENSG00000205992|Q8N4X1\_HUMAN
GTGTATC ENSG00000063978|RNF4 ENSG00000089280|FUS ENSG00000102078|SLC25A14 ENSG00000103091|WDR59 ENSG00000116649|SRM ENSG00000128596|NP\_073579.3 ENSG00000129250|KIF1C ENSG00000160505|NLRP4
ENSG00000164711|LPAL2 ENSG00000166860|ZBTB39 ENSG00000188525|NM\_207480 ENSG00000197461|PDGFA ENSG00000197982|C1orf122 ENSG00000203814|H1ST2H2B ENSG00000204323|Q71RC9\_HUMAN ENSG00000165568|RGPD7
ENSG00000046653|GPM6B ENSG00000047621|C12orf4 ENSG00000113456|RAD1 ENSG00000114062|UBE3A ENSG00000121406|FBP1 ENSG00000125355|FAM70A ENSG00000133106|EPST11
ENSG00000134313|NP\_065789.1 ENSG00000138041|SMEK2 ENSG00000138399|FASTKD1 ENSG00000147655|RSP02 ENSG00000150471|LPHN3 ENSG00000154545|MAGED4 ENSG00000154639|CXADR ENSG00000155329|ZCCHC10
ENSG00000163749|NP\_001036249.1 ENSG00000166068|SPRED1 ENSG00000168152|THAP9 ENSG00000169629|RGPD8 ENSG00000171940|ZNF217 ENSG00000172403|SYNPO2 ENSG00000183054|RGPD6 ENSG00000187243|MAGED4B
GTGTTC ENSG00000007392|LUC7L ENSG000000011021|CLCN6 ENSG00000076108|BAZ2A ENSG00000101361|NOL5A ENSG00000128191|DGCR8 ENSG00000135390|ATP5G2 ENSG00000136444|RSAD1 ENSG00000147100|SLC16A2
ENSG00000158553|POM121L2 ENSG00000160445|ZER1 ENSG00000165699|TSC1 ENSG00000167895|TMC8 ENSG00000173212|C1orf161 ENSG00000174529|PTEM81 ENSG00000180935|Q8N8B3\_HUMAN ENSG00000182981|C9orf56
ENSG00000183837|PNMA3 ENSG00000187979|Q6ZPC6\_HUMAN ENSG00000196460|Q6ZNB4\_HUMAN ENSG00000197177|GPR123 ENSG00000198013|PNMA6A ENSG00000198883|PNMA5 ENSG00000203784|LELP1 ENSG00000203931|LOC729078
ENSG00000204125|Q53S21\_HUMAN ENSG00000072657|TRHE ENSG00000102753|KPNA3 ENSG00000104763|ASHA1 ENSG00000106004|HOXA5 ENSG00000107897|ACBD5 ENSG00000108046|C10orf92 ENSG00000118231|CRYGD
ENSG00000120733|JMJDB1 ENSG00000123505|AMD1 ENSG00000128272|ATF4 ENSG00000134326|NP\_997198.2 ENSG00000140093|SERPINA10 ENSG00000150687|PRSS23 ENSG00000150776|C11orf57 ENSG00000154380|ENAH
ENSG00000155085|C6orf199 ENSG00000160181|TRYF ENSG00000160679|C1orf77 ENSG00000162613|FUBP1 ENSG00000163217|BMP10 ENSG00000164919|COX6C ENSG00000164924|YWHAZ ENSG00000166783|KIAA0430
ENSG00000168385|SEPT2 ENSG00000168582|CRYGA ENSG00000170113|NIP1A ENSG00000174500|GCET2 ENSG00000175265|GOLGA8A ENSG00000203932|LOC728660
GTGTGTC ENSG00000023902|PLEKH01 ENSG00000077157|PPP1R12B ENSG00000091513|TF ENSG00000100448|CTSG ENSG00000106133|NSUN5C ENSG00000125798|FOXA2 ENSG00000129862|VCY ENSG00000129864|VCY1B
ENSG00000135924|DNAJB2 ENSG00000142528|ZNF473 ENSG00000145494|NDUFS6 ENSG00000162576|MXRA8 ENSG00000169059|VCX3A ENSG00000175318|GRAMD2 ENSG00000177504|VCX2 ENSG00000182583|VCX
ENSG00000197430|TMEM10 ENSG00000198742|SMURF1 ENSG00000204274|Q6ZSG4\_HUMAN ENSG00000205642|VCX3B ENSG00000206031|Q6ZT66\_HUMAN ENSG00000102781|KATNAL1 ENSG00000104369|JPH1 ENSG00000107937|GTPBP4
ENSG00000110367|DDX6 ENSG00000111696|NT5DC3 ENSG00000113263|ITK ENSG00000113594|LIFR ENSG00000114062|UBE3A ENSG00000116016|EPAS1 ENSG00000118946|PCDH17 ENSG00000119801|YPEL5
ENSG00000134108|ARL8B ENSG00000138386|NAB1 ENSG00000152503|TRIM36 ENSG00000153250|RBMS1 ENSG00000153989|NUS1 ENSG00000163576|EFHB ENSG00000165060|FXN ENSG00000165409|TSHR
ENSG00000171502|COL24A1 ENSG00000172465|TCEAL1 ENSG00000179833|SERTAD2 ENSG00000182223|ZAR1 ENSG00000186432|KPNA4 ENSG00000204334|ALL162\_HUMAN ENSG00000206527|PTPLB
ENSG00000136199|CXorf56 ENSG00000079616|KIF22 ENSG00000086730|LAT2 ENSG00000097021|ACOT7 ENSG00000100227|POLDIP3 ENSG00000101290|CDS2 ENSG00000101321|C20orf159 ENSG00000102898|NUTF2
ENSG00000125977|EIF2S2 ENSG00000134207|SYT6 ENSG00000136504|MYST2 ENSG00000139436|GIT2 ENSG00000157693|C9orf91 ENSG00000159247|LOC643224 ENSG00000166398|KIAA0355 ENSG00000168824|NSG1\_HUMAN
ENSG00000169020|ATP5I ENSG00000180935|Q8N8B3\_HUMAN ENSG00000185674|LYG2\_HUMAN ENSG00000189159|HNI1 ENSG00000198816|ZNF358 ENSG0000019995|ZNRAN1 ENSG0000083312|TNPO1 ENSG0000095596|CYP26A1
ENSG00000107643|MAPK8 ENSG00000112592|TBP ENSG00000119523|ALG2 ENSG00000129484|PARP2 ENSG00000129682|FGF13 ENSG00000133872|TMEM66 ENSG00000135250|SRPK2 ENSG00000152795|HNRPD
ENSG00000154174|TOMM70A ENSG00000155097|ATP6V1C1 ENSG00000160201|U2AF1 ENSG00000163877|SNIP1 ENSG00000164683|HEY1 ENSG00000168675|C18orf1 ENSG00000171476|HOP\_HUMAN ENSG00000175818|H33ST5
ENSG00000176797|DEFB103B ENSG00000177243|DEFB103A ENSG00000189332|Q4G197\_HUMAN ENSG00000198919|DZIP3\_HUMAN
GTGTGTTA ENSG000000013619|CXorf6 ENSG00000102978|POLR2C ENSG00000127377|CRYGN ENSG00000143398|PIP5K1A ENSG00000144231|POLR2D ENSG00000151650|VENTX ENSG00000152192|POU4F1 ENSG00000155066|PROM2
ENSG00000157014|TATDN2 ENSG00000161016|RPL8 ENSG00000165424|C10orf56 ENSG00000166025|AMOTL1 ENSG00000173281|PPP1R3B ENSG00000173530|TNFRSF10D ENSG00000183657|Q8YW5\_HUMAN ENSG00000184677|ZBTB40
ENSG00000196630|Q8NFF7\_HUMAN ENSG000000019549|SNAI2 ENSG000000082293|COL19A1 ENSG00000089818|NECAP1 ENSG000000091409|ITGA6 ENSG00000113361|CDH6 ENSG00000115524|SF3B1 ENSG00000116497|S100PBP
ENSG00000117724|CENPF ENSG00000121057|AKAP1 ENSG00000123908|EIF2C2 ENSG00000124787|RPP40 ENSG00000126953|TIMM8A ENSG00000136527|SFRS10 ENSG00000147488|ST18 ENSG00000164600|NEUROD6
ENSG00000169908|TM4SF1 ENSG00000170873|MTSS1 ENSG00000175097|RAG2 ENSG00000176896|TFSM1\_HUMAN ENSG00000178982|EIF3S12 ENSG00000187191|DAZ3 ENSG00000188120|DAZ1 ENSG00000204022|LIPJ
ENSG00000205916|DAZ4 ENSG00000205944|DAZ2
GTGTGTTT ENSG00000003137|CYP26B1 ENSG00000007545|CRAMP1L ENSG00000060069|CTDP1 ENSG00000072609|CHFR ENSG00000072832|CRMP1 ENSG00000084710|KIAA0953 ENSG00000101290|CDS2 ENSG00000105202|FBL
ENSG00000106351|HRBL ENSG00000111405|PP1L\_HUMAN ENSG00000112149|CD83 ENSG00000114982|NP\_060461.3 ENSG00000130520|LSM4 ENSG00000132604|TERF2 ENSG00000136925|C9orf97 ENSG00000137842|TMEM62
ENSG00000148400|NOTCH1 ENSG00000166540|ZNF407 ENSG00000168062|BATF2 ENSG00000169803|AR ENSG00000173706|HEG1 ENSG00000177042|TMEM80 ENSG00000177370|TIMM22
ENSG00000183421|RIPK4 ENSG00000183578|TNFAIP8L3 ENSG00000189069|NP\_001013732.1 ENSG00000189159|HNI1 ENSG00000197530|MIB2 ENSG00000197724|PHF2 ENSG00000205913|Q6ZUC4\_HUMAN ENSG0000043093|DCUN1D1
ENSG00000075413|MARK3 ENSG00000101868|POLA1 ENSG00000114757|PEX5L ENSG00000115365|LANCL1 ENSG00000120051|C10orf80 ENSG00000122482|ZNF644 ENSG00000130935|NOL11 ENSG00000134588|USP26
ENSG00000136696|IL1F8 ENSG00000137414|FAM8A1 ENSG00000138081|FBXO11 ENSG00000141127|PRPSA2 ENSG00000146938|NLGN4X ENSG00000156194|PPEF1 ENSG00000158528|PPP1R9A ENSG00000159256|MORC3
ENSG00000164040|PGRMC2 ENSG00000164828|UNC84A ENSG00000167447|C17orf71 ENSG00000168129|DHFRP1 ENSG00000169255|B3GALNT1 ENSG00000171951|SCG2 ENSG00000172340|SUCLG2 ENSG00000174501|NP\_079466.2
ENSG00000174720|LARP7 ENSG00000177879|AP3S1 ENSG00000178222|RNF212 ENSG00000179104|TMT2C ENSG00000183304|FAM9A ENSG00000183647|ZNF530 ENSG00000196611|MMP1 ENSG00000197712|FAM114A1
ENSG00000205323|HCC1\_HUMAN



GTAAAGC ENSG00000036448|MYOM2 ENSG00000117481|NSUN4 ENSG00000125458|NT5C ENSG00000127080|IPPK ENSG00000137313|TRIM26 ENSG00000143632|ACTA1 ENSG00000145113|MUC4 ENSG00000146021|KLHL3 ENSG00000153179|RASSF3 ENSG00000159199|ATP5G1 ENSG00000161509|GRIN2C ENSG00000162949|CAPN13 ENSG00000165388|ZNF488 ENSG00000166224|SGPL1 ENSG00000171224|C10orf35 ENSG00000177646|ACAD9 ENSG00000177971|IMP3 ENSG00000178235|SLITRK1 ENSG00000182177|ASB1N ENSG00000184599|FAM19A3 ENSG00000184924|NP\_001013685.1 ENSG00000189140|Q6ZU77\_HUMAN ENSG00000097033|SH3GLB1 ENSG00000100731|PCNX ENSG00000108001|EBF3 ENSG00000120727|PAIP2 ENSG00000128607|NP\_055812.1 ENSG00000134709|HOOK1 ENSG00000150681|RGS18 ENSG00000152778|IFTT5 ENSG00000156697|UTP14A ENSG00000158985|CDC42SE2 ENSG00000163113|OTUD7B ENSG00000168386|FILLIP1L ENSG00000169554|ZEB2 ENSG00000174106|LEMD3 ENSG00000183604|NR\_002453.4 ENSG00000074054|CLASP1 ENSG00000084636|COL16A1 ENSG00000084636|COL16A1 ENSG00000090924|PLEKHG2 ENSG00000102297|MCM5 ENSG00000103064|SLC7A6 ENSG00000105583|C19orf56 ENSG00000105669|COPE ENSG00000115211|ETF2B4 ENSG00000117448|AKRIA1 ENSG00000123643|SLC36A1 ENSG00000124731|TREM1 ENSG00000124766|SOX4 ENSG00000125485|DDX31 ENSG00000136193|SCRN1 ENSG00000140718|FTO ENSG00000142530|NP\_612420.1 ENSG00000152291|TGOLN2 ENSG00000154832|CXXC1 ENSG00000162676|GFI1 ENSG00000163221|S100A12 ENSG00000163357|DCST1 ENSG00000167757|KLK11 ENSG00000167941|SOST ENSG00000174165|ZDHHC24 ENSG00000174989|FBXW8 ENSG00000179407|DNAJB8 ENSG00000185608|MRPL40 ENSG00000188589|RBM33 ENSG00000198336|MYL4 ENSG00000205106|Q6N098\_HUMAN ENSG00000205979|Q6YYA8\_HUMAN ENSG00000028203|VEZT ENSG00000038945|MSR1 ENSG00000067646|ZFY ENSG000000082996|RNF13 ENSG00000101856|PGRMC1 ENSG00000104635|SLC39A14 ENSG00000104825|NFKB1B ENSG00000105372|RPS19 ENSG00000106714|CNTNAP3 ENSG00000112339|HBS1L ENSG00000116918|TSNAX ENSG00000117632|STMN1 ENSG00000119965|C10orf88 ENSG00000132670|PTPRA ENSG00000135905|DOCK10 ENSG00000135960|EDAR ENSG00000136522|MRPL47 ENSG00000139168|ZCRB1 ENSG00000143947|RPS27A ENSG00000144306|SCRN3 ENSG00000147604|RPL7 ENSG00000152428|MARS2 ENSG00000154007|ASB17 ENSG00000154760|SLFN13 ENSG00000155307|SAMSN1 ENSG00000156876|SASS6 ENSG00000163642|XR\_017284.1 ENSG00000164100|NDST3 ENSG00000165494|PCF11 ENSG00000165525|SDCCAG1 ENSG00000171819|ANGPTL7 ENSG00000178694|NSUN3 ENSG00000179008|C14orf39 ENSG00000180336|NP\_001028831.1 ENSG00000180869|C1orf180 ENSG00000182498|RPS18 ENSG00000184515|NGFRAP1L1 ENSG00000188342|GTF2F2 ENSG00000188848|CCDC4 ENSG00000196505|GDAP2 ENSG00000197345|MRPL21 ENSG00000198105|ZNF248 ENSG00000198836|OPA1 ENSG000002026120|QOD2K5\_HUMAN ENSG00000211446|SEPP1 ENSG000002122085|MTERFD2 ENSG00000122543|ONCO\_HUMAN ENSG00000133985|TTC9 ENSG00000134207|SYT6 ENSG00000135175|PAL3 ENSG00000136040|PLXNC1 ENSG00000141968|VAV1 ENSG00000160714|UBE2Q1 ENSG00000162981|FAM84A ENSG00000169184|NM\_002430.2 ENSG00000170819|BFSP2 ENSG00000172057|ORMDL3 ENSG00000179308|GATA2 ENSG00000185917|SETD4 ENSG00000188706|ZDHHC9 ENSG00000197430|TMEM10 ENSG00000205268|PDE7A ENSG000000071967|CYBRD1 ENSG00000078399|HOXA9 ENSG00000102908|NFAT5 ENSG00000106153|CHCHD2 ENSG00000109158|GABRA4 ENSG00000111300|C12orf30 ENSG00000111885|MAN1A ENSG00000113810|SMC4 ENSG00000120837|NFYB ENSG00000122042|UBL3 ENSG00000124151|NCOA3 ENSG00000130783|CCDC62 ENSG00000135185|C7orf23 ENSG00000136149|XR\_017918.1 ENSG00000137420|NOL7 ENSG00000139973|SYT16 ENSG00000141452|C18orf8 ENSG00000143149|ALDH9A1 ENSG00000145293|ENOPH1 ENSG00000151413|NUBPL ENSG00000155760|FZD7 ENSG00000157224|CLDN12 ENSG00000159873|CCDC117 ENSG00000162624|LHX8 ENSG00000165028|NIPSNAP3B ENSG00000165983|PTER ENSG00000174686|ATF7P1 ENSG00000178074|NP\_710156.2 ENSG00000181744|C3orf58 ENSG00000205036|NP\_001001682.1 ENSG0000022556|NLRP2 ENSG00000104637|PINX1\_HUMAN ENSG00000131188|PRR7 ENSG00000136193|SCRN1 ENSG00000141968|VAV1 ENSG00000142611|PRDM16 ENSG00000143553|SNAPAP ENSG00000143748|NVL ENSG00000146066|HIGD2A ENSG00000151474|FRMD4A ENSG00000160505|NLRP4 ENSG00000175202|HIGD2B ENSG00000176894|PGAM5 ENSG00000178188|SH2B1 ENSG00000197461|PDGFA ENSG00000197982|C1orf122 ENSG00000205744|DENND1C ENSG00000205801|Q6ZTI5\_HUMAN ENSG000000040933|INPP4A ENSG000000071073|MGAT4A ENSG00000102908|NFAT5 ENSG00000116922|C1orf109 ENSG00000125247|TMT4 ENSG00000128654|MTX2 ENSG00000128739|SNRPN ENSG00000131351|NP\_219485.1 ENSG00000131941|RHPN2 ENSG00000136634|IL10 ENSG00000136888|ATP6V1G1 ENSG00000138399|FASTKD1 ENSG00000138684|IL21 ENSG00000144026|ZNF514 ENSG00000144306|SCRN3 ENSG00000154545|MAGED4 ENSG00000155115|C6orf51 ENSG00000164828|UNC94A ENSG00000165028|NIPSNAP3B ENSG00000172845|SP3 ENSG00000176018|LYSMD3 ENSG00000179152|C3orf23 ENSG00000180458|Q8N3U1\_HUMAN ENSG00000184434|LRRIC19 ENSG00000184517|ZFP1 ENSG00000187243|MAGED4B ENSG00000189007|DEADC1 ENSG00000189290|XR\_018254.1 ENSG00000163180|CA11 ENSG00000089280|FUS ENSG00000100104|SRR1L\_HUMAN ENSG00000116726|PRAMEF12 ENSG00000123427|FAM119B ENSG00000127481|ZUBR1 ENSG00000128596|NP\_073579.3 ENSG00000134287|ARF3 ENSG00000135454|B4GALNT1 ENSG00000137817|PARP6 ENSG00000138938|QSTGJ8\_HUMAN ENSG00000147206|INXF3 ENSG00000147255|IGSF1 ENSG00000148814|LRRIC27 ENSG00000148841|KIAA1754 ENSG00000160796|NBEAL2 ENSG00000163462|TRIM46 ENSG00000164674|SYTL3 ENSG00000169442|CD52 ENSG00000171160|C10orf83 ENSG00000182117|NOLA3 ENSG00000182177|ASB18 ENSG00000182330|PRAMEF8 ENSG00000184923|FAM22A ENSG00000188493|C19orf54 ENSG00000204485|LOC729516 ENSG00000204510|PRAMEF7 ENSG00000041357|PSMA4 ENSG000000097033|SH3GLB1 ENSG00000130994|ZFP106 ENSG00000106540|C7orf36 ENSG00000108091|CCDC6 ENSG00000121022|COP55 ENSG00000121390|PSPC1 ENSG00000134365|CFHR4 ENSG00000135222|CSN2 ENSG00000143157|POGK ENSG00000165502|RPL36AL ENSG00000169594|BNC1 ENSG00000171421|MRPL36 ENSG00000185344|ATP6V0A2 ENSG00000040487|PQLC2 ENSG00000103485|QPRT ENSG00000107960|OBFC1 ENSG00000113073|SLC4A9 ENSG00000124212|PTGIS ENSG00000129451|KLK10 ENSG00000137100|DCTN3 ENSG00000138326|RPS24 ENSG00000142544|ATPBD3 ENSG00000144029|MRPS5 ENSG00000152082|FAM128B ENSG00000157856|C2orf39 ENSG00000164674|SYTL3 ENSG00000168242|HIST1H2BI ENSG00000168481|LGI3 ENSG00000170653|ATF7 ENSG00000173040|EVC2 ENSG00000173272|FAM128A ENSG00000189058|APOD ENSG00000198369|SPRED2 ENSG00000100387|RBX1 ENSG00000105810|CDK6 ENSG00000108384|RAD51C ENSG00000113356|POLR3G ENSG00000115221|ITGB6 ENSG00000119203|CPSF3 ENSG00000137869|CYP19A1 ENSG00000145687|SSBP2 ENSG00000147044|CASK ENSG00000147654|EBAG9 ENSG00000147655|RSPO2 ENSG00000160633|SAFB ENSG00000168461|RAB31 ENSG00000169554|ZEB2 ENSG00000177613|CSTF2T ENSG00000181751|C5orf30 ENSG00000182754|RPL9P7 ENSG00000184863|PRR8 ENSG00000188610|FAM72B ENSG00000196550|FAM72A ENSG00000198964|SGMS1 ENSG000000057935|MTA3 ENSG00000070371|CLTCL1 ENSG00000076356|PLXNA2 ENSG00000124374|PAIP2B ENSG00000131149|KIAA0182 ENSG00000141293|SKAP1 ENSG00000141431|Q6ZMX6\_HUMAN ENSG00000142541|RPL13A ENSG00000143222|UFPC1 ENSG00000143545|RAB13 ENSG00000148411|BTBD14A ENSG00000150779|TIM88B ENSG00000157778|C7orf48 ENSG00000160410|SHKB1 ENSG00000163207|IVL ENSG00000165281|FANCG ENSG00000166090|IL25 ENSG00000171872|KLF17 ENSG00000177350|Q6NVV1\_HUMAN ENSG00000180846|C19orf34 ENSG00000196976|LAGE3 ENSG00000197308|NP\_997306.1 ENSG00000198467|TPM2 ENSG00000204049|Q6ZUH9\_HUMAN ENSG00000204226|Q6ZNS0\_HUMAN ENSG00000205420|KRT6A ENSG00000205973|LOC644949 ENSG00000115661|MAP4K3 ENSG00000065060|C6orf107 ENSG00000075131|TIFIN ENSG00000102218|RP2 ENSG00000107758|PPP3CB ENSG00000113558|SKP1A ENSG00000115825|PRKD3 ENSG00000116176|TPSG1 ENSG00000131941|RHPN2 ENSG00000134597|RBMX2 ENSG00000135119|TMEM118 ENSG00000135297|MTO1 ENSG00000139970|RTN1 ENSG00000149311|ATM ENSG00000153207|AHCTF1 ENSG00000153347|FAM81B ENSG00000154734|ADAMTS1 ENSG00000155893|ACPL2 ENSG00000161571|Q5YK65\_HUMAN ENSG00000164327|NP\_689969.2 ENSG00000170946|DPH4 ENSG00000174456|NP\_997318.1 ENSG00000176681|LRRIC37A ENSG00000185127|C6orf120 ENSG00000188153|COL4A5 ENSG00000198276|UCKL1 ENSG00000204711|C9orf135 ENSG00000092964|DPYSL2 ENSG00000099338|C19orf15 ENSG00000100321|SYNGR1 ENSG00000101193|C20orf11 ENSG00000101493|ZNF516 ENSG00000118058|MLL ENSG00000130703|OSBPL2 ENSG00000131196|NFATC1 ENSG00000131368|MRPS25 ENSG00000132522|GPS2 ENSG00000135097|MSI1 ENSG00000135472|FAIM2 ENSG00000136167|LCP1 ENSG00000143546|S100A8 ENSG00000151474|FRMD4A ENSG00000167080|B4GALNT2 ENSG00000167105|TMEM92 ENSG00000175166|PSMD2 ENSG00000176340|CXOR8A ENSG00000184840|TMED9 ENSG00000184935|Q6A101\_HUMAN ENSG00000205214|Q6ZU66\_HUMAN ENSG00000004534|RBM6 ENSG000000048544|MRPS10 ENSG00000052126|PLEKHA5 ENSG00000066855|MTFR1 ENSG00000081154|PCNP ENSG00000102055|PPP1R2P9 ENSG00000106049|HIBADH ENSG00000110172|CHORDC1 ENSG00000112651|MRPL2 ENSG00000115339|GALNT3 ENSG00000131375|CAPN7 ENSG00000132549|VPS13B ENSG00000138448|ITGAV ENSG00000153989|NUS1 ENSG00000155085|C6orf199 ENSG00000163939|PBRM1 ENSG00000171208|NETO2 ENSG00000171988|JMJD1C ENSG00000175305|CCNE2 ENSG00000196792|STRN3 ENSG00000205036|NP\_001001682.1 hsa-miR-802 CAGTAAcaaaagattcctctgt perfect: GTTACTG CAGTAAC GTTAGGA ENSG000000087237|CETP ENSG00000106018|VIPR2 ENSG00000115138|POMC ENSG00000121060|TRIM25 ENSG00000124212|PTGIS ENSG00000126709|IFI6 ENSG00000133985|TTC9 ENSG00000141965|FEM1A ENSG00000158423|RIBC1 ENSG00000162772|ATF3 ENSG00000165383|LRRIC18 ENSG00000168795|ZBTB5 ENSG00000172939|OXSR1 ENSG00000203855|Q8TDP9\_HUMAN ENSG00000072422|RHOBTB1 ENSG00000081177|EXDL2 ENSG00000100902|PSMA6 ENSG00000101782|RIOK3 ENSG00000112992|NNT ENSG00000112996|MRPS30 ENSG00000128578|FAM40B ENSG00000132972|RNF17 ENSG00000134313|NP\_065789.1 ENSG00000136897|MRPL50 ENSG00000136986|DERL1 ENSG00000138161|FAM24B ENSG00000140525|KIAA1794 ENSG00000145246|ATP10D ENSG00000152620|C5orf33 ENSG00000160633|SAFB ENSG00000161010|NP\_001017987.1 ENSG00000162852|C1orf71 ENSG00000163075|NP\_001025167.1 ENSG00000166326|TRIM44 ENSG00000166415|WDR72 ENSG00000167785|ZNF558 ENSG00000168300|PCMTD1 ENSG00000170495|Q6ZNE6\_HUMAN ENSG00000173273|TNKS ENSG00000173473|SMARCC1 ENSG00000182836|PLCXD3 ENSG00000188846|RPL14 ENSG00000197312|SLC1A1 ENSG00000198168|SVIP\_HUMAN ENSG00000118526|TCF21 ENSG00000131152|Q9H693\_HUMAN ENSG00000132004|FBXW9 ENSG00000132773|TOE1 ENSG00000136003|ISCU ENSG00000136485|WDR68 ENSG00000158158|CNNM4 ENSG00000166949|SMAD3 ENSG00000171853|TTC15 ENSG00000173567|GPR113 ENSG00000179452|Q8TDD1\_HUMAN ENSG00000184157|C1orf210 ENSG00000185730|ZNF692 ENSG00000186207|LCE5A ENSG00000187690|NP\_981952.1 ENSG00000197471|SPN ENSG00000197763|TXNRD3 ENSG00000204364|C2 ENSG00000204936|Q8N6Q3-3 ENSG00000205994|Q6ZNS58\_HUMAN ENSG00000082213|C5orf96 ENSG00000100483|C14orf138 ENSG00000106346|USP42 ENSG00000111727|HCFC2 ENSG00000114450|GNB4 ENSG00000118972|FGF23 ENSG00000121311|PRDX4 ENSG00000131508|UBE2D2 ENSG00000134899|ERCC5 ENSG00000136536|MARCH7 ENSG00000137766|UNC13C ENSG00000139263|LRIG3 ENSG00000140937|CDH11 ENSG00000143520|NP\_001014364.1 ENSG00000147853|AK3 ENSG00000152795|HNRPLD ENSG00000162441|LZIC ENSG00000162994|NP\_689598.1 ENSG00000164754|RAD21 ENSG00000165061|ZMAT4 ENSG00000165168|CYBB ENSG00000165434|PGM2L1 ENSG00000170348|TMED10 ENSG00000173597|SUPT1B1 ENSG00000174840|NP\_808881.2 ENSG00000176890|TYMS ENSG00000204164|Q6P095\_HUMAN ENSG00000204177|Q6P095\_HUMAN ENSG00000170946|DPH4 ENSG00000090238|YPEL3 ENSG00000105404|RABAC1 ENSG00000125746|EML2 ENSG00000141580|WDR45L ENSG00000143512|KIAA1822L ENSG00000150990|DHX37 ENSG00000157303|SUSD3 ENSG00000160712|IL6R ENSG00000167080|B4GALNT2 ENSG00000168439|STIP1 ENSG00000169371|SNUPN ENSG00000182156|ENPP7 ENSG00000186090|HTR3D ENSG00000047410|TPR ENSG00000082512|TRAF5 ENSG00000087095|NLK ENSG00000093009|CAA45L ENSG00000100281|HMG2L1 ENSG00000120253|NUP43 ENSG00000121089|NACA3P ENSG00000124172|ATP5E ENSG00000125356|NDUFAL1 ENSG00000132485|ZRANB2 ENSG00000139324|TMT3 ENSG00000140379|BCL2A1 ENSG00000140795|MYLK3\_HUMAN ENSG00000144410|CPO ENSG00000157315|TMED6 ENSG00000162722|TRIM58 ENSG00000163684|RPP14 ENSG00000163938|GNL3 ENSG00000170417|TMEM182 ENSG00000170629|NP\_872440.2 ENSG00000170946|DPH4 ENSG00000176018|LYSMD3 ENSG00000180389|NR\_002162.1 ENSG00000186666|BCDIN3D ENSG00000189212|DPY19L2P1 ENSG00000196531|NACA ENSG00000198315|ZNF192 ENSG00000206384|Q69YTO\_HUMAN GTTATTA ENSG00000033100|CHGUT\_HUMAN ENSG000000054965|KIAA0280 ENSG00000102547|CAB39L ENSG00000105486|LIG1 ENSG00000106070|GRB10 ENSG00000108861|DUSP3 ENSG00000116014|KISS1R ENSG00000117242|DDOST ENSG00000123136|DDX39 ENSG00000123243|TIH5 ENSG00000140263|SORB ENSG00000144031|ANKRD53 ENSG00000145945|FAM50B ENSG00000148468|C10orf38 ENSG00000173457|PPP1R14B ENSG00000173702|MUC13 ENSG00000175287|PHYHD1 ENSG00000175906|ARL4D ENSG00000176845|METRNL ENSG00000196388|NP\_998981.1 ENSG00000197063|MAFG ENSG000002052126|PLEKHA5 ENSG00000054938|CHRDL2 ENSG00000068366|ACSL4 ENSG00000106355|LSM5 ENSG00000107165|TYRP1 ENSG00000109805|NCAPG ENSG00000111816|FRK ENSG00000116703|PDC ENSG00000119878|CRIPT ENSG00000123610|TNFAIP6 ENSG00000125823|CSTL1 ENSG00000138109|CYP2C9 ENSG00000146038|CCDC2 ENSG00000152428|MARS2 ENSG00000153574|RPIA ENSG00000153714|C9orf150 ENSG00000162813|BPNT1 ENSG00000170584|NUDCD2 ENSG00000172469|MANEA ENSG00000174456|NP\_997318.1 ENSG00000185158|LRRIC37B ENSG00000185880|TRIM69 ENSG00000196633|ACN9 ENSG00000197085|Q6EKK1\_HUMAN ENSG00000198589|LRBA ENSG00000199814|KIAA0284 ENSG00000101152|DNAJC5 ENSG00000108106|UBE2S ENSG00000129295|LRRC6 ENSG00000130032|PRRG3 ENSG00000140992|PDDP1 ENSG00000141026|MED9 ENSG00000142534|RPS11 ENSG00000143878|RHOB ENSG00000157110|RBPM5 ENSG00000159556|ISL2 ENSG00000160094|ZNF362 ENSG00000160190|SLC37A1 ENSG00000161572|LYZL6 ENSG00000171608|PIK3CD ENSG00000179165|PXT1 ENSG00000179598|NP\_849158.1 ENSG00000179837|RBM15B ENSG00000185730|ZNF696 ENSG00000196934|LOC440804 ENSG00000198355|PIM3 ENSG00000198909|MAP3K3 ENSG00000202581|Q6ZVY8\_HUMAN ENSG00000203793|Q6ZR74\_HUMAN ENSG00000204876|Q6ZVM9\_HUMAN ENSG00000205502|NP\_001007596.1 ENSG00000205927|OLLIG2 ENSG000000018610|CXorf56 ENSG000000019991|HGF ENSG000000077380|DYNC1I2 ENSG00000081019|RSBN1 ENSG00000088205|DDX18 ENSG00000088386|SLC15A1 ENSG00000094841|UPRT ENSG00000095739|BAMBI ENSG00000112494|UNC93A ENSG00000116717|GADD45A ENSG00000119801|YPEL5 ENSG00000123485|NP\_060880.3 ENSG00000123584|MAGEA9B ENSG00000131773|KHDRBS3 ENSG00000132623|ANKRD5 ENSG00000132825|PPL1R3D ENSG00000134058|CDK7 ENSG00000134152|C15orf29 ENSG00000134389|CFHR5 ENSG00000146426|TIAM2 ENSG00000147592|LACTB2 ENSG00000148943|LIN7C ENSG00000150054|PPP7 ENSG00000151229|SLC2A13 ENSG00000157341|Q8ND77\_HUMAN ENSG00000158477|CD1A ENSG00000163293|NPAL1 ENSG00000163734|CXCL3 ENSG00000164114|MAP9 ENSG00000165443|PHYHIPL ENSG00000166008|MAGEA9 ENSG00000169621|C2orf13 ENSG00000170775|GPR37 ENSG00000171488|LRRIC8 ENSG00000177047|IFNW1 ENSG00000183665|TRMT12 ENSG00000185710|Q8ND77\_HUMAN ENSG00000188215|DCUN1D3 ENSG00000189184|PCDH18 ENSG00000196677|C8orf77 ENSG00000198648|STK39 ENSG00000204899|NP\_001065243.1 GTTCAGT ENSG00000011454|RABGAP1 ENSG00000042445|RETSAT ENSG00000105501|SIGLEC5 ENSG00000106789|CORO2A ENSG00000107957|SH3PXD2A ENSG00000119688|ABCD4 ENSG00000127445|PIN1 ENSG00000134317|GRHL1 ENSG00000136925|C9orf97 ENSG00000147065|MSN ENSG00000147570|DNAJC5B ENSG00000155052|CNTNAP5 ENSG00000158828|PINK1 ENSG00000160014|CALM\_HUMAN ENSG00000162511|LAPTM5 ENSG00000177673|NP\_689827.1 ENSG00000182712|MTCP1 ENSG00000185090|MANEAL ENSG00000186910|HARP1A1 ENSG00000196652|ZKSCAN5 ENSG00000198883|PNMA5 ENSG00000005108|THSD7A ENSG00000014824|SLC30A9 ENSG00000074696|PTPLAD1

ENSG00000083896|YTHDC1 ENSG00000087053|MTMR2 ENSG00000090054|SPTLC1 ENSG00000100811|YY1 ENSG00000101266|CSNK2A1P ENSG00000108061|SHOC2 ENSG00000108582|CPD ENSG00000112695|COX7A2  
ENSG00000124406|ATP8A1 ENSG00000124767|GLO1 ENSG00000125257|ABCC4 ENSG00000134278|SPIRE1 ENSG00000134363|FST ENSG00000149806|FAU ENSG00000152404|CWF19L2 ENSG00000153046|CDYL  
ENSG00000153162|BMP6 ENSG00000157111|TMEM171 ENSG00000163608|C3orf17 ENSG00000164187|LMBRD2 ENSG00000164329|PAPD4 ENSG00000166971|AKTIP ENSG00000167996|FTH1 ENSG00000175029|CTBP2  
ENSG00000177465|ACOT4 ENSG00000185686|PRAME ENSG00000186715|Q13209\_HUMAN ENSG00000186908|ZDHC17 ENSG00000198836|OPAL  
GTTTCATT ENSG00000085978|ATG16L1 ENSG00000086232|EIF2AK1 ENSG00000100448|CTSG ENSG00000104490|NCALD ENSG00000106628|POLD2 ENSG00000116237|ICMT ENSG00000117016|RIMS3 ENSG00000126254|NP\_077297.2  
ENSG00000132323|ILKAP ENSG00000140632|NP\_115958.2 ENSG00000140830|TXNL4B ENSG00000141096|DPEP3 ENSG00000142686|NP\_689587.1 ENSG00000145990|GFOD1 ENSG00000147536|GINS4 ENSG00000148773|MKI67  
ENSG00000158296|SLC13A3 ENSG00000159247|LOC643224 ENSG00000166123|GP27 ENSG00000169093|ASMTL ENSG00000172939|OXSR1 ENSG00000182508|LHFP1L1 ENSG00000183578|TNFAIP8L3 ENSG00000189180|ZNF33A  
ENSG00000205726|ITSN1 ENSG00000038274|MAT2B ENSG00000072849|DERL2 ENSG00000077420|APBB1IP ENSG00000082293|COL19A1 ENSG00000087206|VICM1 ENSG00000100028|SNRPD3 ENSG00000116406|EDEM3  
ENSG00000119917|FIT3 ENSG00000132640|BTBD3 ENSG00000134146|ATPBD4 ENSG00000137434|C6orf52 ENSG00000143859|INSL7 ENSG00000146592|UREB5 ENSG00000148737|TCF7L2 ENSG00000159450|TCHH  
ENSG00000162645|GBP7 ENSG00000163625|WDFY3 ENSG00000163807|KIAA1143 ENSG00000167562|ZNF701 ENSG00000170345|FOS ENSG00000180332|KCTD4 ENSG00000186416|NKRF ENSG00000189290|XR\_018254.1  
ENSG00000198825|INPP5F  
GTTCCCC ENSG00000099985|OSM ENSG00000100142|POLR2F ENSG00000101361|NOL5A ENSG00000107562|CXCL12 ENSG00000120071|KIAA1267 ENSG00000126456|IRF3 ENSG00000140511|HAPLN3  
ENSG00000142185|TRPM2 ENSG00000147130|ZMYM3 ENSG00000148296|SURF6 ENSG00000158483|FAM86C ENSG00000160746|TMEM16K ENSG00000160882|CYP11B1 ENSG00000161850|KRT82 ENSG00000163612|XR\_017899.1  
ENSG00000165782|TMEM55B ENSG00000166016|ABTB2 ENSG00000166819|PLIN ENSG00000169894|MUC3A ENSG00000171084|LOC645332 ENSG00000172782|FADS6 ENSG00000179142|CYP11B2 ENSG00000182108|MYLE\_HUMAN  
ENSG00000184274|C21orf93 ENSG00000184330|S100A7A ENSG00000185386|MAPK11 ENSG00000198013|PNMA6A ENSG00000198700|IPO9 ENSG00000198909|MAP3K3 ENSG00000203959|PIN1L ENSG00000204059|NP\_001013718.1  
ENSG00000204820|Q96NT9\_HUMAN ENSG00000205913|Q6ZUC4\_HUMAN ENSG0000034239|EFCAB1 ENSG00000059573|ALDH18A1 ENSG00000059804|GTR3\_HUMAN ENSG00000073464|CLCN4 ENSG00000121741|ZMYM2 ENSG00000129515|SNX6  
ENSG00000131080|EDA2R ENSG00000134042|MRO ENSG00000136206|WBSRC19 ENSG00000140319|SRP14 ENSG00000153930|ANKFN1 ENSG00000161010|NP\_001017987.1 ENSG00000163347|CLDN1 ENSG00000196371|FUT4  
ENSG00000203727|SAMD5 ENSG00000205505|NP\_001027561.1 ENSG00000205506|NP\_001027561.1 ENSG00000205508|NP\_001018856.1 ENSG00000205509|NP\_001027561.1 ENSG00000205580|NP\_001027561.1  
GTTCCGG ENSG0000007080|CCDC124 ENSG00000100364|C22orf9 ENSG00000100429|HDAC10 ENSG00000102575|ACP5 ENSG00000102858|MGRN1 ENSG00000105771|C19orf61 ENSG00000107831|FGF8  
ENSG00000130119|GNL3L ENSG00000135625|EGR4 ENSG00000139044|B4GALNT3 ENSG00000141101|NOB1 ENSG00000141956|PRDM15 ENSG00000157303|SUSD3 ENSG00000164867|NOS3 ENSG00000167311|ART5  
ENSG00000168412|MTNR1A ENSG00000169682|LAT ENSG00000180279|Q8N4W5\_HUMAN ENSG00000196526|AFAP1 ENSG00000196892|Q9P1D2\_HUMAN ENSG00000197079|KRT35 ENSG00000198937|C6orf129 ENSG00000204418|CLIC1  
ENSG00000204763|Q6ZMK1\_HUMAN ENSG000000061794|MRPS35 ENSG00000111790|FGFR10P2 ENSG00000117479|SLC19A2 ENSG00000125355|FAM70A ENSG00000134070|IRAK2 ENSG00000140945|CDH13 ENSG00000148429|USP6NL  
ENSG00000151693|DDEF2 ENSG00000164040|PGRMC2 ENSG00000165678|GHITM ENSG00000172058|SERF1\_HUMAN ENSG00000175265|GOLGA8A ENSG00000186205|MOSC1 ENSG00000186300|ZNF555 ENSG00000186416|NKRF  
ENSG00000189184|PCDH18 ENSG00000205325|NP\_001001684.1 ENSG00000205572|SERF1\_HUMAN  
GTTCCGT ENSG00000070770|CSNK2A2 ENSG00000099284|H2AFY2 ENSG00000099337|KCNK6 ENSG00000101096|NFATC2 ENSG00000101417|PXMP4 ENSG00000103507|BCKDK ENSG00000107223|EDF1 ENSG00000108878|CACNG1  
ENSG00000113430|IRX4 ENSG00000130511|SSBP4 ENSG00000133943|C14orf159 ENSG00000137198|GMPR ENSG00000160323|ADAMTS13 ENSG00000162494|LRRC38 ENSG00000166582|PRR6 ENSG00000167491|GATA2A  
ENSG00000172020|GAP43 ENSG00000172264|C20orf133 ENSG00000172663|TMEM134 ENSG00000185198|PRSSL1 ENSG00000196388|NP\_998891.1 ENSG00000197472|ZNF695 ENSG00000198892|TMEM58 ENSG0000033030|ZCCHC8  
ENSG00000056972|TRAF3IP2 ENSG00000064787|BCAS1 ENSG00000083828|ZNF586 ENSG00000103018|CYB5B ENSG00000109084|TMEM97 ENSG00000112486|CCR6 ENSG00000116459|ATP5F1 ENSG00000120370|SCYL1BP1  
ENSG00000135052|C9orf155 ENSG00000143493|INTS7 ENSG00000144191|CNGA3 ENSG00000148737|TCF7L2 ENSG00000162670|FAM5C ENSG00000163159|VPS72 ENSG00000168967|PMCHL1 ENSG00000182134|TDRKH  
ENSG00000185420|SMYD3 ENSG00000198533|Q9P1D0\_HUMAN  
GTTTCGAC ENSG00000087586|AURKA ENSG00000102178|UBL4A ENSG00000104888|SLC17A7 ENSG00000108509|CAMTA2 ENSG00000110921|MVK ENSG00000113578|FGF1 ENSG00000124006|OBSL1 ENSG00000125492|BARHL1  
ENSG00000126657|PPY2 ENSG00000135898|GPR55 ENSG00000136630|HLX1 ENSG00000137760|ALKBH8 ENSG00000143878|RHOB ENSG00000149451|ADAM33 ENSG00000152953|STK32B ENSG00000161939|C17orf49  
ENSG00000163286|PBBN\_HUMAN ENSG00000169548|SUHW1 ENSG00000172270|BSG ENSG00000173812|EIF1 ENSG00000182953|NM\_001031.4 ENSG00000183549|NP\_060358.2 ENSG00000183785|PEX26 ENSG00000196739|COL27A1  
ENSG00000204733|Q6ZSH7\_HUMAN ENSG00000205973|LOC644949 ENSG00000085721|RRN3 ENSG00000111247|RAD51AP1 ENSG00000113369|ARRDC3 ENSG00000124479|NDP ENSG00000130779|CLIP1 ENSG00000133111|RFXPAP  
ENSG00000134371|CDC73 ENSG00000135241|PNPLA10P ENSG00000135903|PAX3 ENSG00000136381|IREB2 ENSG00000140450|ARRDC4 ENSG00000140873|ADAMTS18 ENSG00000146757|ZNF92 ENSG00000152133|CCDC75  
ENSG00000154864|FAM38B ENSG00000162407|PPAP2B ENSG00000168204|O95014\_HUMAN ENSG00000168283|BMI1 ENSG00000172348|DSCR1L1 ENSG00000172671|ANUBL1 ENSG00000175279|CORT ENSG00000177324|CXorf20  
ENSG00000203916|HFM1 ENSG00000206029|Q0P633\_HUMAN  
GTTTCGCA ENSG00000048140|TSPAN17 ENSG00000078967|UBE2D4 ENSG00000105058|FAM32A ENSG00000105675|ATP4A ENSG00000110536|NDUFS3 ENSG00000118960|HS1BP3 ENSG00000119782|FKBP1B ENSG00000120071|KIAA1267  
ENSG00000135100|TCF1 ENSG00000136327|NKX2-8 ENSG00000148296|SURF6 ENSG00000161013|MGAT4B ENSG00000162458|FBLIM1 ENSG00000162585|C1orf86 ENSG00000166548|TK2 ENSG00000167657|DAPK3  
ENSG00000168546|GFRA2 ENSG00000169899|Q96MA9\_HUMAN ENSG00000171847|FAM90A1 ENSG00000173585|CCR9 ENSG00000175170|Q5T319\_HUMAN ENSG00000178409|KIAA1553 ENSG00000182310|Q6UWG3\_HUMAN ENSG00000183128|FAM26A  
ENSG00000183242|WTT1 ENSG00000183484|GPR132 ENSG00000186197|ENO1P ENSG00000189325|NP\_001010903.2 ENSG00000198089|SF11 ENSG00000204957|Q6ZVQ6\_HUMAN ENSG00000070269|C14orf101 ENSG00000073417|PDE8A  
ENSG00000089916|C14orf118 ENSG00000100554|ATP6V1D ENSG00000100711|ZYFYE21 ENSG00000100815|TRIP11 ENSG00000107447|DNMT2 ENSG00000109381|ELF2 ENSG00000117713|ARD1A ENSG00000118507|AKAP7  
ENSG00000119285|HEATR1 ENSG00000122335|SERAC1 ENSG00000132305|IMMT ENSG00000132964|CDBK ENSG00000133106|EPSTI1 ENSG00000138180|CEP55 ENSG00000143882|ATP6V1C2 ENSG00000158604|TMED4  
ENSG00000164111|ANXA5 ENSG00000170323|FABP4 ENSG00000170629|NP\_872440.2 ENSG00000185275|CD24 ENSG00000187753|C9orf153 ENSG00000188611|ASAHC2  
GTTTCGT ENSG00000053524|MCF2L2 ENSG00000103507|BCKDK ENSG00000106397|PLOD3 ENSG00000124541|C6orf153 ENSG00000125835|SNRPB ENSG00000130635|COL5A1 ENSG00000130643|DRD1IP ENSG00000130684|ZNF337  
ENSG00000131634|C16orf30 ENSG00000132130|LHX1 ENSG00000146453|PNLDC1 ENSG00000148335|C9orf32 ENSG00000161849|KRT84 ENSG00000170233|Q96AM0\_HUMAN ENSG00000177663|IL17RA ENSG00000179912|R3HDM2  
ENSG00000179943|ZNF579 ENSG00000180818|HOXC10 ENSG00000196892|Q9P1D2\_HUMAN ENSG00000197789|Q8NAA0\_HUMAN ENSG00000198208|RPS6KL1 ENSG00000031691|CENPQ ENSG00000103194|USP10 ENSG00000104517|EDD1  
ENSG00000115053|NCL ENSG00000122376|XR\_015353.1 ENSG0000026803|HSPA2 ENSG00000128710|HOXD10 ENSG00000130413|STK33 ENSG00000143727|ACPI1 ENSG00000155876|RRAG ENSG00000164608|NP\_071373.2  
ENSG00000165874|FAM35A ENSG00000171643|S100Z ENSG00000173464|RNASE11 ENSG00000182512|GLRX5 ENSG00000188463|XR\_015229.1 ENSG00000197085|Q6EKK1\_HUMAN ENSG00000198597|ZNF536 ENSG00000198767|YY2  
ENSG00000198874|TYW1 ENSG00000198924|DCLRE1A  
GTTCTAG ENSG00000099964|MIF ENSG00000100014|SPECC1L ENSG00000100346|CACNA1I ENSG00000101321|C20orf159 ENSG00000104812|GYS1 ENSG00000105287|PRKD2 ENSG00000126583|PRKCG  
ENSG00000140950|KIAA1609 ENSG00000155265|C10orf132 ENSG00000163930|BAP1 ENSG00000164151|Q6ZT40\_HUMAN ENSG00000166949|SMAD3 ENSG00000167131|CCDC103 ENSG00000171314|PGAM1 ENSG00000171786|NHLH1  
ENSG00000174951|FUT1 ENSG00000181026|ISG20L1 ENSG00000182324|KCNJ14 ENSG00000182397|C15orf51 ENSG00000183828|NUDT14 ENSG00000184210|DGAT2L6 ENSG00000185117|NR\_002733.1 ENSG00000185681|C9orf18  
ENSG00000188290|HES4 ENSG00000197041|hCG\_2015269 ENSG00000198668|CALM1 ENSG00000198742|SMURF1 ENSG00000198915|RASGEF1A ENSG00000205726|ITSN1 ENSG00000020922|MRE11A ENSG00000058668|ATP2B4  
ENSG00000087302|C14orf166 ENSG00000089163|SIRT4 ENSG00000107943|C10orf110 ENSG00000112874|NUDT12 ENSG00000117528|ABCD3 ENSG00000129235|TXNL5 ENSG00000138161|FAM24B ENSG00000138813|C4orf17  
ENSG00000139211|AMIGO2 ENSG00000145476|CYP4V2 ENSG00000150540|HNMT ENSG00000152234|ATP5A1 ENSG00000164253|WDR41 ENSG00000167447|C17orf71 ENSG00000167601|AXL ENSG00000170471|KIAA1219  
ENSG00000171862|PTENP1 ENSG00000172071|EIF2AK3 ENSG00000178187|ZNF454 ENSG00000203795|FAM24A ENSG00000205024|Q6ZVP5\_HUMAN  
ENSG00000025434|NR1H3 ENSG00000033011|ALG1 ENSG00000070413|DGCR2 ENSG00000075886|TUBA3D ENSG00000091622|PITPNM3 ENSG00000092820|VIL2 ENSG00000100138|NHP2L1 ENSG00000105700|C19orf50  
ENSG00000107187|LHX3 ENSG00000114316|USP4 ENSG00000116273|PHF13 ENSG00000132478|UNK ENSG00000146094|DOK3 ENSG00000147140|NONO ENSG00000149571|KIRREL3 ENSG00000151353|TMEM18  
ENSG00000151612|NP\_849157.2 ENSG00000162191|SAKS1\_HUMAN ENSG00000162344|FGF19 ENSG00000166682|TMPRSS5 ENSG00000167641|PPP1R14A ENSG00000173093|CCDC63 ENSG00000173585|CCR9 ENSG00000174586|ZNF497  
ENSG00000182272|B4GALNT4 ENSG00000182712|MTCP1 ENSG00000182871|COL18A1 ENSG00000185602|ARHGAP27 ENSG00000187678|SPRY4 ENSG00000188427|XR\_017855.1 ENSG00000196666|Q6P0A1\_HUMAN ENSG00000198033|TUBA3C  
ENSG00000203762|Q6ZTJ3\_HUMAN ENSG00000005483|MLL5 ENSG000000035687|ADSS ENSG000000040731|CDH10 ENSG000000064218|DMRT3 ENSG00000117592|PTPR21 ENSG00000117592|PRDX6  
ENSG00000122884|P4HA1 ENSG00000123297|TSFM ENSG00000124875|CXCL6 ENSG00000131844|MCC2 ENSG00000136238|RAC1 ENSG00000137776|SLTM ENSG00000139517|LNX2 ENSG00000154813|DPH3  
ENSG00000164287|CDC20B ENSG00000164338|UTP15 ENSG00000165704|HPRT1 ENSG00000169129|AFAP1L2 ENSG00000173726|TOMM20 ENSG00000185104|FAF1 ENSG00000186462|NAP1L2 ENSG00000204596|RPP21  
GTTCTTA ENSG00000067365|C16orf68 ENSG00000087365|SF3B2 ENSG00000095303|PTGS1 ENSG00000105538|RASIP1 ENSG00000117154|IGSF21 ENSG00000124164|VAPB ENSG00000128311|TST ENSG00000130340|SNX9  
ENSG00000132514|CLEC10A ENSG00000135503|ACVR1B ENSG00000141034|C17orf39 ENSG00000141580|WDR45L ENSG00000155026|NM\_173565.2 ENSG00000162910|MRPL55 ENSG00000165821|SALL2 ENSG00000168610|STAT3  
ENSG00000169402|NP\_775836.2 ENSG00000173281|PPP1R3B ENSG00000175550|DRAP1 ENSG00000177971|IMP3 ENSG00000179598|NP\_849158.1 ENSG00000184012|TMPRSS2 ENSG00000184164|CRELD2 ENSG00000184857|TMEM186  
ENSG00000196363|WDR5 ENSG00000196501|HIST1H2BN ENSG00000196976|LAGE3 ENSG00000198535|NP\_997205.1 ENSG0000020082212|ME2 ENSG00000106771|C9orf5 ENSG00000108953|YWHAE ENSG00000110172|CHORDC1  
ENSG00000110925|FAM130A1 ENSG00000112081|SFRS3 ENSG00000117289|TXNIP ENSG00000117601|SERPIN1 ENSG00000122068|FYTDD1 ENSG00000122692|SMU1 ENSG00000123562|MORF4L2 ENSG00000123278|RAP2C  
ENSG00000129521|EGLN3 ENSG00000136147|PHF11 ENSG00000141469|SLC14A1 ENSG00000147642|SYBU\_HUMAN ENSG00000150760|DOCK1 ENSG00000158639|PAGE5 ENSG00000166352|C11orf74 ENSG00000169245|CXCL10  
ENSG00000169249|ZRSR1 ENSG00000170847|RPS26P10 ENSG00000171488|LRRC8C ENSG00000184344|GDF3 ENSG00000188419|CHM ENSG00000196442|ZNF432 ENSG00000196933|RPS26L1 ENSG00000197594|ENFP1  
ENSG00000197728|RS26\_HUMAN  
GTTCTTC ENSG00000049239|H6PD ENSG00000099204|ABLIM1 ENSG00000101246|BARFRP1 ENSG00000105997|HOXA3 ENSG00000110203|FOLR3 ENSG00000119777|NP\_060197.4 ENSG00000138166|DUSP5 ENSG00000146094|DOK3  
ENSG00000149305|HTR3B ENSG00000161610|HCRT ENSG00000163823|CCR1 ENSG00000168994|C6orf145 ENSG00000169057|MECP2 ENSG00000173218|VANGL1 ENSG00000177076|ASAHL3 ENSG00000177234|C10orf85  
ENSG00000181250|MYADML ENSG00000185499|MUC1 ENSG00000187741|BLVCA ENSG00000049618|ARID1B ENSG00000052795|Q9H994\_HUMAN ENSG00000060140|STYK1 ENSG00000072849|DERL2 ENSG00000080561|MID2  
ENSG00000082175|PGR ENSG00000100354|TNRC6B ENSG00000117523|BAT2D1 ENSG00000123124|WWP1 ENSG00000128052|KDR ENSG00000131747|P11388-2 ENSG00000135821|GLUL  
ENSG00000136404|TM6SF1 ENSG00000137026|TFNWP18 ENSG00000137845|ADAM10 ENSG00000139291|TMEM19 ENSG00000141425|NP\_060640.2 ENSG00000143452|HORMAD1 ENSG00000147885|IFNA16 ENSG00000151726|ACSL1  
ENSG00000154479|Q6PJF6\_HUMAN ENSG00000164120|HPGD ENSG00000165186|PTCHD1 ENSG00000172262|ZNF131 ENSG00000176915|KIAA0692 ENSG00000182992|Q8I2M0\_HUMAN ENSG00000186803|IFNA10  
GTTGAAA ENSG0000007237|GAS7 ENSG00000077080|ACTL6B ENSG00000077942|FBLN1 ENSG00000104872|PIH1D1 ENSG00000108961|NP\_057576.2 ENSG00000110931|CAMKK2 ENSG00000111249|CUTL2 ENSG00000111641|NOL1  
ENSG00000113389|NPR3 ENSG00000115844|DLX2 ENSG00000116205|C1orf83 ENSG00000116667|C1orf21 ENSG00000125520|SLC2A4ARG ENSG00000131944|C19orf40 ENSG00000142528|ZNF473 ENSG00000169083|AR  
ENSG00000170890|PLA2G1B ENSG00000173163|COMMD1 ENSG00000176595|KBTBD11 ENSG00000177441|Q8N4T9\_HUMAN ENSG00000178589|Q9BT26\_HUMAN ENSG00000180104|EXOC3 ENSG00000188042|ARL4C ENSG00000196415|PRTN3  
ENSG00000197430|TMEM10 ENSG00000206193|Q5HYA3\_HUMAN ENSG00000006422|ZBTB11 ENSG00000068990|GAGE12G ENSG00000081307|UBE1DC1 ENSG00000102239|BR3 ENSG00000109255|NMU  
ENSG00000196989|STIM2 ENSG00000111237|VPS29 ENSG00000120278|PLEKHG1 ENSG00000122417|ODFZL ENSG00000124789|NUP153 ENSG00000135049|AGTPBP1 ENSG00000145715|RASA1 ENSG00000146731|CCT6A  
ENSG00000146809|ASB15 ENSG00000164442|CITED2 ENSG00000164506|ITXBPF5 ENSG00000175175|PPM1E ENSG00000175455|CCDC14 ENSG00000176731|C8orf59 ENSG00000181744|C3orf58 ENSG00000181894|ZNF329  
ENSG00000184428|TOP1MT ENSG00000187601|MAGEH1 ENSG00000189064|NM\_012196.1 ENSG00000198339|HIST1H4I ENSG00000198716|GAGE3 ENSG00000204291|COL15A1 ENSG00000205775|GAGE12B ENSG00000205835|LOC647309  
GTTGAAG ENSG00000063978|RNF4 ENSG00000080815|PSEN1 ENSG00000100077|ADRBK2 ENSG00000100116|GCAT ENSG00000101265|RASSF2 ENSG00000117899|MESDC2 ENSG00000130312|MRPL34 ENSG00000134668|SPOCD1  
ENSG00000137726|FYD6 ENSG00000139436|GIT2 ENSG00000142512|SIGLEC10 ENSG00000147394|ZNF185 ENSG00000152192|POU4F1 ENSG00000155034|FBXL18 ENSG00000155087|ODF1 ENSG00000163873|GRIK3  
ENSG00000169083|AR ENSG00000177238|TRIM72 ENSG00000182473|EXOC7 ENSG00000182660|NP\_001013698.1 ENSG00000189306|ZG14\_HUMAN ENSG00000197373|NP\_001015884.1 ENSG00000204377|C1orf134 ENSG00000055147|C5orf3  
ENSG00000085491|SLC25A24 ENSG00000160105|GARS ENSG00000106771|C9orf5 ENSG00000114541|FRMD4B ENSG00000115963|RND3 ENSG00000117505|DR1 ENSG00000128052|KDR

ENSG00000129197|RPAIN ENSG00000131951|LRRRC9 ENSG00000132570|PCBD2 ENSG00000143933|CALM2 ENSG00000145349|CAMK2D ENSG00000158079|PTPDC1 ENSG00000163029|SMC6 ENSG00000164983|TMEM65  
ENSG00000167720|SRR ENSG00000183513|NP\_001008216.1 ENSG00000196352|CD55 ENSG00000197302|Q7Z2F6\_HUMAN ENSG00000203964|Q8NG36\_HUMAN ENSG00000205608|Q6ZQP9\_HUMAN  
ENSG00000053371|AKR7A2 ENSG00000065057|NTHL1 ENSG00000065675|PRKCQ ENSG00000070413|DGCR2 ENSG00000075426|FOSL2 ENSG00000090674|HCOLN1 ENSG00000100335|SMCR7L ENSG00000102385|DRP2  
ENSG00000112118|MCM3 ENSG00000117305|HMGC1 ENSG00000128594|LRRRC4 ENSG00000130332|LSM7 ENSG00000137656|BUD13 ENSG00000140459|CYP11A1 ENSG00000148840|PPRC1 ENSG00000151779|NP\_056993.2  
ENSG00000158716|DUSP23 ENSG00000164266|SPINK1 ENSG00000166435|XRRA1 ENSG00000167131|CCDC103 ENSG00000167744|NTF5 ENSG00000168701|NM\_014187.2 ENSG00000171847|FAM90A1 ENSG00000184209|NP\_008951.1  
ENSG00000184507|NP\_786883.1 ENSG00000187908|DMBT1 ENSG00000188931|C1orf192 ENSG00000197696|NMB ENSG00000205011|NP\_001007547.1 ENSG00000070882|OSBPL3 ENSG00000092439|TRPM7 ENSG00000102024|PLS3  
ENSG00000104804|TULP2 ENSG00000109046|WSB1 ENSG00000109471|IL2 ENSG00000110756|HPS5 ENSG00000119004|CYP20A1 ENSG00000126858|RHOT1 ENSG00000129682|FGF13 ENSG00000135333|EPHA7  
ENSG00000136866|ZFP37 ENSG00000145545|SRD5A1 ENSG00000156006|NAT2 ENSG00000157540|DYRK1A ENSG00000169891|REPS2 ENSG00000169905|TOR1AIP2 ENSG00000170677|SOCS6 ENSG00000172766|NARG1L  
ENSG00000184293|NP\_742001.1 ENSG00000186073|C15orf41 ENSG00000196792|STRN3 ENSG00000198843|SELT\_HUMAN ENSG00000203681|XR\_017762.1  
GTTGACA ENSG00000066117|SMARCD1 ENSG00000070413|DGCR2 ENSG00000095303|PTGS1 ENSG00000125743|SNRNP22 ENSG00000141431|Q6ZMX6\_HUMAN ENSG00000142528|ZNF473 ENSG00000169442|CD52 ENSG00000171246|NPTX1  
ENSG00000171703|TCEA2 ENSG00000174015|SPERT ENSG00000175567|UCP2 ENSG00000196767|POU3F4 ENSG00000198483|ANKRD35 ENSG00000205307|Q8TEE9\_HUMAN ENSG0000007168|PAPAHL1 ENSG0000015171|ZMYND11  
ENSG00000030419|IKZF2 ENSG00000089225|TBX5 ENSG00000102974|CTCF ENSG00000109606|DHX15 ENSG00000114500|GNB4 ENSG00000116539|ASH1L ENSG00000117569|PTBP2 ENSG000001124103|C2orf107  
ENSG00000129810|SGOL1 ENSG00000134363|FST ENSG00000144642|RBMS3 ENSG00000144824|PLCXD2 ENSG00000151725|MLF1IP ENSG00000163673|DCLK3 ENSG00000163697|APBB2 ENSG00000165572|KBTBD6  
ENSG00000168172|HOOK3 ENSG00000170647|TMEM133 ENSG00000170903|KIAA1826 ENSG00000177465|ACOT4 ENSG00000179902|C1orf194 ENSG00000185664|SILV ENSG00000185873|TMPRSS11B ENSG00000188400|Q6URH7\_HUMAN  
ENSG00000188846|RPL14 ENSG00000188933|NM\_145809.1 ENSG00000189403|HMG1 ENSG00000196946|ZNF705A ENSG00000204899|NP\_001065243.1 ENSG00000205171|Q6PDB3\_HUMAN ENSG00000205524|Q68D70\_HUMAN  
GTTGACC ENSG00000049540|ELN ENSG00000102858|MGRN1 ENSG00000103365|GGA2 ENSG00000111886|GABRR2 ENSG00000113578|FGF1 ENSG00000114923|SLC4A3 ENSG00000124233|SEMG1 ENSG00000129244|ATP1B2  
ENSG00000133561|GMAP6 ENSG00000143376|SNX27 ENSG00000154832|CXXC1 ENSG00000157600|TMEM164 ENSG00000160323|ADAMTS13 ENSG00000163794|UCN ENSG00000165837|Q5W0A0\_HUMAN  
ENSG00000167749|KLK4 ENSG00000174231|PRPF8 ENSG00000182324|KCNJ14 ENSG00000186051|TAL2 ENSG00000189058|APOD ENSG00000198198|KIAA0467 ENSG00000204405|Q6ZQV3\_HUMAN ENSG00000204586|Q6PJP7\_HUMAN  
ENSG00000205979|Q6XYA8\_HUMAN ENSG00000100664|EIF5 ENSG00000106605|BLVRA ENSG00000116212|LRRC42 ENSG00000116574|RHOU ENSG00000119616|FCF1 ENSG00000119943|C10orf33 ENSG00000120162|MOBK12B  
ENSG00000125864|BFSP1 ENSG00000138777|PPA2 ENSG00000146166|GLULD1 ENSG00000149636|DSN1 ENSG00000152207|CYSLTR2 ENSG00000162378|ZYG11B ENSG00000162636|FAM102B ENSG00000163788|SNRK  
ENSG00000166452|C11orf17 ENSG00000170323|FABP4 ENSG00000179295|PTPN11 ENSG00000185652|NTF3 ENSG00000185808|PIGF ENSG00000190857|NP\_060460.3 ENSG00000100156|SLC16A8 ENSG00000101096|NFATC2  
GTTGATC ENSG00000006118|TKM132A ENSG00000023892|DEF6 ENSG00000036448|MYOM2 ENSG00000063127|SLC6A16 ENSG00000073009|IKBKKG ENSG00000090857|NP\_060460.3 ENSG00000100156|SLC16A8 ENSG00000101096|NFATC2  
ENSG00000111644|ACRBP ENSG00000127540|UQCR ENSG00000133067|LGR6 ENSG00000141738|GRB7 ENSG00000163352|LENEP ENSG00000163932|PRKC2 ENSG00000169733|RFNG ENSG00000175482|POLD4  
ENSG00000197063|MAFG ENSG00000197283|SYNGAP1 ENSG00000197582|GPX1 ENSG00000204091|Q3Y452\_HUMAN ENSG00000070718|AP3M2 ENSG00000073921|PICALM ENSG00000080986|NDC80 ENSG00000125772|GDE5\_HUMAN  
ENSG00000127990|SCGE ENSG00000128881|TTBK2 ENSG00000137702|AOPJW7\_HUMAN ENSG00000145908|ZNF300 ENSG00000150526|MTA2 ENSG00000151881|C5orf28 ENSG00000152795|HNRPLD ENSG00000153982|GDPD1  
ENSG00000154262|ABCA6 ENSG00000154727|GABPA ENSG00000159200|DSCR1 ENSG00000164749|HNF4G ENSG00000173113|TR112\_HUMAN ENSG00000177613|CSTF2T ENSG00000184937|WT1 ENSG00000196459|SEDLF

ENSG00000121570|DPPA4 ENSG00000131373|HACL1 ENSG00000132964|CDK8 ENSG00000139926|FRMD6 ENSG00000143190|POUF2F1 ENSG00000143252|SDHC ENSG00000163104|SMARCA1 ENSG00000164294|NP\_001008398.1  
ENSG00000170629|NP\_872440.2 ENSG00000180138|CSNK1A1L ENSG00000203925|LOC647839  
GTTGTAA ENSG000000037757|NP\_115661.1 ENSG00000069020|MAST4 ENSG00000079435|LIPE ENSG00000086062|B4GALT1 ENSG00000092421|SEMA6A ENSG00000100226|GTPBP1 ENSG00000101290|CDS2  
ENSG00000101346|POFUT1 ENSG00000104499|GML ENSG00000110328|GALNTL4 ENSG00000116663|FBXO6 ENSG00000116885|C1orf102 ENSG00000124733|MEA1 ENSG00000130956|HABP4 ENSG00000132323|ILKAP  
ENSG00000132749|MTL5 ENSG00000132846|ZBED3 ENSG00000136068|FLNB ENSG00000136352|TITF1 ENSG00000139436|GIT2 ENSG00000151650|VENTX ENSG00000151882|CCL28 ENSG00000152669|CCNU  
ENSG00000168056|LTBP3 ENSG00000176092|AIML1 ENSG00000177192|PUS1 ENSG00000181026|ISG20L1 ENSG00000182329|Q8IVF9\_HUMAN ENSG00000182352|C17orf77 ENSG00000185955|NP\_001004323.1 ENSG00000187608|ISG15  
ENSG00000204498|NFKB1L1 ENSG0000011295|TTC19 ENSG00000040275|CCDC99 ENSG00000065548|ZC3H15 ENSG00000089094|FBXL10 ENSG00000095787|WAC ENSG00000109255|NMU ENSG00000111731|KIAA0528  
ENSG00000113916|BCL6 ENSG00000119396|RAB14 ENSG00000125931|CITED1 ENSG00000127483|HP1BP3 ENSG00000133961|NUMB ENSG00000135298|BAI3 ENSG00000137090|DMRT1 ENSG00000138678|NP\_116106.2  
ENSG00000139793|MBNL2 ENSG00000145740|SLC30A5 ENSG00000151461|UPF2 ENSG00000158985|CDC42SE2 ENSG00000162409|PRKAA2 ENSG00000163918|RFC4 ENSG00000168564|CDKN2AIP ENSG00000168955|TM4SF20  
ENSG00000170500|LONRF2 ENSG00000171195|MUC7 ENSG00000176797|DEFB103B ENSG00000177243|DEFB103A ENSG00000189056|RELN ENSG00000196350|ZNF492 ENSG00000197846|HIST1H2BF ENSG00000198478|SH3BGR12  
ENSG00000198682|PAPSS2 ENSG00000198783|CCDC16  
GTTGTAC ENSG00000004866|ST7 ENSG00000025800|KPNA6 ENSG00000068831|RASGRP2 ENSG00000100362|PVALB ENSG00000116857|TMEM9 ENSG00000131143|COX4I1 ENSG00000132130|LHX1 ENSG00000141431|Q6ZMX6\_HUMAN  
ENSG00000145864|GABRB2 ENSG00000146374|RSPQ3 ENSG00000156381|ANKRD9 ENSG00000157017|GHR1 ENSG00000159884|CCDC107 ENSG00000162367|TAL1 ENSG00000166856|ADMR ENSG00000167080|B4GALNT2  
ENSG00000172046|USP19 ENSG00000177479|ARIH2 ENSG00000184619|KRBA2 ENSG00000184788|SATL1 ENSG00000189001|SBSN ENSG00000196235|SUPT5H ENSG00000197975|DDX1 ENSG00000099250|NRP1  
ENSG00000117479|SLC19A2 ENSG00000117713|ARID1A ENSG00000129484|PARP2 ENSG00000136754|ABI1 ENSG00000136866|ZFP37 ENSG00000137710|RDY ENSG00000147894|C9orf72 ENSG00000154723|ATP5J  
ENSG00000168028|RPSAP15 ENSG00000168556|ING2 ENSG00000169016|E2F6 ENSG00000169989|TIGD4 ENSG00000171522|PTGER4 ENSG00000179873|NLRP11 ENSG00000184735|DDX53 ENSG00000186439|TRDN  
ENSG00000187009|Q8NFD4\_HUMAN ENSG00000198526|PABPC2 ENSG00000198586|TLK1 ENSG00000204804|FAM27D1 ENSG00000204837|Q2TVT3\_HUMAN  
GTTGTAG ENSG00000101577|LPIN2 ENSG00000103064|SLC7A6 ENSG00000103175|WDFC1 ENSG00000105538|RASP1 ENSG00000106290|TAF6 ENSG00000113194|UBXD8 ENSG00000131152|Q9H693\_HUMAN ENSG00000132958|TPTE2  
ENSG00000143258|USP21 ENSG00000143376|SNX27 ENSG00000166426|CRABP1 ENSG00000169442|CD52 ENSG00000178057|C3orf60 ENSG00000185963|BCD2 ENSG00000196961|AP2A1 ENSG00000209252|MRE11A  
ENSG00000047936|ROSI ENSG00000067369|TP53BP1 ENSG00000124767|GLO1 ENSG00000132283|DNHD1 ENSG00000141458|NPC1 ENSG00000143498|TAF1A ENSG00000145244|CORIN ENSG00000147509|RGS20  
ENSG00000152932|RAB3C ENSG00000153006|NP\_776190.1 ENSG00000154479|Q6PJF6\_HUMAN ENSG00000155890|TRIM42 ENSG00000160201|U2AF1 ENSG00000163217|BMP10 ENSG00000164743|C8orf48 ENSG00000165516|KLHDC2  
ENSG00000168778|C12orf38 ENSG00000170959|DCDC5 ENSG00000198178|CLEC4C ENSG00000203916|HFM1  
GTTGTCC ENSG00000001497|LAS1L ENSG00000065000|AP3D1 ENSG00000082458|DLG3 ENSG00000112941|POLS ENSG00000120889|TNFRSF10B ENSG00000125991|ERGIC3 ENSG00000126878|C9orf58 ENSG00000138092|CENPO  
ENSG00000142319|SLC6A3 ENSG00000162817|C1orf115 ENSG00000162889|MAPKAPK2 ENSG00000163431|LMOD1 ENSG00000167131|CCDC103 ENSG00000168002|POLR2G ENSG00000176946|THAP4 ENSG00000186163|Q4G0S1\_HUMAN  
ENSG00000188038|NRN1L ENSG00000188086|NP\_954652.1 ENSG00000196970|NXF4 ENSG00000009780|FAM76A ENSG00000069493|CLEC2D ENSG00000070159|PTPN3 ENSG00000109320|NFKB1 ENSG00000109670|FBXW7  
ENSG00000120686|UFM1 ENSG00000130844|ZNF331 ENSG00000132825|PPP1R3D ENSG00000135218|CD36 ENSG00000135677|GNS ENSG00000137267|TUBB2A ENSG00000139131|YARS2 ENSG00000163541|SUCLG1  
ENSG00000169359|SLC33A1 ENSG00000171365|CLCN5 ENSG00000174173|RG9MTD1 ENSG00000174408|Q5VZ27\_HUMAN ENSG00000181163|NPM1 ENSG00000197576|HOXA4 ENSG00000197747|S100A10 ENSG00000204611|ZNF616  
GTTGTGG ENSG000000092051|AP1G2 ENSG00000099949|LZTR1 ENSG00000099960|SLC7A4 ENSG00000101321|C2orf159 ENSG00000103005|C16orf57 ENSG00000114268|PFKFB4 ENSG00000117971|CHRNB4 ENSG00000122547|NP\_085139.2  
ENSG00000124587|PEX6 ENSG00000128594|LRRRC4 ENSG00000140807|NKD1 ENSG00000160408|ST6GALNAC6 ENSG00000167280|NP\_001036038.1 ENSG00000167393|PPP2R3B ENSG00000168631|DPCR1 ENSG00000172757|CFL1  
ENSG00000184385|C21orf128 ENSG00000185262|FAM100B ENSG00000196085|C19orf42 ENSG00000196363|WDR5 ENSG00000049759|NEDD4L ENSG00000101049|SGK2 ENSG00000104765|BNIP3L ENSG00000123636|BAZ2B  
ENSG00000125945|ZNF436 ENSG00000130368|MAS1 ENSG00000137691|C11orf70 ENSG00000143882|ATP6V1C2 ENSG00000144893|MED12L ENSG00000163637|PRICKLE2 ENSG00000163939|PBRM1 ENSG00000163946|C3orf63  
ENSG00000171147|NP\_001001317.1 ENSG00000177414|UBE2U ENSG00000182090|C14orf25 ENSG00000183631|Q5JQE8\_HUMAN ENSG00000186432|KPNA4  
GTTGTGG ENSG00000084112|SSH1 ENSG00000092421|SEMA6A ENSG00000105246|EBI3 ENSG00000107831|PGF8 ENSG00000108702|CCL1 ENSG00000112159|MDN1 ENSG00000125798|FOXA2 ENSG00000137275|RIPK1  
ENSG00000143126|CELSR2 ENSG00000155087|ODF1 ENSG00000164626|KCNK5 ENSG00000165566|CDX2 ENSG00000165816|WVA2 ENSG00000173163|COMM1D ENSG00000173171|MTX1 ENSG00000174231|PRPF8  
ENSG00000185684|EP400NL ENSG00000186423|Q8N9S5\_HUMAN ENSG00000188677|PARVB ENSG00000196242|OR2C3 ENSG00000204444|APOM ENSG00000107566|CHUK ENSG00000108700|CCL8 ENSG00000110321|EIF4G2  
ENSG00000116406|EDEM3 ENSG00000119899|SLC17A5 ENSG00000120159|C9orf82 ENSG00000128590|DNAJB9 ENSG00000131725|WDR44 ENSG00000132872|SYT4 ENSG00000135913|USP37 ENSG00000137962|ARHGAP29  
ENSG00000150991|UBIQ\_HUMAN ENSG00000152207|CYSLTR2 ENSG00000156011|PSD3 ENSG00000163322|CCDC98 ENSG00000164164|OTUD4 ENSG00000164736|SOX17 ENSG00000165312|OTUD1 ENSG00000171791|BCL2  
ENSG00000177465|ACOT4 ENSG00000184258|CDR1 ENSG00000186700|Q8N6F3\_HUMAN ENSG00000186767|NP\_001012986.2 ENSG00000196914|ARHGEP12  
GTTGTGG ENSG00000009335|UBE3C ENSG00000075886|TUBA3D ENSG00000084652|TXLNA ENSG00000086015|MAST2 ENSG00000092964|DPYSL2 ENSG00000101146|RAE1 ENSG00000110274|CEP164 ENSG00000112164|GLP1R  
ENSG00000119681|LTBP2 ENSG00000127663|JMJD2B ENSG00000130876|SLC7A10 ENSG00000133980|C14orf115 ENSG00000138303|ASCC1 ENSG00000149474|CSR2BP ENSG00000149547|EI24 ENSG00000152086|TUBA3E  
ENSG00000164649|CDC47L ENSG00000166833|NAV2 ENSG00000167566|KIAA1602 ENSG00000172943|PHF8 ENSG00000176371|ZSCAN2 ENSG00000183929|DUSP5P ENSG00000197549|Q6ZN90\_HUMAN ENSG00000204125|Q53S21\_HUMAN  
ENSG00000008405|CRY1 ENSG000000067798|NAV3 ENSG00000007232|DNAJC10 ENSG00000091409|ITGA6 ENSG00000116001|TIAF1 ENSG00000117399|CDC20 ENSG00000118231|CRYGD ENSG00000119917|IFIT3  
ENSG00000127152|BCL11B ENSG00000129173|E2F8 ENSG00000134769|DTNA ENSG00000136165|ITM2B ENSG00000137992|DBT ENSG00000140153|WDR20 ENSG00000145423|SFRP2 ENSG00000146001|PCDH18  
ENSG00000153037|SRP19 ENSG00000153132|CLGN ENSG00000157576|XR\_018454.1 ENSG00000162694|EXTL2 ENSG00000165169|DYNLT3 ENSG00000166068|SPRED1 ENSG00000169116|PARM1\_HUMAN ENSG00000169490|TM2D2  
ENSG00000172348|DSCR1L1 ENSG00000172554|SNTG2 ENSG00000176165|FOXG1B ENSG00000177494|ZBED2 ENSG00000178053|MLF1 ENSG00000186184|POLR1D ENSG00000188848|CCDC4 ENSG00000198767|YY2  
ENSG00000205581|HMGN1  
GTTTAAA ENSG00000007237|GAS7 ENSG00000084070|SMAP1L ENSG00000092445|TYRO3 ENSG00000100207|TCF20 ENSG00000109072|VTN ENSG00000115129|TP53I3 ENSG00000124766|SOX4 ENSG00000125485|DDX31  
ENSG00000125810|CD93 ENSG00000133246|PRAM1 ENSG00000139174|PRICKLE1 ENSG00000140478|NM\_018652.4 ENSG00000148158|SNX30 ENSG00000154229|PRKCA ENSG00000158769|F11R ENSG00000160791|CCR5  
ENSG00000162271|FAM71A ENSG00000162981|FAM84A ENSG00000168795|ZBTB5 ENSG00000170876|TMEM43 ENSG00000178199|Q6ZRW2\_HUMAN ENSG00000186638|C9orf48 ENSG00000189275|Q6ZRK0\_HUMAN ENSG00000205609|Q9BW98\_HUMAN  
ENSG000001001084|GCLC ENSG00000053770|C14orf108 ENSG00000065613|SLK ENSG00000085563|ABCB1 ENSG00000102029|HSCB ENSG00000102753|KPNA3 ENSG00000104164|PLDN  
ENSG00000106588|PSMA2 ENSG00000112486|CCR6 ENSG00000120438|TCP1 ENSG00000121440|PDZRN3 ENSG00000132855|ANGPTL3 ENSG00000134697|GNL2 ENSG00000136152|COG3 ENSG00000136527|SFRS10  
ENSG00000141424|SLC39A6 ENSG00000141646|SMAD4 ENSG00000148737|KCF7L2 ENSG00000156384|C10orf78 ENSG00000163655|GMP5 ENSG00000164692|COL1A2 ENSG00000166803|KIAA0101 ENSG00000171004|HS6ST2  
ENSG00000172845|SP3 ENSG00000175265|GOLGA8A ENSG00000182359|TFBTB3 ENSG00000186432|KPNA4 ENSG00000188612|SUMO2 ENSG00000197301|Q6ZQ9\_HUMAN ENSG00000197780|TAF13 ENSG00000205542|TMSL1  
GTTTAAG ENSG00000054118|THRAP3 ENSG00000088882|CPXM1 ENSG00000089057|NKC23A2 ENSG00000104889|RNASEH2A ENSG00000105501|SIGLEC5 ENSG00000110906|KCTD10 ENSG00000120907|ADRA1A ENSG00000130244|Q17RN3-2  
ENSG00000130702|LAMA5 ENSG00000130876|SLC7A10 ENSG00000140287|HDC ENSG00000154227|LASS3 ENSG00000159455|LCE2B ENSG00000161944|ASGR2 ENSG00000162804|SNED1 ENSG00000171855|IFNB1  
ENSG00000178952|TUFM ENSG00000180083|WDFC11 ENSG00000180900|SCRIB ENSG00000183044|ABAT ENSG00000196859|KRT39 ENSG00000036257|CUL3 ENSG00000094975|C1orf9 ENSG00000103994|ZFP106  
ENSG00000109332|UBE2D3 ENSG00000110013|SIAE ENSG00000114098|ARMC8 ENSG00000119965|C10orf88 ENSG00000121351|IAPP ENSG00000123473|STIL ENSG00000135525|MAP7 ENSG00000141219|C17orf80  
ENSG00000144481|TRPM8 ENSG00000146242|TPBG ENSG00000149345|U2D3L\_HUMAN ENSG00000155313|USP25 ENSG00000158636|C11orf30 ENSG00000164933|SLC25A32 ENSG00000165169|DYNLT3 ENSG00000168589|DYNLRB2  
ENSG00000169813|HNRPF ENSG00000170892|TSEN34 ENSG00000175449|RFESD ENSG00000176597|B3GNT5 ENSG00000178700|DHFR1L1 ENSG00000179387|ELMOD2 ENSG00000189252|SPANXN3 ENSG00000196482|ESRRG  
ENSG00000197429|IPP ENSG00000204178|TMEM57 ENSG00000204287|HLA-DRA  
GTTTAA ENSG00000006740|RICH2\_HUMAN ENSG00000035403|VCL ENSG00000048342|Q9H8A7\_HUMAN ENSG00000088305|DNMT3B ENSG00000100427|MLC1 ENSG00000105246|EBI3 ENSG00000105648|IFI30 ENSG00000108387|SEPT4  
ENSG00000117154|IGSF21 ENSG00000118526|TCF21 ENSG00000121289|CCDC123 ENSG00000130203|APOE ENSG00000134287|ARF3 ENSG00000144029|MRPS5 ENSG00000160209|PDXK ENSG00000162666|KIAA0040  
ENSG00000166831|RBPMS2 ENSG00000168395|ING5 ENSG00000173281|PPP1R3B ENSG00000177741|Q9BN7\_HUMAN ENSG00000185608|MRPL40 ENSG00000188076|SCGB1C1 ENSG00000189069|NP\_001013732.1 ENSG00000196935|SRGAP1  
ENSG00000198355|PTM3 ENSG00000206149|NP\_950246.1 ENSG00000033030|ZCCHC8 ENSG00000065809|FAM107B ENSG00000070961|ATP2B1 ENSG00000073905|VDAC1 ENSG00000075089|ACTR6 ENSG00000087916|SLC6A14  
ENSG00000101745|ANKRD12 ENSG000001104825|NFKB1B ENSG00000115084|SLC35F5 ENSG00000115524|SF3B1 ENSG00000116171|SCP2 ENSG00000121297|TSHZ3 ENSG000001226249|PDCD2L ENSG00000136982|NP\_076999.1 ENSG00000137261|KIAA0319 ENSG00000137941|TTLL7  
ENSG00000138413|IDH1 ENSG00000143355|LHX9 ENSG00000146433|TMEM181 ENSG00000147649|MTDH ENSG00000150867|PIP5K2A ENSG00000152433|ZNF547 ENSG00000153790|C7orf31 ENSG00000154359|LONRF1  
ENSG00000155545|MIER3 ENSG00000159873|CCDC117 ENSG00000162039|C16orf73 ENSG00000162624|LHX8 ENSG00000165288|BRWD3 ENSG00000165891|E2F7 ENSG00000169139|UBE2V2 ENSG00000170365|SMAD1  
ENSG00000171316|CHD7 ENSG00000179455|MKNR3 ENSG00000180667|YOD1  
perfect: GTTTACA TGTAAC hsa-miR-30a-5p TGTAACatcctcgtactggaag 0  
perfect: GTTTACA TGTAAC hsa-miR-30b TGTAACatcctcactcagct 0  
perfect: GTTTACA TGTAAC hsa-miR-30d TGTAACatccccgactggaag 0  
perfect: GTTTACA TGTAAC hsa-miR-30e-5p TGTAACatccttgactgga 0  
perfect: GTTTACA TGTAAC hsa-miR-30c TGTAACatcctcactcctcagc 0  
GTTTACG ENSG00000099331|MYO9B ENSG00000099937|SERPIND1 ENSG00000105063|SAPS1 ENSG00000110721|CHKA ENSG00000111012|CYP27B1 ENSG00000113430|IRX4 ENSG00000116128|BCL9  
ENSG00000128709|HOXD9 ENSG00000131061|ZNF341 ENSG00000135517|MIP ENSG00000141867|BRD4 ENSG00000146826|C7orf43 ENSG00000149657|LSM14B ENSG00000154928|P54762-3 ENSG00000155846|PPARGC1B  
ENSG00000158869|FCER1G ENSG00000162377|C1orf163 ENSG00000164610|RP9 ENSG00000167768|KRT1 ENSG00000173653|RCE1 ENSG00000182646|TMEM29 ENSG00000185739|SRL ENSG00000187754|SSX2  
ENSG00000197088|NM\_207488 ENSG00000197435|HIST3H2BB ENSG00000079950|STX7 ENSG00000083844|ZNF264 ENSG00000113249|HAVCR1 ENSG00000127324|TSPAN8 ENSG00000133169|BEX1 ENSG00000146243|IRAK1BP1  
ENSG00000152583|SPARCL1 ENSG00000164451|FAM26D ENSG00000164808|KIAA0146 ENSG00000165655|ZNF503 ENSG00000166192|SNUP8 ENSG00000168453|NDUF55 ENSG00000171311|EXOSC1 ENSG00000173320|STOX2  
ENSG00000175198|PCCA ENSG00000180251|SLC9A4 ENSG00000188653|NR\_002807.1  
GTTTACT ENSG00000074601|FRMPD1 ENSG00000092421|SEMA6A ENSG00000099338|C19orf15 ENSG00000118058|MLL ENSG00000124155|PIG7 ENSG00000126422|NDUF22 ENSG00000127377|CRYGN ENSG00000148156|ACTL7B  
ENSG00000148204|CRB2 ENSG00000157933|SKI ENSG00000160803|BQLN4 ENSG00000161381|PLXDC1 ENSG00000166111|SVOP ENSG00000166340|TPP1 ENSG00000166860|ZBTB39 ENSG00000167695|FAM57A

|                              |                                |                                |                                |                               |                              |                                |                                |
|------------------------------|--------------------------------|--------------------------------|--------------------------------|-------------------------------|------------------------------|--------------------------------|--------------------------------|
| ENSG00000170421 KRT8         | ENSG00000205205 C17orf51       | ENSG00000008294 SPAG9          | ENSG00000019549 SNAI2          | ENSG00000068912 C2orf30       | ENSG00000080822 CLDND1       | ENSG00000085788 DDHD2          | ENSG00000104231 ZFAND1         |
| ENSG00000105550 FGF21        | ENSG00000123975 CKS2           | ENSG00000124787 RPP40          | ENSG00000124813 RUNX2          | ENSG00000132498 ANKRD20A1     | ENSG00000138382 METTL5       | ENSG00000139793 MBNL2          | ENSG00000154511 FAM69A         |
| ENSG00000163629 PTPN13       | ENSG00000164164 OTUD4          | ENSG00000164176 EDIL3          | ENSG00000164331 ANKRA2         | ENSG00000169047 IRS1          | ENSG00000170264 NP_115556.1  | ENSG00000183148 ANKRD20A2      | ENSG00000183780 SLC35F3        |
| ENSG00000184786 TCTE3        | ENSG00000196774 ANKRD20A3      | ENSG00000204596 RPP21          | ENSG00000205337 Q6ZVR2_HUMAN   |                               |                              |                                |                                |
| ENSG00000099964 MTF          | ENSG00000100665 SERPINA4       | ENSG00000109132 PHOX2B         | ENSG00000128626 MRPS12         | ENSG00000131149 KIAA0182      | ENSG00000138175 ARL3         | ENSG00000139515 PDX1           | ENSG00000141956 PRDM15         |
| ENSG00000145626 UGT3A1       | ENSG00000155984 TMEM185A       | ENSG00000157017 PHRL           | ENSG00000162298 SYVN1          | ENSG00000162968 Q96MQ0_HUMAN  | ENSG00000163206 SMCP         | ENSG00000168795 ZBTB5          | ENSG00000168928 CTRB2          |
| ENSG00000171443 ZNF524       | ENSG00000185043 CIB1           | ENSG00000206190 ATP10A         | ENSG00000065600 C1orf75        | ENSG00000088035 ALG6          | ENSG00000101384 JAG1         | ENSG00000102805 CLN5           | ENSG00000104447 TRPS1          |
| ENSG00000114248 LRRC31       | ENSG00000116285 ERRF1          | ENSG00000120696 KBTBD7         | ENSG00000129699 NP_067644.2    | ENSG00000113437 KIF3A         | ENSG00000134548 C12orf39     | ENSG00000140265 ZSCAN29        | ENSG00000143889 HNRPLL         |
| ENSG00000145451 GLRA3        | ENSG00000145725 HISPPD1        | ENSG00000145794 MEGF10         | ENSG00000155313 USP25          | ENSG00000163444 TMEM183B      | ENSG00000169129 AFAP1L2      | ENSG00000173960 UBXD4          | ENSG00000180537 RNF182         |
| ENSG00000182093 WRB          | ENSG00000186566 GPATCH8        | ENSG00000187068 NP_001020437.1 | ENSG00000203995 ZYG11A         |                               |                              |                                |                                |
| ENSG00000074590 NUAK1        | ENSG00000084636 COL16A1        | ENSG00000104679 R3HCC1         | ENSG00000104731 KLHDC4         | ENSG00000112578 BYSL          | ENSG00000128311 TST          | ENSG00000137177 KIF13A         | ENSG00000169856 ONECUT1        |
| ENSG00000170276 HSPB2        | ENSG00000184792 OSBP2          | ENSG00000185619 PCGF3          | ENSG00000197063 MAFG           | ENSG00000198700 IPO9          | ENSG00000198785 GRIN3A       | ENSG00000155568 RGPD7          | ENSG00000089818 NECAP1         |
| ENSG00000092531 SNAP23       | ENSG00000100852 ARHGAP5        | ENSG00000105851 PIK3CG         | ENSG00000105879 CBLL1          | ENSG00000111897 SERINC1       | ENSG00000113361 CDH6         | ENSG00000115009 CCL20          | ENSG00000116560 SFPQ           |
| ENSG00000116830 TTF2         | ENSG00000120235 IFNA6          | ENSG00000130347 RTN4IP1        | ENSG00000135968 GCC2           | ENSG00000136698 CFC1          | ENSG00000138069 RAB1A        | ENSG00000143337 TOR1AIP1       | ENSG00000152093 NP_001072998.1 |
| ENSG00000156136 DCK          | ENSG00000158122 C9orf21        | ENSG00000162434 JAK1           | ENSG00000162645 GBP7           | ENSG00000163602 RYBP          | ENSG00000166006 KCNC2        | ENSG00000169629 RGPD8          | ENSG00000173744 HRB            |
| ENSG00000176896 TFSM1_HUMAN  | ENSG00000178573 MAF            | ENSG00000183054 RGPD6          | ENSG00000197121 PGAP1_HUMAN    | ENSG00000197846 HIST1H2BF     | ENSG00000204884 Q6ZVI2_HUMAN | ENSG00000205777 GAGE4          | ENSG00000205777 GAGE4          |
| ENSG00000103275 UBE2I        | ENSG00000104823 ECH1           | ENSG00000105383 CD33           | ENSG00000110906 KCTD10         | ENSG00000123374 CDK2          | ENSG00000133422 MORC2        | ENSG00000134247 PTGFRN         | ENSG00000136895 GARNL3         |
| ENSG00000139083 ETV6         | ENSG00000139613 SMARCC2        | ENSG00000149269 PAK1           | ENSG00000150401 DCUN1D2        | ENSG00000159797 C9orf144      | ENSG00000162490 C1orf187     | ENSG00000162783 IER5           | ENSG00000163251 FZD5           |
| ENSG00000168243 GNV4         | ENSG00000169598 DFEB           | ENSG00000180875 GREM2          | ENSG00000181035 SLC25A42       | ENSG00000185885 IFITM1        | ENSG00000186594 NP_116284.2  | ENSG00000004799 PKD4           | ENSG00000023909 GCLM           |
| ENSG00000078237 C12orf5      | ENSG00000085788 DDHD2          | ENSG00000091879 ANGPT2         | ENSG00000101745 ANKRD12        | ENSG00000104723 TUSC3         | ENSG00000108510 THRAP1       | ENSG00000108924 HLF            | ENSG00000111247 RAD51AP1       |
| ENSG00000128050 PAICS        | ENSG00000133138 TBC1D8B        | ENSG00000133627 ACTR3B         | ENSG00000135333 EPHA7          | ENSG00000138442 WDR12         | ENSG00000143184 XCL1         | ENSG00000146426 TIAM2          | ENSG00000148153 C9orf80        |
| ENSG00000156049 GNA14        | ENSG00000157557 ETS2           | ENSG00000159917 ZNF235         | ENSG00000164749 HNF4G          | ENSG00000165359 DDX26B        | ENSG00000166068 SPRED1       | ENSG00000172733 PURG           | ENSG00000173409 ARV1           |
| ENSG00000174010 KLHL15       | ENSG00000175097 RAG2           | ENSG00000182498 RPS18          | ENSG00000185220 PGBD2          |                               |                              |                                |                                |
| ENSG00000057935 MTA3         | ENSG00000072958 AP1M1          | ENSG00000073849 ST6GAL1        | ENSG00000100321 SYNGR1         | ENSG00000100362 PVALB         | ENSG00000103196 CRISPLD2     | ENSG00000108788 MLX            | ENSG00000113194 UBXD8          |
| ENSG00000124422 USP22        | ENSG00000130035 GALNT8         | ENSG00000159224 GTP            | ENSG00000161016 RPL8           | ENSG00000175318 GRAMD2        | ENSG00000176515 Q8NAX6_HUMAN | ENSG00000176679 TGIF2LY        | ENSG00000178449 C12orf62       |
| ENSG00000185475 NP_955369.1  | ENSG00000198618 PIIA_HUMAN     | ENSG00000204118 NAP1L6         | ENSG00000205431 Q6UWF5_HUMAN   | ENSG000000007372 PAX6         | ENSG000000078399 HOXA9       | ENSG000000091428 RAPGEF4       | ENSG00000102391 RPL36A         |
| ENSG00000105855 ITGB8        | ENSG00000108176 DNAJC12        | ENSG00000114021 NIT2           | ENSG00000115761 NOL10          | ENSG00000116266 STXBP3        | ENSG00000120328 PCDH12       | ENSG00000123610 TNFAIP6        | ENSG00000128683 GAD1           |
| ENSG00000133863 TEX15        | ENSG00000135409 AMHR2          | ENSG00000145721 LIX1           | ENSG00000153201 RANBP2         | ENSG00000153779 TGIF2LX       | ENSG00000154999 MRPS17       | ENSG00000162670 FAM5C          | ENSG00000165672 PRDX3          |
| ENSG00000167004 PDIA3        | ENSG00000170537 TMC7           | ENSG00000172071 EIF2AK3        | ENSG00000174106 LEMD3          | ENSG00000174738 NR1D2         | ENSG00000174808 BTC          | ENSG00000176395 CEACAM20       | ENSG00000181019 NQO1           |
| ENSG00000197442 MAP3K5       | ENSG00000204628 GNB2L1         | ENSG00000205057 CLLU10S        |                                |                               |                              |                                |                                |
| ENSG00000062485 CS           | ENSG00000119487 MAPKAP1        | ENSG00000127124 HIVEP3         | ENSG00000131652 THOC6          | ENSG00000140526 ABHD2         | ENSG00000142949 PTPRF        | ENSG00000143333 RGS16          | ENSG00000151208 DLG5           |
| ENSG00000155275 C4orf23      | ENSG00000159110 IFNAR2         | ENSG00000159618 GPR114         | ENSG00000165507 C10orf10       | ENSG00000169188 APEX2         | ENSG00000169241 RAG1AP1      | ENSG00000175860 NP_001012724.1 | ENSG00000182606 TRAK1          |
| ENSG00000197322 NP_997337.1  | ENSG00000197858 GPAAL1         | ENSG00000204842 ATXN2          | ENSG00000222677 FHL1           | ENSG00000101109 STK4          | ENSG00000115084 SLC35F5      | ENSG00000120690 ELF1           | ENSG00000128245 YWHAH          |
| ENSG00000135387 CAPRIN1      | ENSG00000138760 SCARB2         | ENSG00000141424 SLC39A6        | ENSG00000142615 ELLA2_HUMAN    | ENSG00000142875 PRKACB        | ENSG00000151461 UPF2         | ENSG00000153253 SCN3A          | ENSG00000163492 NP_775919.2    |
| ENSG00000166845 C18orf54     | ENSG00000167383 ZNF229         | ENSG00000168772 CXXC4          | ENSG00000170967 DDI1           | ENSG00000181626 DKFZp779B1634 | ENSG00000183784 C9orf66      | ENSG00000185246 PRPF39         | ENSG00000196285 H33_HUMAN      |
| ENSG00000196639 HRH1         | ENSG00000196677 C8orf77        | ENSG00000198780 Q9H989_HUMAN   | ENSG00000204480 PRAEF19        | ENSG00000204491 PRAEF18       | ENSG00000204503 PRAEF3       |                                |                                |
| ENSG0000012822 CALCOCO1      | ENSG00000103005 C16orf57       | ENSG00000106268 NUDT1          | ENSG00000119280 C1orf198       | ENSG00000126522 CRCP_HUMAN    | ENSG00000133065 SLC41A1      | ENSG00000136003 ISCU           | ENSG00000142794 NBPF3          |
| ENSG00000143940 Q6ZMW3_HUMAN | ENSG00000157978 LDLRAP1        | ENSG00000158352 SHROOM4        | ENSG00000160219 GAB3           | ENSG00000160691 SHC1          | ENSG00000160917 CPSF4        | ENSG00000162415 ZSWIM5         | ENSG00000165495 PKNOX2         |
| ENSG00000167491 GATAD2A      | ENSG00000169083 AR             | ENSG00000185905 C16orf54       | ENSG00000197430 TMEM10         | ENSG00000206193 Q5HYA3_HUMAN  | ENSG00000205057 PAG1         | ENSG00000104825 NFKB1B         | ENSG00000107560 RAB11FIP2      |
| ENSG00000107863 ARHGAP21     | ENSG00000113441 LNPEP          | ENSG00000113805 CNTN3          | ENSG00000118507 AKAP7          | ENSG00000120324 PCDH10        | ENSG00000120458 C10orf61     | ENSG00000123131 PRDX4          | ENSG00000125944 HNRPR          |
| ENSG00000134987 WDR36        | ENSG00000143183 TMC01          | ENSG00000152782 PANK1          | ENSG00000162813 BPNT1          | ENSG00000166363 OR10A5        | ENSG00000166441 RPL27A       | ENSG00000168952 STXB6          | ENSG00000170417 TMEM182        |
| ENSG00000170502 NUDT9        | ENSG00000171204 TMEM126B       | ENSG00000175348 TMEM9B         | ENSG00000198157 NSBP1          |                               |                              |                                |                                |
| ENSG00000068137 PLEKHH3      | ENSG00000090316 MAEA           | ENSG00000090659 CD209          | ENSG00000090889 KIF4A          | ENSG00000105388 CEACAM5       | ENSG00000106333 PCOLCE       | ENSG00000110777 POU2AF1        | ENSG00000122012 SV2C           |
| ENSG00000124920 C11orf9      | ENSG00000132749 MTL5           | ENSG00000134030 KIAA0427       | ENSG00000134516 DOCK2          | ENSG00000136807 CDK9          | ENSG00000136811 ODF2         | ENSG00000138092 CENPO          | ENSG00000144712 CAND2          |
| ENSG00000154928 P54762-3     | ENSG00000163251 FZD5           | ENSG00000163545 NUAK2          | ENSG00000168802 NM_001039690.2 | ENSG00000170100 Q96MU6-2      | ENSG00000173436 C1orf151     | ENSG00000173706 HEG1           | ENSG00000175824 XR_017847.1    |
| ENSG00000180209 MLRS_HUMAN   | ENSG00000184916 JAG2           | ENSG00000187251 C1orf213       | ENSG00000188167 NP_001034859.1 | ENSG00000188559 C20orf74      | ENSG00000196242 OR2C3        | ENSG00000197081 IGF2R          | ENSG00000204235 Q6ZNQ4_HUMAN   |
| ENSG00000004897 CDC27        | ENSG00000037474 NSUN2          | ENSG00000044355 ZIC2           | ENSG00000085377 PREP           | ENSG00000086666 ZFNAD6        | ENSG00000106771 C9orf5       | ENSG00000117594 HSD11B1        | ENSG00000119401 TRIM32         |
| ENSG00000125952 MAX          | ENSG00000128040 SPINK2         | ENSG00000135535 CD164          | ENSG00000156136 DCK            | ENSG00000159855 CND42SE2      | ENSG00000163159 VPS72        | ENSG00000166922 SCG5           | ENSG00000168214 RBFJ           |
| ENSG00000171634 BPTF         | ENSG00000172915 NBEA           | ENSG00000176083 ZNF683         | ENSG00000178074 NP_710156.2    | ENSG00000180855 ZNF443        | ENSG00000182552 RWDD4A       | ENSG00000183337 BCOR           | ENSG00000185015 CA13           |
| ENSG00000186700 Q8N6F3_HUMAN | ENSG00000187944 NP_998773.1    | ENSG00000194646 ZNF799         | ENSG00000197484 Q6ZRH8_HUMAN   | ENSG00000197484 GALP_HUMAN    | ENSG00000197487 GALP_HUMAN   | ENSG00000198455 ZXDB           |                                |
| ENSG00000222840 RNF10        | ENSG00000056558 TRAF1          | ENSG00000089154 GNC1L1         | ENSG00000099954 CECR2          | ENSG00000100216 TOMM22        | ENSG00000103034 NDRG4        | ENSG00000104221 BRF2           | ENSG000001105428 ZNF4          |
| ENSG00000106236 NPTX2        | ENSG00000106789 CORO2A         | ENSG00000115602 IL1RL1         | ENSG00000119227 PIGZ           | ENSG00000119614 CHX10         | ENSG00000120875 DUSP4        | ENSG00000136854 STXBP1         | ENSG00000140263 SORD           |
| ENSG00000148704 VAX1         | ENSG00000157884 NP_001025052.1 | ENSG00000158516 CPA2           | ENSG00000158525 CPA5           | ENSG00000160844 NP_849153.3   | ENSG00000161640 SIGLEC11     | ENSG00000166689 PLEKHA7        | ENSG00000184924 NP_001013685.1 |
| ENSG00000186326 RGS9BP       | ENSG00000205103 HPR            | ENSG00000205106 Q6N098_HUMAN   | ENSG00000082516 GEMIN5         | ENSG00000088386 SLC15A1       | ENSG00000113649 TCERG1       | ENSG00000120519 SLC10A7        | ENSG00000121579 NAT13          |
| ENSG00000126814 TRMT5        | ENSG00000130741 EIF2S3         | ENSG00000133135 RNF128         | ENSG00000133627 ACTR3B         | ENSG00000134644 PUM1          | ENSG00000135241 PNPLA10P     | ENSG00000137185 ZNF193         | ENSG00000137492 PRKRIR         |
| ENSG00000151746 BCD1         | ENSG00000154620 TMSB4Y         | ENSG00000156049 GNA14          | ENSG00000157404 KIT            | ENSG00000165244 ZNF367        | ENSG00000166747 AP1G1        | ENSG00000167528 ZNF641         | ENSG00000168152 THAP9          |
| ENSG00000168384 HLA-DPA1     | ENSG00000175087 PDIK1L         | ENSG00000176256 HMGB4          | ENSG00000179532 C11orf47       | ENSG00000181915 C10orf22      | ENSG00000188653 NR_002807.1  | ENSG00000198830 HMGN2          | ENSG00000198924 DCLRE1A        |
| ENSG0000007314 SCN4A         | ENSG00000044090 CUL7           | ENSG00000067082 KLF6           | ENSG00000082929 C4orf6         | ENSG00000101193 C20orf11      | ENSG00000102755 FLT1         | ENSG00000106009 C7orf27        | ENSG00000116667 C1orf21        |
| ENSG00000116984 MTR          | ENSG00000119638 NEK9           | ENSG00000124766 SOX4           | ENSG00000130768 SMPDL3B        | ENSG00000136935 GOLGA1        | ENSG00000149269 PAK1         | ENSG00000158161 EYA3           | ENSG00000158220 FAM62C         |
| ENSG00000158864 NDUFS2       | ENSG00000161860 SYCE2          | ENSG00000166025 AMOTL1         | ENSG00000169118 CSNK1G1        | ENSG00000173786 CNP           | ENSG00000178110 Q8N9G9_HUMAN | ENSG00000184678 HIST2H2BE      | ENSG00000196652 ZKSCAN5        |
| ENSG00000203814 HST2H2BF     | ENSG00000204257 HLA-DMA        | ENSG00000204356 ROBP           | ENSG00000204579 A4D193_HUMAN   | ENSG000000058091 PFTK1        | ENSG00000109475 RPL34        | ENSG00000116560 SFPQ           | ENSG00000118518 RNF146         |
| ENSG00000125249 RAP2A        | ENSG00000128590 DNAJB9         | ENSG00000131941 RHPN2          | ENSG00000131966 ACTR10         | ENSG00000137714 FDX1          | ENSG00000138794 CASP6        | ENSG00000139364 TMEM132B       | ENSG00000144559 C3orf31        |
| ENSG00000154529 CNTNAP3B     | ENSG00000157578 C21orf13       | ENSG00000163421 PROK2          | ENSG00000164164 OTUD4          | ENSG00000164675 IQUB          | ENSG00000166527 CLEC4D       | ENSG00000172260 NEGR1          | ENSG00000198015 MRPL42         |
| ENSG00000122176 FMOD         | ENSG00000129250 KIF1C          | ENSG00000133661 SFTPD          | ENSG00000134317 GRHL1          | ENSG00000147403 RPL10         | ENSG00000148337 CIZ1         | ENSG00000151882 CCL28          | ENSG00000161955 TNFSF13        |
| ENSG00000169169 CPT1C        | ENSG00000171169 C9orf90        | ENSG00000180935 Q8N8B3_HUMAN   | ENSG00000181577 NP_694978.2    | ENSG00000182749 PAQR7         | ENSG00000185219 ZNF445       | ENSG00000188636 LDLOC1L        | ENSG00000188997 KCTD21         |
| ENSG00000006715 VPS41        | ENSG00000078114 NEBL           | ENSG00000111530 CAND1          | ENSG00000117625 RCOR3          | ENSG00000124596 C6orf130      | ENSG00000124939 SCGB2A1      | ENSG00000127125 PPCS           | ENSG00000136870 ZNF189         |
| ENSG00000146223 RPL7L1       | ENSG00000153234 NR4A2          | ENSG00000164181 ELOVL7         | ENSG00000166240 Q14DG7-2       | ENSG00000171365 CLCN5         | ENSG00000172575 RASGRP1      | ENSG00000173610 UGT2A1         | ENSG00000175768 C9orf105       |
| ENSG00000186300 PWF555       | ENSG00000188477 Q6UXS0_HUMAN   | ENSG00000198130 HIBCH          | ENSG00000203743 Q5J7V3_HUMAN   |                               |                              |                                |                                |

|          |                                |                                |                               |                                |                              |                              |                                |                             |
|----------|--------------------------------|--------------------------------|-------------------------------|--------------------------------|------------------------------|------------------------------|--------------------------------|-----------------------------|
|          | ENSG00000095002 MSH2           | ENSG00000104064 GABPB2         | ENSG00000111247 RAD51AP1      | ENSG00000117143 UAP1           | ENSG00000137975 CLCA2        | ENSG00000138668 HNRPD        | ENSG00000139971 C14orf37       | ENSG00000141367 CLTC        |
|          | ENSG00000143476 DTL            | ENSG00000151151 IPMK           | ENSG00000160868 CYP3A4        | ENSG00000162687 KCNT2          | ENSG00000163624 CDS1         | ENSG00000164122 ASB5         | ENSG00000164190 NIPBL          | ENSG00000173166 RAPH1       |
| GTTTTTC  | ENSG00000183150 GPR19          | ENSG00000183931 ANKRD45        | ENSG00000185984 NR_002593.1   |                                |                              |                              |                                |                             |
|          | ENSG0000011243 AKAP8L          | ENSG00000025800 KPNA6          | ENSG00000036448 MYOM2         | ENSG00000063127 SLC6A16        | ENSG00000077157 PPP1R12B     | ENSG00000090432 C1orf166     | ENSG00000136811 ODF2           | ENSG00000143322 ABL2        |
|          | ENSG00000158470 BAGALT5        | ENSG00000162344 FGF19          | ENSG00000163464 IL8RA         | ENSG00000168631 DPCP1          | ENSG00000170889 RP99         | ENSG00000177468 OLIG3        | ENSG00000180849 C15orf37       | ENSG00000183207 RUVBL2      |
|          | ENSG00000187017 ESPN           | ENSG00000188986 NELFB_HUMAN    | ENSG00000196432 Q9H5F0_HUMAN  | ENSG00000025156 HSF2           | ENSG00000026508 CD44         | ENSG00000033030 ZCCHC8       | ENSG00000094914 AAAS           | ENSG00000100564 PIGH        |
|          | ENSG00000112029 FBXO5          | ENSG00000113790 EHHADH         | ENSG00000117592 PRDX6         | ENSG00000117600 NP_055654.2    | ENSG00000119725 ZNF410       | ENSG00000138678 NP_116106.2  | ENSG00000140262 TCF12          | ENSG00000143252 SDHC        |
|          | ENSG00000145687 SSBP2          | ENSG00000150776 C11orf57       | ENSG00000151792 CTS0          | ENSG00000154727 GABPA          | ENSG00000164109 MAD2L1       | ENSG00000164597 COG5         | ENSG00000165669 C10orf84       | ENSG00000179455 MKNR3       |
| GTTTTTCG | ENSG00000182187 CRYGB          | ENSG00000187098 MITF           | ENSG00000198795 ZNF521        |                                |                              |                              |                                |                             |
|          | ENSG00000141644 ZC3H3          | ENSG00000095370 SH2D3C         | ENSG00000097021 ACOT7         | ENSG00000100678 SLC8A3         | ENSG00000103024 NME3         | ENSG00000105538 RASIP1       | ENSG00000112679 DUSP22         | ENSG00000115461 IGFBP5      |
|          | ENSG00000116478 HDAC1          | ENSG00000126460 PRRG2          | ENSG00000130427 EPO           | ENSG00000140612 SEC11A         | ENSG00000141905 NFIC         | ENSG00000146828 SLC12A9      | ENSG00000152117 Q6ZWB7_HUMAN   | ENSG00000155366 RHOC        |
|          | ENSG00000156858 PRR14          | ENSG00000163064 EN1            | ENSG00000165125 TRPV6         | ENSG00000188486 H2AFX          | ENSG00000198518 HIST1H4E     | ENSG00000198946 SSX4B        | ENSG00000204280 NP_001032647.2 | ENSG00000204335 SP5         |
|          | ENSG00000204645 SSX4           | ENSG00000070367 EXOC5          | ENSG00000076067 RBMS2         | ENSG00000085377 PREP           | ENSG00000085449 WDFY1        | ENSG00000102409 BEXL1        | ENSG00000107643 MAPK8          | ENSG000001123179 EBPL       |
|          | ENSG00000130254 SAFB2          | ENSG00000136261 BZW2           | ENSG00000136688 IL1F9         | ENSG00000147257 GPC3           | ENSG00000163093 BBS5         | ENSG00000164331 ANKRA2       | ENSG00000165929 MTAC2D1        | ENSG00000169126 ARMC4       |
|          | ENSG00000171100 MTM1           | ENSG00000176593 Q8N9G5_HUMAN   | ENSG00000186104 CYP2R1        | ENSG00000188971 NP_001013005.1 |                              |                              |                                |                             |
| GTTTTTTA | ENSG000000011105 TSPAN9        | ENSG00000066044 ELAVL1         | ENSG00000071127 WDR1          | ENSG00000072609 CHFR           | ENSG00000073350 LLGL2        | ENSG00000079974 ANKLB2B      | ENSG00000088854 C20orf194      | ENSG00000102572 STK24       |
|          | ENSG00000103723 AP3B2          | ENSG00000108175 ZMI21          | ENSG00000110092 CCND1         | ENSG00000110786 PTPN5          | ENSG00000111602 TIMELESS     | ENSG00000112599 GUCA1B       | ENSG00000115758 ODC1           | ENSG00000121281 ADCY7       |
|          | ENSG00000123143 PKN1           | ENSG00000129757 CDKN1C         | ENSG00000130956 HABP4         | ENSG00000131148 COX4NB         | ENSG00000132846 ZBED3        | ENSG00000137460 NP_203751.2  | ENSG00000141540 TTYH2          | ENSG00000142208 AKT1        |
|          | ENSG00000147130 ZMYM3          | ENSG00000148842 CNNM2          | ENSG00000154783 FGD5          | ENSG00000156471 PTDSS1         | ENSG00000156486 KCNK2        | ENSG00000157617 C21orf25     | ENSG00000157837 PSL4_HUMAN     | ENSG00000157881 PANK4       |
|          | ENSG00000157933 SKI            | ENSG00000166398 KIAA0355       | ENSG00000167487 KLHL26        | ENSG00000170515 PA2G4          | ENSG00000173402 DAG1         | ENSG00000173621 LRFN4        | ENSG00000175130 MARCKSL1       | ENSG00000175264 CHST1       |
|          | ENSG00000185155 MTXL1          | ENSG00000189159 HN1            | ENSG00000189325 NP_00101903.2 | ENSG00000198174 Q8N9P1_HUMAN   | ENSG00000198858 C19orf22     | ENSG00000203867 RBM20        | ENSG00000205643 NP_997210.3    | ENSG00000035499 DEPDC1B     |
|          | ENSG00000064102 C12orf11       | ENSG00000069956 MAPK6          | ENSG00000072401 UBE2D1        | ENSG00000081019 RSBN1          | ENSG00000081237 PTPRC        | ENSG00000088451 TGDS         | ENSG00000092140 KIAA1333       | ENSG00000106278 PTPRZ1      |
|          | ENSG00000107164 FUBP3          | ENSG00000111581 NUP107         | ENSG00000111605 CPSF6         | ENSG00000113742 CPEB4          | ENSG00000115159 GP2D         | ENSG00000115361 ACADL        | ENSG00000116783 FPGT           | ENSG00000117713 ARID1A      |
|          | ENSG00000118454 ANKRD13C       | ENSG00000127334 DYRK2          | ENSG00000128714 HOXD13        | ENSG00000130816 DNMT1          | ENSG00000136870 ZNF189       | ENSG00000137142 IGFBP1       | ENSG00000141499 WDR79          | ENSG00000144642 RBMS3       |
|          | ENSG00000145703 IQGAP2         | ENSG00000145734 BDP1           | ENSG00000146409 C6orf192      | ENSG00000156026 CCDC109A       | ENSG00000157540 DYRK1A       | ENSG00000163558 PRKCI        | ENSG00000163634 THOC7          | ENSG00000163634 THOC7       |
|          | ENSG00000164326 CARPTP         | ENSG00000169372 CRADD          | ENSG00000169446 TMEM32        | ENSG00000170185 USP38          | ENSG00000171928 FAM18B       | ENSG00000175893 ZDHHC21      | ENSG00000180116 C12orf40       | ENSG00000182367 SNRPELL1    |
| GTTTTTTT | ENSG00000185238 PRMT3          | ENSG00000188811 NP_001017370.1 | ENSG00000196083 IL1RAP        | ENSG00000197329 PELL1          | ENSG00000198060 MARCH5       | ENSG00000198105 ZNF248       | ENSG00000205857 Q7Z5D8_HUMAN   |                             |
|          | ENSG0000015592 STMN4           | ENSG00000090447 TFAP4          | ENSG00000099875 MKNK2         | ENSG00000101665 SMAD7          | ENSG00000102977 ACD          | ENSG00000103723 AP3B2        | ENSG00000104228 TRIM35         | ENSG00000104332 SFRP1       |
|          | ENSG00000105221 ART2           | ENSG00000111652 COPS7A         | ENSG00000112759 SLC29A1       | ENSG00000116984 MTR            | ENSG00000119688 ABCD4        | ENSG00000125743 SNRPD2       | ENSG00000132854 ANR38_HUMAN    | ENSG00000140718 FTO         |
|          | ENSG00000143878 RHOB           | ENSG00000144677 CTDSPLA        | ENSG00000144843 ADPRH         | ENSG00000150401 DCUN1D2        | ENSG00000156973 PDE6D        | ENSG00000164651 SP8          | ENSG00000167642 SPINT2         | ENSG00000169242 EFNA1       |
|          | ENSG00000169306 IL1RAPL1       | ENSG00000183154 Q8NB20_HUMAN   | ENSG00000185668 POU3F1        | ENSG00000188315 C3orf62        | ENSG00000197965 MPZL1        | ENSG000000004766 CCDC132     | ENSG00000005339 CREBBP         | ENSG00000020922 MRE11A      |
|          | ENSG00000048740 CUGBP2         | ENSG00000064692 SNCAIP         | ENSG00000065150 RANBP5        | ENSG00000072849 DERL2          | ENSG00000113805 CNTN3        | ENSG00000116874 WARS2        | ENSG00000118513 MYB            | ENSG00000124097 HMG1L1      |
|          | ENSG00000133111 RFXP2          | ENSG00000136213 CHST12         | ENSG00000136824 SMC2          | ENSG00000137075 RNF38          | ENSG00000142188 TMEM50B      | ENSG00000143494 VASH2        | ENSG00000144857 BOC            | ENSG00000146070 PLA2G7      |
|          | ENSG00000146072 TNFRSF21       | ENSG00000162819 C1orf58        | ENSG00000163714 SR140_HUMAN   | ENSG0000006104104 HMG2         | ENSG00000164736 SOX17        | ENSG00000164758 THRAP6       | ENSG00000165617 DACT1          | ENSG00000170962 PDGFD       |
| TAAAAAC  | ENSG00000173467 AGR3           | ENSG00000177868 CCDC23         | ENSG00000185344 ATP6V0A2      | ENSG00000186020 ZNF529         | ENSG00000186103 ARFGF        | ENSG00000196562 SULF2        | ENSG00000197323 TRIM33         |                             |
|          | ENSG00000055130 CUL1           | ENSG00000088833 NSFL1C         | ENSG00000101361 NOL5A         | ENSG00000103241 FOXF1          | ENSG00000105427 CNFN         | ENSG00000106927 AMPB         | ENSG00000110660 SLC35F2        | ENSG00000118689 FOXO3A      |
|          | ENSG00000119772 DNMT3A         | ENSG00000125633 CCDC93         | ENSG00000126267 COX6B1        | ENSG00000131059 C20orf71       | ENSG00000133922 MYH11        | ENSG00000136695 IL1F5        | ENSG00000137124 ALDH1B1        | ENSG00000139914 NP_981947.1 |
|          | ENSG00000141068 KSR1           | ENSG00000141696 NO55_HUMAN     | ENSG00000142794 NBP3          | ENSG00000160683 BLR1           | ENSG00000163879 DNAL1        | ENSG00000163915 C3orf65      | ENSG00000167393 PPP2R3B        | ENSG00000167851 CD300A      |
|          | ENSG00000168569 NP_001073970.1 | ENSG00000183154 Q8NB20_HUMAN   | ENSG00000183495 EP400         | ENSG00000185442 NP_997329.1    | ENSG00000188242 Q71RB1_HUMAN | ENSG00000197448 GSTK1        | ENSG00000198258 UBL5           | ENSG00000198951 NAGA        |
|          | ENSG00000205434 Q6ZU34_HUMAN   | ENSG00000205927 OLIG2          | ENSG0000003987 MTMR7          | ENSG00000008083 JARID2         | ENSG00000016602 CLCA4        | ENSG00000039560 RAI14        | ENSG00000077327 SPAG6          | ENSG00000080298 RFX3        |
|          | ENSG00000084093 REST           | ENSG00000087470 DNM1L          | ENSG00000101166 SLMO2         | ENSG00000102710 FAM48A         | ENSG00000103707 MTMT         | ENSG00000104442 ARMC1        | ENSG00000115295 CLIP4          | ENSG00000115484 CCT4        |
|          | ENSG00000124882 EREG           | ENSG00000131375 CAPN7          | ENSG00000137871 SIUH4         | ENSG00000146001 PCDH18         | ENSG00000158315 RHBDL2       | ENSG00000162409 PRKAA2       | ENSG00000162814 SPATA17        | ENSG00000162923 WDR26       |
|          | ENSG00000163110 PDLIM5         | ENSG00000164209 SLC25A46       | ENSG00000168944 CCDC100       | ENSG00000172469 MANEA          | ENSG00000174429 ABRA         | ENSG00000176209 C8orf40      | ENSG00000177932 ZNF354C        | ENSG00000179175 C19orf38    |
|          | ENSG00000186009 ATP4B          | ENSG00000188747 NOXA1          | ENSG00000196914 ARHGFE12      | ENSG00000197181 PIWIL2         | ENSG00000198161 PPIAL4       | ENSG00000198252 STYX         | ENSG00000198360 NP_839944.1    | ENSG00000198954 KIAA1279    |
| TAAAACT  | ENSG00000020256 ZFP64          | ENSG00000105617 LENG1          | ENSG00000105722 ERF           | ENSG00000105755 ETHB1          | ENSG00000126243 LRFN3        | ENSG00000127554 GFER         | ENSG00000130287 NCAN           | ENSG00000136935 GOLGA1      |
|          | ENSG00000137133 HINT2          | ENSG00000137288 C6orf125       | ENSG00000139436 GIT2          | ENSG00000149257 SERPINH1       | ENSG00000151779 NP_056993.2  | ENSG00000162543 UBXD3        | ENSG00000162734 PEA15          | ENSG00000166136 NDUFB8      |
|          | ENSG00000166908 PIP5K2C        | ENSG00000170231 FABP6          | ENSG00000172073 C2orf51       | ENSG00000177741 Q9BN7_HUMAN    | ENSG00000177822 XR_017723.1  | ENSG00000177992 C9orf79      | ENSG00000178078 NP_060190.2    | ENSG00000180210 F2          |
|          | ENSG00000183929 XRN2P5P        | ENSG00000184209 NP_008951.1    | ENSG00000186810 CXCR3         | ENSG00000197971 MBP            | ENSG00000198467 TPM2         | ENSG00000198915 RASGEF1A     | ENSG00000048392 RBM2B          | ENSG00000049192 ADAMTS6     |
|          | ENSG00000088930 DUSP2          | ENSG00000093000 NUP50          | ENSG00000099942 CRKL          | ENSG00000102935 ZNF423         | ENSG00000104064 GABPB2       | ENSG00000109471 IL2          | ENSG00000111144 LTA4H          | ENSG00000111726 CMAS        |
|          | ENSG00000113369 ARRDC3         | ENSG00000115446 UNC50          | ENSG00000118200 CAMSAP1L1     | ENSG00000123178 C13orf1        | ENSG00000128050 PATCS        | ENSG00000129003 VPS13C       | ENSG00000144909 OSBPL1         | ENSG00000147533 GOLGA7      |
|          | ENSG00000150961 SEC24D         | ENSG00000152670 DDX4           | ENSG00000152749 GPR180        | ENSG00000153879 CEBPB          | ENSG00000155975 VPS37A       | ENSG00000156831 NSMCE2       | ENSG00000156876 SASS6          | ENSG00000163093 BBS5        |
|          | ENSG00000163659 TTPARP         | ENSG00000164985 PSIP1          | ENSG00000165533 TTC8          | ENSG00000165555 C14orf148      | ENSG00000171564 VGB          | ENSG00000173221 GLRX         | ENSG00000178053 MLF1           | ENSG00000181903 OR4C6       |
| TAAAAAGC | ENSG00000183878 UTY            | ENSG00000196470 SIAH1          | ENSG00000196867 ZFP28         | ENSG00000205174 NP_001019778.1 | ENSG00000206120 QDD2K5_HUMAN |                              |                                |                             |
|          | ENSG00000068323 TFE3           | ENSG00000078295 ADCY2          | ENSG00000099795 NDUFB7        | ENSG00000100099 HPS4           | ENSG00000101470 TNNC2        | ENSG00000101986 ABCD1        | ENSG00000102547 CAB39L         | ENSG00000114767 RRP9        |
|          | ENSG00000123364 HOXC13         | ENSG00000124104 SNX21          | ENSG00000130813 NP_060851.1   | ENSG00000132793 LPIN3          | ENSG00000136059 VILL         | ENSG00000145819 ARHGAP26     | ENSG00000163157 TMOD4          | ENSG00000166104 NP_776166.1 |
|          | ENSG00000168242 HIST1H2BI      | ENSG00000169217 CD2BP2         | ENSG00000171388 APLN          | ENSG00000172965 Q96C48_HUMAN   | ENSG00000173486 FKBP2        | ENSG00000179580 RNF151       | ENSG00000180861 C12orf36       | ENSG00000181378 CCDC108     |
|          | ENSG00000185614 C3orf54        | ENSG00000189129 PLAC9          | ENSG00000197993 KEL           | ENSG00000204542 C6orf15        | ENSG00000101745 ANKRD12      | ENSG00000102069 UBE2NL       | ENSG00000105967 TFEC           | ENSG00000105971 CAV2        |
|          | ENSG00000117632 STMN1          | ENSG00000120210 INSL6          | ENSG00000121207 LRAT          | ENSG00000124193 SFRS6          | ENSG00000125398 SOX9         | ENSG00000133627 ACTR3B       | ENSG00000138668 HNRPD          | ENSG00000145384 FABP2       |
|          | ENSG00000148291 SURF2          | ENSG00000158683 PKD1L1         | ENSG00000162561 TSSK3         | ENSG00000162836 ACP6           | ENSG00000164022 SCYE1        | ENSG00000164211 STARDA       | ENSG00000164327 NP_689969.2    | ENSG00000165972 CCDC38      |
|          | ENSG00000168813 ZNF507         | ENSG00000170624 SGCD           | ENSG00000179796 LRRRC3B       | ENSG00000180332 KCTD4          | ENSG00000182890 GLUD2        | ENSG00000196151 WDSUB1       | ENSG00000196678 EXOD1          | ENSG00000198642 KLHL9       |
| TAAAAATA | ENSG00000028528 SNX1           | ENSG00000042832 TG             | ENSG00000047617 TMEM16B       | ENSG00000075218 GTSE1          | ENSG00000099954 CECR2        | ENSG00000101405 OXT          | ENSG00000102076 OPN1LW         | ENSG00000102977 ACD         |
|          | ENSG00000105339 DENND3         | ENSG00000106615 RHEB           | ENSG00000107338 SHB           | ENSG00000108294 PSMB3          | ENSG00000112062 MAPK14       | ENSG00000113552 GNPDA1       | ENSG00000124785 NRN1           | ENSG00000130711 PRDM12      |
|          | ENSG00000130956 HABP4          | ENSG00000134107 BHLHB2         | ENSG00000147380 OPN1MW        | ENSG00000151353 TMEM18         | ENSG00000153531 ADPRHL1      | ENSG00000156973 PDE6L        | ENSG00000160213 CSTB           | ENSG00000166160 OPN1MW2     |
|          | ENSG00000166540 ZNF407         | ENSG00000169885 CALML6         | ENSG00000171540 OTP           | ENSG00000179562 GCC1           | ENSG00000180198 RCB1         | ENSG00000182325 FBXL6        | ENSG00000182749 PAQR7          | ENSG00000183087 GAS6        |
|          | ENSG00000183103 LYPD4          | ENSG00000183684 THOC4          | ENSG00000184292 TACSTD2       | ENSG00000185684 EP400NL        | ENSG00000186951 PPARA        | ENSG00000187979 Q6ZPC6_HUMAN | ENSG00000189060 H1FO           | ENSG00000189339 SLC35E2     |
|          | ENSG00000196502 SULT1A1        | ENSG00000197448 GSTK1          | ENSG00000204394 IARS          | ENSG00000204405 Q6ZQV3_HUMAN   | ENSG00000005187 ACSM3        | ENSG00000009413 REV3L        | ENSG00000016490 CLCA1          | ENSG00000033122 LRRC7       |

|         |                                  |                               |                                 |                                 |                                 |                               |                               |                                 |                       |
|---------|----------------------------------|-------------------------------|---------------------------------|---------------------------------|---------------------------------|-------------------------------|-------------------------------|---------------------------------|-----------------------|
|         | ENSG00000135632 SMYD5            | ENSG00000140479 PCSK6         | ENSG00000140718 FTO             | ENSG00000141068 KSR1            | ENSG00000142156 COL6A1          | ENSG00000143365 RORC          | ENSG00000143556 S100A7        | ENSG00000151474 FRMD4A          |                       |
|         | ENSG00000151692 RNFL144          | ENSG00000152137 HSPB8         | ENSG00000157240 FZD1            | ENSG00000162490 C1orf187        | ENSG00000163357 DCST1           | ENSG00000167566 KIAA1602      | ENSG00000171747 LGLALS4       | ENSG00000175077 RTP1            |                       |
|         | ENSG00000177504 VCX2             | ENSG00000178409 KIAA1553      | ENSG00000180447 GAS1            | ENSG00000181274 FRAT2           | ENSG00000184292 TACSTD2         | ENSG00000186529 CYP4F3        | ENSG00000186837 C21orf119     | ENSG00000196526 AFAP1           |                       |
|         | ENSG00000196787 HST1H2AG         | ENSG00000198797 FAM5B         | ENSG00000198930 CSAG1           | ENSG00000203945 Q5JFQ1_HUMAN    | ENSG00000216490 CLCA1           | ENSG00000249130 KITLG         | ENSG00000272401 UBE2D1        | ENSG000002101782 RIOK3          |                       |
|         | ENSG00000201843 PSMD10           | ENSG00000202218 RP2           | ENSG00000204549 SQLE            | ENSG00000207669 ATE1            | ENSG00000209738 GLRB            | ENSG00000209919 MTCH2         | ENSG00000212246 SIM1          | ENSG000002121570 DPPA4          |                       |
|         | ENSG00000212578 B4GALT4          | ENSG000002125864 BFSP1        | ENSG000002127324 TSPAN8         | ENSG000002134755 DSC2           | ENSG000002134760 DSG1           | ENSG000002135525 MAP7         | ENSG000002136521 NDUFB5       | ENSG000002136682 CBWD2          |                       |
|         | ENSG000002137948 BRDT            | ENSG000002140575 IQGAP1       | ENSG000002144847 IGSF11         | ENSG000002146282 RARS2          | ENSG000002147996 CBWD1          | ENSG000002153246 PLA2R1       | ENSG000002153975 C6orf113     | ENSG000002154727 GABPA          |                       |
|         | ENSG000002157259 GATAD1          | ENSG000002158077 NLRP14       | ENSG000002163257 C4orf30        | ENSG000002163607 GTPBP8         | ENSG000002163634 THOC7          | ENSG000002165669 C10orf84     | ENSG000002166922 SCG5         | ENSG000002166946 CCNDBP1        |                       |
|         | ENSG000002168143 FAM83B          | ENSG000002168916 ZNF608       | ENSG000002171497 PP1D           | ENSG000002174977 ACOT12         | ENSG000002178604 NP_001034973.1 | ENSG000002180376 CCDC66       | ENSG000002181798 C2orf52      | ENSG000002183990 Q8WZA8_HUMAN   |                       |
|         | ENSG000002188177 ZC3H6           | ENSG000002196074 SYCP2        | ENSG000002196873 CBWD3          | ENSG000002198142 ANKRD57        | ENSG000002204790 CBWD2          | ENSG000002209264 DPYSL2       | ENSG000002209661 CARD10       | ENSG000002209661 CARD10         |                       |
| TAAACAC | ENSG000002007038 PRSS21          | ENSG0000020085465 OVGP1       | ENSG0000020088002 SULT2B1       | ENSG0000020088812 ATRN          | ENSG000002009296 PRDX5          | ENSG000002025999 C2orf114     | ENSG000002026432 LRRC6        | ENSG000002029295 LRRRC6         |                       |
|         | ENSG000002108515 ENO3            | ENSG000002110906 KCTD10       | ENSG000002124678 TCP11          | ENSG000002125999 C2orf114       | ENSG000002129934 PRDX5          | ENSG000002129934 PRDX5        | ENSG000002149777 CIB3         | ENSG000002151498 ACAD8          |                       |
|         | ENSG000002152705 CATSPER3        | ENSG000002159199 ATP5G1       | ENSG000002163221 S100A12        | ENSG000002167208 NP_878274.1    | ENSG000002168904 LRRC28         | ENSG000002174370 C11orf45     | ENSG000002176476 CCDC101      | ENSG000002179761 PIPOX          |                       |
|         | ENSG000002180424 DEFB123         | ENSG000002184481 MLLT7        | ENSG000002184639 NP_001004344.1 | ENSG000002185978 H2AFB3         | ENSG000002187003 ACTL7A         | ENSG000002187144 SPATA21      | ENSG000002188681 Q8TEH8_HUMAN | ENSG000002198082 H2AFB1         |                       |
|         | ENSG000002204305 AGER            | ENSG000002206031 Q6ZT66_HUMAN | ENSG0000020081154 PCNP          | ENSG0000020094975 C1orf9        | ENSG000002100249 C22orf31       | ENSG000002104388 RAB2A        | ENSG000002108384 RAD51C       | ENSG000002127011 SENP6          |                       |
|         | ENSG000002136521 NDUFB5          | ENSG000002143499 SMYD2        | ENSG000002148481 C10orf97       | ENSG000002150347 ARID5B         | ENSG000002151150 ANK3           | ENSG000002155833 CYLC2        | ENSG000002162607 USP1         | ENSG000002165244 ZNF367         |                       |
|         | ENSG000002172954 LYCAT           | ENSG000002177954 RPS27        | ENSG000002196319 Q9H353_HUMAN   | ENSG000002196319 Q9H353_HUMAN   | ENSG000002196319 Q9H353_HUMAN   | ENSG000002196319 Q9H353_HUMAN | ENSG000002196319 Q9H353_HUMAN | ENSG000002196319 Q9H353_HUMAN   |                       |
| TAAACCA | ENSG00000217767 RALBP1           | ENSG00000218625 ATP1A2        | ENSG000002065882 TBC1D1         | ENSG000002100918 REC8           | ENSG000002101638 ST8SIA5        | ENSG000002110195 FOLR1        | ENSG000002116698 SMG7         | ENSG000002123243 ITIH5          |                       |
|         | ENSG000002124766 SOX4            | ENSG000002127663 JMJD2B       | ENSG0000021301777 CDC16         | ENSG000002130656 HBZ            | ENSG000002134531 EMT1           | ENSG000002140263 SORD         | ENSG000002141756 FKBP10       | ENSG000002147536 GINS4          |                       |
|         | ENSG000002148498 PARD3           | ENSG000002149021 SCGB1A1      | ENSG000002149499 EML3           | ENSG000002156599 ZDHHC5         | ENSG000002166947 EPB42          | ENSG000002168427 KLHL30       | ENSG000002168906 MAT2A        | ENSG000002169189 NSMCE1         |                       |
|         | ENSG000002171711 DEFB4           | ENSG000002172543 CTSW         | ENSG000002177257 BD02_HUMAN     | ENSG000002178006 XR_018006.1    | ENSG000002180871 IL8RB          | ENSG000002182490 TSSK2        | ENSG000002182931 WFDC10B      | ENSG000002184945 AQP12A         |                       |
|         | ENSG000002197296 C20orf142       | ENSG000002198569 SLC34A3      | ENSG000002198911 SREBF2         | ENSG000002205609 Q9BW98_HUMAN   | ENSG000002205631 Q9H7S7_HUMAN   | ENSG000002206798 NAV3         | ENSG000002206798 NAV3         | ENSG000002206798 NAV3           |                       |
|         | ENSG000002100426 ZBED4           | ENSG000002101974 ATP11C       | ENSG000002104643 MTMR9          | ENSG000002109184 DCUN1D4        | ENSG000002120215 MLANA          | ENSG000002132463 GRSF1        | ENSG000002143158 BRP44        | ENSG000002144354 CDCA7          |                       |
|         | ENSG000002144366 GULP1           | ENSG000002144893 MEDI2L       | ENSG000002145451 GLRA3          | ENSG000002158639 PAGE5          | ENSG000002162813 BPNT1          | ENSG000002165555 C14orf148    | ENSG000002169035 KLK7         | ENSG000002173409 ARV1           |                       |
|         | ENSG000002183814 LIN9            | ENSG000002198252 STYX         | ENSG000002198252 STYX           | ENSG000002198252 STYX           | ENSG000002198252 STYX           | ENSG000002198252 STYX         | ENSG000002198252 STYX         | ENSG000002198252 STYX           |                       |
| TAAACTA | perfect: TAAACCA TGGTTTA         | hsa-miR-299-5p                | TGGTTTAccgtccaccatacat          | 0                               | ENSG0000020059691 PET112L       | ENSG0000020077157 PPP1R12B    | ENSG0000020088854 C20orf194   | ENSG0000020096384 HSP90AB1      | ENSG0000020099194 SCD |
|         | ENSG0000020048471 NP_001073999.1 | ENSG0000020059691 PET112L     | ENSG0000020077157 PPP1R12B      | ENSG0000020088854 C20orf194     | ENSG0000020096384 HSP90AB1      | ENSG0000020099194 SCD         | ENSG000002101391 CDK5RAP1     | ENSG000002107960 OBFC1          |                       |
|         | ENSG000002108753 TCF2            | ENSG000002109736 NP_001111.2  | ENSG000002117154 IGSF21         | ENSG000002118689 FOXO3A         | ENSG000002119535 CSF3R          | ENSG000002125534 C20orf149    | ENSG000002136950 ARPC5L       | ENSG000002142599 RERE           |                       |
|         | ENSG000002162233 NXF1            | ENSG000002164047 CAMP         | ENSG000002166165 CKB            | ENSG000002166866 MYO1A          | ENSG000002167112 TRUB2          | ENSG000002167800 TBX10        | ENSG000002168000 HNRPUL2      | ENSG000002170549 IRX1           |                       |
|         | ENSG000002171711 DEFB4           | ENSG000002174353 NP_061864.2  | ENSG000002177257 BD02_HUMAN     | ENSG000002184502 GAST           | ENSG000002188525 NM_207480      | ENSG000002196526 AFAP1        | ENSG000002205335 GLYCAM1      | ENSG000002206580 AP4M1          |                       |
|         | ENSG00000240275 CCDC99           | ENSG000002069869 NEDD4        | ENSG000002088298 EDEM2          | ENSG000002102401 ARMCX3         | ENSG000002113100 CDH9           | ENSG000002167711 AGMAT        | ENSG000002125863 MKKS         | ENSG000002138757 G3BP2          |                       |
|         | ENSG000002140015 KCNH5           | ENSG000002140280 LYSD4        | ENSG000002141452 C18orf8        | ENSG000002143742 SRP9           | ENSG000002156140 ADAMT3         | ENSG000002156876 SASS6        | ENSG000002160813 C7orf47      | ENSG000002165525 SDCCAG1        |                       |
|         | ENSG000002165807 C14orf50        | ENSG000002169062 UPF3A        | ENSG000002173451 THAP2          | ENSG000002174123 TLR10          | ENSG000002174780 SRP72          | ENSG000002175305 CCNE2        | ENSG000002176021 GSG2         | ENSG000002178403 NEUROG2        |                       |
| TAAACTC | ENSG000002185873 TMPRSS11B       | ENSG000002187522 HSPA14       | ENSG000002197347 Q6ZVE3_HUMAN   | ENSG000002211446 SEPP1          | ENSG00000205278 KIAA1086        | ENSG000002105640 RPL18A       | ENSG000002106631 MYL7         | ENSG000002106927 AMBP           |                       |
|         | ENSG00000276944 STXB2            | ENSG00000279462 PFAH1B3       | ENSG000002083807 SLC27A5        | ENSG000002089692 LAG3           | ENSG000002131059 C20orf71       | ENSG000002138316 ADAMT14      | ENSG000002140538 NTRK3        | ENSG000002142207 URB1           |                       |
|         | ENSG000002107902 NP_071409.2     | ENSG000002110628 SLC22A18     | ENSG000002124782 RREB1          | ENSG000002131059 C20orf71       | ENSG000002138316 ADAMT14        | ENSG000002140538 NTRK3        | ENSG000002142207 URB1         | ENSG000002143398 PIP5K1A        |                       |
|         | ENSG000002144029 MRPS5           | ENSG000002149600 COMMD7       | ENSG000002150201 FYXD4          | ENSG000002151948 GLT1D1         | ENSG000002153395 AYTL2          | ENSG000002161618 ALDH16A1     | ENSG000002161911 TREML1       | ENSG000002164972 C9orf24        |                       |
|         | ENSG000002171954 NP_775754.1     | ENSG000002172932 ANKRD13D     | ENSG000002173436 C1orf151       | ENSG000002174015 SPERT          | ENSG000002175164 ABO            | ENSG000002177455 CD19         | ENSG000002178602 OTOS         | ENSG000002184108 TRIML1         |                       |
|         | ENSG000002186825 Q580R0-2        | ENSG000002197174 O14606_HUMAN | ENSG000002197285 NR_001536.1    | ENSG000002024771 Q8N95_HUMAN    | ENSG000002025434 Q6ZU3A_HUMAN   | ENSG000002026140 LOC728229    | ENSG000002026140 LOC728229    | ENSG000002026140 LOC728229      |                       |
|         | ENSG0000020095951 HIVEP1         | ENSG000002100601 ALKBH1       | ENSG000002105968 H2AFV          | ENSG000002106536 POU6F2         | ENSG000002111897 SERINC1        | ENSG000002113812 ACTR8        | ENSG000002114279 FGF12        | ENSG000002118520 ARG1           |                       |
|         | ENSG000002122958 VPS26A          | ENSG000002125037 TMEM111      | ENSG000002125384 PTGER2         | ENSG000002131508 UBE2D2         | ENSG000002133710 SPINK5         | ENSG000002137434 C6orf52      | ENSG000002139969 Q9P1J0_HUMAN | ENSG000002152689 RASGRP3        |                       |
|         | ENSG000002152763 WDR78           | ENSG000002155130 MARCKS       | ENSG000002161036 NP_690852.1    | ENSG000002171362 PNMA2          | ENSG000002176896 TFSM1_HUMAN    | ENSG000002177283 FZD8         | ENSG000002183649 Q8NFX8_HUMAN | ENSG000002197069 Q9H399_HUMAN   |                       |
|         | ENSG000002197121 PGAP1_HUMAN     | ENSG000002197142 ACSL5        | ENSG000002197345 MRPL21         | ENSG000002198890 PRMT6          | ENSG000002024178 TMEM57         | ENSG000002029295 TGM1         | ENSG000002029295 TGM1         | ENSG000002029295 TGM1           |                       |
| TAAACTG | ENSG000002070601 FRMPD1          | ENSG000002075702 WDR62        | ENSG000002077009 ITGB1BP3       | ENSG000002085465 OVGP1          | ENSG000002092295 TGM1           | ENSG000002099204 ABLIM1       | ENSG000002104946 TBC1D17      | ENSG000002105619 TFPT           |                       |
|         | ENSG000002107819 SFXN3           | ENSG000002117362 APH1A        | ENSG000002125818 PSMF1          | ENSG000002126456 IRF3           | ENSG000002130479 MAP1S          | ENSG000002133316 WDR74        | ENSG000002142273 CBLC         | ENSG000002142484 TM4SF5         |                       |
|         | ENSG000002154917 RAB6B           | ENSG000002163913 IFT112       | ENSG000002166435 XRRA1          | ENSG000002169704 GP9            | ENSG000002170858 LILRA4         | ENSG000002171475 WIPF2        | ENSG000002171495 NP_775760.2  | ENSG000002180304 OAZ2           |                       |
|         | ENSG000002184574 GPR22           | ENSG000002185189 NRBP2        | ENSG000002196372 ASB13          | ENSG000002009413 REV3L          | ENSG000002059728 MXD1           | ENSG000002078618 NRD1         | ENSG000002088619 EROL1B       | ENSG000002099219 KIAA1815       |                       |
|         | ENSG000002100596 SPTLC2          | ENSG000002102290 PCDH11X      | ENSG000002102753 KPN3           | ENSG000002104671 CTTN6          | ENSG000002114861 FOXP1          | ENSG000002115548 JMJD1A       | ENSG000002125107 CNOT1        | ENSG000002125823 CSTL1          |                       |
|         | ENSG000002126860 EVI2A           | ENSG000002130962 PRRG1        | ENSG000002134982 APC            | ENSG000002136897 MRPL50         | ENSG000002140043 ZADH1          | ENSG000002146242 TPBG         | ENSG000002155850 SLC26A2      | ENSG000002157445 CACNA2D3       |                       |
|         | ENSG000002164588 HCN1            | ENSG000002167004 PDIA3        | ENSG000002168175 C14orf32       | ENSG000002168952 STXBP6         | ENSG000002171055 FEZ2           | ENSG000002171735 CAMTA1       | ENSG000002180423 C11orf77     | ENSG000002185304 NP_001071638.1 |                       |
|         | ENSG000002187627 RGPD1           | ENSG000002197535 MYO5A        | ENSG000002197535 MYO5A          | ENSG000002197535 MYO5A          | ENSG000002197535 MYO5A          | ENSG000002197535 MYO5A        | ENSG000002197535 MYO5A        | ENSG000002197535 MYO5A          |                       |
| TAAACTT | ENSG000002005100 DHX33           | ENSG000002005513 SOX8         | ENSG0000020070495 JMJD6         | ENSG0000020099954 CECR2         | ENSG00000204228 TRIM35          | ENSG000002108479 GALK1        | ENSG000002108961 NP_057576.2  | ENSG000002114650 SCAP           |                       |
|         | ENSG000002116586 MAP1P_HUMAN     | ENSG000002119686 C14orf58     | ENSG000002123136 DDX39          | ENSG000002126709 IFI6           | ENSG000002128311 TST            | ENSG000002134240 HMGCS2       | ENSG000002134490 C18orf45     | ENSG000002137411 GTF2H4         |                       |
|         | ENSG000002140090 SLC24A4         | ENSG000002145020 AMT          | ENSG000002145819 ARHGAP26       | ENSG000002151376 ME3            | ENSG000002152475 Q96EG3_HUMAN   | ENSG000002157514 TSC22D3      | ENSG000002162438 CTRC         | ENSG000002164651 SP8            |                       |
|         | ENSG000002165731 RET             | ENSG000002167393 PPP2R3B      | ENSG000002173862 Q9NWP0_HUMAN   | ENSG000002180083 WFDC11         | ENSG000002183011 LSMD1          | ENSG000002185651 UBE2L3       | ENSG000002185722 ANKFY1       | ENSG000002186654 ARHGAP12       |                       |
|         | ENSG000002189001 SBSN            | ENSG000002189058 APOD         | ENSG000002197549 Q6ZN90_HUMAN   | ENSG000002024092 NP_001001705.1 | ENSG000002041201 TNRC15         | ENSG000002044438 BAT4         | ENSG00000203987 MTMR7         | ENSG00000205812 FBXL3           |                       |
|         | ENSG000002055813 CCDC85A         | ENSG000002080200 NP_705833.2  | ENSG000002084463 WBP11          | ENSG000002087338 GMCL1          | ENSG000002092345 DAZL           | ENSG000002101278 Q9NQ39_HUMAN | ENSG000002102290 PCDH11X      | ENSG000002102531 FNDC3A         |                       |
|         | ENSG000002108468 CBX1            | ENSG000002115524 SF3B1        | ENSG000002115738 ID2            | ENSG000002116906 GNPAT          | ENSG000002118454 ANKRD13C       | ENSG000002120438 TCP1         | ENSG000002124614 RPS10        | ENSG000002126733 DACH2          |                       |
|         | ENSG000002129480 C14orf126       | ENSG000002129625 REEP5        | ENSG000002136014 UFAP4          | ENSG000002137871 SUH4           | ENSG000002140367 UBE2Q2         | ENSG000002143933 CALM2        | ENSG000002143951 NP_056994.3  | ENSG000002151790 TDO2           |                       |
|         | ENSG000002153822 KCNJ16          | ENSG000002154814 OXNAD1       | ENSG000002162814 SPATA17        | ENSG000002163655 GMP5           | ENSG000002166529 ZSCAN21        | ENSG000002170892 TSEN34       | ENSG000002173926 MARCH3       | ENSG000002175305 CCNE2          |                       |
|         | ENSG000002185652 NTF3            | ENSG000002187191 DAZ3         | ENSG000002188120 DAZ1           | ENSG000002205595 AREG           | ENSG000002205916 DAZ4           | ENSG000002205944 DAZ2         | ENSG000002205944 DAZ2         | ENSG000002205944 DAZ2           |                       |
| TAAAGAA | ENSG000002008382 MPND            | ENSG000002008441 NFIX         | ENSG000002009954 BAZ1B          | EN                              |                                 |                               |                               |                                 |                       |

ENSG00000125977|EIF2S2 ENSG00000128918|ALDH1A2 ENSG00000130811|EIF3S4 ENSG00000131097|HIGD1B ENSG00000136854|STXBP1 ENSG00000136942|RPL35 ENSG00000137460|NP\_203751.2 ENSG00000140400|MAN2C1  
ENSG00000143257|NR1I3 ENSG00000158578|ALAS2 ENSG00000162191|SAKS1\_HUMAN ENSG00000165269|AQP7 ENSG00000166261|ZNF202 ENSG00000166741|NNMT ENSG00000170890|PLA2G1B ENSG00000171540|OTF  
ENSG00000172458|IL17D ENSG00000176248|ANAPC2 ENSG00000189409|MPB23A ENSG00000197364|S100A7L2 ENSG00000197565|COL4A6 ENSG00000205702|CYP2D7P1 ENSG00000110818|HIVEP2 ENSG00000066422|ZBTB11  
ENSG000000087303|ND2 ENSG000000090686|USP48 ENSG00000102069|UBE2NL ENSG00000103310|ZP2 ENSG00000103994|ZFP106 ENSG00000107105|ELAVL2 ENSG00000107937|GTBP4 ENSG00000109323|MANBA  
ENSG00000111605|CPSF6 ENSG00000120693|SMAD9 ENSG00000121207|LRAT ENSG00000122376|XR\_015353.1 ENSG00000124097|HMGL1 ENSG00000134762|DSC3 ENSG00000137269|LRRC1 ENSG00000147548|WHSC1L1  
ENSG00000147601|TRF1 ENSG00000151422|FER ENSG00000153936|HS2ST1 ENSG00000164611|PTTG1 ENSG00000166928|NP\_115986.3 ENSG00000168291|PDHB ENSG00000176399|DMRTA1  
ENSG00000177694|NAALADL2 ENSG00000177889|UBE2N ENSG00000178125|NP\_001013648.1 ENSG00000187098|MITF ENSG00000189277|NP\_997365.2 ENSG00000196409|ZNF658B ENSG00000197147|LRRC8B ENSG00000198416|Z658B\_HUMAN  
ENSG00000198526|PABPCP2 ENSG00000205187|Q6ZSG3\_HUMAN  
TAAAGCC ENSG00000007341|ST7L ENSG00000076662|ICAM3 ENSG00000086506|HBQ1 ENSG00000099338|C19orf15 ENSG00000099797|GPSN2 ENSG00000100053|CRYBB3 ENSG00000100122|CRYBB1 ENSG00000101347|SAMHD1  
ENSG00000103876|FAH ENSG00000106628|POLD2 ENSG00000112062|MAPK14 ENSG00000117448|AKR1A1 ENSG00000129965|INS ENSG00000133246|PRAM1 ENSG00000134184|GSTM1 ENSG00000138942|RNF185  
ENSG00000140990|NDUFB10 ENSG00000143418|LASS2 ENSG00000162571|TTL5 ENSG00000165695|C9orf98 ENSG00000167700|MFSD3 ENSG00000167723|TRPV3 ENSG00000170835|CEL ENSG00000173171|MTX1  
ENSG00000177025|C19orf18 ENSG00000179271|GADD45GIP1 ENSG00000183837|PNMA3 ENSG00000184361|C17orf46 ENSG00000187860|NP\_001017437.1 ENSG00000188076|SCGB1C1 ENSG00000205730|NP\_001030013.1 ENSG0000004961|HCCS  
ENSG0000011465|DCN ENSG00000087074|PPP1R15A ENSG00000092020|PPP2R3C ENSG00000101911|PRPS2 ENSG00000105792|Q8Y89\_HUMAN ENSG00000110060|PUS3 ENSG00000116001|TTA1 ENSG00000125931|CITED1  
ENSG00000135048|TMEM2 ENSG00000135413|LACRT ENSG00000137364|TPMT ENSG00000138675|PGF5 ENSG00000151655|ITIH2 ENSG00000153012|LGI2 ENSG00000159140|SON ENSG00000159658|KIAA0494  
ENSG00000163607|GTPBP8 ENSG00000164209|SLC25A46 ENSG00000165097|AOF1 ENSG00000166796|LDHC ENSG00000168411|RFWD3 ENSG00000168619|ADAM18 ENSG00000169604|ANTXR1 ENSG00000173464|RNASE11  
ENSG00000177465|ACOT4 ENSG00000177600|RPLP2 ENSG00000180777|ANKRD30B ENSG00000183649|Q8NFX8\_HUMAN ENSG00000188177|ZC3H6 ENSG00000188846|RPL14 ENSG00000188868|ZNF563 ENSG00000196208|NP\_683701.2  
ENSG00000197054|ZNF763 ENSG00000204026|Q6ZSD2\_HUMAN ENSG00000205252|Q4GOM6\_HUMAN  
TAAAGCT ENSG00000004838|ZMYND10 ENSG000000011052|NME1 ENSG000000019169|PAROC ENSG00000022277|C20orf43 ENSG00000223902|PLEKH01 ENSG00000226036|TNFRSF6B ENSG00000065057|NTHL1 ENSG00000076706|MCAM  
ENSG000000087191|PSMC5 ENSG00000008882|CPXM1 ENSG000000099821|POLRMT ENSG00000100767|PAPLN ENSG00000105404|RABAC1 ENSG00000106268|NUDT1 ENSG00000106538|RARRES2 ENSG00000107745|CBARA1  
ENSG00000110244|APOA4 ENSG00000114019|AMOTL2 ENSG00000114841|DNAH1 ENSG00000115129|TP53I3 ENSG00000125743|SNRPD2 ENSG00000126091|ST3GAL3 ENSG00000126594|DNASE1 ENSG00000129214|SHBG  
ENSG00000130590|SAMD10 ENSG00000131055|COX4I2 ENSG00000132792|CTNBNB1 ENSG00000134107|BHLHB2 ENSG00000134905|CAR2 ENSG00000141664|ZCHC2 ENSG00000148824|MTG1 ENSG00000154330|PGM5P1  
ENSG00000159352|PSMD4 ENSG00000160917|CPSF4 ENSG00000161265|U2AF1L4 ENSG00000162543|ILKAP ENSG00000163961|RNF168 ENSG00000167701|GCTT ENSG00000169020|ATP5I ENSG00000179921|GPBAR1  
ENSG00000182853|VMO1 ENSG00000183551|RGAG4 ENSG00000183637|C21orf30 ENSG00000186583|SPATC1 ENSG00000186831|KRT17 ENSG00000186832|KRT16 ENSG00000187681|ORM1 ENSG00000189171|S100A13  
ENSG00000196408|NOX1 ENSG00000204154|ORM2 ENSG00000032219|ARID4A ENSG00000051180|RAD51 ENSG00000077254|USP33 ENSG00000109920|FBNP4 ENSG00000115866|DARS ENSG00000117724|CENPF  
ENSG00000119392|GLE1L ENSG00000121031|PRKDC ENSG00000122550|KLHL7 ENSG00000132964|CDK8 ENSG00000133226|SRRM1 ENSG00000141452|C18orf8 ENSG00000145423|SFRP2 ENSG00000145681|HAPLN1  
ENSG00000145908|ZNF300 ENSG00000148834|GSTO1 ENSG00000153923|CLCA3 ENSG00000157500|APPL1 ENSG00000157551|KCNJ15 ENSG00000164070|HSPA4L ENSG00000164122|ASB5 ENSG00000164794|KCNV1  
ENSG00000169612|FAM103A1 ENSG00000171566|PLRG1 ENSG00000179175|C9orf38 ENSG00000179399|GPC5 ENSG00000197006|METTL5 ENSG00000197584|KCNMB2 ENSG00000197584|KCNMB2  
TAAAGGA ENSG0000017621|MAGIX ENSG00000070031|SCT ENSG00000105376|ICAM5 ENSG00000116584|ARHGFP2 ENSG00000117640|FAM54B ENSG00000125409|TEKT3 ENSG00000130598|TNNI2 ENSG00000136715|SAP130  
ENSG00000137133|HINT2 ENSG00000141316|SPACA3 ENSG00000144231|POLR2D ENSG00000148468|C10orf38 ENSG00000149646|C20orf152 ENSG00000149792|MRPL49 ENSG00000159723|AGR1 ENSG00000160318|CLDND2  
ENSG00000164309|CMA5A ENSG00000169218|RSP01 ENSG00000169717|ACTR12 ENSG00000170430|MGMT ENSG00000170613|FAM71B ENSG00000174917|NP\_991330.1 ENSG00000179900|REM2 ENSG00000181029|TRAPP3 ENSG00000186676|EEF1G  
ENSG00000187516|CXorf27 ENSG00000189068|VSTM1 ENSG00000204141|Q6ZVW5\_HUMAN ENSG0000016602|CLCA4 ENSG00000054598|FOXCl ENSG00000067715|SYT1 ENSG00000079950|STX7 ENSG00000090686|USP48  
ENSG00000104723|TUSC3 ENSG00000122026|RPL21 ENSG00000124535|WRNIP1 ENSG00000125823|CSTL1 ENSG00000133110|POSTN ENSG00000134758|RNF138 ENSG00000144401|FAM119A ENSG00000146038|DCDC2  
ENSG00000148483|FAM23A ENSG00000150627|WDR17 ENSG00000153246|PLA2R1 ENSG00000154265|ABCA5 ENSG00000156171|TMEM77 ENSG00000158185|ANKRD36 ENSG00000159063|ALG8 ENSG00000163012|ZSWIM2  
ENSG00000163637|PRICKLE2 ENSG00000163785|RYK ENSG00000165351|FBXO33 ENSG00000165521|EML5 ENSG00000166170|BAG5 ENSG00000176593|Q8N9G5\_HUMAN ENSG00000177620|Q9BSL4\_HUMAN ENSG00000187824|NP\_001004313.1  
ENSG00000189369|GSPT2 ENSG00000196912|AN36B\_HUMAN ENSG00000197372|ZNF675 ENSG00000197958|RPL12 ENSG00000197967|Q86U89\_HUMAN ENSG00000198015|MRPL42 ENSG00000204600|NP\_001004349.1  
TAAAGGT ENSG00000006606|CCL26 ENSG0000010327|STAB1 ENSG00000075886|TUBA3D ENSG00000086848|ALG9 ENSG00000100362|PVALB ENSG00000100376|FAM118A ENSG00000102981|PARD6A ENSG00000104518|GSDMDC1  
ENSG00000105255|FSD1 ENSG00000107874|CUEDC2 ENSG00000109072|VTN ENSG00000112659|PARC\_HUMAN ENSG00000116273|PHF13 ENSG00000126602|TRAP1 ENSG00000128159|TUBGCP6 ENSG00000130147|SH3BP4  
ENSG00000130487|KLHD7C7B ENSG00000130635|COL5A1 ENSG00000131188|PRR7 ENSG00000132446|FTHL17 ENSG00000133460|SLC2A11 ENSG00000139890|REM2 ENSG00000142252|GEMIN7  
ENSG00000142530|NP\_612420.1 ENSG00000148156|ACTL7B ENSG00000053666|XR\_017721.1 ENSG00000155367|PPM1J ENSG00000156885|COX6A2 ENSG00000157110|RBPMS ENSG00000160818|GPATCH4 ENSG00000162078|U773\_HUMAN  
ENSG00000162391|C1orf179 ENSG00000163499|CRYBA2 ENSG00000164334|NP\_877438.2 ENSG00000165821|SALL2 ENSG00000166261|ZNF202 ENSG00000167136|ENDOG ENSG00000167515|TRAPP2L ENSG00000174015|SPERT  
ENSG00000174989|FBXW8 ENSG00000177021|LRRC24 ENSG00000178081|LOC653075 ENSG00000178235|SLITRK1 ENSG00000179523|Q8TAS2\_HUMAN ENSG00000179743|Q8N9F6\_HUMAN ENSG00000179950|NP\_055096.2 ENSG00000184345|IQCF2  
ENSG00000184371|CSF1 ENSG00000188038|NRN1L ENSG00000188532|LOC653125 ENSG00000188626|LOC653720 ENSG00000196118|NP\_001014979.1 ENSG00000198033|TUBA3C ENSG00000198471|RTP2 ENSG00000204197|KIFC1  
ENSG00000205609|Q9BW98\_HUMAN ENSG000000036257|CUL3 ENSG000000065978|YBX1 ENSG000000076321|KLHL20 ENSG00000106823|ECM2 ENSG00000115183|TANC1 ENSG00000115425|PECR  
ENSG00000121039|RDH10 ENSG00000127588|GNG13 ENSG00000129235|TXNL5 ENSG00000130638|ATXN10 ENSG00000133983|SYNJ2BP ENSG00000137727|ARHGAP20 ENSG00000137752|CASP1 ENSG00000137992|DBT  
ENSG00000139239|XR\_017789.1 ENSG00000141655|TNFRSF11A ENSG00000142937|RPS8 ENSG00000144891|AGTR1 ENSG00000151164|RAD9B ENSG00000152078|TMEM56 ENSG00000153989|NUS1 ENSG00000155313|USP25  
ENSG00000166012|SNORA25 ENSG00000168384|HLA-DPA1 ENSG00000168542|COL3A1 ENSG00000170495|Q6ZNE6\_HUMAN ENSG00000170571|EMB ENSG00000174444|RPL4 ENSG00000175390|EIF385 ENSG00000181788|SIAH2



ENSG00000169894|MUC3A ENSG00000173432|SAA1 ENSG00000174939|ASPHD1 ENSG00000180229|NP\_001019853.1 ENSG00000181722|ZBTB20 ENSG00000183579|ZNR3 ENSG00000185608|MRPL40 ENSG00000188859|FAM78B ENSG00000189311|PME1 ENSG00000198369|SPRED2 ENSG00000204303|Q6ZVW4\_HUMAN ENSG00000204681|GABBR1 ENSG00000205015|Q6ZNV2\_HUMAN ENSG00000011426|ANLN ENSG00000042317|SPATA7 ENSG00000062650|WAPAL ENSG00000106299|WASL ENSG00000113240|CLK4 ENSG00000114744|COMM2 ENSG00000115474|KCNJ13 ENSG00000116044|NFE2L2 ENSG00000117010|ZNF684 ENSG00000121214|WWP1 ENSG00000124827|GCM2 ENSG00000128708|HAT1 ENSG00000134343|TMEM16C ENSG00000136146|MED4 ENSG00000136542|GALNT5 ENSG00000137996|RTCD1 ENSG00000138315|OIT3 ENSG00000138413|IDH1 ENSG00000143952|VPS54 ENSG00000151093|OXSM ENSG00000151883|PARP8 ENSG00000161048|NP\_945341.2 ENSG00000166685|COC1 ENSG00000171759|PAH ENSG00000175110|MRPS22 ENSG00000178074|NP\_710156.2 ENSG00000185634|SHC4 ENSG00000188313|PLSCR1 ENSG00000197415|VEPH1 ENSG00000198339|H1ST1H4I ENSG00000204595|DPRXP4 ENSG000000079984|CST7 ENSG000000088038|CNOT3 ENSG000000088812|ATRN ENSG00000096088|PGC ENSG00000101144|BMP7 ENSG00000103196|CRISPLD2 ENSG00000104889|RNASEH2A ENSG00000105723|GSK3A ENSG00000113739|STC2 ENSG00000113889|KNG1 ENSG00000115266|APC2 ENSG00000116032|GRIN3B ENSG00000116667|C1orf21 ENSG00000118058|MLL ENSG00000123154|MORG1\_HUMAN ENSG00000124782|RREB1 ENSG00000132405|TBC1D14 ENSG00000135930|EIF4E2 ENSG00000152669|CCNU ENSG00000162191|SAKS1\_HUMAN ENSG00000162337|LRP5 ENSG00000162511|LAPTM5 ENSG00000168237|NP\_660305.2 ENSG00000172382|PRSS27 ENSG00000174231|PRPF8 ENSG00000178028|DMAP1 ENSG00000183488|AMAC1L3 ENSG00000184602|SNN ENSG00000184787|UBE2G2 ENSG00000204303|Q6ZVW4\_HUMAN ENSG00000005700|IBTK ENSG000000087916|SLC6A14 ENSG000000089009|RPL6 ENSG00000101868|POLA1 ENSG00000109472|CPE ENSG00000112406|HECA ENSG00000113595|TRIM23 ENSG00000115183|TANC1 ENSG00000116754|SFRS11 ENSG00000123297|TSMF ENSG000001125351|UFF3B ENSG00000132356|PRKAA1 ENSG00000135002|RFK ENSG00000135750|KCNK1 ENSG00000137563|GGH ENSG00000141198|TOM1L1 ENSG00000143355|LHX9 ENSG00000143507|DUSP10 ENSG00000143514|TP53BP2 ENSG00000151572|TMEM16D ENSG00000155495|MAGEC1 ENSG00000157107|FCHO2 ENSG00000165533|TTC8 ENSG00000167196|FBXO22 ENSG00000173960|UBXD4 ENSG00000178636|Q8N7N2\_HUMAN ENSG00000182498|RPS18 ENSG00000184626|PCDH9 ENSG00000188610|FAM72B ENSG00000196550|FAM72A ENSG00000198301|SDAD1 ENSG00000203756|C6orf191 ENSG00000204010|IFIT1L ENSG00000205212|NP\_001004306.1 TAAATAG ENSG00000105723|GSK3A ENSG00000113739|STC2 ENSG00000113889|KNG1 ENSG00000115266|APC2 ENSG00000116032|GRIN3B ENSG00000116667|C1orf21 ENSG00000118058|MLL ENSG00000123154|MORG1\_HUMAN ENSG00000124782|RREB1 ENSG00000132405|TBC1D14 ENSG00000135930|EIF4E2 ENSG00000152669|CCNU ENSG00000162191|SAKS1\_HUMAN ENSG00000162337|LRP5 ENSG00000162511|LAPTM5 ENSG00000168237|NP\_660305.2 ENSG00000172382|PRSS27 ENSG00000174231|PRPF8 ENSG00000178028|DMAP1 ENSG00000183488|AMAC1L3 ENSG00000184602|SNN ENSG00000184787|UBE2G2 ENSG00000204303|Q6ZVW4\_HUMAN ENSG00000005700|IBTK ENSG000000087916|SLC6A14 ENSG000000089009|RPL6 ENSG00000101868|POLA1 ENSG00000109472|CPE ENSG00000112406|HECA ENSG00000113595|TRIM23 ENSG00000115183|TANC1 ENSG00000116754|SFRS11 ENSG00000123297|TSMF ENSG000001125351|UFF3B ENSG00000132356|PRKAA1 ENSG00000135002|RFK ENSG00000135750|KCNK1 ENSG00000137563|GGH ENSG00000141198|TOM1L1 ENSG00000143355|LHX9 ENSG00000143507|DUSP10 ENSG00000143514|TP53BP2 ENSG00000151572|TMEM16D ENSG00000155495|MAGEC1 ENSG00000157107|FCHO2 ENSG00000165533|TTC8 ENSG00000167196|FBXO22 ENSG00000173960|UBXD4 ENSG00000178636|Q8N7N2\_HUMAN ENSG00000182498|RPS18 ENSG00000184626|PCDH9 ENSG00000188610|FAM72B ENSG00000196550|FAM72A ENSG00000198301|SDAD1 ENSG00000203756|C6orf191 TAAATAT ENSG00000006194|ZNF263 ENSG00000043591|ADRB1 ENSG000000103510|MYST1 ENSG00000105617|LENG1 ENSG00000106367|AP1S1 ENSG00000108788|MLX ENSG00000114656|KIAA1257 ENSG00000115204|MPV17 ENSG00000125820|NXK2-2 ENSG00000130402|ACTN4 ENSG00000132694|YHRHGF11 ENSG00000141570|CBX8 ENSG00000142700|DMRTA2 ENSG00000142920|ADC ENSG00000143217|PVRL4 ENSG00000150594|ADRA2A ENSG00000151353|TMEM18 ENSG00000164778|EN2 ENSG00000165699|TSC1 ENSG00000167286|CD3D ENSG00000168505|GBX2 ENSG00000169194|IL13 ENSG00000179165|PXT1 ENSG00000183172|C2orf32 ENSG00000185668|POU3F1 ENSG00000186474|KLIK12 ENSG00000188778|ADRB3 ENSG00000196526|AFAP1 ENSG00000197616|MYH6 ENSG00000206634|DBF4 ENSG000000029639|TFB1M ENSG00000036257|CUL3 ENSG00000038274|MAT2B ENSG00000047315|POLR2B ENSG00000066405|CLDN18 ENSG00000069869|NEDD4 ENSG00000083097|DOPEY1 ENSG00000083720|OXCT1 ENSG00000091127|PUS7 ENSG00000105825|TFPI2 ENSG00000108055|SMC3 ENSG00000109471|IL2 ENSG00000112029|FBXO5 ENSG00000116266|STXBP3 ENSG00000116729|GPR177 ENSG00000117335|CD46 ENSG00000120370|SCYL1BP1 ENSG00000121621|KIF18A ENSG00000121749|RREB1 ENSG00000122644|ARL4A ENSG00000126790|C14orf149 ENSG00000129636|ITFG1 ENSG00000133773|CCDC59 ENSG00000135218|CD36 ENSG00000135968|GCC2 ENSG00000136197|C7orf25 ENSG00000136536|MARCKL7 ENSG00000138468|SENP7 ENSG00000138658|C4orf21 ENSG00000139116|K1F21A ENSG00000139973|SYT16 ENSG00000144320|KIAA1715 ENSG00000144868|TMEM108 ENSG00000145777|NP\_149024.1 ENSG00000149507|PLAC1L ENSG00000151304|SRFBP1 ENSG00000154710|KCTD7 ENSG00000159086|C21orf66 ENSG00000161980|POLR3K ENSG00000162627|SNX7 ENSG00000163606|CD200R1 ENSG00000164002|C1orf176 ENSG00000166415|WDR72 ENSG00000168267|PTF1A ENSG00000170381|SEMA3E ENSG00000170681|NP\_001018126.1 ENSG00000171204|TMEM126B ENSG00000172461|FUT9 ENSG00000174928|C3orf33 ENSG00000175487|NP\_076428.2 ENSG00000176635|HORMAD2 ENSG00000177301|KLYA2 ENSG00000179299|NSUN7 ENSG00000186340|THBS2 ENSG00000189127|NP\_001004441.1 ENSG000000196937|FAM3C ENSG00000203964|Q8NG36\_HUMAN TAAATCC ENSG00000005100|DXH3 ENSG000000059122|FLYWCH1 ENSG00000072134|EPN2 ENSG00000087250|MT3 ENSG00000099968|BCL2L13 ENSG00000100985|MMP9 ENSG00000105641|SLC5A5 ENSG00000108671|PSMD11 ENSG00000110628|SLC22A18 ENSG00000112514|CUTA ENSG00000112562|SMOC2 ENSG00000113552|GNPDA1 ENSG00000126457|PRMT1 ENSG00000140400|MAN2C1 ENSG00000148180|GSN ENSG00000153266|FEZF2 ENSG00000154478|GPR26 ENSG00000156575|PRG3 ENSG00000157606|SPAT51 ENSG00000162227|TAF6L ENSG00000162490|C1orf187 ENSG00000163157|TMOD4 ENSG00000166828|SCNN1G ENSG00000167100|SAMD14 ENSG00000169436|COL22A1 ENSG00000169575|VPREB1 ENSG00000170955|PRKCDBP ENSG00000173163|COMM1D ENSG00000187516|CXorf27 ENSG00000196139|AKR1C3 ENSG00000197757|HOXC6 ENSG00000198610|AKR1C4 ENSG00000205039|Q6ZQ55\_HUMAN ENSG00000004961|HCCS ENSG00000068793|CYFP1 ENSG00000078177|N4BP2\_HUMAN ENSG00000100522|GNPNAT1 ENSG00000101166|SLMO2 ENSG00000102098|SCML2 ENSG00000108094|CUL2 ENSG00000112773|FAM46A ENSG00000113494|PRLR ENSG00000117139|JARID1B ENSG00000124789|NUP153 ENSG00000128590|DNAJB9 ENSG00000130826|DKC1 ENSG00000133103|COG6 ENSG00000135655|USP15 ENSG00000135999|EPC2 ENSG00000158125|XDH ENSG00000169679|JUB1 ENSG00000174038|C9orf131 ENSG00000196966|H1ST1H3E ENSG00000198633|Q6PDB4\_HUMAN ENSG00000204272|Q63Z42\_HUMAN ENSG00000103374|NUB1 ENSG00000051523|CYBA ENSG00000059377|TBXA1 ENSG00000065882|TBC1D1 ENSG00000075035|WSDC2 ENSG00000092850|TEKT2 ENSG00000095303|PTGS1 ENSG00000106144|CASP2 ENSG00000111678|C1orf57 ENSG00000115211|EIF2B4 ENSG00000119638|NEK9 ENSG00000124357|NAGK ENSG00000127377|CRYGN ENSG00000130283|GDF1 ENSG00000130288|NDUFA13 ENSG00000131188|PRR7 ENSG00000134339|SAA2 ENSG00000134825|C11orf10 ENSG00000135213|POM121 ENSG00000143512|KIAA1822L ENSG00000144199|FAHD2B ENSG00000151348|EXT2 ENSG00000158874|APOA2 ENSG00000162714|ZNF496 ENSG00000163993|S100P ENSG00000165233|C9orf89 ENSG00000165731|RET ENSG00000167525|NP\_689678.1 ENSG00000168928|CTRB2 ENSG00000173404|INSM1 ENSG00000174989|FBXW8 ENSG00000183682|BMP8A ENSG00000196313|NP\_742017.1 ENSG00000198668|CALM1 ENSG0000020206123|Q5BLP8\_HUMAN ENSG00000051415|AMY1A ENSG00000065150|RANBP5 ENSG00000081237|PTPRC ENSG00000099749|CYorf15A ENSG00000100629|C14orf145 ENSG00000107623|GDF10 ENSG00000111802|TTRAP ENSG00000111880|RNGT7 ENSG00000123689|GOS2 ENSG00000147121|ZNF673 ENSG00000151093|OXSM ENSG00000151151|IPMK ENSG00000151422|FER ENSG00000154889|MPPE1 ENSG00000157576|XR\_018454.1 ENSG00000159167|STC1 ENSG00000162769|FLVC1\_HUMAN ENSG00000163249|CCNYL1 ENSG00000165525|SDCCAG1 ENSG00000166441|RPL27A ENSG00000170037|CNTROB ENSG00000174106|LEMD3 ENSG00000174876|AMY1B ENSG00000181626|DKFp779B1634 ENSG00000182010|PLEKHK1 ENSG00000185972|CCIN ENSG00000196318|AMY2A ENSG00000197279|ZNF165 ENSG00000197839|AMY2B ENSG00000198793|FRA1 ENSG00000205581|HMGN1 ENSG00000205592|Q8N4X1\_HUMAN TAAATGG ENSG00000010319|SEMA3G ENSG00000021300|PLEKH1 ENSG00000083814|ZNF671 ENSG000000084234|APLP2 ENSG00000092067|CEBPE ENSG00000100450|GZMH ENSG00000108829|LRRC59 ENSG00000112164|GLP1R ENSG00000115884|SDC1 ENSG00000121289|CCDC123 ENSG00000125089|SH3T2 ENSG00000125841|NRSN2 ENSG00000128045|RASL11B ENSG00000128203|ASPHD2 ENSG00000141002|TCF25 ENSG00000146007|ZMAT2 ENSG00000151376|ME3 ENSG00000158428|NP\_940961.1 ENSG00000160256|C21orf70 ENSG00000164078|MST1R ENSG00000166813|KIF7 ENSG00000167674|NP\_00101520.1 ENSG00000175315|CST6 ENSG00000176979|TRIM60 ENSG00000178158|Q8N7D3\_HUMAN ENSG00000182660|NP\_001013698.1 ENSG00000184923|FAM22A ENSG00000197037|ZNF498 ENSG00000197471|SPN ENSG00000206190|ATP10A ENSG00000052723|NP\_079349.1 ENSG00000064726|BTBD1 ENSG00000072849|DERL2 ENSG00000087299|L2HGDH ENSG00000105750|ZNF85 ENSG00000106299|WASL ENSG00000108021|C10orf18 ENSG00000109339|MAPK10 ENSG00000115590|LLR2 ENSG00000116030|SUMO1P3 ENSG00000116459|ATP5F1 ENSG00000116560|SFPQ ENSG000001145975|C6orf146 ENSG00000148925|BTBD10 ENSG00000151135|C12orf23 ENSG00000151806|GUF1 ENSG00000154099|LRRC50 ENSG00000155592|ZKSCAN2 ENSG00000163053|SLC16A14 ENSG00000164211|STARD4 ENSG00000165588|OTX2 ENSG00000170677|SOCS6 ENSG00000170873|MTSS1 ENSG00000174796|THAP6 ENSG00000177483|NP\_001073973.1 ENSG00000179175|C9orf38 ENSG00000181392|C19orf46 ENSG00000183023|SLC8A1 ENSG00000186222|CNO ENSG00000197791|Q6ZUR4\_HUMAN ENSG00000204524|ZNF805 ENSG00000011021|CLCN6 ENSG00000102076|OPN1LW ENSG00000103855|CD276 ENSG00000106733|PCOLCE ENSG00000122694|C9orf19 ENSG00000123349|PFDN5 ENSG00000125810|CD93 ENSG00000125977|EIF2S2 ENSG00000130950|FAM22F ENSG00000131148|COX4NB ENSG00000131504|DIAPH1 ENSG00000147380|OPN1MW ENSG00000159231|CBR3 ENSG00000164266|SPINK1 ENSG00000166016|ABTB2 ENSG00000166160|OPN1MW2 ENSG00000167261|DPEP2 ENSG00000169084|ZBED1 ENSG00000169885|CALML6 ENSG00000170779|CDCA4 ENSG00000170983|C8orf14 ENSG00000171540|OTP ENSG00000173093|CCDC63 ENSG00000175130|MARCKSL1 ENSG00000177384|Q8N746\_HUMAN ENSG00000179407|DNAJB8 ENSG00000180992|MRPL14 ENSG00000182013|NP\_060685.2 ENSG00000182646|TMEM29 ENSG00000183778|B3GALT5 ENSG00000183955|SETD8 ENSG00000185897|FFAR3 ENSG00000198851|CD3E ENSG00000204459|Q6ZU55\_HUMAN ENSG000000007168|PAFAH1B1 ENSG00000101704|HFE ENSG000000016490|CLCA1 ENSG00000067369|TP53BP1 ENSG00000075292|ZNF638 ENSG00000089335|ZNF302 ENSG00000191039|OSBP18 ENSG00000105398|SULT2A1 ENSG00000108654|DDX5 ENSG00000109255|NMMU ENSG00000110422|HIPK3 ENSG00000112237|CCNC ENSG00000112852|PCDH2 ENSG00000112983|BRD8 ENSG00000120327|PCDHB14 ENSG00000127989|MTFRF ENSG00000130234|ACE2 ENSG00000135336|ORC3L ENSG00000137504|CREBZF ENSG00000138778|CENPE ENSG00000139675|NP\_001011724.1 ENSG00000143337|TOR1AIP1 ENSG00000144460|Q96NL12\_HUMAN ENSG00000145703|IQGAP2 ENSG00000147231|CXorf57 ENSG00000147642|SYBU\_HUMAN ENSG00000148677|ANKRD1 ENSG00000152428|MARS2 ENSG00000153487|ING1 ENSG00000157212|PAXIP1 ENSG00000163071|SPATA18 ENSG00000164209|SLC25A46 ENSG00000170312|CDC2 ENSG00000171791|BCL2 ENSG00000172716|SLFN11 ENSG00000173467|AGR3 ENSG00000174437|ATP2A2 ENSG00000180998|GPR137C ENSG00000188732|C7orf46 ENSG00000196646|ZNF136 ENSG00000197620|CX04A\_HUMAN ENSG00000198185|ZNF334 ENSG00000198919|DZIP3\_HUMAN ENSG00000204789|ZNF204 ENSG00000205221|VIT TAAATTA ENSG00000062485|CS ENSG00000087088|BAX ENSG00000105738|SIPA1L3 ENSG00000106789|CORO2A ENSG00000108106|UBE2S ENSG00000108375|SUPT4H1 ENSG00000115844|DLX2 ENSG00000121281|ADCY7 ENSG00000134825|C11orf10 ENSG00000135930|EIF4E2 ENSG00000143816|WNT9A ENSG00000148826|NKX6-2 ENSG00000158805|ZNF276 ENSG00000158864|NDUFS2 ENSG00000163331|NP\_001017920.1 ENSG00000164062|APEH ENSG00000166578|IQCD ENSG00000168658|NP\_659429.4 ENSG00000169627|BOLA2B ENSG00000170485|NPAS2 ENSG00000197296|C2orf142 ENSG00000204425|Q6ZP74\_HUMAN ENSG00000205711|Q6ZV92\_HUMAN ENSG00000080371|RAB21 ENSG00000081307|UBE1DC1 ENSG00000081818|PCDHB4 ENSG00000095951|HIVEP1 ENSG00000102218|RP2 ENSG00000107984|DKK1 ENSG00000109163|GNRHR ENSG00000112992|NNT ENSG00000114686|MRPL3 ENSG00000120159|C9orf82 ENSG00000122068|FYTTD1 ENSG00000123268|ATF1 ENSG00000124370|MCEE ENSG00000124802|EEF1E1 ENSG00000126790|C14orf149 ENSG00000127083|OMD ENSG00000132855|ANGPTL3 ENSG00000134259|NGF8 ENSG00000134371|CDC73 ENSG00000137558|PI15 ENSG00000137955|RABGGTB ENSG00000138777|PPA2 ENSG00000143631|FLG ENSG00000151131|C12orf45 ENSG00000153575|TUBGCP5 ENSG00000154079|C6orf57 ENSG00000156136|DKC ENSG00000157212|PAXIP1 ENSG00000162980|ARL5A ENSG00000163328|GPR155 ENSG00000163618|CADPS ENSG00000170264|NP\_115556.1 ENSG00000170502|NUDT9 ENSG00000170647|TMEM133 ENSG00000170759|KIF5B ENSG00000185056|Q569G3\_HUMAN ENSG00000185652|NTF3 ENSG00000203726|C1orf99 ENSG00000070495|JMJD6 ENSG00000100335|SMCR7L ENSG00000105011|ASF1B ENSG00000105254|TBCB ENSG00000114982|TBCB ENSG00000115042|FAHD2A ENSG00000118526|TCF21 ENSG00000120332|TNN ENSG00000120451|SNX19 ENSG00000136695|LL1F5 ENSG00000142186|SOX1 ENSG00000149292|TTC12 ENSG00000152315|KCNK13 ENSG00000163885|CCDC37 ENSG00000165644|COMTD1 ENSG00000166578|IQCD ENSG00000166965|RCCD1 ENSG00000170271|C5orf4 ENSG00000170310|STX8 ENSG00000173402|DAG1 ENSG00000173867|MRPL46 ENSG00000175329|ISX ENSG00000175756|AURKAP1 ENSG00000178802|MPI ENSG00000179335|CLK3 ENSG00000189037|DUSP21 ENSG00000198832|SELM\_HUMAN ENSG00000204228|HSD17B8 ENSG00000211454|ARK74\_HUMAN ENSG00000003096|KLHL13 ENSG00000005471|ABCB4 ENSG00000077063|CTTNBP2 ENSG00000077458|FAM76B ENSG00000078579|FGF20 ENSG00000102908|NFAT5 ENSG00000104472|CHRAC1 ENSG00000107566|CHUK ENSG00000112972|HMGC51 ENSG00000115520|COQ10B ENSG00000115866|DARS ENSG00000116717|GADD45A ENSG00000117598|NP\_001010861.1 ENSG0000011024092|CTCF1 ENSG00000138709|LARP2 ENSG00000144366|GULP1 ENSG00000146242|TPBG ENSG00000155545|MIER3 ENSG00000156709|AIFM1 ENSG00000165028|NIPSNAP3B ENSG00000166363|OR10A5 ENSG00000167165|UGT1A1 ENSG00000168538|NP\_068761.4 ENSG00000173376|C4orf31 ENSG00000174132|TMEM157 ENSG00000174748|RPL15 ENSG00000175857|C5orf29 ENSG00000187889|C1orf168 ENSG00000196715|VKORC1L1 ENSG00000198755|RPL10A TAAATTT ENSG00000092964|DPYS12 ENSG00000106927|AMBP ENSG00000115275|GCS1\_HUMAN ENSG00000116809|ZBTB17 ENSG00000129925|TMEM8 ENSG00000130508|PXDND ENSG00000134247|PTGFRN ENSG00000136928|GABBR2 ENSG00000143374|TARS2 ENSG00000144504|ANKMY1 ENSG00000149226|INTS4 ENSG00000158470|B4GALT5 ENSG00000164012|WDR65 ENSG00000164885|CDK5 ENSG00000164916|FOXK1 ENSG00000165271|NOL6 ENSG00000166086|JAM3 ENSG00000166900|STX3 ENSG00000173261|GAS1 ENSG00000180447|GAS1 ENSG00000184451|CCR10 ENSG00000184650|ODF4 ENSG00000185619|PCGF3 ENSG00000187686|XR\_016979.1 ENSG00000204248|COL11A2 ENSG00000008988|RPS20 ENSG00000025156|HSF2 ENSG00000035681|NSMAF ENSG00000054598|FOXK1 ENSG00000065548|ZC3H15 ENSG00000084093|REST ENSG00000088298|EDEM2 ENSG00000101844|ATG4A ENSG00000104290|FZD3 ENSG00000105372|RPS19 ENSG00000108510|THRAP1 ENSG00000119396|RAB14 ENSG00000125033|ENY2 ENSG00000124172|ATP5E ENSG00000124217|MOCS3 ENSG00000140057|AK7 ENSG00000146151|HMGLL1 ENSG00000148154|UCGC ENSG00000154589|LY96 ENSG00000154589|LY96 ENSG00000154589|LY96 ENSG00000154589|LY96 ENSG0000015

ENSG00000132467|SAS10\_HUMAN ENSG00000133226|SRRM1 ENSG00000133639|BTG1 ENSG00000133773|CCDC59 ENSG00000134001|EIF2S1 ENSG00000135090|TAOK3 ENSG00000135914|HTR2B ENSG00000137965|IFI44  
ENSG00000143155|TIPRL ENSG00000144061|NPHP1 ENSG00000144228|SPOPL\_HUMAN ENSG00000145780|FEM1C ENSG00000146469|VIP ENSG00000147883|CDKN2B ENSG00000152484|USP12 ENSG00000154262|ABCA6  
ENSG00000162368|CMPK ENSG00000162670|FAM5C ENSG00000162687|KCNT2 ENSG00000164796|IL8 ENSG00000169427|CRAP2 ENSG00000169905|TOR1AIP2 ENSG00000170759|KIF5B  
ENSG00000170836|PMP1D ENSG00000172209|GPR22 ENSG00000173083|HPST2 ENSG00000177453|NIM1\_HUMAN ENSG00000177853|ZNF518 ENSG00000179119|SPY2D1 ENSG00000180336|NP\_001028831.1 ENSG00000181449|SOX2  
ENSG00000182141|ZNF708 ENSG00000182805|RFPL4B ENSG00000186834|HEXIM1 ENSG00000188153|COL4A5 ENSG00000196233|LCOR ENSG00000197851|NP\_997386.1 ENSG00000205212|NP\_001004306.1 ENSG00000205905|Q6ZWC6\_HUMAN

TAACAAT ENSG00000092529|CAPN3 ENSG00000104386|XR\_017860.1 ENSG00000107562|CXCL12 ENSG00000110375|UPK2 ENSG00000113070|HBEGF ENSG00000122863|CHST3 ENSG00000154764|WNT7A ENSG00000155363|MOV10  
ENSG00000160208|RRP1B ENSG00000161929|NP\_996986.1 ENSG00000166016|ABTB2 ENSG00000166123|GPT2 ENSG00000166167|BTRC ENSG00000167641|PPP1R14A ENSG00000176340|COX8A ENSG00000178585|CTNNBIP1  
ENSG00000185722|ANKFY1 ENSG00000186207|LCE5A ENSG00000081870|C1orf41 ENSG00000085514|PILRA ENSG00000087303|NID2 ENSG00000092199|HNRPC ENSG00000104343|UBE2W ENSG00000104728|ARHGEF10  
ENSG00000112365|ZBTB24 ENSG00000112773|FAM46A ENSG00000127314|RAP1B ENSG00000131732|ZCCHC9 ENSG00000144566|RAB5A ENSG00000146842|NP\_116231.2 ENSG00000154007|ASB17 ENSG00000157500|APPL1  
ENSG00000158411|MITD1 ENSG00000163946|C3orf63 ENSG00000168036|CTNNB1 ENSG00000168172|HOOK3 ENSG00000170584|NUDC2 ENSG00000170873|MTSS1 ENSG00000172716|SLFN11 ENSG00000172900|XR\_017872.1  
ENSG00000174405|LIG4 ENSG00000176276|hCG\_1757335 ENSG00000176542|KIAA2018 ENSG00000181322|TXNDC6 ENSG00000182944|EWSR1 ENSG00000184500|PROS1 ENSG00000187185|Q86VG7\_HUMAN ENSG00000205874|Q6SA06\_HUMAN

TAACACT ENSG00000018625|ATP1A2 ENSG00000087365|SF3B2 ENSG00000089057|SLC23A2 ENSG00000102802|C13orf33 ENSG00000104386|XR\_017860.1 ENSG00000118017|A4GNT ENSG00000129450|SIGLEC9 ENSG00000130035|GALNT8  
ENSG00000130649|CYP2E1 ENSG00000132405|TBC1D14 ENSG00000132773|TOE1 ENSG00000150201|FXYP4 ENSG00000153956|CACNA2D1 ENSG00000163394|CCKAR ENSG00000166220|C10orf27 ENSG00000167394|ZNF668  
ENSG00000167634|NLRP7 ENSG00000170430|MGMT ENSG00000173914|RBM4B ENSG00000186825|Q580R0-2 ENSG00000186994|ANKRD47 ENSG00000187091|PLCD1 ENSG00000204499|Q6P6C6\_HUMAN ENSG00000054983|GALC  
ENSG00000064012|CASP8 ENSG00000106540|C7orf36 ENSG00000106799|TGFBR1 ENSG00000113742|CPEB4 ENSG00000120699|EXOSC8 ENSG00000131795|REMB8A ENSG00000134644|PUM1 ENSG00000154655|L3MBTL4  
ENSG00000158467|SAHH3\_HUMAN ENSG00000163254|CRYGC ENSG00000164754|RAD21 ENSG00000166068|SPRED1 ENSG00000167332|OR51E2 ENSG00000171451|DSEL ENSG00000183542|KLRC4 ENSG00000185551|NR2F2  
ENSG00000187068|NP\_001020437.1 ENSG00000198468|Q8TAF5\_HUMAN ENSG00000205269|Q5T4T1\_HUMAN

TAACAGT ENSG00000006282|SPATA20 ENSG00000008256|PSCD3 ENSG00000011590|ZBTB32 ENSG00000037637|FBXO42 ENSG00000099956|SMARCB1 ENSG00000100266|PACSIN2 ENSG00000102230|PCYT1B ENSG00000111252|SH2B3  
ENSG00000116984|MTR ENSG00000117480|FAAH ENSG00000136378|ADAMTS7 ENSG00000137656|BUD13 ENSG00000141577|AZI1 ENSG00000147100|SLC16A2 ENSG00000147118|ZNF182 ENSG00000151079|KCNB6  
ENSG00000160710|ADAR ENSG00000162511|LAPTM5 ENSG00000168795|ZBTB5 ENSG00000177791|MYO21 ENSG00000179133|HIST1H2BM ENSG00000205193|Q6ZTC6\_HUMAN ENSG00000211454|ARK74\_HUMAN  
ENSG00000050130|C14orf100 ENSG00000092108|SCFD1 ENSG00000101856|PGRMC1 ENSG00000107566|CHUK ENSG00000111860|C6orf204 ENSG00000128641|MYO1B ENSG00000132334|PTPRE ENSG00000135250|SRPK2  
ENSG00000137770|CTDPSL2 ENSG00000137860|SLC28A2 ENSG00000147416|ATP6V1B2 ENSG00000150753|CCT5 ENSG00000162614|NEXN ENSG00000164291|ARSK ENSG00000169045|HNRPH1 ENSG00000172901|LAEVR\_HUMAN  
ENSG00000177398|ASB8 ENSG00000178033|FAM26E ENSG00000180398|MCFD2 ENSG000002023916|HFMI ENSG000002023916|HFMI  
ENSG00000004487|AOF2 ENSG000000011177|INMT ENSG000000073605|GSDML ENSG00000103044|HAS3 ENSG00000105290|ALP1 ENSG00000105383|CD33 ENSG00000113119|TMC06 ENSG00000119715|ESRRB  
ENSG00000124571|XP05 ENSG00000124678|TCP11 ENSG00000130305|INSUN5 ENSG00000153956|CACNA2D1 ENSG00000156030|C14orf43 ENSG00000156486|KCN2S ENSG00000165478|HEPACAM ENSG00000166133|RPUSD2  
ENSG00000167074|TEF ENSG00000174165|ZDHC24 ENSG00000180279|Q8N4W5\_HUMAN ENSG00000181830|SLC35C1 ENSG00000185651|UBE2L3 ENSG00000188385|C10orf39 ENSG00000196747|HIST1H3H ENSG00000198183|PLUNC  
ENSG00000198915|RASGEF1A ENSG00000206580|AP4M1 ENSG000000089818|NECAP1 ENSG00000095564|BTAFA1 ENSG00000102805|CLN5 ENSG00000107186|MPDZ ENSG00000112541|PDE10A  
ENSG00000137473|TTC29 ENSG00000138081|FBXO11 ENSG00000143226|FCGR2A ENSG00000145740|SLC30A5 ENSG00000147649|MTDH ENSG00000154001|PP2R5E ENSG00000158458|NRG2 ENSG00000165525|SDCCAG1  
ENSG00000167283|ATP5L ENSG00000167332|OR51E2 ENSG00000169504|CLIC4 ENSG00000169714|CNBP ENSG00000170027|YWHAG ENSG00000170948|MBD3L1 ENSG00000183753|BPY2C ENSG00000183795|VCY2\_HUMAN  
ENSG00000185894|VCY2\_HUMAN ENSG00000188408|MAGEB5 ENSG00000197140|ADAM32 ENSG00000198814|GK ENSG00000205413|SAMD9

TAACATT ENSG00000005100|DHX33 ENSG00000033011|ALG1 ENSG000000059377|TBXA51 ENSG00000065882|TBC1D1 ENSG00000070413|DGCRC2 ENSG00000074211|PPP2R2C ENSG00000077348|EXOSC5 ENSG00000086848|ALG9  
ENSG00000101079|NDRG3 ENSG00000105501|SIGLEC5 ENSG00000111254|AKAP3 ENSG00000132514|CLEC10A ENSG00000136378|ADAMTS7 ENSG00000141580|WDR45L ENSG00000147536|GINS4 ENSG00000154767|XPC  
ENSG00000155849|ELM01 ENSG00000156486|KCN2S2 ENSG00000157933|SKI ENSG00000158402|CD25C ENSG00000161132|Q9BYA7\_HUMAN ENSG00000162076|NP\_612448.1 ENSG00000165175|MID1IP1 ENSG00000167800|TBX10  
ENSG00000167858|TEKT1 ENSG00000167862|ICT1 ENSG00000176809|LRRC37A3 ENSG00000183530|C22orf30 ENSG00000185436|IL28RA ENSG00000186318|BACE1 ENSG00000204558|Q9BYX6\_HUMAN ENSG00000006128|TAC1  
ENSG00000061455|PRDM6 ENSG00000075651|PLD1 ENSG00000106809|OGN ENSG00000115665|SLC5A7 ENSG00000117758|STX12 ENSG00000119878|CRIP1 ENSG00000126777|KTN1 ENSG00000129003|VPS13C  
ENSG00000135905|DOCK10 ENSG00000136051|KIAA1033 ENSG00000137872|SEMA6D ENSG00000138758|SEPT11 ENSG00000143353|LYPLAL1 ENSG00000143970|ASXL2 ENSG00000144802|NFKBIZ ENSG00000151881|C5orf28  
ENSG00000152689|RASGRP3 ENSG00000154263|ABCA10 ENSG00000154654|NCAM2 ENSG00000164093|PITX2 ENSG00000164188|RANBP3L ENSG00000164902|RNUXA ENSG00000167283|ATP5L ENSG00000168216|LMBRD1  
ENSG00000171806|C1orf156 ENSG00000174010|KLHL15 ENSG00000182977|Q9P1I1\_HUMAN ENSG00000198542|ITGBL1 ENSG00000198692|EIF1AY

TAACCAA ENSG00000055070|C1orf144 ENSG00000100448|CTSG ENSG00000101425|BPI ENSG00000102119|EMD ENSG00000108774|RAB5C ENSG00000115561|VPS24 ENSG00000116198|KIAA0562 ENSG00000129744|ART1  
ENSG00000132470|ITGB4 ENSG00000134107|BHLHB2 ENSG00000136193|SCRN1 ENSG00000136367|ZFHX2 ENSG00000139714|MORN3 ENSG00000148844|KIAA1754 ENSG00000149397|HMBS ENSG00000149679|CABLES2  
ENSG00000150477|KIAA1328 ENSG00000159189|C1QC ENSG00000165140|FBN1 ENSG00000167815|PRDX2 ENSG00000168795|ZBTB5 ENSG00000170485|NPAS2 ENSG00000179168|GGN ENSG00000182117|NOLA3  
ENSG00000188257|PLA2G2A ENSG00000196979|NP\_997392.1 ENSG00000198131|ZNF544 ENSG00000198369|SPRED2 ENSG00000205980|Q6ZU05\_HUMAN ENSG00000060138|CSDA ENSG00000069869|NEDD4 ENSG00000082397|EPB41L3  
ENSG00000102158|IAG2\_HUMAN ENSG00000110756|HPS5 ENSG00000118733|OLFM3 ENSG00000129586|ZBED5 ENSG00000136888|BAAT ENSG00000145708|CRHBP ENSG00000148459|PDSS1 ENSG00000151917|C6orf65  
ENSG00000153130|SCOC ENSG00000155906|RMRND1 ENSG00000169031|COL4A3 ENSG00000169248|CXCL11 ENSG00000169604|ANTXR1 ENSG00000170160|Q6ZU25\_HUMAN ENSG00000172243|PLECTA ENSG00000172845|SP3

TAACCTA ENSG00000006923|STAG3 ENSG00000067082|KLF6 ENSG00000068903|SIRT2 ENSG00000105369|CD79A ENSG00000107815|PEO1 ENSG00000107874|CUEDC2 ENSG00000122121|XPNPEP2 ENSG00000125046|C3orf32  
ENSG00000135424|ITGA7 ENSG00000136859|ANGPTL2 ENSG00000142669|SH3BGR3L3 ENSG00000147127|RAB41 ENSG00000158423|RIBC1 ENSG00000160113|NR2F6 ENSG00000161960|EIF4A1 ENSG00000163263|C1orf189  
ENSG00000167550|RHEBL1 ENSG00000169098|CXorf2 ENSG00000171621|SPSB1 ENSG00000174529|TMEM81 ENSG00000176783|RUFY1 ENSG00000182372|C8orf61 ENSG00000184908|CLCNKB ENSG00000186510|CLCNKA  
ENSG00000203782|LOR ENSG00000009790|TRAF3IP3 ENSG00000031691|CENPO ENSG00000066739|C14orf103 ENSG00000102144|PGK1 ENSG00000104205|SGK3 ENSG000001108094|CUL2 ENSG00000109586|GALNT7  
ENSG00000120210|INSL6 ENSG00000120837|NFYB ENSG00000127922|SHFM1 ENSG00000131941|RHPN2 ENSG00000132646|PCNA ENSG00000136541|KIAA1189 ENSG00000139496|NUPL1 ENSG00000144061|NPHP1  
ENSG00000145321|GC ENSG00000163788|SNRK ENSG00000168619|ADAM18 ENSG00000170180|GYPA ENSG00000173214|KIAA1919 ENSG00000175483|Q94914\_HUMAN ENSG00000176714|CCDC121 ENSG00000182521|TBPL2  
ENSG00000182957|SPATA13 ENSG00000186393|KRT26 ENSG00000186579|DEFB106B ENSG00000187082|D106A\_HUMAN ENSG00000198964|SGMS1

TAACCTC ENSG00000033100|CHGU7\_HUMAN ENSG00000077009|ITGB1BP3 ENSG000000804731|KIF3C ENSG00000089234|BRAP ENSG00000101146|RAE1 ENSG00000105339|DENND3 ENSG00000107562|CXCL12 ENSG00000112658|SRF  
ENSG00000116990|MYCL1 ENSG00000117362|APH1A ENSG00000154768|C17orf50 ENSG00000155506|LARP1 ENSG00000160916|ATP56|ATP56 ENSG00000173210|ABLIM3 ENSG00000180999|C1orf105 ENSG00000183255|PTTG1IP  
ENSG00000186118|Q6PEX7\_HUMAN ENSG00000186470|BTN3A2 ENSG00000203744|ALL170\_HUMAN ENSG00000204544|C6orf205 ENSG00000204620|Q6ZPC8\_HUMAN ENSG0000025796|SEC63 ENSG0000034677|RNF19 ENSG00000080822|CLDN1  
ENSG00000091409|ITGA6 ENSG00000101624|CEP76 ENSG00000104237|RP1 ENSG00000112276|BVES ENSG00000128829|EIF2AK4 ENSG00000134827|TCN1 ENSG00000135299|ANKRD6 ENSG00000135476|ESPL1  
ENSG00000150593|PCDC4 ENSG00000164175|SLC45A2 ENSG00000164284|GRFEL2 ENSG00000169667|MAP3K2 ENSG00000171970|ZNF57 ENSG00000173915|USMG5 ENSG00000176018|LYSMD3 ENSG00000176331|C8orf59  
ENSG00000177981|ASB8 ENSG00000183801|OLFML1 ENSG00000187510|NP\_001004330.1 ENSG00000196735|HLA-DQA1 ENSG00000198408|MGEA5 ENSG00000198770|Q9H396\_HUMAN ENSG00000198961|PJA2 ENSG00000203925|LOC647839

TAACCTG ENSG00000010256|UQCRC1 ENSG00000047644|WWC3 ENSG00000100100|PIK3IP1 ENSG00000105605|CACNG7 ENSG00000124233|SEMG1 ENSG00000146535|GNA12 ENSG00000149474|CSRFP2BP ENSG00000160688|FLAD1  
ENSG00000162444|RBP7 ENSG00000162734|PEA15 ENSG00000163486|SRGAP2 ENSG00000172724|CCL19 ENSG00000174282|ZBTB74 ENSG00000179241|LDLRAD3 ENSG00000184345|IQCF2 ENSG00000196431|CRYBA4  
ENSG00000198290|KIAA0753 ENSG00000080493|SLC7A14 ENSG00000080493|SLC7A14 ENSG00000083750|RRAGB ENSG00000112232|KHDRS2 ENSG00000116176|TPSG1 ENSG00000124783|SSR1  
ENSG00000128059|PPAT ENSG00000137976|DNASE2B ENSG00000138483|CCDC54 ENSG00000139973|SYT16 ENSG00000147649|MTDH ENSG00000158290|CUL4B ENSG00000164172|MOCS2 ENSG00000166197|NOLC1  
ENSG00000169224|C1orf150 ENSG00000169688|MT1B ENSG00000174106|LEMD3 ENSG00000176635|HORMAD2 ENSG00000184937|WT1 ENSG00000187109|NAP1L1 ENSG00000196458|ZNF605 ENSG00000197453|NP\_001001706.1

TAACGAC ENSG00000100216|TOMM22 ENSG00000105066|FIZ1 ENSG00000108774|RAB5C ENSG00000111181|SLC6A12 ENSG00000115641|FHL2 ENSG00000120471|NP\_071395.1 ENSG00000122861|PLAU ENSG00000127585|FBXL16  
ENSG00000133398|MED10 ENSG00000134014|ELP3 ENSG00000134871|COL4A2 ENSG00000136699|SMPD4 ENSG00000142319|SLC6A3 ENSG00000142634|EFHD2 ENSG00000152117|Q6ZWB7\_HUMAN ENSG00000163067|ZNF2  
ENSG00000165801|NP\_060541.3 ENSG00000168242|HIST1H2BI ENSG00000168993|NM\_006651.3 ENSG00000168994|C6orf145 ENSG00000170484|KRT74 ENSG00000177066|Q8NCU6\_HUMAN ENSG00000177741|Q96BN7\_HUMAN ENSG00000177764|ZCCHC3  
ENSG00000181274|FRAT2 ENSG00000182534|MKRA7 ENSG00000198012|XR\_017841.1 ENSG00000198518|HIST1H4E ENSG00000198746|GPATCH3 ENSG000002016082|ISL1 ENSG000002023697|DERA ENSG00000061794|MRPS35  
ENSG00000102554|KLF5 ENSG00000110675|ELMOD1 ENSG00000113790|EHHADH ENSG00000116991|SIPA1L2 ENSG00000126261|SAE2 ENSG00000128641|MYO1B ENSG00000139330|KERA ENSG00000144026|ZNF514  
ENSG00000144407|PTHR2 ENSG00000152207|CYSLTR2 ENSG00000152766|ANKRD22 ENSG00000155324|GRAMD3 ENSG00000163281|GNPDA2 ENSG00000164418|GRIK2 ENSG00000165061|ZMAT4 ENSG00000166292|TMEM100  
ENSG00000166527|CLEC4D ENSG00000166750|SLFN5 ENSG00000172465|TCEAL1 ENSG00000175029|CTBP2 ENSG00000177077|PVRL3 ENSG00000180745|CLRN3 ENSG00000188085|NP\_997320.1 ENSG00000197195|CHURC1  
ENSG00000198398|NP\_997199.1

TAACGCG ENSG00000070770|CSNK2A2 ENSG00000078902|TOLLIP ENSG00000102230|PCYT1B ENSG00000102445|C13orf18 ENSG00000122180|MYO6 ENSG00000123064|DDX54 ENSG00000125872|C20orf75 ENSG00000134287|ARF3  
ENSG00000135835|KIAA1614 ENSG00000148288|GBG1 ENSG00000146388|SLC29A4 ENSG00000167994|RAB3IL1 ENSG00000179743|Q8N9F6\_HUMAN ENSG00000196106|Q8WZ26\_HUMAN ENSG00000196557|CACNA1H ENSG00000198768|APCDD1L  
ENSG00000071537|SEL1L ENSG00000083520|DIS3 ENSG00000122692|SMU1 ENSG00000146938|NLGN4X ENSG00000167193|CRK ENSG00000186340|THBS2 ENSG00000204954|Q69YU5\_HUMAN

TAACGTC ENSG00000071051|NCK2 ENSG00000072062|PRKACA ENSG00000072952|MRV1 ENSG00000091181|IL5RA ENSG00000100401|RANGAP1 ENSG00000101474|C20orf3 ENSG00000122375|OPN4 ENSG00000126561|STAT5A  
ENSG00000129757|CDKN1C ENSG00000130775|C1orf38 ENSG00000134201|GSTM5 ENSG00000137496|I18BP\_HUMAN ENSG00000137825|ITPKA ENSG00000140931|CMTM3 ENSG00000159123|DMRTC\_HUMAN ENSG00000162396|PARS2  
ENSG00000167578|MIA ENSG00000168818|STX18 ENSG00000174353|NP\_061864.2 ENSG00000174576|NPAS4 ENSG00000180598|NP\_057296.1 ENSG00000183632|NP\_057296.1 ENSG00000184911|CXorf50 ENSG00000186837|C21orf119  
ENSG00000188883|KLRG2 ENSG00000196331|HIST1H2BO ENSG00000205456|NP\_057296.1 ENSG00000205457|NP\_057296.1 ENSG00000002016|RAD52 ENSG000000037749|MFAP3 ENSG00000075413|MARK3 ENSG00000077327|SPAG6  
ENSG00000126216|TUBGCP3 ENSG00000134046|MBD2 ENSG00000136044|APPL2 ENSG00000137947|GTF2B ENSG000001447854|UHRF2 ENSG00000149231|CCDC82 ENSG00000163249|CCNYL1  
ENSG00000165899|C12orf64 ENSG00000165985|C1QL3 ENSG00000166803|KIAA0101 ENSG00000174010|KLHL15 ENSG00000182050|MGAT4C ENSG00000186417|GLDN ENSG00000187581|COX8C ENSG00000189299|FOXR2  
ENSG00000196243|C12orf37 ENSG00000197846|HIST1H2BF ENSG00000197919|IFNA1 ENSG00000205156|Q6XUQ8\_HUMAN

TAACGTG ENSG00000019485|PRDM11 ENSG00000067225|PKM2 ENSG00000090316|MAEA ENSG00000092421|SEMA6A ENSG00000101474|C20orf3 ENSG00000103485|QPRT ENSG00000105755|ETHE1 ENSG00000107438|PDLIM1  
ENSG00000162213|WDR8 ENSG00000128346|C22orf23 ENSG00000131061|ZNF341 ENSG00000134291|TMEM106C ENSG00000140443|IGF1R ENSG00000140521|POLG ENSG00000143632|ACTA1 ENSG00000157020|SEC13  
ENSG00000160299|PWP2 ENSG00000161179|NP\_001017964.1 ENSG00000167173|C15orf39 ENSG00000173153|ESRRA ENSG00000176444|CLK2 ENSG00000179820|MYADM ENSG00000180806|HOXC9  
ENSG00000183528|QOVAF8\_HUMAN ENSG00000183678|CTAG1A ENSG00000184009|ACTG1 ENSG00000184033|CTAG1B ENSG00000184743|NP\_056274.3 ENSG00000185085|INTS5 ENSG00000185963|BICD2 ENSG00000198174|Q8N9P1\_HUMAN  
ENSG00000198466|ZNF587 ENSG00000204183|GDF50S ENSG00000205033|Q96DJ9\_HUMAN ENSG00000087842|PIR ENSG00000113532|ST8SIA4 ENSG00000113594|LIFR ENSG00000116721|PRAMEF1 ENSG00000135521|LTV1  
ENSG00000145965|C6orf50 ENSG00000146147|C6orf142 ENSG00000150712|MTMR12 ENSG00000170266|GLB1 ENSG00000171877|FRMD5 ENSG00000180745|CLRN3 ENSG00000187753|C9orf153

|                              |                                |                              |                                |                              |                              |                              |                             |
|------------------------------|--------------------------------|------------------------------|--------------------------------|------------------------------|------------------------------|------------------------------|-----------------------------|
| ENSG00000187969 ZCCHC13      | ENSG00000196071 OR2L13         | ENSG00000198646 NCOA6        | ENSG00000198765 SYCP1          | ENSG00000128203 ASPHD2       | ENSG00000128242 GAL3ST1      | ENSG00000143369 ECM1         | ENSG00000145819 ARHGAP26    |
| ENSG00000065308 TRAM2        | ENSG00000117461 PIK3R3         | ENSG00000125971 DYNLRB1      | ENSG00000126233 SLURP1         | ENSG00000167985 C11orf79     | ENSG00000168002 POLR2G       | ENSG00000168878 SFTPB        | ENSG00000169253 SNAP23      |
| ENSG00000159708 LRRC36       | ENSG00000174171 Q8TCB4_HUMAN   | ENSG00000180900 SCRIB        | ENSG00000183605 SFXN4          | ENSG00000138640 FAM13A1      | ENSG00000138755 CXCL9        | ENSG00000152932 RAB3C        | ENSG00000161036 NP_690852.1 |
| ENSG00000101981 F9           | ENSG00000117500 TMED5          | ENSG00000135045 C9orf40      | ENSG00000138640 FAM13A1        | ENSG00000168032 ENTPD3       | ENSG00000170967 DDI1         | ENSG00000174501 NP_079466.2  | ENSG00000175305 CCNE2       |
| ENSG00000164188 RANBP3L      | ENSG00000164985 PSIP1          | ENSG00000167196 FBXO22       | ENSG00000168032 ENTPD3         | ENSG00000109992 TBC1D10A     | ENSG00000100997 ABHD12       | ENSG000001103343 ZNF174      | ENSG000001125816 NKX2-4     |
| ENSG00000186908 ZDHC17       | ENSG00000198846 TOX            | ENSG00000204010 IFIT1L       | ENSG00000109992 TBC1D10A       | ENSG00000136710 CCDC115      | ENSG00000139648 KRT71        | ENSG00000140031 P1768_HUMAN  | ENSG00000140835 CHST4       |
| ENSG00000073861 TBX21        | ENSG00000087157 PGS1           | ENSG00000099284 H2AFY2       | ENSG00000109992 TBC1D10A       | ENSG00000136710 CCDC115      | ENSG00000139648 KRT71        | ENSG00000140031 P1768_HUMAN  | ENSG00000140835 CHST4       |
| ENSG00000136068 FLNB         | ENSG00000136710 CCDC115        | ENSG00000139648 KRT71        | ENSG00000109992 TBC1D10A       | ENSG000001161921 CXCL16      | ENSG00000163803 PLT1         | ENSG00000167985 C11orf79     | ENSG00000168002 POLR2G      |
| ENSG00000161583 TBC1D3G      | ENSG00000161921 CXCL16         | ENSG00000163803 PLT1         | ENSG00000167985 C11orf79       | ENSG00000177066 Q8NCU6_HUMAN | ENSG00000178188 SH2B1        | ENSG00000183399 Q7L8T7_HUMAN | ENSG00000186081 KRT5        |
| ENSG00000175718 CXorf55      | ENSG00000177066 Q8NCU6_HUMAN   | ENSG00000178188 SH2B1        | ENSG00000183399 Q7L8T7_HUMAN   | ENSG00000198668 CALM1        | ENSG00000101888 NXT2         | ENSG00000102158 IAG2_HUMAN   | ENSG00000104313 EYA1        |
| ENSG00000198125 MB           | ENSG00000137033 IL33           | ENSG00000145362 ANK2         | ENSG00000102158 IAG2_HUMAN     | ENSG00000196704 AMZ2_HUMAN   | ENSG00000198105 ZNF248       | ENSG00000198142 ANKRD57      | ENSG00000198142 ANKRD57     |
| ENSG00000131795 RBM8A        | ENSG00000163006 NP_659415.1    | ENSG00000163539 CLASP2       | ENSG00000165185 KIAA1958       | ENSG00000166441 RPL27A       | ENSG00000168681 Q9H762_HUMAN | ENSG00000172361 CCDC11       | ENSG00000179456 ZNF238      |
| ENSG00000163006 NP_659415.1  | ENSG00000163539 CLASP2         | ENSG00000165185 KIAA1958     | ENSG00000166441 RPL27A         | ENSG00000196704 AMZ2_HUMAN   | ENSG00000198105 ZNF248       | ENSG00000198142 ANKRD57      | ENSG00000198142 ANKRD57     |
| ENSG00000196549 MME          | ENSG00000077070 CSNK2A2        | ENSG00000072736 NFATC3       | ENSG00000079999 KEAP1          | ENSG00000072736 NFATC3       | ENSG00000079999 KEAP1        | ENSG00000124140 SLC12A5      | ENSG00000125998 FAM83C      |
| ENSG00000070770 CSNK2A2      | ENSG00000072736 NFATC3         | ENSG00000079999 KEAP1        | ENSG00000105227 PRX            | ENSG00000153179 RASSF3       | ENSG00000157303 SUSD3        | ENSG00000160298 C21orf58     | ENSG00000166136 NDUF88      |
| ENSG00000138780 GSTCD        | ENSG00000141867 BRD4           | ENSG00000153179 RASSF3       | ENSG00000105227 PRX            | ENSG00000153179 RASSF3       | ENSG00000157303 SUSD3        | ENSG00000160298 C21orf58     | ENSG00000166136 NDUF88      |
| ENSG00000172014 CCDC29       | ENSG00000173786 CNP            | ENSG00000180900 SCRIB        | ENSG00000153179 RASSF3         | ENSG00000171954 NP_775754.1  | ENSG00000177762 C5orf27      | ENSG00000177971 IMP3         | ENSG00000186051 TAL2        |
| ENSG00000065809 FAM107B      | ENSG00000122008 POLK           | ENSG00000140093 SERPINA10    | ENSG00000140093 SERPINA10      | ENSG00000171954 NP_775754.1  | ENSG00000177762 C5orf27      | ENSG00000177971 IMP3         | ENSG00000186051 TAL2        |
| ENSG00000181744 C3orf58      | ENSG00000185038 Q8IUR1_HUMAN   | ENSG00000196812 ZSCAN16      | ENSG00000205810 KLRC3          | ENSG00000140093 SERPINA10    | ENSG00000150627 WDR17        | ENSG00000150753 CCT5         | ENSG00000157005 SST         |
| ENSG0000005075 POLR2J        | ENSG00000051596 THOC3          | ENSG00000088826 SMOX         | ENSG00000093010 COMT           | ENSG00000196812 ZSCAN16      | ENSG00000205810 KLRC3        | ENSG00000100083 GGA1         | ENSG00000106089 STX1A       |
| ENSG00000126883 NUP214       | ENSG00000128645 HOXD1          | ENSG00000130558 OLFM1        | ENSG00000133937 GSC            | ENSG00000196812 ZSCAN16      | ENSG00000205810 KLRC3        | ENSG00000100083 GGA1         | ENSG00000106089 STX1A       |
| ENSG00000170089 THOC3        | ENSG00000171161 ZNF672         | ENSG00000171954 NP_775754.1  | ENSG00000133937 GSC            | ENSG00000196812 ZSCAN16      | ENSG00000205810 KLRC3        | ENSG00000100083 GGA1         | ENSG00000106089 STX1A       |
| ENSG00000205531 NAP1L4       | ENSG00000205711 Q6ZV92_HUMAN   | ENSG00000001630 CYP51A1      | ENSG00000112588 MBTD1          | ENSG00000196812 ZSCAN16      | ENSG00000205810 KLRC3        | ENSG00000100083 GGA1         | ENSG00000106089 STX1A       |
| ENSG00000111275 ALDH2        | ENSG00000111716 LDHB           | ENSG00000117519 CNN3         | ENSG00000141434 MEP1B          | ENSG00000196812 ZSCAN16      | ENSG00000205810 KLRC3        | ENSG00000100083 GGA1         | ENSG00000106089 STX1A       |
| ENSG00000164512 ANKRD55      | ENSG00000169752 NRG4           | ENSG00000175183 CSRFP2       | ENSG00000141434 MEP1B          | ENSG00000196812 ZSCAN16      | ENSG00000205810 KLRC3        | ENSG00000100083 GGA1         | ENSG00000106089 STX1A       |
| ENSG00000197646 PDCD1LG2     | ENSG00000198339 HIST1H4I       | ENSG00000198339 HIST1H4I     | ENSG00000141434 MEP1B          | ENSG00000196812 ZSCAN16      | ENSG00000205810 KLRC3        | ENSG00000100083 GGA1         | ENSG00000106089 STX1A       |
| ENSG00000001461 NPAL3        | ENSG00000066117 SMARCD1        | ENSG00000082805 ERC1         | ENSG00000105501 SIGLEC5        | ENSG00000196812 ZSCAN16      | ENSG00000205810 KLRC3        | ENSG00000100083 GGA1         | ENSG00000106089 STX1A       |
| ENSG00000154319 C8orf13      | ENSG00000155367 PPM1J          | ENSG00000157103 SLC6A1       | ENSG00000162078 U773_HUMAN     | ENSG00000196812 ZSCAN16      | ENSG00000205810 KLRC3        | ENSG00000100083 GGA1         | ENSG00000106089 STX1A       |
| ENSG00000175202 HIGDC2BP     | ENSG00000178343 NP_001073974.1 | ENSG00000088440 MLR5_HUMAN   | ENSG00000162078 U773_HUMAN     | ENSG00000196812 ZSCAN16      | ENSG00000205810 KLRC3        | ENSG00000100083 GGA1         | ENSG00000106089 STX1A       |
| ENSG00000083168 MYST3        | ENSG00000083635 NUFIP1         | ENSG00000088440 MLR5_HUMAN   | ENSG00000162078 U773_HUMAN     | ENSG00000196812 ZSCAN16      | ENSG00000205810 KLRC3        | ENSG00000100083 GGA1         | ENSG00000106089 STX1A       |
| ENSG00000124201 ZNF1X        | ENSG00000128915 NARG2          | ENSG00000130638 ATXN10       | ENSG00000132718 SYT11          | ENSG00000196812 ZSCAN16      | ENSG00000205810 KLRC3        | ENSG00000100083 GGA1         | ENSG00000106089 STX1A       |
| ENSG00000144228 SPOPL_HUMAN  | ENSG00000149345 U2D3L_HUMAN    | ENSG00000151729 SLC25A4      | ENSG00000163492 NP_775919.2    | ENSG00000196812 ZSCAN16      | ENSG00000205810 KLRC3        | ENSG00000100083 GGA1         | ENSG00000106089 STX1A       |
| ENSG00000188039 NWD1         | ENSG00000189403 HMG81          | ENSG00000196886 Q8NAW3_HUMAN | ENSG00000203668 CHML           | ENSG00000196812 ZSCAN16      | ENSG00000205810 KLRC3        | ENSG00000100083 GGA1         | ENSG00000106089 STX1A       |
| ENSG00000006015 C19orf60     | ENSG00000071246 VASH1          | ENSG00000072506 HSD17B10     | ENSG00000100330 MTMR3          | ENSG00000196812 ZSCAN16      | ENSG00000205810 KLRC3        | ENSG00000100083 GGA1         | ENSG00000106089 STX1A       |
| ENSG00000130830 MEP1         | ENSG00000136448 NMT1           | ENSG00000151062 CACNA2D4     | ENSG00000155087 ODF1           | ENSG00000196812 ZSCAN16      | ENSG00000205810 KLRC3        | ENSG00000100083 GGA1         | ENSG00000106089 STX1A       |
| ENSG00000004948 CALCR        | ENSG00000102021 LUZP4          | ENSG00000106809 OGN          | ENSG00000107159 CA9            | ENSG00000196812 ZSCAN16      | ENSG00000205810 KLRC3        | ENSG00000100083 GGA1         | ENSG00000106089 STX1A       |
| ENSG00000113296 THBS4        | ENSG00000114857 NKTR           | ENSG00000120963 ZNF706       | ENSG00000121089 NACA3P         | ENSG00000196812 ZSCAN16      | ENSG00000205810 KLRC3        | ENSG00000100083 GGA1         | ENSG00000106089 STX1A       |
| ENSG00000143552 NUP210L      | ENSG00000144824 PLCXD2         | ENSG00000155313 ZNF25        | ENSG00000155893 ACPL2          | ENSG00000196812 ZSCAN16      | ENSG00000205810 KLRC3        | ENSG00000100083 GGA1         | ENSG00000106089 STX1A       |
| ENSG00000196531 NACA         | ENSG00000063854 HAGH           | ENSG00000106268 NUDT1        | ENSG00000119714 GPR68          | ENSG00000196812 ZSCAN16      | ENSG00000205810 KLRC3        | ENSG00000100083 GGA1         | ENSG00000106089 STX1A       |
| ENSG0000011007 TCEB3         | ENSG00000167615 LENG8          | ENSG00000168014 NP_056346.2  | ENSG00000169230 PRELID1        | ENSG00000196812 ZSCAN16      | ENSG00000205810 KLRC3        | ENSG00000100083 GGA1         | ENSG00000106089 STX1A       |
| ENSG00000163882 POLR2H       | ENSG00000198570 RD3            | ENSG00000054803 CBLN4        | ENSG00000081019 RSBN1          | ENSG00000196812 ZSCAN16      | ENSG00000205810 KLRC3        | ENSG00000100083 GGA1         | ENSG00000106089 STX1A       |
| ENSG00000196935 SRGAP1       | ENSG00000111780 L5E2_HUMAN     | ENSG00000121594 CD80         | ENSG00000124098 C20orf108      | ENSG00000196812 ZSCAN16      | ENSG00000205810 KLRC3        | ENSG00000100083 GGA1         | ENSG00000106089 STX1A       |
| ENSG00000109756 RAPGEF2      | ENSG00000144713 RPL32          | ENSG00000154736 ADAMTS5      | ENSG00000155329 ZCCHC10        | ENSG00000196812 ZSCAN16      | ENSG00000205810 KLRC3        | ENSG00000100083 GGA1         | ENSG00000106089 STX1A       |
| ENSG00000144214 LYG1_HUMAN   | ENSG00000180113 TDRD6          | ENSG00000180772 AGTR2        | ENSG00000196270 Q6ZWE7_HUMAN   | ENSG00000196812 ZSCAN16      | ENSG00000205810 KLRC3        | ENSG00000100083 GGA1         | ENSG00000106089 STX1A       |
| ENSG00000171320 ESCO2        | ENSG00000203847 XR_016130.1    | ENSG00000082641 NFE2L1       | ENSG00000092529 CAPN3          | ENSG00000196812 ZSCAN16      | ENSG00000205810 KLRC3        | ENSG00000100083 GGA1         | ENSG00000106089 STX1A       |
| ENSG000000203847 XR_016130.1 | ENSG00000082641 NFE2L1         | ENSG00000092529 CAPN3        | ENSG00000100290 BIK            | ENSG00000196812 ZSCAN16      | ENSG00000205810 KLRC3        | ENSG00000100083 GGA1         | ENSG00000106089 STX1A       |
| ENSG00000018625 ATP1A2       | ENSG00000171119 NRTN           | ENSG00000178235 SLITRK1      | ENSG00000183495 EP400          | ENSG00000196812 ZSCAN16      | ENSG00000205810 KLRC3        | ENSG00000100083 GGA1         | ENSG00000106089 STX1A       |
| ENSG00000171119 NRTN         | ENSG00000124171 PARD6B         | ENSG00000125703 ATG4C        | ENSG00000125944 HNRPR          | ENSG00000196812 ZSCAN16      | ENSG00000205810 KLRC3        | ENSG00000100083 GGA1         | ENSG00000106089 STX1A       |
| ENSG00000119396 RAB14        | ENSG00000138180 CEP55          | ENSG00000148481 C10orf97     | ENSG00000160131 NP_001017980.1 | ENSG00000196812 ZSCAN16      | ENSG00000205810 KLRC3        | ENSG00000100083 GGA1         | ENSG00000106089 STX1A       |
| ENSG00000136044 APPL2        | ENSG00000180458 Q8N3U1_HUMAN   | ENSG00000181467 RAP2B        | ENSG00000187109 NAP1L1         | ENSG00000196812 ZSCAN16      | ENSG00000205810 KLRC3        | ENSG00000100083 GGA1         | ENSG00000106089 STX1A       |
| ENSG00000171792 C12orf32     | ENSG00000064886 CHI3L2         | ENSG00000065882 TBC1D1       | ENSG00000072501 SMC1A          | ENSG00000196812 ZSCAN16      | ENSG00000205810 KLRC3        | ENSG00000100083 GGA1         | ENSG00000106089 STX1A       |
| ENSG00000013455 ARPC1A       | ENSG00000116198 KIAA0562       | ENSG00000116661 FBXO2        | ENSG00000116663 FBXO6          | ENSG00000196812 ZSCAN16      | ENSG00000205810 KLRC3        | ENSG00000100083 GGA1         | ENSG00000106089 STX1A       |
| ENSG00000111775 COX6A1       | ENSG00000149243 NP_001034637.1 | ENSG00000162981 FAM84A       | ENSG00000166165 CKB            | ENSG00000196812 ZSCAN16      | ENSG00000205810 KLRC3        | ENSG00000100083 GGA1         | ENSG00000106089 STX1A       |
| ENSG00000143632 ACTA1        | ENSG00000058063 ATP11B         | ENSG00000074803 SLC12A1      | ENSG00000081770 NAIP           | ENSG00000196812 ZSCAN16      | ENSG00000205810 KLRC3        | ENSG00000100083 GGA1         | ENSG00000106089 STX1A       |
| ENSG00000006652 IFRD1        | ENSG00000107863 ARHGAP21       | ENSG00000111707 SUDS3        | ENSG00000113525 IL5            | ENSG00000196812 ZSCAN16      | ENSG00000205810 KLRC3        | ENSG00000100083 GGA1         | ENSG00000106089 STX1A       |
| ENSG00000101544 C6orf508     | ENSG00000151715 TMEM45B        | ENSG00000163376 KBTBD8       | ENSG00000165209 STRBP          | ENSG00000196812 ZSCAN16      | ENSG00000205810 KLRC3        | ENSG00000100083 GGA1         | ENSG00000106089 STX1A       |
| ENSG00000135720 DYNCL1L2     | ENSG00000179978 Q59G16_HUMAN   | ENSG00000185015 CA13         | ENSG00000205604 Q6ZUP5_HUMAN   | ENSG00000196812 ZSCAN16      | ENSG00000205810 KLRC3        | ENSG00000100083 GGA1         | ENSG00000106089 STX1A       |
| ENSG00000179978 Q59G16_HUMAN | ENSG00000073888 FGF4           | ENSG00000100084 HIRA         | ENSG00000100591 AHS1           | ENSG00000196812 ZSCAN16      | ENSG00000205810 KLRC3        | ENSG00000100083 GGA1         | ENSG00000106089 STX1A       |
| ENSG000000007384 RHBDP1      | ENSG00000137875 BCL2L10        | ENSG00000138696 BMPR1B       | ENSG00000145949 SGK85_HUMAN    | ENSG00000196812 ZSCAN16      | ENSG00000205810 KLRC3        | ENSG00000100083 GGA1         | ENSG00000106089 STX1A       |
| ENSG00000128594 LRRC4        | ENSG00000162344 FGF19          | ENSG00000162779 C1orf125     | ENSG00000166689 PLEKHA7        | ENSG00000196812 ZSCAN16      | ENSG00000205810 KLRC3        | ENSG00000100083 GGA1         | ENSG00000106089 STX1A       |
| ENSG00000158161 EYA3         | ENSG00000204564 C6orf130       | ENSG00000205878 Q6ZSV2_HUMAN | ENSG00000218261 CPS1           | ENSG00000196812 ZSCAN16      | ENSG00000205810 KLRC3        | ENSG00000100083 GGA1         | ENSG00000106089 STX1A       |
| ENSG00000184454 C1orf130     | ENSG00000130962 PRRG1          | ENSG00000131003 RBM12FP      | ENSG00000134548 C12orf39       | ENSG00000196812 ZSCAN16      | ENSG00000205810 KLRC3        | ENSG00000100083 GGA1         | ENSG00000106089 STX1A       |
| ENSG00000119953 SMNDC1       | ENSG00000149084 HSD17B12       | ENSG00000150276 XR_017783.1  | ENSG00000162852 C1orf71        | ENSG00000196812 ZSCAN16      | ENSG00000205810 KLRC3        | ENSG00000100083 GGA1         | ENSG00000106089 STX1A       |
| ENSG00000146963 LUC7L2       | ENSG00000053702 NRIP2          | ENSG00000063244 U2AF2        | ENSG00000107719 KIAA1274       | ENSG00000196812 ZSCAN16      | ENSG00000205810 KLRC3        | ENSG00000100083 GGA1         | ENSG00000106089 STX1A       |
| ENSG00000006453 BAIAP2L1     | ENSG00000122121 XPNPEP2        | ENSG00000124593 C6orf49      | ENSG00000131944 C19orf40       | ENSG00000196812 ZSCAN16      | ENSG00000205810 KLRC3        | ENSG00000100083 GGA1         | ENSG00000106089 STX1A       |
| ENSG0000016128 BCL9          | ENSG00000171223 JUNB           | ENSG0000017                  |                                |                              |                              |                              |                             |



|                              |                                |                                |                                |                                |                                |                                |                              |
|------------------------------|--------------------------------|--------------------------------|--------------------------------|--------------------------------|--------------------------------|--------------------------------|------------------------------|
| ENSG00000120686 UFM1         | ENSG00000122008 POLK           | ENSG00000134183 GNAT2          | ENSG00000134440 NARS           | ENSG00000136051 KIAA1033       | ENSG00000137558 PI15           | ENSG00000152795 HNRPD          | ENSG00000154007 ASB17        |
| ENSG00000155970 EHPA2        | ENSG00000164848 KIAA1913       | ENSG00000166004 KIAA1731       | ENSG00000166454 K0431_HUMAN    | ENSG00000169064 NM_024687.2    | ENSG00000173915 USMG5          | ENSG00000178691 SUZ12          |                              |
| TAAGTTG                      | ENSG00000141349 G6PC3          | ENSG00000156486 KNS2           | ENSG00000160208 RRP1B          | ENSG00000167641 PPP1R14A       | ENSG00000182660 NP_001013698.1 | ENSG00000188706 ZDHC9          | ENSG00000189339 SLC35E2      |
| ENSG00000198700 IPO9         | ENSG00000204252 HLA-DOA        | ENSG00000204414 CSHL1          | ENSG00000011258 MBT1           | ENSG00000060718 COL11A1        | ENSG00000090530 LEPREL1        | ENSG00000100934 SEC23A         | ENSG00000105866 SP4          |
| ENSG00000108924 HLF          | ENSG00000112146 FBXO9          | ENSG00000112378 PERP           | ENSG00000113810 SMC4           | ENSG00000119729 RHOQ           | ENSG00000133641 C12orf29       | ENSG00000140941 MAP1LC3B       | ENSG00000143653 SCCPDH       |
| ENSG00000145331 RG9MTD2      | ENSG00000149084 HSD17B12       | ENSG00000152022 LXL1           | ENSG00000152484 USP12          | ENSG00000154479 Q6PJF6_HUMAN   | ENSG00000166923 GREM1          | ENSG00000170899 GSTA4          | ENSG00000175073 VCP1P1       |
| ENSG00000178184 PARD6G       | ENSG00000186522 SEPT10         | ENSG00000198729 PPP1R14C       |                                |                                |                                |                                |                              |
| TAATAAC                      | ENSG00000174054 CLASP1         | ENSG00000100299 ARSA           | ENSG00000101445 PPF1R16B       | ENSG00000112320 SOBP           | ENSG00000124731 TREM1          | ENSG00000130812 ANGPTL6        | ENSG00000136463 CCDC44       |
| ENSG00000153298 C6orf54      | ENSG00000163823 CCR1           | ENSG00000168389 MFSD2          | ENSG00000170145 SNF1LK2        | ENSG00000197548 ATG7           | ENSG00000197893 NRAP           | ENSG00000198700 IPO9           | ENSG00000203945 Q5JQP1_HUMAN |
| ENSG00000205801 Q6ZTI5_HUMAN | ENSG00000205917 Q6ZTF1_HUMAN   | ENSG00000205917 Q6ZTF1_HUMAN   | ENSG00000205920 Q6ZTF1_HUMAN   | ENSG000002028203 VEZT          | ENSG00000102908 NFAT5          | ENSG00000103569 AQP9           | ENSG00000111832 RWDD1        |
| ENSG00000133983 SYNJ2BP      | ENSG00000134759 ELP2           | ENSG00000138448 ITGAV          | ENSG00000138829 FBN2           | ENSG00000139921 TXNDC1         | ENSG00000140043 ZADH1          | ENSG00000140836 ATBF1          | ENSG00000143995 MEIS1        |
| ENSG00000144566 RAB5A        | ENSG00000154719 MRPL39         | ENSG00000155115 C6orf51        | ENSG00000156035 PRUNE2         | ENSG00000169684 CHRNA5         | ENSG00000172915 NBEA           | ENSG00000175336 APOF           | ENSG00000197045 GMFB         |
| TAATAAT                      | ENSG00000003147 ICA1           | ENSG00000012061 ERCC1          | ENSG00000059378 PARP12         | ENSG00000087077 TRIP6          | ENSG00000096088 PGC            | ENSG00000100099 HPS4           | ENSG00000101346 POFUT1       |
| ENSG00000122965 RBM19        | ENSG00000126882 FAM78A         | ENSG00000147119 CHST7          | ENSG00000167744 NTF5           | ENSG00000172183 ISG20          | ENSG00000173545 ZNF622         | ENSG00000174231 PRPF8          | ENSG00000177408 PLAC2        |
| ENSG00000185684 EP400NL      | ENSG00000187942 LDLRAD2        | ENSG00000188042 ARL4C          | ENSG00000189069 NP_001013732.1 | ENSG00000189663 C6orf89        | ENSG00000204369 Q6ZUP0_HUMAN   | ENSG00000205015 Q6ZNV2_HUMAN   | ENSG00000206053 HN1L         |
| ENSG00000023909 GCLM         | ENSG00000037965 HOXC8          | ENSG00000070190 DAPP1          | ENSG00000085491 SLC25A24       | ENSG00000091137 SLC26A4        | ENSG00000101190 TCFL5          | ENSG00000103540 CE110_HUMAN    | ENSG00000106031 HOXA13       |
| ENSG00000112874 NUDT12       | ENSG00000114757 PEX5L          | ENSG00000117594 HSD11B1        | ENSG000000121749 TBC1D15       | ENSG00000129566 TEP1           | ENSG00000130348 QRSK1          | ENSG00000133116 KL             | ENSG00000144840 RABL3        |
| ENSG00000151304 SRFBP1       | ENSG00000152078 TMEM56         | ENSG00000155307 SAMS1N         | ENSG00000156172 C8orf37        | ENSG00000164022 SCY1           | ENSG00000164291 ARSL           | ENSG00000167014 C15orf43       | ENSG00000168234 C18orf17     |
| ENSG00000169684 CHRNA5       | ENSG00000170962 PDGFD          | ENSG00000171714 TMEM16E        | ENSG00000175879 HOXD8          | ENSG00000177576 NP_001030177.1 | ENSG00000177888 ZBTB41         | ENSG00000181656 GPR88          | ENSG00000182621 PLCB1        |
| ENSG00000185015 CA13         | ENSG00000185056 Q569G3_HUMAN   | ENSG00000186231 KLHL32         | ENSG00000188732 C7orf46        | ENSG00000196141 NP_056350.1    | ENSG00000197737 Q9H393_HUMAN   | ENSG00000204272 Q63Z42_HUMAN   |                              |
| TAATATA                      | perfect: TAATAAT ATTATTA       | hsa-miR-126* cATTATTA          | ENSG00000007237 GAS7           | ENSG00000011132 APBA3          | ENSG00000011177 INMT           | ENSG000000073792 IGF2BP2       | ENSG00000086015 MAST2        |
| ENSG00000113273 ARSB         | ENSG00000116198 KIAA0562       | ENSG00000123358 NR4A1          | ENSG00000124766 SOX4           | ENSG00000125409 TEKT3          | ENSG00000125746 EML2           | ENSG00000135503 ACVR1B         | ENSG00000137198 GMPR         |
| ENSG00000143850 PLEKHA6      | ENSG00000152104 PTPN14         | ENSG00000158869 FCER1G         | ENSG00000160191 PDE9A          | ENSG00000168575 SLC20A2        | ENSG00000178209 PLEC1          | ENSG00000179388 EGR3           | ENSG00000186594 NP_116284.2  |
| ENSG00000197971 MBP          | ENSG00000067646 ZFY            | ENSG00000086061 DNAJA1         | ENSG00000102893 PHKB           | ENSG00000106392 C1GALT1        | ENSG00000111537 IFNG           | ENSG00000112116 LL17F          | ENSG00000117593 DARS2        |
| ENSG00000118849 RARRS1       | ENSG00000120729 MYOT           | ENSG00000122008 POLK           | ENSG00000123219 CENPK          | ENSG00000126249 PDCD2L         | ENSG00000126524 SBD5           | ENSG00000133808 MICALCL        | ENSG00000135298 BAI3         |
| ENSG00000135338 C6orf152     | ENSG00000137558 PI15           | ENSG00000138035 PNPT1          | ENSG00000139155 SLCO1C1        | ENSG00000139946 PELI2          | ENSG00000142197 DOPEY2         | ENSG00000143815 LBR            | ENSG00000146918 NCAPG        |
| ENSG00000150789 PTS          | ENSG00000156076 WIF1           | ENSG00000164746 Q9NEG2_HUMAN   | ENSG00000165525 SDCCAG1        | ENSG00000168497 SDPR           | ENSG00000168917 TMEM22         | ENSG00000169379 ARL13B         | ENSG00000172399 MYO22        |
| ENSG00000173141 MRP63        | ENSG00000174501 NP_079466.2    | ENSG00000174799 CEP135         | ENSG00000176160 HSF5           | ENSG00000177324 CXorf20        | ENSG00000180116 C12orf40       | ENSG00000180287 PLD5           | ENSG00000185088 RPS27L       |
| ENSG00000187151 ANGPTL5      | ENSG00000188596 C12orf63       | ENSG00000196865 NHLRC2         | ENSG00000197860 SGTB           | ENSG00000198818 SFT2D1         | ENSG00000204987 Q6ZN80_HUMAN   |                                |                              |
| TAATATT                      | ENSG00000003137 CYP26B1        | ENSG00000009335 UBE3C          | ENSG00000048342 Q9H8A7_HUMAN   | ENSG00000072134 EPN2           | ENSG00000084636 COL16A1        | ENSG00000100351 GRAP2          | ENSG00000102921 N4BP1_HUMAN  |
| ENSG00000103064 SLC7A6       | ENSG00000105549 THEG           | ENSG00000106366 SERPINE1       | ENSG00000112715 VEGFA          | ENSG00000114013 CD86           | ENSG00000114650 SCAP           | ENSG00000131899 LLGL1          | ENSG00000137331 IER3         |
| ENSG00000141034 C17orf39     | ENSG00000163155 LYSDM1         | ENSG00000164651 SP8            | ENSG00000168924 LETM1          | ENSG00000175538 KCNK3          | ENSG00000176515 Q9NAX6_HUMAN   | ENSG00000047365 CENTD1         | ENSG00000066697 TMEFF1       |
| ENSG00000095002 MSH2         | ENSG00000101888 NXT2           | ENSG00000103769 RAB11A         | ENSG00000107679 PLEKHA1        | ENSG00000113595 TRIM23         | ENSG00000116830 TTF2           | ENSG00000123728 RAP2C          | ENSG00000132670 PTPRA        |
| ENSG00000133135 RNFL128      | ENSG00000137449 CPEB2          | ENSG00000143756 FBXO28         | ENSG00000146809 ASB15          | ENSG00000147573 TRIM55         | ENSG00000148634 HERC4          | ENSG00000152601 MBNL1          | ENSG00000153207 AHCTF1       |
| ENSG00000154305 MTA3         | ENSG00000154429 C1orf96        | ENSG00000154760 SLFN13         | ENSG00000155313 USP25          | ENSG00000156968 MPV17L         | ENSG00000163638 ADAMTS9        | ENSG00000164066 INTU           | ENSG00000164176 EDIL3        |
| ENSG00000165169 DYNLT3       | ENSG00000167842 MIS12          | ENSG00000168615 ADAM9          | ENSG00000169621 C2orf13        | ENSG00000170734 POLH           | ENSG00000170775 GPR37          | ENSG00000171310 CHST11         | ENSG00000178053 MLF1         |
| ENSG00000180116 C12orf40     | ENSG00000181449 SOX2           | ENSG00000183878 UTY            | ENSG00000185129 PURA           | ENSG00000186700 Q9N6F3_HUMAN   | ENSG00000188313 PLSCR1         | ENSG00000196233 LCOR           | ENSG00000196344 ADH7         |
| TAATCAA                      | ENSG00000099282 TSPAN15        | ENSG00000100979 PLTP           | ENSG00000110492 MDK            | ENSG00000111249 CUTL2          | ENSG00000132383 RPA1           | ENSG00000140287 HDC            | ENSG00000140557 ST8SIA2      |
| ENSG00000156466 GDF6         | ENSG00000160255 ITGB2          | ENSG00000162511 LAPTM5         | ENSG00000173862 Q9NWP0_HUMAN   | ENSG00000188076 SCGB1C1        | ENSG00000197077 Q5THZ5_HUMAN   | ENSG00000197131 Q81W43_HUMAN   | ENSG00000018510 AGPS         |
| ENSG00000082996 RNF13        | ENSG00000102699 PARP4          | ENSG00000102893 PHKB           | ENSG00000105889 Q6NZ63_HUMAN   | ENSG00000112237 CCNC           | ENSG00000113100 CDH9           | ENSG00000113946 CLDN16         | ENSG00000114021 NIT2         |
| ENSG00000128609 NDUFA5       | ENSG00000129460 NGDN           | ENSG00000138685 FGF2           | ENSG00000138829 FBN2           | ENSG00000142875 PRKACB         | ENSG00000157578 C21orf13       | ENSG00000163072 NOSTRIN        | ENSG00000164221 CCDC112      |
| ENSG00000164406 LEAP2        | ENSG00000166006 KCNK2          | ENSG00000177640 CASC2          | ENSG00000178107 Q8N1B8_HUMAN   | ENSG00000178425 NT5DC1         | ENSG00000180869 C1orf180       | ENSG00000182836 PLCXD3         | ENSG00000186104 CYP2R1       |
| ENSG00000187009 Q8NFD4_HUMAN | ENSG00000187054 TMPRSS11A      | ENSG00000188971 NP_001013005.1 | ENSG00000196214 ZNF766         | ENSG00000196562 SULF2          | ENSG00000196954 CASP4          | ENSG00000197846 HIST1H2BF      | ENSG00000198304 ZNF528       |
| ENSG00000198900 TOP1         | ENSG00000204837 Q2TVT3_HUMAN   |                                |                                |                                |                                |                                |                              |
| TAATCCA                      | ENSG00000043822 NP_060895.1    | ENSG00000069812 HES2           | ENSG00000089101 C20orf26       | ENSG00000103184 SEC14L5        | ENSG00000105397 TYK2           | ENSG00000120709 FAM53C         | ENSG00000121289 CCDC123      |
| ENSG00000132321 IQCA         | ENSG00000135966 TGFBRAP1       | ENSG00000139083 ETV6           | ENSG00000146197 SCUBE3         | ENSG00000149653 WFDC6          | ENSG00000157103 SLC6A1         | ENSG00000162666 KIAA0040       | ENSG00000165424 C10orf56     |
| ENSG00000174460 ZCCHC12      | ENSG00000176463 SLCO3A1        | ENSG00000176679 TGIF2LY        | ENSG00000177791 MYOZ1          | ENSG00000179219 TMEM148        | ENSG00000184004 Q6ICL0_HUMAN   | ENSG00000188778 ADRB3          | ENSG00000004961 HCCS         |
| ENSG00000075142 SRI          | ENSG00000085224 ATRX           | ENSG00000095139 ARCN1          | ENSG00000109738 GLRB           | ENSG00000109738 GLRB           | ENSG000001129682 FGF13         | ENSG00000136643 RPS6KC1        |                              |
| ENSG00000137941 TTL7         | ENSG00000138336 CXXC6          | ENSG00000139926 FRMD6          | ENSG00000153207 AHCTF1         | ENSG00000154997 NP_997249.1    | ENSG00000168175 C14orf32       | ENSG00000168843 FSTL5          | ENSG00000170714 FAM19A5      |
| ENSG00000181234 TMEM132C     | ENSG00000182983 ZNF662         | ENSG00000189320 NP_995327.1    | ENSG00000197851 NP_997386.1    | ENSG00000204941 PSG5           | ENSG00000205279 CTXN3          |                                |                              |
| ENSG00000006659 LGALS14      | ENSG00000087077 TRIP6          | ENSG00000089250 NOS1           | ENSG00000104894 CD37           | ENSG00000105198 LGALS13        | ENSG00000123999 INHA           | ENSG00000139083 ETV6           | ENSG00000157184 CPT2         |
| ENSG00000165695 C9orf98      | ENSG00000166763 STRC           | ENSG00000166866 MYO1A          | ENSG00000172965 Q96C48_HUMAN   | ENSG00000173976 RAXL1          | ENSG00000177663 IL17RA         | ENSG00000184639 NP_001004344.1 | ENSG00000204531 POU5F1P1     |
| ENSG00000205335 GLYCAM1      | ENSG00000205881 Q6UXR8_HUMAN   | ENSG00000079257 LXN            | ENSG00000084444 KIAA1467       | ENSG00000095110 FAM55A         | ENSG00000135387 CAPRIN1        | ENSG00000136451 VEZF1          | ENSG00000138138 ATAD1        |
| ENSG00000143368 SF3B4        | ENSG00000145965 C6orf50        | ENSG00000164904 ALDH7A1        | ENSG00000166598 HSP90B1        | ENSG00000171759 PAH            | ENSG00000174695 TMEM167        | ENSG00000177463 NR2C2          | ENSG00000177994 NP_775757.1  |
| ENSG00000184943 NP_443103.1  | ENSG00000186132 NP_001017927.1 | ENSG00000204209 DAXX           |                                |                                |                                |                                |                              |
| TAATCCC                      | ENSG0000017621 MAGIX           | ENSG00000086232 EIF2AK1        | ENSG00000100427 MLC1           | ENSG00000102225 PCTK1          | ENSG00000105369 CD79A          | ENSG00000108947 EFNB3          | ENSG00000109132 PHOX2B       |
| ENSG00000142949 PTPRF        | ENSG00000158796 DEDD           | ENSG00000163468 CCT3           | ENSG00000167130 DOLPP1         | ENSG00000169474 SPRR1A         | ENSG00000171724 K1576_HUMAN    | ENSG00000171861 RNMTL1         | ENSG00000172216 CEBPB        |
| ENSG00000172548 ICHN_HUMAN   | ENSG00000176078 Q9NAN4_HUMAN   | ENSG00000177133 Q6ZV91_HUMAN   | ENSG00000178235 SLITRK1        | ENSG00000184678 HIST2H2BE      | ENSG00000188242 Q71RB1_HUMAN   | ENSG00000197565 COL4A6         | ENSG00000204490 TNF          |
| ENSG00000149191 COX15        | ENSG00000071575 TRIE2          | ENSG00000074935 TUBE1          | ENSG00000101349 PAK7           | ENSG00000101958 GLRA2          | ENSG00000102098 SCML2          | ENSG00000106853 LTB4DH         |                              |
| ENSG00000112200 ZNF451       | ENSG00000128294 TPST2          | ENSG00000130021 HDHD1A         | ENSG00000130699 TAF4           | ENSG00000135018 UBQLN1         | ENSG00000143919 C2orf34        | ENSG00000145284 SCD5           | ENSG00000146001 PCDHB18      |
| ENSG00000152804 HHEX         | ENSG00000152904 GGPS1          | ENSG00000164122 ASB5           | ENSG00000165197 FIGF           | ENSG00000165521 EML5           | ENSG00000171634 BPTF           | ENSG00000176623 FAM82B         | ENSG00000177324 CXorf20      |
| ENSG00000178904 DPY19L3      | ENSG00000182220 ATP6AP2        | ENSG00000205462 Q6ZWC8_HUMAN   |                                |                                |                                |                                |                              |
| TAATCGT                      | ENSG000000110099 LYPLA2        | ENSG00000033627 ATP6V0A1       | ENSG00000056998 GYG2           | ENSG00000073111 MCM2           | ENSG00000081791 KIAA0141       | ENSG00000090316 MAEA           | ENSG00000092098 ISGF3G       |
| ENSG00000114544 SLC41A3      | ENSG00000115241 PPM1G          | ENSG00000117640 FAM54B         | ENSG00000120071 KIAA1267       | ENSG00000128045 RASL11B        | ENSG00000130207 APOC2          | ENSG00000133048 CHI3L1         | ENSG00000143624 INTS3        |
| ENSG00000152953 STK32B       | ENSG00000157152 SYN2           | ENSG00000160208 RRP1B          | ENSG00000160752 FDP5           | ENSG00000161944 ASGR2          | ENSG00000168792 NP_937790.1    | ENSG00000178537 SLC25A20       | ENSG00000179820 MYADM        |
| ENSG00000180735 Q6PJW0_HUMAN | ENSG00000183686 MAGEA5         | ENSG00000197976 CXorf3         | ENSG00000009694 ODZ1           | ENSG00000030304 MUSK           | ENSG00000168697 LAPTM4A        | ENSG00000072319 ALG13          | ENSG00000083535 C13orf24     |
| ENSG00000087338 GMCL1        | ENSG00000089006 SNX5           | ENSG00000104904 OAZ1           | ENSG00000107623 GDF10          | ENSG00000108510 THRAP1         | ENSG00000121351 IAPP           | ENSG00000124406 ATP8A1         | ENSG00000131301 CCNA1        |
| ENSG00000145817 YIPF5        | ENSG00000148572 NRBF2          | ENSG00000156795 C8orf32        | ENSG00000163466 ARPC2          | ENSG00000168769 KIAA1546       | ENSG00000169756 LIMS1          | ENSG00000173124 C10orf129      | ENSG00000177508 IRX3         |
| ENSG00000184867 ARMCX2       | ENSG00000204947 ZNF425         |                                |                                |                                |                                |                                |                              |
| TAATCTC                      | ENSG00000090857 NP_060460.3    | ENSG00000100234 TIMP3          | ENSG00000100445 C14orf124      |                                |                                |                                |                              |



ENSG00000170006|TMMEM154 ENSG00000172086|KRCC1 ENSG00000172733|PURG ENSG00000172817|CYP7B1 ENSG00000173221|GLRX ENSG00000173611|C9orf126 ENSG00000174740|PABPC5 ENSG00000185869|NP\_001032309.2  
ENSG00000186700|Q8N6F3\_HUMAN ENSG00000189060|LITAF ENSG00000198157|NSBP1  
TAATTTT ENSG0000017797|RALBP1 ENSG0000022840|RNF10 ENSG00000048707|VPS13D ENSG00000054523|KIF1B ENSG00000088305|DNMT3B ENSG00000110777|POU2AF1 ENSG00000123353|ORMDL2 ENSG00000124374|PAIP2B  
ENSG00000130635|COL5A1 ENSG00000134864|Q9BVM4\_HUMAN ENSG00000136828|RALGPS1 ENSG00000140090|SLC24A4 ENSG00000141034|C17orf39 ENSG00000141580|WDR45L ENSG00000142599|RERE ENSG00000142611|PRDM16  
ENSG00000144567|C2orf17 ENSG00000146221|NP\_872345.1 ENSG00000152042|NBPFF8 ENSG00000156486|KCN2 ENSG00000168614|NBPFF16 ENSG00000169991|Q5TF58\_HUMAN ENSG00000170638|TRABD ENSG00000182372|C8orf61  
ENSG00000186275|Q5TB04\_HUMAN ENSG00000186350|RXRA ENSG00000187975|NP\_001003682.1 ENSG00000188242|Q71RB1\_HUMAN ENSG00000188554|NBR1 ENSG00000189060|H1F0 ENSG00000189180|ZNF33A ENSG00000196132|MYT1\_HUMAN  
ENSG00000196747|H1ST1H3H ENSG00000196935|SRGAP1 ENSG00000197077|Q5TH25\_HUMAN ENSG00000197386|HD ENSG00000197451|HNRPA ENSG00000203690|TCP10 ENSG00000204304|PBX2 ENSG00000206152|Q6ZV52\_HUMAN  
ENSG00000036257|CUL3 ENSG00000057663|ATG5 ENSG00000058673|ZC3H11A ENSG00000060339|CCAR1 ENSG00000078177|N4BP2\_HUMAN ENSG00000084733|RAB10 ENSG00000095209|TMMEM38B ENSG00000100852|ARHGAP5  
ENSG00000101782|RIOK3 ENSG00000110696|C11orf58 ENSG00000111581|NUP107 ENSG00000112851|ERBB2IP ENSG00000114487|MORC1 ENSG00000120159|C9orf82 ENSG00000128609|NDUFA5  
ENSG00000132498|ANKRD20A1 ENSG00000133641|C12orf29 ENSG00000135914|HTR2B ENSG00000138411|HECW2 ENSG00000143278|F13B ENSG00000143353|LYPLAL1 ENSG00000145331|RG9MTD2 ENSG00000145386|CCNA2  
ENSG00000145428|RNF175 ENSG00000146151|HMGCLL1 ENSG00000150961|SEC24D ENSG00000151725|MLF1IP ENSG00000151962|NP\_659416.1 ENSG00000152430|BOLL ENSG00000153201|RANBP2 ENSG00000154262|ABCA6  
ENSG00000163006|NP\_659415.1 ENSG00000163519|TRAT1 ENSG00000164761|TNFRSF11B ENSG00000169567|HINT1 ENSG00000172007|RAB33B ENSG00000174799|CEP135 ENSG00000177888|ZBTB41 ENSG00000177917|ARL6IP6  
ENSG00000178053|MLF1 ENSG00000180573|H1ST1H2AC ENSG00000182973|CNOT10 ENSG00000183148|ANKRD20A2 ENSG00000196774|ANKRD20A3 ENSG00000197065|FSBP\_HUMAN ENSG00000204716|ANKRD20B  
TACAAAA ENSG00000004866|ST7 ENSG000000071894|CPSF1 ENSG000000073605|GSDML ENSG00000114999|TTL ENSG00000116128|BCL9 ENSG00000116198|KIAA0562 ENSG00000117122|MFAP2 ENSG000001124357|NAGK  
ENSG00000130177|CDC16 ENSG00000156466|GDF6 ENSG00000162408|NOL9 ENSG00000164012|WDR65 ENSG00000173821|RNF213 ENSG00000185189|NRBP2 ENSG00000198535|NP\_997205.1 ENSG00000204120|TNRC15  
ENSG00000204228|HSD17B8 ENSG00000204410|MSH5 ENSG00000205023|Q6ZSF1\_HUMAN ENSG00000206550|LOC285346 ENSG00000034677|RNF19 ENSG000000047597|XK ENSG00000076554|TPD52 ENSG00000099290|NP\_001005751.1  
ENSG00000102554|KLF5 ENSG00000110075|SAPF3 ENSG00000112290|WASF1 ENSG00000113597|NP\_079217.1 ENSG00000115665|SLC5A7 ENSG00000117620|SLC35A3 ENSG00000122026|RPL21  
ENSG00000125355|FAM70A ENSG00000132199|ENOSF1 ENSG00000133136|GBG5L\_HUMAN ENSG00000134697|GNL2 ENSG00000136810|TXN ENSG00000137947|GTF2B ENSG00000143486|LGTN ENSG00000145354|ZCD2  
ENSG00000148908|RGS10 ENSG00000150593|PDCD4 ENSG00000152726|Q5SNT8\_HUMAN ENSG00000153485|C14orf109 ENSG00000163453|IGFBP7 ENSG00000166615|ADAM9 ENSG00000172661|FAM21B ENSG00000173085|COQ2  
ENSG00000173588|CCDC41 ENSG00000174196|FAM21D ENSG00000180777|ANKRD30B ENSG00000187987|ZSCAN23 ENSG00000196104|SPOCK3 ENSG00000196886|Q8NAW3\_HUMAN ENSG00000197345|MRPL21 ENSG00000197782|ZNF780A  
TACAAAC ENSG00000198001|IRAK4 ENSG00000198865|Q4G0S7\_HUMAN ENSG00000198947|DMD ENSG00000204406|MBD5 ENSG00000204595|DPRXP4 ENSG00000205707|LYRM5  
ENSG0000011454|RABGAP1 ENSG000001100558|PLEK2 ENSG00000100985|MMP9 ENSG00000116032|GRIN3B ENSG00000131149|KIAA0182 ENSG00000131378|RFTN1 ENSG00000140287|HDC ENSG00000141337|ARSG  
ENSG00000141569|TRIM65 ENSG00000142186|CYLL1 ENSG00000145949|SGK85\_HUMAN ENSG00000148411|BTBD14A ENSG00000149179|C11orf49 ENSG00000158445|KCNB1 ENSG00000160208|RRP1B ENSG00000164707|SLC13A4  
ENSG00000170231|FABP6 ENSG00000176303|Q8N822\_HUMAN ENSG00000176679|TGIF2LY ENSG00000187664|TM6SF2 ENSG00000188859|FAM78B ENSG00000188931|C1orf192 ENSG00000198019|FCGR1B ENSG00000066629|EML1  
ENSG000000082512|TRAF5 ENSG000000083799|CYLD ENSG00000100380|ST13 ENSG00000102055|PPP1R2P9 ENSG00000105971|CAV2 ENSG00000108839|ALOX12 ENSG00000117601|SERPINC1 ENSG00000120008|BRWD2  
ENSG00000123892|RAB38 ENSG00000137869|CYP19A1 ENSG00000138442|WDR12 ENSG00000139352|ASCL1 ENSG00000140836|ATBF1 ENSG00000145708|CRHBP ENSG00000163606|CD200R1 ENSG00000164985|PSIP1  
ENSG00000170542|SERPINB9 ENSG00000175893|ZDHHC21 ENSG00000181631|P2RY13 ENSG00000184293|NP\_742001.1 ENSG00000184845|DRD1 ENSG00000186298|PPP1CC ENSG00000196387|ZNF140 ENSG00000196792|STRN3  
TACAAAG ENSG000000044012|GUCA2B ENSG00000066382|MPPEP2 ENSG000000089169|RPH3A ENSG00000090554|FLT3LG ENSG00000100918|REC8 ENSG00000101493|ZNF516 ENSG00000103067|RBM35B  
ENSG00000134014|ELP3 ENSG00000134270|SYT6 ENSG00000134339|SAA2 ENSG00000135637|NP\_116168.2 ENSG00000136068|FLNB ENSG00000149929|HIRIP3 ENSG00000156466|GDF6 ENSG00000162367|TALL1  
ENSG00000166833|NAV2 ENSG00000173432|SAA1 ENSG00000180229|NP\_001019853.1 ENSG00000185522|C11orf35 ENSG00000187607|ZNF286A ENSG00000187715|KLHDC6 ENSG00000196501|H1ST1H2B ENSG00000197116|Q9UDD8\_HUMAN  
ENSG00000197838|CYP2A13 ENSG00000206053|HN1L ENSG00000201991|COX15 ENSG00000066651|TRMT11 ENSG00000070367|EXOC5 ENSG00000086061|DNAJA1 ENSG00000104388|RAB2A  
ENSG00000112333|NR2E1 ENSG00000119965|C10orf88 ENSG00000125931|CITED1 ENSG00000138271|GPR87 ENSG00000141433|ADCYAP1 ENSG00000141452|C18orf8 ENSG00000144642|RBM33  
ENSG00000145868|FBXO38 ENSG00000150054|MPF7 ENSG00000150093|ITGB1 ENSG00000162944|RFTN2 ENSG00000163162|RNF149 ENSG00000165359|DDX26B ENSG00000171217|CLDN20 ENSG00000175305|CCNE2  
ENSG00000179455|MKRN3 ENSG00000197497|ZNF665 ENSG00000198682|PAPSS2 ENSG00000203801|Q5R3E8\_HUMAN  
TACAACC ENSG00000081377|CDC14C ENSG00000085662|AKR1B1 ENSG00000133067|LGR6 ENSG00000134571|MYBPC3 ENSG00000143512|KIAA1822L ENSG00000145526|CDH18 ENSG00000148795|CYP17A1 ENSG00000155363|MOV10  
ENSG00000155366|RHOCC ENSG00000164051|CCDC51 ENSG00000168621|GDNF ENSG00000170613|FAM71B ENSG00000174939|ASPHD1 ENSG00000176087|SLC35A4 ENSG00000178951|ZBTB7A ENSG00000180900|SCRIB  
ENSG00000181724|MAP2K1IP1 ENSG00000183605|SMTN ENSG00000184056|VPS33B ENSG00000186197|ENO1P ENSG00000204305|AGER ENSG00000004534|RBM6 ENSG00000034533|ASTE1 ENSG00000086288|TXNDC3  
ENSG00000109184|DCUN1D4 ENSG00000113141|IK ENSG00000116106|EPHA4 ENSG00000117281|CD160 ENSG00000122126|OCLR ENSG00000124198|ARFGF2 ENSG00000125148|MT2A ENSG00000128578|FAM40B  
ENSG00000129071|MBD4 ENSG00000131586|MRPL20 ENSG00000136546|SCN7A ENSG00000143751|C1orf55 ENSG00000150394|CDH8 ENSG00000163608|C3orf17 ENSG00000169116|FARM1\_HUMAN ENSG00000170962|PDGFD  
ENSG00000177111|XR\_016777.1 ENSG00000177994|NP\_775757.1 ENSG00000187193|MT1X ENSG00000206527|PTPLB  
TACAATA ENSG00000020256|ZFP64 ENSG00000063127|SLC6A16 ENSG00000100197|CYP2D6 ENSG00000101440|ASIP ENSG00000105641|SLC5A5 ENSG00000106789|CORO2A ENSG00000118004|COLEC11 ENSG00000125046|C3orf32  
ENSG00000125734|NM\_001080452.1 ENSG00000130175|PRKCSH ENSG00000131059|C20orf71 ENSG00000132677|RHGB ENSG00000133937|GSC ENSG00000139626|ITGB7 ENSG00000141994|DUS3L ENSG00000142751|ATPBD1B  
ENSG00000150401|DCUN1D2 ENSG00000158874|APOA2 ENSG00000164713|BR13 ENSG00000167967|EAF1 ENSG00000169750|RAC3 ENSG00000170054|SERPINA9 ENSG00000170100|Q96MU6-2 ENSG00000184788|SATL1  
ENSG00000187051|RPS19BP1 ENSG00000204511|NM\_001011700.1 ENSG00000205702|CYP2D7P1 ENSG00000010219|DYRK4 ENSG000000099256|PRTFDC1 ENSG00000100483|C14orf138 ENSG00000105971|CAV2  
ENSG00000109270|MAP2K1IP1 ENSG00000112031|MTFRF1 ENSG00000122545|SEPT7 ENSG00000133731|IMPA1 ENSG00000136884|IL21 ENSG00000139155|SLCO1C1 ENSG00000145284|SCD5 ENSG00000157111|TKM171  
ENSG00000159182|NP\_115767.1 ENSG00000163512|AZL2 ENSG00000165124|SVEP1 ENSG00000165682|CLEC1B ENSG00000167766|ZNF83 ENSG00000171033|PKTA ENSG00000171931|FBXW10 ENSG00000172380|GNG12  
ENSG00000174016|FAM46D ENSG00000177606|JUN ENSG00000179097|HTR1F ENSG00000189252|SPANXN3 ENSG00000197956|S100A6 ENSG00000203667|FAM36A ENSG00000203924|SPANXN2 ENSG00000204683|C10orf113  
TACAATG ENSG00000002726|ABP1 ENSG00000068137|PLEKHH3 ENSG00000089737|DDX24 ENSG00000092201|SUPT16H ENSG00000101342|C20orf118 ENSG00000112562|SMOC2 ENSG00000130635|COL5A1 ENSG00000130770|ASS1  
ENSG00000135114|OASL ENSG00000136059|VILL ENSG00000144671|SLC22A14 ENSG00000148408|CANA1B ENSG00000158445|KCNB1 ENSG00000161082|BRUNOL5 ENSG00000163207|IVL ENSG00000170420|APOL6  
ENSG00000170876|TMMEM43 ENSG00000176515|Q8NAX6\_HUMAN ENSG00000177076|ASAH3L ENSG00000181097|Q8NDL7\_HUMAN ENSG00000185100|ADSSL1 ENSG00000186198|NP\_849190.1 ENSG00000196743|GM2A ENSG00000204434|NP\_001017421.1  
ENSG00000204444|APOM ENSG00000206539|Q6ZTN9\_HUMAN ENSG00000033867|SLC4A7 ENSG00000070061|IKBKAP ENSG00000078114|NEBL ENSG00000100425|BRD1 ENSG00000101353|Q9H579-2  
ENSG00000101892|ATP1B4 ENSG00000106733|C9orf95 ENSG00000111816|FRK ENSG00000112541|PDE10A ENSG00000116675|DNAJC6 ENSG00000117228|GBP1 ENSG00000123572|NRK ENSG00000132549|VPS13B  
ENSG00000137806|NDUFA2B ENSG00000140937|CDH11 ENSG00000141141|IDFX52 ENSG00000155438|MKI67IP ENSG00000158966|CACHD1 ENSG00000169554|ZEB2 ENSG00000169612|FAM103A1 ENSG00000171931|FBXW10  
ENSG00000184040|FAM23B ENSG00000185127|C6orf120 ENSG00000185201|IFITM2 ENSG00000186103|ARGFX ENSG00000186340|THBS2 ENSG00000187151|ANGPTL5 ENSG00000196967|ZNF585A  
TACAATT ENSG00000011007|TCEB3 ENSG00000011478|QPCTL ENSG00000012223|LTF ENSG00000057704|TMCC3 ENSG00000075151|EIF4G3 ENSG00000105618|PRPF31 ENSG00000105991|HOXA1 ENSG00000107438|PDLIM1  
ENSG00000108602|ALDH3A1 ENSG00000111254|AKAP3 ENSG00000127666|TMCAM1 ENSG00000129194|SOX15 ENSG00000135596|MICAL1 ENSG00000143171|RXRG ENSG00000147127|RAB41 ENSG00000157064|NMNAT2  
ENSG00000163866|C1orf212 ENSG00000167395|ZNF646 ENSG00000172732|MUS81 ENSG00000174939|ASPHD1 ENSG00000176809|LRRRC37A3 ENSG00000177479|ARIH2 ENSG00000183838|Q96NM2\_HUMAN ENSG00000184566|Q9P1G6\_HUMAN  
ENSG00000205015|Q6ZNV2\_HUMAN ENSG00000205039|Q6ZQ5\_HUMAN ENSG00000205744|DENND1C ENSG00000205980|Q6ZU05\_HUMAN ENSG00000042980|ADAM28 ENSG00000051825|MPHOSPH9 ENSG00000064225|ST3GAL6 ENSG00000079215|SLC1A3  
ENSG00000086475|SEPHS1 ENSG00000090402|SI ENSG00000091879|ANGPT2 ENSG00000092140|KIAA1333 ENSG00000101745|ANKRD12 ENSG00000115415|STAT1 ENSG00000120217|CD274 ENSG00000131016|AKAP12  
ENSG00000135185|C7orf23 ENSG00000135250|SRPK2 ENSG00000137941|ITLL7 ENSG00000145681|HAPLN1 ENSG00000150961|SEC24D ENSG00000156875|HIAT1 ENSG00000163162|RNF149 ENSG00000166503|HDRG3\_HUMAN  
ENSG00000168916|ZNF608 ENSG00000173674|EIF1A1P ENSG00000179008|C14orf39 ENSG00000179300|ZCCHC5 ENSG00000186298|PPP1CC ENSG00000197501|Q9H3B5\_HUMAN  
TACACAC ENSG00000007402|CACNA2D2 ENSG00000066382|MPPEP2 ENSG00000068650|ATP11A ENSG00000074410|CA12 ENSG00000075290|TAF6B ENSG00000106290|TAF6B ENSG00000108405|P2RX1 ENSG00000110171|TRIM3  
ENSG00000115107|STEAP3 ENSG00000119403|PHF19 ENSG00000123171|CCDC70 ENSG00000125726|CD70 ENSG00000148602|LRRRC21 ENSG00000166546|Q3B7T3\_HUMAN ENSG00000167664|TMIGD2 ENSG00000169213|RAB3B  
ENSG00000169218|RSP01 ENSG00000171462|EGFL9 ENSG00000174564|IL20RB ENSG00000176515|Q8NAX6\_HUMAN ENSG00000176953|NFATC2IP ENSG00000181409|AA7K ENSG00000184524|CEND1 ENSG00000187003|ACTL7A  
ENSG00000196844|C11orf38 ENSG00000204274|Q6ZSG4\_HUMAN ENSG00000101951|PAGE4 ENSG00000108306|FBXL20 ENSG00000112541|PDE10A ENSG00000114547|ROPN1B ENSG00000120519|SLC10A7 ENSG00000142494|NP\_060712.2  
ENSG00000144057|ST6GAL2 ENSG00000152254|G6PC2 ENSG00000164161|HHP1 ENSG00000164647|STEAP1 ENSG00000166734|CASC4 ENSG00000171056|SOX7 ENSG00000180957|PITPNB ENSG00000182836|PLCXD3  
ENSG00000186288|RBM32A ENSG00000196233|LCOR ENSG00000196532|H1ST1H3C ENSG00000196664|TLR7 ENSG00000197301|Q6ZQU9\_HUMAN ENSG00000198042|RBM13 ENSG00000198682|PAPSS2 ENSG00000204133|FAM33B  
ENSG00000204699|LOC129870 ENSG00000205707|LYRM5  
TACACCA ENSG00000033050|ABCF2 ENSG00000068650|ATP11A ENSG00000080511|RDH8 ENSG0000010024|UPB1 ENSG00000101298|RAD21L1 ENSG00000103197|TSC2 ENSG00000108702|CCL1 ENSG00000120970|ADRA1A  
ENSG00000124678|TCP11 ENSG00000131697|NPH4P ENSG00000158869|FCER1G ENSG00000161249|DMKN ENSG00000164048|ZNF589 ENSG00000164363|SLC6A18 ENSG00000166949|SMAD3 ENSG00000169230|PRELID1  
ENSG00000169972|PUSL1 ENSG00000170523|KRT83 ENSG00000174177|NP\_001012780.1 ENSG00000176953|NFATC2IP ENSG00000180697|C3orf22 ENSG00000182950|ODF3L1 ENSG00000188086|NP\_954652.1 ENSG00000000003|TSPAN6  
ENSG00000004799|PDK4 ENSG00000054654|SYNE2 ENSG000000883642|APRIN ENSG00000108443|RPS6KB1 ENSG00000127688|GAN ENSG00000127831|VIL1 ENSG00000138041|SMEK2 ENSG00000147437|GNRH1  
ENSG00000154721|JAM2 ENSG00000156463|SH3RF2 ENSG00000163599|CTLA4 ENSG00000164603|NP\_689769.2 ENSG00000170871|K0232\_HUMAN ENSG00000170962|PDGF4 ENSG00000176853|FAM91A1 ENSG00000181013|C17orf47  
ENSG00000186715|Q13209\_HUMAN ENSG00000188529|FUSIP1 ENSG00000197919|IFNA1  
TACACGA ENSG00000036448|MYOM2 ENSG00000074181|NOTCH3 ENSG00000078246|TULP3 ENSG00000082684|SACMA5B ENSG00000111667|USP5 ENSG00000121075|TRX4 ENSG00000123146|CD97 ENSG00000124126|PREX1\_HUMAN  
ENSG00000125869|C20orf103 ENSG00000142449|FBN3 ENSG00000142453|CARM1 ENSG00000143761|ARF1 ENSG00000148602|LRRRC21 ENSG00000153298|C6orf54 ENSG00000163468|CCT3 ENSG00000164711|LPAL2  
ENSG00000167291|TBC1D16 ENSG00000167526|RPL13 ENSG00000176994|SMCR8 ENSG00000177398|UMODL1 ENSG00000182108|MYLE\_HUMAN ENSG00000182175|RGMA ENSG00000182205|Q6ZU70\_HUMAN ENSG00000186301|Q49A61\_HUMAN  
ENSG00000188775|Q6YL47\_HUMAN ENSG00000204071|TCEAL6 ENSG00000204938|Q6ZUS7\_HUMAN ENSG00000076685|NTF5C2 ENSG00000082397|EPB41L3 ENSG00000101825|MXRA5 ENSG00000102763|NP\_001009814.1 ENSG00000112081|SFRS3  
ENSG00000114315|HES1 ENSG00000119899|SLC17A5 ENSG00000120659|TNFRSF11 ENSG00000121895|TMMEM156 ENSG00000125871|C20orf72 ENSG00000129696|C8orf41 ENSG00000130413|STK33 ENSG00000134153|C15orf24  
ENSG00000136052|SLC41A2 ENSG00000139155|SLCO1C1 ENSG00000139329|LUM ENSG00000146360|GPR6 ENSG00000153721|MAGI1 ENSG00000154553|PDLIM3 ENSG00000154721|JAM2 ENSG00000159279|NPY6R  
ENSG00000162702|ZNF281 ENSG00000176407|KCMF1 ENSG00000180815|MAP3K15 ENSG00000186297|GABRA5 ENSG00000196381|ZNF781 ENSG00000196442|ZNF432 ENSG000001029377|NP\_001028736.1  
ENSG00000205293|Q76B50\_HUMAN  
TACACTA ENSG00000005961|ITGA2B ENSG00000067182|TNFRSF1A ENSG00000076201|PTPN23 ENSG00000081277|PKP1 ENSG00000091622|PITPNM3 ENSG00000103200|NME4 ENSG00000125633|CCDC93 ENSG00000127528|KLF2  
ENSG00000135446|CDK4 ENSG00000143369|ECM1 ENSG00000143545|RAB13 ENSG00000145864|GABRB2 ENSG00000162949|CAPN13 ENSG00000163820|FYCO1 ENSG00000166228|PCBD1 ENSG00000167768|KRT1  
ENSG00000170145|SNF1LK2 ENSG00000172890|NADSYN1 ENSG00000178307|TMMEM11 ENSG00000185554|NKF2 ENSG00000185945|NKF2\_HUMAN ENSG00000189001|SBSN ENSG00000006704|GTF2TRD1 ENSG000000011566|MAP4K3  
ENSG000000077254|USP33 ENSG00000101040|ZMYND8 ENSG00000102531|FNDC3A ENSG00000107560|RAB11FIP2 ENSG00000109771|LRP2BP ENSG00000116641|DOCK7 ENSG000001118939|UCHL3 ENSG00000121361|KCNJ8  
ENSG00000135108|FBXO21 ENSG00000137414|FAM8A1 ENSG00000137575|SDCBP ENSG00000138161|FAM24B ENSG00000138658|C4orf21 ENSG00000156140|ADAMTS3 ENSG00000157224|CLDN12 ENSG00000163581|SLC2A2  
ENSG00000164292|RHOBTB3 ENSG00000165409|TSHR ENSG00000170759|KIF5B ENSG00000175426|PCSK1 ENSG00000180287|PLD5 ENSG00000189184|PCDH18  
TACACTG ENSG00000042286|ATFM2

|         |                                |                                |                              |                                |                              |                              |                              |                                |
|---------|--------------------------------|--------------------------------|------------------------------|--------------------------------|------------------------------|------------------------------|------------------------------|--------------------------------|
|         | ENSG00000133985 TTC9           | ENSG00000139797 RNF113B        | ENSG00000143061 IGSF3        | ENSG00000143257 NR1I3          | ENSG00000157110 RBPM5        | ENSG00000162493 PDPN         | ENSG00000163395 NP_840059.1  | ENSG00000169918 OTUD7A         |
|         | ENSG00000170776 AKAP13         | ENSG00000173327 MAP3K11        | ENSG00000177807 KCNJ10       | ENSG00000184709 LRRC26         | ENSG00000186815 TPCN1        | ENSG00000205015 Q6ZNV2_HUMAN | ENSG00000065485 PDIA5        | ENSG00000072849 DERL2          |
|         | ENSG00000173910 FRY            | ENSG00000179335 CDC14A         | ENSG00000191831 ESR1         | ENSG00000101384 JAG1           | ENSG00000130449 ZSWIM6       | ENSG00000103785 INTS12       | ENSG00000143324 XPR1         | ENSG00000143341 HMCN1          |
|         | ENSG00000143970 ASXL2          | ENSG00000146476 C6orf211       | ENSG00000148303 SNORD36A     | ENSG00000152254 G6PC2          | ENSG00000152413 HOMER1       | ENSG00000154144 TBRG1        | ENSG00000156110 ADK          | ENSG00000163001 CCDC104        |
|         | ENSG00000163606 CD200R1        | ENSG00000164930 FZD6           | ENSG00000165476 REEP3        | ENSG00000165678 GHITM          | ENSG00000173698 GPR64        | ENSG00000176624 RKHD2        | ENSG00000184040 FAM23B       | ENSG00000196167 NP_997312.1    |
|         | ENSG00000196387 ZNF140         |                                |                              |                                |                              |                              |                              |                                |
| TACAGAG | ENSG00000070759 TESK2          | ENSG00000092295 TGM1           | ENSG00000096395 MLN          | ENSG00000108828 VAT1           | ENSG00000138131 LOXL4        | ENSG00000141639 MAPK4        | ENSG00000151882 CCL28        | ENSG00000168329 CX3CR1         |
|         | ENSG00000168906 MAT2A          | ENSG00000170581 STAT2          | ENSG00000171456 ASXL1        | ENSG00000175203 DCTN2          | ENSG00000181029 TRAPP5       | ENSG00000182257 C22orf26     | ENSG00000184811 TUSC5        | ENSG00000204446 NP_001001709.1 |
|         | ENSG00000205209 NP_001020762.1 | ENSG00000205742 Q6ZTR4_HUMAN   | ENSG00000003393 ALS2         | ENSG000000080947 Q8IVE0_HUMAN  | ENSG000000087995 METT12A     | ENSG00000100722 ZC3H14       | ENSG00000104267 CA2          | ENSG00000112309 B3GAT2         |
|         | ENSG00000116704 SLC35D1        | ENSG00000127249 ATP13A4        | ENSG00000132153 DHX30        | ENSG00000136436 CALCOCO2       | ENSG00000136869 TLR4         | ENSG00000143458 NP_653219.1  | ENSG00000145365 NP_443096.1  | ENSG00000145491 ROPN1L         |
|         | ENSG00000145675 PIK3R1         | ENSG00000148948 LRRC4          | ENSG00000151743 AMN1         | ENSG00000152229 PSTPIP2        | ENSG00000152422 C18orf25     | ENSG00000152592 DMP1         | ENSG00000163626 COX18        | ENSG00000164485 IL22RA2        |
|         | ENSG00000164675 IQUB           | ENSG00000165819 METTL3         | ENSG00000169062 UPF3A        | ENSG00000172201 IDA            | ENSG00000177800 TMEM78       | ENSG00000178965 C1orf173     | ENSG00000180332 KCTD4        | ENSG00000198710 Q9BWW1_HUMAN   |
|         | ENSG00000198945 L3MBTL3        |                                |                              |                                |                              |                              |                              |                                |
| TACAGTA | ENSG00000089336 KIAA0841       | ENSG00000095015 MAP3K1         | ENSG00000101577 LPIN2        | ENSG00000103061 SLC7A6OS       | ENSG00000117385 LEPRE1       | ENSG00000118971 CCND2        | ENSG00000121577 POPDC2       | ENSG00000121904 CSMD2          |
|         | ENSG00000122735 DNAI1          | ENSG00000136504 MYST2          | ENSG00000145050 ACMET        | ENSG00000153956 CACNA2D1       | ENSG00000157600 TMEM164      | ENSG00000166763 STRC         | ENSG00000167110 GOLGA2       | ENSG00000169403 PTAFR          |
|         | ENSG00000171533 MAP6           | ENSG00000174951 FUT1           | ENSG00000177807 KCNJ10       | ENSG00000182968 SOX1           | ENSG00000183273 CCDC60       | ENSG00000184787 UBE2G2       | ENSG00000188554 NBR1         | ENSG00000197838 CYP2A13        |
|         | ENSG00000005471 ACBC4          | ENSG00000005483 MLL5           | ENSG000000057663 ATG5        | ENSG00000007857 RAB7A          | ENSG00000008279 PKD2L2       | ENSG00000008572 CXorf41      | ENSG00000008543 WDR47        | ENSG000000089177 C20orf23      |
|         | ENSG00000101846 STS            | ENSG00000104863 LIN7B          | ENSG00000106278 PTPRZ1       | ENSG00000106484 MEST           | ENSG00000112379 KIAA1244     | ENSG00000116406 EDEM3        | ENSG00000117751 PPP1R8       | ENSG00000121039 RDH10          |
|         | ENSG00000122042 UBL3           | ENSG00000122870 BICC1          | ENSG00000123066 THRAP2       | ENSG00000124523 SIRT5          | ENSG00000134533 RERG         | ENSG00000135158 UBQLN1       | ENSG00000136158 SPRY2        | ENSG00000137831 UCA            |
|         | ENSG00000167005 NUDT21         | ENSG00000176390 CRLF3          | ENSG00000179774 ATOX7        | ENSG00000183513 NP_001008216.1 | ENSG00000183520 UTP11L       | ENSG00000184613 NELL2        | ENSG00000188021 UBQLN2       |                                |
| TACAGTG | ENSG00000086548 CEACAM6        | ENSG00000103591 P34_HUMAN      | ENSG00000105122 NP_075055.1  | ENSG00000105323 HNRPUL1        | ENSG00000123360 PDE1B        | ENSG00000133026 MYH10        | ENSG00000144681 STAC         | ENSG00000151376 ME3            |
|         | ENSG00000154319 C8orf13        | ENSG00000162337 LRP5           | ENSG00000162728 KCNJ9        | ENSG00000162734 PEA15          | ENSG00000166351 ANKRD21      | ENSG00000170049 KCNAB3       | ENSG00000175283 DOLK         | ENSG00000179950 NP_055096.2    |
|         | ENSG00000183206 POT15_HUMAN    | ENSG00000184209 NP_008951.1    | ENSG00000185885 IFITM1       | ENSG00000189263 Q6ZS22_HUMAN   | ENSG00000196242 OR2C3        | ENSG00000203888 Q6ZRP6_HUMAN | ENSG00000205531 NAP1L4       | ENSG00000205629 LCMT1          |
|         | ENSG00000034693 PEX3           | ENSG00000055211 C6orf72        | ENSG00000056097 ZFR          | ENSG000000075643 MOCOS         | ENSG000000082196 C1QTNF3     | ENSG00000111707 SUDS3        | ENSG00000119396 RAB14        | ENSG00000133124 IRS4           |
|         | ENSG00000134982 APC            | ENSG00000135931 ARMC9          | ENSG00000136044 APPL2        | ENSG00000140905 GCSH           | ENSG00000143153 ATP1B1       | ENSG00000143942 CHAC2        | ENSG00000147471 PROSC        | ENSG00000163072 NOSTRIN        |
|         | ENSG00000165502 RPL36AL        | ENSG00000165973 NELL1          | ENSG00000166845 C18orf54     | ENSG00000169239 CA5B           | ENSG00000169554 ZEB2         | ENSG00000171241 SHCBP1       | ENSG00000173198 CYSLTR1      | ENSG00000189403 HMGB1          |
|         | ENSG00000196715 VKORC1L1       | ENSG00000198252 STYX           |                              |                                |                              |                              |                              |                                |
| TACAGTT | ENSG00000006638 TXA2R          | ENSG00000007314 SCN4A          | ENSG00000047056 WDR37        | ENSG00000065526 SPEN           | ENSG00000074211 PPP2R2C      | ENSG00000079616 KIF22        | ENSG00000099954 CECR2        | ENSG00000101311 C20orf42       |
|         | ENSG00000122085 MTFERFD2       | ENSG00000129194 SOX15          | ENSG00000129538 RNASE1       | ENSG00000144560 VGLL4          | ENSG00000146083 RNF44        | ENSG00000155026 NMN_173565.2 | ENSG00000157110 RBPM5        | ENSG00000166224 SGPL1          |
|         | ENSG00000169402 NP_775836.2    | ENSG00000171724 K1576_HUMAN    | ENSG00000183530 C22orf30     | ENSG00000184164 CRELD2         | ENSG00000186854 Q86V40_HUMAN | ENSG00000034971 MYOC         | ENSG00000061987 MON2         | ENSG00000074696 PTPLAD1        |
|         | ENSG00000075413 MARK3          | ENSG00000077147 TM9SF3         | ENSG00000101003 GINS1        | ENSG00000102743 SLC25A15       | ENSG00000104331 IMPAD1       | ENSG00000106346 USP42        | ENSG00000107863 ARHGAP21     | ENSG00000111328 CDK2AP1        |
|         | ENSG00000111799 K12A1          | ENSG00000120533 ENY2           | ENSG00000120805 ARL1         | ENSG00000122507 BBS9           | ENSG00000123352 SPATS2       | ENSG00000127993 NP_115496.2  | ENSG00000137831 UCA          | ENSG00000144182 LIPT1          |
|         | ENSG00000145687 SSBP2          | ENSG00000146733 PSPH           | ENSG00000146963 LUC7L2       | ENSG00000151287 C13orf27       | ENSG00000152700 SAR1B        | ENSG00000153044 CENPH        | ENSG00000154945 ANKRD40      | ENSG00000164187 LMBRD2         |
|         | ENSG00000164808 KIAA0146       | ENSG00000165832 TRUB1          | ENSG00000167863 ATP5E        | ENSG00000168421 RHOH           | ENSG00000168952 STXBP6       | ENSG00000170836 PPM1D        | ENSG00000177683 THAP5        | ENSG00000179029 TMEM107        |
| TACATAA | ENSG00000185220 PGBD2          | ENSG00000186714 CCDC73         | ENSG00000188877 POTE8_HUMAN  | ENSG00000198692 EIF1AY         | ENSG00000198830 HMGNT2       | ENSG00000203681 XR_017762.1  | ENSG00000205220 PSMB10       |                                |
|         | ENSG00000008441 NFI3           | ENSG00000059377 TBXAS1         | ENSG00000075151 EIF4G3       | ENSG00000077044 DGKD           | ENSG00000077274 CAPN6        | ENSG00000088812 ATRN         | ENSG00000099194 SCD          | ENSG00000104611 SH2D4A         |
|         | ENSG00000111644 ACRBP          | ENSG00000121060 TRIM25         | ENSG00000123144 C19orf43     | ENSG00000123329 ARHGAP9        | ENSG00000136378 ADAMT5       | ENSG00000142186 SCYL1        | ENSG00000153298 C6orf54      | ENSG00000154783 FGD5           |
|         | ENSG00000155087 IOV1           | ENSG00000163207 IVL            | ENSG00000166224 SGPL1        | ENSG00000167617 CDC42EP5       | ENSG00000167967 E4F1         | ENSG00000168505 GBX2         | ENSG00000168575 SLC20A2      | ENSG00000172771 C3orf25        |
|         | ENSG00000180739 EDG8           | ENSG00000183399 Q7L8T7_HUMAN   | ENSG00000185619 PCGF3        | ENSG00000186162 Q86XG0_HUMAN   | ENSG00000205015 Q6ZNV2_HUMAN | ENSG00000205801 Q6ZTI5_HUMAN | ENSG000000010278 CD9         | ENSG00000040933 INPP4A         |
|         | ENSG00000048540 LMO3           | ENSG00000083782 EPYC           | ENSG00000091428 RAPGEF4      | ENSG00000100644 HIF1A          | ENSG00000106819 ASPEN        | ENSG00000107560 RAB11FIP2    | ENSG00000112246 SIM1         | ENSG00000112312 GMNN           |
|         | ENSG00000113212 PCDHE7         | ENSG00000114805 PLCH1          | ENSG00000121440 PZRN3        | ENSG00000123636 BAZ2B          | ENSG00000125845 BMP2         | ENSG00000126733 DACH2        | ENSG00000128513 POT1         | ENSG00000131013 PPI4           |
|         | ENSG00000133808 MICALCL        | ENSG00000136696 LL1F8          | ENSG00000137876 C15orf15     | ENSG00000144674 GOLGA4         | ENSG00000146678 IGFBP1       | ENSG00000148303 SNORD36A     | ENSG00000152422 XRCC4        | ENSG00000153253 SCN3A          |
|         | ENSG00000164002 C1orf176       | ENSG00000164695 CHMP4C         | ENSG00000170381 SEMA3E       | ENSG00000170509 HSD17B13       | ENSG00000170558 CDH2         | ENSG00000172469 MANEA        | ENSG00000177888 ZBTB41       | ENSG00000181908 Q8N9J4_HUMAN   |
|         | ENSG00000184474 Q9FPP4_HUMAN   | ENSG00000197123 ZNF679         | ENSG00000204464 Q5TG92_HUMAN | ENSG00000204804 FAM27D1        |                              |                              |                              |                                |
| TACATAG | ENSG000000023171 GRAMD1B       | ENSG00000073598 FNDC8          | ENSG00000103266 STUB1        | ENSG00000119720 C14orf102      | ENSG00000120907 ADRA1A       | ENSG00000125835 SNRNP        | ENSG00000130177 CDC16        | ENSG00000135966 TGFBAP1        |
|         | ENSG00000138085 C2orf28        | ENSG00000140470 ADAMTS17       | ENSG00000143374 TARS2        | ENSG00000144045 DQX1           | ENSG00000149929 HIRIP3       | ENSG00000155980 KIF5A        | ENSG00000165424 C10orf56     | ENSG00000176809 LRRC37A3       |
|         | ENSG00000204183 GDF50S         | ENSG00000205971 NP_001019848.1 | ENSG000000033122 LRRC7       | ENSG00000108298 RPL19          | ENSG00000109099 PMP22        | ENSG00000128272 ATP4         | ENSG00000131508 UBE2D2       | ENSG00000131941 RHPN2          |
|         | ENSG00000134760 DSG1           | ENSG00000135220 UGT2A3         | ENSG00000135763 KIAA0133     | ENSG00000140043 ZADH1          | ENSG00000154310 TNIK         | ENSG00000155329 ZCCHC10      | ENSG00000161571 Q5YKG5_HUMAN | ENSG00000169239 CA5B           |
|         | ENSG00000174298 NP_694572.1    | ENSG00000175066 GK5            | ENSG00000176681 LRRC37A2     | ENSG00000177301 KCN2A          | ENSG00000178538 CA8          | ENSG00000180233 ZNRFR2       | ENSG00000182333 LIPF         | ENSG00000187772 LIN28B         |
|         | ENSG00000188419 CHM            | ENSG00000189127 NP_001004441.1 | ENSG00000198440 ZNF583       |                                |                              |                              |                              |                                |
| TACATAT | ENSG000000022556 NLRP2         | ENSG00000047644 WWC3           | ENSG00000064309 CDON         | ENSG00000100591 AHS1A          | ENSG00000102802 C13orf33     | ENSG00000104870 FCGRT        | ENSG00000105613 MAST1        | ENSG00000116667 C1orf21        |
|         | ENSG00000124226 ZNF313         | ENSG00000124733 MEAL           | ENSG00000128849 CGNL1        | ENSG00000130294 KIF1A          | ENSG00000156030 C14orf43     | ENSG00000162734 PEA15        | ENSG00000166261 ZNF202       | ENSG00000167941 SOST           |
|         | ENSG00000169410 PTPN9          | ENSG00000170545 NM_001031628.1 | ENSG00000175202 HIGD2B       | ENSG00000178235 SLITRK1        | ENSG00000179388 EGR3         | ENSG00000188042 ARL4C        | ENSG00000204274 Q6ZSG4_HUMAN | ENSG00000033867 SLC4A7         |
|         | ENSG000000044524 EPHA3         | ENSG00000067646 ZFY            | ENSG00000093183 SEC22C       | ENSG00000104472 CHRAC1         | ENSG00000104689 TNFRSF10A    | ENSG00000109272 PF4V1        | ENSG00000112539 C6orf118     | ENSG00000112541 PDE10A         |
|         | ENSG00000114487 MORC1          | ENSG00000114686 MRPL3          | ENSG00000114857 NKRTR        | ENSG00000115840 SLC25A12       | ENSG00000115934 PPL13        | ENSG00000131931 THAP1        | ENSG00000134419 RPS15A       | ENSG00000137558 PT15           |
|         | ENSG00000146360 GPR6           | ENSG00000151690 NP_060164.3    | ENSG00000152092 ASTN1        | ENSG00000152253 SPC25          | ENSG00000152503 TRIM36       | ENSG00000154611 PSMA8        | ENSG00000155970 EPHA2        | ENSG00000159082 SYNJ1          |
|         | ENSG00000163606 CD200R1        | ENSG00000164830 OXR1           | ENSG00000165355 FBXO33       | ENSG00000170542 SERPINB9       | ENSG00000171988 JMJD1C       | ENSG00000177301 KCN2A        | ENSG00000177599 ZNF491       | ENSG00000182827 ACBD3          |
|         | ENSG00000183336 BOLA2          | ENSG00000183354 KIAA2026       | ENSG00000185862 EVI2B        | ENSG00000186130 ZBTB6          | ENSG00000197347 Q6ZVE3_HUMAN |                              |                              |                                |
| TACATTA | ENSG00000100997 ABHD12         | ENSG00000116198 KIAA0562       | ENSG00000121281 ADCY7        | ENSG00000123643 SLC36A1        | ENSG00000125514 C20orf51     | ENSG00000143093 FAM40A       | ENSG00000143409 FAM63A       | ENSG00000143632 ACTA1          |
|         | ENSG00000145192 AHS3           | ENSG00000145949 SGK85_HUMAN    | ENSG00000151474 FRMD4A       | ENSG00000158470 B4GALT5        | ENSG00000159263 SIM2         | ENSG00000164051 CCDC51       | ENSG00000166863 TAC3         | ENSG00000167604 NP_640332.1    |
|         | ENSG00000168350 DEGS2          | ENSG00000176700 SCAND2         | ENSG00000176723 Q8N446_HUMAN | ENSG00000177156 TALDO1         | ENSG00000178188 SH2B1        | ENSG00000181722 ZBTB20       | ENSG00000187095 LILRA2       | ENSG00000196126 HLA-DRB1       |
|         | ENSG00000197283 SYNGAP1        | ENSG00000198077 CYP2A7         | ENSG00000203945 Q5JQJ1_HUMAN | ENSG00000204499 Q6P6C6_HUMAN   | ENSG00000204663 DBF4         | ENSG00000204731 CDH10        | ENSG000002049618 ARID1B      | ENSG00000078177 N4BP2_HUMAN    |
|         | ENSG000000085719 CPNE3         | ENSG00000092140 KIAA1333       | ENSG00000104755 ADAM2        | ENSG00000105835 PBEF1          | ENSG00000107105 ELAVL2       | ENSG00000110172 CHORDC1      | ENSG00000115008 IL1A         | ENSG00000118267 ZNF271         |
|         | ENSG00000122507 BBS9           | ENSG00000128654 MTX2           | ENSG00000138231 DBR1         | ENSG00000138293 NCOA4          | ENSG00000141279 NPEPPS       | ENSG00000145681 HAPLN1       | ENSG00000152193 C13orf7      | ENSG00000154545 MAGED4         |
|         | ENSG00000154997 NP_997249.1    | ENSG00000163602 RYBP           | ENSG00000164484 KIAA1913     | ENSG00000166503 HDGR3_HUMAN    | ENSG00000166896 XRCC6BP1     | ENSG00000170967 DDI1         | ENSG00000171564 FGB          | ENSG00000176055 NP_981951.1    |
|         | ENSG00000178604 NP_001034973.1 | ENSG00000179008 C14orf39       | ENSG00000180479 ZNF571       | ENSG00000182004 SNRPE          | ENSG00000187243 MAGED4B      | ENSG00000198448 Q8N649_HUMAN | ENSG00000205279 CTXN3        |                                |
| TACATTT | ENSG00000085831 C1orf34        | ENSG00000089057 SLC23A2        | ENSG00000106211 HSPB1        | ENSG00000125810 CD93           | ENSG00000130032 PRRG3        | ENSG00000131188              |                              |                                |



|          |                                |                              |                                |                              |                                |                              |                              |                                |
|----------|--------------------------------|------------------------------|--------------------------------|------------------------------|--------------------------------|------------------------------|------------------------------|--------------------------------|
|          | ENSG00000196139 AKR1C3         | ENSG00000198237 GUSL1_HUMAN  | ENSG00000203941 Q5JVP7_HUMAN   | ENSG00000204218 RGL2         | ENSG00000204561 FAM75B         | ENSG0000064012 CASP8         | ENSG0000083937 CHMP2B        | ENSG00000100902 PSMA6          |
|          | ENSG00000101049 SGK2           | ENSG00000101752 MIB1         | ENSG00000105968 H2AFV          | ENSG00000131951 LRRC9        | ENSG00000136636 KCTD3          | ENSG00000138376 BARD1        | ENSG00000145246 ATP10D       | ENSG00000152443 ZNF776         |
|          | ENSG00000152969 JAKMIP1        | ENSG00000153347 FAM81B       | ENSG00000156671 SAMD8          | ENSG00000172380 GNG12        | ENSG00000175646 PRM1           | ENSG00000186480 INSIG1       | ENSG00000187676 B3GALT1      | ENSG00000196865 NHLRC2         |
| TACCCAG  | ENSG00000206131 Q6ZS21_HUMAN   | ENSG0000040531 CTNS          | ENSG00000734370 ATP2A3         | ENSG0000099949 LZTR1         | ENSG00000107954 NEURL          | ENSG00000108788 MLX          | ENSG00000124557 BTN1A1       | ENSG00000126247 CAPNS1         |
|          | ENSG00000126267 COX6B1         | ENSG00000127952 STYXL1       | ENSG00000131400 NAPSA          | ENSG00000131400 NAPSA        | ENSG00000131467 PSME3          | ENSG00000137409 MTCH1        | ENSG00000140650 PMM2         | ENSG00000142961 MOBK2C         |
|          | ENSG00000148200 NR6A1          | ENSG00000160325 C9orf7       | ENSG00000163221 S100A12        | ENSG00000165887 ANKRD2       | ENSG00000166317 SYNPO2L        | ENSG00000167861 C17orf28     | ENSG00000169899 Q9GMA9_HUMAN | ENSG00000174307 PHLDA3         |
|          | ENSG00000177807 KCNJ10         | ENSG00000179914 ITLN1        | ENSG00000180806 HOXC9          | ENSG00000181035 SLC25A42     | ENSG00000188026 NP_847884.1    | ENSG00000197364 S100A7L2     | ENSG00000197496 SLC2A10      | ENSG00000197982 C1orf122       |
|          | ENSG00000203708 Q6ZU99_HUMAN   | ENSG00000204483 Q8N925_HUMAN | ENSG00000206066 IGLL3          | ENSG000000087095 NLK         | ENSG00000113441 LNPEP          | ENSG00000133193 FAM104A      | ENSG00000136111 TBC1D4       | ENSG00000136937 NCBP1          |
|          | ENSG00000138829 FBN2           | ENSG00000139209 SLC38A4      | ENSG00000141655 TNFRSF11A      | ENSG00000148798 INA          | ENSG00000161634 DCD            | ENSG00000162374 ELAVL4       | ENSG00000169064 NM_024687.2  | ENSG00000170891 CYTL1          |
| TACCCAT  | ENSG00000178502 KLHL11         | ENSG00000180787 ZFP3         | ENSG00000184517 ZFP1           | ENSG00000196653 ZNF502       | ENSG00000197312 RSC1A1         | ENSG00000205835 LOC647309    |                              |                                |
|          | ENSG00000092529 CAPN3          | ENSG00000102076 OPN1LW       | ENSG00000105376 ICAM5          | ENSG00000108518 PFN1         | ENSG00000111641 NOL1           | ENSG00000112079 STK38        | ENSG00000116983 HPCAL4       | ENSG00000124678 TCP11          |
|          | ENSG00000124782 RREB1          | ENSG00000138867 C22orf13     | ENSG00000141084 RANBP10        | ENSG00000147380 OPN1MW       | ENSG00000157379 DHRS1          | ENSG00000164674 SYTL3        | ENSG00000166160 OPN1MW2      | ENSG00000169777 TAS2R1         |
|          | ENSG00000171777 RASGRP4        | ENSG00000177098 SCN4B        | ENSG00000178241 Q9P0D4_HUMAN   | ENSG00000197965 MPZL1        | ENSG00000204054 Q6ZSN9_HUMAN   | ENSG00000062650 WAPAL        | ENSG00000072274 TFRC         | ENSG00000102144 PGK1           |
|          | ENSG00000109667 SLC2A9         | ENSG00000118762 PKD2         | ENSG00000125676 THOC2          | ENSG00000139131 YARS2        | ENSG00000139318 DUSP6          | ENSG00000153814 JAZF1        | ENSG00000166349 RAG1         | ENSG00000178202 KDEL2          |
| TACCCCC  | ENSG0000079432 CIC             | ENSG00000095059 DHPS         | ENSG00000102109 PCSK1N         | ENSG00000102225 PCTK1        | ENSG00000107872 FBXL15         | ENSG00000114353 GNAI2        | ENSG00000129245 FXR2         | ENSG00000130711 PRDM12         |
|          | ENSG00000142513 ACPT           | ENSG00000160877 BTBD14B      | ENSG00000162148 C11orf66       | ENSG00000162511 LAPTM5       | ENSG00000163283 ALPPL2         | ENSG00000166025 AMOTL1       | ENSG00000167748 KCLK1        | ENSG00000169738 DCXR           |
|          | ENSG00000171345 KRT19          | ENSG00000175003 SLC22A1      | ENSG00000183785 PEX26          | ENSG00000204550 LOC388564    | ENSG00000205061 Q6ZUP2_HUMAN   | ENSG00000205710 Q6ZR85_HUMAN | ENSG00000076382 SPAG5        | ENSG00000081923 ATP8B1         |
|          | ENSG00000106105 GARS           | ENSG00000111707 SUDS3        | ENSG00000153707 PTPRD          | ENSG00000154174 TOMM70A      | ENSG00000161813 LARP4          | ENSG00000163110 PDLIM5       | ENSG00000165323 FAT3         | ENSG00000167098 SPAG4L         |
|          | ENSG00000168297 PKX            | ENSG00000179796 LRRC3B       | ENSG00000196233 LCOR           | ENSG00000204469 BAT2         | ENSG00000204472 AIF1           | ENSG00000205054 Q6UXP8_HUMAN |                              |                                |
| TACCCCTG | ENSG00000066135 JMJD2A         | ENSG00000072840 EVC          | ENSG00000090512 TMEM11         | ENSG00000103111 MON1B        | ENSG00000110641 TMEM109        | ENSG00000125611 CHCHD5       | ENSG00000136925 C9orf97      | ENSG00000139725 RHOF           |
|          | ENSG00000141744 PNMT           | ENSG00000143321 HDGF         | ENSG00000147140 NONO           | ENSG00000147804 SLC39A4      | ENSG00000148606 POLR3A         | ENSG00000148814 LRRC27       | ENSG00000163362 C1orf106     | ENSG00000164047 CAMP           |
|          | ENSG00000165714 LOH12CR1       | ENSG00000165828 PRAP1        | ENSG00000169418 NPR1           | ENSG00000169877 ERAF         | ENSG00000170545 NM_001031628.1 | ENSG00000173585 CCR9         | ENSG00000173959 RBM14        | ENSG00000176753 NP_001034994.1 |
|          | ENSG00000181625 GYD2           | ENSG00000204775 Q4G0D9_HUMAN | ENSG00000038945 MSR1           | ENSG00000104044 OCA2         | ENSG00000124172 ATP5E          | ENSG00000125414 MYH2         | ENSG00000127831 VIL1         | ENSG00000132207 SULT1A3        |
|          | ENSG00000133106 EPST11         | ENSG00000135821 GLUL         | ENSG00000138134 STAMPB1        | ENSG00000141076 CIRH1A       | ENSG00000143256 PFND2          | ENSG00000145491 ROPN1L       | ENSG00000145734 BDP1         | ENSG00000151849 CENPJ          |
|          | ENSG00000152484 USP12          | ENSG00000163430 FSTL1        | ENSG00000163749 NP_001036249.1 | ENSG00000163947 ARHGEP3      | ENSG00000165195 PIGA           | ENSG00000166343 ZMYND17      | ENSG00000168264 IRF2BP2      | ENSG00000168515 SCGB1D1        |
|          | ENSG00000169688 MT1B           | ENSG00000173113 TR112_HUMAN  | ENSG00000175336 APOF           | ENSG00000180389 NR_002162.1  | ENSG00000183475 ASB7           | ENSG00000197702 PARVA        | ENSG00000204289 C17orf86     | ENSG00000206367 Q6ZR26_HUMAN   |
| TACCTAA  | ENSG0000068903 SIRT2           | ENSG00000088832 FKBP1A       | ENSG00000095015 MAP3K1         | ENSG00000101391 CDK5RAP1     | ENSG00000101407 KIAA0406       | ENSG00000103932 RPAP1        | ENSG00000122543 ONCO_HUMAN   | ENSG00000126602 TRAP1          |
|          | ENSG00000133105 RXFP2          | ENSG00000133937 GSC          | ENSG00000134216 CHIA           | ENSG00000135175 OCM          | ENSG00000137077 CCL21          | ENSG00000141480 ARRB2        | ENSG00000141505 ASGR1        | ENSG00000156413 FUT6           |
|          | ENSG00000157765 SLC34A2        | ENSG00000161798 AQP5         | ENSG00000162194 C11orf48       | ENSG00000163545 NUAK2        | ENSG00000164674 SYTL3          | ENSG00000170291 C17orf81     | ENSG00000170525 PFKFB3       | ENSG00000172724 CCL19          |
|          | ENSG00000184599 FAM19A3        | ENSG00000186825 Q580R0-2     | ENSG00000198225 Q5VWH2_HUMAN   | ENSG00000198502 HLA-DRB5     | ENSG00000203883 SOX18          | ENSG00000205434 Q6ZU34_HUMAN | ENSG00000037965 HOXC8        | ENSG00000070367 EXOC5          |
|          | ENSG00000071537 SEL1L          | ENSG00000082482 CKNK2        | ENSG00000088205 DDX18          | ENSG00000097046 CDC7         | ENSG00000107984 DKK1           | ENSG00000112541 PDE10A       | ENSG00000113441 LNPEP        | ENSG00000119041 GTF3C3         |
|          | ENSG00000119203 CPSF3          | ENSG00000121486 C1orf25      | ENSG00000122042 UBL3           | ENSG00000131791 PRKAB2       | ENSG00000133103 COG6           | ENSG00000133703 KRAS         | ENSG00000133704 IPO8         | ENSG00000133863 TEX15          |
|          | ENSG00000136754 ABI1           | ENSG00000139173 TMEM117      | ENSG00000143653 SCCPDH         | ENSG00000145545 SRD5A1       | ENSG00000150637 CD226          | ENSG00000152455 SUV39H2      | ENSG00000154719 MRPL39       | ENSG00000157230 LOC728132      |
|          | ENSG00000164022 SCYE1          | ENSG00000169905 TOR1AIP2     | ENSG00000198689 SLC9A6         | ENSG00000198814 GK           |                                |                              |                              |                                |
| TACCTCA  | ENSG00000023902 PLEKH01        | ENSG00000073792 IGF2BP2      | ENSG00000091073 DTX2           | ENSG00000099804 CDC34        | ENSG00000107960 OBFC1          | ENSG00000118971 CCND2        | ENSG00000130508 PXDN         | ENSG00000135441 BLOC1S1        |
|          | ENSG00000136731 UCGGL1         | ENSG00000143546 S100A8       | ENSG00000155846 PPARGC1B       | ENSG00000159217 IGF2BP1      | ENSG00000159433 STARD9         | ENSG00000162650 ATXN7L2      | ENSG00000169921 Q75L30_HUMAN | ENSG00000171119 NRTN           |
|          | ENSG00000172053 QRS            | ENSG00000179361 ARID3B       | ENSG00000182378 PLCXD1         | ENSG00000187681 ORM1         | ENSG00000197948 FCHSD1         | ENSG00000204125 Q53S21_HUMAN | ENSG00000204154 ORM2         | ENSG00000010539 ZNF200         |
|          | ENSG00000042317 SPATA7         | ENSG00000092531 SNAP23       | ENSG00000134323 MYCN           | ENSG00000135297 MTO1         | ENSG00000135535 CD164          | ENSG00000136770 DNAJC1       | ENSG00000141429 GALNT1       | ENSG00000150593 PDCD4          |
|          | ENSG00000164654 NP_061878.3    | ENSG00000165449 SLC16A9      | ENSG00000171365 CLCN5          | ENSG00000177058 NP_775785.1  | ENSG00000177917 ARL6IP6        | ENSG00000179476 C14orf28     | ENSG00000182263 FIGN         | ENSG00000187109 NAP1L1         |
|          | ENSG00000187772 LIN28B         |                              |                                |                              |                                |                              |                              |                                |
|          | perfect: TACCTCA TGAGGTA       | hsa-let-7e                   | TGAGGTAaggaggtgtgatagt         | 0                            |                                |                              |                              |                                |
|          | perfect: TACCTCA TGAGGTA       | hsa-let-7f                   | TGAGGTAgttagattgtgatagt        | 0                            |                                |                              |                              |                                |
|          | perfect: TACCTCA TGAGGTA       | hsa-let-7a                   | TGAGGTAgttaggtgtgatagt         | 0                            |                                |                              |                              |                                |
|          | perfect: TACCTCA TGAGGTA       | hsa-let-7b                   | TGAGGTAgttaggtgtgtgagt         | 0                            |                                |                              |                              |                                |
| TACCTCC  | ENSG00000055957 ITI1           | ENSG00000071894 CPSF1        | ENSG00000077274 CAPN6          | ENSG00000105419 Q99687-2     | ENSG00000106367 AP1S1          | ENSG00000114013 CD86         | ENSG00000114993 RTKN         | ENSG00000125084 WNT1           |
|          | ENSG00000130528 HRC            | ENSG00000131475 VPS25        | ENSG00000135390 ATP5G2         | ENSG00000139547 RDH16        | ENSG00000143473 KCNH1          | ENSG00000152082 FAM128B      | ENSG00000172590 MRPL52       | ENSG00000172731 LRRC20         |
|          | ENSG00000173221 FAM128A        | ENSG00000182541 LIMK2        | ENSG00000185739 SRC            | ENSG00000186654 ARHGAP8      | ENSG00000187170 LCE4A          | ENSG00000187838 PLSCR3       | ENSG00000188038 NRN1L        | ENSG00000196153 Q8NAB5_HUMAN   |
|          | ENSG00000082153 BZW1           | ENSG00000087095 NLK          | ENSG00000094880 CDC23          | ENSG00000108039 XPPEP1       | ENSG00000109182 NP_079363.1    | ENSG00000110852 CLEC2B       | ENSG00000125355 FAM70A       | ENSG00000129422 MTUS1          |
|          | ENSG00000129696 C8orf41        | ENSG00000135476 ESPL1        | ENSG00000136891 TEX10          | ENSG00000136933 RABEPK       | ENSG00000155592 ZKSCAN2        | ENSG00000156831 NSMCE2       | ENSG00000162852 C1orf71      | ENSG00000163104 SMARCD1        |
|          | ENSG00000164825 DEFB1          | ENSG00000178999 AURKB        | ENSG00000179144 GIMAP7         | ENSG00000182457 NR_002323.1  | ENSG00000196270 Q6ZWE7_HUMAN   | ENSG00000196433 ASMT         | ENSG00000196730 DAPK1        | ENSG00000198477 SUHW2          |
|          | ENSG00000198855 NP_009007.2    | ENSG00000204104 TRAF3IP1     | ENSG00000204289 C17orf86       |                              |                                |                              |                              |                                |
| TACCTCT  | ENSG00000006695 COX10          | ENSG00000056345 ITGB3        | ENSG00000104833 TUBB4          | ENSG00000107551 RASSF4       | ENSG00000110583 NAT11          | ENSG00000112619 PRPH2        | ENSG00000114737 CISH         | ENSG00000116667 C1orf21        |
|          | ENSG00000124104 SNX21          | ENSG00000128311 TST          | ENSG00000132716 WDR42A         | ENSG00000135503 ACVR1B       | ENSG00000143140 GJA5           | ENSG00000144031 ANKRD53      | ENSG00000149428 HYOU1        | ENSG00000156398 SFXN2          |
|          | ENSG00000163531 NFASC          | ENSG00000163993 S100P        | ENSG00000167625 ZNF526         | ENSG00000170214 ADRA1B       | ENSG00000172936 MYD88          | ENSG00000176422 SPRYD4       | ENSG00000184451 CCR10        | ENSG00000187164 KIAA1598       |
|          | ENSG00000188167 NP_001034859.1 | ENSG00000198929 NOS1AP       | ENSG00000204681 GABBR1         | ENSG00000205610 Q4G105_HUMAN | ENSG00000067334 DNTTIP2        | ENSG00000119048 UBE2B        | ENSG00000119401 TRIM32       | ENSG00000129317 PUS7L          |
|          | ENSG00000136634 ILL0           | ENSG00000138646 HERC5        | ENSG00000143727 ACP1           | ENSG00000149313 AASDHPPT     | ENSG00000153574 RPTA           | ENSG00000153914 SFRS12       | ENSG00000163681 SLMAP        | ENSG00000164089 AGXT2L1        |
|          | ENSG00000164338 UTP15          | ENSG00000171502 COL24A1      | ENSG00000172840 PDP2_HUMAN     | ENSG00000173209 AHS2         | ENSG00000181322 TXNDC6         | ENSG00000183035 CYLC1        | ENSG00000184863 PRR8         | ENSG00000196967 ZNF585A        |
|          | perfect: TACCTCT AGAGGTA       | hsa-miR-202                  | AGAGGTAtagggcatgggaaaa         | 0                            |                                |                              |                              |                                |
|          | perfect: TACCTCT AGAGGTA       | hsa-let-7d                   | AGAGGTAgttaggttgcataagt        | 0                            |                                |                              |                              |                                |
| TACCTGT  | ENSG00000011304 PTBP1          | ENSG00000070404 FSTL3        | ENSG00000125741 OPA3           | ENSG00000131797 C16orf67     | ENSG00000135213 POM121         | ENSG00000145936 KCNMB1       | ENSG00000157152 SYN2         | ENSG00000157837 PSL4_HUMAN     |
|          | ENSG00000158805 ZNF276         | ENSG00000162714 ZNF496       | ENSG00000166025 AMOTL1         | ENSG00000166619 BLCAP        | ENSG00000173862 Q9NWP0_HUMAN   | ENSG00000176490 DIRAS1       | ENSG00000178159 Q8N8A0_HUMAN | ENSG00000180471 C9orf31        |
|          | ENSG00000182149 KIAA0174       | ENSG00000187147 C1orf164     | ENSG00000196313 NP_742017.1    | ENSG00000206045 LOC644844    | ENSG00000012983 MAP4K5         | ENSG00000065485 PDIA5        | ENSG00000100796 SMEK1        | ENSG00000105851 PIK3CG         |
|          | ENSG00000111276 CDKN1B         | ENSG00000115084 SLC35F5      | ENSG00000115944 COX7A2L        | ENSG00000117222 RBBP5        | ENSG00000117751 PPP1R8         | ENSG00000119866 BCL11A       | ENSG00000137492 PRKRIR       | ENSG00000137871 SUHW4          |
|          | ENSG00000139826 ABHD13         | ENSG00000141668 CBLN2        | ENSG00000159200 DSCR1          | ENSG00000163421 PROK2        | ENSG00000164283 ESM1           | ENSG00000166206 GABRB3       | ENSG00000167637 ZNF345       | ENSG00000170088 NP_689894.1    |
|          | ENSG00000170160 Q6ZU57_HUMAN   | ENSG00000180777 ANKRD30B     | ENSG00000183780 SLC35F3        | ENSG00000205423 TMEM188      |                                |                              |                              |                                |
| TACGAA   | ENSG00000056487 PHF21B         | ENSG00000101146 RAE1         | ENSG00000101452 DRX35          | ENSG00000103653 CSK          | ENSG00000105339                |                              |                              |                                |

TACGCCA ENSG00000089060|SLC24A6 ENSG00000092445|TYRO3 ENSG00000100401|RANGAP1 ENSG00000104386|XR\_017860.1 ENSG00000108244|KRT23 ENSG00000117298|ECE1 ENSG00000121454|LHX4 ENSG00000126457|PRMT1 ENSG00000134871|COL4A2 ENSG00000149480|MTA2 ENSG00000154198|Q8N1L4\_HUMAN ENSG00000162494|LRRRC38 ENSG00000162711|NLRP3 ENSG00000163874|ZC3H12A ENSG00000164385|C6orf195 ENSG00000170054|SERPINA9 ENSG00000172183|ISG20 ENSG00000182379|NXP4 ENSG00000182896|TMEM95 ENSG00000184508|HDC3 ENSG00000184654|YV006\_HUMAN ENSG00000185236|RAB11B ENSG00000198910|LICAM ENSG00000204335|SP5 ENSG00000204713|TRIM27 ENSG00000048028|USP28 ENSG00000050165|DKK3 ENSG00000066651|TRMT11 ENSG00000101843|PSMD10 ENSG00000102910|LONP2 ENSG00000104472|CHRAC1 ENSG00000113600|C9 ENSG00000116977|LGAL88 ENSG00000122194|PLG ENSG00000124535|WRN1P1 ENSG00000129003|VPS13C ENSG00000138119|FER1L3 ENSG00000144935|TRPC1 ENSG00000145919|FAM44B ENSG00000148110|HTATL1 ENSG00000151792|CTS0 ENSG00000152760|TCTEX1D1 ENSG00000164253|WDR41 ENSG00000164338|UTP15 ENSG00000166173|LARP6 ENSG00000168679|SLC16A4 ENSG00000174429|ABRA ENSG00000176907|C8orf4 ENSG00000181211|Q8NA17\_HUMAN ENSG00000204007|GLT6D1 ENSG00000100348|TXN2 ENSG00000100721|TCL1A ENSG00000108950|FAM20A ENSG00000115694|STK25 ENSG00000128340|RAC2 ENSG00000129680|MAP7D3 ENSG00000130598|TNNI2 ENSG00000136274|NACAD ENSG00000142945|KIF2C ENSG00000143466|IKBKE ENSG00000146090|RASGEF1C ENSG00000159069|FBXW5 ENSG00000173457|PPP1R14B ENSG00000175229|GAL3ST3 ENSG00000175229|GAL3ST3 ENSG00000180525|C10orf108 ENSG00000181977|PYY2 ENSG00000183114|FAM43B ENSG00000184009|ACTG1 ENSG00000204539|CDSN ENSG0000019186|CYP24A1 ENSG00000058056|USP13 ENSG00000065978|YBX1 ENSG00000075785|RAB7A ENSG00000078589|P2RY10 ENSG00000084073|ZMPSTE24 ENSG00000085382|HACE1 ENSG00000099256|PRTFDC1 ENSG00000100196|KDELR3 ENSG00000114209|PDCD10 ENSG00000119950|MXI1 ENSG00000130449|ZSWIM6 ENSG00000130699|TAF4 ENSG00000131238|PPT1 ENSG00000134758|RNFL38 ENSG00000136842|TMOD1 ENSG00000137364|TPMT ENSG00000138669|PRKG2 ENSG00000139508|SLC46A3 ENSG00000151413|NUBPL ENSG00000153827|TRIP12 ENSG00000154645|CHODL ENSG00000159086|C21orf66 ENSG00000164294|NP\_001008398.1 ENSG00000166752|TMEM83 ENSG00000178105|DDX10 ENSG00000197497|ZNF665 ENSG00000204709|C6orf100 ENSG00000206367|Q6ZR26\_HUMAN

TACGGAT ENSG00000078246|TULP3 ENSG00000088367|EPB41L1 ENSG00000100266|PAC3IN2 ENSG00000108439|PNPO ENSG00000126746|ZNF384 ENSG00000128266|GNAZ ENSG00000130402|ACTN4 ENSG00000131669|NINJ1 ENSG00000132361|KIAA0664 ENSG00000137343|C6orf134 ENSG00000143479|DYRK3 ENSG00000143569|UBAP2L ENSG00000147382|FAM58A ENSG00000158869|FCER1G ENSG00000160469|BRSK1 ENSG00000161955|TNFSF13 ENSG00000166863|TAC3 ENSG00000171160|C10orf83 ENSG00000171954|NP\_775754.1 ENSG00000173039|RELA ENSG00000176182|NP\_00112661.1 ENSG00000177551|NHLH2 ENSG00000183117|CSMD1 ENSG00000184314|Q9H9T1\_HUMAN ENSG00000196331|HIST1H2BO ENSG00000204157|NP\_001013664.1 ENSG00000205020|CCL4L1 ENSG00000071909|MYO3B ENSG00000104231|ZFAND1 ENSG00000110484|SCGB2A2 ENSG00000112115|IL17A ENSG00000121380|BCL2L14 ENSG00000124479|NDP ENSG00000134443|GRP ENSG00000137876|C15orf15 ENSG00000140395|WDR61 ENSG00000143971|ETAA1 ENSG00000146733|SPFH ENSG00000147416|ATP6V1B2 ENSG00000150403|TMCO3 ENSG00000154518|ATP5G3 ENSG00000168129|DHFPR1 ENSG00000173515|C9orf53 ENSG00000173926|MARCH3 ENSG00000176007|C9orf51 ENSG00000178397|NP\_001032240.1 ENSG00000180336|NP\_001028831.1 ENSG00000187372|PCDHB13 ENSG00000187742|SECISBP2 ENSG00000204365|C10orf126 ENSG00000204852|Q2MV58-6 ENSG00000211446|SEPP1 ENSG00000105972|C7orf20 ENSG00000106348|IMPDH1 ENSG00000116017|ARID3A ENSG00000118689|FOXO3A ENSG00000171655|MBD3 ENSG00000076108|BAZ2A ENSG00000085831|C1orf34 ENSG00000099377|HSD3B7 ENSG00000105972|C7orf20 ENSG00000106348|IMPDH1 ENSG00000116017|ARID3A ENSG00000118689|FOXO3A ENSG00000122254|HS3ST2 ENSG00000130702|LAMA5 ENSG00000132510|JMD3 ENSG00000136840|ST6GALNAC4 ENSG00000144712|CAND2 ENSG00000161921|CXCL16 ENSG00000164108|Q9HAJ2\_HUMAN ENSG00000166140|ZFYVE19 ENSG00000166444|ST5 ENSG00000166828|SCN1G ENSG00000169174|PCK9 ENSG00000171357|C1orf190 ENSG00000173404|INSM1 ENSG00000174460|ZCCHC12 ENSG00000176615|LOC652153 ENSG00000185361|TNFAIP8L1 ENSG00000196432|Q9H5F0\_HUMAN ENSG00000013297|CLDN11 ENSG00000071575|TRIB2 ENSG00000082213|C5orf22 ENSG00000085721|RRN3 ENSG00000112299|VNN1 ENSG00000123908|EIF2C2 ENSG00000127314|RAP1B ENSG00000127507|EMR2 ENSG00000136144|RCBTB1 ENSG00000136381|IREB2 ENSG00000138041|SMEK2 ENSG00000138660|C4orf16 ENSG00000141469|SLC14A1 ENSG00000152689|RASGRP3 ENSG00000153147|SMARCA5 ENSG00000162437|RAVER2 ENSG00000177283|FZD8 ENSG00000177406|Q8N503\_HUMAN ENSG00000198793|FRAP1 ENSG00000203837|PNLIPRP3 ENSG00000206209|Q0P633\_HUMAN perfect: TACGGGT ACCCGTA hsa-miR-99b aACCCGTAgaacccgaccttgcg 1 perfect: TACGGGT ACCCGTA hsa-miR-100 aACCCGTAgatccggaacttgcg 1 perfect: TACGGGT ACCCGTA hsa-miR-99a aACCCGTAgatccggaacttgcg 1

TACGGTA ENSG00000001460|C1orf201 ENSG00000004848|ARX ENSG00000066136|NFYC ENSG00000071626|DAZAP1 ENSG00000100280|AP1B1 ENSG00000101421|CHMP4B ENSG00000103489|XYLT1 ENSG00000104524|PYCR1 ENSG00000105647|PIK3R2 ENSG00000105650|PDE4C ENSG00000112715|VEGFA ENSG00000113721|PDGFRB ENSG00000115758|ODC1 ENSG00000154040|CABYR ENSG00000165376|CLDN2 ENSG00000170100|Q96MU6-2 ENSG00000171427|NM\_145293 ENSG00000187638|NM\_207367 ENSG00000196787|HIST1H2AG ENSG00000197968|Q8N231\_HUMAN ENSG00000204013|Q6XYD6\_HUMAN ENSG00000091651|ORC6L ENSG00000100262|ARFGAP3 ENSG00000103037|SETD6 ENSG00000106524|ANKMY2 ENSG00000106609|C7orf42 ENSG00000108021|C10orf18 ENSG00000114346|ECT2 ENSG00000119514|GALNT12 ENSG00000133142|TCEAL4 ENSG00000136875|PRPF4 ENSG00000137571|SLCO5A1 ENSG00000138286|KIAA0974 ENSG00000143420|ENSA ENSG00000143514|TP53BP2 ENSG00000154217|PITPNCL1 ENSG00000162976|PQL3C ENSG00000163714|SR140\_HUMAN ENSG00000164484|KIAA1913 ENSG00000165985|C1QL3 ENSG00000179029|TMEM107 ENSG00000181449|SOX2 ENSG00000182986|NP\_997216.2 ENSG00000185477|GPRIN3 ENSG00000187054|TMPRSS11A ENSG00000188402|NP\_995324.1 ENSG00000197579|TOPORS ENSG00000198741|Q8N9C2\_HUMAN ENSG00000204789|ZNF204 ENSG00000211451|GNRH2 ENSG00000211452|DIO1 ENSG00000106948|AKNA ENSG00000111012|CYP27B1 ENSG00000111186|WNT5B ENSG00000125895|C20orf46 ENSG00000131044|TTLL9 ENSG00000103942|HOMER2 ENSG00000105137|SYDE1 ENSG00000105605|CACNG7 ENSG00000106948|AKNA ENSG00000111012|CYP27B1 ENSG00000111186|WNT5B ENSG00000125895|C20orf46 ENSG00000131044|TTLL9 ENSG00000133069|TMCC2 ENSG00000133874|RNFL22 ENSG00000134317|GRHL1 ENSG00000136630|HLX1 ENSG00000147140|NOMO ENSG00000148468|C10orf38 ENSG00000160339|FCN2 ENSG00000161558|TMEM143 ENSG00000166664|CHRFAM7A ENSG00000175344|CHRNA7 ENSG00000175564|UCP3 ENSG00000176894|PGAM5 ENSG00000177354|C10orf71 ENSG00000178554|Q8N8D4\_HUMAN ENSG00000178971|C17orf68 ENSG00000178977|C17orf44 ENSG00000179057|IGSF22 ENSG00000198213|NM\_207501 ENSG00000061676|NCKAP1 ENSG00000074603|DPP8 ENSG00000093183|SEC22C ENSG00000107938|C10orf137 ENSG00000126010|GRPR ENSG00000128891|CCDC32 ENSG00000130764|LRRC47 ENSG00000131844|MCCC2 ENSG00000135905|DOCK10 ENSG00000163466|ARPC2 ENSG00000168291|PDHB ENSG00000169062|UPF3A ENSG00000173915|USMG5 ENSG00000175928|LRRN1 ENSG00000176746|MAGEB6 ENSG00000185875|THNSL1 ENSG00000197121|PGAP1\_HUMAN ENSG00000204954|Q69YU5\_HUMAN ENSG00000116205|C1orf83 ENSG00000119408|NEK6 ENSG00000130714|POMT1 ENSG00000135820|NP\_997350.1 ENSG00000137331|IER3 ENSG00000139613|SMARCC2 ENSG00000156097|GPR61 ENSG00000162377|C1orf163 ENSG00000164334|NP\_877438.2 ENSG00000167112|TRUB2 ENSG00000168575|SLC20A2 ENSG00000168906|MAT2A ENSG00000175824|XR\_017847.1 ENSG00000175970|NP\_001074002.1 ENSG00000181991|MRPS11 ENSG00000197296|C20orf142 ENSG00000198034|RPS4X ENSG00000198500|Q96C21\_HUMAN ENSG00000204080|Q6ZRQ9\_HUMAN ENSG00000204423|C9orf33 ENSG00000206158|Q6ZVGA\_HUMAN ENSG00000000971|CFH ENSG00000023697|DERA ENSG00000046651|OFD1 ENSG000000058063|ATP11B ENSG00000066279|ASPM ENSG00000080910|CFHR1 ENSG00000081148|IMP62 ENSG00000083535|C13orf24 ENSG00000105954|NPVF ENSG00000106701|FSD1L ENSG00000111046|MYF6 ENSG00000124786|SLC35B3 ENSG00000139263|LRIG3 ENSG00000141141|DDX52 ENSG00000143756|FBXO28 ENSG00000154265|ABCA5 ENSG00000159228|CBR1 ENSG00000164406|LEAP2 ENSG00000166800|LDHAL6A ENSG00000177150|C18orf19 ENSG00000178127|NDUFV2 ENSG00000179873|NLRP11 ENSG00000188848|CCDC4

TACGTAT ENSG00000012124|CD22 ENSG000000666135|JMDJ2A ENSG000000666322|ELOVL1 ENSG00000072832|CRMP1 ENSG00000085978|ATG16L1 ENSG00000110801|PSMD9 ENSG00000126856|Q9NQW5-2 ENSG00000130675|HLXB9 ENSG00000132938|KIAA0774 ENSG00000141401|IMPA2 ENSG00000148468|C10orf38 ENSG00000150477|KIAA1328 ENSG00000163884|KLF15 ENSG00000164379|FOXQ1 ENSG00000166888|STAT6 ENSG00000166965|RCDD1 ENSG00000167491|GATAD2A ENSG00000171680|PLEKHG5 ENSG00000173714|WFIKKN2 ENSG00000177769|TSPAN4 ENSG00000178243|Q9orf62 ENSG00000182646|TMEM29 ENSG00000186827|TNFRSF4 ENSG00000187912|NP\_997273.2 ENSG00000196220|SRGAP3 ENSG00000198518|HIST1H4E ENSG00000204282|Q6YL35\_HUMAN ENSG000000008311|AASS ENSG000000082293|COL19A1 ENSG00000101040|ZMYND8 ENSG00000104408|EIF36 ENSG00000124490|CRISP2 ENSG00000125378|BMP4 ENSG00000152454|ZNF256 ENSG00000152463|OLAH ENSG00000168930|TRIM49 ENSG00000169126|ARMC4 ENSG00000170534|C2orf15 ENSG00000171823|FBXL14 ENSG00000172244|C5orf34 ENSG00000173827|AOAVR7\_HUMAN ENSG00000183801|OLFML1 ENSG00000183878|UTY ENSG00000197817|Q9UHS9\_HUMAN ENSG00000198553|KCNRG ENSG00000100263|RHBDD3 ENSG00000110844|PRPF40B ENSG00000125122|LRRC29 ENSG00000131061|ZNF341 ENSG00000131634|C16orf30 ENSG00000141401|IMPA2 ENSG00000143801|PSEN2 ENSG00000149090|NP\_001001991.1 ENSG00000153956|CACNA2D1 ENSG00000158517|NCF1 ENSG00000160916|ATP5J2 ENSG00000161082|BRUNOL5 ENSG00000162572|SCN1D1 ENSG00000165178|LOC648998 ENSG00000169918|OTUD7A ENSG00000170324|FRMPD2 ENSG00000174165|ZDHHC24 ENSG00000177030|DEAF1 ENSG00000182487|NCF1C ENSG00000185633|NDUFA4L2 ENSG00000204183|GDF5OS ENSG00000204273|HLC-DOB ENSG00000204344|STK19 ENSG00000205020|CCL4L1 ENSG00000205085|NP\_001012457.1 ENSG00000104213|PDGFRL ENSG00000105866|SP4 ENSG00000110852|CLEC2B ENSG00000113369|ARRDC3 ENSG00000116747|TROVE2 ENSG00000121858|TNFSF10 ENSG00000124151|NCOA3 ENSG00000133318|RTN3 ENSG00000135829|DHX9 ENSG00000152583|SPARCL1 ENSG00000155636|DRBP1\_HUMAN ENSG00000156219|ART3 ENSG00000162745|OLFML2B ENSG00000163114|PDHA2 ENSG00000163737|PF4 ENSG00000164326|CARTPT ENSG00000167383|CLMN ENSG00000167383|ZNF229 ENSG00000173928|C19orf39 ENSG00000165959|CLMN ENSG00000101945|SUV39H1 ENSG00000113722|CDX1 ENSG00000119703|C14orf140 ENSG00000125775|SDCBP2 ENSG00000126254|NP\_077297.2 ENSG00000132321|IQCA ENSG00000132911|NMUR2 ENSG00000173584|SMARCE1 ENSG0000010143627|PKLR ENSG000001056853|ZNF689 ENSG000001058483|FAM86C ENSG00000159337|PLA2G4D ENSG00000163612|XR\_017899.1 ENSG00000167085|PHB ENSG00000170122|FOXD4L1 ENSG00000174576|NPAS4 ENSG00000179148|ALOXE3 ENSG00000179165|PXT1 ENSG00000180219|FAM71C ENSG00000182490|TSSK2 ENSG00000183154|Q8NB20\_HUMAN ENSG00000184659|FOXD4L4 ENSG00000187164|KIAA1598 ENSG00000187559|FOXD4L3 ENSG00000196367|TRRAP ENSG00000204673|ART1S1 ENSG00000204779|FOXD4L5 ENSG00000204793|FOXD4L6 ENSG00000204828|FX4L4\_HUMAN ENSG00000000419|DPM1 ENSG00000070540|WIP11 ENSG00000075884|ARHGAP15 ENSG00000076067|RBMS2 ENSG00000109083|IFT20 ENSG00000109320|NFKB1 ENSG00000112110|MRPL18 ENSG00000115761|NOLL10 ENSG000001117262|GPR89A ENSG00000133636|NTS ENSG00000133858|CCDC131 ENSG00000134183|GNAT2 ENSG00000139180|NDUFA9 ENSG00000154263|ABCA10 ENSG00000154646|PRSS7 ENSG00000164749|HNF4G ENSG00000175054|ATR ENSG00000184492|FOXD4 ENSG00000188092|GPR89B ENSG00000196477|Q9UHU4\_HUMAN ENSG00000204217|BMPR2 ENSG00000204453|XR\_019357.1 ENSG00000002586|CD99 ENSG000000011454|RABGAP1 ENSG000000025800|KPN6A ENSG00000070371|CLTCL1 ENSG00000074660|SCARF1 ENSG00000089248|ERP29 ENSG00000092529|CAPN3 ENSG00000105290|APLP1 ENSG00000108518|PFN1 ENSG00000143373|ZNF687 ENSG00000147168|IL2RG ENSG00000155229|MMS19L ENSG00000161202|DVL3 ENSG00000166394|CYB5R2 ENSG00000167880|EVPL ENSG00000183978|CCDC56 ENSG00000187754|SSX2 ENSG00000197401|Q6ZTC5\_HUMAN ENSG00000204562|Q6ZU75\_HUMAN ENSG00000002267|FHL1 ENSG00000064726|BTBD1 ENSG00000101842|VSI61 ENSG00000111799|COL12A1 ENSG00000130770|ATPIF1 ENSG00000137691|C11orf70 ENSG00000137727|ARHGAP20 ENSG00000137975|CLCA2 ENSG00000139357|SLC5A8 ENSG00000147437|GNRH1 ENSG00000153923|CLCA3 ENSG00000154721|JAM2 ENSG00000157450|RNFL11 ENSG00000158485|CD1B ENSG00000166211|SPIC ENSG00000166479|TXNDC10 ENSG00000169688|MT1B ENSG00000170854|MINA ENSG00000196757|ZNF700 ENSG00000004487|AOF2 ENSG000000010671|BTX ENSG00000095319|NUP188 ENSG00000099622|CIRBP ENSG00000107815|PEO1 ENSG00000108576|SLC6A4 ENSG000001124664|SPDEF ENSG00000136463|CCDC44 ENSG00000137648|TMPRSS4 ENSG00000139514|SLC7A1 ENSG00000139546|TARBP2 ENSG00000143545|RAB13 ENSG00000148411|BTBD14A ENSG00000155428|TRIM74 ENSG00000163497|FEV ENSG00000169083|AR ENSG00000171403|KRT9 ENSG00000174264|Q4TT2\_HUMAN ENSG00000174943|KCTD13 ENSG00000176014|TUBB6 ENSG00000177469|PTRF ENSG00000178809|TRIM73 ENSG00000186190|C20orf185 ENSG00000197093|GAL3ST4 ENSG00000198131|ZNF544 ENSG00000005249|PRKAR2B ENSG00000044524|EPHA3 ENSG00000085224|ATRX ENSG00000099250|NRP1 ENSG00000102738|MRPS31 ENSG00000113369|ARRDC3 ENSG00000117280|RAB7L1 ENSG00000117477|C1orf114 ENSG00000132703|APCS ENSG00000134962|KLB ENSG00000136051|KIAA1033 ENSG00000138449|SLC40A1 ENSG00000145721|LIX1 ENSG00000161654|LSM12 ENSG00000163430|FSTL1 ENSG00000163673|DCLK3 ENSG00000165072|MAMDC2 ENSG00000165152|C9orf125 ENSG00000172239|PAIP1 ENSG00000182141|ZNF708 ENSG00000186448|ZNF197 ENSG00000187118|NP\_872329.1 ENSG00000198586|TLK1 ENSG00000198841|KTI12 ENSG00000096070|BRPF3 ENSG00000106077|ABHD11 ENSG00000106125|AQP1 ENSG00000106330|MOSPD3 ENSG00000108828|VAT1 ENSG00000109062|SLC9A3R1 ENSG00000115211|EIF2B4 ENSG00000122859|NEUROG3 ENSG00000130054|TMEM28 ENSG00000131477|RAMP2 ENSG00000143614|GATAD2B ENSG00000144580|RQCD1 ENSG00000148795|CYP17A1 ENSG00000158423|RIBC1 ENSG00000165948|FAM14B ENSG00000167323|STIM1 ENSG00000169059|VCX3A ENSG00000172653|C17orf66 ENSG00000173894|CBX2 ENSG00000175130|MARCKSL1 ENSG00000181085|MAPK15 ENSG00000182538|VCX ENSG00000188368|NP\_954979.2 ENSG00000188910|GJB3 ENSG00000197283|SYNGAP1 ENSG00000197364|SL100A7L2 ENSG00000197622|CDC42SE1 ENSG00000205642|VCX3B ENSG00000064763|MLSTD1 ENSG00000106105|GARS ENSG00000109670|FBXW7 ENSG00000119414|PPP6C ENSG00000128607|NP\_055812.1 ENSG00000147874|FAM29A ENSG00000148950|IMPP1L ENSG00000152213|ARL11 ENSG00000157869|RAB28 ENSG00000161980|POLR3K ENSG00000162645|GBP7 ENSG00000163449|TMEM169 ENSG00000164512|ANKRD55 ENSG00000166881|K0286\_HUMAN ENSG00000171365|CLCN5 ENSG00000173261|PLAC8L1 ENSG00000178163|NP\_444270.2 ENSG00000178965|C1orf173 ENSG00000183155|RAB1F ENSG00000183434|TFDP3 ENSG00000196776|CD47 ENSG000000064655|EYA2 ENSG00000089116|LHX5 ENSG00000099999|RNFL215 ENSG00000105486|LIG1 ENSG00000105568|PPP2R1A ENSG00000112478|VPS52 ENSG00000124641|TRFP ENSG00000129437|KLK14 ENSG00000133149|TEX13A ENSG00000140264|SERP2 ENSG00000149260|CAPN5 ENSG00000156931|VPS8 ENSG00000157483|MYOIE ENSG00000163793|DNAJC5G ENSG00000166961|NP\_689930.1 ENSG00000169598|DFFB ENSG00000169692|ACGPAT2 ENSG00000171219|CDC42BPG ENSG00000175334|BANF1 ENSG00000177042|TMEM80 ENSG00000182495|LDLOC1 ENSG00000185621|PSMD13 ENSG00000188257|PLA2G2A ENSG00000188529|Q9UI51\_HUMAN

|         |                              |                              |                                |                              |                              |                              |                                |                              |
|---------|------------------------------|------------------------------|--------------------------------|------------------------------|------------------------------|------------------------------|--------------------------------|------------------------------|
|         | ENSG00000204268 Q6ZVY1_HUMAN | ENSG00000204443 Q562T6_HUMAN | ENSG00000205191 NP_001070148.1 | ENSG00000013561 RNF14        | ENSG00000066739 C14orf103    | ENSG00000067560 RHOA         | ENSG00000075336 C18orf55       | ENSG00000095794 CREM         |
| TACTGAA | ENSG00000105497 ZNF175       | ENSG00000113916 BCL6         | ENSG00000124659 TBCC           | ENSG00000130844 ZNF331       | ENSG00000134253 TRIM45       | ENSG00000135315 KIAA1009     | ENSG00000151239 TWF1           | ENSG00000153561 RMND5A       |
|         | ENSG00000164794 KCNV1        | ENSG00000170903 KIAA1826     | ENSG00000177917 ARL6IP6        | ENSG00000183067 IGSF5        | ENSG00000184898 RBM43        | ENSG00000203797 DDO          |                                |                              |
|         | ENSG00000005100 DHX33        | ENSG00000007968 E2F2         | ENSG000000064393 H1PK2         | ENSG00000009089 KIF4A        | ENSG00000127952 STYXL1       | ENSG00000137135 C9orf100     | ENSG00000146535 GNAI2          | ENSG00000147059 SPIN2A       |
|         | ENSG00000147481 SNTG1        | ENSG00000148411 BTBD14A      | ENSG00000163794 UCN            | ENSG00000168026 TTC21A       | ENSG00000173210 ABLIM3       | ENSG00000175518 UBQLNL       | ENSG00000182022 ST4S6_HUMAN    | ENSG00000187223 LCE2D        |
|         | ENSG00000204626 Q6ZSR2_HUMAN | ENSG000000029363 BCLAF1      | ENSG000000048392 RRM2B         | ENSG000000081138 CDH7        | ENSG00000118620 ZNF430       | ENSG00000120341 LZTR2        | ENSG00000121871 SLITRK3        | ENSG00000122376 XR_015353.1  |
|         | ENSG00000123297 TSFM         | ENSG00000127863 TNFRSF19     | ENSG00000127914 AKAP9          | ENSG00000132388 UBE2G1       | ENSG00000141642 ELAC1        | ENSG00000144229 THSD7B       | ENSG00000146278 PNRC1          | ENSG00000155629 PK3AP1       |
|         | ENSG00000155755 ALS2CR4      | ENSG00000156467 UQCRC        | ENSG00000165322 ARHGAP12       | ENSG00000165874 FAM35A       | ENSG00000177182 NP_775790.1  | ENSG00000181450 ZNF678       | ENSG00000182827 ACBD3          | ENSG00000186628 FSD2         |
| TACTGCA | ENSG00000187118 NP_872329.1  | ENSG00000197008 ZNF138       | ENSG00000197989 C1orf79        |                              |                              |                              |                                |                              |
|         | ENSG00000053108 FSTL4        | ENSG00000103591 P34_HUMAN    | ENSG00000110721 CHKA           | ENSG00000111252 SH2B3        | ENSG00000121083 DYNLL2       | ENSG00000122188 LAX1         | ENSG00000131233 GJA10          | ENSG00000132205 EMILIN2      |
|         | ENSG00000136271 DDX56        | ENSG00000139641 FAM62A       | ENSG00000140474 ULK3           | ENSG00000159199 ATP5G1       | ENSG00000161618 ALDH16A1     | ENSG00000163814 CDCP1        | ENSG00000164309 CMYA5          | ENSG00000164711 LPAL2        |
|         | ENSG00000166171 NP_056263.1  | ENSG00000168329 CX3CR1       | ENSG00000170613 FAM71B         | ENSG00000171855 IFNB1        | ENSG00000180598 NP_057296.1  | ENSG00000182667 NTRI_HUMAN   | ENSG00000182712 MTCP1          | ENSG00000183632 NP_057296.1  |
|         | ENSG00000183682 BMP8A        | ENSG00000197174 O14606_HUMAN | ENSG00000197285 NR_001536.1    | ENSG00000205456 NP_057296.1  | ENSG00000205457 NP_057296.1  | ENSG00000206083 ZNF409       | ENSG00000102053 ZC3H12B        | ENSG00000106052 TAX1BP1      |
|         | ENSG00000114861 FOXp1        | ENSG00000117602 DSCR1L2      | ENSG00000120137 PANK3          | ENSG00000128578 FAM40B       | ENSG00000134318 ROCK2        | ENSG00000135018 UBQLN1       | ENSG00000136100 VPS36          | ENSG00000139973 SYT16        |
|         | ENSG00000144909 OSBPL11      | ENSG00000151690 NP_060164.3  | ENSG00000151789 ZNF659         | ENSG00000152254 G6PC2        | ENSG00000152601 MBNL1        | ENSG00000155329 ZCCHC10      | ENSG00000163636 PSMD6          | ENSG00000164190 NIPBL        |
|         | ENSG00000165156 ZHX1         | ENSG00000166170 BAG5         | ENSG00000168509 HFE2           | ENSG00000203717 SAMD5        | ENSG00000204869 IGFL4        | ENSG00000204937 Q6ZSS0_HUMAN | ENSG00000205036 NP_001001682.1 |                              |
| TACTGGC | ENSG000000095015 MAP3K1      | ENSG00000101493 ZNF516       | ENSG00000108671 PSMD11         | ENSG00000114113 RBP2         | ENSG00000115107 STEAP3       | ENSG00000116985 BMP8B        | ENSG00000124134 KCNB1          | ENSG00000130147 SH3BP4       |
|         | ENSG00000134369 NAV1         | ENSG00000135930 EIF4E2       | ENSG00000147255 IGSF1          | ENSG00000158104 HPD          | ENSG00000159189 C1QC         | ENSG00000160282 FTCD         | ENSG00000165282 PIGO           | ENSG00000168792 NP_937790.1  |
|         | ENSG00000168899 VAMP5        | ENSG00000176946 THAP4        | ENSG00000181722 ZBTB20         | ENSG00000198754 OXCT2        | ENSG00000205431 Q6UWF5_HUMAN | ENSG00000079931 MOXD1        | ENSG00000108298 RPL19          | ENSG00000114405 C3orf14      |
|         | ENSG00000119396 RAB14        | ENSG00000135018 UBQLN1       | ENSG00000138071 ACTR2          | ENSG00000138593 K0256_HUMAN  | ENSG00000138675 FGF5         | ENSG00000143157 POGK         | ENSG00000144802 NFKBIZ         | ENSG00000166211 SPIC         |
|         | ENSG00000173726 TOMM20       | ENSG00000175893 ZDHC21       | ENSG00000181004 BBS12          | ENSG00000182973 CNOT10       | ENSG00000184258 CDR1         | ENSG00000198169 ZNF251       | ENSG00000204104 TRAF3IP1       | ENSG00000204138 PHACTR4      |
| TACTGGT | ENSG00000205769 Q6ZUR9_HUMAN |                              |                                |                              |                              |                              |                                |                              |
|         | ENSG00000068024 HDAC4        | ENSG00000107147 KCNT1        | ENSG00000108219 TSPAN14        | ENSG00000111775 COX6A1       | ENSG00000117450 PRDX1        | ENSG00000129559 NEDD8        | ENSG00000131462 TUBG1          | ENSG00000134569 LRP4         |
|         | ENSG00000140612 SEC11A       | ENSG00000146192 FGD2         | ENSG00000148290 SURF1          | ENSG00000152669 CCNU         | ENSG00000158813 EDA          | ENSG00000164605 Q5T8I0_HUMAN | ENSG00000166823 MESP1          | ENSG00000166833 NAV2         |
|         | ENSG00000166851 PLK1         | ENSG00000167930 ITFG3        | ENSG00000180878 C11orf42       | ENSG00000181666 HKR1         | ENSG00000183684 THOC4        | ENSG00000185404 Q4ZG65_HUMAN | ENSG00000185608 MRPL40         | ENSG00000188525 NM_207480    |
|         | ENSG00000196126 HLA-DRB1     | ENSG00000198106 RUND2B       | ENSG00000198668 CALM1          | ENSG00000204080 Q6ZRH9_HUMAN | ENSG00000206149 NP_950246.1  | ENSG000000057657 PRDM1       | ENSG00000066777 ARFGEF1        | ENSG00000099250 NRP1         |
|         | ENSG00000104660 LEPROTL1     | ENSG00000106049 HIBADH       | ENSG00000106823 ECM2           | ENSG00000116539 BCL11        | ENSG00000122565 CBX3         | ENSG00000136111 TBC1D4       | ENSG00000141141 DDX52          | ENSG00000150636 CCDC102B     |
|         | ENSG00000157219 HTR5A        | ENSG00000166595 FAM96B       | ENSG00000171509 RXFP1          | ENSG00000172059 KLF11        | ENSG00000178966 RMI1         | ENSG00000183784 C9orf66      | ENSG00000186767 NP_001012986.2 | ENSG00000187372 PCDHB13      |
|         | ENSG00000197372 ZNF675       | ENSG00000205523 Q6ZP97_HUMAN | ENSG00000206131 Q6ZS21_HUMAN   |                              |                              |                              |                                |                              |
| TACTGTA | ENSG00000063169 GLTSCR1      | ENSG00000088854 C20orf194    | ENSG00000100109 TFPI1          | ENSG00000102478 RREB1        | ENSG00000128311 TST          | ENSG00000131914 LIN28        | ENSG00000136205 TNS3           | ENSG00000136928 GABBR2       |
|         | ENSG00000160972 PPP1R16A     | ENSG00000168575 SLC20A2      | ENSG00000170801 HTRA3          | ENSG00000179151 EDC3         | ENSG00000179421 Q8NBA4_HUMAN | ENSG00000184602 SNN          | ENSG00000188807 NP_001010866.1 | ENSG00000064651 SLC12A2      |
|         | ENSG00000064989 CALCR1       | ENSG00000072401 UBE2D1       | ENSG00000085511 MAP3K4         | ENSG00000104067 TJP1         | ENSG00000104177 MYEF2        | ENSG00000115825 PRKD3        | ENSG00000116141 MARK1          | ENSG00000116701 NCF2         |
|         | ENSG00000117620 SLC35A3      | ENSG00000117713 ARID1A       | ENSG00000119707 RBM25          | ENSG00000120278 PLEKHG1      | ENSG00000122779 TRIM24       | ENSG00000123473 STTL1        | ENSG00000130224 LRCH2          | ENSG00000132963 POMP         |
|         | ENSG00000134323 MYCN         | ENSG00000138779 Q9HCM6_HUMAN | ENSG00000138829 FBN2           | ENSG00000146376 ARHGAP18     | ENSG00000151690 NP_060164.3  | ENSG00000153575 TUBGCP5      | ENSG00000154620 TMSB4Y         | ENSG00000164764 NP_694957.2  |
|         | ENSG00000165525 SDCCAG1      | ENSG00000177125 ZBTB34       | ENSG00000180263 FGD6           | ENSG00000182481 KPN2A        | ENSG00000198718 KIAA0423     | ENSG00000198757 Q96NB8_HUMAN | ENSG00000198841 KTI12          | ENSG00000204220 PFDN6        |
|         | perfect: TACTGTA TACAGTA     | hsa-miR-199a*                | TACAGTAgtctgcacattggtt         | 0                            |                              |                              |                                |                              |
|         | perfect: TACTGTA TACAGTA     | hsa-miR-101                  | TACAGTActgtgataactgaag         | 0                            |                              |                              |                                |                              |
|         | perfect: TACTGTA TACAGTA     | hsa-miR-144                  | TACAGTAtagatgatgtactag         | 0                            |                              |                              |                                |                              |
| TACTGTG | ENSG00000006695 COX10        | ENSG00000100030 MAPK1        | ENSG00000106682 EIF4H          | ENSG00000110801 PSMD9        | ENSG00000111641 NOL1         | ENSG00000118257 NRP2         | ENSG00000119771 KLHL29         | ENSG00000136485 WDR68        |
|         | ENSG00000142224 IL19         | ENSG00000158813 EDA          | ENSG00000166965 RCCD1          | ENSG00000170608 FOXA3        | ENSG00000171649 ZIK1         | ENSG00000175220 ARHGAP1      | ENSG00000179348 GATA2          | ENSG00000188901 NP_055226.1  |
|         | ENSG00000189068 VSTM2        | ENSG00000196358 NTNG2        | ENSG00000198366 HIST1H3A       | ENSG00000205452 Q6ZQQ9_HUMAN | ENSG000000044459 C9orf39     | ENSG000000091844 RG17        | ENSG00000100629 C14orf145      | ENSG00000101745 ANKRD12      |
|         | ENSG00000102038 SMARCA1      | ENSG00000112531 QKI          | ENSG00000115414 FN1            | ENSG00000117222 RBBP5        | ENSG00000118418 HMGN3        | ENSG00000119862 NP_054900.1  | ENSG00000124201 ZNFX1          | ENSG00000125384 PTGER2       |
|         | ENSG00000131437 KIF3A        | ENSG00000135241 PNPLA10P     | ENSG00000136542 GALNT5         | ENSG00000142182 DNMT3L       | ENSG00000145649 GZMA         | ENSG00000152409 NP_689618.2  | ENSG00000153779 TGF2LX         | ENSG00000163376 KBTBD8       |
|         | ENSG00000165288 BRWD3        | ENSG00000166348 USP54        | ENSG00000167904 TMEM68         | ENSG00000169032 MAP2K1       | ENSG00000169446 TMEM32       | ENSG00000170425 ADORA2B      | ENSG00000170961 HAS2           | ENSG00000171033 PKIA         |
|         | ENSG00000174574 C1orf108     | ENSG00000175553 K1210_HUMAN  | ENSG00000179144 GIMAP7         | ENSG00000197779 ZNF81        |                              |                              |                                |                              |
| TACTTCA | ENSG00000068831 RASGRP2      | ENSG00000100030 MAPK1        | ENSG00000104386 XR_017860.1    | ENSG00000112514 CUA7A        | ENSG000001023901 GPR83       | ENSG00000129038 LOXL1        | ENSG00000132434 LANCL2         | ENSG00000135624 CCT7         |
|         | ENSG00000139626 ITGB7        | ENSG00000153395 AYTL2        | ENSG00000158109 FAM79A         | ENSG00000158813 EDA          | ENSG00000164711 LPAL2        | ENSG00000173545 ZNF622       | ENSG00000174233 ADCY6          | ENSG00000179837 RBM15B       |
|         | ENSG00000198437 Q8N0T2_HUMAN | ENSG00000204569 PPP1R10      | ENSG0000010219 DYRK4           | ENSG0000023287 RB1CC1        | ENSG00000074695 LMAN1        | ENSG00000079332 SAR1A        | ENSG00000100219 XBP1           | ENSG00000110848 CD69         |
|         | ENSG00000114857 NKTR         | ENSG00000126070 EIF2C3       | ENSG00000128989 ARP19_HUMAN    | ENSG00000138615 CILP         | ENSG00000143727 ACP1         | ENSG00000105907 FOXO1A       | ENSG00000152092 ASTN1          | ENSG00000152942 RAD17        |
|         | ENSG00000155629 PIK3AP1      | ENSG00000163554 SPTA1        | ENSG00000164128 NPY1R          | ENSG00000169813 HNRPF        | ENSG00000170802 FOXN2        | ENSG00000171234 UGT2B7       | ENSG000001730046 NM_207376     | ENSG00000181322 TXNDC6       |
|         | ENSG00000196470 STAH1        | ENSG00000197619 ZNF615       | ENSG00000197756 RPL37A         | ENSG00000203801 Q5R3E8_HUMAN |                              |                              |                                |                              |
| TACTTCC | ENSG00000063180 CA11         | ENSG00000104889 RNASEH2A     | ENSG00000106852 LHX6           | ENSG00000111540 RAB5B        | ENSG00000115107 STEAP3       | ENSG00000116396 KCNCA4       | ENSG00000124226 ZNF313         | ENSG00000145022 TCTA         |
|         | ENSG00000149532 CPSF7_HUMAN  | ENSG00000161202 DVL3         | ENSG00000161791 FMNL3          | ENSG00000178719 GRINA        | ENSG00000180205 WFDCC9       | ENSG00000183862 BMP8A        | ENSG00000184787 UBE2G2         | ENSG00000186594 NP_116284.2  |
|         | ENSG00000196476 C20orf96     | ENSG00000198951 NAGA         | ENSG00000035499 DEPDC1B        | ENSG00000039319 ZFYP16       | ENSG00000100852 ARHGAP5      | ENSG00000106993 CDC37L1      | ENSG00000109208 SMR3A          | ENSG00000109943 CRTAM        |
|         | ENSG00000112309 B3GAT2       | ENSG00000116668 C1orf26      | ENSG00000117601 SERPINC1       | ENSG00000119820 YIPF4        | ENSG00000120279 MYCT1        | ENSG00000124406 ATP8A1       | ENSG00000134057 CCNB1          | ENSG00000136824 SMC2         |
|         | ENSG00000137745 MMP13        | ENSG00000138398 PPIG         | ENSG00000139910 NOVA1          | ENSG00000144410 CPO          | ENSG00000164171 ITGA2        | ENSG00000165694 FRMD7        | ENSG00000166326 TRIM44         | ENSG00000177189 RPS6KA3      |
|         | ENSG00000184786 TCTE3        | ENSG00000196589 MB3L2_HUMAN  | ENSG00000197935 ZNF311         | ENSG00000204941 PSC5         |                              |                              |                                |                              |
| TACTTGA | ENSG00000037637 FBXO42       | ENSG00000040531 CTNS         | ENSG00000068745 IHPK2          | ENSG00000080603 NP_006653.1  | ENSG000000082701 GSK3B       | ENSG00000099364 FBXL19       | ENSG00000099994 SUSD2          | ENSG00000121270 ABCC11       |
|         | ENSG00000151208 DLG5         | ENSG00000171722 C1orf111     | ENSG00000177169 ULK1           | ENSG00000184330 S100A7A      | ENSG00000187741 FANCA        | ENSG00000188525 NM_207480    | ENSG00000035141 NP_116211.1    | ENSG00000038210 PI4K2B       |
|         | ENSG00000078124 PHCA         | ENSG00000082146 ALS2CR2      | ENSG00000092020 PPP2R3C        | ENSG00000105550 FGF21        | ENSG00000110172 CHORDC1      | ENSG00000119139 TJP2         | ENSG00000119203 CPSF3          | ENSG00000119812 FAM98A       |
|         | ENSG00000122912 SLC25A16     | ENSG00000129480 C14orf126    | ENSG00000132964 CDK8           | ENSG00000133119 RFC3         | ENSG00000137504 CREBZF       | ENSG00000138779 Q9HCM6_HUMAN | ENSG00000138792 ENPEP          | ENSG00000143643 TTC13        |
|         | ENSG00000146278 PNRC1        | ENSG00000146757 ZNF92        | ENSG00000150768 DLAT           | ENSG00000151229 SLC2A13      | ENSG00000153923 CLCA3        | ENSG00000154639 CXADR        | ENSG00000164463 NP_705835.1    | ENSG00000165476 REEP3        |
|         | ENSG00000168772 CXXC4        | ENSG00000169299 PGM2         | ENSG00000170365 SMAD1          | ENSG00000176597 B3GNT5       | ENSG00000178425 NT5DC1       | ENSG00000182141 ZNF708       | ENSG00000204334 A1L162_HUMAN   | ENSG00000204884 Q6ZVI2_HUMAN |
|         | perfect: TACTTGA TCAAGTA     | hsa-miR-26b                  | tTCAAGTAattcaggataggtt         | 1                            |                              |                              |                                |                              |
|         | perfect: TACTTGA TCAAGTA     | hsa-miR-26a                  | tTCAAGTAatccaggataggg          | 1                            |                              |                              |                                |                              |
| TACTTGT | ENSG00000001461 NPAL3        | ENSG00000087087 ARS2_HUMAN   | ENSG0000                       |                              |                              |                              |                                |                              |

|         |                                                                                                                                                                                                                                                                                                                                                                                                                                                                                                                                                                                                                                                                                                                                                                                                                                                                                                                                                                                                     |                                                                                                                                                                                                                                                                                                                                                                                                                                                                                                                                                                                                                                                                                                                                                                                                                                                                                                                                                                                              |                                                                                                                                                                                                                                                                                                                                                                                                                                                                                                                                                                                                                                                                                                                                                                                                                                                                                                                                                                                                                  |                                                                                                                                                                                                                                                                                                                                                                                                                                                                                                                                                                                                                                                                                                                                                                                                                                                                                                                                                                                                                                                                                                                                                                               |                                                                                                                                                                                                                                                                                                                                                                                                                                                                                                                                                                                                                                                                                                                                                                                                                                                                                                                                                                                                                                                                                                                                                                        |                                                                                                                                                                                                                                                                                                                                                                                                                                                                                                                                                                                                                                                                                                                                                                                                                                                                                                                                                                                                                                                                                                                                                                                                                                                                                                                                                                                                                                                                                                                                                                                                                                                                                                                                                                                                                                                                                                                                                                                                                                                                                                                                                                                                                                                                                                                                                                                                                                                                                                                                                                                                                                                                                                                                                                                                                                                                                                                                                                                                                                                                                                                                                                                                                                                                                                                 |                                                                                                                                                                                                                                           |                                                                                                                                                                                                           |
|---------|-----------------------------------------------------------------------------------------------------------------------------------------------------------------------------------------------------------------------------------------------------------------------------------------------------------------------------------------------------------------------------------------------------------------------------------------------------------------------------------------------------------------------------------------------------------------------------------------------------------------------------------------------------------------------------------------------------------------------------------------------------------------------------------------------------------------------------------------------------------------------------------------------------------------------------------------------------------------------------------------------------|----------------------------------------------------------------------------------------------------------------------------------------------------------------------------------------------------------------------------------------------------------------------------------------------------------------------------------------------------------------------------------------------------------------------------------------------------------------------------------------------------------------------------------------------------------------------------------------------------------------------------------------------------------------------------------------------------------------------------------------------------------------------------------------------------------------------------------------------------------------------------------------------------------------------------------------------------------------------------------------------|------------------------------------------------------------------------------------------------------------------------------------------------------------------------------------------------------------------------------------------------------------------------------------------------------------------------------------------------------------------------------------------------------------------------------------------------------------------------------------------------------------------------------------------------------------------------------------------------------------------------------------------------------------------------------------------------------------------------------------------------------------------------------------------------------------------------------------------------------------------------------------------------------------------------------------------------------------------------------------------------------------------|-------------------------------------------------------------------------------------------------------------------------------------------------------------------------------------------------------------------------------------------------------------------------------------------------------------------------------------------------------------------------------------------------------------------------------------------------------------------------------------------------------------------------------------------------------------------------------------------------------------------------------------------------------------------------------------------------------------------------------------------------------------------------------------------------------------------------------------------------------------------------------------------------------------------------------------------------------------------------------------------------------------------------------------------------------------------------------------------------------------------------------------------------------------------------------|------------------------------------------------------------------------------------------------------------------------------------------------------------------------------------------------------------------------------------------------------------------------------------------------------------------------------------------------------------------------------------------------------------------------------------------------------------------------------------------------------------------------------------------------------------------------------------------------------------------------------------------------------------------------------------------------------------------------------------------------------------------------------------------------------------------------------------------------------------------------------------------------------------------------------------------------------------------------------------------------------------------------------------------------------------------------------------------------------------------------------------------------------------------------|-----------------------------------------------------------------------------------------------------------------------------------------------------------------------------------------------------------------------------------------------------------------------------------------------------------------------------------------------------------------------------------------------------------------------------------------------------------------------------------------------------------------------------------------------------------------------------------------------------------------------------------------------------------------------------------------------------------------------------------------------------------------------------------------------------------------------------------------------------------------------------------------------------------------------------------------------------------------------------------------------------------------------------------------------------------------------------------------------------------------------------------------------------------------------------------------------------------------------------------------------------------------------------------------------------------------------------------------------------------------------------------------------------------------------------------------------------------------------------------------------------------------------------------------------------------------------------------------------------------------------------------------------------------------------------------------------------------------------------------------------------------------------------------------------------------------------------------------------------------------------------------------------------------------------------------------------------------------------------------------------------------------------------------------------------------------------------------------------------------------------------------------------------------------------------------------------------------------------------------------------------------------------------------------------------------------------------------------------------------------------------------------------------------------------------------------------------------------------------------------------------------------------------------------------------------------------------------------------------------------------------------------------------------------------------------------------------------------------------------------------------------------------------------------------------------------------------------------------------------------------------------------------------------------------------------------------------------------------------------------------------------------------------------------------------------------------------------------------------------------------------------------------------------------------------------------------------------------------------------------------------------------------------------------------------------------|-------------------------------------------------------------------------------------------------------------------------------------------------------------------------------------------------------------------------------------------|-----------------------------------------------------------------------------------------------------------------------------------------------------------------------------------------------------------|
|         | ENSG00000120837 NFYB<br>ENSG00000155970 EFHA2                                                                                                                                                                                                                                                                                                                                                                                                                                                                                                                                                                                                                                                                                                                                                                                                                                                                                                                                                       | ENSG00000122483 CCDC18<br>ENSG00000163939 PBRM1                                                                                                                                                                                                                                                                                                                                                                                                                                                                                                                                                                                                                                                                                                                                                                                                                                                                                                                                              | ENSG00000135476 ESPL1<br>ENSG00000164171 ITGA2                                                                                                                                                                                                                                                                                                                                                                                                                                                                                                                                                                                                                                                                                                                                                                                                                                                                                                                                                                   | ENSG00000135750 KCNK1<br>ENSG00000165417 GTF2A1                                                                                                                                                                                                                                                                                                                                                                                                                                                                                                                                                                                                                                                                                                                                                                                                                                                                                                                                                                                                                                                                                                                               | ENSG00000137573 SULF1<br>ENSG00000168283 BMT1                                                                                                                                                                                                                                                                                                                                                                                                                                                                                                                                                                                                                                                                                                                                                                                                                                                                                                                                                                                                                                                                                                                          | ENSG00000138449 SLC40A1<br>ENSG00000168939 SPRY3                                                                                                                                                                                                                                                                                                                                                                                                                                                                                                                                                                                                                                                                                                                                                                                                                                                                                                                                                                                                                                                                                                                                                                                                                                                                                                                                                                                                                                                                                                                                                                                                                                                                                                                                                                                                                                                                                                                                                                                                                                                                                                                                                                                                                                                                                                                                                                                                                                                                                                                                                                                                                                                                                                                                                                                                                                                                                                                                                                                                                                                                                                                                                                                                                                                                | ENSG00000153560 UBP1<br>ENSG00000172421 EFCAB3                                                                                                                                                                                            | ENSG00000154556 SORBS2<br>ENSG00000174899 Q8N6Q6_HUMAN                                                                                                                                                    |
| TAGAATC | ENSG00000074054 CLASP1<br>ENSG00000158161 EYA3<br>ENSG00000198374 HIST1H2AL<br>ENSG00000105851 PK3CG<br>ENSG00000148584 ACF_HUMAN<br>ENSG00000196167 NP_997312.1                                                                                                                                                                                                                                                                                                                                                                                                                                                                                                                                                                                                                                                                                                                                                                                                                                    | ENSG00000099995 SF3A1<br>ENSG00000163206 SMCP<br>ENSG00000198618 PPIA_HUMAN<br>ENSG00000111701 APOBEC1<br>ENSG00000159579 RSRPY1<br>ENSG00000204711 C9orf135                                                                                                                                                                                                                                                                                                                                                                                                                                                                                                                                                                                                                                                                                                                                                                                                                                 | ENSG00000125485 DDX31<br>ENSG00000171115 GIMAP8<br>ENSG00000198722 UNC13B<br>ENSG00000113520 IL4<br>ENSG00000170791 CHCHD7<br>ENSG00000204118 C9orf135                                                                                                                                                                                                                                                                                                                                                                                                                                                                                                                                                                                                                                                                                                                                                                                                                                                           | ENSG00000128645 HOXD1<br>ENSG00000172379 ARNT2<br>ENSG00000198756 GLT25D2<br>ENSG00000132680 KIAA0907<br>ENSG00000172243 CLEC7A<br>ENSG00000205212 NP_01004306.1                                                                                                                                                                                                                                                                                                                                                                                                                                                                                                                                                                                                                                                                                                                                                                                                                                                                                                                                                                                                              | ENSG00000141012 GALNS<br>ENSG00000173027 WBP1<br>ENSG00000198756 GLT25D2<br>ENSG00000135535 CD164<br>ENSG00000173698 GPR64<br>ENSG00000104889 RNASEH2A                                                                                                                                                                                                                                                                                                                                                                                                                                                                                                                                                                                                                                                                                                                                                                                                                                                                                                                                                                                                                 | ENSG00000142634 EFHD2<br>ENSG00000173210 ABLIM3<br>ENSG00000100845 NP_001010845.1<br>ENSG00000138650 PCDH10<br>ENSG00000183747 ACSM2                                                                                                                                                                                                                                                                                                                                                                                                                                                                                                                                                                                                                                                                                                                                                                                                                                                                                                                                                                                                                                                                                                                                                                                                                                                                                                                                                                                                                                                                                                                                                                                                                                                                                                                                                                                                                                                                                                                                                                                                                                                                                                                                                                                                                                                                                                                                                                                                                                                                                                                                                                                                                                                                                                                                                                                                                                                                                                                                                                                                                                                                                                                                                                            | ENSG00000143570 SLC39A1<br>ENSG00000176371 ZSCAN2<br>ENSG000000071794 HLTF<br>ENSG00000145476 CYP4V2<br>ENSG00000184319 NP_982307.1                                                                                                       | ENSG00000149575 SCN2B<br>ENSG00000179855 GIPC3<br>ENSG000000087510 TFAP2C<br>ENSG00000147036 LANCL3<br>ENSG00000188021 UBQLN2                                                                             |
| TAGAATG | ENSG00000006114 AP1GBP1<br>ENSG00000130830 MPP1<br>ENSG00000182324 KCNJ14<br>ENSG00000068366 ACSL4<br>ENSG00000138779 Q9HCM6_HUMAN<br>ENSG00000163605 PPP4R2<br>ENSG00000204706 Q6ZVS9_HUMAN                                                                                                                                                                                                                                                                                                                                                                                                                                                                                                                                                                                                                                                                                                                                                                                                        | ENSG00000095303 PTGS1<br>ENSG00000140577 CRTC3<br>ENSG00000189321 NR_002940.1<br>ENSG00000081019 RSBN1<br>ENSG00000140043 ZADH1<br>ENSG00000175087 PDIK1L                                                                                                                                                                                                                                                                                                                                                                                                                                                                                                                                                                                                                                                                                                                                                                                                                                    | ENSG00000101350 KIF3B<br>ENSG00000148719 DNAJB12<br>ENSG00000204118 NAP1L6<br>ENSG00000102024 PLS3<br>ENSG00000145715 RAS1<br>ENSG00000178397 NP_001032240.1                                                                                                                                                                                                                                                                                                                                                                                                                                                                                                                                                                                                                                                                                                                                                                                                                                                     | ENSG00000101883 PEPP1_HUMAN<br>ENSG00000157211 CDCP2<br>ENSG000000044524 EPHA3<br>ENSG00000102531 FNDC3A<br>ENSG00000151287 C13orf27<br>ENSG00000185278 ZBTB37                                                                                                                                                                                                                                                                                                                                                                                                                                                                                                                                                                                                                                                                                                                                                                                                                                                                                                                                                                                                                | ENSG00000104889 RNASEH2A<br>ENSG00000161544 CYGB<br>ENSG000000047648 ARHGAP6<br>ENSG00000118523 CTGF<br>ENSG00000152382 TADAL1<br>ENSG00000189079 ARID2                                                                                                                                                                                                                                                                                                                                                                                                                                                                                                                                                                                                                                                                                                                                                                                                                                                                                                                                                                                                                | ENSG00000110446 SLC15A3<br>ENSG00000114982 NP_060461.3<br>ENSG00000170743 SYT9<br>ENSG000000047932 GOPC<br>ENSG00000127083 OMD<br>ENSG00000153721 MAG1I<br>ENSG00000196352 CD55                                                                                                                                                                                                                                                                                                                                                                                                                                                                                                                                                                                                                                                                                                                                                                                                                                                                                                                                                                                                                                                                                                                                                                                                                                                                                                                                                                                                                                                                                                                                                                                                                                                                                                                                                                                                                                                                                                                                                                                                                                                                                                                                                                                                                                                                                                                                                                                                                                                                                                                                                                                                                                                                                                                                                                                                                                                                                                                                                                                                                                                                                                                                 | ENSG00000175193 PARL<br>ENSG000000066654 THUMPDI1<br>ENSG00000135334 C6orf166<br>ENSG00000161714 PLCD3<br>ENSG00000198015 MRPL42                                                                                                          | ENSG00000179914 ITLN1<br>ENSG000000067064 IDI1<br>ENSG00000137672 TRPC6<br>ENSG00000161800 RACGAP1<br>ENSG00000204010 IFIT1L                                                                              |
| TAGACAG | ENSG00000095713 CRTAC1<br>ENSG00000184361 C17orf46<br>ENSG00000110756 HPS5<br>ENSG00000187231 SESTD1<br>ENSG00000008735 MAPK8IP2<br>ENSG00000126460 PRRG2<br>ENSG00000158050 DUSP2<br>ENSG00000178932 Q8N811_HUMAN<br>ENSG000000075142 SRI<br>ENSG00000154380 ENAH<br>ENSG00000185787 MORF4L1                                                                                                                                                                                                                                                                                                                                                                                                                                                                                                                                                                                                                                                                                                       | ENSG00000101363 MANBAL<br>ENSG00000184544 C1orf130<br>ENSG00000124721 DNAH8<br>ENSG00000197329 PELI1<br>ENSG00000029534 ANK1<br>ENSG00000126583 PRKCG<br>ENSG00000163866 C1orf212<br>ENSG00000182242 TEX28_HUMAN<br>ENSG00000082482 KCNK2<br>ENSG00000157551 KCNJ15<br>ENSG00000186974 Q8N6X9_HUMAN                                                                                                                                                                                                                                                                                                                                                                                                                                                                                                                                                                                                                                                                                          | ENSG00000115129 TP53I3<br>ENSG00000186501 C1orf160<br>ENSG00000125378 BMP4<br>ENSG00000198947 DMD<br>ENSG00000095981 KCNK16<br>ENSG00000131408 NR1H2<br>ENSG00000165238 WNK2<br>ENSG00000115129 TP53I3<br>ENSG00000084676 NCOA1<br>ENSG00000162814 SPATA17<br>ENSG00000198081 ZFP161                                                                                                                                                                                                                                                                                                                                                                                                                                                                                                                                                                                                                                                                                                                             | ENSG00000135898 GPR55<br>ENSG00000187144 SPATA21<br>ENSG00000143776 CDC42BPA<br>ENSG00000204370 SDHD<br>ENSG00000099971 PCQAP<br>ENSG00000134871 COL4A2<br>ENSG00000168658 NP_659429.4<br>ENSG00000183114 FAM43B<br>ENSG00000101166 SLMO2<br>ENSG00000163053 SLC16A1A<br>ENSG00000206131 Q6ZS21_HUMAN                                                                                                                                                                                                                                                                                                                                                                                                                                                                                                                                                                                                                                                                                                                                                                                                                                                                         | ENSG00000136718 IMP4<br>ENSG00000197965 MPZL1<br>ENSG00000148426 C1orf47<br>ENSG00000204370 SDHD<br>ENSG00000100983 GSS<br>ENSG00000134871 SPTBN5<br>ENSG00000168658 NP_659429.4<br>ENSG00000183114 FAM43B<br>ENSG00000101190 TCFL5<br>ENSG00000164485 IL22RA2<br>ENSG00000206131 Q6ZS21_HUMAN                                                                                                                                                                                                                                                                                                                                                                                                                                                                                                                                                                                                                                                                                                                                                                                                                                                                         | ENSG00000147955 OPRS1<br>ENSG00000197971 MBP<br>ENSG00000162374 ELAVL4<br>ENSG00000102080 TEX28P2<br>ENSG00000141905 NFIC<br>ENSG00000170214 ADRA1B<br>ENSG00000185254 TEX28P1<br>ENSG00000106617 PRKAG2<br>ENSG00000175643 C16orf75                                                                                                                                                                                                                                                                                                                                                                                                                                                                                                                                                                                                                                                                                                                                                                                                                                                                                                                                                                                                                                                                                                                                                                                                                                                                                                                                                                                                                                                                                                                                                                                                                                                                                                                                                                                                                                                                                                                                                                                                                                                                                                                                                                                                                                                                                                                                                                                                                                                                                                                                                                                                                                                                                                                                                                                                                                                                                                                                                                                                                                                                            | ENSG00000163833 FBXO40<br>ENSG00000204094 Q6ZU93_HUMAN<br>ENSG00000169679 BUB1<br>ENSG00000116337 AMPD2<br>ENSG00000142453 CARM1<br>ENSG00000175003 SLC22A1<br>ENSG00000196331 HIST1H2BO<br>ENSG00000115486 GGCX<br>ENSG00000177889 UBE2N | ENSG00000149575 SCN2B<br>ENSG00000179855 GIPC3<br>ENSG000000087510 TFAP2C<br>ENSG00000147036 LANCL3<br>ENSG00000188021 UBQLN2<br>ENSG00000196581 AJAP1<br>ENSG00000115486 GGCX<br>ENSG00000181744 C3orf58 |
| TAGACGC | ENSG00000008735 MAPK8IP2<br>ENSG00000126460 PRRG2<br>ENSG00000158050 DUSP2<br>ENSG00000178932 Q8N811_HUMAN<br>ENSG000000075142 SRI<br>ENSG00000154380 ENAH<br>ENSG00000185787 MORF4L1<br>ENSG00000110522 NME1<br>ENSG00000115360 SPTBN1<br>ENSG00000165025 SYK<br>ENSG00000110318 KIAA1377<br>ENSG00000164169 NP_612373.2<br>ENSG00000187118 NP_872329.1                                                                                                                                                                                                                                                                                                                                                                                                                                                                                                                                                                                                                                            | ENSG00000029534 ANK1<br>ENSG00000126583 PRKCG<br>ENSG00000163866 C1orf212<br>ENSG00000182242 TEX28_HUMAN<br>ENSG00000082482 KCNK2<br>ENSG00000157551 KCNJ15<br>ENSG00000186974 Q8N6X9_HUMAN<br>ENSG00000022840 RNF10<br>ENSG00000122367 LDB3<br>ENSG00000165271 NOL6<br>ENSG00000113263 TTK<br>ENSG00000165240 ATP7A<br>ENSG00000187193 MT1X                                                                                                                                                                                                                                                                                                                                                                                                                                                                                                                                                                                                                                                 | ENSG00000095981 KCNK16<br>ENSG00000131408 NR1H2<br>ENSG00000165238 WNK2<br>ENSG00000115129 TP53I3<br>ENSG00000084676 NCOA1<br>ENSG00000162814 SPATA17<br>ENSG00000198081 ZFP161<br>ENSG00000064393 HIPK2<br>ENSG00000124074 C16orf48<br>ENSG00000171119 NR1H2<br>ENSG00000114127 XRN1<br>ENSG00000167236 CCL23<br>ENSG00000197771 C1orf119                                                                                                                                                                                                                                                                                                                                                                                                                                                                                                                                                                                                                                                                       | ENSG00000135898 GPR55<br>ENSG00000187144 SPATA21<br>ENSG00000143776 CDC42BPA<br>ENSG00000204370 SDHD<br>ENSG00000099971 PCQAP<br>ENSG00000134871 COL4A2<br>ENSG00000168658 NP_659429.4<br>ENSG00000183114 FAM43B<br>ENSG00000101166 SLMO2<br>ENSG00000163053 SLC16A1A<br>ENSG00000206131 Q6ZS21_HUMAN                                                                                                                                                                                                                                                                                                                                                                                                                                                                                                                                                                                                                                                                                                                                                                                                                                                                         | ENSG00000136718 IMP4<br>ENSG00000197965 MPZL1<br>ENSG00000148426 C1orf47<br>ENSG00000204370 SDHD<br>ENSG00000100983 GSS<br>ENSG00000134871 SPTBN5<br>ENSG00000168658 NP_659429.4<br>ENSG00000183114 FAM43B<br>ENSG00000101190 TCFL5<br>ENSG00000164485 IL22RA2<br>ENSG00000206131 Q6ZS21_HUMAN                                                                                                                                                                                                                                                                                                                                                                                                                                                                                                                                                                                                                                                                                                                                                                                                                                                                         | ENSG00000147955 OPRS1<br>ENSG00000197971 MBP<br>ENSG00000162374 ELAVL4<br>ENSG00000102080 TEX28P2<br>ENSG00000141905 NFIC<br>ENSG00000170214 ADRA1B<br>ENSG00000185254 TEX28P1<br>ENSG00000106617 PRKAG2<br>ENSG00000175643 C16orf75                                                                                                                                                                                                                                                                                                                                                                                                                                                                                                                                                                                                                                                                                                                                                                                                                                                                                                                                                                                                                                                                                                                                                                                                                                                                                                                                                                                                                                                                                                                                                                                                                                                                                                                                                                                                                                                                                                                                                                                                                                                                                                                                                                                                                                                                                                                                                                                                                                                                                                                                                                                                                                                                                                                                                                                                                                                                                                                                                                                                                                                                            | ENSG00000163833 FBXO40<br>ENSG00000204094 Q6ZU93_HUMAN<br>ENSG00000169679 BUB1<br>ENSG00000116337 AMPD2<br>ENSG00000142453 CARM1<br>ENSG00000175003 SLC22A1<br>ENSG00000196331 HIST1H2BO<br>ENSG00000115486 GGCX<br>ENSG00000177889 UBE2N | ENSG00000149575 SCN2B<br>ENSG00000179855 GIPC3<br>ENSG000000087510 TFAP2C<br>ENSG00000147036 LANCL3<br>ENSG00000188021 UBQLN2<br>ENSG00000196581 AJAP1<br>ENSG00000115486 GGCX<br>ENSG00000181744 C3orf58 |
| TAGAGCA | ENSG00000110522 NME1<br>ENSG00000115360 SPTBN1<br>ENSG00000165025 SYK<br>ENSG00000110318 KIAA1377<br>ENSG00000164169 NP_612373.2<br>ENSG00000187118 NP_872329.1<br>ENSG00000100314 CABP7<br>ENSG00000158517 NCF1<br>ENSG00000180901 KCTD2<br>ENSG00000122692 SMU1<br>ENSG00000172007 RAB33B<br>ENSG00000010282 HHATL<br>ENSG00000141562 NARF<br>ENSG00000171345 KRT19<br>ENSG00000125249 RAP2A<br>ENSG00000187123 LYPD6<br>ENSG00000100106 TRIOBP<br>ENSG00000163516 ANKZF1<br>ENSG000000044524 EPHA3<br>ENSG00000141447 OSBP1L1A<br>ENSG00000196267 PPIA<br>ENSG00000070601 FRMPD1<br>ENSG00000142512 STGLEC10<br>ENSG00000008619 ERO1L1B<br>ENSG00000134253 TRIM45<br>ENSG00000165995 CACNB2<br>ENSG000000067365 C16orf68<br>ENSG00000153789 FAM92B<br>ENSG00000185883 ATP6V0C<br>ENSG00000120675 DNAJC15<br>ENSG00000133106 EPST11<br>ENSG00000188400 QGURH7_HUMAN<br>ENSG00000006606 CCL26<br>ENSG00000134216 CHIA<br>ENSG00000184428 TXND5C5<br>ENSG00000135374 ELF5<br>ENSG00000164181 ELOVL7 | ENSG00000022840 RNF10<br>ENSG00000122367 LDB3<br>ENSG00000165271 NOL6<br>ENSG00000113263 TTK<br>ENSG00000165240 ATP7A<br>ENSG00000187193 MT1X<br>ENSG00000106144 CASP2<br>ENSG00000163884 KLF15<br>ENSG00000182487 NCF1C<br>ENSG00000132912 DCTN4<br>ENSG00000172023 REG1B<br>ENSG00000020181 GPR124<br>ENSG00000143198 MGST3<br>ENSG00000174529 TMEM81<br>ENSG00000131482 G6PC<br>ENSG00000196785 Q8N862_HUMAN<br>ENSG00000100335 SMCR7L<br>ENSG00000166272 C10orf26<br>ENSG000000047579 DTNBP1<br>ENSG00000168385 SEPT2<br>ENSG00000197056 ZMYM1<br>ENSG000000085662 AKR1B1<br>ENSG00000184324 CSAG2<br>ENSG00000100249 C22orf31<br>ENSG00000135540 NHS1L1<br>ENSG00000168772 CXXC4<br>ENSG000000067365 C16orf68<br>ENSG00000160712 IL6R<br>ENSG00000204502 PRAMEF5<br>ENSG00000125144 MT1G<br>ENSG00000153339 KIAA1012<br>ENSG00000188400 QGURH7_HUMAN<br>ENSG00000007306 CEACAM7<br>ENSG00000136297 MMD2<br>ENSG00000188428 TXND5C5<br>ENSG00000139926 FRMD6<br>ENSG00000169255 B3GALNT1 | ENSG00000064393 HIPK2<br>ENSG00000124074 C16orf48<br>ENSG00000171119 NR1H2<br>ENSG00000114127 XRN1<br>ENSG00000167236 CCL23<br>ENSG00000197771 C1orf119<br>ENSG00000107815 PEO1<br>ENSG00000164972 C9orf24<br>ENSG00000184260 HIST2H2AC<br>ENSG00000142166 IFNAR1<br>ENSG00000198001 IRAK4<br>ENSG00000066135 JMJD2A<br>ENSG00000146007 ZMAT2<br>ENSG00000175938 TMEM142C<br>ENSG00000136897 MRPL50<br>ENSG00000196785 Q8N862_HUMAN<br>ENSG00000101311 C20orf42<br>ENSG00000167815 PRDX2<br>ENSG000000097046 CDC7<br>ENSG00000180611 C3orf59<br>ENSG00000198189 HSD17B11<br>ENSG00000104081 BMF<br>ENSG00000184584 TMEM173<br>ENSG00000101752 LNPEP<br>ENSG00000151239 TWF1<br>ENSG00000173559 OBFCA2<br>ENSG000000067365 C16orf68<br>ENSG00000160712 IL6R<br>ENSG00000204502 PRAMEF5<br>ENSG00000125144 MT1G<br>ENSG00000153339 KIAA1012<br>ENSG00000188400 QGURH7_HUMAN<br>ENSG000000044012 GUCA2B<br>ENSG00000141068 KSR1<br>ENSG000000023516 AKAP11<br>ENSG00000147180 ZNF711<br>ENSG00000174226 NP_689841.2 | ENSG00000135898 GPR55<br>ENSG00000187144 SPATA21<br>ENSG00000143776 CDC42BPA<br>ENSG00000204370 SDHD<br>ENSG00000099971 PCQAP<br>ENSG00000134871 COL4A2<br>ENSG00000168658 NP_659429.4<br>ENSG00000183114 FAM43B<br>ENSG00000101166 SLMO2<br>ENSG00000163053 SLC16A1A<br>ENSG00000206131 Q6ZS21_HUMAN<br>ENSG00000125813 PAX1<br>ENSG00000165178 LOC648998<br>ENSG00000185379 RAD51L3<br>ENSG00000144736 SHQ1<br>ENSG00000198887 SMC5<br>ENSG00000093167 LRRFIP2<br>ENSG00000146285 SCML4<br>ENSG00000186163 Q4GOS1_HUMAN<br>ENSG00000136897 MRPL50<br>ENSG000001013421.1<br>ENSG0000000203933 NP_001013421.1<br>ENSG00000104941 RSHL1<br>ENSG00000117317 ADCK5<br>ENSG00000108468 CBX1<br>ENSG00000180611 C3orf59<br>ENSG00000198189 HSD17B11<br>ENSG00000111331 OAS3<br>ENSG00000184935 Q6A101_HUMAN<br>ENSG00000113441 LNPEP<br>ENSG00000152495 CAMK4<br>ENSG00000178562 CD28<br>ENSG00000114923 SLC4A3<br>ENSG00000169242 EFNA1<br>ENSG00000204509 PRAMEF6<br>ENSG00000128595 CALU<br>ENSG00000158636 C11orf30<br>ENSG00000189043 NDUFA4<br>ENSG00000100665 SERPINA4<br>ENSG00000141570 CBX8<br>ENSG000000023516 AKAP11<br>ENSG00000147180 ZNF711<br>ENSG00000175324 LSM1 | ENSG00000136718 IMP4<br>ENSG00000197965 MPZL1<br>ENSG00000148426 C1orf47<br>ENSG00000204370 SDHD<br>ENSG00000100983 GSS<br>ENSG00000134871 SPTBN5<br>ENSG00000168658 NP_659429.4<br>ENSG00000183114 FAM43B<br>ENSG00000101190 TCFL5<br>ENSG00000164485 IL22RA2<br>ENSG00000206131 Q6ZS21_HUMAN<br>ENSG00000125813 PAX1<br>ENSG00000165178 LOC648998<br>ENSG00000185379 RAD51L3<br>ENSG00000144736 SHQ1<br>ENSG00000198887 SMC5<br>ENSG00000093167 LRRFIP2<br>ENSG00000146285 SCML4<br>ENSG00000186163 Q4GOS1_HUMAN<br>ENSG00000136897 MRPL50<br>ENSG000001013421.1<br>ENSG0000000203933 NP_001013421.1<br>ENSG00000104941 RSHL1<br>ENSG00000117317 ADCK5<br>ENSG00000108468 CBX1<br>ENSG00000180611 C3orf59<br>ENSG00000198189 HSD17B11<br>ENSG00000111331 OAS3<br>ENSG00000184935 Q6A101_HUMAN<br>ENSG00000113441 LNPEP<br>ENSG00000152495 CAMK4<br>ENSG00000178562 CD28<br>ENSG00000114923 SLC4A3<br>ENSG00000169242 EFNA1<br>ENSG00000204509 PRAMEF6<br>ENSG00000128595 CALU<br>ENSG00000158636 C11orf30<br>ENSG00000189043 NDUFA4<br>ENSG00000100665 SERPINA4<br>ENSG00000141570 CBX8<br>ENSG000000023516 AKAP11<br>ENSG00000147180 ZNF711<br>ENSG00000175324 LSM1 | ENSG00000147955 OPRS1<br>ENSG00000197971 MBP<br>ENSG00000162374 ELAVL4<br>ENSG00000102080 TEX28P2<br>ENSG00000141905 NFIC<br>ENSG00000170214 ADRA1B<br>ENSG00000185254 TEX28P1<br>ENSG00000106617 PRKAG2<br>ENSG00000175643 C16orf75<br>ENSG00000146950 SHROOM2<br>ENSG00000172943 PHF8<br>ENSG00000071967 CYBRD1<br>ENSG00000147894 C9orf72<br>ENSG000000004766 Q6ZUHO_HUMAN<br>ENSG00000100142 POLR2F<br>ENSG00000100427 MLC1<br>ENSG00000155287 SLC25A28<br>ENSG00000186163 Q4GOS1_HUMAN<br>ENSG00000110436 CYP2A13<br>ENSG00000160188 TSGA2<br>ENSG00000118257 NRP2<br>ENSG00000179562 GCC1<br>ENSG00000109158 GABRA4<br>ENSG00000185264 C22orf33<br>ENSG00000204010 IFIT1L<br>ENSG00000125746 EML2<br>ENSG00000184935 Q6A101_HUMAN<br>ENSG00000114796 KLHL24<br>ENSG00000152527 PLEKHH2<br>ENSG00000180938 ZNF572<br>ENSG00000131059 C20orf71<br>ENSG00000169371 SNUPN<br>ENSG00000205851 Q4G0H1_HUMAN<br>ENSG00000128915 NARG2<br>ENSG00000163412 EIF4E3<br>ENSG00000189241 TSPYL1<br>ENSG00000103550 NP_001013009.2<br>ENSG00000161381 PLRXD1<br>ENSG00000102738 MRP531<br>ENSG00000151164 RAD9B<br>ENSG00000181904 C5orf24<br>ENSG00000104941 RSHL1<br>ENSG00000204531 POU5F1P1<br>ENSG00000105852 PON3<br>ENSG00000147166 ITGB1BP2<br>ENSG00000168852 SUGT1L1<br>ENSG000000095066 HOOK2<br>ENSG00000170743 SYT9<br>ENSG00000114346 ECT2<br>ENSG00000145740 SLC30A5<br>ENSG00000196711 NP_997296.1<br>ENSG00000143243 SORT1<br>ENSG00000176473 WRD25<br>ENSG00000177192 PUS1<br>ENSG00000120159 SMNDC1<br>ENSG00000156671 SAMD8<br>ENSG00000185203 Q96S36_HUMAN<br>ENSG00000106290 TAF6<br>ENSG00000118298 CA14<br>ENSG00000196644 LOC728932<br>ENSG00000186364 NUDT17<br>ENSG00000117543 DPH5<br>ENSG00000159063 ALG8<br>ENSG00000197415 VEPPL1<br>ENSG00000143374 TARS2<br>ENSG00000177192 PUS1<br>ENSG00000120159 SMNDC1<br>ENSG00000156671 SAMD8<br>ENSG00000185203 Q96S36_HUMAN<br>ENSG00000106290 TAF6<br>ENSG00000118298 CA14<br>ENSG00000196644 LOC728932<br>ENSG00000186364 NUDT17<br>ENSG00000117543 DPH5<br>ENSG00000159063 ALG8<br>ENSG00000197415 VEPPL1<br>ENSG00000143374 TARS2<br>ENSG00000177192 PUS1<br>ENSG00000120159 SMNDC1<br>ENSG00000156671 SAMD8<br>ENSG00000185203 Q96S36_HUMAN<br>ENSG00000106290 TAF6<br>ENSG00000118298 CA14<br>ENSG00000196644 LOC728932<br>ENSG00000186364 NUDT17<br>ENSG00000117543 DPH5<br>ENSG00000159063 ALG8<br>ENSG00000197415 VEPPL1<br>ENSG00000143374 TARS2<br>ENSG00000177192 PUS1<br>ENSG00000120159 SMNDC1<br>ENSG00000156671 SAMD8<br>ENSG00000185203 Q96S36_HUMAN<br>ENSG00000106290 TAF6<br>ENSG00000118298 CA14<br>ENSG00000196644 LOC728932<br>ENSG00000186364 NUDT17<br>ENSG00000117543 DPH5<br>ENSG00000159063 ALG8<br>ENSG00000197415 VEPPL1<br>ENSG00000143374 TARS2<br>ENSG00000177192 PUS1<br>ENSG00000120159 SMNDC1<br>ENSG00000156671 SAMD8<br>ENSG00000185203 Q96S36_HUMAN<br>ENSG00000106290 TAF6<br>ENSG00000118298 CA14<br>ENSG00000196644 LOC728932<br>ENSG00000186364 NUDT17<br>ENSG00000117543 DPH5<br>ENSG00000159063 ALG8<br>ENSG00000197415 VEPPL1<br>ENSG00000143374 TARS2<br>ENSG00000177192 PUS1<br>ENSG00000120159 SMNDC1<br>ENSG00000156671 SAMD8<br>ENSG00000185203 Q96S36_HUMAN<br>ENSG00000106290 TAF6<br>ENSG00000118298 CA14<br>ENSG00000196644 LOC728932<br>ENSG00000186364 NUDT17<br>ENSG00000117543 DPH5 |                                                                                                                                                                                                                                           |                                                                                                                                                                                                           |

ENSG00000163331|NP\_001017920.1 ENSG00000163885|CCDC37 ENSG00000166965|RCCD1 ENSG00000169184|NM\_002430.2 ENSG00000169213|RAB3B ENSG00000171385|KCND3 ENSG00000171724|K1576\_HUMAN ENSG00000179776|CDH5  
ENSG00000181350|C17orf76 ENSG00000186190|C20orf185 ENSG00000188322|SBK1 ENSG00000121293|MAP4K5 ENSG00000058600|POLR3E ENSG00000085449|WDFY1 ENSG00000089335|ZNF302 ENSG00000092978|GPATCH2  
ENSG00000104093|DMXL2 ENSG00000108187|PBLD ENSG00000122550|KLHL7 ENSG00000132950|ZMYM5 ENSG00000134765|DSCI ENSG00000137449|CPEB2 ENSG00000139329|LUM ENSG00000149658|YTHDF1  
ENSG00000153989|NUS1 ENSG00000163624|CDS1 ENSG00000163629|PTPN13 ENSG00000166266|CUL5 ENSG00000171204|TMEM126B ENSG00000173598|NUDT4 ENSG00000183423|NP\_940908.1 ENSG00000197641|SERPINB13  
ENSG00000197841|ZNF181 ENSG00000198948|FMFAP3L ENSG00000204990|NP\_001008742.1  
ENSG00000004487|AOF2 ENSG00000037637|FBXO42 ENSG00000039523|FAM65A ENSG00000068024|HDAC4 ENSG00000076108|BAZ2A ENSG00000088812|ATRN ENSG00000088876|ZNF343 ENSG00000095066|HOOK2  
ENSG00000100867|DHRS2 ENSG00000125089|SH3TC1 ENSG00000131149|KIAA0182 ENSG00000141431|Q6ZMX6\_HUMAN ENSG00000164051|CCDC51 ENSG00000178449|C12orf62 ENSG00000198400|NTRK1 ENSG00000002745|WNT16  
ENSG00000070087|PFN2 ENSG00000101190|TCFL5 ENSG00000112242|E2F3 ENSG00000113805|CNTN3 ENSG00000119917|IFIT3 ENSG00000121741|ZMYM2 ENSG00000125430|HS3ST3B1 ENSG00000130349|C6orf203  
ENSG00000137831|UACA ENSG00000139278|GLI1PR1 ENSG00000142476|FBXO28 ENSG00000147027|TMEM47 ENSG00000151150|ANKK1 ENSG00000163389|KTELC1 ENSG00000165105|RASEF  
ENSG00000165899|C12orf64 ENSG00000166509|CLEC3A ENSG00000169248|CXCL11 ENSG00000171476|HOP\_HUMAN ENSG00000180251|SLC9A4 ENSG00000181690|PLAG1 ENSG00000196865|NHLRC2 ENSG00000198648|STK39  
ENSG00000204716|ANKRD20B ENSG00000205874|Q6SA06\_HUMAN  
ENSG00000063587|ZNF275 ENSG00000083807|SLC27A5 ENSG00000083814|ZNF671 ENSG00000100077|ADRBK2 ENSG00000100422|CERK ENSG00000100931|CHMP4A ENSG00000110455|NP\_115981.1 ENSG00000114113|RBP2  
ENSG00000116237|ICMT ENSG00000130159|ECSIT ENSG00000134207|SYT6 ENSG00000144504|ANKMY1 ENSG00000146197|SCUBE3 ENSG00000158352|SHROOM4 ENSG00000159588|CCDC17 ENSG00000166780|C16orf45  
ENSG00000184639|NP\_001004344.1 ENSG00000198690|MTMR15 ENSG00000205878|Q6ZSV2\_HUMAN ENSG00000056097|ZFR ENSG000000101752|MIB1 ENSG00000119314|ROD1 ENSG00000134748|PRPF38A ENSG00000138434|SSFA2  
ENSG00000138735|PDE5A ENSG00000141255|SPATA22 ENSG00000148429|USP6NL ENSG00000152661|GJA1 ENSG00000164542|NP\_056129.1 ENSG00000165389|C14orf147 ENSG00000172900|XR\_017872.1 ENSG00000173542|MOBK1A  
ENSG00000177150|C18orf19 ENSG00000177888|ZBTB41 ENSG00000183305|MAGEA6 ENSG00000184750|MAGEA2 ENSG00000185417|CXorf1 ENSG00000196812|ZSCAN16 ENSG00000198533|Q9P1D0\_HUMAN ENSG00000203730|TEDDM1  
ENSG00000204711|C9orf135  
ENSG000000055483|USP36 ENSG00000064300|NGFR ENSG00000074410|CAL12 ENSG00000099194|SCD ENSG00000100335|SMCR7L ENSG00000101457|DNMTTIP1 ENSG00000104941|RSHL1 ENSG00000120875|DUSP4  
ENSG00000124733|MEA1 ENSG00000159784|FAM131B ENSG00000164509|IL131RA ENSG00000168209|DDIT4 ENSG00000174233|ZFAND2A ENSG00000178381|ZFAND2A ENSG00000179242|CDH4 ENSG00000205878|Q6ZSV2\_HUMAN  
ENSG00000107614|TRDMT1 ENSG00000111215|PRR4 ENSG00000115363|TMEM166 ENSG00000119801|YPEL5 ENSG00000125356|NDUFA1 ENSG00000125863|MKKS ENSG00000145850|TIMD4 ENSG00000147507|LYN  
ENSG00000150776|C11orf57 ENSG00000154511|FAM69A ENSG00000155011|DKK2 ENSG00000158079|PTPDC1 ENSG00000164983|TMEM65 ENSG00000170113|NIPA1 ENSG00000179456|ZNF238 ENSG00000196104|SPOCK3  
ENSG00000198533|Q9P1D0\_HUMAN ENSG00000203801|Q5R3E8\_HUMAN ENSG00000205208|NP\_001008394.1  
ENSG00000055163|CYFIP2 ENSG00000075426|FOSL2 ENSG00000101203|COL20A1 ENSG00000103742|NP\_066013.1 ENSG00000115598|IL1RL2 ENSG00000131797|C16orf67 ENSG00000162772|ATF3 ENSG00000164300|SERINC5  
ENSG00000166340|TPP1 ENSG00000174945|AMZ1\_HUMAN ENSG00000177762|C5orf27 ENSG00000179241|LDLRAD3 ENSG00000183044|ABAT ENSG00000185681|C9orf18 ENSG00000186029|Q9NSZ8\_HUMAN ENSG00000187003|ACTL7A  
ENSG00000196396|PTPN1 ENSG00000197081|IGF2R ENSG00000198632|NP\_777590.1 ENSG00000204197|KIFC1 ENSG000000077458|FAM76B ENSG00000105856|HBP1 ENSG00000106341|C7orf16 ENSG00000107165|TYRP1  
ENSG00000113742|CPEB4 ENSG00000114125|RNF7 ENSG00000117906|RCN2 ENSG00000121644|C1orf121 ENSG00000125207|PIWIL1 ENSG00000135341|MAP3K7 ENSG00000136783|NIPSNAP3A ENSG00000138081|FBXO11  
ENSG00000140262|TCF12 ENSG00000140575|IQGAP1 ENSG00000144619|CNTN4 ENSG00000157111|TMEM171 ENSG00000164932|CTHRC1 ENSG00000166295|C10orf104 ENSG00000168813|ZNF507 ENSG00000169519|METT5D1  
ENSG00000176714|CCDC121 ENSG00000180116|C12orf40 ENSG00000187889|C1orf168  
perfect: TAGCATT AATGCTA hsa-miR-155 taAATGCTAatcgtgatagggg 2  
ENSG000000022556|NLRP2 ENSG00000067082|KLF6 ENSG00000072506|HSD17B10 ENSG00000100884|CPNE6 ENSG00000104518|GSDMDC1 ENSG00000105122|NP\_075055.1 ENSG00000112079|STK38 ENSG00000125731|SH2D3A  
ENSG00000128849|CENL1 ENSG00000130821|SLC6A8 ENSG00000138780|GSTCD ENSG00000141431|Q6ZMX6\_HUMAN ENSG00000146013|GFRA3 ENSG00000148297|SURF5 ENSG00000157617|C21orf25 ENSG00000164048|ZNF589  
ENSG00000164270|HTR4 ENSG00000168785|TSPAN5 ENSG00000183431|SF3A3 ENSG00000183444|NR\_002822.2 ENSG00000186187|ZNRF1 ENSG00000189410|SH2D5 ENSG00000197106|SLC6A17 ENSG00000197430|TMEM10  
ENSG00000198336|MYL4 ENSG00000203987|Q6ZRH6\_HUMAN ENSG000000056277|SUHW3 ENSG00000058729|RIOK2 ENSG00000100387|RXR1 ENSG00000102098|SHML2 ENSG00000131791|PRKAB2 ENSG00000135940|COX5B  
ENSG00000143344|RGL1 ENSG00000143756|FBXO28 ENSG00000146592|CREB5 ENSG00000148154|UGCG ENSG00000163939|PBRM1 ENSG00000165819|METTL3 ENSG00000165997|ARL5B ENSG00000168283|BMI1  
ENSG00000170315|UBIQ\_HUMAN ENSG00000174749|C4orf32 ENSG00000176222|ZNF404 ENSG00000189251|Q8WYN8\_HUMAN ENSG00000198791|CNOT7  
ENSG00000033011|ALG1 ENSG00000058799|YIPF1 ENSG00000070371|CLTCL1 ENSG00000070814|TCOF1 ENSG00000070886|EPHA8 ENSG00000111077|TENC1 ENSG00000116337|AMPD2 ENSG00000116514|IBRDC3  
ENSG00000125618|PAX8 ENSG00000130222|GADD45G ENSG00000130402|ACTN4 ENSG00000132329|RAMP1 ENSG00000144115|NP\_060741.2 ENSG00000156097|GPR61 ENSG00000169194|IL13 ENSG00000183678|CTAG1A  
ENSG00000184033|CTAG1B ENSG00000188559|C20orf74 ENSG00000203804|C1orf138 ENSG00000204183|GDF5OS ENSG00000205064|Q6ZVP2\_HUMAN ENSG00000043263|C1orf189 ENSG00000117748|RPA2 ENSG00000120685|C13orf23  
ENSG00000134313|NP\_065789.1 ENSG00000136048|NP\_060840.2 ENSG00000136888|ATP6V1G1 ENSG00000136897|MRPL50 ENSG00000143799|PARP1 ENSG00000146856|AGBL3 ENSG00000149177|PTPRJ ENSG00000155621|C9orf85  
ENSG00000155640|C10orf12 ENSG00000163599|CTLA4 ENSG00000164070|HSPA4L ENSG00000165300|SLITRK5 ENSG00000168229|PTGDR ENSG00000177461|Q8NA31\_HUMAN ENSG00000178202|KDELC2  
ENSG00000186188|GPR120 ENSG00000186377|CYP4X1 ENSG00000197128|ZNF772 ENSG00000203705|TATDN3 ENSG00000204954|Q69YU5\_HUMAN ENSG00000206029|Q0P633\_HUMAN ENSG00000206075|SERPINB5  
ENSG00000044446|PHKA2 ENSG00000047644|WWC3 ENSG00000107554|DNMBP ENSG00000119638|NEK9 ENSG00000121060|TRIM25 ENSG00000124074|C16orf48 ENSG00000124782|RREB1 ENSG00000133069|TMCC2  
ENSG00000136697|IL1F10 ENSG00000137496|I18BP\_HUMAN ENSG00000141639|MAPK4 ENSG00000143367|TUFT1 ENSG00000154222|CC2D1B ENSG00000163263|C1orf189 ENSG00000163486|SRGAP2 ENSG00000166086|JAM3  
ENSG00000166165|CKB ENSG00000167434|CA4 ENSG00000170276|HSPB2 ENSG00000176302|FOXRI ENSG00000177553|C1orf167 ENSG00000196501|H1ST1H2B ENSG00000197965|MPZL1 ENSG00000198668|CALM1  
ENSG00000204540|PSORS1C1 ENSG0000011295|TTC19 ENSG00000030066|NUP160 ENSG00000116729|GPR177 ENSG00000133606|MKRN1 ENSG00000133818|RRAS2 ENSG00000134363|FST ENSG00000136758|YME1L1  
ENSG00000143183|TMC01 ENSG00000143476|DTL ENSG00000144713|RPL32 ENSG00000148175|STOM ENSG00000164056|SPRY1 ENSG00000164111|ANXA5 ENSG00000166747|APIG1 ENSG00000168036|CTNNB1  
ENSG00000169550|MUC15 ENSG00000171843|MLL3 ENSG00000173559|OBFC2A ENSG00000197128|ZNF772 ENSG00000197639|MKRNP5 ENSG00000197657|ZNF323 ENSG00000205462|Q6ZWC8\_HUMAN  
ENSG00000034053|APBA2 ENSG00000085117|CD82 ENSG00000105997|H0XA3 ENSG00000120896|SORBS3 ENSG00000123064|DDX54 ENSG00000127884|ECHS1 ENSG00000130300|PLVAP  
ENSG00000130762|ARHGEF16 ENSG00000133424|LARGE ENSG00000136327|NKX2-8 ENSG00000136802|LRRC8A ENSG00000140526|ABHD2 ENSG00000157514|TSC22D3 ENSG00000162144|CYBASC3 ENSG00000163064|EN1  
ENSG00000164591|MYOZ3 ENSG00000165626|C10orf30 ENSG00000178802|MPI ENSG00000181856|SLC2A4 ENSG00000188272|B4GALNT4 ENSG00000188677|PARVB ENSG00000196808|Q96NJ4\_HUMAN ENSG00000203879|GD11  
ENSG00000206064|Q6ZU89\_HUMAN ENSG00000061676|NCKAP1 ENSG00000064042|NP\_055803.1 ENSG00000090470|PDCD7 ENSG00000103449|SALL1 ENSG00000117069|ST6GALNAC5 ENSG00000117139|JARID1B ENSG00000119048|UBE2B  
ENSG00000119147|C2orf40 ENSG00000123908|EIF2C2 ENSG00000134748|PRPF38A ENSG00000138801|PAPSS1 ENSG00000145241|CENPC1 ENSG00000145309|C4orf35 ENSG00000150093|ITGB1 ENSG00000150681|RGS18  
ENSG00000152382|TADA1L ENSG00000154310|TNIK ENSG00000154359|LONRF1 ENSG00000156049|GNA14 ENSG00000164398|ACSL6 ENSG00000164930|FZD6 ENSG00000170365|SMAD1 ENSG00000171723|GPHN  
ENSG00000174840|NP\_808881.2 ENSG00000180398|MCFD2  
ENSG00000033011|ALG1 ENSG00000082805|ERC1 ENSG00000102962|CCL22 ENSG00000110092|CCND1 ENSG00000112941|POLS ENSG00000132749|MTL5 ENSG00000138175|ARL3 ENSG00000140950|KIAA1609  
ENSG00000154319|C8orf13 ENSG00000157110|RBPM5 ENSG00000168872|DDX19A ENSG00000170049|KCNAB3 ENSG00000173404|INSM1 ENSG00000176809|LRRC37A3 ENSG00000179036|VAMP2 ENSG00000181110|RGAL1  
ENSG00000184221|OLIG1 ENSG00000189363|Q6ZSP4\_HUMAN ENSG00000196372|ASB13 ENSG00000198079|XR\_017925.1 ENSG00000204544|C6orf205 ENSG00000204626|Q6ZSR2\_HUMAN ENSG00000205680|NR\_002931.1 ENSG00000090402|SI  
ENSG00000104728|ARHGEF10 ENSG00000110422|HIPK3 ENSG00000111726|CMAS ENSG00000115652|UXS1 ENSG00000122435|CCDC76 ENSG00000122557|HERPUD2 ENSG00000125351|UPP3B ENSG00000136738|STAM  
ENSG00000145416|MARCH1 ENSG00000147509|RGS20 ENSG00000149345|U2D3L\_HUMAN ENSG00000153201|RANBP2 ENSG00000162606|LITD1 ENSG00000162722|TRIM58 ENSG00000164949|GEM ENSG00000165060|FXN  
ENSG00000166509|CLEC3A ENSG00000168228|ZCCHC4 ENSG00000171723|GPHN ENSG00000175928|LRRN1 ENSG00000176007|C9orf51 ENSG00000176390|CRLF3 ENSG00000179941|BBS10 ENSG00000186280|JMJD2D  
ENSG00000186481|NP\_001025170.1 ENSG00000196344|ADH7  
ENSG00000002726|ABP1 ENSG00000006042|TMEM98 ENSG00000067066|SP100 ENSG00000101997|CCDC22 ENSG00000111481|COPZ1 ENSG00000126214|KLC1 ENSG00000143379|SETDB1 ENSG00000145819|ARHGAP26  
ENSG00000149781|URP2\_HUMAN ENSG00000159840|ZYX ENSG00000167311|ART5 ENSG00000168081|PNOC ENSG00000171307|ZDHHC16 ENSG00000181722|ZBTB20 ENSG00000182054|IDH2 ENSG00000186197|ENO1P  
ENSG00000188589|RBM33 ENSG0000011523|CEP68 ENSG00000101557|USP14 ENSG00000111707|SUDS3 ENSG00000112245|PTP4A1 ENSG00000115365|LANCL1 ENSG00000115665|SLC5A7 ENSG00000132423|COQ3  
ENSG00000134109|EDEM1 ENSG00000135914|HTR2B ENSG00000137941|TTLL7 ENSG00000138675|FGF5 ENSG00000141255|SPATA22 ENSG00000143498|TAF1A ENSG00000144320|KIAA1715 ENSG00000145321|GC  
ENSG00000163539|CLASP2 ENSG00000163634|THOC7 ENSG00000169330|KI024\_HUMAN ENSG00000173145|NOC3L ENSG00000175073|VCPIP1 ENSG00000177459|C8orf47 ENSG00000188386|PPP3R2 ENSG00000205038|PKHD1L1

ENSG00000166900|STX3 ENSG00000182158|CREB3L2 ENSG00000184785|Q96HG1\_HUMAN ENSG00000185811|IKZF1 ENSG00000186118|Q6PEX7\_HUMAN ENSG00000186318|BACE1 ENSG00000197879|MYO1C ENSG00000206550|LOC285346  
 ENSG00000001561|ENPP4 ENSG00000030304|MUSK ENSG00000075407|ZNF37A ENSG00000100890|KIAA0391 ENSG00000123521|SPATS2 ENSG00000123983|ACSL3 ENSG00000132541|HRSP12 ENSG00000133104|SPG20  
 ENSG00000135932|CAB39 ENSG00000144597|EAF1 ENSG00000146476|C6orf211 ENSG00000151748|SAV1 ENSG00000154079|C6orf57 ENSG00000154080|CHST9 ENSG00000156017|C9orf41 ENSG00000157429|ZNF19  
 ENSG00000166510|CCDC68 ENSG00000168383|HLA-DPB1 ENSG00000172469|MANEA ENSG00000175746|NP\_997328.1 ENSG00000177917|ARL6IP6 ENSG00000178150|ZNF114 ENSG00000186297|GABRA5 ENSG00000197566|ZNF624  
 ENSG00000203916|HFM1  
 perfect: TAGGAAA TTTCTTA hsa-miR-202\* TTTCTTAatgcataatacttcttt 0  
 TAGGAAAG ENSG00000048471|NP\_001073999.1 ENSG00000055609|MLL3 ENSG00000089057|SLC23A2 ENSG00000104848|KCNA7 ENSG00000128438|Q9H7M0\_HUMAN ENSG00000130956|HABP4 ENSG00000136327|NKX2-8 ENSG00000136731|UGCG1  
 ENSG00000141639|MAPK4 ENSG00000142541|RPL13A ENSG00000162129|CLPB ENSG00000165699|TSC1 ENSG00000166947|EPB42 ENSG00000167505|Q96NK6\_HUMAN ENSG00000064726|BTBD1 ENSG00000080298|RFK3  
 ENSG00000090470|PDCD7 ENSG00000106025|VTI1B ENSG00000106025|TSPAN12 ENSG00000164884|MEST ENSG00000109944|C11orf63 ENSG00000113593|PPWD1 ENSG00000115896|PLCL1  
 ENSG00000119401|TRIM32 ENSG00000120784|ZFP30 ENSG00000135318|NT5E ENSG00000135547|HEY2 ENSG00000137878|GRINL1A ENSG00000142065|ZFP14 ENSG00000154898|Q8IYA2\_HUMAN ENSG00000166197|NOLC1  
 ENSG00000166363|OR10A5 ENSG00000168743|NPNT ENSG00000170495|Q6ZNE6\_HUMAN ENSG00000171566|PLRG1 ENSG00000183671|GPR1 ENSG00000186369|YN002\_HUMAN ENSG00000196693|ZNF33B ENSG00000205110|Q6TKS8\_HUMAN  
 TAGGACA ENSG00000005513|SOX8 ENSG000000095713|CRTAC1 ENSG00000104974|LILRA1 ENSG00000107819|SFXN3 ENSG00000116863|ADPRHL2 ENSG00000119715|ESRRB ENSG00000128944|C15orf23 ENSG00000130768|SMPDL3B  
 ENSG00000131398|KCNC3 ENSG00000134216|CHIA ENSG00000149646|C20orf152 ENSG00000163833|FBXO40 ENSG00000164080|RAD54L2 ENSG00000164309|CMYA5 ENSG00000166189|HPS6 ENSG00000167612|ANKRD33  
 ENSG00000169093|ASMTL ENSG00000176349|Q8N997\_HUMAN ENSG00000182852|C21orf121 ENSG00000203674|Q6ZT24\_HUMAN ENSG00000204479|PRAEF17 ENSG00000204488|PRAEF16 ENSG00000204748|CGB1 ENSG00000109654|TRIM2  
 ENSG00000130349|C6orf203 ENSG00000132294|EFR3\_HUMAN ENSG00000150051|MKX ENSG00000158185|ANKRD36 ENSG00000159917|ZNF235 ENSG00000168411|RFWD3 ENSG00000172575|RASGRP1 ENSG00000174446|SNAPC5  
 ENSG00000196912|AN36B\_HUMAN ENSG00000204692|OR12D3  
 TAGGACT ENSG00000058262|SEC61A1 ENSG00000087076|HSD17B14 ENSG00000100141|PISD ENSG00000100226|GTPBP1 ENSG00000106635|BCL7B ENSG00000136485|WDR68 ENSG00000142512|SIGLEC10 ENSG00000144681|STAC  
 ENSG00000145864|GABRB2 ENSG00000166136|NDUF8 ENSG00000167173|C15orf39 ENSG00000170581|STAT2 ENSG00000171747|LGALS4 ENSG00000177238|TRIM72 ENSG00000182606|TRAK1 ENSG00000188004|VSI8  
 ENSG00000203814|HIST2H2BF ENSG00000205136|Q3KRG0\_HUMAN ENSG00000034533|ASTE1 ENSG00000091972|CD200 ENSG00000100902|PSMA6 ENSG00000104361|NPAL2 ENSG00000113593|PPWD1 ENSG00000117009|KMO  
 ENSG00000133703|KRAS ENSG00000133805|AMPD3 ENSG00000135678|CPM ENSG00000136643|RPS6KC1 ENSG00000139131|YARS2 ENSG00000139610|ELA1 ENSG00000145982|FARS2 ENSG00000151025|GPR158  
 ENSG00000152240|CCDC5 ENSG00000152413|HOMER1 ENSG00000154485|MMP21 ENSG00000162437|RAVER2 ENSG00000164312|EIF4E3 ENSG00000167840|ZNF232 ENSG00000179873|NLRP11 ENSG00000184007|PTP4A2  
 ENSG00000198492|YTHDF2 ENSG00000198945|L3MBTL3  
 TAGGAGA ENSG00000063015|SEZ6 ENSG00000077009|ITGB1P3 ENSG00000101321|C20orf159 ENSG00000125266|EFNB2 ENSG00000144029|MRPS5 ENSG00000148400|NOTCH1 ENSG00000149305|HTR3B ENSG00000160785|SLC25A44  
 ENSG00000160994|CCDC105 ENSG00000163374|YY1AP1 ENSG00000167080|B4GALNT2 ENSG00000167105|TMEM92 ENSG00000169213|RAB3B ENSG00000173545|ZNF622 ENSG00000183250|C21orf67 ENSG00000183908|LRRC55  
 ENSG00000185650|ZFP36L1 ENSG00000186318|BACE1 ENSG00000198917|C9orf114 ENSG00000203855|Q8TDP9\_HUMAN ENSG00000204487|LTB ENSG000000006757|PNPLA4 ENSG00000023228|NDUFS1 ENSG00000053900|ANAPC4  
 ENSG00000058668|ATP2B4 ENSG00000059804|GTR3\_HUMAN ENSG00000081842|PCDH10 ENSG00000106460|TMEM106B ENSG00000108984|MAP2K6 ENSG00000116898|MRPS15 ENSG00000152348|ATG10 ENSG00000157343|C6orf81  
 ENSG00000164171|ITGA2 ENSG00000164494|PDSS2 ENSG00000173262|SLC2A3 ENSG00000173612|GPRC6A ENSG00000173875|ZNF791 ENSG00000183145|DSCR6 ENSG00000183722|LHFP ENSG00000183747|ACSM2  
 ENSG00000184258|CDR1 ENSG00000188921|PTPLAD2 ENSG00000189212|DPY19L2P1 ENSG00000196167|NP\_997312.1 ENSG00000196653|ZNF502  
 TAGGATT ENSG00000088854|C20orf194 ENSG00000107742|SPOCK2 ENSG00000108947|EFNB3 ENSG00000117242|DDOST ENSG00000122188|LAX1 ENSG00000132915|PDE6A ENSG00000136935|GOLGA1 ENSG00000139540|SLC39A5  
 ENSG00000141505|ASGR1 ENSG00000156398|SFXN2 ENSG00000158578|ALAS2 ENSG00000167634|NLRP7 ENSG00000170290|SLN ENSG00000172460|Q8IVV7\_HUMAN ENSG00000176909|NP\_872380.1 ENSG00000183684|THOC4  
 ENSG00000184935|Q6AI01\_HUMAN ENSG00000185888|NP\_898885.1 ENSG00000187456|RDM1 ENSG00000188112|FLJ90086 ENSG00000206539|Q6ZTN9\_HUMAN ENSG00000008277|ADAM22 ENSG00000065911|MTHFD2 ENSG00000074706|NP\_056368.1  
 ENSG00000087502|ERIGI2 ENSG00000102471|NDFIP2 ENSG00000102554|KLF5 ENSG00000102805|CLN5 ENSG00000103037|SETD6 ENSG00000103599|IQCH ENSG00000136868|BBS7 ENSG00000142867|BCL10  
 ENSG00000144771|LRTM1 ENSG00000154898|Q8IYA2\_HUMAN ENSG00000159256|MORC3 ENSG00000164484|KIAA1913 ENSG00000165525|SDCCAG1 ENSG00000166532|FAM80B ENSG00000170385|SLC30A1 ENSG00000174298|NP\_694572.1  
 ENSG00000182551|ADI1 ENSG00000183309|ZNF623 ENSG00000186471|AKAP14 ENSG00000198176|TFDP1 ENSG00000198304|ZNF528 ENSG00000198648|STK39 ENSG00000198648|STK39  
 TAGGCCGA ENSG00000025800|KPNA6 ENSG00000064932|SBNO2 ENSG00000069011|PITX1 ENSG00000108442|FAM18B2 ENSG00000112559|MDFI ENSG00000116213|WDR8 ENSG00000117472|TSPAN1 ENSG00000119321|FKBP15  
 ENSG00000125813|PAX1 ENSG00000127452|FBXL12 ENSG00000129910|CDH5 ENSG00000131746|TNS4 ENSG00000137522|RNF121 ENSG00000152217|SETBP1 ENSG00000171219|CDC42BPG ENSG00000174374|WBSCR16  
 ENSG00000182289|Q9H9U3\_HUMAN ENSG00000187630|DHRSL2 ENSG00000203697|CAPN8 ENSG00000203865|Q5TC04\_HUMAN ENSG00000072315|TRPC5 ENSG00000100196|KDELR3 ENSG00000107485|GATA3 ENSG00000109084|TMEM97  
 ENSG00000109670|FBXW7 ENSG00000116750|UCLH5 ENSG00000119285|HEATR1 ENSG00000128245|YWHAH ENSG00000132424|C6orf111 ENSG00000133135|RNF128 ENSG00000156976|EIF4A2 ENSG00000166415|WDR72  
 ENSG00000166783|KIAA0430 ENSG00000167383|ZNF229 ENSG00000173705|SUSD5 ENSG00000186834|HEXIM1 ENSG00000189056|RELN ENSG00000189290|XR\_018254.1 ENSG00000198146|ZNF770 ENSG00000205187|Q6ZSG3\_HUMAN  
 TAGGACDA ENSG00000035862|TIMP2 ENSG00000051009|C11orf56 ENSG00000088882|CPXMI ENSG00000096088|PGC ENSG00000102898|NUTF2 ENSG00000104386|XR\_017860.1 ENSG00000105428|ZNR4 ENSG00000107831|FGF8  
 ENSG00000108262|GIT1 ENSG00000108825|AARS2 ENSG00000119973|PRLHR ENSG00000129465|IRPK3 ENSG00000129473|BCL2L2 ENSG00000146834|BCDIN3 ENSG00000151773|CCDC122 ENSG00000152292|SH2D6  
 ENSG00000155719|OTOA ENSG00000160957|RECQL4 ENSG00000188778|ADRB3 ENSG00000196976|LAGE3 ENSG00000064651|SLC12A2 ENSG00000065970|FOXJ2 ENSG00000075407|ZNF37A ENSG00000102763|NP\_001009814.1  
 ENSG00000111707|SUDS3 ENSG00000116668|C1orf26 ENSG00000122482|ZNF644 ENSG00000127922|SHFM1 ENSG00000127951|FGL2 ENSG00000131721|PEPP2\_HUMAN ENSG00000152242|C18orf25 ENSG00000165152|C9orf125  
 ENSG00000169740|ZNF32 ENSG00000177565|TBL1XR1 ENSG00000180458|Q8N3U1\_HUMAN ENSG00000203989|LOC727940  
 TAGGGGG ENSG00000010319|SEMA3B ENSG00000100628|ASB2 ENSG00000105122|NP\_075055.1 ENSG00000105605|CACNG7 ENSG00000117411|B4GALT2 ENSG00000140320|BAHD1 ENSG00000142961|MOBK12C  
 ENSG00000160685|ZBTB7B ENSG00000163016|NP\_660343.1 ENSG00000173153|ESRRA ENSG00000173757|STAT5B ENSG00000183010|PYCR1 ENSG00000187942|LDLRAD2 ENSG00000188743|Q9P169\_HUMAN ENSG00000164900|CLCA1  
 ENSG00000074706|NP\_056368.1 ENSG00000087916|SLC6A14 ENSG00000101109|STK4 ENSG00000115808|STRN ENSG00000120800|UTP20 ENSG00000122696|MCART1 ENSG00000127359|KIAA1147 ENSG00000133083|DCLK1  
 ENSG00000137693|YAP1 ENSG00000141497|ZMYND15 ENSG00000145734|BDP1 ENSG00000152487|NSUN6 ENSG00000153107|ANAPC1 ENSG00000161905|ALOX15 ENSG00000162521|RBBP4 ENSG00000162526|TSSK3  
 ENSG00000166535|A2ML1 ENSG00000166670|MMP10 ENSG00000170085|C5orf25 ENSG00000172292|LASS6 ENSG00000173917|HXP2 ENSG00000185591|SP1 ENSG00000205403|CFI  
 ENSG00000205524|Q6BD70\_HUMAN  
 TAGGGTC ENSG00000100100|PIK3IP1 ENSG00000101076|HNF4A ENSG00000102870|ZNF629 ENSG00000103348|QPR2 ENSG00000118257|NRB2 ENSG00000125966|MMP24 ENSG00000136205|TNS3 ENSG00000140464|PML  
 ENSG00000144040|SFXN5 ENSG00000158161|EYA3 ENSG00000165916|PSMC3 ENSG00000166582|PRR6 ENSG00000170616|SCRT1 ENSG00000172212|XR\_017939.1 ENSG00000178226|PRSS36 ENSG00000180104|EXOC3  
 ENSG00000196943|LTB4R ENSG00000205913|Q6ZUC4\_HUMAN ENSG00000075292|ZNF638 ENSG00000080608|KIAA0020 ENSG00000087206|UIMC1 ENSG00000099251|HSD17B7P2 ENSG00000100596|SPTLC2 ENSG00000105879|CBLL1  
 ENSG00000114491|UMPS ENSG00000117477|C1orf114 ENSG00000117597|C1orf107 ENSG00000127831|VIL1 ENSG00000136868|SLC31A1 ENSG00000150394|CDH8 ENSG00000165868|HSPA12A ENSG00000166529|ZSCAN21  
 ENSG00000177301|KCNA2 ENSG00000188938|FAM120AOS  
 TAGGGTT ENSG000000015413|DPEP1 ENSG00000090674|MCOLN1 ENSG00000100335|SMCR7L ENSG00000101224|CDC25B ENSG00000102871|TRADD ENSG00000112212|BZRP11 ENSG00000115598|IL1RL2 ENSG00000125354|SEPT6  
 ENSG00000125872|C20orf75 ENSG00000130653|PNPLA7 ENSG00000131558|EXOC4 ENSG00000144233|AMMECR1L ENSG00000148773|MK167 ENSG00000159352|PSMD4 ENSG00000160339|FCN2 ENSG00000166165|CKB  
 ENSG00000176092|ATM1L ENSG00000183666|LOC728411 ENSG00000186207|LCE5A ENSG00000197175|Q8TBR1\_HUMAN ENSG00000198237|GUSL1\_HUMAN ENSG00000205726|ITSN1 ENSG00000046653|GPM6B ENSG00000071967|CYBRD1  
 ENSG00000085491|SLC25A24 ENSG00000106540|C7orf36 ENSG00000108587|GOSR1 ENSG00000109689|STIM2 ENSG00000115020|PIP5K3 ENSG00000123104|ITPR2 ENSG00000124098|C20orf108 ENSG00000124193|SFRS6  
 ENSG00000125686|PPARB ENSG00000126950|TMEM35 ENSG00000128059|PPAT ENSG00000137075|RNF38 ENSG00000151033|LYZL2 ENSG00000155130|MARCKS ENSG00000160679|C1orf77 ENSG00000171877|FRMD5  
 ENSG00000181631|P2RY13 ENSG00000198093|ZNF649  
 TAGGTAC ENSG00000100288|CPT1B ENSG00000110917|KIAA0152 ENSG00000114999|TTL ENSG00000116708|PRAEF4 ENSG00000120318|CENTD3 ENSG00000133511|PIK4CA ENSG00000138698|RAP1GDS1 ENSG00000140067|C14orf152  
 ENSG00000151532|VTI1A ENSG00000157358|PRAEF15 ENSG00000162367|TAL1 ENSG00000166507|NDST2 ENSG00000166863|TAC3 ENSG00000167625|ZNF526 ENSG00000167664|TMIGD2 ENSG00000183506|NP\_955377.2  
 ENSG00000197536|NP\_001013739.1 ENSG00000204501|PRAEF9 ENSG00000204502|PRAEF5 ENSG00000204507|LOC729368 ENSG00000204509|PRAEF6 ENSG00000029639|TFB1M ENSG00000095464|PDE6C ENSG00000106460|TMEM106B  
 ENSG00000113441|LNPEP ENSG00000150526|MIA2 ENSG00000154415|PBP1R3A ENSG00000162636|FAM102B ENSG00000164114|MAP9 ENSG00000186448|ZNF197 ENSG00000197359|C15orf34 ENSG00000198075|SULT1C4  
 TAGGTAG ENSG00000102359|SRPX2 ENSG00000110092|CCND1 ENSG00000111540|RAB5B ENSG00000126903|SLC10A3 ENSG00000132275|KIAA0409 ENSG00000139549|DHH ENSG00000141510|TP53 ENSG00000143545|RAB13  
 ENSG00000146828|SLC12A9 ENSG00000148358|GPR107 ENSG00000166949|SMAD3 ENSG00000167695|FAM57A ENSG00000170616|SCRT1 ENSG00000172987|HPSE2 ENSG00000186318|BACE1 ENSG00000196859|KRT39  
 ENSG00000196970|NFX4 ENSG00000205205|C17orf51 ENSG00000202922|MRE11A ENSG00000080166|DCT ENSG00000101544|ZNF508 ENSG00000111266|DUSP16 ENSG00000118523|CTGF ENSG00000129204|USP6  
 ENSG00000138376|BARD1 ENSG00000150625|GPM6A ENSG00000153002|CPB1 ENSG00000172403|SYNP02 ENSG00000188400|Q6URH7\_HUMAN ENSG00000188933|NM\_145809.1 ENSG00000204977|TRIM13  
 TAGGTGC ENSG00000090615|GOLGA3 ENSG00000100445|C14orf124 ENSG00000101290|CDS2 ENSG00000102302|FGD1 ENSG00000107187|LHX3 ENSG00000108516|TNFRSF13B ENSG00000111481|COP21 ENSG00000122729|ACO1  
 ENSG00000130590|SAMD10 ENSG00000136717|BIN1 ENSG00000143786|CNIH3 ENSG00000147689|FAM83A ENSG00000156299|TIAM1 ENSG00000160539|PPAPDC3 ENSG00000167130|DOLPP1 ENSG00000168397|ATG4B  
 ENSG00000172568|NP\_001001343.1 ENSG00000180598|NP\_057296.1 ENSG00000180806|HOCX9 ENSG00000182175|RGM4 ENSG00000183611|RPL32P3 ENSG00000183657|Q8WYW5\_HUMAN ENSG00000189140|Q6ZU77\_HUMAN ENSG00000197131|Q8IW43\_HUMAN  
 ENSG00000203674|Q6ZT24\_HUMAN ENSG00000039139|DNAH5 ENSG00000078140|HIP2 ENSG00000086475|SEPHS1 ENSG00000089335|ZNF302 ENSG00000106031|HOXA13 ENSG00000110218|PANX1 ENSG00000110675|ELMOD1  
 ENSG00000120868|APAF1 ENSG00000125945|ZNF436 ENSG00000129317|PUS7L ENSG00000133119|RFC3 ENSG00000136929|HEMGN ENSG00000150471|LPHN3 ENSG00000163817|SLC6A20 ENSG00000170175|CHRN1  
 ENSG00000171466|ZNF562 ENSG00000178075|GRAMD1C ENSG00000178295|NP\_872431.2 ENSG00000179456|ZNF238 ENSG00000181798|C2orf52 ENSG00000196247|ZNF588 ENSG00000197181|PIWIL2 ENSG00000197323|TRIM33  
 TAGGTGC ENSG00000006831|ADIPOR2 ENSG00000008323|PLEKHG6 ENSG00000105707|HPN ENSG00000115594|IL1R1 ENSG00000117691|NENF ENSG00000120952|PRAEF2 ENSG00000142207|URB1 ENSG00000161270|NPHS1  
 ENSG00000162231|NFX1 ENSG00000166257|SCN3B ENSG00000167815|PRDX2 ENSG00000170608|FOXA3 ENSG00000182511|FES ENSG00000186827|TNFRSF4 ENSG00000188427|XR\_017855.1 ENSG00000189280|GJB5  
 ENSG00000204141|Q6ZVW5\_HUMAN ENSG00000204483|Q8N925\_HUMAN ENSG00000205726|ITSN1 ENSG000000013293|SLC7A14 ENSG000000034713|GABARAPL2 ENSG00000074319|TSG101 ENSG00000078596|ITM2A ENSG00000083642|APRIN  
 ENSG00000085788|DDHD2 ENSG00000100503|NIN ENSG00000103642|LACTB ENSG00000104824|HNRPL ENSG00000112245|PTP4A1 ENSG00000116815|CDF8 ENSG00000119927|GPM1 ENSG00000136231|IGF2BP3  
 ENSG00000143951|NP\_056994.3 ENSG00000165434|PGM2L1 ENSG00000166128|RAB8B ENSG00000166750|SLFN5 ENSG00000169752|NRG4 ENSG00000170734|POLH ENSG00000173515|C9orf53 ENSG00000174007|C3orf34  
 ENSG00000175548|ALG10B ENSG00000182504|LRR1Q2 ENSG00000185915|KLHL34 ENSG00000196549|MME ENSG00000203717|Q6ZUF4\_HUMAN  
 TAGGTTT ENSG00000005102|MEOX1 ENSG00000023191|RNH1 ENSG00000029993|HMGB3 ENSG00000037757|NP\_115661.1 ENSG00000070748|CHAT ENSG00000116273|PHF13 ENSG00000120875|DUSP4 ENSG00000129250|KIF1C  
 ENSG00000132716|WDR42A ENSG00000134287|ARF3 ENSG00000142623|PADI1 ENSG00000144791|LIMD1 ENSG00000163516|ANKZF1 ENSG00000166974|MAPRE2 ENSG00000167183|ATAD4 ENSG00000168061|SAC3D1  
 ENSG00000168286|THAP11 ENSG00000172939|OXSR1 ENSG00000175130|MARCKSL1 ENSG00000196153|Q8NAB5\_HUMAN ENSG0000010244|ZNF207 ENSG00000065328|MCM10 ENSG00000069329|VPS35 ENSG00000107443|CCNJ  
 ENSG00000110848|CD69 ENSG00000111276|CDKN1B ENSG00000112851|ERBB2IP ENSG00000117500|TMED5 ENSG00000128951|DUT ENSG00000134330|Q6PCA9\_HUMAN ENSG00000137996|RTCD1 ENSG00000140043|ZADH1  
 ENSG00000140259|MFAP1 ENSG00000143653|SCCPDH ENSG00000146070|PLA2G7 ENSG00000152270|PDE3B ENSG00000153006|NP\_776190.1 ENSG00000153214|TMEM87B ENSG00000161714|PLCD3 ENSG00000162869|CCDC128  
 ENSG00000163738|MTHFD2L ENSG00000166845|C18orf54 ENSG00000177800|TMEM78 ENSG00000181904|C5orf24 ENSG00000186645|NP\_001027561.1 ENSG00000197121|PGAP1\_HUMAN ENSG00000198305|NP\_001027561.1 ENSG00000205505|NP\_001027561.1

|         |                                |                                |                                |                                |                              |                              |                              |                              |                              |                        |
|---------|--------------------------------|--------------------------------|--------------------------------|--------------------------------|------------------------------|------------------------------|------------------------------|------------------------------|------------------------------|------------------------|
| TAGTAGG | ENSG00000205506 NP_001027561.1 | ENSG00000205508 NP_001018856.1 | ENSG00000205509 NP_001027561.1 | ENSG00000205580 NP_001027561.1 | ENSG00000148358 GPR107       | ENSG00000151364 KCTD14       | ENSG00000167658 EEF2         |                              |                              |                        |
|         | ENSG00000100359 RUTBC3         | ENSG00000103154 EFCBP2         | ENSG00000123685 NP_061134.1    | ENSG00000129282 MRM1           | ENSG00000138294 MSMB         | ENSG00000204516 MICB         | ENSG000001561 ENPP4          |                              |                              |                        |
|         | ENSG00000172070 SCRIPT         | ENSG00000174684 B3GNT1         | ENSG00000181218 HIST3H2A       | ENSG00000183443 ZNRU41_HUMAN   | ENSG00000189334 S100A14      | ENSG00000204516 MICB         | ENSG000001561 ENPP4          |                              |                              |                        |
|         | ENSG00000068615 REEP1          | ENSG00000087206 UIMC1          | ENSG00000093000 NUP50          | ENSG00000100714 MTHFD1         | ENSG00000102081 FMR1         | ENSG00000115020 PIP5K3       | ENSG00000115875 SFRS7        |                              |                              |                        |
|         | ENSG00000118855 MFSD1          | ENSG00000120802 TMPO           | ENSG00000124429 POF1B          | ENSG00000136750 GAD2           | ENSG00000141325 CCDC45       | ENSG00000157224 CLDN12       | ENSG00000158691 ZSCAN12      | ENSG00000163602 RYBP         |                              |                        |
|         | ENSG00000163923 RPL39L         | ENSG00000164073 MFSD8          | ENSG00000164654 NP_061878.3    | ENSG00000165259 CXorf43        | ENSG00000176055 NP_981951.1  | ENSG00000177463 NR2C2        | ENSG00000179578 Q8N4V4_HUMAN | ENSG00000188846 RPL14        |                              |                        |
|         | ENSG00000196116 TDRD7          | ENSG00000198093 ZNF649         | ENSG00000198908 BH1HB9         | ENSG00000130545 CRB3           | ENSG00000131368 MRPS25       | ENSG00000133985 TTC9         | ENSG00000135423 GLS2         | ENSG00000140297 GCNT3        |                              |                        |
| TAGTAGT | ENSG00000073861 TBX21          | ENSG00000081985 IL12RB2        | ENSG00000105329 TGFBI          | ENSG00000180083 WFDC11         | ENSG00000184154 LRRCS51      | ENSG00000186532 SMYD4        | ENSG00000188818 ZDHC11       | ENSG00000198693 Q6ZWB6_HUMAN |                              |                        |
|         | ENSG00000156269 ARD1B          | ENSG00000159388 BTG2           | ENSG00000170631 ZNF16          | ENSG00000138684 IL21           | ENSG00000141497 ZMYND15      | ENSG00000065923 SLC9A7       | ENSG00000079102 RUNX1T1      | ENSG00000100852 ARHGAP5      | ENSG00000101935 AMMECR1      | ENSG00000112972 HMGCS1 |
|         | ENSG00000204434 NP_001017421.1 | ENSG00000015479 MATR3          | ENSG000000059804 GTR3_HUMAN    | ENSG00000122873 ZCD1           | ENSG00000123200 ZC3H13       | ENSG00000129116 PALLD        | ENSG00000131951 LRRCS9       | ENSG00000134352 IL6ST        | ENSG00000134986 C5orf13      |                        |
|         | ENSG00000115170 ACVR1          | ENSG00000120837 NFYB           | ENSG00000122873 ZCD1           | ENSG00000141497 ZMYND15        | ENSG00000156261 CC78         | ENSG00000166848 TERF2IP      | ENSG00000168743 NPNT         | ENSG00000173262 SLC2A3       |                              |                        |
|         | ENSG00000137098 SPAG8          | ENSG00000138381 ASNSD1         | ENSG00000138684 IL21           | ENSG00000141497 ZMYND15        | ENSG00000156261 CC78         | ENSG00000166848 TERF2IP      | ENSG00000168743 NPNT         | ENSG00000173262 SLC2A3       |                              |                        |
|         | ENSG00000185056 Q569G3_HUMAN   | ENSG00000198924 DCLRE1A        | ENSG00000204977 TRIM13         | ENSG00000042062 C20orf175      | ENSG00000055070 Clorf144     | ENSG00000068650 ATP11A       | ENSG00000085185 BCORL1       | ENSG00000095303 PTGS1        | ENSG00000116014 KISS1R       | ENSG00000127946 HIP1   |
| TAGTATT | ENSG0000017797 RALBP1          | ENSG00000132846 ZBED3          | ENSG00000133937 GSC            | ENSG00000148396 KIAA0310       | ENSG00000157379 DHRS1        | ENSG00000166949 SMAD3        | ENSG00000167874 TMEM88       | ENSG00000169635 HIC2         |                              |                        |
|         | ENSG00000129194 SOX15          | ENSG00000178307 TMEM11         | ENSG00000184634 MED12          | ENSG00000185963 BICD2          | ENSG00000186577 C6orf1       | ENSG00000196767 POU3F4       | ENSG00000197037 ZNF498       | ENSG00000010704 HFE          |                              |                        |
|         | ENSG00000177479 ARIH2          | ENSG00000060339 CCAR1          | ENSG00000061676 NCKAP1         | ENSG00000081087 OSTM1          | ENSG00000091436 MLTK_HUMAN   | ENSG00000100568 VT11B        | ENSG00000104131 EIF31        | ENSG00000108848 CROP_HUMAN   |                              |                        |
|         | ENSG00000051341 POLQ           | ENSG00000109458 GAB1           | ENSG00000112232 KHDRBS2        | ENSG00000113525 IL5            | ENSG00000116830 TTF2         | ENSG00000117505 DR1          | ENSG00000122417 ODF2L        | ENSG00000133103 COG6         |                              |                        |
|         | ENSG00000109445 ZNF330         | ENSG00000136750 GAD2           | ENSG00000138779 Q9HGM6_HUMAN   | ENSG00000143631 FLG            | ENSG00000146242 TPBG         | ENSG00000150625 GPM6A        | ENSG00000151893 C10orf46     | ENSG00000156017 C9orf41      |                              |                        |
|         | ENSG00000134077 THUMPDD3       | ENSG00000162645 GBP7           | ENSG00000164975 SNAPC3         | ENSG00000169062 UPF3A          | ENSG00000170522 ELOVL6       | ENSG00000174405 LIG4         | ENSG00000198088 NUP62CL      | ENSG00000198846 TOX          |                              |                        |
|         | ENSG00000158201 ABHD3          | ENSG00000162645 GBP7           | ENSG00000164975 SNAPC3         | ENSG00000169062 UPF3A          | ENSG00000170522 ELOVL6       | ENSG00000174405 LIG4         | ENSG00000198088 NUP62CL      | ENSG00000198846 TOX          |                              |                        |
|         | ENSG00000204899 NP_001065243.1 | ENSG00000100230 PCYT1B         | ENSG00000109079 TNFAIP1        | ENSG00000113552 GNPDA1         | ENSG00000116985 BMP8B        | ENSG00000125409 TEKT3        | ENSG00000126067 PSMB2        | ENSG00000139428 MMAB         |                              |                        |
| TAGTCAC | ENSG0000010030 MAPK1           | ENSG00000159202 UBE2Z          | ENSG00000160710 ADAR           | ENSG00000161981 C16orf33       | ENSG00000165457 FOLR2        | ENSG00000167862 ICT1         | ENSG00000169006 NTSR2        | ENSG00000171722 Clorf111     |                              |                        |
|         | ENSG00000144834 TAGLN3         | ENSG00000182397 C15orf51       | ENSG00000183621 ZNF438         | ENSG00000184012 TMPRSS2        | ENSG00000204805 FAM27E3      | ENSG00000204807 FAM27E2      | ENSG00000205979 Q6XYA8_HUMAN | ENSG00000042781 USH2A        |                              |                        |
|         | ENSG00000176809 LRRCS37A3      | ENSG00000112541 PDE10A         | ENSG00000119912 PDE2           | ENSG00000121207 LRAT           | ENSG00000122512 PMS2         | ENSG00000135052 C9orf155     | ENSG00000139572 GPR84        | ENSG00000150093 ITGB1        |                              |                        |
|         | ENSG00000054219 LY75           | ENSG00000171109 MFN1           | ENSG00000171503 ETFDH          | ENSG00000178187 ZNF454         | ENSG00000186628 FSD2         | ENSG00000196632 WNK3         | ENSG00000197343 ZNF655       | ENSG00000198300 PEG3         |                              |                        |
|         | ENSG00000164758 THRAP6         | ENSG00000204250 C9orf107       | ENSG00000068323 TFE3           | ENSG00000095539 SEMA4G         | ENSG00000096433 ITPR3        | ENSG00000099910 SCARF2       | ENSG00000101945 SUV39H1      | ENSG00000112576 CCND3        |                              |                        |
| TAGTCCG | ENSG00000198855 NP_009007.2    | ENSG00000204250 C9orf107       | ENSG00000068323 TFE3           | ENSG00000095539 SEMA4G         | ENSG00000096433 ITPR3        | ENSG00000099910 SCARF2       | ENSG00000101945 SUV39H1      | ENSG00000112576 CCND3        |                              |                        |
|         | ENSG0000006555 TTC22           | ENSG00000124641 TRFP           | ENSG00000124785 NRN1           | ENSG00000130294 KIF1A          | ENSG00000130948 HSD17B3      | ENSG00000139174 PRICKLE1     | ENSG00000142661 MYOM3        | ENSG00000148296 SURF6        |                              |                        |
|         | ENSG00000122783 C7orf49        | ENSG00000157601 MX1            | ENSG00000161642 PDS1           | ENSG00000166794 PP1B           | ENSG00000166794 PP1B         | ENSG00000170909 NP_573398.1  | ENSG00000173818 NP_775898.2  | ENSG00000174166 Q9BTX9_HUMAN |                              |                        |
|         | ENSG00000149295 DRD2           | ENSG00000174943 KCTD13         | ENSG00000174996 KLC2           | ENSG00000177340 QOVFX0_HUMAN   | ENSG00000185825 BCAP31       | ENSG00000187621 TCL11A       | ENSG00000198294 Q495C9_HUMAN | ENSG00000073712 PLEKHC1      |                              |                        |
|         | ENSG00000174522 MYO1H          | ENSG00000099260 PALMD          | ENSG00000107937 GTPBP4         | ENSG00000108924 HLF            | ENSG00000109189 USP46        | ENSG00000109472 CPE          | ENSG00000110911 SLC11A2      | ENSG00000119917 IFIT3        |                              |                        |
|         | ENSG00000084090 STARD7         | ENSG00000128294 TPST2          | ENSG00000150457 LRMS2          | ENSG00000181915 C10orf22       | ENSG00000204136 GGTA1        | ENSG00000116478 HDA1         | ENSG00000125498 KIR2DL1      | ENSG00000128567 PODXL        | ENSG00000130612 Q6ZSU1_HUMAN |                        |
| TAGTCTA | ENSG00000120008 BRWD2          | ENSG00000170044 ZPLD1          | ENSG00000179104 TMTCC2         | ENSG00000116478 HDA1           | ENSG00000122188 LAX1         | ENSG00000116478 HDA1         | ENSG00000125498 KIR2DL1      | ENSG00000128567 PODXL        | ENSG00000130612 Q6ZSU1_HUMAN |                        |
|         | ENSG00000165322 ARHGAP12       | ENSG00000136950 ARPC5L         | ENSG00000137078 SIT1           | ENSG00000138073 PREB           | ENSG00000151364 KCTD14       | ENSG00000157150 TIMP4        | ENSG00000157216 SSBP3        | ENSG00000165688 PMPCA        |                              |                        |
|         | ENSG00000064533 BAIA2L1        | ENSG00000167633 KIR3DL1        | ENSG00000172113 NME6           | ENSG00000173126 PCP4L1         | ENSG00000173825 TIMGD3       | ENSG00000176438 C14orf49     | ENSG00000181713 Q8NAF7_HUMAN | ENSG00000186081 KRT5         |                              |                        |
|         | ENSG00000130958 SLC35D2        | ENSG00000088782 DEFB127        | ENSG00000100889 PCK2           | ENSG00000108100 CCNY           | ENSG00000108854 SMURF2       | ENSG00000112414 GPR126       | ENSG00000120217 CD274        | ENSG00000120742 RAMP4_HUMAN  |                              |                        |
|         | ENSG00000166582 PRR6           | ENSG00000163807 KIAA1143       | ENSG00000166263 STXB4          | ENSG00000168917 TMEM22         | ENSG00000170558 CDH2         | ENSG00000171877 FRMD5        | ENSG00000173258 ZNF483       | ENSG00000176055 NP_981951.1  |                              |                        |
|         | ENSG00000189013 KIR2DL4        | ENSG00000163807 KIAA1143       | ENSG00000166263 STXB4          | ENSG00000168917 TMEM22         | ENSG00000170558 CDH2         | ENSG00000171877 FRMD5        | ENSG00000173258 ZNF483       | ENSG00000176055 NP_981951.1  |                              |                        |
|         | ENSG00000136940 PDCL           | ENSG00000163807 KIAA1143       | ENSG00000166263 STXB4          | ENSG00000168917 TMEM22         | ENSG00000170558 CDH2         | ENSG00000171877 FRMD5        | ENSG00000173258 ZNF483       | ENSG00000176055 NP_981951.1  |                              |                        |
| TAGTGAC | ENSG00000209993 HMGB3          | ENSG00000075856 SART3          | ENSG00000079393 DUSP13         | ENSG00000101457 DNTTIP1        | ENSG00000108947 EFNB3        | ENSG00000110092 CCND1        | ENSG00000114388 TUSC4        | ENSG00000120942 UBIAD1       |                              |                        |
|         | ENSG00000123643 SLC36A1        | ENSG00000128311 TST            | ENSG00000130201 EXOC3L2        | ENSG00000132906 CASP9          | ENSG00000161860 SYCE2        | ENSG00000164627 KIF6         | ENSG00000167531 LALBA        | ENSG00000167815 PRDX2        |                              |                        |
|         | ENSG00000179452 Q8TDX1_HUMAN   | ENSG00000196296 ATP2A1         | ENSG00000205778 Q6ZMM7_HUMAN   | ENSG00000212131 PDXP           | ENSG00000004779 NDUFAB1      | ENSG00000005249 PRKAR2B      | ENSG00000106803 SEC61B       | ENSG00000115165 PSCDBP       |                              |                        |
|         | ENSG00000120696 KBTBD7         | ENSG00000120963 ZNF706         | ENSG00000135299 ANKRD6         | ENSG00000159921 GNE            | ENSG00000163116 NP_777612.1  | ENSG00000163530 DPPA2        | ENSG00000163534 FCRL1        | ENSG00000164265 SCGB3A2      |                              |                        |
|         | ENSG00000178102 DNAHL1         | ENSG00000187098 MITF           | ENSG00000105369 CD79A          | ENSG00000106070 GRB10          | ENSG00000115956 PLEK         | ENSG00000130309 GLT25D1      | ENSG00000141570 CBX8         | ENSG00000142224 IL19         | ENSG00000143614 GATAD2B      |                        |
| TAGTGAT | ENSG00000104081 BMF            | ENSG00000163206 SMCP           | ENSG00000164871 SPAG11B        | ENSG00000169856 ONECUT1        | ENSG00000177732 SOX12        | ENSG00000178287 SPAG11A      | ENSG00000179950 NP_055096.2  | ENSG00000180900 SCRIB        |                              |                        |
|         | ENSG00000162511 LAPTM5         | ENSG00000186912 P2RY4          | ENSG00000044115 CTNNA1         | ENSG00000167616 NCKAP1         | ENSG00000067715 SYT1         | ENSG00000080572 CXorf41      | ENSG00000083312 TNPO1        | ENSG00000106031 HOXA13       |                              |                        |
|         | ENSG00000182372 Q8orf61        | ENSG00000130347 RTN4IP1        | ENSG00000132283 DNHD1          | ENSG00000134200 TSHB           | ENSG00000134308 YWHAQ        | ENSG00000135316 SYNCRIP      | ENSG00000137090 DMRT1        | ENSG00000141255 SPATA22      |                              |                        |
|         | ENSG00000111906 HDCC2          | ENSG00000151320 AKAP6          | ENSG00000155545 MIER3          | ENSG00000160201 U2AF1          | ENSG00000197568 HHLA3        | ENSG00000117450 PRDX1        | ENSG00000139083 ETV6         | ENSG00000141506 PIK3R5       | ENSG00000142798 HSPG2        |                        |
| TAGTGCC | ENSG00000043669 LYST           | ENSG00000087250 MT3            | ENSG00000100979 PLTP           | ENSG00000104365 IKBKKB         | ENSG00000169241 RAG1AP1      | ENSG00000170465 KRT6C        | ENSG00000172113 NME6         | ENSG00000175197 DDIT3        | ENSG00000178764 ZHX2         |                        |
|         | ENSG00000029233 TMEM176A       | ENSG00000154096 THY1           | ENSG00000165275 RGMTD3         | ENSG00000169241 RAG1AP1        | ENSG00000170465 KRT6C        | ENSG00000172113 NME6         | ENSG00000175197 DDIT3        | ENSG00000178764 ZHX2         | ENSG00000178764 ZHX2         |                        |
|         | ENSG00000143140 GJA5           | ENSG00000187024 PTRH1          | ENSG00000198216 CACNA1E        | ENSG00000198700 IPO9           | ENSG00000137693 YAP1         | ENSG00000162755 NP_689579.3  | ENSG00000163071 SPATA18      | ENSG00000163608 C3orf17      |                              |                        |
|         | ENSG00000185988 PLK5_HUMAN     | ENSG00000124193 SFRS6          | ENSG00000134109 EDEM1          | ENSG00000135407 AVIL           | ENSG00000137693 YAP1         | ENSG00000162755 NP_689579.3  | ENSG00000163071 SPATA18      | ENSG00000163608 C3orf17      |                              |                        |
|         | ENSG00000117280 RAB7L1         | ENSG00000165029 ARCA1          | ENSG00000169155 ZBTB43         | ENSG00000174839 FAM116A        | ENSG00000185038 Q8IUR1_HUMAN | ENSG00000185290 XR_016379.1  | ENSG00000196371 FUT4         | ENSG00000198682 PAPSS2       |                              |                        |
|         | ENSG00000163749 NP_001036249.1 | ENSG00000165029 ARCA1          | ENSG00000169155 ZBTB43         | ENSG00000174839 FAM116A        | ENSG00000185038 Q8IUR1_HUMAN | ENSG00000185290 XR_016379.1  | ENSG00000196371 FUT4         | ENSG00000198682 PAPSS2       |                              |                        |
| TAGTGCG | ENSG00000071127 WDR1           | ENSG00000101082 SLA2           | ENSG00000103202 DECR2          | ENSG00000121060 TRIM25         | ENSG00000130311 C19orf58     | ENSG00000131797 C16orf67     | ENSG00000133069 TMCC2        | ENSG00000141068 KSR1         |                              |                        |
|         | ENSG00000152192 POU4F1         | ENSG00000153303 FRMD1          | ENSG00000157613 CREB3L1        | ENSG00000163866 Clorf212       | ENSG00000165810 BTNL9        | ENSG00000169188 APEX2        | ENSG00000172534 HCF1         | ENSG00000179598 NP_849158.1  |                              |                        |
|         | ENSG00000180139 Q8N925_HUMAN   | ENSG00000197968 Q8N231_HUMAN   | ENSG00000198182 ZNF607         | ENSG00000065923 SLC9A7         | ENSG00000066405 CLDN18       | ENSG00000072422 RHOBTB1      | ENSG00000077522 ACTN2        | ENSG00000081770 NATP         |                              |                        |
|         | ENSG00000089225 TBX5           | ENSG00000091409 ITGA6          | ENSG00000100380 ST13           | ENSG00000106993 CDC37L1        | ENSG00000107679 PLEKHA1      | ENSG00000109381 ELF2         | ENSG00000111911 HINT3        | ENSG00000112964 GHR          |                              |                        |
|         | ENSG00000116285 ERRF1          | ENSG00000131979 GCH1           | ENSG00000135540 NHSL1          | ENSG00000145495 MARCH6         | ENSG00000147649 MTDH         | ENSG00000148429 USP6NL       | ENSG00000163710 PCOLCE2      | ENSG00000164418 GRIK2        |                              |                        |
|         | ENSG00000170142 UBE2E1         | ENSG00000173930 SLC04C1        | ENSG00000177606 JUN            | ENSG00000179978 Q59GI6_HUMAN   | ENSG00000183496 RKHD3        | ENSG00000179978 Q59GI6_HUMAN | ENSG00000183496 RKHD3        | ENSG00000183496 RKHD3        |                              |                        |
| TAGTGTA | ENSG000000003756 RBM5          | ENSG00000025800 KPNA6          | ENSG00000081853 PCDHGA12       | ENSG00000083842 ZNF8           | ENSG00000113194 UBXD8        | ENSG00000133937 GSC          | ENSG00000142149 HUNK         | ENSG00000143787 LEFTY1       |                              |                        |
|         | ENSG00000152669 CCNY           | ENSG00000154930 ACSS1          | ENSG00000158445 KCNB2          | ENSG00000164778 EN2            | ENSG00000166090 IL25         | ENSG00000176444 CLK2         | ENSG00000176444 CLK2         | ENSG00000176444 CLK2         |                              |                        |
|         | ENSG0000010404 IDS             | ENSG00000119318 RAD23B         | ENSG00000121210 KIAA0922       | ENSG00000128872 TMOD2          | ENSG00000131979 GCH1         | ENSG00000133019 CHRM3        | ENSG00000134294 SLC38A2      | ENSG0000013                  |                              |                        |

ENSG00000172331|BPGM ENSG00000175216|CKAP5 ENSG00000181061|HIGD1A ENSG00000182107|TMEM30B ENSG00000182498|RPS18 ENSG00000198075|SULT1C4 ENSG00000198898|CAPZA2 ENSG00000205981|DNAJC19

TAGTTTG ENSG00000051596|THOC3 ENSG00000068137|PLEKHH3 ENSG00000101883|PEPP1\_HUMAN ENSG00000105393|NP\_001028721.1 ENSG00000118526|TCF21 ENSG00000130119|GNL3L ENSG00000131914|LIN28 ENSG00000135956|TMEM127

ENSG00000140950|KIAA1609 ENSG00000142511|GPR32 ENSG00000142599|RERE ENSG00000148337|CIZ1 ENSG00000148408|CACNA1B ENSG00000148606|POLR3A ENSG00000151148|UBE3B ENSG00000166224|SGPL1

ENSG00000166426|CRABP1 ENSG00000170089|THOC3 ENSG00000175193|PARK ENSG00000177493|C1orf215 ENSG00000181873|C1orf69 ENSG00000204197|KIFC1 ENSG00000205742|Q6ZTR4\_HUMAN ENSG00000005302|MSL3L1

ENSG00000009694|ODZ1 ENSG000000064726|BTBD1 ENSG000000080298|RFX3 ENSG000000094841|UPRT ENSG000000101558|VAPA ENSG00000107897|ACBD5 ENSG00000110675|ELMOD1 ENSG00000112996|MRFS30

ENSG00000113580|NR3C1 ENSG00000113645|WWC1 ENSG00000114120|SLC25A36 ENSG00000115520|COQ10B ENSG00000133742|CA1 ENSG00000135374|ELF5 ENSG00000136156|ITM2B ENSG00000142892|PIGK

ENSG00000144891|AGTR1 ENSG00000150337|FCGR1A ENSG00000154359|LONRF1 ENSG00000163131|CTSS ENSG00000171448|ZBTB26 ENSG00000172167|MTBP ENSG00000177324|CXorf20 ENSG00000185038|Q8IUR1\_HUMAN

ENSG00000186310|NAP1L3 ENSG00000187889|C1orf168 ENSG00000203710|CR1 ENSG00000205299|CKLF ENSG00000205299|CKLF

TATAAAA ENSG00000035403|VCL ENSG00000071564|TCF3 ENSG00000075886|TUBA3D ENSG00000100023|PPL2 ENSG00000100285|NEFH ENSG00000102547|CAB39L ENSG00000102904|TSNAXIP1 ENSG00000103067|RBM35B

ENSG00000105617|LENG1 ENSG00000107960|OBFC1 ENSG00000108349|CASC3 ENSG00000112159|MDN1 ENSG00000112941|POLS ENSG00000113578|FGF1 ENSG00000115561|VPS24 ENSG00000123353|ORMDL2

ENSG00000125266|EFNB2 ENSG00000125347|IRF1 ENSG00000131470|PSMC3IP ENSG00000136854|STXBP1 ENSG00000136935|GOLGA1 ENSG00000137460|NP\_203751.2 ENSG00000140403|DNAJA4 ENSG00000140718|FTO

ENSG00000140950|KIAA1609 ENSG00000143365|RORC ENSG00000148400|NOTCH1 ENSG00000151353|TMEM18 ENSG00000151692|RNF144 ENSG00000152086|TUBA3E ENSG00000153298|C6orf54 ENSG00000156466|GDF6

ENSG00000156639|ZFAND3 ENSG00000157483|MYO1E ENSG00000160401|C9orf117 ENSG00000162105|SHANK2 ENSG00000165699|TSC1 ENSG00000166398|KIAA0355 ENSG00000170485|NPAS2

ENSG00000175970|NP\_001074002.1 ENSG00000182704|TSKU ENSG00000185442|NP\_997329.1 ENSG00000185619|PCGF3 ENSG00000187140|FOXD3 ENSG00000187251|C1orf213 ENSG00000197448|GSTK1 ENSG00000197530|MIB2

ENSG00000198033|TUBA3C ENSG00000206193|Q5HYA3\_HUMAN ENSG000000000419|DPM1 ENSG000000020426|MNAT1 ENSG000000069943|PIGB ENSG000000072657|TRHDE ENSG000000073711|PPP2R3A ENSG000000091483|FH

ENSG00000104517|EDD1 ENSG00000105819|PMPCB1 ENSG00000105866|SP4 ENSG00000112761|WISP3 ENSG00000117625|RCOR3 ENSG00000120549|KIAA1217 ENSG00000120690|ELF1 ENSG00000120963|ZNF706

ENSG00000121005|CRISPLD1 ENSG00000128791|TWSG1 ENSG00000134330|Q6PCA9\_HUMAN ENSG00000138381|ASNSD1 ENSG00000139496|NUP1L1 ENSG00000139684|ESD ENSG00000141447|OSBPL1A ENSG00000143341|HMCN1

ENSG00000143952|VPS54 ENSG00000145604|SKP2 ENSG00000150627|WDR17 ENSG00000152749|GPR180 ENSG00000152952|PLOC2 ENSG00000155970|EPHA2 ENSG00000156650|MYST4 ENSG00000158135|RHBDL2

ENSG00000163281|GNPDA2 ENSG00000163669|DNHD2 ENSG00000165028|NIPSNAP3B ENSG00000171522|PTGER4 ENSG00000171862|PTENP1 ENSG00000172497|ACOT12 ENSG00000173198|CYSLTR1 ENSG00000175374|SPESP1

ENSG00000178665|ZNF713 ENSG00000180263|FGD6 ENSG00000181690|PLAG1 ENSG00000184280|ZNF285B ENSG00000184886|PIGW ENSG00000185127|C6orf120 ENSG00000185222|WBP5 ENSG00000185261|C5orf36

ENSG00000185862|EVI2B ENSG00000186130|ZBTB6 ENSG00000186439|TRDN ENSG00000188343|FAM92A1 ENSG00000189376|C8orf76 ENSG00000196151|RDSUB1 ENSG00000196632|WNK3 ENSG00000203668|CHML

ENSG00000205337|Q6ZVR2\_HUMAN

TATAAAC ENSG00000047056|WDR37 ENSG00000066382|MPPED2 ENSG00000110880|CORO1C ENSG00000131037|EPSR1 ENSG00000140538|NTRK3 ENSG00000146374|WSP03 ENSG00000146666|Q9EIP2\_HUMAN ENSG00000153395|AYTL2

ENSG00000158813|EDA ENSG00000162337|LRP5 ENSG00000164061|BSN ENSG00000166123|GPT2 ENSG00000167139|TBC1D21 ENSG00000172046|USP19 ENSG00000172932|ANKRD13D ENSG00000175520|UBQLN3

ENSG00000178235|SLITRKR1 ENSG00000178919|FOXH1 ENSG00000184481|MLLT7 ENSG00000186318|BAC1 ENSG00000196296|ATP2A1 ENSG00000197901|SLC22A6 ENSG00000110932|FMO1 ENSG00000064989|CALCRL

ENSG00000072657|TRHDE ENSG00000073756|PTGS2 ENSG00000078098|FAP ENSG00000100372|SLC25A17 ENSG00000119004|CYP20A1 ENSG00000120662|MTRF1 ENSG00000132623|ANKRD5 ENSG00000137807|KIF23

ENSG00000140987|ZNF434 ENSG00000145287|PLAC8 ENSG00000149100|PCID1 ENSG00000150540|HNMT ENSG00000153832|FBXO36 ENSG00000153922|CHD1 ENSG00000154262|ABCA6 ENSG00000155330|NP\_001001436.1

ENSG00000158435|C2orf29 ENSG00000164746|Q8NEG2\_HUMAN ENSG00000170248|PDCD6IP ENSG00000170959|DCDC5 ENSG00000171657|GPR82 ENSG00000173452|NP\_689987.2 ENSG00000174123|TLR10 ENSG00000174792|C4orf26

ENSG00000176274|MCART6 ENSG00000183091|NEB ENSG00000185477|GPRIN3 ENSG00000188938|FAM120AOS ENSG00000189050|NP\_057209.3 ENSG00000196344|ADH7 ENSG0000020211446|SEPP1

TATAAAG ENSG00000003147|ICA1 ENSG000000009954|BAZ1B ENSG00000067842|ATP2B3 ENSG00000103274|NUPB1 ENSG00000105376|ICAM5 ENSG00000108669|PSCD1 ENSG00000110711|AIP ENSG00000112062|MAPK14

ENSG00000121281|ADCY7 ENSG00000128408|RIBC2 ENSG00000131368|MRPS25 ENSG00000136653|RASSF5 ENSG00000137054|POLR1E ENSG00000137747|TMPRSS13 ENSG00000140990|NDUFB10 ENSG00000143940|Q6ZMW3\_HUMAN

ENSG00000148290|SURF1 ENSG00000150477|KIAA1328 ENSG00000162571|TLL5 ENSG00000162666|KIAA0040 ENSG00000163520|FBLN2 ENSG00000167987|VPS37C ENSG00000176095|IHPK1 ENSG00000179388|EGR3

ENSG00000179523|Q8TAS2\_HUMAN ENSG00000183551|RCAG4 ENSG00000188828|GLRA4 ENSG00000198756|GLT25D2 ENSG00000198756|ISL1 ENSG000000085382|HACE1 ENSG000000099901|RANBP1 ENSG00000101745|ANKRD12

ENSG00000107186|MPDZ ENSG00000113013|HSPA9 ENSG00000117724|CENPF ENSG00000118276|B4GALT6 ENSG00000120868|APAF1 ENSG00000124171|PARD6B ENSG00000126953|TIMM8A ENSG00000127588|GNG13

ENSG00000133641|C12orf29 ENSG00000134202|GSTM3 ENSG00000136522|MRPL47 ENSG00000141380|SS18 ENSG00000143643|TTCL3 ENSG00000145734|BDP1 ENSG00000152518|ZFP36L2 ENSG00000156504|FAM122B

ENSG00000157450|RNF111 ENSG00000162701|DENND1B ENSG00000165092|ALDH1A1 ENSG00000166928|NP\_115986.3 ENSG00000168564|CDKN2AIP ENSG00000169019|COMMD8 ENSG00000171988|JMJD1C ENSG00000172575|RASGRP1

ENSG00000174501|NP\_079466.2 ENSG00000174749|C4orf32 ENSG00000176105|YES1 ENSG00000181610|MRPS23 ENSG00000184575|XPOT ENSG00000187510|NP\_001004330.1 ENSG00000196344|ADH7 ENSG00000197372|ZNF675

ENSG00000198795|ZNF521 ENSG00000205498|Q6ZRB7\_HUMAN

TATAAAT ENSG00000006453|BAIAP2L1 ENSG00000074964|ARHGFEF10L ENSG00000087269|NOL14 ENSG00000090554|FLT3LG ENSG00000100448|CTSG ENSG00000102921|N4BP1\_HUMAN ENSG00000105613|MAST1 ENSG00000106976|DNM1

ENSG00000111186|WNT5B ENSG00000111206|FOXM1 ENSG00000115561|VPS24 ENSG00000123384|LRP1 ENSG00000124225|TMEM161 ENSG00000130340|SNX9 ENSG00000131504|DIAPH1 ENSG00000135213|POM121

ENSG00000140403|DNAJA4 ENSG00000141002|TCF25 ENSG00000142700|DMRTA2 ENSG00000149243|NP\_001034637.1 ENSG00000149269|PAK1 ENSG00000157103|SLC6A1 ENSG00000162511|LAPTM5 ENSG00000164379|FOXQ1

ENSG00000169627|BOLA2B ENSG00000178235|SLITRK1 ENSG00000179165|PXT1 ENSG00000182158|CREB3L2 ENSG00000183778|B3GALT5 ENSG00000185811|IKZF1 ENSG00000186474|KLK12 ENSG00000188185|Q6ZQP8\_HUMAN

ENSG00000188447|XR\_016015.1 ENSG00000196313|NP\_742017.1 ENSG00000204425|Q6ZP74\_HUMAN ENSG00000205726|ITSN1 ENSG000000008311|AASS ENSG000000024526|DEPDC1 ENSG00000035499|DEPDC1B ENSG00000067533|RRP15

ENSG00000072401|UBE2D1 ENSG00000081307|UBE1DC1 ENSG00000092140|KIAA1333 ENSG00000095951|HIVEP1 ENSG00000097033|SH3GLB1 ENSG00000110422|HIPK3 ENSG00000112110|MRPL18 ENSG00000112541|PDE10A

ENSG00000120805|ARL1 ENSG00000123119|EFCBP1 ENSG00000125962|ARMCX5 ENSG00000126804|ZBTB1 ENSG00000128731|HERC2 ENSG00000135047|CTS1L ENSG00000136518|ACTL6A ENSG00000136536|MARCH7

ENSG00000137714|FDX1 ENSG00000138035|PNPT1 ENSG00000138182|MPHOSPH1 ENSG00000141579|ZNF750 ENSG00000144460|Q9GNL2\_HUMAN ENSG00000144868|TMEM108 ENSG00000148154|UGCG ENSG00000149050|ZNF214

ENSG00000150787|PTS ENSG00000155962|CLIC2 ENSG00000156136|DCK ENSG00000164331|ANKRA2 ENSG00000165572|KBTBD6 ENSG00000166006|KCNC2 ENSG00000166971|AKTIP ENSG00000173626|BET3L

ENSG00000181704|YTPF6 ENSG00000183291|SEPI5\_HUMAN ENSG00000183496|RKHD3 ENSG00000185652|NTF3 ENSG00000196285|H33\_HUMAN ENSG00000196455|PIK3R4 ENSG00000197054|ZNF763 ENSG00000198814|GK

TATAACT ENSG00000099992|TBC1D10A ENSG00000104823|ECH1 ENSG00000110328|GALNTL4 ENSG00000112053|SLC26A8 ENSG00000116667|C1orf21 ENSG00000119535|CSF3R ENSG00000126458|RRAS ENSG00000141639|MAPK4

ENSG00000153266|FEZF7 ENSG00000162496|DHRS3 ENSG00000162650|ATXN7L2 ENSG00000163520|FBLN2 ENSG00000164048|ZNF589 ENSG00000176718|C5orf26 ENSG00000178828|RNF186 ENSG00000189401|OTUD6A

ENSG00000198019|FCGR1B ENSG00000055147|C5orf3 ENSG00000081800|SLC13A1 ENSG00000083223|ZCCHC6 ENSG00000107164|FUBP3 ENSG00000110002|LOH1LCR2A ENSG00000114391|RPL24 ENSG00000117533|VAMP4

ENSG00000125249|RAP2A ENSG00000138688|KIAA1109 ENSG00000144136|SLC20A1 ENSG00000148541|FAM13C1 ENSG00000151025|GPR158 ENSG00000154582|TCEB1 ENSG00000164307|ARTS1\_HUMAN ENSG00000168681|Q9H762\_HUMAN

ENSG00000169905|TOR1AIP2 ENSG00000170941|NP\_065895.1 ENSG00000173046|NM\_207376 ENSG00000180182|CRSP2 ENSG00000188313|PLSCR1 ENSG00000198498|NP\_060822.1 ENSG00000204010|IFIT1L ENSG00000204814|Q5VSD8\_HUMAN

ENSG00000204923|NP\_001019851.1 ENSG00000204987|Q6ZN80\_HUMAN

TATAATA ENSG00000003137|CYP26B1 ENSG00000064309|CDON ENSG00000068394|GPKOW ENSG00000079393|DUSP13 ENSG00000090670|BRPF3 ENSG00000105193|RPS12 ENSG00000108641|NP\_056496.1 ENSG00000110375|UPK2

ENSG00000125520|SLC2A4RG ENSG00000130812|ANGPTL6 ENSG00000134339|SAA2 ENSG00000138085|C2orf28 ENSG00000159455|LCE2B ENSG00000164651|SP8 ENSG00000168872|DDX19A

ENSG00000171314|PGAM1 ENSG00000174231|PRPF8 ENSG00000178381|ZFAND2A ENSG00000186594|NP\_116284.2 ENSG00000187180|LCE2C ENSG00000196396|PTPN1 ENSG0000016402|IL20RA ENSG00000083642|APRIN

ENSG00000084453|SLCO1A2 ENSG00000088298|EDEM2 ENSG00000100554|ATP6V1D ENSG00000101888|NXT2 ENSG00000102893|PHK8 ENSG00000106993|CDC37L1 ENSG00000109205|ODAM ENSG00000111700|SLCO1B3

ENSG00000116141|MARK1 ENSG00000117594|HSD11B1 ENSG00000122008|POLK ENSG00000122299|ZC3H7A ENSG00000126524|SBD5 ENSG00000126524|SBD5 ENSG00000129048|CCR1L ENSG00000131876|SNRPA1

ENSG00000133858|CDC131 ENSG00000134538|SLCO1B1 ENSG00000136480|POLG2 ENSG00000136682|CBWD2 ENSG00000137727|ARHGAP20 ENSG00000138688|KIAA1109 ENSG00000139146|FAM60A ENSG00000140905|GC5H

ENSG00000147996|CBWD1 ENSG00000153006|NP\_776190.1 ENSG00000155755|ALS2CR4 ENSG00000156035|PRUNE2 ENSG00000156076|WIF1 ENSG00000156110|ADK ENSG00000164188|RANBP3L ENSG00000169297|NR0B1

ENSG00000169684|CHRNA5 ENSG00000171291|ZNF439 ENSG00000171295|ZNF440 ENSG00000171522|PTGER4 ENSG00000172785|CBWD5 ENSG00000172817|CYP7B1 ENSG00000176597|B3GNT5 ENSG00000177692|C21orf55

ENSG00000180772|AGTR2 ENSG00000183814|LIN9 ENSG00000184434|LRRRC19 ENSG00000185417|CXorf1 ENSG00000196873|CBWD3 ENSG00000197123|ZNF679 ENSG00000197484|Q6ZRH8\_HUMAN ENSG00000197841|ZNF181

ENSG00000204272|Q6Z242\_HUMAN ENSG00000205325|NP\_001001684.1

TATAATG ENSG00000004059|ARF5 ENSG00000072501|SMC1A ENSG00000100647|KIAA0247 ENSG00000100931|CHMP4A ENSG00000100997|ABHD12 ENSG00000101670|LIPG ENSG00000109132|PHOX2B ENSG00000114383|TUSC2

ENSG00000132517|GPR172B ENSG00000137198|GMPR ENSG00000141179|PCTP ENSG00000142611|PRDM16 ENSG00000142920|ADC ENSG00000149115|TNKS1BP1 ENSG00000152104|PTPN14 ENSG00000158869|FCER1G

ENSG00000159110|IFNAR2 ENSG00000160695|VPS11 ENSG00000161860|SYCE2 ENSG00000164627|KIF6 ENSG00000166863|TAC3 ENSG00000170631|ZNF16 ENSG00000174898|TMEM146 ENSG00000175992|Q9BR87\_HUMAN

ENSG00000180875|GREM2 ENSG00000182968|SOX1 ENSG00000184545|DUSP8 ENSG00000100522|GNPNAT1 ENSG00000100934|SEC23A ENSG00000105497|ZNF175 ENSG00000105971|CAV2 ENSG00000112419|PHACTR2

ENSG00000118496|FBXO30 ENSG00000118873|RAB3GAP2 ENSG00000128791|TWSG1 ENSG00000146038|DCDC2 ENSG00000148482|SLC39A12 ENSG00000148572|ZNF162 ENSG00000150275|PCDH15 ENSG00000162695|SLC30A7

ENSG00000163297|ANTXR2 ENSG00000165434|PGM2L1 ENSG00000169714|CNBP ENSG00000170293|CMTM8 ENSG00000178974|FBXO34 ENSG00000183784|C9orf66 ENSG00000186446|ZNF501

ENSG000000015285|WAS ENSG00000102313|TIH5L ENSG00000108702|CCL1 ENSG00000116032|GRIN3B ENSG00000116237|ICMT ENSG00000139626|ITGB7 ENSG00000141569|TRIM65 ENSG00000145526|CDH18

ENSG00000148400|NOTCH1 ENSG00000159110|IFNAR2 ENSG00000169122|FAM110B ENSG00000169750|RAC3 ENSG00000169777|TAS2R1 ENSG00000176444|CLK2 ENSG00000182968|SOX1 ENSG00000185674|LYG2\_HUMAN

ENSG00000187024|PTRH1 ENSG00000188859|FAM78B ENSG00000196747|HIST1H3H ENSG00000204227|RING1 ENSG00000205790|Q6ZTZO\_HUMAN ENSG00000206528|Q6ZSMO\_HUMAN ENSG00000013375|PGM3 ENSG000000023734|STRAP

ENSG00000080298|RFX3 ENSG00000087128|TMPRSS11E ENSG00000100483|C14orf138 ENSG00000105967|TFEC ENSG00000115993|TRAK2 ENSG00000124092|CTCFL ENSG00000134160|TRPM1 ENSG00000136697|GNL2

ENSG00000136750|GAD2 ENSG00000136824|SMC2 ENSG00000140988|RPS2 ENSG00000143942|CHAC2 ENSG00000145868|FBXO38 ENSG00000152457|CTDLR1C ENSG00000159182|NP\_115767.1 ENSG00000161970|RPL26

ENSG00000164117|FBXO7 ENSG00000165076|NP\_001008271.1 ENSG00000165300|SLITRKS5 ENSG00000165521|EML5 ENSG00000168172|HOOK3 ENSG00000168582|CRYGA ENSG00000171943|SRGAP2P1 ENSG00000172575|RASGRP1

ENSG00000173487|LOC729884 ENSG00000173588|CCDC41 ENSG00000180398|MCFD2 ENSG00000182977|Q9P1I1\_HUMAN ENSG00000183423|NP\_940908.1 ENSG00000185880|TRIM69 ENSG00000189043|NDUFA4 ENSG00000196071|OR2L13

ENSG00000196636|ACN9 ENSG00000197149|XR\_019565.1 ENSG00000198963|RORB ENSG00000204683|C10orf113

TATACAG ENSG00000096395|MLN ENSG00000107185|KIAA0258 ENSG00000116983|HPCAL4 ENSG00000123685|NP\_061134.1 ENSG00000124574|ABCC10 ENSG00000133985|TTC9 ENSG00000135446|CDK4

ENSG00000136925|C9orf97 ENSG00000153266|FEZF2 ENSG00000157881|PANK4 ENSG00000162600|OMA1 ENSG00000163795|ZNF513 ENSG00000164151|Q6ZT40\_HUMAN ENSG00000176438|C14orf49 ENSG00000184935|Q6AI01\_HUMAN

ENSG00000187260|WDR86 ENSG00000197769|MAP1LLC3C ENSG00000197816|KIAA1529 ENSG00000204120|TNRC15 ENSG00000204286|Q6ZD78\_HUMAN ENSG00000001084|GCLC ENSG00000007372|PAX6 ENSG000000039123|SKIV2L2

ENSG00000077380|DNYC1I2 ENSG00000100625|SIX4 ENSG00000100722|ZC3H14 ENSG00000106346|USP42 ENSG00000113593|PPWD1 ENSG00000118985|ELL2 ENSG00000124429|POF1B ENSG00000132603|NIP7

ENSG00000136875|PRPF4 ENSG00000138081|FBXO11 ENSG00000138604|GLCE ENSG00000138641|HERC3 ENSG00000140945|CDH13 ENSG00000143458|NP\_653219.1 ENSG00000155313|USP25 ENSG00000164985|PSIP1

ENSG00000167637|ZNF345 ENSG00000167863|ATP5H ENSG00000172845|SP3 ENSG00000174444|RPL4 ENSG00000183878|UTY ENSG00000205189|ZBTB10

TATACAT ENSG000000054282|SDCCAG5 ENSG000000055483|USP36 ENSG000000085063|CB59 ENSG00000109599|SCD ENSG00000101577|LPIN2 ENSG00000103266|STUB1 ENSG00000105613|MAST1 ENSG00000111653|ING4

ENSG00000130177|CDC16 ENSG00000131462|TUBG1 ENSG00000136859|ANGPTL2 ENSG00000143416|SELENBP1 ENSG00000146005|PSD2 ENSG00000147383|NSDHL ENSG00000147576|ADHFE1 ENSG00000151474|FRMD4A

ENSG00000160691|SHC1 ENSG00000162493|PDPN



ENSG00000117152|RGS4 ENSG00000119844|AFTPH ENSG00000123892|RAB38 ENSG00000128694|OSGEPL1 ENSG00000133739|LRRCC1 ENSG00000134198|TSPAN2 ENSG00000136014|USP44 ENSG00000138182|MPHOSPH1 ENSG00000139865|TTC6 ENSG00000148090|AUH ENSG00000150787|PTS ENSG00000151914|DST ENSG00000154188|ANGPT1 ENSG00000162992|NEUROD1 ENSG00000164951|PPM2C ENSG00000165525|SDCCAG1 ENSG00000165637|VDAC2 ENSG00000166263|STXBP4 ENSG00000166704|ZNF606 ENSG00000171988|JMJD1C ENSG00000176601|YSK4 ENSG00000182287|AP1S2 ENSG00000205133|Q629K1\_HUMAN ENSG00000206560|ANKRD28

TATACCA ENSG000000010438|PRSS3 ENSG000000092010|PSME1 ENSG000000112159|MDN1 ENSG000000116649|SRM ENSG000000128242|GAL3ST1 ENSG000000143554|SLC27A3 ENSG000000143569|UBAP2L ENSG000000159261|CLDN14 ENSG00000160691|SHC1 ENSG00000163814|CDCP1 ENSG00000165949|IFIT2 ENSG00000168903|BTNL3 ENSG00000173636|PRSS1 ENSG00000175520|UBQLN3 ENSG00000180385|Q8NAP4\_HUMAN ENSG00000198574|SH2D1B ENSG00000204222|B3GALT4 ENSG00000204303|Q6ZVW4\_HUMAN ENSG00000204982|PRSS2 ENSG000000071537|SEL1L1 ENSG000000089775|ZBTB25 ENSG000000090269|CLEC5A ENSG00000107362|FAM108B1 ENSG00000111215|PRR4 ENSG000000111790|FGFR10P2 ENSG00000114547|ROPN1B ENSG00000121335|PRB4 ENSG00000123178|C13orf1 ENSG00000124795|DEK ENSG00000138376|BARD1 ENSG00000138379|GDF8 ENSG00000143442|POGZ ENSG00000143498|TAF1A ENSG00000144161|ZC3H8 ENSG00000148090|AUH ENSG00000159086|C21orf66 ENSG00000164221|CCDC112 ENSG00000169895|SYAP1 ENSG00000172380|GNL12 ENSG00000180287|PLD5 ENSG00000204155|PARG ENSG00000204334|AL1162\_HUMAN ENSG00000204683|C10orf113

TATACGA ENSG000000086544|ITPKC ENSG00000102007|PLP2 ENSG00000103490|PYCARD ENSG00000105323|HNRPUL1 ENSG00000105738|SIPAL13 ENSG00000108509|CAMTA2 ENSG00000135622|SEMA4F ENSG00000136854|STXBP1 ENSG00000136935|GOLGA1 ENSG00000143140|GJA5 ENSG00000149090|NP\_001001991.1 ENSG00000161996|WDR90 ENSG00000163155|LYSMD1 ENSG00000168792|NP\_937790.1 ENSG00000173530|TNFRSF10D ENSG00000182742|HOXB4 ENSG00000186174|BCL9L ENSG00000188843|NM\_207504 ENSG00000197724|PHF2 ENSG00000198911|SREBF2 ENSG00000203934|Q6ZUQ1\_HUMAN ENSG00000204227|RING1 ENSG00000205592|MUC19 ENSG00000205851|Q4G0H1\_HUMAN ENSG000000080608|KIAA0020 ENSG000000090621|PABPC4 ENSG00000102893|PHKB ENSG00000108395|TRIM37 ENSG00000118523|CTGF ENSG000001124097|HMG1L1 ENSG00000147231|CXorf57 ENSG00000147862|NFIB ENSG00000153339|KIAA1012 ENSG00000162384|C1orf123 ENSG00000168275|C1orf31 ENSG00000176293|ZNF135 ENSG00000186298|PPP1CC ENSG00000196268|ZNF493 ENSG00000196428|TSC22D2 ENSG00000196705|ZNF431 ENSG00000204814|Q5VSD8\_HUMAN

TATACGG ENSG0000000084731|KIF3C ENSG00000112715|VEGFA ENSG00000115758|ODC1 ENSG00000118900|UBN1 ENSG00000120075|HOXB5 ENSG00000131668|BARX1 ENSG00000133216|EPHB2 ENSG00000148468|C10orf38 ENSG00000155984|TMEM185A ENSG00000156599|ZDHC5 ENSG00000160191|PDE9A ENSG00000178159|Q8NBA0\_HUMAN ENSG00000178363|CALML3 ENSG00000180849|C15orf37 ENSG00000180861|C12orf36 ENSG00000183691|NOG ENSG00000185721|DRG1 ENSG00000187638|NM\_207367 ENSG00000196934|LOC440804 ENSG00000204059|NP\_001013718.1 ENSG00000003056|MEPR ENSG000000041515|MYO16 ENSG000000073754|CD5L ENSG00000115310|RTN4 ENSG00000115414|FN1 ENSG00000115464|USP34 ENSG00000122550|KLHL7 ENSG00000126950|TMEM35 ENSG00000135905|DOCK10 ENSG00000135999|EPC2 ENSG00000137500|CCDC90B ENSG00000143520|NP\_001014364.1 ENSG00000143882|ATP6V1C2 ENSG00000144224|UBXD2 ENSG00000149177|PTPRJ ENSG00000151150|ANK3 ENSG00000152689|RASGRP3 ENSG00000162545|CAMK2N1 ENSG00000171195|MUC7 ENSG00000175606|TMEM70 ENSG00000179041|RRS1 ENSG00000187155|CUO85\_HUMAN ENSG00000188001|FAM79B ENSG00000196199|MPF8\_HUMAN ENSG00000211451|GNRHR2

TATACGT ENSG000000066322|ELOVL1 ENSG00000103199|ZNF500 ENSG00000111087|GLI1 ENSG00000112149|CD83 ENSG00000112679|DUSP22 ENSG00000114770|ABCC5 ENSG00000118263|KLF7 ENSG00000125954|FNTB ENSG00000129657|SEC14L1 ENSG00000132938|KIAA0774 ENSG00000133028|SCO1 ENSG00000140534|C15orf42 ENSG00000140807|NKD1 ENSG00000143032|BARHL2 ENSG00000143954|REG3G ENSG00000153956|CACNA2D1 ENSG00000157087|ATP2B2 ENSG00000161277|THAP8 ENSG00000163251|FZD5 ENSG00000166446|CDYL2 ENSG00000172803|NP\_689973.2 ENSG00000174992|ZG16\_HUMAN ENSG00000177045|SIX5 ENSG00000180595|Q8N8C9\_HUMAN ENSG00000181856|SLC2A4 ENSG00000182487|NCF1C ENSG00000183691|NOG ENSG00000198884|Q6UXP0\_HUMAN ENSG00000204183|GDF50S ENSG00000204580|DDR1 ENSG00000205354|Q6ZN60\_HUMAN ENSG00000068784|SRBD1 ENSG00000106799|TGFB1 ENSG00000111142|METAP2 ENSG00000125207|PIWIL1 ENSG00000151012|SLC7A11 ENSG00000164749|HNF4G ENSG00000166800|LDHAL6A ENSG00000167383|ZNF229 ENSG00000168930|TRIM49 ENSG00000169126|ARMC4 ENSG00000171862|PTENP1 ENSG00000173409|ARV1 ENSG00000173827|AOAVR7\_HUMAN ENSG00000177189|RPS6KA3 ENSG00000197566|ZNF624 ENSG00000006075|CCL3 ENSG000000007384|RHBD1 ENSG000000011177|INMT ENSG000000046647|GEMIN8 ENSG000000087085|ACHE ENSG00000095319|NUP188 ENSG00000108852|MPF2 ENSG00000129757|CDKN1C ENSG00000139531|SUOX ENSG00000139624|LASS5 ENSG00000141738|GRB7 ENSG00000149930|TAOK2 ENSG00000156269|ARD1B ENSG00000161013|MGAT4B ENSG00000161921|CXCL16 ENSG00000168505|GBX2 ENSG00000175203|DCTN2 ENSG00000175591|P2RY2 ENSG00000176438|C14orf49 ENSG00000177350|Q6NVV1\_HUMAN ENSG00000180219|FAM71C ENSG00000180875|GREM2 ENSG00000181867|FTMT ENSG00000184788|SATL1 ENSG00000187682|ERAS ENSG00000197536|NP\_001013739.1 ENSG00000204333|Q6ZTP0\_HUMAN ENSG00000204438|BAT4 ENSG00000016490|CLCA1 ENSG00000018510|AGPS ENSG00000035115|SH3YL1 ENSG00000085224|ATRX ENSG00000100505|TRIM9 ENSG00000105792|Q8IY89\_HUMAN ENSG00000105894|PTN ENSG00000106809|OGN ENSG00000112335|SNX3 ENSG00000112378|PERP ENSG00000114374|USP9Y ENSG00000115295|CLIP4 ENSG00000118193|KIF14 ENSG00000118276|B4GALT6 ENSG00000120699|EXOSC8 ENSG00000122417|ODF2L ENSG00000131351|NP\_219485.1 ENSG00000135720|DYNC1L12 ENSG00000136206|WBSR19 ENSG00000139372|TDG ENSG00000152430|BOLL ENSG00000155085|C6orf199 ENSG00000155893|ACPL2 ENSG00000162618|ELTD1 ENSG00000170264|NP\_115556.1 ENSG00000173083|HPSE ENSG00000178996|SNAG1 ENSG00000180979|LRRCS7 ENSG00000196705|ZNF431 ENSG00000197429|IPP ENSG00000205505|NP\_001027561.1 ENSG00000205506|NP\_001027561.1 ENSG00000205508|NP\_001018856.1 ENSG00000205509|NP\_001027561.1 ENSG00000205580|NP\_001027561.1

TATACTG ENSG000000064393|HIPK2 ENSG000000068120|COASY ENSG00000107341|UBE2R2 ENSG00000111775|COX6A1 ENSG00000115648|MLPH ENSG00000118526|TCF21 ENSG00000128567|PODXL ENSG00000145819|ARHGAP26 ENSG00000160209|PDXK ENSG00000164038|NP\_849155.2 ENSG00000164400|CSF2 ENSG00000164605|Q5T8I0\_HUMAN ENSG00000166398|KIAA0355 ENSG00000168575|SLC20A2 ENSG00000171551|ECE1L1 ENSG00000176472|ZNF575 ENSG00000196419|XRCC6 ENSG00000198884|Q6UXP0\_HUMAN ENSG00000206062|Q4G0T4\_HUMAN ENSG00000083312|TNPO1 ENSG00000089335|ZNF302 ENSG00000095564|BTAF1 ENSG00000101574|METTL4 ENSG00000104327|CALB1 ENSG00000110975|SYT10 ENSG00000115919|KYNV ENSG00000121871|SLIT1R3 ENSG00000131941|RHPN2 ENSG00000133731|IMPA1 ENSG00000134318|ROCK2 ENSG00000137492|PRKRIR ENSG00000138814|PPP3CA ENSG00000142182|DNMT3L ENSG00000153914|SFRS12 ENSG00000159658|KIAA0494 ENSG00000160352|ZNF714 ENSG00000164219|PGGT1B ENSG00000164930|FZD6 ENSG00000167766|ZNF83 ENSG00000196705|ZNF431 ENSG00000197841|ZNF181 ENSG00000204220|PFDN6 ENSG00000204869|IGFL4 ENSG00000205269|Q5T4T1\_HUMAN

TATAGAA ENSG00000006282|SPATA20 ENSG000000034510|TMSB10 ENSG000000099968|BCL2L13 ENSG00000110328|GALNTL4 ENSG00000114656|KIAA1257 ENSG00000134243|SORT1 ENSG00000136816|TOR1B ENSG00000136828|RALGPS1 ENSG00000144834|TAGLN3 ENSG00000149294|NCAM1 ENSG00000153395|AYTL2 ENSG00000158987|RAPGEF6 ENSG00000160396|HIPK4 ENSG00000165917|RAPSN ENSG00000166398|KIAA0355 ENSG00000180447|GAS1 ENSG00000180875|GREM2 ENSG00000185219|ZNF445 ENSG00000187678|SPRY4 ENSG00000188554|NBR1 ENSG00000204366|ZBTB12 ENSG00000205771|CATSPER2P1 ENSG000000011114|BTBD7 ENSG000000067704|IARS2 ENSG00000075407|ZNF37A ENSG00000102081|FMR1 ENSG00000102678|FGF9 ENSG00000104331|IMPAD1 ENSG00000105835|BEPF1 ENSG00000109381|ELF2 ENSG00000111913|C6orf32 ENSG00000113520|IL4 ENSG00000120370|SCYL1BP1 ENSG00000123575|CXorf39 ENSG00000127328|RAB3IP ENSG00000128250|RFPL1 ENSG00000128253|RFPL2 ENSG00000128276|RFPL3 ENSG00000131127|ZNF141 ENSG00000134248|HBXIP ENSG00000137876|C15orf15 ENSG00000139352|ASCL1 ENSG00000141446|ESCO1 ENSG00000144935|TRPC1 ENSG00000151327|C14orf24 ENSG00000155744|FAM126B ENSG00000163939|PBRM1 ENSG00000180628|PCGF5 ENSG00000198814|GK ENSG00000203705|TATDN3 ENSG00000203788|Q6ZMM1\_HUMAN

TATAGAC ENSG00000002726|ABP1 ENSG00000006283|CACNA1G ENSG00000078898|BP1L1 ENSG00000092094|OSGEP ENSG00000095319|NUP188 ENSG00000102080|TEX28P2 ENSG00000103510|MYST1 ENSG00000105383|CD33 ENSG00000107438|PDLIM1 ENSG00000114439|BBX ENSG00000119535|CSF3R ENSG00000125834|STK35 ENSG00000125999|C20orf114 ENSG00000131910|NR0B2 ENSG00000137207|YIPF3 ENSG00000148660|CAMK2G ENSG00000149489|ROM1 ENSG00000168505|GBX2 ENSG00000172568|NP\_001001343.1 ENSG00000182242|TEX28\_HUMAN ENSG00000185254|TEX28P1 ENSG00000064933|PMS1 ENSG00000068615|REEP1 ENSG00000072401|UBE2D1 ENSG00000113327|GABRG2 ENSG00000124177|CHD6 ENSG00000124205|EDN3 ENSG00000134108|ARL8B ENSG00000135299|ANKRD6 ENSG00000137806|NDUFAF1 ENSG00000151135|C12orf23 ENSG00000155085|C6orf199 ENSG00000156869|FRRS1 ENSG00000161057|PSMC2 ENSG00000162643|WDR63 ENSG00000163053|SLC16A14 ENSG00000165443|PHYHIP1 ENSG00000169679|BUB1 ENSG00000170017|ALCAM ENSG00000173626|BET3L ENSG00000173744|HRB ENSG00000198099|ADH4 ENSG00000198740|ZNF652 ENSG00000204272|Q63Z42\_HUMAN

TATAGAT ENSG00000006744|ELAC2 ENSG000000063127|SLC6A16 ENSG00000078014|TCOF1 ENSG00000078804|TP53INP2 ENSG00000103932|RPAP1 ENSG00000141431|Q6ZMX6\_HUMAN ENSG00000141552|ANAPC11 ENSG00000143171|RXRG ENSG00000157087|ATP2B2 ENSG00000158987|RAPGEF6 ENSG00000161204|ABCF3 ENSG00000175575|WDR17 ENSG00000180595|Q8N8C9\_HUMAN ENSG00000182022|ST4S6\_HUMAN ENSG00000187451|Q9NWC8\_HUMAN ENSG00000187605|K0401\_HUMAN ENSG00000198171|C20orf116 ENSG00000204511|NM\_001011700.1 ENSG00000001631|KRIT1 ENSG00000005483|MLL5 ENSG00000007350|TKTL1 ENSG00000018610|CXorf56 ENSG00000094880|CDC23 ENSG00000109270|MAP2K11P1 ENSG00000110975|SYT10 ENSG00000112304|THEM2 ENSG00000121350|NP\_079130.2 ENSG00000122406|RPL5 ENSG00000122912|SLC25A16 ENSG00000125450|NUP85 ENSG00000129028|THAP10 ENSG00000134594|RAB33A ENSG00000152382|TADA1L ENSG00000163673|DCLK3 ENSG00000176907|C8orf4 ENSG00000181788|SIAH2 ENSG00000182220|ATP6AP2 ENSG00000183878|UTY ENSG00000196319|Q9H353\_HUMAN ENSG00000203727|SAMD5

TATAGGT ENSG00000005001|PRSS22 ENSG000000079739|PGM1 ENSG00000100982|C20orf67 ENSG00000111540|RAB5B ENSG00000115649|C2orf24 ENSG00000117318|ID3 ENSG00000118004|COLEC11 ENSG00000125285|SOX21 ENSG00000125970|RALY ENSG00000130332|LSM7 ENSG00000130414|NDUFA10 ENSG00000137700|SLC37A4 ENSG00000143171|RXRG ENSG00000147576|ADHFE1 ENSG00000149452|SLC22A8 ENSG00000163900|TMEM41A ENSG00000164403|SHROOM1 ENSG00000166856|ADMR ENSG00000166997|NP\_689968.1 ENSG00000171861|RNMTL1 ENSG00000197680|INE1 ENSG00000205973|LOC644949 ENSG00000087916|SLC6A14 ENSG00000112996|MRPS30 ENSG00000120742|RAMP4\_HUMAN ENSG00000132356|PRKAA1 ENSG00000134884|NP\_060481.3 ENSG00000142864|SERBP1 ENSG00000147162|OGT ENSG00000164440|TXLNB ENSG00000166197|NOLC1 ENSG00000166575|TMEM135 ENSG00000167257|RNF214 ENSG00000173542|MOBK1L1A ENSG00000189144|ZNF573 ENSG00000197223|NP\_006324.1

TATAGTC ENSG000000054116|TRAPP3C ENSG00000101335|MYL9 ENSG00000107960|OBFC1 ENSG00000111087|GLI1 ENSG00000117245|KIF17 ENSG000001123146|CD97 ENSG00000124713|GNMT ENSG00000125409|TEKT3 ENSG00000132128|LRRCC4 ENSG00000142224|IL19 ENSG00000143222|UFC1 ENSG00000146666|Q961P2\_HUMAN ENSG00000157950|SSX2\_HUMAN ENSG00000163814|CDCP1 ENSG00000168658|NP\_659429.4 ENSG00000169856|ONECUT1 ENSG00000173826|KCNH6 ENSG00000181649|PHLDA2 ENSG00000182199|SHMT2 ENSG00000198693|Q6ZW86\_HUMAN ENSG00000204368|SSX7 ENSG00000204648|SSX9 ENSG00000001631|KRIT1 ENSG00000054219|LY75 ENSG000000068781|STON1 ENSG00000103052|GNFNAT1 ENSG00000103769|RAB11A ENSG00000104369|JPH1 ENSG00000109158|GABRA4 ENSG00000114850|SSR3 ENSG00000133101|CCNA1 ENSG00000134183|GNAT2 ENSG00000138380|ALS2CR8 ENSG00000162623|TYW3 ENSG00000164258|NDUFS4 ENSG00000173258|ZNF483 ENSG00000175175|PPM1E ENSG00000180730|TMEM46 ENSG00000184863|PRR8 ENSG00000186687|LYRM7 ENSG00000189079|ARID2 ENSG00000196466|ZNF799 ENSG00000197121|PGAP1\_HUMAN ENSG00000205279|CTXN3

TATAGTT ENSG000000075388|FGF4 ENSG000000090238|YPEL3 ENSG000000092010|PSME1 ENSG00000103343|ZNF174 ENSG00000103932|RPAP1 ENSG00000115461|IGFBP5 ENSG00000118526|TCF21 ENSG00000119280|C1orf198 ENSG00000128576|PODXL ENSG00000133937|GSC ENSG00000138698|RAP1GDS1 ENSG00000139436|GIT2 ENSG00000139644|TEGT ENSG00000147724|NP\_056996.2 ENSG00000147724|NP\_056996.2 ENSG00000157303|SUSD3 ENSG00000163873|GRIK3 ENSG00000187097|ENTPD5 ENSG00000203836|NP\_899228.3 ENSG00000205562|Q86U27\_HUMAN ENSG00000206528|Q6ZSM0\_HUMAN ENSG00000239099|GCLM ENSG000000097033|SH3GLB1 ENSG00000104327|CALB1 ENSG00000106460|TMEM106B ENSG00000107242|P1TP5K1B ENSG00000111364|DDX55 ENSG00000113811|SELK\_HUMAN ENSG00000115425|PECR ENSG00000116459|ATP5F1 ENSG00000124812|CRISP1 ENSG00000134375|TTMM17A ENSG00000135698|MPHOSPH6 ENSG00000137992|DBT ENSG00000144362|KLHL23 ENSG00000146038|CCDC2 ENSG00000147364|FBXO25 ENSG00000147862|NFIB ENSG00000148925|BTBD10 ENSG00000154429|C1orf96 ENSG00000162624|LHX8 ENSG00000163131|CTSS ENSG00000164109|MAD2L1 ENSG00000164190|NIPBL ENSG00000167601|AXL ENSG00000167601|AXL

TATATAC ENSG00000008256|PSCD3 ENSG000000025800|KPNA6 ENSG000000087085|ACHE ENSG00000092820|VIL2 ENSG00000099194|SCD ENSG00000100100|PIK3IP1 ENSG00000107618|RBP3 ENSG00000116032|GRIN3B ENSG00000125746|EML2 ENSG00000132514|CLEC10A ENSG00000143376|SNX27 ENSG00000150477|KIAA1328 ENSG00000168795|ZBTB5 ENSG00000180875|GREM2 ENSG00000182487|NCF1C ENSG00000182749|PAQR7 ENSG00000183049|CAMK1D ENSG00000183691|NOG ENSG00000187605|K0401\_HUMAN ENSG00000188859|FAM78B ENSG00000196419|XRCC6 ENSG000000040275|CCDC99 ENSG00000050730|TNIP3 ENSG00000082146|ALS2CR2 ENSG00000088448|ANKRD10 ENSG00000100206|DMC1 ENSG00000107643|MAPK8 ENSG00000112335|SNX3 ENSG00000113240|CLK4 ENSG00000113441|LNPEP ENSG00000120149|MSX2 ENSG00000123500|COL10A1 ENSG00000130021|HDHD1A ENSG00000134057|CCNB1 ENSG00000134198|TSPAN2 ENSG00000136014|USP44 ENSG00000136155|SCEL ENSG00000136206|WBSR19 ENSG00000137075|RNF38 ENSG00000137960|GIPC2 ENSG00000140945|CDH13 ENSG00000147036|LANCL3 ENSG00000149089|ATP1P ENSG00000156234|CXCL13 ENSG00000161970|RPL26 ENSG00000163558|PRKCI ENSG00000164100|NDST3 ENSG00000164542|NP\_056129.1 ENSG00000164616|FBXL21 ENSG00000170647|TMEM133 ENSG00000171988|JMJD1C ENSG00000172995|ARP21\_HUMAN ENSG00000173588|CCDC41 ENSG00000173930|SLCO4C1 ENSG00000180440|NP\_982276.1 ENSG00000182498|RPS18 ENSG00000183952|Q9H5Q9\_HUMAN ENSG00000205506|NP\_001027561.1 ENSG00000205506|NP\_001027561.1 ENSG00000205509|NP\_001027561.1 ENSG00000205580|NP\_001027561.1 ENSG00000183952|CEACAM21 ENSG00000040608|RTN4R ENSG00000042062|C20orf175 ENSG00000070601|FRMPD1 ENSG00000100982|C20orf67 ENSG00000101440|ASIP ENSG00000111679|PTPN6 ENSG00000112837|TBX18 ENSG00000115461|IGFBP5 ENSG00000119684|MLH3 ENSG00000138136|LBX1 ENSG00000166398|KIAA0355 ENSG00000170549|IRX1 ENSG00000175197|DDIT3 ENSG00000184507|NP\_786883.1 ENSG00000184634|MED12 ENSG00000186442|KRT3 ENSG00000187605|K0401\_HUMAN ENSG000000081087|OSTM1 ENSG000000082556|OPRK1 ENSG00000009104|RGS1 ENSG000000092140|KIAA1333 ENSG00000104343|UBE2W ENSG00000113520|IL4

|         |                                                                                                                                                                                                                                                                                                                                                                                                                                                                                                                                                                                                                                                                                                                                                                                                                                                                                                                                                                                                                                                                              |                                                                                                                                                                                                                                                                                                                                                                                                                                                                                                                                                                                                                                                                                                                                                                                                                                                                                                                                                                                                                                                                                  |                                                                                                                                                                                                                                                                                                                                                                                                                                                                                                                                                                                                                                                                                                                                                                                                                                                                                                                                                                                                                                                                                              |                                                                                                                                                                                                                                                                                                                                                                                                                                                                                                                                                                                                                                                                                                                                                                                                                                                                                                                                                                                                                                                                                                            |                                                                                                                                                                                                                                                                                                                                                                                                                                                                                                                                                                                                                                                                                                                                                                                                                                                                                                                                                                                                                                                                                                                                                                                                                                                                                                                                                                                  |                                                                                                                                                                                                                                                                                                                                                                                                                                                                                                                                                                                                                                                                                                                                                                                                                                                                                                                                                                                                                                                                                                                                                                                                                                                                                                                                                                                                                                                                                                                                                                                                                                                                                                                               |                                                                                                                                                                                                                                                                                                                                                                                                                                                                                                                                                                                                                                                                                                                                                                                                                                                                                                                                                                                                                                                                                                                                                                                                                                                                                                                                                                                                                                                                       |                                                                                                                                                                                                                                                                                                                                                                                                                                                                                                                                                             |                                                                                                                                                                                                                                                                                                                                                                                                                                                                                                                          |                                                                                                                                                                                                                                                                                                                                                    |                                                                                                                                                                                                                                                                                                                                      |                                                                                                                                                                                                                                                                                                                                      |                                                                                                                                                                                                                                                                                                                                            |                                                                                                                                                                                                                                                                                                                                                                                                                                                                                                                                                                                                                                                                                   |                                                                                                                                                                                                                                                                                                                                                                                                                                                                                                                                                                                                                                                                                   |                                                                                                                                                                                                                                                                                                                                                                                                                                                                                                                                                                                                                                                                                   |                                                                                                                                                                                                                                                                                                                                                                                                                                                                                                                                                                                                                                                                                   |                                                                                                                                                                                                                                                                                                                                                                                                                                                                                                                                                                                                                                                                                   |                                                                                                                                                                                                                                                                                                                                                                                                                                                                                                                                                                                                                                                                                   |                                                                                                                                                                                                                                                                                                                                                                                                                                                                                                                                                                                                                                                                                   |                                                                                        |
|---------|------------------------------------------------------------------------------------------------------------------------------------------------------------------------------------------------------------------------------------------------------------------------------------------------------------------------------------------------------------------------------------------------------------------------------------------------------------------------------------------------------------------------------------------------------------------------------------------------------------------------------------------------------------------------------------------------------------------------------------------------------------------------------------------------------------------------------------------------------------------------------------------------------------------------------------------------------------------------------------------------------------------------------------------------------------------------------|----------------------------------------------------------------------------------------------------------------------------------------------------------------------------------------------------------------------------------------------------------------------------------------------------------------------------------------------------------------------------------------------------------------------------------------------------------------------------------------------------------------------------------------------------------------------------------------------------------------------------------------------------------------------------------------------------------------------------------------------------------------------------------------------------------------------------------------------------------------------------------------------------------------------------------------------------------------------------------------------------------------------------------------------------------------------------------|----------------------------------------------------------------------------------------------------------------------------------------------------------------------------------------------------------------------------------------------------------------------------------------------------------------------------------------------------------------------------------------------------------------------------------------------------------------------------------------------------------------------------------------------------------------------------------------------------------------------------------------------------------------------------------------------------------------------------------------------------------------------------------------------------------------------------------------------------------------------------------------------------------------------------------------------------------------------------------------------------------------------------------------------------------------------------------------------|------------------------------------------------------------------------------------------------------------------------------------------------------------------------------------------------------------------------------------------------------------------------------------------------------------------------------------------------------------------------------------------------------------------------------------------------------------------------------------------------------------------------------------------------------------------------------------------------------------------------------------------------------------------------------------------------------------------------------------------------------------------------------------------------------------------------------------------------------------------------------------------------------------------------------------------------------------------------------------------------------------------------------------------------------------------------------------------------------------|----------------------------------------------------------------------------------------------------------------------------------------------------------------------------------------------------------------------------------------------------------------------------------------------------------------------------------------------------------------------------------------------------------------------------------------------------------------------------------------------------------------------------------------------------------------------------------------------------------------------------------------------------------------------------------------------------------------------------------------------------------------------------------------------------------------------------------------------------------------------------------------------------------------------------------------------------------------------------------------------------------------------------------------------------------------------------------------------------------------------------------------------------------------------------------------------------------------------------------------------------------------------------------------------------------------------------------------------------------------------------------|-------------------------------------------------------------------------------------------------------------------------------------------------------------------------------------------------------------------------------------------------------------------------------------------------------------------------------------------------------------------------------------------------------------------------------------------------------------------------------------------------------------------------------------------------------------------------------------------------------------------------------------------------------------------------------------------------------------------------------------------------------------------------------------------------------------------------------------------------------------------------------------------------------------------------------------------------------------------------------------------------------------------------------------------------------------------------------------------------------------------------------------------------------------------------------------------------------------------------------------------------------------------------------------------------------------------------------------------------------------------------------------------------------------------------------------------------------------------------------------------------------------------------------------------------------------------------------------------------------------------------------------------------------------------------------------------------------------------------------|-----------------------------------------------------------------------------------------------------------------------------------------------------------------------------------------------------------------------------------------------------------------------------------------------------------------------------------------------------------------------------------------------------------------------------------------------------------------------------------------------------------------------------------------------------------------------------------------------------------------------------------------------------------------------------------------------------------------------------------------------------------------------------------------------------------------------------------------------------------------------------------------------------------------------------------------------------------------------------------------------------------------------------------------------------------------------------------------------------------------------------------------------------------------------------------------------------------------------------------------------------------------------------------------------------------------------------------------------------------------------------------------------------------------------------------------------------------------------|-------------------------------------------------------------------------------------------------------------------------------------------------------------------------------------------------------------------------------------------------------------------------------------------------------------------------------------------------------------------------------------------------------------------------------------------------------------------------------------------------------------------------------------------------------------|--------------------------------------------------------------------------------------------------------------------------------------------------------------------------------------------------------------------------------------------------------------------------------------------------------------------------------------------------------------------------------------------------------------------------------------------------------------------------------------------------------------------------|----------------------------------------------------------------------------------------------------------------------------------------------------------------------------------------------------------------------------------------------------------------------------------------------------------------------------------------------------|--------------------------------------------------------------------------------------------------------------------------------------------------------------------------------------------------------------------------------------------------------------------------------------------------------------------------------------|--------------------------------------------------------------------------------------------------------------------------------------------------------------------------------------------------------------------------------------------------------------------------------------------------------------------------------------|--------------------------------------------------------------------------------------------------------------------------------------------------------------------------------------------------------------------------------------------------------------------------------------------------------------------------------------------|-----------------------------------------------------------------------------------------------------------------------------------------------------------------------------------------------------------------------------------------------------------------------------------------------------------------------------------------------------------------------------------------------------------------------------------------------------------------------------------------------------------------------------------------------------------------------------------------------------------------------------------------------------------------------------------|-----------------------------------------------------------------------------------------------------------------------------------------------------------------------------------------------------------------------------------------------------------------------------------------------------------------------------------------------------------------------------------------------------------------------------------------------------------------------------------------------------------------------------------------------------------------------------------------------------------------------------------------------------------------------------------|-----------------------------------------------------------------------------------------------------------------------------------------------------------------------------------------------------------------------------------------------------------------------------------------------------------------------------------------------------------------------------------------------------------------------------------------------------------------------------------------------------------------------------------------------------------------------------------------------------------------------------------------------------------------------------------|-----------------------------------------------------------------------------------------------------------------------------------------------------------------------------------------------------------------------------------------------------------------------------------------------------------------------------------------------------------------------------------------------------------------------------------------------------------------------------------------------------------------------------------------------------------------------------------------------------------------------------------------------------------------------------------|-----------------------------------------------------------------------------------------------------------------------------------------------------------------------------------------------------------------------------------------------------------------------------------------------------------------------------------------------------------------------------------------------------------------------------------------------------------------------------------------------------------------------------------------------------------------------------------------------------------------------------------------------------------------------------------|-----------------------------------------------------------------------------------------------------------------------------------------------------------------------------------------------------------------------------------------------------------------------------------------------------------------------------------------------------------------------------------------------------------------------------------------------------------------------------------------------------------------------------------------------------------------------------------------------------------------------------------------------------------------------------------|-----------------------------------------------------------------------------------------------------------------------------------------------------------------------------------------------------------------------------------------------------------------------------------------------------------------------------------------------------------------------------------------------------------------------------------------------------------------------------------------------------------------------------------------------------------------------------------------------------------------------------------------------------------------------------------|----------------------------------------------------------------------------------------|
| TATATAT | ENSG00000123119 EFCBP1<br>ENSG00000156875 HIAT1<br>ENSG00000174628 IQCK<br>ENSG00000062598 ELMO2<br>ENSG00000108797 CNTNAP1<br>ENSG00000160799 CCDC12<br>ENSG00000198879 SFBMT2<br>ENSG00000115750 TAF1B<br>ENSG00000135218 CD36<br>ENSG00000155307 SAMSNI<br>ENSG00000186522 SEPT10<br>ENSG000000041880 PARP3<br>ENSG00000115685 PPP1R7<br>ENSG00000143569 UBAP2L<br>ENSG00000185252 ZNF74<br>ENSG000000011422 PLAUR<br>ENSG000000091127 PUS7<br>ENSG00000112299 VNN1<br>ENSG00000141048 MYH4<br>ENSG00000164168 TMEM34<br>ENSG00000189127 NF_001004441.1<br>ENSG00000005379 B2RAP1<br>ENSG00000108557 RAI1<br>ENSG00000142686 NP_689587.1<br>ENSG00000166111 SVOP<br>ENSG00000188706 ZDHHC9<br>ENSG00000095564 BTAF1<br>ENSG00000127995 CASD1<br>ENSG00000159113 IL10RB<br>ENSG00000174106 LEMD3<br>ENSG00000186960 Q86U37_HUMAN<br>ENSG000000011177 NM1<br>ENSG00000113273 ARSB<br>ENSG00000162444 RBP7<br>ENSG00000100177 RANBP9<br>ENSG00000112742 TTK<br>ENSG00000134744 ZCCHC11<br>ENSG00000162669 NP_001017975.3<br>ENSG00000168118 RAB4A<br>ENSG00000204289 C1orf86 | ENSG00000125450 NUP85<br>ENSG00000163534 FCRL1<br>ENSG00000187569 DPPA3<br>ENSG00000064195 DLX3<br>ENSG00000111652 COPS7A<br>ENSG00000164778 EN2<br>ENSG00000052126 PLEKHA5<br>ENSG00000117525 F3<br>ENSG00000136014 USP44<br>ENSG00000159086 C2orf66<br>ENSG00000197776 KLHDC1<br>ENSG00000060688 WDR57<br>ENSG00000125633 CCDC93<br>ENSG00000147889 CDKN2A<br>ENSG00000187605 K0401_HUMAN<br>ENSG0000012983 MAP4K5<br>ENSG00000092439 TRPM7<br>ENSG00000113441 LNPEP<br>ENSG00000143507 DUSP10<br>ENSG00000164484 KIAA1913<br>ENSG00000189127 NF_001004441.1<br>ENSG00000005379 B2RAP1<br>ENSG00000112149 CD83<br>ENSG00000142686 NP_689587.1<br>ENSG00000166111 SVOP<br>ENSG00000188706 ZDHHC9<br>ENSG00000095564 BTAF1<br>ENSG00000127995 CASD1<br>ENSG00000159113 IL10RB<br>ENSG00000174106 LEMD3<br>ENSG00000186960 Q86U37_HUMAN<br>ENSG000000011177 NM1<br>ENSG00000113273 ARSB<br>ENSG00000162444 RBP7<br>ENSG00000100177 RANBP9<br>ENSG00000112742 TTK<br>ENSG00000134744 ZCCHC11<br>ENSG00000162669 NP_001017975.3<br>ENSG00000168118 RAB4A<br>ENSG00000204289 C1orf86 | ENSG00000136542 GALNT5<br>ENSG00000163939 PBRM1<br>ENSG00000188452 CERKL<br>ENSG00000077782 FGFR1<br>ENSG00000116990 MYCL1<br>ENSG00000171903 CYP4F11<br>ENSG00000087916 SLC6A14<br>ENSG00000120756 PLS1<br>ENSG00000136243 NUPF2<br>ENSG00000165813 C1orf118<br>ENSG00000205505 NP_001027561.1<br>ENSG00000061936 SFRS8<br>ENSG00000128203 ASPHD2<br>ENSG00000150455 TIRAP<br>ENSG000000188859 FAM78B<br>ENSG0000018510 AGPS<br>ENSG00000106625 SIX4<br>ENSG00000115839 RAB3GAP1<br>ENSG00000148672 GLUD5<br>ENSG00000165899 C1orf64<br>ENSG00000198304 ZNF528<br>ENSG00000047056 WDR37<br>ENSG00000118245 TNP1<br>ENSG00000153294 GPR115<br>ENSG00000166965 RCCD1<br>ENSG0000003096 KLHL13<br>ENSG00000100483 C1orf138<br>ENSG00000139505 MTMR6<br>ENSG00000162687 KCNK2<br>ENSG00000175487 NP_076428.2<br>ENSG00000186960 Q86U37_HUMAN<br>ENSG00000022556 NLRP2<br>ENSG00000116128 ECL9<br>ENSG00000166860 ZBTB39<br>ENSG00000100727 C1orf124<br>ENSG00000113205 PCDHB3<br>ENSG00000135241 PNPLA10P<br>ENSG00000162669 NP_001017975.3<br>ENSG00000168118 RAB4A<br>ENSG00000204289 C1orf86 | ENSG00000137959 IFI44L<br>ENSG00000164463 NP_705835.1<br>ENSG00000188831 XR_017793.1<br>ENSG00000099954 CECR2<br>ENSG00000119720 C1orf102<br>ENSG00000177551 NHLH2<br>ENSG00000095564 BTAF1<br>ENSG00000125037 TMEM111<br>ENSG00000143458 NP_653219.1<br>ENSG00000168491 CCDC110<br>ENSG00000205505 NP_001027561.1<br>ENSG00000070770 CSNK2A2<br>ENSG00000132698 RAB25<br>ENSG00000166228 PCBD1<br>ENSG000000188859 FAM78B<br>ENSG00000040341 STAU2<br>ENSG00000101966 BIRC4<br>ENSG00000129317 PUS7L<br>ENSG00000149507 PLACL1<br>ENSG00000169495 HTRA4<br>ENSG00000198939 ZFP2<br>ENSG00000074370 ATP2A3<br>ENSG00000119280 C1orf198<br>ENSG00000153294 GPR115<br>ENSG00000173638 SLC19A1<br>ENSG00000050812 FBXL3<br>ENSG00000107679 PLEKHA1<br>ENSG00000139926 FRMD6<br>ENSG00000165355 FBXO3<br>ENSG00000182931 TCAL7<br>ENSG00000197632 SERPINB2<br>ENSG00000075388 FGF4<br>ENSG00000120709 FAM53C<br>ENSG00000173011 G86TJ2_HUMAN<br>ENSG00000021574 SPAST<br>ENSG00000113658 SMAD5<br>ENSG00000137766 UNC13C<br>ENSG00000175487 NP_076428.2<br>ENSG00000173376 C4orf31<br>ENSG000000204289 C1orf86 | ENSG00000141447 OSBPL1A<br>ENSG00000165525 SDCCAG1<br>ENSG00000204406 MBD5<br>ENSG00000100242 UNC84B<br>ENSG00000031389 SLC6A6<br>ENSG00000186577 C6orf1<br>ENSG00000111231 ATPBD1C<br>ENSG00000126070 EIF2C3<br>ENSG00000140299 BNIP2<br>ENSG0000017863 RP57<br>ENSG00000205508 NP_001018856.1<br>ENSG00000095383 TBC1D2<br>ENSG00000134864 Q9BVM4_HUMAN<br>ENSG00000166228 PCBD1<br>ENSG000000204218 RGL2<br>ENSG00000078177 N4BP2_HUMAN<br>ENSG00000104626 THEX1<br>ENSG00000134318 ROCK2<br>ENSG00000151229 SLC2A13<br>ENSG00000176055 NP_981951.1<br>ENSG000000204478 PRAMEF20<br>ENSG00000104033 ZC3H7B<br>ENSG00000119280 C1orf198<br>ENSG00000158022 TRIM63<br>ENSG00000179361 ARID3B<br>ENSG00000050812 FBXL3<br>ENSG00000112592 TBP<br>ENSG00000139971 C1orf37<br>ENSG00000166845 C18orf54<br>ENSG00000182931 TCAL7<br>ENSG000000198157 NSBP1<br>ENSG00000103550 NP_001013009.2<br>ENSG00000148926 ADM<br>ENSG00000040341 STAU2<br>ENSG00000101966 BIRC4<br>ENSG00000129317 PUS7L<br>ENSG00000149507 PLACL1<br>ENSG00000139926 FRMD6<br>ENSG00000165355 FBXO3<br>ENSG00000182931 TCAL7<br>ENSG00000197632 SERPINB2<br>ENSG00000075388 FGF4<br>ENSG00000120709 FAM53C<br>ENSG00000173011 G86TJ2_HUMAN<br>ENSG00000021574 SPAST<br>ENSG00000113658 SMAD5<br>ENSG00000137766 UNC13C<br>ENSG00000175487 NP_076428.2<br>ENSG00000173376 C4orf31<br>ENSG000000204289 C1orf86 | ENSG00000151229 SLC2A13<br>ENSG00000165533 TTCC8<br>ENSG00000204406 MBD5<br>ENSG00000100242 UNC84B<br>ENSG00000142599 RERE<br>ENSG00000187140 FOXD3<br>ENSG00000113520 IL4<br>ENSG00000128683 GAD1<br>ENSG00000148737 TCF7L2<br>ENSG00000176208 ATAD5<br>ENSG00000205509 NP_001027561.1<br>ENSG00000095383 TBC1D2<br>ENSG00000134864 Q9BVM4_HUMAN<br>ENSG00000166228 PCBD1<br>ENSG00000204257 HLA-DMA<br>ENSG00000078596 IT2MA<br>ENSG00000106415 GLCC11<br>ENSG00000134717 BTF3L4<br>ENSG00000154001 PPP2R5E<br>ENSG00000182890 GLUD2<br>ENSG000000204486 PRAMEF21<br>ENSG00000102078 SLC25A14<br>ENSG00000126464 PRR12<br>ENSG00000158220 FAM62C<br>ENSG00000179388 EGR3<br>ENSG00000050812 FBXL3<br>ENSG00000112592 TBP<br>ENSG00000139971 C1orf37<br>ENSG00000166845 C18orf54<br>ENSG00000182931 TCAL7<br>ENSG000000198157 NSBP1<br>ENSG00000156381 ANKRD9<br>ENSG00000023445 BIRC3<br>ENSG00000118965 WDR35<br>ENSG00000143344 RGL1<br>ENSG00000170571 EMB<br>ENSG00000184378 ARMP1_HUMAN<br>ENSG00000185668 POU3F1<br>ENSG00000158470 B4GALT5<br>ENSG000000204248 COL11A2<br>ENSG00000085382 HACE1<br>ENSG00000120705 ETF1<br>ENSG00000144857 BOC<br>ENSG00000164695 CHMP4C<br>ENSG00000166068 SPRED1<br>ENSG00000178966 RMI1<br>ENSG00000102572 STK24<br>ENSG00000128604 IRF5<br>ENSG0000015348 EXT2<br>ENSG00000110425 BRD1<br>ENSG00000121940 CLCC1<br>ENSG00000147183 CPXCR1<br>ENSG00000166068 SPRED1<br>ENSG00000182747 SLC35D3<br>ENSG00000104368 PLAT<br>ENSG00000129757 CDKN1C<br>ENSG00000158050 DUSP2<br>ENSG00000180447 GAS1<br>ENSG00000188706 ZDHHC9<br>ENSG00000048649 RSF1<br>ENSG00000081479 LRP2<br>ENSG00000114315 HES1<br>ENSG00000147003 TMEM27<br>ENSG00000163093 BBS5<br>ENSG00000163683 C4orf34 | ENSG00000154065 ANKRD29<br>ENSG00000169895 SYAP1<br>ENSG00000101489 BRUNOL4<br>ENSG00000108557 RAI1<br>ENSG00000143376 SNX27<br>ENSG00000196588 MKL1_HUMAN<br>ENSG00000197077 Q5THZ5_HUMAN<br>ENSG00000113532 ST8S1A4<br>ENSG00000114698 PLSCR4<br>ENSG00000133961 NUMB<br>ENSG00000150627 WDR17<br>ENSG00000152402 GUCY1A2<br>ENSG00000179397 C1orf101<br>ENSG00000205508 NP_001027561.1<br>ENSG00000115594 IL1R1<br>ENSG00000137460 NP_203751.2<br>ENSG00000143376 SNX27<br>ENSG00000183444 NR_002822.2<br>ENSG00000006451 RALA<br>ENSG0000009780 FAM76A<br>ENSG00000079246 XRCC5<br>ENSG00000091039 OSBP1A<br>ENSG00000108406 DHX40<br>ENSG00000138779 Q9HGM6_HUMAN<br>ENSG00000155393 HEATR3<br>ENSG00000159822 ZNF230<br>ENSG00000182890 GLUD2<br>ENSG00000187231 SESTD1<br>ENSG00000188971 NP_001013005.1<br>ENSG000000204969 PCDHA2<br>ENSG00000106125 AQP1<br>ENSG00000105991 HOXA1<br>ENSG00000137106 GRHRP<br>ENSG00000162734 PEA15<br>ENSG00000164091 TMEM113<br>ENSG00000183691 NOG<br>ENSG00000056097 ZFR<br>ENSG00000057019 DCBLD2<br>ENSG00000118965 WDR35<br>ENSG00000121351 IAPP<br>ENSG00000158201 ABHD3<br>ENSG00000171208 NETO2<br>ENSG00000172175 MALT1<br>ENSG00000185057 TAF9<br>ENSG00000186222 CNO<br>ENSG00000104967 NOVA2<br>ENSG00000105509 HAS1<br>ENSG00000160685 ZBTB7B<br>ENSG000000204759 Q6ZRY0_HUMAN<br>ENSG00000110075 SAPF3<br>ENSG00000130150 MOSP2<br>ENSG00000155090 KLF10<br>ENSG00000167325 RRM1<br>ENSG00000185267 ARMETL1 | TATATCA<br>ENSG00000189127 NF_001004441.1<br>ENSG00000005379 B2RAP1<br>ENSG00000108557 RAI1<br>ENSG00000142686 NP_689587.1<br>ENSG00000166111 SVOP<br>ENSG00000188706 ZDHHC9<br>ENSG00000095564 BTAF1<br>ENSG00000127995 CASD1<br>ENSG00000159113 IL10RB<br>ENSG00000174106 LEMD3<br>ENSG00000186960 Q86U37_HUMAN<br>ENSG000000011177 NM1<br>ENSG00000113273 ARSB<br>ENSG00000162444 RBP7<br>ENSG00000100177 RANBP9<br>ENSG00000112742 TTK<br>ENSG00000134744 ZCCHC11<br>ENSG00000162669 NP_001017975.3<br>ENSG00000168118 RAB4A<br>ENSG00000204289 C1orf86 | TATATGT<br>ENSG00000007314 SCN4A<br>ENSG00000112149 CD83<br>ENSG00000142686 NP_689587.1<br>ENSG00000166111 SVOP<br>ENSG00000188706 ZDHHC9<br>ENSG00000095564 BTAF1<br>ENSG00000127995 CASD1<br>ENSG00000159113 IL10RB<br>ENSG00000174106 LEMD3<br>ENSG00000186960 Q86U37_HUMAN<br>ENSG000000011177 NM1<br>ENSG00000113273 ARSB<br>ENSG00000162444 RBP7<br>ENSG00000100177 RANBP9<br>ENSG00000112742 TTK<br>ENSG00000134744 ZCCHC11<br>ENSG00000162669 NP_001017975.3<br>ENSG00000168118 RAB4A<br>ENSG00000204289 C1orf86 | TATATTT<br>ENSG00000049769 PPP1R3F<br>ENSG00000118298 CA14<br>ENSG00000130528 HRC<br>ENSG00000158220 FAM62C<br>ENSG00000181035 SLC25A42<br>ENSG00000197296 C2orf142<br>ENSG00000052126 PLEKHA5<br>ENSG00000085491 SLC25A24<br>ENSG00000118200 CAMAP1L1<br>ENSG00000148828 NP_001074467.1<br>ENSG00000164125 C4orf18<br>ENSG00000188014 NP_619643.2 | ENSG00000062598 ELMO2<br>ENSG00000123358 NR4A1<br>ENSG00000130635 COL5A1<br>ENSG00000159217 IGF2BP1<br>ENSG00000181368 NM_032947.3<br>ENSG00000197587 DMB1<br>ENSG00000054803 CBLN4<br>ENSG00000085491 SLC25A24<br>ENSG00000119820 YIPF4<br>ENSG00000148828 NP_001074467.1<br>ENSG00000164125 C4orf18<br>ENSG00000188014 NP_619643.2 | ENSG00000092820 VIL2<br>ENSG00000124313 IQSEC2<br>ENSG00000134490 C18orf45<br>ENSG00000163132 MSX1<br>ENSG00000181368 NM_032947.3<br>ENSG00000198873 GRK5<br>ENSG00000056291 NPFPR2<br>ENSG00000085491 SLC25A24<br>ENSG00000119820 YIPF4<br>ENSG00000148828 NP_001074467.1<br>ENSG00000164125 C4orf18<br>ENSG00000188014 NP_619643.2 | ENSG00000100271 TTLL1<br>ENSG00000162456 NP_872322.1<br>ENSG00000134490 C18orf45<br>ENSG00000163132 MSX1<br>ENSG00000181368 NM_032947.3<br>ENSG00000198873 GRK5<br>ENSG00000056291 NPFPR2<br>ENSG00000085491 SLC25A24<br>ENSG00000119820 YIPF4<br>ENSG00000148828 NP_001074467.1<br>ENSG00000164125 C4orf18<br>ENSG00000188014 NP_619643.2 | ENSG00000102870 ZNF629<br>ENSG00000164051 CCDC51<br>ENSG00000005059 CCDC109B<br>ENSG00000117620 SLC35A3<br>ENSG00000162654 GBP4<br>ENSG00000196812 ZSCAN16<br>ENSG00000128596 NP_073579.3<br>ENSG00000167740 CYB5D2<br>ENSG0000000178057 C3orf60<br>ENSG00000061676 NCKAP1<br>ENSG00000163568 AIM2<br>ENSG00000186908 ZDHHC17<br>ENSG00000191027 VSI2<br>ENSG00000113555 PCDH12<br>ENSG00000161558 TMEM143<br>ENSG00000205538 Q6ZVP1_HUMAN<br>ENSG00000106341 C7orf16<br>ENSG00000150961 SEC24D<br>ENSG00000181072 CHRM2<br>ENSG00000196442 ZNF432<br>ENSG00000061936 SFRS8<br>ENSG00000128203 ASPHD2<br>ENSG00000186912 P2RY4<br>ENSG00000131171 SH3BGR1<br>ENSG00000186628 FSD2 | ENSG00000102870 ZNF629<br>ENSG00000164051 CCDC51<br>ENSG00000005059 CCDC109B<br>ENSG00000117620 SLC35A3<br>ENSG00000162654 GBP4<br>ENSG00000196812 ZSCAN16<br>ENSG00000128596 NP_073579.3<br>ENSG00000167740 CYB5D2<br>ENSG0000000178057 C3orf60<br>ENSG00000061676 NCKAP1<br>ENSG00000163568 AIM2<br>ENSG00000186908 ZDHHC17<br>ENSG00000191027 VSI2<br>ENSG00000113555 PCDH12<br>ENSG00000161558 TMEM143<br>ENSG00000205538 Q6ZVP1_HUMAN<br>ENSG00000106341 C7orf16<br>ENSG00000150961 SEC24D<br>ENSG00000181072 CHRM2<br>ENSG00000196442 ZNF432<br>ENSG00000061936 SFRS8<br>ENSG00000128203 ASPHD2<br>ENSG00000186912 P2RY4<br>ENSG00000131171 SH3BGR1<br>ENSG00000186628 FSD2 | ENSG00000102870 ZNF629<br>ENSG00000164051 CCDC51<br>ENSG00000005059 CCDC109B<br>ENSG00000117620 SLC35A3<br>ENSG00000162654 GBP4<br>ENSG00000196812 ZSCAN16<br>ENSG00000128596 NP_073579.3<br>ENSG00000167740 CYB5D2<br>ENSG0000000178057 C3orf60<br>ENSG00000061676 NCKAP1<br>ENSG00000163568 AIM2<br>ENSG00000186908 ZDHHC17<br>ENSG00000191027 VSI2<br>ENSG00000113555 PCDH12<br>ENSG00000161558 TMEM143<br>ENSG00000205538 Q6ZVP1_HUMAN<br>ENSG00000106341 C7orf16<br>ENSG00000150961 SEC24D<br>ENSG00000181072 CHRM2<br>ENSG00000196442 ZNF432<br>ENSG00000061936 SFRS8<br>ENSG00000128203 ASPHD2<br>ENSG00000186912 P2RY4<br>ENSG00000131171 SH3BGR1<br>ENSG00000186628 FSD2 | ENSG00000102870 ZNF629<br>ENSG00000164051 CCDC51<br>ENSG00000005059 CCDC109B<br>ENSG00000117620 SLC35A3<br>ENSG00000162654 GBP4<br>ENSG00000196812 ZSCAN16<br>ENSG00000128596 NP_073579.3<br>ENSG00000167740 CYB5D2<br>ENSG0000000178057 C3orf60<br>ENSG00000061676 NCKAP1<br>ENSG00000163568 AIM2<br>ENSG00000186908 ZDHHC17<br>ENSG00000191027 VSI2<br>ENSG00000113555 PCDH12<br>ENSG00000161558 TMEM143<br>ENSG00000205538 Q6ZVP1_HUMAN<br>ENSG00000106341 C7orf16<br>ENSG00000150961 SEC24D<br>ENSG00000181072 CHRM2<br>ENSG00000196442 ZNF432<br>ENSG00000061936 SFRS8<br>ENSG00000128203 ASPHD2<br>ENSG00000186912 P2RY4<br>ENSG00000131171 SH3BGR1<br>ENSG00000186628 FSD2 | ENSG00000102870 ZNF629<br>ENSG00000164051 CCDC51<br>ENSG00000005059 CCDC109B<br>ENSG00000117620 SLC35A3<br>ENSG00000162654 GBP4<br>ENSG00000196812 ZSCAN16<br>ENSG00000128596 NP_073579.3<br>ENSG00000167740 CYB5D2<br>ENSG0000000178057 C3orf60<br>ENSG00000061676 NCKAP1<br>ENSG00000163568 AIM2<br>ENSG00000186908 ZDHHC17<br>ENSG00000191027 VSI2<br>ENSG00000113555 PCDH12<br>ENSG00000161558 TMEM143<br>ENSG00000205538 Q6ZVP1_HUMAN<br>ENSG00000106341 C7orf16<br>ENSG00000150961 SEC24D<br>ENSG00000181072 CHRM2<br>ENSG00000196442 ZNF432<br>ENSG00000061936 SFRS8<br>ENSG00000128203 ASPHD2<br>ENSG00000186912 P2RY4<br>ENSG00000131171 SH3BGR1<br>ENSG00000186628 FSD2 | ENSG00000102870 ZNF629<br>ENSG00000164051 CCDC51<br>ENSG00000005059 CCDC109B<br>ENSG00000117620 SLC35A3<br>ENSG00000162654 GBP4<br>ENSG00000196812 ZSCAN16<br>ENSG00000128596 NP_073579.3<br>ENSG00000167740 CYB5D2<br>ENSG0000000178057 C3orf60<br>ENSG00000061676 NCKAP1<br>ENSG00000163568 AIM2<br>ENSG00000186908 ZDHHC17<br>ENSG00000191027 VSI2<br>ENSG00000113555 PCDH12<br>ENSG00000161558 TMEM143<br>ENSG00000205538 Q6ZVP1_HUMAN<br>ENSG00000106341 C7orf16<br>ENSG00000150961 SEC24D<br>ENSG00000181072 CHRM2<br>ENSG00000196442 ZNF432<br>ENSG00000061936 SFRS8<br>ENSG00000128203 ASPHD2<br>ENSG00000186912 P2RY4<br>ENSG00000131171 SH3BGR1<br>ENSG00000186628 FSD2 | ENSG00000102870 ZNF629<br>ENSG00000164051 CCDC51<br>ENSG00000005059 CCDC109B<br>ENSG00000117620 SLC35A3<br>ENSG00000162654 GBP4<br>ENSG00000196812 ZSCAN16<br>ENSG00000128596 NP_073579.3<br>ENSG00000167740 CYB5D2<br>ENSG0000000178057 C3orf60<br>ENSG00000061676 NCKAP1<br>ENSG00000163568 AIM2<br>ENSG00000186908 ZDHHC17<br>ENSG00000191027 VSI2<br>ENSG00000113555 PCDH12<br>ENSG00000161558 TMEM143<br>ENSG00000205538 Q6ZVP1_HUMAN<br>ENSG00000106341 C7orf16<br>ENSG00000150961 SEC24D<br>ENSG00000181072 CHRM2<br>ENSG00000196442 ZNF432<br>ENSG00000061936 SFRS8<br>ENSG00000128203 ASPHD2<br>ENSG00000186912 P2RY4<br>ENSG00000131171 SH3BGR1<br>ENSG00000186628 FSD2 | ENSG00000102870 ZNF629<br>ENSG00000164051 CCDC51<br>ENSG00000005059 CCDC109B<br>ENSG00 |
|---------|------------------------------------------------------------------------------------------------------------------------------------------------------------------------------------------------------------------------------------------------------------------------------------------------------------------------------------------------------------------------------------------------------------------------------------------------------------------------------------------------------------------------------------------------------------------------------------------------------------------------------------------------------------------------------------------------------------------------------------------------------------------------------------------------------------------------------------------------------------------------------------------------------------------------------------------------------------------------------------------------------------------------------------------------------------------------------|----------------------------------------------------------------------------------------------------------------------------------------------------------------------------------------------------------------------------------------------------------------------------------------------------------------------------------------------------------------------------------------------------------------------------------------------------------------------------------------------------------------------------------------------------------------------------------------------------------------------------------------------------------------------------------------------------------------------------------------------------------------------------------------------------------------------------------------------------------------------------------------------------------------------------------------------------------------------------------------------------------------------------------------------------------------------------------|----------------------------------------------------------------------------------------------------------------------------------------------------------------------------------------------------------------------------------------------------------------------------------------------------------------------------------------------------------------------------------------------------------------------------------------------------------------------------------------------------------------------------------------------------------------------------------------------------------------------------------------------------------------------------------------------------------------------------------------------------------------------------------------------------------------------------------------------------------------------------------------------------------------------------------------------------------------------------------------------------------------------------------------------------------------------------------------------|------------------------------------------------------------------------------------------------------------------------------------------------------------------------------------------------------------------------------------------------------------------------------------------------------------------------------------------------------------------------------------------------------------------------------------------------------------------------------------------------------------------------------------------------------------------------------------------------------------------------------------------------------------------------------------------------------------------------------------------------------------------------------------------------------------------------------------------------------------------------------------------------------------------------------------------------------------------------------------------------------------------------------------------------------------------------------------------------------------|----------------------------------------------------------------------------------------------------------------------------------------------------------------------------------------------------------------------------------------------------------------------------------------------------------------------------------------------------------------------------------------------------------------------------------------------------------------------------------------------------------------------------------------------------------------------------------------------------------------------------------------------------------------------------------------------------------------------------------------------------------------------------------------------------------------------------------------------------------------------------------------------------------------------------------------------------------------------------------------------------------------------------------------------------------------------------------------------------------------------------------------------------------------------------------------------------------------------------------------------------------------------------------------------------------------------------------------------------------------------------------|-------------------------------------------------------------------------------------------------------------------------------------------------------------------------------------------------------------------------------------------------------------------------------------------------------------------------------------------------------------------------------------------------------------------------------------------------------------------------------------------------------------------------------------------------------------------------------------------------------------------------------------------------------------------------------------------------------------------------------------------------------------------------------------------------------------------------------------------------------------------------------------------------------------------------------------------------------------------------------------------------------------------------------------------------------------------------------------------------------------------------------------------------------------------------------------------------------------------------------------------------------------------------------------------------------------------------------------------------------------------------------------------------------------------------------------------------------------------------------------------------------------------------------------------------------------------------------------------------------------------------------------------------------------------------------------------------------------------------------|-----------------------------------------------------------------------------------------------------------------------------------------------------------------------------------------------------------------------------------------------------------------------------------------------------------------------------------------------------------------------------------------------------------------------------------------------------------------------------------------------------------------------------------------------------------------------------------------------------------------------------------------------------------------------------------------------------------------------------------------------------------------------------------------------------------------------------------------------------------------------------------------------------------------------------------------------------------------------------------------------------------------------------------------------------------------------------------------------------------------------------------------------------------------------------------------------------------------------------------------------------------------------------------------------------------------------------------------------------------------------------------------------------------------------------------------------------------------------|-------------------------------------------------------------------------------------------------------------------------------------------------------------------------------------------------------------------------------------------------------------------------------------------------------------------------------------------------------------------------------------------------------------------------------------------------------------------------------------------------------------------------------------------------------------|--------------------------------------------------------------------------------------------------------------------------------------------------------------------------------------------------------------------------------------------------------------------------------------------------------------------------------------------------------------------------------------------------------------------------------------------------------------------------------------------------------------------------|----------------------------------------------------------------------------------------------------------------------------------------------------------------------------------------------------------------------------------------------------------------------------------------------------------------------------------------------------|--------------------------------------------------------------------------------------------------------------------------------------------------------------------------------------------------------------------------------------------------------------------------------------------------------------------------------------|--------------------------------------------------------------------------------------------------------------------------------------------------------------------------------------------------------------------------------------------------------------------------------------------------------------------------------------|--------------------------------------------------------------------------------------------------------------------------------------------------------------------------------------------------------------------------------------------------------------------------------------------------------------------------------------------|-----------------------------------------------------------------------------------------------------------------------------------------------------------------------------------------------------------------------------------------------------------------------------------------------------------------------------------------------------------------------------------------------------------------------------------------------------------------------------------------------------------------------------------------------------------------------------------------------------------------------------------------------------------------------------------|-----------------------------------------------------------------------------------------------------------------------------------------------------------------------------------------------------------------------------------------------------------------------------------------------------------------------------------------------------------------------------------------------------------------------------------------------------------------------------------------------------------------------------------------------------------------------------------------------------------------------------------------------------------------------------------|-----------------------------------------------------------------------------------------------------------------------------------------------------------------------------------------------------------------------------------------------------------------------------------------------------------------------------------------------------------------------------------------------------------------------------------------------------------------------------------------------------------------------------------------------------------------------------------------------------------------------------------------------------------------------------------|-----------------------------------------------------------------------------------------------------------------------------------------------------------------------------------------------------------------------------------------------------------------------------------------------------------------------------------------------------------------------------------------------------------------------------------------------------------------------------------------------------------------------------------------------------------------------------------------------------------------------------------------------------------------------------------|-----------------------------------------------------------------------------------------------------------------------------------------------------------------------------------------------------------------------------------------------------------------------------------------------------------------------------------------------------------------------------------------------------------------------------------------------------------------------------------------------------------------------------------------------------------------------------------------------------------------------------------------------------------------------------------|-----------------------------------------------------------------------------------------------------------------------------------------------------------------------------------------------------------------------------------------------------------------------------------------------------------------------------------------------------------------------------------------------------------------------------------------------------------------------------------------------------------------------------------------------------------------------------------------------------------------------------------------------------------------------------------|-----------------------------------------------------------------------------------------------------------------------------------------------------------------------------------------------------------------------------------------------------------------------------------------------------------------------------------------------------------------------------------------------------------------------------------------------------------------------------------------------------------------------------------------------------------------------------------------------------------------------------------------------------------------------------------|----------------------------------------------------------------------------------------|



TATGATA ENSG0000005381|MPO ENSG00000060688|WDR57 ENSG00000072110|ACTN1 ENSG00000072736|NFATC3 ENSG00000092036|C14orf94 ENSG00000095321|CRAT ENSG00000103742|NP\_066013.1 ENSG00000110328|GALNTL4 ENSG00000129450|STGLEC9 ENSG00000131475|VPS25 ENSG00000132911|NMUR2 ENSG00000143379|SETDB1 ENSG00000147127|RAB41 ENSG00000160505|NLRP4 ENSG00000164620|C5orf16 ENSG00000169220|RGS14 ENSG00000172530|BANP ENSG00000178104|PDE4DIP ENSG00000187726|DNAJB13 ENSG00000197430|TMEM10 ENSG00000198131|ZNF544 ENSG00000198535|NP\_997205.1 ENSG00000204652|SNX24 ENSG00000275223|SEMA3C ENSG00000101544|ZNF508 ENSG00000102218|RP2 ENSG00000108984|MAJ2K6 ENSG00000116489|CAPZA1 ENSG00000123106|CCDC91 ENSG00000123213|NLN ENSG00000131931|THAP1 ENSG00000132356|PKAAL1 ENSG00000136098|NEK3 ENSG00000136206|WBSR19 ENSG00000138785|INTS12 ENSG00000143355|LHX9 ENSG00000144566|RAB5A ENSG00000147592|LACTB2 ENSG00000154997|NP\_997249.1 ENSG00000165474|GJB2 ENSG00000165525|SDCCAG1 ENSG00000165985|C1QL3 ENSG00000167384|ZNF180 ENSG00000167904|TMEM68 ENSG00000169570|DTWD2 ENSG00000172845|SP3 ENSG00000181019|NQO1 ENSG00000183496|RKHD3 ENSG00000185272|RBM11 ENSG00000185344|ATP6V0A2 ENSG00000188610|FAM72B ENSG00000189237|NAP5\_HUMAN ENSG00000196550|FAM72A ENSG00000205505|NP\_001027561.1 ENSG00000205506|NP\_001027561.1 ENSG00000205508|NP\_001018856.1 ENSG00000205509|NP\_001027561.1 ENSG00000205580|NP\_001027561.1

TATGATG ENSG00000006712|PAF1 ENSG00000013016|EHD3 ENSG000000108861|DUSP3 ENSG00000117450|PRDX1 ENSG00000132846|ZBED3 ENSG00000135314|C6orf148 ENSG00000138696|BMPR1B ENSG00000141002|TCF25 ENSG00000143786|CNIH3 ENSG00000143878|RHOB ENSG00000144045|DQX1 ENSG00000147155|EBP ENSG00000147955|OPRS1 ENSG00000156486|KCNS2 ENSG00000162817|C1orf115 ENSG00000175781|Q9H5L9\_HUMAN ENSG00000188042|ARL4C ENSG00000188152|FAM22G ENSG00000198881|ASB12 ENSG00000204168|Q6ZRI1\_HUMAN ENSG00000204392|LSM2 ENSG00000204936|Q8N6Q3-3 ENSG00000205804|Q5T6R2\_HUMAN ENSG00000205972|Q8NBCO\_HUMAN ENSG0000006128|TAC1 ENSG00000086061|DNAJA1 ENSG00000091436|MLTK\_HUMAN ENSG00000112305|SMAP1 ENSG00000122378|C10orf58 ENSG00000123131|PRDX4 ENSG00000123178|C13orf1 ENSG00000124275|MTRR ENSG00000143324|XPR1 ENSG00000143355|LHX9 ENSG00000143458|NP\_653219.1 ENSG00000146386|C6orf115 ENSG00000157230|LOC728132 ENSG00000163041|H3F3A ENSG00000165521|EML5 ENSG00000168743|NPNT ENSG00000171843|MLLT3 ENSG00000180730|TMEM46 ENSG00000180785|OR51E1 ENSG00000185664|SILV ENSG00000188740|NBPF5 ENSG00000196639|HRH1 ENSG00000198252|STYX ENSG00000198826|ARHGAP11A ENSG00000205981|DNAJC19

TATGATT ENSG00000001132|APBA3 ENSG00000054282|SDCCAG8 ENSG00000075704|TMCC3 ENSG00000073849|ST6GAL1 ENSG00000108344|PSMD3 ENSG00000112511|PHF1 ENSG00000117360|PRPF3 ENSG00000125633|CCDC93 ENSG00000132004|FBXW9 ENSG00000136378|ADAMT57 ENSG00000157856|C2orf39 ENSG00000160791|CCR5 ENSG00000161958|FGF11 ENSG00000162399|BSND ENSG00000172046|USP19 ENSG00000181625|GIYD2 ENSG00000198618|PPIA\_HUMAN ENSG00000030066|NUP160 ENSG00000066557|LRR40 ENSG00000067560|RHOA ENSG00000078399|HOXA9 ENSG00000081320|STK17B ENSG00000093183|SEC22C ENSG00000101974|ATP11C ENSG00000104237|RP1 ENSG00000114021|NIT2 ENSG00000115239|ASB3 ENSG00000118849|RARRES1 ENSG00000122406|RPL5 ENSG00000122862|SRGN ENSG00000123500|COL10A1 ENSG00000125823|CSTL1 ENSG00000132207|SULT1A3 ENSG00000133116|KL ENSG00000134121|CHL1 ENSG00000138468|SENP7 ENSG00000138688|KIAA1109 ENSG00000143355|LHX9 ENSG00000143674|M3KL4\_HUMAN ENSG00000151470|C4orf33 ENSG00000156171|TMEM77 ENSG00000156735|BAG4 ENSG00000159917|ZNF235 ENSG00000162695|SLC30A7 ENSG00000162814|SPATA17 ENSG00000164122|ASB5 ENSG00000170191|NANP ENSG00000174132|TMEM157 ENSG00000176236|C10orf111 ENSG00000177640|CAS2 ENSG00000177888|ZBTB41 ENSG00000196842|ESRRG ENSG00000196941|SERPINB13 ENSG00000198370|GFPT1 ENSG000002024296|C6orf10 ENSG00000211448|DIO2

TATGCAA ENSG00000047578|KIAA0556 ENSG00000077157|PPP1R12B ENSG00000079393|DUSP13 ENSG00000086062|B4GALT1 ENSG00000095015|MAP3K1 ENSG00000099972|MICAL3 ENSG00000102057|KCND1 ENSG00000102755|FLT1 ENSG00000105641|SLC5A5 ENSG00000112514|CUTA ENSG00000113763|UNC5A ENSG00000116990|MYCL1 ENSG00000117013|KCNQ4 ENSG00000124134|KCNS1 ENSG00000131398|KCNC3 ENSG00000144596|GRIP2 ENSG00000145198|Q9BVH8\_HUMAN ENSG00000149927|DOC2A ENSG00000155363|MOV10 ENSG00000157349|DDX19B ENSG00000157933|SKI ENSG00000159714|ZDHHC1 ENSG00000160691|SHC1 ENSG00000166189|HPS6 ENSG00000175329|ISX ENSG00000189069|NP\_001013732.1 ENSG00000197175|Q8TBR1\_HUMAN ENSG00000203674|Q6ZT2A\_HUMAN ENSG00000204540|PSORS1C1 ENSG00000207204|RDH11 ENSG00000076321|KLHL20 ENSG00000082175|PGR ENSG00000082293|COL19A1 ENSG00000102554|KLF5 ENSG00000109689|STM2 ENSG00000116652|DLEU2L ENSG00000122707|RECK ENSG00000124103|C20orf107 ENSG00000127688|GAN ENSG00000131003|RBM22F ENSG00000135547|HEY2 ENSG00000142507|PSMB6 ENSG00000142615|ELA2A\_HUMAN ENSG00000143494|VASH2 ENSG00000147133|TAF1 ENSG00000148688|RPP30 ENSG00000153936|HS2ST1 ENSG00000154188|ANGPT1 ENSG00000157111|TMEM171 ENSG00000160223|ICOSLG ENSG00000160336|ZNF761 ENSG00000163605|PPP4R2 ENSG00000163743|RCHY1 ENSG00000165355|FBXO33 ENSG00000169554|ZEB2 ENSG00000170927|PKHD1 ENSG00000171714|TMEM16E ENSG00000177800|TMEM78 ENSG00000179981|TSHZ1 ENSG00000180251|SLC9A4 ENSG00000185774|KCNIP4 ENSG00000197510|C21orf116 ENSG00000204838|Q8WUP8\_HUMAN

perfect: TATGCAA TTGCATA hsa-miR-153 TTGCATAgtcacaaaagtga 0

TATGCAT ENSG00000007545|CRAMP1L2 ENSG00000011132|APBA3 ENSG00000013016|EHD3 ENSG00000040608|RTN4R ENSG00000092036|C14orf94 ENSG00000101670|LIPG ENSG00000105648|IFI30 ENSG00000106331|PAX4 ENSG00000122085|MTERFD12 ENSG00000129295|LRR6 ENSG00000130703|OSBPL2 ENSG00000154227|LASS3 ENSG00000154309|DISP1 ENSG00000158525|CPA5 ENSG00000163013|FBXO41 ENSG00000164048|ZNF589 ENSG00000176595|KBTBD11 ENSG00000178243|C9orf62 ENSG00000179388|EGR3 ENSG00000180229|NP\_001019853.1 ENSG00000181666|HKR1 ENSG00000185818|NAT8L ENSG00000196734|LCE1B ENSG00000204175|GPRIN2 ENSG00000038945|MSR1 ENSG00000089335|ZNF302 ENSG00000104537|ANXA13 ENSG00000106415|GLCC11 ENSG00000130024|PHF10 ENSG00000132639|SNAP25 ENSG00000133121|STARD13 ENSG00000135387|CAPRN1 ENSG00000137770|CTDSP2 ENSG00000139151|PLCZ1 ENSG00000143756|FBXO28 ENSG00000147124|ZNF41 ENSG00000153310|FAM49B ENSG00000162891|IL20 ENSG00000168301|KCTD6 ENSG00000169744|LDB2 ENSG00000173198|CVSLP1R1 ENSG00000174032|SLC25A30 ENSG00000198298|ZNF485

TATGCCG ENSG00000008832|FKBP1A ENSG00000096384|HSP90AB1 ENSG00000100565|C14orf166B ENSG00000101307|SIRPB1 ENSG00000115350|POLE4 ENSG00000120071|KIAA1267 ENSG00000123201|GUCY1B2 ENSG00000125457|MIF4GD ENSG00000127418|FGFR1L ENSG00000136270|TBG4 ENSG00000140688|C16orf58 ENSG00000142009|Q9BSM8\_HUMAN ENSG00000142700|DMRTA2 ENSG00000143761|ARF1 ENSG00000145824|CXCL14 ENSG00000146700|SRCR84D ENSG00000166126|AMN ENSG00000167280|NP\_001036038.1 ENSG00000167371|PRRT2 ENSG00000172732|MUS81 ENSG00000176371|ZSCAN2 ENSG00000176533|GN7 ENSG00000176605|C14orf177 ENSG00000182310|Q6UWG3\_HUMAN ENSG00000183519|NSUN5B ENSG00000196139|AKR1C3 ENSG00000198752|CDC42BPB ENSG00000204345|Q6UXZ3\_HUMAN ENSG00000205531|NAP1L4 ENSG00000205629|LCMT1 ENSG000002069849|ATP1B3 ENSG00000070540|WIP11 ENSG00000081479|LRP2 ENSG00000102038|SMARCA1 ENSG00000111850|C6orf162 ENSG00000130449|ZSWT6 ENSG00000130779|CLIP1 ENSG00000137441|FCFBP2 ENSG00000153037|SRP19 ENSG00000154175|ABT3BP ENSG00000164543|STK17A ENSG00000169251|NMD3 ENSG00000169744|LDB2 ENSG00000170471|KIAA1219 ENSG00000183625|CCR3 ENSG00000196199|MPP8\_HUMAN ENSG00000196409|ZNF658B ENSG00000198416|Z658B\_HUMAN

TATGCCT ENSG00000006042|TMEM98 ENSG00000087250|MT3 ENSG00000104823|ECH1 ENSG00000107796|ACTA2 ENSG00000110906|KCTD10 ENSG00000114999|TTL ENSG00000115594|IL1R1 ENSG00000116990|MYCL1 ENSG00000132635|FAM113A ENSG00000132911|NMUR2 ENSG00000148602|LRR21 ENSG00000160716|CHRN2 ENSG00000163531|NFAT3 ENSG00000173210|ABLIM3 ENSG00000173210|AGPAT7 ENSG00000177098|SCN4B ENSG00000178243|C9orf62 ENSG00000186825|Q580R0-2 ENSG00000187773|C18orf51 ENSG00000187792|ZNF70 ENSG00000198641|SYS1 ENSG00000203867|RBM20 ENSG00000205313|FAM106A ENSG0000006451|RALA ENSG00000035687|ADSS ENSG00000049245|VAMP3 ENSG000001084110|HAL ENSG00000111913|C6orf32 ENSG00000113790|EHADH ENSG00000119392|GLE1L ENSG00000123739|PLA2G12A ENSG00000132326|PER2 ENSG00000138190|EXO6 ENSG00000139364|TMEM132B ENSG00000147533|GOLGA7 ENSG00000150093|ITGB1 ENSG00000152518|ZFP3612 ENSG00000162998|FRZB ENSG00000166206|GABRR3 ENSG00000168283|BM11 ENSG00000171121|KCNMB3 ENSG00000172840|PDP2\_HUMAN ENSG00000178691|SUZ12 ENSG00000185057|TAF9 ENSG00000185630|PBX1 ENSG00000187446|CHP1\_HUMAN ENSG00000196360|NR\_002168.1 ENSG00000196914|ARHGEF12 ENSG00000197619|ZNF615 ENSG00000197937|ZNF347 ENSG00000198121|EDG2

TATGCTA ENSG00000010319|SEMA3G ENSG00000013016|EHD3 ENSG00000054282|SDCCAG8 ENSG00000084693|AGBL5 ENSG00000100211|CBL1 ENSG00000100591|AHS1 ENSG00000101365|IDH3B ENSG00000109111|SUPT6H ENSG00000112578|BYSL ENSG00000118971|CCND2 ENSG00000130038|EFCAB4B ENSG00000143575|HAX1 ENSG00000153179|RASSF3 ENSG00000159224|GIP ENSG00000160867|FGFR4 ENSG00000164920|OSR2 ENSG00000166049|PASP1 ENSG00000167536|DHR513 ENSG00000167604|NP\_640332.1 ENSG00000174837|EMR1 ENSG00000175206|NPPA ENSG00000177947|ODF3 ENSG00000185594|SPATA8 ENSG00000188931|C1orf192 ENSG00000197838|CYP2A13 ENSG00000198077|CYP2A7 ENSG00000004948|CALCR ENSG00000102024|PLS3 ENSG00000113569|NUP155 ENSG00000115267|IFIH1 ENSG00000116455|WDR77 ENSG00000118267|ZNF271 ENSG00000118454|ANKRD13C ENSG00000126821|SGP1 ENSG00000145623|OSMR ENSG00000147145|GPR23 ENSG00000163512|AZ12 ENSG00000163735|CXCL5 ENSG00000164332|UBLCP1 ENSG00000169193|CCDC126 ENSG00000171988|JMJD1C ENSG00000174500|GCET2 ENSG00000182139|Q96FU4\_HUMAN ENSG00000184434|LRR19 ENSG00000185009|AP3M1 ENSG00000187823|ZCCHC16

TATGGAA ENSG00000048342|Q9H8A7\_HUMAN ENSG00000092094|OSGEP ENSG00000100099|HPS4 ENSG00000100888|CHD8 ENSG00000101346|POFUT1 ENSG00000104901|DKKL1 ENSG00000110090|CPT1A ENSG00000115758|ODC1 ENSG00000119614|CHX10 ENSG00000134020|PEBPL\_HUMAN ENSG00000141052|MYOCD ENSG00000142528|ZNF473 ENSG00000151779|NP\_056993.2 ENSG00000154978|NM\_030796.3 ENSG00000158158|CNM4 ENSG00000161896|IHPK3 ENSG00000168884|TNIP2 ENSG00000171786|NHLH1 ENSG00000177025|C19orf18 ENSG00000177791|MYO21 ENSG00000180843|KIAA1618 ENSG00000204423|C9orf33 ENSG00000207943|ITGA8 ENSG00000078747|ITCH ENSG00000081665|ZNF253 ENSG00000103160|HSDL1 ENSG00000104517|EDD1 ENSG00000107968|MAP3K8 ENSG00000115425|PECR ENSG00000115827|C2orf37 ENSG00000115840|SLC25A12 ENSG00000117791|MOSC2 ENSG00000118495|PLAGL1 ENSG00000136783|NIPSNAP3A ENSG00000138386|NAB1 ENSG00000139969|Q9PJJO\_HUMAN ENSG00000140379|BCL2A1 ENSG00000141469|SLC14A1 ENSG00000145692|BHMT ENSG00000151090|THRB ENSG00000151704|KCNJ1 ENSG00000151914|DST ENSG00000156467|UQCRB ENSG00000164049|FBXW12 ENSG00000165060|FXN ENSG00000166173|LARP6 ENSG00000180785|OR51E1 ENSG00000183831|ANKRD45 ENSG00000196371|FUT4 ENSG00000196381|ZNF781 ENSG00000196418|ZNF124 ENSG00000197301|Q6ZQU9\_HUMAN ENSG00000197301|Q6ZQU9\_HUMAN ENSG00000120899|PTK2B ENSG00000125656|CLPP ENSG00000138131|LOXL4 ENSG00000143772|ITPKB ENSG00000085552|IGSF9 ENSG00000089723|OTUB2 ENSG00000099795|NDUFB7 ENSG00000106624|AEBP1 ENSG00000120899|PTK2B ENSG00000125656|CLPP ENSG00000138131|LOXL4 ENSG00000143772|ITPKB ENSG00000160606|TLCD1 ENSG00000163795|ZNF513 ENSG00000164151|Q6ZT40\_HUMAN ENSG00000166189|HPS6 ENSG00000166589|CDH16 ENSG00000167434|CA4 ENSG00000168785|TSPAN5 ENSG00000182866|LCK ENSG00000186470|BTN3A2 ENSG00000188931|C1orf192 ENSG00000197114|ZGPTA ENSG00000198483|ANKRD35 ENSG00000205878|Q6ZSV2\_HUMAN ENSG00000087916|SLC6A14 ENSG00000093009|CDC45L ENSG00000101911|PRPS2 ENSG00000104064|GABPB2 ENSG00000109756|RAPGEF2 ENSG00000112695|COX7A2 ENSG00000112902|SEMA5A ENSG00000127125|PPCS ENSG00000132718|SYT11 ENSG00000151414|NEK7 ENSG00000152969|JAKM1P1 ENSG00000155561|NUP205 ENSG00000157111|TMEM171 ENSG00000166479|TXNDC10 ENSG00000173464|RNASE11 ENSG00000178127|NDUFV2 ENSG00000185222|WBP5 ENSG00000185222|WBP5 ENSG00000185222|WBP5 ENSG00000185222|WBP5

TATGGTC ENSG00000042832|TG ENSG00000072736|NFATC3 ENSG00000084731|KLF3C ENSG00000099203|TMED1 ENSG00000102226|USP11 ENSG00000106636|YKT6 ENSG00000114735|HEMK1 ENSG00000120903|CHRNA2 ENSG00000130690|Q96I54\_HUMAN ENSG00000160767|C1orf2 ENSG00000162599|NFIA ENSG00000164405|UQCQR ENSG00000164742|ADCY1 ENSG00000166002|C11orf75 ENSG00000167083|GNGT2 ENSG00000167646|C19orf51 ENSG00000168884|TNIP2 ENSG00000171345|KRT19 ENSG00000179593|ALOX15B ENSG00000180891|CUEDC1 ENSG00000183172|C22orf32 ENSG00000187605|K0401\_HUMAN ENSG00000188816|HMX2 ENSG00000188828|GLRA4 ENSG00000198691|ABCA4 ENSG00000204474|Q5JQD4\_HUMAN ENSG00000204870|Q6ZW03\_HUMAN ENSG00000091844|RGS17 ENSG00000102974|CTCF ENSG00000106723|SPIN1 ENSG00000113361|CDH6 ENSG00000118513|MYB ENSG00000123119|EFCBP1 ENSG00000124882|EREG ENSG00000130957|FBP2 ENSG00000134365|CFHR4 ENSG00000138600|PSL2\_HUMAN ENSG00000149970|CNKSR2 ENSG00000164118|KIAA1712 ENSG00000164182|NDUFA12L ENSG00000169836|TACR3 ENSG00000178175|ZNF366 ENSG00000187098|MITF ENSG00000206125|Q6DA7\_HUMAN

TATGGTG ENSG00000058085|LAMC2 ENSG00000105989|WNT2 ENSG00000109132|PHOX2B ENSG00000115657|ABCB6 ENSG00000147065|MSN ENSG00000147100|SLC16A2 ENSG00000147206|NXF3 ENSG00000163699|Q9H7Y4\_HUMAN ENSG00000166743|ACSM1 ENSG00000167191|GPRC5B ENSG00000171711|DEFB4 ENSG00000172113|NME6 ENSG00000177257|BD02\_HUMAN ENSG00000177427|SMCR7 ENSG00000180644|PRF1 ENSG00000183621|ZNF438 ENSG00000185065|NP\_776154.2 ENSG00000188869|TMC3 ENSG00000204118|NAP1L6 ENSG00000204765|XR\_017851.1 ENSG00000038295|TLL1 ENSG00000091409|ITGA6 ENSG00000102239|BR3 ENSG00000105132|ZNF550 ENSG00000109689|STM2 ENSG00000110484|SCGB2A2 ENSG00000116406|EDEM3 ENSG00000120256|LRP11 ENSG00000121761|Q9UKJ0-3 ENSG00000122566|HNRPA2B1 ENSG00000131171|SH3BGLR ENSG00000136643|RPS6KC1 ENSG00000143013|LMO4 ENSG00000152661|GJA1 ENSG00000157005|SST ENSG00000163449|TMEM169 ENSG00000163681|SLMAP ENSG00000163877|SNIP1 ENSG00000165650|PDZD8 ENSG00000166527|CLEC4D ENSG00000176974|SHMT1 ENSG00000183918|SH2D1A ENSG00000204272|Q63Z42\_HUMAN

TATGTAA ENSG000000010256|UQCRC1 ENSG00000035862|TIMP2 ENSG00000038532|KIAA0350 ENSG00000102080|TEX28P2 ENSG00000108018|SORCS1 ENSG00000112941|POLS ENSG00000130182|ZSCAN10 ENSG00000132164|SLC6A11 ENSG00000133985|TTC9 ENSG00000136205|TNS3 ENSG00000137460|NP\_203751.2 ENSG00000137817|PARP6 ENSG00000142583|SLC2A5 ENSG00000148840|PPRC1 ENSG00000165716|FAM69B ENSG00000166949|SMAD3 ENSG00000169118|CSNK1G1 ENSG00000173212|C1orf161 ENSG00000173281|PPP1R3B ENSG00000176170|SPHK1 ENSG00000177156|TALD01 ENSG00000178028|DMAP1 ENSG00000182242|TEX28\_HUMAN ENSG00000183579|ZNF3 ENSG00000185254|TEX28P1 ENSG00000186603|HPDL ENSG00000188706|ZDHHC9 ENSG00000198369|SPRED2 ENSG00000205560|CHKK ENSG00000005812|FBXL3 ENSG00000007168|PAFAH1B1 ENSG00000204526|DEPDC1 ENSG00000072319|ALG13 ENSG00000086300|SNX10 ENSG00000090402|SI ENSG00000091039|OSBP18 ENSG00000095587|TLL2 ENSG00000100219|XBP1 ENSG00000102290|PCDH11X ENSG00000103160|HSDL1 ENSG00000106034|NP\_079189.3 ENSG00000115380|EFEMP1 ENSG00000117010|ZNF684 ENSG00000118197|DDX59 ENSG00000124209|RAB22A ENSG00000133703|KRAS ENSG00000133863|TEX15 ENSG00000136144|RCBTB1 ENSG00000138069|RAB1A ENSG00000138246|DNRJC13 ENSG00000139211|AMIGO2 ENSG00000139826|ABHD13 ENSG00000146039|SLC17A4 ENSG00000151917|C6orf65 ENSG00000153790|C7orf31 ENSG00000154359|LONRF1 ENSG00000162616|DNAJB4 ENSG00000164040|PAGRC2 ENSG00000175511|EMB ENSG00000171202|TMEM126A ENSG00000178669|DMXL1 ENSG00000174799|CEP135



TATTACT ENSG00000087589|C2orf32 ENSG00000101350|KIF3B ENSG00000119699|TGFB3 ENSG00000130612|Q6ZSU1\_HUMAN ENSG00000131149|KIAA0182 ENSG00000133937|GSC ENSG00000134531|EMP1 ENSG00000146755|TRIM50  
ENSG00000158055|GRHL3 ENSG00000164038|NP\_849155.2 ENSG00000166407|LMO1 ENSG00000168631|DPCR1 ENSG00000169231|THBS3 ENSG00000170445|HARS ENSG00000173867|MRPL46 ENSG00000175197|DDIT3  
ENSG00000177202|SPACA4 ENSG00000185338|SOC1 ENSG00000185475|NP\_955369.1 ENSG00000197175|Q8TBR1\_HUMAN ENSG00000204344|STK19 ENSG00000206163|KRIT1 ENSG00000266583|ISOC1 ENSG00000284453|SLCO1A2  
ENSG00000100219|XBP1 ENSG00000102290|PCDH11X ENSG00000106034|NP\_079189.3 ENSG00000113595|TRIM23 ENSG00000115170|ACVR1 ENSG00000123575|CXorf39 ENSG00000126953|TIMM8A ENSG00000139329|LUM  
ENSG00000144366|GULP1 ENSG00000147488|ST18 ENSG00000147853|AK3 ENSG00000150907|FOXO1A ENSG00000152822|GRM1 ENSG00000163110|PDLIM5 ENSG00000165476|REEP3 ENSG00000165832|TRUB1  
ENSG00000166801|FAM111A ENSG00000169032|MAP2K1 ENSG00000169248|CXCL11 ENSG00000171126|KCNGB3 ENSG00000171766|GATM ENSG00000174808|BTC ENSG00000178538|CA8 ENSG00000178965|Clorf173  
ENSG00000186714|CCDC73 ENSG00000205299|CKLF  
TATTAGG ENSG00000011007|TCEB3 ENSG00000066382|MPPE2 ENSG00000081277|PKP1 ENSG00000099204|ABLIM1 ENSG00000102100|SLC35A2 ENSG00000117242|DDOST ENSG00000159884|CCDC107 ENSG00000166426|CRABP1  
ENSG00000167178|ISLR2 ENSG00000167815|PRDX2 ENSG00000181763|APR2\_HUMAN ENSG00000198641|SYS1 ENSG00000097046|CDC7 ENSG00000109586|GALNT7 ENSG00000110075|SAPS3 ENSG00000127954|Q8WWB0\_HUMAN  
ENSG00000128641|MYO1B ENSG00000137573|SULF1 ENSG00000151012|SLC7A11 ENSG00000165195|PIGA ENSG00000179979|CRIPAK ENSG00000180398|MCFD2 ENSG00000186300|ZNF555 ENSG00000196963|PCDHB16  
ENSG00000198767|YY2 ENSG00000203727|SAMD5 ENSG00000205808|PPAPDC2  
TATTATC ENSG00000025800|KPNA6 ENSG00000065357|DGKA ENSG00000076928|ARHGEF1 ENSG00000108474|PIGL ENSG00000120318|CENTD3 ENSG00000121073|SLC35B1 ENSG00000131149|KIAA0182 ENSG00000137198|GMPR  
ENSG00000169641|LUZP1 ENSG00000175416|CLTB ENSG00000185130|HIST1H2BL ENSG00000188396|NP\_001013654.1 ENSG00000196378|Q9BSZ0\_HUMAN ENSG00000196979|NP\_997392.1 ENSG00000198400|NTRK1 ENSG00000198881|ASB12  
ENSG00000204091|Q3Y452\_HUMAN ENSG00000206062|Q4G0T4\_HUMAN ENSG00000038002|AGA ENSG000000072571|HMMR ENSG00000102271|KLHL4 ENSG00000106049|HIBADH ENSG00000122008|POLK ENSG00000122435|CCDC76  
ENSG00000131003|RBM2F ENSG00000136160|EDNRB ENSG00000138449|SLC40A1 ENSG00000143119|CD53 ENSG00000148516|ZEB1 ENSG00000152620|C5orf33 ENSG00000157181|Clorf27 ENSG00000157214|STEAP2  
ENSG00000157470|FAM81A ENSG00000162699|Q96RF1\_HUMAN ENSG00000165169|DYNLT3 ENSG00000165669|C10orf84 ENSG00000168769|KIAA1546 ENSG00000170248|PDCD6IP ENSG00000177343|PBOV1 ENSG00000179097|HTRIF  
ENSG00000183067|IGSF5 ENSG00000183324|NP\_001035826.1 ENSG00000189184|PCDH18 ENSG00000189290|XR\_018254.1 ENSG00000197851|NP\_997386.1 ENSG00000198477|SUHW2  
ENSG0000013455|ARPC1A ENSG00000032389|TSSC1 ENSG00000061936|SFRS8 ENSG00000065491|TBC1D22B ENSG00000072840|EVC ENSG00000116990|MYCL1 ENSG00000123136|DDX39 ENSG00000129543|FLJ16369  
ENSG00000130038|EFCAB4B ENSG00000130768|SMPDL3B ENSG00000136378|ADAMTS7 ENSG00000144031|ANKRD53 ENSG00000146021|KLHL3 ENSG00000166333|ILK ENSG00000169919|GUSB ENSG00000170379|NP\_775949.1  
ENSG00000170445|HARS ENSG00000175287|PHYHD1 ENSG00000181754|AMIGO1 ENSG00000188869|TMC3 ENSG00000198171|C2orf116 ENSG00000204516|MICB ENSG00000204540|PSORS1C1 ENSG00000206062|Q4G0T4\_HUMAN  
ENSG00000048392|RRM2B ENSG00000086065|CHMP5 ENSG00000102391|RPL36A ENSG00000104497|SNX16 ENSG00000106052|TAX1BP1 ENSG00000109171|SLAIN2 ENSG00000111816|FRK ENSG00000114200|BCHE  
ENSG00000115232|TPGA4 ENSG00000115363|TMEM166 ENSG00000120688|WBP4 ENSG00000122912|SLC25A16 ENSG00000124789|NUP153 ENSG00000125703|ATG4C ENSG00000134056|MRPS36 ENSG00000135698|MPHOSPH6  
ENSG00000144306|SCRN3 ENSG00000147573|TRIM55 ENSG00000149313|AASDHPPT ENSG00000155100|OTUD6B ENSG00000155592|ZKSCAN2 ENSG00000163104|SMARCAD1 ENSG00000164164|OTUD4 ENSG00000164604|GPR85  
ENSG00000164751|PXMP3 ENSG00000166532|FAM80B ENSG00000167332|OR51E2 ENSG00000171657|GPR82 ENSG00000180316|PNPLA1 ENSG00000184984|CHRM5 ENSG00000186522|SEPT10 ENSG00000196447|XR\_017870.1  
ENSG00000198815|FOXJ3  
TATTCAA ENSG00000007306|CEACAM7 ENSG00000054523|KIF1B ENSG00000063438|AHRH ENSG00000070601|FRMPD1 ENSG00000103222|ABCC1 ENSG00000105376|ICAM5 ENSG00000110244|APOA4 ENSG00000110328|GALNTL4  
ENSG00000129538|RNASE1 ENSG00000130429|ARPC1B ENSG00000136193|SCRN1 ENSG00000152192|POU4F1 ENSG00000156030|C14orf43 ENSG00000163219|ARHGAP25 ENSG00000165424|C10orf56 ENSG00000166091|CMTM5  
ENSG00000168575|SLC20A2 ENSG00000171401|KRT13 ENSG00000177352|CCDC71 ENSG00000177984|NP\_976222.1 ENSG00000184516|Q8IVR1\_HUMAN ENSG00000185100|ADSSL1 ENSG00000004799|PKD4 ENSG00000016082|ISL1  
ENSG000000088035|ALG6 ENSG00000091844|RGS17 ENSG00000111615|KRR1 ENSG00000118473|SGIP1 ENSG00000121481|RNF2 ENSG00000130348|QRSL1 ENSG00000130363|RSHL2 ENSG00000134001|EIF2S1  
ENSG00000134757|DSG3 ENSG00000136404|TM6SF1 ENSG00000136886|PFP37 ENSG00000148688|RPP30 ENSG00000151025|GPR158 ENSG00000151923|TIAL1 ENSG00000155629|PIK3AP1 ENSG00000155893|ACPL2  
ENSG00000155906|RMND1 ENSG00000158122|C9orf21 ENSG00000163428|LRRCS8 ENSG00000164244|PRRC1 ENSG00000167384|ZNF180 ENSG00000170584|NUDCD2 ENSG00000176049|JAKMIP2 ENSG00000178460|C8orf45  
ENSG00000179399|GPC5 ENSG00000188313|PLSCR1 ENSG00000197223|NP\_006324.1 ENSG00000197359|C15orf34  
ENSG00000063978|RNF4 ENSG00000109079|TNFAIP1 ENSG00000117394|SLC2A1 ENSG00000121274|PAPD5 ENSG00000144580|RQCD1 ENSG00000148297|SURF5 ENSG00000159792|PSKH1 ENSG00000171724|K1576\_HUMAN  
ENSG00000180385|Q8NAP4\_HUMAN ENSG00000182795|C1orf116 ENSG00000183666|LOC72841 ENSG00000184164|CRELD2 ENSG00000185928|C16orf53 ENSG00000186577|C6orf1 ENSG00000198237|GUSL1\_HUMAN ENSG00000066697|TMEFF1  
ENSG00000067704|IARS2 ENSG00000108064|TFAM ENSG00000109536|FRG1 ENSG00000111011|RSRC2 ENSG00000115145|STAM2 ENSG00000134070|IRAK2 ENSG00000134709|HOOK1 ENSG00000137558|P115  
ENSG00000145439|CBR4 ENSG00000145687|SSBP2 ENSG00000150676|CCDC83 ENSG00000151806|GUF1 ENSG00000152463|OLAH ENSG00000153933|DGKE ENSG00000156218|ADAMTSL3 ENSG00000157107|FCHO2  
ENSG00000160654|CD3G ENSG00000162521|RBBP4 ENSG00000167193|CRK ENSG00000168348|INSM2 ENSG00000170381|SEMA3E ENSG00000186628|FSD2 ENSG00000196233|LCOR ENSG00000197782|ZNF780A  
ENSG00000198795|ZNF521  
TATTCCG ENSG00000010361|FUZ ENSG00000018280|SLC11A1 ENSG00000067191|CACNB1 ENSG00000070614|NDST1 ENSG00000100077|ADRBK2 ENSG00000103168|TAF1C ENSG00000103811|CTSH ENSG00000105997|HOXA3  
ENSG00000109705|BAPX1 ENSG00000111218|PRMT8 ENSG00000125084|WNT1 ENSG00000130956|HABP4 ENSG00000137834|SMAD6 ENSG00000140522|RLBP1 ENSG00000140939|NOL3 ENSG00000142700|DMRTA2  
ENSG00000161835|GRASP ENSG00000166569|CPLX4 ENSG00000167930|ITFG3 ENSG00000170161|Q5VV11\_HUMAN ENSG00000172016|REG3A ENSG00000173404|INSM1 ENSG00000185554|NXF2 ENSG00000185668|POU3F1  
ENSG00000185945|NXF2\_HUMAN ENSG00000196970|NXF4 ENSG00000198844|ARHGEF15 ENSG00000204168|Q6ZR1\_HUMAN ENSG0000023608|SNAPC1 ENSG00000101608|MLRM\_HUMAN ENSG00000108381|ASPA ENSG00000122707|RECK  
ENSG00000134444|KIAA1468 ENSG00000134757|DSG3 ENSG00000146166|GLULD1 ENSG00000150076|C10orf68 ENSG00000151792|CTS0 ENSG00000160062|ZBTB8 ENSG00000161405|IKZF3 ENSG00000163646|CLRN1  
ENSG00000172900|XR\_017872.1 ENSG00000177182|NP\_775790.1 ENSG00000178351|Q8N345\_HUMAN ENSG00000179774|ATO7 ENSG00000182004|SNRPE ENSG00000183960|KCNH8 ENSG00000187919|GSTA1 ENSG00000198121|EDG2  
ENSG00000211451|GNRHR2  
TATTCCG ENSG000000087903|RFK2 ENSG00000103148|C16orf35 ENSG00000103966|EHD4 ENSG00000104228|TRIM35 ENSG00000104899|AMH ENSG00000106089|STX1A ENSG00000110171|TRIM3 ENSG00000113722|CDX1  
ENSG00000125820|NKX2-2 ENSG00000132205|EMILIN2 ENSG00000134684|YARS ENSG00000137747|TMPRSS13 ENSG00000139641|FAM62A ENSG00000157152|SYN2 ENSG00000160803|UBQLN4 ENSG00000167778|SPRYD3  
ENSG00000167874|TMEM88 ENSG00000170049|KCNAB3 ENSG00000177468|ILG1G3 ENSG00000182612|TSPAN10 ENSG00000183760|NP\_001004318.1 ENSG000002004059|NP\_001013718.1 ENSG00000204241|Q6ZUW\_HUMAN ENSG00000204275|HLA-DQB2  
ENSG00000204599|TRIM39 ENSG00000205711|Q6ZV92\_HUMAN ENSG00000006704|GTF2IRD1 ENSG00000068697|LAPTM4A ENSG00000100784|RPS6KA5 ENSG00000105186|ANKRD27 ENSG00000106819|ASPN ENSG00000106823|ECM2  
ENSG00000113597|NP\_079217.1 ENSG000001117475|BLZF1 ENSG00000123595|RAB9A ENSG00000144136|SLC20A1 ENSG00000144820|GPR128 ENSG00000154822|PLCL2 ENSG00000158560|DYNC1I1 ENSG00000162909|CAPN2  
ENSG00000166192|SENP8 ENSG00000169239|CA5B ENSG00000172671|ANUBL1 ENSG00000176201|GBA3 ENSG00000181374|CCL13 ENSG00000186231|KLHL32 ENSG00000196214|ZNF766 ENSG00000196268|ZNF493  
ENSG00000205981|DNAJC19  
TATTCTA ENSG00000005961|ITGA2B ENSG00000083454|P2RX5 ENSG00000095015|MAP3K1 ENSG00000108950|FAM20A ENSG00000110092|CCND1 ENSG00000112023|FOLR3 ENSG00000116032|GRIN3B ENSG00000116237|ICMT  
ENSG00000117360|PPF3 ENSG00000123154|MORGL1\_HUMAN ENSG00000127080|IPPK ENSG00000127527|EPS15L1 ENSG00000131236|CAP1 ENSG00000133466|C1QTNF6 ENSG00000135824|RGS8 ENSG00000136378|ADAMTS7  
ENSG00000162666|KIAA0040 ENSG00000165282|PIGO ENSG00000166224|SGPL1 ENSG00000169919|GUSB ENSG00000174640|SLCO2A1 ENSG00000180999|C1orf105 ENSG00000186638|C9orf48 ENSG00000204323|Q7LRC9\_HUMAN  
ENSG00000205434|Q6ZU34\_HUMAN ENSG00000205653|Q6ZUP2\_HUMAN ENSG0000005471|ABCBA4 ENSG00000048392|RRM2B ENSG00000049130|KITLG ENSG00000067533|RRP15 ENSG00000077327|SPAG6 ENSG00000086289|EPDR1  
ENSG00000099389|C2orf191 ENSG00000101574|METTL4 ENSG00000102021|LUZP4 ENSG00000111554|MDM1 ENSG00000113013|HSPA9 ENSG00000113851|CRBN ENSG00000115165|PSCD8P ENSG00000133872|TMEM66  
ENSG00000135678|CPM ENSG00000140057|AK7 ENSG00000144635|DYNC1LI1 ENSG00000150054|PPP7 ENSG00000155304|STCH ENSG00000162614|NEXN ENSG00000163512|AZL2 ENSG00000164089|AGXT2L1  
ENSG00000165525|SDCCAG1 ENSG00000166803|KIAA0101 ENSG00000170584|NUDCD2 ENSG00000175065|DSG4 ENSG00000178403|NEUROG2 ENSG00000183475|ASB7 ENSG00000186334|SLC36A3 ENSG00000197121|PGAP1\_HUMAN  
ENSG00000197846|HIST1H2BF ENSG00000197888|UGT2B17 ENSG00000198339|HIST1H4I ENSG00000198757|Q96NB8\_HUMAN ENSG00000204370|SDHD  
TATTCTG ENSG00000112822|CALCOCO1 ENSG0000015676|NUDCD3 ENSG00000068354|TBC1D25 ENSG00000087152|ATXN7L3 ENSG00000092853|CLSPN ENSG00000102096|PIM2 ENSG00000105549|THEG  
ENSG00000110446|SLC15A3 ENSG00000111877|MCM9 ENSG00000132286|FXC1 ENSG00000137074|APTJ ENSG00000143093|FAMA0A ENSG00000143418|LASS2 ENSG00000148411|BTBD14A ENSG00000154764|WNT7A  
ENSG00000155252|C10orf65 ENSG00000166664|CHRFAM7A ENSG00000168906|MAT2A ENSG00000173212|Clorf161 ENSG00000174697|LEP ENSG00000174705|SH3PXD2B ENSG00000179240|Q3ZCU0\_HUMAN ENSG00000179766|Q4G129\_HUMAN  
ENSG00000180210|F2 ENSG00000189129|PLAC9 ENSG00000196498|GSTK1 ENSG00000197448|COL4A6 ENSG00000197565|BCLAF1 ENSG00000029363|TCLAF1 ENSG00000055732|MCOLN1 ENSG00000083312|TNPO1  
ENSG00000085365|SCAMP1 ENSG00000096696|DSP ENSG00000100426|ZBED4 ENSG00000101138|CSTF1 ENSG00000108423|TUBD1 ENSG00000110315|RNF141 ENSG00000110693|SOX6 ENSG00000114125|RNF7  
ENSG00000124523|SIRT5 ENSG00000128250|RFPL1 ENSG00000128791|TWSG1 ENSG00000135750|KCNK1 ENSG00000137955|RABGGTB ENSG00000153310|FAM49B ENSG00000153989|NUS1 ENSG00000163602|RYBP  
ENSG00000163710|PCOLCE2 ENSG00000168454|TXNDC2 ENSG00000170325|PRDM10 ENSG00000173275|ZNF449 ENSG00000182977|Q9UHT0\_HUMAN ENSG00000186871|NP\_001009954.1 ENSG00000187772|LIN28B ENSG00000196565|HBE1  
ENSG00000196586|MYO6 ENSG00000197054|ZNF763 ENSG00000198642|KLHL9  
TATTCTT ENSG00000010282|HHATL ENSG00000012779|ALOX5 ENSG00000072858|SIDT1 ENSG00000081377|CDC14C ENSG00000087086|FTL ENSG00000100034|PPM1F ENSG00000101193|C2orf11 ENSG00000103227|TMEM112  
ENSG00000117016|RIMS3 ENSG00000117682|DHDDS ENSG00000125651|GDTF21 ENSG00000132142|ACACA ENSG00000135605|TEC ENSG00000136935|GOLGA1 ENSG00000141994|DUS3L ENSG00000143375|CGN  
ENSG00000159247|LOC643224 ENSG00000175003|SLC22A1 ENSG00000176749|CDK5R1 ENSG00000176887|SOX11 ENSG00000181867|FTMT ENSG00000183633|C14orf132 ENSG00000184314|Q9H9T1\_HUMAN ENSG00000196767|POU3F4  
ENSG00000198901|PRC1 ENSG00000007952|NOX1 ENSG00000054796|SPE1 ENSG00000058673|ZC3H11A ENSG00000102024|PLS3 ENSG00000111834|RSHL3 ENSG00000113211|PCDHB6  
ENSG00000113240|CLK4 ENSG00000114978|MOBK1B ENSG00000120251|GRIA2 ENSG00000121351|IAPP ENSG00000131773|KHDRBS3 ENSG00000134389|CFHR5 ENSG00000136480|POLG2 ENSG00000145833|DDX46  
ENSG00000147614|ATP6V0D2 ENSG00000149761|NUDT22 ENSG00000151414|NEK7 ENSG00000151876|FBXO4 ENSG00000152661|GJA1 ENSG00000160961|ZNF333 ENSG00000162645|GBP7  
ENSG00000163749|NP\_001036249.1 ENSG00000164219|PGGT1B ENSG00000167098|SPAG4L ENSG00000174780|SRP72 ENSG00000180596|HIST1H2BC ENSG00000182070|OR52A1 ENSG00000182512|GLRX5 ENSG00000184647|NP\_940866.2  
ENSG00000189127|NP\_001004441.1 ENSG00000196352|CD55 ENSG00000196447|XR\_017870.1 ENSG00000197734|C14orf178 ENSG00000197776|KLHLDC1 ENSG00000198521|ZNF43 ENSG00000204937|Q6ZSS0\_HUMAN  
TATTGAG ENSG00000062582|MRPS24 ENSG00000076201|PTPN23 ENSG00000119599|WDR21A ENSG00000159486|KCNK2 ENSG00000159110|IFNAR2 ENSG00000160606|TLCD1 ENSG00000165462|PHOX2A  
ENSG00000170161|Q5VV11\_HUMAN ENSG00000171223|JUNB ENSG00000174015|SPERT ENSG00000176887|SOX11 ENSG00000184659|FOXO4L4 ENSG00000185522|C1orf35 ENSG00000185619|PCGF3 ENSG00000185928|C16orf53  
ENSG00000197471|SPN ENSG00000204779|FOXO4L5 ENSG00000204828|FX4L4\_HUMAN ENSG00000205742|Q6ZTR4\_HUMAN ENSG00000206528|Q6ZSMO\_HUMAN ENSG00000009694|OD21 ENSG00000010270|STAR3NL ENSG00000101843|PSMD10  
ENSG00000105497|ZNF175 ENSG00000112902|SEMA5A ENSG00000113494|PRLR ENSG00000116497|S100PBP ENSG00000116741|RGS2 ENSG00000117906|PCN2 ENSG000001123091|RNF11 ENSG00000133858|CCDC131  
ENSG00000137996|RTCD1 ENSG00000143420|ENSA ENSG00000151320|AKAP6 ENSG00000154265|ABCA5 ENSG00000155330|NP\_001001436.1 ENSG00000163607|GTBPB8 ENSG00000164252|AGF1 ENSG00000165209|STRBP  
ENSG00000165621|OXGR1 ENSG00000169019|COMMD8 ENSG00000170017|ALCAM ENSG00000171951|SCG2 ENSG00000173930|SLCO4C1 ENSG00000178127|NDUFV2 ENSG00000178966|RMI1 ENSG00000179008|C14orf39  
ENSG00000184182|UBE2F ENSG00000185020|Q4VXF0\_HUMAN ENSG00000185880|TRIM69 ENSG00000186814|Q86W11\_HUMAN ENSG00000197323|TRIM33 ENSG00000197776|KLHDC1 ENSG00000197959|DNM3 ENSG00000198146|ZNF770  
ENSG00000198642|KLHL9  
TATTGCA ENSG00000052850|ALX4 ENSG00000058085|LAMC2 ENSG00000074054|CLASP1 ENSG00000089737|DDX24 ENSG00000100320|RBM9 ENSG00000104967|NOVA2 ENSG00000128596|NP\_073579.3 ENSG00000129543|FLJ16369  
ENSG00000131738|KRT33B ENSG00000138092|CENPO ENSG00000140478|NM\_018652.4 ENSG00000162444|RBP7 ENSG00000167202|TBC1D2B ENSG00000167311|ART5 ENSG00000171346|KRT15 ENSG00000182968|SOX1  
ENSG00000188660|C21orf125 ENSG00000036257|CUL3 ENSG00000087502|ERGI2 ENSG00000089123|TASP1 ENSG00000100784|RPS6KA5 ENSG00000102053|ZC3H12B ENSG00000102781|KATNAL1 ENSG00000107372|ZFAND5  
ENSG00000110768|GTF2H1 ENSG00000118946|P8BA1 ENSG00000121749|TBC1D15 ENSG00000135298|BAI3 ENSG00000136758|YME1L1 ENSG00000138592|USP8 ENSG00000141452|C18orf8 ENSG00000144354|CDCA7  
ENSG00000144566|RAB5A ENSG00000146416|AIG1 ENSG00000151025|GPR158 ENSG00000172260|NEGR1 ENSG00000172671|ANUBL1 ENSG00000188674|LOC389073 ENSG00000196917|GPR81 ENSG00000205111|CDKL4  
ENSG00000205874|Q6SA06\_HUMAN  
TATTGCC ENSG000000011677|GABRA3 ENSG00000070404|FSTL3 ENSG00000075388|FGF4 ENSG00000105486|LIG1 ENSG00000106144|CASP2 ENSG00000125746|EML2 ENSG00000131558|EXOC4 ENSG00000137310|TCF19

ENSG00000155926|SLA ENSG00000162413|KLHL21 ENSG00000166165|CKE ENSG00000172336|POP7 ENSG00000176595|KBTBD11 ENSG00000182054|IDH2 ENSG00000183248|Q9H6K5\_HUMAN ENSG00000197461|PDGFA  
ENSG00000204227|RING1 ENSG00000048392|RRM2B ENSG00000069493|CLEC2D ENSG000000085832|EFS15 ENSG00000091583|APOH ENSG00000096063|SRPK1 ENSG00000108960|MMD ENSG00000113441|LNPEP  
ENSG00000121406|ZNF549 ENSG00000128513|POT1 ENSG00000128590|DNAJB9 ENSG00000138674|SEC31A ENSG00000140367|UBE2Q2 ENSG00000145740|SLC30A5 ENSG00000150722|PPP1R1C ENSG00000152969|JAKMIP1  
ENSG00000153234|NR4A2 ENSG00000153814|JAZF1 ENSG00000126140|ADAMTS3 ENSG00000164123|NP\_689756.2 ENSG00000164294|NP\_001008398.1 ENSG00000167553|TUBA1C ENSG00000174579|MSL2L1 ENSG00000178184|PARD6G  
ENSG00000186205|MOSC1 ENSG00000206029|Q0P633\_HUMAN  
TATTGCT ENSG0000010327|STAB1 ENSG00000066382|MPPE22 ENSG00000073849|ST6GAL1 ENSG00000107263|RAPGEF1 ENSG00000108518|PFN1 ENSG00000114999|TTL ENSG00000123374|CDK2 ENSG00000144468|RHBD1  
ENSG00000173372|C1QA ENSG00000184787|UBE2G2 ENSG00000196507|TCEAL3 ENSG00000198437|Q8NOT2\_HUMAN ENSG00000090104|RGS1 ENSG00000092969|TGFβ2 ENSG00000102468|HTR2A ENSG00000109046|WSB1  
ENSG00000113838|CRYGS ENSG00000116473|RAP1A ENSG00000117519|CNN3 ENSG00000119844|AFTPH ENSG00000132498|ANKRD20A1 ENSG00000134982|APC ENSG00000136100|VPS36 ENSG00000136754|ABI1  
ENSG00000136810|TXN ENSG00000138180|CEP55 ENSG00000140015|CNNH5 ENSG00000146281|ACY1L2 ENSG00000147050|UTX ENSG00000149124|GLYAT ENSG00000151718|WWC2 ENSG00000153253|SCN3A  
ENSG00000155130|MARCKS ENSG00000156650|MYST4 ENSG00000163950|SLBP ENSG00000165899|C12orf64 ENSG00000168032|ENTP23 ENSG00000168152|THAP9 ENSG00000168280|KIF5C ENSG00000169019|COMMD8  
ENSG00000169504|CLIC4 ENSG00000177576|NP\_001030177.1 ENSG00000183148|ANKRD20A2 ENSG00000188820|FAM26F ENSG00000196774|ANKRD20A3 ENSG00000198597|ZNF536  
TATTGGA ENSG00000072501|SMC1A ENSG00000095970|TREM2 ENSG00000108292|MLLT6 ENSG00000111602|TIMELESS ENSG00000113273|ARSB ENSG00000132846|ZBED3 ENSG00000141504|SAT2 ENSG00000142082|SIRT3  
ENSG00000148832|PAOX ENSG00000151474|FRMD4A ENSG00000153956|CACNA2D1 ENSG00000157881|PANK4 ENSG00000159189|C1QC ENSG00000162772|ATF3 ENSG00000172927|MYEOV ENSG00000197942|Q6ZSS2\_HUMAN  
ENSG00000204820|Q96NT9\_HUMAN ENSG00000008196|TFAP2B ENSG00000078070|MCCC1 ENSG00000102309|PIN4 ENSG00000113328|CCNG1 ENSG00000115295|CLIP4 ENSG00000116688|MFN2 ENSG00000117174|C1orf181  
ENSG00000127311|HELB ENSG00000134375|TIMM17A ENSG00000135999|EPC2 ENSG00000141433|ADCYAP1 ENSG00000142864|SERBP1 ENSG00000146757|ZNF92 ENSG00000146833|TRIM4 ENSG00000153132|CLGN  
ENSG00000153936|HS2ST1 ENSG00000156650|MYST4 ENSG00000158411|MITD1 ENSG00000162928|PEX13 ENSG00000167785|ZNF558 ENSG00000169495|HTRA4 ENSG00000171150|SOCS5 ENSG00000173041|ZNF680  
ENSG00000174792|C4orf26 ENSG00000178935|ZNF552 ENSG00000180398|MCFD2 ENSG00000184258|CDR1 ENSG00000186020|ZNF529 ENSG00000186416|NKRF ENSG00000196268|ZNF493  
TATTGGC ENSG00000048342|Q9H8A7\_HUMAN ENSG00000090857|NP\_060460.3 ENSG00000111331|OAS3 ENSG00000135314|C6orf148 ENSG00000137100|DCTN3 ENSG00000141540|TTYH2 ENSG00000141741|C17orf37 ENSG00000143198|MGST3  
ENSG00000155367|PBM1J ENSG00000164008|C1orf50 ENSG00000167112|TRUB2 ENSG00000169991|Q5TF58\_HUMAN ENSG00000171224|C10orf35 ENSG00000177854|TMEM187 ENSG00000178947|Q86V52\_HUMAN ENSG00000180205|WFDC9  
ENSG00000180697|C3orf22 ENSG00000186442|KRT3 ENSG00000204248|COL11A2 ENSG00000205209|NP\_001020762.1 ENSG00000081800|SLC13A1 ENSG00000101782|RIOK3 ENSG00000109182|NP\_079363.1 ENSG00000111339|ART4  
ENSG00000118733|OLFM3 ENSG00000123570|RAB9B ENSG00000125304|TM9SF2 ENSG00000125868|DSTN ENSG00000128617|OPN1SW ENSG00000135847|ACBD6 ENSG00000139173|TMEM117 ENSG00000152944|SURB7  
ENSG00000155130|MARCKS ENSG00000162980|ARL5A ENSG00000167193|CRK ENSG00000182333|LIPF ENSG00000188419|CHM ENSG00000198300|PEG3  
TATTGGT ENSG00000102445|C13orf18 ENSG00000105509|HAS1 ENSG00000110917|KIAA0152 ENSG00000112715|VEGFA ENSG00000115112|TFCP2L1 ENSG00000118971|CCND2 ENSG00000119402|FBXW2 ENSG00000119682|KIAA0317  
ENSG00000131914|LIN28 ENSG00000133065|SLC41A1 ENSG00000136463|CCDC44 ENSG00000139546|TARBP2 ENSG00000143512|KIAA1822L ENSG00000158445|KCNB1 ENSG00000160650|Q96HZ0\_HUMAN ENSG00000161381|PLXDC1  
ENSG00000164674|KIF23 ENSG00000170423|ARRH7 ENSG00000183963|SMTX ENSG00000187122|ARRGAP19 ENSG00000205631|Q9H7S7\_HUMAN ENSG00000160822|ISL1 ENSG00000077147|TM9SF3 ENSG00000092531|SNAP23  
ENSG00000103018|CYB5B ENSG00000106809|OGN ENSG00000107968|MAP3K8 ENSG00000109814|UGDH ENSG00000135541|AH11 ENSG00000136206|WBSR19 ENSG00000139211|AMIGO2 ENSG00000140945|CDH13  
ENSG00000143756|FBXO28 ENSG00000152894|PTPRK ENSG00000162694|EXTL2 ENSG00000163376|KBTBD8 ENSG00000166404|GPR85 ENSG00000175175|PBM21 ENSG00000185158|LRR37B ENSG00000185742|NP\_997528.1  
ENSG00000186645|NP\_001027561.1 ENSG00000198305|NP\_001027561.1 ENSG00000205505|NP\_001027561.1 ENSG00000205506|NP\_001027561.1 ENSG00000205508|NP\_001027561.1 ENSG00000205509|NP\_001027561.1 ENSG00000205580|NP\_001027561.1  
TATTGTA ENSG000000047644|WWC3 ENSG00000068024|HDAC4 ENSG00000076984|O14733-2 ENSG00000080875|CTTN ENSG00000106070|GRB10 ENSG00000106290|TAF6 ENSG00000113739|STC2 ENSG00000123901|GPR83  
ENSG00000127528|KLF2 ENSG00000142186|SCYL1 ENSG00000143333|RGS16 ENSG00000146535|GNA12 ENSG00000157103|SLC6A1 ENSG00000162981|FAM84A ENSG00000170983|C8orf14 ENSG00000187223|LCE2D  
ENSG00000187678|SPRY4 ENSG00000198668|CALM1 ENSG00000204103|MAFB ENSG00000047365|CENTD1 ENSG00000073711|PPP2R3A ENSG00000085382|HACE1 ENSG00000099246|RAB18 ENSG00000100811|YY1  
ENSG00000105835|PBEF1 ENSG00000107372|ZFAND5 ENSG00000110075|SAP3 ENSG00000119965|C10orf88 ENSG00000121989|ACVR2A ENSG00000127870|RNF6 ENSG00000133739|LRRCC1 ENSG00000134758|RNF138  
ENSG00000135241|NPPLA10P ENSG00000135655|USP15 ENSG00000136158|SPRY2 ENSG00000136929|HEMGN ENSG00000138379|GDF8 ENSG00000144935|TRPC1 ENSG00000145817|YIPF5  
ENSG00000148572|NRBF2 ENSG00000151611|MMAA ENSG00000155313|USP25 ENSG00000156469|MTERFD1 ENSG00000157869|RAB28 ENSG00000162669|NP\_001017975.3 ENSG00000163554|SPTA1 ENSG00000164122|ASB5  
ENSG00000164663|USP49 ENSG00000165934|CPSF2 ENSG00000169193|CCDC126 ENSG00000170180|GYPA ENSG00000184388|RBM32B ENSG00000188419|CHM ENSG00000196323|ZBTB44 ENSG00000198586|TLK1  
ENSG00000198934|MAGEE1 ENSG00000204138|PHACTR4 ENSG00000204406|MBD5 ENSG00000204977|TRIM13  
TATTGTC ENSG00000088812|ATRNL ENSG00000100445|C14orf124 ENSG00000102921|N4BP1\_HUMAN ENSG00000103184|SEC14L5 ENSG00000117682|DHDDS ENSG00000135451|TROAP ENSG00000137106|GRHR ENSG00000140398|NEIL1  
ENSG00000140527|NP\_064597.1 ENSG00000144677|CTDPSL ENSG00000159111|MRPL10 ENSG00000163207|IVL ENSG00000168268|NT5DC2 ENSG00000169548|SUHW1 ENSG00000179115|FARSA ENSG00000183873|SCN5A  
ENSG00000197272|IL27 ENSG00000001626|CFTR ENSG00000007908|SELE ENSG00000008282|SYPL1 ENSG00000072849|DERL2 ENSG00000079387|SENP1 ENSG00000102010|BMX ENSG00000102935|ZNF423  
ENSG00000104356|POP1 ENSG00000107758|PPP3CB ENSG00000108506|INTS2 ENSG00000111875|ASF1A ENSG00000111912|NCOA7 ENSG00000112558|SKP1A ENSG00000114166|PCAF ENSG00000115271|GCA  
ENSG00000116285|ERRFI1 ENSG00000116729|GPR177 ENSG00000118260|CREB1 ENSG00000120992|LYPLA1 ENSG00000121067|SPOP ENSG00000138641|HERC3 ENSG00000139168|ZCRB1  
ENSG00000143514|TP53BP2 ENSG00000143756|FBXO28 ENSG00000146151|HMGCLL1 ENSG00000148950|IMMP1L ENSG00000153820|NP\_085126.1 ENSG00000163492|NP\_775919.2 ENSG00000163697|APBB2 ENSG00000166845|C18orf54  
ENSG00000171867|PRNP ENSG00000172840|PDP2\_HUMAN ENSG00000174808|BTC ENSG00000178403|NEUROG2 ENSG00000185272|RBM11 ENSG00000186105|Q7Z2Q7\_HUMAN ENSG00000197110|IL28B ENSG00000197585|Q5JV89\_HUMAN  
ENSG00000205150|FAM92A3  
TATTGTG ENSG00000104490|NCALD ENSG00000130312|MRPL34 ENSG00000138780|GSTCD ENSG00000149679|CABLES2 ENSG00000156298|TSPAN7 ENSG00000163486|SRGAP2 ENSG00000163521|GLB1L ENSG00000171169|C9orf90  
ENSG00000173011|Q86TJ2\_HUMAN ENSG00000176749|CDK5R1 ENSG00000178467|EGLX\_HUMAN ENSG00000179388|EGR3 ENSG00000182707|FYXD8 ENSG00000033170|FUT8 ENSG00000043355|ZIC2 ENSG00000078579|FGF20  
ENSG00000082293|COL19A1 ENSG00000100906|NFKBIA ENSG00000102290|PCDH11X ENSG00000112541|PDE10A ENSG00000114573|ATP6V1A ENSG00000117906|RCN2 ENSG00000124875|CXCL6 ENSG00000138366|NAB1  
ENSG00000145777|NP\_149024.1 ENSG00000148948|LRRRC4C ENSG00000153214|TMEM87B ENSG00000155097|ATP6V1C1 ENSG00000166337|TAF10 ENSG00000166503|HDCR3\_HUMAN ENSG00000170325|PRDM10 ENSG00000185261|C5orf36  
ENSG00000186310|NAP1L3 ENSG00000186496|ZNF396 ENSG00000187231|SESTD1 ENSG00000188021|UBQLN2 ENSG00000188693|NP\_001038940.1 ENSG00000198157|NSBP1  
TATTGTT ENSG00000108033|SCMH1 ENSG00000073536|NLE1 ENSG00000092421|SEMA6A ENSG00000100918|REC8 ENSG00000104499|GML ENSG00000105246|EBI3 ENSG00000105251|SHD ENSG00000107831|FGF8  
ENSG00000111252|SH2B3 ENSG00000111644|ACRBP ENSG00000113194|UBXD8 ENSG00000113552|GNPDA1 ENSG00000113649|NEK9 ENSG00000132635|FAM113A ENSG00000132749|MTL5 ENSG00000134072|CAMK1  
ENSG00000134690|CDCA8 ENSG00000147130|ZMYN3 ENSG00000148606|POLR3A ENSG00000157884|NP\_001025052.1 ENSG00000159556|ISL2 ENSG00000160410|SHKBP1 ENSG00000162735|PEX19 ENSG00000164266|SPINK1  
ENSG00000164651|SP8 ENSG00000167065|DUSP18 ENSG00000181409|AATK ENSG00000182342|DSCR9 ENSG00000182660|NP\_001013698.1 ENSG00000184678|HIST2H2BE ENSG00000196465|MYL6B ENSG00000203855|Q8TDP9\_HUMAN  
ENSG00000204343|C9orf118 ENSG00000205313|FAM106A ENSG00000205130|C14orf100 ENSG00000070087|PFN2 ENSG00000078747|ITCH ENSG00000083635|NUFIP1 ENSG00000089022|MAPKAPK5  
ENSG00000091972|CD200 ENSG00000100625|SIX4 ENSG00000101247|C20orf7 ENSG00000101544|ZNF508 ENSG00000102098|SCML2 ENSG00000102239|BRS3 ENSG00000105784|NP\_612147.1 ENSG00000114790|NP\_056410.2  
ENSG00000119231|SENP5 ENSG00000121351|IAPP ENSG00000123179|EBFL ENSG00000130396|MLLT4 ENSG00000136143|SUCLA2 ENSG00000139168|ZCRB1 ENSG00000139885|ADAM21 ENSG00000140265|ZSCAN29  
ENSG00000144857|BOC ENSG00000147050|UTX ENSG00000151962|NP\_659416.1 ENSG00000152601|MBNL1 ENSG00000153574|RPIA ENSG00000154760|SLFN13 ENSG00000159921|GNE ENSG00000160131|NP\_001017980.1  
ENSG00000162618|ELTD1 ENSG00000166503|HDGR3\_HUMAN ENSG00000170323|FABP4 ENSG00000171522|PTGER4 ENSG00000171634|BPTF ENSG00000172733|PURG ENSG00000186462|NAP1L2 ENSG00000186487|MYT1L  
ENSG00000204259|Q96PQ5\_HUMAN  
TATTTAA ENSG00000007171|NOS2A ENSG00000075388|FGF4 ENSG00000092421|SEMA6A ENSG00000095752|IL11 ENSG00000099204|ABLIM1 ENSG00000099985|OSM ENSG00000100027|YPEL1 ENSG00000102096|PIM2  
ENSG00000102921|N4BP1\_HUMAN ENSG00000106070|GRB10 ENSG00000108342|CSF3 ENSG00000110080|ST3GAL4 ENSG00000112715|VEGFA ENSG00000112941|POLS ENSG00000114767|RRP9 ENSG00000117834|SLC5A9  
ENSG00000120053|GOT1 ENSG00000125166|GOT2 ENSG00000127418|FGFR1L ENSG00000128266|GNAZ ENSG00000132740|IGHMBP2 ENSG00000141580|WDR45L ENSG00000143811|PYCR2 ENSG00000143878|RHOB  
ENSG00000151348|EXT2 ENSG00000151353|TMEM18 ENSG00000153266|FEZF2 ENSG00000153298|C6orf54 ENSG00000154764|WNT7A ENSG00000158715|SLC45A3 ENSG00000164438|TLX3 ENSG00000164885|CDK5  
ENSG00000165782|TMEM55B ENSG00000167641|PEP19 ENSG00000167641|IL13 ENSG00000167641|JUNB ENSG00000171223|JUNB ENSG00000173546|CSPG4 ENSG00000173812|EIF1 ENSG00000174233|ADCY6  
ENSG00000183154|Q8NB20\_HUMAN ENSG00000184545|DUSP8 ENSG00000188554|NBR1 ENSG00000190245|Q8N7M3\_HUMAN ENSG00000196132|MYT1\_HUMAN ENSG00000196422|KIAA0649 ENSG00000196739|COL27A1 ENSG00000197757|HOXC6  
ENSG00000012983|MAP4K5 ENSG00000036257|CUL3 ENSG00000038002|AGA ENSG00000050393|CCDC90A ENSG00000073756|PTGS2 ENSG00000081237|PTPRC ENSG00000083097|DOPEY1 ENSG00000100380|ST13  
ENSG00000102595|UGCG12 ENSG00000103995|CEP152 ENSG00000106346|USP42 ENSG00000108654|PDHX ENSG00000109471|IL2 ENSG00000110435|PDHX ENSG00000110756|HPS5 ENSG00000111670|GNPTAB  
ENSG00000112874|NUDT1X ENSG00000112964|GHR ENSG00000113302|IL12B ENSG00000113525|IL5 ENSG00000113595|TRIM23 ENSG00000117620|SLC35A3 ENSG00000119707|RBM25 ENSG00000120688|WBP4  
ENSG00000124486|USP9X ENSG00000130363|RSHL2 ENSG00000133641|C12orf29 ENSG00000156787|WDR67 ENSG00000157214|STEA2 ENSG00000162701|DENND1B ENSG00000163217|BMP10 ENSG00000164114|MAP9  
ENSG00000164975|SNAPC3 ENSG00000165650|PDZD8 ENSG00000165899|C12orf64 ENSG00000172974|LOC729317 ENSG00000176225|ATAP1 ENSG00000176842|IRX5 ENSG00000178425|NT5DC1 ENSG00000180116|C12orf40  
ENSG00000180318|CART1 ENSG00000180329|CCDC43 ENSG00000180336|NP\_001028831.1 ENSG00000180458|Q8N3U1\_HUMAN ENSG00000180660|MAB21L1 ENSG00000186479|RGS7BP ENSG00000188732|C7orf46 ENSG00000197576|HOXA4  
ENSG00000197919|IFNA1 ENSG00000197967|Q86U89\_HUMAN ENSG00000205595|AREG  
TATTTAC ENSG00000023902|PLEKH01 ENSG00000068137|PLEKHH3 ENSG00000068394|GPKOW ENSG00000069812|HES2 ENSG00000100034|PPM1F ENSG00000100320|RBM9 ENSG00000100365|NCF4 ENSG00000108474|PIGL  
ENSG00000108861|DUSP3 ENSG00000124422|USP22 ENSG00000124782|RREB1 ENSG00000126602|TRAP1 ENSG00000131143|COX4I1 ENSG00000133561|GIMAP6 ENSG00000138326|RPS24 ENSG00000157349|DDX19B  
ENSG00000157954|WIP12 ENSG00000170233|Q96GAM0\_HUMAN ENSG000001860083|WFDCL1 ENSG00000180758|GPR157 ENSG00000185888|NP\_898885.1 ENSG00000198768|APCDD1L ENSG00000204269|Q6ZVM2\_HUMAN  
ENSG00000205434|Q6ZU34\_HUMAN ENSG00000067167|TRAM1 ENSG00000079950|STX7 ENSG00000080572|CXorf41 ENSG00000083123|BCKDHB ENSG00000086189|DIMIT1L ENSG00000087053|MTMR2 ENSG00000096654|ZNF184  
ENSG00000101871|MDI1 ENSG00000111911|HINT3 ENSG00000112851|ERBB2IP ENSG00000117543|DPH5 ENSG00000119862|NP\_054900.1 ENSG00000134419|RPS15A ENSG00000136159|NUDT15 ENSG00000136521|NDUFB5  
ENSG00000138379|GDF8 ENSG00000139505|MTMR6 ENSG00000147246|HTR2C ENSG00000152942|RAD17 ENSG00000153253|SCN3A ENSG00000155011|DKK2 ENSG00000155099|TMEM55A ENSG00000162409|PRKAA2  
ENSG00000163683|C4orf34 ENSG00000164100|NDST3 ENSG00000166704|ZNF606 ENSG00000173928|C19orf39 ENSG00000177182|NP\_775790.1 ENSG00000182187|CRYGB ENSG00000183150|GPR19 ENSG00000185950|IRS2  
ENSG00000198155|Q49A33\_HUMAN  
TATTTAG ENSG00000003137|CYP26B1 ENSG00000095970|TREM2 ENSG00000100335|SMCR7L ENSG00000107957|SH3PX2A ENSG00000108175|ZMIZ1 ENSG00000116667|C1orf21 ENSG00000126464|PRL12 ENSG00000131435|PDLIM4  
ENSG00000134864|Q9BVM4\_HUMAN ENSG00000136883|KIF12 ENSG00000149646|C20orf152 ENSG00000153789|FAM92B ENSG00000158859|ADAMTS4 ENSG00000160097|FNDC5 ENSG00000166860|ZBTB39 ENSG00000172578|KLHL6  
ENSG00000174483|BBS1 ENSG00000177098|SCN4B ENSG00000068793|CYFIP1 ENSG00000112541|PDE10A ENSG00000115295|CLIP4 ENSG00000116918|TSNAX ENSG00000123219|CENPK ENSG00000129055|ANAPC13  
ENSG00000134548|C12orf39 ENSG00000138604|GLCE ENSG00000141198|TOM1L1 ENSG00000144827|ABHD10 ENSG00000161326|DUSP14 ENSG00000162813|BPNT1 ENSG00000162852|C1orf71 ENSG00000163254|CRYGC  
ENSG00000163818|L2TF1L ENSG00000164440|TXLNB ENSG00000165794|SLC39A2 ENSG00000168374|ARF4 ENSG00000179532|C11orf47 ENSG00000182187|CRYGB ENSG00000196793|ZNF239 ENSG00000196937|FAM3C  
ENSG00000205072|Q6ZR34\_HUMAN  
TATTTAT ENSG000000001617|SEMA3F ENSG00000005001|PRSS22 ENSG00000049769|PPP1R3F ENSG00000063854|HAGH ENSG00000064309|CDON ENSG00000068971|PPP2R5B ENSG00000072195|SPEG ENSG00000076604|TRAF4  
ENSG00000095397|DFNB31 ENSG00000095752|IL11 ENSG00000102245|CD40LG ENSG00000105509|HAS1 ENSG00000105649|RAB3A ENSG00000105997|HOXA3 ENSG00000108375|SUPT4H1  
ENSG00000112715|VEGFA ENSG00000114251|WNT5A ENSG00000117407|ARTN ENSG00000119771|KLHL29 ENSG00000120889|TNFRSF10B ENSG00000124067|LCAT ENSG00000125967|APBA2BP ENSG00000128016|ZFP36  
ENSG00000128342|LIF ENSG00000128652|HOXD3 ENSG00000130164|LDLR ENSG00000130311|C19orf58 ENSG00000130513|GDF15 ENSG00000130734|ATG4D ENSG00000132535|DLG4 ENSG00000133069|TMCC2  
ENSG00000137331|IER3 ENSG00000143333|RGS16 ENSG00000148339|SLC25A25 ENSG000

ENSG00000159556|ISL2 ENSG00000161835|GRASP ENSG00000162344|FGF19 ENSG00000162591|MEGF6 ENSG00000163823|CCR1 ENSG00000166924|NP\_775835.2 ENSG00000168495|POLR3D ENSG00000171873|ADRA1D  
ENSG00000172375|TMEM24 ENSG00000175505|CLCF1 ENSG00000177350|QGNV1\_HUMAN ENSG00000182606|TRAK1 ENSG00000185619|PCGF3 ENSG00000185668|POU3F1 ENSG00000187605|K0401\_HUMAN ENSG00000187678|SPRY4  
ENSG00000188816|HMX2 ENSG00000196361|ELAVL3 ENSG00000197063|MAFG ENSG00000197272|IL27 ENSG00000197496|SLC2A10 ENSG00000197757|HOXC6 ENSG00000204490|TNF ENSG00000204496|LTA  
ENSG00000204820|Q96NT9\_HUMAN ENSG00000033867|SLC4A7 ENSG00000056586|RC3H2 ENSG00000073756|PTGS2 ENSG00000081041|CXCL2 ENSG00000083223|ZCCHC6 ENSG00000094963|FMO2 ENSG00000100206|DMC1  
ENSG00000101574|METTL4 ENSG00000101624|CEP76 ENSG00000109471|IL2 ENSG00000110944|IL23A ENSG00000111537|IFNG ENSG00000112175|BMP5 ENSG00000112183|RBM24 ENSG00000116678|LEPR  
ENSG00000119965|C10orf88 ENSG00000120129|DUSP1 ENSG00000120217|CD274 ENSG00000120242|IFNA8 ENSG00000121350|NP\_079130.2 ENSG00000121350|NP\_079130.2 ENSG00000124802|EEF1B1 ENSG00000125378|BMP4  
ENSG00000125531|C20orf195 ENSG00000125538|IL1B ENSG00000125845|BMP2 ENSG00000126804|ZBTB1 ENSG00000127318|IL22 ENSG00000129636|ITFG1 ENSG00000136141|LRCH1 ENSG00000136634|IL10  
ENSG00000137185|ZNF193 ENSG00000144893|MEDI2L ENSG00000145835|NP\_542387.1 ENSG00000145839|IL9 ENSG00000147082|CCNB3 ENSG00000147488|ST18 ENSG00000148481|C10orf97 ENSG00000148677|ANKRD1  
ENSG00000150768|DLAT ENSG00000151320|AKAP6 ENSG00000152977|ZIC1 ENSG00000153140|CETN3 ENSG00000163734|CXCL3 ENSG00000164114|MAP9 ENSG00000164949|GEM ENSG00000166510|CCDC68  
ENSG00000168267|PTF1A ENSG00000168288|C2orf25 ENSG00000169429|IL8 ENSG00000171126|KCNG3 ENSG00000177047|IFNW1 ENSG00000182118|FAM89A ENSG00000182393|IL29 ENSG00000186340|THBS2  
ENSG00000196449|YRDC ENSG00000197930|ERO1L ENSG00000198945|L3MBTL3 ENSG00000204899|NP\_001065243.1  
TATTTTCG ENSG00000072518|MARK2 ENSG00000100417|PMM1 ENSG00000103550|NP\_001013009.2 ENSG00000113272|THG1L ENSG00000120075|HOXB5 ENSG00000124785|NRN1 ENSG00000126752|SSX1 ENSG00000140451|PIF1  
ENSG00000157950|SSX2\_HUMAN ENSG00000157965|SSX8 ENSG00000163207|IVL ENSG00000165175|MID1IP1 ENSG00000167110|GOLGA2 ENSG00000168005|NP\_612480.1 ENSG00000168890|TMEM150 ENSG00000171483|SSX6  
ENSG00000172789|HOXC5 ENSG00000181649|PHLDA2 ENSG00000184545|DUSP8 ENSG00000185990|F8A3 ENSG00000186654|ARHGAP8 ENSG00000197445|C16orf47 ENSG00000197932|F8A2  
ENSG00000198444|F8A1 ENSG00000198946|SSX4B ENSG00000204368|SSX7 ENSG00000204645|SSX4 ENSG00000204648|SSX9 ENSG00000205064|Q6ZVP2\_HUMAN ENSG00000205159|Q6ZVC9\_HUMAN ENSG00000205792|A4D193\_HUMAN  
ENSG00000100357|ADSL ENSG00000105880|DLX5 ENSG00000111229|ARPC3 ENSG00000117650|NEK2 ENSG00000123485|NP\_060880.3 ENSG00000131007|TTY9A ENSG00000131009|TTY9A\_HUMAN ENSG00000132423|COQ3  
ENSG00000133114|K1AA1704 ENSG00000136492|BRIP1 ENSG00000139133|ALG10 ENSG00000140280|LYSM2 ENSG00000154466|SC1T1 ENSG00000155749|ALS2CR12 ENSG00000160207|HSF2BP ENSG00000160654|CD3G  
ENSG00000161573|CCL16 ENSG00000166938|DIS3L ENSG00000170175|CHRN1 ENSG00000172244|C5orf34 ENSG00000174718|C12orf35 ENSG00000177047|IFNW1 ENSG00000177272|KCNA3 ENSG00000205550|GUSL4\_HUMAN  
ENSG00000205575|GUSL2\_HUMAN  
TATTTTCT ENSG00000066136|NFYC ENSG00000067365|C16orf68 ENSG00000071626|DAZAP1 ENSG00000073536|NLE1 ENSG00000087258|GNAO1 ENSG00000102755|FLT1 ENSG00000102901|CENPT ENSG00000106366|SERPINE1  
ENSG00000106615|RHEB ENSG00000124107|SLPI ENSG00000126602|TRAP1 ENSG00000128918|ALDH1A2 ENSG00000130528|HRC ENSG00000131788|PIAS3 ENSG00000142627|EPA2 ENSG00000149136|SRP1  
ENSG00000151692|RNFB144 ENSG00000152953|STK32B ENSG00000156858|PRR14 ENSG00000158445|KCNB1 ENSG00000163823|CCR1 ENSG00000163879|SEK1 ENSG00000164151|Q6ZT40\_HUMAN ENSG00000166401|SERPINB8  
ENSG00000180861|C12orf36 ENSG00000187531|SIRT7 ENSG00000188004|VSI8 ENSG00000198407|Q8N25\_HUMAN ENSG00000198959|TGM2 ENSG0000003035687|ADSS ENSG00000069702|TGFBR3 ENSG00000078114|NEBL  
ENSG00000078725|DBC1 ENSG00000088930|XRN2 ENSG00000112379|K1AA1244 ENSG00000112812|PRSS16 ENSG00000112981|NME5 ENSG00000115137|NP\_057628.1 ENSG00000138400|NP\_057628.1 ENSG00000120254|MTHFD1L ENSG00000121552|CSTA  
ENSG00000131795|RBM8A ENSG00000133805|AMPD3 ENSG00000135069|PSAT1 ENSG00000136541|K1AA1189 ENSG00000137601|NEK1 ENSG00000138160|KIF11 ENSG00000138434|SSFA2 ENSG00000138685|FGF2  
ENSG00000139517|LNX2 ENSG00000144445|NP\_689732.2 ENSG000001045332|KXHL8 ENSG00000150676|CCDC83 ENSG00000152219|C11orf46 ENSG00000152266|PTH ENSG00000154734|ADAMTS1  
ENSG00000165572|KBTBD6 ENSG00000168288|C2orf25 ENSG00000169508|EBI2 ENSG00000183091|NEB ENSG00000184719|C10orf59 ENSG00000185448|FAM47A ENSG00000186020|ZNF529 ENSG00000196352|CD55  
ENSG00000198173|FAM47C ENSG00000198885|NP\_848590.3 ENSG00000198961|PJA2 ENSG00000204389|HSPA1A ENSG00000204954|Q69YU5\_HUMAN  
TATTTTGC ENSG000000011052|NME1 ENSG000000072858|SIDT1 ENSG00000074211|PPP2R2C ENSG00000092964|DPYSL2 ENSG00000108523|RNFI167 ENSG00000111412|C12orf49 ENSG00000130635|COL5A1 ENSG00000135930|EIF4E2  
ENSG00000143614|GATAD2B ENSG00000144560|VGLL4 ENSG00000163155|LYSM1 ENSG00000182346|DAOA ENSG00000184990|SIVA1 ENSG00000187017|ESP2 ENSG00000198561|CTNND1 ENSG00000205434|Q6ZU34\_HUMAN  
ENSG0000011638|TMEM159 ENSG00000053328|Q5T253\_HUMAN ENSG00000066422|ZBTB11 ENSG00000081019|RSB1 ENSG00000089157|RPLP0 ENSG00000095739|BAMBI ENSG00000101413|C20orf77 ENSG00000102886|GDPD3  
ENSG00000111859|NEDD9 ENSG00000112539|C6orf118 ENSG00000124831|LRRFIP1 ENSG00000133115|STOML3 ENSG00000133710|SPINK5 ENSG00000135919|SERPINE2 ENSG00000136960|ENPP2 ENSG00000137273|FOXF2  
ENSG00000140660|RUND2A ENSG00000144893|MEDI2L ENSG00000146856|AGBL3 ENSG00000149089|APIP ENSG00000150403|TMCO3 ENSG00000154760|SLFN13 ENSG00000163071|SPATA18 ENSG00000164049|FBXW12  
ENSG00000164125|C4orf18 ENSG00000169239|CA5B ENSG00000184374|COLEC10 ENSG00000198146|ZNF770 ENSG00000198718|K1AA0423 ENSG00000206559|ZCWPW2  
ENSG0000006283|CACNA1G ENSG00000009335|UBE3C ENSG00000047644|WWC3 ENSG00000064309|CDON ENSG00000064044|ELAVL1 ENSG00000072110|ACTN1 ENSG00000075702|WDR62  
ENSG00000100234|TIMP3 ENSG00000106236|NPTX2 ENSG00000107957|SH3PXD2A ENSG00000108175|ZMIZ1 ENSG00000111405|PP1\_HUMAN ENSG00000119977|C10orf61 ENSG00000124243|BCAS4 ENSG00000126012|JARID1C  
ENSG00000128594|LRRC4 ENSG00000134871|COL4A2 ENSG00000137221|TJAP1 ENSG00000137709|POU2F3 ENSG00000142207|URB1 ENSG00000143614|GATAD2B ENSG00000144677|CTDSPL ENSG00000153294|GPR115  
ENSG00000157613|IGFBP1 ENSG00000159217|IGFBP1 ENSG00000164366|CCDC127 ENSG00000165280|VCP ENSG00000166086|JAM3 ENSG00000169598|DFFB ENSG00000176911|Q9HAM1\_HUMAN ENSG00000177551|NHLH2  
ENSG00000179165|PXT1 ENSG00000181368|NM\_032947.3 ENSG00000183570|PCBP3 ENSG00000185668|POU3F1 ENSG00000187678|SPRY4 ENSG00000188554|NBR1 ENSG00000203690|TCP10 ENSG00000204084|INPP5B  
ENSG0000008311|AASS ENSG000000011566|MAP4K3 ENSG00000016490|CLCA1 ENSG00000017427|IGF1 ENSG00000038219|FAM44A ENSG00000047315|POLR2B ENSG00000047634|SCML1 ENSG00000065243|PKN2  
ENSG00000070367|EXOC5 ENSG00000089195|TRM6\_HUMAN ENSG00000100784|RPS6KA5 ENSG00000101230|C20orf82 ENSG00000101624|CEP76 ENSG00000101972|STAG2 ENSG00000107020|C9orf46 ENSG00000108055|SMC3  
ENSG00000108064|TFAM ENSG00000112419|PHACTR2 ENSG00000113211|PCDHB6 ENSG00000120262|C6orf97 ENSG00000120327|PCDHB14 ENSG00000122862|SRGN ENSG00000125630|POLR1B ENSG00000134755|DSC2  
ENSG00000135535|CD164 ENSG00000135776|ABCB10 ENSG00000137449|CEPE2 ENSG00000137642|SORL1 ENSG00000148541|FAM13C1 ENSG00000150054|PPP7 ENSG00000151151|IPMK ENSG00000151229|SLC2A13  
ENSG00000151611|MMAA ENSG00000152684|PELO ENSG00000155307|SAMS1 ENSG00000156232|WHDC1 ENSG00000157426|NP\_861522.2 ENSG00000162623|TYW3 ENSG00000162688|AGL ENSG00000164162|ANAPC10  
ENSG00000164244|PRRC1 ENSG00000164291|ARSK ENSG00000164983|TMEM65 ENSG00000165392|WRN ENSG00000165449|SLC16A9 ENSG00000165672|PRDX3 ENSG00000170775|GPR37 ENSG00000172469|MANEA  
ENSG00000172869|DMXL1 ENSG00000175110|MRPS22 ENSG00000176732|PFN4 ENSG00000177111|XR\_016777.1 ENSG00000181751|C5orf30 ENSG00000183496|RKHD3 ENSG00000183878|UTY ENSG00000184886|PIGW  
ENSG00000186231|KLHL32 ENSG00000188659|NP\_001008227.1 ENSG00000197701|ZNF595 ENSG00000203933|NP\_001013421.1 ENSG00000204272|Q63Z42\_HUMAN ENSG00000204961|PCDHA9  
TATTTTTC ENSG0000005379|BZRAP1 ENSG00000025434|NR1H3 ENSG00000058866|DGKG ENSG00000070759|TESK2 ENSG00000086548|CEACAM6 ENSG00000089248|ERP29 ENSG00000092201|SUPT16H ENSG00000100181|CSNK1E  
ENSG00000100410|PHF5A ENSG00000102921|N4BP1\_HUMAN ENSG00000105617|LENG1 ENSG00000116478|HDAC1 ENSG00000121104|FAM117A ENSG00000127452|FBXL12 ENSG00000129757|CDKN1C ENSG00000132510|JMJD3  
ENSG00000139112|GABARAP1 ENSG00000139514|SLC7A1 ENSG00000144092|FBLN5 ENSG00000142207|URB1 ENSG00000142534|RPS11 ENSG00000149547|EL24 ENSG00000153885|KCTD15 ENSG00000155052|CNTNAP5  
ENSG00000160183|TMPRSS3 ENSG00000160712|IL6R1 ENSG00000164587|RPS14 ENSG00000166398|K1AA0355 ENSG00000168286|THAP11 ENSG00000169992|ILGN2 ENSG00000173404|INSM1 ENSG00000177468|OLIG3  
ENSG00000179085|DPM3 ENSG00000184157|C1orf210 ENSG00000185049|WHSC2 ENSG00000185730|ZNF696 ENSG00000186207|LCE5A ENSG00000187559|FOXDL3 ENSG00000188786|MTF1 ENSG00000189060|HLF0  
ENSG00000197435|HIST3H2BB ENSG00000198165|Q9H960\_HUMAN ENSG00000198500|Q96C21\_HUMAN ENSG00000198915|RASGEF1A ENSG00000204394|VARS ENSG00000204793|FOXDL6 ENSG00000003436|TFPI ENSG0000015153|YAF2  
ENSG00000035115|SH3YL1 ENSG00000072657|TRHDE ENSG00000103540|CE110\_HUMAN ENSG00000104290|FZD3 ENSG00000104331|IMPAD1 ENSG00000104756|KCTD9 ENSG00000104951|NUP62 ENSG00000107165|TYRP1  
ENSG00000111817|DSE ENSG00000115520|COQ10B ENSG00000119787|ARL61P2 ENSG00000120235|IFNA6 ENSG00000121005|CRISP1D1 ENSG00000121749|TBC1D15 ENSG00000123106|CCDC91 ENSG00000124496|TRERF1  
ENSG00000129534|C14orf106 ENSG00000134954|ETS1 ENSG00000134987|WDR36 ENSG00000137251|PINAG ENSG00000137449|CPBE2 ENSG00000138669|PRKG2 ENSG00000143341|HMCN1 ENSG00000145730|PAM  
ENSG00000145835|NP\_542387.1 ENSG00000152954|NRN1 ENSG00000153914|SFRS12 ENSG00000154997|NP\_997249.1 ENSG00000159363|ATP13A2 ENSG00000162669|NP\_001017975.3 ENSG00000163694|NP\_061900.1 ENSG00000164307|ARTS1\_HUMAN  
ENSG00000169714|CNBP ENSG00000170289|CNGB3 ENSG00000173917|HOXB2 ENSG00000179119|SPTY2D1 ENSG00000181704|YIPF6 ENSG00000182552|RWDD4A ENSG00000184492|FOXDL4 ENSG00000185220|PGBD2  
ENSG00000196072|BLOC1S2 ENSG00000198060|MARCH5  
TATTTTGG ENSG00000006530|AGK ENSG00000034053|APBA2 ENSG00000057704|TMC5 ENSG00000088305|DNMT3B ENSG00000092820|VIL2 ENSG00000100335|SMCR7L ENSG00000101146|RAE1 ENSG00000102572|STK24  
ENSG00000108821|COL1A1 ENSG00000114770|ABCC5 ENSG00000135801|TM6SF3 ENSG00000153060|TEKT5 ENSG00000154330|PGM5P1 ENSG00000162783|IER5 ENSG00000165424|C10orf56 ENSG00000166833|NAV2  
ENSG00000166886|NAB2 ENSG00000168000|HNRPUL2 ENSG00000169926|KLF13 ENSG00000172965|Q96C48\_HUMAN ENSG00000173020|ADRBK1 ENSG00000173335|CST9 ENSG00000181220|ZNF746 ENSG00000181773|GPR3  
ENSG00000185801|YV007\_HUMAN ENSG00000197296|C20orf142 ENSG00000198704|GPX6 ENSG00000204876|Q6ZVM9\_HUMAN ENSG00000205927|OLIG2 ENSG00000003987|MTMR7 ENSG000000013441|CLK1 ENSG00000030066|NUP160  
ENSG00000031544|NR2E3 ENSG00000034533|ASTE1 ENSG00000038210|PI4K2B ENSG0000004047365|CENTD1 ENSG000000407634|SCML1 ENSG000000468781|STON1 ENSG00000070367|EXOC5 ENSG00000078177|N4BP2\_HUMAN  
ENSG00000079335|CDC14A ENSG00000083937|CHMP2B ENSG00000100372|SLC25A17 ENSG00000101639|CEP192 ENSG00000107105|ELAVL2 ENSG00000108854|SMURF2 ENSG00000112701|SENP6 ENSG00000113658|SMAD5  
ENSG00000114124|GRK7 ENSG00000120696|KBTBD7 ENSG00000122420|PTGFR ENSG00000123612|ACVR1C ENSG00000131864|USP29 ENSG00000134602|MST4\_HUMAN ENSG00000139971|C14orf37 ENSG00000143013|LMO4  
ENSG00000147601|TERF1 ENSG00000148828|NP\_001074467.1 ENSG00000150776|C10orf57 ENSG00000155375|TUBGCP5 ENSG00000155542|C5orf35 ENSG00000156970|BUB1B ENSG00000158985|CDC42SE2 ENSG00000162702|ZNF281  
ENSG00000165124|SVEP1 ENSG00000166130|NP\_710154.1 ENSG00000166148|AVPR1A ENSG00000166266|CUL5 ENSG00000169239|CA5B ENSG00000170632|ARMC10 ENSG00000177735|NP\_775916.1 ENSG00000178125|NP\_001013648.1  
ENSG00000179008|C14orf39 ENSG00000179097|HTR1F ENSG00000182890|GLUD2 ENSG00000183145|DSCR6 ENSG00000188153|COL4A5 ENSG00000188811|NP\_001017370.1 ENSG00000196792|STRN3 ENSG00000198765|SYCP1  
ENSG00000203907|NP\_001073976.1  
TATTTTT ENSG00000072134|EPN2 ENSG00000100292|HMOX1 ENSG00000100335|SMCR7L ENSG00000106683|LIMK1 ENSG00000108417|KRT37 ENSG00000109705|BAPX1 ENSG00000110801|PSMD9 ENSG00000116667|C1orf21  
ENSG00000117148|ACTL8 ENSG00000117298|ECE1 ENSG00000117425|PTCH2 ENSG00000119771|KLHL29 ENSG00000121104|FAM117A ENSG00000121775|TMEM39B ENSG00000125834|STK35 ENSG00000126767|ELK1  
ENSG00000128016|ZFP36 ENSG00000130540|SULT4A1 ENSG00000132819|RBM38 ENSG00000136327|NKX2-8 ENSG00000138623|SEMA7A ENSG00000139718|SETD1B ENSG00000141101|NOB1 ENSG00000156427|FGF18  
ENSG00000158859|ADAMTS4 ENSG00000162981|FAM84A ENSG00000163083|INHBB ENSG00000163686|ABHD6 ENSG00000164742|ADCY1 ENSG00000164916|FOXK1 ENSG00000165804|ZNF219 ENSG00000166900|STX3  
ENSG00000170091|NSG2\_HUMAN ENSG00000172345|STAR5 ENSG00000172538|C10orf73 ENSG00000175906|ARL4D ENSG00000176887|SOX11 ENSG00000177614|PGBD5 ENSG00000179344|HB25\_HUMAN ENSG00000179388|EGR3  
ENSG00000185112|FAM43A ENSG00000185338|SOCS1 ENSG00000186918|FBXO16 ENSG00000187479|Q7Z7L8\_HUMAN ENSG00000196934|LOC440804 ENSG00000198546|ZNF511 ENSG000000019186|CYP24A1 ENSG000000023909|GCLM  
ENSG00000065534|MYLK ENSG00000067533|RRP15 ENSG00000072201|LNX1 ENSG00000081479|LRP2 ENSG00000090470|PDCD7 ENSG00000099138|SLC26A3 ENSG00000096092|TMEM14A  
ENSG00000104205|SGK3 ENSG00000105996|HOXA2 ENSG00000107164|FUBP3 ENSG00000109861|CTSC ENSG00000113327|GABRG2 ENSG00000114978|MOBK1B ENSG00000124882|EREG ENSG00000125247|TMTC4  
ENSG00000125398|SOX9 ENSG00000129003|VPS13C ENSG00000129173|EFZ8 ENSG00000134371|CDC73 ENSG00000134717|BTF3L4 ENSG00000134884|NP\_060481.3 ENSG00000136122|C13orf34 ENSG00000137449|CPEB2  
ENSG00000138160|KIF11 ENSG00000138813|C4orf17 ENSG00000139921|TXNDC1 ENSG00000141469|SLC14A1 ENSG00000144061|NDP1 ENSG00000145220|LYAR\_HUMAN ENSG00000153976|HS3ST3A1  
ENSG00000157557|ETS2 ENSG00000163162|RNFI49 ENSG00000163293|NPAL1 ENSG00000163558|PRKCI ENSG00000164761|TNFRSF11B ENSG00000164879|CA3 ENSG00000164953|TMEM67 ENSG00000166797|FAM96A  
ENSG00000169031|COL4A3 ENSG00000170312|CDC2 ENSG00000170340|B3GNT2 ENSG00000171446|KRT27 ENSG00000171988|JMJD1C ENSG00000173113|TR112\_HUMAN ENSG00000176390|CRLF3 ENSG00000177111|XR\_016777.1  
ENSG00000180376|CCDC66 ENSG00000181690|PLAG1 ENSG00000187098|MITF ENSG00000187109|NAP1L1 ENSG00000188014|NP\_619643.2 ENSG00000189350|NP\_954974.2 ENSG00000196865|NHLRC2 ENSG00000198523|PLN  
ENSG00000198589|LRBA ENSG00000198719|DLL1 ENSG00000204403|CASP12 ENSG00000206527|PTPLB  
TCAAAAG ENSG00000103742|NP\_066013.1 ENSG00000104368|PLAT ENSG00000105991|HOXA1 ENSG00000118058|MLL ENSG00000122176|FMOD ENSG00000122966|CIT ENSG00000131475|VPS25 ENSG00000134107|BHLHB2  
ENSG00000137413|TBN ENSG00000142405|NLRP12 ENSG00000158445|KCNB1 ENSG00000164091|TMEM113 ENSG00000166569|CPLX4 ENSG00000170890|PLA2G1B ENSG00000172818|OVOL1 ENSG00000177066|Q8NCU6\_HUMAN  
ENSG00000178772|CPN2 ENSG00000179082|C9orf106 ENSG00000185651|UBE2L3 ENSG00000188199|FAM22B ENSG00000188312|CENPP ENSG00000203812|H1STH2AA4 ENSG00000204043|FAM22C ENSG00000205742|Q6ZTR4\_HUMAN  
ENSG00000090621|PABPC4 ENSG00000100564|PIGH ENSG00000100811|YY1 ENSG00000104859|SFRS16 ENSG00000105880|DLX5 ENSG00000114757|PEX5L ENSG00000115392|FANCL  
ENSG00000127074|RGS13 ENSG00000130741|EIF2S3 ENSG00000133687|TMTC1 ENSG00000134



TCAAAGC ENSG00000055957|ITI11 ENSG00000068078|FGFR3 ENSG00000081377|CDC14C ENSG00000082641|NFE2L1 ENSG00000102145|GATA1 ENSG00000106211|HSPB1 ENSG00000107554|DNMBP ENSG00000108849|PPY ENSG00000108974|EFNB3 ENSG00000122863|CHST3 ENSG00000140470|ADAMTS17 ENSG00000151364|KCTD14 ENSG00000158296|SLC13A3 ENSG00000158717|RNF166 ENSG00000161558|TMEM143 ENSG00000162522|KIAA1522 ENSG00000167191|GPCR5B ENSG00000169758|C15orf27 ENSG00000183535|C2orf123 ENSG00000184544|C1orf130 ENSG00000204125|Q53S21\_HUMAN ENSG000002082996|ATP2B4 ENSG000002082996|RNF13 ENSG00000107485|GATA3 ENSG00000113494|PLLR ENSG00000124429|POF1B ENSG00000129055|ANAPC13 ENSG00000137473|TTC29 ENSG00000141448|GATA6 ENSG00000143771|CNIH4 ENSG00000145817|YIPF5 ENSG00000150637|CD226 ENSG00000157060|C1orf14 ENSG00000158467|SAHH3\_HUMAN ENSG00000163104|SMARCAD1 ENSG00000164112|TMEM155 ENSG00000164588|HCN1 ENSG00000173273|TNKS ENSG00000179988|PSTK ENSG00000180777|ANKRD30B ENSG00000180817|PPA1 ENSG00000196433|ASMT ENSG00000197375|SLC22A5 ENSG00000198770|Q9H396\_HUMAN ENSG00000204937|Q6ZSS0\_HUMAN TCAAATA ENSG00000006756|ARSD ENSG00000070601|FRMPD1 ENSG00000084072|PPIE ENSG00000099338|C19orf15 ENSG00000099795|NDUFB7 ENSG00000104941|RSHL1 ENSG00000106211|HSPB1 ENSG00000107872|FBXL15 ENSG00000122367|LDB3 ENSG00000130508|PXDND ENSG00000143502|SUSD4 ENSG00000148362|C9orf142 ENSG00000168003|SLC3A2 ENSG00000170613|FAM71B ENSG00000171462|EGFL9 ENSG00000172382|PRSS27 ENSG00000174898|TMEM146 ENSG00000177992|C9orf79 ENSG00000180305|WFDC10A ENSG00000180846|C19orf34 ENSG00000182931|WFDC10B ENSG00000203812|HIST2H2AA4 ENSG00000204197|KIFC1 ENSG00000205653|Q6ZUF2\_HUMAN ENSG00000205770|Q8N847\_HUMAN ENSG00000205805|USP13 ENSG000002071082|RPL31 ENSG000002095564|BTAF1 ENSG00000101842|VSI61 ENSG00000101844|ATG4A ENSG00000102780|DGKH ENSG00000106460|TMEM106B ENSG00000111011|RSRC2 ENSG00000111816|FRK ENSG00000112818|MEP1A ENSG00000115963|RND3 ENSG00000116833|NR5A2 ENSG00000119042|SATB2 ENSG00000121578|B4GALT4 ENSG00000123728|RAP2C ENSG00000129151|BBOX1 ENSG00000132341|RAN ENSG00000133742|CA1 ENSG00000136159|NUDT15 ENSG00000139330|KERA ENSG00000145087|STXBP5L ENSG00000145425|RPS3A ENSG00000147509|RGS20 ENSG00000151131|C12orf45 ENSG00000151806|GUF1 ENSG00000152558|TMEM123 ENSG00000153951|OR4D2 ENSG00000154642|C21orf91 ENSG00000154654|NCAM2 ENSG00000160654|CD3G ENSG00000162753|SLC9A11 ENSG00000164548|TRA2A\_HUMAN ENSG00000165244|ZNF367 ENSG00000165443|PHYHIPL ENSG00000165494|PCF11 ENSG00000168772|CXXC4 ENSG00000169245|CXCL10 ENSG00000177409|SAMD9L ENSG00000183742|NF\_877439.2 ENSG00000185264|C22orf33 ENSG00000185483|ROR1 ENSG00000188313|PLSCR1 ENSG00000197121|PGAP1\_HUMAN ENSG00000197321|SVIL ENSG00000095015|MAP3K1 ENSG00000105374|NKG7 ENSG00000131477|RAMP2 ENSG00000136895|GARNL3 ENSG00000144134|RABL2A ENSG00000147081|AKAP4 ENSG00000156299|TIAM1 ENSG00000158955|WNT9B ENSG00000162511|LAPTM5 ENSG00000167759|KLIK13 ENSG00000167779|IGFBP6 ENSG00000178645|C10orf53 ENSG00000184709|LRRC26 ENSG00000186951|PPARA ENSG00000187516|CXorf27 ENSG00000197174|O14606\_HUMAN ENSG00000197285|NR\_001536.1 ENSG00000197555|SIPAL1L ENSG00000198019|FCGR1B ENSG00000201461|CYP3A43 ENSG000002056972|TRAF3IP2 ENSG000002080644|CHRNA3 ENSG000002095464|PDE6C ENSG00000109771|LRP2BP ENSG00000109805|NCA6P ENSG00000116729|GPR177 ENSG00000130638|ATXN10 ENSG00000130779|CLIP1 ENSG00000136261|BZNF2 ENSG00000138379|GDF8 ENSG00000139597|NP\_438169.2 ENSG00000144619|CNTN4 ENSG00000145495|MARCH6 ENSG00000145623|OSMR ENSG00000147533|GOLGA7 ENSG00000150510|FAM124A ENSG00000150991|UBIQ\_HUMAN ENSG00000158691|ZSCAN12 ENSG00000159216|RUNX1 ENSG00000163072|NOSTRIN ENSG00000163131|CTSS ENSG00000164308|NP\_071745.1 ENSG00000166004|KIAA1731 ENSG00000168681|Q9H762\_HUMAN ENSG00000169139|UBE2V2 ENSG00000171862|PTENP1 ENSG00000174417|TRHR ENSG00000178690|C18orf26 ENSG00000180882|XR\_017823.1 ENSG000001896345|ZNF167 ENSG00000204472|AIF1 TCAACGA ENSG00000022567|SLC45A4 ENSG00000048342|Q9H8A7\_HUMAN ENSG00000068438|FUS1 ENSG00000085063|CD59 ENSG00000087460|GNAS ENSG00000095777|MYO3A ENSG00000101082|SLA2 ENSG00000101224|CDC25B ENSG00000101438|SLC32A1 ENSG00000103852|TTC23 ENSG00000125843|C20orf29 ENSG00000142687|KIAA0319L ENSG00000144230|GPR17 ENSG00000162877|NP\_689704.3 ENSG00000168818|STX18 ENSG00000169218|RSP01 ENSG00000169375|SIN3A ENSG00000175520|UBQLN3 ENSG00000177096|FAM109B ENSG00000178977|C17orf44 ENSG00000179292|TMEM151 ENSG00000179562|GCC1 ENSG00000179562|GCC1 ENSG00000182981|C9orf56 ENSG00000183785|PEX26 ENSG00000185739|SRL ENSG00000188185|Q6ZQP8\_HUMAN ENSG00000196878|LAMB3 ENSG0000020198796|ALPK2 ENSG00000204603|Q69YW3\_HUMAN ENSG000002078053|AMPH ENSG000002079691|LRRC16 ENSG00000102317|RBM3 ENSG00000115828|QPCT ENSG00000116874|WARS2 ENSG00000117091|CD48 ENSG00000128590|DNAJB9 ENSG00000129521|EGLN3 ENSG00000132703|APCS ENSG00000138134|STAMBPL1 ENSG00000139971|C14orf37 ENSG00000140600|SH3GL3 ENSG00000147121|ZNF673 ENSG00000147509|RGS20 ENSG00000155729|KCTD18 ENSG00000170571|EMB ENSG00000170748|HNRGT\_HUMAN ENSG00000170899|GSTA4 ENSG00000179163|FUCA1 ENSG00000181588|RKHD1 ENSG00000183784|C9orf66 ENSG00000186649|NM\_182631 ENSG00000196344|ADH7 ENSG00000196437|ZNF569 ENSG00000197745|SCGB1D4 ENSG00000198046|ZNF667 ENSG00000204977|TRIM13 ENSG00000205227|Q6ZWA8\_HUMAN TCAACGG ENSG00000003147|ICA1 ENSG000000009950|MLXIPL ENSG00000054793|ATP9A ENSG00000063015|SEZ6 ENSG00000070601|FRMPD1 ENSG00000088256|GNA11 ENSG00000103489|XYLT1 ENSG00000105989|WNT2 ENSG00000108244|KRT23 ENSG00000111325|OGFOD2 ENSG00000121068|TBX2 ENSG00000125520|SLC2A4RG ENSG00000136848|DAB2IP ENSG00000137404|NRM ENSG00000137841|PLCB2 ENSG00000140279|DUOX2 ENSG00000164062|APEH ENSG00000164493|C6orf122 ENSG00000167740|CYB5D2 ENSG00000168016|Q8N8K0\_HUMAN ENSG00000172183|ISG20 ENSG00000172738|C6orf128 ENSG00000174171|Q8TCB4\_HUMAN ENSG00000174684|B3GNT1 ENSG00000176029|C11orf16 ENSG00000176076|KCNE1L ENSG00000176946|THAP4 ENSG00000178057|C3orf60 ENSG00000184584|TMEM173 ENSG00000198013|PNMA6A ENSG00000204579|A2RUR5\_HUMAN ENSG0000020010017|RANBP9 ENSG00000054277|OPN3 ENSG00000054803|CBLN4 ENSG00000105954|NPFV ENSG00000106819|ASPN ENSG00000107201|DDX58 ENSG00000111802|TTRAP ENSG000001115163|CENPA ENSG00000116954|RRAGC ENSG00000117153|KLHL12 ENSG00000117713|ARID1A ENSG00000119125|GDA ENSG00000125630|POLR1B ENSG00000138796|HADH ENSG00000143153|ATP1B1 ENSG00000146872|TLK2 ENSG00000150527|CTAGE5 ENSG00000151332|MBIP ENSG00000151704|KCNJ1 ENSG00000158636|C11orf30 ENSG00000163684|RPP14 ENSG00000165672|PRDX3 ENSG00000174226|NP\_689841.2 ENSG00000179010|MRFAP1 ENSG00000186094|AGBL4 ENSG00000198526|PABPCP2 TCAACTA ENSG00000091732|ZC3HC1 ENSG00000095015|MAP3K1 ENSG00000105464|GRIN2D ENSG00000111252|SH2B3 ENSG00000116147|TNR ENSG00000124701|APOBEC2 ENSG00000130227|XPO7 ENSG00000146755|TRIM50 ENSG00000148840|PPRC1 ENSG00000154222|CC2D1B ENSG00000154764|WNT7A ENSG00000163520|FBLN2 ENSG00000167515|TRAPPC2L ENSG00000168826|ZNF509 ENSG00000169213|RAB3B ENSG00000172927|MYEOV ENSG00000183473|SSTR3 ENSG00000184788|SATL1 ENSG00000188312|CENPP ENSG00000196139|AKR1C3 ENSG00000196304|NM\_207389 ENSG00000198879|SFBT2 ENSG00000200898|RPS20 ENSG00000111875|ASF1A ENSG00000117791|MOSC2 ENSG00000122787|AKR1D1 ENSG00000123977|WDR69 ENSG00000127955|GNA11 ENSG00000128915|NARG2 ENSG00000133101|CCNA1 ENSG00000135299|ANKRD6 ENSG00000143013|LMO4 ENSG00000146151|HMGCLL1 ENSG00000157680|DGKI ENSG00000166004|KIAA1731 ENSG00000167236|CCL23 ENSG00000168615|ADAM9 ENSG00000176160|HOF5 ENSG00000185760|KCNQ5 ENSG00000186105|Q7Z2Q7\_HUMAN TCAACTC ENSG00000001497|LAS1L ENSG00000073670|ADAM11 ENSG00000100931|CHMP4A ENSG00000104880|ARHGFB18 ENSG00000105376|ICAM5 ENSG00000105669|COPE ENSG00000112936|C7 ENSG00000115266|APC2 ENSG00000116586|MAP1P\_HUMAN ENSG00000136930|PMB7 ENSG00000138629|UBL7 ENSG00000158786|PLA2G2F ENSG00000161642|ZNF385 ENSG00000162065|TBC1D24 ENSG00000162599|NFIA ENSG00000164048|ZNF589 ENSG00000171649|ZIK1 ENSG00000171786|NHLH1 ENSG00000175329|ISX ENSG00000180219|FAM71C ENSG00000188589|RBM33 ENSG00000198326|C20orf141 ENSG00000198854|C1orf68 ENSG00000198913|Q9H5S2\_HUMAN ENSG00000205851|Q4G0H1\_HUMAN ENSG00000211454|ARK74\_HUMAN ENSG00000202746|HECW1 ENSG00000205544|NOP5\_HUMAN ENSG000002060716|COL11A1 ENSG00000207669|ASNS ENSG000002077514|POLD3 ENSG000002099749|CYorf15A ENSG00000100129|EIF3S6IP ENSG00000102309|PIN4 ENSG00000105483|CARD8 ENSG00000114021|NIT2 ENSG00000117560|FASLG ENSG00000118267|ZNF271 ENSG00000123570|RAB9B ENSG00000135577|NMBR ENSG00000139537|CDC65 ENSG00000140795|MYLK3\_HUMAN ENSG00000144840|RABL3 ENSG00000147121|ZNF673 ENSG00000157890|MEGF11 ENSG00000162654|GBP4 ENSG00000163053|SLC16A14 ENSG00000163114|PDHA2 ENSG00000163960|UBXD7 ENSG00000164512|ANKRD55 ENSG00000171877|FRMD5 ENSG00000196917|GPR81 ENSG00000204596|RPP21 TCAAGTG ENSG00000111737|RAB35 ENSG00000113070|HBEGF ENSG00000128228|SDF2L1 ENSG00000130340|SNX9 ENSG00000134569|LRP4 ENSG00000140538|NTRK3 ENSG00000141664|ZCCHC2 ENSG00000144579|CTDSP1 ENSG00000151882|CCL28 ENSG00000158169|FANCC ENSG00000164309|CMYA5 ENSG00000166473|PKD1L2 ENSG00000169427|CKNK9 ENSG00000170689|HOXB9 ENSG00000171853|TTC15 ENSG00000173039|RELA ENSG00000178796|Q8N921\_HUMAN ENSG00000179051|RC22 ENSG00000183741|CBX6 ENSG00000196218|RYR1 ENSG00000205531|NAP1L4 ENSG00000205723|NP\_079349.1 ENSG00000207334|ABCB11 ENSG00000101856|PGRMC1 ENSG00000102910|LONP2 ENSG00000104341|LAPTM4B ENSG00000104442|ARMC1 ENSG00000112531|QKI ENSG00000125255|SLC10A2 ENSG00000125351|UPF3B ENSG00000128699|ORMDL1 ENSG00000136874|STX17 ENSG00000137872|SOMA6D ENSG00000144306|SCRN3 ENSG00000145247|OC1AD2 ENSG00000146281|NFRSF21 ENSG00000146282|RARS2 ENSG00000155966|RMBD1 ENSG00000164494|PDS52 ENSG00000164654|NP\_061878.3 ENSG00000166889|NP\_689929.1 ENSG00000166927|MS4A7 ENSG00000171033|PKIA ENSG00000174748|RPL15 ENSG00000175885|ZNF611 ENSG00000177889|UBE2N ENSG00000179455|MKNR3 ENSG00000181626|DKFzP779B1.634 ENSG00000181690|PLAG1 ENSG00000198556|ZNF789 TCAATAA ENSG000000019102|VSI62 ENSG00000042832|TG ENSG00000074582|BCS1L ENSG00000084234|APLP2 ENSG00000099204|ABLIM1 ENSG00000102001|CACNA1F ENSG00000102901|CENPT ENSG00000103260|METRN ENSG00000105373|GLTSCR2 ENSG00000105376|ICAM5 ENSG00000106631|MYL7 ENSG00000108479|GALK1 ENSG00000125999|C20orf114 ENSG00000126759|CFP ENSG00000129467|ADCY4 ENSG00000129951|NP\_079164.1 ENSG00000135451|TROMP ENSG00000136274|NACAD ENSG00000136942|RPL35 ENSG00000137288|C6orf125 ENSG00000142765|SYTL1 ENSG00000144580|RQCD1 ENSG00000148826|NKX6-2 ENSG00000149021|SCGB1A1 ENSG00000151353|TMEM18 ENSG00000160752|FDPH ENSG00000161016|NPHS1 ENSG00000161281|COX7A1 ENSG00000163499|CRYBA2 ENSG00000164713|BRI3 ENSG00000166257|SCN3B ENSG00000167700|MFSD3 ENSG00000167858|TEKT1 ENSG00000168000|HNRPL2 ENSG00000169410|PTPN9 ENSG00000169171|ACTRT2 ENSG00000169877|ERAF ENSG00000170310|STX8 ENSG00000171794|UTF1 ENSG00000172053|QARS ENSG00000179240|Q3ZCU0\_HUMAN ENSG00000179428|Q8N6X1\_HUMAN ENSG00000180424|DEFB123 ENSG00000180879|SSR4 ENSG00000184481|MLLT7 ENSG00000187681|ORM1 ENSG00000188100|FAM25\_HUMAN ENSG00000188368|NP\_954979.2 ENSG00000197238|HIST1H4J ENSG00000198307|H2AFB2 ENSG00000204154|ORM2 ENSG00000204859|ZBTB48 ENSG00000206177|HBM ENSG00000206303|Q9NU98\_HUMAN ENSG00000100316|RPL3 ENSG00000100473|COCH ENSG00000101751|POLI ENSG00000104804|TULP2 ENSG00000105467|SYNGR4 ENSG00000113100|CDH9 ENSG00000119640|ACYP1 ENSG00000120802|TMPO ENSG00000123131|PRDX4 ENSG00000124214|STAU1 ENSG00000132842|AP3B1 ENSG00000133110|POSTN ENSG00000137818|RPL18 ENSG00000140265|ZSCAN29 ENSG00000143183|TMCO1 ENSG00000149443|C20orf78 ENSG00000150991|UBIQ\_HUMAN ENSG00000151923|TTAL1 ENSG00000154263|ABCA10 ENSG00000163110|PDLIM5 ENSG00000163463|KRTCAP2 ENSG00000164175|SLC45A2 ENSG00000167637|ZNF345 ENSG00000168273|Q8WVIO\_HUMAN ENSG00000170892|TSEN34 ENSG00000171116|NP\_057237.1 ENSG00000171129|HSFX1 ENSG00000171204|TMEM126B ENSG00000174298|NP\_694572.1 ENSG00000174808|BTC ENSG00000175928|LRRN1 ENSG00000177954|RPS27 ENSG00000179363|TMEM31 ENSG00000181903|OR4C6 ENSG00000182628|FAM33A ENSG00000182774|R817\_HUMAN ENSG00000182899|RPL35A ENSG00000184779|RPS17 ENSG00000185201|IFITM2 ENSG00000197958|RPL12 TCAATAC ENSG000000010671|BTX ENSG00000037757|NP\_115661.1 ENSG00000088826|SMOX ENSG00000089116|LHX5 ENSG00000089639|GMP ENSG00000102302|FGD1 ENSG00000110074|FOXRED1 ENSG00000110245|APOC3 ENSG00000130175|PRKCSH ENSG00000130244|Q17RN3-2 ENSG00000137834|SMAD6 ENSG00000143546|S100A8 ENSG00000149179|C11orf49 ENSG00000155846|PPARGC1B ENSG00000159189|C1QC ENSG00000160593|AMICA1 ENSG00000164707|SLC13A4 ENSG00000167483|FAM129C ENSG00000172543|CTSW ENSG00000173933|RBM4 ENSG00000182319|SG223\_HUMAN ENSG00000182852|C21orf121 ENSG00000184330|S100A7A ENSG00000184716|SERINC4 ENSG00000186847|KRT14 ENSG00000188589|RBM33 ENSG00000189180|ZNF33A ENSG00000197261|C6orf141 ENSG00000198842|DUSP27 ENSG00000115365|LUNCL1 ENSG00000118260|CREB1 ENSG00000130254|SAFB2 ENSG00000136897|MRPL50 ENSG00000137473|TTC29 ENSG00000143278|F13B ENSG00000148848|ADAM12 ENSG00000160633|SAPB ENSG00000162613|FANCL1 ENSG00000171970|ZNF57 ENSG00000177613|CSTF2T ENSG00000178502|KLHL11 ENSG00000185306|C12orf56 ENSG00000185448|FAM47A ENSG00000189132|FAM47B ENSG00000198173|FAM47C ENSG00000204262|COL5A2 ENSG00000204352|C9orf129 TCAATAT ENSG000000066136|NFYC ENSG00000109248|EIF2C1 ENSG00000104738|MCM4 ENSG00000110244|APOA4 ENSG00000118298|CA14 ENSG00000120907|ADRAL1A ENSG00000124299|PEPD ENSG00000130544|ZNF557 ENSG00000130812|ANGPTL6 ENSG00000131686|CA6 ENSG00000154198|Q8N1L4\_HUMAN ENSG00000158445|KCNB1 ENSG00000158816|Q5TIE3\_HUMAN ENSG00000160396|HIPK4 ENSG00000163902|RPN1 ENSG00000173567|GPR113 ENSG00000173862|Q9NWP0\_HUMAN ENSG00000176887|SOX11 ENSG00000177731|FLII1 ENSG00000180385|Q8NAP4\_HUMAN ENSG00000180871|IL8RB ENSG00000184330|S100A7A ENSG00000187095|LILRA2 ENSG00000204538|PSORS1C2 ENSG00000082822|SYPL1 ENSG00000082497|SERATD4 ENSG00000101230|C20orf82 ENSG00000106025|TSPAN12 ENSG00000106080|FKBP14 ENSG00000107611|CUBN ENSG00000111885|MAN1A1 ENSG00000113328|CCNG1 ENSG00000113532|ST8SIA4 ENSG00000118113|MMP8 ENSG00000122339|C6orf35 ENSG00000127954|Q8WWB0\_HUMAN ENSG00000130348|QRSL1 ENSG00000130363|RSHL2 ENSG00000136404|TM6SF1 ENSG00000138674|SEC31A ENSG00000141644|MBD1 ENSG00000157578|C21orf13 ENSG00000161800|RACGAP1 ENSG00000162722|TRIM58 ENSG00000164647|STEAP1 ENSG00000165669|C10orf84 ENSG00000167785|ZNF558 ENSG00000168273|Q8WVIO\_HUMAN ENSG00000170370|EMX2 ENSG00000179059|ZFP42 ENSG00000179934|CCR8 ENSG00000180182|CRSP2 ENSG00000182139|Q96FU4\_HUMAN ENSG00000185068|GTF2H5 ENSG00000186684|NP\_001001665.2 ENSG00000188611|ASAHC2 ENSG00000196110|ZNF699 ENSG00000205604|Q6ZUP5\_HUMAN TCAATGT ENSG00000008130|NADK ENSG00000065618|COL17A1 ENSG00000100413|POLR3H ENSG00000102243|VGLL1 ENSG00000111424|VDR ENSG00000115306|SPTBN1 ENSG00000130159|ECSIT ENSG00000135436|C12orf25 ENSG00000137094|DNAJB5 ENSG00000139574|NPF7 ENSG00000141034|C17orf39 ENSG00000160014|CALM\_HUMAN ENSG00000163900|TMEM41A ENSG00000174640|SLCO2A1 ENSG00000179091|CYC1 ENSG00000189363|Q6ZSP4\_HUMAN ENSG000000007305|TKTL1 ENSG000000019549|SNAI2 ENSG00000106688|SLC1A1 ENSG00000108384|RAD51C ENSG00000112249|ASCC3 ENSG00000117153|KLHL12 ENSG00000117519|CNN3 ENSG00000118514|ALDH8A1 ENSG00000127055|ETF1 ENSG00000125450|NUP85 ENSG00000128272|ATF4 ENSG00000129514|FOXA1 ENSG00000135409|AMHR2 ENSG00000138190|EXOC6 ENSG00000141367|CLTC ENSG00000148848|ADAM12 ENSG00000154645|CHODL ENSG00000162434|JAK1 ENSG00000164128|NPY1R ENSG00000164543|STK17A ENSG00000165169|DYNLT3 ENSG00000166037|CEP57 ENSG00000168348|INSM2 ENSG00000183091|NEB ENSG00000186104|CYP2R1 ENSG00000196262|PPIA ENSG00000198702|Q8NBL2\_HUMAN TCAATTC ENSG00000104972|LILRB1 ENSG000001115956|PLEK ENSG000001117971|CHRN84 ENSG00000130035|GALNT8 ENSG00000158445|KCNB1 ENSG00000161640|SIGLEC11 ENSG00000166908|PIP5K2C ENSG00000169469|SPRR1B

|                                |                              |                              |                              |                                |                              |                                |                              |
|--------------------------------|------------------------------|------------------------------|------------------------------|--------------------------------|------------------------------|--------------------------------|------------------------------|
| ENSG00000169894 MUC3A          | ENSG00000172046 USP19        | ENSG00000172653 C17orf66     | ENSG00000174370 C11orf45     | ENSG00000176340 COX8A          | ENSG00000183128 FAM26A       | ENSG00000183273 CCDC60         | ENSG00000186038 HTR3E        |
| ENSG00000204561 FAM75B         | ENSG00000004948 CALCR        | ENSG00000073921 PICCALM      | ENSG00000082293 COL19A1      | ENSG00000087196 SLC6A14        | ENSG00000103381 NP_060810.1  | ENSG00000106603 C7orf44        | ENSG00000107014 RLN2         |
| ENSG00000110066 SUV420H1       | ENSG00000116199 FAM20B       | ENSG00000117533 VAMP4        | ENSG00000130396 MLLT4        | ENSG00000130939 UBE4B          | ENSG00000131002 CYorf15B     | ENSG00000138068 ST6B1_HUMAN    | ENSG00000140873 ADAMTS18     |
| ENSG00000148798 INA            | ENSG00000157060 C1orf14      | ENSG00000163637 PRICKLE2     | ENSG00000167306 MYO5B        | ENSG00000171126 KCNGB3         | ENSG00000172399 MYO2Z        | ENSG00000173875 ZNF791         | ENSG00000175497 DPP10        |
| ENSG00000178460 C8orf45        | ENSG00000178722 NP_775938.1  | ENSG00000180332 KCTD4        | ENSG00000182992 Q8TZMO_HUMAN | ENSG00000183690 EFHC2          | ENSG00000185002 RFXCDC1      | ENSG00000186974 Q8N6X9_HUMAN   | ENSG00000188393 CLEC2A       |
| ENSG00000188971 NP_001013005.1 | ENSG00000204276 HLA-DQA2     | ENSG00000064270 ATP2C2       | ENSG00000067066 SP100        | ENSG00000077274 CAPN6          | ENSG00000095066 HOOK2        | ENSG00000100319 ZMAT5          | ENSG00000115129 TP53I3       |
| ENSG00000137392 CLPS           | ENSG00000147206 NXF3         | ENSG00000160285 LSS          | ENSG00000163516 ANKZF1       | ENSG00000163879 DNAL1          | ENSG00000165238 WNK2         | ENSG00000165275 RG9MTD3        | ENSG00000166333 ILK          |
| ENSG00000167744 NTF5           | ENSG00000167862 ICT1         | ENSG00000175315 CST6         | ENSG00000180176 TH           | ENSG00000180999 C1orf105       | ENSG00000183666 LOC728411    | ENSG00000184454 C1orf130       | ENSG00000184566 Q9P1G6_HUMAN |
| ENSG00000185860 C1orf110       | ENSG00000197174 O14606_HUMAN | ENSG00000197285 NR_001536.1  | ENSG00000198237 GUSL1_HUMAN  | ENSG00000049618 ARID1B         | ENSG00000057468 MSH4         | ENSG00000057789 GTF2I          | ENSG00000105132 ZNF550       |
| ENSG00000109771 LRP2BF         | ENSG00000115540 PREI3        | ENSG00000125629 INSIG2       | ENSG00000135052 C9orf155     | ENSG00000138381 ASNSD1         | ENSG00000159140 SON          | ENSG00000160049 DFFA           | ENSG00000163636 PSMD6        |
| ENSG00000165555 C14orf148      | ENSG00000168681 Q9H762_HUMAN | ENSG00000169519 METT5D1      | ENSG00000171033 PKIA         | ENSG00000174990 CA5A           | ENSG00000184752 NDUFA12      | ENSG00000186767 NP_001012986.2 | ENSG00000189184 PCDH18       |
| ENSG00000196381 ZNF781         | ENSG00000196563 Q9H375_HUMAN | ENSG00000196937 FAM3C        | ENSG00000198533 Q9P1D0_HUMAN | ENSG00000100909 CPT1A          | ENSG00000111886 GABRR2       | ENSG00000126243 LRFN3          | ENSG00000126243 LRFN3        |
| ENSG00000067365 C16orf68       | ENSG00000087077 TRIP6        | ENSG00000092607 TBX15        | ENSG00000092853 CLSPN        | ENSG00000104129 DNAJC17        | ENSG00000138347 MYFN         | ENSG00000141150 RASL10B        | ENSG00000148158 SNX30        |
| ENSG00000130167 TSPAN16        | ENSG00000130203 APOE         | ENSG00000130640 TUBGCP2      | ENSG00000132635 FAM113A      | ENSG00000133216 EPHB2          | ENSG00000136221 S100A12      | ENSG00000187664 TM6SF2         | ENSG00000197506 SLC28A3      |
| ENSG00000152291 TGOLN2         | ENSG00000157152 SYN2         | ENSG00000158402 CDC25C       | ENSG00000160584 QSK_HUMAN    | ENSG00000162522 KIAA1522       | ENSG00000162482 AKR7A3       | ENSG00000163577 EIF5A2         | ENSG00000163877 SNIP1        |
| ENSG00000204101 Q6ZU91_HUMAN   | ENSG00000008018 PSMB1        | ENSG000000024048 UBR2        | ENSG000000089157 RPLP0       | ENSG000000089225 TBX5          | ENSG00000101413 C20orf77     | ENSG00000116977 LGALS8         | ENSG00000132313 MRPL35       |
| ENSG00000134533 RERG           | ENSG00000137860 SLC28A2      | ENSG00000138160 KIF11        | ENSG00000138755 CXCL9        | ENSG00000162368 CMPK           | ENSG00000163577 EIF5A2       | ENSG00000163877 SNIP1          | ENSG00000164039 BDH2         |
| ENSG00000164647 STEAP1         | ENSG00000165525 SDCCAG1      | ENSG00000166342 NETO1        | ENSG00000171428 NAT1         | ENSG00000172955 ADH6           | ENSG00000184898 RBM43        | ENSG00000188408 MAGEB5         | ENSG00000204977 TRIM13       |
| ENSG00000007923 DNAJC11        | ENSG00000053702 NRIP2        | ENSG00000070031 SCT          | ENSG00000071894 CPSF1        | ENSG00000099864 PALM           | ENSG00000100167 SEPT3        | ENSG00000116017 ARID3A         | ENSG00000123810 NP_085055.1  |
| ENSG00000135740 SLC9A5         | ENSG00000137309 HMGAL        | ENSG00000141086 CFRL         | ENSG00000141449 KIAA1772     | ENSG00000143473 KCNH1          | ENSG00000160172 Q8IW37_HUMAN | ENSG00000161381 PLXDC1         | ENSG00000164711 LPAL2        |
| ENSG00000166546 Q3B7T3_HUMAN   | ENSG00000166947 EPB42        | ENSG00000176828 Q8N9U2_HUMAN | ENSG00000184163 FAM132A      | ENSG00000188427 XR_017855.1    | ENSG00000196366 C9orf163     | ENSG00000203930 Q5JPA2_HUMAN   | ENSG00000204539 CDSN         |
| ENSG00000205414 Q6ZVL8_HUMAN   | ENSG00000049618 ARID1B       | ENSG00000065809 FAM107B      | ENSG00000071462 WBSR22       | ENSG00000091164 TXNL1          | ENSG00000091317 CMTM6        | ENSG00000105132 ZNF550         | ENSG00000129422 MTUS1        |
| ENSG00000131080 EDA2R          | ENSG00000133083 DCLK1        | ENSG00000137942 FBNP1L       | ENSG00000145982 FARS2        | ENSG00000155890 TRIM42         | ENSG00000162482 AKR7A3       | ENSG00000162704 ARPC5          | ENSG00000163541 SUCCL1       |
| ENSG00000163923 RPL39L         | ENSG00000166845 C18orf54     | ENSG00000171772 SYCE1        | ENSG00000179097 HTRIF        | ENSG00000181234 TMEM132C       | ENSG00000181544 FANCB        | ENSG00000185010 F8             | ENSG00000187079 TEAD1        |
| ENSG00000189252 SPANX3L        | ENSG00000189369 GSP2         | ENSG00000198918 RPL39        | ENSG00000204363 SPANX5       | ENSG00000204904 CXorf31        | ENSG00000125447 GGA3         | ENSG00000125966 MMP24          | ENSG00000142279 WTIP         |
| ENSG0000010803 SCMH1           | ENSG00000084628 FAM77C       | ENSG00000100124 ANKRD54      | ENSG00000100865 NP_116019.1  | ENSG00000125447 GGA3           | ENSG00000125966 MMP24        | ENSG00000142279 WTIP           | ENSG00000144524 COPS7B       |
| ENSG00000146540 NP_115726.1    | ENSG00000154229 PRKCA        | ENSG00000170703 TTLL6        | ENSG00000190245 Q8N7M3_HUMAN | ENSG00000197174 O14606_HUMAN   | ENSG00000197285 NR_001536.1  | ENSG00000003989 SLC7A2         | ENSG00000070718 AP3M2        |
| ENSG00000102098 SCML2          | ENSG00000105825 TFPI2        | ENSG00000115540 PREI3        | ENSG00000117602 DSCR1L2      | ENSG00000119707 RBM25          | ENSG00000124098 C20orf108    | ENSG00000127603 MACF1          | ENSG00000131381 ZFYVE20      |
| ENSG00000133193 FAM104A        | ENSG00000134313 NP_065789.1  | ENSG00000162755 NP_689579.3  | ENSG00000164220 F2RL2        | ENSG00000166562 SEC11C         | ENSG00000167383 ZNF229       | ENSG00000167910 CYP7A1         | ENSG00000177182 NP_775790.1  |
| ENSG00000179813 C13orf30       | ENSG00000196562 SULF2        | ENSG00000204279 PAGE3        | ENSG00000130612 Q6ZSU1_HUMAN | ENSG00000137880 GCHFR          | ENSG00000146049 KAAG1        | ENSG00000146707 POMZP3         | ENSG00000153266 FEZF2        |
| ENSG00000089327 FYXD5          | ENSG00000117020 AKT3         | ENSG00000169189 SMCML1       | ENSG00000169683 LRRC45       | ENSG00000180176 TH             | ENSG00000182318 ZSCAN22      | ENSG00000187531 SIRT7          | ENSG0000022976 C14orf131     |
| ENSG00000166069 TMCO5          | ENSG00000168517 HEXIM2       | ENSG00000120693 SMAD9        | ENSG00000122643 NT5C3        | ENSG00000135597 REPS1          | ENSG00000135686 C16orf44     | ENSG00000137251 TINAG          | ENSG00000140157 NIPA2        |
| ENSG00000115705 TPO            | ENSG00000116830 TTF2         | ENSG00000151514 SALL3        | ENSG00000153485 C14orf109    | ENSG00000160199 PKNOX1         | ENSG00000166455 C16orf46     | ENSG00000177406 Q8N503_HUMAN   | ENSG00000180138 CSNK1A1L     |
| ENSG00000146409 C6orf192       | ENSG00000147381 MAGEA4       | ENSG00000151514 SALL3        | ENSG00000153485 C14orf109    | ENSG00000160199 PKNOX1         | ENSG00000166455 C16orf46     | ENSG00000177406 Q8N503_HUMAN   | ENSG00000180138 CSNK1A1L     |
| ENSG00000186684 NP_001001665.2 | ENSG00000197062 ZNF187       | ENSG00000204688 OR2H1        | ENSG00000101076 HNF4A        | ENSG00000104833 TUBB4          | ENSG00000105085 CRSP7        | ENSG00000123364 HOXC13         | ENSG00000148985 NP_055304.1  |
| ENSG00000037637 FBXO42         | ENSG00000081791 KIAA0141     | ENSG00000100109 TFPI1        | ENSG00000162552 WNT4         | ENSG00000173585 CCR9           | ENSG00000175662 TOML2        | ENSG00000184274 C21orf93       | ENSG00000184659 FOXDL4       |
| ENSG00000158109 FAM79A         | ENSG00000159433 STARD9       | ENSG00000160570 DEDD2        | ENSG00000204828 FX4L4_HUMAN  | ENSG00000203006 NUP160         | ENSG00000069329 VPS35        | ENSG00000084676 NCOA1          | ENSG00000101928 MOSPD1       |
| ENSG00000186575 NF2            | ENSG00000197451 HNRPAB       | ENSG00000207479 FOXDL4L5     | ENSG00000120149 MSX2         | ENSG00000133789 SWP70_HUMAN    | ENSG00000134533 RERG         | ENSG00000134644 PUM1           | ENSG00000138641 HERC3        |
| ENSG00000104907 TRMT1          | ENSG00000109084 TMEM97       | ENSG00000109654 TRIM2        | ENSG00000164542 NP_056129.1  | ENSG00000171147 NP_001001317.1 | ENSG00000172006 ZNF554       | ENSG00000175175 PPM1E          | ENSG00000198018 ENTPD7       |
| ENSG00000139173 TMEM117        | ENSG00000139364 TMEM132B     | ENSG00000153558 FBXL2        | ENSG00000105507 CABP5        | ENSG00000124508 BTN2A2         | ENSG00000124701 APOBEC2      | ENSG00000127150 C14orf153      | ENSG00000127412 TRPV5        |
| ENSG0000006453 BAIAP2L1        | ENSG0000013288 MAN2B2        | ENSG00000105507 CABP5        | ENSG00000124508 BTN2A2       | ENSG00000124701 APOBEC2        | ENSG00000127150 C14orf153    | ENSG00000127412 TRPV5          | ENSG00000128408 RIBC2        |
| ENSG00000130734 ATG4D          | ENSG00000141401 IMPA2        | ENSG00000146540 NP_115726.1  | ENSG00000161013 MGAT4B       | ENSG00000161998 Q8N221_HUMAN   | ENSG00000167851 CD300A       | ENSG00000171161 ZNF672         | ENSG00000182490 TSSK2        |
| ENSG00000185896 LAMP1          | ENSG00000186790 FOXO3        | ENSG00000196421 PRR17        | ENSG00000198881 ASB12        | ENSG00000204091 Q3Y452_HUMAN   | ENSG00000205033 Q96DJ9_HUMAN | ENSG00000077097 TOP2B          | ENSG00000095464 PDE6C        |
| ENSG00000103319 EEF2K          | ENSG00000107249 GLIS3        | ENSG00000107938 C10orf137    | ENSG00000116906 GNPAT        | ENSG00000135334 C6orf166       | ENSG00000136492 BRIP1        | ENSG00000137513 NARS2          | ENSG00000137965 IFI44        |
| ENSG00000143643 TTC13          | ENSG00000151665 PIGF         | ENSG00000163541 SUCCL1       | ENSG00000171492 LRRC8D       | ENSG00000173626 BET3L          | ENSG00000182890 GLUD2        | ENSG00000186688 DCDC1          | ENSG00000198556 ZNF789       |
| ENSG00000204261 PSMB9          | ENSG00000050555 LAMC3        | ENSG00000074219 TEAD2        | ENSG00000092616 KIF22        | ENSG00000085831 C1orf34        | ENSG00000099365 STX1B2       | ENSG00000100312 ACR            | ENSG00000101251 SELL12       |
| ENSG00000112658 SRP            | ENSG00000116774 OLFML3       | ENSG00000117013 KCNQ4        | ENSG00000125743 ASB12        | ENSG00000125813 PAX1           | ENSG00000135074 ADAM19       | ENSG00000138101 DTNB           | ENSG00000140406 MESDC1       |
| ENSG00000142484 TM4SF5         | ENSG00000157851 DPYSL5       | ENSG00000160211 G6PD         | ENSG00000164366 CCDC127      | ENSG00000174282 ZBTB4          | ENSG00000175866 BAIAP2       | ENSG00000178209 PLEC1          | ENSG00000179801 C8orf30A     |
| ENSG00000182218 KIAA1822       | ENSG00000182492 BGN          | ENSG00000186979 Q96BK8_HUMAN | ENSG00000187715 KLHDC6       | ENSG00000204603 Q69YW3_HUMAN   | ENSG00000205023 Q6ZSF1_HUMAN | ENSG0000014824 SLC30A9         | ENSG00000054392 HHAT         |
| ENSG00000068489 PRR11          | ENSG00000084092 C4orf14      | ENSG00000096093 EFHC1        | ENSG00000101367 TMEM147      | ENSG00000105677 MYH1           | ENSG00000110906 MYH1         | ENSG00000111490 Q9Y2I9_HUMAN   | ENSG00000113249 HAVCR1       |
| ENSG00000119636 C14orf45       | ENSG00000136213 CHST12       | ENSG00000150394 CDH8         | ENSG00000152642 GPD1L        | ENSG00000155115 C6orf51        | ENSG00000173215 Q96HQ8_HUMAN | ENSG00000182271 TMIGD1         | ENSG00000183726 TMEM50A      |
| ENSG00000069188 SDK2           | ENSG00000087245 MMP2         | ENSG00000089060 SLC24A6      | ENSG00000100027 YPEL1        | ENSG00000103248 MTHFSD         | ENSG00000105245 NUMBL        | ENSG00000105325 FZR1           | ENSG00000122783 C7orf49      |
| ENSG00000125817 CENPB          | ENSG00000126458 RRAS         | ENSG00000130940 CAS21        | ENSG00000131591 C1orf159     | ENSG00000132688 NES            | ENSG00000134369 NAV1         | ENSG00000135148 TRAFD1         | ENSG00000136856 SLC2A8       |
| ENSG00000145040 UCN2           | ENSG00000151640 DPYSL4       | ENSG00000155666 JMJ51        | ENSG00000165553 NGB          | ENSG00000166007 LOC399940      | ENSG00000166887 VPS39        | ENSG00000168994 C6orf145       | ENSG00000170631 ZNF16        |
| ENSG00000173894 CBX2           | ENSG00000174600 CMKLR1       | ENSG00000179036 VAMP2        | ENSG00000181625 GIYD2        | ENSG00000187258 NPSR1          | ENSG00000187741 FANCA        | ENSG00000196502 SULT1A1        | ENSG00000196614 NM_207462    |
| ENSG00000197864 WBSR23         | ENSG00000204455 XR_015868.1  | ENSG00000204619 PPP1R11      | ENSG00000009765 IYD          | ENSG000000979385 CEACAM1       | ENSG00000101343 CRNKL1       | ENSG00000111276 CDKN1B         | ENSG00000124935 SCGB1D2      |
| ENSG00000132207 SULT1A3        | ENSG00000135070 ISCA1        | ENSG00000138795 LEF1         | ENSG00000145687 SSBP2        | ENSG00000147853 AK3            | ENSG00000147872 ADFP         | ENSG00000155906 RMND1          | ENSG00000164675 IQUB         |
| ENSG00000168515 SCGB1D1        | ENSG00000175874 CREG2        | ENSG00000181690 PLAG1        | ENSG00000182463 TSHZ2        | ENSG00000183801 OLFML1         | ENSG00000188452 CERKL        | ENSG00000196565 HBE1           | ENSG00000198625 MDM4         |
| ENSG00000065882 TBC1D1         | ENSG00000100181 CSNK1E       | ENSG00000101004 NLP_HUMAN    | ENSG00000103021 CCDC113      | ENSG00000106012 IQCE           | ENSG00000106070 GRB10        | ENSG00000127191 TRAF2          | ENSG00000128510 CPA4         |
| ENSG00000129245 FXR2           | ENSG00000135363 LMO2         | ENSG00000137309 HMGAL        | ENSG00000137709 POU2F3       | ENSG00000138074 SLC5A6         | ENSG00000140025 C14orf143    | ENSG00000149792 MRPL49         | ENSG00000157014 TATDN2       |
| ENSG00000160688 FLAD1          | ENSG00000166401 SERPINB8     | ENSG00000170100 Q9GMU6-2     | ENSG00000173335 CST9         | ENSG00000180875 GREM2          | ENSG00000204273 HLA-DQB      | ENSG00000036549 ZZZ3           | ENSG00000047230 CTPS2        |
| ENSG00000047932 GOPC           | ENSG00000075391 RASAL2       | ENSG00000101544 ZNF508       | ENSG00000101844 ATG4A        | ENSG00000102804 TSC2D21        | ENSG00000105849 TWISTNB      | ENSG00000108306 FBXL20         | ENSG00000108587 GOSR1        |
| ENSG00000113615 SEC24A         | ENSG00000121989 ACVR2A       | ENSG00000131263 RNF12        | ENSG00000134046 MBD2         | ENSG00000134253 TRIM45         | ENSG00000136160 EDNRB        | ENSG00000138784 NP_060170.1    | ENSG00000138796 HADH         |
| ENSG00000145358 DDIT4L         | ENSG00000156531 PHF6         | ENSG00000162722 TRIM58       | ENSG00000172007 RAB33B       | ENSG00000175324 LSM1           | ENSG00000181392 C19orf46     | ENSG00000183336 BOLA2          | ENSG00000183604 NR_002453.4  |
| ENSG00000185984 NR_002593.1    | ENSG00000196549 MME          | ENSG00000198081 ZFP161       | ENSG00000198304 ZNF528       | ENSG00000203710 CR1            | ENSG00000203808 Q5T552_HUMAN |                                |                              |

|         |                                                                                                                                                                                                                                                                                                                                                                                                                                                                                                                                                                                                                                                                                                                                                                                                                                                                                                                                                                                                                                                                                                                                                                                                                                                                                                                                                                                                                                                                           |                                                                                                                                                                                                                                                                                                                                                                                                                                                                                                                                                                                                                                                                                                                                                                                                                                                                                                                                                                                                                                                                                                                                                                                                                                                                                                                                                                                                                                                                                                         |                                                                                                                                                                                                                                                                                                                                                                                                                                                                                                                                                                                                                                                                                                                                                                                                                                      |                                                                                                                                                                                                                                                                                                                                                                                                                                                                                                                                                                                                       |                                                                                                                                                                                                                                                                                                                                                                      |                                                                                                                                                                                                                                                                                                                                |                                                                                                                                                                                                                                                                                                                                |                                                                                                                                                                                                                                                                                           |
|---------|---------------------------------------------------------------------------------------------------------------------------------------------------------------------------------------------------------------------------------------------------------------------------------------------------------------------------------------------------------------------------------------------------------------------------------------------------------------------------------------------------------------------------------------------------------------------------------------------------------------------------------------------------------------------------------------------------------------------------------------------------------------------------------------------------------------------------------------------------------------------------------------------------------------------------------------------------------------------------------------------------------------------------------------------------------------------------------------------------------------------------------------------------------------------------------------------------------------------------------------------------------------------------------------------------------------------------------------------------------------------------------------------------------------------------------------------------------------------------|---------------------------------------------------------------------------------------------------------------------------------------------------------------------------------------------------------------------------------------------------------------------------------------------------------------------------------------------------------------------------------------------------------------------------------------------------------------------------------------------------------------------------------------------------------------------------------------------------------------------------------------------------------------------------------------------------------------------------------------------------------------------------------------------------------------------------------------------------------------------------------------------------------------------------------------------------------------------------------------------------------------------------------------------------------------------------------------------------------------------------------------------------------------------------------------------------------------------------------------------------------------------------------------------------------------------------------------------------------------------------------------------------------------------------------------------------------------------------------------------------------|--------------------------------------------------------------------------------------------------------------------------------------------------------------------------------------------------------------------------------------------------------------------------------------------------------------------------------------------------------------------------------------------------------------------------------------------------------------------------------------------------------------------------------------------------------------------------------------------------------------------------------------------------------------------------------------------------------------------------------------------------------------------------------------------------------------------------------------|-------------------------------------------------------------------------------------------------------------------------------------------------------------------------------------------------------------------------------------------------------------------------------------------------------------------------------------------------------------------------------------------------------------------------------------------------------------------------------------------------------------------------------------------------------------------------------------------------------|----------------------------------------------------------------------------------------------------------------------------------------------------------------------------------------------------------------------------------------------------------------------------------------------------------------------------------------------------------------------|--------------------------------------------------------------------------------------------------------------------------------------------------------------------------------------------------------------------------------------------------------------------------------------------------------------------------------|--------------------------------------------------------------------------------------------------------------------------------------------------------------------------------------------------------------------------------------------------------------------------------------------------------------------------------|-------------------------------------------------------------------------------------------------------------------------------------------------------------------------------------------------------------------------------------------------------------------------------------------|
| TCAGCGA | ENSG00000181631 P2RY13<br>ENSG00000007237 GAS7<br>ENSG00000129983 CBFA2T3<br>ENSG00000172780 RAB43<br>ENSG00000107485 GATA3<br>ENSG00000166573 GALR1                                                                                                                                                                                                                                                                                                                                                                                                                                                                                                                                                                                                                                                                                                                                                                                                                                                                                                                                                                                                                                                                                                                                                                                                                                                                                                                      | ENSG00000196632 WNK3<br>ENSG00000055483 USP36<br>ENSG00000130725 UBE2M<br>ENSG00000175325 PROF1<br>ENSG00000111704 NANOG<br>ENSG00000170370 EMX2                                                                                                                                                                                                                                                                                                                                                                                                                                                                                                                                                                                                                                                                                                                                                                                                                                                                                                                                                                                                                                                                                                                                                                                                                                                                                                                                                        | ENSG00000204480 PRAMEF19<br>ENSG00000100347 SAMM50<br>ENSG00000140497 SCAMP2<br>ENSG00000181444 ZNF467<br>ENSG00000112706 IMPG1<br>ENSG00000173013 CCDC96                                                                                                                                                                                                                                                                                                                                                                                                                                                                                                                                                                                                                                                                            | ENSG00000204491 PRAMEF18<br>ENSG00000101199 ARFGAP1<br>ENSG00000149489 ROM1<br>ENSG00000184887 BTBD6<br>ENSG00000118961 C2orf43<br>ENSG00000176165 FOXG1B                                                                                                                                                                                                                                                                                                                                                                                                                                             | ENSG00000204503 PRAMEF3<br>ENSG00000101210 EEF1A2<br>ENSG00000153404 NP_443141.2<br>ENSG00000186493 C5orf38<br>ENSG00000153790 C7orf31<br>ENSG00000176485 HRASL53                                                                                                                                                                                                    | ENSG00000105520 NP_073574.1<br>ENSG00000165810 BTNL9<br>ENSG00000152672 AQP8<br>ENSG00000184385 NP_001035800.1<br>ENSG00000187583 PLEKHN1<br>ENSG00000111444 LTA4H<br>ENSG00000135318 NTSE<br>ENSG00000169612 FAM103A1                                                                                                         | ENSG00000108379 WNT3<br>ENSG00000169184 NM_002430.2<br>ENSG0000009790 TRAF3IP3<br>ENSG00000162639 C1orf59<br>ENSG00000113569 NUP155<br>ENSG00000145476 CYP4V2<br>ENSG00000113569 NUP155<br>ENSG00000164258 NDUFS4<br>ENSG000001179136 QBNV9_HUMAN<br>ENSG00000172728 FUT10                                                     | ENSG00000127415 IDUA<br>ENSG00000170549 IRX1<br>ENSG00000078668 VDAC3<br>ENSG00000165685 C12orf59<br>ENSG00000197111 PCBP2<br>ENSG00000123201 GUCY1B2<br>ENSG00000172789 HOXC5<br>ENSG00000189140 Q6ZU77_HUMAN<br>ENSG00000124171 PARD6B<br>ENSG00000148798 INA<br>ENSG00000183508 FAM46C |
| TCAGCTC | ENSG000002028310 BRD9<br>ENSG00000136274 NACAD<br>ENSG00000173039 RELA<br>ENSG00000198952 SMG5<br>ENSG00000124767 GLO1<br>ENSG00000149970 CNKSR2<br>ENSG00000196110 ZNF699                                                                                                                                                                                                                                                                                                                                                                                                                                                                                                                                                                                                                                                                                                                                                                                                                                                                                                                                                                                                                                                                                                                                                                                                                                                                                                | ENSG00000065618 COL17A1<br>ENSG00000136689 IL1RN<br>ENSG00000176101 SSNA1<br>ENSG00000065534 MYLK<br>ENSG00000125107 CNOT1<br>ENSG00000154898 Q8IYA2_HUMAN                                                                                                                                                                                                                                                                                                                                                                                                                                                                                                                                                                                                                                                                                                                                                                                                                                                                                                                                                                                                                                                                                                                                                                                                                                                                                                                                              | ENSG00000074582 BCS1L<br>ENSG00000137073 UBAP2<br>ENSG00000183386 FHL3<br>ENSG000000081842 PCDHA10<br>ENSG00000132965 ALOX5AP<br>ENSG00000155099 TMEM55A                                                                                                                                                                                                                                                                                                                                                                                                                                                                                                                                                                                                                                                                             | ENSG00000101638 ST8SIA5<br>ENSG00000139651 ZNF740<br>ENSG00000184381 PLA2G6<br>ENSG00000106688 SLC1A1<br>ENSG00000133800 XLKD1<br>ENSG00000157193 LRP8                                                                                                                                                                                                                                                                                                                                                                                                                                                | ENSG00000103375 AQP8<br>ENSG00000152672 CLEC4F<br>ENSG00000186453 NP_001035800.1<br>ENSG00000111144 LTA4H<br>ENSG00000135318 NTSE<br>ENSG00000169612 FAM103A1                                                                                                                                                                                                        | ENSG00000114353 GNAI2<br>ENSG00000154478 GPR26<br>ENSG00000187583 PLEKHN1<br>ENSG00000112695 COX7A2<br>ENSG00000145423 SFRP2<br>ENSG00000169612 FAM103A1                                                                                                                                                                       | ENSG00000115844 DLX2<br>ENSG00000171954 NP_775754.1<br>ENSG00000188185 Q6ZQP8_HUMAN<br>ENSG00000113569 NUP155<br>ENSG00000145476 CYP4V2<br>ENSG00000113569 NUP155<br>ENSG00000164258 NDUFS4<br>ENSG000001179136 QBNV9_HUMAN<br>ENSG00000172728 FUT10                                                                           | ENSG00000123201 GUCY1B2<br>ENSG00000172789 HOXC5<br>ENSG00000189140 Q6ZU77_HUMAN<br>ENSG00000124171 PARD6B<br>ENSG00000148798 INA<br>ENSG00000183508 FAM46C                                                                                                                               |
| TCAGCTG | ENSG00000005238 KIAA1539<br>ENSG00000100379 KCTD17<br>ENSG00000137221 TJAP1<br>ENSG00000171045 TSNARE1<br>ENSG00000021488 SLC7A9<br>ENSG00000134532 SOX5<br>ENSG00000170448 NFXL1<br>ENSG00000185250 PPI16<br>ENSG00000059500 MRPL43<br>ENSG00000105640 RPL18A<br>ENSG00000144791 LMD1<br>ENSG00000185404 Q4ZG65_HUMAN<br>ENSG00000204157 NP_001013664.1<br>ENSG00000116741 RGS2<br>ENSG00000141458 NPC1<br>ENSG00000182150 C9orf102<br>ENSG00000066322 ELOVL1<br>ENSG00000139112 GABARAPL1<br>ENSG00000172283 PRY_HUMAN<br>ENSG00000006704 GTF2IRD1<br>ENSG00000140093 SERPINA10<br>ENSG00000157554 ERG<br>ENSG00000185849 Q9P194_HUMAN                                                                                                                                                                                                                                                                                                                                                                                                                                                                                                                                                                                                                                                                                                                                                                                                                                  | ENSG00000007516 BAIAP3<br>ENSG00000103426 CORO7<br>ENSG00000141385 AFG3L2<br>ENSG00000175699 C14orf48<br>ENSG000000095587 TLL2<br>ENSG00000139318 DUSP6<br>ENSG00000171735 CAMTA1<br>ENSG00000185418 TARSL2<br>ENSG00000076356 PLXNA2<br>ENSG00000118894 FAM86A<br>ENSG00000145626 UGT3A1<br>ENSG00000189231 PSG3<br>ENSG00000206190 ATP10A<br>ENSG00000117069 ST6GALNAC5<br>ENSG00000145103 ILDR1<br>ENSG00000183499 DPH3B<br>ENSG00000103710 RASL12<br>ENSG00000143028 SYPL2<br>ENSG00000180834 MAP6D1<br>ENSG000000081923 ATP9B1<br>ENSG00000143815 LBR<br>ENSG00000163145 C1QTNF7                                                                                                                                                                                                                                                                                                                                                                                                                                                                                                                                                                                                                                                                                                                                                                                                                                                                                                                   | ENSG00000011009 LYPLA2<br>ENSG00000107862 GBF1<br>ENSG00000142511 GPR32<br>ENSG00000175920 DOK7<br>ENSG00000111837 MAK<br>ENSG00000143995 MEIS1<br>ENSG00000173614 NMNAT1<br>ENSG00000198836 PPA1<br>ENSG00000077157 PPP1R12B<br>ENSG00000129103 SUMF2<br>ENSG00000157895 C12orf43<br>ENSG00000197174 O14606_HUMAN<br>ENSG00000065060 C6orf107<br>ENSG00000121350 NP_079130.2<br>ENSG00000151012 SLC7A11<br>ENSG00000185305 ARL15<br>ENSG00000106633 GCK<br>ENSG00000156345 CCRK<br>ENSG00000183798 EMILIN3<br>ENSG00000111846 GINT2<br>ENSG00000144057 SLC22A9<br>ENSG00000164181 ELOVL7                                                                                                                                                                                                                                            | ENSG0000013523 ANGEL1<br>ENSG00000109079 TNFAIP1<br>ENSG00000147394 ZNF185<br>ENSG00000181437 XR_017773.1<br>ENSG00000119698 KIAA1622<br>ENSG00000151229 SLC2A13<br>ENSG00000175746 NP_997328.1<br>ENSG0000013523 ANGEL1<br>ENSG00000109079 TNFAIP1<br>ENSG00000147394 ZNF185<br>ENSG00000181437 XR_017773.1<br>ENSG00000119698 KIAA1622<br>ENSG00000151229 SLC2A13<br>ENSG00000175746 NP_997328.1<br>ENSG0000013523 ANGEL1<br>ENSG00000109079 TNFAIP1<br>ENSG00000147394 ZNF185<br>ENSG00000181437 XR_017773.1<br>ENSG00000119698 KIAA1622<br>ENSG00000151229 SLC2A13<br>ENSG00000175746 NP_997328.1 | ENSG00000038382 TRIO<br>ENSG00000116273 PHF13<br>ENSG00000160211 G6PD<br>ENSG00000181437 XR_017773.1<br>ENSG00000120265 PCMT1<br>ENSG00000154813 DPH3<br>ENSG00000176142 TMEM39A<br>ENSG00000038382 TRIO<br>ENSG00000116273 PHF13<br>ENSG00000160211 G6PD<br>ENSG00000181437 XR_017773.1<br>ENSG00000120265 PCMT1<br>ENSG00000154813 DPH3<br>ENSG00000176142 TMEM39A | ENSG00000065029 ZNF76<br>ENSG00000123159 GIPC1<br>ENSG00000164385 C6orf195<br>ENSG00000124205 EDN3<br>ENSG00000163636 PSMD6<br>ENSG00000176171 BNIP3<br>ENSG00000065029 ZNF76<br>ENSG00000123159 GIPC1<br>ENSG00000164385 C6orf195<br>ENSG00000124205 EDN3<br>ENSG00000163636 PSMD6<br>ENSG00000176171 BNIP3                   | ENSG00000067182 TNFRSF1A<br>ENSG00000132688 NES<br>ENSG00000164493 C6orf122<br>ENSG00000124205 EDN3<br>ENSG00000164258 NDUFS4<br>ENSG000001179136 QBNV9_HUMAN<br>ENSG00000067182 TNFRSF1A<br>ENSG00000132688 NES<br>ENSG00000164493 C6orf122<br>ENSG00000124205 EDN3<br>ENSG00000164258 NDUFS4<br>ENSG000001179136 QBNV9_HUMAN | ENSG00000099910 SCARF2<br>ENSG00000134291 TMEM106C<br>ENSG00000166104 NP_776166.1<br>ENSG000000204870 Q6ZW03_HUMAN<br>ENSG00000009694 ODZ1<br>ENSG00000133116 KL<br>ENSG00000167914 GSDM1<br>ENSG00000185238 PRMT3                                                                        |
| TCAGGAA | ENSG00000059500 MRPL43<br>ENSG00000105640 RPL18A<br>ENSG00000144791 LMD1<br>ENSG00000185404 Q4ZG65_HUMAN<br>ENSG00000204157 NP_001013664.1<br>ENSG00000116741 RGS2<br>ENSG00000141458 NPC1<br>ENSG00000182150 C9orf102<br>ENSG00000066322 ELOVL1<br>ENSG00000139112 GABARAPL1<br>ENSG00000172283 PRY_HUMAN<br>ENSG00000006704 GTF2IRD1<br>ENSG00000140093 SERPINA10<br>ENSG00000157554 ERG<br>ENSG00000185849 Q9P194_HUMAN                                                                                                                                                                                                                                                                                                                                                                                                                                                                                                                                                                                                                                                                                                                                                                                                                                                                                                                                                                                                                                                | ENSG0000007516 BAIAP3<br>ENSG00000103426 CORO7<br>ENSG00000141385 AFG3L2<br>ENSG00000175699 C14orf48<br>ENSG000000095587 TLL2<br>ENSG00000139318 DUSP6<br>ENSG00000171735 CAMTA1<br>ENSG00000185418 TARSL2<br>ENSG00000076356 PLXNA2<br>ENSG00000118894 FAM86A<br>ENSG00000145626 UGT3A1<br>ENSG00000189231 PSG3<br>ENSG00000206190 ATP10A<br>ENSG00000117069 ST6GALNAC5<br>ENSG00000145103 ILDR1<br>ENSG00000183499 DPH3B<br>ENSG00000103710 RASL12<br>ENSG00000143028 SYPL2<br>ENSG00000180834 MAP6D1<br>ENSG000000081923 ATP9B1<br>ENSG00000143815 LBR<br>ENSG00000163145 C1QTNF7                                                                                                                                                                                                                                                                                                                                                                                                                                                                                                                                                                                                                                                                                                                                                                                                                                                                                                                    | ENSG00000011009 LYPLA2<br>ENSG00000107862 GBF1<br>ENSG00000142511 GPR32<br>ENSG00000175920 DOK7<br>ENSG00000111837 MAK<br>ENSG00000143995 MEIS1<br>ENSG00000173614 NMNAT1<br>ENSG00000198836 PPA1<br>ENSG00000077157 PPP1R12B<br>ENSG00000129103 SUMF2<br>ENSG00000157895 C12orf43<br>ENSG00000197174 O14606_HUMAN<br>ENSG00000065060 C6orf107<br>ENSG00000121350 NP_079130.2<br>ENSG00000151012 SLC7A11<br>ENSG00000185305 ARL15<br>ENSG00000106633 GCK<br>ENSG00000156345 CCRK<br>ENSG00000183798 EMILIN3<br>ENSG00000111846 GINT2<br>ENSG00000144057 SLC22A9<br>ENSG00000164181 ELOVL7                                                                                                                                                                                                                                            | ENSG0000013523 ANGEL1<br>ENSG00000109079 TNFAIP1<br>ENSG00000147394 ZNF185<br>ENSG00000181437 XR_017773.1<br>ENSG00000120265 PCMT1<br>ENSG00000154813 DPH3<br>ENSG00000176142 TMEM39A<br>ENSG00000038382 TRIO<br>ENSG00000116273 PHF13<br>ENSG00000160211 G6PD<br>ENSG00000181437 XR_017773.1<br>ENSG00000120265 PCMT1<br>ENSG00000154813 DPH3<br>ENSG00000176142 TMEM39A                                                                                                                                                                                                                             | ENSG00000065029 ZNF76<br>ENSG00000123159 GIPC1<br>ENSG00000164385 C6orf195<br>ENSG00000124205 EDN3<br>ENSG00000163636 PSMD6<br>ENSG00000176171 BNIP3<br>ENSG00000065029 ZNF76<br>ENSG00000123159 GIPC1<br>ENSG00000164385 C6orf195<br>ENSG00000124205 EDN3<br>ENSG00000163636 PSMD6<br>ENSG00000176171 BNIP3                                                         | ENSG00000067182 TNFRSF1A<br>ENSG00000132688 NES<br>ENSG00000164493 C6orf122<br>ENSG00000124205 EDN3<br>ENSG00000164258 NDUFS4<br>ENSG000001179136 QBNV9_HUMAN<br>ENSG00000067182 TNFRSF1A<br>ENSG00000132688 NES<br>ENSG00000164493 C6orf122<br>ENSG00000124205 EDN3<br>ENSG00000164258 NDUFS4<br>ENSG000001179136 QBNV9_HUMAN | ENSG00000099910 SCARF2<br>ENSG00000134291 TMEM106C<br>ENSG00000166104 NP_776166.1<br>ENSG000000204870 Q6ZW03_HUMAN<br>ENSG00000009694 ODZ1<br>ENSG00000133116 KL<br>ENSG00000167914 GSDM1<br>ENSG00000185238 PRMT3                                                                                                             |                                                                                                                                                                                                                                                                                           |
| TCAGGAC | ENSG00000059500 MRPL43<br>ENSG00000105640 RPL18A<br>ENSG00000144791 LMD1<br>ENSG00000185404 Q4ZG65_HUMAN<br>ENSG00000204157 NP_001013664.1<br>ENSG00000116741 RGS2<br>ENSG00000141458 NPC1<br>ENSG00000182150 C9orf102<br>ENSG00000066322 ELOVL1<br>ENSG00000139112 GABARAPL1<br>ENSG00000172283 PRY_HUMAN<br>ENSG00000006704 GTF2IRD1<br>ENSG00000140093 SERPINA10<br>ENSG00000157554 ERG<br>ENSG00000185849 Q9P194_HUMAN                                                                                                                                                                                                                                                                                                                                                                                                                                                                                                                                                                                                                                                                                                                                                                                                                                                                                                                                                                                                                                                | ENSG0000007516 BAIAP3<br>ENSG00000103426 CORO7<br>ENSG00000141385 AFG3L2<br>ENSG00000175699 C14orf48<br>ENSG000000095587 TLL2<br>ENSG00000139318 DUSP6<br>ENSG00000171735 CAMTA1<br>ENSG00000185418 TARSL2<br>ENSG00000076356 PLXNA2<br>ENSG00000118894 FAM86A<br>ENSG00000145626 UGT3A1<br>ENSG00000189231 PSG3<br>ENSG00000206190 ATP10A<br>ENSG00000117069 ST6GALNAC5<br>ENSG00000145103 ILDR1<br>ENSG00000183499 DPH3B<br>ENSG00000103710 RASL12<br>ENSG00000143028 SYPL2<br>ENSG00000180834 MAP6D1<br>ENSG000000081923 ATP9B1<br>ENSG00000143815 LBR<br>ENSG00000163145 C1QTNF7                                                                                                                                                                                                                                                                                                                                                                                                                                                                                                                                                                                                                                                                                                                                                                                                                                                                                                                    | ENSG00000011009 LYPLA2<br>ENSG00000107862 GBF1<br>ENSG00000142511 GPR32<br>ENSG00000175920 DOK7<br>ENSG00000111837 MAK<br>ENSG00000143995 MEIS1<br>ENSG00000173614 NMNAT1<br>ENSG00000198836 PPA1<br>ENSG00000077157 PPP1R12B<br>ENSG00000129103 SUMF2<br>ENSG00000157895 C12orf43<br>ENSG00000197174 O14606_HUMAN<br>ENSG00000065060 C6orf107<br>ENSG00000121350 NP_079130.2<br>ENSG00000151012 SLC7A11<br>ENSG00000185305 ARL15<br>ENSG00000106633 GCK<br>ENSG00000156345 CCRK<br>ENSG00000183798 EMILIN3<br>ENSG00000111846 GINT2<br>ENSG00000144057 SLC22A9<br>ENSG00000164181 ELOVL7                                                                                                                                                                                                                                            | ENSG0000013523 ANGEL1<br>ENSG00000109079 TNFAIP1<br>ENSG00000147394 ZNF185<br>ENSG00000181437 XR_017773.1<br>ENSG00000120265 PCMT1<br>ENSG00000154813 DPH3<br>ENSG00000176142 TMEM39A<br>ENSG00000038382 TRIO<br>ENSG00000116273 PHF13<br>ENSG00000160211 G6PD<br>ENSG00000181437 XR_017773.1<br>ENSG00000120265 PCMT1<br>ENSG00000154813 DPH3<br>ENSG00000176142 TMEM39A                                                                                                                                                                                                                             | ENSG00000065029 ZNF76<br>ENSG00000123159 GIPC1<br>ENSG00000164385 C6orf195<br>ENSG00000124205 EDN3<br>ENSG00000163636 PSMD6<br>ENSG00000176171 BNIP3<br>ENSG00000065029 ZNF76<br>ENSG00000123159 GIPC1<br>ENSG00000164385 C6orf195<br>ENSG00000124205 EDN3<br>ENSG00000163636 PSMD6<br>ENSG00000176171 BNIP3                                                         | ENSG00000067182 TNFRSF1A<br>ENSG00000132688 NES<br>ENSG00000164493 C6orf122<br>ENSG00000124205 EDN3<br>ENSG00000164258 NDUFS4<br>ENSG000001179136 QBNV9_HUMAN<br>ENSG00000067182 TNFRSF1A<br>ENSG00000132688 NES<br>ENSG00000164493 C6orf122<br>ENSG00000124205 EDN3<br>ENSG00000164258 NDUFS4<br>ENSG000001179136 QBNV9_HUMAN | ENSG00000099910 SCARF2<br>ENSG00000134291 TMEM106C<br>ENSG00000166104 NP_776166.1<br>ENSG000000204870 Q6ZW03_HUMAN<br>ENSG00000009694 ODZ1<br>ENSG00000133116 KL<br>ENSG00000167914 GSDM1<br>ENSG00000185238 PRMT3                                                                                                             |                                                                                                                                                                                                                                                                                           |
| TCAGGCG | ENSG00000078898 BP1L1<br>ENSG00000174837 EMR1<br>ENSG00000078401 EDN1<br>ENSG00000123595 RAB9A<br>ENSG00000178234 GALNT11<br>ENSG000000055950 MRPL43<br>ENSG00000130427 EPO<br>ENSG00000162571 TTL5<br>ENSG00000073754 CD5L<br>ENSG00000120656 TAF12<br>ENSG00000143493 INTS7<br>ENSG00000178229 ZNF543<br>perfect: TCAGGGA TCCCTGA<br>ENSG00000049768 FOXP3<br>ENSG00000136908 DPM2<br>ENSG00000171680 PLEKHG5<br>ENSG00000188743 Q9P169_HUMAN<br>ENSG00000124721 DNAH8<br>ENSG00000158406 HIST1H4H<br>ENSG00000003137 CYP26B1<br>ENSG00000101321 C20orf159<br>ENSG00000141699 NP_835227.1<br>ENSG00000167771 RCOR2<br>ENSG00000101892 ATP1B4<br>ENSG00000156535 CD109<br>ENSG00000188895 Q68DK7_HUMAN<br>ENSG00000063660 GPC1<br>ENSG00000158715 SLC45A3<br>ENSG00000188532 LOC653125<br>ENSG00000128609 NDUFA5<br>ENSG00000163293 NPAL1<br>ENSG00000006062 MAP3K14<br>ENSG00000135953 MFSD9<br>ENSG00000175155 YPEL2<br>ENSG00000123096 SSPN<br>ENSG00000160145 KALRN<br>ENSG000000055070 C1orf144<br>ENSG00000136059 VILL<br>ENSG00000178952 TUFM<br>ENSG00000203814 HIST2H2BF<br>ENSG00000069764 PLA2G10<br>ENSG00000143742 SRP9<br>ENSG00000168916 ZNF608<br>ENSG00000198710 Q9BWW1_HUMAN<br>ENSG00000003147 ICA1<br>ENSG00000168002 POLR2G<br>ENSG000000061794 MRPS35<br>ENSG00000138346 DNA2L<br>ENSG00000166170 BAG5<br>ENSG00000100991 TRPC4AP<br>ENSG00000166546 Q3B7T3_HUMAN<br>ENSG00000204603 Q69YW3_HUMAN<br>ENSG00000115145 STAM2<br>ENSG00000170959 CDC5 | ENSG00000078898 BP1L1<br>ENSG00000174945 AMZ1_HUMAN<br>ENSG00000083223 ZCCHC6<br>ENSG00000124343 XG<br>ENSG00000178234 GALNT11<br>ENSG000000055950 MRPL43<br>ENSG00000135443 KRT85<br>ENSG00000168255 Q8IZ67_HUMAN<br>ENSG00000087916 SLC6A14<br>ENSG00000129472 RAB2B<br>ENSG00000145391 SETD7<br>ENSG00000185973 TMLHE<br>hsa-miR-125b TCCTGAgacccctaactgtgta 0<br>ENSG00000049768 FOXP3<br>ENSG00000140678 ITGAX<br>ENSG00000172531 PPP1CA<br>ENSG00000188743 Q9P169_HUMAN<br>ENSG00000124721 DNAH8<br>ENSG00000158406 HIST1H4H<br>ENSG00000003137 CYP26B1<br>ENSG00000101321 C20orf159<br>ENSG00000141699 NP_835227.1<br>ENSG00000167771 RCOR2<br>ENSG00000101892 ATP1B4<br>ENSG00000156535 CD109<br>ENSG00000188895 Q68DK7_HUMAN<br>ENSG00000063660 GPC1<br>ENSG00000158715 SLC45A3<br>ENSG00000188532 LOC653125<br>ENSG00000128609 NDUFA5<br>ENSG00000163293 NPAL1<br>ENSG00000006062 MAP3K14<br>ENSG00000135953 MFSD9<br>ENSG00000175155 YPEL2<br>ENSG00000123096 SSPN<br>ENSG00000160145 KALRN<br>ENSG000000055070 C1orf144<br>ENSG00000136059 VILL<br>ENSG00000178952 TUFM<br>ENSG00000203814 HIST2H2BF<br>ENSG00000069764 PLA2G10<br>ENSG00000143742 SRP9<br>ENSG00000168916 ZNF608<br>ENSG00000198710 Q9BWW1_HUMAN<br>ENSG00000003147 ICA1<br>ENSG00000168002 POLR2G<br>ENSG000000061794 MRPS35<br>ENSG00000138346 DNA2L<br>ENSG00000166170 BAG5<br>ENSG00000100991 TRPC4AP<br>ENSG00000166546 Q3B7T3_HUMAN<br>ENSG00000204603 Q69YW3_HUMAN<br>ENSG00000115145 STAM2<br>ENSG00000170959 CDC5 | ENSG00000078898 BP1L1<br>ENSG00000174945 AMZ1_HUMAN<br>ENSG00000083223 ZCCHC6<br>ENSG00000124343 XG<br>ENSG00000178234 GALNT11<br>ENSG000000055950 MRPL43<br>ENSG00000135443 KRT85<br>ENSG00000168255 Q8IZ67_HUMAN<br>ENSG00000087916 SLC6A14<br>ENSG00000129472 RAB2B<br>ENSG00000145391 SETD7<br>ENSG00000185973 TMLHE<br>hsa-miR-125b TCCTGAgacccctaactgtgta 0<br>ENSG00000049768 FOXP3<br>ENSG00000140678 ITGAX<br>ENSG00000172531 PPP1CA<br>ENSG00000188743 Q9P169_HUMAN<br>ENSG00000124721 DNAH8<br>ENSG00000158406 HIST1H4H<br>ENSG00000003137 CYP26B1<br>ENSG00000101321 C20orf159<br>ENSG00000141699 NP_835227.1<br>ENSG00000167771 RCOR2<br>ENSG00000101892 ATP1B4<br>ENSG00000156535 CD109<br>ENSG00000188895 Q68DK7_HUMAN<br>ENSG00000063660 GPC1<br>ENSG00000158715 SLC45A3<br>ENSG00000188532 LOC653125<br>ENSG0000012 |                                                                                                                                                                                                                                                                                                                                                                                                                                                                                                                                                                                                       |                                                                                                                                                                                                                                                                                                                                                                      |                                                                                                                                                                                                                                                                                                                                |                                                                                                                                                                                                                                                                                                                                |                                                                                                                                                                                                                                                                                           |

TCAGTGC ENSG00000126067|PSMB2 ENSG00000143761|ARF1 ENSG00000144579|CTDSP1 ENSG00000157600|TMEM164 ENSG00000166136|NDUFB8 ENSG00000167566|KIAA1602 ENSG00000167861|C17orf28 ENSG00000185838|GNB1L ENSG00000196588|MKL1\_HUMAN ENSG00000198920|KIAA0753 ENSG00000204603|Q69YW3\_HUMAN ENSG00000205866|Q6A109\_HUMAN ENSG00000209413|REV3L ENSG000002038945|MSR1 ENSG000002046653|GPM6B ENSG000002056277|SUHW3 ENSG000002065135|GNAI3 ENSG000002070718|AP3M2 ENSG000002085276|EVI1 ENSG000002095787|WAC ENSG000002107938|C10orf137 ENSG000002108688|CCL7 ENSG000002108960|MMD ENSG000002113319|RASGRF2 ENSG000002116750|UCHL5 ENSG000002134070|TRAK2 ENSG000002134852|CLOCK ENSG000002138592|USP8 ENSG000002139508|SLC46A3 ENSG000002141298|SSH2 ENSG000002141682|PMAIP1 ENSG000002152413|HOMER1 ENSG000002152527|PLEKHH2 ENSG000002158665|SLC5A11 ENSG000002163681|SLMAP ENSG000002166452|C11orf17 ENSG000002167088|SNRPD1 ENSG000002167220|DHDD2 ENSG000002170242|USP47 ENSG000002181847|VSI9 ENSG000002186105|Q7Z2Q7\_HUMAN ENSG000002186480|INSIG1 ENSG000002186522|SEPT10 ENSG000002188404|SELL ENSG00000219993|HMG3B ENSG000002104888|SLC17A7 ENSG000002106948|AKNA ENSG000002107819|SFXN3 ENSG000002108759|KRT32 ENSG000002114739|ACVR2B ENSG000002123643|SLC36A1 ENSG000002129351|ILF3 ENSG000002135740|SLC9A5 ENSG000002136699|SMPD4 ENSG000002136918|NP\_001038941.1 ENSG000002137522|RNF121 ENSG000002141034|C17orf39 ENSG000002148334|PTGES2 ENSG000002148719|DNAJB12 ENSG000002149260|CAPN5 ENSG000002152117|Q6ZWB7\_HUMAN ENSG000002152284|TCF7L1 ENSG000002162227|TAF6L ENSG000002162772|ATF3 ENSG000002168243|GNMG4 ENSG000002170608|FOXA3 ENSG000002171873|ADRA1D ENSG000002176911|Q9HAM1\_HUMAN ENSG000002182352|C17orf77 ENSG000002185744|TNT\_HUMAN ENSG000002204310|AGPAT1 ENSG0000020008197|TFAP2D ENSG000002042813|ZBPB ENSG0000020086300|SNX10 ENSG000002106105|GARS ENSG000002108239|TBC1D12 ENSG000002108960|MMD ENSG000002109381|ELF2 ENSG000002111215|PRR4 ENSG000002111300|C12orf30 ENSG000002112237|CCNC ENSG000002118777|ABCG2 ENSG000002121903|ZSCAN20 ENSG000002132341|RAN ENSG000002142799|NPEPPS ENSG000002152763|WDR78 ENSG000002153066|TXNDC11 ENSG000002163637|PRICKLE2 ENSG000002164099|PRSS12 ENSG000002165185|KIAA1958 ENSG000002165194|PCDH19 ENSG000002165914|TTC7B ENSG000002171208|NETO2 ENSG000002173261|PLAC8L1 ENSG000002176871|WSB2 ENSG000002179930|ZNF648 ENSG000002181798|C2orf52 ENSG000002184983|NDUFA6 ENSG000002196233|LCOR ENSG000002198948|MFAP3L ENSG000002205604|Q6ZUP5\_HUMAN ENSG00000242445|RETSAT ENSG000002104386|XR\_017860.1 ENSG000002104783|KCNN4 ENSG000002109917|ZNF259 ENSG000002113073|SLC4A9 ENSG000002144560|VGLL4 ENSG000002145949|SGK85\_HUMAN ENSG000002151474|FRMD4A ENSG000002155087|ODF1 ENSG000002166272|C10orf26 ENSG000002166540|ZNF47 ENSG000002167080|B4GALNT2 ENSG000002167207|NOD2 ENSG000002167272|POP5 ENSG000002174306|ZHX3 ENSG000002174804|FZD4 ENSG000002177721|NF\_001014301.1 ENSG000002177947|ODF3 ENSG000002186207|LCESA5 ENSG000002186815|TPCN1 ENSG000002186910|SERPINA11 ENSG000002188394|GPR21 ENSG000002198369|SPRED2 ENSG000002204558|Q9BYX6\_HUMAN ENSG0000022042813|ZBPB ENSG000002069248|NUP133 ENSG000002076650|GPATCH1 ENSG000002079332|SAR1A ENSG000002010752|MIB1 ENSG000002102387|TAF7L ENSG000002102974|CTCF ENSG000002106993|CDC37L1 ENSG000002113460|BXDC2 ENSG000002118495|PLAGL1 ENSG000002119969|HELLS ENSG000002130224|LRCH2 ENSG000002135747|G3BP2 ENSG000002138757|EGF ENSG000002144366|GULP1 ENSG000002144407|PTHR2 ENSG000002145687|SSBP2 ENSG000002146151|HMGCLL1 ENSG000002152463|OLAH ENSG000002157542|KCNJ6 ENSG000002160131|NP\_001017980.1 ENSG000002163950|SLBP ENSG000002167383|ZNF229 ENSG000002168214|RBPJ ENSG000002170385|SLC30A1 ENSG000002170471|KIAA1219 ENSG000002170802|FOXN2 ENSG000002174446|SNAPC5 ENSG000002182628|FAM33A ENSG000002185068|GTF2H5 ENSG000002188021|UBQLN2 ENSG000002205293|Q76B50\_HUMAN ENSG00000205073|HOXA11 ENSG000002054523|KIF1B ENSG000002073605|GSFML ENSG000002103061|SLC7A60S ENSG000002103353|UBFD1 ENSG000002132517|GPR172B ENSG000002140830|TXNL4B ENSG000002156973|PDE6D ENSG000002162771|FAM71A ENSG000002163207|IVL ENSG000002168970|PLA2G4B ENSG000002185722|ANKFY1 ENSG000002187173|LCE2A ENSG000002188385|C10orf39 ENSG000002198216|CACNA1E ENSG000002005889|ZFX ENSG0000020012983|MAP4K5 ENSG000002080819|CPOX ENSG0000020080947|Q8IVE0\_HUMAN ENSG0000020088205|DDX18 ENSG0000020091138|SLC26A3 ENSG000002104331|IMPAD1 ENSG000002108700|CCL8 ENSG000002111785|RIC8B ENSG000002113790|EHHADH ENSG000002119723|COQ6 ENSG000002121406|ZNF549 ENSG000002128845|CCPG1 ENSG000002129204|USP6 ENSG000002131269|ABC7 ENSG000002140043|ZADH1 ENSG000002143469|SYT14 ENSG000002150681|RGS18 ENSG000002163029|SMC6 ENSG000002164796|CSMD3 ENSG000002172955|ADH6 ENSG000002172969|LOC285299 ENSG000002175818|HS3S75 ENSG000002176293|ZNF135 ENSG000002176746|MAGEB6 ENSG000002182333|LIPF ENSG000002189190|ZNF600 ENSG000002196917|GPR81 ENSG000002197208|SLC22A4 ENSG000002198482|ZNF808 ENSG000002198889|WDR40B ENSG000002203730|TEDDM1 ENSG000002203857|HSD3B1 ENSG000002203859|HSD3B2 ENSG00000205669|ACOT6 ENSG0000020008323|PLEKHG6 ENSG0000020095383|TBC1D2 ENSG000002104903|LYL1 ENSG000002104967|NOVA2 ENSG000002111252|SH2B3 ENSG000002112659|PARC\_HUMAN ENSG000002117215|PLA2G2D ENSG00000218058|MLL ENSG000002130702|LAMA5 ENSG000002132275|KIAA0409 ENSG000002132915|PDE6A ENSG000002139714|MORN3 ENSG000002140287|HDC ENSG000002140564|FURIN ENSG000002142733|MAP3K6 ENSG000002145990|GFOD1 ENSG000002151692|RNF144 ENSG000002167483|FAM129C ENSG000002172116|CD8B ENSG000002173545|ZNF622 ENSG000002175792|RUVBL1 ENSG000002178026|C22orf36 ENSG000002183864|TOB2 ENSG000002185187|SIGIRR ENSG000002185555|C5orf20 ENSG000002189280|GJB5 ENSG000002189321|NR\_002940.1 ENSG000002072274|TFRC ENSG0000020082213|C5orf22 ENSG000002101049|SGK2 ENSG000002102678|FGF9 ENSG000002113643|RARS ENSG000002115540|PRET3 ENSG000002123570|RAB9B ENSG000002123983|ACSL3 ENSG000002132122|SPATA6 ENSG000002133101|CCNA1 ENSG000002137941|TTLL7 ENSG000002143437|ARNT ENSG000002144644|GADD1 ENSG000002152413|HOMER1 ENSG000002154485|MMP21 ENSG000002166801|FAM111A ENSG000002168566|C6orf151 ENSG000002170786|NP\_620419.2 ENSG000002176624|RKHD2 ENSG000002196167|NP\_997312.1 ENSG000002198833|UBE2J1 ENSG0000020205110|Q6TKS8\_HUMAN ENSG0000020005010|DHX33 ENSG00000211454|RABGAP1 ENSG0000020089101|C20orf26 ENSG0000020096384|HSP90AB1 ENSG000002121289|CCDC123 ENSG000002124574|ABCC10 ENSG000002136828|RALGPS1 ENSG000002141699|NP\_835227.1 ENSG000002142552|RCN3 ENSG000002142973|CYP4B1 ENSG000002151360|ALLC ENSG000002157837|PSL4\_HUMAN ENSG000002158470|B4GALT5 ENSG000002166426|CRABP1 ENSG000002170454|KRT75 ENSG000002173264|GPR137 ENSG000002180083|WFDC11 ENSG000002184314|Q9H9T1\_HUMAN ENSG000002185122|HSF1 ENSG000002188229|TUBB2C ENSG000002188385|C10orf39 ENSG000002188700|NAIP ENSG0000020082497|SERTAD4 ENSG000002008696|HSD17B2 ENSG0000020097033|SH3GLB1 ENSG000002113361|CDH6 ENSG000002118733|NDUFB3 ENSG000002119013|NDUFB3 ENSG000002119523|ALG2 ENSG000002125676|THOC2 ENSG000002129596|CDO1 ENSG000002137770|CTDSP2 ENSG000002138615|CILP ENSG000002141446|ESCO1 ENSG000002143155|TIPRL ENSG000002145147|SLIT2 ENSG000002147687|TATDN1 ENSG000002149100|PCID1 ENSG000002157625|MAP3K7IP3 ENSG000002159904|ZNF225 ENSG000002172869|DMXL1 ENSG000002172955|ADH6 ENSG000002175885|ZNF611 ENSG000002177111|XR\_016777.1 ENSG000002179978|Q59G16\_HUMAN ENSG000002198878|Q9P1L8\_HUMAN ENSG0000020041880|PARP3 ENSG0000020055950|MRPL43 ENSG0000020090554|FLT3LG ENSG000002103490|PYCARD ENSG000002103855|CD276 ENSG000002112655|PTK7 ENSG000002124208|UBE2V1 ENSG000002129250|KIF1C ENSG000002130517|PGPEP1 ENSG000002136697|IL1F10 ENSG000002137059|HMGAL1 ENSG000002142583|SLC2A5 ENSG000002164385|C6orf195 ENSG000002166473|PKD1L2 ENSG000002167323|STIM1 ENSG000002167881|SRP68 ENSG000002168671|UGT3A2 ENSG000002169738|DCXR ENSG000002172033|QRS ENSG000002172155|LCE1D ENSG000002174516|PEL13 ENSG000002177370|TIMM22 ENSG000002182851|NP\_835466.1 ENSG000002186029|Q9NSZ8\_HUMAN ENSG000002186226|LCE1E ENSG000002188488|SERPINA5 ENSG000002197088|NM\_207488 ENSG000002197417|KARL ENSG000002198920|KIAA0753 ENSG0000020205136|Q3KRG0\_HUMAN ENSG000002005059|CCDC109B ENSG000002062725|APBP2 ENSG000002079112|CDH17 ENSG000002080947|Q8IVE0\_HUMAN ENSG00000200086712|CXorf15 ENSG000002094916|CBX5 ENSG000002111619|FAM20B ENSG000002118217|ATF6 ENSG000002123124|WWP1 ENSG000002124935|SCGB1D2 ENSG000002134109|EDEM1 ENSG000002134253|TRIM45 ENSG000002136414|LRCH1 ENSG000002136436|CALCOCO2 ENSG000002139746|RBM26 ENSG000002147010|SH3KBP1 ENSG000002167721|TSR1 ENSG000002181472|ZBTB2 ENSG000002181847|VSI9 ENSG000002185591|SP1 ENSG000002188393|CLEC2A ENSG000002189290|XR\_018254.1 ENSG000002197085|Q6EKK1\_HUMAN ENSG000002204969|PCDH2 ENSG0000020047644|WWC3 ENSG0000020057704|TMCC3 ENSG000002104611|SH2D4A ENSG000002112062|MAPK14 ENSG000002116731|PRDM2 ENSG000002121274|PAPD5 ENSG000002124134|KCNK1 ENSG000002125633|CCDC93 ENSG000002131845|ZNF304 ENSG000002138629|UBL7 ENSG000002140263|SORD ENSG000002140538|NTRK3 ENSG000002157184|CPT2 ENSG000002163017|ACTG2 ENSG000002165699|TSC1 ENSG000002183444|NR\_002822.2 ENSG000002187607|ZNF286A ENSG000002189037|DUSP21 ENSG000002198566|ZNF658 ENSG0000020203662|OR2M1P ENSG000002024319|C4A ENSG000002024342|C4B ENSG000002024443|Q562T6\_HUMAN ENSG0000020205726|ITSN1 ENSG00000211295|TTC19 ENSG000002082068|WDR70 ENSG0000020095587|TLL2 ENSG000002106537|TSPAN13 ENSG000002108001|EBF3 ENSG000002118965|WDR35 ENSG000002122550|KLHL7 ENSG000002123096|SSPN ENSG000002138061|CYP1B1 ENSG000002138286|KIAA0974 ENSG000002143224|PPOX ENSG000002146416|AIG1 ENSG000002151414|NEK7 ENSG000002151693|DEF2 ENSG000002153006|NP\_776190.1 ENSG000002153187|HNRPU ENSG000002164308|NP\_071745.1 ENSG000002168811|IL12A ENSG000002170848|PSG6 ENSG000002171792|C12orf32 ENSG000002173452|NP\_689987.2 ENSG000002176641|RNF152 ENSG000002177200|CHD9 ENSG000002183668|PSG9 ENSG000002185272|RBM11 ENSG000002187231|SESTD1 ENSG000002188868|ZNF563 ENSG000002197054|ZNF763 ENSG000002197619|ZNF615 ENSG000002197894|ADH5 ENSG000002198718|KIAA0423 ENSG000002204006|C1orf185 ENSG000002204201|Q49A40\_HUMAN ENSG000002024699|LOC129870 ENSG00000204705|LOC129870 ENSG00000204954|Q69YU5\_HUMAN ENSG000002068383|INPP5A ENSG000002110324|IL10RA ENSG000002119614|CHX10 ENSG000002127377|CRYGN ENSG000002127388|NM\_198455.2 ENSG000002132911|NMUR2 ENSG000002143126|CELSR2 ENSG000002157823|AP3S2 ENSG000002160271|RALGDS ENSG000002161850|KRT82 ENSG000002162552|WNM74 ENSG000002163009|C2orf48 ENSG000002166557|TMED3 ENSG000002171798|KNDCC1 ENSG000002182871|COL18A1 ENSG000002186407|CD300E ENSG000002065665|SEC61A2 ENSG000002106305|MCA2\_HUMAN ENSG000002113269|RNF130 ENSG000002113594|LIFR ENSG000002130024|PHF10 ENSG000002136048|NP\_060840.2 ENSG000002136546|SCN7A ENSG000002137251|TINAG ENSG000002139357|SLC5A8 ENSG000002146701|MDH2 ENSG000002150687|PRSS23 ENSG000002156265|C21orf7 ENSG000002156869|FRRS1 ENSG000002166881|K0286\_HUMAN ENSG000002167257|RNF214 ENSG000002171209|CSN3 ENSG000002179195|ZNF664 ENSG000002181915|C10orf22 ENSG000002182585|EPGN ENSG000002204699|LOC129870 ENSG000002024705|LOC129870 ENSG00000204939|SLC4A1 ENSG000002005381|MPO ENSG00000213288|MAN2B2 ENSG00000213374|NUB1 ENSG000002067606|PRKCZ ENSG000002073111|MCM2 ENSG000002102977|ACD ENSG000002103126|AXIN1 ENSG000002106459|NRF1 ENSG000002107147|KCN11 ENSG000002107815|PEO1 ENSG000002119782|FKBP1B ENSG000002121266|NP\_116072.2 ENSG000002127266|NP\_116072.2 ENSG000002127445|PIN1 ENSG000002130038|EFCAB4B ENSG000002130768|SMPDL3B ENSG000002142541|RPL13A ENSG000002142657|PGD ENSG000002159712|ANKRD18B ENSG000002160563|CRSP8 ENSG000002164038|NP\_849155.2 ENSG000002164366|CCDC127 ENSG000002166118|SPATA19 ENSG000002167992|VWCE ENSG000002168496|FEN1 ENSG000002168671|UGT3A2 ENSG000002170367|CST5 ENSG0000020203927|Q6ZNY1\_HUMAN ENSG0000020204805|FAM27E3 ENSG0000020204807|FAM27E2 ENSG000002101327|PPY1 ENSG000002104435|STMN2 ENSG000002117174|C1orf181 ENSG000002123545|C6orf66 ENSG000002130449|ZSWIM6 ENSG000002136688|ILLF9 ENSG000002136888|ATP6V1G1 ENSG000002138795|LEF1 ENSG000002139842|CUL4A ENSG000002156642|NPTN ENSG000002156795|C8orf32 ENSG000002157540|DYRK1A ENSG000002163347|CLDN1 ENSG000002163377|FAM19A4 ENSG000002167081|PBX3 ENSG000002168958|C2orf33 ENSG000002169762|TAPT1 ENSG000002173221|GLRX ENSG000002188641|DPYD ENSG000002197203|Q8NAJ9\_HUMAN ENSG000002024261|PSMB9 ENSG000002026538|VGLL3 ENSG000002088899|K0552\_HUMAN ENSG000002102898|NUTF2 ENSG000002110711|AIP ENSG000002115594|ILLR1 ENSG000002125869|C2orf103 ENSG000002126106|TMEM53 ENSG000002126467|TSKS\_HUMAN ENSG000002133661|SFTPD ENSG000002148358|GPR107 ENSG000002159388|BTG2 ENSG000002167600|CYP2S1 ENSG000002171596|NMUR1 ENSG000002182606|TRAK1 ENSG000002186118|Q6PEX7\_HUMAN ENSG000002206152|Q6ZV52\_HUMAN ENSG000002052841|TTC17 ENSG0000020084073|ZMFSTE24 ENSG000002104324|NP\_057218.1 ENSG000002105497|ZNF175 ENSG000002113494|PRLR ENSG000002116560|SFPQ ENSG000002119185|ITGB1BP1 ENSG000002124749|COL21A1 ENSG000002129083|COPB1 ENSG000002132631|C20orf79 ENSG000002147684|NDUFB9 ENSG000002154845|PPP4R1 ENSG000002156006|NAT2 ENSG000002163029|SMC6 ENSG000002165240|ATP7A ENSG000002165675|ENOX2 ENSG000002166927|MS4A7 ENSG000002171612|SLC25A33 ENSG000002180408|Q8NSG0\_HUMAN ENSG000002196850|PPTC7 ENSG000002196885|Q9HAZ8\_HUMAN ENSG000002198551|ZNF627 ENSG000002203864|C1orf137 ENSG000002204597|ZNF818 TCATGTA ENSG00000206025|OSBP1 ENSG000002099995|SF3A1 ENSG000002104848|KCNA7 ENSG000002105738|SIPA1L3 ENSG000002108671|PSMD11 ENSG000002111640|GAPDH ENSG000002112514|CUTA ENSG000002114656|KIAA1257 ENSG000002122359|ANXA11 ENSG000002125954|FNFB ENSG000002133026|MYH10 ENSG000002133275|CSNK1G2 ENSG000002143748|NLM ENSG000002145949|SGK85\_HUMAN ENSG000002146374|RSPO3 ENSG000002151364|KCTD14 ENSG000002151465|CDC123 ENSG000002158864|NDUFS2 ENSG000002163993|S100P ENSG000002167862|ICT1 ENSG000002169598|DFFB ENSG000002170379|NP\_775949.1 ENSG000002183684|THOC4 ENSG000002187456|RDM1 ENSG000002189069|NP\_001013732.1 ENSG000002024531|POU5F1P1 ENSG0000020205335|GLYCAM1 ENSG000002020669|NP\_00101663.1 ENSG000002057252|SOAT1 ENSG000002066084|DIP2B ENSG000002080986|NDC80 ENSG000002090530|LEPREL1 ENSG000002112146|FBXO9 ENSG000002112541|PDE10A ENSG000002116266|STXB3 ENSG000002116560|SFPQ ENSG000002117614|SYF2 ENSG0000021131375|CAPN7 ENSG000002134987|WDR36 ENSG000002139324|TMTC3 ENSG000002147687|TATDN1 ENSG000002148672|GLUDP5 ENSG000002154007|ASB17 ENSG000002162769|FLVC1\_HUMAN ENSG000002163618|CADPS ENSG000002164182|NDUFA12L ENSG000002168772|CXXC4 ENSG000002173376|C4orf31 ENSG000002174429|ABRA ENSG000002179295|PTPN11 ENSG000002185278|ZBTB37 ENSG000002186665|C17orf58 ENSG000002203788|Q6ZMM1\_HUMAN ENSG000002204334|ALL162\_HUMAN TCATGTT ENSG000002007392|LUC7L ENSG0000020055130|CULL1 ENSG0000020064309|CDON ENSG000002112149|CD83 ENSG000002113119|BAG3 ENSG000002124226|ZNF313 ENSG000002127952|STYXL1 ENSG000002131943|C19orf12 ENSG000002134490|C18orf45 ENSG000002146007|ZMAT2 ENSG000002146021|KLHL3 ENSG000002148337|CI21 ENSG000002148842|CNM22 ENSG000002151631|Q9P2A3\_HUMAN ENSG000002162415|ZSWIM5 ENSG000002162490|C1orf187 ENSG000002166578|IQCD ENSG000002170275|CRTAP ENSG000002175182|FAM131A ENSG000002179393|Q9NRE4\_HUMAN ENSG000002180884|ZNF792 ENSG000002196090|PTPR7 ENSG000002204459|Q6ZU55\_HUMAN ENSG0000020204876|Q6ZVM9\_HUMAN ENSG000002026550|LOC285346 ENSG00000210244|ZNF207 ENSG00000210270|STARD3NL ENSG000002303030|ZCCHC8 ENSG00000278668|VDAC3 ENSG000002085832|EPS15 ENSG000002090686|USP48 ENSG000002101132|PFDN4 ENSG000002106688|SLC1A1 ENSG000002111802|TTRAP ENSG000002112902|SEMA5A ENSG000002113163|COL4A3BP ENSG000002114446|IFT57 ENSG000002116761|CTH ENSG000002120278|PLEKHG1 ENSG0000021

TCATTA ENSG00000006659|LGALS14 ENSG000000023191|RNH1 ENSG000000077080|ACTL6B ENSG000000088882|CPXM1 ENSG000000093167|LRRFIP2 ENSG000000100448|CTSG ENSG000000101161|PRPF6 ENSG000000101391|CDK5RAP1 ENSG000000104897|SF3A2 ENSG000000104946|TBC1D17 ENSG000000105198|LGALS13 ENSG000000106123|EPHB6 ENSG000000113739|STC2 ENSG000000122852|SETPA1B ENSG000000124678|TCP11 ENSG000000125788|DEFB126 ENSG000000132716|WDR42A ENSG000000160678|S100A1 ENSG000000160789|LMNA ENSG000000164896|FASTK ENSG000000167644|C19orf33 ENSG000000168261|GDNF ENSG000000168894|NP\_057578.1 ENSG000000169230|PRELID1 ENSG000000172965|Q96C48\_HUMAN ENSG000000173027|WBP1 ENSG000000174206|NP\_689563.3 ENSG000000179562|GCC1 ENSG000000180483|DEFB119 ENSG000000182698|NM\_001007089 ENSG000000183011|LSMD1 ENSG000000185811|IKZF1 ENSG000000185978|H2AFB3 ENSG000000186676|EEF1G ENSG000000188038|NRN1L ENSG000000196378|Q9BSZ0\_HUMAN ENSG000000197253|TRYA1\_HUMAN ENSG000000197901|SLC22A6 ENSG000000198082|H2AFB1 ENSG000000198307|H2AFB2 ENSG00000012174|MBTPS2 ENSG000000042317|SPATA7 ENSG000000049167|ERCC8 ENSG000000064651|SLC12A2 ENSG000000067064|ID1I ENSG000000079112|CDH17 ENSG000000081019|RSBN1 ENSG000000104497|SNX16 ENSG000000106278|PTPRZ1 ENSG000000108100|CCNY ENSG000000110318|KIAA1377 ENSG000000115665|SLC5A7 ENSG000000115963|RND3 ENSG000000116171|SCP2 ENSG000000117625|RCOR3 ENSG000000134146|ATPBD4 ENSG000000137434|C6orf52 ENSG000000137513|NARS2 ENSG000000138002|IFT172 ENSG000000143971|ETA1I ENSG000000153976|HS3ST3A1 ENSG000000163807|KIAA1143 ENSG000000166441|RPL27A ENSG000000168615|ADAM9 ENSG000000175874|CREG2 ENSG000000196741|CXorf24 ENSG000000204019|NP\_001017978.1 ENSG000000204954|Q69YU5\_HUMAN ENSG000000205144|Q6ZV43\_HUMAN TCATTTA ENSG00000001460|C1orf201 ENSG000000064607|SFRS14 ENSG000000089169|RPH3A ENSG000000100888|CHD8 ENSG000000103742|NP\_066013.1 ENSG000000116237|ICMT ENSG000000130540|SULT4A1 ENSG000000130711|PRDM12 ENSG000000133065|SLC41A1 ENSG000000137496|I18BP\_HUMAN ENSG000000137760|ALKBH8 ENSG000000142686|NP\_689587.1 ENSG000000147536|GINS4 ENSG000000148396|KIAA0310 ENSG000000162511|LAPTM5 ENSG000000168824|NSG1\_HUMAN ENSG000000170262|MRAP ENSG000000178409|KIAA1553 ENSG000000183495|EP40 ENSG000000185522|C11orf35 ENSG000000196476|C20orf96 ENSG000000197430|TMEM10 ENSG000000197965|MPZL1 ENSG0000002055732|MCOLN3 ENSG000000100580|TMED8 ENSG000000105967|TFEC ENSG000000111912|NCOA7 ENSG000000116830|TTF2 ENSG000000134249|ADAM30 ENSG000000135535|CD164 ENSG000000138035|PNPT1 ENSG000000139372|TDG ENSG000000143493|INTS7 ENSG000000143753|DEGS1 ENSG000000145476|CYP4V2 ENSG000000148943|LIN7C ENSG000000151475|SLC25A31 ENSG000000151746|BICD1 ENSG000000152729|Q9P136\_HUMAN ENSG000000153147|SMARCA5 ENSG000000155130|MARCKS ENSG000000162702|ZNF281 ENSG000000170745|KCNK3 ENSG000000171659|GPR34 ENSG000000172461|FUT9 ENSG000000173611|C9orf126 ENSG000000174842|GLMN ENSG000000178522|AMBN ENSG000000178695|KCTD12 ENSG000000182050|MGAT4C ENSG000000186628|FSD2 ENSG000000197614|MFAP5 ENSG000000204969|PCDHA2 ENSG000000205150|FAM92A3 ENSG000000206527|PTPLB ENSG000000007545|CRAMP1L ENSG000000081791|KIAA0141 ENSG000000100266|PACSN2 ENSG000000101665|SMAD7 ENSG000000103388|CEACAM5 ENSG000000108556|CHRNE ENSG000000110777|POU2AF1 ENSG000000111725|PRKAB1 ENSG000000120875|DUSP4 ENSG000000128652|HOXD3 ENSG000000135605|TEC ENSG000000143147|GPR161 ENSG000000146047|HIST1H2BA ENSG000000151079|KCNAB ENSG000000151445|C14orf133 ENSG000000160219|GAB3 ENSG000000160392|C19orf47 ENSG000000163823|CCR1 ENSG000000166974|MAPRE2 ENSG000000171084|LOC645332 ENSG000000171357|C1orf190 ENSG000000174206|NP\_689563.3 ENSG000000178971|C17orf68 ENSG000000182154|MRPL41 ENSG000000184935|Q6AI01\_HUMAN ENSG000000189231|PSG3 ENSG000000196085|C19orf42 ENSG000000205761|Q6ZRI7\_HUMAN ENSG000000006715|VPS41 ENSG000000007933|FMO3 ENSG00000010704|HFE ENSG000000087128|TMPRSS11E ENSG000000104375|STK3 ENSG000000109452|INPP4B ENSG000000113319|RASGRF2 ENSG000000114107|CEP70 ENSG000000120279|MYCT1 ENSG000000132872|SYT4 ENSG000000134830|GPR77 ENSG000000135932|CAB39 ENSG000000137033|IL33 ENSG000000149443|NOVA1 ENSG000000149433|C20orf78 ENSG000000164187|LMBRD2 ENSG000000164307|ARTS1\_HUMAN ENSG000000169905|TOR1AIP2 ENSG000000171864|PRND ENSG000000172115|CYCS ENSG000000173487|LOC729884 ENSG000000179299|NSUN7 ENSG000000197054|ZNF763 ENSG000000204757|Q6ZTL5\_HUMAN TCATTTT ENSG000000037637|FBXO42 ENSG000000077274|CAPN6 ENSG000000088832|FKBP1A ENSG000000103742|NP\_066013.1 ENSG000000115318|LOXL3 ENSG000000115561|VPS24 ENSG000000119638|NEK9 ENSG000000120875|DUSP4 ENSG000000124164|VAPB ENSG000000139718|SETD1B ENSG000000143553|SNAPAP ENSG000000146950|SHROOM2 ENSG000000152315|KCNK13 ENSG000000153395|AYTL2 ENSG000000160179|ABCG1 ENSG000000163933|RFT1 ENSG000000166188|ZNF319 ENSG000000169598|DFFB ENSG000000170653|ATF7 ENSG000000172020|GAP43 ENSG000000179912|R3HDM2 ENSG000000182378|PLCXD1 ENSG000000198225|Q5VVH2\_HUMAN ENSG000000204033|LRRC22 ENSG000000204619|PPP1R11 ENSG000000205205|C17orf51 ENSG000000007372|PAX6 ENSG000000047597|XK ENSG000000065135|GNAI3 ENSG000000078596|ITM2A ENSG000000102786|INTS6 ENSG000000105793|GTPBP10 ENSG000000108021|C10orf18 ENSG000000110075|SAP53 ENSG000000112964|GHR ENSG000000113569|NUP155 ENSG000000115808|STRN ENSG000000120458|C11orf61 ENSG000000124831|LRRFIP1 ENSG000000130962|PRRG1 ENSG000000134391|CFHR2 ENSG000000136014|USP44 ENSG000000136688|IL1F9 ENSG000000141298|SSH2 ENSG000000143341|HMCN1 ENSG000000144366|GULP1 ENSG000000147231|CXorf57 ENSG000000160908|ZNF394 ENSG000000163281|GNPDA2 ENSG000000166342|ITOI1 ENSG000000166752|TMEM83 ENSG000000168282|MGAT2 ENSG000000174173|RG9MTD1 ENSG000000174700|PABPC5 ENSG000000175664|C13orf26 ENSG000000179119|SPTY2D1 ENSG000000185873|TMPRSS11B ENSG000000197635|DPP4 ENSG000000198620|XR\_017846.1 ENSG000000198673|FAM19A2 ENSG000000048707|VPS13D ENSG000000068024|HDAC4 ENSG000000078290|EIF2B3 ENSG000000073584|SMARCE1 ENSG000000075290|WNT8B ENSG000000090857|NP\_060460.3 ENSG000000101463|C20orf39 ENSG000000106003|LFNG ENSG000000114349|GNAT1 ENSG000000118137|APOA1 ENSG000000120952|PRAMEF2 ENSG000000139767|KIAA1853 ENSG000000140464|PML ENSG000000142794|NBPF3 ENSG000000149300|C11orf52 ENSG000000152042|NBPF8 ENSG000000162772|ATF3 ENSG000000168614|NBPF16 ENSG000000169926|KLF13 ENSG000000171711|DEFB4 ENSG000000177257|BD02\_HUMAN ENSG000000179241|LDLRAD3 ENSG000000179562|GCC1 ENSG000000179571|NP\_001034792.1 ENSG000000184675|FAM123B ENSG000000186275|Q5TB04\_HUMAN ENSG000000196935|SRGAP1 ENSG000000197291|Q8WV75\_HUMAN ENSG000000203786|KPRP ENSG000000205441|KRTAP10-7 ENSG000000205631|Q9H7S7\_HUMAN ENSG000000039560|RAI14 ENSG000000054219|LY75 ENSG000000064042|NP\_055803.1 ENSG000000066583|ISOC1 ENSG000000072756|TRNT1 ENSG000000091972|CD200 ENSG000000124786|SLC35B3 ENSG000000125107|CNOT1 ENSG000000135269|TES ENSG000000136872|ALDOB ENSG000000138674|SEC31A ENSG000000139318|DUSP6 ENSG000000143669|LYST ENSG000000157827|FMNL2 ENSG000000164171|ITGA2 ENSG000000179859|LOC284023 ENSG000000188162|OTOG ENSG000000188848|CDC4 ENSG000000196966|HIST1H3E ENSG000000198948|MFAP3L ENSG000000203827|XR\_015220.1 ENSG000000205612|Q71JB2\_HUMAN TCCAAT ENSG000000008056|SYN1 ENSG000000085063|CD59 ENSG000000089692|LAG3 ENSG000000101079|NDRG3 ENSG000000104415|WISP1 ENSG000000105066|FIZ1 ENSG000000106333|PCOLCE ENSG000000106927|AMBP ENSG000000107796|ACTA2 ENSG000000108788|MLX ENSG000000114786|ACY1 ENSG000000119547|ONECUT2 ENSG000000120664|LOC646871 ENSG000000122136|OBP2A ENSG000000124449|IRGC ENSG000000125804|C20orf91 ENSG000000131113|PSG1 ENSG000000134020|PEBPL\_HUMAN ENSG000000142512|SIGLEC10 ENSG000000149269|PAK1 ENSG000000158158|CNNM4 ENSG000000165280|VCP ENSG000000167208|NP\_878274.1 ENSG000000178919|FOXE1 ENSG000000179562|GCC1 ENSG000000196567|NP\_942123.1 ENSG000000197430|TMEM10 ENSG000000197435|HIST3H2BB ENSG000000204332|Q6ZU25\_HUMAN ENSG000000075223|SEMA3C ENSG000000102174|PHEX ENSG000000105467|SYNGR4 ENSG000000105967|TFEC ENSG000000105982|RNF32 ENSG000000108587|GOSR1 ENSG000000118454|ANKRD13C ENSG000000119138|KLF9 ENSG000000121005|CRISPLD1 ENSG000000151789|ZNF659 ENSG000000154493|C10orf90 ENSG000000154611|PSMA8 ENSG000000163608|C3orf17 ENSG000000170941|NP\_065895.1 ENSG000000174496|C21orf34 ENSG000000176009|ASCL3 ENSG000000180777|ANKRD30B ENSG000000127869|SH2D2A ENSG000000078900|TP73 ENSG000000103197|TSC2 ENSG000000103855|CD276 ENSG000000108479|GALK1 ENSG000000119681|LTBP2 ENSG000000121083|DYNLL2 ENSG000000122859|NEUROG3 ENSG000000132958|TPTE2 ENSG000000142611|PRDM16 ENSG000000144500|CPNE9 ENSG000000160323|ADAMTS13 ENSG000000162738|VANGL2 ENSG000000168904|LRRC28 ENSG000000181763|APR2\_HUMAN ENSG000000186407|CD300E ENSG000000204312|Q6ZNY8\_HUMAN ENSG000000006704|GTF2IRD1 ENSG000000046604|DSG2 ENSG000000081237|PTPRC ENSG000000100380|ST13 ENSG000000100567|PSMA3 ENSG000000129007|CALML4 ENSG000000132631|C20orf79 ENSG000000140795|MYLK3\_HUMAN ENSG000000141446|ESCO1 ENSG000000163053|SLC16A14 ENSG000000164169|NP\_612373.2 ENSG000000165449|SLC16A9 ENSG000000167257|RNF214 ENSG000000168032|ENTPD3 ENSG000000170153|RNF150 ENSG000000170629|NP\_872440.2 ENSG000000171446|KRT27 ENSG000000186479|RGST7B ENSG000000189212|DPY19L2P1 ENSG000000189320|NP\_995327.1 ENSG000000205227|Q6ZWA8\_HUMAN TCCACAT ENSG000000006062|MAP3K14 ENSG00000006695|COX10 ENSG000000080056|SYN1 ENSG000000025800|KPN6A ENSG000000092421|SEMA6A ENSG000000100146|SOX10 ENSG000000112562|SMOC2 ENSG00000014654|CCDC48 ENSG000000142619|PAD13 ENSG000000143196|DPT ENSG000000152137|HSPB8 ENSG000000155275|C4orf23 ENSG000000157303|SUSD3 ENSG000000167461|RAB8A ENSG000000174370|C11orf45 ENSG000000182795|C1orf116 ENSG000000185065|NP\_776154.2 ENSG000000185838|GNB1L ENSG000000204049|Q6ZUH9\_HUMAN ENSG000000049618|ARID1B ENSG000000065485|PDIA5 ENSG000000068489|PRR11 ENSG000000095139|ARCN1 ENSG000000101842|VSIIG1 ENSG000000104043|ATP9B4 ENSG000000104371|DKK4 ENSG000000106686|C9orf68 ENSG000000111247|RAD51AP1 ENSG000000117152|RGS4 ENSG0000001134308|YWHAQ ENSG0000001145715|RASA1 ENSG000000148429|USP6NL ENSG000000170633|RNF34 ENSG000000176271|ANUB1 ENSG000000174990|CA5A ENSG000000187833|NP\_001073943.1 ENSG000000196677|C8orf77 ENSG000000196730|DAPK1 ENSG000000196876|SCN8A TCCACTG ENSG00000004139|SARM1 ENSG000000076248|UNG ENSG000000087245|MMP2 ENSG000000100385|IL2RB ENSG000000108342|CSF3 ENSG000000108515|ENO3 ENSG000000110076|NRXN2 ENSG000000115677|HDLBP ENSG000000119777|NP\_060197.4 ENSG000000134247|PTGFRN ENSG000000137073|UBAP2 ENSG000000137094|DNAJB5 ENSG000000142207|URB1 ENSG000000142484|TM4SF5 ENSG000000155849|ELMO1 ENSG000000157087|ATP2B2 ENSG000000165272|AQP3 ENSG000000170906|NDUFA3 ENSG000000179335|CLK3 ENSG000000186564|FOXD2 ENSG000000187021|PNLI1PRP1 ENSG000000196943|LTB4R ENSG000000205566|Q8TB02\_HUMAN ENSG00000057663|ATG5 ENSG000000079134|THOC1 ENSG000000079332|SAR1A ENSG000000100316|RPL3 ENSG000000102683|SGCG ENSG000000110002|LOH11CR2A ENSG000000113569|NUP155 ENSG000000115541|HSP1E1 ENSG000000116001|TIA1 ENSG00000018217|ATF6 ENSG000000119899|SLC17A5 ENSG000000120696|KBTBD7 ENSG000000124935|SCGB1D2 ENSG000000133138|TBC1D8B ENSG000000133703|KRAS ENSG000000137501|SYTL2 ENSG000000152779|SLC16A12 ENSG000000153822|KCNJ16 ENSG000000158560|DYNC11I ENSG000000159208|C1orf51 ENSG000000164220|F2RL2 ENSG000000165076|NP\_001088271.1 ENSG000000166796|LDHC ENSG000000168653|NDUFS5 ENSG000000172466|ZNF24 ENSG000000174456|NP\_997318.1 ENSG000000176601|YSK4 ENSG0000000178695|KCTD12 ENSG000000180113|TDDR6 TCCAGAA ENSG000000036828|CASR ENSG000000076248|UNG ENSG000000095303|PTGS1 ENSG000000103184|SEC14L5 ENSG000000104490|NCALD ENSG000000104812|GYS1 ENSG000000107957|SH3PXD2A ENSG000000110786|PTPN5 ENSG000000116990|MYCL1 ENSG000000118257|NRP2 ENSG000000126353|CCR7 ENSG000000131355|EMR3 ENSG000000132003|ZSWIM4 ENSG000000134815|DHX34 ENSG000000137809|ITGA11 ENSG000000142583|SLC2A5 ENSG000000143630|KCNN3 ENSG000000143858|SYT2 ENSG000000147402|GABRQ ENSG000000148358|GPR107 ENSG000000149633|NP\_001025035.1 ENSG000000158887|MPZ ENSG000000161395|PERLD1 ENSG000000163701|IL17RE ENSG000000163975|MF12 ENSG000000178896|EXOSC4 ENSG000000180448|HMHA1 ENSG000000181773|GPR3 ENSG000000183059|XR\_017784.1 ENSG000000183570|PCBP3 ENSG000000185507|IRF7 ENSG000000189140|Q6ZU77\_HUMAN ENSG000000189263|Q6ZS22\_HUMAN ENSG000000203900|Q6ZSD3\_HUMAN ENSG000000057294|PKP2 ENSG000000072849|DERL2 ENSG000000101842|VSIIG1 ENSG000000102886|GDDP3 ENSG000000105467|SYNGR4 ENSG000000106524|ANKMY2 ENSG000000108064|TFAM ENSG000000111907|TPD52L1 ENSG000000119446|RBM18 ENSG000000119537|FVT1 ENSG000000122786|CALD1 ENSG000000133687|TMTC1 ENSG000000138152|BTBD16 ENSG000000147121|ZNF673 ENSG000000148700|ADD3 ENSG000000159186|ATP50 ENSG000000162992|NEUROD1 ENSG000000163785|RYK ENSG000000165105|RASEF ENSG000000168594|ADAM29 ENSG000000173612|GPRC6A ENSG000000177981|ASB8 ENSG000000198838|RYR3 ENSG0000002023788|Q6ZMM1\_HUMAN TCCAGAC ENSG000000004776|HSPB6 ENSG00000005238|KIAA1539 ENSG000000022567|SLC45A4 ENSG000000068976|PYGM ENSG000000090863|GLG1 ENSG000000100058|CRYBB2 ENSG000000101850|GPR143 ENSG000000102003|SYP ENSG000000108515|ENO3 ENSG000000111678|C12orf57 ENSG000000114739|ACVR2B ENSG000000121671|CRY2 ENSG000000126062|TMEM115 ENSG000000127124|HIVEP3 ENSG000000132702|HAPLN2 ENSG000000147113|CXorf36 ENSG000000156575|PRG3 ENSG000000158813|EDA ENSG000000160161|CILP2 ENSG000000161031|PGLYRP2 ENSG000000165970|SLC6A5 ENSG000000167106|FAM102A ENSG000000167522|ANKRD11 ENSG000000168393|DTYMK ENSG000000169662|NP\_997357.1 ENSG000000172943|PHF8 ENSG000000178922|HYI ENSG000000184601|NP\_001088404.1 ENSG000000186423|Q8N9S5\_HUMAN ENSG0000002028116|VRK2 ENSG000000063046|EIF4B ENSG000000087995|METTL2A ENSG000000091157|WDR7 ENSG000000100201|DDX17 ENSG000000103544|NP\_064710.3 ENSG000000113391|C5orf21 ENSG000000115816|CEBPZ ENSG000000138434|SSFPA2 ENSG000000150054|MPP7 ENSG000000153879|CEBPG ENSG000000167840|ZNF232 ENSG000000170417|TMEM182 ENSG000000173610|UGT2A1 ENSG000000174099|MSRB3 ENSG000000184280|ZNF285B ENSG000000186031|Q6ZSY1\_HUMAN ENSG000000186479|RGST7B ENSG000000188611|ASAHC2 ENSG000000196569|LAMA2 ENSG000000198740|ZNF652 TCCAGTA ENSG000000064886|CHI3L2 ENSG000000078804|TP53INP2 ENSG000000084652|TXLNA ENSG000000102445|C13orf18 ENSG000000102921|N4BP1\_HUMAN ENSG000000127054|CPSF3L ENSG000000130119|GNL3L ENSG000000130810|PPAN ENSG000000133149|GARNL3 ENSG000000136925|C9orf97 ENSG000000137073|UBAP2 ENSG000000143198|MGST3 ENSG000000147804|SLC39A4 ENSG000000168995|SIGLEC7 ENSG000000170767|C6orf208 ENSG000000170925|TEX13B ENSG000000173218|VANGL1 ENSG000000174989|FBXW8 ENSG000000177807|KCNJ10 ENSG000000178952|TUFM ENSG000000186818|LILRB4 ENSG000000197194|Q6VEP3\_HUMAN ENSG000000198106|RUNDC2B ENSG000000198397|AZA378\_HUMAN ENSG000000204323|Q71RC9\_HUMAN ENSG000000205778|Q6ZMM7\_HUMAN ENSG000000066855|MTFR1 ENSG000000088756|ARGHAP28 ENSG000000101166|SLMO2 ENSG000000103160|HSDL1 ENSG000000111196|MGN2\_HUMAN ENSG000000111670|GNPTAB ENSG000000118473|SGIP1 ENSG000000127314|RAP1B ENSG000000135940|COX5B ENSG000000138593|K0256\_HUMAN ENSG000000156035|PRUNE2 ENSG000000164296|TTGD6 ENSG000000164691|TAGAP ENSG000000167306|MYO5B ENSG000000170714|FAM19A5 ENSG000000175387|SMAD2 ENSG000000176276|hCG\_1757335 ENSG000000178966|RMI1 ENSG000000187672|ERC2 TCCAGTG ENSG000000057704|TMCC3 ENSG000000071889|FAM3A ENSG000000100142|POLR2F ENSG000000103199|ZNF500 ENSG000000103257|SLC7A5 ENSG000000111752|PHC1 ENSG000000114745|GORASP1 ENSG000000123374|CDK2 ENSG000000132002|DNAJB1 ENSG000000136935|GOLGA1 ENSG000000141985|SH3GL1 ENSG000000143061|IGSF3 ENSG000000159884|CCDC107 ENSG000000163394|CCKAR ENSG000000165548|TMEM63C ENSG000000165970|SLC6A5 ENSG000000167550|RHEB1L ENSG000000169899|Q96MA9\_HUMAN ENSG000000171314|PGAM1 ENSG000000176754|C1orf157 ENSG0

|          |                                                                                                                                                                                                                                                                                                                                                    |                                                                                                                                                                                                                                                                                                                   |                                                                                                                                                                                                                                                                                                                                      |                                                                                                                                                                                                                                                                                                                         |                                                                                                                                                                                                                                                                                                                            |                                                                                                                                                                                                                                                                                                  |                                                                                                                                                                                                                                                                                                                             |                                                                                                                                                                                                                                                                                                                                                                                                                                                                                                                                                                                                                                                                                                                                                                                                                                                            |                                                                                                                                        |
|----------|----------------------------------------------------------------------------------------------------------------------------------------------------------------------------------------------------------------------------------------------------------------------------------------------------------------------------------------------------|-------------------------------------------------------------------------------------------------------------------------------------------------------------------------------------------------------------------------------------------------------------------------------------------------------------------|--------------------------------------------------------------------------------------------------------------------------------------------------------------------------------------------------------------------------------------------------------------------------------------------------------------------------------------|-------------------------------------------------------------------------------------------------------------------------------------------------------------------------------------------------------------------------------------------------------------------------------------------------------------------------|----------------------------------------------------------------------------------------------------------------------------------------------------------------------------------------------------------------------------------------------------------------------------------------------------------------------------|--------------------------------------------------------------------------------------------------------------------------------------------------------------------------------------------------------------------------------------------------------------------------------------------------|-----------------------------------------------------------------------------------------------------------------------------------------------------------------------------------------------------------------------------------------------------------------------------------------------------------------------------|------------------------------------------------------------------------------------------------------------------------------------------------------------------------------------------------------------------------------------------------------------------------------------------------------------------------------------------------------------------------------------------------------------------------------------------------------------------------------------------------------------------------------------------------------------------------------------------------------------------------------------------------------------------------------------------------------------------------------------------------------------------------------------------------------------------------------------------------------------|----------------------------------------------------------------------------------------------------------------------------------------|
| TCCAGTT  | ENSG0000007038 PRSS21<br>ENSG00000088808 PPP1R13B<br>ENSG00000157606 SPAT1S<br>ENSG00000104825 NFKB1B<br>ENSG00000144713 RPL32<br>ENSG00000176256 HMG6A<br>ENSG00000182093 WRB                                                                                                                                                                     | ENSG00000008382 MPND<br>ENSG00000100304 TTL1L2<br>ENSG00000182149 KIAA0174<br>ENSG00000108239 TBC1D12<br>ENSG00000144867 SRPRB<br>ENSG00000182093 WRB                                                                                                                                                             | ENSG00000062598 ELMO2<br>ENSG00000100647 KIAA0247<br>ENSG00000187664 TM6SF2<br>ENSG00000119906 C10orf6<br>ENSG00000155085 C6orf199<br>ENSG00000183022 NR_003148.2                                                                                                                                                                    | ENSG00000063978 RNF4<br>ENSG00000105219 CNTD2<br>ENSG00000187664 TM6SF2<br>ENSG00000123352 SPATS2<br>ENSG00000160629 C17orf32<br>ENSG00000186628 FSD2                                                                                                                                                                   | ENSG00000067082 KLF6<br>ENSG00000124557 BTNL1A1<br>ENSG00000198369 SPRED2<br>ENSG00000124818 OPN5<br>ENSG00000168118 RAB4A<br>ENSG00000188474 ZNF788                                                                                                                                                                       | ENSG00000067225 PKM2<br>ENSG00000126003 PLAGL2<br>ENSG00000198369 SPRED2<br>ENSG00000124818 OPN5<br>ENSG00000168118 RAB4A<br>ENSG00000197054 ZNF763                                                                                                                                              | ENSG00000081059 TCF7<br>ENSG00000129295 LRRC6<br>ENSG00000125156 HSF1<br>ENSG00000130638 ATXN10<br>ENSG00000168411 RFWD3<br>ENSG00000171405 XAGE5                                                                                                                                                                           | ENSG00000082684 SEMA5B<br>ENSG00000136504 MYST2<br>ENSG000001095139 ARCN1<br>ENSG00000133641 C12orf29<br>ENSG00000171714 TMEM16E                                                                                                                                                                                                                                                                                                                                                                                                                                                                                                                                                                                                                                                                                                                           |                                                                                                                                        |
| TCCATAC  | ENSG00000068001 HYAL2<br>ENSG00000135966 TGFBRA1<br>ENSG00000183528 QOVAF8_HUMAN<br>ENSG00000124193 SFRS6<br>ENSG00000181007 ZNF545                                                                                                                                                                                                                | ENSG00000087087 ARS2_HUMAN<br>ENSG00000155367 PPM1J<br>ENSG00000183605 SFXN4<br>ENSG00000134249 ADAM30<br>ENSG00000188501 LCTL                                                                                                                                                                                    | ENSG00000013275 UBE2I<br>ENSG00000155980 KIF5A<br>ENSG00000184923 FAM22A<br>ENSG00000134594 RAB33A<br>ENSG00000188580 TCBA1                                                                                                                                                                                                          | ENSG00000165424 C10orf56<br>ENSG00000197548 ATG7<br>ENSG00000138760 SCARB2<br>ENSG00000196876 SCN8A                                                                                                                                                                                                                     | ENSG00000105131 ABHD9<br>ENSG00000165424 C10orf56<br>ENSG00000138760 SCARB2<br>ENSG00000196876 SCN8A                                                                                                                                                                                                                       | ENSG00000124678 TCP11<br>ENSG00000166860 ZBTB39<br>ENSG0000013375 PGM3<br>ENSG00000143622 RI1<br>ENSG00000198304 ZNF528                                                                                                                                                                          | ENSG00000125975 C20orf173<br>ENSG00000169385 RNASE2<br>ENSG00000102743 SLC25A15<br>ENSG00000144597 EAF1<br>ENSG00000198464 ZNF480                                                                                                                                                                                           | ENSG00000126233 SLURP1<br>ENSG00000169397 RNASE3<br>ENSG00000115816 CEBPZ<br>ENSG00000152601 MBNL1<br>ENSG00000204800 Q96HX1_HUMAN                                                                                                                                                                                                                                                                                                                                                                                                                                                                                                                                                                                                                                                                                                                         | ENSG00000134072 CAMK1<br>ENSG00000178409 KIAA1553<br>ENSG00000119943 C10orf33<br>ENSG00000164687 FABP5<br>ENSG00000204812 Q96HX1_HUMAN |
| TCCATCC  | ENSG00000003249 DBNDD1<br>ENSG00000125740 FOSB<br>ENSG00000167114 SLC27A4<br>ENSG0000016082 ISL1<br>ENSG00000139910 NOVA1<br>ENSG00000168743 NPNT                                                                                                                                                                                                  | ENSG00000004776 HSPB4<br>ENSG00000139880 CDH24<br>ENSG00000169218 RSP01<br>ENSG00000026751 SLAMF7<br>ENSG00000145332 KLHL8<br>ENSG00000173627 APOBEC4                                                                                                                                                             | ENSG00000005379 BZRAP1<br>ENSG00000141576 RNF157<br>ENSG00000183751 TBL3<br>ENSG000000087263 OGFOD1<br>ENSG00000155561 NUP205<br>ENSG00000186115 CYP4F2                                                                                                                                                                              | ENSG00000109956 B3GAT1<br>ENSG00000142453 CARM1<br>ENSG00000185909 KLHDC8B<br>ENSG00000110925 FAM130A1<br>ENSG00000163602 RYBP<br>ENSG00000198551 ZNF627                                                                                                                                                                | ENSG00000110536 NDUFS3<br>ENSG00000149633 NP_001025035.1<br>ENSG00000198917 C9orf114<br>ENSG00000114573 ATP6V1A<br>ENSG00000165194 PCDH19<br>ENSG00000198948 MFAP3L                                                                                                                                                        | ENSG00000111331 OAS3<br>ENSG00000161091 C19orf28<br>ENSG00000204673 AKT1S1<br>ENSG00000114942 EEF1B2<br>ENSG00000165629 ATP5C1<br>ENSG00000204757 Q6ZTL5_HUMAN                                                                                                                                   | ENSG00000115194 SLC30A3<br>ENSG00000161395 PERLD1<br>ENSG00000204851 Q6ZVD1_HUMAN<br>ENSG00000128710 HOXD10<br>ENSG00000167258 CRKRS<br>ENSG00000106078 COBL                                                                                                                                                                | ENSG00000119777 NP_060197.4<br>ENSG00000165376 CLDN2<br>ENSG00000206028 Q6ZVA3_HUMAN<br>ENSG00000137478 FCHSD2<br>ENSG00000168653 NDUFS5                                                                                                                                                                                                                                                                                                                                                                                                                                                                                                                                                                                                                                                                                                                   |                                                                                                                                        |
| TCCATGA  | ENSG00000006210 CX3CL1<br>ENSG00000125815 CST8<br>ENSG00000174705 SH3PXD2B<br>ENSG00000091490 NP_056002.1<br>ENSG00000130037 KCNAs5<br>ENSG00000164031 DNAJB14<br>ENSG00000198468 Q8TAF5_HUMAN                                                                                                                                                     | ENSG00000052850 ALX4<br>ENSG00000137502 RAB30<br>ENSG00000183908 LRRC55<br>ENSG00000091490 NP_056002.1<br>ENSG00000134954 ETS1<br>ENSG00000167306 MYO5B                                                                                                                                                           | ENSG00000056345 ITGB3<br>ENSG00000144468 RHBDD1<br>ENSG00000187516 C6orf27<br>ENSG00000103018 CYB5B<br>ENSG00000138758 SEPT11<br>ENSG00000169031 COL4A3                                                                                                                                                                              | ENSG00000064300 NGFR<br>ENSG00000165606 NP_001073989.1<br>ENSG00000187741 FANCA<br>ENSG00000113231 PDE8B<br>ENSG00000147471 PROSC<br>ENSG00000182457 NR_002323.1                                                                                                                                                        | ENSG00000106038 EBV1<br>ENSG00000165626 C10orf30<br>ENSG00000188305 C19orf35<br>ENSG00000117036 ETV3<br>ENSG00000156172 C8orf37<br>ENSG00000182836 PLCXD3                                                                                                                                                                  | ENSG00000161091 C19orf28<br>ENSG00000204673 AKT1S1<br>ENSG00000114942 EEF1B2<br>ENSG00000165629 ATP5C1<br>ENSG00000204757 Q6ZTL5_HUMAN<br>ENSG00000166482 MFAP4                                                                                                                                  | ENSG000001106100 NOD1<br>ENSG00000172081 MOBK2A<br>ENSG00000204277 Q6ZR66_HUMAN<br>ENSG00000120784 ZFP30<br>ENSG00000162642 C1orf52<br>ENSG00000188747 NOXA1                                                                                                                                                                | ENSG00000108849 PPY<br>ENSG00000173163 COMMD1<br>ENSG00000068489 PRR11<br>ENSG00000122043 Q5TAE0_HUMAN<br>ENSG00000163544 Q96BL6_HUMAN<br>ENSG00000196885 Q9HAZ8_HUMAN                                                                                                                                                                                                                                                                                                                                                                                                                                                                                                                                                                                                                                                                                     |                                                                                                                                        |
| TCCCACC  | ENSG000000007402 CACNA2D2<br>ENSG00000116604 MEF2D<br>ENSG00000157216 SSBP3<br>ENSG00000170367 CST5<br>ENSG00000197150 ABC8<br>ENSG00000042088 TDP1<br>ENSG00000129158 SERGEF<br>ENSG00000159167 STC1<br>ENSG00000181322 TXNDC6<br>ENSG00000043143 PHF15                                                                                           | ENSG00000054356 PTPRN<br>ENSG00000131475 VPS25<br>ENSG00000158246 FAM46B<br>ENSG00000170369 CST2<br>ENSG00000203744 AL1L70_HUMAN<br>ENSG00000065970 FOXJ2<br>ENSG00000131080 EDA2R<br>ENSG00000163637 PRICKLE2<br>ENSG00000198876 WDR40A<br>ENSG00000064601 NOS1                                                  | ENSG00000064195 DLX3<br>ENSG00000135424 ITGA7<br>ENSG00000163497 FEV<br>ENSG00000170373 CST1<br>ENSG000000204421 LY6G6C<br>ENSG00000071909 MYO3B<br>ENSG00000136267 DGKB<br>ENSG00000166752 TMEM83<br>ENSG00000203925 LOC647839<br>ENSG00000100991 TRPC4AP                                                                           | ENSG00000073067 CYP2W1<br>ENSG00000135480 KRT7<br>ENSG00000163703 CRELD1<br>ENSG00000171540 OTF<br>ENSG000000204715 Q4G0Q5_HUMAN<br>ENSG00000085871 MGST2<br>ENSG00000139173 TMEM117<br>ENSG00000166701 AXL<br>ENSG00000204155 PARG<br>ENSG00000100991 TRPC4AP                                                          | ENSG00000099949 LZTR1<br>ENSG00000142784 WDTCT1<br>ENSG00000163870 GPR175<br>ENSG00000179094 PER1<br>ENSG000000205193 Q6ZTC6_HUMAN<br>ENSG00000116675 DNAJC6<br>ENSG00000143669 LYST<br>ENSG00000168675 C18orf1<br>ENSG00000206125 Q68DA7_HUMAN<br>ENSG00000104879 CKM                                                     | ENSG00000101439 CST3<br>ENSG00000143321 HDGF<br>ENSG00000167323 STIM1<br>ENSG00000179862 CITED4<br>ENSG00000205193 Q6ZTC6_HUMAN<br>ENSG00000124205 EDN3<br>ENSG00000148730 EIF4EBP2<br>ENSG00000175556 LNRNF3<br>ENSG00000105379 ETFB                                                            | ENSG00000101441 CST4<br>ENSG00000146083 RNF44<br>ENSG00000168309 FAM107A<br>ENSG00000181789 COPG<br>ENSG00000205751 MRPL23<br>ENSG00000124564 SLC17A3<br>ENSG00000152954 NRSN1<br>ENSG00000172831 FZD8<br>ENSG00000105610 KLF1                                                                                              | ENSG00000103145 HCFC1R1<br>ENSG00000149428 HYOU1<br>ENSG00000168575 SLC20A2<br>ENSG00000182621 TSPAN10<br>ENSG00000007350 TKTL1<br>ENSG00000128039 NP_078868.1<br>ENSG00000155760 FZD7<br>ENSG000001181092 ADIPOQ                                                                                                                                                                                                                                                                                                                                                                                                                                                                                                                                                                                                                                          |                                                                                                                                        |
| TCCCAGA  | ENSG000000043143 PHF15<br>ENSG00000108312 UBTF<br>ENSG00000142961 MOBK2C<br>ENSG00000180999 C1orf105<br>ENSG00000144857 BOC<br>ENSG00000171132 PRKCE                                                                                                                                                                                               | ENSG00000064601 NOS1<br>ENSG00000118160 SLC8A2<br>ENSG00000146826 C7orf43<br>ENSG00000185722 ANKFY1<br>ENSG00000152495 CAMK4<br>ENSG00000178175 ZNF366                                                                                                                                                            | ENSG00000089250 NOS1<br>ENSG00000124212 PTGIS<br>ENSG00000149380 P4HA3<br>ENSG00000196893 Q8N2W8_HUMAN<br>ENSG00000153560 UBP1<br>ENSG00000184083 FAM120C                                                                                                                                                                            | ENSG00000071537 SELL1<br>ENSG00000167754 KLF5<br>ENSG000000071537 SELL1<br>ENSG00000157538 DSCR3<br>ENSG00000186767 NP_001012986.2                                                                                                                                                                                      | ENSG00000100991 TRPC4AP<br>ENSG00000130695 CCDC21<br>ENSG00000168427 KLHL30<br>ENSG00000169951 ZNF764<br>ENSG00000150477 KIAA1328<br>ENSG00000203702 C6orf59<br>ENSG00000121964 GTD1<br>ENSG00000182752 PAPPA                                                                                                              | ENSG00000105379 ETFB<br>ENSG00000131067 GCTL3<br>ENSG00000138100 TRIM54<br>ENSG00000177025 C19orf18<br>ENSG00000150477 KIAA1328<br>ENSG00000203702 C6orf59<br>ENSG00000156802 ATAD2<br>ENSG00000204276 HLA-DQA2                                                                                  | ENSG00000105610 KLF1<br>ENSG00000138100 TRIM54<br>ENSG00000177025 C19orf18<br>ENSG00000116962 NID1<br>ENSG00000205923 CEMP1<br>ENSG00000161405 IKZF3<br>ENSG00000205003 CNTF                                                                                                                                                | ENSG00000108294 PSMB3<br>ENSG00000140320 BAHD1<br>ENSG00000177133 Q6ZV91_HUMAN<br>ENSG00000133226 SRRM1<br>ENSG00000169688 MT1B<br>ENSG00000205637 Q6ZSL6_HUMAN                                                                                                                                                                                                                                                                                                                                                                                                                                                                                                                                                                                                                                                                                            |                                                                                                                                        |
| TCCCAGG  | ENSG00000006062 MAP3K14<br>ENSG00000130590 SAMD10<br>ENSG00000170054 SERPINA9<br>ENSG00000178078 NP_060190.2<br>ENSG00000186111 PIP5K1C<br>ENSG00000033800 PIAS1<br>ENSG00000137265 IRF4<br>ENSG00000178726 THBD<br>ENSG00000006125 AP2B1<br>ENSG00000122085 MTERFD2<br>ENSG00000166257 SCN3B<br>ENSG00000081842 PCDH10<br>ENSG00000139370 SLC15A4 | ENSG00000090565 RAB11FIP3<br>ENSG00000140519 RHCG<br>ENSG00000171219 CDC42BPG<br>ENSG00000179115 FARSA<br>ENSG00000070882 OSBPL3<br>ENSG00000148848 ADAM12<br>ENSG00000183023 SLC8A1<br>ENSG00000006125 AP2B1<br>ENSG00000122188 LAX1<br>ENSG00000179314 WSCD1<br>ENSG00000081842 PCDH10<br>ENSG00000163558 PRKCI | ENSG00000100321 SYNGR1<br>ENSG00000140961 OSGIN1<br>ENSG00000172375 TMEM24<br>ENSG00000180359 C11orf36<br>ENSG00000092148 HECTD1<br>ENSG00000150510 FAM124A<br>ENSG00000184307 ZDHHC23<br>ENSG00000073584 SMARCE1<br>ENSG00000135390 ATP5G2<br>ENSG00000185955 NP_001004323.1<br>ENSG00000109586 GALNT7<br>ENSG00000165152 CA9orf125 | ENSG00000103227 TMEM112<br>ENSG00000144579 CTDSP1<br>ENSG00000172647 PGA5<br>ENSG00000180860 TPRXL<br>ENSG00000106105 GARS<br>ENSG00000153832 FBXO36<br>ENSG00000087076 HSD17B14<br>ENSG00000135930 EIF4E2<br>ENSG00000185955 NP_001004323.1<br>ENSG00000110925 FAM130A1<br>ENSG00000167840 ZNF232                      | ENSG00000105323 HNRPUL1<br>ENSG00000154102 C16orf74<br>ENSG00000173653 RCE1<br>ENSG00000180860 TPRXL<br>ENSG00000116120 FARSB<br>ENSG00000155761 SPAG17<br>ENSG00000104899 AMH<br>ENSG00000135930 SHROOM2<br>ENSG00000204071 TXNDC5<br>ENSG00000121964 GTD1<br>ENSG00000182752 PAPPA                                       | ENSG00000118960 HS1BP3<br>ENSG00000163517 HDAC11<br>ENSG00000174775 HRAS<br>ENSG00000183186 KIAA1957<br>ENSG00000116120 FARSB<br>ENSG00000163518 FCRL4<br>ENSG00000104899 AMH<br>ENSG00000146950 SHROOM2<br>ENSG00000204071 TXNDC5<br>ENSG00000121964 GTD1<br>ENSG00000182752 PAPPA              | ENSG00000119383 PPP2R4<br>ENSG00000164976 KIAA1161<br>ENSG00000175229 GAL3ST3<br>ENSG00000184824 C1QTNF5<br>ENSG00000198909 MAP3K3<br>ENSG00000120733 JMJD1B<br>ENSG00000167117 C17orf73<br>ENSG00000110466 SLC15A3<br>ENSG00000150477 KIAA1328<br>ENSG00000203702 C6orf59<br>ENSG00000156802 ATAD2<br>ENSG00000205003 CNTF | ENSG00000127472 PLA2G5<br>ENSG00000165125 TRPV6<br>ENSG00000177663 IL17RA<br>ENSG00000185386 MAPK11<br>ENSG00000198933 TBKBP1<br>ENSG00000120885 CLU<br>ENSG00000173947 C1orf88<br>ENSG00000114113 RBP2<br>ENSG00000162706 DARC<br>ENSG00000004809 SLC22A16<br>ENSG00000136399 CD302<br>ENSG00000204909 SPINK9                                                                                                                                                                                                                                                                                                                                                                                                                                                                                                                                             |                                                                                                                                        |
| TCCCATC  | ENSG00000006210 CX3CL1<br>ENSG00000125995 C20orf52<br>ENSG00000165269 AQP7<br>ENSG00000188338 SLC38A3<br>ENSG00000099940 SNAP29<br>ENSG00000131724 IL13RA1<br>ENSG00000168675 C18orf1                                                                                                                                                              | ENSG0000011243 AKAP8L<br>ENSG00000132744 ACY3<br>ENSG00000169894 MUC3A<br>ENSG00000196388 NP_998891.1<br>ENSG00000107014 RLN2<br>ENSG00000137822 GCP4_HUMAN<br>ENSG00000169245 CXCL10                                                                                                                             | ENSG00000072952 MRV11<br>ENSG00000134184 GSTM1<br>ENSG00000173535 TNFRSF10C<br>ENSG00000150510 FAM124A<br>ENSG00000184307 ZDHHC23<br>ENSG00000073584 SMARCE1<br>ENSG00000135390 ATP5G2<br>ENSG00000185955 NP_001004323.1<br>ENSG00000109586 GALNT7<br>ENSG00000173610 UGT2A1                                                         | ENSG00000088320 REM1<br>ENSG00000135144 DTX1<br>ENSG00000173805 HAP1<br>ENSG00000153832 FBXO36<br>ENSG00000087076 HSD17B14<br>ENSG00000135930 SHROOM2<br>ENSG00000204071 TXNDC5<br>ENSG00000121964 GTD1<br>ENSG00000182752 PAPPA                                                                                        | ENSG00000089693 MLF2<br>ENSG00000140564 FURIN<br>ENSG00000174282 ZBTB4<br>ENSG00000178922 HYI<br>ENSG00000197444 OGDHL<br>ENSG00000203702 C6orf59<br>ENSG00000123136 NP_079105.4<br>ENSG00000151792 CTSO<br>ENSG00000182752 PAPPA                                                                                          | ENSG00000100350 FOXRED2<br>ENSG00000162576 MXRA8<br>ENSG00000178922 HYI<br>ENSG00000197444 OGDHL<br>ENSG00000203702 C6orf59<br>ENSG00000123136 NP_079105.4<br>ENSG00000151792 CTSO<br>ENSG00000204276 HLA-DQA2                                                                                   | ENSG00000101251 SELL12<br>ENSG00000162738 VANGL2<br>ENSG00000179292 TMEM151<br>ENSG00000120733 JMJD1B<br>ENSG00000167117 C17orf73<br>ENSG00000110466 SLC15A3<br>ENSG00000150477 KIAA1328<br>ENSG00000203702 C6orf59<br>ENSG00000156802 ATAD2<br>ENSG00000205003 CNTF                                                        | ENSG00000105402 NAPA<br>ENSG00000164266 SPINK1<br>ENSG00000186466 AQP7P2<br>ENSG00000172929 TMEM151<br>ENSG00000120733 JMJD1B<br>ENSG00000173947 C1orf88<br>ENSG00000114113 RBP2<br>ENSG00000162706 DARC<br>ENSG00000004809 SLC22A16<br>ENSG00000136399 CD302<br>ENSG00000206075 SERPINB5                                                                                                                                                                                                                                                                                                                                                                                                                                                                                                                                                                  |                                                                                                                                        |
| TCCCAGAA | ENSG00000002330 BAD<br>ENSG00000124593 C6orf49<br>ENSG00000167800 TBX10<br>ENSG00000188338 SLC38A3<br>ENSG00000099940 SNAP29<br>ENSG00000131724 IL13RA1<br>ENSG00000168675 C18orf1                                                                                                                                                                 | ENSG00000072778 ACADVL<br>ENSG00000131471 AOC3<br>ENSG00000171102 OBP2B<br>ENSG00000039537 C6<br>ENSG00000128050 PAICS<br>ENSG00000162998 FRZB<br>ENSG00000077044 DGKB<br>ENSG00000123144 C19orf43<br>ENSG00000171246 NPTX1<br>ENSG00000112146 FBXO9<br>ENSG00000159398 CES7<br>ENSG00000187231 SESTD1            | ENSG00000075151 EIF4G3<br>ENSG00000133250 ZNF414<br>ENSG00000173581 CCDC106<br>ENSG00000102021 LUZP4<br>ENSG00000138095 LRPPRC<br>ENSG00000168032 ENTPD3<br>ENSG00000087365 SF3B2<br>ENSG00000125533 BHLHB4<br>ENSG00000178814 OPLAH<br>ENSG00000113645 WWC1<br>ENSG00000160551 TAOK1<br>ENSG00000198382 UVRAG                       | ENSG00000099834 MUPCDH<br>ENSG00000136717 BIN1<br>ENSG00000175785 PRIMA1<br>ENSG00000104331 IMPAD1<br>ENSG00000138678 NP_116106.2<br>ENSG00000175643 C16orf75<br>ENSG00000088899 K0552_HUMAN<br>ENSG00000126457 PRMT1<br>ENSG00000186350 RXRA<br>ENSG00000113645 WWC1<br>ENSG00000160551 TAOK1<br>ENSG00000198382 UVRAG | ENSG00000101850 GPR143<br>ENSG00000148671 C10orf116<br>ENSG00000178950 GAK<br>ENSG00000106031 HOXA13<br>ENSG00000138678 NP_116106.2<br>ENSG00000182551 ADI1<br>ENSG00000099994 SUSD2<br>ENSG00000133315 LRP16_HUMAN<br>ENSG000001638 TMEM159<br>ENSG00000137513 NARS2<br>ENSG00000140416 TPM1<br>ENSG00000165555 C14orf148 | ENSG00000102302 FGD1<br>ENSG00000149716 ORAOV1<br>ENSG00000182156 ENHP7<br>ENSG00000106031 HOXA13<br>ENSG00000138678 NP_116106.2<br>ENSG00000182551 ADI1<br>ENSG00000159625 CCDC135<br>ENSG00000100934 SEC23A<br>ENSG00000140968 IRF8<br>ENSG00000142129 C17orf80<br>ENSG00000176896 TFSM1_HUMAN | ENSG00000107317 PTGDS<br>ENSG00000158525 CPA5<br>ENSG00000184674 GSTT1<br>ENSG00000112182 BACH2<br>ENSG00000146587 RBKAK<br>ENSG00000156219 ART3<br>ENSG00000103145 HCFC1R1<br>ENSG00000159625 CCDC135<br>ENSG00000104537 ANXA13<br>ENSG00000141219 C17orf80<br>ENSG00000183649 Q8NFX8_HUMAN                                | ENSG00000108641 NP_056496.1<br>ENSG00000167244 IGF2<br>ENSG00000185262 FAM100B<br>ENSG00000112280 COL9A1<br>ENSG00000160294 MCM3AP<br>ENSG00000116035 VAX2<br>ENSG00000160959 LRRC14<br>ENSG00000107249 GLIS3<br>ENSG00000146833 TRIM4<br>ENSG00000183649 Q8NFX8_HUMAN<br>ENSG00000116685 KIAA2013<br>ENSG00000166428 PLD4<br>ENSG00000107249 GLIS3<br>ENSG00000146833 TRIM4<br>ENSG00000183649 Q8NFX8_HUMAN<br>ENSG00000116685 KIAA2013 |                                                                                                                                        |

ENSG00000159339|PADI4 ENSG00000159708|LRRC36 ENSG00000161649|CD300LG ENSG00000167895|TMC8 ENSG00000169750|RAC3 ENSG00000170619|COMMD5 ENSG00000175262|C1orf127 ENSG00000177728|KIAA0195 ENSG00000181123|Q8N7N0\_HUMAN ENSG00000183048|SLC25A10 ENSG00000184988|TMEM106A ENSG00000187091|PLCD1 ENSG00000196235|SUPT5H ENSG00000197249|SERPINA1 ENSG00000204017|Q6ZVB9\_HUMAN ENSG00000204257|HLA-DMA ENSG00000204584|Q6ZSH9\_HUMAN ENSG00000206508|CD44 ENSG0000031081|NP\_065805.1 ENSG0000066294|CD84 ENSG0000070501|POLB ENSG0000071967|CYBRD1 ENSG0000090104|RGS1 ENSG00000901831|ESR1 ENSG0000096060|FKBP5 ENSG00000104356|POP1 ENSG00000115137|NP\_057628.1 ENSG00000123505|AMD1 ENSG00000133808|MICALCL ENSG00000136242|Q9NXD8\_HUMAN ENSG00000142615|ELA2A\_HUMAN ENSG00000147926|NP\_001076593.1 ENSG00000156535|CD109 ENSG00000160813|C7orf47 ENSG00000164684|ZNF704 ENSG00000164929|BAALC ENSG00000170009|Q9NTH0\_HUMAN ENSG00000174514|MFSD4 ENSG00000185070|FLRT2 ENSG00000185664|SILV ENSG00000185775|FAM75A6 ENSG00000196540|FAM75A3 ENSG00000197896|Q5VU36\_HUMAN ENSG00000198018|ENTPD7 ENSG00000198178|CLEC4C ENSG00000204840|Q4VX67\_HUMAN ENSG00000204848|FAM75A2 ENSG00000204849|FAM75A1

TCCCTTA ENSG0000037637|FBXO42 ENSG0000065308|TRAM2 ENSG0000077080|ACTL6B ENSG00000103187|COTL1 ENSG00000103647|CORO2B ENSG00000108523|RNF167 ENSG00000109072|VTN ENSG00000111412|C12orf49 ENSG00000131059|C20orf71 ENSG00000134779|C18orf10 ENSG00000137133|HINT2 ENSG00000140320|BAHD1 ENSG00000143847|PPPIA4 ENSG00000144596|GRIP1 ENSG00000165782|TMEM55B ENSG00000166401|SERPINB8 ENSG00000176078|Q8NAN4\_HUMAN ENSG00000179036|VAMP2 ENSG00000182158|CREB3L2 ENSG00000183250|C21orf67 ENSG00000185082|LBH ENSG00000187664|TM6SF2 ENSG00000198561|CTNND1 ENSG00000204092|NP\_001001705.1 ENSG00000002745|WNT16 ENSG0000011201|KAL1 ENSG00000073282|TP73L ENSG00000081923|ATP8B1 ENSG00000089335|ZNF302 ENSG00000113441|LNPEF ENSG00000115474|KCNJ13 ENSG00000115935|WIPF1 ENSG00000116285|ERRF11 ENSG00000117335|CD46 ENSG00000118496|FBXO30 ENSG00000118777|ABCG2 ENSG00000119013|NDUFB2 ENSG00000125903|DEFB129 ENSG00000131779|PEX11B ENSG00000136870|ZNF189 ENSG00000147166|ITGB1BP2 ENSG00000153779|TGIF2LX ENSG00000154099|LRRC50 ENSG00000161980|POLR3K ENSG00000162695|SLC30A7 ENSG00000164442|CITED2 ENSG00000165443|PHYHIP1 ENSG00000169967|MAP3K2 ENSG00000178999|AURKB ENSG00000185023|RAB6C ENSG00000187987|ZSCAN23 ENSG00000197841|ZNF181 ENSG00000203742|NP\_001032308.1

TCCCTTG ENSG00000008710|PKD1 ENSG00000020129|NCDN ENSG00000039523|FAM65A ENSG00000089356|FXYP3 ENSG00000100991|TRPC4AP ENSG00000111335|OAS2 ENSG00000119403|PHF19 ENSG00000120314|WDR55 ENSG00000120899|PTK2B ENSG00000124104|SNX21 ENSG00000134684|YARS ENSG00000140506|LMAN1L ENSG00000143858|SYT2 ENSG00000155052|CNTNAP5 ENSG00000157306|THTPA ENSG00000157613|CREB3L1 ENSG00000167113|COQ4 ENSG00000169221|TBC1D10B ENSG00000170075|GPR37L1 ENSG00000172602|RND1 ENSG00000176095|IHPK1 ENSG00000177728|KIAA0195 ENSG00000186007|LEMD1 ENSG00000189263|Q6ZS22\_HUMAN ENSG00000196411|EPHB4 ENSG00000066629|EML1 ENSG00000072401|UBE2D1 ENSG00000081307|UBE1DC1 ENSG00000103381|NP\_060810.1 ENSG00000112280|COL9A1 ENSG00000116176|TPSG1 ENSG00000117595|IRF6 ENSG00000118507|AFAP7 ENSG00000124429|POFLB ENSG00000131508|UBE2D2 ENSG00000132153|DHX30 ENSG00000134532|SOX5 ENSG00000136108|CKAP2 ENSG00000148053|NTRK2 ENSG00000152268|SPON1 ENSG00000172493|AFF1 ENSG00000178217|SH2D4B ENSG00000180537|RNF182 ENSG00000184943|NP\_443103.1 ENSG00000198791|CNOT7 ENSG00000006116|CACNG3 ENSG00000070770|CSNK2A2 ENSG00000075234|NP\_060401.2 ENSG00000089289|IGBP1 ENSG000001117215|PLA2G2D ENSG00000118156|ZNF541 ENSG00000120875|DUSP4 ENSG00000125657|TNFSF9 ENSG00000127616|SMARCA4 ENSG00000130159|ECSIT ENSG00000130528|HRC ENSG00000143595|AQP10 ENSG00000146707|POMZP3 ENSG00000161955|TPST3 ENSG00000168671|UGT3A2 ENSG00000170689|HOXB9 ENSG00000171729|TMEM51 ENSG00000171861|RNMTL1 ENSG00000172992|DCAKD ENSG00000178932|Q8N811\_HUMAN ENSG00000182342|DSCR9 ENSG00000182809|CRIP2 ENSG00000183566|LATH\_HUMAN ENSG00000184774|Q49AQ9\_HUMAN ENSG00000187840|EIF4EBP1 ENSG00000198842|DUSP27 ENSG00000198913|Q9H5S2\_HUMAN ENSG00000204763|Q6ZMK1\_HUMAN ENSG00000048649|RSF1 ENSG00000054277|OPN3 ENSG00000071539|TRIP13 ENSG00000091490|NP\_056002.1 ENSG00000104904|OAZ1 ENSG00000106346|USP42 ENSG000001115165|PSCDBP ENSG00000116793|PHTF1 ENSG00000118515|SGK ENSG00000119650|C14orf179 ENSG00000120833|SOCS2 ENSG00000122481|RWDD3 ENSG00000133997|MED6 ENSG00000149177|PTPRJ ENSG00000149507|PLACL1 ENSG00000152404|CWF19L2 ENSG00000165264|NDUFB6 ENSG00000168538|NP\_068761.4 ENSG00000170632|ARMC10 ENSG00000171421|MRPL36 ENSG00000173113|TR112\_HUMAN ENSG00000181211|Q8NA17\_HUMAN ENSG00000182118|FAM89A

TCCGCGG ENSG00000070614|NDST1 ENSG00000072110|ACTN1 ENSG00000104946|TBC1D17 ENSG00000107223|EDF1 ENSG00000110057|UNC93B1 ENSG00000116670|MAD2L2 ENSG00000126460|PRRG2 ENSG00000129282|MRM1 ENSG00000129646|QRICH2 ENSG00000129757|CDKN1C ENSG00000130643|DRD1P ENSG00000138136|LBX1 ENSG00000142303|ADAMT510 ENSG00000144834|TAGLN3 ENSG00000154252|GAL3ST2 ENSG00000160469|BRSK1 ENSG00000160650|Q96H20\_HUMAN ENSG00000161013|MGAT4B ENSG00000161570|CCL5 ENSG00000175470|PPP2R2D ENSG00000177947|ODF3 ENSG00000179526|SHARPIN ENSG00000179943|ZNF579 ENSG00000184113|CLDN5 ENSG00000186635|STAR10 ENSG00000196374|HIST1H2BM ENSG00000197530|MTB2 ENSG00000197721|CR1L ENSG00000198454|Q5SQ13\_HUMAN ENSG00000204633|ACTN3 ENSG00000066629|EML1 ENSG00000070761|C16orf80 ENSG00000081842|PCDHA10 ENSG00000084676|NCOA1 ENSG00000102935|ZNF423 ENSG00000104643|MTMR9 ENSG00000104660|LEPROTL1 ENSG00000122548|K0087\_HUMAN ENSG00000130939|UBE4B ENSG00000140948|ZCCHC14 ENSG00000141448|GATA6 ENSG00000159216|RXNX1 ENSG00000181656|GPR88 ENSG00000185742|NP\_997528.1 ENSG00000034510|TMSB10 ENSG00000099822|HCN2 ENSG00000099910|SCARF2 ENSG00000101210|EEF1A2 ENSG00000103415|HMOX2 ENSG00000106991|ENG ENSG00000115507|OTX1 ENSG00000117984|CTSD ENSG00000130203|APOE ENSG00000130768|SMPDL3B ENSG00000131187|F1R2 ENSG00000133315|LRP16\_HUMAN ENSG00000136280|CCM2 ENSG00000141698|NTSC3L ENSG00000148704|VAX1 ENSG00000153060|TEKT5 ENSG00000162585|C1orf86 ENSG00000163702|IL17RC ENSG00000164438|TLX3 ENSG00000168658|NP\_659429.4 ENSG00000173581|CCDC106 ENSG00000173914|RBM4B ENSG00000183971|NPW ENSG00000184922|FMNL1 ENSG00000185818|NAT8L ENSG00000196293|DUX4 ENSG00000031003|C5orf5 ENSG00000059728|MXD1 ENSG00000083857|FAT ENSG00000129515|SNX6 ENSG00000133193|FAM104A ENSG00000143337|TOR1AIP1 ENSG00000144645|OSBP1L10 ENSG00000147416|ATP6V1B2 ENSG00000204884|Q6ZV12\_HUMAN ENSG00000205740|Q6ZNQ2\_HUMAN ENSG00000205835|LOC647309

TCCGCGT ENSG00000070371|CLTCL1 ENSG00000101194|C20orf59 ENSG00000106397|PLOC3 ENSG00000126353|CCR7 ENSG00000129654|FOXJ1 ENSG00000130669|PAK4 ENSG00000131668|BARX1 ENSG00000142657|PGD ENSG00000144834|TAGLN3 ENSG00000151778|C13orf21 ENSG00000157483|MYO1E ENSG00000167522|ANKRD11 ENSG00000169976|SF3B5 ENSG00000171532|NEUROD2 ENSG00000173581|CCDC106 ENSG00000179428|Q8N6X1\_HUMAN ENSG00000179740|C19orf290S ENSG00000182612|TSPAN10 ENSG00000183684|THOC4 ENSG00000188305|C19orf35 ENSG00000198371|Q8NAS2\_HUMAN ENSG00000198517|MAFK ENSG00000204666|NP\_001001687.1 ENSG00000205033|Q96DJ9\_HUMAN ENSG00000205236|NP\_663165.2 ENSG00000084090|STAR7 ENSG00000112685|EXOC2 ENSG00000113212|PCDHB7 ENSG00000121989|ACVR2A ENSG00000130764|LRRC47 ENSG00000137504|CREBZF ENSG00000162852|C1orf71 ENSG00000167555|ZNF534 ENSG00000168675|C18orf1 ENSG00000173276|ZNF295 ENSG00000176788|BASP1 ENSG00000180190|LIP1 ENSG00000203722|RAET1G ENSG00000002933|TMEM176A ENSG00000023191|RNH1 ENSG00000088992|TESC ENSG00000100577|GSTZ1 ENSG00000100938|NM\_001002000.1 ENSG00000101210|EEF1A2 ENSG00000108442|FAM18B2 ENSG00000108465|CDK5RAP3 ENSG00000113749|HRH2 ENSG00000115649|C2orf24 ENSG00000124466|LYPD3 ENSG00000127220|ABHD8 ENSG00000127527|EPS15L1 ENSG00000128309|MPST ENSG00000130592|LSP1 ENSG00000138698|RAP1GDS1 ENSG00000142224|IL19 ENSG00000144834|TAGLN3 ENSG00000153266|FEZF2 ENSG00000164038|NP\_849155.2 ENSG00000166002|C11orf75 ENSG00000167131|CCDC103 ENSG00000169926|KLF13 ENSG00000173581|CCDC106 ENSG00000197993|KEL ENSG00000204319|C4A ENSG00000204342|C4B ENSG00000205538|Q6ZVP1\_HUMAN ENSG00000100426|ZBED4 ENSG00000122778|Q9HCM3\_HUMAN ENSG00000136869|PLR4 ENSG00000136999|NOV ENSG00000137561|TPPA ENSG00000143469|SYT14 ENSG00000149177|PTPRJ ENSG00000151292|CSNK1G3 ENSG00000162959|MEMO1 ENSG00000163563|MNDA ENSG00000164128|NPY1R ENSG00000171476|HOP\_HUMAN ENSG00000174456|NP\_997318.1 ENSG00000179408|MEMO1P ENSG00000181588|RKHD1 ENSG00000185418|TARSL2 ENSG00000196963|PCDHB16

TCCGGGA ENSG00000005513|SOX8 ENSG000000015413|DPEP1 ENSG00000019485|PRDM11 ENSG00000076662|TCAM3 ENSG00000103423|DNAJ3 ENSG00000105641|SLC5A5 ENSG00000124126|PREX1\_HUMAN ENSG00000129038|LOXL1 ENSG00000130656|HBZ ENSG00000130811|EIF3S4 ENSG00000137203|TFAP2A ENSG00000139083|ETV6 ENSG00000141505|ASGR1 ENSG00000141956|PRDM15 ENSG00000143641|GALNT2 ENSG00000151465|CDC123 ENSG00000164916|FOXK1 ENSG00000167394|ZNF668 ENSG00000169026|MFSB7 ENSG00000172460|Q8VY7\_HUMAN ENSG00000173662|TAS1R1 ENSG00000174238|PITPNA ENSG00000176120|Q9BSY8\_HUMAN ENSG00000180924|Q9BVQ2\_HUMAN ENSG00000182896|TMEM95 ENSG00000182968|SOX1 ENSG00000186818|LILRB4 ENSG00000187699|Q8NBX4\_HUMAN ENSG00000196415|PRTN3 ENSG00000196700|ZNF512B ENSG00000204418|CLIC1 ENSG00000205927|OLIG2 ENSG00000006377|DLX6 ENSG00000051180|RAD51 ENSG00000069122|GPR116 ENSG00000090530|LEPREL1 ENSG00000093183|SEC22C ENSG00000111364|DDX55 ENSG00000117262|GPR89A ENSG00000119421|NDUFA8 ENSG00000129235|TXNL5 ENSG00000132965|ALOX5AP ENSG00000135111|TBX3 ENSG00000139370|SLC15A4 ENSG00000145423|SFRP2 ENSG00000150760|DOCK1 ENSG00000158435|C2orf29 ENSG00000162992|NEUROD1 ENSG00000163738|MTHFD2L ENSG00000164402|SEPT8 ENSG00000166452|C11orf17 ENSG00000173141|MRP63 ENSG00000188092|GPR89B ENSG00000198477|SUHW2 ENSG00000203667|FAM36A ENSG00000205325|NP\_001001684.1

TCCGGGG ENSG000000104774|MAN2B1 ENSG00000112033|PPARD ENSG000001122592|BARHL1 ENSG00000129988|LBP ENSG00000148826|NKK6-2 ENSG00000157093|LYZL4 ENSG00000160094|ZNF362 ENSG00000163485|ADORA1 ENSG00000170442|KRT86 ENSG00000175894|C21orf42 ENSG00000178372|CALML5 ENSG00000180878|C11orf42 ENSG00000197283|SYNGAP1 ENSG00000006757|PNPLA4 ENSG00000054392|HHAT ENSG00000071575|TRIB2 ENSG00000078369|GNB1 ENSG00000095203|EPB41L4B ENSG00000108306|FBXL20 ENSG00000110048|OSBP ENSG00000117602|DSCR1L2 ENSG00000130935|NOL11 ENSG00000134070|IRAK2 ENSG00000134852|CLOCK ENSG00000141448|GATA6 ENSG00000151715|TMEM45B ENSG00000152213|ARL11 ENSG00000153234|NR4A2 ENSG00000162437|RAVER2 ENSG00000162959|MEMO1 ENSG00000163689|NP\_940865.1 ENSG00000164122|ASB5 ENSG00000168280|KIF5C ENSG00000170860|LSM3 ENSG00000183155|RAB1F ENSG00000197172|MAGEA3 ENSG00000206075|SERPINB5 ENSG00000002330|BAD ENSG00000059691|PET112L ENSG00000101417|PMP4 ENSG00000105204|DYRK1B ENSG00000112699|GMD5 ENSG00000130119|GNL3L ENSG00000132394|EEFSEC ENSG00000160117|ANKRD41 ENSG00000166311|SMPD1 ENSG00000168484|SFTPC ENSG00000171443|XPF524 ENSG00000173933|RBM4 ENSG00000183186|KIAA1957 ENSG00000197079|KRT35 ENSG00000198219|Q96N05\_HUMAN ENSG00000066583|ISOC1 ENSG00000075413|MARK3 ENSG00000082397|EPB41L3 ENSG00000107798|LIPA ENSG00000122691|TWIST1 ENSG00000123977|WDR69 ENSG00000125630|POLR1B ENSG00000131941|RHPN2 ENSG00000134453|RBM17 ENSG00000143486|LGTN ENSG00000157551|KCNJ15 ENSG00000166529|ZSCAN21 ENSG00000167601|AXL ENSG00000172197|MBOAT1 ENSG00000178234|GALNT11 ENSG00000185304|NP\_001071638.1 ENSG00000187627|RGPD1 ENSG00000188659|NP\_001008227.1 ENSG00000197321|SVIL

TCCGTTA ENSG00000063761|ADCK1 ENSG00000096433|ITPR3 ENSG00000100297|MCM5 ENSG00000100335|SMCR7L ENSG00000103042|NP\_060701.1 ENSG00000105516|DBP ENSG00000111181|SLC6A12 ENSG00000114270|COL7A1 ENSG00000125445|MRPS7 ENSG00000136488|CSH2 ENSG00000136807|CDK9 ENSG00000137124|ALDH1B1 ENSG00000137700|SLC37A4 ENSG00000157601|MX1 ENSG00000164010|ERMAP ENSG00000168447|SCNN1B ENSG00000169174|PCSK9 ENSG00000172819|RARG ENSG00000176108|CHMP6 ENSG00000196935|SRGAP1 ENSG00000204488|Q8N925\_HUMAN ENSG00000033030|ZCCHC8 ENSG00000034533|ASTE1 ENSG00000054796|SPO11 ENSG00000075413|MARK3 ENSG00000078579|FGF20 ENSG00000093134|VNN3 ENSG00000105136|ZNF419 ENSG00000105856|HBP1 ENSG00000109472|CPE ENSG00000116741|RGS2 ENSG00000117228|GBP1 ENSG00000130764|LRRC47 ENSG00000132541|HRSF12 ENSG00000135336|ORC3L ENSG00000137992|DBT ENSG00000148835|TAF5 ENSG00000164162|ANAPC10 ENSG00000166669|ATF7IP2 ENSG00000170537|TMC7 ENSG00000174482|LINGO2 ENSG00000175606|TMEM70 ENSG00000180917|NP\_060818.3 ENSG00000182901|RGS7 ENSG00000197415|VEPH1

TCCGTTC ENSG00000068097|NP\_071353.4 ENSG00000105552|BCAT2 ENSG00000107223|EDF1 ENSG00000124541|C6orf153 ENSG00000125744|RTN2 ENSG00000132017|NP\_612362.2 ENSG00000138083|SIX3 ENSG00000154832|CXXC1 ENSG00000164438|TLX3 ENSG00000170689|HOXB9 ENSG00000171462|EGFL9 ENSG00000172020|GAP43 ENSG00000172663|TMEM134 ENSG00000172831|CES2 ENSG00000172927|MYEOV ENSG00000173673|HES3 ENSG00000174332|GLIS1 ENSG00000176340|COX8A ENSG00000187961|KLHL17 ENSG00000196557|CACNA1H ENSG00000204482|LST1 ENSG00000008294|SPAG9 ENSG00000049323|LTBP1 ENSG00000072694|FCGR2B ENSG00000075336|C18orf55 ENSG00000081665|ZNF253 ENSG00000089195|TRM6\_HUMAN ENSG00000122643|NT5C3 ENSG00000123124|WWP1 ENSG00000123562|MORF4L2 ENSG00000128845|CCPG1 ENSG00000130816|DNMT1 ENSG00000147381|MAGEA4 ENSG00000154217|PITPNC1 ENSG00000160363|SAFB ENSG00000164406|LEAP2 ENSG00000164794|KCNV1 ENSG00000167912|Q96QE0\_HUMAN ENSG00000170537|TMC7 ENSG00000172179|PRL ENSG00000178187|ZNF454 ENSG00000178222|RNF212 ENSG00000179578|Q8N4V4\_HUMAN ENSG00000183576|SETD3 ENSG00000197576|HOXA4 ENSG00000198393|ZNF26 ENSG00000204814|Q5VSD8\_HUMAN ENSG00000205758|CRYZL1

TCCTAAT ENSG00000013016|EHD3 ENSG00000048342|Q9H8A7\_HUMAN ENSG00000058085|LAMC2 ENSG00000100294|MCAT2 ENSG00000104870|FCGR2 ENSG00000108179|PPIF ENSG00000113739|STC2 ENSG00000123427|FAM19B ENSG00000124701|APOBEC2 ENSG00000130985|UBE1 ENSG00000131097|HIGD1B ENSG00000132824|SERINC3 ENSG00000133661|SFTPD ENSG00000135097|MSI1 ENSG00000136487|GH2 ENSG00000139644|TEGT ENSG00000140090|SLC24A4 ENSG00000140400|MAN2C1 ENSG00000157916|RER1 ENSG00000160916|ATP5J2 ENSG00000162148|C11orf66 ENSG00000162191|SAKS1\_HUMAN ENSG00000162968|Q96MQ0\_HUMAN ENSG00000168079|SCARA5 ENSG00000169918|OTUD7A ENSG00000180139|Q8N925\_HUMAN ENSG00000184990|SIVA1 ENSG00000189162|CSH1 ENSG00000204498|NFKB1L1 ENSG00000075213|SEMA3A ENSG00000099725|PRKY ENSG00000106692|FCMD ENSG00000107651|SEC23IP ENSG00000112210|RAB23 ENSG00000113088|GZMK ENSG00000114978|MOBK1B ENSG00000133703|KRAS ENSG00000146648|EGFR ENSG00000152455|SUV39H2 ENSG00000154429|C1orf96 ENSG00000157578|C21orf13 ENSG00000164258|NDUFS4 ENSG00000165185|KIAA1958 ENSG00000183576|SETD3 ENSG00000204022|LIP2 ENSG00000204832|Q6ZRU3\_HUMAN ENSG00000025434|NR1H3 ENSG00000075290|WNT9B ENSG00000080707|TRIP6 ENSG00000101445|PPP1R16B ENSG00000107554|DNM3P ENSG00000108375|SUPT4H1 ENSG00000108578|BLMH ENSG00000108669|PSCD1 ENSG00000111886|GABRR2 ENSG00000116586|MAP1P\_HUMAN ENSG00000124593|C6orf49 ENSG00000131165|CHMP1A ENSG00000140320|BAHD1 ENSG00000142405|NLRP12 ENSG00000158874|APOA2 ENSG00000166136|NDUFB8 ENSG00000171794|UTF1 ENSG00000175003|SLC22A1 ENSG00000184502|GAST ENSG00000184716|SERINC4 ENSG00000185739|SRL ENSG00000185811|IKZF1 ENSG00000197622|CDC42SE1 ENSG00000203747|FCGR3A ENSG00000204936|Q8N6Q3-3 ENSG00000204048|UBR2 ENSG00000070831|CDC42 ENSG00000080200|NP\_705833.2 ENSG00000080493|SLC4A4 ENSG00000092203|TOX4 ENSG00000114279|FGF12 ENSG00000129810|SGOL1 ENSG00000133962|C14orf161 ENSG00000136048|NP\_060840.2 ENSG00000139537|CCDC65 ENSG00000142182|DNMT3L ENSG00000146733|PSPH ENSG00000149742|SLC22A9 ENSG00000151327|C14orf24 ENSG00000155115|C6orf51

|         |                                |                                |                              |                              |                                |                                |                              |                              |                              |
|---------|--------------------------------|--------------------------------|------------------------------|------------------------------|--------------------------------|--------------------------------|------------------------------|------------------------------|------------------------------|
|         | ENSG00000158560 DYNC1I1        | ENSG00000162747 FCGR3B         | ENSG00000163817 SLC6A20      | ENSG00000164816 DEFA5        | ENSG00000170044 ZPLD1          | ENSG00000170786 NP_620419.2    | ENSG00000171940 ZNF217       | ENSG00000183960 KCNH8        |                              |
| TCCTGCT | ENSG00000188313 PLSCR1         | ENSG00000189241 TSPYL1         | ENSG00000196262 PP1A         | ENSG00000198018 ENTPD7       | ENSG00000198300 PEK3           | ENSG00000204261 PSMB9          | ENSG00000208352 PAGFL1       | ENSG00000108469 REGQL5       | ENSG00000130517 PGPEP1       |
|         | ENSG0000017621 MAGIX           | ENSG00000202784 B4GALT7        | ENSG00000079462 PFAFH1B3     | ENSG00000099917 PCQAP        | ENSG00000104365 IKKB3          | ENSG00000104365 IKKB3          | ENSG00000108469 REGQL5       | ENSG00000130517 PGPEP1       | ENSG00000158106 RHPN1        |
|         | ENSG00000140326 CDAN1          | ENSG00000141741 C17orf37       | ENSG00000142784 WDTCT1       | ENSG00000143167 PQA33        | ENSG00000148356 LRSAM1         | ENSG00000153551 CPTM7          | ENSG00000157978 LDLRAP1      | ENSG00000158106 RHPN1        | ENSG00000170909 NP_573398.1  |
|         | ENSG00000161203 AP2M1          | ENSG00000162738 VANGL2         | ENSG00000163067 ZNF2         | ENSG00000165953 SERPINA12    | ENSG00000166546 Q3B7T3_HUMAN   | ENSG00000169887 Q9UKN1_HUMAN   | ENSG00000170909 NP_573398.1  | ENSG00000170909 NP_573398.1  | ENSG00000173020 ADRBK1       |
|         | ENSG00000173327 MAP3K11        | ENSG00000175166 PSMD2          | ENSG00000175224 KIAA0652     | ENSG00000176986 SEC24C       | ENSG00000179740 C19orf290S     | ENSG00000179886 TIGD5          | ENSG00000180353 HCLS1        | ENSG00000184697 CLDN6        | ENSG00000184697 CLDN6        |
|         | ENSG00000196739 COL27A1        | ENSG00000197696 NMB            | ENSG00000204070 DNDD2        | ENSG00000010219 DYRK4        | ENSG00000069275 NUCKS1         | ENSG00000101966 BIRC4          | ENSG00000110851 PRDM4        | ENSG00000119866 BCL11A       | ENSG00000119866 BCL11A       |
|         | ENSG00000120162 MOBK12B        | ENSG00000132842 AP3B1          | ENSG00000134533 RERG         | ENSG00000144136 SLC20A1      | ENSG00000146223 RPL7L1         | ENSG00000147892 ADAMTSL1       | ENSG00000157259 GATAD1       | ENSG00000158406 HIST14H4     | ENSG00000158406 HIST14H4     |
| TCCTGTA | ENSG00000164338 UTP15          | ENSG00000169302 STK32A         | ENSG00000175483 O94914_HUMAN | ENSG00000185918 DEFA3        | ENSG00000187611 Q6ZTR6_HUMAN   | ENSG00000187922 HMGN4          | ENSG00000185010 F8           | ENSG00000197345 MRPL21       | ENSG00000197345 MRPL21       |
|         | ENSG00000115041 KCNIP3         | ENSG00000124208 UBE2V1         | ENSG00000135926 TMBIM1       | ENSG00000142748 FCN3         | ENSG00000143630 HCN3           | ENSG00000156603 MED19          | ENSG00000158850 B4GALT3      | ENSG00000163157 TMD04        | ENSG00000163157 TMD04        |
|         | ENSG00000169188 APEX2          | ENSG00000172426 C6orf206       | ENSG00000174175 SELP         | ENSG00000178206 C2orf14      | ENSG00000184557 SOC3           | ENSG00000187003 ACTL7A         | ENSG00000187736 SLC23A3      | ENSG00000198881 ASB12        | ENSG00000198881 ASB12        |
|         | ENSG00000203814 HIST2H2BF      | ENSG00000005810 MYCBP2         | ENSG00000016490 CLCA1        | ENSG000000081307 UBE1DC1     | ENSG00000100784 RPS6KA5        | ENSG00000104435 STMN2          | ENSG00000104863 LIN7B        | ENSG00000111530 CAND1        | ENSG00000111530 CAND1        |
|         | ENSG00000116688 MFN2           | ENSG00000134602 MST4_HUMAN     | ENSG00000136960 ENPP2        | ENSG00000141048 MYH4         | ENSG00000141367 CLTC           | ENSG00000144118 RALB           | ENSG00000162595 DIRAS3       | ENSG00000163285 GABRG1       | ENSG00000163285 GABRG1       |
| TCCTTCC | ENSG00000163788 SNRK           | ENSG00000179981 TSHZ1          | ENSG00000185918 DEFA3        | ENSG00000187611 Q6ZTR6_HUMAN | ENSG00000196664 TLR7           | ENSG00000198408 MGEA5          | ENSG00000206047 DEFT1P       | ENSG00000206047 DEFT1P       | ENSG00000206047 DEFT1P       |
|         | ENSG00000004139 SARM1          | ENSG00000078900 TPF3           | ENSG00000079689 SCGN         | ENSG00000083454 P2RX5        | ENSG00000089012 SIRPB2         | ENSG00000094796 KRT31          | ENSG00000099364 FBXL19       | ENSG00000100307 CBX7         | ENSG00000100307 CBX7         |
|         | ENSG00000102996 MMP15          | ENSG00000108771 LGP2_HUMAN     | ENSG00000121671 CRY2         | ENSG00000127241 MASP1        | ENSG00000128713 HOXD11         | ENSG00000129244 ATP1B2         | ENSG00000130182 ZSCAN10      | ENSG00000136319 TTC5         | ENSG00000136319 TTC5         |
|         | ENSG00000139644 TGTG           | ENSG00000141736 ERBB2          | ENSG00000141733 IGFBP4       | ENSG00000142920 ADC          | ENSG00000143321 HDGF           | ENSG00000148204 CRB2           | ENSG00000149483 TMEM138      | ENSG00000160753 RUSC1        | ENSG00000160753 RUSC1        |
|         | ENSG00000161692 DBF4           | ENSG00000167280 NP_001036038.1 | ENSG00000167487 KHLH26       | ENSG00000167962 ZNF598       | ENSG00000168066 SF1            | ENSG00000178709 CLDN9          | ENSG00000180353 HCLS1        | ENSG00000181781 C19orf19     | ENSG00000181781 C19orf19     |
|         | ENSG00000183798 EMILIN3        | ENSG00000184584 TMEM173        | ENSG00000187840 EIF4EBP1     | ENSG00000196186 Q71RF5_HUMAN | ENSG00000198870 C22orf5        | ENSG00000198870 C22orf5        | ENSG00000204421 LY6G6C       | ENSG00000204614 TRI40_HUMAN  | ENSG00000204614 TRI40_HUMAN  |
|         | ENSG00000205460 NP_001004332.1 | ENSG0000022267 FHL1            | ENSG00000065970 FOXJ2        | ENSG00000073464 CLCN4        | ENSG00000076321 KLHL20         | ENSG00000095139 ARCN1          | ENSG00000102317 RBM3         | ENSG00000106603 C7orf44      | ENSG00000106603 C7orf44      |
|         | ENSG00000108599 AKAP10         | ENSG00000117751 PPP1R8         | ENSG00000118515 SGK          | ENSG00000129696 C8orf41      | ENSG00000134086 VHL            | ENSG00000135828 RNASEL         | ENSG00000136888 ATP6V1G1     | ENSG00000138081 FBXO11       | ENSG00000138081 FBXO11       |
|         | ENSG00000140382 HMG20A         | ENSG00000141076 CIRH1A         | ENSG00000148730 EIF4EBP2     | ENSG00000153820 NP_085126.1  | ENSG00000156011 PSD3           | ENSG00000156026 CCDC109A       | ENSG00000156802 ATAD2        | ENSG00000159921 GNE          | ENSG00000159921 GNE          |
|         | ENSG00000162433 AK3L2          | ENSG00000162601 MYSM1          | ENSG00000164692 COL1A2       | ENSG00000165868 HSPA12A      | ENSG00000169519 METT5D1        | ENSG00000171365 CLCN5          | ENSG00000173473 SMARCC1      | ENSG00000175352 NRIP3        | ENSG00000175352 NRIP3        |
|         | ENSG00000179144 GIMAP7         | ENSG00000183022 NR_003148.2    | ENSG00000183784 C9orf66      | ENSG00000185231 MC2R         | ENSG00000197405 C5AR1          | ENSG00000108829 LRRC59         | ENSG00000115594 IL1R1        | ENSG00000141699 NP_835227.1  | ENSG00000141699 NP_835227.1  |
| TCCTTTA | ENSG00000035403 VCL            | ENSG00000087274 ADD1           | ENSG00000089250 NOS1         | ENSG00000090447 TFAP4        | ENSG00000090659 CD209          | ENSG00000165406 MARCH8         | ENSG00000170464 DNAJC18      | ENSG00000182953 NM_001031.4  | ENSG00000182953 NM_001031.4  |
|         | ENSG00000143140 GJA5           | ENSG00000143630 HCN3           | ENSG00000147256 HEUGXX_HUMAN | ENSG00000160296 SIGLEC12     | ENSG00000160710 ADAR           | ENSG00000165406 MARCH8         | ENSG00000170464 DNAJC18      | ENSG00000182953 NM_001031.4  | ENSG00000182953 NM_001031.4  |
|         | ENSG00000188707 C7orf29        | ENSG00000197976 CXorf3         | ENSG00000204386 NEU1         | ENSG00000204733 Q6ZSH7_HUMAN | ENSG00000205061 Q6ZUP2_HUMAN   | ENSG00000205061 Q6ZUP2_HUMAN   | ENSG00000205061 Q6ZUP2_HUMAN | ENSG00000205061 Q6ZUP2_HUMAN | ENSG00000205061 Q6ZUP2_HUMAN |
|         | ENSG00000111885 MAN1A1         | ENSG00000115159 GPD2           | ENSG00000118564 FBXL5        | ENSG00000122565 CBX3         | ENSG00000131015 ULBP2          | ENSG00000138185 ENTPD1         | ENSG00000147044 CASK         | ENSG00000147133 TAF1         | ENSG00000147133 TAF1         |
|         | ENSG00000152683 SLC30A6        | ENSG00000153094 BCL2L11        | ENSG00000155875 C9orf138     | ENSG00000155918 RAET1L       | ENSG00000156482 RPL30          | ENSG00000159917 ZNF235         | ENSG00000163029 SMC6         | ENSG00000163046 C21orf39     | ENSG00000163046 C21orf39     |
|         | ENSG00000164031 DNAJB14        | ENSG00000164117 FBXO8          | ENSG00000167637 ZNF345       | ENSG00000167842 MIS12        | ENSG00000170948 MED3L1         | ENSG00000172086 KRCC1          | ENSG00000172115 CYCS         | ENSG00000180257 ZNF321       | ENSG00000180257 ZNF321       |
|         | ENSG00000182187 CRYGB          | ENSG00000189056 RELN           | ENSG00000198315 ZNF192       | ENSG00000112149 CD83         | ENSG00000115255 REEP6          | ENSG00000125843 C20orf29       | ENSG00000127388 NM_198455.2  | ENSG00000134815 DHX34        | ENSG00000134815 DHX34        |
| TCGAAAC | ENSG00000105075 POLR2J         | ENSG00000155922 STMN4          | ENSG00000108557 RAI1         | ENSG00000112149 CD83         | ENSG00000115255 REEP6          | ENSG00000125843 C20orf29       | ENSG00000127388 NM_198455.2  | ENSG00000134815 DHX34        | ENSG00000134815 DHX34        |
|         | ENSG00000135740 SLC9A5         | ENSG00000137343 C6orf134       | ENSG00000143632 ACTA1        | ENSG00000145526 CDH18        | ENSG00000153266 FEZF2          | ENSG00000157617 C21orf25       | ENSG00000157927 K1849_HUMAN  | ENSG00000166448 TMEM130      | ENSG00000166448 TMEM130      |
|         | ENSG00000166831 RBPMS2         | ENSG00000172663 TMEM134        | ENSG00000179598 NP_849158.1  | ENSG00000180340 FZD2         | ENSG00000183707 Q9EAT3_HUMAN   | ENSG00000184601 NP_001008404.1 | ENSG00000198715 C1orf85      | ENSG00000204490 TNF          | ENSG00000204490 TNF          |
|         | ENSG00000205064 Q6ZVP2_HUMAN   | ENSG00000206026 NP_001032408.1 | ENSG00000008324 SS18L2       | ENSG00000064218 DMRT3        | ENSG00000068784 SRBD1          | ENSG00000071539 TRIP13         | ENSG00000096093 EFHC1        | ENSG00000099256 PRTFDC1      | ENSG00000099256 PRTFDC1      |
|         | ENSG00000135917 SLC19A3        | ENSG00000142871 CYR61          | ENSG00000143870 PDIA6        | ENSG00000144891 AGTR1        | ENSG00000153162 BMP6           | ENSG00000156804 FBXO32         | ENSG00000161405 IKZF3        | ENSG00000161542 PRPSAP1      | ENSG00000161542 PRPSAP1      |
|         | ENSG00000163607 GTPBP8         | ENSG00000164442 CITED2         | ENSG00000173611 C9orf126     | ENSG00000174792 C4orf26      | ENSG00000177689 MAGEB10        | ENSG00000185915 KLHL34         | ENSG00000196214 ZNF766       | ENSG00000196243 C12orf37     | ENSG00000196243 C12orf37     |
|         | ENSG00000197522 SUZ12P         | ENSG00000198331 HYLS1          | ENSG00000063169 GLTSCR1      | ENSG00000099204 ABLIM1       | ENSG00000099622 CIRBP          | ENSG00000103197 TSC2           | ENSG00000119682 KIAA0317     | ENSG00000136895 GARNL3       | ENSG00000136895 GARNL3       |
| TCGAACG | ENSG00000149294 NCAM1          | ENSG00000166619 BLCAP          | ENSG00000187456 RDM1         | ENSG00000196559 C11orf55     | ENSG00000091879 ANGPT2         | ENSG00000105855 ITGB8          | ENSG00000123612 ACVR1C       | ENSG00000135837 CEP350       | ENSG00000135837 CEP350       |
|         | ENSG00000168264 IRF2BP2        | ENSG00000171864 PRND           | ENSG00000187079 TEAD1        | ENSG00000205423 TMEM188      | ENSG00000127472 PLA2G5         | ENSG00000134516 DOCK2          | ENSG00000138136 LBX1         | ENSG00000139044 B4GALNT3     | ENSG00000139044 B4GALNT3     |
| TCGAAGC | ENSG00000049089 COL9A2         | ENSG00000079432 CIC            | ENSG00000101405 OXT          | ENSG00000162699 GMD5         | ENSG00000167565 SERATD3        | ENSG00000175470 PPP2R2D        | ENSG00000183621 ZNF438       | ENSG00000184709 LRRC26       | ENSG00000184709 LRRC26       |
|         | ENSG00000139549 DHH            | ENSG00000158497 HMH81          | ENSG00000162931 TRIM17       | ENSG00000165724 ZMYND19      | ENSG00000198500 Q96C21_HUMAN   | ENSG00000005059 CCDC109B       | ENSG00000034239 EFCAB1       | ENSG00000054983 GALC         | ENSG00000089177 C20orf23     |
|         | ENSG00000196843 ARID5A         | ENSG00000197694 SPTAN1         | ENSG00000198457 CP21A_HUMAN  | ENSG00000109445 ZNF330       | ENSG00000115760 BIRC6          | ENSG00000120658 ENOX1          | ENSG00000122335 SERAC1       | ENSG00000136527 SFRS10       | ENSG00000136527 SFRS10       |
|         | ENSG00000101843 PSMD10         | ENSG00000101916 TLR8           | ENSG00000108406 DHX40        | ENSG00000151806 GUF1         | ENSG00000159259 CHAF1B         | ENSG00000162630 B3GALT2        | ENSG00000174343 CHRNA9       | ENSG00000174496 C21orf34     | ENSG00000174496 C21orf34     |
|         | ENSG00000141367 CLTC           | ENSG00000147416 ATP6V1B2       | ENSG00000149084 HSD17B12     | ENSG00000179136 Q8NAV9_HUMAN | ENSG00000196712 NF1            | ENSG00000197467 COL13A1        | ENSG00000198626 RYR2         | ENSG00000204669 C9orf57      | ENSG00000204669 C9orf57      |
|         | ENSG00000177981 ASB8           | ENSG00000178445 GLDC           | ENSG00000178538 CA8          | ENSG00000109705 BAPX1        | ENSG00000111412 C12orf49       | ENSG00000112079 STK38          | ENSG00000116096 SPR          | ENSG00000119689 DLST         | ENSG00000119689 DLST         |
| TCGAATA | ENSG00000006071 ABCC8          | ENSG0000011304 PTBP1           | ENSG00000100151 PICK1        | ENSG00000109705 BAPX1        | ENSG00000111412 C12orf49       | ENSG00000112079 STK38          | ENSG00000116096 SPR          | ENSG00000119689 DLST         | ENSG00000119689 DLST         |
|         | ENSG00000120087 HOXB7          | ENSG00000133980 C14orf115      | ENSG00000136327 NKK2-8       | ENSG00000141574 SECTM1       | ENSG00000159723 AGRP           | ENSG00000163331 NP_001017920.1 | ENSG00000164651 SP8          | ENSG00000168826 ZNF509       | ENSG00000168826 ZNF509       |
|         | ENSG00000170616 SCRT1          | ENSG00000175287 PHYHD1         | ENSG00000177076 ASAHL3       | ENSG00000177370 TIMM22       | ENSG00000180924 Q9BVQ6_HUMAN   | ENSG00000184787 UBE2G2         | ENSG00000189201 COX19        | ENSG00000197116 Q9UDD8_HUMAN | ENSG00000197116 Q9UDD8_HUMAN |
|         | ENSG00000197162 ZNF688         | ENSG00000197721 CR1L           | ENSG00000197757 HOXC6        | ENSG00000204936 Q8N6Q3-3     | ENSG00000205011 NP_001007547.1 | ENSG000000034971 MYOC          | ENSG00000044459 C9orf39      | ENSG00000099783 HNRPM        | ENSG00000099783 HNRPM        |
|         | ENSG00000101843 PSMD10         | ENSG00000105854 PON2           | ENSG00000106603 C7orf44      | ENSG00000119041 GTF3C3       | ENSG00000134504 KCTD1          | ENSG00000138050 THUMP2         | ENSG00000158185 ANKRD36      | ENSG00000161573 CCL16        | ENSG00000161573 CCL16        |
|         | ENSG00000162606 L1TD1          | ENSG00000163359 COL6A3         | ENSG00000168944 CCDC100      | ENSG00000170500 LONRF2       | ENSG00000170917 NUDT6          | ENSG00000173141 MRP6           | ENSG00000182271 TM1GD1       | ENSG00000186314 PRELID2      | ENSG00000186314 PRELID2      |
|         | ENSG00000196912 AN36B_HUMAN    | ENSG00000203710 CR1            | ENSG00000007129 CEACAM21     | ENSG00000049283 EPN3         | ENSG00000089091 C20orf12       | ENSG00000116584 ARHGEF2        | ENSG00000121410 ALBG         | ENSG00000128346 C22orf23     | ENSG00000137502 RAB30        |
| TCGACCA | ENSG00000006071 ABCC8          | ENSG00000142494 GNAL           | ENSG00000149294 NCAM1        | ENSG00000160471 COX6B2       | ENSG00000164850 GPR30          | ENSG00000165626 C10orf30       | ENSG00000170458 CD14         | ENSG00000173812 EIF1         | ENSG00000179141 Q8N642_HUMAN |
|         | ENSG00000182492 BCN            | ENSG00000182953 NM_001031.4    | ENSG00000185905 C16orf54     | ENSG00000187838 PLSCR3       | ENSG00000197789 Q8NAA0_HUMAN   | ENSG00000197789 Q8NAA0_HUMAN   | ENSG00000197993 KEL          | ENSG00000204938 Q6ZUS7_HUMAN | ENSG00000204938 Q6ZUS7_HUMAN |
|         | ENSG00000068878 PSME4          | ENSG00000092148 HECTD1         | ENSG00000100811 YY1          | ENSG00000102387 TAF7L        | ENSG00000105880 DLX5           | ENSG00000109606 DHX15          | ENSG00000116030 SUMO1P3      | ENSG00000118762 PKD2         | ENSG00000118762 PKD2         |
|         | ENSG00000119616 FCF1           | ENSG00000124479 NDP            | ENSG00000130779 CLIP1        | ENSG00000131238 PPT1         | ENSG00000131951 LRRC9          | ENSG000001                     |                              |                              |                              |



ENSG00000151552|QDPR ENSG00000155749|ALS2CR12 ENSG00000163781|TOPBP1 ENSG00000169519|METT5D1 ENSG00000170502|NUDT9 ENSG00000171421|MRPL36 ENSG00000175395|ZNF25 ENSG00000175556|LONRF3  
TCGCATG ENSG00000179774|ATOH7 ENSG00000182308|WDR21B ENSG00000184254|ALDH1A3 ENSG00000187824|NP\_001004313.1 ENSG00000205462|Q6ZWC8\_HUMAN ENSG00000120075|HOXB5 ENSG00000126705|AHDC1 ENSG00000131871|SELS\_HUMAN  
ENSG00000146374|RSPO3 ENSG00000157916|RER1 ENSG00000159556|ISL1 ENSG00000161395|PERLD1 ENSG00000162591|MEGF6 ENSG00000167642|SPINT2 ENSG00000171847|FAM90A1 ENSG00000172336|POPF7  
ENSG00000177234|C10orf85 ENSG00000185090|MANEAL ENSG00000186837|C12orf119 ENSG00000203685|C1orf95 ENSG00000203774|Q6ZUA8\_HUMAN ENSG00000203934|Q6ZUQ1\_HUMAN ENSG00000204860|C9orf122 ENSG00000212131|PDXP  
ENSG00000003096|KLHL13 ENSG000000038219|FAM44A ENSG000000065413|ANKRD44 ENSG000000066697|TMEFF1 ENSG000000108423|TUBD1 ENSG000000109680|TBC1D19 ENSG00000120833|SOCS2  
TCGCCAG ENSG00000137040|RANBP6 ENSG00000150681|RGS18 ENSG00000155313|USP25 ENSG00000156650|MYST4 ENSG00000164893|SLC7A13 ENSG00000185275|CD24 ENSG00000187498|COL4A1  
ENSG00000008256|PSCD3 ENSG000000053438|NNAT ENSG000000088727|KIF9 ENSG00000100156|SLC16A8 ENSG00000105717|PBX4 ENSG00000106665|CLIP2 ENSG00000128849|CGNL1 ENSG00000131152|Q9H693\_HUMAN  
ENSG00000134317|GRHL1 ENSG00000135702|CHST5 ENSG00000138085|C2orf28 ENSG00000166862|CACNG2 ENSG00000166998|CKMT1A ENSG00000167705|RILP ENSG00000168775|KCRU\_HUMAN ENSG00000172301|C10orf79  
ENSG00000176438|C14orf49 ENSG00000177374|HIC1 ENSG00000177666|PNPLA2 ENSG00000178467|EGLX\_HUMAN ENSG00000181284|TMEM102 ENSG00000196154|S100A4 ENSG00000197272|IL27 ENSG00000197548|ATG7  
ENSG00000197982|C1orf122 ENSG00000204499|Q6P6C6\_HUMAN ENSG00000206539|Q6ZTN9\_HUMAN ENSG0000041515|MYO16 ENSG00000069849|ATP1B3 ENSG00000090530|LEPREL1 ENSG00000091164|TXNL1 ENSG00000100426|ZBED4  
ENSG00000102974|CTCF ENSG00000110934|BIN2 ENSG000001113645|WWC1 ENSG00000114416|FXR1 ENSG00000116750|UCHL5 ENSG00000123352|SPAT2 ENSG00000129515|SNX6 ENSG00000150076|C10orf68  
ENSG00000151917|C6orf65 ENSG00000155393|HEATR3 ENSG00000155438|MKI671P ENSG00000163646|CLRN1 ENSG00000165704|HPRT1 ENSG00000166529|ZSCAN21 ENSG00000167995|BEST1 ENSG00000169398|PTK2  
ENSG00000170175|CHRN1 ENSG00000180917|NP\_060818.3 ENSG00000182747|SLC35D3 ENSG00000184374|COLEC10 ENSG00000185742|NP\_997528.1 ENSG00000196730|DAPK1 ENSG00000198121|EDG2 ENSG00000198743|SLC5A3  
TCGCCAT ENSG00000075043|KCNQ2 ENSG00000099991|CABIN\_HUMAN ENSG00000100836|PABPN1 ENSG00000101210|EEF1A2 ENSG00000103197|TSC2 ENSG00000104953|TLE6 ENSG00000105668|UPK1A ENSG00000122133|PAEP  
ENSG00000136840|ST6GALNAC4 ENSG00000139890|REM2 ENSG00000141873|SLC39A3 ENSG00000143603|KCNN3 ENSG00000146063|TRIM41 ENSG00000147382|FAM58A ENSG00000148358|GPR107 ENSG00000159788|RGS12  
ENSG00000164715|MYTK2 ENSG00000167851|CD300A ENSG00000171621|SPSB1 ENSG00000172831|CES2 ENSG00000176476|CCDC101 ENSG00000179168|GGN ENSG00000197021|CXorf40B ENSG00000198546|ZNF511  
ENSG00000005810|MYCBP2 ENSG000000074201|CLNS1A ENSG000000083828|ZNF586 ENSG00000101230|C20orf82 ENSG00000125868|DSTN ENSG00000149124|GLYAT ENSG00000165914|TTC7B ENSG00000168502|KIAA0802  
ENSG00000176623|FAM82B ENSG00000182197|EXT1 ENSG00000184992|BRI3BP ENSG00000188295|ZNF669 ENSG00000196735|HLA-DQA1 ENSG00000197510|C21orf116 ENSG00000204672|Q8NI72\_HUMAN  
TCGCCCC ENSG000000007314|SCN4A ENSG000000051523|CYBA ENSG000000075618|FSCN1 ENSG000000087085|ACHE ENSG00000090776|EFNB1 ENSG00000100294|MCAT ENSG00000101144|BMP7 ENSG00000101200|AVP  
ENSG00000101276|C20orf54 ENSG00000103653|CSK ENSG00000104899|AMH ENSG00000106125|AQP1 ENSG00000106246|PTCD1 ENSG00000115266|APC2 ENSG00000125084|WNT1 ENSG00000125533|BHLHB4  
ENSG00000126461|NP\_067051.1 ENSG00000132003|ZSWIM4 ENSG00000133027|PEMT ENSG00000134247|PTGFRN ENSG00000134438|RAX ENSG00000136630|HLX1 ENSG00000143434|SEMA6C ENSG00000150201|FXYP4  
ENSG00000158747|NBL1 ENSG00000168477|TNXB ENSG00000177380|PPF1A3 ENSG00000179840|NP\_001038943.1 ENSG00000179965|ZNF771 ENSG00000181284|TMEM102 ENSG00000196187|TMEM63A ENSG00000196614|NM\_207462  
ENSG00000197273|GUCA2A ENSG00000206197|NP\_001013723.1 ENSG000000049245|VAMP3 ENSG000000082153|BZW1 ENSG00000109099|PMP22 ENSG00000117713|ARID1A ENSG00000120129|DUSP1 ENSG00000140057|ATG7  
ENSG00000144118|RALB ENSG00000145715|RASA1 ENSG00000146360|GPR6 ENSG00000157005|SST ENSG00000159445|THEM4 ENSG00000165914|TTC7B ENSG00000168566|C6orf151 ENSG00000169714|CNBP  
TCGCCCG ENSG00000171723|GPHN ENSG00000177068|Q8N269\_HUMAN ENSG00000179859|LOC284023|ENSG00000188404|SELL ENSG00000198382|UVRAG ENSG00000205133|Q629K1\_HUMAN  
ENSG00000007264|MATK ENSG000000066336|SPI1 ENSG000000070182|SPTB ENSG00000105401|CDC37 ENSG00000105419|Q99687-2 ENSG00000107821|KAZALD1 ENSG00000116670|MAD2L2 ENSG00000124159|MATN4  
ENSG00000130311|C19orf58 ENSG00000141526|SLC16A3 ENSG00000142347|MYO1F ENSG00000142910|TTNAGL1 ENSG00000159556|ISL2 ENSG00000160345|C9orf16 ENSG00000163497|FEV ENSG00000164916|FOXK1  
ENSG00000167657|DAPK3 ENSG00000171540|OTF ENSG00000177732|SOX12 ENSG00000178685|PARP10 ENSG00000179943|ZNF579 ENSG00000183072|NKKX2-5 ENSG00000184922|FMNL1 ENSG00000185324|CDK10  
ENSG00000185499|MUC1 ENSG00000203786|KPRP ENSG00000204210|ZBTB22 ENSG00000204538|PSORS1C2 ENSG00000204860|C9orf122 ENSG00000124380|SNUT3\_HUMAN ENSG00000141433|ADCYAP1 ENSG00000153684|NP\_001012455.1  
ENSG00000164608|NP\_071373.2 ENSG00000182107|TMEM30B ENSG00000183629|GOLGA8 ENSG00000205024|Q6ZVP5\_HUMAN  
TCGCCGAG ENSG00000002330|BAD ENSG000000058866|DGKG ENSG00000100055|PSCD4 ENSG00000105662|CRTC1 ENSG00000105737|GRIK5 ENSG00000124006|OBSL1 ENSG00000125285|SOX21 ENSG00000129354|AP1M2  
ENSG00000145214|DGKG ENSG00000161929|NP\_996986.1 ENSG00000164850|GPR30 ENSG00000165879|FRAT1 ENSG00000167566|KIAA1602 ENSG00000170767|C6orf208 ENSG00000172534|HCFC1 ENSG00000173011|Q86TJ2\_HUMAN  
ENSG00000174996|KLC2 ENSG00000175264|CHST1 ENSG00000181220|ZNF746 ENSG00000185668|POU3F1 ENSG00000198291|Q6ZTP9\_HUMAN ENSG00000203987|Q6ZR86\_HUMAN ENSG00000205064|Q6ZVP2\_HUMAN ENSG00000205927|OLIG2  
ENSG00000104369|JPH1 ENSG00000134046|MBD2 ENSG00000137710|RDX ENSG00000141655|TNFRSF11A ENSG00000147044|CASK ENSG00000151461|UPF2 ENSG00000181784|ANG ENSG00000186009|ATP4B  
TCGC GTT ENSG00000105610|KLF1 ENSG00000107140|TESK1 ENSG00000108786|HSD17B1 ENSG00000127527|EPS15L1 ENSG00000128645|HOXD1 ENSG00000135898|GPR55 ENSG00000138835|RGS3 ENSG00000140264|SERF2  
ENSG00000151468|CCDC3 ENSG00000159692|CTBP1 ENSG00000170265|ZNF282 ENSG00000185112|FAM43A ENSG00000187013|C17orf82 ENSG00000196132|MYT1\_HUMAN ENSG00000197976|CXorf3 ENSG00000205236|NP\_663165.2  
ENSG000000065600|C1orf75 ENSG00000105983|LMBR1 ENSG00000112992|NNT ENSG00000113369|ARRDC2 ENSG000001136213|SOCS2 ENSG00000136213|CHST12 ENSG00000137273|FOXF2 ENSG00000155189|AGPAT5  
ENSG00000162374|ELAVL4 ENSG00000164144|ARFP1P ENSG00000165476|REEP3 ENSG00000166206|GABRB3 ENSG00000168280|KIF5C ENSG00000169504|CLIC4 ENSG00000176293|ZNF135 ENSG00000177613|CSTF2T  
ENSG00000180044|Q8N54\_HUMAN ENSG00000197585|Q5JV89\_HUMAN ENSG00000198168|SVIP\_HUMAN  
TCGC TAT ENSG000000071564|TCF3 ENSG000000076864|RAP1GAP ENSG00000100605|ITPK1 ENSG00000114316|USP4 ENSG00000127412|TRPV5 ENSG00000130956|HABP4 ENSG00000133313|CNDP2 ENSG00000140598|EFTUD1  
ENSG00000148468|C10orf38 ENSG00000161939|C17orf49 ENSG00000165804|ZNF219 ENSG00000166199|ALKBH3 ENSG00000166997|NP\_689968.1 ENSG00000168539|CHRM1 ENSG00000178795|GDPD4 ENSG00000179452|Q8TDK1\_HUMAN  
ENSG00000180806|HOXC9 ENSG00000183785|PEX26 ENSG00000185324|CDK10 ENSG00000185739|SRL ENSG00000189263|Q6ZSZ2\_HUMAN ENSG00000196581|AJAP1 ENSG00000196624|NP\_997381.1 ENSG00000197763|TXNRD3  
ENSG00000204092|NP\_001001705.1 ENSG00000204301|NOTCH4 ENSG00000205033|Q96DJ9\_HUMAN ENSG00000205452|Q6ZQQ9\_HUMAN ENSG00000078269|SYNJ2 ENSG00000100644|HIF1A ENSG00000106588|PSMA2 ENSG00000108654|DDX5  
ENSG00000109805|NCAPG ENSG00000113360|RNAEN ENSG00000115361|ACADL ENSG00000122674|C7orf28A ENSG00000135070|ISCA1 ENSG00000136492|BRIP1 ENSG00000145284|SCD5 ENSG00000146574|C7orf28B  
ENSG00000150457|LAT2 ENSG00000152433|ZNF547 ENSG00000155816|FAMN2 ENSG00000157869|RAB28 ENSG00000163646|CLRN1 ENSG00000165118|C9orf64 ENSG00000165995|CACNB2 ENSG00000169554|ZEB2  
ENSG00000171766|GATM ENSG00000179163|FUCA1 ENSG00000197110|IL28B ENSG00000198741|Q8N9C2\_HUMAN  
TCGC TDC ENSG00000005206|PSL1\_HUMAN ENSG000000077009|ITGB1BP3 ENSG000000078898|BP1L1 ENSG000000089505|CMTM1 ENSG00000104953|TLE6 ENSG00000105221|AKT2 ENSG00000108509|CAMTA2  
ENSG00000124140|SLC12A5 ENSG00000130487|KLHD7B ENSG00000130598|TNNT2 ENSG00000130643|DRD1P ENSG00000131094|CLQL1 ENSG00000135966|TGFBRAP1 ENSG00000136490|LIMD2 ENSG00000141404|GNAL  
ENSG00000146834|BCDIN3 ENSG00000155034|FBXL18 ENSG00000163633|C4orf36 ENSG00000167046|Q5JT57\_HUMAN ENSG00000177374|HIC1 ENSG00000196374|HIST1H2BM ENSG00000198618|PIIA\_HUMAN ENSG000002016|RAD52  
ENSG00000005421|PON1 ENSG000000073905|VDAC1 ENSG000000079459|FDFT1 ENSG00000102401|ARMCX3 ENSG00000102804|TSC22D1 ENSG00000103035|PSMD7 ENSG00000107077|JMJ2C ENSG00000108510|THRAP1  
ENSG00000109911|ELP4 ENSG00000127774|TMEM93 ENSG00000128731|HERC2 ENSG00000130254|SAFB2 ENSG00000136235|GNPMB ENSG00000141279|NPEPPS ENSG00000106512|ANKRD55 ENSG00000166848|TERF2IP  
ENSG00000188463|XR\_015229.1 ENSG00000196141|NP\_056350.1 ENSG00000196262|PP1A ENSG00000196470|SIAH1 ENSG00000204086|RP4A  
TCGC TTA ENSG000000066056|TIE1 ENSG00000101463|C20orf39 ENSG00000105722|ERF ENSG00000118898|PPL ENSG00000124191|TOX2 ENSG00000132793|LPIN3 ENSG00000133878|DUSP26  
ENSG00000134014|ELP3 ENSG00000140939|NOL3 ENSG00000144712|CAND2 ENSG00000148468|C10orf38 ENSG00000158006|PFAH2 ENSG00000172016|REG3A ENSG00000172216|CEBPB ENSG00000181713|Q8NAF7\_HUMAN  
ENSG00000181877|Q8NAZ9\_HUMAN ENSG00000182149|KIAA0174 ENSG00000197444|OGDHL ENSG00000205711|Q6ZV92\_HUMAN ENSG00000101266|CSNK2A1P ENSG00000121964|GTDC1 ENSG00000122376|XR\_015353.1 ENSG00000128683|GAD1  
ENSG00000130816|DNMT1 ENSG00000131779|PEX11B ENSG00000131781|FMO5 ENSG00000131951|LRR9C ENSG00000135205|NP\_065930.2 ENSG00000139970|RTN1 ENSG00000147606|SLC26A7 ENSG00000150045|KLRP1  
ENSG00000152782|PANK1 ENSG00000160679|C1orf77 ENSG00000162909|CAPN2 ENSG00000163510|NP\_065994.1 ENSG00000163689|NP\_940865.1 ENSG00000164398|ACSL6 ENSG00000165874|FAM35A ENSG00000166012|SNORA25  
ENSG00000169299|PGM2 ENSG00000170542|SERPINB9 ENSG00000172900|XR\_017872.1 ENSG00000175105|ZNF654 ENSG00000177047|IFNW1 ENSG00000181690|PLAG1 ENSG00000182220|ATP6AP2 ENSG00000186416|NKRF  
ENSG00000196227|C20orf177 ENSG00000197747|S100A10  
TCGC TTG ENSG000000014216|CAPN1 ENSG00000001282|LMCD1 ENSG00000104886|PLEKHJ1 ENSG00000112679|DUSP22 ENSG00000119242|CCDC92 ENSG00000122735|DNAI1 ENSG00000125505|LENG4 ENSG00000125971|DYNLRB1  
ENSG00000127220|ABHD8 ENSG00000129932|DOHH ENSG00000130303|BST2 ENSG00000140553|UNC45A ENSG00000140553|UNC45A ENSG00000143030|GTF3C5 ENSG00000148308|GTF3C5 ENSG00000157017|GHRL ENSG00000158571|PFKFB1  
ENSG00000163704|PRRT3 ENSG00000171223|JUNB ENSG00000171298|GAA ENSG00000182378|PLCXD1 ENSG00000185361|TNFAIP8L1 ENSG00000187451|Q9NWC8\_HUMAN ENSG00000187730|GABRD ENSG00000100528|CNIH  
ENSG00000100711|ZFYVE21 ENSG00000107201|DDX58 ENSG00000112695|COX7A2 ENSG00000113384|GOLPH3 ENSG00000116652|DLEU2 ENSG00000120885|CLU ENSG00000136478|TEX2 ENSG00000136874|STX17  
ENSG00000138802|SEC24B ENSG00000139370|SLC15A4 ENSG00000140968|IRF8 ENSG00000148798|INA ENSG00000151917|C6orf65 ENSG00000153283|CD96 ENSG00000162909|CAPN2 ENSG00000164093|PTTX2  
ENSG00000164815|ORC5L ENSG00000165409|TSHR ENSG00000165474|GJB2 ENSG00000166535|A2ML1 ENSG00000171243|SOSTDC1 ENSG00000172288|CDY1\_HUMAN ENSG00000172352|CDY1 ENSG00000196392|Q8IWW4\_HUMAN  
ENSG00000198612|COPS8  
TCGCCGG ENSG000000026036|TNFRSF6B ENSG00000040608|RTN4R ENSG00000053524|MCF2L2 ENSG00000054611|TBC1D22A ENSG00000089351|GRAMD1A ENSG00000100151|PICK1 ENSG00000115507|OTX1 ENSG00000119688|ABCD4  
ENSG00000125968|ID1 ENSG00000126001|CEP250 ENSG00000130300|PLVAP ENSG00000130312|MRPL34 ENSG00000131668|BARX1 ENSG00000137331|IER3 ENSG00000137731|FXYP2 ENSG00000139890|REM2  
ENSG00000140955|NP\_631913.2 ENSG00000149600|COMMD7 ENSG00000151365|THRSF ENSG00000158104|HPD ENSG00000160796|NBEAL2 ENSG00000165698|C9orf9 ENSG00000167657|DAPK3 ENSG00000168758|SEMA4C  
ENSG00000170412|GPCR5C ENSG00000171124|FUT3 ENSG00000173838|RNF190 ENSG00000177374|HIC1 ENSG00000180902|D2HGDH ENSG00000184221|OLIG1 ENSG00000186891|TNFRSF18 ENSG00000187013|C17orf82  
ENSG00000187479|Q7Z7L8\_HUMAN ENSG00000204314|PRRT1 ENSG00000205566|Q8TB02\_HUMAN ENSG00000064313|TAF2 ENSG00000071054|MAP4K4 ENSG00000116833|NR5A2 ENSG00000132334|PTPRE ENSG00000137269|LRRCL1  
ENSG00000171517|EDG7 ENSG00000180044|Q8N54\_HUMAN ENSG00000180440|NP\_982276.1  
TCGC GTAC ENSG000000065526|SPEN ENSG000000076984|O14733-2 ENSG00000100417|PMM1 ENSG00000108244|KRT23 ENSG00000123159|GIPC1 ENSG00000132128|LRRCL4 ENSG00000136444|RSAD1  
ENSG00000143393|PIK4CB ENSG00000157020|SEC13 ENSG00000165175|MID1IP1 ENSG00000169410|PTPN9 ENSG00000170049|KCNAB3 ENSG00000172789|HOXC5 ENSG00000173212|C1orf161 ENSG00000174915|PTDSS2  
ENSG00000179240|Q3ZCU0\_HUMAN ENSG00000183778|B3GALT5 ENSG00000198910|L1CAM ENSG00000198929|NOS1AP ENSG00000204474|Q5JQD4\_HUMAN ENSG00000205336|GPR56 ENSG00000205528|Q6ZRE2\_HUMAN ENSG00000205770|Q8N847\_HUMAN  
ENSG00000206126|Q6ZV82\_HUMAN ENSG000000081800|SLC13A1 ENSG00000107077|JMJD2C ENSG00000107371|EXOSC3 ENSG00000108854|SMURF2 ENSG00000111897|SERINC1 ENSG00000120217|CD274 ENSG00000129675|ARHGGEF6  
ENSG00000133119|RFC3 ENSG00000136044|APPL2 ENSG00000136682|CBWD2 ENSG00000137801|THBS1 ENSG00000141655|TNFRSF11A ENSG00000144452|ABCA12 ENSG00000146648|EGFR ENSG00000151617|EDNRA  
ENSG00000155761|SPAG17 ENSG00000166173|LARP6 ENSG00000169239|CA5B ENSG00000183022|NR\_003148.2 ENSG00000186814|Q86W11\_HUMAN ENSG00000196319|Q9H353\_HUMAN ENSG00000197412|Q8N8G3\_HUMAN  
TCGC GTAT ENSG000000010295|NP\_542768.1 ENSG00000102003|SYP ENSG00000104419|NDRG1 ENSG00000105997|HOXA3 ENSG00000107954|NEURL ENSG00000111602|TIMELESS ENSG00000115884|SDC1 ENSG00000120049|KCNIP2  
ENSG00000124126|PREX1\_HUMAN ENSG00000142686|NP\_689587.1 ENSG00000142700|DMRTA2 ENSG00000143093|FAM40A ENSG00000147753|TTY7\_HUMAN ENSG00000147761|TTY7\_HUMAN ENSG00000152953|STK32B ENSG00000165280|VCP  
ENSG00000171720|HDAC3 ENSG00000173210|ABLM3 ENSG00000174683|C8orf78 ENSG00000176986|SEC24C ENSG00000184292|TACSTD2 ENSG00000185052|SLC24A3 ENSG00000192660|SFTFPG ENSG00000197976|CXorf3  
ENSG00000204581|Q6ZU44\_HUMAN ENSG00000204845|Q6ZUC3\_HUMAN ENSG00000205927|OLIG2 ENSG00000080503|SMARCA2 ENSG00000094916|CBX5 ENSG00000104497|SNX16 ENSG00000106819|ASP1 ENSG00000107938|C10orf137  
ENSG00000113810|SMC4 ENSG00000127989|MTFRF ENSG00000131781|FMO5 ENSG00000136379|FAM108C1 ENSG00000137285|TUBB2B ENSG00000142871|CYR61 ENSG00000145860|RNF145 ENSG00000148835|TAF5  
ENSG00000152942|RAD17 ENSG00000164597|COG5 ENSG00000173113|TR112\_HUMAN ENSG00000177047|IFNW1 ENSG00000177138|FAM9B ENSG00000180138|CSNK1A1L ENSG00000183304|FAM9A ENSG00000196247|ZNF588  
ENSG00000204133|FAM33B ENSG00000205144|Q6ZV43\_HUMAN  
TCGC GTTA ENSG00000006695|COX10 ENSG000000072195|SPEG ENSG000000072840|EVC ENSG00000092220|SUPT16H ENSG00000100599|RIN3 ENSG00000110880|CORO1C ENSG00000116521|SCAMP3 ENSG00000118526|TCF21  
ENSG00000129757|CDKN1C ENSG00000134824|FADS2 ENSG00000137309|HMGAI ENSG00000143940|Q6ZMW3\_HUMAN ENSG00000144681|STAC ENSG00000151062|CACNA2D4 ENSG00000161996|WDR90 ENSG00000166448|TMEM130  
ENSG00000168137|SETD5 ENSG00000170426|NP\_683695.1 ENSG00000171903|CYP4F11 ENSG00000180849|C15orf37 ENSG00000187642|C1orf170 ENSG00000188486|H2AFX ENSG00000188883|KLRG2

|          |                              |                              |                              |                                |                              |                                |                              |                              |
|----------|------------------------------|------------------------------|------------------------------|--------------------------------|------------------------------|--------------------------------|------------------------------|------------------------------|
|          | ENSG00000196331 HIST1H2BO    | ENSG00000196724 ZNF418       | ENSG00000197942 Q6ZSS2_HUMAN | ENSG00000076043 REXO2          | ENSG00000078725 DBC1         | ENSG00000100357 ADSL           | ENSG00000102935 ZNF423       | ENSG00000104472 CHRA1        |
|          | ENSG00000105186 ANKRD27      | ENSG00000114331 CENTB2       | ENSG00000123636 BAZ2B        | ENSG00000131003 RBM2F          | ENSG00000138413 IDH1         | ENSG00000145919 FAM44B         | ENSG00000151689 INPP1        | ENSG00000152382 TADA1L       |
|          | ENSG00000154263 ABCA10       | ENSG00000162944 RFTN2        | ENSG00000163002 NUP35        | ENSG00000164089 AGXT2L1        | ENSG00000165416 SUGT1        | ENSG00000173917 HOXB2          | ENSG00000178446 C21orf100    | ENSG00000183665 TRMT12       |
| TCGGTTC  | ENSG00000187951 FAM7A2       | ENSG00000189369 GSPT2        | ENSG00000198692 EIF1AY       | ENSG00000101074 R3HDM1         | ENSG00000101442 ACTR5        | ENSG00000103275 UBE2I          | ENSG00000104637 PINK1_HUMAN  | ENSG00000104976 SNAPC2       |
|          | ENSG00000022277 C20orf43     | ENSG00000095906 NUPB2        | ENSG00000099622 CIRBP        | ENSG00000101074 R3HDM1         | ENSG00000101442 ACTR5        | ENSG00000103275 UBE2I          | ENSG00000104637 PINK1_HUMAN  | ENSG00000104976 SNAPC2       |
|          | ENSG00000107816 LATS2        | ENSG00000108961 NP_057576.2  | ENSG00000110171 TRIM3        | ENSG00000113108 SRA1           | ENSG00000126768 TIMM17B      | ENSG00000130165 ELOF1          | ENSG00000132024 CC2D1A       | ENSG00000138083 SIX3         |
|          | ENSG00000140511 HAPLN3       | ENSG00000161835 GRASP        | ENSG00000167244 IGF2         | ENSG00000168517 HEXTM2         | ENSG00000173621 LRFN4        | ENSG00000178188 SH2B1          | ENSG00000182557 SPN3         | ENSG00000186868 MAPT         |
|          | ENSG00000204210 ZBTB22       | ENSG00000206013 IFITM5       | ENSG00000008196 TFAP2B       | ENSG00000031081 NP_065805.1    | ENSG000000092531 SNAP23      | ENSG00000106823 ECM2           | ENSG00000124535 WRNIP1       | ENSG00000132837 DMGDH        |
|          | ENSG00000138119 FER1L3       | ENSG00000141448 GATA6        | ENSG00000145284 SCD5         | ENSG00000147416 ATP6V1B2       | ENSG00000151514 SALL3        | ENSG00000162607 USP1           | ENSG00000162664 ZNF326       | ENSG00000169040 PMCHL2       |
| TCGGTTT  | ENSG00000169271 HSPB3        | ENSG00000172752 NP_694996.3  | ENSG00000177143 CETN1        | ENSG00000181374 CCL13          | ENSG00000203943 SAMD13       | ENSG00000101096 NFATC2         | ENSG00000107281 NFPD1        | ENSG00000110446 SLC15A3      |
|          | ENSG00000072110 ACTN1        | ENSG00000079435 LIFE         | ENSG00000093100 MICA3_HUMAN  | ENSG00000130812 ANGPTL6        | ENSG00000135702 CHST5        | ENSG00000161082 BRUNOL5        | ENSG00000162032 SPSB3        | ENSG00000167962 ZNF598       |
|          | ENSG00000127957 PMS2L3       | ENSG00000130332 LSM7         | ENSG00000130810 PPAN         | ENSG00000130812 ANGPTL6        | ENSG00000135702 CHST5        | ENSG00000161082 BRUNOL5        | ENSG00000162032 SPSB3        | ENSG00000167962 ZNF598       |
|          | ENSG00000167992 VWCE         | ENSG00000172216 CEBPB        | ENSG00000172965 Q96C48_HUMAN | ENSG00000175221 THRAP5         | ENSG00000176980 PRR10        | ENSG00000177121 Q8N6L5_HUMAN   | ENSG00000183605 SFXN4        | ENSG00000187634 SAMD11       |
|          | ENSG00000189339 SLC35E2      | ENSG00000204362 Q6ZS05_HUMAN | ENSG00000204538 PSORS1C2     | ENSG00000066405 CLDN18         | ENSG00000101695 RNF125       | ENSG00000101916 TLR8           | ENSG00000102935 ZNF423       | ENSG00000108055 SMC3         |
|          | ENSG00000124562 SNRPC        | ENSG00000126777 KTN1         | ENSG00000128394 APOBEC3G     | ENSG00000138395 ALS2CR7        | ENSG00000141040 ZNF287       | ENSG00000141127 PRPSAP2        | ENSG00000150244 TRIM48       | ENSG00000151655 ITIH2        |
|          | ENSG00000160194 NDUFV3       | ENSG00000163093 BBS5         | ENSG00000164114 MAP9         | ENSG00000164185 ZNF474         | ENSG00000174132 TMEM157      | ENSG00000176915 KIAA0692       | ENSG00000177272 KCNA3        | ENSG00000177494 ZBED2        |
| TCGTATA  | ENSG00000181374 CCL13        | ENSG00000183091 NEB          | ENSG00000184943 NP_443103.1  | ENSG00000087903 RFX2           | ENSG00000100385 IL2RB        | ENSG00000115073 ACTR1B         | ENSG00000116148 CCNL2        | ENSG00000120071 KIAA1267     |
|          | ENSG00000012211 LMO6         | ENSG00000050426 LETMD1       | ENSG00000087258 GNAO1        | ENSG00000162174 ASRGL1         | ENSG00000164970 C9orf25      | ENSG00000171161 ZNF672         | ENSG00000173638 SLC19A1      | ENSG00000177885 GRB2         |
|          | ENSG00000124212 PTGIS        | ENSG00000136574 GATA4        | ENSG00000162174 ASRGL1       | ENSG00000164970 C9orf25        | ENSG00000171161 ZNF672       | ENSG00000173638 SLC19A1        | ENSG00000177885 GRB2         | ENSG00000180447 GAS1         |
|          | ENSG00000186642 PDE2A        | ENSG00000188743 Q9P169_HUMAN | ENSG00000189201 COX19        | ENSG00000197448 GSTK1          | ENSG00000204713 TRIM27       | ENSG00000204845 Q6ZUC3_HUMAN   | ENSG0000002016 RAD52         | ENSG00000100811 YY1          |
|          | ENSG00000101843 PSMD10       | ENSG00000107014 RLN2         | ENSG00000113845 C3orf1       | ENSG00000134440 NARS           | ENSG00000136943 CTS2L        | ENSG00000137720 C11orf1        | ENSG00000141338 ABCA8        | ENSG00000142867 BCL10        |
|          | ENSG00000150961 SEC24D       | ENSG00000152977 ZIC1         | ENSG00000159279 NPY6R        | ENSG00000174343 CHRNA9         | ENSG00000180613 GSH2_HUMAN   | ENSG00000186160 CYP4Z1         | ENSG00000196597 ZNF782       | ENSG00000203705 TATDN3       |
| TCGTATG  | ENSG00000205111 CDKL4        | ENSG00000047578 KIAA0556     | ENSG00000054282 SDCCAG8      | ENSG00000072738 IL4R           | ENSG00000088832 FKBP1A       | ENSG00000101665 SMAD7          | ENSG00000107282 APBA1        | ENSG00000112562 SMOC2        |
|          | ENSG00000132694 ARHGEF11     | ENSG00000135094 SDS          | ENSG00000148356 LRSAM1       | ENSG00000148356 LRSAM1         | ENSG00000156515 HK1          | ENSG00000162063 CCNF           | ENSG00000166261 ZNF202       | ENSG00000167371 PRRT2        |
|          | ENSG00000170091 NSG2_HUMAN   | ENSG00000173269 MMRN2        | ENSG00000182742 HOBX4        | ENSG00000188986 NELFB_HUMAN    | ENSG00000197417 CARLK        | ENSG00000205562 Q86U27_HUMAN   | ENSG00000205653 Q6ZUF2_HUMAN | ENSG00000206062 Q4G0T4_HUMAN |
|          | ENSG00000004897 CSD27        | ENSG00000047346 KIAA1370     | ENSG00000061455 PRDM6        | ENSG00000074266 EED            | ENSG00000076770 MBNL3        | ENSG00000079112 CDH17          | ENSG00000086065 CHMP5        | ENSG00000110696 C11orf58     |
|          | ENSG00000112343 TRIM38       | ENSG00000125879 OTOR         | ENSG00000134323 MYCN         | ENSG00000138162 TACC2          | ENSG00000138640 FAM13A1      | ENSG00000146360 GPR6           | ENSG00000164600 NEUROD6      | ENSG00000165197 FIGF         |
|          | ENSG00000165985 C1QL3        | ENSG00000166523 CLEC4E       | ENSG00000168405 CMAH         | ENSG00000170777 TPD52L3        | ENSG00000171466 ZNF562       | ENSG00000171530 TBCA           | ENSG00000173926 MARCH3       | ENSG00000175745 NR2F1        |
| TCGTCAA  | ENSG00000178974 FOXO3A       | ENSG00000182255 KCNA4        | ENSG00000183475 ASB7         | ENSG00000187187 ZNF546         | ENSG00000188379 IFNA2        | ENSG00000205269 Q5T4T1_HUMAN   | ENSG00000112543 SLC25A35     | ENSG00000125875 TBC1D20      |
|          | ENSG00000073060 SCARB1       | ENSG00000085741 WNT11        | ENSG00000099337 KCNK6        | ENSG00000101363 MANBAL         | ENSG00000103275 UBE2I        | ENSG00000116786 PLEKHM2        | ENSG00000125434 SLC25A35     | ENSG00000125875 TBC1D20      |
|          | ENSG00000130775 C1orf38      | ENSG00000135248 NP_115988.1  | ENSG00000137288 C6orf125     | ENSG00000141552 ANAPC11        | ENSG00000161642 ZNF385       | ENSG00000165606 NP_001073989.1 | ENSG00000172738 C6orf128     | ENSG00000174576 NPAS4        |
|          | ENSG00000178531 CTNNA1       | ENSG00000180846 C19orf34     | ENSG00000182490 TSSK2        | ENSG00000184047 DIABLO         | ENSG00000186162 Q86XGO_HUMAN | ENSG00000187953 NR_002217.1    | ENSG00000190245 Q8N7M3_HUMAN | ENSG00000190245 Q8N7M3_HUMAN |
|          | ENSG00000197021 CXorf40B     | ENSG00000011295 TTC19        | ENSG00000036549 ZZZ3         | ENSG00000064225 ST3GAL6        | ENSG00000075673 ATP12A       | ENSG00000080822 CLDND1         | ENSG00000105216 LSM14A       | ENSG00000107949 BCCIP        |
|          | ENSG00000123975 CKS2         | ENSG00000136869 TLR4         | ENSG00000144891 AGTR1        | ENSG00000169519 METT5D1        | ENSG00000169752 NRG4         | ENSG00000171241 SHCBP1         | ENSG00000174456 NP_997318.1  | ENSG00000185203 Q96S36_HUMAN |
| TCGTGAC  | ENSG00000038358 EDC4         | ENSG00000060491 OGFR         | ENSG00000070729 CNGB1        | ENSG00000080511 RDH8           | ENSG00000088826 SMOX         | ENSG00000100417 PMM1           | ENSG00000100884 CPNE6        | ENSG00000105193 RPS16        |
|          | ENSG00000116035 VAX2         | ENSG00000124541 C6orf153     | ENSG00000125492 BARHL1       | ENSG00000126457 PRMT1          | ENSG00000127084 FGD3         | ENSG00000130958 SLC35D2        | ENSG00000134463 ECHDC3       | ENSG00000136305 CIDEB        |
|          | ENSG00000142009 Q9BMS8_HUMAN | ENSG00000145945 FAM50B       | ENSG00000149925 ALDOA        | ENSG00000166444 ST5            | ENSG00000166780 C16orf45     | ENSG00000169093 ASMTL          | ENSG00000170214 ADRA1B       | ENSG00000171813 PWWP2        |
|          | ENSG00000176887 SOX11        | ENSG00000182205 Q6ZUT0_HUMAN | ENSG00000185347 C14orf80     | ENSG00000073803 MAP3K13        | ENSG00000101190 TCFL5        | ENSG00000106714 CNTNAP3        | ENSG00000111581 NUP107       | ENSG00000119523 ALG2         |
|          | ENSG00000122299 ZC3H7A       | ENSG00000135486 HNRPA1       | ENSG00000145692 BHMT         | ENSG00000150656 CNDP1          | ENSG00000152154 TMEM117      | ENSG00000152954 NRSN1          | ENSG00000154001 PPP2R5E      | ENSG00000163646 CLRN1        |
| TCGGTTAG | ENSG00000163738 MTHFD2L      | ENSG00000164949 GEM          | ENSG00000165091 TMCL1        | ENSG00000179299 INSUN7         | ENSG00000180263 FGD6         | ENSG00000180787 ZFP3           | ENSG00000103423 DNAJA3       | ENSG00000105369 CD79A        |
|          | ENSG00000005513 SOX8         | ENSG00000008516 MMP25        | ENSG00000077549 CAPZB        | ENSG00000079313 REXO1          | ENSG00000101306 MYLK2        | ENSG00000103187 COTL1          | ENSG00000103423 DNAJA3       | ENSG00000105369 CD79A        |
|          | ENSG00000110492 MDK          | ENSG00000122854 SFTPA2B      | ENSG00000125843 C20orf29     | ENSG00000131148 COX4NB         | ENSG00000133895 MEN1         | ENSG00000167613 LAIR1          | ENSG00000169057 MECP2        | ENSG00000177441 Q8N4T9_HUMAN |
|          | ENSG00000180139 Q8N9Z5_HUMAN | ENSG00000182314 SFTPA2       | ENSG00000182352 C17orf77     | ENSG00000183134 GPR44          | ENSG00000183778 B3GALT5      | ENSG00000203762 Q6ZTJ3_HUMAN   | ENSG00000203919 Q6ZM51_HUMAN | ENSG00000068878 PSME4        |
|          | ENSG00000100902 PSMA6        | ENSG00000106344 RBM28        | ENSG00000115761 NOL10        | ENSG00000116918 TSNAX          | ENSG00000118515 SGK          | ENSG00000123576 ESX1           | ENSG00000131007 TTY9A        | ENSG00000131009 TTY9A_HUMAN  |
|          | ENSG00000133627 ACTR3B       | ENSG00000134046 MBD2         | ENSG00000137601 NEK1         | ENSG00000138794 CASP6          | ENSG00000143799 PARP1        | ENSG00000144891 AGTR1          | ENSG00000145808 ADAMTS19     | ENSG00000146223 RPL7L1       |
|          | ENSG00000155749 ALS2CR12     | ENSG00000162521 RBBP4        | ENSG00000162976 PQLC3        | ENSG00000165985 C1QL3          | ENSG00000167842 MIS12        | ENSG00000168383 HLA-DPB1       | ENSG00000171560 FGA          | ENSG00000173226 IQCB1        |
| TCGGTTC  | ENSG00000176171 BNIP3        | ENSG00000197595 NP_997323.1  | ENSG00000204814 Q5VSD8_HUMAN | ENSG00000107223 EDF1           | ENSG00000124140 SLC12A5      | ENSG00000125733 TRIP10         | ENSG00000127616 SMARCA4      | ENSG00000128713 HOXD11       |
|          | ENSG00000053524 MCF2L2       | ENSG00000058404 CAMK2B       | ENSG00000063245 EPN1         | ENSG00000104292 ADC            | ENSG00000162277 TAF1C        | ENSG00000163216 SPRR2F         | ENSG00000165623 C10orf49     | ENSG00000166959 MS4A8B       |
|          | ENSG00000131242 RAB11FIP4    | ENSG00000134184 GSTM1        | ENSG00000135596 MICAL1       | ENSG00000182482 NP_001032755.1 | ENSG00000183605 SFXN4        | ENSG00000196805 SPRR2A         | ENSG00000198691 ABCA4        | ENSG00000018236 CNTN1        |
|          | ENSG00000171105 INSR         | ENSG00000176809 LRRC37A3     | ENSG00000182342 DSCR9        | ENSG00000087510 TFAP2C         | ENSG00000110002 LOH11CR2A    | ENSG00000122299 ZC3H7A         | ENSG00000132680 KIAA0907     | ENSG00000148057 C9orf103     |
|          | ENSG00000077420 APBB1P       | ENSG00000081770 NAIP         | ENSG00000083828 ZNF586       | ENSG00000162384 C1orf123       | ENSG00000166173 LARP6        | ENSG00000168522 FNNTA          | ENSG00000174456 NP_997318.1  | ENSG00000179978 Q59GI6_HUMAN |
|          | ENSG00000152409 NP_689618.2  | ENSG00000187601 MAGEH3       | ENSG00000188295 ZNF669       | ENSG00000196533 C1orf186       | ENSG00000204388 HSPA1B       | ENSG00000204588 Q68D16_HUMAN   | ENSG00000102100 SLC35A2      | ENSG00000104946 TBC1D17      |
| TCGTCT   | ENSG00000054793 ATP9A        | ENSG00000057935 MTA3         | ENSG00000068724 TTC7A        | ENSG00000078295 ADCY2          | ENSG00000092038 HSPAL3       | ENSG00000093072 CECR1          | ENSG000001161583 TBC1D3G     | ENSG00000161610 HCRT         |
|          | ENSG00000105509 HAS1         | ENSG00000141034 C17orf39     | ENSG00000141401 IMPA2        | ENSG00000146828 SLC12A9        | ENSG00000157933 SKI          | ENSG00000161583 TBC1D3G        | ENSG00000161610 HCRT         | ENSG00000162910 MRPL55       |
|          | ENSG00000164399 IL3          | ENSG00000164651 SP8          | ENSG00000170089 THOC3        | ENSG00000170233 Q96AM0_HUMAN   | ENSG00000172379 ARNT2        | ENSG00000173545 ZNF622         | ENSG00000174115 TBCD3_HUMAN  | ENSG00000183044 ABAT         |
|          | ENSG00000185128 LOC729873    | ENSG00000186918 FBXO16       | ENSG00000188849 LOC729837    | ENSG00000197681 TBC1D3         | ENSG00000205019 TBC1D3C      | ENSG00000039600 SOX30          | ENSG00000055332 EIF2AK2      | ENSG00000131931 THAP1        |
|          | ENSG00000077935 SMC1B        | ENSG00000084453 SLC01A2      | ENSG00000101323 HAO1         | ENSG00000111231 ATPBD1C        | ENSG00000131068 DEFB118      | ENSG00000136098 NEK3           | ENSG00000139946 PELL2        | ENSG00000143633 C1orf131     |
|          | ENSG00000147257 GPC3         | ENSG00000168280 KIF5C        | ENSG00000169508 EBI2         | ENSG00000184613 NELL2          | ENSG00000188175 NP_937794.1  | ENSG00000197183 C20orf112      | ENSG00000198743 SLC5A3       | ENSG00000198932 GPRASP1      |
| TCGGTTG  | ENSG00000203711 C6orf99      | ENSG00000053524 MCF2L2       | ENSG00000101004 SRR1L_HUMAN  | ENSG00000118096 C11orf60       | ENSG00000118557 PMFBP1       | ENSG00000122140 MRPS2          | ENSG00000125266 EFNB2        | ENSG00000125820 NKX2-2       |
|          | ENSG00000133315 LRP16_HUMAN  | ENSG00000139437 TCHP         | ENSG00000155066 PROM2        | ENSG00000164610 RP9            | ENSG00000173171 MTX1         | ENSG00000174307 PHLDA3         | ENSG00000182902 SLC25A18     | ENSG00000184060 CENTA2       |
|          | ENSG00000185043 CIB1         | ENSG00000186912 P2RY4        | ENSG00000196892 Q9P1D2_HUMAN | ENSG00000204095 Q6ZV88_HUMAN   | ENSG00000205792 A4D193_HUMAN | ENSG00000072133 RPS6KA6        | ENSG00000099942 CRKL         | ENSG00000100557 C14orf105    |
|          | ENSG00000102172 SMS          | ENSG00000109606 DHX15        | ENSG00000113368 LMNB1        | ENSG00000123179 EBP1           | ENSG00000130764 LRRC47       | ENSG00000149187 CUGBP1         | ENSG00000154640 BTG3         | ENSG00000186130 ZBTB6        |
|          | ENSG00000158301 GPRASP2      | ENSG00000162374 ELAVL4       | ENSG00000163159 VPS72        | ENSG00000164167 LSM6           | ENSG00000166529 ZSCAN21      | ENSG00000177508 IRX3           | ENSG00000182070 ORS2A1       | ENSG00000186130 ZBTB6        |
| TCCTAAC  | ENSG00000010256 UQCRC1       | ENSG00000100985 MMP9         | ENSG00000110880 CORO1C       | ENSG0000                       |                              |                                |                              |                              |



ENSG00000134955|SLC37A2 ENSG00000160716|CHRN2 ENSG00000161395|PERLD1 ENSG00000161955|TNFSF13 ENSG00000163462|TRIM46 ENSG00000166257|SCN3B ENSG00000169385|RNASE2 ENSG00000169894|MUC3A  
ENSG00000170162|VGLL2 ENSG00000171450|CDK5R2 ENSG00000172943|PHF8 ENSG00000175106|CDRT4 ENSG00000175992|FOSL1 ENSG00000175662|TOM1L2 ENSG00000177951|BET1L ENSG00000178409|KIAA1553  
ENSG00000180818|HGXCL10 ENSG00000181123|QSN7N0\_HUMAN ENSG00000185219|ZNF445 ENSG00000188305|C19orf35 ENSG00000198374|HIST1H2AL\_HUMAN ENSG00000204645|SSX4 ENSG00000205821|NP\_001020630.1  
ENSG00000107295|SH3GL2 ENSG00000109920|FBNP4 ENSG00000115850|LCT ENSG00000119523|ALG2 ENSG00000124177|CHD6 ENSG00000134371|CDC73 ENSG00000138758|SEPT11 ENSG00000143226|FCGR2A  
ENSG00000152944|SURB7 ENSG00000160961|ZNF333 ENSG00000162521|RBBP4 ENSG00000175984|DENND2C ENSG00000179097|HTR1F ENSG00000181322|TXNDC6 ENSG00000181472|ZBTB2 ENSG00000181847|V5IG9  
ENSG00000186297|GABRA5 ENSG00000189127|NP\_001004441.1 ENSG00000197791|Q6ZUR4\_HUMAN ENSG00000205227|Q6ZWA8\_HUMAN  
TCTCCCC ENSG00000002822|MAD1L1 ENSG00000005486|NM\_001040457.1 ENSG00000007314|SCN4A ENSG00000063169|GLTSCR1 ENSG00000063244|U2AF2 ENSG00000064195|DLX3 ENSG00000072062|PRKACA ENSG00000072518|MARK2  
ENSG00000086758|HUWE1 ENSG00000089558|KCNH4 ENSG00000105767|CADM4 ENSG00000107187|LHX3 ENSG00000107263|RAPGEF1 ENSG00000108262|GIT1 ENSG00000108883|EFTUD2 ENSG00000111642|CHD4  
ENSG00000111684|MBOAT5 ENSG00000112041|TULP1 ENSG00000112640|PPP2R5D ENSG00000125492|BARHL1 ENSG00000125780|TGM3 ENSG00000126247|CAPNS1 ENSG00000129451|KLK10 ENSG00000132507|EIF5AP1  
ENSG00000136457|CHAD ENSG00000136877|PFGS ENSG00000137166|FOXP4 ENSG00000139182|CLSTN3 ENSG00000140479|PKC6 ENSG00000142675|CNKSR1 ENSG00000143126|CELSR2 ENSG00000144031|ANKRD53  
ENSG00000146122|DAAM2 ENSG00000159314|NP\_777579.1 ENSG00000168878|SFTPB ENSG00000170439|METTL7B ENSG00000171450|CDK5R2 ENSG00000175793|SFN ENSG00000178709|CLDN9 ENSG00000178919|FOXE1  
ENSG00000179218|CALR ENSG00000183386|FHL3 ENSG00000196361|ELAVL3 ENSG00000198794|SCAMP5 ENSG00000204168|Q6ZRI1\_HUMAN ENSG00000204371|EHMT2 ENSG00000009780|FAM76A ENSG0000021826|CPS1  
ENSG00000054598|FOXC1 ENSG00000055813|CCDC85A ENSG00000081818|PCDH8 ENSG00000092199|HNRPC ENSG00000096060|FKBP5 ENSG00000106692|FCMD ENSG00000107186|MPDZ ENSG00000107937|GTPBP4  
ENSG00000119878|CRIPT ENSG00000124721|DNAH8 ENSG00000134324|LPDIN1 ENSG00000144118|RALB ENSG00000152022|LIX1L ENSG00000154556|BSB2 ENSG00000180138|CSNK1A1L ENSG00000187068|NP\_001020437.1  
ENSG00000197329|PELI1  
TCTCCTG ENSG00000053372|MRTO4 ENSG00000054356|PTPRN ENSG00000083838|ZNF446 ENSG00000092036|C14orf94 ENSG00000100242|UNC84B ENSG00000103742|NP\_066013.1 ENSG00000104892|KLC3 ENSG00000107331|ABCA2  
ENSG00000107731|UNC5B ENSG00000116852|KIF21B ENSG00000122733|KIAA1045 ENSG00000125089|SH3PC1 ENSG00000125319|C17orf53 ENSG00000127948|POR ENSG00000128016|ZFP36 ENSG00000130766|SESN2  
ENSG00000135632|SMYD5 ENSG00000136931|NR5A1 ENSG00000138092|CENPO ENSG00000140511|HAPLN3 ENSG00000142784|WDFC1 ENSG00000143845|ETNK2 ENSG00000144524|COPS7B ENSG00000146192|FGD2  
ENSG00000161939|C17orf49 ENSG00000163218|PGLYRP4 ENSG00000167157|PRRX2 ENSG00000167889|MGAT5B ENSG00000168490|PHYHIP ENSG00000171786|NHLH1 ENSG00000177096|FAM109B ENSG00000183979|NPB  
ENSG00000188706|ZDHHC9 ENSG00000197061|HIST1H4C ENSG00000206551|Q6ZT99\_HUMAN ENSG00000039537|C6 ENSG00000058668|ATP2B4 ENSG00000085511|MAP3K4 ENSG00000102886|GDPD3 ENSG00000104341|LAPTM4B  
ENSG00000105948|TTC26 ENSG00000110851|PRDM4 ENSG00000115254|XAL1 ENSG00000117280|RAB7L1 ENSG00000120733|JMJDB1 ENSG00000123836|PKFBE2 ENSG00000135776|ABC10 ENSG00000138246|DNAJC13  
ENSG00000144191|CNGA3 ENSG00000146872|TLK2 ENSG00000149124|PPP4R1 ENSG00000154845|PPP4R1 ENSG0000015827|LXN1 ENSG00000161654|LSM12 ENSG00000162616|DNAJB4 ENSG00000164616|FBXL21  
ENSG00000166523|CLEC4E ENSG00000177465|ACOT4 ENSG00000179941|BBS10 ENSG00000180777|ANKRD30B ENSG00000183649|Q8NFX8\_HUMAN ENSG00000184227|ACOT1 ENSG00000197712|FAM114A1 ENSG00000197977|ELOVL2  
TCTCCTT ENSG00000012124|CD22 ENSG00000039650|PNKP ENSG00000046647|GEMIN8 ENSG00000068400|GRIPAP1 ENSG00000071553|ATP6AP1 ENSG00000079462|PAFAH1B3 ENSG00000101276|C20orf54 ENSG00000111664|GNB3  
ENSG00000120903|CHRNA2 ENSG00000121904|CSMD2 ENSG00000125820|NMX2-2 ENSG00000129816|NR\_001538.1 ENSG00000129845|O14605\_HUMAN ENSG00000130649|CYP2E1 ENSG00000135446|CDK4 ENSG00000142920|ADC  
ENSG00000150281|CTF1 ENSG00000154928|P54762-3 ENSG00000155254|MARVELD1 ENSG00000160753|RUSC1 ENSG00000164620|C5orf16 ENSG00000167900|TK1 ENSG00000168066|SF1 ENSG00000170296|GABARAP  
ENSG00000174669|SLC29A2 ENSG00000179218|CALR ENSG00000185990|F8A3 ENSG00000186049|KRT73 ENSG00000188986|NELFB\_HUMAN ENSG00000197932|F8A2 ENSG00000198444|F8A1 ENSG00000205441|KRTAP10-7  
ENSG00000025293|PHF20 ENSG00000042429|CRSP6 ENSG00000048991|R3HDM1 ENSG00000057512|SRI ENSG00000084444|KIAA1467 ENSG00000115539|ASH1L ENSG00000119121|TRPM6 ENSG00000138641|HERC3  
ENSG00000140987|GAD7A4 ENSG00000141433|ADCYAP1 ENSG00000143252|SDHC ENSG00000140027|PLAC8 ENSG00000152022|LIX1L ENSG0000015827|RNF20 ENSG00000163694|NP\_061900.1 ENSG00000167332|OR51E2  
ENSG00000171209|CSN3 ENSG00000174136|RGMB ENSG00000179008|C14orf39 ENSG00000182187|CRYGB ENSG00000184899|Q9P181\_HUMAN ENSG00000185973|TMLHE ENSG00000187951|FAM7A2 ENSG00000197062|ZNF187  
ENSG00000198740|ZNF652 ENSG00000198961|PJA2 ENSG00000204961|PCDHA9 ENSG00000103353|UBFD1 ENSG00000105707|HPN ENSG00000110025|SNX15 ENSG00000133321|RARRES3 ENSG00000139433|GLTP  
ENSG00000039987|BEST2 ENSG00000071246|VASH1 ENSG00000099834|MUPCDH ENSG00000103353|UBFD1 ENSG00000105707|HPN ENSG00000110025|SNX15 ENSG00000133321|RARRES3 ENSG00000139433|GLTP  
ENSG00000142687|KIAA0319L ENSG00000154537|FAM27C ENSG00000161267|BDH1 ENSG00000162413|KLHL21 ENSG00000167664|TM6GD2 ENSG00000170215|FAM27B ENSG00000176723|Q8N446\_HUMAN ENSG00000182368|FAM27A  
ENSG00000196374|HIST1H2BM ENSG00000197249|SERPINA1 ENSG00000198618|PPIA\_HUMAN ENSG00000206075|SERPINB5 ENSG00000167664|TM6GD2 ENSG00000170215|FAM27B ENSG00000176723|Q8N446\_HUMAN ENSG00000182368|FAM27A  
ENSG00000102401|ARMCX3 ENSG00000112309|B3GAT2 ENSG00000119979|FAM45A ENSG00000122035|RASL11A ENSG00000134389|CFHR5 ENSG00000151690|NP\_060164.3 ENSG00000152952|PLOC2 ENSG00000163510|NP\_065994.1  
ENSG00000164442|CITED2 ENSG00000165028|NIPSNAP3B ENSG00000168681|Q9H762\_HUMAN ENSG00000173083|HPSE ENSG00000185985|SLITTRK2 ENSG00000188402|NP\_995324.1 ENSG00000196262|PPIA ENSG00000197140|ADAM32  
ENSG00000197405|CSAR1 ENSG00000197595|NP\_997323.1 ENSG00000203956|FAM45B ENSG00000206075|SERPINB5  
TCTCTCT ENSG00000090659|CD209 ENSG00000100767|PAPLN ENSG00000103313|MEVF ENSG00000106638|TBL2 ENSG00000112079|STK38 ENSG00000112715|VEGFA ENSG00000116213|WDR8 ENSG00000116649|SRM  
ENSG00000119782|FKBP1B ENSG00000120068|HOXB8 ENSG00000121310|ECHDC2 ENSG00000124232|RBPJL ENSG00000139767|KIAA1853 ENSG00000141401|IMPA2 ENSG00000143318|CASQ1 ENSG00000143850|PLEKHA6  
ENSG00000151474|FRMD4A ENSG00000152291|TGNL2 ENSG00000160097|FINDC5 ENSG00000166135|HIF1AN ENSG00000168314|MOBP ENSG00000170653|ATF7 ENSG00000172212|XR\_017939.1  
ENSG00000173210|ABLIM3 ENSG00000173757|STAT5B ENSG00000182158|CREB3L2 ENSG00000184452|Q9UHT6\_HUMAN ENSG00000184840|TMED9 ENSG00000189409|MMP23A ENSG00000203697|CAPN8 ENSG00000206561|COLQ  
ENSG00000104044|IDS ENSG00000052841|TTC17 ENSG00000107789|MINP1 ENSG00000112812|PRSS16 ENSG00000114127|XRN1 ENSG00000131779|PEX11B ENSG00000135452|TSPAN31 ENSG00000140455|USP3  
ENSG00000144460|Q96NL2\_HUMAN ENSG00000147257|GPC3 ENSG00000152214|RIT2 ENSG00000153233|PTPRR ENSG00000164287|CDC20B ENSG00000164451|FAM26D ENSG00000167332|OR51E2 ENSG00000179399|GPC5  
ENSG00000185015|CA13 ENSG00000185104|FAF1 ENSG00000197872|FAM49A  
TCTGACC ENSG00000077984|CST7 ENSG00000100170|SLC5A1 ENSG00000100266|PACSN2 ENSG00000104731|KLHDC4 ENSG00000116039|ATP6V1B1 ENSG00000116663|FBXO6 ENSG00000119333|WDR34 ENSG00000125910|EDG6  
ENSG00000126233|SLURP1 ENSG00000129990|SYT5 ENSG00000131652|THOC6 ENSG00000139549|DHH ENSG00000142675|CNKSR1 ENSG00000149295|DRD2 ENSG00000154025|SLC5A10 ENSG00000157881|PANK4  
ENSG00000158571|PKFBL1 ENSG00000161583|TBC1D3G ENSG00000168096|ANKS3 ENSG00000170779|CDC4A ENSG00000174115|TBCD3\_HUMAN ENSG00000177238|TRIM72 ENSG00000178951|ZBTB7A ENSG00000179051|RCC2  
ENSG00000183077|AFMID ENSG00000183087|GAS6 ENSG00000185128|LOC729873 ENSG00000185966|LCE3E ENSG00000188849|LOC729837 ENSG00000189309|TBC1D3B ENSG00000198366|HIST1H3A ENSG00000204537|Q6ZTQ9\_HUMAN  
ENSG00000205019|TBC1D3C ENSG00000068784|SRBD1 ENSG00000077809|GTF2I ENSG00000078401|EDN1 ENSG00000104369|JPH1 ENSG00000105699|LSR ENSG00000117859|OSBPL9 ENSG00000119953|SMND1  
ENSG00000127951|FGL2 ENSG00000131781|FMO5 ENSG00000134333|LDA ENSG00000138378|STAT4 ENSG00000140153|WDR20 ENSG00000149548|CCDC15 ENSG00000154493|C10orf90 ENSG00000157341|Q8ND77\_HUMAN  
ENSG00000159197|KCN2E ENSG00000163964|PIGX ENSG00000167230|C17orf78 ENSG00000169330|K1024\_HUMAN ENSG00000174004|LRRC33 ENSG00000175809|ZNF645 ENSG00000179029|TMEM107 ENSG00000181322|TXNDC6  
ENSG00000184492|FOXD4 ENSG00000185710|Q8ND77\_HUMAN ENSG00000186469|GNG2 ENSG00000187601|MAGEH1 ENSG00000196611|MMP1 ENSG00000197102|DYNC1H1 ENSG00000197576|HOXA4 ENSG00000198157|NSBP1  
ENSG00000205144|Q6ZV43\_HUMAN  
TCTGATC ENSG00000006831|ADIPOR2 ENSG00000101346|POFUT1 ENSG00000103490|PYCARD ENSG00000105447|GRWD1 ENSG00000120913|PDLIM2 ENSG00000143340|C1orf76 ENSG00000143842|SOX13 ENSG00000144063|MALL  
ENSG00000150201|FYXD4 ENSG00000158296|SLC13A3 ENSG00000162761|LXN1A ENSG00000168621|GDNF ENSG00000169105|CHST14 ENSG00000185684|EP400NL ENSG00000204092|NP\_001001705.1 ENSG00000205460|NP\_001004332.1  
ENSG00000061676|NCKAP1 ENSG00000072080|SPP2 ENSG00000078674|PCM1 ENSG00000091527|CDV3 ENSG00000101413|C20orf77 ENSG00000107943|C10orf110 ENSG00000119725|ZNF410 ENSG00000120963|ZNF706  
ENSG00000129484|PARP2 ENSG00000132825|PPP1R3D ENSG00000133657|ATP13A3 ENSG00000148229|POLE3 ENSG00000157005|SST ENSG00000166275|AS3MT ENSG00000175054|ATR ENSG00000180667|YOD1  
ENSG00000185250|PPIL6 ENSG00000196792|STRN3 ENSG00000203864|C1orf137  
TCTGATG ENSG00000040487|PQLC2 ENSG00000054523|KIF1B ENSG00000090615|GOLGA3 ENSG00000103168|TAF1C ENSG00000106236|NPTX2 ENSG00000114316|USP4 ENSG00000125804|C20orf91 ENSG00000129009|ISLR  
ENSG00000129221|AIPL1 ENSG00000134369|NAV1 ENSG00000136270|TBG4 ENSG00000136867|SLC31A2 ENSG00000141068|KSR1 ENSG00000142544|ATPBD3 ENSG00000144043|TEX261 ENSG00000144843|ADPRH  
ENSG00000151348|EXT2 ENSG00000161381|PLXDC1 ENSG00000161939|C17orf49 ENSG00000162430|SEPN1 ENSG00000164733|CTSB ENSG00000166819|PLIN1 ENSG00000166949|SMAD3 ENSG00000177098|SCN4B  
ENSG00000183578|TNFAIP8L3 ENSG00000184454|C1orf130 ENSG00000203783|PRR9 ENSG00000204010|Q6ZV28\_HUMAN ENSG00000204741|TPR ENSG00000060718|COL11A1 ENSG00000082482|KCNK2 ENSG00000084444|KIAA1467  
ENSG00000086598|TMED2 ENSG00000088970|C20orf19 ENSG00000102290|PCDH11X ENSG00000115183|TANC1 ENSG00000116688|MFN2 ENSG00000117543|CASQ2 ENSG00000118729|CASQ2 ENSG00000125430|HS3ST3B1  
ENSG00000129028|THAP10 ENSG00000133019|CHRM3 ENSG00000134025|NM\_022659.2 ENSG00000150471|LPHN3 ENSG00000160131|NP\_001017980.1 ENSG00000161800|RACGAP1 ENSG00000163312|NP\_598375.2 ENSG00000164483|SAMD3  
ENSG00000164754|RAD21 ENSG00000168385|SEPT2 ENSG00000178459|Q8N2E2\_HUMAN ENSG00000185104|FAF1 ENSG00000197415|VEP1 ENSG00000204291|COL15A1  
ENSG00000053702|NRIP2 ENSG000001009303|PTGS1 ENSG00000117899|MESDC2 ENSG00000124226|ZNF313 ENSG00000124839|RAB17 ENSG00000125740|FOSB ENSG00000125804|C20orf91 ENSG00000156603|MED19  
ENSG00000163993|S100P ENSG00000166257|SCN3B ENSG00000166261|ZNF202 ENSG00000168329|CX3CR1 ENSG00000186868|MAPT ENSG00000196220|SRGAP3 ENSG00000196358|NTNG2 ENSG00000204574|ABCF1  
ENSG00000021602|KLRA1 ENSG00000048740|CUGBP2 ENSG00000073282|TP73L ENSG00000085719|CPNE3 ENSG00000090530|LEPREL1 ENSG00000096063|SRPK1 ENSG00000109709|SYDE2 ENSG00000104327|CALB1  
ENSG00000115828|QPCT ENSG00000121741|ZMYM2 ENSG00000132424|C6orf111 ENSG00000132424|C6orf111 ENSG00000138207|RBP4 ENSG00000144827|ABHD10 ENSG00000152495|CAMK4 ENSG00000154274|C4orf19  
ENSG00000163412|EIF4E3 ENSG00000165197|FIGF ENSG00000165655|ZNF503 ENSG00000166783|KIAA0430 ENSG00000167283|ATP5L ENSG00000168405|CMAH ENSG00000171241|SHCBP1 ENSG00000176160|HSF5  
ENSG00000178295|NP\_872431.2 ENSG00000178636|Q8N7N2\_HUMAN ENSG00000178695|KCTD12 ENSG00000181072|CHRM2 ENSG00000188463|XR\_015229.1 ENSG00000196214|ZNF766 ENSG00000197170|PSMD12 ENSG00000203705|TATDN3  
TCTGCAA ENSG00000008086|CDKL5 ENSG00000077274|CAPN6 ENSG000000999204|ABLIM1 ENSG00000101144|BMP7 ENSG00000101282|RSPO4 ENSG00000102007|PLP2 ENSG00000106927|AMBP ENSG00000109132|PHOX2B  
ENSG00000110324|IL10RA ENSG00000117640|FAM54B ENSG000001125999|C20orf114 ENSG00000126432|PRDX5 ENSG00000136931|NR5A1 ENSG00000160753|RUSC1 ENSG00000166664|CHRFAM7A ENSG00000167600|CYP2P1  
ENSG00000176261|ZBTB80S ENSG00000176357|C10orf55 ENSG00000185022|MAFF ENSG00000188396|NP\_001013654.1 ENSG00000205061|Q6ZUP2\_HUMAN ENSG00000205061|Q6ZUP2\_HUMAN ENSG00000205061|Q6ZUP2\_HUMAN ENSG00000205061|Q6ZUP2\_HUMAN  
ENSG00000101138|CSTF1 ENSG00000114850|SSR3 ENSG00000124203|C20orf174 ENSG00000125630|POLR1B ENSG00000126950|TMEM35 ENSG00000143995|MEIS1 ENSG00000152457|DCLRE1C ENSG00000152582|NP\_653323.1  
ENSG00000163328|GPR155 ENSG00000164049|FBXW12 ENSG00000166206|GABRB3 ENSG00000169621|C2orf13 ENSG00000171121|KCMB3 ENSG00000172296|SPTLC3 ENSG00000182957|SPATA13 ENSG00000183718|TRIM52  
ENSG00000187145|MRPS21 ENSG00000187672|ERC2 ENSG00000187761|PAGE2B ENSG00000196565|HBE1 ENSG00000198633|Q6PDB4\_HUMAN  
TCTGCCT ENSG000000061337|LTS1 ENSG00000070886|EPHA8 ENSG00000079308|TNS1 ENSG00000090020|SLC9A1 ENSG00000099875|MKNK2 ENSG00000100991|TRPC4AP ENSG00000105088|OLFML2 ENSG00000105419|Q99687-2  
ENSG00000110583|NAT11 ENSG00000110651|CD81 ENSG00000110844|PRPF40B ENSG00000112759|SLC29A1 ENSG00000115041|KCNP3 ENSG00000115649|C2orf24 ENSG00000119280|C1orf198 ENSG00000122859|NEUROG3  
ENSG00000123815|ADCK4 ENSG00000124602|UNC5CL ENSG00000127564|PRMYT1 ENSG00000131748|STAR3 ENSG00000141965|FEM1A ENSG00000142961|MOBK12C ENSG00000144152|NP\_694946.1 ENSG00000144468|RHBD1  
ENSG00000146007|ZMAT2 ENSG00000149418|ST14 ENSG00000149922|TBX6 ENSG00000162365|CYP4A2 ENSG00000163218|PGLYRP4 ENSG00000167741|GGT6 ENSG00000169562|GJB1 ENSG00000171992|SYNPO  
ENSG00000174938|SEZ6L2 ENSG00000175115|PACS1 ENSG00000180861|C12orf36 ENSG00000186049|KRT73 ENSG00000187164|KIAA1598 ENSG00000188677|PARV6 ENSG00000189143|CLDN4 ENSG00000196724|ZNF418  
ENSG00000197858|GPA1 ENSG00000206126|Q6ZAD2\_HUMAN ENSG00000089177|C20orf23 ENSG00000099942|CRKL ENSG00000108946|PRKAR1A ENSG00000109536|FRG1 ENSG00000111962|UST  
ENSG00000116574|RHOU ENSG00000132357|SCAMP6 ENSG00000134249|ADAM30 ENSG00000134250|NOTCH2 ENSG00000135318|NTSE5 ENSG00000135837|CEP350 ENSG00000136161|RCBTB2 ENSG00000138759|FRAS1  
ENSG00000152242|C18orf25 ENSG00000152332|UHMK1 ENSG00000153162|BMP6 ENSG00000164220|P2RL2 ENSG00000165997|ARL5B ENSG00000166363|OR10A5 ENSG00000167196|FBXO22 ENSG00000169981|ZNF35  
ENSG00000175857|C5orf29 ENSG00000183022|NR\_003148.2 ENSG00000185127|C6orf120 ENSG00000188216|Q5JST9\_HUMAN ENSG00000205111|CDKL4  
TCTGCTA ENSG00000062582|MRPS24 ENSG00000100122|CRYBB1 ENSG00000103184|SEC14L5 ENSG00000106246|PTCD1 ENSG00000131059|C20orf71 ENSG00000132635|FAM113A ENSG00000134193|REG4 ENSG00000136274|NACAD  
ENSG00000144843|ADPRH ENSG00000148180|GSN ENSG00000148337|CIZ1 ENSG00000158816|Q5TIE3\_HUMAN ENSG00000167858|TEKT1 ENSG00000179598|NP\_849158.1 ENSG00000180205|WDFC9 ENSG00000180219|FAM71C  
ENSG00000196396|PTPN1 ENSG00000196476|C20orf96 ENSG00000079385|CEACAM1 ENSG00000100249|C20orf31 ENSG00000

|          |                                |                              |                              |                              |                               |                              |                              |                              |
|----------|--------------------------------|------------------------------|------------------------------|------------------------------|-------------------------------|------------------------------|------------------------------|------------------------------|
|          | ENSG00000125675 GRIA3          | ENSG00000137804 NUSAP1       | ENSG00000143256 PFDN2        | ENSG00000157450 RNF111       | ENSG00000160201 U2AF1         | ENSG00000163735 CXCL5        | ENSG00000164120 HPGD         | ENSG00000196447 XR_017870.1  |
| TCTGTGCA | ENSG00000196565 HBE1           | ENSG00000100012 SEC14L3      | ENSG00000105357 MYH14        | ENSG00000117308 GALE         | ENSG00000120913 PDLIM2        | ENSG00000122694 C9orf19      | ENSG00000141576 RNF157       | ENSG00000158050 DUSP2        |
|          | ENSG00000158773 USF1           | ENSG00000163699 Q9HY4_HUMAN  | ENSG00000166831 RBPM2        | ENSG00000167642 SPINT2       | ENSG00000167741 GGT6          | ENSG00000169921 Q75L30_HUMAN | ENSG00000173702 MUC13        | ENSG00000174400 Q8TB00_HUMAN |
|          | ENSG00000180878 C11orf42       | ENSG00000183160 TMEM119      | ENSG00000185024 BRF1         | ENSG00000197251 NP_997380.1  | ENSG00000197561 ELA2          | ENSG00000205414 Q62VL8_HUMAN | ENSG00000205804 Q5T6R2_HUMAN | ENSG00000005483 MLL5         |
|          | ENSG00000031003 C5orf5         | ENSG00000065518 NDUFB4       | ENSG00000066777 ARFGEF1      | ENSG00000091986 CCDC80       | ENSG00000110048 OSBP          | ENSG00000111696 NT5DC3       | ENSG00000118292 C1orf54      | ENSG00000125845 BMP2         |
|          | ENSG00000128656 CHN1           | ENSG00000128845 CCPG1        | ENSG00000145491 ROPN1L       | ENSG00000152782 PANK1        | ENSG00000156103 MMP16         | ENSG00000157219 HTR5A        | ENSG00000169439 SDC2         | ENSG00000170852 KBTBD2       |
| TCTGTGTA | ENSG00000173302 GPR148         | ENSG00000180370 PAK2         | ENSG00000182187 CRYGB        | ENSG00000187446 CHP1_HUMAN   | ENSG00000204217 BMPR2         | ENSG00000107742 SPOCK2       | ENSG00000110244 APOA4        | ENSG00000114648 KLHL18       |
|          | ENSG00000041880 PARP3          | ENSG00000044012 GUCA2B       | ENSG00000053108 FSTL4        | ENSG00000101193 C20orf11     | ENSG00000102879 CORO1A        | ENSG00000146122 DAAM2        | ENSG00000149262 INTS4        | ENSG00000152669 CCNU         |
|          | ENSG00000123933 MXD4           | ENSG00000128652 HOXD3        | ENSG00000129744 ART1         | ENSG00000130821 SLC6A8       | ENSG00000143772 ITPKB         | ENSG00000172460 Q8IVY7_HUMAN | ENSG00000175220 ARHGAP1      | ENSG00000180739 EDG8         |
|          | ENSG00000160058 BSDC1          | ENSG00000162493 PDFN         | ENSG00000163486 SRGAP2       | ENSG00000164520 RAET1E       | ENSG00000168828 OR13J1        | ENSG000001103035 PSMD7       | ENSG00000112394 SLC16A10     | ENSG00000128641 MYO1B        |
|          | ENSG00000187223 LCE2D          | ENSG00000198794 SCAMP5       | ENSG00000023608 SNAPC1       | ENSG00000073711 PPP2R3A      | ENSG00000101892 ATP1B4        | ENSG00000154723 ATP5J        | ENSG00000154727 GABPA        | ENSG00000159200 DSCR1        |
|          | ENSG00000134308 YWHAQ          | ENSG00000136541 KIAA1189     | ENSG00000137561 TTPA         | ENSG00000153989 NUS1         | ENSG00000154723 ATP5J         | ENSG00000154727 GABPA        | ENSG00000159200 DSCR1        | ENSG00000164989 C9orf93      |
|          | ENSG00000170248 PDCD6IP        | ENSG00000182552 RWDD4A       | ENSG00000183508 FAM46C       | ENSG00000196660 SLC30A10     | ENSG00000197969 VPS13A        |                              |                              |                              |
| TCTGTGTG | ENSG00000054523 KIF1B          | ENSG00000081692 JMJD2        | ENSG00000099308 MAST3        | ENSG00000101849 TBL1X        | ENSG00000114268 PFKFB4        | ENSG00000117425 PTCH2        | ENSG00000125046 C3orf32      | ENSG00000127472 PLA2G5       |
|          | ENSG00000128510 CPA4           | ENSG00000132589 FLOT2        | ENSG00000136297 MMD2         | ENSG00000136383 ALPK3        | ENSG00000144648 CCBP2         | ENSG00000146122 DAAM2        | ENSG00000155506 LARP1        | ENSG00000158109 FAM79A       |
|          | ENSG00000159792 PSKH1          | ENSG00000160058 BSDC1        | ENSG00000163352 LENEP        | ENSG00000168546 GFRA2        | ENSG00000178971 C17orf68      | ENSG00000180249 Q8N872_HUMAN | ENSG00000180924 Q9BVQ6_HUMAN | ENSG00000181031 RPH3AL       |
|          | ENSG00000181585 TMIE           | ENSG00000204865 Q6ZSD6_HUMAN | ENSG000000044574 HSPA5       | ENSG000000081800 SLC13A1     | ENSG00000097046 CDC7          | ENSG00000100528 CNTH         | ENSG00000120262 C6orf97      | ENSG00000124198 ARFGFE2      |
|          | ENSG00000133019 CHR3M          | ENSG00000134419 RPS15A       | ENSG00000138613 APH1B        | ENSG00000144026 ZNF514       | ENSG00000153558 FBXL2         | ENSG00000160145 KALRN        | ENSG00000162843 WDR64        | ENSG00000163646 CLRN1        |
|          | ENSG00000163960 UBXD7          | ENSG00000164252 AGGF1        | ENSG00000166275 AS3MT        | ENSG00000170113 NIPA1        | ENSG00000172115 CYCS          | ENSG00000188921 PTPLAD2      | ENSG00000197935 ZNF311       | ENSG00000204272 Q63Z42_HUMAN |
| TCTGTAG  | ENSG00000011677 GABRA3         | ENSG00000088826 SMOX         | ENSG00000101224 CDC25B       | ENSG00000102572 STK24        | ENSG00000109072 VTN           | ENSG00000109089 CDR2L        | ENSG00000112149 CD83         | ENSG00000112659 PARC_HUMAN   |
|          | ENSG00000125818 PSMF1          | ENSG00000128918 ALDH1A2      | ENSG00000144852 NR1I2        | ENSG00000159337 PLA2G4D      | ENSG00000166224 SGPL1         | ENSG00000166546 Q3B73_HUMAN  | ENSG00000168490 PHYHIP       | ENSG00000170484 KRT74        |
|          | ENSG00000171903 CYP4F11        | ENSG00000176261 ZBTB80S      | ENSG00000184945 AQP12A       | ENSG00000187170 LCE4A        | ENSG00000188997 KCTD21        | ENSG00000196070 Q6ZVY7_HUMAN | ENSG00000198768 APCDD1L      | ENSG0000023608 SNAPC1        |
|          | ENSG00000069869 NEDD4          | ENSG00000082996 RNF13        | ENSG00000109674 NEIL3        | ENSG00000139819 PPARG1A      | ENSG00000111783 RF4           | ENSG00000113300 CNOT6        | ENSG00000123213 NLN          | ENSG00000136813 KIAA0368     |
|          | ENSG00000139970 RTN1           | ENSG00000141433 ADCYAP1      | ENSG00000148154 UGCG         | ENSG00000151514 SALL3        | ENSG00000153162 BMP6          | ENSG00000163162 RNF149       | ENSG00000163714 SR140_HUMAN  | ENSG00000164466 SFXN1        |
|          | ENSG00000165525 SDCCAG1        | ENSG00000171320 ESCO2        | ENSG00000177606 JUN          | ENSG00000182498 RPS18        | ENSG00000182774 RS17_HUMAN    | ENSG00000184779 RPS17        | ENSG00000186300 ZNF555       | ENSG00000196350 ZNF492       |
| TCTGTAT  | ENSG00000198380 GFPT1          | ENSG00000205144 Q6ZV43_HUMAN |                              |                              |                               |                              |                              |                              |
|          | ENSG00000011304 PTBP1          | ENSG00000074410 CA12         | ENSG00000075886 TUBA3D       | ENSG00000092820 VIL2         | ENSG00000093072 MECR1         | ENSG00000100605 ITPK1        | ENSG00000101104 C20orf119    | ENSG00000103056 SMPD3        |
|          | ENSG00000110917 KIAA0152       | ENSG00000116883 C1orf113     | ENSG00000132002 DNAJB1       | ENSG00000135077 HAVCR2       | ENSG00000136504 MYST2         | ENSG00000139797 RNF113B      | ENSG00000140990 NDUFB10      | ENSG00000145214 DGKJ         |
|          | ENSG00000152086 TUBA3E         | ENSG00000155926 SLA          | ENSG00000167617 CDF2E5       | ENSG00000171456 ASXL1        | ENSG00000175003 SLC22A1       | ENSG00000186470 BTN3A2       | ENSG00000186654 ARHGAP8      | ENSG00000189231 PSG3         |
|          | ENSG00000197757 HOXC6          | ENSG00000198033 TUBA3C       | ENSG00000198879 SFBMT2       | ENSG00000005249 PRKAR2B      | ENSG00000030066 NUP160        | ENSG00000047249 ATP6V1H      | ENSG00000067177 PHKA1        | ENSG00000075420 FNDC3B       |
|          | ENSG00000099246 RAB18          | ENSG00000100941 PNN          | ENSG00000101966 BTRC4        | ENSG00000101977 MCF2         | ENSG00000102409 BEXL1         | ENSG00000103449 SALL1        | ENSG00000106689 LHX2         | ENSG00000109339 MAPK10       |
|          | ENSG00000117151 CTBS           | ENSG00000117479 SLC19A2      | ENSG00000117533 VAMP4        | ENSG00000122299 ZC3H7A       | ENSG00000125355 FAM70A        | ENSG00000131203 INDO         | ENSG00000131473 ACLY         | ENSG00000132464 ENAM         |
|          | ENSG00000135018 UOQLN1         | ENSG00000141338 ABCA8        | ENSG00000141424 SLC39A6      | ENSG00000143079 CTTNBP2NL    | ENSG00000143184 XCL1          | ENSG00000143631 FLG          | ENSG00000143952 VPS54        | ENSG00000145703 IQGAP2       |
|          | ENSG00000148655 C10orf11       | ENSG00000162692 VCAM1        | ENSG00000162701 DENND1B      | ENSG00000162769 FLVC1_HUMAN  | ENSG00000163788 SNRK          | ENSG00000172243 CLEC7A       | ENSG00000174827 PDZK1        | ENSG00000177596 Q8NA50_HUMAN |
|          | ENSG00000182986 NP_997216.2    | ENSG00000182997 Q9UHT0_HUMAN | ENSG00000188133 PLSCR1       | ENSG00000198252 STYX         | ENSG00000205299 CKLF          |                              |                              |                              |
| TCTGTCA  | ENSG00000038532 KIAA0350       | ENSG00000068976 PYGM         | ENSG00000071127 WDR1         | ENSG00000073331 ALPK1        | ENSG00000089685 BIRC5         | ENSG00000105700 C19orf50     | ENSG00000114988 LMAN2L       | ENSG00000126214 KLC1         |
|          | ENSG00000126561 STAT5A         | ENSG00000136193 SCRN1        | ENSG00000142208 AKT1         | ENSG00000162174 ASRGL1       | ENSG00000164916 FOXK1         | ENSG00000175315 CST6         | ENSG00000178802 MFI          | ENSG00000183444 NR_002822.2  |
|          | ENSG00000196421 PRR17          | ENSG00000198307 H2AFB2       | ENSG0000011426 ANLN          | ENSG00000035687 ADSS         | ENSG00000042781 USH2A         | ENSG00000064692 SNCAIP       | ENSG00000094916 CBX5         | ENSG00000106541 AGR2         |
|          | ENSG00000107789 MINPP1         | ENSG00000109171 SLAIN2       | ENSG00000111729 CLEC4A       | ENSG00000111783 RF4          | ENSG00000113580 NR3C1         | ENSG00000119041 GTFC33       | ENSG00000132639 SNAP25       | ENSG00000135341 MAP3K7       |
|          | ENSG00000144061 NHPH1          | ENSG00000145781 COMMD10      | ENSG00000163618 CADPS        | ENSG00000170006 TMEM154      | ENSG00000171033 PKTA          | ENSG00000171195 MUC7         | ENSG00000196360 NR_002168.1  |                              |
| TCTGTGA  | perfect: TCTGTCA TGACAGA       | hsa-miR-542-3p               | tgTGACAGAttgataactgaaa       | 2                            |                               |                              |                              |                              |
|          | ENSG00000033011 ALG1           | ENSG00000057704 TMCC3        | ENSG00000075826 SEC31B       | ENSG00000078872 NFS1         | ENSG00000082805 ERC1          | ENSG00000101146 RAE1         | ENSG00000101474 C20orf3      | ENSG00000104969 SGTA         |
|          | ENSG00000106976 DNM1           | ENSG00000107338 SHB          | ENSG00000110514 MADD         | ENSG00000111674 ENO2         | ENSG00000115318 LOXL3         | ENSG00000122852 SFTPALB      | ENSG00000137070 IL11RA       | ENSG00000146094 DOK3         |
|          | ENSG00000153786 ZDHHC7         | ENSG00000163686 ABHD6        | ENSG00000165376 CLDN2        | ENSG00000167604 NP_640332.1  | ENSG00000171302 CANT1         | ENSG00000185214 KLHL22       | ENSG00000203774 Q6ZU48_HUMAN | ENSG00000204576 PRR3         |
|          | ENSG00000204892 NP_001034845.1 | ENSG00000005302 MSL3L1       | ENSG000000048649 RSF1        | ENSG000000054690 PLEKHH1     | ENSG000000060303 Q9NU98_HUMAN | ENSG00000084073 ZMPSTE24     | ENSG00000100218 RTDR1        | ENSG00000105948 TTC26        |
|          | ENSG00000111885 MAN1A1         | ENSG00000112130 RNF8         | ENSG00000120158 RC1L         | ENSG00000123570 RAB9B        | ENSG00000143971 ETAA1         | ENSG00000148154 UGCG         | ENSG00000168916 ZNF608       | ENSG00000173221 GLRX         |
|          | ENSG00000181915 C10orf22       | ENSG00000185753 CXorf38      | ENSG00000186439 TRDN         | ENSG00000196632 WNK3         | ENSG00000198301 SDAD1         | ENSG00000204480 PRAMEF19     | ENSG00000204491 PRAMEF18     | ENSG00000204503 PRAMEF3      |
| TCTGTGG  | ENSG00000080511 RDH8           | ENSG00000097007 ABL1         | ENSG00000104953 TLE6         | ENSG00000115756 HPCAL1       | ENSG00000120907 ADRA1A        | ENSG00000125968 ID1          | ENSG00000129103 SUMF2        | ENSG00000129347 NP_075384.3  |
|          | ENSG00000130287 NCAN           | ENSG00000130749 C19orf7      | ENSG00000135622 SEMA4F       | ENSG00000137193 PIM1         | ENSG00000144741 SLC25A26      | ENSG00000164061 BSN          | ENSG00000167513 CDT1         | ENSG00000169814 BTD          |
|          | ENSG00000172992 DCAKD          | ENSG00000177076 ASAH3        | ENSG00000177239 MAN1B1       | ENSG00000177699 Q8N849_HUMAN | ENSG00000183010 PYCR1         | ENSG00000189091 SF3B3        | ENSG00000196814 FAM125B      | ENSG00000196839 ADA          |
|          | ENSG00000198165 Q9H960_HUMAN   | ENSG00000204028 Q6ZRR4_HUMAN | ENSG00000066084 DIP2B        | ENSG00000066739 C14orf103    | ENSG000000079246 XRCC5        | ENSG00000102580 DNAJC3       | ENSG00000103254 C16orf24     | ENSG00000112319 EYA4         |
|          | ENSG00000112584 FAM120B        | ENSG00000114125 RNF7         | ENSG00000118496 FBXO30       | ENSG00000122884 P4HA1        | ENSG00000124813 RUNX2         | ENSG00000128951 DUT          | ENSG00000132437 DDC          | ENSG00000133083 DCLK1        |
|          | ENSG00000137601 NEK1           | ENSG00000137752 CASP1        | ENSG00000137869 CYP19A1      | ENSG00000143390 REF5         | ENSG00000145685 LHFPL2        | ENSG00000173064 C12orf51     | ENSG00000187185 Q86VG7_HUMAN | ENSG00000197714 ZNF460       |
| TCTGTGT  | ENSG00000197756 RPL37A         | ENSG00000204596 RPP21        | ENSG00000205293 Q76B50_HUMAN |                              |                               |                              |                              |                              |
|          | ENSG00000054356 PTPRN          | ENSG00000063322 IXL          | ENSG00000076108 BAZ2A        | ENSG00000086758 HUWE1        | ENSG00000100075 SLC25A1       | ENSG00000100395 L3MBTL2      | ENSG00000100401 RANGAP1      | ENSG00000100417 PMM1         |
|          | ENSG00000110844 PRPF40B        | ENSG00000112139 MDGA1        | ENSG00000116254 CHD5         | ENSG00000122641 INHBA        | ENSG00000122694 C9orf19       | ENSG00000128591 FAL1         | ENSG00000130640 TUBGCP2      | ENSG00000137275 RIPK1        |
|          | ENSG00000143093 FAM40A         | ENSG00000148158 SNX30        | ENSG00000159692 CTBP1        | ENSG00000160325 C9orf7       | ENSG00000163431 LMOD1         | ENSG00000170122 FOXDL1       | ENSG00000172014 CCDC29       | ENSG00000172867 KRT2         |
|          | ENSG00000175318 GRAMD2         | ENSG00000176490 DIRAS1       | ENSG00000176945 MUC20        | ENSG00000181754 AMIGO1       | ENSG00000186174 BCL9L         | ENSG00000188589 RBM3         | ENSG00000197694 SPTAN1       | ENSG00000197921 HES5         |
|          | ENSG00000203783 PRR9           | ENSG00000205426 KRT81        | ENSG00000205444 Q5G014_HUMAN | ENSG000000075223 SEMA3C      | ENSG00000075945 KIFAP3        | ENSG00000009060 PAPOLA       | ENSG00000095596 CYP26A1      | ENSG00000095951 HIVEP1       |
|          | ENSG00000100354 TNRC6B         | ENSG00000101695 RNF125       | ENSG00000101898 MCTS1        | ENSG00000103544 NP_064710.3  | ENSG00000110700 RPS13         | ENSG00000112812 PRSS16       | ENSG00000112893 MAN2A1       | ENSG00000119541 VPS4B        |
|          | ENSG00000130770 ATPIF1         | ENSG00000131779 PEX11B       | ENSG00000134755 DSC2         | ENSG00000137075 RNF38        | ENSG00000138796 HADH          | ENSG00000138916 PAPSS1       | ENSG00000144476 CXCR7        | ENSG00000144761 CXCR7        |
|          | ENSG00000152382 TADA1L         | ENSG00000158615 PPP1R15B     | ENSG00000161980 POLR3K       | ENSG00000164187 LMBRD2       | ENSG00000184226 PCDH9         | ENSG00000184492 FOX4         | ENSG00000187772 LIN28B       | ENSG00000197442 MAP3K5       |
| TCTGTTA  | ENSG00000204592 HLA-E          | ENSG00000088543 C3orf18      | ENSG00000092964 DPYSL2       | ENSG00000099984 GSTT2        | ENSG00000101193 C20orf11      |                              |                              |                              |

|          |                                |                              |                                |                                |                              |                                |                                |                              |
|----------|--------------------------------|------------------------------|--------------------------------|--------------------------------|------------------------------|--------------------------------|--------------------------------|------------------------------|
|          | ENSG00000147140 NONO           | ENSG00000158525 CPA5         | ENSG00000162804 SNED1          | ENSG00000168784 BPESC1         | ENSG00000173372 C1QA         | ENSG00000177294 FBXO39         | ENSG00000177963 RIC8A          | ENSG00000180758 GPR157       |
|          | ENSG00000184012 TMPRSS2        | ENSG00000187239 FNBP1        | ENSG00000197283 SYNGAP1        | ENSG00000203811 HIST2H3A       | ENSG00000203813 HIST2H3C     | ENSG00000086300 SNX10          | ENSG00000099942 CRKL           | ENSG00000107014 RLN2         |
|          | ENSG00000112031 MTRF1L         | ENSG00000120210 INSL6        | ENSG00000135108 FXO21          | ENSG00000135932 CAB39          | ENSG00000136044 APPL2        | ENSG00000136541 KIAA1189       | ENSG00000138658 C4orf21        | ENSG00000139324 TMTC3        |
|          | ENSG00000143612 C1orfF43       | ENSG00000146463 ZMYM4        | ENSG00000163610 Q9NUUO_HUMAN   | ENSG00000163630 SYNPR          | ENSG00000169905 TOR1AIP2     | ENSG00000170500 LONRF2         | ENSG00000174010 KLHL15         | ENSG00000203705 TATDN3       |
|          | ENSG00000204397 NP_001017534.1 |                              |                                |                                |                              |                                |                                |                              |
| TCTTTATC | ENSG00000007080 CCDC124        | ENSG000000023902 PLEKH01     | ENSG00000067066 SP100          | ENSG00000105538 RASIP1         | ENSG00000106333 PCOLCE       | ENSG00000106400 ZNHIT1         | ENSG00000110799 VWF            | ENSG00000114767 RRP9         |
|          | ENSG00000116670 MAD2L2         | ENSG00000125810 CD93         | ENSG00000131188 PRR7           | ENSG00000143318 CASQ1          | ENSG00000167378 IRGQ         | ENSG00000172016 REG3A          | ENSG00000178057 C3orf60        | ENSG00000181789 COFG         |
|          | ENSG00000183562 Q9P1L5_HUMAN   | ENSG00000186910 SERPINA11    | ENSG00000196943 LTB4R          | ENSG00000197077 Q5THZ5_HUMAN   | ENSG00000198535 NP_997205.1  | ENSG00000008018 PSMB1          | ENSG00000101892 ATP1B4         | ENSG00000120137 PANK3        |
|          | ENSG00000125355 FAM70A         | ENSG00000129682 FGF13        | ENSG00000131238 PPT1           | ENSG00000134830 GPR77          | ENSG00000163817 SLC6A20      | ENSG00000164122 ASB5           | ENSG00000164989 C9orf93        | ENSG00000165186 PTCHD1       |
|          | ENSG00000168830 HTR1E          | ENSG00000169906 S100G        | ENSG00000170340 B3GNT2         | ENSG00000172673 C6orf190       | ENSG00000173542 MOBK1A       | ENSG00000176593 Q8N9G5_HUMAN   | ENSG00000188725 NP_001041714.1 | ENSG00000189067 LITAF        |
| TCTTTATT | ENSG00000005007 UPF1           | ENSG00000011454 RABGAP1      | ENSG00000058085 LAMC2          | ENSG00000072134 EPN2           | ENSG00000087365 SF3B2        | ENSG00000100427 MLC1           | ENSG00000102096 PIM2           | ENSG00000102226 USP11        |
|          | ENSG00000105443 PSCD2          | ENSG00000108961 NP_057576.2  | ENSG00000123154 MORG1_HUMAN    | ENSG00000127419 TMEM175        | ENSG00000131788 PIAS3        | ENSG00000132801 ZSWIM3         | ENSG00000149679 CABLES2        | ENSG00000152192 POU4F1       |
|          | ENSG00000154330 PGM5P1         | ENSG00000179598 NP_849158.1  | ENSG00000181274 FRAT2          | ENSG00000182362 C21orf57       | ENSG00000084453 SLCO1A2      | ENSG00000085365 SCAMP1         | ENSG00000091039 OSBPL8         | ENSG00000106819 ASPN         |
|          | ENSG00000106993 CDC37L1        | ENSG00000108510 THRAP1       | ENSG00000111358 GTF2H3         | ENSG00000113140 SPARC          | ENSG00000113600 C9           | ENSG00000117010 ZNF684         | ENSG00000123219 CENPK          | ENSG00000124827 GCM2         |
|          | ENSG00000127483 HP1BP3         | ENSG00000133773 CCDC59       | ENSG00000133997 MED6           | ENSG00000139209 SLC38A4        | ENSG00000146463 ZMYM4        | ENSG00000148737 TCF7L2         | ENSG00000150275 PCDH15         | ENSG00000150667 FSIP1        |
|          | ENSG00000152332 UHMK1          | ENSG00000153823 PID1         | ENSG00000164219 PGGT1B         | ENSG00000164485 IL22RA2        | ENSG00000164741 DLCL1        | ENSG00000179536 HTR1D          | ENSG00000183354 KIAA2026       | ENSG00000185477 GPRIN3       |
|          | ENSG00000188001 FAM79B         | ENSG00000197223 NP_006324.1  | ENSG000000204259 Q96PQ5_HUMAN  | ENSG000000205637 Q6ZSL6_HUMAN  |                              |                                |                                |                              |
| TCTTCAG  | ENSG00000002834 LASP1          | ENSG00000006194 ZNF263       | ENSG00000078699 CBFA2T2        | ENSG00000105509 HAS1           | ENSG00000107262 BAG1         | ENSG00000108439 PNPO           | ENSG00000111424 VDR            | ENSG00000115318 LOXL3        |
|          | ENSG00000116128 BCL9           | ENSG00000116698 SMG7         | ENSG00000116857 TMEM9          | ENSG00000119772 DNMT3A         | ENSG00000124164 VAPB         | ENSG00000132155 RAF1           | ENSG00000133980 C14orf115      | ENSG00000166435 XKRA1        |
|          | ENSG00000173636 PRSS1          | ENSG00000179361 ARID3B       | ENSG00000181031 RPH3AL         | ENSG00000182473 EXOC7          | ENSG00000184216 IRAK1        | ENSG00000185499 MUC1           | ENSG00000186453 NP_001035800.1 | ENSG00000187013 C17orf82     |
|          | ENSG00000198756 C1orf52        | ENSG00000204479 PRAMEF17     | ENSG00000204488 PRAMEF16       | ENSG00000204733 Q6ZSH7_HUMAN   | ENSG00000010539 ZNF200       | ENSG00000014919 COX15          | ENSG00000072571 HMHR           | ENSG00000102309 PIN4         |
|          | ENSG00000103569 AQP9           | ENSG00000115548 JMJD1A       | ENSG00000117650 NEK2           | ENSG00000121350 NP_079130.2    | ENSG00000129521 EGLN3        | ENSG00000138640 FAM13A1        | ENSG00000138798 EGF            | ENSG00000140455 USP3         |
|          | ENSG00000146223 RPL7L1         | ENSG00000146839 ZAN          | ENSG00000149187 CUGBP1         | ENSG00000150712 MTMR12         | ENSG00000153113 CAST         | ENSG00000160336 ZNF761         | ENSG00000162419 GMEB1          | ENSG00000162521 RBBP4        |
|          | ENSG00000163328 GPR155         | ENSG00000164219 PGGT1B       | ENSG00000165572 KBTBD6         | ENSG00000167562 ZNF701         | ENSG00000170185 USP38        | ENSG00000176363 NP_001011539.1 | ENSG00000184280 ZNF285B        | ENSG00000185842 Q4VXG5_HUMAN |
|          | ENSG00000189190 BNFG600        | ENSG00000196946 ZNF705A      | ENSG00000198482 ZNF808         | ENSG00000198538 ZNF28          | ENSG00000198799 LRG2         | ENSG00000204604 ZNF468         | ENSG00000204947 ZNF425         |                              |
| TCTTCTT  | ENSG00000073009 IKBK6          | ENSG00000090659 CD209        | ENSG00000092098 ISGF3G         | ENSG00000100139 MICALL1        | ENSG00000100142 POLR2F       | ENSG00000106470 KIAA0247       | ENSG00000100931 CHMP4A         | ENSG00000101448 SPINLW1      |
|          | ENSG00000104228 TRIM35         | ENSG00000105997 HOXA3        | ENSG00000110844 PRPF40B        | ENSG00000111669 TPI1           | ENSG00000115556 PLCD4        | ENSG00000122012 SV2C           | ENSG00000123342 MMP19          | ENSG00000125898 FAM110A      |
|          | ENSG00000130612 Q6ZSX1_HUMAN   | ENSG00000130649 CYP2E1       | ENSG00000131408 NR1H2          | ENSG00000132589 FLOT2          | ENSG00000132801 ZSWIM3       | ENSG00000134779 C18orf10       | ENSG00000135454 B4GALNT1       | ENSG00000137834 SMAD6        |
|          | ENSG00000144043 TEX261         | ENSG00000145029 NICN1        | ENSG00000148219 ASTN2          | ENSG00000160202 CRYA4          | ENSG00000162365 CYP4A22      | ENSG00000167371 PRRT2          | ENSG00000169814 BTD            | ENSG00000171786 NHLH1        |
|          | ENSG00000172508 Q8N467_HUMAN   | ENSG00000175189 INHBC        | ENSG00000176358 TAC4           | ENSG00000179028 NP_001013709.1 | ENSG00000180357 ZNF609       | ENSG00000182776 NP_001013709.1 | ENSG00000184824 C1QTNF5        | ENSG00000185332 TMEM105      |
|          | ENSG00000186141 POLR3C         | ENSG00000186575 NF2          | ENSG00000186815 TPCN1          | ENSG00000186912 P2RY4          | ENSG00000187048 CYP4A11      | ENSG00000188888 GPR179         | ENSG00000196329 GIMAP5         | ENSG00000196892 Q9P1D2_HUMAN |
|          | ENSG00000197265 GTF2E2         | ENSG00000204310 AGPAT1       | ENSG00000204538 PSORS1C2       | ENSG0000017260 ATP2C1          | ENSG00000175191 TTTC17       | ENSG00000069535 MAOB           | ENSG00000079691 LRRK16         | ENSG00000090263 MRPS33       |
|          | ENSG00000102886 GDDP3          | ENSG00000112812 PRSS16       | ENSG00000116771 AGMAT          | ENSG00000117519 CNN3           | ENSG00000118972 FGF23        | ENSG00000130741 EIF2S3         | ENSG00000131473 ACLY           | ENSG00000132274 TRIM22       |
|          | ENSG00000135452 TSPAN31        | ENSG00000137285 TUBB2B       | ENSG00000144840 RABL3          | ENSG00000147010 SH3KBP1        | ENSG00000152268 SPON1        | ENSG00000153037 SRP19          | ENSG00000162601 MYSM1          | ENSG00000166405 RIC3         |
| TCTTCGA  | ENSG00000166913 YWHAB          | ENSG00000168930 TRIM49       | ENSG00000172262 ZNF131         | ENSG00000173827 A0AVR7_HUMAN   | ENSG00000183145 DSCR6        | ENSG00000203730 TEDDM1         |                                |                              |
|          | ENSG00000034510 TMSB10         | ENSG00000087086 FTL          | ENSG00000089159 PXN            | ENSG00000101425 BPI            | ENSG00000102445 C13orf18     | ENSG00000113196 HAND1          | ENSG00000116824 CD2            | ENSG00000133063 CHIT1        |
|          | ENSG00000149300 C1orf52        | ENSG00000151651 ADAM8        | ENSG00000166819 PLIN           | ENSG00000168785 TSPAN5         | ENSG00000169122 FAM110B      | ENSG00000174166 Q9BTTX9_HUMAN  | ENSG00000179523 Q8TAS2_HUMAN   | ENSG00000181368 NM_032947.3  |
|          | ENSG00000183549 NP_060358.2    | ENSG00000183558 HIST2H2AA3   | ENSG00000198500 Q96C21_HUMAN   | ENSG0000026508 CD44            | ENSG00000096696 DSP          | ENSG00000100478 AP451          | ENSG00000114405 C3orf14        | ENSG00000117009 KMO          |
|          | ENSG00000119616 FCF1           | ENSG00000123213 NLN          | ENSG00000132498 ANKRD20A1      | ENSG00000132631 C20orf79       | ENSG00000138079 SLC3A1       | ENSG00000138308 FLA2G12B       | ENSG00000151883 PARP8          | ENSG00000169302 STK32A       |
|          | ENSG00000169914 OTUD3          | ENSG00000170854 MINA         | ENSG00000174899 Q8N6Q6_HUMAN   | ENSG00000178878 APOLD1         | ENSG00000179300 ZCCHC5       | ENSG00000180408 Q8N5G0_HUMAN   | ENSG00000180787 ZFP3           | ENSG00000183148 ANKRD20A2    |
|          | ENSG00000185053 SGCZ           | ENSG00000196290 NIF3L1       | ENSG00000196712 NF1            | ENSG00000196774 ANKRD20A3      | ENSG00000197442 MAP3K5       | ENSG00000198331 HYLS1          | ENSG00000198718 KIAA0423       | ENSG00000204287 HLA-DRA      |
| TCTTCTG  | ENSG00000089159 PXN            | ENSG00000090857 NP_060460.3  | ENSG00000101346 POFUT1         | ENSG00000108349 CASC3          | ENSG00000113732 ATP6V0E1     | ENSG00000122367 LDB3           | ENSG00000123643 SLC36A1        | ENSG00000129221 AIPL1        |
|          | ENSG00000135702 CHST5          | ENSG00000136383 ALPK3        | ENSG00000138031 ADCY3          | ENSG00000146700 SRCRB4D        | ENSG00000148702 HABP2        | ENSG00000169221 TBC1D10B       | ENSG00000170486 KRT72          | ENSG00000173914 RBM4B        |
|          | ENSG00000177951 BET1L          | ENSG00000179344 HB25_HUMAN   | ENSG00000179761 PIPOX          | ENSG00000184840 TMED9          | ENSG00000204275 HLA-DQB2     | ENSG00000013503 POLR3B         | ENSG00000081386 ZNF510         | ENSG00000082146 ALS2CR2      |
|          | ENSG00000084444 KIAA1467       | ENSG00000102362 SYTL4        | ENSG00000105974 CAV1           | ENSG00000113790 EHHADH         | ENSG00000140382 HMG20A       | ENSG00000141456 Q9RIZL8-2      | ENSG00000146833 TRIM4          | ENSG00000147509 RGS20        |
|          | ENSG00000154217 PTPNC1         | ENSG00000160629 C17orf32     | ENSG00000162852 C1orf71        | ENSG00000164049 FBXW12         | ENSG00000171132 PRKCE        | ENSG00000175497 DPP10          | ENSG00000177083 ZNF683         | ENSG00000177738 Q8N4J7_HUMAN |
|          | ENSG00000180011 ZADH2          | ENSG00000180777 ANKRD30B     | ENSG00000182752 PAPPA          | ENSG00000196636 ACN9           | ENSG00000197603 NP_075561.2  | ENSG00000198682 PAPSS2         | ENSG00000198919 DZIP3_HUMAN    | ENSG00000204138 PHACTR4      |
|          | ENSG00000204672 Q8NI72_HUMAN   | ENSG00000205144 Q6ZV43_HUMAN |                                |                                |                              |                                |                                |                              |
| TCTTGCA  | ENSG00000013588 GPRC5A         | ENSG00000054148 PHPT1        | ENSG0000006065308 TRAM2        | ENSG00000086015 MAST2          | ENSG00000093072 CECR1        | ENSG00000100234 TIMP3          | ENSG00000105085 CRSP7          | ENSG00000108352 RAPGEFL1     |
|          | ENSG00000117682 DHDDS          | ENSG00000125818 PSMF1        | ENSG00000128482 ZNF179         | ENSG00000128908 INOC1          | ENSG00000130035 GALNT8       | ENSG00000131059 C20orf71       | ENSG00000138769 CDKL2          | ENSG00000155886 SLC24A2      |
|          | ENSG00000163915 C3orf65        | ENSG00000167565 SERTAD3      | ENSG00000167641 PPP1R14A       | ENSG00000177992 C9orf79        | ENSG00000181039 ANKRD34      | ENSG00000184314 Q9H9T1_HUMAN   | ENSG00000198881 ASB12          | ENSG00000065883 CDC2L5       |
|          | ENSG00000081870 C1orf41        | ENSG00000086666 ZFAND6       | ENSG00000102471 NDFIP2         | ENSG00000106483 SFRP4          | ENSG00000108100 CCNY         | ENSG00000109654 TRIM2          | ENSG00000112305 SMAP1          | ENSG00000112701 SENP6        |
|          | ENSG00000122203 KIAA1191       | ENSG00000131931 THAP1        | ENSG00000135185 C7orf23        | ENSG00000135547 HEY2           | ENSG00000139946 PELI2        | ENSG00000147027 TMEM47         | ENSG00000153814 JAZF1          | ENSG00000155816 FMN2         |
|          | ENSG00000161654 LSM12          | ENSG00000173928 C19orf39     | ENSG00000196785 Q8N862_HUMAN   | ENSG00000198533 Q9P1D0_HUMAN   | ENSG00000205171 Q6PDB3_HUMAN | ENSG00000205246 NP_001005472.1 |                                |                              |
| TCTTGCG  | ENSG0000002586 CD99            | ENSG00000099785 MARCH2       | ENSG00000107263 RAPGEF1        | ENSG00000110057 UNC93B1        | ENSG00000118156 ZNF541       | ENSG00000122952 ZWINT          | ENSG00000125910 EDG6           | ENSG00000127419 TMEM175      |
|          | ENSG00000131668 BARX1          | ENSG00000136715 SAP130       | ENSG00000147889 CDKN2A         | ENSG00000158864 NDUFS2         | ENSG00000164216 TSSK1B       | ENSG00000170454 KRT75          | ENSG00000171700 RGS19          | ENSG00000177156 TALD01       |
|          | ENSG00000177202 SPACA4         | ENSG00000180806 HOXC9        | ENSG00000183072 NDX2-5         | ENSG00000184584 TMEM173        | ENSG00000197265 GTF2E2       | ENSG00000100749 VRK1           | ENSG00000102786 INTS6          | ENSG00000103769 RAB11A       |
|          | ENSG00000106609 C7orf42        | ENSG00000110675 ELMOD1       | ENSG00000115850 LCT            | ENSG00000123496 IL13RA2        | ENSG00000128891 CCDC32       | ENSG00000133115 STOML3         | ENSG00000135750 KCNK1          | ENSG00000136108 CKAP2        |
|          | ENSG00000140543 DET1           | ENSG00000145244 CORIN        | ENSG00000150045 KLRF1          | ENSG00000153487 ING1           | ENSG00000154975 CA10         | ENSG00000157502 MUM1L1         | ENSG00000162545 CAMK2N1        | ENSG00000163710 PCOLCE2      |
|          | ENSG00000165300 SLITRK5        | ENSG00000171566 PLRG1        | ENSG00000183336 BOLA2          | ENSG00000183784 C9orf66        | ENSG00000196597 ZNF782       |                                |                                |                              |
| TCTTGGG  | ENSG00000062282 DGAT2          | ENSG00000076604 TRAF4        | ENSG00000090273 NUDC           | ENSG00000100330 MTMR3          | ENSG00000100385 IL2RB        | ENSG00000100813 ACIN1          | ENSG00000111252 SH2B3          | ENSG00000116857 TMEM9        |
|          | ENSG00000117411 B4GALT2        | ENSG00000119535 CSF3R        | ENSG00000128928 IVD            | ENSG00000132004 FBXW9          | ENSG00000141098 FGD2         | ENSG00000142102 ATHL1          | ENSG00000143630 HCN3           | ENSG00000147140 NONO         |
|          | ENSG00000147224 PRPS1          | ENSG00000149930 TAOK2        | ENSG00000160293 VAV2           | ENSG00000163803 PLB1           | ENSG00000166557 TMED3        | ENSG00000169258 GPRIN1         | ENSG00000170550 Q8WVU8_HUMAN   | ENSG00000185122 HSF1         |
|          | ENSG00000185801 YV007_HUMAN    | ENSG00000197021 CXorf40B     | ENSG00000204131 NP_001013649.1 | ENSG00000056277 SUH3S          | ENSG00000101892 ATP1B4       | ENSG00000109919 MTCH2          | ENSG00000127366 TAS2R5         | ENSG00000134202 GSTM3        |
|          | ENSG00000139146 FAM60A         | ENSG00000139908 TSSK4        | ENSG00000148680 HTR7           | ENSG00000151553 KIAA1600       | ENSG00000153113 CAST         | ENSG00000156006 NAT2           | ENSG00000169891 REPS2          | ENSG00000170677 SOCS6        |
|          | ENSG00000172955 ADH6           | ENSG00000178202 KDELC2       | ENSG00000181704 YIPF6          | ENSG00000182977 Q9P1I1_HUMAN   | ENSG00000196754 S100A2       | ENSG00000197062 ZNF187         | EN                             |                              |

|                              |                              |                                |                                |                                |                              |                                |                              |                           |                              |                              |                        |
|------------------------------|------------------------------|--------------------------------|--------------------------------|--------------------------------|------------------------------|--------------------------------|------------------------------|---------------------------|------------------------------|------------------------------|------------------------|
| ENSG00000113100 CDH9         | ENSG00000114686 MRPL3        | ENSG00000118496 FBXO30         | ENSG00000118961 C2orf43        | ENSG00000126226 PCID2          | ENSG00000134025 NM_022659.2  | ENSG00000136100 VPS36          | ENSG00000138792 ENPEP        |                           |                              |                              |                        |
| ENSG00000141456 Q8IZL8-2     | ENSG00000145349 CAMK2D       | ENSG00000150625 GPM6A          | ENSG00000152726 Q5SNT8_HUMAN   | ENSG00000156374 PCGF6          | ENSG00000159917 ZNF235       | ENSG00000160588 U2966_HUMAN    | ENSG00000164105 SAP30        |                           |                              |                              |                        |
| ENSG00000165304 MELK         | ENSG00000166348 USP54        | ENSG00000171502 COL24A1        | ENSG00000172661 FAM21B         | ENSG00000174196 FAM21D         | ENSG00000178386 ZNF223       | ENSG00000188001 FAM79B         | ENSG00000188085 NP_997320.1  |                           |                              |                              |                        |
| ENSG00000196850 PPTC7        |                              |                                |                                |                                |                              |                                |                              |                           |                              |                              |                        |
| TCTTTTC                      | ENSG00000026950 BTN3A1       | ENSG00000057757 C1orf128       | ENSG00000076108 BAZ2A          | ENSG00000085465 OVGP1          | ENSG00000100141 PISD         | ENSG00000100246 DNAL4          | ENSG00000103855 CD276        | ENSG00000105605 CACNG7    | ENSG00000125166 GOT2         | ENSG00000125798 FOXA2        | ENSG00000162738 VANGL2 |
| ENSG00000111540 RAB5B        | ENSG00000114544 SLC41A3      | ENSG00000115234 SNX17          | ENSG00000120055 C10orf95       | ENSG00000120332 TNN            | ENSG000001197697 HIST1H2BE   | ENSG00000197697 HIST1H2BE      | ENSG00000197789 Q8NA00_HUMAN | ENSG00000198366 HIST1H3A  |                              |                              |                        |
| ENSG00000127946 HIP1         | ENSG00000130958 SLC35D2      | ENSG00000140264 SERF2          | ENSG00000143032 BARHL2         | ENSG00000146047 HIST1H2BA      | ENSG00000147118 ZNF182       | ENSG00000158717 RNF166         | ENSG00000162738 VANGL2       |                           |                              |                              |                        |
| ENSG00000163823 CCR1         | ENSG00000165175 MID1IP1      | ENSG00000166924 NP_775835.2    | ENSG00000167083 GNGT2          | ENSG00000168298 HIST1H1E       | ENSG00000172375 TMEM24       | ENSG00000174348 PODN           | ENSG00000174989 FBXW8        |                           |                              |                              |                        |
| ENSG00000175229 GAL3ST3      | ENSG00000177479 ARIH2        | ENSG00000183596 TIM16_HUMAN    | ENSG00000188706 ZDHHC9         | ENSG00000188778 ADRB3          | ENSG00000197697 HIST1H2BE    | ENSG00000197789 Q8NA00_HUMAN   | ENSG00000198366 HIST1H3A     |                           |                              |                              |                        |
| ENSG00000198374 HIST1H2AL    | ENSG00000006837 CDKL3        | ENSG00000023041 ZDHHC6         | ENSG00000077616 NAALAD2        | ENSG00000082153 BZW1           | ENSG00000085382 HACE1        | ENSG00000085491 SLC25A24       | ENSG00000089818 NECAP1       |                           |                              |                              |                        |
| ENSG00000100522 GNPNAT1      | ENSG00000100625 SIX4         | ENSG00000101109 STK4           | ENSG00000104442 ARMC1          | ENSG00000104765 BNIP3L         | ENSG00000111049 MYF5         | ENSG00000112983 BRD8           | ENSG00000115866 DARS         |                           |                              |                              |                        |
| ENSG00000118564 FBXL5        | ENSG00000130856 ZNF236       | ENSG00000150628 SPATA4         | ENSG00000151876 FBXO4          | ENSG00000153002 CPB1           | ENSG00000153317 DDEF1        | ENSG00000156414 TDRD9          | ENSG00000162545 CAMK2N1      |                           |                              |                              |                        |
| ENSG00000162614 NEXN         | ENSG00000172410 INSL5        | ENSG00000175487 NP_076428.2    | ENSG00000176896 TFSM1_HUMAN    | ENSG00000188653 NR_002807.1    | ENSG00000196632 WNK3         | ENSG00000197024 ZNF398         | ENSG00000204271 SPIN3        |                           |                              |                              |                        |
| ENSG00000205608 Q6ZQP9_HUMAN |                              |                                |                                |                                |                              |                                |                              |                           |                              |                              |                        |
| TCTTTTG                      | ENSG00000006125 AP2B1        | ENSG00000044446 PHKA2          | ENSG00000067082 KLF6           | ENSG00000079782 GPX5           | ENSG00000099821 POLRMT       | ENSG00000101146 RAE1           | ENSG00000101638 ST8SIA5      | ENSG00000110395 CBL       | ENSG00000143376 SNX27        | ENSG00000143786 CNIH3        | ENSG00000173120 FBXL11 |
| ENSG00000111348 ARHGDI1      | ENSG00000114767 RRP9         | ENSG00000132906 VSP9           | ENSG00000134216 CHIA           | ENSG00000135148 TRAFD1         | ENSG00000139083 ETV6         | ENSG00000143376 SNX27          | ENSG00000143786 CNIH3        |                           |                              |                              |                        |
| ENSG00000153029 MR1          | ENSG00000162298 SYVN1        | ENSG00000162738 VANGL2         | ENSG00000165006 UBAP1          | ENSG00000166860 ZBTB39         | ENSG00000168135 KCNJ4        | ENSG00000169083 AR             | ENSG00000173120 FBXL11       |                           |                              |                              |                        |
| ENSG00000173585 CCR9         | ENSG00000175376 NP_115701.2  | ENSG00000176595 KBTBD11        | ENSG00000177764 ZCCHC3         | ENSG00000183633 C14orf132      | ENSG00000187736 SLC23A3      | ENSG00000188056 TREML4         | ENSG00000196666 Q6P0A1_HUMAN |                           |                              |                              |                        |
| ENSG00000196935 SRCAP1       | ENSG00000196959 CES1         | ENSG00000198165 Q9H960_HUMAN   | ENSG00000198848 NR_003276.1    | ENSG00000204092 NP_001001705.1 | ENSG00000204312 Q6ZNY8_HUMAN | ENSG00000205683 DPF3           | ENSG00000205683 MLLT10       |                           |                              |                              |                        |
| ENSG00000089397 CHMP2B       | ENSG00000100219 XBP1         | ENSG00000101901 CXorf45        | ENSG00000104447 TRPS1          | ENSG00000104671 DCTN6          | ENSG00000105708 ZNF14        | ENSG00000129083 COPB1          | ENSG00000129151 BBOX1        |                           |                              |                              |                        |
| ENSG00000137509 PRCP         | ENSG00000139687 RB1          | ENSG00000145331 RGXMTD2        | ENSG00000149806 FAU            | ENSG00000151689 INPP1          | ENSG00000154473 BUB3         | ENSG00000156011 PSD3           | ENSG00000162998 FRZB         |                           |                              |                              |                        |
| ENSG00000164287 CDC20B       | ENSG00000164830 OXR1         | ENSG00000165730 PTOX1          | ENSG00000168264 IRF2BP2        | ENSG00000169398 PTRK2          | ENSG00000174130 TLR6         | ENSG00000179363 TMEM31         | ENSG00000180190 C8orf42      |                           |                              |                              |                        |
| ENSG00000182050 MGAT4C       | ENSG00000185015 CA13         | ENSG00000185203 Q96S36_HUMAN   | ENSG00000185272 RBM11          | ENSG00000188001 FAM79B         | ENSG00000189195 BTBD8        | ENSG00000196912 AN36B_HUMAN    | ENSG00000198945 L3MBTL3      |                           |                              |                              |                        |
| TGAAAAAT                     | ENSG00000006114 AP1GBP1      | ENSG00000006194 ZNF263         | ENSG000000054118 THRAP3        | ENSG000000075275 CELSR1        | ENSG00000078319 PMS2L1       | ENSG00000089154 GCN1L1         | ENSG00000101405 OXT          | ENSG00000102755 FLT1      | ENSG00000134864 Q9BVM4_HUMAN | ENSG00000136689 IL1RN        |                        |
| ENSG00000111642 CHD4         | ENSG00000114770 ABCC5        | ENSG00000118526 TCF21          | ENSG00000125815 CST8           | ENSG00000129244 ATP1B2         | ENSG00000132773 TOE1         | ENSG00000134864 Q9BVM4_HUMAN   | ENSG00000136689 IL1RN        |                           |                              |                              |                        |
| ENSG00000136830 FAM129B      | ENSG00000140090 SLC24A4      | ENSG00000142528 ZNF473         | ENSG00000147099 HDAC8          | ENSG00000147536 GINS4          | ENSG00000158796 DEDD         | ENSG00000162458 FBLIM1         | ENSG00000168016 Q8N8K0_HUMAN |                           |                              |                              |                        |
| ENSG00000169083 AR           | ENSG00000171246 NPTX1        | ENSG00000172073 C2orf51        | ENSG00000173212 C1orf161       | ENSG00000173585 CCR9           | ENSG00000176595 KBTBD11      | ENSG00000180424 DEFB123        | ENSG00000187953 NR_002217.1  |                           |                              |                              |                        |
| ENSG00000198632 NP_777590.1  | ENSG00000205181 QOVF22_HUMAN | ENSG00000002549 LAP3           | ENSG000000043093 DCUN1D1       | ENSG00000048544 MRPS10         | ENSG00000091137 SLC26A4      | ENSG00000091986 CCDC80         | ENSG00000096006 CRISP3       |                           |                              |                              |                        |
| ENSG00000100372 SLC25A17     | ENSG00000100749 VRK1         | ENSG00000101773 RBBP8          | ENSG00000101951 PAGE4          | ENSG00000104290 FZD3           | ENSG00000106511 MEOX2        | ENSG00000107560 RAB11FIP2      | ENSG00000109255 NMMU         |                           |                              |                              |                        |
| ENSG00000112706 IMPG1        | ENSG00000120519 SLC10A7      | ENSG00000134198 TSPAN2         | ENSG00000136514 RTP4           | ENSG00000138722 MMRN1          | ENSG00000139116 KIF21A       | ENSG00000151657 KIN            | ENSG00000153064 BANK1        |                           |                              |                              |                        |
| ENSG00000153575 TUBGCP5      | ENSG00000156304 SFRS15       | ENSG00000159228 CBR1           | ENSG00000159596 TMEM69         | ENSG00000165071 TMEM71         | ENSG00000165805 C12orf50     | ENSG00000168152 THAP9          | ENSG00000169126 ARMC4        |                           |                              |                              |                        |
| ENSG00000170381 SEMA3E       | ENSG00000171103 NP_060380.2  | ENSG00000172239 PAIP1          | ENSG00000177200 CHD9           | ENSG00000177485 ZBTB33         | ENSG00000180777 ANKRD30B     | ENSG00000185261 C5orf36        | ENSG00000185985 SLITRK2      |                           |                              |                              |                        |
| ENSG00000197008 ZNF138       | ENSG00000197275 RAD54B       | ENSG00000197810 Q9PF60_HUMAN   | ENSG00000198838 RYR3           |                                |                              |                                |                              |                           |                              |                              |                        |
| ENSG00000106789 CORO2A       | ENSG00000108821 COL1A1       | ENSG00000114113 RBP2           | ENSG00000114268 PFKFB4         | ENSG00000134825 C11orf10       | ENSG00000140470 ADAMTS17     | ENSG00000140598 EFTUD1         | ENSG00000142273 CBLC         |                           |                              |                              |                        |
| ENSG00000148300 REXO4        | ENSG00000148384 INPP5E       | ENSG00000151650 VENTX          | ENSG00000157014 TATDN2         | ENSG00000162763 LRRC52         | ENSG00000163515 RETNLB       | ENSG00000164379 FOXQ1          | ENSG00000171475 WIPF2        |                           |                              |                              |                        |
| ENSG00000173163 COMMD1       | ENSG00000177441 Q8NAT9_HUMAN | ENSG00000181031 RPH3AL         | ENSG00000185838 GNB1L          | ENSG00000203784 LELP1          | ENSG00000204017 Q6ZVB9_HUMAN | ENSG00000205089 NP_001034869.1 | ENSG0000007062 PROM1         |                           |                              |                              |                        |
| ENSG00000052795 Q9H994_HUMAN | ENSG00000074706 NP_056368.1  | ENSG00000078369 GNB1           | ENSG00000089225 TBX5           | ENSG00000108468 CBX1           | ENSG00000110436 SLC1A2       | ENSG00000115421 PAPOLG         | ENSG00000118322 ATP10B       |                           |                              |                              |                        |
| ENSG00000120868 APAF1        | ENSG00000130939 UBE4B        | ENSG00000137757 CASP5          | ENSG00000137776 SLTM           | ENSG00000144785 TMEM4          | ENSG00000146038 DCDC2        | ENSG00000146872 TLK2           | ENSG00000148737 TCF7L2       |                           |                              |                              |                        |
| ENSG00000148950 IMMP1L       | ENSG00000151164 RAD9B        | ENSG00000157445 CACNA2D3       | ENSG00000158639 PAGE5          | ENSG00000167230 C17orf78       | ENSG00000179152 C3orf23      | ENSG00000182287 AP1S2          | ENSG00000183813 CCR4         |                           |                              |                              |                        |
| ENSG00000187761 PAGE2B       | ENSG00000198042 RBM13        | ENSG00000198522 ZNF512         | ENSG00000203705 TATDN3         | ENSG00000204279 PAGE3          |                              |                                |                              |                           |                              |                              |                        |
| TGAAACT                      | ENSG00000054967 TNFRSF19L    | ENSG00000072121 ZFUYE26        | ENSG00000092098 ISGF3G         | ENSG00000103489 XYL1           | ENSG00000126231 PROZ         | ENSG00000129757 CDKN1C         | ENSG00000130675 HLXB9        | ENSG00000136930 PSMB7     | ENSG00000168826 ZNF509       | ENSG00000176887 SOX11        | ENSG00000182606 TRAK1  |
| ENSG00000140044 NP_569736.1  | ENSG00000141568 FOXK2        | ENSG00000143549 TPM3           | ENSG00000153798 LDLRAP1        | ENSG00000166860 ZBTB39         | ENSG00000102699 PARP4        | ENSG00000110693 SOX6           | ENSG00000113838 CRYGS        | ENSG00000134982 APC       |                              |                              |                        |
| ENSG00000196970 NXF4         | ENSG00000204410 MSH5         | ENSG00000204576 PRR3           | ENSG00000049167 ERCC8          | ENSG00000070961 ATP2B1         | ENSG00000102699 PARP4        | ENSG00000110693 SOX6           | ENSG00000113838 CRYGS        | ENSG00000134982 APC       |                              |                              |                        |
| ENSG00000113851 CRBN         | ENSG00000120694 HSPH1        | ENSG00000121848 ORF364         | ENSG00000122481 RWDD3          | ENSG00000122507 BBS9           | ENSG00000128294 TPST2        | ENSG00000132912 DCTN4          | ENSG00000134982 APC          |                           |                              |                              |                        |
| ENSG00000137274 BPHL         | ENSG00000153130 SCOC         | ENSG00000153951 XNF4D2         | ENSG00000169429 IL8            | ENSG00000173452 NP_689987.2    | ENSG00000174718 C12orf35     | ENSG00000175868 CALCB          | ENSG00000177694 NAALADL2     |                           |                              |                              |                        |
| ENSG00000180628 PCGF5        | ENSG00000181211 Q8NA17_HUMAN | ENSG00000187191 DAZ3           | ENSG00000188120 DAZ1           | ENSG00000196344 ADH7           | ENSG00000198846 TOX          | ENSG00000198924 DCLRE1A        | ENSG00000204291 COL15A1      |                           |                              |                              |                        |
| ENSG00000205916 DAZ4         | ENSG00000205944 DAZ2         |                                |                                |                                |                              |                                |                              |                           |                              |                              |                        |
| TGAAAGG                      | ENSG00000020181 GPR124       | ENSG00000084234 APLP2          | ENSG00000110583 NAT11          | ENSG00000112599 GUCA1B         | ENSG00000123374 CDK2         | ENSG00000125449 ARMC7          | ENSG00000131148 COX4NB       | ENSG00000133216 EPHB2     | ENSG00000167723 TRPV3        | ENSG00000173244 Q8N8D0_HUMAN |                        |
| ENSG00000143125 PROK1        | ENSG00000145888 GLRA1        | ENSG00000158195 WASF2          | ENSG00000159176 CSRP1          | ENSG00000159348 CYB5R1         | ENSG00000165731 RET          | ENSG00000185219 ZNF445         | ENSG00000187699 Q8N8X4_HUMAN | ENSG00000205718 LOC653656 |                              |                              |                        |
| ENSG00000179348 GATA2        | ENSG00000182315 NP_653215.1  | ENSG00000182631 RXFP3          | ENSG00000183260 C20orf135      | ENSG00000184774 Q49A9_HUMAN    | ENSG00000185219 ZNF445       | ENSG00000187699 Q8N8X4_HUMAN   | ENSG00000205718 LOC653656    |                           |                              |                              |                        |
| ENSG00000004897 CDC27        | ENSG00000069345 DNAJA2       | ENSG00000101782 RIOK3          | ENSG00000105483 CARD8          | ENSG00000109586 GALNT7         | ENSG00000112038 OPRM1        | ENSG00000134046 MBD2           | ENSG00000135272 MDFIC        |                           |                              |                              |                        |
| ENSG00000138686 BBS7         | ENSG00000146674 IGFBP3       | ENSG00000148444 COMMD3         | ENSG00000150433 NP_001074015.1 | ENSG00000154127 STS1_HUMAN     | ENSG00000158691 ZSCAN12      | ENSG00000163492 NP_775919.2    | ENSG00000164442 CITED2       |                           |                              |                              |                        |
| ENSG00000166848 TERF2IP      | ENSG00000169248 CXCL11       | ENSG00000171135 JAGN1          | ENSG00000171291 ZNF439         | ENSG00000171943 SRGAP2P1       | ENSG00000179119 SPTY2D1      | ENSG00000179813 C13orf30       | ENSG00000185231 MC2R         |                           |                              |                              |                        |
| ENSG00000197054 ZNF763       | ENSG00000198551 FOXJ3        | ENSG00000198815 FOXJ3          | ENSG00000206384 Q69YT0_HUMAN   |                                |                              |                                |                              |                           |                              |                              |                        |
| TGAAATA                      | ENSG00000082781 ITGB5        | ENSG00000092421 SEMA67         | ENSG00000102265 TIMP1          | ENSG00000104872 PIHD1          | ENSG00000105048 TNNT1        | ENSG00000108515 ENO3           | ENSG00000119227 PIG2         | ENSG00000120029 C10orf76  | ENSG00000137193 PIM1         | ENSG00000137709 POU2F3       |                        |
| ENSG00000122254 HS3ST2       | ENSG00000122711 SPINK4       | ENSG00000124444 ZNF576         | ENSG00000124701 APOBEC2        | ENSG00000130255 RPL36          | ENSG00000135365 PHF21A       | ENSG00000137193 PIM1           | ENSG00000137709 POU2F3       |                           |                              |                              |                        |
| ENSG00000140990 NDUFB1       | ENSG00000142534 RPS11        | ENSG00000144730 IL17RD         | ENSG00000145626 UGT3A1         | ENSG00000162148 C11orf66       | ENSG00000164012 WDR65        | ENSG00000166002 C11orf75       | ENSG00000167261 DPEP2        |                           |                              |                              |                        |
| ENSG00000169436 COL22A1      | ENSG00000173530 TNFRSF10D    | ENSG00000176444 CLK2           | ENSG00000182968 SOX1           | ENSG00000183255 PTTG1IP        | ENSG00000184108 TRIML1       | ENSG00000184787 UBE2G2         | ENSG00000185379 RAD51L3      |                           |                              |                              |                        |
| ENSG00000185481 C21orf129    | ENSG00000188554 NBR1         | ENSG00000204059 NP_001013718.1 | ENSG0000017260 ATP2C1          | ENSG00000078142 PIK3C3         | ENSG00000085224 ATRX         | ENSG00000091137 SLC26A4        | ENSG00000101811 CSTF2        |                           |                              |                              |                        |
| ENSG00000103642 LACTB        | ENSG00000115590 IL1R2        | ENSG00000117143 UAF1           | ENSG00000122481 RWDD3          | ENSG00000122707 RECK           | ENSG00000122770 PEX1         | ENSG00000134198 TSPAN2         | ENSG00000137145 DENND4C      |                           |                              |                              |                        |
| ENSG00000137960 GIPC2        | ENSG00000138069 RAB1A        | ENSG00000138336 CXCC6          | ENSG00000140299 BNIP2          | ENSG00000140905 GCSH           | ENSG00000140937 CDH11        | ENSG00000143971 ETAA1          | ENSG00000145287 PLAC8        |                           |                              |                              |                        |
| ENSG00000145839 IL9          | ENSG00000146678 IGFBP1       | ENSG00000149634 C20orf165      | ENSG00000151748 SAV1           | ENSG00000151914 DST            | ENSG00000158604 TMED4        | ENSG00000159256 MORC3          | ENSG00000163512 AZI2         |                           |                              |                              |                        |
| ENSG00000166881 K0286_HUMAN  | ENSG00000169021 UCRFS1       | ENSG00000170903 KIAA1826       | ENSG00000172586 CHCHD1         | ENSG00000172954 LYCAT          | ENSG00000184434 LRRC19       | ENSG00000187461 C6orf114       | ENSG00000196353 CPNE4        |                           |                              |                              |                        |
| ENSG00000198944 ANKRD43      | ENSG00000203847 XR_016130.1  |                                |                                |                                |                              |                                |                              |                           |                              |                              |                        |
| TGAAATG                      | ENSG00000047056 WDR37        | ENSG00000047644 WWC3           | ENSG00000068985 PAGE1          | ENSG00000101004 NLP_HUMAN      | ENSG00000101421 CHMP4B       | ENSG00000121769 FABP3          | ENSG00000135824 RGS8         | ENSG00000139197 PEX5      | ENSG00000166831 VWA2         | ENSG00000166883 KLF15        | ENSG00000166963 MAP1A  |
| ENSG00000141431 Q6ZMX6_HUMAN | ENSG00000141985 SH3GL1       | ENSG00000144231 POLR2D         | ENSG00000144730 IL17RD         | ENSG00000163884 KLF15          | ENSG00000165816 VWA2         | ENSG00000166831 VWA2           | ENSG0                        |                           |                              |                              |                        |

ENSG00000158079|PTPDC1 ENSG00000158435|C2orf29 ENSG00000160062|ZBTB8 ENSG00000162545|CAMK2N1 ENSG00000162645|GBP7 ENSG00000168497|SDPR ENSG00000169752|NRG4 ENSG00000181656|GPR88  
ENSG00000187118|NP\_872329.1 ENSG00000187185|Q86V67\_HUMAN ENSG00000196352|CD55 ENSG00000196950|SLC39A10 ENSG00000203970|DEFB11 ENSG00000204424|LY6G6D  
TGAACCG ENSG00000064393|HIPK2 ENSG00000089558|KCNH4 ENSG00000099998|GGTLA1 ENSG00000105438|KDEL1A ENSG00000114650|UPK1A ENSG00000125409|TEKT3 ENSG00000126464|PRR12  
ENSG00000131849|ZNF132 ENSG00000134072|CAMK1 ENSG00000142186|SCYL1 ENSG00000146205|TMEM16G ENSG00000147168|IL2RG ENSG00000155275|C4orf23 ENSG00000160741|CRTC2 ENSG00000163064|EN1  
ENSG00000171045|TSNARE1 ENSG00000175592|FOSL1 ENSG00000182087|C19orf6 ENSG00000183707|Q96AT3\_HUMAN ENSG00000196893|Q8NZW8\_HUMAN ENSG00000197261|C6orf141 ENSG00000036473|OTC ENSG000000043462|LCP2  
ENSG00000069509|FUNDCl ENSG00000087995|METTL2A ENSG00000094841|UPRT ENSG00000111052|LINTA ENSG00000112238|PRDM13 ENSG00000113645|WWC1 ENSG00000118515|SGK ENSG00000123297|TSFM  
ENSG00000124831|LRRFP1 ENSG00000131007|TTY9A ENSG00000131009|TTY9A\_HUMAN ENSG00000138162|TACC2 ENSG00000144891|AGTR1 ENSG00000155833|CYLC2 ENSG00000167346|MMP26 ENSG00000169981|ZNF35  
ENSG00000177459|C8orf47 ENSG00000179066|Q86VG9\_HUMAN ENSG00000196867|ZFP28 ENSG00000198221|NP\_001035973.1 ENSG00000203780|FANK1  
TGAACCT ENSG00000006638|TBXA2R ENSG00000099968|BCL2L13 ENSG00000102145|GATA1 ENSG00000114650|SCAP ENSG00000120094|HOXB1 ENSG00000127564|PKMYT1 ENSG00000128313|APOL5  
ENSG00000130177|CDC16 ENSG00000132130|LHX1 ENSG00000134905|CAR52 ENSG00000155052|CNTNAP5 ENSG00000155666|JMD5 ENSG00000164048|ZNF589 ENSG00000166261|ZNF202 ENSG00000167202|TBC1D2B  
ENSG00000168569|NP\_001073970.1 ENSG00000169918|OTUD7A ENSG00000171773|TXNL6 ENSG00000120533|QARS ENSG00000175221|THRAP5 ENSG00000176473|WDR25 ENSG00000185504|C17orf70 ENSG00000186326|RGS9BP  
ENSG00000196581|AJAP1 ENSG00000204319|C4A ENSG00000204342|C4B ENSG00000204487|LTB ENSG00000205059|CCDC109B ENSG0000010704|HFE ENSG00000085788|DDHD2 ENSG00000104435|STMN2  
ENSG00000104643|MTMR9 ENSG00000110002|LOH11CR2A ENSG00000122512|PMS2 ENSG00000127328|RAB31P ENSG00000132475|H3F3B ENSG00000135297|MTO1 ENSG00000139372|TDG ENSG00000141642|ELAC1  
ENSG00000145391|SETD7 ENSG00000146963|LUC7L2 ENSG00000150593|PDCD4 ENSG00000150753|CCT5 ENSG00000159450|TCHH ENSG00000163697|APBB2 ENSG00000164253|WDR41 ENSG00000170315|UBIQ\_HUMAN  
ENSG00000173915|USMG5 ENSG00000174840|NP\_808881.2 ENSG00000189290|XR\_018254.1  
TGAACCG ENSG00000006638|TBXA2R ENSG00000069020|MAST4 ENSG00000083454|P2RX5 ENSG00000100462|PRMT5 ENSG00000103269|RHBDL1 ENSG00000116726|PRAMEF12 ENSG00000132746|ALDH3B2 ENSG00000146067|Q9NW00\_HUMAN  
ENSG00000150556|NP\_808879.2 ENSG00000153446|NP\_689672.2 ENSG00000160220|PWP2 ENSG00000160404|TOR2A ENSG00000162496|DHR3 ENSG00000166825|ANPEP ENSG00000167311|ART5 ENSG00000170631|ZNF16  
ENSG00000171720|HDAC3 ENSG00000174407|C2orf166 ENSG00000176078|Q8NAN4\_HUMAN ENSG00000181781|C19orf19 ENSG00000183019|C19orf59 ENSG00000183562|Q9P1L5\_HUMAN ENSG00000184390|Q6ICM0\_HUMAN ENSG00000206162|Q6ZVH1\_HUMAN  
ENSG000000081770|NAIP ENSG000001106511|MEOX2 ENSG00000111790|FGFR10P2 ENSG00000113240|CLK4 ENSG00000113851|CRBN ENSG00000119596|YLP1 ENSG00000127603|MACF1 ENSG00000146587|RBAK  
ENSG00000151514|SALL3 ENSG00000152229|PSTPIP2 ENSG00000153162|BMP6 ENSG00000163714|SR140\_HUMAN ENSG00000166669|ATF7IP2 ENSG00000167555|ZNF534 ENSG00000168384|HLA-DPA1 ENSG00000169045|HNRPH1  
ENSG00000173406|DAB1 ENSG00000175105|ZNF654 ENSG00000179978|Q59GI6\_HUMAN ENSG00000185689|Q6NXX5\_HUMAN ENSG00000198856|NP\_067050.1 ENSG00000204171|Q6STG2\_HUMAN  
TGAACGT ENSG00000003400|CASP10 ENSG00000105717|PBX4 ENSG00000117419|PRNP1P ENSG00000139437|TCHP ENSG00000141316|SPACA3 ENSG00000146453|PNLDC1 ENSG00000154917|RAB6B  
ENSG00000167080|B4GALNT2 ENSG00000167759|KLIK3 ENSG00000169474|SPRR1A ENSG00000170122|FOXDL1 ENSG00000172590|MRPL52 ENSG00000174400|Q8TBO\_HUMAN ENSG00000178685|PARP10 ENSG00000182362|C21orf57  
ENSG00000187260|WDR86 ENSG00000187559|FOXDL3 ENSG00000189037|DUSP21 ENSG00000204793|FOXDL6 ENSG00000109674|NEIL3 ENSG00000109944|C11orf63 ENSG00000116251|RPL22 ENSG00000131126|TEX101  
ENSG00000131737|KRT34 ENSG00000135040|MAK10 ENSG00000140740|UQCRC2 ENSG00000143633|C1orf131 ENSG00000159259|CHAF1B ENSG00000164808|KIAA0146 ENSG00000164815|ORC5L ENSG00000172765|TMCC1  
ENSG00000172967|XKR3 ENSG00000184492|FOXDL4 ENSG00000185037|XR\_016629.1 ENSG00000196285|H33\_HUMAN ENSG00000196553|NP\_001004331.1 ENSG00000197990|XR\_016643.1 ENSG00000198689|SLC9A6 ENSG00000205156|Q6UXQ8\_HUMAN  
TGAACCTG ENSG00000064999|ANKS1A ENSG00000091536|MYO15A ENSG00000100056|DGCR14 ENSG00000101019|C2orf44 ENSG00000113070|HBEGF ENSG00000114654|CCDC48 ENSG00000117697|NSL1 ENSG00000119714|GPR68  
ENSG00000122223|CD244 ENSG00000133026|MYH10 ENSG00000138030|KHK ENSG00000138769|CDKL2 ENSG00000142082|SIRT3 ENSG00000143196|DPT ENSG00000143217|PVRL4 ENSG00000143858|SYT2  
ENSG00000144231|POLR2D ENSG00000165861|ZFYVE1 ENSG00000173404|INSM1 ENSG00000174171|Q8TCB4\_HUMAN ENSG00000185090|MANEAL ENSG00000203784|LELP1 ENSG00000203900|Q6ZSD3\_HUMAN  
ENSG00000064218|DMRT3 ENSG00000070961|ATP2B1 ENSG00000079482|OPHN1 ENSG00000085433|WDR47 ENSG00000100568|VT11B ENSG00000101856|PGRMC1 ENSG00000115289|PCGF1 ENSG00000136379|FAM108C1  
ENSG00000141076|CIRH1A ENSG00000148153|C9orf80 ENSG00000151693|DDEF2 ENSG00000154645|CHODL ENSG00000155096|AZIN1 ENSG00000168386|FILIP1L ENSG00000172262|ZNF131 ENSG00000177683|THAP5  
ENSG00000178127|NDUFV2 ENSG00000185551|NR2F2 ENSG00000186369|YNO02\_HUMAN ENSG00000188386|PPP3R2 ENSG00000196442|ZNF432 ENSG00000198948|MFAP3L ENSG00000203681|XR\_017762.1  
ENSG00000203705|TATDN3 ENSG00000204038|Q6ZRL6\_HUMAN  
TGAAGAA ENSG00000006114|AP1GBP1 ENSG00000048342|Q9H8A7\_HUMAN ENSG00000055950|MRPL43 ENSG00000071051|NCK2 ENSG00000073584|SMARCE1 ENSG00000082805|ERC1 ENSG00000099968|BCL2L13 ENSG00000106070|GRB10  
ENSG00000114982|NP\_060461.3 ENSG00000115350|POLE4 ENSG00000116584|ARHGEP2 ENSG00000119333|WDR34 ENSG00000119682|KIAA0317 ENSG00000130713|EXOSC2 ENSG00000130956|HABP4 ENSG00000132321|IQCA  
ENSG00000147100|SLC16A2 ENSG00000152291|TGOLN2 ENSG00000154928|P54762-3 ENSG00000155229|MMS19L ENSG00000174951|FU1 ENSG00000176515|Q8NAX6\_HUMAN ENSG00000185811|IKZF1 ENSG00000185831|NR\_003081.1  
ENSG00000187033|SAMD7 ENSG00000196787|HIST1H2AG ENSG00000197021|CxorF40B ENSG00000197353|LYPD2 ENSG00000198566|ZNF658 ENSG00000203697|CAPN8 ENSG00000205683|DPF3 ENSG00000205771|CATSPER2P1  
ENSG00000001626|CFTR ENSG00000004948|CALCR ENSG000000207075|PRKCH ENSG000000047410|TPR ENSG000000054267|ARD1D2 ENSG00000062194|GGBP1 ENSG00000083544|TDRD3 ENSG00000095464|PDE6C  
ENSG00000106013|ANKRD7 ENSG00000108443|RPS6KB1 ENSG00000113100|CDH9 ENSG00000113615|SEC24A ENSG00000116652|VLEU2L ENSG00000121380|BCL2L14 ENSG00000129003|VPS13C ENSG00000131127|ZNF141  
ENSG00000133107|TRPC4 ENSG00000133983|SYNJ2BP ENSG00000136688|IL1F9 ENSG00000138495|COX17 ENSG00000139719|VPS33A ENSG00000143514|TF53BP2 ENSG00000144642|RBMS3 ENSG00000151233|Q8IXV1\_HUMAN  
ENSG00000152409|NP\_689618.2 ENSG00000155393|HEATR3 ENSG00000156206|C15orf26 ENSG00000160352|ZNF714 ENSG00000163377|FAM19A4 ENSG00000165392|WRN ENSG00000166670|MMP10 ENSG00000169193|CCDC126  
ENSG00000169359|SLC33A1 ENSG00000170264|NP\_115556.1 ENSG00000170866|LILRA3 ENSG00000173692|PSMD1 ENSG00000178562|CD28 ENSG00000182621|PLCB1 ENSG00000187510|NP\_001004330.1 ENSG00000188175|NP\_937794.1  
ENSG00000196172|ZNF681 ENSG00000198420|NP\_055534.1  
TGAAGCT ENSG00000084652|TXLNA ENSG00000101577|LPIN2 ENSG00000101945|SUV39H1 ENSG00000104888|SLC17A7 ENSG00000110442|COMMD9 ENSG00000117461|PIK3R3 ENSG00000117481|NSUN4 ENSG00000123992|DNPEP  
ENSG00000136717|BIN1 ENSG00000136931|NR5A1 ENSG00000154930|ACSS1 ENSG00000156885|COX6A2 ENSG00000160949|NFKBIL2 ENSG00000162817|C1orf115 ENSG00000162910|MRPL55 ENSG00000163961|RNF168  
ENSG00000164010|ERMAP ENSG00000165801|NP\_060541.3 ENSG00000167685|ZNF444 ENSG00000169469|SPRR1B ENSG00000177096|FAM109B ENSG00000180424|DEFB123 ENSG00000183762|KREMEN1 ENSG00000184060|CENTA2  
ENSG00000184144|CNTN2 ENSG00000184385|C21orf128 ENSG00000198213|NM\_207501 ENSG00000198929|NOS1AP ENSG00000202581|Q6ZVY8\_HUMAN ENSG00000101951|PAGE4 ENSG00000104435|STMN2 ENSG00000106080|FKBP14  
ENSG00000109181|UGT2B10 ENSG00000112276|BVES ENSG00000115652|UXS1 ENSG00000116120|FAR5B ENSG00000125246|CLYBL ENSG00000127603|MACF1 ENSG00000133818|RRAS2 ENSG00000135828|RNASEL  
ENSG00000141542|RAB40B ENSG00000155850|SLC26A2 ENSG00000159256|MORC3 ENSG00000162607|USP1 ENSG00000163605|PPP4R2 ENSG00000164466|SFXN1 ENSG00000170903|KIAA1826 ENSG00000171234|UGT2B7  
ENSG00000182457|NR\_002323.1 ENSG00000188408|MAGEB5 ENSG00000204334|ALL162\_HUMAN  
TGAAGTC ENSG00000028310|BRD9 ENSG00000080603|NP\_006653.1 ENSG00000089169|RPH3A ENSG00000116396|KCNC4 ENSG00000137331|IER3 ENSG00000157014|TATDN2 ENSG00000159461|AMFR ENSG00000164216|TSSK1B  
ENSG00000166961|NP\_689930.1 ENSG00000167280|NP\_001036038.1 ENSG00000169057|MECP2 ENSG00000184811|TUSC5 ENSG00000185933|FAM26C ENSG00000187288|CIDEC ENSG00000188185|Q6ZQP8\_HUMAN ENSG00000188976|NOC2L  
ENSG00000189275|Q6ZRK0\_HUMAN ENSG00000197766|CFD ENSG00000204775|Q4G0D9\_HUMAN ENSG00000205609|Q9BW98\_HUMAN ENSG00000207452|NTN4 ENSG000002079459|FDF1 ENSG00000208444|KIAA1467 ENSG00000200262|ARFGAP3  
ENSG00000112031|MTRF1L ENSG00000114166|PCAF ENSG00000115963|RND3 ENSG00000120742|RAMP4\_HUMAN ENSG00000120833|SOCS2 ENSG00000134532|SOX5 ENSG00000141448|GATA6 ENSG00000145365|NP\_443096.1  
ENSG00000147586|MRPS28 ENSG00000151893|C10orf46 ENSG00000152904|GGPS1 ENSG00000154217|PITPNCL1 ENSG00000157554|ERG ENSG00000163738|MTHFD12L ENSG00000164308|NP\_071745.1 ENSG00000164841|TMEM74  
ENSG00000174343|CHRNA9 ENSG00000182457|NR\_002323.1 ENSG00000183631|Q5JQE8\_HUMAN ENSG00000187823|ZCCHC16 ENSG00000196914|ARHGEP12 ENSG00000197062|ZNF187 ENSG00000204201|Q49A40\_HUMAN  
TGAAGTG ENSG000000054118|THRAP3 ENSG00000065057|NTHL1 ENSG00000076706|MCAM ENSG00000106003|LFNG ENSG00000113048|MRPS27 ENSG00000115620|IL1RL1 ENSG00000122711|SPINK4 ENSG00000124762|CDKN1A  
ENSG00000125810|CD93 ENSG00000125816|NKX2-4 ENSG00000140474|ULK3 ENSG00000141744|PNMT ENSG00000149305|HTR3B ENSG00000152953|STK32B ENSG00000153551|CMTM7 ENSG00000157064|NMNAT2  
ENSG00000165916|PSMC3 ENSG00000167702|KIFC2 ENSG00000183955|SETD8 ENSG00000188775|Q6YL47\_HUMAN ENSG00000196517|SLC6A9 ENSG00000197465|GYPE ENSG00000198373|WWP2 ENSG00000198585|NUDT16  
ENSG00000205191|NP\_001070148.1 ENSG000000013297|CLDN11 ENSG000000015479|MATR3 ENSG00000064012|CASP8 ENSG00000096696|DSP ENSG00000106392|C1GALT1 ENSG00000112664|NUDT3 ENSG00000116741|RGS2  
ENSG00000117868|FAM62B ENSG00000122299|ZC3H7A ENSG00000132406|TMEM128 ENSG00000132498|ANKRD20A1 ENSG00000133104|SPG20 ENSG00000133703|KRAS ENSG00000133740|E2F5 ENSG00000146731|CCT6A  
ENSG00000152382|TADA1L ENSG00000152700|SAR1B ENSG00000158185|ANKRD36 ENSG00000163162|RNF149 ENSG00000165434|PGM2L1 ENSG00000165525|SDCCAG1 ENSG00000170632|ARMC10 ENSG00000175426|PCSK1  
ENSG00000178425|NT5DC1 ENSG00000182004|SNRPE ENSG00000183148|ANKRD20A2 ENSG00000186369|YNO02\_HUMAN ENSG00000186481|NP\_001025170.1 ENSG00000188404|SELL ENSG00000196774|ANKRD20A3  
TGAAGTT ENSG00000059378|PARP12 ENSG00000065621|GSTO2 ENSG00000116990|MYCL1 ENSG00000124134|KCN51 ENSG00000127957|PMS2L3 ENSG00000131944|C19orf40 ENSG00000141664|ZCCHC2 ENSG00000148842|CNM2  
ENSG00000162298|SYVN1 ENSG00000162576|MXRA8 ENSG00000166860|ZBTB39 ENSG00000168026|TTC21A ENSG00000173011|Q86TJ2\_HUMAN ENSG00000173281|PPP1R3B ENSG00000175155|YPEL2 ENSG00000179755|XR\_017798.1  
ENSG00000180471|C9orf31 ENSG00000182660|NP\_001013698.1 ENSG00000184209|NP\_008951.1 ENSG00000186326|RGS9BP ENSG00000186919|LGCZL1 ENSG00000189306|ZG14\_HUMAN ENSG000002007372|PAX6 ENSG000002057252|SOAT1  
ENSG00000070367|EXOC5 ENSG00000083535|C13orf24 ENSG00000100357|ADSL ENSG00000102081|FMR1 ENSG00000106080|FKBP14 ENSG00000106804|C5 ENSG00000107105|ELAVL2 ENSG00000113456|RAD1  
ENSG00000113460|BXDC2 ENSG00000113638|TTC33 ENSG00000117143|UAP1 ENSG00000122042|UBL3 ENSG00000123091|RNF11 ENSG00000124802|EEF1E1 ENSG00000132475|H3F3B ENSG00000135486|HNRPA1  
ENSG00000136051|KIAA1033 ENSG00000137941|TTLL7 ENSG00000138668|HNRPD ENSG00000143815|LBR ENSG00000144021|CIAO1 ENSG00000144867|SRPB ENSG00000148291|SURF2 ENSG00000151514|SALL3  
ENSG00000151923|TIAL1 ENSG00000153561|RMND5A ENSG00000153814|JAZF1 ENSG00000155833|CYLC2 ENSG00000155850|SLC26A2 ENSG00000164116|GUCY1A3 ENSG00000164983|TMEM65 ENSG00000166068|SPRED1  
ENSG00000170099|Q9NTH0\_HUMAN ENSG00000171316|CHD7 ENSG00000172733|PURG ENSG00000186697|Q86T06\_HUMAN ENSG00000198040|ZNF84 ENSG00000198798|MAGEB3  
TGAATAA ENSG00000055118|KCNH2 ENSG00000065057|NTHL1 ENSG00000100058|CRYBB2 ENSG00000100453|GZMB ENSG00000102007|PLP2 ENSG00000105997|HOXA3 ENSG00000110195|FOLR1 ENSG00000112039|FANCE  
ENSG00000112640|PPP2R5D ENSG00000116151|MORN1 ENSG00000120332|TNN ENSG00000125652|ALKBH7 ENSG00000127578|WFKTKN1 ENSG00000129925|TMEM8 ENSG00000130518|KIAA1683 ENSG00000135441|BLOC1S1  
ENSG00000137522|RNF121 ENSG00000142544|ATPBD3 ENSG00000142686|NP\_689587.1 ENSG00000142789|ELA3A ENSG00000143512|KIAA1822L ENSG00000153446|NP\_689672.2 ENSG00000159674|SPON2 ENSG00000161960|EIF4A1  
ENSG00000163823|CCR1 ENSG00000164266|SPINK1 ENSG00000167523|C16orf55 ENSG00000169020|ATP5I ENSG00000169093|ASMTL ENSG00000170835|CBL ENSG00000171847|FAM90A1 ENSG00000172543|CTSW  
ENSG00000172653|C17orf66 ENSG00000175093|SPSB4 ENSG00000184209|NP\_008951.1 ENSG00000185615|PDIA2 ENSG00000187170|LCE4A ENSG00000188536|HBA2 ENSG00000188784|PLA2G2E  
ENSG00000198785|GRIN3A ENSG00000205879|FAM90A25P ENSG00000205996|FAM90A10 ENSG00000205998|FAM90A9 ENSG00000206000|FAM90A18 ENSG00000206002|FAM90A3 ENSG00000206005|FAM90A8 ENSG00000206008|XR\_015341.1  
ENSG00000206023|FAM90A7 ENSG00000206123|Q5BLP8\_HUMAN ENSG00000206172|HBA1 ENSG000002021461|CYP3A43 ENSG000002028203|VEZT ENSG000002090520|DNABJ11 ENSG00000100191|SLC5A4 ENSG00000100218|RTDR1  
ENSG00000100519|PSMC6 ENSG00000101278|Q9NQ39\_HUMAN ENSG00000104804|TULP2 ENSG00000107938|C10orf137 ENSG00000108932|SLC16A6 ENSG00000110436|SLC1A2 ENSG000001120802|TMPO ENSG00000124333|SYBL1  
ENSG00000124614|RPS10 ENSG00000130224|LRCH2 ENSG00000132122|SPATA6 ENSG00000133083|DCLK1 ENSG00000135486|HNRPA1 ENSG00000135842|FAM129A ENSG00000138279|ANXA7 ENSG00000148690|C10orf4  
ENSG00000152520|PAN3 ENSG00000153207|AHCTF1 ENSG00000156467|UQCRC2 ENSG00000156469|MTERFD1 ENSG00000160207|HSF2BP ENSG00000162927|NP\_653310.1 ENSG00000163386|KIAA1245 ENSG00000163544|Q96BL6\_HUMAN  
ENSG00000164308|NP\_071745.1 ENSG00000164695|CHMP4C ENSG00000165120|C7orf45 ENSG00000168280|KIF5C ENSG00000168591|TMUB2 ENSG00000171657|GPR82 ENSG00000176009|ASCL3 ENSG00000177888|ZBTB41  
ENSG00000179083|FAM133A ENSG00000180776|ZDHC20 ENSG00000183675|PTPN20B ENSG00000189369|GSPT2 ENSG00000197479|PCDH11 ENSG00000198755|RPL10A ENSG00000204179|PTPN20A ENSG00000205174|NP\_001019778.1  
TGAATCA ENSG00000008086|CDKL5 ENSG00000047644|WWC3 ENSG00000093072|CECR1 ENSG00000123901|GPR83 ENSG00000134207|SYT6 ENSG00000134240|HMGCS2 ENSG00000136816|TOR1B ENSG00000149932|NP\_001077082.1  
ENSG00000158296|SLC13A3 ENSG00000159217|TGF2BP1 ENSG00000160213|CSTB ENSG00000163882|POLR2H ENSG00000164520|RAET1E ENSG00000167208|NP\_878274.1 ENSG00000171115|GMAP8 ENSG00000171960|PPIH  
ENSG00000175634|RPS6KB2 ENSG00000182698|NM\_001007089 ENSG00000185739|SRL ENSG00000187908|DMBT1 ENSG00000005469|CROT ENSG0000014824|SLC30A9 ENSG00000081770|NAIP ENSG00000083168|MYST3  
ENSG00000084073|ZMPSTE24 ENSG00000092439|TRPM7 ENSG00000092978|GPATCH2 ENSG00000102383|ZDHC15 ENSG00000108091|CCDC6 ENSG00000110318|KIAA1377 ENSG0000



TGAATGT ENSG0000068028|RASSF1 ENSG0000074054|CLASP1 ENSG0000088832|FKBP1A ENSG0000100307|CBX7 ENSG00000101265|RASSF2 ENSG00000101849|TBL1X ENSG00000106366|SERPINE1 ENSG00000110906|KCTD10 ENSG00000115956|PLEK ENSG00000116883|C1orf113 ENSG00000117834|SLC5A9 ENSG00000119599|WDR21A ENSG00000125166|GOT2 ENSG00000129244|ATP1B2 ENSG00000129862|VCY ENSG00000129864|VCY1B ENSG00000131152|Q9H693\_HUMAN ENSG00000132002|DNAJB1 ENSG00000144677|CTDSPL ENSG00000147454|SLC25A37 ENSG00000163050|CABC1 ENSG00000166007|LOC399940 ENSG00000170100|Q96MU6-2 ENSG00000174282|ZBTB4 ENSG00000174951|FUT1 ENSG00000177504|VCX2 ENSG00000177728|KIAA0195 ENSG00000197586|ENTPD6 ENSG00000198131|ZNF544 ENSG00000198225|Q5VVH2\_HUMAN ENSG00000198929|NOS1AP ENSG00000204455|XR\_015868.1 ENSG00000066427|ATXN3 ENSG00000070882|OSBPL3 ENSG00000080819|CPOX ENSG00000083312|TNPO1 ENSG00000096264|NCR2 ENSG000000109471|IL2 ENSG000000111731|KIAA0528 ENSG000000117000|RLF ENSG00000118454|ANKRD13C ENSG00000118785|SPP1 ENSG00000133636|NTS ENSG00000133704|IPO8 ENSG00000134152|C15orf29 ENSG00000135905|DOCK10 ENSG00000141198|TOML1L ENSG00000142065|ZFP14 ENSG00000143149|ALDH9A1 ENSG00000144026|ZNF514 ENSG00000145365|NP\_443096.1 ENSG00000147121|ZNF673 ENSG00000150712|MTMR12 ENSG00000153684|NP\_001012455.1 ENSG00000163463|KRTCAP2 ENSG00000167766|ZNF83 ENSG00000169891|REPS2 ENSG00000171291|ZNF439 ENSG00000171492|LRRC8D ENSG00000174652|ZNF266 ENSG00000175676|GOLGA8F ENSG00000182263|FIGN ENSG00000183629|GOLGA8G ENSG00000188611|ASHA2C ENSG00000188868|ZNF563 ENSG00000196418|ZNF124 ENSG00000204201|Q49A40\_HUMAN ENSG00000204789|ZNF204 perfect: TGAATGT ACATTC hsa-miR-181d aACATTCattgtgtgctggtgggtt 1

TGAATTA ENSG0000064999|ANKS1A ENSG0000072134|EPN2 ENSG00000090889|KIF4A ENSG00000101849|TBL1X ENSG00000103742|NP\_066013.1 ENSG00000114316|USP4 ENSG00000124233|SEMG1 ENSG00000124422|USP22 ENSG00000124731|TREM1 ENSG00000125810|CD93 ENSG00000129450|SIGLEC9 ENSG00000150201|FXDY4 ENSG00000150401|DCUN1D2 ENSG00000154222|CC2D1B ENSG00000157045|NTAN1 ENSG00000158480|SPATA2 ENSG00000158828|PINK1 ENSG00000162735|PEX19 ENSG00000166974|MAPRE2 ENSG00000172724|CCL19 ENSG00000183044|ABAT ENSG00000188086|NP\_954652.1 ENSG00000197175|Q8TBR1\_HUMAN ENSG00000197182|NM\_207477 ENSG00000198089|SFI1 ENSG00000198668|CALM1 ENSG00000204359|FTD ENSG00000001626|CFTR ENSG000000055917|PUM2 ENSG00000100380|ST13 ENSG00000100557|C14orf105 ENSG00000111615|KRR1 ENSG00000113946|CLDN16 ENSG00000119541|VPS4B ENSG00000120686|UFM1 ENSG00000122692|SMU1 ENSG00000122779|TRIM24 ENSG00000132872|SYT4 ENSG00000134762|DSC3 ENSG00000135838|NPL ENSG00000137693|YAP1 ENSG00000138061|CYP1B1 ENSG00000140988|RPS2 ENSG00000144815|FAM55C ENSG00000145703|IQGAP2 ENSG00000147679|C8orf53 ENSG00000150667|FSIP1 ENSG00000155827|RNF20 ENSG00000156140|ADAMTS3 ENSG00000156958|GALK2 ENSG00000162409|PRKAA2 ENSG00000162664|ZNF326 ENSG00000162998|FRG2 ENSG00000163412|EIF4E3 ENSG00000164031|DNAJB14 ENSG00000170677|SOCS6 ENSG00000174799|CEP135 ENSG00000174891|RSRC1 ENSG00000175175|PPM1E ENSG00000177596|Q8NA50\_HUMAN ENSG00000182552|RWDD4A ENSG00000183671|GPR1 ENSG00000184277|TM2D3 ENSG00000188313|PLSCR1 ENSG00000188820|FAM26F ENSG00000197149|XR\_019565.1 ENSG00000197817|Q9UHS9\_HUMAN ENSG00000198719|DLL1 ENSG00000205302|SNX2

TGAATTG ENSG0000006007|GDE1\_HUMAN ENSG00000011677|GABRA3 ENSG00000013725|CD6 ENSG00000026652|AGPAT4 ENSG00000066382|MPPE2 ENSG00000083307|GRHL2 ENSG00000100105|PATZ1 ENSG00000104848|KCNA7 ENSG00000106992|AK1 ENSG00000116685|KIAA2013 ENSG00000120875|DUSP4 ENSG00000125651|GTF2F1 ENSG00000130810|PPAN ENSG00000139410|SDSL ENSG00000139436|GIT2 ENSG00000158578|ALAS2 ENSG00000163083|INHBB ENSG00000165949|IFI27 ENSG00000169598|DEFP ENSG00000182315|NP\_653215.1 ENSG00000196502|SULT1A1 ENSG00000196739|COL27A1 ENSG00000197373|NP\_001015884.1 ENSG00000205522|LOC255411 ENSG00000205718|LOC653656 ENSG00000205881|Q6UXR8\_HUMAN ENSG00000006625|C7orf24 ENSG00000107077|JMJD2C ENSG00000109572|CLCN3 ENSG00000112245|PTP4A1 ENSG00000119392|GLE1L ENSG00000120242|IFNA8 ENSG00000120265|PCMT1 ENSG00000121579|NAT13 ENSG00000135698|MPHOSPH6 ENSG00000137504|CREBZF ENSG00000138346|DNA2L ENSG00000138795|LEF1 ENSG00000138802|SEC24B ENSG00000143457|GOLPH3L ENSG00000143870|PDIA6 ENSG00000146476|C6orf211 ENSG00000147649|MTDH ENSG00000156374|PCGF6 ENSG00000167034|NKK3-1 ENSG00000168724|DNJA5\_HUMAN ENSG00000175279|CORT ENSG00000175535|PNLIP ENSG00000179144|GIMAF7 ENSG00000180488|FAM73A ENSG00000185551|NR2F2 ENSG00000204691|NR\_002819.1 ENSG00000205112|Q6UXR9\_HUMAN ENSG00000205269|Q5T4T1\_HUMAN ENSG00000136199|CXorf6 ENSG00000100605|ITPK1 ENSG00000103876|FAH ENSG00000104332|SFRP1 ENSG00000120471|NP\_071395.1 ENSG00000140479|PCSK6 ENSG00000141639|MAPK4 ENSG00000143878|RHOB ENSG00000144730|IL17RD ENSG00000160219|GAB3 ENSG00000162511|LAPTM5 ENSG00000167774|NDUFA7 ENSG00000168329|CX3CR1 ENSG00000172568|NP\_001001343.1 ENSG00000176136|MC5R ENSG00000178977|C17orf44 ENSG00000180083|WFDLC1 ENSG00000180735|Q6PJW0\_HUMAN ENSG00000189410|SH2D5 ENSG00000196767|POU3F4 ENSG000000067048|DDX3X ENSG00000081665|ZNF253 ENSG00000102804|TSC22D1 ENSG00000107984|DKK1 ENSG00000115084|SLC35F5 ENSG00000116062|MSH6 ENSG00000121742|GJB6 ENSG00000122378|C10orf58 ENSG00000123739|PLA2G12A ENSG00000123977|WDR69 ENSG00000124103|C20orf107 ENSG00000127249|ATP13A4 ENSG00000131127|ZNF141 ENSG00000152822|GRM1 ENSG00000156206|C15orf26 ENSG00000161652|C19orf41 ENSG00000162630|B3GALT2 ENSG00000162699|Q9RFR1\_HUMAN ENSG00000163518|FCRL4 ENSG00000164307|ARTS1\_HUMAN ENSG00000166250|NP\_079045.1 ENSG00000166321|NUDT13 ENSG00000170348|TMED10 ENSG00000170881|RNF139 ENSG00000171360|KRT38 ENSG00000172752|NP\_694996.3 ENSG00000173088|Q5VUS1\_HUMAN ENSG00000176160|HSF5 ENSG00000185551|NR2F2 ENSG00000185787|MORF4L1 ENSG00000196593|NM\_207439 ENSG00000198221|NP\_01035973.1 ENSG00000203964|Q8NG36\_HUMAN ENSG00000006831|ADIPOR2 ENSG00000075826|SEC3B1 ENSG00000085063|CD59 ENSG00000100982|C20orf67 ENSG00000102466|FGF14 ENSG00000112941|POLS ENSG00000117480|FAAH ENSG00000125746|EML2 ENSG00000134287|ARF3 ENSG00000139266|MARCN9 ENSG00000142149|HUNK ENSG00000150456|NGAMT2 ENSG00000174613|KCNQ1DN ENSG00000185554|NXF2 ENSG00000185945|NXF2\_HUMAN ENSG00000187726|DNAJB13 ENSG00000189337|NP\_001018000.1 ENSG00000198700|IPO9 ENSG00000205804|Q5T6R2\_HUMAN ENSG0000012660|ELOVL5 ENSG0000014919|COX15 ENSG0000025795|Q9H994\_HUMAN ENSG00000085382|HACE1 ENSG00000104497|SNX16 ENSG00000107362|FAM108B1 ENSG00000112249|ASCC3 ENSG00000115267|IFIH1 ENSG00000124201|ZNFX1 ENSG00000125903|DEFB129 ENSG00000129472|RAB2B ENSG00000133731|IMPA1 ENSG00000134363|FST ENSG00000138152|BTBD16 ENSG00000139151|PLCZ1 ENSG00000143158|BRP44 ENSG00000147036|LANCL3 ENSG00000155307|SAMSN1 ENSG00000167720|SRR ENSG00000168234|C18orf17 ENSG00000172399|MYOZ2 ENSG00000184434|LRRC19 ENSG00000185015|CA13 ENSG00000185344|ATP6V0A2 ENSG00000196511|TPK1 ENSG00000198814|GK ENSG00000198821|COL1A2 ENSG00000121104|FAM117A ENSG00000123154|MORG1\_HUMAN ENSG00000130508|PXDN ENSG00000137767|SQRD1 ENSG00000144648|CCBP2 ENSG00000157978|LDRAP1 ENSG00000161021|LTC4S ENSG00000161618|ALDH16A1 ENSG00000168784|BPESC1 ENSG00000170743|SYT9 ENSG00000181625|GIYD2 ENSG00000182950|ODF3L1 ENSG00000183908|LRRC55 ENSG00000186918|FBXO16 ENSG00000196502|SULT1A1 ENSG00000205730|NP\_001030013.1 ENSG00000044115|CTNNA1 ENSG00000053254|CHES1 ENSG00000102743|SLC25A15 ENSG00000107036|KIAA1432 ENSG00000109061|MYH1 ENSG00000114573|ATP6V1A ENSG00000119314|ROD1 ENSG00000122545|SEPT7 ENSG00000124120|C20orf121 ENSG00000124831|LRRF1P1 ENSG00000124831|LRRF1P1 ENSG00000129116|PALLD ENSG00000131508|UBE2D2 ENSG00000132207|SULT1A3 ENSG00000132964|CDK8 ENSG00000134548|C12orf39 ENSG00000138829|FBN2 ENSG00000141048|MYH4 ENSG00000143882|ATP6V1C2 ENSG00000144362|KLHL23 ENSG00000154736|ADAMTS5 ENSG00000158290|CUL1B ENSG00000160201|U2AF1 ENSG00000162434|JAK1 ENSG00000163071|SPATA18 ENSG00000163347|CLDN1 ENSG00000163606|CD200R1 ENSG00000163918|RFC4 ENSG00000165152|C9orf125 ENSG00000175535|PNLIP ENSG00000177707|PVRL3 ENSG00000178184|PAR6G ENSG00000183542|KLRC4 ENSG00000188653|NR\_002807.1 ENSG00000198081|ZFP161 ENSG00000205036|NP\_001001682.1 ENSG00000211452|DIO1

TGACCAC ENSG00000010256|UQCRC1 ENSG00000079308|TNS1 ENSG00000105072|C19orf44 ENSG00000105327|BBC3 ENSG00000115112|TFPC2L1 ENSG00000127533|F2RL3 ENSG00000135622|SEMA4F ENSG00000137313|TRIM26 ENSG00000140931|CMTM3 ENSG00000153404|NP\_443141.2 ENSG00000154928|P54762-3 ENSG00000156453|PCDH1 ENSG00000167323|STIM1 ENSG00000167595|C19orf55 ENSG00000169241|RAG1AP1 ENSG00000169662|NP\_997357.1 ENSG00000198959|TGM2 ENSG00000046653|GPM6B ENSG00000070961|ATP2B1 ENSG00000084444|KIAA1467 ENSG00000101115|SALL4 ENSG00000111300|C12orf30 ENSG00000152818|UTRN ENSG00000153495|C13orf16 ENSG00000160199|PKNOX1 ENSG00000164332|UBLCP1 ENSG00000170681|NP\_001018126.1 ENSG00000171530|TBCA ENSG00000175874|CREG2 ENSG00000184344|GDF3 ENSG00000196967|ZNF585A ENSG00000198721|PECI ENSG00000204262|COL5A2 ENSG00000205110|Q6TKS8\_HUMAN

TGACCAG ENSG00000062485|CS ENSG00000086102|NFX1 ENSG00000106628|POLD2 ENSG00000107731|UNC5B ENSG00000110237|ARHGEF17 ENSG00000122861|PLAU ENSG00000123374|CDK7 ENSG00000125170|DOK4 ENSG00000134490|C18orf45 ENSG00000140323|DISP2 ENSG00000143515|ATP8B2 ENSG00000162878|SG493\_HUMAN ENSG00000166780|C16orf45 ENSG00000169006|NTRSR2 ENSG00000169436|COL22A1 ENSG00000171596|NMUR1 ENSG00000171813|PWWP2 ENSG00000171984|C20orf196 ENSG00000178772|CPN2 ENSG00000182533|CAV3 ENSG00000184221|OLIG1 ENSG00000184677|ZBTB40 ENSG00000188089|PLA2G4E ENSG00000188859|FAM78B ENSG00000190245|Q8N7M3\_HUMAN ENSG00000198291|Q6ZTP9\_HUMAN ENSG00000203662|OR2M1P ENSG00000204792|Q6ZU62\_HUMAN ENSG00000008988|RPS20 ENSG00000009790|TRAF3IP3 ENSG00000073614|JARI1A ENSG00000075239|ACAT1 ENSG00000085276|EVI1 ENSG00000101752|MIB1 ENSG00000106648|GALNTL5 ENSG00000111981|ULBP1 ENSG00000112308|C6orf62 ENSG00000116539|ASH1L ENSG00000122644|ARL4A ENSG00000124120|C20orf121 ENSG00000133808|MICALCL ENSG00000143751|C1orf55 ENSG00000145321|GC ENSG00000152558|TMEM123 ENSG00000157557|ETS2 ENSG00000164825|DEFB1 ENSG00000172421|EFCAB3 ENSG00000173258|ZNF483

TGACCAG ENSG00000049239|H6PD ENSG00000100427|MLC1 ENSG00000105671|DDX49 ENSG00000107140|TESK1 ENSG00000128564|VGF ENSG00000132017|NP\_612362.2 ENSG00000133315|LRP16\_HUMAN ENSG00000136274|NACAD ENSG00000142552|RCN3 ENSG00000146535|GNA12 ENSG00000160345|C9orf116 ENSG00000167925|GHDC ENSG00000188086|NP\_954652.1 ENSG00000188373|C10orf99 ENSG00000196747|HIST1H3H ENSG00000197562|RAB40C ENSG00000204633|ACTN3 ENSG00000204792|Q6ZU62\_HUMAN ENSG00000205037|Q6ZT72\_HUMAN ENSG00000077522|ACTN2 ENSG00000091527|CDV3 ENSG00000101349|PAK7 ENSG00000101928|MOSPD1 ENSG00000109572|CLCN3 ENSG00000112297|ATM1 ENSG00000114670|NEK11 ENSG00000118402|ELOVL4 ENSG00000120647|CCDC77 ENSG00000124214|STAU1 ENSG00000129422|MTUS1 ENSG00000134070|IRAK2 ENSG00000136099|PCDH8 ENSG00000138614|C15orf44 ENSG00000140153|WDR20 ENSG00000153207|AHCTF1 ENSG00000153250|RBMS1 ENSG00000165061|ZMAT4 ENSG00000169062|UFP3A ENSG00000169688|MT1B ENSG00000184007|PTP4A2 ENSG00000185950|IRS2 ENSG00000186086|NBPF4 ENSG00000196511|TPK1 ENSG00000197851|NP\_997386.1 ENSG00000198304|ZNF528 ENSG00000198898|CAPZA2 ENSG00000205921|C21orf54 ENSG00000006116|CACNG3 ENSG00000006194|ZNF263 ENSG00000009830|POMT2 ENSG00000029534|ANK1 ENSG00000070814|TCOF1 ENSG00000100307|CBX7 ENSG00000103249|CLCN7 ENSG00000108509|CAMTA2 ENSG00000110719|TCIRG1 ENSG00000112041|TULP1 ENSG00000112511|PHF1 ENSG00000115844|DLX2 ENSG00000116584|ARHGEF2 ENSG00000124330|IL9R ENSG00000130748|TMEM160 ENSG00000136908|DPM2 ENSG00000139194|RBP5 ENSG00000142207|URB1 ENSG00000146700|SRCRB4D ENSG00000161031|PGLYRP2 ENSG00000166741|NMMT ENSG00000167680|SEMA6B ENSG00000168569|NP\_001073970.1 ENSG00000176340|COX8A ENSG00000181110|RGAG1 ENSG00000182768|NGRN ENSG00000185830|C22orf37 ENSG00000188368|NP\_954979.2 ENSG00000205837|Q6ZVL4\_HUMAN ENSG0000009765|IYD ENSG0000023330|ALAS1 ENSG00000054392|HHAT ENSG000000056277|SUHW3 ENSG00000079102|RUNK1T1 ENSG00000089818|NECAP1 ENSG00000101557|USP14 ENSG00000111885|MAN1A1 ENSG00000112182|BACH2 ENSG00000119965|C10orf88 ENSG00000120063|GNA13 ENSG00000121594|CD80 ENSG00000122787|AKR1D1 ENSG00000123892|RAB38 ENSG00000127863|TNFRSF19 ENSG00000136869|TLR4 ENSG00000140987|ZNF434 ENSG00000141161|UNC45B ENSG00000145890|TRIM42 ENSG00000163171|C8orf23 ENSG00000163513|TGFB2 ENSG00000164112|TMEM155 ENSG00000165512|ZNF22 ENSG00000175809|ZNF645 ENSG00000205874|Q6SA06\_HUMAN

TGACCTT ENSG0000006740|RICH2\_HUMAN ENSG00000100368|CSF2R2 ENSG00000100413|POLR3H ENSG00000102921|N4BP1\_HUMAN ENSG00000104833|TUBB4 ENSG00000108830|RND2 ENSG00000126759|CFP ENSG00000127362|TAS2R3 ENSG00000127804|METT10D ENSG00000129816|NR\_001538.1 ENSG00000129845|O14605\_HUMAN ENSG00000130813|NP\_060851.1 ENSG00000136895|GARNL3 ENSG00000164010|ERMAP ENSG00000165795|NDRG2 ENSG00000166167|BTRC ENSG00000167483|FAM129C ENSG00000168993|NM\_006651.3 ENSG00000185739|SRL ENSG00000188505|NP\_001001414.1 ENSG00000197136|PCNXL3 ENSG00000055211|C6orf72 ENSG00000090470|PDCD7 ENSG00000099940|SNAP29 ENSG00000105887|MTPN ENSG00000124209|RAB22A ENSG00000143390|RFX5 ENSG00000143756|FBXO28 ENSG00000144021|CIAO1 ENSG00000146477|SLC22A3 ENSG00000149187|CUGBP1 ENSG00000151461|UPF2 ENSG00000164049|FBXW12 ENSG00000174010|KLHL15 ENSG00000178457|C21orf94 ENSG00000179981|TSHZ1 ENSG00000183022|NR\_003148.2 ENSG00000183508|FAM46C ENSG00000196917|GPR81 ENSG00000197563|PIGN

TGACGCA ENSG000000037637|FBXO42 ENSG00000060558|GNA15 ENSG00000103811|CTSH ENSG00000104731|KLHDC4 ENSG00000105737|GRIK5 ENSG00000111652|COPFS7A ENSG00000119333|WDR34 ENSG00000122687|FTSJ2 ENSG00000123159|GLPC1 ENSG00000142684|CNSH2 ENSG00000142910|TINAGL1 ENSG00000160886|LY6K ENSG00000160994|CCND105 ENSG00000163704|PRRT3 ENSG00000164935|TMTSF4 ENSG00000171302|CANT1 ENSG00000174166|Q9BTX9\_HUMAN ENSG00000174775|HRAS ENSG00000175470|PPP2R2D ENSG00000184916|JAG2 ENSG00000185966|LCB3E ENSG00000187017|ESPN ENSG00000188486|H2AFX ENSG00000196139|AKR1C3 ENSG00000197173|NP\_001013689.1 ENSG00000203762|Q6ZTJ3\_HUMAN ENSG00000205061|Q6ZUP2\_HUMAN ENSG0000019549|SNAI2 ENSG00000023608|SNAPC1 ENSG00000024862|CCDC28A ENSG00000053254|CHES1 ENSG00000104435|TFMN2 ENSG00000113648|H2AFY ENSG00000114473|IQCG ENSG00000117114|LPHN2 ENSG00000117859|OSBPL9 ENSG00000122194|PLG ENSG00000129197|RPAIN ENSG00000130037|KCNA5 ENSG00000134333|LDHA ENSG00000136213|CHST12 ENSG00000138378|STAT4 ENSG00000144306|SCRN3 ENSG00000144476|CXCR7 ENSG00000148143|ZNF462 ENSG00000162441|LZIC ENSG00000164825|DEFB1 ENSG00000165685|C12orf59 ENSG00000197620|CX04A\_HUMAN ENSG00000198221|NP\_001035973.1

TGACTAA ENSG00000055957|ITI1 ENSG00000102100|SLC35A2 ENSG00000106236|NPTX2 ENSG00000119535|CSF3R ENSG00000125810|CD93 ENSG00000129451|KLK10 ENSG00000136630|HLX1 ENSG00000155287|SLC25A28 ENSG00000161911|TREM1L ENSG00000164325|TMEM174 ENSG00000164871|SPAG11B ENSG00000172379|ARNT2 ENSG00000176463|SLCO3A1 ENSG00000178287|SPAG11A ENSG00000180900|SCRIB ENSG00000183666|LOC728411 ENSG00000184144|CNTN2 ENSG00000186152|LILRB3 ENSG00000188488|SERPINA5 ENSG00000198237|GUSL1\_HUMAN ENSG00000205522|LOC255411 ENSG0000008197|TFAP2D ENSG00000023843|ACCN5 ENSG00000065833|ME1 ENSG00000110756|HPS5 ENSG00000116459|ATP5F1 ENSG00000124532|MRS2L ENSG00000132967|Q5T7C0\_HUMAN ENSG00000134278|SP1RE1 ENSG00000135002|RFK ENSG00000138411|HECW2 ENSG00000157259|GATAD1 ENSG00000161654|LSM12 ENSG00000164221|CCDC112 ENSG00000168843|FSTL5 ENSG00000169752|NRG4 ENSG00000170941|NP\_065895.1 ENSG00000171863|RPS7 ENSG00000174721|FGFBP3 ENSG00000174899|Q8N6Q6\_HUMAN ENSG00000184752|NDUFA12 ENSG00000198826|ARHGAP11A ENSG00000204711|C9orf135

Table with 10 columns: Gene Name, Gene ID, Gene Name, Gene ID, Gene Name, Gene ID, Gene Name, Gene ID, Gene Name, Gene ID. Rows include various gene entries such as TACTGT, TACTTT, TGAGAAC, TGAGAAT, TGAGAGA, TGAGCAC, TGAGCCA, TGAGCCC, TGAGCCT, TGAGCGA, TGAGGCT, TGAGGGT, and TGAGTAA.



ENSG00000205592|MUC19 ENSG00000206026|NP\_001032408.1 ENSG00000206567|NP\_001008737.1 ENSG00000042813|ZBPB ENSG00000050438|SLC4A8 ENSG00000067064|IDI1 ENSG00000095587|TLL2 ENSG00000101745|ANKRD12
ENSG00000103740|ACSB1 ENSG00000106462|EZH2 ENSG00000107485|GATA3 ENSG00000109787|KLF3 ENSG00000112761|WISP3 ENSG00000113742|CEPB4 ENSG00000115232|ITGA4 ENSG00000124535|WRN1P1
ENSG00000125246|CLEYBL ENSG00000139218|SFRS2IP ENSG00000151458|ANKRD50 ENSG00000153253|SCN3A ENSG00000153802|TMPRSS11D ENSG00000156136|DCK ENSG00000164292|RHOTB3 ENSG00000165682|CLEC1B
ENSG00000166527|CLEC4D ENSG00000167117|C17orf73 ENSG00000168280|KIF5C ENSG00000177800|TMEM78 ENSG00000179144|GIMAP7 ENSG00000179222|MAGED1 ENSG00000183718|TRIM52 ENSG00000198912|C1orf174
ENSG00000205024|Q6ZVP5\_HUMAN
TGCAAAAT ENSG00000054965|K1AA0280 ENSG00000100320|BMB9 ENSG00000101004|NLP\_HUMAN ENSG00000101361|NOL5A ENSG00000105229|PIAS4 ENSG00000105507|CABP5 ENSG00000115107|STEAP3 ENSG00000116667|C1orf21
ENSG00000120949|TNFRSF8 ENSG00000136286|MYO1G ENSG00000139083|ETV6 ENSG00000139266|MARCH9 ENSG00000151779|NP\_056993.2 ENSG00000157326|DHR54 ENSG00000161103|Q5BK6\_HUMAN ENSG00000163346|PBXIP1
ENSG00000163815|CLEC3B ENSG00000168824|NSG1\_HUMAN ENSG00000169059|VCX3A ENSG00000173862|Q9NWP0\_HUMAN ENSG00000175892|Q8NAT4\_HUMAN ENSG00000177504|VCX2 ENSG00000182583|VCX ENSG00000183929|DUSP5P
ENSG00000185963|BTCD2 ENSG00000187630|DHR54L2 ENSG00000188091|C9orf164 ENSG00000197852|C1orf183 ENSG00000198569|SLC34A3 ENSG00000203782|LOR ENSG00000205020|SKAP2 ENSG0000030066|NUP160
ENSG00000051415|AMY1A ENSG00000069702|TGFBR3 ENSG00000104327|CALB1 ENSG00000109572|CLCN3 ENSG00000109654|TRIM2 ENSG00000111802|TTRAP ENSG00000114166|PCAF ENSG00000115084|SLC35F5
ENSG00000126803|HSPA2 ENSG00000133107|TRPC4 ENSG00000145423|SFRP2 ENSG00000145451|GLRA3 ENSG00000154359|LONRF1 ENSG00000156502|SUFV3L1 ENSG00000160856|FCRL3 ENSG00000162745|OLFML2B
ENSG00000165338|HECTD2 ENSG00000165805|C12orf50 ENSG00000167193|CRK ENSG00000168405|CMAH ENSG00000171091|NANP ENSG00000171155|C1GALT1C1 ENSG00000171431|KRT20 ENSG00000172000|ZNF556
ENSG00000174876|AMY1B ENSG00000175073|VCP1P1 ENSG00000177600|RPLP2 ENSG00000180694|TMEM64 ENSG00000180787|ZFP3 ENSG00000181072|CHRM2 ENSG00000182463|TSHZ2 ENSG00000188400|Q6URH7\_HUMAN
ENSG00000188933|NM\_145809.1 ENSG00000198482|ZNF808 ENSG00000198542|ITGBL1 ENSG00000204688|OR2H1 ENSG00000204987|Q6ZNR0\_HUMAN ENSG00000205721|Q6ZWJ2\_HUMAN
TGCAAGT ENSG00000001497|LAS1L ENSG00000086848|ALG9 ENSG00000106927|AMPB ENSG00000117013|KCNQ4 ENSG00000127412|TRPV5 ENSG00000128313|APOL5 ENSG00000130035|GALNT8 ENSG00000141012|GALNS
ENSG00000158220|FAM62C ENSG00000158748|HTR6 ENSG00000167580|AQP2 ENSG00000168079|SCAR5 ENSG00000188525|NM\_207480 ENSG00000204438|BAT4 ENSG00000205061|Q6ZUP2\_HUMAN ENSG00000211114|BTBD7
ENSG00000038102|NP\_001073948.1 ENSG00000047346|K1AA1370 ENSG00000062370|ZNF228 ENSG00000170191|CRNKL1 ENSG00000101367|MAPRE1 ENSG00000106829|TLE4 ENSG00000108506|INTS2
ENSG00000109189|USP46 ENSG00000110060|PUS3 ENSG00000111859|NDD9 ENSG00000111913|C6orf32 ENSG00000131711|MAP1B ENSG00000145592|RPL37 ENSG00000147684|NDUFB9 ENSG00000163947|ARHGEF3
ENSG00000165685|C12orf59 ENSG00000169751|NRG4 ENSG00000170561|IRX2 ENSG00000170832|USP32 ENSG00000174514|MFSD4 ENSG00000180628|PCGF5 ENSG00000180730|TMEM46 ENSG00000182263|FIGN
ENSG00000188400|Q6URH7\_HUMAN ENSG00000188916|NP\_001034851.1 ENSG00000188933|NM\_145809.1 ENSG00000196285|H33\_HUMAN ENSG00000198633|Q6PDB4\_HUMAN ENSG00000205156|Q6UXQ8\_HUMAN
TGCAATA ENSG00000023171|GRAMD1B ENSG00000051009|C11orf56 ENSG00000051523|CYBA ENSG00000066136|NFYC ENSG00000090615|GOLGA3 ENSG00000090975|PITPNM2 ENSG00000100320|BMB9 ENSG00000108516|TNFRSF13B
ENSG00000116128|BCL9 ENSG00000116396|KCNCA ENSG00000124140|SLC12A5 ENSG00000126432|PRDX5 ENSG00000130635|COL5A1 ENSG00000139436|GIT2 ENSG00000144800|NOTCH1
ENSG00000152767|FARP1 ENSG00000157103|SLC6A1 ENSG00000163812|ZDHHC3 ENSG00000167139|TBC1D21 ENSG00000169385|RNASE2 ENSG00000169397|RNASE3 ENSG00000176490|DIRAS1 ENSG00000177673|NP\_689827.1
ENSG00000186474|KLK12 ENSG00000203931|LOC729078 ENSG00000205875|LOC197350 ENSG0000023297|CLDN11 ENSG00000223608|SNAPC1 ENSG00000265911|MTHFD2 ENSG00000084093|REST ENSG00000088387|DOCK9
ENSG00000107864|CEPB3 ENSG00000110321|EIF4G2 ENSG00000110848|CD69 ENSG00000116406|EDEN3 ENSG00000122912|SLC25A16 ENSG00000129317|PUS7L ENSG00000136826|KLF4 ENSG00000139508|SLC46A3
ENSG00000142507|PSMB6 ENSG00000148450|MSRB2 ENSG00000148634|HERC4 ENSG00000151789|ZNF659 ENSG00000152582|NP\_653323.1 ENSG00000156162|DPY19L4 ENSG00000156374|PCGF6 ENSG00000162630|B3GALT2
ENSG00000162998|FRZB ENSG00000164691|TAGAP ENSG00000176834|NP\_061959.2 ENSG00000182754|RPL9P7 ENSG00000186019|ZNF224 ENSG00000187533|NP\_999876.1 ENSG00000196387|ZNF140 ENSG00000203932|LOC728660
ENSG00000204334|ALL162\_HUMAN ENSG00000206560|ANKRD28
TGCAATC perfect: TGCAATA TATTGCA hsa-miR-32 TATTGCAcattactaagtgttc 0
ENSG00000102226|USP11 ENSG00000104856|RELB ENSG00000110245|APOC3 ENSG00000115607|IL18RAP ENSG00000120907|ADRA1A ENSG00000125999|C20orf114 ENSG00000132906|CASP9 ENSG00000143450|OAZ3
ENSG00000153789|FAM92B ENSG00000155087|ODF1 ENSG00000156411|C14orf2 ENSG00000157110|RBPM5 ENSG00000159110|IFNAR2 ENSG00000169410|PTPN9 ENSG00000171475|WIPF2 ENSG00000173040|EVC2
ENSG00000176340|COX8A ENSG00000189013|KIR2DL4 ENSG00000197879|MYO1C ENSG00000198106|RUNC2B ENSG00000203674|Q6TZ4\_HUMAN ENSG00000083168|MYST3 ENSG00000091164|TXNL1 ENSG00000100592|DAAM1
ENSG00000107758|PPP3CB ENSG00000111716|LDHB ENSG00000112893|MAN2A1 ENSG00000114054|PCCB ENSG00000114107|CEP70 ENSG00000116745|REP65 ENSG00000119042|SATB2 ENSG00000124882|EREG
ENSG00000133083|DCLK1 ENSG00000133393|C16orf63 ENSG00000136213|CHST12 ENSG00000138398|PP1G ENSG00000140153|WDR20 ENSG00000151881|C5orf28 ENSG00000153822|KCNJ16 ENSG00000153923|CLCA3
ENSG00000155744|FAM126B ENSG00000155962|CLIC2 ENSG00000156787|WDR67 ENSG00000179915|NRX1B\_HUMAN ENSG00000184517|ZFP1 ENSG00000187372|PCDH13 ENSG00000188992|LIPI ENSG00000197053|FAM74A4
TGCAATT ENSG00000069812|HES2 ENSG00000073008|PVR ENSG00000075886|TUBA3D ENSG00000081377|CDC14C ENSG00000116032|GRIN3B ENSG00000126432|PRDX5 ENSG00000134369|NAV1 ENSG00000136848|DAB2IP
ENSG00000136895|GARNL3 ENSG00000138869|C22orf16 ENSG00000146666|Q961P2\_HUMAN ENSG00000148704|VAX1 ENSG00000152086|TUBA3E ENSG00000162104|ADCY9 ENSG00000162493|PDPN ENSG00000162779|C1orf125
ENSG00000170983|C9orf14 ENSG00000178343|NP\_001073974.1 ENSG00000185352|HS6BT3 ENSG00000198033|TUBA3C ENSG00000198089|SFI1 ENSG00000204248|COL11A2 ENSG00000006634|DBF4 ENSG00000092140|K1AA1333
ENSG00000102055|PPP1R2P9 ENSG00000114124|GRK7 ENSG00000120833|SOCS2 ENSG00000125351|UPF3B ENSG00000134200|TSHB ENSG00000138757|G3BP2 ENSG00000143344|RGL1 ENSG00000147124|ZNF41
ENSG00000154217|PITPNC1 ENSG00000159256|MORC3 ENSG00000165195|PIGA ENSG00000171150|SOCS5 ENSG00000180458|Q8N3U1\_HUMAN ENSG00000181072|CHRM2 ENSG00000182831|C16orf72 ENSG00000183475|ASB7
ENSG00000197713|RPE ENSG00000198677|K1AA0372 ENSG00000205830|NP\_997373.1
TGCAACA perfect: TGCAATT AATTGCA hsa-miR-367 AATTGCActtttagcaatgtgtga 0
ENSG0000011454|RABGAP1 ENSG00000043591|ADRB1 ENSG00000048707|VPS13D ENSG00000078319|PMS2L1 ENSG00000089169|RPH3A ENSG00000101265|RASSF2 ENSG00000102547|CAB39L ENSG00000112936|C7
ENSG00000128159|TUBGCP6 ENSG00000136828|RALGPS1 ENSG00000136928|GABBR2 ENSG00000143375|CGN ENSG00000143862|ARL8A ENSG00000147081|AKAP4 ENSG00000148660|CAMK2G ENSG00000154096|THY1
ENSG00000155265|C10orf132 ENSG00000175170|Q5T319\_HUMAN ENSG00000177337|NP\_001034885.1 ENSG00000177558|TMEM162 ENSG00000182446|NPL0C4 ENSG00000185838|GNB1L ENSG00000196432|Q9H5F0\_HUMAN ENSG00000198632|NP\_77590.1
ENSG00000204094|Q6ZU93\_HUMAN ENSG00000205673|Q6ZR74\_HUMAN ENSG00000068885|IFT80 ENSG00000069764|PLA2G10 ENSG00000083168|MYST3 ENSG00000084090|STARD7 ENSG00000100196|KDEL3
ENSG00000100644|H1F1A ENSG00000101166|SLMO2 ENSG00000109061|MYH1 ENSG00000109163|GNRHR ENSG00000110321|EIF4G2 ENSG00000116001|TTA1 ENSG00000120699|EXOSC8 ENSG00000126861|OMG
ENSG00000129824|RPS4Y1 ENSG00000132669|RIN2 ENSG00000144481|TRPM8 ENSG00000146376|ARHGAP18 ENSG00000152894|PTPRK ENSG00000153107|ANAPC1 ENSG00000162992|NEUROD1 ENSG00000163376|KBTBD8
ENSG00000168615|ADAM9 ENSG00000171116|NP\_057237.1 ENSG00000183801|OLFML1 ENSG00000183943|PRKX ENSG00000198677|K1AA0372 ENSG00000205364|MTLM
TGCAACC ENSG00000051523|CYBA ENSG00000089159|PXN ENSG00000090097|PCBP4 ENSG00000099795|NDUFB7 ENSG00000099957|P2RXL1 ENSG00000101017|CD40 ENSG00000103043|VAC14 ENSG00000122852|SFTPA1B
ENSG00000122854|SFTPA2B ENSG00000127388|NM\_198455.2 ENSG00000137073|UBAP2 ENSG00000140564|FURIN ENSG00000141985|SH3GL1 ENSG00000142290|FXDY7 ENSG00000144115|NP\_060741.2 ENSG00000153902|LGI4
ENSG00000162896|PIGR ENSG00000163913|IFT122 ENSG00000166448|TMEM130 ENSG00000166831|RBPM52 ENSG00000171604|CXXC5 ENSG00000175170|Q5T319\_HUMAN ENSG00000176973|FAM89B ENSG00000177225|PDDC1
ENSG00000177427|SMCR7 ENSG00000180921|FAM83H ENSG00000182314|SFTPA2 ENSG00000182404|LYRM4 ENSG00000183103|LYPD4 ENSG00000185303|SFTPA1 ENSG00000185386|MAPK11 ENSG00000204842|ATXN2
ENSG00000077935|SMC1B ENSG00000116962|NID1 ENSG00000117523|BAT2D1 ENSG00000120262|C6orf97 ENSG00000125355|FAM70A ENSG00000134324|LPIN1 ENSG00000141456|Q8IZL8-2
ENSG00000156467|UQCRB ENSG00000166263|STXBP4 ENSG00000173215|Q96HQ8\_HUMAN ENSG00000182565|Q8NOW1\_HUMAN ENSG00000183943|PRKX ENSG00000188585|Q6ZU45\_HUMAN
TGCAACT ENSG00000075290|WNT8B ENSG00000076248|UNG ENSG00000101945|SUV39H1 ENSG00000108262|GIT1 ENSG00000120903|CHRNA2 ENSG00000124557|BTNL1A1 ENSG00000127377|CRYGN ENSG00000127415|IDUA
ENSG00000127743|IL17B ENSG00000132155|RAF1 ENSG00000143512|K1AA1822L ENSG00000146830|PERO1 ENSG00000157870|C1orf93 ENSG00000158786|PLA2G2F ENSG00000167182|SP2 ENSG00000168159|RNF187
ENSG00000172819|RARG ENSG00000175938|TMEM142C ENSG00000183399|Q7L8T7\_HUMAN ENSG00000186676|EEF1G ENSG00000188100|FAM25\_HUMAN ENSG00000188312|CENPP ENSG00000198831|Q8IYX2\_HUMAN ENSG00000069966|GNB5
ENSG00000070831|CDC42 ENSG00000100249|C22orf31 ENSG00000117601|SERPINC1 ENSG00000135108|FBXO21 ENSG00000138767|CNOT6L ENSG00000141668|CBLN2 ENSG00000146373|IBRDC1 ENSG00000151151|IPMK
ENSG00000161647|MP3 ENSG00000164171|ITGA2 ENSG00000165516|KLHDC2 ENSG00000166575|TMEM135 ENSG00000170191|NANP ENSG00000177613|CSTFT2 ENSG00000182831|C16orf72 ENSG00000197969|VPS13A
TGCACTA ENSG000000082684|SEMA5B ENSG00000105755|ETHE1 ENSG00000115226|FNDC4 ENSG00000120509|PDZD11 ENSG00000125347|IRF1 ENSG00000126903|SLC10A3 ENSG00000130600|H19 ENSG00000146926|ASB10
ENSG00000154222|CC2D1B ENSG00000164309|CMYA5 ENSG00000165699|TSC1 ENSG00000172336|POP7 ENSG00000179965|ZNF771 ENSG00000181852|RNF41 ENSG00000196396|PTPN1 ENSG00000205293|PHF20
ENSG00000103381|NP\_060810.1 ENSG00000106772|K1AA0367 ENSG00000109689|STIM2 ENSG00000130779|CLIP1 ENSG00000133812|SBF2 ENSG00000135940|COX5B ENSG00000144566|RAB5A ENSG00000147488|ST18
ENSG00000151726|ACSL1 ENSG00000155111|CDC2L6 ENSG00000157193|LRP8 ENSG00000164303|ENPP6 ENSG00000164933|SLC25A32 ENSG00000165156|ZHX1 ENSG00000169820|CGAT2\_HUMAN ENSG00000170315|UBIQ\_HUMAN
ENSG00000177453|NIM1\_HUMAN ENSG00000179981|TSHZ1 ENSG00000189251|Q8WYN8\_HUMAN ENSG00000198739|LRRTM3
TGCACTC ENSG00000054148|PHPT1 ENSG00000075426|FOSL2 ENSG00000086015|MAST2 ENSG00000097007|ABL1 ENSG00000129467|ADCY4 ENSG00000139200|C12orf53 ENSG00000140650|PMM2 ENSG00000143921|ABCG8
ENSG00000144043|TEX261 ENSG00000148341|SH3GLB2 ENSG00000157606|SPAT51 ENSG00000158423|RIBC1 ENSG00000160233|LRRC3 ENSG00000161958|FGF11 ENSG00000162073|PAQR4 ENSG00000164850|GPR30
ENSG00000167641|PPP1R14A ENSG00000169084|ZBED1 ENSG00000169926|KLF13 ENSG00000178602|OTOS ENSG00000179028|NP\_001013709.1 ENSG00000182776|NP\_001013709.1 ENSG00000184650|ODF4 ENSG00000185386|MAPK11
ENSG00000197251|NP\_997380.1 ENSG00000203793|Q6ZR74\_HUMAN ENSG00000204048|Q6ZUG3\_HUMAN ENSG00000204310|AGPAT1 ENSG00000206140|LOC728229 ENSG00000074657|ZNF532 ENSG00000078401|EDN1 ENSG00000085433|WDR47
ENSG00000104863|LIN7B ENSG00000124882|EREG ENSG00000135862|LAMC1 ENSG00000138641|HERC3 ENSG00000151014|CCRN4L ENSG00000151623|NR3C2 ENSG00000152443|ZNF776 ENSG00000154447|SH3RF1
ENSG00000154710|KCTD7 ENSG00000154822|PLCL2 ENSG00000163412|EIF4E3 ENSG00000165862|PNL1PRP2 ENSG00000166927|MS4A7 ENSG00000171864|PRND ENSG00000173273|TNKS ENSG00000183023|SLC8A1
ENSG00000188580|TCBA1 ENSG00000198464|ZNF480 ENSG00000206560|ANKRD28
TGCACTG ENSG00000026036|TNFRSF6B ENSG00000055070|C1orf144 ENSG00000070985|TRPM5 ENSG00000071205|ARHGAP10 ENSG00000110148|CCKBR ENSG00000113048|MRPS27 ENSG00000115648|MLPH ENSG00000118707|TGIF2
ENSG00000122783|C7orf49 ENSG00000125084|WNT1 ENSG00000137073|UBAP2 ENSG00000158470|B4GALT5 ENSG00000161638|ITGA5 ENSG00000164591|MYOZ3 ENSG00000166024|C10orf28 ENSG00000180176|TH
ENSG00000184371|CSF1 ENSG00000187531|SIRT7 ENSG00000188786|MTF1 ENSG00000198180|ZNF33A ENSG00000204103|MAFB ENSG00000204275|HLA-DQB2 ENSG00000204569|PPP1R10 ENSG00000204584|Q6ZSH9\_HUMAN
ENSG00000059728|MXD1 ENSG00000077254|USP33 ENSG00000085433|WDR47 ENSG00000100784|RPS6KA5 ENSG00000101901|Cxorf45 ENSG00000106511|MEOX2 ENSG00000109790|KHLH5 ENSG00000111711|GOLT1B
ENSG00000115310|RTN4 ENSG00000122034|GTF3A ENSG00000125823|CSTL1 ENSG00000126216|ITGB7 ENSG00000131269|ABCB7 ENSG00000134108|ARL8B ENSG00000139218|SFRS2IP ENSG00000151725|MLF1IP
ENSG00000152242|C18orf25 ENSG00000155111|CDC2L6 ENSG00000156642|NPTN ENSG00000159082|SYNJ1 ENSG00000166971|AKT1P ENSG00000170989|EDG1 ENSG00000173926|MARCH3 ENSG00000182220|ATP6AP2
ENSG00000182512|GLRX5 ENSG00000187010|RHD ENSG00000189266|PNRC2 ENSG00000197959|DNM3 ENSG00000205036|NP\_001001682.1 ENSG00000205524|Q68D70\_HUMAN
TGCACTT perfect: TGCACTG CAGTGC hsa-miR-130b CAGTGCaatgatgaaggccat 0
perfect: TGCACTG CAGTGC hsa-miR-152 tCAGTGCatgacagaacttggg 1
perfect: TGCACTG CAGTGC hsa-miR-130a CAGTGCaatgttaaaaggccat 0
perfect: TGCACTG CAGTGC hsa-miR-148a tCAGTGCactacagaactttgt 1
perfect: TGCACTG CAGTGC hsa-miR-148b tCAGTGCatcacagaactttgt 1
ENSG00000088543|C3orf18 ENSG00000100077|ADRBK2 ENSG00000100124|ANKRD54 ENSG00000101412|E2F1 ENSG00000103723|AP3B2 ENSG00000112320|SOBP ENSG00000116857|TMEM9 ENSG00000120889|TNFRSF10B
ENSG00000124313|IQSEC2 ENSG00000129473|BCL2L2 ENSG00000130956|HABP4 ENSG00000138769|CDK12 ENSG00000139625|MAP3K12 ENSG00000144655|AXUD1 ENSG00000148396|K1AA0310 ENSG00000154330|PGM5P1
ENSG00000158480|SPATA2 ENSG00000164896|FASTK ENSG00000167483|FAM129C ENSG00000169188|APEX2 ENSG00000186654|ARHGAP8 ENSG00000052841|ITC17 ENSG00000057019|DCBLD2 ENSG00000064218|DMRT3
ENSG00000066739|C14orf103 ENSG00000081818|PCDH84 ENSG00000100483|C14orf138 ENSG00000105856|HBP1 ENSG00000113088|GZMK ENSG00000134049|IER3IP1 ENSG00000143387|CTSK ENSG00000146072|TNFRSF21

|         |                                |                                |                                |                              |                              |                                |                              |                                |
|---------|--------------------------------|--------------------------------|--------------------------------|------------------------------|------------------------------|--------------------------------|------------------------------|--------------------------------|
|         | ENSG00000147684 NDUFB9         | ENSG00000150991 UBIQ_HUMAN     | ENSG00000151835 SACS           | ENSG00000154856 APCDD1       | ENSG00000160961 ZNF333       | ENSG00000163513 TGFBR2         | ENSG00000163624 CDS1         | ENSG00000164603 NP_689769.2    |
| TGCAGAT | ENSG00000167475 SCAMP4         | ENSG00000177200 CHD9           | ENSG00000179813 C13orf30       | ENSG00000181072 CHRM2        | ENSG00000197442 MAP3K5       | ENSG00000197646 PDCD1LG2       | ENSG00000203956 FAM45B       |                                |
|         | ENSG00000178499 MAP4           | ENSG00000160505 NTHL1          | ENSG00000168024 HDAC4          | ENSG00000100116 GCRAT        | ENSG00000101350 KIF3B        | ENSG00000101577 LPIN2          | ENSG00000119632 FAM14A       | ENSG00000124508 BTN2A2         |
|         | ENSG00000125633 CCDC93         | ENSG00000134240 HMGCS2         | ENSG00000134825 C11orf10       | ENSG00000136731 UGCGL1       | ENSG00000139428 MMAB         | ENSG00000141431 Q6ZMX6_HUMAN   | ENSG00000141540 TTYH2        | ENSG00000148204 CRB2           |
|         | ENSG00000155926 SLA            | ENSG00000176248 ANAPC2         | ENSG00000177417 Q9GRH9_HUMAN   | ENSG00000180424 DEFB123      | ENSG00000182175 RGMA         | ENSG00000188786 MTF1           | ENSG00000196465 MYL6B        | ENSG00000204101 Q6ZU91_HUMAN   |
|         | ENSG00000205209 NP_001020762.1 | ENSG00000206026 NP_001032408.1 | ENSG00000011201 KALL1          | ENSG00000023041 ZDHHC6       | ENSG00000054938 CHRD12       | ENSG00000079482 OPHN1          | ENSG00000088448 ANKRD10      | ENSG00000089063 C20orf30       |
|         | ENSG00000101333 PLCB4          | ENSG00000105983 LMBR1          | ENSG00000115310 RTN4           | ENSG00000132718 SYT11        | ENSG00000133119 RFC3         | ENSG00000138459 SLC35A5        | ENSG00000139330 KERA         | ENSG00000149218 ENDOD1         |
|         | ENSG00000157450 RNFL11         | ENSG00000159450 TCHH           | ENSG00000168852 SUGT1L1        | ENSG00000170948 MBD3L1       | ENSG00000171362 PNMA2        | ENSG00000175874 CREG2          | ENSG00000176601 YSK4         | ENSG00000186094 AGBL4          |
| TGCAGCT | ENSG00000196632 WNK3           | ENSG00000197716 Q9UHV1_HUMAN   | ENSG00000204348 DOM3Z          |                              |                              |                                |                              |                                |
|         | ENSG00000005381 MPO            | ENSG00000009830 POMT2          | ENSG00000010295 NP_542768.1    | ENSG00000073067 CYP2W1       | ENSG00000099957 P2RXL1       | ENSG00000100099 HPS4           | ENSG00000108773 GCN5L2       | ENSG00000113722 CDX1           |
|         | ENSG00000128487 SPECC1         | ENSG00000129535 NRL            | ENSG00000130649 CYP2E1         | ENSG00000131797 C16orf67     | ENSG00000136895 GARNL3       | ENSG00000154978 NM_030796.3    | ENSG00000159496 RGDSR_HUMAN  | ENSG00000161243 FBXO27         |
|         | ENSG00000163126 ANKRD23        | ENSG00000165275 RG9MTD3        | ENSG00000167862 ICT1           | ENSG00000169885 CALML6       | ENSG00000179526 SHARPIN      | ENSG00000182109 Q8N214_HUMAN   | ENSG00000183018 SPNS2        | ENSG00000197798 FAM118B        |
|         | ENSG00000198324 FAM109A        | ENSG00000204412 Q6ZTP5_HUMAN   | ENSG00000026297 RNASET2        | ENSG00000059573 ALDH18A1     | ENSG00000069974 RAB27A       | ENSG00000070831 CDC42          | ENSG00000089818 NECAP1       | ENSG00000100629 C14orf145      |
|         | ENSG00000104472 CHRA2R         | ENSG00000107771 KIAA1128       | ENSG00000112309 B3GAT2         | ENSG00000115289 PCGF1        | ENSG00000121089 NACA3P       | ENSG00000124097 HMG1L1         | ENSG00000124198 ARFGEF2      | ENSG00000127314 RAP1B          |
|         | ENSG00000128739 SNRPN          | ENSG00000137691 C11orf70       | ENSG00000137942 FBNBP1L        | ENSG00000138293 NCOA4        | ENSG00000138468 SENF7        | ENSG00000138796 HADH           | ENSG00000139352 ASCL1        | ENSG00000144746 ARL6IP5        |
|         | ENSG00000145741 BTF3           | ENSG00000146872 TLK2           | ENSG00000151693 DDEF2          | ENSG00000153201 RANBP2       | ENSG00000165862 PNLIPRP2     | ENSG00000171402 XAGE3          | ENSG00000172461 FUT9         | ENSG00000176276 hCG_1757335    |
| TGCAGTT | ENSG00000179981 TSHZ1          | ENSG00000196531 NACA           | ENSG00000198863 RUND1          | ENSG00000203681 XR_017762.1  | ENSG00000204866 IGFL2        | ENSG00000205036 NP_001001682.1 |                              |                                |
|         | ENSG00000017797 RALBP1         | ENSG00000099204 ABLIM1         | ENSG00000102178 UBL4A          | ENSG00000103723 AP3B2        | ENSG00000105392 CRX          | ENSG00000114302 PKRKA2A        | ENSG00000115844 DLX2         | ENSG00000122140 MRPS2          |
|         | ENSG00000164091 TMEM113        | ENSG00000164151 Q6ZT40_HUMAN   | ENSG00000169375 SIN3A          | ENSG00000170613 FAM71B       | ENSG00000171552 BCL2L1       | ENSG00000171793 CTPS           | ENSG00000172379 ARNT2        | ENSG00000177744 NP_775923.1    |
|         | ENSG00000180249 Q8N872_HUMAN   | ENSG00000183172 C22orf32       | ENSG00000185619 PCGF3          | ENSG00000188677 PARVB        | ENSG00000196331 HIST1H2BO    | ENSG00000202581 Q6ZVY8_HUMAN   | ENSG00000005302 MSL3L1       | ENSG00000009694 ODZ1           |
|         | ENSG00000078053 AMPH           | ENSG00000088766 CRLS1          | ENSG00000089335 SLF302         | ENSG00000095574 IKZF5        | ENSG00000100316 RPL3         | ENSG00000102554 KLF5           | ENSG00000113851 CRBN         | ENSG00000115548 JMJ1A          |
|         | ENSG00000115964 PNO1           | ENSG00000115966 ATF6           | ENSG00000121871 SLITRK3        | ENSG00000123091 RNFL11       | ENSG00000127022 CANX         | ENSG00000130347 RTN4IP1        | ENSG00000133872 TMEM66       | ENSG00000135298 BAI3           |
|         | ENSG00000135316 SYNCRIP        | ENSG00000135409 AMHR2          | ENSG00000138386 NAB1           | ENSG00000147027 TMEM47       | ENSG00000162630 B3GALT2      | ENSG00000163655 GMPS           | ENSG00000172318 B3GALT1      | ENSG00000180190 C8orf42        |
|         | ENSG00000182621 PLCB1          | ENSG00000183990 Q8WZA8_HUMAN   |                                |                              |                              |                                |                              |                                |
| TGCATAC | ENSG00000075043 KCNQ2          | ENSG00000080511 RDH8           | ENSG00000095970 TREM2          | ENSG00000101439 CST3         | ENSG00000111641 NOL1         | ENSG00000114378 HYAL1          | ENSG00000119535 CSF3R        | ENSG00000125895 C20orf46       |
|         | ENSG00000130653 PNPLA7         | ENSG00000131096 PYY            | ENSG00000137875 BCL2L10        | ENSG00000154309 DISP1        | ENSG00000158423 RIBC1        | ENSG00000161202 DVL3           | ENSG00000162398 C1orf177     | ENSG00000163067 ZNF2           |
|         | ENSG00000166143 PPP1R14D       | ENSG00000174171 Q8TCB4_HUMAN   | ENSG00000177112 Q8N6V7_HUMAN   | ENSG00000178243 C9orf62      | ENSG00000182054 IDH2         | ENSG00000186827 TNFRSF4        | ENSG00000188554 NBR1         | ENSG00000188636 LDOC1L         |
|         | ENSG00000203785 SPRR2E         | ENSG00000203871 C6orf164       | ENSG00000006634 DBF4           | ENSG00000074695 LMAN1        | ENSG00000081770 NAIP         | ENSG00000101162 TUBB1          | ENSG00000102144 PGK1         | ENSG00000117625 RCOR3          |
|         | ENSG00000124788 ATXN1          | ENSG00000132196 HSD17B7        | ENSG00000132386 SERPINF1       | ENSG00000135070 TSCA1        | ENSG00000136826 KLF4         | ENSG00000143995 MEIS1          | ENSG00000144228 SPOPL_HUMAN  | ENSG00000166262 C15orf33       |
| TGCATCT | ENSG00000166595 FAM96B         | ENSG00000179978 Q59GI6_HUMAN   | ENSG00000189007 DEADC1         | ENSG00000196605 Q08AG5_HUMAN |                              |                                |                              |                                |
|         | ENSG00000070413 DGCR2          | ENSG00000075618 FSCN1          | ENSG00000101074 R3HDML         | ENSG00000112977 DAP          | ENSG00000119599 WDR21A       | ENSG00000131944 C19orf40       | ENSG00000149600 COMMD7       | ENSG00000152082 FAM128B        |
|         | ENSG00000159712 ANKRD18B       | ENSG00000160209 PDXK           | ENSG00000162892 IL2A           | ENSG00000167371 PRRT2        | ENSG00000168928 CTRB2        | ENSG00000175573 C11orf68       | ENSG00000177076 ASAHL3       | ENSG00000178795 GDPD4          |
|         | ENSG00000187021 PNLIPRP1       | ENSG00000197766 CFD            | ENSG00000206028 Q6ZVA3_HUMAN   | ENSG00000059758 PCTK2        | ENSG00000100744 C14orf129    | ENSG00000101052 IFT52          | ENSG00000107372 ZFAND5       | ENSG00000107518 ATRNL1         |
|         | ENSG00000111843 TMEM14C        | ENSG00000117500 TMED5          | ENSG00000118922 KLF12          | ENSG00000119523 ALG2         | ENSG00000132549 VPS13B       | ENSG00000135837 CEP350         | ENSG00000135968 GCC2         | ENSG00000137210 TMEM14B        |
|         | ENSG00000137876 C15orf15       | ENSG00000144357 ZNF650         | ENSG00000144815 FAM55C         | ENSG00000150907 FOXO1A       | ENSG00000156374 PCGF6        | ENSG00000173612 GPRC6A         | ENSG00000185129 PURA         | ENSG00000185523 NP_001019772.1 |
|         | ENSG00000198799 LRIG2          |                                |                                |                              |                              |                                |                              |                                |
| TGCATGA | ENSG00000009830 POMT2          | ENSG00000068654 POLR1A         | ENSG00000100167 SEPT3          | ENSG00000108961 NP_057576.2  | ENSG00000116990 MYCL1        | ENSG00000135622 SEMA4F         | ENSG00000148343 FAM73B       | ENSG00000149557 FEZ1           |
|         | ENSG00000158858 LSM11          | ENSG00000161267 BDH1           | ENSG00000164062 APEH           | ENSG00000164270 HTR4         | ENSG00000165887 ANKRD2       | ENSG00000168427 KLHL30         | ENSG00000171533 MAP6         |                                |
|         | ENSG00000174564 IL20RB         | ENSG00000176087 SLC35A4        | ENSG00000177875 NP_001013657.2 | ENSG00000179766 Q4G129_HUMAN | ENSG00000179776 CDH5         | ENSG00000185332 TMEM105        | ENSG00000185818 NAT8L        | ENSG00000196396 PTPN1          |
|         | ENSG00000197081 IGF2R          | ENSG00000204946 ZNF783         | ENSG00000073969 NSF            | ENSG00000081870 C1orf41      | ENSG00000082068 WDR70        | ENSG00000101333 PLCB4          | ENSG00000101856 PGRMC1       | ENSG00000118276 B4GALT6        |
|         | ENSG00000120051 C10orf80       | ENSG00000125257 ABCC4          | ENSG00000127954 Q9BWB0_HUMAN   | ENSG00000130818 ZNF426       | ENSG00000132485 ZRANB2       | ENSG00000136267 DGKB           | ENSG00000145649 GZMA         | ENSG00000164308 NP_071745.1    |
|         | ENSG00000166527 CLEC4D         | ENSG00000172201 TD4            | ENSG00000176407 KCMF1          | ENSG00000178175 ZNF366       | ENSG00000182141 ZNF708       | ENSG00000183783 KCTD8          | ENSG00000186432 KPNA4        | ENSG00000187123 LYPD6          |
| TGCATGC | ENSG00000188971 NP_001013005.1 | ENSG00000196350 ZNF492         | ENSG00000196876 SCN8A          | ENSG00000197716 Q9UHV1_HUMAN | ENSG00000205874 Q6SA06_HUMAN |                                |                              |                                |
|         | ENSG00000066044 ELAVL1         | ENSG00000106089 STX1A          | ENSG00000125815 CST8           | ENSG00000128802 GDF2         | ENSG00000130540 SULT4A1      | ENSG00000130640 TUBGCP2        | ENSG00000139574 NPF          | ENSG00000157330 C1orf158       |
|         | ENSG00000157765 SLC34A2        | ENSG00000166135 HIF1AN         | ENSG00000173093 CCDC63         | ENSG00000174306 ZHX3         | ENSG00000177468 OLIG3        | ENSG00000178243 C9orf62        | ENSG00000181826 Q8IUW5_HUMAN | ENSG00000183785 PEX26          |
|         | ENSG00000185838 GNB1L          | ENSG00000188984 AADACL3        | ENSG00000196378 Q9BSZ0_HUMAN   | ENSG00000197386 HD           | ENSG00000000005 TMMD         | ENSG00000105568 RGPD7          | ENSG00000137749 MFAP3        | ENSG00000047315 POLR2B         |
|         | ENSG00000008473 RAB10          | ENSG00000100354 TNRC6B         | ENSG00000106723 SPIN1          | ENSG00000107560 RAB11FIP2    | ENSG00000110318 KIAA1377     | ENSG00000111450 STX2           | ENSG00000112419 PHACTR2      | ENSG00000114757 PEX5L          |
|         | ENSG00000115159 GPD2           | ENSG00000116194 ANGPTL1        | ENSG00000119927 GPAM           | ENSG00000120549 KIAA1217     | ENSG00000120860 CCDC53       | ENSG00000132313 MRPL35         | ENSG00000135968 GCC2         | ENSG00000136267 DGKB           |
|         | ENSG00000136870 ZNF189         | ENSG00000139910 NOVA1          | ENSG00000139977 NAT12          | ENSG00000151092 NGLY1        | ENSG00000158023 WDR66        | ENSG00000163519 TRAT1          | ENSG00000169629 RGPD8        | ENSG00000171362 PNMA2          |
|         | ENSG00000174446 SNAPC5         | ENSG00000181656 GPR88          | ENSG00000182223 ZAR1           | ENSG00000183054 RGPD6        | ENSG00000185345 PARK2        | ENSG00000186094 AGBL4          |                              |                                |
| TGCATGT | ENSG00000077238 IL4R           | ENSG000000888876 ZNF343        | ENSG00000100234 TMP3           | ENSG00000108604 SMARCD2      | ENSG00000116337 AMPD2        | ENSG00000131183 SLC34A1        | ENSG00000132589 FLOT2        | ENSG00000134247 PTGFRN         |
|         | ENSG00000155858 LSM11          | ENSG00000168676 KCTD19         | ENSG00000169094 PLEKHQ1        | ENSG00000177992 C9orf79      | ENSG00000178243 C9orf62      | ENSG00000179388 EGR3           | ENSG00000185818 NAT8L        | ENSG00000188760 NP_001005209.1 |
|         | ENSG00000203855 Q8TDP9_HUMAN   | ENSG00000050748 MAPK9          | ENSG00000051108 HERPUD1        | ENSG00000102893 PHKB         | ENSG00000106723 SPIN1        | ENSG00000107758 PPP3CB         | ENSG00000112077 RHAG         | ENSG00000125772 GDE5_HUMAN     |
|         | ENSG00000129586 ZBED5          | ENSG00000136100 VPS36          | ENSG00000143933 CALM2          | ENSG00000147573 TRIM55       | ENSG00000147588 PMP2         | ENSG00000152661 GJA1           | ENSG00000157890 MEGF11       | ENSG00000165983 PTER           |
| TGCATTA | ENSG00000166670 MMP10          | ENSG00000170745 KCNK3          | ENSG00000174442 ZWILCH         | ENSG00000182747 SLC35D3      | ENSG00000187123 LYPD6        | ENSG00000196071 OR2L13         | ENSG00000196318 AMY2A        |                                |
|         | ENSG00000022840 RNFL10         | ENSG00000053371 KATRA2         | ENSG00000070413 DGCR2          | ENSG00000078898 BP1L1        | ENSG00000100368 CSF2RB       | ENSG00000102524 TBCB           | ENSG00000124157 SEMG2        | ENSG00000129473 BCL2L2         |
|         | ENSG00000131368 MRPS25         | ENSG00000135820 NP_997350.1    | ENSG00000140612 SEC11A         | ENSG00000145949 SGK85_HUMAN  | ENSG00000146926 ASB10        | ENSG00000154227 LASS3          | ENSG00000155254 MARVELD1     | ENSG00000157856 C2orf39        |
|         | ENSG00000161791 FNNL3          | ENSG00000164077 MON1A          | ENSG00000166224 SGPL1          | ENSG00000169575 VPREB1       | ENSG00000175520 UBQLN3       | ENSG00000177947 ODF3           | ENSG00000178922 HYI          | ENSG00000183862 CNGA2          |
|         | ENSG00000186141 POLR3C         | ENSG00000050165 DKK3           | ENSG00000054938 CHRD12         | ENSG00000056586 RC3H2        | ENSG00000072364 AFF4         | ENSG00000076685 NT5C2          | ENSG00000080546 SESN1        | ENSG00000080644 CHRNA3         |
|         | ENSG00000104435 STMN2          | ENSG00000107669 ATE1           | ENSG00000109790 KLHL5          | ENSG00000112312 GMNN         | ENSG00000114030 KPNA1        | ENSG00000121297 TSHZ3          | ENSG00000125779 PANK2        | ENSG00000128731 HERC2          |
|         | ENSG00000133794 ARNTL          | ENSG00000135002 RFK            | ENSG00000136197 C7orf25        | ENSG00000141452 C18orf8      | ENSG00000144306 SCRN3        | ENSG00000144891 AGTR1          | ENSG00000152154 TMEM178      | ENSG00000154080 CHST9          |
|         | ENSG00000154582 TCEB1          | ENSG00000162753 SLC9A11        | ENSG00000163558 PRKCI          | ENSG00000164182 NDUFA12L     | ENSG00000164543 STK17A       | ENSG00000166479 TXNDC10        | ENSG00000167220 HDDH2        | ENSG00000168411 RFWD3          |
| TGCATTC | ENSG00000185972 CCIN           | ENSG00000197713 RPE            | ENSG00000198554 WDHD1          | ENSG00000204837 Q2TVT3_HUMAN |                              |                                |                              |                                |
|         | ENSG00000007237 GAS7           | ENSG00000038382 TRIO           |                                |                              |                              |                                |                              |                                |

|         |                                |                                |                              |                                |                                |                                |                              |                                |
|---------|--------------------------------|--------------------------------|------------------------------|--------------------------------|--------------------------------|--------------------------------|------------------------------|--------------------------------|
|         | ENSG00000118058 MLL            | ENSG00000124196 FAM112A        | ENSG00000127388 NM_198455.2  | ENSG00000132819 RBM38          | ENSG00000134871 COL4A2         | ENSG00000145002 FAM86B1        | ENSG00000148606 POLR3A       | ENSG00000155275 C4orf23        |
|         | ENSG00000160471 COX6B2         | ENSG00000161031 PGLYRP2        | ENSG00000163793 DNAJC5G      | ENSG00000167202 TBC1D2B        | ENSG00000168066 SF1            | ENSG00000169696 ASPCR1         | ENSG00000173369 C1QB         | ENSG00000178038 ALS2CL         |
|         | ENSG00000178719 GRINA          | ENSG00000182154 MRPL41         | ENSG00000185838 GNB1L        | ENSG00000186523 NR_003494.1    | ENSG00000186866 POFUT2         | ENSG00000188910 GJB3           | ENSG00000196614 NM_207462    | ENSG00000196987 NP_001034857.2 |
|         | ENSG00000204601 Q4G0G9_HUMAN   | ENSG00000062650 WAPAL          | ENSG00000100644 HIF1A        | ENSG00000109255 NMU            | ENSG00000109756 RAGEF2         | ENSG00000117152 RGSA           | ENSG00000125900 STRPD        | ENSG00000135540 NHS1L          |
|         | ENSG00000135766 EGLN1          | ENSG00000143013 LMO4           | ENSG00000146223 RPL7L1       | ENSG00000158079 PTPDC1         | ENSG00000163075 NP_001025167.1 | ENSG00000167236 CCL23          | ENSG00000171428 NAT1         | ENSG00000178172 SPINK6         |
|         | ENSG00000180287 PLD5           | ENSG00000181004 BBS12          | ENSG00000186340 THBS2        | ENSG00000186787 SPIN2B         |                                |                                |                              |                                |
| TGCCAGG | ENSG00000013288 MAN2B2         | ENSG00000071246 VASH1          | ENSG00000099869 IGF2AS       | ENSG00000101945 SUV39H1        | ENSG00000107281 NPDC1          | ENSG00000107954 NEURL          | ENSG00000116983 HPCAL4       | ENSG00000124006 OBSL1          |
|         | ENSG00000124608 AARS2          | ENSG00000132746 ALDH3B2        | ENSG00000138326 RPS24        | ENSG00000141959 PFKL           | ENSG00000146670 CDCA5          | ENSG00000149090 NP_001001991.1 | ENSG00000161996 WDR90        | ENSG00000166924 NP_775835.2    |
|         | ENSG00000167962 ZNF598         | ENSG00000169174 PCSK9          | ENSG00000173838 RNF190       | ENSG00000174332 GLIS1          | ENSG00000175707 C1orf172       | ENSG00000176058 C9orf75        | ENSG00000182896 TMEM95       | ENSG00000183535 C21orf123      |
|         | ENSG00000186451 SPATA12        | ENSG00000023318 TXNDC4         | ENSG00000050628 PTGER3       | ENSG00000070269 C14orf101      | ENSG00000083520 DIS3           | ENSG00000100316 RPL3           | ENSG00000102543 CDADC1       | ENSG00000107943 C10orf110      |
|         | ENSG00000115806 GORASP2        | ENSG00000138134 STAMPB1L       | ENSG00000143776 CDC42BPA     | ENSG00000146072 TNFRSF21       | ENSG00000148225 WDR31          | ENSG00000154813 DPH3           | ENSG00000163444 TMEM183B     | ENSG00000164418 GRIK2          |
|         | ENSG00000166343 ZMYND17        | ENSG00000166405 RIC3           | ENSG00000166595 FAM96B       | ENSG00000169439 SDC2           | ENSG00000171867 PRNP           | ENSG00000172403 SYNPO2         | ENSG00000173113 TR112_HUMAN  | ENSG00000175352 NRIP3          |
| TGCCAGT | ENSG00000177613 CSTF2T         | ENSG00000187193 MTX1           | ENSG00000188477 Q6UXS0_HUMAN | ENSG00000197702 PARVA          | ENSG00000198099 ADH4           | ENSG00000198417 MT1F           |                              |                                |
|         | ENSG00000076248 UNG            | ENSG00000113721 PDGFRB         | ENSG00000116133 DHCR24       | ENSG00000131467 PSME3          | ENSG00000136840 ST6GALNAC4     | ENSG00000136878 USP20          | ENSG00000139515 PDX1         | ENSG00000142794 NBPF3          |
|         | ENSG00000166444 ST5            | ENSG00000167505 Q96NK6_HUMAN   | ENSG00000169057 MECP2        | ENSG00000182584 C20orf134      | ENSG00000188185 Q6ZQP8_HUMAN   | ENSG00000197157 SND1           | ENSG00000198246 SLC29A3      | ENSG00000198700 IPO9           |
|         | ENSG00000205528 Q6ZRE2_HUMAN   | ENSG00000065534 MYLK           | ENSG00000106341 C7orf16      | ENSG00000121406 ZNF549         | ENSG00000139977 NAT12          | ENSG00000145730 PAM            | ENSG00000147416 ATP6V1B2     | ENSG00000150540 HNMT           |
|         | ENSG00000152495 CAMK4          | ENSG00000154734 ADAMTS1        | ENSG00000155850 SLC26A2      | ENSG00000162695 SLC30A7        | ENSG00000171208 NETO2          | ENSG00000175105 ZNF654         | ENSG00000176714 CCDC121      | ENSG00000183690 EFHC2          |
|         | ENSG00000185737 NRG3           | ENSG00000189266 PNRC2          | ENSG00000197977 ELOVL2       | ENSG00000204019 NP_001017978.1 |                                |                                |                              |                                |
| TGCCCCC | ENSG00000007968 E2F2           | ENSG00000068903 SIRT2          | ENSG00000073670 ADAM11       | ENSG00000087152 ATXN7L3        | ENSG00000099864 PALM           | ENSG00000100285 NEFH           | ENSG00000100319 ZMAT5        | ENSG00000100949 RABGGTA        |
|         | ENSG00000101180 HRH3           | ENSG00000105520 NP_073574.1    | ENSG00000105711 SCN1B        | ENSG00000108852 MPP2           | ENSG00000109113 RAB34          | ENSG00000114853 ZBTB47         | ENSG00000117419 PRNP         | ENSG00000123989 CHSS2_HUMAN    |
|         | ENSG00000125170 DOK4           | ENSG00000127388 NM_198455.2    | ENSG00000127399 LRRC61       | ENSG00000128298 BAIAP2L2       | ENSG00000129990 SYT5           | ENSG00000131759 RARA           | ENSG00000132507 EIF5AP1      | ENSG00000132535 DLG4           |
|         | ENSG00000135077 MYI1           | ENSG00000135722 FBXL8          | ENSG00000139219 COL2A1       | ENSG00000142449 FBN3           | ENSG00000143842 SOX13          | ENSG00000145198 Q9BVBH_HUMAN   | ENSG00000149591 TAGLN        | ENSG00000149925 ALDOA          |
|         | ENSG00000155366 RHOC           | ENSG00000156860 FBR5           | ENSG00000158815 FGF17        | ENSG00000162065 TBC1D24        | ENSG00000162396 PARS2          | ENSG00000167685 ZNF444         | ENSG00000169710 FASN         | ENSG00000173457 PPP1R14B       |
|         | ENSG00000173805 HAP1           | ENSG00000174903 RAB1B          | ENSG00000174938 SEZ6L2       | ENSG00000175793 SFN            | ENSG00000177105 RHOG           | ENSG00000177728 KIAA0195       | ENSG00000178498 DTX3         | ENSG00000184697 CLDN6          |
|         | ENSG00000187513 GJA4           | ENSG00000188322 SBK1           | ENSG00000188566 NDOR1        | ENSG00000188763 FZD9           | ENSG00000204661 LOC729569      | ENSG00000202587 HS3ST1         | ENSG00000079482 OPHN1        | ENSG00000108578 GOSR1          |
|         | ENSG00000125827 TXNDC13        | ENSG00000145335 SNCA           | ENSG00000159267 HLCS         | ENSG00000166598 HSP90B1        | ENSG00000167601 AXL            | ENSG00000180354 C7orf41        | ENSG00000187474 FPRL2        | ENSG00000204469 BAT2           |
| TGCCCGA | ENSG00000055955 MUSTN1         | ENSG00000101213 PTK6           | ENSG00000101294 HM13         | ENSG00000103024 NME3           | ENSG00000105732 ZNF574         | ENSG00000107874 CUEDC2         | ENSG00000116985 BMP8B        | ENSG00000138698 RAP1GDS1       |
|         | ENSG00000158786 PLA2G2F        | ENSG00000163704 PRRT3          | ENSG00000167131 CCDC103      | ENSG00000167850 CD300C         | ENSG00000168010 ATG16L2        | ENSG00000170166 HOXD4          | ENSG00000173599 PC           | ENSG00000177666 PNPLA2         |
|         | ENSG00000180209 MLRS_HUMAN     | ENSG00000181444 ZNF467         | ENSG00000186350 RXRA         | ENSG00000187609 NP_060290.3    | ENSG00000197114 ZGAP1          | ENSG00000006459 JHDM1L         | ENSG00000023572 GLRX2        | ENSG00000044574 HSPA5          |
|         | ENSG00000082482 KCNK2          | ENSG00000104689 TNFRSF10A      | ENSG00000108839 ALOX12       | ENSG00000109099 PMP22          | ENSG00000125398 SOX9           | ENSG00000134644 PUM1           | ENSG00000139618 BRCA2        | ENSG00000144354 CDCA7          |
|         | ENSG00000152527 PLEKHH2        | ENSG00000154493 C10orf90       | ENSG00000165119 HNRPK        | ENSG00000170345 FOS            | ENSG00000174574 C1orf108       | ENSG00000183022 NR_003148.2    | ENSG00000188001 FAM79B       | ENSG00000196141 NP_056350.1    |
|         | ENSG00000196937 FAM3C          | ENSG00000197535 MYO5A          | ENSG00000197614 MFAP5        | ENSG00000198865 Q4G0S7_HUMAN   | ENSG00000205325 NP_001001684.1 |                                |                              |                                |
| TGCCCGT | ENSG00000003137 CYP26B1        | ENSG00000079277 MKNK1          | ENSG00000082805 ERC1         | ENSG00000101210 EEF1A2         | ENSG00000105321 CCDC9          | ENSG00000105327 BBC3           | ENSG00000110711 AIP          | ENSG00000130584 ZBTB46         |
|         | ENSG00000130751 NPAS1          | ENSG00000133519 NP_689722.1    | ENSG00000141580 WDR45L       | ENSG00000142538 TIP39_HUMAN    | ENSG00000154832 CXXC1          | ENSG00000160209 PDXK           | ENSG00000163221 S100A12      | ENSG00000170925 TEX13B         |
|         | ENSG00000172159 FRMD3          | ENSG00000176022 B3GALT6        | ENSG00000180359 C11orf36     | ENSG00000184163 FAM132A        | ENSG00000187942 LDLRAD2        | ENSG00000196182 STK40          | ENSG00000197386 HD           | ENSG00000198832 SELM_HUMAN     |
|         | ENSG00000065978 YBX1           | ENSG00000083844 ZNF264         | ENSG00000100425 BRD1         | ENSG00000111731 KIAA0528       | ENSG00000122376 XR_015353.1    | ENSG00000136527 SFRS10         | ENSG00000144736 SHQ1         | ENSG00000144891 AGTR1          |
|         | ENSG00000146872 TLK2           | ENSG00000150093 ITGB1          | ENSG00000152782 PANK1        | ENSG00000154864 FAM38B         | ENSG00000163406 SLC15A2        | ENSG00000168564 CDKN2AIP       | ENSG00000168681 Q9H762_HUMAN | ENSG00000176165 FOXG1B         |
|         | ENSG00000183475 ASB7           | ENSG00000185753 CXorf38        | ENSG00000186009 ATP4B        | ENSG00000188917 CXorf34        | ENSG00000196532 HIST1H3C       | ENSG00000196589 MB3L2_HUMAN    | ENSG00000197085 Q6EKK1_HUMAN | ENSG00000197930 ERO1L          |
|         | ENSG00000205144 Q6ZV43_HUMAN   |                                |                              |                                |                                |                                |                              |                                |
| TGCCCTA | ENSG00000007341 ST7L           | ENSG00000011347 SYT7           | ENSG00000085644 ZNF213       | ENSG00000100263 RHBDD3         | ENSG00000102057 KCND1          | ENSG00000124615 MOCS1          | ENSG00000134569 LRP4         | ENSG00000140688 C16orf58       |
|         | ENSG00000147804 SLC39A4        | ENSG00000158195 WASF2          | ENSG00000164047 CAMP         | ENSG00000167861 C17orf28       | ENSG00000168314 MOBP           | ENSG00000168906 MAT2A          | ENSG00000169118 CSNK1G1      | ENSG00000169247 SH3TC2         |
|         | ENSG00000172538 C10orf73       | ENSG00000173327 MAP3K11        | ENSG00000173801 JUP          | ENSG00000179477 ALOX12B        | ENSG00000185681 C9orf18        | ENSG00000187638 NM_207367      | ENSG00000196576 PLXNB2       | ENSG00000203708 Q6ZU99_HUMAN   |
|         | ENSG00000067955 CBFB           | ENSG00000075420 FNDC3B         | ENSG00000084444 KIAA1467     | ENSG00000104312 RIPK2          | ENSG00000124783 SSR1           | ENSG00000126453 BCL2L1L2       | ENSG00000129675 ARHGEP6      | ENSG00000145358 DDIT4L         |
|         | ENSG00000145721 LIX1           | ENSG00000146938 NLGN4X         | ENSG00000147684 NDUFB9       | ENSG00000156869 FRRS1          | ENSG00000159377 PSMB4          | ENSG00000164265 SCGB3A2        | ENSG00000168384 HLA-DPA1     | ENSG00000170006 TMEM154        |
|         | ENSG00000173559 OBFCA2         | ENSG00000177675 CD163L1        | ENSG00000183833 C3orf15      | ENSG00000187189 TSPYL4         | ENSG00000189241 TSPYL1         | ENSG00000201825 O14513-3       | ENSG000002026185 LOC152118   |                                |
| TGCCGGC | ENSG00000084072 PPIE           | ENSG00000104880 ARHGEF18       | ENSG00000105404 RABAC1       | ENSG00000106038 EVX1           | ENSG00000108387 SEPT4          | ENSG00000115523 GNLY           | ENSG00000124593 C6orf49      | ENSG00000128342 LIF            |
|         | ENSG00000130731 NP_001035251.1 | ENSG00000130751 NPAS1          | ENSG00000149679 CABLES2      | ENSG00000159842 ABR            | ENSG00000174917 NP_991330.1    | ENSG00000175164 ABO            | ENSG00000176919 C8G          | ENSG00000177025 C19orf18       |
|         | ENSG00000177294 FBXO39         | ENSG00000179740 C19orf290S     | ENSG00000182511 FES          | ENSG00000183873 SCN5A          | ENSG00000184709 LRRC26         | ENSG00000184916 JAG2           | ENSG00000188589 RBM33        | ENSG00000189077 NP_114131.1    |
|         | ENSG00000065978 YBX1           | ENSG00000069966 GNB5           | ENSG00000083799 CYLD         | ENSG00000102683 SGCG           | ENSG00000103319 EEF2K          | ENSG00000112972 HMGCS1         | ENSG00000124535 WRNIP1       | ENSG00000139631 CSAD           |
|         | ENSG00000144642 RBMS3          | ENSG00000152931 PART1_HUMAN    | ENSG00000153162 BMP6         | ENSG00000153904 DDAH1          | ENSG00000155592 ZKSCAN2        | ENSG00000163534 FCRL1          | ENSG00000171819 ANGPTL7      | ENSG00000174721 FGFBP3         |
|         | ENSG00000183784 C9orf66        | ENSG00000188215 DCUN1D3        | ENSG00000197142 ACSL5        |                                |                                |                                |                              |                                |
| TGCCGGG | ENSG00000043822 NP_060895.1    | ENSG00000059377 TBXAS1         | ENSG00000064490 RFXANK       | ENSG00000075240 NP_055939.1    | ENSG00000087076 HSD17B14       | ENSG00000101470 TNNC2          | ENSG00000130382 MLLT1        | ENSG00000133661 SFTPD          |
|         | ENSG00000134438 RAX            | ENSG00000139722 VPS37B         | ENSG00000141568 FOXK2        | ENSG00000141577 AZI1           | ENSG00000143515 ATP8B2         | ENSG00000144591 GMPPA          | ENSG00000148805 NR_002934.2  | ENSG00000160953 MUM1           |
|         | ENSG00000171984 C20orf196      | ENSG00000174177 NP_001012780.1 | ENSG00000177408 PLAC2        | ENSG00000180539 C9orf139       | ENSG00000183729 NPBW1          | ENSG00000188660 C21orf125      | ENSG00000197191 NP_945352.1  | ENSG00000197766 CFD            |
|         | ENSG00000198324 FAM109A        | ENSG00000087995 METTL2A        | ENSG00000109323 MANBA        | ENSG00000109458 GAB1           | ENSG00000112592 TBP            | ENSG00000113712 CSNK1A1        | ENSG00000115364 MRPL19       | ENSG00000133193 FAM104A        |
|         | ENSG00000143612 C1orf43        | ENSG00000148908 RGS10          | ENSG00000150527 CTAGE5       | ENSG00000151914 DST            | ENSG00000162692 VCAM1          | ENSG00000163635 ATXN7          | ENSG00000165055 METTL2B      | ENSG00000165914 TTC7B          |
|         | ENSG00000173207 CKS1B          | ENSG00000175390 EIF3S5         | ENSG00000175989 C11orf69     | ENSG00000177426 TGIF1          | ENSG00000178556 LOC652904      | ENSG00000183780 SLC35F3        | ENSG00000189367 C6orf174     | ENSG00000196876 SCN8A          |
|         | ENSG00000203827 XR_015220.1    | ENSG00000203832 NBPF20         |                              |                                |                                |                                |                              |                                |
| TGCCGGT | ENSG00000010626 LRRC23         | ENSG00000089327 FXD5           | ENSG00000099985 OSM          | ENSG00000100003 SEC14L2        | ENSG00000105738 SIPA1L3        | ENSG00000107130 FREQ7          | ENSG00000115204 MPV17        | ENSG00000123933 MXD4           |
|         | ENSG00000125901 MRPS26         | ENSG00000131116 ZNF428         | ENSG00000184824 C1QTNF5      | ENSG00000196139 AKR1C3         | ENSG00000198077 CYP2A7         | ENSG00000205631 Q9H7S7_HUMAN   | ENSG00000207044 HFE          | ENSG00000205465 SYNE2          |
|         | ENSG00000070087 PRN2           | ENSG00000076321 KLHL20         | ENSG00000096401 CDC5L        | ENSG00000103018 CYF5B          | ENSG00000104432 IL1            | ENSG00000111537 IFNG           | ENSG00000111850 C6orf162     | ENSG00000113812 ACTR8          |
|         | ENSG00000130939 UBE4B          | ENSG00000133627 ACTR3B         | ENSG00000135018 UBQLN1       | ENSG00000144891 AGTR1          | ENSG00000149968 MMP3           | ENSG00000157259 GATAD1         | ENSG00000160207 HSF2BP       | ENSG00000162775 MKL1           |
|         | ENSG00000163638 ADAMTS9        | ENSG00000165757 KIAA1462       | ENSG00000166801 FAM111A      | ENSG00000169016 E2F6           | ENSG00000173376 C4orf31        | ENSG00000184575 XPOT           | ENSG00000203827 XR_015220.1  | ENSG00000203832 NBPF20         |
| TGCCATA | ENSG00000005961 ITGA2B         | ENSG00000071246 VASH1          | ENSG00000072506 HSD17B10     | ENSG00000080662 B4GALT1        | ENSG00000100441 KIAA0323       | ENSG00000102388 DRP2           | ENSG00000108829 LRRC59       | ENSG00000115306 SPTBN1         |
|         | ENSG00000126970 KIAA1166       | ENSG00000132793 LPTN3          | ENSG00000135930 EIF4E2       | ENSG00000162779 C1orf125       | ENSG00000167612 ANKRD33        | ENSG00000167674 NP_001001520.1 | ENSG00000170043 TRAPPC1      | ENSG00000172940 SLC22A13       |
|         | ENSG00000177156 TALD01         | ENSG00000180249 Q8N872_HUMAN   | ENSG00000182541 LIMK2        | ENSG00000197122 SRC            | ENSG00000197194 Q6VEP3_HUMAN   | ENSG00000198397 A2A3T8_HUMAN   | ENSG00000198668 CALM1        | ENSG00000206140 LOC728229      |
|         | ENSG00000206551 Q6ZT99_HUMAN   | ENSG00000065518 NDUFB4         |                              |                                |                                |                                |                              |                                |

ENSG00000159423|ALDH4A1 ENSG00000162542|TMCO4 ENSG00000164054|NP\_057563.3 ENSG00000166145|SPINT1 ENSG00000166741|NNMT ENSG00000167657|DAPK3 ENSG00000168389|MFS2 ENSG00000171793|CTPS  
ENSG00000172824|Q6P2E5\_HUMAN ENSG00000179344|HB25\_HUMAN ENSG00000185049|WHS2 ENSG00000204275|HLA-DQB2 ENSG00000206053|HN1L ENSG00000106477|TSGA1 ENSG00000108960|MMD ENSG00000111860|C6orf204  
ENSG00000114638|UPK1B ENSG00000118523|CTGF ENSG00000119203|CPSF3 ENSG00000124749|COL21A1 ENSG00000133740|E2F5 ENSG00000133805|AMPD3 ENSG00000134046|MBD2 ENSG00000134873|CLDN10  
ENSG00000135976|Q53S06\_HUMAN ENSG00000138795|LEF1 ENSG00000140968|IRF8 ENSG00000163235|TGFA ENSG00000166321|NUDT13 ENSG00000166881|K0286\_HUMAN ENSG00000169032|MAP2K1 ENSG00000171121|KCNMB3  
ENSG00000179136|Q8NAV9\_HUMAN ENSG00000180354|C7orf41 ENSG00000196653|ZNF502 ENSG00000197969|VPS13A ENSG00000206532|Q1RN00\_HUMAN  
ENSG0000011304|PTBP1 ENSG00000048342|Q9H8A7\_HUMAN ENSG00000096433|ITPR3 ENSG00000101150|TPD52L2 ENSG00000103855|CD276 ENSG00000110711|AIP ENSG00000113732|ATP6V0E1 ENSG00000114988|LMAN2L  
ENSG00000124920|C11orf9 ENSG00000125755|SYMPK ENSG00000131196|NFATC1 ENSG00000132589|FLOT2 ENSG00000135605|TEC ENSG00000135773|CAPN9 ENSG00000166387|PFF1BP2 ENSG00000168928|CTRB2  
ENSG00000173349|SFT2D3 ENSG00000178814|OPLAH ENSG00000180447|GAS1 ENSG00000183686|MAGEA5 ENSG00000196218|RYR1 ENSG00000197226|TBC1D9B ENSG00000197697|HIST1H2BE ENSG000002070882|OSBPL3  
ENSG00000102158|IAG2\_HUMAN ENSG00000102239|BRS3 ENSG00000102763|NP\_00109814.1 ENSG00000102781|KATNAL1 ENSG00000109536|FRG1 ENSG00000118985|ELL2 ENSG00000120215|MLANA ENSG00000122884|P4HA1  
ENSG00000127947|PTPN12 ENSG00000136826|KLF4 ENSG00000144061|NPHP1 ENSG00000145555|MYO10 ENSG00000153162|BMP6 ENSG00000153574|RPIA ENSG00000155530|LRGUK ENSG00000163110|PDLIM5  
ENSG00000167315|ACAA2 ENSG00000168916|ZNF608 ENSG00000173928|C19orf39 ENSG00000186522|SEPT10 ENSG00000189067|LITAF ENSG00000203730|TEDDM1  
perfect: TGCCCTTA TAAGGCA hsa-miR-506 TAAGGCAcctcttgagtaga 0  
TGCCCTC ENSG0000014216|CAPN1 ENSG00000077454|LRCH4 ENSG00000079462|PAFAH1B3 ENSG00000088826|SMOX ENSG00000101350|KIF3B ENSG00000102125|TAZ ENSG00000104881|PPP1R13L ENSG00000111199|TRPV4  
ENSG00000113732|ATP6V0E1 ENSG00000126458|RRAS ENSG00000126952|NXF5 ENSG00000130766|SESN2 ENSG00000133619|KRBA1 ENSG00000136457|CHAD ENSG00000137709|POU2F3 ENSG00000144579|CTDSP1  
ENSG00000152672|CLEC4F ENSG00000159792|PSKH1 ENSG00000164967|C9orf23 ENSG00000167644|C19orf33 ENSG00000170442|KRT86 ENSG00000181513|ACBD4 ENSG00000181778|C9orf71 ENSG00000182796|Q6UW1\_HUMAN  
ENSG00000186423|Q8N9S5\_HUMAN ENSG00000189275|Q6ZRK0\_HUMAN ENSG00000196970|NXF4 ENSG00000197070|ARRDC1 ENSG00000059769|GNL1 ENSG00000109046|WSB1 ENSG00000124813|RUNX2 ENSG00000125772|GDE5\_HUMAN  
ENSG00000134253|TRIM45 ENSG00000134343|TMEM16C ENSG00000135324|C6orf117 ENSG00000139597|NP\_438169.2 ENSG00000146072|TNFRSF21 ENSG00000148690|C10orf4 ENSG00000158125|XDH ENSG00000158467|SAHH3\_HUMAN  
ENSG00000161654|LSM12 ENSG00000162946|C1orf136 ENSG00000165071|TMEM71 ENSG00000175040|CHST2 ENSG00000176797|DEFB103B ENSG00000177243|DEFB103A ENSG00000186566|GPATCH8 ENSG00000188452|CERKL

TGCCCTG ENSG00000036565|SLC18A1 ENSG00000053372|MRTO4 ENSG00000088888|MAVS\_HUMAN ENSG00000099282|TSPAN15 ENSG00000101311|C20orf42 ENSG00000105700|C19orf50 ENSG00000106636|YKT6 ENSG00000109758|HGFAC  
ENSG00000112159|MDN1 ENSG00000114999|TTL ENSG00000116871|MAP7D1 ENSG00000121653|MAPK8IP1 ENSG00000132321|IQCA ENSG00000133027|PEMT ENSG00000133874|RNF122 ENSG00000137841|PLCB2  
ENSG00000142959|BEST4 ENSG00000143614|GATAD2B ENSG00000144579|CTDSP1 ENSG00000146122|DAAM2 ENSG00000158352|SHROOM4 ENSG00000163346|PBX1P1 ENSG00000167987|VPS37C ENSG00000167994|RAB3IL1  
ENSG00000177105|RHOG ENSG00000177697|CD151 ENSG00000196808|Q96N4\_HUMAN ENSG00000197353|LYPD2 ENSG00000197373|NP\_001015884.1 ENSG00000205023|Q6ZSF1\_HUMAN ENSG00000006634|DBF4 ENSG00000077279|DCX  
ENSG00000101247|C20orf7 ENSG00000108256|NUFIP2 ENSG00000110218|PANX1 ENSG00000113790|EHHADH ENSG00000115361|ACADL ENSG00000116922|C1orf109 ENSG00000129116|PALLD ENSG00000132463|GRSF1  
ENSG00000143153|ATP1B1 ENSG00000147400|CETN2 ENSG00000152332|UHMK1 ENSG00000156103|MMP16 ENSG00000163638|ADAMTS9 ENSG00000164466|SFXN1 ENSG00000164989|C9orf93 ENSG00000165410|CFL2  
ENSG00000165525|SDCCAG1 ENSG00000168582|CRYGA ENSG00000182139|Q96FU4\_HUMAN ENSG00000184277|TM2D3 ENSG00000197756|RPL37A ENSG00000198648|STK39  
ENSG00000037637|FBXO42 ENSG00000065361|EREB3 ENSG00000075035|WSCD2 ENSG00000084693|AGBL5 ENSG00000086062|B4GALT1 ENSG00000106367|AP1S1 ENSG00000108349|CASC3 ENSG00000110395|CBL  
ENSG00000111335|OAS2 ENSG00000112561|TFEB ENSG00000119599|WDR21A ENSG00000119718|EIF2B2 ENSG00000121769|FABP3 ENSG00000126391|NP\_114110.1 ENSG00000126756|UXT ENSG00000127124|HIVEP3  
ENSG00000138031|ADCY3 ENSG00000140488|BRUNOL6 ENSG00000141293|SKAP1 ENSG00000144152|NP\_694946.1 ENSG00000147889|CDKN2A ENSG00000159388|BTG2 ENSG00000160949|NFKBIL2 ENSG00000166289|PLEKHF1  
ENSG00000169921|Q75L30\_HUMAN ENSG00000170275|CRTAP ENSG00000171302|CANT1 ENSG00000173402|DAG1 ENSG00000174374|WBSR16 ENSG00000175213|ZNF408 ENSG00000175779|NP\_997327.1  
ENSG00000196155|PLEKHG4 ENSG00000204159|NM\_133374.2 ENSG00000055211|C6orf72 ENSG00000065135|GNAI3 ENSG00000068697|LAPTM4A ENSG00000100664|EIF5 ENSG00000104164|PLDN ENSG00000108960|MMD  
ENSG00000111700|SLCO1B3 ENSG00000115365|LANCL1 ENSG00000115977|AAK1 ENSG00000126261|SAE2 ENSG00000129472|RAB2B ENSG00000133808|MICALCL ENSG00000134884|NP\_060481.3 ENSG00000135318|NT5E  
ENSG00000136247|ZDHHC4 ENSG00000140575|TQGA1 ENSG00000143933|CALM2 ENSG00000157625|MAP3K7IP3 ENSG00000162695|SLC30A7 ENSG00000163638|ADAMTS9 ENSG00000169490|TM2D2 ENSG00000178074|NP\_710156.2  
ENSG00000181904|C5orf24 ENSG00000182890|GLUD2 ENSG00000182957|SPATA13 ENSG00000183067|TGSF5 ENSG00000185002|RFKDC1 ENSG00000198856|NP\_067050.1 ENSG00000205111|CDKL4  
ENSG00000089356|FYXD3 ENSG00000105514|RAB3D ENSG00000107815|PEO1 ENSG00000108753|TCF2 ENSG00000109705|BAPX1 ENSG000001125816|NKX2-4 ENSG00000128709|HOXD9  
ENSG00000132932|ATP8A2 ENSG00000139193|CD27 ENSG00000159387|IRX6 ENSG00000160310|PRMT2 ENSG00000163794|UCN ENSG00000166359|WDR88 ENSG00000176383|B3GNT4 ENSG00000183605|SFXN4  
ENSG00000185730|ZNF696 ENSG00000196959|CES1 ENSG00000198848|NR\_003276.1 ENSG00000204914|NP\_940843.1 ENSG00000204916|NP\_940843.1 ENSG00000204917|NP\_940843.1 ENSG00000204918|NP\_940843.1  
ENSG00000204919|NP\_940843.1  
ENSG00000204938|Q6ZU57\_HUMAN ENSG00000205793|Q6ZT42\_HUMAN ENSG00000206150|RNASEL1 ENSG00000006377|DLX6 ENSG00000064102|C12orf11 ENSG00000065427|KARS ENSG00000077254|USP33 ENSG00000080345|RIF1  
ENSG00000081181|ARG2 ENSG00000100196|KDEL3 ENSG00000109339|MAPK10 ENSG00000110321|EIF4G2 ENSG00000111046|MYF6 ENSG00000113649|TCERG1 ENSG00000121351|IAPP ENSG00000129055|ANAPC13  
ENSG00000134389|CFHR5 ENSG00000137674|MMP20 ENSG00000146386|C6orf115 ENSG00000151834|GABRA2 ENSG00000168204|O95014\_HUMAN ENSG00000169612|FAM103A1 ENSG00000172164|SNTB1 ENSG00000173221|GLRX  
ENSG00000179674|ARL14 ENSG00000185873|TMPRSS11B ENSG00000187145|MRPS21 ENSG00000187601|MAGEH1 ENSG00000203780|FANK1  
ENSG0000017621|MAGIX ENSG00000067182|TNFRSF1A ENSG00000086758|HUWE1 ENSG00000099817|POLR2E ENSG00000103942|HOMER2 ENSG00000105202|FBL ENSG00000116852|KIF21B ENSG00000131634|C16orf30  
ENSG00000143294|PRCC ENSG00000143393|PIK4CB ENSG00000148335|C9orf32 ENSG00000151364|KCTD14 ENSG00000163064|EN1 ENSG00000163479|SSR2 ENSG00000170043|TRAPPC1 ENSG00000197444|OGDHL  
ENSG00000198131|ZNF544 ENSG00000198457|CP21A\_HUMAN ENSG00000203691|Q9UI51\_HUMAN ENSG00000204335|SP5 ENSG00000205929|C21orf62 ENSG00000069966|GNB5 ENSG00000087995|METTL2A ENSG00000115806|GORASP2  
ENSG00000138641|HERC3 ENSG00000138784|NP\_060170.1 ENSG00000141279|NPEPPS ENSG00000150637|CD226 ENSG00000151552|QDPR ENSG00000158042|MRPL17 ENSG00000159917|ZNF235 ENSG00000166478|ZNF143  
ENSG00000170949|ZNF160 ENSG00000171564|FGB ENSG00000183508|FAM46C ENSG00000186297|GABRA5 ENSG00000188402|NP\_995324.1 ENSG00000196091|MYBPC1 ENSG00000196532|HIST1H3C ENSG00000198743|SLC5A3

TGCGAGT ENSG00000051596|THOC3 ENSG00000105193|RPS16 ENSG00000115353|TACR1 ENSG00000128564|VGF ENSG00000133398|MED10 ENSG00000140031|P1768\_HUMAN ENSG00000142046|TMEM91 ENSG00000143374|TARS2  
ENSG00000148341|SH3GLB2 ENSG00000148399|WDR85 ENSG00000161328|LRRC56 ENSG00000168476|REEP4 ENSG00000170089|THOC3 ENSG00000170238|XR\_017738.1 ENSG00000180697|C3orf22 ENSG00000185359|HGS  
ENSG00000204487|LTB ENSG00000205191|NP\_001070148.1 ENSG00000206081|Q6ZVK3\_HUMAN ENSG00000077809|GTF2I ENSG00000082175|PGR ENSG00000100478|AP4S1 ENSG00000103342|GSPT1 ENSG00000111046|MYF6  
ENSG00000115761|NOL10 ENSG00000117114|LPHN2 ENSG00000121570|DPP4 ENSG00000130045|C9orf121 ENSG00000130254|SABF2 ENSG00000130363|RSHL2 ENSG00000130396|MLLT4 ENSG00000134744|ZCCHC11  
ENSG00000138796|HADH ENSG00000140391|TSPAN3 ENSG00000153250|RBMS1 ENSG00000154548|SRR3\_HUMAN ENSG00000155438|MKI67IP ENSG00000156265|C21orf7 ENSG00000163644|PPM1K ENSG00000164683|HEY1  
ENSG00000166704|ZNF606 ENSG00000172058|SERF1\_HUMAN ENSG00000175643|C16orf75 ENSG00000183665|TRMT12 ENSG00000196285|H33\_HUMAN ENSG00000196846|NCOA6 ENSG00000205572|SERF1\_HUMAN  
ENSG00000002586|CD99 ENSG00000008128|CDC2L1 ENSG00000010671|BTK ENSG00000071051|NCK2 ENSG00000100294|MCAT ENSG00000100364|C22orf9 ENSG00000107438|PDLIM1 ENSG00000116039|ATP6V1B1  
ENSG00000117318|ID3 ENSG00000118156|C19orf43 ENSG00000123144|C19orf43 ENSG00000128262|Q9NTU6\_HUMAN ENSG00000133398|MED10 ENSG00000134571|MYBPC3 ENSG00000143921|ABCG8 ENSG00000157150|TIMP4  
ENSG00000160310|PRMT2 ENSG00000163141|BNIPL1 ENSG00000167619|TMEM145 ENSG00000169683|LRRC45 ENSG00000178381|ZFAND2A ENSG00000182156|ENPP7 ENSG00000182272|B4GALNT4 ENSG00000187479|Q7Z7L8\_HUMAN  
ENSG00000188060|RAB42 ENSG00000196724|ZNF418 ENSG00000206580|AP4M1 ENSG0000011638|TMEM159 ENSG00000020539|RRAGD ENSG00000106609|C7orf42 ENSG00000108839|ALOX12 ENSG00000115163|CENPA  
ENSG00000115525|ST3GAL5 ENSG00000117713|ARID1A ENSG00000119899|SLC17A5 ENSG00000121742|GJB6 ENSG00000133115|STOML3 ENSG00000137440|FGBBP1 ENSG00000145416|MARCH1  
ENSG00000148153|C9orf80 ENSG00000153214|TMEM87B ENSG00000163449|TMEM169 ENSG00000164089|AGXT2L1 ENSG00000166206|GABRB3 ENSG00000168589|DYNLRB2 ENSG00000169612|FAM103A1 ENSG00000171766|GATM  
ENSG00000173046|NM\_207376 ENSG00000177606|JUN ENSG00000182180|MRPS16 ENSG00000204706|Q6ZVS9\_HUMAN  
ENSG00000054148|PHPT1 ENSG00000086504|MRPL28 ENSG00000102977|ACD ENSG00000106113|CRHR2 ENSG00000119402|FBXW2 ENSG00000125618|PAX8 ENSG00000135124|P2RX4 ENSG00000164399|IL3  
ENSG00000167131|CDCC103 ENSG00000169393|ELYSBP1 ENSG00000170421|KRT8 ENSG00000171060|C8orf74 ENSG00000175223|Q8TCI8\_HUMAN ENSG00000176463|SLCO3A1 ENSG00000176946|THAP4 ENSG00000179044|EXOC3L  
ENSG00000185198|PRSS11 ENSG00000104043|ATP8B4 ENSG00000104043|ATP8B4 ENSG00000114120|SLC25A36 ENSG00000121440|PDZRN3 ENSG00000130764|LRRC47 ENSG00000132964|CDK8  
ENSG00000133393|C16orf63 ENSG00000135048|TMEM2 ENSG00000135655|USP15 ENSG00000136379|FAM108C1 ENSG00000150337|FCGR1A ENSG00000150459|SAP18 ENSG00000152348|ATG10 ENSG00000153823|PID1  
ENSG00000163681|SLMAP ENSG00000166148|AVPR1A ENSG00000180815|MAP3K15 ENSG00000183918|SH2D1A ENSG00000186222|CNO ENSG00000186645|NP\_001027561.1 ENSG00000198218|QRICH1 ENSG00000198305|NP\_001027561.1  
ENSG00000198719|DLL1 ENSG00000205323|HCC1\_HUMAN ENSG00000205505|NP\_001027561.1 ENSG00000205506|NP\_001027561.1 ENSG00000205508|NP\_001027561.1 ENSG00000205509|NP\_001027561.1 ENSG00000205509|NP\_001027561.1  
ENSG00000069812|HES2 ENSG00000101438|SLC32A1 ENSG00000102796|DHRS12 ENSG00000108528|SLC25A11 ENSG00000118689|FOXO3A ENSG00000121905|HPCA ENSG00000125454|SLC25A19 ENSG00000126460|PRRG2  
ENSG00000130649|CYP2E1 ENSG00000134871|COL4A2 ENSG00000134917|Q5FWF1\_HUMAN ENSG00000142700|DMRTA2 ENSG00000165462|PHOX2A ENSG00000166444|ST5 ENSG00000166592|RRAD ENSG00000169894|MUC3A  
ENSG00000170426|NP\_683695.1 ENSG00000171680|PLEKHG5 ENSG00000172678|OR13A1 ENSG00000172878|NP\_954697.1 ENSG00000178209|PLEC1 ENSG00000182871|COL18A1 ENSG00000185567|AHNAK2 ENSG00000204033|LRRC22  
ENSG00000204386|NEU1 ENSG00000034713|GABARAPL2 ENSG00000064995|TAF11 ENSG00000078369|GNB1 ENSG00000081800|SLC13A1 ENSG00000112852|PCDHB2 ENSG00000117748|RPA2 ENSG00000117751|PPP1R8  
ENSG00000133115|STOML3 ENSG00000136141|LRCH1 ENSG00000142494|NP\_060712.2 ENSG00000146223|RPL7L1 ENSG00000150667|FSIP1 ENSG00000151514|SALL3 ENSG00000151748|SAV1 ENSG00000152219|C11orf46  
ENSG00000158301|GPRASP2 ENSG00000164099|PRSS12 ENSG00000165685|C12orf59 ENSG00000165862|PNLIPRP2 ENSG00000180979|LRRC57 ENSG00000183780|SLC35F3 ENSG00000185742|NP\_997528.1 ENSG00000188295|ZNF669  
ENSG00000198767|YY2 ENSG00000206559|ZCWPW2

TGCTAAC ENSG0000000991513|TF ENSG00000100330|MTMR3 ENSG000001100591|AHS1 ENSG00000100997|ABHD12 ENSG00000102904|TSNAXIP1 ENSG00000105198|LGALS13 ENSG00000119408|NEK6 ENSG00000120509|PDZD11  
ENSG00000129009|ISLR ENSG00000132514|CLEC10A ENSG00000135636|DYSF ENSG00000136378|ADAMTS7 ENSG00000155363|MOV10 ENSG00000158402|CDC25C ENSG00000163061|Q9BSF9\_HUMAN ENSG00000163263|C1orf189  
ENSG00000165131|C7orf34 ENSG00000167858|TEKT1 ENSG00000196859|KRT39 ENSG00000204474|Q5JQD4\_HUMAN ENSG00000205994|Q6ZN58\_HUMAN ENSG00000054983|GALC ENSG00000079785|DDX1 ENSG00000085382|HACE1  
ENSG00000102362|SYTL4 ENSG00000104047|DTWD1 ENSG00000109771|LRP2BP ENSG00000132842|AP3B1 ENSG00000134371|CDC73 ENSG00000134480|CCNH ENSG00000136881|BAAT ENSG00000145362|ANK2  
ENSG00000146147|C6orf142 ENSG00000147416|ATP6V1B2 ENSG00000150471|LPHN3 ENSG00000152034|MCHR2 ENSG00000155324|GRAMD3 ENSG00000158639|PAGE5 ENSG00000166441|RPL27A ENSG00000170185|USP38  
ENSG00000174156|GSTA3 ENSG00000186031|Q6ZSY1\_HUMAN ENSG00000197959|DNM3 ENSG00000204954|Q69YU5\_HUMAN  
ENSG00000074590|NUAK1 ENSG00000100141|PISD ENSG00000100263|RHBD3 ENSG00000100346|CACNA1I ENSG00000107341|UBE2R2 ENSG00000114268|PFKFB4 ENSG00000134287|ARF3 ENSG00000142173|COL6A2  
ENSG00000145864|GABRB2 ENSG00000146047|HIST1H2BA ENSG00000147113|C9orf36 ENSG00000147123|NDUFB11 ENSG00000149925|ALDOA ENSG00000154309|DISP1 ENSG00000159224|GIP ENSG00000160325|C9orf7  
ENSG00000162910|MRPL55 ENSG00000167595|C19orf55 ENSG00000175318|GRAMD2 ENSG00000184056|VPS33B ENSG00000187664|TM6SF2 ENSG00000066629|EML1 ENSG00000102218|RTDR1 ENSG00000108255|CRYBA1  
ENSG00000109846|CRYAB ENSG00000135373|EHF ENSG00000137040|RANBP6 ENSG00000143622|RT1 ENSG00000156976|EIF4A2 ENSG00000162368|CMPK ENSG00000166068|SPRED1 ENSG00000167088|SNRPD1  
ENSG00000170312|CDC2 ENSG00000175646|PRM1 ENSG00000184005|ST6GALNAC3 ENSG00000185129|PURA ENSG00000196565|HBE1 ENSG00000196605|Q08AG5\_HUMAN ENSG00000205758|CRYZL1  
ENSG00000072501|SMC1A ENSG00000087087|ARS2\_HUMAN ENSG00000092295|TGM1 ENSG00000114745|GORASP1 ENSG00000114770|ABCC5 ENSG00000119402|FBXW2 ENSG00000125409|TEKT3 ENSG00000126267|COX6B1  
ENSG00000130244|Q17RN3-2 ENSG00000131143|COX4I1 ENSG00000137133|HINT2 ENSG00000137656|BUD13 ENSG00000148337|CI21 ENSG00000156486|KNS2 ENSG00000158480|SPATA2 ENSG00000162600|OMA1  
ENSG00000164051|CDCC51 ENSG00000166667|HNT NP\_001026789.1 ENSG00000175663|TMEM134 ENSG00000179994|NP\_001030016.1 ENSG00000181026|ISG20L1 ENSG00000186994|ANKRD47 ENSG00000188901|NP\_055226.1  
ENSG00000205238|NP\_001026789.1 ENSG00000049247|UTS2 ENSG00000065970|FOXJ2 ENSG00000066651|TRMT11 ENSG00000079102|RUNX1T1 ENSG00000081052|COL4A4 ENSG00000103494|NP\_056087.2 ENSG00000107643|MAPK8  
ENSG00000113282|CLINT1 ENSG00000122507|BBS9 ENSG00000123219|CENPK ENSG00000132837|DMGDH ENSG00000148700|ADD3 ENSG00000151834|GABRA2 ENSG00000156463|SH3RF2 ENSG00000163032|VSNL1  
ENSG00000164100|NDST3 ENSG00000164675|TQUB ENSG00000165525|SDCCAG1 ENSG00000178460|C8orf45 ENSG00000181690|PLAG1 ENSG00000





ENSG00000100376|FAM118A ENSG00000101265|RASSF2 ENSG00000104081|BMF ENSG00000114988|LMAN2L ENSG00000119703|C14orf140 ENSG00000124225|TMEPAI ENSG00000140807|NKD1 ENSG00000141527|CARD14  
ENSG00000143569|UBAP2L ENSG00000148158|SNX30 ENSG00000149294|NCAM1 ENSG00000157823|AP3S2 ENSG00000158457|TSPAN33 ENSG00000159266|Q69YJ1\_HUMAN ENSG00000163464|IL8RA ENSG00000168763|CNNM3  
ENSG00000173269|MMRN2 ENSG00000177551|NHLH2 ENSG00000178554|Q8N8D4\_HUMAN ENSG00000183495|EP400 ENSG00000186951|PPARA ENSG00000187177|N4BP2\_HUMAN ENSG00000082556|OPRK1 ENSG00000089006|SNX5  
ENSG00000100987|V5X1 ENSG00000112541|PDE10A ENSG00000113361|CDH6 ENSG00000115935|WIPF1 ENSG00000118231|CRYGD ENSG00000129518|EAPP ENSG00000129625|REEP5 ENSG00000137575|SDCBP  
ENSG00000144130|NT5DC4 ENSG00000144867|SRPRB ENSG00000145703|IQGAP2 ENSG00000153094|BCL2L1 ENSG00000156508|EEF1A1 ENSG00000164049|FBXW12 ENSG00000164099|PRSS12 ENSG00000164631|ZNF12  
ENSG00000168589|DYNLRB2 ENSG00000171360|KRT38 ENSG00000179300|ZCCHC5 ENSG00000184984|CHRM5 ENSG00000185408|ORSK1 ENSG00000198739|LRRTM3 ENSG00000204279|PAGE3 ENSG00000204480|PRAMEF19  
ENSG00000204491|PRAMEF18 ENSG00000204503|PRAMEF3  
TGGAAAT ENSG00000057757|C1orf128 ENSG00000068985|PAGE1 ENSG00000099194|SCD ENSG00000104901|DKKL1 ENSG00000104918|RETN ENSG00000112164|GLP1R ENSG00000114999|TTL ENSG00000116031|CD207  
ENSG00000116148|CNL2 ENSG00000117305|HMGCL ENSG00000118017|A4GNT ENSG00000120332|TNN ENSG00000123364|HOXC13 ENSG00000131686|CA6 ENSG00000134287|ARF3 ENSG00000135469|COQ10A  
ENSG00000135824|RGS8 ENSG00000149575|SCN2B ENSG00000162981|FAM84A ENSG00000163155|LYSMD1 ENSG00000163814|CDCP1 ENSG00000169919|GUSB ENSG00000172568|NP\_001001343.1 ENSG00000176595|KBTBD11  
ENSG00000180901|KCTD2 ENSG00000187953|NR\_002217.1 ENSG00000188706|ZDHC9 ENSG00000196407|THEM5 ENSG00000205159|Q6ZVC9\_HUMAN ENSG00000009765|IYD ENSG00000035720|STAP1\_HUMAN  
ENSG00000064692|SNCAIP ENSG00000100575|TIMM9 ENSG00000111783|RFX4 ENSG00000111961|SASH1 ENSG00000115828|QPCT ENSG00000120658|ENOX1 ENSG00000122591|FAM126A ENSG00000124260|MAGEA10  
ENSG00000132541|HRSP12 ENSG00000134371|CDC73 ENSG00000135222|CSN2 ENSG00000138463|DIRC2 ENSG00000144445|NP\_689732.2 ENSG00000146457|WTAP ENSG00000151413|NUBPL ENSG00000152749|GPR180  
ENSG00000154646|PRSS7 ENSG00000159267|HLCS ENSG00000163735|CXCL5 ENSG00000164418|GRIK2 ENSG00000173674|EIF1A1 ENSG00000181467|RAP2B ENSG00000182827|ACBD3 ENSG00000197301|Q6ZQU9\_HUMAN  
ENSG00000198646|NCOA6 ENSG00000205269|Q5T4T1\_HUMAN  
TGGAAAC ENSG00000005102|MEOX1 ENSG00000061273|HDAC7A ENSG00000071051|NCK2 ENSG00000078687|TNRC6C ENSG00000088833|NSFL1C ENSG00000102878|HSF4 ENSG00000104611|SH2D4A ENSG00000111674|ENO2  
ENSG00000116809|ZBTB17 ENSG00000127377|CRYGN ENSG00000134020|PEBPL\_HUMAN ENSG00000144583|MARCH4 ENSG00000149577|SIDT2 ENSG00000161638|ITGA5 ENSG00000173641|HSPB7 ENSG00000174600|CMKLR1  
ENSG00000180210|F2 ENSG00000181123|Q8N7N0\_HUMAN ENSG000000081138|CDH7 ENSG000000010367|MAPRE1 ENSG00000114861|FOXP1 ENSG00000115386|REGL ENSG00000135119|TMEM118 ENSG00000135720|DYNC11L2  
ENSG00000136213|CHST12 ENSG00000140455|USP3 ENSG00000143157|POGK ENSG00000143437|ARNT ENSG00000155097|ATP6V1C1 ENSG00000159873|CCDC117 ENSG00000163254|CRYGC ENSG00000163539|CLASP2  
ENSG00000168118|RAB4A ENSG00000175483|O94914\_HUMAN ENSG00000181013|C17orf47 ENSG00000183765|CHEK2 ENSG00000189136|NM\_207382  
TGGAAATC ENSG000000074410|CA12 ENSG00000100053|CRYBB3 ENSG00000105371|ICAM4 ENSG00000105643|ARRDC2 ENSG00000112936|C7 ENSG00000115594|IL1R1 ENSG00000120664|LOC646871 ENSG00000126258|FXD1  
ENSG00000136297|MMD2 ENSG00000136695|LL1F5 ENSG00000142082|SIRT3 ENSG00000143450|OAZ3 ENSG00000154096|THY1 ENSG00000154783|FGD5 ENSG00000156398|SFXN2 ENSG00000156975|MF12  
ENSG00000167105|TMEM92 ENSG00000171533|MAP6 ENSG00000171916|NP\_001035167.2 ENSG00000197549|Q6ZN90\_HUMAN ENSG00000197993|KEL ENSG00000205444|Q5G014\_HUMAN ENSG00000205592|MUC19 ENSG00000006468|ETV1  
ENSG00000059758|PCTK2 ENSG00000080839|RBL1 ENSG00000100532|CGRRF1 ENSG00000111341|MGF ENSG000001123610|TNFAIP6 ENSG00000128739|SNRNP ENSG00000133800|XLKD1 ENSG00000133818|RRAS2  
ENSG00000138271|GPR87 ENSG00000146039|SLC17A4 ENSG00000153914|SFRS12 ENSG00000154874|NP\_872374.3 ENSG00000160633|SAFB ENSG00000164828|UNC84A ENSG00000166181|API5 ENSG00000167842|MIS12  
ENSG00000173480|ZNF417 ENSG00000176407|KCMF1 ENSG00000182308|WDR21B ENSG00000185418|TARSL2 ENSG00000188687|SLC4A5 ENSG00000189237|NAP5\_HUMAN ENSG00000197006|METTL9 ENSG00000198380|GFPT1  
ENSG00000198814|GK ENSG00000204611|ZNF616 ENSG00000205647|CSN1S2A  
TGGAAATG ENSG00000011332|DPF1 ENSG00000055950|MRPL43 ENSG00000061337|LZTS1 ENSG00000100207|TCF20 ENSG00000102466|FGF14 ENSG00000103168|TAF1C ENSG00000105066|FIZ1 ENSG00000108375|SUPT4H1  
ENSG00000116218|NPHS2 ENSG00000126432|PRDX5 ENSG00000139436|GIT2 ENSG00000154928|P54762-3 ENSG00000155269|GPR78 ENSG00000163961|RNF168 ENSG00000167191|GPRC5B ENSG00000167792|NDUFV1  
ENSG00000168243|GNG4 ENSG00000172215|CXCR6 ENSG00000197019|SERTAD1 ENSG00000197622|CDC42SE1 ENSG00000197818|SLC9A8 ENSG00000204235|Q6ZNQ4\_HUMAN ENSG00000204423|C9orf33  
ENSG00000065809|FAM107B ENSG00000112249|ASCC3 ENSG00000115590|ILLR2 ENSG00000116106|EPHA4 ENSG00000116183|PAPPA2 ENSG00000116560|SFPQ ENSG00000120215|MLANA ENSG00000129636|ITFG1  
ENSG00000135346|CGA ENSG00000145907|G3BP1 ENSG00000153574|RPIA ENSG00000162702|ZNF281 ENSG00000163518|FCRL4 ENSG00000167384|ZNF180 ENSG00000170266|GLB1 ENSG00000172288|CDY1\_HUMAN  
ENSG00000172352|CDY1 ENSG00000174456|NP\_997318.1 ENSG00000175782|SLC35E3 ENSG00000180815|MAP3K15 ENSG00000181894|ZNF329 ENSG00000187611|Q6ZTR6\_HUMAN  
TGGAAAT ENSG00000005073|HOXA11 ENSG00000006194|ZNF263 ENSG000000054523|K1F1B ENSG00000078061|ARAF ENSG00000106459|NRF1 ENSG00000107796|ACTA2 ENSG00000118096|C11orf60 ENSG00000125447|GGA3  
ENSG00000132854|ANX38\_HUMAN ENSG00000138030|KHK ENSG00000139112|GABARAPL1 ENSG00000143140|GJA5 ENSG00000148158|SNX30 ENSG00000152217|SETBP1 ENSG00000158006|PAFAH2 ENSG00000158764|ITLN2  
ENSG00000160803|UBQLN4 ENSG00000181938|GINS3 ENSG00000182450|KCNK4 ENSG00000187239|FNBP1 ENSG00000196668|NP\_997319.1 ENSG00000196844|C11orf38 ENSG00000198012|XR\_017841.1 ENSG00000198690|MTMR15  
ENSG00000205031|Q6XYE2\_HUMAN ENSG00000206193|Q5HYA3\_HUMAN ENSG000000038945|MSR1 ENSG000000085840|ORCL1 ENSG00000100219|XBP1 ENSG00000101624|CEP76 ENSG00000102383|ZDHC15 ENSG00000106733|C9orf95  
ENSG00000137944|CBL2 ENSG00000139496|NUP11 ENSG00000141429|GALNT1 ENSG00000147003|TMEM27 ENSG00000189252|SPANXN3 ENSG00000196458|ZNF605 ENSG00000196877|NP\_001018132.2 ENSG00000198156|NP\_001018132.2 ENSG00000198586|TLK1  
ENSG00000166173|LARP6 ENSG00000169439|SDC2 ENSG00000170340|B3GNT2 ENSG00000171940|ZNF217 ENSG00000172752|NP\_694996.3 ENSG00000189079|ARID2 ENSG00000197181|PIWIL2 ENSG00000197695|Q8N203\_HUMAN  
ENSG00000198218|QRICH1 ENSG00000205905|Q6ZWC6\_HUMAN  
TGGACAA ENSG000000073792|IGF2BP2 ENSG00000086102|NFX1 ENSG00000087460|GNAS ENSG00000095981|KCNK16 ENSG00000099308|MAST3 ENSG00000099864|PALM ENSG00000101224|CDC25B ENSG00000119771|KLHL29  
ENSG00000124701|APOBEC2 ENSG00000125804|C20orf91 ENSG00000132792|CTNBL1 ENSG00000139445|FOXN4 ENSG00000143940|Q6ZMW3\_HUMAN ENSG00000152042|NBPFF8 ENSG00000156097|GPR61 ENSG00000161896|IHPK3  
ENSG00000162676|GF11 ENSG00000167461|RAB8A ENSG00000167792|NDUFV1 ENSG00000170581|STAT2 ENSG00000171855|IFNB1 ENSG00000173227|SYT12 ENSG00000175221|THRAP5 ENSG00000180471|C9orf31  
ENSG00000187686|XR\_016979.1 ENSG00000197364|S100A7L2 ENSG00000204005|Q6ZP22\_HUMAN ENSG00000205670|C21orf51 ENSG00000112182|BACH2 ENSG00000112305|SMAP1 ENSG00000113356|POLR3G ENSG00000120262|C6orf97  
ENSG00000134765|DSC1 ENSG00000146872|TLK2 ENSG00000154310|TNK1 ENSG00000156050|C14orf44 ENSG00000163285|GABRG1 ENSG00000163669|DNHD2 ENSG00000165588|OTX2 ENSG00000167230|C17orf78  
ENSG00000173114|LRRN3 ENSG00000177888|ZBTB41 ENSG00000188193|C6orf155 ENSG00000189252|SPANXN3 ENSG00000196458|ZNF605 ENSG00000196877|NP\_001018132.2 ENSG00000198156|NP\_001018132.2 ENSG00000198586|TLK1  
ENSG00000203924|SPANXN2 ENSG00000204363|SPANXN5 ENSG00000204829|CBWD7 ENSG00000205442|C9orf134  
TGGACAG ENSG00000007047|MARK4 ENSG000001087191|PSMC5 ENSG00000100401|RANGAP1 ENSG00000103042|NP\_060701.1 ENSG00000103365|GGA2 ENSG00000103710|RASL12 ENSG00000125652|ALKBH7 ENSG00000137309|HMGA1  
ENSG00000153531|ADPRHL1 ENSG00000159455|LCE2B ENSG00000162975|KCNF1 ENSG00000164711|LPAL2 ENSG00000165886|UBTD1 ENSG00000166351|ANKRD21 ENSG00000167644|C19orf33 ENSG00000167964|RAB26  
ENSG00000168785|TSPAN5 ENSG00000175048|ZDHC14 ENSG00000179912|R3HDM2 ENSG00000180035|ZNF553 ENSG00000180902|D2HGDH ENSG00000183206|POT15\_HUMAN ENSG00000185065|NP\_776154.2 ENSG00000196196|NP\_001034881.1  
ENSG00000203905|Q6ZRC6\_HUMAN ENSG00000204359|CFB ENSG00000205138|NP\_001036096.1 ENSG00000204526|DEPDC1 ENSG00000069966|GNB5 ENSG00000073910|FRY ENSG00000083168|MYST3 ENSG00000085514|PILRA  
ENSG00000102743|SLC25A15 ENSG00000107779|BMPR1A ENSG00000111196|MGNT2\_HUMAN ENSG00000113356|POLR3G ENSG00000122691|TWIST1 ENSG00000127125|PPCS ENSG00000137038|C9orf123 ENSG00000141380|SS18  
ENSG00000146039|SLC17A4 ENSG00000148154|UGCG ENSG00000150867|PIP5K2A ENSG00000152518|ZFP36L2 ENSG00000155324|GRAMD3 ENSG00000163217|BMP10 ENSG00000165525|SDCCAG1 ENSG00000165682|CLEC1B  
ENSG00000166405|RIC3 ENSG00000173334|TRIB1 ENSG00000174444|RPL4 ENSG00000188709|TRAM3 ENSG00000188848|CCDC4 ENSG00000196553|NP\_001004331.1 ENSG00000203742|NP\_001032308.1  
TGGACCA ENSG00000081059|TCF7 ENSG00000099795|NDUFB7 ENSG00000100181|CSNK1E ENSG00000101079|NDRG3 ENSG00000101152|DNAJC5 ENSG00000102001|CACNA1F ENSG00000105649|RAB3A ENSG00000108370|RGS9  
ENSG00000111775|COX6A1 ENSG00000132563|REEP2 ENSG00000135077|HAVCR2 ENSG00000135632|SMYD5 ENSG00000137507|LRRC32 ENSG00000147144|CCDC120 ENSG00000159479|MED8 ENSG00000160271|RALGDS  
ENSG00000164605|Q5T8T0\_HUMAN ENSG00000167595|C19orf55 ENSG00000167695|FAM57A ENSG00000168026|TTC21A ENSG00000169020|ATP5I ENSG00000171160|C10orf83 ENSG00000172940|SLC22A13 ENSG00000172992|DCAKD  
ENSG00000174175|SELPL ENSG00000176515|Q8NAX6\_HUMAN ENSG00000177380|PPF1A3 ENSG00000178028|DMAP1 ENSG00000183566|LATH\_HUMAN ENSG00000186910|SERPINA11 ENSG00000187953|NR\_002217.1 ENSG00000187975|NP\_001003682.1  
ENSG00000196535|MYO18A ENSG00000196878|LAMB3 ENSG00000197136|PCNXL3 ENSG00000212131|PDXP ENSG00000001167|NFYA ENSG00000008197|TFAP2D ENSG00000043093|DCUN1D1 ENSG00000053900|ANAPC4  
ENSG00000089094|FBXL10 ENSG00000100796|SMEK1 ENSG00000106803|SEC61B ENSG00000112695|COX7A2 ENSG00000116954|RRAGC ENSG00000139800|ZIC5 ENSG00000144161|ZC3H8 ENSG00000144810|COL8A1  
ENSG00000146648|EGFR ENSG00000152558|TMEM123 ENSG00000159167|STC1 ENSG00000165685|C12orf59 ENSG00000171147|NP\_001001317.1 ENSG00000182457|NR\_002323.1 ENSG00000187221|LHFP ENSG00000186409|NP\_001074319.1  
ENSG00000187823|ZCCHC16 ENSG00000188215|DCUN1D3 ENSG00000189266|PNRC2 ENSG00000196812|ZSCAN16  
TGGACCG ENSG00000004866|ST7 ENSG000000026652|AGPAT4 ENSG00000042022|ABHD14A ENSG00000064270|ATP2C2 ENSG00000068383|INPP5A ENSG00000083290|ULK2 ENSG00000089820|ARHGAP4 ENSG00000090674|MCOLN1  
ENSG00000105072|C19orf44 ENSG00000105607|GCDH ENSG00000106683|LIMK1 ENSG00000110987|BCL7A ENSG00000111775|COX6A1 ENSG00000132773|TOE1 ENSG00000135636|DYSF ENSG00000142606|MMEL1  
ENSG00000142694|C1orf78 ENSG00000154764|WNT7A ENSG00000157856|C2orf39 ENSG00000166426|CRABP1 ENSG00000167543|TP53I13 ENSG00000167566|KIAA1602 ENSG00000167992|VWCE ENSG00000169093|ASMTL  
ENSG00000172771|C3orf25 ENSG00000176876|PXMP2 ENSG00000177112|Q8N6V7\_HUMAN ENSG00000183978|CCDC56 ENSG00000189339|SLC35E2 ENSG00000196408|NOXO1 ENSG00000189019|FCGR1B ENSG00000205994|Q6ZM58\_HUMAN  
ENSG00000070269|C14orf101 ENSG00000083223|ZCCHC6 ENSG00000095787|WAC ENSG00000100629|C14orf145 ENSG00000101230|C20orf82 ENSG00000106689|LHX2 ENSG00000119139|TJP2 ENSG00000121895|TMEM156  
ENSG00000126814|TRMT5 ENSG00000128872|TMOD2 ENSG00000131016|AKAP12 ENSG00000134248|HBXIP ENSG00000135547|HEY2 ENSG00000150337|FCGR1A ENSG00000150403|TMCO3 ENSG00000157800|SLC37A3  
ENSG00000164494|PDSS2 ENSG00000165566|FAM123A ENSG00000171824|EXOS10 ENSG00000181019|NQO1 ENSG00000186665|C17orf58 ENSG00000187498|COL4A1 ENSG00000198648|STK39  
TGGACTA ENSG00000004866|ST7 ENSG00000100888|CHD8 ENSG00000105370|LIM2 ENSG00000105509|HAS1 ENSG00000120907|ADRA1A ENSG00000121577|POPDC2 ENSG00000129194|SOX15 ENSG00000158714|SLAMF8  
ENSG00000158716|DUSP23 ENSG00000158882|TOMM40L ENSG00000166167|BTRC ENSG00000171163|ZNF692 ENSG00000175602|CCDC85B ENSG00000176092|AIM1L ENSG00000176092|AIM1L ENSG00000176534|RL41\_HUMAN  
ENSG00000185650|ZFP36L1 ENSG00000186470|BTN3A2 ENSG00000204633|ACTN3 ENSG0000021826|CPS1 ENSG00000053900|ANAPC4 ENSG00000079387|SENP1 ENSG00000083635|NUFIP1 ENSG00000100372|SLC25A17  
ENSG00000112773|FAM46A ENSG00000114127|XRN1 ENSG00000115128|PM14\_HUMAN ENSG00000115165|PSCD8P ENSG00000131269|ABC7 ENSG00000138757|G3BP2 ENSG00000139131|YARS2 ENSG00000143344|RGL1  
ENSG00000162437|RAVER2 ENSG00000165076|NP\_001008271.1 ENSG00000169291|SHE ENSG00000170629|NP\_872440.2 ENSG00000175087|PDK1L1 ENSG00000177181|FAM80A ENSG00000189350|NP\_954974.2 ENSG00000204209|DAXX  
TGGACTG ENSG00000103066|LYPLA3 ENSG00000105875|NP\_054868.2 ENSG00000122861|PLAU ENSG00000125741|OPA3 ENSG00000149182|ZNF289 ENSG00000151498|ACAD8 ENSG00000153029|MR1 ENSG00000155506|LARP1  
ENSG00000160888|IER2 ENSG00000161671|NP\_996261.1 ENSG00000163352|LENEP ENSG00000163435|ELF3 ENSG00000164871|SPAG11B ENSG00000165556|CDX2 ENSG00000174527|MYO1H ENSG00000178287|SPAG11A  
ENSG00000185830|C22orf37 ENSG00000196456|ZNF775 ENSG00000203709|C1orf132 ENSG00000204120|TNRC15 ENSG00000204569|PPP1R10 ENSG00000066697|TMEFF1 ENSG00000070718|AP3M2 ENSG00000092148|HECTD1  
ENSG00000136143|SUCLA2 ENSG00000140832|MARVELD3 ENSG00000140873|ADAMTS18 ENSG00000141380|SS18 ENSG00000152503|TRIM36 ENSG00000155329|ZCHC5 ENSG00000171466|ZNF562 ENSG00000173705|SUSD5  
TGGACTT ENSG00000062822|POLD1 ENSG00000080815|PSEN1 ENSG00000086548|CEACAM6 ENSG00000088827|SIGLEC1 ENSG00000108292|MLLT6 ENSG00000116254|IRF1 ENSG00000125347|IRF1 ENSG00000134243|SORT1  
ENSG00000134690|CDC8A ENSG00000138166|DUSP5 ENSG00000146013|FCRA3 ENSG00000151882|CCL28 ENSG00000163472|TMEM79 ENSG00000163823|CCR1 ENSG00000164048|ZNF589 ENSG00000173349|SFT2D3  
ENSG00000178537|SLC25A20 ENSG00000180914|OXTR ENSG00000182580|EPHB3 ENSG00000186702|NP\_079360.1 ENSG00000187736|SLC23A3 ENSG00000188559|C20orf74 ENSG00000198722|UNC13B ENSG00000204049|Q6ZUH9\_HUMAN  
ENSG00000206193|Q5HYA3\_HUMAN ENSG000000019995|ZRBAN1 ENSG000000068784|SRBD1 ENSG00000074527|NTN4 ENSG00000104064|GABP2 ENSG00000108384|RAD51C ENSG00000113658|SMAD5 ENSG00000115009|CCL20  
ENSG00000127483|HP1BP3 ENSG00000128585|MKLN1 ENSG00000134759|ELP2 ENSG00000134954|ETS1 ENSG00000135413|LACRT ENSG00000145545|SRD5A1 ENSG00000146250|PRSS35 ENSG00000157426|NP\_861522.2  
ENSG00000159086|C21orf66 ENSG00000160679|C1orf77 ENSG00000162434|JAK1 ENSG00000163946|C3orf63 ENSG00000165630|PRPF18 ENSG00000178127|NDUFV2 ENSG00000188243|COMMD6 ENSG00000198795|ZNF521  
ENSG00000206384|Q69YT0\_HUMAN  
TGGAGAA ENSG00000004660|CAMKK1 ENSG00000008853|RHOTB2 ENSG00000078872|NFS1 ENSG00000100647|KIAA0247 ENSG00000102245|CD40LG ENSG00000121410|ALB6 ENSG00000125998|FAM83C ENSG00000140519|RHCG  
ENSG00000146021|KLHL3 ENSG00000147382|FAM58A ENSG00000148343|FAM73B ENSG00000164011|ZNF691 ENSG00000166104|NP\_776166.1 ENSG00000166123|GTM2 ENSG00000175699|C14orf48 ENSG00000175906|ARL4D  
ENSG00000178006|XR\_018006.1 ENSG00000181563|C1orf211 ENSG00000185739|SRL ENSG00000187033|SAMD7 ENSG00000197653|DNAH10 ENSG00000204616|TRIP31 ENSG00000204633|ACTN3 ENSG00000069849|ATP1B3

|         |                                |                              |                              |                                |                              |                              |                              |                                |
|---------|--------------------------------|------------------------------|------------------------------|--------------------------------|------------------------------|------------------------------|------------------------------|--------------------------------|
|         | ENSG00000072364 AFF4           | ENSG00000077943 ITGA8        | ENSG00000081148 IMPG2        | ENSG00000091844 RGS17          | ENSG00000107105 ELAVL2       | ENSG00000118596 SLC16A7      | ENSG00000123595 RAB9A        | ENSG00000132530 NP_954590.1    |
|         | ENSG00000136521 NDUFB5         | ENSG00000138029 HADHB        | ENSG00000138757 G3BP2        | ENSG00000142871 CYR61          | ENSG00000144357 ZNF650       | ENSG00000151893 C10orf46     | ENSG00000152443 ZNF776       | ENSG00000154874 NP_872374.3    |
|         | ENSG00000158185 ANKRD36        | ENSG00000162813 BPNT1        | ENSG00000163424 C3orf30      | ENSG00000165300 SLITRK5        | ENSG00000170847 RPS26P10     | ENSG00000170854 MINA         | ENSG00000179010 MRFAP1       | ENSG00000196912 AN36B_HUMAN    |
|         | ENSG00000196933 ANKRD6L1       | ENSG00000196946 ZNF705A      | ENSG00000197728 RS26_HUMAN   | ENSG00000198040 ZNF84          | ENSG00000198482 ZNF808       | ENSG00000204201 Q49A40_HUMAN | ENSG00000204219 TCEA3        | ENSG00000204604 ZNF468         |
| TGGATGT | ENSG00000054116 TRAPP3         | ENSG00000065675 PRKCQ        | ENSG00000089723 OTUB2        | ENSG00000125633 CCDC93         | ENSG00000136859 ANGPTL2      | ENSG00000143333 RGS16        | ENSG00000148408 CACNA1B      | ENSG00000158006 PAFAH2         |
|         | ENSG00000158882 TOMM40L        | ENSG00000160014 CALM_HUMAN   | ENSG00000162892 IL24         | ENSG00000163820 FYCO1          | ENSG00000165272 AQP3         | ENSG00000165643 SOHLH1       | ENSG00000166007 LOC399940    | ENSG00000166135 HIF1AN         |
|         | ENSG00000166908 PIP5K2C        | ENSG00000170430 MGMT         | ENSG00000175470 PPP2R2D      | ENSG00000182459 NP_997342.1    | ENSG00000183207 RUVBL2       | ENSG00000183600 Q66K37_HUMAN | ENSG00000185386 MAPK11       | ENSG00000198471 RTP2           |
|         | ENSG00000204455 XR_015868.1    | ENSG00000205927 OLIG2        | ENSG00000206751 SLAMF7       | ENSG00000203960 SOX30          | ENSG00000240288 TDP1         | ENSG00000101901 CXorf45      | ENSG00000102931 ARL2BP       | ENSG00000116497 S100PBP        |
|         | ENSG00000121742 GJB6           | ENSG00000122482 ZNF644       | ENSG00000126653 CCDC55       | ENSG00000127314 RAP1B          | ENSG00000127423 C1orf135     | ENSG00000132466 ANKRD17      | ENSG00000132639 SNAP25       | ENSG00000136240 KDEL2R         |
|         | ENSG00000146833 TRIM4          | ENSG00000150753 CCT5         | ENSG00000157131 C8A          | ENSG00000162520 SYNC1          | ENSG00000162545 CAMK2N1      | ENSG00000164182 NDUFA12L     | ENSG00000168204 O95014_HUMAN | ENSG00000170502 NUDT9          |
|         | ENSG00000172594 SMPDL3A        | ENSG00000176276 hCG_1757335  | ENSG00000180817 PPA1         | ENSG00000180881 CAPS2          | ENSG00000184307 ZDHHC23      | ENSG00000185875 THNSL1       | ENSG00000198468 Q8TAF5_HUMAN | ENSG00000203742 NP_001032308.1 |
| TGGATTA | ENSG00000074211 PPP2R2C        | ENSG00000082014 SMARCD3      | ENSG00000099977 DDT          | ENSG00000100024 UPB1           | ENSG00000104941 RSHL1        | ENSG00000105559 PLEKHA4      | ENSG00000116809 ZBTB17       | ENSG00000116984 MTR            |
|         | ENSG00000117020 AKT3           | ENSG00000123329 ARHGAP9      | ENSG00000123992 DNPEP        | ENSG00000130635 COL5A1         | ENSG00000155026 NM_173565.2  | ENSG00000160200 CBS          | ENSG00000160710 ADAR         | ENSG00000166484 MAPK7          |
|         | ENSG00000169402 NP_775836.2    | ENSG00000176531 PHLDB3       | ENSG00000186919 LGICZ1       | ENSG00000198700 IPO9           | ENSG00000200700 UPP2         | ENSG00000204596 DNAH5        | ENSG00000278579 FGF20        | ENSG00000285224 ATRX           |
|         | ENSG00000091009 RBM27          | ENSG00000100567 PSMA3        | ENSG00000102174 PHEX         | ENSG00000107362 FAM108B1       | ENSG00000114391 RPL24        | ENSG00000115091 ACTR3        | ENSG00000153989 NUS1         | ENSG00000156136 DCK            |
|         | ENSG00000162722 TRIM58         | ENSG00000164414 SLC35A1      | ENSG00000164933 SLC25A32     | ENSG00000167186 COQ7           | ENSG00000168502 KIAA0802     | ENSG00000169612 FAM103A1     | ENSG00000173276 ZNF295       | ENSG00000182899 RPL35A         |
|         | ENSG00000185973 TMLHE          | ENSG00000186487 MYT1L        | ENSG00000187109 NAP1L1       | ENSG00000196344 ADH7           | ENSG00000197142 ACSL5        | ENSG00000197756 RPL37A       | ENSG00000198771 RCSD1        | ENSG00000198824 C13orf8        |
| TGGATTC | ENSG00000057704 TMCC3          | ENSG00000067829 IDH3G        | ENSG00000080031 PTPRH        | ENSG00000088367 EPB41L1        | ENSG00000104365 IKBK         | ENSG00000110583 NAT11        | ENSG00000123360 PDE1B        | ENSG00000132376 SKIP_HUMAN     |
|         | ENSG00000135436 C12orf25       | ENSG00000136859 ANGPTL2      | ENSG00000141744 PNMT         | ENSG00000151474 FRMD4A         | ENSG00000155256 ZFYVE27      | ENSG00000155886 SLC24A2      | ENSG00000171992 SYNPO        | ENSG00000176762 Q8N1N1_HUMAN   |
|         | ENSG00000177721 NP_001014301.1 | ENSG00000180424 DEFB123      | ENSG00000185117 NR_002733.1  | ENSG00000185187 SIGIRR         | ENSG00000058673 ZC3H11A      | ENSG00000078369 GNB1         | ENSG00000101846 STS          | ENSG00000124120 C20orf121      |
|         | ENSG00000126838 PZP            | ENSG00000135374 ELF5         | ENSG00000152234 ATP5A1       | ENSG00000152620 C5orf33        | ENSG00000163377 FAM19A       | ENSG00000163840 DTX3L        | ENSG00000166197 NOLC1        | ENSG00000169193 CCDC126        |
|         | ENSG00000174429 ABRA           | ENSG00000187676 B3GALTL      | ENSG00000197576 HOXA4        | ENSG00000204038 Q6ZRL6_HUMAN   | ENSG00000204178 TMEM57       | ENSG00000204596 RPP21        | ENSG00000205885 Q6UWM6_HUMAN |                                |
| TGGATTG | ENSG00000092067 CEBPE          | ENSG00000123992 DNPEP        | ENSG00000124164 VAPB         | ENSG00000126264 HCST           | ENSG00000130810 PPAN         | ENSG00000131477 RAMP2        | ENSG00000149646 C20orf152    | ENSG00000154957 ZNF18          |
|         | ENSG00000158748 HTR6           | ENSG00000162066 AMDHD2       | ENSG00000170889 RPS9         | ENSG00000171703 TCEA2          | ENSG00000182541 LIMK2        | ENSG00000198618 PIIA_HUMAN   | ENSG00000205851 Q4G0H1_HUMAN | ENSG000002010818 HIVEP2        |
|         | ENSG00000135611 RNF14          | ENSG00000221602 KLRA1        | ENSG00000048828 FAM120A      | ENSG00000054803 CBLN4          | ENSG00000068615 REEP1        | ENSG00000092148 HECTD1       | ENSG00000110851 PRDM4        | ENSG00000115875 SFRS7          |
|         | ENSG00000116251 RPL22          | ENSG00000119401 TRIM32       | ENSG00000130349 C6orf203     | ENSG00000132670 PTPRA          | ENSG00000136754 AB11         | ENSG00000147145 GPR23        | ENSG00000147586 MRPS28       | ENSG00000159592 GPBP1L1        |
|         | ENSG00000167081 PBX3           | ENSG00000171360 KRM138       | ENSG00000181264 TMEM136      | ENSG00000188085 NP_997320.1    | ENSG00000198783 CCDC16       |                              |                              |                                |
| TGGCAAA | ENSG00000066135 JMJD2A         | ENSG00000100767 PAPLN        | ENSG00000103264 FBXO31       | ENSG00000103966 EHD4           | ENSG00000115884 SDC1         | ENSG00000125089 SH3TC1       | ENSG00000141096 DPEP3        | ENSG00000143140 GJA5           |
|         | ENSG00000161929 NP_996986.1    | ENSG00000167065 DUSP18       | ENSG00000169006 NTR2         | ENSG00000172818 OVOL1          | ENSG00000178934 LEG7_HUMAN   | ENSG00000180139 Q8N9Z5_HUMAN | ENSG00000185674 LYG2_HUMAN   | ENSG00000185744 TNT_HUMAN      |
|         | ENSG00000187975 NP_001003682.1 | ENSG00000198561 CTNND1       | ENSG00000198690 MTMR15       | ENSG00000205076 LGALS7         | ENSG00000205313 FAM106A      | ENSG00000205955 ZNF403       | ENSG00000211295 TTC19        | ENSG00000219995 ZNRANB1        |
|         | ENSG00000047597 XK             | ENSG00000078053 AMPH         | ENSG00000081665 ZNF253       | ENSG00000105750 ZNF85          | ENSG00000109519 GREP1L       | ENSG00000112319 EYA4         | ENSG00000118322 ATP10B       | ENSG00000129480 C14orf126      |
|         | ENSG00000145425 RPS3A          | ENSG00000152785 BMP3         | ENSG00000160336 ZNF761       | ENSG00000160352 ZNF714         | ENSG00000161905 ALOX15       | ENSG00000164442 C1TED2       | ENSG00000164756 SLC30A8      | ENSG00000165800 CASP7          |
|         | ENSG00000171476 HOP_HUMAN      | ENSG00000173610 UGT2A1       | ENSG00000176236 C10orf111    | ENSG00000180332 KCTD4          | ENSG00000180370 PAK2         | ENSG00000185849 Q9P194_HUMAN | ENSG00000189190 ZNF600       | ENSG00000196268 ZNF493         |
|         | ENSG00000196705 ZNF431         | ENSG00000197594 ENPP1        | ENSG00000197619 ZNF615       | ENSG00000198538 ZNF28          | ENSG00000204604 ZNF468       |                              |                              |                                |
| TGGCACT | ENSG0000007541 PIGQ            | ENSG00000065618 COL17A1      | ENSG00000070731 ST6GALNAC2   | ENSG00000081692 JMJD4          | ENSG00000100060 MFNG         | ENSG00000100239 SAPS2        | ENSG00000106638 TBL2         | ENSG00000119227 PIGZ           |
|         | ENSG00000124444 ZNF576         | ENSG00000124762 CDKN1A       | ENSG00000131504 DIAPH1       | ENSG00000149305 HTR3B          | ENSG00000158747 NBL1         | ENSG00000163431 LMOD1        | ENSG00000164061 BSN          | ENSG00000167523 C16orf55       |
|         | ENSG00000174744 BRMS1          | ENSG00000174851 YIF1A        | ENSG00000176973 FAM89B       | ENSG00000185602 ARHGAP27       | ENSG00000185651 UBE2L3       | ENSG00000188706 ZDHHC9       | ENSG00000197976 CXorf3       | ENSG00000205181 QOVF22_HUMAN   |
|         | ENSG00000205653 Q6ZUF2_HUMAN   | ENSG00000205923 CEMP1        | ENSG0000031003 C5orf5        | ENSG00000054267 ARID4B         | ENSG000000067048 DDX3X       | ENSG00000172803 FBXW11       | ENSG00000085721 RRN3         | ENSG00000089472 HEPH           |
|         | ENSG00000092148 HECTD1         | ENSG00000099940 SNAP29       | ENSG00000100522 GNFAT1       | ENSG00000102053 ZC3H12B        | ENSG00000104863 LIN7B        | ENSG00000113643 RARS         | ENSG00000115540 PREI3        | ENSG00000121210 KIAA0922       |
|         | ENSG00000133657 ATP13A3        | ENSG00000135541 AH11         | ENSG00000152022 LX1L         | ENSG00000152332 UHMK1          | ENSG00000163534 FCRL1        | ENSG00000164258 NDUFS4       | ENSG00000172465 TCEAL1       | ENSG00000177640 CASC2          |
|         | ENSG00000185591 SP1            | ENSG00000197412 Q8N8G3_HUMAN | ENSG00000203743 Q5J7V3_HUMAN |                                |                              |                              |                              |                                |
| TGGCATA | ENSG00000006194 ZNF263         | ENSG00000057704 TMCC3        | ENSG00000073146 MOV10L1      | ENSG00000103023 NP_001073961.1 | ENSG00000103222 ABCC1        | ENSG00000104518 GSDMDC1      | ENSG00000114735 HEMK1        | ENSG00000116661 FBXO2          |
|         | ENSG00000122359 ANXA11         | ENSG00000134107 BHLHB2       | ENSG00000134339 SAA2         | ENSG00000138780 GSTCD          | ENSG00000141026 MED9         | ENSG00000141570 CBX8         | ENSG00000142207 URB1         | ENSG00000143297 FCRL5          |
|         | ENSG00000148296 SURF6          | ENSG00000167941 SOST         | ENSG00000168237 NP_660305.2  | ENSG00000168758 SEMA4C         | ENSG00000169184 NM_002430.2  | ENSG00000170420 APOL6        | ENSG00000176946 THAP4        | ENSG00000178952 TUFM           |
|         | ENSG00000179240 Q3ZCUO_HUMAN   | ENSG00000180878 C11orf42     | ENSG00000196365 LONP1        | ENSG00000204248 COL11A2        | ENSG00000205804 Q5T6R2_HUMAN | ENSG00000067560 RHOA         | ENSG00000076382 SPAG5        | ENSG00000105216 LSM14A         |
|         | ENSG00000105967 TFEC           | ENSG00000110318 KIAA1377     | ENSG00000115091 ACTR3        | ENSG00000115944 COX7A2L        | ENSG00000116560 SFPQ         | ENSG00000120586 MRC1         | ENSG00000124275 MTRR         | ENSG00000129682 FGF13          |
|         | ENSG00000131002 Cyorf15B       | ENSG00000131174 COX7B        | ENSG00000134324 LPIN1        | ENSG00000135655 USP15          | ENSG00000147853 AK3          | ENSG00000150540 HNMT         | ENSG00000151090 THRB         | ENSG00000164924 YWHAZ          |
|         | ENSG00000165186 PTCHD1         | ENSG00000165694 FRMD7        | ENSG00000170558 CDH2         | ENSG00000174944 P2RY14         | ENSG00000176624 RKHD2        | ENSG00000181019 NQO1         | ENSG00000183748 MRC1L1       | ENSG00000197959 DNM3           |
|         | ENSG00000198169 ZNF251         |                              |                              |                                |                              |                              |                              |                                |
| TGGCATC | ENSG0000013573 DDX11           | ENSG00000099972 MICAL3       | ENSG00000120457 KCNJ5        | ENSG00000125347 IRF1           | ENSG00000133980 C14orf115    | ENSG00000136444 RSAD1        | ENSG00000136487 GH2          | ENSG00000154096 THY1           |
|         | ENSG00000156515 HK1            | ENSG00000161939 C17orf49     | ENSG00000163263 C1orf189     | ENSG00000167535 CACNB3         | ENSG00000167741 GGT6         | ENSG00000168453 HR           | ENSG00000178645 C10orf53     | ENSG00000180935 Q8N8B3_HUMAN   |
|         | ENSG00000182117 NOLA3          | ENSG00000183018 SPNS2        | ENSG00000189162 CSH1         | ENSG00000196273 C14orf70       | ENSG00000198437 Q8N0T2_HUMAN | ENSG00000204414 CSHL1        | ENSG00000204582 Q6Z2R2_HUMAN | ENSG00000207511 DLG1           |
|         | ENSG00000087053 MTMR2          | ENSG00000102524 TNFSF13B     | ENSG00000115541 HSPF1        | ENSG00000116922 C1orf109       | ENSG00000122126 OCLR         | ENSG00000133302 ANKRD32      | ENSG00000135374 ELF5         | ENSG00000137806 NDUFAF1        |
|         | ENSG00000141428 C18orf21       | ENSG00000150867 PIP5K2A      | ENSG00000151849 CENPJ        | ENSG00000154645 CHODL          | ENSG00000156218 ADAMTSL3     | ENSG00000163291 PAQR3        | ENSG00000169340 NP_777584.1  | ENSG00000175746 NP_997328.1    |
|         | ENSG00000182333 LIPF           | ENSG00000198178 CLEC4C       | ENSG00000204757 Q6ZTL5_HUMAN |                                |                              |                              |                              |                                |
| TGGCATG | ENSG00000063015 SEZ6           | ENSG00000104812 GYS1         | ENSG00000112977 DAP          | ENSG00000117266 PCTK3          | ENSG00000126698 DNAJC8       | ENSG00000130307 USHBP1       | ENSG00000130950 FAM22F       | ENSG00000136367 ZFH2           |
|         | ENSG00000143127 ITGA10         | ENSG00000143816 WNT9A        | ENSG00000151348 EXT2         | ENSG00000163239 TDRD10         | ENSG00000163812 ZDHHC3       | ENSG00000167985 C11orf79     | ENSG00000169247 SH3TC2       | ENSG00000181873 C1orf69        |
|         | ENSG00000203793 Q6ZR74_HUMAN   | ENSG00000204443 Q562T6_HUMAN | ENSG00000206193 Q5HYA3_HUMAN |                                |                              |                              |                              |                                |
|         | ENSG00000108384 RAD51C         | ENSG00000109133 TMEM33       | ENSG00000114948 ADAM23       | ENSG00000119965 C10orf88       | ENSG00000129699 NP_067644.2  | ENSG00000133059 RIPK5        | ENSG00000144410 CPO          | ENSG00000162643 WDR63          |
|         | ENSG00000168461 RAB31          | ENSG00000173387 Q9P007_HUMAN | ENSG00000176871 WSB2         | ENSG00000179532 C11orf47       | ENSG00000179859 LOC284023    | ENSG00000180869 C1orf180     | ENSG00000183952 Q9H5Q9_HUMAN | ENSG00000196660 SLC30A10       |
|         | ENSG00000197223 NP_006324.1    | ENSG00000198944 ANKRD43      | ENSG00000205777 GAGE4        |                                |                              |                              |                              |                                |
| TGGCATT | ENSG0000008516 MMP25           | ENSG0000018625 ATP1A2        | ENSG00000209993 HMG3         | ENSG00000056998 GYG2           | ENSG00000082684 SEMA5B       | ENSG00000099797 GPSN2        | ENSG00000100422 CERK         | ENSG00000114302 PRKAR2A        |
|         | ENSG00000119682 KIAA0317       | ENSG00000121104 FAM117A      | ENSG00000130803 ZNF317       | ENSG00000131113 PSG1           | ENSG00000136827 TOR1A        | ENSG00000137275 RIPK1        | ENSG00000143786 CNIH3        | ENSG00000151208 DLG5           |
|         | ENSG00000165821 SALL2          | ENSG00000168397 ATG4B        | ENSG00000169094 PLEKHQ1      | ENSG00000172183 ISG20          | ENSG00000180304 OAZ2         | ENSG00000180935 Q8N8B3_HUMAN | ENSG00000184785 Q96HG1_HUMAN | ENSG00000198700 IPO9           |
|         | ENSG00000198879 SFBMT2         | ENSG00000205804 Q5T6R2_HUMAN | ENSG00000067955 CBFB         | ENSG00000085365 SCAMP1         | ENSG00000094840 CDC6         | ENSG00000102531 FNDC3A       | ENSG00000105851 PIK3CG       | ENSG00000106031 HOXA13         |
|         | ENSG00000109184 DCUN1D4        | ENSG00000112319 EYA4         | ENSG00000114942 EEF1B2       | ENSG00000119396 RAB14          | ENSG00000119862 NP_054900.1  | ENSG00000125249 RAP2A        | ENSG00000131174 COX7B        | ENSG00000136888 ATP6V1G1       |
|         | ENSG00000153684 NP_001012455.1 | ENSG00000162695 SLC30A7      | ENSG00000163637 PRICKLE2     | ENSG00000168118 RAB4A          | EN                           |                              |                              |                                |

|         |                                |                                |                                |                              |                             |                              |                                |                              |
|---------|--------------------------------|--------------------------------|--------------------------------|------------------------------|-----------------------------|------------------------------|--------------------------------|------------------------------|
|         | ENSG00000114770 ABCC5          | ENSG00000119782 FKBP1B         | ENSG00000128594 LRRC4          | ENSG00000145626 UGT3A1       | ENSG00000147457 CHMP7       | ENSG00000150455 TIRAP        | ENSG00000153060 TEKT5          | ENSG00000155660 PDIA4        |
|         | ENSG00000161944 ASGR2          | ENSG00000162896 PIGR           | ENSG00000165059 PRKACG         | ENSG00000168906 MATA2        | ENSG00000177700 POLR2L      | ENSG00000178719 GRINA        | ENSG00000180914 OXR7           | ENSG00000185022 MAFF         |
|         | ENSG00000185831 NR_003081.1    | ENSG00000186810 CXCR3          | ENSG00000198520 NP_001004307.1 | ENSG0000010025156 HSF2       | ENSG00000050130 C14orf100   | ENSG000000081913 PHLPP       | ENSG000000086061 DNAJA1        | ENSG000000099256 PRTFDC1     |
|         | ENSG00000108854 SMURF2         | ENSG00000109519 GRPEL1         | ENSG00000112238 PRDM13         | ENSG00000117289 TXNIP1       | ENSG00000119844 AFTPH       | ENSG00000120549 KIAA1217     | ENSG00000122299 ZC3H7A         | ENSG00000125899 C20orf187    |
|         | ENSG00000131482 G6PC           | ENSG00000135697 BCMO1          | ENSG00000136982 NP_076999.1    | ENSG00000137770 CTDSP2       | ENSG00000139323 WDR51B      | ENSG00000140391 TSPAN3       | ENSG00000143149 ALDH9A1        | ENSG00000147316 MCPH1        |
| TGGCGTC | ENSG00000163281 GNPDA2         | ENSG00000163377 FAM19A4        | ENSG00000172315 TP53RK         | ENSG00000180287 PLD5         | ENSG00000186188 GPR120      | ENSG00000196072 BLOC1S2      |                                |                              |
|         | ENSG00000043143 PHF15          | ENSG00000064489 MEF2B          | ENSG00000101152 DNAJC5         | ENSG00000103266 STUB1        | ENSG00000104880 ARHGEF18    | ENSG00000104883 PEX11G       | ENSG00000111644 ACRBP          | ENSG00000114270 COL7A1       |
|         | ENSG00000125875 TBC1D20        | ENSG00000130300 PLVAP          | ENSG00000158517 NCF1           | ENSG00000159339 PADI4        | ENSG00000160796 NBEAL2      | ENSG00000163395 NP_840059.1  | ENSG00000165178 LOC648998      | ENSG00000169682 LAT          |
|         | ENSG00000170525 PFKFB3         | ENSG00000171401 KRT13          | ENSG00000175567 UCP2           | ENSG00000178821 TMEM52       | ENSG00000182487 NCF1C       | ENSG00000183605 SFXN4        | ENSG00000196415 PRTN3          | ENSG00000205710 Q6ZRU5_HUMAN |
|         | ENSG00000065183 WDR3           | ENSG00000065665 SEC61A2        | ENSG00000079102 RXN1T1         | ENSG00000100262 ARFGAP3      | ENSG00000100425 BRD1        | ENSG00000102837 OLFEM4       | ENSG00000102908 NFAT5          | ENSG00000103671 TRIP4        |
|         | ENSG00000106524 ANKMY2         | ENSG00000111670 GNPTAB         | ENSG00000111790 FUGR10P2       | ENSG00000123636 BAZ2B        | ENSG00000125245 GPR18       | ENSG00000126777 PATN1        | ENSG00000131620 TMEM16A        | ENSG00000132763 MMACHC       |
|         | ENSG00000133812 SBF2           | ENSG00000139180 NDUFA9         | ENSG00000149187 CUGBP1         | ENSG00000153574 RPIA         | ENSG00000155324 GRAMD3      | ENSG00000157212 KXN1P        | ENSG00000164128 NPY1R          | ENSG00000166292 TMEM100      |
|         | ENSG00000166295 C10orf104      | ENSG00000171311 EXOSC1         | ENSG00000185275 CD24           | ENSG00000186334 SLC36A3      |                             |                              |                                |                              |
| TGGCTAA | ENSG00000103023 NP_001073961.1 | ENSG00000108786 HSD17B1        | ENSG00000112320 SOBP           | ENSG00000116273 PHF13        | ENSG00000118257 NRP2        | ENSG00000121152 NCAPH        | ENSG00000124249 KCNK15         | ENSG00000138942 RNF185       |
|         | ENSG00000142765 SYTL1          | ENSG00000158748 HTR6           | ENSG00000166143 PPP1R14D       | ENSG00000166165 CKB          | ENSG00000166965 RCCD1       | ENSG00000171722 C1orf111     | ENSG00000171855 IFNB1          | ENSG00000172940 SLC22A13     |
|         | ENSG00000173786 CNP            | ENSG00000173862 Q9NWP0_HUMAN   | ENSG00000178226 PRSS36         | ENSG00000186190 C20orf185    | ENSG00000188554 NBR1        | ENSG00000197296 C20orf142    | ENSG00000135033 POLR3B         | ENSG00000034239 EFCAB1       |
|         | ENSG00000080839 RBL1           | ENSG00000093134 VNN3           | ENSG00000106993 CDC37L1        | ENSG00000110218 PANX1        | ENSG00000112245 PTFA1       | ENSG00000115808 STRN         | ENSG00000118816 CCN1           | ENSG00000135847 ACBD6        |
|         | ENSG00000138685 FGF2           | ENSG00000152268 SPON1          | ENSG00000154310 TNIK           | ENSG00000154654 NCAM2        | ENSG00000159140 SON         | ENSG00000163006 NP_659415.1  | ENSG00000164116 GUCY1A3        | ENSG00000164122 ASB5         |
|         | ENSG00000164746 Q8NEG2_HUMAN   | ENSG00000170786 NP_620419.2    | ENSG00000171502 COL2A4L1       | ENSG00000176142 TMEM39A      | ENSG00000181004 BBS12       | ENSG00000184895 SRY          | ENSG00000185417 CXorf1         |                              |
| TGGCTCA | ENSG0000012124 CD22            | ENSG00000068028 RASSF1         | ENSG00000071246 VASH1          | ENSG00000101445 PPP1R16B     | ENSG00000112763 BTN2A1      | ENSG00000115207 GTF3C2       | ENSG00000115268 RPS15          | ENSG00000123901 GPR83        |
|         | ENSG00000124508 BTN2A2         | ENSG00000154478 GPR26          | ENSG00000156860 FBRS           | ENSG00000164047 CAMP         | ENSG00000166548 TK2         | ENSG00000167861 C17orf28     | ENSG00000168826 ZNF509         | ENSG00000171357 C1orf190     |
|         | ENSG00000171872 KLF17          | ENSG00000172780 RAB43          | ENSG00000172782 FADS6          | ENSG00000175662 TOML1L2      | ENSG00000176754 C1orf157    | ENSG00000180198 RCC1         | ENSG00000181885 CLDN7          | ENSG00000188394 GPR21        |
|         | ENSG00000204490 TNF            | ENSG00000205913 Q6ZUC4_HUMAN   | ENSG00000042781 USH2A          | ENSG00000104765 BNIP3L       | ENSG00000108389 MTMR4       | ENSG00000109189 USP46        | ENSG00000110484 SCGB2A2        | ENSG00000112306 RPS12        |
|         | ENSG00000112425 EPM2A          | ENSG00000124193 SFRS6          | ENSG00000124939 SCGB2A1        | ENSG00000134986 C5orf13      | ENSG00000156697 UTP14A      | ENSG00000160181 TFF2         | ENSG00000166986 MARS           | ENSG00000170074 NP_775934.3  |
|         | ENSG00000171365 CLCN5          | ENSG00000186432 KPNAA4         | ENSG00000187068 NP_001020437.1 | ENSG00000187123 LYPD6        | ENSG00000188611 ASAH2C      | ENSG00000196357 ZNF565       |                                |                              |
| TGGGACT | ENSG00000004399 PLXND1         | ENSG00000090273 NUDC           | ENSG00000100401 RANGAP1        | ENSG00000100949 RABGGTA      | ENSG00000106638 TBL2        | ENSG00000119946 CNNM1        | ENSG00000120318 CENTD3         | ENSG00000127226 NP_116072.2  |
|         | ENSG00000133398 MED10          | ENSG00000134595 SOX3           | ENSG00000137331 IER3           | ENSG00000143373 ZNF687       | ENSG00000159202 UBE2Z       | ENSG00000159556 ISL2         | ENSG00000162585 C1orf86        | ENSG00000166189 HPS6         |
|         | ENSG00000167992 VWCE           | ENSG00000173153 ESRRA          | ENSG00000173805 HAP1           | ENSG00000174206 NP_689653.3  | ENSG00000179823 XR_017713.1 | ENSG00000183386 FHL3         | ENSG00000189410 SH2D5          | ENSG00000024048 UBR2         |
|         | ENSG00000106536 POU6F2         | ENSG00000115084 SLC35F5        | ENSG00000119139 TUF2           | ENSG00000123066 THRAP2       | ENSG00000125945 ZNF436      | ENSG00000133112 TPT1         | ENSG00000133641 C12orf29       | ENSG00000135821 GLUL         |
|         | ENSG00000141655 TNFRSF11A      | ENSG00000142615 ELA2A_HUMAN    | ENSG00000144749 LRIG1          | ENSG00000145147 SLIT2        | ENSG00000145675 PIK3R1      | ENSG00000156017 C9orf41      | ENSG00000161010 NP_001017987.1 | ENSG00000170006 TMEM154      |
|         | ENSG00000171217 CLDN20         | ENSG00000185305 ARL15          | ENSG00000198876 WDR40A         |                              |                             |                              |                                |                              |
| TGGGATC | ENSG00000006210 CX3CL1         | ENSG00000047849 MAP4           | ENSG00000075826 BEC31B         | ENSG00000129270 MMP28        | ENSG00000130477 UNC13A      | ENSG00000134369 NAV1         | ENSG00000141985 SH3GL1         |                              |
|         | ENSG00000151468 CDC3           | ENSG00000169314 C22orf15       | ENSG00000169627 SOLA2B         | ENSG00000173846 PLK3         | ENSG00000174903 RAB1B       | ENSG00000178081 LOC653075    | ENSG00000186844 LCE1A          | ENSG00000204080 Q6ZRU9_HUMAN |
|         | ENSG00000204619 PPP1R11        | ENSG00000206152 Q6ZV52_HUMAN   | ENSG00000037474 NSUN2          | ENSG00000079156 OSBP1L       | ENSG00000118729 CASQ2       | ENSG00000125037 TMEM111      | ENSG00000132388 UBE2G1         | ENSG00000135413 LACRT        |
|         | ENSG00000135999 EPC2           | ENSG00000137462 TLR2           | ENSG00000143190 POU2F1         | ENSG00000153187 HNRPU        | ENSG00000153879 CEBPG       | ENSG00000158528 PPP1R9A      | ENSG00000164684 ZNF704         | ENSG00000169071 ROR2         |
|         | ENSG00000169116 PARG_HUMAN     | ENSG00000169564 PCBP1          | ENSG00000198130 HIBCH          | ENSG00000204560 DHX16        |                             |                              |                                |                              |
| TGGGCAT | ENSG00000049769 PPP1R3F        | ENSG00000058085 LAMC2          | ENSG00000060558 GNA15          | ENSG00000070404 FSTL3        | ENSG00000083307 GRHL2       | ENSG00000107738 C10orf54     | ENSG00000122711 SPINK4         | ENSG00000123353 ORMDL2       |
|         | ENSG00000125449 ARMC7          | ENSG00000128944 C15orf23       | ENSG00000134955 SLC37A2        | ENSG00000139880 CDH24        | ENSG00000152705 CATSPER3    | ENSG00000158710 TAGLN2       | ENSG00000160917 CPSF4          | ENSG00000161998 Q8N221_HUMAN |
|         | ENSG00000163915 C3orf65        | ENSG00000169598 DFEB           | ENSG00000171631 P2RY6          | ENSG00000180358 Q8N1X6_HUMAN | ENSG00000182704 TSKU        | ENSG00000182857 Q6P168_HUMAN | ENSG00000183762 KREMEN1        | ENSG00000184216 IRAK1        |
|         | ENSG00000186702 NP_079360.1    | ENSG00000196166 NP_997295.1    | ENSG00000205270 Q6P168_HUMAN   | ENSG00000205270 Q6P168_HUMAN | ENSG00000113594 LIFR        | ENSG00000115170 ACVR1        | ENSG00000137720 C11orf1        | ENSG00000146963 LUC7L2       |
|         | ENSG00000147679 C8orf53        | ENSG00000154548 SRR35_HUMAN    | ENSG00000163444 TMEM183B       | ENSG00000164823 OSGIN2       | ENSG00000165023 DIRAS2      | ENSG00000173041 ZNF680       | ENSG00000176641 RNF152         | ENSG00000188611 ASAH2C       |
| TGGGCTG | ENSG00000004139 SARM1          | ENSG00000005381 MPO            | ENSG00000011028 MRC2           | ENSG00000027847 B4GALT7      | ENSG00000052344 PRSS8       | ENSG00000064205 WISP2        | ENSG00000067225 PKM2           | ENSG00000073350 LLGL2        |
|         | ENSG00000073598 FNDC8          | ENSG00000076864 RAP1GAP        | ENSG00000082684 SEMA5B         | ENSG00000091622 PITPNM3      | ENSG00000099840 C19orf36    | ENSG00000099904 ZDHHC8       | ENSG00000102057 KCND1          | ENSG00000103148 C16orf35     |
|         | ENSG00000103266 STUB1          | ENSG00000110665 C11orf21       | ENSG00000125149 C16orf70       | ENSG00000130165 ELOF1        | ENSG00000131748 STARD3      | ENSG00000132681 ATP1A4       | ENSG00000136448 NMT1           | ENSG00000159261 CLDN14       |
|         | ENSG00000160392 C19orf47       | ENSG00000165804 ZNF219         | ENSG00000169991 Q5TF58_HUMAN   | ENSG00000171992 SYNPO        | ENSG00000172057 ORMDL3      | ENSG00000179141 Q8N642_HUMAN | ENSG00000182704 TSKU           | ENSG00000185818 NAT8L        |
|         | ENSG00000187695 Q6ZUG5_HUMAN   | ENSG00000188976 NOC2L          | ENSG00000197558 Q7B6B1_HUMAN   | ENSG00000198324 FAM109A      | ENSG00000009780 FAM76A      | ENSG00000024048 UBR2         | ENSG00000070061 KKBKAP         | ENSG00000089053 ANAPC5       |
|         | ENSG00000110693 SOX6           | ENSG00000116251 RPL22          | ENSG00000119725 ZNF410         | ENSG00000119801 YPEL5        | ENSG00000121579 NAT13       | ENSG00000143486 LGTN         | ENSG00000154122 ANKH           | ENSG00000157680 DGKI         |
|         | ENSG00000159212 CLIC6          | ENSG00000162702 ZNF281         | ENSG00000168172 HOOK3          | ENSG00000171617 ENC1         | ENSG00000172197 MBOAT1      | ENSG00000172840 PDP2_HUMAN   | ENSG00000177981 ASB8           | ENSG00000182263 FIGN         |
|         | ENSG00000184943 NP_443103.1    | ENSG00000205921 C21orf54       |                                |                              |                             |                              |                                |                              |
| TGGGGAT | ENSG000000203747 FCGR3A        | ENSG00000004939 SLC4A1         | ENSG00000055950 MRPL43         | ENSG00000060566 CREB3L3      | ENSG00000066135 JMJD2A      | ENSG00000068400 GRIPAP1      | ENSG00000084652 TXLNA          | ENSG00000099364 FBXL19       |
|         | ENSG00000100207 TCF20          | ENSG00000107147 KCNK1          | ENSG00000107185 KIAA0258       | ENSG00000126353 CCR7         | ENSG00000128482 ZNF179      | ENSG00000130584 ZBTB46       | ENSG00000133874 RNF122         | ENSG00000135916 ITM2C        |
|         | ENSG00000139112 GABARAPL1      | ENSG00000143196 DPT            | ENSG00000144596 GRIP2          | ENSG00000153406 NMRAL1       | ENSG00000163286 PPBN_HUMAN  | ENSG00000163481 RNF25        | ENSG00000175538 KCNE3          | ENSG00000177886 Q8N819_HUMAN |
|         | ENSG00000204394 VARS           | ENSG00000205138 NP_001036096.1 | ENSG00000205913 Q6ZUC4_HUMAN   | ENSG00000206189 NP_001550.1  |                             |                              |                                |                              |
|         | ENSG00000112695 COX7A2         | ENSG00000116285 ERRF1          | ENSG00000117153 KLHL12         | ENSG00000118434 SPACA1       | ENSG00000118985 ELL2        | ENSG00000134057 CCNB1        | ENSG00000136242 Q9NXD8_HUMAN   | ENSG00000138814 PPP3CA       |
|         | ENSG00000148730 EIF4EBP2       | ENSG00000162747 FCGR3B         | ENSG00000164265 SCGB3A2        | ENSG00000165259 CXorf43      | ENSG00000167528 ZNF641      | ENSG00000169567 HINT1        | ENSG00000173614 NMNAT1         | ENSG00000174038 C9orf131     |
| TGGGGCA | ENSG00000179295 PTPN11         | ENSG00000181192 DHTKD1         | ENSG00000184254 ALDH1A3        |                              |                             |                              |                                |                              |
|         | ENSG00000042445 RETSAT         | ENSG00000060656 PTPRU          | ENSG00000083845 RPS5           | ENSG00000090273 NUDC         | ENSG00000099341 PSMD8       | ENSG00000100242 UNC84B       | ENSG00000106948 AKNA           | ENSG00000108591 DRG2         |
|         | ENSG00000108830 RND2           | ENSG00000109111 SUPP6H         | ENSG00000110324 ILL10RA        | ENSG00000114853 ZBTB47       | ENSG00000117016 RIMS3       | ENSG00000117899 MEB5D2       | ENSG00000129654 FOXJ1          | ENSG00000132793 LPIN3        |
|         | ENSG00000134640 MTNR1B         | ENSG00000140474 ULK3           | ENSG00000145214 DGKQ           | ENSG00000160072 ATAD3B       | ENSG00000160318 CLDN2       | ENSG00000173421 CCDC36       | ENSG00000173959 RBM14          | ENSG00000174080 CTSF         |
|         | ENSG00000178038 ALS2CL         | ENSG00000182218 KIAA1822       | ENSG00000186350 RXRA           | ENSG00000187942 LDLRAD2      | ENSG00000196700 ZNF512B     | ENSG00000204256 BRD2         | ENSG00000205356 NP_056210.1    | ENSG00000025293 PHF20        |
|         | ENSG00000131080 EDA2R          | ENSG00000131979 GCH1           | ENSG00000133678 CJ057_HUMAN    | ENSG00000135720 DYNCL1I2     | ENSG00000136122 C13orf34    | ENSG00000139146 FAM60A       | ENSG00000145982 FARS2          | ENSG00000151623 NR3C2        |
|         | ENSG00000156395 SORCS3         | ENSG00000165417 GTF2A1         | ENSG00000179981 TSHZ1          | ENSG00000181234 TMEM132C     | ENSG00000196616 ADH1C       | ENSG00000196917 GPR81        | ENSG00000198081 ZFP161         | ENSG00000203729 C1orf120     |
| TGGGGGA | ENSG00000076928 ARHGEF1        | ENSG00000099364 FBXL19         | ENSG00000100253 MIOX           | ENSG00000100311 PDGFB        | ENSG00000101282 RSPO4       | ENSG00000109501 WFS1         | ENSG00000112041 TULP1          | ENSG00000114742 TSPAN1       |
|         | ENSG00000119522 DENND1A        | ENSG00000122515 ZMIZ2          | ENSG00000128016 ZFP36          | ENSG00000130758 MAP3K10      | ENSG00000135414 GDF11       | ENSG00000142959 BEST4        | ENSG00000146830 PERQ1          | ENSG00000148343 FAM73B       |
|         | ENSG00000151474 FRMD4A         | ENSG00000155363 MOV10          | ENSG00000160213 CSTB           | ENSG00000160685 ZBTB7B       | ENSG00000163701 ILL17RE     | ENSG00000165059 PRKACG       | ENSG00000166546 Q3B7T3_HUMAN   | ENSG00000168071 CCDC88       |
|         | ENSG00000169403 PTAFR          | ENSG00000171992 SYNPO          | ENSG00000174282 ZBTB4          | ENSG00000177469 PTRF         | ENSG00000181929 PRKAG1      | ENSG00000196961 AP2A1        | ENSG00000197283 SYNGAP1        | ENSG00000197892 KIF13B       |
|         | ENSG00000203774 Q6ZUA8_HUMAN   | ENSG00000204446 NP_001001709.1 | ENSG00000065060 C6orf107       | ENSG00000078269 SYNJ2        | ENSG00000079387 SENP1       | ENSG00000110063 DCPS         | ENSG000001                     |                              |

Table with 10 columns: Gene ID, Gene Name, Gene ID, Gene Name, Gene ID, Gene Name, Gene ID, Gene Name, Gene ID, Gene Name. Rows include various gene identifiers such as TGGGTGT, TGGGTTT, TGGTAAA, TGGTAAC, TGGTAAT, TGGTACG, TGGTACT, TGGTAGT, TGGTCGA, TGGTGAC, TGGTGCG, TGGTGCT, and TGGTGTA, along with their corresponding gene names and accession numbers.

ENSG00000170819|BFSP2 ENSG00000179407|DNAJB8 ENSG00000180822|Q8N950\_HUMAN ENSG00000181938|GINS3 ENSG00000198471|RTP2 ENSG00000198610|AKR1C4 ENSG00000204248|COL11A2 ENSG00000204558|Q9BYX6\_HUMAN  
ENSG00000205979|Q6XYA8\_HUMAN ENSG00000010072|C1orf124 ENSG000000094804|CDC6 ENSG000000101856|PGRMC1 ENSG00000104412|SCG3 ENSG00000104447|TRPS1 ENSG00000109814|UGDH ENSG00000115652|UXS1  
ENSG00000118873|RAB3GAP2 ENSG00000121440|PDZRN3 ENSG00000122402|UBL3 ENSG00000122692|SMU1 ENSG00000132950|ZMYM5 ENSG00000134200|TSHB ENSG00000139746|RBM26 ENSG00000140299|BNIP2  
ENSG00000141279|NPEPP5 ENSG00000147604|RPL7 ENSG00000154415|PPP1R3A ENSG00000165071|TMEM71 ENSG00000165389|C14orf147 ENSG00000165494|PCF11 ENSG00000166323|C1orf65 ENSG00000170855|TRIAF1  
ENSG00000180917|NP\_060818.3 ENSG00000181626|DKFZp779B1634 ENSG00000185915|KLHL34 ENSG00000197429|IFP ENSG00000197822|OCLN ENSG00000203778|NP\_001028736.1 ENSG00000203916|HFM1 ENSG00000211446|SEPP1

TGGTTAT ENSG00000002919|SNX11 ENSG00000007545|CRAMP1L ENSG00000029993|HMGCB3 ENSG00000104386|XR\_017860.1 ENSG00000108175|ZMIZ1 ENSG00000128203|ASPHD2 ENSG00000129757|CDKN1C ENSG00000132275|KIAA0409  
ENSG00000140263|SORD ENSG00000154222|CC2D1B ENSG00000156486|KCNK2 ENSG00000160410|SHKBP1 ENSG00000162408|NOL9 ENSG00000162714|ZNF496 ENSG00000163833|FBXO40 ENSG00000164935|TM7SF4  
ENSG00000165606|NP\_001073989.1 ENSG00000165948|FAM14B ENSG00000167080|B4GALNT2 ENSG00000167595|C19orf55 ENSG00000179452|Q8TDK1\_HUMAN ENSG00000187260|WDR86 ENSG00000187260|WDR86 ENSG00000154779|MATR3 ENSG0000018510|AGPS  
ENSG00000021488|SLC7A9 ENSG00000090382|LYZ ENSG00000100784|RPS6KA5 ENSG00000101856|PGRMC1 ENSG00000109654|TRM2 ENSG00000109814|UGDH ENSG00000112245|PTP4A1 ENSG00000112851|ERBB2IP  
ENSG00000115919|KYNL ENSG00000120805|ARL1 ENSG00000134874|DZIP1 ENSG00000150361|KLHL1 ENSG00000151327|C14orf24 ENSG00000152380|NP\_991111.1 ENSG00000159216|RUNX1 ENSG00000161905|ALOX15  
ENSG00000164663|USP49 ENSG00000168118|RAB4A ENSG00000172845|SZP3 ENSG00000177459|C8orf47 ENSG00000179532|C1orf47 ENSG00000186020|ZNF529 ENSG00000188659|NP\_001008227.1 ENSG00000196865|NHLRC2

TGGTTCA ENSG00000006831|ADIPOR2 ENSG00000007314|SCN4A ENSG00000068120|COASY ENSG00000068985|PAGE1 ENSG00000077157|PPP1R12B ENSG00000107957|SH3PXD2A ENSG00000114019|AMOTL2 ENSG00000114982|NP\_060461.3  
ENSG00000115041|KCNIP3 ENSG00000143816|WNT9A ENSG00000148290|SURF1 ENSG00000148337|CIZ1 ENSG00000156466|GDF6 ENSG00000160803|UBQLN4 ENSG00000162735|PEX19 ENSG00000177673|NP\_689827.1  
ENSG00000182329|Q8IVF9\_HUMAN ENSG00000182852|C21orf121 ENSG00000186910|SERPINA11 ENSG00000198012|XR\_017841.1 ENSG00000204228|HSD17B8 ENSG00000205181|Q0VFZ2\_HUMAN ENSG0000016402|IL20RA ENSG00000104341|LAPTM4B  
ENSG00000109320|NFKB1 ENSG00000112695|COX7A2 ENSG00000124479|NDP ENSG00000132669|RIN2 ENSG00000133119|RFC3 ENSG00000133119|RFC3 ENSG00000134532|SOX5 ENSG00000150625|GPM6A  
ENSG00000151553|KIAA1600 ENSG00000155903|RASA2 ENSG00000163072|NOSTRIN ENSG00000166128|RAB8B ENSG00000169271|HSPB3 ENSG00000170009|Q9NTHO\_HUMAN ENSG00000172000|ZNF556 ENSG00000174607|UGT8  
ENSG00000197329|PELI1 ENSG00000198408|MGEA5

TGGTTCG ENSG00000067182|TNFRSF1A ENSG00000080293|SCTR ENSG00000103507|BCKDK ENSG00000110046|NP\_055919.1 ENSG00000122678|POLM ENSG00000127528|KLF2 ENSG00000129221|AIPL1 ENSG00000129946|SHC2  
ENSG00000132911|NMUR2 ENSG00000134516|DOCK2 ENSG00000136630|HLX1 ENSG00000140511|HAPLN3 ENSG00000141378|PTRH2 ENSG00000157379|DHRS1 ENSG00000169094|PLEKHQ1 ENSG00000170550|Q8WVU8\_HUMAN  
ENSG00000176076|KCNEL1 ENSG00000179218|CALR ENSG00000180818|HOXC10 ENSG00000183092|BEGIN\_HUMAN ENSG00000183549|NP\_060358.2 ENSG00000185130|HIST1H2BL ENSG00000185801|YV007\_HUMAN ENSG00000196126|HLA-DRB1  
ENSG00000196557|CACNA1H ENSG00000197847|SLC22A20 ENSG00000102444|ZNF207 ENSG00000011295|TTC19 ENSG0000012817|JARID1D ENSG0000038427|VEFAN ENSG00000073417|PDE8A ENSG00000106344|RBM28  
ENSG00000106541|AGR2 ENSG00000109606|DHX15 ENSG00000115596|YLPM1 ENSG00000122335|SERAC1 ENSG00000124224|PPP4R1L ENSG00000126070|VICF2C3 ENSG00000134242|PTPN22 ENSG00000134375|TIMM17A  
ENSG00000144815|FAM55C ENSG00000147231|CXorf57 ENSG00000155876|RAGA ENSG00000173960|UBXD4 ENSG00000175279|COR ENSG00000176171|BNIP3 ENSG00000182512|GLRX5 ENSG00000198825|INPP5F  
ENSG00000203916|HFM1 ENSG00000205462|Q6ZWC8\_HUMAN

TGGTTCT ENSG00000007968|E2F2 ENSG00000042445|RETSAT ENSG00000048707|VPS13D ENSG00000092201|SUPT16H ENSG00000100312|ACR ENSG00000105697|HAMP ENSG00000118655|DCLRE1B ENSG00000122254|HS3ST2  
ENSG00000124160|NCOA5 ENSG00000124772|CPNE5 ENSG00000134291|TMEM106C ENSG00000136504|MYST2 ENSG00000138769|CDKL2 ENSG00000146007|ZMAT2 ENSG00000157064|NMNAT2 ENSG00000167641|PPP1R14A  
ENSG00000167695|FAM57A ENSG00000169375|SIN3A ENSG00000169894|MUC3A ENSG00000173585|CCR9 ENSG00000178789|CD300LB ENSG00000185112|FAM34A ENSG00000198574|SH2D1B ENSG00000204268|Q6ZVY1\_HUMAN  
ENSG00000058668|ATP2B4 ENSG00000059804|GTR3\_HUMAN ENSG00000094916|CBX5 ENSG00000100934|SEC23A ENSG00000101230|C20orf82 ENSG00000106605|BLVRA ENSG00000107968|MAP3K8 ENSG00000112531|QKI  
ENSG00000113163|COL4A3BP ENSG00000114790|NP\_056410.2 ENSG00000123843|C4BPB ENSG00000125538|IL1B ENSG00000125827|TXNDC13 ENSG00000126773|C14orf135 ENSG00000136634|IL10 ENSG00000147416|ATP6V1B2  
ENSG00000158966|CACHD1 ENSG00000161326|DUSP14 ENSG00000167601|AXL ENSG00000169744|LDB2 ENSG00000179833|SERTAD2 ENSG00000204688|OR2H1  
ENSG00000011332|DFP1 ENSG00000025772|TOMM34 ENSG00000092964|DPYSL2 ENSG00000106018|VIPR2 ENSG00000114988|LMAN2L ENSG00000118707|TGIF2 ENSG00000125991|ERGIC3 ENSG00000132130|LHX1  
ENSG00000132323|ILKAP ENSG00000133313|CNDP2 ENSG00000134490|C18orf45 ENSG00000143167|GPA33 ENSG00000149294|NCAM1 ENSG00000151882|CCL28 ENSG00000154930|ACSS1 ENSG00000182541|LIMK2  
ENSG00000184601|NP\_001008404.1 ENSG00000188038|NRN1L ENSG00000196155|PLEKHG4 ENSG00000196363|WDR5 ENSG00000203783|PRR9 ENSG00000205307|Q8TEE9\_HUMAN ENSG00000205770|Q8N847\_HUMAN ENSG00000008083|JARID2  
ENSG00000062096|ARSF ENSG00000065613|SLK ENSG00000081181|ARG2 ENSG00000095787|WAC ENSG00000110321|EIF4G2 ENSG00000112232|KHDRBS2 ENSG00000114529|C3orf52 ENSG00000114796|KLHL24  
ENSG00000116750|UCHL5 ENSG00000117569|PTBP2 ENSG00000121101|TEX14 ENSG00000125304|TM9SF2 ENSG00000136881|BAAT ENSG00000145384|FABP2 ENSG00000146802|TMEM168 ENSG00000152700|SAR1B  
ENSG00000153989|NUS1 ENSG00000157576|XR\_018454.1 ENSG00000162409|PRKAA2 ENSG00000163683|C4orf34 ENSG00000164164|OTUD4 ENSG00000169155|ZBTB43 ENSG00000171617|ENC1 ENSG00000182944|EWSR1  
ENSG00000205604|Q6ZUP5\_HUMAN

TGTAAAA ENSG00000007402|CACNA2D2 ENSG00000075218|GTSE1 ENSG00000088812|ATRN ENSG00000100084|HIRA ENSG00000101445|PPP1R16B ENSG00000102076|OPN1LW ENSG00000102898|NUTF2 ENSG00000103275|UBE2I  
ENSG00000112159|MDN1 ENSG00000113048|MRPS27 ENSG00000131242|RAB11FIP4 ENSG00000135503|ACVR1B ENSG00000136112|UTP14C ENSG00000136352|TITF1 ENSG00000144681|STAC ENSG00000147380|OPN1MW  
ENSG00000151062|CACNA2D4 ENSG00000157617|C21orf25 ENSG00000160339|FCN2 ENSG00000162951|LRRTM1 ENSG00000166160|OPN1MW2 ENSG00000167393|PPP2R3B ENSG00000168243|GNG4 ENSG00000168824|NSG1\_HUMAN  
ENSG00000169885|CALML6 ENSG00000181045|SLC26A11 ENSG00000184292|TACSFD2 ENSG00000185052|SLC24A3 ENSG00000185112|FAM34A ENSG00000188056|TREM1A ENSG00000189069|NP\_001013732.1 ENSG00000196526|AFAP1  
ENSG00000197077|Q5THZ5\_HUMAN ENSG00000198258|UBL5 ENSG00000205431|Q6UWF5\_HUMAN ENSG0000015171|ZMYND11 ENSG00000064218|DMRT3 ENSG00000073756|PTGS2 ENSG00000075651|PLD1 ENSG00000100519|PSMC6  
ENSG00000100883|SRP54 ENSG00000104671|DCTM6 ENSG00000105879|CBLL1 ENSG00000106443|PHF14 ENSG00000111647|NP\_001006948.1 ENSG00000113580|NR3C1 ENSG00000113966|ARL6 ENSG00000118873|RAB3GAP2  
ENSG00000123728|RAP2C ENSG00000124198|ARFGF2 ENSG00000131969|ABHD12B ENSG00000134058|CDK7 ENSG00000135269|TES ENSG00000137666|EGLN1 ENSG00000135999|EPC2 ENSG00000137501|SYTL2  
ENSG00000138336|CXXC6 ENSG00000138594|TMOD3 ENSG00000138802|SC2E4B ENSG00000145833|DDX46 ENSG00000145835|NP\_542387.1 ENSG00000150681|RGS18 ENSG00000150768|DLAT ENSG00000153922|CHD1  
ENSG00000156875|HIAT1 ENSG00000158615|PPP1R15B ENSG00000163322|CCDC98 ENSG00000171757|LRRC34 ENSG00000171989|LDHAL6B ENSG00000173276|ZNF295 ENSG00000174099|MSR1B  
ENSG00000175054|ATR ENSG00000177200|CHD9 ENSG00000179981|TSHZ1 ENSG00000188611|ASAH2C ENSG00000189308|LIN54 ENSG00000196711|NP\_997296.1 ENSG00000198689|SLC9A6 ENSG00000204351|SKIV2L

TGTAAAG ENSG00000065882|TBC1D1 ENSG00000075035|WSCD2 ENSG00000100422|CERK ENSG00000101493|ZNF516 ENSG00000104332|SFRP1 ENSG00000124593|C6orf49 ENSG00000133028|SCO1 ENSG00000138617|PARP16  
ENSG00000140403|DNAJA4 ENSG00000144730|IL17RD ENSG00000146670|CDCA5 ENSG00000154330|PGM5P1 ENSG00000163915|C3orf65 ENSG00000166780|C16orf45 ENSG00000168274|HIST1H2AE ENSG00000168792|NP\_937790.1  
ENSG00000170100|Q96MU6-2 ENSG00000173253|DMRT2 ENSG00000174989|FBXW8 ENSG00000179598|NP\_849158.1 ENSG00000183579|ZNRF3 ENSG00000185651|UBE2L3 ENSG00000187608|ISG15 ENSG00000196970|NXP4  
ENSG00000204141|Q6ZVM5\_HUMAN ENSG00000204235|Q6ZNQ4\_HUMAN ENSG00000204820|Q9GNT9\_HUMAN ENSG00000204876|Q6ZVM9\_HUMAN ENSG000000002745|WNT16 ENSG00000005812|FBXL3 ENSG00000058729|RIOK2 ENSG00000069345|DNAJA2  
ENSG00000079557|AFM ENSG00000121039|RDH10 ENSG00000123091|RNF11 ENSG00000123200|ZC3H13 ENSG00000125823|CSTL1 ENSG00000127588|GNL3 ENSG00000129534|C14orf106 ENSG00000131263|RNF12  
ENSG00000135486|HNRPA1 ENSG00000137752|CASP1 ENSG00000138778|CENPE ENSG00000145908|ZNF300 ENSG00000155096|AZIN1 ENSG00000155313|USP25 ENSG00000156469|MTERFD1 ENSG00000156650|MYST4  
ENSG00000157557|ETS2 ENSG00000162086|ZNF75A ENSG00000162959|MEMO1 ENSG00000163607|GTPBP8 ENSG00000165525|SDCCAG1 ENSG00000166035|LIPC ENSG00000168542|COL3A1 ENSG00000169744|LDB2  
ENSG00000164576|SAP30L ENSG00000166920|C15orf48 ENSG00000168267|PTF1A ENSG00000169679|BUB1 ENSG00000170561|IRX2 ENSG00000171928|FAM18B ENSG00000172594|SMPDL3A ENSG00000181610|MRPS23  
ENSG00000183735|TBK1 ENSG00000185417|CXorf1 ENSG00000187508|Q7Z2R7\_HUMAN ENSG00000187815|ZNF642 ENSG00000188014|NP\_619643.2 ENSG00000189079|ARID2 ENSG00000189292|NP\_001002919.1 ENSG00000205334|Q6ZVL0\_HUMAN

TGTAAAT ENSG00000061936|SFRS8 ENSG00000075856|SART3 ENSG00000079616|KIF22 ENSG00000095370|SH2D3C ENSG00000099821|POLRMT ENSG00000100109|TFPI11 ENSG00000100395|L3MBTL2 ENSG00000103423|DNAJA3  
ENSG00000105723|GSK3A ENSG00000108175|ZMIZ1 ENSG00000121904|CSMD2 ENSG00000123358|NR4A1 ENSG00000124766|SOX4 ENSG00000125084|WNT1 ENSG00000127377|CRYGN ENSG00000128045|RASL11B  
ENSG00000130052|STARDB ENSG00000130711|PRDM12 ENSG00000130956|HABP4 ENSG00000132164|SLC6A11 ENSG00000132694|ARHGFE11 ENSG00000133316|WDR74 ENSG00000139718|SETD1B  
ENSG00000142544|ATPBD3 ENSG00000142920|ADC ENSG00000143761|ARF1 ENSG00000162227|TAF6L ENSG00000163157|TMOD4 ENSG00000163884|KLF15 ENSG00000167207|NOD2 ENSG00000170983|C8orf14  
ENSG00000174206|NP\_689653.3 ENSG00000177303|CASKIN2 ENSG00000178028|DMP1 ENSG00000182646|TMEM29 ENSG00000196576|PLXNB2 ENSG00000198369|SPRED2 ENSG00000198668|CALM1 ENSG00000205562|Q86U27\_HUMAN  
ENSG0000001084|GCLC ENSG00000006634|DBF4 ENSG00000008324|SS18L2 ENSG00000068912|C2orf30 ENSG00000074695|LMAN1 ENSG00000077458|FAM76B ENSG00000101745|ANKRD12 ENSG00000102390|CXorf26  
ENSG00000102974|CTCF ENSG00000105866|SP4 ENSG00000107984|DKK1 ENSG00000110367|DDX6 ENSG00000114209|PDCD10 ENSG00000116560|SFPQ ENSG00000116815|CD58 ENSG00000117616|C1orf63  
ENSG00000118473|SGIP1 ENSG000001126216|TUBGCP3 ENSG00000130699|TAF4 ENSG00000131002|CYorf15B ENSG00000133135|RNF128 ENSG00000133627|ACTR3B ENSG00000135837|CEP350 ENSG00000136492|BRIP1  
ENSG00000136997|MYC ENSG00000137936|BCAR3 ENSG00000139116|KIF21A ENSG00000139597|NP\_438169.2 ENSG00000143153|ATP1B1 ENSG00000143228|NUP2 ENSG00000146352|C6orf213 ENSG00000146376|ARHGAP18  
ENSG00000149231|CCDC82 ENSG00000153922|CHD1 ENSG00000156804|PFXO32 ENSG00000157107|FCHO2 ENSG00000159086|C21orf66 ENSG00000163689|NP\_940865.1 ENSG00000163950|SLBP ENSG00000164329|PAPD4  
ENSG00000164576|SAP30L ENSG00000166920|C15orf48 ENSG00000168267|PTF1A ENSG00000169679|BUB1 ENSG00000170561|IRX2 ENSG00000171928|FAM18B ENSG00000172594|SMPDL3A ENSG00000181610|MRPS23  
ENSG00000183735|TBK1 ENSG00000185417|CXorf1 ENSG00000187508|Q7Z2R7\_HUMAN ENSG00000187815|ZNF642 ENSG00000188014|NP\_619643.2 ENSG00000189079|ARID2 ENSG00000189292|NP\_001002919.1 ENSG00000205334|Q6ZVL0\_HUMAN

TGTAACT ENSG00000011105|TSPAN9 ENSG00000065882|TBC1D1 ENSG00000072506|HSD17B10 ENSG00000074410|CA12 ENSG00000112658|SRF ENSG00000115594|IL1R1 ENSG00000119280|C1orf198 ENSG00000128311|TST  
ENSG00000148795|CYP17A1 ENSG00000152475|Q9BEG3\_HUMAN ENSG00000158987|RAPGEF6 ENSG00000162415|ZSWIM5 ENSG00000167615|LENG8 ENSG00000168906|MAT2A ENSG00000174521|TTC9B ENSG00000178343|NP\_001073974.1  
ENSG00000187838|PLSCR3 ENSG00000188011|NP\_776182.2 ENSG00000198785|GRIN3A ENSG00000204444|APOM ENSG00000206026|NP\_001032408.1 ENSG0000011638|TMEM159 ENSG00000080822|CLDN1 ENSG00000082996|RNF13  
ENSG00000109738|GLRB ENSG00000111799|COL12A1 ENSG00000114120|SLC25A36 ENSG00000118503|TNFAIP3 ENSG00000119711|ALDH6A1 ENSG00000120008|BRWD2 ENSG00000120586|MRC1 ENSG00000121486|C1orf25  
ENSG00000124201|ZNFX1 ENSG00000124784|RIOK1 ENSG00000126226|PCID2 ENSG00000130037|KCNAs ENSG00000132667|GNS ENSG00000136542|GALNT5 ENSG00000139160|NP\_776163.1  
ENSG00000143933|CALM2 ENSG00000147650|LRP12 ENSG00000148672|GLUDP5 ENSG00000150337|FCGR1A ENSG00000152484|USP12 ENSG00000152778|IFIT5 ENSG00000156265|C21orf7 ENSG00000159167|STC1  
ENSG00000163071|SPATA18 ENSG00000167196|FBXO22 ENSG00000172733|PURG ENSG00000178996|SNAG1 ENSG00000182890|GLUD2 ENSG00000183748|MRC1L1 ENSG00000185238|PRMT3 ENSG00000185290|XR\_016379.1

TGTAAAGT ENSG00000037757|NP\_115661.1 ENSG00000048707|VPS13D ENSG00000060069|CTDP1 ENSG00000100764|PSMC1 ENSG00000101290|CDS2 ENSG00000102547|CAB39L ENSG00000106290|TAF6 ENSG00000130508|PXDN  
ENSG00000133065|SLC41A1 ENSG00000145911|N4BP3\_HUMAN ENSG00000148773|MKI67 ENSG00000151208|DLG5 ENSG00000151882|CCL28 ENSG00000160208|RRP1B ENSG00000163521|GLB1L ENSG00000172927|MYEOV  
ENSG00000174238|PITPNA ENSG00000175147|C1orf126 ENSG00000176022|B3GALT6 ENSG00000180758|GPR157 ENSG00000187251|C1orf213 ENSG00000188199|FAM22B ENSG00000188706|ZDHHX9 ENSG00000188859|FAM78B  
ENSG00000204043|FAM22C ENSG00000204092|NP\_001001705.1 ENSG00000205878|Q6ZSV2\_HUMAN ENSG00000007168|PAFAH1B1 ENSG00000008282|SYPL1 ENSG00000083750|RRAGB ENSG00000111328|CDK2AP1 ENSG00000113088|GZMK  
ENSG00000116299|KIAA1324 ENSG00000119729|RHQO ENSG00000119953|SMNDC1 ENSG00000123600|METTL8 ENSG00000130023|C6orf70 ENSG00000131263|RNF12 ENSG00000133961|NUMB ENSG00000139910|NOVA1  
ENSG00000145777|NP\_149024.1 ENSG00000146678|IGFBP1 ENSG00000152409|NP\_689618.2 ENSG00000162595|DIRAS3 ENSG00000163534|FCRL1 ENSG00000163607|GTPBP8 ENSG00000165678|GHITM ENSG00000175455|CCDC14  
ENSG00000180488|FAM73A ENSG00000184258|CDR1 ENSG00000188085|NP\_997320.1 ENSG00000188641|DPYD ENSG00000188921|PTPLAD2 ENSG00000196646|ZNF136 ENSG00000197279|ZNF165 ENSG00000198824|C13orf8

TGTAAATA ENSG00000012061|ERCC1 ENSG00000018625|ATP1A2 ENSG00000068097|NP\_071353.4 ENSG00000086015|MAST2 ENSG00000086848|ALG9 ENSG00000100450|GZMH ENSG00000104953|TLE6 ENSG00000105258|POLR2I  
ENSG00000105705|SF4 ENSG00000111639|MRPL51 ENSG00000112062|MAFK14 ENSG00000114013|CD86 ENSG00000114650|SCAP ENSG00000116663|FBXO6 ENSG00000125388|GRK4 ENSG00000126264|HCST  
ENSG00000130724|CHMP2A ENSG00000134072|CAMK1 ENSG00000135926|TM6IM1 ENSG00000136485|WDR68 ENSG00000140465|CYP1A1 ENSG00000140950|KIAA1609 ENSG00000143398|PIP5K1A ENSG00000143554|SLC27A3

ENSG00000157992|KRTCAP3 ENSG00000170485|NPAS2 ENSG00000170876|TMEM43 ENSG00000182872|RBM10 ENSG00000184164|CRELD2 ENSG00000184743|NP\_056274.3 ENSG00000187860|NP\_001017437.1 ENSG00000197616|MYH6
ENSG00000198471|RTP2 ENSG00000010270|STARD3NL ENSG00000010818|HIVEP2 ENSG00000069509|FUNDCl ENSG00000082153|BZM1 ENSG00000096717|SIRT1 ENSG00000105982|RNF32 ENSG00000123179|EBPL
ENSG00000124260|MAGEA10 ENSG00000129480|C14orf126 ENSG00000133703|KRAS ENSG00000134419|RPS15A ENSG00000134982|APC ENSG00000138459|SLC35A5 ENSG00000142197|DOPEY2 ENSG00000144460|Q96NL2\_HUMAN
ENSG00000148090|AUH ENSG00000155755|ALS2CR4 ENSG00000161298|ZNF382 ENSG00000165164|CXorf22 ENSG00000165527|ARF6 ENSG00000167766|ZNF83 ENSG00000169131|ZNF354A ENSG00000172869|DMXL1
ENSG00000174106|LEMD3 ENSG00000175104|TRAF6 ENSG00000176390|CRLF3 ENSG00000180408|Q8NSG0\_HUMAN ENSG00000181392|C19orf46 ENSG00000181784|ANG ENSG00000182141|ZNF708 ENSG00000182585|EPGN
ENSG00000187257|RSBN1L ENSG00000188596|C12orf63 ENSG00000197442|MAP3K5 ENSG00000197484|Q6ZRH8\_HUMAN ENSG00000198903|Q6ZV72\_HUMAN
TGTAATC ENSG00000069812|HES2 ENSG00000100034|PFM1F ENSG00000100365|NCF4 ENSG00000103742|NP\_066013.1 ENSG00000107562|CXCL12 ENSG00000108671|PSMD11 ENSG00000124731|TREM1 ENSG00000130544|ZNF557
ENSG00000131477|RAMP2 ENSG00000137166|FOXP4 ENSG00000146374|RSPO3 ENSG00000164740|NR\_003034.1 ENSG00000166224|SGPL1 ENSG00000168970|PLA2G4B ENSG00000177947|ODF3 ENSG00000182352|C17orf77
ENSG00000184194|GPR173 ENSG00000187492|NP\_001007541.1 ENSG00000011566|MAP4K3 ENSG00000023516|AKAP11 ENSG000000053770|C14orf108 ENSG00000070061|IKBKAP ENSG00000092470|WDR76 ENSG00000104327|CALB1
ENSG00000115008|IL1A ENSG00000118495|PLAGL1 ENSG00000126777|KTN1 ENSG00000131844|MCCC2 ENSG00000138829|FBN2 ENSG00000146278|PNRC1 ENSG00000164120|HPGD ENSG00000164161|HHIP
ENSG00000165084|C8orf34 ENSG00000170948|MED3L1 ENSG00000178395|C1orf65 ENSG00000178445|GLDC ENSG00000180772|AGTR2 ENSG00000185842|Q4VXG5\_HUMAN ENSG00000186700|Q8N6F3\_HUMAN ENSG00000198682|PAPSS2

TGTAAT ENSG00000022840|RNF10 ENSG00000077157|PPP1R12B ENSG00000087088|BAX ENSG00000101265|RASSF2 ENSG00000101493|ZNF516 ENSG00000102076|OPN1LW ENSG00000130703|OSBPL2 ENSG00000137834|SMAD6
ENSG00000146535|GNA12 ENSG00000147380|OPN1MW ENSG00000159263|SIM2 ENSG00000161944|ASGR2 ENSG00000162408|NOL9 ENSG00000165837|Q5W0A0\_HUMAN ENSG00000166160|OPN1MW2 ENSG00000169083|AR
ENSG00000172932|ANKRD13D ENSG00000188901|NP\_055226.1 ENSG00000189143|CLDN4 ENSG00000203871|C6orf164 ENSG00000205015|Q6ZNV2\_HUMAN ENSG00000057252|SOAT1 ENSG00000060709|RIMBP2 ENSG00000070961|ATP2B1
ENSG00000078177|N4BP2\_HUMAN ENSG00000082482|KCNK2 ENSG00000088387|DOCK9 ENSG00000102760|C13orf15 ENSG00000104177|MYEF2 ENSG00000104613|INTS10 ENSG00000106278|PTRPR1 ENSG00000111269|CREBL2
ENSG00000111879|C6orf60 ENSG00000113387|SUB1 ENSG00000115464|USP34 ENSG00000118473|SGIP1 ENSG00000120992|LYPLA1 ENSG00000122481|RWDD3 ENSG00000127870|RNF6 ENSG00000135018|UBQLN1
ENSG00000135535|CD164 ENSG00000137509|PRCP ENSG00000137513|NARS2 ENSG00000137766|UNC13C ENSG00000140153|WDR20 ENSG00000144229|THSD7B ENSG00000145451|GLRA3 ENSG00000146166|GLULD1
ENSG00000151093|OXSM ENSG00000151657|KIN ENSG00000152990|GPR125 ENSG00000156970|BUB1B ENSG00000159128|IFNGR2 ENSG00000160218|TMEM1 ENSG00000162409|PRKAA2
ENSG00000163347|CLDN1 ENSG00000169299|PGM2 ENSG00000170185|USP38 ENSG00000171320|ESCO2 ENSG00000183735|TBK1 ENSG00000186300|ZNF555 ENSG00000196914|ARHGFE12 ENSG00000198521|ZNF43

TGTAACA ENSG00000004866|ST7 ENSG00000006740|RICH2\_HUMAN ENSG00000065491|TBC1D22B ENSG00000071894|CPSF1 ENSG00000074755|ZZEF1 ENSG00000090554|FLT3LG ENSG00000092607|TBX15 ENSG00000100197|CYP2D6
ENSG00000110987|BCL7A ENSG00000118257|NRP2 ENSG00000128045|RASL11B ENSG00000136828|RALGPS1 ENSG00000142186|SCYL1 ENSG00000143549|TPM3 ENSG00000152192|POU4F1 ENSG00000153885|KCTD15
ENSG00000156466|GDF6 ENSG00000157017|GHRL ENSG00000157103|SLC6A1 ENSG00000162244|RPL29 ENSG00000166016|ABTB2 ENSG00000168621|GDNF ENSG00000173404|INSM1 ENSG00000174502|SLC26A9
ENSG00000177076|ASAH3L ENSG00000186638|C9orf48 ENSG00000203784|LELP1 ENSG00000205702|CYP2D7P1 ENSG00000205980|Q6ZU05\_HUMAN ENSG00000073905|VDAC1 ENSG00000081237|PTPRC ENSG00000102804|TSC22D1
ENSG00000105835|PBEF1 ENSG00000108296|CCDC49 ENSG00000108384|RAD51C ENSG00000108561|C1QBP ENSG00000111445|RFC5 ENSG00000113583|C5orf15 ENSG00000115183|TANC1 ENSG00000121057|AKAP1
ENSG00000121578|B4GALT4 ENSG00000124198|ARFGEF2 ENSG00000128656|CHN1 ENSG00000132357|CAR6 ENSG00000138271|GPR87 ENSG00000139793|MBNL2 ENSG00000140937|CDH11 ENSG00000141452|C18orf8
ENSG00000144229|THSD7B ENSG00000145362|ANK2 ENSG00000149218|ENDOD1 ENSG00000157542|KCNJ6 ENSG00000157576|XR\_018454.1 ENSG00000157890|MEGF11 ENSG00000162545|CAMK2N1 ENSG00000165338|HECTD2
ENSG00000165659|DACH1 ENSG00000165682|CLEC1B ENSG00000166509|CLEC3A ENSG00000166986|MARS ENSG00000167332|ORS1E2 ENSG00000173406|DAB1 ENSG00000174628|IQCK ENSG00000183780|SLC35F3
ENSG00000186297|GABRA5 ENSG00000186298|PPP1C ENSG00000186487|MYT1L ENSG00000187009|Q8NFD4\_HUMAN ENSG00000197702|PARVA ENSG00000197956|S100A6 ENSG00000198682|PAPSS2 ENSG00000204406|MBD5
ENSG00000204837|Q2TVT3\_HUMAN ENSG00000205581|HMGN1

TGTAACAC ENSG00000068650|ATP11A ENSG00000070785|EIF2B3 ENSG00000100302|RASD2 ENSG00000103852|TTC23 ENSG00000105613|MAST1 ENSG00000106290|TAF6 ENSG00000113763|UNC5A ENSG00000116032|GRIN3B
ENSG00000123243|ITIH5 ENSG00000125726|CD70 ENSG00000125804|C20orf91 ENSG00000131183|SLC34A1 ENSG00000132002|DNAJB1 ENSG00000133985|TTC9 ENSG00000134775|FHOD3 ENSG00000136504|MYST2
ENSG00000139797|RNF113B ENSG00000143140|GJA5 ENSG00000158864|NDUF52 ENSG00000164270|HTR4 ENSG00000167749|KLR4 ENSG00000185668|POU3F1 ENSG00000186543|Q6ZWC0\_HUMAN ENSG00000186815|TPCN1
ENSG00000203783|PRR9 ENSG00000206539|Q6ZTN9\_HUMAN ENSG000000039123|SKIV2L2 ENSG00000102543|CDADC1 ENSG00000103194|USP10 ENSG00000110955|ATP5B ENSG00000115761|NOL10
ENSG00000117000|RLF ENSG00000119938|PPP1R3C ENSG00000120215|MLANA ENSG00000132570|PCBD2 ENSG00000141298|SSH2 ENSG00000145247|OCIAD2 ENSG00000148303|SNORD36A ENSG00000151693|DDEF2
ENSG00000152760|TCTEX1D1 ENSG00000153721|MAG11 ENSG00000153790|C7orf31 ENSG00000164938|TP53INP1 ENSG00000165309|ARMC3 ENSG00000173947|C1orf88 ENSG00000196885|Q9HAZ8\_HUMAN ENSG00000204133|FAM33B

TGTAACAG ENSG00000006007|GDE1A\_HUMAN ENSG00000020633|RUNX3 ENSG00000054967|TNFRSF19L ENSG00000086548|CEACAM6 ENSG00000102996|MMP15 ENSG00000105613|MAST1 ENSG00000108352|RAPGEFL1 ENSG00000110514|MADD
ENSG00000119487|MAPKAP1 ENSG00000121068|TBX2 ENSG00000125149|C16orf70 ENSG00000125388|GRK4 ENSG00000131242|RAB11FIP4 ENSG00000132130|LHX1 ENSG00000136848|DAB2IP ENSG00000137193|PIM1
ENSG00000140992|PPDK1 ENSG00000141258|RUTBC1 ENSG00000142748|FCN3 ENSG00000143590|EFNA3 ENSG00000157110|RBMPS ENSG00000160691|SHC1 ENSG00000162337|LRP5 ENSG00000162706|DARC
ENSG00000166444|ST5 ENSG00000166448|TMEM130 ENSG00000168818|STX18 ENSG00000172977|HTATIP ENSG00000177807|KCNJ10 ENSG00000181938|GINS3 ENSG00000182742|HOXB4 ENSG00000186897|C1QL4
ENSG00000196367|TRRAP ENSG00000203930|Q5JPA2\_HUMAN ENSG00000205531|NAP1L4 ENSG00000007062|PROM1 ENSG00000010818|HIVEP2 ENSG00000048392|RRM2B ENSG00000052126|PLEKHA5 ENSG00000066777|ARFGEF1
ENSG00000070018|LRP6 ENSG00000076716|GPC4 ENSG00000084676|NCOA1 ENSG00000089177|C20orf23 ENSG00000102290|PCDH11X ENSG00000102606|ARHGFE7 ENSG00000104863|LIN7B ENSG00000108510|THRAP1
ENSG00000113163|COL4A3BP ENSG00000114646|CSPG5 ENSG00000115840|SLC25A12 ENSG00000116752|BCAS2 ENSG00000116991|SIPAL12 ENSG00000132153|DHHX3 ENSG00000133639|BTG1 ENSG00000136048|NP\_060840.2
ENSG00000139926|FRMD6 ENSG00000142192|APP ENSG00000147050|UTX ENSG00000149970|CNKSR2 ENSG00000151834|GABRA2 ENSG00000152910|CNTNAP4 ENSG00000153132|CLGN ENSG00000159917|ZNF235
ENSG00000163877|SNIP1 ENSG00000164600|NEUROD6 ENSG00000169554|ZEB2 ENSG00000170365|SMAD1 ENSG00000171723|GPHN ENSG00000174437|ATP2A2 ENSG00000181449|SOX2 ENSG00000198586|TLK1
ENSG00000198739|LRRTM3

TGTAACAT ENSG00000023171|GRAMD1B ENSG00000067182|TNFRSF1A ENSG00000073792|IGF2BP2 ENSG00000104611|SH2D4A ENSG00000108262|GIT1 ENSG00000108509|CAMTA2 ENSG00000121068|TBX2 ENSG00000125285|SOX21
ENSG00000125492|BARHL1 ENSG00000132510|JMD3 ENSG00000135114|OASL ENSG00000136848|DAB2IP ENSG00000137288|C6orf125 ENSG00000139178|C1RL ENSG00000143217|PVRL4 ENSG00000145824|CXCL14
ENSG00000156860|FBR3 ENSG00000162344|FGF19 ENSG00000163884|KLF15 ENSG00000164091|TMEM113 ENSG00000168575|SLC20A2 ENSG00000169375|SIN3A ENSG00000180357|ZNF609 ENSG00000185818|NAT8L
ENSG00000186185|NP\_001073912.1 ENSG00000197506|SLC28A3 ENSG00000197565|COL4A6 ENSG00000197724|PHF2 ENSG00000203867|RBM20 ENSG00000204569|PPP1R10 ENSG0000005810|MYCBP2 ENSG00000010818|HIVEP2
ENSG00000040731|CDH10 ENSG00000067798|NAV3 ENSG00000068305|MEF2A ENSG00000068615|REEP1 ENSG00000068796|KIF2A ENSG00000075303|SLC25A40 ENSG00000078269|SYNJ2 ENSG00000080298|RFX3
ENSG00000080839|RBL1 ENSG00000113263|ITK ENSG00000115008|IL1A ENSG00000116350|SFRS4 ENSG00000117143|UAP1 ENSG00000117713|ARID5A ENSG00000118181|RPS25 ENSG00000132842|AP3B1
ENSG00000134121|CHL1 ENSG00000134644|PUM1 ENSG00000134851|TMEM165 ENSG00000135409|AMHR2 ENSG00000135698|MPHOSPH6 ENSG00000137876|C15orf15 ENSG00000138246|DNAJC13 ENSG00000138592|USP8
ENSG00000144749|LRIG1 ENSG00000145495|MARCH6 ENSG00000146360|GPR6 ENSG00000148303|SNORD36A ENSG00000149231|CCDC82 ENSG00000151572|TMEM16D ENSG00000151572|SORBS2 ENSG00000156140|ADAMTS3
ENSG00000157542|KCNJ6 ENSG00000168348|INSM2 ENSG00000169297|NR0B1 ENSG00000172915|NBEA ENSG00000173334|TRIB1 ENSG00000177301|KCNA2 ENSG00000178974|FBXO34 ENSG00000182901|RGS7
ENSG00000184708|EIF4ENIF1 ENSG00000184999|SLC22A10 ENSG00000185057|TAF9 ENSG00000196917|GPR81 ENSG00000197147|LRRRC8B ENSG00000204804|FAM27D1 ENSG00000204804|FAM27D1
ENSG00000159122|FLYWCH1 ENSG00000066136|NFYC ENSG00000088367|EPB41L1 ENSG00000101065|CARD10 ENSG00000101187|SLCO4A1 ENSG00000101421|CHMP4B ENSG00000103942|HOMER2 ENSG00000105647|PIK3R2
ENSG00000111186|WNT5B ENSG00000118898|PPL ENSG00000137842|TMEM22 ENSG00000142541|RPL13A ENSG00000143569|UBAP2L ENSG00000144230|GPR17 ENSG00000156381|ANKRD9 ENSG00000160469|BRSK1
ENSG00000167393|PPP2R3B ENSG00000168394|TAP1 ENSG00000170100|Q96MU6-2 ENSG00000171357|C1orf190 ENSG00000171551|ECEL1 ENSG00000175376|NP\_115701.2 ENSG00000179886|TIGD5 ENSG00000185627|PSMD13
ENSG00000186815|TPCN1 ENSG00000196331|HIST1H2BO ENSG00000197445|C16orf47 ENSG00000197461|PDGFA ENSG000002025745|Q71MF4\_HUMAN ENSG00000061455|PRDM6 ENSG00000065328|MCM10 ENSG00000067167|TRAM1
ENSG00000091651|ORC6L ENSG00000104231|ZFAND1 ENSG00000120549|KIAA1217 ENSG00000129521|EGLN3 ENSG00000135976|Q53S06\_HUMAN ENSG00000140395|WDR61 ENSG00000143971|ETAA1 ENSG00000154639|CXADR
ENSG00000154856|ARCCD1 ENSG00000157796|WDR19 ENSG00000163029|SMC6 ENSG00000163697|APBB2 ENSG00000165985|C1QL3 ENSG00000168646|AXIN2 ENSG00000170242|USP47 ENSG00000174405|LIG4
ENSG00000178700|DHFRL1 ENSG00000185875|THNSL1 ENSG00000187155|CU085\_HUMAN ENSG00000187372|PCDH13 ENSG00000197967|Q86U89\_HUMAN ENSG00000198597|ZNF536 ENSG00000198807|PAX9
ENSG00000006831|ADIPOR2 ENSG0000008128|CDC2L1 ENSG00000068137|PLEKHH3 ENSG00000074054|CLASP1 ENSG00000087258|GNAO1 ENSG00000102445|C13orf18 ENSG00000112562|SMOC2 ENSG00000112855|HARS2
ENSG00000116205|C1orf83 ENSG00000129450|SIGLEC9 ENSG00000140400|MAN2C1 ENSG00000145526|CDH18 ENSG00000148396|KIAA0310 ENSG00000157211|CDCP2 ENSG00000164309|CMYA5 ENSG00000166069|TMCO5
ENSG00000170858|LILRA4 ENSG00000179151|EDC3 ENSG00000180184|Q8NF75\_HUMAN ENSG00000185651|UBE2L3 ENSG00000188042|ARL4C ENSG00000198854|C1orf68 ENSG00000204313|NP\_001028830.1 ENSG00000204760|Q6ZNS8\_HUMAN
ENSG00000010704|HFE ENSG00000076554|TPD52 ENSG00000081237|PTPRC ENSG00000082996|RNF13 ENSG00000088448|ANKRD10 ENSG00000088451|TGDS ENSG00000107560|RAB11FIP2 ENSG00000111981|ULBP1
ENSG00000113161|HMGCR ENSG00000115084|SLC35F5 ENSG00000116141|MARK1 ENSG00000127483|H3F3B ENSG00000132475|H3F3P ENSG00000133574|GIMAP4 ENSG00000134058|CDK7 ENSG00000134874|DZIP1
ENSG00000137420|NOL7 ENSG00000164451|FAM26D ENSG00000168769|KIAA1546 ENSG00000171877|FRMD5 ENSG00000178636|Q8N7N2\_HUMAN ENSG00000186017|ZNF566 ENSG00000188021|UBQLN2 ENSG00000196268|ZNF493

TGTAAGT ENSG00000007341|ST7L ENSG00000074590|NUAK1 ENSG00000106290|TAF6 ENSG00000115468|EFHD1 ENSG00000146221|NP\_872345.1 ENSG00000146950|SHROOM2 ENSG00000156299|TIAM1 ENSG00000163633|C4orf36
ENSG00000166508|MCM7 ENSG00000168398|BDKRB2 ENSG00000169548|SUHW1 ENSG00000171703|TCEA2 ENSG00000172476|RAB40A ENSG00000204257|HLA-DMA ENSG00000205973|LOC644949 ENSG00000033867|SLC4A7
ENSG00000095787|WAC ENSG00000111859|NEDD9 ENSG00000117560|FASLG ENSG00000119953|SMNDC1 ENSG00000129596|CDO1 ENSG00000131003|RBMV2FP ENSG00000133997|MED6
ENSG00000134987|WDR36 ENSG00000137845|ADAM10 ENSG00000140386|ZNF291 ENSG00000144559|C3orf31 ENSG00000151240|DIP2C ENSG00000152332|UHMK1 ENSG00000155090|KLF10 ENSG00000164466|SF3X1
ENSG00000169504|CLIC4 ENSG00000170035|UBE2E4P ENSG00000172201|IN2 ENSG00000177606|JUN ENSG00000184007|PTP4A2 ENSG00000184012|UBE2F ENSG00000188629|ZNF177

TGTAACA ENSG00000063587|ZNF275 ENSG00000063978|RNF4 ENSG00000074755|ZZEF1 ENSG00000083807|SLC27A5 ENSG00000087237|CEP7 ENSG00000103742|NP\_066013.1 ENSG00000117016|RIMS3 ENSG00000125445|MRPS7
ENSG00000136935|GOLGA1 ENSG00000141431|Q6ZMX6\_HUMAN ENSG00000144504|ANKMY1 ENSG00000166546|Q3B7T3\_HUMAN ENSG00000167261|DPEP2 ENSG00000167470|MDIN ENSG00000168209|DDIT4 ENSG00000168795|ZBTB5
ENSG00000171649|ZIK1 ENSG00000185744|TNT\_HUMAN ENSG00000187003|ACTL7A ENSG00000188290|HES4 ENSG00000188290|HES4 ENSG00000056586|RC3H2 ENSG000000087301|KIAA1344 ENSG00000106605|BLVRA ENSG00000107201|DDX58
ENSG00000111276|CDKN1B ENSG00000113460|BXDC2 ENSG00000119314|ROD1 ENSG00000122376|XR\_015353.1 ENSG00000125356|NDUFA1 ENSG00000131375|CAPN7 ENSG00000135070|ISCA1 ENSG00000143363|PRUNE
ENSG00000143514|TP53BP2 ENSG00000151694|ADAM17 ENSG00000153162|BMP6 ENSG00000154099|LRRRC50 ENSG00000154479|Q6PJF6\_HUMAN ENSG00000155545|MIER3 ENSG00000165874|FAM35A ENSG00000167842|HIS12
ENSG00000169193|CDC126 ENSG00000172239|PAIP1 ENSG00000176871|WSB2 ENSG00000181234|TMEM132C ENSG00000187821|ZCCHC16 ENSG00000197841|ZNF181 ENSG00000204711|C9orf135 ENSG00000205144|Q6ZV43\_HUMAN
ENSG00000205874|Q6SA06\_HUMAN

TGTAAGC ENSG00000003756|RBM5 ENSG00000032888|MAN2B2 ENSG00000067606|PRKCZ ENSG00000070444|MNT ENSG00000090238|YPEL3 ENSG00000099804|CDC34 ENSG00000100726|TEL02 ENSG00000101850|GPR143
ENSG00000108671|PSMD11 ENSG00000114316|USP4 ENSG00000124493|GRM4 ENSG00000124702|KLHDC3 ENSG00000129932|DOHH ENSG00000130758|MAP3K10 ENSG00000132749|MTL5 ENSG00000145194|ECE2
ENSG00000157514|TSC22D3 ENSG00000157884|NP\_001025052.1 ENSG00000162600|OMA1 ENSG00000163064|EN1 ENSG00000164318|EGFLAM ENSG00000167972|ABCA3 ENSG00000170379|NP\_775949.1 ENSG00000170442|KRT86
ENSG00000172789|HXC05 ENSG00000176261|ZBTB80S ENSG00000182272|B4GALNT4 ENSG00000197106|SLC6A17 ENSG00000203945|Q5JFQ1\_HUMAN ENSG00000204314|PRRT1 ENSG00000078668|VDAC3 ENSG00000090402|SI
ENSG00000109445|ZNF330 ENSG00000114423|CBLB ENSG00000131931|THAP1 ENSG00000136273|HUS1\_HUMAN ENSG00000136938|ANP32B ENSG00000138801|PAPSS1 ENSG00000145241|CENPC1 ENSG00000146276|GABRR1
ENSG00000150361|KLHL1 ENSG00000154639|CXADR ENSG00000162595|DIRAS3 ENSG00000163797|MRPL33 ENSG00000165060|FXN ENSG00000172164|SNTB1 ENSG00000172466|ZNF24 ENSG00000172748|ZNF596
ENSG00000174456|NP\_997318.1 ENSG00000176974|SMT1 ENSG00000180398|MCFP2 ENSG00000182983|ZNF662 ENSG00000205212|NP\_00104306.1

TGTAGCT ENSG00000008438|PGLYRP1 ENSG00000072501|SMC1A ENSG00000109072|VTN ENSG00000110880|CORO1C ENSG00000116580|GON4L ENSG00000118971|CCND2 ENSG00000125084|WNT1 ENSG00000130703|OSBPL2 ENSG00000132958|TPTE2 ENSG00000143321|HDGF ENSG00000147224|PRFS1 ENSG00000147394|ZNF185 ENSG00000149136|SSRPI ENSG00000159337|PLA2G4D ENSG00000168906|MAT2A ENSG00000184945|AQP12A ENSG00000185176|AQP12B ENSG00000197435|HIST3H2BB ENSG00000204580|DDR1 ENSG00000033867|SLC4A7 ENSG00000103599|IQCH ENSG00000115875|SFRS7 ENSG00000118363|SPCS2 ENSG00000119787|ARL6IP2 ENSG00000127314|RAP1B ENSG00000128272|ATF4 ENSG00000131351|NP\_219485.1 ENSG00000133872|TMEM66 ENSG00000135046|ANXA1 ENSG00000138468|SENP7 ENSG00000139168|ZCRB1 ENSG00000155111|CDC2L6 ENSG00000155115|C6orf51 ENSG00000156671|SAMD8 ENSG00000164616|FBXL21 ENSG00000165092|ALDH1A1 ENSG00000167081|PBX3 ENSG00000167196|FBXO22 ENSG00000170035|UBE2E4P ENSG00000173655|Q5T909\_HUMAN ENSG00000175556|LONRF3 ENSG00000176276|hCG\_1757335 ENSG00000179520|SLC17A8 ENSG00000180938|ZNF572 ENSG00000186462|NAP1L2 ENSG00000187325|TAF9B ENSG00000197714|ZNF460 ENSG00000198468|Q8TAF5\_HUMAN ENSG00000198526|PABPCF2 ENSG00000204220|PFDN6 perfect: TGTAGCT AGCTACA hsa-miR-221 AGCTACAttgtctgtctgggtttc 0 perfect: TGTAGCT AGCTACA hsa-miR-222 AGCTACAtctggctactgggtcttc 0 TGTAGTA ENSG00000075826|SEC31B ENSG00000085662|AKR1B1 ENSG00000092621|PHGDH ENSG00000100138|NHP2L1 ENSG00000100462|PRMT5 ENSG00000101457|DNMTIP1 ENSG00000117425|PTCH2 ENSG00000129282|MRM1 ENSG00000130414|NDUFA10 ENSG00000142224|IL19 ENSG00000158195|WASF2 ENSG00000159720|ATP6V0D1 ENSG00000172070|SCRT2 ENSG00000180992|MRPL14 ENSG00000189419|NP\_997266.2 ENSG00000196747|HIST1H3H ENSG000000021355|SERPINB1 ENSG00000064726|BTBD1 ENSG00000066697|TMEFF1 ENSG00000070882|OSBP13 ENSG00000073614|JARID1A ENSG00000102024|PLS3 ENSG00000108588|CCDC47 ENSG00000120685|C13orf23 ENSG000000121741|ZMYM2 ENSG00000123091|RNF11 ENSG00000155629|PIK3AP1 ENSG000000156802|ATAD2 ENSG00000163946|C3orf63 ENSG00000164049|FBXW12 ENSG00000164329|PAPD4 ENSG00000166233|ARIH1 ENSG00000170903|KIAA1826 ENSG00000172765|TMCC1 ENSG00000177324|CXorf20 ENSG00000186468|RPS23 ENSG00000186908|ZDHHC17 ENSG00000189367|C6orf174 ENSG00000195338|CEACAM5 ENSG00000105388|CEACAM5 ENSG00000105538|RASIP1 ENSG00000115138|POMC ENSG00000115902|SLC1A4 ENSG00000124233|SEMG1 ENSG00000127616|SMARCA4 ENSG00000134287|ARF3 ENSG00000148400|NOTCH1 ENSG00000160219|GAB3 ENSG00000170145|SNF1LK2 ENSG00000185681|C9orf18 ENSG00000188199|FAM22B ENSG00000197182|NM\_207477 ENSG00000197965|MPZL1 ENSG00000204043|FAM22C ENSG00000031691|CENPF ENSG00000077232|DNAJC10 ENSG00000106355|LSM5 ENSG00000113742|CPEB4 ENSG00000115310|RTN4 ENSG00000118495|PLAGL1 ENSG00000123240|OPTN ENSG00000128059|PPAT ENSG00000128845|CCPG1 ENSG00000132781|MUTYH ENSG00000135164|DMTF1 ENSG00000139793|MBNL2 ENSG00000141279|NPEPPS ENSG00000148737|TCF7L2 ENSG00000152256|PDK1 ENSG00000152601|MBNL1 ENSG00000157341|Q8ND77\_HUMAN ENSG00000157869|RAB28 ENSG00000165525|SDCCAG1 ENSG00000165997|ARL5B ENSG00000166532|FAM80B ENSG00000171150|SOC55 ENSG00000171843|MLLT3 ENSG00000180190|C8orf42 ENSG00000183508|FAM46C ENSG00000183527|DSCR2 ENSG00000185238|PRMT3 ENSG00000185261|C5orf36 ENSG00000185710|Q8ND77\_HUMAN ENSG00000188158|NHS ENSG00000188917|CXorf34 ENSG00000189043|NDUFA4 ENSG00000197780|TAF13 ENSG00000198843|SELT\_HUMAN TGTATAC ENSG00000055483|USP36 ENSG00000111087|GLI1 ENSG00000115607|IL18RAP ENSG00000117640|FAM54B ENSG00000121083|DYNLL2 ENSG00000123685|NP\_061134.1 ENSG00000127952|STYXL1 ENSG00000129657|SEC14L1 ENSG00000146083|RNF44 ENSG00000146755|TRIM50 ENSG00000154917|RAB6B ENSG00000158195|WASF2 ENSG00000158445|KCNB1 ENSG00000162105|SHANK2 ENSG00000167617|CDC42EP5 ENSG00000181713|Q8NAF7\_HUMAN ENSG00000185674|LYG2\_HUMAN ENSG00000197769|MAP1LC3C ENSG00000198901|PRC1 ENSG00000203945|Q5JPQ1\_HUMAN ENSG00000204303|Q6ZVW4\_HUMAN ENSG00000205851|Q4GOH1\_HUMAN ENSG00000206528|Q6ZSMO\_HUMAN ENSG00000004897|CDC27 ENSG00000080371|RAB21 ENSG00000104660|LEPROTL1 ENSG00000113384|GOLPH3 ENSG00000113532|ST8SIA4 ENSG00000116754|SFRS11 ENSG00000120156|TEK ENSG00000134323|MYCN ENSG00000134376|CRB1 ENSG00000137273|FOXF2 ENSG00000137955|RABGGTB ENSG00000139173|TMEM117 ENSG00000139233|C12orf31 ENSG00000145147|SLIT2 ENSG00000146360|GPR6 ENSG00000148483|FAM23A ENSG00000148655|C10orf11 ENSG00000150667|FSIP1 ENSG00000152457|DCLRE1C ENSG00000155085|C6orf199 ENSG00000156219|ART3 ENSG00000164024|METAP1 ENSG00000165655|ZNF503 ENSG00000166147|FBN1 ENSG00000168876|ANKRD49 ENSG00000173452|NP\_689987.2 ENSG00000174226|NP\_689841.2 ENSG00000185261|C5orf36 ENSG00000198597|ZNF536 ENSG00000204334|A1L162\_HUMAN ENSG00000075426|FOSL2 ENSG00000096384|HSP90AB1 ENSG00000099956|SMARCB1 ENSG00000103510|MYST1 ENSG00000107438|PDLIM1 ENSG00000111087|GLI1 ENSG00000124374|PAIP2B ENSG00000125285|SOX21 ENSG00000130332|LSM7 ENSG00000132002|DNAJB1 ENSG00000134825|C10orf10 ENSG00000143171|RXRG ENSG00000147724|NP\_056996.2 ENSG00000149294|NCAM1 ENSG00000149557|FEZ1 ENSG00000154096|THY1 ENSG00000163866|C1orf212 ENSG00000164091|TMEM113 ENSG00000164651|SP8 ENSG00000166167|BTRC ENSG00000166888|STAT6 ENSG00000175063|UBE2C ENSG00000177493|C1orf215 ENSG00000179241|LDLRAD3 ENSG00000186577|C6orf1 ENSG00000186648|C14orf121 ENSG00000187678|SPRY4 ENSG00000204499|Q6P6C6\_HUMAN ENSG00000019549|SNAI2 ENSG00000081189|MEF2C ENSG00000081913|PHLPP ENSG00000096968|JAK2 ENSG00000101911|PRRS2 ENSG00000102781|KATNAL1 ENSG00000105216|LSM14A ENSG00000106484|MEST ENSG00000110911|SLC11A2 ENSG00000113302|IL12B ENSG00000114346|ECT2 ENSG00000115254|XAB1 ENSG00000119396|RAB14 ENSG00000134594|RAB33A ENSG00000135269|TES1 ENSG00000137992|DBT ENSG00000143756|FBXO28 ENSG00000152382|TADA1L ENSG00000164109|MAD2L1 ENSG00000164190|NIPBL ENSG00000169504|CLIC4 ENSG00000173452|NP\_689987.2 ENSG00000174226|NP\_689841.2 ENSG00000179915|NRX1B\_HUMAN ENSG00000184182|UBE2F ENSG00000189403|HMGB1 ENSG00000204711|C9orf135 TGTATAT ENSG00000003756|RBM5 ENSG00000005379|BZRAP1 ENSG00000029993|HMGB3 ENSG00000047056|WDR37 ENSG00000064489|MEF2B ENSG00000090554|FLT3LG ENSG00000092820|VIL2 ENSG00000100242|UNC84B ENSG00000101290|CDS2 ENSG00000101670|LIPG ENSG00000110711|AIP ENSG00000116883|C1orf113 ENSG00000117318|ID3 ENSG00000122986|HVCN1 ENSG00000124313|IQSEC2 ENSG00000126705|AHDC1 ENSG00000142686|NP\_689587.1 ENSG00000146021|KLHL3 ENSG00000157837|PSL4\_HUMAN ENSG00000158022|TRIM63 ENSG00000158220|FAM62C ENSG00000160799|CCDC12 ENSG00000164778|EN2 ENSG00000166111|SVOP ENSG00000173638|SLC19A1 ENSG00000179240|Q3ZCU0\_HUMAN ENSG00000180447|GAS1 ENSG00000183579|ZNF3 ENSG00000183691|NOG ENSG00000184675|FAM123B ENSG00000186654|ARHGAP8 ENSG00000187147|C1orf164 ENSG00000188385|C10orf39 ENSG00000198873|GRK5 ENSG00000198915|RASGEF1A ENSG00000204084|INPP5B ENSG00000204569|PPP1R10 ENSG00000088869|HEATR5B ENSG00000055917|PUM2 ENSG00000060762|BRP44L ENSG00000076685|NT5C2 ENSG00000078142|PIK3C3 ENSG00000081479|LRP2 ENSG00000082438|COBL1 ENSG00000083123|BCKDHB ENSG00000095564|BTAF1 ENSG00000100906|NFKBIA ENSG00000102554|KLF5 ENSG00000104388|RAB2A ENSG00000107968|MAP3K8 ENSG00000113441|LNPEP ENSG00000113597|NP\_079217.1 ENSG00000116785|CFHR3 ENSG00000117616|C1orf63 ENSG00000119787|ARL6IP2 ENSG00000119965|C10orf88 ENSG00000123737|EXOSC9 ENSG00000123975|CKS2 ENSG00000127337|YEATS4 ENSG00000127914|AKAP9 ENSG00000129514|FOXAL1 ENSG00000130779|CLIP1 ENSG00000132356|PRKAA1 ENSG00000133103|COG6 ENSG00000136099|PCDH8 ENSG00000138036|NUP12 ENSG00000138182|MPHOSPH1 ENSG00000140299|BNIP2 ENSG00000145386|CCNA2 ENSG00000146678|IGFBP1 ENSG00000151150|ANK3 ENSG00000162607|USP1 ENSG00000163162|RNF149 ENSG00000164944|KIAA1429 ENSG00000165813|C10orf118 ENSG00000166068|SPRED1 ENSG00000166800|LDHAL6A ENSG00000166855|CLPX ENSG00000170775|GPR37 ENSG00000172175|MALT1 ENSG00000174899|Q8N6Q6\_HUMAN ENSG00000182916|TCEAL7 ENSG00000187508|Q7Z2R7\_HUMAN ENSG00000188542|DUSP28 ENSG00000196505|GDAP2 ENSG00000198757|Q96NB8\_HUMAN ENSG00000198822|GRM3 TGTATCG ENSG00000006075|CCL3 ENSG00000053524|MCF2L2 ENSG00000066248|NGEF ENSG00000085978|ATG16L1 ENSG00000100151|PICK1 ENSG00000100461|RBM23 ENSG00000104969|SGTA ENSG000001105717|PBX4 ENSG00000108557|RAI1 ENSG00000114812|VIPR1 ENSG00000121104|FAM117A ENSG00000123360|PDE1B ENSG00000129925|TMEM8 ENSG00000132694|ARHGEF11 ENSG00000135362|NP\_079117.2 ENSG00000137726|FXDY6 ENSG00000140044|NP\_569736.1 ENSG00000142528|ZNF473 ENSG00000143502|SUS4 ENSG00000161955|TNFSF13 ENSG00000167693|NKNX ENSG00000172819|RARG ENSG00000174547|MRPL11 ENSG00000180806|HOXC9 ENSG00000184584|TMEM173 ENSG00000189429|RNF207 ENSG00000197586|ENTPD6 ENSG00000198831|Q8IYX2\_HUMAN ENSG00000204197|KIFC1 ENSG000000006704|GTF2IRD1 ENSG0000011258|MBTD1 ENSG00000037474|NSUN2 ENSG00000080503|SMARCA3 ENSG00000100811|YY1 ENSG00000106069|CHN2 ENSG00000107672|NSMCE4A ENSG00000110696|C11orf58 ENSG00000116830|TFE2 ENSG00000117724|SNRPC ENSG00000131068|DEFB118 ENSG00000136213|CHST12 ENSG00000139618|BRCA2 ENSG00000144668|ITGA9 ENSG00000153037|SRP19 ENSG00000157869|RAB28 ENSG00000162607|USP1 ENSG00000163359|COL6A3 ENSG00000164692|COL1A2 ENSG00000165655|ZNF503 ENSG00000167165|UGT1A1 ENSG00000167460|TFM4 ENSG00000173692|PSMD1 ENSG00000175857|C5orf29 ENSG00000196214|ZNF766 TGTATGA ENSG00000063660|GPC1 ENSG00000087077|TRIP6 ENSG00000114999|TTL ENSG00000123136|DDX39 ENSG00000133056|PIK3C2B ENSG00000140990|NDUFB10 ENSG00000160714|UBE2Q1 ENSG00000162889|MAPKAPK2 ENSG00000166888|STAT6 ENSG00000173163|COMMD1 ENSG00000173638|SLC19A1 ENSG00000185082|LBH ENSG00000185619|PCGF3 ENSG00000185818|NATL8 ENSG00000189069|NP\_001013732.1 ENSG00000198242|RPL23A ENSG00000198369|SPRED2 ENSG00000206550|LOC285346 ENSG0000005054219|LY75 ENSG00000075568|TMEM131 ENSG000000808019|CPOX ENSG00000086061|DNAJA1 ENSG00000089335|ZNF302 ENSG00000091482|SMPX ENSG00000106511|MEOX2 ENSG00000112541|PDE10A ENSG00000126010|GRPR ENSG00000128641|MYO1B ENSG00000134042|MRO ENSG00000134152|C15orf29 ENSG00000136247|ZDHHC4 ENSG00000137752|CASP1 ENSG00000138640|FAM13A1 ENSG00000143947|RPS27A ENSG00000144057|ST6GAL2 ENSG00000146250|PRSS35 ENSG00000146463|ZMYM4 ENSG00000146909|NOM1 ENSG00000158411|MITD1 ENSG00000160679|C1orf77 ENSG00000164466|FXN1 ENSG00000165682|CLEC1B ENSG00000168502|CCDC68 ENSG00000168502|KIAA0802 ENSG00000170471|KIAA1219 ENSG00000185760|KCNQ5 ENSG00000188133|NP\_99723.1 TGTATGT ENSG00000000938|FGR ENSG00000005381|MPO ENSG00000102955|NP\_542768.1 ENSG00000102034|ELF4 ENSG00000112562|SMOC2 ENSG00000114656|KIAA1257 ENSG00000130035|GALNT8 ENSG00000132164|SLC6A11 ENSG00000132694|ARHGEF11 ENSG00000133195|SLC39A11 ENSG00000136444|RSAD1 ENSG00000136950|ARPC5L ENSG00000138834|MAPK8IP3 ENSG00000139797|RNF113B ENSG00000140526|ABHD2 ENSG00000142686|NP\_689587.1 ENSG00000150594|ADRA2A ENSG00000155926|SLA ENSG00000160172|Q8ITW3\_HUMAN ENSG00000160714|UBE2Q1 ENSG00000162783|IER5 ENSG00000164151|Q6ZT40\_HUMAN ENSG00000165138|ANKS6 ENSG00000165272|AQP3 ENSG00000166135|HIF1AN ENSG00000173218|VANGL1 ENSG00000173404|INSM1 ENSG00000173638|SLC19A1 ENSG00000177384|Q9NT46\_HUMAN ENSG00000181250|MYADM1 ENSG00000186654|ARHGAP8 ENSG00000187514|PTMA ENSG00000196739|COL27A1 ENSG0000012983|MAP4K5 ENSG00000100206|DMC1 ENSG00000100519|PSMC6 ENSG00000108588|CCDC47 ENSG00000111196|MGNT2\_HUMAN ENSG00000111231|ATPBD1C ENSG00000111269|CREBL2 ENSG00000112116|IL17F ENSG00000117152|RGS4 ENSG00000118985|ELL2 ENSG00000140945|CDH13 ENSG00000141424|SLC39A6 ENSG00000144320|KIAA1715 ENSG00000146842|NP\_116231.2 ENSG00000154553|PDLIM3 ENSG00000176890|TYMS ENSG00000177917|ARL6IP6 ENSG00000178999|AURKB ENSG00000179387|ELMD02 ENSG00000184719|C10orf59 ENSG00000197302|Q7Z2F6\_HUMAN ENSG00000198836|OPAI1 ENSG00000204680|Q5VYG3\_HUMAN ENSG00000204952|FBX47\_HUMAN TGTATTA ENSG00000061936|SFRS8 ENSG00000064309|CDON ENSG00000088888|MAVS\_HUMAN ENSG00000099330|OCEL1 ENSG00000099995|SF3A1 ENSG00000100227|POLDIP3 ENSG00000101104|C20orf119 ENSG00000106009|C7orf27 ENSG00000113194|UBXD8 ENSG00000114767|RRP9 ENSG00000117450|PRDX1 ENSG00000124225|TMPEAI ENSG00000128918|ALDH1A2 ENSG00000129194|SOX15 ENSG00000139874|SSTR1 ENSG00000163900|TMEM41A ENSG00000170430|MGMT ENSG00000173786|CNP ENSG00000175503|CLCF1 ENSG00000196209|Q5JXA8\_HUMAN ENSG00000196378|Q9BSZ0\_HUMAN ENSG00000196396|PTPN11 ENSG00000197472|ZNF695 ENSG00000198881|ASB12 ENSG00000205020|CCL4L1 ENSG00000049323|LTBP1 ENSG00000060303|Q9NU98\_HUMAN ENSG00000065135|GNAI3 ENSG00000090104|RGS1 ENSG00000090989|EXOC1 ENSG00000101323|HAO1 ENSG00000108960|MMD ENSG00000109920|FBNP4 ENSG00000112144|ICK ENSG00000114315|HES1 ENSG00000115232|ITGA4 ENSG00000115339|GALNT3 ENSG00000121931|C1orf103 ENSG00000131003|RBM2F ENSG00000132872|SYT4 ENSG00000140299|BNIP2 ENSG00000143753|DEGS1 ENSG00000145331|RG9MTD2 ENSG00000145740|SLC30A5 ENSG00000153130|SCOC ENSG00000156172|C8orf37 ENSG00000164611|PTTG1 ENSG00000164691|TAGAP ENSG00000169230|FZD6 ENSG00000166734|CASC4 ENSG00000172139|SLC9A10 ENSG00000172809|RPL38 ENSG00000174437|ATP2A2 ENSG00000174799|CEP135 ENSG00000182774|RS17\_HUMAN ENSG00000184779|RPS17 ENSG00000189292|NP\_001002919.1 ENSG00000198795|ZNF521 perfect: TGTATTA TAATACA hsa-miR-369-3p aaTAATACAtggttgcattt 2 TGTATTC ENSG00000012232|EXTL3 ENSG00000076108|BAZ2A ENSG00000101443|WFD2C ENSG00000105374|NKG7 ENSG00000108349|CASC3 ENSG00000112514|CUTA ENSG00000116996|ZP4 ENSG00000131113|PSG1 ENSG00000133026|MYH10 ENSG00000135926|TMBIM1 ENSG00000139433|GLTP ENSG00000143093|FAM40A ENSG00000159247|LOC643224 ENSG00000166435|XRRA1 ENSG00000166900|STX3 ENSG00000168329|CX3CR1 ENSG00000174529|TMEM81 ENSG00000175003|SLC22A1 ENSG00000177455|CD19 ENSG00000182342|DSCR9 ENSG00000185955|NP\_001004323.1 ENSG00000197175|Q8TBR1\_HUMAN ENSG00000197565|COL4A6 ENSG00000205653|Q6ZUF2\_HUMAN ENSG00000205878|Q6ZSV2\_HUMAN ENSG00000003096|KLHL13 ENSG000000005249|PRKAR2B ENSG00000065518|NDUFB4 ENSG00000068878|PSME4 ENSG00000083750|RRAGB ENSG00000102309|PIN4 ENSG00000106537|TSPAN13 ENSG00000111834|RSHL3 ENSG00000111906|HDDC2 ENSG00000114423|CBLB ENSG00000119917|IFI3 ENSG00000134440|NARS ENSG00000136783|NIPSNAP3A ENSG00000154553|PDLIM3 ENSG00000154553|ABCA5 ENSG00000158560|DYNCL11 ENSG00000161048|NP\_945341.2 ENSG00000162607|USP1 ENSG00000165621|OXGR1 ENSG00000166240|Q14DG7-2 ENSG00000166848|TERF2IP ENSG00000168454|TXNDC2 ENSG00000172900|XR\_017872.1 ENSG00000178935|ZNF552 ENSG00000196459|SEDP1 ENSG00000198765|SYCP1 ENSG00000198799|LRIG2 ENSG00000204370|SDHD ENSG00000205299|CKLF ENSG00000001461|NPAL3 ENSG00000085185|CORL1 ENSG00000101350|K1F3B ENSG00000118900|UBN1 ENSG00000125485|DDX31 ENSG00000131914|LIN28 ENSG00000133985|TTC9 ENSG00000147256|RHGX\_HUMAN ENSG00000168894|NP\_057578.1 ENSG00000179028|NP\_001013709.1 ENSG00000182776|NP\_001013709.1 ENSG00000183864|TOB2 ENSG00000204414|CSHL1 ENSG00000030066|NUP160 ENSG00000065911|MTHFD2 ENSG00000086061|DNAJA1 ENSG00000100811|YY1 ENSG00000106278|PTPRZ1 ENSG00000117906|RCN2 ENSG00000119965|C10orf88 ENSG00000123179|EBP1 ENSG00000125944|HNRPR1 ENSG00000126261|SAE2 ENSG00000126945|HNRPH2 ENSG00000132498|ANKRD20A1 ENSG00000133104|SPG20 ENSG00000136021|SCYL2 ENSG00000138668|HNRPD ENSG00000140265|ZSCAN29 ENSG00000142864|SRFBP1 ENSG00000152443|ZNF776 ENSG00000154265|ABCA5

ENSG00000154529|CNTNAP3B ENSG00000164308|NP\_071745.1 ENSG00000165621|OXGR1 ENSG00000168679|SLC16A4 ENSG00000169495|HTRA4 ENSG00000169902|TPST1 ENSG00000172733|PURG ENSG00000177879|AP3S1  
ENSG00000178295|NP\_872431.2 ENSG00000183148|ANKRD20A2 ENSG00000185020|Q4VXF0\_HUMAN ENSG00000185950|IRS2 ENSG00000186310|NAP1L3 ENSG00000196774|ANKRD20A3 ENSG00000198301|SDAD1 ENSG00000198646|NCOA6  
ENSG00000204588|Q68DL6\_HUMAN  
TGTTATT ENSG00000007171|NOS2A ENSG00000012822|CALCOCO1 ENSG00000025800|KPNA6 ENSG00000049769|PPP1R3F ENSG00000067082|KLF6 ENSG00000086062|B4GALT1 ENSG00000089723|OTUB2 ENSG00000092201|SUPT16H  
ENSG00000100181|CSNK1E ENSG000000101146|RAE1 ENSG000000106070|GRB10 ENSG00000111653|ING4 ENSG00000116667|C1orf21 ENSG00000120075|HOXB5 ENSG00000127452|FBXL12 ENSG00000128594|LRRC4  
ENSG00000128652|HXOD3 ENSG00000130513|GDF15 ENSG00000131100|ATP6V1E1 ENSG00000131389|SLC6A6 ENSG00000131914|LIN28 ENSG00000133985|TTC9 ENSG00000134247|PTGFRN ENSG00000140451|PIF1  
ENSG00000148200|NR6A1 ENSG00000148498|PARD3 ENSG00000148985|NP\_055304.1 ENSG00000151498|ACAD8 ENSG00000157950|SSX2\_HUMAN ENSG00000159202|UBE2Z ENSG00000160714|UBE2Q1 ENSG00000165424|C10orf56  
ENSG00000166398|KIAA0355 ENSG00000166900|STX3 ENSG00000170682|Q96NU5\_HUMAN ENSG00000171456|ASXL1 ENSG00000173575|CHD2 ENSG00000189231|PSG3 ENSG00000197757|HOXC6 ENSG00000204368|SSX7  
ENSG00000204648|SSX9 ENSG00000010561|ENFP4 ENSG00000016490|CLCA1 ENSG00000034533|ASTE1 ENSG00000038210|PI4K2B ENSG00000066654|THUMP1 ENSG00000101843|PSMD10  
ENSG00000101972|STAG2 ENSG00000107104|ANKRD15 ENSG00000109674|NEIL3 ENSG00000109771|LRP2BP ENSG00000110848|CD69 ENSG00000111727|HCFC2 ENSG00000116688|MFN2 ENSG00000120937|NPPB  
ENSG00000121989|ACVR2A ENSG00000125845|BMP2 ENSG00000126787|DLG7 ENSG00000127329|PTPRB ENSG00000127720|C12orf26 ENSG00000130037|KCNA5 ENSG00000138735|PDE5A ENSG00000138750|NUP54  
ENSG00000139921|ZKND1 ENSG00000140600|SH3GL3 ENSG00000142621|FHAD1 ENSG00000143184|XCL1 ENSG00000145220|LYAR\_HUMAN ENSG00000145354|ZCD2 ENSG00000148828|NP\_001074467.1 ENSG00000151729|SLC25A4  
ENSG00000152818|UTRN ENSG00000154001|PPP2R5E ENSG00000155438|MKI671P ENSG00000155755|ALS2CR4 ENSG00000155816|FMN2 ENSG00000159140|SON ENSG00000163818|LZTFL1 ENSG00000169126|ARMC4  
ENSG00000169504|CLIC4 ENSG00000170340|B3GNT2 ENSG00000172175|MALT1 ENSG00000172969|LOC285299 ENSG00000172974|LOC729317 ENSG00000174106|LEMD3 ENSG00000179476|C14orf28 ENSG00000182093|WRB  
ENSG00000182400|TRAPPC6B ENSG00000182565|Q8NOW1\_HUMAN ENSG00000182997|Q9UHT0\_HUMAN ENSG00000183878|UTY ENSG00000204390|HSPA1L ENSG00000205097|NP\_001005217.1 ENSG00000206527|PTPLB  
TGTCAAA ENSG00000055163|FYFIP2 ENSG00000055957|ITIH1 ENSG00000074410|CA12 ENSG00000080472|PPIE ENSG00000092421|SEMA6A ENSG00000107223|EDF1 ENSG00000120451|SNX19 ENSG00000124074|C16orf48  
ENSG00000125954|CNTB ENSG00000130803|ZNF317 ENSG00000132854|ANR38\_HUMAN ENSG00000148362|C9orf142 ENSG00000163220|S100A9 ENSG00000180205|WFDC9 ENSG00000180305|WFDC10A ENSG00000182931|WFDC10B  
ENSG00000187686|XR\_016979.1 ENSG00000003096|KLHL13 ENSG000000088451|TGDS ENSG00000101844|ATG4A ENSG00000113916|BCL6 ENSG00000119912|IDE ENSG00000131089|ARHGFB9 ENSG00000137942|FNBP1L  
ENSG00000143199|NP\_060887.1 ENSG00000144061|NHP1 ENSG00000145491|RPN1L ENSG00000147145|GPR23 ENSG00000151490|PTPRO ENSG00000163071|SPATA18 ENSG00000163535|SGOL2 ENSG00000164588|HCN1  
ENSG00000166263|STXBPA ENSG00000166349|RAG1 ENSG00000167637|ZNF345 ENSG00000167904|TMEM68 ENSG00000172748|ZNF596 ENSG00000178403|NEUROG2 ENSG00000182986|NP\_997216.2 ENSG00000198739|LRRTM3  
ENSG00000204800|Q96HX1\_HUMAN ENSG00000204812|Q96HX1\_HUMAN  
TGTC AAT ENSG00000102243|VGLL1 ENSG00000113761|ZNF346 ENSG00000129559|NEDD8 ENSG00000129744|ART1 ENSG00000135114|OASL ENSG00000136942|RPL35 ENSG00000139574|NPF1  
ENSG00000119485|PRDM11 ENSG00000162148|C11orf66 ENSG00000165716|FAM69B ENSG00000166257|SCN3B ENSG00000167779|IGFBP6 ENSG00000172046|USP19 ENSG00000172053|QARS ENSG00000172476|RAB40A  
ENSG00000161281|COX7A1 ENSG00000174460|ZCCHC12 ENSG00000175854|C9orf119 ENSG00000179168|GGN ENSG00000182795|C1orf116 ENSG00000183128|FAM2A6 ENSG00000184945|AQP12A ENSG00000185000|DGAT1 ENSG00000185978|H2AFB3  
ENSG00000187156|Q86TT0\_HUMAN ENSG00000198082|H2AFB1 ENSG00000198307|H2AFB2 ENSG00000204058|C10orf41 ENSG00000206177|HBM ENSG000000001626|CFTR ENSG00000006128|TAC1 ENSG00000008282|SYPL1  
ENSG00000011523|CEP68 ENSG00000049319|SRD5A2 ENSG00000102452|NALCN ENSG00000109332|UBE2D3 ENSG00000115875|SFRS7 ENSG00000119801|YPEL5 ENSG00000122339|C6orf35 ENSG00000134698|EIF2C4  
ENSG00000135070|ISCA1 ENSG00000135828|RNASEL ENSG00000135903|PAX3 ENSG00000136758|YME1L1 ENSG00000144895|EIF2A ENSG00000145794|MEGF10 ENSG00000149345|U2D3L\_HUMAN ENSG00000157470|FAM81A  
ENSG00000164949|GEM ENSG00000169744|LDB2 ENSG00000170370|EMX2 ENSG00000171032|ZNF350 ENSG00000172209|GPR22 ENSG00000177599|ZNF491 ENSG00000182923|CEP63 ENSG00000183726|TMEM50A  
ENSG00000185518|SV2B ENSG00000196270|Q6ZWE7\_HUMAN ENSG00000198872|PEG10  
TGTCAGC ENSG00000072182|ACCN4 ENSG00000089692|LAG3 ENSG00000100055|PSCD4 ENSG00000101181|GTPBP5 ENSG00000120057|SFRP5 ENSG00000121671|CRY2 ENSG00000121774|KHDRBS1  
ENSG00000064666|CNN2 ENSG00000102271|SPINK4 ENSG00000130032|PRRG3 ENSG00000130193|C8orf55 ENSG00000137522|RNF121 ENSG00000138964|PARVG ENSG00000148158|SNX30 ENSG00000154781|C3orf19  
ENSG00000122490|PQLC1 ENSG00000122711|SPINK4 ENSG00000130032|PRRG3 ENSG00000130193|C8orf55 ENSG00000137522|RNF121 ENSG00000138964|PARVG ENSG00000148158|SNX30 ENSG00000154781|C3orf19  
ENSG00000164855|NP\_689902.2 ENSG00000167110|GOLGA2 ENSG00000168000|HNRPUL2 ENSG00000168159|RNF187 ENSG00000171302|CANT1 ENSG00000173349|SFT2D3 ENSG00000179801|C8orf30A ENSG00000181110|RGAG1  
ENSG00000181555|SETD2 ENSG00000185176|AQP12B ENSG00000186979|Q96BK8\_HUMAN ENSG00000187792|ZNF70 ENSG00000204865|Q6ZSD6\_HUMAN ENSG00000205979|Q6XYA8\_HUMAN ENSG00000052126|PLEKHA5 ENSG00000083799|CYLD  
ENSG00000101888|NXT2 ENSG00000101901|CXorf45 ENSG00000114850|SSR3 ENSG00000124098|C20orf108 ENSG00000135324|C6orf117 ENSG00000144452|ABCA12 ENSG00000152931|PART1\_HUMAN ENSG00000165355|FBXO33  
ENSG00000165685|C12orf59 ENSG00000170006|TMEM154 ENSG00000176853|FAM91A1 ENSG00000177497|CXorf42 ENSG00000181495|C5orf23 ENSG00000198865|Q4G0S7\_HUMAN ENSG00000204171|Q6STG2\_HUMAN ENSG00000205024|Q6ZVP5\_HUMAN  
TGTCAGT ENSG00000099821|POLRMT ENSG00000102900|NUP93 ENSG00000112139|MDGA1 ENSG00000114019|AMOTL2 ENSG00000136059|VILL ENSG00000143375|CGN ENSG00000144036|EXOC6B ENSG00000146950|SHROOM2  
ENSG00000162511|LAPTM5 ENSG00000163812|ZDHC3 ENSG00000179817|MRGPRX4 ENSG00000180139|Q8N9Z5\_HUMAN ENSG00000197081|IGF2R ENSG00000198641|SY51 ENSG00000204603|Q69YW3\_HUMAN ENSG00000205792|A4D193\_HUMAN  
ENSG00000092969|TGFB2 ENSG00000095574|IKZF5 ENSG00000110958|PTGES3 ENSG00000116497|S100BPB ENSG00000117625|RCOR3 ENSG00000118495|PLAGL1 ENSG00000122692|SMU1 ENSG00000124198|ARFGF2  
ENSG00000125249|RAP2A ENSG00000133961|NUMB ENSG00000143514|TP53BP2 ENSG00000145354|ZCD2 ENSG00000145780|FEM1C ENSG00000146151|HMGCLL1 ENSG00000152484|USP12 ENSG00000167088|SNRPD1  
ENSG00000169554|ZEB2 ENSG00000171657|GPR82 ENSG00000174780|SRP72 ENSG00000189184|PCDH18 ENSG00000198339|HIST1H4I ENSG00000198759|EGFL6 ENSG00000198815|FOXJ3  
TGTCAC ENSG00000001617|SEMA3F ENSG00000010295|NP\_542768.1 ENSG00000011332|DPF1 ENSG00000070915|SLC12A3 ENSG00000072163|LIMS2 ENSG00000099337|KCNK6 ENSG00000100321|SYNGR1 ENSG00000105568|PPP2R1A  
ENSG00000110076|NRXN2 ENSG00000110497|NP\_060219.2 ENSG00000110514|MADD ENSG00000125804|C20orf91 ENSG00000126106|TMEM53 ENSG00000131669|NIN1J1 ENSG00000132275|KIAA0409 ENSG00000139192|TAPBP1  
ENSG00000140835|CHST4 ENSG00000160844|NP\_849153.3 ENSG00000167522|ANKRD11 ENSG00000167600|CYP2S1 ENSG00000172867|KRT2 ENSG00000176828|Q8N9U2\_HUMAN ENSG00000182841|Q9NSQ0\_HUMAN ENSG00000182981|C9orf56  
ENSG00000183092|BEGIN\_HUMAN ENSG00000185022|MAFF ENSG00000204443|Q562T6\_HUMAN ENSG00000065600|C1orf75 ENSG00000066583|ISOC1 ENSG00000067048|DDX3X ENSG00000095627|TDRD1 ENSG00000101413|C20orf77  
ENSG00000106105|GARS ENSG00000113494|PRLR ENSG00000120860|CCDC53 ENSG00000129625|REEP5 ENSG00000130856|ZNF236 ENSG00000143013|LMO4 ENSG00000151151|IPMK ENSG00000153006|NP\_776190.1  
ENSG00000153044|CENPH ENSG00000153317|DDEF1 ENSG00000154898|Q8IYA2\_HUMAN ENSG00000155621|C9orf85 ENSG00000157510|AFAP1L1 ENSG00000159208|C1orf51 ENSG00000163541|SUGL1 ENSG00000173302|GPR148  
ENSG00000177143|CETN1 ENSG00000178074|NP\_710156.2 ENSG00000184280|ZNF285B ENSG00000204403|CASP12  
TGTC CAT ENSG00000054866|NM\_001040457.1 ENSG00000053702|NRIP2 ENSG00000054967|TNFRSF19L ENSG00000072110|ACTN1 ENSG00000093167|LRRFIP2 ENSG00000103197|TSC2 ENSG00000110786|PTPN5 ENSG00000116983|HPCAL4  
ENSG00000124571|XPO5 ENSG00000125149|C16orf70 ENSG00000125821|DTD1 ENSG00000141639|MAPK4 ENSG00000152953|STK32B ENSG00000156298|TSPAN7 ENSG00000173163|COMMD1 ENSG00000177384|Q9NT46\_HUMAN  
ENSG00000182318|ZSCAN22 ENSG00000185744|TNT\_HUMAN ENSG00000189325|NP\_001010903.2 ENSG00000204033|LRRC22 ENSG000000004948|CALCR ENSG000000009844|VTAL1 ENSG00000102144|PGK1 ENSG00000102743|SLC25A15  
ENSG00000109063|MYH3 ENSG00000120647|CCDC77 ENSG00000124749|COL2LA1 ENSG00000130818|ZNF426 ENSG00000134138|METS2 ENSG00000136709|WDR33 ENSG00000137804|NUSAP1 ENSG00000150048|CLEC1A  
ENSG00000156395|SORCS3 ENSG00000163697|APBB2 ENSG00000165985|C1QL3 ENSG00000182463|TSHZ2 ENSG00000183155|RAB1F ENSG00000186334|NP\_001011539.1 ENSG00000188747|NOXA1  
TGTC CCT ENSG00000054488|WDR54 ENSG00000102951|NP\_542768.1 ENSG000000065491|TBC1D22B ENSG00000070614|NDST1 ENSG00000100101|NOL12 ENSG00000101460|MAP1LC3A ENSG00000104853|CLPTM1 ENSG00000105808|RASA4  
ENSG00000115216|NRBP1 ENSG00000118004|COLEC11 ENSG00000120053|GOT1 ENSG00000125319|C17orf53 ENSG00000126878|C9orf58 ENSG00000127663|JMJD2B ENSG00000137404|NRM ENSG00000141258|RUTBC1  
ENSG00000142611|BRPM16 ENSG00000149600|COMMD7 ENSG00000150281|CTF1 ENSG00000158470|B4GALT5 ENSG00000167083|CNGT2 ENSG00000168334|CMYA1 ENSG00000169220|RGS14 ENSG00000174903|RAB1B  
ENSG00000178531|CTXN1 ENSG00000179271|GADD45GIP1 ENSG00000180448|HMHA1 ENSG00000184345|IQCF2 ENSG00000197324|LRP10 ENSG00000197697|HIST1H2BE ENSG00000198704|GPX6 ENSG00000205698|LOC648426  
ENSG00000104044|IDS ENSG00000065970|FOXJ2 ENSG00000081818|PCDHB4 ENSG00000086289|EPDR1 ENSG00000089225|TBX5 ENSG00000102910|LONP2 ENSG00000118777|ABCG2 ENSG00000120820|GLT8D2  
ENSG00000125430|HS3ST3B1 ENSG00000125931|CITRDL1 ENSG00000136874|SPX17 ENSG00000144840|RABL3 ENSG00000146648|EGFR ENSG00000147533|GOLGA7 ENSG00000152454|ZNF256 ENSG00000152778|IFIT5  
ENSG00000161980|POLR3K ENSG00000164949|GEM ENSG00000169519|METT5D1 ENSG00000172840|PDP2\_HUMAN ENSG00000173215|Q96HQ8\_HUMAN ENSG00000185070|FLRT2 ENSG00000204692|OR12D3 ENSG00000205036|NP\_001001682.1  
TGTC CGG ENSG0000007520|C16orf42 ENSG0000007866|TEAD3 ENSG00000070778|PTPN21 ENSG00000075043|KCNQ2 ENSG00000107130|FREQ ENSG00000116882|HAO2 ENSG00000127666|TICAM1 ENSG00000128536|NP\_689963.2  
ENSG00000149480|MTA2 ENSG00000159720|ATP6VD01 ENSG00000160087|UBE2J2 ENSG00000164362|TERT ENSG00000169991|Q5TF58\_HUMAN ENSG00000171631|P2RY6 ENSG00000173662|TAS1R1 ENSG00000175294|CATSPER1  
ENSG00000182950|ODF3L1 ENSG00000197283|SYNGAP1 ENSG00000197858|GPAAL1 ENSG00000022267|PHL1 ENSG00000054796|SP011 ENSG00000065600|C1orf75 ENSG00000066887|PSME4 ENSG00000081913|PHLP1  
ENSG00000095794|CREM ENSG00000101544|ZNF508 ENSG00000102743|SLC25A15 ENSG00000107798|LIPA ENSG00000111266|DUSP16 ENSG00000114354|TFG ENSG00000119185|ITGB1BP1 ENSG00000120685|C13orf23  
ENSG00000135111|TBX3 ENSG00000156232|WHDC1 ENSG00000162959|MEMO1 ENSG00000164190|NIPBL ENSG00000167910|CYP7A1 ENSG00000177508|IRX3 ENSG00000179408|MEMO1P ENSG00000179774|ATOH7  
ENSG00000183831|ANKRD45 ENSG00000188463|XR\_015229.1 ENSG00000205462|Q6ZWC8\_HUMAN ENSG00000206075|SERPINB5  
TGTC CTG ENSG00000068971|PPP2R5B ENSG00000084652|TXLNA ENSG00000090539|CHRD ENSG00000116852|KIF21B ENSG00000124067|LCAT ENSG00000140545|MFGE8 ENSG00000140995|NP\_997397.1 ENSG00000143167|GPA33  
ENSG00000160781|PAQR6 ENSG00000164626|CKNK5 ENSG00000167797|CDK2AP2 ENSG00000171813|PWPP2 ENSG00000176490|DIRAS1 ENSG00000179364|PACS2 ENSG00000182500|TMEM142A ENSG00000183837|PNMA3  
ENSG00000185024|BRF1 ENSG00000188249|XR\_019050.1 ENSG00000188986|NELFB\_HUMAN ENSG00000197586|ENTPD6 ENSG00000204175|GPRIN2 ENSG00000204938|Q6ZUS7\_HUMAN ENSG00000010219|DYRK4 ENSG00000054219|LY75  
ENSG00000077943|ITGA8 ENSG00000078369|GNB1 ENSG00000080947|Q8IVE0\_HUMAN ENSG00000106025|TSPAN12 ENSG00000111237|VPS29 ENSG00000111364|DDX55 ENSG00000116704|SLC35D1 ENSG00000118432|CNR1  
ENSG00000124535|WRNIP1 ENSG00000125831|CST11 ENSG00000129235|TXNL5 ENSG00000129460|NGDN ENSG00000134070|IRAK2 ENSG00000134769|DTNA ENSG00000136888|ATP6V1G1 ENSG00000141048|MYH4  
ENSG00000144597|EAF1 ENSG00000145919|FAM44B ENSG00000146409|C6orf192 ENSG00000147041|SYTL5 ENSG00000148110|HIATL1 ENSG00000152795|HNRPDL ENSG00000166889|NP\_689929.1 ENSG00000184492|FOXD4  
ENSG00000187189|TSPYL4 ENSG00000198855|NP\_009007.2 ENSG00000198963|RORB  
TGTC GCG ENSG000000090674|MCOLN1 ENSG00000105963|CENTA1 ENSG00000108511|HOXB6 ENSG00000125459|MSTO1 ENSG00000126500|FLRT1 ENSG00000134595|SOX3 ENSG00000136878|USP20 ENSG00000141905|NFIC  
ENSG00000153902|LGI4 ENSG00000154118|JPH3 ENSG00000160972|PPP1R16A ENSG00000165643|SOHLH1 ENSG00000167491|GATAD2A ENSG00000169683|LRRC45 ENSG00000170049|KCNAB3 ENSG00000170579|DLGAP1  
ENSG00000171861|RNMTL1 ENSG00000173020|ADRBK1 ENSG00000173976|RAXL1 ENSG00000181027|FKRP ENSG00000183242|WIT1 ENSG00000186493|C5orf38 ENSG00000191713|NP\_001013689.1 ENSG00000197406|DIO3  
ENSG00000198643|FAM3D ENSG00000205396|Q6ZRG2\_HUMAN ENSG00000205927|OLIG2 ENSG00000054277|OPN3 ENSG00000066405|CLDN18 ENSG00000111707|SUDS3 ENSG00000114125|RNF7 ENSG00000162374|ELAVL4  
ENSG00000170540|ARL61P1 ENSG00000198719|DLL1  
TGTC TAA ENSG00000100263|RHBDD3 ENSG00000105559|PLEKHA4 ENSG00000123405|NFE2 ENSG00000127564|PKMYT1 ENSG00000130508|PXDN ENSG00000134531|EMP1 ENSG00000140986|RPL3L ENSG00000148180|GSN  
ENSG00000148498|PARD3 ENSG00000155858|LSM11 ENSG00000166856|ADMR ENSG00000167110|GOLGA2 ENSG00000170099|SERPINA6 ENSG00000170549|IRX1 ENSG00000176678|FOXL1 ENSG00000179115|FARSA  
ENSG00000180359|C11orf36 ENSG00000183495|EP400 ENSG00000186575|NFB2 ENSG00000188525|NM\_207480 ENSG00000196684|HSH2D ENSG00000211454|ARK74\_HUMAN ENSG00000011114|BTBD7 ENSG00000011426|ANLN  
ENSG00000067334|DNHTTIP2 ENSG00000075785|RAB7A ENSG00000088035|ALG6 ENSG00000107537|PHYH ENSG00000111875|ASF1A ENSG00000113916|BCL6 ENSG000001133103|COG6 ENSG00000133124|IRS4  
ENSG00000135750|KCNK1 ENSG00000137449|CPBE2 ENSG00000146469|VIP ENSG00000152430|BOLL ENSG00000152457|DCLRE1C ENSG00000153234|NR4A2 ENSG00000164600|NEUROD6 ENSG00000164924|YWHAZ  
ENSG00000170248|PCPD61P ENSG00000172673|C6orf190 ENSG00000173334|TRIB1 ENSG00000173597|SULT1B1 ENSG00000185523|NP\_001019772.1 ENSG00000188419|CHM ENSG00000204897|KRT25  
TGTC TAG ENSG00000072134|EPN2 ENSG00000102243|VGLL1 ENSG00000106565|TMEM176B ENSG00000112139|MDGA1 ENSG00000113273|ARSB ENSG00000114388|TUSC4 ENSG00000121281|ADCY7 ENSG00000123901|GPR83  
ENSG00000132286|FXC1 ENSG00000161958|PGF11 ENSG00000162734|PEA15 ENSG00000167394|ZNF668 ENSG00000188427|XR\_017855.1 ENSG00000204092|NP\_001001705.1 ENSG00000004809|SLC22A16 ENSG00000077279|DCX  
ENSG00000089472|HEPH ENSG00000134308|YWHAQ ENSG00000136111|PBL1 ENSG00000136866|ZFP37 ENSG00000138185|ENTPD1 ENSG00000138604|GLCE ENSG00000138767|CNOT6L ENSG00000147166|ITGB1BP2  
ENSG00000151320|AKAP6 ENSG00000157404|KIT ENSG00000162654|GBP4 ENSG00000162687|KCNT2 ENSG00000163755|HPS3 ENSG00000164684|ZNF704 ENSG00000168280|KIF5C ENSG00000172023|REG1B  
ENSG00000177613|CSTF2T ENSG00000182628|FAM33A ENSG00000184661|CDCA2 ENSG00000188400|Q6



ENSG00000126464|PRR12 ENSG00000126709|IFI6 ENSG00000130702|LAMA5 ENSG00000158423|RIBC1 ENSG00000159842|ABR ENSG00000167862|ICT1 ENSG00000170291|C17orf81 ENSG00000170465|KRT6C ENSG00000176261|ZBTB80S ENSG00000184923|FAM22A ENSG00000188828|GLRA4 ENSG00000197194|Q6VEP3\_HUMAN ENSG00000198397|AZA378\_HUMAN ENSG00000204197|KIFC1 ENSG00000019549|SNAI2 ENSG00000029363|BCLAF1 ENSG00000050309|CCDC90A ENSG00000081154|PCNP ENSG00000089195|TRM6\_HUMAN ENSG00000106853|LTB4DH ENSG00000118514|ALDH8A1 ENSG00000119541|VPS4B ENSG00000125037|TMEM111 ENSG00000134709|HOOK1 ENSG00000135747|ZNF670 ENSG00000147231|CXorf57 ENSG00000153162|BMP6 ENSG00000156017|C9orf41 ENSG00000163322|CCDC98 ENSG00000167553|TUBA1C ENSG00000171428|NAT1 ENSG00000176624|RKHD2 ENSG00000180730|TMEM46 ENSG00000184374|COL1C10 ENSG00000187118|NP\_872329.1 ENSG00000187889|C1orf168 ENSG00000075290|WNT8B ENSG00000092445|TYRO3 ENSG00000116731|PRDM2 ENSG00000116731|PRDM2 ENSG00000146007|ZMAT2 ENSG00000149781|URP2\_HUMAN ENSG00000158987|RAPGEF6 ENSG00000163873|GRIK3 ENSG00000171747|LGALS4 ENSG00000177468|OLIG3 ENSG00000178243|C9orf62 ENSG00000181274|FRAT2 ENSG00000183741|CBX6 ENSG00000186998|EMID1 ENSG00000188396|NP\_001013654.1 ENSG00000038945|MSR1 ENSG00000076003|MCM6 ENSG00000078401|EDN1 ENSG00000111906|HDDC2 ENSG00000114374|USP9Y ENSG00000117543|DPH5 ENSG00000122778|Q9HCM3\_HUMAN ENSG00000134343|TMEM16C ENSG00000135549|PKIB ENSG00000143493|INTS7 ENSG00000140376|FBXO28 ENSG00000144771|LRTM1 ENSG00000148834|GSTO1 ENSG00000150347|ARID5B ENSG00000152455|SUV39H2 ENSG00000157502|MUM1L1 ENSG00000166783|KIAA0430 ENSG00000169239|CA5B ENSG00000170540|ARL6IP1 ENSG00000197045|GMFB ENSG00000197312|RSC1A1 ENSG00000198018|ENTPD7 ENSG00000198304|ZNF528 ENSG00000198825|INPP5F ENSG00000204683|C10orf113

TGTCTGA

TGTCTTA

TGTGAAA

TGTGAAC

TGTGAAT

TGTGACA

TGTGACT

TGTGAGC

TGTGATA

TGTGATC

TGTGATT

TGTGCAA

TGTGCAT

ENSG0000004455|AK2 ENSG00000037637|FBXO42 ENSG00000070495|JMJ6 ENSG00000101493|ZNF516 ENSG00000115594|ILIR1 ENSG00000116133|DHCR24 ENSG00000130876|SLC7A10 ENSG00000137054|POLR1E ENSG00000140632|NP\_115958.2 ENSG00000141506|PIK3R5 ENSG00000155980|KIF5A ENSG00000161265|U2AF1L4 ENSG00000162415|ZSWIM5 ENSG00000163067|ZNF2 ENSG00000169184|NM\_002430.2 ENSG00000172965|Q96C48\_HUMAN ENSG00000204414|CSHL1 ENSG00000204425|Q6ZP74\_HUMAN ENSG00000021355|SERPINB1 ENSG00000089099|RPL6 ENSG00000106034|NP\_079189.3 ENSG00000112796|ENPP5 ENSG00000121406|ZNF549 ENSG00000126861|OMG ENSG00000135828|RNASEL ENSG00000144182|LIP1T ENSG00000148426|C10orf47 ENSG00000159167|STC1 ENSG00000163001|CCDC104 ENSG00000163788|SNRK ENSG00000166971|AKTIP ENSG00000178397|NP\_001032240.1 ENSG00000180787|ZFP3 ENSG00000181315|ZNF322A ENSG00000186231|KLHL32 ENSG00000187772|LIN28B ENSG00000188801|ZNF322B ENSG00000204683|C10orf113 ENSG00000204683|C10orf113 ENSG00000175289|PCGF1 ENSG00000102547|CAB39L ENSG000001123388|HOXC11 ENSG00000132471|WBP2 ENSG00000138801|ZNF322B ENSG00000135801|TAF5L ENSG00000135824|RGS8 ENSG00000137709|POU2F3 ENSG00000142273|CBLC ENSG00000144355|DLX1 ENSG00000148384|INPP5E ENSG00000148408|CACNA1B ENSG00000152128|TMEM163 ENSG00000156411|C14orf2 ENSG00000164574|GALNT10 ENSG00000165731|RET ENSG00000167604|NP\_640332.1 ENSG00000170906|NDUFA3 ENSG00000172005|MAL ENSG00000175130|MARCKSL1 ENSG00000175906|ARL4D ENSG00000176444|CLK2 ENSG00000184825|HIST1H2AH ENSG00000187239|FBNP1 ENSG00000188242|Q71RB1\_HUMAN ENSG00000196432|Q9H5F0\_HUMAN ENSG00000204446|NP\_001001709.1 ENSG00000204576|PRR3 ENSG00000205424|Q6ZW00\_HUMAN ENSG00000205592|MUC19 ENSG00000206323|Q6ZRN5\_HUMAN ENSG00000004864|SLC25A13 ENSG00000064199|SPA17 ENSG00000068796|KIF2A ENSG00000070669|ASNS ENSG00000081665|ZNF253 ENSG00000087095|NLK ENSG00000090989|EXOC1 ENSG00000103160|HSDL1 ENSG00000114450|GNB4 ENSG00000115289|PCGF1 ENSG00000117593|DARS2 ENSG00000118496|FBXO30 ENSG00000129691|ASH2L ENSG00000131002|CYorf15B ENSG00000132872|SYT4 ENSG00000137965|IFT44 ENSG00000168615|ADAM9 ENSG00000169131|ZNF354A ENSG00000170425|ADORA2B ENSG00000173221|GLRX ENSG00000180828|BHLHB5 ENSG00000180917|NP\_060818.3 ENSG00000182070|OR52A1 ENSG00000185247|MAGEA11 ENSG00000186814|Q86W11\_HUMAN ENSG00000196247|ZNF588 ENSG00000196632|WNK3 ENSG00000196705|ZNF431 ENSG00000196937|FAM3C ENSG00000197605|ZNF431 ENSG00000196937|FAM3C ENSG00000196937|FAM3C ENSG00000101152|DNAJC5 ENSG00000101224|CDC25B ENSG00000101932|PHOX2B ENSG00000111877|MCM9 ENSG00000125755|SYMPK ENSG00000133026|MYH10 ENSG00000137074|APTX ENSG00000147570|DNAJB5 ENSG00000159263|SIM2 ENSG00000160298|C21orf58 ENSG00000162337|LRP5 ENSG00000163902|RPN1 ENSG00000164778|EN2 ENSG00000173404|INSM1 ENSG00000179028|NP\_001013709.1 ENSG00000182776|NP\_001013709.1 ENSG00000189159|HN1 ENSG00000196431|CRYBA4 ENSG00000197721|CR1L ENSG00000203812|HIST2H2AA4 ENSG00000205452|Q6ZQ09\_HUMAN ENSG00000088035|ALG6 ENSG00000106723|SPIN1 ENSG00000108021|C10orf18 ENSG00000109787|KLF3 ENSG00000109819|PPARGC1A ENSG00000117601|SERPIN1 ENSG00000117713|ARID1A ENSG00000128590|DNAJB9 ENSG00000132950|ZMYM5 ENSG00000134588|USP26 ENSG00000134769|DTNA ENSG00000137872|SEMA6D ENSG00000147434|CHRNA6 ENSG00000151725|MLF1IP ENSG00000163249|CCNYL1 ENSG00000164808|KIAA0146 ENSG00000166573|GALR1 ENSG00000174695|TMEM167 ENSG00000088808|PPP1R13B ENSG00000100105|PAT2 ENSG00000104055|TGM5 ENSG00000104886|PLEKHJ1 ENSG00000107796|ACTA2 ENSG00000111877|MCM9 ENSG00000125652|ALKBH7 ENSG00000127124|HIVEP3 ENSG00000129816|NR\_001538.1 ENSG00000129845|OL14605\_HUMAN ENSG00000137843|PAK6 ENSG00000142230|SAE1 ENSG00000142544|ATPBD3 ENSG00000147059|SPIN2A ENSG00000148200|NR6A1 ENSG00000157617|C21orf25 ENSG00000158850|B4GALT3 ENSG00000163050|CABC1 ENSG00000163545|NUAK2 ENSG00000166167|BTRC ENSG00000166823|MESP1 ENSG00000168758|SEMA4C ENSG00000170162|VGLL2 ENSG00000172939|OXSR1 ENSG00000173702|MUC13 ENSG00000183686|MAGEA5 ENSG00000185615|PDIA2 ENSG00000186029|Q9NSZ8\_HUMAN ENSG00000187733|C18orf51 ENSG00000203793|Q6ZR74\_HUMAN ENSG00000206123|Q5BLP8\_HUMAN ENSG00000003989|SLC7A2 ENSG00000084090|STARD7 ENSG00000101966|BIRC4 ENSG00000105708|ZNF14 ENSG00000109775|C4orf20 ENSG00000109787|KLF3 ENSG00000110318|KIAA1377 ENSG00000112773|FAM46A ENSG00000113366|LMNB1 ENSG00000115946|PNO1 ENSG00000128585|MKLN1 ENSG00000132429|POPDC3 ENSG00000133997|MED6 ENSG00000136158|SPRY2 ENSG00000136371|MTHFS ENSG00000139163|ETNK1 ENSG00000143149|ALDH9A1 ENSG00000146909|NOM1 ENSG00000147381|MAGEA4 ENSG00000156709|AIFM1 ENSG00000163605|PPP4R ENSG00000165304|MELK ENSG00000165355|FBXO33 ENSG00000165757|KIAA1462 ENSG00000165943|MOAP1 ENSG00000166922|SCG5 ENSG00000171033|PKIA ENSG00000172058|SERF1\_HUMAN ENSG00000177738|Q8N4J7\_HUMAN ENSG00000182197|EXT1 ENSG00000184708|EIF4ENIF1 ENSG00000186496|ZNF396 ENSG00000187772|LIN28B ENSG00000196418|ZNF124 ENSG00000204671|LL31 ENSG00000205572|SERF1\_HUMAN ENSG00000205572|SERF1\_HUMAN ENSG00000006007|GDE1\_HUMAN ENSG00000086544|ITPKC ENSG00000100376|FAM118A ENSG00000145063|NM\_182586 ENSG00000147256|RHGXX\_HUMAN ENSG00000159247|LOC643224 ENSG00000164151|Q6ZT40\_HUMAN ENSG00000165699|TSC1 ENSG00000167695|FAM57A ENSG00000185933|FAM26C ENSG00000189159|HN1 ENSG00000197296|C20orf142 ENSG00000197506|SLC28A3 ENSG00000198471|RTP2 ENSG00000204602|Q6ZU19\_HUMAN ENSG00000060303|Q9NU98\_HUMAN ENSG00000081665|ZNF253 ENSG00000100262|ARFGAP3 ENSG00000112038|OPRM1 ENSG00000118620|ZNF430 ENSG00000123240|OPTN ENSG00000131127|ZNF141 ENSG00000136783|NIPSNAP3A ENSG00000136938|ANP32B ENSG00000138433|CIR\_HUMAN ENSG00000138604|GLCE ENSG00000144381|HSPD1 ENSG00000144867|SRRP ENSG00000146376|ARHGAP18 ENSG00000146729|GBAS ENSG00000152242|C18orf25 ENSG00000152348|ATG10 ENSG00000152382|TAD1L ENSG00000163788|SNRK ENSG00000166337|TAF10 ENSG00000169291|SHE ENSG00000178604|NP\_001034973.1 ENSG00000197020|ZNF100 ENSG00000198538|ZNF28 ENSG00000198898|CAPZA2 ENSG00000204604|ZNF468

TGTGACT

TGTGAGC

TGTGATA

TGTGATC

TGTGATT

TGTGCAA

TGTGCAT

ENSG00000004975|DVL2 ENSG00000034053|APBA2 ENSG00000057757|C1orf128 ENSG00000065675|PRKCQ ENSG00000066117|SMARCD1 ENSG00000078872|NFS1 ENSG00000080573|COL5A3 ENSG00000085063|CD59 ENSG00000101189|C20orf20 ENSG00000102466|FGF14 ENSG00000106976|DNM1 ENSG00000110514|MADD ENSG00000111678|C12orf57 ENSG00000115641|FHL2 ENSG000001127528|KLF2 ENSG00000130479|MAP1S ENSG00000147206|NKF3 ENSG00000160392|C19orf47 ENSG00000170577|SIX2 ENSG00000171790|SLFN1 ENSG00000174365|NR\_003239.1 ENSG00000174576|NPAS4 ENSG00000176783|RUFY1 ENSG00000177441|Q8N4T9\_HUMAN ENSG00000183762|KREMEN1 ENSG00000185602|ARHGAP27 ENSG00000188447|XR\_016015.1 ENSG00000197968|Q8N231\_HUMAN ENSG00000198883|PNMA5 ENSG00000205610|Q4G105\_HUMAN ENSG00000102444|ZNF207 ENSG00000070761|C16orf80 ENSG00000079819|EPB41L2 ENSG00000101951|PAGE4 ENSG00000108395|TRIM37 ENSG00000111537|IFNG ENSG00000115419|GLS ENSG00000122877|EGR2 ENSG00000124275|MTRR ENSG00000124688|MAD2L1BP ENSG00000127588|GNL3 ENSG00000128710|HOXD10 ENSG00000128891|CCDC32 ENSG00000134046|MBD2 ENSG00000137393|IBRDC2 ENSG00000138075|ABCG5 ENSG00000139173|TMEM117 ENSG00000140987|ZNF434 ENSG00000141448|GATA6 ENSG00000143742|SRP9 ENSG00000144224|UBXD2 ENSG00000146278|PNRC1 ENSG00000147231|CXorf57 ENSG00000148153|C9orf80 ENSG00000164112|TMEM155 ENSG00000164182|NDUFA12L ENSG00000169248|CXCL11 ENSG00000175029|CTBP2 ENSG00000181322|TXNDC6 ENSG00000186487|MYT1L ENSG00000198646|NCOA6 ENSG00000198833|UBE2J1 ENSG00000198833|UBE2J1 ENSG00000006712|PAF1 ENSG00000007541|PIGQ ENSG00000008118|CAMK1G ENSG00000088827|SIGLEC1 ENSG00000100991|TRPC4AP ENSG00000101146|RAE1 ENSG0000010102030|ARD1A ENSG00000112855|HARS2 ENSG00000124313|IQSEC2 ENSG00000130803|ZNF317 ENSG00000136807|CDK9 ENSG00000138031|ADCY3 ENSG00000146830|PERQ1 ENSG00000148965|SAA4 ENSG00000160993|ALKBH4 ENSG00000167881|SRP68 ENSG00000169258|GPRIN1 ENSG00000173846|PLK3 ENSG00000174171|Q8TBCB\_HUMAN ENSG00000178498|DTX3 ENSG00000178927|C17orf62 ENSG00000182912|C21orf90 ENSG00000183637|C21orf30 ENSG00000185215|TNFAIP2 ENSG00000188735|NP\_001074294.1 ENSG00000189110|Q6ZKR9\_HUMAN ENSG00000196070|Q6ZVY7\_HUMAN ENSG00000197586|ENTPD6 ENSG00000068781|STON1 ENSG00000085832|EPS15 ENSG00000104435|STMN2 ENSG00000106603|C7orf44 ENSG00000117036|ETV3 ENSG00000117592|PRDX6 ENSG000001156535|CD109 ENSG00000162769|FLVCL1\_HUMAN ENSG00000166037|CEP57 ENSG00000169446|TMEM32 ENSG00000169891|REPS2 ENSG00000169967|MAP3K2 ENSG00000170417|TMEM182 ENSG00000170965|PLACL1 ENSG00000175885|ZNF611 ENSG00000176641|HSPD1 ENSG00000183022|NP\_003148.2 ENSG00000004461|NPAL3 ENSG00000002933|TMEM176A ENSG00000005100|DHX33 ENSG00000026950|BTN3A1 ENSG00000074410|CAL2 ENSG00000081277|PKP1 ENSG00000104967|NOVA2 ENSG00000105227|PRX ENSG00000111671|SPSB2 ENSG00000111801|BTN3A1 ENSG00000114982|NP\_060461.3 ENSG00000119431|HDHD3 ENSG00000121775|TMEM39B ENSG00000125991|ERGIC3 ENSG00000137070|ASS1 ENSG00000139644|TEGT ENSG00000158717|RNF166 ENSG00000162426|SLC45A1 ENSG00000162735|PEX19 ENSG00000169371|SNUPN ENSG00000171385|KCNDB3 ENSG00000174989|FBXW8 ENSG00000186207|LCE5A ENSG00000198756|GLT25D2 ENSG00000206193|SHY3A\_HUMAN ENSG000000000003|TSPAN6 ENSG000000035141|PLAUR ENSG00000035141|NP\_116211.1 ENSG00000079134|THOC1 ENSG00000100503|NIN ENSG00000107984|DKK1 ENSG00000110696|C11orf58 ENSG00000112144|ICK ENSG00000125703|ATG4C ENSG00000129317|PUS7L ENSG00000148483|FAM23A ENSG00000152932|RAB3C ENSG00000153951|ORAD2 ENSG00000156103|MMP16 ENSG00000156162|DPY19L4 ENSG00000163376|KBTBD8 ENSG00000163491|NEK10 ENSG00000163683|C4orf34 ENSG00000163875|C1orf149 ENSG00000164930|FZD6 ENSG00000169126|ARMC4 ENSG00000198498|NP\_060822.1 ENSG00000203864|C1orf137 ENSG00000204289|C17orf86 ENSG00000204977|TRIM13

TGTGATC

TGTGATT

TGTGCAA

TGTGCAT

ENSG000000078246|TULP3 ENSG00000092621|PHGDH ENSG00000099977|DDT ENSG00000119686|C14orf58 ENSG00000125447|GGA3 ENSG00000128389|NM\_032262 ENSG00000131188|PRR7 ENSG00000134864|Q9BVM4\_HUMAN ENSG00000143365|RORC ENSG00000145990|GFOD1 ENSG00000148411|BTBD14A ENSG00000154229|PRKCA ENSG00000158158|CNM4 ENSG00000163961|RNF168 ENSG00000165269|AQP7 ENSG00000166900|STX3 ENSG00000175756|AURKAIP1 ENSG00000180509|KCNE1 ENSG00000186466|AQP7P2 ENSG00000004468|CD38 ENSG00000069329|VPS35 ENSG00000102931|ARL2BP ENSG00000119938|PPP1R3C ENSG00000125398|SOX9 ENSG00000131007|TTY9A ENSG00000131009|TTY9A\_HUMAN ENSG00000134253|TRIM45 ENSG00000139537|CCDC65 ENSG00000143363|PRUNE ENSG00000143437|ARNT ENSG00000145349|CAMK2D ENSG00000145495|MARCB6 ENSG00000148948|LRRRC4C ENSG00000150045|KLRFL1 ENSG00000151849|CENPJ ENSG00000152133|CCDC75 ENSG00000153922|CHD1 ENSG00000165985|C1QL3 ENSG00000168582|CRYGA ENSG00000185068|GTF2H5 ENSG00000187994|NP\_940847.1 ENSG00000188653|NR\_002807.1 ENSG00000189067|LITAF ENSG00000198964|SGMS1 ENSG00000204026|Q6ZSD2\_HUMAN ENSG00000054523|KIF1B ENSG00000071205|ARHGAP10 ENSG00000072858|SIDT1 ENSG00000075234|NP\_060401.2 ENSG00000088682|COQ9 ENSG00000103591|P34\_HUMAN ENSG00000104419|NDRG1 ENSG00000110497|NP\_060219.2 ENSG00000112062|MAPK14 ENSG00000124126|PREX1\_HUMAN ENSG00000137709|POU2F3 ENSG00000139624|LASS5 ENSG00000143450|OAZ3 ENSG00000163812|ZDHHC3 ENSG00000165025|SYK ENSG00000169084|ZBED1 ENSG00000170162|VGLL2 ENSG00000171060|C8orf74 ENSG00000173020|ADRBK1 ENSG00000197417|CARLK ENSG00000197746|PSAP ENSG00000205352|Q9NZ81-2 ENSG00000012660|ELOVL5 ENSG00000135831|HEBP1 ENSG00000090054|SPTLC1 ENSG00000100811|YY1 ENSG00000112796|ENPP5 ENSG00000118804|GET1\_HUMAN ENSG00000124209|RAB22A ENSG00000126945|HNRPH2 ENSG00000132437|DDC ENSG00000133636|NTS ENSG00000145349|CAMK2D ENSG00000146809|ASB15 ENSG00000152582|NP\_653323.1 ENSG00000159435|C2orf29 ENSG00000164951|PPM2C ENSG00000168175|C14orf32 ENSG00000168405|CMAH ENSG00000169045|HNRPH1 ENSG00000170775|GPR37 ENSG00000178346|C6orf61 ENSG00000179059|ZFP42 ENSG00000179163|FUCAL1 ENSG00000180263|FGD6 ENSG00000185053|SGC2 ENSG00000185792|NLRP9 ENSG00000023171|GRAMD1B ENSG00000063322|TXL ENSG00000100285|NEFH ENSG00000103021|CCDC113 ENSG00000105392|CRX ENSG00000114988|LMAN2L ENSG00000115602|IL1RL1 ENSG00000125089|SH3TC1 ENSG00000126705|AHDIC1 ENSG00000142583|SLC2A5 ENSG00000142686|NP\_689587.1 ENSG00000143198|MGST3 ENSG00000159123|DMRTC\_HUMAN ENSG00000159348|CYB5R1 ENSG00000160445|ZER1 ENSG00000162772|ATF3 ENSG00000166159|LRTM2 ENSG00000173253|DMRT2 ENSG00000180104|EXOC3 ENSG00000184911|CXorf50 ENSG00000186474|KLK12 ENSG00000197670|Q9H800\_HUMAN ENSG00000198373|WWP2 ENSG00000198569|SLC34A3 ENSG00000203784|LELP1 ENSG00000003393|ALS2 ENSG00000009413|REB3L ENSG000000091844|RGS17 ENSG00000102780|DGKH ENSG00000110848|CD69 ENSG00000112081|SFRS3 ENSG00000112182|BACH2 ENSG00000115839|RAB3GAP1 ENSG00000120253|NUP43 ENSG00000137845|ADAM10 ENSG00000142676|RPL11 ENSG00000143401|ANP32E ENSG00000143458|NP\_653219.1 ENSG00000143507|DUSP10 ENSG00000152465|NMT2 ENSG00000152894|PTPRK ENSG00000153253|SCN3A ENSG00000154645|CHODL ENSG00000155744|FAM126B ENSG00000159256|MORC3 ENSG00000160856|FCRL3 ENSG00000162630|B3GALT2 ENSG00000162692|VCAM1 ENSG00000165494|PCF11 ENSG00000165943|MOAP1 ENSG00000172000|ZNF556 ENSG00000173258|ZNF483 ENSG00000174628|IQCK ENSG00000179902|C1orf194 ENSG00000187672|ERC2 ENSG00000198468|Q8TAF5\_HUMAN

TGTGCAT

perfect: TGTGCAA TTGCACA hsa-miR-32 taTTGCACAttactaagtgttc 2 ENSG00000075856|SART3 ENSG00000100075|SLC25A1 ENSG00000100593|THSD3 ENSG00000101412|E2F1 ENSG00000110042|DTX4 ENSG00000113048|MRPS27 ENSG00000125633|CCDC93 ENSG00000125810|CD93 ENSG00000129473|BCL2L2 ENSG00000131183|SLC34A1 ENSG00000138964|PARVG ENSG00000145920|CPLX2 ENSG00000146007|ZMAT2 ENSG00000148408|CACNA1B ENSG00000151353|TMEM18 ENSG00000166135|HIF1AN ENSG00000166716|ZNF592 ENSG00000167748|KLK1 ENSG00000169696|ASPSRC1 ENSG00000174564|IL20RB ENSG00000178243|C9orf62 ENSG00000178537|SLC25A20 ENSG00000178803|Q8NAW6\_HUMAN ENSG00000179240|Q3ZCU0\_HUMAN ENSG00000180935|Q8N8B3\_HUMAN ENSG00000184060|CENTA2 ENSG00000185615|PDIA2 ENSG00000187792|ZNF70 ENSG00000196242|OR2C3 ENSG000001

|          |                              |                                |                              |                                |                              |                              |                                |                                |
|----------|------------------------------|--------------------------------|------------------------------|--------------------------------|------------------------------|------------------------------|--------------------------------|--------------------------------|
|          | ENSG00000204100 Q6ZV28_HUMAN | ENSG00000204576 PRR3           | ENSG00000205354 Q6ZN60_HUMAN | ENSG00000060709 RIMBP2         | ENSG00000071537 SEL1L        | ENSG00000076716 GPC4         | ENSG00000080166 DCT            | ENSG00000085365 SCAMP1         |
|          | ENSG00000102038 SMARCA1      | ENSG00000118418 HMGN3          | ENSG00000124201 ZNF1         | ENSG00000126016 AMOT           | ENSG00000127989 MTFRF        | ENSG00000133111 RFXPAC       | ENSG00000134333 LDHA           | ENSG00000146457 WTAP           |
|          | ENSG00000147364 FBXA25       | ENSG00000147535 PPAPDC1B       | ENSG00000147588 PMP2         | ENSG00000147642 SYBU_HUMAN     | ENSG00000149050 ZNF214       | ENSG00000152428 MARS2        | ENSG00000154474 KBTBD10        | ENSG00000156140 ADAMTS3        |
| TGTGCCA  | ENSG00000163599 CTLA4        | ENSG00000165983 PTER           | ENSG00000171478 SPACA5B      | ENSG00000172572 PDE3A          | ENSG00000176018 LYSMD3       | ENSG00000198799 LRIG2        |                                |                                |
|          | ENSG00000063761 ADCK1        | ENSG00000067191 CACNB1         | ENSG00000101280 ANGPT4       | ENSG00000101441 CST4           | ENSG00000105953 OGDH         | ENSG00000108828 VAT1         | ENSG00000111678 C12orf57       | ENSG00000126752 SSX1           |
|          | ENSG00000127511 SN3B         | ENSG00000127743 LL17B          | ENSG00000127824 TUBA4A       | ENSG00000130827 PLXNA3         | ENSG00000131183 SLC34A1      | ENSG00000145063 NM_182586    | ENSG00000145194 ECE2           | ENSG00000157965 SSX8           |
|          | ENSG00000158555 GDPD5        | ENSG00000158955 WNT9B          | ENSG00000165583 SSX5         | ENSG00000169242 EFNA1          | ENSG00000171483 SSX6         | ENSG00000171984 C20orf196    | ENSG00000173959 RBM14          | ENSG00000196581 AJAP1          |
|          | ENSG00000198946 SSX4B        | ENSG00000203988 Q6ZU49_HUMAN   | ENSG00000204645 SSX4         | ENSG00000206562 METTL6         | ENSG000000000457 SCYL3       | ENSG00000023318 TXNDC4       | ENSG00000047648 ARHGAP6        | ENSG00000069966 GNB5           |
|          | ENSG00000072042 RDH11        | ENSG00000091428 RAPGEF4        | ENSG00000106829 TLE4         | ENSG00000108296 CCDC49         | ENSG00000119401 TRIM32       | ENSG00000123213 NLN          | ENSG00000123297 TSMF           | ENSG00000131016 AKAP12         |
|          | ENSG00000131779 PEX11B       | ENSG00000136813 KIAA0368       | ENSG00000137265 IRF4         | ENSG00000147642 SYBU_HUMAN     | ENSG00000162520 SYNC1        | ENSG00000163421 PROK2        | ENSG00000165914 TTC7B          | ENSG00000166128 RAB8B          |
|          | ENSG00000167117 C17orf73     | ENSG00000167220 HDHD2          | ENSG00000169032 MAP2K1       | ENSG00000169495 HTRA4          | ENSG00000176714 CCDC121      | ENSG00000178445 GLDC         | ENSG00000183753 BPFY2C         | ENSG00000183795 VCY2_HUMAN     |
| TGTGCCC  | ENSG00000185894 VCY2_HUMAN   |                                |                              |                                |                              |                              |                                |                                |
|          | ENSG0000012822 CALCOCO1      | ENSG00000022277 C20orf43       | ENSG00000049768 FOXP3        | ENSG00000067191 CACNB1         | ENSG00000072163 LIMS2        | ENSG00000077235 GTF3C1       | ENSG00000093217 XYLB           | ENSG00000099282 TSPAN15        |
|          | ENSG00000100203 PPIL2        | ENSG00000100341 PNPLA5         | ENSG00000105640 RPL18A       | ENSG00000117419 PRNPIP         | ENSG00000132879 PBOX44       | ENSG00000133316 WDR74        | ENSG00000135437 RDH5           | ENSG00000143178 TBX19          |
|          | ENSG00000145040 UCN2         | ENSG00000158195 WASF2          | ENSG00000165568 AKR1CL2      | ENSG00000166887 VPS39          | ENSG00000167815 PRDX2        | ENSG00000173020 ADRBK1       | ENSG00000174403 NP_689970.1    | ENSG00000174516 PELI3          |
|          | ENSG00000177408 PLAC2        | ENSG00000177947 ODF3           | ENSG00000178252 WDR6         | ENSG00000179477 ALOX12B        | ENSG00000180935 Q8N8B3_HUMAN | ENSG00000182057 Q8IXR4_HUMAN | ENSG00000189433 GJB4           | ENSG00000197558 Q76B61_HUMAN   |
|          | ENSG00000204579 AZRUR5_HUMAN | ENSG00000100596 SPTLC2         | ENSG00000101977 MCF2         | ENSG00000106258 CYP3A5         | ENSG00000108256 NUFIP2       | ENSG00000110367 DDX6         | ENSG00000123570 RAB9B          | ENSG00000126088 UROD           |
|          | ENSG00000133169 BEX1         | ENSG00000134198 TSPAN2         | ENSG00000135821 GLUL         | ENSG00000147145 GPR23          | ENSG00000152240 CCDC5        | ENSG00000156239 NGAMT1       | ENSG00000157456 CCNB2          | ENSG00000162433 AK3L2          |
|          | ENSG00000163636 PSMD6        | ENSG00000164645 NF_689919.1    | ENSG00000165891 E2F7         | ENSG00000170786 NP_620419.2    | ENSG00000177410 Q5QHF1_HUMAN | ENSG00000186314 PRELID2      | ENSG00000196639 HRH1           | ENSG00000205359 SLC06A1        |
| TGTGCCCT | ENSG00000206367 Q6ZR26_HUMAN |                                |                              |                                |                              |                              |                                |                                |
|          | ENSG00000072778 ACADVL       | ENSG00000078061 ARAF           | ENSG00000100101 NOL12        | ENSG00000101439 CST3           | ENSG00000108179 PP1F         | ENSG00000115107 STEAP3       | ENSG00000115194 SLC30A3        | ENSG00000125965 GDF5           |
|          | ENSG00000127578 WIKIKN1      | ENSG00000141527 CARD14         | ENSG00000142327 RNFPEL1      | ENSG00000146221 NP_872345.1    | ENSG00000143479 DYRK3        | ENSG00000143772 ITPKB        | ENSG00000169105 CHST14         | ENSG00000175573 C11orf68       |
|          | ENSG00000177105 RHOG         | ENSG00000178243 C9orf62        | ENSG00000178928 TPRX1        | ENSG00000180935 Q8N8B3_HUMAN   | ENSG00000196295 Q8N867_HUMAN | ENSG00000198664 Q9BTR0_HUMAN | ENSG00000205937 RNPS1          | ENSG00000206177 HBM            |
|          | ENSG00000111422 PLAUR        | ENSG0000013583 HEBP1           | ENSG00000049759 NEDD4L       | ENSG00000059588 TARBP1         | ENSG00000081386 ZNF510       | ENSG00000090530 LEPREL1      | ENSG00000101868 POLA1          | ENSG00000102804 TSC22D1        |
|          | ENSG00000111783 RFX4         | ENSG00000114062 UBE3A          | ENSG00000115365 LANCL1       | ENSG00000119203 CPSF3          | ENSG00000122884 PAXH1        | ENSG00000123500 COL10A1      | ENSG00000123892 RAB38          | ENSG00000128294 TPST2          |
|          | ENSG00000134253 TRIM45       | ENSG00000139116 KIF21A         | ENSG00000140660 RUND2A       | ENSG00000143469 SYT14          | ENSG00000146109 ABT1         | ENSG00000155324 GRAMD3       | ENSG00000157107 FCHO2          | ENSG00000158467 SAHH3_HUMAN    |
|          | ENSG00000163607 GTPBP8       | ENSG00000164404 GDF9           | ENSG00000166240 Q14DG7-2     | ENSG00000168582 CRYGA          | ENSG00000171864 PRND         | ENSG00000175818 HS3ST5       | ENSG00000198903 Q6ZV72_HUMAN   | ENSG00000205608 Q6ZQP9_HUMAN   |
| TGTGCTT  | ENSG00000115676 NUDCD3       | ENSG00000036448 MYOM2          | ENSG00000067840 PDZD4        | ENSG00000073111 MCM2           | ENSG00000104872 PIH1D1       | ENSG00000105278 KIAA1086     | ENSG00000107262 BAG1           | ENSG00000110801 PSMD9          |
|          | ENSG00000117461 PK3K3        | ENSG00000134061 CD180          | ENSG00000138294 MMMB         | ENSG00000141391 SLMO1          | ENSG00000143479 DYRK3        | ENSG00000143772 ITPKB        | ENSG00000165059 PRKACG         | ENSG00000166033 HTRA1          |
|          | ENSG00000166257 SCN3B        | ENSG00000168802 NM_001039690.2 | ENSG00000169676 DRD5         | ENSG00000176605 C14orf177      | ENSG00000184916 JAG2         | ENSG00000184923 FAM22A       | ENSG00000188735 NP_001074294.1 | ENSG00000203762 Q62TJ3_HUMAN   |
|          | ENSG00000203783 PRR9         | ENSG00000204657 OR2H2          | ENSG00000205726 ITSN1        | ENSG00000068615 REEP1          | ENSG00000072803 FBXW1        | ENSG00000100201 DDX17        | ENSG00000102837 OLFM4          | ENSG00000103540 CE110_HUMAN    |
|          | ENSG00000108590 MED31        | ENSG00000112530 PACRG          | ENSG00000138668 HNRPD        | ENSG00000144815 FAM55C         | ENSG00000153250 RBMX1        | ENSG00000154545 MAGED4       | ENSG00000162864 NP_775920.1    | ENSG00000170500 LONRF2         |
| TGTGGTC  | ENSG00000182220 ATP6AP2      | ENSG00000187243 MAGD4B         | ENSG00000196482 ESRRG        | ENSG00000100626 GALNTL1        | ENSG00000103005 C16orf57     | ENSG00000105875 NP_054868.2  | ENSG00000124107 SLPI           | ENSG00000125966 MMP24          |
|          | ENSG00000008056 SYN1         | ENSG00000052749 RRP12          | ENSG00000100626 GALNTL1      | ENSG00000103005 C16orf57       | ENSG00000105875 NP_054868.2  | ENSG00000124107 SLPI         | ENSG00000125966 MMP24          | ENSG00000127804 METTL10D       |
|          | ENSG00000130723 KIAA0515     | ENSG00000133317 LGALS12        | ENSG00000143319 ISG20L2      | ENSG00000143382 ADAMTSL4       | ENSG00000145949 SGR85_HUMAN  | ENSG00000161270 NPHS1        | ENSG00000162511 LAPTM5         | ENSG00000167280 NP_001036038.1 |
|          | ENSG00000175591 P2RY2        | ENSG00000176022 B3GALT6        | ENSG00000179598 NP_849158.1  | ENSG00000182707 FXYD8          | ENSG00000185684 EP400NL      | ENSG00000197562 RAB40C       | ENSG00000198366 HIST1H3A       | ENSG00000203746 FCGR2C         |
|          | ENSG00000204586 Q6PJP7_HUMAN | ENSG00000205670 C21orf51       | ENSG00000004459 C9orf39      | ENSG00000111215 PRR4           | ENSG00000114520 SNX4         | ENSG00000116183 PAPPA2       | ENSG00000127366 TAS2R5         | ENSG00000135070 ISCA1          |
|          | ENSG00000157219 HTR5A        | ENSG00000159763 PIP            | ENSG00000163558 PRKCI        | ENSG00000164983 TMEM65         | ENSG00000169906 S100G        | ENSG00000175426 PCSK1        | ENSG00000176165 FOXG1B         | ENSG00000184280 ZNF285B        |
| TGTGTAA  | ENSG00000184349 EFNA5        | ENSG00000196812 ZSCAN16        | ENSG000000065675 PRKCQ       | ENSG00000075035 WSCD2          | ENSG00000079616 KIF22        | ENSG00000080845 DLGAP4       | ENSG00000086015 MAST2          | ENSG00000087586 AURKA          |
|          | ENSG00000004848 ARX          | ENSG00000006062 MAP3K14        | ENSG00000099821 POLRMT       | ENSG00000100767 PAPLN          | ENSG00000107807 TLX1         | ENSG00000132932 ATP8A2       | ENSG00000139445 FOXN4          | ENSG00000141664 ZCCHC2         |
|          | ENSG00000088808 PPP1R13B     | ENSG00000092054 MYH7           | ENSG00000168924 LETM1        | ENSG00000169213 RAB3B          | ENSG00000175799 NP_997327.1  | ENSG00000185722 ANKFY1       | ENSG00000188428 TXNDC5         | ENSG00000197122 SRC            |
|          | ENSG00000148158 SNX30        | ENSG00000165731 RET            | ENSG00000204564 C6orf136     | ENSG00000205089 NP_001034869.1 | ENSG00000053900 ANAPC4       | ENSG00000065413 ANKRD44      | ENSG00000073464 CLCN4          | ENSG00000089048 ESF1           |
|          | ENSG00000204043 FAM22C       | ENSG00000109762 SNX25          | ENSG00000111605 CPSF6        | ENSG00000112232 KHDRBS2        | ENSG00000116791 CRYZ         | ENSG00000118473 SGIP1        | ENSG00000118705 RPN2           | ENSG00000119906 C10orf6        |
|          | ENSG00000108231 LGI1         | ENSG00000120265 PCMT1          | ENSG00000124201 ZNFX1        | ENSG00000128731 HERC2          | ENSG00000132122 SPATA6       | ENSG00000133106 EGPST1       | ENSG00000135486 HNRPA1         | ENSG00000136688 ILLF9          |
|          | ENSG000001137960 GIPC2       | ENSG00000147642 SYBU_HUMAN     | ENSG00000148572 NRBF2        | ENSG00000154945 ANKRD40        | ENSG00000159904 ZNF225       | ENSG00000161980 POLR3K       | ENSG00000163586 FABP1          | ENSG00000163714 SR140_HUMAN    |
|          | ENSG00000165533 TTC8         | ENSG00000168214 RBPJ           | ENSG00000179046 NP_775824.1  | ENSG00000180998 GPR137C        | ENSG00000181392 C19orf46     | ENSG00000184384 MAML2        | ENSG00000186462 NAP1L2         | ENSG00000188611 ASHA2C         |
| TGTGTAT  | ENSG00000196305 IARS         | ENSG00000196937 FAM3C          | ENSG00000198081 ZFP161       | ENSG00000104081 BMF            | ENSG00000108557 RAI1         | ENSG00000124225 TMEMPAI      | ENSG00000126970 KIAA1166       | ENSG00000131467 PSME3          |
|          | ENSG00000080470 SMAP1L       | ENSG00000086062 B4GALT1        | ENSG00000087191 PSMC5        | ENSG00000141258 RUTBC1         | ENSG00000143093 FAMA0A       | ENSG00000144843 ADPRH        | ENSG00000146859 TMEM140        | ENSG00000150977 NP_659495.1    |
|          | ENSG00000133985 TTC9         | ENSG00000136859 ANGPTL2        | ENSG00000139433 GLTP         | ENSG00000162415 ZSWIM5         | ENSG00000162783 IER5         | ENSG00000164970 C9orf25      | ENSG00000165138 ANKS6          | ENSG00000165272 AQP3           |
|          | ENSG00000154096 THY1         | ENSG00000157950 SSX2_HUMAN     | ENSG00000159202 UBE2Z        | ENSG00000172867 KRT2           | ENSG00000173638 SLC19A1      | ENSG00000178104 PDE4DIP      | ENSG00000179388 EGR3           | ENSG00000180935 Q8N8B3_HUMAN   |
|          | ENSG00000166819 PLIN         | ENSG00000167641 PPP1R14A       | ENSG00000169347 GP2          | ENSG00000204368 SSX7           | ENSG00000204568 MRPS18B      | ENSG00000204648 SSX9         | ENSG00000206706 IKBKAP         | ENSG00000207818 NRD1           |
|          | ENSG00000185082 LBH          | ENSG00000187773 C18orf51       | ENSG00000198796 ALPK2        | ENSG00000102217 RBM3           | ENSG00000102317 RBM3         | ENSG00000107566 CHUK         | ENSG00000109674 NEIL3          | ENSG00000113387 SUB1           |
|          | ENSG00000086666 ZFAND6       | ENSG00000088930 XRN2           | ENSG00000100262 ARFGAP3      | ENSG00000134644 PUM1           | ENSG00000134830 GPR77        | ENSG00000135486 HNRPA1       | ENSG00000135549 PKIB           | ENSG00000137261 KIAA0319       |
|          | ENSG00000113811 SELK_HUMAN   | ENSG00000117152 RGS4           | ENSG00000127914 AKAP9        | ENSG00000156504 FAM122B        | ENSG00000162595 DIRAS3       | ENSG00000163606 CD200R1      | ENSG00000164938 TP53INP1       | ENSG00000165416 SUGT1          |
|          | ENSG00000145708 CRHBP        | ENSG00000153130 SCOC           | ENSG00000156194 PPEF2        | ENSG00000171262 FAM98B         | ENSG00000172175 MALT1        | ENSG00000173046 NM_207376    | ENSG00000173113 TR112_HUMAN    | ENSG00000175487 NP_076428.2    |
| TGTGTCC  | ENSG00000166532 FAM80B       | ENSG00000166845 C18orf54       | ENSG00000167699 GLOD4        | ENSG00000205769 Q6ZUR9_HUMAN   |                              |                              |                                |                                |
|          | ENSG00000182916 TCEAL7       | ENSG00000184434 LRRCL19        | ENSG00000205769 Q6ZUR9_HUMAN |                                |                              |                              |                                |                                |
|          | ENSG00000068383 INPP5A       | ENSG00000099326 MZF1           | ENSG00000099904 ZDHHC8       | ENSG00000100075 SLC25A1        | ENSG00000100138 NHP2L1       | ENSG00000110514 MADD         | ENSG00000117410 ATP6V0B        | ENSG00000124232 RBPJL          |
|          | ENSG00000127129 EDN2         | ENSG00000131459 GFPT2          | ENSG00000138030 KHK          | ENSG00000140835 CHST4          | ENSG00000165643 SOHLH1       | ENSG00000167771 RCOR2        | ENSG00000167797 CDK2AP2        | ENSG00000177674 AGTRAP         |
|          | ENSG00000180935 Q8N8B3_HUMAN | ENSG00000182606 TRAK1          | ENSG00000198909 MAP3K3       | ENSG00000203702 C6orf59        | ENSG00000205673 Q6ZRX0_HUMAN | ENSG00000006757 PNPLA4       | ENSG00000009694 ODZ1           | ENSG00000109756 RAPGEF2        |
|          | ENSG00000125246 CLYBL        | ENSG00000125850 OVOL2          | ENSG00000136144 RCBTB1       | ENSG00000141076 CIRH1A         | ENSG00000158560 DYNC11       | ENSG00000160633 SAFB         | ENSG00000162433 AK3L2          | ENSG00000164822 DEFA6          |
|          | ENSG00000166200 COPS2        | ENSG00000168939 SPRY3          | ENSG00000171055 FEZ2         | ENSG00000172493 AFF1           | ENSG00000179300 ZCCHC5       | ENSG00000186446 ZNF501       | ENSG00000187123 LYPD6          | ENSG00000188747 NOXA1          |
| TGTGTCT  | ENSG00000006125 AP2B1        | ENSG00000058404 CAMK2B         | ENSG00000058799 YIPF1        |                                |                              |                              |                                |                                |

ENSG00000122339|C6orf35 ENSG00000122417|ODF2L ENSG00000129071|MBD4 ENSG00000129675|ARHGFE6 ENSG00000133059|RIPK5 ENSG00000134453|RBM17 ENSG00000135837|CEP350 ENSG00000138069|RAB1A  
ENSG00000147246|HTR2C ENSG00000155090|KLF10 ENSG00000164404|GDF9 ENSG00000166352|C11orf74 ENSG00000167553|TUBA1C ENSG00000168280|KIF5C ENSG00000172572|PDE3A ENSG00000173517|SG269\_HUMAN  
ENSG00000176407|KCMF1 ENSG00000179222|MAGED1 ENSG00000185737|NRC3 ENSG00000188800|TMC02 ENSG00000198482|ESRRG ENSG00000198689|SLC9A6 ENSG00000204348|DOM3Z ENSG00000204348|DOM3Z ENSG00000101412|E2F1  
ENSG00000005381|MPO ENSG00000043591|ADRB1 ENSG00000063438|AHRR ENSG00000066136|TFYC ENSG00000080845|DLGAP4 ENSG00000087191|PSMC5 ENSG00000099365|STX1B2 ENSG00000101412|E2F1  
ENSG00000105131|ABHD9 ENSG00000112139|MDGA1 ENSG00000116604|MEF2D ENSG00000120053|GOT1 ENSG00000135365|PHF21A ENSG00000140983|RHOT2 ENSG00000142686|NP\_689587.1 ENSG00000142973|CYP4B1  
ENSG00000144843|ADPRH ENSG00000145029|NICN1 ENSG00000145920|CPLX2 ENSG00000151651|ADAM8 ENSG00000163932|PRKCD ENSG00000164970|C9orf25 ENSG00000166135|HIFIAN ENSG00000166780|C16orf45  
ENSG00000167202|TBC1D2B ENSG00000167680|SEMA6B ENSG00000176490|DIRAS1 ENSG00000177663|IL17RA ENSG00000177854|TMEM187 ENSG00000178243|C9orf62 ENSG00000179598|NP\_849158.1 ENSG00000180935|Q8N8B3\_HUMAN  
ENSG00000185818|NAT8L ENSG00000198691|ABCA4 ENSG000000051108|HERPUD1 ENSG00000075413|MARK3 ENSG00000122417|ODF2L ENSG00000127463|KIAA0090 ENSG00000128607|NP\_055812.1 ENSG00000129071|MBD4  
ENSG00000137142|IGFBPL1 ENSG00000138759|FRAS1 ENSG000001433458|NP\_653219.1 ENSG00000144218|AFF3 ENSG00000151617|EDNRA ENSG00000158023|WDR66 ENSG00000164024|METAP1 ENSG00000164283|ESM1  
ENSG00000166783|KIAA0430 ENSG00000172572|PDE3A ENSG00000175387|SMAD2 ENSG00000175390|EIF3S5 ENSG00000176896|TFSM1\_HUMAN ENSG00000181392|C19orf46 ENSG00000182670|TTC3 ENSG00000189195|BTBD8  
ENSG00000196236|XPNPEP3 ENSG00000198646|NCOA6 ENSG00000205992|Q8N4X1\_HUMAN  
ENSG00000007392|LUC7L ENSG00000029993|HMG63 ENSG00000072832|CRMP1 ENSG00000074054|CLASP1 ENSG00000076108|BAZ2A ENSG00000100138|NHP2L1 ENSG00000103227|TMEM112 ENSG00000105127|AKAP8  
ENSG00000106133|NSUN5C ENSG00000110786|PTNP5 ENSG00000112679|DUSP22 ENSG00000113739|STC2 ENSG00000115758|ODC1 ENSG00000117461|PIK3R3 ENSG00000133884|DPF2 ENSG00000136444|RSAD1  
ENSG00000151651|ADAM8 ENSG00000158553|POM121L2 ENSG00000164088|PPM1M ENSG00000165802|NELF ENSG00000166526|ZNF3 ENSG00000166619|BLCAP ENSG00000167895|TMC8 ENSG00000172345|STARD5  
ENSG00000172819|RARG ENSG00000180304|QAZ2 ENSG00000180935|Q8N8B3\_HUMAN ENSG00000182053|XR\_016180.1 ENSG00000183117|CSMD1 ENSG00000184216|IRAK1 ENSG00000187979|Q6ZPC6\_HUMAN ENSG00000197586|ENTP6D  
ENSG00000204098|Q6ZUI5\_HUMAN ENSG00000204525|HLA-C ENSG00000012048|BRCA1 ENSG00000040341|STAU2 ENSG00000042088|TDP1 ENSG00000064787|BCAS1 ENSG00000072682|P4HA2 ENSG00000090487|SPG21  
ENSG00000102606|ARHGFE7 ENSG00000107186|MPDZ ENSG00000109819|PPARGC1A ENSG00000113205|PCDH8 ENSG00000116288|PARK7 ENSG00000118231|CRYG ENSG00000121207|LRAT ENSG00000121931|C1orf103  
ENSG00000125551|PLGLB1 ENSG00000126787|DLG7 ENSG00000134375|TIMM17A ENSG00000138078|PREPL ENSG00000138180|CEP55 ENSG00000146477|SLC22A3 ENSG00000151247|EIF4E ENSG00000152382|TADA1L  
ENSG00000157540|DYRK1A ENSG00000160223|ICOSLG ENSG00000166783|KIAA0430 ENSG00000168582|CRYGA ENSG00000169040|PMCHL2 ENSG00000169659|PLGLA1 ENSG00000170345|FOS ENSG00000172292|LASS6  
ENSG00000179008|C14orf39 ENSG00000183281|PLGB\_HUMAN ENSG00000183423|NP\_940908.1 ENSG00000184402|SS18L1 ENSG00000197375|SLC22A5  
ENSG00000068985|PAGE1 ENSG00000083814|ZNF671 ENSG00000086758|HUWE1 ENSG00000100207|TCF20 ENSG00000100211|CBY1 ENSG00000101290|CDS2 ENSG00000101321|C20orf159 ENSG00000105202|FBL  
ENSG00000109501|WFS1 ENSG00000124160|NCOA5 ENSG00000129187|DCTD ENSG00000129864|VCY1B ENSG00000129864|VCY1B ENSG00000130695|CCDC21 ENSG00000143761|ARF1 ENSG00000147223|Q5JRB8\_HUMAN  
ENSG00000156471|PTDSS1 ENSG00000158186|MRAS ENSG00000162458|FBLIM1 ENSG00000162576|MXRA8 ENSG00000169020|ATP5I ENSG00000172014|CCDC29 ENSG00000177504|VCX2 ENSG00000182768|NGRN  
ENSG00000183117|CSMD1 ENSG00000189430|NCR1 ENSG00000198816|ZNF358 ENSG00000205064|Q6ZVP2\_HUMAN ENSG00000205307|Q8TEE9\_HUMAN ENSG00000011638|TMEM159 ENSG00000095596|CYP26A1 ENSG00000101413|C20orf77  
ENSG00000102781|KATNAL1 ENSG00000103544|NP\_064710.3 ENSG00000105887|MTFN ENSG00000112893|MAN2A1 ENSG00000119514|GALNT12 ENSG00000125814|NAPB ENSG00000127688|GAN ENSG00000133606|MKRN1  
ENSG00000134108|ARL8B ENSG00000147400|CETN2 ENSG00000155097|ATP6V1C1 ENSG00000156925|ZIC3 ENSG00000162836|ACP6 ENSG00000169429|IL8 ENSG00000171132|PRKCE ENSG00000171155|C1GALT1C1  
ENSG00000175818|HS3ST5 ENSG00000176165|FOXG1B ENSG00000177640|CASC2 ENSG00000178982|EIF3S12 ENSG00000179456|ZNF238 ENSG00000182263|FIGN ENSG00000183336|BOLA2 ENSG00000185220|PGBD2  
ENSG00000189332|Q4G197\_HUMAN ENSG00000196072|BLOC1S2 ENSG00000197584|KCNMB2 ENSG00000197639|MKRN5  
ENSG00000074211|PPP2R2C ENSG00000116198|KIAA0562 ENSG00000135956|TMEM127 ENSG00000143632|ACTA1 ENSG00000159199|ATP5G1 ENSG00000163394|CKAR ENSG00000165140|FBP1 ENSG00000165275|RG9MTD3  
ENSG00000168824|NSG1\_HUMAN ENSG00000179837|RBM15B ENSG00000184923|FAM22A ENSG00000185219|ZNF445 ENSG00000188186|NP\_001008396.1 ENSG00000189140|HUMAN ENSG00000147223|Q5JRB8\_HUMAN ENSG0000005483|MLL5  
ENSG00000049618|ARID1B ENSG00000055211|C6orf72 ENSG00000064218|DMRT3 ENSG00000075945|KIFAP3 ENSG00000097033|SH3GLB1 ENSG00000102781|KATNAL1 ENSG00000106537|TSPAN13 ENSG00000112761|WISP3  
ENSG00000115850|LCT ENSG00000120948|TARDBP ENSG00000127022|CANX ENSG00000134709|HOOK1 ENSG00000145365|NP\_443096.1 ENSG00000145908|ZNF300 ENSG00000146469|VIP ENSG00000147027|TMEM47  
ENSG00000147274|RBMX ENSG00000150681|RGS18 ENSG00000152601|MBNL1 ENSG00000161547|SFRS2 ENSG00000164746|Q8NEG2\_HUMAN ENSG00000169554|ZEB2 ENSG00000182489|XKRX ENSG00000187109|NAP1L1  
ENSG00000197510|C21orf116 ENSG00000198015|MRPL42 ENSG00000198648|STK39  
ENSG00000063978|RNF4 ENSG00000074054|CLASP1 ENSG00000078085|ACHE ENSG00000106852|LHX6 ENSG00000131188|PRR7 ENSG00000137100|DCTN3 ENSG00000139531|SUOX ENSG00000141096|DPEP3  
ENSG00000141576|RNF157 ENSG00000142046|TMEM91 ENSG00000153885|KCTD15 ENSG00000156298|TSPAN7 ENSG00000161381|PLXDC1 ENSG00000162804|SNED1 ENSG00000164711|LPAL2 ENSG00000167645|YIF1B  
ENSG00000175283|DOLK ENSG00000196743|GM2A ENSG00000198901|PRC1 ENSG00000205801|Q6ZTT5\_HUMAN ENSG00000032219|ARID4A ENSG00000040933|INPP4A ENSG00000071073|MGAT4A ENSG00000076258|FMO4  
ENSG00000104341|LAPTMB4 ENSG00000107201|DDX58 ENSG00000109184|DCUN1D4 ENSG00000120519|PAIP2 ENSG00000120727|PAIP2 ENSG00000128654|MTX2 ENSG00000128739|SNRPN ENSG00000130224|LRCH2  
ENSG00000134352|IL6ST ENSG00000138399|FASTKD1 ENSG00000139117|CPNE8 ENSG00000144746|ARL6IP5 ENSG00000151287|C13orf27 ENSG00000154545|MAGED4 ENSG00000164930|FZD6 ENSG00000165028|NIPSNAP3B  
ENSG00000169239|CA5B ENSG00000177853|ZNF518 ENSG00000187243|MAGED4B ENSG00000188343|FAM92A1 ENSG00000197008|ZNF138 ENSG00000197969|VPS13A ENSG00000204038|Q6ZRL6\_HUMAN  
perfect: TGTATA TATAACA hsa-miR-194 TGTAAACgcaactcctgtgga 0  
ENSG00000007306|CEACAM7 ENSG000000013016|EHD3 ENSG00000006604|ELAVL1 ENSG00000076108|BAZ2A ENSG00000102870|ZNF629 ENSG00000106400|ZNHIT1 ENSG00000110446|SLC15A3 ENSG00000118245|TNF1  
ENSG00000124374|PAIP2B ENSG00000125965|GDF5 ENSG00000132915|PDE6A ENSG00000133321|RARRES3 ENSG00000157110|RBPM5 ENSG00000163382|APOA1BP ENSG00000170290|SLN  
ENSG00000178110|Q8N9G9\_HUMAN ENSG00000188167|NP\_001034859.1 ENSG00000196501|HIST1H2BN ENSG00000203941|Q5JVP7\_HUMAN ENSG0000031544|NR2E3 ENSG00000104341|LAPTMB4 ENSG00000120253|NUP43 ENSG00000123595|RAB9A  
ENSG00000124789|NUP153 ENSG00000126261|SAE2 ENSG00000133627|ACTR3B ENSG00000134504|KCTD1 ENSG00000140968|IRF8 ENSG00000145284|SCD5 ENSG00000145850|TIMD4 ENSG00000146457|WTAP  
ENSG00000151835|SACS ENSG00000157502|MUM1L1 ENSG00000160813|C7orf47 ENSG00000164548|TRA2A\_HUMAN ENSG00000166845|C18orf54 ENSG00000170190|SLC16A5 ENSG00000171195|MUC7 ENSG00000171819|ANGPTL7  
ENSG00000176597|B3GN75 ENSG00000177410|Q5QHF1\_HUMAN ENSG00000178105|DDX10 ENSG00000196850|PPTC7 ENSG00000198780|Q9H989\_HUMAN ENSG00000204259|Q96PQ5\_HUMAN ENSG00000204977|TRIM13  
ENSG00000100228|RAB36 ENSG00000100285|NEFH ENSG00000111245|MYL2 ENSG00000114115|RBP1 ENSG00000116604|MEF2D ENSG000001125388|GRK4 ENSG00000125834|STK35 ENSG00000130294|KIF1A  
ENSG00000131019|ULBP3 ENSG00000132446|FTHL17 ENSG00000143322|ABL2 ENSG00000146666|Q96IP2\_HUMAN ENSG00000170291|C17orf81 ENSG00000176383|B3GNT4 ENSG00000178764|ZHX2 ENSG00000180900|SCRIB  
ENSG00000183128|FAM26A ENSG00000204540|PSORS1C1 ENSG00000091583|APOH ENSG00000101752|MTB1 ENSG00000101935|AMMECR1 ENSG00000108255|CRYBA1 ENSG00000111247|RAD51AP1 ENSG00000114098|ARMC8  
ENSG00000117868|FAM62B ENSG00000119446|RBM18 ENSG00000128791|TWSG1 ENSG00000132953|XPO4 ENSG00000133103|COG6 ENSG00000133138|TBC1D8B ENSG00000145725|HISPPD1 ENSG00000155130|MARCKS  
ENSG00000164294|NP\_001008398.1 ENSG00000170852|KBTBD2 ENSG00000179979|CRIPAK ENSG00000180611|C3orf59  
ENSG00000003137|CYP26B1 ENSG00000092010|PSME1 ENSG00000126368|NR1D1 ENSG00000130635|COL5A1 ENSG00000135213|POM121 ENSG00000136485|WDR68 ENSG00000155287|SLC25A28 ENSG00000159455|LCE2B  
ENSG00000161973|CCDC42 ENSG00000162105|SHANK2 ENSG00000173281|PPP1R3B ENSG00000180638|NP\_690872.2 ENSG00000181867|FTMT ENSG00000187180|LCE2C ENSG00000196758|NM\_207483 ENSG00000196843|ARID5A  
ENSG00000206528|Q6ZSM0\_HUMAN ENSG00000005812|FBXL3 ENSG000000036549|ZZZ3 ENSG00000100934|SEC23A ENSG00000104267|CA2 ENSG00000106080|FKBP14 ENSG00000110435|PDHX ENSG00000110436|SLC1A2  
ENSG00000112531|QR1 ENSG00000124275|MTRR ENSG00000130741|EIF2S3 ENSG00000131747|P11388-2 ENSG00000134333|LDHA ENSG00000135241|PNPLA10P ENSG00000138801|PAPSS1 ENSG00000154263|ABCA10  
ENSG00000163110|PDLIM5 ENSG00000168955|TM4SF20 ENSG00000174123|TLR10 ENSG00000174953|DHX36 ENSG00000176774|MAGEB18 ENSG00000178163|NP\_444270.2 ENSG00000178966|RMI1 ENSG00000178997|EXDL1  
ENSG00000181007|ZNF545 ENSG00000183337|BCOR ENSG00000188629|ZNF177 ENSG00000189079|ARID2 ENSG00000196071|OR2L13 ENSG00000196177|ACADSB ENSG00000197579|TOPORS ENSG00000198889|WDR40B  
perfect: TGTATA TATAACA hsa-miR-410 aaTATAACagatggcctgt 2  
ENSG000000054967|TNFRSF19L ENSG00000076108|BAZ2A ENSG00000090615|GOLGA3 ENSG00000102050|PRAF2 ENSG00000105127|AKAP8 ENSG00000106638|TBL2 ENSG00000107819|SFXN3 ENSG00000111678|C12orf57  
ENSG00000123243|ITIH5 ENSG00000131043|C20orf4 ENSG00000131435|PDLIM4 ENSG00000131910|NR0B2 ENSG00000136297|MMD2 ENSG00000136444|RSAD1 ENSG00000147100|SLC16A2 ENSG00000158296|SLC13A3  
ENSG00000162735|PEX19 ENSG00000167889|MGAT5B ENSG00000167895|TMC8 ENSG00000169885|CALML6 ENSG00000172073|C2orf51 ENSG00000183837|PNMA3 ENSG00000185585|OLFML2A ENSG00000186301|Q49A61\_HUMAN  
ENSG00000196460|Q6ZNB4\_HUMAN ENSG00000203931|LOC729078 ENSG00000204013|Q6XYD6\_HUMAN ENSG00000206064|Q6ZU89\_HUMAN ENSG0000032514|PGBD3 ENSG000000446653|GPM6B ENSG00000085449|WDFY1 ENSG00000095794|CREM  
ENSG00000100483|C14orf138 ENSG00000102931|ARL2BP ENSG00000105708|ZNF14 ENSG00000106346|USP42 ENSG00000106415|GLCCI1 ENSG00000108046|C10orf92 ENSG00000110958|PTGES3 ENSG00000112414|GPR126  
ENSG00000116183|PAPPA2 ENSG00000116874|WARS2 ENSG00000119125|GDA ENSG00000122692|SMU1 ENSG00000128272|ATF1 ENSG00000130818|ZNF426 ENSG00000131238|PPT1 ENSG00000143315|PIGM  
ENSG00000144026|ZNF514 ENSG00000152822|GRM1 ENSG00000153779|TGIF2LX ENSG00000155085|C6orf199 ENSG00000157912|FAM114A1 ENSG00000158597|ZNF536 ENSG00000203932|LOC728660 ENSG00000205227|Q6ZWA8\_HUMAN  
ENSG00000067606|PRKCZ ENSG00000101096|NFATC2 ENSG00000102858|MGRN1 ENSG00000104499|GML ENSG00000104998|IL27RA ENSG00000105705|TF7 ENSG00000106397|PLOC3 ENSG00000130511|SSBP4  
ENSG00000133943|C14orf159 ENSG00000137198|GMPR ENSG00000141505|ASGR1 ENSG00000157303|SUSD3 ENSG00000157992|KRTCAP3 ENSG00000158825|CDA ENSG00000160323|ADAMTS13 ENSG00000172020|GAP43  
ENSG00000172264|C20orf133 ENSG00000172663|TMEM134 ENSG00000183826|BTBD9 ENSG00000185198|PRSSL1 ENSG00000197079|KRT35 ENSG00000204418|CLIC1 ENSG00000010017|RANBP9 ENSG00000033030|ZCCHC8  
ENSG00000061455|PRDM6 ENSG00000087128|TMPRSS11E ENSG00000112812|PRSS16 ENSG00000116459|ATP5F1 ENSG00000120370|SCYL1BP1 ENSG00000125351|UPF3B ENSG00000127311|HELB ENSG00000160181|TFE2  
ENSG00000162670|FAM5C ENSG00000163159|VPS72 ENSG00000163644|PPM1K ENSG00000173487|LOC729884 ENSG00000176728|CYO14\_HUMAN ENSG00000177461|Q8NA31\_HUMAN ENSG00000185418|TARSL2 ENSG00000185420|SMYD3  
ENSG00000186416|NKRFP ENSG00000205038|PKHD1L1  
ENSG00000004848|ARK ENSG000000056345|ITGB3 ENSG00000067365|C16orf68 ENSG00000090659|CD209 ENSG00000110583|NAT11 ENSG00000115112|TFPC2L1 ENSG00000126353|CCR7 ENSG00000134569|LRP4  
ENSG00000140067|C14orf152 ENSG00000141744|PNMT ENSG00000142583|SLC2A5 ENSG00000153029|MR1 ENSG00000157617|C21orf25 ENSG00000162910|MRPL55 ENSG00000163484|SRGAP2 ENSG00000166224|SGPL1  
ENSG00000169242|EFNA1 ENSG00000172301|C17orf79 ENSG00000173218|VANGL1 ENSG00000173281|PPP1R3B ENSG00000177234|C10orf85 ENSG00000179820|MYADM ENSG00000181250|MYADML ENSG00000005339|CREBBP  
ENSG00000046774|MAGEC2 ENSG00000049618|ARID1B ENSG00000056277|SUHW3 ENSG00000090487|SPG21 ENSG00000100505|TRIM9 ENSG00000104067|TJP1 ENSG00000111605|CPSF6 ENSG00000113575|PPP2CA  
ENSG00000116761|CTH ENSG00000121297|TSHZ3 ENSG00000123562|MORF4L2 ENSG00000125945|ZNF436 ENSG00000128052|KDR ENSG00000132718|SYT11 ENSG00000135535|CD164 ENSG00000136147|PHF11  
ENSG00000137026|IFNWP18 ENSG00000154723|ATP5J ENSG00000164764|NP\_694957.2 ENSG00000165168|CYBB ENSG00000198597|LARP6 ENSG00000168172|HOOK3 ENSG00000169249|ZRSR1 ENSG00000182263|FIGN  
ENSG00000103365|GGA2 ENSG00000108312|UBTF ENSG00000111886|GABRR2 ENSG00000114268|PFKFB4 ENSG00000119714|GPR68 ENSG00000125743|SNRPD2 ENSG00000133026|MYH10 ENSG00000142082|SIRT3  
ENSG00000148158|SNX30 ENSG00000165837|Q5W0A0\_HUMAN ENSG00000167693|NXN ENSG00000172548|ICHN\_HUMAN ENSG00000174231|PRPF8 ENSG00000174502|SLC26A9 ENSG00000181852|RNF41 ENSG00000183044|ABAT  
ENSG00000185442|NP\_997329.1 ENSG00000186831|KRT17 ENSG00000187855|ASCL4 ENSG00000196767|POU3F4 ENSG00000205307|Q8TEE9\_HUMAN ENSG00000205629|LCMT1 ENSG00000089225|TBX5 ENSG00000102974|CTCF  
ENSG00000107581|EIF3S10 ENSG00000109606|DHX15 ENSG00000124103|C20orf107 ENSG00000129810|SGOL1 ENSG00000134363|FST ENSG00000144642|RBMS3 ENSG00000144824|PLCXD2 ENSG00000145555|MYO10  
ENSG00000151725|MLF1P ENSG00000164933|SLC25A32 ENSG00000166250|NP\_079045.1 ENSG00000170348|TMED10 ENSG00000170903|KIAA1826 ENSG00000175556|LONRF3 ENSG00000175885|ZNF611 ENSG00000176390|CRLF3  
ENSG00000177465|ACOT4 ENSG00000178982|EIF3S12 ENSG00000179902|C1orf194 ENSG00000188400|Q6URH7\_HUMAN ENSG00000188846|RPL14 ENSG00000188933|NM\_145809.1 ENSG00000189403|HMG61 ENSG00000196511|TPK1  
ENSG00000198710|Q9BWW1\_HUMAN ENSG00000205442|C9orf134 ENSG00000205524|Q68D70\_HUMAN  
perfect: TGTGAC GTCACAA hsa-miR-505 GTCACAActtgctgttcctc 0  
ENSG000000028137|TNFRSF1B ENSG00000074054|CLASP1 ENSG00000077044|DGKD ENSG00000087087|ARS2\_HUMAN ENSG00000102445|C13orf18 ENSG00000102547|CAB39L ENSG00000104852|SNRP70 ENSG00000105202|FBL  
ENSG00000107831|FCF8 ENSG00000110090|CPTA1 ENSG00000115902|SLC1A4 ENSG00000124766|SOX4 ENSG00000125633|CCDC93 ENSG00000126749|EMG1 ENSG00000129862|VCY ENSG00000129864|VCY1B

ENSG00000132383|RPA1 ENSG00000148158|SNX30 ENSG00000166743|ACSM1 ENSG00000167065|DUSP18 ENSG00000169118|CSNK1G1 ENSG00000170091|NSG2\_HUMAN ENSG00000171773|TXNL6 ENSG00000176383|B3GNT4  
ENSG00000180824|Q8NAH5\_HUMAN ENSG00000188589|RBM3 ENSG00000189339|SLC35E2 ENSG00000203697|CAPN8 ENSG00000204862|CCDC28A ENSG000002080986|NDC80 ENSG000002096746|HNRPH3 ENSG00000212290|PCDH11X  
ENSG00000111731|KIAA0528 ENSG00000112237|CCNC ENSG00000114120|SLC25A36 ENSG00000121807|CCR2 ENSG00000128578|FAM40B ENSG00000130021|HDHD1A ENSG00000153234|NR4A2 ENSG00000153558|FBXL2  
ENSG00000162836|ACP6 ENSG00000163293|NPAL1 ENSG00000165973|NELL1 ENSG00000168303|C7orf11 ENSG00000171951|SCG2 ENSG00000176018|LHSD1A3 ENSG00000178457|C21orf94 ENSG00000180228|PRKRA  
ENSG00000188848|CCDC4 ENSG00000196262|PPIA ENSG00000196754|SL00A2 ENSG00000197223|NP\_006324.1 ENSG00000105202|FBL ENSG00000106631|MYL7 ENSG00000112149|CD83 ENSG00000125798|FOXA2  
ENSG0000025772|TOMM34 ENSG00000208922|PEBP1 ENSG00000100385|IL2RB ENSG00000102466|PGF14 ENSG00000196220|SRGAP3 ENSG00000205609|Q9B98\_HUMAN ENSG00000004864|SLC25A13 ENSG00000008282|SYPL1  
ENSG00000129862|VCY ENSG00000129864|VCY1B ENSG00000136828|RALGPS1 ENSG00000152082|FAM128B ENSG00000155506|LARP1 ENSG00000158927|C8orf58 ENSG00000169059|VCX3A ENSG00000170689|HOXB9  
ENSG00000177504|VCX2 ENSG00000180185|FAHD1 ENSG00000180861|C12orf36 ENSG00000182583|VCX ENSG00000182742|HOXB4 ENSG00000197798|FAM118B ENSG00000204459|Q6ZU55\_HUMAN ENSG00000205313|FAM106A  
ENSG00000205642|VCX3B ENSG00000205726|ITSN1 ENSG00000112011|KAL1 ENSG00000066739|C14orf103 ENSG00000069122|GPR116 ENSG00000086712|CXorf15 ENSG00000115896|PLCL1 ENSG00000136240|KDEL2R  
ENSG00000142188|TMEM50B ENSG00000149289|ZC3H12C ENSG00000150991|UBIQ\_HUMAN ENSG00000151292|CSNK1G3 ENSG00000152242|C18orf25 ENSG00000152601|MBNL1 ENSG00000164124|TMEM144 ENSG00000171634|BPTF  
ENSG00000174780|SRP72 ENSG00000175029|CTBP2 ENSG00000179833|SERTAD2 ENSG00000181915|C10orf22 ENSG00000189134|C6orf194 ENSG00000196963|PCDHB16 ENSG00000206527|PTPLB  
ENSG000000072134|EPN2 ENSG000000090776|EFNB1 ENSG00000100448|CTSG ENSG00000101224|CDC25B ENSG00000106133|NSUN5C ENSG00000120875|DUSP4 ENSG00000128191|DGCR8 ENSG00000129187|DCTD  
ENSG00000134216|CHIA ENSG00000144659|SLC25A38 ENSG00000145029|NICN1 ENSG00000149633|NP\_001025035.1 ENSG00000154370|TRIM11 ENSG00000158014|SLC30A2 ENSG00000164008|C1orf50 ENSG00000167208|NP\_878274.1  
ENSG00000167434|CA4 ENSG00000169894|MUC3A ENSG00000172432|GTPBP2 ENSG00000183856|IQGAP3 ENSG00000196220|SRGAP3 ENSG00000205609|Q9B98\_HUMAN ENSG00000004864|SLC25A13 ENSG00000008282|SYPL1  
ENSG00000072315|TRPC5 ENSG00000076513|ANKRD13A ENSG00000079482|OPHN1 ENSG00000094755|GABRP ENSG00000102781|KATNAL1 ENSG00000105205|CLC ENSG00000107643|MAPK8 ENSG00000116016|EPAS1  
ENSG00000128513|POT1 ENSG00000142937|RPS8 ENSG00000150540|HNMT ENSG00000152154|TMEM178 ENSG00000165060|FXN ENSG00000165409|TSHR ENSG00000170677|SOCS6 ENSG00000178904|DPY19L3

ENSG00000048740|CUGBP2 ENSG00000057149|SERPINB4 ENSG00000075711|DLG1 ENSG00000109534|NOLA1 ENSG00000112812|PRSS16 ENSG00000115415|STAT1 ENSG00000119596|YLP1M ENSG00000120696|KBTBD7  
ENSG00000128040|SPINK2 ENSG00000129518|EAPP ENSG00000131725|WDR44 ENSG00000136206|WBSR19 ENSG00000138138|ATAD1 ENSG00000155530|LRGUK ENSG00000162604|TM2D1 ENSG00000165091|TMC1  
ENSG00000166922|SCG5 ENSG00000167014|C15orf43 ENSG00000167475|SCAMP4 ENSG00000167528|ZNF641 ENSG00000168681|Q9H762\_HUMAN ENSG00000175483|O94914\_HUMAN ENSG00000176083|ZNF683 ENSG00000184378|ARPM1\_HUMAN  
ENSG00000198815|FOXJ3 ENSG00000198919|DZIP3\_HUMAN  
TGTTTTC ENSG00000006695|COX10 ENSG000000065057|NTHL1 ENSG00000075886|TUBA3D ENSG00000086015|MAST2 ENSG00000092820|VIL2 ENSG00000100181|CSNK1E ENSG00000100335|SMCR7L ENSG00000100767|PAPLN  
ENSG00000101079|NDRG3 ENSG00000102181|CD99L2 ENSG00000103653|CSK ENSG00000105339|DENND3 ENSG00000108878|CACNG1 ENSG00000110324|IL10RA ENSG00000130287|NCAN ENSG00000131771|PPP1R1B  
ENSG00000132471|WBP2 ENSG00000133980|C14orf115 ENSG00000136816|TOR1B ENSG00000139574|NFFF ENSG00000141699|NP\_835227.1 ENSG00000141956|PRDM15 ENSG00000152086|TUBA3E ENSG00000155254|MARVELD1  
ENSG00000168903|BTNL3 ENSG00000171246|NPTX1 ENSG00000172061|LRRCL15 ENSG00000184334|Q71RG6\_HUMAN ENSG00000187051|RPS19BP1 ENSG00000187953|NR\_002217.1 ENSG00000204241|Q6ZU8\_HUMAN ENSG00000204574|ABCF1  
ENSG00000205064|Q6ZVP2\_HUMAN ENSG000000061987|MON2 ENSG000000067445|TRO ENSG000000090487|SPG21 ENSG00000101162|TUBB1 ENSG00000104691|UBXD6 ENSG00000112697|TMEM30A ENSG00000114573|ATPV61A  
ENSG00000118523|CTGF ENSG00000121895|TMEM156 ENSG00000128294|TPST2 ENSG00000128617|OPN1SW ENSG00000129596|CDO1 ENSG00000131003|RBMV2FP ENSG00000132640|BTBD3 ENSG00000134597|RBMX2  
ENSG00000137075|RNF38 ENSG00000137103|C9orf127 ENSG00000138185|ENTPDI ENSG00000138593|K0256\_HUMAN ENSG00000138757|G3BP2 ENSG00000139926|FRMD6 ENSG00000150051|MKX ENSG00000154556|SORBS2  
ENSG00000156011|PSD3 ENSG00000156875|HIAT1 ENSG00000170836|PPM1D ENSG00000173905|GOLPH4 ENSG00000176697|BDNF ENSG00000185480|C12orf48 ENSG00000189195|BTBD8  
ENSG00000063978|RNF4 ENSG00000101146|RAE1 ENSG00000104490|NCALD ENSG00000107262|BAG1 ENSG00000110777|POU2AF1 ENSG00000118046|STK11 ENSG00000124067|LCAT ENSG00000124160|NCOA5  
ENSG00000124216|SNAI1 ENSG00000126091|ST3GAL3 ENSG00000130038|EFCAB4B ENSG00000136444|RSAD1 ENSG00000139644|TEGT ENSG00000141956|PRDM15 ENSG00000143614|GATAD2B ENSG00000144063|MALL  
ENSG00000144583|MARCH4 ENSG00000144677|CTDSPL ENSG00000157191|NECAP2 ENSG00000158457|TSPAN33 ENSG00000160161|CILP2 ENSG00000166526|ZNF3 ENSG00000167526|RPL13 ENSG00000172775|NIP30\_HUMAN  
ENSG00000175906|ARL4D ENSG00000188786|MTF1 ENSG00000204118|NAP1L6 ENSG00000050130|C14orf100 ENSG00000079332|SAR1A ENSG000000091157|WDR7 ENSG00000100614|PPM1A ENSG00000102098|SCML2  
ENSG00000102387|TAF7L ENSG00000111704|NANOG ENSG00000112234|FBXL4 ENSG00000116560|SFPQ ENSG00000117625|RCOR3 ENSG00000122778|Q9HCM3\_HUMAN ENSG00000123977|WDR69 ENSG00000124479|NDP  
ENSG00000126653|CCDC55 ENSG00000132326|PER2 ENSG00000133393|C16orf63 ENSG00000133858|CCDC131 ENSG00000136870|ZNF189 ENSG00000138735|PDE5A ENSG00000148730|EIF4EBP2 ENSG00000148828|NP\_001074467.1  
ENSG00000153132|CLGN ENSG00000166363|OR10A5 ENSG00000170681|NP\_001018126.1 ENSG00000172969|LOC285299 ENSG00000179010|MRFAP1 ENSG00000181626|DKFZp779B1634 ENSG00000182568|SATB1 ENSG00000205097|NP\_001005217.1  
TGTTTGT ENSG00000004455|AK2 ENSG000000006712|PAF1 ENSG000000029993|HMG3 ENSG00000073111|MCM2 ENSG00000082781|ITGB5 ENSG00000083307|GRHL2 ENSG00000084652|TXLNA ENSG00000101290|CDS2  
ENSG00000102904|TSNAXIP1 ENSG00000103522|IL21R ENSG00000109736|NP\_001111.2 ENSG00000110917|KIAA0152 ENSG00000120075|HOXB5 ENSG00000126890|CTAG2 ENSG00000129250|KIF1C ENSG00000132749|MTL5  
ENSG00000135631|RAB11FIP5 ENSG00000138696|BMPR1B ENSG00000139624|LASS5 ENSG00000149474|CSR2BP ENSG00000153294|GPR115 ENSG00000158815|FGF17 ENSG00000162415|ZSWIM5 ENSG00000166033|HTRA1  
ENSG00000166049|PASD1 ENSG00000168209|DDIT4 ENSG00000168269|FOXI1 ENSG00000169710|FASN ENSG00000171223|JUNB ENSG00000171604|CXCC5 ENSG00000175866|BAIAP2 ENSG00000179837|RBM15B  
ENSG00000183678|CTAG1A ENSG00000184033|CTAG1B ENSG00000184935|Q6AI01\_HUMAN ENSG00000187650|NP\_001017921.1 ENSG00000001561|ENPP4 ENSG00000003989|SLC7A2 ENSG00000010278|CD9 ENSG00000021574|SPAST  
ENSG00000032514|PGBD3 ENSG00000048740|CUGBP2 ENSG00000068784|SRBD1 ENSG00000070190|DAPP1 ENSG00000071539|TRIP13 ENSG00000085511|MAP3K4 ENSG00000087300|KIAA1344 ENSG00000102055|PPP1R2P9  
ENSG00000104635|SLC39A14 ENSG00000105825|TFPI2 ENSG00000107864|CEPB3 ENSG00000109805|NCAPG ENSG00000114346|ECT2 ENSG00000115339|CALML3 ENSG00000116701|NCF2 ENSG00000121964|GTDCC1  
ENSG00000122545|SEPT7 ENSG00000128590|DNAJB9 ENSG00000135002|RFK ENSG00000136819|C9orf78 ENSG00000138135|CH25H ENSG00000141127|PRPSAP2 ENSG00000143190|POU2F1 ENSG00000145495|MARCH6  
ENSG00000145708|CRHB ENSG00000155629|PIK3AP1 ENSG00000163125|KIAA0460 ENSG00000163349|HIPK1 ENSG00000163904|SENP2 ENSG00000164327|NP\_689969.2 ENSG00000164741|DLC1 ENSG00000166170|BAG5  
ENSG00000170745|KCN3 ENSG00000171492|LRRRC8D ENSG00000176927|EFCAB5 ENSG00000202459|Q96PQ5\_HUMAN ENSG00000205195|Q6ZTB1\_HUMAN  
TGTTTTA perfect: TGTTTGT ACAACA hsa-miR-495 aaACAACAatggtgcacttcttt 2 ENSG0000006530|AGK ENSG00000013374|NUB1 ENSG00000022556|NLRP2 ENSG00000065618|COL17A1 ENSG00000072062|PRKACA ENSG00000092529|CAPN3 ENSG00000099284|H2AFY2  
ENSG00000099968|BCL2L13 ENSG00000101158|TH1L ENSG00000101265|RASSF2 ENSG00000105323|HNRPUL1 ENSG00000112149|CD83 ENSG00000119638|NEK9 ENSG00000121281|ADCY7 ENSG00000122952|ZWINT  
ENSG00000124641|TRFP ENSG00000124785|NRN1 ENSG00000125733|TRIP10 ENSG00000126767|ELK1 ENSG00000126883|NUP214 ENSG00000130164|LDLR ENSG00000136319|TTC5 ENSG00000136689|IL1RN  
ENSG00000137124|ALDH1B1 ENSG00000140830|TXNL4B ENSG00000148400|NOTCH1 ENSG00000152042|NBPFB ENSG00000152044|TSC22D3 ENSG00000157617|C21orf25 ENSG00000162543|UBXD3 ENSG00000164379|FOXQ1  
ENSG00000171700|RGS19 ENSG00000172432|GTPBP2 ENSG00000176887|SOX11 ENSG00000177885|GRB2 ENSG00000183421|RIPK4 ENSG00000183431|SF3A3 ENSG00000184014|RAB6IP1 ENSG00000185651|UBE2L3  
ENSG00000186951|PPARA ENSG00000197530|MIB2 ENSG00000203908|NP\_001017361.1 ENSG000000015479|MATR3 ENSG000000038219|FAM44A ENSG00000004515|MYO16 ENSG00000070756|PABPC1 ENSG00000072803|FBXW11  
ENSG00000075420|PAPOLA ENSG00000090060|PAPOLA ENSG00000092140|KIAA1333 ENSG00000095209|TMEM38B ENSG00000101972|STAG2 ENSG00000108691|CCL2 ENSG00000111371|SLC38A1 ENSG00000111897|SERINC1  
ENSG00000112232|KHDRBS2 ENSG00000112739|PRPF4B ENSG00000115020|PIP5K3 ENSG00000116001|TIA1 ENSG00000116745|RPE65 ENSG00000121351|IAPP ENSG00000123636|BAZ2B ENSG00000124198|ARFGF2  
ENSG00000124459|ZNF45 ENSG00000124802|EEF1E1 ENSG00000131873|CHSY1 ENSG00000133703|KRAS ENSG00000138668|HNRP5 ENSG00000139675|NP\_001011724.1 ENSG00000144935|TRPC1 ENSG00000146242|TPBG  
ENSG00000150093|ITGB1 ENSG00000152487|NSUN6 ENSG00000158234|FAIM ENSG00000163624|CDS1 ENSG00000164109|MAD2L1 ENSG00000164463|NP\_705835.1 ENSG00000164746|Q8NEG2\_HUMAN ENSG00000165097|AOF1  
ENSG00000170629|NP\_872440.2 ENSG00000172031|ABHD7 ENSG00000175455|CCDC14 ENSG00000180336|NP\_001028831.1 ENSG00000181626|DKFZp779B1634 ENSG00000183150|GPR19 ENSG00000187522|HSPA14 ENSG00000198265|HEL2  
ENSG00000205810|KLR3  
TGTTTTT ENSG00000003137|CYP26B1 ENSG00000029993|HMG3 ENSG00000072609|CHFR ENSG00000077800|FKBP6 ENSG00000078900|TP73 ENSG00000090615|GOLGA3 ENSG00000090776|EFNB1 ENSG00000100036|SLC35B4  
ENSG00000100292|HMOX1 ENSG00000103126|AXIN1 ENSG00000104332|SRFP1 ENSG00000105173|CCNE1 ENSG00000105438|KDELRL1 ENSG00000106003|LFNG ENSG00000108175|ZMIZ1 ENSG00000112149|CD83  
ENSG00000115694|STK25 ENSG00000119771|KLHL29 ENSG00000119915|ELOVL3 ENSG00000126457|PRMT1 ENSG00000129355|CDKN2D ENSG00000130287|NCAN ENSG00000135437|RDH5 ENSG00000136877|FPGS  
ENSG00000141034|C17orf39 ENSG00000143878|RHOB ENSG00000144677|CTDSP1 ENSG00000147454|SLC25A37 ENSG00000150401|DCUN1D2 ENSG00000157014|TATDN2 ENSG00000160190|SLC37A1 ENSG00000165138|ANKS6  
ENSG00000165970|SLC6A5 ENSG00000167487|KLHL26 ENSG00000172775|NIP30\_HUMAN ENSG00000174697|LEP ENSG00000176678|FOXL1 ENSG00000177191|B3GNT8 ENSG00000182054|IDH2 ENSG00000185082|LBH  
ENSG00000188315|C3orf62 ENSG00000197968|Q8N231\_HUMAN ENSG00000198034|RPS4X ENSG00000204103|MAFB ENSG00000005175|NP\_078880.1 ENSG00000064692|SNCAIP ENSG00000072849|DERL2 ENSG00000074266|EED  
ENSG00000077264|PAK3 ENSG00000078596|ITM2A ENSG00000089022|MAPKAPK5 ENSG00000091986|CCDC80 ENSG00000104205|SGK3 ENSG00000106714|CNTNAP3 ENSG00000107798|LIPA ENSG00000109118|PHF12  
ENSG00000110633|SOX6 ENSG00000111745|ELK3 ENSG00000111605|PSF6 ENSG00000111711|GOL1F1B ENSG00000115145|STAM2 ENSG00000116679|INSYIABP ENSG00000120289|MAGEB4 ENSG00000120555|Q5W161\_HUMAN  
ENSG00000122481|RWDD3 ENSG00000129534|C14orf106 ENSG00000139826|ABHD13 ENSG00000140382|HMG20A ENSG00000140575|IQGAP1 ENSG00000143337|TOR1AIP1 ENSG00000143815|LBR ENSG00000145451|GLRA3  
ENSG00000145781|COMMD10 ENSG00000149289|ZC3H12C ENSG00000156017|C9orf41 ENSG00000163069|SGCB ENSG00000163634|THOC7 ENSG00000164758|THRAP6 ENSG00000165629|ATP5C1 ENSG00000165983|PTER  
ENSG00000166750|SLFN5 ENSG00000166821|PEX11A ENSG00000169255|B3GALNT1 ENSG00000171634|BPTF ENSG00000171735|CMTA1 ENSG00000183267|SNRPEL1 ENSG00000187325|TAF9B  
ENSG00000196038|IL1RAP ENSG00000197006|METTL9 ENSG00000197147|LRRCB8 ENSG00000198301|SDAD1  
TTAAAAA ENSG00000046660|CAMKK1 ENSG00000011304|PTBP1 ENSG00000068650|ATP11A ENSG00000085831|C1orf34 ENSG00000085998|POMGNT1 ENSG00000086758|HUWE1 ENSG00000090615|GOLGA3 ENSG00000096433|ITPR3  
ENSG00000099889|ARVCF ENSG00000099968|BCL2L13 ENSG00000100216|TOMM22 ENSG00000100296|THOC5 ENSG00000103196|CRISPLD2 ENSG00000108312|UBTF ENSG00000110713|NUP98 ENSG00000112320|SOBP  
ENSG00000116984|MTR ENSG00000120087|HOXB7 ENSG00000123143|PKN1 ENSG00000124243|BCAS4 ENSG00000124766|SOX4 ENSG00000125485|DDX33 ENSG00000125633|CCDC93 ENSG00000125755|SYMPK  
ENSG00000126522|CRCP\_HUMAN ENSG00000130702|LAMA5 ENSG00000131149|KIAA0182 ENSG00000135820|NP\_997350.1 ENSG00000136854|STXBP1 ENSG00000137124|ALDH1B1 ENSG00000141034|C17orf39 ENSG00000143006|DMRTB1  
ENSG00000143502|SUSD4 ENSG00000148158|SNX30 ENSG00000148704|VAX1 ENSG00000151692|RNF144 ENSG00000156574|NODAL ENSG00000158480|SPATA2 ENSG00000162981|FAM84A ENSG00000163902|RPN1  
ENSG00000169184|NM\_002430.2 ENSG00000172345|STARD5 ENSG00000174804|FZD4 ENSG00000179388|EGR3 ENSG00000180447|GAS1 ENSG00000182968|SOX1 ENSG00000185651|UBE2L3 ENSG00000189159|HN1  
ENSG00000196132|MYT1\_HUMAN ENSG00000197019|SERTAD1 ENSG00000197173|NP\_001013689.1 ENSG00000198728|LDB1 ENSG00000204059|NP\_001013718.1 ENSG00000205434|Q6ZU34\_HUMAN ENSG00000206528|Q6ZSM0\_HUMAN ENSG0000005700|IBTK  
ENSG00000014123|KIAA0776 ENSG000000019991|HGF ENSG00000064313|TAF2 ENSG00000065183|WDR3 ENSG00000081087|OSTM1 ENSG00000085365|SCAMP1 ENSG00000087502|ERGIC2 ENSG00000091483|FH  
ENSG00000101557|USP14 ENSG00000103707|MTFMT ENSG00000105825|TFPI2 ENSG00000107443|CCNJ ENSG00000108651|UTP6 ENSG00000109180|OC1AD1 ENSG00000110768|GTF2H1 ENSG00000112761|WISP3  
ENSG00000115295|CLIP4 ENSG00000116745|RPE65 ENSG00000117151|CTBS ENSG00000119147|C2orf40 ENSG00000121486|C1orf25 ENSG00000126733|DACH2 ENSG00000129315|CCNT1 ENSG00000132170|PPARG  
ENSG00000136045|PWP1 ENSG00000137561|TTPA ENSG00000141946|ZMK3 ENSG00000143753|DEGS1 ENSG00000145839|IL9 ENSG00000148483|FAM23A ENSG00000152954|NRSN1 ENSG00000153989|NUS1  
ENSG00000154646|PRSS7 ENSG00000156384|C10orf78 ENSG00000162409|PRKAA2 ENSG00000166266|CUL5 ENSG00000166803|KIAA0101 ENSG00000168955|TM4SF20 ENSG00000169679|BUB1 ENSG00000170264|NP\_115556.1  
ENSG00000170516|COX7B2 ENSG00000171862|PTENP1 ENSG00000176018|LYSMD3 ENSG00000176842|IRX5 ENSG00000178074|NP\_710156.2 ENSG00000178502|KLHL11 ENSG00000182141|ZNF708 ENSG00000183423|NP\_940908.1  
ENSG00000184530|C6orf58 ENSG00000185129|PURA ENSG00000185551|NR2F2 ENSG00000189127|NP\_001004441.1 ENSG00000197323|TRIM33 ENSG00000198160|MIER1 ENSG00000198511|Q8N9A9\_HUMAN ENSG00000198767|YY2  
ENSG00000205810|KLR3  
TTAAAAA ENSG00000005073|HOXA11 ENSG00000075426|FOSL2 ENSG00000078295|ADRY2 ENSG00000090863|GLG1 ENSG00000100077|ADRBK2 ENSG00000101161|PRPF6 ENSG00000105202|FBL ENSG00000107554|DNMBP  
ENSG00000109132|PHOX2B ENSG00000110660|SLC35F2 ENSG00000114767|RRC9 ENSG00000124104|SNX21 ENSG00000130032|PRRG3 ENSG00000131459|GFPT2 ENSG00000132323|ILKAP ENSG00000132478|UNK  
ENSG00000139613|SMARCC2 ENSG00000141026|MED9 ENSG00000144583|MARCH4 ENSG00000154222|CC2D1B ENSG00000158402|CDC25C ENSG00000159217|IGF2BP1 ENSG00000167491|GATAD2A ENSG00000170876|TMEM43  
ENSG00000172965|Q96C48\_HUMAN ENSG00000177744|NP\_775923.1 ENSG00000178159|Q8N8A0\_HUMAN ENSG00000179165|PXT1 ENSG00000183579|ZNRF3 ENSG00000185722|ANKFY1 ENSG00000186638|C9orf48 ENSG00000196787|HIST1H2AG  
ENSG00000204847|FAM74A1 ENSG00000075089|ACTR6 ENSG00000081154|PCNP ENSG00000095110|FAM55A ENSG00000105855|ITGB8 ENSG00000110172|CHORDC1 ENSG00000105855|ITGB8 ENSG00000116906|GNPAT ENSG00000117009|KMO  
ENSG00000131023|LATS1 ENSG00000132963|POMP ENSG00000135371|SNX14 ENSG00000135525|MAP7 ENSG00000135541|AHM1 ENSG00000136696|IL1F8 ENSG00000138668|HNRPD ENSG00000139263|LRIG3  
ENSG00000139842|CUL4A ENSG00000143162|CREG1 ENSG00000147465|STAR ENSG00000154640|BTG3 ENSG00000163444|TMEM183B ENSG00000165410|CFL2 ENSG00000166752|TMEM83 ENSG00000170425|ADORA2B  
ENSG00000171517|EDG7 ENSG00000171606|ZNF274 ENSG00000173207|CTSB ENSG00000173890|GPR160 ENSG00000176871|WSB2 ENSG00000178556|LOC652904 ENSG00000181449|SOX2 ENSG00000182752|PAPPA  
ENSG00000185842|Q4VXG5\_HUMAN ENSG00000187231|SESTD1 ENSG00000188811|NP\_001017370.1 ENSG00000189134|C6orf194 ENSG00000196865|NHLRC2 ENSG00000198453|ZNF568 ENSG00000204315|FKBP1  
TTAAAAA ENSG00000006007|GDE1\_HUMAN ENSG00000006453|BAIAP2L1 ENSG000000028528|SNX1 ENSG00000049239|H6PD ENSG00000100403|ZC3H7B ENSG00000101489|BRUNOL4 ENSG00000105989|WNT2 ENSG00000107562|CXCL12  
ENSG00000113273|ARSB ENSG00000113657|DPYSL3 ENSG00000116525|TRIM62 ENSG00000119487|MAPKAP1 ENSG00000123146|CD97 ENSG00000125485|DDX33 ENSG00000127377|CRYGN ENSG00000129187|DCTD  
ENSG00000130956|HABP4 ENSG00000131044|TTLL9 ENSG00000131368|MPRS2 ENSG00000131871|SELS\_HUMAN ENSG00000132749|MTL5 ENSG00000132854|ANR38\_HUMAN ENSG00000134882|UBAC2 ENSG00000141560|KT3K\_HUMAN  
ENSG00000141574|SCTM1 ENSG00000144596|GRIP2 ENSG00000148606|POLAR1 ENSG00000150401|BCUN1D2 ENSG00000158470|B4GALT5 ENSG00000158516|CPA2 ENSG00000161791|FMNL3 ENSG00000162408|NOL9  
ENSG00000162873|KLHDC8A ENSG00000163486|SRGAP2 ENSG00000167522|ANKRD11 ENSG00000169174|PCSK9 ENSG00000174992|ZG16\_HUMAN ENSG00000176302|FOXR1 ENSG00000176887|SOX11 ENSG00000178409|KIAA1553  
ENSG00000179051|RC2 ENSG00000180483|DEFB119 ENSG00000182749|PAQR7 ENSG00000184774|Q49A9\_HUMAN ENSG00000185049|WHSC2 ENSG00000187239|FNBP1 ENSG00000196242|OR2C3 ENSG00000196787|HIST1H2AG  
ENSG00000197965|MPZL1 ENSG00000198901|PRC1 ENSG00000203697|CAPN8 ENSG00000001631|KRIT1 ENSG00000064835|POU1F1 ENSG00000065243|PKN2 ENSG00000075292|ZNF638  
ENSG00000077254|USP33 ENSG00000078177|N4BP2\_HUMAN ENSG00000082269|KIAA1411 ENSG00000097046|CDC7 ENSG00000101901|CXorf45 ENSG00000104131|EIF3S1 ENSG00000106701|FSD1L ENSG00000107020|C9orf46  
ENSG00000109861|CTSC ENSG00000111530|CAND1 ENSG00000111713|GYS2 ENSG00000112357|PEX7 ENSG00000115290|GRB14 ENSG00000116171|SCP2 ENSG00000120586|MRC1 ENSG00000122042|UBL3  
ENSG00000123219|CENPK ENSG00000124406|ATP8A1 ENSG00000127324|TSPAN8 ENSG00000131171|SH3BGR1 ENSG00000131373|HACL1 ENSG00000134545|KLR3 ENSG00000136160|EDNRB ENSG00000136371|MTHFS  
ENSG00000137252|HCRTR2 ENSG00000138688|KIAA1109 ENSG00000140043|ZADH1 ENSG00000143942|CHAC2 ENSG00000145247|OCIAD2 ENSG000

|                                |                                |                                |                                |                              |                              |                              |                                |
|--------------------------------|--------------------------------|--------------------------------|--------------------------------|------------------------------|------------------------------|------------------------------|--------------------------------|
| ENSG00000162687 KCNT2          | ENSG00000162944 RFTN2          | ENSG00000163376 KBTBD8         | ENSG00000163536 SERPIN1        | ENSG00000164039 BDH2         | ENSG00000164180 TMEM161B     | ENSG00000165629 ATP5C1       | ENSG00000166922 SCG5           |
| ENSG00000168143 FAM83B         | ENSG00000170185 USP38          | ENSG00000171320 ESCO2          | ENSG00000174343 CHRNA9         | ENSG00000175893 ZDHHC21      | ENSG00000177683 THAP5        | ENSG00000181690 PLAG1        | ENSG00000181798 C2orf52        |
| ENSG00000182993 C12orf60       | ENSG00000183748 MRC1L1         | ENSG00000183833 C3orf15        | ENSG00000187815 ZNF642         | ENSG00000197170 PSMD12       | ENSG00000198168 SVIP_HUMAN   | ENSG00000198533 Q9P1D0_HUMAN | ENSG00000198814 GK             |
| ENSG00000198898 CAPZA2         | ENSG00000198964 SGMS1          | ENSG00000203667 FAM36A         | ENSG00000203704 LOC648359      |                              |                              |                              |                                |
| ENSG00000003400 CASP10         | ENSG00000005513 SOX8           | ENSG00000006695 COX10          | ENSG00000033100 CHGUT_HUMAN    | ENSG00000050327 ARHGEF5      | ENSG00000069696 DRD4         | ENSG00000100065 CARD10       | ENSG00000104228 TRIM35         |
| ENSG00000104897 SF3A2          | ENSG00000124762 CDKN1A         | ENSG00000125354 SEPT6          | ENSG00000138942 RNF185         | ENSG00000148200 NR6A1        | ENSG00000148660 CAMK2G       | ENSG00000152705 CATSPER3     | ENSG00000159199 ATP5G1         |
| ENSG00000163155 LYSMD1         | ENSG00000164048 ZNF589         | ENSG00000169118 CSNK1G1        | ENSG00000169676 DRD5           | ENSG00000173349 SFT2D3       | ENSG00000176476 CCDC101      | ENSG00000181363 Q66K80-2     | ENSG00000182660 NP_001013698.1 |
| ENSG00000184164 CRELD2         | ENSG00000185065 NP_776154.2    | ENSG00000187003 ACTL7A         | ENSG00000188822 CNR2           | ENSG00000190245 Q8N7M3_HUMAN | ENSG00000196263 ZNF471       | ENSG00000196378 Q9BSZ0_HUMAN | ENSG00000197430 TMEM10         |
| ENSG00000203747 FCGR3A         | ENSG00000204157 NP_001013664.1 | ENSG00000204305 AGER           | ENSG00000204309 Q6ZSQ3_HUMAN   | ENSG00000204380 Q6ZTQ2_HUMAN | ENSG00000206549 TSP50_HUMAN  | ENSG00000205174 SPAT         | ENSG00000205174 YTHDC2         |
| ENSG00000047621 C12orf4        | ENSG00000076685 NT5C2          | ENSG00000090581 GNPTG          | ENSG00000097033 SH3GLB1        | ENSG00000101132 PFND4        | ENSG00000102271 KLHL4        | ENSG00000111880 RNGTT        | ENSG00000115524 SF3B1          |
| ENSG00000118965 WDR35          | ENSG00000132406 TMEM128        | ENSG00000132855 ANGPTL3        | ENSG00000137672 TRPC6          | ENSG00000143355 LHX9         | ENSG00000143499 SMYD2        | ENSG00000147121 ZNF673       | ENSG00000147892 ADAMTSL1       |
| ENSG00000151239 TWF1           | ENSG00000155833 CYLC2          | ENSG00000158488 CD1E           | ENSG00000165288 BRWD3          | ENSG00000167904 TMEM68       | ENSG00000171202 TMEM126A     | ENSG00000175745 NR2F1        | ENSG00000180245 RRH            |
| ENSG00000180458 Q8N3U1_HUMAN   | ENSG00000182898 TCHHL1         | ENSG00000187210 GCNT1          | ENSG00000197991 PCDH20         | ENSG00000205156 Q6UXQ8_HUMAN |                              |                              |                                |
| ENSG00000063180 CA11           | ENSG00000075886 TUBA3D         | ENSG00000100376 FAM118A        | ENSG00000101577 LPIN2          | ENSG00000102981 PARD6A       | ENSG00000108349 CASC3        | ENSG00000112599 GUCA1B       | ENSG00000115602 IL1RL1         |
| ENSG00000115718 PROC           | ENSG00000117640 FAM54B         | ENSG00000125409 TEKT3          | ENSG00000126602 TRAP1          | ENSG00000137133 HINT2        | ENSG00000139890 REM2         | ENSG00000147123 NDUFB11      | ENSG00000153666 XR_017721.1    |
| ENSG00000157110 RBPMS          | ENSG00000160766 GBAP           | ENSG00000167136 ENDOG          | ENSG00000169218 RSP01          | ENSG00000170430 MGMT         | ENSG00000176595 KBTBD11      | ENSG00000177628 GBA          | ENSG00000178081 LOC653075      |
| ENSG00000180509 KCNE1          | ENSG00000184345 TQCF2          | ENSG00000184988 TMEM106A       | ENSG00000186676 EEF1G          | ENSG00000187516 CXorf27      | ENSG00000187979 Q6ZPC6_HUMAN | ENSG00000188038 NRN1L        | ENSG00000188532 LOC653125      |
| ENSG00000188626 LOC653720      | ENSG00000198033 TUBA3C         | ENSG00000204319 C4A            | ENSG00000204342 C4B            | ENSG00000039123 SKIV2L2      | ENSG00000067715 SYT1         | ENSG00000090382 LYZ          | ENSG00000105928 DFNA5          |
| ENSG00000106399 RPA3           | ENSG00000107672 NSMCE4A        | ENSG00000108953 WHAE           | ENSG00000109320 NFKB1          | ENSG00000110013 SIAE         | ENSG00000116641 DOCK7        | ENSG00000125257 ABCC4        | ENSG00000134758 RNF138         |
| ENSG00000140157 NIPA2          | ENSG00000145721 LIX1           | ENSG00000148634 HERC4          | ENSG00000151229 SLC2A13        | ENSG00000151893 C10orf46     | ENSG00000154265 ABCA5        | ENSG00000155792 DEPDC6       | ENSG00000163694 NP_061900.1    |
| ENSG00000165060 FXN            | ENSG00000175513 TSGA10IP       | ENSG00000180667 YOD1           | ENSG00000186481 NP_001025170.1 | ENSG00000187742 SECT1BP2     | ENSG00000198833 UBE2J1       |                              |                                |
| ENSG00000009335 WRPS3          | ENSG00000019102 VSI62          | ENSG00000072858 SDIT1          | ENSG00000077312 BNRPA          | ENSG00000089250 NOS1         | ENSG00000105193 RPS16        | ENSG00000109625 CPZ          | ENSG000001122729 ACO1          |
| ENSG00000123992 DNPEP          | ENSG00000125977 EIF2S2         | ENSG00000127554 GFER           | ENSG00000131944 C19orf40       | ENSG00000132801 ZSWIM3       | ENSG00000134905 CARSD2       | ENSG00000145819 ARHGAP26     | ENSG00000147065 MSN            |
| ENSG00000158769 F11r           | ENSG00000160691 SHC1           | ENSG00000164077 MON1A          | ENSG00000164889 SLC4A2         | ENSG00000164896 FASTK        | ENSG00000165861 ZFYVE1       | ENSG00000166167 BTRC         | ENSG00000168795 ZBTB5          |
| ENSG00000170983 C8orf14        | ENSG00000171456 ASXL1          | ENSG00000175611 C9orf130       | ENSG00000180385 Q8NAP4_HUMAN   | ENSG00000181444 ZNF467       | ENSG00000182698 NM_001007089 | ENSG00000183578 TNFAIP8L3    | ENSG00000184221 OLIG1          |
| ENSG00000184924 NP_001013685.1 | ENSG00000185049 WHSC2          | ENSG00000187024 PTRH1          | ENSG00000197430 TMEM10         | ENSG00000197724 PHF2         | ENSG00000205609 Q9BW98_HUMAN | ENSG00000000419 DPM1         | ENSG00000024862 CCDC28A        |
| ENSG00000050393 CCDC90A        | ENSG00000055211 C6orf72        | ENSG00000056277 SUHW3          | ENSG00000057252 SOAT1          | ENSG00000075413 MARK3        | ENSG00000095587 TLL2         | ENSG00000097096 SYDE2        | ENSG00000099250 NRP1           |
| ENSG00000100209 HSCB           | ENSG00000105810 CDK6           | ENSG00000116906 GNPAT          | ENSG00000118596 SLC16A7        | ENSG00000122203 KIAA1191     | ENSG00000134278 SPIRE1       | ENSG00000135905 DOCK10       | ENSG00000136688 IL1F9          |
| ENSG00000137558 PI15           | ENSG00000138379 GDF8           | ENSG00000139679 P2RY5          | ENSG00000147592 LACTB2         | ENSG00000152894 PTRK         | ENSG00000154429 C1orf96      | ENSG00000154438 ASZ1         | ENSG00000161813 LARP4          |
| ENSG00000163655 GMPS           | ENSG00000165097 AOF1           | ENSG00000169860 P2RY1          | ENSG00000170160 Q6ZU57_HUMAN   | ENSG00000171155 C1GALT1C1    | ENSG00000179059 ZFP42        | ENSG00000181904 C5orf24      | ENSG00000182504 LRR1Q2         |
| ENSG00000183496 RKHD3          | ENSG00000186871 NP_001009954.1 | ENSG00000189042 ZNF567         | ENSG00000198521 ZNF43          |                              |                              |                              |                                |
| perfect: TAAAGT ACTTTAA        | hsa-miR-302b*                  | ACTTTAAcatggaagtgcctttc        | 0                              |                              |                              |                              |                                |
| ENSG00000004455 AK2            | ENSG00000006831 ADIPOR2        | ENSG00000011454 RABGAP1        | ENSG00000043591 ADRB1          | ENSG00000088812 ATRN         | ENSG00000110395 CBL          | ENSG00000116032 GRIN3B       | ENSG00000116237 ICMT           |
| ENSG00000123335 ORMDL2         | ENSG00000142700 DMRTA2         | ENSG00000152217 SETBP1         | ENSG00000162337 LRP5           | ENSG00000162771 FAM71A       | ENSG00000163081 NP_694583.1  | ENSG00000164651 SP8          | ENSG00000164778 EN2            |
| ENSG00000169194 IL13           | ENSG00000169213 RAB3B          | ENSG00000169247 SH3TC2         | ENSG00000170161 Q5VV11_HUMAN   | ENSG00000180340 FZD2         | ENSG00000182953 NM_001031.4  | ENSG00000183632 NP_057296.1  | ENSG00000204013 Q6XYD6_HUMAN   |
| ENSG00000204098 Q6ZUI5_HUMAN   | ENSG00000204304 PBX2           | ENSG00000205456 NP_057296.1    | ENSG00000205457 NP_057296.1    | ENSG0000005700 IBTK          | ENSG00000021826 CPS1         | ENSG00000023287 RB1CC1       | ENSG00000029639 TFB1M          |
| ENSG00000069869 NEDD4          | ENSG00000069943 PIGB           | ENSG00000080546 SESN1          | ENSG00000080397 DOPEY1         | ENSG00000085563 ABCB1        | ENSG00000089009 RPL6         | ENSG00000089123 TASP1        | ENSG00000092203 TOX4           |
| ENSG00000104447 TRPS1          | ENSG00000108278 ZNHIT3         | ENSG00000109471 IL2            | ENSG00000113597 NP_079217.1    | ENSG00000115540 PREI3        | ENSG00000117010 ZNF684       | ENSG00000118496 FBXO30       | ENSG00000120662 MTRF1          |
| ENSG00000122550 KLHL7          | ENSG00000125885 MCM8           | ENSG00000128708 HAT1           | ENSG00000134627 PIWIL4         | ENSG00000135679 MDM2         | ENSG00000136197 C7orf25      | ENSG00000137501 SYTL2        | ENSG00000138315 OIT3           |
| ENSG00000139263 LRIG3          | ENSG00000146476 C6orf211       | ENSG00000155329 ZCCHC10        | ENSG00000156256 USP16          | ENSG00000162409 PRKAA2       | ENSG00000162627 SNX7         | ENSG00000163743 RCHY1        | ENSG00000164932 CTHRC1         |
| ENSG00000165023 DIRAS2         | ENSG00000168228 ZCCHC4         | ENSG00000168938 PPIC           | ENSG00000176635 HORMAD2        | ENSG00000176714 CCDC121      | ENSG00000179299 NSUN7        | ENSG00000182150 C9orf102     | ENSG00000182504 LRR1Q2         |
| ENSG00000186444 NP_997313.1    | ENSG00000183891 TTC32          | ENSG00000187118 NP_872329.1    | ENSG00000189079 ARI2D          | ENSG00000196680 Q8WZ27_HUMAN | ENSG00000198160 MIER1        | ENSG00000203760 C6orf173     |                                |
| ENSG00000009335 UBE3C          | ENSG00000036828 CASR           | ENSG00000064309 CDON           | ENSG00000084234 APLP2          | ENSG00000090889 KIF4A        | ENSG00000095303 PTGS1        | ENSG00000100207 TCF20        | ENSG00000103067 RBM35B         |
| ENSG00000114656 KIAA1257       | ENSG00000122694 C9orf19        | ENSG00000123201 GUCY1B2        | ENSG00000131188 PRR7           | ENSG00000140623 SEPT12       | ENSG00000140632 NP_115958.2  | ENSG00000141431 Q6ZMX6_HUMAN | ENSG00000141485 SLC13A5        |
| ENSG00000141639 MAPK4          | ENSG00000141664 ZCCHC2         | ENSG00000143502 SUSD4          | ENSG00000144677 CTDSPL         | ENSG00000164651 SP8          | ENSG00000168928 CTRB2        | ENSG00000174788 PCP2         | ENSG00000183682 BMP8A          |
| ENSG00000196588 AJAP1          | ENSG00000197746 PSAP           | ENSG00000198089 SFI1           | ENSG00000203867 GRK5           | ENSG00000203867 RBM20        | ENSG00000205145 AMY1A        | ENSG00000206560 C1orf75      | ENSG00000206706 IDI1           |
| ENSG00000006795 CBFB           | ENSG00000078269 SYNJ2          | ENSG00000089177 C20orf23       | ENSG00000100528 CNIH           | ENSG00000112308 C6orf62      | ENSG00000113583 C5orf15      | ENSG00000114346 ECT2         | ENSG00000120327 PCDHB14        |
| ENSG00000120798 NR2C1          | ENSG00000125814 NAPB           | ENSG00000132549 VPS13B         | ENSG00000135679 MDM2           | ENSG00000135951 CASK         | ENSG00000147044 CASR         | ENSG00000147231 CXorf57      | ENSG00000149089 AP1P           |
| ENSG00000151093 OXSM           | ENSG00000159167 STC1           | ENSG00000165637 VDAC2          | ENSG00000168118 RAB4A          | ENSG00000171150 SOCS5        | ENSG00000172974 LOC729317    | ENSG00000174876 AMY1B        | ENSG00000177461 Q8NA31_HUMAN   |
| ENSG00000182010 PLEKHK1        | ENSG00000187626 ZKSCAN4        | ENSG00000196318 AMY2A          | ENSG00000197223 NP_006324.1    | ENSG00000197275 RAD54B       | ENSG00000197614 MFAP5        | ENSG00000197839 AMY2B        | ENSG00000205992 Q8N4X1_HUMAN   |
| ENSG00000085063 CD59           | ENSG00000101342 C20orf118      | ENSG00000108106 UBE2S          | ENSG00000113070 HBEGF          | ENSG00000115844 DLX2         | ENSG00000116128 BCL9         | ENSG00000126594 DNASE1       | ENSG00000130147 SH3BP4         |
| ENSG00000135457 TFCP2          | ENSG00000151148 UBE3P          | ENSG00000162298 SYVN1          | ENSG00000165271 NOL6           | ENSG00000165644 COMTD1       | ENSG00000166900 STX3         | ENSG00000166965 RCCD1        | ENSG00000169627 BOLA2B         |
| ENSG00000173210 ABLIM3         | ENSG00000175550 DRAP1          | ENSG00000184451 CCR10          | ENSG00000188056 TREM14         | ENSG00000197019 SERTAD1      | ENSG00000197506 SLC28A3      | ENSG00000205528 Q6ZRE2_HUMAN | ENSG00000205620 Q6ZRB6_HUMAN   |
| ENSG00000003436 TFPI           | ENSG0000006459 JHDM1D          | ENSG00000033178 UBE1L2         | ENSG00000035687 ADSS           | ENSG00000038295 TLL1         | ENSG00000055332 EIF2AK2      | ENSG00000067064 IDI1         | ENSG00000078140 HIP2           |
| ENSG00000078589 P2RY10         | ENSG00000085491 SLC25A24       | ENSG00000089177 C20orf23       | ENSG00000100567 PSMA3          | ENSG00000103381 NP_060810.1  | ENSG00000112992 NNT          | ENSG00000115993 TRAK2        | ENSG00000117151 CTBS           |
| ENSG00000118473 SGIP1          | ENSG00000121749 TBC1D15        | ENSG00000123091 RNF11          | ENSG00000130224 LRCH2          | ENSG00000133731 IMPA1        | ENSG00000134259 NGFB         | ENSG00000135090 TAOK3        | ENSG00000135316 SYNCRIP        |
| ENSG00000137558 PI15           | ENSG00000144228 SPOPL_HUMAN    | ENSG00000144366 GULP1          | ENSG00000144895 EIF2A          | ENSG00000145736 GTF2H2       | ENSG00000148057 C9orf103     | ENSG00000153922 CHD1         | ENSG00000154642 C21orf91       |
| ENSG00000155330 NP_001001436.1 | ENSG00000156017 C9orf41        | ENSG00000162999 DUSP19         | ENSG00000163681 SLMAP          | ENSG00000164209 SLC25A46     | ENSG00000165476 REEP3        | ENSG00000168216 LMBRD1       | ENSG00000170759 KIF5B          |
| ENSG00000171492 LRRC8D         | ENSG00000177888 ZBTB41         | ENSG00000178904 DPY19L3        | ENSG00000183474 NP_001035955.1 | ENSG00000185056 Q569G3_HUMAN | ENSG00000186687 LYRM7        | ENSG00000187268 FAM9C        | ENSG00000187772 LIN28B         |
| ENSG00000197323 TRIM33         | ENSG00000198380 GFPT1          | ENSG00000198839 ZNF277P        |                                |                              |                              |                              |                                |
| ENSG00000063854 HAGH           | ENSG00000065268 WDR18          | ENSG00000088256 GNAI1          | ENSG00000106018 VIPR2          | ENSG00000124449 IRGC         | ENSG00000125731 SH2D3A       | ENSG00000134247 PTGFRN       | ENSG00000152192 POU4F1         |
| ENSG00000164080 RAD54L2        | ENSG00000164733 CTSB           | ENSG00000166016 ABTB2          | ENSG00000176887 SOX11          | ENSG00000178235 SLIT1RK1     | ENSG00000198369 SPRED2       | ENSG00000198407 Q8NCZ5_HUMAN | ENSG00000204059 NP_001013718.1 |
| ENSG00000204118 NAP1L6         | ENSG00000005469 CROT           | ENSG00000080166 DCT            | ENSG00000080514 PILRA          | ENSG00000093183 SEC22C       | ENSG00000104728 ARHGEF10     | ENSG00000105854 PON2         | ENSG00000111799 COL12A1        |
| ENSG00000115808 STRN           | ENSG00000117600 NP_055654.2    | ENSG00000118690 ARMC2          | ENSG00000120051 C10orf80       | ENSG00000121058 COIL         | ENSG00000127074 RGS13        | ENSG00000137561 TTPA         | ENSG00000138814 PPP3CA         |
| ENSG00000144034 TPRK           | ENSG00000147202 DIAPH2         | ENSG00000151693 DNEF2          | ENSG00000152804 HHX            | ENSG00000153012 LG12         | ENSG00000153802 TMPRSS11D    | ENSG00000154263 ABCA10       | ENSG00000163001 CCDC104        |
| ENSG00000164182 NDRFB1A12L     | ENSG00000186879 NM_178121      | ENSG00000188811 NP_001017370.1 | ENSG00000196071 OR2L13         | ENSG00000198511 Q8N9A9_HUMAN | ENSG00000198741 Q8N9C2_HUMAN | ENSG00000204837 Q2TVT3_HUMAN |                                |
| ENSG00000057704 TMCC3          | ENSG00000059378 PARP12         | ENSG00000065882 TBC1D1         | ENSG00000068650 ATP11A         | ENSG00000073605 GSMDL        | ENSG00000100024 UPB1         | ENSG00000102921 N4BP1_HUMAN  | ENSG00000104490 NCALD          |
| ENSG00000105383 CD33           | ENSG00000105501 SIGLEC5        | ENSG00000124208 UBE2V1         | ENSG00000139874 SSTR1          | ENSG00000146285 SCML4        |                              |                              |                                |

|         |                              |                             |                              |                                |                                |                                |                             |                             |                              |                              |                              |                                |                                |                                |                                |                                |
|---------|------------------------------|-----------------------------|------------------------------|--------------------------------|--------------------------------|--------------------------------|-----------------------------|-----------------------------|------------------------------|------------------------------|------------------------------|--------------------------------|--------------------------------|--------------------------------|--------------------------------|--------------------------------|
|         | ENSG00000110700 RPS13        | ENSG00000111049 MYF5        | ENSG00000113597 NP_079217.1  | ENSG00000117528 ABCD3          | ENSG00000120742 RAMP4_HUMAN    | ENSG00000129204 USP6           | ENSG00000135272 MDFIC       | ENSG00000136156 ITM2B       |                              |                              |                              |                                |                                |                                |                                |                                |
|         | ENSG00000137575 SDCBP        | ENSG00000150753 CCT5        | ENSG00000154727 GABPA        | ENSG00000164117 FBXO8          | ENSG00000166509 CLEC3A         | ENSG00000168383 HLA-DPBI       | ENSG00000170312 CDC2        | ENSG00000172766 NARG1L      |                              |                              |                              |                                |                                |                                |                                |                                |
| TTAACTC | ENSG00000174501 NP_079466.2  | ENSG00000176407 KCMF1       | ENSG00000180138 CSNK1A1L     | ENSG00000105255 FSD1           | ENSG00000117020 AKT3           | ENSG00000125872 C20orf75       | ENSG00000129657 SEC14L1     | ENSG00000130768 SMPDL3B     | ENSG00000137124 ALDH1B1      | ENSG00000137709 POU2F3       | ENSG00000139644 TEGT         | ENSG00000146535 GNA12          | ENSG00000148468 C10orf38       | ENSG00000161381 PLXDC1         | ENSG00000171475 WIPF2          |                                |
|         | ENSG00000174370 C11orf45     | ENSG00000176383 B3GNT4      | ENSG00000185681 C9orf18      | ENSG00000185860 C10orf110      | ENSG00000186951 PPARA          | ENSG00000188822 C10orf1        | ENSG00000204385 CTL4_HUMAN  | ENSG00000205268 PDE7A       | ENSG00000080839 RBL1         | ENSG00000081154 PCNP         | ENSG00000084453 SLCO1A2      | ENSG00000103740 ACSBG1         | ENSG00000119013 NDUFB3         | ENSG00000130699 TAF4           | ENSG00000131437 KIF3A          | ENSG00000132549 VPS13B         |
|         | ENSG00000156011 PSD3         | ENSG00000162864 NP_775920.1 | ENSG00000164691 TAGAP        | ENSG00000165156 ZHX1           | ENSG00000166326 TRIM44         | ENSG00000171147 NP_001001317.1 | ENSG00000175928 LRRN1       | ENSG00000196350 ZNF492      | ENSG00000205608 Q6ZQP9_HUMAN | ENSG00000077157 PPP1R12B     | ENSG00000100949 RABGGTA      | ENSG00000105379 ETFB           | ENSG00000109132 PHOX2B         | ENSG00000116661 FBXO2          | ENSG00000117013 KCNQ4          | ENSG00000118257 NRP2           |
| TTAACTT | ENSG00000063587 ZNF275       | ENSG00000121766 ZCCHC17     | ENSG00000124164 VAPB         | ENSG00000124766 SOX4           | ENSG00000134243 VORT           | ENSG00000149243 NP_001034637.1 | ENSG00000151882 CCL28       | ENSG00000162779 C10orf125   | ENSG00000119946 CNM1         | ENSG00000164651 SP8          | ENSG00000170525 PFKFB3       | ENSG00000176120 Q9BSY8_HUMAN   | ENSG00000179598 NP_849158.1    | ENSG00000184887 BTBD6          | ENSG00000186326 RGS9BP         | ENSG00000196361 ELAVL3         |
|         | ENSG00000164078 MST1R        | ENSG00000198369 SPRED2      | ENSG00000204564 C6orf136     | ENSG00000006652 IFRD1          | ENSG00000008294 SPAG9          | ENSG00000056586 RC3H2          | ENSG00000066455 GOLGA5      | ENSG00000074201 CLNS1A      | ENSG00000196743 GM2A         | ENSG00000082126 MPP4         | ENSG00000083750 RRAGB        | ENSG00000090104 RGS1           | ENSG00000091972 CD200          | ENSG00000101639 CEP192         | ENSG00000102362 SYTL4          | ENSG00000103449 SALL1          |
|         | ENSG00000104290 FZD3         | ENSG00000110066 SUV420H1    | ENSG00000113525 IL5          | ENSG00000113575 PPP2CA         | ENSG00000114107 CEP70          | ENSG00000114450 GNB4           | ENSG00000114698 PLSCR4      | ENSG00000114757 PEX5L       | ENSG00000119661 DNAL1        | ENSG00000124380 SNUT3_HUMAN  | ENSG00000126821 SGPP1        | ENSG00000131003 RBM12          | ENSG00000133858 CCDC131        | ENSG00000135241 PNPLA10P       | ENSG00000141458 NPC1           | ENSG00000150276 XR_017783.1    |
|         | ENSG00000154079 C6orf57      | ENSG00000159658 KIAA0494    | ENSG00000163328 GPR155       | ENSG00000165646 SLC18A2        | ENSG00000166928 NP_115986.3    | ENSG00000167216 KATNAL2        | ENSG00000169302 STK32A      | ENSG00000170633 RNF34       | ENSG00000171476 HOP_HUMAN    | ENSG00000172444 C5orf34      | ENSG00000174827 PDZK1        | ENSG00000180182 CRSP2          | ENSG00000180245 RRH            | ENSG00000205612 Q71JB2_HUMAN   | ENSG00000206120 QDD2K5_HUMAN   | ENSG00000206120 QDD2K5_HUMAN   |
| TTAAGAT | ENSG00000050733 HOXA11       | ENSG00000061936 SFRS8       | ENSG00000062485 CSZ          | ENSG00000100116 GCAT           | ENSG00000108786 HSD17B1        | ENSG00000110395 CBL            | ENSG00000116667 C10orf21    | ENSG00000122085 MTERFD2     | ENSG00000141696 NO55_HUMAN   | ENSG00000143549 TPM3         | ENSG00000145949 SGK85_HUMAN  | ENSG00000147804 SLC39A4        | ENSG00000165140 FBP1           | ENSG00000166086 JAM3           | ENSG00000166189 HPS6           | ENSG00000166398 KIAA0355       |
|         | ENSG00000168928 CTRB2        | ENSG00000173349 SFT2D3      | ENSG00000176986 SEC24C       | ENSG00000182968 SOX1           | ENSG00000204282 Q6YL35_HUMAN   | ENSG00000204301 NOTCH4         | ENSG00000205441 KRTAP10-7   | ENSG00000207679 PLEKHA1     | ENSG00000111554 MDM1         | ENSG00000111700 SLC01B3      | ENSG00000113407 TARS         | ENSG00000116678 LEPR           | ENSG00000117155 SSX2IP         | ENSG00000118492 C6orf103       | ENSG00000119820 YIPF4          | ENSG00000120008 BRWD2          |
|         | ENSG00000120688 WBP4         | ENSG00000128059 PPAT        | ENSG00000132475 H3F3B        | ENSG00000134748 PRPF38A        | ENSG00000136144 RCBTB1         | ENSG00000147202 DIAPH2         | ENSG00000151470 C4orf33     | ENSG00000154447 SH3RF1      | ENSG00000126240 USP24        | ENSG00000162664 ZNF326       | ENSG00000164796 CSMD3        | ENSG00000165288 BRWD3          | ENSG00000170509 HSD17B13       | ENSG00000170748 HNRGT_HUMAN    | ENSG00000170855 TRIAP1         | ENSG00000172667 ZMAT3          |
| TTAAGCC | ENSG00000176208 ATAD5        | ENSG00000176728 CYO14_HUMAN | ENSG00000180458 Q8NSU1_HUMAN | ENSG00000180481 GLIPR1L2       | ENSG00000186314 PRELID2        | ENSG00000197672 NP_997331.1    | ENSG00000198961 PAJ2        | ENSG00000199731 PAJ2        | ENSG0000007341 ST7L          | ENSG00000117481 NSUN4        | ENSG00000128626 MRFS12       | ENSG00000134531 EMP1           | ENSG00000143258 USP21          | ENSG00000144550 CPNE9          | ENSG00000145022 TCTA           | ENSG00000158169 FANCC          |
|         | ENSG00000161202 DVL3         | ENSG00000164885 CDK5        | ENSG00000165424 C10orf56     | ENSG00000166104 NP_776166.1    | ENSG00000170955 PRKCDP         | ENSG00000174233 ADCY6          | ENSG00000177191 B3GNT8      | ENSG00000183044 ABAT        | ENSG00000189190 LGICZ1       | ENSG00000189140 Q6ZU77_HUMAN | ENSG00000056586 RC3H2        | ENSG00000078747 ITCH           | ENSG00000112584 FAM120B        | ENSG00000116199 FAM20B         | ENSG00000136842 TMOD1          | ENSG00000145741 BTF3           |
|         | ENSG00000146592 CREB5        | ENSG00000150459 SAP18       | ENSG00000153339 KIAA1012     | ENSG00000153822 KCNJ16         | ENSG00000156697 UTP14A         | ENSG00000158636 C11orf30       | ENSG00000164144 ARFTP1      | ENSG00000164308 NP_071745.1 | ENSG00000174106 LEMD3        | ENSG00000158360 NRR_002453.4 | ENSG00000183722 LHFP         | ENSG00000186031 Q6ZSY1_HUMAN   | ENSG00000188846 RPL14          | ENSG00000188846 RPL14          | ENSG00000204189 Q587I5_HUMAN   | ENSG00000206367 Q6ZR26_HUMAN   |
| TTAAGCT | ENSG00000052835 ZNF785       | ENSG00000053371 AKR7A2      | ENSG00000068323 TFE3         | ENSG00000090920 FCGBP          | ENSG00000101457 DNTT1P1        | ENSG00000110455 NP_115981.1    | ENSG00000111775 COX6A1      | ENSG00000127080 IPPK        | ENSG00000136205 TNS3         | ENSG00000143632 ACTA1        | ENSG00000159199 ATP5G1       | ENSG00000162735 PEX19          | ENSG00000164605 Q5T8I0_HUMAN   | ENSG00000164713 BRI3           | ENSG00000169991 Q5TF58_HUMAN   | ENSG00000170322 NFRKB          |
|         | ENSG00000174111 SOMCS7       | ENSG00000175779 NP_997327.1 | ENSG00000180422 C16orf81     | ENSG00000183443 A2RU41_HUMAN   | ENSG00000196507 TCEAL3         | ENSG00000198785 GRIN3A         | ENSG00000203318 TXNDC4      | ENSG000002055147 C5orf3     | ENSG00000064218 DMRT3        | ENSG00000080546 SESN1        | ENSG00000097033 SH3GLB1      | ENSG00000100028 SNRPD3         | ENSG00000106701 FSD1L          | ENSG00000107104 ANKRD15        | ENSG00000112242 E2F3           | ENSG00000112242 E2F3           |
|         | ENSG00000123240 OPTN         | ENSG00000124784 RIOK1       | ENSG00000125384 PTGER2       | ENSG00000135324 C6orf117       | ENSG00000135931 ARMC9          | ENSG00000145284 SCD5           | ENSG00000148481 C10orf97    | ENSG00000152268 SPON1       | ENSG00000152684 PELO         | ENSG00000162851 TFB2M        | ENSG00000163249 CCNYL1       | ENSG00000164347 GFM2           | ENSG00000165333 TTCC           | ENSG00000166411 IDH3A          | ENSG00000166881 K0286_HUMAN    | ENSG00000167283 ATP5L          |
| TTAAGTA | ENSG00000169544 ZEB2         | ENSG00000180228 PRKR2       | ENSG00000188647 PTAR1        | ENSG00000205171 Q6PDB3_HUMAN   | ENSG00000205981 DNAJC19        | ENSG00000154198 Q8N1L4_HUMAN   | ENSG00000163394 CCAR        | ENSG00000164051 CCDC51      | ENSG00000169974 ARPC1B       | ENSG00000169607 CKAP2L       | ENSG00000169813 HNRPF        | ENSG00000174738 NRLD2          | ENSG00000174738 NRLD2          | ENSG00000179387 ELMOD2         | ENSG00000180336 NP_001028831.1 | ENSG00000180336 NP_001028831.1 |
|         | ENSG00000134555 ARPC1A       | ENSG00000089057 SLC23A2     | ENSG00000119402 FBXW2        | ENSG00000140848 CPNE2          | ENSG00000154198 Q8N1L4_HUMAN   | ENSG00000163394 CCAR           | ENSG00000164051 CCDC51      | ENSG00000165275 RG9MTD3     | ENSG00000169974 ARPC1B       | ENSG00000169607 CKAP2L       | ENSG00000169813 HNRPF        | ENSG00000174738 NRLD2          | ENSG00000174738 NRLD2          | ENSG00000179387 ELMOD2         | ENSG00000180336 NP_001028831.1 | ENSG00000180336 NP_001028831.1 |
|         | ENSG00000169974 SF3B5        | ENSG00000185352 HS6ST3      | ENSG00000186007 LEMD1        | ENSG00000203876 Q5T6G7_HUMAN   | ENSG00000203608 SNAPC1         | ENSG00000203608 SNAPC1         | ENSG00000203601 MTMR1       | ENSG00000208020 NP_705833.2 | ENSG00000089225 TBX5         | ENSG00000104517 EDD1         | ENSG00000105865 DUS4L        | ENSG00000110925 FAM130A1       | ENSG00000115966 ATF2           | ENSG00000117505 DR1            | ENSG00000117625 RCOR3          | ENSG00000117625 RCOR3          |
|         | ENSG00000122548 K0087_HUMAN  | ENSG00000126861 OMG         | ENSG00000132356 PRKAA1       | ENSG00000134538 SLCO1B1        | ENSG00000162702 ZNF281         | ENSG00000163558 PRKCI          | ENSG00000164983 TMEM65      | ENSG00000165105 RASEF       | ENSG00000165494 PCF11        | ENSG00000169607 CKAP2L       | ENSG00000169813 HNRPF        | ENSG00000174738 NRLD2          | ENSG00000174738 NRLD2          | ENSG00000179387 ELMOD2         | ENSG00000180336 NP_001028831.1 | ENSG00000180336 NP_001028831.1 |
| TTAAGTC | ENSG00000183496 RKHD3        | ENSG00000183831 ANKRD45     | ENSG00000189299 FOXK2        | ENSG00000198860 C10orf19       | ENSG00000203668 CHML           | ENSG00000072501 SMC1A          | ENSG00000074590 NUAK1       | ENSG00000079435 LIPE        | ENSG00000183496 RKHD3        | ENSG00000183831 ANKRD45      | ENSG00000189299 FOXK2        | ENSG00000198860 C10orf19       | ENSG00000203668 CHML           | ENSG00000072501 SMC1A          | ENSG00000074590 NUAK1          | ENSG00000079435 LIPE           |
|         | ENSG00000103067 GIPR         | ENSG00000047056 WDR37       | ENSG00000063438 AHRR         | ENSG00000072501 SMC1A          | ENSG00000074590 NUAK1          | ENSG00000079435 LIPE           | ENSG00000095303 PTGS1       | ENSG00000095303 PTGS1       | ENSG00000103067 GIPR         | ENSG00000047056 WDR37        | ENSG00000063438 AHRR         | ENSG00000072501 SMC1A          | ENSG00000074590 NUAK1          | ENSG00000079435 LIPE           | ENSG00000095303 PTGS1          | ENSG00000095303 PTGS1          |
|         | ENSG00000160959 LRRRC14      | ENSG00000166763 STRC        | ENSG00000178814 OPLAH        | ENSG00000203908 NP_001017361.1 | ENSG00000203908 NP_001017361.1 | ENSG00000203908 NP_001017361.1 | ENSG00000204264 PSMB8       | ENSG00000204914 NP_940843.1 | ENSG00000160959 LRRRC14      | ENSG00000166763 STRC         | ENSG00000178814 OPLAH        | ENSG00000203908 NP_001017361.1 | ENSG00000203908 NP_001017361.1 | ENSG00000203908 NP_001017361.1 | ENSG00000204264 PSMB8          | ENSG00000204914 NP_940843.1    |
|         | ENSG00000204917 NP_940843.1  | ENSG00000204918 NP_940843.1 | ENSG00000204919 NP_940843.1  | ENSG00000204919 NP_940843.1    | ENSG00000204919 NP_940843.1    | ENSG00000204919 NP_940843.1    | ENSG00000204919 NP_940843.1 | ENSG00000204919 NP_940843.1 | ENSG00000204917 NP_940843.1  | ENSG00000204918 NP_940843.1  | ENSG00000204919 NP_940843.1  | ENSG00000204919 NP_940843.1    | ENSG00000204919 NP_940843.1    | ENSG00000204919 NP_940843.1    | ENSG00000204919 NP_940843.1    | ENSG00000204919 NP_940843.1    |
|         | ENSG00000106355 LSM5         | ENSG00000106829 TLE4        | ENSG00000125675 GRIA3        | ENSG00000135297 MTO1           | ENSG00000135776 ABCB10         | ENSG00000163605 PPP4R2         | ENSG00000164975 SNAPC3      | ENSG00000166321 NUDT13      | ENSG00000170892 TSEN34       | ENSG00000173200 PARP15       | ENSG00000175395 ZNF25        | ENSG00000175606 TMEM70         | ENSG00000180869 C10orf180      | ENSG00000181264 TMEM136        | ENSG00000185915 KLHL34         | ENSG00000185985 SLITRRK2       |
| TTAAGTG | ENSG00000187611 Q6ZTR6_HUMAN | ENSG00000198876 WDR40A      | ENSG00000204201 Q49A40_HUMAN | ENSG00000205773 LOC652517      | ENSG00000103184 SEC14L5        | ENSG00000105501 SIGLEC5        | ENSG00000110906 KCTD10      | ENSG00000124678 TCP11       | ENSG00000187611 Q6ZTR6_HUMAN | ENSG00000198876 WDR40A       | ENSG00000204201 Q49A40_HUMAN | ENSG00000205773 LOC652517      | ENSG00000103184 SEC14L5        | ENSG00000105501 SIGLEC5        | ENSG00000110906 KCTD10         | ENSG00000124678 TCP11          |
|         | ENSG00000143398 PIP5K1A      | ENSG00000145050 ARMET       | ENSG00000162723 SLAMF9       | ENSG00000164889 SLC4A2         | ENSG00000166257 SCN3B          | ENSG00000171855 IFNB1          | ENSG00000184923 FAM22A      | ENSG00000185650 ZFP36L1     | ENSG00000143398 PIP5K1A      | ENSG00000145050 ARMET        | ENSG00000162723 SLAMF9       | ENSG00000164889 SLC4A2         | ENSG00000166257 SCN3B          | ENSG00000171855 IFNB1          | ENSG00000184923 FAM22A         | ENSG00000185650 ZFP36L1        |
|         | ENSG00000102605 HN1L         | ENSG00000002745 WNT16       | ENSG00000058668 ATP2B4       | ENSG00000085719 CPNE3          | ENSG00000091527 CDV3           | ENSG00000102043 MTMR8          | ENSG00000109458 GAB1        | ENSG00000111145 ELK3        | ENSG00000102605 HN1L         | ENSG00000002745 WNT16        | ENSG00000058668 ATP2B4       | ENSG00000085719 CPNE3          | ENSG00000091527 CDV3           | ENSG00000102043 MTMR8          | ENSG00000109458 GAB1           | ENSG00000111145 ELK3           |
|         | ENSG00000113240 CLK4         | ENSG00000117525 F3          | ENSG00000120948 TARDBP       | ENSG00000138757 G3BP2          | ENSG00000140280 LYSMD2         | ENSG00000143507 DUSP10         | ENSG00000145439 CBR4        | ENSG00000150722 PPP1R1C     | ENSG00000113240 CLK4         | ENSG00000117525 F3           | ENSG00000120948 TARDBP       | ENSG00000138757 G3BP2          | ENSG00000140280 LYSMD2         | ENSG00000143507 DUSP10         | ENSG00000145439 CBR4           | ENSG00000150722 PPP1R1C        |
|         | ENSG00000151806 GUF1         | ENSG00000152465 NMT2        | ENSG00000163113 OTUD7B       | ENSG00000164176 EDIL3          | ENSG00000172071 EIF2AK3        | ENSG00000176697 BDNF           | ENSG00000182899 RPL35A      | ENSG00000185972 CCIN        | ENSG00000151806 GUF1         | ENSG00000152465 NMT2         | ENSG00000163113 OTUD7B       | ENSG00000164176 EDIL3          | ENSG00000172071 EIF2AK3        | ENSG00000176697 BDNF           | ENSG00000182899 RPL35A         | ENSG00000185972 CCIN           |
| TTAATAA | ENSG00000003147 ICA1         | ENSG00000062822 POLD1       | ENSG00000080470 SMAP1L       | ENSG00000102977 ACD            | ENSG00000103710 RASL12         | ENSG00000105520 NP_073574.1    | ENSG00000115211 EIF2B4      | ENSG00000117448 AKR1A1      | ENSG00000003147 ICA1         | ENSG00000062822 POLD1        | ENSG00000080470 SMAP1L       | ENSG00000102977 ACD            | ENSG00000103710 RASL12         | ENSG00000105520 NP_073574.1    | ENSG00000115211 EIF2B4         | ENSG00000117448 AKR            |

ENSG00000165152|C9orf125 ENSG00000165355|FBXO33 ENSG00000166068|SPRED1 ENSG00000174606|ANGEL2 ENSG00000181234|TMEM132C ENSG00000181481|RNF135 ENSG00000184943|NP\_443103.1 ENSG00000197170|PSMD12  
ENSG00000197479|PCDH11 ENSG00000203724|C1orf53 ENSG00000204941|PSG5 ENSG00000105509|HAS1 ENSG00000117450|PRDX1 ENSG00000126778|SIX1 ENSG00000132716|WDR42A ENSG00000136040|PLXNC1  
TTAATCT ENSG0000064999|ANKS1A ENSG0000070601|FRMPD1 ENSG00000083454|P2RX5 ENSG00000169083|AR ENSG00000170819|BFP52 ENSG00000171533|MAP6 ENSG00000177947|ODF3 ENSG00000179241|LDLRAD3  
ENSG00000144029|MRPS5 ENSG00000165275|RG9MTD3 ENSG00000168259|DNAJC7 ENSG000001184261|KCNK12 ENSG00000050030|KIAA2022 ENSG00000069275|NUCKS1 ENSG00000083642|APRIN ENSG00000106052|TAX1BP1 ENSG00000108298|RPL19  
ENSG00000181396|NP\_078924.1 ENSG00000183495|EP400 ENSG00000116260|SLC35A3 ENSG00000135838|NPL ENSG00000138792|ENPEP ENSG00000141979|CALR3 ENSG00000143514|TP53BP2  
ENSG00000108688|CCL7 ENSG00000164442|CITED2 ENSG00000165029|ABCA1 ENSG00000170365|SMAD1 ENSG00000177494|ZBED2 ENSG00000178966|RMI1  
TTAATGA ENSG0000075151|EIF4G3 ENSG00000092421|SEMA6A ENSG00000106077|ABHD11 ENSG00000106333|PCOLCE ENSG00000110880|CORO1C ENSG00000116237|ICMT ENSG00000119684|MLH3 ENSG00000124164|VAPB  
ENSG00000125618|PAX8 ENSG00000138617|PARP16 ENSG00000142082|SIRT3 ENSG00000166136|NDUFB8 ENSG00000171222|SCAND1 ENSG00000172602|RND1 ENSG00000176095|IHPK1  
ENSG00000182329|Q8IVF9\_HUMAN ENSG00000182968|SOX1 ENSG00000188706|ZDHC9 ENSG00000196365|LONP1 ENSG00000197182|NM\_207477 ENSG00000204369|Q6ZUP0\_HUMAN ENSG0000033178|UBEL12 ENSG0000053328|Q5T253\_HUMAN  
ENSG00000060762|BRP44L ENSG00000096717|SIRT1 ENSG00000106723|SPIN1 ENSG00000107897|ACBD5 ENSG00000112311|ATPBD1C ENSG00000116641|DOCK7 ENSG00000118507|AKAP7  
ENSG00000120253|NUP43 ENSG00000123584|MAGEA9B ENSG00000129474|JUB ENSG00000132950|ZMYM5 ENSG00000136152|COG3 ENSG00000137871|SUHW4 ENSG00000138686|BBS7  
ENSG00000138771|SHROOM3 ENSG00000139746|RBM26 ENSG00000145451|GLRA3 ENSG00000149970|CNKSR2 ENSG00000152583|SPARCL1 ENSG00000155629|PIK3AP1 ENSG00000164284|GRPEL2 ENSG00000165219|GAPVD1  
ENSG00000165512|ZNF22 ENSG00000166008|MAGEA9 ENSG00000166035|LIPC ENSG00000172086|KRCC1 ENSG00000173988|Q5TBN0\_HUMAN ENSG00000176160|HSF5 ENSG00000176774|MAGEB18 ENSG00000178074|NP\_710156.2  
ENSG00000180336|NP\_001028831.1 ENSG00000187533|NP\_999876.1 ENSG00000196968|FUT11  
TTAATGC ENSG00000075388|FGF4 ENSG00000105755|ETHE1 ENSG00000123144|C19orf43 ENSG00000123349|PFDN5 ENSG00000124164|VAPB ENSG00000129351|ILF3 ENSG00000131196|NFATC1 ENSG00000145949|SGK85\_HUMAN  
ENSG00000160208|RRP1B ENSG00000165275|RG9MTD3 ENSG00000166763|STRC ENSG00000167862|ICT1 ENSG00000168795|ZBTB5 ENSG00000179766|Q4G129\_HUMAN ENSG00000182315|NP\_653215.1 ENSG00000183558|HIST2H2AA3  
ENSG00000186543|Q6ZWC0\_HUMAN ENSG00000203747|FCGR3A ENSG00000203812|HIST2H2AA4 ENSG00000204071|TCEAL6 ENSG00000205718|LOC65365 ENSG00000205726|ITSN1 ENSG0000057019|DCBLD2 ENSG0000066926|FECH  
ENSG00000100644|HF1A ENSG00000103479|RBL2 ENSG00000104343|UBE2W ENSG00000104388|RAB2A ENSG00000104660|LEPROTL1 ENSG00000107651|SEC23IP ENSG00000112406|HECA ENSG00000115254|XAB1  
ENSG00000118777|ABCG2 ENSG00000119866|BCL11A ENSG00000125703|ATG4C ENSG00000136240|KDELRL2 ENSG00000137804|NUSAP1 ENSG00000138615|CILP ENSG00000138779|Q9HCM6\_HUMAN ENSG00000143889|HNRPLL  
ENSG00000146278|PNRC1 ENSG00000146457|WTAP ENSG00000156875|HIAT1 ENSG00000164164|OTUD4 ENSG00000165862|PNLI1PR2 ENSG00000171150|SOCS5 ENSG00000172766|NARG1L ENSG00000172954|LYCAT  
ENSG00000174628|IQCK ENSG00000179021|C3orf38 ENSG00000196616|ADH1C  
TTAATGG ENSG00000077080|ACTLB6 ENSG00000077157|PPP1R12B ENSG00000085063|CD59 ENSG00000087460|GNAS ENSG00000092847|EIF2C1 ENSG00000130956|HABP4 ENSG00000136895|GARNL3 ENSG00000140263|SORD  
ENSG00000140564|FURIN ENSG00000149243|NP\_001034637.1 ENSG00000149532|CPSF7\_HUMAN ENSG00000161911|TREM1 ENSG00000167641|PPP1R14A ENSG00000167723|TRPV3 ENSG00000168010|ATG16L2 ENSG00000168496|FEN1  
ENSG00000169184|NM\_002430.2 ENSG00000172301|C17orf79 ENSG00000176095|IHPK1 ENSG00000179913|B3GNT3 ENSG00000179914|ITLN1 ENSG00000183495|EP400 ENSG00000196998|WDR45 ENSG00000203867|BMD20  
ENSG00000204581|Q6ZU04\_HUMAN ENSG00000203228|NDUFB1 ENSG00000203697|DERA ENSG00000396001|SOX30 ENSG00000071539|TRIP13 ENSG00000078237|C12orf5 ENSG00000087510|TFAP2C ENSG00000106080|FKBP14  
ENSG00000106780|MEGF9 ENSG000001108381|ASPA ENSG00000112232|KHDRBS2 ENSG00000134086|VHL ENSG00000137806|NDUFA1 ENSG00000140043|ZADH1 ENSG00000144566|RAB5A ENSG00000144821|MYH15  
ENSG00000150625|GPM6A ENSG00000151164|RAD9B ENSG00000152242|C18orf25 ENSG00000156049|GNA14 ENSG00000164180|TMEM161B ENSG00000165617|DACT1 ENSG00000170891|CYTL1 ENSG00000172995|ARP21\_HUMAN  
ENSG00000177853|ZNF518 ENSG00000179144|GIMAP7 ENSG00000183952|QHR5Q9\_HUMAN ENSG00000186468|RPS23 ENSG00000188206|Q5R114\_HUMAN ENSG00000204010|IFITL1 ENSG00000205462|Q6ZWC8\_HUMAN  
TTAATTA ENSG00000007402|CACNA2D2 ENSG00000069696|DRD4 ENSG00000087460|GNAS ENSG00000105246|EBI3 ENSG00000105443|PSCD2 ENSG00000112715|VEGFA ENSG00000117154|IGSF21  
ENSG00000132383|RPA1 ENSG00000133985|TTC9 ENSG00000134207|SYT6 ENSG00000142623|PAD11 ENSG00000143061|IGSF3 ENSG00000148339|SLC25A25 ENSG00000154928|P54762-3 ENSG00000163914|RHO  
ENSG00000166435|XRR1 ENSG00000186790|FOXE3 ENSG00000197864|WBSR23 ENSG00000198754|OXCT2 ENSG0000023697|DERA ENSG0000023909|GCLM ENSG00000090402|SI ENSG00000101928|MOSPD1  
ENSG00000102189|EEA1 ENSG00000104723|TUSC3 ENSG00000106701|WSD1L ENSG00000107165|TYRP1 ENSG00000108100|CCNY ENSG00000113810|SMC4 ENSG00000114062|UBE3A ENSG00000114200|BCH2  
ENSG00000123594|ATXN3L ENSG00000129071|MBD4 ENSG00000133636|NTS ENSG00000134153|C1orf524 ENSG00000134982|APC ENSG00000136560|TANK ENSG00000139800|ZIC5 ENSG00000145244|CORIN  
ENSG00000146263|C6orf167 ENSG00000148019|CEP78 ENSG00000151413|NUPBL ENSG00000156026|CCDC109A ENSG00000156136|DCK ENSG00000162971|NP\_001034782.1 ENSG00000164687|FABP5  
ENSG00000165471|MBL2 ENSG00000165630|PRPF18 ENSG00000166803|KIAA0101 ENSG00000169551|CXorf48 ENSG00000169756|LIMS1 ENSG00000171320|ESCO2 ENSG00000172167|MTBP ENSG00000173890|GPR160  
ENSG00000177888|ZBTB41 ENSG00000180574|Q5IOX0\_HUMAN ENSG00000183385|TTY8\_HUMAN ENSG00000185290|XR\_016379.1 ENSG00000185700|TTY8\_HUMAN ENSG00000189127|NP\_001004441.1 ENSG00000198521|ZNF43  
ENSG00000198843|SELT\_HUMAN  
ENSG00000198954|KIAA1279 ENSG00000204977|TRIM13  
TTAATTT ENSG00000011454|RABGAP1 ENSG00000054523|KIF1B ENSG00000092820|VIL2 ENSG00000095059|DHPS ENSG00000107130|FREO ENSG00000112715|VEGFA ENSG00000126012|JARID1C ENSG00000131470|PSMC3IP  
ENSG00000132906|CASP9 ENSG00000136950|ARPC5L ENSG00000141580|WDR45L ENSG00000143862|ARL8A ENSG00000145949|SGK85\_HUMAN ENSG00000146221|NP\_872345.1 ENSG00000147224|PRPS1 ENSG00000148704|VAX1  
ENSG00000152042|NBPF8 ENSG00000163251|FZD5 ENSG00000164045|CDK25A ENSG00000166224|SGPL1 ENSG00000168614|NBPF16 ENSG00000169184|NM\_002430.2 ENSG00000169991|Q5TF58\_HUMAN ENSG00000171450|CDK5R2  
ENSG00000172057|ORMDL3 ENSG00000175155|YPEL2 ENSG00000176749|CDK5R1 ENSG00000179571|NP\_001034792.1 ENSG00000181814|Q6NW39\_HUMAN ENSG00000184678|HIST2H2BE ENSG00000185619|PCGF3 ENSG00000186275|Q5TB04\_HUMAN  
ENSG00000197386|HD ENSG00000197451|HNRPAB ENSG00000198355|PTM3 ENSG00000204304|PBX2 ENSG00000141213|KIAA0776 ENSG00000036257|CUL3 ENSG00000060339|CCAR1 ENSG00000061794|MRPS35  
ENSG00000073756|PTGS2 ENSG00000075945|KIFAP3 ENSG00000078399|HOXA9 ENSG00000080910|CFHR1 ENSG00000085832|EPS15 ENSG00000087338|GMCL1 ENSG00000087495|PHACTR3 ENSG00000096696|DSP  
ENSG00000100852|ARHGAP5 ENSG00000104549|SQLE ENSG00000104689|TFRFR310A ENSG00000112200|ZNF451 ENSG00000112701|SENP6 ENSG00000115896|PLCL1 ENSG00000117569|PTBP2 ENSG00000118762|PKD2  
ENSG00000120159|Q9orf82 ENSG00000121101|TEX14 ENSG00000128656|CHN1 ENSG00000130783|CCDC62 ENSG00000132334|PTPRE ENSG00000132541|HRSPI2 ENSG00000133640|LRR1Q1 ENSG00000135597|REPS1  
ENSG00000136244|IL6 ENSG00000139163|ETNK1 ENSG00000143228|NUP2 ENSG00000145386|CCNA2 ENSG00000145428|RNF175 ENSG00000146701|MDH2 ENSG00000147488|ST18 ENSG00000149743|TRPT1  
ENSG00000151116|UEVLD ENSG00000152404|CWF19L2 ENSG00000153201|RANBP2 ENSG00000154265|ABCA5 ENSG00000156017|C9orf41 ENSG00000163950|SLBP ENSG00000164129|NPY5R ENSG00000165813|C10orf118  
ENSG00000165997|ARL5B ENSG00000170634|ACYP2 ENSG00000171109|MFN1 ENSG00000173542|MOBK1A ENSG00000173930|SLCO4C1 ENSG00000173988|Q5TBN0\_HUMAN ENSG00000178074|NP\_710156.2 ENSG00000179456|ZNF238  
TTACAAC ENSG00000180573|HIST1H2AC ENSG00000182827|ACBD3 ENSG00000182973|CNOT10 ENSG00000186974|Q8N6X9\_HUMAN ENSG00000196104|SPOCK3 ENSG00000198157|NSBP1 ENSG00000203827|XR\_015220.1  
ENSG00000081377|CDC14C ENSG00000118526|TCF21 ENSG00000132142|ACACA ENSG00000148297|SURF5 ENSG00000155363|MOV10 ENSG00000160345|C9orf116 ENSG00000161572|LYZL6 ENSG00000162599|NFIA  
ENSG00000166123|GPT2 ENSG00000173511|VEGFB ENSG00000177479|ARIH2 ENSG00000178951|ZBTB7A ENSG00000048392|RRM2B ENSG00000082293|COL19A1 ENSG00000091527|CDV3 ENSG00000102738|MRPS31  
ENSG00000108094|CUL2 ENSG00000113141|TK ENSG00000114796|KLHL24 ENSG00000118496|FBXO30 ENSG00000129317|PUS7L ENSG00000130024|VEG1F ENSG00000131007|TTY9A ENSG00000131009|TTY9A\_HUMAN  
ENSG00000133742|CA1 ENSG00000136758|YME1L1 ENSG00000137033|IL33 ENSG00000138379|GDF8 ENSG00000147408|CGAT1\_HUMAN ENSG00000151690|NP\_060164.3 ENSG00000153823|PID1 ENSG00000155130|MARCKS  
ENSG00000163378|C3orf64 ENSG00000163738|MTHFD2L ENSG00000165240|ATP7A ENSG00000170009|Q9NTH0\_HUMAN ENSG00000170419|VSTM2 ENSG00000170967|DDI1 ENSG00000172915|NBEA ENSG00000179833|SERTAD2  
ENSG00000181481|RNF135 ENSG00000185104|FAF1 ENSG00000186974|Q8N6X9\_HUMAN  
TTACAAT ENSG00000012223|LTF ENSG00000104332|SFRP1 ENSG00000107438|PDLIM1 ENSG00000111254|AKAP3 ENSG00000117682|DHDS ENSG00000125968|ID1 ENSG00000127561|SYNGR3 ENSG00000127666|TICAM1  
ENSG00000135114|OASL ENSG00000135596|MICAL1 ENSG00000140848|CPNE2 ENSG00000141510|TP53 ENSG00000163866|C1orf212 ENSG00000166224|SGPL1 ENSG00000167967|E4F1 ENSG00000167967|E4F1 ENSG00000173349|SFT2D3  
ENSG00000176809|LRRC37A3 ENSG00000184566|Q9P1G6\_HUMAN ENSG00000196743|GM2A ENSG00000205744|DENND1C ENSG00000205980|Q6ZU05\_HUMAN ENSG00000051825|MPHOSPH9 ENSG00000073712|PLEKHC1 ENSG00000082397|EPB41L3  
ENSG00000089048|ESF1 ENSG00000100425|BRD1 ENSG00000104765|BNIP3L ENSG00000109189|USP46 ENSG00000109686|NP\_00109555.2 ENSG00000113916|BCL6 ENSG00000117724|CENPF ENSG00000118495|FLAGL1  
ENSG00000120279|MYCT1 ENSG00000121931|C1orf103 ENSG00000123595|RAB9A ENSG00000132963|POMP ENSG00000134049|IER3IP1 ENSG00000143889|HNRPLL ENSG00000149289|ZC3H12C ENSG00000151715|TMEM45B  
ENSG00000163162|RNF149 ENSG00000169612|FAM103A1 ENSG00000171931|FBXW10 ENSG00000189252|SPANXN3 ENSG00000203924|SPANXN2 ENSG00000205302|SNX2 ENSG00000205307|BTNL1A ENSG00000124557|BTNL1A ENSG00000141096|DPEP3 ENSG00000146666|Q96IP2\_HUMAN  
ENSG0000007402|CACNA2D2 ENSG00000066382|MPPE2D ENSG00000069812|HES2 ENSG00000111331|OAS3 ENSG00000124557|BTNL1A ENSG00000124557|BTNL1A ENSG00000141096|DPEP3 ENSG00000146666|Q96IP2\_HUMAN  
ENSG00000148602|LRRC21 ENSG00000159625|CCDC135 ENSG00000176261|ZBTB80S ENSG00000176749|CDK5R1 ENSG00000188042|ARL4C ENSG00000204157|NP\_001013664.1 ENSG00000204356|RDBP ENSG00000205023|Q6ZSF1\_HUMAN  
ENSG00000076258|FMO4 ENSG00000088035|ALG6 ENSG00000101624|CEPF7 ENSG00000106025|TSPAN12 ENSG00000106511|MEOX2 ENSG00000114030|KPNA1 ENSG00000118777|ABCG2 ENSG00000136539|CD302  
ENSG00000136997|MYC ENSG00000142188|TMEM50B ENSG00000144354|CCA7 ENSG00000146445|OSBPL10 ENSG00000144810|COL8A1 ENSG00000145681|HAPLN1 ENSG00000152932|RAB3C ENSG00000163322|CCDC98  
ENSG00000164543|STK17A ENSG00000164647|STEAP1 ENSG00000165995|CACNB2 ENSG00000167863|ATP5H ENSG00000177600|RPLP2 ENSG00000196350|ZNF492 ENSG00000197359|C15orf34 ENSG00000198648|STK39  
ENSG00000198791|CNOT7 ENSG00000204026|Q6ZSD2\_HUMAN ENSG00000204937|Q6ZSS0\_HUMAN  
TTACACT ENSG00000035403|VCL ENSG00000055371|AKR7A2 ENSG00000057704|TMCC3 ENSG00000074054|CLASP1 ENSG00000076201|PTPN23 ENSG00000092621|PHGDH ENSG00000100453|GZMB  
ENSG00000108671|PSMD11 ENSG00000112212|BZRP13 ENSG00000115661|STK16 ENSG00000142207|URB1 ENSG00000149575|SCN2B ENSG00000155926|SLA ENSG00000157110|RBPM5 ENSG00000159784|FAM131B  
ENSG00000166526|ZNF3 ENSG00000170776|AKAP13 ENSG00000172379|ARNT2 ENSG00000175220|ARHGAP1 ENSG00000178807|ZNF100 ENSG00000178381|ZFAND2A ENSG00000184709|LRRC26 ENSG00000186063|C1orf80  
ENSG00000065485|PDIA5 ENSG00000105866|SP4 ENSG00000109458|GAB1 ENSG00000109771|LRP2BP ENSG00000119042|SATB2 ENSG00000121361|KCNJ8 ENSG00000136738|STAM ENSG00000137414|FAM8A1  
ENSG00000138658|C4orf21 ENSG00000143341|HMGN1 ENSG00000145780|FEM1C ENSG00000147050|UTX ENSG00000152229|PSTPIP2 ENSG00000155970|EPHA2 ENSG00000156076|WIF1 ENSG00000163001|CCDC104  
ENSG00000163642|XR\_017284.1 ENSG00000164930|FZD6 ENSG00000165678|GHITM ENSG00000167553|TUBA1C ENSG00000169255|B3GALNT1 ENSG00000172817|CYP7B1 ENSG00000173041|ZNF680 ENSG00000173406|DAB1  
ENSG00000196387|ZNF140 ENSG00000198393|ZNF26  
TTACAGT ENSG00000047056|WDR37 ENSG00000073146|MOV10L1 ENSG00000074211|PPP2R2C ENSG00000099954|CECR2 ENSG00000100918|REC8 ENSG00000101311|C20orf42 ENSG00000101391|CDK5RAP1 ENSG00000101473|ACOT8  
ENSG00000105991|HOXA1 ENSG00000111252|SH2B3 ENSG00000124249|KCNK15 ENSG00000134369|NAV1 ENSG00000144560|VGLL4 ENSG00000146083|RNF44 ENSG00000149262|INTS4 ENSG00000155026|NM\_173565.2  
ENSG00000160208|RRP1B ENSG00000160714|UBE2Q1 ENSG00000162408|NOL9 ENSG00000167110|GOLGA2 ENSG00000169402|NP\_775836.2 ENSG00000173757|STAT5B ENSG00000174951|FUT1 ENSG00000175283|DOLK  
ENSG00000182968|SOX1 ENSG00000184209|NP\_008951.1 ENSG00000188554|NBR1 ENSG00000197296|C20orf142 ENSG00000197838|CYP2A13 ENSG00000057663|ATG5 ENSG00000067064|IDI1 ENSG00000075413|MARK3  
ENSG00000075643|MOCOS ENSG00000080572|CXorf41 ENSG00000104472|CHRA1 ENSG00000104691|UBXD6 ENSG00000109458|GAB1 ENSG00000111328|CDK2AP1 ENSG00000112379|KIAA1244 ENSG00000115159|GPD2  
ENSG00000117859|OSBPL9 ENSG00000122507|BBS9 ENSG00000123352|SPAT2 ENSG00000123684|LPGAT1 ENSG00000125255|SLC10A2 ENSG00000127588|GNM3 ENSG00000135945|REV1 ENSG00000136158|SPRY2  
ENSG00000139921|TXNDC1 ENSG00000144642|RBMS3 ENSG00000152700|SAR1B ENSG00000155640|C10orf12 ENSG00000163683|C4orf34 ENSG00000168301|KCTD6 ENSG00000168952|STXBP6 ENSG00000171241|SHCB1  
ENSG00000177683|THAP5 ENSG00000183520|UTP11L ENSG00000185915|KLHL34 ENSG00000188021|UBQLN2 ENSG00000198692|EIF1A ENSG00000198741|Q8N9C2\_HUMAN ENSG00000203681|XR\_017762.1  
TTACATT ENSG00000012232|EXTL3 ENSG00000055163|FYFIP2 ENSG00000107341|UBE2R2 ENSG00000125474|ABCC10 ENSG00000125810|CDP3 ENSG00000131188|PRR7 ENSG00000144730|IL17RD  
ENSG00000169083|AR ENSG00000169598|DFFB ENSG00000176887|SOX11 ENSG00000181722|ZBTB20 ENSG00000186141|POLR3C ENSG00000204657|OR2H2 ENSG00000205431|Q6UWF5\_HUMAN ENSG00000205980|Q6ZU05\_HUMAN  
ENSG00000010810|RYN ENSG00000054796|SPO11 ENSG00000056277|SUHW3 ENSG00000066629|EML1 ENSG00000072041|SLC6A15 ENSG00000083123|BCKDH ENSG00000085719|CPNE3 ENSG00000091490|NP\_056002.1  
ENSG00000101782|RTOX3 ENSG00000104755|ADAM2 ENSG00000107854|TNKS2 ENSG00000112183|BMPD4 ENSG00000118113|MKP8 ENSG00000118113|MKP8 ENSG00000118113|MKP8 ENSG00000118113|MKP8 ENSG00000118113|MKP8  
ENSG00000124098|C20orf108 ENSG00000128654|MTX2 ENSG00000130224|LRCH2 ENSG00000134744|ZCCHC11 ENSG00000139921|TXNDC1 ENSG00000144285|SCN1A ENSG00000149443|C20orf78 ENSG00000152193|C13orf7  
ENSG00000155099|TMEM55A ENSG00000164188|RANBP3L ENSG00000166349|RAG1 ENSG00000171209|CSN3 ENSG00000174010|KLHL15 ENSG00000176236|C10orf111 ENSG00000178691|SUZ12 ENSG00000197707|Q9H363\_HUMAN  
ENSG00000198448|Q8N649\_HUMAN ENSG00000205604|Q6ZUP5\_HUMAN



|         |                              |                                |                                |                              |                              |                                |                              |                              |
|---------|------------------------------|--------------------------------|--------------------------------|------------------------------|------------------------------|--------------------------------|------------------------------|------------------------------|
| TTACCAA | ENSG00000040487 PQLC2        | ENSG00000068394 GPKOW          | ENSG00000075275 CELSR1         | ENSG00000101210 EEFLA2       | ENSG00000101336 HCK          | ENSG00000103264 FBXO31         | ENSG00000105648 IFI30        | ENSG00000115841 FAM82A       |
|         | ENSG00000118526 TCF21        | ENSG00000131845 ZNF304         | ENSG00000132478 UNK            | ENSG00000137817 PARP6        | ENSG00000146083 RNF44        | ENSG00000154309 DISP1          | ENSG00000157045 NTAN1        | ENSG00000160808 MYL3         |
|         | ENSG00000163067 ZNF2         | ENSG00000163157 TMD04          | ENSG00000167286 CD3D           | ENSG00000167723 TRPV3        | ENSG00000177294 FBXO39       | ENSG00000177721 NP_001014301.1 | ENSG00000186951 PPARA        | ENSG00000196476 C20orf96     |
|         | ENSG00000197993 KEL          | ENSG00000035141 NP_116211.1    | ENSG00000035720 STAP1_HUMAN    | ENSG00000079134 THOC1        | ENSG00000080371 RAB21        | ENSG00000102794 LOC730803      | ENSG00000107020 C9orf46      | ENSG00000107614 TRDMT1       |
|         | ENSG00000108381 ASPA         | ENSG00000111783 RFK4           | ENSG00000119969 HELLS          | ENSG00000126858 RHOT1        | ENSG00000133393 C16orf63     | ENSG00000139318 DUSP6          | ENSG00000139908 TSSK4        | ENSG00000148950 IMMP1L       |
|         | ENSG00000152944 SUBR7        | ENSG00000153989 NUS1           | ENSG00000154007 ASB17          | ENSG00000166326 TRIM44       | ENSG00000166845 C18orf54     | ENSG00000172318 B3GALT1        | ENSG00000174016 FAM46D       | ENSG00000184079 ZNF571       |
|         | ENSG00000185088 RPS27L       | ENSG00000185129 PURA           | ENSG00000185483 ROR1           | ENSG00000205269 Q5T4T1_HUMAN | ENSG00000206027 Q6ZUT4_HUMAN |                                |                              |                              |
| TTACCAG | ENSG00000069020 MAST4        | ENSG00000073605 GSDML          | ENSG00000086062 B4GALT1        | ENSG00000089723 OTUB2        | ENSG00000108786 HSD17B1      | ENSG00000127362 TAS2R3         | ENSG00000156466 GDF6         | ENSG00000163017 ACTG2        |
|         | ENSG00000167693 NXN          | ENSG00000167749 KLK4           | ENSG00000170271 C5orf4         | ENSG00000175779 NP_997327.1  | ENSG00000175824 XR_017847.1  | ENSG00000176136 MC5R           | ENSG00000180083 WFDC11       | ENSG00000187258 NPSR1        |
|         | ENSG00000196507 TCEAL3       | ENSG00000005483 MLL5           | ENSG00000073712 PLEKHC1        | ENSG00000082438 COBL1        | ENSG00000083937 CHMP2B       | ENSG00000103740 ACSBG1         | ENSG00000104131 EIF3S1       | ENSG00000105968 H2AFV        |
|         | ENSG00000119673 ACOT2        | ENSG00000120162 MOBK12B        | ENSG00000122482 ZNF644         | ENSG00000124060 ATP8A1       | ENSG00000133169 BEX1         | ENSG00000134318 ROCK2          | ENSG00000137757 CASP5        | ENSG00000138640 FAM13A1      |
|         | ENSG00000139910 NOVA1        | ENSG00000148925 BTBD10         | ENSG00000149289 ZNC3H12C       | ENSG00000151917 C6orf65      | ENSG00000159921 GNE          | ENSG00000182752 PAPPA          | ENSG00000186184 POLR1D       | ENSG00000196511 TPK1         |
| TTACCCA | ENSG00000013275 PSMC4        | ENSG00000070886 EPHA8          | ENSG00000074211 PPP2R2C        | ENSG00000090554 FLT3LG       | ENSG00000108352 RAPGEFL1     | ENSG00000108523 RNF167         | ENSG00000116698 SMG7         | ENSG00000121774 KHDRBS1      |
|         | ENSG00000124782 RREB1        | ENSG00000128965 CHAC1          | ENSG00000130307 USHBP1         | ENSG00000134668 SPOCD1       | ENSG00000158715 SLC45A3      | ENSG00000163221 S100A12        | ENSG00000164082 GRM2         | ENSG00000168894 NP_057578.1  |
|         | ENSG00000169777 TAS2R1       | ENSG00000179914 ITLN1          | ENSG00000196787 HIST1H2AG      | ENSG00000197122 SRC          | ENSG00000197465 GYPE         | ENSG00000197496 SLC2A10        | ENSG00000204028 Q6ZRR4_HUMAN | ENSG00000204483 Q8N925_HUMAN |
|         | ENSG00000049246 PER3         | ENSG00000066583 TSOC1          | ENSG00000086300 SNX10          | ENSG00000087095 NLK          | ENSG00000105132 ZNF550       | ENSG00000107771 KIAA1128       | ENSG00000121022 COPS5        | ENSG00000124939 SCGB2A1      |
|         | ENSG00000125676 THOC2        | ENSG00000143162 CREG1          | ENSG00000146276 GABRR1         | ENSG00000163738 MTFHD2L      | ENSG00000169271 HSPB3        | ENSG00000185849 QXP194_HUMAN   | ENSG00000197969 VPS13A       |                              |
| TTACCCC | ENSG00000063180 CA11         | ENSG00000095059 DHP5           | ENSG00000102109 PCSK1N         | ENSG00000107872 FBXL15       | ENSG00000108352 RAPGEFL1     | ENSG00000115844 DLX2           | ENSG00000122735 DNAI1        | ENSG00000131059 C20orf71     |
|         | ENSG00000135503 ACVR1B       | ENSG00000150967 ABCY9          | ENSG00000158526 TSR2           | ENSG00000160445 ZER1         | ENSG00000160877 BTBD14B      | ENSG00000167755 KLK6           | ENSG00000171345 KRT19        | ENSG00000172943 PHF8         |
|         | ENSG00000173027 WBP1         | ENSG00000173456 RNF26          | ENSG00000184923 FAM22A         | ENSG00000188152 FAM22G       | ENSG00000196666 Q6P0A1_HUMAN | ENSG00000203930 Q5JPA2_HUMAN   | ENSG00000205061 Q6ZUP2_HUMAN | ENSG00000005189 NP_112203.1  |
|         | ENSG00000076382 SPAG5        | ENSG00000081923 ATP9B1         | ENSG00000106105 GARS           | ENSG00000118733 OLFM3        | ENSG00000133059 RIPK5        | ENSG00000134313 NP_065789.1    | ENSG00000138448 ITGAV        | ENSG00000148798 INA          |
|         | ENSG00000154174 TOMM70A      | ENSG00000154447 SH3RF1         | ENSG00000163125 KIAA0460       | ENSG00000167098 SPAG4L       | ENSG00000172244 C5orf34      | ENSG00000173473 SMARCC1        | ENSG00000178502 KLHL11       | ENSG00000204472 AIF1         |
| TTACCCT | ENSG00000036565 SLC18A1      | ENSG00000089280 FUS            | ENSG00000103111 MON1B          | ENSG00000107341 UBE2R2       | ENSG00000118689 FOXO3A       | ENSG00000126746 ZNF384         | ENSG00000132142 ACACA        | ENSG00000132507 EIF5AP1      |
|         | ENSG00000135624 CCT7         | ENSG00000140090 SLC24A4        | ENSG00000140678 ITGAX          | ENSG00000141337 ARSG         | ENSG00000148814 LRRC27       | ENSG00000149262 INTS4          | ENSG00000176302 FOXK1        | ENSG00000180205 WFDC9        |
|         | ENSG00000185019 UBOX5        | ENSG00000204775 Q4G0D9_HUMAN   | ENSG00000007350 TKTL1          | ENSG00000054938 CHRD12       | ENSG00000100505 TRIM9        | ENSG00000106355 LSM5           | ENSG00000106993 CDC37L1      | ENSG00000120370 SCYL1BP1     |
|         | ENSG00000126821 SGFP1        | ENSG00000135108 FBXO21         | ENSG00000145491 ROPN1L         | ENSG00000148730 EIF4EBP2     | ENSG00000151849 CENPJ        | ENSG00000156052 GNAQ           | ENSG00000163947 ARHGFB3      | ENSG00000166343 ZMYND17      |
| TTACCAG | ENSG00000074370 ATP2A3       | ENSG00000103723 AP3B2          | ENSG00000104415 WISP1          | ENSG00000108592 FTSJ3        | ENSG00000110514 MADD         | ENSG00000117407 ARTN           | ENSG00000119919 NKX2-3       | ENSG00000120457 KCNJ5        |
|         | ENSG00000124593 C6orf49      | ENSG00000142515 KLK3           | ENSG00000148187 MRFR           | ENSG00000151062 CACNA2D4     | ENSG00000166689 PLEKHA7      | ENSG00000167011 NP_940973.1    | ENSG00000167768 KRT1         | ENSG00000169347 GP2          |
|         | ENSG00000170577 SIX2         | ENSG00000170653 ATF7           | ENSG00000175779 NP_997327.1    | ENSG00000178038 ALS2CL       | ENSG00000198377 RBM15B       | ENSG00000180549 FUT7           | ENSG00000184824 C1QTNF5      | ENSG00000196331 HIST1H2BO    |
|         | ENSG00000204585 Q8N8T0_HUMAN | ENSG00000204666 NP_00101687.1  | ENSG00000066651 TRMT11         | ENSG00000083937 CHMP2B       | ENSG00000108278 ZNFHIT3      | ENSG00000114790 NP_056410.2    | ENSG00000115850 LCT          | ENSG00000122877 EGR2         |
|         | ENSG00000136881 BAAT         | ENSG00000137492 PRKR1          | ENSG00000137878 GRIN1LA        | ENSG00000138293 NCOA4        | ENSG00000147862 NFB1         | ENSG00000151490 PTPRO          | ENSG00000152428 MARS2        | ENSG00000157554 ERG          |
|         | ENSG00000164386 NP_997378.2  | ENSG00000167721 TSR1           | ENSG00000170340 B3GNT2         | ENSG00000170786 NP_620419.2  | ENSG00000204178 TMEM57       |                                |                              |                              |
| TTACCTC | ENSG00000023902 PLEKH01      | ENSG00000056345 ITGB3          | ENSG00000070444 MNT            | ENSG00000100918 REC8         | ENSG00000104833 TUBB4        | ENSG00000107960 OBFC1          | ENSG00000112619 PRPH2        | ENSG00000114737 CISH         |
|         | ENSG00000115318 LOXL3        | ENSG00000128311 TST            | ENSG00000132716 WDR42A         | ENSG00000135503 ACVR1B       | ENSG00000137288 C6orf125     | ENSG00000139547 RDH16          | ENSG00000152082 FAM128B      | ENSG00000159433 STARD9       |
|         | ENSG00000172590 MRPL52       | ENSG00000173272 FAM128A        | ENSG00000180999 C1orf105       | ENSG00000181110 RGAG1        | ENSG00000187170 LCE4A        | ENSG00000198909 MAP3K3         | ENSG00000198929 NOS1AP       | ENSG00000204125 Q53S21_HUMAN |
|         | ENSG00000067334 DNMTTIP2     | ENSG00000089472 HEPH           | ENSG00000092531 SNAP23         | ENSG00000094880 CDC23        | ENSG00000100505 TRIM9        | ENSG00000134970 TTCAM2         | ENSG00000136014 USP44        | ENSG00000138646 HERC5        |
|         | ENSG00000143033 MTF2         | ENSG00000150593 PDCD4          | ENSG00000153914 SFRS12         | ENSG00000156876 SASS6        | ENSG00000173209 AHS2         | ENSG00000177917 ARL6IP6        | ENSG00000178229 ZNF543       | ENSG00000184863 PRR8         |
|         | ENSG00000188610 FAM72B       | ENSG00000189043 NDUFA4         | ENSG00000196550 FAM72A         | ENSG00000196967 ZNF585A      | ENSG00000198770 Q9H396_HUMAN | ENSG00000198855 NP_009007.2    |                              |                              |
| TTACCTT | ENSG00000033100 CHGUT_HUMAN  | ENSG00000042832 TG             | ENSG00000101104 C20orf119      | ENSG00000105246 EB13         | ENSG00000106330 MOSPD3       | ENSG00000110195 FOI1R          | ENSG00000115306 SPTBN1       | ENSG00000116983 HPCAL4       |
|         | ENSG00000119782 FKBP1B       | ENSG00000120889 TNFRSF10B      | ENSG00000123415 SMUG1          | ENSG00000139112 GABARAPL1    | ENSG00000142544 ATPBD3       | ENSG00000144029 MRP5           | ENSG00000145626 UGT3A1       | ENSG00000149532 CPSF7_HUMAN  |
|         | ENSG00000163251 FZD5         | ENSG00000170653 ATF7           | ENSG00000171724 K1576_HUMAN    | ENSG00000172939 OXSR1        | ENSG00000177807 KCNJ10       | ENSG00000181577 NP_694978.2    | ENSG00000183011 LSMD1        | ENSG00000189037 DUSP21       |
|         | ENSG00000189058 APOD         | ENSG00000205214 Q6ZU66_HUMAN   | ENSG00000205814 Q6ZRC0_HUMAN   | ENSG00000038945 MSR1         | ENSG00000055211 C6orf72      | ENSG00000079950 STX7           | ENSG00000112280 COL9A1       | ENSG00000113649 TCERG1       |
|         | ENSG00000122862 SRGN         | ENSG00000124253 PCK1           | ENSG00000132466 ANKRD17        | ENSG00000143970 ASXL2        | ENSG00000145476 CYP4V2       | ENSG00000154175 ABI3BP         | ENSG00000164746 Q8NEG2_HUMAN | ENSG00000170035 UBE2E4P      |
|         | ENSG00000174628 IQCK         | ENSG00000176007 C9orf51        | ENSG00000178397 NP_001032240.1 | ENSG00000197635 DPP4         | ENSG00000198826 ARHGAP11A    |                                |                              |                              |
| TTACGAC | ENSG00000004142 POLDIP2      | ENSG00000088325 TPX2           | ENSG00000121068 TBX2           | ENSG00000122966 CIT          | ENSG00000129195 FAM64A       | ENSG00000130766 SESN2          | ENSG00000131871 SELS_HUMAN   | ENSG00000134460 IL2RA        |
|         | ENSG00000140522 RLBP1        | ENSG00000151948 GLT1D1         | ENSG00000163064 EN1            | ENSG00000181977 PYY2         | ENSG00000188152 FAM22G       | ENSG00000196367 TRRAP          | ENSG00000197763 TXNRD3       | ENSG00000204309 Q6ZSQ3_HUMAN |
|         | ENSG00000023697 DERA         | ENSG00000037965 HOXC8          | ENSG00000049759 NEBD4L         | ENSG00000050540 LIMA1        | ENSG00000087510 TFAP2C       | ENSG00000110934 BIN2           | ENSG00000111615 KRR1         | ENSG00000114030 KPNA1        |
|         | ENSG00000114742 WDR48        | ENSG00000117602 DSRCL12        | ENSG00000121749 TBC1D15        | ENSG00000123500 COL10A1      | ENSG00000127083 TMAP         | ENSG00000128463 TMEM85         | ENSG00000130957 FBP2         | ENSG00000132485 ZRANB2       |
|         | ENSG00000146151 HMGC1L1      | ENSG00000156313 RFPGR          | ENSG00000158473 CD1D           | ENSG00000165588 OTX2         | ENSG00000166153 DEPDC4       | ENSG00000168653 NDUFS5         | ENSG00000170180 GYPA         | ENSG00000171199 PROL1        |
|         | ENSG00000173320 STOX2        | ENSG00000180044 Q8N5S4_HUMAN   | ENSG00000182077 PTCHD3         | ENSG00000184588 PDE4B        | ENSG00000186700 Q8N6F3_HUMAN | ENSG00000196968 FUT11          | ENSG00000204389 HSPA1A       | ENSG00000205221 VIT          |
| TTACGAG | ENSG00000010610 CD4          | ENSG00000101463 C20orf39       | ENSG00000103245 NANFL          | ENSG00000106948 AKNA         | ENSG00000109113 RAB34        | ENSG00000125520 SLC24A6        | ENSG00000126368 NR1D1        | ENSG00000128389 NM_032262    |
|         | ENSG00000129465 RIPK3        | ENSG00000133424 LARGE          | ENSG00000136297 IMD2           | ENSG00000144063 MALL         | ENSG00000148296 SURF6        | ENSG00000149716 ORAOV1         | ENSG00000152767 FARP1        | ENSG00000157020 SEC13        |
|         | ENSG00000157916 RER1         | ENSG00000160271 RALGDS         | ENSG00000172738 C6orf128       | ENSG00000173653 RCE1         | ENSG00000176980 PRR10        | ENSG00000182534 MXR7           | ENSG00000183978 CCDC56       | ENSG00000196652 ZKSCAN5      |
|         | ENSG00000206150 RNASE13      | ENSG00000042088 TDP1           | ENSG00000053254 CHES1          | ENSG00000102897 LYRM1        | ENSG00000121903 ZSCAN20      | ENSG00000124535 WNLIF1         | ENSG00000128951 DUT          | ENSG00000132498 ANKRD20A1    |
|         | ENSG00000140463 BBS4         | ENSG00000141542 RAB40B         | ENSG00000152942 RAD17          | ENSG00000161405 IKZF3        | ENSG00000163518 FCRL4        | ENSG00000163734 CXCL3          | ENSG00000164442 CITED2       | ENSG00000170881 RNF139       |
|         | ENSG00000170954 ZNF415       | ENSG00000178974 FBXO34         | ENSG00000182986 NP_997216.2    | ENSG00000183148 ANKRD20A2    | ENSG00000186458 DB132_HUMAN  | ENSG00000196774 ANKRD20A3      | ENSG00000198551 ZNF627       | ENSG00000205498 Q6ZRB7_HUMAN |
| TTACGCC | ENSG00000042445 RETSAT       | ENSG00000105516 DBP            | ENSG00000106683 LIMK1          | ENSG00000115297 TLX2         | ENSG00000126457 PRMT1        | ENSG00000130600 H19            | ENSG00000132376 SKIP_HUMAN   | ENSG00000135773 CAPN9        |
|         | ENSG00000137313 TRIM26       | ENSG00000146285 SCML4          | ENSG00000154198 Q8N1L4_HUMAN   | ENSG00000159069 FBXW5        | ENSG00000161682 Q8NOU1_HUMAN | ENSG00000162494 LRRC38         | ENSG00000162711 NLRP3        | ENSG00000164385 C6orf195     |
|         | ENSG00000180525 C10orf108    | ENSG00000181709 Q96DH5_HUMAN   | ENSG00000182500 TMEM142A       | ENSG00000184009 ACTG1        | ENSG00000185236 RAB11B       | ENSG00000198853 RUSC2          | ENSG00000198910 L1CAM        | ENSG00000205205 C17orf51     |
|         | ENSG00000048028 USP28        | ENSG00000078589 P2RY10         | ENSG00000085382 HACE1          | ENSG00000088970 C20orf19     | ENSG00000099256 PRTFDC1      | ENSG00000113249 HAVCR1         | ENSG00000114209 PDCD10       | ENSG00000123594 ATXN3L       |
|         | ENSG00000130449 ZSWIM6       | ENSG00000130699 TAF4           | ENSG00000136842 TMOD1          | ENSG00000136875 PRPF4        | ENSG00000138119 FER1L3       | ENSG00000144935 TRPC1          | ENSG00000151413 NUBPL        | ENSG00000151792 CTS2         |
|         | ENSG00000152760 TCTEX1D1     | ENSG00000153827 TRIP12         | ENSG00000154645 CHODL          | ENSG00000161654 LSM12        | ENSG00000162437 RAVER1       | ENSG00000164338 UTP15          | ENSG00000168566 C6orf151     | ENSG00000168679 SLC16A4      |
|         | ENSG00000176907 C8orf4       | ENSG00000188725 NP_001041714.1 | ENSG00000189241 TSPYL1         | ENSG00000197069 Q9H399_HUMAN | ENSG00000204007 GLT6D1       | ENSG00000204709 C6orf100       |                              |                              |
| TTACGTA | ENSG00000007392 LUC7L        | ENSG00000063244 U2AF2          | ENSG00000066135 JMJD2A         | ENSG00000072832 CRMP1        | ENSG00000099331 MYO9B        | ENSG00000099937 SERPIND1       | ENSG00000110442 COMMD9       | ENSG00000121775 TMEM39B      |
|         | ENSG00000128563 PRKRIP1      | ENSG00000135820 NP_997350.1    | ENSG00000148468 C10orf38       | ENSG00000162377 C1orf163     | ENSG00000163884 KLF15        | ENSG00000167969 DCI            | ENSG00000168906 MAT2A        | ENSG0000                     |

ENSG00000152022|LIX1L ENSG00000153237|NP\_620158.2 ENSG00000158290|CUL4B ENSG00000158615|PPP1R15B ENSG00000163738|MTHFD2L ENSG00000168118|RAB4A ENSG00000169621|C2orf13 ENSG00000182899|RPL35A
TTACTCA ENSG00000185448|FAM47A ENSG00000187823|ZCCHC16 ENSG00000188153|COL4A5 ENSG00000205707|LYRM5 ENSG00000142961|MOBK2C ENSG00000148337|CIZ1 ENSG00000148602|LRRC21 ENSG00000157017|GHRL ENSG00000052841|TTC17
ENSG00000102445|C13orf18 ENSG00000122223|CD244 ENSG00000130294|KIF1A ENSG00000133985|TTC9 ENSG00000142961|MOBK2C ENSG00000148337|CIZ1 ENSG00000148602|LRRC21 ENSG00000157017|GHRL ENSG00000052841|TTC17
ENSG00000160710|ADAR ENSG00000166435|XRR1A ENSG00000169231|THBS3 ENSG00000172212|XR\_017939.1 ENSG00000176828|Q8N9U2\_HUMAN ENSG00000179428|Q8N6X1\_HUMAN ENSG00000114266|ANLN ENSG00000052841|TTC17
ENSG00000081818|PCDHB4 ENSG00000084453|SLC01A2 ENSG00000100744|C14orf129 ENSG00000112297|AIM1 ENSG00000123595|RAB9A ENSG00000124875|CXCL6 ENSG00000126858|RHOT1 ENSG00000127083|OMD
ENSG00000134852|CLOCK ENSG00000135940|COX5B ENSG00000140743|CDR2 ENSG00000143753|DEG1 ENSG00000147905|ZCCHC7 ENSG00000164930|FZD6 ENSG00000166704|ZNF606 ENSG00000169953|HSFY2
ENSG00000172468|HSFY1 ENSG00000175348|TMEM9B ENSG00000179934|CCR8 ENSG00000197641|SERPINB13 ENSG00000204201|Q49A40\_HUMAN
TTACTCT ENSG00000056558|TRAF1 ENSG00000100888|CHD8 ENSG00000103005|C16orf57 ENSG00000111775|COX6A1 ENSG00000115306|SPTBN1 ENSG00000134531|EMP1 ENSG00000141084|RANBP10 ENSG00000144681|STAC
ENSG00000148156|ACTL7B ENSG00000151502|VPS26B ENSG00000164605|Q5T810\_HUMAN ENSG00000167110|GOLGA2 ENSG00000168079|SCARA5 ENSG00000172264|C20orf133 ENSG00000173914|RBM4B ENSG00000176753|NP\_001034994.1
ENSG00000179841|AKAP5 ENSG00000182446|NPL0C4 ENSG00000184678|HIST2H2BE ENSG00000204516|MICB ENSG00000005469|CROT ENSG000000031081|NP\_065805.1 ENSG000000068912|C2orf30 ENSG000000078596|ITM2A
ENSG00000081177|EXDL2 ENSG00000102024|PLS3 ENSG00000113742|CPEB4 ENSG00000116906|GNPAT ENSG00000134056|MRPS36 ENSG00000134548|C12orf39 ENSG00000145908|ZNF300 ENSG00000152782|PANK1
ENSG00000155729|KCTD18 ENSG00000163347|CLDN1 ENSG00000165934|CPSF2 ENSG00000166206|GABRB3 ENSG00000181322|TXNDC6 ENSG00000186376|ZNF75 ENSG00000186579|DEFB106B ENSG00000187082|DI06A\_HUMAN
ENSG00000187268|FAM9C ENSG00000198526|PABPCP2 ENSG00000198795|ZNF521 ENSG00000204147|ASAH2B
TTACTGT ENSG00000006695|COX10 ENSG00000099338|C19orf15 ENSG00000100030|MAPK1 ENSG00000116663|FBXO6 ENSG00000125266|EFNB2 ENSG00000128311|TST ENSG00000132142|ACACA
ENSG00000134882|UBAC2 ENSG00000136167|LCP1 ENSG00000145882|PCYOX1L ENSG00000147065|MSN ENSG00000149547|EI24 ENSG00000162415|ZSWIM5 ENSG00000179151|EDC3 ENSG00000179348|GATA2
ENSG00000185475|NP\_955369.1 ENSG00000197081|IGF2R ENSG00000198089|SF11 ENSG00000198366|HIST1H3A ENSG00000203685|C1orf95 ENSG00000206549|TSP50\_HUMAN ENSG00000065243|PKN2 ENSG00000065609|SNAP91
ENSG00000069535|MAOB ENSG00000072401|UBE2D1 ENSG00000075415|SLC25A3 ENSG00000079387|SEN1 ENSG00000102271|K1LH4 ENSG00000109445|ZNF330 ENSG00000114850|SSR3 ENSG000001121207|LRAT ENSG00000121207|LRAT
ENSG00000123983|ACSL3 ENSG00000131724|IL13RA1 ENSG00000135220|UGT2A3 ENSG00000147679|C8orf53 ENSG00000156261|CC78 ENSG00000163606|CD200R1 ENSG00000165392|WRN ENSG00000165914|TTC7B
ENSG00000170248|PCDC61P ENSG00000170425|ADORA2B ENSG00000171951|SCG2 ENSG00000174606|ANGEL2 ENSG00000175497|DPP10 ENSG00000176222|ZNF404 ENSG00000181744|C3orf58 ENSG00000183150|GPR19
ENSG00000196792|STRN3 ENSG00000196877|NP\_001018132.2 ENSG00000197147|LRRC8B ENSG00000198156|NP\_001018132.2
TTACTTC ENSG000000064309|CDON ENSG000000089159|PXN ENSG000000099338|C19orf15 ENSG00000104386|XR\_017860.1 ENSG000001122694|C9orf19 ENSG00000126458|RRAS ENSG00000131462|TUBG1 ENSG00000132434|LANCL2
ENSG00000133561|GIMAP6 ENSG00000135624|CCT7 ENSG00000144233|AMECR1L ENSG00000148841|K1AA1754 ENSG00000171357|C1orf190 ENSG00000172939|OXSR1 ENSG00000189058|APOD ENSG00000196476|C20orf96
ENSG00000198518|HIST1H4E ENSG00000009413|REV3L ENSG00000076003|MCM6 ENSG00000089157|RPLP0 ENSG00000102290|PCDH11X ENSG00000109943|CRTAM ENSG00000115165|PSCDBP ENSG00000129586|ZBED5
ENSG00000134057|CCNB1 ENSG00000134852|CLOCK ENSG00000136021|SCYL2 ENSG00000152749|GPR180 ENSG00000153922|CHD1 ENSG00000161654|LSM12 ENSG00000169905|TOR1AIP2 ENSG00000170356|NR\_002157.1
ENSG00000184786|TCTE3 ENSG00000189277|NP\_997365.2 ENSG00000196350|ZNF492 ENSG00000196963|PCDH16 ENSG00000197935|ZNF311 ENSG00000206131|Q6ZS21\_HUMAN
ENSG00000015285|WAS ENSG000000082701|GSK3B ENSG00000090615|GOLGA3 ENSG00000099364|FBXL19 ENSG00000099984|GSTT2 ENSG00000103365|GGA2 ENSG00000111775|COX6A1 ENSG00000133433|GSTT2\_HUMAN
ENSG00000135365|PHF21A ENSG00000135956|TMEM127 ENSG00000143028|SYPL2 ENSG00000148704|VAX1 ENSG00000151208|DLG5 ENSG00000158955|WNT9B ENSG00000164605|Q5T810\_HUMAN ENSG00000173027|WBP1
ENSG00000173585|CCR9 ENSG00000174989|FBXW8 ENSG00000188525|NM\_207480 ENSG00000196501|HIST1H2BN ENSG00000197114|ZGPAT ENSG00000204405|Q6ZQV3\_HUMAN ENSG00000206539|Q6ZTN9\_HUMAN ENSG00000007952|NOX1
ENSG00000047249|ATP6V1H ENSG00000104343|UBE2W ENSG00000105550|FGF21 ENSG00000112294|ALDH5A1 ENSG00000115170|ACVR1 ENSG00000116783|PFGT ENSG00000119812|FAM98A ENSG00000124207|CSE1L
ENSG00000128731|HERC2 ENSG00000128989|ARPL19\_HUMAN ENSG00000134294|SLC38A2 ENSG00000135999|EPC2 ENSG00000138231|DBR1 ENSG00000145331|RG9MTD2 ENSG00000150361|KLHL1
ENSG00000153574|RPIA ENSG00000163624|CDS1 ENSG00000164402|SEPT8 ENSG00000164879|CA3 ENSG00000168916|ZNF608 ENSG00000170248|PCDC61P ENSG00000189043|NDUFA4 ENSG00000204596|RPP21

perfect: TTACTTG CAAGTAA hsa-miR-26b ttCAAGTAAttcaggataggtt 2
perfect: TTACTTG CAAGTAA hsa-miR-26a ttCAAGTAAtccaggataggg 2
TTAGAAA ENSG00000037637|FBXO42 ENSG00000054118|THRAP3 ENSG00000073792|IGF2BP2 ENSG00000074054|CLASP1 ENSG00000100422|CERK ENSG00000103591|P34\_HUMAN ENSG00000110917|K1AA0152 ENSG00000112782|CLIC5
ENSG00000119280|C1orf198 ENSG00000119973|PRLHR ENSG00000126012|JARID1C ENSG00000129195|FAM64A ENSG00000132749|MTL5 ENSG00000138175|ARL3 ENSG00000138311|ZNF365 ENSG00000141639|MAPK4
ENSG00000145626|UGT3A1 ENSG00000149932|NP\_001077082.1 ENSG00000151692|RNF144 ENSG00000154478|GPR26 ENSG00000157110|RBPMS ENSG00000158525|CPA5 ENSG00000165699|TSC1 ENSG00000166152|C16orf78
ENSG00000166900|STX3 ENSG00000167505|Q96NK6\_HUMAN ENSG00000169057|MECP2 ENSG00000169662|NP\_997357.1 ENSG00000169668|NP\_997357.1 ENSG00000177762|C5orf27 ENSG00000185963|BTCD2 ENSG00000186716|BCR
ENSG00000188428|TXNDC5 ENSG00000197251|NP\_997380.1 ENSG00000204425|Q6ZP74\_HUMAN ENSG00000205061|Q6ZV22\_HUMAN ENSG00000205711|Q6ZV92\_HUMAN ENSG00000205778|Q6ZMM7\_HUMAN ENSG00000069509|FUNDCl ENSG00000089335|ZNF302
ENSG00000102471|NDFIP2 ENSG00000113212|PCDHB7 ENSG00000114541|FRMD4B ENSG00000116127|ALMS1 ENSG00000118520|ARG1 ENSG00000119661|DNAL1 ENSG00000135355|NP\_115991.1 ENSG00000137513|NARS2
ENSG00000137561|TTPA ENSG00000138685|FGF2 ENSG00000139687|RB1 ENSG00000140057|AK7 ENSG00000142864|SERBP1 ENSG00000145354|ZCD2 ENSG00000146242|TPBG ENSG00000147027|TMEM47
ENSG00000152729|Q9P136\_HUMAN ENSG00000156531|PHF6 ENSG00000162851|TFB2M ENSG00000165476|REEP3 ENSG00000166415|WDR72 ENSG00000169446|TMEM32 ENSG00000174840|NP\_808881.2 ENSG00000176293|ZNF135
ENSG00000182919|C11orf54 ENSG00000184349|EFNA5 ENSG00000186184|POLR1D ENSG00000186697|Q86T06\_HUMAN ENSG00000189007|DEADC1 ENSG00000196350|ZNF492 ENSG00000197841|ZNF181 ENSG00000198542|ITGBL1
ENSG00000204219|TCEA3 ENSG00000204330|NP\_064592.1
TTAGAA ENSG000000007341|ST7L ENSG000000018625|ATPIA2 ENSG00000106789|CORO2A ENSG00000111602|TIMELESS ENSG00000124164|VAPB ENSG00000124212|PTGIS ENSG00000144741|SLC25A26 ENSG00000147059|SPIN2A
ENSG00000149021|SCGB1A1 ENSG00000157017|GHRL ENSG00000158169|FANCC ENSG00000168298|HIST1H1E ENSG00000168928|CTRB2 ENSG00000170743|SYT9 ENSG00000172831|CES2 ENSG00000172939|OXSR1
ENSG00000172943|PHF8 ENSG00000173120|FBXL11 ENSG00000196433|HUMAN ENSG00000197077|Q5THZ5\_HUMAN ENSG00000198722|UNC13B ENSG00000205434|Q6ZU34\_HUMAN ENSG00000032514|PGBD3 ENSG00000037749|MFAP3
ENSG00000073969|NSF ENSG00000095209|TMEM38B ENSG00000100644|HIF1A ENSG00000107566|CHUK ENSG00000111880|RNFTT ENSG00000114125|RNF7 ENSG00000115977|AAK1 ENSG00000116005|PCYOX1
ENSG00000132000|PNDNL1 ENSG00000135750|KCNK1 ENSG00000139324|TMTC3 ENSG00000146038|CDC2 ENSG00000154007|ASB17 ENSG00000155893|ACPL2 ENSG00000165678|GHITM ENSG00000165929|MTAC2D1
ENSG00000174721|FGFBP3 ENSG00000198597|ZNF536
TTAGAGA ENSG00000009917|PCQAP ENSG00000009964|MIF ENSG00000119638|NEK9 ENSG00000128802|GDF2 ENSG00000132915|PDE6A ENSG00000142230|SAE1 ENSG00000145626|UGT3A1 ENSG00000146221|NP\_872345.1
ENSG00000148795|CYP17A1 ENSG00000167930|ITFG3 ENSG00000172061|LRRC15 ENSG00000182950|ODF3L1 ENSG00000183652|Q9P1L5\_HUMAN ENSG00000185404|Q4ZG65\_HUMAN ENSG00000185955|NP\_001004323.1 ENSG00000189069|NP\_001013732.1
ENSG00000050405|LIMA1 ENSG00000064651|SLC12A2 ENSG00000076003|MCM6 ENSG00000080819|CPOX ENSG00000102738|MRPS31 ENSG00000109339|MAPK10 ENSG00000110002|LOH1CR2A ENSG00000124198|ARFGF2
ENSG00000137168|PIF1L ENSG00000137449|CPEB2 ENSG00000137831|UACA ENSG00000138160|KIF11 ENSG00000143742|SRP9 ENSG00000144026|PXF5 ENSG00000145794|MEGF10 ENSG00000157654|PALM2
ENSG00000162642|C1orf52 ENSG00000164296|TIGD6 ENSG00000168303|C7orf11 ENSG00000179144|GIMAP7 ENSG00000180785|ORS1E1
TTAGATT ENSG00000034063|UHRF1 ENSG000000048707|VPS13D ENSG00000070495|JMJD6 ENSG00000077157|PPP1R12B ENSG00000089250|NOS1 ENSG00000107341|UBE2R2 ENSG00000114982|NP\_060461.3 ENSG00000116205|C1orf83
ENSG00000116667|C1orf21 ENSG00000122188|LAX1 ENSG00000129250|KIF1C ENSG00000132434|LANCL2 ENSG00000143061|IGSF3 ENSG00000154025|SLC5A10 ENSG00000157653|C9orf43 ENSG00000160051|IQCC
ENSG00000168066|SF1 ENSG00000170291|C17orf81 ENSG00000174939|ASPHD1 ENSG00000183838|Q96NM2\_HUMAN ENSG00000186638|C9orf48 ENSG00000197696|NMB ENSG0000021574|SPAST ENSG00000092140|K1AA1333
ENSG00000096006|CRISP3 ENSG00000100557|C14orf105 ENSG00000101842|V5IG1 ENSG00000102452|NALCN ENSG00000107581|EIF3S10 ENSG00000114391|RPL24 ENSG00000115808|STRN ENSG00000117595|IRF6
ENSG00000118873|RAB3GAP2 ENSG00000119698|K1AA1622 ENSG00000119812|FAM98A ENSG00000120690|ELF1 ENSG00000127955|GNAI1 ENSG00000131013|PPI14 ENSG00000132676|DAP3 ENSG00000136044|APPL2
ENSG00000150667|FSIP1 ENSG00000152256|PDK1 ENSG00000152601|MBNL1 ENSG00000152700|SAR1B ENSG00000155313|USP25 ENSG00000158201|ABHD3 ENSG00000162852|C1orf71 ENSG00000164128|NPY1R
ENSG00000165097|AO1 ENSG00000166803|K1AA0101 ENSG00000166848|TERF2IP ENSG00000172403|SYNP02 ENSG00000172766|NARG1L ENSG00000173276|BNF295 ENSG00000185278|ZBTB34 ENSG00000196344|ADH7
ENSG00000197323|TRIM33
TTAGCAT ENSG000000064300|NGFR ENSG00000064309|CDON ENSG00000101350|KIF3B ENSG00000104941|RSHL1 ENSG00000115598|IL1RL2 ENSG00000120071|K1AA1267 ENSG00000124733|MEA1 ENSG00000128191|DGCR8
ENSG00000135083|CCNJL ENSG00000143850|PLEKHA6 ENSG00000164300|SERINC5 ENSG00000168159|RNF187 ENSG00000172578|KLHL6 ENSG00000177762|C5orf27 ENSG00000177807|KCNJ10 ENSG00000178764|ZHX2
ENSG00000180900|SCRIB ENSG00000188589|RBM33 ENSG00000196652|ZKSCAN5 ENSG00000198632|NP\_775590.1 ENSG00000204197|KIF1C ENSG0000000115666|MAP4K3 ENSG00000065243|PRK2 ENSG00000075643|MOCOS
ENSG00000106341|C7orf16 ENSG00000107669|ATE1 ENSG00000112081|SFRS3 ENSG00000116980|YPEL5 ENSG00000127314|RAP1B ENSG00000128513|POT1 ENSG00000130962|PRRG1 ENSG00000134371|CDC73
ENSG00000139211|AMIGO2 ENSG00000146376|ARHGAP18 ENSG00000163249|CENY1L ENSG00000172175|MALT1
TTAGCCA ENSG00000072840|EVC ENSG00000100226|GTPBP1 ENSG00000102870|ZNF629 ENSG00000108786|HSD17B1 ENSG00000110324|IL10RA ENSG00000112079|STK38 ENSG00000132932|ATP8A2 ENSG00000136167|LCP1
ENSG00000136448|NMT1 ENSG00000138780|GSTCD ENSG00000140505|CYP1A2 ENSG00000143740|C1orf142 ENSG00000146013|GFRA3 ENSG00000151208|DLG5 ENSG00000164048|ZNF589 ENSG00000164270|HTR4
ENSG00000167110|GOLGA2 ENSG00000168781|HISPPD2A ENSG00000174989|FBXW8 ENSG00000175938|TMEM142C ENSG00000187516|CXorf27 ENSG00000189410|SH2D5 ENSG00000198326|C20orf141 ENSG00000198336|MYL4
ENSG0000031081|NP\_065805.1 ENSG00000056277|SUHW3 ENSG000000089157|RPLP0 ENSG00000100281|HMG2L1 ENSG00000105136|ZNF419 ENSG00000109445|ZNF330 ENSG00000134109|EDEM1 ENSG00000139496|NUPL1
ENSG00000143190|POU2F1 ENSG00000153283|CD96 ENSG00000159086|C21orf66 ENSG00000165588|OTX2 ENSG00000171365|CLCN5 ENSG00000176222|ZNF404 ENSG00000185774|KCNIP4 ENSG00000197110|IL28B
TTAGCGG ENSG00000005156|LIG3 ENSG00000079393|DUSP13 ENSG00000095906|NUBP2 ENSG00000099910|SCARF2 ENSG00000101004|NLP\_HUMAN ENSG00000105127|AKAP8 ENSG00000107821|KAZALD1 ENSG00000118263|KLF7
ENSG00000125084|WNT1 ENSG00000129354|AP1M2 ENSG00000130303|BST2 ENSG00000138887|MPZ ENSG00000160539|PPAPDC3 ENSG00000163251|FZD5 ENSG00000164108|Q9HAJ2\_HUMAN ENSG00000165816|VWA2
ENSG00000166924|NP\_775835.2 ENSG00000167194|Q96LL3\_HUMAN ENSG00000167895|TMC8 ENSG00000168056|LTPB3 ENSG00000174374|WBSR1B ENSG00000178921|PFAS ENSG00000179523|Q8TAS2\_HUMAN ENSG00000180924|Q9BVQ6\_HUMAN
ENSG00000182687|GALR2 ENSG00000183519|NSUN5B ENSG00000198873|GRK5 ENSG000000066427|ATXN3 ENSG000000075785|RAB7A ENSG000001101751|POLI ENSG00000102452|NALCN ENSG00000104904|OAZ1
ENSG00000106004|HOXA5 ENSG00000110218|PANX1 ENSG00000120696|KBTBD7 ENSG00000123739|PLA2G12A ENSG00000131844|MCCC2 ENSG00000134533|RERG ENSG00000136986|DERL1 ENSG00000148672|GLUDP5
ENSG00000154620|TMSB4Y ENSG00000158966|CACHD1 ENSG00000165322|ARHGAP12 ENSG00000167635|ZNF146 ENSG00000170370|EMX2 ENSG00000172840|PDP2\_HUMAN ENSG00000175556|LONRF3 ENSG00000198741|Q8N9C2\_HUMAN
TTAGCTA ENSG000000002726|ABP1 ENSG00000049541|RFC2 ENSG00000072501|SMC1A ENSG00000103932|RPAP1 ENSG00000145819|ARHGAP26 ENSG00000149300|C11orf52 ENSG00000162981|FAM84A ENSG00000166569|CPLX4
ENSG00000167723|TRPV3 ENSG00000182054|IDH2 ENSG00000186197|ENO1P ENSG00000203685|C1orf95 ENSG00000204174|PYPYR1 ENSG00000205219|Q6XU7\_HUMAN ENSG00000019991|HGF
ENSG00000077458|FAM76B ENSG00000079101|CLUL1 ENSG00000079385|CEACAM1 ENSG00000085224|ATRX ENSG00000100814|CCNB1IP1 ENSG00000112992|NNT ENSG00000113013|HSPA9 ENSG00000120337|TNFSF18
ENSG00000121316|NP\_079105.4 ENSG00000124253|PCK1 ENSG00000128050|PAICS ENSG00000139151|PLCZ1 ENSG00000144196|Q9BXZ2\_HUMAN ENSG00000144460|Q96NL2\_HUMAN ENSG00000144840|RABL3 ENSG00000145088|EAF2
ENSG00000145782|ATG12 ENSG00000161594|KLHL10 ENSG00000163257|C4orf30 ENSG00000168461|RAB31 ENSG00000181751|C5orf30 ENSG00000183675|PTPN20B ENSG00000198898|CAPZA2 ENSG00000204179|PTPN20A
ENSG00000205707|LYRM5
TTAGGAA ENSG000000011376|LARS2 ENSG00000036828|CASR ENSG00000075426|FOSL2 ENSG00000104848|KCNA7 ENSG00000105357|MYH14 ENSG00000108639|SYNGR2 ENSG00000123243|ITIH5 ENSG00000130956|HABP4
ENSG00000131196|NFATC1 ENSG00000133026|MYH10 ENSG00000141965|FEM1A ENSG00000165714|LOH12CR1 ENSG00000166188|ZNF319 ENSG00000169118|CSNK1G1 ENSG00000184785|Q96HG1\_HUMAN ENSG00000188859|FAM78B
ENSG00000205761|Q6ZRI7\_HUMAN ENSG00000206528|Q6ZSM0\_HUMAN ENSG00000071991|CDH19 ENSG00000072415|MPP5 ENSG00000077327|SPAG6 ENSG00000090470|PDCD7 ENSG00000104369|JPH1 ENSG00000123091|RNF11
ENSG00000129317|PUS7L ENSG00000135272|MDFFC ENSG00000135677|GNS ENSG00000135932|CAB39 ENSG00000137878|GRINL1A ENSG00000146476|C6orf211 ENSG00000155011|DKK2 ENSG00000162384|C1orf123

|         |                              |                              |                              |                              |                              |                                |                              |                              |
|---------|------------------------------|------------------------------|------------------------------|------------------------------|------------------------------|--------------------------------|------------------------------|------------------------------|
|         | ENSG00000166263 STXBP4       | ENSG00000166363 OR10A5       | ENSG00000168282 MGAT2        | ENSG00000172469 MANEA        | ENSG00000176018 LYSDM3       | ENSG00000178722 NP_775938.1    | ENSG00000183671 GPR1         | ENSG00000185432 METTL7A      |
| TTAGGAC | ENSG00000186297 GABRA5       | ENSG00000197961 ZNF121       | ENSG00000204709 C6orf100     | ENSG00000205905 Q6ZWC6_HUMAN |                              |                                |                              |                              |
|         | ENSG00000058262 SEC61A1      | ENSG00000084731 KIF3C        | ENSG00000095713 CRTAC1       | ENSG00000106018 VIPR2        | ENSG00000114013 CD86         | ENSG00000114982 NP_060461.3    | ENSG00000122359 ANXA11       | ENSG00000125818 PSMF1        |
|         | ENSG00000128944 C15orf23     | ENSG00000131242 RAB11FIP4    | ENSG00000134216 CHIA         | ENSG00000142512 SIGLEC10     | ENSG00000149646 C20orf152    | ENSG00000160714 UBE2Q1         | ENSG00000164062 APEH         | ENSG00000174502 SLC26A9      |
|         | ENSG00000181763 APR2_HUMAN   | ENSG00000203814 HIST2H2BF    | ENSG000000034533 ASTE1       | ENSG00000086598 TMED2        | ENSG00000100902 PSMA6        | ENSG00000113593 PPWD1          | ENSG00000119414 PPP6C        | ENSG00000133703 KRAS         |
|         | ENSG00000134532 SOX5         | ENSG00000135333 EPHA7        | ENSG00000143384 MCL1         | ENSG00000145982 FARS2        | ENSG00000154305 MIA3         | ENSG00000159917 ZNF235         | ENSG00000162437 RAVER2       | ENSG00000165591 FAAH2        |
|         | ENSG00000166479 TXNDC10      | ENSG00000167840 ZNF232       | ENSG00000169224 C1orf150     | ENSG00000171126 KCNQ3        | ENSG00000178202 KDELC2       | ENSG00000179873 NLRP11         | ENSG00000186439 TRDN         |                              |
| TTAGGTT | ENSG00000009335 UBE3C        | ENSG00000072501 SMCIA1       | ENSG00000093100 MICA3_HUMAN  | ENSG00000099956 SMARCB1      | ENSG00000103742 NP_066013.1  | ENSG00000107618 RBP3           | ENSG00000108219 TSPAN14      | ENSG00000110917 KIAA0152     |
|         | ENSG00000120875 DUSP4        | ENSG00000126934 MAP2K2       | ENSG00000132716 WDR42A       | ENSG00000134243 SORT1        | ENSG00000142623 PADI1        | ENSG00000149782 PLCB3          | ENSG00000160710 ADAR         | ENSG00000160712 IL6R         |
|         | ENSG00000163486 SRGAP2       | ENSG00000168061 SAC3D1       | ENSG00000172939 OXSR1        | ENSG00000173349 SFT2D3       | ENSG00000183495 EP400        | ENSG00000065328 MCM10          | ENSG00000074201 CLNS1A       | ENSG00000083937 CHMP2B       |
|         | ENSG00000094975 C1orf9       | ENSG00000102317 RBM3         | ENSG00000102349 KLF8         | ENSG00000105866 SP4          | ENSG00000108953 YWHAE        | ENSG00000115596 WNT6           | ENSG00000140043 ZADH1        | ENSG00000140259 MFAP1        |
|         | ENSG00000144306 SCRN3        | ENSG00000144827 ABHD10       | ENSG00000146001 PCDHB18      | ENSG00000151366 NDUFC2       | ENSG00000153187 HNRPU        | ENSG00000163606 CD200R1        | ENSG00000163738 MTHFD2L      | ENSG00000164284 GRPEL2       |
|         | ENSG00000166181 API5         | ENSG00000167601 AXL          | ENSG00000169905 TOR1AIP2     | ENSG00000177800 TMEM78       | ENSG00000186579 DEFB106B     | ENSG00000187082 D106A_HUMAN    | ENSG00000188215 DCUN1D3      |                              |
| TTAGTAT | ENSG00000042062 C20orf175    | ENSG00000068650 ATP11A       | ENSG00000095303 PTGS1        | ENSG00000099954 CECR2        | ENSG00000115234 SNX17        | ENSG00000115596 WNT6           | ENSG00000116014 KISS1R       | ENSG00000120915 EPHX2        |
|         | ENSG00000125445 MRPS7        | ENSG00000127946 HIP1         | ENSG00000137808 NOX5         | ENSG00000139083 ETV6         | ENSG00000148158 SNX30        | ENSG00000156030 C14orf43       | ENSG00000157379 DHSR1        | ENSG00000166860 ZBTB39       |
|         | ENSG00000178307 TMEM11       | ENSG00000184634 MED12        | ENSG00000078177 N4BP2_HUMAN  | ENSG00000091436 MLTK_HUMAN   | ENSG00000106537 TSPAN13      | ENSG00000108848 CROP_HUMAN     | ENSG00000108946 PRKAR1A      | ENSG00000109790 KLHL5        |
|         | ENSG00000111455 ELK3         | ENSG00000113211 PCDHB6       | ENSG00000116830 TTF2         | ENSG00000133103 COG6         | ENSG00000136870 ZNF189       | ENSG00000137504 CREBZF         | ENSG00000138448 ITGAV        | ENSG00000143079 CTTNBP2NL    |
|         | ENSG00000154511 FAM69A       | ENSG00000162645 GBP7         | ENSG00000166800 LDHAL6A      | ENSG00000167904 TMEM68       | ENSG00000178997 EXDL1        | ENSG00000182628 FAM33A         | ENSG00000182983 ZNF662       | ENSG00000187533 NP_999876.1  |
| TTAGTCT | ENSG00000078902 TOLLIP       | ENSG00000088812 ATRN         | ENSG00000101104 C20orf119    | ENSG00000101849 TBL1X        | ENSG00000103353 UBFD1        | ENSG00000104731 KLHDC4         | ENSG00000117154 IGSF21       | ENSG00000141431 Q6ZMX6_HUMAN |
|         | ENSG00000157150 TMP4         | ENSG00000157600 TMEM164      | ENSG00000158882 TOMM40L      | ENSG00000166743 ACSM1        | ENSG00000170876 TMEM43       | ENSG00000171163 ZNF692         | ENSG00000172016 REG3A        | ENSG00000176438 C14orf49     |
|         | ENSG00000183128 FAM26A       | ENSG00000206053 HN1L         | ENSG00000065534 MYLK         | ENSG00000104290 FZD3         | ENSG00000105851 PIK3CG       | ENSG000001108091 CCDC6         | ENSG00000109674 NEIL3        | ENSG00000114416 FXR1         |
|         | ENSG00000119929 CUTC         | ENSG00000120733 JMJD1B       | ENSG00000120742 RAMP4_HUMAN  | ENSG00000122068 FYT1D1       | ENSG00000133135 RNFL128      | ENSG00000134489 HRH4           | ENSG00000144771 LRTM1        | ENSG00000147874 FAM29A       |
|         | ENSG00000148175 STOM         | ENSG00000153283 CD96         | ENSG00000159593 MAPBP1       | ENSG00000162923 WDR26        | ENSG00000163254 CRYG         | ENSG00000163807 KIAA1143       | ENSG00000164252 AGGF1        | ENSG00000169891 REPS2        |
|         | ENSG00000170037 CNTROB       | ENSG00000177888 ZBTB41       | ENSG00000178573 APPF5        | ENSG00000184900 SUMO3        | ENSG00000198825 INPP5F       | ENSG00000204800 Q96HX1_HUMAN   | ENSG00000204812 Q96HX1_HUMAN | ENSG00000204954 Q69YU5_HUMAN |
| TTAGTGT | ENSG00000089737 DDX24        | ENSG00000100181 CSNK1E       | ENSG00000101188 NTRSR1       | ENSG00000103021 CCDC113      | ENSG00000103199 ZNF500       | ENSG00000113657 DPYSL3         | ENSG00000126752 SSX1         | ENSG00000129437 KLK14        |
|         | ENSG00000138698 RAP1GDS1     | ENSG00000145990 GFOD1        | ENSG00000149294 NCAM1        | ENSG00000155511 GRIA1        | ENSG00000157950 SSX2_HUMAN   | ENSG00000157965 SSX8           | ENSG00000164707 SLC13A4      | ENSG00000165583 SSX5         |
|         | ENSG00000173757 STAT5B       | ENSG00000174306 ZHX3         | ENSG00000176170 SPHK1        | ENSG00000204368 SSX7         | ENSG00000204648 SSX9         | ENSG00000205726 ITSN1          | ENSG00000087263 OGFOD1       | ENSG00000092199 HNRPC        |
|         | ENSG00000100426 ZBED4        | ENSG00000101134 DOK5         | ENSG00000105851 MYLK3CG      | ENSG00000113790 EHHADH       | ENSG00000113790 EHHADH       | ENSG00000116830 TTF2           | ENSG00000135164 DMTF1        | ENSG00000136143 SUCLA2       |
|         | ENSG00000136155 SCEL         | ENSG00000137558 PI15         | ENSG00000138653 NDST4        | ENSG00000138678 NP_116106.2  | ENSG00000147854 UHRF2        | ENSG00000163586 FABP1          | ENSG00000171502 COL24A1      | ENSG00000171766 GATM         |
|         | ENSG00000184227 ACOT1        | ENSG00000186416 NKRF         | ENSG00000186687 LYRM7        | ENSG00000188641 DPYD         | ENSG00000198898 CAPZA2       |                                |                              |                              |
| TTATAAA | ENSG00000008729 NOL14        | ENSG00000103067 RBM35B       | ENSG00000104881 PPP1R13L     | ENSG00000105376 ICAM5        | ENSG00000107185 KIAA0258     | ENSG00000112941 POLS           | ENSG00000115561 VPS24        | ENSG00000125347 IRF1         |
|         | ENSG00000135773 CAPN9        | ENSG00000143940 Q6ZMW3_HUMAN | ENSG00000145990 GFOD1        | ENSG00000148400 NOTCH1       | ENSG00000151353 TMEM18       | ENSG00000162337 LRP5           | ENSG00000162761 LMX1A        | ENSG00000166025 AMOTL1       |
|         | ENSG00000169627 BOLA2B       | ENSG00000171160 C10orf83     | ENSG00000172932 ANKRD13D     | ENSG00000173020 ADRBK1       | ENSG00000178235 SLIT1R1      | ENSG00000179165 PXT1           | ENSG00000179523 Q8TAS2_HUMAN | ENSG00000180198 RCC1         |
|         | ENSG00000181110 RGAG1        | ENSG00000184481 MLLT7        | ENSG00000197530 MIB2         | ENSG00000198693 Q6ZW86_HUMAN | ENSG00000203793 Q6ZR74_HUMAN | ENSG00000204369 Q6ZUP0_HUMAN   | ENSG00000204425 Q6ZP74_HUMAN | ENSG0000011426 ANLN          |
|         | ENSG00000020426 MNAT1        | ENSG00000069956 MAPK6        | ENSG00000097096 SYDE2        | ENSG00000100784 RPS6KA5      | ENSG00000104369 JPH1         | ENSG00000105750 ZNF85          | ENSG00000105819 PMPCB        | ENSG00000105866 SP4          |
|         | ENSG00000111615 KRR1         | ENSG00000115946 PNO1         | ENSG00000134215 VAV3         | ENSG00000136522 MRPL47       | ENSG00000138231 DBR1         | ENSG00000141380 SS18           | ENSG00000141579 ZNF750       | ENSG00000143278 F13B         |
|         | ENSG00000143341 HMCN1        | ENSG00000144868 TMEM108      | ENSG00000144893 MEDI2L       | ENSG00000145604 SKP2         | ENSG00000150627 WDR17        | ENSG00000150787 PTS            | ENSG00000152952 PLOC2        | ENSG00000153814 JAZF1        |
|         | ENSG00000154727 GABPA        | ENSG00000156650 MYST4        | ENSG00000163669 DNHD2        | ENSG00000164331 ANKRA2       | ENSG00000164615 CAMLG        | ENSG00000165072 MAMDC2         | ENSG00000165533 TTC8         | ENSG00000166006 KCNK2        |
|         | ENSG00000166971 AKTIP        | ENSG00000169251 NMD3         | ENSG00000171862 PTENP1       | ENSG00000171928 FAM18B       | ENSG00000172167 MTBP         | ENSG00000173266 BET3L          | ENSG00000178074 NP_710156.2  | ENSG00000181610 MRPS23       |
| TTATAAC | ENSG00000183091 NEB          | ENSG00000185477 GPRIN3       | ENSG00000189376 C8orf76      | ENSG00000196459 SEDLF        | ENSG00000204716 ANKRD20B     | ENSG00000204899 NP_001065243.1 | ENSG00000206527 PTPLB        |                              |
|         | ENSG00000008256 PSCD3        | ENSG00000092529 CAPN3        | ENSG00000104823 ECH1         | ENSG00000110328 GALNTL4      | ENSG00000110844 PRPF40B      | ENSG00000114923 SLC4A3         | ENSG00000116984 MTR          | ENSG00000141968 VAV1         |
|         | ENSG00000143632 ACTA1        | ENSG00000148840 PPRC1        | ENSG00000162650 ATXN7L2      | ENSG00000162777 DENND2D      | ENSG00000165699 TSC1         | ENSG00000166377 ATP9B          | ENSG00000166540 ZNF407       | ENSG00000167550 RHEBL1       |
|         | ENSG00000172530 BANP         | ENSG00000172987 HPSE2        | ENSG00000174483 BBS1         | ENSG00000176595 KBTBD11      | ENSG00000204218 RGL2         | ENSG00000066557 LRRC40         | ENSG00000087301 KIAA1344     | ENSG00000105866 SP4          |
|         | ENSG00000107560 RAB11FIP2    | ENSG00000109099 PMP22        | ENSG00000111731 KIAA0528     | ENSG00000117311 RPL24        | ENSG00000117500 TMED5        | ENSG00000121486 C1orf25        | ENSG00000126814 TRMT5        | ENSG00000127954 Q8WWB0_HUMAN |
|         | ENSG00000137818 RPLP1        | ENSG00000138061 CYP1B1       | ENSG00000145293 ENOPH1       | ENSG00000145740 SLC30A5      | ENSG00000154582 TCEB1        | ENSG00000161547 SFRS2          | ENSG00000163377 FAM19A4      | ENSG00000164327 NP_689969.2  |
| TTATACA | ENSG00000165694 FRMD7        | ENSG00000172201 ID4          | ENSG00000181449 SOX2         | ENSG00000184899 Q9P181_HUMAN | ENSG00000204010 IFITM1L      | ENSG00000204923 NP_001019851.1 |                              |                              |
|         | ENSG00000008441 NFIKX        | ENSG0000015285 WAS           | ENSG00000079277 MKNK1        | ENSG00000096384 HSP90AB1     | ENSG00000100027 YPEL1        | ENSG00000103490 PYCARD         | ENSG00000108702 CCL1         | ENSG00000121281 ADCY7        |
|         | ENSG00000130177 CDC16        | ENSG00000132481 TRIM47       | ENSG00000132846 ZBED3        | ENSG00000135446 CDK4         | ENSG00000148400 NOTCH1       | ENSG00000160094 ZNF362         | ENSG00000164976 KIAA1161     | ENSG00000169991 Q5TF58_HUMAN |
|         | ENSG00000176438 C14orf49     | ENSG00000176723 Q8N446_HUMAN | ENSG00000184566 Q9P1G6_HUMAN | ENSG00000186318 BACE1        | ENSG00000187024 PTRH1        | ENSG00000196422 KIAA0649       | ENSG00000197816 KIAA1529     | ENSG00000204286 Q6ZW78_HUMAN |
|         | ENSG00000205015 Q6ZNV2_HUMAN | ENSG00000007372 PAX6         | ENSG00000042781 USH2A        | ENSG00000055732 MCOLN3       | ENSG00000082996 RNFL13       | ENSG00000091490 NP_056002.1    | ENSG00000091879 ANGPT2       | ENSG00000102908 NFAT5        |
|         | ENSG00000115514 TXNDC9       | ENSG00000117010 ZNF684       | ENSG00000120256 LRP11        | ENSG00000134697 GNL2         | ENSG00000138182 MPHOSPH1     | ENSG00000139926 FRMD6          | ENSG00000140988 RPS2         | ENSG00000143889 HNRPLL       |
|         | ENSG00000143971 ETAA1        | ENSG00000154734 ADAMTSL1     | ENSG00000159182 NP_115767.1  | ENSG00000162992 NEUROD1      | ENSG00000164930 FZD6         | ENSG00000164985 PSTIP1         | ENSG00000165359 DDX26B       | ENSG00000166710 B2M          |
|         | ENSG00000167637 ZNF345       | ENSG00000167863 ATP5H        | ENSG00000168724 DNJA5_HUMAN  | ENSG00000175483 O94914_HUMAN | ENSG00000177683 THAP5        | ENSG00000177888 ZBTB41         | ENSG00000185880 TRIM69       | ENSG00000197149 XR_019565.1  |
| TTATACG | ENSG00000037280 FLT4         | ENSG00000086544 ITPKC        | ENSG00000105323 HNRPUL1      | ENSG00000105738 SIPALL3      | ENSG00000108509 CAMTA2       | ENSG00000111725 PRKAB1         | ENSG00000114770 ABCC5        | ENSG00000119681 LTBP2        |
|         | ENSG00000125954 FNTB         | ENSG00000133216 EPHB2        | ENSG00000136854 STXBP1       | ENSG00000142961 MOBKLC2      | ENSG00000143954 REG3G        | ENSG00000149090 NP_001001991.1 | ENSG00000160191 PDE9A        | ENSG00000161277 THAP8        |
|         | ENSG00000166446 CDYL2        | ENSG00000168792 NP_937790.1  | ENSG00000173530 TNFRSF10D    | ENSG00000180849 C15orf37     | ENSG00000183691 NOG          | ENSG00000187650 NP_001017921.1 | ENSG00000197724 PHF2         | ENSG00000198911 SREBF2       |
|         | ENSG00000203934 Q6ZUQ1_HUMAN | ENSG00000090621 PABPC4       | ENSG00000102128 RB40L_HUMAN  | ENSG00000104691 UBXD6        | ENSG00000111421 METAP2       | ENSG00000124097 HMG1L1         | ENSG00000125207 PIWIL1       | ENSG00000147862 NFIIB        |
| TTATACT | ENSG00000156194 PPEF2        | ENSG00000164749 HNF4G        | ENSG00000173409 ARV1         | ENSG00000179041 RRS1         | ENSG00000197566 ZNF624       |                                |                              |                              |
|         | ENSG00000007384 RHBD1        | ENSG00000043591 ADRB1        | ENSG00000064393 HIPK2        | ENSG00000118526 TCF21        | ENSG00000121775 TMEM39B      | ENSG00000125976 RBM12          | ENSG00000127080 IPPK         | ENSG00000129038 LOXL1        |
|         | ENSG00000131148 COX4NB       | ENSG00000136816 TOR1B        | ENSG00000136895 GARNL3       | ENSG00000158006 PAFAH2       | ENSG00000161640 SIGLEC11     | ENSG00000164038 NP_849155.2    | ENSG00000164400 CSF2         | ENSG00000167094 TTC16        |
|         | ENSG00000167977 KCTD5        | ENSG00000168505 GBX2         | ENSG00000168701 NM_014187.2  | ENSG00000176438 C14orf49     | ENSG00000176472 ZNF575       | ENSG00000176887 SOX11          | ENSG00000181867 FTMT         | ENSG00000183838 Q96NM2_HUMAN |
|         | ENSG0000018510 AGPS          | ENSG00000081665 ZNF253       | ENSG00000083312 TNPO1        | ENSG00000106809 OGN          | ENSG00000112183 RBM24        | ENSG00000113282 CLINT1         | ENSG00000115946 PNO1         | ENSG00000116044 NFE2L2       |
|         | ENSG00000117174 C1orf181     | ENSG00000118276 B4GALT6      | ENSG00000118518 RNFL146      | ENSG00000119979 FAM45A       | ENSG00000123684 LPGAT1       | ENSG00000127947 PTPN12         | ENSG00000128708 HAT1         | ENSG00000134884 NP_060481.3  |
|         | ENSG00000135750 KCNK1        | ENSG00000156265 C21orf7      | ENSG00000160352 ZNF714       | ENSG00000164219 PGFT1B       | ENSG00000164332 UBLCP1       | ENSG00000167766 ZNF83          | ENSG00000168152 THAP9        | ENSG00000173208 ABCD2        |
|         | ENSG00000178852 C17orf57     | ENSG00000178996 SNAG1        | ENSG00000196705 ZNF431       | ENSG00000197020 ZNF100       | ENSG00000197123 ZNF679       | ENSG00000197841 ZNF181         | ENSG00000198088 NUP62CL      | ENSG00000204869 IGFL4        |
| TTATAGA | ENSG00000006756 ARSD         | ENSG                         |                              |                              |                              |                                |                              |                              |

ENSG00000131016|AKAP12 ENSG00000135040|MAK10 ENSG00000148123|NP\_060223.2 ENSG00000149177|PTPRJ ENSG00000154263|ABCA10 ENSG00000157111|TMEM171 ENSG00000163577|EIF5A2 ENSG00000164118|KIAA1712  
ENSG00000164619|BMPEP ENSG00000165355|FBXO33 ENSG00000165891|E2F7 ENSG00000169905|TOR1AIP2 ENSG00000170088|NP\_689894.1 ENSG00000170160|Q6ZU57\_HUMAN ENSG00000171843|MLLT3 ENSG00000172733|PURG  
ENSG00000181634|TNFSF15 ENSG00000183878|UTY ENSG00000186960|Q86U37\_HUMAN ENSG00000197991|PCDH20 ENSG00000198157|NSBP1 ENSG00000198612|COPS8 ENSG00000198743|SLC5A3  
ENSG00000064309|CDON ENSG00000065491|TBC1D22B ENSG00000099985|OSM ENSG00000100311|PDGFB ENSG00000104941|RSHL1 ENSG00000105997|HOXA3 ENSG00000106078|COBL ENSG00000110395|CBL  
ENSG00000110880|CORO1C ENSG00000126883|NUP214 ENSG00000127663|JMJD2B ENSG00000139625|MAP3K12 ENSG00000158050|DUSP2 ENSG00000158220|FAM62C ENSG00000162650|ATXN7L2 ENSG00000164366|CCDC127  
ENSG00000169118|CSNK1G1 ENSG00000171219|CDC42BPG ENSG00000176753|NP\_001034994.1 ENSG00000177551|NHLH2 ENSG00000181368|NM\_032947.3 ENSG00000181852|RNF41 ENSG00000181867|FTMT ENSG00000182968|SOX1  
ENSG00000183955|SETD8 ENSG00000185022|MAFF ENSG00000185100|ADSSL1 ENSG00000185404|Q4ZG65\_HUMAN ENSG00000185668|POU3F1 ENSG00000188038|NRN1L ENSG0000002745|WNT16 ENSG0000005249|PRKAR2B  
ENSG00000010278|CD9 ENSG00000020426|MNAT1 ENSG00000021776|AQR ENSG00000072201|LNK1 ENSG00000074527|NTN4 ENSG00000081237|PTPRC ENSG00000085365|SCAMP1 ENSG00000095002|MSH2  
ENSG00000095209|TMEM38B ENSG00000104205|SGK3 ENSG00000111247|RAD51AP1 ENSG00000115009|CCL20 ENSG00000116473|RAP1A ENSG00000118200|CAMSAP1L1 ENSG00000120242|IFNA8 ENSG00000126947|ARMCX1  
ENSG00000128609|NDUFA5 ENSG00000131931|THAP1 ENSG00000133104|SPG20 ENSG00000135069|PSAT1 ENSG00000135205|NP\_065930.2 ENSG00000138379|GDF8 ENSG00000138468|SENP7 ENSG00000138801|PAPSS1  
ENSG00000138814|PPP3CA ENSG00000139263|LRIG3 ENSG00000145332|KLHL8 ENSG00000146476|C6orf211 ENSG00000148828|NP\_001074467.1 ENSG00000151881|C5orf28 ENSG00000155100|OTUD6B ENSG00000155158|C9orf52  
ENSG00000155304|STCH ENSG00000157426|NP\_861522.2 ENSG00000162669|NP\_001017975.3 ENSG00000162813|BPNT1 ENSG00000163093|BBS5 ENSG00000163510|NP\_065994.1 ENSG00000166068|SPRED1 ENSG00000166415|WDR72  
ENSG00000171241|SHCBP1 ENSG00000171502|COL24A1 ENSG00000172969|LOC285299 ENSG00000173041|ZNF680 ENSG00000176208|ATAD5 ENSG00000183891|TTC32 ENSG00000185984|NR\_002593.1 ENSG00000187118|NP\_872329.1  
ENSG00000196177|ACADSB ENSG00000196459|SEDLF ENSG00000196793|ZNF239 ENSG00000196963|PCDH16 ENSG00000198887|SMC5 ENSG00000204217|BMPR2 ENSG00000205097|NP\_001005217.1

perfect: TTATATT AATATA hsa-miR-410 AATATAacacagatggcctgt 0  
TTATCAT ENSG00000037757|NP\_115661.1 ENSG00000067066|SP100 ENSG00000089737|DDX24 ENSG00000108474|PIGL ENSG00000115902|SLC1A4 ENSG00000123329|ARHGAP9 ENSG00000124164|VAPB ENSG00000141505|ASGR1  
ENSG00000148842|CNNM2 ENSG00000154114|TBCEL ENSG00000160584|QSK\_HUMAN ENSG00000162408|NOL9 ENSG00000163866|C1orf212 ENSG00000168002|POLR2G ENSG00000169230|PRELID1 ENSG00000170262|MRAP  
ENSG00000175416|CLTB ENSG00000182352|C1orf777 ENSG00000183562|Q9P1L5\_HUMAN ENSG00000186074|CD300LF ENSG00000187715|KLHDC6 ENSG00000196139|AKR1C3 ENSG00000019991|HGF ENSG00000064313|TAF2  
ENSG00000067533|RRP15 ENSG00000073712|PLEKHC1 ENSG00000084733|RAB10 ENSG00000105810|CDK6 ENSG00000106299|WASL ENSG00000108561|C1QBP ENSG00000112739|PRPF4B ENSG00000121871|SLITRK3  
ENSG00000122008|POLK ENSG00000126550|HTN1 ENSG00000128050|PAICS ENSG00000129048|CCRL1 ENSG00000131203|INDO ENSG00000133808|MICALCL ENSG00000135697|BCMO1 ENSG00000136869|TLR4  
ENSG00000137434|C6orf52 ENSG00000138449|SLC40A1 ENSG00000148426|C10orf47 ENSG00000148672|GLUDP5 ENSG00000163743|RCHY1 ENSG00000166006|KCNC2 ENSG00000166206|GABRB3 ENSG00000166510|CCDC68  
ENSG00000170270|C14orf142 ENSG00000171448|ZBTB26 ENSG00000173200|PARP15 ENSG00000187231|SESTD1 ENSG00000189184|PCDH18 ENSG00000196344|ADH7 ENSG00000197195|CHURC1 ENSG00000205649|HTN3

TTATCCC ENSG00000006125|AP2B1 ENSG00000015285|WAS ENSG00000065882|TBC1D1 ENSG00000093217|XYLB ENSG00000099977|DDT ENSG00000100056|DGCR14 ENSG00000105538|RASIP1 ENSG00000111254|AKAP3  
ENSG00000113273|ARSB ENSG00000115594|IL1R1 ENSG00000125149|C16orf70 ENSG00000125740|POSB ENSG00000131188|PRR7 ENSG00000135114|OASL ENSG00000136935|GOLGA1 ENSG00000143398|PIP5K1A  
ENSG00000160678|S100A1 ENSG00000164711|LPAL2 ENSG00000170043|TRAPPC1 ENSG00000171747|C11orf80 ENSG00000173715|P1orf58 ENSG00000175166|PSMD2 ENSG00000184935|Q6A101\_HUMAN ENSG00000189321|NR\_002940.1  
ENSG00000196535|MYO18A ENSG00000198400|NTRK1 ENSG00000204620|Q6ZPC8\_HUMAN ENSG0000024526|DEPDC1 ENSG00000064989|CALCRL ENSG00000094755|GABRP ENSG00000105967|TFEC ENSG00000112624|KIAA0240  
ENSG00000115970|THADA ENSG00000119013|NDUFB3 ENSG00000119042|SATB2 ENSG00000124564|SLC17A3 ENSG00000124900|SPRYD5 ENSG00000132153|DHX3 ENSG00000132386|SERPINF1 ENSG00000133019|CHRM3  
ENSG00000134001|EIF2S1 ENSG00000134827|TCN1 ENSG00000137098|SPAG8 ENSG00000150244|TRIM48 ENSG00000155744|FAM126B ENSG00000163444|TMEM183B ENSG00000164040|PGRMC2 ENSG00000164823|OSGIN2  
ENSG00000168619|ADAM18 ENSG00000177613|CSTF2T ENSG00000185272|RBM11 ENSG00000186104|CYP2R1 ENSG00000187123|LYPD6 ENSG00000196083|IL1RAP ENSG00000197594|ENPP1 ENSG00000197712|FAM114A1  
ENSG00000204453|XR\_019357.1

TTATCGA ENSG000000011451|WIZ ENSG00000067596|DHX8 ENSG00000099985|OSM ENSG00000101412|E2F1 ENSG00000122122|CXorf9 ENSG00000125084|WNT1 ENSG00000130052|STARD8 ENSG00000137275|RIPK1  
ENSG00000145014|TMEM44 ENSG00000146521|C6orf123 ENSG00000153266|FEZF2 ENSG00000163050|CABC1 ENSG00000164711|LPAL2 ENSG00000166448|TMEM130 ENSG00000166619|BLCAP ENSG00000175287|PHYH1  
ENSG00000175781|Q9H5L9\_HUMAN ENSG00000178932|Q9N811\_HUMAN ENSG00000181773|GPR3 ENSG00000184545|DUSP8 ENSG00000187953|NR\_002217.1 ENSG00000197152|Q96NB7\_HUMAN ENSG00000197408|CYP2B6 ENSG00000203811|HIST2H3A  
ENSG00000203813|HIST2H3C ENSG00000204241|Q6ZU8\_HUMAN ENSG00000204957|Q6ZVQ6\_HUMAN ENSG00000105879|CBL1 ENSG00000107863|ARHGAP21 ENSG00000108296|CCDC49 ENSG00000109606|DHX15 ENSG00000110079|MS4A4A  
ENSG00000137955|RABGGTB ENSG00000137975|CLCA2 ENSG00000138050|THUMP22 ENSG00000145287|PLAC8 ENSG00000147145|GPR23 ENSG00000165914|TTC7B ENSG00000167216|KATNAL2 ENSG00000178397|NP\_001032240.1  
ENSG00000181449|SOX2 ENSG00000183648|NDUFB1 ENSG00000189332|Q4G197\_HUMAN

TTATCTC ENSG00000023902|PLEKH01 ENSG00000048342|Q9H8A7\_HUMAN ENSG00000067066|SP100 ENSG00000101883|PEPP1\_HUMAN ENSG00000110711|AIP ENSG00000113739|STC2 ENSG00000127526|SLC35E1 ENSG00000136297|MMD2  
ENSG00000141084|RANBP10 ENSG00000142748|FCN3 ENSG00000168671|UGT3A2 ENSG00000168792|NP\_937790.1 ENSG00000179335|CLK3 ENSG00000183019|C19orf59 ENSG00000186910|SERPIN11 ENSG00000188394|GPR21  
ENSG00000160328|MCM10 ENSG00000104325|DECR1 ENSG00000104859|SFRS16 ENSG00000106034|NP\_079189.3 ENSG00000106605|BLVRA ENSG00000116729|GPR177 ENSG00000134830|GPR77 ENSG00000143119|CD53  
ENSG00000145358|DDIT4L ENSG00000145817|YIPF5 ENSG00000168769|KIAA1546 ENSG00000171295|ZNF440 ENSG00000172175|MALT1 ENSG00000172292|LASS6 ENSG00000172493|AFF1 ENSG00000180773|SLC36A4  
ENSG00000181384|Q9H9U9\_HUMAN ENSG00000182197|EXT1 ENSG00000182518|FAM104B ENSG00000184040|FAM23B ENSG00000198440|ZNF583

TTATCTT ENSG00000025800|KPNAB6 ENSG00000088888|MAVS\_HUMAN ENSG00000092201|SUPT16H ENSG00000102076|OPN1LW ENSG00000104823|ECH1 ENSG00000105991|HOXA1 ENSG00000106211|HSPB1 ENSG00000108551|RASD1  
ENSG00000110799|VWF ENSG00000114999|TTL ENSG00000115844|DLX2 ENSG00000115956|PLEK ENSG00000131462|TUBG1 ENSG00000132275|KIAA0409 ENSG00000132446|FTHL17 ENSG00000134247|PTGFRN  
ENSG00000143127|ITGA10 ENSG00000143198|MGST3 ENSG00000147380|OPN1MW ENSG00000152291|TGOLN2 ENSG00000160710|ADAR ENSG00000164012|WDR65 ENSG00000165948|FAM14B ENSG00000166160|OPN1MW2  
ENSG00000166578|IQCD ENSG00000172653|C17orf66 ENSG00000175329|ISX ENSG00000175906|ARLD4 ENSG00000186910|SERPIN11 ENSG00000188589|RBM33 ENSG00000198610|AKR1C4 ENSG00000198618|PPIA\_HUMAN  
ENSG00000204098|Q6ZU15\_HUMAN ENSG00000205434|Q6ZU34\_HUMAN ENSG00000050201|SKAP2 ENSG00000050581|MYCBF2 ENSG00000009307|NRAS ENSG00000064703|DDX20 ENSG00000071967|CYBRD1 ENSG00000085224|ATRX  
ENSG00000089123|TASP1 ENSG00000100852|ARHGAP5 ENSG00000104154|SLC30A4 ENSG00000118785|SPP1 ENSG00000122008|POLK ENSG00000131263|RNF12 ENSG00000136143|SUCLA2 ENSG00000136937|NCBP1  
ENSG00000139163|ETN1 ENSG00000139187|KLRG1 ENSG00000147488|ST18 ENSG00000151287|C13orf27 ENSG00000153822|KCNC16 ENSG00000163735|CXCL5 ENSG00000163964|PIGX ENSG00000169504|CLIC4  
ENSG00000170629|NP\_872440.2 ENSG00000170734|POLH ENSG00000173674|EIF1AP1 ENSG00000175928|LRRN1 ENSG00000182264|IZUMO1 ENSG00000189212|DPY19L2P1 ENSG00000198157|NSBP1 ENSG00000204217|BMPR2

TTATGAC ENSG000000054793|ATP9A ENSG00000092036|C14orf94 ENSG00000101850|GPR143 ENSG00000103200|NME4 ENSG00000104823|ECH1 ENSG00000105499|PLA2G4C ENSG00000116014|KISS1R ENSG00000129559|NEDD8  
ENSG00000130244|Q17RN3-2 ENSG00000134243|SORT1 ENSG00000136003|ISCU ENSG00000137073|UBAP2 ENSG00000151692|RNF144 ENSG00000157617|C21orf25 ENSG00000164008|C1orf50 ENSG00000167774|NDUFA7  
ENSG00000168070|NP\_001032302.1 ENSG00000174206|NP\_689653.3 ENSG00000174529|TMEM81 ENSG00000180683|Q8NTA4\_HUMAN ENSG00000183011|LSMD1 ENSG00000184157|C1orf210 ENSG00000185252|ZNF74 ENSG00000187492|NP\_001007541.1  
ENSG00000198753|PLXNB3 ENSG00000203941|Q5JVP7\_HUMAN ENSG00000082482|KCNK2 ENSG00000109061|MYH1 ENSG00000110172|CHORDC1 ENSG00000113302|IL12B ENSG00000115145|STAM2 ENSG00000121210|KIAA0922  
ENSG00000124795|DEK ENSG00000133020|MYH8 ENSG00000134899|ERCC5 ENSG00000137714|FDX1 ENSG00000147434|CHRNA6 ENSG00000152457|DCLRE1C ENSG00000152795|HNRPDL ENSG00000153790|C7orf31  
ENSG00000156689|GLYATL2 ENSG00000164822|DEFA6 ENSG00000168967|PMCHL1 ENSG00000173302|GPR148 ENSG00000184344|GDF3 ENSG00000204899|NP\_001065243.1 ENSG00000205707|LYRM5  
ENSG00000073849|ST6GAL1 ENSG00000099338|C19orf15 ENSG00000101425|BPI ENSG00000105808|RASA4 ENSG00000120332|TNN ENSG00000125901|MRPS26 ENSG00000131462|TUBG1 ENSG00000139083|ETV6  
ENSG00000143314|MRPL24 ENSG00000146197|SCUBE3 ENSG00000165837|Q5W0A0\_HUMAN ENSG00000166407|LMO1 ENSG00000168003|SLC3A2 ENSG00000170322|NFRKB ENSG00000179115|FARSA ENSG00000179452|Q8TDK1\_HUMAN  
ENSG00000179901|ZNF154 ENSG00000183399|Q7L8T7\_HUMAN ENSG000000023228|NDUFS1 ENSG00000054219|LY75 ENSG000000069849|ATP1B3 ENSG00000083828|ZNF586 ENSG00000092020|PPP2R3C ENSG00000097046|CDC7  
ENSG00000114541|FRMD4B ENSG00000116459|ATP5F1 ENSG00000171151|CTBS ENSG00000125703|ATG4C ENSG00000148848|ADAM12 ENSG00000149289|ZC3H12C ENSG00000152443|ZNF776 ENSG00000153951|OR4D2  
ENSG00000159873|CCDC117 ENSG00000162378|ZYG11B ENSG00000165124|SVEP1 ENSG00000165185|KIAA1958 ENSG00000176142|TMEM39A ENSG00000179869|ABCA13 ENSG00000181065|Q9P161\_HUMAN ENSG00000183784|C9orf66  
ENSG00000184863|PRR8

TTATGAT ENSG00000073849|ST6GAL1 ENSG00000092036|C14orf94 ENSG00000099960|SLC7A4 ENSG00000107185|KIAA0258 ENSG00000108344|PSMD3 ENSG00000125266|EFNB2 ENSG00000131389|SLC6A6 ENSG00000132004|FBXW9  
ENSG00000132846|ZBED3 ENSG00000136378|ADAMTS7 ENSG00000143786|CNIH3 ENSG00000157856|C2orf39 ENSG00000176909|NP\_872380.1 ENSG00000185619|PCGF3 ENSG00000198618|PPIA\_HUMAN ENSG00000198668|CALM1  
ENSG00000198881|ASB12 ENSG00000204168|Q6ZRI1\_HUMAN ENSG00000204936|LSM2 ENSG00000204936|Q8N6Q3-3 ENSG00000073712|PLEKHC1 ENSG00000081320|STK17B ENSG00000100557|C14orf105 ENSG00000106346|USP42  
ENSG00000106537|TSPAN13 ENSG00000106554|CHCHD3 ENSG00000108039|XPNPEP1 ENSG00000111247|RAD51AP1 ENSG00000112343|TRIM38 ENSG00000120526|NUDCD1 ENSG00000121031|PRKDC ENSG00000121313|PRDX4  
ENSG00000124275|MTRR ENSG00000136098|NEK3 ENSG00000137766|UNC13C ENSG00000142192|APP ENSG00000143355|LHX9 ENSG00000144566|RAB5A ENSG00000147854|UHRF2 ENSG00000148481|C10orf97  
ENSG00000156374|PCGF6 ENSG00000164659|KIAA1324L ENSG00000181903|OR4C6 ENSG00000185344|ATP6V0A2 ENSG00000196850|PPTC7 ENSG00000198498|NP\_060822.1  
ENSG000000011132|APBA3 ENSG00000052835|ZNF785 ENSG00000077157|PPP1R12B ENSG00000079393|DUSP13 ENSG00000087269|NOL14 ENSG00000092036|C14orf94 ENSG00000095015|MAP3K1 ENSG00000099972|MICAL3  
ENSG00000101439|CST3 ENSG00000102755|FLT1 ENSG00000103184|SEC14L5 ENSG00000105648|IFI30 ENSG00000105648|SLC36A1 ENSG00000137054|POLR1E ENSG00000139433|GLTP ENSG00000141342|PLEKHM1  
ENSG00000156486|KCNS2 ENSG00000157933|SKI ENSG00000158525|CPA5 ENSG00000162761|LMX1A ENSG00000164048|ZNF589 ENSG00000167107|NP\_079425.2 ENSG00000171163|ZNF692 ENSG00000173436|C1orf151  
ENSG00000176595|KBTBD11 ENSG00000177169|ULK1 ENSG00000180739|EDG8 ENSG00000181666|HKR1 ENSG00000197175|Q8TBR1\_HUMAN ENSG00000204540|PSORS1C1 ENSG00000023041|ZDHC6 ENSG00000072042|RDH11  
ENSG00000089094|FBXL10 ENSG00000100784|RPS6KA5 ENSG00000105866|SP4 ENSG00000111300|C12orf30 ENSG00000115254|XAB1 ENSG00000115966|ATF2 ENSG00000122707|RECK ENSG00000125247|TMTC4  
ENSG00000129514|FOXA1 ENSG00000132639|SNAP25 ENSG00000135999|EPC2 ENSG00000136826|KLF4 ENSG00000146592|CREB5 ENSG00000147202|DIAPH2 ENSG00000148688|RPP30 ENSG00000148690|C10orf4  
ENSG00000149345|U2D3L\_HUMAN ENSG00000151025|GPR158 ENSG00000151247|EIF4E ENSG000001545380|ENAH ENSG00000154582|TCEB1 ENSG00000154727|GABPA ENSG00000162616|DNAJB4 ENSG00000162891|IL20  
ENSG00000169744|LDB2 ENSG00000171714|TMEM16E ENSG00000177800|TMEM78 ENSG00000188467|SLC24A5 ENSG00000189367|C6orf174 ENSG00000197989|C1orf79  
TTATGCG ENSG00000005238|KIAA1539 ENSG00000006534|ALDH3B1 ENSG00000009006|LTPB1 ENSG00000009707|ABL1 ENSG00000106003|LFNG ENSG00000130558|OLFM1 ENSG00000135124|P2RX4 ENSG00000135362|NP\_079117.2  
ENSG00000139547|RDH16 ENSG00000141295|SCRN2 ENSG00000142002|DDP9 ENSG00000147065|MSN ENSG00000148335|C9orf32 ENSG00000158927|C8orf58 ENSG00000159792|PSKH1 ENSG00000161955|TNFSF13  
ENSG00000163468|CCT3 ENSG00000163704|PRRT3 ENSG00000167680|SEMA6B ENSG00000171793|CTPS ENSG00000177614|PGBD5 ENSG00000179421|Q8NBA4\_HUMAN ENSG00000182379|NXP4 ENSG00000205562|Q86U27\_HUMAN  
ENSG00000020922|MRE11A ENSG00000067560|RHOA ENSG00000071991|CDH19 ENSG00000075568|TMEM131 ENSG00000087510|TFAP2C ENSG00000102401|ARMCX3 ENSG00000107077|JMJD2C ENSG00000109674|NEIL3  
ENSG00000123352|SPATS2 ENSG00000129515|SNX6 ENSG00000136929|HEMGN ENSG00000137674|MMP20 ENSG00000141279|NPEPPS ENSG00000152154|TMEM178 ENSG00000164056|SPRY1 ENSG00000166478|ZNF143  
ENSG00000166704|ZNF606 ENSG00000173221|GLRX ENSG00000174010|KLHL15 ENSG00000182393|IL29 ENSG00000196532|HIST1H3C ENSG00000197737|Q9H393\_HUMAN  
TTATGGC ENSG00000010318|PHF7 ENSG000000074590|NUAK1 ENSG000000087088|BAX ENSG000000088256|GNAI1 ENSG00000091622|PITPNM3 ENSG00000092853|CLSPN ENSG00000100141|PISD ENSG00000105997|HOXA3  
ENSG00000108106|UBE2S ENSG00000115594|IL1R1 ENSG00000126461|NP\_067051.1 ENSG00000129543|FLJ16369 ENSG00000130035|GALNT8 ENSG00000135406|PRPH ENSG00000143578|CREB3L4 ENSG00000144031|ANKRD53  
ENSG00000154096|THY1 ENSG00000162267|TIH3 ENSG00000165623|C10orf49 ENSG00000167074|TEF ENSG00000176946|THAP4 ENSG00000182584|C20orf134 ENSG00000198585|NUDT16 ENSG00000053900|ANAPC4  
ENSG00000075223|SEMA3C ENSG00000104067|TJ10 ENSG00000106028|SSBP1 ENSG00000112175|BMP5 ENSG00000116560|SPF2 ENSG00000117523|BAT2D1 ENSG00000121089|NACA3P  
ENSG00000124172|ATP5E ENSG00000125356|NDUFA1 ENSG00000140795|MYLK3\_HUMAN ENSG00000151418|ATP6V1G3 ENSG00000153936|HS2ST1 ENSG00000155313|USP25 ENSG00000175513|TSGA10IP ENSG00000180389|NR\_002162.1  
ENSG00000187889|C1orf168 ENSG00000188659|NP\_001008227.1 ENSG00000196531|NACA ENSG00000204628|GNB2L1

TTATGGT ENSG000000089101|C20orf26 ENSG00000100982|C20orf67 ENSG00000102226|USP11 ENSG00000104499|GML ENSG00000105717|PBX4 ENSG00000127124|HIVEP3 ENSG0000013

ENSG00000143512|KIAA1822L|ENSG00000162599|NFIA ENSG00000162735|PEX19 ENSG00000163026|C2orf44 ENSG00000165671|NSD1 ENSG00000167080|B4GALNT2 ENSG00000170445|HARS ENSG00000171345|KRT19  
ENSG00000172113|NME6 ENSG00000175287|PHYHD1 ENSG00000183621|ZNF438 ENSG00000187605|K0401\_HUMAN ENSG00000034677|RNFL19 ENSG00000043093|DCUN1D1 ENSG00000105825|TFPI2 ENSG00000112739|PRPF4B  
ENSG00000113361|CDH6 ENSG00000115183|TANC1 ENSG00000118503|MYB ENSG00000131717|SH3BGR1 ENSG00000137561|TPA ENSG00000146802|TMEM168 ENSG00000151090|THR3 ENSG00000153721|MAGI1  
ENSG00000162722|TRIM58 ENSG00000164182|NDUFA12L ENSG00000172007|RAB33B ENSG00000182963|GJA7 ENSG00000185483|ROR1 ENSG00000198176|TFDP1 ENSG00000198898|CAPZA2 ENSG00000198945|L3MBTL3  
ENSG00000206384|Q69YT0\_HUMAN  
TTATTAC ENSG00000072518|MARK2 ENSG00000099308|MAST3 ENSG00000100918|REC8 ENSG00000105443|PSCD2 ENSG00000114737|CISH ENSG00000117877|CD3EAP ENSG00000130612|Q6ZSU1\_HUMAN ENSG00000131149|KIAA0182  
ENSG00000132142|ACACA ENSG00000134452|FBXO18 ENSG00000143632|ACTA1 ENSG00000144677|CTDSPL ENSG00000152192|POU4F1 ENSG00000163866|C1orf212 ENSG00000166407|LMO1 ENSG00000168621|GDNF  
ENSG00000170445|HARS ENSG00000171160|C10orf83 ENSG00000172724|HCL19 ENSG00000175197|DDIT3 ENSG00000183087|GAS6 ENSG00000204103|MAFB ENSG00000023287|RB1CC1 ENSG00000023608|SNAPC1  
ENSG00000106355|LSM5 ENSG00000107186|MPD2 ENSG00000112406|HECA ENSG00000115170|ACVR1 ENSG00000119965|C10orf88 ENSG00000119965|C10orf88 ENSG00000134539|KLRD1 ENSG00000135045|C9orf40  
ENSG00000138658|C4orf21 ENSG00000139329|LUM ENSG00000147488|ST18 ENSG00000155189|AGPAT5 ENSG00000155330|NP\_001001436.1 ENSG00000164616|FBXL21 ENSG00000165659|DACH1 ENSG00000165972|CCDC38  
ENSG00000169895|SYAP1 ENSG00000174628|IQCK ENSG00000180071|ANKRD18A ENSG00000182919|C11orf54 ENSG00000197510|C21orf116 ENSG00000197603|NP\_075561.2 ENSG00000198252|STYX  
TTATTCA ENSG000000007306|CEACAM7 ENSG00000008256|PSCD3 ENSG00000112211|LMO6 ENSG00000038382|TRIO ENSG00000105254|TBCB ENSG00000105617|LENG1 ENSG00000105991|HOXA1  
ENSG00000112062|MAPK14 ENSG00000120451|SNX19 ENSG00000130164|LDLR ENSG00000132510|JMJD3 ENSG00000153498|C13orf28 ENSG00000154478|GPR26 ENSG00000162714|ZNF496 ENSG00000163800|C2orf16  
ENSG00000163814|CDCP1 ENSG00000165238|WNK2 ENSG00000167393|PPP2R3B ENSG00000176749|CDK5R1 ENSG00000183666|LOC728411 ENSG00000184164|CRELD2 ENSG00000186825|Q58OR0-2 ENSG00000188229|TUBB2C  
ENSG00000189120|SP6 ENSG00000197558|Q76B61\_HUMAN ENSG00000198237|GUSL1\_HUMAN ENSG00000204141|Q6ZVW5\_HUMAN ENSG00000206158|Q6ZVG4\_HUMAN ENSG00000009711|CFH ENSG00000011426|ANLN ENSG00000080910|CFHR1  
ENSG00000084453|SLCO1A2 ENSG00000086666|ZFAND6 ENSG00000101938|CHRDL1 ENSG00000102174|PHEX ENSG00000102387|TAF7L ENSG00000110841|PPFIBP1 ENSG00000112365|ZBTB24 ENSG00000113569|NUP155  
ENSG00000115183|TANC1 ENSG00000116641|DOCK7 ENSG00000116711|PLA2G4A ENSG00000119231|SEN5 ENSG00000123219|CENPK ENSG00000125538|IL1B ENSG00000127955|GNAI1 ENSG00000136634|IL1A  
ENSG00000136696|IL1F8 ENSG00000137558|PI15 ENSG00000138792|ENPEP ENSG00000139168|ZCRB1 ENSG00000145439|CBR4 ENSG00000151025|GPR158 ENSG00000151327|C14orf24 ENSG00000152463|OLAH  
ENSG00000156234|CXCL13 ENSG00000157542|KCNJ6 ENSG00000159279|NYP6R ENSG00000164212|ASB5 ENSG00000164741|DLR1 ENSG00000167193|CRK ENSG00000172167|MTBP  
ENSG00000172461|FUT9 ENSG00000173930|SLCO4C1 ENSG00000181450|ZNF678 ENSG00000185418|TARSL2 ENSG00000196865|NHLRC2 ENSG00000197584|KCNMB2  
TTATTCG ENSG00000010361|FUZ ENSG00000099860|GADD45B ENSG00000102226|USP11 ENSG00000102466|PGF14 ENSG00000103148|C16orf35 ENSG00000104899|AMH ENSG00000108797|CNTNAP1 ENSG00000110171|TRIM3  
ENSG00000113722|CDX1 ENSG000001125084|WNT1 ENSG00000125492|BARHL1 ENSG00000139613|SMARCC2 ENSG00000152042|NBPFF8 ENSG00000154074|NBPFF8 ENSG00000157911|PEX10 ENSG00000159123|DMRTC\_HUMAN  
ENSG00000159556|ISL2 ENSG00000160345|C9orf116 ENSG00000161835|GRASP ENSG00000161914|ZNF653 ENSG00000167874|TMEM88 ENSG00000174365|NR\_003239.1 ENSG00000177468|OLIG3 ENSG00000182612|TSPAN10  
ENSG00000183760|NP\_001004318.1 ENSG00000184911|CXorf50 ENSG00000185668|POU3F1 ENSG00000203836|NP\_899228.3 ENSG00000204168|Q6ZRI1\_HUMAN ENSG00000101608|MLRM\_HUMAN ENSG00000101624|CEP76 ENSG00000104361|NPAL2  
ENSG00000105171|POP4 ENSG00000106823|ECM2 ENSG00000112742|ITK ENSG00000115919|KYNL ENSG00000120533|ENY2 ENSG00000126803|HSPA2 ENSG00000132530|NP\_954590.1 ENSG00000137500|CCDC90B  
ENSG00000138135|CH25H ENSG00000138592|USP8 ENSG00000144820|GPR128 ENSG00000145781|COMMD10 ENSG00000147571|CRH ENSG00000150045|KLRF1 ENSG00000161405|IKZF3 ENSG00000163159|VPS72  
ENSG00000166192|SENPF8 ENSG00000167283|ATP5L ENSG00000171295|ZNF440 ENSG00000174325|DIRC1 ENSG00000177047|IFNW1 ENSG00000179546|HTR1D ENSG00000179774|ATOH7 ENSG00000187581|COX8C  
ENSG00000205981|DNAJC19 ENSG00000211451|GNRHR2  
TTATTCT ENSG000000064309|CDON ENSG00000072858|SIDT1 ENSG00000102096|PIM2 ENSG00000105549|THEG ENSG00000106789|CORO2A ENSG00000110446|SLC15A3 ENSG00000110801|PSMD9 ENSG00000111877|MCM9  
ENSG00000112640|PPP2R5D ENSG00000116032|GRIN3B ENSG00000125651|GTF2F1 ENSG00000131236|CAP1 ENSG00000134075|C3orf10 ENSG00000135605|TEC ENSG00000141867|BRD4 ENSG00000141994|DUS3L  
ENSG00000143178|TBX19 ENSG00000143373|ZNF687 ENSG00000154781|C3orf19 ENSG00000182606|TRAK1 ENSG00000196218|RYR1 ENSG00000198901|PRC1 ENSG00000005471|ABCB4 ENSG00000055211|C6orf72  
ENSG00000068366|ACSL4 ENSG00000081800|SLC13A1 ENSG00000095574|IKZF5 ENSG00000104290|FZD3 ENSG00000123983|ACSL3 ENSG00000127328|RAB31P ENSG00000129128|SPCS3 ENSG00000131089|ARHGEF9  
ENSG00000133111|RFKAP ENSG00000137714|FDX1 ENSG00000137955|RABGGTB ENSG00000139971|C14orf37 ENSG00000144057|AK7 ENSG00000144635|DYNCL11 ENSG00000146963|LUC7L2 ENSG00000147231|CXorf57  
ENSG00000147614|ATP6V0D2 ENSG00000149761|NUDT22 ENSG00000152266|PTH ENSG00000160961|ZNF333 ENSG00000162614|NEXN ENSG00000164112|TMEM155 ENSG00000164219|PGGT1B ENSG00000165997|ARL5B  
ENSG00000167098|SPAG4L ENSG00000168228|ZCCHC4 ENSG00000169032|MAP2K1 ENSG00000169621|C2orf13 ENSG00000170629|NP\_872440.2 ENSG00000177889|UBE2N ENSG00000179869|ABCA13 ENSG00000182070|OR52A1  
ENSG00000186452|TMPRSS12 ENSG00000188649|C10orf130 ENSG00000189127|NP\_001004441.1 ENSG00000197054|ZNF763 ENSG00000197734|C14orf178 ENSG00000197888|UGT2B17 ENSG00000198648|STK39 ENSG00000203701|C1orf140  
ENSG00000205637|Q6ZSL6\_HUMAN  
TTATTGC ENSG000000006432|MAP3K9 ENSG00000010327|STAB1 ENSG00000011677|GABRA3 ENSG00000058085|LAMC2 ENSG00000063587|ZNF275 ENSG00000070404|FSTL3 ENSG00000099194|SCD ENSG00000100335|SMCR7L  
ENSG00000103184|SEC14L5 ENSG00000105486|LIG1 ENSG00000107263|RAPGEF1 ENSG00000108518|PFN1 ENSG00000110092|CCND1 ENSG00000125816|NKX2-4 ENSG00000129543|FLJ16369 ENSG00000160712|IL6R  
ENSG00000166165|CKB ENSG00000173244|Q8N8D0\_HUMAN ENSG00000181938|GINS3 ENSG00000184787|UBE2G2 ENSG00000198437|Q8NOT2\_HUMAN ENSG00000035499|DEFDC1B ENSG00000036257|CUL3 ENSG00000051341|POLQ  
ENSG00000082269|KIAA1411 ENSG00000088930|XRN2 ENSG00000100784|RPS6KA5 ENSG00000106723|SPIN1 ENSG00000110848|CD69 ENSG00000111450|STX2 ENSG00000113444|LNPEP ENSG00000117519|CNN3  
ENSG00000118946|PCDH17 ENSG00000135269|TES ENSG00000135298|BAI3 ENSG00000136100|VPS36 ENSG00000138180|CEP55 ENSG00000141433|ADCYAP1 ENSG00000141452|C18orf8 ENSG00000150361|KLHL1  
ENSG00000150722|PPP1R1C ENSG00000152944|SURB7 ENSG00000164463|NP\_705835.1 ENSG00000165899|C12orf64 ENSG00000168152|THAP9 ENSG00000169504|CLIC4 ENSG00000177576|NP\_001030177.1 ENSG00000185477|GPRIN3  
ENSG00000186205|MOSC1 ENSG00000188820|FAM26F ENSG00000198176|TFDP1  
TTATTGG ENSG000000001617|SEMA3F ENSG00000087088|BAX ENSG00000100949|RABGGTA ENSG00000101457|DNTTIP1 ENSG00000106133|NSUN5C ENSG00000111602|TIMELESS ENSG00000111665|CDCA3  
ENSG00000112715|VEGFA ENSG00000130513|GDF15 ENSG00000135314|C6orf148 ENSG00000137100|DCTN3 ENSG00000141540|TTYH2 ENSG00000148832|PAOX ENSG00000173210|ABLIM3 ENSG00000173421|CCDC36  
ENSG00000176490|DIRAS1 ENSG00000180697|C3orf22 ENSG00000197942|Q6ZSS2\_HUMAN ENSG00000204197|KIFC1 ENSG00000001201|KAL1 ENSG000000054803|CBLN4 ENSG00000062725|APPBP2 ENSG00000080665|CHMP5  
ENSG00000101745|ANKRD12 ENSG00000109814|UGDH ENSG00000111339|ART4 ENSG00000115365|LANCL1 ENSG00000117174|C1orf181 ENSG00000132467|SAS10\_HUMAN ENSG00000136206|WBSR19  
ENSG00000139173|TMEM117 ENSG00000145476|CYP4V2 ENSG00000150361|KLHL1 ENSG00000154265|ABCA5 ENSG00000162928|PEX13 ENSG00000163376|KBTBD8 ENSG00000165730|STOX1 ENSG00000166803|KIAA0101  
ENSG00000171657|GPR82 ENSG00000180398|MCFD2 ENSG00000180938|ZNF572 ENSG00000182831|C16orf72 ENSG00000205505|NP\_001027561.1 ENSG00000205506|NP\_001027561.1 ENSG00000205508|NP\_001018856.1 ENSG00000205509|NP\_001027561.1  
ENSG00000205580|NP\_001027561.1  
TTATTGT ENSG000000010803|SCMH1 ENSG00000076984|O14733-2 ENSG00000103184|SEC14L5 ENSG00000105246|EBI3 ENSG00000105251|SHD ENSG00000112159|MDN1 ENSG00000113048|MRPS27 ENSG00000119638|NEK9  
ENSG00000123901|GPR83 ENSG00000132275|KIAA0409 ENSG00000132749|MTL5 ENSG00000135451|TROAP ENSG00000142186|SCYL1 ENSG00000143333|RGS16 ENSG00000143862|ARL8A ENSG00000159556|ISL2  
ENSG00000162981|FAM84A ENSG00000163521|GLB1L ENSG00000164266|SPINK1 ENSG00000168268|NTSDC2 ENSG00000168610|STAT3 ENSG00000169194|IL13 ENSG00000171224|C10orf35  
ENSG00000173210|ABLIM3 ENSG00000181409|AATK ENSG00000197272|IL27 ENSG00000198909|MAP3K3 ENSG00000204343|C9orf118 ENSG00000003989|SLC7A2 ENSG00000004468|CD38 ENSG00000059758|PCTK2  
ENSG00000100906|FBXK1A ENSG00000107758|PPP3CB ENSG00000109762|SNX25 ENSG00000113532|ST8S1A4 ENSG00000118513|MYB ENSG00000133731|IMP1 ENSG00000135905|DOCK10 ENSG00000136143|SUCLA2  
ENSG00000136943|CTSL2 ENSG00000137449|CPEB2 ENSG00000138036|DYNCL11 ENSG00000139168|ZCRB1 ENSG00000144935|TRPC1 ENSG00000145817|YIPF5 ENSG00000147647|DPYS ENSG00000162624|LHX8  
ENSG00000163492|NP\_775919.2 ENSG00000163554|SPTA1 ENSG00000164070|HSPA4L ENSG00000166451|CENPN ENSG00000171522|PTGER4 ENSG00000171634|BPTF ENSG00000171848|RRM2 ENSG00000180251|SLC9A4  
ENSG00000186487|MYT1L ENSG00000187151|ANGPTL5 ENSG00000198353|HOXC4 ENSG00000204259|Q96PQ5\_HUMAN ENSG00000204671|IL13  
TTATTTA ENSG000000005001|PRSS22 ENSG00000064309|CDON ENSG00000072134|EPN2 ENSG00000075388|PGF4 ENSG00000084731|KIF3C ENSG00000092421|SEMA6A ENSG00000095752|IL11 ENSG00000100027|YPEL1  
ENSG00000101412|E2F1 ENSG00000105443|PSCD2 ENSG00000105509|HAS1 ENSG00000105649|RAB3A ENSG00000114251|WNT5A ENSG00000114767|RRP9 ENSG00000115844|DLX2 ENSG00000125166|GOT2  
ENSG00000128016|ZFP36 ENSG00000128342|LIF ENSG00000130513|GDF15 ENSG00000132535|DLG4 ENSG00000143333|RGS16 ENSG00000149646|C20orf152 ENSG00000149926|FAM57B ENSG00000158859|ADAMTS4  
ENSG00000159556|ISL2 ENSG00000160190|SLC37A1 ENSG00000160305|DLP2A ENSG00000162666|KIAA0040 ENSG00000164438|TLX3 ENSG00000166924|NP\_775835.2 ENSG00000167110|GOLGA2 ENSG00000169194|IL13  
ENSG00000172375|TMEM24 ENSG00000175505|CLCF1 ENSG00000178235|SLITRK1 ENSG00000182606|TRAK1 ENSG00000183154|Q8NB20\_HUMAN ENSG00000184302|SIX6 ENSG00000188554|NBR1 ENSG00000190245|Q8NM73\_HUMAN  
ENSG00000196422|KIAA0649 ENSG00000197272|IL27 ENSG00000043462|LCP2 ENSG00000056586|RC3H2 ENSG00000059758|PCTK2 ENSG00000066557|LRRC40 ENSG00000073756|PTGS2 ENSG00000075420|FNDC3B  
ENSG00000076554|TPD52 ENSG00000080822|CLDN1 ENSG00000081026|MAGI3 ENSG00000094963|FMO2 ENSG00000101132|PFND4 ENSG00000102595|UGCG2L2 ENSG00000104369|JPH1 ENSG00000104689|TNFRSF10A  
ENSG00000106052|TAX1BP1 ENSG00000109046|WSB1 ENSG00000109471|IL2 ENSG00000110944|IL23A ENSG00000111726|CMAS ENSG00000111911|HINT3 ENSG00000112175|BMP5 ENSG00000113302|IL12B  
ENSG00000113525|IL5 ENSG00000113595|TRIM23 ENSG00000116991|SIPAL12 ENSG00000120129|DUSP1 ENSG00000120242|IFNA8 ENSG00000120539|MASTL ENSG00000123500|COL10A1 ENSG00000134371|CDC73  
ENSG00000137185|ZNF193 ENSG00000144827|ABHD10 ENSG00000146433|TMEM181 ENSG00000152952|PLOC2 ENSG00000156504|FAM122B ENSG00000156787|WDR67 ENSG00000163217|BMP10 ENSG00000163734|CXCL3  
ENSG00000164114|MAP9 ENSG00000164983|TMEM65 ENSG00000165655|ZNF503 ENSG00000168267|PTF1A ENSG00000169018|FEM1B ENSG00000169429|IL8 ENSG00000171310|CHST11 ENSG00000176971|NP\_976249.1  
ENSG00000177047|IFNW1 ENSG00000179981|TSHZ1 ENSG00000182393|IL29 ENSG00000188732|C7orf46 ENSG00000204899|NP\_001065243.1 ENSG00000204961|PCDH9  
TTATTTT ENSG000000004478|FKBP4 ENSG00000058866|DGKG ENSG00000062038|LDH3 ENSG00000082641|NFE2L1 ENSG000001008410|PHF5A ENSG00000100427|MLC1 ENSG00000103034|NDRG4 ENSG00000103512|NOMO1\_HUMAN  
ENSG00000108175|ZMIZ1 ENSG00000110801|PSMD9 ENSG00000111412|C12orf49 ENSG00000118971|CCND2 ENSG00000122085|MTERFD2 ENSG00000123965|NP\_777590.1 ENSG00000124164|VAPB ENSG00000126012|JARID1C  
ENSG00000129250|KIF1C ENSG00000130311|C19orf58 ENSG00000130584|ZBTB46 ENSG00000133069|TMCC2 ENSG00000134871|COL4A2 ENSG00000139514|SLC7A1 ENSG00000140830|TXNL4B ENSG00000142207|URB1  
ENSG00000142534|RPS11 ENSG00000148842|CNNM2 ENSG00000152104|PTPN14 ENSG00000158545|NP\_653205.2 ENSG00000159263|SIM2 ENSG00000164082|GRM2 ENSG00000166886|NAB2 ENSG00000168487|BMP1  
ENSG00000173706|HEG1 ENSG00000176753|NP\_001034994.1 ENSG00000176887|SOX11 ENSG00000179348|GATA2 ENSG00000181778|C9orf71 ENSG00000184205|TSPYL2 ENSG00000185164|NOMO3 ENSG00000185338|SOCS1  
ENSG00000185668|POU3F1 ENSG00000187479|Q7Z7L8\_HUMAN ENSG00000187559|FOXDL3 ENSG00000187678|SPRY4 ENSG00000196739|COL27A1 ENSG00000196934|LOC440804 ENSG00000204613|TRIM10 ENSG00000205011|NP\_001007547.1  
ENSG00000205927|OLIG2 ENSG00000006459|JHDM1D ENSG00000047634|SCML1 ENSG00000057252|SOAT1 ENSG00000067533|RRP15 ENSG00000070061|IKBKAP ENSG00000075089|ACTR6 ENSG00000105996|HOXA2  
ENSG00000107864|CPEB3 ENSG00000108700|CCL8 ENSG00000111231|ATPBD1C ENSG00000112701|SENPF6 ENSG00000113327|GABRG2 ENSG00000113742|CPEB4 ENSG00000114978|MOBK1B ENSG00000117143|UAP1  
ENSG00000122008|POLK ENSG00000123106|CCDC91 ENSG00000123545|C6orf66 ENSG00000134146|ATPBD4 ENSG00000135222|CSN2 ENSG00000135272|MBDFIC ENSG00000135776|ABCB10 ENSG00000137499|CPEB2  
ENSG00000137642|SORL1 ENSG00000139687|RB1 ENSG00000143341|HMCN1 ENSG00000146426|TIAM2 ENSG00000146476|C6orf211 ENSG00000152332|UHMK1 ENSG00000152359|C5orf37 ENSG00000153914|SFRS12  
ENSG00000157214|STEAP2 ENSG00000163421|PROK2 ENSG00000163818|LZTFL1 ENSG00000164190|NIPBL ENSG00000164244|PRRC1 ENSG00000169714|CNBP ENSG00000171446|KRT27 ENSG00000174606|ANGEL2  
ENSG00000174718|C12orf35 ENSG00000176624|RKHD2 ENSG00000176988|FMR1NB ENSG00000177111|XR\_016777.1 ENSG00000182700|NP\_001007190.1 ENSG00000185056|Q569G3\_HUMAN ENSG00000189350|NP\_954974.2 ENSG00000197658|NP\_775857.1  
ENSG00000197701|ZNF595 ENSG00000198146|ZNF770 ENSG00000198791|CNOT7  
TTCAAA ENSG000000007306|CEACAM7 ENSG00000033327|GAB2 ENSG00000070601|FRMPD1 ENSG00000075275|CELSR1 ENSG00000079616|KIF22 ENSG00000100351|GRAP2 ENSG00000104888|SLC17A7 ENSG00000104941|RSHL1  
ENSG00000107872|FBXL15 ENSG00000110987|BCL7A ENSG00000117115|PADI2 ENSG00000122367|LDB3 ENSG00000130508|PXDND ENSG00000143502|SUSD4 ENSG00000145626|UGT3A1 ENSG00000145819|ARHGAP26  
ENSG00000151360|ALLC ENSG00000162105|SHANK2 ENSG00000162511|LAPTM5 ENSG00000163219|ARHGAP25 ENSG00000164742|ADCY1 ENSG00000169084|ZBED1 ENSG00000169213|RAB3B ENSG00000170613|FAM71B  
ENSG00000174898|TMEM146 ENSG00000175779|NP\_997327.1 ENSG00000182606|TRAK1 ENSG00000183686|MAGEA5 ENSG00000185189|NRBP2 ENSG00000185619|PCGF3 ENSG00000185722|ANKFY1 ENSG00000185811|IKZF1  
ENSG00000189311|PPME1 ENSG00000203812|HIST2H2AA4 ENSG00000205061|Q6ZUP2\_HUMAN ENSG00000205670|C21orf51 ENSG00000005471|ABCB4 ENSG00000029363|BCLAF1 ENSG00000052723|NP\_079349.1 ENSG00000104691|UBXD6  
ENSG00000105982|RNF32 ENSG00000109819|PPARGC1A ENSG00000110060|PUS3 ENSG00000112081|SFRS3 ENSG00000112701|SENPF6 ENSG000001

ENSG00000153951|OR4D2 ENSG00000158485|CD1B ENSG00000163558|PRKCI ENSG00000164398|ACSL6 ENSG00000164796|CSMD3 ENSG00000170915|PAQR8 ENSG00000172410|INSL5 ENSG00000174016|FAM46D  
ENSG00000175077|PDIK1L ENSG00000176774|MAGEB18 ENSG00000177068|QBN269\_HUMAN ENSG00000179175|C9orf38 ENSG00000185437|SH3BG1 ENSG00000185483|RORI ENSG00000188313|PLSCR1 ENSG00000196586|MYO6  
TTCACAA ENSG00000197054|GALP\_HUMAN ENSG00000197594|ENPP1 ENSG00000198814|GK ENSG00000203730|TEDDM1 ENSG00000206559|ZCWPW2  
ENSG00000055609|MLL3 ENSG00000101311|C2orf42 ENSG00000102901|CENPT ENSG00000103852|TTC23 ENSG00000105374|NKG7 ENSG00000118707|TGIF2 ENSG00000144134|RABL2A ENSG00000156299|TIAM1  
ENSG00000164649|CDA7L ENSG00000166979|C21orf63 ENSG00000175824|XR\_017847.1 ENSG00000176754|C1orf157 ENSG00000186951|PPARA ENSG00000189140|Q6ZU77\_HUMAN ENSG00000197081|IGF2R ENSG00000198019|FCGR1B  
ENSG00000204633|ACTN3 ENSG00000080644|CHRNA3 ENSG00000082269|KIAA1411 ENSG00000084110|HAL ENSG00000090054|SPPLC1 ENSG00000092208|STP1 ENSG00000095464|PDE6C ENSG00000105136|ZNF419  
ENSG00000108510|THRAP1 ENSG00000110429|FBXO3 ENSG00000115760|BIRC6 ENSG00000123473|STIL ENSG00000135341|MAP3K7 ENSG00000138823|MTTP ENSG00000150991|UBIQ\_HUMAN ENSG00000154511|FAM69A  
ENSG00000157450|RNFL11 ENSG00000159882|ZNF230 ENSG00000167081|PBX3 ENSG00000170927|PKHD1 ENSG00000175387|SMAD2 ENSG00000180882|XR\_017823.1 ENSG00000182463|TSHZ2 ENSG00000184005|ST6GALNAC3  
ENSG00000196350|ZNF492 ENSG00000204259|Q96PQ5\_HUMAN  
TTCAACT ENSG00000089336|KIAA0841 ENSG00000089685|BIRC5 ENSG00000104960|PTOV1 ENSG00000105376|ICAM5 ENSG00000115461|IGFBP5 ENSG00000116586|MAP1P\_HUMAN ENSG00000121281|ADCY7  
ENSG00000134864|Q9BVM4\_HUMAN ENSG00000151474|FRMD4A ENSG00000167858|TEKT1 ENSG00000171490|RSL1D1 ENSG00000171649|ZIK1 ENSG00000171960|PPIH ENSG00000175329|ISX ENSG00000178235|SLITRK1  
ENSG00000198019|FCGR1B ENSG00000198911|SREBF2 ENSG00000204080|Q6ZRQ9\_HUMAN ENSG00000205980|Q6ZU05\_HUMAN ENSG00000004961|HCCS ENSG00000010810|FYN ENSG00000017427|IGF1 ENSG00000018510|AGPS  
ENSG00000065609|SNAP91 ENSG00000106258|CYP3A5 ENSG00000118267|ZNF271 ENSG00000124812|CRISP1 ENSG00000125879|OTOR ENSG00000135577|NMBR ENSG00000138071|ACTR2 ENSG00000139343|SNRPF  
ENSG00000154415|PPP1R3A ENSG00000169248|CXCL11 ENSG00000170852|KBTBD2 ENSG00000176055|NP\_981951.1 ENSG00000178690|C18orf26 ENSG00000189221|MAOA ENSG00000196785|Q8N862\_HUMAN ENSG00000198551|ZNF627  
ENSG00000204596|RPP21  
TTCACGC ENSG00000013619|CXorf6 ENSG00000048342|Q9H8A7\_HUMAN ENSG00000100014|SPEC1L ENSG00000100918|REC8 ENSG00000103365|GGA2 ENSG00000111737|RAB35 ENSG00000122515|ZMIZ2 ENSG00000122733|KIAA1045  
ENSG00000131019|ULBP3 ENSG00000135213|POM121 ENSG00000137073|UBAP2 ENSG00000138166|DUSP5 ENSG00000144040|SFKN5 ENSG00000155980|KIF5A ENSG00000156711|MAPK13 ENSG00000162490|C1orf187  
ENSG00000163882|POLR2H ENSG00000166979|C21orf63 ENSG00000171855|IFNB1 ENSG00000182240|BACE2 ENSG00000183929|DUSP5P ENSG00000196313|NP\_742017.1 ENSG00000197948|FCHSD1 ENSG00000198937|C6orf129  
ENSG00000205851|Q4G0H1\_HUMAN ENSG00000039068|CDH1 ENSG00000056586|RC3H2 ENSG00000100612|DHR87 ENSG00000112146|FBXO9 ENSG00000129484|PARP2 ENSG00000135374|ELF5 ENSG00000138078|PREPL  
ENSG00000138459|SLC35A5 ENSG00000150051|MKX ENSG00000152969|JAKMIP1 ENSG00000163576|EFHB ENSG00000164816|DEFA5 ENSG00000165621|OXGR1 ENSG00000165678|GHITM ENSG00000170113|NIPA1  
ENSG00000170537|TMC7 ENSG00000173273|TNKS ENSG00000173905|GOLPH4 ENSG00000175885|ZNF611 ENSG00000176731|C8orf59 ENSG00000186615|Q8EY8\_HUMAN ENSG00000187761|PAGE2B ENSG00000204217|BMPR2  
ENSG00000204815|TTC25 ENSG00000205637|Q6ZSL6\_HUMAN  
TTCACAGT ENSG00000057704|TMCC3 ENSG00000074054|CLASP1 ENSG00000074410|CA12 ENSG00000106077|ABHD11 ENSG00000113070|HBEGF ENSG00000123171|CCDC70 ENSG00000125611|CHCHD5 ENSG00000134917|Q5FWF1\_HUMAN  
ENSG00000143575|HAX1 ENSG00000151062|CACNA2D4 ENSG00000151117|TMEM86A ENSG00000152086|TUBA3E ENSG00000155984|TMEM185A ENSG00000164733|CTS5 ENSG00000177595|LRDD ENSG00000182953|NM\_001031.4  
ENSG00000185608|MRPL40 ENSG00000198033|TUBA3C ENSG00000205424|Q6ZW00\_HUMAN ENSG00000205531|NAP1L4 ENSG00000162585|C1orf48 ENSG00000163009|C2orf48 ENSG00000166787|SAA3 ENSG00000169393|ELSPBP1  
ENSG00000120837|NFYB ENSG00000122507|BBS9 ENSG00000122565|CBX3 ENSG00000123131|PRDX4 ENSG00000136122|C13orf34 ENSG00000136872|ALDOB ENSG00000137414|FAM8A1 ENSG00000138668|HNRPD  
ENSG00000155906|RMND1 ENSG00000162664|ZNF326 ENSG00000164244|PRRC1 ENSG00000165416|SUGT1 ENSG00000166752|TMEM83 ENSG00000170185|USP38 ENSG00000171316|CHD7 ENSG00000171766|GATM  
ENSG00000173452|NP\_689987.2 ENSG00000175175|PPM1E ENSG00000179119|SPTY2D1 ENSG00000179455|MKNR3 ENSG00000188463|XR\_015229.1 ENSG00000198874|TYW1 ENSG00000204961|PCDHA9  
TTCACATC ENSG00000044880|PARP3 ENSG00000047644|WWC3 ENSG00000095066|HOK2 ENSG00000107341|UBE2R2 ENSG00000130544|ZNF557 ENSG00000130649|CYP2E1 ENSG00000132881|C1orf89 ENSG00000150477|KIAA1328  
ENSG00000154478|GPR26 ENSG00000160051|IQCC ENSG00000162408|NOL9 ENSG00000162585|C1orf86 ENSG00000163009|C2orf48 ENSG00000166787|SAA3 ENSG00000169393|ELSPBP1  
ENSG00000169856|ONECUT1 ENSG00000175334|BANF1 ENSG00000176920|FUT2 ENSG00000182240|BACE2 ENSG00000188015|S100A3 ENSG00000204444|APOM ENSG00000000003|TSPAN6 ENSG00000072080|SPP2  
ENSG00000102174|PHEX ENSG00000105205|CLC ENSG00000107758|PPP3CB ENSG00000111859|NEDD9 ENSG00000112305|SMAP1 ENSG00000114124|GRK7 ENSG00000114446|IFT57 ENSG00000114520|SNX4  
ENSG00000116898|MRPS15 ENSG00000125245|GPR18 ENSG00000137872|SEMA6D ENSG00000148634|HERC4 ENSG00000151617|EDNRA ENSG00000154175|ABI3BP ENSG00000155011|DKK2 ENSG00000155304|STCH  
ENSG00000162755|NP\_689579.3 ENSG00000163492|NP\_775919.2 ENSG00000163737|PF4 ENSG00000168589|DYNLRB2 ENSG00000176160|HSF5 ENSG00000181065|Q9P161\_HUMAN ENSG00000185345|PARK2 ENSG00000196900|NP\_997291.1  
ENSG00000203943|SAMD13  
TTCACATT ENSG00000087269|NOL14 ENSG00000088854|C2orf194 ENSG00000100122|CRYBB1 ENSG00000102445|C13orf18 ENSG00000103353|UBFD1 ENSG00000105088|OLFM2 ENSG00000110328|GALNTL4 ENSG00000113273|ARSB  
ENSG00000133195|SLC39A11 ENSG00000135404|CD63 ENSG00000148158|SNX30 ENSG00000152082|FAM128B ENSG00000154222|CC2D1B ENSG00000154928|P54762-3 ENSG00000157064|NMNAT2 ENSG00000161640|SIGLEC11  
ENSG00000166959|MS4A8B ENSG00000170421|KRT8 ENSG00000171724|K1576\_HUMAN ENSG00000176340|COX8A ENSG00000185963|BICD2 ENSG00000166787|CALM1 ENSG00000198668|CALM1 ENSG00000204561|FAM75B ENSG0000021355|SERPINB1  
ENSG00000038210|PT4K2B ENSG00000079950|STX7 ENSG00000081019|RSBN1 ENSG00000082293|COL19A1 ENSG00000102172|SMS ENSG00000108506|INTS2 ENSG00000112029|FBXO5 ENSG00000113966|ARL6  
ENSG00000114796|KLHL24 ENSG00000117479|SLC19A2 ENSG00000121481|ZNF2 ENSG00000123575|CXorf39 ENSG00000130224|LRCH2 ENSG00000133574|GIMAP4 ENSG00000134900|PPP2 ENSG00000141040|ZNF287  
ENSG00000142192|ALP ENSG00000144182|LIP1T1 ENSG00000149050|RNF214 ENSG00000149507|PLACL1 ENSG00000153684|NP\_001012455.1 ENSG00000159212|CLIC6 ENSG00000161573|CCL16 ENSG00000169224|C1orf150  
ENSG00000172399|MYO22 ENSG00000175676|GOLGA8F ENSG00000178460|C8orf45 ENSG00000180332|KCTD4 ENSG00000180815|MAP3K15 ENSG00000181634|TNFSF15 ENSG00000183629|GOLGA8G ENSG00000185002|RFXDC1  
ENSG00000188848|CCDC4 ENSG00000198718|KIAA0423 ENSG00000205905|Q6ZWC6\_HUMAN  
TTCACCA ENSG00000092607|TBX15 ENSG00000100605|ITPK1 ENSG00000101199|ARFGAP1 ENSG00000122547|NP\_085139.2 ENSG00000125804|C2orf91 ENSG00000135114|OASL ENSG00000138303|ASCC1 ENSG00000157152|SYN2  
ENSG00000160172|Q8IW37\_HUMAN ENSG00000161202|DVL3 ENSG00000164711|LPAL2 ENSG00000177757|FAM87B ENSG00000182366|FA87B\_HUMAN ENSG00000183444|NR\_002822.2 ENSG00000204459|Q6ZU55\_HUMAN ENSG00000204048|UBR2  
ENSG00000053328|Q5T253\_HUMAN ENSG00000101384|JAG1 ENSG00000102387|TAF7L ENSG00000105825|TFPI2 ENSG00000127914|AKAP9 ENSG00000134533|RERG ENSG00000135655|USP15  
ENSG00000155629|PK3AP1 ENSG00000165525|SDCCAG1 ENSG00000166147|FBN1 ENSG00000167910|CYP7A1 ENSG00000171428|NAT1 ENSG00000172901|LAEVR\_HUMAN ENSG00000173517|SG269\_HUMAN ENSG00000173627|APOBEC4  
ENSG00000173681|CXorf23 ENSG00000175348|TMEM9B ENSG00000184900|SUMO3 ENSG00000189369|GSPT2 ENSG00000197969|VPS13A ENSG00000204279|PAGE3 ENSG00000206535|A1A4G5\_HUMAN  
TTCACCT ENSG00000011304|PTBP1 ENSG00000070748|CHAT ENSG00000081791|KIAA0141 ENSG00000099812|C19orf21 ENSG00000100344|PNPLA3 ENSG00000110072|TCL1A ENSG00000104142|VPS18 ENSG00000104833|TUBB4  
ENSG00000122783|C7orf49 ENSG00000126003|PLAGL2 ENSG00000163898|LIP1 ENSG00000166167|BTRC ENSG00000166949|SMAD3 ENSG00000167182|SP2 ENSG00000167770|OTUB1 ENSG00000175048|ZDHC14  
ENSG00000184330|S100A7A ENSG000000044574|HSPA5 ENSG00000065060|C6orf107 ENSG00000066855|MTFR1 ENSG00000100218|RTDR1 ENSG00000110693|SOX6 ENSG00000119509|INVS  
ENSG00000119537|FVT1 ENSG00000136634|IL10 ENSG00000136875|PRPF4 ENSG00000138614|C15orf44 ENSG00000138650|PCDH10 ENSG00000139352|ASCL1 ENSG00000139364|TMEM132B ENSG00000141646|SMAD4  
ENSG00000144893|MED12L ENSG00000146072|TNFRSF21 ENSG00000148450|MSRB2 ENSG00000152620|C5orf33 ENSG00000153558|FBXL2 ENSG00000156482|RPL30 ENSG00000163322|CCDC98 ENSG00000163875|C1orf149  
ENSG00000164338|UTP15 ENSG00000165416|SUGT1 ENSG00000171147|NP\_001001317.1 ENSG00000156000172399|MYO22 ENSG00000178403|NEUROG2 ENSG00000180287|PLD5 ENSG00000183801|OLFM1L ENSG00000187823|ZCCHC16  
ENSG00000196511|TPK1  
TTCACCTC ENSG00000006432|MAP3K9 ENSG00000085831|C1orf34 ENSG00000100221|JOSD1 ENSG00000100266|PACIN2 ENSG00000100312|ACR ENSG00000101251|SEL1L2 ENSG00000110446|SLC15A3 ENSG00000112478|VPS52  
ENSG00000132471|WBP2 ENSG00000134339|SAA2 ENSG00000149179|C11orf49 ENSG00000155428|TRIM74 ENSG00000166900|STX3 ENSG00000166974|MAPRE2 ENSG00000167286|CD3D ENSG00000167757|KLK11  
ENSG00000169347|GP2 ENSG00000173432|SAA1 ENSG00000176978|DPF7 ENSG00000178809|TRIM73 ENSG00000182208|MOB2\_HUMAN ENSG00000182492|BGN ENSG00000182578|CSF1R ENSG00000184246|Q96P8\_HUMAN  
ENSG00000186163|Q4G0S1\_HUMAN ENSG00000187170|LCE4A ENSG00000198821|CD247 ENSG00000205620|Q6ZRB6\_HUMAN ENSG0000033170|FUT8 ENSG00000073910|FRY ENSG00000081177|EXDL2 ENSG00000084092|C4orf14  
ENSG00000101367|MAPREL1 ENSG00000111912|NCOA7 ENSG00000119636|C14orf45 ENSG00000119979|FAM45A ENSG00000120594|PLXDC2 ENSG00000122482|ZNF644 ENSG00000124275|MTRR ENSG00000134897|BIVM  
ENSG00000143753|DEGS1 ENSG00000143994|ABHD1 ENSG00000145041|Q8TBD9\_HUMAN ENSG00000151893|C10orf46 ENSG00000156234|CXCL13 ENSG00000162433|AK3L2 ENSG00000163412|EIF4E3 ENSG00000163492|NP\_775919.2  
ENSG00000163875|C1orf149 ENSG00000165389|C14orf147 ENSG00000172955|ADH7 ENSG00000174607|UGT8  
TTCACGT ENSG000000084234|APLP2 ENSG00000100181|CSNK1E ENSG00000105245|NUMBL ENSG00000105401|CDC37 ENSG00000106070|GRB10 ENSG00000106078|COBL ENSG00000114988|LMAN2L ENSG00000120094|HOXB1  
ENSG00000123643|SLC36A1 ENSG00000125447|GGA3 ENSG00000131236|CAP1 ENSG00000134825|C11orf10 ENSG00000137309|HMGAI ENSG00000141569|TRIM65 ENSG00000145194|ECE2 ENSG00000151498|ACAD8  
ENSG00000165533|NGB ENSG00000170100|Q96MU6-2 ENSG00000171872|KLF17 ENSG00000176986|SEC24C ENSG00000180875|GREM2 ENSG00000184274|C21orf93 ENSG00000198471|RTP2 ENSG0000019186|CYP24A1  
ENSG00000166689|PLEKHA7 ENSG00000102804|TSC22D1 ENSG00000106346|USP42 ENSG00000107789|MINPP1 ENSG00000125868|DSTN ENSG00000133740|E2F5 ENSG00000134001|EIF2S1  
ENSG00000134070|IRAK2 ENSG00000134253|TRIM45 ENSG00000134333|LDHA ENSG00000137824|FAM82C ENSG00000138413|IDH1 ENSG00000147872|ADFP ENSG00000151304|SRFBP1 ENSG00000165030|NFIL3  
ENSG00000167785|ZNF558 ENSG00000171806|C1orf156 ENSG00000172175|MALT1 ENSG00000183513|NP\_001008216.1 ENSG00000184500|PROS1 ENSG00000185414|MRPL30 ENSG00000196886|Q8NAW3\_HUMAN ENSG00000197585|Q5JV89\_HUMAN  
ENSG00000198900|TOP1  
TTCACCT ENSG00000062282|DGAT2 ENSG00000067191|CACNB1 ENSG00000068354|TBC1D25 ENSG00000087274|ADD1 ENSG00000089597|GANAB ENSG00000100285|NEFH ENSG00000108349|CASC3 ENSG00000110090|CPT1A  
ENSG00000115459|RBED1 ENSG00000125804|C2orf91 ENSG00000136867|SLC31A2 ENSG00000140564|FURIN ENSG00000147439|BIN3 ENSG00000152475|Q96EG3\_HUMAN ENSG00000155886|SLC24A2 ENSG00000157617|C21orf25  
ENSG00000158578|ALAS2 ENSG00000159388|BTG2 ENSG00000161265|U2AF1L4 ENSG00000163915|C3orf65 ENSG00000181031|RPH3AL ENSG00000182533|CAV3 ENSG00000184678|HIST2H2BE ENSG00000188828|GLRA4  
ENSG00000188859|FAM78B ENSG00000204312|Q6ZNY8\_HUMAN ENSG00000204438|BAT4 ENSG00000204569|PPP1R10 ENSG00000008294|SPAG9 ENSG00000027697|IFNGR1 ENSG00000038427|VCAN ENSG00000073711|PPP2R3A  
ENSG00000077264|PAK3 ENSG00000100711|ZFYVE21 ENSG00000107938|C10orf137 ENSG00000117598|NP\_001010861.1 ENSG00000121058|COIL ENSG00000131781|FMO5 ENSG00000134028|ADAMDEC1 ENSG00000136108|CKAP2  
ENSG00000138160|KIF11 ENSG00000143184|XCL1 ENSG00000143185|XCL2 ENSG00000143363|PRUNE ENSG00000170500|LONRF2 ENSG00000173068|BNC2 ENSG00000174740|PABPC5 ENSG00000177058|NP\_775785.1  
ENSG00000183347|GBP6 ENSG00000187068|NP\_001020437.1 ENSG00000188243|COMMD6  
TTCAGAG ENSG00000004139|SARM1 ENSG00000005379|BZRAP1 ENSG00000008853|RHOBTB2 ENSG00000057704|TMCC3 ENSG00000100243|CYB5R3 ENSG00000104974|LILRA1 ENSG00000115073|ACTR1B ENSG00000115318|LOXL3  
ENSG00000116031|CD207 ENSG00000132155|RAF1 ENSG00000132911|NMUR2 ENSG00000145920|CPLX2 ENSG00000146047|HIST1H2BA ENSG00000156222|SLC28A1 ENSG00000159110|IFNAR2 ENSG00000166436|TRIM66  
ENSG00000166689|PLEKHA7 ENSG00000168298|HIST1H1E ENSG00000174306|ZHX3 ENSG00000175860|NP\_001012724.1 ENSG00000183611|RPL32P3 ENSG00000184207|NP\_001035830.1 ENSG00000186063|C1orf80 ENSG00000196694|Q6UXP9\_HUMAN  
ENSG00000197681|TBC1D3 ENSG00000197697|HIST1H2BE ENSG00000197753|LHFPL5 ENSG00000198366|HIST1H3A ENSG00000198374|HIST1H2AL ENSG00000198411|NM\_207443 ENSG00000204141|Q6ZVW5\_HUMAN ENSG00000204710|TPR  
ENSG00000054598|FOXCl ENSG00000072041|SLC6A15 ENSG00000081386|ZNF510 ENSG00000085563|ABC1 ENSG00000100196|KDELR3 ENSG00000110544|ZNF508 ENSG00000101782|RIOK3 ENSG00000109536|FRG1  
ENSG00000112541|PDE10A ENSG00000113161|HMGR1 ENSG00000114125|RNFP7 ENSG000001122591|FAM126A ENSG00000131779|PEX11B ENSG00000144476|CXCR7 ENSG00000153071|DAB2 ENSG00000157341|Q8ND77\_HUMAN  
ENSG00000158691|ZSCAN12 ENSG00000164611|PTTG1 ENSG00000166148|AVPR1A ENSG00000166240|Q14DG7-2 ENSG00000168538|NP\_068761.4 ENSG00000173655|Q5T909\_HUMAN ENSG00000177620|Q9BSL4\_HUMAN ENSG00000179299|NSUN7  
ENSG00000180573|HIST1H2AC ENSG00000185710|Q8ND77\_HUMAN ENSG00000185880|TRIM69 ENSG00000187083|Q8NEQ1\_HUMAN ENSG00000197989|C1orf79 ENSG00000198478|SH3BGR2 ENSG00000198492|YTHDF2 ENSG00000204104|TRAF3IP1  
TTCAGGA ENSG00000066735|Q96GK3\_HUMAN ENSG000000086548|CEACAM6 ENSG000000088876|ZNF343 ENSG00000103150|MLYCD ENSG00000103196|CRISPLD2 ENSG00000104368|PLAT ENSG00000105388|CEACAM5 ENSG00000139197|PEX5  
ENSG00000146859|TMEM140 ENSG00000149294|NCAM1 ENSG00000149596|JPH2 ENSG00000154040|CABYR ENSG00000162344|FGF19 ENSG00000162951|LRRMT1 ENSG00000167741|GGT6 ENSG00000168016|Q8N80\_HUMAN  
ENSG00000169926|KLF13 ENSG00000171388|APLN ENSG00000173218|VANGL1 ENSG00000177951|BET1L ENSG00000183519|NSUN5B ENSG00000185963|BTCD2 ENSG00000187979|Q6ZPC6\_HUMAN ENSG00000189231|PSG3  
ENSG00000198929|NOS1AP ENSG00000204157|NP\_001013664.1 ENSG00000204479|PRAMEF17 ENSG00000204488|PRAMEF16 ENSG00000204704|HFE ENSG000000043514|TRIT1 ENSG00000077279|DCX ENSG00000109814|UGDH  
ENSG00000112333|NR2E1 ENSG00000121350|NP\_079130.2 ENSG00000121858|TNFSF10 ENSG00000122884|P4HA1 ENSG00000124827|GCM2 ENSG00000138095|LRPPRC ENSG00000138593|K0256\_HUMAN ENSG00000138640|FAM13A1

|         |                                                                                                                                                                                                                                                                                                                                                                                                                                                                                                 |                                                                                                                                                                                                                                                                                                                                                                                                                                                                                                  |                                                                                                                                                                                                                                                                                                                                                                                                                                                                                              |                                                                                                                                                                                                                                                                                                                                                                                                                                                                                  |                                                                                                                                                                                                                                                                                                                                                                                                                                                                                                                                                                                                                                                                                                                                                                                                                                                                                                                |                                                                                                                                                                                                                                                                                                                                                                                                                                                                                                                                                                                                                                                                                                                                                                                                                                                                                                                                                                                                                                                                                                                                                                                                                                                                                                                                                                                                                                                                                                                                                                                                                                                                                                                        |                                                                                                                                                                                                                                                                                                                                                                                                                                                                                                                                                                                                                                                                                                                           |                                                                                                                                                                                                                                                                                                                                                                                                                                                                                                                                                                                                                                                                                                                                                                                                                                                                                                                                                                                                                                                                                                                                                                                                                                                                                                                                                                                                                                                                                                                                                                                                                                                                                                                                                                                                                                                                                                                                                                                                                                                                                                                                                                                                                                                                                                                                                                                                                                                                                                                                                                                                                                                                                                                                                                                                                                                                                                                                                                                                                                                                                                                                                                                                                                                                                                                                                                                                                                                                                                                                                                                                                                                                                                                                                                                                                                                                                                                                                                                                                                                                                                                                                                                                                                                                                                                                                                                                                                                                                                                                                                                                                                                                                                                                                                                                                                                                                                                                                                                                                                                                                                                                                                                                                                                                                                                                                                                                                                                                                                                                                                                                                                                                                                                                                                                                                                                                                                                                                                                                                                                                                                                                                                                                                                                                                                                                                                                                                |
|---------|-------------------------------------------------------------------------------------------------------------------------------------------------------------------------------------------------------------------------------------------------------------------------------------------------------------------------------------------------------------------------------------------------------------------------------------------------------------------------------------------------|--------------------------------------------------------------------------------------------------------------------------------------------------------------------------------------------------------------------------------------------------------------------------------------------------------------------------------------------------------------------------------------------------------------------------------------------------------------------------------------------------|----------------------------------------------------------------------------------------------------------------------------------------------------------------------------------------------------------------------------------------------------------------------------------------------------------------------------------------------------------------------------------------------------------------------------------------------------------------------------------------------|----------------------------------------------------------------------------------------------------------------------------------------------------------------------------------------------------------------------------------------------------------------------------------------------------------------------------------------------------------------------------------------------------------------------------------------------------------------------------------|----------------------------------------------------------------------------------------------------------------------------------------------------------------------------------------------------------------------------------------------------------------------------------------------------------------------------------------------------------------------------------------------------------------------------------------------------------------------------------------------------------------------------------------------------------------------------------------------------------------------------------------------------------------------------------------------------------------------------------------------------------------------------------------------------------------------------------------------------------------------------------------------------------------|------------------------------------------------------------------------------------------------------------------------------------------------------------------------------------------------------------------------------------------------------------------------------------------------------------------------------------------------------------------------------------------------------------------------------------------------------------------------------------------------------------------------------------------------------------------------------------------------------------------------------------------------------------------------------------------------------------------------------------------------------------------------------------------------------------------------------------------------------------------------------------------------------------------------------------------------------------------------------------------------------------------------------------------------------------------------------------------------------------------------------------------------------------------------------------------------------------------------------------------------------------------------------------------------------------------------------------------------------------------------------------------------------------------------------------------------------------------------------------------------------------------------------------------------------------------------------------------------------------------------------------------------------------------------------------------------------------------------|---------------------------------------------------------------------------------------------------------------------------------------------------------------------------------------------------------------------------------------------------------------------------------------------------------------------------------------------------------------------------------------------------------------------------------------------------------------------------------------------------------------------------------------------------------------------------------------------------------------------------------------------------------------------------------------------------------------------------|----------------------------------------------------------------------------------------------------------------------------------------------------------------------------------------------------------------------------------------------------------------------------------------------------------------------------------------------------------------------------------------------------------------------------------------------------------------------------------------------------------------------------------------------------------------------------------------------------------------------------------------------------------------------------------------------------------------------------------------------------------------------------------------------------------------------------------------------------------------------------------------------------------------------------------------------------------------------------------------------------------------------------------------------------------------------------------------------------------------------------------------------------------------------------------------------------------------------------------------------------------------------------------------------------------------------------------------------------------------------------------------------------------------------------------------------------------------------------------------------------------------------------------------------------------------------------------------------------------------------------------------------------------------------------------------------------------------------------------------------------------------------------------------------------------------------------------------------------------------------------------------------------------------------------------------------------------------------------------------------------------------------------------------------------------------------------------------------------------------------------------------------------------------------------------------------------------------------------------------------------------------------------------------------------------------------------------------------------------------------------------------------------------------------------------------------------------------------------------------------------------------------------------------------------------------------------------------------------------------------------------------------------------------------------------------------------------------------------------------------------------------------------------------------------------------------------------------------------------------------------------------------------------------------------------------------------------------------------------------------------------------------------------------------------------------------------------------------------------------------------------------------------------------------------------------------------------------------------------------------------------------------------------------------------------------------------------------------------------------------------------------------------------------------------------------------------------------------------------------------------------------------------------------------------------------------------------------------------------------------------------------------------------------------------------------------------------------------------------------------------------------------------------------------------------------------------------------------------------------------------------------------------------------------------------------------------------------------------------------------------------------------------------------------------------------------------------------------------------------------------------------------------------------------------------------------------------------------------------------------------------------------------------------------------------------------------------------------------------------------------------------------------------------------------------------------------------------------------------------------------------------------------------------------------------------------------------------------------------------------------------------------------------------------------------------------------------------------------------------------------------------------------------------------------------------------------------------------------------------------------------------------------------------------------------------------------------------------------------------------------------------------------------------------------------------------------------------------------------------------------------------------------------------------------------------------------------------------------------------------------------------------------------------------------------------------------------------------------------------------------------------------------------------------------------------------------------------------------------------------------------------------------------------------------------------------------------------------------------------------------------------------------------------------------------------------------------------------------------------------------------------------------------------------------------------------------------------------------------------------------------------------------------------------------------------------------------------------------------------------------------------------------------------------------------------------------------------------------------------------------------------------------------------------------------------------------------------------------------------------------------------------------------------------------------------------------------------------------------------------------------------------------------------|
|         | ENSG00000150337 FCGR1A<br>ENSG00000166173 LARP6                                                                                                                                                                                                                                                                                                                                                                                                                                                 | ENSG00000151422 FER<br>ENSG00000166432 ZMAT1                                                                                                                                                                                                                                                                                                                                                                                                                                                     | ENSG00000152944 SURB7<br>ENSG00000170044 ZPLD1                                                                                                                                                                                                                                                                                                                                                                                                                                               | ENSG00000155592 ZKSCAN2<br>ENSG00000173744 HRB                                                                                                                                                                                                                                                                                                                                                                                                                                   | ENSG00000156875 HIAT1<br>ENSG00000183499 DPH3B                                                                                                                                                                                                                                                                                                                                                                                                                                                                                                                                                                                                                                                                                                                                                                                                                                                                 | ENSG00000160588 U2966_HUMAN<br>ENSG00000186188 GPR120                                                                                                                                                                                                                                                                                                                                                                                                                                                                                                                                                                                                                                                                                                                                                                                                                                                                                                                                                                                                                                                                                                                                                                                                                                                                                                                                                                                                                                                                                                                                                                                                                                                                  | ENSG00000162407 PPAP2B<br>ENSG00000188452 CERKL                                                                                                                                                                                                                                                                                                                                                                                                                                                                                                                                                                                                                                                                           | ENSG00000162521 RBBP4<br>ENSG00000198393 ZNF26                                                                                                                                                                                                                                                                                                                                                                                                                                                                                                                                                                                                                                                                                                                                                                                                                                                                                                                                                                                                                                                                                                                                                                                                                                                                                                                                                                                                                                                                                                                                                                                                                                                                                                                                                                                                                                                                                                                                                                                                                                                                                                                                                                                                                                                                                                                                                                                                                                                                                                                                                                                                                                                                                                                                                                                                                                                                                                                                                                                                                                                                                                                                                                                                                                                                                                                                                                                                                                                                                                                                                                                                                                                                                                                                                                                                                                                                                                                                                                                                                                                                                                                                                                                                                                                                                                                                                                                                                                                                                                                                                                                                                                                                                                                                                                                                                                                                                                                                                                                                                                                                                                                                                                                                                                                                                                                                                                                                                                                                                                                                                                                                                                                                                                                                                                                                                                                                                                                                                                                                                                                                                                                                                                                                                                                                                                                                                                 |
| TTCAGGC | ENSG00000068985 PAGE1<br>ENSG000000115602 IL1RL1<br>ENSG00000188883 KLRG2<br>ENSG00000119917 IFIT3<br>ENSG00000174032 SLC25A30                                                                                                                                                                                                                                                                                                                                                                  | ENSG00000099795 NDUF7<br>ENSG000000131652 THOC6<br>ENSG00000204240 Q6ZVKO_HUMAN<br>ENSG00000124177 CHD6<br>ENSG00000179300 ZCCHC5                                                                                                                                                                                                                                                                                                                                                                | ENSG00000100968 NFATC4<br>ENSG00000142583 SLC2A5<br>ENSG00000204574 ABCF1<br>ENSG00000144010 LOC653192<br>ENSG00000180616 SSTR2                                                                                                                                                                                                                                                                                                                                                              | ENSG00000101098 RIMS4<br>ENSG00000144711 IQSQC1<br>ENSG00000206250 WAPAL<br>ENSG00000144015 TRIM43<br>ENSG00000180730 TMEM46                                                                                                                                                                                                                                                                                                                                                     | ENSG00000104299 INT9_HUMAN<br>ENSG00000170776 AKAP13<br>ENSG00000208384 WAPAL<br>ENSG00000144061 NPHP1<br>ENSG00000182628 FAM33A                                                                                                                                                                                                                                                                                                                                                                                                                                                                                                                                                                                                                                                                                                                                                                               | ENSG00000109705 BAPX1<br>ENSG00000171552 BCL2L1<br>ENSG00000200426 ZBED4<br>ENSG00000147471 PROSC<br>ENSG00000186031 Q6ZSY1_HUMAN                                                                                                                                                                                                                                                                                                                                                                                                                                                                                                                                                                                                                                                                                                                                                                                                                                                                                                                                                                                                                                                                                                                                                                                                                                                                                                                                                                                                                                                                                                                                                                                      | ENSG00000111271 ACAD10<br>ENSG00000177504 VCX2<br>ENSG00000100426 ZBED4<br>ENSG00000147649 MTDH<br>ENSG00000189308 LIN54                                                                                                                                                                                                                                                                                                                                                                                                                                                                                                                                                                                                  | ENSG00000113578 FGF1<br>ENSG00000179837 RBM15B<br>ENSG00000110975 SYT10<br>ENSG00000155961 RAB39B<br>ENSG00000197343 ZNF655                                                                                                                                                                                                                                                                                                                                                                                                                                                                                                                                                                                                                                                                                                                                                                                                                                                                                                                                                                                                                                                                                                                                                                                                                                                                                                                                                                                                                                                                                                                                                                                                                                                                                                                                                                                                                                                                                                                                                                                                                                                                                                                                                                                                                                                                                                                                                                                                                                                                                                                                                                                                                                                                                                                                                                                                                                                                                                                                                                                                                                                                                                                                                                                                                                                                                                                                                                                                                                                                                                                                                                                                                                                                                                                                                                                                                                                                                                                                                                                                                                                                                                                                                                                                                                                                                                                                                                                                                                                                                                                                                                                                                                                                                                                                                                                                                                                                                                                                                                                                                                                                                                                                                                                                                                                                                                                                                                                                                                                                                                                                                                                                                                                                                                                                                                                                                                                                                                                                                                                                                                                                                                                                                                                                                                                                                    |
| TTCAGTA | ENSG00000013619 CXorf6<br>ENSG00000124140 SLC12A5<br>ENSG00000185917 SETD4<br>ENSG00000061794 MRPS35<br>ENSG00000112280 COL9A1<br>ENSG00000138346 DNA2L<br>ENSG00000174010 KLHL15<br>ENSG00000196774 ANKRD20A3<br>ENSG00000042445 RETSAT<br>ENSG00000113272 THG1L<br>ENSG00000166540 ZNF407<br>ENSG00000196189 SEMA4A<br>ENSG00000069248 NUP133<br>ENSG00000108389 MTMR4<br>ENSG00000129480 C14orf126<br>ENSG00000163093 BBS5<br>ENSG00000180828 BHLHB5<br>ENSG00000198353 HOXC4                | ENSG00000077009 ITGB1BP3<br>ENSG00000135503 ACVR1B<br>ENSG00000186577 C6orf1<br>ENSG00000064651 SLC12A2<br>ENSG00000114850 SSR3<br>ENSG00000149507 PLAC1L<br>ENSG00000174016 FAM46D<br>ENSG00000197054 ZNF763<br>ENSG00000090316 MAEA<br>ENSG00000114656 KIAA1257<br>ENSG00000173272 FAM128A<br>ENSG00000196652 ZKSCAN5<br>ENSG00000076650 GPATC1<br>ENSG00000113163 COL4A3BP<br>ENSG00000130396 MLLT4<br>ENSG00000163751 CPA3<br>ENSG00000182504 LRR1Q2                                         | ENSG00000077274 CAPN6<br>ENSG00000149305 HTR3B<br>ENSG00000189321 NR_002940.1<br>ENSG00000066557 LRRRC40<br>ENSG00000115520 COQ10B<br>ENSG00000155304 STCH<br>ENSG00000176055 NP_981951.1<br>ENSG00000198482 ZNF808<br>ENSG00000101890 GUCY2F<br>ENSG00000115956 PLEK<br>ENSG00000182158 CREB3L2<br>ENSG00000204576 PRR3<br>ENSG00000002060 PAPOLA<br>ENSG00000113648 H2AFY<br>ENSG00000135747 ZNF670<br>ENSG00000165240 ATPF7A<br>ENSG00000182628 FAM33A                                    | ENSG00000092529 CAPN3<br>ENSG00000165714 LOH12CR1<br>ENSG00000197982 Clorf122<br>ENSG00000083896 YTHDC1<br>ENSG00000115866 DARS<br>ENSG00000162688 AGL<br>ENSG00000177483 NP_001073973.1<br>ENSG00000102245 CD40LG<br>ENSG00000131368 MRPS25<br>ENSG00000183530 C22orf30<br>ENSG000000204765 XR_017851.1<br>ENSG00000090600 PAPOLA<br>ENSG00000117569 PTBP2<br>ENSG00000135747 ZNF670<br>ENSG00000167383 ZNF229<br>ENSG00000184588 PDE4B                                         | ENSG00000100448 CTSNG<br>ENSG00000166619 BLCAP<br>ENSG00000198535 NP_997205.1<br>ENSG00000104643 MTMR9<br>ENSG00000119314 ROD1<br>ENSG00000163563 MND4<br>ENSG00000177853 ZNF518<br>ENSG00000104228 TRIM35<br>ENSG00000131467 PSME3<br>ENSG00000183778 B3GALT5<br>ENSG000000204779 FOXD4L5<br>ENSG00000090382 LYZ<br>ENSG00000119969 HELLS<br>ENSG00000137558 PI15<br>ENSG00000169252 ALRB2<br>ENSG00000187676 B3GALT<br>ENSG00000102445 C13orf18<br>ENSG00000136859 ANGPTL2<br>ENSG00000185722 ANKFY1<br>ENSG0000011785 RIC8B<br>ENSG00000164211 STAR4<br>ENSG00000197020 ZNF100<br>ENSG00000100979 PLTP<br>ENSG00000167483 FAM129C<br>ENSG00000093000 NUP50<br>ENSG00000137675 MMP27<br>ENSG00000153201 RANBP2<br>ENSG00000196167 NP_997312.1<br>ENSG00000108018 SORCS1<br>ENSG00000104263 SORD<br>ENSG00000204410 MSH5<br>ENSG00000120555 Q5W161_HUMAN<br>ENSG00000163002 NUP35<br>ENSG00000188761 C1orf178 | ENSG00000106144 CASP2<br>ENSG00000168002 POLR2G<br>ENSG00000198742 SMURF1<br>ENSG00000107443 CCNJ<br>ENSG00000123178 C13orf1<br>ENSG00000164347 GFM2<br>ENSG00000177853 ZNF518<br>ENSG00000106125 AQP1<br>ENSG00000132446 FTHL17<br>ENSG00000184659 FOXD4L4<br>ENSG000000204828 FX4L4_HUMAN<br>ENSG00000100523 DDHD1<br>ENSG00000120436 GPR31<br>ENSG00000147853 AK3<br>ENSG00000169564 PCBP1<br>ENSG00000196826 ZNF709<br>ENSG00000103353 UBFD1<br>ENSG00000145864 GABR2<br>ENSG00000188706 ZDHHC9<br>ENSG00000118620 ZNF430<br>ENSG00000176293 ZNF135<br>ENSG00000198042 RBM13<br>ENSG00000100979 PLTP<br>ENSG00000171467 ZNF318<br>ENSG00000103540 CE110_HUMAN<br>ENSG00000139187 KLRG1<br>ENSG00000159579 RSRPY1<br>ENSG00000205110 Q6TKS8_HUMAN<br>ENSG00000114982 NP_060461.3<br>ENSG00000148985 NP_055304.1<br>ENSG00000204410 MSH5<br>ENSG00000120555 Q5W161_HUMAN<br>ENSG00000163002 NUP35<br>ENSG00000197054 ZNF187<br>ENSG00000115107 STEAP3<br>ENSG00000165606 NP_001073989.1<br>ENSG0000006652 IFRD1<br>ENSG00000143224 PPOX<br>ENSG00000163603 C4orf34<br>ENSG00000197062 ZNF187<br>ENSG00000119408 NEK6<br>ENSG00000170161 Q5VV11_HUMAN<br>ENSG0000011426 ANLN<br>ENSG00000143727 ACP1<br>ENSG00000165525 SDCCAG1<br>ENSG00000198718 KIAA0423<br>ENSG00000119682 KIAA0317<br>ENSG00000148399 WDR85<br>ENSG00000206634 DBF4<br>ENSG00000143315 PIGM<br>ENSG00000176907 C8orf4<br>ENSG00000180257 ZNF321<br>ENSG00000198538 ZNF28<br>ENSG000001110395 CBL<br>ENSG00000155052 CNTNAP5<br>ENSG00000186910 SERPINA11<br>ENSG00000205864 KRTPA5-6<br>ENSG00000101349 PAK7<br>ENSG00000120539 MASTL<br>ENSG00000124486 USP9X<br>ENSG00000150048 CLEC1A<br>ENSG00000175449 RFESD<br>ENSG00000197121 PGAP1_HUMAN | ENSG000001110395 CBL<br>ENSG00000155052 CNTNAP5<br>ENSG00000186910 SERPINA11<br>ENSG00000205864 KRTPA5-6<br>ENSG00000101349 PAK7<br>ENSG00000120539 MASTL<br>ENSG00000124486 USP9X<br>ENSG00000150048 CLEC1A<br>ENSG00000175449 RFESD<br>ENSG00000197121 PGAP1_HUMAN                                                                                                                                                                                                                                                                                                                                                                                                                                                      |                                                                                                                                                                                                                                                                                                                                                                                                                                                                                                                                                                                                                                                                                                                                                                                                                                                                                                                                                                                                                                                                                                                                                                                                                                                                                                                                                                                                                                                                                                                                                                                                                                                                                                                                                                                                                                                                                                                                                                                                                                                                                                                                                                                                                                                                                                                                                                                                                                                                                                                                                                                                                                                                                                                                                                                                                                                                                                                                                                                                                                                                                                                                                                                                                                                                                                                                                                                                                                                                                                                                                                                                                                                                                                                                                                                                                                                                                                                                                                                                                                                                                                                                                                                                                                                                                                                                                                                                                                                                                                                                                                                                                                                                                                                                                                                                                                                                                                                                                                                                                                                                                                                                                                                                                                                                                                                                                                                                                                                                                                                                                                                                                                                                                                                                                                                                                                                                                                                                                                                                                                                                                                                                                                                                                                                                                                                                                                                                                |
| TTCATAC | ENSG00000005073 HOXA11<br>ENSG00000127481 ZUBR1<br>ENSG00000164713 BRI3<br>ENSG00000091138 SLC26A3<br>ENSG00000154727 GABPA<br>ENSG00000189190 ZNF600<br>ENSG00000204604 ZNF468<br>ENSG00000183633 C14orf132<br>ENSG00000125266 EFNB2<br>ENSG00000186652 PRG2<br>ENSG00000135999 EPC2<br>ENSG00000152242 C18orf25<br>ENSG00000172175 MALT1<br>ENSG00000074040 FTSL3<br>ENSG00000124104 SNX21<br>ENSG00000203662 OR2M1P<br>ENSG00000067208 EVI5<br>ENSG00000157282 PANK1<br>ENSG00000170848 PSG6 | ENSG0000011478 QPCTL<br>ENSG00000131149 KIAA0182<br>ENSG00000165699 TSC1<br>ENSG00000100852 ARHGAP5<br>ENSG00000160336 ZNF761<br>ENSG00000196172 ZNF681<br>ENSG00000204789 ZNF204<br>ENSG00000055130 CUL1<br>ENSG00000134824 FADS2<br>ENSG00000186825 Q58OR0-2<br>ENSG00000137420 NOL7<br>ENSG00000152413 HOMER1<br>ENSG00000178966 RMI1<br>ENSG00000089057 SLC23A2<br>ENSG00000124164 VAPB<br>ENSG00000203662 OR2M1P<br>ENSG00000106537 TSPAN13<br>ENSG00000155959 VBP1<br>ENSG00000183668 PSG9 | ENSG00000065882 TBC1D1<br>ENSG00000132517 GPR172B<br>ENSG00000180825 ANKFY1<br>ENSG00000106399 RPA3<br>ENSG00000160352 ZNF714<br>ENSG00000196442 ZNF432<br>ENSG00000205669 ACOT6<br>ENSG00000095383 TBC1D2<br>ENSG00000135472 FAIM2<br>ENSG00000188229 TUBB2C<br>ENSG00000137674 MMP20<br>ENSG00000152954 NRSN1<br>ENSG00000184500 PROS1<br>ENSG00000100320 RBM9<br>ENSG00000130508 PKDN<br>ENSG00000204319 C4A<br>ENSG00000110958 PTGES3<br>ENSG00000159113 IL10RB<br>ENSG00000187268 FAM9C | ENSG00000073605 GSDML<br>ENSG00000136859 ANGPTL2<br>ENSG00000185722 ANKFY1<br>ENSG0000011785 RIC8B<br>ENSG00000164211 STAR4<br>ENSG00000197020 ZNF100<br>ENSG00000100979 PLTP<br>ENSG00000167483 FAM129C<br>ENSG00000093000 NUP50<br>ENSG00000137675 MMP27<br>ENSG00000153201 RANBP2<br>ENSG00000196167 NP_997312.1<br>ENSG00000108018 SORCS1<br>ENSG00000104263 SORD<br>ENSG00000204410 MSH5<br>ENSG00000120555 Q5W161_HUMAN<br>ENSG00000163002 NUP35<br>ENSG00000197054 ZNF187 | ENSG00000102445 C13orf18<br>ENSG00000145864 GABR2<br>ENSG00000188706 ZDHHC9<br>ENSG00000118620 ZNF430<br>ENSG00000176293 ZNF135<br>ENSG00000198042 RBM13<br>ENSG00000100979 PLTP<br>ENSG00000167483 FAM129C<br>ENSG00000093000 NUP50<br>ENSG00000137675 MMP27<br>ENSG00000153201 RANBP2<br>ENSG00000196167 NP_997312.1<br>ENSG00000108018 SORCS1<br>ENSG00000104263 SORD<br>ENSG00000204410 MSH5<br>ENSG00000120555 Q5W161_HUMAN<br>ENSG00000163002 NUP35<br>ENSG00000197054 ZNF187                                                                                                                                                                                                                                                                                                                                                                                                                            | ENSG00000103353 UBFD1<br>ENSG00000145864 GABR2<br>ENSG00000188706 ZDHHC9<br>ENSG00000118620 ZNF430<br>ENSG00000176293 ZNF135<br>ENSG00000198042 RBM13<br>ENSG00000100979 PLTP<br>ENSG00000167483 FAM129C<br>ENSG00000093000 NUP50<br>ENSG00000137675 MMP27<br>ENSG00000153201 RANBP2<br>ENSG00000196167 NP_997312.1<br>ENSG00000108018 SORCS1<br>ENSG00000104263 SORD<br>ENSG00000204410 MSH5<br>ENSG00000120555 Q5W161_HUMAN<br>ENSG00000163002 NUP35<br>ENSG00000197054 ZNF187                                                                                                                                                                                                                                                                                                                                                                                                                                                                                                                                                                                                                                                                                                                                                                                                                                                                                                                                                                                                                                                                                                                                                                                                                                       | ENSG00000106125 AQP1<br>ENSG00000132446 FTHL17<br>ENSG00000184659 FOXD4L4<br>ENSG000000204828 FX4L4_HUMAN<br>ENSG00000100523 DDHD1<br>ENSG00000120436 GPR31<br>ENSG00000147853 AK3<br>ENSG00000169564 PCBP1<br>ENSG00000196826 ZNF709<br>ENSG00000103353 UBFD1<br>ENSG00000145864 GABR2<br>ENSG00000188706 ZDHHC9<br>ENSG00000118620 ZNF430<br>ENSG00000176293 ZNF135<br>ENSG00000198042 RBM13<br>ENSG00000100979 PLTP<br>ENSG00000167483 FAM129C<br>ENSG00000093000 NUP50<br>ENSG00000137675 MMP27<br>ENSG00000153201 RANBP2<br>ENSG00000196167 NP_997312.1<br>ENSG00000108018 SORCS1<br>ENSG00000104263 SORD<br>ENSG00000204410 MSH5<br>ENSG00000120555 Q5W161_HUMAN<br>ENSG00000163002 NUP35<br>ENSG00000197054 ZNF187 | ENSG00000106246 PTCD1<br>ENSG00000179335 CLK3<br>ENSG00000198742 SMURF1<br>ENSG00000108932 SLC16A6<br>ENSG00000132498 ANKRD20A1<br>ENSG00000164542 NP_056129.1<br>ENSG00000183148 ANKRD20A2<br>ENSG00000196177 ACADSB<br>ENSG00000116663 FBXO6<br>ENSG00000182712 MTCP1<br>ENSG00000203814 HIST2H2BF<br>ENSG00000111145 ELK3<br>ENSG00000132498 ANKRD20A1<br>ENSG00000137273 FOXF2<br>ENSG00000164542 NP_056129.1<br>ENSG00000183148 ANKRD20A2<br>ENSG00000196177 ACADSB<br>ENSG00000116663 FBXO6<br>ENSG00000182712 MTCP1<br>ENSG00000203814 HIST2H2BF<br>ENSG00000111145 ELK3<br>ENSG00000132498 ANKRD20A1<br>ENSG00000137273 FOXF2<br>ENSG00000164542 NP_056129.1<br>ENSG00000183148 ANKRD20A2<br>ENSG00000196177 ACADSB<br>ENSG00000116663 FBXO6<br>ENSG00000182712 MTCP1<br>ENSG00000203814 HIST2H2BF<br>ENSG00000111145 ELK3<br>ENSG00000132498 ANKRD20A1<br>ENSG00000137273 FOXF2<br>ENSG00000164542 NP_056129.1<br>ENSG00000183148 ANKRD20A2<br>ENSG00000196177 ACADSB<br>ENSG00000116663 FBXO6<br>ENSG00000182712 MTCP1<br>ENSG00000203814 HIST2H2BF<br>ENSG00000111145 ELK3<br>ENSG00000132498 ANKRD20A1<br>ENSG00000137273 FOXF2<br>ENSG00000164542 NP_056129.1<br>ENSG00000183148 ANKRD20A2<br>ENSG00000196177 ACADSB<br>ENSG00000116663 FBXO6<br>ENSG00000182712 MTCP1<br>ENSG00000203814 HIST2H2BF<br>ENSG00000111145 ELK3<br>ENSG00000132498 ANKRD20A1<br>ENSG00000137273 FOXF2<br>ENSG00000164542 NP_056129.1<br>ENSG00000183148 ANKRD20A2<br>ENSG00000196177 ACADSB<br>ENSG00000116663 FBXO6<br>ENSG00000182712 MTCP1<br>ENSG00000203814 HIST2H2BF<br>ENSG00000111145 ELK3<br>ENSG00000132498 ANKRD20A1<br>ENSG00000137273 FOXF2<br>ENSG00000164542 NP_056129.1<br>ENSG00000183148 ANKRD20A2<br>ENSG00000196177 ACADSB<br>ENSG00000116663 FBXO6<br>ENSG00000182712 MTCP1<br>ENSG00000203814 HIST2H2BF<br>ENSG00000111145 ELK3<br>ENSG00000132498 ANKRD20A1<br>ENSG00000137273 FOXF2<br>ENSG00000164542 NP_056129.1<br>ENSG00000183148 ANKRD20A2<br>ENSG00000196177 ACADSB<br>ENSG00000116663 FBXO6<br>ENSG00000182712 MTCP1<br>ENSG00000203814 HIST2H2BF<br>ENSG00000111145 ELK3<br>ENSG00000132498 ANKRD20A1<br>ENSG00000137273 FOXF2<br>ENSG00000164542 NP_056129.1<br>ENSG00000183148 ANKRD20A2<br>ENSG00000196177 ACADSB<br>ENSG00000116663 FBXO6<br>ENSG00000182712 MTCP1<br>ENSG00000203814 HIST2H2BF<br>ENSG00000111145 ELK3<br>ENSG00000132498 ANKRD20A1<br>ENSG00000137273 FOXF2<br>ENSG00000164542 NP_056129.1<br>ENSG00000183148 ANKRD20A2<br>ENSG00000196177 ACADSB<br>ENSG00000116663 FBXO6<br>ENSG00000182712 MTCP1<br>ENSG00000203814 HIST2H2BF<br>ENSG00000111145 ELK3<br>ENSG00000132498 ANKRD20A1<br>ENSG00000137273 FOXF2<br>ENSG00000164542 NP_056129.1<br>ENSG00000183148 ANKRD20A2<br>ENSG00000196177 ACADSB<br>ENSG00000116663 FBXO6<br>ENSG00000182712 MTCP1<br>ENSG00000203814 HIST2H2BF<br>ENSG00000111145 ELK3<br>ENSG00000132498 ANKRD20A1<br>ENSG00000137273 FOXF2<br>ENSG00000164542 NP_056129.1<br>ENSG00000183148 ANKRD20A2<br>ENSG00000196177 ACADSB<br>ENSG00000116663 FBXO6<br>ENSG00000182712 MTCP1<br>ENSG00000203814 HIST2H2BF<br>ENSG00000111145 ELK3<br>ENSG00000132498 ANKRD20A1<br>ENSG00000137273 FOXF2<br>ENSG00000164542 NP_056129.1<br>ENSG00000183148 ANKRD20A2<br>ENSG00000196177 ACADSB<br>ENSG00000116663 FBXO6<br>ENSG00000182712 MTCP1<br>ENSG00000203814 HIST2H2BF<br>ENSG00000111145 ELK3<br>ENSG00000132498 ANKRD20A1<br>ENSG00000137273 FOXF2<br>ENSG00000164542 NP_056129.1<br>ENSG00000183148 ANKRD20A2<br>ENSG00000196177 ACADSB<br>ENSG00000116663 FBXO6<br>ENSG00000182712 MTCP1<br>ENSG00000203814 HIST2H2BF<br>ENSG00000111145 ELK3<br>ENSG00000132498 ANKRD20A1<br>ENSG00000137273 FOXF2<br>ENSG00000164542 NP_056129.1<br>ENSG00000183148 ANKRD20A2<br>ENSG00000196177 ACADSB<br>ENSG00000116663 FBXO6<br>ENSG00000182712 MTCP1<br>ENSG00000203814 HIST2H2BF<br>ENSG00000111145 ELK3<br>ENSG00000132498 ANKRD20A1<br>ENSG00000137273 FOXF2<br>ENSG00000164542 NP_056129.1<br>ENSG00000183148 ANKRD20A2<br>ENSG00000196177 ACADSB<br>ENSG00000116663 FBXO6<br>ENSG00000182712 MTCP1<br>ENSG00000203814 HIST2H2BF<br>ENSG00000111145 ELK3<br>ENSG00000132498 ANKRD20A1<br>ENSG00000137273 FOXF2<br>ENSG00000164542 NP_056129.1<br>ENSG00000183148 ANKRD20A2<br>ENSG00000196177 ACADSB<br>ENSG00000116663 FBXO6<br>ENSG00000182712 MTCP1<br>ENSG00000203814 HIST2H2BF<br>ENSG00000111145 ELK3<br>ENSG00000132498 ANKRD20A1<br>ENSG00000137273 FOXF2<br>ENSG00000164542 NP_056129.1<br>ENSG00000183148 ANKRD20A2<br>ENSG00000196177 ACADSB<br>ENSG00000116663 FBXO6<br>ENSG00000182712 MTCP1<br>ENSG00000203814 HIST2H2BF<br>ENSG00000111145 ELK3<br>ENSG00000132498 ANKRD20A1<br>ENSG00000137273 FOXF2<br>ENSG00000164542 NP_056129.1<br>ENSG00000183148 ANKRD20A2<br>ENSG00000196177 ACADSB<br>ENSG00000116663 FBXO6<br>ENSG00000182712 MTCP1<br>ENSG00000203814 HIST2H2BF<br>ENSG00000111145 ELK3<br>ENSG00000132498 ANKRD20A1<br>ENSG00000137273 FOXF2<br>ENSG00000164542 NP_056129.1<br>ENSG00000183148 ANKRD20A2<br>ENSG00000196177 ACADSB<br>ENSG00000116663 FBXO6<br>ENSG00000182712 MTCP1<br>ENSG00000203814 HIST2H2BF<br>ENSG00000111145 ELK3<br>ENSG00000132498 ANKRD20A1<br>ENSG00000137273 FOXF2<br>ENSG00000164542 NP_056129.1<br>ENSG00000183148 ANKRD20A2<br>ENSG00000196177 ACADSB<br>ENSG00000116663 FBXO6<br>ENSG00000182712 MTCP1<br>ENSG00000203814 HIST2H2BF<br>ENSG00000111145 ELK3<br>ENSG00000132498 ANKRD20A1<br>ENSG00000137273 FOXF2<br>ENSG00000164542 NP_056129.1<br>ENSG00000183148 ANKRD20A2<br>ENSG00000196177 ACADSB<br>ENSG00000116663 FBXO6<br>ENSG00000182712 MTCP1<br>ENSG00000203814 HIST2H2BF<br>ENSG00000111145 ELK3<br>ENSG00000132498 ANKRD20A1<br>ENSG00000137273 FOXF2<br>ENSG00000164542 NP_056129.1<br>ENSG00000183148 ANKRD20A2<br>ENSG00000196177 ACADSB<br>ENSG00000116663 FBXO6<br>ENSG00000182712 MTCP1<br>ENSG00000203814 HIST2H2BF<br>ENSG00000111145 ELK3<br>ENSG00000132498 ANKRD20A1<br>ENSG00000137273 FOXF2<br>ENSG00000164542 NP_056129.1<br>ENSG00000183148 ANKRD20A2<br>ENSG00000196177 ACADSB<br>ENSG00000116663 FBXO6<br>ENSG00000182712 MTCP1<br>ENSG00000203814 HIST2H2BF<br>ENSG00000111145 ELK3<br>ENSG00000132498 ANKRD20A1<br>ENSG00000137273 FOXF2<br>ENSG00000164542 NP_056129.1<br>ENSG00000183148 ANKRD20A2<br>ENSG00000196177 ACADSB<br>ENSG00000116663 FBXO6<br>ENSG00000182712 MTCP1<br>ENSG00000203814 HIST2H2BF<br>ENSG00000111145 ELK3<br>ENSG00 |

|         |                              |                              |                              |                                |                              |                                |                                |                              |
|---------|------------------------------|------------------------------|------------------------------|--------------------------------|------------------------------|--------------------------------|--------------------------------|------------------------------|
|         | ENSG00000125351 UPF3B        | ENSG00000135604 STX11        | ENSG00000136826 KLF4         | ENSG00000140743 CDR2           | ENSG00000145723 ZH2C2        | ENSG00000153201 RANBP2         | ENSG00000154240 CCDC46         | ENSG00000163554 SPTA1        |
|         | ENSG00000182489 XRRX         | ENSG00000185002 RFDC1        | ENSG00000185414 MLRCL30      | ENSG00000196505 GDAP2          | ENSG00000205156 Q6UXQ8_HUMAN |                                |                                |                              |
| TTCGCC  | ENSG0000011590 ZBTB32        | ENSG0000012163 LIMS2         | ENSG000001001567 SLC16A8     | ENSG00000107223 EDF1           | ENSG00000116670 MAD2L2       | ENSG00000126005 ITGB4BP        | ENSG00000126460 PRRG2          |                              |
|         | ENSG00000130182 ZSCAN10      | ENSG00000132819 RBM38        | ENSG00000138136 LXB1         | ENSG00000144834 TAGLN3         | ENSG00000160255 ITGB2        | ENSG00000160469 BRSK1          | ENSG00000164707 SLC13A4        | ENSG00000167105 TMEM92       |
|         | ENSG00000170956 CBACAM3      | ENSG00000177627 C12orf54     | ENSG00000179219 TMEM148      | ENSG00000196374 HIST1H2BM      | ENSG00000197942 Q6ZSS2_HUMAN | ENSG00000203908 NP_001017361.1 | ENSG00000205205 C17orf51       | ENSG000000043355 ZIC2        |
|         | ENSG00000070761 C16orf80     | ENSG00000071575 TRIB2        | ENSG00000078399 HOXA9        | ENSG00000102935 MLL110         | ENSG00000102543 CDADC1       | ENSG00000102935 ZNF423         | ENSG00000104313 EYA1           | ENSG00000106031 HOXA13       |
|         | ENSG00000107518 ATRNL1       | ENSG00000113205 PCDHB3       | ENSG00000113812 ACTR8        | ENSG00000126216 TUBGCP3        | ENSG00000130021 HDHD1A       | ENSG00000130939 UBE4B          | ENSG00000136938 ANP32B         | ENSG00000153012 LG12         |
|         | ENSG00000175390 EIF3B5       | ENSG00000180138 CSNK1A1L     | ENSG00000180828 BHLHB5       | ENSG00000188001 FAM79B         | ENSG00000197110 IL28B        | ENSG00000197584 KCNMB2         | ENSG00000198382 UVRAG          | ENSG00000205524 Q68D70_HUMAN |
| TTCGCCG | ENSG00000070371 CLTCL1       | ENSG00000099822 HCN2         | ENSG00000101152 DNAJC5       | ENSG00000101194 C20orf59       | ENSG00000101210 EEF1A2       | ENSG00000106397 PLOC3          | ENSG00000115507 OTX1           | ENSG00000119919 NKX2-3       |
|         | ENSG00000131668 BARX1        | ENSG00000136280 CCM2         | ENSG00000141698 NT5C3L       | ENSG00000141971 FAM125A        | ENSG00000142657 PGD          | ENSG00000145494 NDUFS6         | ENSG00000150175 PDZD5B         | ENSG00000153060 TEKT5        |
|         | ENSG00000153531 ADPRHL1      | ENSG00000163702 IL17RC       | ENSG00000163975 MF12         | ENSG00000168056 LTBP3          | ENSG00000169976 SF3B5        | ENSG00000170324 FRMPD2         | ENSG00000177340 QOVFX0_HUMAN   | ENSG00000179428 Q8N6X1_HUMAN |
|         | ENSG00000180849 C15orf37     | ENSG00000182087 C19orf6      | ENSG00000183072 NKX2-5       | ENSG00000183242 WIT1           | ENSG00000187140 FOXD3        | ENSG00000188305 C19orf35       | ENSG00000197704 PDZD5A         | ENSG00000204401 Q8N0T0_HUMAN |
|         | ENSG00000129515 SNX6         | ENSG00000143337 TOR1AIP1     | ENSG00000162852 C1orf71      | ENSG00000171791 BCL2           | ENSG00000173276 ZNF295       | ENSG00000180190 C8orf42        | ENSG00000203722 RAET1G         |                              |
| TTCGCCG | ENSG0000007080 CCDC124       | ENSG0000019485 PRDM11        | ENSG00000079435 LIPE         | ENSG00000124126 PREX1_HUMAN    | ENSG00000141956 PRDM15       | ENSG00000158428 NP_940961.1    | ENSG00000160953 MUM1           | ENSG00000167619 TMEM145      |
|         | ENSG00000167930 ITFG3        | ENSG00000168412 MTNR1A       | ENSG00000176120 Q9BSY8_HUMAN | ENSG00000179823 XR_017713.1    | ENSG00000180878 C11orf42     | ENSG00000182511 FES            | ENSG00000183838 Q96NM2_HUMAN   | ENSG00000186818 LILRB4       |
|         | ENSG00000198488 B3GN76       | ENSG00000198937 C6orf129     | ENSG00000204418 CLIC1        | ENSG00000041515 MYO16          | ENSG00000051180 RAD51        | ENSG00000061794 MRPS35         | ENSG00000069122 GPR116         | ENSG00000087995 METTL2A      |
|         | ENSG00000111364 DDX55        | ENSG00000117262 GPR89A       | ENSG00000119421 NDUFA5       | ENSG00000129235 TXNL5          | ENSG00000132965 ALOX5AP      | ENSG00000134070 IRAK2          | ENSG00000134852 CLOCK          | ENSG00000154258 ABCA9        |
|         | ENSG00000159197 KCNK2        | ENSG00000162992 NEUROD1      | ENSG00000163689 NP_940865.1  | ENSG00000163738 MTHFD2L        | ENSG00000164035 EMCN         | ENSG00000166452 C11orf17       | ENSG00000170860 LSM3           | ENSG00000172058 SERF1_HUMAN  |
|         | ENSG00000173141 MRP63        | ENSG00000175746 NP_997328.1  | ENSG00000186205 MOSC1        | ENSG00000188092 GPR89B         | ENSG00000197172 MAGEA3       | ENSG00000204291 COL15A1        | ENSG00000205325 NP_001001684.1 | ENSG00000205572 SERF1_HUMAN  |
| TTCGCCG | ENSG0000002330 BAD           | ENSG00000100364 C22orf9      | ENSG00000100604 CHGA         | ENSG00000101417 PXMP4          | ENSG00000103415 HMOX2        | ENSG00000107831 FGF8           | ENSG00000110651 CD81           | ENSG00000113108 SRA1         |
|         | ENSG00000123329 ARHGAP9      | ENSG00000125844 RRBP1        | ENSG00000128254 C22orf24     | ENSG00000130119 GNL3L          | ENSG00000137825 ITPKA        | ENSG00000138092 CENPO          | ENSG00000141101 NOB1           | ENSG00000162711 NLRP3        |
|         | ENSG00000164740 NR_003034.1  | ENSG00000166126 AMN          | ENSG00000167434 CA4          | ENSG00000168016 Q8N8K0_HUMAN   | ENSG00000171401 KRT13        | ENSG00000171443 ZNF524         | ENSG00000173933 RBM4           | ENSG00000179023 KLHDC7A      |
|         | ENSG00000181026 ISG20L1      | ENSG00000186526 CYP4F8       | ENSG00000196092 PAX5         | ENSG00000197079 KRT35          | ENSG00000197694 SPTAN1       | ENSG00000204938 Q6ZU57_HUMAN   | ENSG00000003989 SLC7A2         | ENSG00000025156 HSF2         |
|         | ENSG00000066583 ISOC1        | ENSG00000085377 PREP         | ENSG00000090686 USP48        | ENSG00000099256 PRTFDC1        | ENSG00000110723 EXPH5        | ENSG00000115504 GHT1           | ENSG00000120656 TAF12          | ENSG00000121964 GTDC1        |
|         | ENSG00000131779 PEX11B       | ENSG00000131941 RHPN2        | ENSG00000138592 USP8         | ENSG00000140968 IRF8           | ENSG00000163808 KIF15        | ENSG00000165678 HBITM          | ENSG00000166529 ZSCAN21        | ENSG00000175348 TMEM9B       |
|         | ENSG00000183520 UTP11L       | ENSG00000186416 NKRF         | ENSG00000196290 NIF3L1       | ENSG00000197321 SVIL           | ENSG00000197846 HIST1H2BF    | ENSG00000204389 HSPA1A         |                                |                              |
| TTCGCCG | ENSG00000070729 CNGB1        | ENSG00000100012 SEC14L3      | ENSG00000111186 WNT5B        | ENSG00000121104 FAM117A        | ENSG00000123364 HOXC13       | ENSG00000139174 PRICKLE1       | ENSG00000145020 AMT            | ENSG00000151640 DPYSL4       |
|         | ENSG00000156603 MED19        | ENSG00000161642 ZNF385       | ENSG00000165006 UBAP1        | ENSG00000168800 NM_001039690.2 | ENSG00000170238 XR_017738.1  | ENSG00000172878 NP_954697.1    | ENSG00000178605 GTPBP6         | ENSG00000187140 FOXD3        |
|         | ENSG00000196295 Q8N867_HUMAN | ENSG00000196747 HIST1H3      | ENSG00000204308 RNF5         | ENSG00000204526 HCCG27         | ENSG00000075303 SLC25A40     | ENSG00000080618 CPB2           | ENSG00000100554 ATP6V1D        | ENSG00000101182 PSMA7        |
|         | ENSG00000114023 C3orf28      | ENSG00000116288 PARK7        | ENSG00000136099 PCDH8        | ENSG00000136805 C9orf4         | ENSG00000139759 IFI44L       | ENSG00000139618 BRCA2          | ENSG00000144868 TMEM108        | ENSG00000145348 TBCK_HUMAN   |
|         | ENSG00000153951 OR4D2        | ENSG00000155876 RAGA         | ENSG00000155876 RAGA         | ENSG00000156467 UQCRCB         | ENSG00000174891 RSRC1        | ENSG00000175322 ZNF519         | ENSG00000182134 TRKH           | ENSG00000198542 ITGBL1       |
| TTCCTGG | ENSG00000198553 KCNRG        | ENSG00000198856 NP_067050.1  | ENSG00000204567 Q6ZTG9_HUMAN |                                |                              |                                |                                |                              |
|         | ENSG00000080056 SYN1         | ENSG00000080031 PTPRH        | ENSG00000104884 ERCC2        | ENSG00000110047 EHD1           | ENSG00000114993 RTKN         | ENSG00000119383 PPP2R4         | ENSG00000123358 NR4A1          | ENSG00000127526 SLC35E1      |
|         | ENSG00000129559 NEDD8        | ENSG00000132017 NP_612362.2  | ENSG00000135632 SMYD5        | ENSG00000136485 WDR68          | ENSG00000138942 RNF185       | ENSG00000140263 SORD           | ENSG00000154342 WNT3A          | ENSG00000156097 GPR61        |
|         | ENSG00000156413 FUT6         | ENSG00000161849 KRT84        | ENSG00000162396 PARS2        | ENSG00000162576 MKXRA8         | ENSG00000163348 PYGO2        | ENSG00000165125 TRPV6          | ENSG00000167771 RCOR2          | ENSG00000168005 NP_612480.1  |
|         | ENSG00000168528 SERINC2      | ENSG00000174680 C21orf9      | ENSG00000186316 Q96NA9_HUMAN | ENSG00000188060 RAB42          | ENSG00000197746 PSAP         | ENSG00000204174 PPYR1          | ENSG00000204569 PPP1R10        | ENSG00000205793 Q6ZT42_HUMAN |
|         | ENSG0000002746 HECW1         | ENSG00000204048 UBR2         | ENSG00000037965 HOXC8        | ENSG00000066379 ZNRD1          | ENSG00000104863 LIN7B        | ENSG00000107201 DDX58          | ENSG00000111783 RF4            | ENSG00000118231 CRYGD        |
|         | ENSG00000120279 MYCT1        | ENSG00000124120 C20orf121    | ENSG00000125107 CNOT1        | ENSG00000137509 PRCP           | ENSG00000138308 PLA2G12B     | ENSG00000141298 SSH2           | ENSG00000142494 NP_060712.2    | ENSG00000143162 CREG1        |
|         | ENSG00000146109 ABT1         | ENSG00000152944 SURB7        | ENSG00000159363 ATP13A2      | ENSG00000162909 CAPN2          | ENSG00000166348 USP54        | ENSG00000166405 R1C3           | ENSG00000179136 Q8NAV9_HUMAN   | ENSG00000183576 SETD3        |
| TTCCTGT | ENSG00000188761 C1orf178     | ENSG00000188959 C9orf152     | ENSG00000198015 MRPL42       | ENSG00000198221 NP_001035973.1 | ENSG00000204524 ZNF805       |                                |                                |                              |
|         | ENSG00000092929 UNC13D       | ENSG00000105011 ASF1B        | ENSG00000108219 TSPAN14      | ENSG00000110107 PRPF19         | ENSG00000112033 PPARD        | ENSG00000121766 ZCCHC17        | ENSG00000131845 ZNF304         | ENSG00000139644 TEGT         |
|         | ENSG00000145029 NICN1        | ENSG00000146826 C7orf43      | ENSG00000154358 OBSCN        | ENSG00000160753 RUSC1          | ENSG00000163202 LCE3D        | ENSG00000165782 TMEM55B        | ENSG00000166682 TMPRSS5        | ENSG00000168005 NP_612480.1  |
|         | ENSG00000169188 APEX2        | ENSG00000174175 SELP         | ENSG00000174243 DDX23        | ENSG00000176980 PRR10          | ENSG00000198805 NP           | ENSG00000204525 HLA-C          | ENSG00000204892 NP_001034845.1 | ENSG00000205726 ITSN1        |
|         | ENSG0000008294 SPAG9         | ENSG0000016490 CLCA1         | ENSG00000101310 SEC23B       | ENSG00000104660 LEPROTL1       | ENSG00000105939 ZC3HAV1      | ENSG00000112208 BAG2           | ENSG00000112664 NUDT3          | ENSG00000118579 MED28        |
|         | ENSG00000130826 DKC1         | ENSG00000131737 KRT34        | ENSG00000133858 CCDC131      | ENSG00000138386 NAB1           | ENSG00000140600 SH3GL3       | ENSG00000143751 C1orf55        | ENSG00000145365 NP_443096.1    | ENSG00000149231 CCDC82       |
|         | ENSG00000155313 USP25        | ENSG00000163788 SNRK         | ENSG00000164112 TMEM155      | ENSG00000166415 WDR72          | ENSG00000170962 PDGFD        | ENSG00000178562 CD28           | ENSG00000183305 MAGEA6         | ENSG00000184750 MAGEA2       |
|         | ENSG00000184984 CHRM5        | ENSG00000196285 H33_HUMAN    | ENSG00000198963 RORB         |                                |                              |                                |                                |                              |
| TTCCTTC | ENSG00000049089 COL9A2       | ENSG00000094796 KRT31        | ENSG00000102996 MMP15        | ENSG00000111335 OAS2           | ENSG00000111801 BTN3A3       | ENSG00000112053 SLC26A8        | ENSG00000121152 NCAPH          | ENSG00000121671 CRY2         |
|         | ENSG00000128713 HOXD11       | ENSG00000133026 MYH10        | ENSG00000135956 TMEM127      | ENSG00000141736 ERBB2          | ENSG00000149483 TMEM138      | ENSG00000159479 MED8           | ENSG00000160753 RUSC1          | ENSG00000162736 NCSTN        |
|         | ENSG00000167011 NP_940973.1  | ENSG00000168490 PHYHIP       | ENSG00000169884 WNT10B       | ENSG00000172548 ICHN_HUMAN     | ENSG00000178709 CLDN9        | ENSG00000179165 PXT1           | ENSG00000179823 XR_017713.1    | ENSG00000180879 SSR4         |
|         | ENSG00000182362 C21orf57     | ENSG00000184584 TMEM173      | ENSG00000189180 ZNF33A       | ENSG00000196313 NP_742017.1    | ENSG00000197408 CYP2B6       | ENSG00000007350 TKTL1          | ENSG00000042781 USH2A          | ENSG00000048740 CUGBP2       |
|         | ENSG00000052841 TTC17        | ENSG00000053328 Q5T253_HUMAN | ENSG00000065970 FOXJ2        | ENSG00000079691 LRRCL16        | ENSG00000081181 ARG2         | ENSG00000095139 ARCN1          | ENSG00000110048 OSBP           | ENSG00000110079 MS4A4A       |
|         | ENSG00000112812 HMG20A       | ENSG00000115415 STAT1        | ENSG00000123066 THRAP2       | ENSG00000123444 KBTBD4         | ENSG00000134109 EDEM1        | ENSG00000135837 CEP350         | ENSG00000139055 ERP27          | ENSG00000139679 P2RY5        |
|         | ENSG00000140382 HMG20A       | ENSG00000140481 CCDC33       | ENSG00000148303 SNORD36A     | ENSG00000148484 RSU1           | ENSG00000148834 GSTO1        | ENSG00000153820 NP_085126.1    | ENSG00000156026 CCDC109A       | ENSG00000163430 FSTL1        |
|         | ENSG00000163637 PRICKLE2     | ENSG00000164929 BAALC        | ENSG00000167528 ZNF641       | ENSG00000175857 C5orf29        | ENSG00000180787 ZFP3         | ENSG00000197140 ADAM32         | ENSG00000197405 C5AR1          |                              |
| TTCGAAC | ENSG00000058085 LAMC2        | ENSG00000063169 GLTSCR1      | ENSG00000090020 SLC9A1       | ENSG00000099860 GADD45B        | ENSG00000101365 IDH3B        | ENSG00000104888 SLC17A7        | ENSG00000115318 LOXL3          | ENSG00000116824 CD2          |
|         | ENSG00000123965 NP_777590.1  | ENSG00000130520 LSM4         | ENSG00000131845 ZNF304       | ENSG00000133878 DUSP26         | ENSG00000140403 DNAJA4       | ENSG00000160323 ADAMTS13       | ENSG00000162585 C1orf86        | ENSG00000167191 GPRC5B       |
|         | ENSG00000168907 PLA2G4F      | ENSG00000184221 OLIG1        | ENSG00000185668 POU3F1       | ENSG00000197435 HIST3H2BB      | ENSG00000037241 RPL26L1      | ENSG00000071991 CDH19          | ENSG00000111837 MAK            | ENSG00000112378 PERP         |
|         | ENSG00000120215 MLANA        | ENSG00000121390 PSPC1        | ENSG00000131873 CHSY1        | ENSG00000131876 SNRPA1         | ENSG00000132530 NP_954590.1  | ENSG00000137055 PLAA           | ENSG00000138095 LRPPRC         | ENSG00000139133 ALG10        |
|         | ENSG00000154608 CEP170L      | ENSG00000158185 ANKRD36      | ENSG00000160062 ZBTB8        | ENSG00000163610 Q9NUU0_HUMAN   | ENSG00000164616 FBXL21       | ENSG00000171681 ATF7IP         | ENSG00000173728 C1orf100       | ENSG00000184226 PCDH9        |
|         | ENSG00000196937 FAM3C        | ENSG00000198876 WDR40A       | ENSG00000205791 LOH12CR2     |                                |                              |                                |                                |                              |
| TTCGACC | ENSG00000090674 MCOLN1       | ENSG00000104888 SLC17A7      | ENSG00000105131 ABHD9        | ENSG00000105972 C7orf20        | ENSG00000140548 ZNF710       | ENSG00000149300 C11orf52       | ENSG00000160471 COX6B2         | ENSG00000161682 Q8N0U1_HUMAN |
|         | ENSG00000161939 C17orf49     | ENSG00000163701 IL17RE       | ENSG00000165175 MID1IP1      | ENSG00000170458 CD14           | ENSG00000173812 EIF1         | ENSG00000178709 CLDN9          | ENSG00000179965 ZNF771         | ENSG00000182492 BGN          |
|         | ENSG00000182953 NM_001031.4  | ENSG00000183354 NP_060358.2  | ENSG00000186837 C21orf119    | ENSG00000197081 IGF2R          | ENSG00000205313 FAM106A      | ENSG0000000460 C1orf112        | ENSG00000064042 NP_055803.1    | ENSG00000083828 ZNF586       |
|         | ENSG00000087053 MTMR2        | ENSG00000105880 DLX5         | ENSG00000106483 SFRP4        | ENSG00000119616 FCF1           | ENSG00000122479 NDP          | ENSG00000128845 CCPG1          | ENSG00000134046 MBD2           | ENSG00000136235 GNMB         |
|         | ENSG00000136986 DERL1        | ENSG00000138109 CYP2C9       | ENSG00000141140 MYOHD1       | ENSG00000146909 NOM1           | ENSG00000152133 CCDC75       | ENSG00000154217 PITPNC1        | ENSG00000154359 LONRF1         | EN                           |



TTCGCTA ENSG00000075275|CELSR1 ENSG00000100077|ADRBK2 ENSG00000101542|CDH20 ENSG00000103034|NDRG4 ENSG00000110801|PSMD9 ENSG00000119686|C14orf58 ENSG00000135365|PHF21A ENSG00000155265|C10orf132 ENSG00000162076|NP\_612448.1 ENSG00000164010|ERMAP ENSG00000166159|LRTM2 ENSG00000168539|CHRM1 ENSG00000169662|NP\_997357.1 ENSG00000170550|Q8WVU8\_HUMAN ENSG00000180509|KCNE1 ENSG00000185668|POU3F1 ENSG00000187808|ANKRD58 ENSG00000196367|TRRAP ENSG00000204266|NM\_001025448 ENSG00000204335|SP5 ENSG00000204589|Q6ZWG6\_HUMAN ENSG0000027232|DNAJC10 ENSG00000278081|LAMP3 ENSG00000090581|GNPTG ENSG00000106588|PSMA2 ENSG00000106733|C9orf95 ENSG00000108654|DDX5 ENSG00000113838|CRYGS ENSG00000136492|BRIP1 ENSG00000140937|CDH11 ENSG00000144357|ZNF650 ENSG00000154485|MMP21 ENSG00000154898|Q8IYA2\_HUMAN ENSG00000157869|RAB28 ENSG00000163646|CLRN1 ENSG00000165474|GJB2 ENSG00000169554|ZEB2 ENSG00000171208|NETO2 ENSG00000171766|GATM ENSG00000173198|CYSLTR1 ENSG00000179163|FUCA1 ENSG00000189050|NP\_057209.3 ENSG00000189266|PNRC2 ENSG00000198741|Q8N9C2\_HUMAN

TTCGCTG ENSG00000054793|ATP9A ENSG00000065621|GSTO2 ENSG00000088992|TESC ENSG00000099864|PALM ENSG00000103811|CTS5 ENSG00000106245|BUD31 ENSG00000106384|MOGAT3 ENSG00000110455|NP\_115981.1 ENSG00000119333|WDR34 ENSG00000123901|GPR83 ENSG00000124140|SLC12A5 ENSG00000130487|KLHDC7B ENSG00000130822|PNCK ENSG00000134398|ERN2 ENSG00000164707|SLC13A4 ENSG00000167046|Q5JT57\_HUMAN ENSG00000167930|ITFG3 ENSG00000170054|SERPINA9 ENSG00000171302|CANT1 ENSG00000171551|ECE1 ENSG00000181649|PHLDA2 ENSG00000183562|Q9P1L5\_HUMAN ENSG00000197093|GAL3ST4 ENSG00000204283|NP\_001001685.1 ENSG00000205704|Q6ICG7\_HUMAN ENSG00000007350|TKTL1 ENSG000000061455|PRDM6 ENSG00000072571|HMMR ENSG00000102409|BEXL1 ENSG00000103035|PSMD7 ENSG00000108510|THRAP1 ENSG00000109519|GRPEL1 ENSG00000115415|STAT1 ENSG00000127774|TMEM93 ENSG00000127870|RNF6 ENSG00000128050|PAICS ENSG00000129596|CDO1 ENSG00000135604|STX11 ENSG00000148057|C9orf103 ENSG00000155307|SAMS1 ENSG00000155868|CRSP9 ENSG00000159398|CES7 ENSG00000164287|CDC20B ENSG00000164548|TRA2A\_HUMAN ENSG00000166321|NUDT13 ENSG00000174718|C12orf35 ENSG00000177508|IRX3 ENSG00000178988|MRFAP1L1 ENSG00000185290|XR\_016379.1 ENSG00000186288|RBM32A ENSG00000186684|NP\_001001665.2 ENSG00000187919|GSTA1 ENSG00000188848|CCDC4 ENSG00000196141|NP\_056350.1 ENSG00000196470|STAH1 ENSG00000198074|AKR1B10

TTCGCTA ENSG00000007392|LUC7L ENSG00000065526|SPEN ENSG00000100417|PMM1 ENSG00000101150|TPD5L2 ENSG00000102003|SYP ENSG00000107954|NEURL ENSG00000124126|PREX1\_HUMAN ENSG00000124233|SEMGI ENSG00000130813|NP\_060851.1 ENSG00000147789|ZNF7 ENSG00000161847|RAVER1 ENSG00000165879|FRAT1 ENSG00000170049|KCNAB3 ENSG00000170549|IRX1 ENSG00000170767|C6orf208 ENSG00000171160|C10orf83 ENSG00000176986|SEC24C ENSG00000184292|TACSTD2 ENSG00000196260|SFTPG ENSG00000198910|L1CAM ENSG00000203971|Q6ZRT1\_HUMAN ENSG00000205266|Q6ZRU5\_HUMAN ENSG00000205927|OLIG2 ENSG00000206943|PIGB ENSG00000075142|SRI ENSG00000080503|SMARCA2 ENSG00000094916|CBX5 ENSG00000104643|MTMR9 ENSG00000107371|EXOSC3 ENSG00000113810|SMC4 ENSG00000114120|SLC25A36 ENSG00000117475|BLZF1 ENSG00000124217|MCCS3 ENSG00000136044|APPL2 ENSG00000137285|TUBB2B ENSG00000142871|CYR61 ENSG00000143452|HORMAD1 ENSG00000152942|RAD17 ENSG00000153012|LGI2 ENSG00000163631|ALB ENSG00000164597|COG5 ENSG00000165359|DDX26B ENSG00000165487|EFGA1 ENSG00000168564|CDKN2AIP ENSG00000169239|CA5B ENSG00000183022|NR\_003148.2 ENSG00000186814|Q86W11\_HUMAN ENSG00000198498|NP\_060822.1 ENSG00000204133|FAM33B

TTCGTAC ENSG00000029534|ANK1 ENSG000000059915|PSD ENSG00000069812|HES2 ENSG00000074800|ENO1 ENSG00000100605|ITPK1 ENSG00000112118|MCM3 ENSG00000116478|HDAC1 ENSG00000121413|ZSCAN18 ENSG00000125977|EIF2S2 ENSG00000132002|DNAJB1 ENSG00000132793|LPIN3 ENSG00000139613|SMARCC2 ENSG00000148814|LRRC27 ENSG00000154928|P54762-3 ENSG00000157601|MX1 ENSG00000168477|TNXB ENSG00000168890|TMEM150 ENSG00000169925|BRD3 ENSG00000170214|ADRA1B ENSG00000174015|SPERT ENSG00000175644|TLL11 ENSG00000184205|TSPYL2 ENSG00000184524|CEND1 ENSG00000184697|CLDN6 ENSG00000198294|Q495C9\_HUMAN ENSG00000006074|CCL18 ENSG00000048544|MRPS10 ENSG00000086065|CHMP5 ENSG00000102805|CLN5 ENSG00000117143|UAP1 ENSG00000133997|MED6 ENSG00000134138|MEIS2 ENSG00000135698|MPHOSPH6 ENSG00000135828|RNASEL ENSG00000144837|PLA1A ENSG00000144893|MEDI2L ENSG00000146457|WTAP ENSG00000150756|NP\_954584.1 ENSG00000154646|PRSS7 ENSG00000157341|Q8ND77\_HUMAN ENSG00000164093|PITX2 ENSG00000174408|Q5VZ27\_HUMAN ENSG00000176171|BNIP3 ENSG00000185710|Q8ND77\_HUMAN ENSG00000188612|SUMO2 ENSG00000196428|TSC2D2 ENSG00000197779|ZNF81 ENSG00000204291|COL15A1

TTCGTCA ENSG000000019582|CD74 ENSG00000095383|TBC1D2 ENSG00000109101|FOXN1 ENSG00000115042|FAHD2A ENSG00000116786|PLEKHM2 ENSG00000119782|FKBP1B ENSG00000127884|ECHS1 ENSG00000134201|GSTM5 ENSG00000138073|PREB ENSG00000143547|Q5VUQ9\_HUMAN ENSG00000166473|PKDL1L2 ENSG00000166979|C21orf63 ENSG00000175203|DCTN2 ENSG00000176515|Q8NAX6\_HUMAN ENSG00000176718|C5orf26 ENSG00000182490|TSSK2 ENSG00000183160|TMEM119 ENSG00000184205|TSPYL2 ENSG00000186532|SMYD4 ENSG00000186838|SELV\_HUMAN ENSG00000198643|FAM3D ENSG00000198693|Q6ZW86\_HUMAN ENSG0000044115|CTNNA1 ENSG0000047410|TPR ENSG00000090487|SPG21 ENSG00000100632|ERH ENSG00000109099|PMP22 ENSG00000115541|HSP11 ENSG00000124659|TBCC ENSG00000135334|C6orf166 ENSG00000156500|FAM122C ENSG00000162702|ZNF281 ENSG00000164506|STXB5 ENSG00000171714|TMEM16E ENSG00000172752|NP\_694996.3 ENSG00000174021|GN5 ENSG00000174226|NP\_689841.2 ENSG00000177406|Q8N503\_HUMAN ENSG00000178403|NEUROG2 ENSG00000178459|Q8N2E2\_HUMAN ENSG00000183784|C9orf66

TTCGTGC ENSG000000050327|ARHGEF5 ENSG00000067606|PRKC2 ENSG00000095777|MYO3A ENSG00000108344|PSMD3 ENSG00000111737|RAB35 ENSG00000115461|IGFBP5 ENSG00000123815|ADCK4 ENSG00000126460|PRRG2 ENSG00000130175|PRKCSH ENSG00000135457|TFCP2 ENSG00000146067|Q9NW00\_HUMAN ENSG00000160180|TFP3 ENSG00000161860|SYCE2 ENSG00000164620|C5orf16 ENSG00000168517|HEXIM2 ENSG00000168528|SERINC2 ENSG00000170233|Q96AM0\_HUMAN ENSG00000174837|EMR1 ENSG00000177374|HIC1 ENSG00000182173|TSEN54 ENSG00000183621|ZNF438 ENSG00000184545|DUSP8 ENSG00000187180|LCE2C ENSG00000196892|Q9PID2\_HUMAN ENSG00000204168|Q6ZRI1\_HUMAN ENSG00000204573|Q6ZV05\_HUMAN ENSG00000204589|Q6ZWG6\_HUMAN ENSG0000085377|PREP ENSG00000103194|USP10 ENSG00000126803|HSPA2 ENSG00000128710|HOXD10 ENSG00000136052|SLC41A2 ENSG00000138135|CH25H ENSG00000140093|SERPINA10 ENSG00000143727|ACP1 ENSG00000144891|AGTR1 ENSG00000145041|Q8TBD9\_HUMAN ENSG00000152465|NMT2 ENSG00000153157|NP\_001035364.1 ENSG00000155111|CDC2L6 ENSG00000162384|C1orf123 ENSG00000170185|USP38 ENSG00000178338|ZNF354B ENSG00000180408|Q8N5G0\_HUMAN ENSG00000187581|COX8C ENSG00000197535|MYO5A ENSG00000205156|Q6UXQ8\_HUMAN ENSG00000175453|CRAMP1L ENSG00000104490|NCALD ENSG00000106397|PLOD3 ENSG00000107738|C10orf54 ENSG00000111245|MYL2 ENSG00000116544|DLGAP3 ENSG00000125835|SNRPB ENSG00000130518|KIAA1683 ENSG00000132130|LHX1 ENSG00000136271|DDX56 ENSG00000146670|CDCA5 ENSG00000158710|TAGLN2 ENSG00000166136|NDUFB8 ENSG00000166473|PKDL1L2 ENSG00000172009|THOP1 ENSG00000179219|TMEM148 ENSG00000186868|MAPT ENSG00000188385|C10orf39 ENSG00000005302|MBSL3L1 ENSG00000101624|CEP76 ENSG00000115053|NUF1 ENSG00000115839|RAB3GAP1 ENSG00000128891|CCDC32 ENSG00000161905|ALOX15 ENSG00000164331|ANKRA2 ENSG00000175040|CHST2 ENSG00000177620|Q9BSL4\_HUMAN ENSG00000183499|DPH3B ENSG00000184905|TCEAL2 ENSG00000197405|C5AR1 ENSG00000198924|DCLRE1A ENSG00000204672|Q8NI72\_HUMAN

TTCTAAG ENSG00000006756|ARSD ENSG00000083842|ZNF8 ENSG00000084207|GSTP1 ENSG00000085465|OVGP1 ENSG00000101670|LIPG ENSG00000104499|GML ENSG00000112941|POLS ENSG00000114841|DNAH1 ENSG00000115112|TFPC2L1 ENSG00000129467|ADCY4 ENSG00000138311|ZNF365 ENSG00000140950|KIAA1609 ENSG00000142700|DMRTA2 ENSG00000147912|FBXO10 ENSG00000151208|DLG5 ENSG00000155980|KIF5A ENSG00000157103|SLC6M1 ENSG00000168242|HIST1H2BI ENSG00000171747|LGALS4 ENSG00000173163|COMMD1 ENSG00000177201|SPACA2 ENSG00000185085|INTS5 ENSG00000048991|R3HDM1 ENSG00000054803|CBLN4 ENSG00000099389|C20orf191 ENSG00000100852|ARHGAP5 ENSG00000113851|CRBN ENSG00000120129|DUSP1 ENSG00000128829|EIF2AK4 ENSG00000128845|CCPG1 ENSG00000137720|C11orf1 ENSG00000141543|EIF4A3 ENSG00000147604|RPL7 ENSG00000151422|FER ENSG00000154380|ENAH ENSG00000163113|OTUD7B ENSG00000163512|AZI2 ENSG00000165646|SLC18A2 ENSG00000167601|AXL ENSG00000171155|C1GALT1C1 ENSG00000174010|KLHL15 ENSG00000175606|TMEM70 ENSG00000178522|AMBN ENSG00000179299|NSUN7 ENSG00000179813|C13orf30 ENSG00000188463|XR\_015229.1 ENSG00000198146|ZNF770 ENSG00000198874|TYW1 ENSG00000204348|DOM3Z

TTCTACA ENSG00000100030|MAPK1 ENSG00000101082|SLA2 ENSG00000102981|PARD6A ENSG00000109132|PHOX2B ENSG00000123411|IKZF4 ENSG00000125652|ALKBH7 ENSG00000127527|EPS15L1 ENSG00000132792|CTNBL1 ENSG00000166947|EPB42 ENSG00000172939|OXSR1 ENSG00000174939|ASPHD1 ENSG00000175505|CLCF1 ENSG00000176515|Q8NAX6\_HUMAN ENSG00000182950|ODF3L1 ENSG00000184012|TMPRSS2 ENSG00000189058|APOD ENSG00000204305|AGER ENSG00000205974|Q6ZVY3\_HUMAN ENSG00000002267|PHL1 ENSG00000072364|AFF4 ENSG000000083896|YTHDC1 ENSG00000114021|NIT2 ENSG00000115806|GORASP2 ENSG00000117519|CNN3 ENSG00000117862|TXNDC12 ENSG00000132640|BTBD3 ENSG00000134086|VHL ENSG00000134873|CLDN10 ENSG00000135269|TES ENSG00000138449|SLC40A1 ENSG00000141433|ADCYAP1 ENSG00000144061|NPHP1 ENSG00000152430|BOLL ENSG00000154736|ADAMTS5 ENSG00000155906|RMND1 ENSG00000157500|APPL1 ENSG00000159873|CCDC117 ENSG00000164543|STK17A ENSG00000165525|SDCCAG1 ENSG00000166527|CLEC4D ENSG00000169239|CA5B ENSG00000170892|TSEN34 ENSG00000174899|Q8N6Q6\_HUMAN ENSG00000178403|NEUROG2 ENSG00000185201|IFITM2 ENSG00000189056|RELN ENSG00000197020|ZNF100 ENSG00000197841|ZNF181 ENSG00000203864|C1orf137

TTCTACC ENSG00000006659|LGALS14 ENSG00000084731|KIF3C ENSG00000089597|GANAB ENSG00000090554|FLT3LG ENSG00000105198|LGALS13 ENSG00000105376|ICAM5 ENSG00000126785|RHOJ ENSG00000131236|CAP1 ENSG00000131771|PPP1R1B ENSG00000133065|SLC41A1 ENSG00000135912|TTL4 ENSG00000139445|FOXN4 ENSG00000143845|ETNK2 ENSG00000158352|SHROOM4 ENSG00000161265|U2AF1L4 ENSG00000164967|C9orf23 ENSG00000166900|STX3 ENSG00000169918|OTUD7A ENSG00000171992|SYNPO ENSG00000176422|SPRYD4 ENSG00000180139|Q8N9Z5\_HUMAN ENSG00000204369|Q6ZUP0\_HUMAN ENSG00000005471|ABCB4 ENSG00000102362|SYTL4 ENSG00000102837|OLFML4 ENSG00000106686|C9orf68 ENSG00000118113|MMP8 ENSG00000121039|RDH10 ENSG00000125414|MYH2 ENSG00000133641|C12orf29 ENSG00000137038|C9orf123 ENSG00000143256|PFDN2 ENSG00000143469|SYT14 ENSG00000153558|FBXL2 ENSG00000159113|IL10RB ENSG00000163006|NP\_659415.1 ENSG00000163071|SPATA18 ENSG00000164099|PRSS12 ENSG00000164265|SCGB3A2 ENSG00000174799|CEP135 ENSG00000178999|AURKB ENSG00000182457|NR\_002323.1 ENSG00000183035|CYLC1

TTCTACT ENSG00000006125|AP2B1 ENSG00000063978|RNF4 ENSG00000084628|FAM77C ENSG00000087076|HSD17B14 ENSG00000090975|PITPNM2 ENSG00000121766|ZCCHC17 ENSG00000130035|GALNT8 ENSG00000133561|GMAP6 ENSG00000137074|APTX ENSG00000139641|FAM62A ENSG00000141568|FOXK2 ENSG00000141549|ACAD8 ENSG00000151498|ACAD8 ENSG00000153481|NP\_060680.2 ENSG00000159495|TGM7 ENSG00000161791|FNNL3 ENSG00000163814|CDCP1 ENSG00000166998|CKMT1A ENSG00000168775|KCRU\_HUMAN ENSG00000172775|NIP30\_HUMAN ENSG00000173171|MTX1 ENSG00000177992|C9orf79 ENSG00000188828|GLRA4 ENSG00000196526|AFAP1 ENSG00000204842|ATXN2 ENSG00000067208|EVI5 ENSG00000079819|EPB41L2 ENSG00000100784|RPS6KA5 ENSG00000101958|GLRA2 ENSG00000108406|DHX40 ENSG00000108578|GOSR1 ENSG00000113742|CPEB4 ENSG00000117598|NP\_001010861.1 ENSG00000117632|STMN1 ENSG00000119912|IDE ENSG00000120215|MLANA ENSG00000120254|MTHFD1L ENSG00000122786|CALD1 ENSG00000129472|RAB2B ENSG00000133136|GBG5L\_HUMAN ENSG00000136783|NIPSNAP3A ENSG00000137090|DMRT1 ENSG00000141579|ZNF750 ENSG00000143153|ATP1B1 ENSG00000147364|FBXO25 ENSG00000150722|PPP1R1C ENSG00000165028|NIPSNAP3B ENSG00000167088|SNRPD1 ENSG00000170941|NP\_065895.1 ENSG00000172239|PAIP1 ENSG00000173674|EIF1AP1 ENSG00000182983|ZNF662 ENSG00000185264|C22orf33 ENSG00000197142|ACSL5 ENSG00000197489|BXDC1 ENSG00000204466|DGKK ENSG00000086548|CEACAM6 ENSG00000101321|C20orf159 ENSG00000104812|GYS1 ENSG00000106635|BCL7B ENSG00000115598|IL1RL2 ENSG00000124145|SDC4 ENSG00000126583|PRKCG ENSG00000129009|ISLR ENSG00000130766|SESN2 ENSG00000135605|TEC ENSG00000158882|TOMM40L ENSG00000165633|C10orf72 ENSG00000167105|TMEM92 ENSG00000167202|TBC1D2B ENSG00000167286|CD3D ENSG00000167977|KCTD5 ENSG00000168792|NP\_937790.1 ENSG00000170091|NSG2\_HUMAN ENSG00000171053|NP\_612151.1 ENSG00000171115|GIMAP8 ENSG00000173825|TIGD3 ENSG00000174951|FUT1 ENSG00000181026|ISG20L1 ENSG00000182324|KCNJ14 ENSG00000183828|NUDT14 ENSG00000184210|DGAT2L6 ENSG00000184436|THAP7 ENSG00000203755|Q6ZVU5\_HUMAN ENSG00000205632|Q6ZVF7\_HUMAN ENSG00000205703|NP\_001010910.1 ENSG00000205726|ITSN1 ENSG00000205742|Q6ZTR4\_HUMAN ENSG00000003987|MTMR7 ENSG000000067533|RRP15 ENSG00000101574|METTL4 ENSG00000102144|PGK1 ENSG00000102174|PHEX ENSG00000113810|SMC4 ENSG00000115164|PSCDBP ENSG00000117592|PRDX6 ENSG00000120255|LRP11 ENSG00000122565|CBX3 ENSG00000125484|GTF3C4 ENSG00000126858|RHOT1 ENSG00000133574|GIMAP4 ENSG00000137693|YAP1 ENSG00000137941|TTL7 ENSG00000139343|SNRPF ENSG00000143183|TMCO1 ENSG00000150637|CD226 ENSG00000158122|C9orf21 ENSG00000167601|AXL ENSG00000171055|FEZ2 ENSG00000172071|EIF2AK3 ENSG00000188730|VWC2 ENSG00000197716|Q9UHV1\_HUMAN ENSG00000198270|TMEM116 ENSG00000198478|SH3BGR1L2 ENSG00000198825|INPP5F ENSG00000204954|Q69YU5\_HUMAN

TTCTATA ENSG000000010165|KIAA0859 ENSG00000056558|TRAF1 ENSG00000063587|ZNF275 ENSG000000668078|FGFR3 ENSG00000101311|C20orf42 ENSG00000101457|DNMTTIP1 ENSG00000113273|ARSB ENSG00000114383|TUSC2 ENSG00000116032|GRIN3B ENSG00000122176|FMOD ENSG00000139083|ETV6 ENSG00000143554|SLC27A3 ENSG00000153298|C6orf54 ENSG00000158517|NCF1 ENSG00000161860|SYCE2 ENSG00000163900|TMEM41A ENSG00000165178|LOC648998 ENSG00000166123|GPT2 ENSG00000175992|Q9BR87\_HUMAN ENSG00000177384|Q9NT46\_HUMAN ENSG00000178235|SLITRKL1 ENSG00000182487|NCF1C ENSG00000185219|ZNF445 ENSG00000204248|COL11A2 ENSG00000205037|Q6ZT72\_HUMAN ENSG000000025726|ITSN1 ENSG000000023228|NDUFS1 ENSG000000064651|SLC12A2 ENSG000000064703|DDX20 ENSG000000081148|IMP2 ENSG0000000100523|DDHD1 ENSG00000102271|KLHL4 ENSG00000104327|CALB1 ENSG00000109158|GABRA4 ENSG00000110031|LPXN ENSG00000113163|COL4A3BP ENSG00000113212|PCDHB7 ENSG00000119446|RBM18 ENSG00000126858|RHOT1 ENSG00000127074|RGS13 ENSG00000138246|DNAJC13 ENSG00000141655|TNFRSF11A ENSG00000143013|LMO4 ENSG00000150054|PPP7 ENSG00000164106|SCRG1\_HUMAN ENSG00000170561|IRX2 ENSG00000171566|PLRG1 ENSG00000178604|NP\_001034973.1 ENSG00000182752|PAPPA ENSG00000184378|ARPM1\_HUMAN ENSG00000185127|C6orf120 ENSG00000185261|C5orf36 ENSG00000188730|VWC2 ENSG00000196236|XPNEP3 ENSG00000198718|KIAA0423 ENSG00000205758|CRYZL1

TTCTCAG ENSG00000006125|AP2B1 ENSG00000006831|ADIPOR2 ENSG00000034063|UHRF1 ENSG00000085831|C1orf34 ENSG00000099365|STX1B2 ENSG00000101670|LIPG ENSG00000108469|RECLL5 ENSG00000124164|VAPB ENSG00000125485|DDX31 ENSG00000136859|ANGPTL2 ENSG00000144659|SLC25A38 ENSG00000154227|LASS3 ENSG00000154928|P54762-3 ENSG00000167395|ZNF646 ENSG00000169118|CSNK1G1 ENSG00000170162|VGLL2 ENSG00000174498|PUNC ENSG00000174744|BRMS1 ENSG00000177721|NP\_001014301.1 ENSG00000178921|PFAS ENSG00000179094|PER1 ENSG00000179148|ALOXE3 ENSG00000182196|ARL6IP4 ENSG00000197079|KRT35

|         |                              |                                |                              |                                |                              |                                |                              |                              |
|---------|------------------------------|--------------------------------|------------------------------|--------------------------------|------------------------------|--------------------------------|------------------------------|------------------------------|
|         | ENSG00000197724 PHF2         | ENSG00000198585 NUDT16         | ENSG00000198785 GRIN3A       | ENSG00000203865 Q5TC04_HUMAN   | ENSG00000204252 HLA-DOA      | ENSG00000205307 Q8TEE9_HUMAN   | ENSG00000205648 Q6ZR54_HUMAN | ENSG00000206162 Q6ZVH1_HUMAN |
|         | ENSG00000064787 BCAS1        | ENSG00000100722 ZC3H14         | ENSG00000105483 CARD8        | ENSG00000108666 C17orf75       | ENSG00000116001 TIA1         | ENSG00000131711 MAP1B          | ENSG00000144034 TPRKB        | ENSG00000148123 NP_060223.2  |
|         | ENSG00000152932 RAB3C        | ENSG00000158185 ANKRD36        | ENSG00000169040 PMCHL2       | ENSG00000170006 TMEM154        | ENSG00000186908 ZDHHC17      | ENSG00000188021 UBQLN2         | ENSG00000196233 LCOR         | ENSG00000196912 AN36B_HUMAN  |
| TTCTCTA | ENSG00000196966 HSTH13E      | ENSG00000197967 Q86U89_HUMAN   |                              |                                |                              |                                |                              |                              |
|         | ENSG000000010322 NLSCH       | ENSG000000042832 TG            | ENSG000000089012 SIRPB2      | ENSG000000089169 RPH3A         | ENSG00000100105 PATZ1        | ENSG00000111641 NOL1           | ENSG00000132155 RAF1         | ENSG00000133454 MYO18B       |
|         | ENSG00000134531 EMP1         | ENSG00000140025 C14orf143      | ENSG00000146007 ZMAT2        | ENSG00000146122 DAAM2          | ENSG00000147130 ZMYM3        | ENSG00000148200 NR6A1          | ENSG00000162735 PEX19        | ENSG00000162968 Q96MQ0_HUMAN |
|         | ENSG00000164626 KCNK5        | ENSG00000176393 RNPEP          | ENSG00000182013 NP_060685.2  | ENSG00000183535 C21orf123      | ENSG00000198959 TGM2         | ENSG00000205726 ITSN1          | ENSG00000201461 CYP3A43      | ENSG00000066294 CD84         |
|         | ENSG00000067533 RRP15        | ENSG00000115365 LANCL1         | ENSG00000119335 SET          | ENSG00000123575 CXorf39        | ENSG00000128050 PAICS        | ENSG00000129534 C14orf106      | ENSG00000133800 XLKD1        | ENSG00000135917 SLC19A3      |
|         | ENSG00000137575 SDCBP        | ENSG00000138162 TACC2          | ENSG00000143653 SCCPDH       | ENSG00000143799 PARP1          | ENSG00000149806 FAU          | ENSG00000152253 SPC25          | ENSG00000160223 ICOSLG       | ENSG00000161048 NP_945341.2  |
|         | ENSG00000163617 KIAA1407     | ENSG00000163946 C3orf63        | ENSG00000164244 PRRC1        | ENSG00000164924 YWHAZ          | ENSG00000165572 KBTBD6       | ENSG00000171360 KRT38          | ENSG00000173542 MOBKLA       | ENSG00000174944 P2RY14       |
| TTCTGAC | ENSG00000175455 CCDC14       | ENSG00000184735 DDX53          | ENSG00000203756 C6orf191     |                                |                              |                                |                              |                              |
|         | ENSG00000001460 C1orf201     | ENSG00000007968 E2F2           | ENSG000000086848 ALG9        | ENSG00000104833 TUBB4          | ENSG00000110169 HPX          | ENSG00000112782 CLIC5          | ENSG00000116809 ZBTB17       | ENSG00000116885 C1orf102     |
|         | ENSG00000119333 WDR34        | ENSG00000124641 TRFP           | ENSG00000126012 JARI1D1C     | ENSG00000126264 HCST           | ENSG00000137313 TRIM26       | ENSG00000142082 SIRT3          | ENSG00000145949 SGK85_HUMAN  | ENSG00000147123 NDUFB11      |
|         | ENSG00000151062 CACNA2D4     | ENSG00000159588 CCDC17         | ENSG00000162873 KLHDC8A      | ENSG00000163823 CCR1           | ENSG00000167470 MIDN         | ENSG00000169964 TMEM42         | ENSG00000174945 AMZ1_HUMAN   | ENSG00000178772 CPN2         |
|         | ENSG00000180104 EXOC3        | ENSG00000198307 H2AFB2         | ENSG00000204619 PPP1R11      | ENSG00000205974 Q6ZVY3_HUMAN   | ENSG00000050730 TMIP3        | ENSG00000056972 TRAF3IP2       | ENSG00000068784 SRBD1        | ENSG00000101911 PRPS2        |
|         | ENSG00000104825 NFKB1B       | ENSG00000105889 Q6NF63_HUMAN   | ENSG00000106392 C1GALT1      | ENSG00000107864 CPEB3          | ENSG00000112394 SLC16A10     | ENSG00000113269 RNF130         | ENSG00000115020 PIP5K3       | ENSG00000116062 MSH6         |
|         | ENSG00000116954 RAGC         | ENSG00000128052 KDR            | ENSG00000132680 KIAA0907     | ENSG00000136238 RAC1           | ENSG00000140382 HMG20A       | ENSG00000149084 HSD17B12       | ENSG00000153561 RMND5A       | ENSG00000165246 NLGN4Y       |
|         | ENSG00000166295 C10orf104    | ENSG00000169862 CTNND2         | ENSG00000171116 NP_057237.1  | ENSG00000171129 HSFX1          | ENSG00000179029 TMEM107      | ENSG00000197563 PIGN           | ENSG00000204628 GNB2L1       | ENSG00000205110 Q6TKS8_HUMAN |
| TTCTGAT | ENSG00000050426 LETMD1       | ENSG00000053702 NRIP2          | ENSG00000090615 GOLGA3       | ENSG00000106236 NPTX2          | ENSG00000110195 FOLR1        | ENSG00000110880 CORO1C         | ENSG00000112715 VEGFA        | ENSG00000117899 MESDC2       |
|         | ENSG00000122642 FKBP9        | ENSG00000129009 ISLR           | ENSG00000136205 TNS3         | ENSG00000139514 SLC7A1         | ENSG00000141068 KSR1         | ENSG00000142623 PADI1          | ENSG00000149532 CPSF7_HUMAN  | ENSG00000161381 PLXDC1       |
|         | ENSG00000175121 WDFC5        | ENSG00000176595 KBTBD11        | ENSG00000177156 TALD01       | ENSG00000182108 MYLE_HUMAN     | ENSG00000182667 NTR1_HUMAN   | ENSG00000182667 NTR1_HUMAN     | ENSG00000183117 CSMD1        | ENSG00000183242 WIT1         |
|         | ENSG00000196220 SRGAP3       | ENSG00000205460 NP_001004332.1 | ENSG00000205642 VCX3B        | ENSG0000038002 AGA             | ENSG00000049245 VAMP3        | ENSG00000061676 NCKAP1         | ENSG00000089050 RBPP9        | ENSG00000100225 FBXO7        |
|         | ENSG00000105793 GTPBP10      | ENSG00000112584 FAM120B        | ENSG00000120265 PCMT1        | ENSG00000124523 SIRT5          | ENSG00000126953 TIMM8A       | ENSG00000133675 ATP13A3        | ENSG00000140987 ZNF434       | ENSG00000144320 KIAA1715     |
|         | ENSG00000144827 ABHD10       | ENSG00000147316 MCPH1          | ENSG00000151792 CTSO         | ENSG00000152266 PTH            | ENSG00000153936 HS2ST1       | ENSG00000154864 FNA38B         | ENSG00000156500 FAM122C      | ENSG00000157224 CLDN12       |
|         | ENSG00000163412 EIF4E3       | ENSG00000164483 SAMD3          | ENSG00000165197 FTGF         | ENSG00000166797 FAM96A         | ENSG00000168385 SEPT2        | ENSG00000168813 ZNF507         | ENSG00000170242 USP47        | ENSG00000175857 C5orf29      |
|         | ENSG00000177738 Q8N4J7_HUMAN | ENSG00000178295 NP_872431.2    | ENSG00000178459 Q8N2E2_HUMAN | ENSG00000196110 ZNF699         | ENSG00000198625 MDM4         | ENSG00000198932 GPRASP1        | ENSG00000203705 TATDN3       | ENSG00000204291 COL15A1      |
| TTCTGCA | ENSG00000035862 TIMP2        | ENSG00000065618 COL17A1        | ENSG00000100368 CSF2RB       | ENSG00000106070 GRB10          | ENSG00000113273 ARSB         | ENSG00000119599 WDR21A         | ENSG00000126432 PRDX5        | ENSG00000134247 PTGFRN       |
|         | ENSG00000134882 UBAC2        | ENSG00000139890 REM2           | ENSG00000141258 RUTBC1       | ENSG00000143845 ETNK2          | ENSG00000145990 GFOD1        | ENSG00000158987 RAPGF6         | ENSG00000160182 TFF1         | ENSG00000160216 AGPAT3       |
|         | ENSG00000160818 GPATCH4      | ENSG00000166484 MAPK7          | ENSG00000166664 CHRFAM7A     | ENSG00000176261 ZBTB80S        | ENSG00000178927 C17orf62     | ENSG00000178928 TPRX1          | ENSG00000182335 Q8TE90_HUMAN | ENSG00000183242 WIT1         |
|         | ENSG00000184922 FMNL1        | ENSG00000186529 CYP4F3         | ENSG00000201355 SERPINB1     | ENSG00000060303 Q9NU98_HUMAN   | ENSG00000089063 C20orf30     | ENSG00000111799 COL12A1        | ENSG000000014638 UPK1B       | ENSG00000115738 ID2          |
|         | ENSG00000115827 C2orf37      | ENSG00000125630 POLR1B         | ENSG00000132274 TRIM22       | ENSG00000137727 ARHGAP20       | ENSG00000141456 Q8ZL8-2      | ENSG00000143153 ATP1B1         | ENSG00000151914 DST          | ENSG00000152582 NP_653323.1  |
|         | ENSG00000154813 DPH3         | ENSG00000155011 DKK2           | ENSG00000157107 FCHO2        | ENSG00000157540 DYRK1A         | ENSG00000164049 FBXW12       | ENSG00000167475 SCAMP4         | ENSG00000168152 THAP9        | ENSG00000168710 AHCYL1       |
| TTCTGGC | ENSG00000183718 TRIM52       | ENSG00000187189 TSPYL4         | ENSG00000198642 KLHL9        | ENSG00000205036 NP_001001682.1 |                              |                                |                              |                              |
|         | ENSG00000008118 CAMK1G       | ENSG00000034063 UHRF1          | ENSG00000085978 ATG16L1      | ENSG00000101298 RAD21L1        | ENSG00000107882 SUFU         | ENSG00000110243 APOA5          | ENSG00000118894 FAM86A       | ENSG00000118898 PPL          |
|         | ENSG00000127412 TRPV5        | ENSG00000134780 DAGLA          | ENSG00000136720 HS6ST1       | ENSG00000136856 SLC2A8         | ENSG00000137486 ARRB1        | ENSG00000144043 TEX261         | ENSG000001448358 GPR107      | ENSG00000148841 KIAA1754     |
|         | ENSG00000148985 NP_055304.1  | ENSG00000158796 DEDD           | ENSG00000163612 XR_017899.1  | ENSG00000172757 CFL1           | ENSG00000174992 ZG16_HUMAN   | ENSG00000180304 OAZ2           | ENSG00000180921 FAM83H       | ENSG00000185386 MAPK11       |
|         | ENSG00000204099 NEU4         | ENSG00000204490 TNF            | ENSG00000204859 ZBTB48       | ENSG00000205414 Q6ZVL8_HUMAN   | ENSG00000205841 Q6ZV47_HUMAN | ENSG00000010404 IDS            | ENSG00000067334 DNTTIP2      | ENSG00000079215 SLC1A3       |
|         | ENSG00000096696 DSP          | ENSG00000110048 OSBP           | ENSG00000112394 SLC16A10     | ENSG00000113231 PDE8B          | ENSG00000119866 BCL11A       | ENSG00000122481 RWDD3          | ENSG00000130826 DKC1         | ENSG00000136940 PDCL         |
|         | ENSG00000139357 SLC5A8       | ENSG00000145491 ROPN1L         | ENSG00000147676 MAL2         | ENSG00000149806 FAU            | ENSG00000156103 MMPL16       | ENSG00000179833 SERATD2        | ENSG00000182187 CRYGB        |                              |
| TTCTGGT | ENSG00000004139 SARM1        | ENSG00000004478 FKBP4          | ENSG00000104969 SGTA         | ENSG00000105428 ZNRF4          | ENSG00000118971 CCND2        | ENSG00000132589 FLOT2          | ENSG00000133313 CNDP2        | ENSG00000146122 DAAM2        |
|         | ENSG00000155252 C10orf65     | ENSG00000157064 MNAT2          | ENSG00000163486 SRGAP2       | ENSG00000169213 RAB3B          | ENSG00000172460 Q8TVY7_HUMAN | ENSG00000173039 RELA           | ENSG00000178971 C17orf68     | ENSG00000181274 FRAT2        |
|         | ENSG00000184935 Q6AI01_HUMAN | ENSG00000196581 AJAP1          | ENSG00000196943 LTBR         | ENSG00000197373 NP_001015884.1 | ENSG00000070882 OSBPL3       | ENSG00000074695 LMAN1          | ENSG00000100596 SPTLC2       | ENSG00000104164 PLDN         |
|         | ENSG00000110925 FAM130A1     | ENSG00000112812 PRSS16         | ENSG00000128656 CHN1         | ENSG00000143493 INTS7          | ENSG00000145907 G3BP1        | ENSG00000147231 CXorf57        | ENSG00000152443 ZNF776       | ENSG00000153989 NUS1         |
|         | ENSG00000155640 C10orf12     | ENSG00000157578 C21orf13       | ENSG00000166669 ATF7IP2      | ENSG00000168036 CTNNB1         | ENSG00000169981 ZNF35        | ENSG00000170113 NIPA1          | ENSG00000170248 PDCD6IP      | ENSG00000172115 CYCS         |
|         | ENSG00000173406 DAB1         | ENSG00000181626 DKFZp779B1634  | ENSG00000188921 PTPLAD2      | ENSG00000197935 ZNF311         | ENSG00000197969 VPS13A       | ENSG000000204688 OR2H1         |                              |                              |
| TTCTGTA | ENSG000000019144 PHLDB1      | ENSG00000075886 TUBA3D         | ENSG00000085185 BCORL1       | ENSG00000087152 ATXN7L3        | ENSG00000087152 ATXN7L3      | ENSG00000087258 GNAO1          | ENSG00000092820 VIL2         | ENSG00000102572 STK24        |
|         | ENSG00000107731 UNC5B        | ENSG00000108774 RAB5C          | ENSG00000114388 TUSC4        | ENSG00000119280 C1orf198       | ENSG00000124766 SOX4         | ENSG00000127526 SLC35E1        | ENSG00000132002 DNAJB1       | ENSG00000138617 PARP16       |
|         | ENSG00000148773 MKI67        | ENSG00000151612 NP_849157.2    | ENSG00000152086 TUBA3E       | ENSG00000163933 RFT1           | ENSG00000165821 SALL2        | ENSG00000166546 Q3B7T3_HUMAN   | ENSG00000167617 CDC42EP5     | ENSG00000167641 PPP1R14A     |
|         | ENSG00000168309 FAM107A      | ENSG00000171456 ASXL1          | ENSG00000180357 ZNF609       | ENSG00000182534 MXRA7          | ENSG00000184988 TMEM106A     | ENSG00000187492 NP_001007541.1 | ENSG00000189231 PSG3         | ENSG00000198033 TUBA3C       |
|         | ENSG00000198690 MTMR15       | ENSG00000205266 Q6ZRU5_HUMAN   | ENSG00000005302 MSL3L1       | ENSG00000047249 ATP6V1H        | ENSG00000103449 SALL1        | ENSG00000104695 PPP2CB         | ENSG00000108423 TUBD1        | ENSG00000111783 RFX4         |
|         | ENSG00000116652 DLEU2L       | ENSG00000123575 CXorf39        | ENSG00000128250 RFPL1        | ENSG00000128276 RFPL3          | ENSG00000131844 MCCC2        | ENSG00000135018 UBQLN1         | ENSG00000143631 FLG          | ENSG00000148655 C10orf11     |
|         | ENSG00000165181 C9orf84      | ENSG00000169490 TM2D2          | ENSG00000169621 C2orf13      | ENSG00000173114 LRRN3          | ENSG00000182050 MGAT4C       | ENSG00000182774 RS17_HUMAN     | ENSG00000182997 Q9UHT0_HUMAN | ENSG00000183230 CTNNA3       |
|         | ENSG00000183520 UTP11L       | ENSG00000184575 XPOT           | ENSG00000184779 RPS17        | ENSG00000187191 DAZ3           | ENSG00000188120 DAZ1         | ENSG00000205916 DAZ4           | ENSG00000205944 DAZ2         |                              |
| TTCTGTG | ENSG00000048342 Q9H8A7_HUMAN | ENSG000000088002 SULT2B1       | ENSG000000090659 CD209       | ENSG00000100721 TC11A          | ENSG00000103429 BFAR         | ENSG00000104969 SGTA           | ENSG00000105700 C19orf50     | ENSG00000110906 KCTD10       |
|         | ENSG00000114770 ABCC5        | ENSG00000125166 GOT2           | ENSG00000131378 RFTN1        | ENSG00000132383 RPA1           | ENSG00000140092 FBLN5        | ENSG00000151176 NP_775813.1    | ENSG00000160193 WDR4         | ENSG00000165553 NGB          |
|         | ENSG00000166540 ZNF407       | ENSG00000167323 STIM1          | ENSG00000169221 TBC1D10B     | ENSG00000178951 ZBTB7A         | ENSG00000183010 PYCR1        | ENSG00000184840 TMED9          | ENSG00000187048 CYP4A11      | ENSG00000196084 UBIQ_HUMAN   |
|         | ENSG00000196666 Q6P0A1_HUMAN | ENSG00000196943 LTBR           | ENSG00000198879 SFMBT2       | ENSG00000203755 Q6ZVU5_HUMAN   | ENSG00000203774 Q6ZUA8_HUMAN | ENSG00000204157 NP_001013664.1 | ENSG00000021574 SPAST        | ENSG00000050438 SLC4A8       |
|         | ENSG00000064692 SNCAIP       | ENSG00000102743 SLC25A15       | ENSG00000107789 MINPP1       | ENSG00000112812 PRSS16         | ENSG00000113456 RAD1         | ENSG00000116898 MRPS15         | ENSG00000120063 GNA13        | ENSG00000134121 CHL1         |
|         | ENSG00000148680 HTR7         | ENSG00000148730 EIF4EBP2       | ENSG00000154217 PITPNC1      | ENSG00000160188 TSGA2          | ENSG00000163618 CADPS        | ENSG00000165185 KIAA1958       | ENSG00000165416 SUGT1        | ENSG00000167721 TSR1         |
|         | ENSG00000168958 C2orf33      | ENSG00000169248 CXCL11         | ENSG00000171195 MUC7         | ENSG00000172765 TMCC1          | ENSG00000176083 ZNF683       | ENSG00000179455 MXRN3          | ENSG00000181798 C2orf52      | ENSG00000186458 DB132_HUMAN  |
|         | ENSG00000196459 SEDLP        | ENSG00000198087 CD2AP          | ENSG00000198203 SULT1C2      |                                |                              |                                |                              |                              |
| TTCTTAA | ENSG00000029993 HMG3         | ENSG00000072840 EVC            | ENSG00000074054 CLASP1       | ENSG00000106333 PCOLCE         | ENSG00000108828 VAT1         | ENSG00000110713 NUP98          | ENSG00000119487 MAPKAP1      | ENSG00000124782 RREB1        |
|         | ENSG00000125633 CCDC93       | ENSG00000125816 NKX2-4         | ENSG00000126602 TRAP1        | ENSG00000134243 SORT1          | ENSG00000138617 PARP16       | ENSG00000141540 TTYH2          | ENSG00000142528 ZNF473       | ENSG00000143398 PIP5K1A      |
|         | ENSG00000144231 POLR2D       | ENSG00000146197 SCUBE3         | ENSG00000148468 C10orf38     | ENSG00000162910 MRPL55         | ENSG00000163251 FZD5         | ENSG00000164151 Q6ZT40_HUMAN   | ENSG00000165821 SALL2        | ENSG00000172426 C6orf206     |
|         | ENSG00000175550 DRAP1        | ENSG00000180357 ZNF609         | ENSG00000184261 KCNK12       | ENSG00000188901 NP_055226.1    | ENSG00000197971 MBP          | ENSG00000204157 NP_001013664.1 | ENSG00000021574 SPAST        | ENSG00000080910 CFHR1        |
|         | ENSG00000100528 CNIH         | ENSG00000100644 HIF1A          | ENSG00000111834 RSHL3        | ENSG00000112539 C6orf118       | ENSG00000112981 NME          |                                |                              |                              |

ENSG00000157954|WIPI2 ENSG00000158813|EDA ENSG00000161692|DBF4B ENSG00000165671|NSD1 ENSG00000166377|ATP9B ENSG00000168671|UGT3A2 ENSG00000170581|STAT2 ENSG00000173914|RBM4B  
ENSG00000179241|LDLRAD3 ENSG00000182534|MXRA7 ENSG00000184574|GPR92 ENSG00000187773|C18orf51 ENSG00000188783|PRELP ENSG00000197976|CYXorf3 ENSG00000203785|SPRR2E ENSG00000005955|ZNF403  
ENSG00000070087|PFN2 ENSG00000070087|PFN2 ENSG00000099901|RANBP1 ENSG00000115232|ITGA4 ENSG00000115963|RND3 ENSG00000124788|ATXN1 ENSG00000131015|ULBP2 ENSG00000134548|C12orf39  
ENSG00000135697|BCMO1 ENSG00000140481|CCDC33 ENSG00000155561|NUP205 ENSG00000155918|RAET1L ENSG00000160188|TSGA2 ENSG00000163960|UBXD7 ENSG00000164056|SPRY1 ENSG00000165124|SVEP1  
ENSG00000165474|GJB2 ENSG00000174944|P2RY14 ENSG00000175066|GK5 ENSG00000178346|C6orf61 ENSG00000184647|NP\_940866.2 ENSG00000196569|LAMA2 ENSG00000203722|RAET1G  
ENSG0000006194|ZNF263 ENSG00000034063|UHRF1 ENSG00000084070|SMAP1L ENSG00000085872|CHERP ENSG00000100376|FAM118A ENSG00000102802|C13orf33 ENSG00000113272|THG1L  
ENSG00000114999|TTL ENSG00000131944|C19orf40 ENSG00000133392|MYH11 ENSG00000136112|UTP14C ENSG00000140031|P1768\_HUMAN ENSG00000143061|IGSF3 ENSG00000147099|HDAC8 ENSG00000147536|GINS4  
ENSG00000154478|GPR26 ENSG00000158161|EYA3 ENSG00000159461|AMFR ENSG00000160307|S100B ENSG00000162377|C1orf163 ENSG00000169083|AR ENSG00000173244|Q8N8D0\_HUMAN ENSG00000173253|DMRT2  
ENSG00000175824|XR\_017847.1 ENSG00000176595|KBTBD11 ENSG00000176887|SOX11 ENSG00000177721|NP\_001014301.1 ENSG00000177807|KCNJ10 ENSG00000184640|SEPT9 ENSG00000196230|TUBB ENSG00000205033|Q96DJ9\_HUMAN  
ENSG00000205181|QOVFZ2\_HUMAN ENSG00000066422|ZBTB11 ENSG00000100372|SLC25A17 ENSG00000101773|RBBP8 ENSG00000101951|PAGE4 ENSG00000109255|NMO ENSG00000110347|MMP12 ENSG00000112796|ENPP5  
ENSG00000112992|NNT ENSG00000120802|TMPO ENSG00000121749|TBC1D15 ENSG00000121989|ACVR2A ENSG00000125848|FLRT3 ENSG00000134121|CHL1 ENSG00000140450|ARRDC4 ENSG00000143870|PDIA6  
ENSG00000150076|C10orf68 ENSG00000151332|MBIP ENSG00000151657|KIN ENSG00000152684|PELO ENSG00000152952|FLOD2 ENSG00000153064|BANK1 ENSG00000155970|EFHA2 ENSG00000159596|TMEM69  
ENSG00000163539|CLASP2 ENSG00000164118|KIAA1712 ENSG00000164209|SLC25A46 ENSG00000167377|ZNF23 ENSG00000169800|RBM11 ENSG00000171103|NP\_060380.2 ENSG00000172239|PAIP1 ENSG00000174622|RBM1A2  
ENSG00000175646|PRM1 ENSG00000176049|JAKMIP2 ENSG00000176731|C8orf59 ENSG00000180233|ZNRF2 ENSG00000185261|C5orf36 ENSG00000185985|SLITRK2 ENSG00000186310|NAP1L3 ENSG00000196455|PIK3R4  
ENSG00000196705|ZNF431 ENSG00000197275|RAD54B ENSG00000206011|RBM11 ENSG00000206046|RBM11C  
TTGAAAC ENSG00000103196|CRISPLD2 ENSG00000106638|TBL2 ENSG00000111249|CUTL2 ENSG00000114013|CD86 ENSG00000114113|RBP2 ENSG00000126264|HLST ENSG00000130985|UBE1 ENSG00000131196|NFATC1  
ENSG00000131914|LIN28 ENSG00000133321|RARRES3 ENSG00000136854|SUXBP1 ENSG00000141540|TTYH2 ENSG00000144231|POLR2D ENSG00000155846|PPARGC1B ENSG00000162763|LRRCS2 ENSG00000166860|ZBTB39  
ENSG00000173163|COMMD1 ENSG00000176887|SOX11 ENSG00000177441|Q8N4T9\_HUMAN ENSG00000183421|RIPK4 ENSG00000185052|SLC24A3 ENSG00000186825|Q580R0-2 ENSG00000189171|S100A13 ENSG00000196166|NP\_997295.1  
ENSG00000198915|RASGEF1A ENSG00000034239|EFCAB1 ENSG00000070961|ATP2B1 ENSG00000075420|FNDC3B ENSG00000111224|PARP1 ENSG00000112238|PRDM13 ENSG00000113838|CRYGS ENSG00000116574|RHOU  
ENSG00000116717|GADD45A ENSG00000122481|RWDD3 ENSG00000122958|VPS26A ENSG00000126261|SAE2 ENSG00000128294|TPST2 ENSG00000128654|MTX2 ENSG00000130939|UBE4B ENSG00000134321|RSAD2  
ENSG00000136872|ALDOB ENSG00000137274|BPHL ENSG00000143493|INTS7 ENSG00000144218|AFF3 ENSG00000146729|GBAS ENSG00000147571|CRH ENSG00000152022|LIX1L ENSG00000153130|SCOC  
ENSG00000157445|CACNA2D3 ENSG00000161970|RPL26 ENSG00000162944|RFTN2 ENSG00000164180|TMEM161B ENSG00000170881|LIPR139 ENSG00000171055|FEZ2 ENSG00000172071|EIF2AK3 ENSG00000184428|TOP1MT  
ENSG00000197024|ZNF398 ENSG00000205835|LOC647309  
TTGAAAT ENSG00000056998|GYG2 ENSG00000063169|GLTSCR1 ENSG00000100216|TOMM22 ENSG00000101004|NLP\_HUMAN ENSG00000101421|CHMP4B ENSG00000103241|FOXF1 ENSG00000104872|PIH1D1 ENSG00000105048|TNNT1  
ENSG00000106635|BCL7B ENSG00000115758|ODC1 ENSG00000119227|TMG ENSG00000119686|C14orf58 ENSG00000120029|C10orf76 ENSG00000130032|PRRG3 ENSG00000131459|GFPT2 ENSG00000136731|UGCGL1  
ENSG00000140105|WARS ENSG00000145949|SGK85\_HUMAN ENSG000001048200|NR6A1 ENSG00000157087|ATP2B2 ENSG00000161671|NP\_996261.1 ENSG00000162105|SHANK2 ENSG00000163884|KLF15 ENSG00000164266|SPINK1  
ENSG00000166833|NAV2 ENSG00000171475|WIPF2 ENSG00000171608|PIK3CD ENSG00000173702|MUC13 ENSG00000177854|TMEM187 ENSG00000178589|Q9BT26\_HUMAN ENSG00000180304|OAZ2 ENSG00000183929|DUSP5P  
ENSG00000184787|UBE2G2 ENSG00000196085|C19orf42 ENSG00000197965|MPZL1 ENSG00000204059|NP\_001013718.1 ENSG00000038295|TLL1 ENSG00000039319|ZFYVE16 ENSG00000043093|DCUN1D1 ENSG00000059758|PCTK2  
ENSG00000062370|ZNF228 ENSG00000077097|TOP2B ENSG00000078142|PIK3C3 ENSG00000081307|UBE1DC1 ENSG00000095787|WAC ENSG00000101811|CSTF2 ENSG00000103642|LACTB ENSG00000113712|CSNK1A1  
ENSG00000124172|ATP5E2 ENSG00000128654|MTX2 ENSG00000130741|ENRPA1 ENSG00000131876|SNRPA1 ENSG00000132837|DMGDH ENSG00000133135|RNFL128 ENSG00000133739|LRRCC1 ENSG00000135838|NPL  
ENSG00000137504|CREBZF ENSG00000137960|GIPC2 ENSG00000138336|CXXC6 ENSG00000145725|HISPPD1 ENSG00000146242|TPBG ENSG00000146809|ASB15 ENSG00000154380|ENAH ENSG00000156836|C11orf30  
ENSG00000164323|KIAA1430 ENSG00000166839|ANKDD1A ENSG00000168291|PDHB ENSG00000174456|NP\_997318.1 ENSG00000180389|NR\_002162.1 ENSG00000181617|C4orf7 ENSG00000187689|AMTN ENSG00000188010|MORN2  
ENSG00000196091|MYBP1 ENSG00000196353|CPNE4 ENSG00000196704|AM22\_HUMAN ENSG00000198339|HIST1H4I ENSG00000198818|SFT2D1 ENSG00000198944|ANKRD43  
TTGAACA ENSG00000002919|SNX11 ENSG00000072062|PRKACA ENSG00000136112|UTP14C ENSG00000151117|TMEM86A ENSG00000151360|ALLC ENSG00000158525|CPA5 ENSG00000160323|ADAMTS13 ENSG00000161281|COX7A1  
ENSG00000161640|STGLEC11 ENSG00000166123|GPT2 ENSG00000169194|IL13 ENSG00000176303|Q8N822\_HUMAN ENSG00000177112|Q8N6V7\_HUMAN ENSG00000184110|EIF358 ENSG00000185917|SETD4 ENSG00000185928|C16orf53  
ENSG00000187792|ZNF70 ENSG00000189037|DUSP21 ENSG00000198756|GLT25D2 ENSG00000204264|PSMB8 ENSG00000079819|EPB41L2 ENSG00000084093|REST ENSG00000086991|NOX4 ENSG00000104131|EIF3S1  
ENSG00000104164|PLDN ENSG00000109184|DCUN1D4 ENSG00000112761|WISP3 ENSG000001016171|SCP2 ENSG00000123728|RAP2C ENSG00000135045|C9orf40 ENSG00000137500|CCDC90B ENSG00000143341|HMGN1  
ENSG00000143742|SRP9 ENSG00000145808|ADAMTS19 ENSG00000146476|C6orf211 ENSG00000150051|MKX ENSG00000157576|XR\_018454.1 ENSG00000164808|KIAA0146 ENSG00000165209|STRBP ENSG00000166848|TERF2IP  
ENSG00000171566|PLRG1 ENSG00000177853|ZNF518 ENSG00000205581|HMGN1  
TTGAACC ENSG00000006638|TBXA2R ENSG00000110211|CLCN6 ENSG00000064393|HIPK2 ENSG00000068724|TTC7A ENSG00000102050|PRAF2 ENSG00000102145|GATA1 ENSG00000106636|YKT6 ENSG00000124155|PIGT  
ENSG00000125409|TEKT3 ENSG00000127564|PKMYT1 ENSG00000129965|INS ENSG00000138780|GSTCD ENSG00000142173|COL6A2 ENSG00000142794|NBP3 ENSG00000149923|PPP4C ENSG00000154319|C8orf13  
ENSG00000158882|TOMM40L ENSG00000164048|ZNF589 ENSG00000170577|SIX2 ENSG00000173436|C1orf151 ENSG00000173826|KCNH6 ENSG00000178226|PRSS36 ENSG00000185522|C11orf35 ENSG00000186326|RGS9BP  
ENSG00000204487|LTB ENSG00000204626|Q6ZSR2\_HUMAN ENSG00000205268|PDE7A ENSG00000205633|NP\_001010902.1 ENSG00000005059|CCDC109B ENSG00000010704|HFE ENSG000000078114|NEBL ENSG00000017943|C10orf110  
ENSG00000116489|CAPZA1 ENSG00000120948|TARDBP ENSG00000127328|RAB3IP ENSG00000129292|PHF20L1 ENSG00000131724|IL13RA1 ENSG00000134769|DTNA ENSG00000140450|ARRDC4 ENSG00000150394|CDH8  
ENSG00000162545|CAMK2N1 ENSG00000163697|APBB2 ENSG00000167193|CRK ENSG00000171142|ATP6V1E2 ENSG00000172901|LAEVR\_HUMAN ENSG00000173452|NP\_689987.2 ENSG00000177483|NP\_001073973.1 ENSG00000177842|ZNF620  
ENSG00000184661|CDCA2 ENSG00000187185|Q8FVG7\_HUMAN ENSG00000188687|SLC4A5 ENSG00000203970|DEFB111 ENSG00000205150|FAM92A3 ENSG00000211448|DIO2  
TTGAACG ENSG000000011451|WIZ ENSG000000072958|AP1M1 ENSG00000090447|TFAP4 ENSG00000100462|PRMT5 ENSG00000106635|BCL7B ENSG00000111669|TP11 ENSG00000112576|CCND3 ENSG00000117020|AKT3  
ENSG00000120068|HOXB8 ENSG00000130810|PPAN ENSG00000132321|IQCA ENSG00000135723|FHOD1 ENSG00000141316|SPACA3 ENSG00000150990|DHX37 ENSG00000162496|DHR3 ENSG00000164050|PLXNB1  
ENSG00000167311|ART5 ENSG00000175611|C9orf130 ENSG00000183519|NSUN5B ENSG00000183888|C1orf64 ENSG00000184232|OAF ENSG00000185298|Q6PK04\_HUMAN ENSG00000189037|DUSP21 ENSG00000198355|PIM3  
ENSG00000205039|Q6ZQS5\_HUMAN ENSG00000111328|CDK2AP1 ENSG00000111358|GTF2H3 ENSG00000113083|LOX ENSG00000119596|YLP1 ENSG00000120784|ZFP30 ENSG00000125571|IL1F7 ENSG00000130844|ZNF331  
ENSG00000131174|COX7B ENSG00000141458|NPC1 ENSG00000145337|PIGY ENSG00000146731|CCTA6 ENSG00000150275|PCDH15 ENSG00000151514|SALL3 ENSG00000151687|ANKAR ENSG00000152804|HHEX  
ENSG00000154143|PANX3 ENSG00000163584|RPL22L1 ENSG00000164815|ORC5L ENSG00000168384|HLA-DPA1 ENSG00000168564|CDKN2AIP ENSG00000175040|CHST2 ENSG00000182107|TMEM30B ENSG00000185037|XR\_016629.1  
ENSG00000188519|Q7Z4Q0\_HUMAN ENSG00000197990|XR\_016643.1 ENSG00000198689|SLC9A6 ENSG00000203666|EFCAB2  
TTGAACT ENSG00000090659|CD209 ENSG00000102802|C13orf33 ENSG00000105559|PLEKHA4 ENSG00000105808|RASA4 ENSG00000106635|BCL7B ENSG00000110395|CBL ENSG00000124208|UBE2V1 ENSG00000126594|DNASE1  
ENSG00000133424|LARGE ENSG00000134287|ARF3 ENSG00000134668|SPOC1 ENSG00000138166|DUSP5 ENSG00000142082|SIRT3 ENSG00000154978|NM\_030796.3 ENSG00000173404|INSM1 ENSG00000174233|ADCY6  
ENSG00000177741|Q96BN7\_HUMAN ENSG00000178919|FOXE1 ENSG00000197471|SPN ENSG00000204305|AGER ENSG000000091436|MLTK\_HUMAN ENSG00000100926|TM9SF1 ENSG00000112280|COL9A1 ENSG00000112343|TRIM38  
ENSG00000113649|TCERG1 ENSG00000114423|CBLB ENSG00000114861|FOXP1 ENSG00000117151|CTBS ENSG00000117226|GBP3 ENSG00000125571|IL1F7 ENSG00000134853|PDGFRA ENSG00000137492|PRKRIR  
ENSG00000141076|CTRHA1 ENSG00000147419|CCDC25 ENSG00000155096|AZIN1 ENSG00000163714|SR140\_HUMAN ENSG00000165240|ATP7A ENSG00000165476|REEP3 ENSG00000168938|PPIC ENSG00000178127|NDUFV2  
ENSG00000198168|SVIP\_HUMAN ENSG00000198795|ZNF521  
TTGAAGA ENSG00000066136|NFYC ENSG00000100077|ADRBK2 ENSG00000100116|GCAT ENSG00000100351|GRAP2 ENSG00000101150|TPD52L2 ENSG00000103264|FBXO31 ENSG00000118971|CCND2 ENSG00000135245|HIG2\_HUMAN  
ENSG00000140263|SORD ENSG00000140718|FTO ENSG00000142512|SIGLEC10 ENSG00000144468|RHBDD1 ENSG00000157693|C9orf91 ENSG00000163067|ZNF2 ENSG00000165699|TSC1 ENSG00000167085|PHB  
ENSG00000170004|CHD3 ENSG00000174851|YIF1A ENSG00000177225|PDDC1 ENSG00000180735|Q6PJW0\_HUMAN ENSG00000185917|SETD4 ENSG00000196739|COL27A1 ENSG00000197021|CXorf40B ENSG00000197353|LYPD2  
ENSG00000198053|SRPA ENSG00000198246|SLC29A3 ENSG00000204304|PBX2 ENSG00000204410|MSH5 ENSG00000205039|Q6ZQS5\_HUMAN ENSG00000205352|Q9NZ81-2 ENSG00000090487|SPG21 ENSG00000108239|TBC1D12  
ENSG00000111711|GOLT1B ENSG00000115947|ORC4L ENSG00000116652|DLEU2L ENSG00000119725|ZNF410 ENSG00000122068|FYT1D1 ENSG00000131375|CAPN2 ENSG00000131375|CAPN2 ENSG00000137492|PRKRIR ENSG00000145632|PLK2  
ENSG00000155189|AGPAT5 ENSG00000158473|CD1D ENSG00000164188|RAMBP3L ENSG00000164398|ACSL6 ENSG00000165392|WRN ENSG00000166822|TMEM170 ENSG00000168384|HLA-DPA1 ENSG00000168411|RFWD3  
ENSG00000170866|LILRA3 ENSG00000173674|EIF1AP1 ENSG00000178997|EXDL1 ENSG00000184258|CDR1 ENSG00000185787|MORF4L1 ENSG00000203797|DDO ENSG00000203797|DDO  
ENSG00000053371|AKR7A2 ENSG00000062582|MRPS24 ENSG00000065057|NTHL1 ENSG00000090674|MCOLN1 ENSG00000090674|MCOLN1 ENSG00000101350|KIF3B ENSG00000110195|FOLR1 ENSG00000110448|CD5  
ENSG00000112039|FANCE ENSG00000113194|UBXD8 ENSG00000113657|DPYSL3 ENSG00000116151|MORN1 ENSG00000122735|DNAI1 ENSG00000131196|NFATC1 ENSG00000135441|BLOC1S1 ENSG00000140955|NP\_631913.2  
ENSG00000150477|KIAA1328 ENSG00000151498|ACAD8 ENSG00000154252|GAL3ST2 ENSG00000157617|C21orf25 ENSG00000158716|DUSP23 ENSG00000160271|RALGDS ENSG00000160710|ADAR ENSG00000164266|SPINK1  
ENSG00000164300|SERINC5 ENSG00000164742|ADCY1 ENSG00000165879|FRAT1 ENSG00000166689|PLEKHA7 ENSG00000167744|NTF5 ENSG00000175697|GPR156 ENSG00000176946|THAP4 ENSG00000178241|Q9P0D4\_HUMAN  
ENSG00000178952|TUFM ENSG00000184209|NP\_008951.1 ENSG00000184924|NP\_001013685.1 ENSG00000186716|BCR ENSG00000187170|LCE4A ENSG00000188536|HBA2 ENSG00000192623|ZNF471 ENSG00000206172|HBA1  
ENSG00000001629|ANKIB1 ENSG00000005436|C2orf3 ENSG00000028203|VEZT ENSG000000099246|RAB18 ENSG00000101278|Q9NQ39\_HUMAN ENSG00000101384|JAG1 ENSG00000102401|ARMCX3 ENSG00000104804|TULP2  
ENSG00000107105|ELAVL2 ENSG00000110841|PPF1BP1 ENSG00000112818|MEP1A ENSG00000117054|ACADM ENSG00000118762|PKD2 ENSG00000121931|C1orf103 ENSG00000122557|HERPUD2 ENSG00000124614|RPS10  
ENSG00000136522|MRPL47 ENSG00000137947|GTF2B ENSG00000138279|ANXA7 ENSG00000140941|MAP1LC3B ENSG00000145703|IQGAP2 ENSG00000145734|BDP1 ENSG00000145781|COMMD10 ENSG00000154639|CXADR  
ENSG00000158185|ANKRD36 ENSG00000160207|HSF2BP ENSG00000162664|ZNF326 ENSG00000163319|MRPS18C ENSG00000164307|ARTS1\_HUMAN ENSG00000165156|ZH1 ENSG00000168291|PDHB ENSG00000171291|ZNF439  
ENSG00000171862|PTENP1 ENSG00000173559|OBFC2A ENSG00000177272|KCNA3 ENSG00000184258|CDR1 ENSG00000184735|DDX53 ENSG00000189369|GSP22 ENSG00000196912|AN36B\_HUMAN ENSG00000198755|RPL10A  
ENSG00000203681|XR\_017762.1 ENSG00000203963|C1orf141  
TTGAATG ENSG00000006638|TBXA2R ENSG00000065882|TBC1D1 ENSG00000074054|CLASP1 ENSG00000099204|ABLIM1 ENSG00000101605|MYO1 ENSG00000111331|OAS3 ENSG00000112562|SMOC2 ENSG00000117305|HMGCL  
ENSG00000125166|GOT2 ENSG00000134882|UBAC2 ENSG00000135744|AGT ENSG00000144677|CTDSPL ENSG00000145990|GFOD1 ENSG00000151779|NP\_056993.2 ENSG00000153395|AYTL2 ENSG00000160714|UBE2Q1  
ENSG00000166073|PRNP176 ENSG00000175824|XR\_017847.1 ENSG00000178206|C2orf14 ENSG00000184602|SNN ENSG00000197043|ANXA6 ENSG00000205106|Q6N098\_HUMAN ENSG0000011465|DCN ENSG0000011465|DCN  
ENSG00000067048|DDX3X ENSG00000070882|OSBPL3 ENSG00000079459|FDFT1 ENSG00000109471|IL2 ENSG00000111142|METAP2 ENSG00000113580|NR3C1 ENSG00000113649|TCERG1 ENSG00000115738|ID2  
ENSG00000118785|SPP1 ENSG00000133858|CCDC131 ENSG00000137075|RNF38 ENSG00000137819|PAQR5 ENSG00000138079|SLC3A1 ENSG00000138246|DNAJC13 ENSG00000138614|C15orf44 ENSG00000140153|WDR20  
ENSG00000143499|SMYD2 ENSG00000150712|MTMR12 ENSG00000155330|NP\_00101436.1 ENSG00000156976|EIF4A2 ENSG00000165630|PRPF18 ENSG00000165916|ZNF608 ENSG00000168916|ZNF608  
ENSG00000175928|LRRN1 ENSG00000178997|EXDL1 ENSG00000182504|LRR1Q2 ENSG00000188820|FAM26F ENSG00000198843|SELT\_HUMAN ENSG00000204970|PCDH1  
TTGAATT ENSG00000006007|GDI1\_HUMAN ENSG00000074660|SCARF1 ENSG00000101670|LIPG ENSG000001017562|CXCL12 ENSG00000118707|TGIF2 ENSG00000120875|DUSP4 ENSG00000125810|CD93  
ENSG00000130332|LSM7 ENSG00000143398|PIP5K1A ENSG00000145819|ARHGAP26 ENSG00000147454|SLC25A37 ENSG00000169598|DFFB ENSG00000171847|FAM90A1 ENSG00000183255|PTTG1IP ENSG00000196739|COL27A1  
ENSG00000197182|NM\_207477 ENSG00000204359|CFB ENSG00000205879|FAM90A25P ENSG00000065154|OAT ENSG00000078596|ITM2A ENSG00000082293|COL19A1 ENSG00000102781|KATNAL1 ENSG00000110756|HPS5  
ENSG00000112218|GPR63 ENSG00000112701|SENP6 ENSG00000123728|AKAP9 ENSG00000127914|AKAP9 ENSG00000135698|MPHOSPH6 ENSG00000136560|TANK ENSG00000137601|NEK1  
ENSG00000139180|NDUFA9 ENSG00000139496|NUPL1 ENSG00000141255|SPATA22 ENSG00000145331|RG9MTD2 ENSG00000151135|C12orf23 ENSG00000155393|HEATR3 ENSG00000155729|KCTD18 ENSG00000156009|MAGEA8  
ENSG00000173744

ENSG00000144504|ANKMY1 ENSG00000157617|C21orf25 ENSG00000169057|MECP2 ENSG00000176595|KBTBD11 ENSG00000177408|PLAC2 ENSG00000181350|C17orf76 ENSG00000185155|MIXL1 ENSG00000186118|Q6PEX7\_HUMAN  
ENSG00000187607|ZNF286A ENSG00000189069|NP\_001013732.1 ENSG00000196758|NM\_207483 ENSG00000196758|NM\_207483 ENSG00000104375|STK3 ENSG00000108239|TBC1D12 ENSG00000112175|BMP5 ENSG00000116161|CACYPB  
ENSG00000124479|NDP ENSG00000136709|WDR33 ENSG00000137962|ARHGAP29 ENSG00000145416|MARCH1 ENSG00000148229|POLE3 ENSG00000159917|ZNF235 ENSG00000163600|ICOS ENSG00000166503|HDGR3\_HUMAN  
ENSG00000175066|GK5 ENSG00000179902|C1orf194 ENSG00000185664|SILV ENSG00000187325|TAF9B ENSG00000189292|NP\_001002919.1 ENSG00000198400|ZNF84 ENSG00000205171|Q6PDB3\_HUMAN  
ENSG00000006530|AGK ENSG000000077549|CAP2B ENSG00000106012|IQCE ENSG00000112655|PTK7 ENSG00000112679|DUSP22 ENSG00000129245|FXR2 ENSG00000131094|C1QL1 ENSG00000134802|SLC43A3  
ENSG00000137809|ITGA11 ENSG00000151651|ADAM8 ENSG00000154832|CCXC1 ENSG00000164379|FOXO1 ENSG00000167536|DHR512 ENSG00000196153|Q8NAB5\_HUMAN ENSG00000196747|HIST1H3 ENSG00000197670|Q9H800\_HUMAN  
ENSG00000204582|Q6ZR28\_HUMAN ENSG00000204633|ACTN3 ENSG00000073910|FRY ENSG00000079819|EPB41L2 ENSG00000096746|HNRPH3 ENSG00000112297|AIM1 ENSG00000112305|SMAP1 ENSG00000113231|PDE8B  
ENSG00000115875|SFRS7 ENSG00000120215|MLANA ENSG00000120647|CCDC77 ENSG00000124214|STAU1 ENSG00000129514|FOXAL1 ENSG00000136099|PCDH8 ENSG00000143493|INTS7 ENSG00000144642|RBMS3  
ENSG00000145147|SLIT2 ENSG00000145919|FAM44B ENSG00000168564|CDKN2AIP ENSG00000182950|ODF3L1 ENSG00000185275|CD24 ENSG00000196511|TPK1  
ENSG00000105137|SYDE1 ENSG00000111412|C12orf49 ENSG00000114656|KIAA1257 ENSG00000132600|PRMT7 ENSG00000135723|FHOD1 ENSG00000136167|LCP1 ENSG00000139651|ZNF740 ENSG00000141485|SLC13A5  
ENSG00000147081|AKAP4 ENSG00000152291|TGOLN2 ENSG00000158220|FAM62C ENSG00000163872|YEATS2 ENSG00000171649|ZIK1 ENSG00000173545|ZNF622 ENSG00000178381|ZFAND2A ENSG00000178919|FOXE1  
ENSG00000182158|CREB3L2 ENSG00000182325|FBXL6 ENSG00000182950|ODF3L1 ENSG00000183633|C14orf132 ENSG00000185085|INTS5 ENSG00000188843|NM\_207504 ENSG00000189196|Q6ZUD9\_HUMAN ENSG00000197766|CFD  
ENSG00000070087|PFN2 ENSG000000072080|SPP2 ENSG00000074706|NP\_056368.1 ENSG00000076003|MCM6 ENSG00000079215|SLC1A3 ENSG00000100578|KIAA0586 ENSG00000105708|ZNF14 ENSG00000115295|CLIP4  
ENSG00000116183|PAPPA2 ENSG00000118432|CNR1 ENSG00000123165|ACTR11 ENSG00000125903|DEFB129 ENSG00000131351|NP\_219485.1 ENSG00000134532|SOX5 ENSG00000138190|EXOC6 ENSG00000139180|NDUFA9  
ENSG00000144481|TRPM8 ENSG00000145908|ZNF300 ENSG00000147041|SYTL5 ENSG00000150347|ARID5B ENSG00000155508|CNOT8 ENSG00000159256|MORC3 ENSG00000172869|DMXL1 ENSG00000173334|TRIB1  
ENSG00000178053|MLF1 ENSG00000185518|SV2B ENSG00000198161|PPIAL4 ENSG00000198360|NP\_839944.1 ENSG00000198936|NP\_839944.1  
ENSG00000006534|ALDH3B1 ENSG00000008382|PMND ENSG00000073008|PVR ENSG00000107819|SFXN3 ENSG00000114737|CISH ENSG00000119383|PPP2R4 ENSG00000125695|STRAD\_HUMAN ENSG00000131849|ZNF132  
ENSG00000135363|LMO2 ENSG00000135632|SMYD5 ENSG00000141504|SAT2 ENSG00000142102|ATHL1 ENSG00000147457|CHMP7 ENSG00000160296|SIGLEC12 ENSG00000161395|PERLD1 ENSG00000168995|SIGLEC7  
ENSG00000169884|WMT10B ENSG00000171136|RLN3 ENSG00000196123|NP\_001035805.1 ENSG00000196624|NP\_997381.1 ENSG00000205452|Q6ZQQ9\_HUMAN ENSG00000008197|TFAP2D ENSG00000080493|SLC4A4 ENSG00000089818|NECAP1  
ENSG00000092531|SNAP23 ENSG00000108389|MTMR4 ENSG00000111358|GTF2H3 ENSG00000114450|GNB4 ENSG00000124721|DNAH8 ENSG00000143252|SDHC ENSG00000152778|IFIT5 ENSG00000153896|ZNF599  
ENSG00000159208|C1orf51 ENSG00000161654|LSM12 ENSG00000163322|CCDC98 ENSG00000164056|SPRY1 ENSG00000164741|DLCL1 ENSG00000165646|SLC18A2 ENSG00000168646|AXIN2 ENSG00000169967|MAP3K2  
ENSG00000172239|PAIP1 ENSG00000176915|KIAA0692 ENSG00000186448|ZNF197 ENSG00000188501|LCTL ENSG00000189212|DPY19L2P1 ENSG00000204873|KRTAP9-3  
ENSG00000075426|FOSL2 ENSG00000086506|HBQ1 ENSG00000103274|NUBP1 ENSG00000119684|MLH3 ENSG00000122188|LAX1 ENSG00000125995|C20orf52 ENSG00000128849|CGNL1 ENSG00000135622|SEMA4F  
ENSG00000139797|RNF113B ENSG00000139998|RAB15 ENSG00000143614|GATAD2B ENSG00000151692|RNF144 ENSG00000160862|AZGP1 ENSG00000166167|BTRC ENSG00000167807|NP\_001026904.1 ENSG00000168970|PLA2G4B  
ENSG00000171960|PIH1 ENSG00000186191|C20orf186 ENSG00000187186|CCL27 ENSG00000189196|Q6ZUD9\_HUMAN ENSG00000196085|C19orf42 ENSG00000204759|Q6ZRYO\_HUMAN ENSG00000205560|CHKK ENSG0000030066|NUP160  
ENSG00000070831|CDC42 ENSG000000076641|PAG1 ENSG000000082153|BZW1 ENSG000000090269|CLEC5A ENSG00000108588|CCDC47 ENSG00000114127|XRN1 ENSG00000116729|GPR177 ENSG00000116954|RRAGC  
ENSG00000169884|ANAPC13 ENSG00000135333|EPHA7 ENSG00000152700|SAR1B ENSG00000167528|ZNF641 ENSG00000169850|LOR1AIP2 ENSG00000178695|KCTD12 ENSG00000184378|ARPM1\_HUMAN  
ENSG00000186471|AKAP14 ENSG00000196966|HIST1H3E ENSG00000198203|SULT1C2 ENSG00000198669|XKR9 ENSG00000204019|NP\_001017978.1  
ENSG000000047056|WDR37 ENSG00000102547|CAB39L ENSG00000108702|CCL1 ENSG00000109079|TNAI1 ENSG00000111087|GLI1 ENSG00000113194|UBXD8 ENSG00000121775|TMEM39B ENSG00000125991|ERIGC3  
ENSG00000128567|PODXL ENSG00000134955|SLC37A2 ENSG00000148158|SNX30 ENSG00000149269|PAK1 ENSG00000152082|FAM128B ENSG00000158169|FANCC ENSG00000160972|PPP1R16A ENSG00000162191|SAKS1\_HUMAN  
ENSG00000165606|NP\_001073989.1 ENSG00000173727|FAM128A ENSG00000178110|Q8N9G9\_HUMAN ENSG00000184451|CCR10 ENSG00000185888|NP\_898885.1 ENSG00000192796|C20orf142 ENSG00000198077|CYP2A7 ENSG00000206149|NP\_950246.1  
ENSG00000008405|CRY1 ENSG00000021826|CPS1 ENSG00000056586|RC3H2 ENSG00000077585|GPR137B ENSG00000086619|ERO1LB ENSG00000100614|PPM1A ENSG00000100650|SFRS5 ENSG00000100811|YY1  
ENSG00000102128|RB40L\_HUMAN ENSG00000102218|RP2 ENSG00000111711|GOLT1B ENSG00000112290|WASF1 ENSG00000113946|CLDN16 ENSG00000114796|KLHL24 ENSG00000115084|SLC35F5 ENSG00000125630|POLR1B  
ENSG00000125703|ATG4C ENSG00000130224|LRCH2 ENSG00000138346|DNA2L1 ENSG00000153113|CAST ENSG00000153936|HS2T1 ENSG00000155744|FAM126B ENSG00000159873|CCDC117 ENSG00000164221|CCDC112  
ENSG00000170748|HNRGT\_HUMAN ENSG00000173905|GOLPH4 ENSG00000176007|C9orf51 ENSG00000181704|YIPF6 ENSG00000182898|TCHHL1 ENSG00000185634|SHC4 ENSG00000186297|GABRA5 ENSG00000187098|MITF  
ENSG00000188243|COMMD6 ENSG00000203778|NP\_001028736.1 ENSG00000203788|Q6ZMM1\_HUMAN  
ENSG00000051596|THOC3 ENSG00000099994|SUSD2 ENSG00000105202|FBL ENSG00000106211|HSPB1 ENSG00000119718|EIF2B2 ENSG00000124237|C20orf85 ENSG00000125409|TEKT3 ENSG00000125976|RBM12  
ENSG00000130032|PRRG3 ENSG00000130723|KIAA0515 ENSG00000133067|LGR6 ENSG00000137076|TLN1 ENSG00000146067|Q9NW00\_HUMAN ENSG00000149115|TNKS1BP1 ENSG00000149929|HIRIP3 ENSG00000160505|NLRP4  
ENSG00000160785|SLC25A44 ENSG00000168970|PLA2G4B ENSG00000170089|THOC3 ENSG00000170275|CRTAP ENSG00000173821|RNF213 ENSG00000175334|BANF1 ENSG00000184164|CRELD2 ENSG00000189001|SBSN  
ENSG00000189339|SLC35E2 ENSG00000204174|PPYR1 ENSG00000135611|RNF14 ENSG00000056586|RC3H2 ENSG00000065328|MCM10 ENSG00000092199|HNRPC ENSG00000106829|TLE4 ENSG00000109063|MYH3  
ENSG00000120159|C9orf82 ENSG00000120820|GLT8D2 ENSG00000123096|SSFN ENSG00000134323|MYCN ENSG00000149289|ZC3H12C ENSG00000151694|ADAM17 ENSG00000154529|CNTNAP3B ENSG00000162971|NP\_001034782.1  
ENSG00000164031|DNAJB14 ENSG00000170448|NFXL1 ENSG00000170848|PSG6 ENSG00000172239|PAIP1 ENSG00000181065|Q9P161\_HUMAN ENSG00000181552|FAM12B ENSG00000186369|YNO02\_HUMAN ENSG00000187105|HEATR4  
ENSG00000197928|ZNF677 ENSG00000205299|CKLF  
ENSG00000004660|CAMKK1 ENSG00000007171|NOS2A ENSG00000083290|ULK2 ENSG00000089220|PEBP1 ENSG00000090659|CD209 ENSG00000101407|KIAA0406 ENSG00000120332|TNN ENSG00000140478|NM\_018652.4  
ENSG00000142303|ADAMTS10 ENSG00000143382|ADAMTSL4 ENSG00000149792|MRPL49 ENSG00000151468|CCDC3 ENSG00000161031|PGLYRP2 ENSG00000164216|TSSK1B ENSG00000167695|FAM57A ENSG00000170485|NPAS2  
ENSG00000177303|CASKIN2 ENSG00000178971|C17orf68 ENSG00000180139|Q8N925\_HUMAN ENSG00000181757|SLC22A18AS ENSG00000183691|NOG ENSG00000187513|GJA4 ENSG00000197565|COL4A6 ENSG00000203961|Q6ZRE1\_HUMAN  
ENSG00000204054|Q6ZNS9\_HUMAN ENSG00000204316|MRPL38 ENSG00000204459|Q6ZU55\_HUMAN ENSG00000011426|ANLN ENSG00000024862|CCDC28A ENSG00000038002|AGA ENSG00000075089|ACTR6 ENSG00000081803|CADPS2  
ENSG00000087995|METTL2A ENSG00000102048|ASB9 ENSG00000104722|NEFM ENSG00000109445|ZNF330 ENSG00000112214|FHL5 ENSG00000120805|ARL1 ENSG00000125900|SIRPD ENSG00000126088|UROD  
ENSG00000131174|COX7B ENSG00000137274|BPHL ENSG00000147082|CCNB3 ENSG00000148377|IDI2 ENSG00000150275|PCDH15 ENSG00000154438|ASZ1 ENSG00000165055|METTL2B ENSG00000169045|HNRPH1  
ENSG00000170027|YWHG ENSG00000175989|C11orf69 ENSG00000178445|GLDC ENSG00000185414|MRPL30 ENSG00000198088|NUP62CL ENSG00000198650|TAT  
ENSG00000068024|HDAC4 ENSG00000088812|ATRN ENSG00000089693|MLF2 ENSG00000101193|C20orf11 ENSG00000101421|CHMP4B ENSG00000104415|WISP1 ENSG00000107957|SH3PXD2A  
ENSG00000108883|EFTUD2 ENSG00000113272|THGLL ENSG00000113734|BNIP1 ENSG00000124785|NRRN1 ENSG00000125633|CCDC93 ENSG00000138942|RNF185 ENSG00000142207|URB1 ENSG00000145945|FAM50B  
ENSG00000151353|TMEM18 ENSG00000151692|RNF144 ENSG00000164010|ERMAP ENSG00000164896|FASTK ENSG00000167723|TRPV3 ENSG00000170767|C6orf208 ENSG00000174851|YIF1A ENSG00000180598|NP\_057296.1  
ENSG00000198369|SPRED2 ENSG00000058091|PFTK1 ENSG00000059769|GNM1 ENSG00000067113|PPAP2A ENSG00000075292|ZNF638 ENSG00000083077|UBE1DC1 ENSG000000882213|C5orf22 ENSG00000088205|DDX18  
ENSG00000102401|ARMXC3 ENSG00000102452|NALCN ENSG00000102678|FGF9 ENSG00000109762|SNX25 ENSG00000111907|TPD52L1 ENSG00000112144|ICK ENSG00000112851|ERBB2IP ENSG00000123728|RAP2C  
ENSG00000134440|NARS ENSG00000134717|BTF3L4 ENSG00000137960|IFPC2 ENSG00000140450|ARRDC4 ENSG00000145287|PLAC8 ENSG00000148516|ZEB1 ENSG00000155970|EFHA2 ENSG00000162199|PKNOX1  
ENSG00000162782|TDRD5 ENSG00000162836|ACP6 ENSG00000163285|GABRG1 ENSG00000163421|PROK2 ENSG00000166800|LDHAL6A ENSG00000170989|EDG1 ENSG00000179119|SPTY2D1 ENSG00000179195|ZNF664  
ENSG00000181704|YIPF6 ENSG00000198743|SLC5A3 ENSG00000204182|CTGLF1  
ENSG0000003137|CYP26B1 ENSG00000058085|LAMC2 ENSG00000100294|MCAT ENSG00000103942|HOMER2 ENSG00000119614|CHX10 ENSG00000130177|CDC16 ENSG00000131059|C20orf71 ENSG00000137100|DCTN3  
ENSG00000139629|GALNT6 ENSG00000141349|G6PC3 ENSG00000145526|CDH18 ENSG00000149679|CABLES2 ENSG00000153048|CARHSP1 ENSG00000161249|DMKN ENSG00000165949|IFI27 ENSG00000166508|MCM7  
ENSG00000170262|MRAP ENSG00000173093|CCDC63 ENSG00000173702|MUC13 ENSG00000175287|PHYHD1 ENSG00000181938|GINS3 ENSG00000182346|DAOA ENSG00000187173|LCE2A ENSG00000205664|Q6PJD4\_HUMAN  
ENSG00000205929|C21orf62 ENSG00000108443|RPS6KB1 ENSG00000114062|UBE3A ENSG00000116016|EPAS1 ENSG00000116176|TPSG1 ENSG00000118939|UCLH3 ENSG00000128617|OPN1SW  
ENSG00000134602|MTS4\_HUMAN ENSG00000137103|C9orf127 ENSG000001045391|SETD7 ENSG00000147246|HTR2C ENSG00000159251|ACTC1 ENSG00000169439|SDC2 ENSG00000171763|SPATA5L1 ENSG00000172554|SNTG2  
ENSG00000174156|GSTA3 ENSG00000180964|TCEAL8 ENSG00000182223|ZAR1 ENSG00000185345|PARK2 ENSG00000185774|KCNIP4 ENSG00000187574|KCNIP4 ENSG00000197412|Q8N8G3\_HUMAN ENSG00000197953|AADACL2  
ENSG00000053108|FSTL4 ENSG00000062822|POLD1 ENSG00000084628|FAM77C ENSG00000092964|DPYSL2 ENSG00000095397|DFNB31 ENSG00000100376|FAM118A ENSG00000101452|DHX35 ENSG00000104490|NCALD  
ENSG00000106006|HOXA6 ENSG00000116237|TCMT ENSG00000125826|RBCK1 ENSG00000130035|GALNT8 ENSG00000160097|FNDC5 ENSG00000160752|FDP5 ENSG00000161929|NP\_996986.1 ENSG00000164300|SERINC5  
ENSG00000164334|NP\_877438.2 ENSG00000174903|RAB1B ENSG00000178802|MPI ENSG00000180185|FAHD1 ENSG00000184650|ODF4 ENSG00000185825|NM\_207480 ENSG00000197506|SLC28A3 ENSG00000197549|Q6ZN90\_HUMAN  
ENSG00000047346|KIAA1370 ENSG00000047621|C12orf4 ENSG00000077713|SLC25A43 ENSG00000082512|TRAF5 ENSG00000091664|SLC17A6 ENSG00000111859|NEDD9 ENSG00000112972|HMGC31 ENSG00000114107|CEP70  
ENSG00000114698|PLSCR4 ENSG00000114757|PEX5L ENSG00000131373|HACL1 ENSG00000135913|USP37 ENSG00000136897|MRPL50 ENSG00000146151|HMGCLL1 ENSG00000147684|NDUFB9 ENSG00000166004|KIAA1731  
ENSG00000166326|TRIM44 ENSG00000176177|FAMTHD1 ENSG00000185760|KCNQ5 ENSG00000196785|Q8N862\_HUMAN ENSG00000196917|GPR81 ENSG00000198945|L3MBTL3  
ENSG00000043591|ADRB1 ENSG000000081760|AACS ENSG00000093072|CECR1 ENSG00000099954|CECR2 ENSG00000117643|MAN1C1 ENSG00000130305|NSUN5 ENSG00000130706|ADRM1 ENSG00000133937|GSC  
ENSG00000139200|C12orf53 ENSG00000143878|RHOB ENSG00000146830|PERQ1 ENSG00000158711|ELKA ENSG00000162496|DHR53 ENSG00000168334|CMYA1 ENSG00000168758|SEMA4C ENSG00000172689|MS4A10  
ENSG00000183519|NSUN5B ENSG00000185052|SLC24A3 ENSG00000187479|Q7Z7L8\_HUMAN ENSG00000188242|Q71RB1\_HUMAN ENSG00000189429|RNF207 ENSG00000196204|Q6NUR6\_HUMAN ENSG00000196370|Q96K66\_HUMAN ENSG00000205424|Q6ZW00\_HUMAN  
ENSG00000205673|Q6ZRX0\_HUMAN ENSG00000205795|CYS1 ENSG00000206189|NR\_001550.1 ENSG00000015171|ZMYND11 ENSG00000066185|ZMYND12 ENSG00000067798|NAV3 ENSG00000069345|DNAJA2 ENSG00000069764|PLA2G10  
ENSG00000074966|TKX ENSG00000104361|NPAL2 ENSG00000108582|CPD ENSG00000109756|RAPGEF2 ENSG00000116001|TIA1 ENSG00000117114|LPHN2 ENSG00000118515|SGK ENSG00000124788|ATXN1  
ENSG00000129824|RPS4Y1 ENSG00000134769|DTNA ENSG00000135837|CEP350 ENSG00000139173|TMEM117 ENSG00000144182|LIPT1 ENSG00000154359|LONRF1 ENSG00000162992|NEUROD1 ENSG00000163923|RPL39L  
ENSG00000166747|AP1G1 ENSG00000171241|SHCBP1 ENSG00000173928|C19orf39 ENSG00000188848|CCDC4  
hsa-miR-19a TGTGCAAtcttatgcaaaaactga 0  
TTTGACC ENSG00000025772|TOMM34 ENSG00000063180|CA11 ENSG00000072110|ACTN1 ENSG00000075340|ADD2 ENSG000000100106|TRIOBP ENSG00000119383|PPP2R4 ENSG00000119686|C14orf58  
ENSG00000123992|DNPEP ENSG00000124557|BTNL1A1 ENSG00000125954|FNTB ENSG00000127413|IL17B ENSG00000127743|IL17B ENSG00000132155|RAF1 ENSG00000140564|FURIN ENSG00000146666|Q96IP2\_HUMAN  
ENSG00000154222|CC2D1B ENSG00000155886|SLC24A2 ENSG00000166220|C10orf27 ENSG00000167580|AQP2 ENSG00000171703|TCEA2 ENSG00000172366|C16orf14 ENSG00000174015|SPERT ENSG00000175518|UBQLN1  
ENSG00000183929|DUSP5P ENSG00000188536|HBA2 ENSG00000189037|DUSP21 ENSG00000197296|C20orf142 ENSG00000205434|Q6ZU34\_HUMAN ENSG00000072315|TRPC5 ENSG00000095787|WAC ENSG00000100249|C22orf31  
ENSG00000100784|RPS6KA5 ENSG00000101773|RBBP8 ENSG00000111241|FGF6 ENSG00000111846|GCNT2 ENSG00000117601|SERPINC1 ENSG00000130957|FBP2 ENSG00000135932|CAB39 ENSG00000137414|FAM8A1  
ENSG00000139324|TMTCC3 ENSG00000145780|FEM1C ENSG00000154305|MTA3 ENSG00000165516|KLHDC2 ENSG00000187554|TLR5 ENSG00000203925|LOC647839 ENSG00000205423|TMEM188  
ENSG00000067840|PDZ4 ENSG00000104856|REL3 ENSG00000105202|FBL ENSG00000116273|PHF13 ENSG00000116604|MEF2D ENSG00000124243|BCAS4 ENSG00000125733|F2RL3 ENSG00000132740|IGHMBP2  
ENSG00000145901|TNIP1 ENSG00000149927|DOC2A ENSG00000158019|BRE ENSG00000159387|TRX6 ENSG00000162849|KIF26B ENSG00000163520|FBLN2 ENSG00000166402|TUB ENSG00000166426|CRABP1  
ENSG00000181649|PHLDA2 ENSG00000183443|A2RU41\_HUMAN ENSG00000196370|Q96R66\_HUMAN ENSG00000197892|KIF13B ENSG00000198610|AKR1C4 ENSG00000198643|FAM3D ENSG00000198873|GRK5 ENSG00000008394|MGST1  
ENSG00000058091|PFTK1 ENSG00000058600|POLR3E ENSG00000090376|IRAK3 ENSG00000113712|CSNK1A1 ENSG00000114790|NP\_056410.2 ENSG00000117862|TXNDC12 ENSG00000123561|SERPINA7 ENSG00000124207|CSE1L  
ENSG00000133808|MICALCL1 ENSG00000138297|TIMM23 ENSG00000138376|BARD1 ENSG00000141627|DYM ENSG00000145703|IQGAP2 ENSG00000147862|NFIB ENSG00000163554|SPTA1 ENSG00000164035|EMCN  
ENSG00000166596|WDR16 ENSG00000171132|

TTGCACT ENSG0000055070|Clorf144 ENSG00000086015|MAST2 ENSG00000092295|TGM1 ENSG00000103723|AP3B2 ENSG00000108292|MLLT6 ENSG00000120509|PDZD11 ENSG00000125084|WNT1 ENSG00000129467|ADCY4  
ENSG00000130600|H19 ENSG00000130956|HABP4 ENSG00000138769|CDKL2 ENSG00000151148|UBE3B ENSG00000164850|GPR30 ENSG00000164896|FASTK ENSG00000165699|TSC1 ENSG00000167483|FAM129C  
ENSG00000167641|PPP1R14A ENSG00000169057|MECP2 ENSG00000173120|FBXL11 ENSG00000175264|CHST1 ENSG00000179950|NP\_055096.2 ENSG00000184650|ODF4 ENSG00000185069|KRT76 ENSG00000188483|IER5L  
ENSG00000206528|Q6ZSM0\_HUMAN ENSG000000081818|PCDH84 ENSG000000085433|WDR47 ENSG00000100784|RPS6KA5 ENSG00000105856|HBP1 ENSG00000106511|MEOX2 ENSG00000109654|TRIM2 ENSG00000110367|DDX6  
ENSG00000111711|GOLTB1 ENSG00000115109|EPB41L5 ENSG00000115170|ACVR1 ENSG00000131269|ABC87 ENSG00000134049|IER3IP1 ENSG00000138641|HERC3 ENSG00000140153|WDR20 ENSG00000143756|FBXO28  
ENSG00000147642|SYBU\_HUMAN ENSG00000150991|UBIQ\_HUMAN ENSG00000157077|ZFYVE9 ENSG00000164209|SLC25A46 ENSG00000164603|NP\_689769.2 ENSG00000165195|PIGA ENSG00000198160|MIER1  
perfect: TTGCACT AGTGCAA hsa-miR-130b cAGTGCATgatgaaagggcat 1  
perfect: TTGCACT AGTGCAA hsa-miR-130a cAGTGCATgtttaaagggcat 1  
TTGCAGA ENSG00000060069|CTDP1 ENSG00000065057|NTHL1 ENSG00000095059|DHFS ENSG00000101144|BMP7 ENSG00000101146|RAE1 ENSG00000107719|KIAA1274 ENSG00000116205|Clorf83 ENSG00000119772|DNMT3A  
ENSG00000123349|PFDN5 ENSG00000126500|FLRT1 ENSG00000136112|UTF14C ENSG00000138629|UBL7 ENSG00000145901|TNP1 ENSG00000146535|GNA12 ENSG00000152705|CATSPER3 ENSG00000163083|INHBB  
ENSG00000164010|ERMAP ENSG00000169194|IL13 ENSG00000177354|Clorf71 ENSG00000182667|NTR1\_HUMAN ENSG00000183421|RIPK4 ENSG00000185294|NP\_787078.1 ENSG00000186029|Q9NSZ8\_HUMAN ENSG00000186090|HTR3D  
ENSG00000186275|Q5TB04\_HUMAN ENSG000001198960|ARMCX6 ENSG00000205205|Clorf51 ENSG00000054938|CHRDL2 ENSG00000067064|ID1 ENSG00000102781|KATNAL1 ENSG00000112541|PDE10A ENSG00000115310|RTN4  
ENSG00000117600|NP\_055654.2 ENSG00000118946|PCDH17 ENSG000001024788|ATXN1 ENSG00000125944|HNRPR ENSG00000140743|CDR2 ENSG00000149218|ENDOD1 ENSG00000163377|FAM19A4 ENSG00000163518|FCRL4  
ENSG00000163625|WDFY3 ENSG00000175874|CREG2 ENSG00000180190|C8orf42 ENSG00000183952|Q9HSQ9\_HUMAN ENSG00000185658|BRWD1 ENSG00000186416|NKRF ENSG00000187742|SECISBP2 ENSG00000189292|NP\_001002919.1  
ENSG00000205024|Q6ZVP5\_HUMAN  
TTGCAGC ENSG00000100302|RASD2 ENSG00000130803|ZNF317 ENSG00000136828|RALGPS1 ENSG00000138769|CDKL2 ENSG00000139832|RAB20 ENSG00000143032|BARHL2 ENSG00000144677|CTDSPL ENSG00000149131|SERPING1  
ENSG00000163815|CLEC3B ENSG00000163933|RFT1 ENSG00000172732|MUS81 ENSG00000173227|SYT12 ENSG00000182013|NP\_060685.2 ENSG00000182566|CLEC4G ENSG00000182912|C21orf90 ENSG00000185065|NP\_776154.2  
ENSG00000187170|LCE4A ENSG00000196943|LTBR4 ENSG00000197088|NM\_207488 ENSG00000198614|C4orf12 ENSG00000198641|SY51 ENSG00000198960|ARMCX6 ENSG00000204412|Q6ZTP5\_HUMAN ENSG00000205974|Q6ZVY3\_HUMAN  
ENSG00000048991|R3HDM1 ENSG00000070087|PFN2 ENSG00000101384|JAG1 ENSG00000104043|ATPB84 ENSG00000106443|PHF14 ENSG00000106483|SERP4 ENSG00000112873|SNRPN ENSG000001133106|EPST11  
ENSG00000137776|SLTM ENSG00000138641|HERC3 ENSG00000143674|M3KL4\_HUMAN ENSG00000144746|ARL6IP5 ENSG00000151693|DDEF2 ENSG00000154380|ENAH ENSG00000155189|AGPAT5 ENSG00000158290|CUL4B  
ENSG00000165500|PPI15 ENSG00000171402|XAGE3 ENSG00000172461|FUT9 ENSG00000174106|LEM3D  
TTGCATG ENSG00000006638|TBXA2R ENSG00000015676|NUDC3 ENSG00000076984|O14733-2 ENSG00000101150|TPD52L2 ENSG00000112149|CD83 ENSG00000115718|PROC ENSG00000116198|KIAA0562 ENSG00000125967|APBA2BP  
ENSG00000145819|ARHGAP26 ENSG00000148411|BTBD14A ENSG00000156711|MAPK13 ENSG00000164270|HTR4 ENSG00000166436|TRIM66 ENSG00000174697|LEP ENSG00000177992|C9orf79 ENSG00000183049|CAMK1D  
ENSG00000187017|ESP1 ENSG00000198664|Q9BTR0\_HUMAN ENSG00000198700|IPO9 ENSG00000204241|Q6ZU8\_HUMAN ENSG00000204425|Q6ZP74\_HUMAN ENSG00000062716|TMEM49 ENSG00000081870|Clorf41 ENSG00000082068|WDR70  
ENSG00000083312|TNPO1 ENSG000000102053|ZC3H12B ENSG00000106723|SPIN1 ENSG00000110422|HIPK3 ENSG00000112077|RHAG ENSG00000118276|B4GALT6 ENSG00000120051|C10orf80  
ENSG00000129586|ZBED5 ENSG00000129682|FGF13 ENSG00000139329|LUM ENSG00000144802|NFKB1Z ENSG00000145649|GZMA ENSG00000147862|NFIB ENSG00000151164|RAD9B ENSG00000156103|MMP16  
ENSG00000163638|ADAMTS9 ENSG00000164164|OTUD4 ENSG00000172201|ID4 ENSG00000172954|LYCAT ENSG00000174442|ZWILCH ENSG00000174446|SNAPC5 ENSG00000186432|KPN4 ENSG00000205874|Q6SA06\_HUMAN  
TTGCCAA ENSG00000102076|OPN1LW ENSG00000105137|SYDE1 ENSG00000116584|ARHGFE2 ENSG00000118689|FOXO3A ENSG00000125995|C20orf52 ENSG00000130147|SH3BP4 ENSG00000131165|CHMP1A ENSG00000135473|USP52  
ENSG00000137312|FLOT1 ENSG00000140488|BRUNOL6 ENSG00000142748|FCN3 ENSG00000147380|OPN1MW ENSG00000156471|PTDSS1 ENSG00000157613|CREB3L1 ENSG00000166160|OPN1MW2 ENSG00000184012|TMPRSS2  
ENSG00000184640|SEPT9 ENSG00000196085|C19orf42 ENSG00000197616|MYH6 ENSG00000205878|Q6ZSV2\_HUMAN ENSG00000037749|MFAP3 ENSG00000038219|FAM44A ENSG00000082213|C5orf22 ENSG00000091129|NRCAM  
ENSG00000091844|RGS17 ENSG00000095139|ARCN1 ENSG00000108395|TRIM37 ENSG00000116704|SLC35D1 ENSG00000120253|NUP43 ENSG00000134504|KCTD1 ENSG00000136099|PCDH8 ENSG00000138071|ACTR2  
ENSG00000145545|SRD5A1 ENSG00000145715|RASA1 ENSG00000151366|INDUFC2 ENSG00000151835|SACS ENSG00000152620|C5orf33 ENSG00000163638|ADAMTS9 ENSG00000164683|HEY1 ENSG00000168374|ARF4  
ENSG00000183990|Q6WZ8\_HUMAN ENSG00000184984|CHRM5 ENSG00000187010|RHD ENSG00000197817|Q9UHS9\_HUMAN ENSG00000198650|TAT ENSG00000205133|Q629K1\_HUMAN  
perfect: TTGCCAA TTGCCAA hsa-miR-182 tTTGCCAAtggtagaactca 1  
TTGCCCT ENSG00000003137|CYP26B1 ENSG00000005381|MPO ENSG00000079805|DNM2 ENSG00000082805|ERC1 ENSG00000085644|ZNF213 ENSG00000100949|RABGTA ENSG00000101146|RAE1 ENSG00000112493|TAPBP  
ENSG00000120057|SERP5 ENSG00000130175|PRKCSH ENSG00000132017|NP\_612362.2 ENSG00000139998|RAB15 ENSG00000140264|SERF2 ENSG00000140320|BAHD1 ENSG00000143620|EFNA4 ENSG00000146216|TTBK1  
ENSG00000155506|LARP1 ENSG00000163346|PBX1P1 ENSG00000172613|RAD9A ENSG00000177951|BET1L ENSG00000188086|NP\_954652.1 ENSG00000198837|DENND4B ENSG00000075711|DLG1 ENSG00000092969|TGFB2  
ENSG00000100796|SMEK1 ENSG00000101367|MAPRE1 ENSG00000102781|KATNAL1 ENSG00000106483|SERP4 ENSG00000117152|RGS4 ENSG00000119121|TRPM6 ENSG00000132429|PODPC3 ENSG00000145391|SETD7  
ENSG00000147684|NDUFB9 ENSG00000156535|CD109 ENSG00000159377|PSMB4 ENSG00000165632|TAF3 ENSG00000166889|NP\_689929.1 ENSG00000168515|SCGB1D1 ENSG00000170927|PKHD1 ENSG00000173559|OBFC2A  
ENSG00000175104|TRAF6 ENSG00000184860|NP\_660151.2 ENSG00000187189|TSPYL4 ENSG00000197745|SCGB1D4 ENSG00000198522|ZNF512  
TTGCCCT ENSG00000001461|NAL3 ENSG000000075035|WSCD2 ENSG00000084207|GSTP1 ENSG00000116667|Clorf21 ENSG00000116871|MAP7D1 ENSG00000118257|NRP2 ENSG00000119772|DNMT3A ENSG00000119973|PRLHR  
ENSG00000121281|ADCY7 ENSG00000121769|FABP3 ENSG00000123243|ITIH5 ENSG00000125755|SYMFK ENSG00000127124|HIVEP3 ENSG00000127544|HMGC52 ENSG00000136731|UGCG1 ENSG00000143418|LASS2  
ENSG00000161649|CD300LG ENSG00000164587|RPS14 ENSG00000166833|NAV2 ENSG00000167535|CACNB3 ENSG00000170577|SIX2 ENSG00000173281|PPP1R3B ENSG00000175213|ZNF408 ENSG00000197430|TMEM10  
ENSG00000198700|IPO9 ENSG00000006634|DBF4 ENSG000000024526|DEPDC1 ENSG00000065559|MAP2K4 ENSG00000100926|TM9SF1 ENSG00000102763|NP\_001009814.1 ENSG00000102886|GDPD3 ENSG00000104164|PLDN  
ENSG00000111404|NP\_079006.1 ENSG00000117262|GPR89A ENSG00000117519|CNN3 ENSG00000121542|SEC22A ENSG00000124831|LRRF1P1 ENSG00000129116|PALLD ENSG00000129472|RAB2B ENSG00000137959|IFI44L  
ENSG00000143779|MBOAT2 ENSG00000147400|CETN2 ENSG00000154710|KCTD7 ENSG00000161980|POLR3K ENSG00000164938|TP53INP1 ENSG00000165525|SDCCAG1 ENSG00000166454|K0431\_HUMAN ENSG00000170677|SOCS6  
ENSG00000182890|GLUD2 ENSG00000185591|SP1 ENSG00000186297|GABRA5 ENSG00000186566|GPATCH8 ENSG00000188092|GPR89B ENSG00000204370|DHDD ENSG00000204370|DHDD  
TTGCAGG ENSG00000058799|YIPF1 ENSG00000067182|TNFRSF1A ENSG00000105202|FBL ENSG00000122180|MYO6 ENSG00000126705|AHDC1 ENSG00000136840|ST6GALNAC4 ENSG00000139531|SUOX ENSG00000147889|CDKN2A  
ENSG00000151364|KCTD14 ENSG00000156345|CCRK ENSG00000157388|CACNA1D ENSG00000160505|NLRP4 ENSG00000162373|C10orf165 ENSG00000165698|C9orf9 ENSG00000168476|REEP4 ENSG00000168884|TNP2  
ENSG00000170454|KRT75 ENSG00000177614|PGBD5 ENSG00000181218|H1ST3H2A ENSG00000186897|C1QL4 ENSG00000196923|PDLIM7 ENSG00000198131|ZNF544 ENSG00000198835|GJA12 ENSG00000204362|Q6ZS05\_HUMAN  
ENSG00000205191|NP\_001070148.1 ENSG00000008083|JARID2 ENSG00000016402|IL20RA ENSG00000043514|TRIT1 ENSG00000082175|PGR ENSG00000100749|VRK1 ENSG00000113212|PCDH7 ENSG00000115761|NOL10  
ENSG00000115806|GORASP2 ENSG00000120647|CCDC77 ENSG00000129170|CSRP3 ENSG00000140391|TSPAN3 ENSG00000155438|MKI67P ENSG00000164093|PITX2 ENSG00000171564|FGB ENSG00000175643|C16orf75  
ENSG00000179008|C14orf39 ENSG00000183508|FAM46C ENSG00000188297|GABRA5 ENSG00000188402|NP\_995324.1 ENSG00000196285|H33\_HUMAN ENSG00000196792|STRN3 ENSG00000198646|NCOA6 ENSG00000198743|SLC5A3  
TTGCAGT ENSG00000002586|CD99 ENSG00000003400|CASP10 ENSG00000006114|AP1GBP1 ENSG00000010671|BTK ENSG00000116039|ATP6V1B1 ENSG00000118156|ZNF514 ENSG00000118689|FOXO3A ENSG00000129152|MYO1  
ENSG00000136205|TNS3 ENSG00000143867|OSR1 ENSG00000148842|CNNM2 ENSG00000151640|DPYSL4 ENSG00000157150|TIMP4 ENSG00000163155|LYSMD1 ENSG00000163793|DNAJC5G ENSG00000167619|TMEM145  
ENSG00000169100|SLC25A6 ENSG00000169683|LRRC45 ENSG00000171302|CANT1 ENSG00000171532|NEUROD2 ENSG00000171604|CXXC5 ENSG00000172878|NP\_954697.1 ENSG00000174400|Q8TB00\_HUMAN ENSG00000180806|HOXC9  
ENSG00000184601|NP\_001008404.1 ENSG00000187479|Q7Z7L8\_HUMAN ENSG00000188176|SMTNL2 ENSG00000002016|RADS2 ENSG00000104691|UBXD6 ENSG00000105851|PIK3CG ENSG00000106609|C7orf42 ENSG00000110958|PTGES3  
ENSG00000118434|SPACA1 ENSG00000118507|AKAP7 ENSG00000119048|UBE2B ENSG00000132669|RIN2 ENSG00000135069|PSAT1 ENSG00000135750|KCNK1 ENSG00000139610|ELA1 ENSG00000140905|GC5H  
ENSG00000145416|MARCH1 ENSG00000148153|C9orf80 ENSG00000154447|SH3RF1 ENSG00000166855|CLPX ENSG00000173046|NM\_207376 ENSG00000179520|SLC17A8 ENSG00000179796|LRRC3B ENSG00000183784|C9orf66  
ENSG00000184474|Q96FP4\_HUMAN ENSG00000188295|ZNF669 ENSG00000204669|C9orf57  
TTGCAGC ENSG00000006015|C19orf60 ENSG00000038358|EDC4 ENSG000000064545|TMEM161A ENSG00000067606|PRKCZ ENSG00000100429|HDAC10 ENSG00000125386|C4orf8 ENSG00000127616|SMARCA4 ENSG00000137106|GRHRP  
ENSG00000140983|RHOT2 ENSG00000142233|NP\_665806.1 ENSG00000153902|LG14 ENSG00000161921|CXCL16 ENSG00000166126|AMN ENSG00000168785|TSPAN5 ENSG00000168970|PLA2G4B ENSG00000172270|BSG  
ENSG00000172663|TMEM134 ENSG00000174576|NPAS4 ENSG00000177105|RHOG ENSG00000181652|ATG9B ENSG00000182087|C19orf6 ENSG00000186837|C21orf119 ENSG00000196293|DUX4 ENSG00000203883|SOX18  
ENSG00000032514|PGBD3 ENSG00000066583|ISOC1 ENSG000000081041|CXCL2 ENSG00000086475|SEPHS1 ENSG000001090060|PAPOLA ENSG00000101266|FSCK2A1P ENSG00000105939|ZC3HAV1 ENSG00000109572|CLCN3  
ENSG00000114315|HES1 ENSG00000133193|FAM104A ENSG00000136044|APPL2 ENSG00000136379|FAM108C1 ENSG00000137968|SLC44A5 ENSG00000143226|CNR2A ENSG00000144118|RALB ENSG00000146039|SLC17A4  
ENSG00000148053|NTRK2 ENSG00000151615|POU4F2 ENSG00000163466|ARPC2 ENSG00000170153|RNF150 ENSG00000170633|RNF34 ENSG00000182090|C14orf25 ENSG00000185345|PARK2 ENSG00000186700|Q8N6F3\_HUMAN  
ENSG00000188085|NP\_997320.1 ENSG00000198846|TOX  
TTGCAGC ENSG000000099785|MARCH2 ENSG00000099822|HCN2 ENSG00000103653|CSK ENSG00000105401|CDC37 ENSG00000121413|ZSCAN18 ENSG00000137392|CLPS ENSG00000142484|TM4SF5 ENSG00000149136|SSRP1  
ENSG00000170955|PRKC2BP1 ENSG00000178372|CALML5 ENSG00000184047|DIABLO ENSG00000197444|OGDHL ENSG00000049167|ERCC8 ENSG00000073712|PLEKHC1 ENSG00000102804|TSC22D1 ENSG00000104695|PPP2CB  
ENSG00000108733|PEX12 ENSG00000113583|C5orf15 ENSG00000114030|KPN1 ENSG00000116793|PHTP1 ENSG00000118855|MFSD1 ENSG00000128891|CCDC32 ENSG00000136044|APPL2 ENSG00000144354|CDCA7  
ENSG00000147650|LRP12 ENSG00000164466|SFXN1 ENSG00000165185|KIAA1958 ENSG00000169045|HNRPH1 ENSG00000184474|Q96FP4\_HUMAN ENSG00000184899|Q9P181\_HUMAN ENSG00000187611|Q6ZTR6\_HUMAN ENSG00000196980|NR\_002827.1  
TTGCAGG ENSG00000069812|HES2 ENSG000000070770|CSNK2A2 ENSG00000074317|SNCB ENSG00000092929|UNC13D ENSG00000103269|RHBDL1 ENSG00000122952|ZWINT ENSG00000125898|FAM110A ENSG00000143536|CRNN  
ENSG00000158623|TSGA13 ENSG00000160161|CILP2 ENSG00000170260|ZNF212 ENSG00000173421|CCDC36 ENSG00000176973|FAM89B ENSG00000184548|TMEM173 ENSG00000185627|PSMD13 ENSG00000185825|BCAP31  
ENSG00000198879|SEMBT2 ENSG000000204386|NEU1 ENSG00000023572|GLRX2 ENSG00000089177|C20orf23 ENSG00000091127|PUS7 ENSG00000104361|NPM2 ENSG00000104517|EDD1 ENSG00000107201|DDX58  
ENSG00000112214|FHL5 ENSG00000112852|PCDH2 ENSG00000119878|CRIP2 ENSG00000120690|ELF1 ENSG00000124786|SLC35B3 ENSG00000133115|STOML3 ENSG00000136158|SPRY2 ENSG00000158301|GPRASP2  
ENSG00000164073|MFSD8 ENSG00000165685|C12orf59 ENSG00000165862|PNLI1P2 ENSG00000183291|SEP15\_HUMAN ENSG00000206559|ZCWPW2  
TTGCAGC ENSG00000002330|BAD ENSG00000059122|FLYWCH1 ENSG00000106348|IMPDH1 ENSG00000107829|FBXW4 ENSG00000115641|FHL2 ENSG00000119718|EIF2B2 ENSG00000124541|C6orf153 ENSG00000166925|TSC22D4  
ENSG00000167754|KLK5 ENSG00000167992|VWCE ENSG00000173653|RCE1 ENSG00000178773|CPNE7 ENSG00000185990|F8A3 ENSG00000196976|LAGE3 ENSG00000197451|HNRPAB ENSG00000197932|F8A2  
ENSG00000198444|F8A1 ENSG00000038219|FAM44A ENSG00000101782|R1OK3 ENSG00000102362|SYTL4 ENSG00000106609|C7orf42 ENSG00000112335|SNX3 ENSG00000112367|KIAA0274 ENSG00000116285|ERRF11  
ENSG00000116771|AGMAT ENSG00000118729|CASQ2 ENSG00000126950|TMEM35 ENSG00000129682|FGF13 ENSG00000133606|MKRN1 ENSG00000135111|TBX3 ENSG00000135900|MRPL44 ENSG00000136108|CKAP2  
ENSG00000145384|FABP2 ENSG00000153714|C9orf150 ENSG00000153721|MAGI1 ENSG00000163075|NP\_001025167.1 ENSG00000165934|CPSF2 ENSG00000168646|AXIN2 ENSG00000172845|SP3 ENSG00000173141|MRP63  
ENSG00000177606|JUN ENSG00000180882|XR\_017823.1 ENSG00000183022|NR\_003148.2 ENSG00000204026|Q6ZSD2\_HUMAN  
TTGCATA ENSG00000100234|TIMP3 ENSG00000106078|COBL ENSG00000143772|ITPKB ENSG00000147113|CXorf36 ENSG00000147123|NDUFB11 ENSG00000159784|FAM131B ENSG00000162910|MRPL55 ENSG00000166436|TRIM66  
ENSG00000166508|MCM7 ENSG00000173786|CNP ENSG00000186994|ANKRD47 ENSG00000044115|CTNNA1 ENSG00000079102|RUNX1T1 ENSG00000104047|DTWD1 ENSG00000111670|GNPTAB ENSG00000111817|DSE  
ENSG00000117519|CNN3 ENSG00000118514|ALDH8A1 ENSG00000119508|NR4A3 ENSG00000124875|CXCL6 ENSG00000135087|DMG3B ENSG00000138615|CILP ENSG00000151240|DIP2C ENSG00000161533|ACOX1  
ENSG00000163032|VSNL1 ENSG00000161313|CTSS ENSG00000164124|TMEM144 ENSG00000164841|TMEM74 ENSG00000170242|USP47 ENSG00000171262|FAM98B ENSG00000171943|SRGAP2P1 ENSG00000178460|C8orf45  
ENSG00000184005|ST6GALNAC3 ENSG00000184227|ACOT1 ENSG00000185551|NR2F2 ENSG00000196605|Q08AG5\_HUMAN ENSG00000204954|Q69YU5\_HUMAN  
TTGCATC ENSG000000082684|SEMA5B ENSG00000100931|CHMP4A ENSG00000101265|RASSF2 ENSG00000107341|UBE2R2 ENSG00000110328|GALNTL4 ENSG00000110713|NUP98 ENSG00000124374|PAIP2B ENSG00000127946|HIP1

|                                |                              |                              |                              |                                |                              |                              |                                |
|--------------------------------|------------------------------|------------------------------|------------------------------|--------------------------------|------------------------------|------------------------------|--------------------------------|
| ENSG00000131845 ZNF304         | ENSG00000132470 ITGB4        | ENSG00000134247 PTGFRN       | ENSG00000138031 ADCY3        | ENSG00000151465 CDC123         | ENSG00000158874 APOA2        | ENSG00000159199 ATP5G1       | ENSG00000162571 TTLL5          |
| ENSG00000166133 RPUS2          | ENSG00000173862 Q9NWP0_HUMAN | ENSG00000175518 UBQLNL       | ENSG00000177096 FAM109B      | ENSG00000178026 C22orf36       | ENSG00000181437 XR_017773.1  | ENSG00000183633 C14orf132    | ENSG00000196501 HIST1H2BN      |
| ENSG00000196976 LAGE3          | ENSG00000204418 CLIC1        | ENSG00000205434 Q6ZU34_HUMAN | ENSG00000205434 Q6ZU34_HUMAN | ENSG00000205471 ABC4           | ENSG00000205683 ME1          | ENSG000002090104 RGS1        | ENSG000002100129 EIF3S6IP      |
| ENSG00000100380 ST13           | ENSG00000114331 CENTB2       | ENSG00000121335 PRB4         | ENSG00000125144 MT1G         | ENSG00000125355 FAM70A         | ENSG00000132429 POPD3C       | ENSG00000136810 TXN          | ENSG00000139597 NP_438169.2    |
| ENSG00000141979 CALR3          | ENSG00000143815 LBR          | ENSG00000145839 IL9          | ENSG00000151883 PARP8        | ENSG00000154582 TCBE1          | ENSG00000159921 GNE          | ENSG00000162687 KCNT2        | ENSG00000163539 CLASP2         |
| ENSG00000163577 EIF5A2         | ENSG00000164221 CCDC112      | ENSG00000169688 MT1B         | ENSG00000172954 LYCAT        | ENSG00000176593 Q8N9G5_HUMAN   | ENSG00000185753 CXorf38      | ENSG00000187193 MT1X         | ENSG00000197453 NP_001001706.1 |
| ENSG00000198417 MT1F           | ENSG00000204597 ZNF818       | ENSG00000205358 MT1H         | ENSG00000102934 PLLP         | ENSG00000106628 POLD2          | ENSG00000110779 KIAA1274     | ENSG00000109758 HGFAC        | ENSG00000110324 IL10RA         |
| ENSG00000007923 DNAJC11        | ENSG00000077238 IL4R         | ENSG00000100335 SMCR7L       | ENSG00000140990 NDUFB10      | ENSG00000143393 PIK4CB         | ENSG00000151650 VENTX        | ENSG00000155984 TMEM185A     | ENSG00000161896 IHPK3          |
| ENSG00000112273 HDGF11         | ENSG00000136878 USP21        | ENSG00000140598 EMTU1        | ENSG00000180595 Q8N8C9_HUMAN | ENSG00000182534 MXRA7          | ENSG00000182575 NXP3         | ENSG00000196176 HIST1H4A     | ENSG00000197265 GTF2E2         |
| ENSG00000167588 GPD1           | ENSG00000175213 ZNF408       | ENSG00000177951 BET1L        | ENSG00000206613 SLK          | ENSG00000206513 SLK            | ENSG00000104517 EDD1         | ENSG00000105483 CARD8        | ENSG00000107651 SEC23IP        |
| ENSG00000198574 SH2D1B         | ENSG00000047779 NDUFAB1      | ENSG00000120486 BRCA1        | ENSG00000119820 YIPF4        | ENSG00000120129 DUSP1          | ENSG00000126246 TMEM149      | ENSG00000132639 SNAP25       | ENSG00000133138 TBC1D8B        |
| ENSG00000113971 ACAD11         | ENSG00000117133 BXDC5        | ENSG00000118363 SPCS2        | ENSG00000166268 C12orf28     | ENSG00000166669 ATF7IP2        | ENSG00000170927 PKHD1        | ENSG00000182919 C11orf54     | ENSG00000185920 PTCH1          |
| ENSG00000137265 IRF4           | ENSG00000137996 RTCD1        | ENSG00000138162 TACC2        | ENSG00000110324 IL10RA       | ENSG00000118017 A4GNT          | ENSG00000125888 C20orf179    | ENSG00000129473 BCL2L2       | ENSG00000130584 ZBTB46         |
| ENSG00000198176 TFDP1          | ENSG00000203837 PNLIPRP3     | ENSG00000089060 SLC24A6      | ENSG00000137809 ITGA11       | ENSG00000142794 NBPF3          | ENSG00000158710 TAGLN2       | ENSG00000159231 CBR3         | ENSG00000161558 TMEM143        |
| ENSG00000077782 FGFR1          | ENSG00000088832 FKBP1A       | ENSG00000135824 RGS8         | ENSG00000162144 CYBASC3      | ENSG00000170779 CDC4A          | ENSG00000173153 ADRR1        | ENSG00000176909 NP_872380.1  | ENSG00000177697 CD151          |
| ENSG00000135631 RAB11FIP5      | ENSG00000135740 SLC9A5       | ENSG00000163517 HDAC11       | ENSG00000197818 SLC9A8       | ENSG00000198225 Q5VUH2_HUMAN   | ENSG00000198742 SMURF1       | ENSG00000198925 ATG9A        | ENSG00000205159 Q6ZVC9_HUMAN   |
| ENSG00000162065 TBC1D24        | ENSG00000162144 CYBASC3      | ENSG00000163517 HDAC11       | ENSG00000197818 SLC9A8       | ENSG00000198225 Q5VUH2_HUMAN   | ENSG00000198742 SMURF1       | ENSG00000198925 ATG9A        | ENSG00000205159 Q6ZVC9_HUMAN   |
| ENSG00000179820 MYADM          | ENSG00000196230 TUBB         | ENSG00000197818 SLC9A8       | ENSG00000197818 SLC9A8       | ENSG00000198225 Q5VUH2_HUMAN   | ENSG00000198742 SMURF1       | ENSG00000198925 ATG9A        | ENSG00000205159 Q6ZVC9_HUMAN   |
| ENSG00000149199 COX15          | ENSG00000090530 LEPREL1      | ENSG00000100568 VIT1B        | ENSG00000102468 HTR2A        | ENSG00000111906 HDDC2          | ENSG00000119048 UBE2B        | ENSG00000120885 CLU          | ENSG00000121067 SPOP           |
| ENSG00000134308 YWHAQ          | ENSG00000135525 MAP7         | ENSG00000137449 CPEB2        | ENSG00000140575 IQGAP1       | ENSG00000153283 CD9E           | ENSG00000153487 ING1         | ENSG00000158560 DYNCL11      | ENSG00000160551 TAOK1          |
| ENSG00000166200 COPS2          | ENSG00000170677 SOCS6        | ENSG00000171502 COL24A1      | ENSG00000176293 ZNF135       | ENSG00000181061 HIGD1A         | ENSG00000186340 THBS2        | ENSG00000197641 SERPINB13    | ENSG00000204334 A1L162_HUMAN   |
| ENSG00000204388 HSPA1B         | ENSG0000009830 POMT2         | ENSG00000100181 CSNK1E       | ENSG00000101216 GMEB2        | ENSG00000103888 KIAA1199       | ENSG00000107554 DNMBP        | ENSG00000110245 APOC3        | ENSG00000124157 SEMG2          |
| ENSG00000130032 PRRG3          | ENSG00000134216 CHIA         | ENSG00000139874 SSTR1        | ENSG00000147100 SLC16A2      | ENSG00000154227 LASS3          | ENSG00000160785 SLC25A44     | ENSG00000163481 RNF25        | ENSG00000167633 KIR3DL1        |
| ENSG00000169184 NM_002430.2    | ENSG00000172159 FRMD3        | ENSG00000174989 FBXW8        | ENSG00000177455 CD19         | ENSG00000179082 C9orf106       | ENSG00000187764 SEMA4D       | ENSG00000189013 KIR2DL4      | ENSG00000198690 MTMR15         |
| ENSG00000203674 Q6ZT24_HUMAN   | ENSG00000205477 Q6ZR94_HUMAN | ENSG00000100934 SEC23A       | ENSG00000106853 LTBD4B       | ENSG00000112078 KCTD20         | ENSG00000128585 MKLN1        | ENSG00000133742 CA1          | ENSG00000136146 MED4           |
| ENSG00000137804 NUSAP1         | ENSG00000145741 BTF3         | ENSG00000147251 DOCK11       | ENSG00000153037 SRP19        | ENSG00000160131 NP_001017980.1 | ENSG00000165525 SDCCAG1      | ENSG00000166510 CCDC68       | ENSG00000168175 C14orf32       |
| ENSG00000169239 CA5B           | ENSG00000173141 MRP63        | ENSG00000179008 C14orf39     | ENSG00000180488 FAM73A       | ENSG00000180667 YOD1           | ENSG00000197085 Q6EKK1_HUMAN | ENSG00000205293 Q7B650_HUMAN | ENSG00000205544 C17orf61       |
| ENSG00000015592 STMN4          | ENSG00000042493 CAPG         | ENSG00000043822 NP_060895.1  | ENSG00000058085 LAMC2        | ENSG00000070759 TESK2          | ENSG00000101146 RAE1         | ENSG00000105447 GRWD1        | ENSG00000107341 UBE2R2         |
| ENSG00000110011 DNAJC4         | ENSG00000110169 HPX          | ENSG00000120709 FAM53C       | ENSG00000123643 SLC36A1      | ENSG00000132002 DNAJB1         | ENSG00000135443 KRT85        | ENSG00000135926 TMBIM1       | ENSG00000137726 FXYP6          |
| ENSG00000139436 GIT2           | ENSG00000142619 PADI3        | ENSG00000143787 LEFTY1       | ENSG00000161940 BCL6B        | ENSG00000180879 SSR4           | ENSG00000188589 RBM33        | ENSG00000203941 Q5JVP7_HUMAN | ENSG00000204231 RXRB           |
| ENSG00000036549 ZZZ3           | ENSG00000077458 FAM76B       | ENSG00000084733 RAB10        | ENSG00000101844 ATGA4        | ENSG00000113810 SMC4           | ENSG00000114573 ATP6V1A      | ENSG00000117593 DARS2        | ENSG00000132661 NXT1           |
| ENSG00000135974 C2orf49        | ENSG00000136143 SUCLA2       | ENSG00000140600 SH3GL3       | ENSG00000145425 RPS3A        | ENSG00000154493 C10orf90       | ENSG00000154608 CEP170L      | ENSG00000156265 C21orf7      | ENSG00000156374 PCGF6          |
| ENSG00000157869 RAB2F          | ENSG00000164287 CDC20B       | ENSG00000164694 FNDC1        | ENSG00000165105 RASEF        | ENSG00000167186 COQ1           | ENSG00000180011 ZADH2        | ENSG00000180011 ZADH2        | ENSG00000180011 ZADH2          |
| ENSG00000010327 STAB1          | ENSG00000077797 RALBP1       | ENSG00000071894 CPSF1        | ENSG00000099338 C19orf15     | ENSG00000100888 CHD8           | ENSG00000102080 TEX28P2      | ENSG00000102287 GABRE        | ENSG00000102796 DHRS12         |
| ENSG00000112936 C7             | ENSG00000126561 STAT5A       | ENSG00000137074 APTX         | ENSG00000142511 GPR32        | ENSG00000154478 GPR26          | ENSG00000164088 PPM1M        | ENSG00000164091 TMEM113      | ENSG00000164742 ADCY1          |
| ENSG00000166189 HSP6           | ENSG00000167641 PPP1R14A     | ENSG00000169213 SLC3B        | ENSG00000175318 GRAMD2       | ENSG00000182242 TEX28_HUMAN    | ENSG00000185254 TEX28P1      | ENSG00000188786 MTF1         | ENSG00000203865 Q5TC04_HUMAN   |
| ENSG00000205089 NP_001034869.1 | ENSG00000205609 Q9BW98_HUMAN | ENSG00000205620 Q6ZRB6_HUMAN | ENSG0000009413 REV3L         | ENSG00000061676 NCKAP1         | ENSG00000106511 MEOX2        | ENSG00000107242 PIP5K1B      | ENSG00000114279 FGF12          |
| ENSG00000116688 MFN2           | ENSG00000117322 CR2          | ENSG00000134897 BIVM         | ENSG00000135821 GLUL         | ENSG00000138483 CCDC54         | ENSG00000138646 HERC5        | ENSG00000139116 KIF21A       | ENSG00000143771 CNIH4          |
| ENSG00000144445 NP_689732.2    | ENSG00000144559 C3orf31      | ENSG00000145794 MEGF10       | ENSG00000151914 DST          | ENSG00000151929 BAG3           | ENSG00000155099 TMEM55A      | ENSG00000156482 RPL30        | ENSG00000165650 PDZD8          |
| ENSG00000165995 CACNB2         | ENSG00000168036 CTNNB1       | ENSG00000182992 Q8IZMO_HUMAN | ENSG00000185088 RPS27L       | ENSG00000186767 NP_001012986.2 | ENSG00000187446 CHP1_HUMAN   | ENSG00000197860 SGTB         | ENSG00000198087 CD2AP          |
| ENSG00000018625 ATP1A2         | ENSG00000057757 C1orf128     | ENSG00000085831 C1orf34      | ENSG00000087245 MMP2         | ENSG00000090857 NP_060460.3    | ENSG00000100600 LGMN         | ENSG00000103353 UBFD1        | ENSG00000112576 CCND3          |
| ENSG00000114999 TTL            | ENSG00000120875 DUSP4        | ENSG00000136485 WDR68        | ENSG00000137310 TCF19        | ENSG00000140092 FBLN5          | ENSG00000150281 CTF1         | ENSG00000155052 CNTNAP5      | ENSG00000157693 C9orf91        |
| ENSG00000162104 ADCY9          | ENSG00000165698 C9orf9       | ENSG00000168016 Q8N8K0_HUMAN | ENSG00000174306 ZHX3         | ENSG00000179428 Q8N6X1_HUMAN   | ENSG00000185117 NR_002733.1  | ENSG00000197077 Q5TH25_HUMAN | ENSG00000198216 CACNA1E        |
| ENSG00000204590 GNL1           | ENSG00000206539 Q6ZTN9_HUMAN | ENSG0000003056 MGPR          | ENSG00000064012 CASP8        | ENSG00000065978 YBX1           | ENSG00000074706 NP_056368.1  | ENSG00000080546 SESN1        | ENSG00000100664 EIF5           |
| ENSG00000102743 SLC25A15       | ENSG00000104064 GABPB2       | ENSG00000104331 IMPAD1       | ENSG00000106511 MEOX2        | ENSG00000106701 FSD1L          | ENSG00000106804 C5           | ENSG00000112818 MEP1A        | ENSG00000120885 CLU            |
| ENSG00000121297 TSHZ3          | ENSG00000125124 BBS2         | ENSG00000127993 NP_115496.2  | ENSG00000129514 FOXAL1       | ENSG00000139977 NAT12          | ENSG00000145545 SRD5A1       | ENSG00000150656 CNDP1        | ENSG00000163563 MNDA           |
| ENSG00000166037 CEP57          | ENSG00000167088 SNRPD1       | ENSG00000168175 C14orf32     | ENSG00000168283 BMI1         | ENSG00000170962 PDGFD          | ENSG00000173988 Q5TBN0_HUMAN | ENSG00000177200 CHD9         | ENSG00000198382 UVRAG          |
| ENSG00000205057 CLLULOS        | ENSG0000004455 AK2           | ENSG00000102878 HSF4         | ENSG00000104889 RNASEH2A     | ENSG00000106246 PTCD1          | ENSG00000108312 UBTF         | ENSG00000111641 NOL1         | ENSG00000125810 CD93           |
| ENSG00000131196 NFATC1         | ENSG00000136718 IMP4         | ENSG00000143774 GUK1         | ENSG00000144583 MARCH4       | ENSG00000145526 CDH18          | ENSG00000147100 SLC16A2      | ENSG00000155254 MARVELD1     | ENSG00000160789 LMNA           |
| ENSG00000164048 ZNF589         | ENSG00000164091 TMEM113      | ENSG00000166974 MAPRE2       | ENSG00000170525 PFKFB3       | ENSG00000171456 ASXL1          | ENSG00000171681 ORM1         | ENSG00000204154 ORM2         | ENSG00000205592 MUC19          |
| ENSG00000205593 FAM116B        | ENSG0000008018 PSMB1         | ENSG00000069849 ATP1B3       | ENSG00000081138 CDH7         | ENSG00000100697 DICER1         | ENSG00000101367 MAPRE1       | ENSG00000102805 CLN5         | ENSG00000106648 GALNTL5        |
| ENSG00000115942 ORC2L          | ENSG00000118777 ABCG2        | ENSG00000120686 UFM1         | ENSG00000121335 PRB4         | ENSG00000123610 TNFAIP6        | ENSG00000137055 PLAA         | ENSG00000145632 PLK2         | ENSG00000162441 LZIC           |
| ENSG00000163254 CRYGC          | ENSG00000165120 C7orf45      | ENSG00000166503 HDGR3_HUMAN  | ENSG00000167553 TUBA1C       | ENSG00000168036 CTNNB1         | ENSG00000170289 CNGB3        | ENSG00000172809 RPL38        | ENSG00000178988 MRFAP1L1       |
| ENSG00000179930 ZNF648         | ENSG00000198105 ZNF248       | ENSG00000204464 Q5TG92_HUMAN | ENSG00000205220 PSMB10       | ENSG00000108264 TADA2L         | ENSG00000111412 C12orf49     | ENSG00000112936 C7           | ENSG00000113732 ATP6V0E1       |
| ENSG00000006555 TTPC3          | ENSG00000100234 TIMP3        | ENSG00000105697 HAMF         | ENSG00000106125 AQP1         | ENSG00000139436 GIT2           | ENSG00000169083 AR           | ENSG00000177885 GRB2         | ENSG00000179240 Q3ZCU0_HUMAN   |
| ENSG00000116667 C1orf21        | ENSG00000126432 PRDX5        | ENSG00000138030 KHK          | ENSG00000139433 GLTP         | ENSG000001024914 NP_940843.1   | ENSG00000204916 NP_940843.1  | ENSG00000204917 NP_940843.1  | ENSG00000204918 NP_940843.1    |
| ENSG00000184330 S100A7         | ENSG00000188997 KCTD21       | ENSG00000198632 NP_777590.1  | ENSG00000198915 RASGEF1A     | ENSG00000104413 RBM35A         | ENSG00000105793 GTBPB10      | ENSG00000108506 INTS2        | ENSG00000108924 HLF            |
| ENSG00000204919 NP_940843.1    | ENSG00000037474 NSUN2        | ENSG00000060140 STYK1        | ENSG00000074803 SLC12A1      | ENSG00000138271 GPR87          | ENSG00000143970 ASXL2        | ENSG00000149177 PTPRJ        | ENSG00000152990 GPR125         |
| ENSG00000113638 TTC33          | ENSG00000132498 ANKRD20A1    | ENSG00000133818 RRAS2        | ENSG00000135913 USP37        | ENSG00000138271 GPR87          | ENSG00000143970 ASXL2        | ENSG00000149177 PTPRJ        | ENSG00000152990 GPR125         |
| ENSG00000161326 DUSP14         | ENSG00000164180 TMEM161B     | ENSG00000164932 CTHRC1       | ENSG00000172243 CLEC7A       | ENSG00000180481 GLIPR1L2       | ENSG00000182489 XKRX         | ENSG00000182831 C16orf72     | ENSG00000183148 ANKRD20A2      |
| ENSG00000196774 ANKRD20A3      | ENSG00000198018 ENTPD7       | ENSG00000205905 Q6ZWC6_HUMAN | ENSG00000100181 CSNK1E       | ENSG00000101199 ARFGAP1        | ENSG00000104972 LILRB1       | ENSG00000104998 IL27RA       | ENSG00000111676 ATN1           |
| ENSG00000006606 CCL26          | ENSG00000055130 CUL1         | ENSG00000100181 CSNK1E       | ENSG00000101199 ARFGAP1      | ENSG00000138316 ADAMTS14       | ENSG00000138316 ADAMTS14     | ENSG00000143110 C1orf162     | ENSG00000144120 TMEM177        |
| ENSG00000125818 PSMF1          | ENSG00000126264 HCST1        | ENSG00000132821 C20orf102    | ENSG00000135097 MSI1         | ENSG00000169020 ATP5I          | ENSG00000174175 SELP         | ENSG00000178028 DMAPI1       | ENSG00000189430 NCR1           |
| ENSG00000148384 INPP5E         | ENSG00000156510 HKDC1        | ENSG00000163521 GLB1L        | ENSG00000164048 ZNF589       | ENSG00000153900 ANAPC4         | ENSG00000100281 HMG2L1       | ENSG00000100796 SMEK1        | ENSG00000106803 SEC61B         |
| ENSG00000204235 Q6ZNQ4_HUMAN   | ENSG00000205864 KRTAP5-6     | ENSG00000025039 RRAGD        | ENSG00000053900 ANAPC4       | ENSG00000143368 SF3B4          | ENSG00000144810 COL8A1       | ENSG00000154473 BUB3         | ENSG00000164258 NDUF54         |
| EN                             |                              |                              |                              |                                |                              |                              |                                |

TTGGATG ENSG00000101452|DHX35 ENSG00000103021|CCDC113 ENSG00000115112|TFPC2L1 ENSG00000116852|KIF21B ENSG00000125999|C2orf114 ENSG00000136859|ANGPTL2 ENSG00000137133|HINT2 ENSG00000139174|PRICKLE1  
ENSG00000143502|SUSD4 ENSG00000144681|STAC ENSG00000157312|PDF ENSG00000166007|LOC399940 ENSG00000174374|WBSR1B ENSG00000176753|NP\_001034994.1 ENSG00000177098|SCN4B ENSG00000182698|NM\_001007089  
ENSG00000182953|NM\_001031.4 ENSG00000183207|RUVBL2 ENSG00000186470|BTNA2 ENSG00000196567|NP\_942123.1 ENSG00000204455|XR\_015868.1 ENSG00000205670|C2orf51 ENSG00000208018|PSMB1 ENSG00000205889|Q6NZ63\_HUMAN  
ENSG00000113140|SPARC ENSG00000115944|COX7A2L ENSG00000118292|C1orf54 ENSG00000118985|ELL2 ENSG00000122482|ZNF644 ENSG00000126653|CCDC55 ENSG00000131508|UBE2D2 ENSG00000132466|ANKRD17  
ENSG00000136240|KDELRL2 ENSG00000139921|TXNDC1 ENSG00000145675|PIK3R1 ENSG00000161800|RACGAP1 ENSG00000162545|CAMK2N1 ENSG00000162642|C1orf52 ENSG00000165061|ZMAT4 ENSG00000168204|O95014\_HUMAN  
ENSG00000168384|HLA-DPA1 ENSG00000168461|RAB31 ENSG00000171208|NETO2 ENSG00000177111|XR\_016777.1 ENSG00000180828|BHLHB5 ENSG00000181788|SIAH2 ENSG00000183305|MAGEA6 ENSG00000184750|MAGEA2  
ENSG00000196531|NACA ENSG00000198468|Q8TAF5\_HUMAN ENSG00000198948|MFAP3L  
TTGGATT ENSG00000005073|HOXA11 ENSG00000067829|IDH3G ENSG00000107185|KIAA0258 ENSG00000108829|LRRC59 ENSG00000116809|ZBTB17 ENSG00000124641|TRFP ENSG00000124766|SOX4 ENSG00000126264|HCST  
ENSG00000135097|MSI1 ENSG00000140632|NP\_115958.2 ENSG00000141720|PIPSK2B ENSG00000141756|FKBP10 ENSG00000144233|AMMECR1L ENSG00000154957|ZNF18 ENSG00000157837|PSL4\_HUMAN ENSG00000166908|PIP5K2C  
ENSG00000167774|NDUFA7 ENSG00000169710|FASN ENSG00000177721|NP\_001014301.1 ENSG00000181274|FRAT2 ENSG00000185187|SIGIRR ENSG00000187979|Q6ZPC6\_HUMAN ENSG00000196739|COL27A1 ENSG00000196844|C11orf38  
ENSG00000198879|SFBMT2 ENSG00000205851|Q4GOH1\_HUMAN ENSG00000030066|NUP160 ENSG00000032514|PGBD3 ENSG00000062650|WAPAL ENSG00000075785|RAB7A ENSG00000079950|STX7 ENSG00000083642|APRN  
ENSG00000091009|RBM27 ENSG00000101846|STS ENSG00000107104|ANKRD15 ENSG00000110429|FBXO3 ENSG00000114391|RPL24 ENSG00000119401|TRIM32 ENSG00000120279|MYCT1 ENSG00000135249|RINT1  
ENSG00000135374|ELF5 ENSG00000139973|SYT16 ENSG00000142864|SERBP1 ENSG00000187109|NAP1L1 ENSG00000188402|NP\_995324.1 ENSG00000196344|ADH7 ENSG00000198719|DLL1 ENSG00000205189|ZBTB10  
ENSG00000205885|Q6UWM6\_HUMAN  
TTGGCCT ENSG00000002834|LASP1 ENSG00000100321|SYNGR1 ENSG00000101444|AHCY ENSG00000103005|C16orf57 ENSG00000117984|CTSDB ENSG00000124772|CPNE5 ENSG00000133067|LGR6 ENSG00000136811|ODF2  
ENSG00000146007|ZMAT2 ENSG00000151224|MAT1A ENSG00000154133|ROBO4 ENSG00000158292|GPR153 ENSG00000160613|PCSK7 ENSG00000161920|MED11 ENSG00000162367|TAL1 ENSG00000163155|LYSMD1  
ENSG00000171148|TADA3L ENSG00000179262|RAD23A ENSG00000183248|K9H6K5\_HUMAN ENSG00000183862|CNGA2 ENSG00000185214|KLHL22 ENSG00000196624|NP\_997381.1 ENSG00000197077|Q5THZ5\_HUMAN ENSG00000204071|TCEAL6  
ENSG00000204343|C9orf118 ENSG00000078618|NRD1 ENSG00000104325|DECR1 ENSG00000107485|GATA3 ENSG00000107771|KIAA1128 ENSG00000109805|NCAPG ENSG00000116898|MRPS15 ENSG00000125304|TM9SF2  
ENSG00000128617|OPN1SW ENSG00000136404|TM6SF1 ENSG00000143702|CEP170 ENSG00000152795|HNRPDL ENSG00000156253|C21orf6 ENSG00000158290|CUL4B ENSG00000169914|OTUD3 ENSG00000171295|ZNF440  
ENSG00000174456|NP\_997318.1 ENSG00000179813|C13orf30  
TTGGCTA ENSG00000072134|EPN2 ENSG00000125651|GTF2F1 ENSG00000137868|STRA6 ENSG00000142765|SYTL1 ENSG00000158748|HTR6 ENSG00000165282|PIGO ENSG00000167272|POP5 ENSG00000168621|GDNF  
ENSG00000171224|C10orf35 ENSG00000170595|KBTBD11 ENSG00000176595|LTB4R ENSG00000189750|RBBP9 ENSG00000192910|LONP2 ENSG00000196940|FAM126A ENSG00000197077|Q5THZ5\_HUMAN ENSG00000204071|TCEAL6  
ENSG00000135847|ACBD6 ENSG00000138685|FGF2 ENSG00000145439|CBR4 ENSG00000146411|SLC2A12 ENSG00000147677|EIF3S3 ENSG00000152133|CCDC75 ENSG00000155744|FAM126B ENSG00000159377|PSMB4  
ENSG00000162374|ELAVL4 ENSG00000164122|ASB5 ENSG00000166068|SPRED1 ENSG00000168283|BMI1 ENSG00000169446|TMEM32 ENSG00000176142|TMEM39A ENSG00000177683|THAP5 ENSG00000184895|SRY  
ENSG00000185278|ZBTB37  
TTGGGTG ENSG000000087152|ATXN7L3 ENSG00000092850|TEKT2 ENSG00000101076|HNF4A ENSG00000107833|NPM3 ENSG00000108578|BLMH ENSG00000119402|FBXW2 ENSG00000120875|DUSP4 ENSG00000140557|ST8SIA2  
ENSG00000142528|KFN743 ENSG00000142546|NOS1P ENSG00000144648|CCBP2 ENSG00000158445|KCNB1 ENSG00000163823|CCR1 ENSG00000165138|ANKK6 ENSG00000167550|RHEBL1 ENSG00000170608|FOXA3  
ENSG00000184574|GPR92 ENSG00000186106|ANKRD46 ENSG00000186564|FOXO2 ENSG00000198746|GPATCH3 ENSG00000206193|Q5HYA3\_HUMAN ENSG0000009790|TRAF3IP3 ENSG00000062725|APPBP2 ENSG00000066777|ARFGF1  
ENSG00000070669|ASNS ENSG00000085788|DDHD2 ENSG00000086598|TMED2 ENSG00000102189|EEA1 ENSG00000107372|ZFAND5 ENSG00000116299|KIAA1324 ENSG00000117751|PPP1R8 ENSG00000119285|HEATR1  
ENSG00000121481|RNF2 ENSG00000122126|OCLR ENSG00000141298|SSH2 ENSG00000143252|SDHC ENSG00000145992|RPL37 ENSG00000158023|WDR66 ENSG00000158560|DYNCL11 ENSG00000164828|UNC84A  
ENSG00000171217|CLDN20 ENSG00000171940|ZNF217 ENSG00000172179|PRL ENSG00000173947|C1orf88 ENSG00000178074|NP\_710156.2 ENSG00000182827|ACBD3 ENSG00000185056|Q569G3\_HUMAN ENSG00000196632|WNK3  
ENSG00000196946|ZNF705A ENSG00000203995|ZYG11A ENSG00000204287|HLA-DRA ENSG00000204478|PRAMEF20 ENSG00000204486|PRAMEF21  
ENSG00000025800|KPN6A ENSG00000075426|FOSL2 ENSG000000807586|AURKA ENSG00000100105|PAT21 ENSG00000100401|RANGAP1 ENSG00000104848|KCNA7 ENSG00000126091|ST3GAL3  
ENSG00000129993|CFBFA2T3 ENSG00000135605|TEC ENSG00000135632|SMYD5 ENSG00000141664|ZCCHC2 ENSG00000147130|ZMYX3 ENSG00000149182|ZNF289 ENSG00000154370|TRIM11 ENSG00000170525|PKFB3  
ENSG00000175315|CST6 ENSG00000175538|KCNE3 ENSG00000182667|NTRI\_HUMAN ENSG00000185818|NAT8L ENSG00000188038|NRN1L ENSG00000204569|PPP1R10 ENSG00000023608|SNAPC1 ENSG00000051180|RAD51  
ENSG00000069849|ATP1B3 ENSG00000096746|HNRPH3 ENSG00000112078|KCTD20 ENSG00000112167|C6orf64 ENSG00000115548|JMJD1A ENSG00000116679|IVNS1ABP ENSG00000119541|VPS4B ENSG00000150773|PIH1D2  
ENSG00000151694|ADAM17 ENSG00000151883|PARP8 ENSG00000152428|MARS2 ENSG00000155100|OTUD6B ENSG00000156050|C14orf44 ENSG00000158042|MRPL17 ENSG00000163281|GNPDA2 ENSG00000170681|NP\_001018126.1  
ENSG00000171488|LRRC8C ENSG00000171408|QSVZ27\_HUMAN ENSG00000175073|VCP1P1 ENSG00000179008|C14orf39 ENSG00000188917|CXorf34 ENSG00000197713|RPE  
ENSG00000005100|DHX3 ENSG0000007038|PRSS21 ENSG00000048707|VPS13D ENSG00000088038|CNOT3 ENSG00000105443|PSCD2 ENSG00000105726|ATP13A1 ENSG00000119686|C14orf58 ENSG00000124116|WFD3  
ENSG00000134668|SPOCD1 ENSG00000140403|DNAJA4 ENSG00000142784|WDC1 ENSG00000143409|FAM63A ENSG00000148832|PAOX ENSG00000162676|GF11 ENSG00000163331|NP\_001017920.1 ENSG00000163833|FBXO40  
ENSG00000166199|ALKBH3 ENSG00000174502|SLC26A9 ENSG00000174521|TTC9B ENSG00000183596|TIM16\_HUMAN ENSG00000187239|FNB1 ENSG00000188636|LDOC1L ENSG00000204558|Q9BYX6\_HUMAN ENSG00000205979|Q6XYA8\_HUMAN  
ENSG00000025039|RRAGD ENSG00000066654|THUMPDI ENSG00000072042|RHD11 ENSG00000078747|ITCH ENSG00000079134|THOC1 ENSG00000086619|EROL1B ENSG00000103018|CYB5B ENSG00000108582|CPD  
ENSG00000112237|CCNC ENSG00000113387|SUB1 ENSG00000117133|BXDC5 ENSG00000117724|CENPF ENSG00000113554|AHI1 ENSG00000136938|ANP32B ENSG00000137819|PAQR5  
ENSG00000145592|RPL37 ENSG00000147145|GPR23 ENSG00000152382|TADA1L ENSG00000152620|C5orf33 ENSG00000158122|C9orf21 ENSG00000162687|KCNT2 ENSG00000165525|SDCCAG1 ENSG00000169504|CLIC4  
ENSG00000170142|UBE2E1 ENSG00000177640|CASC2 ENSG00000183340|JRK1 ENSG00000184900|SUMO3 ENSG00000203788|Q6ZMM1\_HUMAN ENSG00000204869|IGFL4  
TTGGTAT ENSG00000008552|IGSF9 ENSG00000099330|OCEL1 ENSG00000100104|SRR1L\_HUMAN ENSG00000103064|SLC7A6 ENSG00000108576|SLC6A4 ENSG00000114019|AMOTL2 ENSG00000117410|ATP6V0B ENSG00000127526|SLC35E1  
ENSG00000130244|Q17RN3-2 ENSG00000132792|CTNBL1 ENSG00000143545|RAB13 ENSG00000144560|VGLL4 ENSG00000164674|SYTL3 ENSG00000166860|ZBTB39 ENSG00000170835|CEL ENSG00000173163|COMMD1  
ENSG00000176531|PHLDB3 ENSG00000187024|PTRH1 ENSG00000196204|Q6NUR6\_HUMAN ENSG00000204221|WDR46 ENSG00000205106|Q6N098\_HUMAN ENSG00000027697|IFNGR1 ENSG00000100644|HIF1A ENSG00000116497|S100BPB  
ENSG00000118965|WDR35 ENSG00000119514|GALNT12 ENSG00000143452|HORMAD1 ENSG00000145907|G3BP1 ENSG00000146833|TRIM4 ENSG00000147687|TATDN1 ENSG00000151715|TMEM45B ENSG00000166173|LARP6  
ENSG00000169122|FAM103A1 ENSG00000177613|CSTF2T ENSG00000179222|MAGED1 ENSG00000180287|PLD5 ENSG00000185267|ARMETL1 ENSG00000188133|NP\_997723.1 ENSG00000196963|PCDHB16  
ENSG00000004142|POLDIP2 ENSG00000085998|POSTGNT1 ENSG00000095059|PYGB ENSG00000104081|BMF ENSG00000116396|KCNC4 ENSG00000119777|NP\_060197.4 ENSG00000128313|APOL5  
ENSG00000129951|NP\_079164.1 ENSG00000133065|SLC41A1 ENSG00000136059|VILL ENSG00000156858|PRR14 ENSG00000157765|SLC34A2 ENSG00000158006|PAPFAH2 ENSG00000164711|LPAL2 ENSG00000166833|NAV2  
ENSG00000167778|SPRYD3 ENSG00000169918|OTUD7A ENSG00000171649|ZIK1 ENSG00000172965|Q96C48\_HUMAN ENSG00000182397|C15orf51 ENSG00000185442|NP\_997329.1 ENSG00000205629|LCMT1 ENSG00000091317|CMTM6  
ENSG00000100568|VTI1B ENSG00000103540|CE110\_HUMAN ENSG00000119446|RBM18 ENSG000001025414|MYH2 ENSG000001133020|MYH8 ENSG00000134769|DTNA ENSG00000143256|PPD2 ENSG00000143324|XPR1  
ENSG00000143442|POGZ ENSG00000144445|NP\_689732.2 ENSG00000144771|LRTM1 ENSG00000156508|EEF1A1 ENSG00000159216|RUNX1 ENSG00000161405|IKZF3 ENSG00000163646|CLRN1 ENSG00000167460|TPM4  
ENSG00000170632|ARMC10 ENSG00000175989|C11orf69 ENSG00000183690|EFHC2 ENSG00000184943|NP\_443103.1 ENSG00000198046|ZNF667  
TTGGTCC ENSG00000006210|CX3CL1 ENSG00000072121|ZFYVE26 ENSG00000075035|WSCD2 ENSG00000100053|CRYBB3 ENSG00000100348|TXN2 ENSG00000101019|C2orf44 ENSG00000103249|CLCN7 ENSG00000107185|KIAA0258  
ENSG00000109065|NAT9 ENSG00000115112|TFPC2L1 ENSG00000119682|KIAA0317 ENSG00000130038|EFCAB4B ENSG00000143570|SLC39A1 ENSG00000148400|NOTCH1 ENSG00000166860|ZBTB39 ENSG00000181885|CLDN7  
ENSG00000183633|C14orf132 ENSG00000184650|ODF4 ENSG00000185885|IFTM1 ENSG00000197245|GRRP1 ENSG00000197245|GRRP1 ENSG00000197245|GRRP1 ENSG00000197245|GRRP1 ENSG00000197245|GRRP1 ENSG00000197245|GRRP1  
ENSG00000100926|TM9SF1 ENSG00000105976|MET ENSG00000115008|IL1A ENSG00000119707|RBM25 ENSG00000134294|SLC38A2 ENSG00000135821|GLUL ENSG00000143368|SF3B4 ENSG00000145428|RNF175  
ENSG00000151240|DIP2C ENSG00000153774|CFDP1 ENSG00000156219|ART3 ENSG00000156697|UTP14A ENSG00000159228|CBR1 ENSG00000163430|FSTL1 ENSG00000166323|C11orf65 ENSG00000173387|Q9P007\_HUMAN  
ENSG00000181704|YIPF6 ENSG00000183395|PMCH ENSG00000197620|CXO4A\_HUMAN  
TTGGTCC ENSG00000006555|TTC22 ENSG00000058866|DGKG ENSG00000071051|NCK2 ENSG00000099910|SCARF2 ENSG00000099991|CABIN\_HUMAN ENSG00000103042|NP\_060701.1 ENSG00000112799|LYR6 ENSG00000137411|GTF2H4  
ENSG00000141002|TCF25 ENSG00000141510|TP53 ENSG00000153294|PRK15 ENSG00000157306|THTPA ENSG00000160404|TOR2A ENSG00000161692|DBF4B ENSG00000164509|IL31RA ENSG00000168487|BMP1  
ENSG00000175376|NP\_115701.2 ENSG00000175416|CLTB ENSG00000175518|UBQLNL ENSG00000177238|TRIM72 ENSG00000179840|NP\_001038943.1 ENSG00000185527|PDE6G ENSG00000196943|LTB4R ENSG00000205631|Q9H7S7\_HUMAN  
ENSG00000164022|IL20RA ENSG00000056586|RC3H2 ENSG00000071203|MS4A12 ENSG00000079691|LRRC16 ENSG00000094916|CBX5 ENSG00000106511|MEOX2 ENSG00000107518|ATRNL1 ENSG00000107625|DDX50  
ENSG00000126945|HNRPH2 ENSG00000151917|C6orf65 ENSG00000152795|HNRPDL ENSG00000154710|KCTD7 ENSG00000155329|ZCCHC10 ENSG00000158270|COLEC12 ENSG00000168036|CTNNB1 ENSG00000168283|BMI1  
ENSG00000170289|CNGB3 ENSG00000170786|NP\_620419.2 ENSG00000170989|EDG1 ENSG00000174574|C1orf108 ENSG00000176774|MAGEB18 ENSG00000178351|Q8N345\_HUMAN ENSG00000178726|THBD ENSG00000182107|TMEM30B  
ENSG00000185551|NR2F2 ENSG00000189292|NP\_001002919.1 ENSG00000197467|COL13A1 ENSG00000197991|PCDH20 ENSG00000198889|WDR40B ENSG00000205570|GUSL2\_HUMAN  
TTGGTGC ENSG00000005206|PSL1\_HUMAN ENSG000000049540|ELN ENSG000000076604|TRAF4 ENSG000000080573|COL5A3 ENSG000000083290|ULK2 ENSG00000099814|KIAA0284 ENSG00000102921|N4BP1\_HUMAN ENSG00000108010|TXNL2  
ENSG00000108312|UBTF ENSG00000115112|TFPC2L1 ENSG00000115194|SLC30A3 ENSG00000136731|UGCG1L ENSG00000140650|PMM2 ENSG00000158022|TRIM63 ENSG00000159199|ATP5G1 ENSG00000163815|CLEC3B  
ENSG00000166167|BTRC ENSG00000170265|ZNF282 ENSG00000180448|HMC3L1 ENSG00000183655|KLHL25 ENSG00000188064|WNT7B ENSG00000197063|MAFG ENSG00000197355|UAP1L1 ENSG00000203783|PRR9  
ENSG00000204576|PRR3 ENSG00000205107|NP\_001001679.1 ENSG00000205531|NAP1L4 ENSG00000006576|PHTF2 ENSG00000023318|TXNDC4 ENSG00000060718|COL11A1 ENSG00000062096|ARSF ENSG00000064995|TAF11  
ENSG00000070718|AP3M2 ENSG00000108395|TRIM37 ENSG00000114857|KTR4 ENSG00000118402|ELOVL4 ENSG00000130024|PHF10 ENSG00000137770|CTDSP2 ENSG00000139357|SLC5A8 ENSG00000143776|CDC42BPA  
ENSG00000144893|MED12L ENSG00000150961|SEC24D ENSG00000162433|AK3L2 ENSG00000163444|TMEM183B ENSG00000165288|BRWD3 ENSG00000166881|QO28L6\_HUMAN ENSG00000168385|SEPT2 ENSG00000174839|FAM116A  
ENSG00000186416|NKRF ENSG00000198889|WDR40B  
TTGGTGG ENSG00000001617|SEMA3F ENSG00000050327|ARHGEP5 ENSG00000062598|ELMO2 ENSG00000100147|CCDC134 ENSG00000100335|SMCR7L ENSG00000103089|FA2H ENSG00000105612|DNASE2 ENSG00000119682|KIAA0317  
ENSG00000121104|FAM117A ENSG00000131446|MGAT1 ENSG00000135926|TM6IM1 ENSG00000151208|DLG5 ENSG00000151348|EXT2 ENSG00000155052|CNTNAP5 ENSG00000159231|CBR3 ENSG00000162981|FAM84A  
ENSG00000163481|RNF25 ENSG00000165553|NGB ENSG00000165606|NP\_001073989.1 ENSG00000166402|TUB ENSG00000167194|Q96LL3\_HUMAN ENSG00000184144|CNTN2 ENSG00000186350|RXRA ENSG00000188786|MTF1  
ENSG00000047365|CENTD1 ENSG00000064726|BTBD1 ENSG00000069974|RAB27A ENSG00000085721|RRN3 ENSG00000090530|LEPREL1 ENSG00000090931|CMTM6 ENSG00000091317|CMTM6 ENSG00000100316|RPL3 ENSG00000115839|RAB3GAP1  
ENSG00000117505|DR1 ENSG00000117632|STMN1 ENSG00000119396|RAB14 ENSG00000121210|KIAA0922 ENSG00000121570|DPPA4 ENSG00000125629|INSIG2 ENSG00000126838|PZP ENSG00000129204|USP6  
ENSG00000131373|HACL1 ENSG00000134121|CHL1 ENSG00000136738|STAM ENSG00000143190|POU2F1 ENSG00000147676|MAL2 ENSG00000150048|CLEC1A ENSG00000153951|OR4D2 ENSG00000164112|TMEM155  
ENSG00000165119|HNRPK ENSG00000166295|C10orf104 ENSG00000170832|USP32 ENSG00000172288|CDY1\_HUMAN ENSG00000172288|CDY1 ENSG00000173387|Q9P007\_HUMAN ENSG00000183952|Q9H5Q9\_HUMAN  
ENSG00000184992|BRI3BP ENSG00000188400|Q6URH7\_HUMAN ENSG00000188933|NM\_145809.1 ENSG00000196428|TSC22D2 ENSG00000196850|PPTC7 ENSG00000197312|RSC1A1 ENSG00000197584|KCNMB2  
TTGGTGT ENSG00000007306|CEACAM7 ENSG00000007545|CRAMP1L ENSG00000065057|NTHL1 ENSG00000100410|PHF5A ENSG00000101144|BMP7 ENSG00000101444|BMP7 ENSG00000110042|DTX4 ENSG00000116580|GON4L ENSG00000124194|GDAP1L1  
ENSG00000124422|USP22 ENSG00000124570|SERPINB6 ENSG00000125743|SNRPD2 ENSG00000125813|PXF1 ENSG00000129295|LRRC6 ENSG00000135077|HAVCR2 ENSG00000136848|DAB2IP ENSG00000138074|SLC5A6  
ENSG00000138085|C2orf28 ENSG00000140718|FTO ENSG00000157600|TMEM164 ENSG00000159164|SV2A ENSG00000163995|ABLIM2 ENSG00000164711|LPAL2 ENSG00000166007|LOC399940 ENSG00000166619|BLCA1  
ENSG00000168394|TA1 ENSG00000171603|CLSTN1 ENSG00000176371|ZSCAN2 ENSG00000179082|C9orf106 ENSG00000182372|C8orf61 ENSG00000196084|UBIQ\_HUMAN ENSG00000196084|UBIQ\_HUMAN  
ENSG00000204455|XR\_015868.1 ENSG00000056097|ZFR ENSG000000078140|HIP2 ENSG00000079246|XRCC5 ENSG00000100372|SLC25A17 ENSG00000105677|TMEM147 ENSG00000111885|MAN1A1 ENSG0000012685|EXOC2  
ENSG00000119048|UBE2B ENSG00000121089|NACA3P ENSG00000122335|SERAC1 ENSG0

TTGTAAA ENSG00000189067|LITAF ENSG00000196531|NACA ENSG000000034053|APBA2 ENSG000000061936|SFRS8 ENSG00000002421|SEMA6A ENSG00000106628|POLD2 ENSG00000115844|DLX2 ENSG00000124766|SOX4 ENSG00000125820|NKX2-2 ENSG00000130711|PRDM12 ENSG00000130956|HABP4 ENSG00000132323|ILKAP ENSG00000132749|MTL5 ENSG00000133316|WDR74 ENSG00000134107|BHLHB2 ENSG00000136352|TITF1 ENSG00000140534|C15orf42 ENSG00000154330|PGM5P1 ENSG00000162227|TAF6L ENSG00000162367|TALI ENSG00000163915|C3orf65 ENSG00000168546|GFRA2 ENSG00000172977|HTATIP ENSG00000181045|SLC26A11 ENSG00000184916|JAG2 ENSG00000186654|ARHGAP8 ENSG00000187140|FOXO3 ENSG00000187608|ISG15 ENSG00000196242|OR2C3 ENSG00000196576|FLKXNB2 ENSG00000204235|QZGNQ4\_HUMAN ENSG00000204876|Q6ZVM9\_HUMAN ENSG00000001084|GCLC ENSG00000006576|PHTF2 ENSG000000013441|CLK1 ENSG000000040275|ICG299 ENSG000000062194|GPBB1 ENSG00000100442|FKBP3 ENSG00000100519|PSMC6 ENSG00000100941|PNN ENSG00000104613|INTS10 ENSG00000106443|PHF14 ENSG00000107290|SETX ENSG00000109787|KLF3 ENSG00000113810|SMC4 ENSG00000114209|PDCD10 ENSG00000115446|UNC50 ENSG00000115825|PRKD3 ENSG00000119396|RAB14 ENSG00000121039|RDH10 ENSG00000126216|TUBGCP3 ENSG00000135766|EGLN1 ENSG00000135999|EPC2 ENSG00000138587|MNS1 ENSG00000138778|CENPE ENSG00000138779|Q9HCM6\_HUMAN ENSG00000139116|KTF21A ENSG00000140043|ZADH1 ENSG00000143228|NUF2 ENSG00000144824|PLCXD2 ENSG00000145246|ATP10D ENSG00000146038|DCDC2 ENSG00000146352|C6orf213 ENSG00000155313|USP25 ENSG00000156875|HIAT1 ENSG00000156970|BUB1B ENSG00000157107|FCHO2 ENSG00000158092|NCK1 ENSG00000163950|SLBP ENSG00000164329|PAPD4 ENSG00000166454|KO431\_HUMAN ENSG00000166920|C15orf48 ENSG00000168438|CDC40 ENSG00000169047|IRS1 ENSG00000169744|LDB2 ENSG00000170381|SEMA3E ENSG00000170561|IRX2 ENSG00000171100|MTM1 ENSG00000172209|GPR22



|         |                                |                              |                              |                              |                              |                              |                                |                              |
|---------|--------------------------------|------------------------------|------------------------------|------------------------------|------------------------------|------------------------------|--------------------------------|------------------------------|
|         | ENSG00000131914 LIN28          | ENSG00000141569 TRIM65       | ENSG00000143376 SNX27        | ENSG00000148498 PARD3        | ENSG00000158109 FAM79A       | ENSG00000162396 PARS2        | ENSG00000165424 C10orf56       | ENSG00000166377 ATP9B        |
|         | ENSG00000167641 PPP1R14A       | ENSG00000169410 PTPN9        | ENSG00000172379 ARNT2        | ENSG00000173436 C10orf151    | ENSG00000174804 FZD4         | ENSG00000175505 CLCF1        | ENSG00000182346 DAOA           | ENSG00000183255 PTTG1IP      |
|         | ENSG00000183864 TOB2           | ENSG00000186594 NF_116284.2  | ENSG00000188428 TXNDC5       | ENSG00000197565 COL4A6       | ENSG00000198879 SFBMT2       | ENSG00000197565 CSHL1        | ENSG00000205726 ITSN1          | ENSG00000205022 SLC25A5      |
|         | ENSG00000138210 P14K2B         | ENSG00000054267 ARID4B       | ENSG00000058272 PPP1R12A     | ENSG00000059588 TARBP1       | ENSG00000066654 THUMP1       | ENSG00000088750 RRAGB        | ENSG00000086189 DIMIT1L        | ENSG00000102048 ASB9         |
|         | ENSG00000104166 PLDN           | ENSG00000104290 FZD3         | ENSG00000107104 ANKRD15      | ENSG00000108582 CPD          | ENSG00000113441 LNPEP        | ENSG00000113658 SMAD5        | ENSG00000114744 COMMD2         | ENSG00000116830 TTF2         |
|         | ENSG00000119414 PPP6C          | ENSG00000123179 EBPL         | ENSG00000125944 HNRPR        | ENSG00000133393 C16orf63     | ENSG00000137478 FNCHSD2      | ENSG00000138735 PDE5A        | ENSG000001164128 NPY1R         | ENSG00000158636 C11orf30     |
|         | ENSG00000164129 NPY5R          | ENSG00000164338 UTP15        | ENSG00000164930 FZD6         | ENSG00000170542 SERPINB9     | ENSG00000172969 LOC285299    | ENSG00000176124 DLEU1        | ENSG00000188379 IFNA2          | ENSG00000189050 NP_057209.3  |
|         | ENSG00000198765 SYCP1          | ENSG00000204814 Q5VSD8_HUMAN |                              |                              |                              |                              |                                |                              |
| TTGTGCA | ENSG00000019485 PRDM11         | ENSG00000055163 CYFIP2       | ENSG00000084072 PPIE         | ENSG00000095713 CRTAC1       | ENSG00000108018 SORCS1       | ENSG00000124074 C16orf48     | ENSG00000128322 IGLL1          | ENSG00000136942 RPL35        |
|         | ENSG00000138698 RAP1GDS1       | ENSG00000142207 URB1         | ENSG00000162148 C11orf66     | ENSG00000169548 SUHW1        | ENSG00000172943 PHF8         | ENSG00000180205 WFDCC9       | ENSG00000184330 S100A7A        | ENSG00000184945 AQP12A       |
|         | ENSG00000204058 C10orf41       | ENSG00000206066 IGLL3        | ENSG00000008282 SYPL1        | ENSG00000023228 NDUFS1       | ENSG00000066777 ARFGEF1      | ENSG00000080819 CPOX         | ENSG00000081177 EXDL2          | ENSG00000088451 TGDS         |
|         | ENSG00000107165 TYRP1          | ENSG00000111247 RAD51AP1     | ENSG00000112232 KHDRBS2      | ENSG00000113327 GABRG2       | ENSG00000114686 MRPL3        | ENSG00000118246 FASTKD2      | ENSG00000120948 TARDBP         | ENSG00000122339 C6orf35      |
|         | ENSG00000134049 IER3IP1        | ENSG00000135299 ANKRD6       | ENSG00000137055 PLAA         | ENSG00000137942 FNBPL1       | ENSG00000143653 SCCPDH       | ENSG00000144306 SCRN3        | ENSG00000164128 NPY1R          | ENSG00000164588 HCN1         |
|         | ENSG00000164616 FBXL21         | ENSG00000166349 RAG1         | ENSG00000167720 SRR          | ENSG00000170855 TRIAP1       | ENSG00000177599 FZD491       | ENSG00000183726 TMEM50A      | ENSG00000186376 ZNF75          | ENSG00000197601 MLSTD2       |
| TTGTGAC | ENSG00000197639 MKNRP5         | ENSG00000198872 PEG10        | ENSG00000204800 Q96HX1_HUMAN | ENSG00000204812 Q96HX1_HUMAN |                              |                              |                                |                              |
|         | ENSG00000072858 SIDT1          | ENSG00000087077 TRIP6        | ENSG00000100221 JOSD1        | ENSG00000100227 POLDIP3      | ENSG00000105705 SF4          | ENSG00000111641 NOL1         | ENSG00000123992 DNPEP          | ENSG00000134575 ACP2         |
|         | ENSG00000136699 SMPD4          | ENSG00000152117 Q6ZWB7_HUMAN | ENSG00000164733 CTSB         | ENSG00000171570 EGLN2        | ENSG00000173272 FAM128A      | ENSG00000174521 TTC9B        | ENSG00000176473 WDR25          | ENSG00000180509 KCNE1        |
|         | ENSG00000182315 NP_653215.1    | ENSG00000185332 TMEM105      | ENSG00000189001 SBSN         | ENSG00000205718 LOC653656    | ENSG00000206193 Q5HYA3_HUMAN | ENSG00000006634 DBF4         | ENSG00000006715 VPS41          | ENSG00000077721 UBE2A        |
|         | ENSG00000079931 MOXD1          | ENSG00000081870 C10orf41     | ENSG00000109061 MYH1         | ENSG00000114790 NP_056410.2  | ENSG00000118260 CREB1        | ENSG00000121316 NP_079105.4  | ENSG00000121848 ZNF364         | ENSG00000124659 TBCC         |
|         | ENSG00000136783 NIPSNAP3A      | ENSG00000141048 MYH4         | ENSG00000142507 PSMB6        | ENSG00000154451 GBP5         | ENSG00000171867 PRNP         | ENSG00000176222 ZNF404       | ENSG00000182141 ZNF708         | ENSG00000184226 PCDH9        |
|         | ENSG00000184301 LOC284428      | ENSG00000187105 HEATR4       | ENSG00000196589 MS3L2_HUMAN  | ENSG00000197110 IL28B        | ENSG000002040178 TMEM57      | ENSG000002050717 MBD3L2      |                                |                              |
| TTGTGAT | ENSG00000093167 LRRFP2         | ENSG00000102119 EMD          | ENSG00000103510 MYST1        | ENSG00000105198 LGALS13      | ENSG00000111331 OAS3         | ENSG00000114388 TUSC4        | ENSG00000124571 XPO5           | ENSG00000141560 KT3K_HUMAN   |
|         | ENSG00000143297 FCRL5          | ENSG00000148339 SLC25A25     | ENSG00000154978 NM_030796.3  | ENSG00000157606 SPATS1       | ENSG00000168575 SLC20A2      | ENSG00000173349 SFT2D3       | ENSG00000184924 NP_001013685.1 | ENSG00000187516 C10orf27     |
|         | ENSG00000188786 MTF1           | ENSG00000196084 UBIQ_HUMAN   | ENSG00000196739 COL27A1      | ENSG00000197037 ZNF498       | ENSG00000205431 Q6UWF5_HUMAN | ENSG00000206193 Q5HYA3_HUMAN | ENSG00000066185 ZMYND12        | ENSG00000072571 HMMR         |
|         | ENSG00000083844 ZNF264         | ENSG00000104695 PPP2CB       | ENSG00000109320 NFKB1        | ENSG00000127463 KIAA0090     | ENSG00000139168 ZCRB1        | ENSG00000140157 NIPA4        | ENSG00000151151 IPMK           | ENSG00000153339 KIAA1012     |
|         | ENSG00000153896 ZNF599         | ENSG00000154265 ABCA5        | ENSG00000156802 ATAD2        | ENSG00000162624 LHX8         | ENSG00000164181 ELOVL7       | ENSG00000164332 UBLCP1       | ENSG00000165264 NDUFB6         | ENSG00000165694 FRMD7        |
| TTGTGCG | ENSG00000166200 COPS2          | ENSG00000168916 UBE2E1       | ENSG00000171858 RPS21        | ENSG00000171858 RPS21        | ENSG00000183023 SLC8A1       | ENSG00000197603 NP_075561.2  | ENSG00000203995 ZYG11A         |                              |
|         | ENSG0000007237 GAS7            | ENSG00000028528 SNX1         | ENSG00000089057 SLC23A2      | ENSG00000100324 MAP3K7IP1    | ENSG00000101236 RNF24        | ENSG00000110921 MVK          | ENSG00000125971 DYNLRB1        | ENSG00000126822 PLEKHG3      |
|         | ENSG00000126890 CTAG2          | ENSG00000130560 UBAC1        | ENSG00000135148 TRAFD1       | ENSG00000141385 AFG3L2       | ENSG00000141858 SAMD1        | ENSG00000142945 KIF2C        | ENSG00000151376 ME3            | ENSG00000161558 TMEM143      |
|         | ENSG00000164379 FOXQ1          | ENSG00000171314 PGAM1        | ENSG00000175166 PSMD2        | ENSG00000177340 QOVFX0_HUMAN | ENSG00000177646 ACAD9        | ENSG00000179344 HB25_HUMAN   | ENSG00000182335 Q8TEE9_HUMAN   | ENSG00000182646 TMEM29       |
|         | ENSG00000183678 CTAG1A         | ENSG00000184033 CTAG1B       | ENSG00000197041 hCG_2015269  | ENSG00000197445 C16orf47     | ENSG00000204048 Q6ZUG3_HUMAN | ENSG00000204601 Q4GOG9_HUMAN | ENSG0000010017 RANBP9          | ENSG00000100644 HIF1A        |
|         | ENSG00000103194 USP10          | ENSG00000113384 GOLPH3       | ENSG00000120526 NUDCD1       | ENSG00000121058 COIL         | ENSG00000131779 PEX11B       | ENSG00000134899 ERCC5        | ENSG00000136143 SUCLA2         | ENSG00000139318 DUSP6        |
|         | ENSG00000146648 EGFR           | ENSG00000153283 CD96         | ENSG000001609714 CNBP        | ENSG00000173193 PARP14       | ENSG00000174496 C21orf34     | ENSG00000186017 ZNF566       |                                |                              |
| TTGTGAA | ENSG00000074211 PPP2R2C        | ENSG00000109132 PHOX2B       | ENSG00000124641 TRFP         | ENSG00000125652 ALKBH7       | ENSG00000137074 APT_X        | ENSG00000137203 TFAP2A       | ENSG00000140632 NP_115958.2    | ENSG00000142273 CBLC         |
|         | ENSG00000144355 DLX1           | ENSG00000152104 PTEN14       | ENSG00000156298 TSPAN7       | ENSG00000157110 RBMPS        | ENSG00000167083 GNMT2        | ENSG00000170776 AKAP13       | ENSG00000173702 MUC13          | ENSG00000175697 GPR156       |
|         | ENSG00000176769 TCERG1L        | ENSG00000184825 HIST1H2AH    | ENSG00000185615 PDIA2        | ENSG00000188242 Q71RB1_HUMAN | ENSG00000204576 PRR3         | ENSG00000205424 Q6ZW00_HUMAN | ENSG00000205452 Q6ZQ09_HUMAN   | ENSG0000004948 CALCR         |
|         | ENSG0000014641 MDH1            | ENSG00000048649 RSF1         | ENSG00000064199 SPAL7        | ENSG000000668781 STON1       | ENSG00000068796 KIF2A        | ENSG00000083642 APRIN1       | ENSG00000090989 EXOC1          | ENSG00000092199 HNRPC        |
|         | ENSG00000102055 PPP1R2P9       | ENSG00000110318 KIAA1377     | ENSG00000112394 SLC16A10     | ENSG00000112773 FAM46A       | ENSG00000116679 IVNS1ABP     | ENSG00000119414 PPP6C        | ENSG00000120694 HSPH1          | ENSG00000124783 SSR1         |
|         | ENSG00000133740 EFZ5           | ENSG00000133997 MED6         | ENSG00000136897 MRPL50       | ENSG00000138750 NUP54        | ENSG00000145777 NP_149024.1  | ENSG00000147434 CHRNA6       | ENSG00000151414 NEK7           | ENSG00000156920 GPR112       |
|         | ENSG00000162624 LHX8           | ENSG00000163605 PPP4R2       | ENSG00000165832 TRUB1        | ENSG00000174106 LEMD3        | ENSG00000182070 OR52A1       | ENSG00000185246 PRPF39       | ENSG00000186814 Q86W11_HUMAN   | ENSG00000196323 ZBTB44       |
| TTGTGAT | ENSG00000054523 KIF1B          | ENSG000000666117 SMARCD1     | ENSG00000100060 MFNG         | ENSG00000107262 BAG1         | ENSG00000109079 TNFAIP1      | ENSG00000112320 SOBP         | ENSG00000112562 SMOC2          | ENSG00000115641 FHL2         |
|         | ENSG00000117461 PIK3R3         | ENSG00000117899 MESDC2       | ENSG00000125149 C16orf70     | ENSG00000125991 ERGC13       | ENSG00000128228 SDF2L1       | ENSG00000145990 GFOD1        | ENSG00000148158 SNX30          | ENSG00000149679 CABLES2      |
|         | ENSG00000162735 PEX19          | ENSG00000163521 GLB1L        | ENSG00000163961 RNF168       | ENSG00000165269 AQP7         | ENSG00000168906 MAT2A        | ENSG00000171060 C8orf74      | ENSG00000180509 KCNE1          | ENSG00000181830 SLC35C1      |
|         | ENSG00000185650 ZFP36L1        | ENSG00000186466 AQP7P2       | ENSG00000197417 CARKL        | ENSG00000006459 JHDM1D       | ENSG00000021461 CYP3A43      | ENSG00000043355 ZIC2         | ENSG00000061794 MRPS35         | ENSG00000078399 HOXA9        |
|         | ENSG00000081803 CADPS2         | ENSG00000101134 DOX5         | ENSG00000102781 KATNAL1      | ENSG00000108001 EBF3         | ENSG00000115363 TMMB166      | ENSG00000125355 FAM70A       | ENSG00000125703 ATG4C          | ENSG00000126945 HNRPH2       |
|         | ENSG00000133636 NTS            | ENSG00000135960 EDAR         | ENSG00000137513 NARS2        | ENSG00000145293 ENOPH1       | ENSG00000145425 RPS3A        | ENSG00000153951 OR4D2        | ENSG00000154153 NP_001030022.1 | ENSG00000163683 C4orf34      |
|         | ENSG00000168405 CMAH           | ENSG00000168582 CRYGA        | ENSG00000169019 COMMD8       | ENSG00000169045 HNRPH1       | ENSG00000169612 FAM103A1     | ENSG00000178177 LCORL        | ENSG00000179059 ZFP42          | ENSG00000180660 MAB21L1      |
|         | ENSG00000182139 Q96FU4_HUMAN   | ENSG00000185053 SGCZ         | ENSG00000187994 NP_940847.1  | ENSG00000196458 ZNF605       | ENSG00000203864 C10orf137    |                              |                                |                              |
| TTGTGCA | ENSG00000067596 DHX8           | ENSG00000075426 FOSL2        | ENSG00000102034 ELF4         | ENSG00000113719 ERGC11       | ENSG00000116883 C10orf113    | ENSG00000125089 SH3TC1       | ENSG00000131148 COX4NB         | ENSG00000136193 SCRN1        |
|         | ENSG00000141179 PCTP           | ENSG00000144029 MRPS5        | ENSG00000144036 EXOC6B       | ENSG00000144120 TMEM177      | ENSG00000151353 TMEM18       | ENSG00000160214 RRP1         | ENSG00000160791 CCR5           | ENSG00000162415 ZSWIM5       |
|         | ENSG00000166965 RCCD1          | ENSG00000167261 DPEP2        | ENSG00000169696 ASPSCR1      | ENSG00000176490 DIRA51       | ENSG00000177408 FLAC2        | ENSG00000183399 Q7L877_HUMAN | ENSG00000198816 ZNF358         | ENSG00000204100 Q6ZV28_HUMAN |
|         | ENSG00000204847 FAM74A1        | ENSG00000048544 MRPS10       | ENSG00000104067 TJP1         | ENSG00000112308 C6orf62      | ENSG00000112773 PAM46A       | ENSG00000115170 ACVR1        | ENSG00000118407 FILIP1         | ENSG00000119396 RAB14        |
|         | ENSG00000125823 CSTL1          | ENSG00000129682 FGF13        | ENSG00000130338 TULP4        | ENSG00000130449 ZSWIM6       | ENSG00000130816 DNMT1        | ENSG00000134308 YWHAQ        | ENSG00000134333 LDHA           | ENSG00000136478 TEX2         |
|         | ENSG00000152465 NMT2           | ENSG00000152822 GRM1         | ENSG00000159256 MORC3        | ENSG00000163599 CTLA4        | ENSG00000171478 SPACA5B      | ENSG00000171681 ATF7IP       | ENSG00000179902 C10orf194      | ENSG00000187889 C10orf168    |
| TTGTGCC | ENSG0000010610 CD4             | ENSG00000067191 CACNB1       | ENSG00000090776 EFNB1        | ENSG00000090863 GLG1         | ENSG00000100299 ARSA         | ENSG00000108479 GALK1        | ENSG00000111678 C12orf57       | ENSG00000113552 GNPDA1       |
|         | ENSG00000114745 GORASP1        | ENSG00000117419 PRNP2P       | ENSG00000118058 MLL          | ENSG00000125843 C20orf29     | ENSG00000127743 IL17B        | ENSG00000136697 IL1F10       | ENSG00000139194 RBP5           | ENSG00000139436 GIT2         |
|         | ENSG00000139651 ZNF740         | ENSG00000144231 POLR2D       | ENSG00000145194 ECE2         | ENSG00000154330 PGM5P1       | ENSG00000160220 PWP2         | ENSG00000162735 PEX19        | ENSG00000163026 C2orf44        | ENSG00000167702 KIFC2        |
|         | ENSG00000173163 COMMD1         | ENSG00000180935 Q8N8B3_HUMAN | ENSG00000203951 A2RUP6_HUMAN | ENSG00000047648 ARHGAP6      | ENSG00000049759 NEDD4L       | ENSG00000091664 SLC17A6      | ENSG00000118523 CTGF           | ENSG00000118946 PCDH17       |
|         | ENSG00000121039 RDH10          | ENSG00000123297 TSFM         | ENSG00000126821 SGPP1        | ENSG00000131016 AKAP12       | ENSG00000139116 KIF21A       | ENSG00000143469 SYT11        | ENSG00000147145 GPR23          | ENSG00000154258 ABCA9        |
|         | ENSG00000163421 PROK2          | ENSG00000168172 HOOK3        | ENSG00000170561 IRX2         | ENSG00000174106 LEMD3        | ENSG00000175818 HS3ST5       | ENSG00000183753 BPY2C        | ENSG00000183795 VCY2_HUMAN     | ENSG00000185894 VCY2_HUMAN   |
| TTGTGGA | ENSG00000204178 TMEM57         |                              |                              |                              |                              |                              |                                |                              |
|         | ENSG00000085872 CHERP          | ENSG00000112562 SMOC2        | ENSG00000124374 PAIP2B       | ENSG00000131845 ZNF304       | ENSG00000132749 MTL5         | ENSG00000140400 MAN2C1       | ENSG00000141179 PCTP           | ENSG00000142961 MOBK12C      |
|         | ENSG00000147113 C10orf36       | ENSG00000149474 CSR2BP       | ENSG00000150401 DCUN1D2      | ENSG00000157064 NMNAT2       | ENSG00000157693 C9orf91      | ENSG00000160691 SHC1         | ENSG00000167130 DOLPP1         | ENSG00000167393 PPP2R3B      |
|         | ENSG00000168802 NM_001039690.2 | ENSG00000169925 BRD3         | ENSG00000177699 Q8N849_HUMAN | ENSG00000183929 DUSP59       | ENSG00000185739 SRL          | ENSG00000205562 Q86U27_HUMAN | ENSG00000100209 HSCB           | ENSG00000101266 CSNK2A1P     |
|         | ENSG00000153921 SPIN1          | ENSG00000112175 BMP5         | ENSG00000113532 ST8S1A4      | ENSG00000114686 MRPL3        | ENSG00000117569 PTBP2        | ENSG00000121440 PDZRN3       | ENSG00000131370 SH3BP5         | ENSG00000136826 KLF4         |
|         | ENSG00000137876 C15orf15       | ENSG00000145041 Q8TBD9_HUMAN | ENSG00000145495 MARCH6       | ENSG00000147883 CDKN2B       | ENSG00000149177 PTPRJ        | ENSG00000155097 ATP6V1C1     | ENSG00000163467 C10orf182      | ENSG00000163939 PBRM1        |
|         | ENSG00000163                   |                              |                              |                              |                              |                              |                                |                              |

TTGTTAC ENSG0000022556|NLRP2 ENSG00000100335|SMCR7L ENSG00000116667|Clorf21 ENSG00000121775|TMEM39B ENSG00000130703|OSBPL2 ENSG00000131188|PRR7 ENSG00000137100|DCTN3 ENSG00000150779|TIMM8B  
ENSG00000160117|ANKRD41 ENSG00000160410|SHKBP1 ENSG00000175166|PSMD2 ENSG00000185963|BTCD2 ENSG00000196976|LAGE3 ENSG00000197506|SLC28A3 ENSG00000198013|FNMA6A ENSG00000004534|RBM6  
ENSG00000229363|BCLAF1 ENSG00000073910|FRY ENSG00000076258|FMO4 ENSG00000079134|THOC1 ENSG00000106714|CNTNAP3 ENSG00000112144|ICK ENSG00000119203|CPSF3  
ENSG00000119231|SENP5 ENSG00000120265|PCMT1 ENSG00000125879|OTOR ENSG00000132549|VPS13B ENSG00000144746|ARL6IP5 ENSG00000152822|GTM1 ENSG00000155085|C6orf199  
ENSG00000177853|ZNF518 ENSG00000177917|ARL6IP6 ENSG00000178074|NP\_710156.2 ENSG00000182827|ACBD3 ENSG00000197657|ZNF323 ENSG00000198739|LRRTM3  
perfact: TTGTTAC GTAACAA hsa-miR-802 caGTAACAAaagattcatccttgt 2

TTGTTCC ENSG00000100304|TLL12 ENSG00000118971|CCND2 ENSG00000123243|ITIH5 ENSG00000128408|RIBC2 ENSG00000133069|TMCC2 ENSG00000141510|TP53 ENSG00000143502|SUSD4 ENSG00000147130|ZMYM3  
ENSG00000155269|GPR78 ENSG00000158296|SLC13A3 ENSG00000160882|CYP11B1 ENSG00000162543|UBXD3 ENSG00000162735|PEX19 ENSG00000162892|IL24 ENSG00000167889|MGAT5B ENSG00000169084|ZBED1  
ENSG00000170091|NSG2\_HUMAN ENSG00000170260|ZNF212 ENSG00000170653|ATF7 ENSG00000182660|NP\_001013698.1 ENSG00000196970|NFX4 ENSG00000203786|KPRP ENSG000002096|ARSF ENSG00000069122|GPR116  
ENSG00000081800|SLC13A1 ENSG00000085449|WDFY1 ENSG00000087995|METTL2A ENSG00000095794|CREM ENSG00000104863|LIN7B ENSG00000105708|ZNF14 ENSG00000114529|C3orf52 ENSG00000116183|PAPPA2  
ENSG00000127311|HELB ENSG00000130818|ZNF426 ENSG00000134138|MEIS2 ENSG00000142937|RPS8 ENSG00000143149|ALDH9A1 ENSG00000144566|RAB5A ENSG00000147533|GOLGA7 ENSG00000152779|SLC16A12  
ENSG00000154889|MPPE1 ENSG00000156395|SORCS3 ENSG00000170345|FOS ENSG00000175066|GK5 ENSG00000177409|SAMD9L ENSG00000196459|SEDL1 ENSG00000204171|Q6STG2\_HUMAN  
TTGTTGC ENSG00000004455|AK2 ENSG00000033100|CHGUT\_HUMAN ENSG00000051009|C1orf56 ENSG00000054523|KIF1B ENSG00000101224|CDC25B ENSG00000108702|CCL1 ENSG00000130054|TMEM28 ENSG00000138107|ACTR1A  
ENSG00000152082|FAM128B ENSG00000162408|NOL9 ENSG00000162438|CTRC ENSG00000165949|IFI27 ENSG00000167967|E4F1 ENSG00000171450|CDK5R2 ENSG00000179241|LDLRAD3 ENSG00000179421|Q8NBA4\_HUMAN  
ENSG00000181409|AATK ENSG00000182022|ST4S6\_HUMAN ENSG00000189058|APOD ENSG00000197256|ANKRD25 ENSG00000198960|ARMCX6 ENSG00000205313|FAM106A ENSG00000205609|Q9B9W8\_HUMAN ENSG00000206539|Q6ZTN9\_HUMAN  
ENSG00000005700|IBTK ENSG0000010404|IDS ENSG00000048740|CUGBP2 ENSG00000061676|NCKAP1 ENSG00000070087|PFN2 ENSG00000081177|EXDL2 ENSG00000102189|EEA1 ENSG00000106392|C1GALT1  
ENSG00000106853|LTB4DH ENSG00000110321|EIF4G2 ENSG00000114279|FGF12 ENSG00000128607|NP\_055812.1 ENSG00000132661|NXT1 ENSG00000133606|MKRN1 ENSG00000138160|KIF11 ENSG00000139977|NAT12  
ENSG00000140262|TCF12 ENSG00000141425|NP\_060640.2 ENSG00000150991|UBIQ\_HUMAN ENSG00000151292|CSNK1G3 ENSG00000155729|KCTD18 ENSG00000162702|ZNF281 ENSG00000166266|CUL5 ENSG00000171056|SOX7  
ENSG00000174780|SRP72 ENSG00000181915|C1orf22 ENSG00000186767|NP\_001012986.2 ENSG00000205612|Q71JB2\_HUMAN  
TTGTTGT ENSG00000013374|NUB1 ENSG00000063244|U2AF2 ENSG00000090659|CD209 ENSG00000092421|SEMA6A ENSG00000103064|SLC7A6 ENSG00000104499|GML ENSG00000118971|CCND2 ENSG00000120875|DUSP4  
ENSG00000135363|LMO2 ENSG00000157837|PSL4\_HUMAN ENSG00000158578|ALAS2 ENSG00000162889|MAPKAPK2 ENSG00000166900|STX3 ENSG00000172534|HCFC1 ENSG00000177762|C5orf27 ENSG00000180357|ZNF609  
ENSG00000182466|Q3ZCU0\_HUMAN ENSG00000187975|NP\_001003682.1 ENSG00000188677|PARVB ENSG00000204080|Q6ZRQ9\_HUMAN ENSG00000204125|Q53S21\_HUMAN ENSG00000204876|Q6ZVM9\_HUMAN ENSG0000038295|PLL1 ENSG00000054938|CHRD12  
ENSG00000072803|FBXW11 ENSG00000104177|MYEF2 ENSG00000105821|Q99543-2 ENSG00000106701|FSD1L ENSG00000106829|TLE4 ENSG00000113441|LNPEP ENSG00000114062|UBE3A ENSG00000114120|SLC25A36  
ENSG00000114374|USP9Y ENSG00000114487|MORC1 ENSG00000118231|CRYGD ENSG00000118873|RAB3GAP2 ENSG00000133872|TMEM66 ENSG00000135913|USP37 ENSG00000145423|SFRP2 ENSG00000151929|BAG3  
ENSG00000153827|TRIP12 ENSG00000164548|TRA2A\_HUMAN ENSG00000164736|SOX17 ENSG00000168283|BMT1 ENSG00000168582|CRYGA ENSG00000170037|CNTROB ENSG00000172817|CYP7B1 ENSG00000173068|BNC2  
ENSG00000175928|LRRN1 ENSG00000177483|NP\_001073973.1 ENSG00000179869|ABCA13 ENSG00000182264|IZUMO1 ENSG00000183783|KCTD8 ENSG00000184226|PCDH9 ENSG00000186184|POLR1D ENSG00000198830|HMGN2  
ENSG00000204291|COL15A1

TTGTTTA ENSG00000092051|AP1G2 ENSG00000104499|GML ENSG00000112159|MDN1 ENSG00000120889|TNFRSF10B ENSG00000125347|IRF1 ENSG00000126522|CRCP\_HUMAN ENSG00000141956|PRDM15 ENSG00000142959|BEST4  
ENSG00000143862|ARL8A ENSG00000145990|GFOD1 ENSG00000162761|LXM1A ENSG00000166086|JAM3 ENSG00000169598|DFFB ENSG00000169635|HIC2 ENSG00000170145|SNF1LK2 ENSG00000176357|C10orf55  
ENSG00000179240|Q3ZCU0\_HUMAN ENSG00000186951|PPARA ENSG00000188385|C1orf39 ENSG00000188396|NP\_001013654.1 ENSG00000188483|IER5L ENSG00000189385|Q8N814\_HUMAN ENSG00000205431|Q6UWF5\_HUMAN ENSG00000206149|NP\_950246.1  
ENSG00000034677|RNF19 ENSG00000064199|SPA17 ENSG00000064313|TAF2 ENSG00000068697|LAPTM4A ENSG00000095574|IKZF5 ENSG00000104164|PLDN ENSG00000110700|RPS13 ENSG00000115009|CCL20  
ENSG00000115020|PIP5K3 ENSG00000117000|RLF ENSG00000118276|B4GALT6 ENSG00000120217|CD274 ENSG00000120235|IFNA6 ENSG00000126733|DACH2 ENSG00000129003|VPS13C ENSG00000135945|REV1  
ENSG00000139793|MBNL2 ENSG00000140181|HERC2P2 ENSG00000147649|MTDH ENSG00000148057|C9orf103 ENSG00000155744|FAM126B ENSG00000158985|DACH2SE2 ENSG00000163660|CCNL1 ENSG00000164323|K1AA1430  
ENSG00000164331|ANKRA2 ENSG00000166479|TXNDC10 ENSG00000169139|UBE2V2 ENSG00000169570|DTWD2 ENSG00000170074|NP\_775934.3 ENSG00000174738|NR1D2 ENSG00000178074|NP\_710156.2 ENSG00000181449|SOX2  
ENSG00000188612|SUMO2 ENSG00000204691|NR\_002819.1

TTTAAAA ENSG00000029993|HMGB3 ENSG00000074964|ARHGEF10L ENSG00000099284|H2AFY2 ENSG00000099968|BCL2L13 ENSG00000099995|SF3A1 ENSG00000101417|PXPMP4 ENSG00000101489|BRUNOL4 ENSG00000101849|TBL1X  
ENSG00000103067|RBM35B ENSG00000103196|CRISPLD2 ENSG00000112941|POLS ENSG00000115325|DOK1 ENSG00000116205|C1orf83 ENSG00000119973|PRLHR ENSG00000123143|PKN1 ENSG00000124243|BCAS4  
ENSG00000124766|SOX4 ENSG00000130032|PRRG3 ENSG00000132478|UNK ENSG00000136816|TOR1B ENSG00000136854|STXBP1 ENSG00000139613|GLTP ENSG00000139613|SMARCC2 ENSG00000141034|C17orf39  
ENSG00000143614|GATAD2B ENSG00000145819|ARHGAP26 ENSG00000145990|GFOD1 ENSG00000147119|CHST7 ENSG00000148158|SNX30 ENSG00000148400|NOTCH1 ENSG00000148660|CAMK2G ENSG00000150401|DCUN1D2  
ENSG00000151692|RNF144 ENSG00000154222|CC2D1B ENSG00000156298|TSPAN7 ENSG00000156466|GDF6 ENSG00000157617|C21orf25 ENSG00000158470|B4GALT5 ENSG00000158793|NIT1 ENSG00000159217|IGF2BP1  
ENSG00000163820|FYCO1 ENSG00000164778|EN2 ENSG00000176678|FOXL1 ENSG00000176887|SOX11 ENSG00000177363|NP\_981967.1 ENSG00000178159|Q8N8A0\_HUMAN ENSG00000178409|K1AA1553 ENSG00000180447|GAS1  
ENSG00000182013|NP\_060685.2 ENSG00000182968|SOX1 ENSG00000183255|PTTG1IP ENSG00000183579|ZNRF3 ENSG00000183684|THOC4 ENSG00000185049|WHSC2 ENSG00000185722|ANKFY1 ENSG00000187239|FNBP1  
ENSG00000197019|SERITAD1 ENSG00000197173|NP\_001013689.1 ENSG00000197451|HNRPAB ENSG00000197536|NP\_001013739.1 ENSG00000198732|SMOC1 ENSG0000014123|K1AA0776 ENSG00000199191|HGF ENSG00000042429|CRSP6  
ENSG00000049130|KITLG ENSG00000075415|SLC25A3 ENSG00000078177|N4BP2\_HUMAN ENSG00000081087|OSTM1 ENSG00000082175|PGR ENSG00000082753|AYTL1 ENSG00000087303|NID2 ENSG00000087502|ERIGC2  
ENSG00000095110|FAM55A ENSG00000101901|CXorf45 ENSG00000102309|PIN4 ENSG00000102595|UGCG12 ENSG00000104343|UBE2W ENSG00000104643|MTMR9 ENSG00000105825|TFPI2 ENSG00000106701|FSD1L  
ENSG00000109861|CTSC ENSG00000109971|HSPA8 ENSG00000111713|GYS2 ENSG00000111897|SERINC1 ENSG00000114166|PAB1 ENSG00000117620|SLC35A3 ENSG00000118418|HMGN3 ENSG00000119314|ROD1  
ENSG00000121022|COPP5 ENSG00000121351|IAPP ENSG00000121989|ACVRA2 ENSG00000122512|PMS2 ENSG00000122912|SLC25A16 ENSG00000123066|THRAP2 ENSG00000123119|EFCBP1 ENSG00000131023|LATS1  
ENSG00000131437|KIF3A ENSG00000132855|ANGPTL3 ENSG00000134755|DSC2 ENSG00000136051|K1AA1033 ENSG00000137500|VPS36 ENSG00000136530|MARCH7 ENSG00000136810|TXN ENSG00000137252|HCRTR2  
ENSG00000138071|ACTR2 ENSG00000138382|METTL5 ENSG00000138709|LARP2 ENSG00000139746|RBM26 ENSG00000141646|SMAD4 ENSG00000143753|DEGS1 ENSG00000145247|OCIAD2 ENSG00000145721|LIX1  
ENSG00000145839|IL9 ENSG00000146281|ACY1L2 ENSG00000148943|LIN7C ENSG00000150051|MKX ENSG00000151923|TIAL1 ENSG00000154646|PRSS7 ENSG00000156049|GNA14 ENSG00000156304|SFRS15  
ENSG00000157625|MAP3K7IP3 ENSG00000162664|ZNF326 ENSG00000164169|NP\_612373.2 ENSG00000164219|PGGT1B ENSG00000165244|ZNF367 ENSG00000166266|CUL5 ENSG00000166532|FAM80B ENSG00000166575|TMEM135  
ENSG00000167034|NFKX3-1 ENSG00000168955|TM4SF20 ENSG00000169379|ARL13B ENSG00000169507|NP\_775783.1 ENSG00000170142|UBE2E1 ENSG00000170264|NP\_115556.1 ENSG00000170516|COX7B2 ENSG00000171502|COL24A1  
ENSG00000171517|EDG7 ENSG00000171988|JMJD1C ENSG00000172671|ANUB1L ENSG00000176102|CSTF3 ENSG00000177324|CXorf20 ENSG00000177932|ZNF354C ENSG00000183423|NP\_940908.1 ENSG00000188452|CERKL  
ENSG00000196353|CPNE4 ENSG00000196678|EXOD1 ENSG00000196867|ZFP28 ENSG00000197323|TRIM33 ENSG00000198160|MIRER1 ENSG00000198511|Q8N9A9\_HUMAN ENSG00000198767|YY2 ENSG00000198887|SMC5  
ENSG00000203704|LOC648359 ENSG00000203710|CR1

TTTAAAC ENSG00000017797|RALBP1 ENSG00000075151|EIF4G3 ENSG00000075275|CELSR1 ENSG00000099954|CECR2 ENSG00000112562|SMOC2 ENSG00000124374|PAIP2B ENSG00000124762|CDKN1A ENSG00000124766|SOX4  
ENSG00000144029|MRPS5 ENSG00000148200|NR6A1 ENSG00000148660|CAMK2G ENSG00000156599|ZDHHC5 ENSG00000160803|UBQLN4 ENSG00000169118|CSNK1G1 ENSG00000169676|DRD5 ENSG00000171604|CXXC5  
ENSG00000173011|Q86TJ2\_HUMAN ENSG00000173812|EIF1 ENSG00000175294|CATSPER1 ENSG00000178188|SH2B1 ENSG00000180447|GAS1 ENSG00000181363|Q66K80-2 ENSG00000197077|Q5TH25\_HUMAN ENSG00000035681|NSMAF  
ENSG00000080007|DDX43 ENSG00000090581|GNPTG ENSG00000100478|AP481 ENSG00000102974|CTCF ENSG00000105851|PIK3CG ENSG00000112964|GHR ENSG00000116679|IVNS1ABP  
ENSG00000116771|AGMAT ENSG00000130783|CCDC62 ENSG00000132463|GRSF1 ENSG00000132823|C20orf111 ENSG00000132855|ANGPTL3 ENSG00000133112|TPT1 ENSG00000136014|USP44 ENSG00000137561|TTPA  
ENSG00000142856|ITGB3BP ENSG00000143756|FBXO28 ENSG00000171202|TMEM126A ENSG00000171408|PDE7B ENSG00000175305|CCNE2 ENSG00000179456|ZNF238 ENSG00000187951|FAM7A2  
ENSG00000188342|GTF2F2 ENSG00000198252|STYX

TTTAAAT ENSG00000004455|AK2 ENSG00000006831|ADIPOR2 ENSG00000037637|FBXO42 ENSG00000043822|NP\_060895.1 ENSG00000048707|VPS13D ENSG00000075388|FGF4 ENSG00000084234|APLP2 ENSG00000088812|ATRN  
ENSG00000090889|KIF4A ENSG00000100207|TCF20 ENSG00000100335|SMCR7L ENSG00000110274|CEP164 ENSG00000115844|DLX2 ENSG00000123303|ORMDL2 ENSG00000125810|CD93 ENSG00000130147|SH3BP4  
ENSG00000143786|CNIH3 ENSG00000148384|INPP5E ENSG00000148843|PDCD11 ENSG00000151348|EXT2 ENSG00000152217|SETBP1 ENSG00000153944|MSI2 ENSG00000158161|EYA3 ENSG00000163081|NP\_694583.1  
ENSG00000164108|Q9HAJ2\_HUMAN ENSG00000164651|SP8 ENSG00000169194|IL13 ENSG00000169344|UMOD ENSG00000175892|Q8NAT4\_HUMAN ENSG00000179820|MYADM ENSG00000180598|NP\_057296.1 ENSG00000183632|NP\_057296.1  
ENSG00000185619|PCGF3 ENSG00000188706|ZDHHC9 ENSG00000204013|Q6XYD6\_HUMAN ENSG00000205456|NP\_057296.1 ENSG00000205457|NP\_057296.1 ENSG00000205711|Q6ZV92\_HUMAN ENSG00000023572|GLRX2  
ENSG00000064933|PMS1 ENSG00000065600|C1orf75 ENSG00000067955|CBFB ENSG00000083097|DOPEY1 ENSG00000083535|C13orf24 ENSG00000084073|ZMPSTE24 ENSG00000101972|STAG2 ENSG00000109911|ELP4  
ENSG00000111713|GYS2 ENSG00000116266|STXBP3 ENSG00000117650|NEK2 ENSG00000118260|CREB1 ENSG00000120327|PCDH14 ENSG00000120662|MTRF1 ENSG00000127720|C12orf26 ENSG00000129514|FOXAI  
ENSG00000132855|ANGPTL3 ENSG00000133302|ANKRD32 ENSG00000134318|ROCK2 ENSG00000135272|MDF1C ENSG00000137968|SLC44A5 ENSG00000138792|ENPEP ENSG00000139263|LRIG3  
ENSG00000139324|TMTC3 ENSG00000144935|TRPC1 ENSG00000145451|GLRA3 ENSG00000149089|APIP ENSG00000154719|MRPL39 ENSG00000155099|TMEM55A ENSG00000156265|C21orf7 ENSG00000161980|POLR3K  
ENSG00000162851|TFB2M ENSG00000164220|F2RL2 ENSG00000164758|THRAP6 ENSG00000165832|TRUB1 ENSG00000166843|FSTL5 ENSG00000177602|SLC35A3 ENSG00000178904|DPY19L3 ENSG00000180458|Q8N3U1\_HUMAN  
ENSG00000180628|PCGF5 ENSG00000186665|C17orf58 ENSG00000186687|LYRM7 ENSG00000197275|RAD54B ENSG00000197323|TRIM33 ENSG00000197791|Q6ZUR4\_HUMAN ENSG00000197919|IFNA1 ENSG00000198380|GFPT1  
ENSG00000205835|LOC647309 ENSG00000205981|DNAJC19

TTTAAACA ENSG00000063854|HAGH ENSG00000064999|ANKS1A ENSG00000074211|PPP2R2C ENSG00000075275|CELSR1 ENSG00000087365|SF3B2 ENSG00000099995|SF3A1 ENSG00000100266|PACIN2 ENSG00000103742|NP\_066013.1  
ENSG00000104490|NCALD ENSG00000105323|HNRPUL1 ENSG00000105383|CD33 ENSG00000106018|VIPR2 ENSG00000111737|RAB35 ENSG00000124208|UBE2V1 ENSG00000125731|SH2D3A ENSG00000128313|APOL5  
ENSG00000138617|PARP16 ENSG00000141577|AZI1 ENSG00000146083|RNF44 ENSG00000146285|SCML4 ENSG00000148842|CNM2 ENSG00000155026|NM\_173565.2 ENSG00000156486|KCN2S2 ENSG00000157570|TSPAN18  
ENSG00000162076|NP\_612448.1 ENSG00000164080|RAD54L2 ENSG00000168795|ZBTB5 ENSG00000169402|NP\_775836.2 ENSG00000176887|SOX11 ENSG00000182022|ST4S6\_HUMAN ENSG00000183044|ABAT ENSG00000204059|NP\_001013718.1  
ENSG00000204084|INPP5B ENSG00000205592|MUC19 ENSG00000049249|TNFRSF9 ENSG00000066697|TMEM11 ENSG00000069275|NUCKS1 ENSG00000115808|STRN ENSG00000120729|MYOT ENSG00000124171|PARD6B  
ENSG00000127314|RAP1B ENSG00000130023|C6orf70 ENSG00000134139|NP\_065789.1 ENSG00000136160|EDNRB ENSG00000136636|KCTD3 ENSG00000138592|USP8 ENSG00000139826|ABHD13 ENSG00000143315|PIGM  
ENSG00000144057|ST6GAL2 ENSG00000146842|NP\_116231.2 ENSG00000152503|TRIM36 ENSG00000153802|TMPRSS11D ENSG00000155903|RASA2 ENSG00000162688|AGL ENSG00000163428|LRRC58 ENSG00000163600|ICOS  
ENSG00000164808|K1AA0146 ENSG00000165379|LRNF5 ENSG00000165899|C12orf64 ENSG00000167014|C15orf43 ENSG00000172785|CBWD5 ENSG00000176276|hCG\_1757335 ENSG00000188811|NP\_001017370.1 ENSG00000189046|ALKBH2  
ENSG00000196116|TDRD7

TTTAACT ENSG00000063587|ZNF275 ENSG00000072134|EPN2 ENSG00000096433|ITPR3 ENSG00000100949|RABGGTA ENSG00000108578|BLMH ENSG00000109956|B3GAT1 ENSG00000110395|CBL  
ENSG00000124164|VAPB ENSG00000124766|SOX4 ENSG00000125166|GOT2 ENSG00000131914|LIN28 ENSG00000132423|SORT1 ENSG00000143549|TPM3 ENSG00000143811|PYCR2 ENSG00000151882|CCL28  
ENSG00000152192|POU4F1 ENSG00000159461|AMFR ENSG00000160209|PDXK ENSG00000162779|C1orf125 ENSG00000164078|MST1R ENSG00000167105|TMEM92 ENSG00000171105|INSR ENSG00000175155|YPEL2  
ENSG00000176383|B3GNT4 ENSG00000178919|FOXE1 ENSG00000180209|MLRS\_HUMAN ENSG00000185681|C9orf18 ENSG00000188167|NP\_001034859.1 ENSG00000204564|C6orf136 ENSG00000205726|ITSN1 ENSG00000002745|WNT16  
ENSG0000018610|CXorf56 ENSG00000066455|GOLGA5 ENSG00000073711|PPP2R3A ENSG00000076641|PAG1 ENSG00000082175|PGR ENSG00000082175|PGR ENSG00000091409|ITGA6 ENSG00000106004|HOXA5  
ENSG00000110066|SUV420H1 ENSG00000110700|RPS13 ENSG00000111049|MYP5 ENSG00000111981|ULBP1 ENSG00000113013|HSPA9 ENSG00000113525|IL5 ENSG00000114062|UBE3A ENSG00000117505|DR1  
ENSG00000118849|RRRES1 ENSG00000131263|RNF12 ENSG00000131979|GCH1 ENSG00000139168|ZCRB1 ENSG00000139233|C12orf31 ENSG00000141198|TOM1L1 ENSG00000143190|POU2F1 ENSG00000144224|UBXD2  
ENSG00000150276|XR\_017783.1 ENSG00000152944|SURB7 ENSG00

|         |                                                                                                                                                                                                                                                                                                                                                                                                                                                                                                                                                                                                                                                                                                                                                                                                                                                                                                                                                                                                                                                                                                                                                                                                                                                                                                                                                                                                                                                                                                                                                                                                                                                                                                                                                                                                                                                                                                                                                                                                                                                                                                                                                                                                                                                                                                                                                                                                                                                                                                                                                                                                                                                                                                                                                                                                                                                                                                                                                                                                                                                                                                                                                                                                                                                                                                                                                                                                                                                                                                                                                                                                                                                                                                                                                                                                                                                                                                                                                                                                                                                                                                                                                                                                                                                                                                                                                                                                                                                                                                                                                                                                                                                                                                                                                                                                                                                                                                                                                                                                                                                                                                                                                                                                                                                                                                                                                                                                                                                                                                                                                                                                                                                                                                                                                                                                                                                                                                                                                                                                                                                                                                                                                                                                                                                                                                                                                                                                                                                                                                                                                                                                                                                                                                                                                                                                                                                                                                                                                                                                                                                                                                                                                                                                                                                                                                                                                                                                                                                                                                                                                                                                                                                                                                                                                                                                                                                                                                                                                                                                                                                                                                                                                                                                                                                                                                                                                                                                                                                                                                                                                                                                                                                                                                                                                                                                                                                                                                                                                                                                                                                                                                                                                                                                                                                                                                                                                                                                                                                                                                                                                                                                                                                                                                                                                                                                                                                                                                                                                                                                                                                                                                                                                                                                                                                                                                                                                                                                                                                                                                                                                                                                                                                                                                                                                                                                                                                                                                                                                                                                                                                                                                                                                                                                                                                                                                                                                                                                                                                                                                                                                                                                                                                                                                                                                                                                                                                                                                                                                                                                                                                                                                                                                                                                                                                                                                                                                                                                                                                                                                                                                                                                                                                                                                                                                                                                                                                                                                                                                                                                                                                                                                                                                                                                                                                                                                                                                                                                                                                                                                                                                                                                                                                                                                                                                                                                                                                                                                                                                                                                                                                                                                                                                                                                                                                                                                                                                                                                                                                                                                                                                                                                                                                                                                                                                                                                                                                                                                                                                                                                                                                                                                                                                                                                                                                                                                                                                                                                                                                                                                                                                                                                                                                                                                                                                                                                                                                                                                                                                                                                                                                                                                                                                                                                                                                                                                                                                                                                                                                                                                                                                                                  |
|---------|----------------------------------------------------------------------------------------------------------------------------------------------------------------------------------------------------------------------------------------------------------------------------------------------------------------------------------------------------------------------------------------------------------------------------------------------------------------------------------------------------------------------------------------------------------------------------------------------------------------------------------------------------------------------------------------------------------------------------------------------------------------------------------------------------------------------------------------------------------------------------------------------------------------------------------------------------------------------------------------------------------------------------------------------------------------------------------------------------------------------------------------------------------------------------------------------------------------------------------------------------------------------------------------------------------------------------------------------------------------------------------------------------------------------------------------------------------------------------------------------------------------------------------------------------------------------------------------------------------------------------------------------------------------------------------------------------------------------------------------------------------------------------------------------------------------------------------------------------------------------------------------------------------------------------------------------------------------------------------------------------------------------------------------------------------------------------------------------------------------------------------------------------------------------------------------------------------------------------------------------------------------------------------------------------------------------------------------------------------------------------------------------------------------------------------------------------------------------------------------------------------------------------------------------------------------------------------------------------------------------------------------------------------------------------------------------------------------------------------------------------------------------------------------------------------------------------------------------------------------------------------------------------------------------------------------------------------------------------------------------------------------------------------------------------------------------------------------------------------------------------------------------------------------------------------------------------------------------------------------------------------------------------------------------------------------------------------------------------------------------------------------------------------------------------------------------------------------------------------------------------------------------------------------------------------------------------------------------------------------------------------------------------------------------------------------------------------------------------------------------------------------------------------------------------------------------------------------------------------------------------------------------------------------------------------------------------------------------------------------------------------------------------------------------------------------------------------------------------------------------------------------------------------------------------------------------------------------------------------------------------------------------------------------------------------------------------------------------------------------------------------------------------------------------------------------------------------------------------------------------------------------------------------------------------------------------------------------------------------------------------------------------------------------------------------------------------------------------------------------------------------------------------------------------------------------------------------------------------------------------------------------------------------------------------------------------------------------------------------------------------------------------------------------------------------------------------------------------------------------------------------------------------------------------------------------------------------------------------------------------------------------------------------------------------------------------------------------------------------------------------------------------------------------------------------------------------------------------------------------------------------------------------------------------------------------------------------------------------------------------------------------------------------------------------------------------------------------------------------------------------------------------------------------------------------------------------------------------------------------------------------------------------------------------------------------------------------------------------------------------------------------------------------------------------------------------------------------------------------------------------------------------------------------------------------------------------------------------------------------------------------------------------------------------------------------------------------------------------------------------------------------------------------------------------------------------------------------------------------------------------------------------------------------------------------------------------------------------------------------------------------------------------------------------------------------------------------------------------------------------------------------------------------------------------------------------------------------------------------------------------------------------------------------------------------------------------------------------------------------------------------------------------------------------------------------------------------------------------------------------------------------------------------------------------------------------------------------------------------------------------------------------------------------------------------------------------------------------------------------------------------------------------------------------------------------------------------------------------------------------------------------------------------------------------------------------------------------------------------------------------------------------------------------------------------------------------------------------------------------------------------------------------------------------------------------------------------------------------------------------------------------------------------------------------------------------------------------------------------------------------------------------------------------------------------------------------------------------------------------------------------------------------------------------------------------------------------------------------------------------------------------------------------------------------------------------------------------------------------------------------------------------------------------------------------------------------------------------------------------------------------------------------------------------------------------------------------------------------------------------------------------------------------------------------------------------------------------------------------------------------------------------------------------------------------------------------------------------------------------------------------------------------------------------------------------------------------------------------------------------------------------------------------------------------------------------------------------------------------------------------------------------------------------------------------------------------------------------------------------------------------------------------------------------------------------------------------------------------------------------------------------------------------------------------------------------------------------------------------------------------------------------------------------------------------------------------------------------------------------------------------------------------------------------------------------------------------------------------------------------------------------------------------------------------------------------------------------------------------------------------------------------------------------------------------------------------------------------------------------------------------------------------------------------------------------------------------------------------------------------------------------------------------------------------------------------------------------------------------------------------------------------------------------------------------------------------------------------------------------------------------------------------------------------------------------------------------------------------------------------------------------------------------------------------------------------------------------------------------------------------------------------------------------------------------------------------------------------------------------------------------------------------------------------------------------------------------------------------------------------------------------------------------------------------------------------------------------------------------------------------------------------------------------------------------------------------------------------------------------------------------------------------------------------------------------------------------------------------------------------------------------------------------------------------------------------------------------------------------------------------------------------------------------------------------------------------------------------------------------------------------------------------------------------------------------------------------------------------------------------------------------------------------------------------------------------------------------------------------------------------------------------------------------------------------------------------------------------------------------------------------------------------------------------------------------------------------------------------------------------------------------------------------------------------------------------------------------------------------------------------------------------------------------------------------------------------------------------------------------------------------------------------------------------------------------------------------------------------------------------------------------------------------------------------------------------------------------------------------------------------------------------------------------------------------------------------------------------------------------------------------------------------------------------------------------------------------------------------------------------------------------------------------------------------------------------------------------------------------------------------------------------------------------------------------------------------------------------------------------------------------------------------------------------------------------------------------------------------------------------------------------------------------------------------------------------------------------------------------------------------------------------------------------------------------------------------------------------------------------------------------------------------------------------------------------------------------------------------------------------------------------------------------------------------------------------------------------------------------------------------------------------------------------------------------------------------------------------------------------------------------------------------------------------------------------------------------------------------------------------------------------------------------------------------------------------------------------------------------------------------------------------------------------------------------------------------------------------------------------------------------------------------------------------------------------------------------------------------------------------------------------------------------------------------------------------------------------------------------------------------------------------------------------------------------------------------------------------------------------------------------------------------------------------------------------------------------------------------------------------------------------------------------------------------------------------------------------------------------------------------------------------------------------------------------------------------------------------------------------------------------------------------------------------------------------------------------------------------------------------------------------------------------------------------------------------------------------------------------------------------------------------------------------------------------------------------------------------------------------------------------------------------------------------------------------------------------------------------------------------------------------------------------------------------------------------------------------------------------------------------------------------------------------------------------------------------------------------------------------------------------------------------------------------------------------------------------------------------------------------------------------------------------------------------------------------------------------------------------------------------------------------------------------------------------------------------------------------------------------------------------------------------------------------------------------------------------------------------------------------------------------------------------------------------------------------------------------------------------------------------------------------------------------------------------------------------------------------------------------------------------------------------------------------------------------------------------------------------------------------------------------------------------------------------------------------------------|
| TTTAAGA | ENSG00000165476 REEP3<br>ENSG00000177200 CHD9<br>ENSG00000070407 MARK4<br>ENSG00000125166 GOT2<br>ENSG00000197976 CYXorf3<br>ENSG00000053747 LAMA3<br>ENSG00000108848 CROP_HUMAN<br>ENSG00000151470 C4orf33<br>ENSG00000171522 PTGER4<br>ENSG00000100030 MAPK1<br>ENSG00000156471 PTDSS1<br>ENSG00000198089 SF11<br>ENSG00000104231 ZFAND1<br>ENSG00000135776 ABCBL1<br>ENSG00000154153 NP_001030022.1<br>ENSG00000168811 IL12A<br>ENSG00000185985 SLITRK2<br>ENSG00000003147 ICA1<br>ENSG00000105520 NP_073574.1<br>ENSG00000142599 RERE<br>ENSG00000163794 UCN<br>ENSG00000188706 ZDHHC9<br>ENSG00000033030 ZCCHC8<br>ENSG00000102580 DNAJC3<br>ENSG00000116830 TFF2<br>ENSG00000143199 NP_060887.1<br>ENSG00000163217 BMP10<br>ENSG00000170180 GYPA<br>ENSG00000187611 Q6ZTR6_HUMAN<br>ENSG00000058085 LAMC2<br>ENSG00000123349 PFDN5<br>ENSG00000142082 SIRT3<br>ENSG00000168395 ING5<br>ENSG00000205718 LOC653656<br>ENSG00000111046 MYF6<br>ENSG00000136152 COG3<br>ENSG00000164104 HMGB2<br>ENSG00000183520 UTP11L<br>ENSG000000011207 TCEB3<br>ENSG00000112115 VEGFA<br>ENSG00000164045 CDC25A<br>ENSG00000186790 FOXE3<br>ENSG00000030066 NUP160<br>ENSG00000087338 GMCL1<br>ENSG00000113615 SEC24A<br>ENSG00000135047 CTS1L<br>ENSG00000139800 ZIC5<br>ENSG00000158234 FAIM<br>ENSG00000171502 COL24A1<br>ENSG00000198677 KIAA0372<br>ENSG000000081377 CDC14C<br>ENSG00000135624 CCT7<br>ENSG00000151062 CACNA2D4<br>ENSG00000033867 SLC4A7<br>ENSG00000094963 FMO2<br>ENSG00000131007 TTY9A<br>ENSG00000156313 RPGR<br>ENSG00000168615 ADAM9<br>ENSG00000204628 GNB2L1<br>ENSG00000039523 FAM65A<br>ENSG00000118900 UBN1<br>ENSG00000172061 LRRRC15<br>ENSG00000008072 CXorf41<br>ENSG00000134744 ZCCHC11<br>ENSG00000165338 HECTD2<br>ENSG00000089336 KIAA0841<br>ENSG00000168709 SCARA5<br>ENSG00000184990 SIVA1<br>ENSG00000107105 ELAVL2<br>ENSG00000136897 MRPL50<br>ENSG00000160588 U2966_HUMAN<br>ENSG00000182107 TMEM30B<br>ENSG00000136199 CXorf6<br>ENSG00000108786 HSD17B1<br>ENSG00000163157 TMOD4<br>ENSG00000196476 C20orf96<br>ENSG00000114124 GRK7<br>ENSG00000162959 MEMO1<br>ENSG00000179408 MEMO1P<br>ENSG00000132755 PSMC4<br>ENSG00000132507 EIF5AP1<br>ENSG00000169777 TAS2R1<br>ENSG00000204405 Q6ZQV3_HUMAN<br>ENSG00000135108 FBXO21<br>ENSG00000023902 PLEKHO1<br>ENSG00000119522 DENND1A<br>ENSG00000136444 RSAD1<br>ENSG00000172590 MRPL52<br>ENSG00000079950 STX7<br>ENSG00000138286 KIAA0974<br>ENSG00000168542 COL3A1<br>ENSG00000178234 GALNT11<br>ENSG00000128266 GNAZ<br>ENSG00000204120 TNRC15<br>ENSG00000057019 DCBLD2<br>ENSG00000110768 GTF2H1<br>ENSG00000152484 USP12<br>ENSG00000171791 BCL2<br>ENSG00000105501 SIGLEC5<br>ENSG00000163814 CDCP1<br>ENSG00000204103 MAFB<br>ENSG00000108691 CCL2<br>ENSG00000140280 LYSMD2<br>ENSG00000155313 USP25<br>ENSG00000170160 Q6ZU57_HUMAN<br>ENSG00000196243 C12orf37<br>ENSG00000048342 Q9H8A7_HUMAN<br>ENSG00000111641 NOL1<br>ENSG00000142623 PADI1<br>ENSG00000172183 ISG20<br>ENSG00000189069 NP_001013732.1<br>ENSG00000034533 ASTE1<br>ENSG00000104497 SNX16<br>ENSG00000120251 GRIA2<br>ENSG00000143469 SYT14<br>ENSG00000164118 KIAA1712<br>ENSG00000170584 NUDC2<br>ENSG00000187611 Q6ZTR6_HUMAN<br>ENSG00000058085 LAMC2<br>ENSG00000123349 PFDN5<br>ENSG00000142082 SIRT3<br>ENSG00000168395 ING5<br>ENSG00000205718 LOC653656<br>ENSG00000111046 MYF6<br>ENSG00000136152 COG3<br>ENSG00000164104 HMGB2<br>ENSG00000183520 UTP11L<br>ENSG000000011207 TCEB3<br>ENSG00000112115 VEGFA<br>ENSG00000164045 CDC25A<br>ENSG00000186790 FOXE3<br>ENSG00000030066 NUP160<br>ENSG00000087338 GMCL1<br>ENSG00000113615 SEC24A<br>ENSG00000135047 CTS1L<br>ENSG00000139800 ZIC5<br>ENSG00000158234 FAIM<br>ENSG00000171502 COL24A1<br>ENSG00000198677 KIAA0372<br>ENSG000000081377 CDC14C<br>ENSG00000135624 CCT7<br>ENSG00000151062 CACNA2D4<br>ENSG00000033867 SLC4A7<br>ENSG00000094963 FMO2<br>ENSG00000131007 TTY9A<br>ENSG00000156313 RPGR<br>ENSG00000168615 ADAM9<br>ENSG00000204628 GNB2L1<br>ENSG00000039523 FAM65A<br>ENSG00000118900 UBN1<br>ENSG00000172061 LRRRC15<br>ENSG00000008072 CXorf41<br>ENSG00000134744 ZCCHC11<br>ENSG00000165338 HECTD2<br>ENSG00000089336 KIAA0841<br>ENSG00000168709 SCARA5<br>ENSG00000184990 SIVA1<br>ENSG00000107105 ELAVL2<br>ENSG00000136897 MRPL50<br>ENSG00000160588 U2966_HUMAN<br>ENSG00000182107 TMEM30B<br>ENSG00000136199 CXorf6<br>ENSG00000108786 HSD17B1<br>ENSG00000163157 TMOD4<br>ENSG00000196476 C20orf96<br>ENSG00000114124 GRK7<br>ENSG00000162959 MEMO1<br>ENSG00000179408 MEMO1P<br>ENSG00000132755 PSMC4<br>ENSG00000132507 EIF5AP1<br>ENSG00000169777 TAS2R1<br>ENSG00000204405 Q6ZQV3_HUMAN<br>ENSG00000135108 FBXO21<br>ENSG00000038358 EDC4<br>ENSG00000121413 ZSCAN18<br>ENSG00000137193 PIMI1<br>ENSG00000180861 C12orf36<br>ENSG00000106537 TSPAN13<br>ENSG00000143970 ASXL2<br>ENSG00000169551 CXorf48<br>ENSG00000187109 NAP1L1<br>ENSG00000174248 UNG<br>ENSG00000141540 TTYH2<br>ENSG00000204301 NOTCH4<br>ENSG00000083312 TNPO1<br>ENSG00000117155 SSX2IP<br>ENSG00000152977 ZIC1<br>ENSG00000182645 C10orf96<br>ENSG00000114019 AMOTL2<br>ENSG00000164889 SLC4A2<br>ENSG00000204733 Q6ZSH7_HUMAN<br>ENSG00000112115 IL17A<br>ENSG00000140285 FGF7<br>ENSG00000163558 PRKCI<br>ENSG00000176554 NANOGP1<br>ENSG00000196243 C12orf37<br>ENSG00000048342 Q9H8A7_HUMAN<br>ENSG00000062485 CS<br>ENSG00000111641 NOL1<br>ENSG00000143614 GATAD2B<br>ENSG00000175077 RTP1<br>ENSG0000000197283 SYNGAP1<br>ENSG00000059588 TARBP1<br>ENSG00000109814 UGDH<br>ENSG00000121988 ZFRANB3<br>ENSG00000164244 PRRC1<br>ENSG00000170734 POLH<br>ENSG00000189212 DPY19L2P1<br>ENSG00000179942 FBLN1<br>ENSG00000124164 VAPB<br>ENSG00000143398 PIF5K1A<br>ENSG00000173153 ESRRA<br>ENSG000000011566 MAP4K3<br>ENSG00000111231 ATPBD1C<br>ENSG00000137871 SUHW4<br>ENSG00000165617 DACT1<br>ENSG00000184886 PIGW<br>ENSG00000145454 RABGAP1<br>ENSG00000131368 MRPS25<br>ENSG00000166224 SGPL1<br>ENSG00000187638 NM_207367<br>ENSG00000036257 CUL3<br>ENSG00000100281 HMG2L1<br>ENSG00000115524 SF3B1<br>ENSG00000135597 REPS1<br>ENSG00000141429 GALNT1<br>ENSG00000162630 B3GALT2<br>ENSG00000172167 MTBP<br>ENSG00000198833 UBE2J1<br>ENSG00000100101 NOL12<br>ENSG00000136689 IL1RN<br>ENSG00000168792 NP_937790.1<br>ENSG00000051825 BPHOSPH9<br>ENSG00000099901 RANBP1<br>ENSG00000131009 TTY9A_HUMAN<br>ENSG00000162520 SYNC1<br>ENSG00000171931 FBXW10<br>ENSG00000204628 GNB2L1<br>ENSG00000044090 CUL7<br>ENSG00000126003 PLAGL2<br>ENSG00000179151 EDC3<br>ENSG00000101134 DOK5<br>ENSG00000135945 REV1<br>ENSG00000170734 POLH<br>ENSG00000089336 KIAA0841<br>ENSG00000169598 DFFB<br>ENSG00000205431 Q6UWF5_HUMAN<br>ENSG00000109814 UGDH<br>ENSG00000139826 ABHD13<br>ENSG00000160588 U2966_HUMAN<br>ENSG00000183354 KIAA2026<br>ENSG00000053108 FSTL4<br>ENSG00000115841 FAM82A<br>ENSG00000167986 DBB1<br>ENSG00000198663 C6orf89<br>ENSG00000115504 EHBP1<br>ENSG00000163625 WDFY3<br>ENSG00000188653 NR_002807.1<br>ENSG00000043822 NP_060895.1<br>ENSG00000141337 ARSG<br>ENSG00000172943 PHF8<br>ENSG00000204405 Q6ZQV3_HUMAN<br>ENSG00000145362 ANK2<br>ENSG00000169551 CXorf48<br>ENSG00000187109 NAP1L1<br>ENSG00000174248 UNG<br>ENSG00000141540 TTYH2<br>ENSG00000204301 NOTCH4<br>ENSG00000083312 TNPO1<br>ENSG00000117155 SSX2IP<br>ENSG00000152977 ZIC1<br>ENSG00000182645 C10orf96<br>ENSG00000114019 AMOTL2<br>ENSG00000164889 SLC4A2<br>ENSG00000204733 Q6ZSH7_HUMAN<br>ENSG00000112115 IL17A<br>ENSG00000140285 FGF7<br>ENSG00000163558 PRKCI<br>ENSG00000176554 NANOGP1<br>ENSG00000196243 C12orf37<br>ENSG00000048342 Q9H8A7_HUMAN<br>ENSG00000062485 CS<br>ENSG00000111641 NOL1<br>ENSG00000143614 GATAD2B<br>ENSG00000175077 RTP1<br>ENSG0000000197283 SYNGAP1<br>ENSG00000059588 TARBP1<br>ENSG00000109814 UGDH<br>ENSG00000121988 ZFRANB3<br>ENSG00000164244 PRRC1<br>ENSG00000170734 POLH<br>ENSG00000189212 DPY19L2P1<br>ENSG00000179942 FBLN1<br>ENSG00000124164 VAPB<br>ENSG00000143398 PIF5K1A<br>ENSG00000173153 ESRRA<br>ENSG000000011566 MAP4K3<br>ENSG00000111231 ATPBD1C<br>ENSG00000137871 SUHW4<br>ENSG00000165617 DACT1<br>ENSG00000184886 PIGW<br>ENSG00000145454 RABGAP1<br>ENSG00000131368 MRPS25<br>ENSG00000166224 SGPL1<br>ENSG00000187638 NM_207367<br>ENSG00000036257 CUL3<br>ENSG00000100281 HMG2L1<br>ENSG00000115524 SF3B1<br>ENSG00000135597 REPS1<br>ENSG00000141429 GALNT1<br>ENSG00000162630 B3GALT2<br>ENSG00000172167 MTBP<br>ENSG00000198833 UBE2J1<br>ENSG00000100101 NOL12<br>ENSG00000136689 IL1RN<br>ENSG00000168792 NP_937790.1<br>ENSG00000051825 BPHOSPH9<br>ENSG00000099901 RANBP1<br>ENSG00000131009 TTY9A_HUMAN<br>ENSG00000162520 SYNC1<br>ENSG00000171931 FBXW10<br>ENSG00000204628 GNB2L1<br>ENSG00000044090 CUL7<br>ENSG00000126003 PLAGL2<br>ENSG00000179151 EDC3<br>ENSG00000101134 DOK5<br>ENSG00000135945 REV1<br>ENSG00000170734 POLH<br>ENSG00000089336 KIAA0841<br>ENSG00000169598 DFFB<br>ENSG00000205431 Q6UWF5_HUMAN<br>ENSG00000109814 UGDH<br>ENSG00000139826 ABHD13<br>ENSG00000160588 U2966_HUMAN<br>ENSG00000183354 KIAA2026<br>ENSG00000053108 FSTL4<br>ENSG00000115841 FAM82A<br>ENSG00000167986 DBB1<br>ENSG00000198663 C6orf89<br>ENSG00000115504 EHBP1<br>ENSG00000163625 WDFY3<br>ENSG00000188653 NR_002807.1<br>ENSG00000043822 NP_060895.1<br>ENSG00000141337 ARSG<br>ENSG00000172943 PHF8<br>ENSG00000204405 Q6ZQV3_HUMAN<br>ENSG00000145362 ANK2<br>ENSG00000169551 CXorf48<br>ENSG00000187109 NAP1L1<br>ENSG00000174248 UNG<br>ENSG00000141540 TTYH2<br>ENSG00000204301 NOTCH4<br>ENSG00000083312 TNPO1<br>ENSG00000117155 SSX2IP<br>ENSG00000152977 ZIC1<br>ENSG00000182645 C10orf96<br>ENSG00000114019 AMOTL2<br>ENSG00000164889 SLC4A2<br>ENSG00000204733 Q6ZSH7_HUMAN<br>ENSG00000112115 IL17A<br>ENSG00000140285 FGF7<br>ENSG00000163558 PRKCI<br>ENSG00000176554 NANOGP1<br>ENSG00000196243 C12orf37<br>ENSG00000048342 Q9H8A7_HUMAN<br>ENSG00000062485 CS<br>ENSG00000111641 NOL1<br>ENSG00000143614 GATAD2B<br>ENSG00000175077 RTP1<br>ENSG0000000197283 SYNGAP1<br>ENSG00000059588 TARBP1<br>ENSG00000109814 UGDH<br>ENSG00000121988 ZFRANB3<br>ENSG00000164244 PRRC1<br>ENSG00000170734 POLH<br>ENSG00000189212 DPY19L2P1<br>ENSG00000179942 FBLN1<br>ENSG00000124164 VAPB<br>ENSG00000143398 PIF5K1A<br>ENSG00000173153 ESRRA<br>ENSG000000011566 MAP4K3<br>ENSG00000111231 ATPBD1C<br>ENSG00000137871 SUHW4<br>ENSG00000165617 DACT1<br>ENSG00000184886 PIGW<br>ENSG00000145454 RABGAP1<br>ENSG00000131368 MRPS25<br>ENSG00000166224 SGPL1<br>ENSG00000187638 NM_207367<br>ENSG00000036257 CUL3<br>ENSG00000100281 HMG2L1<br>ENSG00000115524 SF3B1<br>ENSG00000135597 REPS1<br>ENSG00000141429 GALNT1<br>ENSG00000162630 B3GALT2<br>ENSG00000172167 MTBP<br>ENSG00000198833 UBE2J1<br>ENSG00000100101 NOL12<br>ENSG00000136689 IL1RN<br>ENSG00000168792 NP_937790.1<br>ENSG00000051825 BPHOSPH9<br>ENSG00000099901 RANBP1<br>ENSG00000131009 TTY9A_HUMAN<br>ENSG00000162520 SYNC1<br>ENSG00000171931 FBXW10<br>ENSG00000204628 GNB2L1<br>ENSG00000044090 CUL7<br>ENSG00000126003 PLAGL2<br>ENSG00000179151 EDC3<br>ENSG00000101134 DOK5<br>ENSG00000135945 REV1<br>ENSG00000170734 POLH<br>ENSG00000089336 KIAA0841<br>ENSG00000169598 DFFB<br>ENSG00000205431 Q6UWF5_HUMAN<br>ENSG00000109814 UGDH<br>ENSG00000139826 ABHD13<br>ENSG00000160588 U2966_HUMAN<br>ENSG00000183354 KIAA2026<br>ENSG00000053108 FSTL4<br>ENSG00000115841 FAM82A<br>ENSG00000167986 DBB1<br>ENSG00000198663 C6orf89<br>ENSG00000115504 EHBP1<br>ENSG00000163625 WDFY3<br>ENSG00000188653 NR_002807.1<br>ENSG00000043822 NP_060895.1<br>ENSG00000141337 ARSG<br>ENSG00000172943 PHF8<br>ENSG00000204405 Q6ZQV3_HUMAN<br>ENSG00000145362 ANK2<br>ENSG00000169551 CXorf48<br>ENSG00000187109 NAP1L1<br>ENSG00000174248 UNG<br>ENSG00000141540 TTYH2<br>ENSG00000204301 NOTCH4<br>ENSG00000083312 TNPO1<br>ENSG00000117155 SSX2IP<br>ENSG00000152977 ZIC1<br>ENSG00000182645 C10orf96<br>ENSG00000114019 AMOTL2<br>ENSG00000164889 SLC4A2<br>ENSG00000204733 Q6ZSH7_HUMAN<br>ENSG00000112115 IL17A<br>ENSG00000140285 FGF7<br>ENSG00000163558 PRKCI<br>ENSG00000176554 NANOGP1<br>ENSG00000196243 C12orf37<br>ENSG00000048342 Q9H8A7_HUMAN<br>ENSG00000062485 CS<br>ENSG00000111641 NOL1<br>ENSG00000143614 GATAD2B<br>ENSG00000175077 RTP1<br>ENSG0000000197283 SYNGAP1<br>ENSG00000059588 TARBP1<br>ENSG00000109814 UGDH<br>ENSG00000121988 ZFRANB3<br>ENSG00000164244 PRRC1<br>ENSG00000170734 POLH<br>ENSG00000189212 DPY19L2P1<br>ENSG00000179942 FBLN1<br>ENSG00000124164 VAPB<br>ENSG00000143398 PIF5K1A<br>ENSG00000173153 ESRRA<br>ENSG000000011566 MAP4K3<br>ENSG00000111231 ATPBD1C<br>ENSG00000137871 SUHW4<br>ENSG00000165617 DACT1<br>ENSG00000184886 PIGW<br>ENSG00000145454 RABGAP1<br>ENSG00000131368 MRPS25<br>ENSG00000166224 SGPL1<br>ENSG00000187638 NM_207367<br>ENSG00000036257 CUL3<br>ENSG00000100281 HMG2L1<br>ENSG00000115524 SF3B1<br>ENSG00000135597 REPS1<br>ENSG00000141429 GALNT1<br>ENSG00000162630 B3GALT2<br>ENSG00000172167 MTBP<br>ENSG00000198833 UBE2J1<br>ENSG00000100101 NOL12<br>ENSG00000136689 IL1RN<br>ENSG00000168792 NP_937790.1<br>ENSG00000051825 BPHOSPH9<br>ENSG00000099901 RANBP1<br>ENSG00000131009 TTY9A_HUMAN<br>ENSG00000162520 SYNC1<br>ENSG00000171931 FBXW10<br>ENSG00000204628 GNB2L1<br>ENSG00000044090 CUL7<br>ENSG00000126003 PLAGL2<br>ENSG00000179151 EDC3<br>ENSG00000101134 DOK5<br>ENSG00000135945 REV1<br>ENSG00000170734 POLH<br>ENSG00000089336 KIAA0841<br>ENSG00000169598 DFFB<br>ENSG00000205431 Q6UWF5_HUMAN<br>ENSG00000109814 UGDH<br>ENSG00000139826 ABHD13<br>ENSG00000160588 U2966_HUMAN<br>ENSG00000183354 KIAA2026<br>ENSG00000053108 FSTL4<br>ENSG00000115841 FAM82A<br>ENSG00000167986 DBB1<br>ENSG00000198663 C6orf89<br>ENSG00000115504 EHBP1<br>ENSG00000163625 WDFY3<br>ENSG00000188653 NR_002807.1<br>ENSG00000043822 NP_060895.1<br>ENSG00000141337 ARSG<br>ENSG00000172943 PHF8<br>ENSG00000204405 Q6ZQV3_HUMAN<br>ENSG00000145362 ANK2<br>ENSG00000169551 CXorf48<br>ENSG00000187109 NAP1L1<br>ENSG00000174248 UNG<br>ENSG00000141540 TTYH2<br>ENSG00000204301 NOTCH4<br>ENSG00000083312 TNPO1<br>ENSG00000117155 SSX2IP<br>ENSG00000152977 ZIC1<br>ENSG00000182645 C10orf96<br>ENSG00000114019 AMOTL2<br>ENSG00000164889 SLC4A2<br>ENSG00000204733 Q6ZSH7_HUMAN<br>ENSG00000112115 IL17A<br>ENSG00000140285 FGF7<br>ENSG00000163558 PRKCI<br>ENSG00000176554 NANOGP1<br>ENSG00000196243 C12orf37<br>ENSG00000048342 Q9H8A7_HUMAN<br>ENSG00000062485 CS<br>ENSG00000111641 NOL1<br>ENSG00000143614 GATAD2B<br>ENSG00000175077 RTP1<br>ENSG0000000197283 SYNGAP1<br>ENSG00000059588 TARBP1<br>ENSG00000109814 UGDH<br>ENSG00000121988 ZFRANB3<br>ENSG00000164244 PRRC1<br>ENSG00000170734 POLH<br>ENSG00000189212 DPY19L2P1<br>ENSG00000179942 FBLN1<br>ENSG00000124164 VAPB<br>ENSG00000143398 PIF5K1A<br>ENSG00000173153 ESRRA<br>ENSG000000011566 MAP4K3<br>ENSG00000111231 ATPBD1C<br>ENSG00000137871 SUHW4<br>ENSG00000165617 DACT1<br>ENSG00000184886 PIGW<br>ENSG00000145454 RABGAP1<br>ENSG00000131368 MRPS25<br>ENSG00000166224 SGPL1<br>ENSG00000187638 NM_207367<br>ENSG00000036257 CUL3<br>ENSG00000100281 HMG2L1<br>ENSG00000115524 SF3B1<br>ENSG00000135597 REPS1<br>ENSG00000141429 GALNT1<br>ENSG00000162630 B3GALT2<br>ENSG00000172167 MTBP<br>ENSG00000198833 UBE2J1<br>ENSG00000100101 NOL12<br>ENSG00000136689 IL1RN<br>ENSG00000168792 NP_937790.1<br>ENSG00000051825 BPHOSPH9<br>ENSG00000099901 RANBP1<br>ENSG00000131009 TTY9A_HUMAN<br>ENSG00000162520 SYNC1<br>ENSG00000171931 FBXW10<br>ENSG00000204628 GNB2L1<br>ENSG00000044090 CUL7<br>ENSG00000126003 PLAGL2<br>ENSG00000179151 EDC3<br>ENSG00000101134 DOK5<br>ENSG00000135945 REV1<br>ENSG00000170734 POLH<br>ENSG00000089336 KIAA0841<br>ENSG00000169598 DFFB<br>ENSG00000205431 Q6UWF5_HUMAN<br>ENSG00000109814 UGDH<br>ENSG00000139826 ABHD13<br>ENSG00000160588 U2966_HUMAN<br>ENSG00000183354 KIAA2026<br>ENSG00000053108 FSTL4<br>ENSG00000115841 FAM82A<br>ENSG00000167986 DBB1<br>ENSG00000198663 C6orf89<br>ENSG00000115504 EHBP1<br>ENSG00000163625 WDFY3<br>ENSG00000188653 NR_002807.1<br>ENSG00000043822 NP_060895.1<br>ENSG00000141337 ARSG<br>ENSG00000172943 PHF8<br>ENSG00000204405 Q6ZQV3_HUMAN<br>ENSG00000145362 ANK2<br>ENSG00000169551 CXorf48<br>ENSG00000187109 NAP1L1<br>ENSG00000174248 UNG<br>ENSG00000141540 TTYH2<br>ENSG00000204301 NOTCH4<br>ENSG00000083312 TNPO1<br>ENSG00000117155 SSX2IP<br>ENSG00000152977 ZIC1<br>ENSG00000182645 C10orf96<br>ENSG00000114019 AMOTL2<br>ENSG00000164889 SLC4A2 |
|---------|----------------------------------------------------------------------------------------------------------------------------------------------------------------------------------------------------------------------------------------------------------------------------------------------------------------------------------------------------------------------------------------------------------------------------------------------------------------------------------------------------------------------------------------------------------------------------------------------------------------------------------------------------------------------------------------------------------------------------------------------------------------------------------------------------------------------------------------------------------------------------------------------------------------------------------------------------------------------------------------------------------------------------------------------------------------------------------------------------------------------------------------------------------------------------------------------------------------------------------------------------------------------------------------------------------------------------------------------------------------------------------------------------------------------------------------------------------------------------------------------------------------------------------------------------------------------------------------------------------------------------------------------------------------------------------------------------------------------------------------------------------------------------------------------------------------------------------------------------------------------------------------------------------------------------------------------------------------------------------------------------------------------------------------------------------------------------------------------------------------------------------------------------------------------------------------------------------------------------------------------------------------------------------------------------------------------------------------------------------------------------------------------------------------------------------------------------------------------------------------------------------------------------------------------------------------------------------------------------------------------------------------------------------------------------------------------------------------------------------------------------------------------------------------------------------------------------------------------------------------------------------------------------------------------------------------------------------------------------------------------------------------------------------------------------------------------------------------------------------------------------------------------------------------------------------------------------------------------------------------------------------------------------------------------------------------------------------------------------------------------------------------------------------------------------------------------------------------------------------------------------------------------------------------------------------------------------------------------------------------------------------------------------------------------------------------------------------------------------------------------------------------------------------------------------------------------------------------------------------------------------------------------------------------------------------------------------------------------------------------------------------------------------------------------------------------------------------------------------------------------------------------------------------------------------------------------------------------------------------------------------------------------------------------------------------------------------------------------------------------------------------------------------------------------------------------------------------------------------------------------------------------------------------------------------------------------------------------------------------------------------------------------------------------------------------------------------------------------------------------------------------------------------------------------------------------------------------------------------------------------------------------------------------------------------------------------------------------------------------------------------------------------------------------------------------------------------------------------------------------------------------------------------------------------------------------------------------------------------------------------------------------------------------------------------------------------------------------------------------------------------------------------------------------------------------------------------------------------------------------------------------------------------------------------------------------------------------------------------------------------------------------------------------------------------------------------------------------------------------------------------------------------------------------------------------------------------------------------------------------------------------------------------------------------------------------------------------------------------------------------------------------------------------------------------------------------------------------------------------------------------------------------------------------------------------------------------------------------------------------------------------------------------------------------------------------------------------------------------------------------------------------------------------------------------------------------------------------------------------------------------------------------------------------------------------------------------------------------------------------------------------------------------------------------------------------------------------------------------------------------------------------------------------------------------------------------------------------------------------------------------------------------------------------------------------------------------------------------------------------------------------------------------------------------------------------------------------------------------------------------------------------------------------------------------------------------------------------------------------------------------------------------------------------------------------------------------------------------------------------------------------------------------------------------------------------------------------------------------------------------------------------------------------------------------------------------------------------------------------------------------------------------------------------------------------------------------------------------------------------------------------------------------------------------------------------------------------------------------------------------------------------------------------------------------------------------------------------------------------------------------------------------------------------------------------------------------------------------------------------------------------------------------------------------------------------------------------------------------------------------------------------------------------------------------------------------------------------------------------------------------------------------------------------------------------------------------------------------------------------------------------------------------------------------------------------------------------------------------------------------------------------------------------------------------------------------------------------------------------------------------------------------------------------------------------------------------------------------------------------------------------------------------------------------------------------------------------------------------------------------------------------------------------------------------------------------------------------------------------------------------------------------------------------------------------------------------------------------------------------------------------------------------------------------------------------------------------------------------------------------------------------------------------------------------------------------------------------------------------------------------------------------------------------------------------------------------------------------------------------------------------------------------------------------------------------------------------------------------------------------------------------------------------------------------------------------------------------------------------------------------------------------------------------------------------------------------------------------------------------------------------------------------------------------------------------------------------------------------------------------------------------------------------------------------------------------------------------------------------------------------------------------------------------------------------------------------------------------------------------------------------------------------------------------------------------------------------------------------------------------------------------------------------------------------------------------------------------------------------------------------------------------------------------------------------------------------------------------------------------------------------------------------------------------------------------------------------------------------------------------------------------------------------------------------------------------------------------------------------------------------------------------------------------------------------------------------------------------------------------------------------------------------------------------------------------------------------------------------------------------------------------------------------------------------------------------------------------------------------------------------------------------------------------------------------------------------------------------------------------------------------------------------------------------------------------------------------------------------------------------------------------------------------------------------------------------------------------------------------------------------------------------------------------------------------------------------------------------------------------------------------------------------------------------------------------------------------------------------------------------------------------------------------------------------------------------------------------------------------------------------------------------------------------------------------------------------------------------------------------------------------------------------------------------------------------------------------------------------------------------------------------------------------------------------------------------------------------------------------------------------------------------------------------------------------------------------------------------------------------------------------------------------------------------------------------------------------------------------------------------------------------------------------------------------------------------------------------------------------------------------------------------------------------------------------------------------------------------------------------------------------------------------------------------------------------------------------------------------------------------------------------------------------------------------------------------------------------------------------------------------------------------------------------------------------------------------------------------------------------------------------------------------------------------------------------------------------------------------------------------------------------------------------------------------------------------------------------------------------------------------------------------------------------------------------------------------------------------------------------------------------------------------------------------------------------------------------------------------------------------------------------------------------------------------------------------------------------------------------------------------------------------------------------------------------------------------------------------------------------------------------------------------------------------------------------------------------------------------------------------------------------------------------------------------------------------------------------------------------------------------------------------------------------------------------------------------------------------------------------------------------------------------------------------------------------------------------------------------------------------------------------------------------------------------------------------------------------------------------------------------------------------------------------------------------------------------------------------------------------------------------------------------------------------------------------------------------------------------------------------------------------------------------------------------------------------------------------------------------------------------------------------------------------------------------------------------------------------------------------------------------------------------------------------------------------------------------------------------------------------------------------------------------------------------------------------------------------------------------------------------------------------------------------------------------------------------------------------------------------------------------------------------------------------------------------------------------------------------------------------------------------------------------------------------------------------------------------------------------------------------------------------------------------------------------------------------------------------------------------------------------------------------------------------------------------------------------------------------------------------------------------------------------------------------------------------------------------------------------------------------------------------------------------------------------------------------------------------------------------------------------------------------------------------------------------------------------------------------------------------------------------------------------------------------------------------------------|



ENSG00000116560|SFPO ENSG00000116830|TTF2 ENSG00000120526|NUDCD1 ENSG00000124198|ARFGF2 ENSG00000125848|FLRT3 ENSG00000127463|KIAA0090 ENSG00000130224|LRCH2 ENSG00000135241|PNPLA10P  
ENSG00000138757|G3BP2 ENSG00000150627|WDR17 ENSG00000152683|SLC30A6 ENSG00000153914|SFRS12 ENSG00000157576|XR\_018454.1 ENSG00000162368|CMPK ENSG00000163818|LZTFL1 ENSG00000164695|CHMP4C  
TTTAGTC ENSG00000166800|LDHAL6A ENSG00000167088|SNRPD1 ENSG00000175928|LRRN1 ENSG00000178295|NP\_872431.2 ENSG00000186487|MYT1L ENSG00000197121|PGAP1\_HUMAN ENSG00000205581|HMG1  
ENSG00000068097|NP\_071353.4 ENSG00000078902|TOLLIP ENSG00000084636|COL16A1 ENSG00000102547|CAB39L ENSG00000103353|UBFD1 ENSG00000104679|R3HCC1 ENSG00000104731|KLHDC4 ENSG00000115461|IGFBP5  
ENSG00000143578|CREB3L4 ENSG00000149503|INCNENP ENSG00000152669|CCNY ENSG00000156486|KCNK2 ENSG00000157600|TMEM164 ENSG00000161179|NP\_001017964.1 ENSG00000164403|SHROOM1 ENSG00000166257|SCN3B  
ENSG00000166743|ACSM1 ENSG00000167754|KLK5 ENSG00000170876|TMEM43 ENSG00000171163|ZNF692 ENSG00000172016|REG3A ENSG00000174989|FBXW8 ENSG00000176876|FXMP2 ENSG00000197081|IGF2R  
ENSG00000198700|IPO9 ENSG00000066084|DIP2B ENSG00000068615|REEP1 ENSG00000089335|ZNF302 ENSG00000101343|CRNKL1 ENSG00000101966|BIRC4 ENSG00000109674|NEIL3 ENSG00000120742|RAMP4\_HUMAN  
ENSG00000128641|MYO1B ENSG00000134371|CDC73 ENSG00000134489|HRH4 ENSG00000135297|MTO1 ENSG00000137575|SDCBP ENSG00000139146|FAM60A ENSG00000156171|TMEM77 ENSG00000159593|APBP1  
ENSG00000163001|CDC104 ENSG00000163254|CRYGC ENSG00000163807|KIAA1143 ENSG00000167034|MXK3-1 ENSG00000170540|ARL16IP1 ENSG00000178573|MAF ENSG00000185278|ZBTB37 ENSG00000198300|PEG3  
TTTAGTT ENSG0000022840|RNF10 ENSG00000056345|ITGB3 ENSG00000099875|MKNK2 ENSG00000104679|R3HCC1 ENSG00000108349|CASC3 ENSG00000120509|PDZD11 ENSG00000122547|NP\_085139.2 ENSG00000128645|HOXD1  
ENSG00000131467|PSME3 ENSG00000139436|GIT2 ENSG00000142599|RERE ENSG00000149657|LSM14B ENSG00000160209|PDXK ENSG00000160305|DIP2A ENSG00000162510|MATN1 ENSG00000163879|DNAL1  
ENSG00000167182|SP2 ENSG00000167491|GATAD2A ENSG00000169217|CD2BP2 ENSG00000170276|HSPB2 ENSG00000173253|DMRT2 ENSG00000173436|C1orf151 ENSG00000175550|DRAP1 ENSG00000183495|EP400  
ENSG00000196652|ZKSCAN5 ENSG00000198369|SPRED2 ENSG00000015568|RGPD7 ENSG00000079335|CDC14A ENSG00000081818|PCDHB4 ENSG00000094841|UPRT ENSG00000101266|CSNK2A1P ENSG00000101935|AMMECR1  
ENSG00000103657|HERC1 ENSG00000111530|CAND1 ENSG00000112851|ERBB2IP ENSG00000112996|MRP30 ENSG00000123545|C6orf66 ENSG00000123728|RAP2C ENSG00000137770|CTDSP2L ENSG00000143799|PARP1  
ENSG00000148426|C10orf47 ENSG00000150722|PPP1R1C ENSG00000151694|ADAM17 ENSG00000151881|C5orf28 ENSG00000153904|DDAH1 ENSG00000165813|C10orf118 ENSG00000166432|ZMAT1  
ENSG00000169564|PCBP1 ENSG00000169629|RGPD8 ENSG00000170681|NP\_001018126.1 ENSG00000171681|ATF7IP1 ENSG00000183054|RGPD6 ENSG00000185038|Q8IUR1\_HUMAN ENSG00000197111|PCBP2  
TTTATAA ENSG00000064309|CDON ENSG00000092607|TBX15 ENSG00000100099|HPS4 ENSG00000101290|CDS2 ENSG00000103067|RBM35B ENSG00000105339|DENND3 ENSG00000105376|ICAM5 ENSG00000107185|KIAA0258  
ENSG00000110801|PSMD9 ENSG00000118655|DCLRE1B ENSG00000119457|SLC6A2 ENSG00000124374|PAIP2B ENSG00000125347|IRF1 ENSG00000127528|KLF2 ENSG00000131459|GFP2 ENSG00000135773|CAPN9  
ENSG00000136731|UGCG1 ENSG00000143319|ISG20L2 ENSG00000146021|KLHL3 ENSG00000148400|NOTCH1 ENSG00000149115|TNKS1BP1 ENSG00000153395|AYTL2 ENSG00000154102|C16orf74 ENSG00000154229|PRKCA  
ENSG00000162650|ATXN7L2 ENSG00000162761|LMX1A ENSG00000166448|TMEM130 ENSG00000166689|PLEKHA7 ENSG00000168631|DPCR1 ENSG00000168872|DDX19A ENSG00000169598|DFFB ENSG00000173020|ADRBK1  
ENSG00000179523|QSTAS2\_HUMAN ENSG00000180198|RCC1 ENSG00000180875|GREM2 ENSG00000184557|SOC3 ENSG00000188483|IER5L ENSG00000197530|MI2 ENSG00000198959|TGM2 ENSG00000204262|MNAT1  
ENSG00000035499|DEPDC1B ENSG00000043093|DCUN1D1 ENSG00000072401|UBE2D1 ENSG00000082175|PGR ENSG00000097096|SYDE2 ENSG00000101745|ANKRD12 ENSG00000104361|NPAL2 ENSG00000104369|JPH1  
ENSG00000108559|NUP88 ENSG00000110909|PMP22 ENSG00000111615|KRR1 ENSG00000112992|NNT ENSG00000115946|PNO1 ENSG00000117868|FAM62B ENSG00000120910|PPP3CC ENSG00000122507|BBS9  
ENSG00000123104|ITPR2 ENSG00000129636|ITFG1 ENSG00000132475|H3F3B ENSG00000135750|KCNK1 ENSG00000135945|REV1 ENSG00000136522|MRPL47 ENSG00000138442|WDR12 ENSG00000138794|CASP6  
ENSG00000141380|SS18 ENSG00000143341|HMCN1 ENSG00000144229|THSD7B ENSG00000145604|SKP2 ENSG00000151151|IPMK ENSG00000152683|SLC30A6 ENSG00000153936|HS2ST1 ENSG00000155970|EFA2  
ENSG00000156313|RPGR ENSG00000163669|DNHD2 ENSG00000163714|SR140\_HUMAN ENSG00000164434|FABP7 ENSG00000165072|MAMDC2 ENSG00000165084|C8orf34 ENSG00000165533|TTC8 ENSG00000165650|PDZD8  
ENSG00000166971|AKTIP ENSG00000173208|ABCD2 ENSG00000173276|ZNF295 ENSG00000173451|THAP2 ENSG00000173930|SLCO4C1 ENSG00000177324|CXorf20 ENSG00000178691|SUZ12 ENSG00000180694|TMEM64  
TTTATAC ENSG00000181449|SOX2 ENSG00000182944|EWSR1 ENSG00000185869|NP\_001032309.2 ENSG00000186452|TMPRSS12 ENSG00000188725|NP\_001041714.1  
ENSG0000015285|WAS ENSG00000064393|H1PK2 ENSG00000064393|H1PK2 ENSG00000079277|MKNK1 ENSG00000095139|NUP188 ENSG00000100027|YPEL1 ENSG00000101452|DHX35 ENSG00000103490|PYCARD  
ENSG00000110906|KCTD10 ENSG00000121775|TMEM39B ENSG00000125976|RBM12 ENSG00000130590|SAMD10 ENSG00000136895|GARNL3 ENSG00000139832|RAB20 ENSG00000144560|VGLL4 ENSG00000160691|SHC1  
ENSG00000164038|NP\_849155.2 ENSG00000167977|KCTD5 ENSG00000169991|Q5TF58\_HUMAN ENSG00000172936|MYD88 ENSG00000176438|C14orf49 ENSG00000179335|CLK3 ENSG00000185885|IFITM1 ENSG00000187024|PTRH1  
ENSG00000205015|Q6ZNV2\_HUMAN ENSG00000042781|USH2A ENSG00000048740|CUGBP2 ENSG00000054796|SPO11 ENSG00000056736|IL17RB ENSG00000079387|SENP1 ENSG00000091138|SLC26A3 ENSG00000101052|IFT52  
ENSG00000101574|METTL4 ENSG00000101624|CEP76 ENSG00000106809|OGN ENSG00000108953|YWHAE ENSG00000112183|RBM24 ENSG00000112893|MAN2A1 ENSG00000115514|TXNDC9 ENSG00000123473|STIL  
ENSG00000133110|POSTN ENSG00000134884|NP\_060481.3 ENSG00000139263|LRIG3 ENSG00000139668|WDFY2 ENSG00000140988|RPS2 ENSG00000143337|TOR1AIP1 ENSG00000150712|MTMR12 ENSG00000152022|LIX1L  
ENSG00000152455|SUV39H2 ENSG00000154734|ADAMTS1 ENSG00000156103|MMP16 ENSG00000156194|PPEF2 ENSG00000159182|NP\_115767.1 ENSG00000162378|ZYG11B ENSG00000162992|NEUROD1 ENSG00000163069|SGCB  
ENSG00000164219|PGT1B ENSG00000164307|ARTS1\_HUMAN ENSG00000164930|FZD6 ENSG00000167720|SRR ENSG00000167766|ZNF83 ENSG00000168152|THAP9 ENSG00000168916|ZNF608 ENSG00000170599|KIF5B  
ENSG00000178852|C17orf57 ENSG00000186073|C15orf41 ENSG00000187155|CUO85\_HUMAN ENSG00000196705|ZNF431 ENSG00000197123|ZNF679 ENSG00000197149|XR\_019565.1 ENSG00000197841|ZNF181 ENSG00000198780|Q9H989\_HUMAN  
ENSG00000198843|SELT\_HUMAN  
TTTATAT ENSG00000054793|ATP9A ENSG00000064309|CDON ENSG00000072736|NFATC3 ENSG00000074370|ATP2A3 ENSG00000076108|BAZ2A ENSG00000078246|TULP3 ENSG00000085733|CTTN ENSG00000101189|C2orf20  
ENSG00000103275|UBE2I ENSG00000105997|HOXA3 ENSG00000108797|CNTNAP1 ENSG00000112149|CD83 ENSG00000112715|VEGFA ENSG00000116478|HDAC1 ENSG00000122687|FTSJ2 ENSG00000124216|SNAI1  
ENSG00000126883|NUP214 ENSG00000127663|JMD2B ENSG00000129757|CDKN1C ENSG00000130545|CRB3 ENSG00000130723|KIAA0515 ENSG00000141510|TP53 ENSG00000143375|CGN ENSG00000143376|SNX2  
ENSG00000147899|CDKN2A ENSG00000156381|ANKRD9 ENSG00000159388|BTG2 ENSG00000162650|ATXN7L2 ENSG00000166860|ZBTB39 ENSG00000166949|SMAD3 ENSG00000167202|TBC1D2B ENSG00000177551|NHLH2  
ENSG00000181035|SLC25A42 ENSG00000185022|MAFF ENSG00000186594|NP\_116284.2 ENSG00000188038|NRN1L ENSG00000197724|PHF2 ENSG00000198909|MAP3K3 ENSG0000001561|ENPP4 ENSG0000008294|SPAG9  
ENSG00000033867|SLC4A7 ENSG00000082512|TRAF5 ENSG00000095002|MSH2 ENSG00000100629|C14orf145 ENSG00000101972|STAG2 ENSG00000102038|SMARCA1 ENSG00000104412|TTC35 ENSG00000105835|PBEF1  
ENSG00000106278|PTPRZ1 ENSG00000110779|BMPR1A ENSG00000111247|RAD51AP1 ENSG00000112531|QKI ENSG00000113396|SLC27A6 ENSG00000115183|TANC1 ENSG00000116473|RAP1A ENSG00000121940|CLCC1  
ENSG00000126216|TUBGCP3 ENSG00000127329|PTPRB ENSG00000135069|PSAT1 ENSG00000136014|USP44 ENSG00000138379|GDF8 ENSG00000139631|CSAD ENSG00000140299|BNIP2 ENSG00000146476|C6orf211  
ENSG00000147133|TAF1 ENSG00000150526|MIA2 ENSG00000151239|TWF1 ENSG00000151414|NEK7 ENSG00000152307|AHCTF1 ENSG00000157107|FCHO2 ENSG00000159917|ZNF235 ENSG00000163378|C3orf64  
ENSG00000165115|KIF27 ENSG00000166068|SPRED1 ENSG00000169379|ARL13B ENSG00000174010|KLHL15 ENSG00000176208|ATAD5 ENSG00000178202|KDELC2 ENSG00000179152|C3orf23 ENSG00000179476|C14orf28  
ENSG00000179981|TSHZ1 ENSG00000183337|BCOR ENSG00000183814|LIN9 ENSG00000185652|NTF3 ENSG00000187772|LIN28B ENSG00000196793|ZNF239 ENSG00000197930|ERO1L ENSG00000197991|PCDH20  
ENSG00000206559|ZCWPW2  
TTTATCA ENSG00000062485|CS ENSG00000067066|SP100 ENSG00000072134|EPN2 ENSG00000099985|OSM ENSG00000103047|TMCO7 ENSG00000110880|CORO1C ENSG00000110931|CAMKK2 ENSG00000113889|KNG1  
ENSG00000115902|SLC1A4 ENSG00000115956|PLEK ENSG00000121464|VAPB ENSG00000134369|NAV1 ENSG00000148408|CACNA1B ENSG00000148842|CNNM2 ENSG00000158296|SLC13A3 ENSG00000169230|PRELID1  
ENSG00000170262|MRAP ENSG00000171462|EGFL9 ENSG00000178977|C17orf44 ENSG00000182377|C8orf61 ENSG00000196139|AKR1C3 ENSG00000196186|Q71RF5\_HUMAN ENSG00000198399|ITSN2 ENSG00000204657|OR2H2  
ENSG00000052126|PLEKHA5 ENSG00000073712|PLEKHC1 ENSG00000074319|TSG101 ENSG00000102054|RBBP7 ENSG00000113282|CLINT1 ENSG00000119523|ALG2 ENSG00000120647|CCDC77 ENSG00000124177|CHD6  
ENSG00000125304|TM9SF2 ENSG00000133808|MICALCL ENSG00000134146|ATPBD4 ENSG00000134900|TPP2 ENSG00000138741|TRPC3 ENSG00000139926|FRMD6 ENSG00000140319|SRP14 ENSG00000141298|F8H2  
ENSG00000145332|KLHL8 ENSG00000154654|NCAM2 ENSG00000159882|ZNF230 ENSG00000164168|TMEM34 ENSG00000164418|GRIK2 ENSG00000165338|HECTD2 ENSG00000165672|PRDX3 ENSG00000165813|C10orf118  
ENSG00000166006|KCNC2 ENSG00000170270|C14orf142 ENSG00000170325|PRDM10 ENSG00000171431|KRT20 ENSG00000173141|MRP63 ENSG00000173200|PARP15 ENSG00000196549|MME ENSG00000197935|ZNF311  
ENSG00000198533|Q9P1D0\_HUMAN ENSG00000198642|KLHL9  
TTTATCC ENSG00000029993|HMGB3 ENSG00000065882|TBC1D1 ENSG00000093217|XYLB ENSG00000101144|BMP7 ENSG00000102970|CCL17 ENSG00000111249|CUTL2 ENSG00000113273|ARSB ENSG00000115594|IL1R1  
ENSG00000116667|C1orf21 ENSG00000122176|FMO2 ENSG00000120475|NAGK ENSG00000125815|CST8 ENSG00000126749|EMG1 ENSG00000127564|PKMYT1 ENSG00000128652|HOXD3 ENSG00000139625|MAP3K12  
ENSG00000150477|KIAA1328 ENSG00000154222|CC2D1B ENSG00000167710|ADAR ENSG00000169777|TAS2R1 ENSG00000171357|C1orf190 ENSG00000174989|FBXW8 ENSG00000175166|PSMD2 ENSG00000182053|XR\_016180.1  
ENSG00000184261|KCNK12 ENSG00000185352|HS6ST3 ENSG00000186326|RGS9BP ENSG00000197296|C20orf142 ENSG00000204620|Q6ZPC8\_HUMAN ENSG00000081770|NAIP ENSG000000110696|C11orf58 ENSG00000115970|THADA  
ENSG00000125531|C20orf195 ENSG00000132153|DHX30 ENSG00000135329|SLCSA8 ENSG00000139357|C1orf32 ENSG00000147121|ZNF673 ENSG00000148377|IDI2 ENSG00000155099|TMEM55A  
ENSG00000168769|KIAA1546 ENSG00000170571|EMB ENSG00000170927|PKHD1 ENSG00000171405|XAGE5 ENSG00000175387|SMAD2 ENSG00000176714|CCDC121 ENSG00000178636|Q8N7N2\_HUMAN ENSG00000179978|Q59GI6\_HUMAN  
ENSG00000185201|IFITM2 ENSG00000188404|SELL ENSG00000197594|ENPP1 ENSG00000197594|ENPP1  
TTTATCG ENSG00000076864|RAP1GAP ENSG00000089505|CMTM1 ENSG00000101412|E2F1 ENSG00000102302|FGD1 ENSG00000106012|IQCE ENSG00000106615|RHEB ENSG00000111602|TIMELESS  
ENSG00000113763|UNC5A ENSG00000115844|DLX2 ENSG00000125084|WNT1 ENSG00000125821|DTD1 ENSG00000131148|COX4NB ENSG00000131591|C1orf159 ENSG00000135929|CYP27A1 ENSG00000136720|HS6ST1  
ENSG00000143740|C1orf142 ENSG00000153266|FEZF2 ENSG00000162951|LRRTM1 ENSG00000168070|NP\_001032302.1 ENSG00000169218|RSP01 ENSG00000171357|C1orf190 ENSG00000177971|IMP3 ENSG00000178233|C6orf137  
ENSG00000181773|GPR3 ENSG00000184545|DUSP8 ENSG00000187953|NP\_002217.1 ENSG00000197445|C16orf47 ENSG00000204049|Q6ZUH9\_HUMAN ENSG00000204957|Q6ZVQ6\_HUMAN ENSG00000146461|MDH1 ENSG00000084453|SLC01A2  
ENSG00000086475|SEPHS1 ENSG00000107949|BCC1P ENSG00000112303|VNN2 ENSG00000118418|HMGN3 ENSG00000120328|PCDH12 ENSG00000122512|PMS2 ENSG00000125944|HNRPR ENSG00000129071|MBD4  
ENSG00000137814|CEP27 ENSG00000162614|NEXN ENSG00000164114|KLP9 ENSG00000166226|CCT2 ENSG00000172288|CDY1\_HUMAN ENSG00000172352|CDY1 ENSG00000174326|SLC16A11 ENSG00000182004|SNRPE  
ENSG00000189332|Q4G197\_HUMAN  
TTTATGC ENSG00000006042|TMEM98 ENSG00000055955|MUSTN1 ENSG00000067082|KLF6 ENSG00000079393|DUSP13 ENSG00000082458|DLG3 ENSG00000085733|CTTN ENSG00000102755|FLT1 ENSG00000105648|IFI30  
ENSG00000113194|UBXD8 ENSG00000130340|SNX9 ENSG00000134287|ARF3 ENSG00000143575|HAX1 ENSG00000148290|SURF1 ENSG00000159224|GIP ENSG00000159714|ZDHH1 ENSG00000161016|RPL8  
ENSG00000162444|RBP7 ENSG00000171163|ZNF692 ENSG00000177169|ULK1 ENSG00000180739|EDG8 ENSG00000183741|CBX6 ENSG00000185619|PCGF3 ENSG00000188523|NP\_997300.1 ENSG00000197175|Q8TBR1\_HUMAN  
ENSG00000037965|HOXC8 ENSG00000064012|CASP8 ENSG00000100644|HIF1A ENSG00000105866|SP4 ENSG00000109332|UBE2D3 ENSG00000112144|ICK ENSG00000113810|SMC4 ENSG00000115966|ATF2  
ENSG00000119812|FAM98A ENSG00000132639|SNAP25 ENSG00000135643|KCNMB4 ENSG00000138668|HNRPD ENSG00000147180|ZNF711 ENSG00000148688|RPP30 ENSG00000149100|PCID1 ENSG00000149345|U2D3L\_HUMAN  
ENSG00000151025|GPR158 ENSG00000151247|EIF4E ENSG00000152601|MBNL1 ENSG00000152954|NRSN1 ENSG00000154727|GABPA ENSG00000162891|IL20 ENSG00000163738|MTHFD2L ENSG00000169744|LDB2  
ENSG00000174792|C4orf26 ENSG00000176395|CEACAM20 ENSG00000178425|NT5DC1 ENSG00000185057|TAF9 ENSG00000186684|NP\_001001665.2 ENSG00000196227|C20orf177 ENSG00000197006|METTL9 ENSG00000197937|ZNF347  
ENSG00000198087|CD2AP ENSG00000198398|NP\_997199.1  
TTTATGG ENSG00000006114|AP1GBP1 ENSG00000051009|C11orf56 ENSG00000076248|UNG ENSG00000092094|OSGEP ENSG00000092853|CLSPN ENSG00000104499|GML ENSG00000111424|VDR ENSG00000112579|FOXA2  
ENSG00000130035|GALNT8 ENSG00000131355|EMR3 ENSG00000131389|SLC6A6 ENSG00000131914|LIN28 ENSG00000153294|GPR115 ENSG00000154783|FGD5 ENSG00000162267|ITIH3 ENSG00000171345|KRT19  
ENSG00000182606|TRAK1 ENSG00000183621|ZNF438 ENSG00000184811|TUSC5 ENSG00000189077|NP\_114131.1 ENSG00000206508|CD44 ENSG00000062725|APPBP2 ENSG00000082212|ME2 ENSG00000102580|DNAJC3  
ENSG00000104517|EDD1 ENSG00000111247|RAD51AP1 ENSG00000112739|PRPF4B ENSG00000113300|CNOT6 ENSG00000114346|ECT2 ENSG00000116560|SFPO ENSG00000125124|BBS2  
ENSG00000133687|TMTC1 ENSG00000134758|RNF138 ENSG00000162695|SLC30A7 ENSG00000169744|LDB2 ENSG00000174628|IQCK ENSG00000175513|TSGA10IP ENSG00000204628|GNB2L1  
TTTATTA ENSG00000009335|UBE3C ENSG00000058085|LAMC2 ENSG00000088812|ATRN ENSG00000090509|DHPS ENSG00000099308|MAST3 ENSG00000103742|NP\_066013.1 ENSG00000103966|EHD4 ENSG00000114316|USP4  
ENSG00000114737|CISH ENSG00000115956|PLEK ENSG00000116128|BCL9 ENSG00000130402|ACTN4 ENSG00000131149|KIAA0182 ENSG00000132321|IQCA ENSG00000139514|SLC7A1 ENSG00000141696|NO55\_HUMAN  
ENSG00000143398|PTP5K1A ENSG00000163064|EN1 ENSG00000169375|STN3A ENSG00000171160|C10orf83 ENSG00000171793|CTPS ENSG00000176302|FOXO1 ENSG00000176422|SPRYD4 ENSG00000176595|KBTBD11  
ENSG00000177468|OLIG3 ENSG00000183495|EP400 ENSG00000184601|NP\_001008404.1 ENSG00000184787|UBE2G2 ENSG00000188290|HES4 ENSG00000188396|NP\_001013654.1 ENSG00000188428|TXNDC5 ENSG00000196242|OR2C3  
ENSG00000203793|Q6ZR74\_HUMAN ENSG00000204013|Q6XYD6\_HUMAN ENSG00000205434|Q6ZU34\_HUMAN ENSG00000223608|SNAPC1 ENSG00000276554|TPD52 ENSG00000081800|SLC13A1 ENSG00000091664|SLC

ENSG00000100554|ATP6V1D ENSG00000101955|SRPX ENSG00000102781|KATNAL1 ENSG00000104177|MYEF2 ENSG00000107018|RLN1 ENSG00000109586|GALNT7 ENSG00000112584|FAM120B ENSG00000113742|CPEB4  
ENSG00000114062|UBE3A ENSG00000114744|COMMD2 ENSG00000115170|ACVR1 ENSG00000120242|IFNA8 ENSG00000122008|POLK ENSG00000124789|NUP153 ENSG00000132465|IGJ ENSG00000132581|SDF2  
ENSG00000135040|MAK10 ENSG00000136141|LRCH1 ENSG00000137500|CCDC90B ENSG00000137601|NEK1 ENSG00000138448|ITGAV ENSG00000140043|ZADH1 ENSG00000143155|TIPRL ENSG00000143493|INTS7  
ENSG00000144366|GULP1 ENSG00000144827|ABHD10 ENSG00000147488|ST18 ENSG00000150938|CRIM1 ENSG00000152484|USP12 ENSG00000155330|NP\_001001436.1 ENSG00000160188|TSGA2 ENSG00000162624|LHX8  
ENSG00000163104|SMARCA1 ENSG00000164949|GEM ENSG00000165972|CCDC38 ENSG00000167216|KATNAL2 ENSG00000167842|MIS12 ENSG00000168078|PBK ENSG00000168267|PTF1A ENSG00000169429|IL8  
ENSG00000172007|RAB33B ENSG00000174106|LEMD3 ENSG00000176732|PFN4 ENSG00000177683|THAP5 ENSG00000182400|TRAPP6B ENSG00000185068|GTF2H5 ENSG00000185272|RBM11 ENSG00000185873|TMPRSS11B  
ENSG00000187508|Q7Z2R7\_HUMAN ENSG00000198846|TOX ENSG00000203965|NP\_115813.1  
TTTTATTG ENSG00000001617|SEMA3F ENSG00000011677|GABRA3 ENSG00000068024|HDAC4 ENSG000000103184|SEC14L5 ENSG000000111412|C12orf49 ENSG000000116580|GON4L ENSG000000124067|LCAT ENSG000000130956|HABP4  
ENSG000000135451|TROAP ENSG000000135605|TEC ENSG000000165462|PHOX2A ENSG000000168268|NT5DC2 ENSG000000168824|NSG1\_HUMAN ENSG000000169635|HIC2 ENSG000000171224|C10orf35 ENSG000000173244|Q8N8D0\_HUMAN  
ENSG000000173421|CCDC36 ENSG000000176887|SOX11 ENSG000000184659|FOXDL4 ENSG000000185522|C11orf35 ENSG000000197272|IL27 ENSG000000197766|CFD ENSG000000204779|FOXDL5 ENSG000000204828|FX4L4\_HUMAN  
ENSG00000205770|Q8N847\_HUMAN ENSG00000035499|DEPDC1B ENSG00000036257|CUL3 ENSG00000081041|CXCL2 ENSG00000089048|ESF1 ENSG00000092439|TRPM7 ENSG00000102781|KATNAL1 ENSG00000105132|ZNF550  
ENSG00000105967|TFEC ENSG00000107771|KIAA1128 ENSG00000112218|GPR63 ENSG00000118965|WDR35 ENSG00000119396|RAB14 ENSG00000119787|ARL6IP2 ENSG00000121406|ZNF549 ENSG00000125772|GDE5\_HUMAN  
ENSG00000134046|MBD2 ENSG00000140395|WDR61 ENSG00000144554|FANCD2 ENSG00000145332|KLHL8 ENSG00000150527|CTAGE5 ENSG00000153066|TXNDC11 ENSG00000155130|MARCKS ENSG00000163492|NP\_775919.2  
ENSG00000164162|ANAPC10 ENSG00000164347|GFM2 ENSG00000165487|EFHA1 ENSG00000165621|OXGR1 ENSG00000166479|TXNDC10 ENSG00000171634|BPTF ENSG00000171989|LDHAL6B ENSG00000172915|NBEA  
ENSG00000178741|COX5A ENSG00000186231|KLHL32 ENSG00000198176|TFDP1 ENSG00000198814|GK ENSG00000203722|RAET1G ENSG00000204671|IL31  
TTTTATT ENSG00000006075|CCL3 ENSG00000006530|AGK ENSG00000009335|UBE3C ENSG00000064309|CDON ENSG00000068650|ATP11A ENSG00000084764|MAPRE3 ENSG00000092421|SEMA6A ENSG00000095752|IL11  
ENSG00000101452|DHX35 ENSG00000103723|AP3B2 ENSG00000105290|ALPL1 ENSG00000110324|IL10RA ENSG00000112159|MDN1 ENSG00000112715|VEGFA ENSG00000116138|DNAJC16 ENSG00000116237|ICMT  
ENSG00000123243|ITIH5 ENSG00000124785|NRN1 ENSG00000126767|ELK1 ENSG00000129473|BCL2L2 ENSG00000130311|C19orf58 ENSG00000130734|ATG4D ENSG00000132507|EIF5AP1 ENSG00000133069|TMCC2  
ENSG00000134107|BHLHE2 ENSG00000140478|NM\_018652.4 ENSG00000143878|RHOB ENSG00000144655|AXUD1 ENSG00000156030|C14orf43 ENSG00000158859|ADAMT54 ENSG00000161082|BRUNOL5 ENSG00000162981|FAM84A  
ENSG00000163155|LYSMD1 ENSG00000164082|GRM2 ENSG00000164438|TLX3 ENSG00000164651|SP8 ENSG00000164713|BRI3 ENSG00000166090|IL25 ENSG00000166619|BLCAP ENSG00000166924|NP\_775835.2  
ENSG00000167658|EEF2 ENSG00000168621|GDNF ENSG00000168631|DPCR1 ENSG00000176532|PRR15 ENSG00000180598|NP\_057296.1 ENSG00000182667|NTR1\_HUMAN ENSG00000185668|POU3F1 ENSG00000187479|Q7Z7L8\_HUMAN  
ENSG00000197272|IL27 ENSG00000033867|SLC4A7 ENSG00000065883|CCDC2L5 ENSG00000075223|SEMA3C ENSG00000078177|N4BP2\_HUMAN ENSG00000085491|SLC25A24 ENSG00000105996|HOXA2 ENSG00000111530|CAND1  
ENSG00000113209|PCDH85 ENSG00000114978|MOBK1B ENSG00000115239|ASB3 ENSG00000117143|UAP1 ENSG00000119698|KIAA1622 ENSG00000120242|IFNA8 ENSG00000124275|MTRR ENSG00000125207|PIWIL1  
ENSG00000125247|TMTC4 ENSG00000125845|BMP2 ENSG00000127922|SHFM1 ENSG00000134146|ATPBD4 ENSG00000134884|NP\_060481.3 ENSG00000136169|SETDB2 ENSG00000137642|SORL1 ENSG00000147488|ST18  
ENSG00000151746|BCD1 ENSG00000152359|C5orf37 ENSG00000153714|C9orf150 ENSG00000158615|PPP1R15B ENSG00000161813|LARP4 ENSG00000162643|WDR63 ENSG00000163558|PRKCI ENSG00000163738|MTHFD2L  
ENSG00000166479|TXNDC10 ENSG00000171928|FAM18B ENSG00000173559|OBFC2A ENSG00000174718|C12orf35 ENSG00000175455|CCDC14 ENSG00000175893|ZDHHC21 ENSG00000176624|RKHD2 ENSG00000179476|C14orf28  
ENSG00000180694|MEM64 ENSG00000182393|IL29 ENSG00000187098|MITF ENSG00000188732|C7orf46 ENSG00000189184|PCDH18 ENSG00000196428|TSC2D2 ENSG00000197460|Q8WYX1\_HUMAN ENSG00000197498|BXDC1  
ENSG00000198146|ZNF770 ENSG00000205857|Q7Z5D8\_HUMAN  
TTTCACT ENSG000000011451|WIZ ENSG00000084628|FAM77C ENSG00000085831|C1orf34 ENSG00000087274|ADD1 ENSG00000103047|TMCO7 ENSG00000103064|SLC7A6 ENSG00000110721|CHKA ENSG00000114770|ABCC5  
ENSG00000114988|LMAN2L ENSG00000125447|GGA3 ENSG00000130540|SULT4A1 ENSG00000140564|FURIN ENSG00000162651|U2AF1L4 ENSG00000162458|BLIM1 ENSG00000167286|CD3D ENSG00000177885|GRB2  
ENSG00000180875|GREM2 ENSG00000181938|GINS3 ENSG00000188707|C7orf29 ENSG00000188859|FAM78B ENSG00000198471|RTPE2 ENSG00000204240|Q6ZVKO\_HUMAN ENSG00000011638|TMEM159 ENSG00000012504|NR1H4  
ENSG00000085365|SCAMP1 ENSG00000100711|ZFYVE21 ENSG00000104497|SNX16 ENSG00000113595|TRIM23 ENSG00000117322|CR2 ENSG00000126581|BECN1 ENSG00000132664|POLR3F ENSG00000134001|EIF2S1  
ENSG00000137824|FAM82C ENSG00000138109|CYP2C9 ENSG00000141429|GALNT1 ENSG00000143753|DEG1 ENSG00000156234|CXCL13 ENSG00000163875|C1orf149 ENSG00000164167|LSM6 ENSG00000165030|NFIL3  
ENSG00000165841|CYP2C19 ENSG00000168175|C14orf32 ENSG00000174749|C4orf32 ENSG00000177613|CSTF2T ENSG00000179175|C9orf38 ENSG00000185414|MRPL30  
TTTCATG ENSG00000005381|MPO ENSG00000084070|SMAP1L ENSG00000089057|SLC23A2 ENSG00000092529|CAPN3 ENSG00000100364|C12orf9 ENSG00000105991|HOXA1 ENSG00000122863|CHST3 ENSG00000128918|ALDH1A2  
ENSG00000136026|CKAP4 ENSG00000151948|GLT1D1 ENSG00000157895|C12orf43 ENSG00000162804|SNED1 ENSG00000166557|TMED3 ENSG00000167505|Q96NK6\_HUMAN ENSG00000185619|PCGF3 ENSG00000188368|NP\_954979.2  
ENSG00000204319|C4B ENSG00000206528|Q6ZSMO\_HUMAN ENSG00000206561|COLQ ENSG00000006128|TAC1 ENSG00000046604|DSG2 ENSG00000067208|EVI5 ENSG00000101977|MCF2  
ENSG00000104324|NP\_057218.1 ENSG00000107679|PLEKHA1 ENSG00000110318|KIAA1377 ENSG00000114466|IFT57 ENSG00000118200|CAMSAP1L1 ENSG00000118246|FASTKD2 ENSG00000118507|AKAP7 ENSG00000120555|Q5W161\_HUMAN  
ENSG00000122958|VPS26A ENSG00000123594|ATXN3L ENSG00000129083|COPB1 ENSG00000133863|TEX15 ENSG00000142065|ZFP14 ENSG00000154240|CCDC46 ENSG00000156096|UGT2B4 ENSG00000160218|TMEM1  
ENSG00000163359|COL6A3 ENSG00000164109|MAD2L1 ENSG00000165650|PDZD8 ENSG00000176142|TMEM39A ENSG00000181381|Q5H9U9\_HUMAN ENSG00000184388|RBM32B ENSG00000186288|RBM32A ENSG00000196968|FUT11  
ENSG00000198477|SUHW2  
TTTCCAA ENSG00000088832|FKBP1A ENSG00000100285|NEFH ENSG00000105617|LENG1 ENSG00000109758|HGFAC ENSG00000110442|COMMD9 ENSG00000118137|APOA1 ENSG00000118894|FAM86A ENSG00000131043|C20orf4  
ENSG00000140526|ABHD7 ENSG00000160323|ADAMTS13 ENSG00000160539|PPAPDC3 ENSG00000165025|SYK ENSG00000165633|C10orf72 ENSG00000166340|TPP1 ENSG00000166435|XRRAL1 ENSG00000168016|Q8N8K0\_HUMAN  
ENSG00000171017|LRRC8E ENSG00000177096|FAM109B ENSG00000180447|GAS1 ENSG00000180861|C12orf36 ENSG00000182378|PLCXD1 ENSG00000198225|Q5VHV2\_HUMAN ENSG00000198293|Q96HM8\_HUMAN ENSG00000198374|HIST1H2AL  
ENSG00000198742|SMURF1 ENSG00000204312|Q6ZNY8\_HUMAN ENSG00000205268|PDE7A ENSG00000206150|RNASE13 ENSG00000014123|KIAA0776 ENSG00000064995|TAF11 ENSG00000072756|TRNT1 ENSG00000080644|CHRNA3  
ENSG00000096087|GSTA2 ENSG00000101191|DIDO1 ENSG00000101323|HAO1 ENSG00000109220|CHIC2 ENSG00000109270|MAP2K1IP1 ENSG00000111875|ASF1A ENSG000001118520|ARG1 ENSG000001120324|PCDH10  
ENSG00000120733|JMJDB1 ENSG00000138674|SEC31A ENSG00000141456|Q8IZL8-2 ENSG00000149573|EVA1 ENSG00000153363|C1orf97 ENSG00000155011|DKK2 ENSG00000163608|C3orf17 ENSG00000176009|ASCL3  
ENSG00000181562|FAM12A ENSG00000182457|NR\_002323.1 ENSG00000184845|DRD1 ENSG00000186714|CCDC73 ENSG00000187919|GSTA1 ENSG00000189332|Q4G197\_HUMAN ENSG00000205081|XR\_017999.1  
TTTCCAC ENSG0000008853|RHOBTB2 ENSG00000101849|TBL1X ENSG00000108825|AARSD1 ENSG00000115204|MPV17 ENSG00000123388|HOXC11 ENSG00000124107|SLPI ENSG00000124508|BTN2A2 ENSG00000126970|KIAA1166  
ENSG00000130528|HRC ENSG00000132604|TERF2 ENSG00000136811|ODF2 ENSG00000148156|ACT17B ENSG00000151079|KCNAB6 ENSG00000161692|DBF4B ENSG00000166526|ZNF3  
ENSG00000167483|FAM129C ENSG00000168014|NP\_056346.2 ENSG00000175077|RTP1 ENSG00000180357|ZNF609 ENSG00000180824|Q8NAH5\_HUMAN ENSG00000183207|RUVBL2 ENSG00000183633|C14orf132 ENSG00000187483|SERPINA13  
ENSG00000205761|Q6ZR17\_HUMAN ENSG00000205918|Q6A1A2\_HUMAN ENSG0000008952|TLOC1 ENSG00000010219|DYRK4 ENSG00000053747|LAMA3 ENSG00000075711|DLG1 ENSG00000078114|NEBL ENSG00000094914|AAAS  
ENSG00000100316|RPL3 ENSG00000104435|STMN2 ENSG00000112186|CAP2 ENSG00000112812|PRSS16 ENSG00000136611|LRCH1 ENSG00000139971|C14orf37 ENSG00000144891|AGTR1 ENSG00000145715|RASAL1  
ENSG00000151553|KIAA1600 ENSG00000157796|WDR19 ENSG00000164600|NEUROD6 ENSG00000165609|NUDT5 ENSG00000167211|TSR1 ENSG00000168807|SNTB2 ENSG00000169330|K1024\_HUMAN ENSG00000172175|MALT1  
ENSG00000180660|MAB2L1L ENSG00000182187|CRYGB ENSG00000196352|CD55 ENSG00000197851|NP\_997386.1  
TTTCCCA ENSG00000035403|VCL ENSG000000065361|EREB3 ENSG00000083845|RP55 ENSG00000100445|C14orf124 ENSG00000100813|ACIN1 ENSG00000116990|MYCL1 ENSG00000125457|MIF4G ENSG00000139269|INHBE  
ENSG00000139644|TEGT ENSG00000141994|DUS3L ENSG00000146007|ZMAT2 ENSG00000156097|GPR61 ENSG00000158163|DZIP1L ENSG00000158286|C1orf188 ENSG00000162738|VAVL2 ENSG00000166526|ZNF3  
ENSG00000168928|CTRB2 ENSG00000169100|SLC25A6 ENSG00000169118|CSNK1G1 ENSG00000169992|NLGN2 ENSG00000174282|ZBTB74 ENSG00000181781|C19orf19 ENSG00000185721|DRG1 ENSG00000186081|KRT5  
ENSG00000186318|BACE1 ENSG00000189321|NR\_002940.1 ENSG00000205730|NP\_001030013.1 ENSG00000206623|Q6ZRN5\_HUMAN ENSG00000092871|RFFL ENSG00000111490|Q9Y2I9\_HUMAN ENSG00000112964|GHR ENSG00000115616|SLC9A2  
ENSG00000129158|SERGEF ENSG00000129625|REEP5 ENSG00000131791|PRKAB2 ENSG00000132953|XPO4 ENSG00000154305|MIA3 ENSG00000154646|PRSS7 ENSG00000163254|CRYGC ENSG00000165525|SDCCAG1  
ENSG00000171360|KRT38 ENSG00000173988|Q5TBNO\_HUMAN ENSG00000174173|RG9MTD1 ENSG00000176007|C9orf51 ENSG00000178177|LCORL ENSG00000183647|ZNF530 ENSG00000183649|Q8NFX8\_HUMAN ENSG00000186479|RGS7BP  
ENSG00000187994|NP\_940847.1 ENSG00000188162|OTOG ENSG00000196477|Q9UHU4\_HUMAN ENSG00000197817|Q9UHS9\_HUMAN  
TTTCCCG ENSG00000101417|PXMP4 ENSG00000123239|ARHGAP9 ENSG00000132702|HAPLN2 ENSG00000141385|AFG3L2 ENSG00000149925|ALDOA ENSG00000158428|NP\_940961.1 ENSG00000160741|CRTC2 ENSG00000164740|NR\_003034.1  
ENSG00000171443|ZNF524 ENSG00000173933|RBM4 ENSG00000181722|ZBTB20 ENSG00000182342|DSCR9 ENSG00000182749|PAQR7 ENSG00000183443|ARU41\_HUMAN ENSG00000183838|Q96NM2\_HUMAN ENSG00000184599|FAM19A3  
ENSG00000186526|CYP4F8 ENSG00000196943|LTB4R ENSG00000025156|HSF2 ENSG00000077420|APBB1IP ENSG00000108590|MED31 ENSG00000111142|METAP2 ENSG00000115504|EHBP1 ENSG00000116793|PTTF1  
ENSG0000017262|GPR89A ENSG00000119421|NDUFA8 ENSG00000121964|GTDC1 ENSG00000132429|POPPC3 ENSG00000132965|ALOX5AP ENSG00000135604|STX11 ENSG00000150403|TMCO3 ENSG00000159197|KCNE2  
ENSG00000164035|EMCN ENSG00000164070|HSPA4L ENSG00000170175|CHRN1B ENSG00000173141|MRP63 ENSG00000173548|TMEM9B ENSG00000183520|UTP11L ENSG00000188092|GPR89B ENSG00000196290|NIF3L1  
ENSG00000196968|FUT11 ENSG00000204291|COL15A1 ENSG00000204389|HSPA1A  
TTTCCCTG ENSG00000004142|POLDIP2 ENSG00000064886|CHI3L2 ENSG00000089280|FUS ENSG00000099203|TMED1 ENSG00000106144|CASP2 ENSG00000115112|TFCP2L1 ENSG00000116863|ADPHL2  
ENSG00000120055|C10orf95 ENSG00000125861|GFRA4 ENSG00000131845|ZNF304 ENSG00000132906|CASP9 ENSG00000141013|GAS8 ENSG00000141639|MAPK4 ENSG00000143333|RGS16 ENSG00000145022|TCTA  
ENSG00000154764|WNT7A ENSG00000155265|C10orf132 ENSG00000156413|FUT6 ENSG00000158161|EYA3 ENSG00000162396|PARS2 ENSG00000162413|KLHL21 ENSG00000167208|NP\_878274.1 ENSG00000168005|NP\_612480.1  
ENSG00000169188|APEX2 ENSG00000181781|C19orf19 ENSG00000186844|LCE1A ENSG00000187630|DHRS4L2 ENSG00000204892|NP\_001034845.1 ENSG00000205726|ITSN1 ENSG00000205793|Q6ZT42\_HUMAN ENSG00000008294|SPAG9  
ENSG00000040731|CDH10 ENSG00000046653|GPM6B ENSG00000083799|CYLD ENSG00000101310|SEC23B ENSG00000101966|BIRC4 ENSG00000117152|RGS4 ENSG00000119318|RAD23B ENSG00000120662|MTRF1  
ENSG00000124688|MAD2L1BP ENSG00000125827|TXNDC13 ENSG00000131737|KRT34 ENSG00000149651|SPINT4 ENSG00000151792|CTSO ENSG00000152380|NP\_991111.1 ENSG00000154856|APCDD1 ENSG00000159363|ATP13A2  
ENSG00000163637|PRICKLE2 ENSG00000166348|USP54 ENSG00000168267|PTF1A ENSG00000170537|TMC7 ENSG00000170962|PDGFD ENSG00000172840|PDP2\_HUMAN ENSG00000177463|NR2C2 ENSG00000179456|ZNF238  
ENSG00000189067|LITAF ENSG00000198105|ZNF248 ENSG00000198771|RCSD1 ENSG00000206125|Q68DA7\_HUMAN  
TTTCCCTT ENSG00000006740|RICH2\_HUMAN ENSG00000003523|ANGEL1 ENSG00000035403|VCL ENSG00000037637|FBXO42 ENSG00000065308|TRAM2 ENSG00000074590|NUAK1 ENSG00000094796|KRT31 ENSG00000103353|UBFD1  
ENSG00000103423|DNAJA3 ENSG00000106682|EIF4H ENSG00000110395|CBL ENSG00000111335|OAS2 ENSG00000115234|SNX17 ENSG00000128510|CPA4 ENSG00000132846|ZBED3 ENSG00000135622|SEMA4F  
ENSG00000135773|CAPN9 ENSG00000135926|TMBIM1 ENSG00000137124|ALDH1B1 ENSG00000142599|RERE ENSG00000146834|BCDIN3 ENSG00000149483|TMEM138 ENSG00000159217|IGF2BP1 ENSG00000159479|MED8  
ENSG00000160710|ADAR ENSG00000160753|RUSC1 ENSG00000164916|FOXK1 ENSG00000166317|SYNPO2L ENSG00000166436|TRIM66 ENSG00000182768|NGRN ENSG00000183154|Q8NB20\_HUMAN ENSG00000184584|TMEM173  
ENSG00000203871|C6orf164 ENSG00000205033|Q96DJ9\_HUMAN ENSG00000001629|ANKIB1 ENSG00000050730|TNIP3 ENSG00000067533|RRP15 ENSG00000077279|DCX ENSG00000079819|EPB41L2 ENSG00000094914|AAAS  
ENSG00000100987|VXS1 ENSG00000104131|EIF3S1 ENSG00000109618|UGTAP\_HUMAN ENSG00000113319|RASGRF2 ENSG00000114200|BCH2 ENSG00000116171|SCP2 ENSG00000129226|CD68 ENSG00000129696|C8orf41  
ENSG00000132842|AP3B1 ENSG00000134308|YWHAQ ENSG00000138735|PDE5A ENSG00000139318|DUSP6 ENSG00000155100|OTUD6B ENSG00000157224|CLDN12 ENSG00000163389|KTELC1 ENSG00000164117|FBXO8  
ENSG00000164616|FBXL21 ENSG00000164663|USP49 ENSG00000165983|PTER ENSG00000168379|Q8WM95\_HUMAN ENSG00000179021|C3orf38 ENSG00000181381|Q5H9U9\_HUMAN ENSG00000183283|DAZAP2 ENSG00000185742|NP\_997528.1  
ENSG00000186700|Q8N873\_HUMAN ENSG00000204706|Q6ZV95\_HUMAN  
TTTCCGAC ENSG00000004776|HSPB6 ENSG00000101421|CHMP4B ENSG00000101605|MYOM1 ENSG00000105972|C7orf20 ENSG00000136026|CKAP4 ENSG00000140479|PCSK6 ENSG00000142208|AKT1 ENSG00000143547|Q5VUQ9\_HUMAN  
ENSG00000143761|ARF1 ENSG00000170458|CD14 ENSG00000174527|MYO1H ENSG00000177370|TIMM22 ENSG00000177468|OLIG3 ENSG00000178709|CLDN9 ENSG00000179523|Q8TAS2\_HUMAN ENSG00000181035|SLC25A42  
ENSG00000183242|WIT1 ENSG00000185155|MIXL1 ENSG00000185624|PABO ENSG00000185518|HIST1H4E ENSG00000203774|Q6ZUA8\_HUMAN ENSG00000204226|Q6ZNS0\_HUMAN ENSG00000204860|Q9orf122  
ENSG00000039068|CDH1 ENSG00000048462|TNFRSF17 ENSG00000049449|RCN1 ENSG00000083828|ZNF586 ENSG00000089094|FBXL10 ENSG00000105880|DLX5 ENSG00000107485|GATA3 ENSG00000109832|DDX25  
ENSG00000112378|PERP ENSG00000115850|LCT ENSG00000119537|FVT1 ENSG0

|         |                                |                                |                             |                              |                              |                              |                              |                              |
|---------|--------------------------------|--------------------------------|-----------------------------|------------------------------|------------------------------|------------------------------|------------------------------|------------------------------|
|         | ENSG00000159596 TMEM69         | ENSG00000163826 LUZPPP1        | ENSG00000164879 CA3         | ENSG00000169554 ZEB2         | ENSG00000172716 SLFN11       | ENSG00000172733 PURG         | ENSG00000173917 HOXB2        | ENSG00000175768 C9orf105     |
| TTTCGTT | ENSG00000178105 DDX10          | ENSG00000178403 NEUROG2        | ENSG00000180869 C1orf180    | ENSG00000196968 FUT11        | ENSG00000197776 KLHDC1       | ENSG00000198918 RPL39        |                              |                              |
|         | ENSG00000050820 BCAR1          | ENSG00000088812 ATRN           | ENSG00000103024 NME3        | ENSG00000104299 INT9_HUMAN   | ENSG00000112679 DUSP22       | ENSG00000116014 KISS1R       | ENSG00000135596 MICAL1       | ENSG00000140577 CRTC3        |
|         | ENSG00000140612 SEC11A         | ENSG00000146828 SLC12A9        | ENSG00000153944 MSI2        | ENSG00000163064 EN1          | ENSG00000166869 CHP2_HUMAN   | ENSG00000168259 DNAJC7       | ENSG00000170089 THOC3        | ENSG00000170145 SNFLK2       |
|         | ENSG00000170486 KRT72          | ENSG00000172530 BANP           | ENSG00000173992 CCS         | ENSG00000176194 CIDEA        | ENSG00000185475 NP_955369.1  | ENSG00000196136 SERPINA3     | ENSG00000205792 A4D193_HUMAN | ENSG00000000419 DPM1         |
|         | ENSG00000075292 ZNF638         | ENSG00000079332 SAR1A          | ENSG00000088782 DEFB127     | ENSG00000100664 EIF5         | ENSG00000104643 MTMR9        | ENSG00000104760 FGL1         | ENSG00000114315 HES1         | ENSG00000120885 CLU          |
|         | ENSG00000121644 C1orf121       | ENSG00000123179 EBPL           | ENSG00000125351 UPF3B       | ENSG00000135047 CTSLL1       | ENSG00000135829 DHX9         | ENSG00000143278 F13B         | ENSG00000153140 CETN3        | ENSG00000156675 RAB11FIP1    |
|         | ENSG00000160199 PKNOX1         | ENSG00000162631 NTNG1          | ENSG00000163159 VPS72       | ENSG00000163631 ALB          | ENSG00000165434 PGM2L1       | ENSG00000165572 KBTBD6       | ENSG00000166923 GREM1        | ENSG00000168263 KCNV2        |
| TTTCTAA | ENSG00000170315 UBIQ_HUMAN     | ENSG00000173655 Q5T909_HUMAN   | ENSG00000180210 F2          | ENSG00000189251 Q8WYN8_HUMAN | ENSG00000181918 LRRRC8B      | ENSG00000204388 HSPA1B       |                              |                              |
|         | ENSG00000034063 UHRF1          | ENSG00000047849 MAP4           | ENSG00000084207 GSTP1       | ENSG00000099194 SCD          | ENSG00000099204 ABLIM1       | ENSG00000101665 SMAD7        | ENSG00000114841 DNAH1        | ENSG00000116809 ZBTB17       |
|         | ENSG00000139531 SUOX           | ENSG00000146047 HIST1H2BA      | ENSG00000154229 PRKCA       | ENSG00000154783 FGD5         | ENSG00000163435 ELF3         | ENSG00000163879 DNAL1        | ENSG00000171747 LGALS4       | ENSG00000177551 NHLH2        |
|         | ENSG00000178764 ZHX2           | ENSG00000179085 DPM3           | ENSG00000180210 F2          | ENSG00000180304 OAZ2         | ENSG00000181918 Q8N9J9_HUMAN | ENSG00000188042 ARL4C        | ENSG00000196526 AFAP1        | ENSG00000198369 SPRED2       |
|         | ENSG00000198574 SH2D1B         | ENSG00000205726 ITSN1          | ENSG00000069702 TGFBR3      | ENSG00000112769 LAMA4        | ENSG00000133302 ANKRD32      | ENSG00000134086 VHL          | ENSG00000137449 CPEB2        | ENSG00000138190 EXOC6        |
|         | ENSG00000139780 NP_001010977.1 | ENSG00000150045 KLRFL1         | ENSG00000150625 GPM6A       | ENSG00000150676 CCDC83       | ENSG00000151239 TWF1         | ENSG00000153975 C6orf113     | ENSG00000157214 STEAP2       | ENSG00000162618 ELTD1        |
|         | ENSG00000163507 K1AA1524       | ENSG00000167601 AXL            | ENSG00000168291 PDHB        | ENSG00000170791 CHCHD7       | ENSG00000170917 NUDT6        | ENSG00000171566 PLRG1        | ENSG00000172673 C6orf190     | ENSG00000174749 C4orf32      |
| TTTCTAC | ENSG00000181191 PJA1           | ENSG00000182645 C10orf96       | ENSG00000183091 NEB         | ENSG00000183789 Q96MJ2_HUMAN | ENSG00000188641 DPYD         | ENSG00000198586 TLK1         | ENSG00000198885 NP_848590.3  |                              |
|         | ENSG00000066659 LGALS14        | ENSG00000090554 FLT3LG         | ENSG00000090975 PITPNM2     | ENSG00000102981 PAR6A        | ENSG00000105198 LGALS13      | ENSG00000105376 ICAM5        | ENSG00000108829 LRRCS9       | ENSG00000109132 PHOX2B       |
|         | ENSG00000112079 STK38          | ENSG00000124006 OBSL1          | ENSG00000124160 NCOA5       | ENSG00000125652 ALKBH7       | ENSG00000127957 PMS2L3       | ENSG00000132792 CTNBB1       | ENSG00000133065 SLC41A1      | ENSG00000139445 FOXN4        |
|         | ENSG00000141568 FOXK2          | ENSG00000143845 ETNK2          | ENSG00000149428 HYOU1       | ENSG00000161791 FNNL3        | ENSG00000162415 ZSMW5        | ENSG00000163083 INHBB        | ENSG00000163699 Q9H7Y4_HUMAN | ENSG00000173171 MTX1         |
|         | ENSG00000176422 SPRYD4         | ENSG00000184792 OSBP2          | ENSG00000196743 GM2A        | ENSG00000198915 RASGEF1A     | ENSG00000205485 Q6DCA4_HUMAN | ENSG00000014919 COX15        | ENSG00000023697 DERA         | ENSG00000101958 GLRA2        |
|         | ENSG00000102362 SYTL4          | ENSG00000105849 TWISTNB        | ENSG00000108578 GOSR1       | ENSG00000117519 CNN3         | ENSG00000117862 TXNDC12      | ENSG00000119912 IDE          | ENSG00000120254 MTHFD1L      | ENSG00000131007 TTY9A        |
|         | ENSG00000131009 TTY9A_HUMAN    | ENSG00000137038 C9orf123       | ENSG00000144061 NPHP1       | ENSG00000145332 KLHL8        | ENSG00000147364 FBXO25       | ENSG00000163864 NMNAT3       | ENSG00000164099 PRSS12       | ENSG00000165028 NIPSNAP3B    |
|         | ENSG00000166575 TMEM135        | ENSG00000170892 TSEN34         | ENSG00000174010 KLHL15      | ENSG00000183649 Q8NFX8_HUMAN | ENSG00000185201 IFITM2       | ENSG00000186031 Q6ZSY1_HUMAN | ENSG00000187266 EPOR         | ENSG00000189056 RELN         |
| TTTCTAT | ENSG00000198205 ZXDA           |                                |                             |                              |                              |                              |                              |                              |
|         | ENSG00000068078 FGFR3          | ENSG00000075035 WSCD2          | ENSG00000099204 ABLIM1      | ENSG00000100100 PIK3IP1      | ENSG00000105202 FBL          | ENSG00000113552 GNPDA1       | ENSG00000113739 STC2         | ENSG00000116478 HDAC1        |
|         | ENSG00000118971 CNCD2          | ENSG00000125977 EIF2S2         | ENSG00000132286 FXR1        | ENSG00000135365 PHF21A       | ENSG00000140807 NKD1         | ENSG00000141179 PCTP         | ENSG00000141431 Q6ZMX6_HUMAN | ENSG00000143466 IKBKE        |
|         | ENSG00000144560 VGLL4          | ENSG00000153298 C6orf54        | ENSG00000164010 ERMAP       | ENSG00000169991 Q5TF58_HUMAN | ENSG00000182154 MRPL41       | ENSG00000182346 DAOA         | ENSG00000185436 IL28RA       | ENSG00000196070 Q6ZVY7_HUMAN |
|         | ENSG00000196460 Q6ZNB4_HUMAN   | ENSG00000197238 HIST1H4J       | ENSG00000197296 C20orf142   | ENSG00000198407 Q8NCZ5_HUMAN | ENSG00000003436 TFPI         | ENSG00000076650 GPATCH1      | ENSG00000081148 IMP2         | ENSG00000082153 BZW1         |
|         | ENSG00000087916 SLC6A14        | ENSG00000104231 ZFAND1         | ENSG00000104327 CALB1       | ENSG00000109158 GABRA4       | ENSG00000113163 COL4A3BP     | ENSG00000113212 PCDH7        | ENSG00000113946 CLDN16       | ENSG00000115365 LANCL1       |
|         | ENSG00000115419 GLS            | ENSG00000116251 RPL22          | ENSG00000120992 LYPLA1      | ENSG00000134025 NMN_022659.2 | ENSG00000134049 IER3IP1      | ENSG00000138641 HERC3        | ENSG00000144048 DUSP11       | ENSG00000144597 EAF1         |
|         | ENSG00000145740 SLC30A5        | ENSG00000147592 LACTB2         | ENSG00000150768 DLAT        | ENSG00000151458 ANKRD50      | ENSG00000151876 FBXO4        | ENSG00000154080 CHST9        | ENSG00000173226 IQCB1        | ENSG00000174016 FAM46D       |
| TTTCTGG | ENSG00000183496 RKHD3          | ENSG00000185261 C5orf36        | ENSG00000188730 VWC2        | ENSG00000198168 SVIP_HUMAN   | ENSG00000204406 MBD5         |                              |                              |                              |
|         | ENSG00000099830 POMT2          | ENSG00000064205 WISP2          | ENSG00000075388 FGF4        | ENSG00000075426 POSL2        | ENSG00000090661 LASSA4       | ENSG00000100030 MAPK1        | ENSG00000108179 PPIF         | ENSG00000111752 PHC1         |
|         | ENSG00000115507 OTX1           | ENSG00000117148 ACTL8          | ENSG00000122861 PLAU        | ENSG00000124226 ZNF313       | ENSG00000124574 ABCC10       | ENSG000000127412 TRPV5       | ENSG00000136828 RALGPS1      | ENSG00000143222 UFC1         |
|         | ENSG00000144043 TEX261         | ENSG00000144647 C3orf39        | ENSG00000151176 NP_775813.1 | ENSG00000172460 Q8IVY7_HUMAN | ENSG00000174951 FUT1         | ENSG00000178921 PFAS         | ENSG00000179241 LDLRAD3      | ENSG00000180884 ZNF792       |
|         | ENSG00000180992 MRPL14         | ENSG00000184935 Q6AI01_HUMAN   | ENSG00000185090 MANEAL      | ENSG00000196432 Q9H5F0_HUMAN | ENSG00000211445 GPX3         | ENSG00000013364 MVP          | ENSG00000024048 UBR2         | ENSG00000084444 K1AA1467     |
|         | ENSG00000104164 PLDN           | ENSG00000115008 TL1A           | ENSG00000122448 RWD33       | ENSG00000128656 CHN1         | ENSG00000136141 LRCH1        | ENSG00000156256 USP16        | ENSG00000162864 NP_775920.1  | ENSG00000163554 SPTA1        |
|         | ENSG00000165264 NDUFB6         | ENSG00000174574 C1orf108       | ENSG00000182187 CRYGB       | ENSG00000184845 DRD1         | ENSG00000204611 ZNF616       | ENSG00000204688 ORZ2H1       | ENSG00000205544 C17orf61     | ENSG00000205769 Q6ZUR9_HUMAN |
| TTTGAAA | ENSG00000047644 WWC3           | ENSG00000063169 GLTSCR1        | ENSG00000072062 PRKACA      | ENSG00000089154 GCN1L1       | ENSG00000103241 FOXF1        | ENSG00000105428 ZNRF4        | ENSG00000105997 HOXA3        | ENSG00000106635 BCL7B        |
|         | ENSG00000112149 CD83           | ENSG00000114113 RBP2           | ENSG00000118257 NRP2        | ENSG00000119227 PIGZ         | ENSG00000123643 SLC36A1      | ENSG00000130703 OSBP12       | ENSG00000136710 CCDC115      | ENSG00000136731 UGCG1        |
|         | ENSG00000136854 STXBP1         | ENSG00000138175 ARL3           | ENSG00000143061 IGSF3       | ENSG00000144231 POLR2D       | ENSG00000145949 SGR85_HUMAN  | ENSG00000147099 HDAC8        | ENSG00000148200 NR6A1        | ENSG00000157087 ATP2B2       |
|         | ENSG00000162174 ASRGL1         | ENSG00000163884 KLF15          | ENSG00000163898 LIPH        | ENSG00000164266 SPINK1       | ENSG00000166833 NAV2         | ENSG00000168397 ATG4B        | ENSG00000171621 SPSB1        | ENSG00000175564 UCP3         |
|         | ENSG00000176718 C5orf26        | ENSG00000181856 SLC2A4         | ENSG00000185481 C21orf129   | ENSG00000196526 AFAP1        | ENSG00000198879 SFMBT2       | ENSG00000205181 QOVFZ2_HUMAN | ENSG00000043093 DCUN1D1      | ENSG00000061676 NCKAP1       |
|         | ENSG00000088123 BCKDHB         | ENSG00000085491 SLC25A24       | ENSG00000088386 SLC15A1     | ENSG00000103642 LACTB        | ENSG00000111554 MDM1         | ENSG00000111897 SERINC1      | ENSG00000112584 FAM120B      | ENSG00000116717 GADD45A      |
|         | ENSG00000120992 LYPLA1         | ENSG00000121989 ACVR2A         | ENSG00000122958 VPS26A      | ENSG00000126814 TRMT5        | ENSG00000130741 EIF2S3       | ENSG00000131725 WDR44        | ENSG00000133135 RNFI28       | ENSG00000133789 SWP70_HUMAN  |
|         | ENSG00000133863 TEX15          | ENSG00000135220 UGT2A3         | ENSG00000137274 BPHL        | ENSG00000137504 CREBZF       | ENSG00000138448 ITGAV        | ENSG00000139517 LNX2         | ENSG00000139921 TXNDC1       | ENSG00000140057 AK7          |
|         | ENSG00000144746 ARL6IP5        | ENSG00000146242 TPBG           | ENSG00000151287 C13orf27    | ENSG00000151806 GUF1         | ENSG00000153064 BANK1        | ENSG00000153237 NP_620158.2  | ENSG00000156504 FAM122B      | ENSG00000163534 FCRL1        |
|         | ENSG00000168229 PTGDR          | ENSG00000175087 PDIK1L         | ENSG00000175895 PLEKHF2     | ENSG00000178966 RMI1         | ENSG00000180660 MAB21L1      | ENSG00000183833 C3orf15      | ENSG00000185261 C5orf36      | ENSG00000188313 PLSCR1       |
|         | ENSG00000189369 GSP2           | ENSG00000197275 RAD54B         | ENSG00000204116 CHIC1       |                              |                              |                              |                              |                              |
| TTTGAA  | ENSG00000051000 DXH33          | ENSG00000066638 TBXA2R         | ENSG00000064655 EYA2        | ENSG00000092964 DPYSL2       | ENSG00000100014 SPECC1L      | ENSG00000105559 PLEKHA4      | ENSG00000105808 RASA4        | ENSG00000111249 CUTL2        |
|         | ENSG00000125409 TEKT3          | ENSG00000127526 SLC35E1        | ENSG00000127564 PKMYT1      | ENSG00000133424 LARGE        | ENSG00000134668 SPOCD1       | ENSG00000138166 DUSP5        | ENSG00000144560 VGLL4        | ENSG00000151360 ALLC         |
|         | ENSG00000152042 NBPF8          | ENSG00000158525 CPA5           | ENSG00000161640 SIGLEC11    | ENSG00000172534 HCPC1        | ENSG00000172939 OXSR1        | ENSG00000178789 CD300LB      | ENSG00000189037 DUSP21       | ENSG00000196090 PTPRT        |
|         | ENSG00000198768 APCDD1L        | ENSG00000005059 LITB           | ENSG00000005059 CCDC109B    | ENSG00000025156 HSF2         | ENSG00000100523 DDHD1        | ENSG00000109184 DCUN1D4      | ENSG00000111860 C6orf204     | ENSG00000113083 LOX          |
|         | ENSG00000125571 IL1F7          | ENSG00000129691 ASH2L1         | ENSG00000133627 ACTR3B      | ENSG00000151687 ANKAR        | ENSG00000154217 PITPNC1      | ENSG00000155096 AZIN1        | ENSG00000161980 POLR3K       | ENSG00000164099 PRSS12       |
| TTTGAAG | ENSG00000165195 PIGA           | ENSG00000172262 ZNF131         | ENSG00000176974 SHMT1       | ENSG00000178741 COX5A        |                              |                              |                              |                              |
|         | ENSG00000052835 ZNF785         | ENSG00000089057 SLC23A2        | ENSG00000092607 TBX15       | ENSG00000092847 EIF2C1       | ENSG00000106236 NPTX2        | ENSG00000107130 FREQ         | ENSG00000113552 GNPDA1       | ENSG00000115602 IL1RL1       |
|         | ENSG00000117899 MESDC2         | ENSG00000124145 SDC4           | ENSG00000134243 SORT1       | ENSG00000140263 SORD         | ENSG00000141744 PNMT         | ENSG00000145016 Q96CK5_HUMAN | ENSG00000146670 CDCA5        | ENSG00000152291 TGOLN2       |
|         | ENSG00000157330 C1orf158       | ENSG00000158516 CPA2           | ENSG00000162951 LRRTM1      | ENSG00000167323 STIM1        | ENSG00000168505 GBX2         | ENSG00000180424 DEFB123      | ENSG00000188859 FAM78B       | ENSG00000198219 Q96N05_HUMAN |
|         | ENSG00000204410 MSH5           | ENSG00000205103 HPR            | ENSG00000064726 BTBD1       | ENSG00000065833 ME1          | ENSG00000077147 TM9SF3       | ENSG00000090487 SPG21        | ENSG00000094975 C1orf9       | ENSG00000099725 PRKY         |
|         | ENSG00000109181 UGT2B10        | ENSG00000109832 DDX25          | ENSG00000111605 CPSF6       | ENSG00000111832 RWDD1        | ENSG00000118985 ELL2         | ENSG00000119725 ZNF410       | ENSG00000119888 TACSTD1      | ENSG00000122068 FYT2D1       |
|         | ENSG00000125304 MYSF2          | ENSG00000133107 TRPC4          | ENSG00000136891 TXL10       | ENSG00000137492 PRKRIR       | ENSG00000141446 ESCO1        | ENSG00000142875 PKRACB       | ENSG00000143013 LMO4         | ENSG00000145375 SPATA5       |
|         | ENSG00000145907 G3BP1          | ENSG00000156504 FAM122B        | ENSG00000156508 EEF1A1      | ENSG00000158125 XDH          | ENSG00000163735 CXCL5        | ENSG00000164176 EDIL3        | ENSG00000164283 ESM1         | ENSG00000164398 ACSL6        |
|         | ENSG00000166157 TPTE           | ENSG00000166822 TMEM170        | ENSG00000168152 THAP9       | ENSG00000168384 HLA-DPA1     | ENSG00000171659 GPR34        | ENSG00000173542 MOBK1L1A     | ENSG00000174485 DENND4A      | ENSG00000185275 CD24         |
| TTTGAAT | ENSG00000065882 TBC1D1         | ENSG00000067082 KLF6           | ENSG00000099204 ABLIM1      | ENSG00000099954 CECR2        | ENSG00000101890 GUCY2F       | ENSG00000104490 NCALD        | ENSG00000110195 FOLR1        | ENSG00000110448 CD5          |
|         | ENSG00000112562 SMOC2          | ENSG00000114988 LMBN2L         | ENSG00000120451 SNX19       | ENSG00000120875 DUSP4        | ENSG00000125633 CCDC93       | ENSG00000125977 EIF2S2       | ENSG00000126561 STAT5A       | ENSG00000130598 TNNI2        |
|         | ENSG00000151498 ACAD8          | ENSG00000155858 LSM11          | ENSG00000160714 UBE2Q1      | ENSG00000166073 GPR176       | ENSG00000166228 PCBD1        | ENSG00000173011 Q86TJ2_HUMAN | ENSG00000175824 XR_017847.1  | ENSG00000182372 C8orf61      |
|         | ENSG00000182698 NM_001007089   | ENSG00000184924 NP_001013685.1 | ENSG00000188536 HBA2        | ENSG00000205033 Q96DJ9_HUMAN | ENSG00000                    |                              |                              |                              |

|                              |                                |                              |                              |                                |                                |                               |                              |                              |                              |
|------------------------------|--------------------------------|------------------------------|------------------------------|--------------------------------|--------------------------------|-------------------------------|------------------------------|------------------------------|------------------------------|
| ENSG00000156876 SASS6        | ENSG00000157538 DSCR3          | ENSG00000164253 WDR41        | ENSG00000165209 STRBP        | ENSG00000174326 SLC16A11       | ENSG00000179300 ZCCHC5         | ENSG00000183649 Q8NFX8_HUMAN  | ENSG00000186432 KPNA4        |                              |                              |
| ENSG00000187325 TAF9B        | ENSG00000188659 NP_001008227.1 | ENSG00000205769 Q6ZUR9_HUMAN | ENSG00000110614 CASP2        | ENSG00000110395 CBL            | ENSG00000111087 GLI1           | ENSG00000112079 STK38         | ENSG00000113194 UBXD8        | ENSG00000121775 TMEM39B      |                              |
| ENSG00000125409 TEKT3        | ENSG00000125976 RBM12          | ENSG00000126767 ELK1         | ENSG00000126767 ELK1         | ENSG00000138780 GSTCD          | ENSG00000140526 ABHD2          | ENSG00000148408 CACNA1B       | ENSG00000149269 PAK1         | ENSG00000151348 EXT2         |                              |
| ENSG00000152953 STK32B       | ENSG00000154978 NM_030796.3    | ENSG00000160219 GAB3         | ENSG00000162191 SAKS1_HUMAN  | ENSG00000162191 SAKS1_HUMAN    | ENSG00000162408 NOL9           | ENSG00000173821 RNF213        | ENSG00000176887 SOX11        | ENSG00000178110 Q8N9G9_HUMAN |                              |
| ENSG00000184164 CRELD2       | ENSG00000203814 HIST2H2BF      | ENSG00000004799 PKD4         | ENSG00000008405 CRY1         | ENSG00000008405 CRY1           | ENSG00000008952 TLOC1          | ENSG000000047597 XK           | ENSG000000056586 RC3H2       | ENSG00000102218 RP2          |                              |
| ENSG00000105929 ATP6V0A4     | ENSG00000106993 CDC37L1        | ENSG00000113658 SMAD5        | ENSG00000116791 CRY2         | ENSG00000120159 C9orf82        | ENSG00000122557 HERPUD2        | ENSG00000128534 LSM8          | ENSG00000128590 DNAJB9       | ENSG00000134700 HOOK1        |                              |
| ENSG00000134700 HOOK1        | ENSG00000151475 SLC25A31       | ENSG00000152219 C11orf46     | ENSG00000154188 ANGPT1       | ENSG00000154529 CNTNAP3B       | ENSG00000155393 HEATR3         | ENSG00000157578 C21orf13      | ENSG00000160980 ZNF394       | ENSG00000164951 PPM2C        |                              |
| ENSG00000164951 PPM2C        | ENSG00000165118 C9orf64        | ENSG00000165832 TRUB1        | ENSG00000165983 PTER         | ENSG00000170961 HAS2           | ENSG00000173046 NP_207376      | ENSG00000174749 C4orf32       | ENSG00000176177 ENTH1D       | ENSG00000185020 Q4VXF0_HUMAN |                              |
| ENSG00000185020 Q4VXF0_HUMAN | ENSG00000187601 MAGEH1         | ENSG00000198799 LRIG2        | ENSG00000205299 CKLF         | ENSG00000205707 LYRM5          | ENSG00000103196 CRISPLD2       | ENSG00000107562 CXCL12        | ENSG00000133195 SLC39A11     | ENSG000000043591 ADRB1       |                              |
| ENSG00000005007 UPF1         | ENSG00000044090 CUL7           | ENSG000000095303 PTGS1       | ENSG00000101193 C20orf11     | ENSG00000102755 FLT1           | ENSG00000143940 Q6ZMW3_HUMAN   | ENSG00000148396 KIAA0310      | ENSG00000151692 RNF144       | ENSG00000152475 Q96EG3_HUMAN |                              |
| ENSG00000136504 MYST2        | ENSG00000136731 UGCG1          | ENSG00000138942 RNF185       | ENSG00000143940 Q6ZMW3_HUMAN | ENSG00000143940 Q6ZMW3_HUMAN   | ENSG00000175376 NP_115701.2    | ENSG00000177741 Q96BN7_HUMAN  | ENSG00000186577 C6orf1       | ENSG00000188315 C3orf62      | ENSG00000198879 SFBMT2       |
| ENSG00000164061 BSN          | ENSG00000164896 FASTK          | ENSG00000174851 YIF1A        | ENSG00000174851 YIF1A        | ENSG00000175376 NP_115701.2    | ENSG00000048828 FAM120A        | ENSG00000058091 PFTK1         | ENSG00000064703 DDX20        | ENSG00000072042 RDH11        | ENSG00000086065 CHMP5        |
| ENSG00000205159 Q6ZVC9_HUMAN | ENSG00000205726 ITSN1          | ENSG00000205792 A4D193_HUMAN | ENSG00000048828 FAM120A      | ENSG00000058091 PFTK1          | ENSG00000113638 TTC33          | ENSG00000137428 RAP2C         | ENSG00000130066 SAT1         | ENSG00000131931 THAP1        | ENSG00000131966 ACTR10       |
| ENSG00000102781 KATNAL1      | ENSG00000108443 RPS6KB1        | ENSG00000112996 MRPS30       | ENSG00000113387 SUB1         | ENSG00000113638 TTC33          | ENSG00000123714 FAM8A1         | ENSG00000137509 PRCP          | ENSG00000138071 ACTR2        | ENSG00000139233 C12orf31     | ENSG00000145287 PLAC8        |
| ENSG00000131966 ACTR10       | ENSG00000132963 POMP           | ENSG00000134717 BTF3L4       | ENSG00000135549 PKIB         | ENSG00000135913 USP37          | ENSG00000165105 RASEF          | ENSG00000165288 BRWD3         | ENSG00000172673 C6orf190     | ENSG00000178053 MLF1         | ENSG00000139233 C12orf31     |
| ENSG00000139233 C12orf31     | ENSG00000161970 RPL26          | ENSG00000161970 RPL26        | ENSG00000163421 PROK2        | ENSG00000165105 RASEF          | ENSG00000108292 MLLT6          | ENSG00000123992 DNPEP         | ENSG00000124107 SLPI         | ENSG00000130600 H19          | ENSG00000100994 PYGB         |
| ENSG00000206125 Q68DA7_HUMAN | ENSG00000100994 PYGB           | ENSG00000103200 NME4         | ENSG00000106348 IMPDH1       | ENSG00000108292 MLLT6          | ENSG00000139200 C12orf53       | ENSG00000152049 KCNE4         | ENSG00000164309 CMYA5        | ENSG00000164896 FASTK        | ENSG00000135930 EIF4E2       |
| TTTGAC                       | ENSG00000132155 RAF1           | ENSG00000136485 WDR68        | ENSG00000137843 PAK6         | ENSG00000137843 PAK6           | ENSG00000174282 ZBTB4          | ENSG00000175115 PACS1         | ENSG00000175264 CHST1        | ENSG00000184068 Q8N8F0_HUMAN | ENSG00000168758 SEMA4C       |
| ENSG00000167483 FAM129C      | ENSG00000168758 SEMA4C         | ENSG00000169057 MECP2        | ENSG00000174282 ZBTB4        | ENSG00000175115 PACS1          | ENSG00000015171 ZMYND11        | ENSG00000068366 ACSL4         | ENSG00000069764 PLA2G10      | ENSG00000081479 LRP2         | ENSG00000187479 Q7Z7L8_HUMAN |
| ENSG00000185112 FAM43A       | ENSG00000187479 Q7Z7L8_HUMAN   | ENSG00000205033 Q96J9_HUMAN  | ENSG00000015171 ZMYND11      | ENSG00000068366 ACSL4          | ENSG00000111241 PGF6           | ENSG00000114790 NP_056410.2   | ENSG00000117601 SERPINC1     | ENSG00000123700 KCNJ2        | ENSG00000100784 RPS6KA5      |
| ENSG00000100784 RPS6KA5      | ENSG00000101773 RBBP8          | ENSG00000105856 HBP1         | ENSG00000111241 PGF6         | ENSG00000114790 NP_056410.2    | ENSG00000135873 CEP350         | ENSG00000138593 K0256_HUMAN   | ENSG00000140153 WDR20        | ENSG00000145860 RNF145       | ENSG00000107733 C14orf118    |
| ENSG00000129824 RPS4Y1       | ENSG00000130413 STK33          | ENSG00000134769 DTNA         | ENSG00000135873 CEP350       | ENSG00000138593 K0256_HUMAN    | ENSG00000164386 NP_997378.2    | ENSG00000164386 NP_997378.2   | ENSG00000164386 NP_997378.2  | ENSG00000164386 NP_997378.2  | ENSG00000107733 C14orf118    |
| ENSG00000154359 LONRF1       | ENSG00000162695 SLC30A7        | ENSG00000163624 CDS1         | ENSG00000163624 CDS1         | ENSG00000164386 NP_997378.2    | ENSG00000006069 CTDP1          | ENSG00000085063 CDS9          | ENSG00000095059 DHPS         | ENSG00000101146 RAE1         | ENSG00000006114 AP1GBP1      |
| TTTGAC                       | ENSG00000006114 AP1GBP1        | ENSG00000085063 CDS9         | ENSG00000095059 DHPS         | ENSG00000101146 RAE1           | ENSG00000106003 LFNG           | ENSG00000111245 MYL2          | ENSG00000121104 FAM117A      | ENSG00000130711 PRDM12       | ENSG00000006069 CTDP1        |
| ENSG00000130711 PRDM12       | ENSG00000131849 ZNF132         | ENSG00000135312 HTR1B        | ENSG00000162552 WNT4         | ENSG00000163013 FBXO41         | ENSG00000164087 WDR51A         | ENSG00000168484 SFTPC         | ENSG00000172269 DPAGT1       | ENSG00000177354 C10orf71     | ENSG00000131849 ZNF132       |
| ENSG00000177354 C10orf71     | ENSG00000180509 KCNK1          | ENSG00000183633 C14orf132    | ENSG00000198960 ARMCX6       | ENSG00000005302 MSL3L1         | ENSG00000048991 R3HDM1         | ENSG00000058600 POLR3E        | ENSG00000088766 CRLS1        | ENSG00000185112 FAM43A       | ENSG00000180509 KCNK1        |
| ENSG00000088916 C14orf118    | ENSG00000100316 RPL3           | ENSG00000102753 KPN4         | ENSG00000111224 PARP11       | ENSG00000112541 PDE10A         | ENSG00000115233 PSMD14         | ENSG00000116288 PARK7         | ENSG00000120563 LYZL1        | ENSG00000125691 RPL23        | ENSG00000100316 RPL3         |
| ENSG00000125691 RPL23        | ENSG00000130449 ZSWIM6         | ENSG00000132718 SYT11        | ENSG00000137776 SLTM         | ENSG00000144824 PLCXD2         | ENSG00000151033 LYZL2          | ENSG00000154380 ENAH          | ENSG00000156011 PSD3         | ENSG00000161573 CCL16        | ENSG00000130449 ZSWIM6       |
| ENSG00000161573 CCL16        | ENSG00000162378 ZYGI1B         | ENSG00000163377 FAM19A4      | ENSG00000180190 C8orf42      | ENSG00000185261 C5orf36        | ENSG00000186869 NP_001038940.1 | ENSG00000189292 NP_00102919.1 | ENSG00000137106 GRHR         | ENSG00000140983 RHOT2        | ENSG00000162378 ZYGI1B       |
| ENSG000000064545 TMEM161A    | ENSG00000103653 CSK            | ENSG00000121413 ZSCAN18      | ENSG00000126778 SIX1         | ENSG00000128626 MRPS12         | ENSG00000136720 HS6ST1         | ENSG00000137106 GRHR          | ENSG00000140983 RHOT2        | ENSG00000142484 TM4S5        | ENSG00000103653 CSK          |
| ENSG00000142484 TM4S5        | ENSG00000142657 PGD            | ENSG00000147576 ADHFL1       | ENSG00000149136 SSRP1        | ENSG00000153902 LG14           | ENSG00000168040 FADD           | ENSG00000170919 Q5SVS6_HUMAN  | ENSG00000174576 NPAS4        | ENSG00000178372 CALML5       | ENSG00000142657 PGD          |
| ENSG00000178372 CALML5       | ENSG00000182404 LYRM4          | ENSG00000185761 ADAMTSL5     | ENSG00000186837 C21orf119    | ENSG00000197444 OGDHL          | ENSG00000203959 PIN1L          | ENSG000000049167 ERCC8        | ENSG00000065665 SEC61A2      | ENSG00000066583 ISOC1        | ENSG00000182404 LYRM4        |
| ENSG00000066583 ISOC1        | ENSG00000086475 SEPHS1         | ENSG00000104695 PPP2CB       | ENSG00000105880 DLX5         | ENSG00000114030 KPNA1          | ENSG00000115942 ORC2L          | ENSG00000116793 PHTF1         | ENSG00000135324 C6orf117     | ENSG00000145337 PIGY         | ENSG00000086475 SEPHS1       |
| ENSG00000145337 PIGY         | ENSG00000152894 PTPRK          | ENSG00000153207 AHCTF1       | ENSG00000166503 HDGR3_HUMAN  | ENSG00000170633 RNF34          | ENSG00000184474 Q96FP4_HUMAN   | ENSG00000186009 ATP4B         | ENSG00000186700 Q8N6F3_HUMAN | ENSG00000188085 NP_997320.1  | ENSG00000152894 PTPRK        |
| ENSG00000188085 NP_997320.1  | ENSG000000082684 SEMA5B        | ENSG00000108702 CCL1         | ENSG00000110713 NUP98        | ENSG00000126749 EMG1           | ENSG00000134243 SORT1          | ENSG00000154767 XPC           | ENSG00000158874 APOA2        | ENSG00000075035 WSCD2        | ENSG000000082684 SEMA5B      |
| TTTGCTA                      | ENSG00000075035 WSCD2          | ENSG00000166436 TRIM66       | ENSG00000166508 MCM7         | ENSG00000167011 NP_940973.1    | ENSG00000170464 DNAJC18        | ENSG00000175329 ISX           | ENSG00000176615 LOC652153    | ENSG00000162571 TLL5         | ENSG00000166436 TRIM66       |
| ENSG00000162571 TLL5         | ENSG00000180184 Q8N75_HUMAN    | ENSG00000186951 PPARA        | ENSG00000188869 TMC3         | ENSG00000189060 H1FO           | ENSG00000196242 OR2C3          | ENSG00000198373 WWP2          | ENSG00000198754 OXCT2        | ENSG00000180184 Q8N75_HUMAN  | ENSG00000186951 PPARA        |
| ENSG00000000000 TSPAN6       | ENSG00000005471 ABCB4          | ENSG00000042781 USH2A        | ENSG00000044115 CTNNA1       | ENSG00000079499 BCCIP          | ENSG00000110002 LOH11CR2A      | ENSG00000110315 RNF141        | ENSG00000110436 SLC1A2       | ENSG00000000000 TSPAN6       | ENSG00000005471 ABCB4        |
| ENSG00000000000 TSPAN6       | ENSG00000113441 LNPEP          | ENSG00000115159 GPD2         | ENSG00000119812 FAM98A       | ENSG00000122507 BBS9           | ENSG00000133639 BTG1           | ENSG00000139517 LNX2          | ENSG00000143653 SCCPDH       | ENSG00000113441 LNPEP        | ENSG00000115159 GPD2         |
| ENSG00000113441 LNPEP        | ENSG00000151240 DIP2C          | ENSG00000151834 GABRA2       | ENSG00000152078 TMEM56       | ENSG00000163032 VSNL1          | ENSG00000168411 RFWD3          | ENSG00000170242 USP47         | ENSG00000171560 FGA          | ENSG00000151240 DIP2C        | ENSG00000151834 GABRA2       |
| ENSG00000147488 ST18         | ENSG00000173852 DPY19L1        | ENSG00000188021 UBQLN2       | ENSG00000196605 Q08AG5_HUMAN | ENSG00000198252 STYX           | ENSG00000100335 SMCR7L         | ENSG00000102034 ELF4          | ENSG00000107831 FGF8         | ENSG00000173852 DPY19L1      | ENSG00000188021 UBQLN2       |
| ENSG000000054523 KIF1B       | ENSG00000077238 L14R           | ENSG00000077238 L14R         | ENSG00000077238 L14R         | ENSG00000077238 L14R           | ENSG00000100335 SMCR7L         | ENSG00000102034 ELF4          | ENSG00000107831 FGF8         | ENSG000000054523 KIF1B       | ENSG00000077238 L14R         |
| ENSG0000014770 ABCC5         | ENSG00000118017 A4GNT          | ENSG00000123384 LRR1         | ENSG00000127824 TUBA4A       | ENSG00000132471 WBP2           | ENSG00000135740 SLC9A5         | ENSG00000138175 ARL3          | ENSG000001014750 STAC2       | ENSG0000014770 ABCC5         | ENSG00000118017 A4GNT        |
| ENSG00000149474 CSR2BP2      | ENSG00000169955 ZNF747         | ENSG00000170767 C6orf208     | ENSG00000173153 ESRRA        | ENSG00000104369 JPH1           | ENSG00000106069 CHN2           | ENSG00000108021 C10orf18      | ENSG00000111554 MDM1         | ENSG00000149474 CSR2BP2      | ENSG00000169955 ZNF747       |
| ENSG00000196230 TUBB         | ENSG00000065135 GNAI3          | ENSG00000065534 MYLK         | ENSG00000104369 JPH1         | ENSG00000106069 CHN2           | ENSG00000126246 TMEM149        | ENSG00000135655 USP15         | ENSG00000137996 RTCD1        | ENSG00000196230 TUBB         | ENSG00000065135 GNAI3        |
| ENSG00000131269 ABCB7        | ENSG00000117133 BXDC5          | ENSG00000120129 DUSP1        | ENSG00000124486 USP9X        | ENSG00000126246 TMEM149        | ENSG00000166200 COPS2          | ENSG00000170677 SOCS6         | ENSG00000174312 TMEM131      | ENSG00000131269 ABCB7        | ENSG00000117133 BXDC5        |
| ENSG00000143437 ARNT         | ENSG00000145349 CAMK2D         | ENSG00000154813 DPH3         | ENSG00000163312 OTUD1        | ENSG00000166200 COPS2          | ENSG00000170677 SOCS6          | ENSG00000174312 TMEM131       | ENSG00000174312 TMEM131      | ENSG00000143437 ARNT         | ENSG00000145349 CAMK2D       |
| ENSG00000186340 THBS2        | ENSG00000188761 C1orf178       | ENSG00000197323 TRIM33       | ENSG00000204388 HSPA1B       | ENSG000000077157 PPP1R12B      | ENSG000000080189 SLC35C2       | ENSG00000104852 SNRP70        | ENSG00000104998 IL27RA       | ENSG00000186340 THBS2        | ENSG00000188761 C1orf178     |
| ENSG000000056998 GYG2        | ENSG00000075234 NP_060401.2    | ENSG00000077157 PPP1R12B     | ENSG000000080189 SLC35C2     | ENSG00000104852 SNRP70         | ENSG00000110956 KCTD10         | ENSG00000115841 AMOTL2        | ENSG00000119686 C14orf58     | ENSG000000056998 GYG2        | ENSG00000075234 NP_060401.2  |
| ENSG00000116128 BCL9         | ENSG00000132792 CTNBL1         | ENSG00000135953 MFSD9        | ENSG00000144120 TMEM177      | ENSG00000149243 NP_001034637.1 | ENSG00000154957 ZNF18          | ENSG00000161618 ALDH16A1      | ENSG00000164605 Q5T8I0_HUMAN | ENSG00000116128 BCL9         | ENSG00000132792 CTNBL1       |
| ENSG00000165699 TSC1         | ENSG00000167261 DPEP2          | ENSG00000169020 ATP51        | ENSG00000170776 AKAP13       | ENSG00000178159 Q8N8A0_HUMAN   | ENSG00000179241 LDLRAD3        | ENSG00000181027 FKRP          | ENSG00000182195 LDOC1        | ENSG00000165699 TSC1         | ENSG00000167261 DPEP2        |
| ENSG00000204859 ZBTB48       | ENSG00000205864 KRTAP5-6       | ENSG00000066697 TMEFF1       | ENSG00000066855 MTFR1        | ENSG00000071909 MYO3B          | ENSG00000089053 ANAPC5         | ENSG00000102189 EEA1          | ENSG00000107789 MTNFP1       | ENSG00000204859 ZBTB48       | ENSG00000205864 KRTAP5-6     |
| ENSG00000112182 BACH2        | ENSG00000113356 POLR3G         | ENSG00000116194 ANGPTL1      | ENSG00000116954 RRAGC        | ENSG00000120162 MOBK2B         | ENSG00000125257 ABCC4          | ENSG00000125398 SOX9          | ENSG00000125879 OTOR         | ENSG00000112182 BACH2        | ENSG00000113356 POLR3G       |
| ENSG00000131269 ABCB7        | ENSG00000134954 ETS1           | ENSG00000138399 FASTKD1      | ENSG00000143653 SCCPDH       | ENSG00000144810 COL8A1         | ENSG00000146039 SLC17A4        | ENSG0                         |                              |                              |                              |



TTTGTAG ENSG00000182141|ZNF708 ENSG00000186487|MYT1L ENSG00000189277|NP\_997365.2 ENSG00000197467|COL13A1 ENSG00000124544|LRCH4 ENSG00000087258|GNAO1 ENSG00000088305|DNMT3B ENSG00000100226|GTPBP1 ENSG00000100271|TTL1 ENSG00000103591|P34\_HUMAN ENSG00000120075|HOXB5 ENSG00000127571|XPO5 ENSG00000125818|PSMF1 ENSG00000125861|GFRA4 ENSG00000128228|SDF2L1 ENSG00000128652|HOXD3 ENSG00000140400|MAN2C1 ENSG00000140798|ABCC12 ENSG00000144028|ASCC3L1 ENSG00000148606|POLR3A ENSG00000151353|TMEM18 ENSG00000157064|NMNAT2 ENSG00000166508|MCM7 ENSG00000168924|LETM1 ENSG00000169921|Q75L30\_HUMAN ENSG00000170743|SYT9 ENSG00000180385|Q8NAP4\_HUMAN ENSG00000182158|CREB3L2 ENSG00000183444|NR\_002822.2 ENSG00000184481|MLLT7 ENSG00000188775|Q6YL47\_HUMAN ENSG00000189319|FAM53B ENSG00000196422|KIAA0649 ENSG00000204792|Q6ZU62\_HUMAN ENSG00000081913|PHLPP ENSG00000108984|MAP2K6 ENSG00000111783|RFX4 ENSG00000111859|NEDD9 ENSG00000115084|SLC35F5 ENSG00000115163|CENPA ENSG00000116830|TTF2 ENSG00000122643|NT5C3 ENSG00000124193|SFRS6 ENSG00000132781|MUTYH ENSG00000143514|TF53BP2 ENSG00000147892|ADAMTSL1 ENSG00000159873|CCDC117 ENSG00000163074|NM\_024534 ENSG00000164484|KIAA1913 ENSG00000165259|CXorf43 ENSG00000168522|FN1A ENSG00000170035|UBE2E4P ENSG00000170873|MTSS1 ENSG00000172059|KLF11 ENSG00000182118|FAM89A ENSG00000182805|RFPL4B ENSG00000183336|BOLA2 ENSG00000183527|DSCR2 ENSG00000185875|THNSL1 ENSG00000185985|SLITRKK2 ENSG00000186908|ZDHHC17 ENSG00000188848|CCDC4 ENSG00000197780|TAF13 ENSG00000198105|ZNF248 ENSG00000064309|CDON ENSG00000065526|SPEN ENSG00000075218|GTSE1 ENSG00000075856|SART3 ENSG00000079616|KIF22 ENSG00000089336|KIAA0841 ENSG00000090776|EFNB1 ENSG00000100344|PNPLA3 ENSG00000102572|STK24 ENSG00000103168|TAF1C ENSG00000105229|PIAS4 ENSG00000106070|GRB10 ENSG00000112062|MAPK14 ENSG00000114767|RRP9 ENSG00000115561|VPS24 ENSG00000116604|MEF2D ENSG00000117450|PRDX1 ENSG00000117640|FAM54B ENSG00000119689|DLST ENSG00000124216|SNAI1 ENSG00000131233|GJA10 ENSG00000131914|LIN28 ENSG00000136327|NKX2-8 ENSG00000143761|ARF1 ENSG00000158022|TRIM63 ENSG00000158109|FAM79A ENSG00000159261|CLDN14 ENSG00000162396|PARS2 ENSG00000166860|ZBTB39 ENSG00000168826|ZNF509 ENSG00000170485|NPAS2 ENSG00000177728|KIAA0195 ENSG00000180447|GAS1 ENSG00000183255|PTTG1IP ENSG00000183864|TOB2 ENSG00000185049|WHSC2 ENSG00000198797|FAM5B ENSG00000198873|GRK5 ENSG00000004809|SLC22A16 ENSG00000007372|PAX6 ENSG00000074657|ZNF532 ENSG00000083097|DOPEY1 ENSG00000086189|DIMITL ENSG00000091482|SMPX ENSG00000100519|PSMC6 ENSG00000100811|YY1 ENSG00000101040|ZMYND8 ENSG00000101384|JAG1 ENSG00000101639|CEP192 ENSG00000102048|ASB9 ENSG00000102781|KATNAL1 ENSG00000105939|ZC3HAV1 ENSG00000107104|ANKRD15 ENSG00000107864|CPEB3 ENSG00000108688|CCL7 ENSG00000109184|DCUN1D4 ENSG00000109920|FBNP4 ENSG00000111196|MGN2\_HUMAN ENSG00000111328|CDK2AP1 ENSG00000113658|SMAD5 ENSG00000113916|BCL6 ENSG00000114315|HE51 ENSG00000114744|COMMD2 ENSG00000115170|ACVR1 ENSG00000115539|PDCD3 ENSG00000116752|BCAS2 ENSG00000116830|TTF2 ENSG00000117525|F3 ENSG00000117616|C1orf63 ENSG00000121005|SCRIP1 ENSG00000121570|DPPA4 ENSG00000122482|ZNF644 ENSG00000127914|AKAP9 ENSG00000132680|KIAA0907 ENSG00000138735|PDE5A ENSG00000139173|TMEM117 ENSG00000140299|BNIP2 ENSG00000141424|SLC39A6 ENSG00000143742|SRP9 ENSG00000145438|CCNA2 ENSG00000145907|G3BP1 ENSG00000150760|DOCK1 ENSG00000153140|CETN3 ENSG00000154265|ABCA5 ENSG00000155816|FMN2 ENSG00000157796|WDR19 ENSG00000164199|GPR98 ENSG00000164944|KIAA1429 ENSG00000165572|KBTBD6 ENSG00000167904|TMEM68 ENSG00000171940|ZNF217 ENSG00000176124|DLEU1 ENSG00000176208|ATAD5 ENSG00000176276|hCG\_1757335 ENSG00000182963|GJA7 ENSG00000183722|LHFP ENSG00000196455|PK3R4 ENSG00000211446|SEPP1 ENSG00000093167|LRRFIP2 ENSG00000102119|EMD ENSG00000103264|FBXO31 ENSG00000103510|MYST1 ENSG00000103522|IL21R ENSG00000105198|LGALS13 ENSG00000157606|SPATS1 ENSG00000162148|C1orf66 ENSG00000164733|CTS5 ENSG00000170091|NSG2\_HUMAN ENSG00000173349|SFT2D3 ENSG00000176473|WDR25 ENSG00000181577|NP\_694978.2 ENSG00000183955|SETD8 ENSG00000184945|AQP12A ENSG00000185332|TMEM105 ENSG00000196084|UBIQ\_HUMAN ENSG00000196614|NM\_207462 ENSG00000197037|ZNF498 ENSG00000204118|NAP1L6 ENSG00000205703|NP\_001010910.1 ENSG00000206193|Q5HYA3\_HUMAN ENSG0000023041|ZDHHC6 ENSG00000032514|PGBD3 ENSG00000066618|ZMYND12 ENSG00000072274|TFR3 ENSG00000080503|SARMCA2 ENSG00000085788|DDHD2 ENSG00000101447|FAM83D ENSG00000101844|ATG4A ENSG00000102024|PLS3 ENSG00000114686|MRPL3 ENSG00000114790|NP\_056410.2 ENSG00000133703|KRAS ENSG00000136758|YME1L1 ENSG00000144306|SCRN3 ENSG00000147606|SLC26A7 ENSG00000156802|ATAD2 ENSG00000158092|NCK1 ENSG00000162624|LHX8 ENSG00000163818|LZTFL1 ENSG00000164022|SCYE1 ENSG00000165694|FRMD7 ENSG00000166200|COPS2 ENSG00000171634|BPTF ENSG00000171858|RPS21 ENSG00000183726|TMEM50A ENSG00000185873|TMPRSS11B ENSG00000188732|C7orf46 ENSG00000197601|MLST2 ENSG00000198642|KLHL9 ENSG00000204800|Q96HX1\_HUMAN ENSG00000204812|Q96HX1\_HUMAN ENSG00000206527|PTPLB ENSG00000009335|UBE3C ENSG00000070413|DGCR2 ENSG00000073111|MCST2 ENSG00000075426|POST2 ENSG00000090863|GLG1 ENSG00000100994|PYGB ENSG00000111667|USP5 ENSG00000119714|GPR68 ENSG00000122952|ZWINT ENSG00000125843|C2orf29 ENSG00000127743|IL17B ENSG00000131435|PDLIM4 ENSG00000131771|PPP1R1B ENSG00000139436|GIT2 ENSG00000143878|RHOB ENSG00000154330|PGM5P1 ENSG00000157833|FAM59B ENSG00000160058|BSDC1 ENSG00000162415|ZSWIM5 ENSG00000163026|C2orf44 ENSG00000166111|SVOP ENSG00000166317|SYNPO2L ENSG00000176490|DIRAS1 ENSG00000179241|LDLRAD3 ENSG00000180935|Q8N8B3\_HUMAN ENSG00000204100|Q6ZV28\_HUMAN ENSG0000000457|SYCL3 ENSG00000042088|TDP1 ENSG00000065883|CDC2L5 ENSG00000069535|MAOB ENSG00000071243|ING3 ENSG00000102780|DGKH ENSG00000102781|KATNAL1 ENSG00000103540|CE110\_HUMAN ENSG00000112308|C6orf62 ENSG00000118407|FILIP1 ENSG00000120341|LZTR2 ENSG00000124535|WRNIP1 ENSG00000124789|NUP153 ENSG00000131016|AKAP12 ENSG00000134363|FST ENSG00000137504|CREBZF ENSG00000137872|SEMA6D ENSG00000139117|CPNE8 ENSG00000139505|MTMR6 ENSG00000143612|C1orf43 ENSG00000147145|GPR23 ENSG00000154545|MAGED4 ENSG00000162775|MKL1 ENSG00000164645|NP\_689919.1 ENSG00000166920|C15orf48 ENSG00000177853|ZNF518 ENSG00000179902|C1orf194 ENSG00000182899|RPL35A ENSG00000187243|MAGED4B ENSG00000196167|NP\_997312.1 ENSG00000197926|Q8NAI6\_HUMAN ENSG000000057757|C1orf128 ENSG00000067840|PDZD4 ENSG00000100461|RBM23 ENSG00000102802|C13orf33 ENSG00000102900|NUP93 ENSG00000102967|DHODH ENSG00000103196|CRISPLD2 ENSG00000103522|IL21R ENSG00000105137|SYDE1 ENSG00000115317|HTRA2 ENSG00000131845|ZNF304 ENSG00000135973|GPR45 ENSG00000137726|FYXD6 ENSG00000139644|TEGT ENSG00000147432|CHRN3 ENSG00000149474|CSRP2BP ENSG00000157064|NMNAT2 ENSG00000167074|TEF ENSG00000167523|C16orf55 ENSG00000167565|SERTAD3 ENSG00000170382|LRRN2 ENSG00000170893|TRH ENSG00000171649|ZIK1 ENSG00000175781|Q9H519\_HUMAN ENSG00000179913|B3GNT3 ENSG00000104517|EDD1 ENSG00000106609|C7orf42 ENSG00000111358|GTF2H3 ENSG00000111432|FZD10 ENSG00000113595|TRIM23 ENSG00000114124|GRK7 ENSG00000118785|SPP1 ENSG00000124596|C6orf130 ENSG00000125814|NAPB ENSG00000136141|LRCH1 ENSG00000139343|SNRPF ENSG00000140374|ETFA ENSG00000143442|POG2 ENSG00000151552|QDPR ENSG00000151893|C10orf46 ENSG00000152443|ZNF776 ENSG00000155097|ATP6V1C1 ENSG00000165525|SDCCAG1 ENSG00000167306|MYO5B ENSG00000168591|TMUB2 ENSG00000173559|OBFC2A ENSG00000178988|MRFAP1L1 ENSG00000182805|RFPL4B ENSG00000182952|HMGNA2 ENSG00000184613|NELL2 ENSG00000197170|PSMD12 ENSG00000206560|ANKRD28 ENSG00000206560|ANKRD28 ENSG00000206560|ANKRD28 ENSG00000037637|FBXO42 ENSG00000047056|WDR37 ENSG00000065361|ERBB3 ENSG00000067141|NEO1 ENSG00000087191|PSMC5 ENSG00000101224|CDC25B ENSG00000108828|VAT1 ENSG00000110514|MADD ENSG00000116604|MEF2D ENSG00000116698|SMG7 ENSG00000122497|BNPP14 ENSG00000131467|PSME3 ENSG00000148158|STX30 ENSG00000151692|RNFI144 ENSG00000153294|GPR115 ENSG00000161016|RPL8 ENSG00000162408|NOL9 ENSG00000163545|NUAK2 ENSG00000168614|BNPP14 ENSG00000169057|MECP2 ENSG00000171223|JUNB ENSG00000171604|CXXC5 ENSG00000179094|PER1 ENSG00000180901|KCTD2 ENSG00000183154|Q8NB20\_HUMAN ENSG00000186564|POXD2 ENSG00000187678|SPRY4 ENSG00000188706|ZDHHC9 ENSG00000205878|Q6ZSV2\_HUMAN ENSG0000039068|CDH1 ENSG00000057657|PRDM1 ENSG00000065609|SNAP91 ENSG00000071575|TRIB2 ENSG00000095787|WAC ENSG00000095951|HIVEP1 ENSG00000103599|IQCH ENSG00000106013|ANKRD7 ENSG00000112242|E2F3 ENSG00000115524|SF3B1 ENSG00000120802|TMPO ENSG00000124207|CSE1L ENSG00000127463|KIAA0090 ENSG00000130338|TULP4 ENSG00000139842|CUL4A ENSG00000145284|SCD5 ENSG00000147180|ZNF711 ENSG00000147231|CXorf57 ENSG00000153130|SCOC ENSG00000153879|CEBPG ENSG00000154240|CCDC46 ENSG00000159208|C1orf51 ENSG00000163536|SERPINI1 ENSG00000171004|H56ST2 ENSG00000177689|MAGEB10 ENSG00000185203|Q96S36\_HUMAN ENSG00000189195|BTBD8 ENSG00000197584|KCNMB2 ENSG00000048707|VPS13D ENSG00000063978|RNF4 ENSG00000076248|UNG ENSG00000090339|ICAP1 ENSG00000100335|SMCR7L ENSG00000106078|COBL ENSG00000108349|CASC3 ENSG00000114656|KIAA1257 ENSG00000116667|C1orf21 ENSG00000131188|PRR7 ENSG00000134690|CDCA8 ENSG00000136827|TOR1A ENSG00000144560|VGLL4 ENSG00000145990|GFOD1 ENSG00000154229|PRKCA ENSG00000168209|DDIT4 ENSG00000168610|STAT3 ENSG00000170161|Q5VV11\_HUMAN ENSG00000173702|MUC13 ENSG00000182325|FBXL6 ENSG00000204385|CTLA4\_HUMAN ENSG00000301544|NR2E3 ENSG00000074527|NTN4 ENSG00000102048|SCLB ENSG00000104635|SLC39A14 ENSG00000105879|SBLL1 ENSG00000112701|SENPE6 ENSG00000113300|CNOT6 ENSG00000115232|ITGA4 ENSG00000118496|FBXO30 ENSG00000120690|ELF1 ENSG00000120727|PAIP2 ENSG00000123607|TTC21B ENSG00000137090|DMRT1 ENSG00000137766|UNC13C ENSG00000144224|UBXD2 ENSG00000144935|TRPC1 ENSG00000145907|G3BP1 ENSG00000152428|MARS2 ENSG00000154438|ASZ1 ENSG00000165637|VDAC2 ENSG00000173110|HSPA6 ENSG00000173226|TQCB1 ENSG00000176927|EFCA5 ENSG00000177853|ZNF518 ENSG00000182107|TMEM30B ENSG00000185278|ZBTB37 ENSG00000196850|PPTC7 ENSG00000204259|Q96PQ5\_HUMAN ENSG00000004455|AK2 ENSG00000077797|RALBP1 ENSG00000029993|HMGB3 ENSG00000034063|UHRF1 ENSG00000049239|H6PD ENSG00000049656|CLPTM1L ENSG00000070423|RNFI26 ENSG00000072062|PRKACA ENSG00000072858|SIDT1 ENSG00000074964|ARHGFP10L ENSG00000084234|APLP2 ENSG00000088812|ATRN ENSG00000088854|C2orf194 ENSG00000090889|KIF4A ENSG00000099284|H2AFY2 ENSG00000099995|SF3A1 ENSG00000101417|PXPMP4 ENSG00000101849|TELLX ENSG00000103067|RPLM3 ENSG00000104228|TRIM35 ENSG00000108349|CASC3 ENSG00000110931|CAMKK2 ENSG00000112511|PHF1 ENSG00000124766|SOX4 ENSG00000125810|CD93 ENSG00000130032|PRRG3 ENSG00000132434|LANCL2 ENSG00000132478|UNK ENSG00000137275|RIFK1 ENSG00000139433|GLTP ENSG00000141034|C17orf39 ENSG00000142207|URB1 ENSG00000143614|GATAD2B ENSG00000143816|PNT9A ENSG00000144677|CTDSP1 ENSG00000145819|ARHGAP26 ENSG0000015532|VT11A ENSG00000153944|MSI2 ENSG00000155465|SLC7A7 ENSG00000155659|ZDHHC5 ENSG00000159217|IGF2BP1 ENSG00000160113|NR2F6 ENSG00000160191|PDE9A ENSG00000163820|FYCO1 ENSG00000164366|CCDC127 ENSG00000165633|C10orf72 ENSG00000165810|BTNL9 ENSG00000167941|SOST ENSG00000169676|DRD5 ENSG00000172458|IL17D ENSG00000173349|SFT2D3 ENSG00000176887|SOX11 ENSG00000178188|SH2B1 ENSG00000180447|GAS1 ENSG00000180509|KCNE1 ENSG00000183495|EP400 ENSG00000183579|ZNRF3 ENSG00000185049|WHSC2 ENSG00000185100|ADSSL1 ENSG00000187140|FOXD3 ENSG00000187239|FNBP1 ENSG00000197536|NP\_001013739.1 ENSG00000198174|Q8N9P1\_HUMAN ENSG00000205927|OLIG2 ENSG000000033867|SLC4A7 ENSG00000055732|MCOLN3 ENSG00000067955|CEFB ENSG00000078177|N4BP2\_HUMAN ENSG00000081087|OSTM1 ENSG00000096717|SIRT1 ENSG00000101752|MIB1 ENSG00000101972|STAG2 ENSG00000104303|UBE2W ENSG00000105855|ITGB8 ENSG00000107164|FUBP3 ENSG00000109861|CTSC ENSG00000111713|GYS2 ENSG00000113742|CPEB4 ENSG00000114166|PCAF ENSG00000116030|SUMO1P3 ENSG00000118260|CREB1 ENSG00000118454|ANKRD13C ENSG00000118495|PLAGL1 ENSG00000119314|ROD1 ENSG00000120251|GRIA2 ENSG00000121351|IAPP ENSG00000121621|KIF18A ENSG00000123066|THRAP2 ENSG00000127720|C12orf26 ENSG00000131437|KIF3A ENSG00000132855|ANGPTL3 ENSG00000134152|C15orf29 ENSG00000134755|DSC2 ENSG00000136014|USP44 ENSG00000136897|MRPL50 ENSG00000137968|SLC44A5 ENSG00000138385|SSB ENSG00000138641|HERC3 ENSG00000138779|Q9HCM6\_HUMAN ENSG00000138795|LEF1 ENSG00000138795|LEF1 ENSG00000139263|LRIG3 ENSG00000143401|ANP32E ENSG00000145703|IQGAP2 ENSG00000145721|LIX1 ENSG00000148943|LIN7C ENSG00000149089|APIP ENSG00000150054|MPP7 ENSG00000152256|PDK1 ENSG00000153006|NP\_776190.1 ENSG00000154664|PRSS7 ENSG00000156136|DCK ENSG00000157107|FCHO2 ENSG00000163694|NP\_061900.1 ENSG00000164169|NP\_612373.2 ENSG00000164932|CTHRC1 ENSG00000166266|CUL5 ENSG00000166266|CUL5 ENSG00000170160|Q6ZU57\_HUMAN ENSG00000170961|HAS2 ENSG00000176105|YES1 ENSG00000177932|ZNF354C ENSG00000178202|PLEKHK1 ENSG00000182011|PLEKHK1 ENSG00000182944|EWSR1 ENSG00000183878|UTY ENSG00000187151|ANGPTL5 ENSG00000188153|COL4A5 ENSG00000189042|ZNF567 ENSG00000189403|HMGB1 ENSG00000197323|TRIM33 ENSG00000198887|SMC5 ENSG00000203710|CR1 ENSG00000002586|CD99 ENSG00000003147|JCA1 ENSG00000003452|MAP2K3 ENSG00000048707|VPS13D ENSG00000059378|PARP12 ENSG00000066044|ELAVL1 ENSG00000073111|MCM2 ENSG00000077942|FBLN1 ENSG00000079277|MKNK1 ENSG00000092820|VIL2 ENSG00000101347|SAMHD1 ENSG00000102904|TSNAXIP1 ENSG00000102977|ACD ENSG00000107957|SH3PXD2A ENSG00000108578|BLMH ENSG00000116514|IBRD3 ENSG00000117362|APH1A ENSG00000119688|ABCD4 ENSG00000125633|CCDC93 ENSG00000131899|LLGL1 ENSG00000132155|RAF1 ENSG00000134274|PTGFRN ENSG00000134274|PTGFRN ENSG00000135605|TEC ENSG00000140025|C14orf143 ENSG00000140398|NEILL1 ENSG00000140478|NM\_018652.4 ENSG00000142208|AKT1 ENSG00000142599|RERE ENSG00000142794|NBPFF3 ENSG00000147099|HDAC8 ENSG00000152042|NBPFF8 ENSG00000157240|FZD1 ENSG00000157617|C21orf25 ENSG00000159217|IGF2BP1 ENSG00000166224|SGP1L ENSG00000166833|NAV2 ENSG00000168666|SF1 ENSG00000168614|NBPFF6 ENSG00000168994|C6orf145 ENSG00000169991|Q5TF58\_HUMAN ENSG00000170390|DCLK2 ENSG00000170638|TRABD ENSG00000171450|CDK5R2 ENSG00000172183|ISG20 ENSG00000176532|PRR15 ENSG00000179571|NP\_001034792.1 ENSG00000180735|Q6PJW0\_HUMAN ENSG00000180849|C15orf37 ENSG00000186275|Q5TB04\_HUMAN ENSG00000187638|NM\_207367 ENSG00000188364|TMSL4 ENSG00000188554|NBR1 ENSG00000188589|RBM33 ENSG00000188706|ZDHHC9 ENSG00000188818|ZDHHC11 ENSG00000198668|CALM1 ENSG00000039123|SKIV2L2 ENSG00000082438|COBLL1 ENSG00000080750|ERGC12 ENSG00000088035|ALG6 ENSG00000099783|HNRPM ENSG00000102218|RP2 ENSG00000102935|ZNF423 ENSG00000109814|UGDH ENSG00000111231|ATPBBD1C ENSG00000111358|TAF1B ENSG00000115750|TAF1B ENSG00000115808|STRN ENSG00000117010|ZNF684 ENSG00000117479|SLC19A2 ENSG00000118200|CAMSAP1L1 ENSG00000122035|RASL11A ENSG00000123572|NRK ENSG00000123908|EIF2C2 ENSG00000127483|HP1BP3 ENSG00000134007|ADAM20 ENSG00000136156|ITM2B ENSG00000136943|CTSL2 ENSG00000139144|PIK3C2G ENSG00000139324|TMTCC3 ENSG00000142867|BCL10 ENSG00000142875|PRKACB ENSG00000143633|C1orf131 ENSG00000143889|HNRPL3 ENSG00000145386|CCNA2 ENSG00000145451|GLRA3 ENSG00000146281|ACY1L2 ENSG00000148700|ADD3 ENSG00000152430|BOLL ENSG00000153207|ARHCTF1 ENSG00000153914|SFRS12 ENSG00000155393|HEATR3 ENSG00000159131|GART ENSG00000159131|GART ENSG00000162627|SNX7 ENSG00000162630|B3GALT2 ENSG00000163606|CD200R1 ENSG00000164118|KIAA1712 ENSG00000165813|C10orf118 ENSG00000170734|POLH ENSG00000171488|LRRC8C ENSG00000177917|ARL6IP6 ENSG00000180116|C12orf40 ENSG00000182010|PLEKHK1 ENSG00000183145|DSCR6 ENSG00000183814|LIN9 ENSG00000185238|PRMT3 ENSG00000198015|MRPL42 ENSG00000198265|HELZ ENSG00000198682|PAPSS2 ENSG00000204296|C6orf10

TTTTTACA ENSG00000044090|CUL7 ENSG00000054116|TRAPPC3 ENSG00000089336|KIAA0841 ENSG00000092529|CAPN3 ENSG00000100246|DNAL4 ENSG00000101150|TPD52L2 ENSG00000101193|C2orf11 ENSG00000103723|AP3B2 ENSG00000110906|KCTD10 ENSG00000111725|PRKAB1 ENSG00000114656|KIAA1257 ENSG00000116984|MTR ENSG00000118900|UBN1 ENSG00000121281|ADCY7 ENSG00000130340|SNX9 ENSG00000130433|CACNG6 ENSG00000132854|ANR3B\_HUMAN ENSG00000133398|MED10 ENSG00000135114|OASL ENSG00000136689|ILIRN ENSG00000136811|ODF2 ENSG00000136827|TORIA ENSG00000136828|RALGPS1 ENSG00000140992|PDPK1 ENSG00000141510|TP53 ENSG00000141965|FEM1A ENSG00000142453|CARM1 ENSG00000143940|Q6ZMW3\_HUMAN ENSG00000145824|CXCL14 ENSG00000151692|RNFL14 ENSG00000170390|DCLK2 ENSG00000170779|CDCA4 ENSG00000171105|INSR ENSG00000176911|Q9HAM1\_HUMAN ENSG00000180739|EDG8 ENSG00000184787|UBE2G2 ENSG00000204304|PBX2 ENSG00000204713|TRIM27 ENSG00000208839|TBPL1 ENSG00000240731|CDH10 ENSG00000041982|TNC ENSG00000051825|MPHOSPH9 ENSG00000064102|C12orf11 ENSG00000065883|CDC2L5 ENSG00000075643|MOCOS ENSG00000080371|RAB21 ENSG00000081479|LRP2 ENSG00000085719|CPNE3 ENSG00000089472|HEPH ENSG00000101166|SLMO2 ENSG00000101639|CEP192 ENSG00000105793|GTPBP10 ENSG00000109814|UGDH ENSG00000112183|RBM24 ENSG00000115415|STAT1 ENSG00000118495|PLAGL1 ENSG00000124171|PARD6B ENSG00000133794|ARNTL ENSG00000135597|REPS1 ENSG00000138660|C4orf16 ENSG00000139826|ABHD13 ENSG00000139921|TXNDC1 ENSG00000143919|C2orf34 ENSG00000152457|DCLREL1C ENSG00000155329|ZCCHC10 ENSG00000156886|ITGAD ENSG00000159267|HLCS ENSG00000162670|FAM5C ENSG00000164188|FAM13P ENSG00000169612|FAM103A1 ENSG00000177600|RPLP2 ENSG00000185275|CD24 ENSG00000196353|CPNE4 ENSG00000205133|Q629K1\_HUMAN

TTTTTACC ENSG00000077274|CAPN6 ENSG00000101210|EEF1A2 ENSG00000107872|FBXL15 ENSG00000108786|HSD17B1 ENSG00000110195|FOLR1 ENSG00000115841|FAM82A ENSG00000130706|ADRM1 ENSG00000130724|CHMP2A ENSG00000131652|THOC6 ENSG00000132446|FTHL17 ENSG00000134460|IL2RA ENSG00000137193|PIM1 ENSG00000141337|ARSG ENSG00000157933|SKI ENSG00000163221|S100A12 ENSG00000167986|DBB1 ENSG00000170271|C5orf4 ENSG00000172534|HCFC1 ENSG00000178409|KIAA1553 ENSG00000179165|PXT1 ENSG00000183856|IQGAP3 ENSG00000187170|LCE4A ENSG00000196476|C2orf96 ENSG00000005483|MLL5 ENSG00000061676|NCKAP1 ENSG00000075785|RAB7A ENSG00000079691|LRRC16 ENSG00000101981|F9 ENSG00000109171|SLAIN2 ENSG00000115361|ACADL ENSG00000128886|ELL3 ENSG00000133059|RIPK5 ENSG00000141646|SMAD4 ENSG00000144445|NP\_689732.2 ENSG00000146674|IGFBP3 ENSG00000147162|OGT ENSG00000148516|ZEB1 ENSG00000157230|LOC728132 ENSG00000158270|COLEC12 ENSG00000159346|ADIPOR1 ENSG00000163104|SMARCAD1 ENSG00000164975|SNAPC3 ENSG00000170035|UBE2E4P ENSG00000187325|TAF9B ENSG00000188653|NR\_002807.1 ENSG00000196381|ZNF781 ENSG00000196648|NP\_937824.1 ENSG00000197978|NP\_937824.1 ENSG00000211452|DIO1 ENSG00000208056|SYN1 ENSG000000018625|ATPIA2 ENSG00000065308|TRAM2 ENSG00000078967|UBE2D4 ENSG00000099284|H2AFY2 ENSG00000100109|TFIP11 ENSG00000103591|P34\_HUMAN ENSG00000104332|SFRP1 ENSG00000107341|UBE2R2 ENSG00000111602|TIMELESS ENSG00000112977|DAP ENSG00000131652|THOC6 ENSG00000148158|SNK30 ENSG00000149932|NP\_001077082.1 ENSG00000150594|ADRA2A ENSG00000154783|FGD5 ENSG00000155858|LSM11 ENSG00000155926|SLA ENSG00000159692|CTBP1 ENSG00000164651|SP8 ENSG00000167930|ITFG3 ENSG00000168763|CNNM3 ENSG00000177741|Q96BN7\_HUMAN ENSG00000180385|Q8NAP4\_HUMAN ENSG00000184260|HIST2H2AC ENSG00000186638|C9orf48 ENSG00000198471|RTP2 ENSG00000205485|Q6DCA4\_HUMAN ENSG00000205620|Q6ZRB6\_HUMAN ENSG00000205726|ITSN1 ENSG00000006625|C7orf24 ENSG00000008405|CRY1 ENSG000000016490|CLCA1 ENSG00000106034|NP\_079189.3 ENSG000000113300|CNOT6 ENSG000000113583|C5orf15 ENSG00000116127|ALMS1 ENSG00000120802|TMPO ENSG00000124813|RUNX2 ENSG00000135535|CD164 ENSG00000143033|MTF2 ENSG00000143889|HNRPLL ENSG00000156531|PHF6 ENSG00000156787|WDR67 ENSG00000162616|DNAJB4 ENSG00000163012|ZSWIM2 ENSG00000163710|PCOLCE2 ENSG00000165240|ATP7A ENSG00000165813|C10orf118 ENSG00000168116|KIAA1586 ENSG00000168246|UBTD2 ENSG00000168952|STXBP6 ENSG00000173083|HPSE ENSG00000182831|C16orf72 ENSG00000183783|KCTD8 ENSG00000189050|NP\_057209.3 ENSG00000197755|O14513-3 ENSG00000198822|GRM3 ENSG00000008256|PSCD3 ENSG000000047644|WWC3 ENSG00000064309|CDON ENSG00000272736|NFATC3 ENSG00000082781|ITGB5 ENSG00000100290|BIK ENSG00000101189|C2orf20 ENSG00000101452|DHX35 ENSG00000110992|CNDN1 ENSG00000110801|PSMD9 ENSG00000110906|KCTD10 ENSG00000113272|THGL1 ENSG00000113272|THGL1 ENSG00000126786|SOX4 ENSG00000127528|KLF2 ENSG00000128016|ZFP36 ENSG00000131148|COX4NB ENSG00000136731|UGCG1 ENSG00000141510|TP53 ENSG00000149115|TNKS1BP1 ENSG00000149483|TMEM138 ENSG00000153395|AYTL2 ENSG00000158163|DZIP1L ENSG00000162772|ATF3 ENSG00000163083|INHBB ENSG00000167202|TBC1D2B ENSG00000168758|SEMA4C ENSG00000173020|ADRBK1 ENSG00000176444|CLK2 ENSG00000179388|EGR3 ENSG00000180198|RCC1 ENSG00000180447|GAS1 ENSG00000183092|BEGIN\_HUMAN ENSG00000196422|KIAA0649 ENSG00000197530|MI2 ENSG00000065243|PKN2 ENSG00000071243|ING3 ENSG000000081721|DUSP12 ENSG000000091317|CMTM6 ENSG000000092140|KIAA1333 ENSG00000095002|MSH2 ENSG00000101745|ANKRD12 ENSG00000104213|PDGFR1 ENSG00000104290|FZD3 ENSG00000106460|TMEM106B ENSG00000108055|SMC3 ENSG00000108100|CCNY ENSG00000113282|CLINT1 ENSG00000113396|SLC27A6 ENSG00000115183|TANC1 ENSG00000116473|RAP1A ENSG00000119004|NYP20A1 ENSG00000120756|PLS1 ENSG00000123473|STIL ENSG00000125630|POLR1B ENSG00000125885|MCM8 ENSG00000126814|TRMT5 ENSG00000128791|TWSG1 ENSG00000128845|CCPG1 ENSG00000132603|CINP7 ENSG00000136014|USP44 ENSG00000138182|MPHOSPH1 ENSG00000138468|SENP7 ENSG00000138685|FGF7 ENSG00000141448|GATA6 ENSG00000144668|ITGA9 ENSG00000146243|IRAK1BP1 ENSG00000150995|ITPR1 ENSG00000151151|IPMK ENSG00000151694|ADAM17 ENSG00000153207|AHCTF1 ENSG00000156171|TMEM77 ENSG00000156256|USP16 ENSG00000158122|C9orf21 ENSG00000158411|MITD1 ENSG00000162607|USP1 ENSG00000162972|C2orf47 ENSG00000163714|SR140\_HUMAN ENSG00000164434|FABP7 ENSG00000164761|TNFRSF11B ENSG00000164930|FZD6 ENSG00000165072|MAMDC2 ENSG00000165449|SLC16A9 ENSG00000165525|SDCCAG1 ENSG00000166292|TMEM100 ENSG00000168229|PTGDR ENSG00000173559|OBFC2A ENSG00000173930|SLCO4C1 ENSG00000176907|C8orf4 ENSG00000179152|C3orf23 ENSG00000179476|C14orf28 ENSG00000185483|ROR1 ENSG00000186665|C17orf58 ENSG00000187772|LIN28B ENSG00000188177|ZC3H6 ENSG00000197991|PCDH20 ENSG00000198157|NSBP1 ENSG00000198740|ZNF652 ENSG000000075240|NP\_055939.1 ENSG00000089505|CMTM1 ENSG00000092068|SLC7A8 ENSG00000099985|OSM ENSG00000103047|TMCO7 ENSG00000113889|KNG1 ENSG00000115956|PLEK ENSG00000004455|AK2 ENSG00000118707|TGIF2 ENSG00000119280|C1orf198 ENSG00000122176|FMO2 ENSG00000125741|OPA3 ENSG00000127564|PKMYT1 ENSG00000132446|FTHL17 ENSG00000137460|NP\_203751.2 ENSG00000141568|FOXK2 ENSG00000148400|NOTCH1 ENSG00000148842|CNNM2 ENSG00000157103|SLC6A1 ENSG00000159217|IGFBP1 ENSG00000162408|NLMY1 ENSG00000162676|GF11 ENSG00000163933|RFT1 ENSG00000171357|C1orf190 ENSG00000171456|ASXL1 ENSG00000173281|PPP1R3B ENSG00000175166|PSMD2 ENSG00000180861|C12orf36 ENSG00000183421|RIPK4 ENSG00000188394|GPR21 ENSG00000197653|DNAH10 ENSG00000198742|SMURF1 ENSG00000198858|C19orf22 ENSG00000204098|Q6ZUI5\_HUMAN ENSG00000204657|ORZ2 ENSG00000205610|Q4GL05\_HUMAN ENSG00000006652|IFRD1 ENSG00000017427|IGF1 ENSG000000080618|CPB2 ENSG00000080839|RBL1 ENSG00000114248|LRRC31 ENSG00000125304|TM9SF2 ENSG00000131002|CYorf15B ENSG00000134001|EIF2S1 ENSG00000136206|WBSR19 ENSG00000144815|FAM55C ENSG00000153832|FBXO36 ENSG00000157470|FAM81A ENSG00000163964|PIGX ENSG00000166845|C18orf54 ENSG00000168385|SEPT2 ENSG00000170734|POLH ENSG00000173200|PARP15 ENSG00000174326|SLC16A11 ENSG00000175073|VCPIP1 ENSG00000177425|PAWR ENSG00000186687|LYRM7 ENSG00000187191|DAZ3 ENSG00000188120|DAZ1 ENSG00000189332|Q4G197\_HUMAN ENSG00000196968|FUT11 ENSG00000205508|NP\_001018856.1 ENSG00000205916|DAZ4 ENSG00000205944|DAZ2

TTTTTATG ENSG00000051009|C11orf56 ENSG00000059378|PARP12 ENSG00000092036|C14orf94 ENSG00000100077|ADRBK2 ENSG00000101161|PRPF6 ENSG00000101246|ARFRP1 ENSG00000130147|SH3BP4 ENSG00000131389|SLC6A6 ENSG00000134690|CDCA8 ENSG00000140623|SEPT12 ENSG00000143515|ATP8B2 ENSG00000143786|CNIH3 ENSG00000144730|IL17RD ENSG00000162267|ITIH3 ENSG00000166860|ZBTB39 ENSG00000169347|GP2 ENSG00000169598|DFFB ENSG00000170162|VGLL2 ENSG00000172270|BSG ENSG00000173244|Q8N8D0\_HUMAN ENSG00000177384|Q9NT46\_HUMAN ENSG00000181016|NP\_872403.1 ENSG00000182372|C8orf61 ENSG00000185619|PCGF3 ENSG00000188523|NP\_997300.1 ENSG00000198690|MTMR15 ENSG00000206069|NP\_001001663.1 ENSG00000062725|APBBP2 ENSG00000065883|CDC2L5 ENSG00000069849|ATP1B3 ENSG00000072319|ALG13 ENSG00000078081|LAMP3 ENSG00000087206|UIMC1 ENSG00000100784|RPS6KA5 ENSG00000102524|TNFSF13B ENSG00000105948|TTC26 ENSG00000108651|UTP6 ENSG00000111247|RAD51AP1 ENSG00000111261|MANSCL1 ENSG00000112029|FBXO5 ENSG00000115760|BIRC6 ENSG00000118418|HMGN3 ENSG00000119523|ALG2 ENSG00000130741|EIF2S3 ENSG00000134049|IER3IP1 ENSG00000135387|CAPRN1 ENSG00000137449|CPEB2 ENSG00000137770|CTDSP2 ENSG00000137821|LRRC49 ENSG00000138760|SCARB2 ENSG00000139263|LRIG3 ENSG00000141499|WDR79 ENSG00000142188|TMEM50B ENSG00000144642|RBM33 ENSG00000144959|AADACL1 ENSG00000156689|GLYATL2 ENSG00000162687|KCNT2 ENSG00000163689|NP\_940865.1 ENSG00000163734|CXCL3 ENSG00000163738|MTHFD2L ENSG00000169744|LDB2 ENSG00000172172|MRPL13 ENSG00000183098|GPC6 ENSG00000186452|TMPRSS12 ENSG00000196227|C2orf177 ENSG00000198087|CD2AP ENSG00000203760|C6orf173

TTTTTATT ENSG00000005100|DHX33 ENSG00000006530|AGK ENSG00000009335|UBE3C ENSG00000062038|CDH3 ENSG00000064309|CDON ENSG00000067141|NEO1 ENSG00000084234|APLP2 ENSG00000103742|NP\_066013.1 ENSG00000106144|CASP2 ENSG00000112159|MDN1 ENSG00000114316|USP4 ENSG00000116017|ARID3A ENSG00000120451|SNX19 ENSG00000125798|FOXO2 ENSG00000126012|JARID1C ENSG00000129250|KIF1C ENSG00000130311|C19orf58 ENSG00000133561|GIMAP6 ENSG00000141994|DUS3L ENSG00000143553|SNAPAP ENSG00000143878|RHOB ENSG00000147439|BIN3 ENSG00000156030|C14orf43 ENSG00000158859|ADAMTS4 ENSG00000159123|DMRTC\_HUMAN ENSG00000163064|EN1 ENSG00000164438|TLX3 ENSG00000164713|BR13 ENSG00000166619|BLCAP ENSG00000168334|CMYA1 ENSG00000168795|ZBTB5 ENSG00000170445|HARS ENSG00000172818|OVOL1 ENSG00000173621|LRFN4 ENSG00000176078|Q8NAN4\_HUMAN ENSG00000176678|FOXL1 ENSG00000178199|Q6ZRW2\_HUMAN ENSG00000182158|CREB3L2 ENSG00000182606|TRAK1 ENSG00000182667|NTRI\_HUMAN ENSG00000184911|CxorF50 ENSG00000185668|POU3F1 ENSG00000185990|FBA3 ENSG00000187251|C1orf213 ENSG00000197932|F8A2 ENSG00000198444|F8A1 ENSG00000204013|Q6XYD6\_HUMAN ENSG00000204103|MAFB ENSG00000204613|TRIM10 ENSG00000205434|Q6ZU34\_HUMAN ENSG000000028839|TBPL1 ENSG00000037474|NSUN2 ENSG000000041515|MYO16 ENSG000000047634|SCML1 ENSG000000067369|TP53BP1 ENSG00000075223|SEMA3C ENSG00000078177|N4BP2\_HUMAN ENSG00000095627|TDRD1 ENSG00000101955|SRPX ENSG00000105996|HOXA2 ENSG00000110841|PFF1BP1 ENSG00000111339|ART4 ENSG00000112851|ERBB2IP ENSG00000113088|GZMK ENSG00000113209|PCDHB5 ENSG00000114127|XRN1 ENSG00000114978|MOBK1B ENSG00000115295|CLIP4 ENSG00000115966|ATF2 ENSG00000117054|ACADM ENSG00000117143|UAP1 ENSG00000122008|POLK ENSG00000124882|EREG ENSG00000130699|TAF4 ENSG00000134389|CFHR5 ENSG00000135776|ABC810 ENSG00000138741|UACA ENSG00000138741|TRPC3 ENSG00000139971|C14orf37 ENSG00000143353|LYPLAL1 ENSG00000144827|ABHD10 ENSG00000145907|G3BP1 ENSG00000146476|C6orf211 ENSG00000159256|MORC3 ENSG00000164161|HHIP ENSG00000166479|TXNDC10 ENSG00000170558|CDH2 ENSG00000175664|C13orf26 ENSG00000175857|C5orf29 ENSG00000176055|NP\_981951.1 ENSG00000176624|RKHD2 ENSG00000176732|PFN4 ENSG00000177683|THAP5 ENSG00000179119|SPTY2D1 ENSG00000183496|RKHD3 ENSG00000185873|TMPRSS11B ENSG00000186231|KLHL32 ENSG00000187944|NP\_998773.1 ENSG00000188175|XR\_937794.1 ENSG00000189184|PCDH18 ENSG00000196381|ZNF781 ENSG00000197498|BXDC1 ENSG00000198730|CTR9 ENSG00000204899|NP\_001065243.1 ENSG00000205083|Q6P5W2\_HUMAN ENSG00000205505|NP\_001027561.1 ENSG00000205506|NP\_001027561.1 ENSG00000205509|NP\_001018856.1 ENSG00000205509|NP\_001027561.1 ENSG00000205580|NP\_001027561.1 ENSG00000205857|Q7Z5D8\_HUMAN ENSG00000034063|UHRF1 ENSG00000081059|TCF7 ENSG00000085831|C1orf34 ENSG00000087274|ADD1 ENSG00000107816|LZTS2 ENSG00000110090|CPT1A ENSG00000120071|KIAA1267 ENSG00000139112|GABARAP1 ENSG00000141569|TRIM65 ENSG00000150086|GRIN2B ENSG00000150594|ADRA2A ENSG00000155984|TMEM185A ENSG00000158470|B4GALT5 ENSG00000165138|ANKS6 ENSG00000165698|C9orf9 ENSG00000183955|SETD8 ENSG00000184639|NP\_001004344.1 ENSG00000185860|C1orf110 ENSG00000204312|Q6ZNY8\_HUMAN ENSG0000011638|TMEM159 ENSG0000014123|KIAA0776 ENSG0000033122|LRRC7 ENSG00000085365|SCAMP1 ENSG00000092199|HNRPC ENSG00000101132|PFDN4 ENSG00000104497|SNX16 ENSG00000110031|LPXN ENSG00000114120|SLC25A36 ENSG00000116266|STXB3P ENSG00000116750|UCHL5 ENSG00000119041|GTF3C3 ENSG00000120458|C11orf61 ENSG00000126581|BECN1 ENSG00000137960|GIPC2 ENSG00000138592|USP8 ENSG00000141429|GALNT1 ENSG00000143387|CTXK ENSG00000143476|DTL ENSG00000143476|DTL ENSG00000143476|DTL ENSG00000143476|DTL

TTTTTCCA ENSG00000057757|C1orf128 ENSG00000070770|CSNK2A2 ENSG00000077157|PPP1R12B ENSG00000086062|B4GALT1 ENSG00000089248|ERP29 ENSG00000105617|LENG1 ENSG00000107815|PEO1 ENSG00000110931|CAMKK2 ENSG00000111249|CUTL2 ENSG00000116667|C1orf21 ENSG00000119946|CNNM1 ENSG00000132693|CRP ENSG00000134287|ARF3 ENSG00000135930|EIF4E2 ENSG00000136828|RALGPS1 ENSG00000140807|NKD1 ENSG00000144712|CAND2 ENSG00000160179|ABCG1 ENSG00000162344|FGF19 ENSG00000162399|BSND ENSG00000163812|ZDHHC3 ENSG00000169084|ZBED1 ENSG00000170161|Q5VV11\_HUMAN ENSG00000170515|PA2G4 ENSG00000170653|ATF7 ENSG00000175779|NP\_997327.1 ENSG00000177822|XR\_017723.1 ENSG00000183207|RUVBL2 ENSG00000183549|NP\_060358.2 ENSG00000186792|IFRD2 ENSG00000187033|SAMD7 ENSG00000196295|Q8N867\_HUMAN ENSG00000197448|GSTK1 ENSG00000198369|SPRED2 ENSG00000008196|TFAP2B ENSG00000014123|KIAA0776 ENSG0000024862|CCDC28A ENSG00000094914|AAAS ENSG00000096087|GSTA2 ENSG00000096717|SIRT1 ENSG00000100890|KIAA0391 ENSG00000101367|MAPRE1 ENSG00000102048|ASB9 ENSG00000103018|CYB5B ENSG00000104237|RP1 ENSG00000106069|CHN2 ENSG00000112186|CAP2 ENSG00000114816|STAT1 ENSG00000116793|PHTF1 ENSG00000119912|DAPRE1 ENSG00000123416|TUBA1B ENSG00000124429|POF1B ENSG00000124788|ATXN1 ENSG00000139946|PBLI2 ENSG00000140259|MFAP1 ENSG00000143870|PIA6 ENSG00000145730|PAM ENSG00000150628|SPATA4 ENSG00000154727|GABPA ENSG00000154997|NP\_997249.1 ENSG00000165115|KIF27 ENSG00000168769|KIAA1546 ENSG00000171126|KCNG3 ENSG00000181562|FAM12A ENSG00000185873|TMPRSS11B ENSG00000186714|CCDC73 ENSG00000189332|Q4G197\_HUMAN ENSG00000196319|Q9H353\_HUMAN ENSG00000196885|Q9HAZ8\_HUMAN ENSG00000197410|DCHS2 ENSG00000204691|NR\_002819.1 ENSG00000205187|Q6ZSG3\_HUMAN

TTTTTCCG ENSG00000002330|BAD ENSG000000070729|CNGB1 ENSG00000090615|GOLGA3 ENSG00000101445|PPP1R16B ENSG00000105137|SYDE1 ENSG00000106665|CLIP2 ENSG00000108784|NAGLU ENSG00000126003|PLAGL2 ENSG00000160072|ATAD3B ENSG00000160255|ITGB2 ENSG00000164740|NR\_003034.1 ENSG00000170445|HARS ENSG00000174332|GLIS1 ENSG00000175894|C21orf29 ENSG00000178950|GAK ENSG00000183443|A2RU41\_HUMAN ENSG00000185627|PSMD13 ENSG00000187605|K0401\_HUMAN ENSG00000196747|HIST1H3H ENSG00000198114|C2orf46 ENSG00000077420|APBB1IP ENSG00000100478|AP4S1 ENSG00000101546|C18orf22 ENSG00000105982|RNF32 ENSG00000118564|FBXL5 ENSG00000118849|RARRES1 ENSG00000121390|PSPC1 ENSG00000123124|WWP1 ENSG00000129197|RPAIN ENSG00000132965|ALOX5AP ENSG00000135222|CSN2 ENSG00000168264|IRF2BP2 ENSG00000181163|NPM1 ENSG00000182223|ZAR1 ENSG00000183520|UPT11L ENSG00000185532|PRK61 ENSG00000196968|FUT11 ENSG00000204389|HSPA1A ENSG00000206538|VGLL3

TTTTCTA ENSG00000004478|FKBP4 ENSG00000006555|TTC22 ENSG000000011007|TCEB3 ENSG000000026652|AGPAT4 ENSG000000054523|KIF1B ENSG000000074842|C19orf10 ENSG000000099991|CABIN\_HUMAN ENSG000000101004|NLP\_HUMAN  
ENSG000000101665|SMAD7 ENSG000000105202|FBL ENSG000000105656|ELL ENSG000000112941|POL2 ENSG000000114841|DNAH1 ENSG000000119599|WDR21A ENSG000000119772|DNMT3A ENSG000000124194|GDAP1L1  
ENSG000000130270|ATP8B3 ENSG000000133056|PIK3C2B ENSG000000145990|GFD01 ENSG000000146122|DAAM2 ENSG000000151208|DLG5 ENSG000000152291|TGNL2 ENSG000000156599|ZDHC5 ENSG000000159023|EPB41  
ENSG000000159733|ZFYVE28 ENSG000000160208|RRP1B ENSG000000160233|LRRC3 ENSG000000161544|CYGB ENSG000000163435|ELF3 ENSG000000166398|KIAA0355 ENSG000000167182|SP2 ENSG000000173244|Q8N8D0\_HUMAN  
ENSG000000173404|INSM1 ENSG000000174243|DDX23 ENSG000000174989|FBXW8 ENSG000000176422|SPRYD4 ENSG000000179085|DPM3 ENSG000000181991|MRPS11 ENSG000000183734|ASCL2 ENSG000000185049|WHSC2  
ENSG000000185614|C3orf54 ENSG000000196526|AFAP1 ENSG000000205726|ITSN1 ENSG00000003436|TFPI ENSG000000048028|USP28 ENSG000000065911|MTHFD2 ENSG000000079950|STX7 ENSG000000082269|KIAA1411  
ENSG000000095209|TMEM38B ENSG000000100852|ARHGAP5 ENSG000000101888|NXT2 ENSG000000106692|FCMD ENSG000000112983|BRD8 ENSG000000114166|PCAF ENSG000000117525|F3 ENSG000000117569|PTBP2  
ENSG000000118307|CASC1 ENSG000000122786|CALD1 ENSG0000001232091|RNF11 ENSG000000131007|TTY9A\_HUMAN ENSG000000132603|NIP7 ENSG000000132661|NXT1 ENSG000000137038|C9orf123  
ENSG000000138496|PARP9 ENSG000000138722|MMRN1 ENSG000000139496|NUP1L1 ENSG000000144048|DUSP11 ENSG000000148516|ZEB1 ENSG000000151239|TWF1 ENSG000000155816|FMN2 ENSG000000162409|PRKAA2  
ENSG000000162521|RBBP4 ENSG000000162695|SLC30A7 ENSG000000165646|SLC18A2 ENSG000000165813|C10orf118 ENSG000000174010|KLHL15 ENSG000000174749|C4orf32 ENSG000000174799|CEP135 ENSG000000177613|CSTF2T  
ENSG000000182093|WRB ENSG000000185261|C5orf36 ENSG000000188730|VWC2 ENSG000000189730|VWC2 ENSG000000189730|VWC2 ENSG000000189730|VWC2  
TTTTGAA ENSG000000052835|ZNF785 ENSG000000064655|EYA2 ENSG000000105127|AKAP8 ENSG000000105229|PIAS4 ENSG000000114988|LMAN2L ENSG000000125633|CCDC93 ENSG000000137193|PIM1 ENSG000000138031|ADCY3  
ENSG000000138166|DUSP5 ENSG000000138175|ARL3 ENSG000000143549|TPM3 ENSG000000147454|SLC25A3 ENSG000000149716|ORAOV1 ENSG000000151360|ALLC ENSG000000151498|ACAD8 ENSG000000156030|C14orf43  
ENSG000000157087|ATP2B2 ENSG000000163067|ZNF2 ENSG000000164266|SPINK1 ENSG000000166073|GPR176 ENSG000000166833|NAV2 ENSG000000167941|SOST ENSG000000168546|GFRA2 ENSG000000172458|IL17D  
ENSG000000182372|C8orf61 ENSG000000184675|FAM123B ENSG000000185722|ANKFY1 ENSG000000185801|YV007\_HUMAN ENSG000000189182|KRT77 ENSG000000198752|CDC42BPB ENSG000000204380|Q6ZTQ2\_HUMAN ENSG00000003987|MTMR7  
ENSG000000008394|MGST1 ENSG000000038210|PI4K2B ENSG000000043093|DCUN1D1 ENSG000000049860|HEXB ENSG000000070961|ATP2B1 ENSG000000077254|LUXP3 ENSG000000083123|BCKDHB ENSG000000083642|APRIN  
ENSG000000103642|LACTB ENSG000000104549|SQLE ENSG000000107864|CEUB3 ENSG000000111530|CAND1 ENSG000000113083|LOX ENSG000000115303|PIP5K3 ENSG000000115502|PI5K3  
ENSG000000119812|FAM98A ENSG000000119844|AFTPH ENSG000000120008|BXND2 ENSG000000120802|TMPO ENSG000000120948|TARDBP ENSG000000122873|ZCD1 ENSG000000128654|MTX2 ENSG000000129691|ASH2L  
ENSG000000135387|CAPRIN1 ENSG000000139517|LNX2 ENSG000000139921|TXND1 ENSG000000139973|SYT16 ENSG000000140030|GPR65 ENSG000000152076|C10orf68 ENSG000000151287|C13orf27 ENSG000000162636|FAM102B  
ENSG000000164176|EDIL3 ENSG000000165490|NP\_659455.2 ENSG000000166822|TMEM170 ENSG000000169398|PTK2 ENSG000000170962|PDGFD ENSG000000174010|KLHL15 ENSG000000177853|ZNF518 ENSG000000188820|FAM26F  
ENSG000000196418|ZNF124 ENSG000000196912|AN36B\_HUMAN ENSG000000197275|RAD54B  
TTTTGAG ENSG000000009954|BAZ1B ENSG000000065308|TRAM2 ENSG000000088280|DDEF1 ENSG000000100266|PACSIN2 ENSG000000105251|SHD ENSG000000108591|DRG2 ENSG000000120664|LOC646871 ENSG000000123374|CDK2  
ENSG000000125695|STRAD\_HUMAN ENSG000000125815|CST8 ENSG000000128563|PRKRIP1 ENSG000000129473|BCL2L2 ENSG000000131097|HIGD1B ENSG000000144843|ADPRH ENSG000000145949|SGK85\_HUMAN ENSG000000147224|PRFS1  
ENSG000000149547|EI24 ENSG000000157916|RER1 ENSG000000168255|Q8IZ67\_HUMAN ENSG000000169084|ZBED1 ENSG000000189196|Q6ZUD9\_HUMAN ENSG000000204256|BRD2 ENSG000000058729|RIOK2 ENSG000000080839|RBL1  
ENSG000000090989|EXOC1 ENSG000000105708|ZNF14 ENSG000000107643|MAPK8 ENSG000000111231|ATPBD1C ENSG000000124486|USP9X ENSG000000125484|GTF3C4 ENSG000000125691|RPL23 ENSG000000134028|ADAMDEC1  
ENSG000000137154|RPS6 ENSG000000138050|THUMP2 ENSG000000142494|NP\_060712.2 ENSG000000146839|ZAN ENSG000000151689|INP1 ENSG000000162976|PQLC3 ENSG000000163661|PTX3 ENSG000000163738|MTHFD2L  
ENSG000000164144|ARFIP1 ENSG000000164985|PSIP1 ENSG000000165512|ZNF52 ENSG000000170385|SLC30A1 ENSG000000171792|C12orf32 ENSG000000178074|NP\_710156.2 ENSG000000180257|ZNF321 ENSG000000182197|EXT1  
ENSG000000182973|CNOT10 ENSG000000187325|TAF9B ENSG000000196966|HIST1H3E ENSG000000197695|Q8N203\_HUMAN ENSG000000205769|Q6ZUR9\_HUMAN  
TTTTGAT ENSG000000006740|RICH2\_HUMAN ENSG000000048332|Q9H8A7\_HUMAN ENSG000000078295|ADCY2 ENSG000000101265|RASSF2 ENSG000000101448|SPINLW1 ENSG000000103023|NP\_001073961.1 ENSG000000106211|HSPB1 ENSG000000109625|CPZ  
ENSG000000122729|AC01 ENSG000000124226|ZNF313 ENSG000000125409|TEKT3 ENSG000000126767|ELK1 ENSG000000133195|SLC39A11 ENSG000000136504|MYST2 ENSG000000150594|ADRA2A ENSG000000164896|FASTK  
ENSG000000168575|SLC20A2 ENSG000000168784|BPESC1 ENSG000000172757|CFE1 ENSG000000186577|C6orf1 ENSG000000188315|C3orf62 ENSG000000196132|MYT1\_HUMAN ENSG000000196498|NCOR2 ENSG00000007952|NOX1  
ENSG000000008952|TLOC1 ENSG000000039600|SOX30 ENSG000000056277|ZUH3 ENSG000000064313|TAF2 ENSG000000086619|CHMP5 ENSG000000086619|EOM1L1B ENSG000000087495|PHACTR3 ENSG000000107758|PPP3CB  
ENSG000000116761|CTH ENSG000000120696|KBTBD7 ENSG000000123200|SC3H13 ENSG000000127980|PEX1 ENSG000000131469|RPL27 ENSG000000132963|POMP ENSG000000134046|MBD2 ENSG000000134644|PUM1  
ENSG000000139218|SFRS2IP ENSG000000147601|TERF1 ENSG000000147874|FAM29A ENSG000000152670|DDX4 ENSG000000156313|RPCR ENSG000000160908|ZNF394 ENSG000000162598|C1orf87 ENSG000000164329|PAPD4  
ENSG000000165288|BRWD3 ENSG000000166266|CUL5 ENSG000000166349|RAG1 ENSG000000170293|CMT8 ENSG000000170584|NUDC2 ENSG000000173674|EIF1A1 ENSG000000178053|MLF1 ENSG000000178234|GALNT11  
TTTTGCA ENSG000000038382|TRIO ENSG000000049883|PTCD2 ENSG000000064309|CDON ENSG000000101146|RAE1 ENSG000000103200|NME4 ENSG000000116774|OLFML3 ENSG000000121104|FAM117A ENSG000000123349|PFDN5  
ENSG000000126778|SIX1 ENSG000000131378|RFTN1 ENSG000000136827|TOR1A ENSG000000137709|POU2F3 ENSG000000140950|KIAA1609 ENSG000000141580|WDR45L ENSG000000160213|CSTB ENSG000000163815|CLEC3B  
ENSG000000164649|CDCA7L ENSG000000165138|ANKS6 ENSG000000168484|SFTPC ENSG000000174903|RAB1B ENSG000000180598|NP\_057296.1 ENSG000000183955|SETD8 ENSG000000185990|F8A3 ENSG000000187479|Q7Z7L8\_HUMAN  
ENSG000000188488|SERPINA5 ENSG000000197932|F8A2 ENSG000000198444|EPB15 ENSG000000085832|EPS15 ENSG000000101447|FAM83D ENSG000000101773|RBBP8 ENSG000000107249|GLIS3 ENSG000000111530|CAND1  
ENSG000000112077|RHAG ENSG000000114529|C3orf52 ENSG000000114757|PEX5L ENSG000000120948|TARDBP ENSG000000123689|G0S2 ENSG000000123700|KCNJ2 ENSG000000125944|HNRPR ENSG000000132406|TMEM128  
ENSG000000134644|PUM1 ENSG000000144824|PLCXD2 ENSG000000145439|CBR4 ENSG000000147854|UHRF2 ENSG000000154533|PDLIM3 ENSG000000156502|SUPV3L1 ENSG000000162695|SLC30A7 ENSG000000163376|KBTBD8  
ENSG000000163624|CSD1 ENSG000000165410|CFL2 ENSG000000166889|NP\_689929.1 ENSG000000170340|B3GNT2 ENSG000000170989|EDG1 ENSG000000172139|SLC9A10 ENSG000000175895|PLEKHF2 ENSG000000176542|KIAA2018  
ENSG000000188693|NP\_001038940.1 ENSG000000196371|FUT4 ENSG000000198160|MIER1 ENSG000000205208|NP\_001008394.1  
TTTTGCC ENSG000000034053|APBA2 ENSG000000089057|SLC23A2 ENSG000000099821|POLRMT ENSG000000101004|NLP\_HUMAN ENSG000000104872|PIH1D1 ENSG000000110395|CBL ENSG000000130813|NP\_060851.1 ENSG000000140534|C15orf42  
ENSG000000141258|RUTBC1 ENSG000000155849|ELMO1 ENSG000000161998|Q8N221\_HUMAN ENSG000000166833|NAV2 ENSG000000166888|STAT6 ENSG000000169921|Q75L30\_HUMAN ENSG000000170684|ZNF342 ENSG000000179820|MYADM  
ENSG000000181991|MRPS11 ENSG000000183530|C2orf30 ENSG000000188559|C20orf74 ENSG000000197081|TGFR2 ENSG000000204312|Q6ZNY8\_HUMAN ENSG000000067533|RRP15 ENSG000000070367|EXOC5 ENSG000000082515|MRPL22  
ENSG000000088387|DOCK9 ENSG000000094963|FMO2 ENSG000000115165|PSCDBP ENSG000000115977|AAK1 ENSG000000132356|PRKAA1 ENSG000000135090|TAK3 ENSG000000136158|SPRY2  
ENSG000000137168|PP1L1 ENSG000000143183|TMCO1 ENSG000000144401|FAM119A ENSG000000145244|CORIN ENSG000000146938|NLGN4X ENSG000000147400|CETN2 ENSG000000147862|NFIB ENSG000000158467|SAHH3\_HUMAN  
ENSG000000163376|KBTBD8 ENSG000000166349|RAG1 ENSG000000167637|ZNF345 ENSG000000171204|TMEM126B ENSG000000180667|YOD1 ENSG000000188529|FUSIP1 ENSG000000196715|VKORC1L1 ENSG000000197817|Q9UHS9\_HUMAN  
ENSG000000205212|NP\_001004306.1  
TTTTGGA ENSG000000101342|C20orf118 ENSG000000112599|GUCA1B ENSG000000112855|HARS2 ENSG000000119280|C1orf198 ENSG000000119699|TGFβ3 ENSG000000125818|PSMF1 ENSG000000133105|RXFP2 ENSG000000146005|PSD2  
ENSG000000156973|PDE6D ENSG000000159784|FAM131B ENSG000000160789|LMNA ENSG000000167136|ENDOG ENSG000000168906|MAT2A ENSG000000169083|AR ENSG000000170776|AKAP13 ENSG000000177721|NP\_00104301.1  
ENSG000000178409|KIAA1553 ENSG000000181027|FKRP ENSG000000183778|B3GALT5 ENSG000000184678|HIST2H2BE ENSG000000186029|Q9NSZ8\_HUMAN ENSG000000186970|KRTAP15-1 ENSG000000196085|C19orf42 ENSG000000204120|TNRC15  
ENSG000000008083|JARID2 ENSG000000061656|SPAG4 ENSG000000070540|WIPI1 ENSG000000083535|C13orf24 ENSG000000085840|ORC1L ENSG000000115539|PDCL3 ENSG000000124784|RIOK1 ENSG000000125879|OTOR  
ENSG000000125944|HNRPR ENSG000000132680|KIAA0907 ENSG000000133818|RRAS2 ENSG000000136805|C3orf4 ENSG000000137499|CPBE2 ENSG000000137996|TRCD1 ENSG000000138162|TACC2 ENSG000000152022|LIX1L  
ENSG000000156414|TDRD9 ENSG000000163281|GNPDA2 ENSG000000163576|EFHB ENSG000000167637|ZNF345 ENSG000000168421|RHOH ENSG000000178988|MRFAP1L1 ENSG000000188693|NP\_001038940.1 ENSG000000196636|ACN9  
ENSG000000198719|DLL1 ENSG000000203701|C1orf140 ENSG000000205885|Q6UWM6\_HUMAN  
TTTTGGC ENSG000000034053|APBA2 ENSG000000100395|L3MBTL2 ENSG000000101473|ACOT8 ENSG000000103241|FOXF1 ENSG000000105549|THEG ENSG000000108788|MLX ENSG000000115884|SDC1 ENSG000000117899|MESDC2  
ENSG000000125804|C20orf91 ENSG000000127362|TAS2R3 ENSG000000140830|TXNL4B ENSG000000142686|NP\_689587.1 ENSG000000143093|FAM40A ENSG000000157045|NTAN1 ENSG000000166949|SMAD3 ENSG000000169921|Q75L30\_HUMAN  
ENSG000000171222|SCAND1 ENSG000000177084|POLE ENSG000000185442|NP\_997329.1 ENSG000000197283|SYNGAP1 ENSG000000206528|Q6ZSMO\_HUMAN ENSG00000024048|UBR2 ENSG000000078579|FGF20 ENSG000000087301|KIAA1344  
ENSG000000116898|MRPS15 ENSG000000124788|ATXN1 ENSG000000131115|ZNF227 ENSG000000132669|RIN2 ENSG000000133059|RIPK5 ENSG000000135577|NMBR ENSG000000138363|ATIC ENSG000000157193|LRP8  
ENSG000000164534|STK17A ENSG000000165806|CASP7 ENSG000000180611|C3orf59 ENSG000000197045|GMFB ENSG000000198455|ZXD8 ENSG000000198692|EIF1AY  
TTTTGGT ENSG00000002834|LASP1 ENSG00000006695|CXO10 ENSG000000095059|DHPS ENSG000000101577|LPIN2 ENSG000000106078|COBL ENSG000000129295|LRRC6 ENSG000000130511|SSBP4 ENSG000000138769|CDKL2  
ENSG000000138938|Q5TGJ8\_HUMAN ENSG000000143570|SLC39A1 ENSG000000144648|CCBP2 ENSG000000149269|PAK1 ENSG000000159023|EPB41 ENSG000000160058|BSDC1 ENSG000000166833|NAV2 ENSG000000167130|DOLPP1  
ENSG000000170310|STX8 ENSG000000170608|FOXA3 ENSG000000171649|ZIK1 ENSG000000172965|Q96C48\_HUMAN ENSG000000179912|R3HDM2 ENSG000000186951|PPARA ENSG000000196652|ZKSCAN5 ENSG000000197506|SLC28A3  
ENSG000000198879|SFMBT2 ENSG000000205927|OLIG2 ENSG000000206539|Q6ZTN9\_HUMAN ENSG000000005302|MSL3L1 ENSG000000039139|DNAH5 ENSG000000084093|REST ENSG000000092345|DAZL  
ENSG000000101958|GLRA2 ENSG000000103657|HERC1 ENSG000000106588|PSMA2 ENSG000000113648|H2AFY ENSG000000123594|ATRXN3L ENSG000000124479|NDP ENSG000000134057|CCNB1 ENSG000000145349|CAMK2D  
ENSG000000159658|KIAA0494 ENSG000000160207|HSF2BP ENSG000000164109|MAD2L1 ENSG000000167005|NUDT21 ENSG000000167014|C15orf43 ENSG000000172340|SUCLG2 ENSG000000175087|PDIK1L ENSG000000177111|XR\_016777.1  
ENSG000000182512|GLRX5 ENSG000000185020|Q4VXF0\_HUMAN ENSG000000196586|MYO6 ENSG000000197791|Q6ZUR4\_HUMAN ENSG000000197822|OCLN  
TTTTGTA ENSG000000060069|CTDP1 ENSG000000069399|BCL3 ENSG000000071564|TCF3 ENSG000000075856|SART3 ENSG000000079616|KIF22 ENSG000000099875|MKNK2 ENSG000000100084|HIRA ENSG000000100226|GTPBP1  
ENSG000000100344|PNPLA3 ENSG000000101493|ZNF516 ENSG000000106070|GRB10 ENSG000000107882|SUFU ENSG000000112062|MAPK14 ENSG000000116990|MYCL1 ENSG000000120087|HOXB7 ENSG000000124216|SNAI1  
ENSG000000126698|DNAJC8 ENSG000000129152|MYOD1 ENSG000000131148|COX4NB ENSG000000131914|LIN28 ENSG000000136848|DAB2IP ENSG000000140943|MBTPS1 ENSG000000158022|TRIM63 ENSG000000159261|CLDN14  
ENSG000000160208|RRP1B ENSG000000162367|TAL1 ENSG000000162783|IER5 ENSG000000163141|BNIP1 ENSG000000166860|ZBTB39 ENSG000000166978|MRB ENSG000000167711|SERPINF2 ENSG000000168140|VASN  
ENSG000000169375|SN3A ENSG000000170485|NPAS2 ENSG000000176769|TCERG1L ENSG000000176887|SOX11 ENSG000000180758|GPR157 ENSG000000182158|CREB3L2 ENSG000000182968|SOX1 ENSG000000183579|ZNF3  
ENSG000000184916|JAG2 ENSG000000185049|WHSC2 ENSG000000196422|KIAA0649 ENSG000000196581|AJAP1 ENSG000000197446|CYP2F1 ENSG000000198668|CALM1 ENSG000000198785|GRIN3A ENSG000000198797|FAM5B  
ENSG000000198873|GRK5 ENSG000000204792|Q6ZU62\_HUMAN ENSG000000030066|NUP160 ENSG000000038020|AGA ENSG0000000038210|PI4K2B ENSG000000047634|SCML1 ENSG000000088205|DDX18  
ENSG000000100519|PSMC6 ENSG000000100811|YY1 ENSG000000101639|CEP192 ENSG000000101955|SRPX ENSG000000102128|RB40L\_HUMAN ENSG000000102554|KLF5 ENSG000000104517|EDD1 ENSG000000104613|INTS10  
ENSG000000105216|LSM14A ENSG000000105866|SP4 ENSG000000105996|HOXA2 ENSG000000107668|MAP3K8 ENSG000000108001|EBF3 ENSG000000113161|HMGR ENSG000000113240|CLK4 ENSG000000113368|LMNB1  
ENSG000000113742|CPEB4 ENSG000000117289|TXNIP1 ENSG000000117616|C1orf63 ENSG000000118953|SMNDC1 ENSG000000120549|KIAA1217 ENSG000000120690|ELF1 ENSG000000121578|B4GALT4 ENSG000000126773|C14orf135  
ENSG000000127914|AKAP9 ENSG000000134086|VHL ENSG000000134323|MYCN ENSG000000135919|SERPINE2 ENSG000000138587|MNS1 ENSG000000139352|ASCL1 ENSG000000141542|RAB40B ENSG000000144229|THSD7B  
ENSG000000148123|NP\_060223.2 ENSG000000155816|FMN2 ENSG000000159140|SON ENSG000000162407|PPAP2B ENSG000000164032|H2AFZ ENSG000000164104|HMGB2 ENSG000000164746|Q8NEG2\_HUMAN  
ENSG000000164944|KIAA1429 ENSG000000167904|TMEM68 ENSG000000168438|CDC40 ENSG000000168564|CDKN2AIP ENSG000000169379|ARL13B ENSG000000175691|ZNF77 ENSG000000175745|NR2F1 ENSG000000182552|RWD4A  
ENSG000000182963|GJA7 ENSG000000184588|PDE4B ENSG000000198721|PEIC1 ENSG000000198721|PEIC1  
TTTTGTG ENSG000000003137|CYP26B1 ENSG000000011347|SYT7 ENSG000000002993|HMGCB3 ENSG000000067840|PDZD4 ENSG000000071282|LMCD1 ENSG000000079689|SCGN ENSG000000106100|NOD1 ENSG000000111348|ARHGDI8  
ENSG000000111652|COP57A ENSG000000117461|PIK3R3 ENSG000000130520|LSMA ENSG000000131771|PPP1R1B ENSG000000139514|SLC7A1 ENSG000000140526|ABHD2 ENSG000000143258|USP21 ENSG000000145819|ARHGAP26



ENSG00000124374|PAIP2B ENSG00000128591|FLNC ENSG00000130287|NCAN ENSG00000131368|MRPS25 ENSG00000131652|THOC6 ENSG00000132846|ZBED3 ENSG00000136877|FPGS ENSG00000140950|KIAA1609  
ENSG00000143515|ATP8B2 ENSG00000143614|GATAD2B ENSG00000145050|ARMET ENSG00000148200|NR6A1 ENSG00000148840|PPRC1 ENSG00000150401|DCUN1D2 ENSG00000152128|TMEM163 ENSG00000153395|AYTL2  
ENSG00000160113|NR2F6 ENSG00000160318|CLDND2 ENSG00000163812|ZDHHC3 ENSG00000164778|EN2 ENSG00000166123|GPT2 ENSG00000166833|NAV2 ENSG00000167642|SPINT2 ENSG00000168496|FEN1  
ENSG00000172458|IL17D ENSG00000173402|DAG1 ENSG00000176749|CDK5R1 ENSG00000176887|SOX11 ENSG00000179241|LDLRAD3 ENSG00000179344|HB25\_HUMAN ENSG00000179428|Q8N6X1\_HUMAN ENSG00000179776|CDH5  
ENSG00000186318|BACE1 ENSG00000186716|BCR ENSG00000188176|SMTNL2 ENSG00000197283|SYNGAP1 ENSG00000017427|IGF1 ENSG00000034693|PEX3 ENSG00000039123|SKIV2L2 ENSG00000067955|CBFB  
ENSG00000069956|MAPK6 ENSG00000073905|VDAC1 ENSG00000080608|KIAA0020 ENSG00000084093|REST ENSG00000099783|HNRPM ENSG00000104067|TJP1 ENSG00000105793|GTPBP10 ENSG00000107864|CPEB3  
ENSG00000112964|GHR ENSG00000114127|XRN1 ENSG00000114315|HES1 ENSG00000114446|IFT57 ENSG00000116191|RALGPS2 ENSG00000116874|WARS2 ENSG00000117479|SLC19A2 ENSG00000120837|NFYB  
ENSG00000130699|TAF4 ENSG00000133111|RFXAP ENSG00000135318|NT5E ENSG00000136213|CHST12 ENSG00000137720|C11orf1 ENSG00000137807|KIF23 ENSG00000138594|TMOD3 ENSG00000139263|LRIG3  
ENSG00000140284|SLC27A2 ENSG00000142188|TMEM50B ENSG00000144935|TRPC1 ENSG00000147926|NP\_001076593.1 ENSG00000148700|ADD3 ENSG00000153147|SMARCA5 ENSG00000157576|XR\_018454.1 ENSG00000159131|GART  
ENSG00000164161|HHIP ENSG00000164758|THRAP6 ENSG00000166452|C11orf17 ENSG00000168502|KIAA0802 ENSG00000171943|SRGAP2P1 ENSG00000173467|AGR3 ENSG00000183878|UTY ENSG00000185344|ATP6V0A2  
ENSG00000185775|FAM75A6 ENSG00000186298|PPP1CC ENSG00000196540|FAM75A3 ENSG00000197323|TRIM33 ENSG00000197896|Q5VU36\_HUMAN ENSG00000198642|KLHL9 ENSG00000198947|DMD ENSG00000204840|Q4VX67\_HUMAN  
ENSG00000204848|FAM75A2 ENSG00000204849|FAM75A1 ENSG00000205581|HMG1
