# Supplementary material for: Genome-wide survey of microRNA–transcription factor feed-forward regulatory circuits in human
Source: PubMed Central journal article supplement — Mol Biosyst. 2009 Jun 19;5(8):854–67. doi: 10.1039/b900177h (PMC2898627; doi:10.1039/b900177h), 2009-06-19
Supplement: b900177h_add_file_6.pdf [file b900177h_add_file_6.pdf]

# Circuits raw data.

# Raw circuits obtained with our pipeline, using (-900/+100) nt around TSS as choice for the promoter regions. Each line represents a single circuit.

# File is TAB delimited and columns are:  
# Column 0 is the circuit id, composed by:  
# - Transcription Factor name  
# - Ensembl pre-miRNA id  
# - miRNA precursor id (pre-miRNA)  
# - miRNA mature id  
# Columns 1 contains the Ensembl gene\_id of the joint target (jt) genes.

# A plain text ASCII version of this file is available at: <http://personalpages.to.infn.it/~cora/circuits/index.html>

|                                                 |                                   |
|-------------------------------------------------|-----------------------------------|
| AFP1 ENSG00000199072 hsa-let-7f-1 hsa-let-7f    | jt:ENSG00000197948 FCHSD1         |
| AFP1 ENSG00000199072 hsa-let-7f-1 hsa-let-7f    | jt:ENSG00000204538 PSORS1C2       |
| AFP1 ENSG00000199072 hsa-let-7f-1 hsa-let-7f    | jt:ENSG00000179165 PXT1           |
| AFP1 ENSG00000199133 hsa-let-7d hsa-let-7d      | jt:ENSG00000204538 PSORS1C2       |
| AFP1 ENSG00000199133 hsa-let-7d hsa-let-7d      | jt:ENSG00000179165 PXT1           |
| AFP1 ENSG00000199165 hsa-let-7a-1 hsa-let-7a    | jt:ENSG00000197948 FCHSD1         |
| AFP1 ENSG00000199165 hsa-let-7a-1 hsa-let-7a    | jt:ENSG00000204538 PSORS1C2       |
| AFP1 ENSG00000199165 hsa-let-7a-1 hsa-let-7a    | jt:ENSG00000179165 PXT1           |
| AFP1 ENSG00000199177 hsa-mir-31 hsa-miR-31      | jt:ENSG00000153814 JAZF1          |
| AFP1 ENSG00000199177 hsa-mir-31 hsa-miR-31      | jt:ENSG00000110799 VWF            |
| AFP1 ENSG00000207698 hsa-mir-32 hsa-miR-32      | jt:ENSG00000198373 WWP2           |
| AFP1 ENSG00000207698 hsa-mir-32 hsa-miR-32      | jt:ENSG00000112081 SFRS3          |
| AFP1 ENSG00000207698 hsa-mir-32 hsa-miR-32      | jt:ENSG00000204323 Q71RC9_HUMAN   |
| AFP1 ENSG00000207698 hsa-mir-32 hsa-miR-32      | jt:ENSG00000143401 ANP32E         |
| AFP1 ENSG00000207698 hsa-mir-32 hsa-miR-32      | jt:ENSG00000151789 ZNF659         |
| AFP1 ENSG00000207698 hsa-mir-32 hsa-miR-32      | jt:ENSG00000178110 Q8N9G9_HUMAN   |
| AFP1 ENSG00000208017 hsa-mir-140 hsa-miR-140    | jt:ENSG00000049130 KITLG          |
| AFP1 ENSG00000208017 hsa-mir-140 hsa-miR-140    | jt:ENSG00000205609 Q9BW98_HUMAN   |
| AHR ENSG00000199032 hsa-mir-425 hsa-miR-425-3p  | jt:ENSG00000181798 C2orf52        |
| AHR ENSG00000199032 hsa-mir-425 hsa-miR-425-3p  | jt:ENSG00000153132 CLGN           |
| AHR ENSG00000199032 hsa-mir-425 hsa-miR-425-3p  | jt:ENSG00000173581 CCDC106        |
| AHR ENSG00000199032 hsa-mir-425 hsa-miR-425-3p  | jt:ENSG00000146963 LUC7L2         |
| AHR ENSG00000199032 hsa-mir-425 hsa-miR-425-3p  | jt:ENSG00000053524 MCF2L2         |
| AHR ENSG00000199032 hsa-mir-425 hsa-miR-425-3p  | jt:ENSG00000116691 ANKRD38        |
| AHR ENSG00000199066 hsa-mir-330 hsa-miR-330     | jt:ENSG00000137727 ARHGAP20       |
| AHR ENSG00000199066 hsa-mir-330 hsa-miR-330     | jt:ENSG00000168411 RFWD3          |
| AHR ENSG00000199066 hsa-mir-330 hsa-miR-330     | jt:ENSG00000162642 C1orf52        |
| AHR ENSG00000207562 hsa-mir-34c hsa-miR-34c     | jt:ENSG00000198586 TLK1           |
| AHR ENSG00000207562 hsa-mir-34c hsa-miR-34c     | jt:ENSG00000179909 ZNF154         |
| AHR ENSG00000207562 hsa-mir-34c hsa-miR-34c     | jt:ENSG00000131951 LRRC9          |
| AHR ENSG00000207567 hsa-mir-142 hsa-miR-142-3p  | jt:ENSG00000136636 KCTD3          |
| AHR ENSG00000207567 hsa-mir-142 hsa-miR-142-3p  | jt:ENSG00000141971 FAM125A        |
| AHR ENSG00000207567 hsa-mir-142 hsa-miR-142-3p  | jt:ENSG00000169919 GUSB           |
| AHR ENSG00000207567 hsa-mir-142 hsa-miR-142-3p  | jt:ENSG00000088812 ATRN           |
| AHR ENSG00000207567 hsa-mir-142 hsa-miR-142-3p  | jt:ENSG00000165417 GTF2A1         |
| AHR ENSG00000207567 hsa-mir-142 hsa-miR-142-3p  | jt:ENSG00000106540 C7orf36        |
| AHR ENSG00000207567 hsa-mir-142 hsa-miR-142-5p  | jt:ENSG00000124357 NAGK           |
| AHR ENSG00000207567 hsa-mir-142 hsa-miR-142-5p  | jt:ENSG00000023191 RNH1           |
| AHR ENSG00000207567 hsa-mir-142 hsa-miR-142-5p  | jt:ENSG00000144659 SLC25A38       |
| AHR ENSG00000207633 hsa-mir-505 hsa-miR-505     | jt:ENSG00000188846 RPL14          |
| AHR ENSG00000207811 hsa-mir-34b hsa-miR-34b     | jt:ENSG00000198586 TLK1           |
| AHR ENSG00000207811 hsa-mir-34b hsa-miR-34b     | jt:ENSG00000179909 ZNF154         |
| AHR ENSG00000207811 hsa-mir-34b hsa-miR-34b     | jt:ENSG00000131951 LRRC9          |
| AHR ENSG00000207955 hsa-mir-219-2 hsa-miR-219   | jt:ENSG00000099725 PRKY           |
| AHR ENSG00000207955 hsa-mir-219-2 hsa-miR-219   | jt:ENSG00000166435 XRRAL          |
| AHR ENSG00000207955 hsa-mir-219-2 hsa-miR-219   | jt:ENSG00000170264 NP_115556.1    |
| AHR ENSG00000207955 hsa-mir-219-2 hsa-miR-219   | jt:ENSG00000134901 KDELC1         |
| AHR ENSG00000207955 hsa-mir-219-2 hsa-miR-219   | jt:ENSG00000114982 NP_060461.3    |
| AHR ENSG00000207955 hsa-mir-219-2 hsa-miR-219   | jt:ENSG00000173457 PPP1R14B       |
| AHR ENSG00000207955 hsa-mir-219-2 hsa-miR-219   | jt:ENSG00000165948 FAM14B         |
| AHR ENSG00000211590 hsa-mir-802 hsa-miR-802     | jt:ENSG00000092964 DPYSL2         |
| AHR ENSG00000211590 hsa-mir-802 hsa-miR-802     | jt:ENSG00000184935 Q6A101_HUMAN   |
| AHR ENSG00000211590 hsa-mir-802 hsa-miR-802     | jt:ENSG00000101193 C2orf11        |
| AHR ENSG00000211590 hsa-mir-802 hsa-miR-802     | jt:ENSG00000112651 MRPL2          |
| AHR ENSG00000211590 hsa-mir-802 hsa-miR-802     | jt:ENSG00000205036 NP_001001682.1 |
| AHR ENSG00000211590 hsa-mir-802 hsa-miR-802     | jt:ENSG00000029363 BCLAF1         |
| AML1 ENSG00000199058 hsa-mir-302b hsa-miR-302b  | jt:ENSG00000173530 TNFRSF10D      |
| AML1 ENSG00000199058 hsa-mir-302b hsa-miR-302b  | jt:ENSG00000177337 NP_001034885.1 |
| AML1 ENSG00000199058 hsa-mir-302b hsa-miR-302b  | jt:ENSG00000143314 MRPL24         |
| AML1 ENSG00000199058 hsa-mir-302b hsa-miR-302b  | jt:ENSG00000144354 CDC47          |
| AML1 ENSG00000199058 hsa-mir-302b hsa-miR-302b  | jt:ENSG00000128604 IRF5           |
| AML1 ENSG00000199058 hsa-mir-302b hsa-miR-302b  | jt:ENSG00000144711 IQSEC1         |
| AML1 ENSG00000199058 hsa-mir-302b hsa-miR-302b  | jt:ENSG00000139970 RTN1           |
| AML1 ENSG00000199058 hsa-mir-302b hsa-miR-302b  | jt:ENSG00000188193 C6orf155       |
| AML1 ENSG00000199058 hsa-mir-302b hsa-miR-302b  | jt:ENSG00000108389 MTMR4          |
| AML1 ENSG00000199058 hsa-mir-302b hsa-miR-302b  | jt:ENSG00000180667 YOD1           |
| AML1 ENSG00000199058 hsa-mir-302b hsa-miR-302b  | jt:ENSG00000183826 BTBD9          |
| AML1 ENSG00000199058 hsa-mir-302b hsa-miR-302b  | jt:ENSG00000204542 C6orf15        |
| AML1 ENSG00000199058 hsa-mir-302b hsa-miR-302b  | jt:ENSG00000100647 KIAA0247       |
| AML1 ENSG00000199058 hsa-mir-302b hsa-miR-302b  | jt:ENSG00000135604 STX11          |
| AML1 ENSG00000199058 hsa-mir-302b hsa-miR-302b  | jt:ENSG00000168061 SAC3D1         |
| AML1 ENSG00000199058 hsa-mir-302b hsa-miR-302b* | jt:ENSG00000024862 CCDC28A        |
| AML1 ENSG00000199058 hsa-mir-302b hsa-miR-302b* | jt:ENSG00000136688 IL1F9          |
| AML1 ENSG00000199058 hsa-mir-302b hsa-miR-302b* | jt:ENSG00000122729 ACO1           |
| AML1 ENSG00000199058 hsa-mir-302b hsa-miR-302b* | jt:ENSG00000183496 RKHD3          |
| AML1 ENSG00000199058 hsa-mir-302b hsa-miR-302b* | jt:ENSG00000165861 ZFYVE1         |
| AML1 ENSG00000199058 hsa-mir-302b hsa-miR-302b* | jt:ENSG00000095587 TLI2           |
| AML1 ENSG00000199058 hsa-mir-302b hsa-miR-302b* | jt:ENSG00000171456 ASXL1          |
| AML1 ENSG00000199085 hsa-mir-148a hsa-miR-148a  | jt:ENSG00000026036 TNFRSF6B       |
| AML1 ENSG00000199085 hsa-mir-148a hsa-miR-148a  | jt:ENSG00000136842 TMOD1          |
| AML1 ENSG00000199085 hsa-mir-148a hsa-miR-148a  | jt:ENSG00000180537 RNF182         |
| AML1 ENSG00000199085 hsa-mir-148a hsa-miR-148a  | jt:ENSG00000173926 MARCH3         |
| AML1 ENSG00000199085 hsa-mir-148a hsa-miR-148a  | jt:ENSG00000125084 WNT1           |
| AML1 ENSG00000199085 hsa-mir-148a hsa-miR-148a  | jt:ENSG00000135374 ELF5           |
| AML1 ENSG00000199085 hsa-mir-148a hsa-miR-148a  | jt:ENSG00000130052 STARD8         |
| AML1 ENSG00000199085 hsa-mir-148a hsa-miR-148a  | jt:ENSG00000204584 Q6ZSH9_HUMAN   |
| AML1 ENSG00000199085 hsa-mir-148a hsa-miR-148a  | jt:ENSG00000151418 ATP6V1G3       |
| AML1 ENSG00000199085 hsa-mir-148a hsa-miR-148a  | jt:ENSG00000111711 GOLT1B         |
| AML1 ENSG00000199085 hsa-mir-148a hsa-miR-148a  | jt:ENSG00000137073 UBAP2          |
| AML1 ENSG00000199089 hsa-mir-202 hsa-miR-202    | jt:ENSG00000135297 MTO1           |

AML1 | ENSG00000199089 | hsa-mir-202 | hsa-miR-202 | jt:ENSG00000056345 | ITGB3  
AML1 | ENSG00000199089 | hsa-mir-202 | hsa-miR-202 | jt:ENSG00000143473 | KCNHI1  
AML1 | ENSG00000199089 | hsa-mir-202 | hsa-miR-202 | jt:ENSG00000187164 | KIAA1598  
AML1 | ENSG00000199089 | hsa-mir-202 | hsa-miR-202 | jt:ENSG00000177058 | NP\_775785.1  
AML1 | ENSG00000199089 | hsa-mir-202 | hsa-miR-202 | jt:ENSG00000204681 | GABBR1  
AML1 | ENSG00000199089 | hsa-mir-202 | hsa-miR-202 | jt:ENSG00000186827 | TNFRSF4  
AML1 | ENSG00000199089 | hsa-mir-202 | hsa-miR-202 | jt:ENSG00000164654 | NP\_061878.3  
AML1 | ENSG00000199089 | hsa-mir-202 | hsa-miR-202\* | jt:ENSG00000155087 | ODF1  
AML1 | ENSG00000199102 | hsa-mir-302c | hsa-miR-302c | jt:ENSG00000173530 | TNFRSF10D  
AML1 | ENSG00000199102 | hsa-mir-302c | hsa-miR-302c | jt:ENSG00000177337 | NP\_001034885.1  
AML1 | ENSG00000199102 | hsa-mir-302c | hsa-miR-302c | jt:ENSG00000143314 | MRPL24  
AML1 | ENSG00000199102 | hsa-mir-302c | hsa-miR-302c | jt:ENSG00000144354 | CDCA7  
AML1 | ENSG00000199102 | hsa-mir-302c | hsa-miR-302c | jt:ENSG00000128604 | IRF5  
AML1 | ENSG00000199102 | hsa-mir-302c | hsa-miR-302c | jt:ENSG00000144711 | IQSEC1  
AML1 | ENSG00000199102 | hsa-mir-302c | hsa-miR-302c | jt:ENSG00000139970 | RTN1  
AML1 | ENSG00000199102 | hsa-mir-302c | hsa-miR-302c | jt:ENSG00000188193 | C6orf155  
AML1 | ENSG00000199102 | hsa-mir-302c | hsa-miR-302c | jt:ENSG00000108389 | MTMR4  
AML1 | ENSG00000199102 | hsa-mir-302c | hsa-miR-302c | jt:ENSG00000180667 | YOD1  
AML1 | ENSG00000199102 | hsa-mir-302c | hsa-miR-302c | jt:ENSG00000183826 | BTBD9  
AML1 | ENSG00000199102 | hsa-mir-302c | hsa-miR-302c | jt:ENSG00000204542 | C6orf15  
AML1 | ENSG00000199102 | hsa-mir-302c | hsa-miR-302c | jt:ENSG00000100647 | KIAA0247  
AML1 | ENSG00000199102 | hsa-mir-302c | hsa-miR-302c | jt:ENSG00000135604 | STX11  
AML1 | ENSG00000199102 | hsa-mir-302c | hsa-miR-302c | jt:ENSG00000168061 | SAC3D1  
AML1 | ENSG00000199102 | hsa-mir-302c | hsa-miR-302c\* | jt:ENSG00000073605 | GSDML  
AML1 | ENSG00000199102 | hsa-mir-302c | hsa-miR-302c\* | jt:ENSG00000073712 | PLEKHC1  
AML1 | ENSG00000199102 | hsa-mir-302c | hsa-miR-302c\* | jt:ENSG00000073282 | TP73L  
AML1 | ENSG00000199102 | hsa-mir-302c | hsa-miR-302c\* | jt:ENSG00000097033 | SH3GLB1  
AML1 | ENSG00000199102 | hsa-mir-302c | hsa-miR-302c\* | jt:ENSG00000129538 | RNASE1  
AML1 | ENSG00000199102 | hsa-mir-302c | hsa-miR-302c\* | jt:ENSG00000185198 | PRSSL1  
AML1 | ENSG00000199102 | hsa-mir-302c | hsa-miR-302c\* | jt:ENSG00000147614 | ATP6V0D2  
AML1 | ENSG00000199102 | hsa-mir-302c | hsa-miR-302c\* | jt:ENSG00000159455 | LCE2B  
AML1 | ENSG00000199102 | hsa-mir-302c | hsa-miR-302c\* | jt:ENSG00000125772 | GDE5\_HUMAN  
AML1 | ENSG00000199122 | hsa-mir-148b | hsa-miR-148b | jt:ENSG00000196972 | Q86V52\_HUMAN  
AML1 | ENSG00000199122 | hsa-mir-148b | hsa-miR-148b | jt:ENSG00000026036 | TNFRSF6B  
AML1 | ENSG00000199122 | hsa-mir-148b | hsa-miR-148b | jt:ENSG00000136842 | TMOD1  
AML1 | ENSG00000199122 | hsa-mir-148b | hsa-miR-148b | jt:ENSG00000180537 | RNF182  
AML1 | ENSG00000199122 | hsa-mir-148b | hsa-miR-148b | jt:ENSG00000173926 | MARCH3  
AML1 | ENSG00000199122 | hsa-mir-148b | hsa-miR-148b | jt:ENSG00000125084 | WNT1  
AML1 | ENSG00000199122 | hsa-mir-148b | hsa-miR-148b | jt:ENSG00000135374 | ELF5  
AML1 | ENSG00000199122 | hsa-mir-148b | hsa-miR-148b | jt:ENSG00000130052 | STARD8  
AML1 | ENSG00000199122 | hsa-mir-148b | hsa-miR-148b | jt:ENSG00000204584 | Q6ZSH9\_HUMAN  
AML1 | ENSG00000199122 | hsa-mir-148b | hsa-miR-148b | jt:ENSG00000151418 | ATP6V1G3  
AML1 | ENSG00000199122 | hsa-mir-148b | hsa-miR-148b | jt:ENSG00000206193 | Q5HYA3\_HUMAN  
AML1 | ENSG00000199122 | hsa-mir-148b | hsa-miR-148b | jt:ENSG00000111711 | GOLTB1  
AML1 | ENSG00000199122 | hsa-mir-148b | hsa-miR-148b | jt:ENSG00000137073 | UBAP2  
AML1 | ENSG00000199145 | hsa-mir-302d | hsa-miR-302d | jt:ENSG00000173530 | TNFRSF10D  
AML1 | ENSG00000199145 | hsa-mir-302d | hsa-miR-302d | jt:ENSG00000177337 | NP\_001034885.1  
AML1 | ENSG00000199145 | hsa-mir-302d | hsa-miR-302d | jt:ENSG00000143314 | MRPL24  
AML1 | ENSG00000199145 | hsa-mir-302d | hsa-miR-302d | jt:ENSG00000144354 | CDCA7  
AML1 | ENSG00000199145 | hsa-mir-302d | hsa-miR-302d | jt:ENSG00000128604 | IRF5  
AML1 | ENSG00000199145 | hsa-mir-302d | hsa-miR-302d | jt:ENSG00000144711 | IQSEC1  
AML1 | ENSG00000199145 | hsa-mir-302d | hsa-miR-302d | jt:ENSG00000139970 | RTN1  
AML1 | ENSG00000199145 | hsa-mir-302d | hsa-miR-302d | jt:ENSG00000188193 | C6orf155  
AML1 | ENSG00000199145 | hsa-mir-302d | hsa-miR-302d | jt:ENSG00000108389 | MTMR4  
AML1 | ENSG00000199145 | hsa-mir-302d | hsa-miR-302d | jt:ENSG00000180667 | YOD1  
AML1 | ENSG00000199145 | hsa-mir-302d | hsa-miR-302d | jt:ENSG00000183826 | BTBD9  
AML1 | ENSG00000199145 | hsa-mir-302d | hsa-miR-302d | jt:ENSG00000204542 | C6orf15  
AML1 | ENSG00000199145 | hsa-mir-302d | hsa-miR-302d | jt:ENSG00000100647 | KIAA0247  
AML1 | ENSG00000199145 | hsa-mir-302d | hsa-miR-302d | jt:ENSG00000135604 | STX11  
AML1 | ENSG00000199145 | hsa-mir-302d | hsa-miR-302d | jt:ENSG00000168061 | SAC3D1  
AML1 | ENSG00000199169 | hsa-mir-367 | hsa-miR-367 | jt:ENSG00000091664 | SLC17A6  
AML1 | ENSG00000199169 | hsa-mir-367 | hsa-miR-367 | jt:ENSG00000173040 | EVC2  
AML1 | ENSG00000199169 | hsa-mir-367 | hsa-miR-367 | jt:ENSG00000069812 | HES2  
AML1 | ENSG00000199169 | hsa-mir-367 | hsa-miR-367 | jt:ENSG00000110848 | CDE9  
AML1 | ENSG00000199169 | hsa-mir-367 | hsa-miR-367 | jt:ENSG00000198677 | KIAA0372  
AML1 | ENSG00000199169 | hsa-mir-367 | hsa-miR-367 | jt:ENSG00000196186 | Q71RF5\_HUMAN  
AML1 | ENSG00000199169 | hsa-mir-367 | hsa-miR-367 | jt:ENSG00000136478 | TEX2  
AML1 | ENSG00000199169 | hsa-mir-367 | hsa-miR-367 | jt:ENSG00000128641 | MYO1B  
AML1 | ENSG00000199169 | hsa-mir-367 | hsa-miR-367 | jt:ENSG00000198106 | RUNCDC2B  
AML1 | ENSG00000199169 | hsa-mir-367 | hsa-miR-367 | jt:ENSG00000081377 | CDC14C  
AML1 | ENSG00000199169 | hsa-mir-367 | hsa-miR-367 | jt:ENSG00000154217 | PITPN1  
AML1 | ENSG00000199169 | hsa-mir-367 | hsa-miR-367 | jt:ENSG00000023171 | GRAMD1B  
AML1 | ENSG00000199177 | hsa-mir-31 | hsa-miR-31 | jt:ENSG0000013588 | GPRC5A  
AML1 | ENSG00000199177 | hsa-mir-31 | hsa-miR-31 | jt:ENSG00000073969 | NSF  
AML1 | ENSG00000199177 | hsa-mir-31 | hsa-miR-31 | jt:ENSG00000106483 | SFRP4  
AML1 | ENSG00000199177 | hsa-mir-31 | hsa-miR-31 | jt:ENSG00000151715 | TMEM45B  
AML1 | ENSG00000199177 | hsa-mir-31 | hsa-miR-31 | jt:ENSG00000100612 | DHRS7  
AML1 | ENSG00000207611 | hsa-mir-149 | hsa-miR-149 | jt:ENSG00000128731 | HERC2  
AML1 | ENSG00000207611 | hsa-mir-149 | hsa-miR-149 | jt:ENSG00000157856 | C2orf39  
AML1 | ENSG00000207611 | hsa-mir-149 | hsa-miR-149 | jt:ENSG00000138111 | TMEM180  
AML1 | ENSG00000207611 | hsa-mir-149 | hsa-miR-149 | jt:ENSG00000168297 | PKX  
AML1 | ENSG00000207611 | hsa-mir-149 | hsa-miR-149 | jt:ENSG00000059573 | ALDH18A1  
AML1 | ENSG00000207611 | hsa-mir-149 | hsa-miR-149 | jt:ENSG00000205852 | Q6ZWI3\_HUMAN  
AML1 | ENSG00000207611 | hsa-mir-149 | hsa-miR-149 | jt:ENSG00000167994 | RAB31L1  
AML1 | ENSG00000207611 | hsa-mir-149 | hsa-miR-149 | jt:ENSG00000121481 | RNF2  
AML1 | ENSG00000207611 | hsa-mir-149 | hsa-miR-149 | jt:ENSG00000118816 | CCNI  
AML1 | ENSG00000207728 | hsa-mir-449b | hsa-miR-449b | jt:ENSG00000167965 | NM\_022372.3  
AML1 | ENSG00000207728 | hsa-mir-449b | hsa-miR-449b | jt:ENSG00000164616 | FBXL21  
AML1 | ENSG00000207728 | hsa-mir-449b | hsa-miR-449b | jt:ENSG00000034239 | EFCAB1  
AML1 | ENSG00000207728 | hsa-mir-449b | hsa-miR-449b | jt:ENSG00000112478 | VPS52  
AML1 | ENSG00000207728 | hsa-mir-449b | hsa-miR-449b | jt:ENSG00000198719 | DLL1  
AML1 | ENSG00000207728 | hsa-mir-449b | hsa-miR-449b | jt:ENSG00000119782 | FKBP1B  
AML1 | ENSG00000207728 | hsa-mir-449b | hsa-miR-449b | jt:ENSG00000148296 | SURF6  
AML1 | ENSG00000207728 | hsa-mir-449b | hsa-miR-449b | jt:ENSG00000113328 | CCNG1  
AML1 | ENSG00000207728 | hsa-mir-449b | hsa-miR-449b | jt:ENSG00000131951 | LRRC9  
AML1 | ENSG00000207777 | hsa-mir-10a | hsa-miR-10a | jt:ENSG00000073282 | TP73L  
AML1 | ENSG00000207777 | hsa-mir-10a | hsa-miR-10a | jt:ENSG00000197585 | Q5JV89\_HUMAN  
AML1 | ENSG00000207777 | hsa-mir-10a | hsa-miR-10a | jt:ENSG00000114982 | NP\_060461.3  
AML1 | ENSG00000207777 | hsa-mir-10a | hsa-miR-10a | jt:ENSG00000147082 | CCNB3  
AML1 | ENSG00000207777 | hsa-mir-10a | hsa-miR-10a | jt:ENSG00000106952 | TNFSF8  
AML1 | ENSG00000207777 | hsa-mir-10a | hsa-miR-10a | jt:ENSG00000147536 | GINS4  
AML1 | ENSG00000207939 | hsa-mir-223 | hsa-miR-223 | jt:ENSG00000143878 | RHOA  
AML1 | ENSG00000207939 | hsa-mir-223 | hsa-miR-223 | jt:ENSG00000187726 | DNAAF1B3  
AML1 | ENSG00000207939 | hsa-mir-223 | hsa-miR-223 | jt:ENSG00000170906 | NDUFA3  
AML1 | ENSG00000207939 | hsa-mir-223 | hsa-miR-223 | jt:ENSG00000104946 | TBC1D17

AML1 | ENSG00000207939 | hsa-mir-223 | hsa-miR-223 | jt:ENSG00000205502 | NP\_001007596.1  
AML1 | ENSG00000207939 | hsa-mir-223 | hsa-miR-223 | jt:ENSG00000117154 | IGSF21  
AML1 | ENSG00000207939 | hsa-mir-223 | hsa-miR-223 | jt:ENSG00000100596 | SPTLC2  
AML1 | ENSG00000207939 | hsa-mir-223 | hsa-miR-223 | jt:ENSG00000134245 | WNT2B  
AML1 | ENSG00000207939 | hsa-mir-223 | hsa-miR-223 | jt:ENSG00000129465 | R1PK3  
AML1 | ENSG00000207939 | hsa-mir-223 | hsa-miR-223 | jt:ENSG00000135374 | ELF5  
AML1 | ENSG00000207939 | hsa-mir-223 | hsa-miR-223 | jt:ENSG00000133460 | SLC2A11  
AML1 | ENSG00000207939 | hsa-mir-223 | hsa-miR-223 | jt:ENSG00000179630 | C13orf31  
AML1 | ENSG00000207939 | hsa-mir-223 | hsa-miR-223 | jt:ENSG00000118689 | FOXO3A  
AP-1 | ENSG00000207567 | hsa-mir-142 | hsa-miR-142-3p | jt:ENSG00000169213 | RAB3B  
AP-1 | ENSG00000207567 | hsa-mir-142 | hsa-miR-142-3p | jt:ENSG00000175197 | DDIT3  
AP-1 | ENSG00000207567 | hsa-mir-142 | hsa-miR-142-3p | jt:ENSG00000106540 | C7orf36  
AP-1 | ENSG00000207567 | hsa-mir-142 | hsa-miR-142-3p | jt:ENSG00000113211 | PCDBH6  
AP-1 | ENSG00000207567 | hsa-mir-142 | hsa-miR-142-3p | jt:ENSG00000163254 | CRYGC  
AP-1 | ENSG00000207567 | hsa-mir-142 | hsa-miR-142-3p | jt:ENSG00000124767 | GLO1  
AP-1 | ENSG00000207567 | hsa-mir-142 | hsa-miR-142-3p | jt:ENSG00000134318 | ROCK2  
AP-1 | ENSG00000207567 | hsa-mir-142 | hsa-miR-142-5p | jt:ENSG00000067533 | RRP15  
AP-1 | ENSG00000207567 | hsa-mir-142 | hsa-miR-142-5p | jt:ENSG00000079257 | LXN  
AP-1 | ENSG00000207567 | hsa-mir-142 | hsa-miR-142-5p | jt:ENSG00000196793 | ZNF239  
AP-1 | ENSG00000207752 | hsa-mir-199a-1 | hsa-miR-199a | jt:ENSG00000170430 | MGMT  
AP-1 | ENSG00000207752 | hsa-mir-199a-1 | hsa-miR-199a\* | jt:ENSG00000119707 | RBM25  
AP-1 | ENSG00000207752 | hsa-mir-199a-1 | hsa-miR-199a\* | jt:ENSG00000114796 | KLHL24  
AP-1 | ENSG00000207752 | hsa-mir-199a-1 | hsa-miR-199a\* | jt:ENSG00000175535 | PNLIP  
AP-2ALPHA | ENSG00000207596 | hsa-mir-194-2 | hsa-miR-194 | jt:ENSG00000141576 | RNF157  
AP-2ALPHA | ENSG00000207596 | hsa-mir-194-2 | hsa-miR-194 | jt:ENSG00000139531 | SUOX  
AP-2ALPHA | ENSG00000207596 | hsa-mir-194-2 | hsa-miR-194 | jt:ENSG00000157306 | THTPA  
AP-2ALPHA | ENSG00000207596 | hsa-mir-194-2 | hsa-miR-194 | jt:ENSG00000198569 | SLC34A3  
AP-2ALPHA | ENSG00000207596 | hsa-mir-194-2 | hsa-miR-194 | jt:ENSG00000120727 | PAIP2  
AP-2ALPHA | ENSG00000207596 | hsa-mir-194-2 | hsa-miR-194 | jt:ENSG00000182093 | WRB  
AP-2ALPHA | ENSG00000207648 | hsa-mir-192 | hsa-miR-192 | jt:ENSG00000188389 | PDCD1  
AP-2ALPHA | ENSG00000207648 | hsa-mir-192 | hsa-miR-192 | jt:ENSG00000163636 | PSMD6  
AP-2ALPHA | ENSG00000207648 | hsa-mir-192 | hsa-miR-192 | jt:ENSG00000163075 | NP\_001025167.1  
AP-2ALPHA | ENSG00000207708 | hsa-mir-141 | hsa-miR-141 | jt:ENSG00000010295 | NP\_542768.1  
AP-2ALPHA | ENSG00000207708 | hsa-mir-141 | hsa-miR-141 | jt:ENSG00000087263 | OGFOD1  
AP-2ALPHA | ENSG00000207708 | hsa-mir-141 | hsa-miR-141 | jt:ENSG00000133124 | IRS4  
AP-2ALPHA | ENSG00000207708 | hsa-mir-141 | hsa-miR-141 | jt:ENSG00000177981 | ASB8  
AP-2ALPHA | ENSG00000207708 | hsa-mir-141 | hsa-miR-141 | jt:ENSG00000118777 | MCM9  
AP-2ALPHA | ENSG00000207708 | hsa-mir-141 | hsa-miR-141 | jt:ENSG00000118200 | CAMSAP1L1  
AP-2ALPHA | ENSG00000207708 | hsa-mir-141 | hsa-miR-141 | jt:ENSG00000170385 | SLC30A1  
AP-2ALPHA | ENSG00000207708 | hsa-mir-141 | hsa-miR-141 | jt:ENSG00000205269 | Q5T4T1\_HUMAN  
AP-2ALPHA | ENSG00000207708 | hsa-mir-141 | hsa-miR-141 | jt:ENSG00000175175 | PPM1E  
AP-2ALPHA | ENSG00000207708 | hsa-mir-141 | hsa-miR-141 | jt:ENSG00000130287 | NCAN  
AP-2ALPHA | ENSG00000207708 | hsa-mir-141 | hsa-miR-141 | jt:ENSG00000116497 | S100PBP  
AP-2ALPHA | ENSG00000207708 | hsa-mir-141 | hsa-miR-141 | jt:ENSG00000107562 | CXCL12  
AP-2ALPHA | ENSG00000207708 | hsa-mir-141 | hsa-miR-141 | jt:ENSG00000137040 | RANBP6  
AP-2ALPHA | ENSG00000207713 | hsa-mir-200c | hsa-miR-200c | jt:ENSG00000035862 | TIMP2  
AP-2ALPHA | ENSG00000207713 | hsa-mir-200c | hsa-miR-200c | jt:ENSG00000054277 | OPN3  
AP-2ALPHA | ENSG00000207713 | hsa-mir-200c | hsa-miR-200c | jt:ENSG00000112851 | ERBB2IP  
AP-2ALPHA | ENSG00000207713 | hsa-mir-200c | hsa-miR-200c | jt:ENSG00000116285 | ERRFI1  
AP-2ALPHA | ENSG00000207713 | hsa-mir-200c | hsa-miR-200c | jt:ENSG0000006114 | AP1GBP1  
AP-2ALPHA | ENSG00000207713 | hsa-mir-200c | hsa-miR-200c | jt:ENSG00000196204 | Q6NUR6\_HUMAN  
AP-2ALPHA | ENSG00000207713 | hsa-mir-200c | hsa-miR-200c | jt:ENSG00000138061 | CYP11B1  
AP-2ALPHA | ENSG00000207713 | hsa-mir-200c | hsa-miR-200c | jt:ENSG00000137040 | RANBP6  
AP-2ALPHA | ENSG00000207713 | hsa-mir-200c | hsa-miR-200c | jt:ENSG00000183873 | SCN5A  
AP-2ALPHA | ENSG00000207713 | hsa-mir-200c | hsa-miR-200c | jt:ENSG00000185065 | NP\_776154.2  
AP-4 | ENSG00000199080 | hsa-mir-133b | hsa-miR-133b | jt:ENSG00000163485 | ADORA1  
AP-4 | ENSG00000199080 | hsa-mir-133b | hsa-miR-133b | jt:ENSG0000006114 | AP1GBP1  
AP-4 | ENSG00000207604 | hsa-mir-206 | hsa-miR-206 | jt:ENSG00000074696 | PTPN12  
AP-4 | ENSG00000207604 | hsa-mir-206 | hsa-miR-206 | jt:ENSG00000162105 | SHANK2  
AP-4 | ENSG00000207708 | hsa-mir-141 | hsa-miR-141 | jt:ENSG00000171150 | SOCS5  
AP-4 | ENSG00000207708 | hsa-mir-141 | hsa-miR-141 | jt:ENSG00000006740 | RICH2\_HUMAN  
AP-4 | ENSG00000207713 | hsa-mir-200c | hsa-miR-200c | jt:ENSG00000164707 | SLC13A4  
AP-4 | ENSG00000207713 | hsa-mir-200c | hsa-miR-200c | jt:ENSG0000006114 | AP1GBP1  
AP-4 | ENSG00000207713 | hsa-mir-200c | hsa-miR-200c | jt:ENSG00000112851 | ERBB2IP  
AP-4 | ENSG00000207713 | hsa-mir-200c | hsa-miR-200c | jt:ENSG00000122417 | ODF2L  
AP-4 | ENSG00000207713 | hsa-mir-200c | hsa-miR-200c | jt:ENSG00000008256 | PSCD3  
AP-4 | ENSG00000207713 | hsa-mir-200c | hsa-miR-200c | jt:ENSG00000183421 | R1PK4  
AREB6 | ENSG00000198973 | hsa-mir-375 | hsa-miR-375 | jt:ENSG00000140479 | PCSK6  
AREB6 | ENSG00000198973 | hsa-mir-375 | hsa-miR-375 | jt:ENSG00000162337 | LRP5  
AREB6 | ENSG00000198973 | hsa-mir-375 | hsa-miR-375 | jt:ENSG00000148702 | HABP2  
AREB6 | ENSG00000198973 | hsa-mir-375 | hsa-miR-375 | jt:ENSG00000129204 | USP6  
AREB6 | ENSG00000198973 | hsa-mir-375 | hsa-miR-375 | jt:ENSG00000151806 | GUF1  
AREB6 | ENSG00000198973 | hsa-mir-375 | hsa-miR-375 | jt:ENSG00000117519 | CNN3  
AREB6 | ENSG00000198973 | hsa-mir-375 | hsa-miR-375 | jt:ENSG00000088179 | PTPN4  
AREB6 | ENSG00000198973 | hsa-mir-375 | hsa-miR-375 | jt:ENSG00000163642 | XR\_017284.1  
AREB6 | ENSG00000198973 | hsa-mir-375 | hsa-miR-375 | jt:ENSG00000123472 | ATPAF1  
AREB6 | ENSG00000198973 | hsa-mir-375 | hsa-miR-375 | jt:ENSG00000119440 | LCN1L1  
AREB6 | ENSG00000198973 | hsa-mir-375 | hsa-miR-375 | jt:ENSG00000196338 | NLGN3  
AREB6 | ENSG00000198973 | hsa-mir-375 | hsa-miR-375 | jt:ENSG00000128011 | LRFN1  
AREB6 | ENSG00000198973 | hsa-mir-375 | hsa-miR-375 | jt:ENSG00000171885 | AQP4  
AREB6 | ENSG00000198973 | hsa-mir-375 | hsa-miR-375 | jt:ENSG00000108753 | TCF2  
AREB6 | ENSG00000199032 | hsa-mir-425 | hsa-miR-425-3p | jt:ENSG00000176046 | NUPR1\_HUMAN  
AREB6 | ENSG00000199032 | hsa-mir-425 | hsa-miR-425-3p | jt:ENSG00000198382 | UVRAG  
AREB6 | ENSG00000199032 | hsa-mir-425 | hsa-miR-425-3p | jt:ENSG00000130762 | ARHGEF16  
AREB6 | ENSG00000199032 | hsa-mir-425 | hsa-miR-425-3p | jt:ENSG00000067560 | RHOA  
AREB6 | ENSG00000199032 | hsa-mir-425 | hsa-miR-425-3p | jt:ENSG00000178538 | CA8  
AREB6 | ENSG00000199080 | hsa-mir-133b | hsa-miR-133b | jt:ENSG00000178789 | CD300LB  
AREB6 | ENSG00000199080 | hsa-mir-133b | hsa-miR-133b | jt:ENSG00000197540 | GZMM  
AREB6 | ENSG00000199080 | hsa-mir-133b | hsa-miR-133b | jt:ENSG0000005884 | ITGA3  
AREB6 | ENSG00000199161 | hsa-mir-126 | hsa-miR-126 | jt:ENSG00000165209 | STRBP  
AREB6 | ENSG00000199161 | hsa-mir-126 | hsa-miR-126 | jt:ENSG00000051108 | HERPUD1  
AREB6 | ENSG00000199161 | hsa-mir-126 | hsa-miR-126 | jt:ENSG00000141527 | CARD14  
AREB6 | ENSG00000199161 | hsa-mir-126 | hsa-miR-126 | jt:ENSG00000146833 | TRIM4  
AREB6 | ENSG00000199161 | hsa-mir-126 | hsa-miR-126 | jt:ENSG00000188402 | NP\_995324.1  
AREB6 | ENSG00000199161 | hsa-mir-126 | hsa-miR-126 | jt:ENSG00000172889 | EGFL7  
AREB6 | ENSG00000199161 | hsa-mir-126 | hsa-miR-126 | jt:ENSG00000145675 | PIK3R1  
AREB6 | ENSG00000199161 | hsa-mir-126 | hsa-miR-126 | jt:ENSG00000168703 | WFDC12  
AREB6 | ENSG00000199161 | hsa-mir-126 | hsa-miR-126 | jt:ENSG00000147889 | CDKN2A  
AREB6 | ENSG00000199161 | hsa-mir-126 | hsa-miR-126 | jt:ENSG00000155090 | KLF10  
AREB6 | ENSG00000199161 | hsa-mir-126 | hsa-miR-126 | jt:ENSG00000185504 | C17orf70  
AREB6 | ENSG00000199161 | hsa-mir-126 | hsa-miR-126 | jt:ENSG00000198963 | RORB  
AREB6 | ENSG00000199161 | hsa-mir-126 | hsa-miR-126 | jt:ENSG00000153558 | FBXL2  
AREB6 | ENSG00000199161 | hsa-mir-126 | hsa-miR-126 | jt:ENSG00000107758 | PPP3CB  
AREB6 | ENSG00000199161 | hsa-mir-126 | hsa-miR-126\* | jt:ENSG00000177599 | ZNF491  
AREB6 | ENSG00000199161 | hsa-mir-126 | hsa-miR-126\* | jt:ENSG00000163515 | RETNLB

AREB6|ENSG00000199161|hsa-mir-126|hsa-miR-126\*|jt:ENSG00000198012|XR\_017841.1  
AREB6|ENSG00000199161|hsa-mir-126|hsa-miR-126\*|jt:ENSG00000134864|Q9BVM4\_HUMAN  
AREB6|ENSG00000199161|hsa-mir-126|hsa-miR-126\*|jt:ENSG00000205658|Q6ZUU6\_HUMAN  
AREB6|ENSG00000199161|hsa-mir-126|hsa-miR-126\*|jt:ENSG00000003147|ICA1  
AREB6|ENSG00000199161|hsa-mir-126|hsa-miR-126\*|jt:ENSG00000145439|CBR4  
AREB6|ENSG00000199161|hsa-mir-126|hsa-miR-126\*|jt:ENSG00000141646|SMAD4  
AREB6|ENSG00000199161|hsa-mir-126|hsa-miR-126\*|jt:ENSG00000197696|NMB  
AREB6|ENSG00000199161|hsa-mir-126|hsa-miR-126\*|jt:ENSG00000205808|PPAFDC2  
AREB6|ENSG00000199161|hsa-mir-126|hsa-miR-126\*|jt:ENSG00000171858|RPS21  
AREB6|ENSG00000199161|hsa-mir-126|hsa-miR-126\*|jt:ENSG00000163918|RFC4  
AREB6|ENSG00000199161|hsa-mir-126|hsa-miR-126\*|jt:ENSG00000158423|RIBC1  
AREB6|ENSG00000199161|hsa-mir-126|hsa-miR-126\*|jt:ENSG00000186017|ZNF566  
AREB6|ENSG00000199161|hsa-mir-126|hsa-miR-126\*|jt:ENSG00000181392|C19orf46  
AREB6|ENSG00000199161|hsa-mir-126|hsa-miR-126\*|jt:ENSG00000147003|TMEM27  
AREB6|ENSG00000199161|hsa-mir-126|hsa-miR-126\*|jt:ENSG00000112062|MAPK14  
AREB6|ENSG00000199177|hsa-mir-31|hsa-miR-31|jt:ENSG00000177156|TALDO1  
AREB6|ENSG00000199177|hsa-mir-31|hsa-miR-31|jt:ENSG00000188199|FAM22B  
AREB6|ENSG00000199177|hsa-mir-31|hsa-miR-31|jt:ENSG00000204043|FAM22C  
AREB6|ENSG00000199177|hsa-mir-31|hsa-miR-31|jt:ENSG00000162520|SYNC1  
AREB6|ENSG00000199177|hsa-mir-31|hsa-miR-31|jt:ENSG00000102471|NDFIP2  
AREB6|ENSG00000199177|hsa-mir-31|hsa-miR-31|jt:ENSG00000153814|JAZF1  
AREB6|ENSG00000207568|hsa-mir-203|hsa-miR-203|jt:ENSG00000153575|TUBGCP5  
AREB6|ENSG00000207568|hsa-mir-203|hsa-miR-203|jt:ENSG00000188483|IER5L  
AREB6|ENSG00000207568|hsa-mir-203|hsa-miR-203|jt:ENSG00000110777|POU2AF1  
AREB6|ENSG00000207568|hsa-mir-203|hsa-miR-203|jt:ENSG00000125347|IRF1  
AREB6|ENSG00000207568|hsa-mir-203|hsa-miR-203|jt:ENSG00000100376|FAM118A  
AREB6|ENSG00000207568|hsa-mir-203|hsa-miR-203|jt:ENSG00000135114|OASL  
AREB6|ENSG00000207568|hsa-mir-203|hsa-miR-203|jt:ENSG00000173698|GPR64  
AREB6|ENSG00000207568|hsa-mir-203|hsa-miR-203|jt:ENSG00000138802|SEC24B  
AREB6|ENSG00000207568|hsa-mir-203|hsa-miR-203|jt:ENSG00000197701|ZNF595  
AREB6|ENSG00000207572|hsa-mir-363|hsa-miR-363|jt:ENSG00000144583|MARCH4  
AREB6|ENSG00000207572|hsa-mir-363|hsa-miR-363|jt:ENSG00000125351|UPF3B  
AREB6|ENSG00000207572|hsa-mir-363|hsa-miR-363|jt:ENSG00000205875|LOC197350  
AREB6|ENSG00000207572|hsa-mir-363|hsa-miR-363|jt:ENSG00000197713|RPE  
AREB6|ENSG00000207572|hsa-mir-363|hsa-miR-363|jt:ENSG00000180104|EXOC3  
AREB6|ENSG00000207572|hsa-mir-363|hsa-miR-363|jt:ENSG00000116032|GRIN3B  
AREB6|ENSG00000207596|hsa-mir-194-2|hsa-miR-194|jt:ENSG00000174628|IQCK  
AREB6|ENSG00000207596|hsa-mir-194-2|hsa-miR-194|jt:ENSG00000169239|CASE  
AREB6|ENSG00000207596|hsa-mir-194-2|hsa-miR-194|jt:ENSG00000150201|FXDY4  
AREB6|ENSG00000207596|hsa-mir-194-2|hsa-miR-194|jt:ENSG00000147536|GINS4  
AREB6|ENSG00000207596|hsa-mir-194-2|hsa-miR-194|jt:ENSG00000087085|ACHE  
AREB6|ENSG00000207596|hsa-mir-194-2|hsa-miR-194|jt:ENSG00000169031|COL4A3  
AREB6|ENSG00000207602|hsa-mir-106a|hsa-miR-106a|jt:ENSG00000169662|NP\_997357.1  
AREB6|ENSG00000207602|hsa-mir-106a|hsa-miR-106a|jt:ENSG00000207697|IFNGR1  
AREB6|ENSG00000207602|hsa-mir-106a|hsa-miR-106a|jt:ENSG00000163513|TGFB2  
AREB6|ENSG00000207602|hsa-mir-106a|hsa-miR-106a|jt:ENSG00000196460|Q6ZNB4\_HUMAN  
AREB6|ENSG00000207602|hsa-mir-106a|hsa-miR-106a|jt:ENSG00000132975|GPR12  
AREB6|ENSG00000207602|hsa-mir-106a|hsa-miR-106a|jt:ENSG00000148481|C10orf97  
AREB6|ENSG00000207602|hsa-mir-106a|hsa-miR-106a|jt:ENSG00000050405|LIMA1  
AREB6|ENSG00000207602|hsa-mir-106a|hsa-miR-106a|jt:ENSG00000147036|LANCL3  
AREB6|ENSG00000207602|hsa-mir-106a|hsa-miR-106a|jt:ENSG00000185722|ANKFY1  
AREB6|ENSG00000207602|hsa-mir-106a|hsa-miR-106a|jt:ENSG00000115561|VPS24  
AREB6|ENSG00000207602|hsa-mir-106a|hsa-miR-106a|jt:ENSG0000011454|RABGAP1  
AREB6|ENSG00000207602|hsa-mir-106a|hsa-miR-106a|jt:ENSG00000147536|GINS4  
AREB6|ENSG00000207602|hsa-mir-106a|hsa-miR-106a|jt:ENSG00000171885|AQP4  
AREB6|ENSG00000207602|hsa-mir-106a|hsa-miR-106a|jt:ENSG00000124762|CDKN1A  
AREB6|ENSG00000207604|hsa-mir-206|hsa-miR-206|jt:ENSG00000166747|AP1G1  
AREB6|ENSG00000207604|hsa-mir-206|hsa-miR-206|jt:ENSG00000106034|NP\_079189.3  
AREB6|ENSG00000207604|hsa-mir-206|hsa-miR-206|jt:ENSG00000094841|UFPT  
AREB6|ENSG00000207630|hsa-mir-7-3|hsa-miR-7|jt:ENSG00000112706|IMPG1  
AREB6|ENSG00000207630|hsa-mir-7-3|hsa-miR-7|jt:ENSG00000169474|SPRR1A  
AREB6|ENSG00000207630|hsa-mir-7-3|hsa-miR-7|jt:ENSG00000203747|FCGR3A  
AREB6|ENSG00000207630|hsa-mir-7-3|hsa-miR-7|jt:ENSG00000205658|Q6ZUU6\_HUMAN  
AREB6|ENSG00000207630|hsa-mir-7-3|hsa-miR-7|jt:ENSG00000138785|INTS12  
AREB6|ENSG00000207630|hsa-mir-7-3|hsa-miR-7|jt:ENSG00000141161|UNC45B  
AREB6|ENSG00000207630|hsa-mir-7-3|hsa-miR-7|jt:ENSG00000185591|SP1  
AREB6|ENSG00000207630|hsa-mir-7-3|hsa-miR-7|jt:ENSG00000105556|NP\_060020.1  
AREB6|ENSG00000207630|hsa-mir-7-3|hsa-miR-7|jt:ENSG00000178980|SEFW1  
AREB6|ENSG00000207630|hsa-mir-7-3|hsa-miR-7|jt:ENSG00000158006|PAPAH2  
AREB6|ENSG00000207630|hsa-mir-7-3|hsa-miR-7|jt:ENSG00000166260|COX11  
AREB6|ENSG00000207630|hsa-mir-7-3|hsa-miR-7|jt:ENSG00000177992|C9orf79  
AREB6|ENSG00000207630|hsa-mir-7-3|hsa-miR-7|jt:ENSG00000118473|SGIP1  
AREB6|ENSG00000207630|hsa-mir-7-3|hsa-miR-7|jt:ENSG00000123342|MMP19  
AREB6|ENSG00000207648|hsa-mir-192|hsa-miR-192|jt:ENSG00000181437|XR\_017773.1  
AREB6|ENSG00000207648|hsa-mir-192|hsa-miR-192|jt:ENSG00000109079|TNFAIP1  
AREB6|ENSG00000207648|hsa-mir-192|hsa-miR-192|jt:ENSG00000188389|PDCD1  
AREB6|ENSG00000207648|hsa-mir-192|hsa-miR-192|jt:ENSG00000066322|ELOVL1  
AREB6|ENSG00000207648|hsa-mir-192|hsa-miR-192|jt:ENSG00000163075|NP\_001025167.1  
AREB6|ENSG00000207710|hsa-mir-20b|hsa-miR-20b|jt:ENSG00000143727|ACP1  
AREB6|ENSG00000207710|hsa-mir-20b|hsa-miR-20b|jt:ENSG00000119125|GDA  
AREB6|ENSG00000207710|hsa-mir-20b|hsa-miR-20b|jt:ENSG00000163513|TGFB2  
AREB6|ENSG00000207710|hsa-mir-20b|hsa-miR-20b|jt:ENSG00000196460|Q6ZNB4\_HUMAN  
AREB6|ENSG00000207710|hsa-mir-20b|hsa-miR-20b|jt:ENSG00000132975|GPR12  
AREB6|ENSG00000207710|hsa-mir-20b|hsa-miR-20b|jt:ENSG00000170390|DCLK2  
AREB6|ENSG00000207710|hsa-mir-20b|hsa-miR-20b|jt:ENSG00000050405|LIMA1  
AREB6|ENSG00000207710|hsa-mir-20b|hsa-miR-20b|jt:ENSG00000135801|TAF5L  
AREB6|ENSG00000207710|hsa-mir-20b|hsa-miR-20b|jt:ENSG00000147036|LANCL3  
AREB6|ENSG00000207710|hsa-mir-20b|hsa-miR-20b|jt:ENSG00000115561|VPS24  
AREB6|ENSG00000207710|hsa-mir-20b|hsa-miR-20b|jt:ENSG00000144645|OSBPL10  
AREB6|ENSG00000207710|hsa-mir-20b|hsa-miR-20b|jt:ENSG0000011454|RABGAP1  
AREB6|ENSG00000207710|hsa-mir-20b|hsa-miR-20b|jt:ENSG00000124762|CDKN1A  
AREB6|ENSG00000207732|hsa-mir-218-1|hsa-miR-218|jt:ENSG00000184434|LRRIC19  
AREB6|ENSG00000207732|hsa-mir-218-1|hsa-miR-218|jt:ENSG00000170516|COX7B2  
AREB6|ENSG00000207732|hsa-mir-218-1|hsa-miR-218|jt:ENSG00000188428|TXNDC5  
AREB6|ENSG00000207732|hsa-mir-218-1|hsa-miR-218|jt:ENSG00000085978|ATG16L1  
AREB6|ENSG00000207732|hsa-mir-218-1|hsa-miR-218|jt:ENSG00000138604|GLCE  
AREB6|ENSG00000207732|hsa-mir-218-1|hsa-miR-218|jt:ENSG00000198589|LRBA  
AREB6|ENSG00000207732|hsa-mir-218-1|hsa-miR-218|jt:ENSG00000204241|Q6ZUU8\_HUMAN  
AREB6|ENSG00000207732|hsa-mir-218-1|hsa-miR-218|jt:ENSG00000185053|SGCZ  
AREB6|ENSG00000207732|hsa-mir-218-1|hsa-miR-218|jt:ENSG00000185504|C17orf70  
AREB6|ENSG00000207819|hsa-mir-9-3|hsa-miR-9|jt:ENSG00000044115|CTNNA1  
AREB6|ENSG00000207819|hsa-mir-9-3|hsa-miR-9|jt:ENSG00000137709|POU2F3  
AREB6|ENSG00000207819|hsa-mir-9-3|hsa-miR-9|jt:ENSG00000100376|FAM118A  
AREB6|ENSG00000207819|hsa-mir-9-3|hsa-miR-9|jt:ENSG00000124608|AARS2  
AREB6|ENSG00000207819|hsa-mir-9-3|hsa-miR-9|jt:ENSG00000159797|C9orf144

AREB6|ENSG00000207819|hsa-mir-9-3|hsa-miR-9|jt:ENSG00000133800|XLKD1  
AREB6|ENSG00000207819|hsa-mir-9-3|hsa-miR-9|jt:ENSG00000149499|EML3  
AREB6|ENSG00000207819|hsa-mir-9-3|hsa-miR-9|jt:ENSG00000168781|HISPPD2A  
AREB6|ENSG00000207819|hsa-mir-9-3|hsa-miR-9|jt:ENSG00000177283|FZD8  
AREB6|ENSG00000207819|hsa-mir-9-3|hsa-miR-9|jt:ENSG00000178538|CA8  
AREB6|ENSG00000207819|hsa-mir-9-3|hsa-miR-9\*|jt:ENSG00000102904|TSNAXIP1  
AREB6|ENSG00000207819|hsa-mir-9-3|hsa-miR-9\*|jt:ENSG00000172164|SNTB1  
AREB6|ENSG00000207819|hsa-mir-9-3|hsa-miR-9\*|jt:ENSG00000124785|NRN1  
AREB6|ENSG00000207819|hsa-mir-9-3|hsa-miR-9\*|jt:ENSG00000188199|FAM22B  
AREB6|ENSG00000207819|hsa-mir-9-3|hsa-miR-9\*|jt:ENSG00000159199|ATP5G1  
AREB6|ENSG00000207819|hsa-mir-9-3|hsa-miR-9\*|jt:ENSG00000054967|TNFRSF19L  
AREB6|ENSG00000207819|hsa-mir-9-3|hsa-miR-9\*|jt:ENSG00000132793|LPIN3  
AREB6|ENSG00000207819|hsa-mir-9-3|hsa-miR-9\*|jt:ENSG00000140505|CYP1A2  
AREB6|ENSG00000207819|hsa-mir-9-3|hsa-miR-9\*|jt:ENSG00000143940|Q6ZMW3\_HUMAN  
AREB6|ENSG00000207819|hsa-mir-9-3|hsa-miR-9\*|jt:ENSG00000135324|C6orf117  
AREB6|ENSG00000208017|hsa-mir-140|hsa-miR-140|jt:ENSG00000182490|TSSK2  
AREB6|ENSG00000208017|hsa-mir-140|hsa-miR-140|jt:ENSG00000086232|EIF2AK1  
AREB6|ENSG00000208017|hsa-mir-140|hsa-miR-140|jt:ENSG00000159650|UROCI  
AREB6|ENSG00000208017|hsa-mir-140|hsa-miR-140|jt:ENSG00000156925|ZIC3  
AREB6|ENSG00000208017|hsa-mir-140|hsa-miR-140|jt:ENSG00000106780|MEGF9  
AREB6|ENSG00000208017|hsa-mir-140|hsa-miR-140|jt:ENSG00000165168|CYBB  
AREB6|ENSG00000208017|hsa-mir-140|hsa-miR-140|jt:ENSG00000197448|GSTK1  
AREB6|ENSG00000208017|hsa-mir-140|hsa-miR-140|jt:ENSG00000190245|Q8N7M3\_HUMAN  
AREB6|ENSG00000208017|hsa-mir-140|hsa-miR-140|jt:ENSG00000118898|PPL  
AREB6|ENSG00000208017|hsa-mir-140|hsa-miR-140|jt:ENSG00000154096|THY1  
AREB6|ENSG00000208017|hsa-mir-140|hsa-miR-140|jt:ENSG00000101290|CDS2  
ATF-1|ENSG00000199121|hsa-mir-26b|hsa-miR-26b|jt:ENSG00000135365|PHF21A  
ATF-1|ENSG00000199121|hsa-mir-26b|hsa-miR-26b|jt:ENSG00000173027|WBP1  
ATF-1|ENSG00000199121|hsa-mir-26b|hsa-miR-26b|jt:ENSG00000143643|TTC13  
ATF-1|ENSG00000199153|hsa-mir-30d|hsa-miR-30d|jt:ENSG00000186594|NP\_116284.2  
ATF-1|ENSG00000199153|hsa-mir-30d|hsa-miR-30d|jt:ENSG00000102098|SCML2  
ATF-1|ENSG00000199153|hsa-mir-30d|hsa-miR-30d|jt:ENSG00000133627|ACTR3B  
ATF-1|ENSG00000207581|hsa-mir-199b|hsa-miR-199b|jt:ENSG00000108515|ENO3  
ATF-1|ENSG00000207582|hsa-mir-30b|hsa-miR-30b|jt:ENSG00000186594|NP\_116284.2  
ATF-1|ENSG00000207582|hsa-mir-30b|hsa-miR-30b|jt:ENSG00000102098|SCML2  
ATF-1|ENSG00000207582|hsa-mir-30b|hsa-miR-30b|jt:ENSG00000133627|ACTR3B  
ATF-1|ENSG00000207949|hsa-mir-214|hsa-miR-214|jt:ENSG00000149201|CCDC81  
ATF-1|ENSG00000207953|hsa-mir-212|hsa-miR-212|jt:ENSG00000188290|HES4  
ATF-1|ENSG00000207953|hsa-mir-212|hsa-miR-212|jt:ENSG00000170689|HOXB9  
ATF-1|ENSG00000208024|hsa-mir-199a-2|hsa-miR-199a-2|jt:ENSG00000108515|ENO3  
ATF-1|ENSG00000208024|hsa-mir-199a-2|hsa-miR-199a-2|jt:ENSG00000100109|TFIP11  
ATF-1|ENSG00000208024|hsa-mir-199a-2|hsa-miR-199a-2|jt:ENSG00000182712|MTCP1  
ATF6|ENSG00000207581|hsa-mir-199b|hsa-miR-199b|jt:ENSG00000206198|NR\_001535.1  
ATF6|ENSG00000207752|hsa-mir-199a-1|hsa-miR-199a-1|jt:ENSG00000206198|NR\_001535.1  
ATF6|ENSG00000207752|hsa-mir-199a-1|hsa-miR-199a-1|jt:ENSG00000188384|Q6ZUQ5\_HUMAN  
ATF6|ENSG00000207752|hsa-mir-199a-1|hsa-miR-199a-1|jt:ENSG00000205271|Q6ZUQ5\_HUMAN  
ATF6|ENSG00000207752|hsa-mir-199a-1|hsa-miR-199a-1|jt:ENSG00000205275|Q6ZUQ5\_HUMAN  
ATF6|ENSG00000207752|hsa-mir-199a-1|hsa-miR-199a-1|jt:ENSG00000182712|MTCP1  
ATF6|ENSG00000207752|hsa-mir-199a-1|hsa-miR-199a-1|jt:ENSG00000179151|EDC3  
ATF6|ENSG00000207752|hsa-mir-199a-1|hsa-miR-199a-1|jt:ENSG00000132549|VPS13B  
ATF6|ENSG00000207752|hsa-mir-199a-1|hsa-miR-199a-1|jt:ENSG00000198718|KIAA0423  
ATF6|ENSG00000207949|hsa-mir-214|hsa-miR-214|jt:ENSG00000167468|GFX4  
ATF6|ENSG00000207953|hsa-mir-212|hsa-miR-212|jt:ENSG00000173848|NET1  
ATF6|ENSG00000207953|hsa-mir-212|hsa-miR-212|jt:ENSG00000182077|PTCHD3  
ATF6|ENSG00000207953|hsa-mir-212|hsa-miR-212|jt:ENSG00000160882|CYP11B1  
ATF6|ENSG00000207953|hsa-mir-212|hsa-miR-212|jt:ENSG00000170689|HOXB9  
ATF6|ENSG00000208024|hsa-mir-199a-2|hsa-miR-199a-2|jt:ENSG00000206198|NR\_001535.1  
ATF6|ENSG00000208024|hsa-mir-199a-2|hsa-miR-199a-2|jt:ENSG00000188384|Q6ZUQ5\_HUMAN  
ATF6|ENSG00000208024|hsa-mir-199a-2|hsa-miR-199a-2|jt:ENSG00000205271|Q6ZUQ5\_HUMAN  
ATF6|ENSG00000208024|hsa-mir-199a-2|hsa-miR-199a-2|jt:ENSG00000205275|Q6ZUQ5\_HUMAN  
ATF6|ENSG00000208024|hsa-mir-199a-2|hsa-miR-199a-2|jt:ENSG00000182712|MTCP1  
ATF6|ENSG00000208024|hsa-mir-199a-2|hsa-miR-199a-2|jt:ENSG00000179151|EDC3  
ATF6|ENSG00000208024|hsa-mir-199a-2|hsa-miR-199a-2|jt:ENSG00000132549|VPS13B  
ATF6|ENSG00000208024|hsa-mir-199a-2|hsa-miR-199a-2|jt:ENSG00000198718|KIAA0423  
BACH2|ENSG00000198973|hsa-mir-375|hsa-miR-375|jt:ENSG00000148702|HABP2  
BACH2|ENSG00000198973|hsa-mir-375|hsa-miR-375|jt:ENSG00000117000|LRF1  
BACH2|ENSG00000198973|hsa-mir-375|hsa-miR-375|jt:ENSG00000151458|ANKRD50  
BACH2|ENSG00000198973|hsa-mir-375|hsa-miR-375|jt:ENSG00000178110|Q8N9G9\_HUMAN  
BACH2|ENSG00000198973|hsa-mir-375|hsa-miR-375|jt:ENSG00000183649|Q8NFX8\_HUMAN  
BACH2|ENSG00000198973|hsa-mir-375|hsa-miR-375|jt:ENSG00000143772|ITPKB  
BACH2|ENSG00000199059|hsa-mir-135b|hsa-miR-135b|jt:ENSG00000188100|FAM25\_HUMAN  
BACH2|ENSG00000199059|hsa-mir-135b|hsa-miR-135b|jt:ENSG00000125827|TXNDCL3  
BACH2|ENSG00000199059|hsa-mir-135b|hsa-miR-135b|jt:ENSG00000184654|YV006\_HUMAN  
BACH2|ENSG00000199059|hsa-mir-135b|hsa-miR-135b|jt:ENSG00000173153|ESRRA  
BACH2|ENSG00000199059|hsa-mir-135b|hsa-miR-135b|jt:ENSG00000095752|IL11  
BACH2|ENSG00000199059|hsa-mir-135b|hsa-miR-135b|jt:ENSG00000164935|TM7SF4  
BACH2|ENSG00000199059|hsa-mir-135b|hsa-miR-135b|jt:ENSG00000167861|C17orf28  
BACH2|ENSG00000199059|hsa-mir-135b|hsa-miR-135b|jt:ENSG00000197415|VEPFI  
BACH2|ENSG00000199059|hsa-mir-135b|hsa-miR-135b|jt:ENSG00000102181|CD99L2  
BACH2|ENSG00000199059|hsa-mir-135b|hsa-miR-135b|jt:ENSG00000198246|SLC29A3  
BACH2|ENSG00000207731|hsa-mir-506|hsa-miR-506|jt:ENSG00000167600|CYP2S1  
BACH2|ENSG00000207731|hsa-mir-506|hsa-miR-506|jt:ENSG00000110711|AIP  
BACH2|ENSG00000207731|hsa-mir-506|hsa-miR-506|jt:ENSG00000132463|GRSF1  
BACH2|ENSG00000207731|hsa-mir-506|hsa-miR-506|jt:ENSG00000136826|KLF4  
BACH2|ENSG00000207731|hsa-mir-506|hsa-miR-506|jt:ENSG00000173349|SFT2D3  
BACH2|ENSG00000207731|hsa-mir-506|hsa-miR-506|jt:ENSG00000065361|ERBB3  
BRCA1|ENSG00000207624|hsa-mir-194-1|hsa-miR-194-1|jt:ENSG00000122862|SRGN  
BRCA1|ENSG00000207624|hsa-mir-194-1|hsa-miR-194-1|jt:ENSG00000160712|IL6R  
BRCA1|ENSG00000207624|hsa-mir-194-1|hsa-miR-194-1|jt:ENSG00000169239|CA5B  
BRCA1|ENSG00000207624|hsa-mir-194-1|hsa-miR-194-1|jt:ENSG00000085872|CHERP  
BRCA1|ENSG00000207624|hsa-mir-194-1|hsa-miR-194-1|jt:ENSG00000137100|DCTN3  
BRCA1|ENSG00000207624|hsa-mir-194-1|hsa-miR-194-1|jt:ENSG00000165028|NIPSNAP3B  
BRCA1|ENSG00000207624|hsa-mir-194-1|hsa-miR-194-1|jt:ENSG00000147536|GINS4  
BRCA1|ENSG00000207624|hsa-mir-194-1|hsa-miR-194-1|jt:ENSG00000164711|LPLAL2  
BRCA1|ENSG00000207777|hsa-mir-10a|hsa-miR-10a|jt:ENSG00000147536|GINS4  
BRCA1|ENSG00000207777|hsa-mir-10a|hsa-miR-10a|jt:ENSG00000114982|NP\_060461.3  
C-REL|ENSG00000198972|hsa-let-7e|hsa-let-7e|jt:ENSG00000105419|Q99687-2  
C-REL|ENSG00000198972|hsa-let-7e|hsa-let-7e|jt:ENSG00000143851|PTPN7  
C-REL|ENSG00000198972|hsa-let-7e|hsa-let-7e|jt:ENSG00000177410|Q5QHF1\_HUMAN  
C-REL|ENSG00000198972|hsa-let-7e|hsa-let-7e|jt:ENSG00000082153|BZW1  
C-REL|ENSG00000198972|hsa-let-7e|hsa-let-7e|jt:ENSG00000150593|PDCD4  
C-REL|ENSG00000198972|hsa-let-7e|hsa-let-7e|jt:ENSG00000118503|TNFAIP3  
C-REL|ENSG00000198972|hsa-let-7e|hsa-let-7e|jt:ENSG00000187681|ORM1  
C-REL|ENSG00000198972|hsa-let-7e|hsa-let-7e|jt:ENSG00000204154|ORM2  
C-REL|ENSG00000198972|hsa-let-7e|hsa-let-7e|jt:ENSG00000135912|TTL4

C-REL|ENSG00000198972|hsa-let-7e|hsa-let-7e jt:ENSG00000071967|CYBRD1  
C-REL|ENSG00000198972|hsa-let-7e|hsa-let-7e jt:ENSG00000125084|WNT1  
C-REL|ENSG00000198972|hsa-let-7e|hsa-let-7e jt:ENSG00000023902|PLEKHO1  
C-REL|ENSG00000198972|hsa-let-7e|hsa-let-7e jt:ENSG00000158615|PPP1R15B  
C-REL|ENSG00000198972|hsa-let-7e|hsa-let-7e jt:ENSG00000072501|SMC1A  
C-REL|ENSG00000198972|hsa-let-7e|hsa-let-7e jt:ENSG00000168952|STXBP6  
C-REL|ENSG00000198972|hsa-let-7e|hsa-let-7e jt:ENSG00000198929|NOS1AP  
C-REL|ENSG00000199017|hsa-mir-1-1|hsa-miR-1 jt:ENSG00000162105|SHANK2  
C-REL|ENSG00000199017|hsa-mir-1-1|hsa-miR-1 jt:ENSG00000002834|LASP1  
C-REL|ENSG00000199017|hsa-mir-1-1|hsa-miR-1 jt:ENSG00000136297|MMD2  
C-REL|ENSG00000199017|hsa-mir-1-1|hsa-miR-1 jt:ENSG00000107854|TNKS2  
C-REL|ENSG00000199017|hsa-mir-1-1|hsa-miR-1 jt:ENSG00000131269|ABCB7  
C-REL|ENSG00000199017|hsa-mir-1-1|hsa-miR-1 jt:ENSG00000125695|STRAD\_HUMAN  
C-REL|ENSG00000199036|hsa-mir-219-1|hsa-miR-219 jt:ENSG00000186187|ZNRF1  
C-REL|ENSG00000199036|hsa-mir-219-1|hsa-miR-219 jt:ENSG00000183018|SPNS2  
C-REL|ENSG00000199036|hsa-mir-219-1|hsa-miR-219 jt:ENSG00000118496|FBXO30  
C-REL|ENSG00000199036|hsa-mir-219-1|hsa-miR-219 jt:ENSG00000171855|IFNB1  
C-REL|ENSG00000199036|hsa-mir-219-1|hsa-miR-219 jt:ENSG00000108702|CCL1  
C-REL|ENSG00000199036|hsa-mir-219-1|hsa-miR-219 jt:ENSG00000181817|LSM10  
C-REL|ENSG00000199036|hsa-mir-219-1|hsa-miR-219 jt:ENSG00000119508|NR4A3  
C-REL|ENSG00000199036|hsa-mir-219-1|hsa-miR-219 jt:ENSG00000154274|C4orf19  
C-REL|ENSG00000199036|hsa-mir-219-1|hsa-miR-219 jt:ENSG00000095066|HOOK2  
C-REL|ENSG00000199036|hsa-mir-219-1|hsa-miR-219 jt:ENSG00000189325|NP\_001010903.2  
C-REL|ENSG00000199036|hsa-mir-219-1|hsa-miR-219 jt:ENSG00000161031|PGLYRP2  
C-REL|ENSG00000199036|hsa-mir-219-1|hsa-miR-219 jt:ENSG00000113643|RARS  
C-REL|ENSG00000199036|hsa-mir-219-1|hsa-miR-219 jt:ENSG00000187095|LILRA2  
C-REL|ENSG00000199036|hsa-mir-219-1|hsa-miR-219 jt:ENSG00000180881|CAPS2  
C-REL|ENSG00000199036|hsa-mir-219-1|hsa-miR-219 jt:ENSG00000114982|NP\_060461.3  
C-REL|ENSG00000199036|hsa-mir-219-1|hsa-miR-219 jt:ENSG00000179387|ELMOD2  
C-REL|ENSG00000199036|hsa-mir-219-1|hsa-miR-219 jt:ENSG00000197077|Q5THZ5\_HUMAN  
C-REL|ENSG00000199036|hsa-mir-219-1|hsa-miR-219 jt:ENSG00000101200|AVP  
C-REL|ENSG00000199077|hsa-mir-129-2|hsa-miR-129 jt:ENSG00000162105|SHANK2  
C-REL|ENSG00000199077|hsa-mir-129-2|hsa-miR-129 jt:ENSG00000163781|TOPBP1  
C-REL|ENSG00000199077|hsa-mir-129-2|hsa-miR-129 jt:ENSG00000147316|MCPH1  
C-REL|ENSG00000199077|hsa-mir-129-2|hsa-miR-129 jt:ENSG00000198929|NOS1AP  
C-REL|ENSG00000199122|hsa-mir-148b|hsa-miR-148b jt:ENSG0000015592|STMN4  
C-REL|ENSG00000199122|hsa-mir-148b|hsa-miR-148b jt:ENSG00000070985|TRPM5  
C-REL|ENSG00000199122|hsa-mir-148b|hsa-miR-148b jt:ENSG00000180176|TH  
C-REL|ENSG00000199122|hsa-mir-148b|hsa-miR-148b jt:ENSG00000155111|CDC2L6  
C-REL|ENSG00000199122|hsa-mir-148b|hsa-miR-148b jt:ENSG00000118263|KLF7  
C-REL|ENSG00000199122|hsa-mir-148b|hsa-miR-148b jt:ENSG00000124313|IQSEC2  
C-REL|ENSG00000199122|hsa-mir-148b|hsa-miR-148b jt:ENSG00000187010|RHD  
C-REL|ENSG00000199122|hsa-mir-148b|hsa-miR-148b jt:ENSG00000189180|ZNF33A  
C-REL|ENSG00000199122|hsa-mir-148b|hsa-miR-148b jt:ENSG00000106511|MEOX2  
C-REL|ENSG00000199122|hsa-mir-148b|hsa-miR-148b jt:ENSG00000161638|ITGA5  
C-REL|ENSG00000199122|hsa-mir-148b|hsa-miR-148b jt:ENSG00000122034|GTF3A  
C-REL|ENSG00000199122|hsa-mir-148b|hsa-miR-148b jt:ENSG00000147684|NDUFB9  
C-REL|ENSG00000199122|hsa-mir-148b|hsa-miR-148b jt:ENSG00000069956|MAPK6  
C-REL|ENSG00000199122|hsa-mir-148b|hsa-miR-148b jt:ENSG00000125084|WNT1  
C-REL|ENSG00000199122|hsa-mir-148b|hsa-miR-148b jt:ENSG00000131269|ABCB7  
C-REL|ENSG00000199122|hsa-mir-148b|hsa-miR-148b jt:ENSG00000142700|DMRTA2  
C-REL|ENSG00000199122|hsa-mir-148b|hsa-miR-148b jt:ENSG00000196972|Q86V52\_HUMAN  
C-REL|ENSG00000199122|hsa-mir-148b|hsa-miR-148b jt:ENSG00000198964|SGMS1  
C-REL|ENSG00000199122|hsa-mir-148b|hsa-miR-148b jt:ENSG00000130052|STARD8  
C-REL|ENSG00000199122|hsa-mir-148b|hsa-miR-148b jt:ENSG00000137073|UBAP2  
C-REL|ENSG00000199122|hsa-mir-148b|hsa-miR-148b jt:ENSG00000162191|SAKS1\_HUMAN  
C-REL|ENSG00000199122|hsa-mir-148b|hsa-miR-148b jt:ENSG00000170989|EDG1  
C-REL|ENSG00000199161|hsa-mir-126|hsa-miR-126 jt:ENSG00000128805|ARHGAP22  
C-REL|ENSG00000199161|hsa-mir-126|hsa-miR-126 jt:ENSG00000159200|DSCR1  
C-REL|ENSG00000199161|hsa-mir-126|hsa-miR-126 jt:ENSG00000146648|EGFR  
C-REL|ENSG00000199161|hsa-mir-126|hsa-miR-126 jt:ENSG00000105647|PIK3R2  
C-REL|ENSG00000199161|hsa-mir-126|hsa-miR-126 jt:ENSG00000198219|Q96N05\_HUMAN  
C-REL|ENSG00000199161|hsa-mir-126|hsa-miR-126 jt:ENSG00000124191|TOX2  
C-REL|ENSG00000199161|hsa-mir-126|hsa-miR-126 jt:ENSG00000145675|PIK3R1  
C-REL|ENSG00000199161|hsa-mir-126|hsa-miR-126 jt:ENSG00000138617|PARP16  
C-REL|ENSG00000199161|hsa-mir-126|hsa-miR-126 jt:ENSG00000163638|ADAMTS9  
C-REL|ENSG00000199161|hsa-mir-126|hsa-miR-126 jt:ENSG00000172889|EGFL7  
C-REL|ENSG00000199161|hsa-mir-126|hsa-miR-126\* jt:ENSG00000056998|GYG2  
C-REL|ENSG00000199161|hsa-mir-126|hsa-miR-126\* jt:ENSG00000188042|ARL4C  
C-REL|ENSG00000199161|hsa-mir-126|hsa-miR-126\* jt:ENSG00000103540|CE110\_HUMAN  
C-REL|ENSG00000199161|hsa-mir-126|hsa-miR-126\* jt:ENSG00000133116|KL  
C-REL|ENSG00000199161|hsa-mir-126|hsa-miR-126\* jt:ENSG00000117594|HSD11B1  
C-REL|ENSG00000199161|hsa-mir-126|hsa-miR-126\* jt:ENSG00000008382|MPND  
C-REL|ENSG00000199161|hsa-mir-126|hsa-miR-126\* jt:ENSG00000181656|GPR88  
C-REL|ENSG00000199161|hsa-mir-126|hsa-miR-126\* jt:ENSG00000177599|ZNF491  
C-REL|ENSG00000199161|hsa-mir-126|hsa-miR-126\* jt:ENSG00000125734|NM\_001080452.1  
C-REL|ENSG00000199161|hsa-mir-126|hsa-miR-126\* jt:ENSG00000173545|ZNF622  
C-REL|ENSG00000199161|hsa-mir-126|hsa-miR-126\* jt:ENSG00000152078|TMEM56  
C-REL|ENSG00000199161|hsa-mir-126|hsa-miR-126\* jt:ENSG00000182621|PLCB1  
C-REL|ENSG00000199161|hsa-mir-126|hsa-miR-126\* jt:ENSG00000122965|RBM19  
C-REL|ENSG00000199161|hsa-mir-126|hsa-miR-126\* jt:ENSG00000158423|RIBC1  
C-REL|ENSG00000199161|hsa-mir-126|hsa-miR-126\* jt:ENSG00000112062|MAPK14  
C-REL|ENSG00000199161|hsa-mir-126|hsa-miR-126\* jt:ENSG00000104953|TLE6  
C-REL|ENSG00000199161|hsa-mir-126|hsa-miR-126\* jt:ENSG00000186231|KLHL32  
C-REL|ENSG00000199161|hsa-mir-126|hsa-miR-126\* jt:ENSG00000169131|ZNF354A  
C-REL|ENSG00000199161|hsa-mir-126|hsa-miR-126\* jt:ENSG00000169016|E2F6  
C-REL|ENSG00000199161|hsa-mir-126|hsa-miR-126\* jt:ENSG00000130724|CHMP2A  
C-REL|ENSG00000199161|hsa-mir-126|hsa-miR-126\* jt:ENSG00000205808|PPAPDC2  
C-REL|ENSG00000207550|hsa-mir-99b|hsa-miR-99b jt:ENSG00000161921|XCCL16  
C-REL|ENSG00000207550|hsa-mir-99b|hsa-miR-99b jt:ENSG00000136144|RCBTB1  
C-REL|ENSG00000207550|hsa-mir-99b|hsa-miR-99b jt:ENSG00000082213|C5orf22  
C-REL|ENSG00000207550|hsa-mir-99b|hsa-miR-99b jt:ENSG00000127314|RAP1B  
C-REL|ENSG00000207550|hsa-mir-99b|hsa-miR-99b jt:ENSG00000166444|ST5  
C-REL|ENSG00000207562|hsa-mir-34c|hsa-miR-34c jt:ENSG00000177410|Q5QHF1\_HUMAN  
C-REL|ENSG00000207562|hsa-mir-34c|hsa-miR-34c jt:ENSG00000007541|PIGQ  
C-REL|ENSG00000207562|hsa-mir-34c|hsa-miR-34c jt:ENSG00000136247|ZDHH4  
C-REL|ENSG00000207562|hsa-mir-34c|hsa-miR-34c jt:ENSG00000198586|TLK1  
C-REL|ENSG00000207562|hsa-mir-34c|hsa-miR-34c jt:ENSG00000177303|CASKIN2  
C-REL|ENSG00000207562|hsa-mir-34c|hsa-miR-34c jt:ENSG00000198719|DLL1  
C-REL|ENSG00000207562|hsa-mir-34c|hsa-miR-34c jt:ENSG00000108797|CNTNAP1  
C-REL|ENSG00000207562|hsa-mir-34c|hsa-miR-34c jt:ENSG00000118513|MYB  
C-REL|ENSG00000207562|hsa-mir-34c|hsa-miR-34c jt:ENSG00000143466|IKBKE  
C-REL|ENSG00000207568|hsa-mir-203|hsa-miR-203 jt:ENSG00000110777|POU2AF1  
C-REL|ENSG00000207568|hsa-mir-203|hsa-miR-203 jt:ENSG00000125810|CD93  
C-REL|ENSG00000207568|hsa-mir-203|hsa-miR-203 jt:ENSG00000172818|OVOL1

C-REL|ENSG00000207568|hsa-mir-203|hsa-miR-203 jt:ENSG00000143621|ILF2  
C-REL|ENSG00000207568|hsa-mir-203|hsa-miR-203 jt:ENSG00000173698|GPR64  
C-REL|ENSG00000207568|hsa-mir-203|hsa-miR-203 jt:ENSG00000068650|ATP11A  
C-REL|ENSG00000207568|hsa-mir-203|hsa-miR-203 jt:ENSG00000165478|HEPACAM  
C-REL|ENSG00000207568|hsa-mir-203|hsa-miR-203 jt:ENSG00000041982|TNC  
C-REL|ENSG00000207568|hsa-mir-203|hsa-miR-203 jt:ENSG00000138617|PARF16  
C-REL|ENSG00000207568|hsa-mir-203|hsa-miR-203 jt:ENSG00000173046|NM\_207376  
C-REL|ENSG00000207568|hsa-mir-203|hsa-miR-203 jt:ENSG00000145824|CXCL14  
C-REL|ENSG00000207752|hsa-mir-199a-1|hsa-miR-199a jt:ENSG00000108515|ENO3  
C-REL|ENSG00000207752|hsa-mir-199a-1|hsa-miR-199a jt:ENSG00000204580|DDR1  
C-REL|ENSG00000207752|hsa-mir-199a-1|hsa-miR-199a jt:ENSG00000167182|SP2  
C-REL|ENSG00000207752|hsa-mir-199a-1|hsa-miR-199a jt:ENSG00000163660|CCNL1  
C-REL|ENSG00000207752|hsa-mir-199a-1|hsa-miR-199a jt:ENSG00000129116|PALLD  
C-REL|ENSG00000207752|hsa-mir-199a-1|hsa-miR-199a\* jt:ENSG00000131914|LIN28  
C-REL|ENSG00000207752|hsa-mir-199a-1|hsa-miR-199a\* jt:ENSG00000140403|DNAJA4  
C-REL|ENSG00000207752|hsa-mir-199a-1|hsa-miR-199a\* jt:ENSG00000088899|K0552\_HUMAN  
C-REL|ENSG00000207752|hsa-mir-199a-1|hsa-miR-199a\* jt:ENSG00000118600|TMEM5  
C-REL|ENSG00000207752|hsa-mir-199a-1|hsa-miR-199a\* jt:ENSG00000198901|PRC1  
C-REL|ENSG00000207752|hsa-mir-199a-1|hsa-miR-199a\* jt:ENSG00000123473|STIL  
C-REL|ENSG00000207752|hsa-mir-199a-1|hsa-miR-199a\* jt:ENSG00000180263|FGD6  
C-REL|ENSG00000207752|hsa-mir-199a-1|hsa-miR-199a\* jt:ENSG00000188153|COL4A5  
C-REL|ENSG00000207752|hsa-mir-199a-1|hsa-miR-199a\* jt:ENSG00000117713|ARID1A  
C-REL|ENSG00000207752|hsa-mir-199a-1|hsa-miR-199a\* jt:ENSG00000170801|HTRA3  
C-REL|ENSG00000207752|hsa-mir-199a-1|hsa-miR-199a\* jt:ENSG00000137648|TMPRSS4  
C-REL|ENSG00000207752|hsa-mir-199a-1|hsa-miR-199a\* jt:ENSG00000073331|ALPK1  
C-REL|ENSG00000207752|hsa-mir-199a-1|hsa-miR-199a\* jt:ENSG00000100461|RBM23  
C-REL|ENSG00000207764|hsa-mir-133a-2|hsa-miR-133a jt:ENSG00000146648|EGFR  
C-REL|ENSG00000207764|hsa-mir-133a-2|hsa-miR-133a jt:ENSG00000137507|LRRC32  
C-REL|ENSG00000207764|hsa-mir-133a-2|hsa-miR-133a jt:ENSG00000167371|PRRT2  
C-REL|ENSG00000207764|hsa-mir-133a-2|hsa-miR-133a jt:ENSG00000120437|ACAT2  
C-REL|ENSG00000207764|hsa-mir-133a-2|hsa-miR-133a jt:ENSG00000139572|GPR84  
C-REL|ENSG00000207764|hsa-mir-133a-2|hsa-miR-133a jt:ENSG00000180471|C9orf31  
C-REL|ENSG00000207764|hsa-mir-133a-2|hsa-miR-133a jt:ENSG00000163485|ADORA1  
C-REL|ENSG00000207764|hsa-mir-133a-2|hsa-miR-133a jt:ENSG00000084207|GSTP1  
C-REL|ENSG00000207764|hsa-mir-133a-2|hsa-miR-133a jt:ENSG00000103200|NME4  
C-REL|ENSG00000207764|hsa-mir-133a-2|hsa-miR-133a jt:ENSG00000102050|PRAF2  
C-REL|ENSG00000207811|hsa-mir-34b|hsa-miR-34b jt:ENSG00000177410|Q5QHF1\_HUMAN  
C-REL|ENSG00000207811|hsa-mir-34b|hsa-miR-34b jt:ENSG00000007541|PIGQ  
C-REL|ENSG00000207811|hsa-mir-34b|hsa-miR-34b jt:ENSG00000136247|ZDHH4  
C-REL|ENSG00000207811|hsa-mir-34b|hsa-miR-34b jt:ENSG00000198586|TLK1  
C-REL|ENSG00000207811|hsa-mir-34b|hsa-miR-34b jt:ENSG00000177303|CASKIN2  
C-REL|ENSG00000207811|hsa-mir-34b|hsa-miR-34b jt:ENSG00000198719|DLL1  
C-REL|ENSG00000207811|hsa-mir-34b|hsa-miR-34b jt:ENSG00000108797|CNTNAP1  
C-REL|ENSG00000207811|hsa-mir-34b|hsa-miR-34b jt:ENSG00000118513|MYB  
C-REL|ENSG00000207811|hsa-mir-34b|hsa-miR-34b jt:ENSG00000143466|IKBKE  
C-REL|ENSG00000207955|hsa-mir-219-2|hsa-miR-219 jt:ENSG00000186187|ZNRF1  
C-REL|ENSG00000207955|hsa-mir-219-2|hsa-miR-219 jt:ENSG00000183018|SPNS2  
C-REL|ENSG00000207955|hsa-mir-219-2|hsa-miR-219 jt:ENSG00000118496|FBXO30  
C-REL|ENSG00000207955|hsa-mir-219-2|hsa-miR-219 jt:ENSG00000171855|IFNB1  
C-REL|ENSG00000207955|hsa-mir-219-2|hsa-miR-219 jt:ENSG00000108702|CCL1  
C-REL|ENSG00000207955|hsa-mir-219-2|hsa-miR-219 jt:ENSG00000181817|LSM10  
C-REL|ENSG00000207955|hsa-mir-219-2|hsa-miR-219 jt:ENSG00000119508|NR4A3  
C-REL|ENSG00000207955|hsa-mir-219-2|hsa-miR-219 jt:ENSG00000154274|C4orf19  
C-REL|ENSG00000207955|hsa-mir-219-2|hsa-miR-219 jt:ENSG00000095066|HOOK2  
C-REL|ENSG00000207955|hsa-mir-219-2|hsa-miR-219 jt:ENSG00000189325|NP\_001010903.2  
C-REL|ENSG00000207955|hsa-mir-219-2|hsa-miR-219 jt:ENSG00000161031|PGLYRP2  
C-REL|ENSG00000207955|hsa-mir-219-2|hsa-miR-219 jt:ENSG00000113643|RARS  
C-REL|ENSG00000207955|hsa-mir-219-2|hsa-miR-219 jt:ENSG00000187095|LILRA2  
C-REL|ENSG00000207955|hsa-mir-219-2|hsa-miR-219 jt:ENSG00000180881|CAPS2  
C-REL|ENSG00000207955|hsa-mir-219-2|hsa-miR-219 jt:ENSG00000114982|NP\_060461.3  
C-REL|ENSG00000207955|hsa-mir-219-2|hsa-miR-219 jt:ENSG00000179387|ELMOD2  
C-REL|ENSG00000207955|hsa-mir-219-2|hsa-miR-219 jt:ENSG00000197077|Q5THZ5\_HUMAN  
C-REL|ENSG00000207955|hsa-mir-219-2|hsa-miR-219 jt:ENSG00000101200|AVP  
CAC-BP|ENSG00000198972|hsa-let-7e|hsa-let-7e jt:ENSG00000105419|Q99687-2  
CAC-BP|ENSG00000198972|hsa-let-7e|hsa-let-7e jt:ENSG00000143851|PTPN7  
CAC-BP|ENSG00000198972|hsa-let-7e|hsa-let-7e jt:ENSG00000177410|Q5QHF1\_HUMAN  
CAC-BP|ENSG00000198972|hsa-let-7e|hsa-let-7e jt:ENSG0000023902|PLEKHO1  
CAC-BP|ENSG00000198972|hsa-let-7e|hsa-let-7e jt:ENSG00000071967|CYBRD1  
CAC-BP|ENSG00000199036|hsa-mir-219-1|hsa-miR-219 jt:ENSG00000186187|ZNRF1  
CAC-BP|ENSG00000199036|hsa-mir-219-1|hsa-miR-219 jt:ENSG00000183018|SPNS2  
CAC-BP|ENSG00000199036|hsa-mir-219-1|hsa-miR-219 jt:ENSG00000142606|MMEL1  
CAC-BP|ENSG00000199036|hsa-mir-219-1|hsa-miR-219 jt:ENSG00000178226|PRSS36  
CAC-BP|ENSG00000199036|hsa-mir-219-1|hsa-miR-219 jt:ENSG00000102265|TIMP1  
CAC-BP|ENSG00000202569|hsa-mir-146b|hsa-miR-146b jt:ENSG00000177111|XR\_016777.1  
CAC-BP|ENSG00000202569|hsa-mir-146b|hsa-miR-146b jt:ENSG00000177990|DFY19L2  
CAC-BP|ENSG00000207550|hsa-mir-99b|hsa-miR-99b jt:ENSG00000161921|CXCL16  
CAC-BP|ENSG00000207562|hsa-mir-34c|hsa-miR-34c jt:ENSG00000177410|Q5QHF1\_HUMAN  
CAC-BP|ENSG00000207562|hsa-mir-34c|hsa-miR-34c jt:ENSG00000007541|PIGQ  
CAC-BP|ENSG00000207562|hsa-mir-34c|hsa-miR-34c jt:ENSG00000136247|ZDHH4  
CAC-BP|ENSG00000207562|hsa-mir-34c|hsa-miR-34c jt:ENSG00000189159|HN1  
CAC-BP|ENSG00000207568|hsa-mir-203|hsa-miR-203 jt:ENSG00000110777|POU2AF1  
CAC-BP|ENSG00000207568|hsa-mir-203|hsa-miR-203 jt:ENSG00000125810|CD93  
CAC-BP|ENSG00000207568|hsa-mir-203|hsa-miR-203 jt:ENSG00000133216|EPHB2  
CAC-BP|ENSG00000207585|hsa-mir-181d|hsa-miR-181d jt:ENSG00000129244|ATP1B2  
CAC-BP|ENSG00000207585|hsa-mir-181d|hsa-miR-181d jt:ENSG00000073756|PTGS2  
CAC-BP|ENSG00000207585|hsa-mir-181d|hsa-miR-181d jt:ENSG00000160789|LMNA  
CAC-BP|ENSG00000207623|hsa-mir-205|hsa-miR-205 jt:ENSG00000152270|PDE3B  
CAC-BP|ENSG00000207811|hsa-mir-34b|hsa-miR-34b jt:ENSG00000177410|Q5QHF1\_HUMAN  
CAC-BP|ENSG00000207811|hsa-mir-34b|hsa-miR-34b jt:ENSG00000007541|PIGQ  
CAC-BP|ENSG00000207811|hsa-mir-34b|hsa-miR-34b jt:ENSG00000136247|ZDHH4  
CAC-BP|ENSG00000207811|hsa-mir-34b|hsa-miR-34b jt:ENSG00000189159|HN1  
CACD|ENSG00000199032|hsa-mir-425|hsa-miR-425-3p jt:ENSG00000067560|RHOA  
CACD|ENSG00000199032|hsa-mir-425|hsa-miR-425-3p jt:ENSG00000053524|MCF2L2  
CACD|ENSG00000199032|hsa-mir-425|hsa-miR-425-3p jt:ENSG00000167178|ISLR2  
CACD|ENSG00000207585|hsa-mir-181d|hsa-miR-181d jt:ENSG00000153684|NP\_001012455.1  
CACD|ENSG00000207585|hsa-mir-181d|hsa-miR-181d jt:ENSG00000175676|GOLGA8F  
CACD|ENSG00000207585|hsa-mir-181d|hsa-miR-181d jt:ENSG00000183629|GOLGA8G  
CACD|ENSG00000207585|hsa-mir-181d|hsa-miR-181d jt:ENSG00000129244|ATP1B2  
CACD|ENSG00000207623|hsa-mir-205|hsa-miR-205 jt:ENSG00000156675|RAB11FIP1  
CACD|ENSG00000207623|hsa-mir-205|hsa-miR-205 jt:ENSG00000085871|MGST2  
CACD|ENSG00000207789|hsa-mir-26a-2|hsa-miR-26a jt:ENSG00000158161|EYA3  
CACD|ENSG00000207789|hsa-mir-26a-2|hsa-miR-26a jt:ENSG00000174989|FBXW8  
CACD|ENSG00000207789|hsa-mir-26a-2|hsa-miR-26a jt:ENSG00000103365|GGA2  
CDP|ENSG00000198987|hsa-mir-16-2|hsa-miR-16 jt:ENSG00000149201|CCDC81  
CDP|ENSG00000198987|hsa-mir-16-2|hsa-miR-16 jt:ENSG00000119403|PHF19

CDP|ENSG00000199036|hsa-mir-219-1|hsa-miR-219 jt:ENSG00000113810|SMC4  
CDP|ENSG00000199036|hsa-mir-219-1|hsa-miR-219 jt:ENSG00000134901|KDELCL1  
CDP|ENSG00000199036|hsa-mir-219-1|hsa-miR-219 jt:ENSG00000187871|GFRAL  
CDP|ENSG00000199036|hsa-mir-219-1|hsa-miR-219 jt:ENSG00000204138|PHACTR4  
CDP|ENSG00000207819|hsa-mir-9-3|hsa-miR-9 jt:ENSG00000136938|ANP32B  
CDP|ENSG00000207819|hsa-mir-9-3|hsa-miR-9 jt:ENSG00000137709|POUF2F3  
CDP|ENSG00000207819|hsa-mir-9-3|hsa-miR-9 jt:ENSG00000092531|SNAP23  
CDP|ENSG00000207819|hsa-mir-9-3|hsa-miR-9\* jt:ENSG00000124785|NRN1  
CDP|ENSG00000207819|hsa-mir-9-3|hsa-miR-9\* jt:ENSG00000104765|BNIP3L  
CDP|ENSG00000207819|hsa-mir-9-3|hsa-miR-9\* jt:ENSG00000118363|SPCS2  
CDP|ENSG00000207819|hsa-mir-9-3|hsa-miR-9\* jt:ENSG00000159199|ATP5G1  
CDX-2|ENSG00000198981|hsa-mir-29a|hsa-miR-29a jt:ENSG00000050030|KIAA2022  
CDX-2|ENSG00000198981|hsa-mir-29a|hsa-miR-29a jt:ENSG00000105856|HBP1  
CDX-2|ENSG00000208017|hsa-mir-140|hsa-miR-140 jt:ENSG00000136052|SLC41A2  
CDX-2|ENSG00000208017|hsa-mir-140|hsa-miR-140 jt:ENSG00000118898|PPL  
CHOP-C|EBPALPHA|ENSG00000199059|hsa-mir-135b|hsa-miR-135b jt:ENSG00000171931|FBXW10  
CHOP-C|EBPALPHA|ENSG00000207630|hsa-mir-7-3|hsa-miR-7 jt:ENSG00000106003|LFNG  
CHOP-C|EBPALPHA|ENSG00000207630|hsa-mir-7-3|hsa-miR-7 jt:ENSG00000166913|YWHAB  
CHOP-C|EBPALPHA|ENSG00000207792|hsa-mir-151|hsa-miR-151 jt:ENSG00000174695|TMEM167  
CHOP-C|EBPALPHA|ENSG00000208009|hsa-mir-130a|hsa-miR-130a jt:ENSG00000175264|CHST1  
CHX10|ENSG00000199024|hsa-mir-103-2|hsa-miR-103 jt:ENSG00000120265|PCMT1  
CHX10|ENSG00000199024|hsa-mir-103-2|hsa-miR-103 jt:ENSG00000149182|ZNF289  
CHX10|ENSG00000199024|hsa-mir-103-2|hsa-miR-103 jt:ENSG00000119403|PHF19  
CHX10|ENSG00000199024|hsa-mir-103-2|hsa-miR-103 jt:ENSG00000144285|SCN1A  
CHX10|ENSG00000199149|hsa-mir-20a|hsa-miR-20a jt:ENSG00000175155|YPEL2  
CHX10|ENSG00000199149|hsa-mir-20a|hsa-miR-20a jt:ENSG00000144285|SCN1A  
CHX10|ENSG00000207610|hsa-mir-19a|hsa-miR-19a jt:ENSG00000155189|AGPAT5  
CHX10|ENSG00000207610|hsa-mir-19a|hsa-miR-19a jt:ENSG00000095739|BAMBI  
CHX10|ENSG00000207610|hsa-mir-19a|hsa-miR-19a jt:ENSG00000139200|C12orf53  
CHX10|ENSG00000207610|hsa-mir-19a|hsa-miR-19a jt:ENSG00000163596|ICALL  
CHX10|ENSG00000207610|hsa-mir-19a|hsa-miR-19a jt:ENSG00000117601|SERPINC1  
CHX10|ENSG00000207745|hsa-mir-17|hsa-miR-17-5p jt:ENSG00000057019|DCBLD2  
CHX10|ENSG00000207745|hsa-mir-17|hsa-miR-17-5p jt:ENSG00000126224|LHX8  
CHX10|ENSG00000207745|hsa-mir-17|hsa-miR-17-5p jt:ENSG00000203793|Q6ZR74\_HUMAN  
CHX10|ENSG00000207752|hsa-mir-199a-1|hsa-miR-199a jt:ENSG00000129116|PALLD  
CHX10|ENSG00000207752|hsa-mir-199a-1|hsa-miR-199a\* jt:ENSG00000118600|C6orf204  
CHX10|ENSG00000207752|hsa-mir-199a-1|hsa-miR-199a\* jt:ENSG00000159224|GIP  
CHX10|ENSG00000207752|hsa-mir-199a-1|hsa-miR-199a\* jt:ENSG00000005884|ITGA3  
CHX10|ENSG00000207752|hsa-mir-199a-1|hsa-miR-199a\* jt:ENSG00000105967|TFEC  
CHX10|ENSG00000207752|hsa-mir-199a-1|hsa-miR-199a\* jt:ENSG00000180305|WFDC10A  
CHX10|ENSG00000207752|hsa-mir-199a-1|hsa-miR-199a\* jt:ENSG00000109208|SMR3A  
CHX10|ENSG00000207863|hsa-mir-125b-2|hsa-miR-125b jt:ENSG00000172531|PPP1CA  
CREB|ENSG00000207617|hsa-mir-24-1|hsa-miR-189 jt:ENSG00000019505|SYT13  
CREB|ENSG00000207953|hsa-mir-212|hsa-miR-212 jt:ENSG00000188290|HES4  
CREB|ENSG00000207953|hsa-mir-212|hsa-miR-212 jt:ENSG00000110768|GTF2H1  
CRX|ENSG00000199122|hsa-mir-148b|hsa-miR-148b jt:ENSG00000166024|C10orf28  
CRX|ENSG00000199122|hsa-mir-148b|hsa-miR-148b jt:ENSG00000198964|SGM5  
CRX|ENSG00000199122|hsa-mir-148b|hsa-miR-148b jt:ENSG00000151418|ATP6V1G3  
CRX|ENSG00000208017|hsa-mir-140|hsa-miR-140 jt:ENSG00000107165|TYRFP1  
CRX|ENSG00000208017|hsa-mir-140|hsa-miR-140 jt:ENSG00000126705|AHDC1  
CRX|ENSG00000208017|hsa-mir-140|hsa-miR-140 jt:ENSG00000184602|SNN  
CRX|ENSG00000208017|hsa-mir-140|hsa-miR-140 jt:ENSG00000157110|RBPMS  
CdxA|ENSG00000198975|hsa-let-7a-2|hsa-let-7a jt:ENSG00000141429|GALNT1  
CdxA|ENSG00000198975|hsa-let-7a-2|hsa-let-7a jt:ENSG00000072501|SMC1A  
CdxA|ENSG00000198975|hsa-let-7a-2|hsa-let-7a jt:ENSG00000164654|NP\_061878.3  
CdxA|ENSG00000198975|hsa-let-7a-2|hsa-let-7a jt:ENSG00000125741|OPA3  
CdxA|ENSG00000198975|hsa-let-7a-2|hsa-let-7a jt:ENSG00000144031|ANKRD53  
CdxA|ENSG00000198975|hsa-let-7a-2|hsa-let-7a jt:ENSG00000181322|TXNDC6  
CdxA|ENSG00000199072|hsa-let-7f-1|hsa-let-7f jt:ENSG00000141429|GALNT1  
CdxA|ENSG00000199072|hsa-let-7f-1|hsa-let-7f jt:ENSG00000072501|SMC1A  
CdxA|ENSG00000199072|hsa-let-7f-1|hsa-let-7f jt:ENSG00000164654|NP\_061878.3  
CdxA|ENSG00000199072|hsa-let-7f-1|hsa-let-7f jt:ENSG00000125741|OPA3  
CdxA|ENSG00000199072|hsa-let-7f-1|hsa-let-7f jt:ENSG00000144031|ANKRD53  
CdxA|ENSG00000199072|hsa-let-7f-1|hsa-let-7f jt:ENSG00000181322|TXNDC6  
CdxA|ENSG00000199133|hsa-let-7d|hsa-let-7d jt:ENSG00000072501|SMC1A  
CdxA|ENSG00000199133|hsa-let-7d|hsa-let-7d jt:ENSG00000173209|AHS2  
CdxA|ENSG00000199133|hsa-let-7d|hsa-let-7d jt:ENSG00000125741|OPA3  
CdxA|ENSG00000199133|hsa-let-7d|hsa-let-7d jt:ENSG00000144031|ANKRD53  
CdxA|ENSG00000199133|hsa-let-7d|hsa-let-7d jt:ENSG00000181322|TXNDC6  
CdxA|ENSG00000199135|hsa-mir-101-1|hsa-miR-101 jt:ENSG00000064989|CALCRL  
CdxA|ENSG00000199135|hsa-mir-101-1|hsa-miR-101 jt:ENSG00000109511|ANXA10  
CdxA|ENSG00000199135|hsa-mir-101-1|hsa-miR-101 jt:ENSG00000086619|ERO1LB  
CdxA|ENSG00000199135|hsa-mir-101-1|hsa-miR-101 jt:ENSG00000116701|NCF2  
CdxA|ENSG00000199135|hsa-mir-101-1|hsa-miR-101 jt:ENSG00000198841|KTI12  
CdxA|ENSG00000199135|hsa-mir-101-1|hsa-miR-101 jt:ENSG00000187790|FANCM  
CdxA|ENSG00000199135|hsa-mir-101-1|hsa-miR-101 jt:ENSG00000138376|BARD1  
CdxA|ENSG00000199135|hsa-mir-101-1|hsa-miR-101 jt:ENSG00000134375|TIMM17A  
CdxA|ENSG00000199165|hsa-let-7a-1|hsa-let-7a jt:ENSG00000141429|GALNT1  
CdxA|ENSG00000199165|hsa-let-7a-1|hsa-let-7a jt:ENSG00000072501|SMC1A  
CdxA|ENSG00000199165|hsa-let-7a-1|hsa-let-7a jt:ENSG00000164654|NP\_061878.3  
CdxA|ENSG00000199165|hsa-let-7a-1|hsa-let-7a jt:ENSG00000125741|OP3  
CdxA|ENSG00000199165|hsa-let-7a-1|hsa-let-7a jt:ENSG00000144031|ANKRD53  
CdxA|ENSG00000199165|hsa-let-7a-1|hsa-let-7a jt:ENSG00000181322|TXNDC6  
CdxA|ENSG00000207572|hsa-mir-363|hsa-miR-363 jt:ENSG00000144583|MARCH4  
CdxA|ENSG00000207572|hsa-mir-363|hsa-miR-363 jt:ENSG00000204248|COL11A2  
CdxA|ENSG00000207602|hsa-mir-106a|hsa-miR-106a jt:ENSG00000136811|ODF2  
CdxA|ENSG00000207602|hsa-mir-106a|hsa-miR-106a jt:ENSG00000124762|CDKN1A  
CdxA|ENSG00000207602|hsa-mir-106a|hsa-miR-106a jt:ENSG00000180917|NP\_060818.3  
CdxA|ENSG00000207602|hsa-mir-106a|hsa-miR-106a jt:ENSG00000171885|AQP4  
CdxA|ENSG00000207602|hsa-mir-106a|hsa-miR-106a jt:ENSG00000163281|GNPDA2  
CdxA|ENSG00000207602|hsa-mir-106a|hsa-miR-106a jt:ENSG00000134375|TIMM17A  
CdxA|ENSG00000207624|hsa-mir-194-1|hsa-miR-194 jt:ENSG00000197969|VPS13A  
CdxA|ENSG00000207624|hsa-mir-194-1|hsa-miR-194 jt:ENSG00000188343|FAM92A1  
CdxA|ENSG00000207624|hsa-mir-194-1|hsa-miR-194 jt:ENSG00000104763|ASAH1  
CdxA|ENSG00000207624|hsa-mir-194-1|hsa-miR-194 jt:ENSG00000177853|ZNF518  
CdxA|ENSG00000207710|hsa-mir-20b|hsa-miR-20b jt:ENSG00000136811|ODF2  
CdxA|ENSG00000207710|hsa-mir-20b|hsa-miR-20b jt:ENSG00000124762|CDKN1A  
CdxA|ENSG00000207710|hsa-mir-20b|hsa-miR-20b jt:ENSG00000180917|NP\_060818.3  
CdxA|ENSG00000207710|hsa-mir-20b|hsa-miR-20b jt:ENSG00000100644|HIF1A  
CdxA|ENSG00000207710|hsa-mir-20b|hsa-miR-20b jt:ENSG00000163281|GNPDA2  
CdxA|ENSG00000207710|hsa-mir-20b|hsa-miR-20b jt:ENSG00000134375|TIMM17A  
CdxA|ENSG00000207710|hsa-mir-20b|hsa-miR-20b jt:ENSG00000127511|SIN3B  
CdxA|ENSG00000207971|hsa-mir-125b-1|hsa-miR-125b jt:ENSG00000205205|C17orf51  
CdxA|ENSG00000207971|hsa-mir-125b-1|hsa-miR-125b jt:ENSG00000138111|TMEM180  
CdxA|ENSG00000207971|hsa-mir-125b-1|hsa-miR-125b jt:ENSG00000186314|PRELID2



CdxA|ENSG00000207971|hsa-mir-125b-1|hsa-miR-125b jt:ENSG00000172215|CXCR6  
CdxA|ENSG00000207971|hsa-mir-125b-1|hsa-miR-125b jt:ENSG00000111537|IFNG  
CdxA|ENSG00000207971|hsa-mir-125b-1|hsa-miR-125b jt:ENSG00000156234|CXCL13  
CdxA|ENSG00000207971|hsa-mir-125b-1|hsa-miR-125b jt:ENSG00000088205|DDX18  
CdxA|ENSG00000207971|hsa-mir-125b-1|hsa-miR-125b jt:ENSG00000095303|PTGS1  
CdxA|ENSG00000207994|hsa-mir-100|hsa-miR-100 jt:ENSG00000177406|Q8N503\_HUMAN  
CdxA|ENSG00000207994|hsa-mir-100|hsa-miR-100 jt:ENSG00000105972|C7orf20  
CdxA|ENSG00000207994|hsa-mir-100|hsa-miR-100 jt:ENSG00000177283|FZD8  
CdxA|ENSG00000207994|hsa-mir-100|hsa-miR-100 jt:ENSG00000112299|VNN1  
DBP|ENSG00000198981|hsa-mir-29a|hsa-miR-29a jt:ENSG00000198198|KIAA0467  
DBP|ENSG00000198981|hsa-mir-29a|hsa-miR-29a jt:ENSG00000185650|ZFP36L1  
DBP|ENSG00000199072|hsa-let-7f-1|hsa-let-7f jt:ENSG00000179476|C14orf28  
DBP|ENSG00000199130|hsa-mir-365-1|hsa-miR-365 jt:ENSG00000173209|AHS2  
DBP|ENSG00000199130|hsa-mir-365-1|hsa-miR-365 jt:ENSG00000197860|SGTB  
DBP|ENSG00000199133|hsa-let-7d|hsa-let-7d jt:ENSG00000173209|AHS2  
DBP|ENSG00000199133|hsa-let-7d|hsa-let-7d jt:ENSG00000179476|C14orf28  
DBP|ENSG00000199165|hsa-let-7a-1|hsa-let-7a jt:ENSG00000179476|C14orf28  
E2F|ENSG00000207611|hsa-mir-149|hsa-miR-149 jt:ENSG00000182199|SHMT2  
E4F1|ENSG00000198974|hsa-mir-30e|hsa-miR-30e-5p jt:ENSG00000139636|LMBR1L  
E4F1|ENSG00000198974|hsa-mir-30e|hsa-miR-30e-5p jt:ENSG00000162624|LHX8  
E4F1|ENSG00000198974|hsa-mir-30e|hsa-miR-30e-5p jt:ENSG00000186594|NF\_116284.2  
E4F1|ENSG00000198974|hsa-mir-30e|hsa-miR-30e-5p jt:ENSG00000205269|Q5T4T1\_HUMAN  
E4F1|ENSG00000198974|hsa-mir-30e|hsa-miR-30e-5p jt:ENSG00000083635|NUFIP1  
E4F1|ENSG00000207962|hsa-mir-30c-1|hsa-miR-30c jt:ENSG00000139636|LMBR1L  
E4F1|ENSG00000207962|hsa-mir-30c-1|hsa-miR-30c jt:ENSG00000162624|LHX8  
E4F1|ENSG00000207962|hsa-mir-30c-1|hsa-miR-30c jt:ENSG00000186594|NF\_116284.2  
E4F1|ENSG00000207962|hsa-mir-30c-1|hsa-miR-30c jt:ENSG00000205269|Q5T4T1\_HUMAN  
E4F1|ENSG00000207962|hsa-mir-30c-1|hsa-miR-30c jt:ENSG00000083635|NUFIP1  
EGR|ENSG00000207568|hsa-mir-203|hsa-miR-203 jt:ENSG00000101361|NOL5A  
EGR|ENSG00000207568|hsa-mir-203|hsa-miR-203 jt:ENSG00000162702|ZNF281  
EGR|ENSG00000207568|hsa-mir-203|hsa-miR-203 jt:ENSG00000072041|SLC6A15  
EGR|ENSG00000207611|hsa-mir-149|hsa-miR-149 jt:ENSG00000187609|NP\_060290.3  
EGR|ENSG00000207611|hsa-mir-149|hsa-miR-149 jt:ENSG00000100034|PPM1F  
EGR|ENSG00000207611|hsa-mir-149|hsa-miR-149 jt:ENSG00000197444|OGDHL  
EGR|ENSG00000207614|hsa-mir-193a|hsa-miR-193a jt:ENSG00000012779|ALOX5  
EGR|ENSG00000207614|hsa-mir-193a|hsa-miR-193a jt:ENSG00000171365|CLCN5  
EGR|ENSG00000207614|hsa-mir-193a|hsa-miR-193a jt:ENSG00000084090|STARD7  
EGR|ENSG00000207614|hsa-mir-193a|hsa-miR-193a jt:ENSG00000137478|FCHSD2  
EGR|ENSG00000207614|hsa-mir-193a|hsa-miR-193a jt:ENSG00000156218|ADAMTSL3  
EGR|ENSG00000207614|hsa-mir-193a|hsa-miR-193a jt:ENSG00000167716|WDR81  
EGR|ENSG00000207757|hsa-mir-93|hsa-miR-93 jt:ENSG00000121903|ZSCAN20  
EGR|ENSG00000207757|hsa-mir-93|hsa-miR-93 jt:ENSG00000180667|YOD1  
EGR|ENSG00000207757|hsa-mir-93|hsa-miR-93 jt:ENSG00000121871|SLITRK3  
EGR|ENSG00000208036|hsa-mir-106b|hsa-miR-106b jt:ENSG00000121903|ZSCAN20  
EGR|ENSG00000208036|hsa-mir-106b|hsa-miR-106b jt:ENSG00000180667|YOD1  
EGR|ENSG00000208036|hsa-mir-106b|hsa-miR-106b jt:ENSG00000121871|SLITRK3  
ELF-1|ENSG00000198987|hsa-mir-16-2|hsa-miR-16 jt:ENSG00000122140|MRPS2  
ELF-1|ENSG00000198987|hsa-mir-16-2|hsa-miR-16 jt:ENSG00000167778|SPRYD3  
ELF-1|ENSG00000198987|hsa-mir-16-2|hsa-miR-16 jt:ENSG00000172725|PTPRCAP  
ELF-1|ENSG00000198987|hsa-mir-16-2|hsa-miR-16 jt:ENSG00000163867|ZMYM6  
ELF-1|ENSG00000199080|hsa-mir-133b|hsa-miR-133b jt:ENSG00000137507|LRRC32  
ELF-1|ENSG00000199080|hsa-mir-133b|hsa-miR-133b jt:ENSG00000163568|AIM2  
ELF-1|ENSG00000199080|hsa-mir-133b|hsa-miR-133b jt:ENSG00000154822|PLCL2  
ELF-1|ENSG00000199080|hsa-mir-133b|hsa-miR-133b jt:ENSG00000084207|GSTP1  
ELF-1|ENSG00000199080|hsa-mir-133b|hsa-miR-133b jt:ENSG00000120437|ACAT2  
ELF-1|ENSG00000199082|hsa-mir-342|hsa-miR-342 jt:ENSG00000169314|C22orf15  
ELF-1|ENSG00000199082|hsa-mir-342|hsa-miR-342 jt:ENSG00000154736|ADAMT55  
ELF-1|ENSG00000199082|hsa-mir-342|hsa-miR-342 jt:ENSG00000128891|CCDC32  
ELF-1|ENSG00000199082|hsa-mir-342|hsa-miR-342 jt:ENSG00000137393|IBRDC2  
ELF-1|ENSG00000199082|hsa-mir-342|hsa-miR-342 jt:ENSG00000181904|C5orf24  
ELF-1|ENSG00000199082|hsa-mir-342|hsa-miR-342 jt:ENSG00000130939|UBE4B  
ELF-1|ENSG00000199082|hsa-mir-342|hsa-miR-342 jt:ENSG00000121807|CCR2  
ELF-1|ENSG00000199082|hsa-mir-342|hsa-miR-342 jt:ENSG00000197713|RPE  
ELF-1|ENSG00000199082|hsa-mir-342|hsa-miR-342 jt:ENSG00000167085|PHB  
ELF-1|ENSG00000199082|hsa-mir-342|hsa-miR-342 jt:ENSG00000185298|Q6PK04\_HUMAN  
ELF-1|ENSG00000207795|hsa-mir-155|hsa-miR-155 jt:ENSG00000144034|TPRKB  
ELF-1|ENSG00000207795|hsa-mir-155|hsa-miR-155 jt:ENSG00000107165|TYR1  
ELF-1|ENSG00000207795|hsa-mir-155|hsa-miR-155 jt:ENSG00000106341|C7orf16  
ELF-1|ENSG00000207795|hsa-mir-155|hsa-miR-155 jt:ENSG00000112312|GMNN  
ELF-1|ENSG00000207795|hsa-mir-155|hsa-miR-155 jt:ENSG00000114113|RBP2  
ELF-1|ENSG00000207795|hsa-mir-155|hsa-miR-155 jt:ENSG00000109790|KLHL5  
ELF-1|ENSG00000207795|hsa-mir-155|hsa-miR-155 jt:ENSG00000101457|DNTTIP1  
ELF-1|ENSG00000207795|hsa-mir-155|hsa-miR-155 jt:ENSG00000055163|CYFIP2  
ELF-1|ENSG00000207795|hsa-mir-155|hsa-miR-155 jt:ENSG00000146926|ASB1  
ELF-1|ENSG00000207795|hsa-mir-155|hsa-miR-155 jt:ENSG00000196396|PTPN1  
ELF-1|ENSG00000207808|hsa-mir-27a|hsa-miR-27a jt:ENSG00000109184|DCUN1D4  
ELF-1|ENSG00000207808|hsa-mir-27a|hsa-miR-27a jt:ENSG00000101958|GLRA2  
ELF-1|ENSG00000207808|hsa-mir-27a|hsa-miR-27a jt:ENSG00000205761|Q6ZRI7\_HUMAN  
ELF-1|ENSG00000207808|hsa-mir-27a|hsa-miR-27a jt:ENSG00000079134|THOC1  
ELF-1|ENSG00000207808|hsa-mir-27a|hsa-miR-27a jt:ENSG00000167723|TRPV3  
ELF-1|ENSG00000207808|hsa-mir-27a|hsa-miR-27a jt:ENSG00000173221|GLRX  
ELF-1|ENSG00000207808|hsa-mir-27a|hsa-miR-27a jt:ENSG00000182841|Q9NSQ0\_HUMAN  
ELF-1|ENSG00000207949|hsa-mir-214|hsa-miR-214 jt:ENSG00000110328|GALNTL4  
ELF-1|ENSG00000207949|hsa-mir-214|hsa-miR-214 jt:ENSG00000121848|ZNF364  
ELF-1|ENSG00000207949|hsa-mir-214|hsa-miR-214 jt:ENSG00000110851|PRDM4  
ELF-1|ENSG00000207949|hsa-mir-214|hsa-miR-214 jt:ENSG00000167578|MIA  
ELF-1|ENSG00000207949|hsa-mir-214|hsa-miR-214 jt:ENSG00000104894|CD37  
ELF-1|ENSG00000207980|hsa-mir-23a|hsa-miR-23a jt:ENSG00000113615|SEC24A  
ELF-1|ENSG00000207980|hsa-mir-23a|hsa-miR-23a jt:ENSG00000188938|FAM120AOS  
ELF-1|ENSG00000207980|hsa-mir-23a|hsa-miR-23a jt:ENSG00000109184|DCUN1D4  
ELF-1|ENSG00000207980|hsa-mir-23a|hsa-miR-23a jt:ENSG00000163376|KBTBD8  
ELF-1|ENSG00000207980|hsa-mir-23a|hsa-miR-23a jt:ENSG00000163781|TOPBP1  
ELF-1|ENSG00000207980|hsa-mir-23a|hsa-miR-23a jt:ENSG00000205592|MUC19  
ELF-1|ENSG00000207980|hsa-mir-23a|hsa-miR-23a jt:ENSG00000111424|VDR  
ELF-1|ENSG00000207980|hsa-mir-23a|hsa-miR-23a jt:ENSG00000204026|Q6ZSD2\_HUMAN  
ELF-1|ENSG00000207980|hsa-mir-23a|hsa-miR-23a jt:ENSG00000120868|APAF1  
ELF-1|ENSG00000207980|hsa-mir-23a|hsa-miR-23a jt:ENSG00000177800|TMEM78  
ELF-1|ENSG00000207980|hsa-mir-23a|hsa-miR-23a jt:ENSG00000147119|CHST7  
ELF-1|ENSG00000207980|hsa-mir-23a|hsa-miR-23a jt:ENSG00000180257|ZNF321  
ELF-1|ENSG00000207980|hsa-mir-23a|hsa-miR-23a jt:ENSG00000110497|NP\_060219.2  
ELF-1|ENSG00000207980|hsa-mir-23a|hsa-miR-23a jt:ENSG00000198380|GFPT1  
ELF-1|ENSG00000207980|hsa-mir-23a|hsa-miR-23a jt:ENSG00000067066|SP100  
ELF-1|ENSG00000207980|hsa-mir-23a|hsa-miR-23a jt:ENSG00000120279|MYCT1  
ELF-1|ENSG00000208024|hsa-mir-199a-2|hsa-miR-199a jt:ENSG00000185674|LYG2\_HUMAN  
ELF-1|ENSG00000208024|hsa-mir-199a-2|hsa-miR-199a jt:ENSG00000154736|ADAMT55

ELF-1|ENSG00000208024|hsa-mir-199a-2|hsa-miR-199a|jt:ENSG00000204380|Q6ZTQ2\_HUMAN  
ELF-1|ENSG00000208024|hsa-mir-199a-2|hsa-miR-199a|jt:ENSG00000204580|DDR1  
ELF-1|ENSG00000208024|hsa-mir-199a-2|hsa-miR-199a\*|jt:ENSG00000204220|PFDN6  
ELF-1|ENSG00000208024|hsa-mir-199a-2|hsa-miR-199a\*|jt:ENSG00000139973|SYT16  
ELF-1|ENSG00000208024|hsa-mir-199a-2|hsa-miR-199a\*|jt:ENSG00000116141|MARK1  
ELF-1|ENSG00000208024|hsa-mir-199a-2|hsa-miR-199a\*|jt:ENSG00000111641|NOLL1  
ELF-1|ENSG00000208024|hsa-mir-199a-2|hsa-miR-199a\*|jt:ENSG00000148985|NP\_055304.1  
ELF-1|ENSG00000208024|hsa-mir-199a-2|hsa-miR-199a\*|jt:ENSG00000110395|CBL  
ELF-1|ENSG00000208024|hsa-mir-199a-2|hsa-miR-199a\*|jt:ENSG00000134152|C15orf29  
ELF-1|ENSG00000208024|hsa-mir-199a-2|hsa-miR-199a\*|jt:ENSG00000105967|TFEC  
ELF-1|ENSG00000208024|hsa-mir-199a-2|hsa-miR-199a\*|jt:ENSG00000117360|PRPF3  
ELF-1|ENSG00000209707|hsa-mir-24-2|hsa-miR-24|jt:ENSG00000203709|C1orf132  
ELF-1|ENSG00000209707|hsa-mir-24-2|hsa-miR-24|jt:ENSG00000162458|FBLIM1  
ELF-1|ENSG00000209707|hsa-mir-24-2|hsa-miR-24|jt:ENSG00000132141|CCT6B  
ELF-1|ENSG00000209707|hsa-mir-24-2|hsa-miR-24|jt:ENSG00000142188|TMEM50B  
ELF-1|ENSG00000209707|hsa-mir-24-2|hsa-miR-24|jt:ENSG00000162430|SEPN1  
ELF-1|ENSG00000209707|hsa-mir-24-2|hsa-miR-24|jt:ENSG00000106384|MOGAT3  
ELF-1|ENSG00000209707|hsa-mir-24-2|hsa-miR-24|jt:ENSG00000114019|AMOTL2  
ELF-1|ENSG00000209707|hsa-mir-24-2|hsa-miR-24|jt:ENSG00000172460|Q8IVY7\_HUMAN  
ELF-1|ENSG00000209707|hsa-mir-24-2|hsa-miR-24|jt:ENSG00000138641|HERC3  
ELF-1|ENSG00000209707|hsa-mir-24-2|hsa-miR-24|jt:ENSG00000148965|SAA4  
ELF-1|ENSG00000209707|hsa-mir-24-2|hsa-miR-24|jt:ENSG00000168528|SERINC2  
ELF-1|ENSG00000209707|hsa-mir-24-2|hsa-miR-24|jt:ENSG00000152527|PLEKHH2  
ELF-1|ENSG00000209707|hsa-mir-24-2|hsa-miR-24|jt:ENSG00000103184|SEC14L5  
ELF-1|ENSG00000209707|hsa-mir-24-2|hsa-miR-24|jt:ENSG00000100147|CCDC134  
ELF-1|ENSG00000211590|hsa-mir-802|hsa-miR-802|jt:ENSG00000099338|C19orf15  
ELF-1|ENSG00000211590|hsa-mir-802|hsa-miR-802|jt:ENSG00000022556|NLRP2  
ELF-1|ENSG00000211590|hsa-mir-802|hsa-miR-802|jt:ENSG00000131196|NFATC1  
ELF-1|ENSG00000211590|hsa-mir-802|hsa-miR-802|jt:ENSG00000079134|THOC1  
ELF-1|ENSG00000211590|hsa-mir-802|hsa-miR-802|jt:ENSG00000092964|DPYSL2  
ELF-1|ENSG00000211590|hsa-mir-802|hsa-miR-802|jt:ENSG00000100321|SYNGR1  
ELK-1|ENSG00000207585|hsa-mir-181d|hsa-miR-181d|jt:ENSG00000110906|KCTD10  
ELK-1|ENSG00000207585|hsa-mir-181d|hsa-miR-181d|jt:ENSG00000115956|PLEK  
ELK-1|ENSG00000207585|hsa-mir-181d|hsa-miR-181d|jt:ENSG00000126432|PRDX5  
ELK-1|ENSG00000207585|hsa-mir-181d|hsa-miR-181d|jt:ENSG00000088832|FKBP1A  
ELK-1|ENSG00000207585|hsa-mir-181d|hsa-miR-181d|jt:ENSG00000073756|PTGS2  
ELK-1|ENSG00000207585|hsa-mir-181d|hsa-miR-181d|jt:ENSG00000105705|SF4  
ELK-1|ENSG00000207585|hsa-mir-181d|hsa-miR-181d|jt:ENSG00000170100|Q96MU6-2  
ELK-1|ENSG00000207585|hsa-mir-181d|hsa-miR-181d|jt:ENSG00000198929|NOS1AP  
ELK-1|ENSG00000207585|hsa-mir-181d|hsa-miR-181d|jt:ENSG00000074054|CLASP1  
ER|ENSG00000198973|hsa-mir-375|hsa-miR-375|jt:ENSG00000180385|Q8NAP4\_HUMAN  
ER|ENSG00000198973|hsa-mir-375|hsa-miR-375|jt:ENSG00000047410|TPR  
ER|ENSG00000198973|hsa-mir-375|hsa-miR-375|jt:ENSG00000060709|RIMBP2  
ER|ENSG00000198973|hsa-mir-375|hsa-miR-375|jt:ENSG00000205566|Q8TB02\_HUMAN  
ER|ENSG00000198973|hsa-mir-375|hsa-miR-375|jt:ENSG00000130227|XPO7  
ER|ENSG00000198973|hsa-mir-375|hsa-miR-375|jt:ENSG00000166272|C10orf26  
ER|ENSG00000198973|hsa-mir-375|hsa-miR-375|jt:ENSG00000119440|LCN1L1  
ER|ENSG00000198973|hsa-mir-375|hsa-miR-375|jt:ENSG00000123472|ATPAF1  
ER|ENSG00000198973|hsa-mir-375|hsa-miR-375|jt:ENSG00000170653|ATF7  
ER|ENSG00000198973|hsa-mir-375|hsa-miR-375|jt:ENSG00000092853|CLSPN  
ER|ENSG00000198973|hsa-mir-375|hsa-miR-375|jt:ENSG00000129204|USP6  
ER|ENSG00000198973|hsa-mir-375|hsa-miR-375|jt:ENSG00000198692|EIF1AY  
ER|ENSG00000198973|hsa-mir-375|hsa-miR-375|jt:ENSG00000118855|MFS1D1  
ER|ENSG00000198973|hsa-mir-375|hsa-miR-375|jt:ENSG00000204832|Q6ZRU3\_HUMAN  
ER|ENSG00000198973|hsa-mir-375|hsa-miR-375|jt:ENSG00000142182|DNMT3L  
ER|ENSG00000198973|hsa-mir-375|hsa-miR-375|jt:ENSG00000162374|ELAVL4  
ER|ENSG00000198973|hsa-mir-375|hsa-miR-375|jt:ENSG00000114805|PLCH1  
ER|ENSG00000198973|hsa-mir-375|hsa-miR-375|jt:ENSG00000138134|STAMPBPL1  
ER|ENSG00000198973|hsa-mir-375|hsa-miR-375|jt:ENSG00000196153|Q8NAB5\_HUMAN  
ER|ENSG00000198973|hsa-mir-375|hsa-miR-375|jt:ENSG00000117000|RLF  
ER|ENSG00000198973|hsa-mir-375|hsa-miR-375|jt:ENSG00000178110|Q8N9G9\_HUMAN  
ER|ENSG00000198973|hsa-mir-375|hsa-miR-375|jt:ENSG00000204661|LOC729569  
ER|ENSG00000198973|hsa-mir-375|hsa-miR-375|jt:ENSG00000173728|C1orf100  
ER|ENSG00000198973|hsa-mir-375|hsa-miR-375|jt:ENSG00000188315|C3orf62  
ER|ENSG00000198973|hsa-mir-375|hsa-miR-375|jt:ENSG00000139323|WDR51B  
ER|ENSG00000198973|hsa-mir-375|hsa-miR-375|jt:ENSG00000117791|MOSC2  
ER|ENSG00000198974|hsa-mir-30e|hsa-miR-30e-3p|jt:ENSG00000196933|RPS26L1  
ER|ENSG00000198974|hsa-mir-30e|hsa-miR-30e-3p|jt:ENSG00000101574|METT14  
ER|ENSG00000198974|hsa-mir-30e|hsa-miR-30e-3p|jt:ENSG00000181472|ZBTB2  
ER|ENSG00000198974|hsa-mir-30e|hsa-miR-30e-3p|jt:ENSG00000203784|LELP1  
ER|ENSG00000198974|hsa-mir-30e|hsa-miR-30e-3p|jt:ENSG00000166401|SERPINB8  
ER|ENSG00000198974|hsa-mir-30e|hsa-miR-30e-3p|jt:ENSG00000204581|Q6ZU44\_HUMAN  
ER|ENSG00000198974|hsa-mir-30e|hsa-miR-30e-3p|jt:ENSG00000166292|TMEM100  
ER|ENSG00000198974|hsa-mir-30e|hsa-miR-30e-5p|jt:ENSG00000161998|Q8N221\_HUMAN  
ER|ENSG00000198974|hsa-mir-30e|hsa-miR-30e-5p|jt:ENSG00000123643|SLC36A1  
ER|ENSG00000198974|hsa-mir-30e|hsa-miR-30e-5p|jt:ENSG00000173320|STOX2  
ER|ENSG00000198974|hsa-mir-30e|hsa-miR-30e-5p|jt:ENSG00000180667|YOD1  
ER|ENSG00000198974|hsa-mir-30e|hsa-miR-30e-5p|jt:ENSG00000179151|EDC3  
ER|ENSG00000198974|hsa-mir-30e|hsa-miR-30e-5p|jt:ENSG00000121578|B4GALT4  
ER|ENSG00000198974|hsa-mir-30e|hsa-miR-30e-5p|jt:ENSG00000119686|C14orf58  
ER|ENSG00000198974|hsa-mir-30e|hsa-miR-30e-5p|jt:ENSG00000156735|BAG4  
ER|ENSG00000198974|hsa-mir-30e|hsa-miR-30e-5p|jt:ENSG00000172819|RARG  
ER|ENSG00000198974|hsa-mir-30e|hsa-miR-30e-5p|jt:ENSG00000148541|FAM13C1  
ER|ENSG00000198974|hsa-mir-30e|hsa-miR-30e-5p|jt:ENSG00000205269|Q5T4T1\_HUMAN  
ER|ENSG00000198974|hsa-mir-30e|hsa-miR-30e-5p|jt:ENSG00000175564|UCP3  
ER|ENSG00000198974|hsa-mir-30e|hsa-miR-30e-5p|jt:ENSG00000134531|EMP1  
ER|ENSG00000198974|hsa-mir-30e|hsa-miR-30e-5p|jt:ENSG00000001084|GCLC  
ER|ENSG00000198974|hsa-mir-30e|hsa-miR-30e-5p|jt:ENSG00000091157|WDR7  
ER|ENSG00000198974|hsa-mir-30e|hsa-miR-30e-5p|jt:ENSG00000101134|DOK5  
ER|ENSG00000198974|hsa-mir-30e|hsa-miR-30e-5p|jt:ENSG00000058600|POLR3E  
ER|ENSG00000198974|hsa-mir-30e|hsa-miR-30e-5p|jt:ENSG00000079739|PGM1  
ER|ENSG00000198974|hsa-mir-30e|hsa-miR-30e-5p|jt:ENSG00000147649|MTDH  
ER|ENSG00000198974|hsa-mir-30e|hsa-miR-30e-5p|jt:ENSG00000138069|RAB1A  
ER|ENSG00000198974|hsa-mir-30e|hsa-miR-30e-5p|jt:ENSG00000159873|CCDC117  
ER|ENSG00000198974|hsa-mir-30e|hsa-miR-30e-5p|jt:ENSG00000137941|TTL7  
ER|ENSG00000198974|hsa-mir-30e|hsa-miR-30e-5p|jt:ENSG00000033867|SLC4A7  
ER|ENSG00000198974|hsa-mir-30e|hsa-miR-30e-5p|jt:ENSG00000143590|EFNA3  
ER|ENSG00000199017|hsa-mir-1-1|hsa-miR-1|jt:ENSG00000152661|GJA1  
ER|ENSG00000199017|hsa-mir-1-1|hsa-miR-1|jt:ENSG00000130590|SAMD10  
ER|ENSG00000199017|hsa-mir-1-1|hsa-miR-1|jt:ENSG00000205358|MT1H  
ER|ENSG00000199017|hsa-mir-1-1|hsa-miR-1|jt:ENSG00000095139|ARCN1  
ER|ENSG00000199017|hsa-mir-1-1|hsa-miR-1|jt:ENSG00000107854|TNKS2  
ER|ENSG00000199017|hsa-mir-1-1|hsa-miR-1|jt:ENSG00000094841|UPRT  
ER|ENSG00000199017|hsa-mir-1-1|hsa-miR-1|jt:ENSG00000198417|MT1F  
ER|ENSG00000199017|hsa-mir-1-1|hsa-miR-1|jt:ENSG00000166747|AP1G1

ER|ENSG00000199017|hsa-mir-1-1|hsa-miR-1|jt:ENSG00000179036|VAMP2  
ER|ENSG00000199017|hsa-mir-1-1|hsa-miR-1|jt:ENSG00000197417|CARKL  
ER|ENSG00000199017|hsa-mir-1-1|hsa-miR-1|jt:ENSG00000158402|CDC25C  
ER|ENSG00000199024|hsa-mir-103-2|hsa-miR-103|jt:ENSG00000105173|CCNE1  
ER|ENSG00000199024|hsa-mir-103-2|hsa-miR-103|jt:ENSG00000137171|KLC4  
ER|ENSG00000199024|hsa-mir-103-2|hsa-miR-103|jt:ENSG00000149201|CCDC81  
ER|ENSG00000199024|hsa-mir-103-2|hsa-miR-103|jt:ENSG00000069275|NUCKS1  
ER|ENSG00000199024|hsa-mir-103-2|hsa-miR-103|jt:ENSG00000105085|CRSP7  
ER|ENSG00000199024|hsa-mir-103-2|hsa-miR-103|jt:ENSG00000135968|GCC2  
ER|ENSG00000199024|hsa-mir-103-2|hsa-miR-103|jt:ENSG00000164305|CASP3  
ER|ENSG00000199024|hsa-mir-103-2|hsa-miR-103|jt:ENSG00000116704|SLC35D1  
ER|ENSG00000199024|hsa-mir-103-2|hsa-miR-103|jt:ENSG00000176095|IHPK1  
ER|ENSG00000199024|hsa-mir-103-2|hsa-miR-103|jt:ENSG00000158560|DYNC111  
ER|ENSG00000199024|hsa-mir-103-2|hsa-miR-103|jt:ENSG00000166311|SMPD1  
ER|ENSG00000199024|hsa-mir-103-2|hsa-miR-103|jt:ENSG00000129473|BCL2L2  
ER|ENSG00000199059|hsa-mir-135b|hsa-miR-135b|jt:ENSG00000114480|GBE1  
ER|ENSG00000199059|hsa-mir-135b|hsa-miR-135b|jt:ENSG00000099822|HCN2  
ER|ENSG00000199059|hsa-mir-135b|hsa-miR-135b|jt:ENSG00000102181|CD99L2  
ER|ENSG00000199059|hsa-mir-135b|hsa-miR-135b|jt:ENSG00000168026|TTC21A  
ER|ENSG00000199059|hsa-mir-135b|hsa-miR-135b|jt:ENSG00000164061|BSN  
ER|ENSG00000199059|hsa-mir-135b|hsa-miR-135b|jt:ENSG00000173464|RNASEL1  
ER|ENSG00000199059|hsa-mir-135b|hsa-miR-135b|jt:ENSG00000091879|ANGPT2  
ER|ENSG00000199059|hsa-mir-135b|hsa-miR-135b|jt:ENSG00000184774|Q49AQ9\_HUMAN  
ER|ENSG00000199059|hsa-mir-135b|hsa-miR-135b|jt:ENSG00000115137|NP\_057628.1  
ER|ENSG00000199059|hsa-mir-135b|hsa-miR-135b|jt:ENSG00000107816|LZTS2  
ER|ENSG00000199059|hsa-mir-135b|hsa-miR-135b|jt:ENSG00000198429|ZNF69  
ER|ENSG00000199059|hsa-mir-135b|hsa-miR-135b|jt:ENSG00000135842|FAM129A  
ER|ENSG00000199059|hsa-mir-135b|hsa-miR-135b|jt:ENSG00000122176|FMOD  
ER|ENSG00000199059|hsa-mir-135b|hsa-miR-135b|jt:ENSG00000095752|IL11  
ER|ENSG00000199059|hsa-mir-135b|hsa-miR-135b|jt:ENSG00000135070|ISCA1  
ER|ENSG00000199059|hsa-mir-135b|hsa-miR-135b|jt:ENSG00000130589|PR285\_HUMAN  
ER|ENSG00000199059|hsa-mir-135b|hsa-miR-135b|jt:ENSG00000125931|CITED1  
ER|ENSG00000199059|hsa-mir-135b|hsa-miR-135b|jt:ENSG00000198959|TGM2  
ER|ENSG00000199059|hsa-mir-135b|hsa-miR-135b|jt:ENSG00000030304|MUSK  
ER|ENSG00000199059|hsa-mir-135b|hsa-miR-135b|jt:ENSG00000180424|DEFB123  
ER|ENSG00000199059|hsa-mir-135b|hsa-miR-135b|jt:ENSG00000167700|MFS03  
ER|ENSG00000199059|hsa-mir-135b|hsa-miR-135b|jt:ENSG00000167861|C17orf28  
ER|ENSG00000199059|hsa-mir-135b|hsa-miR-135b|jt:ENSG00000185294|NP\_787078.1  
ER|ENSG00000199059|hsa-mir-135b|hsa-miR-135b|jt:ENSG00000113494|PRLR  
ER|ENSG00000199066|hsa-mir-330|hsa-miR-330|jt:ENSG00000084754|HADHA  
ER|ENSG00000199066|hsa-mir-330|hsa-miR-330|jt:ENSG00000091972|CD200  
ER|ENSG00000199066|hsa-mir-330|hsa-miR-330|jt:ENSG00000104267|CA2  
ER|ENSG00000199066|hsa-mir-330|hsa-miR-330|jt:ENSG00000094963|FMO2  
ER|ENSG00000199066|hsa-mir-330|hsa-miR-330|jt:ENSG00000073111|MCM2  
ER|ENSG00000199066|hsa-mir-330|hsa-miR-330|jt:ENSG00000164916|FOXK1  
ER|ENSG00000199066|hsa-mir-330|hsa-miR-330|jt:ENSG00000107897|ACBD5  
ER|ENSG00000199066|hsa-mir-330|hsa-miR-330|jt:ENSG00000162642|C1orf52  
ER|ENSG00000199066|hsa-mir-330|hsa-miR-330|jt:ENSG00000146242|TPBG  
ER|ENSG00000199066|hsa-mir-330|hsa-miR-330|jt:ENSG00000161203|AP2M1  
ER|ENSG00000199066|hsa-mir-330|hsa-miR-330|jt:ENSG00000163961|RNF168  
ER|ENSG00000199066|hsa-mir-330|hsa-miR-330|jt:ENSG00000167723|TRPV3  
ER|ENSG00000199066|hsa-mir-330|hsa-miR-330|jt:ENSG00000143178|TBX19  
ER|ENSG00000199122|hsa-mir-148b|hsa-miR-148b|jt:ENSG00000106384|MOGAT3  
ER|ENSG00000199122|hsa-mir-148b|hsa-miR-148b|jt:ENSG00000105366|SIGLEC8  
ER|ENSG00000199122|hsa-mir-148b|hsa-miR-148b|jt:ENSG00000198854|C1orf68  
ER|ENSG00000199122|hsa-mir-148b|hsa-miR-148b|jt:ENSG00000034063|UHRF1  
ER|ENSG00000199122|hsa-mir-148b|hsa-miR-148b|jt:ENSG00000122034|GTF3A  
ER|ENSG00000199122|hsa-mir-148b|hsa-miR-148b|jt:ENSG00000156642|NPTN  
ER|ENSG00000199122|hsa-mir-148b|hsa-miR-148b|jt:ENSG00000166024|C10orf28  
ER|ENSG00000199122|hsa-mir-148b|hsa-miR-148b|jt:ENSG00000205653|Q6ZUF2\_HUMAN  
ER|ENSG00000199122|hsa-mir-148b|hsa-miR-148b|jt:ENSG00000137073|UBAP2  
ER|ENSG00000199122|hsa-mir-148b|hsa-miR-148b|jt:ENSG00000182220|ATP6AP2  
ER|ENSG00000199122|hsa-mir-148b|hsa-miR-148b|jt:ENSG00000101901|CXorf45  
ER|ENSG00000199122|hsa-mir-148b|hsa-miR-148b|jt:ENSG00000205036|NP\_001001682.1  
ER|ENSG00000199122|hsa-mir-148b|hsa-miR-148b|jt:ENSG00000205524|Q68D70\_HUMAN  
ER|ENSG00000199122|hsa-mir-148b|hsa-miR-148b|jt:ENSG00000113048|MRPS27  
ER|ENSG00000199122|hsa-mir-148b|hsa-miR-148b|jt:ENSG00000131711|MAP1B  
ER|ENSG00000199122|hsa-mir-148b|hsa-miR-148b|jt:ENSG00000070985|TRPM5  
ER|ENSG00000199122|hsa-mir-148b|hsa-miR-148b|jt:ENSG00000156466|GDF6  
ER|ENSG00000199122|hsa-mir-148b|hsa-miR-148b|jt:ENSG00000206193|Q5HYA3\_HUMAN  
ER|ENSG00000199122|hsa-mir-148b|hsa-miR-148b|jt:ENSG00000134851|TMEM165  
ER|ENSG00000199122|hsa-mir-148b|hsa-miR-148b|jt:ENSG00000165097|AOF1  
ER|ENSG00000199135|hsa-mir-101-1|hsa-miR-101|jt:ENSG00000176276|hCG\_1757335  
ER|ENSG00000199135|hsa-mir-101-1|hsa-miR-101|jt:ENSG00000019991|HGF  
ER|ENSG00000199135|hsa-mir-101-1|hsa-miR-101|jt:ENSG00000179151|EDC3  
ER|ENSG00000199135|hsa-mir-101-1|hsa-miR-101|jt:ENSG00000136928|GABBR2  
ER|ENSG00000199135|hsa-mir-101-1|hsa-miR-101|jt:ENSG00000160972|PPP1R16A  
ER|ENSG00000199135|hsa-mir-101-1|hsa-miR-101|jt:ENSG00000182923|CEP63  
ER|ENSG00000199135|hsa-mir-101-1|hsa-miR-101|jt:ENSG00000136205|TNS3  
ER|ENSG00000199135|hsa-mir-101-1|hsa-miR-101|jt:ENSG00000170801|HTRA3  
ER|ENSG00000199135|hsa-mir-101-1|hsa-miR-101|jt:ENSG00000168118|RAB4A  
ER|ENSG00000199135|hsa-mir-101-1|hsa-miR-101|jt:ENSG00000198863|RUNC1  
ER|ENSG00000199135|hsa-mir-101-1|hsa-miR-101|jt:ENSG00000186111|PIP5K1C  
ER|ENSG00000199135|hsa-mir-101-1|hsa-miR-101|jt:ENSG00000104067|TJP1  
ER|ENSG00000199135|hsa-mir-101-1|hsa-miR-101|jt:ENSG00000170608|FOXA3  
ER|ENSG00000199135|hsa-mir-101-1|hsa-miR-101|jt:ENSG00000168575|SLC20A2  
ER|ENSG00000199135|hsa-mir-101-1|hsa-miR-101|jt:ENSG00000117620|SLC35A3  
ER|ENSG00000199135|hsa-mir-101-1|hsa-miR-101|jt:ENSG00000188807|NP\_001010866.1  
ER|ENSG00000199135|hsa-mir-101-1|hsa-miR-101|jt:ENSG00000088854|C20orf194  
ER|ENSG00000199135|hsa-mir-101-1|hsa-miR-101|jt:ENSG00000175220|ARHGAP1  
ER|ENSG00000199135|hsa-mir-101-1|hsa-miR-101|jt:ENSG00000100109|TFIP11  
ER|ENSG00000199135|hsa-mir-101-1|hsa-miR-101|jt:ENSG00000119707|RBM25  
ER|ENSG00000199135|hsa-mir-101-1|hsa-miR-101|jt:ENSG00000180263|FGD6  
ER|ENSG00000199135|hsa-mir-101-1|hsa-miR-101|jt:ENSG00000093167|LRRFIP2  
ER|ENSG00000199158|hsa-mir-96|hsa-miR-96|jt:ENSG00000166924|NP\_775835.2  
ER|ENSG00000199158|hsa-mir-96|hsa-miR-96|jt:ENSG00000108515|ENO3  
ER|ENSG00000199158|hsa-mir-96|hsa-miR-96|jt:ENSG00000197616|MYH6  
ER|ENSG00000199158|hsa-mir-96|hsa-miR-96|jt:ENSG00000058866|DGKG  
ER|ENSG00000199158|hsa-mir-96|hsa-miR-96|jt:ENSG00000147853|AK3  
ER|ENSG00000199158|hsa-mir-96|hsa-miR-96|jt:ENSG00000117281|CD160  
ER|ENSG00000199158|hsa-mir-96|hsa-miR-96|jt:ENSG00000169495|HTRA4  
ER|ENSG00000199158|hsa-mir-96|hsa-miR-96|jt:ENSG00000174365|NR\_003239.1  
ER|ENSG00000199158|hsa-mir-96|hsa-miR-96|jt:ENSG00000172819|RARG  
ER|ENSG00000199158|hsa-mir-96|hsa-miR-96|jt:ENSG00000067191|CACNB1  
ER|ENSG00000199158|hsa-mir-96|hsa-miR-96|jt:ENSG00000176261|ZBTB80S



ER|ENSG00000207705|hsa-mir-129-1|hsa-miR-129|jt:ENSG00000178602|OTOS  
ER|ENSG00000207705|hsa-mir-129-1|hsa-miR-129|jt:ENSG00000178796|Q8N9Z1\_HUMAN  
ER|ENSG00000207732|hsa-mir-218-1|hsa-miR-218|jt:ENSG00000206069|NP\_001001663.1  
ER|ENSG00000207732|hsa-mir-218-1|hsa-miR-218|jt:ENSG00000137075|RNF38  
ER|ENSG00000207732|hsa-mir-218-1|hsa-miR-218|jt:ENSG00000188935|Q6ZU24\_HUMAN  
ER|ENSG00000207732|hsa-mir-218-1|hsa-miR-218|jt:ENSG00000198589|LRBA  
ER|ENSG00000207732|hsa-mir-218-1|hsa-miR-218|jt:ENSG00000171540|OTF  
ER|ENSG00000207732|hsa-mir-218-1|hsa-miR-218|jt:ENSG00000181852|RNF41  
ER|ENSG00000207732|hsa-mir-218-1|hsa-miR-218|jt:ENSG00000136942|RPL35  
ER|ENSG00000207732|hsa-mir-218-1|hsa-miR-218|jt:ENSG00000161048|NP\_945341.2  
ER|ENSG00000207732|hsa-mir-218-1|hsa-miR-218|jt:ENSG00000076554|TPD52  
ER|ENSG00000207732|hsa-mir-218-1|hsa-miR-218|jt:ENSG00000147400|CETN2  
ER|ENSG00000207732|hsa-mir-218-1|hsa-miR-218|jt:ENSG00000152207|CYSLTR2  
ER|ENSG00000207732|hsa-mir-218-1|hsa-miR-218|jt:ENSG00000203931|LOC729078  
ER|ENSG00000207732|hsa-mir-218-1|hsa-miR-218|jt:ENSG00000203932|LOC728660  
ER|ENSG00000207732|hsa-mir-218-1|hsa-miR-218|jt:ENSG00000113048|MRPS27  
ER|ENSG00000207732|hsa-mir-218-1|hsa-miR-218|jt:ENSG00000197106|SLC6A17  
ER|ENSG00000207732|hsa-mir-218-1|hsa-miR-218|jt:ENSG00000120727|PAIP2  
ER|ENSG00000207732|hsa-mir-218-1|hsa-miR-218|jt:ENSG00000204241|Q6ZUU8\_HUMAN  
ER|ENSG00000207732|hsa-mir-218-1|hsa-miR-218|jt:ENSG00000185053|SGCZ  
ER|ENSG00000207764|hsa-mir-133a-2|hsa-miR-133a|jt:ENSG00000137507|LRRC32  
ER|ENSG00000207764|hsa-mir-133a-2|hsa-miR-133a|jt:ENSG00000163485|ADORA1  
ER|ENSG00000207764|hsa-mir-133a-2|hsa-miR-133a|jt:ENSG00000143858|SYT2  
ER|ENSG00000207764|hsa-mir-133a-2|hsa-miR-133a|jt:ENSG00000163295|ALPI  
ER|ENSG00000207794|hsa-mir-451|hsa-miR-451|jt:ENSG00000186009|ATP4B  
ER|ENSG00000207794|hsa-mir-451|hsa-miR-451|jt:ENSG00000080298|RFX3  
ER|ENSG00000207794|hsa-mir-451|hsa-miR-451|jt:ENSG00000134324|LPIN1  
ER|ENSG00000207794|hsa-mir-451|hsa-miR-451|jt:ENSG00000136630|HLX1  
ER|ENSG00000207794|hsa-mir-451|hsa-miR-451|jt:ENSG00000123131|PRDX4  
ER|ENSG00000207794|hsa-mir-451|hsa-miR-451|jt:ENSG00000103496|STX4  
ER|ENSG00000207794|hsa-mir-451|hsa-miR-451|jt:ENSG00000125895|C20orf46  
ER|ENSG00000207794|hsa-mir-451|hsa-miR-451|jt:ENSG00000169062|UPF3A  
ER|ENSG00000207794|hsa-mir-451|hsa-miR-451|jt:ENSG00000109684|NP\_443196.1  
ER|ENSG00000207947|hsa-mir-152|hsa-miR-152|jt:ENSG00000106384|MOGAT3  
ER|ENSG00000207947|hsa-mir-152|hsa-miR-152|jt:ENSG00000105366|SIGLEC8  
ER|ENSG00000207947|hsa-mir-152|hsa-miR-152|jt:ENSG00000198854|Clorf68  
ER|ENSG00000207947|hsa-mir-152|hsa-miR-152|jt:ENSG0000034063|UHRF1  
ER|ENSG00000207947|hsa-mir-152|hsa-miR-152|jt:ENSG00000122034|GTF3A  
ER|ENSG00000207947|hsa-mir-152|hsa-miR-152|jt:ENSG00000156642|NPTN  
ER|ENSG00000207947|hsa-mir-152|hsa-miR-152|jt:ENSG00000166024|C10orf28  
ER|ENSG00000207947|hsa-mir-152|hsa-miR-152|jt:ENSG00000205653|Q6ZUF2\_HUMAN  
ER|ENSG00000207947|hsa-mir-152|hsa-miR-152|jt:ENSG00000137073|UBAF2  
ER|ENSG00000207947|hsa-mir-152|hsa-miR-152|jt:ENSG00000182220|ATP6AP2  
ER|ENSG00000207947|hsa-mir-152|hsa-miR-152|jt:ENSG00000101901|CXorf45  
ER|ENSG00000207947|hsa-mir-152|hsa-miR-152|jt:ENSG00000205036|NP\_001001682.1  
ER|ENSG00000207947|hsa-mir-152|hsa-miR-152|jt:ENSG00000205524|Q68D70\_HUMAN  
ER|ENSG00000207947|hsa-mir-152|hsa-miR-152|jt:ENSG00000113048|MRPS27  
ER|ENSG00000207947|hsa-mir-152|hsa-miR-152|jt:ENSG00000131711|MAP1B  
ER|ENSG00000207947|hsa-mir-152|hsa-miR-152|jt:ENSG00000070985|TRPM5  
ER|ENSG00000207947|hsa-mir-152|hsa-miR-152|jt:ENSG00000156466|GDF6  
ER|ENSG00000207947|hsa-mir-152|hsa-miR-152|jt:ENSG00000206193|Q5HYA3\_HUMAN  
ER|ENSG00000207947|hsa-mir-152|hsa-miR-152|jt:ENSG00000134851|TMEM165  
ER|ENSG00000207947|hsa-mir-152|hsa-miR-152|jt:ENSG00000165097|AOF1  
ER|ENSG00000207962|hsa-mir-30c-1|hsa-miR-30c|jt:ENSG00000161998|Q8N221\_HUMAN  
ER|ENSG00000207962|hsa-mir-30c-1|hsa-miR-30c|jt:ENSG00000123643|SLC36A1  
ER|ENSG00000207962|hsa-mir-30c-1|hsa-miR-30c|jt:ENSG00000173320|STOX2  
ER|ENSG00000207962|hsa-mir-30c-1|hsa-miR-30c|jt:ENSG00000180667|YOD1  
ER|ENSG00000207962|hsa-mir-30c-1|hsa-miR-30c|jt:ENSG00000179151|EDC3  
ER|ENSG00000207962|hsa-mir-30c-1|hsa-miR-30c|jt:ENSG00000121578|B4GALT4  
ER|ENSG00000207962|hsa-mir-30c-1|hsa-miR-30c|jt:ENSG00000119686|C14orf58  
ER|ENSG00000207962|hsa-mir-30c-1|hsa-miR-30c|jt:ENSG00000156735|BAG4  
ER|ENSG00000207962|hsa-mir-30c-1|hsa-miR-30c|jt:ENSG00000172819|RARG  
ER|ENSG00000207962|hsa-mir-30c-1|hsa-miR-30c|jt:ENSG00000148541|FAM13C1  
ER|ENSG00000207962|hsa-mir-30c-1|hsa-miR-30c|jt:ENSG00000205269|Q5T4T1\_HUMAN  
ER|ENSG00000207962|hsa-mir-30c-1|hsa-miR-30c|jt:ENSG00000175564|UCP3  
ER|ENSG00000207962|hsa-mir-30c-1|hsa-miR-30c|jt:ENSG00000134531|EMPI1  
ER|ENSG00000207962|hsa-mir-30c-1|hsa-miR-30c|jt:ENSG0000001084|GCLC  
ER|ENSG00000207962|hsa-mir-30c-1|hsa-miR-30c|jt:ENSG00000091157|WDR7  
ER|ENSG00000207962|hsa-mir-30c-1|hsa-miR-30c|jt:ENSG00000101134|DOK5  
ER|ENSG00000207962|hsa-mir-30c-1|hsa-miR-30c|jt:ENSG00000058600|POLR3E  
ER|ENSG00000207962|hsa-mir-30c-1|hsa-miR-30c|jt:ENSG00000079739|PGM1  
ER|ENSG00000207962|hsa-mir-30c-1|hsa-miR-30c|jt:ENSG00000147649|MTDH  
ER|ENSG00000207962|hsa-mir-30c-1|hsa-miR-30c|jt:ENSG00000138069|RAB1A  
ER|ENSG00000207962|hsa-mir-30c-1|hsa-miR-30c|jt:ENSG00000159873|CCDC117  
ER|ENSG00000207962|hsa-mir-30c-1|hsa-miR-30c|jt:ENSG00000137941|TTL7  
ER|ENSG00000207962|hsa-mir-30c-1|hsa-miR-30c|jt:ENSG00000033867|SLC4A7  
ER|ENSG00000207962|hsa-mir-30c-1|hsa-miR-30c|jt:ENSG00000143590|EFNA3  
ER|ENSG00000207990|hsa-mir-182|hsa-miR-182|jt:ENSG00000197616|MYH6  
ER|ENSG00000207990|hsa-mir-182|hsa-miR-182|jt:ENSG00000147853|AK3  
ER|ENSG00000207990|hsa-mir-182|hsa-miR-182|jt:ENSG00000169495|HTRA4  
ER|ENSG00000207990|hsa-mir-182|hsa-miR-182|jt:ENSG00000172819|RARG  
ER|ENSG00000207990|hsa-mir-182|hsa-miR-182|jt:ENSG00000095139|ARCN1  
ER|ENSG00000207990|hsa-mir-182|hsa-miR-182|jt:ENSG00000176261|ZBTB80S  
ER|ENSG00000207990|hsa-mir-182|hsa-miR-182|jt:ENSG00000085831|Clorf34  
ER|ENSG00000207990|hsa-mir-182|hsa-miR-182|jt:ENSG00000146859|TMEM140  
ER|ENSG00000207990|hsa-mir-182|hsa-miR-182|jt:ENSG00000136813|KIAA0361  
ER|ENSG00000207990|hsa-mir-182|hsa-miR-182|jt:ENSG00000116704|SLC35D1  
ER|ENSG00000207990|hsa-mir-182|hsa-miR-182|jt:ENSG00000137312|FLOT1  
ER|ENSG00000207990|hsa-mir-182|hsa-miR-182|jt:ENSG00000156110|ADK  
ER|ENSG00000207990|hsa-mir-182|hsa-miR-182|jt:ENSG00000120253|NUP43  
ER|ENSG00000207990|hsa-mir-182|hsa-miR-182|jt:ENSG00000038219|FAM44A  
ER|ENSG00000207990|hsa-mir-182|hsa-miR-182|jt:ENSG00000205133|Q629K1\_HUMAN  
ER|ENSG00000208009|hsa-mir-130a|hsa-miR-130a|jt:ENSG00000077312|SNRPA  
ER|ENSG00000208009|hsa-mir-130a|hsa-miR-130a|jt:ENSG00000055813|CCDC85A  
ER|ENSG00000208009|hsa-mir-130a|hsa-miR-130a|jt:ENSG00000203925|LOC647839  
ER|ENSG00000208009|hsa-mir-130a|hsa-miR-130a|jt:ENSG00000138641|HERC3  
ER|ENSG00000208009|hsa-mir-130a|hsa-miR-130a|jt:ENSG00000123395|C12orf44  
ER|ENSG00000208009|hsa-mir-130a|hsa-miR-130a|jt:ENSG00000122034|GTF3A  
ER|ENSG00000208009|hsa-mir-130a|hsa-miR-130a|jt:ENSG00000156642|NPTN  
ER|ENSG00000208009|hsa-mir-130a|hsa-miR-130a|jt:ENSG00000165195|PIGA  
ER|ENSG00000208009|hsa-mir-130a|hsa-miR-130a|jt:ENSG00000166024|C10orf28  
ER|ENSG00000208009|hsa-mir-130a|hsa-miR-130a|jt:ENSG00000086015|MAST2  
ER|ENSG00000208009|hsa-mir-130a|hsa-miR-130a|jt:ENSG00000188483|IER5L  
ER|ENSG00000208009|hsa-mir-130a|hsa-miR-130a|jt:ENSG00000157077|ZFYVE9  
ER|ENSG00000208009|hsa-mir-130a|hsa-miR-130a|jt:ENSG00000189069|NP\_001013732.1

ER|ENSG00000208009|hsa-mir-130a|hsa-miR-130a|jt:ENSG00000137073|UBAP2  
ER|ENSG00000208009|hsa-mir-130a|hsa-miR-130a|jt:ENSG00000182220|ATP6AP2  
ER|ENSG00000208009|hsa-mir-130a|hsa-miR-130a|jt:ENSG00000101901|CXorf45  
ER|ENSG00000208009|hsa-mir-130a|hsa-miR-130a|jt:ENSG00000120509|PDZD11  
ER|ENSG00000208009|hsa-mir-130a|hsa-miR-130a|jt:ENSG00000205036|NP\_001001682.1  
ER|ENSG00000208009|hsa-mir-130a|hsa-miR-130a|jt:ENSG00000130956|HABP4  
ER|ENSG00000208009|hsa-mir-130a|hsa-miR-130a|jt:ENSG00000147642|SYBU\_HUMAN  
ER|ENSG00000208009|hsa-mir-130a|hsa-miR-130a|jt:ENSG00000205524|Q68D70\_HUMAN  
ER|ENSG00000208009|hsa-mir-130a|hsa-miR-130a|jt:ENSG00000113048|MRPS27  
ER|ENSG00000208009|hsa-mir-130a|hsa-miR-130a|jt:ENSG00000070985|TRPM5  
ER|ENSG00000208009|hsa-mir-130a|hsa-miR-130a|jt:ENSG00000206528|Q6ZSMO\_HUMAN  
ER|ENSG00000208009|hsa-mir-130a|hsa-miR-130a|jt:ENSG00000181690|PLAG1  
ER|ENSG00000208009|hsa-mir-130a|hsa-miR-130a|jt:ENSG00000129467|ADCY4  
ER|ENSG00000208009|hsa-mir-130a|hsa-miR-130a|jt:ENSG00000109654|TRIM2  
ER|ENSG00000208009|hsa-mir-130a|hsa-miR-130a|jt:ENSG00000103723|AP3B2  
ETS|ENSG00000207808|hsa-mir-27a|hsa-miR-27a|jt:ENSG00000167723|TRPV3  
ETS|ENSG00000207939|hsa-mir-223|hsa-miR-223|jt:ENSG00000151148|UBE3B  
ETS|ENSG00000207939|hsa-mir-223|hsa-miR-223|jt:ENSG00000091136|LAMB1  
ETS|ENSG00000207939|hsa-mir-223|hsa-miR-223|jt:ENSG00000168385|SEPT2  
ETS|ENSG00000207939|hsa-mir-223|hsa-miR-223|jt:ENSG00000170638|FRABD  
ETS|ENSG00000207939|hsa-mir-223|hsa-miR-223|jt:ENSG00000161572|LYZL6  
ETS|ENSG00000207939|hsa-mir-223|hsa-miR-223|jt:ENSG00000187726|DNAJB13  
ETS|ENSG00000207939|hsa-mir-223|hsa-miR-223|jt:ENSG00000123268|ATF1  
ETS|ENSG00000207939|hsa-mir-223|hsa-miR-223|jt:ENSG00000198000|NOL8  
ETS|ENSG00000207949|hsa-mir-214|hsa-miR-214|jt:ENSG00000110328|GALNTL4  
ETS|ENSG00000207980|hsa-mir-23a|hsa-miR-23a|jt:ENSG00000113615|SEC24A  
ETS|ENSG00000207980|hsa-mir-23a|hsa-miR-23a|jt:ENSG00000188938|FAM120AOS  
ETS|ENSG00000207980|hsa-mir-23a|hsa-miR-23a|jt:ENSG00000204026|Q6ZSD2\_HUMAN  
ETS|ENSG00000208024|hsa-mir-199a-2|hsa-miR-199a\*|jt:ENSG00000204220|PFDN6  
ETS|ENSG00000208024|hsa-mir-199a-2|hsa-miR-199a\*|jt:ENSG00000116141|MARK1  
ETS|ENSG00000209707|hsa-mir-24-2|hsa-miR-24-2|jt:ENSG00000162458|FBLIM1  
ETS|ENSG00000209707|hsa-mir-24-2|hsa-miR-24-2|jt:ENSG00000132141|CCT6B  
ETS|ENSG00000209707|hsa-mir-24-2|hsa-miR-24-2|jt:ENSG00000106384|MOGAT3  
ETS|ENSG00000209707|hsa-mir-24-2|hsa-miR-24-2|jt:ENSG00000114019|AMOTL2  
ETS|ENSG00000209707|hsa-mir-24-2|hsa-miR-24-2|jt:ENSG00000172460|Q8IVY7\_HUMAN  
ETS|ENSG00000209707|hsa-mir-24-2|hsa-miR-24-2|jt:ENSG00000103184|SEC14L5  
FAC1|ENSG00000199130|hsa-mir-365-1|hsa-miR-365-1|jt:ENSG00000189251|Q8WYN8\_HUMAN  
FAC1|ENSG00000199130|hsa-mir-365-1|hsa-miR-365-1|jt:ENSG00000198785|GRIN3A  
FAC1|ENSG00000199130|hsa-mir-365-1|hsa-miR-365-1|jt:ENSG00000184574|GPR92  
FAC1|ENSG00000207562|hsa-mir-34c|hsa-miR-34c|jt:ENSG00000186190|C20orf185  
FAC1|ENSG00000207562|hsa-mir-34c|hsa-miR-34c|jt:ENSG00000009694|ODZ1  
FAC1|ENSG00000207811|hsa-mir-34b|hsa-miR-34b|jt:ENSG00000186190|C20orf185  
FAC1|ENSG00000207811|hsa-mir-34b|hsa-miR-34b|jt:ENSG00000009694|ODZ1  
FOX1|ENSG00000207585|hsa-mir-181d|hsa-miR-181d|jt:ENSG00000128228|SDF2L1  
FOX1|ENSG00000199094|hsa-mir-30c-2|hsa-miR-30c-2|jt:ENSG00000102098|SCML2  
FOX1|ENSG00000199094|hsa-mir-30c-2|hsa-miR-30c-2|jt:ENSG00000125804|C20orf91  
FOX1|ENSG00000199094|hsa-mir-30c-2|hsa-miR-30c-2|jt:ENSG00000143590|EFNA3  
FOX1|ENSG00000199094|hsa-mir-30c-2|hsa-miR-30c-2|jt:ENSG00000091157|WDR7  
FOX1|ENSG00000199094|hsa-mir-30c-2|hsa-miR-30c-2|jt:ENSG00000105136|ZNF419  
FOX1|ENSG00000199094|hsa-mir-30c-2|hsa-miR-30c-2|jt:ENSG00000173320|STOX2  
FOX1|ENSG00000207585|hsa-mir-181d|hsa-miR-181d|jt:ENSG00000204455|XR\_015868.1  
FOX1|ENSG00000207585|hsa-mir-181d|hsa-miR-181d|jt:ENSG00000139209|SLC38A4  
FOX1|ENSG00000207585|hsa-mir-181d|hsa-miR-181d|jt:ENSG00000131969|ABHD12B  
FOX1|ENSG00000207585|hsa-mir-181d|hsa-miR-181d|jt:ENSG00000169891|REPS2  
FOX1|ENSG00000207585|hsa-mir-181d|hsa-miR-181d|jt:ENSG00000158483|FAM86C  
FOX1|ENSG00000207789|hsa-mir-26a-2|hsa-miR-26a-2|jt:ENSG00000107938|C10orf137  
FOX1|ENSG00000207789|hsa-mir-26a-2|hsa-miR-26a-2|jt:ENSG00000145331|RG9MTD2  
FOX1|ENSG00000207789|hsa-mir-26a-2|hsa-miR-26a-2|jt:ENSG00000165476|REEP3  
FOX1|ENSG00000207789|hsa-mir-26a-2|hsa-miR-26a-2|jt:ENSG00000186205|MOSC1  
FOX1|ENSG00000207789|hsa-mir-26a-2|hsa-miR-26a-2|jt:ENSG00000204405|Q6ZQV3\_HUMAN  
FOX1|ENSG00000207827|hsa-mir-30a|hsa-miR-30a-3p|jt:ENSG00000183488|AMAC1L3  
FOX1|ENSG00000207827|hsa-mir-30a|hsa-miR-30a-3p|jt:ENSG00000110768|GTF2H1  
FOX1|ENSG00000207827|hsa-mir-30a|hsa-miR-30a-5p|jt:ENSG00000102098|SCML2  
FOX1|ENSG00000207827|hsa-mir-30a|hsa-miR-30a-5p|jt:ENSG00000125804|C20orf91  
FOX1|ENSG00000207827|hsa-mir-30a|hsa-miR-30a-5p|jt:ENSG00000143590|EFNA3  
FOX1|ENSG00000207827|hsa-mir-30a|hsa-miR-30a-5p|jt:ENSG00000091157|WDR7  
FOX1|ENSG00000207827|hsa-mir-30a|hsa-miR-30a-5p|jt:ENSG00000105136|ZNF419  
FOX1|ENSG00000207827|hsa-mir-30a|hsa-miR-30a-5p|jt:ENSG00000173320|STOX2  
FREAC-3|ENSG00000207585|hsa-mir-181d|hsa-miR-181d|jt:ENSG00000128228|SDF2L1  
FREAC-4|ENSG00000198981|hsa-mir-29a|hsa-miR-29a|jt:ENSG00000168398|BDKRB2  
FREAC-4|ENSG00000198981|hsa-mir-29a|hsa-miR-29a|jt:ENSG00000105856|HBP1  
FREAC-4|ENSG00000198981|hsa-mir-29a|hsa-miR-29a|jt:ENSG00000125386|C4orf8  
FREAC-4|ENSG00000198981|hsa-mir-29a|hsa-miR-29a|jt:ENSG00000115194|SLC30A3  
FREAC-4|ENSG00000198981|hsa-mir-29a|hsa-miR-29a|jt:ENSG00000188153|COL4A5  
FREAC-4|ENSG00000198981|hsa-mir-29a|hsa-miR-29a|jt:ENSG00000168542|COL3A1  
FREAC-4|ENSG00000198981|hsa-mir-29a|hsa-miR-29a|jt:ENSG00000103034|NDRG4  
FREAC-4|ENSG00000207752|hsa-mir-199a-1|hsa-miR-199a-1|jt:ENSG00000136536|MARCH7  
FREAC-4|ENSG00000207752|hsa-mir-199a-1|hsa-miR-199a-1|jt:ENSG00000163263|C1orf189  
FREAC-4|ENSG00000207752|hsa-mir-199a-1|hsa-miR-199a-1|jt:ENSG00000134490|C18orf45  
FREAC-4|ENSG00000207752|hsa-mir-199a-1|hsa-miR-199a-1|jt:ENSG00000130021|HDHD1A  
FREAC-4|ENSG00000207752|hsa-mir-199a-1|hsa-miR-199a-1|jt:ENSG00000145354|ZCD2  
FREAC-4|ENSG00000207752|hsa-mir-199a-1|hsa-miR-199a-1|jt:ENSG00000204220|PFDN6  
FREAC-4|ENSG00000207752|hsa-mir-199a-1|hsa-miR-199a-1|jt:ENSG00000151690|NP\_060164.3  
FREAC-4|ENSG00000207752|hsa-mir-199a-1|hsa-miR-199a-1|jt:ENSG00000111860|C6orf204  
FREAC-4|ENSG00000207752|hsa-mir-199a-1|hsa-miR-199a-1|jt:ENSG00000059758|PCTK2  
FREAC-4|ENSG00000207752|hsa-mir-199a-1|hsa-miR-199a-1|jt:ENSG00000188153|COL4A5  
FREAC-4|ENSG00000207752|hsa-mir-199a-1|hsa-miR-199a-1|jt:ENSG00000135926|TMBIM1  
FREAC-4|ENSG00000207752|hsa-mir-199a-1|hsa-miR-199a-1|jt:ENSG00000179456|ZNF238  
FREAC-4|ENSG00000207752|hsa-mir-199a-1|hsa-miR-199a-1|jt:ENSG00000140598|EFTUD1  
FREAC-4|ENSG00000207809|hsa-mir-139|hsa-miR-139|jt:ENSG00000170035|UBE2E4P  
FREAC-4|ENSG00000207809|hsa-mir-139|hsa-miR-139|jt:ENSG00000159423|ALDH4A1  
FREAC-4|ENSG00000207809|hsa-mir-139|hsa-miR-139|jt:ENSG00000143479|DYRK3  
FREAC-4|ENSG00000207809|hsa-mir-139|hsa-miR-139|jt:ENSG00000140386|ZNF291  
FREAC-4|ENSG00000207809|hsa-mir-139|hsa-miR-139|jt:ENSG00000175556|LONRF3  
FREAC-4|ENSG00000207809|hsa-mir-139|hsa-miR-139|jt:ENSG00000182992|Q8IZMO\_HUMAN  
FREAC-4|ENSG00000207949|hsa-mir-214|hsa-miR-214|jt:ENSG00000154493|C10orf90  
FREAC-4|ENSG00000207949|hsa-mir-214|hsa-miR-214|jt:ENSG00000058668|ATP2B4  
FREAC-4|ENSG00000207949|hsa-mir-214|hsa-miR-214|jt:ENSG00000141985|SH3GL1  
FREAC-4|ENSG00000207949|hsa-mir-214|hsa-miR-214|jt:ENSG00000182195|LDOC1  
FREAC-4|ENSG00000207949|hsa-mir-214|hsa-miR-214|jt:ENSG00000164588|HCN1  
FREAC-4|ENSG00000208024|hsa-mir-199a-2|hsa-miR-199a-2|jt:ENSG00000136536|MARCH7  
FREAC-4|ENSG00000208024|hsa-mir-199a-2|hsa-miR-199a-2|jt:ENSG00000163263|C1orf189  
FREAC-4|ENSG00000208024|hsa-mir-199a-2|hsa-miR-199a-2|jt:ENSG00000134490|C18orf45  
FREAC-4|ENSG00000208024|hsa-mir-199a-2|hsa-miR-199a-2|jt:ENSG00000130021|HDHD1A  
FREAC-4|ENSG00000208024|hsa-mir-199a-2|hsa-miR-199a-2|jt:ENSG00000145354|ZCD2

FREAC-4 | ENSG00000208024 | hsa-mir-199a-2 | hsa-miR-199a\* | jt:ENSG00000204220 | PFDN6  
FREAC-4 | ENSG00000208024 | hsa-mir-199a-2 | hsa-miR-199a\* | jt:ENSG00000151690 | NP\_060164.3  
FREAC-4 | ENSG00000208024 | hsa-mir-199a-2 | hsa-miR-199a\* | jt:ENSG00000118660 | C6orf204  
FREAC-4 | ENSG00000208024 | hsa-mir-199a-2 | hsa-miR-199a\* | jt:ENSG00000059758 | PCTK2  
FREAC-4 | ENSG00000208024 | hsa-mir-199a-2 | hsa-miR-199a\* | jt:ENSG00000188153 | COL4A5  
FREAC-4 | ENSG00000208024 | hsa-mir-199a-2 | hsa-miR-199a\* | jt:ENSG00000135926 | TMBIM1  
FREAC-4 | ENSG00000208024 | hsa-mir-199a-2 | hsa-miR-199a\* | jt:ENSG00000179456 | ZNF238  
FREAC-4 | ENSG00000208024 | hsa-mir-199a-2 | hsa-miR-199a\* | jt:ENSG00000140598 | EFTUD1  
FREAC-4 | ENSG00000211590 | hsa-mir-802 | hsa-miR-802 | jt:ENSG00000175305 | CCNE2  
FREAC-4 | ENSG00000211590 | hsa-mir-802 | hsa-miR-802 | jt:ENSG00000178074 | NP\_710156.2  
FREAC-4 | ENSG00000211590 | hsa-mir-802 | hsa-miR-802 | jt:ENSG00000081154 | PCNP  
FREAC-4 | ENSG00000211590 | hsa-mir-802 | hsa-miR-802 | jt:ENSG00000198739 | LRRMT3  
FREAC-4 | ENSG00000211590 | hsa-mir-802 | hsa-miR-802 | jt:ENSG00000022556 | NLRF2  
FREAC-4 | ENSG00000211590 | hsa-mir-802 | hsa-miR-802 | jt:ENSG00000131196 | NFATC1  
GABP | ENSG00000199066 | hsa-mir-330 | hsa-miR-330 | jt:ENSG00000127152 | BCL11B  
GABP | ENSG00000199066 | hsa-mir-330 | hsa-miR-330 | jt:ENSG00000162642 | C1orf52  
GABP | ENSG00000199066 | hsa-mir-330 | hsa-miR-330 | jt:ENSG00000168411 | RFWD3  
GABP | ENSG00000199066 | hsa-mir-330 | hsa-miR-330 | jt:ENSG00000107897 | ACBD5  
GABP | ENSG00000199066 | hsa-mir-330 | hsa-miR-330 | jt:ENSG00000131469 | RPL27  
GABP | ENSG00000199066 | hsa-mir-330 | hsa-miR-330 | jt:ENSG00000173473 | SMARCC1  
GABP | ENSG00000199066 | hsa-mir-330 | hsa-miR-330 | jt:ENSG00000146242 | TPFG  
GABP | ENSG00000199066 | hsa-mir-330 | hsa-miR-330 | jt:ENSG00000163961 | RNF168  
GABP | ENSG00000199066 | hsa-mir-330 | hsa-miR-330 | jt:ENSG00000123297 | TSPM  
GABP | ENSG00000199122 | hsa-mir-148b | hsa-miR-148b | jt:ENSG00000204584 | Q6ZSH9\_HUMAN  
GABP | ENSG00000199122 | hsa-mir-148b | hsa-miR-148b | jt:ENSG00000055070 | C1orf144  
GABP | ENSG00000199122 | hsa-mir-148b | hsa-miR-148b | jt:ENSG00000159082 | SYNJ1  
GABP | ENSG00000199122 | hsa-mir-148b | hsa-miR-148b | jt:ENSG00000151694 | ADAM17  
GABP | ENSG00000199122 | hsa-mir-148b | hsa-miR-148b | jt:ENSG00000187531 | SIRT7  
GABP | ENSG00000199122 | hsa-mir-148b | hsa-miR-148b | jt:ENSG00000160961 | ZNF333  
GABP | ENSG00000199122 | hsa-mir-148b | hsa-miR-148b | jt:ENSG00000115310 | RTN4  
GABP | ENSG00000199122 | hsa-mir-148b | hsa-miR-148b | jt:ENSG00000205036 | NP\_001001682.1  
GABP | ENSG00000199122 | hsa-mir-148b | hsa-miR-148b | jt:ENSG00000111711 | GOL1B  
GABP | ENSG00000199122 | hsa-mir-148b | hsa-miR-148b | jt:ENSG00000136842 | TMOD1  
GABP | ENSG00000199122 | hsa-mir-148b | hsa-miR-148b | jt:ENSG00000131711 | MAP1B  
GABP | ENSG00000199122 | hsa-mir-148b | hsa-miR-148b | jt:ENSG00000145860 | RNF145  
GABP | ENSG00000207732 | hsa-mir-218-1 | hsa-miR-218 | jt:ENSG00000085978 | ATG16L1  
GABP | ENSG00000207732 | hsa-mir-218-1 | hsa-miR-218 | jt:ENSG00000076864 | RAP1GAP  
GABP | ENSG00000207732 | hsa-mir-218-1 | hsa-miR-218 | jt:ENSG00000119688 | ABCD4  
GABP | ENSG00000207732 | hsa-mir-218-1 | hsa-miR-218 | jt:ENSG00000166689 | PLEKHA7  
GABP | ENSG00000207732 | hsa-mir-218-1 | hsa-miR-218 | jt:ENSG00000171540 | OTP  
GABP | ENSG00000207939 | hsa-mir-223 | hsa-miR-223 | jt:ENSG00000151148 | UBE3B  
GABP | ENSG00000207939 | hsa-mir-223 | hsa-miR-223 | jt:ENSG00000091136 | LAMB1  
GABP | ENSG00000207939 | hsa-mir-223 | hsa-miR-223 | jt:ENSG00000170638 | TRABD  
GABP | ENSG00000207939 | hsa-mir-223 | hsa-miR-223 | jt:ENSG00000163364 | Q96D13\_HUMAN  
GABP | ENSG00000207939 | hsa-mir-223 | hsa-miR-223 | jt:ENSG00000064490 | RFXANK  
GABP | ENSG00000207939 | hsa-mir-223 | hsa-miR-223 | jt:ENSG00000044555 | AK2  
GABP | ENSG00000207939 | hsa-mir-223 | hsa-miR-223 | jt:ENSG00000112290 | WASF1  
GABP | ENSG00000207939 | hsa-mir-223 | hsa-miR-223 | jt:ENSG00000103429 | BFAF  
GABP | ENSG00000207939 | hsa-mir-223 | hsa-miR-223 | jt:ENSG00000122432 | SPATA1  
GABP | ENSG00000207939 | hsa-mir-223 | hsa-miR-223 | jt:ENSG00000145860 | RNF145  
GABP | ENSG00000207939 | hsa-mir-223 | hsa-miR-223 | jt:ENSG00000115415 | STAT1  
GABP | ENSG00000208009 | hsa-mir-130a | hsa-miR-130a | jt:ENSG00000151148 | UBE3B  
GABP | ENSG00000208009 | hsa-mir-130a | hsa-miR-130a | jt:ENSG00000204584 | Q6ZSH9\_HUMAN  
GABP | ENSG00000208009 | hsa-mir-130a | hsa-miR-130a | jt:ENSG00000143756 | FBXO28  
GABP | ENSG00000208009 | hsa-mir-130a | hsa-miR-130a | jt:ENSG00000055070 | C1orf144  
GABP | ENSG00000208009 | hsa-mir-130a | hsa-miR-130a | jt:ENSG00000164209 | SLC25A46  
GABP | ENSG00000208009 | hsa-mir-130a | hsa-miR-130a | jt:ENSG00000159082 | SYNJ1  
GABP | ENSG00000208009 | hsa-mir-130a | hsa-miR-130a | jt:ENSG00000187531 | SIRT7  
GABP | ENSG00000208009 | hsa-mir-130a | hsa-miR-130a | jt:ENSG00000164896 | FASTK  
GABP | ENSG00000208009 | hsa-mir-130a | hsa-miR-130a | jt:ENSG00000115310 | RTN4  
GABP | ENSG00000208009 | hsa-mir-130a | hsa-miR-130a | jt:ENSG00000189401 | OTUD6A  
GABP | ENSG00000208009 | hsa-mir-130a | hsa-miR-130a | jt:ENSG00000205036 | NP\_001001682.1  
GABP | ENSG00000208009 | hsa-mir-130a | hsa-miR-130a | jt:ENSG00000111711 | GOL1B  
GABP | ENSG00000208009 | hsa-mir-130a | hsa-miR-130a | jt:ENSG00000152291 | TCOLN2  
GABP | ENSG00000208009 | hsa-mir-130a | hsa-miR-130a | jt:ENSG00000166689 | PLEKHA7  
GABP | ENSG00000208017 | hsa-mir-140 | hsa-miR-140 | jt:ENSG00000167384 | ZNF140  
GABP | ENSG00000208017 | hsa-mir-140 | hsa-miR-140 | jt:ENSG00000184602 | SNN  
GABP | ENSG00000208017 | hsa-mir-140 | hsa-miR-140 | jt:ENSG00000128595 | CALU  
GABP | ENSG00000208017 | hsa-mir-140 | hsa-miR-140 | jt:ENSG00000205609 | Q9BW98\_HUMAN  
GABP | ENSG00000208017 | hsa-mir-140 | hsa-miR-140 | jt:ENSG00000086232 | EIF2AK1  
GABP | ENSG00000208017 | hsa-mir-140 | hsa-miR-140 | jt:ENSG00000140688 | C16orf58  
HIF-1 | ENSG00000199032 | hsa-mir-425 | hsa-miR-425-3p | jt:ENSG00000142676 | RPL11  
HIF-1 | ENSG00000199032 | hsa-mir-425 | hsa-miR-425-3p | jt:ENSG00000105672 | ETV2  
HIF-1 | ENSG00000199032 | hsa-mir-425 | hsa-miR-425-3p | jt:ENSG00000120129 | DUSP1  
HIF-1 | ENSG00000207581 | hsa-mir-199b | hsa-miR-199b | jt:ENSG00000108515 | ENO3  
HIF-1 | ENSG00000207581 | hsa-mir-199b | hsa-miR-199b | jt:ENSG00000176986 | SEC24C  
HIF-1 | ENSG00000207581 | hsa-mir-199b | hsa-miR-199b | jt:ENSG00000204380 | Q6ZTQ2\_HUMAN  
HIF-1 | ENSG00000207581 | hsa-mir-199b | hsa-miR-199b | jt:ENSG00000196724 | ZNF418  
HIF-1 | ENSG00000207581 | hsa-mir-199b | hsa-miR-199b | jt:ENSG00000145681 | HAPLN1  
HIF-1 | ENSG00000207581 | hsa-mir-199b | hsa-miR-199b | jt:ENSG00000206198 | NR\_001535.1  
HIF-1 | ENSG00000207617 | hsa-mir-24-1 | hsa-miR-189 | jt:ENSG00000135974 | C2orf49  
HIF-1 | ENSG00000207617 | hsa-mir-24-1 | hsa-miR-189 | jt:ENSG00000195055 | SYT13  
HIF-1 | ENSG00000207617 | hsa-mir-24-1 | hsa-miR-24 | jt:ENSG00000132141 | CCT6B  
HIF-1 | ENSG00000207617 | hsa-mir-24-1 | hsa-miR-24 | jt:ENSG00000142188 | TMEM50B  
HIF-1 | ENSG00000207617 | hsa-mir-24-1 | hsa-miR-24 | jt:ENSG00000047634 | SCML1  
HIF-1 | ENSG00000207617 | hsa-mir-24-1 | hsa-miR-24 | jt:ENSG00000135924 | DNAJB2  
HIF-1 | ENSG00000207617 | hsa-mir-24-1 | hsa-miR-24 | jt:ENSG00000143442 | POGZ  
HIF-1 | ENSG00000207617 | hsa-mir-24-1 | hsa-miR-24 | jt:ENSG00000132275 | KIAA0409  
HIF-1 | ENSG00000207617 | hsa-mir-24-1 | hsa-miR-24 | jt:ENSG00000149043 | SYT8  
HIF-1 | ENSG00000207617 | hsa-mir-24-1 | hsa-miR-24 | jt:ENSG00000172840 | PDP2\_HUMAN  
HIF-1 | ENSG00000207617 | hsa-mir-24-1 | hsa-miR-24 | jt:ENSG00000171729 | TMEM51  
HIF-1 | ENSG00000207617 | hsa-mir-24-1 | hsa-miR-24 | jt:ENSG00000181873 | C1orf69  
HIF-1 | ENSG00000207617 | hsa-mir-24-1 | hsa-miR-24 | jt:ENSG00000110925 | FAMI30A1  
HIF-1 | ENSG00000207617 | hsa-mir-24-1 | hsa-miR-24 | jt:ENSG00000124702 | KLHDC3  
HIF-1 | ENSG00000207617 | hsa-mir-24-1 | hsa-miR-24 | jt:ENSG00000140548 | ZNF710  
HIF-1 | ENSG00000207617 | hsa-mir-24-1 | hsa-miR-24 | jt:ENSG00000091527 | CDV3  
HIF-1 | ENSG00000207949 | hsa-mir-214 | hsa-miR-214 | jt:ENSG00000116649 | SRM  
HIF-1 | ENSG00000207949 | hsa-mir-214 | hsa-miR-214 | jt:ENSG00000134780 | DAGLA  
HIF-1 | ENSG00000207949 | hsa-mir-214 | hsa-miR-214 | jt:ENSG00000164588 | HCN1  
HIF-1 | ENSG00000207949 | hsa-mir-214 | hsa-miR-214 | jt:ENSG00000171551 | ECEL1  
HIF-1 | ENSG00000207949 | hsa-mir-214 | hsa-miR-214 | jt:ENSG00000167468 | GPX4  
HIF-1 | ENSG00000208024 | hsa-mir-199a-2 | hsa-miR-199a | jt:ENSG00000108515 | ENO3  
HIF-1 | ENSG00000208024 | hsa-mir-199a-2 | hsa-miR-199a | jt:ENSG00000176986 | SEC24C  
HIF-1 | ENSG00000208024 | hsa-mir-199a-2 | hsa-miR-199a | jt:ENSG00000204380 | Q6ZTQ2\_HUMAN  
HIF-1 | ENSG00000208024 | hsa-mir-199a-2 | hsa-miR-199a | jt:ENSG00000196724 | ZNF418

HIF-1|ENSG00000208024|hsa-mir-199a-2|hsa-miR-199a|jt:ENSG00000145681|HAPLN1  
HIF-1|ENSG00000208024|hsa-mir-199a-2|hsa-miR-199a|jt:ENSG00000206198|NR\_001535.1  
HIF-1|ENSG00000208024|hsa-mir-199a-2|hsa-miR-199a\*|jt:ENSG00000188384|Q6ZUQ5\_HUMAN  
HIF-1|ENSG00000208024|hsa-mir-199a-2|hsa-miR-199a\*|jt:ENSG00000205271|Q6ZUQ5\_HUMAN  
HIF-1|ENSG00000208024|hsa-mir-199a-2|hsa-miR-199a\*|jt:ENSG00000205275|Q6ZUQ5\_HUMAN  
HIF-1|ENSG00000208024|hsa-mir-199a-2|hsa-miR-199a\*|jt:ENSG00000182712|MTCF1  
HIF-1|ENSG00000208024|hsa-mir-199a-2|hsa-miR-199a\*|jt:ENSG00000198841|KTI12  
HIF-1|ENSG00000208024|hsa-mir-199a-2|hsa-miR-199a\*|jt:ENSG00000119707|RBM25  
HIF-1|ENSG00000208024|hsa-mir-199a-2|hsa-miR-199a\*|jt:ENSG00000204539|CDSN  
HIF-1|ENSG00000208024|hsa-mir-199a-2|hsa-miR-199a\*|jt:ENSG00000136928|GABBR2  
HIF-1|ENSG00000208024|hsa-mir-199a-2|hsa-miR-199a\*|jt:ENSG00000183960|KCNH8  
HIF-1|ENSG00000208024|hsa-mir-199a-2|hsa-miR-199a\*|jt:ENSG00000206125|Q68DA7\_HUMAN  
HIF-1|ENSG00000208024|hsa-mir-199a-2|hsa-miR-199a\*|jt:ENSG00000132549|VPS13B  
HIF-1|ENSG00000208024|hsa-mir-199a-2|hsa-miR-199a\*|jt:ENSG00000179151|EDC3  
HIF-1|ENSG00000208024|hsa-mir-199a-2|hsa-miR-199a\*|jt:ENSG00000082458|DLG3  
HMGYI|ENSG00000198987|hsa-mir-16-2|hsa-miR-16|jt:ENSG00000134343|TMEM16C  
HMGYI|ENSG00000198987|hsa-mir-16-2|hsa-miR-16|jt:ENSG00000069275|NUCKS1  
HMGYI|ENSG00000198987|hsa-mir-16-2|hsa-miR-16|jt:ENSG00000205808|PPAPDC2  
HMGYI|ENSG00000207947|hsa-mir-152|hsa-miR-152|jt:ENSG00000170989|EDG1  
HMGYI|ENSG00000207947|hsa-mir-152|hsa-miR-152|jt:ENSG00000196972|Q86V52\_HUMAN  
HMGYI|ENSG00000207947|hsa-mir-152|hsa-miR-152|jt:ENSG00000142700|DMRTA2  
HMGYI|ENSG00000207947|hsa-mir-152|hsa-miR-152|jt:ENSG00000164933|SLC25A32  
HMGYI|ENSG00000207947|hsa-mir-152|hsa-miR-152|jt:ENSG00000113578|FGF1  
HMGYI|ENSG00000207947|hsa-mir-152|hsa-miR-152|jt:ENSG00000161638|ITGA5  
HMGYI|ENSG00000207947|hsa-mir-152|hsa-miR-152|jt:ENSG00000106511|MEOX2  
HMGYI|ENSG00000207947|hsa-mir-152|hsa-miR-152|jt:ENSG00000116016|EPAS1  
HMGYI|ENSG00000207947|hsa-mir-152|hsa-miR-152|jt:ENSG00000189180|ZNF33A  
HMGYI|ENSG00000207947|hsa-mir-152|hsa-miR-152|jt:ENSG00000151694|ADAM17  
HMGYI|ENSG00000207947|hsa-mir-152|hsa-miR-152|jt:ENSG00000069956|MAPK6  
HMGYI|ENSG00000207947|hsa-mir-152|hsa-miR-152|jt:ENSG00000180537|RNF182  
HNF-1|ENSG00000194717|hsa-mir-494|hsa-miR-494|jt:ENSG00000198919|DZIP3\_HUMAN  
HNF-1|ENSG00000194717|hsa-mir-494|hsa-miR-494|jt:ENSG00000133863|TEX15  
HNF-1|ENSG00000194717|hsa-mir-494|hsa-miR-494|jt:ENSG00000006576|PHTF2  
HNF-1|ENSG00000194717|hsa-mir-494|hsa-miR-494|jt:ENSG00000085382|HACE1  
HNF-1|ENSG00000194717|hsa-mir-494|hsa-miR-494|jt:ENSG00000135697|BCMO1  
HNF-1|ENSG00000194717|hsa-mir-494|hsa-miR-494|jt:ENSG00000165323|FAT3  
HNF-1|ENSG00000194717|hsa-mir-494|hsa-miR-494|jt:ENSG00000156313|RPGR  
HNF-1|ENSG00000194717|hsa-mir-494|hsa-miR-494|jt:ENSG00000173914|RBM4B  
HNF-1|ENSG00000194717|hsa-mir-494|hsa-miR-494|jt:ENSG00000133640|LRR1Q1  
HNF-1|ENSG00000194717|hsa-mir-494|hsa-miR-494|jt:ENSG00000188901|NP\_055226.1  
HNF-1|ENSG00000194717|hsa-mir-494|hsa-miR-494|jt:ENSG00000178457|C21orf94  
HNF-1|ENSG00000194717|hsa-mir-494|hsa-miR-494|jt:ENSG00000143641|GALNT2  
HNF-1|ENSG00000194717|hsa-mir-494|hsa-miR-494|jt:ENSG00000204388|HSPA1B  
HNF-1|ENSG00000194717|hsa-mir-494|hsa-miR-494|jt:ENSG00000149575|SCN2B  
HNF-1|ENSG00000194717|hsa-mir-494|hsa-miR-494|jt:ENSG00000118113|MMP8  
HNF-1|ENSG00000199012|hsa-mir-412|hsa-miR-412|jt:ENSG00000124225|TMEPAI  
HNF-1|ENSG00000199012|hsa-mir-412|hsa-miR-412|jt:ENSG00000131508|UBE2D2  
HNF-1|ENSG00000199015|hsa-mir-377|hsa-miR-377|jt:ENSG00000183762|KREMEN1  
HNF-1|ENSG00000199015|hsa-mir-377|hsa-miR-377|jt:ENSG00000143190|POU2F1  
HNF-1|ENSG00000199015|hsa-mir-377|hsa-miR-377|jt:ENSG00000105072|C19orf44  
HNF-1|ENSG00000199015|hsa-mir-377|hsa-miR-377|jt:ENSG00000181192|DHTKD1  
HNF-1|ENSG00000199015|hsa-mir-377|hsa-miR-377|jt:ENSG00000159348|CYB5R1  
HNF-1|ENSG00000199015|hsa-mir-377|hsa-miR-377|jt:ENSG00000114982|NP\_060461.3  
HNF-1|ENSG00000199015|hsa-mir-377|hsa-miR-377|jt:ENSG00000137075|RNF38  
HNF-1|ENSG00000199015|hsa-mir-377|hsa-miR-377|jt:ENSG00000163145|C1QTNF7  
HNF-1|ENSG00000199020|hsa-mir-381|hsa-miR-381|jt:ENSG00000169193|CCDC126  
HNF-1|ENSG00000199020|hsa-mir-381|hsa-miR-381|jt:ENSG00000159140|SON  
HNF-1|ENSG00000199020|hsa-mir-381|hsa-miR-381|jt:ENSG00000145495|MARCH6  
HNF-1|ENSG00000199020|hsa-mir-381|hsa-miR-381|jt:ENSG00000169026|MFSO7  
HNF-1|ENSG00000199020|hsa-mir-381|hsa-miR-381|jt:ENSG00000188933|NM\_145809.1  
HNF-1|ENSG00000199020|hsa-mir-381|hsa-miR-381|jt:ENSG00000102158|TAG2\_HUMAN  
HNF-1|ENSG00000199020|hsa-mir-381|hsa-miR-381|jt:ENSG00000054803|CBLN4  
HNF-1|ENSG00000199020|hsa-mir-381|hsa-miR-381|jt:ENSG00000143641|GALNT2  
HNF-1|ENSG00000199020|hsa-mir-381|hsa-miR-381|jt:ENSG00000116833|NR5A2  
HNF-1|ENSG00000199020|hsa-mir-381|hsa-miR-381|jt:ENSG00000131003|RBM22FP  
HNF-1|ENSG00000199020|hsa-mir-381|hsa-miR-381|jt:ENSG00000204304|PEX2  
HNF-1|ENSG00000199020|hsa-mir-381|hsa-miR-381|jt:ENSG00000139793|MBNL2  
HNF-1|ENSG00000199020|hsa-mir-381|hsa-miR-381|jt:ENSG00000141720|PIP5K2B  
HNF-1|ENSG00000199020|hsa-mir-381|hsa-miR-381|jt:ENSG00000185674|LYG2\_HUMAN  
HNF-1|ENSG00000199025|hsa-mir-369|hsa-miR-369-3p|jt:ENSG00000124225|TMEPAI  
HNF-1|ENSG00000199025|hsa-mir-369|hsa-miR-369-3p|jt:ENSG00000120688|WBP4  
HNF-1|ENSG00000199025|hsa-mir-369|hsa-miR-369-3p|jt:ENSG00000117450|PRDX1  
HNF-1|ENSG00000199025|hsa-mir-369|hsa-miR-369-3p|jt:ENSG00000164611|PTTG1  
HNF-1|ENSG00000199025|hsa-mir-369|hsa-miR-369-3p|jt:ENSG00000087495|PHACTR3  
HNF-1|ENSG00000199025|hsa-mir-369|hsa-miR-369-3p|jt:ENSG00000153130|SCOC  
HNF-1|ENSG00000199025|hsa-mir-369|hsa-miR-369-3p|jt:ENSG00000131003|RBM22FP  
HNF-1|ENSG00000199025|hsa-mir-369|hsa-miR-369-3p|jt:ENSG00000169554|ZEB2  
HNF-1|ENSG00000199025|hsa-mir-369|hsa-miR-369-5p|jt:ENSG00000157450|RNF111  
HNF-1|ENSG00000199025|hsa-mir-369|hsa-miR-369-5p|jt:ENSG00000189223|Q7Z3M5\_HUMAN  
HNF-1|ENSG00000199025|hsa-mir-369|hsa-miR-369-5p|jt:ENSG00000162585|C1orf86  
HNF-1|ENSG00000199025|hsa-mir-369|hsa-miR-369-5p|jt:ENSG00000167768|KRT1  
HNF-1|ENSG00000199025|hsa-mir-369|hsa-miR-369-5p|jt:ENSG00000164823|OSGIN2  
HNF-1|ENSG00000199025|hsa-mir-369|hsa-miR-369-5p|jt:ENSG00000181191|PJA1  
HNF-1|ENSG00000199025|hsa-mir-369|hsa-miR-369-5p|jt:ENSG00000175483|O94914\_HUMAN  
HNF-1|ENSG00000199069|hsa-mir-323|hsa-miR-323|jt:ENSG00000119729|RHOQ  
HNF-1|ENSG00000199069|hsa-mir-323|hsa-miR-323|jt:ENSG00000197635|DPP4  
HNF-1|ENSG00000199092|hsa-mir-410|hsa-miR-410|jt:ENSG00000118200|CAMSAP1L1  
HNF-1|ENSG00000199092|hsa-mir-410|hsa-miR-410|jt:ENSG00000196843|ARID5A  
HNF-1|ENSG00000199092|hsa-mir-410|hsa-miR-410|jt:ENSG00000110395|CBL  
HNF-1|ENSG00000199092|hsa-mir-410|hsa-miR-410|jt:ENSG00000185404|Q4ZG65\_HUMAN  
HNF-1|ENSG00000199092|hsa-mir-410|hsa-miR-410|jt:ENSG000002021776|AQR  
HNF-1|ENSG00000199092|hsa-mir-410|hsa-miR-410|jt:ENSG00000196963|PCDHB16  
HNF-1|ENSG00000199107|hsa-mir-409|hsa-miR-409-5p|jt:ENSG00000128710|HOXD10  
HNF-1|ENSG00000199107|hsa-mir-409|hsa-miR-409-5p|jt:ENSG00000152527|PLEKHH2  
HNF-1|ENSG00000199107|hsa-mir-409|hsa-miR-409-5p|jt:ENSG00000107611|CUBN  
HNF-1|ENSG00000199107|hsa-mir-409|hsa-miR-409-5p|jt:ENSG00000143222|UFCL1  
HNF-1|ENSG00000199149|hsa-mir-20a|hsa-miR-20a|jt:ENSG00000145819|ARHGAP26  
HNF-1|ENSG00000199149|hsa-mir-20a|hsa-miR-20a|jt:ENSG00000151025|GPR158  
HNF-1|ENSG00000199149|hsa-mir-20a|hsa-miR-20a|jt:ENSG00000132975|GPR12  
HNF-1|ENSG00000199149|hsa-mir-20a|hsa-miR-20a|jt:ENSG00000163131|CTSS  
HNF-1|ENSG00000199149|hsa-mir-20a|hsa-miR-20a|jt:ENSG00000183826|BTBD9  
HNF-1|ENSG00000199149|hsa-mir-20a|hsa-miR-20a|jt:ENSG00000177169|ULK1  
HNF-1|ENSG00000199149|hsa-mir-20a|hsa-miR-20a|jt:ENSG00000054803|CBLN4  
HNF-1|ENSG00000199149|hsa-mir-20a|hsa-miR-20a|jt:ENSG00000005469|CROT  
HNF-1|ENSG00000202641|hsa-mir-484|hsa-miR-484|jt:ENSG00000161714|PLCD3



HNH-1|ENSG00000202641|hsa-mir-484|hsa-miR-484|jt:ENSG00000180815|MAP3K15  
HNH-1|ENSG00000202641|hsa-mir-484|hsa-miR-484|jt:ENSG00000162889|MAPKAPK2  
HNH-1|ENSG00000207610|hsa-mir-19a|hsa-miR-19a|jt:ENSG00000155189|AGPAT5  
HNH-1|ENSG00000207610|hsa-mir-19a|hsa-miR-19a|jt:ENSG00000117114|LPHN2  
HNH-1|ENSG00000207610|hsa-mir-19a|hsa-miR-19a|jt:ENSG00000162992|NEUROD1  
HNH-1|ENSG00000207610|hsa-mir-19a|hsa-miR-19a|jt:ENSG00000168758|SEMA4C  
HNH-1|ENSG00000207610|hsa-mir-19a|hsa-miR-19a|jt:ENSG00000121892|NP\_056015.1  
HNH-1|ENSG00000207610|hsa-mir-19a|hsa-miR-19a|jt:ENSG00000133937|GSC  
HNH-1|ENSG00000207610|hsa-mir-19a|hsa-miR-19a|jt:ENSG00000108582|CPD  
HNH-1|ENSG00000207610|hsa-mir-19a|hsa-miR-19a|jt:ENSG00000111241|FGF6  
HNH-1|ENSG00000207610|hsa-mir-19a|hsa-miR-19a|jt:ENSG00000067798|NAV3  
HNH-1|ENSG00000207610|hsa-mir-19a|hsa-miR-19a|jt:ENSG00000139200|C12orf53  
HNH-1|ENSG00000207610|hsa-mir-19a|hsa-miR-19a|jt:ENSG00000138593|K0256\_HUMAN  
HNH-1|ENSG00000207610|hsa-mir-19a|hsa-miR-19a|jt:ENSG00000156049|GNA14  
HNH-1|ENSG00000207610|hsa-mir-19a|hsa-miR-19a|jt:ENSG00000115956|PLEK  
HNH-1|ENSG00000207610|hsa-mir-19a|hsa-miR-19a|jt:ENSG00000153707|PTPRD  
HNH-1|ENSG00000207618|hsa-mir-144|hsa-miR-144|jt:ENSG00000184602|SNN  
HNH-1|ENSG00000207618|hsa-mir-144|hsa-miR-144|jt:ENSG00000145819|ARHGAP26  
HNH-1|ENSG00000207618|hsa-mir-144|hsa-miR-144|jt:ENSG00000164400|CSF2  
HNH-1|ENSG00000207618|hsa-mir-144|hsa-miR-144|jt:ENSG00000119707|REM25  
HNH-1|ENSG00000207618|hsa-mir-144|hsa-miR-144|jt:ENSG00000110321|EIF4G2  
HNH-1|ENSG00000207618|hsa-mir-144|hsa-miR-144|jt:ENSG00000088854|C20orf194  
HNH-1|ENSG00000207635|hsa-mir-499|hsa-miR-499|jt:ENSG00000205171|Q6PDB3\_HUMAN  
HNH-1|ENSG00000207635|hsa-mir-499|hsa-miR-499|jt:ENSG00000001461|NPAL3  
HNH-1|ENSG00000207635|hsa-mir-499|hsa-miR-499|jt:ENSG00000169139|UBE2V2  
HNH-1|ENSG00000207635|hsa-mir-499|hsa-miR-499|jt:ENSG00000204414|CSHL1  
HNH-1|ENSG00000207743|hsa-mir-495|hsa-miR-495|jt:ENSG00000175895|PLEKHF2  
HNH-1|ENSG00000207743|hsa-mir-495|hsa-miR-495|jt:ENSG00000143190|POU2F1  
HNH-1|ENSG00000207743|hsa-mir-495|hsa-miR-495|jt:ENSG00000103066|LYPLA3  
HNH-1|ENSG00000207743|hsa-mir-495|hsa-miR-495|jt:ENSG00000205195|Q6ZTB1\_HUMAN  
HNH-1|ENSG00000207743|hsa-mir-495|hsa-miR-495|jt:ENSG00000174521|TTC9B  
HNH-1|ENSG00000207743|hsa-mir-495|hsa-miR-495|jt:ENSG00000135631|RAB11FIP5  
HNH-1|ENSG00000207743|hsa-mir-495|hsa-miR-495|jt:ENSG00000145495|MARCH6  
HNH-1|ENSG00000207743|hsa-mir-495|hsa-miR-495|jt:ENSG00000182667|NTR1\_HUMAN  
HNH-1|ENSG00000207743|hsa-mir-495|hsa-miR-495|jt:ENSG00000167207|NOD2  
HNH-1|ENSG00000207743|hsa-mir-495|hsa-miR-495|jt:ENSG00000142528|ZNF473  
HNH-1|ENSG00000207743|hsa-mir-495|hsa-miR-495|jt:ENSG00000163904|SENP2  
HNH-1|ENSG00000207745|hsa-mir-17|hsa-miR-17-5p|jt:ENSG00000151025|GPR158  
HNH-1|ENSG00000207745|hsa-mir-17|hsa-miR-17-5p|jt:ENSG00000132975|GPR12  
HNH-1|ENSG00000207745|hsa-mir-17|hsa-miR-17-5p|jt:ENSG00000163131|CTSS  
HNH-1|ENSG00000207745|hsa-mir-17|hsa-miR-17-5p|jt:ENSG00000183826|BTBD9  
HNH-1|ENSG00000207745|hsa-mir-17|hsa-miR-17-5p|jt:ENSG00000005469|CROT  
HNH-1|ENSG00000207745|hsa-mir-17|hsa-miR-17-5p|jt:ENSG00000203793|Q6ZR74\_HUMAN  
HNH-1|ENSG00000207749|hsa-mir-299|hsa-miR-299-5p|jt:ENSG00000049130|KITLG  
HNH-1|ENSG00000207749|hsa-mir-299|hsa-miR-299-5p|jt:ENSG00000168427|KLHL30  
HNH-1|ENSG00000207749|hsa-mir-299|hsa-miR-299-5p|jt:ENSG00000140263|SORB  
HNH-1|ENSG00000207749|hsa-mir-299|hsa-miR-299-5p|jt:ENSG00000175183|CSRFP2  
HNH-1|ENSG00000207749|hsa-mir-299|hsa-miR-299-5p|jt:ENSG00000149021|SCGB1A1  
HNH-1|ENSG00000207749|hsa-mir-299|hsa-miR-299-5p|jt:ENSG00000067798|NAV3  
HNH-1|ENSG00000207749|hsa-mir-299|hsa-miR-299-5p|jt:ENSG00000196967|ZNF585A  
HNH-1|ENSG00000207749|hsa-mir-299|hsa-miR-299-5p|jt:ENSG00000198569|SLC34A3  
HNH-1|ENSG00000207749|hsa-mir-299|hsa-miR-299-5p|jt:ENSG00000144366|GULP1  
HNH-1|ENSG00000207749|hsa-mir-299|hsa-miR-299-5p|jt:ENSG00000167380|ZNF226  
HNH-1|ENSG00000207754|hsa-mir-487b|hsa-miR-487b|jt:ENSG00000122852|SFTPA1B  
HNH-1|ENSG00000207754|hsa-mir-487b|hsa-miR-487b|jt:ENSG00000185303|SFTPA1  
HNH-1|ENSG00000207754|hsa-mir-487b|hsa-miR-487b|jt:ENSG00000104341|LAPTM4B  
HNH-1|ENSG00000207754|hsa-mir-487b|hsa-miR-487b|jt:ENSG00000198822|GRM3  
HNH-1|ENSG00000207754|hsa-mir-487b|hsa-miR-487b|jt:ENSG00000165259|CXorf43  
HNH-1|ENSG00000207754|hsa-mir-487b|hsa-miR-487b|jt:ENSG00000092529|CAPN3  
HNH-1|ENSG00000207761|hsa-mir-329-1|hsa-miR-329-1|jt:ENSG00000126698|DNAJC8  
HNH-1|ENSG00000207761|hsa-mir-329-1|hsa-miR-329-1|jt:ENSG00000171155|C1GALT1C1  
HNH-1|ENSG00000207761|hsa-mir-329-1|hsa-miR-329-1|jt:ENSG00000151500|THYN1  
HNH-1|ENSG00000207761|hsa-mir-329-1|hsa-miR-329-1|jt:ENSG00000157870|C1orf93  
HNH-1|ENSG00000207761|hsa-mir-329-1|hsa-miR-329-1|jt:ENSG00000168758|SEMA4C  
HNH-1|ENSG00000207761|hsa-mir-329-1|hsa-miR-329-1|jt:ENSG00000102781|KATNAL1  
HNH-1|ENSG00000207761|hsa-mir-329-1|hsa-miR-329-1|jt:ENSG00000131508|UBE2D2  
HNH-1|ENSG00000207761|hsa-mir-329-1|hsa-miR-329-1|jt:ENSG00000134247|PTGFRN  
HNH-1|ENSG00000207761|hsa-mir-329-1|hsa-miR-329-1|jt:ENSG00000169139|UBE2V2  
HNH-1|ENSG00000207761|hsa-mir-329-1|hsa-miR-329-1|jt:ENSG00000083896|YTHDC1  
HNH-1|ENSG00000207761|hsa-mir-329-1|hsa-miR-329-1|jt:ENSG00000188086|NP\_954652.1  
HNH-1|ENSG00000207794|hsa-mir-451|hsa-miR-451|jt:ENSG00000178996|SNAG1  
HNH-1|ENSG00000207961|hsa-mir-496|hsa-miR-496|jt:ENSG00000109163|GNRHR  
HNH-1|ENSG00000207961|hsa-mir-496|hsa-miR-496|jt:ENSG00000174521|TTC9B  
HNH-1|ENSG00000207961|hsa-mir-496|hsa-miR-496|jt:ENSG00000181192|DHTKD1  
HNH-1|ENSG00000207961|hsa-mir-496|hsa-miR-496|jt:ENSG00000057252|SOAT1  
HNH-1|ENSG00000207961|hsa-mir-496|hsa-miR-496|jt:ENSG00000175104|TRAF6  
HNH-1|ENSG00000207961|hsa-mir-496|hsa-miR-496|jt:ENSG00000077147|TM9SF3  
HNH-1|ENSG00000207961|hsa-mir-496|hsa-miR-496|jt:ENSG00000164007|CLDN19  
HNH-1|ENSG00000207961|hsa-mir-496|hsa-miR-496|jt:ENSG00000197430|TMEM10  
HNH-1|ENSG00000207961|hsa-mir-496|hsa-miR-496|jt:ENSG00000169432|SCN9A  
HNH-3|ENSG00000199036|hsa-mir-219-1|hsa-miR-219-1|jt:ENSG00000196877|NP\_001018132.2  
HNH-3|ENSG00000199036|hsa-mir-219-1|hsa-miR-219-1|jt:ENSG00000198156|NP\_001018132.2  
HNH-3|ENSG00000199036|hsa-mir-219-1|hsa-miR-219-1|jt:ENSG00000105549|THEG  
HNH-3|ENSG00000199036|hsa-mir-219-1|hsa-miR-219-1|jt:ENSG00000197555|SIPA1L1  
HNH-3|ENSG00000199036|hsa-mir-219-1|hsa-miR-219-1|jt:ENSG00000177553|C1orf167  
HNH-3|ENSG00000199036|hsa-mir-219-1|hsa-miR-219-1|jt:ENSG00000186187|ZNRF1  
HNH-3|ENSG00000199036|hsa-mir-219-1|hsa-miR-219-1|jt:ENSG00000120262|C6orf97  
HNH-3|ENSG00000199036|hsa-mir-219-1|hsa-miR-219-1|jt:ENSG00000171557|FGG  
HNH-3|ENSG00000199036|hsa-mir-219-1|hsa-miR-219-1|jt:ENSG00000043822|NP\_060895.1  
HNH-3|ENSG00000199036|hsa-mir-219-1|hsa-miR-219-1|jt:ENSG00000205670|C21orf51  
HNH-3|ENSG00000199036|hsa-mir-219-1|hsa-miR-219-1|jt:ENSG00000112246|SIM1  
HNH-3|ENSG00000199036|hsa-mir-219-1|hsa-miR-219-1|jt:ENSG00000183018|SPNS2  
HNH-3|ENSG00000199036|hsa-mir-219-1|hsa-miR-219-1|jt:ENSG00000155906|RMND1  
HNH-3|ENSG00000199036|hsa-mir-219-1|hsa-miR-219-1|jt:ENSG00000149506|ZP1  
HNH-3|ENSG00000199072|hsa-let-7f-1|hsa-let-7f-1|jt:ENSG00000118971|CCND2  
HNH-3|ENSG00000199072|hsa-let-7f-1|hsa-let-7f-1|jt:ENSG00000164654|NP\_061878.3  
HNH-3|ENSG00000199072|hsa-let-7f-1|hsa-let-7f-1|jt:ENSG00000183035|CYLC1  
HNH-3|ENSG00000199072|hsa-let-7f-1|hsa-let-7f-1|jt:ENSG00000179476|C14orf28  
HNH-3|ENSG00000199072|hsa-let-7f-1|hsa-let-7f-1|jt:ENSG00000177058|NP\_775785.1  
HNH-3|ENSG00000199072|hsa-let-7f-1|hsa-let-7f-1|jt:ENSG00000187109|NAP1L1  
HNH-3|ENSG00000199072|hsa-let-7f-1|hsa-let-7f-1|jt:ENSG00000105419|Q99687-2  
HNH-3|ENSG00000199072|hsa-let-7f-1|hsa-let-7f-1|jt:ENSG00000181322|TXNDC6  
HNH-3|ENSG00000199072|hsa-let-7f-1|hsa-let-7f-1|jt:ENSG00000172053|QARS  
HNH-3|ENSG00000199072|hsa-let-7f-1|hsa-let-7f-1|jt:ENSG00000182263|FIGN  
HNH-3|ENSG00000199077|hsa-mir-129-2|hsa-miR-129-2|jt:ENSG00000146409|C6orf192

HNH-F-3|ENSG00000199077|hsa-mir-129-2|hsa-miR-129|jt:ENSG00000145416|MARCH1  
HNH-F-3|ENSG00000199077|hsa-mir-129-2|hsa-miR-129|jt:ENSG00000120533|ENY2  
HNH-F-3|ENSG00000199077|hsa-mir-129-2|hsa-miR-129|jt:ENSG00000133627|ACTR3B  
HNH-F-3|ENSG00000199077|hsa-mir-129-2|hsa-miR-129|jt:ENSG00000198693|Q6ZW86\_HUMAN  
HNH-F-3|ENSG00000199077|hsa-mir-129-2|hsa-miR-129|jt:ENSG00000164849|GPR146  
HNH-F-3|ENSG00000199077|hsa-mir-129-2|hsa-miR-129|jt:ENSG0000016082|ISL1  
HNH-F-3|ENSG00000199094|hsa-mir-30c-2|hsa-miR-30c|jt:ENSG00000102098|SCML2  
HNH-F-3|ENSG00000199094|hsa-mir-30c-2|hsa-miR-30c|jt:ENSG00000157470|FAM81A  
HNH-F-3|ENSG00000199094|hsa-mir-30c-2|hsa-miR-30c|jt:ENSG00000197121|PGAP1\_HUMAN  
HNH-F-3|ENSG00000199094|hsa-mir-30c-2|hsa-miR-30c|jt:ENSG00000168955|TM4SF20  
HNH-F-3|ENSG00000199094|hsa-mir-30c-2|hsa-miR-30c|jt:ENSG00000133392|MYH11  
HNH-F-3|ENSG00000199094|hsa-mir-30c-2|hsa-miR-30c|jt:ENSG00000143355|LHX9  
HNH-F-3|ENSG00000199094|hsa-mir-30c-2|hsa-miR-30c|jt:ENSG00000189298|ZKSCAN3  
HNH-F-3|ENSG00000199094|hsa-mir-30c-2|hsa-miR-30c|jt:ENSG00000198826|ARHGAP11A  
HNH-F-3|ENSG00000199094|hsa-mir-30c-2|hsa-miR-30c|jt:ENSG00000180574|Q5I0X0\_HUMAN  
HNH-F-3|ENSG00000199094|hsa-mir-30c-2|hsa-miR-30c|jt:ENSG00000133627|ACTR3B  
HNH-F-3|ENSG00000199094|hsa-mir-30c-2|hsa-miR-30c|jt:ENSG00000116128|BCL9  
HNH-F-3|ENSG00000199094|hsa-mir-30c-2|hsa-miR-30c|jt:ENSG00000162039|C16orf73  
HNH-F-3|ENSG00000199094|hsa-mir-30c-2|hsa-miR-30c|jt:ENSG00000185002|RFXDC1  
HNH-F-3|ENSG00000199130|hsa-mir-365-1|hsa-miR-365|jt:ENSG00000173209|AHS2  
HNH-F-3|ENSG00000199130|hsa-mir-365-1|hsa-miR-365|jt:ENSG00000197860|SGTB  
HNH-F-3|ENSG00000199133|hsa-let-7d|hsa-let-7d|jt:ENSG00000153914|SFRS12  
HNH-F-3|ENSG00000199133|hsa-let-7d|hsa-let-7d|jt:ENSG00000183035|CYLC1  
HNH-F-3|ENSG00000199133|hsa-let-7d|hsa-let-7d|jt:ENSG00000149313|AASDHPPT  
HNH-F-3|ENSG00000199133|hsa-let-7d|hsa-let-7d|jt:ENSG00000107551|RASSF4  
HNH-F-3|ENSG00000199133|hsa-let-7d|hsa-let-7d|jt:ENSG00000173209|AHS2  
HNH-F-3|ENSG00000199133|hsa-let-7d|hsa-let-7d|jt:ENSG00000179476|C14orf28  
HNH-F-3|ENSG00000199133|hsa-let-7d|hsa-let-7d|jt:ENSG00000105419|Q99687-2  
HNH-F-3|ENSG00000199133|hsa-let-7d|hsa-let-7d|jt:ENSG00000181322|TXNDC6  
HNH-F-3|ENSG00000199133|hsa-let-7d|hsa-let-7d|jt:ENSG00000172053|QARS  
HNH-F-3|ENSG00000199165|hsa-let-7a-1|hsa-let-7a|jt:ENSG00000118971|CCND2  
HNH-F-3|ENSG00000199165|hsa-let-7a-1|hsa-let-7a|jt:ENSG00000164654|NP\_061878.3  
HNH-F-3|ENSG00000199165|hsa-let-7a-1|hsa-let-7a|jt:ENSG00000183035|CYLC1  
HNH-F-3|ENSG00000199165|hsa-let-7a-1|hsa-let-7a|jt:ENSG00000179476|C14orf28  
HNH-F-3|ENSG00000199165|hsa-let-7a-1|hsa-let-7a|jt:ENSG00000177058|NP\_77585.1  
HNH-F-3|ENSG00000199165|hsa-let-7a-1|hsa-let-7a|jt:ENSG00000187109|NAP1L1  
HNH-F-3|ENSG00000199165|hsa-let-7a-1|hsa-let-7a|jt:ENSG00000105419|Q99687-2  
HNH-F-3|ENSG00000199165|hsa-let-7a-1|hsa-let-7a|jt:ENSG00000181322|TXNDC6  
HNH-F-3|ENSG00000199165|hsa-let-7a-1|hsa-let-7a|jt:ENSG00000172053|QARS  
HNH-F-3|ENSG00000199177|hsa-mir-31|hsa-miR-31|jt:ENSG00000182263|FIGN  
HNH-F-3|ENSG00000199177|hsa-mir-31|hsa-miR-31|jt:ENSG00000156711|MAPK13  
HNH-F-3|ENSG00000199177|hsa-mir-31|hsa-miR-31|jt:ENSG00000189037|DUSP21  
HNH-F-3|ENSG00000207586|hsa-mir-135a-2|hsa-miR-135a|jt:ENSG00000091879|ANGPT2  
HNH-F-3|ENSG00000207586|hsa-mir-135a-2|hsa-miR-135a|jt:ENSG00000185736|ADARB2  
HNH-F-3|ENSG00000207586|hsa-mir-135a-2|hsa-miR-135a|jt:ENSG00000163719|MTMR14  
HNH-F-3|ENSG00000207586|hsa-mir-135a-2|hsa-miR-135a|jt:ENSG00000143418|LASS2  
HNH-F-3|ENSG00000207586|hsa-mir-135a-2|hsa-miR-135a|jt:ENSG00000198429|ZNF69  
HNH-F-3|ENSG00000207586|hsa-mir-135a-2|hsa-miR-135a|jt:ENSG00000172845|SP3  
HNH-F-3|ENSG00000207586|hsa-mir-135a-2|hsa-miR-135a|jt:ENSG00000162694|EXTL2  
HNH-F-3|ENSG00000207635|hsa-mir-499|hsa-miR-499|jt:ENSG00000172965|Q96C48\_HUMAN  
HNH-F-3|ENSG00000207635|hsa-mir-499|hsa-miR-499|jt:ENSG00000184943|NP\_443103.1  
HNH-F-3|ENSG00000207635|hsa-mir-499|hsa-miR-499|jt:ENSG00000104154|SLC30A4  
HNH-F-3|ENSG00000207827|hsa-mir-30a|hsa-miR-30a-3p|jt:ENSG00000168273|Q8WV10\_HUMAN  
HNH-F-3|ENSG00000207827|hsa-mir-30a|hsa-miR-30a-3p|jt:ENSG00000183488|AMAC1L3  
HNH-F-3|ENSG00000207827|hsa-mir-30a|hsa-miR-30a-5p|jt:ENSG00000102098|SCML2  
HNH-F-3|ENSG00000207827|hsa-mir-30a|hsa-miR-30a-5p|jt:ENSG00000157470|FAM81A  
HNH-F-3|ENSG00000207827|hsa-mir-30a|hsa-miR-30a-5p|jt:ENSG00000197121|PGAP1\_HUMAN  
HNH-F-3|ENSG00000207827|hsa-mir-30a|hsa-miR-30a-5p|jt:ENSG00000168955|TM4SF20  
HNH-F-3|ENSG00000207827|hsa-mir-30a|hsa-miR-30a-5p|jt:ENSG00000133392|MYH11  
HNH-F-3|ENSG00000207827|hsa-mir-30a|hsa-miR-30a-5p|jt:ENSG00000143355|LHX9  
HNH-F-3|ENSG00000207827|hsa-mir-30a|hsa-miR-30a-5p|jt:ENSG00000189298|ZKSCAN3  
HNH-F-3|ENSG00000207827|hsa-mir-30a|hsa-miR-30a-5p|jt:ENSG00000198826|ARHGAP11A  
HNH-F-3|ENSG00000207827|hsa-mir-30a|hsa-miR-30a-5p|jt:ENSG00000180574|Q5I0X0\_HUMAN  
HNH-F-3|ENSG00000207827|hsa-mir-30a|hsa-miR-30a-5p|jt:ENSG00000133627|ACTR3B  
HNH-F-3|ENSG00000207827|hsa-mir-30a|hsa-miR-30a-5p|jt:ENSG00000116128|BCL9  
HNH-F-3|ENSG00000207827|hsa-mir-30a|hsa-miR-30a-5p|jt:ENSG00000162039|C16orf73  
HNH-F-3|ENSG00000207827|hsa-mir-30a|hsa-miR-30a-5p|jt:ENSG00000185002|RFXDC1  
HNH-F-4|ENSG00000207705|hsa-mir-129-1|hsa-miR-129|jt:ENSG00000169509|CRCT1  
HNH-F-4|ENSG00000207705|hsa-mir-129-1|hsa-miR-129|jt:ENSG00000203945|Q5JFQ1\_HUMAN  
HNH-F-4|ENSG00000207705|hsa-mir-129-1|hsa-miR-129|jt:ENSG00000178602|OTOS  
HNH-F-4|ENSG00000207705|hsa-mir-129-1|hsa-miR-129|jt:ENSG00000134138|MEIS2  
HNH-F-4|ENSG00000207705|hsa-mir-129-1|hsa-miR-129|jt:ENSG00000146409|C6orf192  
HOXA4|ENSG00000199077|hsa-mir-129-2|hsa-miR-129|jt:ENSG00000105058|FAM32A  
HOXA4|ENSG00000199077|hsa-mir-129-2|hsa-miR-129|jt:ENSG00000198518|HIST1H4E  
HOXA4|ENSG00000199077|hsa-mir-129-2|hsa-miR-129|jt:ENSG00000198929|NOS1AP  
HOXA4|ENSG00000199122|hsa-mir-148b|hsa-miR-148b|jt:ENSG00000109790|KLHL5  
HOXA4|ENSG00000199122|hsa-mir-148b|hsa-miR-148b|jt:ENSG00000182220|ATP6AP2  
HOXA4|ENSG00000199122|hsa-mir-148b|hsa-miR-148b|jt:ENSG00000047621|C12orf4  
HOXA4|ENSG00000199149|hsa-mir-20a|hsa-miR-20a|jt:ENSG00000175155|YPEL2  
HOXA4|ENSG00000199149|hsa-mir-20a|hsa-miR-20a|jt:ENSG00000104517|EDD1  
HOXA4|ENSG00000199149|hsa-mir-20a|hsa-miR-20a|jt:ENSG00000154065|ANKRD29  
HOXA4|ENSG00000199149|hsa-mir-20a|hsa-miR-20a|jt:ENSG00000100629|C14orf145  
HOXA4|ENSG00000207610|hsa-mir-19a|hsa-miR-19a|jt:ENSG00000155189|AGPAT5  
HOXA4|ENSG00000207610|hsa-mir-19a|hsa-miR-19a|jt:ENSG00000163596|ICAL1  
HOXA4|ENSG00000207610|hsa-mir-19a|hsa-miR-19a|jt:ENSG00000117601|SERPINC1  
HOXA4|ENSG00000207610|hsa-mir-19a|hsa-miR-19a|jt:ENSG00000078699|CBFA2T2  
HOXA4|ENSG00000207745|hsa-mir-17|hsa-miR-17-5p|jt:ENSG00000104517|EDD1  
HOXA4|ENSG00000207745|hsa-mir-17|hsa-miR-17-5p|jt:ENSG00000187678|SPRY4  
HOXA4|ENSG00000207745|hsa-mir-17|hsa-miR-17-5p|jt:ENSG00000154065|ANKRD29  
HOXA4|ENSG00000207745|hsa-mir-17|hsa-miR-17-5p|jt:ENSG00000162624|LHX8  
HOXA4|ENSG00000207745|hsa-mir-17|hsa-miR-17-5p|jt:ENSG00000203793|Q6ZR74\_HUMAN  
HOXA4|ENSG00000207863|hsa-mir-125b-2|hsa-miR-125b|jt:ENSG00000161021|LTC4S  
HOXA4|ENSG00000207863|hsa-mir-125b-2|hsa-miR-125b|jt:ENSG00000065361|ERBB3  
HOXA4|ENSG00000207863|hsa-mir-125b-2|hsa-miR-125b|jt:ENSG00000106993|CDC37L1  
HOXA4|ENSG00000207863|hsa-mir-125b-2|hsa-miR-125b|jt:ENSG00000172531|PPP1CA  
HOXA4|ENSG00000207863|hsa-mir-125b-2|hsa-miR-125b|jt:ENSG00000047621|C12orf4  
HOXA4|ENSG00000207863|hsa-mir-125b-2|hsa-miR-125b|jt:ENSG00000110274|CEP164  
HOXA4|ENSG00000207950|hsa-mir-296|hsa-miR-296|jt:ENSG00000138823|MTTP  
HOXA7|ENSG00000199089|hsa-mir-202|hsa-miR-202|jt:ENSG00000124104|SNX21  
HOXA7|ENSG00000199089|hsa-mir-202|hsa-miR-202|jt:ENSG00000112619|PRPF2  
HOXA7|ENSG00000199089|hsa-mir-202|hsa-miR-202|jt:ENSG00000164825|DEFB1  
HOXA7|ENSG00000199158|hsa-mir-96|hsa-miR-96|jt:ENSG00000113070|HBEFG  
HOXA7|ENSG00000199158|hsa-mir-96|hsa-miR-96|jt:ENSG00000072042|RDH11  
HOXA7|ENSG00000199158|hsa-mir-96|hsa-miR-96|jt:ENSG00000135454|B4GALNT1  
HOXA7|ENSG00000207691|hsa-mir-183|hsa-miR-183|jt:ENSG00000113070|HBEFG

HOXA7|ENSG00000207691|hsa-mir-183|hsa-miR-183 jt:ENSG00000072042|RDH11  
HOXA7|ENSG00000207691|hsa-mir-183|hsa-miR-183 jt:ENSG00000135454|B4GALNT1  
HOXA7|ENSG00000207691|hsa-mir-183|hsa-miR-183 jt:ENSG00000166743|ACSM1  
HOXA7|ENSG00000207691|hsa-mir-183|hsa-miR-183 jt:ENSG00000172456|NP\_060761.2  
HOXA7|ENSG00000207990|hsa-mir-182|hsa-miR-182 jt:ENSG00000113070|HBE6F  
HOXA7|ENSG00000207990|hsa-mir-182|hsa-miR-182 jt:ENSG00000197817|Q9UHS9\_HUMAN  
HP1|ENSG00000207791|hsa-mir-497|hsa-miR-497 jt:ENSG00000144867|SRPRB  
HP1|ENSG00000207929|hsa-mir-195|hsa-miR-195 jt:ENSG00000144867|SRPRB  
HSF|ENSG00000199085|hsa-mir-148a|hsa-miR-148a jt:ENSG00000130052|STARD8  
HSF|ENSG00000199085|hsa-mir-148a|hsa-miR-148a jt:ENSG00000162191|SAKS1\_HUMAN  
HSF2|ENSG00000199072|hsa-let-7f-1|hsa-let-7f jt:ENSG00000177058|NP\_775785.1  
HSF2|ENSG00000199072|hsa-let-7f-1|hsa-let-7f jt:ENSG00000133136|GBG5L\_HUMAN  
HSF2|ENSG00000199072|hsa-let-7f-1|hsa-let-7f jt:ENSG00000150593|PDCD4  
HSF2|ENSG00000199072|hsa-let-7f-1|hsa-let-7f jt:ENSG00000187772|LIN28B  
HSF2|ENSG00000199072|hsa-let-7f-1|hsa-let-7f jt:ENSG00000135297|MTO1  
HSF2|ENSG00000199072|hsa-let-7f-1|hsa-let-7f jt:ENSG00000134323|MYCN  
HSF2|ENSG00000199072|hsa-let-7f-1|hsa-let-7f jt:ENSG00000094963|FMO2  
HSF2|ENSG00000199072|hsa-let-7f-1|hsa-let-7f jt:ENSG00000179476|C14orf28  
HSF2|ENSG00000199072|hsa-let-7f-1|hsa-let-7f jt:ENSG00000187838|PLSCR3  
HSF2|ENSG00000199072|hsa-let-7f-1|hsa-let-7f jt:ENSG00000138036|DYNC2LI1  
HSF2|ENSG00000199072|hsa-let-7f-1|hsa-let-7f jt:ENSG00000135476|ESPL1  
HSF2|ENSG00000199072|hsa-let-7f-1|hsa-let-7f jt:ENSG00000204538|PSORS1C2  
HSF2|ENSG00000199072|hsa-let-7f-1|hsa-let-7f jt:ENSG00000161558|TMEM143  
HSF2|ENSG00000199072|hsa-let-7f-1|hsa-let-7f jt:ENSG00000169921|Q75L30\_HUMAN  
HSF2|ENSG00000199077|hsa-mir-129-2|hsa-miR-129 jt:ENSG00000163781|TOPBP1  
HSF2|ENSG00000199077|hsa-mir-129-2|hsa-miR-129 jt:ENSG00000161642|ZNF385  
HSF2|ENSG00000199077|hsa-mir-129-2|hsa-miR-129 jt:ENSG00000189292|NP\_001002919.1  
HSF2|ENSG00000199085|hsa-mir-148a|hsa-miR-148a jt:ENSG00000142700|DMRTA2  
HSF2|ENSG00000199085|hsa-mir-148a|hsa-miR-148a jt:ENSG00000055070|C1orf144  
HSF2|ENSG00000199085|hsa-mir-148a|hsa-miR-148a jt:ENSG00000126216|TUBGCP3  
HSF2|ENSG00000199085|hsa-mir-148a|hsa-miR-148a jt:ENSG00000118707|TGIF2  
HSF2|ENSG00000199085|hsa-mir-148a|hsa-miR-148a jt:ENSG00000197959|DNM3  
HSF2|ENSG00000199085|hsa-mir-148a|hsa-miR-148a jt:ENSG00000101901|CXorf45  
HSF2|ENSG00000199085|hsa-mir-148a|hsa-miR-148a jt:ENSG00000112333|NR2E1  
HSF2|ENSG00000199085|hsa-mir-148a|hsa-miR-148a jt:ENSG00000204048|Q6ZUG3\_HUMAN  
HSF2|ENSG00000199085|hsa-mir-148a|hsa-miR-148a jt:ENSG00000182512|GLRX5  
HSF2|ENSG00000199085|hsa-mir-148a|hsa-miR-148a jt:ENSG00000164258|NDUFS4  
HSF2|ENSG00000199085|hsa-mir-148a|hsa-miR-148a jt:ENSG00000173212|C1orf161  
HSF2|ENSG00000199085|hsa-mir-148a|hsa-miR-148a jt:ENSG00000115648|MLPH  
HSF2|ENSG00000199085|hsa-mir-148a|hsa-miR-148a jt:ENSG00000151694|ADAM17  
HSF2|ENSG00000199085|hsa-mir-148a|hsa-miR-148a jt:ENSG00000130052|STARD8  
HSF2|ENSG00000199085|hsa-mir-148a|hsa-miR-148a jt:ENSG00000188786|MTF1  
HSF2|ENSG00000199133|hsa-let-7d|hsa-let-7d jt:ENSG00000205610|Q4G105\_HUMAN  
HSF2|ENSG00000199133|hsa-let-7d|hsa-let-7d jt:ENSG00000133136|GBG5L\_HUMAN  
HSF2|ENSG00000199133|hsa-let-7d|hsa-let-7d jt:ENSG00000129317|PUS7L  
HSF2|ENSG00000199133|hsa-let-7d|hsa-let-7d jt:ENSG00000187772|LIN28B  
HSF2|ENSG00000199133|hsa-let-7d|hsa-let-7d jt:ENSG00000171502|COL24A1  
HSF2|ENSG00000199133|hsa-let-7d|hsa-let-7d jt:ENSG00000110583|NAT11  
HSF2|ENSG00000199133|hsa-let-7d|hsa-let-7d jt:ENSG00000164089|AGXT2L1  
HSF2|ENSG00000199133|hsa-let-7d|hsa-let-7d jt:ENSG00000094963|FMO2  
HSF2|ENSG00000199133|hsa-let-7d|hsa-let-7d jt:ENSG00000179476|C14orf28  
HSF2|ENSG00000199133|hsa-let-7d|hsa-let-7d jt:ENSG00000187838|PLSCR3  
HSF2|ENSG00000199133|hsa-let-7d|hsa-let-7d jt:ENSG00000138036|DYNC2LI1  
HSF2|ENSG00000199133|hsa-let-7d|hsa-let-7d jt:ENSG00000135476|ESPL1  
HSF2|ENSG00000199133|hsa-let-7d|hsa-let-7d jt:ENSG00000204538|PSORS1C2  
HSF2|ENSG00000199133|hsa-let-7d|hsa-let-7d jt:ENSG00000107551|RASSF4  
HSF2|ENSG00000199133|hsa-let-7d|hsa-let-7d jt:ENSG00000161558|TMEM143  
HSF2|ENSG00000199133|hsa-let-7d|hsa-let-7d jt:ENSG00000184863|PRR8  
HSF2|ENSG00000199133|hsa-let-7d|hsa-let-7d jt:ENSG00000149428|HYOU1  
HSF2|ENSG00000199133|hsa-let-7d|hsa-let-7d jt:ENSG00000169921|Q75L30\_HUMAN  
HSF2|ENSG00000199165|hsa-let-7a-1|hsa-let-7a jt:ENSG00000177058|NP\_775785.1  
HSF2|ENSG00000199165|hsa-let-7a-1|hsa-let-7a jt:ENSG00000133136|GBG5L\_HUMAN  
HSF2|ENSG00000199165|hsa-let-7a-1|hsa-let-7a jt:ENSG00000150593|PDCD4  
HSF2|ENSG00000199165|hsa-let-7a-1|hsa-let-7a jt:ENSG00000187772|LIN28B  
HSF2|ENSG00000199165|hsa-let-7a-1|hsa-let-7a jt:ENSG00000135297|MTO1  
HSF2|ENSG00000199165|hsa-let-7a-1|hsa-let-7a jt:ENSG00000134323|MYCN  
HSF2|ENSG00000199165|hsa-let-7a-1|hsa-let-7a jt:ENSG00000094963|FMO2  
HSF2|ENSG00000199165|hsa-let-7a-1|hsa-let-7a jt:ENSG00000179476|C14orf28  
HSF2|ENSG00000199165|hsa-let-7a-1|hsa-let-7a jt:ENSG00000187838|PLSCR3  
HSF2|ENSG00000199165|hsa-let-7a-1|hsa-let-7a jt:ENSG00000138036|DYNC2LI1  
HSF2|ENSG00000199165|hsa-let-7a-1|hsa-let-7a jt:ENSG00000135476|ESPL1  
HSF2|ENSG00000199165|hsa-let-7a-1|hsa-let-7a jt:ENSG00000204538|PSORS1C2  
HSF2|ENSG00000199165|hsa-let-7a-1|hsa-let-7a jt:ENSG00000161558|TMEM143  
HSF2|ENSG00000199165|hsa-let-7a-1|hsa-let-7a jt:ENSG00000169921|Q75L30\_HUMAN  
HSF2|ENSG00000207635|hsa-mir-499|hsa-miR-499 jt:ENSG00000198860|C1orf19  
HSF2|ENSG00000207635|hsa-mir-499|hsa-miR-499 jt:ENSG00000169189|NSMCE1  
HSF2|ENSG00000207635|hsa-mir-499|hsa-miR-499 jt:ENSG00000126861|OMG  
HSF2|ENSG00000207718|hsa-mir-15a|hsa-miR-15a jt:ENSG00000138685|FGF2  
HSF2|ENSG00000207718|hsa-mir-15a|hsa-miR-15a jt:ENSG00000124208|UBE2V1  
HSF2|ENSG00000207718|hsa-mir-15a|hsa-miR-15a jt:ENSG00000069275|NUCKS1  
HSF2|ENSG00000207718|hsa-mir-15a|hsa-miR-15a jt:ENSG00000159231|CBR3  
HSF2|ENSG00000207718|hsa-mir-15a|hsa-miR-15a jt:ENSG00000204388|HSPA1B  
HSF2|ENSG00000207728|hsa-mir-449b|hsa-miR-449b jt:ENSG00000205610|Q4G105\_HUMAN  
HSF2|ENSG00000207728|hsa-mir-449b|hsa-miR-449b jt:ENSG00000120215|MLANA  
HSF2|ENSG00000207728|hsa-mir-449b|hsa-miR-449b jt:ENSG00000113328|CCNG1  
HSF2|ENSG00000207728|hsa-mir-449b|hsa-miR-449b jt:ENSG00000105323|HNRPUL1  
HSF2|ENSG00000207728|hsa-mir-449b|hsa-miR-449b jt:ENSG00000168334|CMYA1  
HSF2|ENSG00000207728|hsa-mir-449b|hsa-miR-449b jt:ENSG00000172689|MS4A10  
HSF2|ENSG00000207728|hsa-mir-449b|hsa-miR-449b jt:ENSG00000069849|ATP1B3  
HSF2|ENSG00000207728|hsa-mir-449b|hsa-miR-449b jt:ENSG00000116704|SLC35D1  
HSF2|ENSG00000207728|hsa-mir-449b|hsa-miR-449b jt:ENSG00000134070|IRAK2  
HSF2|ENSG00000207752|hsa-mir-199a-1|hsa-miR-199a jt:ENSG00000136536|MARCH7  
HSF2|ENSG00000207752|hsa-mir-199a-1|hsa-miR-199a jt:ENSG00000082701|GSK3B  
HSF2|ENSG00000207752|hsa-mir-199a-1|hsa-miR-199a jt:ENSG00000109084|TMEM97  
HSF2|ENSG00000207752|hsa-mir-199a-1|hsa-miR-199a jt:ENSG00000134490|C18orf45  
HSF2|ENSG00000207752|hsa-mir-199a-1|hsa-miR-199a jt:ENSG00000154736|ADAMT5  
HSF2|ENSG00000207752|hsa-mir-199a-1|hsa-miR-199a\* jt:ENSG00000148985|NP\_053304.1  
HSF2|ENSG00000207752|hsa-mir-199a-1|hsa-miR-199a\* jt:ENSG00000123473|STIL  
HSF2|ENSG00000207752|hsa-mir-199a-1|hsa-miR-199a\* jt:ENSG00000198757|Q96NB8\_HUMAN  
HSF2|ENSG00000207752|hsa-mir-199a-1|hsa-miR-199a\* jt:ENSG00000198901|PRC1  
HSF2|ENSG00000207752|hsa-mir-199a-1|hsa-miR-199a\* jt:ENSG00000130669|PAK4  
HSF2|ENSG00000207752|hsa-mir-199a-1|hsa-miR-199a\* jt:ENSG00000165525|SDCCAG1  
HSF2|ENSG00000207752|hsa-mir-199a-1|hsa-miR-199a\* jt:ENSG00000135926|TMBIM1  
HSF2|ENSG00000207752|hsa-mir-199a-1|hsa-miR-199a\* jt:ENSG00000180398|MCFD2  
HSF2|ENSG00000207752|hsa-mir-199a-1|hsa-miR-199a\* jt:ENSG00000206125|Q68DA7\_HUMAN

HSF2|ENSG00000207752|hsa-mir-199a-1|hsa-miR-199a\*|jt:ENSG00000142687|KIAA0319L  
HSF2|ENSG00000207752|hsa-mir-199a-1|hsa-miR-199a\*|jt:ENSG00000137648|TMPRSS4  
HSF2|ENSG00000207752|hsa-mir-199a-1|hsa-miR-199a\*|jt:ENSG00000134323|MYCN  
HSF2|ENSG00000207752|hsa-mir-199a-1|hsa-miR-199a\*|jt:ENSG00000180263|FGD6  
HSF2|ENSG00000207752|hsa-mir-199a-1|hsa-miR-199a\*|jt:ENSG00000162415|ZSWIM5  
HSF2|ENSG00000207752|hsa-mir-199a-1|hsa-miR-199a\*|jt:ENSG00000084072|PPIE  
HSF2|ENSG00000207752|hsa-mir-199a-1|hsa-miR-199a\*|jt:ENSG00000136205|TNS3  
HSF2|ENSG00000207752|hsa-mir-199a-1|hsa-miR-199a\*|jt:ENSG00000204539|CDSN  
HSF2|ENSG00000207752|hsa-mir-199a-1|hsa-miR-199a\*|jt:ENSG00000198563|ATP6V1G2  
HSF2|ENSG00000207950|hsa-mir-296|hsa-miR-296|jt:ENSG00000102225|PCTK1  
HSF2|ENSG00000207950|hsa-mir-296|hsa-miR-296|jt:ENSG00000175901|XR\_017883.1  
HSF2|ENSG00000207950|hsa-mir-296|hsa-miR-296|jt:ENSG00000119917|IFIIT3  
HSF2|ENSG00000207950|hsa-mir-296|hsa-miR-296|jt:ENSG00000179364|PACS2  
HSF2|ENSG00000207950|hsa-mir-296|hsa-miR-296|jt:ENSG00000090097|PCBP4  
HSF2|ENSG00000207950|hsa-mir-296|hsa-miR-296|jt:ENSG00000127774|TMEM93  
HSF2|ENSG00000207950|hsa-mir-296|hsa-miR-296|jt:ENSG00000178175|ZNF366  
HSF2|ENSG00000207950|hsa-mir-296|hsa-miR-296|jt:ENSG00000141574|SECTM1  
HSF2|ENSG00000207950|hsa-mir-296|hsa-miR-296|jt:ENSG00000158022|TRIM63  
HSF2|ENSG00000207950|hsa-mir-296|hsa-miR-296|jt:ENSG00000090006|LTBP4  
HSF2|ENSG00000207950|hsa-mir-296|hsa-miR-296|jt:ENSG00000136717|BIN1  
HSF2|ENSG00000207950|hsa-mir-296|hsa-miR-296|jt:ENSG00000167680|SEMA6B  
HSF2|ENSG00000208006|hsa-mir-16-1|hsa-miR-16-1|jt:ENSG00000138685|FGF2  
HSF2|ENSG00000208006|hsa-mir-16-1|hsa-miR-16-1|jt:ENSG00000124208|UBE2V1  
HSF2|ENSG00000208006|hsa-mir-16-1|hsa-miR-16-1|jt:ENSG00000069275|NUCKS1  
HSF2|ENSG00000208006|hsa-mir-16-1|hsa-miR-16-1|jt:ENSG00000159231|CBR3  
HSF2|ENSG00000208006|hsa-mir-16-1|hsa-miR-16-1|jt:ENSG00000204388|HSPA1B  
ICSBP|ENSG00000207568|hsa-mir-203|hsa-miR-203|jt:ENSG00000197701|ZNF595  
ICSBP|ENSG00000207939|hsa-mir-223|hsa-miR-223|jt:ENSG00000148926|ADM  
ICSBP|ENSG00000207939|hsa-mir-223|hsa-miR-223|jt:ENSG00000184502|GAST  
ICSBP|ENSG00000207939|hsa-mir-223|hsa-miR-223|jt:ENSG00000172179|PRL  
ICSBP|ENSG00000207939|hsa-mir-223|hsa-miR-223|jt:ENSG00000121964|GTDC1  
ICSBP|ENSG00000207939|hsa-mir-223|hsa-miR-223|jt:ENSG00000118689|FOXO3A  
ICSBP|ENSG00000211590|hsa-mir-802|hsa-miR-802|jt:ENSG00000101493|ZNF516  
IK-1|ENSG00000207618|hsa-mir-144|hsa-miR-144|jt:ENSG00000124201|ZNFX1  
IK-1|ENSG00000207731|hsa-mir-506|hsa-miR-506|jt:ENSG00000096093|EFHC1  
IK-1|ENSG00000207731|hsa-mir-506|hsa-miR-506|jt:ENSG00000109536|FRG1  
IK-1|ENSG00000207731|hsa-mir-506|hsa-miR-506|jt:ENSG00000203730|TEDDM1  
IPF1|ENSG00000199085|hsa-mir-148a|hsa-miR-148a|jt:ENSG00000122783|C7orf49  
IPF1|ENSG00000207863|hsa-mir-125b-2|hsa-miR-125b-2|jt:ENSG00000095794|CREM  
IPF1|ENSG00000207863|hsa-mir-125b-2|hsa-miR-125b-2|jt:ENSG00000123064|DDX54  
IPF1|ENSG00000207971|hsa-mir-125b-1|hsa-miR-125b-1|jt:ENSG00000095794|CREM  
IPF1|ENSG00000207971|hsa-mir-125b-1|hsa-miR-125b-1|jt:ENSG00000123064|DDX54  
IRF|ENSG00000199065|hsa-mir-101-2|hsa-miR-101-2|jt:ENSG00000100109|TFIP11  
IRF|ENSG00000199065|hsa-mir-101-2|hsa-miR-101-2|jt:ENSG00000151690|NF\_060164.3  
IRF|ENSG00000199065|hsa-mir-101-2|hsa-miR-101-2|jt:ENSG00000162851|TFB2M  
IRF|ENSG00000199133|hsa-let-7d|hsa-let-7d|jt:ENSG00000110583|NAT11  
IRF|ENSG00000207568|hsa-mir-203|hsa-miR-203|jt:ENSG00000113070|HBEGF  
IRF|ENSG00000207568|hsa-mir-203|hsa-miR-203|jt:ENSG00000167941|SOST  
IRF|ENSG00000207971|hsa-mir-125b-1|hsa-miR-125b-1|jt:ENSG00000171791|BCL2  
IRF|ENSG00000207971|hsa-mir-125b-1|hsa-miR-125b-1|jt:ENSG00000142765|SYTL1  
IRF|ENSG00000207994|hsa-mir-100|hsa-miR-100|jt:ENSG00000118689|FOXO3A  
IRF|ENSG00000207994|hsa-mir-100|hsa-miR-100|jt:ENSG00000071575|TRIB2  
IRF|ENSG00000207994|hsa-mir-100|hsa-miR-100|jt:ENSG00000162437|RAVER2  
IRF-1|ENSG00000199094|hsa-mir-30c-2|hsa-miR-30c-2|jt:ENSG00000101134|DOK5  
IRF-1|ENSG00000199094|hsa-mir-30c-2|hsa-miR-30c-2|jt:ENSG00000141068|KSR1  
IRF-1|ENSG00000199094|hsa-mir-30c-2|hsa-miR-30c-2|jt:ENSG00000165891|E2F7  
IRF-1|ENSG00000199094|hsa-mir-30c-2|hsa-miR-30c-2|jt:ENSG00000157741|Q6ZU65\_HUMAN  
IRF-1|ENSG00000199094|hsa-mir-30c-2|hsa-miR-30c-2|jt:ENSG00000171316|CHD7  
IRF-1|ENSG00000207638|hsa-mir-99a|hsa-miR-99a|jt:ENSG00000118689|FOXO3A  
IRF-1|ENSG00000207638|hsa-mir-99a|hsa-miR-99a|jt:ENSG00000136144|RCBTB1  
IRF-1|ENSG00000207827|hsa-mir-30a|hsa-miR-30a-5p|jt:ENSG00000101134|DOK5  
IRF-1|ENSG00000207827|hsa-mir-30a|hsa-miR-30a-5p|jt:ENSG00000141068|KSR1  
IRF-1|ENSG00000207827|hsa-mir-30a|hsa-miR-30a-5p|jt:ENSG00000165891|E2F7  
IRF-1|ENSG00000207827|hsa-mir-30a|hsa-miR-30a-5p|jt:ENSG00000157741|Q6ZU65\_HUMAN  
IRF-1|ENSG00000207827|hsa-mir-30a|hsa-miR-30a-5p|jt:ENSG00000171316|CHD7  
IRF-1|ENSG00000207863|hsa-mir-125b-2|hsa-miR-125b-2|jt:ENSG00000157119|KBTBD5  
IRF-7|ENSG00000199032|hsa-mir-425|hsa-miR-425-3p|jt:ENSG00000167178|ISLR2  
IRF-7|ENSG00000199032|hsa-mir-425|hsa-miR-425-3p|jt:ENSG00000172867|KRT2  
IRF-7|ENSG00000199032|hsa-mir-425|hsa-miR-425-3p|jt:ENSG00000049323|LTBP1  
IRF-7|ENSG00000199032|hsa-mir-425|hsa-miR-425-3p|jt:ENSG00000184937|WT1  
IRF-7|ENSG00000199032|hsa-mir-425|hsa-miR-425-3p|jt:ENSG00000170852|KBTBD2  
IRF-7|ENSG00000199059|hsa-mir-135b|hsa-miR-135b|jt:ENSG00000121774|KHDRBS1  
IRF-7|ENSG00000199059|hsa-mir-135b|hsa-miR-135b|jt:ENSG00000073792|IGF2BP2  
IRF-7|ENSG00000199059|hsa-mir-135b|hsa-miR-135b|jt:ENSG00000198018|ENTPD7  
IRF-7|ENSG00000199059|hsa-mir-135b|hsa-miR-135b|jt:ENSG00000102181|CD99L2  
IRF-7|ENSG00000199059|hsa-mir-135b|hsa-miR-135b|jt:ENSG00000198429|ZNF69  
IRF-7|ENSG00000199059|hsa-mir-135b|hsa-miR-135b|jt:ENSG00000135452|TSPAN31  
IRF-7|ENSG00000199059|hsa-mir-135b|hsa-miR-135b|jt:ENSG00000167700|MFSD3  
IRF-7|ENSG00000199059|hsa-mir-135b|hsa-miR-135b|jt:ENSG00000164935|TM7SF4  
IRF-7|ENSG00000199059|hsa-mir-135b|hsa-miR-135b|jt:ENSG00000136811|ODF2  
IRF-7|ENSG00000199059|hsa-mir-135b|hsa-miR-135b|jt:ENSG00000184774|Q49AQ9\_HUMAN  
IRF-7|ENSG00000199059|hsa-mir-135b|hsa-miR-135b|jt:ENSG00000114480|GBE1  
IRF-7|ENSG00000199059|hsa-mir-135b|hsa-miR-135b|jt:ENSG00000197851|NF\_997386.1  
IRF-7|ENSG00000199077|hsa-mir-129-2|hsa-miR-129-2|jt:ENSG00000170310|STX8  
IRF-7|ENSG00000199077|hsa-mir-129-2|hsa-miR-129-2|jt:ENSG00000134138|MEIS2  
IRF-7|ENSG00000199077|hsa-mir-129-2|hsa-miR-129-2|jt:ENSG00000158435|C2orf29  
IRF-7|ENSG00000199077|hsa-mir-129-2|hsa-miR-129-2|jt:ENSG00000136720|HS6ST1  
IRF-7|ENSG00000199080|hsa-mir-133b|hsa-miR-133b|jt:ENSG00000212131|PDXP  
IRF-7|ENSG00000199080|hsa-mir-133b|hsa-miR-133b|jt:ENSG00000069696|DRD4  
IRF-7|ENSG00000199080|hsa-mir-133b|hsa-miR-133b|jt:ENSG00000144580|RQC1  
IRF-7|ENSG00000199080|hsa-mir-133b|hsa-miR-133b|jt:ENSG00000167371|PRRT2  
IRF-7|ENSG00000199080|hsa-mir-133b|hsa-miR-133b|jt:ENSG00000154822|PLCL2  
IRF-7|ENSG00000207585|hsa-mir-181d|hsa-miR-181d|jt:ENSG00000171766|GATM  
IRF-7|ENSG00000207585|hsa-mir-181d|hsa-miR-181d|jt:ENSG00000169891|REPS2  
IRF-7|ENSG00000207585|hsa-mir-181d|hsa-miR-181d|jt:ENSG00000163463|KRTCAP2  
IRF-7|ENSG00000207585|hsa-mir-181d|hsa-miR-181d|jt:ENSG00000177728|KIAA0195  
IRF-7|ENSG00000207585|hsa-mir-181d|hsa-miR-181d|jt:ENSG00000128228|SDF2L1  
IRF-7|ENSG00000207585|hsa-mir-181d|hsa-miR-181d|jt:ENSG00000204789|ZNF204  
IRF-7|ENSG00000207604|hsa-mir-206|hsa-miR-206|jt:ENSG00000160211|G6PD  
IRF-7|ENSG00000207604|hsa-mir-206|hsa-miR-206|jt:ENSG00000137364|TPMT  
IRF-7|ENSG00000207604|hsa-mir-206|hsa-miR-206|jt:ENSG00000176476|CCDC101  
IRF-7|ENSG00000207604|hsa-mir-206|hsa-miR-206|jt:ENSG00000074696|PTPLAD1  
IRF-7|ENSG00000207604|hsa-mir-206|hsa-miR-206|jt:ENSG00000165807|C14orf50  
IRF-7|ENSG00000207604|hsa-mir-206|hsa-miR-206|jt:ENSG00000104880|ARHGEF18  
IRF-7|ENSG00000207623|hsa-mir-205|hsa-miR-205|jt:ENSG00000138629|UBL7

IRF-7|ENSG00000207623|hsa-mir-205|hsa-miR-205 jt:ENSG00000182631|RXFP3  
IRF-7|ENSG00000207623|hsa-mir-205|hsa-miR-205 jt:ENSG00000125686|PPARBP  
IRF-7|ENSG00000207623|hsa-mir-205|hsa-miR-205 jt:ENSG00000176105|YES1  
IRF-7|ENSG00000207623|hsa-mir-205|hsa-miR-205 jt:ENSG00000072840|EVC  
IRF-7|ENSG00000207623|hsa-mir-205|hsa-miR-205 jt:ENSG00000114982|NP\_060461.3  
IRF-7|ENSG00000207728|hsa-mir-449b|hsa-miR-449b jt:ENSG00000116704|SLC35D1  
IRF-7|ENSG00000207728|hsa-mir-449b|hsa-miR-449b jt:ENSG00000112759|SLC29A1  
IRF-7|ENSG00000207728|hsa-mir-449b|hsa-miR-449b jt:ENSG00000198719|DLL1  
IRF-7|ENSG00000207728|hsa-mir-449b|hsa-miR-449b jt:ENSG00000107282|APBA1  
IRF-7|ENSG00000207728|hsa-mir-449b|hsa-miR-449b jt:ENSG00000048740|CUGBP2  
IRF-7|ENSG00000207728|hsa-mir-449b|hsa-miR-449b jt:ENSG00000108797|CNTNAP1  
IRF-7|ENSG00000207728|hsa-mir-449b|hsa-miR-449b jt:ENSG00000131951|LRRC9  
IRF-7|ENSG00000207789|hsa-mir-26a-2|hsa-miR-26a jt:ENSG00000148704|VAX1  
IRF-7|ENSG00000207789|hsa-mir-26a-2|hsa-miR-26a jt:ENSG00000164574|GALNT10  
IRF-7|ENSG00000207789|hsa-mir-26a-2|hsa-miR-26a jt:ENSG00000164879|CA3  
IRF-7|ENSG00000207789|hsa-mir-26a-2|hsa-miR-26a jt:ENSG00000134001|EIF2S1  
IRF-7|ENSG00000207789|hsa-mir-26a-2|hsa-miR-26a jt:ENSG00000189043|NDUFA4  
IRF-7|ENSG00000207789|hsa-mir-26a-2|hsa-miR-26a jt:ENSG00000128989|ARF19\_HUMAN  
IRF-7|ENSG00000207789|hsa-mir-26a-2|hsa-miR-26a jt:ENSG00000037637|FBXO42  
IRF-7|ENSG00000207789|hsa-mir-26a-2|hsa-miR-26a jt:ENSG00000153574|RPIA  
IRF-7|ENSG00000207789|hsa-mir-26a-2|hsa-miR-26a jt:ENSG00000099364|FBXL19  
IRF-7|ENSG00000207789|hsa-mir-26a-2|hsa-miR-26a jt:ENSG00000082146|ALS2CR2  
IRF-7|ENSG00000207789|hsa-mir-26a-2|hsa-miR-26a jt:ENSG00000177822|XR\_017723.1  
IRF-7|ENSG00000207789|hsa-mir-26a-2|hsa-miR-26a jt:ENSG00000082701|GSK3B  
IRF-7|ENSG00000207789|hsa-mir-26a-2|hsa-miR-26a jt:ENSG00000138231|DBR1  
IRF-7|ENSG00000207789|hsa-mir-26a-2|hsa-miR-26a jt:ENSG00000143643|TTC13  
IRF-7|ENSG00000207789|hsa-mir-26a-2|hsa-miR-26a jt:ENSG00000178425|NT5DC1  
IRF-7|ENSG00000207955|hsa-mir-219-2|hsa-miR-219 jt:ENSG00000184895|SRY  
IRF-7|ENSG00000207955|hsa-mir-219-2|hsa-miR-219 jt:ENSG00000173930|SLC04C1  
IRF-7|ENSG00000207955|hsa-mir-219-2|hsa-miR-219 jt:ENSG00000067177|PHKA1  
IRF-7|ENSG00000207955|hsa-mir-219-2|hsa-miR-219 jt:ENSG00000119508|NR4A3  
IRF-7|ENSG00000207955|hsa-mir-219-2|hsa-miR-219 jt:ENSG00000138600|PSL2\_HUMAN  
IRF-7|ENSG00000207955|hsa-mir-219-2|hsa-miR-219 jt:ENSG00000182107|TMEM30B  
IRF-7|ENSG00000207955|hsa-mir-219-2|hsa-miR-219 jt:ENSG00000112183|RBM24  
IRF-7|ENSG00000207955|hsa-mir-219-2|hsa-miR-219 jt:ENSG00000179387|ELMOD2  
IRF-7|ENSG00000207955|hsa-mir-219-2|hsa-miR-219 jt:ENSG00000114982|NP\_060461.3  
IRF-7|ENSG00000211590|hsa-mir-802|hsa-miR-802 jt:ENSG00000198739|LRRMT3  
IRF-7|ENSG00000211590|hsa-mir-802|hsa-miR-802 jt:ENSG00000101193|C20orf11  
IRF-7|ENSG00000211590|hsa-mir-802|hsa-miR-802 jt:ENSG00000106714|CNTNAP3  
IRF-7|ENSG00000211590|hsa-mir-802|hsa-miR-802 jt:ENSG00000048544|MRPS10  
IRF-7|ENSG00000211590|hsa-mir-802|hsa-miR-802 jt:ENSG00000197657|ZNF323  
IRF-7|ENSG00000211590|hsa-mir-802|hsa-miR-802 jt:ENSG00000066855|MTFR1  
IRF1|ENSG00000198981|hsa-mir-29a|hsa-miR-29a jt:ENSG00000147065|MSN  
IRF1|ENSG00000198981|hsa-mir-29a|hsa-miR-29a jt:ENSG00000150779|TIMM8B  
IRF1|ENSG00000199065|hsa-mir-101-2|hsa-miR-101 jt:ENSG00000187790|FANCM  
IRF1|ENSG00000199161|hsa-mir-126|hsa-miR-126 jt:ENSG00000146648|EGFR  
IRF1|ENSG00000199161|hsa-mir-126|hsa-miR-126 jt:ENSG00000172889|EGFL7  
IRF1|ENSG00000199161|hsa-mir-126|hsa-miR-126 jt:ENSG00000113384|GOLPH3  
IRF1|ENSG00000199161|hsa-mir-126|hsa-miR-126 jt:ENSG00000164039|BDH2  
IRF1|ENSG00000199161|hsa-mir-126|hsa-miR-126 jt:ENSG00000180011|ZADH2  
IRF1|ENSG00000199161|hsa-mir-126|hsa-miR-126\* jt:ENSG00000121879|PIK3CA  
IRF1|ENSG00000199161|hsa-mir-126|hsa-miR-126\* jt:ENSG00000177822|XR\_017723.1  
IRF1|ENSG00000199161|hsa-mir-126|hsa-miR-126\* jt:ENSG00000186017|ZNF566  
IRF1|ENSG00000199161|hsa-mir-126|hsa-miR-126\* jt:ENSG00000148634|HERC4  
IRF1|ENSG00000199161|hsa-mir-126|hsa-miR-126\* jt:ENSG00000188732|C7orf46  
IRF1|ENSG00000199161|hsa-mir-126|hsa-miR-126\* jt:ENSG00000185015|CAI3  
IRF1|ENSG00000199161|hsa-mir-126|hsa-miR-126\* jt:ENSG00000141646|SMAD4  
IRF1|ENSG00000199161|hsa-mir-126|hsa-miR-126\* jt:ENSG0000007038|PRSS21  
IRF1|ENSG00000199161|hsa-mir-126|hsa-miR-126\* jt:ENSG00000144840|RABL3  
IRF1|ENSG00000199161|hsa-mir-126|hsa-miR-126\* jt:ENSG00000074054|CLASP1  
IY|ENSG00000198987|hsa-mir-16-2|hsa-miR-16 jt:ENSG00000204388|HSPA1B  
IY|ENSG00000198987|hsa-mir-16-2|hsa-miR-16 jt:ENSG00000134343|TMEM16C  
IY|ENSG00000198987|hsa-mir-16-2|hsa-miR-16 jt:ENSG00000069275|NUCKS1  
IY|ENSG00000198987|hsa-mir-16-2|hsa-miR-16 jt:ENSG00000205808|PPAPDC2  
IY|ENSG00000207731|hsa-mir-506|hsa-miR-506 jt:ENSG00000125755|SYMFK  
IY|ENSG00000207731|hsa-mir-506|hsa-miR-506 jt:ENSG00000006715|VPS41  
IY|ENSG00000207731|hsa-mir-506|hsa-miR-506 jt:ENSG00000152254|G6PC2  
IY|ENSG00000207731|hsa-mir-506|hsa-miR-506 jt:ENSG00000168916|ZNF608  
IY|ENSG00000207731|hsa-mir-506|hsa-miR-506 jt:ENSG00000111424|VDR  
IY|ENSG00000207731|hsa-mir-506|hsa-miR-506 jt:ENSG00000134253|TRIM45  
IY|ENSG00000207731|hsa-mir-506|hsa-miR-506 jt:ENSG00000100625|SIX4  
IY|ENSG00000207731|hsa-mir-506|hsa-miR-506 jt:ENSG00000184232|OAF  
IY|ENSG00000207731|hsa-mir-506|hsa-miR-506 jt:ENSG00000114867|EIF4G1  
IY|ENSG00000207731|hsa-mir-506|hsa-miR-506 jt:ENSG00000131196|NFATC1  
IY|ENSG00000207731|hsa-mir-506|hsa-miR-506 jt:ENSG00000084652|TXLNA  
IY|ENSG00000207731|hsa-mir-506|hsa-miR-506 jt:ENSG00000172819|RARG  
IY|ENSG00000207731|hsa-mir-506|hsa-miR-506 jt:ENSG00000117569|PTBP2  
IY|ENSG00000207947|hsa-mir-152|hsa-miR-152 jt:ENSG00000189180|ZNF33A  
IY|ENSG00000207947|hsa-mir-152|hsa-miR-152 jt:ENSG00000170989|EDG1  
IY|ENSG00000207947|hsa-mir-152|hsa-miR-152 jt:ENSG00000196972|Q86V52\_HUMAN  
IY|ENSG00000207947|hsa-mir-152|hsa-miR-152 jt:ENSG00000142700|DMRTA2  
IY|ENSG00000207947|hsa-mir-152|hsa-miR-152 jt:ENSG00000164933|SLC25A32  
IY|ENSG00000207947|hsa-mir-152|hsa-miR-152 jt:ENSG00000152242|C18orf25  
IY|ENSG00000207947|hsa-mir-152|hsa-miR-152 jt:ENSG00000113578|FGF1  
IY|ENSG00000207947|hsa-mir-152|hsa-miR-152 jt:ENSG00000161638|ITGA5  
IY|ENSG00000207947|hsa-mir-152|hsa-miR-152 jt:ENSG00000106511|MEOX2  
IY|ENSG00000207947|hsa-mir-152|hsa-miR-152 jt:ENSG00000116016|EPAS1  
IY|ENSG00000207947|hsa-mir-152|hsa-miR-152 jt:ENSG00000151694|ADAM17  
IY|ENSG00000207947|hsa-mir-152|hsa-miR-152 jt:ENSG00000069956|MAPK6  
IY|ENSG00000207947|hsa-mir-152|hsa-miR-152 jt:ENSG00000180537|RNF182  
IY|ENSG00000207947|hsa-mir-152|hsa-miR-152 jt:ENSG00000107282|APBA1  
IY|ENSG00000207947|hsa-mir-152|hsa-miR-152 jt:ENSG00000137073|UBAP2  
IY|ENSG00000207950|hsa-mir-296|hsa-miR-296 jt:ENSG00000063245|EPN1  
IY|ENSG00000207950|hsa-mir-296|hsa-miR-296 jt:ENSG00000140044|NP\_569736.1  
IY|ENSG00000207950|hsa-mir-296|hsa-miR-296 jt:ENSG00000116251|RPL22  
IY|ENSG00000207950|hsa-mir-296|hsa-miR-296 jt:ENSG00000137491|SLC02B1  
IY|ENSG00000207950|hsa-mir-296|hsa-miR-296 jt:ENSG00000159674|SPON2  
IY|ENSG00000207950|hsa-mir-296|hsa-miR-296 jt:ENSG00000171791|BCL2  
IY|ENSG00000207950|hsa-mir-296|hsa-miR-296 jt:ENSG00000136717|BIN1  
IY|ENSG00000207950|hsa-mir-296|hsa-miR-296 jt:ENSG00000102225|PCTK1  
LEF1|ENSG00000199094|hsa-mir-30c-2|hsa-miR-30c jt:ENSG00000116497|S100PBP  
LEF1|ENSG00000199094|hsa-mir-30c-2|hsa-miR-30c jt:ENSG00000152433|ZNF547  
LEF1|ENSG00000199094|hsa-mir-30c-2|hsa-miR-30c jt:ENSG00000155545|MIER3  
LEF1|ENSG00000199094|hsa-mir-30c-2|hsa-miR-30c jt:ENSG00000129680|MAP7D3  
LEF1|ENSG00000199094|hsa-mir-30c-2|hsa-miR-30c jt:ENSG00000179151|EDC3

|      |                 |                |              |                    |                |
|------|-----------------|----------------|--------------|--------------------|----------------|
| LEF1 | ENSG00000199094 | hsa-mir-30c-2  | hsa-miR-30c  | jt:ENSG00000162490 | C1orf187       |
| LEF1 | ENSG00000199094 | hsa-mir-30c-2  | hsa-miR-30c  | jt:ENSG00000147649 | MTDH           |
| LEF1 | ENSG00000199094 | hsa-mir-30c-2  | hsa-miR-30c  | jt:ENSG00000145725 | HISPPD1        |
| LEF1 | ENSG00000199094 | hsa-mir-30c-2  | hsa-miR-30c  | jt:ENSG00000119686 | C14orf58       |
| LEF1 | ENSG00000199094 | hsa-mir-30c-2  | hsa-miR-30c  | jt:ENSG00000185483 | ROR1           |
| LEF1 | ENSG00000199094 | hsa-mir-30c-2  | hsa-miR-30c  | jt:ENSG00000138413 | IDH1           |
| LEF1 | ENSG00000199094 | hsa-mir-30c-2  | hsa-miR-30c  | jt:ENSG00000127329 | PTPRB          |
| LEF1 | ENSG00000199094 | hsa-mir-30c-2  | hsa-miR-30c  | jt:ENSG00000148541 | FAM13C1        |
| LEF1 | ENSG00000199094 | hsa-mir-30c-2  | hsa-miR-30c  | jt:ENSG00000065526 | SPEN           |
| LEF1 | ENSG00000199094 | hsa-mir-30c-2  | hsa-miR-30c  | jt:ENSG00000074266 | EED            |
| LEF1 | ENSG00000199094 | hsa-mir-30c-2  | hsa-miR-30c  | jt:ENSG00000143590 | EFNA3          |
| LEF1 | ENSG00000199094 | hsa-mir-30c-2  | hsa-miR-30c  | jt:ENSG00000112486 | CCR6           |
| LEF1 | ENSG00000199094 | hsa-mir-30c-2  | hsa-miR-30c  | jt:ENSG00000102098 | SCML2          |
| LEF1 | ENSG00000199094 | hsa-mir-30c-2  | hsa-miR-30c  | jt:ENSG00000146433 | TMEM181        |
| LEF1 | ENSG00000199094 | hsa-mir-30c-2  | hsa-miR-30c  | jt:ENSG00000155846 | PPARGC1B       |
| LEF1 | ENSG00000199094 | hsa-mir-30c-2  | hsa-miR-30c  | jt:ENSG00000173530 | TNFRSF10D      |
| LEF1 | ENSG00000199094 | hsa-mir-30c-2  | hsa-miR-30c  | jt:ENSG00000058600 | POLR3E         |
| LEF1 | ENSG00000199094 | hsa-mir-30c-2  | hsa-miR-30c  | jt:ENSG00000158715 | SLC45A3        |
| LEF1 | ENSG00000199161 | hsa-mir-126    | hsa-miR-126  | jt:ENSG00000107362 | FAM108B1       |
| LEF1 | ENSG00000199161 | hsa-mir-126    | hsa-miR-126  | jt:ENSG00000141527 | CARD14         |
| LEF1 | ENSG00000199161 | hsa-mir-126    | hsa-miR-126  | jt:ENSG00000169410 | PTPN9          |
| LEF1 | ENSG00000199161 | hsa-mir-126    | hsa-miR-126  | jt:ENSG00000198219 | Q96N05_HUMAN   |
| LEF1 | ENSG00000199161 | hsa-mir-126    | hsa-miR-126  | jt:ENSG00000146648 | EGFR           |
| LEF1 | ENSG00000199161 | hsa-mir-126    | hsa-miR-126  | jt:ENSG00000164039 | BDH2           |
| LEF1 | ENSG00000199161 | hsa-mir-126    | hsa-miR-126  | jt:ENSG00000100284 | TOM1           |
| LEF1 | ENSG00000199161 | hsa-mir-126    | hsa-miR-126  | jt:ENSG00000120659 | TNFRSF11       |
| LEF1 | ENSG00000199161 | hsa-mir-126    | hsa-miR-126  | jt:ENSG00000115758 | ODC1           |
| LEF1 | ENSG00000199161 | hsa-mir-126    | hsa-miR-126  | jt:ENSG00000047365 | CENTD1         |
| LEF1 | ENSG00000199161 | hsa-mir-126    | hsa-miR-126  | jt:ENSG00000130690 | Q96I54_HUMAN   |
| LEF1 | ENSG00000199161 | hsa-mir-126    | hsa-miR-126  | jt:ENSG00000182217 | HIST2H4B       |
| LEF1 | ENSG00000199161 | hsa-mir-126    | hsa-miR-126  | jt:ENSG00000183941 | HIST2H4A       |
| LEF1 | ENSG00000199161 | hsa-mir-126    | hsa-miR-126  | jt:ENSG00000139197 | PEX5           |
| LEF1 | ENSG00000199161 | hsa-mir-126    | hsa-miR-126  | jt:ENSG00000145632 | PLK2           |
| LEF1 | ENSG00000199161 | hsa-mir-126    | hsa-miR-126  | jt:ENSG00000101421 | CHMP4B         |
| LEF1 | ENSG00000199161 | hsa-mir-126    | hsa-miR-126  | jt:ENSG00000203930 | Q5JPA2_HUMAN   |
| LEF1 | ENSG00000199161 | hsa-mir-126    | hsa-miR-126  | jt:ENSG00000151704 | KCNJ1          |
| LEF1 | ENSG00000199161 | hsa-mir-126    | hsa-miR-126  | jt:ENSG00000172889 | EGFL7          |
| LEF1 | ENSG00000199161 | hsa-mir-126    | hsa-miR-126  | jt:ENSG00000118762 | PKD2           |
| LEF1 | ENSG00000199161 | hsa-mir-126    | hsa-miR-126* | jt:ENSG00000115355 | KIAA1212       |
| LEF1 | ENSG00000199161 | hsa-mir-126    | hsa-miR-126* | jt:ENSG00000105705 | SF4            |
| LEF1 | ENSG00000199161 | hsa-mir-126    | hsa-miR-126* | jt:ENSG00000164022 | SCYE1          |
| LEF1 | ENSG00000199161 | hsa-mir-126    | hsa-miR-126* | jt:ENSG00000155545 | MIER3          |
| LEF1 | ENSG00000199161 | hsa-mir-126    | hsa-miR-126* | jt:ENSG00000147003 | TMEM27         |
| LEF1 | ENSG00000199161 | hsa-mir-126    | hsa-miR-126* | jt:ENSG00000133116 | KL             |
| LEF1 | ENSG00000199161 | hsa-mir-126    | hsa-miR-126* | jt:ENSG00000170458 | CD14           |
| LEF1 | ENSG00000199161 | hsa-mir-126    | hsa-miR-126* | jt:ENSG00000174231 | PRPF8          |
| LEF1 | ENSG00000199161 | hsa-mir-126    | hsa-miR-126* | jt:ENSG0000009780  | FAM76A         |
| LEF1 | ENSG00000199161 | hsa-mir-126    | hsa-miR-126* | jt:ENSG00000189069 | NP_001013732.1 |
| LEF1 | ENSG00000199161 | hsa-mir-126    | hsa-miR-126* | jt:ENSG00000114650 | SCAP           |
| LEF1 | ENSG00000199161 | hsa-mir-126    | hsa-miR-126* | jt:ENSG00000100299 | ARSA           |
| LEF1 | ENSG00000199161 | hsa-mir-126    | hsa-miR-126* | jt:ENSG00000096088 | PGC            |
| LEF1 | ENSG00000199161 | hsa-mir-126    | hsa-miR-126* | jt:ENSG00000112062 | MAPK14         |
| LEF1 | ENSG00000199161 | hsa-mir-126    | hsa-miR-126* | jt:ENSG00000110315 | RNF141         |
| LEF1 | ENSG00000199161 | hsa-mir-126    | hsa-miR-126* | jt:ENSG00000175756 | AURKA1P1       |
| LEF1 | ENSG00000199161 | hsa-mir-126    | hsa-miR-126* | jt:ENSG00000100422 | CERK           |
| LEF1 | ENSG00000199161 | hsa-mir-126    | hsa-miR-126* | jt:ENSG00000163586 | FABP1          |
| LEF1 | ENSG00000199161 | hsa-mir-126    | hsa-miR-126* | jt:ENSG00000070190 | DAPP1          |
| LEF1 | ENSG00000199161 | hsa-mir-126    | hsa-miR-126* | jt:ENSG00000162981 | FAM84A         |
| LEF1 | ENSG00000199161 | hsa-mir-126    | hsa-miR-126* | jt:ENSG00000174683 | C8orf78        |
| LEF1 | ENSG00000199161 | hsa-mir-126    | hsa-miR-126* | jt:ENSG00000204248 | COL11A2        |
| LEF1 | ENSG00000199161 | hsa-mir-126    | hsa-miR-126* | jt:ENSG00000165862 | PNLIPRP2       |
| LEF1 | ENSG00000199161 | hsa-mir-126    | hsa-miR-126* | jt:ENSG00000118194 | TNNT2          |
| LEF1 | ENSG00000199161 | hsa-mir-126    | hsa-miR-126* | jt:ENSG00000155307 | SAMSN1         |
| LEF1 | ENSG00000199161 | hsa-mir-126    | hsa-miR-126* | jt:ENSG00000198785 | GRIN3A         |
| LEF1 | ENSG00000199161 | hsa-mir-126    | hsa-miR-126* | jt:ENSG00000206053 | HN1L           |
| LEF1 | ENSG00000199161 | hsa-mir-126    | hsa-miR-126* | jt:ENSG00000109738 | GLRB           |
| LEF1 | ENSG00000199161 | hsa-mir-126    | hsa-miR-126* | jt:ENSG00000171759 | PAH            |
| LEF1 | ENSG00000199161 | hsa-mir-126    | hsa-miR-126* | jt:ENSG00000008869 | HEATR5B        |
| LEF1 | ENSG00000199161 | hsa-mir-126    | hsa-miR-126* | jt:ENSG00000177822 | XR_017723.1    |
| LEF1 | ENSG00000199161 | hsa-mir-126    | hsa-miR-126* | jt:ENSG00000186468 | RPS23          |
| LEF1 | ENSG00000199177 | hsa-mir-31     | hsa-miR-31   | jt:ENSG0000013588  | GPRC5A         |
| LEF1 | ENSG00000199177 | hsa-mir-31     | hsa-miR-31   | jt:ENSG00000189037 | DUSP21         |
| LEF1 | ENSG00000199177 | hsa-mir-31     | hsa-miR-31   | jt:ENSG00000151715 | TMEM45B        |
| LEF1 | ENSG00000199177 | hsa-mir-31     | hsa-miR-31   | jt:ENSG00000167930 | ITFG3          |
| LEF1 | ENSG00000199177 | hsa-mir-31     | hsa-miR-31   | jt:ENSG00000107854 | TNKS2          |
| LEF1 | ENSG00000199177 | hsa-mir-31     | hsa-miR-31   | jt:ENSG00000162520 | SYNCL1         |
| LEF1 | ENSG00000207568 | hsa-mir-203    | hsa-miR-203  | jt:ENSG00000145824 | CXCL14         |
| LEF1 | ENSG00000207568 | hsa-mir-203    | hsa-miR-203  | jt:ENSG00000131381 | ZFYVE20        |
| LEF1 | ENSG00000207568 | hsa-mir-203    | hsa-miR-203  | jt:ENSG00000188483 | IER5L          |
| LEF1 | ENSG00000207568 | hsa-mir-203    | hsa-miR-203  | jt:ENSG00000165152 | C9orf125       |
| LEF1 | ENSG00000207568 | hsa-mir-203    | hsa-miR-203  | jt:ENSG00000147383 | NSDHL          |
| LEF1 | ENSG00000207568 | hsa-mir-203    | hsa-miR-203  | jt:ENSG00000113070 | HBEGF          |
| LEF1 | ENSG00000207568 | hsa-mir-203    | hsa-miR-203  | jt:ENSG00000110777 | POU2AF1        |
| LEF1 | ENSG00000207568 | hsa-mir-203    | hsa-miR-203  | jt:ENSG00000135114 | OASL           |
| LEF1 | ENSG00000207581 | hsa-mir-199b   | hsa-miR-199b | jt:ENSG00000100554 | ATP6V1D        |
| LEF1 | ENSG00000207581 | hsa-mir-199b   | hsa-miR-199b | jt:ENSG00000145681 | HAPLN1         |
| LEF1 | ENSG00000207581 | hsa-mir-199b   | hsa-miR-199b | jt:ENSG00000128655 | PDE11A         |
| LEF1 | ENSG00000207581 | hsa-mir-199b   | hsa-miR-199b | jt:ENSG00000136536 | MARCH7         |
| LEF1 | ENSG00000207581 | hsa-mir-199b   | hsa-miR-199b | jt:ENSG00000163660 | CNNL1          |
| LEF1 | ENSG00000207581 | hsa-mir-199b   | hsa-miR-199b | jt:ENSG00000186468 | RPS23          |
| LEF1 | ENSG00000207586 | hsa-mir-135a-2 | hsa-miR-135a | jt:ENSG00000100350 | FOXRED2        |
| LEF1 | ENSG00000207586 | hsa-mir-135a-2 | hsa-miR-135a | jt:ENSG00000135842 | FAM129A        |
| LEF1 | ENSG00000207586 | hsa-mir-135a-2 | hsa-miR-135a | jt:ENSG00000122787 | AKR1D1         |
| LEF1 | ENSG00000207586 | hsa-mir-135a-2 | hsa-miR-135a | jt:ENSG00000102181 | CD99L2         |
| LEF1 | ENSG00000207586 | hsa-mir-135a-2 | hsa-miR-135a | jt:ENSG00000137090 | DMRT1          |
| LEF1 | ENSG00000207586 | hsa-mir-135a-2 | hsa-miR-135a | jt:ENSG00000143771 | CNIH4          |
| LEF1 | ENSG00000207586 | hsa-mir-135a-2 | hsa-miR-135a | jt:ENSG00000185294 | NP_787078.1    |
| LEF1 | ENSG00000207586 | hsa-mir-135a-2 | hsa-miR-135a | jt:ENSG00000114480 | GBE1           |
| LEF1 | ENSG00000207586 | hsa-mir-135a-2 | hsa-miR-135a | jt:ENSG00000124194 | GDAF1L1        |
| LEF1 | ENSG00000207586 | hsa-mir-135a-2 | hsa-miR-135a | jt:ENSG00000147654 | EBAG9          |
| LEF1 | ENSG00000207586 | hsa-mir-135a-2 | hsa-miR-135a | jt:ENSG00000173464 | RNASEH1        |
| LEF1 | ENSG00000207586 | hsa-mir-135a-2 | hsa-miR-135a | jt:ENSG00000185736 | ADARE2         |
| LEF1 | ENSG00000207586 | hsa-mir-135a-2 | hsa-miR-135a | jt:ENSG00000058056 | USP13          |
| LEF1 | ENSG00000207586 | hsa-mir-135a-2 | hsa-miR-135a | jt:ENSG00000198018 | ENTPD7         |
| LEF1 | ENSG00000207586 | hsa-mir-135a-2 | hsa-miR-135a | jt:ENSG00000132434 | LANCL2         |

LEF1|ENSG00000207586|hsa-mir-135a-2|hsa-miR-135a|jt:ENSG00000171931|FBXW10  
LEF1|ENSG00000207586|hsa-mir-135a-2|hsa-miR-135a|jt:ENSG00000135452|TSPAN31  
LEF1|ENSG00000207698|hsa-mir-32|hsa-miR-32|jt:ENSG00000063322|IXL  
LEF1|ENSG00000207698|hsa-mir-32|hsa-miR-32|jt:ENSG00000084093|REST  
LEF1|ENSG00000207698|hsa-mir-32|hsa-miR-32|jt:ENSG00000172000|ZNF556  
LEF1|ENSG00000207698|hsa-mir-32|hsa-miR-32|jt:ENSG00000115602|IL1RL1  
LEF1|ENSG00000207698|hsa-mir-32|hsa-miR-32|jt:ENSG00000160856|FCRL3  
LEF1|ENSG00000207698|hsa-mir-32|hsa-miR-32|jt:ENSG00000143164|IQWD1  
LEF1|ENSG00000207698|hsa-mir-32|hsa-miR-32|jt:ENSG00000143198|MGST3  
LEF1|ENSG00000207698|hsa-mir-32|hsa-miR-32|jt:ENSG00000142583|SLC2A5  
LEF1|ENSG00000207698|hsa-mir-32|hsa-miR-32|jt:ENSG00000159123|DMRTC\_HUMAN  
LEF1|ENSG00000207698|hsa-mir-32|hsa-miR-32|jt:ENSG00000180104|EXOC3  
LEF1|ENSG00000207698|hsa-mir-32|hsa-miR-32|jt:ENSG00000184911|CXorf50  
LEF1|ENSG00000207698|hsa-mir-32|hsa-miR-32|jt:ENSG00000120253|NUP43  
LEF1|ENSG00000207698|hsa-mir-32|hsa-miR-32|jt:ENSG00000134109|EDEM1  
LEF1|ENSG00000207698|hsa-mir-32|hsa-miR-32|jt:ENSG00000164691|TAGAP  
LEF1|ENSG00000207698|hsa-mir-32|hsa-miR-32|jt:ENSG00000173517|SG269\_HUMAN  
LEF1|ENSG00000207698|hsa-mir-32|hsa-miR-32|jt:ENSG00000090615|GOLGA3  
LEF1|ENSG00000207698|hsa-mir-32|hsa-miR-32|jt:ENSG00000155744|FAM126B  
LEF1|ENSG00000207698|hsa-mir-32|hsa-miR-32|jt:ENSG00000176834|NP\_061959.2  
LEF1|ENSG00000207698|hsa-mir-32|hsa-miR-32|jt:ENSG00000157103|SLC6A1  
LEF1|ENSG00000207698|hsa-mir-32|hsa-miR-32|jt:ENSG00000105428|ZNRF4  
LEF1|ENSG00000207698|hsa-mir-32|hsa-miR-32|jt:ENSG00000198569|SLC34A3  
LEF1|ENSG00000207698|hsa-mir-32|hsa-miR-32|jt:ENSG00000151789|ZNF659  
LEF1|ENSG00000207698|hsa-mir-32|hsa-miR-32|jt:ENSG00000148704|VAX1  
LEF1|ENSG00000207698|hsa-mir-32|hsa-miR-32|jt:ENSG00000165943|MOAP1  
LEF1|ENSG00000207698|hsa-mir-32|hsa-miR-32|jt:ENSG00000100346|CACNA1I  
LEF1|ENSG00000207698|hsa-mir-32|hsa-miR-32|jt:ENSG00000154645|CHODL  
LEF1|ENSG00000207698|hsa-mir-32|hsa-miR-32|jt:ENSG00000143450|OAZ3  
LEF1|ENSG00000207698|hsa-mir-32|hsa-miR-32|jt:ENSG00000153789|FAM92B  
LEF1|ENSG00000207698|hsa-mir-32|hsa-miR-32|jt:ENSG00000129317|PUS7L  
LEF1|ENSG00000207698|hsa-mir-32|hsa-miR-32|jt:ENSG00000163694|NP\_061900.1  
LEF1|ENSG00000207698|hsa-mir-32|hsa-miR-32|jt:ENSG00000137845|ADAM10  
LEF1|ENSG00000207698|hsa-mir-32|hsa-miR-32|jt:ENSG00000174628|IQCK  
LEF1|ENSG00000207698|hsa-mir-32|hsa-miR-32|jt:ENSG00000159348|CYB5R1  
LEF1|ENSG00000207698|hsa-mir-32|hsa-miR-32|jt:ENSG00000112210|RAB23  
LEF1|ENSG00000207698|hsa-mir-32|hsa-miR-32|jt:ENSG00000003393|ALS2  
LEF1|ENSG00000207698|hsa-mir-32|hsa-miR-32|jt:ENSG00000142507|PSMB6  
LEF1|ENSG00000207698|hsa-mir-32|hsa-miR-32|jt:ENSG00000117461|PIK3R3  
LEF1|ENSG00000207698|hsa-mir-32|hsa-miR-32|jt:ENSG00000176853|FAM91A1  
LEF1|ENSG00000207705|hsa-mir-129-1|hsa-miR-129|jt:ENSG00000164849|GPR146  
LEF1|ENSG00000207705|hsa-mir-129-1|hsa-miR-129|jt:ENSG00000105058|FAM32A  
LEF1|ENSG00000207705|hsa-mir-129-1|hsa-miR-129|jt:ENSG00000111671|SPSB2  
LEF1|ENSG00000207705|hsa-mir-129-1|hsa-miR-129|jt:ENSG00000203945|Q5JFQ1\_HUMAN  
LEF1|ENSG00000207705|hsa-mir-129-1|hsa-miR-129|jt:ENSG00000162105|SHANK2  
LEF1|ENSG00000207705|hsa-mir-129-1|hsa-miR-129|jt:ENSG00000147316|MCPH1  
LEF1|ENSG00000207705|hsa-mir-129-1|hsa-miR-129|jt:ENSG00000134138|MEIS2  
LEF1|ENSG00000207705|hsa-mir-129-1|hsa-miR-129|jt:ENSG00000184983|NDUFA6  
LEF1|ENSG00000207705|hsa-mir-129-1|hsa-miR-129|jt:ENSG00000146409|C6orf192  
LEF1|ENSG00000207705|hsa-mir-129-1|hsa-miR-129|jt:ENSG00000070214|SLC44A1  
LEF1|ENSG00000207777|hsa-mir-10a|hsa-miR-10a|jt:ENSG00000143198|MGST3  
LEF1|ENSG00000207777|hsa-mir-10a|hsa-miR-10a|jt:ENSG00000144681|STAC  
LEF1|ENSG00000207777|hsa-mir-10a|hsa-miR-10a|jt:ENSG00000106952|TNFSF8  
LEF1|ENSG00000207777|hsa-mir-10a|hsa-miR-10a|jt:ENSG00000110484|SCGB2A2  
LEF1|ENSG00000207777|hsa-mir-10a|hsa-miR-10a|jt:ENSG00000182263|FIGN  
LEF1|ENSG00000207808|hsa-mir-27a|hsa-miR-27a|jt:ENSG00000184005|ST6GALNAC3  
LEF1|ENSG00000207808|hsa-mir-27a|hsa-miR-27a|jt:ENSG00000130479|MAP1S  
LEF1|ENSG00000207808|hsa-mir-27a|hsa-miR-27a|jt:ENSG00000178554|Q8N8D4\_HUMAN  
LEF1|ENSG00000207808|hsa-mir-27a|hsa-miR-27a|jt:ENSG00000133812|SBF2  
LEF1|ENSG00000207808|hsa-mir-27a|hsa-miR-27a|jt:ENSG00000152409|NP\_689618.2  
LEF1|ENSG00000207808|hsa-mir-27a|hsa-miR-27a|jt:ENSG00000170500|LONRF2  
LEF1|ENSG00000207808|hsa-mir-27a|hsa-miR-27a|jt:ENSG00000157103|SLC6A1  
LEF1|ENSG00000207808|hsa-mir-27a|hsa-miR-27a|jt:ENSG00000174574|C1orf108  
LEF1|ENSG00000207808|hsa-mir-27a|hsa-miR-27a|jt:ENSG00000006114|AP1GBP1  
LEF1|ENSG00000207808|hsa-mir-27a|hsa-miR-27a|jt:ENSG00000142544|ATPBD3  
LEF1|ENSG00000207808|hsa-mir-27a|hsa-miR-27a|jt:ENSG00000179144|GIMAP7  
LEF1|ENSG00000207808|hsa-mir-27a|hsa-miR-27a|jt:ENSG00000055070|C1orf144  
LEF1|ENSG00000207808|hsa-mir-27a|hsa-miR-27a|jt:ENSG00000145632|PLK2  
LEF1|ENSG00000207808|hsa-mir-27a|hsa-miR-27a|jt:ENSG00000129816|NR\_001538.1  
LEF1|ENSG00000207808|hsa-mir-27a|hsa-miR-27a|jt:ENSG00000129845|O14605\_HUMAN  
LEF1|ENSG00000207827|hsa-mir-30a|hsa-miR-30a-3p|jt:ENSG00000204581|Q6ZU44\_HUMAN  
LEF1|ENSG00000207827|hsa-mir-30a|hsa-miR-30a-3p|jt:ENSG00000116984|MTR  
LEF1|ENSG00000207827|hsa-mir-30a|hsa-miR-30a-3p|jt:ENSG00000017797|RALBP1  
LEF1|ENSG00000207827|hsa-mir-30a|hsa-miR-30a-3p|jt:ENSG00000001460|C1orf201  
LEF1|ENSG00000207827|hsa-mir-30a|hsa-miR-30a-3p|jt:ENSG00000103449|SALL1  
LEF1|ENSG00000207827|hsa-mir-30a|hsa-miR-30a-3p|jt:ENSG00000167930|ITFG3  
LEF1|ENSG00000207827|hsa-mir-30a|hsa-miR-30a-5p|jt:ENSG00000116497|S100BPB  
LEF1|ENSG00000207827|hsa-mir-30a|hsa-miR-30a-5p|jt:ENSG00000152433|ZNF547  
LEF1|ENSG00000207827|hsa-mir-30a|hsa-miR-30a-5p|jt:ENSG00000155545|MIER3  
LEF1|ENSG00000207827|hsa-mir-30a|hsa-miR-30a-5p|jt:ENSG00000129680|MAP7D3  
LEF1|ENSG00000207827|hsa-mir-30a|hsa-miR-30a-5p|jt:ENSG00000179151|EDC3  
LEF1|ENSG00000207827|hsa-mir-30a|hsa-miR-30a-5p|jt:ENSG00000162490|C1orf187  
LEF1|ENSG00000207827|hsa-mir-30a|hsa-miR-30a-5p|jt:ENSG00000147649|MTDH  
LEF1|ENSG00000207827|hsa-mir-30a|hsa-miR-30a-5p|jt:ENSG00000145725|HISPPD1  
LEF1|ENSG00000207827|hsa-mir-30a|hsa-miR-30a-5p|jt:ENSG00000119686|C14orf58  
LEF1|ENSG00000207827|hsa-mir-30a|hsa-miR-30a-5p|jt:ENSG00000185483|ROR1  
LEF1|ENSG00000207827|hsa-mir-30a|hsa-miR-30a-5p|jt:ENSG00000138413|IDH1  
LEF1|ENSG00000207827|hsa-mir-30a|hsa-miR-30a-5p|jt:ENSG00000127329|PTPRB  
LEF1|ENSG00000207827|hsa-mir-30a|hsa-miR-30a-5p|jt:ENSG00000148541|FAM13C1  
LEF1|ENSG00000207827|hsa-mir-30a|hsa-miR-30a-5p|jt:ENSG00000065526|SPEN  
LEF1|ENSG00000207827|hsa-mir-30a|hsa-miR-30a-5p|jt:ENSG00000074266|EED  
LEF1|ENSG00000207827|hsa-mir-30a|hsa-miR-30a-5p|jt:ENSG00000143590|EFNA3  
LEF1|ENSG00000207827|hsa-mir-30a|hsa-miR-30a-5p|jt:ENSG00000112486|CCR6  
LEF1|ENSG00000207827|hsa-mir-30a|hsa-miR-30a-5p|jt:ENSG00000102098|SCML2  
LEF1|ENSG00000207827|hsa-mir-30a|hsa-miR-30a-5p|jt:ENSG00000146433|TMEM181  
LEF1|ENSG00000207827|hsa-mir-30a|hsa-miR-30a-5p|jt:ENSG00000155846|PPARGC1B  
LEF1|ENSG00000207827|hsa-mir-30a|hsa-miR-30a-5p|jt:ENSG00000173530|TNFRSF10D  
LEF1|ENSG00000207827|hsa-mir-30a|hsa-miR-30a-5p|jt:ENSG00000058600|POLR3E  
LEF1|ENSG00000207827|hsa-mir-30a|hsa-miR-30a-5p|jt:ENSG00000158715|SLC45A3  
LEF1|ENSG00000207933|hsa-mir-9-1|hsa-miR-9|jt:ENSG00000136938|ANP32B  
LEF1|ENSG00000207933|hsa-mir-9-1|hsa-miR-9|jt:ENSG00000070159|PTPN3  
LEF1|ENSG00000207933|hsa-mir-9-1|hsa-miR-9|jt:ENSG00000136717|BIN1  
LEF1|ENSG00000207933|hsa-mir-9-1|hsa-miR-9|jt:ENSG00000168781|HISPPD2A  
LEF1|ENSG00000207933|hsa-mir-9-1|hsa-miR-9|jt:ENSG00000205703|NP\_001010910.1  
LEF1|ENSG00000207933|hsa-mir-9-1|hsa-miR-9|jt:ENSG00000188935|Q6ZU24\_HUMAN





LEF1|ENSG00000207980|hsa-mir-23a|hsa-miR-23a|jt:ENSG00000128272|ATF4  
LEF1|ENSG00000207980|hsa-mir-23a|hsa-miR-23a|jt:ENSG00000108179|PP1F  
LEF1|ENSG00000207980|hsa-mir-23a|hsa-miR-23a|jt:ENSG00000143450|OAZ3  
LEF1|ENSG00000207980|hsa-mir-23a|hsa-miR-23a|jt:ENSG00000173041|ZNF680  
LEF1|ENSG00000207980|hsa-mir-23a|hsa-miR-23a|jt:ENSG00000109339|MAPK10  
LEF1|ENSG00000207980|hsa-mir-23a|hsa-miR-23a|jt:ENSG00000094804|CDC6  
LEF1|ENSG00000207980|hsa-mir-23a|hsa-miR-23a|jt:ENSG00000078618|NRD1  
LEF1|ENSG00000207980|hsa-mir-23a|hsa-miR-23a|jt:ENSG00000166619|BLCAP  
LEF1|ENSG00000207980|hsa-mir-23a|hsa-miR-23a|jt:ENSG00000166900|STX3  
LEF1|ENSG00000207980|hsa-mir-23a|hsa-miR-23a|jt:ENSG00000087152|ATXN7L3  
LEF1|ENSG00000207980|hsa-mir-23a|hsa-miR-23a|jt:ENSG00000185220|PGBD2  
LEF1|ENSG00000207980|hsa-mir-23a|hsa-miR-23a|jt:ENSG00000177800|TMEM78  
LEF1|ENSG00000207980|hsa-mir-23a|hsa-miR-23a|jt:ENSG00000106366|SERPINE1  
LEF1|ENSG00000207980|hsa-mir-23a|hsa-miR-23a|jt:ENSG00000204033|LRRC22  
LEF1|ENSG00000207980|hsa-mir-23a|hsa-miR-23a|jt:ENSG00000163376|KBTBD8  
LEF1|ENSG00000209707|hsa-mir-24-2|hsa-miR-24|jt:ENSG00000100897|WDR23  
LEF1|ENSG00000209707|hsa-mir-24-2|hsa-miR-24|jt:ENSG00000183813|CCR4  
LEF1|ENSG00000209707|hsa-mir-24-2|hsa-miR-24|jt:ENSG00000187257|RSBN1L  
LEF1|ENSG00000209707|hsa-mir-24-2|hsa-miR-24|jt:ENSG00000164684|ZNF704  
LEF1|ENSG00000209707|hsa-mir-24-2|hsa-miR-24|jt:ENSG00000179862|CITED4  
LEF1|ENSG00000209707|hsa-mir-24-2|hsa-miR-24|jt:ENSG00000067191|CACNB1  
LEF1|ENSG00000209707|hsa-mir-24-2|hsa-miR-24|jt:ENSG00000184601|NP\_001008404.1  
LEF1|ENSG00000209707|hsa-mir-24-2|hsa-miR-24|jt:ENSG00000106384|MOGAT3  
LEF1|ENSG00000209707|hsa-mir-24-2|hsa-miR-24|jt:ENSG00000109320|FMO1  
LEF1|ENSG00000209707|hsa-mir-24-2|hsa-miR-24|jt:ENSG00000166206|GABRB3  
LEF1|ENSG00000209707|hsa-mir-24-2|hsa-miR-24|jt:ENSG00000162236|STX5  
LEF1|ENSG00000209707|hsa-mir-24-2|hsa-miR-24|jt:ENSG00000182393|IL29  
LEF1|ENSG00000209707|hsa-mir-24-2|hsa-miR-24|jt:ENSG00000164296|TIGD6  
LEF1|ENSG00000209707|hsa-mir-24-2|hsa-miR-24|jt:ENSG00000148965|SAA4  
LEF1|ENSG00000209707|hsa-mir-24-2|hsa-miR-24|jt:ENSG00000162430|SEPN1  
LEF1|ENSG00000209707|hsa-mir-24-2|hsa-miR-24|jt:ENSG00000143442|POGZ  
LEF1|ENSG00000209707|hsa-mir-24-2|hsa-miR-24|jt:ENSG00000196345|ZNF167  
LEF1|ENSG00000211590|hsa-mir-802|hsa-miR-802|jt:ENSG00000106714|CNTNAP3  
LEF1|ENSG00000211590|hsa-mir-802|hsa-miR-802|jt:ENSG00000205214|Q6ZU66\_HUMAN  
LEF1|ENSG00000211590|hsa-mir-802|hsa-miR-802|jt:ENSG00000205036|NP\_001001682.1  
LEF1|ENSG00000211590|hsa-mir-802|hsa-miR-802|jt:ENSG00000153989|NUS1  
LEF1|ENSG00000211590|hsa-mir-802|hsa-miR-802|jt:ENSG00000112144|ICK  
LEF1|ENSG00000211590|hsa-mir-802|hsa-miR-802|jt:ENSG00000052126|PLEKHA5  
LEF1|ENSG00000211590|hsa-mir-802|hsa-miR-802|jt:ENSG00000151474|FRMD4A  
LEF1|ENSG00000211590|hsa-mir-802|hsa-miR-802|jt:ENSG00000125879|OTOR  
LEF1|ENSG00000211590|hsa-mir-802|hsa-miR-802|jt:ENSG00000106049|HIBADH  
LHX3|ENSG00000207863|hsa-mir-125b-2|hsa-miR-125b|jt:ENSG00000157119|KBTBD5  
LRF|ENSG00000199122|hsa-mir-148b|hsa-miR-148b|jt:ENSG00000136842|TMOD1  
MAZ|ENSG00000198973|hsa-mir-375|hsa-miR-375|jt:ENSG00000116786|PLEKHM2  
MAZ|ENSG00000198973|hsa-mir-375|hsa-miR-375|jt:ENSG00000181039|ANKRD34  
MAZ|ENSG00000198973|hsa-mir-375|hsa-miR-375|jt:ENSG00000165359|DDX26B  
MAZ|ENSG00000198973|hsa-mir-375|hsa-miR-375|jt:ENSG00000189079|ARID2  
MAZ|ENSG00000198986|hsa-let-7a-3|hsa-let-7a|jt:ENSG00000104833|TUBB4  
MAZ|ENSG00000198986|hsa-let-7a-3|hsa-let-7a|jt:ENSG00000023902|PLEKH01  
MAZ|ENSG00000198986|hsa-let-7a-3|hsa-let-7a|jt:ENSG00000106367|AP1S1  
MAZ|ENSG00000198986|hsa-let-7a-3|hsa-let-7a|jt:ENSG00000171365|CLCN5  
MAZ|ENSG00000198986|hsa-let-7a-3|hsa-let-7a|jt:ENSG00000187772|LIN28B  
MAZ|ENSG00000198986|hsa-let-7a-3|hsa-let-7a|jt:ENSG00000198105|ZNF248  
MAZ|ENSG00000199059|hsa-mir-135b|hsa-miR-135b|jt:ENSG00000184774|Q49AQ9\_HUMAN  
MAZ|ENSG00000199059|hsa-mir-135b|hsa-miR-135b|jt:ENSG00000124194|GDAP1L1  
MAZ|ENSG00000199059|hsa-mir-135b|hsa-miR-135b|jt:ENSG00000099822|HCN2  
MAZ|ENSG00000199059|hsa-mir-135b|hsa-miR-135b|jt:ENSG00000197415|VEPH1  
MAZ|ENSG00000207865|hsa-mir-34a|hsa-miR-34a|jt:ENSG00000107159|CA9  
MAZ|ENSG00000207865|hsa-mir-34a|hsa-miR-34a|jt:ENSG00000166971|AKTIP  
MAZ|ENSG00000207865|hsa-mir-34a|hsa-miR-34a|jt:ENSG00000142319|SLC6A3  
MAZ|ENSG00000207875|hsa-let-7b|hsa-let-7b|jt:ENSG00000104833|TUBB4  
MAZ|ENSG00000207875|hsa-let-7b|hsa-let-7b|jt:ENSG00000023902|PLEKH01  
MAZ|ENSG00000207875|hsa-let-7b|hsa-let-7b|jt:ENSG00000106367|AP1S1  
MAZ|ENSG00000207875|hsa-let-7b|hsa-let-7b|jt:ENSG00000171365|CLCN5  
MAZ|ENSG00000207875|hsa-let-7b|hsa-let-7b|jt:ENSG00000187772|LIN28B  
MAZ|ENSG00000207875|hsa-let-7b|hsa-let-7b|jt:ENSG00000198105|ZNF248  
MAZ|ENSG00000207933|hsa-mir-9-1|hsa-miR-9|jt:ENSG00000110756|HPS5  
MAZ|ENSG00000207933|hsa-mir-9-1|hsa-miR-9\*|jt:ENSG00000197594|ENPP1  
MEF-2|ENSG00000199017|hsa-mir-1-1|hsa-miR-1|jt:ENSG00000152661|GJA1  
MEF-2|ENSG00000207548|hsa-mir-217|hsa-miR-217|jt:ENSG00000100647|KIAA0247  
MEF-2|ENSG00000207548|hsa-mir-217|hsa-miR-217|jt:ENSG00000151631|Q9P2A3\_HUMAN  
MEF-2|ENSG00000207624|hsa-mir-194-1|hsa-miR-194|jt:ENSG00000180758|GPR157  
MEF-2|ENSG00000207635|hsa-mir-499|hsa-miR-499|jt:ENSG00000110693|SOX6  
MEF-2|ENSG00000207635|hsa-mir-499|hsa-miR-499|jt:ENSG00000160180|TF3  
MEF-2|ENSG00000207635|hsa-mir-499|hsa-miR-499|jt:ENSG00000108219|TSPAN14  
MEF-2|ENSG00000207635|hsa-mir-499|hsa-miR-499|jt:ENSG00000169139|UBE2V2  
MEF-2|ENSG00000207764|hsa-mir-133a-2|hsa-miR-133a|jt:ENSG00000101489|BRUNO14  
MEF-2|ENSG00000207764|hsa-mir-133a-2|hsa-miR-133a|jt:ENSG00000154822|PLCL2  
MEIS1|ENSG00000198972|hsa-let-7e|hsa-let-7e|jt:ENSG00000162650|ATXN7L2  
MEIS1|ENSG00000198972|hsa-let-7e|hsa-let-7e|jt:ENSG00000177410|Q5QHF1\_HUMAN  
MEIS1|ENSG00000198972|hsa-let-7e|hsa-let-7e|jt:ENSG00000198105|ZNF248  
MEIS1|ENSG00000198972|hsa-let-7e|hsa-let-7e|jt:ENSG00000187109|NAP1L1  
MEIS1|ENSG00000198972|hsa-let-7e|hsa-let-7e|jt:ENSG00000105697|HAMP  
MEIS1|ENSG00000198972|hsa-let-7e|hsa-let-7e|jt:ENSG00000143851|PTPN7  
MEIS1|ENSG00000198972|hsa-let-7e|hsa-let-7e|jt:ENSG00000148200|NR6A1  
MEIS1|ENSG00000198972|hsa-let-7e|hsa-let-7e|jt:ENSG00000119906|C10orf6  
MEIS1|ENSG00000198972|hsa-let-7e|hsa-let-7e|jt:ENSG00000133136|GBG5\_HUMAN  
MEIS1|ENSG00000198972|hsa-let-7e|hsa-let-7e|jt:ENSG00000160094|ZNF362  
MEIS1|ENSG00000198972|hsa-let-7e|hsa-let-7e|jt:ENSG00000023902|PLEKH01  
MEIS1|ENSG00000198972|hsa-let-7e|hsa-let-7e|jt:ENSG00000120440|TTLL2  
MEIS1|ENSG00000198972|hsa-let-7e|hsa-let-7e|jt:ENSG00000085491|SLC25A24  
MEIS1|ENSG00000198972|hsa-let-7e|hsa-let-7e|jt:ENSG00000143458|NP\_653219.1  
MEIS1|ENSG00000198972|hsa-let-7e|hsa-let-7e|jt:ENSG00000169921|Q75L30\_HUMAN  
MEIS1|ENSG00000198972|hsa-let-7e|hsa-let-7e|jt:ENSG00000159217|IGF2BP1  
MEIS1|ENSG00000198972|hsa-let-7e|hsa-let-7e|jt:ENSG00000179476|C14orf28  
MEIS1|ENSG00000198972|hsa-let-7e|hsa-let-7e|jt:ENSG00000171552|BCL2L1  
MEIS1|ENSG00000198972|hsa-let-7e|hsa-let-7e|jt:ENSG00000118503|TNFAIP3  
MEIS1|ENSG00000198972|hsa-let-7e|hsa-let-7e|jt:ENSG00000184895|SRV  
MEIS1|ENSG00000198972|hsa-let-7e|hsa-let-7e|jt:ENSG00000165449|SLC16A9  
MEIS1|ENSG00000198972|hsa-let-7e|hsa-let-7e|jt:ENSG00000198929|NOS1AP  
MEIS1|ENSG00000198975|hsa-let-7a-2|hsa-let-7a|jt:ENSG00000162650|ATXN7L2  
MEIS1|ENSG00000198975|hsa-let-7a-2|hsa-let-7a|jt:ENSG00000198105|ZNF248  
MEIS1|ENSG00000198975|hsa-let-7a-2|hsa-let-7a|jt:ENSG00000187109|NAP1L1  
MEIS1|ENSG00000198975|hsa-let-7a-2|hsa-let-7a|jt:ENSG00000143851|PTPN7  
MEIS1|ENSG00000198975|hsa-let-7a-2|hsa-let-7a|jt:ENSG00000148200|NR6A1

MEIS1|ENSG00000198975|hsa-let-7a-2|hsa-let-7a-2|jt:ENSG00000119906|C10orf6  
MEIS1|ENSG00000198975|hsa-let-7a-2|hsa-let-7a-2|jt:ENSG00000133136|GBG5L\_HUMAN  
MEIS1|ENSG00000198975|hsa-let-7a-2|hsa-let-7a-2|jt:ENSG00000160094|ZNF362  
MEIS1|ENSG00000198975|hsa-let-7a-2|hsa-let-7a-2|jt:ENSG00000023902|PLEKH01  
MEIS1|ENSG00000198975|hsa-let-7a-2|hsa-let-7a-2|jt:ENSG00000169921|Q75L30\_HUMAN  
MEIS1|ENSG00000198975|hsa-let-7a-2|hsa-let-7a-2|jt:ENSG00000159217|IGF2BP1  
MEIS1|ENSG00000198975|hsa-let-7a-2|hsa-let-7a-2|jt:ENSG00000179476|C14orf28  
MEIS1|ENSG00000198975|hsa-let-7a-2|hsa-let-7a-2|jt:ENSG00000165449|SLC16A9  
MEIS1|ENSG00000198986|hsa-let-7a-3|hsa-let-7a-3|jt:ENSG00000162650|ATXN7L2  
MEIS1|ENSG00000198986|hsa-let-7a-3|hsa-let-7a-3|jt:ENSG00000198105|ZNF248  
MEIS1|ENSG00000198986|hsa-let-7a-3|hsa-let-7a-3|jt:ENSG00000187109|NAP1L1  
MEIS1|ENSG00000198986|hsa-let-7a-3|hsa-let-7a-3|jt:ENSG00000143851|PTPN7  
MEIS1|ENSG00000198986|hsa-let-7a-3|hsa-let-7a-3|jt:ENSG00000148200|NR6A1  
MEIS1|ENSG00000198986|hsa-let-7a-3|hsa-let-7a-3|jt:ENSG00000119906|C10orf6  
MEIS1|ENSG00000198986|hsa-let-7a-3|hsa-let-7a-3|jt:ENSG00000133136|GBG5L\_HUMAN  
MEIS1|ENSG00000198986|hsa-let-7a-3|hsa-let-7a-3|jt:ENSG00000160094|ZNF362  
MEIS1|ENSG00000198986|hsa-let-7a-3|hsa-let-7a-3|jt:ENSG00000023902|PLEKH01  
MEIS1|ENSG00000198986|hsa-let-7a-3|hsa-let-7a-3|jt:ENSG00000169921|Q75L30\_HUMAN  
MEIS1|ENSG00000198986|hsa-let-7a-3|hsa-let-7a-3|jt:ENSG00000159217|IGF2BP1  
MEIS1|ENSG00000198986|hsa-let-7a-3|hsa-let-7a-3|jt:ENSG00000179476|C14orf28  
MEIS1|ENSG00000198986|hsa-let-7a-3|hsa-let-7a-3|jt:ENSG00000165449|SLC16A9  
MEIS1|ENSG00000199065|hsa-mir-101-2|hsa-miR-101-2|jt:ENSG00000168118|RAB4A  
MEIS1|ENSG00000199065|hsa-mir-101-2|hsa-miR-101-2|jt:ENSG00000182923|CEP63  
MEIS1|ENSG00000199065|hsa-mir-101-2|hsa-miR-101-2|jt:ENSG00000108784|NAGLU  
MEIS1|ENSG00000199065|hsa-mir-101-2|hsa-miR-101-2|jt:ENSG00000131914|LIN28  
MEIS1|ENSG00000199065|hsa-mir-101-2|hsa-miR-101-2|jt:ENSG00000179151|EDC3  
MEIS1|ENSG00000199065|hsa-mir-101-2|hsa-miR-101-2|jt:ENSG00000130224|LRCH2  
MEIS1|ENSG00000199065|hsa-mir-101-2|hsa-miR-101-2|jt:ENSG00000173821|RNF213  
MEIS1|ENSG00000199065|hsa-mir-101-2|hsa-miR-101-2|jt:ENSG00000132964|CDK8  
MEIS1|ENSG00000199065|hsa-mir-101-2|hsa-miR-101-2|jt:ENSG00000198757|Q96NB8\_HUMAN  
MEIS1|ENSG00000199065|hsa-mir-101-2|hsa-miR-101-2|jt:ENSG00000186111|PIP5K1C  
MEIS1|ENSG00000199065|hsa-mir-101-2|hsa-miR-101-2|jt:ENSG00000134375|TIMM17A  
MEIS1|ENSG00000199065|hsa-mir-101-2|hsa-miR-101-2|jt:ENSG00000175220|ARHGAP1  
MEIS1|ENSG00000199065|hsa-mir-101-2|hsa-miR-101-2|jt:ENSG00000104067|TJP1  
MEIS1|ENSG00000199065|hsa-mir-101-2|hsa-miR-101-2|jt:ENSG00000120278|PLEKHG1  
MEIS1|ENSG00000199065|hsa-mir-101-2|hsa-miR-101-2|jt:ENSG00000151292|CSNK1G3  
MEIS1|ENSG00000199065|hsa-mir-101-2|hsa-miR-101-2|jt:ENSG00000093167|LRRFIP2  
MEIS1|ENSG00000199065|hsa-mir-101-2|hsa-miR-101-2|jt:ENSG00000132669|RIN2  
MEIS1|ENSG00000199065|hsa-mir-101-2|hsa-miR-101-2|jt:ENSG00000153779|TGIF2LX  
MEIS1|ENSG00000199065|hsa-mir-101-2|hsa-miR-101-2|jt:ENSG00000176679|TGIF2LY  
MEIS1|ENSG00000199065|hsa-mir-101-2|hsa-miR-101-2|jt:ENSG00000132963|POMP  
MEIS1|ENSG00000199065|hsa-mir-101-2|hsa-miR-101-2|jt:ENSG00000198863|RUNDC1  
MEIS1|ENSG00000199065|hsa-mir-101-2|hsa-miR-101-2|jt:ENSG00000177125|ZBTB34  
MEIS1|ENSG00000199065|hsa-mir-101-2|hsa-miR-101-2|jt:ENSG00000072401|UBE2D1  
MEIS1|ENSG00000199065|hsa-mir-101-2|hsa-miR-101-2|jt:ENSG00000085511|MAP3K4  
MEIS1|ENSG00000199065|hsa-mir-101-2|hsa-miR-101-2|jt:ENSG0000019991|HGF  
MEIS1|ENSG00000199089|hsa-mir-202|hsa-miR-202|jt:ENSG00000162650|ATXN7L2  
MEIS1|ENSG00000199089|hsa-mir-202|hsa-miR-202|jt:ENSG00000006695|COX10  
MEIS1|ENSG00000199089|hsa-mir-202|hsa-miR-202|jt:ENSG00000129317|PUS7L  
MEIS1|ENSG00000199089|hsa-mir-202|hsa-miR-202|jt:ENSG00000149428|HYOU1  
MEIS1|ENSG00000199089|hsa-mir-202|hsa-miR-202|jt:ENSG00000107551|RASSF4  
MEIS1|ENSG00000199089|hsa-mir-202|hsa-miR-202|jt:ENSG00000204681|GABR1  
MEIS1|ENSG00000199089|hsa-mir-202|hsa-miR-202|jt:ENSG00000140950|KIAA1609  
MEIS1|ENSG00000199089|hsa-mir-202|hsa-miR-202|jt:ENSG00000133121|STARTD13  
MEIS1|ENSG00000199089|hsa-mir-202|hsa-miR-202|jt:ENSG00000170214|ADRA1B  
MEIS1|ENSG00000199089|hsa-mir-202|hsa-miR-202|jt:ENSG00000138315|OIT3  
MEIS1|ENSG00000199089|hsa-mir-202|hsa-miR-202|jt:ENSG00000198929|NOS1AP  
MEIS1|ENSG00000199089|hsa-mir-202|hsa-miR-202\*|jt:ENSG00000104415|WISP1  
MEIS1|ENSG00000199089|hsa-mir-202|hsa-miR-202\*|jt:ENSG00000123983|ACSL3  
MEIS1|ENSG00000199089|hsa-mir-202|hsa-miR-202\*|jt:ENSG00000186318|BACE1  
MEIS1|ENSG00000199089|hsa-mir-202|hsa-miR-202\*|jt:ENSG00000175746|NF\_997328.1  
MEIS1|ENSG00000199089|hsa-mir-202|hsa-miR-202\*|jt:ENSG00000001561|ENPP4  
MEIS1|ENSG00000199089|hsa-mir-202|hsa-miR-202\*|jt:ENSG00000155087|ODF1  
MEIS1|ENSG00000199089|hsa-mir-202|hsa-miR-202\*|jt:ENSG00000206550|LOC285346  
MEIS1|ENSG00000199089|hsa-mir-202|hsa-miR-202\*|jt:ENSG00000157429|ZNF19  
MEIS1|ENSG00000199094|hsa-mir-30c-2|hsa-miR-30c-2|jt:ENSG00000163288|GABRB1  
MEIS1|ENSG00000199094|hsa-mir-30c-2|hsa-miR-30c-2|jt:ENSG00000079739|PGM1  
MEIS1|ENSG00000199094|hsa-mir-30c-2|hsa-miR-30c-2|jt:ENSG00000170365|SMAD1  
MEIS1|ENSG00000199094|hsa-mir-30c-2|hsa-miR-30c-2|jt:ENSG00000154274|C4orf19  
MEIS1|ENSG00000199094|hsa-mir-30c-2|hsa-miR-30c-2|jt:ENSG00000145725|HISPPD1  
MEIS1|ENSG00000199094|hsa-mir-30c-2|hsa-miR-30c-2|jt:ENSG00000179151|EDC3  
MEIS1|ENSG00000199094|hsa-mir-30c-2|hsa-miR-30c-2|jt:ENSG00000151572|TMEM16D  
MEIS1|ENSG00000199094|hsa-mir-30c-2|hsa-miR-30c-2|jt:ENSG00000121594|CD80  
MEIS1|ENSG00000199094|hsa-mir-30c-2|hsa-miR-30c-2|jt:ENSG00000143590|EFNA3  
MEIS1|ENSG00000199094|hsa-mir-30c-2|hsa-miR-30c-2|jt:ENSG00000155545|MIER3  
MEIS1|ENSG00000199094|hsa-mir-30c-2|hsa-miR-30c-2|jt:ENSG00000172819|RARG  
MEIS1|ENSG00000199094|hsa-mir-30c-2|hsa-miR-30c-2|jt:ENSG00000185002|RFXDC1  
MEIS1|ENSG00000199094|hsa-mir-30c-2|hsa-miR-30c-2|jt:ENSG00000105501|SIGLEC5  
MEIS1|ENSG00000199094|hsa-mir-30c-2|hsa-miR-30c-2|jt:ENSG00000115239|ASB3  
MEIS1|ENSG00000199094|hsa-mir-30c-2|hsa-miR-30c-2|jt:ENSG00000137261|KIAA0319  
MEIS1|ENSG00000199094|hsa-mir-30c-2|hsa-miR-30c-2|jt:ENSG00000148541|FAM13C1  
MEIS1|ENSG00000199094|hsa-mir-30c-2|hsa-miR-30c-2|jt:ENSG00000162490|C1orf187  
MEIS1|ENSG00000199094|hsa-mir-30c-2|hsa-miR-30c-2|jt:ENSG00000142039|CCDC97  
MEIS1|ENSG00000199094|hsa-mir-30c-2|hsa-miR-30c-2|jt:ENSG00000116128|BCL9  
MEIS1|ENSG00000199094|hsa-mir-30c-2|hsa-miR-30c-2|jt:ENSG00000175564|UCP3  
MEIS1|ENSG00000199135|hsa-mir-101-1|hsa-miR-101-1|jt:ENSG00000168118|RAB4A  
MEIS1|ENSG00000199135|hsa-mir-101-1|hsa-miR-101-1|jt:ENSG00000182923|CEP63  
MEIS1|ENSG00000199135|hsa-mir-101-1|hsa-miR-101-1|jt:ENSG00000108784|NAGLU  
MEIS1|ENSG00000199135|hsa-mir-101-1|hsa-miR-101-1|jt:ENSG00000131914|LIN28  
MEIS1|ENSG00000199135|hsa-mir-101-1|hsa-miR-101-1|jt:ENSG00000179151|EDC3  
MEIS1|ENSG00000199135|hsa-mir-101-1|hsa-miR-101-1|jt:ENSG00000130224|LRCH2  
MEIS1|ENSG00000199135|hsa-mir-101-1|hsa-miR-101-1|jt:ENSG00000173821|RNF213  
MEIS1|ENSG00000199135|hsa-mir-101-1|hsa-miR-101-1|jt:ENSG00000132964|CDK8  
MEIS1|ENSG00000199135|hsa-mir-101-1|hsa-miR-101-1|jt:ENSG00000198757|Q96NB8\_HUMAN  
MEIS1|ENSG00000199135|hsa-mir-101-1|hsa-miR-101-1|jt:ENSG00000186111|PIP5K1C  
MEIS1|ENSG00000199135|hsa-mir-101-1|hsa-miR-101-1|jt:ENSG00000134375|TIMM17A  
MEIS1|ENSG00000199135|hsa-mir-101-1|hsa-miR-101-1|jt:ENSG00000175220|ARHGAP1  
MEIS1|ENSG00000199135|hsa-mir-101-1|hsa-miR-101-1|jt:ENSG00000104067|TJP1  
MEIS1|ENSG00000199135|hsa-mir-101-1|hsa-miR-101-1|jt:ENSG00000120278|PLEKHG1  
MEIS1|ENSG00000199135|hsa-mir-101-1|hsa-miR-101-1|jt:ENSG00000151292|CSNK1G3  
MEIS1|ENSG00000199135|hsa-mir-101-1|hsa-miR-101-1|jt:ENSG00000093167|LRRFIP2  
MEIS1|ENSG00000199135|hsa-mir-101-1|hsa-miR-101-1|jt:ENSG00000132669|RIN2  
MEIS1|ENSG00000199135|hsa-mir-101-1|hsa-miR-101-1|jt:ENSG00000153779|TGIF2LX  
MEIS1|ENSG00000199135|hsa-mir-101-1|hsa-miR-101-1|jt:ENSG00000176679|TGIF2LY  
MEIS1|ENSG00000199135|hsa-mir-101-1|hsa-miR-101-1|jt:ENSG00000132963|POMP

MEIS1|ENSG00000199135|hsa-mir-101-1|hsa-miR-101|jt:ENSG00000198863|RUNDC1  
MEIS1|ENSG00000199135|hsa-mir-101-1|hsa-miR-101|jt:ENSG00000177125|ZBTB34  
MEIS1|ENSG00000199135|hsa-mir-101-1|hsa-miR-101|jt:ENSG00000072401|UBE2D1  
MEIS1|ENSG00000199135|hsa-mir-101-1|hsa-miR-101|jt:ENSG00000085511|MAP3K4  
MEIS1|ENSG00000199135|hsa-mir-101-1|hsa-miR-101|jt:ENSG00000019991|HGF  
MEIS1|ENSG00000207550|hsa-mir-99b|hsa-miR-99b|jt:ENSG00000152689|RASGRP3  
MEIS1|ENSG00000207550|hsa-mir-99b|hsa-miR-99b|jt:ENSG00000203837|PNLIPRP3  
MEIS1|ENSG00000207550|hsa-mir-99b|hsa-miR-99b|jt:ENSG00000177406|Q8N503\_HUMAN  
MEIS1|ENSG00000207550|hsa-mir-99b|hsa-miR-99b|jt:ENSG00000196432|Q9H5F0\_HUMAN  
MEIS1|ENSG00000207550|hsa-mir-99b|hsa-miR-99b|jt:ENSG00000162437|RAVER2  
MEIS1|ENSG00000207550|hsa-mir-99b|hsa-miR-99b|jt:ENSG00000185361|TNFAIP8L1  
MEIS1|ENSG00000207550|hsa-mir-99b|hsa-miR-99b|jt:ENSG00000144712|CAND2  
MEIS1|ENSG00000207550|hsa-mir-99b|hsa-miR-99b|jt:ENSG00000116017|ARID3A  
MEIS1|ENSG00000207550|hsa-mir-99b|hsa-miR-99b|jt:ENSG00000136840|ST6GALNAC4  
MEIS1|ENSG00000207550|hsa-mir-99b|hsa-miR-99b|jt:ENSG00000164108|Q9HAJ2\_HUMAN  
MEIS1|ENSG00000207611|hsa-mir-149|hsa-miR-149|jt:ENSG00000158966|CACHD1  
MEIS1|ENSG00000207611|hsa-mir-149|hsa-miR-149|jt:ENSG00000167994|RAB3IL1  
MEIS1|ENSG00000207611|hsa-mir-149|hsa-miR-149|jt:ENSG00000189363|Q6ZSP4\_HUMAN  
MEIS1|ENSG00000207611|hsa-mir-149|hsa-miR-149|jt:ENSG00000103067|RBM35B  
MEIS1|ENSG00000207611|hsa-mir-149|hsa-miR-149|jt:ENSG00000162430|SEPN1  
MEIS1|ENSG00000207611|hsa-mir-149|hsa-miR-149|jt:ENSG00000204946|ZNF783  
MEIS1|ENSG00000207611|hsa-mir-149|hsa-miR-149|jt:ENSG00000168781|HISPPD2A  
MEIS1|ENSG00000207611|hsa-mir-149|hsa-miR-149|jt:ENSG00000074317|SNCB  
MEIS1|ENSG00000207611|hsa-mir-149|hsa-miR-149|jt:ENSG00000151474|FRMD4A  
MEIS1|ENSG00000207611|hsa-mir-149|hsa-miR-149|jt:ENSG00000164061|BSN  
MEIS1|ENSG00000207611|hsa-mir-149|hsa-miR-149|jt:ENSG00000172273|MIZF  
MEIS1|ENSG00000207611|hsa-mir-149|hsa-miR-149|jt:ENSG00000102313|TIH5L  
MEIS1|ENSG00000207624|hsa-mir-194-1|hsa-miR-194|jt:ENSG00000161381|PLXDC1  
MEIS1|ENSG00000207624|hsa-mir-194-1|hsa-miR-194|jt:ENSG00000003756|RBM5  
MEIS1|ENSG00000207624|hsa-mir-194-1|hsa-miR-194|jt:ENSG00000137100|DCTN3  
MEIS1|ENSG00000207624|hsa-mir-194-1|hsa-miR-194|jt:ENSG00000177853|ZNF518  
MEIS1|ENSG00000207624|hsa-mir-194-1|hsa-miR-194|jt:ENSG00000092445|TYRO3  
MEIS1|ENSG00000207624|hsa-mir-194-1|hsa-miR-194|jt:ENSG00000077312|SNRPA  
MEIS1|ENSG00000207624|hsa-mir-194-1|hsa-miR-194|jt:ENSG00000087085|ACHE  
MEIS1|ENSG00000207624|hsa-mir-194-1|hsa-miR-194|jt:ENSG00000130224|LRCH2  
MEIS1|ENSG00000207624|hsa-mir-194-1|hsa-miR-194|jt:ENSG00000198569|SLC34A3  
MEIS1|ENSG00000207624|hsa-mir-194-1|hsa-miR-194|jt:ENSG00000134352|IL6ST  
MEIS1|ENSG00000207624|hsa-mir-194-1|hsa-miR-194|jt:ENSG00000197008|ZNF138  
MEIS1|ENSG00000207624|hsa-mir-194-1|hsa-miR-194|jt:ENSG00000197969|VPS13A  
MEIS1|ENSG00000207624|hsa-mir-194-1|hsa-miR-194|jt:ENSG00000040933|INPP4A  
MEIS1|ENSG00000207624|hsa-mir-194-1|hsa-miR-194|jt:ENSG00000085872|CHERP  
MEIS1|ENSG00000207624|hsa-mir-194-1|hsa-miR-194|jt:ENSG00000178028|DMAF1  
MEIS1|ENSG00000207624|hsa-mir-194-1|hsa-miR-194|jt:ENSG00000131188|PRR7  
MEIS1|ENSG00000207624|hsa-mir-194-1|hsa-miR-194|jt:ENSG00000151287|C13orf27  
MEIS1|ENSG00000207624|hsa-mir-194-1|hsa-miR-194|jt:ENSG00000165028|NIPSNAP3B  
MEIS1|ENSG00000207624|hsa-mir-194-1|hsa-miR-194|jt:ENSG00000204038|Q6ZRL6\_HUMAN  
MEIS1|ENSG00000207624|hsa-mir-194-1|hsa-miR-194|jt:ENSG00000071073|MGAT4A  
MEIS1|ENSG00000207624|hsa-mir-194-1|hsa-miR-194|jt:ENSG00000162804|SNED1  
MEIS1|ENSG00000207624|hsa-mir-194-1|hsa-miR-194|jt:ENSG00000081800|SLC13A1  
MEIS1|ENSG00000207638|hsa-mir-99a|hsa-miR-99a|jt:ENSG00000152689|RASGRP3  
MEIS1|ENSG00000207638|hsa-mir-99a|hsa-miR-99a|jt:ENSG00000203837|PNLIPRP3  
MEIS1|ENSG00000207638|hsa-mir-99a|hsa-miR-99a|jt:ENSG00000177406|Q8N503\_HUMAN  
MEIS1|ENSG00000207638|hsa-mir-99a|hsa-miR-99a|jt:ENSG00000196432|Q9H5F0\_HUMAN  
MEIS1|ENSG00000207638|hsa-mir-99a|hsa-miR-99a|jt:ENSG00000162437|RAVER2  
MEIS1|ENSG00000207638|hsa-mir-99a|hsa-miR-99a|jt:ENSG00000185361|TNFAIP8L1  
MEIS1|ENSG00000207638|hsa-mir-99a|hsa-miR-99a|jt:ENSG00000144712|CAND2  
MEIS1|ENSG00000207638|hsa-mir-99a|hsa-miR-99a|jt:ENSG00000116017|ARID3A  
MEIS1|ENSG00000207638|hsa-mir-99a|hsa-miR-99a|jt:ENSG00000136840|ST6GALNAC4  
MEIS1|ENSG00000207638|hsa-mir-99a|hsa-miR-99a|jt:ENSG00000164108|Q9HAJ2\_HUMAN  
MEIS1|ENSG00000207698|hsa-mir-32|hsa-miR-32|jt:ENSG00000172000|ZNF556  
MEIS1|ENSG00000207698|hsa-mir-32|hsa-miR-32|jt:ENSG00000129317|PUS7L  
MEIS1|ENSG00000207698|hsa-mir-32|hsa-miR-32|jt:ENSG00000173517|SG269\_HUMAN  
MEIS1|ENSG00000207698|hsa-mir-32|hsa-miR-32|jt:ENSG00000144583|MARCH4  
MEIS1|ENSG00000207698|hsa-mir-32|hsa-miR-32|jt:ENSG00000165943|MOAP1  
MEIS1|ENSG00000207698|hsa-mir-32|hsa-miR-32|jt:ENSG00000142583|SLC2A5  
MEIS1|ENSG00000207698|hsa-mir-32|hsa-miR-32|jt:ENSG00000196186|Q71RF5\_HUMAN  
MEIS1|ENSG00000207698|hsa-mir-32|hsa-miR-32|jt:ENSG00000160445|ZER1  
MEIS1|ENSG00000207698|hsa-mir-32|hsa-miR-32|jt:ENSG00000198569|SLC34A3  
MEIS1|ENSG00000207698|hsa-mir-32|hsa-miR-32|jt:ENSG00000105392|CRX  
MEIS1|ENSG00000207698|hsa-mir-32|hsa-miR-32|jt:ENSG00000084093|REST  
MEIS1|ENSG00000207698|hsa-mir-32|hsa-miR-32|jt:ENSG00000135414|GDF11  
MEIS1|ENSG00000207698|hsa-mir-32|hsa-miR-32|jt:ENSG00000166159|LRTM2  
MEIS1|ENSG00000207698|hsa-mir-32|hsa-miR-32|jt:ENSG00000137845|ADAM10  
MEIS1|ENSG00000207698|hsa-mir-32|hsa-miR-32|jt:ENSG00000204323|Q71RC9\_HUMAN  
MEIS1|ENSG00000207698|hsa-mir-32|hsa-miR-32|jt:ENSG00000165494|PCF11  
MEIS1|ENSG00000207698|hsa-mir-32|hsa-miR-32|jt:ENSG00000091844|RGS17  
MEIS1|ENSG00000207698|hsa-mir-32|hsa-miR-32|jt:ENSG00000143458|NP\_653219.1  
MEIS1|ENSG00000207698|hsa-mir-32|hsa-miR-32|jt:ENSG00000091664|SLC17A6  
MEIS1|ENSG00000207698|hsa-mir-32|hsa-miR-32|jt:ENSG00000170238|XR\_017738.1  
MEIS1|ENSG00000207698|hsa-mir-32|hsa-miR-32|jt:ENSG00000117461|PIK3R3  
MEIS1|ENSG00000207698|hsa-mir-32|hsa-miR-32|jt:ENSG00000152894|PTPRK  
MEIS1|ENSG00000207698|hsa-mir-32|hsa-miR-32|jt:ENSG00000152767|FARF1  
MEIS1|ENSG00000207698|hsa-mir-32|hsa-miR-32|jt:ENSG00000173040|EVC2  
MEIS1|ENSG00000207698|hsa-mir-32|hsa-miR-32|jt:ENSG00000103021|CCDC113  
MEIS1|ENSG00000207698|hsa-mir-32|hsa-miR-32|jt:ENSG00000116128|BCL9  
MEIS1|ENSG00000207698|hsa-mir-32|hsa-miR-32|jt:ENSG00000139508|SLC46A3  
MEIS1|ENSG00000207708|hsa-mir-141|hsa-miR-141|jt:ENSG00000133124|IRS4  
MEIS1|ENSG00000207708|hsa-mir-141|hsa-miR-141|jt:ENSG00000112379|KIAA1244  
MEIS1|ENSG00000207708|hsa-mir-141|hsa-miR-141|jt:ENSG00000028839|TBPL1  
MEIS1|ENSG00000207708|hsa-mir-141|hsa-miR-141|jt:ENSG00000198105|ZNF248  
MEIS1|ENSG00000207708|hsa-mir-141|hsa-miR-141|jt:ENSG00000073910|FRY  
MEIS1|ENSG00000207708|hsa-mir-141|hsa-miR-141|jt:ENSG00000189403|HMGB1  
MEIS1|ENSG00000207708|hsa-mir-141|hsa-miR-141|jt:ENSG00000185880|TRIM69  
MEIS1|ENSG00000207708|hsa-mir-141|hsa-miR-141|jt:ENSG00000100448|CTS3  
MEIS1|ENSG00000207708|hsa-mir-141|hsa-miR-141|jt:ENSG00000197641|SERPINB13  
MEIS1|ENSG00000207708|hsa-mir-141|hsa-miR-141|jt:ENSG00000107554|DNMBP  
MEIS1|ENSG00000207708|hsa-mir-141|hsa-miR-141|jt:ENSG00000162433|AK3L2  
MEIS1|ENSG00000207708|hsa-mir-141|hsa-miR-141|jt:ENSG00000138434|SSFA2  
MEIS1|ENSG00000207708|hsa-mir-141|hsa-miR-141|jt:ENSG00000146360|GPR6  
MEIS1|ENSG00000207708|hsa-mir-141|hsa-miR-141|jt:ENSG00000142459|EVI5L  
MEIS1|ENSG00000207708|hsa-mir-141|hsa-miR-141|jt:ENSG00000145990|GFOD1  
MEIS1|ENSG00000207708|hsa-mir-141|hsa-miR-141|jt:ENSG00000205307|Q8TE9\_HUMAN  
MEIS1|ENSG00000207708|hsa-mir-141|hsa-miR-141|jt:ENSG00000169184|NM\_002430.2  
MEIS1|ENSG00000207708|hsa-mir-141|hsa-miR-141|jt:ENSG00000155966|AFF2  
MEIS1|ENSG00000207708|hsa-mir-141|hsa-miR-141|jt:ENSG00000152382|TADA1L

MEIS1|ENSG00000207708|hsa-mir-141|hsa-miR-141|jt:ENSG00000205017|CCL3L1  
MEIS1|ENSG00000207708|hsa-mir-141|hsa-miR-141|jt:ENSG00000205021|CCL3L3  
MEIS1|ENSG00000207708|hsa-mir-141|hsa-miR-141|jt:ENSG00000134207|SYT6  
MEIS1|ENSG00000207708|hsa-mir-141|hsa-miR-141|jt:ENSG00000177125|ZBTB34  
MEIS1|ENSG00000207708|hsa-mir-141|hsa-miR-141|jt:ENSG00000100181|CSNK1E  
MEIS1|ENSG00000207713|hsa-mir-200c|hsa-miR-200c|jt:ENSG00000112379|KIAA1244  
MEIS1|ENSG00000207713|hsa-mir-200c|hsa-miR-200c|jt:ENSG00000115963|RND3  
MEIS1|ENSG00000207713|hsa-mir-200c|hsa-miR-200c|jt:ENSG00000122417|ODF2L  
MEIS1|ENSG00000207713|hsa-mir-200c|hsa-miR-200c|jt:ENSG00000102385|DRP2  
MEIS1|ENSG00000207713|hsa-mir-200c|hsa-miR-200c|jt:ENSG00000148429|USP6NL  
MEIS1|ENSG00000207713|hsa-mir-200c|hsa-miR-200c|jt:ENSG00000188493|C19orf54  
MEIS1|ENSG00000207713|hsa-mir-200c|hsa-miR-200c|jt:ENSG00000165410|CFL2  
MEIS1|ENSG00000207713|hsa-mir-200c|hsa-miR-200c|jt:ENSG00000183783|KCTD8  
MEIS1|ENSG00000207713|hsa-mir-200c|hsa-miR-200c|jt:ENSG00000035862|TIMP2  
MEIS1|ENSG00000207713|hsa-mir-200c|hsa-miR-200c|jt:ENSG00000156469|MTERFD1  
MEIS1|ENSG00000207713|hsa-mir-200c|hsa-miR-200c|jt:ENSG00000204323|Q71RC9\_HUMAN  
MEIS1|ENSG00000207713|hsa-mir-200c|hsa-miR-200c|jt:ENSG00000158716|DUSP23  
MEIS1|ENSG00000207713|hsa-mir-200c|hsa-miR-200c|jt:ENSG00000105793|GTPBP10  
MEIS1|ENSG00000207713|hsa-mir-200c|hsa-miR-200c|jt:ENSG00000197343|ZNF655  
MEIS1|ENSG00000207713|hsa-mir-200c|hsa-miR-200c|jt:ENSG00000173027|WBP1  
MEIS1|ENSG00000207713|hsa-mir-200c|hsa-miR-200c|jt:ENSG00000173705|SUSD5  
MEIS1|ENSG00000207713|hsa-mir-200c|hsa-miR-200c|jt:ENSG00000115084|SLC35F5  
MEIS1|ENSG00000207713|hsa-mir-200c|hsa-miR-200c|jt:ENSG00000117600|NP\_055654.2  
MEIS1|ENSG00000207713|hsa-mir-200c|hsa-miR-200c|jt:ENSG00000182831|C16orf72  
MEIS1|ENSG00000207713|hsa-mir-200c|hsa-miR-200c|jt:ENSG00000183873|SCN5A  
MEIS1|ENSG00000207713|hsa-mir-200c|hsa-miR-200c|jt:ENSG00000141562|NARF  
MEIS1|ENSG00000207713|hsa-mir-200c|hsa-miR-200c|jt:ENSG00000125954|FNTE  
MEIS1|ENSG00000207728|hsa-mir-449b|hsa-miR-449b|jt:ENSG00000177410|Q5QHF1\_HUMAN  
MEIS1|ENSG00000207728|hsa-mir-449b|hsa-miR-449b|jt:ENSG00000172689|MS4A10  
MEIS1|ENSG00000207728|hsa-mir-449b|hsa-miR-449b|jt:ENSG00000177303|CASKIN2  
MEIS1|ENSG00000207728|hsa-mir-449b|hsa-miR-449b|jt:ENSG00000110675|ELMOD1  
MEIS1|ENSG00000207728|hsa-mir-449b|hsa-miR-449b|jt:ENSG00000162302|RPS6KA4  
MEIS1|ENSG00000207728|hsa-mir-449b|hsa-miR-449b|jt:ENSG00000182329|Q8IVF9\_HUMAN  
MEIS1|ENSG00000207728|hsa-mir-449b|hsa-miR-449b|jt:ENSG00000132911|NMUR2  
MEIS1|ENSG00000207728|hsa-mir-449b|hsa-miR-449b|jt:ENSG00000116704|SLC35D1  
MEIS1|ENSG00000207728|hsa-mir-449b|hsa-miR-449b|jt:ENSG00000112478|VPS52  
MEIS1|ENSG00000207728|hsa-mir-449b|hsa-miR-449b|jt:ENSG00000131951|LRRC9  
MEIS1|ENSG00000207728|hsa-mir-449b|hsa-miR-449b|jt:ENSG00000148296|SURF6  
MEIS1|ENSG00000207728|hsa-mir-449b|hsa-miR-449b|jt:ENSG00000048740|CUGBP2  
MEIS1|ENSG00000207728|hsa-mir-449b|hsa-miR-449b|jt:ENSG00000120708|TGFB1  
MEIS1|ENSG00000207827|hsa-mir-30a|hsa-miR-30a-3p|jt:ENSG00000168658|NP\_659429.4  
MEIS1|ENSG00000207827|hsa-mir-30a|hsa-miR-30a-3p|jt:ENSG00000162951|LRRTM1  
MEIS1|ENSG00000207827|hsa-mir-30a|hsa-miR-30a-3p|jt:ENSG00000185532|PRKG1  
MEIS1|ENSG00000207827|hsa-mir-30a|hsa-miR-30a-3p|jt:ENSG00000116984|MTR  
MEIS1|ENSG00000207827|hsa-mir-30a|hsa-miR-30a-3p|jt:ENSG00000153560|UBP1  
MEIS1|ENSG00000207827|hsa-mir-30a|hsa-miR-30a-3p|jt:ENSG00000166292|TMEM100  
MEIS1|ENSG00000207827|hsa-mir-30a|hsa-miR-30a-3p|jt:ENSG00000197852|C1orf183  
MEIS1|ENSG00000207827|hsa-mir-30a|hsa-miR-30a-3p|jt:ENSG00000189007|DEADC1  
MEIS1|ENSG00000207827|hsa-mir-30a|hsa-miR-30a-3p|jt:ENSG00000197728|RS26\_HUMAN  
MEIS1|ENSG00000207827|hsa-mir-30a|hsa-miR-30a-3p|jt:ENSG00000174171|Q8TCB4\_HUMAN  
MEIS1|ENSG00000207827|hsa-mir-30a|hsa-miR-30a-3p|jt:ENSG00000158639|PAGE5  
MEIS1|ENSG00000207827|hsa-mir-30a|hsa-miR-30a-3p|jt:ENSG00000187761|PAGE2B  
MEIS1|ENSG00000207827|hsa-mir-30a|hsa-miR-30a-3p|jt:ENSG0000017797|RALBP1  
MEIS1|ENSG00000207827|hsa-mir-30a|hsa-miR-30a-5p|jt:ENSG00000163288|GABRB1  
MEIS1|ENSG00000207827|hsa-mir-30a|hsa-miR-30a-5p|jt:ENSG00000079739|PGM1  
MEIS1|ENSG00000207827|hsa-mir-30a|hsa-miR-30a-5p|jt:ENSG00000170365|SMAD1  
MEIS1|ENSG00000207827|hsa-mir-30a|hsa-miR-30a-5p|jt:ENSG00000154274|C4orf19  
MEIS1|ENSG00000207827|hsa-mir-30a|hsa-miR-30a-5p|jt:ENSG00000145725|HISPPP1  
MEIS1|ENSG00000207827|hsa-mir-30a|hsa-miR-30a-5p|jt:ENSG00000179151|EDC3  
MEIS1|ENSG00000207827|hsa-mir-30a|hsa-miR-30a-5p|jt:ENSG00000151572|TMEM16D  
MEIS1|ENSG00000207827|hsa-mir-30a|hsa-miR-30a-5p|jt:ENSG00000121594|CD80  
MEIS1|ENSG00000207827|hsa-mir-30a|hsa-miR-30a-5p|jt:ENSG00000143590|EFNA3  
MEIS1|ENSG00000207827|hsa-mir-30a|hsa-miR-30a-5p|jt:ENSG00000155545|MIER3  
MEIS1|ENSG00000207827|hsa-mir-30a|hsa-miR-30a-5p|jt:ENSG00000172819|RARG  
MEIS1|ENSG00000207827|hsa-mir-30a|hsa-miR-30a-5p|jt:ENSG00000185002|RFXXDC1  
MEIS1|ENSG00000207827|hsa-mir-30a|hsa-miR-30a-5p|jt:ENSG00000105501|SIGLEC5  
MEIS1|ENSG00000207827|hsa-mir-30a|hsa-miR-30a-5p|jt:ENSG00000115239|ASB3  
MEIS1|ENSG00000207827|hsa-mir-30a|hsa-miR-30a-5p|jt:ENSG00000137261|KIAA0319  
MEIS1|ENSG00000207827|hsa-mir-30a|hsa-miR-30a-5p|jt:ENSG00000148541|FAM13C1  
MEIS1|ENSG00000207827|hsa-mir-30a|hsa-miR-30a-5p|jt:ENSG00000162490|C1orf187  
MEIS1|ENSG00000207827|hsa-mir-30a|hsa-miR-30a-5p|jt:ENSG00000142039|CCDC97  
MEIS1|ENSG00000207827|hsa-mir-30a|hsa-miR-30a-5p|jt:ENSG00000116128|BCL9  
MEIS1|ENSG00000207827|hsa-mir-30a|hsa-miR-30a-5p|jt:ENSG00000175564|UCP3  
MEIS1|ENSG00000207863|hsa-mir-125b-2|hsa-miR-125b|jt:ENSG00000113161|HMGR  
MEIS1|ENSG00000207863|hsa-mir-125b-2|hsa-miR-125b|jt:ENSG00000175779|NP\_997327.1  
MEIS1|ENSG00000207863|hsa-mir-125b-2|hsa-miR-125b|jt:ENSG00000145391|SETD7  
MEIS1|ENSG00000207863|hsa-mir-125b-2|hsa-miR-125b|jt:ENSG00000123064|DDX54  
MEIS1|ENSG00000207863|hsa-mir-125b-2|hsa-miR-125b|jt:ENSG00000131914|LIN28  
MEIS1|ENSG00000207863|hsa-mir-125b-2|hsa-miR-125b|jt:ENSG00000205191|NP\_001070148.1  
MEIS1|ENSG00000207863|hsa-mir-125b-2|hsa-miR-125b|jt:ENSG00000182359|KBTBD3  
MEIS1|ENSG00000207863|hsa-mir-125b-2|hsa-miR-125b|jt:ENSG00000166787|SAA3P  
MEIS1|ENSG00000207863|hsa-mir-125b-2|hsa-miR-125b|jt:ENSG00000111981|ULBP1  
MEIS1|ENSG00000207863|hsa-mir-125b-2|hsa-miR-125b|jt:ENSG00000120656|TAF12  
MEIS1|ENSG00000207863|hsa-mir-125b-2|hsa-miR-125b|jt:ENSG00000111537|IFNG  
MEIS1|ENSG00000207863|hsa-mir-125b-2|hsa-miR-125b|jt:ENSG00000167383|ZNF229  
MEIS1|ENSG00000207863|hsa-mir-125b-2|hsa-miR-125b|jt:ENSG00000100628|ASB2  
MEIS1|ENSG00000207863|hsa-mir-125b-2|hsa-miR-125b|jt:ENSG00000133121|STARD13  
MEIS1|ENSG00000207863|hsa-mir-125b-2|hsa-miR-125b|jt:ENSG00000205307|Q8TEE9\_HUMAN  
MEIS1|ENSG00000207863|hsa-mir-125b-2|hsa-miR-125b|jt:ENSG00000198208|RPS6KL1  
MEIS1|ENSG00000207863|hsa-mir-125b-2|hsa-miR-125b|jt:ENSG00000100796|SMEK1  
MEIS1|ENSG00000207863|hsa-mir-125b-2|hsa-miR-125b|jt:ENSG00000178351|Q8N345\_HUMAN  
MEIS1|ENSG00000207863|hsa-mir-125b-2|hsa-miR-125b|jt:ENSG00000196616|ADH1C  
MEIS1|ENSG00000207863|hsa-mir-125b-2|hsa-miR-125b|jt:ENSG00000134258|VTCN1  
MEIS1|ENSG00000207863|hsa-mir-125b-2|hsa-miR-125b|jt:ENSG00000167754|KLK5  
MEIS1|ENSG00000207863|hsa-mir-125b-2|hsa-miR-125b|jt:ENSG00000136840|ST6GALNAC4  
MEIS1|ENSG00000207863|hsa-mir-125b-2|hsa-miR-125b|jt:ENSG00000169758|C15orf27  
MEIS1|ENSG00000207863|hsa-mir-125b-2|hsa-miR-125b|jt:ENSG00000133561|GIMAP6  
MEIS1|ENSG00000207863|hsa-mir-125b-2|hsa-miR-125b|jt:ENSG00000087916|SLC6A14  
MEIS1|ENSG00000207863|hsa-mir-125b-2|hsa-miR-125b|jt:ENSG00000110274|CEP164  
MEIS1|ENSG00000207863|hsa-mir-125b-2|hsa-miR-125b|jt:ENSG00000102313|TIH5L  
MEIS1|ENSG00000207863|hsa-mir-125b-2|hsa-miR-125b|jt:ENSG00000129472|RAB2B  
MEIS1|ENSG00000207875|hsa-let-7b|hsa-let-7b|jt:ENSG00000162650|ATXN7L2  
MEIS1|ENSG00000207875|hsa-let-7b|hsa-let-7b|jt:ENSG00000198105|ZNF248  
MEIS1|ENSG00000207875|hsa-let-7b|hsa-let-7b|jt:ENSG00000187109|NAP1L1  
MEIS1|ENSG00000207875|hsa-let-7b|hsa-let-7b|jt:ENSG00000143851|PTPN7

MEIS1|ENSG00000207875|hsa-let-7b|hsa-let-7b|jt:ENSG00000148200|NR6A1  
MEIS1|ENSG00000207875|hsa-let-7b|hsa-let-7b|jt:ENSG00000119906|C10orf6  
MEIS1|ENSG00000207875|hsa-let-7b|hsa-let-7b|jt:ENSG00000133136|GBG5L\_HUMAN  
MEIS1|ENSG00000207875|hsa-let-7b|hsa-let-7b|jt:ENSG00000160094|ZNF362  
MEIS1|ENSG00000207875|hsa-let-7b|hsa-let-7b|jt:ENSG00000023902|PLEKH01  
MEIS1|ENSG00000207875|hsa-let-7b|hsa-let-7b|jt:ENSG00000169921|Q75L30\_HUMAN  
MEIS1|ENSG00000207875|hsa-let-7b|hsa-let-7b|jt:ENSG00000159217|IGF2BP1  
MEIS1|ENSG00000207875|hsa-let-7b|hsa-let-7b|jt:ENSG00000179476|C14orf28  
MEIS1|ENSG00000207875|hsa-let-7b|hsa-let-7b|jt:ENSG00000165449|SLC16A9  
MEIS1|ENSG00000207933|hsa-mir-9-1|hsa-miR-9|jt:ENSG00000119227|PIGZ  
MEIS1|ENSG00000207933|hsa-mir-9-1|hsa-miR-9|jt:ENSG00000109061|MYH1  
MEIS1|ENSG00000207933|hsa-mir-9-1|hsa-miR-9|jt:ENSG00000159184|HOXB13  
MEIS1|ENSG00000207933|hsa-mir-9-1|hsa-miR-9|jt:ENSG00000197585|Q5JV89\_HUMAN  
MEIS1|ENSG00000207933|hsa-mir-9-1|hsa-miR-9|jt:ENSG00000144191|CNGA3  
MEIS1|ENSG00000207933|hsa-mir-9-1|hsa-miR-9|jt:ENSG00000060138|CSDA  
MEIS1|ENSG00000207933|hsa-mir-9-1|hsa-miR-9|jt:ENSG00000117281|CD160  
MEIS1|ENSG00000207933|hsa-mir-9-1|hsa-miR-9|jt:ENSG00000110881|ACCN2  
MEIS1|ENSG00000207933|hsa-mir-9-1|hsa-miR-9|jt:ENSG00000168781|HISPPD2A  
MEIS1|ENSG00000207933|hsa-mir-9-1|hsa-miR-9|jt:ENSG00000106541|AGR2  
MEIS1|ENSG00000207933|hsa-mir-9-1|hsa-miR-9|jt:ENSG00000178538|CA8  
MEIS1|ENSG00000207933|hsa-mir-9-1|hsa-miR-9|jt:ENSG00000174683|C8orf78  
MEIS1|ENSG00000207933|hsa-mir-9-1|hsa-miR-9|jt:ENSG00000188162|OTOG  
MEIS1|ENSG00000207933|hsa-mir-9-1|hsa-miR-9|jt:ENSG00000196739|COL27A1  
MEIS1|ENSG00000207933|hsa-mir-9-1|hsa-miR-9|jt:ENSG00000089063|C20orf30  
MEIS1|ENSG00000207933|hsa-mir-9-1|hsa-miR-9|jt:ENSG00000064195|DLX3  
MEIS1|ENSG00000207933|hsa-mir-9-1|hsa-miR-9\*|jt:ENSG00000013619|CXorf6  
MEIS1|ENSG00000207933|hsa-mir-9-1|hsa-miR-9\*|jt:ENSG00000133794|ARNFL  
MEIS1|ENSG00000207933|hsa-mir-9-1|hsa-miR-9\*|jt:ENSG00000205036|NP\_001001682.1  
MEIS1|ENSG00000207933|hsa-mir-9-1|hsa-miR-9\*|jt:ENSG00000118363|SFC52  
MEIS1|ENSG00000207933|hsa-mir-9-1|hsa-miR-9\*|jt:ENSG00000180357|ZNF609  
MEIS1|ENSG00000207933|hsa-mir-9-1|hsa-miR-9\*|jt:ENSG00000182329|Q8IVF9\_HUMAN  
MEIS1|ENSG00000207933|hsa-mir-9-1|hsa-miR-9\*|jt:ENSG00000113300|CNOT6  
MEIS1|ENSG00000207933|hsa-mir-9-1|hsa-miR-9\*|jt:ENSG00000108021|C10orf10  
MEIS1|ENSG00000207933|hsa-mir-9-1|hsa-miR-9\*|jt:ENSG00000130414|NDUFA18  
MEIS1|ENSG00000207933|hsa-mir-9-1|hsa-miR-9\*|jt:ENSG00000132321|TCA  
MEIS1|ENSG00000207933|hsa-mir-9-1|hsa-miR-9\*|jt:ENSG00000165156|ZHX1  
MEIS1|ENSG00000207933|hsa-mir-9-1|hsa-miR-9\*|jt:ENSG00000101246|ARFRP1  
MEIS1|ENSG00000207933|hsa-mir-9-1|hsa-miR-9\*|jt:ENSG00000163110|PDLIM5  
MEIS1|ENSG00000207949|hsa-mir-214|hsa-miR-214|jt:ENSG00000171303|KCNK3  
MEIS1|ENSG00000207949|hsa-mir-214|hsa-miR-214|jt:ENSG00000082556|OPRK1  
MEIS1|ENSG00000207949|hsa-mir-214|hsa-miR-214|jt:ENSG00000140955|NP\_631913.2  
MEIS1|ENSG00000207949|hsa-mir-214|hsa-miR-214|jt:ENSG00000147892|ADAMTSL1  
MEIS1|ENSG00000207949|hsa-mir-214|hsa-miR-214|jt:ENSG00000172987|HPSE2  
MEIS1|ENSG00000207949|hsa-mir-214|hsa-miR-214|jt:ENSG00000163958|ZDHHC19  
MEIS1|ENSG00000207949|hsa-mir-214|hsa-miR-214|jt:ENSG00000205358|MT1H  
MEIS1|ENSG00000207949|hsa-mir-214|hsa-miR-214|jt:ENSG00000058668|ATP2B4  
MEIS1|ENSG00000207949|hsa-mir-214|hsa-miR-214|jt:ENSG00000182952|HMGN4  
MEIS1|ENSG00000207949|hsa-mir-214|hsa-miR-214|jt:ENSG00000110851|PRDM4  
MEIS1|ENSG00000207949|hsa-mir-214|hsa-miR-214|jt:ENSG00000173020|ADRBK1  
MEIS1|ENSG00000207949|hsa-mir-214|hsa-miR-214|jt:ENSG00000167468|GPX4  
MEIS1|ENSG00000207949|hsa-mir-214|hsa-miR-214|jt:ENSG00000121848|ZNF364  
MEIS1|ENSG00000207950|hsa-mir-296|hsa-miR-296|jt:ENSG00000167895|TMC8  
MEIS1|ENSG00000207950|hsa-mir-296|hsa-miR-296|jt:ENSG00000142449|FBN3  
MEIS1|ENSG00000207950|hsa-mir-296|hsa-miR-296|jt:ENSG00000170279|C7orf33  
MEIS1|ENSG00000207950|hsa-mir-296|hsa-miR-296|jt:ENSG00000090097|PCBP4  
MEIS1|ENSG00000207950|hsa-mir-296|hsa-miR-296|jt:ENSG00000184363|PKP3  
MEIS1|ENSG00000207950|hsa-mir-296|hsa-miR-296|jt:ENSG00000187796|CARD9  
MEIS1|ENSG00000207950|hsa-mir-296|hsa-miR-296|jt:ENSG00000101246|ARFRP1  
MEIS1|ENSG00000207950|hsa-mir-296|hsa-miR-296|jt:ENSG00000167680|SEMA6B  
MEIS1|ENSG00000207971|hsa-mir-125b-1|hsa-miR-125b|jt:ENSG00000113161|HMGR  
MEIS1|ENSG00000207971|hsa-mir-125b-1|hsa-miR-125b|jt:ENSG00000175779|NP\_997327.1  
MEIS1|ENSG00000207971|hsa-mir-125b-1|hsa-miR-125b|jt:ENSG00000145391|SETD7  
MEIS1|ENSG00000207971|hsa-mir-125b-1|hsa-miR-125b|jt:ENSG00000123064|DDX54  
MEIS1|ENSG00000207971|hsa-mir-125b-1|hsa-miR-125b|jt:ENSG00000131914|LIN28  
MEIS1|ENSG00000207971|hsa-mir-125b-1|hsa-miR-125b|jt:ENSG00000205191|NP\_001070148.1  
MEIS1|ENSG00000207971|hsa-mir-125b-1|hsa-miR-125b|jt:ENSG00000182359|KBTBD3  
MEIS1|ENSG00000207971|hsa-mir-125b-1|hsa-miR-125b|jt:ENSG00000166787|SAA3P  
MEIS1|ENSG00000207971|hsa-mir-125b-1|hsa-miR-125b|jt:ENSG00000111981|ULBP1  
MEIS1|ENSG00000207971|hsa-mir-125b-1|hsa-miR-125b|jt:ENSG00000120656|TAF12  
MEIS1|ENSG00000207971|hsa-mir-125b-1|hsa-miR-125b|jt:ENSG00000111537|IFNG  
MEIS1|ENSG00000207971|hsa-mir-125b-1|hsa-miR-125b|jt:ENSG00000167383|ZNF229  
MEIS1|ENSG00000207971|hsa-mir-125b-1|hsa-miR-125b|jt:ENSG00000100628|ASB2  
MEIS1|ENSG00000207971|hsa-mir-125b-1|hsa-miR-125b|jt:ENSG00000133121|STARD13  
MEIS1|ENSG00000207971|hsa-mir-125b-1|hsa-miR-125b|jt:ENSG00000205307|Q8TEE9\_HUMAN  
MEIS1|ENSG00000207971|hsa-mir-125b-1|hsa-miR-125b|jt:ENSG00000198208|RPS6KL1  
MEIS1|ENSG00000207971|hsa-mir-125b-1|hsa-miR-125b|jt:ENSG00000100796|SMEK1  
MEIS1|ENSG00000207971|hsa-mir-125b-1|hsa-miR-125b|jt:ENSG00000178351|Q8N345\_HUMAN  
MEIS1|ENSG00000207971|hsa-mir-125b-1|hsa-miR-125b|jt:ENSG00000196616|ADH1C  
MEIS1|ENSG00000207971|hsa-mir-125b-1|hsa-miR-125b|jt:ENSG00000134258|VTCN1  
MEIS1|ENSG00000207971|hsa-mir-125b-1|hsa-miR-125b|jt:ENSG00000167754|KLK5  
MEIS1|ENSG00000207971|hsa-mir-125b-1|hsa-miR-125b|jt:ENSG00000136840|ST6GALNAC4  
MEIS1|ENSG00000207971|hsa-mir-125b-1|hsa-miR-125b|jt:ENSG00000169758|C15orf27  
MEIS1|ENSG00000207971|hsa-mir-125b-1|hsa-miR-125b|jt:ENSG00000133561|GIMAP6  
MEIS1|ENSG00000207971|hsa-mir-125b-1|hsa-miR-125b|jt:ENSG00000087916|SLC6A14  
MEIS1|ENSG00000207971|hsa-mir-125b-1|hsa-miR-125b|jt:ENSG00000110274|CEP164  
MEIS1|ENSG00000207971|hsa-mir-125b-1|hsa-miR-125b|jt:ENSG00000102313|ITIH5L  
MEIS1|ENSG00000207971|hsa-mir-125b-1|hsa-miR-125b|jt:ENSG00000129472|RAB2B  
MEIS1|ENSG00000207994|hsa-mir-100|hsa-miR-100|jt:ENSG00000152689|RASGRP3  
MEIS1|ENSG00000207994|hsa-mir-100|hsa-miR-100|jt:ENSG00000203837|PNL1PRP3  
MEIS1|ENSG00000207994|hsa-mir-100|hsa-miR-100|jt:ENSG00000177406|Q8N503\_HUMAN  
MEIS1|ENSG00000207994|hsa-mir-100|hsa-miR-100|jt:ENSG00000196432|Q9H5F0\_HUMAN  
MEIS1|ENSG00000207994|hsa-mir-100|hsa-miR-100|jt:ENSG00000162437|RAVER2  
MEIS1|ENSG00000207994|hsa-mir-100|hsa-miR-100|jt:ENSG00000185361|TNFAIP8L1  
MEIS1|ENSG00000207994|hsa-mir-100|hsa-miR-100|jt:ENSG00000144712|CAND2  
MEIS1|ENSG00000207994|hsa-mir-100|hsa-miR-100|jt:ENSG00000116017|ARID3A  
MEIS1|ENSG00000207994|hsa-mir-100|hsa-miR-100|jt:ENSG00000136840|ST6GALNAC4  
MEIS1|ENSG00000207994|hsa-mir-100|hsa-miR-100|jt:ENSG00000164108|Q9HAJ2\_HUMAN  
MEIS1|ENSG00000208024|hsa-mir-199a-2|hsa-miR-199a|jt:ENSG00000170430|MGMT  
MEIS1|ENSG00000208024|hsa-mir-199a-2|hsa-miR-199a|jt:ENSG00000196724|ZNF418  
MEIS1|ENSG00000208024|hsa-mir-199a-2|hsa-miR-199a|jt:ENSG00000129116|PALLD  
MEIS1|ENSG00000208024|hsa-mir-199a-2|hsa-miR-199a|jt:ENSG00000163599|CTLA4  
MEIS1|ENSG00000208024|hsa-mir-199a-2|hsa-miR-199a|jt:ENSG00000163263|C1orf189  
MEIS1|ENSG00000208024|hsa-mir-199a-2|hsa-miR-199a|jt:ENSG00000206198|NR\_001535.1  
MEIS1|ENSG00000208024|hsa-mir-199a-2|hsa-miR-199a|jt:ENSG00000173227|SYT12  
MEIS1|ENSG00000208024|hsa-mir-199a-2|hsa-miR-199a\*|jt:ENSG00000123178|C13orf1

MEIS1|ENSG00000208024|hsa-mir-199a-2|hsa-miR-199a\*|jt:ENSG00000146021|KLHL3  
MEIS1|ENSG00000208024|hsa-mir-199a-2|hsa-miR-199a\*|jt:ENSG00000131914|LIN28  
MEIS1|ENSG00000208024|hsa-mir-199a-2|hsa-miR-199a\*|jt:ENSG00000179151|EDC3  
MEIS1|ENSG00000208024|hsa-mir-199a-2|hsa-miR-199a\*|jt:ENSG00000005884|ITGA3  
MEIS1|ENSG00000208024|hsa-mir-199a-2|hsa-miR-199a\*|jt:ENSG00000130224|LRCH2  
MEIS1|ENSG00000208024|hsa-mir-199a-2|hsa-miR-199a\*|jt:ENSG00000132549|VPS13B  
MEIS1|ENSG00000208024|hsa-mir-199a-2|hsa-miR-199a\*|jt:ENSG00000180205|WFDC9  
MEIS1|ENSG00000208024|hsa-mir-199a-2|hsa-miR-199a\*|jt:ENSG00000162415|ZSWIM5  
MEIS1|ENSG00000208024|hsa-mir-199a-2|hsa-miR-199a\*|jt:ENSG00000159140|SON  
MEIS1|ENSG00000208024|hsa-mir-199a-2|hsa-miR-199a\*|jt:ENSG00000198757|Q96NB8\_HUMAN  
MEIS1|ENSG00000208024|hsa-mir-199a-2|hsa-miR-199a\*|jt:ENSG00000082458|DLG3  
MEIS1|ENSG00000208024|hsa-mir-199a-2|hsa-miR-199a\*|jt:ENSG00000134121|CHLL1  
MEIS1|ENSG00000208024|hsa-mir-199a-2|hsa-miR-199a\*|jt:ENSG00000163539|CLASP2  
MEIS1|ENSG00000208024|hsa-mir-199a-2|hsa-miR-199a\*|jt:ENSG00000104067|TJPI  
MEIS1|ENSG00000208024|hsa-mir-199a-2|hsa-miR-199a\*|jt:ENSG00000140598|EFTUD1  
MEIS1|ENSG00000208024|hsa-mir-199a-2|hsa-miR-199a\*|jt:ENSG00000120278|PLEKHG1  
MEIS1|ENSG00000208024|hsa-mir-199a-2|hsa-miR-199a\*|jt:ENSG00000204539|CDSN  
MEIS1|ENSG00000208024|hsa-mir-199a-2|hsa-miR-199a\*|jt:ENSG00000105329|TGFB1  
MEIS1|ENSG00000208024|hsa-mir-199a-2|hsa-miR-199a\*|jt:ENSG00000165156|ZHX1  
MEIS1|ENSG00000208024|hsa-mir-199a-2|hsa-miR-199a\*|jt:ENSG00000179456|ZNF238  
MEIS1|ENSG00000208024|hsa-mir-199a-2|hsa-miR-199a\*|jt:ENSG00000132963|POMP  
MEIS1|ENSG00000208024|hsa-mir-199a-2|hsa-miR-199a\*|jt:ENSG00000135919|SERPINE2  
MEIS1|ENSG00000208024|hsa-mir-199a-2|hsa-miR-199a\*|jt:ENSG00000177125|ZBTB34  
MEIS1|ENSG00000208024|hsa-mir-199a-2|hsa-miR-199a\*|jt:ENSG00000148411|BTBD14A  
MEIS1|ENSG00000208024|hsa-mir-199a-2|hsa-miR-199a\*|jt:ENSG00000072401|UBE2D1  
MEIS1|ENSG00000208024|hsa-mir-199a-2|hsa-miR-199a\*|jt:ENSG00000085511|MAP3K4  
MIF-1|ENSG00000199024|hsa-mir-103-2|hsa-miR-103|jt:ENSG00000159231|CBR3  
MIF-1|ENSG00000199024|hsa-mir-103-2|hsa-miR-103|jt:ENSG00000107738|C10orf54  
MIF-1|ENSG00000207808|hsa-mir-27a|hsa-miR-27a|jt:ENSG00000101958|GLRA2  
MIF-1|ENSG00000207808|hsa-mir-27a|hsa-miR-27a|jt:ENSG00000174574|C1orf108  
MIF-1|ENSG00000207808|hsa-mir-27a|hsa-miR-27a|jt:ENSG00000129816|NR\_001538.1  
MIF-1|ENSG00000207808|hsa-mir-27a|hsa-miR-27a|jt:ENSG00000129845|O14605\_HUMAN  
MIF-1|ENSG00000207808|hsa-mir-27a|hsa-miR-27a|jt:ENSG00000114316|USP4  
MIF-1|ENSG00000207980|hsa-mir-23a|hsa-miR-23a|jt:ENSG00000103591|P34\_HUMAN  
MIF-1|ENSG00000207980|hsa-mir-23a|hsa-miR-23a|jt:ENSG00000105053|VRK3  
MIF-1|ENSG00000207980|hsa-mir-23a|hsa-miR-23a|jt:ENSG00000106366|SERPINE1  
MIF-1|ENSG00000207980|hsa-mir-23a|hsa-miR-23a|jt:ENSG00000100784|RPS6KA5  
MIF-1|ENSG00000207980|hsa-mir-23a|hsa-miR-23a|jt:ENSG00000168016|Q8N8K0\_HUMAN  
MIF-1|ENSG00000207980|hsa-mir-23a|hsa-miR-23a|jt:ENSG00000204862|CCDC28A  
MIF-1|ENSG00000207980|hsa-mir-23a|hsa-miR-23a|jt:ENSG00000150045|KLRF1  
MIF-1|ENSG00000209707|hsa-mir-24-2|hsa-miR-24|jt:ENSG00000206113|Q6ZU27\_HUMAN  
MIF-1|ENSG00000209707|hsa-mir-24-2|hsa-miR-24|jt:ENSG00000162430|SEPN1  
MIF-1|ENSG00000209707|hsa-mir-24-2|hsa-miR-24|jt:ENSG00000101040|ZMYND8  
MIF-1|ENSG00000207562|hsa-mir-34c|hsa-miR-34c|jt:ENSG00000177303|CASKIN2  
MIF-1|ENSG00000207811|hsa-mir-34b|hsa-miR-34b|jt:ENSG00000177303|CASKIN2  
MYC|ENSG00000199089|hsa-mir-202|hsa-miR-202|jt:ENSG00000119048|UBE2B  
MYC|ENSG00000199089|hsa-mir-202|hsa-miR-202|jt:ENSG00000133121|STARD13  
MYC|ENSG00000199089|hsa-mir-202|hsa-miR-202|jt:ENSG00000176422|SPRYD4  
MYC|ENSG00000199089|hsa-mir-202|hsa-miR-202|jt:ENSG00000198535|NP\_997205.1  
MYC|ENSG00000199089|hsa-mir-202|hsa-miR-202|jt:ENSG00000171970|ZNF57  
MYC|ENSG00000199089|hsa-mir-202|hsa-miR-202|jt:ENSG00000138646|HERC5  
MYC|ENSG00000199089|hsa-mir-202|hsa-miR-202|jt:ENSG00000186827|TNFRSF4  
MYC|ENSG00000199089|hsa-mir-202|hsa-miR-202|jt:ENSG00000172840|PDP2\_HUMAN  
MYC|ENSG00000199089|hsa-mir-202|hsa-miR-202|jt:ENSG00000187164|KIAA1598  
MYC|ENSG00000199089|hsa-mir-202|hsa-miR-202|jt:ENSG00000104660|LEPROTL1  
MYC|ENSG00000199089|hsa-mir-202|hsa-miR-202|jt:ENSG00000143727|ACPI1  
MYC|ENSG00000199089|hsa-mir-202|hsa-miR-202|jt:ENSG00000110583|NAT11  
MYC|ENSG00000199089|hsa-mir-202|hsa-miR-202\*|jt:ENSG00000133104|SPG20  
MYC|ENSG00000199089|hsa-mir-202|hsa-miR-202\*|jt:ENSG00000146476|C6orf211  
MYC|ENSG00000199089|hsa-mir-202|hsa-miR-202\*|jt:ENSG00000184785|Q96HG1\_HUMAN  
MYC|ENSG00000199149|hsa-mir-20a|hsa-miR-20a|jt:ENSG00000122870|BICC1  
MYC|ENSG00000199149|hsa-mir-20a|hsa-miR-20a|jt:ENSG00000130413|STK33  
MYC|ENSG00000199149|hsa-mir-20a|hsa-miR-20a|jt:ENSG00000100987|VXS1  
MYC|ENSG00000199149|hsa-mir-20a|hsa-miR-20a|jt:ENSG00000104517|EDD1  
MYC|ENSG00000199149|hsa-mir-20a|hsa-miR-20a|jt:ENSG00000140090|SLC24A4  
MYC|ENSG00000199149|hsa-mir-20a|hsa-miR-20a|jt:ENSG00000102908|NFAT5  
MYC|ENSG00000199149|hsa-mir-20a|hsa-miR-20a|jt:ENSG00000101412|E2F1  
MYC|ENSG00000199149|hsa-mir-20a|hsa-miR-20a|jt:ENSG00000157617|C21orf25  
MYC|ENSG00000199149|hsa-mir-20a|hsa-miR-20a|jt:ENSG00000160401|C9orf117  
MYC|ENSG00000199149|hsa-mir-20a|hsa-miR-20a|jt:ENSG00000085274|MYNN  
MYC|ENSG00000199187|hsa-mir-365-2|hsa-miR-365|jt:ENSG00000100030|MAPK1  
MYC|ENSG00000199187|hsa-mir-365-2|hsa-miR-365|jt:ENSG00000183735|TBK1  
MYC|ENSG00000207585|hsa-mir-181d|hsa-miR-181d|jt:ENSG00000138756|BMP2K  
MYC|ENSG00000207585|hsa-mir-181d|hsa-miR-181d|jt:ENSG00000106366|SERPINE1  
MYC|ENSG00000207585|hsa-mir-181d|hsa-miR-181d|jt:ENSG00000163463|KRTCAP2  
MYC|ENSG00000207585|hsa-mir-181d|hsa-miR-181d|jt:ENSG00000101849|TBL1X  
MYC|ENSG00000207585|hsa-mir-181d|hsa-miR-181d|jt:ENSG00000113649|TCERG1  
MYC|ENSG00000207585|hsa-mir-181d|hsa-miR-181d|jt:ENSG00000117000|RLF  
MYC|ENSG00000207585|hsa-mir-181d|hsa-miR-181d|jt:ENSG00000101265|RASSF2  
MYC|ENSG00000207585|hsa-mir-181d|hsa-miR-181d|jt:ENSG00000129244|ATP1B2  
MYC|ENSG00000207585|hsa-mir-181d|hsa-miR-181d|jt:ENSG00000131969|ABHD12B  
MYC|ENSG00000207585|hsa-mir-181d|hsa-miR-181d|jt:ENSG00000197586|ENTPD6  
MYC|ENSG00000207585|hsa-mir-181d|hsa-miR-181d|jt:ENSG00000119599|WDR21A  
MYC|ENSG00000207585|hsa-mir-181d|hsa-miR-181d|jt:ENSG00000144677|CTDSP1  
MYC|ENSG00000207610|hsa-mir-19a|hsa-miR-19a|jt:ENSG00000152049|KCNE4  
MYC|ENSG00000207610|hsa-mir-19a|hsa-miR-19a|jt:ENSG00000130413|STK33  
MYC|ENSG00000207610|hsa-mir-19a|hsa-miR-19a|jt:ENSG00000103200|NME4  
MYC|ENSG00000207610|hsa-mir-19a|hsa-miR-19a|jt:ENSG00000183519|NSUN5B  
MYC|ENSG00000207610|hsa-mir-19a|hsa-miR-19a|jt:ENSG00000100784|RPS6KA5  
MYC|ENSG00000207610|hsa-mir-19a|hsa-miR-19a|jt:ENSG00000162992|NEUROD1  
MYC|ENSG00000207610|hsa-mir-19a|hsa-miR-19a|jt:ENSG00000130305|NSUN5  
MYC|ENSG00000207610|hsa-mir-19a|hsa-miR-19a|jt:ENSG00000179036|VAMP2  
MYC|ENSG00000207610|hsa-mir-19a|hsa-miR-19a|jt:ENSG00000198718|KIAA0423  
MYC|ENSG00000207610|hsa-mir-19a|hsa-miR-19a|jt:ENSG00000167483|FAM129C  
MYC|ENSG00000207610|hsa-mir-19a|hsa-miR-19a|jt:ENSG00000078699|CBFA2T2  
MYC|ENSG00000207610|hsa-mir-19a|hsa-miR-19a|jt:ENSG00000081479|LRP2  
MYC|ENSG00000207610|hsa-mir-19a|hsa-miR-19a|jt:ENSG00000134769|DTNA  
MYC|ENSG00000207610|hsa-mir-193a|hsa-miR-193a|jt:ENSG00000189429|RNF207  
MYC|ENSG00000207614|hsa-mir-193a|hsa-miR-193a|jt:ENSG00000185875|THNSL1  
MYC|ENSG00000207614|hsa-mir-193a|hsa-miR-193a|jt:ENSG00000155256|ZFYVE27  
MYC|ENSG00000207614|hsa-mir-193a|hsa-miR-193a|jt:ENSG00000184470|TXNFRD2  
MYC|ENSG00000207614|hsa-mir-193a|hsa-miR-193a|jt:ENSG00000078070|MCCC1  
MYC|ENSG00000207614|hsa-mir-193a|hsa-miR-193a|jt:ENSG00000174456|NP\_997318.1  
MYC|ENSG00000207614|hsa-mir-193a|hsa-miR-193a|jt:ENSG00000183828|NUDT14  
MYC|ENSG00000207614|hsa-mir-193a|hsa-miR-193a|jt:ENSG00000054392|HHAT

MYC|ENSG00000207614|hsa-mir-193a|hsa-miR-193a|jt:ENSG00000196084|UBIQ\_HUMAN  
MYC|ENSG00000207614|hsa-mir-193a|hsa-miR-193a|jt:ENSG00000108932|SLC16A6  
MYC|ENSG00000207614|hsa-mir-193a|hsa-miR-193a|jt:ENSG00000158089|GALNT14  
MYC|ENSG00000207614|hsa-mir-193a|hsa-miR-193a|jt:ENSG00000137478|FCHSD2  
MYC|ENSG00000207614|hsa-mir-193a|hsa-miR-193a|jt:ENSG00000139641|FAM62A  
MYC|ENSG00000207635|hsa-mir-499|hsa-miR-499|jt:ENSG00000163788|SNRK  
MYC|ENSG00000207745|hsa-mir-17|hsa-miR-17-5p|jt:ENSG00000106683|LIMK1  
MYC|ENSG00000207745|hsa-mir-17|hsa-miR-17-5p|jt:ENSG00000130413|STK33  
MYC|ENSG00000207745|hsa-mir-17|hsa-miR-17-5p|jt:ENSG00000170390|DCLK2  
MYC|ENSG00000207745|hsa-mir-17|hsa-miR-17-5p|jt:ENSG00000100987|VSX1  
MYC|ENSG00000207745|hsa-mir-17|hsa-miR-17-5p|jt:ENSG00000104517|EDD1  
MYC|ENSG00000207745|hsa-mir-17|hsa-miR-17-5p|jt:ENSG00000135801|TAF5L  
MYC|ENSG00000207745|hsa-mir-17|hsa-miR-17-5p|jt:ENSG00000100644|HIF1A  
MYC|ENSG00000207745|hsa-mir-17|hsa-miR-17-5p|jt:ENSG00000203793|Q6ZR74\_HUMAN  
MYC|ENSG00000207745|hsa-mir-17|hsa-miR-17-5p|jt:ENSG00000144645|OSBPL10  
MYC|ENSG00000207745|hsa-mir-17|hsa-miR-17-5p|jt:ENSG00000101412|E2F1  
MYC|ENSG00000207745|hsa-mir-17|hsa-miR-17-5p|jt:ENSG00000143727|ACP1  
MYC|ENSG00000207745|hsa-mir-17|hsa-miR-17-5p|jt:ENSG00000085274|MYNN  
MYC|ENSG00000207745|hsa-mir-17|hsa-miR-17-5p|jt:ENSG00000131584|CENTB5  
MYC|ENSG00000207745|hsa-mir-17|hsa-miR-17-5p|jt:ENSG00000119125|GDA  
MYC|ENSG00000207950|hsa-mir-296|hsa-miR-296|jt:ENSG00000139515|PDX1  
MYC|ENSG00000207950|hsa-mir-296|hsa-miR-296|jt:ENSG00000178947|Q86V52\_HUMAN  
MYC|ENSG00000207950|hsa-mir-296|hsa-miR-296|jt:ENSG00000167680|SEMA6B  
MYC|ENSG00000207950|hsa-mir-296|hsa-miR-296|jt:ENSG00000123933|MXD4  
MYC|ENSG00000207950|hsa-mir-296|hsa-miR-296|jt:ENSG00000104783|KCNN4  
MYC|ENSG00000207950|hsa-mir-296|hsa-miR-296|jt:ENSG00000141526|SLC16A3  
MYOD|ENSG00000198973|hsa-mir-375|hsa-miR-375|jt:ENSG00000154874|NP\_872374.3  
MYOD|ENSG00000198973|hsa-mir-375|hsa-miR-375|jt:ENSG00000108551|RASD1  
MYOD|ENSG00000198973|hsa-mir-375|hsa-miR-375|jt:ENSG00000166272|C10orf26  
MYOD|ENSG00000198973|hsa-mir-375|hsa-miR-375|jt:ENSG00000162337|LRP5  
MYOD|ENSG00000198973|hsa-mir-375|hsa-miR-375|jt:ENSG00000205566|Q8TB02\_HUMAN  
MYOD|ENSG00000198973|hsa-mir-375|hsa-miR-375|jt:ENSG00000151806|GUF1  
MYOD|ENSG00000198973|hsa-mir-375|hsa-miR-375|jt:ENSG00000117519|CNN3  
MYOD|ENSG00000198973|hsa-mir-375|hsa-miR-375|jt:ENSG00000088179|PTPN4  
MYOD|ENSG00000198973|hsa-mir-375|hsa-miR-375|jt:ENSG00000123472|ATPAF1  
MYOD|ENSG00000198973|hsa-mir-375|hsa-miR-375|jt:ENSG00000162595|DIRAS3  
MYOD|ENSG00000198973|hsa-mir-375|hsa-miR-375|jt:ENSG00000148702|HABP2  
MYOD|ENSG00000198973|hsa-mir-375|hsa-miR-375|jt:ENSG00000171885|AQP4  
MYOD|ENSG00000199032|hsa-mir-425|hsa-miR-425-3p|jt:ENSG00000182557|SPNS3  
MYOD|ENSG00000199032|hsa-mir-425|hsa-miR-425-3p|jt:ENSG00000178538|CA8  
MYOD|ENSG00000199032|hsa-mir-425|hsa-miR-425-3p|jt:ENSG00000176046|NUPR1\_HUMAN  
MYOD|ENSG00000199032|hsa-mir-425|hsa-miR-425-3p|jt:ENSG00000198382|UVRAG  
MYOD|ENSG00000199032|hsa-mir-425|hsa-miR-425-3p|jt:ENSG00000067560|RHOA  
MYOD|ENSG00000199036|hsa-mir-219-1|hsa-miR-219|jt:ENSG00000196877|NP\_001018132.2  
MYOD|ENSG00000199036|hsa-mir-219-1|hsa-miR-219|jt:ENSG00000133511|PIK4CA  
MYOD|ENSG00000199036|hsa-mir-219-1|hsa-miR-219|jt:ENSG00000182107|TMEM30B  
MYOD|ENSG00000199036|hsa-mir-219-1|hsa-miR-219|jt:ENSG00000178226|PRSS36  
MYOD|ENSG00000199036|hsa-mir-219-1|hsa-miR-219|jt:ENSG00000189325|NP\_001010903.2  
MYOD|ENSG00000199036|hsa-mir-219-1|hsa-miR-219|jt:ENSG00000197364|S100A7L2  
MYOD|ENSG00000199036|hsa-mir-219-1|hsa-miR-219|jt:ENSG00000133985|TTC9  
MYOD|ENSG00000199036|hsa-mir-219-1|hsa-miR-219|jt:ENSG00000188193|C6orf155  
MYOD|ENSG00000199036|hsa-mir-219-1|hsa-miR-219|jt:ENSG00000185133|PIB5PA  
MYOD|ENSG00000199036|hsa-mir-219-1|hsa-miR-219|jt:ENSG00000140416|TPM1  
MYOD|ENSG00000199036|hsa-mir-219-1|hsa-miR-219|jt:ENSG00000161031|PGLYRP2  
MYOD|ENSG00000199036|hsa-mir-219-1|hsa-miR-219|jt:ENSG00000106665|CLIP2  
MYOD|ENSG00000199036|hsa-mir-219-1|hsa-miR-219|jt:ENSG00000112246|SIM1  
MYOD|ENSG00000207568|hsa-mir-203|hsa-miR-203|jt:ENSG00000153575|TUBGCP5  
MYOD|ENSG00000207568|hsa-mir-203|hsa-miR-203|jt:ENSG00000188483|IER5L  
MYOD|ENSG00000207568|hsa-mir-203|hsa-miR-203|jt:ENSG00000143322|ABL2  
MYOD|ENSG00000207568|hsa-mir-203|hsa-miR-203|jt:ENSG00000162702|ZNF281  
MYOD|ENSG00000207568|hsa-mir-203|hsa-miR-203|jt:ENSG00000135114|OASL  
MYOD|ENSG00000207568|hsa-mir-203|hsa-miR-203|jt:ENSG00000104824|HNRFL  
MYOD|ENSG00000207572|hsa-mir-363|hsa-miR-363|jt:ENSG00000165943|MOAP1  
MYOD|ENSG00000207572|hsa-mir-363|hsa-miR-363|jt:ENSG00000114124|GRK7  
MYOD|ENSG00000207572|hsa-mir-363|hsa-miR-363|jt:ENSG00000163694|NP\_061900.1  
MYOD|ENSG00000207572|hsa-mir-363|hsa-miR-363|jt:ENSG00000069812|HES2  
MYOD|ENSG00000207572|hsa-mir-363|hsa-miR-363|jt:ENSG00000066634|DBF4  
MYOD|ENSG00000207572|hsa-mir-363|hsa-miR-363|jt:ENSG00000136478|TEX2  
MYOD|ENSG00000207572|hsa-mir-363|hsa-miR-363|jt:ENSG00000143164|IQWD1  
MYOD|ENSG00000207572|hsa-mir-363|hsa-miR-363|jt:ENSG00000180458|Q8N3U1\_HUMAN  
MYOD|ENSG00000207572|hsa-mir-363|hsa-miR-363|jt:ENSG00000205875|LOC197350  
MYOD|ENSG00000207572|hsa-mir-363|hsa-miR-363|jt:ENSG00000125351|UPF3B  
MYOD|ENSG00000207572|hsa-mir-363|hsa-miR-363|jt:ENSG00000197713|RPE  
MYOD|ENSG00000207572|hsa-mir-363|hsa-miR-363|jt:ENSG00000180104|EXOC3  
MYOD|ENSG00000207572|hsa-mir-363|hsa-miR-363|jt:ENSG00000147124|ZNF41  
MYOD|ENSG00000207602|hsa-mir-106a|hsa-miR-106a|jt:ENSG00000145362|ANK2  
MYOD|ENSG00000207602|hsa-mir-106a|hsa-miR-106a|jt:ENSG00000169662|NP\_997357.1  
MYOD|ENSG00000207602|hsa-mir-106a|hsa-miR-106a|jt:ENSG00000189409|MMP23A  
MYOD|ENSG00000207602|hsa-mir-106a|hsa-miR-106a|jt:ENSG0000011454|RABGAP1  
MYOD|ENSG00000207602|hsa-mir-106a|hsa-miR-106a|jt:ENSG00000196460|Q6ZNB4\_HUMAN  
MYOD|ENSG00000207602|hsa-mir-106a|hsa-miR-106a|jt:ENSG0000027697|IFNGR1  
MYOD|ENSG00000207602|hsa-mir-106a|hsa-miR-106a|jt:ENSG00000050405|LIMA1  
MYOD|ENSG00000207602|hsa-mir-106a|hsa-miR-106a|jt:ENSG00000153234|NR4A2  
MYOD|ENSG00000207602|hsa-mir-106a|hsa-miR-106a|jt:ENSG00000186951|PPARA  
MYOD|ENSG00000207602|hsa-mir-106a|hsa-miR-106a|jt:ENSG00000173627|APOBEC4  
MYOD|ENSG00000207602|hsa-mir-106a|hsa-miR-106a|jt:ENSG00000147036|LANCL3  
MYOD|ENSG00000207602|hsa-mir-106a|hsa-miR-106a|jt:ENSG00000115561|VPS24  
MYOD|ENSG00000207602|hsa-mir-106a|hsa-miR-106a|jt:ENSG00000138449|SLC40A1  
MYOD|ENSG00000207602|hsa-mir-106a|hsa-miR-106a|jt:ENSG00000146360|GPR6  
MYOD|ENSG00000207602|hsa-mir-106a|hsa-miR-106a|jt:ENSG00000104888|SLC17A7  
MYOD|ENSG00000207602|hsa-mir-106a|hsa-miR-106a|jt:ENSG00000185722|ANKFY1  
MYOD|ENSG00000207602|hsa-mir-106a|hsa-miR-106a|jt:ENSG00000171885|AQP4  
MYOD|ENSG00000207623|hsa-mir-205|hsa-miR-205|jt:ENSG00000066634|DBF4  
MYOD|ENSG00000207623|hsa-mir-205|hsa-miR-205|jt:ENSG00000189325|NP\_001010903.2  
MYOD|ENSG00000207623|hsa-mir-205|hsa-miR-205|jt:ENSG00000109906|ZBTB16  
MYOD|ENSG00000207710|hsa-mir-20b|hsa-miR-20b|jt:ENSG00000145362|ANK2  
MYOD|ENSG00000207710|hsa-mir-20b|hsa-miR-20b|jt:ENSG00000169509|CRCT1  
MYOD|ENSG00000207710|hsa-mir-20b|hsa-miR-20b|jt:ENSG00000189409|MMP23A  
MYOD|ENSG00000207710|hsa-mir-20b|hsa-miR-20b|jt:ENSG0000011454|RABGAP1  
MYOD|ENSG00000207710|hsa-mir-20b|hsa-miR-20b|jt:ENSG00000196460|Q6ZNB4\_HUMAN  
MYOD|ENSG00000207710|hsa-mir-20b|hsa-miR-20b|jt:ENSG00000050405|LIMA1  
MYOD|ENSG00000207710|hsa-mir-20b|hsa-miR-20b|jt:ENSG00000153234|NR4A2  
MYOD|ENSG00000207710|hsa-mir-20b|hsa-miR-20b|jt:ENSG00000187699|Q8NBX4\_HUMAN  
MYOD|ENSG00000207710|hsa-mir-20b|hsa-miR-20b|jt:ENSG00000173627|APOBEC4  
MYOD|ENSG00000207710|hsa-mir-20b|hsa-miR-20b|jt:ENSG00000135801|TAF5L

MYOD|ENSG00000207710|hsa-mir-20b|hsa-miR-20b|jt:ENSG00000170390|DCLK2  
MYOD|ENSG00000207710|hsa-mir-20b|hsa-miR-20b|jt:ENSG00000147036|LANCL3  
MYOD|ENSG00000207710|hsa-mir-20b|hsa-miR-20b|jt:ENSG00000115561|VPS24  
MYOD|ENSG00000207710|hsa-mir-20b|hsa-miR-20b|jt:ENSG00000138449|SLC40A1  
MYOD|ENSG00000207710|hsa-mir-20b|hsa-miR-20b|jt:ENSG00000146360|GPR6  
MYOD|ENSG00000207710|hsa-mir-20b|hsa-miR-20b|jt:ENSG00000104888|SLC17A7  
MYOD|ENSG00000207732|hsa-mir-218-1|hsa-miR-218|jt:ENSG00000182533|CAV3  
MYOD|ENSG00000207732|hsa-mir-218-1|hsa-miR-218|jt:ENSG00000158578|ALAS2  
MYOD|ENSG00000207732|hsa-mir-218-1|hsa-miR-218|jt:ENSG00000181852|RNF41  
MYOD|ENSG00000207732|hsa-mir-218-1|hsa-miR-218|jt:ENSG00000170516|COX7B2  
MYOD|ENSG00000207732|hsa-mir-218-1|hsa-miR-218|jt:ENSG00000184434|LRRRC19  
MYOD|ENSG00000207732|hsa-mir-218-1|hsa-miR-218|jt:ENSG00000180354|C7orf41  
MYOD|ENSG00000207732|hsa-mir-218-1|hsa-miR-218|jt:ENSG00000188428|TXNDC5  
MYOD|ENSG00000207732|hsa-mir-218-1|hsa-miR-218|jt:ENSG00000138604|GLCE  
MYOD|ENSG00000207732|hsa-mir-218-1|hsa-miR-218|jt:ENSG00000085978|ATG16L1  
MYOD|ENSG00000207732|hsa-mir-218-1|hsa-miR-218|jt:ENSG00000198589|LRBA  
MYOD|ENSG00000207732|hsa-mir-218-1|hsa-miR-218|jt:ENSG00000185053|SGCZ  
MYOD|ENSG00000207732|hsa-mir-218-1|hsa-miR-218|jt:ENSG00000185933|FAM26C  
MYOD|ENSG00000207732|hsa-mir-218-1|hsa-miR-218|jt:ENSG00000205052|Q6ZSS1\_HUMAN  
MYOD|ENSG00000207784|hsa-mir-542|hsa-miR-542-3p|jt:ENSG00000068976|PYGM  
MYOD|ENSG00000207784|hsa-mir-542|hsa-miR-542-3p|jt:ENSG00000175315|CST6  
MYOD|ENSG00000207784|hsa-mir-542|hsa-miR-542-3p|jt:ENSG00000198307|H2AFB2  
MYOD|ENSG00000207784|hsa-mir-542|hsa-miR-542-3p|jt:ENSG00000126214|KLC1  
MYOD|ENSG00000207865|hsa-mir-34a|hsa-miR-34a|jt:ENSG00000204619|PPP1R11  
MYOD|ENSG00000207865|hsa-mir-34a|hsa-miR-34a|jt:ENSG00000053918|KCNQ1  
MYOD|ENSG00000207865|hsa-mir-34a|hsa-miR-34a|jt:ENSG00000149575|SCN2B  
MYOD|ENSG00000207865|hsa-mir-34a|hsa-miR-34a|jt:ENSG00000175592|FOSL1  
MYOD|ENSG00000207865|hsa-mir-34a|hsa-miR-34a|jt:ENSG00000133740|E2F5  
MYOD|ENSG00000207865|hsa-mir-34a|hsa-miR-34a|jt:ENSG00000168994|C6orf145  
MYOD|ENSG00000207865|hsa-mir-34a|hsa-miR-34a|jt:ENSG00000182749|PAQR7  
MYOD|ENSG00000208017|hsa-mir-140|hsa-miR-140|jt:ENSG00000145362|ANK2  
MYOD|ENSG00000208017|hsa-mir-140|hsa-miR-140|jt:ENSG00000182490|TSSK2  
MYOD|ENSG00000208017|hsa-mir-140|hsa-miR-140|jt:ENSG00000086232|EIF2AK1  
MYOD|ENSG00000208017|hsa-mir-140|hsa-miR-140|jt:ENSG00000188816|HMX2  
MYOD|ENSG00000208017|hsa-mir-140|hsa-miR-140|jt:ENSG00000154096|THY1  
MYOD|ENSG00000208017|hsa-mir-140|hsa-miR-140|jt:ENSG00000158578|ALAS2  
MYOD|ENSG00000208017|hsa-mir-140|hsa-miR-140|jt:ENSG00000159650|UROC1  
MYOD|ENSG00000208017|hsa-mir-140|hsa-miR-140|jt:ENSG00000205111|CDKL4  
MYOD|ENSG00000208017|hsa-mir-140|hsa-miR-140|jt:ENSG00000186951|PPARA  
MYOD|ENSG00000208017|hsa-mir-140|hsa-miR-140|jt:ENSG00000165168|CYBB  
MYOD|ENSG00000208017|hsa-mir-140|hsa-miR-140|jt:ENSG00000118898|PPL  
MYOD|ENSG00000208017|hsa-mir-140|hsa-miR-140|jt:ENSG00000101290|CDS2  
MYOD|ENSG00000208017|hsa-mir-140|hsa-miR-140|jt:ENSG00000156925|ZIC3  
NCX|ENSG00000198972|hsa-let-7e|hsa-let-7e|jt:ENSG00000187109|NAP1L1  
NCX|ENSG00000198972|hsa-let-7e|hsa-let-7e|jt:ENSG00000187772|LIN28B  
NCX|ENSG00000198972|hsa-let-7e|hsa-let-7e|jt:ENSG00000197948|FCHSD1  
NCX|ENSG00000198972|hsa-let-7e|hsa-let-7e|jt:ENSG00000125741|OPA3  
NCX|ENSG00000198972|hsa-let-7e|hsa-let-7e|jt:ENSG00000136770|DNAJC1  
NCX|ENSG00000198972|hsa-let-7e|hsa-let-7e|jt:ENSG00000163104|SMARCAAD1  
NCX|ENSG00000198972|hsa-let-7e|hsa-let-7e|jt:ENSG00000171365|CLCN5  
NCX|ENSG00000198972|hsa-let-7e|hsa-let-7e|jt:ENSG00000160094|ZNF362  
NCX|ENSG00000198972|hsa-let-7e|hsa-let-7e|jt:ENSG00000179165|PXT1  
NCX|ENSG00000199065|hsa-mir-101-2|hsa-miR-101|jt:ENSG00000151292|CSNK1G3  
NCX|ENSG00000199065|hsa-mir-101-2|hsa-miR-101|jt:ENSG0000011638|TMEM159  
NCX|ENSG00000199065|hsa-mir-101-2|hsa-miR-101|jt:ENSG00000088854|C20orf194  
NCX|ENSG00000199065|hsa-mir-101-2|hsa-miR-101|jt:ENSG00000188807|NP\_001010866.1  
NCX|ENSG00000199065|hsa-mir-101-2|hsa-miR-101|jt:ENSG00000151690|NP\_060164.3  
NCX|ENSG00000199149|hsa-mir-20a|hsa-miR-20a|jt:ENSG00000175155|YPEL2  
NCX|ENSG00000199149|hsa-mir-20a|hsa-miR-20a|jt:ENSG00000143107|FNDC7  
NCX|ENSG00000199149|hsa-mir-20a|hsa-miR-20a|jt:ENSG00000166435|XRR1A  
NCX|ENSG00000199149|hsa-mir-20a|hsa-miR-20a|jt:ENSG00000050405|LIMA1  
NCX|ENSG00000199149|hsa-mir-20a|hsa-miR-20a|jt:ENSG00000196460|Q6ZNB4\_HUMAN  
NCX|ENSG00000199149|hsa-mir-20a|hsa-miR-20a|jt:ENSG00000145362|ANK2  
NCX|ENSG00000199149|hsa-mir-20a|hsa-miR-20a|jt:ENSG00000136935|GOLGA1  
NCX|ENSG00000207550|hsa-mir-99b|hsa-miR-99b|jt:ENSG00000112299|VNN1  
NCX|ENSG00000207572|hsa-mir-363|hsa-miR-363|jt:ENSG00000126432|PRDX5  
NCX|ENSG00000207572|hsa-mir-363|hsa-miR-363|jt:ENSG00000143450|OAZ3  
NCX|ENSG00000207572|hsa-mir-363|hsa-miR-363|jt:ENSG00000204248|COL11A2  
NCX|ENSG00000207572|hsa-mir-363|hsa-miR-363|jt:ENSG00000205830|NP\_997373.1  
NCX|ENSG00000207572|hsa-mir-363|hsa-miR-363|jt:ENSG00000173517|SG269\_HUMAN  
NCX|ENSG00000207572|hsa-mir-363|hsa-miR-363|jt:ENSG00000136895|GARNL3  
NCX|ENSG00000207572|hsa-mir-363|hsa-miR-363|jt:ENSG00000198089|SFT1  
NCX|ENSG00000207572|hsa-mir-363|hsa-miR-363|jt:ENSG00000081377|CDC14C  
NCX|ENSG00000207572|hsa-mir-363|hsa-miR-363|jt:ENSG00000178110|Q8N9G9\_HUMAN  
NCX|ENSG00000207602|hsa-mir-106a|hsa-miR-106a|jt:ENSG00000143107|FNDC7  
NCX|ENSG00000207602|hsa-mir-106a|hsa-miR-106a|jt:ENSG00000205937|RNPS1  
NCX|ENSG00000207602|hsa-mir-106a|hsa-miR-106a|jt:ENSG00000184384|MAML2  
NCX|ENSG00000207602|hsa-mir-106a|hsa-miR-106a|jt:ENSG00000166435|XRR1A  
NCX|ENSG00000207602|hsa-mir-106a|hsa-miR-106a|jt:ENSG00000050405|LIMA1  
NCX|ENSG00000207602|hsa-mir-106a|hsa-miR-106a|jt:ENSG00000196460|Q6ZNB4\_HUMAN  
NCX|ENSG00000207602|hsa-mir-106a|hsa-miR-106a|jt:ENSG00000145362|ANK2  
NCX|ENSG00000207602|hsa-mir-106a|hsa-miR-106a|jt:ENSG00000204118|NAP1L6  
NCX|ENSG00000207602|hsa-mir-106a|hsa-miR-106a|jt:ENSG00000142583|SLC2A5  
NCX|ENSG00000207610|hsa-mir-19a|hsa-miR-19a|jt:ENSG00000155189|AGPAT5  
NCX|ENSG00000207610|hsa-mir-19a|hsa-miR-19a|jt:ENSG00000163596|ICAL1  
NCX|ENSG00000207610|hsa-mir-19a|hsa-miR-19a|jt:ENSG00000117601|SERPINC1  
NCX|ENSG00000207610|hsa-mir-19a|hsa-miR-19a|jt:ENSG00000124788|ATXN1  
NCX|ENSG00000207610|hsa-mir-19a|hsa-miR-19a|jt:ENSG00000187155|CUO85\_HUMAN  
NCX|ENSG00000207610|hsa-mir-19a|hsa-miR-19a|jt:ENSG00000113648|H2AFY  
NCX|ENSG00000207610|hsa-mir-19a|hsa-miR-19a|jt:ENSG00000100249|C22orf31  
NCX|ENSG00000207610|hsa-mir-19a|hsa-miR-19a|jt:ENSG00000185112|FAM43A  
NCX|ENSG00000207638|hsa-mir-99a|hsa-miR-99a|jt:ENSG00000112299|VNN1  
NCX|ENSG00000207710|hsa-mir-20b|hsa-miR-20b|jt:ENSG00000143107|FNDC7  
NCX|ENSG00000207710|hsa-mir-20b|hsa-miR-20b|jt:ENSG00000166435|XRR1A  
NCX|ENSG00000207710|hsa-mir-20b|hsa-miR-20b|jt:ENSG00000050405|LIMA1  
NCX|ENSG00000207710|hsa-mir-20b|hsa-miR-20b|jt:ENSG00000143622|RIT1  
NCX|ENSG00000207710|hsa-mir-20b|hsa-miR-20b|jt:ENSG00000196460|Q6ZNB4\_HUMAN  
NCX|ENSG00000207710|hsa-mir-20b|hsa-miR-20b|jt:ENSG00000145362|ANK2  
NCX|ENSG00000207745|hsa-mir-17|hsa-miR-17-5p|jt:ENSG00000143107|FNDC7  
NCX|ENSG00000207745|hsa-mir-17|hsa-miR-17-5p|jt:ENSG00000166435|XRR1A  
NCX|ENSG00000207745|hsa-mir-17|hsa-miR-17-5p|jt:ENSG00000050405|LIMA1  
NCX|ENSG00000207745|hsa-mir-17|hsa-miR-17-5p|jt:ENSG00000143622|RIT1  
NCX|ENSG00000207745|hsa-mir-17|hsa-miR-17-5p|jt:ENSG00000196460|Q6ZNB4\_HUMAN  
NCX|ENSG00000207745|hsa-mir-17|hsa-miR-17-5p|jt:ENSG00000145362|ANK2  
NCX|ENSG00000207784|hsa-mir-542|hsa-miR-542-3p|jt:ENSG00000142208|AKT1



NCX|ENSG00000207784|hsa-mir-542|hsa-miR-542-3p|jt:ENSG00000113580|NR3C1  
NCX|ENSG00000207792|hsa-mir-151|hsa-miR-151|jt:ENSG00000135346|CGA  
NCX|ENSG00000207792|hsa-mir-151|hsa-miR-151|jt:ENSG00000102271|KLHL4  
NCX|ENSG00000207792|hsa-mir-151|hsa-miR-151|jt:ENSG00000136940|PDL  
NCX|ENSG00000207792|hsa-mir-151|hsa-miR-151|jt:ENSG00000147869|CER1  
NCX|ENSG00000207792|hsa-mir-151|hsa-miR-151|jt:ENSG00000102243|VGLL1  
NCX|ENSG00000207863|hsa-mir-125b-2|hsa-miR-125b|jt:ENSG00000125449|ARMC7  
NCX|ENSG00000207863|hsa-mir-125b-2|hsa-miR-125b|jt:ENSG00000153885|KCTD15  
NCX|ENSG00000207863|hsa-mir-125b-2|hsa-miR-125b|jt:ENSG00000089639|GMIP  
NCX|ENSG00000207863|hsa-mir-125b-2|hsa-miR-125b|jt:ENSG00000136895|GARNL3  
NCX|ENSG00000207863|hsa-mir-125b-2|hsa-miR-125b|jt:ENSG00000205191|NF\_001070148.1  
NCX|ENSG00000207863|hsa-mir-125b-2|hsa-miR-125b|jt:ENSG00000171169|C9orf90  
NCX|ENSG00000207863|hsa-mir-125b-2|hsa-miR-125b|jt:ENSG00000106993|CDC37L1  
NF-AT|ENSG00000198987|hsa-mir-16-2|hsa-miR-16|jt:ENSG00000125657|TNFSF9  
NF-AT|ENSG00000198987|hsa-mir-16-2|hsa-miR-16|jt:ENSG00000134343|TMEM16C  
NF-AT|ENSG00000198987|hsa-mir-16-2|hsa-miR-16|jt:ENSG00000131381|ZFYVE20  
NF-AT|ENSG00000199077|hsa-mir-129-2|hsa-miR-129|jt:ENSG00000163781|TOPBP1  
NF-AT|ENSG00000199077|hsa-mir-129-2|hsa-miR-129|jt:ENSG00000147316|MCPH1  
NF-AT|ENSG00000199077|hsa-mir-129-2|hsa-miR-129|jt:ENSG00000161642|ZNF385  
NF-AT|ENSG00000199077|hsa-mir-129-2|hsa-miR-129|jt:ENSG00000164849|GPR146  
NF-AT|ENSG00000199085|hsa-mir-148a|hsa-miR-148a|jt:ENSG00000189180|ZNF33A  
NF-AT|ENSG00000199085|hsa-mir-148a|hsa-miR-148a|jt:ENSG00000125084|WNT1  
NF-AT|ENSG00000199085|hsa-mir-148a|hsa-miR-148a|jt:ENSG00000101901|CXorf45  
NF-AT|ENSG00000199085|hsa-mir-148a|hsa-miR-148a|jt:ENSG00000170989|EDG1  
NF-AT|ENSG00000199085|hsa-mir-148a|hsa-miR-148a|jt:ENSG00000161638|ITGA5  
NF-AT|ENSG00000199085|hsa-mir-148a|hsa-miR-148a|jt:ENSG00000185760|KCNQ5  
NF-AT|ENSG00000199085|hsa-mir-148a|hsa-miR-148a|jt:ENSG00000106511|MEOX2  
NF-AT|ENSG00000199085|hsa-mir-148a|hsa-miR-148a|jt:ENSG00000116016|EPAS1  
NF-AT|ENSG00000199085|hsa-mir-148a|hsa-miR-148a|jt:ENSG00000151079|KCNAB6  
NF-AT|ENSG00000199085|hsa-mir-148a|hsa-miR-148a|jt:ENSG00000180537|RNF182  
NF-AT|ENSG00000199085|hsa-mir-148a|hsa-miR-148a|jt:ENSG00000182220|ATP6AP2  
NF-E2|ENSG00000207567|hsa-mir-142|hsa-miR-142-3p|jt:ENSG00000169213|RAB3B  
NF-E2|ENSG00000207567|hsa-mir-142|hsa-miR-142-5p|jt:ENSG00000067533|RRP15  
NF-Y|ENSG00000199122|hsa-mir-148b|hsa-miR-148b|jt:ENSG00000174851|YIF1A  
NF-Y|ENSG00000199122|hsa-mir-148b|hsa-miR-148b|jt:ENSG00000179476|C14orf28  
NF-Y|ENSG00000199122|hsa-mir-148b|hsa-miR-148b|jt:ENSG00000205524|Q68D70\_HUMAN  
NF-Y|ENSG00000199122|hsa-mir-148b|hsa-miR-148b|jt:ENSG00000100784|RPS6KA5  
NF-Y|ENSG00000199122|hsa-mir-148b|hsa-miR-148b|jt:ENSG00000155111|CDC2L6  
NF-Y|ENSG00000199122|hsa-mir-148b|hsa-miR-148b|jt:ENSG00000126216|TUBGC3  
NF-Y|ENSG00000199122|hsa-mir-148b|hsa-miR-148b|jt:ENSG00000059728|MXD1  
NF-Y|ENSG00000199122|hsa-mir-148b|hsa-miR-148b|jt:ENSG00000189266|PNRC2  
NF-Y|ENSG00000199122|hsa-mir-148b|hsa-miR-148b|jt:ENSG00000182512|GLRX5  
NF-Y|ENSG00000199122|hsa-mir-148b|hsa-miR-148b|jt:ENSG00000134851|TMEM165  
NF-Y|ENSG00000199122|hsa-mir-148b|hsa-miR-148b|jt:ENSG00000158796|DEDD  
NF-Y|ENSG00000199122|hsa-mir-148b|hsa-miR-148b|jt:ENSG00000085433|WDR47  
NF-Y|ENSG00000199122|hsa-mir-148b|hsa-miR-148b|jt:ENSG00000165588|OTX2  
NF-Y|ENSG00000199122|hsa-mir-148b|hsa-miR-148b|jt:ENSG00000118707|TGIF2  
NF-Y|ENSG00000199122|hsa-mir-148b|hsa-miR-148b|jt:ENSG00000126903|SLC10A3  
NF-Y|ENSG00000199122|hsa-mir-148b|hsa-miR-148b|jt:ENSG00000172053|QARS  
NF-Y|ENSG00000199122|hsa-mir-148b|hsa-miR-148b|jt:ENSG00000204569|PPP1R10  
NF-Y|ENSG00000199122|hsa-mir-148b|hsa-miR-148b|jt:ENSG00000015592|STMN4  
NF-Y|ENSG00000199122|hsa-mir-148b|hsa-miR-148b|jt:ENSG00000147684|NDUFB9  
NF-Y|ENSG00000207547|hsa-mir-25|hsa-miR-25|jt:ENSG00000197174|O14606\_HUMAN  
NF-Y|ENSG00000207547|hsa-mir-25|hsa-miR-25|jt:ENSG00000117461|PIK3R3  
NF-Y|ENSG00000207547|hsa-mir-25|hsa-miR-25|jt:ENSG00000144583|MARCH4  
NF-Y|ENSG00000207547|hsa-mir-25|hsa-miR-25|jt:ENSG00000197285|NR\_001536.1  
NF-Y|ENSG00000207547|hsa-mir-25|hsa-miR-25|jt:ENSG00000197147|LRR8B  
NF-Y|ENSG00000207547|hsa-mir-25|hsa-miR-25|jt:ENSG00000175676|GOLGA8F  
NF-Y|ENSG00000207547|hsa-mir-25|hsa-miR-25|jt:ENSG00000135414|GDF11  
NF-Y|ENSG00000207547|hsa-mir-25|hsa-miR-25|jt:ENSG00000112210|RAB23  
NF-Y|ENSG00000207624|hsa-mir-194-1|hsa-miR-194|jt:ENSG00000032219|ARID4A  
NF-Y|ENSG00000207624|hsa-mir-194-1|hsa-miR-194|jt:ENSG00000109184|DCUN1D4  
NF-Y|ENSG00000207624|hsa-mir-194-1|hsa-miR-194|jt:ENSG00000144746|ARL6IP5  
NF-Y|ENSG00000207624|hsa-mir-194-1|hsa-miR-194|jt:ENSG00000077312|SNRPA  
NF-Y|ENSG00000207624|hsa-mir-194-1|hsa-miR-194|jt:ENSG00000198901|PRC1  
NF-Y|ENSG00000207624|hsa-mir-194-1|hsa-miR-194|jt:ENSG00000174628|JQCK  
NF-Y|ENSG00000207624|hsa-mir-194-1|hsa-miR-194|jt:ENSG00000139531|SUOX  
NF-Y|ENSG00000207624|hsa-mir-194-1|hsa-miR-194|jt:ENSG00000125834|STK35  
NF-Y|ENSG00000207624|hsa-mir-194-1|hsa-miR-194|jt:ENSG00000141576|RNF157  
NF-Y|ENSG00000207624|hsa-mir-194-1|hsa-miR-194|jt:ENSG00000197008|ZNF138  
NF-Y|ENSG00000207624|hsa-mir-194-1|hsa-miR-194|jt:ENSG00000136297|MMD2  
NF-Y|ENSG00000207624|hsa-mir-194-1|hsa-miR-194|jt:ENSG00000071073|MGAT4A  
NF-Y|ENSG00000207624|hsa-mir-194-1|hsa-miR-194|jt:ENSG00000130224|LRCH2  
NF-Y|ENSG00000207624|hsa-mir-194-1|hsa-miR-194|jt:ENSG00000153879|CEBPG  
NF-Y|ENSG00000207624|hsa-mir-194-1|hsa-miR-194|jt:ENSG00000147536|GINS4  
NF-Y|ENSG00000207630|hsa-mir-7-3|hsa-miR-7|jt:ENSG00000180834|MAP6D1  
NF-Y|ENSG00000207630|hsa-mir-7-3|hsa-miR-7|jt:ENSG00000185591|SP1  
NF-Y|ENSG00000207630|hsa-mir-7-3|hsa-miR-7|jt:ENSG00000136485|WDR68  
NF-Y|ENSG00000207630|hsa-mir-7-3|hsa-miR-7|jt:ENSG00000203747|FCGR3A  
NF-Y|ENSG00000207630|hsa-mir-7-3|hsa-miR-7|jt:ENSG00000141161|UNC45B  
NF-Y|ENSG00000207630|hsa-mir-7-3|hsa-miR-7|jt:ENSG00000124767|GLO1  
NF-Y|ENSG00000207630|hsa-mir-7-3|hsa-miR-7|jt:ENSG00000125703|ATG4C  
NF-Y|ENSG00000207630|hsa-mir-7-3|hsa-miR-7|jt:ENSG00000105556|NF\_060020.1  
NF-Y|ENSG00000207630|hsa-mir-7-3|hsa-miR-7|jt:ENSG00000174106|LEM3  
NF-Y|ENSG00000207630|hsa-mir-7-3|hsa-miR-7|jt:ENSG00000082213|C5orf22  
NF-Y|ENSG00000207638|hsa-mir-99a|hsa-miR-99a|jt:ENSG0000013297|CLDN11  
NF-Y|ENSG00000207638|hsa-mir-99a|hsa-miR-99a|jt:ENSG00000198793|FRAP1  
NF-Y|ENSG00000207638|hsa-mir-99a|hsa-miR-99a|jt:ENSG00000105972|C7orf20  
NF-Y|ENSG00000207638|hsa-mir-99a|hsa-miR-99a|jt:ENSG00000185361|TNFAIP8L1  
NF-Y|ENSG00000207638|hsa-mir-99a|hsa-miR-99a|jt:ENSG00000174460|ZCCHC12  
NF-Y|ENSG00000207638|hsa-mir-99a|hsa-miR-99a|jt:ENSG00000082213|C5orf22  
NF-Y|ENSG00000207649|hsa-mir-138-2|hsa-miR-138|jt:ENSG00000164684|ZNF704  
NF-Y|ENSG00000207649|hsa-mir-138-2|hsa-miR-138|jt:ENSG00000118322|ATP10B  
NF-Y|ENSG00000207649|hsa-mir-138-2|hsa-miR-138|jt:ENSG00000153561|RMND5A  
NF-Y|ENSG00000207649|hsa-mir-138-2|hsa-miR-138|jt:ENSG00000086712|CXorf15  
NF-Y|ENSG00000207757|hsa-mir-93|hsa-miR-93|jt:ENSG00000134375|TIMM17A  
NF-Y|ENSG00000207757|hsa-mir-93|hsa-miR-93|jt:ENSG00000101412|E2F1  
NF-Y|ENSG00000207757|hsa-mir-93|hsa-miR-93|jt:ENSG00000104517|EDD1  
NF-Y|ENSG00000207757|hsa-mir-93|hsa-miR-93|jt:ENSG00000139508|SLC46A3  
NF-Y|ENSG00000207757|hsa-mir-93|hsa-miR-93|jt:ENSG00000168000|HNRFPUL2  
NF-Y|ENSG00000207757|hsa-mir-93|hsa-miR-93|jt:ENSG00000180667|YOD1  
NF-Y|ENSG00000207757|hsa-mir-93|hsa-miR-93|jt:ENSG00000166435|XRRRA1  
NF-Y|ENSG00000207757|hsa-mir-93|hsa-miR-93|jt:ENSG00000163577|EIF5A2  
NF-Y|ENSG00000207757|hsa-mir-93|hsa-miR-93|jt:ENSG00000060662|MAP3K14  
NF-Y|ENSG00000207757|hsa-mir-93|hsa-miR-93|jt:ENSG00000145362|ANK2

NF-Y|ENSG00000207757|hsa-mir-93|hsa-miR-93 jt:ENSG00000167106|FAM102A  
NF-Y|ENSG00000207757|hsa-mir-93|hsa-miR-93 jt:ENSG00000165244|ZNF367  
NF-Y|ENSG00000207863|hsa-mir-125b-2|hsa-miR-125b jt:ENSG00000113161|HMGCR  
NF-Y|ENSG00000207863|hsa-mir-125b-2|hsa-miR-125b jt:ENSG00000155621|C9orf85  
NF-Y|ENSG00000207863|hsa-mir-125b-2|hsa-miR-125b jt:ENSG00000182858|ALG12  
NF-Y|ENSG00000207863|hsa-mir-125b-2|hsa-miR-125b jt:ENSG00000130348|QRS11  
NF-Y|ENSG00000207863|hsa-mir-125b-2|hsa-miR-125b jt:ENSG00000110075|SAPS3  
NF-Y|ENSG00000207863|hsa-mir-125b-2|hsa-miR-125b jt:ENSG00000167302|C17orf56  
NF-Y|ENSG00000207863|hsa-mir-125b-2|hsa-miR-125b jt:ENSG00000095794|CREM  
NF-Y|ENSG00000207863|hsa-mir-125b-2|hsa-miR-125b jt:ENSG00000123064|DDX54  
NF-Y|ENSG00000207863|hsa-mir-125b-2|hsa-miR-125b jt:ENSG00000171169|C9orf90  
NF-Y|ENSG00000207863|hsa-mir-125b-2|hsa-miR-125b jt:ENSG00000205913|Q6ZUC4\_HUMAN  
NF-Y|ENSG00000207863|hsa-mir-125b-2|hsa-miR-125b jt:ENSG00000143390|RFX5  
NF-Y|ENSG00000207863|hsa-mir-125b-2|hsa-miR-125b jt:ENSG00000170927|PKHD1  
NF-Y|ENSG00000207863|hsa-mir-125b-2|hsa-miR-125b jt:ENSG00000138111|TMEM180  
NF-Y|ENSG00000207863|hsa-mir-125b-2|hsa-miR-125b jt:ENSG00000110274|CEP164  
NF-Y|ENSG00000207863|hsa-mir-125b-2|hsa-miR-125b jt:ENSG00000178229|ZNF543  
NF-Y|ENSG00000207863|hsa-mir-125b-2|hsa-miR-125b jt:ENSG00000118322|ATP10B  
NF-Y|ENSG00000207863|hsa-mir-125b-2|hsa-miR-125b jt:ENSG00000166787|SAA3P  
NF-Y|ENSG00000207863|hsa-mir-125b-2|hsa-miR-125b jt:ENSG00000137860|SLC28A2  
NF-Y|ENSG00000207863|hsa-mir-125b-2|hsa-miR-125b jt:ENSG00000181026|ISG20L1  
NF-Y|ENSG00000207939|hsa-mir-223|hsa-miR-223 jt:ENSG00000164746|Q8NEG2\_HUMAN  
NF-Y|ENSG00000207939|hsa-mir-223|hsa-miR-223 jt:ENSG00000117528|ABCD3  
NF-Y|ENSG00000207939|hsa-mir-223|hsa-miR-223 jt:ENSG00000134982|APC  
NF-Y|ENSG00000207939|hsa-mir-223|hsa-miR-223 jt:ENSG00000165525|SDCCAG1  
NF-Y|ENSG00000207939|hsa-mir-223|hsa-miR-223 jt:ENSG00000123268|ATF1  
NF-Y|ENSG00000207939|hsa-mir-223|hsa-miR-223 jt:ENSG00000100596|SPTLC2  
NF-Y|ENSG00000207939|hsa-mir-223|hsa-miR-223 jt:ENSG00000114346|ECT2  
NF-Y|ENSG00000207939|hsa-mir-223|hsa-miR-223 jt:ENSG00000110911|SLC11A2  
NF-Y|ENSG00000207939|hsa-mir-223|hsa-miR-223 jt:ENSG00000187953|NR\_002217.1  
NF-Y|ENSG00000207939|hsa-mir-223|hsa-miR-223 jt:ENSG00000075702|WDR62  
NF-Y|ENSG00000207939|hsa-mir-223|hsa-miR-223 jt:ENSG00000143507|DUSP10  
NF-Y|ENSG00000207939|hsa-mir-223|hsa-miR-223 jt:ENSG00000105379|ETFB  
NF-Y|ENSG00000207939|hsa-mir-223|hsa-miR-223 jt:ENSG00000154040|CABYR  
NF-Y|ENSG00000207939|hsa-mir-223|hsa-miR-223 jt:ENSG00000078246|TULP3  
NF-Y|ENSG00000207939|hsa-mir-223|hsa-miR-223 jt:ENSG00000198420|NP\_055534.1  
NF-Y|ENSG00000207939|hsa-mir-223|hsa-miR-223 jt:ENSG00000099219|KIAA1815  
NF-Y|ENSG00000208036|hsa-mir-106b|hsa-miR-106b jt:ENSG00000134375|TIMM17A  
NF-Y|ENSG00000208036|hsa-mir-106b|hsa-miR-106b jt:ENSG00000101412|E2F1  
NF-Y|ENSG00000208036|hsa-mir-106b|hsa-miR-106b jt:ENSG00000141664|ZCCHC2  
NF-Y|ENSG00000208036|hsa-mir-106b|hsa-miR-106b jt:ENSG00000099985|OSM  
NF-Y|ENSG00000208036|hsa-mir-106b|hsa-miR-106b jt:ENSG00000145819|ARHGAP26  
NF-Y|ENSG00000208036|hsa-mir-106b|hsa-miR-106b jt:ENSG00000104517|EDD1  
NF-Y|ENSG00000208036|hsa-mir-106b|hsa-miR-106b jt:ENSG00000139508|SLC46A3  
NF-Y|ENSG00000208036|hsa-mir-106b|hsa-miR-106b jt:ENSG00000168000|HNRPUL2  
NF-Y|ENSG00000208036|hsa-mir-106b|hsa-miR-106b jt:ENSG00000180667|YOD1  
NF-Y|ENSG00000208036|hsa-mir-106b|hsa-miR-106b jt:ENSG00000166435|XRR1  
NF-Y|ENSG00000208036|hsa-mir-106b|hsa-miR-106b jt:ENSG00000163577|EIF5A2  
NF-Y|ENSG00000208036|hsa-mir-106b|hsa-miR-106b jt:ENSG00000166743|ACSM1  
NF-Y|ENSG00000208036|hsa-mir-106b|hsa-miR-106b jt:ENSG0000006062|MAP3K14  
NF-Y|ENSG00000208036|hsa-mir-106b|hsa-miR-106b jt:ENSG00000145362|ANK2  
NF-Y|ENSG00000208036|hsa-mir-106b|hsa-miR-106b jt:ENSG00000167106|FAM102A  
NF-Y|ENSG00000208036|hsa-mir-106b|hsa-miR-106b jt:ENSG00000165244|ZNF367  
NF-Y|ENSG00000208036|hsa-mir-106b|hsa-miR-106b jt:ENSG00000110911|SLC11A2  
NF-Y|ENSG00000208036|hsa-mir-106b|hsa-miR-106b jt:ENSG00000143507|DUSP10  
NF-Y|ENSG00000208036|hsa-mir-106b|hsa-miR-106b jt:ENSG00000160401|C9orf117  
NKX2-5|ENSG00000207548|hsa-mir-217|hsa-miR-217 jt:ENSG00000106069|CHN2  
NKX2-5|ENSG00000207548|hsa-mir-217|hsa-miR-217 jt:ENSG00000204977|TRIM13  
NKX2-5|ENSG00000207548|hsa-mir-217|hsa-miR-217 jt:ENSG00000101974|ATP11C  
NKX2-5|ENSG00000207548|hsa-mir-217|hsa-miR-217 jt:ENSG00000130300|PLVAP  
NKX2-5|ENSG00000207548|hsa-mir-217|hsa-miR-217 jt:ENSG00000133980|C14orf115  
NKX2-5|ENSG00000207548|hsa-mir-217|hsa-miR-217 jt:ENSG00000205413|SAMD9  
NKX2-5|ENSG00000207548|hsa-mir-217|hsa-miR-217 jt:ENSG00000124406|ATP8A1  
NKX2-5|ENSG00000207633|hsa-mir-505|hsa-miR-505 jt:ENSG00000185442|NP\_997329.1  
NKX2-5|ENSG00000207633|hsa-mir-505|hsa-miR-505 jt:ENSG00000170903|KIAA1826  
NKX2-5|ENSG00000207731|hsa-mir-506|hsa-miR-506 jt:ENSG00000048342|Q9H8A7\_HUMAN  
NKX2-5|ENSG00000207731|hsa-mir-506|hsa-miR-506 jt:ENSG00000141141|DDX52  
NKX2-5|ENSG00000207731|hsa-mir-506|hsa-miR-506 jt:ENSG00000155530|LRGUK  
NKX2-5|ENSG00000207731|hsa-mir-506|hsa-miR-506 jt:ENSG00000164089|AGXT2L1  
NKX2-5|ENSG00000207933|hsa-mir-9-1|hsa-miR-9 jt:ENSG00000204071|TCEAL6  
NKX2-5|ENSG00000207933|hsa-mir-9-1|hsa-miR-9 jt:ENSG00000109061|MYH1  
NKX2-5|ENSG00000207933|hsa-mir-9-1|hsa-miR-9 jt:ENSG00000182450|KCNK4  
NKX2-5|ENSG00000207933|hsa-mir-9-1|hsa-miR-9 jt:ENSG00000137965|IFI44  
NKX2-5|ENSG00000207933|hsa-mir-9-1|hsa-miR-9 jt:ENSG00000107614|TRDMT1  
NKX2-5|ENSG00000207933|hsa-mir-9-1|hsa-miR-9 jt:ENSG00000183784|C9orf66  
NKX2-5|ENSG00000207933|hsa-mir-9-1|hsa-miR-9\* jt:ENSG00000204628|GNB2L1  
NKX2-5|ENSG00000207933|hsa-mir-9-1|hsa-miR-9\* jt:ENSG00000188519|Q7Z4Q0\_HUMAN  
NKX2-5|ENSG00000207933|hsa-mir-9-1|hsa-miR-9\* jt:ENSG00000184083|FAM120C  
NKX2-5|ENSG00000207933|hsa-mir-9-1|hsa-miR-9\* jt:ENSG00000178401|NP\_079178.2  
NKX2-5|ENSG00000207933|hsa-mir-9-1|hsa-miR-9\* jt:ENSG00000185985|SLITRK2  
NKX2-5|ENSG00000207950|hsa-mir-296|hsa-miR-296 jt:ENSG00000170279|C7orf33  
NKX6-2|ENSG00000199177|hsa-mir-31|hsa-miR-31 jt:ENSG00000153814|JAZF1  
NKX6-2|ENSG00000207586|hsa-mir-135a-2|hsa-miR-135a jt:ENSG00000100350|FOXRED2  
NKX6-2|ENSG00000207638|hsa-mir-99a|hsa-miR-99a jt:ENSG00000082213|C5orf22  
NKX6-2|ENSG00000207638|hsa-mir-99a|hsa-miR-99a jt:ENSG00000152689|RASGRP3  
NKX6-2|ENSG00000207795|hsa-mir-155|hsa-miR-155 jt:ENSG00000166170|BAG5  
NKX6-2|ENSG00000207795|hsa-mir-155|hsa-miR-155 jt:ENSG00000160336|ZNF761  
NKX6-2|ENSG00000207795|hsa-mir-155|hsa-miR-155 jt:ENSG00000198632|NP\_777590.1  
NKX6-2|ENSG00000207795|hsa-mir-155|hsa-miR-155 jt:ENSG00000101457|DNTTIP1  
NKX6-2|ENSG00000207863|hsa-mir-125b-2|hsa-miR-125b jt:ENSG00000124721|DNAH8  
NKX6-2|ENSG00000207863|hsa-mir-125b-2|hsa-miR-125b jt:ENSG00000157119|KBTBD5  
NRF-1|ENSG00000207792|hsa-mir-151|hsa-miR-151 jt:ENSG00000164040|PGRMC2  
NRF-1|ENSG00000207792|hsa-mir-151|hsa-miR-151 jt:ENSG00000137075|RNF38  
OCTAMER|ENSG00000198975|hsa-let-7a-2|hsa-let-7a jt:ENSG00000179165|PXT1  
OCTAMER|ENSG00000198975|hsa-let-7a-2|hsa-let-7a jt:ENSG00000148200|NR6A1  
OCTAMER|ENSG00000198975|hsa-let-7a-2|hsa-let-7a jt:ENSG00000197948|FCHSD1  
OCTAMER|ENSG00000198975|hsa-let-7a-2|hsa-let-7a jt:ENSG00000165449|SLC16A9  
OCTAMER|ENSG00000202641|hsa-mir-484|hsa-miR-484 jt:ENSG00000142166|IFNAR1  
OCTAMER|ENSG00000202641|hsa-mir-484|hsa-miR-484 jt:ENSG00000099282|TSPAN15  
OCTAMER|ENSG00000202641|hsa-mir-484|hsa-miR-484 jt:ENSG00000109501|WFS1  
OCTAMER|ENSG00000207586|hsa-mir-135a-2|hsa-miR-135a jt:ENSG00000141965|FEM1A  
OCTAMER|ENSG00000207586|hsa-mir-135a-2|hsa-miR-135a jt:ENSG00000198429|ZNF69  
OCTAMER|ENSG00000207586|hsa-mir-135a-2|hsa-miR-135a jt:ENSG00000100350|FOXRED2  
OCTAMER|ENSG00000207705|hsa-mir-129-1|hsa-miR-129 jt:ENSG00000145416|MARCH1  
OCTAMER|ENSG00000207705|hsa-mir-129-1|hsa-miR-129 jt:ENSG00000172345|STARD5

OCTAMER|ENSG00000207705|hsa-mir-129-1|hsa-miR-129|jt:ENSG0000029534|ANK1  
OCTAMER|ENSG00000207971|hsa-mir-125b-1|hsa-miR-125b|jt:ENSG00000125449|ARMC7  
OCTAMER|ENSG00000207971|hsa-mir-125b-1|hsa-miR-125b|jt:ENSG00000137265|IRF4  
OCTAMER|ENSG00000207971|hsa-mir-125b-1|hsa-miR-125b|jt:ENSG00000112195|TREM12  
OCTAMER|ENSG00000207994|hsa-mir-100|hsa-miR-100|jt:ENSG00000118689|FOXO3A  
OCTAMER|ENSG00000207994|hsa-mir-100|hsa-miR-100|jt:ENSG00000116017|ARID3A  
PAX-4|ENSG00000199077|hsa-mir-129-2|hsa-miR-129|jt:ENSG00000145416|MARCH1  
PAX-4|ENSG00000199077|hsa-mir-129-2|hsa-miR-129|jt:ENSG00000105058|FAM32A  
PAX-4|ENSG00000199077|hsa-mir-129-2|hsa-miR-129|jt:ENSG0000016082|ISL1  
PAX-4|ENSG00000199085|hsa-mir-148a|hsa-miR-148a|jt:ENSG00000109790|KLHL5  
PAX-4|ENSG00000199085|hsa-mir-148a|hsa-miR-148a|jt:ENSG00000182220|ATP6AP2  
PAX-4|ENSG00000199085|hsa-mir-148a|hsa-miR-148a|jt:ENSG00000134851|TMEM165  
PAX-4|ENSG00000199085|hsa-mir-148a|hsa-miR-148a|jt:ENSG00000204048|QZUG3\_HUMAN  
PAX-4|ENSG00000199149|hsa-mir-20a|hsa-miR-20a|jt:ENSG00000175155|YFEL2  
PAX-4|ENSG00000199149|hsa-mir-20a|hsa-miR-20a|jt:ENSG00000143107|FNDC7  
PAX-4|ENSG00000199149|hsa-mir-20a|hsa-miR-20a|jt:ENSG00000104517|EDD1  
PAX-4|ENSG00000207610|hsa-mir-19a|hsa-miR-19a|jt:ENSG00000155189|AGPAT5  
PAX-4|ENSG00000207610|hsa-mir-19a|hsa-miR-19a|jt:ENSG00000197329|PELL1  
PAX-4|ENSG00000207610|hsa-mir-19a|hsa-miR-19a|jt:ENSG00000095739|BAMBI  
PAX-4|ENSG00000207610|hsa-mir-19a|hsa-miR-19a|jt:ENSG00000139200|C12orf53  
PAX-4|ENSG00000207610|hsa-mir-19a|hsa-miR-19a|jt:ENSG00000163596|ICAIL  
PAX-4|ENSG00000207610|hsa-mir-19a|hsa-miR-19a|jt:ENSG00000117601|SERPINC1  
PAX-4|ENSG00000207610|hsa-mir-19a|hsa-miR-19a|jt:ENSG00000138593|K0256\_HUMAN  
PAX-4|ENSG00000207745|hsa-mir-17|hsa-miR-17-5p|jt:ENSG00000143107|FNDC7  
PAX-4|ENSG00000207745|hsa-mir-17|hsa-miR-17-5p|jt:ENSG00000104517|EDD1  
PAX-4|ENSG00000207745|hsa-mir-17|hsa-miR-17-5p|jt:ENSG00000057019|DCBLD2  
PAX-4|ENSG00000207745|hsa-mir-17|hsa-miR-17-5p|jt:ENSG00000187678|SPRY4  
PAX-4|ENSG00000207745|hsa-mir-17|hsa-miR-17-5p|jt:ENSG00000162624|LHX8  
PAX-4|ENSG00000207745|hsa-mir-17|hsa-miR-17-5p|jt:ENSG00000203793|Q6ZR74\_HUMAN  
PAX-4|ENSG00000207752|hsa-mir-199a-1|hsa-miR-199a|jt:ENSG00000176986|SEC24C  
PAX-4|ENSG00000207752|hsa-mir-199a-1|hsa-miR-199a\*|jt:ENSG00000111860|C6orf204  
PAX-4|ENSG00000207752|hsa-mir-199a-1|hsa-miR-199a\*|jt:ENSG00000159224|GIP  
PAX-4|ENSG00000207752|hsa-mir-199a-1|hsa-miR-199a\*|jt:ENSG00000005884|ITGA3  
PAX-4|ENSG00000207752|hsa-mir-199a-1|hsa-miR-199a\*|jt:ENSG00000105967|TFEC  
PAX-4|ENSG00000207752|hsa-mir-199a-1|hsa-miR-199a\*|jt:ENSG00000180305|WFDC10A  
PAX-4|ENSG00000207752|hsa-mir-199a-1|hsa-miR-199a\*|jt:ENSG00000184602|SNN  
PAX-4|ENSG00000207752|hsa-mir-199a-1|hsa-miR-199a\*|jt:ENSG00000088854|C2orf194  
PAX-4|ENSG00000207752|hsa-mir-199a-1|hsa-miR-199a\*|jt:ENSG00000131914|LIN28  
PAX-4|ENSG00000207752|hsa-mir-199a-1|hsa-miR-199a\*|jt:ENSG00000145354|ZCD2  
PAX-4|ENSG00000207752|hsa-mir-199a-1|hsa-miR-199a\*|jt:ENSG00000188153|COL4A5  
PAX-4|ENSG00000207863|hsa-mir-125b-2|hsa-miR-125b|jt:ENSG00000100628|ASB2  
PAX-4|ENSG00000207863|hsa-mir-125b-2|hsa-miR-125b|jt:ENSG00000131914|LIN28  
PAX-4|ENSG00000207863|hsa-mir-125b-2|hsa-miR-125b|jt:ENSG00000137265|IRF4  
PAX-4|ENSG00000207863|hsa-mir-125b-2|hsa-miR-125b|jt:ENSG00000065361|ERBB3  
PAX-4|ENSG00000207863|hsa-mir-125b-2|hsa-miR-125b|jt:ENSG00000106993|CDC37L1  
PAX-4|ENSG00000207863|hsa-mir-125b-2|hsa-miR-125b|jt:ENSG00000172531|PPP1CA  
PBX-1|ENSG00000199024|hsa-mir-103-2|hsa-miR-103|jt:ENSG00000204388|HSPA1B  
PBX-1|ENSG00000199024|hsa-mir-103-2|hsa-miR-103|jt:ENSG00000149182|ZNF289  
PBX-1|ENSG00000199024|hsa-mir-103-2|hsa-miR-103|jt:ENSG00000163444|TMEM183B  
PBX-1|ENSG00000199024|hsa-mir-103-2|hsa-miR-103|jt:ENSG00000140854|KATNB1  
PBX-1|ENSG00000199024|hsa-mir-103-2|hsa-miR-103|jt:ENSG00000144285|SCN1A  
PBX-1|ENSG00000207586|hsa-mir-135a-2|hsa-miR-135a|jt:ENSG00000095787|WAC  
PBX-1|ENSG00000207586|hsa-mir-135a-2|hsa-miR-135a|jt:ENSG00000135486|HNRPA1  
PBX-1|ENSG00000207586|hsa-mir-135a-2|hsa-miR-135a|jt:ENSG00000118322|ATP10B  
PBX-1|ENSG00000207586|hsa-mir-135a-2|hsa-miR-135a|jt:ENSG00000149806|FAU  
PBX-1|ENSG00000207586|hsa-mir-135a-2|hsa-miR-135a|jt:ENSG00000122012|SV2C  
PBX-1|ENSG00000207586|hsa-mir-135a-2|hsa-miR-135a|jt:ENSG00000135452|TSPAN31  
PEA3|ENSG00000199080|hsa-mir-133b|hsa-miR-133b|jt:ENSG00000163568|AIM2  
PEA3|ENSG00000199080|hsa-mir-133b|hsa-miR-133b|jt:ENSG00000139572|GPR84  
PEA3|ENSG00000199080|hsa-mir-133b|hsa-miR-133b|jt:ENSG00000122705|CLTA  
PEA3|ENSG00000199080|hsa-mir-133b|hsa-miR-133b|jt:ENSG00000120437|ACAT2  
PEA3|ENSG00000199082|hsa-mir-342|hsa-miR-342|jt:ENSG00000089195|TRM6\_HUMAN  
PEA3|ENSG00000199082|hsa-mir-342|hsa-miR-342|jt:ENSG00000185298|Q6PK04\_HUMAN  
PEA3|ENSG00000199082|hsa-mir-342|hsa-miR-342|jt:ENSG00000132002|DNAJB1  
PEA3|ENSG00000199082|hsa-mir-342|hsa-miR-342|jt:ENSG00000184708|EIF4ENIF1  
PEA3|ENSG00000199082|hsa-mir-342|hsa-miR-342|jt:ENSG00000138095|LRPPRC  
PEA3|ENSG00000199082|hsa-mir-342|hsa-miR-342|jt:ENSG00000181904|C5orf24  
PEA3|ENSG00000199082|hsa-mir-342|hsa-miR-342|jt:ENSG00000137393|IBRDC2  
PEA3|ENSG00000199082|hsa-mir-342|hsa-miR-342|jt:ENSG00000130939|UBE4B  
PEA3|ENSG00000199082|hsa-mir-342|hsa-miR-342|jt:ENSG00000121807|CCR2  
PEA3|ENSG00000199082|hsa-mir-342|hsa-miR-342|jt:ENSG00000197713|RPE  
PEA3|ENSG00000199082|hsa-mir-342|hsa-miR-342|jt:ENSG00000167085|PHB  
PEA3|ENSG00000207585|hsa-mir-181d|hsa-miR-181d|jt:ENSG00000110906|KCTD10  
PEA3|ENSG00000207585|hsa-mir-181d|hsa-miR-181d|jt:ENSG00000105705|SF4  
PEA3|ENSG00000207585|hsa-mir-181d|hsa-miR-181d|jt:ENSG00000126432|PRDX5  
PEA3|ENSG00000207585|hsa-mir-181d|hsa-miR-181d|jt:ENSG00000170100|Q96MU6-2  
PEA3|ENSG00000207585|hsa-mir-181d|hsa-miR-181d|jt:ENSG00000088832|FKBP1A  
PEA3|ENSG00000207585|hsa-mir-181d|hsa-miR-181d|jt:ENSG00000160789|LMNA  
PEA3|ENSG00000207585|hsa-mir-181d|hsa-miR-181d|jt:ENSG00000118454|ANKRD13C  
PEA3|ENSG00000207585|hsa-mir-181d|hsa-miR-181d|jt:ENSG00000174652|ZNF266  
PEA3|ENSG00000207585|hsa-mir-181d|hsa-miR-181d|jt:ENSG00000106366|SERPINE1  
PEA3|ENSG00000207585|hsa-mir-181d|hsa-miR-181d|jt:ENSG00000132002|DNAJB1  
PEA3|ENSG00000207585|hsa-mir-181d|hsa-miR-181d|jt:ENSG00000133636|NTS  
PEA3|ENSG00000207585|hsa-mir-181d|hsa-miR-181d|jt:ENSG00000179914|ITLN1  
PEA3|ENSG00000207585|hsa-mir-181d|hsa-miR-181d|jt:ENSG00000073756|PTGS2  
PEA3|ENSG00000207585|hsa-mir-181d|hsa-miR-181d|jt:ENSG00000204201|Q49A40\_HUMAN  
PEA3|ENSG00000207585|hsa-mir-181d|hsa-miR-181d|jt:ENSG00000074054|CLASP1  
PEA3|ENSG00000207604|hsa-mir-206|hsa-miR-206|jt:ENSG00000168000|HNRPFUL2  
PEA3|ENSG00000207789|hsa-mir-26a-2|hsa-miR-26a|jt:ENSG00000047249|ATP6V1H  
PEA3|ENSG00000207789|hsa-mir-26a-2|hsa-miR-26a|jt:ENSG00000114648|KLHL18  
PEA3|ENSG00000207789|hsa-mir-26a-2|hsa-miR-26a|jt:ENSG00000090615|GOLGA3  
PEA3|ENSG00000207789|hsa-mir-26a-2|hsa-miR-26a|jt:ENSG00000113845|C3orf1  
PEA3|ENSG00000207789|hsa-mir-26a-2|hsa-miR-26a|jt:ENSG00000138231|DBR1  
PEA3|ENSG00000207789|hsa-mir-26a-2|hsa-miR-26a|jt:ENSG00000100376|FAM118A  
PEA3|ENSG00000207789|hsa-mir-26a-2|hsa-miR-26a|jt:ENSG00000183955|SETD8  
PEA3|ENSG00000207789|hsa-mir-26a-2|hsa-miR-26a|jt:ENSG00000135365|PHF21A  
PEA3|ENSG00000207789|hsa-mir-26a-2|hsa-miR-26a|jt:ENSG00000173027|WBP1  
PEA3|ENSG00000207789|hsa-mir-26a-2|hsa-miR-26a|jt:ENSG00000176597|B3GNT5  
PEA3|ENSG00000207789|hsa-mir-26a-2|hsa-miR-26a|jt:ENSG00000099994|SUSD2  
PEA3|ENSG00000207789|hsa-mir-26a-2|hsa-miR-26a|jt:ENSG00000134001|EIF2S1  
PEA3|ENSG00000207789|hsa-mir-26a-2|hsa-miR-26a|jt:ENSG00000129480|C14orf126  
PEA3|ENSG00000207789|hsa-mir-26a-2|hsa-miR-26a|jt:ENSG00000110172|CHORDC1  
PEA3|ENSG00000207789|hsa-mir-26a-2|hsa-miR-26a|jt:ENSG00000111775|COX6A1  
PEA3|ENSG00000207789|hsa-mir-26a-2|hsa-miR-26a|jt:ENSG00000138792|ENPEP  
PEA3|ENSG00000207789|hsa-mir-26a-2|hsa-miR-26a|jt:ENSG00000121270|ABCC11

PEA3|ENSG00000207789|hsa-mir-26a-2|hsa-miR-26a|jt:ENSG00000133858|CCDC131  
PEA3|ENSG00000207789|hsa-mir-26a-2|hsa-miR-26a|jt:ENSG00000183929|DUSP5P  
PEA3|ENSG00000207789|hsa-mir-26a-2|hsa-miR-26a|jt:ENSG00000165476|REEP3  
PEA3|ENSG00000207789|hsa-mir-26a-2|hsa-miR-26a|jt:ENSG00000107938|C10orf137  
PEA3|ENSG00000207789|hsa-mir-26a-2|hsa-miR-26a|jt:ENSG00000137504|CREBZF  
PEA3|ENSG00000207791|hsa-mir-497|hsa-miR-497|jt:ENSG00000204388|HSPA1B  
PEA3|ENSG00000207791|hsa-mir-497|hsa-miR-497|jt:ENSG00000104859|SFRS16  
PEA3|ENSG00000207791|hsa-mir-497|hsa-miR-497|jt:ENSG00000107738|C10orf54  
PEA3|ENSG00000207791|hsa-mir-497|hsa-miR-497|jt:ENSG00000130584|ZBTB46  
PEA3|ENSG00000207791|hsa-mir-497|hsa-miR-497|jt:ENSG00000122140|MRPS2  
PEA3|ENSG00000207791|hsa-mir-497|hsa-miR-497|jt:ENSG00000167778|SPRYD3  
PEA3|ENSG00000207791|hsa-mir-497|hsa-miR-497|jt:ENSG00000172725|PTPRCAP  
PEA3|ENSG00000207792|hsa-mir-151|hsa-miR-151|jt:ENSG00000135346|CGA  
PEA3|ENSG00000207792|hsa-mir-151|hsa-miR-151|jt:ENSG00000189325|NF\_001010903.2  
PEA3|ENSG00000207792|hsa-mir-151|hsa-miR-151|jt:ENSG00000182504|LRR1Q2  
PEA3|ENSG00000207792|hsa-mir-151|hsa-miR-151|jt:ENSG00000174695|TMEM167  
PEA3|ENSG00000207792|hsa-mir-151|hsa-miR-151|jt:ENSG00000147869|CER1  
PEA3|ENSG00000207795|hsa-mir-155|hsa-miR-155|jt:ENSG00000144034|TPRKB  
PEA3|ENSG00000207795|hsa-mir-155|hsa-miR-155|jt:ENSG00000077458|FAM76B  
PEA3|ENSG00000207795|hsa-mir-155|hsa-miR-155|jt:ENSG00000135341|MAP3K7  
PEA3|ENSG00000207795|hsa-mir-155|hsa-miR-155|jt:ENSG00000143079|CTTNBP2NL  
PEA3|ENSG00000207795|hsa-mir-155|hsa-miR-155|jt:ENSG00000113742|CPEB4  
PEA3|ENSG00000207795|hsa-mir-155|hsa-miR-155|jt:ENSG00000160336|ZNF761  
PEA3|ENSG00000207795|hsa-mir-155|hsa-miR-155|jt:ENSG00000196396|PTPN1  
PEA3|ENSG00000207795|hsa-mir-155|hsa-miR-155|jt:ENSG00000164300|SERINC5  
PEA3|ENSG00000207795|hsa-mir-155|hsa-miR-155|jt:ENSG00000112312|GMN  
PEA3|ENSG00000207795|hsa-mir-155|hsa-miR-155|jt:ENSG00000147100|SLC16A2  
PEA3|ENSG00000207795|hsa-mir-155|hsa-miR-155|jt:ENSG00000114113|RBP2  
PEA3|ENSG00000207795|hsa-mir-155|hsa-miR-155|jt:ENSG00000109790|KLHL5  
PEA3|ENSG00000207795|hsa-mir-155|hsa-miR-155|jt:ENSG00000101457|DNTTIP1  
PEA3|ENSG00000207795|hsa-mir-155|hsa-miR-155|jt:ENSG00000164077|MON1A  
PEA3|ENSG00000207795|hsa-mir-155|hsa-miR-155|jt:ENSG00000105856|HBP1  
PEA3|ENSG00000207808|hsa-mir-27a|hsa-miR-27a|jt:ENSG00000100348|TXN2  
PEA3|ENSG00000207808|hsa-mir-27a|hsa-miR-27a|jt:ENSG00000145194|ECE2  
PEA3|ENSG00000207808|hsa-mir-27a|hsa-miR-27a|jt:ENSG00000148339|SLC25A25  
PEA3|ENSG00000207808|hsa-mir-27a|hsa-miR-27a|jt:ENSG00000169118|CSNK1G1  
PEA3|ENSG00000207808|hsa-mir-27a|hsa-miR-27a|jt:ENSG00000088854|C20orf194  
PEA3|ENSG00000207808|hsa-mir-27a|hsa-miR-27a|jt:ENSG00000079134|THOC1  
PEA3|ENSG00000207808|hsa-mir-27a|hsa-miR-27a|jt:ENSG00000205761|Q6ZRI7\_HUMAN  
PEA3|ENSG00000207808|hsa-mir-27a|hsa-miR-27a|jt:ENSG00000055070|C10orf144  
PEA3|ENSG00000207808|hsa-mir-27a|hsa-miR-27a|jt:ENSG00000167723|TRPV3  
PEA3|ENSG00000207808|hsa-mir-27a|hsa-miR-27a|jt:ENSG00000135334|C6orf166  
PEA3|ENSG00000207929|hsa-mir-195|hsa-miR-195|jt:ENSG00000204388|HSPA1B  
PEA3|ENSG00000207929|hsa-mir-195|hsa-miR-195|jt:ENSG00000104859|SFRS16  
PEA3|ENSG00000207929|hsa-mir-195|hsa-miR-195|jt:ENSG00000107738|C10orf54  
PEA3|ENSG00000207929|hsa-mir-195|hsa-miR-195|jt:ENSG00000130584|ZBTB46  
PEA3|ENSG00000207929|hsa-mir-195|hsa-miR-195|jt:ENSG00000122140|MRPS2  
PEA3|ENSG00000207929|hsa-mir-195|hsa-miR-195|jt:ENSG00000167778|SPRYD3  
PEA3|ENSG00000207929|hsa-mir-195|hsa-miR-195|jt:ENSG00000172725|PTPRCAP  
PEA3|ENSG00000207949|hsa-mir-214|hsa-miR-214|jt:ENSG00000110328|GALNT4  
PEA3|ENSG00000207949|hsa-mir-214|hsa-miR-214|jt:ENSG00000121848|ZNF364  
PEA3|ENSG00000207949|hsa-mir-214|hsa-miR-214|jt:ENSG00000198042|RBM13  
PEA3|ENSG00000207980|hsa-mir-23a|hsa-miR-23a|jt:ENSG00000113615|SEC24A  
PEA3|ENSG00000207980|hsa-mir-23a|hsa-miR-23a|jt:ENSG00000188938|FAM120AOS  
PEA3|ENSG00000207980|hsa-mir-23a|hsa-miR-23a|jt:ENSG00000182004|SNRPE  
PEA3|ENSG00000207980|hsa-mir-23a|hsa-miR-23a|jt:ENSG00000103591|P34\_HUMAN  
PEA3|ENSG00000207980|hsa-mir-23a|hsa-miR-23a|jt:ENSG00000094804|CDC6  
PEA3|ENSG00000207980|hsa-mir-23a|hsa-miR-23a|jt:ENSG00000105053|VRK3  
PEA3|ENSG00000207980|hsa-mir-23a|hsa-miR-23a|jt:ENSG00000183955|SETD8  
PEA3|ENSG00000207980|hsa-mir-23a|hsa-miR-23a|jt:ENSG0000024862|CCDC28A  
PEA3|ENSG00000207980|hsa-mir-23a|hsa-miR-23a|jt:ENSG00000204026|Q6ZSD2\_HUMAN  
PEA3|ENSG00000207980|hsa-mir-23a|hsa-miR-23a|jt:ENSG00000120586|MRC1  
PEA3|ENSG00000207980|hsa-mir-23a|hsa-miR-23a|jt:ENSG00000183748|MRC1L1  
PEA3|ENSG00000207980|hsa-mir-23a|hsa-miR-23a|jt:ENSG00000183686|MAGEA5  
PEA3|ENSG00000207980|hsa-mir-23a|hsa-miR-23a|jt:ENSG00000106366|SERPINE1  
PEA3|ENSG00000207980|hsa-mir-23a|hsa-miR-23a|jt:ENSG00000133636|NTS  
PEA3|ENSG00000207980|hsa-mir-23a|hsa-miR-23a|jt:ENSG00000206193|Q5HYA3\_HUMAN  
PEA3|ENSG00000207980|hsa-mir-23a|hsa-miR-23a|jt:ENSG00000175556|LONRF3  
PEA3|ENSG00000207980|hsa-mir-23a|hsa-miR-23a|jt:ENSG00000177800|TMEM78  
PEA3|ENSG00000207980|hsa-mir-23a|hsa-miR-23a|jt:ENSG00000147119|CHST7  
PEA3|ENSG00000207980|hsa-mir-23a|hsa-miR-23a|jt:ENSG00000180257|ZNF321  
PEA3|ENSG00000207980|hsa-mir-23a|hsa-miR-23a|jt:ENSG00000087152|ATXN7L3  
PEA3|ENSG00000207980|hsa-mir-23a|hsa-miR-23a|jt:ENSG00000182541|LIMK2  
PEA3|ENSG00000207980|hsa-mir-23a|hsa-miR-23a|jt:ENSG00000198380|GFPT1  
PEA3|ENSG00000207980|hsa-mir-23a|hsa-miR-23a|jt:ENSG00000067066|SP100  
PEA3|ENSG00000207980|hsa-mir-23a|hsa-miR-23a|jt:ENSG00000144749|LRIG1  
PEA3|ENSG00000207980|hsa-mir-23a|hsa-miR-23a|jt:ENSG00000148200|NR6A1  
PEA3|ENSG00000207980|hsa-mir-23a|hsa-miR-23a|jt:ENSG00000078618|NRD1  
PEA3|ENSG00000207980|hsa-mir-23a|hsa-miR-23a|jt:ENSG00000163961|RNF168  
PEA3|ENSG00000207980|hsa-mir-23a|hsa-miR-23a|jt:ENSG00000109771|LRP2BP  
PEA3|ENSG00000208024|hsa-mir-199a-2|hsa-miR-199a|jt:ENSG00000148481|C10orf97  
PEA3|ENSG00000208024|hsa-mir-199a-2|hsa-miR-199a|jt:ENSG00000105699|LSR  
PEA3|ENSG00000208024|hsa-mir-199a-2|hsa-miR-199a|jt:ENSG00000176986|SEC24C  
PEA3|ENSG00000208024|hsa-mir-199a-2|hsa-miR-199a|jt:ENSG00000100554|ATP6V1D  
PEA3|ENSG00000208024|hsa-mir-199a-2|hsa-miR-199a|jt:ENSG00000204580|DDR1  
PEA3|ENSG00000208024|hsa-mir-199a-2|hsa-miR-199a\*|jt:ENSG00000204220|PFDN6  
PEA3|ENSG00000208024|hsa-mir-199a-2|hsa-miR-199a\*|jt:ENSG00000132549|VPS13B  
PEA3|ENSG00000208024|hsa-mir-199a-2|hsa-miR-199a\*|jt:ENSG00000088854|C20orf194  
PEA3|ENSG00000208024|hsa-mir-199a-2|hsa-miR-199a\*|jt:ENSG00000112299|VNN1  
PEA3|ENSG00000208024|hsa-mir-199a-2|hsa-miR-199a\*|jt:ENSG00000139973|SYT16  
PEA3|ENSG00000208024|hsa-mir-199a-2|hsa-miR-199a\*|jt:ENSG00000159140|SON  
PEA3|ENSG00000208024|hsa-mir-199a-2|hsa-miR-199a\*|jt:ENSG00000116141|MARK1  
PEA3|ENSG00000208024|hsa-mir-199a-2|hsa-miR-199a\*|jt:ENSG00000100461|BEM23  
PEA3|ENSG00000208024|hsa-mir-199a-2|hsa-miR-199a\*|jt:ENSG00000198718|KIAA0423  
PEA3|ENSG00000208024|hsa-mir-199a-2|hsa-miR-199a\*|jt:ENSG00000146021|KLHL3  
PEA3|ENSG00000208024|hsa-mir-199a-2|hsa-miR-199a\*|jt:ENSG00000123473|STIL  
PEA3|ENSG00000208024|hsa-mir-199a-2|hsa-miR-199a\*|jt:ENSG00000132963|POMP  
PEA3|ENSG00000208024|hsa-mir-199a-2|hsa-miR-199a\*|jt:ENSG00000198841|KTI12  
PEA3|ENSG00000208024|hsa-mir-199a-2|hsa-miR-199a\*|jt:ENSG00000148985|NF\_055304.1  
PEA3|ENSG00000208024|hsa-mir-199a-2|hsa-miR-199a\*|jt:ENSG00000105967|TFEC  
PEA3|ENSG00000208024|hsa-mir-199a-2|hsa-miR-199a\*|jt:ENSG00000117360|PRPF3  
PEA3|ENSG00000208024|hsa-mir-199a-2|hsa-miR-199a\*|jt:ENSG00000123178|C13orf1  
PEA3|ENSG00000208024|hsa-mir-199a-2|hsa-miR-199a\*|jt:ENSG00000206125|Q68DA7\_HUMAN  
PEA3|ENSG00000209707|hsa-mir-24-2|hsa-miR-24|jt:ENSG00000169715|MT1JP  
PEA3|ENSG00000209707|hsa-mir-24-2|hsa-miR-24|jt:ENSG00000196345|ZNF167

PEA3|ENSG00000209707|hsa-mir-24-2|hsa-miR-24 jt:ENSG00000162458|FBLIM1  
PEA3|ENSG00000209707|hsa-mir-24-2|hsa-miR-24 jt:ENSG00000015676|NUDCD3  
PEA3|ENSG00000209707|hsa-mir-24-2|hsa-miR-24 jt:ENSG00000132141|CCT6B  
PEA3|ENSG00000209707|hsa-mir-24-2|hsa-miR-24 jt:ENSG00000106384|MOGAT3  
PEA3|ENSG00000209707|hsa-mir-24-2|hsa-miR-24 jt:ENSG00000114019|AMOTL2  
PEA3|ENSG00000209707|hsa-mir-24-2|hsa-miR-24 jt:ENSG00000172460|Q8IVY7\_HUMAN  
PEA3|ENSG00000209707|hsa-mir-24-2|hsa-miR-24 jt:ENSG00000179862|CITED4  
PEA3|ENSG00000209707|hsa-mir-24-2|hsa-miR-24 jt:ENSG00000082153|BZW1  
PEA3|ENSG00000209707|hsa-mir-24-2|hsa-miR-24 jt:ENSG00000176194|CIDEA  
PEA3|ENSG00000209707|hsa-mir-24-2|hsa-miR-24 jt:ENSG00000143442|POGZ  
PEA3|ENSG00000209707|hsa-mir-24-2|hsa-miR-24 jt:ENSG00000138641|HERC3  
PEA3|ENSG00000209707|hsa-mir-24-2|hsa-miR-24 jt:ENSG00000148965|SAA4  
PEA3|ENSG00000209707|hsa-mir-24-2|hsa-miR-24 jt:ENSG00000168528|SERINC2  
PEA3|ENSG00000209707|hsa-mir-24-2|hsa-miR-24 jt:ENSG00000101040|ZMYND8  
PEA3|ENSG00000209707|hsa-mir-24-2|hsa-miR-24 jt:ENSG00000103184|SEC14L5  
PEA3|ENSG00000209707|hsa-mir-24-2|hsa-miR-24 jt:ENSG00000100147|CCDC134  
PEA3|ENSG00000209707|hsa-mir-24-2|hsa-miR-24 jt:ENSG00000068903|SIRT2  
PITX2|ENSG00000208017|hsa-mir-140|hsa-miR-140 jt:ENSG00000107165|TYRP1  
POU1F1|ENSG00000199077|hsa-mir-129-2|hsa-miR-129 jt:ENSG00000178602|OTOS  
POU3F2|ENSG00000199065|hsa-mir-101-2|hsa-miR-101 jt:ENSG00000165995|CACNB2  
POU3F2|ENSG00000199065|hsa-mir-101-2|hsa-miR-101 jt:ENSG00000184602|SNN  
POU3F2|ENSG00000207624|hsa-mir-194-1|hsa-miR-194 jt:ENSG00000158470|B4GALT5  
POU3F2|ENSG00000207624|hsa-mir-194-1|hsa-miR-194 jt:ENSG00000153879|CEBPG  
POU3F2|ENSG00000207752|hsa-mir-199a-1|hsa-miR-199a\* jt:ENSG00000159224|GIP  
POU3F2|ENSG00000207752|hsa-mir-199a-1|hsa-miR-199a\* jt:ENSG00000142687|KIAA0319L  
POU3F2|ENSG00000207752|hsa-mir-199a-1|hsa-miR-199a\* jt:ENSG00000184602|SNN  
POU6F1|ENSG00000207728|hsa-mir-449b|hsa-miR-449b jt:ENSG00000020129|NCDN  
POU6F1|ENSG00000207728|hsa-mir-449b|hsa-miR-449b jt:ENSG00000108797|CNTNAP1  
RFX|ENSG00000199032|hsa-mir-425|hsa-miR-425-3p jt:ENSG00000138678|NF\_116106.2  
RFX|ENSG00000199032|hsa-mir-425|hsa-miR-425-3p jt:ENSG00000132522|GPS2  
RFX|ENSG00000199032|hsa-mir-425|hsa-miR-425-3p jt:ENSG00000130762|ARHGGEF16  
RFX|ENSG00000199032|hsa-mir-425|hsa-miR-425-3p jt:ENSG00000153132|CLGN  
RFX|ENSG00000199085|hsa-mir-148a|hsa-miR-148a jt:ENSG00000165588|OTX2  
RFX|ENSG00000199085|hsa-mir-148a|hsa-miR-148a jt:ENSG00000116016|EPAS1  
RFX|ENSG00000199085|hsa-mir-148a|hsa-miR-148a jt:ENSG00000182220|ATP6AP2  
RFX|ENSG00000199085|hsa-mir-148a|hsa-miR-148a jt:ENSG00000142700|DMRTA2  
RFX|ENSG00000199085|hsa-mir-148a|hsa-miR-148a jt:ENSG00000180537|RNF182  
RFX|ENSG00000199085|hsa-mir-148a|hsa-miR-148a jt:ENSG00000122034|GTF3A  
RFX|ENSG00000199085|hsa-mir-148a|hsa-miR-148a jt:ENSG00000173681|CXorf23  
RFX|ENSG00000199085|hsa-mir-148a|hsa-miR-148a jt:ENSG00000131269|ABC7  
RFX|ENSG00000199085|hsa-mir-148a|hsa-miR-148a jt:ENSG00000059728|MXD1  
RFX|ENSG00000207585|hsa-mir-181d|hsa-miR-181d jt:ENSG00000139209|SLC38A4  
RFX|ENSG00000207585|hsa-mir-181d|hsa-miR-181d jt:ENSG00000171766|GATM  
RFX|ENSG00000207585|hsa-mir-181d|hsa-miR-181d jt:ENSG00000197586|ENTP6  
RFX|ENSG00000207585|hsa-mir-181d|hsa-miR-181d jt:ENSG00000159873|CCDC117  
RFX|ENSG00000207585|hsa-mir-181d|hsa-miR-181d jt:ENSG00000083312|TNPO1  
RFX|ENSG00000207585|hsa-mir-181d|hsa-miR-181d jt:ENSG00000118894|FAM86A  
RFX|ENSG00000207585|hsa-mir-181d|hsa-miR-181d jt:ENSG00000163612|XR\_017899.1  
RFX|ENSG00000207585|hsa-mir-181d|hsa-miR-181d jt:ENSG00000145819|ARHGAP26  
RFX|ENSG00000207585|hsa-mir-181d|hsa-miR-181d jt:ENSG00000171084|LOC645332  
RFX|ENSG00000207611|hsa-mir-149|hsa-miR-149 jt:ENSG00000068796|KIF2A  
RFX|ENSG00000207611|hsa-mir-149|hsa-miR-149 jt:ENSG00000103067|RBM35B  
RFX|ENSG00000207611|hsa-mir-149|hsa-miR-149 jt:ENSG00000158966|CACHD1  
RFX|ENSG00000207611|hsa-mir-149|hsa-miR-149 jt:ENSG00000204483|Q8N925\_HUMAN  
RFX|ENSG00000207611|hsa-mir-149|hsa-miR-149 jt:ENSG00000172273|MI2F  
RFX|ENSG00000207611|hsa-mir-149|hsa-miR-149 jt:ENSG00000121481|RNF2  
RORALPHA2|ENSG00000199017|hsa-mir-1-1|hsa-miR-1 jt:ENSG00000173612|GPRC6A  
RORALPHA2|ENSG00000199017|hsa-mir-1-1|hsa-miR-1 jt:ENSG00000102452|NALCN  
RORALPHA2|ENSG00000199130|hsa-mir-365-1|hsa-miR-365 jt:ENSG00000198546|ZNF511  
RORALPHA2|ENSG00000199130|hsa-mir-365-1|hsa-miR-365 jt:ENSG00000183735|TBK1  
RORALPHA2|ENSG00000199149|hsa-mir-20a|hsa-miR-20a jt:ENSG00000037280|FLT4  
RORALPHA2|ENSG00000199149|hsa-mir-20a|hsa-miR-20a jt:ENSG00000104517|EDD1  
RORALPHA2|ENSG00000199149|hsa-mir-20a|hsa-miR-20a jt:ENSG00000099875|MKNK2  
RORALPHA2|ENSG00000199149|hsa-mir-20a|hsa-miR-20a jt:ENSG00000163577|EIF5A2  
RORALPHA2|ENSG00000207610|hsa-mir-19a|hsa-miR-19a jt:ENSG00000117601|SERPINC1  
RORALPHA2|ENSG00000207610|hsa-mir-19a|hsa-miR-19a jt:ENSG00000108582|CPD  
RORALPHA2|ENSG00000207610|hsa-mir-19a|hsa-miR-19a jt:ENSG00000198718|KIAA0423  
RORALPHA2|ENSG00000207610|hsa-mir-19a|hsa-miR-19a jt:ENSG00000205929|C21orf62  
RORALPHA2|ENSG00000207610|hsa-mir-19a|hsa-miR-19a jt:ENSG00000147642|SYBU\_HUMAN  
RORALPHA2|ENSG00000207610|hsa-mir-19a|hsa-miR-19a jt:ENSG00000170743|SYT9  
RORALPHA2|ENSG00000207745|hsa-mir-17|hsa-miR-17-5p jt:ENSG000000037280|FLT4  
RORALPHA2|ENSG00000207745|hsa-mir-17|hsa-miR-17-5p jt:ENSG00000104517|EDD1  
RORALPHA2|ENSG00000207745|hsa-mir-17|hsa-miR-17-5p jt:ENSG00000163577|EIF5A2  
RORALPHA2|ENSG00000207745|hsa-mir-17|hsa-miR-17-5p jt:ENSG00000164597|COG5  
RORALPHA2|ENSG00000207764|hsa-mir-133a-2|hsa-miR-133a jt:ENSG00000008197|TFAP2D  
RORALPHA2|ENSG00000207764|hsa-mir-133a-2|hsa-miR-133a jt:ENSG00000143858|SYT2  
RORALPHA2|ENSG00000207764|hsa-mir-133a-2|hsa-miR-133a jt:ENSG00000154822|PLCL2  
RORALPHA2|ENSG00000207863|hsa-mir-125b-2|hsa-miR-125b jt:ENSG00000100147|CCDC134  
RORALPHA2|ENSG00000207863|hsa-mir-125b-2|hsa-miR-125b jt:ENSG00000170786|NP\_620419.2  
RORALPHA2|ENSG00000207863|hsa-mir-125b-2|hsa-miR-125b jt:ENSG00000174808|BTC  
RORALPHA2|ENSG00000207863|hsa-mir-125b-2|hsa-miR-125b jt:ENSG00000100796|SMEK1  
RORALPHA2|ENSG00000207863|hsa-mir-125b-2|hsa-miR-125b jt:ENSG00000135443|KRT85  
RORALPHA2|ENSG00000207863|hsa-mir-125b-2|hsa-miR-125b jt:ENSG00000143390|RFX5  
RORALPHA2|ENSG00000207863|hsa-mir-125b-2|hsa-miR-125b jt:ENSG00000100628|ASB2  
RORALPHA2|ENSG00000207863|hsa-mir-125b-2|hsa-miR-125b jt:ENSG00000156234|CXCL13  
RORALPHA2|ENSG00000207863|hsa-mir-125b-2|hsa-miR-125b jt:ENSG00000100599|RXN3  
RP58|ENSG00000207752|hsa-miR-199a-1|hsa-miR-199a\* jt:ENSG00000151690|NP\_060164.3  
RP58|ENSG00000208024|hsa-mir-199a-2|hsa-miR-199a\* jt:ENSG00000151690|NP\_060164.3  
RREB-1|ENSG00000199122|hsa-mir-148b|hsa-miR-148b jt:ENSG00000170989|EDG1  
RREB-1|ENSG00000199122|hsa-mir-148b|hsa-miR-148b jt:ENSG00000204101|Q6ZU91\_HUMAN  
RREB-1|ENSG00000207731|hsa-mir-506|hsa-miR-506 jt:ENSG00000136877|FPGS  
RREB-1|ENSG00000207731|hsa-mir-506|hsa-miR-506 jt:ENSG00000065361|ERBB3  
RREB-1|ENSG00000207731|hsa-mir-506|hsa-miR-506 jt:ENSG00000109536|FRG1  
RREB-1|ENSG00000207731|hsa-mir-506|hsa-miR-506 jt:ENSG00000135773|CAPN9  
RREB-1|ENSG00000207731|hsa-mir-506|hsa-miR-506 jt:ENSG00000086062|B4GALT2  
RREB-1|ENSG00000207789|hsa-mir-26a-2|hsa-miR-26a jt:ENSG00000082146|ALS2CT1  
RREB-1|ENSG00000207789|hsa-mir-26a-2|hsa-miR-26a jt:ENSG00000129250|KIF1C  
RREB-1|ENSG00000207789|hsa-mir-26a-2|hsa-miR-26a jt:ENSG00000037637|FBXO42  
RREB-1|ENSG00000207789|hsa-mir-26a-2|hsa-miR-26a jt:ENSG00000116783|PPGT  
SF-1|ENSG00000207635|hsa-mir-499|hsa-miR-499 jt:ENSG00000124449|IRGC  
SF-1|ENSG00000207635|hsa-mir-499|hsa-miR-499 jt:ENSG00000173436|Clorf151  
SF-1|ENSG00000207764|hsa-mir-133a-2|hsa-miR-133a jt:ENSG00000143858|SYT2  
SMAD-3|ENSG00000198976|hsa-mir-429|hsa-miR-429 jt:ENSG00000183873|SCN5A  
SMAD-3|ENSG00000207607|hsa-mir-200a|hsa-miR-200a jt:ENSG00000198909|MAP3K3  
SMAD-3|ENSG00000207607|hsa-mir-200a|hsa-miR-200a jt:ENSG00000154545|MAGED4

SMAD-3|ENSG00000207607|hsa-mir-200a|hsa-miR-200a jt:ENSG00000187243|MAGED4B  
SMAD-3|ENSG00000207607|hsa-mir-200a|hsa-miR-200a\* jt:ENSG00000076108|BAZ2A  
SMAD-3|ENSG00000207607|hsa-mir-200a|hsa-miR-200a\* jt:ENSG00000147654|EBAG9  
SMAD-3|ENSG00000207607|hsa-mir-200a|hsa-miR-200a\* jt:ENSG00000197657|ZNF323  
SMAD-3|ENSG00000207730|hsa-mir-200b|hsa-miR-200b jt:ENSG00000183873|SCN5A  
SMAD-3|ENSG00000207730|hsa-mir-200b|hsa-miR-200b jt:ENSG00000173027|WBP1  
SMAD-3|ENSG00000207950|hsa-mir-296|hsa-miR-296 jt:ENSG00000141526|SLC16A3  
SMAD-3|ENSG00000207950|hsa-mir-296|hsa-miR-296 jt:ENSG00000172232|AZU1  
SMAD-3|ENSG00000207950|hsa-mir-296|hsa-miR-296 jt:ENSG00000206013|IFITM5  
SOX-5|ENSG00000198975|hsa-let-7a-2|hsa-let-7a jt:ENSG00000133136|GBG5L\_HUMAN  
SOX-5|ENSG00000198975|hsa-let-7a-2|hsa-let-7a jt:ENSG00000135476|ESPL1  
SOX-5|ENSG00000198975|hsa-let-7a-2|hsa-let-7a jt:ENSG00000143851|PTPN7  
SOX-5|ENSG00000198975|hsa-let-7a-2|hsa-let-7a jt:ENSG00000143546|S100A8  
SOX-5|ENSG00000198975|hsa-let-7a-2|hsa-let-7a jt:ENSG00000163104|SMARCAD1  
SOX-5|ENSG00000198975|hsa-let-7a-2|hsa-let-7a jt:ENSG00000092531|SNAP23  
SOX-5|ENSG00000198975|hsa-let-7a-2|hsa-let-7a jt:ENSG00000187772|LIN28B  
SOX-5|ENSG00000198975|hsa-let-7a-2|hsa-let-7a jt:ENSG00000148200|NR6A1  
SOX-5|ENSG00000198975|hsa-let-7a-2|hsa-let-7a jt:ENSG00000082153|BZW1  
SOX-5|ENSG00000198975|hsa-let-7a-2|hsa-let-7a jt:ENSG00000164654|NP\_061878.3  
SOX-5|ENSG00000198975|hsa-let-7a-2|hsa-let-7a jt:ENSG00000144031|ANKRD53  
SOX-5|ENSG00000198975|hsa-let-7a-2|hsa-let-7a jt:ENSG00000138036|DYNC2LI1  
SOX-5|ENSG00000198975|hsa-let-7a-2|hsa-let-7a jt:ENSG00000135441|BLOC1S1  
SOX-5|ENSG00000198975|hsa-let-7a-2|hsa-let-7a jt:ENSG00000187164|KIAA1598  
SOX-5|ENSG00000198975|hsa-let-7a-2|hsa-let-7a jt:ENSG00000198105|ZNF248  
SOX-5|ENSG00000198975|hsa-let-7a-2|hsa-let-7a jt:ENSG00000181322|TXNDC6  
SOX-5|ENSG00000198981|hsa-mir-29a|hsa-miR-29a jt:ENSG00000095203|EPB41L4B  
SOX-5|ENSG00000198981|hsa-mir-29a|hsa-miR-29a jt:ENSG00000132142|ACACA  
SOX-5|ENSG00000198981|hsa-mir-29a|hsa-miR-29a jt:ENSG00000182197|EXT1  
SOX-5|ENSG00000198981|hsa-mir-29a|hsa-miR-29a jt:ENSG00000136883|KIF12  
SOX-5|ENSG00000198981|hsa-mir-29a|hsa-miR-29a jt:ENSG00000097046|CDC7  
SOX-5|ENSG00000198981|hsa-mir-29a|hsa-miR-29a jt:ENSG00000131153|GINS2  
SOX-5|ENSG00000198981|hsa-mir-29a|hsa-miR-29a jt:ENSG00000105856|HBP1  
SOX-5|ENSG00000198981|hsa-mir-29a|hsa-miR-29a jt:ENSG00000113140|SPARC  
SOX-5|ENSG00000198981|hsa-mir-29a|hsa-miR-29a jt:ENSG00000132313|MRPL35  
SOX-5|ENSG00000198981|hsa-mir-29a|hsa-miR-29a jt:ENSG00000143162|CREG1  
SOX-5|ENSG00000198981|hsa-mir-29a|hsa-miR-29a jt:ENSG00000140873|ADAMT518  
SOX-5|ENSG00000198981|hsa-mir-29a|hsa-miR-29a jt:ENSG00000050030|KIAA2022  
SOX-5|ENSG00000198981|hsa-mir-29a|hsa-miR-29a jt:ENSG00000143341|HMCN1  
SOX-5|ENSG00000198981|hsa-mir-29a|hsa-miR-29a jt:ENSG00000142632|ARRGGEF19  
SOX-5|ENSG00000198981|hsa-mir-29a|hsa-miR-29a jt:ENSG00000197615|C8orf49  
SOX-5|ENSG00000198981|hsa-mir-29a|hsa-miR-29a jt:ENSG00000188153|COL4A5  
SOX-5|ENSG00000198981|hsa-mir-29a|hsa-miR-29a jt:ENSG00000108821|COL1A1  
SOX-5|ENSG00000198981|hsa-mir-29a|hsa-miR-29a jt:ENSG00000067798|NAV3  
SOX-5|ENSG00000198981|hsa-mir-29a|hsa-miR-29a jt:ENSG00000137558|PI15  
SOX-5|ENSG00000198981|hsa-mir-29a|hsa-miR-29a jt:ENSG00000113580|NR3C1  
SOX-5|ENSG00000198981|hsa-mir-29a|hsa-miR-29a jt:ENSG00000132780|NASP  
SOX-5|ENSG00000198981|hsa-mir-29a|hsa-miR-29a jt:ENSG00000125386|C4orf8  
SOX-5|ENSG00000198981|hsa-mir-29a|hsa-miR-29a jt:ENSG00000158125|XDH  
SOX-5|ENSG00000198981|hsa-mir-29a|hsa-miR-29a jt:ENSG00000154227|LASS3  
SOX-5|ENSG00000199058|hsa-mir-302b|hsa-miR-302b jt:ENSG00000204542|C6orf15  
SOX-5|ENSG00000199058|hsa-mir-302b|hsa-miR-302b jt:ENSG00000168000|HNRPU12  
SOX-5|ENSG00000199058|hsa-mir-302b|hsa-miR-302b jt:ENSG00000180471|C9orf31  
SOX-5|ENSG00000199058|hsa-mir-302b|hsa-miR-302b jt:ENSG00000086102|NFX1  
SOX-5|ENSG00000199058|hsa-mir-302b|hsa-miR-302b jt:ENSG00000163486|SRGAP2  
SOX-5|ENSG00000199058|hsa-mir-302b|hsa-miR-302b jt:ENSG00000204319|C4A  
SOX-5|ENSG00000199058|hsa-mir-302b|hsa-miR-302b jt:ENSG00000204342|C4B  
SOX-5|ENSG00000199058|hsa-mir-302b|hsa-miR-302b jt:ENSG00000143199|NP\_060887.1  
SOX-5|ENSG00000199058|hsa-mir-302b|hsa-miR-302b jt:ENSG00000101247|C20orf7  
SOX-5|ENSG00000199058|hsa-mir-302b|hsa-miR-302b jt:ENSG00000177337|NP\_001034885.1  
SOX-5|ENSG00000199058|hsa-mir-302b|hsa-miR-302b jt:ENSG00000188800|TMCO2  
SOX-5|ENSG00000199058|hsa-mir-302b|hsa-miR-302b jt:ENSG00000150457|LATS2  
SOX-5|ENSG00000199058|hsa-mir-302b|hsa-miR-302b jt:ENSG00000132514|CLEC10A  
SOX-5|ENSG00000199058|hsa-mir-302b|hsa-miR-302b jt:ENSG00000149305|HTR3B  
SOX-5|ENSG00000199058|hsa-mir-302b|hsa-miR-302b jt:ENSG00000168078|PBK  
SOX-5|ENSG00000199058|hsa-mir-302b|hsa-miR-302b jt:ENSG00000163281|GNPDA2  
SOX-5|ENSG00000199058|hsa-mir-302b|hsa-miR-302b\* jt:ENSG00000164077|MON1A  
SOX-5|ENSG00000199058|hsa-mir-302b|hsa-miR-302b\* jt:ENSG00000131944|C19orf40  
SOX-5|ENSG00000199058|hsa-mir-302b|hsa-miR-302b\* jt:ENSG00000179059|ZFP42  
SOX-5|ENSG00000199058|hsa-mir-302b|hsa-miR-302b\* jt:ENSG00000182504|LRR1Q2  
SOX-5|ENSG00000199058|hsa-mir-302b|hsa-miR-302b\* jt:ENSG00000122729|ACO1  
SOX-5|ENSG00000199058|hsa-mir-302b|hsa-miR-302b\* jt:ENSG00000072858|SIDT1  
SOX-5|ENSG00000199058|hsa-mir-302b|hsa-miR-302b\* jt:ENSG00000137558|PI15  
SOX-5|ENSG00000199077|hsa-mir-129-2|hsa-miR-129 jt:ENSG00000029534|ANK1  
SOX-5|ENSG00000199077|hsa-mir-129-2|hsa-miR-129 jt:ENSG00000178602|OTOS  
SOX-5|ENSG00000199077|hsa-mir-129-2|hsa-miR-129 jt:ENSG00000164849|GPR146  
SOX-5|ENSG00000199077|hsa-mir-129-2|hsa-miR-129 jt:ENSG00000172410|INSI5  
SOX-5|ENSG00000199077|hsa-mir-129-2|hsa-miR-129 jt:ENSG00000128254|C22orf24  
SOX-5|ENSG00000199077|hsa-mir-129-2|hsa-miR-129 jt:ENSG00000158435|C2orf29  
SOX-5|ENSG00000199077|hsa-mir-129-2|hsa-miR-129 jt:ENSG00000145416|MARCH1  
SOX-5|ENSG00000199080|hsa-mir-133b|hsa-miR-133b jt:ENSG00000105976|MET  
SOX-5|ENSG00000199080|hsa-mir-133b|hsa-miR-133b jt:ENSG00000169717|ACTRT2  
SOX-5|ENSG00000199080|hsa-mir-133b|hsa-miR-133b jt:ENSG00000143368|SF3B4  
SOX-5|ENSG00000199080|hsa-mir-133b|hsa-miR-133b jt:ENSG00000180471|C9orf31  
SOX-5|ENSG00000199080|hsa-mir-133b|hsa-miR-133b jt:ENSG00000122705|CLTA  
SOX-5|ENSG00000199080|hsa-mir-133b|hsa-miR-133b jt:ENSG00000066114|APIGBP1  
SOX-5|ENSG00000199080|hsa-mir-133b|hsa-miR-133b jt:ENSG00000163485|ADORA1  
SOX-5|ENSG00000199094|hsa-mir-30c-2|hsa-miR-30c jt:ENSG00000138413|IDH1  
SOX-5|ENSG00000199094|hsa-mir-30c-2|hsa-miR-30c jt:ENSG00000071054|MAP4K4  
SOX-5|ENSG00000199094|hsa-mir-30c-2|hsa-miR-30c jt:ENSG00000142039|CCDC97  
SOX-5|ENSG00000199094|hsa-mir-30c-2|hsa-miR-30c jt:ENSG00000159873|CCDC117  
SOX-5|ENSG00000199094|hsa-mir-30c-2|hsa-miR-30c jt:ENSG00000169139|UBE2V2  
SOX-5|ENSG00000199094|hsa-mir-30c-2|hsa-miR-30c jt:ENSG00000171320|ESCO2  
SOX-5|ENSG00000199094|hsa-mir-30c-2|hsa-miR-30c jt:ENSG00000105136|ZNF419  
SOX-5|ENSG00000199094|hsa-mir-30c-2|hsa-miR-30c jt:ENSG00000138069|RAB1A  
SOX-5|ENSG00000199094|hsa-mir-30c-2|hsa-miR-30c jt:ENSG00000162490|C1orf187  
SOX-5|ENSG00000199094|hsa-mir-30c-2|hsa-miR-30c jt:ENSG00000099954|CECR2  
SOX-5|ENSG00000199094|hsa-mir-30c-2|hsa-miR-30c jt:ENSG00000123643|SLC36A1  
SOX-5|ENSG00000199094|hsa-mir-30c-2|hsa-miR-30c jt:ENSG00000165891|EF27  
SOX-5|ENSG00000199094|hsa-mir-30c-2|hsa-miR-30c jt:ENSG00000168955|TM4SF20  
SOX-5|ENSG00000199094|hsa-mir-30c-2|hsa-miR-30c jt:ENSG00000162039|C16orf3  
SOX-5|ENSG00000199094|hsa-mir-30c-2|hsa-miR-30c jt:ENSG00000158715|SLC45A3  
SOX-5|ENSG00000199094|hsa-mir-30c-2|hsa-miR-30c jt:ENSG00000173320|STOX2  
SOX-5|ENSG00000199094|hsa-mir-30c-2|hsa-miR-30c jt:ENSG00000135387|CAPRN1  
SOX-5|ENSG00000199094|hsa-mir-30c-2|hsa-miR-30c jt:ENSG00000127329|PTPRB  
SOX-5|ENSG00000199094|hsa-mir-30c-2|hsa-miR-30c jt:ENSG00000151572|TMEM16D

SOX-5|ENSG00000199094|hsa-mir-30c-2|hsa-miR-30c|jt:ENSG00000165288|BRWD3  
SOX-5|ENSG00000199094|hsa-mir-30c-2|hsa-miR-30c|jt:ENSG00000143355|LHX9  
SOX-5|ENSG00000199094|hsa-mir-30c-2|hsa-miR-30c|jt:ENSG00000069869|NEDD4  
SOX-5|ENSG00000199094|hsa-mir-30c-2|hsa-miR-30c|jt:ENSG00000137941|TTLL7  
SOX-5|ENSG00000199094|hsa-mir-30c-2|hsa-miR-30c|jt:ENSG00000148541|FAM13C1  
SOX-5|ENSG00000199102|hsa-mir-302c|hsa-miR-302c|jt:ENSG00000204542|C6orf15  
SOX-5|ENSG00000199102|hsa-mir-302c|hsa-miR-302c|jt:ENSG00000168000|HNRPUL2  
SOX-5|ENSG00000199102|hsa-mir-302c|hsa-miR-302c|jt:ENSG00000180471|C9orf31  
SOX-5|ENSG00000199102|hsa-mir-302c|hsa-miR-302c|jt:ENSG00000086102|NFX1  
SOX-5|ENSG00000199102|hsa-mir-302c|hsa-miR-302c|jt:ENSG00000163486|SRGAP2  
SOX-5|ENSG00000199102|hsa-mir-302c|hsa-miR-302c|jt:ENSG00000204319|C4A  
SOX-5|ENSG00000199102|hsa-mir-302c|hsa-miR-302c|jt:ENSG00000204342|C4B  
SOX-5|ENSG00000199102|hsa-mir-302c|hsa-miR-302c|jt:ENSG00000143199|NP\_060887.1  
SOX-5|ENSG00000199102|hsa-mir-302c|hsa-miR-302c|jt:ENSG00000101247|C20orf7  
SOX-5|ENSG00000199102|hsa-mir-302c|hsa-miR-302c|jt:ENSG00000177337|NP\_001034885.1  
SOX-5|ENSG00000199102|hsa-mir-302c|hsa-miR-302c|jt:ENSG00000188800|TMCO2  
SOX-5|ENSG00000199102|hsa-mir-302c|hsa-miR-302c|jt:ENSG00000150457|LATS2  
SOX-5|ENSG00000199102|hsa-mir-302c|hsa-miR-302c|jt:ENSG00000132514|CLEC10A  
SOX-5|ENSG00000199102|hsa-mir-302c|hsa-miR-302c|jt:ENSG00000149305|HTR3B  
SOX-5|ENSG00000199102|hsa-mir-302c|hsa-miR-302c|jt:ENSG00000168078|PBK  
SOX-5|ENSG00000199102|hsa-mir-302c|hsa-miR-302c|jt:ENSG00000163281|GNPDA2  
SOX-5|ENSG00000199102|hsa-mir-302c|hsa-miR-302c\*|jt:ENSG00000130309|GLT25D1  
SOX-5|ENSG00000199102|hsa-mir-302c|hsa-miR-302c\*|jt:ENSG00000047644|WWC3  
SOX-5|ENSG00000199102|hsa-mir-302c|hsa-miR-302c\*|jt:ENSG00000124177|CHD6  
SOX-5|ENSG00000199102|hsa-mir-302c|hsa-miR-302c\*|jt:ENSG00000136205|TNS3  
SOX-5|ENSG00000199102|hsa-mir-302c|hsa-miR-302c\*|jt:ENSG00000103342|GSP1  
SOX-5|ENSG00000199102|hsa-mir-302c|hsa-miR-302c\*|jt:ENSG00000157211|CDCP2  
SOX-5|ENSG00000199102|hsa-mir-302c|hsa-miR-302c\*|jt:ENSG00000182504|LRR1Q2  
SOX-5|ENSG00000199102|hsa-mir-302c|hsa-miR-302c\*|jt:ENSG00000166024|C10orf28  
SOX-5|ENSG00000199102|hsa-mir-302c|hsa-miR-302c\*|jt:ENSG00000184923|FAM22A  
SOX-5|ENSG00000199102|hsa-mir-302c|hsa-miR-302c\*|jt:ENSG00000151224|MAT1A  
SOX-5|ENSG00000199102|hsa-mir-302c|hsa-miR-302c\*|jt:ENSG00000140386|ZNF291  
SOX-5|ENSG00000199102|hsa-mir-302c|hsa-miR-302c\*|jt:ENSG00000204252|HLA-DOA  
SOX-5|ENSG00000199102|hsa-mir-302c|hsa-miR-302c\*|jt:ENSG00000000003|TSPAN6  
SOX-5|ENSG00000199102|hsa-mir-302c|hsa-miR-302c\*|jt:ENSG00000147614|ATP6VD2  
SOX-5|ENSG00000199102|hsa-mir-302c|hsa-miR-302c\*|jt:ENSG00000007968|E2F2  
SOX-5|ENSG00000199102|hsa-mir-302c|hsa-miR-302c\*|jt:ENSG00000152082|FAM128B  
SOX-5|ENSG00000199122|hsa-mir-148b|hsa-miR-148b|jt:ENSG00000160961|ZNF333  
SOX-5|ENSG00000199122|hsa-mir-148b|hsa-miR-148b|jt:ENSG00000204584|Q6ZSH9\_HUMAN  
SOX-5|ENSG00000199122|hsa-mir-148b|hsa-miR-148b|jt:ENSG00000126216|TUBGCP3  
SOX-5|ENSG00000199122|hsa-mir-148b|hsa-miR-148b|jt:ENSG00000118263|KLF7  
SOX-5|ENSG00000199122|hsa-mir-148b|hsa-miR-148b|jt:ENSG00000158470|B4GALT5  
SOX-5|ENSG00000199122|hsa-mir-148b|hsa-miR-148b|jt:ENSG00000109790|KLHL5  
SOX-5|ENSG00000199122|hsa-mir-148b|hsa-miR-148b|jt:ENSG00000166024|C10orf28  
SOX-5|ENSG00000199122|hsa-mir-148b|hsa-miR-148b|jt:ENSG00000173681|CXorf23  
SOX-5|ENSG00000199122|hsa-mir-148b|hsa-miR-148b|jt:ENSG00000100784|RPS6KA5  
SOX-5|ENSG00000199122|hsa-mir-148b|hsa-miR-148b|jt:ENSG00000164258|NDUFS4  
SOX-5|ENSG00000199122|hsa-mir-148b|hsa-miR-148b|jt:ENSG00000204275|HLA-DQB2  
SOX-5|ENSG00000199122|hsa-mir-148b|hsa-miR-148b|jt:ENSG00000131711|MAP1B  
SOX-5|ENSG00000199122|hsa-mir-148b|hsa-miR-148b|jt:ENSG00000131269|ABCB7  
SOX-5|ENSG00000199122|hsa-mir-148b|hsa-miR-148b|jt:ENSG00000189266|PNRC2  
SOX-5|ENSG00000199122|hsa-mir-148b|hsa-miR-148b|jt:ENSG00000206193|Q5HYA3\_HUMAN  
SOX-5|ENSG00000199122|hsa-mir-148b|hsa-miR-148b|jt:ENSG00000047621|C12orf4  
SOX-5|ENSG00000199122|hsa-mir-148b|hsa-miR-148b|jt:ENSG00000124357|NAGK  
SOX-5|ENSG00000199145|hsa-mir-302d|hsa-miR-302d|jt:ENSG00000204542|C6orf15  
SOX-5|ENSG00000199145|hsa-mir-302d|hsa-miR-302d|jt:ENSG00000168000|HNRPUL2  
SOX-5|ENSG00000199145|hsa-mir-302d|hsa-miR-302d|jt:ENSG00000180471|C9orf31  
SOX-5|ENSG00000199145|hsa-mir-302d|hsa-miR-302d|jt:ENSG00000086102|NFX1  
SOX-5|ENSG00000199145|hsa-mir-302d|hsa-miR-302d|jt:ENSG00000163486|SRGAP2  
SOX-5|ENSG00000199145|hsa-mir-302d|hsa-miR-302d|jt:ENSG00000204319|C4A  
SOX-5|ENSG00000199145|hsa-mir-302d|hsa-miR-302d|jt:ENSG00000204342|C4B  
SOX-5|ENSG00000199145|hsa-mir-302d|hsa-miR-302d|jt:ENSG00000143199|NP\_060887.1  
SOX-5|ENSG00000199145|hsa-mir-302d|hsa-miR-302d|jt:ENSG00000101247|C20orf7  
SOX-5|ENSG00000199145|hsa-mir-302d|hsa-miR-302d|jt:ENSG00000177337|NP\_001034885.1  
SOX-5|ENSG00000199145|hsa-mir-302d|hsa-miR-302d|jt:ENSG00000188800|TMCO2  
SOX-5|ENSG00000199145|hsa-mir-302d|hsa-miR-302d|jt:ENSG00000150457|LATS2  
SOX-5|ENSG00000199145|hsa-mir-302d|hsa-miR-302d|jt:ENSG00000132514|CLEC10A  
SOX-5|ENSG00000199145|hsa-mir-302d|hsa-miR-302d|jt:ENSG00000149305|HTR3B  
SOX-5|ENSG00000199145|hsa-mir-302d|hsa-miR-302d|jt:ENSG00000168078|PBK  
SOX-5|ENSG00000199145|hsa-mir-302d|hsa-miR-302d|jt:ENSG00000163281|GNPDA2  
SOX-5|ENSG00000199153|hsa-mir-30d|hsa-miR-30d|jt:ENSG00000138413|IDH1  
SOX-5|ENSG00000199153|hsa-mir-30d|hsa-miR-30d|jt:ENSG00000071054|MAP4K4  
SOX-5|ENSG00000199153|hsa-mir-30d|hsa-miR-30d|jt:ENSG00000142039|CCDC97  
SOX-5|ENSG00000199153|hsa-mir-30d|hsa-miR-30d|jt:ENSG00000159873|CCDC117  
SOX-5|ENSG00000199153|hsa-mir-30d|hsa-miR-30d|jt:ENSG00000169139|UBE2V2  
SOX-5|ENSG00000199153|hsa-mir-30d|hsa-miR-30d|jt:ENSG00000171320|ESCO2  
SOX-5|ENSG00000199153|hsa-mir-30d|hsa-miR-30d|jt:ENSG00000105136|ZNF419  
SOX-5|ENSG00000199153|hsa-mir-30d|hsa-miR-30d|jt:ENSG00000138069|RAB1A  
SOX-5|ENSG00000199153|hsa-mir-30d|hsa-miR-30d|jt:ENSG00000162490|C1orf187  
SOX-5|ENSG00000199153|hsa-mir-30d|hsa-miR-30d|jt:ENSG00000099954|CECR2  
SOX-5|ENSG00000199153|hsa-mir-30d|hsa-miR-30d|jt:ENSG00000123643|SLC36A1  
SOX-5|ENSG00000199153|hsa-mir-30d|hsa-miR-30d|jt:ENSG00000165891|E2F7  
SOX-5|ENSG00000199153|hsa-mir-30d|hsa-miR-30d|jt:ENSG00000168955|TM4SF20  
SOX-5|ENSG00000199153|hsa-mir-30d|hsa-miR-30d|jt:ENSG00000162039|C16orf73  
SOX-5|ENSG00000199153|hsa-mir-30d|hsa-miR-30d|jt:ENSG00000158715|SLC45A3  
SOX-5|ENSG00000199153|hsa-mir-30d|hsa-miR-30d|jt:ENSG00000173320|STOX2  
SOX-5|ENSG00000199153|hsa-mir-30d|hsa-miR-30d|jt:ENSG00000135387|CAPRIN1  
SOX-5|ENSG00000199153|hsa-mir-30d|hsa-miR-30d|jt:ENSG00000127329|PTPRB  
SOX-5|ENSG00000199153|hsa-mir-30d|hsa-miR-30d|jt:ENSG00000151572|TMEM16D  
SOX-5|ENSG00000199153|hsa-mir-30d|hsa-miR-30d|jt:ENSG00000165288|BRWD3  
SOX-5|ENSG00000199153|hsa-mir-30d|hsa-miR-30d|jt:ENSG00000143355|LHX9  
SOX-5|ENSG00000199153|hsa-mir-30d|hsa-miR-30d|jt:ENSG00000069869|NEDD4  
SOX-5|ENSG00000199153|hsa-mir-30d|hsa-miR-30d|jt:ENSG00000137941|TTLL7  
SOX-5|ENSG00000199169|hsa-mir-367|hsa-miR-367|jt:ENSG00000148541|FAM13C1  
SOX-5|ENSG00000199169|hsa-mir-367|hsa-miR-367|jt:ENSG00000138413|IDH1  
SOX-5|ENSG00000199169|hsa-mir-367|hsa-miR-367|jt:ENSG00000176853|FAM91A1  
SOX-5|ENSG00000199169|hsa-mir-367|hsa-miR-367|jt:ENSG00000137440|FGFBP1  
SOX-5|ENSG00000199169|hsa-mir-367|hsa-miR-367|jt:ENSG00000198677|KIAA0372  
SOX-5|ENSG00000199169|hsa-mir-367|hsa-miR-367|jt:ENSG00000197713|RPE  
SOX-5|ENSG00000199169|hsa-mir-367|hsa-miR-367|jt:ENSG00000146666|Q96IP2\_HUMAN  
SOX-5|ENSG00000199169|hsa-mir-367|hsa-miR-367|jt:ENSG00000147124|ZNF41  
SOX-5|ENSG00000199169|hsa-mir-367|hsa-miR-367|jt:ENSG00000173517|SG269\_HUMAN  
SOX-5|ENSG00000199169|hsa-mir-367|hsa-miR-367|jt:ENSG00000148704|VAX1  
SOX-5|ENSG00000199169|hsa-mir-367|hsa-miR-367|jt:ENSG00000128641|MYO1B  
SOX-5|ENSG00000199169|hsa-mir-367|hsa-miR-367|jt:ENSG00000102055|PPP1R2P9

SOX-5|ENSG00000199169|hsa-mir-367|hsa-miR-367|jt:ENSG0000006634|DBF4  
SOX-5|ENSG00000199169|hsa-mir-367|hsa-miR-367|jt:ENSG00000187372|PCDHB13  
SOX-5|ENSG00000199169|hsa-mir-367|hsa-miR-367|jt:ENSG00000197174|O14606 HUMAN  
SOX-5|ENSG00000199169|hsa-mir-367|hsa-miR-367|jt:ENSG00000197285|NR\_001536.1  
SOX-5|ENSG00000199169|hsa-mir-367|hsa-miR-367|jt:ENSG00000091664|SLC17A6  
SOX-5|ENSG00000199169|hsa-mir-367|hsa-miR-367|jt:ENSG00000136895|GARNL3  
SOX-5|ENSG00000199177|hsa-mir-31|hsa-miR-31|jt:ENSG00000188199|FAM22B  
SOX-5|ENSG00000199177|hsa-mir-31|hsa-miR-31|jt:ENSG00000204043|FAM22C  
SOX-5|ENSG00000199177|hsa-mir-31|hsa-miR-31|jt:ENSG00000013588|GPRC5A  
SOX-5|ENSG00000199177|hsa-mir-31|hsa-miR-31|jt:ENSG00000168939|SPRY3  
SOX-5|ENSG00000199177|hsa-mir-31|hsa-miR-31|jt:ENSG00000155886|SLC24A2  
SOX-5|ENSG00000199177|hsa-mir-31|hsa-miR-31|jt:ENSG00000131059|C20orf71  
SOX-5|ENSG00000207582|hsa-mir-30b|hsa-miR-30b|jt:ENSG00000138413|IDH1  
SOX-5|ENSG00000207582|hsa-mir-30b|hsa-miR-30b|jt:ENSG00000071054|MAP4K4  
SOX-5|ENSG00000207582|hsa-mir-30b|hsa-miR-30b|jt:ENSG00000142039|CCDC97  
SOX-5|ENSG00000207582|hsa-mir-30b|hsa-miR-30b|jt:ENSG00000159873|CCDC117  
SOX-5|ENSG00000207582|hsa-mir-30b|hsa-miR-30b|jt:ENSG00000169139|UBE2V2  
SOX-5|ENSG00000207582|hsa-mir-30b|hsa-miR-30b|jt:ENSG00000171320|ESCO2  
SOX-5|ENSG00000207582|hsa-mir-30b|hsa-miR-30b|jt:ENSG00000105136|ZNF419  
SOX-5|ENSG00000207582|hsa-mir-30b|hsa-miR-30b|jt:ENSG00000138069|RAB1A  
SOX-5|ENSG00000207582|hsa-mir-30b|hsa-miR-30b|jt:ENSG00000162490|C1orf187  
SOX-5|ENSG00000207582|hsa-mir-30b|hsa-miR-30b|jt:ENSG00000099954|CECR2  
SOX-5|ENSG00000207582|hsa-mir-30b|hsa-miR-30b|jt:ENSG00000123643|SLC36A1  
SOX-5|ENSG00000207582|hsa-mir-30b|hsa-miR-30b|jt:ENSG00000165891|E2F7  
SOX-5|ENSG00000207582|hsa-mir-30b|hsa-miR-30b|jt:ENSG00000168955|TM4SF20  
SOX-5|ENSG00000207582|hsa-mir-30b|hsa-miR-30b|jt:ENSG00000162039|C16orf73  
SOX-5|ENSG00000207582|hsa-mir-30b|hsa-miR-30b|jt:ENSG00000158715|SLC45A3  
SOX-5|ENSG00000207582|hsa-mir-30b|hsa-miR-30b|jt:ENSG00000173320|STOX2  
SOX-5|ENSG00000207582|hsa-mir-30b|hsa-miR-30b|jt:ENSG00000135387|CAPRN1  
SOX-5|ENSG00000207582|hsa-mir-30b|hsa-miR-30b|jt:ENSG00000127329|PTPRB  
SOX-5|ENSG00000207582|hsa-mir-30b|hsa-miR-30b|jt:ENSG00000151572|TMEM16D  
SOX-5|ENSG00000207582|hsa-mir-30b|hsa-miR-30b|jt:ENSG00000165288|BRWD3  
SOX-5|ENSG00000207582|hsa-mir-30b|hsa-miR-30b|jt:ENSG00000143355|LHX9  
SOX-5|ENSG00000207582|hsa-mir-30b|hsa-miR-30b|jt:ENSG00000069869|NEDD4  
SOX-5|ENSG00000207582|hsa-mir-30b|hsa-miR-30b|jt:ENSG00000137941|TTL7  
SOX-5|ENSG00000207582|hsa-mir-30b|hsa-miR-30b|jt:ENSG00000148541|FAM13C1  
SOX-5|ENSG00000207604|hsa-mir-206|hsa-miR-206|jt:ENSG00000168000|HNRFPUL2  
SOX-5|ENSG00000207604|hsa-mir-206|hsa-miR-206|jt:ENSG00000131269|ABCB7  
SOX-5|ENSG00000207604|hsa-mir-206|hsa-miR-206|jt:ENSG00000125695|STRAD HUMAN  
SOX-5|ENSG00000207604|hsa-mir-206|hsa-miR-206|jt:ENSG00000002834|LASP1  
SOX-5|ENSG00000207611|hsa-mir-149|hsa-miR-149|jt:ENSG00000204483|Q8N925 HUMAN  
SOX-5|ENSG00000207611|hsa-mir-149|hsa-miR-149|jt:ENSG00000022976|C14orf131  
SOX-5|ENSG00000207611|hsa-mir-149|hsa-miR-149|jt:ENSG00000197444|OGDHL  
SOX-5|ENSG00000207611|hsa-mir-149|hsa-miR-149|jt:ENSG00000121481|RNF2  
SOX-5|ENSG00000207611|hsa-mir-149|hsa-miR-149|jt:ENSG00000038532|KIAA0350  
SOX-5|ENSG00000207611|hsa-mir-149|hsa-miR-149|jt:ENSG00000128731|HERC2  
SOX-5|ENSG00000207617|hsa-mir-24-1|hsa-miR-189|jt:ENSG00000188549|NP\_997263.1  
SOX-5|ENSG00000207617|hsa-mir-24-1|hsa-miR-189|jt:ENSG00000172410|INSL5  
SOX-5|ENSG00000207617|hsa-mir-24-1|hsa-miR-189|jt:ENSG00000147892|ADAMTSL1  
SOX-5|ENSG00000207617|hsa-mir-24-1|hsa-miR-189|jt:ENSG00000175893|ZDHHC21  
SOX-5|ENSG00000207617|hsa-mir-24-1|hsa-miR-189|jt:ENSG00000144596|GRIP2  
SOX-5|ENSG00000207617|hsa-mir-24-1|hsa-miR-189|jt:ENSG00000122786|CALD1  
SOX-5|ENSG00000207617|hsa-mir-24-1|hsa-miR-24|jt:ENSG00000160404|TOR2A  
SOX-5|ENSG00000207617|hsa-mir-24-1|hsa-miR-24|jt:ENSG00000110925|FAM130A1  
SOX-5|ENSG00000207617|hsa-mir-24-1|hsa-miR-24|jt:ENSG00000088766|CRLS1  
SOX-5|ENSG00000207617|hsa-mir-24-1|hsa-miR-24|jt:ENSG00000184923|FAM22A  
SOX-5|ENSG00000207617|hsa-mir-24-1|hsa-miR-24|jt:ENSG00000082153|BZW1  
SOX-5|ENSG00000207617|hsa-mir-24-1|hsa-miR-24|jt:ENSG00000140835|CHST4  
SOX-5|ENSG00000207617|hsa-mir-24-1|hsa-miR-24|jt:ENSG00000196345|ZNF167  
SOX-5|ENSG00000207617|hsa-mir-24-1|hsa-miR-24|jt:ENSG00000117560|FASLG  
SOX-5|ENSG00000207617|hsa-mir-24-1|hsa-miR-24|jt:ENSG00000164684|ZNF704  
SOX-5|ENSG00000207617|hsa-mir-24-1|hsa-miR-24|jt:ENSG00000148700|ADD3  
SOX-5|ENSG00000207617|hsa-mir-24-1|hsa-miR-24|jt:ENSG00000163485|ADORA1  
SOX-5|ENSG00000207617|hsa-mir-24-1|hsa-miR-24|jt:ENSG00000138641|HERC3  
SOX-5|ENSG00000207617|hsa-mir-24-1|hsa-miR-24|jt:ENSG00000143442|POGZ  
SOX-5|ENSG00000207617|hsa-mir-24-1|hsa-miR-24|jt:ENSG00000134042|MRO  
SOX-5|ENSG00000207617|hsa-mir-24-1|hsa-miR-24|jt:ENSG00000091527|CDV3  
SOX-5|ENSG00000207623|hsa-mir-205|hsa-miR-205|jt:ENSG00000196935|SRGAP1  
SOX-5|ENSG00000207623|hsa-mir-205|hsa-miR-205|jt:ENSG00000182518|FAM104B  
SOX-5|ENSG00000207623|hsa-mir-205|hsa-miR-205|jt:ENSG00000112079|STK38  
SOX-5|ENSG00000207623|hsa-mir-205|hsa-miR-205|jt:ENSG00000165879|FRAT1  
SOX-5|ENSG00000207623|hsa-mir-205|hsa-miR-205|jt:ENSG00000114982|NP\_060461.3  
SOX-5|ENSG00000207623|hsa-mir-205|hsa-miR-205|jt:ENSG00000064989|CALCRL  
SOX-5|ENSG00000207623|hsa-mir-205|hsa-miR-205|jt:ENSG00000066634|DBF4  
SOX-5|ENSG00000207649|hsa-mir-138-2|hsa-miR-138|jt:ENSG00000187840|EIF4EBP1  
SOX-5|ENSG00000207649|hsa-mir-138-2|hsa-miR-138|jt:ENSG00000164684|ZNF704  
SOX-5|ENSG00000207649|hsa-mir-138-2|hsa-miR-138|jt:ENSG00000177182|NP\_775790.1  
SOX-5|ENSG00000207649|hsa-mir-138-2|hsa-miR-138|jt:ENSG00000170523|KRT83  
SOX-5|ENSG00000207731|hsa-mir-506|hsa-miR-506|jt:ENSG00000134910|STT3A  
SOX-5|ENSG00000207731|hsa-mir-506|hsa-miR-506|jt:ENSG00000167600|CYP2S1  
SOX-5|ENSG00000207731|hsa-mir-506|hsa-miR-506|jt:ENSG00000145555|MYO10  
SOX-5|ENSG00000207731|hsa-mir-506|hsa-miR-506|jt:ENSG00000174886|NDUFA11  
SOX-5|ENSG00000207731|hsa-mir-506|hsa-miR-506|jt:ENSG00000113732|ATP6V0E1  
SOX-5|ENSG00000207731|hsa-mir-506|hsa-miR-506|jt:ENSG00000203730|TEDDM1  
SOX-5|ENSG00000207731|hsa-mir-506|hsa-miR-506|jt:ENSG00000144061|NPHF1  
SOX-5|ENSG00000207731|hsa-mir-506|hsa-miR-506|jt:ENSG00000110711|AIP  
SOX-5|ENSG00000207731|hsa-mir-506|hsa-miR-506|jt:ENSG00000126952|NXF5  
SOX-5|ENSG00000207731|hsa-mir-506|hsa-miR-506|jt:ENSG00000159792|PSKH1  
SOX-5|ENSG00000207731|hsa-mir-506|hsa-miR-506|jt:ENSG00000184232|OAF  
SOX-5|ENSG00000207795|hsa-mir-155|hsa-miR-155|jt:ENSG00000144228|SPOPL HUMAN  
SOX-5|ENSG00000207795|hsa-mir-155|hsa-miR-155|jt:ENSG00000164077|MON1A  
SOX-5|ENSG00000207795|hsa-mir-155|hsa-miR-155|jt:ENSG00000080644|CHRNA3  
SOX-5|ENSG00000207795|hsa-mir-155|hsa-miR-155|jt:ENSG00000135002|RFK  
SOX-5|ENSG00000207795|hsa-mir-155|hsa-miR-155|jt:ENSG00000160336|ZNF761  
SOX-5|ENSG00000207795|hsa-mir-155|hsa-miR-155|jt:ENSG00000109790|KLHL5  
SOX-5|ENSG00000207795|hsa-mir-155|hsa-miR-155|jt:ENSG00000132824|SERINC3  
SOX-5|ENSG00000207795|hsa-mir-155|hsa-miR-155|jt:ENSG00000105856|HBP1  
SOX-5|ENSG00000207795|hsa-mir-155|hsa-miR-155|jt:ENSG00000101842|VSI1  
SOX-5|ENSG00000207795|hsa-mir-155|hsa-miR-155|jt:ENSG00000143079|CTTNBP2NL  
SOX-5|ENSG00000207795|hsa-mir-155|hsa-miR-155|jt:ENSG00000168813|ZNF507  
SOX-5|ENSG00000207795|hsa-mir-155|hsa-miR-155|jt:ENSG00000010704|HFE  
SOX-5|ENSG00000207795|hsa-mir-155|hsa-miR-155|jt:ENSG00000140575|IQGAP1  
SOX-5|ENSG00000207795|hsa-mir-155|hsa-miR-155|jt:ENSG00000113597|NP\_079217.1  
SOX-5|ENSG00000207795|hsa-mir-155|hsa-miR-155|jt:ENSG00000148737|TCF7L2  
SOX-5|ENSG00000207795|hsa-mir-155|hsa-miR-155|jt:ENSG00000112312|GMNN



SOX-5|ENSG00000207795|hsa-mir-155|hsa-miR-155|jt:ENSG00000147892|ADAMTSL1  
SOX-5|ENSG00000207795|hsa-mir-155|hsa-miR-155|jt:ENSG00000117906|RCN2  
SOX-5|ENSG00000207795|hsa-mir-155|hsa-miR-155|jt:ENSG00000007968|E2F2  
SOX-5|ENSG00000207827|hsa-mir-30a|hsa-miR-30a-3p|jt:ENSG00000158639|PAGE5  
SOX-5|ENSG00000207827|hsa-mir-30a|hsa-miR-30a-3p|jt:ENSG00000203784|LELP1  
SOX-5|ENSG00000207827|hsa-mir-30a|hsa-miR-30a-3p|jt:ENSG00000185532|PRKG1  
SOX-5|ENSG00000207827|hsa-mir-30a|hsa-miR-30a-3p|jt:ENSG00000164975|SNAPC3  
SOX-5|ENSG00000207827|hsa-mir-30a|hsa-miR-30a-3p|jt:ENSG00000149305|HTR3B  
SOX-5|ENSG00000207827|hsa-mir-30a|hsa-miR-30a-5p|jt:ENSG00000138413|IDH1  
SOX-5|ENSG00000207827|hsa-mir-30a|hsa-miR-30a-5p|jt:ENSG00000071054|MAP4K4  
SOX-5|ENSG00000207827|hsa-mir-30a|hsa-miR-30a-5p|jt:ENSG00000142039|CCDC97  
SOX-5|ENSG00000207827|hsa-mir-30a|hsa-miR-30a-5p|jt:ENSG00000159873|CCDC117  
SOX-5|ENSG00000207827|hsa-mir-30a|hsa-miR-30a-5p|jt:ENSG00000169139|UBE2V2  
SOX-5|ENSG00000207827|hsa-mir-30a|hsa-miR-30a-5p|jt:ENSG00000171320|ESCO2  
SOX-5|ENSG00000207827|hsa-mir-30a|hsa-miR-30a-5p|jt:ENSG00000105136|ZNF419  
SOX-5|ENSG00000207827|hsa-mir-30a|hsa-miR-30a-5p|jt:ENSG00000138069|RAB1A  
SOX-5|ENSG00000207827|hsa-mir-30a|hsa-miR-30a-5p|jt:ENSG00000162490|C1orf187  
SOX-5|ENSG00000207827|hsa-mir-30a|hsa-miR-30a-5p|jt:ENSG00000099954|CECR2  
SOX-5|ENSG00000207827|hsa-mir-30a|hsa-miR-30a-5p|jt:ENSG00000123643|SLC36A1  
SOX-5|ENSG00000207827|hsa-mir-30a|hsa-miR-30a-5p|jt:ENSG00000165891|E2F7  
SOX-5|ENSG00000207827|hsa-mir-30a|hsa-miR-30a-5p|jt:ENSG00000168955|TM4SF20  
SOX-5|ENSG00000207827|hsa-mir-30a|hsa-miR-30a-5p|jt:ENSG00000162039|C16orf73  
SOX-5|ENSG00000207827|hsa-mir-30a|hsa-miR-30a-5p|jt:ENSG00000158715|SLC45A3  
SOX-5|ENSG00000207827|hsa-mir-30a|hsa-miR-30a-5p|jt:ENSG00000173320|STOX2  
SOX-5|ENSG00000207827|hsa-mir-30a|hsa-miR-30a-5p|jt:ENSG00000135387|CAPRN1  
SOX-5|ENSG00000207827|hsa-mir-30a|hsa-miR-30a-5p|jt:ENSG00000127329|PTPRB  
SOX-5|ENSG00000207827|hsa-mir-30a|hsa-miR-30a-5p|jt:ENSG00000151572|TMEM16D  
SOX-5|ENSG00000207827|hsa-mir-30a|hsa-miR-30a-5p|jt:ENSG00000165288|BRWD3  
SOX-5|ENSG00000207827|hsa-mir-30a|hsa-miR-30a-5p|jt:ENSG00000143355|LHX9  
SOX-5|ENSG00000207827|hsa-mir-30a|hsa-miR-30a-5p|jt:ENSG00000069869|NEDD4  
SOX-5|ENSG00000207827|hsa-mir-30a|hsa-miR-30a-5p|jt:ENSG00000137941|TTLL7  
SOX-5|ENSG00000207827|hsa-mir-30a|hsa-miR-30a-5p|jt:ENSG00000148541|FAM13C1  
SOX-5|ENSG00000207933|hsa-mir-9-1|hsa-miR-9|jt:ENSG00000187994|NP\_940847.1  
SOX-5|ENSG00000207933|hsa-mir-9-1|hsa-miR-9|jt:ENSG00000118894|FAM86A  
SOX-5|ENSG00000207933|hsa-mir-9-1|hsa-miR-9|jt:ENSG00000143190|POU2F1  
SOX-5|ENSG00000207933|hsa-mir-9-1|hsa-miR-9|jt:ENSG00000137965|IFI44  
SOX-5|ENSG00000207933|hsa-mir-9-1|hsa-miR-9|jt:ENSG00000136872|ALDOB  
SOX-5|ENSG00000207933|hsa-mir-9-1|hsa-miR-9|jt:ENSG00000178538|CA8  
SOX-5|ENSG00000207933|hsa-mir-9-1|hsa-miR-9|jt:ENSG00000073584|SMARCE1  
SOX-5|ENSG00000207933|hsa-mir-9-1|hsa-miR-9|jt:ENSG00000109061|MYH1  
SOX-5|ENSG00000207933|hsa-mir-9-1|hsa-miR-9|jt:ENSG00000086991|NOX4  
SOX-5|ENSG00000207933|hsa-mir-9-1|hsa-miR-9|jt:ENSG00000157554|ERG  
SOX-5|ENSG00000207933|hsa-mir-9-1|hsa-miR-9|jt:ENSG00000092531|SNAP23  
SOX-5|ENSG00000207933|hsa-mir-9-1|hsa-miR-9|jt:ENSG00000174683|C8orf78  
SOX-5|ENSG00000207933|hsa-mir-9-1|hsa-miR-9|jt:ENSG00000117335|CD46  
SOX-5|ENSG00000207933|hsa-mir-9-1|hsa-miR-9|jt:ENSG00000109113|RAB34  
SOX-5|ENSG00000207933|hsa-mir-9-1|hsa-miR-9|jt:ENSG00000169439|SDC2  
SOX-5|ENSG00000207933|hsa-mir-9-1|hsa-miR-9|jt:ENSG00000206193|Q5HYA3\_HUMAN  
SOX-5|ENSG00000207933|hsa-mir-9-1|hsa-miR-9|jt:ENSG00000082516|GEMIN5  
SOX-5|ENSG00000207933|hsa-mir-9-1|hsa-miR-9|jt:ENSG00000041982|TNC  
SOX-5|ENSG00000207933|hsa-mir-9-1|hsa-miR-9\*|jt:ENSG00000174442|ZWILCH  
SOX-5|ENSG00000207933|hsa-mir-9-1|hsa-miR-9\*|jt:ENSG00000186326|RC9SBP  
SOX-5|ENSG00000207933|hsa-mir-9-1|hsa-miR-9\*|jt:ENSG00000178401|NP\_079178.2  
SOX-5|ENSG00000207933|hsa-mir-9-1|hsa-miR-9\*|jt:ENSG00000196482|ESRRG  
SOX-5|ENSG00000207933|hsa-mir-9-1|hsa-miR-9\*|jt:ENSG00000143940|Q6ZMW3\_HUMAN  
SOX-5|ENSG00000207933|hsa-mir-9-1|hsa-miR-9\*|jt:ENSG00000057019|DCBLD2  
SOX-5|ENSG00000207933|hsa-mir-9-1|hsa-miR-9\*|jt:ENSG00000126945|HNRPH2  
SOX-5|ENSG00000207933|hsa-mir-9-1|hsa-miR-9\*|jt:ENSG00000197594|ENPP1  
SOX-5|ENSG00000207933|hsa-mir-9-1|hsa-miR-9\*|jt:ENSG00000166104|NP\_776166.1  
SOX-5|ENSG00000207933|hsa-mir-9-1|hsa-miR-9\*|jt:ENSG00000188199|FAM22B  
SOX-5|ENSG00000207933|hsa-mir-9-1|hsa-miR-9\*|jt:ENSG00000189369|GSPT2  
SOX-5|ENSG00000207933|hsa-mir-9-1|hsa-miR-9\*|jt:ENSG00000114982|NP\_060461.3  
SOX-5|ENSG00000207933|hsa-mir-9-1|hsa-miR-9\*|jt:ENSG00000104765|BNIP3L  
SOX-5|ENSG00000207933|hsa-mir-9-1|hsa-miR-9\*|jt:ENSG00000170509|HSD17B13  
SOX-5|ENSG00000207933|hsa-mir-9-1|hsa-miR-9\*|jt:ENSG00000102104|RS1  
SOX-5|ENSG00000207933|hsa-mir-9-1|hsa-miR-9\*|jt:ENSG00000143622|RIT1  
SOX-5|ENSG00000207933|hsa-mir-9-1|hsa-miR-9\*|jt:ENSG00000049130|KITLG  
SOX-5|ENSG00000207933|hsa-mir-9-1|hsa-miR-9\*|jt:ENSG00000182329|Q8IVF9\_HUMAN  
SOX-5|ENSG00000207933|hsa-mir-9-1|hsa-miR-9\*|jt:ENSG00000163281|GNPDA2  
SOX-5|ENSG00000207955|hsa-mir-219-2|hsa-miR-219|jt:ENSG00000133511|PIK4CA  
SOX-5|ENSG00000207955|hsa-mir-219-2|hsa-miR-219|jt:ENSG00000136869|TLR4  
SOX-5|ENSG00000207955|hsa-mir-219-2|hsa-miR-219|jt:ENSG00000203867|RBM20  
SOX-5|ENSG00000207955|hsa-mir-219-2|hsa-miR-219|jt:ENSG00000180139|Q8N9Z5\_HUMAN  
SOX-5|ENSG00000207955|hsa-mir-219-2|hsa-miR-219|jt:ENSG00000163486|SRGAP2  
SOX-5|ENSG00000207955|hsa-mir-219-2|hsa-miR-219|jt:ENSG00000163788|SNRK  
SOX-5|ENSG00000207955|hsa-mir-219-2|hsa-miR-219|jt:ENSG00000109667|SLC2A9  
SOX-5|ENSG00000207955|hsa-mir-219-2|hsa-miR-219|jt:ENSG00000114982|NP\_060461.3  
SOX-5|ENSG00000207955|hsa-mir-219-2|hsa-miR-219|jt:ENSG00000184895|SRY  
SOX-5|ENSG00000207955|hsa-mir-219-2|hsa-miR-219|jt:ENSG00000172717|C14orf54  
SOX-5|ENSG00000207955|hsa-mir-219-2|hsa-miR-219|jt:ENSG00000043822|NP\_060895.1  
SOX-5|ENSG00000207955|hsa-mir-219-2|hsa-miR-219|jt:ENSG00000179387|ELMOD2  
SOX-5|ENSG00000207955|hsa-mir-219-2|hsa-miR-219|jt:ENSG00000173930|SLC04C1  
SOX-5|ENSG00000207955|hsa-mir-219-2|hsa-miR-219|jt:ENSG00000178776|NP\_996849.2  
SOX-5|ENSG00000207955|hsa-mir-219-2|hsa-miR-219|jt:ENSG00000161031|PGLYRP2  
SOX-5|ENSG00000207955|hsa-mir-219-2|hsa-miR-219|jt:ENSG00000171557|FGG  
SOX-5|ENSG00000207955|hsa-mir-219-2|hsa-miR-219|jt:ENSG00000074054|CLASP1  
SOX-5|ENSG00000207955|hsa-mir-219-2|hsa-miR-219|jt:ENSG00000129744|ART1  
SOX-5|ENSG00000207971|hsa-mir-125b-1|hsa-miR-125b|jt:ENSG00000136908|DPM2  
SOX-5|ENSG00000207971|hsa-mir-125b-1|hsa-miR-125b|jt:ENSG00000112195|TREM2  
SOX-5|ENSG00000207971|hsa-mir-125b-1|hsa-miR-125b|jt:ENSG00000141380|SS18  
SOX-5|ENSG00000207971|hsa-mir-125b-1|hsa-miR-125b|jt:ENSG00000187840|EIF4EBP1  
SOX-5|ENSG00000207971|hsa-mir-125b-1|hsa-miR-125b|jt:ENSG00000133561|GIMAP6  
SOX-5|ENSG00000207971|hsa-mir-125b-1|hsa-miR-125b|jt:ENSG00000136383|ALPK3  
SOX-5|ENSG00000207971|hsa-mir-125b-1|hsa-miR-125b|jt:ENSG00000161021|LTC4S  
SOX-5|ENSG00000207971|hsa-mir-125b-1|hsa-miR-125b|jt:ENSG00000205126|NP\_001027025.1  
SOX-5|ENSG00000207971|hsa-mir-125b-1|hsa-miR-125b|jt:ENSG00000188743|Q9P169\_HUMAN  
SOX-5|ENSG00000207971|hsa-mir-125b-1|hsa-miR-125b|jt:ENSG00000130427|EPO  
SOX-5|ENSG00000207971|hsa-mir-125b-1|hsa-miR-125b|jt:ENSG00000174808|BTC  
SOX-5|ENSG00000207971|hsa-mir-125b-1|hsa-miR-125b|jt:ENSG00000110274|CEP164  
SOX-5|ENSG00000207971|hsa-mir-125b-1|hsa-miR-125b|jt:ENSG00000073754|CD5L  
SOX-5|ENSG00000207971|hsa-mir-125b-1|hsa-miR-125b|jt:ENSG00000184508|HDDC3  
SOX-5|ENSG00000207971|hsa-mir-125b-1|hsa-miR-125b|jt:ENSG00000130348|QRS11  
SOX-5|ENSG00000207971|hsa-mir-125b-1|hsa-miR-125b|jt:ENSG00000142102|ATHL1  
SOX-5|ENSG00000207971|hsa-mir-125b-1|hsa-miR-125b|jt:ENSG00000095794|CREM  
SOX-5|ENSG00000207971|hsa-mir-125b-1|hsa-miR-125b|jt:ENSG00000205081|XR\_017999.1

SOX-5|ENSG00000207971|hsa-mir-125b-1|hsa-miR-125b|jt:ENSG00000007968|E2F2  
SOX-5|ENSG00000207971|hsa-mir-125b-1|hsa-miR-125b|jt:ENSG00000076716|GPC4  
SOX-5|ENSG00000207971|hsa-mir-125b-1|hsa-miR-125b|jt:ENSG00000047621|C12orf4  
SOX-5|ENSG00000207971|hsa-mir-125b-1|hsa-miR-125b|jt:ENSG00000136895|GARNL3  
SOX-5|ENSG00000207971|hsa-mir-125b-1|hsa-miR-125b|jt:ENSG00000100796|SMEK1  
SOX-5|ENSG00000207971|hsa-mir-125b-1|hsa-miR-125b|jt:ENSG00000160796|NBEAL2  
SOX-5|ENSG00000207994|hsa-mir-100|hsa-miR-100|jt:ENSG00000013297|CLDN11  
SOX-5|ENSG00000207994|hsa-mir-100|hsa-miR-100|jt:ENSG000000203837|PNLIPRP3  
SOX-5|ENSG00000207994|hsa-mir-100|hsa-miR-100|jt:ENSG000000173404|INSM1  
SOX-5|ENSG00000207994|hsa-mir-100|hsa-miR-100|jt:ENSG00000012299|VNN1  
SP-1|ENSG00000198973|hsa-mir-375|hsa-miR-375|jt:ENSG000000103241|FOXF1  
SP-1|ENSG00000198973|hsa-mir-375|hsa-miR-375|jt:ENSG000000140479|PCSK6  
SP-1|ENSG00000198973|hsa-mir-375|hsa-miR-375|jt:ENSG00000163642|XR\_017284.1  
SP-1|ENSG00000198973|hsa-mir-375|hsa-miR-375|jt:ENSG00000198692|EIF1AY  
SP-1|ENSG00000198973|hsa-mir-375|hsa-miR-375|jt:ENSG00000106524|ANKMY2  
SP-1|ENSG00000198973|hsa-mir-375|hsa-miR-375|jt:ENSG00000183597|C22orf25  
SP-1|ENSG00000198973|hsa-mir-375|hsa-miR-375|jt:ENSG000000112531|QKI  
SP-1|ENSG00000198973|hsa-mir-375|hsa-miR-375|jt:ENSG000000132122|SPATA6  
SP-1|ENSG00000198973|hsa-mir-375|hsa-miR-375|jt:ENSG000000188315|C3orf62  
SP-1|ENSG00000198973|hsa-mir-375|hsa-miR-375|jt:ENSG000000100483|C14orf138  
SP-1|ENSG00000198974|hsa-mir-30e|hsa-miR-30e-3p|jt:ENSG00000169684|CHRNA5  
SP-1|ENSG00000198974|hsa-mir-30e|hsa-miR-30e-3p|jt:ENSG00000168658|NP\_659429.4  
SP-1|ENSG00000198974|hsa-mir-30e|hsa-miR-30e-5p|jt:ENSG00000142319|SLC6A3  
SP-1|ENSG00000198974|hsa-mir-30e|hsa-miR-30e-5p|jt:ENSG00000058600|POLR3E  
SP-1|ENSG00000198974|hsa-mir-30e|hsa-miR-30e-5p|jt:ENSG000000165288|BRWD3  
SP-1|ENSG00000198974|hsa-mir-30e|hsa-miR-30e-5p|jt:ENSG00000087903|RFX2  
SP-1|ENSG00000198974|hsa-mir-30e|hsa-miR-30e-5p|jt:ENSG000000162490|C1orf187  
SP-1|ENSG00000198974|hsa-mir-30e|hsa-miR-30e-5p|jt:ENSG000000104497|SNX16  
SP-1|ENSG00000198974|hsa-mir-30e|hsa-miR-30e-5p|jt:ENSG00000180574|Q5IOX0\_HUMAN  
SP-1|ENSG00000198974|hsa-mir-30e|hsa-miR-30e-5p|jt:ENSG000000115112|TFCP2L1  
SP-1|ENSG00000198974|hsa-mir-30e|hsa-miR-30e-5p|jt:ENSG000000105991|HOXA1  
SP-1|ENSG00000198974|hsa-mir-30e|hsa-miR-30e-5p|jt:ENSG00000057657|PRDM1  
SP-1|ENSG00000198974|hsa-mir-30e|hsa-miR-30e-5p|jt:ENSG000000124787|RPP40  
SP-1|ENSG00000198974|hsa-mir-30e|hsa-miR-30e-5p|jt:ENSG000000144935|TRPC1  
SP-1|ENSG00000199032|hsa-mir-425|hsa-miR-425-3p|jt:ENSG000000163322|CCDC98  
SP-1|ENSG00000199032|hsa-mir-425|hsa-miR-425-3p|jt:ENSG000000178538|CA8  
SP-1|ENSG00000199122|hsa-mir-148b|hsa-miR-148b|jt:ENSG000000204103|MAFB  
SP-1|ENSG00000199122|hsa-mir-148b|hsa-miR-148b|jt:ENSG000000176749|CDK5R1  
SP-1|ENSG00000199122|hsa-mir-148b|hsa-miR-148b|jt:ENSG000000111711|GOLT1B  
SP-1|ENSG00000199122|hsa-mir-148b|hsa-miR-148b|jt:ENSG000000196972|Q86V52\_HUMAN  
SP-1|ENSG00000199122|hsa-mir-148b|hsa-miR-148b|jt:ENSG000000077254|USP33  
SP-1|ENSG00000199122|hsa-mir-148b|hsa-miR-148b|jt:ENSG000000179476|C14orf28  
SP-1|ENSG00000199122|hsa-mir-148b|hsa-miR-148b|jt:ENSG000000118707|TGIF2  
SP-1|ENSG00000199122|hsa-mir-148b|hsa-miR-148b|jt:ENSG000000100483|C14orf138  
SP-1|ENSG000000199187|hsa-mir-365-2|hsa-miR-365|jt:ENSG000000186326|RGS9BP  
SP-1|ENSG000000199187|hsa-mir-365-2|hsa-miR-365|jt:ENSG000000185803|GPR172A  
SP-1|ENSG000000199187|hsa-mir-365-2|hsa-miR-365|jt:ENSG000000196388|NP\_998891.1  
SP-1|ENSG000000199187|hsa-mir-365-2|hsa-miR-365|jt:ENSG000000205664|Q6FJD4\_HUMAN  
SP-1|ENSG000000199187|hsa-mir-365-2|hsa-miR-365|jt:ENSG00000089737|DDX24  
SP-1|ENSG000000207568|hsa-mir-203|hsa-miR-203|jt:ENSG000000104824|HNRPL  
SP-1|ENSG000000207568|hsa-mir-203|hsa-miR-203|jt:ENSG000000125347|IRF1  
SP-1|ENSG000000207568|hsa-mir-203|hsa-miR-203|jt:ENSG000000173046|NM\_207376  
SP-1|ENSG000000207611|hsa-mir-149|hsa-miR-149|jt:ENSG000000130270|ATP8B3  
SP-1|ENSG000000207611|hsa-mir-149|hsa-miR-149|jt:ENSG000000158966|CACHD1  
SP-1|ENSG000000207611|hsa-mir-149|hsa-miR-149|jt:ENSG000000109062|SLC9A3R1  
SP-1|ENSG000000207611|hsa-mir-149|hsa-miR-149|jt:ENSG000000074317|SNCB  
SP-1|ENSG000000207611|hsa-mir-149|hsa-miR-149|jt:ENSG000000187609|NP\_060290.3  
SP-1|ENSG000000207614|hsa-mir-193a|hsa-miR-193a|jt:ENSG000000137478|FCHSD2  
SP-1|ENSG000000207614|hsa-mir-193a|hsa-miR-193a|jt:ENSG000000168675|C18orf1  
SP-1|ENSG000000207614|hsa-mir-193a|hsa-miR-193a|jt:ENSG000000172771|C3orf25  
SP-1|ENSG000000207614|hsa-mir-193a|hsa-miR-193a|jt:ENSG00000012779|ALOX5  
SP-1|ENSG000000207614|hsa-mir-193a|hsa-miR-193a|jt:ENSG000000183597|C22orf25  
SP-1|ENSG000000207614|hsa-mir-193a|hsa-miR-193a|jt:ENSG000000198870|C9orf96  
SP-1|ENSG000000207614|hsa-mir-193a|hsa-miR-193a|jt:ENSG000000158813|EDA  
SP-1|ENSG000000207614|hsa-mir-193a|hsa-miR-193a|jt:ENSG000000172354|GNB2  
SP-1|ENSG000000207614|hsa-mir-193a|hsa-miR-193a|jt:ENSG000000028528|SNX1  
SP-1|ENSG000000207614|hsa-mir-193a|hsa-miR-193a|jt:ENSG000000105552|BCAT2  
SP-1|ENSG000000207614|hsa-mir-193a|hsa-miR-193a|jt:ENSG000000137497|NUMA1  
SP-1|ENSG000000207698|hsa-mir-32|hsa-miR-32|jt:ENSG000000100320|RBM9  
SP-1|ENSG000000207698|hsa-mir-32|hsa-miR-32|jt:ENSG000000147119|CHST7  
SP-1|ENSG000000207698|hsa-mir-32|hsa-miR-32|jt:ENSG000000090975|PITPNM2  
SP-1|ENSG000000207698|hsa-mir-32|hsa-miR-32|jt:ENSG000000137845|ADAM10  
SP-1|ENSG000000207698|hsa-mir-32|hsa-miR-32|jt:ENSG000000116396|KCNC4  
SP-1|ENSG000000207698|hsa-mir-32|hsa-miR-32|jt:ENSG000000066136|NFYC  
SP-1|ENSG000000207698|hsa-mir-32|hsa-miR-32|jt:ENSG000000114988|LMAN2L  
SP-1|ENSG000000207698|hsa-mir-32|hsa-miR-32|jt:ENSG000000128641|MYO1B  
SP-1|ENSG000000207698|hsa-mir-32|hsa-miR-32|jt:ENSG000000156162|DPY19L4  
SP-1|ENSG000000207698|hsa-mir-32|hsa-miR-32|jt:ENSG000000156374|PCGF6  
SP-1|ENSG000000207698|hsa-mir-32|hsa-miR-32|jt:ENSG000000090615|GOLGA3  
SP-1|ENSG000000207698|hsa-mir-32|hsa-miR-32|jt:ENSG000000126705|AHDC1  
SP-1|ENSG000000207739|hsa-mir-218-2|hsa-miR-218|jt:ENSG000000136942|RPL35  
SP-1|ENSG000000207739|hsa-mir-218-2|hsa-miR-218|jt:ENSG000000003249|DENDD1  
SP-1|ENSG000000207739|hsa-mir-218-2|hsa-miR-218|jt:ENSG000000119771|KLHL29  
SP-1|ENSG000000207739|hsa-mir-218-2|hsa-miR-218|jt:ENSG000000188428|TXNDC5  
SP-1|ENSG000000207739|hsa-mir-218-2|hsa-miR-218|jt:ENSG000000120333|MRPS14  
SP-1|ENSG000000207739|hsa-mir-218-2|hsa-miR-218|jt:ENSG000000174775|HRAS  
SP-1|ENSG000000207784|hsa-mir-542|hsa-miR-542-3p|jt:ENSG000000071127|WDR1  
SP-1|ENSG000000207784|hsa-mir-542|hsa-miR-542-3p|jt:ENSG000000094916|CBX5  
SP-1|ENSG000000207784|hsa-mir-542|hsa-miR-542-3p|jt:ENSG000000114988|LMAN2L  
SP-1|ENSG000000207962|hsa-mir-30c-1|hsa-miR-30c|jt:ENSG000000142319|SLC6A3  
SP-1|ENSG000000207962|hsa-mir-30c-1|hsa-miR-30c|jt:ENSG00000058600|POLR3E  
SP-1|ENSG000000207962|hsa-mir-30c-1|hsa-miR-30c|jt:ENSG000000165288|BRWD3  
SP-1|ENSG000000207962|hsa-mir-30c-1|hsa-miR-30c|jt:ENSG00000087903|RFX2  
SP-1|ENSG000000207962|hsa-mir-30c-1|hsa-miR-30c|jt:ENSG000000162490|C1orf187  
SP-1|ENSG000000207962|hsa-mir-30c-1|hsa-miR-30c|jt:ENSG000000104497|SNX16  
SP-1|ENSG000000207962|hsa-mir-30c-1|hsa-miR-30c|jt:ENSG000000180574|Q5IOX0\_HUMAN  
SP-1|ENSG000000207962|hsa-mir-30c-1|hsa-miR-30c|jt:ENSG000000115112|TFCP2L1  
SP-1|ENSG000000207962|hsa-mir-30c-1|hsa-miR-30c|jt:ENSG000000105991|HOXA1  
SP-1|ENSG000000207962|hsa-mir-30c-1|hsa-miR-30c|jt:ENSG00000057657|PRDM1  
SP-1|ENSG000000207962|hsa-mir-30c-1|hsa-miR-30c|jt:ENSG000000124787|RPP40  
SP-1|ENSG000000207962|hsa-mir-30c-1|hsa-miR-30c|jt:ENSG000000144935|TRPC1  
SREBP-1|ENSG000000207950|hsa-mir-296|hsa-miR-296|jt:ENSG000000172354|GNB2  
SREBP-1|ENSG000000208017|hsa-mir-140|hsa-miR-140|jt:ENSG000000182118|FAM89A  
SREBP-1|ENSG000000208017|hsa-mir-140|hsa-miR-140|jt:ENSG000000198677|KIAA0372  
SREBP-1|ENSG000000208017|hsa-mir-140|hsa-miR-140|jt:ENSG000000198033|TUBA3C



SRY|ENSG00000199020|hsa-mir-381|hsa-miR-381|jt:ENSG00000078142|PIK3C3  
SRY|ENSG00000199020|hsa-mir-381|hsa-miR-381|jt:ENSG00000054267|ARID4B  
SRY|ENSG00000199020|hsa-mir-381|hsa-miR-381|jt:ENSG00000120156|TEK  
SRY|ENSG00000199020|hsa-mir-381|hsa-miR-381|jt:ENSG00000181666|HKR1  
SRY|ENSG00000199020|hsa-mir-381|hsa-miR-381|jt:ENSG00000136327|NKX2-8  
SRY|ENSG00000199020|hsa-mir-381|hsa-miR-381|jt:ENSG00000095564|BTAf1  
SRY|ENSG00000199020|hsa-mir-381|hsa-miR-381|jt:ENSG00000176208|ATAD5  
SRY|ENSG00000199020|hsa-mir-381|hsa-miR-381|jt:ENSG00000133639|BTG1  
SRY|ENSG00000199020|hsa-mir-381|hsa-miR-381|jt:ENSG00000135900|MRPL44  
SRY|ENSG00000199020|hsa-mir-381|hsa-miR-381|jt:ENSG00000116785|CFHR3  
SRY|ENSG00000199020|hsa-mir-381|hsa-miR-381|jt:ENSG00000184009|ACTG1  
SRY|ENSG00000199025|hsa-mir-369|hsa-miR-369-3p|jt:ENSG00000120688|WBP4  
SRY|ENSG00000199025|hsa-mir-369|hsa-miR-369-3p|jt:ENSG00000162104|ADCY9  
SRY|ENSG00000199025|hsa-mir-369|hsa-miR-369-3p|jt:ENSG00000130768|SMPDL3B  
SRY|ENSG00000199025|hsa-mir-369|hsa-miR-369-3p|jt:ENSG00000042062|C2orf175  
SRY|ENSG00000199025|hsa-mir-369|hsa-miR-369-3p|jt:ENSG00000140057|AK7  
SRY|ENSG00000199025|hsa-mir-369|hsa-miR-369-3p|jt:ENSG00000100227|POLDDIP3  
SRY|ENSG00000199025|hsa-mir-369|hsa-miR-369-3p|jt:ENSG00000145331|RG9MTD2  
SRY|ENSG00000199025|hsa-mir-369|hsa-miR-369-3p|jt:ENSG00000162980|ARL5A  
SRY|ENSG00000199025|hsa-mir-369|hsa-miR-369-3p|jt:ENSG00000102385|DRP2  
SRY|ENSG00000199025|hsa-mir-369|hsa-miR-369-3p|jt:ENSG00000140299|BNIP2  
SRY|ENSG00000199025|hsa-mir-369|hsa-miR-369-3p|jt:ENSG00000169554|ZEB2  
SRY|ENSG00000199025|hsa-mir-369|hsa-miR-369-3p|jt:ENSG00000146250|PRSS35  
SRY|ENSG00000199025|hsa-mir-369|hsa-miR-369-3p|jt:ENSG00000065135|GNAI3  
SRY|ENSG00000199025|hsa-mir-369|hsa-miR-369-3p|jt:ENSG00000145740|SLC30A5  
SRY|ENSG00000199025|hsa-mir-369|hsa-miR-369-3p|jt:ENSG00000133398|MED10  
SRY|ENSG00000199025|hsa-mir-369|hsa-miR-369-3p|jt:ENSG00000087495|PHACTR3  
SRY|ENSG00000199025|hsa-mir-369|hsa-miR-369-5p|jt:ENSG00000080803|JARID2  
SRY|ENSG00000199025|hsa-mir-369|hsa-miR-369-5p|jt:ENSG00000120694|HSPH1  
SRY|ENSG00000199025|hsa-mir-369|hsa-miR-369-5p|jt:ENSG00000122417|ODF2L  
SRY|ENSG00000199025|hsa-mir-369|hsa-miR-369-5p|jt:ENSG00000119508|NR4A3  
SRY|ENSG00000199025|hsa-mir-369|hsa-miR-369-5p|jt:ENSG00000196616|ADHIC  
SRY|ENSG00000199025|hsa-mir-369|hsa-miR-369-5p|jt:ENSG00000163421|PROK2  
SRY|ENSG00000199025|hsa-mir-369|hsa-miR-369-5p|jt:ENSG00000166938|DIS3L  
SRY|ENSG00000199025|hsa-mir-369|hsa-miR-369-5p|jt:ENSG00000187969|ZCCHC13  
SRY|ENSG00000199069|hsa-mir-323|hsa-miR-323|jt:ENSG00000142676|RPL11  
SRY|ENSG00000199069|hsa-mir-323|hsa-miR-323|jt:ENSG00000185262|FAM100B  
SRY|ENSG00000199069|hsa-mir-323|hsa-miR-323|jt:ENSG00000132639|SNAP25  
SRY|ENSG00000199092|hsa-mir-410|hsa-miR-410|jt:ENSG00000163510|NP\_065994.1  
SRY|ENSG00000199092|hsa-mir-410|hsa-miR-410|jt:ENSG00000177551|NHLH2  
SRY|ENSG00000199092|hsa-mir-410|hsa-miR-410|jt:ENSG00000145332|KLHL8  
SRY|ENSG00000199092|hsa-mir-410|hsa-miR-410|jt:ENSG00000151881|C5orf28  
SRY|ENSG00000199092|hsa-mir-410|hsa-miR-410|jt:ENSG00000095209|TMEM38B  
SRY|ENSG00000199092|hsa-mir-410|hsa-miR-410|jt:ENSG00000104205|SGK3  
SRY|ENSG00000199092|hsa-mir-410|hsa-miR-410|jt:ENSG00000116473|RAP1A  
SRY|ENSG00000199092|hsa-mir-410|hsa-miR-410|jt:ENSG00000106080|FKBP14  
SRY|ENSG00000199092|hsa-mir-410|hsa-miR-410|jt:ENSG00000176208|ATAD5  
SRY|ENSG00000199092|hsa-mir-410|hsa-miR-410|jt:ENSG00000110395|CBL  
SRY|ENSG00000199092|hsa-mir-410|hsa-miR-410|jt:ENSG00000126883|NUP214  
SRY|ENSG00000199092|hsa-mir-410|hsa-miR-410|jt:ENSG00000174123|TLR10  
SRY|ENSG00000199092|hsa-mir-410|hsa-miR-410|jt:ENSG00000196071|OR2L13  
SRY|ENSG00000199092|hsa-mir-410|hsa-miR-410|jt:ENSG00000204217|BMPR2  
SRY|ENSG00000199092|hsa-mir-410|hsa-miR-410|jt:ENSG00000198889|WDR40B  
SRY|ENSG00000199092|hsa-mir-410|hsa-miR-410|jt:ENSG00000135205|NP\_065930.2  
SRY|ENSG00000199107|hsa-mir-409|hsa-miR-409-5p|jt:ENSG00000125385|RPS29  
SRY|ENSG00000199107|hsa-mir-409|hsa-miR-409-5p|jt:ENSG00000130768|SMPDL3B  
SRY|ENSG00000199107|hsa-mir-409|hsa-miR-409-5p|jt:ENSG00000143222|UFC1  
SRY|ENSG00000199107|hsa-mir-409|hsa-miR-409-5p|jt:ENSG00000134825|C11orf10  
SRY|ENSG00000199107|hsa-mir-409|hsa-miR-409-5p|jt:ENSG00000155008|APOOL  
SRY|ENSG00000199107|hsa-mir-409|hsa-miR-409-5p|jt:ENSG00000127184|COX7C  
SRY|ENSG00000199107|hsa-mir-409|hsa-miR-409-5p|jt:ENSG00000138696|BMPR1B  
SRY|ENSG00000199107|hsa-mir-409|hsa-miR-409-5p|jt:ENSG00000143198|MGST3  
SRY|ENSG00000199107|hsa-mir-409|hsa-miR-409-5p|jt:ENSG0000010404|IDS  
SRY|ENSG00000199122|hsa-mir-148b|hsa-miR-148b|jt:ENSG00000135205|NP\_065930.2  
SRY|ENSG00000199122|hsa-mir-148b|hsa-miR-148b|jt:ENSG00000166024|C10orf28  
SRY|ENSG00000199122|hsa-mir-148b|hsa-miR-148b|jt:ENSG00000055070|C1orf44  
SRY|ENSG00000199122|hsa-mir-148b|hsa-miR-148b|jt:ENSG00000189180|ZNF33A  
SRY|ENSG00000199122|hsa-mir-148b|hsa-miR-148b|jt:ENSG00000137642|SORL1  
SRY|ENSG00000199122|hsa-mir-148b|hsa-miR-148b|jt:ENSG00000118707|TGIF2  
SRY|ENSG00000199122|hsa-mir-148b|hsa-miR-148b|jt:ENSG00000151725|MLF1IP  
SRY|ENSG00000199122|hsa-mir-148b|hsa-miR-148b|jt:ENSG00000137073|UBAP2  
SRY|ENSG00000199122|hsa-mir-148b|hsa-miR-148b|jt:ENSG00000085433|WDR47  
SRY|ENSG00000199122|hsa-mir-148b|hsa-miR-148b|jt:ENSG00000101901|CXorf45  
SRY|ENSG00000199122|hsa-mir-148b|hsa-miR-148b|jt:ENSG00000115310|RTN4  
SRY|ENSG00000199122|hsa-mir-148b|hsa-miR-148b|jt:ENSG00000135541|AH11  
SRY|ENSG00000199122|hsa-mir-148b|hsa-miR-148b|jt:ENSG00000205653|Q6ZUF2\_HUMAN  
SRY|ENSG00000199122|hsa-mir-148b|hsa-miR-148b|jt:ENSG00000172053|QARS  
SRY|ENSG00000199122|hsa-mir-148b|hsa-miR-148b|jt:ENSG00000204103|MAFB  
SRY|ENSG00000199122|hsa-mir-148b|hsa-miR-148b|jt:ENSG00000173926|MARCH3  
SRY|ENSG00000199177|hsa-mir-31|hsa-miR-31|jt:ENSG00000117152|RGS4  
SRY|ENSG00000199177|hsa-mir-31|hsa-miR-31|jt:ENSG00000013588|GPRC5A  
SRY|ENSG00000199177|hsa-mir-31|hsa-miR-31|jt:ENSG00000110799|VWF  
SRY|ENSG00000207585|hsa-mir-181d|hsa-miR-181d|jt:ENSG00000083312|TNPO1  
SRY|ENSG00000207585|hsa-mir-181d|hsa-miR-181d|jt:ENSG00000105705|SF4  
SRY|ENSG00000207585|hsa-mir-181d|hsa-miR-181d|jt:ENSG00000084652|TXLNA  
SRY|ENSG00000207585|hsa-mir-181d|hsa-miR-181d|jt:ENSG00000204455|XR\_015868.1  
SRY|ENSG00000207585|hsa-mir-181d|hsa-miR-181d|jt:ENSG00000065882|TBC1D1  
SRY|ENSG00000207585|hsa-mir-181d|hsa-miR-181d|jt:ENSG00000163463|KRTCAP2  
SRY|ENSG00000207585|hsa-mir-181d|hsa-miR-181d|jt:ENSG00000160789|LMNA  
SRY|ENSG00000207585|hsa-mir-181d|hsa-miR-181d|jt:ENSG00000160844|NP\_849153.3  
SRY|ENSG00000207585|hsa-mir-181d|hsa-miR-181d|jt:ENSG00000183648|NDUFB1  
SRY|ENSG00000207585|hsa-mir-181d|hsa-miR-181d|jt:ENSG00000206561|COLQ  
SRY|ENSG00000207585|hsa-mir-181d|hsa-miR-181d|jt:ENSG00000152520|PAN3  
SRY|ENSG00000207585|hsa-mir-181d|hsa-miR-181d|jt:ENSG00000169891|REPS2  
SRY|ENSG00000207585|hsa-mir-181d|hsa-miR-181d|jt:ENSG00000106852|LHX6  
SRY|ENSG00000207585|hsa-mir-181d|hsa-miR-181d|jt:ENSG00000139746|RBM26  
SRY|ENSG00000207585|hsa-mir-181d|hsa-miR-181d|jt:ENSG00000171766|GATM  
SRY|ENSG00000207698|hsa-mir-32|hsa-miR-32|jt:ENSG00000198373|WPP2  
SRY|ENSG00000207698|hsa-mir-32|hsa-miR-32|jt:ENSG00000084093|REST  
SRY|ENSG00000207698|hsa-mir-32|hsa-miR-32|jt:ENSG00000112210|RAB23  
SRY|ENSG00000207698|hsa-mir-32|hsa-miR-32|jt:ENSG00000142676|RPL11  
SRY|ENSG00000207698|hsa-mir-32|hsa-miR-32|jt:ENSG00000081377|CDC14C  
SRY|ENSG00000207698|hsa-mir-32|hsa-miR-32|jt:ENSG00000139508|SLC46A3  
SRY|ENSG00000207698|hsa-mir-32|hsa-miR-32|jt:ENSG00000163694|NP\_061900.1  
SRY|ENSG00000207698|hsa-mir-32|hsa-miR-32|jt:ENSG00000162779|C1orf125



SRY|ENSG00000207870|hsa-mir-221|hsa-miR-221|jt:ENSG00000186462|NAP1L2  
SRY|ENSG00000207870|hsa-mir-221|hsa-miR-221|jt:ENSG00000187325|TAF9B  
SRY|ENSG00000207870|hsa-mir-221|hsa-miR-221|jt:ENSG00000204220|PFDN6  
SRY|ENSG00000207870|hsa-mir-221|hsa-miR-221|jt:ENSG00000135046|ANXA1  
SRY|ENSG00000207870|hsa-mir-221|hsa-miR-221|jt:ENSG00000175556|LONRF3  
SRY|ENSG00000207961|hsa-mir-496|hsa-miR-496|jt:ENSG0000033867|SLC4A7  
SRY|ENSG00000207961|hsa-mir-496|hsa-miR-496|jt:ENSG00000197430|TMEM10  
SRY|ENSG00000207961|hsa-mir-496|hsa-miR-496|jt:ENSG00000165119|HNRPK  
SRY|ENSG00000207961|hsa-mir-496|hsa-miR-496|jt:ENSG00000153233|PTPRR  
SRY|ENSG00000207961|hsa-mir-496|hsa-miR-496|jt:ENSG00000125995|C20orf52  
SRY|ENSG00000207961|hsa-mir-496|hsa-miR-496|jt:ENSG00000162616|DNAJB4  
SRY|ENSG00000208017|hsa-mir-140|hsa-miR-140|jt:ENSG0000049130|KITLG  
SRY|ENSG00000208017|hsa-mir-140|hsa-miR-140|jt:ENSG00000102898|NUTF2  
SRY|ENSG00000208017|hsa-mir-140|hsa-miR-140|jt:ENSG00000082701|GSK3B  
SRY|ENSG00000208017|hsa-mir-140|hsa-miR-140|jt:ENSG00000041353|RAB27B  
SRY|ENSG00000208017|hsa-mir-140|hsa-miR-140|jt:ENSG00000205111|CDKL4  
SRY|ENSG00000208017|hsa-mir-140|hsa-miR-140|jt:ENSG00000131558|EXOC4  
SRY|ENSG00000208017|hsa-mir-140|hsa-miR-140|jt:ENSG00000124208|UBE2V1  
SRY|ENSG00000208017|hsa-mir-140|hsa-miR-140|jt:ENSG00000107165|TYRFP1  
SRY|ENSG00000208017|hsa-mir-140|hsa-miR-140|jt:ENSG00000163581|SLC2A2  
SRY|ENSG00000208017|hsa-mir-140|hsa-miR-140|jt:ENSG00000007350|TKTL1  
SRY|ENSG00000208017|hsa-mir-140|hsa-miR-140|jt:ENSG00000136352|TITF1  
SRY|ENSG00000208017|hsa-mir-140|hsa-miR-140|jt:ENSG00000110717|NDUFS8  
SRY|ENSG00000208017|hsa-mir-140|hsa-miR-140|jt:ENSG00000145362|ANK2  
STAT1|ENSG00000207728|hsa-mir-449b|hsa-miR-449b|jt:ENSG00000136247|ZDHHC4  
STAT1|ENSG00000207728|hsa-mir-449b|hsa-miR-449b|jt:ENSG00000143466|IKBKE  
STAT1|ENSG00000207728|hsa-mir-449b|hsa-miR-449b|jt:ENSG00000118513|MYB  
STAT1|ENSG00000207728|hsa-mir-449b|hsa-miR-449b|jt:ENSG00000172689|MS4A10  
STAT1|ENSG00000207728|hsa-mir-449b|hsa-miR-449b|jt:ENSG00000134070|TRAK2  
STAT1|ENSG00000207728|hsa-mir-449b|hsa-miR-449b|jt:ENSG00000198586|TLK1  
STAT1|ENSG00000207728|hsa-mir-449b|hsa-miR-449b|jt:ENSG00000113328|CCNG1  
STAT1|ENSG00000207728|hsa-mir-449b|hsa-miR-449b|jt:ENSG00000186190|C20orf185  
STAT1|ENSG00000207777|hsa-mir-10a|hsa-miR-10a|jt:ENSG00000119508|NR4A3  
STAT1|ENSG00000207777|hsa-mir-10a|hsa-miR-10a|jt:ENSG00000197863|ZNF790  
STAT1|ENSG00000207777|hsa-mir-10a|hsa-miR-10a|jt:ENSG00000171984|C20orf196  
STAT1|ENSG00000207939|hsa-mir-223|hsa-miR-223|jt:ENSG00000151148|UBE3B  
STAT1|ENSG00000207939|hsa-mir-223|hsa-miR-223|jt:ENSG00000172179|PRL  
STAT1|ENSG00000207939|hsa-mir-223|hsa-miR-223|jt:ENSG00000170906|NDUFA3  
STAT1|ENSG00000207939|hsa-mir-223|hsa-miR-223|jt:ENSG00000204397|NP\_001017534.1  
STAT1|ENSG00000207939|hsa-mir-223|hsa-miR-223|jt:ENSG00000150086|GRIN2B  
STAT1|ENSG00000207939|hsa-mir-223|hsa-miR-223|jt:ENSG00000091136|LAMB1  
STAT1|ENSG00000207939|hsa-mir-223|hsa-miR-223|jt:ENSG00000170638|TRABD  
STAT1|ENSG00000207939|hsa-mir-223|hsa-miR-223|jt:ENSG00000174238|PITFNA  
STAT1|ENSG00000207939|hsa-mir-223|hsa-miR-223|jt:ENSG00000162191|SAKS1\_HUMAN  
STAT1|ENSG00000207939|hsa-mir-223|hsa-miR-223|jt:ENSG00000158006|PAFAH2  
STAT1|ENSG00000207939|hsa-mir-223|hsa-miR-223|jt:ENSG00000179630|C13orf31  
STAT1|ENSG00000207939|hsa-mir-223|hsa-miR-223|jt:ENSG00000149970|CNKSR2  
STAT1|ENSG00000207939|hsa-mir-223|hsa-miR-223|jt:ENSG00000080815|PSEN1  
STAT1|ENSG00000207939|hsa-mir-223|hsa-miR-223|jt:ENSG00000117154|IGSF21  
STAT1|ENSG00000207939|hsa-mir-223|hsa-miR-223|jt:ENSG00000165525|SDCCAG1  
STAT1|ENSG00000208009|hsa-mir-130a|hsa-miR-130a|jt:ENSG00000151148|UBE3B  
STAT1|ENSG00000208009|hsa-mir-130a|hsa-miR-130a|jt:ENSG00000204584|Q6ZSH9\_HUMAN  
STAT1|ENSG00000208009|hsa-mir-130a|hsa-miR-130a|jt:ENSG00000143756|FBXO28  
STAT1|ENSG00000208009|hsa-mir-130a|hsa-miR-130a|jt:ENSG00000189180|ZNF33A  
STAT1|ENSG00000208009|hsa-mir-130a|hsa-miR-130a|jt:ENSG00000173926|MARCH3  
STAT1|ENSG00000208009|hsa-mir-130a|hsa-miR-130a|jt:ENSG00000182512|GLRX5  
STAT1|ENSG00000208009|hsa-mir-130a|hsa-miR-130a|jt:ENSG00000187531|SIRT7  
STAT1|ENSG00000208009|hsa-mir-130a|hsa-miR-130a|jt:ENSG00000204569|PPP1R10  
STAT1|ENSG00000208009|hsa-mir-130a|hsa-miR-130a|jt:ENSG00000152242|C18orf25  
STAT1|ENSG00000208009|hsa-mir-130a|hsa-miR-130a|jt:ENSG00000162998|FRZB  
STAT1|ENSG00000208009|hsa-mir-130a|hsa-miR-130a|jt:ENSG00000168619|ADAM18  
STAT1|ENSG00000208009|hsa-mir-130a|hsa-miR-130a|jt:ENSG00000184371|CSF1  
STAT1|ENSG00000208009|hsa-mir-130a|hsa-miR-130a|jt:ENSG00000177807|KCNJ10  
STAT1|ENSG00000208009|hsa-mir-130a|hsa-miR-130a|jt:ENSG00000055070|C1orf144  
STAT1|ENSG00000208009|hsa-mir-130a|hsa-miR-130a|jt:ENSG00000115648|MLPH  
STAT1|ENSG00000208009|hsa-mir-130a|hsa-miR-130a|jt:ENSG00000164896|FASTK  
STAT1|ENSG00000208009|hsa-mir-130a|hsa-miR-130a|jt:ENSG00000152291|TGOLN2  
STAT1|ENSG00000208009|hsa-mir-130a|hsa-miR-130a|jt:ENSG00000092295|TGM1  
STAT1|ENSG00000208009|hsa-mir-130a|hsa-miR-130a|jt:ENSG00000171703|TCEA2  
STAT1|ENSG00000208009|hsa-mir-130a|hsa-miR-130a|jt:ENSG00000131269|ABC7  
T3R|ENSG00000199024|hsa-mir-103-2|hsa-miR-103|jt:ENSG00000105085|CRSF7  
T3R|ENSG00000199024|hsa-mir-103-2|hsa-miR-103|jt:ENSG00000204005|Q6ZP22\_HUMAN  
T3R|ENSG00000199024|hsa-mir-103-2|hsa-miR-103|jt:ENSG00000137171|KLC4  
T3R|ENSG00000199024|hsa-mir-103-2|hsa-miR-103|jt:ENSG00000135638|EMX1  
T3R|ENSG00000199024|hsa-mir-103-2|hsa-miR-103|jt:ENSG00000107738|C10orf54  
T3R|ENSG00000199122|hsa-mir-148b|hsa-miR-148b|jt:ENSG00000135968|GCC2  
T3R|ENSG00000199122|hsa-mir-148b|hsa-miR-148b|jt:ENSG00000069956|MAPK6  
T3R|ENSG00000199122|hsa-mir-148b|hsa-miR-148b|jt:ENSG00000206193|Q5HYA3\_HUMAN  
T3R|ENSG00000199122|hsa-mir-148b|hsa-miR-148b|jt:ENSG0000026036|TNFRSF6B  
T3R|ENSG00000199122|hsa-mir-148b|hsa-miR-148b|jt:ENSG00000110756|HPS5  
T3R|ENSG00000199122|hsa-mir-148b|hsa-miR-148b|jt:ENSG00000165097|AOF1  
T3R|ENSG00000199122|hsa-mir-148b|hsa-miR-148b|jt:ENSG00000162191|SAKS1\_HUMAN  
T3R|ENSG00000199122|hsa-mir-148b|hsa-miR-148b|jt:ENSG00000105366|SIGLEC8  
T3R|ENSG00000199122|hsa-mir-148b|hsa-miR-148b|jt:ENSG00000198854|C1orf68  
T3R|ENSG00000199122|hsa-mir-148b|hsa-miR-148b|jt:ENSG00000156642|NPTN  
T3R|ENSG00000199122|hsa-mir-148b|hsa-miR-148b|jt:ENSG00000166024|C10orf28  
T3R|ENSG00000199122|hsa-mir-148b|hsa-miR-148b|jt:ENSG00000205653|Q6ZUF2\_HUMAN  
T3R|ENSG00000199122|hsa-mir-148b|hsa-miR-148b|jt:ENSG00000151418|ATP6V1G3  
T3R|ENSG00000199122|hsa-mir-148b|hsa-miR-148b|jt:ENSG00000134851|TMEM165  
T3R|ENSG00000207633|hsa-mir-505|hsa-miR-505|jt:ENSG00000107581|EIF3S10  
T3R|ENSG00000207633|hsa-mir-505|hsa-miR-505|jt:ENSG00000129810|SGOL1  
T3R|ENSG00000207633|hsa-mir-505|hsa-miR-505|jt:ENSG00000119714|GPR68  
T3R|ENSG00000207633|hsa-mir-505|hsa-miR-505|jt:ENSG00000125743|SNRPD2  
T3R|ENSG00000207633|hsa-mir-505|hsa-miR-505|jt:ENSG00000148158|SNX30  
T3R|ENSG00000207633|hsa-mir-505|hsa-miR-505|jt:ENSG00000181852|RNF41  
T3R|ENSG00000207633|hsa-mir-505|hsa-miR-505|jt:ENSG00000196511|TPK1  
T3R|ENSG00000207635|hsa-mir-499|hsa-miR-499|jt:ENSG00000124449|IRGC  
T3R|ENSG00000207635|hsa-mir-499|hsa-miR-499|jt:ENSG00000111912|NCOA7  
T3R|ENSG00000207635|hsa-mir-499|hsa-miR-499|jt:ENSG00000104154|SLC30A4  
T3R|ENSG00000207635|hsa-mir-499|hsa-miR-499|jt:ENSG00000203782|LOR  
T3R|ENSG00000207635|hsa-mir-499|hsa-miR-499|jt:ENSG00000110693|SOX6  
T3R|ENSG00000207635|hsa-mir-499|hsa-miR-499|jt:ENSG00000108219|TSPAN14  
T3R|ENSG00000207732|hsa-mir-218-1|hsa-miR-218|jt:ENSG00000169435|RASSF5  
T3R|ENSG00000207732|hsa-mir-218-1|hsa-miR-218|jt:ENSG00000206069|NP\_001001663.1  
T3R|ENSG00000207732|hsa-mir-218-1|hsa-miR-218|jt:ENSG00000137075|RNF38

|                                                        |                                 |
|--------------------------------------------------------|---------------------------------|
| T3R ENSG00000207732 hsa-mir-218-1 hsa-miR-218          | jt:ENSG00000188935 Q6ZU24_HUMAN |
| T3R ENSG00000207732 hsa-mir-218-1 hsa-miR-218          | jt:ENSG00000176357 C10orf55     |
| T3R ENSG00000207732 hsa-mir-218-1 hsa-miR-218          | jt:ENSG00000198589 LRBA         |
| T3R ENSG00000207732 hsa-mir-218-1 hsa-miR-218          | jt:ENSG00000164120 HPGD         |
| T3R ENSG00000207732 hsa-mir-218-1 hsa-miR-218          | jt:ENSG00000171540 OTF          |
| T3R ENSG00000207732 hsa-mir-218-1 hsa-miR-218          | jt:ENSG00000181852 RNF41        |
| T3R ENSG00000207960 hsa-mir-153-2 hsa-miR-153          | jt:ENSG00000124134 KCNS1        |
| T3R ENSG00000207960 hsa-mir-153-2 hsa-miR-153          | jt:ENSG00000117971 CHRNB4       |
| T3R ENSG00000207960 hsa-mir-153-2 hsa-miR-153          | jt:ENSG00000142233 NP_665806.1  |
| T3R ENSG00000207960 hsa-mir-153-2 hsa-miR-153          | jt:ENSG00000079156 OSBPL6       |
| T3R ENSG00000207960 hsa-mir-153-2 hsa-miR-153          | jt:ENSG00000117013 KCNQ4        |
| T3R ENSG00000207960 hsa-mir-153-2 hsa-miR-153          | jt:ENSG00000157111 TMEM171      |
| T3R ENSG00000207960 hsa-mir-153-2 hsa-miR-153          | jt:ENSG00000112514 CUTA         |
| T3R ENSG00000207960 hsa-mir-153-2 hsa-miR-153          | jt:ENSG00000154188 ANGPT1       |
| T3R ENSG00000207960 hsa-mir-153-2 hsa-miR-153          | jt:ENSG00000104738 MCM4         |
| TAL-1ALPHA/E47 ENSG00000207611 hsa-mir-149 hsa-miR-149 | jt:ENSG00000168781 HISPPD2A     |
| TBP ENSG00000207694 hsa-mir-1-2 hsa-miR-1              | jt:ENSG00000102452 NALCN        |
| TBP ENSG00000207694 hsa-mir-1-2 hsa-miR-1              | jt:ENSG00000163673 DCLK3        |
| TBP ENSG00000207694 hsa-mir-1-2 hsa-miR-1              | jt:ENSG00000204596 RFP21        |
| TCF-1(P) ENSG00000207611 hsa-mir-149 hsa-miR-149       | jt:ENSG00000187609 NP_060290.3  |
| TCF-1(P) ENSG00000207611 hsa-mir-149 hsa-miR-149       | jt:ENSG00000109062 SLC9A3R1     |
| TCF-1(P) ENSG00000207611 hsa-mir-149 hsa-miR-149       | jt:ENSG00000099331 MYO9B        |
| TCF-1(P) ENSG00000207611 hsa-mir-149 hsa-miR-149       | jt:ENSG00000130270 ATP8B3       |
| TCF-1(P) ENSG00000207611 hsa-mir-149 hsa-miR-149       | jt:ENSG00000133193 FAM104A      |
| TCF-1(P) ENSG00000207611 hsa-mir-149 hsa-miR-149       | jt:ENSG00000141325 CCDC45       |
| TCF-1(P) ENSG00000207611 hsa-mir-149 hsa-miR-149       | jt:ENSG00000070614 NDST1        |
| TCF-1(P) ENSG00000207611 hsa-mir-149 hsa-miR-149       | jt:ENSG00000151474 FRMD4A       |
| TCF-1(P) ENSG00000207611 hsa-mir-149 hsa-miR-149       | jt:ENSG00000138111 TMEM180      |
| TCF-1(P) ENSG00000207705 hsa-mir-129-1 hsa-miR-129     | jt:ENSG00000103326 SOLH         |
| TCF-1(P) ENSG00000207705 hsa-mir-129-1 hsa-miR-129     | jt:ENSG00000158435 C2orf29      |
| TCF-1(P) ENSG00000207705 hsa-mir-129-1 hsa-miR-129     | jt:ENSG00000169509 CRCT1        |
| TCF-1(P) ENSG00000207705 hsa-mir-129-1 hsa-miR-129     | jt:ENSG00000101977 MCF2         |
| TCF-1(P) ENSG00000207784 hsa-mir-542 hsa-miR-542-3p    | jt:ENSG00000071127 WDR1         |
| TCF-1(P) ENSG00000207784 hsa-mir-542 hsa-miR-542-3p    | jt:ENSG00000094916 CBX5         |
| TCF-1(P) ENSG00000207784 hsa-mir-542 hsa-miR-542-3p    | jt:ENSG00000145781 COMM10       |
| TCF-1(P) ENSG00000207784 hsa-mir-542 hsa-miR-542-3p    | jt:ENSG00000183444 NR_002822.2  |
| TCF-1(P) ENSG00000207784 hsa-mir-542 hsa-miR-542-3p    | jt:ENSG00000106541 AGR2         |
| TCF-1(P) ENSG00000207789 hsa-mir-26a-2 hsa-miR-26a     | jt:ENSG00000104343 UBE2W        |
| TCF-1(P) ENSG00000207789 hsa-mir-26a-2 hsa-miR-26a     | jt:ENSG00000129480 C14orf126    |
| TCF-1(P) ENSG00000207789 hsa-mir-26a-2 hsa-miR-26a     | jt:ENSG00000178425 NT5DC1       |
| TCF-1(P) ENSG00000207789 hsa-mir-26a-2 hsa-miR-26a     | jt:ENSG00000150361 KLHL1        |
| TCF-1(P) ENSG00000207789 hsa-mir-26a-2 hsa-miR-26a     | jt:ENSG00000108660 MAB21L1      |
| TCF-1(P) ENSG00000207789 hsa-mir-26a-2 hsa-miR-26a     | jt:ENSG00000092020 PPP2R3C      |
| TCF-1(P) ENSG00000207789 hsa-mir-26a-2 hsa-miR-26a     | jt:ENSG00000182141 ZNF708       |
| TCF-1(P) ENSG00000207789 hsa-mir-26a-2 hsa-miR-26a     | jt:ENSG00000138336 CXXC6        |
| TCF-1(P) ENSG00000207789 hsa-mir-26a-2 hsa-miR-26a     | jt:ENSG00000114648 KLHL18       |
| TCF-4 ENSG00000199161 hsa-mir-126 hsa-miR-126          | jt:ENSG00000107362 FAM108B1     |
| TCF-4 ENSG00000199161 hsa-mir-126 hsa-miR-126          | jt:ENSG00000141527 CARD14       |
| TCF-4 ENSG00000199161 hsa-mir-126 hsa-miR-126          | jt:ENSG00000169410 PTPN9        |
| TCF-4 ENSG00000199161 hsa-mir-126 hsa-miR-126          | jt:ENSG00000130690 Q96I54_HUMAN |
| TCF-4 ENSG00000199161 hsa-mir-126 hsa-miR-126          | jt:ENSG00000198219 Q96N05_HUMAN |
| TCF-4 ENSG00000199161 hsa-mir-126 hsa-miR-126          | jt:ENSG00000172889 EGFL7        |
| TCF-4 ENSG00000199161 hsa-mir-126 hsa-miR-126*         | jt:ENSG00000115355 KIAA1212     |
| TCF-4 ENSG00000199161 hsa-mir-126 hsa-miR-126*         | jt:ENSG00000170458 CD14         |
| TCF-4 ENSG00000199161 hsa-mir-126 hsa-miR-126*         | jt:ENSG00000112062 MAPK14       |
| TCF-4 ENSG00000199161 hsa-mir-126 hsa-miR-126*         | jt:ENSG00000110315 RNF141       |
| TCF-4 ENSG00000199161 hsa-mir-126 hsa-miR-126*         | jt:ENSG00000070190 DAPP1        |
| TCF-4 ENSG00000199161 hsa-mir-126 hsa-miR-126*         | jt:ENSG00000100422 CERK         |
| TCF-4 ENSG00000199161 hsa-mir-126 hsa-miR-126*         | jt:ENSG00000163586 FABP1        |
| TCF-4 ENSG00000199161 hsa-mir-126 hsa-miR-126*         | jt:ENSG00000165862 PNLIPRP2     |
| TCF-4 ENSG00000199161 hsa-mir-126 hsa-miR-126*         | jt:ENSG00000206053 HN1L         |
| TCF-4 ENSG00000199161 hsa-mir-126 hsa-miR-126*         | jt:ENSG00000174231 PRPF8        |
| TCF-4 ENSG00000199161 hsa-mir-126 hsa-miR-126*         | jt:ENSG00000177822 XR_017723.1  |
| TCF-4 ENSG00000207568 hsa-mir-203 hsa-miR-203          | jt:ENSG00000186468 RPS23        |
| TCF-4 ENSG00000207568 hsa-mir-203 hsa-miR-203          | jt:ENSG00000145824 CXCL14       |
| TCF-4 ENSG00000207568 hsa-mir-203 hsa-miR-203          | jt:ENSG00000188483 IER5L        |
| TCF-4 ENSG00000207777 hsa-mir-10a hsa-miR-10a          | jt:ENSG00000144681 STAC         |
| TCF-4 ENSG00000207777 hsa-mir-10a hsa-miR-10a          | jt:ENSG00000143198 MGST3        |
| TCF-4 ENSG00000207777 hsa-mir-10a hsa-miR-10a          | jt:ENSG00000182263 FIGN         |
| TCF-4 ENSG00000207808 hsa-mir-27a hsa-miR-27a          | jt:ENSG00000130479 MAP1S        |
| TCF-4 ENSG00000207808 hsa-mir-27a hsa-miR-27a          | jt:ENSG00000157103 SLC6A1       |
| TCF-4 ENSG00000207808 hsa-mir-27a hsa-miR-27a          | jt:ENSG00000174574 C1orf108     |
| TCF-4 ENSG00000207808 hsa-mir-27a hsa-miR-27a          | jt:ENSG00000006114 AP1GBP1      |
| TCF-4 ENSG00000207808 hsa-mir-27a hsa-miR-27a          | jt:ENSG00000184005 ST6GALNAC3   |
| TCF-4 ENSG00000207808 hsa-mir-27a hsa-miR-27a          | jt:ENSG00000055070 C1orf144     |
| TCF-4 ENSG00000207808 hsa-mir-27a hsa-miR-27a          | jt:ENSG00000152409 NP_689618.2  |
| TCF-4 ENSG00000207950 hsa-mir-296 hsa-miR-296          | jt:ENSG00000140511 HAPLN3       |
| TCF-4 ENSG00000207980 hsa-mir-23a hsa-miR-23a          | jt:ENSG00000132471 WBP2         |
| TCF-4 ENSG00000207980 hsa-mir-23a hsa-miR-23a          | jt:ENSG00000174990 CA5A         |
| TCF-4 ENSG00000207980 hsa-mir-23a hsa-miR-23a          | jt:ENSG00000157103 SLC6A1       |
| TCF-4 ENSG00000207980 hsa-mir-23a hsa-miR-23a          | jt:ENSG00000182107 TMEM30B      |
| TCF-4 ENSG00000207980 hsa-mir-23a hsa-miR-23a          | jt:ENSG00000167774 NDUFA7       |
| TCF-4 ENSG00000207980 hsa-mir-23a hsa-miR-23a          | jt:ENSG00000163491 NEK10        |
| TCF-4 ENSG00000207980 hsa-mir-23a hsa-miR-23a          | jt:ENSG00000185220 PGBD2        |
| TCF-4 ENSG00000207980 hsa-mir-23a hsa-miR-23a          | jt:ENSG00000163376 KBTBD8       |
| TCF-4 ENSG00000209707 hsa-mir-24-2 hsa-miR-24          | jt:ENSG00000187257 RSBN1L       |
| TCF-4 ENSG00000209707 hsa-mir-24-2 hsa-miR-24          | jt:ENSG00000010932 FMO1         |
| TCF-4 ENSG00000209707 hsa-mir-24-2 hsa-miR-24          | jt:ENSG00000166206 GABRB3       |
| TEF ENSG00000207777 hsa-mir-10a hsa-miR-10a            | jt:ENSG00000162409 PRKAA2       |
| TEF ENSG00000207777 hsa-mir-10a hsa-miR-10a            | jt:ENSG00000165891 E2F7         |
| TEL-2 ENSG00000207980 hsa-mir-23a hsa-miR-23a          | jt:ENSG00000113615 SEC24A       |
| TEL-2 ENSG00000207980 hsa-mir-23a hsa-miR-23a          | jt:ENSG00000188938 FAM120AOS    |
| TEL-2 ENSG00000208024 hsa-mir-199a-2 hsa-miR-199a*     | jt:ENSG00000204220 PFDN6        |
| TEL-2 ENSG00000209707 hsa-mir-24-2 hsa-miR-24          | jt:ENSG00000162458 FBLIM1       |
| TEL-2 ENSG00000209707 hsa-mir-24-2 hsa-miR-24          | jt:ENSG00000132141 CCT6B        |
| TFE ENSG00000207586 hsa-mir-135a-2 hsa-miR-135a        | jt:ENSG00000188100 FAM25_HUMAN  |
| TFII-I ENSG00000198973 hsa-mir-375 hsa-miR-375         | jt:ENSG00000116786 PLEKHM2      |
| TFII-I ENSG00000207933 hsa-mir-9-1 hsa-miR-9           | jt:ENSG00000188888 GPR179       |
| TFII-I ENSG00000207933 hsa-mir-9-1 hsa-miR-9*          | jt:ENSG00000049130 KITLG        |
| YY1 ENSG00000198975 hsa-let-7a-2 hsa-let-7a            | jt:ENSG00000164045 CDC25A       |
| YY1 ENSG00000198975 hsa-let-7a-2 hsa-let-7a            | jt:ENSG00000177058 NP_775785.1  |
| YY1 ENSG00000198975 hsa-let-7a-2 hsa-let-7a            | jt:ENSG00000161558 TMEM143      |
| YY1 ENSG00000198975 hsa-let-7a-2 hsa-let-7a            | jt:ENSG00000133136 GBG5L_HUMAN  |
| YY1 ENSG00000198975 hsa-let-7a-2 hsa-let-7a            | jt:ENSG00000139998 RAB15        |
| YY1 ENSG00000198975 hsa-let-7a-2 hsa-let-7a            | jt:ENSG00000187109 NAP1L1       |

YY1|ENSG00000198975|hsa-let-7a-2|hsa-let-7a|jt:ENSG00000158615|PPP1R15B  
YY1|ENSG00000198975|hsa-let-7a-2|hsa-let-7a|jt:ENSG00000071894|CPSF1  
YY1|ENSG00000198987|hsa-mir-16-2|hsa-miR-16|jt:ENSG00000176095|IHPK1  
YY1|ENSG00000198987|hsa-mir-16-2|hsa-miR-16|jt:ENSG00000165985|C1QL3  
YY1|ENSG00000198987|hsa-mir-16-2|hsa-miR-16|jt:ENSG00000131381|ZFVYE20  
YY1|ENSG00000199032|hsa-mir-425|hsa-miR-425-3p|jt:ENSG00000184324|CSAG2  
YY1|ENSG00000199032|hsa-mir-425|hsa-miR-425-3p|jt:ENSG00000111266|DUSP16  
YY1|ENSG00000199032|hsa-mir-425|hsa-miR-425-3p|jt:ENSG00000185742|NP\_997528.1  
YY1|ENSG00000199032|hsa-mir-425|hsa-miR-425-3p|jt:ENSG00000171109|MFN1  
YY1|ENSG00000199032|hsa-mir-425|hsa-miR-425-3p|jt:ENSG00000147381|MAGEA4  
YY1|ENSG00000199032|hsa-mir-425|hsa-miR-425-3p|jt:ENSG00000163322|CCDC98  
YY1|ENSG00000199032|hsa-mir-425|hsa-miR-425-3p|jt:ENSG00000198382|UVRAG  
YY1|ENSG00000199036|hsa-mir-219-1|hsa-miR-219|jt:ENSG00000177553|C1orf167  
YY1|ENSG00000199036|hsa-mir-219-1|hsa-miR-219|jt:ENSG00000113810|SMC4  
YY1|ENSG00000199036|hsa-mir-219-1|hsa-miR-219|jt:ENSG00000173457|PPP1R14B  
YY1|ENSG00000199036|hsa-mir-219-1|hsa-miR-219|jt:ENSG00000095066|HOOK2  
YY1|ENSG00000199085|hsa-mir-148a|hsa-miR-148a|jt:ENSG00000112333|NR2E1  
YY1|ENSG00000199085|hsa-mir-148a|hsa-miR-148a|jt:ENSG00000204423|C9orf33  
YY1|ENSG00000199085|hsa-mir-148a|hsa-miR-148a|jt:ENSG00000055070|C1orf144  
YY1|ENSG00000199085|hsa-mir-148a|hsa-miR-148a|jt:ENSG00000166024|C10orf28  
YY1|ENSG00000199085|hsa-mir-148a|hsa-miR-148a|jt:ENSG00000159082|SYNJ1  
YY1|ENSG00000199085|hsa-mir-148a|hsa-miR-148a|jt:ENSG00000140564|FURIN  
YY1|ENSG00000199085|hsa-mir-148a|hsa-miR-148a|jt:ENSG00000145860|RNF145  
YY1|ENSG00000199135|hsa-mir-101-1|hsa-miR-101|jt:ENSG00000138779|Q9HCEM6\_HUMAN  
YY1|ENSG00000199135|hsa-mir-101-1|hsa-miR-101|jt:ENSG00000121089|NACA3P  
YY1|ENSG00000199135|hsa-mir-101-1|hsa-miR-101|jt:ENSG00000115825|PRKD3  
YY1|ENSG00000199135|hsa-mir-101-1|hsa-miR-101|jt:ENSG00000204220|PFDN6  
YY1|ENSG00000199135|hsa-mir-101-1|hsa-miR-101|jt:ENSG00000139998|RAB15  
YY1|ENSG00000199135|hsa-mir-101-1|hsa-miR-101|jt:ENSG00000117713|ARID1A  
YY1|ENSG00000199135|hsa-mir-101-1|hsa-miR-101|jt:ENSG00000128594|LRRC4  
YY1|ENSG00000199135|hsa-mir-101-1|hsa-miR-101|jt:ENSG00000144566|RAB5A  
YY1|ENSG00000199135|hsa-mir-101-1|hsa-miR-101|jt:ENSG00000180263|FGD6  
YY1|ENSG00000199135|hsa-mir-101-1|hsa-miR-101|jt:ENSG00000175220|ARHGAP1  
YY1|ENSG00000199135|hsa-mir-101-1|hsa-miR-101|jt:ENSG00000141034|C17orf39  
YY1|ENSG00000199135|hsa-mir-101-1|hsa-miR-101|jt:ENSG00000119707|RBM25  
YY1|ENSG00000199135|hsa-mir-101-1|hsa-miR-101|jt:ENSG00000151690|NP\_060164.3  
YY1|ENSG00000199135|hsa-mir-101-1|hsa-miR-101|jt:ENSG00000159167|STC1  
YY1|ENSG00000199135|hsa-mir-101-1|hsa-miR-101|jt:ENSG00000197712|FAM114A1  
YY1|ENSG00000199135|hsa-mir-101-1|hsa-miR-101|jt:ENSG00000173821|RNF213  
YY1|ENSG00000199135|hsa-mir-101-1|hsa-miR-101|jt:ENSG00000198757|Q96NB8\_HUMAN  
YY1|ENSG00000207567|hsa-mir-142|hsa-miR-142-3p|jt:ENSG00000147421|HMBOX1  
YY1|ENSG00000207567|hsa-mir-142|hsa-miR-142-3p|jt:ENSG00000154529|CNTNAP3B  
YY1|ENSG00000207567|hsa-mir-142|hsa-miR-142-3p|jt:ENSG00000109208|SMR3A  
YY1|ENSG00000207567|hsa-mir-142|hsa-miR-142-3p|jt:ENSG00000145919|FAM44B  
YY1|ENSG00000207567|hsa-mir-142|hsa-miR-142-3p|jt:ENSG00000185555|C5orf20  
YY1|ENSG00000207567|hsa-mir-142|hsa-miR-142-3p|jt:ENSG00000136238|RAC1  
YY1|ENSG00000207567|hsa-mir-142|hsa-miR-142-3p|jt:ENSG00000198028|ZNF560  
YY1|ENSG00000207567|hsa-mir-142|hsa-miR-142-3p|jt:ENSG00000174016|FAM46D  
YY1|ENSG00000207567|hsa-mir-142|hsa-miR-142-3p|jt:ENSG00000106299|WASL  
YY1|ENSG00000207567|hsa-mir-142|hsa-miR-142-3p|jt:ENSG00000113231|PDE8B  
YY1|ENSG00000207567|hsa-mir-142|hsa-miR-142-3p|jt:ENSG00000169919|GUSB  
YY1|ENSG00000207567|hsa-mir-142|hsa-miR-142-3p|jt:ENSG00000197712|FAM114A1  
YY1|ENSG00000207567|hsa-mir-142|hsa-miR-142-5p|jt:ENSG00000129675|ARHGEP6  
YY1|ENSG00000207567|hsa-mir-142|hsa-miR-142-5p|jt:ENSG00000054803|CBLN4  
YY1|ENSG00000207567|hsa-mir-142|hsa-miR-142-5p|jt:ENSG00000104823|ECH1  
YY1|ENSG00000207567|hsa-mir-142|hsa-miR-142-5p|jt:ENSG00000136816|TOR1B  
YY1|ENSG00000207567|hsa-mir-142|hsa-miR-142-5p|jt:ENSG00000134480|CCNH  
YY1|ENSG00000207585|hsa-mir-181d|hsa-miR-181d|jt:ENSG00000143314|MRPL24  
YY1|ENSG00000207585|hsa-mir-181d|hsa-miR-181d|jt:ENSG00000175426|PCSK1  
YY1|ENSG00000207585|hsa-mir-181d|hsa-miR-181d|jt:ENSG00000100307|CBX7  
YY1|ENSG00000207585|hsa-mir-181d|hsa-miR-181d|jt:ENSG00000198929|NOS1AP  
YY1|ENSG00000207585|hsa-mir-181d|hsa-miR-181d|jt:ENSG00000147121|ZNF673  
YY1|ENSG00000207585|hsa-mir-181d|hsa-miR-181d|jt:ENSG00000114124|GRK7  
YY1|ENSG00000207585|hsa-mir-181d|hsa-miR-181d|jt:ENSG00000138735|PDE5A  
YY1|ENSG00000207585|hsa-mir-181d|hsa-miR-181d|jt:ENSG00000159873|CCDC117  
YY1|ENSG00000207585|hsa-mir-181d|hsa-miR-181d|jt:ENSG00000132002|DNAJB1  
YY1|ENSG00000207585|hsa-mir-181d|hsa-miR-181d|jt:ENSG00000113649|TCERG1  
YY1|ENSG00000207585|hsa-mir-181d|hsa-miR-181d|jt:ENSG00000177728|KIAA0195  
YY1|ENSG00000207725|hsa-mir-222|hsa-miR-222|jt:ENSG00000168906|MAT2A  
YY1|ENSG00000207725|hsa-mir-222|hsa-miR-222|jt:ENSG00000204220|PFDN6  
YY1|ENSG00000207725|hsa-mir-222|hsa-miR-222|jt:ENSG00000186462|NAP1L2  
YY1|ENSG00000207725|hsa-mir-222|hsa-miR-222|jt:ENSG00000167196|FBXO22  
YY1|ENSG00000207725|hsa-mir-222|hsa-miR-222|jt:ENSG00000138468|SENF7  
YY1|ENSG00000207791|hsa-mir-497|hsa-miR-497|jt:ENSG00000176095|IHPK1  
YY1|ENSG00000207791|hsa-mir-497|hsa-miR-497|jt:ENSG00000165985|C1QL3  
YY1|ENSG00000207791|hsa-mir-497|hsa-miR-497|jt:ENSG00000131381|ZFVYE20  
YY1|ENSG00000207870|hsa-mir-221|hsa-miR-221|jt:ENSG00000168906|MAT2A  
YY1|ENSG00000207870|hsa-mir-221|hsa-miR-221|jt:ENSG00000204220|PFDN6  
YY1|ENSG00000207870|hsa-mir-221|hsa-miR-221|jt:ENSG00000186462|NAP1L2  
YY1|ENSG00000207870|hsa-mir-221|hsa-miR-221|jt:ENSG00000167196|FBXO22  
YY1|ENSG00000207870|hsa-mir-221|hsa-miR-221|jt:ENSG00000138468|SENF7  
YY1|ENSG00000207929|hsa-mir-195|hsa-miR-195|jt:ENSG00000176095|IHPK1  
YY1|ENSG00000207929|hsa-mir-195|hsa-miR-195|jt:ENSG00000165985|C1QL3  
YY1|ENSG00000207929|hsa-mir-195|hsa-miR-195|jt:ENSG00000131381|ZFVYE20  
YY1|ENSG00000207971|hsa-mir-125b-1|hsa-miR-125b|jt:ENSG00000007968|E2F2  
YY1|ENSG00000207971|hsa-mir-125b-1|hsa-miR-125b|jt:ENSG00000138613|APH1B  
YY1|ENSG00000207971|hsa-mir-125b-1|hsa-miR-125b|jt:ENSG00000174099|MSRB3  
YY1|ENSG00000207971|hsa-mir-125b-1|hsa-miR-125b|jt:ENSG00000100796|SMEK1  
YY1|ENSG00000207971|hsa-mir-125b-1|hsa-miR-125b|jt:ENSG00000119541|VPS4B  
YY1|ENSG00000207971|hsa-mir-125b-1|hsa-miR-125b|jt:ENSG00000110274|CEP164  
YY1|ENSG00000207971|hsa-mir-125b-1|hsa-miR-125b|jt:ENSG00000077713|SLC25A43  
YY1|ENSG00000207971|hsa-mir-125b-1|hsa-miR-125b|jt:ENSG00000124721|DNAH8  
YY1|ENSG00000207971|hsa-mir-125b-1|hsa-miR-125b|jt:ENSG00000120656|TAF12  
YY1|ENSG00000207971|hsa-mir-125b-1|hsa-miR-125b|jt:ENSG00000138111|TMEM180  
YY1|ENSG00000207971|hsa-mir-125b-1|hsa-miR-125b|jt:ENSG00000167302|C17orf56  
YY1|ENSG00000207994|hsa-mir-100|hsa-miR-100|jt:ENSG00000118689|FOXO3A  
YY1|ENSG00000207994|hsa-mir-100|hsa-miR-100|jt:ENSG00000106348|IMPDH1  
YY1|ENSG00000207994|hsa-mir-100|hsa-miR-100|jt:ENSG00000177283|FZD8  
YY1|ENSG00000207994|hsa-mir-100|hsa-miR-100|jt:ENSG00000144712|CAND2  
v-Myb|ENSG00000198987|hsa-mir-16-2|hsa-miR-16|jt:ENSG00000100150|DEPDC5  
v-Myb|ENSG00000198987|hsa-mir-16-2|hsa-miR-16|jt:ENSG00000149136|SSRP1  
v-Myb|ENSG00000198987|hsa-mir-16-2|hsa-miR-16|jt:ENSG00000138685|FGF2  
v-Myb|ENSG00000198987|hsa-mir-16-2|hsa-miR-16|jt:ENSG00000125657|TNFSF9  
v-Myb|ENSG00000198987|hsa-mir-16-2|hsa-miR-16|jt:ENSG00000131381|ZFVYE20  
v-Myb|ENSG00000199121|hsa-mir-26b|hsa-miR-26b|jt:ENSG00000107938|C10orf137



|                                               |                                   |
|-----------------------------------------------|-----------------------------------|
| v-Myb ENSG00000199121 hsa-mir-26b hsa-miR-26b | jt:ENSG00000168772 CXXC4          |
| v-Myb ENSG00000199121 hsa-mir-26b hsa-miR-26b | jt:ENSG00000169299 PGM2           |
| v-Myb ENSG00000199121 hsa-mir-26b hsa-miR-26b | jt:ENSG00000119203 CPSF3          |
| v-Myb ENSG00000207777 hsa-mir-10a hsa-miR-10a | jt:ENSG00000204850 NP_001013695.1 |
| v-Myb ENSG00000207777 hsa-mir-10a hsa-miR-10a | jt:ENSG00000100321 SYNGR1         |
