# Supplementary material for: Genome-wide survey of microRNA–transcription factor feed-forward regulatory circuits in human
Source: PubMed Central journal article supplement — Mol Biosyst. 2009 Jun 19;5(8):854–67. doi: 10.1039/b900177h (PMC2898627; doi:10.1039/b900177h), 2009-06-19
Supplement: b900177h_add_file_7.pdf [file b900177h_add_file_7.pdf]

# Circuits related to unknown TF raw data.

# Raw circuits obtained with our pipeline, for which we do not have a robust association of  
# the promoter element to any known Transcription Factor Binding Site. Each line represents a  
# single circuit.

# File is TAB delimited and columns are:  
# Column 0 is the circuit id, composed by:  
# - promoter DNA motifs  
# - Ensembl pre-miRNA id  
# - miRNA precursor id (pre-miRNA)  
# - miRNA mature id  
# Columns 1 contains the Ensembl gene\_id of the joint target (jt) genes.

# A plain text ASCII version of this file is available at: <http://personalpages.to.infn.it/~cora/circuits/index.html>

```
AAAAAGTGC|ENSG00000198987|hsa-mir-16-2|hsa-miR-16jt:ENSG00000129473|BCL2L2
AAAAATACC|ENSG00000207635|hsa-mir-499|hsa-miR-499jt:ENSG00000108219|TSPAN14
AAAACTCCC|ENSG00000199077|hsa-mir-129-2|hsa-miR-129jt:ENSG00000164849|GPR146
AAAACTCGG|ENSG00000207933|hsa-mir-9-1|hsa-miR-9*jt:ENSG00000132718|SYT11
AAAGCCGCG|ENSG00000207953|hsa-mir-212|hsa-miR-212jt:ENSG00000102996|MMP15
AAAGCCGG|ENSG00000207728|hsa-mir-449b|hsa-miR-449bjt:ENSG00000069849|ATP1B3
AAAGCGAG|ENSG00000207586|hsa-mir-135a-2|hsa-miR-135ajt:ENSG00000185436|IL28RA
AAAGGCC|ENSG00000199058|hsa-mir-302b|hsa-miR-302b*jt:ENSG00000056277|SUHW3
AAAGGCC|ENSG00000199135|hsa-mir-101-1|hsa-miR-101jt:ENSG00000104177|MYEF2
AAAGGCC|ENSG00000199135|hsa-mir-101-1|hsa-miR-101jt:ENSG00000153046|CDYL
AAAGGCCG|ENSG00000207698|hsa-mir-32|hsa-miR-32jt:ENSG00000166159|LRTM2
AAAGGGTT|ENSG00000198987|hsa-mir-16-2|hsa-miR-16jt:ENSG00000149182|ZNF289
AAAGGTGT|ENSG00000202641|hsa-mir-484|hsa-miR-484jt:ENSG00000162889|MAPKAPK2
AAAGTGAC|ENSG00000198973|hsa-mir-375|hsa-miR-375jt:ENSG00000174403|NP_689970.1
AAAGT|ENSG00000199085|hsa-mir-148a|hsa-miR-148ajt:ENSG00000142700|DMRTA2
AAAGTTGC|ENSG00000199085|hsa-mir-148a|hsa-miR-148ajt:ENSG00000189266|PNRC2
AAAAAAGC|ENSG00000199065|hsa-mir-101-2|hsa-miR-101jt:ENSG00000154889|MPPE1
AAAAATTT|ENSG00000199102|hsa-mir-302c|hsa-miR-302c*jt:ENSG00000129633|C14orf130
AAACCAGAC|ENSG00000207691|hsa-mir-183|hsa-miR-183jt:ENSG00000088179|PTPN4
AAACCGGA|ENSG00000207649|hsa-mir-138-2|hsa-miR-138jt:ENSG00000196092|PAX5
AAACCGGA|ENSG00000207649|hsa-mir-138-2|hsa-miR-138jt:ENSG00000171861|RNMTL1
AAACCGCT|ENSG00000207698|hsa-mir-32|hsa-miR-32jt:ENSG00000203931|LOC729078
AAACGGCG|ENSG00000198973|hsa-mir-375|hsa-miR-375jt:ENSG00000180914|OXTR
AAACGTTG|ENSG00000199065|hsa-mir-101-2|hsa-miR-101jt:ENSG00000170801|HTRA3
AAACTTCAG|ENSG00000199121|hsa-mir-26b|hsa-miR-26bjt:ENSG00000157343|C6orf81
AAACTTGAA|ENSG00000199161|hsa-mir-126|hsa-miR-126jt:ENSG00000116096|SPR
AAACTTGAA|ENSG00000199161|hsa-mir-126|hsa-miR-126jt:ENSG00000172889|EGFL7
AAAGAA|ENSG00000207694|hsa-mir-1-2|hsa-miR-1jt:ENSG00000107854|TNKS2
AAAGAA|ENSG00000207694|hsa-mir-1-2|hsa-miR-1jt:ENSG00000125788|DEFB126
AAAGAGGAT|ENSG00000207635|hsa-mir-499|hsa-miR-499jt:ENSG00000198860|C1orf19
AAAGAGTCC|ENSG00000207795|hsa-mir-155|hsa-miR-155jt:ENSG00000204183|GDF50S
AAAGACTA|ENSG00000207865|hsa-mir-34a|hsa-miR-34ajt:ENSG00000110442|COMMD9
AAAGGC|ENSG00000199169|hsa-mir-367|hsa-miR-367jt:ENSG00000136895|GARNL3
AAAGGCA|ENSG00000199058|hsa-mir-302b|hsa-miR-302b*jt:ENSG00000077312|SNRPA
AAAGGCA|ENSG00000199169|hsa-mir-367|hsa-miR-367jt:ENSG00000136895|GARNL3
AAAGGCA|ENSG00000199169|hsa-mir-367|hsa-miR-367jt:ENSG00000197713|RPE
AAAGGTCTC|ENSG00000199059|hsa-mir-135b|hsa-miR-135bjt:ENSG00000106483|SFRP4
AAAGGTCTC|ENSG00000199059|hsa-mir-135b|hsa-miR-135bjt:ENSG00000184774|Q49AQ9_HUMAN
AAAGTACCA|ENSG00000207939|hsa-mir-223|hsa-miR-223jt:ENSG00000172179|PRL
AAAGTCCAG|ENSG00000199161|hsa-mir-126|hsa-miR-126jt:ENSG00000172889|EGFL7
AAAGTCCAG|ENSG00000199161|hsa-mir-126|hsa-miR-126*jt:ENSG00000197696|NMB
AAAGTCCAG|ENSG00000207630|hsa-mir-7-3|hsa-miR-7jt:ENSG00000106003|LFNG
AAAGTCCG|ENSG00000199161|hsa-mir-126|hsa-miR-126jt:ENSG00000172889|EGFL7
AAAGTCTG|ENSG00000207950|hsa-mir-296|hsa-miR-296jt:ENSG00000136717|BIN1
AAAGTCTT|ENSG00000199085|hsa-mir-148a|hsa-miR-148ajt:ENSG00000165097|AOF1
AAAGTTGCC|ENSG00000199085|hsa-mir-148a|hsa-miR-148ajt:ENSG00000189266|PNRC2
AAAGTTGCC|ENSG00000199085|hsa-mir-148a|hsa-miR-148ajt:ENSG00000165588|OTX2
AAAGTTGCT|ENSG00000207732|hsa-mir-218-1|hsa-miR-218jt:ENSG00000183722|LHFP
AAAGTTGGG|ENSG00000207614|hsa-mir-193a|hsa-miR-193ajt:ENSG00000188786|MTF1
AAATAAACC|ENSG00000199077|hsa-mir-129-2|hsa-miR-129jt:ENSG00000133627|ACTR3B
AAATACCTG|ENSG00000199130|hsa-mir-365-1|hsa-miR-365jt:ENSG00000102287|GABRE
AAATAGAGG|ENSG00000207809|hsa-mir-139|hsa-miR-139jt:ENSG00000170035|UBE2E4P
AAATAGATC|ENSG00000198981|hsa-mir-29a|hsa-miR-29ajt:ENSG00000188153|COL4A5
AAATAGCCC|ENSG00000207635|hsa-mir-499|hsa-miR-499jt:ENSG00000132698|RAB25
AAATAGCG|ENSG00000207764|hsa-mir-133a-2|hsa-miR-133ajt:ENSG00000101489|BRUNOL4
AAATAGCG|ENSG00000207764|hsa-mir-133a-2|hsa-miR-133ajt:ENSG00000105976|MET
AAATAGCTG|ENSG00000207950|hsa-mir-296|hsa-miR-296jt:ENSG00000090006|LTBP4
AAATCAATG|ENSG00000207939|hsa-mir-223|hsa-miR-223jt:ENSG00000005100|DHX33
AAATCAGCT|ENSG00000199153|hsa-mir-30d|hsa-miR-30djt:ENSG00000102098|SCML2
AAATCAGCT|ENSG00000199153|hsa-mir-30d|hsa-miR-30djt:ENSG00000091157|WDR7
AAATCAGCT|ENSG00000207582|hsa-mir-30b|hsa-miR-30bjt:ENSG00000102098|SCML2
AAATCAGCT|ENSG00000207582|hsa-mir-30b|hsa-miR-30bjt:ENSG00000091157|WDR7
AAATCAGGC|ENSG00000207950|hsa-mir-296|hsa-miR-296jt:ENSG00000206158|Q6ZVG4_HUMAN
AAATCCCGT|ENSG00000207630|hsa-mir-7-3|hsa-miR-7jt:ENSG00000173039|RELA
AAATCCCGC|ENSG00000207752|hsa-mir-199a-1|hsa-miR-199a*jt:ENSG00000130224|LRCH2
AAATCCCTAA|ENSG00000207752|hsa-mir-199a-1|hsa-miR-199ajt:ENSG00000163263|C1orf189
AAATCCCTC|ENSG00000199024|hsa-mir-103-2|hsa-miR-103jt:ENSG00000105085|CRSP7
AAATGAGGT|ENSG00000198972|hsa-let-7e|hsa-let-7ejt:ENSG00000136490|LIMD2
AAATGAGGT|ENSG00000198972|hsa-let-7e|hsa-let-7ejt:ENSG00000137841|PLCB2
AAATGAGGT|ENSG00000198972|hsa-let-7e|hsa-let-7ejt:ENSG00000143851|PTPN7
AAATGCAAC|ENSG00000207548|hsa-mir-217|hsa-miR-217jt:ENSG00000204977|TRIM13
AAATGTGCA|ENSG00000199066|hsa-mir-330|hsa-miR-330jt:ENSG00000089225|TBX5
AAATGTGCA|ENSG00000199066|hsa-mir-330|hsa-miR-330jt:ENSG00000125898|FAM110A
AAATGTGCA|ENSG00000199066|hsa-mir-330|hsa-miR-330jt:ENSG00000137727|ARHGAP20
AAATTAGGC|ENSG00000207863|hsa-mir-125b-2|hsa-miR-125bjt:ENSG00000137860|SLC28A2
AAATTCCCC|ENSG00000207953|hsa-mir-212|hsa-miR-212jt:ENSG00000188290|HES4
AAATTTGCTT|ENSG00000199085|hsa-mir-148a|hsa-miR-148ajt:ENSG00000204569|PPP1R10
AACACACAGT|ENSG00000198974|hsa-mir-30e|hsa-miR-30e-5pjt:ENSG00000105136|ZNF419
AACACACAGT|ENSG00000207962|hsa-mir-30c-1|hsa-miR-30cjt:ENSG00000105136|ZNF419
AACACAGCC|ENSG00000207586|hsa-mir-135a-2|hsa-miR-135ajt:ENSG00000135842|FAM129A
AACACAGCAC|ENSG00000199080|hsa-mir-133b|hsa-miR-133bjt:ENSG00000163568|AIM2
AACACAGCG|ENSG00000198974|hsa-mir-30e|hsa-miR-30e-3pjt:ENSG00000101574|METTL4
AACACCA|ENSG00000207725|hsa-mir-222|hsa-miR-222jt:ENSG00000176276|hCG_1757335
AACACCA|ENSG00000207870|hsa-mir-221|hsa-miR-221jt:ENSG00000176276|hCG_1757335
AACACTGGC|ENSG00000198987|hsa-mir-16-2|hsa-miR-16jt:ENSG00000129473|BCL2L2
AACACTGGC|ENSG00000207618|hsa-mir-144|hsa-miR-144jt:ENSG00000118526|TCF21
AACACTGGC|ENSG00000207624|hsa-mir-194-1|hsa-miR-194jt:ENSG00000128739|SNRPN
AACACTGGC|ENSG00000207624|hsa-mir-194-1|hsa-miR-194jt:ENSG00000152454|ZNF256
AACAGCTGT|ENSG00000199121|hsa-mir-26b|hsa-miR-26bjt:ENSG00000135999|EPC2
```

AACAGGAAT | ENSG00000202569 | hsa-mir-146b | hsa-miR-146b | jt:ENSG00000189201 | COX19  
AACAGGAAT | ENSG00000207705 | hsa-mir-129-1 | hsa-miR-129 | jt:ENSG00000198693 | Q6ZW86\_HUMAN  
AACAGGTCT | ENSG00000199085 | hsa-mir-148a | hsa-miR-148a | jt:ENSG00000151725 | MLF1IP  
AACAGTTC | ENSG00000207752 | hsa-mir-199a-1 | hsa-miR-199a\* | jt:ENSG00000145354 | ZCD2  
AACAGTTC | ENSG00000207752 | hsa-mir-199a-1 | hsa-miR-199a\* | jt:ENSG00000082458 | DLG3  
AACATGCCT | ENSG00000207863 | hsa-mir-125b-2 | hsa-miR-125b | jt:ENSG00000197681 | TBC1D3  
AACATGCTG | ENSG00000207947 | hsa-mir-152 | hsa-miR-152 | jt:ENSG00000137073 | UBAP2  
AACATTGAC | ENSG00000199058 | hsa-mir-302b | hsa-miR-302b | jt:ENSG00000149305 | HTR3B  
AACATTGAC | ENSG00000199102 | hsa-mir-302c | hsa-miR-302c | jt:ENSG00000149305 | HTR3B  
AACATTGAC | ENSG00000199145 | hsa-mir-302d | hsa-miR-302d | jt:ENSG00000149305 | HTR3B  
AACCAACTT | ENSG00000207624 | hsa-mir-194-1 | hsa-miR-194 | jt:ENSG00000032219 | ARID4A  
AACCAACTT | ENSG00000207624 | hsa-mir-194-1 | hsa-miR-194 | jt:ENSG00000081800 | SLC13A1  
AACCAATCC | ENSG00000199149 | hsa-mir-20a | hsa-miR-20a | jt:ENSG00000100030 | MAPK1  
AACCAATCC | ENSG00000199149 | hsa-mir-20a | hsa-miR-20a | jt:ENSG00000145362 | ANK2  
AACCAATCC | ENSG00000199149 | hsa-mir-20a | hsa-miR-20a | jt:ENSG00000154065 | ANKRD29  
AACCAATCC | ENSG00000207745 | hsa-mir-17 | hsa-miR-17-5p | jt:ENSG00000145362 | ANK2  
AACCAATCC | ENSG00000207745 | hsa-mir-17 | hsa-miR-17-5p | jt:ENSG00000154065 | ANKRD29  
AACCAATCC | ENSG00000207745 | hsa-mir-17 | hsa-miR-17-5p | jt:ENSG00000204019 | NP\_001017978.1  
AACCACTTG | ENSG00000199032 | hsa-mir-425 | hsa-miR-425-3p | jt:ENSG00000104332 | SFRP1  
AACAGACA | ENSG00000198972 | hsa-let-7e | hsa-let-7e | jt:ENSG00000143252 | SDHC  
AACAGCTG | ENSG00000199130 | hsa-mir-365-1 | hsa-miR-365 | jt:ENSG00000107937 | GTPBP4  
AACCATAGA | ENSG00000199122 | hsa-mir-148b | hsa-miR-148b | jt:ENSG00000198964 | SGMS1  
AACCATCCA | ENSG00000207610 | hsa-mir-19a | hsa-miR-19a | jt:ENSG00000111328 | CDK2AP1  
AACCATCCA | ENSG00000207610 | hsa-mir-19a | hsa-miR-19a | jt:ENSG00000125810 | CD93  
AACCCATTC | ENSG00000199085 | hsa-mir-148a | hsa-miR-148a | jt:ENSG00000105366 | SIGLEC8  
AACCCGAGC | ENSG00000207955 | hsa-mir-219-2 | hsa-miR-219 | jt:ENSG00000051009 | C11orf56  
AACCTCAC | ENSG00000198981 | hsa-mir-29a | hsa-miR-29a | jt:ENSG00000115194 | SLC30A3  
AACCTCAC | ENSG00000198981 | hsa-mir-29a | hsa-miR-29a | jt:ENSG00000136487 | GH2  
AACCTGAC | ENSG00000199059 | hsa-mir-135b | hsa-miR-135b | jt:ENSG00000197851 | NP\_997386.1  
AACCGAATC | ENSG00000199158 | hsa-mir-96 | hsa-miR-96 | jt:ENSG00000187098 | MITF  
AACCGAATC | ENSG00000207990 | hsa-mir-182 | hsa-miR-182 | jt:ENSG00000187098 | MITF  
AACCGCTG | ENSG00000207585 | hsa-mir-181d | hsa-miR-181d | jt:ENSG00000088832 | FKBP1A  
AACCTCCC | ENSG00000208024 | hsa-mir-199a-2 | hsa-miR-199a\* | jt:ENSG00000105855 | ITGB8  
AACCTGCC | ENSG00000207955 | hsa-mir-219-2 | hsa-miR-219 | jt:ENSG00000140416 | TPML  
AACCTTGT | ENSG00000207819 | hsa-mir-9-3 | hsa-miR-9\* | jt:ENSG00000049130 | KITLG  
AACCTTGT | ENSG00000207819 | hsa-mir-9-3 | hsa-miR-9\* | jt:ENSG00000102038 | SMARCA1  
AACGACGC | ENSG00000207971 | hsa-mir-125b-1 | hsa-miR-125b | jt:ENSG00000141401 | IMPA2  
AACGACGC | ENSG00000207994 | hsa-mir-100 | hsa-miR-100 | jt:ENSG00000138041 | SMEK2  
AACGACTC | ENSG00000198987 | hsa-mir-16-2 | hsa-miR-16 | jt:ENSG00000140854 | KATNB1  
AACGAGCA | ENSG00000207947 | hsa-mir-152 | hsa-miR-152 | jt:ENSG00000142700 | DMRTA2  
AACGCGAG | ENSG00000207819 | hsa-mir-9-3 | hsa-miR-9 | jt:ENSG00000117335 | CD46  
AACGCGGG | ENSG00000199121 | hsa-mir-26b | hsa-miR-26b | jt:ENSG00000164402 | SEPT8  
AACGCGGG | ENSG00000207698 | hsa-mir-32 | hsa-miR-32 | jt:ENSG00000160445 | ZER1  
AACGCTCC | ENSG00000207751 | hsa-mir-130b | hsa-miR-130b | jt:ENSG00000151148 | UBE3B  
AACGGCAGA | ENSG00000199161 | hsa-mir-126 | hsa-miR-126 | jt:ENSG00000115758 | ODC1  
AACGGCAGA | ENSG00000199161 | hsa-mir-126 | hsa-miR-126 | jt:ENSG00000172889 | EGF7  
AACGGCAGA | ENSG00000199161 | hsa-mir-126 | hsa-miR-126 | jt:ENSG00000164163 | ABCE1  
AACGGTCT | ENSG00000199085 | hsa-mir-148a | hsa-miR-148a | jt:ENSG00000151725 | MLF1IP  
AACGTGCG | ENSG00000207933 | hsa-mir-9-1 | hsa-miR-9 | jt:ENSG00000130023 | C6orf70  
AACGTGCG | ENSG00000207933 | hsa-mir-9-1 | hsa-miR-9\* | jt:ENSG00000206053 | HNL1  
AACGTAAG | ENSG00000199072 | hsa-let-7f-1 | hsa-let-7f | jt:ENSG00000164654 | NP\_061878.3  
AACGTAAG | ENSG00000199165 | hsa-let-7a-1 | hsa-let-7a | jt:ENSG00000164654 | NP\_061878.3  
AACGTCTG | ENSG00000207926 | hsa-mir-135a-1 | hsa-miR-135a | jt:ENSG00000135842 | FAM129A  
AACTACAAG | ENSG00000207790 | hsa-mir-29b-2 | hsa-miR-29b | jt:ENSG00000130032 | PRRG3  
AACTACAAG | ENSG00000207966 | hsa-mir-29c | hsa-miR-29c | jt:ENSG00000130032 | PRRG3  
AACTACCCA | ENSG00000207731 | hsa-mir-506 | hsa-miR-506 | jt:ENSG00000114541 | FRMD4B  
AACTCAAGG | ENSG00000198974 | hsa-mir-30e | hsa-miR-30e-5p | jt:ENSG00000123643 | SLC36A1  
AACTCAAGG | ENSG00000198974 | hsa-mir-30e | hsa-miR-30e-5p | jt:ENSG00000135387 | CAPRIN1  
AACTCAAGG | ENSG00000207962 | hsa-mir-30c-1 | hsa-miR-30c | jt:ENSG00000123643 | SLC36A1  
AACTCAAGG | ENSG00000207962 | hsa-mir-30c-1 | hsa-miR-30c | jt:ENSG00000135387 | CAPRIN1  
AACTCTAA | ENSG00000207698 | hsa-mir-32 | hsa-miR-32 | jt:ENSG00000090615 | GOLGA3  
AACTGGCT | ENSG00000207792 | hsa-mir-151 | hsa-miR-151 | jt:ENSG00000131002 | Cyorf15B  
AACTGTTA | ENSG00000207752 | hsa-mir-199a-1 | hsa-miR-199a\* | jt:ENSG00000145354 | ZCD2  
AACTCAAC | ENSG00000207795 | hsa-mir-155 | hsa-miR-155 | jt:ENSG00000148737 | TCF7L2  
AACTTCGC | ENSG00000207614 | hsa-mir-193a | hsa-miR-193a | jt:ENSG00000159131 | GART  
AACTTGAGC | ENSG00000199122 | hsa-mir-148b | hsa-miR-148b | jt:ENSG00000152242 | C18orf25  
AACTTGAGC | ENSG00000199122 | hsa-mir-148b | hsa-miR-148b | jt:ENSG00000077254 | USP33  
AACTTGATC | ENSG00000207980 | hsa-mir-23a | hsa-miR-23a | jt:ENSG00000163110 | PDLIM5  
AAGAAGTCT | ENSG00000207764 | hsa-mir-133a-2 | hsa-miR-133a | jt:ENSG00000143858 | SYT2  
AAGACCAGC | ENSG00000207947 | hsa-mir-152 | hsa-miR-152 | jt:ENSG00000204048 | Q6ZUG3\_HUMAN  
AAGACCTT | ENSG00000198987 | hsa-mir-16-2 | hsa-miR-16 | jt:ENSG00000114698 | PLSCR4  
AAGAGCGGA | ENSG00000207713 | hsa-mir-200c | hsa-miR-200c | jt:ENSG00000198498 | NP\_060822.1  
AAGAGGATC | ENSG00000207939 | hsa-mir-223 | hsa-miR-223 | jt:ENSG00000163364 | Q96D13\_HUMAN  
AAGAGTAA | ENSG00000199085 | hsa-mir-148a | hsa-miR-148a | jt:ENSG00000174851 | YIF1A  
AAGATAAAT | ENSG00000199161 | hsa-mir-126 | hsa-miR-126 | jt:ENSG00000169410 | PTPN9  
AAGATAAAT | ENSG00000199161 | hsa-mir-126 | hsa-miR-126 | jt:ENSG00000172889 | EGF7  
AAGATGACC | ENSG00000199158 | hsa-mir-96 | hsa-miR-96 | jt:ENSG00000117600 | NP\_055654.2  
AAGATGACC | ENSG00000199158 | hsa-mir-96 | hsa-miR-96 | jt:ENSG00000137766 | UNC13C  
AAGATGACC | ENSG00000207990 | hsa-mir-182 | hsa-miR-182 | jt:ENSG00000137766 | UNC13C  
AAGATGGAT | ENSG00000207971 | hsa-mir-125b-1 | hsa-miR-125b | jt:ENSG00000110274 | CEP164  
AAGCATGGC | ENSG00000207618 | hsa-mir-144 | hsa-miR-144 | jt:ENSG00000114388 | TUSC4  
AAGCATGGC | ENSG00000207633 | hsa-mir-505 | hsa-miR-505 | jt:ENSG00000089225 | TBX5  
AAGCATGGC | ENSG00000207633 | hsa-mir-505 | hsa-miR-505 | jt:ENSG00000198710 | Q9BWW1\_HUMAN  
AAGCCAATG | ENSG00000198975 | hsa-let-7a-2 | hsa-let-7a | jt:ENSG00000187838 | PLSCR3  
AAGCCAATG | ENSG00000207971 | hsa-mir-125b-1 | hsa-miR-125b | jt:ENSG00000142765 | SYTL1  
AAGCCCCGC | ENSG00000207784 | hsa-mir-542 | hsa-miR-542-3p | jt:ENSG00000035687 | ADSS  
AAGCCCCGC | ENSG00000207784 | hsa-mir-542 | hsa-miR-542-3p | jt:ENSG00000105700 | C19orf50  
AAGCCCGC | ENSG00000207960 | hsa-mir-153-2 | hsa-miR-153 | jt:ENSG00000082293 | COL19A1  
AAGCGATT | ENSG00000199089 | hsa-mir-202 | hsa-miR-202\* | jt:ENSG00000156017 | C9orf41  
AAGCGATT | ENSG00000199089 | hsa-mir-202 | hsa-miR-202\* | jt:ENSG00000156017 | C9orf41  
AAGCGATTG | ENSG00000199122 | hsa-mir-148b | hsa-miR-148b | jt:ENSG00000106511 | MEOX2  
AAGCGATTG | ENSG00000199122 | hsa-mir-148b | hsa-miR-148b | jt:ENSG00000126903 | SLC10A3  
AAGCCCTCC | ENSG00000207585 | hsa-mir-181d | hsa-miR-181d | jt:ENSG00000119599 | WDR21A  
AAGCCCTCC | ENSG00000207819 | hsa-mir-9-3 | hsa-miR-9\* | jt:ENSG00000124785 | NRN1  
AAGCGGG | ENSG00000207953 | hsa-mir-212 | hsa-miR-212 | jt:ENSG00000134744 | ZCCHC11  
AAGCTCG | ENSG00000198974 | hsa-mir-30e | hsa-miR-30e-3p | jt:ENSG00000162951 | LRRTM1  
AAGCTTGA | ENSG00000207795 | hsa-mir-155 | hsa-miR-155 | jt:ENSG00000134905 | CARS2  
AAGRAACT | ENSG00000199072 | hsa-let-7f-1 | hsa-let-7f | jt:ENSG00000135535 | CD164  
AAGGAACCT | ENSG00000199072 | hsa-let-7f-1 | hsa-let-7f | jt:ENSG00000159217 | IGF2BP1  
AAGGAACCT | ENSG00000199133 | hsa-let-7d | hsa-let-7d | jt:ENSG00000159217 | IGF2BP1  
AAGGAACCT | ENSG00000199165 | hsa-let-7a-1 | hsa-let-7a | jt:ENSG00000135535 | CD164  
AAGGAACCT | ENSG00000199165 | hsa-let-7a-1 | hsa-let-7a | jt:ENSG00000159217 | IGF2BP1  
AAGGAATAA | ENSG00000207617 | hsa-mir-24-1 | hsa-miR-24 | jt:ENSG00000169891 | REPS2  
AAGGATTGT | ENSG00000199094 | hsa-mir-30c-2 | hsa-miR-30c | jt:ENSG00000127329 | PTPRB  
AAGGATTGT | ENSG00000207827 | hsa-mir-30a | hsa-miR-30a-3p | jt:ENSG00000101574 | METTL4

AAGGATTGT | ENSG00000207827 | hsa-mir-30a | hsa-miR-30a-5p | jt:ENSG00000127329 | PTPRB  
AAGGATTC | ENSG00000199135 | hsa-mir-101-1 | hsa-miR-101 | jt:ENSG00000196531 | NACA  
AAGGCCAAC | ENSG00000199024 | hsa-mir-103-2 | hsa-miR-103 | jt:ENSG00000154359 | LONRF1  
AAGGCCACA | ENSG00000199161 | hsa-mir-126 | hsa-miR-126 | jt:ENSG00000172889 | EGF17  
AAGGCCACA | ENSG00000199161 | hsa-mir-126 | hsa-miR-126\* | jt:ENSG00000100422 | CERK  
AAGGCCACA | ENSG00000208009 | hsa-mir-130a | hsa-miR-130a | jt:ENSG00000055813 | CCDC85A  
AAGGCGTCC | ENSG00000207568 | hsa-mir-203 | hsa-miR-203 | jt:ENSG00000041982 | TNC  
AAGGCTCCC | ENSG00000199135 | hsa-mir-101-1 | hsa-miR-101 | jt:ENSG00000105321 | CCDC9  
AAGGCTCCC | ENSG00000199135 | hsa-mir-101-1 | hsa-miR-101 | jt:ENSG00000128311 | TST  
AAGGGG | ENSG00000199036 | hsa-mir-219-1 | hsa-miR-219 | jt:ENSG00000018625 | ATP1A2  
AAGGGGTTA | ENSG00000207708 | hsa-mir-141 | hsa-miR-141 | jt:ENSG00000103647 | CORO2B  
AAGGTAGTA | ENSG00000199149 | hsa-mir-20a | hsa-miR-20a | jt:ENSG00000128604 | IRF5  
AAGGTAGTA | ENSG00000207745 | hsa-mir-17 | hsa-miR-17-5p | jt:ENSG00000128604 | IRF5  
AAGGTAGTA | ENSG00000207745 | hsa-mir-17 | hsa-miR-17-5p | jt:ENSG00000204019 | NP\_001017978.1  
AAGGTGTGT | ENSG00000199059 | hsa-mir-135b | hsa-miR-135b | jt:ENSG00000073792 | IGF2BP2  
AAGTAACCT | ENSG00000199094 | hsa-mir-30c-2 | hsa-miR-30c | jt:ENSG00000150594 | ADRA2A  
AAGTAACCT | ENSG00000207827 | hsa-mir-30a | hsa-miR-30a-3p | jt:ENSG00000149305 | HTR3B  
AAGTAACCT | ENSG00000207827 | hsa-mir-30a | hsa-miR-30a-5p | jt:ENSG00000150594 | ADRA2A  
AAGTACAAA | ENSG00000207809 | hsa-mir-139 | hsa-miR-139 | jt:ENSG00000198477 | SUHW2  
AAGTAGGGC | ENSG00000199059 | hsa-mir-135b | hsa-miR-135b | jt:ENSG00000136867 | SLC31A2  
AAGTAGGGC | ENSG00000207581 | hsa-mir-199b | hsa-miR-199b | jt:ENSG00000163660 | CCNL1  
AAGTAGTCC | ENSG00000199177 | hsa-mir-31 | hsa-miR-31 | jt:ENSG00000155886 | SLC24A2  
AAGTAGTGA | ENSG00000207947 | hsa-mir-152 | hsa-miR-152 | jt:ENSG00000206193 | QSHYA3\_HUMAN  
AAGTCTCC | ENSG00000207624 | hsa-mir-194-1 | hsa-miR-194 | jt:ENSG00000077312 | SNRPA  
AAGTCTGCT | ENSG00000199094 | hsa-mir-30c-2 | hsa-miR-30c | jt:ENSG00000115239 | ASB3  
AAGTCTGCT | ENSG00000207827 | hsa-mir-30a | hsa-miR-30a-5p | jt:ENSG00000115239 | ASB3  
AAGTGAC | ENSG00000207586 | hsa-mir-135a-2 | hsa-miR-135a | jt:ENSG00000135842 | FAM129A  
AAGTGACGC | ENSG00000194717 | hsa-mir-494 | hsa-miR-494 | jt:ENSG00000104969 | SGTA  
AAGTGACGC | ENSG00000194717 | hsa-mir-494 | hsa-miR-494 | jt:ENSG00000180316 | PNPLA1  
AAGTGACGC | ENSG00000199069 | hsa-mir-323 | hsa-miR-323 | jt:ENSG00000185760 | KCNQ5  
AAGTGACGC | ENSG00000199092 | hsa-mir-410 | hsa-miR-410 | jt:ENSG00000085365 | SCAMP1  
AAGTGACGC | ENSG00000199092 | hsa-mir-410 | hsa-miR-410 | jt:ENSG00000135241 | PNPLA10P  
AAGTGACGC | ENSG00000207743 | hsa-mir-495 | hsa-miR-495 | jt:ENSG00000101363 | MANBAL  
AAGTGACGC | ENSG00000207749 | hsa-mir-299 | hsa-miR-299-5p | jt:ENSG00000205609 | Q9BW98\_HUMAN  
AAGTGACGC | ENSG00000207754 | hsa-mir-487b | hsa-miR-487b | jt:ENSG000000051108 | HERPUD1  
AAGTGCCAG | ENSG00000207596 | hsa-mir-194-2 | hsa-miR-194 | jt:ENSG00000161547 | SFRS2  
AAGTGGCCT | ENSG00000199177 | hsa-mir-31 | hsa-miR-31 | jt:ENSG00000101337 | TM9SF4  
AAGTGGCGA | ENSG00000199161 | hsa-mir-126 | hsa-miR-126 | jt:ENSG00000172889 | EGF17  
AAGTGGCGC | ENSG00000207980 | hsa-mir-23a | hsa-miR-23a | jt:ENSG00000163125 | KIAA0460  
AAGTGGCGC | ENSG00000207980 | hsa-mir-23a | hsa-miR-23a | jt:ENSG00000103591 | P34\_HUMAN  
AAGTGGCGC | ENSG00000209707 | hsa-mir-24-2 | hsa-miR-24 | jt:ENSG00000176194 | CIDEA  
AAGTGGGCT | ENSG00000207947 | hsa-mir-152 | hsa-miR-152 | jt:ENSG00000102755 | FLT1  
AAGTGGGCT | ENSG00000207947 | hsa-mir-152 | hsa-miR-152 | jt:ENSG00000116016 | EPAS1  
AAGTGGTAA | ENSG00000199025 | hsa-mir-369 | hsa-miR-369-3p | jt:ENSG00000164691 | TAGAP  
AAGTGGTAA | ENSG00000207743 | hsa-mir-495 | hsa-miR-495 | jt:ENSG00000104635 | SLC39A14  
AAGTGGTAA | ENSG00000207749 | hsa-mir-299 | hsa-miR-299-5p | jt:ENSG00000131351 | NP\_219485.1  
AAGTGGTAA | ENSG00000207749 | hsa-mir-299 | hsa-miR-299-5p | jt:ENSG00000116748 | AMPD1  
AAGTGTAGT | ENSG00000207610 | hsa-mir-19a | hsa-miR-19a | jt:ENSG00000154359 | LONRF1  
AAGTGTGTC | ENSG00000207954 | hsa-mir-138-1 | hsa-miR-138 | jt:ENSG00000182912 | C21orf90  
AAGTTGCTG | ENSG00000199158 | hsa-mir-96 | hsa-miR-96 | jt:ENSG00000105856 | HBP1  
AAGTTGGCA | ENSG00000207718 | hsa-mir-15a | hsa-miR-15a | jt:ENSG00000140854 | KATNB1  
AAGTTGGCA | ENSG00000208006 | hsa-mir-16-1 | hsa-miR-16 | jt:ENSG00000140854 | KATNB1  
AAGTTGGGA | ENSG00000207739 | hsa-mir-218-2 | hsa-miR-218 | jt:ENSG00000158578 | ALAS2  
AAGTTGGGT | ENSG00000199149 | hsa-mir-20a | hsa-miR-20a | jt:ENSG00000180860 | PGA3  
AAGTTGGGT | ENSG00000199149 | hsa-mir-20a | hsa-miR-20a | jt:ENSG00000204973 | PGA4  
AAGTTGGGT | ENSG00000199149 | hsa-mir-20a | hsa-miR-20a | jt:ENSG00000172647 | PGA5  
AAGTTGGGT | ENSG00000207745 | hsa-mir-17 | hsa-miR-17-5p | jt:ENSG000000001617 | SEMA3F  
AAGTTGGTG | ENSG00000199058 | hsa-mir-302b | hsa-miR-302b | jt:ENSG00000163131 | CTSS  
AAGTTGGTG | ENSG00000199102 | hsa-mir-302c | hsa-miR-302c | jt:ENSG00000163131 | CTSS  
AAGTTGGTG | ENSG00000199145 | hsa-mir-302d | hsa-miR-302d | jt:ENSG00000163131 | CTSS  
AAGTTGTTG | ENSG00000207548 | hsa-mir-217 | hsa-miR-217 | jt:ENSG00000166033 | HTRA1  
AAGTTTGTG | ENSG00000207933 | hsa-mir-9-1 | hsa-miR-9 | jt:ENSG00000154319 | C8orf13  
AAGTTTGTG | ENSG00000207933 | hsa-mir-9-1 | hsa-miR-9 | jt:ENSG00000174683 | C8orf78  
AATAAACCC | ENSG00000199077 | hsa-mir-129-2 | hsa-miR-129 | jt:ENSG00000133627 | ACTR3B  
AATAACTGT | ENSG00000207971 | hsa-mir-125b-1 | hsa-miR-125b | jt:ENSG00000169758 | C15orf27  
AATACTGAC | ENSG00000194717 | hsa-mir-494 | hsa-miR-494 | jt:ENSG00000108439 | PNPO  
AATACTGAC | ENSG00000199020 | hsa-mir-381 | hsa-miR-381 | jt:ENSG00000078142 | PIK3C3  
AATACTGAC | ENSG00000199025 | hsa-mir-369 | hsa-miR-369-3p | jt:ENSG00000162980 | ARL5A  
AATACTGAC | ENSG00000199092 | hsa-mir-410 | hsa-miR-410 | jt:ENSG00000154263 | ABCA10  
AATACTGCC | ENSG00000207784 | hsa-mir-542 | hsa-miR-542-3p | jt:ENSG00000171195 | MUC7  
AATACTTGC | ENSG00000207610 | hsa-mir-19a | hsa-miR-19a | jt:ENSG00000116001 | TIA1  
AATACTTGC | ENSG00000207610 | hsa-mir-19a | hsa-miR-19a | jt:ENSG00000164600 | NEUROD6  
AATACTTGC | ENSG00000207745 | hsa-mir-17 | hsa-miR-17-5p | jt:ENSG00000164597 | COG5  
AATAGCGC | ENSG00000198987 | hsa-mir-16-2 | hsa-miR-16 | jt:ENSG00000131381 | ZFYVE20  
AATAGCGC | ENSG00000199065 | hsa-mir-101-2 | hsa-miR-101 | jt:ENSG00000131914 | LIN28  
AATAGCGC | ENSG00000199065 | hsa-mir-101-2 | hsa-miR-101 | jt:ENSG00000153575 | TUBGCP5  
AATAGCGC | ENSG00000199065 | hsa-mir-101-2 | hsa-miR-101 | jt:ENSG00000122779 | TRIM24  
AATAGCGC | ENSG00000199065 | hsa-mir-101-2 | hsa-miR-101 | jt:ENSG00000122779 | TRIM24  
AATAGCGC | ENSG00000202641 | hsa-mir-484 | hsa-miR-484 | jt:ENSG00000100711 | ZFYVE21  
AATAGCGC | ENSG00000202641 | hsa-mir-484 | hsa-miR-484 | jt:ENSG00000109501 | WFS1  
AATAGCGC | ENSG00000202641 | hsa-mir-484 | hsa-miR-484 | jt:ENSG00000126215 | XRCC3  
AATCAATTG | ENSG00000207939 | hsa-mir-223 | hsa-miR-223 | jt:ENSG00000165525 | SDCCAG1  
AATCACAGG | ENSG00000207819 | hsa-mir-9-3 | hsa-miR-9\* | jt:ENSG00000101150 | TPD52L2  
AATCACATC | ENSG00000207633 | hsa-mir-505 | hsa-miR-505 | jt:ENSG00000205524 | Q68D70\_HUMAN  
AATCAGCCA | ENSG00000207950 | hsa-mir-296 | hsa-miR-296 | jt:ENSG00000137309 | HMGAL1  
AATCAGCCA | ENSG00000207950 | hsa-mir-296 | hsa-miR-296 | jt:ENSG00000184363 | PKP3  
AATCAGCCA | ENSG00000207950 | hsa-mir-296 | hsa-miR-296 | jt:ENSG00000178175 | ZNF366  
AATCAGCTG | ENSG00000199153 | hsa-mir-30d | hsa-miR-30d | jt:ENSG00000091157 | WDR7  
AATCAGCTG | ENSG00000199153 | hsa-mir-30d | hsa-miR-30d | jt:ENSG00000134531 | EMP1  
AATCAGCTG | ENSG00000207582 | hsa-mir-30b | hsa-miR-30b | jt:ENSG00000091157 | WDR7  
AATCAGCTG | ENSG00000207582 | hsa-mir-30b | hsa-miR-30b | jt:ENSG00000134531 | EMP1  
AATCAGCTG | ENSG00000207784 | hsa-mir-542 | hsa-miR-542-3p | jt:ENSG00000111729 | CLEC4A  
AATCAGGCT | ENSG00000207705 | hsa-mir-129-1 | hsa-miR-129 | jt:ENSG00000178796 | Q8N9Z1\_HUMAN  
AATCCAATC | ENSG00000208017 | hsa-mir-140 | hsa-miR-140 | jt:ENSG00000131558 | EXOC4  
AATCCAATT | ENSG00000199058 | hsa-mir-302b | hsa-miR-302b | jt:ENSG00000090054 | SPTLC1  
AATCCAATT | ENSG00000199058 | hsa-mir-302b | hsa-miR-302b\* | jt:ENSG00000186871 | NP\_001009954.1  
AATCCAATT | ENSG00000199102 | hsa-mir-302c | hsa-miR-302c | jt:ENSG00000090054 | SPTLC1  
AATCCAATT | ENSG00000199145 | hsa-mir-302d | hsa-miR-302d | jt:ENSG00000090054 | SPTLC1  
AATCCAGGA | ENSG00000198972 | hsa-let-7e | hsa-miR-let-7e | jt:ENSG00000085491 | SLC25A24  
AATCCATGA | ENSG00000211590 | hsa-mir-802 | hsa-miR-802 | jt:ENSG00000171988 | JMD1C  
AATCCCGGA | ENSG00000207751 | hsa-mir-130b | hsa-miR-130b | jt:ENSG00000165699 | TSC1  
AATCCGAGC | ENSG00000207596 | hsa-mir-194-2 | hsa-miR-194 | jt:ENSG00000141576 | RNF157  
AATCCGAGC | ENSG00000207596 | hsa-mir-194-2 | hsa-miR-194 | jt:ENSG00000180758 | GPR157  
AATCCGAA | ENSG00000207955 | hsa-mir-219-2 | hsa-miR-219 | jt:ENSG00000135535 | CD164  
AATCTGGT | ENSG00000199072 | hsa-let-7f-1 | hsa-miR-let-7f | jt:ENSG00000198105 | ZNF248

AATCCTGGT|ENSG00000199133|hsa-let-7d|hsa-let-7d|jt:ENSG00000198105|ZNF248  
AATCCTGGT|ENSG00000199165|hsa-let-7a-1|hsa-let-7a|jt:ENSG00000198105|ZNF248  
AATCGCCTG|ENSG00000207949|hsa-mir-214|hsa-miR-214|jt:ENSG00000149201|CCDC81  
AATCGCCTG|ENSG00000208024|hsa-mir-199a-2|hsa-miR-199a\*|jt:ENSG00000146021|KLHL3  
AATCGCTTC|ENSG00000199122|hsa-mir-148b|hsa-miR-148b|jt:ENSG00000188786|MTF1  
AATCGGAAG|ENSG00000207790|hsa-mir-29b-2|hsa-miR-29b|jt:ENSG00000188064|WNT7B  
AATCGGAAG|ENSG00000207966|hsa-mir-29c|hsa-miR-29c|jt:ENSG00000188064|WNT7B  
AATCGGGCT|ENSG00000199085|hsa-mir-148a|hsa-miR-148a|jt:ENSG00000059728|MXD1  
AATCGTCA|ENSG00000207694|hsa-mir-1-2|hsa-miR-1|jt:ENSG00000168000|HNRPU2  
AATCTCCGC|ENSG00000207955|hsa-mir-219-2|hsa-miR-219|jt:ENSG00000111371|SLC38A1  
AATCTCCCT|ENSG00000207955|hsa-mir-219-2|hsa-miR-219|jt:ENSG00000095066|HOOK2  
AATCTCGC|ENSG00000199058|hsa-mir-302b|hsa-miR-302b\*|jt:ENSG00000138379|GDF8  
AATCTCGC|ENSG00000207698|hsa-mir-32|hsa-miR-32|jt:ENSG00000125089|SH3TC1  
AATCTGCCA|ENSG00000199089|hsa-mir-202|hsa-miR-202|jt:ENSG00000164825|DEFB1  
AATCTGGGC|ENSG00000207971|hsa-mir-125b-1|hsa-miR-125b|jt:ENSG00000143390|RFX5  
AATGAAGCC|ENSG00000207705|hsa-mir-129-1|hsa-miR-129|jt:ENSG00000111671|SPSB2  
AATGACCAT|ENSG00000207955|hsa-mir-219-2|hsa-miR-219|jt:ENSG00000162769|FLVC1\_HUMAN  
AATGACTAC|ENSG00000199065|hsa-mir-101-2|hsa-miR-101|jt:ENSG00000179151|EDC3  
AATGACTGC|ENSG00000207949|hsa-mir-214|hsa-miR-214|jt:ENSG00000136750|GAD2  
AATGAGTCT|ENSG00000198975|hsa-let-7a-2|hsa-let-7a|jt:ENSG00000148200|NR6A1  
AATGATCCT|ENSG00000199122|hsa-mir-148b|hsa-miR-148b|jt:ENSG00000151725|MLF1IP  
AATGATCCT|ENSG00000199122|hsa-mir-148b|hsa-miR-148b|jt:ENSG00000198854|Clorf68  
AATGATTGC|ENSG00000198975|hsa-let-7a-2|hsa-let-7a|jt:ENSG00000150593|PDCD4  
AATGATTGG|ENSG00000207586|hsa-mir-135a-2|hsa-miR-135a|jt:ENSG00000135486|HNRPA1  
AATGCACAA|ENSG00000199080|hsa-mir-133b|hsa-miR-133b|jt:ENSG00000163485|ADORA1  
AATGCACAA|ENSG00000207604|hsa-mir-206|hsa-miR-206|jt:ENSG00000125788|DEFB126  
AATGCAGCG|ENSG00000207751|hsa-mir-130b|hsa-miR-130b|jt:ENSG00000189401|OTUD6A  
AATGGAATG|ENSG00000198981|hsa-mir-29a|hsa-miR-29a|jt:ENSG00000182197|EXT1  
AATGGACTC|ENSG00000207784|hsa-mir-542|hsa-miR-542-3p|jt:ENSG00000094916|CBX5  
AATGGAGGT|ENSG00000207795|hsa-mir-155|hsa-miR-155|jt:ENSG00000101842|VSI1  
AATGGAGGT|ENSG00000207795|hsa-mir-155|hsa-miR-155|jt:ENSG00000186029|QNSZ8\_HUMAN  
AATGGCAGT|ENSG00000198981|hsa-mir-29a|hsa-miR-29a|jt:ENSG00000105856|HBP1  
AATGGCAGT|ENSG00000198981|hsa-mir-29a|hsa-miR-29a|jt:ENSG00000196569|LAMA2  
AATGGCAGT|ENSG00000199015|hsa-mir-377|hsa-miR-377|jt:ENSG00000177614|PGBD5  
AATGGCAGT|ENSG00000199020|hsa-mir-381|hsa-miR-381|jt:ENSG00000160401|C9orf117  
AATGGCAGT|ENSG00000199069|hsa-mir-323|hsa-miR-323|jt:ENSG00000198799|LRIG2  
AATGGCAGT|ENSG00000199092|hsa-mir-410|hsa-miR-410|jt:ENSG00000127663|JMJD2B  
AATGGCAGT|ENSG00000207743|hsa-mir-495|hsa-miR-495|jt:ENSG00000157617|C21orf25  
AATGGCAGT|ENSG00000207749|hsa-mir-299|hsa-miR-299-5p|jt:ENSG00000127663|JMJD2B  
AATGGCAGT|ENSG00000207749|hsa-mir-299|hsa-miR-299-5p|jt:ENSG00000132912|DCTN4  
AATGGCAGT|ENSG00000207961|hsa-mir-496|hsa-miR-496|jt:ENSG00000203784|LELP1  
AATGGCCAA|ENSG00000199020|hsa-mir-381|hsa-miR-381|jt:ENSG00000120156|TEK  
AATGGCCAA|ENSG00000199025|hsa-mir-369|hsa-miR-369-3p|jt:ENSG00000173786|CNP  
AATGGCCAA|ENSG00000199092|hsa-mir-410|hsa-miR-410|jt:ENSG00000126947|ARMCX1  
AATGGCCAA|ENSG00000207749|hsa-mir-299|hsa-miR-299-5p|jt:ENSG00000067798|NAV3  
AATGGCCAA|ENSG00000207749|hsa-mir-299|hsa-miR-299-5p|jt:ENSG00000133169|BEX1  
AATGGCCAA|ENSG00000207754|hsa-mir-487b|hsa-miR-487b|jt:ENSG00000126947|ARMCX1  
AATGGCCAA|ENSG00000207754|hsa-mir-487b|hsa-miR-487b|jt:ENSG00000177741|Q96BN7\_HUMAN  
AATGGCCAA|ENSG00000207961|hsa-mir-496|hsa-miR-496|jt:ENSG00000197430|TMEM10  
AATGGCCGA|ENSG00000207731|hsa-mir-506|hsa-miR-506|jt:ENSG0000011304|PTBP1  
AATGGCCGA|ENSG00000207731|hsa-mir-506|hsa-miR-506|jt:ENSG00000173928|C19orf39  
AATGGCTGG|ENSG00000199085|hsa-mir-148a|hsa-miR-148a|jt:ENSG00000173212|Clorf161  
AATGGCTGG|ENSG00000207610|hsa-mir-19a|hsa-miR-19a|jt:ENSG00000095739|BAMBI  
AATGGCTGG|ENSG00000207745|hsa-mir-17|hsa-miR-17-5p|jt:ENSG00000001617|SEMA3F  
AATGGGAAC|ENSG00000199122|hsa-mir-148b|hsa-miR-148b|jt:ENSG00000100784|RPS6KA5  
AATGGGAAC|ENSG00000199122|hsa-mir-148b|hsa-miR-148b|jt:ENSG00000179476|C14orf28  
AATGGGCCG|ENSG00000208036|hsa-mir-106b|hsa-miR-106b|jt:ENSG00000099985|OSM  
AATGGTCA|ENSG00000207955|hsa-mir-219-2|hsa-miR-219|jt:ENSG00000162769|FLVC1\_HUMAN  
AATGTCCAG|ENSG00000199161|hsa-mir-126|hsa-miR-126|jt:ENSG00000166173|LARF6  
AATGTCCAG|ENSG00000199161|hsa-mir-126|hsa-miR-126|jt:ENSG00000172889|EGFL7  
AATGTCCAG|ENSG00000199161|hsa-mir-126|hsa-miR-126\*|jt:ENSG00000100099|HPS4  
AATGTCCAG|ENSG00000199161|hsa-mir-126|hsa-miR-126\*|jt:ENSG00000151304|SRFBP1  
AATGTCCAG|ENSG00000199161|hsa-mir-126|hsa-miR-126\*|jt:ENSG00000174683|C8orf78  
AATGTCTGG|ENSG00000199036|hsa-mir-219-1|hsa-miR-219|jt:ENSG00000161533|ACOX1  
AATGTGCC|ENSG00000207568|hsa-mir-203|hsa-miR-203|jt:ENSG00000144560|VGLL4  
AATGTGCC|ENSG00000199094|hsa-mir-30c-2|hsa-miR-30c|jt:ENSG00000131558|EXOC4  
AATGTGCC|ENSG00000207827|hsa-mir-30a|hsa-miR-30a-5p|jt:ENSG00000131558|EXOC4  
AATGTGGAG|ENSG00000199089|hsa-mir-202|hsa-miR-202|jt:ENSG00000141428|C18orf21  
AATGTGGAG|ENSG00000199089|hsa-mir-202|hsa-miR-202|jt:ENSG00000143140|GJA5  
AATTAATG|ENSG00000207618|hsa-mir-144|hsa-miR-144|jt:ENSG00000164038|NP\_849155.2  
AATTAACAC|ENSG00000199149|hsa-mir-20a|hsa-miR-20a|jt:ENSG00000144285|SCN1A  
AATTAATGC|ENSG00000199058|hsa-mir-302b|hsa-miR-302b\*|jt:ENSG00000075413|MARK3  
AATTAACCTA|ENSG00000198974|hsa-mir-30e|hsa-miR-30e-5p|jt:ENSG0000017105|ELAVL2  
AATTAACCTA|ENSG00000207962|hsa-mir-30c-1|hsa-miR-30c|jt:ENSG00000107105|ELAVL2  
AATTAGCAG|ENSG00000207731|hsa-mir-506|hsa-miR-506|jt:ENSG00000100625|SIX4  
AATTAGCAG|ENSG00000207731|hsa-mir-506|hsa-miR-506|jt:ENSG00000118985|ELL2  
AATTAGT|ENSG00000199072|hsa-let-7f-1|hsa-let-7f|jt:ENSG00000125741|OPA3  
AATTAGT|ENSG00000199072|hsa-let-7f-1|hsa-let-7f|jt:ENSG00000163104|SMARCAD1  
AATTAGT|ENSG00000199133|hsa-let-7d|hsa-let-7d|jt:ENSG00000125741|OPA3  
AATTAGT|ENSG00000199133|hsa-let-7d|hsa-let-7d|jt:ENSG00000163104|SMARCAD1  
AATTAGT|ENSG00000199165|hsa-let-7a-1|hsa-let-7a|jt:ENSG00000125741|OPA3  
AATTAGT|ENSG00000199165|hsa-let-7a-1|hsa-let-7a|jt:ENSG00000163104|SMARCAD1  
AATTAGTTC|ENSG00000207610|hsa-mir-19a|hsa-miR-19a|jt:ENSG00000110092|CCND1  
AATTATAG|ENSG00000207562|hsa-mir-34c|hsa-miR-34c|jt:ENSG00000110675|ELMOD1  
AATTATAG|ENSG00000207811|hsa-mir-34b|hsa-miR-34b|jt:ENSG00000110675|ELMOD1  
AATTATAGC|ENSG00000208024|hsa-mir-199a-2|hsa-miR-199a|jt:ENSG00000176986|SEC2C4  
AATTATAGC|ENSG00000208024|hsa-mir-199a-2|hsa-miR-199a\*|jt:ENSG00000064989|CALCRL  
AATTATCAT|ENSG00000207548|hsa-mir-217|hsa-miR-217|jt:ENSG00000001461|NPAL3  
AATTATGG|ENSG00000199085|hsa-mir-148a|hsa-miR-148a|jt:ENSG00000126216|TUBGCP3  
AATTACACC|ENSG00000207694|hsa-mir-1-2|hsa-miR-1|jt:ENSG00000130590|SAMD10  
AATTACATG|ENSG00000207949|hsa-mir-214|hsa-miR-214|jt:ENSG00000171100|MTM1  
AATTACATG|ENSG00000208024|hsa-mir-199a-2|hsa-miR-199a|jt:ENSG00000154736|ADAMTS5  
AATTCGAC|ENSG00000207960|hsa-mir-153-2|hsa-miR-153|jt:ENSG00000118217|ATF6  
AATTCCTCC|ENSG00000207939|hsa-mir-223|hsa-miR-223|jt:ENSG00000112290|WASF1  
AATTCCTCC|ENSG00000207819|hsa-mir-9-3|hsa-miR-9|jt:ENSG00000138674|SEC31A  
AATTGACTG|ENSG00000207610|hsa-mir-19a|hsa-miR-19a|jt:ENSG00000118482|PHF3  
AATTGCAA|ENSG00000207617|hsa-mir-24-1|hsa-miR-189|jt:ENSG00000187073|Q86TS2\_HUMAN  
AATTGCAA|ENSG00000207617|hsa-mir-24-1|hsa-miR-24|jt:ENSG00000135503|ACVR1B  
AATTGCAAA|ENSG00000207548|hsa-mir-217|hsa-miR-217|jt:ENSG00000138386|NAB1  
AATTGCAGC|ENSG00000207955|hsa-mir-219-2|hsa-miR-219|jt:ENSG00000051009|C11orf56  
AATTGCAGC|ENSG00000207955|hsa-mir-219-2|hsa-miR-219|jt:ENSG00000186281|NP\_997211.2  
AATTGCTGG|ENSG00000207618|hsa-mir-144|hsa-miR-144|jt:ENSG00000206062|Q4G0T4\_HUMAN  
AATTGGACT|ENSG00000207602|hsa-mir-106a|hsa-miR-106a|jt:ENSG00000005469|CROT  
AATTGGACT|ENSG00000207710|hsa-mir-20b|hsa-miR-20b|jt:ENSG00000005469|CROT  
AATTGGTAC|ENSG00000207955|hsa-mir-219-2|hsa-miR-219|jt:ENSG00000149742|SLC22A9

AATTGGTGG|ENSG00000207863|hsa-mir-125b-2|hsa-miR-125b jt:ENSG00000175489|LRR25  
AATTGGTGG|ENSG00000207863|hsa-mir-125b-2|hsa-miR-125b jt:ENSG00000175779|NP\_997327.1  
AATTTGATC|ENSG00000199177|hsa-mir-31|hsa-miR-31 jt:ENSG00000168939|SPRY3  
AATTTGATC|ENSG00000207718|hsa-mir-15a|hsa-miR-15a jt:ENSG00000114698|PLSCR4  
AATTTGATC|ENSG00000208006|hsa-mir-16-1|hsa-miR-16-1 jt:ENSG00000114698|PLSCR4  
AATTTGATC|ENSG00000207550|hsa-mir-99b|hsa-miR-99b jt:ENSG00000152689|RASGRP3  
ACAAACCGC|ENSG00000207607|hsa-mir-200a|hsa-miR-200a jt:ENSG00000198909|MAP3K3  
ACAAACCGC|ENSG00000207607|hsa-mir-200a|hsa-miR-200a\* jt:ENSG00000152953|STK32B  
ACAAAGGTC|ENSG00000199059|hsa-mir-135b|hsa-miR-135b jt:ENSG00000184774|Q49AQ9\_HUMAN  
ACAAAGTCC|ENSG00000199161|hsa-mir-126|hsa-miR-126 jt:ENSG00000172889|EGFL7  
ACAAAGTCC|ENSG00000199161|hsa-mir-126|hsa-miR-126 jt:ENSG00000203930|Q5JPA2\_HUMAN  
ACAAATGCA|ENSG00000202641|hsa-mir-484|hsa-miR-484 jt:ENSG00000196878|LAMB3  
ACAAACCCG|ENSG00000207751|hsa-mir-130b|hsa-miR-130b jt:ENSG00000166024|C10orf28  
ACAAACCGA|ENSG00000194717|hsa-mir-494|hsa-miR-494 jt:ENSG00000007944|MYLIP  
ACAAACCGA|ENSG00000199020|hsa-mir-381|hsa-miR-381 jt:ENSG00000164024|METAP1  
ACAAACCGA|ENSG00000199092|hsa-mir-410|hsa-miR-410 jt:ENSG00000134333|LDHA  
ACAAACCGA|ENSG00000199092|hsa-mir-410|hsa-miR-410 jt:ENSG00000010278|CD9  
ACAAACCGA|ENSG00000207743|hsa-mir-495|hsa-miR-495 jt:ENSG00000010278|CD9  
ACAAACCGA|ENSG00000207761|hsa-mir-329-1|hsa-miR-329 jt:ENSG00000166526|ZNF3  
ACAAAGCGA|ENSG00000199024|hsa-mir-103-2|hsa-miR-103 jt:ENSG00000086598|TMED2  
ACAAAGCGA|ENSG00000199024|hsa-mir-103-2|hsa-miR-103 jt:ENSG00000112297|AIM1  
ACAAAGCGA|ENSG00000199089|hsa-mir-202|hsa-miR-202 jt:ENSG00000129317|PUS7L  
ACAAAGGCC|ENSG00000199058|hsa-mir-302b|hsa-miR-302b jt:ENSG00000204319|C4A  
ACAAAGGCC|ENSG00000199058|hsa-mir-302b|hsa-miR-302b jt:ENSG00000204342|C4B  
ACAAAGGCC|ENSG00000199102|hsa-mir-302c|hsa-miR-302c jt:ENSG00000204319|C4A  
ACAAAGGCC|ENSG00000199102|hsa-mir-302c|hsa-miR-302c jt:ENSG00000204342|C4B  
ACAAAGGCC|ENSG00000199102|hsa-mir-302c|hsa-miR-302c\* jt:ENSG00000130309|GLT25D1  
ACAAAGGCC|ENSG00000199145|hsa-mir-302d|hsa-miR-302d jt:ENSG00000204319|C4A  
ACAAAGGCC|ENSG00000199145|hsa-mir-302d|hsa-miR-302d jt:ENSG00000204342|C4B  
ACAAATGCT|ENSG00000207827|hsa-mir-30a|hsa-miR-30a-3p jt:ENSG00000181472|ZBTB2  
ACAAATGCT|ENSG00000199036|hsa-mir-219-1|hsa-miR-219 jt:ENSG00000197555|SIPAL1L1  
ACAAATGCT|ENSG00000199153|hsa-mir-30d|hsa-miR-30d jt:ENSG00000033867|SLC4A7  
ACAAATGCT|ENSG00000199153|hsa-mir-30d|hsa-miR-30d jt:ENSG00000171320|ESCO2  
ACAAATGCT|ENSG00000207582|hsa-mir-30b|hsa-miR-30b jt:ENSG00000033867|SLC4A7  
ACAAATGCT|ENSG00000207582|hsa-mir-30b|hsa-miR-30b jt:ENSG00000171320|ESCO2  
ACAAATGCT|ENSG00000207933|hsa-mir-9-1|hsa-miR-9\* jt:ENSG00000143940|Q6ZMW3\_HUMAN  
ACAAATGCT|ENSG00000207638|hsa-mir-99a|hsa-miR-99a jt:ENSG00000169174|PCSK9  
ACAAATGCT|ENSG00000207617|hsa-mir-24-1|hsa-miR-189 jt:ENSG00000188549|NP\_997263.1  
ACAAATGCT|ENSG00000199122|hsa-mir-148b|hsa-miR-148b jt:ENSG00000106511|MEOX2  
ACAAATGCT|ENSG00000199122|hsa-mir-148b|hsa-miR-148b jt:ENSG00000106511|MEOX2  
ACAAATGCT|ENSG00000199015|hsa-mir-377|hsa-miR-377 jt:ENSG00000173867|MRPL46  
ACAAATGCT|ENSG00000199015|hsa-mir-377|hsa-miR-377 jt:ENSG00000033170|FUT8  
ACAAATGCT|ENSG00000199025|hsa-mir-369|hsa-miR-369-3p jt:ENSG00000126003|PLAGL2  
ACAAATGCT|ENSG00000199025|hsa-mir-369|hsa-miR-369-5p jt:ENSG00000148634|HERC4  
ACAAATGCT|ENSG00000207749|hsa-mir-299|hsa-miR-299-5p jt:ENSG00000080166|DCT  
ACAAATGCT|ENSG00000207749|hsa-mir-299|hsa-miR-299-5p jt:ENSG00000171711|DEFB4  
ACAAATGCT|ENSG00000207749|hsa-mir-299|hsa-miR-299-5p jt:ENSG00000177257|BD02\_HUMAN  
ACAAATGCT|ENSG00000207863|hsa-mir-125b-2|hsa-miR-125b jt:ENSG00000205126|NP\_001027025.1  
ACAAATGCT|ENSG00000207819|hsa-mir-9-3|hsa-miR-9\* jt:ENSG00000049130|KITLG  
ACAAATGCT|ENSG00000207581|hsa-mir-199b|hsa-miR-199b jt:ENSG00000183542|KLRC4  
ACAAATGCT|ENSG00000207751|hsa-mir-130b|hsa-miR-130b jt:ENSG00000197959|DNM3  
ACAAATGCT|ENSG00000207638|hsa-mir-99a|hsa-miR-99a jt:ENSG00000169174|PCSK9  
ACAAATGCT|ENSG00000207863|hsa-mir-125b-2|hsa-miR-125b jt:ENSG00000099953|MMP11  
ACAAACCGA|ENSG00000207547|hsa-mir-25|hsa-miR-25 jt:ENSG00000143164|IQWD1  
ACAAACCGA|ENSG00000208036|hsa-mir-106b|hsa-miR-106b jt:ENSG00000205212|NP\_001004306.1  
ACAAACCGA|ENSG00000198987|hsa-mir-16-2|hsa-miR-16-2 jt:ENSG00000115806|GORASP2  
ACAACTGGG|ENSG00000199158|hsa-mir-96|hsa-miR-96 jt:ENSG00000144749|LRIG1  
ACAACTGGG|ENSG00000207691|hsa-mir-183|hsa-miR-183 jt:ENSG00000119614|CHX10  
ACAACTGGG|ENSG00000207691|hsa-mir-183|hsa-miR-183 jt:ENSG00000144749|LRIG1  
ACAACTGGG|ENSG00000207614|hsa-mir-193a|hsa-miR-193a jt:ENSG00000198681|MAGEA1  
ACAACTGGG|ENSG00000207953|hsa-mir-212|hsa-miR-212 jt:ENSG00000121316|NP\_079105.4  
ACAACTGGG|ENSG00000199161|hsa-mir-126|hsa-miR-126 jt:ENSG00000172889|EGFL7  
ACAACTGGG|ENSG00000199161|hsa-mir-126|hsa-miR-126\* jt:ENSG00000177408|PLAC2  
ACAACTGGG|ENSG00000207567|hsa-mir-142|hsa-miR-142-3p jt:ENSG00000140948|ZCCHC14  
ACAACTGGG|ENSG00000207567|hsa-mir-142|hsa-miR-142-3p jt:ENSG00000154529|CNTNAP3B  
ACAACTGTA|ENSG00000207819|hsa-mir-9-3|hsa-miR-9 jt:ENSG00000159082|SYN1  
ACAACTGGG|ENSG00000207596|hsa-mir-194-2|hsa-miR-194 jt:ENSG00000156298|TSPAN7  
ACAACTGTA|ENSG00000198973|hsa-mir-375|hsa-miR-375 jt:ENSG00000157404|KIT  
ACAACTCAA|ENSG00000199149|hsa-mir-20a|hsa-miR-20a jt:ENSG0000006062|MAP3K14  
ACAACTCAA|ENSG00000199149|hsa-mir-20a|hsa-miR-20a jt:ENSG00000166435|XRR1  
ACAACTCAA|ENSG00000207610|hsa-mir-19a|hsa-miR-19a jt:ENSG00000081479|LRP2  
ACAACTCAA|ENSG00000207610|hsa-mir-19a|hsa-miR-19a jt:ENSG00000205673|Q6ZRX0\_HUMAN  
ACAACTCAA|ENSG00000207745|hsa-mir-17|hsa-miR-17-5p jt:ENSG0000006062|MAP3K14  
ACAACTCAA|ENSG00000207745|hsa-mir-17|hsa-miR-17-5p jt:ENSG00000166435|XRR1  
ACAACTGCT|ENSG00000199094|hsa-mir-30c-2|hsa-miR-30c jt:ENSG00000058600|POLR3E  
ACAACTGCT|ENSG00000207827|hsa-mir-30a|hsa-miR-30a-5p jt:ENSG00000058600|POLR3E  
ACAGACATC|ENSG00000199153|hsa-mir-30d|hsa-miR-30d jt:ENSG00000172819|RARG  
ACAGACATC|ENSG00000207582|hsa-mir-30b|hsa-miR-30b jt:ENSG00000172819|RARG  
ACAGACCCA|ENSG00000207949|hsa-mir-214|hsa-miR-214 jt:ENSG00000182195|LDOC1  
ACAGATGGC|ENSG00000207572|hsa-mir-363|hsa-miR-363 jt:ENSG00000121274|PAPD5  
ACAGATGGC|ENSG00000207602|hsa-mir-106a|hsa-miR-106a jt:ENSG00000186487|MYT1L  
ACAGATGGC|ENSG00000207710|hsa-mir-20b|hsa-miR-20b jt:ENSG00000186487|MYT1L  
ACAGATGTC|ENSG00000199058|hsa-mir-302b|hsa-miR-302b jt:ENSG00000153234|NR4A2  
ACAGATGTC|ENSG00000199102|hsa-mir-302c|hsa-miR-302c jt:ENSG00000153234|NR4A2  
ACAGATGTC|ENSG00000199102|hsa-mir-302c|hsa-miR-302c\* jt:ENSG00000161572|LYZL6  
ACAGATGTC|ENSG00000199145|hsa-mir-302d|hsa-miR-302d jt:ENSG00000153234|NR4A2  
ACAGATGTC|ENSG00000199169|hsa-mir-367|hsa-miR-367 jt:ENSG00000180458|Q8N3U1\_HUMAN  
ACAGATGTC|ENSG00000199169|hsa-mir-367|hsa-miR-367 jt:ENSG00000186697|Q86T06\_HUMAN  
ACAGCCATC|ENSG00000198981|hsa-mir-29a|hsa-miR-29a jt:ENSG00000050030|KIAA2022  
ACAGCCATC|ENSG00000198981|hsa-mir-29a|hsa-miR-29a jt:ENSG00000205107|NP\_001001679.1  
ACAGCCATC|ENSG00000199059|hsa-mir-135b|hsa-miR-135b jt:ENSG00000172845|SP3  
ACAGGTCTG|ENSG00000199085|hsa-mir-148a|hsa-miR-148a jt:ENSG00000151725|MLF1IP  
ACAGTGGG|ENSG00000199158|hsa-mir-96|hsa-miR-96 jt:ENSG00000072042|RDH11  
ACAGTGGG|ENSG00000207691|hsa-mir-183|hsa-miR-183 jt:ENSG00000072042|RDH11  
ACATAATCT|ENSG00000207971|hsa-mir-125b-1|hsa-miR-125b jt:ENSG00000073754|CD5L  
ACATAATCT|ENSG00000207971|hsa-mir-125b-1|hsa-miR-125b jt:ENSG00000118322|ATP10B  
ACATACGG|ENSG00000207586|hsa-mir-135a-2|hsa-miR-135a jt:ENSG00000172845|SP3  
ACATCAAT|ENSG00000199135|hsa-mir-101-1|hsa-miR-101 jt:ENSG00000136928|GABBR2  
ACATCACCC|ENSG00000199158|hsa-mir-96|hsa-miR-96 jt:ENSG00000162298|SYVN1  
ACATCACCC|ENSG00000207691|hsa-mir-183|hsa-miR-183 jt:ENSG00000111799|COL12A1  
ACATCACCC|ENSG00000207691|hsa-mir-183|hsa-miR-183 jt:ENSG00000119614|CHX10  
ACATCACCC|ENSG00000207691|hsa-mir-183|hsa-miR-183 jt:ENSG00000162298|SYVN1  
ACATCACCT|ENSG00000207610|hsa-mir-19a|hsa-miR-19a jt:ENSG00000137843|PAK6  
ACATCACG|ENSG00000207586|hsa-mir-135a-2|hsa-miR-135a jt:ENSG00000132434|LANCL2  
ACATCACGG|ENSG00000207624|hsa-mir-194-1|hsa-miR-194 jt:ENSG00000138867|C22orf13

ACATCATCC|ENSG00000207949|hsa-mir-214|hsa-miR-214|jt:ENSG00000153823|PID1  
ACATCATCC|ENSG00000208024|hsa-mir-199a-2|hsa-miR-199a\*|jt:ENSG00000164379|FOXQ1  
ACATCATCC|ENSG00000208024|hsa-mir-199a-2|hsa-miR-199a\*|jt:ENSG00000180398|MCFD2  
ACATCTCCC|ENSG00000207939|hsa-mir-223|hsa-miR-223|jt:ENSG00000117528|ABCD3  
ACATCTCCC|ENSG00000207939|hsa-mir-223|hsa-miR-223|jt:ENSG00000130775|Clorf38  
ACATGCTGA|ENSG00000207865|hsa-mir-34a|hsa-miR-34a|jt:ENSG00000204619|PPP1R11  
ACATGCTGC|ENSG00000199094|hsa-mir-30c-2|hsa-miR-30c|jt:ENSG00000189298|ZKSCAN3  
ACATGCTGC|ENSG00000207827|hsa-mir-30a|hsa-miR-30a-5p|jt:ENSG00000189298|ZKSCAN3  
ACATGCTGC|ENSG00000207947|hsa-mir-152|hsa-miR-152|jt:ENSG00000137073|UBAP2  
ACATGGTGA|ENSG00000199015|hsa-mir-377|hsa-miR-377|jt:ENSG00000166682|TMPRSS5  
ACATGGTGA|ENSG00000199025|hsa-mir-369|hsa-miR-369-3p|jt:ENSG00000061936|SFRS8  
ACATGGTGA|ENSG00000207749|hsa-mir-299|hsa-miR-299-5p|jt:ENSG00000206066|IGLL3  
ACATTAACT|ENSG00000199094|hsa-mir-30c-2|hsa-miR-30c|jt:ENSG00000198301|SDAD1  
ACATTAACT|ENSG00000207827|hsa-mir-30a|hsa-miR-30a-5p|jt:ENSG00000198301|SDAD1  
ACATTAAGC|ENSG00000207624|hsa-mir-194-1|hsa-miR-194|jt:ENSG00000177853|ZNF518  
ACATTATG|ENSG00000198986|hsa-let-7a-3|hsa-miR-7a-3|jt:ENSG00000135535|CD164  
ACATTATG|ENSG00000207875|hsa-let-7b|hsa-miR-7b|jt:ENSG00000135535|CD164  
ACATTCCTC|ENSG00000207752|hsa-mir-199a-1|hsa-miR-199a\*|jt:ENSG00000123178|Cl3orf1  
ACATTCGC|ENSG00000207718|hsa-mir-15a|hsa-miR-15a|jt:ENSG00000159231|CBR3  
ACATTCGC|ENSG00000208006|hsa-mir-16-1|hsa-miR-16|jt:ENSG00000159231|CBR3  
ACATTGAAC|ENSG00000207586|hsa-mir-135a-2|hsa-miR-135a|jt:ENSG00000113494|PRLR  
ACATTGCCT|ENSG00000207618|hsa-mir-144|hsa-miR-144|jt:ENSG00000102547|CAB39L  
ACATTGGCT|ENSG00000207971|hsa-mir-125b-1|hsa-miR-125b|jt:ENSG00000142765|SYTL1  
ACATTGGCT|ENSG00000207971|hsa-mir-125b-1|hsa-miR-125b|jt:ENSG00000205913|Q6ZUC4\_HUMAN  
ACCAACCAG|ENSG00000198986|hsa-let-7a-3|hsa-miR-7a-3|jt:ENSG00000187164|KIAA1598  
ACCAACCAG|ENSG00000207875|hsa-let-7b|hsa-miR-7b|jt:ENSG00000187164|KIAA1598  
ACCAATAAG|ENSG00000207694|hsa-mir-1-2|hsa-miR-1|jt:ENSG00000173612|GPRC6A  
ACCAATCCC|ENSG00000199059|hsa-mir-135b|hsa-miR-135b|jt:ENSG00000072501|SMC1A  
ACCAATCCT|ENSG00000199149|hsa-mir-20a|hsa-miR-20a|jt:ENSG00000145362|ANK2  
ACCAATCCT|ENSG00000199149|hsa-mir-20a|hsa-miR-20a|jt:ENSG00000154065|ANKRD29  
ACCAATCCT|ENSG00000207745|hsa-mir-17|hsa-miR-17-5p|jt:ENSG00000187678|SPRY4  
ACCAATCCT|ENSG00000207745|hsa-mir-17|hsa-miR-17-5p|jt:ENSG00000145362|ANK2  
ACCAATCCT|ENSG00000207745|hsa-mir-17|hsa-miR-17-5p|jt:ENSG00000154065|ANKRD29  
ACCAATGAC|ENSG00000207947|hsa-mir-152|hsa-miR-152|jt:ENSG00000115310|RTN4  
ACCACCAGA|ENSG00000199121|hsa-mir-26b|hsa-miR-26b|jt:ENSG00000099984|GSTT2  
ACCACCAGA|ENSG00000199121|hsa-mir-26b|hsa-miR-26b|jt:ENSG00000133433|GSTT2\_HUMAN  
ACCACGGA|ENSG00000194717|hsa-mir-494|hsa-miR-494|jt:ENSG00000164093|PITX2  
ACCACGGA|ENSG00000199025|hsa-mir-369|hsa-miR-369-3p|jt:ENSG00000162104|ADCY9  
ACCACGGA|ENSG00000199025|hsa-mir-369|hsa-miR-369-3p|jt:ENSG00000163900|TMEM41A  
ACCACGGA|ENSG00000199107|hsa-mir-409|hsa-miR-409-5p|jt:ENSG00000162641|Clorf62  
ACCACGGA|ENSG00000207754|hsa-mir-487b|hsa-miR-487b|jt:ENSG00000204914|NP\_940843.1  
ACCACGGA|ENSG00000207754|hsa-mir-487b|hsa-miR-487b|jt:ENSG00000204916|NP\_940843.1  
ACCACGGA|ENSG00000207754|hsa-mir-487b|hsa-miR-487b|jt:ENSG00000204917|NP\_940843.1  
ACCACGGA|ENSG00000207754|hsa-mir-487b|hsa-miR-487b|jt:ENSG00000204918|NP\_940843.1  
ACCACGGA|ENSG00000207754|hsa-mir-487b|hsa-miR-487b|jt:ENSG00000204919|NP\_940843.1  
ACCACGGA|ENSG00000207761|hsa-mir-329-1|hsa-miR-329|jt:ENSG00000169744|LDB2  
ACCACTG|ENSG00000198981|hsa-mir-29a|hsa-miR-29a|jt:ENSG00000169330|K1024\_HUMAN  
ACCACTG|ENSG00000198981|hsa-mir-29a|hsa-miR-29a|jt:ENSG00000139372|TDG  
ACCACTTAG|ENSG00000194717|hsa-mir-494|hsa-miR-494|jt:ENSG00000151835|SACS  
ACCACTTAG|ENSG00000207754|hsa-mir-487b|hsa-miR-487b|jt:ENSG00000204370|SDHD  
ACCAGAGAC|ENSG00000199082|hsa-mir-342|hsa-miR-342|jt:ENSG00000159348|CYB5R1  
ACCAGATGC|ENSG00000207728|hsa-mir-449b|hsa-miR-449b|jt:ENSG00000131951|LRRC9  
ACCAGATTG|ENSG00000199158|hsa-mir-96|hsa-miR-96|jt:ENSG00000170961|HAS2  
ACCAGATTG|ENSG00000207990|hsa-mir-182|hsa-miR-182|jt:ENSG00000170961|HAS2  
ACCAGTAGC|ENSG00000199149|hsa-mir-20a|hsa-miR-20a|jt:ENSG00000168078|PBK  
ACCAGTAGC|ENSG00000207745|hsa-mir-17|hsa-miR-17-5p|jt:ENSG00000168078|PBK  
ACCATCGT|ENSG00000207732|hsa-mir-218-1|hsa-miR-218|jt:ENSG00000166402|TUB  
ACCATGGAG|ENSG00000207630|hsa-mir-7-3|hsa-miR-7|jt:ENSG00000118473|SGIP1  
ACCATGTGC|ENSG00000194717|hsa-mir-494|hsa-miR-494|jt:ENSG00000166349|RAG1  
ACCATGTGC|ENSG00000199012|hsa-mir-412|hsa-miR-412|jt:ENSG00000073060|SCARB1  
ACCATGTGC|ENSG00000199025|hsa-mir-369|hsa-miR-369-3p|jt:ENSG00000101323|HAO1  
ACCATGTGC|ENSG00000199092|hsa-mir-410|hsa-miR-410|jt:ENSG000000002745|WNT16  
ACCATGTGC|ENSG00000199092|hsa-mir-410|hsa-miR-410|jt:ENSG000000005812|FBXL3  
ACCATGTGC|ENSG00000199107|hsa-mir-409|hsa-miR-409-5p|jt:ENSG00000128606|LRRC17  
ACCATGTGC|ENSG00000207761|hsa-mir-329-1|hsa-miR-329|jt:ENSG00000156471|PTDSS1  
ACCCAAACT|ENSG00000207819|hsa-mir-9-3|hsa-miR-9\*|jt:ENSG00000118363|SPCS2  
ACCCACCAG|ENSG00000207980|hsa-mir-23a|hsa-miR-23a|jt:ENSG00000156162|DPY19L4  
ACCCCAATA|ENSG00000207638|hsa-mir-99a|hsa-miR-99a|jt:ENSG00000136381|IREB2  
ACCCCAATA|ENSG00000207638|hsa-mir-99a|hsa-miR-99a|jt:ENSG00000136840|ST6GALNAC4  
ACCCCAATA|ENSG00000207863|hsa-mir-125b-2|hsa-miR-125b|jt:ENSG00000136840|ST6GALNAC4  
ACCCCTC|ENSG00000199036|hsa-mir-219-1|hsa-miR-219|jt:ENSG00000184895|SRY  
ACCCCGCT|ENSG00000207562|hsa-mir-34c|hsa-miR-34c|jt:ENSG00000116704|SLC35D1  
ACCCCGCT|ENSG00000207811|hsa-mir-34b|hsa-miR-34b|jt:ENSG00000116704|SLC35D1  
ACCCGGAAG|ENSG00000208017|hsa-mir-140|hsa-miR-140|jt:ENSG00000167384|ZNF181  
ACCCGGAAG|ENSG00000208017|hsa-mir-140|hsa-miR-140|jt:ENSG00000086232|EIF2AK1  
ACCCGGCGC|ENSG00000207617|hsa-mir-24-1|hsa-miR-24|jt:ENSG00000157538|DSCR3  
ACCCTAATC|ENSG00000199058|hsa-mir-302b|hsa-miR-302b|jt:ENSG00000161642|ZNF385  
ACCCTAATC|ENSG00000199102|hsa-mir-302c|hsa-miR-302c|jt:ENSG00000161642|ZNF385  
ACCCTAATC|ENSG00000199102|hsa-mir-302c|hsa-miR-302c\*|jt:ENSG00000139324|TMTC3  
ACCCTAATC|ENSG00000199145|hsa-mir-302d|hsa-miR-302d|jt:ENSG00000161642|ZNF385  
ACCCCTTA|ENSG00000199133|hsa-let-7d|hsa-miR-7d|jt:ENSG00000119048|UBE2B  
ACCCGTGA|ENSG00000207602|hsa-mir-106a|hsa-miR-106a|jt:ENSG00000169662|NP\_997357.1  
ACCCGTGA|ENSG00000207602|hsa-mir-106a|hsa-miR-106a|jt:ENSG00000121871|SLITRK3  
ACCCGTGA|ENSG00000207710|hsa-mir-20b|hsa-miR-20b|jt:ENSG00000121871|SLITRK3  
ACCCCTCAC|ENSG00000207618|hsa-mir-144|hsa-miR-144|jt:ENSG00000126749|EMG1  
ACCCCTCAC|ENSG00000207618|hsa-mir-144|hsa-miR-144|jt:ENSG00000171551|ECE11  
ACCGAATC|ENSG00000199158|hsa-mir-96|hsa-miR-96|jt:ENSG00000187098|MITF  
ACCGAATC|ENSG00000207990|hsa-mir-182|hsa-miR-182|jt:ENSG00000187098|MITF  
ACCGAATCT|ENSG00000199158|hsa-mir-96|hsa-miR-96|jt:ENSG00000187098|MITF  
ACCGAATCT|ENSG00000207990|hsa-mir-182|hsa-miR-182|jt:ENSG00000187098|MITF  
ACCGAGAGT|ENSG00000207777|hsa-mir-10a|hsa-miR-10a|jt:ENSG00000100242|UNC84B  
ACCGATA|ENSG00000202641|hsa-mir-484|hsa-miR-484|jt:ENSG00000159167|STC1  
ACCCGC|ENSG00000199121|hsa-mir-26b|hsa-miR-26b|jt:ENSG00000137504|CREBZF  
ACCCGC|ENSG00000199121|hsa-mir-26b|hsa-miR-26b|jt:ENSG00000104343|UBE2W  
ACCCGCAC|ENSG00000207585|hsa-mir-181d|hsa-miR-181d|jt:ENSG00000145365|NP\_443096.1  
ACCCGCAC|ENSG00000207585|hsa-mir-181d|hsa-miR-181d|jt:ENSG00000204201|Q49A4\_HUMAN  
ACCCGCAC|ENSG00000207638|hsa-mir-99a|hsa-miR-99a|jt:ENSG00000082213|C5orf22  
ACCCGCAC|ENSG00000207863|hsa-mir-125b-2|hsa-miR-125b|jt:ENSG00000119541|VPS4B  
ACCCGGCT|ENSG00000199024|hsa-mir-103-2|hsa-miR-103|jt:ENSG00000149182|ZNF289  
ACCCGGCT|ENSG00000199024|hsa-mir-103-2|hsa-miR-103|jt:ENSG00000198719|DLL1  
ACCCGTAG|ENSG00000208024|hsa-mir-199a-2|hsa-miR-199a\*|jt:ENSG00000171608|PIK3CD  
ACCCGTAG|ENSG00000208024|hsa-mir-199a-2|hsa-miR-199a\*|jt:ENSG00000119707|RBM25  
ACCGGA|ENSG00000199122|hsa-mir-148b|hsa-miR-148b|jt:ENSG00000110756|HP55  
ACCGGA|ENSG00000199122|hsa-mir-148b|hsa-miR-148b|jt:ENSG00000047621|C12orf4  
ACCGAAC|ENSG00000207789|hsa-mir-26a-2|hsa-miR-26a|jt:ENSG00000183955|SETD8

ACCGTCACC|ENSG00000199032|hsa-mir-425|hsa-miR-425-3p|jt:ENSG00000181798|C2orf52  
ACCTAAATC|ENSG00000199153|hsa-mir-30d|hsa-miR-30d|jt:ENSG00000033867|SLC4A7  
ACCTAAATC|ENSG00000207582|hsa-mir-30b|hsa-miR-30b|jt:ENSG00000033867|SLC4A7  
ACCTACCAAG|ENSG00000207947|hsa-mir-152|hsa-miR-152|jt:ENSG00000165588|OTX2  
ACCTATTGG|ENSG00000207718|hsa-mir-15a|hsa-miR-15a|jt:ENSG00000131381|ZFVYE20  
ACCTATTGG|ENSG00000208006|hsa-mir-16-1|hsa-miR-16|jt:ENSG00000131381|ZFVYE20  
ACCTCATCA|ENSG00000198975|hsa-let-7a-2|hsa-let-7a|jt:ENSG00000094963|FMO2  
ACCTCATCA|ENSG00000207971|hsa-mir-125b-1|hsa-miR-125b|jt:ENSG00000175489|LRRC25  
ACCTCATCA|ENSG00000207994|hsa-mir-100|hsa-miR-100|jt:ENSG00000185361|TNFAIP8L1  
ACCTCGTCC|ENSG00000199023|hsa-mir-339|hsa-miR-339|jt:ENSG00000177045|SIX5  
ACCTCTCGC|ENSG00000207614|hsa-mir-193a|hsa-miR-193a|jt:ENSG00000188215|DCUN1D3  
ACCTGAAGG|ENSG00000207691|hsa-mir-183|hsa-miR-183|jt:ENSG00000083857|FAT  
ACCTGACTG|ENSG00000198981|hsa-mir-29a|hsa-miR-29a|jt:ENSG00000198872|PEG10  
ACCTGAGAT|ENSG00000207610|hsa-mir-19a|hsa-miR-19a|jt:ENSG00000095739|BAMBI  
ACCTGAGAT|ENSG00000207610|hsa-mir-19a|hsa-miR-19a|jt:ENSG00000139173|TMEM117  
ACCTGCCGG|ENSG00000207953|hsa-mir-212|hsa-miR-212|jt:ENSG00000124491|F13A1  
ACCTGCCGT|ENSG00000207630|hsa-mir-7-3|hsa-miR-7|jt:ENSG00000136485|WDR68  
ACCTGTCTA|ENSG00000207792|hsa-mir-151|hsa-miR-151|jt:ENSG00000090857|NP\_060460.3  
ACCTGTTGC|ENSG00000199085|hsa-mir-148a|hsa-miR-148a|jt:ENSG00000059278|MXD1  
ACCTTTGGA|ENSG00000194717|hsa-mir-494|hsa-miR-494|jt:ENSG00000135968|GCC2  
ACCTTTGGA|ENSG00000199020|hsa-mir-381|hsa-miR-381|jt:ENSG00000145386|CCNA2  
ACCTTTGGA|ENSG00000199020|hsa-mir-381|hsa-miR-381|jt:ENSG00000163114|PDHA2  
ACCTTTGGA|ENSG00000199020|hsa-mir-381|hsa-miR-381|jt:ENSG00000204397|NP\_001017534.1  
ACGACTCT|ENSG00000207698|hsa-mir-32|hsa-miR-32|jt:ENSG00000003393|ALS2  
ACGACTCT|ENSG00000207698|hsa-mir-32|hsa-miR-32|jt:ENSG00000186019|ZNF224  
ACGACTCT|ENSG00000207698|hsa-mir-32|hsa-miR-32|jt:ENSG00000206560|ANKRD28  
ACGAGACA|ENSG00000198972|hsa-let-7e|hsa-let-7e|jt:ENSG00000071967|CYBRD1  
ACGAGACA|ENSG00000207550|hsa-mir-99b|hsa-miR-99b|jt:ENSG00000185361|TNFAIP8L1  
ACGAGGAAG|ENSG00000198986|hsa-let-7a-3|hsa-let-7a|jt:ENSG00000159217|IGF2BP1  
ACGAGGAAG|ENSG00000207875|hsa-let-7b|hsa-let-7b|jt:ENSG00000159217|IGF2BP1  
ACGAGGACA|ENSG00000207596|hsa-mir-194-2|hsa-miR-194|jt:ENSG00000178028|DMPA1  
ACGAGGCTC|ENSG00000199089|hsa-mir-202|hsa-miR-202\*|jt:ENSG00000143333|RGS16  
ACGATCCC|ENSG00000207752|hsa-mir-199a-1|hsa-miR-199a\*|jt:ENSG00000110395|CBL  
ACGATCCC|ENSG00000207863|hsa-mir-125b-2|hsa-miR-125b|jt:ENSG00000184508|HDDC3  
ACGCAAT|ENSG00000207633|hsa-mir-505|hsa-miR-505|jt:ENSG00000134363|FST  
ACGCAATC|ENSG00000207698|hsa-mir-32|hsa-miR-32|jt:ENSG00000124140|SLC12A5  
ACGCAATC|ENSG00000207698|hsa-mir-32|hsa-miR-32|jt:ENSG00000143458|NP\_653219.1  
ACGCAATC|ENSG00000207698|hsa-mir-32|hsa-miR-32|jt:ENSG00000115602|ILIRL1  
ACGCACCCC|ENSG00000199187|hsa-mir-365-2|hsa-miR-365|jt:ENSG00000189251|Q8WYN8\_HUMAN  
ACGCACTGC|ENSG00000199025|hsa-mir-369|hsa-miR-369-3p|jt:ENSG00000166734|CASC4  
ACGCACTGC|ENSG00000199025|hsa-mir-369|hsa-miR-369-5p|jt:ENSG00000134954|ETS1  
ACGCACTGC|ENSG00000199069|hsa-mir-323|hsa-miR-323|jt:ENSG00000135940|COX5B  
ACGCGCCG|ENSG00000199121|hsa-mir-26b|hsa-miR-26b|jt:ENSG00000119812|FAM98A  
ACGCATACA|ENSG00000199036|hsa-mir-219-1|hsa-miR-219|jt:ENSG00000133985|TTC9  
ACGCATCTG|ENSG00000198973|hsa-mir-375|hsa-miR-375|jt:ENSG00000166317|SYNPO2L  
ACGCCACGG|ENSG00000207955|hsa-mir-219-2|hsa-miR-219|jt:ENSG00000134901|KDELCL1  
ACGCCCAT|ENSG00000207954|hsa-mir-138-1|hsa-miR-138|jt:ENSG00000131759|PAPA  
ACGCCCC|ENSG00000199032|hsa-mir-425|hsa-miR-425-3p|jt:ENSG00000198382|UVRAG  
ACGCCCC|ENSG00000199122|hsa-mir-148b|hsa-miR-148b|jt:ENSG00000122783|C7orf49  
ACGCCG|ENSG00000207953|hsa-mir-212|hsa-miR-212|jt:ENSG00000145715|RASA1  
ACGCCG|ENSG00000207953|hsa-mir-212|hsa-miR-212|jt:ENSG00000154065|ANKRD29  
ACGCCGACA|ENSG00000198974|hsa-mir-30e|hsa-miR-30e-5p|jt:ENSG00000105501|SIGLEC5  
ACGCCGACA|ENSG00000198974|hsa-mir-30e|hsa-miR-30e-5p|jt:ENSG00000137261|KIAA0319  
ACGCCGACA|ENSG00000207962|hsa-mir-30c-1|hsa-miR-30c|jt:ENSG00000105501|SIGLEC5  
ACGCCGACA|ENSG00000207962|hsa-mir-30c-1|hsa-miR-30c|jt:ENSG00000137261|KIAA0319  
ACGCTGAT|ENSG00000207624|hsa-mir-194-1|hsa-miR-194|jt:ENSG00000197969|VPS13A  
ACGCTGAT|ENSG00000207624|hsa-mir-194-1|hsa-miR-194|jt:ENSG00000071073|MGAT4A  
ACGCTGGCT|ENSG00000207764|hsa-mir-133a-2|hsa-miR-133a|jt:ENSG00000146648|EGFR  
ACCTGTTG|ENSG00000207585|hsa-mir-181d|hsa-miR-181d|jt:ENSG00000146469|VIP  
ACGGATTC|ENSG00000199161|hsa-mir-126|hsa-miR-126|jt:ENSG00000172889|EGFL7  
ACGGATTC|ENSG00000199161|hsa-mir-126|hsa-miR-126\*|jt:ENSG00000117594|HSD11B1  
ACGGCG|ENSG00000207819|hsa-mir-9-3|hsa-miR-9|jt:ENSG00000110756|HP55  
ACGGCG|ENSG00000207819|hsa-mir-9-3|hsa-miR-9|jt:ENSG00000119227|PIG2  
ACGGCG|ENSG00000207819|hsa-mir-9-3|hsa-miR-9|jt:ENSG00000089063|C20orf30  
ACGGCTCCT|ENSG00000199187|hsa-mir-365-2|hsa-miR-365|jt:ENSG00000196388|NP\_998891.1  
ACGGCTTCC|ENSG00000207953|hsa-mir-212|hsa-miR-212|jt:ENSG00000102996|MMP15  
ACGGGTCC|ENSG00000199089|hsa-mir-202|hsa-miR-202\*|jt:ENSG00000166900|STX3  
ACGGGGTCC|ENSG00000199089|hsa-mir-202|hsa-miR-202\*|jt:ENSG00000184785|Q96HG1\_HUMAN  
ACGGTCCGG|ENSG00000199032|hsa-mir-425|hsa-miR-425-3p|jt:ENSG00000170852|KBTBD2  
ACGGTTGG|ENSG00000207567|hsa-mir-142|hsa-miR-142-5p|jt:ENSG00000205434|Q6ZU34\_HUMAN  
ACGGTTGG|ENSG00000207960|hsa-mir-153-2|hsa-miR-153|jt:ENSG00000153936|HS2ST1  
ACGGTTGG|ENSG00000207960|hsa-mir-153-2|hsa-miR-153|jt:ENSG00000082293|COL19A1  
ACGTAAGG|ENSG00000198974|hsa-mir-30e|hsa-miR-30e-3p|jt:ENSG00000139178|C1RL  
ACGTAAGG|ENSG00000207819|hsa-mir-9-3|hsa-miR-9\*|jt:ENSG00000102038|SMARCA1  
ACGTCAAGA|ENSG00000208024|hsa-mir-199a-2|hsa-miR-199a|jt:ENSG00000108515|ENO3  
ACGTCTCCA|ENSG00000199135|hsa-mir-101-1|hsa-miR-101|jt:ENSG00000179151|EDC3  
ACGTGAAGA|ENSG00000199161|hsa-mir-126|hsa-miR-126|jt:ENSG00000172889|EGFL7  
ACGTGAAGA|ENSG00000199161|hsa-mir-126|hsa-miR-126|jt:ENSG00000159200|DSCR1  
ACGTGAGCC|ENSG00000207819|hsa-mir-9-3|hsa-miR-9|jt:ENSG00000155906|RMND1  
ACGTGAGGA|ENSG00000199135|hsa-mir-101-1|hsa-miR-101|jt:ENSG00000105321|CCDC9  
ACGTGAGGA|ENSG00000207585|hsa-mir-181d|hsa-miR-181d|jt:ENSG00000100307|CBX7  
ACGTGGAGA|ENSG00000207585|hsa-mir-181d|hsa-miR-181d|jt:ENSG00000131152|Q9H693\_HUMAN  
ACGTGGCAA|ENSG00000199149|hsa-mir-20a|hsa-miR-20a|jt:ENSG00000085274|MYNN  
ACGTGGCAA|ENSG00000207745|hsa-mir-17|hsa-miR-17-5p|jt:ENSG00000085274|MYNN  
ACGTGGGCT|ENSG00000199161|hsa-mir-126|hsa-miR-126|jt:ENSG00000172889|EGFL7  
ACGTGGGCT|ENSG00000199161|hsa-mir-126|hsa-miR-126\*|jt:ENSG00000172466|ZNF24  
ACGTTCCGG|ENSG00000207614|hsa-mir-193a|hsa-miR-193a|jt:ENSG00000105552|BCAT2  
ACGTTCCGG|ENSG00000207614|hsa-mir-193a|hsa-miR-193a|jt:ENSG00000162236|STX5  
ACGTTGCA|ENSG00000207585|hsa-mir-181d|hsa-miR-181d|jt:ENSG00000170100|Q96MU6-2  
ACTAAAGC|ENSG00000207955|hsa-mir-219-2|hsa-miR-219|jt:ENSG00000154451|GBP5  
ACTAAATCC|ENSG00000198981|hsa-mir-29a|hsa-miR-29a|jt:ENSG00000205107|NP\_001001679.1  
ACTAATCC|ENSG00000208017|hsa-mir-140|hsa-miR-140|jt:ENSG00000107165|TYRP1  
ACTACA|ENSG00000208017|hsa-mir-140|hsa-miR-140|jt:ENSG00000205609|Q9BW98\_HUMAN  
ACTACAGAT|ENSG00000207731|hsa-mir-506|hsa-miR-506|jt:ENSG00000114737|CISH  
ACTACGGA|ENSG00000199065|hsa-mir-101-2|hsa-miR-101|jt:ENSG00000114999|TTL  
ACTACGGA|ENSG00000207954|hsa-mir-138-1|hsa-miR-138|jt:ENSG00000157927|K1849\_HUMAN  
ACTACTTTC|ENSG00000199094|hsa-mir-30c-2|hsa-miR-30c|jt:ENSG00000121578|B4GALT4  
ACTACTTTC|ENSG00000199094|hsa-mir-30c-2|hsa-miR-30c|jt:ENSG00000170682|Q96NU5\_HUMAN  
ACTACTTTC|ENSG00000207827|hsa-mir-30a|hsa-miR-30a-5p|jt:ENSG00000121578|B4GALT4  
ACTACTTTC|ENSG00000207827|hsa-mir-30a|hsa-miR-30a-5p|jt:ENSG00000170682|Q96NU5\_HUMAN  
ACTAGTTAA|ENSG00000199102|hsa-mir-302c|hsa-miR-302c\*|jt:ENSG00000099968|ECL2L13  
ACTAGTTAA|ENSG00000207602|hsa-mir-106a|hsa-miR-106a|jt:ENSG00000147036|LANCL3  
ACTAGTTAA|ENSG00000207710|hsa-mir-20b|hsa-miR-20b|jt:ENSG00000147036|LANCL3  
ACTACAAC|ENSG00000199094|hsa-mir-30c-2|hsa-miR-30c|jt:ENSG00000129680|MAP7D3  
ACTACAAC|ENSG00000199094|hsa-mir-30c-2|hsa-miR-30c|jt:ENSG00000196460|Q6ZNB4\_HUMAN

ACTCACAAC | ENSG00000207827 | hsa-mir-30a | hsa-miR-30a-5p | jt:ENSG00000129680 | MAP7D3  
ACTCACAAC | ENSG00000207827 | hsa-mir-30a | hsa-miR-30a-5p | jt:ENSG00000196460 | Q6ZNB4\_HUMAN  
ACTCAGCT | ENSG00000207585 | hsa-mir-181d | hsa-miR-181d | jt:ENSG00000171766 | GATM  
ACTCAGGTA | ENSG00000207567 | hsa-mir-142 | hsa-miR-142-5p | jt:ENSG00000104823 | ECH1  
ACTCATTCG | ENSG00000207744 | hsa-mir-10b | hsa-miR-10b | jt:ENSG00000110484 | SCGB2A2  
ACTCCCATC | ENSG00000207618 | hsa-mir-144 | hsa-miR-144 | jt:ENSG00000142182 | DNMT3L  
ACTCCCATC | ENSG00000207618 | hsa-mir-144 | hsa-miR-144 | jt:ENSG00000072401 | UBE2D1  
ACTCCCATC | ENSG00000207794 | hsa-mir-451 | hsa-miR-451 | jt:ENSG00000080298 | RFX3  
ACTCCCGGA | ENSG00000199187 | hsa-mir-365-2 | hsa-miR-365 | jt:ENSG00000107937 | GTPBP4  
ACTCCCGGA | ENSG00000207614 | hsa-mir-193a | hsa-miR-193a | jt:ENSG00000012779 | ALOX5  
ACTCCCGGA | ENSG00000207614 | hsa-mir-193a | hsa-miR-193a | jt:ENSG00000198933 | TBKBP1  
ACTCGGCAG | ENSG00000207607 | hsa-mir-200a | hsa-miR-200a\* | jt:ENSG00000180957 | PITPNB  
ACTCGGCAG | ENSG00000207730 | hsa-mir-200b | hsa-miR-200b | jt:ENSG00000114735 | HEMK1  
ACTCGGTC | ENSG00000199085 | hsa-mir-148a | hsa-miR-148a | jt:ENSG00000185760 | KCNQ5  
ACTCGGTC | ENSG00000199085 | hsa-mir-148a | hsa-miR-148a | jt:ENSG00000204101 | Q6ZU91\_HUMAN  
ACTCTTACA | ENSG00000198975 | hsa-let-7a-2 | hsa-let-7a | jt:ENSG00000073792 | IGF2BP2  
ACTCTTACA | ENSG00000207971 | hsa-mir-125b-1 | hsa-miR-125b | jt:ENSG00000112195 | TREML2  
ACTCTTGTG | ENSG00000207744 | hsa-mir-10b | hsa-miR-10b | jt:ENSG00000072274 | TFR3  
ACTGCACAT | ENSG00000207705 | hsa-mir-129-1 | hsa-miR-129 | jt:ENSG00000178602 | OTOS  
ACTGACCAT | ENSG00000199020 | hsa-mir-381 | hsa-miR-381 | jt:ENSG00000108349 | CASC3  
ACTGACCAT | ENSG00000207749 | hsa-mir-299 | hsa-miR-299-5p | jt:ENSG00000182490 | TSSK2  
ACTGACCAT | ENSG00000207961 | hsa-mir-496 | hsa-miR-496 | jt:ENSG00000057252 | SOAT1  
ACTGACCAT | ENSG00000207961 | hsa-mir-496 | hsa-miR-496 | jt:ENSG00000067113 | PPAP2A  
ACTGACGTC | ENSG00000207630 | hsa-mir-7-3 | hsa-miR-7 | jt:ENSG00000118473 | SGIP1  
ACTGATTCA | ENSG00000198973 | hsa-mir-375 | hsa-miR-375 | jt:ENSG00000137975 | CLCA2  
ACTGCAACC | ENSG00000207708 | hsa-mir-141 | hsa-miR-141 | jt:ENSG00000126091 | ST3GAL3  
ACTGCACCA | ENSG00000199149 | hsa-mir-20a | hsa-miR-20a | jt:ENSG00000162302 | RPS6KA4  
ACTGCACCA | ENSG00000207610 | hsa-mir-19a | hsa-miR-19a | jt:ENSG00000093072 | CECR1  
ACTGCACCA | ENSG00000207610 | hsa-mir-19a | hsa-miR-19a | jt:ENSG00000105856 | HBP1  
ACTGCACCA | ENSG00000207745 | hsa-mir-17 | hsa-miR-17-5p | jt:ENSG00000100644 | HIF1A  
ACTGCAGCG | ENSG00000199161 | hsa-mir-126 | hsa-miR-126 | jt:ENSG00000172889 | EGFL7  
ACTGCATAA | ENSG00000199149 | hsa-mir-20a | hsa-miR-20a | jt:ENSG00000186487 | MYT1L  
ACTGCATAA | ENSG00000207745 | hsa-mir-17 | hsa-miR-17-5p | jt:ENSG00000186487 | MYT1L  
ACTGCGCG | ENSG00000202641 | hsa-mir-484 | hsa-miR-484 | jt:ENSG00000172554 | SNTG2  
ACTTAAACT | ENSG00000199023 | hsa-mir-339 | hsa-miR-339 | jt:ENSG00000163217 | BMP10  
ACTTACCCA | ENSG00000199149 | hsa-mir-20a | hsa-miR-20a | jt:ENSG00000100987 | VXS1  
ACTTACCCA | ENSG00000207745 | hsa-mir-17 | hsa-miR-17-5p | jt:ENSG00000100987 | VXS1  
ACTTACTCA | ENSG00000202569 | hsa-mir-146b | hsa-miR-146b | jt:ENSG00000180233 | ZNRF2  
ACTTAGCAA | ENSG00000198975 | hsa-let-7a-2 | hsa-let-7a | jt:ENSG00000133136 | GBG5\_HUMAN  
ACTTAGCAA | ENSG00000199149 | hsa-mir-20a | hsa-miR-20a | jt:ENSG00000160401 | C9orf117  
ACTTAGCAA | ENSG00000199149 | hsa-mir-20a | hsa-miR-20a | jt:ENSG00000183826 | BTBD9  
ACTTAGCAA | ENSG00000207610 | hsa-mir-19a | hsa-miR-19a | jt:ENSG00000117601 | SERPINC1  
ACTTAGCAA | ENSG00000207610 | hsa-mir-19a | hsa-miR-19a | jt:ENSG00000184068 | Q8N8F0\_HUMAN  
ACTTAGCAA | ENSG00000207745 | hsa-mir-17 | hsa-miR-17-5p | jt:ENSG00000183826 | BTBD9  
ACTTATAC | ENSG00000207581 | hsa-mir-199b | hsa-miR-199b | jt:ENSG0000019084 | TMEM97  
ACTTACCC | ENSG00000207863 | hsa-mir-125b-2 | hsa-miR-125b | jt:ENSG00000141867 | BRD4  
ACTTACCC | ENSG00000207863 | hsa-mir-125b-2 | hsa-miR-125b | jt:ENSG00000179361 | ARID3B  
ACTTCAGCC | ENSG00000199058 | hsa-mir-302b | hsa-miR-302b | jt:ENSG00000172053 | QARS  
ACTTCAGCC | ENSG00000199102 | hsa-mir-302c | hsa-miR-302c | jt:ENSG00000172053 | QARS  
ACTTCAGCC | ENSG00000199102 | hsa-mir-302c | hsa-miR-302c\* | jt:ENSG0000002933 | TMEM176A  
ACTTCAGCC | ENSG00000199102 | hsa-mir-302c | hsa-miR-302c\* | jt:ENSG00000161572 | LYZL6  
ACTTCAGCC | ENSG00000199145 | hsa-mir-302d | hsa-miR-302d | jt:ENSG00000172053 | QARS  
ACTTCAGCC | ENSG00000199169 | hsa-mir-367 | hsa-miR-367 | jt:ENSG00000146666 | Q96IP2\_HUMAN  
ACTTCGCCA | ENSG00000207614 | hsa-mir-193a | hsa-miR-193a | jt:ENSG00000166166 | C14orf172  
ACTTCGTC | ENSG00000207971 | hsa-mir-125b-1 | hsa-miR-125b | jt:ENSG00000170892 | TSEN34  
ACTTCGTC | ENSG00000207994 | hsa-mir-100 | hsa-miR-100 | jt:ENSG00000085721 | RRN3  
ACTTCGTC | ENSG00000207994 | hsa-mir-100 | hsa-miR-100 | jt:ENSG00000138041 | SMEK2  
ACTTCGTC | ENSG00000207994 | hsa-mir-100 | hsa-miR-100 | jt:ENSG00000164108 | Q9HAJ2\_HUMAN  
ACTTCGTC | ENSG00000207994 | hsa-mir-100 | hsa-miR-100 | jt:ENSG00000138041 | SMEK2  
ACTTCGTC | ENSG00000207994 | hsa-mir-100 | hsa-miR-100 | jt:ENSG00000164108 | Q9HAJ2\_HUMAN  
ACTTGAAC | ENSG00000207789 | hsa-mir-26a-2 | hsa-miR-26a | jt:ENSG00000198648 | STK39  
ACTTGAATC | ENSG00000199058 | hsa-mir-302b | hsa-miR-302b | jt:ENSG00000168000 | HNRPUL2  
ACTTGAATC | ENSG00000199058 | hsa-mir-302b | hsa-miR-302b | jt:ENSG00000173039 | RELB  
ACTTGAATC | ENSG00000199058 | hsa-mir-302b | hsa-miR-302b\* | jt:ENSG00000050393 | CCDC90A  
ACTTGAATC | ENSG00000199058 | hsa-mir-302b | hsa-miR-302b\* | jt:ENSG00000165861 | ZFYVE1  
ACTTGAATC | ENSG00000199102 | hsa-mir-302c | hsa-miR-302c | jt:ENSG00000168000 | HNRPUL2  
ACTTGAATC | ENSG00000199102 | hsa-mir-302c | hsa-miR-302c | jt:ENSG00000173039 | RELB  
ACTTGAATC | ENSG00000199145 | hsa-mir-302d | hsa-miR-302d | jt:ENSG00000168000 | HNRPUL2  
ACTTGAATC | ENSG00000199145 | hsa-mir-302d | hsa-miR-302d | jt:ENSG00000173039 | RELB  
ACTTGAATC | ENSG00000199169 | hsa-mir-367 | hsa-miR-367 | jt:ENSG00000124766 | SOX4  
ACTTCCCTC | ENSG00000211590 | hsa-mir-802 | hsa-miR-802 | jt:ENSG00000052126 | PLEKHA5  
ACTTGCATA | ENSG00000198975 | hsa-let-7a-2 | hsa-let-7a | jt:ENSG00000177058 | NP\_775785.1  
ACTTGGATC | ENSG00000199032 | hsa-mir-425 | hsa-miR-425-3p | jt:ENSG00000158488 | CD1E  
ACTTGGATC | ENSG00000199032 | hsa-mir-425 | hsa-miR-425-3p | jt:ENSG00000172867 | KRT2  
ACTTGTGCG | ENSG00000199085 | hsa-mir-148a | hsa-miR-148a | jt:ENSG00000173926 | MARCH3  
ACTTGTGCG | ENSG00000199161 | hsa-mir-126 | hsa-miR-126 | jt:ENSG00000172889 | EGFL7  
ACTTTTCCA | ENSG00000198973 | hsa-mir-375 | hsa-miR-375 | jt:ENSG00000204660 | NP\_001013740.1  
AGAAAACGG | ENSG00000208009 | hsa-mir-130a | hsa-miR-130a | jt:ENSG00000152256 | PDK1  
AGAAAACGG | ENSG00000208009 | hsa-mir-130a | hsa-miR-130a | jt:ENSG00000184371 | CSF1  
AGAAAACGG | ENSG00000199122 | hsa-mir-148b | hsa-miR-148b | jt:ENSG00000165588 | OTX2  
AGAACTAAT | ENSG00000207610 | hsa-mir-19a | hsa-miR-19a | jt:ENSG00000054965 | KIAA0280  
AGAACTAAT | ENSG00000207610 | hsa-mir-19a | hsa-miR-19a | jt:ENSG00000110092 | CNND1  
AGAACTGCG | ENSG00000207732 | hsa-mir-218-1 | hsa-miR-218 | jt:ENSG00000156574 | NODAL  
AGAACTGTC | ENSG00000207947 | hsa-mir-152 | hsa-miR-152 | jt:ENSG00000159082 | SYNJ1  
AGAAAGCAT | ENSG00000199122 | hsa-mir-148b | hsa-miR-148b | jt:ENSG00000118263 | KLF7  
AGAACTGCC | ENSG00000208024 | hsa-mir-199a-2 | hsa-miR-199a\* | jt:ENSG00000123178 | C13orf1  
AGAACTGCTC | ENSG00000207819 | hsa-mir-9-3 | hsa-miR-9 | jt:ENSG00000110881 | ACCN2  
AGAACTGCTC | ENSG00000207819 | hsa-mir-9-3 | hsa-miR-9 | jt:ENSG00000159184 | HOXB13  
AGAAATTTCA | ENSG00000199121 | hsa-mir-26b | hsa-miR-26b | jt:ENSG00000145819 | ARHGAP26  
AGCAATGG | ENSG00000207863 | hsa-mir-125b-2 | hsa-miR-125b | jt:ENSG00000135443 | KRT85  
AGCAATGG | ENSG00000207971 | hsa-mir-125b-1 | hsa-miR-125b | jt:ENSG00000135443 | KRT85  
AGACACCGG | ENSG00000198976 | hsa-mir-429 | hsa-miR-429 | jt:ENSG00000034677 | RNF19  
AGACACCGG | ENSG00000198976 | hsa-mir-429 | hsa-miR-429 | jt:ENSG00000156469 | MTERF1  
AGACACCGG | ENSG00000207730 | hsa-mir-200b | hsa-miR-200b | jt:ENSG00000034677 | RNF19  
AGACACCGG | ENSG00000207730 | hsa-mir-200b | hsa-miR-200b | jt:ENSG00000156469 | MTERF1  
AGACACCGG | ENSG00000207739 | hsa-mir-218-2 | hsa-miR-218 | jt:ENSG00000174775 | HRAS  
AGACAGAAC | ENSG00000207607 | hsa-mir-200a | hsa-miR-200a | jt:ENSG00000135472 | FAIM2  
AGACAGAAC | ENSG00000207607 | hsa-mir-200a | hsa-miR-200a | jt:ENSG00000125870 | SNRFB2  
AGACAGAAC | ENSG00000207607 | hsa-mir-200a | hsa-miR-200a | jt:ENSG00000163072 | NOSTRIN  
AGACAGAGC | ENSG00000207947 | hsa-mir-152 | hsa-miR-152 | jt:ENSG00000069956 | MAPK6  
AGACCGGAG | ENSG00000198973 | hsa-mir-375 | hsa-miR-375 | jt:ENSG00000112541 | PDE10A  
AGACCGGGG | ENSG00000207648 | hsa-mir-192 | hsa-miR-192 | jt:ENSG00000173548 | SH3PX3  
AGACCTTTG | ENSG00000199059 | hsa-mir-135b | hsa-miR-135b | jt:ENSG00000184774 | Q49AQ9\_HUMAN  
AGACGTGGG | ENSG00000199161 | hsa-mir-126 | hsa-miR-126 | jt:ENSG00000172889 | EGFL7  
AGACGTGGG | ENSG00000199161 | hsa-mir-126 | hsa-miR-126\* | jt:ENSG00000183596 | TIM16\_HUMAN

AGACGTGGG|ENSG00000199161|hsa-mir-126|hsa-miR-126\*|jt:ENSG00000205808|PPAPDC2  
AGACTGGAC|ENSG00000199036|hsa-mir-219-1|hsa-miR-219|jt:ENSG00000185614|C3orf54  
AGAGAAG|ENSG00000202641|hsa-mir-484|hsa-miR-484|jt:ENSG00000139800|ZIC5  
AGAGAG|ENSG00000207809|hsa-mir-139|hsa-miR-139|jt:ENSG00000159423|ALDH4A1  
AGAGATAAC|ENSG00000199058|hsa-mir-302b|hsa-miR-302b\*|jt:ENSG00000125977|EIF2S2  
AGAGATAGG|ENSG00000207710|hsa-mir-20b|hsa-miR-20b|jt:ENSG00000162949|CAPN13  
AGAGATCAC|ENSG00000199121|hsa-mir-26b|hsa-miR-26b|jt:ENSG00000157343|C6orf81  
AGAGATCCT|ENSG00000207939|hsa-mir-223|hsa-miR-223|jt:ENSG00000168569|NP\_001073970.1  
AGAGATCCT|ENSG00000207939|hsa-mir-223|hsa-miR-223|jt:ENSG00000198420|NP\_055534.1  
AGAGATTAC|ENSG00000199015|hsa-mir-377|hsa-miR-377|jt:ENSG00000115946|PNO1  
AGAGATTAC|ENSG00000199020|hsa-mir-381|hsa-miR-381|jt:ENSG00000085224|ATRX  
AGAGATTAC|ENSG00000199020|hsa-mir-381|hsa-miR-381|jt:ENSG00000151458|ANKRD50  
AGAGATTAC|ENSG00000199020|hsa-mir-381|hsa-miR-381|jt:ENSG00000198759|EGFL6  
AGAGATTAC|ENSG00000199069|hsa-mir-323|hsa-miR-323|jt:ENSG00000151458|ANKRD50  
AGAGATTAC|ENSG00000199092|hsa-mir-410|hsa-miR-410|jt:ENSG00000187180|LCE2C  
AGAGATTAC|ENSG00000207743|hsa-mir-495|hsa-miR-495|jt:ENSG00000144852|NRI12  
AGAGATTAC|ENSG00000207761|hsa-mir-329-1|hsa-miR-329|jt:ENSG00000158528|PPP1R9A  
AGAGATTAC|ENSG00000207961|hsa-mir-496|hsa-miR-496|jt:ENSG00000189157|Q6ZV65\_HUMAN  
AGAGCCAAT|ENSG00000207789|hsa-mir-26a-2|hsa-miR-26a|jt:ENSG00000111775|COX6A1  
AGAGGCCA|ENSG00000207948|hsa-mir-328|hsa-miR-328|jt:ENSG00000162728|KCNJ9  
AGAGGCCGA|ENSG00000207617|hsa-mir-24-1|hsa-miR-189|jt:ENSG00000188549|NP\_997263.1  
AGAGTGTGC|ENSG00000199085|hsa-mir-148a|hsa-miR-148a|jt:ENSG00000125084|WNT1  
AGAGTGTGC|ENSG00000199085|hsa-mir-148a|hsa-miR-148a|jt:ENSG00000171867|PRNP  
AGAGTTAAG|ENSG00000199058|hsa-mir-302b|hsa-miR-302b|jt:ENSG00000177954|RPS27  
AGAGTTAAG|ENSG00000199058|hsa-mir-302b|hsa-miR-302b\*|jt:ENSG00000139679|P2RY5  
AGAGTTAAG|ENSG00000199102|hsa-mir-302c|hsa-miR-302c|jt:ENSG00000177954|RPS27  
AGAGTTAAG|ENSG00000199145|hsa-mir-302d|hsa-miR-302d|jt:ENSG00000177954|RPS27  
AGATAAAGC|ENSG00000208009|hsa-mir-130a|hsa-miR-130a|jt:ENSG00000181751|C5orf30  
AGATAGGAG|ENSG00000199058|hsa-mir-302b|hsa-miR-302b\*|jt:ENSG00000197430|TMEM10  
AGATAGGAG|ENSG00000199158|hsa-mir-96|hsa-miR-96|jt:ENSG00000173598|NUDT4  
AGATAGGAG|ENSG00000207691|hsa-mir-183|hsa-miR-183|jt:ENSG00000173598|NUDT4  
AGATATCAA|ENSG00000207710|hsa-mir-20b|hsa-miR-20b|jt:ENSG00000198633|Q6PDB4\_HUMAN  
AGATCAGAC|ENSG00000207819|hsa-mir-9-3|hsa-miR-9|jt:ENSG00000173212|C1orf161  
AGATCGCCA|ENSG00000207819|hsa-mir-9-3|hsa-miR-9|jt:ENSG00000108604|SMARCD2  
AGATCTAGC|ENSG00000207819|hsa-mir-9-3|hsa-miR-9|jt:ENSG00000092531|SNAP23  
AGATCTCAC|ENSG00000207939|hsa-mir-223|hsa-miR-223|jt:ENSG00000101883|PEPP1\_HUMAN  
AGATCTCAC|ENSG00000207939|hsa-mir-223|hsa-miR-223|jt:ENSG00000105341|NP\_060505.1  
AGATCTCG|ENSG00000198974|hsa-mir-30e|hsa-miR-30e-5p|jt:ENSG00000185112|FAM43A  
AGATCTCG|ENSG00000207962|hsa-mir-30c-1|hsa-miR-30c|jt:ENSG00000185112|FAM43A  
AGATGGATG|ENSG00000207691|hsa-mir-183|hsa-miR-183|jt:ENSG0000006071|ABCC8  
AGATGGATG|ENSG00000207990|hsa-mir-182|hsa-miR-182|jt:ENSG00000135473|USP52  
AGATGGGGC|ENSG00000207777|hsa-mir-10a|hsa-miR-10a|jt:ENSG00000147082|CCNB3  
AGATGGTCA|ENSG00000207731|hsa-mir-506|hsa-miR-506|jt:ENSG00000152254|G6PC2  
AGATGGTGC|ENSG00000207752|hsa-mir-199a-1|hsa-miR-199a\*|jt:ENSG00000148948|LRRC4C  
AGATGTTCC|ENSG00000207581|hsa-mir-199b|hsa-miR-199b|jt:ENSG00000176986|SEC24C  
AGATTAAGG|ENSG00000208017|hsa-mir-140|hsa-miR-140|jt:ENSG00000154096|THY1  
AGATTCATC|ENSG00000207784|hsa-mir-542|hsa-miR-542-3p|jt:ENSG00000163618|CADPS  
AGATTCATC|ENSG00000207994|hsa-mir-100|hsa-miR-100|jt:ENSG00000185361|TNFAIP8L1  
AGATTGCCA|ENSG00000199058|hsa-mir-302b|hsa-miR-302b|jt:ENSG00000128604|IRF5  
AGATTGCCA|ENSG00000199102|hsa-mir-302c|hsa-miR-302c|jt:ENSG00000128604|IRF5  
AGATTGCCA|ENSG00000199145|hsa-mir-302d|hsa-miR-302d|jt:ENSG00000128604|IRF5  
AGATTGTGA|ENSG00000199149|hsa-mir-20a|hsa-miR-20a|jt:ENSG0000011454|RABGAP1  
AGATTGTGA|ENSG00000199149|hsa-mir-20a|hsa-miR-20a|jt:ENSG00000123411|IKZF4  
AGATTGTGA|ENSG00000207610|hsa-mir-19a|hsa-miR-19a|jt:ENSG0000011859|NEDD9  
AGATTGTGA|ENSG00000207745|hsa-mir-17|hsa-miR-17-5p|jt:ENSG0000011454|RABGAP1  
AGCAATCC|ENSG00000207610|hsa-mir-19a|hsa-miR-19a|jt:ENSG00000095739|BAMBI  
AGCAATCC|ENSG00000207610|hsa-mir-19a|hsa-miR-19a|jt:ENSG00000183929|DUSP5P  
AGCAAGTAT|ENSG00000207745|hsa-mir-17|hsa-miR-17-5p|jt:ENSG00000164597|COG5  
AGCCAAAG|ENSG00000199161|hsa-mir-126|hsa-miR-126|jt:ENSG00000172889|EGFL7  
AGCCACCG|ENSG00000207960|hsa-mir-153-2|hsa-miR-153|jt:ENSG00000113763|UNC5A  
AGCAGGTA|ENSG00000207939|hsa-mir-223|hsa-miR-223|jt:ENSG00000133116|KL  
AGCAGGTAG|ENSG00000207596|hsa-mir-194-2|hsa-miR-194|jt:ENSG00000032219|ARID4A  
AGCAGGTAG|ENSG00000207648|hsa-mir-192|hsa-miR-192|jt:ENSG00000137261|KIAA0319  
AGCAGTTAA|ENSG00000199072|hsa-let-7f-1|hsa-let-7f|jt:ENSG00000159217|IGF2BP1  
AGCAGTTAA|ENSG00000199133|hsa-let-7d|hsa-let-7d|jt:ENSG00000159217|IGF2BP1  
AGCAGTTAA|ENSG00000199165|hsa-let-7a-1|hsa-let-7a|jt:ENSG00000159217|IGF2BP1  
AGCATGCC|ENSG00000202641|hsa-mir-484|hsa-miR-484|jt:ENSG00000204084|INPP5B  
AGCATAAT|ENSG00000199058|hsa-mir-302b|hsa-miR-302b|jt:ENSG00000134375|TIMM17A  
AGCATAAT|ENSG00000199058|hsa-mir-302b|hsa-miR-302b\*|jt:ENSG00000075413|MARK3  
AGCATAAT|ENSG00000199058|hsa-mir-302b|hsa-miR-302b\*|jt:ENSG00000205609|Q9B98\_HUMAN  
AGCATAAT|ENSG00000199102|hsa-mir-302c|hsa-miR-302c|jt:ENSG00000134375|TIMM17A  
AGCATAAT|ENSG00000199145|hsa-mir-302d|hsa-miR-302d|jt:ENSG00000134375|TIMM17A  
AGCCAACAT|ENSG00000207954|hsa-mir-138-1|hsa-miR-138|jt:ENSG00000113263|ITK  
AGCCAACAT|ENSG00000207954|hsa-mir-138-1|hsa-miR-138|jt:ENSG00000120217|CD274  
AGCCAATTA|ENSG00000199130|hsa-mir-365-1|hsa-miR-365|jt:ENSG00000131174|COX7B  
AGCCAGTCA|ENSG00000207731|hsa-mir-506|hsa-miR-506|jt:ENSG0000011304|PTBP1  
AGCCATTGG|ENSG00000199149|hsa-mir-20a|hsa-miR-20a|jt:ENSG00000099985|OSM  
AGCCATTGG|ENSG00000207610|hsa-mir-19a|hsa-miR-19a|jt:ENSG00000130305|NSUN5  
AGCCATTGG|ENSG00000207610|hsa-mir-19a|hsa-miR-19a|jt:ENSG00000183519|NSUN5B  
AGCCATTGG|ENSG00000207610|hsa-mir-19a|hsa-miR-19a|jt:ENSG00000185112|FAM43A  
AGCCATTGG|ENSG00000207745|hsa-mir-17|hsa-miR-17-5p|jt:ENSG00000001617|SEMA3F  
AGCCACCG|ENSG00000207960|hsa-mir-153-2|hsa-miR-153|jt:ENSG00000198252|STYX  
AGCCATTTC|ENSG00000207708|hsa-mir-141|hsa-miR-141|jt:ENSG00000148704|VAX1  
AGCCATTTC|ENSG00000207708|hsa-mir-141|hsa-miR-141|jt:ENSG00000196110|ZNF699  
AGCCCTTA|ENSG00000198973|hsa-mir-375|hsa-miR-375|jt:ENSG00000196263|ZNF471  
AGCCCTTG|ENSG00000207827|hsa-mir-30a|hsa-miR-30a-3p|jt:ENSG00000181472|ZBTB2  
AGCCCGCC|ENSG00000207708|hsa-mir-141|hsa-miR-141|jt:ENSG00000172301|C17orf79  
AGCCCGG|ENSG00000198973|hsa-mir-375|hsa-miR-375|jt:ENSG00000189079|ARID2  
AGCCGATGA|ENSG00000199036|hsa-mir-219-1|hsa-miR-219|jt:ENSG00000133985|TTC9  
AGCCGC|ENSG00000207953|hsa-mir-212|hsa-miR-212|jt:ENSG00000145782|ATG12  
AGCCGC|ENSG00000207953|hsa-mir-212|hsa-miR-212|jt:ENSG00000155858|LSM11  
AGCCGCCAA|ENSG00000207568|hsa-mir-203|hsa-miR-203|jt:ENSG00000075651|PLD1  
AGCCCGG|ENSG00000207953|hsa-mir-212|hsa-miR-212|jt:ENSG00000145782|ATG12  
AGCCCGG|ENSG00000207953|hsa-mir-212|hsa-miR-212|jt:ENSG00000155858|LSM11  
AGCCCGG|ENSG00000199065|hsa-mir-101-2|hsa-miR-101|jt:ENSG00000064651|SLC12A2  
AGCCCGG|ENSG00000199065|hsa-mir-101-2|hsa-miR-101|jt:ENSG00000166546|Q3B7T3\_HUMAN  
AGCCCG|ENSG00000207953|hsa-mir-212|hsa-miR-212|jt:ENSG00000188290|HES4  
AGCCTAAT|ENSG00000207618|hsa-mir-144|hsa-miR-144|jt:ENSG00000091317|CMTM6  
AGCCTATAA|ENSG00000199177|hsa-mir-31|hsa-miR-31|jt:ENSG00000170624|SGCD  
AGCCTTAT|ENSG00000199082|hsa-mir-342|hsa-miR-342|jt:ENSG00000147224|PRPS1  
AGCAATTG|ENSG00000207751|hsa-mir-130b|hsa-miR-130b|jt:ENSG00000205524|Q68D70\_HUMAN  
AGCGACCTC|ENSG00000199077|hsa-mir-129-2|hsa-miR-129|jt:ENSG00000184983|NDUFA6  
AGCGAGCC|ENSG00000207614|hsa-mir-193a|hsa-miR-193a|jt:ENSG00000155754|ALS2CR11  
AGCGAGCC|ENSG00000207614|hsa-mir-193a|hsa-miR-193a|jt:ENSG00000172771|C3orf25  
AGCGAGCC|ENSG00000207614|hsa-mir-193a|hsa-miR-193a|jt:ENSG00000186910|SERPINA11

AGCGATTG|ENSG00000199122|hsa-mir-148b|hsa-miR-148b jt:ENSG00000126903|SLC10A3  
AGCGATTG|ENSG00000199122|hsa-mir-148b|hsa-miR-148b jt:ENSG00000182220|ATP6AP2  
AGCGCA|ENSG00000207949|hsa-mir-214|hsa-miR-214 jt:ENSG00000161682|Q8NOU1\_HUMAN  
AGCGCA|ENSG00000208024|hsa-mir-199a-2|hsa-miR-199a jt:ENSG00000105699|LSR  
AGCGCAGC|ENSG00000207792|hsa-mir-151|hsa-miR-151jt:ENSG00000173473|SMARCC1  
AGCGCACT|ENSG00000199177|hsa-mir-31|hsa-miR-31 jt:ENSG00000101337|TM9SF  
AGCGCACTG|ENSG00000207819|hsa-mir-9-3|hsa-miR-9\* jt:ENSG00000130414|NDUFA10  
AGCGCC|ENSG00000199122|hsa-mir-148b|hsa-miR-148b jt:ENSG00000140090|SLC24A4  
AGCGCC|ENSG00000199122|hsa-mir-148b|hsa-miR-148b jt:ENSG00000134851|TMEM165  
AGCGCC|ENSG00000207955|hsa-mir-219-2|hsa-miR-219 jt:ENSG00000140848|CPNE2  
AGCGCG|ENSG00000199032|hsa-mir-425|hsa-miR-425-3pjt:ENSG00000138678|NP\_116106.2  
AGCGCG|ENSG00000199032|hsa-mir-425|hsa-miR-425-3pjt:ENSG00000163322|CCDC98  
AGCGCGTA|ENSG00000199121|hsa-mir-26b|hsa-miR-26b jt:ENSG00000128714|HOXD13  
AGCGCTCAC|ENSG00000199130|hsa-mir-365-1|hsa-miR-365 jt:ENSG00000059691|PET112L  
AGCGCTCAC|ENSG00000207819|hsa-mir-9-3|hsa-miR-9\* jt:ENSG00000166619|BLCAP  
AGCGCTCCA|ENSG00000207585|hsa-mir-181d|hsa-miR-181d jt:ENSG00000119599|WDR21A  
AGCGCTGTC|ENSG00000207614|hsa-mir-193a|hsa-miR-193a jt:ENSG00000140795|MYLK3\_HUMAN  
AGCGCTGTC|ENSG00000207614|hsa-mir-193a|hsa-miR-193a jt:ENSG00000172771|C3orf25  
AGCGGCACA|ENSG00000207949|hsa-mir-214|hsa-miR-214jt:ENSG00000082556|OPRK1  
AGCGGCGTG|ENSG00000199065|hsa-mir-101-2|hsa-miR-101 jt:ENSG00000128594|LRRC4  
AGCGGCGTG|ENSG00000199065|hsa-mir-101-2|hsa-miR-101 jt:ENSG00000130294|KIF1A  
AGCGGCGTG|ENSG00000199065|hsa-mir-101-2|hsa-miR-101 jt:ENSG00000138376|BARD1  
AGCGTGCGG|ENSG00000207614|hsa-mir-193a|hsa-miR-193a jt:ENSG00000079482|OPHN1  
AGCTAATAA|ENSG00000199153|hsa-mir-30d|hsa-miR-30djt:ENSG00000033867|SLC4A7  
AGCTAATAA|ENSG00000207582|hsa-mir-30b|hsa-miR-30bjt:ENSG00000033867|SLC4A7  
AGCTACTGG|ENSG00000198974|hsa-mir-30e|hsa-miR-30e-3p jt:ENSG00000166317|SYNPO2L  
AGCTACTGG|ENSG00000199149|hsa-mir-20a|hsa-miR-20ajt:ENSG00000136935|GOLGA1  
AGCTACTGG|ENSG00000199149|hsa-mir-20a|hsa-miR-20ajt:ENSG00000161800|RACGAP1  
AGCTACTGG|ENSG00000199149|hsa-mir-20a|hsa-miR-20ajt:ENSG00000168078|PBK  
AGCTACTGG|ENSG00000207745|hsa-mir-17|hsa-miR-17-5p jt:ENSG00000161800|RACGAP1  
AGCTACTGG|ENSG00000207745|hsa-mir-17|hsa-miR-17-5p jt:ENSG00000168078|PBK  
AGCTATTTA|ENSG00000199032|hsa-mir-425|hsa-miR-425-3p jt:ENSG00000132522|GPS2  
AGCTCACAC|ENSG00000199012|hsa-mir-412|hsa-miR-412jt:ENSG00000165699|TSC1  
AGCTCACAC|ENSG00000199020|hsa-mir-381|hsa-miR-381jt:ENSG00000168481|LGI3  
AGCTCACAC|ENSG00000199025|hsa-mir-369|hsa-miR-369-3p jt:ENSG00000109775|C4orf20  
AGCTCACAC|ENSG00000199025|hsa-mir-369|hsa-miR-369-5p jt:ENSG00000178589|Q9BT26\_HUMAN  
AGCTCACAC|ENSG00000199092|hsa-mir-410|hsa-miR-410jt:ENSG00000110436|SLC1A2  
AGCTCACAC|ENSG00000199092|hsa-mir-410|hsa-miR-410jt:ENSG00000178163|NP\_444270.2  
AGCTCACAC|ENSG00000199092|hsa-mir-410|hsa-miR-410jt:ENSG00000196843|ARID5A  
AGCTCACAC|ENSG00000207743|hsa-mir-495|hsa-miR-495jt:ENSG00000163125|KIAA0460  
AGCTCACAC|ENSG00000207743|hsa-mir-495|hsa-miR-495jt:ENSG00000121351|IAPP  
AGCTCACAC|ENSG00000207749|hsa-mir-299|hsa-miR-299-5p jt:ENSG00000149021|SCGB1A1  
AGCTCACAC|ENSG00000207749|hsa-mir-299|hsa-miR-299-5p jt:ENSG00000205442|C9orf134  
AGCTCACAC|ENSG00000207761|hsa-mir-329-1|hsa-miR-329 jt:ENSG00000206131|Q6ZS21\_HUMAN  
AGCTCATTTG|ENSG00000199077|hsa-mir-129-2|hsa-miR-129 jt:ENSG00000182108|MYLE\_HUMAN  
AGCTCGGGT|ENSG00000199094|hsa-mir-30c-2|hsa-miR-30c jt:ENSG00000150594|ADRA2A  
AGCTCGGGT|ENSG00000207827|hsa-mir-30a|hsa-miR-30a-5p jt:ENSG00000150594|ADRA2A  
AGCTGACC|ENSG00000207751|hsa-mir-130b|hsa-miR-130b jt:ENSG00000147642|SYBU\_HUMAN  
AGCTGATTC|ENSG00000207784|hsa-mir-542|hsa-miR-542-3p jt:ENSG00000111729|CLEC4A  
AGCTGCCTA|ENSG00000199158|hsa-mir-96|hsa-miR-96 jt:ENSG00000155886|SLC24A2  
AGCTGTTGA|ENSG00000207604|hsa-mir-206|hsa-miR-206jt:ENSG00000198417|MT1F  
AGCTGTTGA|ENSG00000207604|hsa-mir-206|hsa-miR-206jt:ENSG00000205358|MT1H  
AGCTTGTC|ENSG00000207638|hsa-mir-99a|hsa-miR-99ajt:ENSG00000169174|PCSK9  
AGCTTGTC|ENSG00000207863|hsa-mir-125b-2|hsa-miR-125b jt:ENSG00000184185|KCNJ12  
AGCTTTGCG|ENSG00000198981|hsa-mir-29a|hsa-miR-29ajt:ENSG00000113140|SPARC  
AGGAAGA|ENSG00000207819|hsa-mir-9-3|hsa-miR-9 jt:ENSG00000138792|ENPEP  
AGGAAGA|ENSG00000207819|hsa-mir-9-3|hsa-miR-9\* jt:ENSG00000203943|SAMD13  
AGGAAGA|ENSG00000207933|hsa-mir-9-1|hsa-miR-9 jt:ENSG00000138792|ENPEP  
AGGAAGA|ENSG00000207933|hsa-mir-9-1|hsa-miR-9\* jt:ENSG00000203943|SAMD13  
AGGAATCAC|ENSG00000207585|hsa-mir-181d|hsa-miR-181d jt:ENSG00000133636|NTS  
AGGACACAA|ENSG00000207635|hsa-mir-499|hsa-miR-499jt:ENSG00000143768|LEFTY2  
AGGACTTTA|ENSG00000194717|hsa-mir-494|hsa-miR-494jt:ENSG00000135596|MICAL1  
AGGACTTTA|ENSG00000199012|hsa-mir-412|hsa-miR-412jt:ENSG00000174564|IL20RB  
AGGACTTTA|ENSG00000199020|hsa-mir-381|hsa-miR-381jt:ENSG00000162783|IER5  
AGGACTTTA|ENSG00000199025|hsa-mir-369|hsa-miR-369-3p jt:ENSG00000162980|ARL5A  
AGGACTTTA|ENSG00000199025|hsa-mir-369|hsa-miR-369-5p jt:ENSG00000122417|ODF2L  
AGGACTTTA|ENSG00000199069|hsa-mir-323|hsa-miR-323jt:ENSG00000198799|LRIG2  
AGGACTTTA|ENSG00000199092|hsa-mir-410|hsa-miR-410jt:ENSG00000206528|Q6ZSMO\_HUMAN  
AGGACTTTA|ENSG00000199107|hsa-mir-409|hsa-miR-409-5p jt:ENSG00000167780|SOAT2  
AGGACTTTA|ENSG00000207743|hsa-mir-495|hsa-miR-495jt:ENSG00000164741|DLCL1  
AGGACTTTA|ENSG00000207961|hsa-mir-496|hsa-miR-496jt:ENSG00000206528|Q6ZSMO\_HUMAN  
AGGAGC|ENSG00000207990|hsa-mir-182|hsa-miR-182 jt:ENSG00000145545|SRD5A1  
AGGAGCGAA|ENSG00000207955|hsa-mir-219-2|hsa-miR-219 jt:ENSG00000074054|CLASP1  
AGGAGCGAA|ENSG00000207955|hsa-mir-219-2|hsa-miR-219 jt:ENSG00000173457|PPP1R14B  
AGGAGCGTA|ENSG00000207550|hsa-mir-99b|hsa-miR-99bjt:ENSG00000153147|SMARCA5  
AGGATGACA|ENSG00000198986|hsa-let-7a-3|hsa-let-7ajt:ENSG00000162650|ATXN7L2  
AGGATGACA|ENSG00000207875|hsa-let-7b|hsa-let-7b jt:ENSG00000162650|ATXN7L2  
AGGATGACT|ENSG00000199077|hsa-mir-129-2|hsa-miR-129 jt:ENSG00000163781|TOPBP1  
AGGATGCCA|ENSG00000207731|hsa-mir-506|hsa-miR-506jt:ENSG00000116574|RHOV  
AGGATGCCA|ENSG00000207731|hsa-mir-506|hsa-miR-506jt:ENSG00000126952|NXF5  
AGGATGCCA|ENSG00000199085|hsa-mir-148a|hsa-miR-148a jt:ENSG00000180537|RNFL182  
AGGATGCCA|ENSG00000199085|hsa-mir-148a|hsa-miR-148a jt:ENSG00000134851|TMEM165  
AGGATGCCA|ENSG00000199085|hsa-mir-148a|hsa-miR-148a jt:ENSG00000165588|OTX2  
AGGATTTAT|ENSG00000199024|hsa-mir-103-2|hsa-miR-103 jt:ENSG00000138685|FGF2  
AGGATTTCC|ENSG00000207752|hsa-mir-199a-1|hsa-miR-199a\* jt:ENSG0000013561|RNFL14  
AGGCAATAT|ENSG00000199153|hsa-mir-30d|hsa-miR-30djt:ENSG00000198301|SDAD1  
AGGCAATAT|ENSG00000199153|hsa-mir-30d|hsa-miR-30djt:ENSG00000198511|Q8N9A9\_HUMAN  
AGGCAATAT|ENSG00000207582|hsa-mir-30b|hsa-miR-30bjt:ENSG00000198301|SDAD1  
AGGCAATAT|ENSG00000207582|hsa-mir-30b|hsa-miR-30bjt:ENSG00000198511|Q8N9A9\_HUMAN  
AGGCAAGTA|ENSG00000207568|hsa-mir-203|hsa-miR-203jt:ENSG00000132932|ATP8A2  
AGGCATGTG|ENSG00000199015|hsa-mir-377|hsa-miR-377jt:ENSG00000131188|PRR7  
AGGCATGTG|ENSG00000199020|hsa-mir-381|hsa-miR-381jt:ENSG00000156650|MYST4  
AGGCATGTG|ENSG00000199025|hsa-mir-369|hsa-miR-369-5p jt:ENSG00000134954|ETS1  
AGGCATGTG|ENSG00000199025|hsa-mir-369|hsa-miR-369-5p jt:ENSG00000162585|C1orf86  
AGGCATGTG|ENSG00000199025|hsa-mir-369|hsa-miR-369-5p jt:ENSG00000188234|XR\_016668.1  
AGGCATGTG|ENSG00000199092|hsa-mir-410|hsa-miR-410jt:ENSG00000178966|RMI1  
AGGCATGTG|ENSG00000207754|hsa-mir-487b|hsa-miR-487b jt:ENSG00000156650|MYST4  
AGGCATGTG|ENSG00000207961|hsa-mir-496|hsa-miR-496jt:ENSG00000204758|Q6ZUG4\_HUMAN  
AGGCCAACT|ENSG00000199024|hsa-mir-103-2|hsa-miR-103 jt:ENSG00000154359|LONRF1  
AGGCCAACT|ENSG00000199122|hsa-mir-148b|hsa-miR-148b jt:ENSG00000124357|NAGK  
AGGCCAGAT|ENSG00000208024|hsa-mir-199a-2|hsa-miR-199a jt:ENSG00000173083|HPSE  
AGGCCATTG|ENSG00000207819|hsa-mir-9-3|hsa-miR-9 jt:ENSG00000196176|HIST1H4A  
AGGCCATTG|ENSG00000207819|hsa-mir-9-3|hsa-miR-9\* jt:ENSG00000049130|KITLG  
AGGCCGTTG|ENSG00000199065|hsa-mir-101-2|hsa-miR-101 jt:ENSG00000104133|NP\_079413.3  
AGCGCACC|ENSG00000207953|hsa-mir-212|hsa-miR-212jt:ENSG00000122687|FTSJ2

AGGCGC|ENSG00000207698|hsa-mir-32|hsa-miR-32 jt:ENSG00000112893|MAN2A1  
AGGCCACC|ENSG00000198972|hsa-let-7e|hsa-let-7e jt:ENSG00000091073|DTX2  
AGGCCGAC|ENSG00000199036|hsa-mir-219-1|hsa-miR-219 jt:ENSG00000162769|FLVC1\_HUMAN  
AGGCCGAC|ENSG00000207698|hsa-mir-32|hsa-miR-32 jt:ENSG00000063322|IXL  
AGGCCGTA|ENSG00000207933|hsa-mir-9-1|hsa-miR-9 jt:ENSG00000065911|MTHFD2  
AGGCCGTC|ENSG00000198974|hsa-mir-30e|hsa-miR-30e-5p jt:ENSG00000196937|FAM3C  
AGGCCGTC|ENSG00000207744|hsa-mir-10b|hsa-miR-10b jt:ENSG00000146802|TMEM168  
AGGCCGTC|ENSG00000207962|hsa-mir-30c-1|hsa-miR-30c jt:ENSG00000196937|FAM3C  
AGGCCG|ENSG00000207630|hsa-mir-7-3|hsa-miR-7 jt:ENSG00000185591|SP1  
AGGCCGCAA|ENSG00000208009|hsa-mir-130a|hsa-miR-130a jt:ENSG00000156642|NPTN  
AGGCTAAGG|ENSG00000207617|hsa-mir-24-1|hsa-miR-189 jt:ENSG00000144596|GRIP2  
AGGCTTCTA|ENSG00000207730|hsa-mir-200b|hsa-miR-200b jt:ENSG00000105122|NP\_075055.1  
AGGCTTCTA|ENSG00000207730|hsa-mir-200b|hsa-miR-200b jt:ENSG00000115963|RND3  
AGGCTTCTA|ENSG00000207808|hsa-mir-27a|hsa-miR-27a jt:ENSG00000167723|TRPV3  
AGGCTTCTA|ENSG00000207980|hsa-mir-23a|hsa-miR-23a jt:ENSG00000128272|ATF4  
AGGCTTCTA|ENSG00000209707|hsa-mir-24-2|hsa-miR-24 jt:ENSG00000103740|ACSBG1  
AGGGAGATC|ENSG00000207751|hsa-mir-130b|hsa-miR-130b jt:ENSG00000092295|TGM1  
AGGGAGC|ENSG00000207547|hsa-mir-25|hsa-miR-25 jt:ENSG00000119922|IFIT2  
AGGGCATTG|ENSG00000207585|hsa-mir-181d|hsa-miR-181d jt:ENSG00000131152|Q9H693\_HUMAN  
AGGGCGG|ENSG00000207751|hsa-mir-130b|hsa-miR-130b jt:ENSG00000181751|C5orf30  
AGGGGATTG|ENSG00000207630|hsa-mir-7-3|hsa-miR-7 jt:ENSG00000106003|LFNG  
AGGGGATTG|ENSG00000207630|hsa-mir-7-3|hsa-miR-7 jt:ENSG00000119865|C2orf32  
AGGGGCG|ENSG00000202644|hsa-mir-484|hsa-miR-484 jt:ENSG00000100711|ZFYVE21  
AGGGGCG|ENSG00000202644|hsa-mir-484|hsa-miR-484 jt:ENSG00000127334|DYRK2  
AGGGGCG|ENSG00000202644|hsa-mir-484|hsa-miR-484 jt:ENSG00000175093|SPSB4  
AGGGGCG|ENSG00000202644|hsa-mir-484|hsa-miR-484 jt:ENSG00000139641|FAM62A  
AGGGGCG|ENSG00000202644|hsa-mir-484|hsa-miR-484 jt:ENSG00000100711|ZFYVE21  
AGGGGCGG|ENSG00000202644|hsa-mir-484|hsa-miR-484 jt:ENSG00000105066|FIZ1  
AGGGG|ENSG00000199036|hsa-mir-219-1|hsa-miR-219 jt:ENSG00000018625|ATP1A2  
AGGGGCG|ENSG00000198974|hsa-mir-30e|hsa-miR-30e-5p jt:ENSG00000058600|POLR3E  
AGGGGCG|ENSG00000207962|hsa-mir-30c-1|hsa-miR-30c jt:ENSG00000058600|POLR3E  
AGGGGTG|ENSG00000199036|hsa-mir-219-1|hsa-miR-219 jt:ENSG00000173457|PPP1R14B  
AGGGTTAA|ENSG00000207708|hsa-mir-141|hsa-miR-141 jt:ENSG00000103647|CORO2B  
AGGGTAATA|ENSG00000199153|hsa-mir-30d|hsa-miR-30d jt:ENSG00000156735|BAG4  
AGGGTAATA|ENSG00000207582|hsa-mir-30b|hsa-miR-30b jt:ENSG00000156735|BAG4  
AGGGTCTCA|ENSG00000199024|hsa-mir-103-2|hsa-miR-103 jt:ENSG00000160767|Clorf2  
AGGGTTAAG|ENSG00000207618|hsa-mir-144|hsa-miR-144 jt:ENSG00000198718|KIAA0423  
AGGTAACAA|ENSG00000198974|hsa-mir-30e|hsa-miR-30e-3p jt:ENSG00000166317|SYNPO2L  
AGGTAACAA|ENSG00000198974|hsa-mir-30e|hsa-miR-30e-5p jt:ENSG00000198511|Q8N9A9\_HUMAN  
AGGTAACAA|ENSG00000207725|hsa-mir-222|hsa-miR-222 jt:ENSG00000008438|PGLYRP1  
AGGTAACAA|ENSG00000207795|hsa-mir-155|hsa-miR-155 jt:ENSG00000113597|NP\_079217.1  
AGGTAACAA|ENSG00000207870|hsa-mir-221|hsa-miR-221 jt:ENSG00000008438|PGLYRP1  
AGGTAACAA|ENSG00000207962|hsa-mir-30c-1|hsa-miR-30c jt:ENSG00000198511|Q8N9A9\_HUMAN  
AGGTAAGTG|ENSG00000207618|hsa-mir-144|hsa-miR-144 jt:ENSG00000169220|RGS14  
AGGTAATGA|ENSG00000209707|hsa-mir-24-2|hsa-miR-24 jt:ENSG00000082482|CKNC2  
AGGTAATGA|ENSG00000209707|hsa-mir-24-2|hsa-miR-24 jt:ENSG00000138641|HERC3  
AGGTAATGA|ENSG00000209707|hsa-mir-24-2|hsa-miR-24 jt:ENSG00000148965|SAA4  
AGGTACGG|ENSG00000207568|hsa-mir-203|hsa-miR-203 jt:ENSG00000162702|ZNF281  
AGGTACGG|ENSG00000198976|hsa-mir-429|hsa-miR-429 jt:ENSG00000127947|PTPN12  
AGGTACGG|ENSG00000207730|hsa-mir-200b|hsa-miR-200b jt:ENSG00000127947|PTPN12  
AGGTACCG|ENSG00000208017|hsa-mir-140|hsa-miR-140 jt:ENSG00000156925|ZIC3  
AGGTAGTC|ENSG00000207572|hsa-mir-363|hsa-miR-363 jt:ENSG00000197147|LRRC8B  
AGGTAGTC|ENSG00000207572|hsa-mir-363|hsa-miR-363 jt:ENSG00000128641|MYO1B  
AGGTAGTC|ENSG00000207710|hsa-mir-20b|hsa-miR-20b jt:ENSG00000135801|TAF5L  
AGGTGGACT|ENSG00000207955|hsa-mir-219-2|hsa-miR-219 jt:ENSG00000129744|ART1  
AGGTGCTC|ENSG00000199161|hsa-mir-126|hsa-miR-126 jt:ENSG00000172889|EGFL7  
AGGTGCTC|ENSG00000199161|hsa-mir-126|hsa-miR-126\* jt:ENSG00000105705|SF4  
AGGTGCTC|ENSG00000207947|hsa-mir-152|hsa-miR-152 jt:ENSG00000135374|ELF5  
AGGTGCTC|ENSG00000207947|hsa-mir-152|hsa-miR-152 jt:ENSG00000205524|Q68D70\_HUMAN  
AGGTGTGTC|ENSG00000199059|hsa-mir-135b|hsa-miR-135b jt:ENSG00000073792|IGF2BP2  
AGGTGTGTC|ENSG00000199059|hsa-mir-135b|hsa-miR-135b jt:ENSG00000198959|TGM2  
AGTAAGGAG|ENSG00000207789|hsa-mir-26a-2|hsa-miR-26a-2 jt:ENSG00000115170|ACVR1  
AGTACACC|ENSG00000207567|hsa-mir-142|hsa-miR-142-3p jt:ENSG00000154529|CNTNAP3B  
AGTACCAAT|ENSG00000207955|hsa-mir-219-2|hsa-miR-219 jt:ENSG00000149742|SLC22A9  
AGTAGCTGG|ENSG00000207607|hsa-mir-200a|hsa-miR-200a jt:ENSG00000169184|NM\_002430.2  
AGTAGGAAG|ENSG00000199080|hsa-mir-133b|hsa-miR-133b jt:ENSG00000163568|AIM2  
AGTAGGACA|ENSG00000199065|hsa-mir-101-2|hsa-miR-101 jt:ENSG00000136928|GABBR2  
AGTCAGCAC|ENSG00000207865|hsa-mir-34a|hsa-miR-34a jt:ENSG00000122783|C7orf49  
AGTCATGAG|ENSG00000207933|hsa-mir-9-1|hsa-miR-9 jt:ENSG00000141048|MYH4  
AGTCATGCG|ENSG00000207863|hsa-mir-125b-2|hsa-miR-125b jt:ENSG00000089558|KCNH4  
AGTCATTCC|ENSG00000198974|hsa-mir-30e|hsa-miR-30e-3p jt:ENSG00000175155|YPEL2  
AGTCATTCC|ENSG00000198974|hsa-mir-30e|hsa-miR-30e-5p jt:ENSG00000175155|YPEL2  
AGTCATTCC|ENSG00000207962|hsa-mir-30c-1|hsa-miR-30c jt:ENSG00000175155|YPEL2  
AGTCATTGG|ENSG00000199072|hsa-let-7f-1|hsa-let-7f jt:ENSG00000160094|ZNF362  
AGTCATTGG|ENSG00000199133|hsa-let-7d|hsa-let-7d jt:ENSG00000160094|ZNF362  
AGTCATTGG|ENSG00000199165|hsa-let-7a-1|hsa-let-7a jt:ENSG00000160094|ZNF362  
AGTCCACAG|ENSG00000199066|hsa-mir-330|hsa-miR-330 jt:ENSG00000107331|ABCA2  
AGTCCAAA|ENSG00000199023|hsa-mir-339|hsa-miR-339 jt:ENSG00000136451|VEZF1  
AGTCCGAG|ENSG00000207623|hsa-mir-205|hsa-miR-205 jt:ENSG00000189325|NP\_001010903.2  
AGTCTGAG|ENSG00000207698|hsa-mir-32|hsa-miR-32 jt:ENSG00000196387|ZNF140  
AGTCTGTA|ENSG00000199122|hsa-mir-148b|hsa-miR-148b jt:ENSG00000145860|RNF145  
AGTCTGAAC|ENSG00000199149|hsa-mir-20a|hsa-miR-20a jt:ENSG00000085274|MYNN  
AGTCTGAAC|ENSG00000207610|hsa-mir-19a|hsa-miR-19a jt:ENSG00000179036|VAMP2  
AGTCTGAAC|ENSG00000207610|hsa-mir-19a|hsa-miR-19a jt:ENSG0000015171|ZMYND11  
AGTCTGAAC|ENSG00000207610|hsa-mir-19a|hsa-miR-19a jt:ENSG00000067798|NAV3  
AGTCTGAAC|ENSG00000207610|hsa-mir-19a|hsa-miR-19a jt:ENSG00000197329|PELI1  
AGTCTGAAC|ENSG00000207745|hsa-mir-17|hsa-miR-17-5p jt:ENSG00000085274|MYNN  
AGTCTGAAC|ENSG00000207745|hsa-mir-17|hsa-miR-17-5p jt:ENSG00000164597|COG5  
AGTCTGGCA|ENSG00000199032|hsa-mir-425|hsa-miR-425-3p jt:ENSG00000175334|BANF1  
AGTCTGGCA|ENSG00000207585|hsa-mir-181d|hsa-miR-181d jt:ENSG00000144677|CTDSPL  
AGTGAAGCC|ENSG00000207949|hsa-mir-214|hsa-miR-214 jt:ENSG00000075234|NP\_060401.2  
AGTGAAGCC|ENSG00000208024|hsa-mir-199a-2|hsa-miR-199a\* jt:ENSG00000196814|FAM125B  
AGTGCATCT|ENSG00000198973|hsa-mir-375|hsa-miR-375 jt:ENSG00000204660|NP\_001013740.1  
AGTGACCCG|ENSG00000207954|hsa-mir-138-1|hsa-miR-138 jt:ENSG00000054598|FOXO1  
AGTGACGCA|ENSG00000199094|hsa-mir-30c-2|hsa-miR-30c jt:ENSG00000065882|TBC1D1  
AGTGACGCA|ENSG00000207827|hsa-mir-30a|hsa-miR-30a-5p jt:ENSG00000065882|TBC1D1  
AGTGACGCG|ENSG00000194717|hsa-mir-494|hsa-miR-494 jt:ENSG00000180316|PNPLA1  
AGTGACGCC|ENSG00000199012|hsa-mir-412|hsa-miR-412 jt:ENSG00000140403|DNAJ4  
AGTGACGCC|ENSG00000199069|hsa-mir-323|hsa-miR-323 jt:ENSG00000185760|KCNQ5  
AGTGACGCC|ENSG00000199092|hsa-mir-410|hsa-miR-410 jt:ENSG00000185100|ADSSL1  
AGTGACGCC|ENSG00000199107|hsa-mir-409|hsa-miR-409-5p jt:ENSG00000095383|TBC1D2  
AGTGACGCC|ENSG00000199187|hsa-mir-365-2|hsa-miR-365 jt:ENSG00000116016|EPAS1  
AGTGACCCG|ENSG00000207614|hsa-mir-193a|hsa-miR-193a jt:ENSG00000100564|PIGH  
AGTGACCGG|ENSG00000198976|hsa-mir-429|hsa-miR-429 jt:ENSG00000080822|CLDND1  
AGTGACCGG|ENSG00000207607|hsa-mir-200a|hsa-miR-200a jt:ENSG00000126091|ST3GAL3

AGTGAGCGG|ENSG00000207607|hsa-mir-200a|hsa-miR-200a\*|jt:ENSG00000101350|KIF3B  
AGTGAGCGG|ENSG00000207607|hsa-mir-200a|hsa-miR-200a\*|jt:ENSG00000147654|EBAG9  
AGTGAGCGG|ENSG00000207730|hsa-mir-200b|hsa-miR-200b|jt:ENSG00000080822|CLDND1  
AGTGAGCGG|ENSG00000207730|hsa-mir-200b|hsa-miR-200b|jt:ENSG00000134243|SORT1  
AGTGAGTCA|ENSG00000199059|hsa-mir-135b|hsa-miR-135b|jt:ENSG00000102181|CD99L2  
AGTGAGTCA|ENSG00000199059|hsa-mir-135b|hsa-miR-135b|jt:ENSG00000198246|SLC29A3  
AGTGATGTC|ENSG00000198974|hsa-mir-30e|hsa-miR-30e-5p|jt:ENSG00000138069|RAB1A  
AGTGATGTC|ENSG00000198974|hsa-mir-30e|hsa-miR-30e-5p|jt:ENSG00000104497|SNX16  
AGTGATGTC|ENSG00000207962|hsa-mir-30c-1|hsa-miR-30c|jt:ENSG00000138069|RAB1A  
AGTGATGTC|ENSG00000207962|hsa-mir-30c-1|hsa-miR-30c|jt:ENSG00000104497|SNX16  
AGTGGCGTG|ENSG00000207819|hsa-mir-9-3|hsa-miR-9|jt:ENSG00000107651|SEC23IP  
AGTGGCGTG|ENSG00000207819|hsa-mir-9-3|hsa-miR-9\*|jt:ENSG00000130414|NDUFA10  
AGTGGCGCC|ENSG00000207980|hsa-mir-23a|hsa-miR-23a|jt:ENSG00000197265|GTF2E2  
AGTGGGCCA|ENSG00000208009|hsa-mir-130a|hsa-miR-130a|jt:ENSG00000180176|TH  
AGTGGGTCA|ENSG00000199158|hsa-mir-96|hsa-miR-96|jt:ENSG00000085831|Clorf34  
AGTGGGTCA|ENSG00000207990|hsa-mir-182|hsa-miR-182|jt:ENSG00000085831|Clorf34  
AGTGGTTGC|ENSG00000199158|hsa-mir-96|hsa-miR-96|jt:ENSG00000131378|RFTN1  
AGTGGTTGC|ENSG00000199158|hsa-mir-96|hsa-miR-96|jt:ENSG00000182993|Cl2orf60  
AGTGGTTGC|ENSG00000207990|hsa-mir-182|hsa-miR-182|jt:ENSG00000131378|RFTN1  
AGTGTAGTC|ENSG00000207610|hsa-mir-19a|hsa-miR-19a|jt:ENSG00000170632|ARMC10  
AGTGTCCAA|ENSG00000199122|hsa-mir-148b|hsa-miR-148b|jt:ENSG00000100483|Cl4orf138  
AGTGTGCA|ENSG00000198974|hsa-mir-30e|hsa-miR-30e-5p|jt:ENSG00000163738|MTHFD2L  
AGTGTGCA|ENSG00000198974|hsa-mir-30e|hsa-miR-30e-5p|jt:ENSG00000168955|TM4SF20  
AGTGTGCA|ENSG00000207962|hsa-mir-30c-1|hsa-miR-30c|jt:ENSG00000163738|MTHFD2L  
AGTGTGCA|ENSG00000207962|hsa-mir-30c-1|hsa-miR-30c|jt:ENSG00000168955|TM4SF20  
AGTTAACAC|ENSG00000207624|hsa-mir-194-1|hsa-miR-194|jt:ENSG00000204038|Q6ZRL6\_HUMAN  
AGTTACGGC|ENSG00000199017|hsa-mir-1-1|hsa-miR-1|jt:ENSG00000111962|UST  
AGTTGCAGG|ENSG00000194717|hsa-mir-494|hsa-miR-494|jt:ENSG00000155846|PPARGC1B  
AGTTGCAGG|ENSG00000194717|hsa-mir-494|hsa-miR-494|jt:ENSG00000178177|LCORL  
AGTTGCAGG|ENSG00000199012|hsa-mir-412|hsa-miR-412|jt:ENSG00000154783|FGD5  
AGTTGCAGG|ENSG00000199020|hsa-mir-381|hsa-miR-381|jt:ENSG00000146678|IGFBP1  
AGTTGCAGG|ENSG00000199025|hsa-mir-369|hsa-miR-369-3p|jt:ENSG00000102755|FLT1  
AGTTGCAGG|ENSG00000199025|hsa-mir-369|hsa-miR-369-5p|jt:ENSG00000131037|EPS8L1  
AGTTGCAGG|ENSG00000207749|hsa-mir-299|hsa-miR-299-5p|jt:ENSG00000198569|SLC34A3  
AGTTGCAGG|ENSG00000207754|hsa-mir-487b|hsa-miR-487b|jt:ENSG00000165259|CXorf43  
AGTTGCAGG|ENSG00000207761|hsa-mir-329-1|hsa-miR-329|jt:ENSG00000168758|SEMA4C  
AGTTGCAGG|ENSG00000207761|hsa-mir-329-1|hsa-miR-329|jt:ENSG00000138621|PPCDC  
AGTTGCAGG|ENSG00000207961|hsa-mir-496|hsa-miR-496|jt:ENSG00000164258|NDUFS4  
AGTTGCCAG|ENSG00000199065|hsa-mir-101-2|hsa-miR-101|jt:ENSG00000088854|C20orf194  
AGTTGCCAG|ENSG00000199065|hsa-mir-101-2|hsa-miR-101|jt:ENSG00000154620|TMSB4Y  
AGTTGCCAG|ENSG00000207602|hsa-mir-106a|hsa-miR-106a|jt:ENSG00000128604|IRF5  
AGTTGCCAG|ENSG00000207602|hsa-mir-106a|hsa-miR-106a|jt:ENSG00000163497|FEV  
AGTTGCCAG|ENSG00000207618|hsa-mir-144|hsa-miR-144|jt:ENSG00000088854|C20orf194  
AGTTGCCAG|ENSG00000207618|hsa-mir-144|hsa-miR-144|jt:ENSG00000154620|TMSB4Y  
AGTTGCCAG|ENSG00000207710|hsa-mir-20b|hsa-miR-20b|jt:ENSG00000128604|IRF5  
AGTTGCCAG|ENSG00000207710|hsa-mir-20b|hsa-miR-20b|jt:ENSG00000187678|SPRY4  
AGTTGCTAT|ENSG00000207949|hsa-mir-214|hsa-miR-214|jt:ENSG00000167578|MTA  
AGTTGGAGC|ENSG00000207586|hsa-mir-135a-2|hsa-miR-135a|jt:ENSG00000168539|CHRM1  
AGTTGGCC|ENSG00000207739|hsa-mir-218-2|hsa-miR-218|jt:ENSG00000157014|TATDN2  
AGTTGGCC|ENSG00000207749|hsa-mir-299|hsa-miR-299-5p|jt:ENSG00000183066|WBP2NL  
AGTTGGCC|ENSG00000207754|hsa-mir-487b|hsa-miR-487b|jt:ENSG00000153684|NP\_001012455.1  
AGTTGGCC|ENSG00000207754|hsa-mir-487b|hsa-miR-487b|jt:ENSG00000175676|GOLGA8F  
AGTTGGCC|ENSG00000207754|hsa-mir-487b|hsa-miR-487b|jt:ENSG00000183629|GOLGA8G  
AGTTGGCC|ENSG00000207961|hsa-mir-496|hsa-miR-496|jt:ENSG00000188647|PTAR1  
AGTTGGCC|ENSG00000207865|hsa-mir-34a|hsa-miR-34a|jt:ENSG00000166971|AKT1P  
AGTTGGGTG|ENSG00000199149|hsa-mir-20a|hsa-miR-20a|jt:ENSG00000162302|RPS6KA4  
AGTTGGTAA|ENSG00000207694|hsa-mir-1-2|hsa-miR-1|jt:ENSG00000131097|HIGD1B  
AGTTGTAG|ENSG00000207698|hsa-mir-32|hsa-miR-32|jt:ENSG00000198373|WWP2  
AGTTGTAG|ENSG00000208017|hsa-mir-140|hsa-miR-140|jt:ENSG00000205609|Q9WB98\_HUMAN  
AGTTTAAGG|ENSG00000202641|hsa-mir-484|hsa-miR-484|jt:ENSG00000117479|SLC19A2  
AGTTGAAC|ENSG00000207705|hsa-mir-129-1|hsa-miR-129|jt:ENSG00000178602|OTOS  
ATAAAGGC|ENSG00000207618|hsa-mir-144|hsa-miR-144|jt:ENSG00000176472|ZNF575  
ATAAATTA|ENSG00000207548|hsa-mir-217|hsa-miR-217|jt:ENSG00000100030|MAPK1  
ATAAAGCCC|ENSG00000199135|hsa-mir-101-1|hsa-miR-101|jt:ENSG00000144566|RAB5A  
ATAAAGGGG|ENSG00000207728|hsa-mir-449b|hsa-miR-449b|jt:ENSG00000164616|FBXL21  
ATAAATAGA|ENSG00000199058|hsa-mir-302b|hsa-miR-302b|jt:ENSG00000135604|STX11  
ATAAATAGA|ENSG00000199102|hsa-mir-302c|hsa-miR-302c|jt:ENSG00000135604|STX11  
ATAAATAGA|ENSG00000199145|hsa-mir-302d|hsa-miR-302d|jt:ENSG00000135604|STX11  
ATAAATCAG|ENSG00000207698|hsa-mir-32|hsa-miR-32|jt:ENSG00000160856|FCRL3  
ATAAGAGGG|ENSG00000199077|hsa-mir-129-2|hsa-miR-129|jt:ENSG00000172482|AGXT  
ATAAGCAAC|ENSG00000199065|hsa-mir-101-2|hsa-miR-101|jt:ENSG00000120733|JMJD1B  
ATAAATAGTA|ENSG00000199072|hsa-let-7f-1|hsa-let-7f|jt:ENSG00000163104|SMARCAD1  
ATAAATAGTA|ENSG00000199133|hsa-let-7d|hsa-let-7d|jt:ENSG00000163104|SMARCAD1  
ATAAATAGTA|ENSG00000199165|hsa-let-7a-1|hsa-let-7a|jt:ENSG00000163104|SMARCAD1  
ATAATTGAG|ENSG00000207602|hsa-mir-106a|hsa-miR-106a|jt:ENSG00000143107|FNDC7  
ATAATTGAG|ENSG00000207710|hsa-mir-20b|hsa-miR-20b|jt:ENSG00000137996|RTCD1  
ATAATTGAG|ENSG00000207710|hsa-mir-20b|hsa-miR-20b|jt:ENSG00000143107|FNDC7  
ATACATCC|ENSG00000199169|hsa-mir-367|hsa-miR-367|jt:ENSG00000153789|FAM92B  
ATACCTGTC|ENSG00000207971|hsa-mir-125b-1|hsa-miR-125b|jt:ENSG00000169758|Cl5orf27  
ATACCTGTC|ENSG00000207994|hsa-mir-100|hsa-miR-100|jt:ENSG00000198793|FRAP1  
ATACTGCAG|ENSG00000199094|hsa-mir-30c-2|hsa-miR-30c|jt:ENSG00000156735|BAG4  
ATACTGCAG|ENSG00000207827|hsa-mir-30a|hsa-miR-30a-5p|jt:ENSG00000156735|BAG4  
ATAGCCGG|ENSG00000207752|hsa-mir-199a-1|hsa-miR-199a\*|jt:ENSG00000135919|SERPINE2  
ATAGCCTTG|ENSG00000207567|hsa-mir-142|hsa-miR-142-3p|jt:ENSG00000169919|GUSB  
ATAGCCTTG|ENSG00000207567|hsa-mir-142|hsa-miR-142-3p|jt:ENSG00000109208|SMR3A  
ATAGCTGAG|ENSG00000207819|hsa-mir-9-3|hsa-miR-9|jt:ENSG00000141349|G6PC3  
ATAGGCCAG|ENSG00000207623|hsa-mir-205|hsa-miR-205|jt:ENSG00000072840|EVC  
ATAGCCGG|ENSG00000202641|hsa-mir-484|hsa-miR-484|jt:ENSG00000134324|LPIN1  
ATAGCCGG|ENSG00000202641|hsa-mir-484|hsa-miR-484|jt:ENSG00000175482|POLDA  
ATAGGCTGC|ENSG00000207708|hsa-mir-141|hsa-miR-141|jt:ENSG00000196912|AN36B\_HUMAN  
ATAGGCTGC|ENSG00000207708|hsa-mir-141|hsa-miR-141|jt:ENSG00000185880|TRIM69  
ATAGGCTGC|ENSG00000207713|hsa-mir-200c|hsa-miR-200c|jt:ENSG00000183783|KCTD8  
ATAGGTGCA|ENSG00000207863|hsa-mir-125b-2|hsa-miR-125b|jt:ENSG00000185973|TMLHE  
ATATACCC|ENSG00000199017|hsa-mir-1-1|hsa-miR-1|jt:ENSG00000111962|UST  
ATATCCGG|ENSG00000207777|hsa-mir-10a|hsa-miR-10a|jt:ENSG00000163611|CCDC52  
ATATTCCTC|ENSG00000199065|hsa-mir-101-2|hsa-miR-101|jt:ENSG00000165525|SDCCAG1  
ATCAACTCC|ENSG00000199122|hsa-mir-148b|hsa-miR-148b|jt:ENSG00000137073|UBAP2  
ATCAACTCC|ENSG00000199122|hsa-mir-148b|hsa-miR-148b|jt:ENSG00000122783|C7orf49  
ATCAAGCCA|ENSG00000207548|hsa-mir-217|hsa-miR-217|jt:ENSG00000196565|HBE1  
ATCAAGGTG|ENSG00000207950|hsa-mir-296|hsa-miR-296|jt:ENSG00000137309|HMGAL  
ATCAATGC|ENSG00000207585|hsa-mir-181d|hsa-miR-181d|jt:ENSG00000169891|REPS2  
ATCAATGC|ENSG00000207939|hsa-mir-223|hsa-miR-223|jt:ENSG00000165525|SDCCAG1  
ATCACCAG|ENSG00000199094|hsa-mir-30c-2|hsa-miR-30c|jt:ENSG00000171320|ESCO2  
ATCACCAG|ENSG00000207827|hsa-mir-30a|hsa-miR-30a-5p|jt:ENSG00000171320|ESCO2  
ATCACCAG|ENSG00000207562|hsa-mir-34c|hsa-miR-34c|jt:ENSG00000146216|TTBK1

ATCACCGCC|ENSG00000207811|hsa-mir-34b|hsa-miR-34b|jt:ENSG00000146216|TTBK1  
ATCACCTTG|ENSG00000207610|hsa-mir-19a|hsa-miR-19a|jt:ENSG00000163624|CDS1  
ATCACTCAC|ENSG00000199072|hsa-let-7f-1|hsa-let-7f|jt:ENSG00000138036|DYNC2LI1  
ATCACTCAC|ENSG00000199133|hsa-let-7d|hsa-let-7d|jt:ENSG00000138036|DYNC2LI1  
ATCACTCAC|ENSG00000199165|hsa-let-7a-1|hsa-let-7a|jt:ENSG00000138036|DYNC2LI1  
ATCACTTCC|ENSG00000209707|hsa-mir-24-2|hsa-miR-24|jt:ENSG00000148965|SAA4  
ATCAGACG|ENSG00000207819|hsa-mir-9-3|hsa-miR-9\*|jt:ENSG00000150093|ITGB1  
ATCAGACG|ENSG00000207819|hsa-mir-9-3|hsa-miR-9\*|jt:ENSG00000187257|RSBN1L  
ATCAGCCAG|ENSG00000207954|hsa-mir-138-1|hsa-miR-138|jt:ENSG00000170523|KRT83  
ATCAGCTGA|ENSG00000199094|hsa-mir-30c-2|hsa-miR-30c|jt:ENSG00000091157|WDR7  
ATCAGCTGA|ENSG00000207827|hsa-mir-30a|hsa-miR-30a-5p|jt:ENSG00000091157|WDR7  
ATCAGCTGG|ENSG00000199153|hsa-mir-30d|hsa-miR-30d|jt:ENSG00000186594|NP\_116284.2  
ATCAGCTGG|ENSG00000199153|hsa-mir-30d|hsa-miR-30d|jt:ENSG00000134531|EMP1  
ATCAGCTGG|ENSG00000207582|hsa-mir-30b|hsa-miR-30b|jt:ENSG00000186594|NP\_116284.2  
ATCAGCTGG|ENSG00000207582|hsa-mir-30b|hsa-miR-30b|jt:ENSG00000134531|EMP1  
ATCAGGAGC|ENSG00000194717|hsa-mir-494|hsa-miR-494|jt:ENSG00000139329|LUM  
ATCAGGAGC|ENSG00000199020|hsa-mir-381|hsa-miR-381|jt:ENSG00000145495|MARCH6  
ATCAGGAGC|ENSG00000199020|hsa-mir-381|hsa-miR-381|jt:ENSG00000136099|PCDH8  
ATCAGGAGC|ENSG00000207743|hsa-mir-495|hsa-miR-495|jt:ENSG00000145495|MARCH6  
ATCAGGAGC|ENSG00000207749|hsa-mir-299|hsa-miR-299-5p|jt:ENSG00000149021|SCGB1A1  
ATCAGGAGC|ENSG00000207961|hsa-mir-496|hsa-miR-496|jt:ENSG00000100302|RASD2  
ATCAGGAGC|ENSG00000207961|hsa-mir-496|hsa-miR-496|jt:ENSG00000136099|PCDH8  
ATCAGGCA|ENSG00000198972|hsa-let-7e|hsa-let-7e|jt:ENSG00000177058|NP\_775785.1  
ATCATTTTA|ENSG00000207971|hsa-mir-125b-1|hsa-miR-125b|jt:ENSG00000137265|IRF4  
ATCATTTTA|ENSG00000207971|hsa-mir-125b-1|hsa-miR-125b|jt:ENSG00000138613|APH1B  
ATCCAATA|ENSG00000199149|hsa-mir-20a|hsa-miR-20a|jt:ENSG00000186487|MYT1L  
ATCCAATA|ENSG00000207745|hsa-mir-17|hsa-miR-17-5p|jt:ENSG00000186487|MYT1L  
ATCCAATCC|ENSG00000194717|hsa-mir-494|hsa-miR-494|jt:ENSG00000068697|LAPTM4A  
ATCCAATCC|ENSG00000199015|hsa-mir-377|hsa-miR-377|jt:ENSG00000090054|SPTLC1  
ATCCAATCC|ENSG00000207743|hsa-mir-495|hsa-miR-495|jt:ENSG00000001561|ENPP4  
ATCCAATCC|ENSG00000207749|hsa-mir-299|hsa-miR-299-5p|jt:ENSG00000116698|SMG7  
ATCCAATCC|ENSG00000208017|hsa-mir-140|hsa-miR-140|jt:ENSG00000154096|THY1  
ATCCAATGA|ENSG00000199072|hsa-let-7f-1|hsa-let-7f|jt:ENSG00000023902|PLEKHO1  
ATCCAATGA|ENSG00000199165|hsa-let-7a-1|hsa-let-7a|jt:ENSG00000023902|PLEKHO1  
ATCCACTAG|ENSG00000207732|hsa-mir-218-1|hsa-miR-218|jt:ENSG00000185053|SGCZ  
ATCCAGTCC|ENSG00000198987|hsa-mir-16-2|hsa-miR-16|jt:ENSG00000149201|CCDC8  
ATCCAAAA|ENSG00000207698|hsa-mir-32|hsa-miR-32|jt:ENSG00000174628|IQCK  
ATCCCGG|ENSG00000207751|hsa-mir-130b|hsa-miR-130b|jt:ENSG00000071205|ARHGAP10  
ATCCCTGTG|ENSG00000207744|hsa-mir-10b|hsa-miR-10b|jt:ENSG00000119508|NR4A3  
ATCCGCTCC|ENSG00000199072|hsa-let-7f-1|hsa-let-7f|jt:ENSG00000162650|ATXN7L2  
ATCCGCTCC|ENSG00000199165|hsa-let-7a-1|hsa-let-7a|jt:ENSG00000162650|ATXN7L2  
ATCCGGGCA|ENSG00000207819|hsa-mir-9-3|hsa-miR-9|jt:ENSG00000119227|PIGZ  
ATCCGGGCA|ENSG00000207819|hsa-mir-9-3|hsa-miR-9\*|jt:ENSG00000204425|Q6ZP74\_HUMAN  
ATCCGTG|ENSG00000207971|hsa-mir-125b-1|hsa-miR-125b|jt:ENSG00000099953|MMP11  
ATCCGTG|ENSG00000207725|hsa-mir-222|hsa-miR-222|jt:ENSG00000127314|RAP1B  
ATCCGTGA|ENSG00000207870|hsa-mir-221|hsa-miR-221|jt:ENSG00000127314|RAP1B  
ATCCGCCCC|ENSG00000207819|hsa-mir-9-3|hsa-miR-9\*|jt:ENSG00000187098|MITF  
ATCCGCTG|ENSG00000207949|hsa-mir-214|hsa-miR-214|jt:ENSG00000149201|CCDC81  
ATCCGCTG|ENSG00000208024|hsa-mir-199a-2|hsa-miR-199a\*|jt:ENSG00000146021|KLHL3  
ATCCGCTG|ENSG00000207949|hsa-mir-214|hsa-miR-214|jt:ENSG00000136750|GAD2  
ATCGTCTC|ENSG00000199122|hsa-mir-148b|hsa-miR-148b|jt:ENSG00000118263|KLF7  
ATCGCAG|ENSG00000207863|hsa-mir-125b-2|hsa-miR-125b|jt:ENSG00000179361|ARID3B  
ATCTCCAAG|ENSG00000207618|hsa-mir-144|hsa-miR-144|jt:ENSG00000165029|ABCA1  
ATCTCCAAG|ENSG00000207618|hsa-mir-144|hsa-miR-144|jt:ENSG00000198841|KTI12  
ATCTCCAAG|ENSG00000207794|hsa-mir-451|hsa-miR-451|jt:ENSG00000074603|PPP8  
ATCTCCTTG|ENSG00000198974|hsa-mir-30e|hsa-miR-30e-5p|jt:ENSG00000111331|OAS3  
ATCTCCTTG|ENSG00000199158|hsa-mir-96|hsa-miR-96|jt:ENSG00000106688|SLC1A1  
ATCTCCTTG|ENSG00000207691|hsa-mir-183|hsa-miR-183|jt:ENSG00000119614|CHX10  
ATCTCCTTG|ENSG00000207962|hsa-mir-30c-1|hsa-miR-30c|jt:ENSG00000111331|OAS3  
ATCTCG|ENSG00000207698|hsa-mir-32|hsa-miR-32|jt:ENSG00000186019|ZNF224  
ATCTCGC|ENSG00000207698|hsa-mir-32|hsa-miR-32|jt:ENSG00000186019|ZNF224  
ATCTCGCG|ENSG00000207698|hsa-mir-32|hsa-miR-32|jt:ENSG00000143164|IQWD1  
ATCTCGCG|ENSG00000207698|hsa-mir-32|hsa-miR-32|jt:ENSG00000159256|MORC3  
ATCTCGCG|ENSG00000207698|hsa-mir-32|hsa-miR-32|jt:ENSG00000173253|DMRT2  
ATCTCGCG|ENSG00000207698|hsa-mir-32|hsa-miR-32|jt:ENSG00000159256|MORC3  
ATCTGAGCC|ENSG00000207623|hsa-mir-205|hsa-miR-205|jt:ENSG00000140937|CDH11  
ATCTGAGTG|ENSG00000199177|hsa-mir-31|hsa-miR-31|jt:ENSG00000136271|DDX56  
ATCTGAGTG|ENSG00000207950|hsa-mir-296|hsa-miR-296|jt:ENSG00000104524|PYCR1  
ATCTGCAAC|ENSG00000202569|hsa-mir-146b|hsa-miR-146b|jt:ENSG00000170271|C5orf4  
ATCTGCATA|ENSG00000207638|hsa-mir-99a|hsa-miR-99a|jt:ENSG00000153147|SMARCA5  
ATCTGCATG|ENSG00000207863|hsa-mir-125b-2|hsa-miR-125b|jt:ENSG00000130427|EPO  
ATCTGCATG|ENSG00000207863|hsa-mir-125b-2|hsa-miR-125b|jt:ENSG00000141506|PIK3R5  
ATCTGCTGC|ENSG00000199158|hsa-mir-96|hsa-miR-96|jt:ENSG00000119913|TECTB  
ATCTGCTGC|ENSG00000199158|hsa-mir-96|hsa-miR-96|jt:ENSG00000150045|KLR1  
ATCTGCTGC|ENSG00000207990|hsa-mir-182|hsa-miR-182|jt:ENSG00000119913|TECTB  
ATCTGCTGC|ENSG00000207990|hsa-mir-182|hsa-miR-182|jt:ENSG00000150045|KLR1  
ATCTGCTTA|ENSG00000207572|hsa-mir-363|hsa-miR-363|jt:ENSG00000120833|SOCS2  
ATCTGCTTA|ENSG00000207790|hsa-mir-29b-2|hsa-miR-29b|jt:ENSG00000136883|KIF12  
ATCTGCTTA|ENSG00000207790|hsa-mir-29b-2|hsa-miR-29b|jt:ENSG00000168542|COL3A1  
ATCTGCTTA|ENSG00000207966|hsa-mir-29c|hsa-miR-29c|jt:ENSG00000136883|KIF12  
ATCTGCTTA|ENSG00000207966|hsa-mir-29c|hsa-miR-29c|jt:ENSG00000168542|COL3A1  
ATCTGGAAC|ENSG00000198974|hsa-mir-30e|hsa-miR-30e-5p|jt:ENSG00000175564|UCP3  
ATCTGGAAC|ENSG00000207962|hsa-mir-30c-1|hsa-miR-30c|jt:ENSG00000175564|UCP3  
ATCTGGACC|ENSG00000207791|hsa-mir-497|hsa-miR-497|jt:ENSG00000149182|ZNF289  
ATCTGGACC|ENSG00000207929|hsa-mir-195|hsa-miR-195|jt:ENSG00000149182|ZNF289  
ATCTGTGAG|ENSG00000199080|hsa-mir-133b|hsa-miR-133b|jt:ENSG00000106803|SEC61B  
ATCTGTGAG|ENSG00000207624|hsa-mir-194-1|hsa-miR-194|jt:ENSG00000071073|MGAT4A  
ATCTTGATG|ENSG00000199025|hsa-mir-369|hsa-miR-369-5p|jt:ENSG00000135373|EHF  
ATCTTGATG|ENSG00000199025|hsa-mir-369|hsa-miR-369-5p|jt:ENSG00000166226|CCT2  
ATCTTGATG|ENSG00000199069|hsa-mir-323|hsa-miR-323|jt:ENSG00000197635|DPP4  
ATCTTGATG|ENSG00000199092|hsa-mir-410|hsa-miR-410|jt:ENSG00000185404|Q4ZG65\_HUMAN  
ATCTTGATG|ENSG00000207743|hsa-mir-495|hsa-miR-495|jt:ENSG00000162415|ZSWIM5  
ATCTTGATG|ENSG00000207961|hsa-mir-496|hsa-miR-496|jt:ENSG00000074803|SLC12A1  
ATCTTGATG|ENSG00000207961|hsa-mir-496|hsa-miR-496|jt:ENSG00000130182|ZSCAN10  
ATCTTGTGG|ENSG00000199058|hsa-mir-302b|hsa-miR-302b|jt:ENSG00000177337|NP\_001034885.1  
ATCTTGTGG|ENSG00000199102|hsa-mir-302c|hsa-miR-302c|jt:ENSG00000177337|NP\_001034885.1  
ATCTTGTGG|ENSG00000199145|hsa-mir-302d|hsa-miR-302d|jt:ENSG00000177337|NP\_001034885.1  
ATCTTTTGA|ENSG00000199135|hsa-mir-101-1|hsa-miR-101|jt:ENSG00000132963|POMP  
ATGAAAGGG|ENSG00000207792|hsa-mir-151|hsa-miR-151|jt:ENSG00000135424|ITGA7  
ATGAAATCA|ENSG00000207648|hsa-mir-192|hsa-miR-192|jt:ENSG00000183632|NP\_057296.1  
ATGAAATCA|ENSG00000207648|hsa-mir-192|hsa-miR-192|jt:ENSG00000205456|NP\_057296.1  
ATGAAATCA|ENSG00000207648|hsa-mir-192|hsa-miR-192|jt:ENSG00000205457|NP\_057296.1  
ATGAAGCCC|ENSG00000207705|hsa-mir-129-1|hsa-miR-129|jt:ENSG00000111671|SPSB2  
ATGAAGTCA|ENSG00000207939|hsa-mir-223|hsa-miR-223|jt:ENSG00000083168|MYST3  
ATGACAAAG|ENSG00000199077|hsa-mir-129-2|hsa-miR-129|jt:ENSG00000162105|SHANK2

ATGACCGC|ENSG00000207617|hsa-mir-24-1|hsa-miR-24 jt:ENSG00000088766|CRLS1  
ATGACCGC|ENSG00000207617|hsa-mir-24-1|hsa-miR-24 jt:ENSG00000149742|SLC22A9  
ATGACGGG|ENSG00000207777|hsa-mir-10a|hsa-miR-10a jt:ENSG00000204850|NP\_001013695.1  
ATGAGCTTG|ENSG00000207623|hsa-mir-205|hsa-miR-205 jt:ENSG00000115944|COX7A2L  
ATGAGGTA|ENSG00000207624|hsa-mir-194-1|hsa-miR-194 jt:ENSG00000076258|FMO4  
ATGAGGTA|ENSG00000207624|hsa-mir-194-1|hsa-miR-194 jt:ENSG00000134769|DTNA  
ATGAGGTA|ENSG00000207624|hsa-mir-194-1|hsa-miR-194 jt:ENSG00000164711|LPAL2  
ATGAGTGA|ENSG00000207698|hsa-mir-32|hsa-miR-32 jt:ENSG00000103021|CCDC13  
ATGATGAAG|ENSG00000207939|hsa-mir-223|hsa-miR-223 jt:ENSG00000130775|Clorf38  
ATGATTGCA|ENSG00000198975|hsa-let-7a-2|hsa-let-7a jt:ENSG00000125741|OPA3  
ATGCACTTC|ENSG00000207732|hsa-mir-218-1|hsa-miR-218 jt:ENSG00000187068|NP\_001020437.1  
ATGCAGCCA|ENSG00000199135|hsa-mir-101-1|hsa-miR-101 jt:ENSG00000117620|SLC35A3  
ATGCCAGTC|ENSG00000199017|hsa-mir-1-1|hsa-miR-1 jt:ENSG00000143125|PROK1  
ATGCCATCA|ENSG00000199102|hsa-mir-302c|hsa-miR-302c\* jt:ENSG00000139209|SLC38A4  
ATGCCATCA|ENSG00000199169|hsa-mir-367|hsa-miR-367 jt:ENSG00000119922|IFIT2  
ATGCCATCA|ENSG00000199169|hsa-mir-367|hsa-miR-367 jt:ENSG00000187372|PCDHB13  
ATGCCAAT|ENSG00000207863|hsa-mir-125b-2|hsa-miR-125b jt:ENSG00000143390|RFX5  
ATGCCCAA|ENSG00000207960|hsa-mir-153-2|hsa-miR-153 jt:ENSG00000047578|KIAA0556  
ATGCCGAGG|ENSG00000199089|hsa-mir-202|hsa-miR-202 jt:ENSG00000167625|ZNF526  
ATGCCGAGG|ENSG00000199089|hsa-mir-202|hsa-miR-202 jt:ENSG00000132716|WDR42A  
ATGCCGCA|ENSG00000207777|hsa-mir-10a|hsa-miR-10a jt:ENSG00000178351|Q8N345\_HUMAN  
ATGCCGCA|ENSG00000207863|hsa-mir-125b-2|hsa-miR-125b jt:ENSG00000178351|Q8N345\_HUMAN  
ATGCCGCA|ENSG00000207777|hsa-mir-10a|hsa-miR-10a jt:ENSG00000178351|Q8N345\_HUMAN  
ATGCCGCA|ENSG00000207863|hsa-mir-125b-2|hsa-miR-125b jt:ENSG00000178351|Q8N345\_HUMAN  
ATGCCGCA|ENSG00000207933|hsa-mir-9-1|hsa-miR-9 jt:ENSG00000182983|ZNF662  
ATGCCGCA|ENSG00000207744|hsa-mir-10b|hsa-miR-10b jt:ENSG00000114982|NP\_060461.3  
ATGCCGCG|ENSG00000207953|hsa-mir-212|hsa-miR-212 jt:ENSG00000145715|RASA1  
ATGCCGGAC|ENSG00000207980|hsa-mir-23a|hsa-miR-23a jt:ENSG00000142156|COL6A1  
ATGCCGGAC|ENSG00000207980|hsa-mir-23a|hsa-miR-23a jt:ENSG00000198948|MFAP3L  
ATGCTAATG|ENSG00000207933|hsa-mir-9-1|hsa-miR-9 jt:ENSG00000060138|CSDA  
ATGCTCAA|ENSG00000207954|hsa-mir-138-1|hsa-miR-138 jt:ENSG00000054598|FOXCI  
ATGGAGATG|ENSG00000199004|hsa-mir-21|hsa-miR-21 jt:ENSG00000141293|SKAP1  
ATGGAGCC|ENSG00000207602|hsa-mir-106a|hsa-miR-106a jt:ENSG00000164796|CSMD3  
ATGGATGG|ENSG00000207751|hsa-mir-130b|hsa-miR-130b jt:ENSG00000187010|RHD  
ATGGATGG|ENSG00000199012|hsa-mir-412|hsa-miR-412 jt:ENSG00000127445|PIN1  
ATGGATTGG|ENSG00000207749|hsa-mir-299|hsa-miR-299-5p jt:ENSG00000183814|LIN9  
ATGGATTGG|ENSG00000207961|hsa-mir-496|hsa-miR-496 jt:ENSG00000152266|PTH  
ATGGATTGG|ENSG00000207961|hsa-mir-496|hsa-miR-496 jt:ENSG00000203784|LELP1  
ATGGCAGC|ENSG00000199065|hsa-mir-101-2|hsa-miR-101 jt:ENSG00000139998|RAB15  
ATGGCCAAG|ENSG00000207948|hsa-mir-328|hsa-miR-328 jt:ENSG00000174576|NPAS4  
ATGGCCAAG|ENSG00000207980|hsa-mir-23a|hsa-miR-23a jt:ENSG00000137872|SEMA6D  
ATGGCCAAG|ENSG00000207980|hsa-mir-23a|hsa-miR-23a jt:ENSG00000197054|ZNF763  
ATGGCCCA|ENSG00000199036|hsa-mir-219-1|hsa-miR-219 jt:ENSG00000051009|C11orf56  
ATGGCCCA|ENSG00000207980|hsa-mir-23a|hsa-miR-23a jt:ENSG00000168824|NSG1\_HUMAN  
ATGGCCTCG|ENSG00000207819|hsa-mir-9-3|hsa-miR-9 jt:ENSG00000206193|Q5HYA3\_HUMAN  
ATGGCGCC|ENSG00000207732|hsa-mir-218-1|hsa-miR-218 jt:ENSG00000174775|HRAS  
ATGGCGGA|ENSG00000207731|hsa-mir-506|hsa-miR-506 jt:ENSG00000173928|C19orf39  
ATGGCGGAG|ENSG00000207731|hsa-mir-506|hsa-miR-506 jt:ENSG0000011304|PTBP1  
ATGGCGGAG|ENSG00000207731|hsa-mir-506|hsa-miR-506 jt:ENSG00000173928|C19orf39  
ATGGCGTC|ENSG00000199023|hsa-mir-339|hsa-miR-339 jt:ENSG00000168748|CA7  
ATGGCTCG|ENSG00000207732|hsa-mir-218-1|hsa-miR-218 jt:ENSG00000178177|LCORL  
ATGGGAACC|ENSG00000207596|hsa-mir-194-2|hsa-miR-194 jt:ENSG00000076258|FMO4  
ATGGGACAC|ENSG00000199025|hsa-mir-369|hsa-miR-369-3p jt:ENSG00000065135|GNAI3  
ATGGGACAC|ENSG00000199025|hsa-mir-369|hsa-miR-369-5p jt:ENSG00000125813|PAX1  
ATGGGACAC|ENSG00000207596|hsa-mir-194-2|hsa-miR-194 jt:ENSG00000032219|ARID4A  
ATGGGACAC|ENSG00000207743|hsa-mir-495|hsa-miR-495 jt:ENSG00000158815|FGF17  
ATGGGACCA|ENSG00000207607|hsa-mir-200a|hsa-miR-200a jt:ENSG00000105967|TFEC  
ATGGGACCA|ENSG00000207607|hsa-mir-200a|hsa-miR-200a\* jt:ENSG00000157240|FZD1  
ATGGGCGCC|ENSG00000207757|hsa-mir-93|hsa-miR-93 jt:ENSG00000146360|GPR6  
ATGGGCGCC|ENSG00000208036|hsa-mir-106b|hsa-miR-106b jt:ENSG00000146360|GPR6  
ATGGGCTAG|ENSG00000207708|hsa-mir-141|hsa-miR-141 jt:ENSG00000186462|NAP1L2  
ATGGGGCCA|ENSG00000207980|hsa-mir-23a|hsa-miR-23a jt:ENSG00000168824|NSG1\_HUMAN  
ATGGGGCCA|ENSG00000209707|hsa-mir-24-2|hsa-miR-24 jt:ENSG00000168528|SERINC2  
ATGGTAACC|ENSG00000198974|hsa-mir-30e|hsa-miR-30e-5p jt:ENSG00000134531|EMP1  
ATGGTAACC|ENSG00000207962|hsa-mir-30c-1|hsa-miR-30c jt:ENSG00000134531|EMP1  
ATGGTGTTC|ENSG00000198976|hsa-mir-429|hsa-miR-429 jt:ENSG00000081087|OSTM1  
ATGGTGTTC|ENSG00000207607|hsa-mir-200a|hsa-miR-200a\* jt:ENSG00000135914|HTR2B  
ATGGTGTTC|ENSG00000207607|hsa-mir-200a|hsa-miR-200a\* jt:ENSG00000163714|SR140\_HUMAN  
ATGGTGTTC|ENSG00000207730|hsa-mir-200b|hsa-miR-200b jt:ENSG00000081087|OSTM1  
ATGTCAAC|ENSG00000207728|hsa-mir-449b|hsa-miR-449b jt:ENSG00000116704|SLC35D1  
ATGTACAC|ENSG00000207939|hsa-mir-223|hsa-miR-223 jt:ENSG00000196460|Q6ZNB4\_HUMAN  
ATGTACCC|ENSG00000208024|hsa-mir-199a-2|hsa-miR-199a\* jt:ENSG00000154620|TMSB4Y  
ATGTACC|ENSG00000199004|hsa-mir-21|hsa-miR-21 jt:ENSG00000183621|ZNF438  
ATGTACC|ENSG00000199004|hsa-mir-21|hsa-miR-21 jt:ENSG00000173391|OLR1  
ATGTCACTG|ENSG00000198981|hsa-mir-29a|hsa-miR-29a jt:ENSG00000124116|WFDC3  
ATGTCAAGG|ENSG00000199161|hsa-mir-126|hsa-miR-126 jt:ENSG00000166173|LARP6  
ATGTCAAGG|ENSG00000199161|hsa-mir-126|hsa-miR-126 jt:ENSG00000172889|EGFL7  
ATGTCAAGG|ENSG00000199161|hsa-mir-126|hsa-miR-126\* jt:ENSG00000174683|C8orf78  
ATGTCAATG|ENSG00000207638|hsa-mir-99a|hsa-miR-99a jt:ENSG00000169174|PCSK9  
ATGTCCCG|ENSG00000207792|hsa-mir-151|hsa-miR-151 jt:ENSG00000168701|NM\_014187.2  
ATGTCCCG|ENSG00000207960|hsa-mir-153-2|hsa-miR-153 jt:ENSG00000131003|RBM2FP  
ATGTCCCG|ENSG00000207960|hsa-mir-153-2|hsa-miR-153 jt:ENSG00000148840|PPRC1  
ATGTCTGGG|ENSG00000207623|hsa-mir-205|hsa-miR-205 jt:ENSG00000138629|UBL7  
ATGTGATTG|ENSG00000207633|hsa-mir-505|hsa-miR-505 jt:ENSG00000151725|MLF1IP  
ATGTGCAGG|ENSG00000199094|hsa-mir-30c-2|hsa-miR-30c jt:ENSG00000152433|ZNF547  
ATGTGCAGG|ENSG00000199094|hsa-mir-30c-2|hsa-miR-30c jt:ENSG00000198511|Q8N9A9\_HUMAN  
ATGTGCAGG|ENSG00000207827|hsa-mir-30a|hsa-miR-30a-5p jt:ENSG00000152433|ZNF547  
ATGTGCAGG|ENSG00000207827|hsa-mir-30a|hsa-miR-30a-5p jt:ENSG00000198511|Q8N9A9\_HUMAN  
ATGTGCCAC|ENSG00000208024|hsa-mir-199a-2|hsa-miR-199a jt:ENSG00000145681|HAPLN1  
ATGTGCCCA|ENSG00000199059|hsa-mir-135b|hsa-miR-135b jt:ENSG00000143418|LASS2  
ATGTGCCCA|ENSG00000199059|hsa-mir-135b|hsa-miR-135b jt:ENSG00000145920|CPLX2  
ATGTGGGCG|ENSG00000199036|hsa-mir-219-1|hsa-miR-219 jt:ENSG00000106665|CLIP2  
ATGTGGGCG|ENSG00000199036|hsa-mir-219-1|hsa-miR-219 jt:ENSG00000135535|CD164  
ATGTTTATG|ENSG00000199177|hsa-mir-31|hsa-miR-31 jt:ENSG00000101337|TM9SF4  
ATTAACCTA|ENSG00000207790|hsa-mir-29b-2|hsa-miR-29b jt:ENSG00000139357|SLC5A8  
ATTAACCTA|ENSG00000207966|hsa-mir-29c|hsa-miR-29c jt:ENSG00000139357|SLC5A8  
ATTAACGTA|ENSG00000207994|hsa-mir-100|hsa-miR-100 jt:ENSG00000127507|EMR2  
ATTAATCC|ENSG00000199094|hsa-mir-30c-2|hsa-miR-30c jt:ENSG00000128606|LRR17  
ATTAATCC|ENSG00000207827|hsa-mir-30a|hsa-miR-30a-5p jt:ENSG00000128606|LRR17  
ATTAATGAG|ENSG00000199130|hsa-mir-365-1|hsa-miR-365 jt:ENSG00000162989|KCNJ3  
ATTAATGGG|ENSG00000207572|hsa-mir-363|hsa-miR-363 jt:ENSG00000138757|G3BP2  
ATTACAAGG|ENSG00000199169|hsa-mir-367|hsa-miR-367 jt:ENSG00000081377|CDC14C  
ATTACAGCC|ENSG00000198986|hsa-let-7a-3|hsa-miR-7a jt:ENSG00000135535|CD164  
ATTACAGCC|ENSG00000207875|hsa-let-7b|hsa-miR-7b jt:ENSG00000135535|CD164  
ATTACCCG|ENSG00000207955|hsa-mir-219-2|hsa-miR-219 jt:ENSG00000109667|SLC2A9

ATTACCGC|ENSG00000207863|hsa-mir-125b-2|hsa-miR-125b jt:ENSG00000148848|ADAM12  
ATTACCTC|ENSG00000207980|hsa-mir-23a|hsa-miR-23a jt:ENSG00000168175|C14orf32  
ATTACCTC|ENSG00000209707|hsa-mir-24-2|hsa-miR-24 jt:ENSG00000184601|NP\_001008404.1  
ATTACCTCC|ENSG00000207980|hsa-mir-23a|hsa-miR-23a jt:ENSG00000168175|C14orf32  
ATTACCTCC|ENSG00000207980|hsa-mir-23a|hsa-miR-23a jt:ENSG0000066557|LRRC40  
ATTACCTCC|ENSG00000209707|hsa-mir-24-2|hsa-miR-24 jt:ENSG00000082482|CKNK2  
ATTACTCAC|ENSG00000199059|hsa-mir-135b|hsa-miR-135b jt:ENSG00000124194|GDAP1L1  
ATTAGGATTC|ENSG00000207784|hsa-mir-542|hsa-miR-542-3p jt:ENSG00000042781|USH2A  
ATTAGGAAT|ENSG00000207617|hsa-mir-24-1|hsa-miR-24 jt:ENSG00000184601|NP\_001008404.1  
ATTAGGAAT|ENSG00000207617|hsa-mir-24-1|hsa-miR-24 jt:ENSG0000068903|SIRT2  
ATTAGGAAT|ENSG00000207617|hsa-mir-24-1|hsa-miR-24 jt:ENSG00000164684|ZNF704  
ATTAGGCAG|ENSG00000199085|hsa-mir-148a|hsa-miR-148a jt:ENSG00000204048|Q6ZUG3\_HUMAN  
ATTAGGCAG|ENSG00000199085|hsa-mir-148a|hsa-miR-148a jt:ENSG00000135374|BLF5  
ATTAGGGGC|ENSG00000199032|hsa-mir-425|hsa-miR-425-3p jt:ENSG00000064601|CTSA  
ATTAGGGTA|ENSG00000199169|hsa-mir-367|hsa-miR-367 jt:ENSG00000137440|FGFBP1  
ATTATGTGG|ENSG00000199092|hsa-mir-410|hsa-miR-410 jt:ENSG00000173041|ZNF680  
ATTATGTGG|ENSG00000207754|hsa-mir-487b|hsa-miR-487b jt:ENSG00000205302|SNX2  
ATTATGTGG|ENSG00000207961|hsa-mir-496|hsa-miR-496 jt:ENSG00000196247|ZNF588  
ATTCAAATC|ENSG00000207548|hsa-mir-217|hsa-miR-217 jt:ENSG00000001461|NPAL3  
ATTCACCTG|ENSG00000199135|hsa-mir-101-1|hsa-miR-101 jt:ENSG00000179421|Q8NBA4\_HUMAN  
ATTCAGAG|ENSG00000199058|hsa-mir-302b|hsa-miR-302b jt:ENSG00000100647|KIAA0247  
ATTCAGAG|ENSG00000199058|hsa-mir-302b|hsa-miR-302b jt:ENSG00000149305|HTR3B  
ATTCAGAG|ENSG00000199102|hsa-mir-302c|hsa-miR-302c jt:ENSG00000100647|KIAA0247  
ATTCAGAG|ENSG00000199102|hsa-mir-302c|hsa-miR-302c jt:ENSG00000149305|HTR3B  
ATTCAGAG|ENSG00000199145|hsa-mir-302d|hsa-miR-302d jt:ENSG00000100647|KIAA0247  
ATTCAGAG|ENSG00000199145|hsa-mir-302d|hsa-miR-302d jt:ENSG00000149305|HTR3B  
ATTCAGAG|ENSG00000207550|hsa-mir-99b|hsa-miR-99b jt:ENSG00000118689|FOXO3A  
ATTCAGGG|ENSG00000208024|hsa-mir-199a-2|hsa-miR-199a jt:ENSG00000173083|HPSE  
ATTCATCAG|ENSG00000207548|hsa-mir-217|hsa-miR-217 jt:ENSG00000071054|MAP4K4  
ATTCACCA|ENSG00000207649|hsa-mir-138-2|hsa-miR-138 jt:ENSG00000151461|UPF2  
ATTCACCTC|ENSG00000199094|hsa-mir-30c-2|hsa-miR-30c jt:ENSG00000163964|PIG1  
ATTCACCTC|ENSG00000199094|hsa-mir-30c-2|hsa-miR-30c jt:ENSG00000187790|FANCM  
ATTCACCTC|ENSG00000207827|hsa-mir-30a|hsa-miR-30a-5p jt:ENSG00000163964|PIG1  
ATTCACCTC|ENSG00000207827|hsa-mir-30a|hsa-miR-30a-5p jt:ENSG00000187790|FANCM  
ATTCACGCA|ENSG00000207955|hsa-mir-219-2|hsa-miR-219 jt:ENSG00000178226|PRSS36  
ATTCATCA|ENSG00000199153|hsa-mir-30d|hsa-miR-30d jt:ENSG00000104497|SNX16  
ATTCATCA|ENSG00000207582|hsa-mir-30b|hsa-miR-30b jt:ENSG00000104497|SNX16  
ATTCCTCGG|ENSG00000207728|hsa-mir-449b|hsa-miR-449b jt:ENSG00000113328|CCNG1  
ATTCCTCGG|ENSG00000199130|hsa-mir-365-1|hsa-miR-365 jt:ENSG00000188386|PPP3R2  
ATTCCTCTC|ENSG00000207947|hsa-mir-152|hsa-miR-152 jt:ENSG00000166024|C10orf28  
ATTCCTACTC|ENSG00000207638|hsa-mir-99a|hsa-miR-99a jt:ENSG00000166444|ST5  
ATTCCTACTC|ENSG00000207863|hsa-mir-125b-2|hsa-miR-125b jt:ENSG00000073754|CD5L  
ATTCCTGTC|ENSG00000207819|hsa-mir-9-3|hsa-miR-9 jt:ENSG00000110881|ACCN2  
ATTCCTGTC|ENSG00000207819|hsa-mir-9-3|hsa-miR-9 jt:ENSG00000204071|TCEAL6  
ATTGACATC|ENSG00000199058|hsa-mir-302b|hsa-miR-302b jt:ENSG00000151474|FRMD4A  
ATTGACATC|ENSG00000199102|hsa-mir-302c|hsa-miR-302c jt:ENSG00000151474|FRMD4A  
ATTGACATC|ENSG00000199145|hsa-mir-302d|hsa-miR-302d jt:ENSG00000151474|FRMD4A  
ATTGACCAA|ENSG00000199177|hsa-mir-31|hsa-miR-31 jt:ENSG00000073969|NSF  
ATTGACGG|ENSG00000207764|hsa-mir-133a-2|hsa-miR-133a jt:ENSG00000180471|C9orf31  
ATTGATGGC|ENSG00000207955|hsa-mir-219-2|hsa-miR-219 jt:ENSG00000184895|SRY  
ATTGATGGG|ENSG00000198981|hsa-mir-29a|hsa-miR-29a jt:ENSG00000181004|BBS12  
ATTGATCGG|ENSG00000207761|hsa-mir-329-1|hsa-miR-329 jt:ENSG00000114770|ABCC5  
ATTGATGGG|ENSG00000207961|hsa-mir-496|hsa-miR-496 jt:ENSG00000211448|DIO2  
ATTGCGAC|ENSG00000199032|hsa-mir-425|hsa-miR-425-3p jt:ENSG00000138678|NP\_116106.2  
ATTGCGTC|ENSG00000207698|hsa-mir-32|hsa-miR-32 jt:ENSG00000143458|NP\_653219.1  
ATTGGAGGA|ENSG00000199065|hsa-mir-101-2|hsa-miR-101 jt:ENSG00000044758|KIAA0556  
ATTGGAGGA|ENSG00000199065|hsa-mir-101-2|hsa-miR-101 jt:ENSG00000180263|FGD6  
ATTGGAGGA|ENSG00000199065|hsa-mir-101-2|hsa-miR-101 jt:ENSG00000198757|Q96NB8\_HUMAN  
ATTGGAGGA|ENSG00000207819|hsa-mir-9-3|hsa-miR-9 jt:ENSG00000196739|COL27A1  
ATTGGAGGA|ENSG00000207819|hsa-mir-9-3|hsa-miR-9\* jt:ENSG00000057019|DCBLD2  
ATTGATAC|ENSG00000194717|hsa-mir-494|hsa-miR-494 jt:ENSG00000198155|Q49A33\_HUMAN  
ATTGATAC|ENSG00000199012|hsa-mir-412|hsa-miR-412 jt:ENSG00000182631|RXFP3  
ATTGATAC|ENSG00000199092|hsa-mir-410|hsa-miR-410 jt:ENSG00000196268|ZNF493  
ATTGATAC|ENSG00000207761|hsa-mir-329-1|hsa-miR-329 jt:ENSG00000164736|SOX17  
ATTGATAC|ENSG00000207961|hsa-mir-496|hsa-miR-496 jt:ENSG00000152266|PTH  
ATTGATTA|ENSG00000198975|hsa-let-7a-2|hsa-let-7a jt:ENSG00000023902|PLEKHO1  
ATTGATTC|ENSG00000199058|hsa-mir-302b|hsa-miR-302b jt:ENSG00000165097|AOF1  
ATTGATTC|ENSG00000199058|hsa-mir-302b|hsa-miR-302b\* jt:ENSG00000165097|AOF1  
ATTGATTC|ENSG00000199102|hsa-mir-302c|hsa-miR-302c jt:ENSG00000165097|AOF1  
ATTGATTC|ENSG00000199145|hsa-mir-302d|hsa-miR-302d jt:ENSG00000165097|AOF1  
ATTGCCAGC|ENSG00000207604|hsa-mir-206|hsa-miR-206 jt:ENSG00000136297|MMD2  
ATTGCCAC|ENSG00000207863|hsa-mir-125b-2|hsa-miR-125b jt:ENSG00000110075|SAPS3  
ATTGCCAC|ENSG00000207863|hsa-mir-125b-2|hsa-miR-125b jt:ENSG00000186314|PRELID2  
ATTGCCCA|ENSG00000207819|hsa-mir-9-3|hsa-miR-9 jt:ENSG00000182450|KCNK4  
ATTGCCCA|ENSG00000207819|hsa-mir-9-3|hsa-miR-9\* jt:ENSG00000159199|ATP5G1  
ATTGGCTTC|ENSG00000199032|hsa-mir-425|hsa-miR-425-3p jt:ENSG00000064601|CTSA  
ATTGGCTTC|ENSG00000199032|hsa-mir-425|hsa-miR-425-3p jt:ENSG00000125872|C20orf75  
ATTGGCTTC|ENSG00000199065|hsa-mir-101-2|hsa-miR-101 jt:ENSG00000130224|LRCH2  
ATTGGGGGC|ENSG00000207585|hsa-mir-181d|hsa-miR-181d jt:ENSG00000160789|LMNA  
ATTGGTAC|ENSG00000207955|hsa-mir-219-2|hsa-miR-219 jt:ENSG00000149742|SLC22A9  
ATTGGTAC|ENSG00000199024|hsa-mir-103-2|hsa-miR-103 jt:ENSG00000054523|KIF1B  
ATTGGTCCG|ENSG00000199065|hsa-mir-101-2|hsa-miR-101 jt:ENSG00000047578|KIAA0556  
ATTGGTGA|ENSG00000207863|hsa-mir-125b-2|hsa-miR-125b jt:ENSG00000155621|C9orf85  
ATTGGTGA|ENSG00000207947|hsa-mir-152|hsa-miR-152 jt:ENSG00000182512|GLRX5  
ATTGGTTG|ENSG00000207649|hsa-mir-138-2|hsa-miR-138 jt:ENSG00000153561|RMND5A  
ATTGTCAGG|ENSG00000207635|hsa-mir-499|hsa-miR-499 jt:ENSG00000143537|ADAM15  
ATTGTGAAA|ENSG00000207633|hsa-mir-505|hsa-miR-505 jt:ENSG00000119714|GPR68  
ATTGTGACC|ENSG00000199149|hsa-mir-20a|hsa-miR-20a jt:ENSG00000166971|AKTIP  
ATTGTGACC|ENSG00000199149|hsa-mir-20a|hsa-miR-20a jt:ENSG00000123411|IKZF4  
ATTGTGACC|ENSG00000207610|hsa-mir-19a|hsa-miR-19a jt:ENSG00000158764|ITLN2  
ATTGTGACC|ENSG00000207745|hsa-mir-17|hsa-miR-17-5p jt:ENSG00000166971|AKTIP  
ATTGTGGGG|ENSG00000207604|hsa-mir-206|hsa-miR-206 jt:ENSG00000162105|SHANK2  
ATTTAAGA|ENSG00000199153|hsa-mir-30d|hsa-miR-30d jt:ENSG00000151572|TMEM16D  
ATTTAAGA|ENSG00000207582|hsa-mir-30b|hsa-miR-30b jt:ENSG00000151572|TMEM16D  
ATTTACAAC|ENSG00000207596|hsa-mir-194-2|hsa-miR-194 jt:ENSG00000169239|CA5B  
ATTTAGTAA|ENSG00000207624|hsa-mir-194-1|hsa-miR-194 jt:ENSG00000196743|GM2A  
ATTTATCCC|ENSG00000199072|hsa-let-7f-1|hsa-let-7f jt:ENSG00000094963|FMO2  
ATTTATCCC|ENSG00000199133|hsa-let-7d|hsa-let-7d jt:ENSG00000094963|FMO2  
ATTTATCCC|ENSG00000199165|hsa-let-7a-1|hsa-let-7a jt:ENSG00000094963|FMO2  
ATTTATGTC|ENSG00000199153|hsa-mir-30d|hsa-miR-30d jt:ENSG00000196460|Q6ZNB4\_HUMAN  
ATTTATGTC|ENSG00000207582|hsa-mir-30b|hsa-miR-30b jt:ENSG00000196460|Q6ZNB4\_HUMAN  
ATTTATTTT|ENSG00000207548|hsa-mir-217|hsa-miR-217 jt:ENSG00000149474|CSRFP2BP  
ATTTACAAA|ENSG00000207950|hsa-mir-296|hsa-miR-296 jt:ENSG00000137309|HMGAL1  
ATTTCTAGG|ENSG00000207939|hsa-mir-223|hsa-miR-223 jt:ENSG00000103429|BFAI  
ATTTCTCG|ENSG00000207752|hsa-mir-199a-1|hsa-miR-199a\* jt:ENSG00000005884|ITGA3

ATTTGAACC|ENSG00000198975|hsa-let-7a-2|hsa-let-7a|jt:ENSG00000164045|CDC25A  
ATTTGCTCC|ENSG00000199085|hsa-mir-148a|hsa-miR-148a|jt:ENSG00000151694|ADAM17  
ATTTGCTCC|ENSG00000199085|hsa-mir-148a|hsa-miR-148a|jt:ENSG00000047621|C12orf4  
ATTTGGAAG|ENSG00000207635|hsa-mir-499|hsa-miR-499|jt:ENSG00000204414|CSHL1  
ATTTGGCG|ENSG00000207757|hsa-mir-93|hsa-miR-93|jt:ENSG00000104517|EDD1  
ATTTGGCG|ENSG00000208036|hsa-mir-106b|hsa-miR-106b|jt:ENSG00000104517|EDD1  
ATTTGTTAG|ENSG00000199065|hsa-mir-101-2|hsa-miR-101|jt:ENSG00000064989|CALCRL  
CAAAATA|ENSG00000199058|hsa-mir-302b|hsa-miR-302b\*|jt:ENSG00000161813|LARP4  
CAAAATA|ENSG00000199169|hsa-mir-367|hsa-miR-367|jt:ENSG00000126432|PRDX5  
CAAAACAGA|ENSG00000199158|hsa-mir-96|hsa-miR-96|jt:ENSG00000144579|CTDSP1  
CAAAACAGA|ENSG00000207691|hsa-mir-183|hsa-miR-183|jt:ENSG00000144579|CTDSP1  
CAAACTCG|ENSG00000207705|hsa-mir-129-1|hsa-miR-129|jt:ENSG00000147316|MCPH1  
CAAACTCTA|ENSG00000199149|hsa-mir-20a|hsa-miR-20a|jt:ENSG00000163577|EIF5A2  
CAAACTCTA|ENSG00000207745|hsa-mir-17|hsa-miR-17-5p|jt:ENSG00000163577|EIF5A2  
CAAACTTAC|ENSG00000207954|hsa-mir-138-1|hsa-miR-138|jt:ENSG00000118322|ATP10B  
CAAACTTGC|ENSG00000207971|hsa-mir-125b-1|hsa-miR-125b|jt:ENSG00000089558|KCNH4  
CAAACTTGC|ENSG00000207971|hsa-mir-125b-1|hsa-miR-125b|jt:ENSG00000141401|IMPA2  
CAAAAGGACC|ENSG00000207939|hsa-mir-223|hsa-miR-223|jt:ENSG00000175868|CALCB  
CAAAAGGACC|ENSG00000207939|hsa-mir-223|hsa-miR-223|jt:ENSG00000115267|IFIH1  
CAAAAGCGA|ENSG00000207790|hsa-mir-29b-2|hsa-miR-29b|jt:ENSG00000157827|FMNL2  
CAAAAGCGA|ENSG00000207966|hsa-mir-29c|hsa-miR-29c|jt:ENSG00000157827|FMNL2  
CAAAAGTCCA|ENSG00000199161|hsa-mir-126|hsa-miR-126|jt:ENSG00000100417|PMM1  
CAAAAGTCCA|ENSG00000199161|hsa-mir-126|hsa-miR-126|jt:ENSG00000169410|PTPN9  
CAAAAGTCCA|ENSG00000199161|hsa-mir-126|hsa-miR-126|jt:ENSG00000172889|EGFL7  
CAAAAGTGA|ENSG00000207732|hsa-mir-218-1|hsa-miR-218|jt:ENSG00000112139|MDGA1  
CAAAAGTGA|ENSG00000207732|hsa-mir-218-1|hsa-miR-218|jt:ENSG00000148291|SURF2  
CAAAAGTGA|ENSG00000207732|hsa-mir-218-1|hsa-miR-218|jt:ENSG00000185504|C17orf70  
CAAAATAA|ENSG00000208017|hsa-mir-140|hsa-miR-140|jt:ENSG00000108960|MMD  
CAAAATCCAC|ENSG00000207548|hsa-mir-217|hsa-miR-217|jt:ENSG00000120278|PLEKHG1  
CAAAATCGG|ENSG00000207596|hsa-mir-194-2|hsa-miR-194|jt:ENSG00000161381|PLXDC1  
CAAAATGAGG|ENSG00000207947|hsa-mir-152|hsa-miR-152|jt:ENSG00000204584|Q6ZSH9\_HUMAN  
CAAAATGGGG|ENSG00000207980|hsa-mir-23a|hsa-miR-23a|jt:ENSG00000185920|PTCH1  
CAAAATGGGG|ENSG00000207980|hsa-mir-23a|hsa-miR-23a|jt:ENSG00000067066|SP100  
CAAAATGGGG|ENSG00000209707|hsa-mir-24-2|hsa-miR-24|jt:ENSG00000198900|TOP1  
CAAAATGGGG|ENSG00000209707|hsa-mir-24-2|hsa-miR-24|jt:ENSG00000105327|BBC3  
CAAAATGGTC|ENSG00000207926|hsa-mir-135a-1|hsa-miR-135a|jt:ENSG00000135842|FAM129A  
CAAAATCTG|ENSG00000199085|hsa-mir-148a|hsa-miR-148a|jt:ENSG00000100784|RPS6KA5  
CAACAGGTC|ENSG00000199085|hsa-mir-148a|hsa-miR-148a|jt:ENSG00000059728|MXD1  
CAACCAATG|ENSG00000207649|hsa-mir-138-2|hsa-miR-138|jt:ENSG00000153561|RMND5A  
CAACAGCAA|ENSG00000199135|hsa-mir-101-1|hsa-miR-101|jt:ENSG00000153575|TUBGCP5  
CAACCTTGC|ENSG00000207567|hsa-mir-142|hsa-miR-142-3p|jt:ENSG00000109458|GAB1  
CAACCGTC|ENSG00000207789|hsa-mir-26a-2|hsa-miR-26a|jt:ENSG00000204334|AL1L62\_HUMAN  
CAACGCAG|ENSG00000199024|hsa-mir-103-2|hsa-miR-103|jt:ENSG00000182077|PTCHD3  
CAACGCGG|ENSG00000207955|hsa-mir-219-2|hsa-miR-219|jt:ENSG00000099725|PRKY  
CAACGCGA|ENSG00000199135|hsa-mir-101-1|hsa-miR-101|jt:ENSG00000116237|ICMT  
CAACGGTC|ENSG00000207933|hsa-mir-9-1|hsa-miR-9\*|jt:ENSG00000114982|NP\_060461.3  
CAACTCCCG|ENSG00000207586|hsa-mir-135a-2|hsa-miR-135a|jt:ENSG00000143771|CN1H4  
CAACTCCTA|ENSG00000207933|hsa-mir-9-1|hsa-miR-9\*|jt:ENSG00000184083|FAM120C  
CAACTCCTA|ENSG00000207933|hsa-mir-9-1|hsa-miR-9\*|jt:ENSG00000188519|Q7Z4Q0\_HUMAN  
CAACTTGAG|ENSG00000199122|hsa-mir-148b|hsa-miR-148b|jt:ENSG00000204569|PPP1R10  
CAACTTGCA|ENSG00000207980|hsa-mir-23a|hsa-miR-23a|jt:ENSG00000206193|Q5HYA3\_HUMAN  
CAACTTTTC|ENSG00000198981|hsa-mir-29a|hsa-miR-29a|jt:ENSG00000177045|SIX5  
CAAGAGCAC|ENSG00000207754|hsa-mir-487b|hsa-miR-487b|jt:ENSG00000122852|SFTPA1B  
CAAGAGCAC|ENSG00000207754|hsa-mir-487b|hsa-miR-487b|jt:ENSG00000185303|SFTPA1  
CAAGAGCAC|ENSG00000207761|hsa-mir-329-1|hsa-miR-329|jt:ENSG00000112972|HMGCS1  
CAAGATGAC|ENSG00000199158|hsa-mir-96|hsa-miR-96|jt:ENSG00000172819|RARG  
CAAGATGAC|ENSG00000207990|hsa-mir-182|hsa-miR-182|jt:ENSG00000172819|RARG  
CAAGATGCC|ENSG00000199036|hsa-mir-219-1|hsa-miR-219|jt:ENSG00000109667|SLC2A9  
CAAGATGCC|ENSG00000207990|hsa-mir-182|hsa-miR-182|jt:ENSG00000135473|USP52  
CAAGATGCC|ENSG00000207990|hsa-mir-182|hsa-miR-182|jt:ENSG00000151835|SACS  
CAAGATGTG|ENSG00000199094|hsa-mir-30c-2|hsa-miR-30c|jt:ENSG00000113966|ARL6  
CAAGATGTG|ENSG00000207827|hsa-mir-30a|hsa-miR-30a-5p|jt:ENSG00000113966|ARL6  
CAAGCCCTA|ENSG00000207617|hsa-mir-24-1|hsa-miR-189|jt:ENSG00000162419|GMEB1  
CAAGCCCTA|ENSG00000207617|hsa-mir-24-1|hsa-miR-24|jt:ENSG00000132563|REEF2  
CAAGCCGCG|ENSG00000199065|hsa-mir-101-2|hsa-miR-101|jt:ENSG00000117713|ARID1A  
CAAGCGCAG|ENSG00000198974|hsa-mir-30e|hsa-miR-30e-5p|jt:ENSG00000135596|MICAL1  
CAAGCGCAG|ENSG00000207962|hsa-mir-30c-1|hsa-miR-30c|jt:ENSG00000135596|MICAL1  
CAAGGACGC|ENSG00000207732|hsa-mir-218-1|hsa-miR-218|jt:ENSG00000132259|CNGA4  
CAAGGGCAC|ENSG00000198974|hsa-mir-30e|hsa-miR-30e-3p|jt:ENSG00000124334|TL9R  
CAAGGGCAC|ENSG00000198974|hsa-mir-30e|hsa-miR-30e-5p|jt:ENSG00000163288|GABRB1  
CAAGGGCAC|ENSG00000207962|hsa-mir-30c-1|hsa-miR-30c|jt:ENSG00000163288|GABRB1  
CAAGGGCGA|ENSG00000207784|hsa-mir-542|hsa-miR-542-3p|jt:ENSG00000109171|SLAIN2  
CAAGGGTGA|ENSG00000199036|hsa-mir-219-1|hsa-miR-219|jt:ENSG00000120262|C6orf97  
CAAGGGTGA|ENSG00000199036|hsa-mir-219-1|hsa-miR-219|jt:ENSG00000140678|ITGAX  
CAAGGGTGA|ENSG00000199036|hsa-mir-219-1|hsa-miR-219|jt:ENSG00000166435|XRR1  
CAAGGGTGA|ENSG00000199187|hsa-mir-365-2|hsa-miR-365|jt:ENSG00000178928|TPRX1  
CAAGGGTGA|ENSG00000207614|hsa-mir-193a|hsa-miR-193a|jt:ENSG00000155659|VSTG4  
CAAGGTGTC|ENSG00000199158|hsa-mir-96|hsa-miR-96|jt:ENSG00000178764|ZHX2  
CAAGGTGTC|ENSG00000207691|hsa-mir-183|hsa-miR-183|jt:ENSG00000178764|ZHX2  
CAAGGTTTA|ENSG00000207819|hsa-mir-9-3|hsa-miR-9|jt:ENSG00000169083|JAR  
CAAGTCTAG|ENSG00000207949|hsa-mir-214|hsa-miR-214|jt:ENSG00000173020|ADRBK1  
CAAGTCTAG|ENSG00000208024|hsa-mir-199a-2|hsa-miR-199a\*|jt:ENSG00000133460|SLC2A11  
CAAGTGCAA|ENSG00000199153|hsa-mir-30d|hsa-miR-30d|jt:ENSG00000113966|ARL6  
CAAGTGCAA|ENSG00000207582|hsa-mir-30b|hsa-miR-30b|jt:ENSG00000113966|ARL6  
CAAGTGCC|ENSG00000199094|hsa-mir-30c-2|hsa-miR-30c|jt:ENSG00000196937|FAM3C  
CAAGTGCC|ENSG00000207827|hsa-mir-30a|hsa-miR-30a-5p|jt:ENSG00000196937|FAM3C  
CAAGTTAAG|ENSG00000207790|hsa-mir-29b-2|hsa-miR-29b|jt:ENSG00000163449|TMEM169  
CAAGTTAAG|ENSG00000207966|hsa-mir-29c|hsa-miR-29c|jt:ENSG00000163449|TMEM169  
CAAGTTCCG|ENSG00000199025|hsa-mir-369|hsa-miR-369-5p|jt:ENSG00000125813|PAX1  
CAAGTTCCG|ENSG00000207743|hsa-mir-495|hsa-miR-495|jt:ENSG00000092820|VIL2  
CAAGTTCCG|ENSG00000207961|hsa-mir-496|hsa-miR-496|jt:ENSG00000077147|TM9SF3  
CAAGTTTGC|ENSG00000199161|hsa-mir-126|hsa-miR-126|jt:ENSG00000116096|SPR  
CAAGTTTGC|ENSG00000199161|hsa-mir-126|hsa-miR-126|jt:ENSG00000146648|EGFR  
CAAGTTTGC|ENSG00000199161|hsa-mir-126|hsa-miR-126|jt:ENSG00000172889|EGFL7  
CAAGTTTGC|ENSG00000207698|hsa-mir-32|hsa-miR-32|jt:ENSG00000112081|SFRS3  
CAATAAAGC|ENSG00000199122|hsa-mir-148b|hsa-miR-148b|jt:ENSG00000135541|AH11  
CAATAAAGC|ENSG00000199122|hsa-mir-148b|hsa-miR-148b|jt:ENSG00000179476|C14orf28  
CAATAATGA|ENSG00000198987|hsa-mir-16-2|hsa-miR-16|jt:ENSG00000167778|SPRYD3  
CAATAGCG|ENSG00000199065|hsa-mir-101-2|hsa-miR-101|jt:ENSG00000122779|TRIM24  
CAATAGCTG|ENSG00000199036|hsa-mir-219-1|hsa-miR-219|jt:ENSG00000197555|SIPAL11  
CAATAGGC|ENSG00000202641|hsa-mir-484|hsa-miR-484|jt:ENSG00000100711|ZFYE21  
CAATAGGC|ENSG00000202641|hsa-mir-484|hsa-miR-484|jt:ENSG00000126215|XRCC3  
CAATAGGTG|ENSG00000207638|hsa-mir-99a|hsa-miR-99a|jt:ENSG00000169174|PCKS9  
CAATAGTC|ENSG00000207617|hsa-mir-24-1|hsa-miR-189|jt:ENSG00000188549|NP\_997263.1  
CAATCAGAA|ENSG00000199077|hsa-mir-129-2|hsa-miR-129|jt:ENSG00000133627|ACTR3B

CAATCATAA|ENSG00000199149|hsa-mir-20a|hsa-miR-20a|jt:ENSG00000166743|ACSM1  
CAATCATAA|ENSG00000207610|hsa-mir-19a|hsa-miR-19a|jt:ENSG00000153707|PTPRD  
CAATCCATC|ENSG00000207961|hsa-mir-496|hsa-miR-496|jt:ENSG00000203784|LELP1  
CAATCCCG|ENSG00000207732|hsa-mir-218-1|hsa-miR-218|jt:ENSG00000162601|MYSM1  
CAATCCCGG|ENSG00000207751|hsa-mir-130b|hsa-miR-130b|jt:ENSG00000071205|ARHGAP10  
CAATCCCGG|ENSG00000207751|hsa-mir-130b|hsa-miR-130b|jt:ENSG00000165699|TSC1  
CAATCGCA|ENSG00000208017|hsa-mir-140|hsa-miR-140|jt:ENSG00000128595|CALU  
CAATCGGA|ENSG00000207790|hsa-mir-29b-2|hsa-miR-29b|jt:ENSG00000162704|ARPC5  
CAATCGGA|ENSG00000207790|hsa-mir-29b-2|hsa-miR-29b|jt:ENSG00000204118|NAP1L6  
CAATCGGA|ENSG00000207966|hsa-mir-29c|hsa-miR-29c|jt:ENSG00000162704|ARPC5  
CAATCGGA|ENSG00000207966|hsa-mir-29c|hsa-miR-29c|jt:ENSG00000204118|NAP1L6  
CAATCGGAA|ENSG00000207790|hsa-mir-29b-2|hsa-miR-29b|jt:ENSG00000188064|WNT7B  
CAATCGGAA|ENSG00000207966|hsa-mir-29c|hsa-miR-29c|jt:ENSG00000188064|WNT7B  
CAATCGGC|ENSG00000207638|hsa-mir-99a|hsa-miR-99a|jt:ENSG0000013297|CLDN11  
CAATCTCCA|ENSG00000207635|hsa-mir-499|hsa-miR-499|jt:ENSG00000156875|HIAT1  
CAATCTCCA|ENSG00000207926|hsa-mir-135a-1|hsa-miR-135a|jt:ENSG00000103067|RBM35B  
CAATCTCCC|ENSG00000199122|hsa-mir-148b|hsa-miR-148b|jt:ENSG00000100483|C14orf138  
CAATCTGGC|ENSG00000199089|hsa-mir-202|hsa-miR-202|jt:ENSG00000164825|DEFB1  
CAATGAATG|ENSG00000207630|hsa-mir-7-3|hsa-miR-7|jt:ENSG00000108515|ENO3  
CAATGACG|ENSG00000199065|hsa-mir-101-2|hsa-miR-101|jt:ENSG00000047578|KIAA0556  
CAATGACG|ENSG00000199065|hsa-mir-101-2|hsa-miR-101|jt:ENSG00000134375|TIMM17A  
CAATGACG|ENSG00000199065|hsa-mir-101-2|hsa-miR-101|jt:ENSG00000187790|FANCM  
CAATGAGCA|ENSG00000198975|hsa-let-7a-2|hsa-let-7a|jt:ENSG00000071894|CPSF1  
CAATGAGGG|ENSG00000207980|hsa-mir-23a|hsa-miR-23a|jt:ENSG00000081665|ZNF253  
CAATGAGGG|ENSG00000209707|hsa-mir-24-2|hsa-miR-24|jt:ENSG00000140199|SLC12A6  
CAATGACCC|ENSG00000207863|hsa-mir-125b-2|hsa-miR-125b|jt:ENSG00000174808|BTC  
CAATGTAC|ENSG00000199085|hsa-mir-148a|hsa-miR-148a|jt:ENSG00000131269|ABCB7  
CAATGTAC|ENSG00000207939|hsa-mir-223|hsa-miR-223|jt:ENSG00000164588|HCN1  
CAATGTAC|ENSG00000207939|hsa-mir-223|hsa-miR-223|jt:ENSG00000129465|RIPK3  
CAATGTTA|ENSG00000207618|hsa-mir-144|hsa-miR-144|jt:ENSG00000189068|VSTM1  
CAATTAGGA|ENSG00000207617|hsa-mir-24-1|hsa-miR-24|jt:ENSG00000166206|GABRB3  
CAATTCG|ENSG00000207751|hsa-mir-130b|hsa-miR-130b|jt:ENSG00000205524|Q68D70\_HUMAN  
CAATTGCCA|ENSG00000207581|hsa-mir-199b|hsa-miR-199b|jt:ENSG00000183542|KLRC4  
CACAAAC|ENSG00000207607|hsa-mir-200a|hsa-miR-200a|jt:ENSG00000182621|PLCB1  
CACAAAC|ENSG00000207607|hsa-mir-200a|hsa-miR-200a|jt:ENSG00000163072|NOSTRIN  
CACAAACCG|ENSG00000199161|hsa-mir-126|hsa-miR-126|jt:ENSG00000138617|PARP16  
CACAAACCG|ENSG00000199161|hsa-mir-126|hsa-miR-126|jt:ENSG00000172889|EGFL7  
CACAAGATG|ENSG00000199036|hsa-mir-219-1|hsa-miR-219|jt:ENSG00000178776|NP\_996849.2  
CACAATGCC|ENSG00000199058|hsa-mir-302b|hsa-miR-302b|jt:ENSG00000185551|NR2F2  
CACAATGCC|ENSG00000199058|hsa-mir-302b|hsa-miR-302b\*|jt:ENSG00000197724|PHF2  
CACAATGCC|ENSG00000199102|hsa-mir-302c|hsa-miR-302c|jt:ENSG00000185551|NR2F2  
CACAATGCC|ENSG00000199145|hsa-mir-302d|hsa-miR-302d|jt:ENSG00000185551|NR2F2  
CACAATGGA|ENSG00000198981|hsa-mir-29a|hsa-miR-29a|jt:ENSG00000100263|RHBD3  
CACATAAC|ENSG00000207581|hsa-mir-199b|hsa-miR-199b|jt:ENSG00000093010|COMT  
CACATAATC|ENSG00000198975|hsa-let-7a-2|hsa-let-7a|jt:ENSG00000179361|ARID3B  
CACATAATC|ENSG00000207971|hsa-mir-125b-1|hsa-miR-125b|jt:ENSG00000179361|ARID3B  
CACATAATC|ENSG00000207971|hsa-mir-125b-1|hsa-miR-125b|jt:ENSG00000118322|ATP10B  
CACATACGG|ENSG00000207586|hsa-mir-135a-2|hsa-miR-135a|jt:ENSG00000172845|SP3  
CACACTGG|ENSG00000207752|hsa-mir-199a-1|hsa-miR-199a\*|jt:ENSG00000151690|NP\_060164.3  
CACATG|ENSG00000207731|hsa-mir-506|hsa-miR-506|jt:ENSG00000055211|C6orf71  
CACATGGTG|ENSG00000199092|hsa-mir-410|hsa-miR-410|jt:ENSG00000002745|WNT16  
CACATGGTG|ENSG00000207749|hsa-mir-299|hsa-miR-299-5p|jt:ENSG00000206066|IGLL3  
CACATGGTG|ENSG00000207754|hsa-mir-487b|hsa-miR-487b|jt:ENSG00000122854|SFTPA2B  
CACCACCA|ENSG00000198986|hsa-let-7a-3|hsa-let-7a|jt:ENSG00000187164|KIAA1598  
CACCACCA|ENSG00000207875|hsa-let-7b|hsa-let-7b|jt:ENSG00000187164|KIAA1598  
CACCATCC|ENSG00000207725|hsa-mir-222|hsa-miR-222|jt:ENSG00000072501|SMC1A  
CACCATCC|ENSG00000207870|hsa-mir-221|hsa-miR-221|jt:ENSG00000072501|SMC1A  
CACCATTCT|ENSG00000207610|hsa-mir-19a|hsa-miR-19a|jt:ENSG00000128294|TPST2  
CACCATTCT|ENSG00000207610|hsa-mir-19a|hsa-miR-19a|jt:ENSG00000117601|SERPINC1  
CACCAGCAA|ENSG00000202641|hsa-mir-484|hsa-miR-484|jt:ENSG00000180815|MAP3K15  
CACCAGCAA|ENSG00000202641|hsa-mir-484|hsa-miR-484|jt:ENSG00000159167|STC1  
CACCCTTCA|ENSG00000207618|hsa-mir-144|hsa-miR-144|jt:ENSG00000088854|C20orf194  
CACCCTTCA|ENSG00000207618|hsa-mir-144|hsa-miR-144|jt:ENSG00000126749|EMG1  
CACCCTAGGG|ENSG00000207630|hsa-mir-7-3|hsa-miR-7|jt:ENSG00000079691|LRRC16  
CACCCTAGG|ENSG00000199177|hsa-mir-31|hsa-miR-31|jt:ENSG00000102471|NDFIP2  
CACGCATAC|ENSG00000199036|hsa-mir-219-1|hsa-miR-219|jt:ENSG00000133985|TTC9  
CACGCCCC|ENSG00000199032|hsa-mir-425|hsa-miR-425-3p|jt:ENSG00000198382|UVRAG  
CACGCCCC|ENSG00000207789|hsa-mir-26a-2|hsa-miR-26a|jt:ENSG00000174989|FBXW8  
CACGCCCC|ENSG00000207789|hsa-mir-26a-2|hsa-miR-26a|jt:ENSG00000146278|PNRC1  
CACGCCTCA|ENSG00000207728|hsa-mir-449b|hsa-miR-449b|jt:ENSG00000034239|EFCAB1  
CACGCGCAC|ENSG00000198974|hsa-mir-30e|hsa-miR-30e-5p|jt:ENSG00000149970|CNKSR2  
CACGCGCAC|ENSG00000207962|hsa-mir-30c-1|hsa-miR-30c|jt:ENSG00000149970|CNKSR2  
CACGCGCC|ENSG00000207617|hsa-mir-24-1|hsa-miR-24|jt:ENSG00000157538|DSCR3  
CACGCGGAA|ENSG00000199036|hsa-mir-219-1|hsa-miR-219|jt:ENSG00000119508|NR4A3  
CACGCGGCA|ENSG00000207819|hsa-mir-9-3|hsa-miR-9\*|jt:ENSG00000156395|SORCS3  
CACGCGTCC|ENSG00000207819|hsa-mir-9-3|hsa-miR-9\*|jt:ENSG00000169607|CKAP2L  
CACGCGACAG|ENSG00000199130|hsa-mir-365-1|hsa-miR-365|jt:ENSG00000183735|TBK1  
CACGCGTTC|ENSG00000207819|hsa-mir-9-3|hsa-miR-9\*|jt:ENSG00000172071|EIF2AK3  
CACGCGCCA|ENSG00000199121|hsa-mir-26b|hsa-miR-26b|jt:ENSG00000197114|ZGPAT  
CACGCTCC|ENSG00000199121|hsa-mir-26b|hsa-miR-26b|jt:ENSG00000183929|DUSP5P  
CACGTGAGA|ENSG00000207752|hsa-mir-199a-1|hsa-miR-199a\*|jt:ENSG00000132549|VPS13B  
CACGTGAGC|ENSG00000199089|hsa-mir-202|hsa-miR-202|jt:ENSG00000119048|UBE2B  
CACGTGAGC|ENSG00000199089|hsa-mir-202|hsa-miR-202\*|jt:ENSG00000146476|C6orf211  
CACGTTTA|ENSG00000207926|hsa-mir-135a-1|hsa-miR-135a|jt:ENSG00000143418|LASS2  
CACGTTTA|ENSG00000207926|hsa-mir-135a-1|hsa-miR-135a|jt:ENSG00000091879|ANGPT2  
CACTAAATA|ENSG00000199077|hsa-mir-129-2|hsa-miR-129|jt:ENSG00000071205|ARHGAP10  
CACTCAGTC|ENSG00000207548|hsa-mir-217|hsa-miR-217|jt:ENSG00000115963|RND3  
CACTCTGAC|ENSG00000207933|hsa-mir-9-1|hsa-miR-9\*|jt:ENSG00000122122|CXorf9  
CACTCTGGC|ENSG00000207948|hsa-mir-328|hsa-miR-328|jt:ENSG00000104848|KCNK7  
CACTGGCTA|ENSG00000199085|hsa-mir-148a|hsa-miR-148a|jt:ENSG00000189180|ZNF33A  
CACTGGCTA|ENSG00000207624|hsa-mir-194-1|hsa-miR-194|jt:ENSG00000120519|SLC10A7  
CACTGGCTA|ENSG00000207624|hsa-mir-194-1|hsa-miR-194|jt:ENSG00000128739|SNRPN  
CACTGTGCG|ENSG00000207947|hsa-mir-152|hsa-miR-152|jt:ENSG00000165862|PNLIPRP2  
CACTTAGCA|ENSG00000199149|hsa-mir-20a|hsa-miR-20a|jt:ENSG00000160401|C9orf117  
CACTTAGCA|ENSG00000199149|hsa-mir-20a|hsa-miR-20a|jt:ENSG00000183826|BTBD9  
CACTTAGCA|ENSG00000207610|hsa-mir-19a|hsa-miR-19a|jt:ENSG00000184068|Q8N8F0\_HUMAN  
CACTTAGCA|ENSG00000207745|hsa-mir-17|hsa-miR-17-5p|jt:ENSG00000183826|BTBD9  
CACTTATTA|ENSG00000207971|hsa-mir-125b-1|hsa-miR-125b|jt:ENSG00000178795|GDPD4  
CACTTGTA|ENSG00000199059|hsa-mir-135b|hsa-miR-135b|jt:ENSG00000197291|Q8WV75\_HUMAN  
CACTTTACA|ENSG00000198974|hsa-mir-30e|hsa-miR-30e-5p|jt:ENSG00000198324|FAM109A  
CACTTTACA|ENSG00000198974|hsa-mir-30e|hsa-miR-30e-5p|jt:ENSG00000179455|MKRN3  
CACTTTACA|ENSG00000207962|hsa-mir-30c-1|hsa-miR-30c|jt:ENSG00000198324|FAM109A  
CACTTTACA|ENSG00000207962|hsa-mir-30c-1|hsa-miR-30c|jt:ENSG00000179455|MKRN3  
CACTTTC|ENSG00000199161|hsa-mir-126|hsa-miR-126|jt:ENSG00000172889|EGFL7  
CACTTTCCG|ENSG00000207710|hsa-mir-20b|hsa-miR-20b|jt:ENSG00000114302|PRKAR2A

CAGACAATG|ENSG00000207863|hsa-mir-125b-2|hsa-miR-125b jt:ENSG00000137265|IRF4  
CAGACAC|ENSG00000198976|hsa-mir-429|hsa-miR-429 jt:ENSG00000183873|SCN5A  
CAGACAC|ENSG00000207607|hsa-mir-200a|hsa-miR-200a jt:ENSG00000138434|SSFA2  
CAGACAC|ENSG00000207607|hsa-mir-200a|hsa-miR-200a\* jt:ENSG00000173480|ZNF417  
CAGACAC|ENSG00000207730|hsa-mir-200b|hsa-miR-200b jt:ENSG00000183873|SCN5A  
CAGACATAA|ENSG00000199153|hsa-mir-30d|hsa-miR-30d jt:ENSG00000179455|MKNR3  
CAGACATAA|ENSG00000207582|hsa-mir-30b|hsa-miR-30b jt:ENSG00000179455|MKNR3  
CAGACATTC|ENSG00000207752|hsa-mir-199a-1|hsa-miR-199a\* jt:ENSG00000131914|LIN28  
CAGACGTGA|ENSG00000199161|hsa-mir-126|hsa-miR-126 jt:ENSG00000110243|APOA5  
CAGACGTGA|ENSG00000199161|hsa-mir-126|hsa-miR-126\* jt:ENSG00000172889|EGFL7  
CAGACGTGA|ENSG00000199161|hsa-mir-126|hsa-miR-126\* jt:ENSG00000163918|RFC4  
CAGAGGGCC|ENSG00000207607|hsa-mir-200a|hsa-miR-200a jt:ENSG00000140749|IGSF6  
CAGAGGGCC|ENSG00000207730|hsa-mir-200b|hsa-miR-200b jt:ENSG00000006114|AP1GBP1  
CAGATAACC|ENSG00000199133|hsa-let-7d|hsa-miR-7d jt:ENSG00000205610|Q4G105\_HUMAN  
CAGATACAG|ENSG00000207635|hsa-mir-499|hsa-miR-499 jt:ENSG00000037637|FBXO42  
CAGATACAG|ENSG00000207635|hsa-mir-499|hsa-miR-499 jt:ENSG00000173436|Clorf151  
CAGATAGGA|ENSG00000199058|hsa-mir-302b|hsa-miR-302b\* jt:ENSG00000136688|IL1F9  
CAGATAGGA|ENSG00000199058|hsa-mir-302b|hsa-miR-302b\* jt:ENSG00000197430|TMEM10  
CAGATATCA|ENSG00000207572|hsa-mir-363|hsa-miR-363 jt:ENSG00000162493|PDPN  
CAGATATCA|ENSG00000207710|hsa-mir-20b|hsa-miR-20b jt:ENSG00000198633|Q6PDB4\_HUMAN  
CAGATCAGC|ENSG00000207948|hsa-mir-328|hsa-miR-328 jt:ENSG00000001617|SEMA3F  
CAGCAAGAC|ENSG00000198986|hsa-let-7a-3|hsa-miR-7a3 jt:ENSG00000135476|ESPL1  
CAGCAAGAC|ENSG00000207875|hsa-let-7b|hsa-miR-7b jt:ENSG00000135476|ESPL1  
CAGCAATTA|ENSG00000207618|hsa-mir-144|hsa-miR-144 jt:ENSG00000205711|Q6ZV92\_HUMAN  
CAGCACAAA|ENSG00000199161|hsa-mir-126|hsa-miR-126 jt:ENSG00000172889|EGFL7  
CAGCACAAA|ENSG00000199161|hsa-mir-126|hsa-miR-126\* jt:ENSG00000143554|SLC27A3  
CAGCATGCC|ENSG00000202641|hsa-mir-484|hsa-miR-484 jt:ENSG00000110925|FAM130A1  
CAGCATGCC|ENSG00000202641|hsa-mir-484|hsa-miR-484 jt:ENSG00000204084|INPP5B  
CAGCATGTC|ENSG00000207865|hsa-mir-34a|hsa-miR-34a jt:ENSG00000204619|PPP1R1  
CAGCCG|ENSG00000207953|hsa-mir-212|hsa-miR-212 jt:ENSG00000145782|ATG12  
CAGCCGAAA|ENSG00000207611|hsa-mir-149|hsa-miR-149 jt:ENSG00000068796|KIF2A  
CAGCCGAAA|ENSG00000207611|hsa-mir-149|hsa-miR-149 jt:ENSG00000168101|NUDT16L1  
CAGCCCGGG|ENSG00000199024|hsa-mir-103-2|hsa-miR-103 jt:ENSG00000144867|SRPRB  
CAGCCCGGG|ENSG00000199024|hsa-mir-103-2|hsa-miR-103 jt:ENSG00000158813|EDA  
CAGCCTTAC|ENSG00000207572|hsa-mir-363|hsa-miR-363 jt:ENSG00000138869|C22orf16  
CAGCCTTAC|ENSG00000207602|hsa-mir-106a|hsa-miR-106a jt:ENSG00000167106|FAM102A  
CAGCCTTAC|ENSG00000207710|hsa-mir-20b|hsa-miR-20b jt:ENSG00000167106|FAM102A  
CAGCCTTAC|ENSG00000207819|hsa-mir-9-3|hsa-miR-9 jt:ENSG00000086991|NOX4  
CAGCCTTAC|ENSG00000207819|hsa-mir-9-3|hsa-miR-9\* jt:ENSG00000143940|Q6ZMW3\_HUMAN  
CAGCCG|ENSG00000207562|hsa-mir-34c|hsa-miR-34c jt:ENSG00000171314|PGAM1  
CAGCCG|ENSG00000207811|hsa-mir-34b|hsa-miR-34b jt:ENSG00000171314|PGAM1  
CAGCCGC|ENSG00000199122|hsa-mir-148b|hsa-miR-148b jt:ENSG00000140090|SLC24A4  
CAGCCGAAC|ENSG00000207744|hsa-mir-10b|hsa-miR-10b jt:ENSG00000119508|NR4A3  
CAGCTCCTA|ENSG00000199122|hsa-mir-148b|hsa-miR-148b jt:ENSG00000071205|ARHGAP10  
CAGCTCCTA|ENSG00000199122|hsa-mir-148b|hsa-miR-148b jt:ENSG00000113048|MRPS27  
CAGGACAAC|ENSG00000207790|hsa-mir-29b-2|hsa-miR-29b jt:ENSG00000134369|NAV1  
CAGGACAAC|ENSG00000207790|hsa-mir-29b-2|hsa-miR-29b jt:ENSG00000204633|ACTN3  
CAGGACAAC|ENSG00000207966|hsa-mir-29c|hsa-miR-29c jt:ENSG00000134369|NAV1  
CAGGACAAC|ENSG00000207966|hsa-mir-29c|hsa-miR-29c jt:ENSG00000204633|ACTN3  
CAGGATATC|ENSG00000198981|hsa-mir-29a|hsa-miR-29a jt:ENSG00000108821|COL1A1  
CAGGATTAG|ENSG00000207752|hsa-mir-199a-1|hsa-miR-199a jt:ENSG00000145681|HAPLN1  
CAGGATTAG|ENSG00000207752|hsa-mir-199a-1|hsa-miR-199a\* jt:ENSG00000188807|NP\_001010866.1  
CAGGCAACG|ENSG00000199094|hsa-mir-30c-2|hsa-miR-30c jt:ENSG00000157470|FAM81A  
CAGGCAACG|ENSG00000207827|hsa-mir-30a|hsa-miR-30a-5p jt:ENSG00000157470|FAM81A  
CAGGCGGAA|ENSG00000199024|hsa-mir-103-2|hsa-miR-103 jt:ENSG00000086598|TMED2  
CAGGCGGAA|ENSG00000199024|hsa-mir-103-2|hsa-miR-103 jt:ENSG00000092020|PPP2R3C  
CAGGGA|ENSG00000199161|hsa-mir-126|hsa-miR-126 jt:ENSG00000172889|EGFL7  
CAGGGA|ENSG00000207751|hsa-mir-130b|hsa-miR-130b jt:ENSG00000110148|CKBR  
CAGGGA|ENSG00000207751|hsa-mir-130b|hsa-miR-130b jt:ENSG00000185069|KRR76  
CAGGGCTTA|ENSG00000207808|hsa-mir-27a|hsa-miR-27a jt:ENSG00000178965|Clorf173  
CAGGGCTTA|ENSG00000207980|hsa-mir-23a|hsa-miR-23a jt:ENSG00000178074|NP\_710156.2  
CAGGGCTTA|ENSG00000209707|hsa-mir-24-2|hsa-miR-24 jt:ENSG00000196345|ZNF167  
CAGGGGTTA|ENSG00000207728|hsa-mir-449b|hsa-miR-449b jt:ENSG00000108797|CNTNAP1  
CAGGGGTTA|ENSG00000207728|hsa-mir-449b|hsa-miR-449b jt:ENSG00000116704|SLC35D1  
CAGGTAAGG|ENSG00000207694|hsa-mir-1-2|hsa-miR-1 jt:ENSG00000094755|GABRP  
CAGGTAAGG|ENSG00000207708|hsa-mir-141|hsa-miR-141 jt:ENSG00000023287|RB1CC1  
CAGGTAAGG|ENSG00000207708|hsa-mir-141|hsa-miR-141 jt:ENSG00000064309|CDON  
CAGGTAAGG|ENSG00000207708|hsa-mir-141|hsa-miR-141 jt:ENSG00000112379|KIAA1244  
CAGGTAAGG|ENSG00000207713|hsa-mir-200c|hsa-miR-200c jt:ENSG00000112379|KIAA1244  
CAGGTAGCC|ENSG00000207624|hsa-mir-194-1|hsa-miR-194 jt:ENSG00000198901|PRC1  
CAGGTGCAA|ENSG00000207623|hsa-mir-205|hsa-miR-205 jt:ENSG00000187753|C9orf153  
CAGGTGCAA|ENSG00000207713|hsa-mir-200c|hsa-miR-200c jt:ENSG00000182712|MTCP1  
CAGGTTTGC|ENSG00000207705|hsa-mir-129-1|hsa-miR-129 jt:ENSG00000128254|C22orf24  
CAGTATCCA|ENSG00000199025|hsa-mir-369|hsa-miR-369-3p jt:ENSG00000113194|UBXD8  
CAGTATCCA|ENSG00000199025|hsa-mir-369|hsa-miR-369-5p jt:ENSG00000183023|SLC8A1  
CAGTATCCA|ENSG00000199092|hsa-mir-410|hsa-miR-410 jt:ENSG00000081237|PTPRC  
CAGTATCCA|ENSG00000207749|hsa-mir-299|hsa-miR-299-5p jt:ENSG00000167380|ZNF226  
CAGTCATTA|ENSG00000207731|hsa-mir-506|hsa-miR-506 jt:ENSG00000136877|PFGS  
CAGTCCAAG|ENSG00000207708|hsa-mir-141|hsa-miR-141 jt:ENSG00000205428|C9orf35  
CAGTCCAAG|ENSG00000207713|hsa-mir-200c|hsa-miR-200c jt:ENSG00000086666|ZFAND6  
CAGTCCAAG|ENSG00000207713|hsa-mir-200c|hsa-miR-200c jt:ENSG00000183844|FAM3B  
CAGTCCACC|ENSG00000207567|hsa-mir-142|hsa-miR-142-5p jt:ENSG00000205698|LOC648426  
CAGTGAGG|ENSG00000207623|hsa-mir-205|hsa-miR-205 jt:ENSG00000122971|ACADS  
CAGTGAGG|ENSG00000207607|hsa-mir-200a|hsa-miR-200a jt:ENSG00000126091|ST3GAL3  
CAGTGAGG|ENSG00000207730|hsa-mir-200b|hsa-miR-200b jt:ENSG00000134243|SORT1  
CAGTGATGG|ENSG00000207731|hsa-mir-506|hsa-miR-506 jt:ENSG00000189067|LITAF  
CAGTTTGA|ENSG00000207705|hsa-mir-129-1|hsa-miR-129 jt:ENSG00000178602|OTOS  
CATAAATCC|ENSG00000207586|hsa-mir-135a-2|hsa-miR-135a jt:ENSG00000143771|CNIH4  
CATAACAAC|ENSG00000199177|hsa-mir-31|hsa-miR-31 jt:ENSG00000117152|RGS4  
CATAATGCG|ENSG00000207749|hsa-mir-299|hsa-miR-299-5p jt:ENSG00000183066|WBP2NL  
CATATG|ENSG00000207863|hsa-mir-125b-2|hsa-miR-125b jt:ENSG00000166928|NP\_115986.3  
CATATGCG|ENSG00000207808|hsa-mir-27a|hsa-miR-27a jt:ENSG00000142549|LOC402665  
CATATGCG|ENSG00000207980|hsa-mir-23a|hsa-miR-23a jt:ENSG00000166619|BLCAP  
CATCAATAA|ENSG00000198981|hsa-mir-29a|hsa-miR-29a jt:ENSG00000163600|ICOS  
CATCAATGC|ENSG00000199025|hsa-mir-369|hsa-miR-369-3p jt:ENSG00000102755|FLT1  
CATCACCCG|ENSG00000207562|hsa-mir-34c|hsa-miR-34c jt:ENSG00000118513|MYB  
CATCACCCG|ENSG00000207562|hsa-mir-34c|hsa-miR-34c jt:ENSG00000146216|TTBK1  
CATCACCCG|ENSG00000207811|hsa-mir-34b|hsa-miR-34b jt:ENSG00000118513|MYB  
CATCACCCG|ENSG00000207811|hsa-mir-34b|hsa-miR-34b jt:ENSG00000146216|TTBK1  
CATCATAA|ENSG00000207618|hsa-mir-144|hsa-miR-144 jt:ENSG00000153575|TUBGCP5  
CATCATAA|ENSG00000207618|hsa-mir-144|hsa-miR-144 jt:ENSG00000182481|KPN2A  
CATCATCCC|ENSG00000208024|hsa-mir-199a-2|hsa-miR-199a jt:ENSG00000120733|JMJD1B  
CATCATCCC|ENSG00000208024|hsa-mir-199a-2|hsa-miR-199a\* jt:ENSG00000110721|CHKA  
CATCATCCC|ENSG00000208024|hsa-mir-199a-2|hsa-miR-199a\* jt:ENSG00000171608|PIK3CD  
CATCATCCC|ENSG00000208024|hsa-mir-199a-2|hsa-miR-199a\* jt:ENSG00000180398|MCFD2

CATCATCCC | ENSG00000208024 | hsa-mir-199a-2 | hsa-miR-199a\* | jt:ENSG00000175535 | PNLIP  
CATCATTTAC | ENSG00000207618 | hsa-mir-144 | hsa-miR-144 | jt:ENSG00000145819 | ARHGAP26  
CATCATTTAG | ENSG00000199082 | hsa-mir-342 | hsa-miR-342 | jt:ENSG00000137393 | IBRDC2  
CATCCCTTA | ENSG00000207630 | hsa-mir-7-3 | hsa-miR-7 | jt:ENSG00000147687 | TATDN1  
CATCCGGCG | ENSG00000207955 | hsa-mir-219-2 | hsa-miR-219 | jt:ENSG00000133511 | PIK4CA  
CATCTTTGGA | ENSG00000199158 | hsa-mir-96 | hsa-miR-96 | jt:ENSG00000055070 | Clorf144  
CATCTTTGGA | ENSG00000207691 | hsa-mir-183 | hsa-miR-183 | jt:ENSG00000055070 | Clorf144  
CATGAATCA | ENSG00000207863 | hsa-mir-125b-2 | hsa-miR-125b | jt:ENSG00000133561 | GIMAP6  
CATGACAAA | ENSG00000207764 | hsa-mir-133a-2 | hsa-miR-133a | jt:ENSG00000143257 | NR1I3  
CATGACGC | ENSG00000207739 | hsa-mir-218-2 | hsa-miR-218 | jt:ENSG00000076554 | TPD52  
CATGCCAGC | ENSG00000207926 | hsa-mir-135a-1 | hsa-miR-135a | jt:ENSG00000173464 | RNASEL1  
CATGCCGA | ENSG00000207863 | hsa-mir-125b-2 | hsa-miR-125b | jt:ENSG00000170892 | TSEN34  
CATGCCGGA | ENSG00000207980 | hsa-mir-23a | hsa-miR-23a | jt:ENSG00000142156 | COL6A1  
CATGCTC | ENSG00000199012 | hsa-mir-412 | hsa-miR-412 | jt:ENSG00000182631 | RXFP3  
CATGCTC | ENSG00000199015 | hsa-mir-377 | hsa-miR-377 | jt:ENSG00000177614 | PGBD5  
CATGCTC | ENSG00000199069 | hsa-mir-323 | hsa-miR-323 | jt:ENSG00000184040 | FAM23B  
CATGCTC | ENSG00000199092 | hsa-mir-410 | hsa-miR-410 | jt:ENSG00000118200 | CAMSAP1L1  
CATGCTC | ENSG00000207743 | hsa-mir-495 | hsa-miR-495 | jt:ENSG00000203983 | LOC652679  
CATGCTTC | ENSG00000202569 | hsa-mir-146b | hsa-miR-146b | jt:ENSG00000143469 | SYTL4  
CATGGAAGC | ENSG00000207954 | hsa-mir-138-1 | hsa-miR-138 | jt:ENSG00000136488 | CSH2  
CATGGAAGC | ENSG00000207954 | hsa-mir-138-1 | hsa-miR-138 | jt:ENSG00000151948 | GLT1D1  
CATGGAGCA | ENSG00000199161 | hsa-mir-126 | hsa-miR-126 | jt:ENSG00000172889 | EGF17  
CATGGAGCA | ENSG00000199161 | hsa-mir-126 | hsa-miR-126\* | jt:ENSG00000037965 | HOXC8  
CATGGAGCA | ENSG00000199161 | hsa-mir-126 | hsa-miR-126\* | jt:ENSG00000065978 | YBX1  
CATGGAGCA | ENSG00000199161 | hsa-mir-126 | hsa-miR-126\* | jt:ENSG00000139239 | XR\_017789.1  
CATGGATGG | ENSG00000207751 | hsa-mir-130b | hsa-miR-130b | jt:ENSG00000187010 | RHD  
CATGGCACA | ENSG00000199020 | hsa-mir-381 | hsa-miR-381 | jt:ENSG00000131003 | RBY2FP  
CATGGCACA | ENSG00000199025 | hsa-mir-369 | hsa-miR-369-3p | jt:ENSG00000131003 | RBY2FP  
CATGGCACA | ENSG00000199025 | hsa-mir-369 | hsa-miR-369-5p | jt:ENSG00000101544 | ZNF508  
CATGGCACA | ENSG00000199107 | hsa-mir-409 | hsa-miR-409-5p | jt:ENSG00000047597 | XK  
CATGGCACA | ENSG00000199107 | hsa-mir-409 | hsa-miR-409-5p | jt:ENSG00000124233 | SEMG1  
CATGGCACA | ENSG00000207743 | hsa-mir-495 | hsa-miR-495 | jt:ENSG00000032514 | PGBD3  
CATGGCGA | ENSG00000199020 | hsa-mir-381 | hsa-miR-381 | jt:ENSG00000173145 | NOC3L  
CATGGCGA | ENSG00000199025 | hsa-mir-369 | hsa-miR-369-5p | jt:ENSG00000178589 | Q9BT26\_HUMAN  
CATGGCGA | ENSG00000199069 | hsa-mir-323 | hsa-miR-323 | jt:ENSG00000112234 | FBXL4  
CATGGCGA | ENSG00000199069 | hsa-mir-323 | hsa-miR-323 | jt:ENSG00000123349 | PFDN5  
CATGGCGA | ENSG00000199092 | hsa-mir-410 | hsa-miR-410 | jt:ENSG00000005249 | PRKAR2B  
CATGGCGA | ENSG00000207743 | hsa-mir-495 | hsa-miR-495 | jt:ENSG00000121940 | CLCC1  
CATGGCGA | ENSG00000207754 | hsa-mir-487b | hsa-miR-487b | jt:ENSG00000154240 | CCDC46  
CATGGCGC | ENSG00000207567 | hsa-mir-142 | hsa-miR-142-5p | jt:ENSG00000054803 | CBLN4  
CATGGTCCC | ENSG00000207623 | hsa-mir-205 | hsa-miR-205 | jt:ENSG00000112079 | STK38  
CATGGTGAA | ENSG00000194717 | hsa-mir-494 | hsa-miR-494 | jt:ENSG00000141664 | ZCCHC2  
CATGGTGAA | ENSG00000199020 | hsa-mir-381 | hsa-miR-381 | jt:ENSG00000196976 | LAGE3  
CATGGTGAA | ENSG00000199020 | hsa-mir-381 | hsa-miR-381 | jt:ENSG00000143494 | VASH2  
CATGGTGAA | ENSG00000199092 | hsa-mir-410 | hsa-miR-410 | jt:ENSG00000005249 | PRKAR2B  
CATGGTGAA | ENSG00000207743 | hsa-mir-495 | hsa-miR-495 | jt:ENSG00000134321 | RSAD2  
CATGGTGAA | ENSG00000207961 | hsa-mir-496 | hsa-miR-496 | jt:ENSG00000142583 | SLC2A5  
CATGTCAAC | ENSG00000199107 | hsa-mir-409 | hsa-miR-409-5p | jt:ENSG00000141627 | DYM  
CATGTCAAC | ENSG00000207743 | hsa-mir-495 | hsa-miR-495 | jt:ENSG00000084652 | TXLNA  
CATGTCAAC | ENSG00000207743 | hsa-mir-495 | hsa-miR-495 | jt:ENSG00000171223 | JUNE  
CATGTCAAC | ENSG00000207743 | hsa-mir-495 | hsa-miR-495 | jt:ENSG00000121964 | GTDC1  
CATGTCAAC | ENSG00000207754 | hsa-mir-487b | hsa-miR-487b | jt:ENSG00000113600 | C9  
CATGTCAAC | ENSG00000207761 | hsa-mir-329-1 | hsa-miR-329 | jt:ENSG00000166526 | ZNF3  
CATGTCTGA | ENSG00000207949 | hsa-mir-214 | hsa-miR-214 | jt:ENSG00000147892 | ADAMTSL1  
CATGTCTGA | ENSG00000207971 | hsa-mir-125b-1 | hsa-miR-125b | jt:ENSG00000076716 | GPC4  
CATGTCTGA | ENSG00000207971 | hsa-mir-125b-1 | hsa-miR-125b | jt:ENSG00000170927 | PKHD1  
CATGTGTGG | ENSG00000207731 | hsa-mir-506 | hsa-miR-506 | jt:ENSG00000198663 | C6orf89  
CATTACAGA | ENSG00000199072 | hsa-let-7f-1 | hsa-let-7f | jt:ENSG00000133136 | GBG5L\_HUMAN  
CATTACAGA | ENSG00000199133 | hsa-let-7d | hsa-miR-7d | jt:ENSG00000133136 | GBG5L\_HUMAN  
CATTACAGA | ENSG00000199165 | hsa-let-7a-1 | hsa-miR-7a | jt:ENSG00000133136 | GBG5L\_HUMAN  
CATTACCTC | ENSG00000207980 | hsa-mir-23a | hsa-miR-23a | jt:ENSG00000168175 | C14orf32  
CATTACCTC | ENSG00000207980 | hsa-mir-23a | hsa-miR-23a | jt:ENSG00000066557 | LRRCC4  
CATTACCTC | ENSG00000209707 | hsa-mir-24-2 | hsa-miR-24 | jt:ENSG00000082482 | KCN2  
CATTACCTC | ENSG00000209707 | hsa-mir-24-2 | hsa-miR-24 | jt:ENSG00000148965 | SAA4  
CATTACGC | ENSG00000207618 | hsa-mir-144 | hsa-miR-144 | jt:ENSG00000166398 | KIAA0355  
CATTACGC | ENSG00000207618 | hsa-mir-144 | hsa-miR-144 | jt:ENSG00000101574 | METTL4  
CATTACAC | ENSG00000199133 | hsa-let-7d | hsa-miR-7d | jt:ENSG00000056345 | ITGB3  
CATTACACC | ENSG00000199133 | hsa-let-7d | hsa-miR-7d | jt:ENSG00000056345 | ITGB3  
CATTATGCG | ENSG00000207953 | hsa-mir-212 | hsa-miR-212 | jt:ENSG00000196644 | LOC728932  
CATTCTTGC | ENSG00000207784 | hsa-mir-542 | hsa-miR-542-3p | jt:ENSG00000113580 | NR3C1  
CATTGGAGG | ENSG00000194717 | hsa-mir-494 | hsa-miR-494 | jt:ENSG00000140280 | LYSMD2  
CATTGGAGG | ENSG00000199012 | hsa-mir-412 | hsa-miR-412 | jt:ENSG00000167117 | C17orf73  
CATTGGAGG | ENSG00000199012 | hsa-mir-412 | hsa-miR-412 | jt:ENSG00000153066 | TXNDC11  
CATTGGAGG | ENSG00000199015 | hsa-mir-377 | hsa-miR-377 | jt:ENSG00000159882 | ZNF230  
CATTGGAGG | ENSG00000199020 | hsa-mir-381 | hsa-miR-381 | jt:ENSG00000136099 | PCDH8  
CATTGGAGG | ENSG00000199025 | hsa-mir-369 | hsa-miR-369-3p | jt:ENSG00000090989 | EXOC1  
CATTGGAGG | ENSG00000199069 | hsa-mir-323 | hsa-miR-323 | jt:ENSG00000067066 | SP100  
CATTGGAGG | ENSG00000199092 | hsa-mir-410 | hsa-miR-410 | jt:ENSG00000127663 | JMJD2B  
CATTGGAGG | ENSG00000207743 | hsa-mir-495 | hsa-miR-495 | jt:ENSG00000182667 | NTR1\_HUMAN  
CATTGGAGG | ENSG00000207749 | hsa-mir-299 | hsa-miR-299-5p | jt:ENSG00000127663 | JMJD2B  
CATTGGAGG | ENSG00000207749 | hsa-mir-299 | hsa-miR-299-5p | jt:ENSG00000109667 | SLC2A9  
CATTGGAGG | ENSG00000207961 | hsa-mir-496 | hsa-miR-496 | jt:ENSG00000136099 | PCDH8  
CATTGGTGG | ENSG00000207947 | hsa-mir-152 | hsa-miR-152 | jt:ENSG00000158796 | DEDD  
CATTGTGCC | ENSG00000198981 | hsa-mir-29a | hsa-miR-29a | jt:ENSG00000136487 | GH2  
CATTATATG | ENSG00000198975 | hsa-let-7a-2 | hsa-miR-7a | jt:ENSG00000183035 | CYLC1  
CATTTCAGG | ENSG00000207947 | hsa-mir-152 | hsa-miR-152 | jt:ENSG00000070731 | ST6GALNAC2  
CATTTCAGG | ENSG00000207947 | hsa-mir-152 | hsa-miR-152 | jt:ENSG00000139218 | SFRS21P  
CATTTCAGG | ENSG00000207947 | hsa-mir-152 | hsa-miR-152 | jt:ENSG00000156642 | NPTN  
CATTGGCCC | ENSG00000207980 | hsa-mir-23a | hsa-miR-23a | jt:ENSG00000167774 | NDUFA7  
CATTGGCCC | ENSG00000209707 | hsa-mir-24-2 | hsa-miR-24 | jt:ENSG00000150967 | ABCB9  
CATTGGCCC | ENSG00000209707 | hsa-mir-24-2 | hsa-miR-24 | jt:ENSG00000160404 | TOR2A  
CATTTTGAG | ENSG00000207705 | hsa-mir-129-1 | hsa-miR-129 | jt:ENSG00000198693 | Q6ZW86\_HUMAN  
CCAAAACCT | ENSG00000207752 | hsa-mir-199a-1 | hsa-miR-199a\* | jt:ENSG00000157423 | Q4G0P3-5  
CCAAAAGGC | ENSG00000207698 | hsa-mir-32 | hsa-miR-32 | jt:ENSG00000162692 | VCAM1  
CCAAAAGTAG | ENSG00000207572 | hsa-mir-363 | hsa-miR-363 | jt:ENSG00000178110 | Q8N9G9\_HUMAN  
CCAAAAGTTC | ENSG00000199077 | hsa-mir-129-2 | hsa-miR-129 | jt:ENSG00000178602 | OTOS  
CCAAAAGTTC | ENSG00000199077 | hsa-mir-129-2 | hsa-miR-129 | jt:ENSG00000198518 | HIST1H4E  
CCAAAATGAG | ENSG00000207567 | hsa-mir-142 | hsa-miR-142-3p | jt:ENSG00000134852 | CLOCK  
CCAAAATGAG | ENSG00000207567 | hsa-mir-142 | hsa-miR-142-3p | jt:ENSG00000123843 | C4BFB  
CCAAAATGCG | ENSG00000194717 | hsa-mir-494 | hsa-miR-494 | jt:ENSG00000184014 | RAB6IP1  
CCAAAATGCG | ENSG00000194717 | hsa-mir-494 | hsa-miR-494 | jt:ENSG00000127928 | NGNT1  
CCAAAATGCG | ENSG00000199020 | hsa-mir-381 | hsa-miR-381 | jt:ENSG00000116830 | TTF2  
CCAAAATGCG | ENSG00000199020 | hsa-mir-381 | hsa-miR-381 | jt:ENSG00000127914 | AKAP9  
CCAAAATGCG | ENSG00000199020 | hsa-mir-381 | hsa-miR-381 | jt:ENSG00000145495 | MARCH6  
CCAAAATGCG | ENSG00000199025 | hsa-mir-369 | hsa-miR-369-3p | jt:ENSG00000170430 | MGMT

CCAATGGC | ENSG00000199025 | hsa-mir-369 | hsa-miR-369-3p | jt:ENSG00000162897 | FCAMR  
 CCAATGGC | ENSG00000199107 | hsa-mir-409 | hsa-miR-409-5p | jt:ENSG00000127928 | NGT1  
 CCAATGGC | ENSG00000207743 | hsa-mir-495 | hsa-miR-495 | jt:ENSG00000145495 | MARCH6  
 CCAATGGC | ENSG00000207749 | hsa-mir-299 | hsa-miR-299-5p | jt:ENSG00000165443 | PHYHIP1  
 CCAATGGC | ENSG00000207749 | hsa-mir-299 | hsa-miR-299-5p | jt:ENSG00000168427 | KLHL30  
 CCAATGGC | ENSG00000207761 | hsa-mir-329-1 | hsa-miR-329 | jt:ENSG00000158528 | PPIR9A  
 CCAATGGG | ENSG00000207808 | hsa-mir-27a | hsa-miR-27a | jt:ENSG00000188091 | C9orf164  
 CCAATGGG | ENSG00000207980 | hsa-mir-23a | hsa-miR-23a | jt:ENSG00000067066 | SP100  
 CCAATGGG | ENSG00000207980 | hsa-mir-23a | hsa-miR-23a | jt:ENSG00000103591 | P34\_HUMAN  
 CCAATGGG | ENSG00000211590 | hsa-mir-802 | hsa-miR-802 | jt:ENSG00000081154 | PCNP  
 CCAACATGG | ENSG00000207567 | hsa-mir-142 | hsa-miR-142-3p | jt:ENSG00000094975 | Clorf9  
 CCAACATGG | ENSG00000207567 | hsa-mir-142 | hsa-miR-142-5p | jt:ENSG00000136816 | TOR1B  
 CCAACATGG | ENSG00000207954 | hsa-mir-138-1 | hsa-miR-138 | jt:ENSG00000136488 | CSH2  
 CCAACCAGA | ENSG00000199122 | hsa-mir-148b | hsa-miR-148b | jt:ENSG00000122783 | C7orf49  
 CCAACCAGA | ENSG00000207596 | hsa-mir-194-2 | hsa-miR-194 | jt:ENSG00000040933 | INPP4A  
 CCAACCATC | ENSG00000198972 | hsa-let-7e | hsa-let-7e | jt:ENSG00000135821 | GLUL  
 CCAACCATC | ENSG00000207610 | hsa-mir-19a | hsa-miR-19a | jt:ENSG00000054965 | KIAA0280  
 CCAACCATC | ENSG00000207610 | hsa-mir-19a | hsa-miR-19a | jt:ENSG00000175264 | CHST1  
 CCAACCATC | ENSG00000207610 | hsa-mir-19a | hsa-miR-19a | jt:ENSG00000101773 | RBBP8  
 CCAACCATC | ENSG00000207745 | hsa-mir-17 | hsa-miR-17-5p | jt:ENSG00000131584 | CENTB5  
 CCAACGCAG | ENSG00000199024 | hsa-mir-103-2 | hsa-miR-103 | jt:ENSG00000182077 | PTCHD3  
 CCAACTTCA | ENSG00000199015 | hsa-mir-377 | hsa-miR-377 | jt:ENSG00000131188 | PRR7  
 CCAACTTCA | ENSG00000199025 | hsa-mir-369 | hsa-miR-369-5p | jt:ENSG00000173714 | WFIKKN2  
 CCAACTTCA | ENSG00000199092 | hsa-mir-410 | hsa-miR-410 | jt:ENSG00000106078 | COBL  
 CCAACTTCA | ENSG00000207761 | hsa-mir-329-1 | hsa-miR-329 | jt:ENSG00000106078 | COBL  
 CCAACTTCA | ENSG00000207961 | hsa-mir-496 | hsa-miR-496 | jt:ENSG00000127241 | MASP1  
 CCAACTTCA | ENSG00000207961 | hsa-mir-496 | hsa-miR-496 | jt:ENSG00000135114 | OASL  
 CCAACTTTC | ENSG00000199187 | hsa-mir-365-2 | hsa-miR-365 | jt:ENSG00000102287 | GABRE  
 CCAACTTTC | ENSG00000199187 | hsa-mir-365-2 | hsa-miR-365 | jt:ENSG00000184860 | NP\_660151.2  
 CCAACTTTC | ENSG00000207614 | hsa-mir-193a | hsa-miR-193a | jt:ENSG00000188786 | MTF1  
 CCAAGATGG | ENSG00000199036 | hsa-mir-219-1 | hsa-miR-219 | jt:ENSG00000095066 | HOOK2  
 CCAAGTAAG | ENSG00000199059 | hsa-mir-135b | hsa-miR-135b | jt:ENSG00000122778 | Q9HCM3\_HUMAN  
 CCAAGTCAC | ENSG00000199161 | hsa-mir-126 | hsa-miR-126 | jt:ENSG00000100284 | TOM1  
 CCAAGTCAC | ENSG00000199161 | hsa-mir-126 | hsa-miR-126 | jt:ENSG00000172889 | EGF17  
 CCAAGTCAC | ENSG00000199161 | hsa-mir-126 | hsa-miR-126\* | jt:ENSG00000104953 | TLE6  
 CCAAGTCAC | ENSG00000199161 | hsa-mir-126 | hsa-miR-126\* | jt:ENSG00000112874 | NUDT12  
 CCAAGTTAC | ENSG00000199177 | hsa-mir-31 | hsa-miR-31 | jt:ENSG00000100380 | ST13  
 CCAATAAAG | ENSG00000199122 | hsa-mir-148b | hsa-miR-148b | jt:ENSG00000135541 | AH1  
 CCAATAAAG | ENSG00000199122 | hsa-mir-148b | hsa-miR-148b | jt:ENSG00000179426 | C14orf28  
 CCAATCC | ENSG00000199059 | hsa-mir-135b | hsa-miR-135b | jt:ENSG00000058056 | USP13  
 CCAATCCAG | ENSG00000207585 | hsa-mir-181d | hsa-miR-181d | jt:ENSG00000150712 | MTMR12  
 CCAATCCGG | ENSG00000207926 | hsa-mir-135a-1 | hsa-miR-135a | jt:ENSG00000058056 | USP13  
 CCAATCGCA | ENSG00000208017 | hsa-mir-140 | hsa-miR-140 | jt:ENSG00000082701 | GSK3B  
 CCAATCGCA | ENSG00000208017 | hsa-mir-140 | hsa-miR-140 | jt:ENSG00000188816 | HMX2  
 CCAATCGGC | ENSG00000207638 | hsa-mir-99a | hsa-miR-99a | jt:ENSG0000013297 | CLDN11  
 CCAATCGGC | ENSG00000207638 | hsa-mir-99a | hsa-miR-99a | jt:ENSG00000136144 | RCBTB1  
 CCAATGCC | ENSG00000207604 | hsa-mir-206 | hsa-miR-206 | jt:ENSG00000166747 | APIG1  
 CCACAAAAG | ENSG00000207611 | hsa-mir-149 | hsa-miR-149 | jt:ENSG00000038532 | KIAA0350  
 CCACAAACC | ENSG00000199177 | hsa-mir-31 | hsa-miR-31 | jt:ENSG00000107854 | TNKS2  
 CCACAGGG | ENSG00000207649 | hsa-mir-138-2 | hsa-miR-138 | jt:ENSG00000131669 | NINJ1  
 CCACATAAA | ENSG00000207581 | hsa-mir-199b | hsa-miR-199b | jt:ENSG00000130021 | HDHD1A  
 CCACATC | ENSG00000199158 | hsa-mir-96 | hsa-miR-96 | jt:ENSG00000198826 | ARHGAP11a  
 CCACATC | ENSG00000207691 | hsa-mir-183 | hsa-miR-183 | jt:ENSG00000198826 | ARHGAP11a  
 CCACATC | ENSG00000207990 | hsa-mir-182 | hsa-miR-182 | jt:ENSG00000137312 | FLOT1  
 CCACATGCC | ENSG00000194717 | hsa-mir-494 | hsa-miR-494 | jt:ENSG00000176083 | ZNF683  
 CCACATGCC | ENSG00000199015 | hsa-mir-377 | hsa-miR-377 | jt:ENSG00000131188 | PRR7  
 CCACATGCC | ENSG00000199020 | hsa-mir-381 | hsa-miR-381 | jt:ENSG00000105641 | SLC5A5  
 CCACATGCC | ENSG00000199020 | hsa-mir-381 | hsa-miR-381 | jt:ENSG00000156650 | MYST4  
 CCACATGCC | ENSG00000199025 | hsa-mir-369 | hsa-miR-369-3p | jt:ENSG00000174437 | ATP2A2  
 CCACATGCC | ENSG00000199025 | hsa-mir-369 | hsa-miR-369-5p | jt:ENSG00000134954 | ETS1  
 CCACATGCC | ENSG00000199025 | hsa-mir-369 | hsa-miR-369-5p | jt:ENSG00000164616 | FXL21  
 CCACATGCC | ENSG00000199025 | hsa-mir-369 | hsa-miR-369-5p | jt:ENSG00000188234 | XR\_016668.1  
 CCACATGCC | ENSG00000199092 | hsa-mir-410 | hsa-miR-410 | jt:ENSG00000157426 | NP\_861522.2  
 CCACATGCC | ENSG00000207743 | hsa-mir-495 | hsa-miR-495 | jt:ENSG00000164164 | OTUD4  
 CCACATGCC | ENSG00000207749 | hsa-mir-299 | hsa-miR-299-5p | jt:ENSG00000130656 | HBZ  
 CCACATGCC | ENSG00000207749 | hsa-mir-299 | hsa-miR-299-5p | jt:ENSG00000205631 | Q9H7S7\_HUMAN  
 CCACATGCC | ENSG00000207754 | hsa-mir-487b | hsa-miR-487b | jt:ENSG00000156650 | MYST4  
 CCACATGCC | ENSG00000207961 | hsa-mir-496 | hsa-miR-496 | jt:ENSG00000169131 | ZNF354A  
 CCACATGGA | ENSG00000207950 | hsa-mir-296 | hsa-miR-296 | jt:ENSG00000206158 | Q6ZVG4\_HUMAN  
 CCACCAA | ENSG00000207694 | hsa-mir-1-2 | hsa-miR-1 | jt:ENSG00000094755 | GABRP  
 CCACCAACG | ENSG00000199161 | hsa-mir-126 | hsa-miR-126 | jt:ENSG00000172889 | EGF17  
 CCACCTAGG | ENSG00000208017 | hsa-mir-140 | hsa-miR-140 | jt:ENSG00000154096 | THY1  
 CCACCG | ENSG00000199032 | hsa-mir-425 | hsa-miR-425-3p | jt:ENSG0000015479 | MATR3  
 CCACCG | ENSG00000199032 | hsa-mir-425 | hsa-miR-425-3p | jt:ENSG00000053524 | MCF2L2  
 CCACCG | ENSG00000199032 | hsa-mir-425 | hsa-miR-425-3p | jt:ENSG00000067560 | RHOA  
 CCACGTCTC | ENSG00000199161 | hsa-mir-126 | hsa-miR-126 | jt:ENSG00000172889 | EGF17  
 CCACGTCTC | ENSG00000199161 | hsa-mir-126 | hsa-miR-126\* | jt:ENSG00000205808 | PPAPDC2  
 CCACGTTA | ENSG00000199024 | hsa-mir-103-2 | hsa-miR-103 | jt:ENSG00000100697 | DICER1  
 CCACGTTTC | ENSG00000207604 | hsa-mir-206 | hsa-miR-206 | jt:ENSG00000205358 | MT1H  
 CCACTTATA | ENSG00000207586 | hsa-mir-135a-2 | hsa-miR-135a | jt:ENSG00000135452 | TSPAN31  
 CCAGACCAA | ENSG00000198976 | hsa-mir-429 | hsa-miR-429 | jt:ENSG00000135723 | FHOD1  
 CCAGACCAA | ENSG00000207607 | hsa-mir-200a | hsa-miR-200a | jt:ENSG00000177125 | ZBTB34  
 CCAGACCAA | ENSG00000207730 | hsa-mir-200b | hsa-miR-200b | jt:ENSG00000135723 | FHOD1  
 CCAGACCAA | ENSG00000207730 | hsa-mir-200b | hsa-miR-200b | jt:ENSG00000104972 | LILRB1  
 CCAGAGTCG | ENSG00000199036 | hsa-mir-219-1 | hsa-miR-219 | jt:ENSG00000165948 | FAM14B  
 CCAGATAAA | ENSG00000207789 | hsa-mir-26a-2 | hsa-miR-26a | jt:ENSG00000114648 | KLHL18  
 CCAGATAGA | ENSG00000199102 | hsa-mir-302c | hsa-miR-302c\* | jt:ENSG00000151224 | MAT1A  
 CCAGATAGA | ENSG00000199169 | hsa-mir-367 | hsa-miR-367 | jt:ENSG00000148704 | VAX1  
 CCAGATAGA | ENSG00000207731 | hsa-mir-506 | hsa-miR-506 | jt:ENSG00000183686 | MAGEA5  
 CCAGATAGA | ENSG00000207731 | hsa-mir-506 | hsa-miR-506 | jt:ENSG00000168528 | SERINC2  
 CCAGATGCG | ENSG00000207752 | hsa-mir-199a-1 | hsa-miR-199a\* | jt:ENSG00000005884 | ITGA3  
 CCAGATGCG | ENSG00000207752 | hsa-mir-199a-1 | hsa-miR-199a\* | jt:ENSG00000105329 | TGFBI  
 CCAGATGTC | ENSG00000198973 | hsa-mir-375 | hsa-miR-375 | jt:ENSG00000092140 | KIAA1333  
 CCAGATGTC | ENSG00000207784 | hsa-mir-542 | hsa-miR-542-3p | jt:ENSG00000126561 | STAT5A  
 CCAGCCCA | ENSG00000199059 | hsa-mir-135b | hsa-miR-135b | jt:ENSG00000103005 | C16orf57  
 CCAGCCGAA | ENSG00000207611 | hsa-mir-149 | hsa-miR-149 | jt:ENSG00000068796 | KIF2A  
 CCAGCCTTA | ENSG00000207819 | hsa-mir-9-3 | hsa-miR-9 | jt:ENSG00000124198 | ARFGEP2  
 CCAGCGCCA | ENSG00000207949 | hsa-mir-214 | hsa-miR-214 | jt:ENSG00000089177 | C20orf23  
 CCAGGG | ENSG00000207791 | hsa-mir-497 | hsa-miR-497 | jt:ENSG00000119403 | PHF19  
 CCAGGG | ENSG00000207929 | hsa-mir-195 | hsa-miR-195 | jt:ENSG00000119403 | PHF19  
 CCAGGG | ENSG00000207948 | hsa-mir-328 | hsa-miR-328 | jt:ENSG00000185332 | TMEM105  
 CCAGGTAGC | ENSG00000207624 | hsa-mir-194-1 | hsa-miR-194 | jt:ENSG00000198901 | PRC1  
 CCAGTGACC | ENSG00000198974 | hsa-mir-30e | hsa-miR-30e-5p | jt:ENSG00000161998 | Q8N221\_HUMAN  
 CCAGTGACC | ENSG00000207962 | hsa-mir-30c-1 | hsa-miR-30c | jt:ENSG00000161998 | Q8N221\_HUMAN  
 CCAGTGTC | ENSG00000198974 | hsa-mir-30e | hsa-miR-30e-5p | jt:ENSG00000161896 | IHPK3

CCAGTGTC|ENSG00000198974|hsa-mir-30e|hsa-miR-30e-5p|jt:ENSG00000162968|Q96MQ0\_HUMAN  
CCAGTGTC|ENSG00000207962|hsa-mir-30c-1|hsa-miR-30c|jt:ENSG00000161896|IHPK3  
CCAGTGTC|ENSG00000207962|hsa-mir-30c-1|hsa-miR-30c|jt:ENSG00000162968|Q96MQ0\_HUMAN  
CCATAATTA|ENSG00000207863|hsa-mir-125b-2|hsa-miR-125b|jt:ENSG00000172531|PPP1CA  
CCATGACAA|ENSG00000207585|hsa-mir-181d|hsa-miR-181d|jt:ENSG00000134152|C15orf29  
CCATCACAC|ENSG00000207933|hsa-mir-9-1|hsa-miR-9\*|jt:ENSG00000103061|SLC7A6OS  
CCATCACAC|ENSG00000207933|hsa-mir-9-1|hsa-miR-9\*|jt:ENSG00000131242|RAB11FIP4  
CCATCACAC|ENSG00000207933|hsa-mir-9-1|hsa-miR-9\*|jt:ENSG00000163110|PDLIM5  
CCATCACAC|ENSG00000207933|hsa-mir-9-1|hsa-miR-9\*|jt:ENSG00000188519|Q7Z4Q0\_HUMAN  
CCATCGGG|ENSG00000198972|hsa-let-7e|hsa-let-7e|jt:ENSG00000139998|RAB15  
CCATCTTAC|ENSG00000199135|hsa-mir-101-1|hsa-miR-101|jt:ENSG00000120733|JMJD1B  
CCATGACAA|ENSG00000207618|hsa-mir-144|hsa-miR-144|jt:ENSG00000151690|NP\_060164.3  
CCATGACAA|ENSG00000207618|hsa-mir-144|hsa-miR-144|jt:ENSG00000165899|C12orf64  
CCATGTGCC|ENSG00000199020|hsa-mir-381|hsa-miR-381|jt:ENSG0000011304|PTBP1  
CCATGTGCC|ENSG00000199020|hsa-mir-381|hsa-miR-381|jt:ENSG00000131003|RMY2FP  
CCATGTGCC|ENSG00000199025|hsa-mir-369|hsa-miR-369-3p|jt:ENSG00000131003|RMY2FP  
CCATGTGCC|ENSG00000199025|hsa-mir-369|hsa-miR-369-5p|jt:ENSG00000120963|ZNF706  
CCATGTGCC|ENSG00000199025|hsa-mir-369|hsa-miR-369-5p|jt:ENSG00000179598|NP\_849158.1  
CCATGTGCC|ENSG00000199092|hsa-mir-410|hsa-miR-410|jt:ENSG00000181368|NM\_032947.3  
CCATGTGCC|ENSG00000199107|hsa-mir-409|hsa-miR-409-5p|jt:ENSG00000143198|MGST3  
CCATGTGCC|ENSG00000207754|hsa-mir-487b|hsa-miR-487b|jt:ENSG00000122854|SFTPA2B  
CCATGTGCC|ENSG00000207754|hsa-mir-487b|hsa-miR-487b|jt:ENSG00000152422|XRCC4  
CCATGTGCC|ENSG00000207754|hsa-mir-487b|hsa-miR-487b|jt:ENSG00000182314|SFTPA2  
CCATGTGCC|ENSG00000207761|hsa-mir-329-1|hsa-miR-329|jt:ENSG00000110786|PTPN5  
CCATGTGCC|ENSG00000207761|hsa-mir-329-1|hsa-miR-329|jt:ENSG00000156471|PTDSS1  
CCATTAA|ENSG00000207572|hsa-mir-363|hsa-miR-363|jt:ENSG00000138757|G3BP2  
CCATTACC|ENSG00000199072|hsa-let-7f-1|hsa-let-7f|jt:ENSG0000023902|PLEKH01  
CCATTACC|ENSG00000199072|hsa-let-7f-1|hsa-let-7f|jt:ENSG00000106367|AP1S1  
CCATTACC|ENSG00000199133|hsa-let-7d|hsa-let-7d|jt:ENSG00000106367|AP1S1  
CCATTACC|ENSG00000199165|hsa-let-7a-1|hsa-let-7a|jt:ENSG0000023902|PLEKH01  
CCATTACC|ENSG00000199165|hsa-let-7a-1|hsa-let-7a|jt:ENSG00000106367|AP1S1  
CCATTACC|ENSG00000207950|hsa-mir-296|hsa-miR-296|jt:ENSG00000188191|PRKAR1B  
CCATTGTC|ENSG00000198981|hsa-mir-29a|hsa-miR-29a|jt:ENSG00000130032|PRRG3  
CCATTCTTA|ENSG00000199077|hsa-mir-129-2|hsa-miR-129|jt:ENSG00000111671|SPSB2  
CCATTGGA|ENSG00000207562|hsa-mir-34c|hsa-miR-34c|jt:ENSG00000120708|TGFB1  
CCATTGGA|ENSG00000207811|hsa-mir-34b|hsa-miR-34b|jt:ENSG00000120708|TGFB1  
CCATTGTC|ENSG00000207808|hsa-mir-27a|hsa-miR-27a|jt:ENSG00000169118|CSNK1G1  
CCATTGTC|ENSG00000207980|hsa-mir-23a|hsa-miR-23a|jt:ENSG00000158470|B4GALT5  
CCCACTTA|ENSG00000207739|hsa-mir-218-2|hsa-miR-218|jt:ENSG00000112214|FHL5  
CCCAAGTC|ENSG00000199020|hsa-mir-381|hsa-miR-381|jt:ENSG00000115464|USP34  
CCCAAGTC|ENSG00000199025|hsa-mir-369|hsa-miR-369-3p|jt:ENSG00000101974|ATP11C  
CCCAAGTC|ENSG00000199025|hsa-mir-369|hsa-miR-369-5p|jt:ENSG00000169925|BRD3  
CCCAAGTC|ENSG00000207749|hsa-mir-299|hsa-miR-299-5p|jt:ENSG00000101974|ATP11C  
CCCAAGTC|ENSG00000207761|hsa-mir-329-1|hsa-miR-329|jt:ENSG00000166619|BLCAP  
CCCAAGTC|ENSG00000207961|hsa-mir-496|hsa-miR-496|jt:ENSG00000115464|USP34  
CCCAATGAG|ENSG00000199122|hsa-mir-148b|hsa-miR-148b|jt:ENSG00000059728|MXD1  
CCCAACTA|ENSG00000207604|hsa-mir-206|hsa-miR-206|jt:ENSG00000162105|SHANK2  
CCCAATGA|ENSG00000207950|hsa-mir-296|hsa-miR-296|jt:ENSG00000141526|SLC16A3  
CCCACTTA|ENSG00000199065|hsa-mir-101-2|hsa-miR-101|jt:ENSG00000104067|TJP1  
CCCACTAA|ENSG00000199085|hsa-mir-148a|hsa-miR-148a|jt:ENSG00000205036|NP\_001001682.1  
CCCACTAA|ENSG00000207809|hsa-mir-139|hsa-miR-139|jt:ENSG00000143479|DYRK3  
CCCAGG|ENSG00000207713|hsa-mir-200c|hsa-miR-200c|jt:ENSG00000158716|DUSP23  
CCCAGGATA|ENSG00000198986|hsa-let-7a-3|hsa-let-7a|jt:ENSG00000134259|NGFB  
CCCAGGATA|ENSG00000207875|hsa-let-7b|hsa-let-7b|jt:ENSG00000134259|NGFB  
CCCAGGTA|ENSG00000207713|hsa-mir-200c|hsa-miR-200c|jt:ENSG00000185652|NTF3  
CCCACTTA|ENSG00000208024|hsa-mir-199a-2|hsa-miR-199a\*|jt:ENSG00000137936|BCAR3  
CCCATACC|ENSG00000207596|hsa-mir-194-2|hsa-miR-194|jt:ENSG00000177853|ZNF518  
CCCATC|ENSG00000199085|hsa-mir-148a|hsa-miR-148a|jt:ENSG00000187010|RHD  
CCCATGCAA|ENSG00000198974|hsa-mir-30e|hsa-miR-30e-5p|jt:ENSG00000128606|LRRC17  
CCCATGCAA|ENSG00000198976|hsa-mir-429|hsa-miR-429|jt:ENSG00000134874|DZIP1  
CCCATGCAA|ENSG00000207607|hsa-mir-200a|hsa-miR-200a|jt:ENSG00000203814|HIST2H2BF  
CCCATGCAA|ENSG00000207607|hsa-mir-200a|hsa-miR-200a\*|jt:ENSG00000166340|TPP1  
CCCATGCAA|ENSG00000207730|hsa-mir-200b|hsa-miR-200b|jt:ENSG00000134874|DZIP1  
CCCATGCAA|ENSG00000207962|hsa-mir-30c-1|hsa-miR-30c|jt:ENSG00000128606|LRRC17  
CCCATGTA|ENSG00000199092|hsa-mir-410|hsa-miR-410|jt:ENSG00000138814|PPP3CA  
CCCATGTA|ENSG00000207743|hsa-mir-495|hsa-miR-495|jt:ENSG00000083307|GRHL2  
CCCATGTA|ENSG00000207743|hsa-mir-495|hsa-miR-495|jt:ENSG00000162437|RAVER2  
CCCATGAC|ENSG00000208036|hsa-mir-106b|hsa-miR-106b|jt:ENSG00000141699|NP\_835227.1  
CCCATGAC|ENSG00000208036|hsa-mir-106b|hsa-miR-106b|jt:ENSG00000161048|NP\_945341.2  
CCCATGGC|ENSG00000207630|hsa-mir-7-3|hsa-miR-7|jt:ENSG00000174106|LEMD3  
CCCATAGG|ENSG00000207926|hsa-mir-135a-1|hsa-miR-135a|jt:ENSG00000137090|DMRT1  
CCCATTTAA|ENSG00000207572|hsa-mir-363|hsa-miR-363|jt:ENSG00000138757|G3BP2  
CCCATTTAA|ENSG00000207602|hsa-mir-106a|hsa-miR-106a|jt:ENSG00000204118|NAP1L6  
CCCATTTAA|ENSG00000199036|hsa-mir-219-1|hsa-miR-219|jt:ENSG00000196684|HSH2D  
CCCCC|ENSG00000198976|hsa-mir-429|hsa-miR-429|jt:ENSG00000125954|FNTE  
CCCCC|ENSG00000207607|hsa-mir-200a|hsa-miR-200a|jt:ENSG00000148704|VAX1  
CCCCC|ENSG00000207730|hsa-mir-200b|hsa-miR-200b|jt:ENSG00000125954|FNTE  
CCCCC|ENSG00000207808|hsa-mir-27a|hsa-miR-27a|jt:ENSG00000103160|HSDL1  
CCCCCCCAG|ENSG00000198986|hsa-let-7a-3|hsa-let-7a|jt:ENSG00000136490|LIMD2  
CCCCCCCAG|ENSG00000207875|hsa-let-7b|hsa-let-7b|jt:ENSG00000136490|LIMD2  
CCCCCG|ENSG00000199032|hsa-mir-425|hsa-miR-425-3p|jt:ENSG00000170852|KBTBD2  
CCCCCTCA|ENSG00000207808|hsa-mir-27a|hsa-miR-27a|jt:ENSG00000188091|C9orf164  
CCCCCGG|ENSG00000207960|hsa-mir-153-2|hsa-miR-153|jt:ENSG00000143494|VASH2  
CCCCGTGC|ENSG00000199015|hsa-mir-377|hsa-miR-377|jt:ENSG00000099365|STX1B2  
CCCCGTGC|ENSG00000207743|hsa-mir-495|hsa-miR-495|jt:ENSG00000169710|FASN  
CCCCGTGC|ENSG00000207749|hsa-mir-299|hsa-miR-299-5p|jt:ENSG00000196338|NLGN3  
CCCCGTGC|ENSG00000207761|hsa-mir-329-1|hsa-miR-329|jt:ENSG00000187068|NP\_001020437.1  
CCCCGTGC|ENSG00000207961|hsa-mir-496|hsa-miR-496|jt:ENSG00000205325|NP\_001001684.1  
CCCCCT|ENSG00000207933|hsa-mir-9-1|hsa-miR-9|jt:ENSG00000109113|RAB34  
CCCCCT|ENSG00000207933|hsa-mir-9-1|hsa-miR-9\*|jt:ENSG00000130962|PRRG1  
CCCCCCC|ENSG00000207623|hsa-mir-205|hsa-miR-205|jt:ENSG00000186474|KLK12  
CCCCCTTA|ENSG00000199077|hsa-mir-129-2|hsa-miR-129|jt:ENSG00000172482|AGXT  
CCCCGTGC|ENSG00000202641|hsa-mir-484|hsa-miR-484|jt:ENSG00000178726|THBD  
CCCCGTGC|ENSG00000202641|hsa-mir-484|hsa-miR-484|jt:ENSG00000197019|SERTAD1  
CCCCTTAGG|ENSG00000207617|hsa-mir-24-1|hsa-miR-24|jt:ENSG00000100897|WDR23  
CCCCTTAGG|ENSG00000208009|hsa-mir-130a|hsa-miR-130a|jt:ENSG00000110367|DDX6  
CCCCTTAGG|ENSG00000208009|hsa-mir-130a|hsa-miR-130a|jt:ENSG00000161638|ITGA5  
CCCCTTAGG|ENSG00000208009|hsa-mir-130a|hsa-miR-130a|jt:ENSG00000179950|NP\_055096.2  
CCCCTTC|ENSG00000199036|hsa-mir-219-1|hsa-miR-219|jt:ENSG0000018625|ATP1A2  
CCCCTTC|ENSG00000207933|hsa-mir-9-1|hsa-miR-9\*|jt:ENSG00000102038|SMARCA1  
CCCCTTC|ENSG00000207933|hsa-mir-9-1|hsa-miR-9\*|jt:ENSG00000184083|FAM120C  
CCCCTTTC|ENSG00000198974|hsa-mir-30e|hsa-miR-30e-3p|jt:ENSG00000065923|SLC9A7  
CCCCTTTC|ENSG00000198974|hsa-mir-30e|hsa-miR-30e-3p|jt:ENSG00000175155|YPEL2  
CCCCTTTC|ENSG00000198974|hsa-mir-30e|hsa-miR-30e-5p|jt:ENSG00000175155|YPEL2  
CCCCTTTC|ENSG00000207962|hsa-mir-30c-1|hsa-miR-30c|jt:ENSG00000175155|YPEL2

CCCGAAATC|ENSG00000198973|hsa-mir-375|hsa-miR-375|jt:ENSG00000170653|ATP7  
CCCGCG|ENSG00000207568|hsa-mir-203|hsa-miR-203|jt:ENSG00000133216|EPHB2  
CCCGCG|ENSG00000207568|hsa-mir-203|hsa-miR-203|jt:ENSG00000197724|PHF2  
CCCGCG|ENSG00000207960|hsa-mir-153-2|hsa-miR-153|jt:ENSG00000113763|UNC5A  
CCCGCGC|ENSG00000199032|hsa-mir-425|hsa-miR-425-3p|jt:ENSG00000181798|C2orf52  
CCCGCGC|ENSG00000207611|hsa-mir-149|hsa-miR-149|jt:ENSG00000158966|CACHD1  
CCCGCGC|ENSG00000207611|hsa-mir-149|hsa-miR-149|jt:ENSG00000158966|CACHD1  
CCCGCGC|ENSG00000207611|hsa-mir-149|hsa-miR-149|jt:ENSG00000169991|Q5TF58\_HUMAN  
CCCGCGC|ENSG00000207611|hsa-mir-149|hsa-miR-149|jt:ENSG00000187609|NP\_060290.3  
CCCGCGC|ENSG00000207953|hsa-mir-212|hsa-miR-212|jt:ENSG00000188290|HES4  
CCCGCGC|ENSG00000207953|hsa-mir-212|hsa-miR-212|jt:ENSG00000055732|MCOLN3  
CCCGCGC|ENSG00000198973|hsa-mir-375|hsa-miR-375|jt:ENSG00000163642|XR\_017284.1  
CCCGGG|ENSG00000198973|hsa-mir-375|hsa-miR-375|jt:ENSG00000047410|TPR  
CCCGGG|ENSG00000207568|hsa-mir-203|hsa-miR-203|jt:ENSG00000133216|EPHB2  
CCCGTCAGC|ENSG00000207751|hsa-mir-130b|hsa-miR-130b|jt:ENSG00000120509|PDZD11  
CCCGTCAGC|ENSG00000207751|hsa-mir-130b|hsa-miR-130b|jt:ENSG00000181751|C5orf30  
CCCGTGAGC|ENSG00000199089|hsa-mir-202|hsa-miR-202|jt:ENSG00000162104|ADCY9  
CCCTACTTA|ENSG00000198974|hsa-mir-30e|hsa-miR-30e-5p|jt:ENSG00000143590|EFNA3  
CCCTACTTA|ENSG00000207962|hsa-mir-30c-1|hsa-miR-30c|jt:ENSG00000143590|EFNA3  
CCCTCATT|ENSG00000199130|hsa-mir-365-1|hsa-miR-365|jt:ENSG00000183735|TBK1  
CCCTCCGCC|ENSG00000198973|hsa-mir-375|hsa-miR-375|jt:ENSG00000117519|CNN3  
CCCTCTAGG|ENSG00000207808|hsa-mir-27a|hsa-miR-27a|jt:ENSG00000173221|GLRX  
CCCTCTAGG|ENSG00000207980|hsa-mir-23a|hsa-miR-23a|jt:ENSG00000185220|PGBD2  
CCCTCTTGA|ENSG00000198972|hsa-let-7e|hsa-let-7e|jt:ENSG00000135441|BLOC1S1  
CCCTGACAA|ENSG00000207635|hsa-mir-499|hsa-miR-499|jt:ENSG00000161265|U2AF1L4  
CCCTGGCC|ENSG00000199059|hsa-mir-135b|hsa-miR-135b|jt:ENSG00000136867|SLC31A2  
CCCTGGCCG|ENSG00000207954|hsa-mir-138-1|hsa-miR-138|jt:ENSG00000171861|RNMTL1  
CCCTGGGA|ENSG00000199059|hsa-mir-135b|hsa-miR-135b|jt:ENSG00000185294|NP\_787078.1  
CCCTGTCCG|ENSG00000202641|hsa-mir-484|hsa-miR-484|jt:ENSG00000099385|BCL7C  
CCCTTGCAA|ENSG00000207863|hsa-mir-125b-2|hsa-miR-125b|jt:ENSG00000073754|CD5L  
CCCTTGTC|ENSG00000194717|hsa-mir-494|hsa-miR-494|jt:ENSG00000162598|C1orf87  
CCCTTGTC|ENSG00000194717|hsa-mir-494|hsa-miR-494|jt:ENSG00000180316|PNPLA1  
CCCTTGTC|ENSG00000194717|hsa-mir-494|hsa-miR-494|jt:ENSG00000181784|ANG  
CCCTTGTC|ENSG00000199015|hsa-mir-377|hsa-miR-377|jt:ENSG00000166682|TMPRSS5  
CCCTTGTC|ENSG00000199020|hsa-mir-381|hsa-miR-381|jt:ENSG00000196976|LAGE3  
CCCTTGTC|ENSG00000199020|hsa-mir-381|hsa-miR-381|jt:ENSG00000138448|ITGAV  
CCCTTGTC|ENSG00000199025|hsa-mir-369|hsa-miR-369-5p|jt:ENSG00000138080|EMILIN1  
CCCTTGTC|ENSG00000207743|hsa-mir-495|hsa-miR-495|jt:ENSG00000121940|CLCC1  
CCCTTGTC|ENSG00000207754|hsa-mir-487b|hsa-miR-487b|jt:ENSG00000183831|ANKRD45  
CCGACGCGG|ENSG00000207562|hsa-mir-34c|hsa-miR-34c|jt:ENSG00000171314|PGAM1  
CCGACGCGG|ENSG00000207811|hsa-mir-34b|hsa-miR-34b|jt:ENSG00000171314|PGAM1  
CCGAGAAAC|ENSG00000199187|hsa-mir-365-2|hsa-miR-365|jt:ENSG00000123552|USP45  
CCGAGTCCA|ENSG00000198976|hsa-mir-429|hsa-miR-429|jt:ENSG00000134371|CDC73  
CCGAGTCCA|ENSG00000207607|hsa-mir-200a|hsa-miR-200a|jt:ENSG00000119688|ABCD4  
CCGAGTCCA|ENSG00000207730|hsa-mir-200b|hsa-miR-200b|jt:ENSG00000134371|CDC73  
CCGAGTTC|ENSG00000207933|hsa-mir-9-1|hsa-miR-9\*|jt:ENSG00000205036|NP\_001001682.1  
CCGATTTA|ENSG00000207708|hsa-mir-141|hsa-miR-141|jt:ENSG00000100181|CSNK1E  
CCGCAC|ENSG00000199121|hsa-mir-26b|hsa-miR-26b|jt:ENSG00000130675|HLXB9  
CCGCAC|ENSG00000199121|hsa-mir-26b|hsa-miR-26b|jt:ENSG00000128989|ARP19\_HUMAN  
CCGAGAAG|ENSG00000211590|hsa-mir-802|hsa-miR-802|jt:ENSG00000073910|FRY  
CCGCCCC|ENSG00000198974|hsa-mir-30e|hsa-miR-30e-5p|jt:ENSG00000180667|YOD1  
CCGCCCC|ENSG00000198974|hsa-mir-30e|hsa-miR-30e-5p|jt:ENSG00000196937|FAM3C  
CCGCCCC|ENSG00000207962|hsa-mir-30c-1|hsa-miR-30c|jt:ENSG00000180667|YOD1  
CCGCCCC|ENSG00000207962|hsa-mir-30c-1|hsa-miR-30c|jt:ENSG00000196937|FAM3C  
CCGCCCG|ENSG00000198973|hsa-mir-375|hsa-miR-375|jt:ENSG00000103241|FOXF1  
CCGCCCG|ENSG00000207698|hsa-mir-32|hsa-miR-32|jt:ENSG00000003393|ALS2  
CCGCCG|ENSG00000207611|hsa-mir-149|hsa-miR-149|jt:ENSG00000158966|CACHD1  
CCGCCG|ENSG00000207611|hsa-mir-149|hsa-miR-149|jt:ENSG00000169991|Q5TF58\_HUMAN  
CCGCCG|ENSG00000207611|hsa-mir-149|hsa-miR-149|jt:ENSG00000038532|KIAA0350  
CCGCCGTC|ENSG00000207764|hsa-mir-133a-2|hsa-miR-133a|jt:ENSG00000137507|LRRC32  
CCGCCTC|ENSG00000207630|hsa-mir-7-3|hsa-miR-7|jt:ENSG00000198824|C13orf8  
CCGCCAAAC|ENSG00000199161|hsa-mir-126|hsa-miR-126|jt:ENSG00000103489|XYLT1  
CCGCCAAAC|ENSG00000199161|hsa-mir-126|hsa-miR-126|jt:ENSG00000172889|EGFL7  
CCGCCAAAC|ENSG00000199161|hsa-mir-126|hsa-miR-126\*|jt:ENSG00000144840|RABL3  
CCGCCG|ENSG00000199032|hsa-mir-425|hsa-miR-425-3p|jt:ENSG00000108468|CBX1  
CCGCCG|ENSG00000207611|hsa-mir-149|hsa-miR-149|jt:ENSG00000158966|CACHD1  
CCGCCG|ENSG00000207611|hsa-mir-149|hsa-miR-149|jt:ENSG00000169991|Q5TF58\_HUMAN  
CCGCCG|ENSG00000207960|hsa-mir-153-2|hsa-miR-153|jt:ENSG00000113763|UNC5A  
CCGCCG|ENSG00000207960|hsa-mir-153-2|hsa-miR-153|jt:ENSG00000163605|PPP4R2  
CCGCTC|ENSG00000207562|hsa-mir-34c|hsa-miR-34c|jt:ENSG00000146216|TTBK1  
CCGCTC|ENSG00000207811|hsa-mir-34b|hsa-miR-34b|jt:ENSG00000146216|TTBK1  
CCGCTCAA|ENSG00000207955|hsa-mir-219-2|hsa-miR-219|jt:ENSG00000111371|SLC38A1  
CCGCTGAGC|ENSG00000207953|hsa-mir-212|hsa-miR-212|jt:ENSG00000134882|UBAC2  
CCGCTGGAG|ENSG00000208024|hsa-mir-199a-2|hsa-miR-199a\*|jt:ENSG00000198718|KIAA0423  
CCGGAAGGA|ENSG00000199024|hsa-mir-103-2|hsa-miR-103|jt:ENSG00000196204|Q6NUR6\_HUMAN  
CCGGACCAG|ENSG00000199161|hsa-mir-126|hsa-miR-126|jt:ENSG00000172889|EGFL7  
CCGGACCAG|ENSG00000199161|hsa-mir-126|hsa-miR-126\*|jt:ENSG00000170485|NPAS2  
CCGGAGACA|ENSG00000207947|hsa-mir-152|hsa-miR-152|jt:ENSG00000131269|ABCB7  
CCGGATGC|ENSG00000207865|hsa-mir-34a|hsa-miR-34a|jt:ENSG00000111678|C12orf57  
CCGGCAGCA|ENSG00000207950|hsa-mir-296|hsa-miR-296|jt:ENSG00000178175|ZNF366  
CCGGCATGC|ENSG00000199161|hsa-mir-126|hsa-miR-126|jt:ENSG00000105647|PIK3R2  
CCGGCATGC|ENSG00000199161|hsa-mir-126|hsa-miR-126|jt:ENSG00000172889|EGFL7  
CCGGCATGC|ENSG00000199161|hsa-mir-126|hsa-miR-126|jt:ENSG00000101421|CHMP4B  
CCGGCATGC|ENSG00000199161|hsa-mir-126|hsa-miR-126|jt:ENSG00000107758|PPP3CB  
CCGGCATGC|ENSG00000199161|hsa-mir-126|hsa-miR-126\*|jt:ENSG00000189266|PNRC2  
CCGGCATGC|ENSG00000208009|hsa-mir-130a|hsa-miR-130a|jt:ENSG00000189266|PNRC2  
CCGGCG|ENSG00000207728|hsa-mir-449b|hsa-miR-449b|jt:ENSG00000109956|B3GAT1  
CCGGCG|ENSG00000207728|hsa-mir-449b|hsa-miR-449b|jt:ENSG00000177303|CASKIN2  
CCGGCG|ENSG00000207728|hsa-mir-449b|hsa-miR-449b|jt:ENSG00000134070|TRAK2  
CCGGCTAA|ENSG00000199023|hsa-mir-339|hsa-miR-339|jt:ENSG00000136451|VEZF1  
CCGGGAATA|ENSG00000199085|hsa-mir-148a|hsa-miR-148a|jt:ENSG00000131269|ABCB7  
CCGGGG|ENSG00000198973|hsa-mir-375|hsa-miR-375|jt:ENSG00000163642|XR\_017284.1  
CCGGGG|ENSG00000198973|hsa-mir-375|hsa-miR-375|jt:ENSG00000183597|C22orf25  
CCGGGG|ENSG00000207960|hsa-mir-153-2|hsa-miR-153|jt:ENSG00000023228|NDUFS1  
CCGGGG|ENSG00000207960|hsa-mir-153-2|hsa-miR-153|jt:ENSG00000095015|MAP3K1  
CCGGGG|ENSG00000207960|hsa-mir-153-2|hsa-miR-153|jt:ENSG00000113763|UNC5A  
CCGGGG|ENSG00000207960|hsa-mir-153-2|hsa-miR-153|jt:ENSG00000157933|SKI  
CCGGGGG|ENSG00000198973|hsa-mir-375|hsa-miR-375|jt:ENSG00000103241|FOXF1  
CCGGGGG|ENSG00000198973|hsa-mir-375|hsa-miR-375|jt:ENSG00000163642|XR\_017284.1  
CCGGGGTAG|ENSG00000207617|hsa-mir-24-1|hsa-miR-189|jt:ENSG00000163558|PRKCI

CCGGGTTCG|ENSG00000207792|hsa-mir-151|hsa-miR-151 jt:ENSG00000108349|CASC3  
CCGGGTTCGA|ENSG00000207568|hsa-mir-203|hsa-miR-203 jt:ENSG00000162702|ZNF281  
CCGGGTGAC|ENSG00000207617|hsa-mir-24-1|hsa-miR-24 jt:ENSG00000157538|DSCR3  
CCGGTCCAC|ENSG00000199161|hsa-mir-126|hsa-miR-126 jt:ENSG00000130690|Q96154\_HUMAN  
CCGGTCCAC|ENSG00000199161|hsa-mir-126|hsa-miR-126 jt:ENSG00000172889|EGFL7  
CCGGTCCAC|ENSG00000199161|hsa-mir-126|hsa-miR-126\* jt:ENSG00000163918|RFC4  
CCGGTGACG|ENSG00000199032|hsa-mir-425|hsa-miR-425-3p jt:ENSG00000104332|SFRP1  
CCGGTGACG|ENSG00000199032|hsa-mir-425|hsa-miR-425-3p jt:ENSG00000185742|NP\_997528.1  
CCGGTGACG|ENSG00000207819|hsa-mir-9-3|hsa-miR-9 jt:ENSG00000169439|SDC2  
CCGGTGACG|ENSG00000208017|hsa-mir-140|hsa-miR-140 jt:ENSG00000167157|PRRX2  
CCGTCAAA|ENSG00000199024|hsa-mir-103-2|hsa-miR-103 jt:ENSG00000137171|KLC4  
CCGTGGTGC|ENSG00000207705|hsa-mir-129-1|hsa-miR-129 jt:ENSG00000160822|ISL1  
CCGTGGTGC|ENSG00000207926|hsa-mir-135a-1|hsa-miR-135a jt:ENSG00000103591|P34\_HUMAN  
CCGTTCG|ENSG00000207744|hsa-mir-10b|hsa-miR-10b jt:ENSG00000146802|TMEM168  
CCGTTCG|ENSG00000207784|hsa-mir-542|hsa-miR-542-3p jt:ENSG00000038532|KIAA0350  
CCGTTCG|ENSG00000199135|hsa-mir-101-1|hsa-miR-101 jt:ENSG00000072401|UBE2D1  
CCGTTCG|ENSG00000199135|hsa-mir-101-1|hsa-miR-101 jt:ENSG00000123473|STIL  
CCTAAGAG|ENSG00000199122|hsa-mir-148b|hsa-miR-148b jt:ENSG00000160961|ZNF333  
CCTAAGGAG|ENSG00000194717|hsa-mir-494|hsa-miR-494 jt:ENSG00000051009|C11orf56  
CCTAAGGAG|ENSG00000199012|hsa-mir-412|hsa-miR-412 jt:ENSG00000188653|NR\_002807.1  
CCTAAGGAG|ENSG00000199015|hsa-mir-377|hsa-miR-377 jt:ENSG00000088682|COQ9  
CCTAAGGAG|ENSG00000199015|hsa-mir-377|hsa-miR-377 jt:ENSG00000188653|NR\_002807.1  
CCTAAGGAG|ENSG00000199020|hsa-mir-381|hsa-miR-381 jt:ENSG00000108641|NP\_056496.1  
CCTAAGGAG|ENSG00000207743|hsa-mir-495|hsa-miR-495 jt:ENSG00000071539|TRIP13  
CCTAAGGAG|ENSG00000207749|hsa-mir-299|hsa-miR-299-5p jt:ENSG00000160799|CCDC12  
CCTAATCG|ENSG00000207623|hsa-mir-205|hsa-miR-205 jt:ENSG00000152270|PDE3B  
CCTAATTCG|ENSG00000207617|hsa-mir-24-1|hsa-miR-24 jt:ENSG00000176194|CIDEA  
CCTAATTCG|ENSG00000207617|hsa-mir-24-1|hsa-miR-24 jt:ENSG00000166206|GABRB3  
CCTACAGAC|ENSG00000199121|hsa-mir-26b|hsa-miR-26b jt:ENSG00000133119|RFC3  
CCTACCAGA|ENSG00000207947|hsa-mir-152|hsa-miR-152 jt:ENSG00000165588|OTX2  
CCTAGAGGA|ENSG00000207731|hsa-mir-506|hsa-miR-506 jt:ENSG00000135773|CAPN9  
CCTAGTGA|ENSG00000207618|hsa-mir-144|hsa-miR-144 jt:ENSG00000171551|ECEL1  
CCTAGTGA|ENSG00000207731|hsa-mir-506|hsa-miR-506 jt:ENSG00000196196|NP\_001034881.1  
CCTAGTGA|ENSG00000207731|hsa-mir-506|hsa-miR-506 jt:ENSG00000114988|LMAN2L  
CCTAGTGC|ENSG00000207581|hsa-mir-199b|hsa-miR-199b jt:ENSG00000082641|NFE2L1  
CCTATGACA|ENSG00000198981|hsa-mir-29a|hsa-miR-29a jt:ENSG00000130032|PRRG3  
CCTATCTCC|ENSG00000199158|hsa-mir-96|hsa-miR-96 jt:ENSG00000197616|MYH6  
CCTATCTCC|ENSG00000207691|hsa-mir-183|hsa-miR-183 jt:ENSG00000197616|MYH6  
CCTATCTCC|ENSG00000207990|hsa-mir-182|hsa-miR-182 jt:ENSG00000196085|C19orf42  
CCTATCTCC|ENSG00000207990|hsa-mir-182|hsa-miR-182 jt:ENSG00000197616|MYH6  
CCTATCTGC|ENSG00000199058|hsa-mir-302b|hsa-miR-302b\* jt:ENSG00000136688|IL1F9  
CCTATCTGC|ENSG00000199058|hsa-mir-302b|hsa-miR-302b\* jt:ENSG00000189042|ZNF567  
CCTATCTGC|ENSG00000199058|hsa-mir-302b|hsa-miR-302b\* jt:ENSG00000197430|TMEM107  
CCTATCTGC|ENSG00000207790|hsa-mir-29b-2|hsa-miR-29b-2 jt:ENSG00000136883|KIF12  
CCTATCTGC|ENSG00000207790|hsa-mir-29b-2|hsa-miR-29b-2 jt:ENSG00000136688|IL1F9  
CCTATCTGC|ENSG00000207966|hsa-mir-29c|hsa-miR-29c jt:ENSG00000136683|KIF12  
CCTATCTGC|ENSG00000207966|hsa-mir-29c|hsa-miR-29c jt:ENSG00000136688|IL1F9  
CCTATGGCA|ENSG00000207708|hsa-mir-141|hsa-miR-141 jt:ENSG00000066739|C14orf103  
CCTATGGCA|ENSG00000207713|hsa-mir-200c|hsa-miR-200c jt:ENSG00000183873|SCN5A  
CCTACGAC|ENSG00000198981|hsa-mir-29a|hsa-miR-29a jt:ENSG00000115194|SLC30A3  
CCTCATGGA|ENSG00000207808|hsa-mir-27a|hsa-miR-27a jt:ENSG00000167220|HDHD2  
CCTCCG|ENSG00000198973|hsa-mir-375|hsa-miR-375 jt:ENSG00000117519|CNN3  
CCTCCG|ENSG00000198973|hsa-mir-375|hsa-miR-375 jt:ENSG00000143333|RGS16  
CCTCCGC|ENSG00000198973|hsa-mir-375|hsa-miR-375 jt:ENSG00000112531|QKI  
CCTCCGC|ENSG00000198973|hsa-mir-375|hsa-miR-375 jt:ENSG00000148702|HABP2  
CCTCCGC|ENSG00000198973|hsa-mir-375|hsa-miR-375 jt:ENSG00000112531|QKI  
CCTCCGC|ENSG00000198973|hsa-mir-375|hsa-miR-375 jt:ENSG00000143333|RGS16  
CCTCCGAA|ENSG00000207585|hsa-mir-181d|hsa-miR-181d jt:ENSG00000088832|FKBP1A  
CCTCCGTAC|ENSG00000207789|hsa-mir-26a-2|hsa-miR-26a-2 jt:ENSG00000135999|EPC2  
CCTCGAAG|ENSG00000202641|hsa-mir-484|hsa-miR-484 jt:ENSG00000152952|FLOD2  
CCTCTTATC|ENSG00000199077|hsa-mir-129-2|hsa-miR-129-2 jt:ENSG00000145416|MARCH1  
CCTGACGG|ENSG00000207732|hsa-mir-218-1|hsa-miR-218-1 jt:ENSG00000187068|NP\_001020437.1  
CCTGACTAC|ENSG00000207728|hsa-mir-449b|hsa-miR-449b jt:ENSG00000134070|TRAK2  
CCTGATTA|ENSG00000199025|hsa-mir-369|hsa-miR-369-3p jt:ENSG00000060303|Q9NU98\_HUMAN  
CCTGATTA|ENSG00000199092|hsa-mir-410|hsa-miR-410 jt:ENSG00000130635|COL5A1  
CCTGATTA|ENSG00000199092|hsa-mir-410|hsa-miR-410 jt:ENSG00000111247|RAD51AP1  
CCTGATTA|ENSG00000207743|hsa-mir-495|hsa-miR-495 jt:ENSG00000177343|PBOV1  
CCTGATTA|ENSG00000207754|hsa-mir-487b|hsa-miR-487b jt:ENSG00000184047|DIABLO  
CCTGCAA|ENSG00000207698|hsa-mir-32|hsa-miR-32 jt:ENSG00000091664|SLC17A6  
CCTGCAAC|ENSG00000207698|hsa-mir-32|hsa-miR-32 jt:ENSG00000003393|ALS2  
CCTGCAAC|ENSG00000207698|hsa-mir-32|hsa-miR-32 jt:ENSG00000091664|SLC17A6  
CCTGCACAA|ENSG00000199065|hsa-mir-101-2|hsa-miR-101-2 jt:ENSG00000136205|TNS3  
CCTGCACAA|ENSG00000199065|hsa-mir-101-2|hsa-miR-101-2 jt:ENSG00000198718|KIAA0423  
CCTGCCAAA|ENSG00000199059|hsa-mir-135b|hsa-miR-135b jt:ENSG00000160951|PTGER1  
CCTGCCAAA|ENSG00000199059|hsa-mir-135b|hsa-miR-135b jt:ENSG00000185436|IL28RA  
CCTGCCAAA|ENSG00000199059|hsa-mir-135b|hsa-miR-135b jt:ENSG00000124194|GDAP1L1  
CCTGCCAAA|ENSG00000199059|hsa-mir-135b|hsa-miR-135b jt:ENSG00000204397|NP\_001017534.1  
CCTGCTAAG|ENSG00000198973|hsa-mir-375|hsa-miR-375 jt:ENSG00000182090|C14orf25  
CCTGGCAG|ENSG00000207567|hsa-mir-142|hsa-miR-142-3p jt:ENSG000000011566|MAP4K3  
CCTGGCTTA|ENSG00000207604|hsa-mir-206|hsa-miR-206 jt:ENSG00000155849|ELMO1  
CCTGTGTA|ENSG00000207790|hsa-mir-29b-2|hsa-miR-29b-2 jt:ENSG00000109099|PMP22  
CCTGTGTA|ENSG00000207790|hsa-mir-29b-2|hsa-miR-29b-2 jt:ENSG00000143162|CREG1  
CCTGTGTA|ENSG00000207966|hsa-mir-29c|hsa-miR-29c jt:ENSG00000109099|PMP22  
CCTGTGTA|ENSG00000207966|hsa-mir-29c|hsa-miR-29c jt:ENSG00000143162|CREG1  
CCTGTTCG|ENSG00000207568|hsa-mir-203|hsa-miR-203 jt:ENSG00000041982|TNC  
CCTGTTCG|ENSG00000199085|hsa-mir-148a|hsa-miR-148a jt:ENSG00000180537|RNFI182  
CCTTAAAGC|ENSG00000207708|hsa-mir-141|hsa-miR-141 jt:ENSG00000010295|NP\_542768.1  
CCTTAAAGC|ENSG00000207713|hsa-mir-200c|hsa-miR-200c jt:ENSG00000162980|ARL5A  
CCTTAAATA|ENSG00000202569|hsa-mir-146b|hsa-miR-146b jt:ENSG00000175104|TRAF6  
CCTTATCAG|ENSG00000207933|hsa-mir-9-1|hsa-miR-9\* jt:ENSG00000111252|SH2B3  
CCTTCACAC|ENSG00000199161|hsa-mir-126|hsa-miR-126 jt:ENSG00000172889|EGFL7  
CCTTCACAC|ENSG00000199161|hsa-mir-126|hsa-miR-126\* jt:ENSG00000144840|RABL3  
CCTTCTTCG|ENSG00000207648|hsa-mir-192|hsa-miR-192 jt:ENSG00000185090|MANEAL  
CCTTCTTCG|ENSG00000207777|hsa-mir-10a|hsa-miR-10a jt:ENSG00000204850|NP\_001013695.1  
CCTTCCCA|ENSG00000199080|hsa-mir-133b|hsa-miR-133b jt:ENSG00000143256|PFDN2  
CCTTTAAGC|ENSG00000199094|hsa-mir-30c-2|hsa-miR-30c-2 jt:ENSG00000134247|PTGFRN  
CCTTTAAGC|ENSG00000199094|hsa-mir-30c-2|hsa-miR-30c-2 jt:ENSG00000141068|KSR1  
CCTTTAAGC|ENSG00000199094|hsa-mir-30c-2|hsa-miR-30c-2 jt:ENSG00000175564|UCP3  
CCTTTAAGC|ENSG00000207827|hsa-mir-30a|hsa-miR-30a-5p jt:ENSG00000134247|PTGFRN  
CCTTTAAGC|ENSG00000207827|hsa-mir-30a|hsa-miR-30a-5p jt:ENSG00000141068|KSR1  
CCTTTAAGC|ENSG00000207827|hsa-mir-30a|hsa-miR-30a-5p jt:ENSG00000175564|UCP3  
CCTTTATA|ENSG00000207548|hsa-mir-217|hsa-miR-217 jt:ENSG00000173041|ZNF680  
CCTTTGTA|ENSG00000199059|hsa-mir-135b|hsa-miR-135b jt:ENSG00000162694|EXTL2  
CCTTTTATC|ENSG00000207618|hsa-mir-144|hsa-miR-144 jt:ENSG00000198841|KTI12  
CGAACTCC|ENSG00000199161|hsa-mir-126|hsa-miR-126 jt:ENSG00000172889|EGFL7

CGACCAACC|ENSG00000207562|hsa-mir-34c|hsa-miR-34c|jt:ENSG00000182329|Q8IVF9\_HUMAN  
CGACCAACC|ENSG00000207811|hsa-mir-34b|hsa-miR-34b|jt:ENSG00000182329|Q8IVF9\_HUMAN  
CGACCCCC|ENSG00000207614|hsa-mir-193a|hsa-miR-193a|jt:ENSG00000204366|ZBTB12  
CGACGACC|ENSG00000207751|hsa-mir-130b|hsa-miR-130b|jt:ENSG00000108292|MLLT6  
CGACGTGA|ENSG00000207933|hsa-mir-9-1|hsa-miR-9|jt:ENSG00000138674|SEC31A  
CGACGTGA|ENSG00000207933|hsa-mir-9-1|hsa-miR-9\*|jt:ENSG00000113300|CNOT6  
CGACGTGAC|ENSG00000207933|hsa-mir-9-1|hsa-miR-9|jt:ENSG00000138674|SEC31A  
CGACTCCA|ENSG00000207698|hsa-mir-32|hsa-miR-32|jt:ENSG00000196387|ZNF140  
CGACTTCC|ENSG00000199089|hsa-mir-202|hsa-miR-202|jt:ENSG00000164825|DEFB1  
CGAGACAGA|ENSG00000198976|hsa-mir-429|hsa-miR-429|jt:ENSG00000183691|NOG  
CGAGACAGA|ENSG00000198976|hsa-mir-429|hsa-miR-429|jt:ENSG00000183873|SCN5A  
CGAGACAGA|ENSG00000198976|hsa-mir-429|hsa-miR-429|jt:ENSG00000165410|CFL2  
CGAGACAGA|ENSG00000207607|hsa-mir-200a|hsa-miR-200a|jt:ENSG00000106351|HRBL  
CGAGACAGA|ENSG00000207607|hsa-mir-200a|hsa-miR-200a|jt:ENSG00000182621|PLCB1  
CGAGACAGA|ENSG00000207730|hsa-mir-200b|hsa-miR-200b|jt:ENSG00000183691|NOG  
CGAGACAGA|ENSG00000207730|hsa-mir-200b|hsa-miR-200b|jt:ENSG00000183873|SCN5A  
CGAGACAGA|ENSG00000207730|hsa-mir-200b|hsa-miR-200b|jt:ENSG00000165410|CFL2  
CGAGACGA|ENSG00000207752|hsa-mir-199a-1|hsa-miR-199a\*|jt:ENSG00000119707|RBM25  
CGAGATCA|ENSG00000198987|hsa-mir-16-2|hsa-miR-16|jt:ENSG00000171307|ZDHHC16  
CGAGCGC|ENSG00000207739|hsa-mir-218-2|hsa-miR-218|jt:ENSG00000166689|PLEKHA7  
CGAGTCCA|ENSG00000199023|hsa-mir-339|hsa-miR-339|jt:ENSG00000104976|SNAPC2  
CGAGGAAA|ENSG00000199032|hsa-mir-425|hsa-miR-425-3p|jt:ENSG00000137547|MRPL15  
CGATGTGC|ENSG00000199161|hsa-mir-126|hsa-miR-126|jt:ENSG00000172889|EGFL7  
CGATGTGC|ENSG00000199161|hsa-mir-126|hsa-miR-126|jt:ENSG00000151704|KCNJ1  
CGATGTGC|ENSG00000199161|hsa-mir-126|hsa-miR-126\*|jt:ENSG00000105982|RNF32  
CGATTTA|ENSG00000207949|hsa-mir-214|hsa-miR-214|jt:ENSG00000110851|PRDM4  
CGATTTA|ENSG00000208024|hsa-mir-199a-2|hsa-miR-199a\*|jt:ENSG00000135919|SERPINE2  
CGATTTA|ENSG00000208017|hsa-mir-140|hsa-miR-140|jt:ENSG00000154096|THY1  
CGATTTAC|ENSG00000207713|hsa-mir-200c|hsa-miR-200c|jt:ENSG00000182004|SNRPE  
CGCAATGC|ENSG00000199065|hsa-mir-101-2|hsa-miR-101|jt:ENSG00000138376|BARD1  
CGCACC|ENSG00000199187|hsa-mir-365-2|hsa-miR-365|jt:ENSG00000183735|TBK1  
CGCACTTC|ENSG00000199161|hsa-mir-126|hsa-miR-126|jt:ENSG00000172889|EGFL7  
CGCACTTC|ENSG00000207744|hsa-mir-10b|hsa-miR-10b|jt:ENSG00000166688|C1orf26  
CGCAGCAG|ENSG00000207792|hsa-mir-151|hsa-miR-151|jt:ENSG00000204561|FAM75B  
CGCAGTAC|ENSG00000207691|hsa-mir-183|hsa-miR-183|jt:ENSG00000167658|EEF2  
CGCATCTC|ENSG00000207604|hsa-mir-206|hsa-miR-206|jt:ENSG00000107854|TNKS2  
CGCATTAG|ENSG00000199122|hsa-mir-148b|hsa-miR-148b|jt:ENSG00000085433|WDR47  
CGCCAAAAC|ENSG00000199122|hsa-mir-148b|hsa-miR-148b|jt:ENSG00000116016|EPAS1  
CGCCAACTC|ENSG00000207739|hsa-mir-218-2|hsa-miR-218|jt:ENSG00000157014|TATDN2  
CGCCACTTA|ENSG00000207819|hsa-mir-9-3|hsa-miR-9\*|jt:ENSG00000196482|ESRRG  
CGCCACGTC|ENSG00000207819|hsa-mir-9-3|hsa-miR-9\*|jt:ENSG00000130962|PRRG1  
CGCCACTTC|ENSG00000207980|hsa-mir-23a|hsa-miR-23a|jt:ENSG00000197265|GTF2E2  
CGCCACTTC|ENSG00000207980|hsa-mir-23a|hsa-miR-23a|jt:ENSG00000103591|P34\_HUMAN  
CGCCACTTC|ENSG00000209707|hsa-mir-24-2|hsa-miR-24|jt:ENSG00000124702|KLHDC3  
CGCCAG|ENSG00000207757|hsa-mir-93|hsa-miR-93|jt:ENSG00000050405|LIMA1  
CGCCAG|ENSG00000207955|hsa-mir-219-2|hsa-miR-219|jt:ENSG00000163788|SNRK  
CGCCAG|ENSG00000207955|hsa-mir-219-2|hsa-miR-219|jt:ENSG00000167792|NDUFV1  
CGCCAG|ENSG00000207955|hsa-mir-219-2|hsa-miR-219|jt:ENSG00000113810|SMC4  
CGCCAG|ENSG00000208036|hsa-mir-106b|hsa-miR-106b|jt:ENSG00000050405|LIMA1  
CGCCATCTC|ENSG00000207794|hsa-mir-451|hsa-miR-451|jt:ENSG00000134324|LPIN1  
CGCCACAAA|ENSG00000207567|hsa-mir-142|hsa-miR-142-3p|jt:ENSG00000134590|FAM127A  
CGCCCCC|ENSG00000198974|hsa-mir-30e|hsa-miR-30e-5p|jt:ENSG00000057657|PRDM1  
CGCCCCC|ENSG00000198974|hsa-mir-30e|hsa-miR-30e-5p|jt:ENSG00000058600|POLR3E  
CGCCCCC|ENSG00000207962|hsa-mir-30c-1|hsa-miR-30c|jt:ENSG00000057657|PRDM1  
CGCCCCC|ENSG00000207962|hsa-mir-30c-1|hsa-miR-30c|jt:ENSG00000058600|POLR3E  
CGCCGA|ENSG00000207614|hsa-mir-193a|hsa-miR-193a|jt:ENSG00000168675|C18orf1  
CGCCGC|ENSG00000207960|hsa-mir-153-2|hsa-miR-153|jt:ENSG00000185774|KCNIP4  
CGCCGACG|ENSG00000207611|hsa-mir-149|hsa-miR-149|jt:ENSG00000109062|SLC9A3R1  
CGCCGATC|ENSG00000199065|hsa-mir-101-2|hsa-miR-101|jt:ENSG00000126882|FAM78A  
CGCCCTC|ENSG00000207698|hsa-mir-32|hsa-miR-32|jt:ENSG00000143164|IQWD1  
CGCCCTC|ENSG00000207698|hsa-mir-32|hsa-miR-32|jt:ENSG00000143164|IQWD1  
CGCCCTC|ENSG00000207960|hsa-mir-153-2|hsa-miR-153|jt:ENSG00000109689|STIM2  
CGCCCTC|ENSG00000207960|hsa-mir-153-2|hsa-miR-153|jt:ENSG00000198252|STYX  
CGCCCTCC|ENSG00000207698|hsa-mir-32|hsa-miR-32|jt:ENSG00000143164|IQWD1  
CGCCCTCC|ENSG00000207698|hsa-mir-32|hsa-miR-32|jt:ENSG00000197147|LRRRC8B  
CGCGACCAG|ENSG00000207568|hsa-mir-203|hsa-miR-203|jt:ENSG00000188483|IER5L  
CGCGAG|ENSG00000207698|hsa-mir-32|hsa-miR-32|jt:ENSG00000148634|HERC4  
CGCGAG|ENSG00000207784|hsa-mir-542|hsa-miR-542-3p|jt:ENSG00000135341|MAP3K7  
CGCGAGCG|ENSG00000207611|hsa-mir-149|hsa-miR-149|jt:ENSG00000164061|BSN  
CGCGCC|ENSG00000199187|hsa-mir-365-2|hsa-miR-365|jt:ENSG00000186326|RGS9BP  
CGCGCC|ENSG00000207614|hsa-mir-193a|hsa-miR-193a|jt:ENSG00000108932|SLC16A6  
CGCGCC|ENSG00000207614|hsa-mir-193a|hsa-miR-193a|jt:ENSG00000156218|ADAMTSL3  
CGCGCC|ENSG00000207617|hsa-mir-24-1|hsa-miR-189|jt:ENSG00000196262|PPIA  
CGCGCC|ENSG00000207617|hsa-mir-24-1|hsa-miR-24|jt:ENSG00000206113|Q6ZU27\_HUMAN  
CGCGCC|ENSG00000207792|hsa-mir-151|hsa-miR-151|jt:ENSG00000156564|LRFN2  
CGCGCCC|ENSG00000207614|hsa-mir-193a|hsa-miR-193a|jt:ENSG00000156218|ADAMTSL3  
CGCGCG|ENSG00000199032|hsa-mir-425|hsa-miR-425-3p|jt:ENSG00000049323|LTBP1  
CGCGCG|ENSG00000199032|hsa-mir-425|hsa-miR-425-3p|jt:ENSG00000163322|CCDC98  
CGCGCGAGA|ENSG00000207698|hsa-mir-32|hsa-miR-32|jt:ENSG00000196387|ZNF140  
CGCGCG|ENSG00000207953|hsa-mir-212|hsa-miR-212|jt:ENSG00000145782|ATG12  
CGCGCG|ENSG00000207953|hsa-mir-212|hsa-miR-212|jt:ENSG00000155858|LSM11  
CGCGGCTGC|ENSG00000199032|hsa-mir-425|hsa-miR-425-3p|jt:ENSG00000067560|RHOA  
CGCGGCTGC|ENSG00000199032|hsa-mir-425|hsa-miR-425-3p|jt:ENSG00000137547|MRPL15  
CGCGGTCAC|ENSG00000208017|hsa-mir-140|hsa-miR-140|jt:ENSG00000156925|ZIC3  
CGCGTGCAA|ENSG00000199085|hsa-mir-148a|hsa-miR-148a|jt:ENSG00000106511|MEOX2  
CGCGTGCCG|ENSG00000207617|hsa-mir-24-1|hsa-miR-24|jt:ENSG00000078967|UBE2D4  
CGCGTGCCG|ENSG00000207617|hsa-mir-24-1|hsa-miR-24|jt:ENSG00000091527|CDV3  
CGCGTGTGA|ENSG00000207819|hsa-mir-9-3|hsa-miR-9|jt:ENSG00000091436|MLTK\_HUMAN  
CGCGTTAC|ENSG00000202641|hsa-mir-484|hsa-miR-484|jt:ENSG00000088899|K0552\_HUMAN  
CGCGTTCCG|ENSG00000207614|hsa-mir-193a|hsa-miR-193a|jt:ENSG00000198870|C9orf96  
CGCTCACAA|ENSG00000207752|hsa-mir-199a-1|hsa-miR-199a|jt:ENSG00000109084|TMEM97  
CGCTCCAAC|ENSG00000207955|hsa-mir-219-2|hsa-miR-219|jt:ENSG00000111371|SLC38A1  
CGCTGACTC|ENSG00000207819|hsa-mir-9-3|hsa-miR-9|jt:ENSG00000205703|NP\_001010910.1  
CGCTGCCGA|ENSG00000207792|hsa-mir-151|hsa-miR-151|jt:ENSG00000156564|LRFN2  
CGCTGCGTA|ENSG00000199077|hsa-mir-129-2|hsa-miR-129|jt:ENSG00000170310|STX8  
CGCTGGACA|ENSG00000198976|hsa-mir-429|hsa-miR-429|jt:ENSG00000143494|VASH2  
CGCTGGACA|ENSG00000207730|hsa-mir-200b|hsa-miR-200b|jt:ENSG00000143494|VASH2  
CGCTGTTGC|ENSG00000199065|hsa-mir-101-2|hsa-miR-101|jt:ENSG00000136379|FAM108C1  
CGCTGTTGC|ENSG00000199065|hsa-mir-101-2|hsa-miR-101|jt:ENSG00000104177|MYEF2  
CGCTTTAC|ENSG00000199094|hsa-mir-30c-2|hsa-miR-30c|jt:ENSG00000119686|C14orf58  
CGCTTTAC|ENSG00000199094|hsa-mir-30c-2|hsa-miR-30c|jt:ENSG00000155846|PPARGC1B  
CGCTTTAC|ENSG00000199094|hsa-mir-30c-2|hsa-miR-30c|jt:ENSG00000001084|GCLC  
CGCTTTAC|ENSG00000199094|hsa-mir-30c-2|hsa-miR-30c|jt:ENSG00000163288|GABRB1  
CGCTTTAC|ENSG00000207827|hsa-mir-30a|hsa-miR-30a-5p|jt:ENSG00000119686|C14orf58  
CGCTTTAC|ENSG00000207827|hsa-mir-30a|hsa-miR-30a-5p|jt:ENSG00000155846|PPARGC1B

CGCTTTAC|ENSG00000207827|hsa-mir-30a|hsa-miR-30a-5p jt:ENSG0000001084|GCLC  
CGCTTTAC|ENSG00000207827|hsa-mir-30a|hsa-miR-30a-5p jt:ENSG00000163288|GABRB1  
CGCTTTACG|ENSG00000199094|hsa-mir-30c-2|hsa-miR-30c jt:ENSG0000001084|GCLC  
CGCTTTACG|ENSG00000207827|hsa-mir-30a|hsa-miR-30a-5p jt:ENSG0000001084|GCLC  
CGCTTTCTA|ENSG00000199122|hsa-mir-148b|hsa-miR-148b jt:ENSG00000151694|ADAM17  
CGGAAAAGC|ENSG00000207713|hsa-mir-200c|hsa-miR-200c jt:ENSG00000182831|C16orf72  
CGGAAAAGC|ENSG00000207784|hsa-mir-542|hsa-miR-542-3p jt:ENSG00000135341|MAP3K7  
CGGAAAAGC|ENSG00000199089|hsa-mir-202|hsa-miR-202 jt:ENSG00000198535|NP\_997205.1  
CGGAAAAGC|ENSG00000199089|hsa-mir-202|hsa-miR-202\* jt:ENSG00000131148|COX4NB  
CGGAAAGCA|ENSG00000199122|hsa-mir-148b|hsa-miR-148b jt:ENSG00000172053|QARS  
CGGAAAGCA|ENSG00000199032|hsa-mir-425|hsa-miR-425-3p jt:ENSG00000007255|TRAPPC6A  
CGGAATGC|ENSG00000207547|hsa-mir-25|hsa-miR-25 jt:ENSG00000178110|Q8N9G9\_HUMAN  
CGGAATGC|ENSG00000208036|hsa-mir-106b|hsa-miR-106b jt:ENSG00000110911|SLC11A2  
CGGACAGGA|ENSG00000202641|hsa-mir-484|hsa-miR-484 jt:ENSG00000099821|POLRMT  
CGGACAGGA|ENSG00000202641|hsa-mir-484|hsa-miR-484 jt:ENSG00000178726|THBD  
CGGACCGTC|ENSG00000207562|hsa-mir-34c|hsa-miR-34c jt:ENSG00000007541|PIGQ  
CGGACCGTC|ENSG00000207811|hsa-mir-34b|hsa-miR-34b jt:ENSG00000007541|PIGQ  
CGGACTAC|ENSG00000207784|hsa-mir-542|hsa-miR-542-3p jt:ENSG00000035687|ADSS  
CGGACTAC|ENSG00000207784|hsa-mir-542|hsa-miR-542-3p jt:ENSG00000038532|KIAA0350  
CGGACTACA|ENSG00000207784|hsa-mir-542|hsa-miR-542-3p jt:ENSG00000035687|ADSS  
CGGACTACA|ENSG00000207784|hsa-mir-542|hsa-miR-542-3p jt:ENSG00000038532|KIAA0350  
CGGAGACGC|ENSG00000207739|hsa-mir-218-2|hsa-miR-218 jt:ENSG00000140987|ZNF434  
CGGATTGGA|ENSG00000207926|hsa-mir-135a-1|hsa-miR-135a jt:ENSG00000058056|USP13  
CGGAGGAA|ENSG00000199121|hsa-mir-26b|hsa-miR-26b jt:ENSG00000187741|FANCA  
CGGCATGC|ENSG00000198974|hsa-mir-30e|hsa-miR-30e-5p jt:ENSG00000159873|CCDC117  
CGGCATGC|ENSG00000207863|hsa-mir-125b-2|hsa-miR-125b jt:ENSG00000167383|ZNF229  
CGGCATGC|ENSG00000207962|hsa-mir-30c-1|hsa-miR-30c jt:ENSG00000159873|CCDC117  
CGGCATGC|ENSG00000199161|hsa-mir-126|hsa-miR-126 jt:ENSG00000172889|EGFL7  
CGGCCAGC|ENSG00000207739|hsa-mir-218-2|hsa-miR-218 jt:ENSG00000183807|C6orf189  
CGGCCTCTA|ENSG00000207960|hsa-mir-153-2|hsa-miR-153 jt:ENSG00000047578|KIAA0556  
CGGCCTCTA|ENSG00000207960|hsa-mir-153-2|hsa-miR-153 jt:ENSG00000124103|C20orf107  
CGGCCG|ENSG00000207953|hsa-mir-212|hsa-miR-212 jt:ENSG00000130699|TAF4  
CGGCCCAA|ENSG00000202641|hsa-mir-484|hsa-miR-484 jt:ENSG00000171425|ZNF580  
CGGCCCCC|ENSG00000207585|hsa-mir-181d|hsa-miR-181d jt:ENSG00000118276|B4GALT6  
CGGCCGTA|ENSG00000207955|hsa-mir-219-2|hsa-miR-219 jt:ENSG00000047578|KIAA0556  
CGCGGTGTC|ENSG00000198976|hsa-mir-429|hsa-miR-429 jt:ENSG00000122008|POLK  
CGCGGTGTC|ENSG00000207730|hsa-mir-200b|hsa-miR-200b jt:ENSG00000122008|POLK  
CGGCTC|ENSG00000199187|hsa-mir-365-2|hsa-miR-365 jt:ENSG00000138756|BMP2K  
CGGCTC|ENSG00000199187|hsa-mir-365-2|hsa-miR-365 jt:ENSG00000186326|RGS9BP  
CGGCTC|ENSG00000207611|hsa-mir-149|hsa-miR-149 jt:ENSG00000109062|SLC9A3R1  
CGGCTC|ENSG00000207611|hsa-mir-149|hsa-miR-149 jt:ENSG00000169991|Q5TF58\_HUMAN  
CGGCTC|ENSG00000207611|hsa-mir-149|hsa-miR-149 jt:ENSG00000177700|POLR2L  
CGGCTC|ENSG00000207614|hsa-mir-193a|hsa-miR-193a jt:ENSG00000160606|TLC1D1  
CGGCTCCTA|ENSG00000207764|hsa-mir-133a-2|hsa-miR-133a jt:ENSG00000137507|LRRC32  
CGGAAAAG|ENSG00000198975|hsa-let-7a-2|hsa-let-7a jt:ENSG00000023902|PLEKH01  
CGGAAAAG|ENSG00000198975|hsa-let-7a-2|hsa-let-7a jt:ENSG00000106367|AP1S1  
CGGAAAAG|ENSG00000207971|hsa-mir-125b-1|hsa-miR-125b jt:ENSG00000141867|BRD4  
CGGAAAAG|ENSG00000207994|hsa-mir-100|hsa-miR-100 jt:ENSG00000177406|Q8N503\_HUMAN  
CGGAAACTC|ENSG00000207792|hsa-mir-151|hsa-miR-151 jt:ENSG00000144867|SRPRB  
CGGGAATA|ENSG00000199085|hsa-mir-148a|hsa-miR-148a jt:ENSG00000070985|TRPM5  
CGGGAATA|ENSG00000199085|hsa-mir-148a|hsa-miR-148a jt:ENSG00000131269|ABCB7  
CGGGAATAG|ENSG00000199085|hsa-mir-148a|hsa-miR-148a jt:ENSG00000070985|TRPM5  
CGGGAATCC|ENSG00000207623|hsa-mir-205|hsa-miR-205 jt:ENSG00000176105|YES1  
CGGGAATCC|ENSG00000207955|hsa-mir-219-2|hsa-miR-219 jt:ENSG00000118496|FBXO30  
CGGGAATCC|ENSG00000207955|hsa-mir-219-2|hsa-miR-219 jt:ENSG00000135535|CD164  
CGGGACAA|ENSG00000199122|hsa-mir-148b|hsa-miR-148b jt:ENSG00000147684|NDUFB9  
CGGGAG|ENSG00000199187|hsa-mir-365-2|hsa-miR-365 jt:ENSG00000179104|TMTC2  
CGGGAG|ENSG00000207614|hsa-mir-193a|hsa-miR-193a jt:ENSG00000196187|TMEM63A  
CGGGAG|ENSG00000207614|hsa-mir-193a|hsa-miR-193a jt:ENSG00000198870|C9orf96  
CGGGAG|ENSG00000207698|hsa-mir-32|hsa-miR-32 jt:ENSG00000109670|FBXW7  
CGGGAG|ENSG00000207698|hsa-mir-32|hsa-miR-32 jt:ENSG00000178110|Q8N9G9\_HUMAN  
CGGGCA|ENSG00000199017|hsa-mir-1-1|hsa-miR-1 jt:ENSG00000102452|NALCN  
CGGGCA|ENSG00000207764|hsa-mir-133a-2|hsa-miR-133a jt:ENSG00000069696|DRD4  
CGGGCACGA|ENSG00000207585|hsa-mir-181d|hsa-miR-181d jt:ENSG00000106852|LHX6  
CGGGCAGC|ENSG00000207708|hsa-mir-141|hsa-miR-141 jt:ENSG00000091409|ITGA6  
CGGGCAGC|ENSG00000207708|hsa-mir-141|hsa-miR-141 jt:ENSG00000135472|FAIM2  
CGGGCC|ENSG00000199121|hsa-mir-26b|hsa-miR-26b jt:ENSG00000130675|HLXB9  
CGGGCC|ENSG00000199121|hsa-mir-26b|hsa-miR-26b jt:ENSG00000135365|PHF21A  
CGGGCC|ENSG00000199121|hsa-mir-26b|hsa-miR-26b jt:ENSG00000177169|ULK1  
CGGGCC|ENSG00000199121|hsa-mir-26b|hsa-miR-26b jt:ENSG00000119812|FAM98A  
CGGGCC|ENSG00000199121|hsa-mir-26b|hsa-miR-26b jt:ENSG00000132964|CDK8  
CGGGCC|ENSG00000207568|hsa-mir-203|hsa-miR-203 jt:ENSG00000197701|ZNF595  
CGGGCC|ENSG00000207960|hsa-mir-153-2|hsa-miR-153 jt:ENSG00000113763|UNC5A  
CGGGCTAC|ENSG00000207784|hsa-mir-542|hsa-miR-542-3p jt:ENSG00000038532|KIAA0350  
CGGGCTAGA|ENSG00000207698|hsa-mir-32|hsa-miR-32 jt:ENSG00000143450|OAZ3  
CGGGCTCTA|ENSG00000207708|hsa-mir-141|hsa-miR-141 jt:ENSG00000203814|HIST2H2BF  
CGGGGCAA|ENSG00000198973|hsa-mir-375|hsa-miR-375 jt:ENSG00000140479|PCSK6  
CGGGTAAGA|ENSG00000211590|hsa-mir-802|hsa-miR-802 jt:ENSG00000119231|SNRP5  
CGGGTACA|ENSG00000199066|hsa-mir-330|hsa-miR-330 jt:ENSG00000101115|SALL4  
CGGGTGAGC|ENSG00000199032|hsa-mir-425|hsa-miR-425-3p jt:ENSG00000120129|DUSP1  
CGGGTGAGC|ENSG00000207607|hsa-mir-200a|hsa-miR-200a jt:ENSG00000099194|SCD  
CGGGTGAGC|ENSG00000207607|hsa-mir-200a|hsa-miR-200a jt:ENSG00000144136|SLC20A1  
CGGGTGAGC|ENSG00000207607|hsa-mir-200a|hsa-miR-200a jt:ENSG00000198105|ZNF248  
CGGTCAAC|ENSG00000199135|hsa-mir-101-1|hsa-miR-101 jt:ENSG00000104067|TJP1  
CGGTCTCGC|ENSG00000207617|hsa-mir-24-1|hsa-miR-189 jt:ENSG00000196262|PPIA  
CGGTGACTC|ENSG00000207585|hsa-mir-181d|hsa-miR-181d jt:ENSG00000145365|NP\_443096.1  
CGGTGCTGA|ENSG00000207960|hsa-mir-153-2|hsa-miR-153 jt:ENSG00000149927|DOC2A  
CGGTTGTC|ENSG00000199012|hsa-mir-412|hsa-miR-412 jt:ENSG00000182631|RXFP3  
CGGTTGTC|ENSG00000199025|hsa-mir-369|hsa-miR-369-3p jt:ENSG00000174437|ATP2A2  
CGGTTGTC|ENSG00000199092|hsa-mir-410|hsa-miR-410 jt:ENSG00000134333|LDHA  
CGGTTGTC|ENSG00000199092|hsa-mir-410|hsa-miR-410 jt:ENSG00000111247|RAD51AP1  
CGGTTGTC|ENSG00000199107|hsa-mir-409|hsa-miR-409-5p jt:ENSG00000177125|ZBTB34  
CGGTTGTC|ENSG00000207743|hsa-mir-495|hsa-miR-495 jt:ENSG00000204259|Q96PQ5\_HUMAN  
CGGTTGTC|ENSG00000207749|hsa-mir-299|hsa-miR-299-5p jt:ENSG00000198252|STYX  
CGGTTGTC|ENSG00000207961|hsa-mir-496|hsa-miR-496 jt:ENSG00000136897|MRPL50  
CGGTTGTC|ENSG00000207961|hsa-mir-496|hsa-miR-496 jt:ENSG00000031698|SARS  
CGGTTGTC|ENSG00000207961|hsa-mir-496|hsa-miR-496 jt:ENSG00000082153|BZW1  
CGGTTGTC|ENSG00000207961|hsa-mir-496|hsa-miR-496 jt:ENSG00000204351|SKIV2L  
CGGTTTCAA|ENSG00000207789|hsa-mir-26a-2|hsa-miR-26a jt:ENSG00000164163|ABCE1  
CGTAAA|ENSG00000207610|hsa-mir-19a|hsa-miR-19a jt:ENSG00000140153|WDR20  
CGTAAAGC|ENSG00000199094|hsa-mir-30c-2|hsa-miR-30c jt:ENSG000000083635|NUFIP1  
CGTAAAGC|ENSG00000199094|hsa-mir-30c-2|hsa-miR-30c jt:ENSG0000001084|GCLC  
CGTAAAGC|ENSG00000207827|hsa-mir-30a|hsa-miR-30a-3p jt:ENSG00000185532|PRKG1  
CGTAAAGC|ENSG00000207827|hsa-mir-30a|hsa-miR-30a-5p jt:ENSG00000083635|NUFIP1  
CGTAAAGC|ENSG00000207827|hsa-mir-30a|hsa-miR-30a-5p jt:ENSG0000001084|GCLC

CGTAGTAG|ENSG00000199133|hsa-let-7d|hsa-let-7d jt:ENSG00000163531|NFASC  
CGTCAAAA|ENSG00000208024|hsa-mir-199a-2|hsa-miR-199a jt:ENSG00000130021|HDHD1A  
CGTCAAAA|ENSG00000208024|hsa-mir-199a-2|hsa-miR-199a jt:ENSG00000130021|HDHD1A  
CGTCAAGTC|ENSG00000199130|hsa-mir-365-1|hsa-miR-365 jt:ENSG00000102287|GABRE  
CGTCACTTC|ENSG00000194717|hsa-mir-494|hsa-miR-494 jt:ENSG00000104969|SGTA  
CGTCACTTC|ENSG00000199020|hsa-mir-381|hsa-miR-381 jt:ENSG00000171469|ZNF561  
CGTCACTTC|ENSG00000199020|hsa-mir-381|hsa-miR-381 jt:ENSG00000095564|BTAF1  
CGTCACTTC|ENSG00000199020|hsa-mir-381|hsa-miR-381 jt:ENSG00000196455|PIK3R4  
CGTCACTTC|ENSG00000199025|hsa-mir-369|hsa-miR-369-5p jt:ENSG00000135974|C2orf49  
CGTCACTTC|ENSG00000199069|hsa-mir-323|hsa-miR-323 jt:ENSG00000122692|SMU1  
CGTCACTTC|ENSG00000207743|hsa-mir-495|hsa-miR-495 jt:ENSG00000109736|NP\_001111.2  
CGTCACTTC|ENSG00000207743|hsa-mir-495|hsa-miR-495 jt:ENSG00000101363|MANBAL  
CGTCACTTC|ENSG00000207749|hsa-mir-299|hsa-miR-299-5p jt:ENSG00000205609|Q9BW98\_HUMAN  
CGTCACTTC|ENSG00000207754|hsa-mir-487b|hsa-miR-487b jt:ENSG00000055044|NOP5\_HUMAN  
CGTCAAGTC|ENSG00000207728|hsa-mir-449b|hsa-miR-449b jt:ENSG00000007541|PIGQ  
CGTCAAGTC|ENSG00000207751|hsa-mir-130b|hsa-miR-130b jt:ENSG00000125084|WNT1  
CGTCAAGTC|ENSG00000207751|hsa-mir-130b|hsa-miR-130b jt:ENSG00000180176|TH  
CGTCAAGTC|ENSG00000207819|hsa-mir-9-3|hsa-miR-9 jt:ENSG00000169083|AR  
CGTCACTTC|ENSG00000207581|hsa-mir-199b|hsa-miR-199b jt:ENSG00000154736|ADAMTS5  
CGTCACTTC|ENSG00000207752|hsa-mir-199a-1|hsa-miR-199a jt:ENSG00000154736|ADAMTS5  
CGTCACTTC|ENSG00000207752|hsa-mir-199a-1|hsa-miR-199a\* jt:ENSG00000198901|PRC1  
CGTCAAGTC|ENSG00000207751|hsa-mir-130b|hsa-miR-130b jt:ENSG00000173926|MARCH3  
CGTCACTTC|ENSG00000207764|hsa-mir-133a-2|hsa-miR-133a jt:ENSG00000114631|PODXL2  
CGTCCCTAG|ENSG00000199161|hsa-mir-126|hsa-miR-126 jt:ENSG00000172889|EGFL7  
CGTCCCTAG|ENSG00000199161|hsa-mir-126|hsa-miR-126\* jt:ENSG00000177599|ZNF491  
CGTCCGCGA|ENSG00000199077|hsa-mir-129-2|hsa-miR-129 jt:ENSG00000147316|MCPH1  
CGTCCGAGC|ENSG00000207933|hsa-mir-9-1|hsa-miR-9 jt:ENSG00000089063|C2orf30  
CGTCTCCTA|ENSG00000199130|hsa-mir-365-1|hsa-miR-365 jt:ENSG00000173209|AHS2  
CGTCTTAC|ENSG00000199089|hsa-mir-202|hsa-miR-202\* jt:ENSG00000001561|ENPF4  
CGTGACAC|ENSG00000199036|hsa-mir-219-1|hsa-miR-219 jt:ENSG00000129744|ART1  
CGTGACTA|ENSG00000199077|hsa-mir-129-2|hsa-miR-129 jt:ENSG00000178110|Q8N9G9\_HUMAN  
CGTGACTC|ENSG00000208036|hsa-mir-106b|hsa-miR-106b jt:ENSG00000072121|ZFVVE26  
CGTGACTCC|ENSG00000208036|hsa-mir-106b|hsa-miR-106b jt:ENSG00000104946|TBC1D17  
CGTGACTCC|ENSG00000208036|hsa-mir-106b|hsa-miR-106b jt:ENSG00000134352|IL6ST  
CGTGATAG|ENSG00000198987|hsa-mir-16-2|hsa-miR-16 jt:ENSG00000107738|C10orf54  
CGTGATAG|ENSG00000199072|hsa-let-7f-1|hsa-let-7f jt:ENSG00000106367|AP1S1  
CGTGATAG|ENSG00000199133|hsa-let-7d|hsa-let-7d jt:ENSG00000106367|AP1S1  
CGTGATAG|ENSG00000199165|hsa-let-7a-1|hsa-let-7a jt:ENSG00000106367|AP1S1  
CGTGCAAC|ENSG00000199085|hsa-mir-148a|hsa-miR-148a jt:ENSG00000113048|MRPS27  
CGTGCAAC|ENSG00000199085|hsa-mir-148a|hsa-miR-148a jt:ENSG00000137073|UBAP2  
CGTGCAAC|ENSG00000199085|hsa-mir-148a|hsa-miR-148a jt:ENSG00000204101|Q6ZU91\_HUMAN  
CGTGCAACA|ENSG00000199085|hsa-mir-148a|hsa-miR-148a jt:ENSG00000137073|UBAP2  
CGTGCAACA|ENSG00000199085|hsa-mir-148a|hsa-miR-148a jt:ENSG00000204101|Q6ZU91\_HUMAN  
CGTGCTCAC|ENSG00000207739|hsa-mir-218-2|hsa-miR-218 jt:ENSG00000104365|IKBKB  
CGTGCTGCC|ENSG00000199023|hsa-mir-339|hsa-miR-339 jt:ENSG00000176101|SSNA1  
CGTGTGTC|ENSG00000199023|hsa-mir-339|hsa-miR-339 jt:ENSG00000205031|Q6XYE2\_HUMAN  
CGTGGAGC|ENSG00000199058|hsa-mir-302b|hsa-miR-302b\* jt:ENSG00000154438|ASZ1  
CGTGGCGA|ENSG00000207614|hsa-mir-193a|hsa-miR-193a jt:ENSG00000188215|DCUN1D3  
CGTGGCGAG|ENSG00000198986|hsa-let-7a-3|hsa-let-7a jt:ENSG00000107960|OBFC1  
CGTGGCGAG|ENSG00000207875|hsa-let-7b|hsa-let-7b jt:ENSG00000107960|OBFC1  
CGTGGTTC|ENSG00000199020|hsa-mir-381|hsa-miR-381 jt:ENSG00000185915|KLHL34  
CGTGGTTC|ENSG00000199025|hsa-mir-369|hsa-miR-369-3p jt:ENSG00000162104|ADCY9  
CGTGGTTC|ENSG00000199025|hsa-mir-369|hsa-miR-369-3p jt:ENSG00000156172|C8orf37  
CGTGGTTC|ENSG00000207754|hsa-mir-487b|hsa-miR-487b jt:ENSG00000124772|CPNE5  
CGTGGTTC|ENSG00000207961|hsa-mir-496|hsa-miR-496 jt:ENSG00000111640|GAPDH  
CGTAAAA|ENSG00000199085|hsa-mir-148a|hsa-miR-148a jt:ENSG00000113578|FGF1  
CGTAAAA|ENSG00000207602|hsa-mir-106a|hsa-miR-106a jt:ENSG00000143314|MRPL24  
CGTAAAA|ENSG00000207710|hsa-mir-20b|hsa-miR-20b jt:ENSG00000143314|MRPL24  
CGTAAAA|ENSG00000207710|hsa-mir-20b|hsa-miR-20b jt:ENSG00000162949|CAPN13  
CGTGGCCAG|ENSG00000207585|hsa-mir-181d|hsa-miR-181d jt:ENSG00000160172|Q8IW37\_HUMAN  
CTAAAAGCC|ENSG00000207586|hsa-mir-135a-2|hsa-miR-135a jt:ENSG00000103005|C16orf57  
CTAAAACCA|ENSG00000207581|hsa-mir-199b|hsa-miR-199b jt:ENSG00000163599|CTLA4  
CTAAAAGTA|ENSG00000207795|hsa-mir-155|hsa-miR-155 jt:ENSG00000198632|NP\_777590.1  
CTAAATTGC|ENSG00000199085|hsa-mir-148a|hsa-miR-148a jt:ENSG00000135541|AHL1  
CTAAATTGC|ENSG00000199085|hsa-mir-148a|hsa-miR-148a jt:ENSG00000173212|C1orf161  
CTAAAGCAG|ENSG00000207618|hsa-mir-144|hsa-miR-144 jt:ENSG00000106346|USP42  
CTAAGCCCA|ENSG00000199161|hsa-mir-126|hsa-miR-126 jt:ENSG00000105647|PIK3R2  
CTAAGCCCA|ENSG00000199161|hsa-mir-126|hsa-miR-126 jt:ENSG00000172889|EGFL7  
CTAAGCCCA|ENSG00000199161|hsa-mir-126|hsa-miR-126\* jt:ENSG00000186017|ZNF566  
CTAAGCCCA|ENSG00000199161|hsa-mir-126|hsa-miR-126\* jt:ENSG00000176728|CYO14\_HUMAN  
CTAATTGCA|ENSG00000207617|hsa-mir-24-1|hsa-miR-189 jt:ENSG00000163558|PRKCI  
CTAATTGCA|ENSG00000207617|hsa-mir-24-1|hsa-miR-24 jt:ENSG00000166206|GABRB3  
CTACACTTC|ENSG00000199149|hsa-mir-20a|hsa-miR-20a jt:ENSG00000054803|CBLN4  
CTACACTTC|ENSG00000207585|hsa-mir-181d|hsa-miR-181d jt:ENSG00000105705|SF4  
CTACGACTC|ENSG00000207698|hsa-mir-32|hsa-miR-32 jt:ENSG00000196387|ZNF140  
CTACGGAA|ENSG00000207954|hsa-mir-138-1|hsa-miR-138 jt:ENSG00000157927|K1849\_HUMAN  
CTACTGCCA|ENSG00000207732|hsa-mir-218-1|hsa-miR-218 jt:ENSG00000198589|LRBA  
CTACTTGT|ENSG00000207795|hsa-mir-155|hsa-miR-155 jt:ENSG00000087237|CETP  
CTAGAAGCA|ENSG00000207633|hsa-mir-505|hsa-miR-505 jt:ENSG00000196511|TPK1  
CTAGAGGGA|ENSG00000207939|hsa-mir-223|hsa-miR-223 jt:ENSG00000100596|SPTLC2  
CTAGCCCGC|ENSG00000207611|hsa-mir-149|hsa-miR-149 jt:ENSG00000183145|DSCR6  
CTAGGTAAA|ENSG00000194717|hsa-mir-494|hsa-miR-494 jt:ENSG00000135968|GCC2  
CTAGGTAAA|ENSG00000199020|hsa-mir-381|hsa-miR-381 jt:ENSG00000204120|TNRC15  
CTAGGTAAA|ENSG00000199020|hsa-mir-381|hsa-miR-381 jt:ENSG00000163114|PDHA2  
CTAGGTAAA|ENSG00000199092|hsa-mir-410|hsa-miR-410 jt:ENSG00000196963|PCDH16  
CTAGGTAAA|ENSG00000207754|hsa-mir-487b|hsa-miR-487b jt:ENSG00000136738|STAM  
CTAGTGAAA|ENSG00000199094|hsa-mir-30c-2|hsa-miR-30c jt:ENSG00000152433|ZNF547  
CTAGTGAAA|ENSG00000207827|hsa-mir-30a|hsa-miR-30a-5p jt:ENSG00000152433|ZNF547  
CTATAAAG|ENSG00000207953|hsa-mir-212|hsa-miR-212 jt:ENSG00000131653|TRAF7  
CTATCTTCC|ENSG00000207638|hsa-mir-99a|hsa-miR-99a jt:ENSG00000153147|SMARCA5  
CTATTCCCA|ENSG00000207618|hsa-mir-144|hsa-miR-144 jt:ENSG00000160209|PDXK  
CTATTCCCA|ENSG00000207618|hsa-mir-144|hsa-miR-144 jt:ENSG00000102547|CAB39L  
CTCAAACCA|ENSG00000194717|hsa-mir-494|hsa-miR-494 jt:ENSG00000109132|PHOX2B  
CTCAAACCA|ENSG00000199020|hsa-mir-381|hsa-miR-381 jt:ENSG00000131003|RBMY2FP  
CTCAAACCA|ENSG00000199020|hsa-mir-381|hsa-miR-381 jt:ENSG00000185674|LYG2\_HUMAN  
CTCAAACCA|ENSG00000199025|hsa-mir-369|hsa-miR-369-3p jt:ENSG00000131003|RBMY2FP  
CTCAAACCA|ENSG00000199025|hsa-mir-369|hsa-miR-369-3p jt:ENSG00000182774|RS17\_HUMAN  
CTCAAACCA|ENSG00000199025|hsa-mir-369|hsa-miR-369-3p jt:ENSG00000184779|RPS17  
CTCAAACCA|ENSG00000199092|hsa-mir-410|hsa-miR-410 jt:ENSG0000010278|CD9  
CTCAAACCA|ENSG00000199107|hsa-mir-409|hsa-miR-409-5p jt:ENSG00000106538|RARRES2  
CTCAAACCA|ENSG00000199107|hsa-mir-409|hsa-miR-409-5p jt:ENSG00000107611|CUBN  
CTCAAACCA|ENSG00000199121|hsa-mir-26b|hsa-miR-26b jt:ENSG00000037637|FBXO42  
CTCAAACCA|ENSG00000199121|hsa-mir-26b|hsa-miR-26b jt:ENSG00000135999|EPC2  
CTCAAACCA|ENSG00000207743|hsa-mir-495|hsa-miR-495 jt:ENSG00000140264|SERF2  
CTCAAACCA|ENSG00000207743|hsa-mir-495|hsa-miR-495 jt:ENSG0000010278|CD9

CTCAAACCA|ENSG00000207754|hsa-mir-487b|hsa-miR-487b|jt:ENSG00000122852|SFTPA1B  
CTCAAACCA|ENSG00000207754|hsa-mir-487b|hsa-miR-487b|jt:ENSG00000185303|SFTPA1  
CTCAAACCA|ENSG00000207754|hsa-mir-487b|hsa-miR-487b|jt:ENSG00000122854|SFTPA2B  
CTCAAACCA|ENSG00000207754|hsa-mir-487b|hsa-miR-487b|jt:ENSG00000182314|SFTPA2  
CTCAAACCA|ENSG00000207761|hsa-mir-329-1|hsa-miR-329|jt:ENSG00000188937|NYX  
CTCAAACCA|ENSG00000207961|hsa-mir-496|hsa-miR-496|jt:ENSG00000109133|TMEM33  
CTCAAACCA|ENSG00000199094|hsa-mir-30c-2|hsa-miR-30c|jt:ENSG00000129680|MAP7D3  
CTCAAACCA|ENSG00000199094|hsa-mir-30c-2|hsa-miR-30c|jt:ENSG00000196460|Q6ZNB4\_HUMAN  
CTCAAACCA|ENSG00000207827|hsa-mir-30a|hsa-miR-30a-5p|jt:ENSG00000129680|MAP7D3  
CTCAAACCA|ENSG00000207827|hsa-mir-30a|hsa-miR-30a-5p|jt:ENSG00000196460|Q6ZNB4\_HUMAN  
CTCACATAC|ENSG00000207618|hsa-mir-144|hsa-miR-144|jt:ENSG00000092421|SEMA6A  
CTCACCC|ENSG00000207808|hsa-mir-27a|hsa-miR-27a|jt:ENSG00000142182|DNMT3L  
CTCACCC|ENSG00000207980|hsa-mir-23a|hsa-miR-23a|jt:ENSG00000088899|K0552\_HUMAN  
CTCACCC|ENSG00000207980|hsa-mir-23a|hsa-miR-23a|jt:ENSG00000140623|SEPT12  
CTCACCC|ENSG00000207980|hsa-mir-23a|hsa-miR-23a|jt:ENSG00000167774|NDUFA7  
CTCACCC|ENSG00000209707|hsa-mir-24-2|hsa-miR-24|jt:ENSG00000053918|KCNQ1  
CTCACCC|ENSG00000209707|hsa-mir-24-2|hsa-miR-24|jt:ENSG00000183813|CCR4  
CTCACGAC|ENSG00000199122|hsa-mir-148b|hsa-miR-148b|jt:ENSG00000127533|F2RL3  
CTCACGAC|ENSG00000198981|hsa-mir-29a|hsa-miR-29a|jt:ENSG00000115194|SLC30A3  
CTCACACAA|ENSG00000207730|hsa-mir-200b|hsa-miR-200b|jt:ENSG00000188707|C7orf29  
CTCACACGC|ENSG00000207607|hsa-mir-200a|hsa-miR-200a|jt:ENSG00000131773|KHDRBS3  
CTCACACGC|ENSG00000207607|hsa-mir-200a|hsa-miR-200a|jt:ENSG00000165424|C10orf56  
CTCACACGC|ENSG00000207607|hsa-mir-200a|hsa-miR-200a|jt:ENSG00000196935|SRGAP1  
CTCACACGC|ENSG00000207607|hsa-mir-200a|hsa-miR-200a\*|jt:ENSG00000100445|C14orf124  
CTCACACGC|ENSG00000207730|hsa-mir-200b|hsa-miR-200b|jt:ENSG00000164051|CCDC51  
CTCAGTAGC|ENSG00000207607|hsa-mir-200a|hsa-miR-200a|jt:ENSG00000010295|NF\_542768.1  
CTCAGTAGC|ENSG00000207607|hsa-mir-200a|hsa-miR-200a\*|jt:ENSG00000076108|BAZ2A  
CTCAGTAGC|ENSG00000207607|hsa-mir-200a|hsa-miR-200a\*|jt:ENSG00000101350|KIF3B  
CTCAGTAGC|ENSG00000207607|hsa-mir-200a|hsa-miR-200a\*|jt:ENSG00000050730|TNIP3  
CTCAGTAGC|ENSG00000207607|hsa-mir-200a|hsa-miR-200a\*|jt:ENSG00000172845|SP3  
CTCAGTAGC|ENSG00000207607|hsa-mir-200a|hsa-miR-200a\*|jt:ENSG00000176907|C8orf4  
CTCAGTAGC|ENSG00000207730|hsa-mir-200b|hsa-miR-200b|jt:ENSG00000120685|C13orf23  
CTCATC|ENSG00000207618|hsa-mir-144|hsa-miR-144|jt:ENSG00000184602|SNN  
CTCATC|ENSG00000207731|hsa-mir-506|hsa-miR-506|jt:ENSG00000096093|EFHC1  
CTCATC|ENSG00000207731|hsa-mir-506|hsa-miR-506|jt:ENSG00000113732|ATP6V0E1  
CTCATGTTTC|ENSG00000199122|hsa-mir-148b|hsa-miR-148b|jt:ENSG00000114650|SCAP  
CTCATTACC|ENSG00000207980|hsa-mir-23a|hsa-miR-23a|jt:ENSG00000131002|CYorf15B  
CTCATTCAA|ENSG00000207548|hsa-mir-217|hsa-miR-217|jt:ENSG00000166752|TMEM83  
CTCATTAC|ENSG00000207739|hsa-mir-218-2|hsa-miR-218|jt:ENSG00000183722|LHFP  
CTCATTCCA|ENSG00000198981|hsa-mir-29a|hsa-miR-29a|jt:ENSG00000164692|COL1A2  
CTCCATAAA|ENSG00000208017|hsa-mir-140|hsa-miR-140|jt:ENSG00000188816|HMX2  
CTCCATAAA|ENSG00000208017|hsa-mir-140|hsa-miR-140|jt:ENSG00000198677|KIAA0372  
CTCCCTTAA|ENSG00000198987|hsa-mir-16-2|hsa-miR-16-2|jt:ENSG00000115998|C2orf42  
CTCCCTTAA|ENSG00000207718|hsa-mir-15a|hsa-miR-15a|jt:ENSG00000115998|C2orf42  
CTCCCTTAA|ENSG00000208006|hsa-mir-16-1|hsa-miR-16-1|jt:ENSG00000115998|C2orf42  
CTCCGAACC|ENSG00000199077|hsa-mir-129-2|hsa-miR-129|jt:ENSG00000203945|Q5JQP1\_HUMAN  
CTCCGC|ENSG00000198973|hsa-mir-375|hsa-miR-375|jt:ENSG00000112531|QKI  
CTCCGC|ENSG00000198973|hsa-mir-375|hsa-miR-375|jt:ENSG00000140992|PDPK1  
CTCCGCC|ENSG00000198973|hsa-mir-375|hsa-miR-375|jt:ENSG00000112531|QKI  
CTCCGAAA|ENSG00000199017|hsa-mir-1-1|hsa-miR-1|jt:ENSG00000168000|HNRPUL2  
CTCCGAAC|ENSG00000207732|hsa-mir-218-1|hsa-miR-218|jt:ENSG00000157014|TATDN2  
CTCCGAAC|ENSG00000207732|hsa-mir-218-1|hsa-miR-218|jt:ENSG00000164120|HPGD  
CTCCGATC|ENSG00000198974|hsa-mir-30e|hsa-miR-30e-5p|jt:ENSG00000133392|MYH11  
CTCCGATC|ENSG00000207962|hsa-mir-30c-1|hsa-miR-30c|jt:ENSG00000133392|MYH11  
CTCGAGCTC|ENSG00000198974|hsa-mir-30e|hsa-miR-30e-5p|jt:ENSG00000135596|MICAL1  
CTCGAGCTC|ENSG00000207962|hsa-mir-30c-1|hsa-miR-30c|jt:ENSG00000135596|MICAL1  
CTCGGACC|ENSG00000207953|hsa-mir-212|hsa-miR-212|jt:ENSG00000134744|ZCCHC11  
CTCGGACC|ENSG00000207953|hsa-mir-212|hsa-miR-212|jt:ENSG00000142188|TMEM50B  
CTCGTAGC|ENSG00000207708|hsa-mir-141|hsa-miR-141|jt:ENSG00000155966|AFF2  
CTCGGAAGA|ENSG00000199082|hsa-mir-342|hsa-miR-342|jt:ENSG00000184708|EIF4ENIF1  
CTCGGCCAA|ENSG00000199121|hsa-mir-26b|hsa-miR-26b|jt:ENSG00000130675|HLXB9  
CTCGGCTCA|ENSG00000199058|hsa-mir-302b|hsa-miR-302b|jt:ENSG00000185744|TNT\_HUMAN  
CTCGGCTCA|ENSG00000199102|hsa-mir-302c|hsa-miR-302c|jt:ENSG00000185744|TNT\_HUMAN  
CTCGGCTCA|ENSG00000199145|hsa-mir-302d|hsa-miR-302d|jt:ENSG00000185744|TNT\_HUMAN  
CTCGGCTCA|ENSG00000199169|hsa-mir-367|hsa-miR-367|jt:ENSG00000112893|MAN2A1  
CTCGGCTCA|ENSG00000207614|hsa-mir-193a|hsa-miR-193a|jt:ENSG00000185744|TNT\_HUMAN  
CTCTAACAA|ENSG00000207610|hsa-mir-19a|hsa-miR-19a|jt:ENSG00000163923|RPL39L  
CTCTACAGC|ENSG00000207618|hsa-mir-144|hsa-miR-144|jt:ENSG00000117713|ARID1A  
CTCTATTC|ENSG00000207809|hsa-mir-139|hsa-miR-139|jt:ENSG00000170035|UBE2E4P  
CTCTCTAAC|ENSG00000207933|hsa-mir-9-1|hsa-miR-9|jt:ENSG00000188888|GPR179  
CTCTCTAAC|ENSG00000207933|hsa-mir-9-1|hsa-miR-9\*|jt:ENSG00000180357|ZNF609  
CTCTTGTA|ENSG00000207752|hsa-mir-199a-1|hsa-miR-199a\*|jt:ENSG00000136205|TNS3  
CTGAACCAA|ENSG00000207630|hsa-mir-7-3|hsa-miR-7|jt:ENSG00000182289|Q9H9U3\_HUMAN  
CTGAATCAG|ENSG00000199072|hsa-let-7f-1|hsa-let-7f|jt:ENSG00000143851|PTPN7  
CTGAATCAG|ENSG00000199072|hsa-let-7f-1|hsa-let-7f|jt:ENSG00000197948|FCHSD1  
CTGAATCAG|ENSG00000199133|hsa-let-7d|hsa-let-7d|jt:ENSG00000143851|PTPN7  
CTGAATCAG|ENSG00000199133|hsa-let-7d|hsa-let-7d|jt:ENSG00000163531|NFASC  
CTGAATCAG|ENSG00000199165|hsa-let-7a-1|hsa-let-7a|jt:ENSG00000143851|PTPN7  
CTGAATCAG|ENSG00000199165|hsa-let-7a-1|hsa-let-7a|jt:ENSG00000197948|FCHSD1  
CTGAATGGC|ENSG00000207732|hsa-mir-218-1|hsa-miR-218|jt:ENSG00000203931|LOC729078  
CTGACCATC|ENSG00000207731|hsa-mir-506|hsa-miR-506|jt:ENSG00000152254|G6PC2  
CTGACGACA|ENSG00000207728|hsa-mir-449b|hsa-miR-449b|jt:ENSG00000119782|FKBP1B  
CTGAGCCGA|ENSG00000199169|hsa-mir-367|hsa-miR-367|jt:ENSG00000112893|MAN2A1  
CTGAGCCGA|ENSG00000199169|hsa-mir-367|hsa-miR-367|jt:ENSG00000182831|C16orf72  
CTGAGCCGA|ENSG00000199169|hsa-mir-367|hsa-miR-367|jt:ENSG00000186474|KLIK1  
CTGAGTAAC|ENSG00000199059|hsa-mir-135b|hsa-miR-135b|jt:ENSG00000113494|PRLR  
CTGATGCAA|ENSG00000199158|hsa-mir-96|hsa-miR-96|jt:ENSG00000185304|NP\_001071638.1  
CTGATGCAA|ENSG00000199158|hsa-mir-96|hsa-miR-96|jt:ENSG00000187627|RGPD1  
CTGATGCAA|ENSG00000207990|hsa-mir-182|hsa-miR-182|jt:ENSG00000185304|NP\_001071638.1  
CTGATGCAA|ENSG00000207990|hsa-mir-182|hsa-miR-182|jt:ENSG00000187627|RGPD1  
CTGATGGTA|ENSG00000198974|hsa-mir-30e|hsa-miR-30e-3p|jt:ENSG00000204581|Q6ZU44\_HUMAN  
CTGATTAAC|ENSG00000194717|hsa-mir-494|hsa-miR-494|jt:ENSG00000006576|PHTF7  
CTGATTAAC|ENSG00000207749|hsa-mir-299|hsa-miR-299-5p|jt:ENSG00000180964|TCEAL8  
CTGATTAAC|ENSG00000207761|hsa-mir-329-1|hsa-miR-329|jt:ENSG00000168758|SEMA4C  
CTGATTCAC|ENSG00000198973|hsa-mir-375|hsa-miR-375|jt:ENSG00000134001|EIF2S1  
CTGCAACTC|ENSG00000199012|hsa-mir-412|hsa-miR-412|jt:ENSG00000165699|TSC1  
CTGCAACTC|ENSG00000199015|hsa-mir-377|hsa-miR-377|jt:ENSG00000040487|PQLC2  
CTGCAACTC|ENSG00000199020|hsa-mir-381|hsa-miR-381|jt:ENSG00000146678|IGFBP1  
CTGCAACTC|ENSG00000199092|hsa-mir-410|hsa-miR-410|jt:ENSG00000166068|SPRED1  
CTGCAACTC|ENSG00000207749|hsa-mir-299|hsa-miR-299-5p|jt:ENSG00000101638|ST8SIA5  
CTGCAACTC|ENSG00000207961|hsa-mir-496|hsa-miR-496|jt:ENSG00000164258|NDUFS4  
CTGCCAACA|ENSG00000198981|hsa-mir-29a|hsa-miR-29a|jt:ENSG00000164692|COL1A2  
CTGCCAACA|ENSG00000198981|hsa-mir-29a|hsa-miR-29a|jt:ENSG00000176658|MYO1D  
CTGCCAACA|ENSG00000198981|hsa-mir-29a|hsa-miR-29a|jt:ENSG00000137558|PI15  
CTGCCATA|ENSG00000207633|hsa-mir-505|hsa-miR-505|jt:ENSG00000170348|TMED10

CTGCCGAGA|ENSG00000207617|hsa-mir-24-1|hsa-miR-24|jt:ENSG00000160867|FGFR4  
CTGCCATC|ENSG00000207926|hsa-mir-135a-1|hsa-miR-135a|jt:ENSG00000198246|SLC29A3  
CTGCCGATA|ENSG00000199077|hsa-mir-129-2|hsa-miR-129|jt:ENSG00000170310|STX8  
CTGCCGATAA|ENSG00000199077|hsa-mir-129-2|hsa-miR-129|jt:ENSG00000170310|STX8  
CTGCCGTGAC|ENSG00000207732|hsa-mir-218-1|hsa-miR-218|jt:ENSG00000206069|NP\_001001663.1  
CTGCCGTGAC|ENSG00000207757|hsa-mir-93|hsa-miR-93|jt:ENSG00000146072|TNFRSF21  
CTGCCGTGAC|ENSG00000208036|hsa-mir-106b|hsa-miR-106b|jt:ENSG00000146072|TNFRSF21  
CTGCCGTGAC|ENSG00000208036|hsa-mir-106b|hsa-miR-106b|jt:ENSG00000172647|PGA5  
CTGCCGTGACA|ENSG00000207949|hsa-mir-214|hsa-miR-214|jt:ENSG00000140955|NP\_631913.2  
CTGGAACAA|ENSG00000211590|hsa-mir-802|hsa-miR-802|jt:ENSG00000048544|MRPS10  
CTGGACCAC|ENSG00000199089|hsa-mir-202|hsa-miR-202|jt:ENSG00000116667|Clorf21  
CTGGCGTACA|ENSG00000207581|hsa-mir-199b|hsa-miR-199b|jt:ENSG00000204580|DDR1  
CTGGGTACA|ENSG00000207948|hsa-mir-328|hsa-miR-328|jt:ENSG00000159650|UROCI  
CTGCTGTGA|ENSG00000207790|hsa-mir-29b-2|hsa-miR-29b|jt:ENSG00000119950|MXI1  
CTGGTGTGA|ENSG00000207790|hsa-mir-29b-2|hsa-miR-29b|jt:ENSG00000171824|EXOSC10  
CTGGTGTGA|ENSG00000207966|hsa-mir-29c|hsa-miR-29c|jt:ENSG00000119950|MXI1  
CTGGTGTGA|ENSG00000207966|hsa-mir-29c|hsa-miR-29c|jt:ENSG00000171824|EXOSC10  
CTGGTTAAA|ENSG00000207572|hsa-mir-363|hsa-miR-363|jt:ENSG00000159256|MORC3  
CTGGTTAAA|ENSG00000207602|hsa-mir-106a|hsa-miR-106a|jt:ENSG00000005469|CROT  
CTGGTTAAA|ENSG00000207710|hsa-mir-20b|hsa-miR-20b|jt:ENSG00000005469|CROT  
CTGGTTGCC|ENSG00000199023|hsa-mir-339|hsa-miR-339|jt:ENSG00000206064|QZU89\_HUMAN  
CTGGTTGCC|ENSG00000199023|hsa-mir-339|hsa-miR-339|jt:ENSG00000196975|ANXA4  
CTGGTTGGA|ENSG00000199122|hsa-mir-148b|hsa-miR-148b|jt:ENSG00000182220|ATP6AP2  
CTGGTTGGA|ENSG00000199135|hsa-mir-101-1|hsa-miR-101|jt:ENSG00000154889|MPPE1  
CTGGTTTAC|ENSG00000207698|hsa-mir-32|hsa-miR-32|jt:ENSG00000051523|CYBA  
CTGGTTTAC|ENSG00000207698|hsa-mir-32|hsa-miR-32|jt:ENSG00000090975|PITPNM2  
CTGTAATGA|ENSG00000199133|hsa-let-7d|hsa-let-7d|jt:ENSG00000138646|HERC5  
CTGTACATC|ENSG00000199072|hsa-let-7f-1|hsa-let-7f|jt:ENSG00000187109|NAP1L1  
CTGTACATC|ENSG00000199153|hsa-mir-30d|hsa-miR-30d|jt:ENSG00000065882|TBC1D1  
CTGTACATC|ENSG00000199165|hsa-let-7a-1|hsa-let-7a|jt:ENSG00000187109|NAP1L1  
CTGTACATC|ENSG00000207582|hsa-mir-30b|hsa-miR-30b|jt:ENSG00000065882|TBC1D1  
CTGTACATC|ENSG00000208024|hsa-mir-199a-2|hsa-miR-199a|jt:ENSG00000167182|SP2  
CTGTAGGTA|ENSG00000198974|hsa-mir-30e|hsa-miR-30e-3p|jt:ENSG00000166401|SERPINB8  
CTGTATTGA|ENSG00000208009|hsa-mir-130a|hsa-miR-130a|jt:ENSG00000177453|NIM1\_HUMAN  
CTGTATTGA|ENSG00000208009|hsa-mir-130a|hsa-miR-130a|jt:ENSG00000189266|ENRC2  
CTGTCGGTC|ENSG00000207567|hsa-mir-142|hsa-miR-142-3p|jt:ENSG0000011252|SH2B3  
CTGTCGGGA|ENSG00000207732|hsa-mir-218-1|hsa-miR-218|jt:ENSG00000140525|KIAA1794  
CTGTGC|ENSG00000198986|hsa-let-7a-3|hsa-let-7a|jt:ENSG00000130508|FXDN  
CTGTGC|ENSG00000207875|hsa-let-7b|hsa-let-7b|jt:ENSG00000130508|FXDN  
CTGTGGCAC|ENSG00000208024|hsa-mir-199a-2|hsa-miR-199a\*|jt:ENSG00000168490|PHYHIP  
CTGTGGCAC|ENSG00000208024|hsa-mir-199a-2|hsa-miR-199a\*|jt:ENSG00000072401|UBE2D1  
CTGTCCAA|ENSG00000199036|hsa-mir-219-1|hsa-miR-219|jt:ENSG00000105549|THEG  
CTGTCCAA|ENSG00000199036|hsa-mir-219-1|hsa-miR-219|jt:ENSG00000149506|ZP1  
CTGTCCAA|ENSG00000199036|hsa-mir-219-1|hsa-miR-219|jt:ENSG00000180139|Q8N9Z5\_HUMAN  
CTGTCCAA|ENSG00000199036|hsa-mir-219-1|hsa-miR-219|jt:ENSG00000197364|S100A7L2  
CTGTTGACA|ENSG00000207827|hsa-mir-30a|hsa-miR-30a-3p|jt:ENSG00000203784|LELP1  
CTGTTGATC|ENSG00000199023|hsa-mir-339|hsa-miR-339|jt:ENSG00000128791|TWSG1  
CTGTTTGA|ENSG00000207585|hsa-mir-181d|hsa-miR-181d|jt:ENSG00000147454|SLC25A37  
CTGTTTGA|ENSG00000198987|hsa-mir-16-2|hsa-miR-16|jt:ENSG00000162144|CYBASC3  
CTTAAACTC|ENSG00000207694|hsa-mir-1-2|hsa-miR-1|jt:ENSG00000125788|DEFB126  
CTTAAAGAC|ENSG00000207955|hsa-mir-219-2|hsa-miR-219|jt:ENSG00000140848|CPNE2  
CTTAAACCC|ENSG00000207708|hsa-mir-141|hsa-miR-141|jt:ENSG00000103647|CORO2B  
CTTAAACCC|ENSG00000207713|hsa-mir-200c|hsa-miR-200c|jt:ENSG00000148290|SURF1  
CTTACTGCA|ENSG00000199135|hsa-mir-101-1|hsa-miR-101|jt:ENSG00000130224|LRCH2  
CTTACTGCA|ENSG00000207790|hsa-mir-29b-2|hsa-miR-29b|jt:ENSG00000204118|NAP1L6  
CTTACTGCA|ENSG00000207966|hsa-mir-29c|hsa-miR-29c|jt:ENSG00000204118|NAP1L6  
CTTAGGTA|ENSG00000207710|hsa-mir-20b|hsa-miR-20b|jt:ENSG00000170390|DCLK2  
CTTATATA|ENSG00000199017|hsa-mir-1-1|hsa-miR-1|jt:ENSG00000111962|UST  
CTTATATAC|ENSG00000199017|hsa-mir-1-1|hsa-miR-1|jt:ENSG00000111962|UST  
CTTATATAC|ENSG00000199017|hsa-mir-1-1|hsa-miR-1|jt:ENSG00000125788|DEFB126  
CTTATACAGC|ENSG00000207933|hsa-mir-9-1|hsa-miR-9|jt:ENSG00000138792|ENPEP  
CTTATCTGC|ENSG00000207949|hsa-mir-214|hsa-miR-214|jt:ENSG00000082556|OPRK1  
CTTACACCC|ENSG00000199161|hsa-mir-126|hsa-miR-126|jt:ENSG00000172889|EGFL7  
CTTACACCC|ENSG00000199161|hsa-mir-126|hsa-miR-126\*|jt:ENSG00000175779|NP\_997327.1  
CTTACGTC|ENSG00000199161|hsa-mir-126|hsa-miR-126|jt:ENSG00000172889|EGFL7  
CTTACGTC|ENSG00000199161|hsa-mir-126|hsa-miR-126\*|jt:ENSG00000103111|MON1B  
CTTACGAC|ENSG00000207960|hsa-mir-153-2|hsa-miR-153|jt:ENSG00000105641|SLC5A5  
CTTACATCA|ENSG00000199020|hsa-mir-381|hsa-miR-381|jt:ENSG00000135269|TES  
CTTACATCA|ENSG00000199025|hsa-mir-369|hsa-miR-369-3p|jt:ENSG00000153130|SCOC  
CTTACATCA|ENSG00000199069|hsa-mir-323|hsa-miR-323|jt:ENSG00000188997|KCTD21  
CTTACATCA|ENSG00000207749|hsa-mir-299|hsa-miR-299-5p|jt:ENSG00000169035|KLK7  
CTTACATCA|ENSG00000207749|hsa-mir-299|hsa-miR-299-5p|jt:ENSG00000144354|CDCA7  
CTTACATCA|ENSG00000207754|hsa-mir-487b|hsa-miR-487b|jt:ENSG00000196581|AJAP1  
CTTCAACG|ENSG00000199024|hsa-mir-103-2|hsa-miR-103|jt:ENSG00000125657|TNFSF9  
CTTCCGGTA|ENSG00000199122|hsa-mir-148b|hsa-miR-148b|jt:ENSG00000055070|Clorf144  
CTTCTCG|ENSG00000199161|hsa-mir-126|hsa-miR-126|jt:ENSG00000172889|EGFL7  
CTTCTCG|ENSG00000207949|hsa-mir-214|hsa-miR-214|jt:ENSG00000058668|ATP2B4  
CTTCTCG|ENSG00000208024|hsa-mir-199a-2|hsa-miR-199a\*|jt:ENSG00000143641|GALNT2  
CTTCTGGC|ENSG00000207596|hsa-mir-194-2|hsa-miR-194|jt:ENSG00000178028|DMAP1  
CTTCTAGGA|ENSG00000207808|hsa-mir-27a|hsa-miR-27a|jt:ENSG00000168758|SEMA4C  
CTTCTAGGA|ENSG00000207980|hsa-mir-23a|hsa-miR-23a|jt:ENSG00000024862|CCDC28A  
CTTCTAGGA|ENSG00000209707|hsa-mir-24-2|hsa-miR-24|jt:ENSG00000198106|RUND2B  
CTTGAATCA|ENSG00000199058|hsa-mir-302b|hsa-miR-302b|jt:ENSG00000173039|RELA  
CTTGAATCA|ENSG00000199102|hsa-mir-302c|hsa-miR-302c|jt:ENSG00000173039|RELA  
CTTGAATCA|ENSG00000199145|hsa-mir-302d|hsa-miR-302d|jt:ENSG00000173039|RELA  
CTTGTGTA|ENSG00000207795|hsa-mir-155|hsa-miR-155|jt:ENSG00000197081|IGF2R  
CTTGTAAAG|ENSG00000207585|hsa-mir-181d|hsa-miR-181d|jt:ENSG00000109471|IL2  
CTTGTGACA|ENSG00000207725|hsa-mir-222|hsa-miR-222|jt:ENSG00000135046|ANXA1  
CTTGTGACA|ENSG00000207870|hsa-mir-221|hsa-miR-221|jt:ENSG00000135046|ANXA1  
CTTGTGACC|ENSG00000199059|hsa-mir-135b|hsa-miR-135b|jt:ENSG00000168676|KCTD19  
CTTTAARAC|ENSG00000199122|hsa-mir-148b|hsa-miR-148b|jt:ENSG00000087470|DNM1L  
CTTTAATGC|ENSG00000207586|hsa-mir-135a-2|hsa-miR-135a|jt:ENSG00000185436|IL28RA  
CTTTCCGGA|ENSG00000198974|hsa-mir-30e|hsa-miR-30e-5p|jt:ENSG00000134247|PTGFRN  
CTTTCCGGA|ENSG00000207962|hsa-mir-30c-1|hsa-miR-30c|jt:ENSG00000134247|PTGFRN  
CTTTCTAGA|ENSG00000207808|hsa-mir-27a|hsa-miR-27a|jt:ENSG00000104886|PLEKHJ1  
CTTTGCCTA|ENSG00000207752|hsa-mir-199a-1|hsa-miR-199a\*|jt:ENSG00000120278|PLEKHJ1  
CTTTGGAAC|ENSG00000207933|hsa-mir-9-1|hsa-miR-9|jt:ENSG00000173212|Clorf161  
CTTTGGAAC|ENSG00000209703|hsa-mir-9-1|hsa-miR-9\*|jt:ENSG00000133794|ARNTL  
CTTTGGACC|ENSG00000207586|hsa-mir-135a-2|hsa-miR-135a|jt:ENSG00000006831|ADIPOR2  
CTTTGTAC|ENSG00000207933|hsa-mir-9-1|hsa-miR-9|jt:ENSG00000203786|KPRP  
CTTTGTAC|ENSG00000207933|hsa-mir-9-1|hsa-miR-9\*|jt:ENSG00000178401|NP\_079178.2  
CTTTGTAC|ENSG00000199059|hsa-mir-135b|hsa-miR-135b|jt:ENSG00000162694|EXTL2  
CTTTTCCC|ENSG00000199085|hsa-mir-148a|hsa-miR-148a|jt:ENSG00000112333|NR2E1  
CTTTTCGA|ENSG00000207865|hsa-mir-34a|hsa-miR-34a|jt:ENSG00000133740|EF5  
GAAAAGTCA|ENSG00000207865|hsa-mir-34a|hsa-miR-34a|jt:ENSG00000150593|PDCD4



GACACGTA|ENSG00000199149|hsa-mir-20a|hsa-miR-20a jt:ENSG00000054803|CBLN4  
GACACGTA|ENSG00000207610|hsa-mir-19a|hsa-miR-19a jt:ENSG00000205424|Q6ZW00\_HUMAN  
GACACTGTC|ENSG00000202641|hsa-mir-484|hsa-miR-484 jt:ENSG00000178726|THBD  
GACAGACAA|ENSG00000207586|hsa-mir-135a-2|hsa-miR-135a jt:ENSG00000113494|PRLR  
GACAGCCAA|ENSG00000207732|hsa-mir-218-1|hsa-miR-218 jt:ENSG00000198589|LRBA  
GACAGCGGA|ENSG00000207955|hsa-mir-219-2|hsa-miR-219 jt:ENSG00000113643|RRAS  
GACAGCGGA|ENSG00000207955|hsa-mir-219-2|hsa-miR-219 jt:ENSG00000205670|C2Iorf51  
GACAGGGGA|ENSG00000199153|hsa-mir-30d|hsa-miR-30d jt:ENSG00000185112|FAM43A  
GACAGGGGA|ENSG00000207582|hsa-mir-30b|hsa-miR-30b jt:ENSG00000185112|FAM43A  
GACATCTGC|ENSG00000207635|hsa-mir-499|hsa-miR-499 jt:ENSG00000111912|NCOA7  
GACCAACCA|ENSG00000207939|hsa-mir-223|hsa-miR-223 jt:ENSG00000130775|C1orf38  
GACCAATA|ENSG00000199036|hsa-mir-219-1|hsa-miR-219 jt:ENSG00000197555|SIPA1L1  
GACCCGTC|ENSG00000199089|hsa-mir-202|hsa-miR-202 jt:ENSG00000129317|PUS7L  
GACCCGGAA|ENSG00000208017|hsa-mir-140|hsa-miR-140 jt:ENSG00000086232|EIF2AK1  
GACCCGCCA|ENSG00000199032|hsa-mir-425|hsa-miR-425-3p jt:ENSG00000138678|NP\_116106.2  
GACCCGTA|ENSG00000207949|hsa-mir-214|hsa-miR-214 jt:ENSG00000160325|C9orf7  
GACCCGTA|ENSG00000208024|hsa-mir-199a-2|hsa-miR-199a\* jt:ENSG00000153575|TUBGCP5  
GACCCGGAA|ENSG00000199085|hsa-mir-148a|hsa-miR-148a jt:ENSG00000106511|MEOX2  
GACCCGGAA|ENSG00000207586|hsa-mir-135a-2|hsa-miR-135a jt:ENSG00000073792|IGF2BP2  
GACCCGGAA|ENSG00000207586|hsa-mir-135a-2|hsa-miR-135a jt:ENSG00000203727|SAMD5  
GACCTGAGC|ENSG00000199122|hsa-mir-148b|hsa-miR-148b jt:ENSG00000205524|Q68D70\_HUMAN  
GACCTGAGC|ENSG00000199122|hsa-mir-148b|hsa-miR-148b jt:ENSG00000206193|Q5HYA3\_HUMAN  
GACCTGCGC|ENSG00000207630|hsa-mir-7-3|hsa-miR-7 jt:ENSG00000099940|SNAP29  
GACCTTCAA|ENSG00000199158|hsa-mir-96|hsa-miR-96 jt:ENSG00000007402|CACNA2D2  
GACCTTCAA|ENSG00000199158|hsa-mir-96|hsa-miR-96 jt:ENSG00000162755|NP\_689579.3  
GACCTTCAA|ENSG00000207691|hsa-mir-183|hsa-miR-183 jt:ENSG00000162755|NP\_689579.3  
GACGAAGCC|ENSG00000207614|hsa-mir-193a|hsa-miR-193a jt:ENSG00000129474|JUB  
GACGCAATC|ENSG00000207698|hsa-mir-32|hsa-miR-32 jt:ENSG00000143458|NP\_653219.1  
GACGGACAC|ENSG00000207791|hsa-mir-497|hsa-miR-497 jt:ENSG00000054523|KIF1B  
GACGGACAC|ENSG00000207929|hsa-mir-195|hsa-miR-195 jt:ENSG00000054523|KIF1B  
GACGTACCC|ENSG00000207617|hsa-mir-24-1|hsa-miR-189 jt:ENSG00000122786|CALD1  
GACGTGGCA|ENSG00000207581|hsa-mir-199b|hsa-miR-199b jt:ENSG00000176986|SEC24C  
GACGTGGCA|ENSG00000207752|hsa-mir-199a-1|hsa-miR-199a jt:ENSG00000176986|SEC24C  
GACGTGGCA|ENSG00000207752|hsa-mir-199a-1|hsa-miR-199a\* jt:ENSG00000114796|KLHL24  
GACGTGGCA|ENSG00000208024|hsa-mir-199a-2|hsa-miR-199a jt:ENSG00000176986|SEC24C  
GACGTGGCA|ENSG00000208024|hsa-mir-199a-2|hsa-miR-199a\* jt:ENSG00000114796|KLHL24  
GACTACA|ENSG00000208009|hsa-mir-130a|hsa-miR-130a jt:ENSG00000169509|CRCT1  
GACTCAAA|ENSG00000199020|hsa-mir-381|hsa-miR-381 jt:ENSG00000176208|ATAD5  
GACTCAAA|ENSG00000199025|hsa-mir-369|hsa-miR-369-3p jt:ENSG00000164611|PTTG1  
GACTCAAA|ENSG00000199092|hsa-mir-410|hsa-miR-410 jt:ENSG00000176208|ATAD5  
GACTCAGGC|ENSG00000207939|hsa-mir-223|hsa-miR-223 jt:ENSG00000205608|Q6ZP9\_HUMAN  
GACTCAGGC|ENSG00000207939|hsa-mir-223|hsa-miR-223 jt:ENSG00000115598|IL1RL2  
GACTCCTGC|ENSG00000207567|hsa-mir-142|hsa-miR-142-3p jt:ENSG00000105829|BET1  
GACTCGGCA|ENSG00000207607|hsa-mir-200a|hsa-miR-200a\* jt:ENSG00000180957|PITPNB  
GACTCTCCA|ENSG00000207562|hsa-mir-34c|hsa-miR-34c jt:ENSG00000197616|MYH6  
GACTCTCCA|ENSG00000207811|hsa-mir-34b|hsa-miR-34b jt:ENSG00000197616|MYH6  
GACTCTCCA|ENSG00000207949|hsa-mir-214|hsa-miR-214 jt:ENSG00000116649|SRM  
GACTGTGAC|ENSG00000207623|hsa-mir-205|hsa-miR-205 jt:ENSG00000152270|PDE3B  
GACTTCA|ENSG00000199058|hsa-mir-302b|hsa-miR-302b\* jt:ENSG00000122729|ACO1  
GACTTCA|ENSG00000199072|hsa-let-7f-1|hsa-let-7f jt:ENSG00000196700|ZNF512B  
GACTTCA|ENSG00000199102|hsa-mir-302c|hsa-miR-302c\* jt:ENSG00000139324|TMTCC3  
GACTTCA|ENSG00000199102|hsa-mir-302c|hsa-miR-302c\* jt:ENSG00000124343|XG  
GACTTCA|ENSG00000199133|hsa-let-7d|hsa-let-7d jt:ENSG00000153574|RPIA  
GACTTCA|ENSG00000199133|hsa-let-7d|hsa-let-7d jt:ENSG00000196700|ZNF512B  
GACTTCA|ENSG00000199165|hsa-let-7a-1|hsa-let-7a jt:ENSG00000196700|ZNF512B  
GACTTCA|ENSG00000199169|hsa-mir-367|hsa-miR-367 jt:ENSG00000146666|Q96IP2\_HUMAN  
GACTTCA|ENSG00000199169|hsa-mir-367|hsa-miR-367 jt:ENSG00000147119|CHST7  
GACTTCAGC|ENSG00000199058|hsa-mir-302b|hsa-miR-302b\* jt:ENSG00000122729|ACO1  
GACTTCAGC|ENSG00000199169|hsa-mir-367|hsa-miR-367 jt:ENSG00000146666|Q96IP2\_HUMAN  
GACTTCTTA|ENSG00000211590|hsa-mir-802|hsa-miR-802 jt:ENSG00000152822|GRM1  
GACTTGAAC|ENSG00000208024|hsa-mir-199a-2|hsa-miR-199a jt:ENSG00000130021|HDHD1A  
GACTTGAAC|ENSG00000208024|hsa-mir-199a-2|hsa-miR-199a jt:ENSG00000204580|DDR1  
GAGACACTC|ENSG00000207567|hsa-mir-142|hsa-miR-142-3p jt:ENSG00000113494|PRLR  
GAGACACTC|ENSG00000207567|hsa-mir-142|hsa-miR-142-5p jt:ENSG00000135298|BAI3  
GAGACACTC|ENSG00000207567|hsa-mir-142|hsa-miR-142-5p jt:ENSG00000133997|MED6  
GAGACACTC|ENSG00000207586|hsa-mir-135a-2|hsa-miR-135a jt:ENSG00000113494|PRLR  
GAGACTACA|ENSG00000202641|hsa-mir-484|hsa-miR-484 jt:ENSG00000135637|NP\_116168.2  
GAGAGATAA|ENSG00000199058|hsa-mir-302b|hsa-miR-302b\* jt:ENSG00000125977|EIF2S2  
GAGAGATAA|ENSG00000199102|hsa-mir-302c|hsa-miR-302c\* jt:ENSG00000189058|APOD  
GAGAGGA|ENSG00000207865|hsa-mir-34a|hsa-miR-34a jt:ENSG00000145348|TBCK\_HUMAN  
GAGACTGTC|ENSG00000207777|hsa-mir-10a|hsa-miR-10a jt:ENSG00000139269|INHBE  
GAGATAAAA|ENSG00000207635|hsa-mir-499|hsa-miR-499 jt:ENSG00000132698|RAB25  
GAGATAACA|ENSG00000199058|hsa-mir-302b|hsa-miR-302b\* jt:ENSG00000125977|EIF2S2  
GAGATCACC|ENSG00000198973|hsa-mir-375|hsa-miR-375 jt:ENSG00000060709|RIMP2  
GAGATCACC|ENSG00000198973|hsa-mir-375|hsa-miR-375 jt:ENSG00000102802|C13orf33  
GAGATGTCA|ENSG00000207572|hsa-mir-363|hsa-miR-363 jt:ENSG00000170983|C8orf14  
GAGATGTCA|ENSG00000207710|hsa-mir-20b|hsa-miR-20b jt:ENSG00000114302|PRKAR2A  
GAGATGTCA|ENSG00000207710|hsa-mir-20b|hsa-miR-20b jt:ENSG00000159387|IRX6  
GAGCAAAAC|ENSG00000199153|hsa-mir-30d|hsa-miR-30d jt:ENSG00000058600|POLR3E  
GAGCAAAAC|ENSG00000199153|hsa-mir-30d|hsa-miR-30d jt:ENSG00000134460|IL2RA  
GAGCAAAAC|ENSG00000207582|hsa-mir-30b|hsa-miR-30b jt:ENSG00000058600|POLR3E  
GAGCAAAAC|ENSG00000207582|hsa-mir-30b|hsa-miR-30b jt:ENSG00000134460|IL2RA  
GAGCCG|ENSG00000207819|hsa-mir-9-3|hsa-miR-9\* jt:ENSG00000133794|ARNTL  
GAGCCGAGA|ENSG00000207744|hsa-mir-10b|hsa-miR-10b jt:ENSG00000147082|CCNB3  
GAGCCGACA|ENSG00000207792|hsa-mir-151|hsa-miR-151 jt:ENSG00000168701|NM\_014187.2  
GAGCTAATC|ENSG00000207572|hsa-mir-363|hsa-miR-363 jt:ENSG00000178343|NP\_001073974.1  
GAGCTCTTA|ENSG00000199161|hsa-mir-126|hsa-miR-126 jt:ENSG00000172889|EGFL7  
GAGCTGATA|ENSG00000199169|hsa-mir-367|hsa-miR-367 jt:ENSG00000205875|LOC197350  
GAGCTGATA|ENSG00000207933|hsa-mir-9-1|hsa-miR-9\* jt:ENSG00000187098|MITF  
GAGGAARTC|ENSG00000199058|hsa-mir-302b|hsa-miR-302b jt:ENSG00000168000|HNRPUL2  
GAGGAARTC|ENSG00000199058|hsa-mir-302b|hsa-miR-302b jt:ENSG00000163513|TGFB2  
GAGGAARTC|ENSG00000199102|hsa-mir-302c|hsa-miR-302c jt:ENSG00000168000|HNRPUL2  
GAGGAARTC|ENSG00000199102|hsa-mir-302c|hsa-miR-302c jt:ENSG00000163513|TGFB2  
GAGGAARTC|ENSG00000199145|hsa-mir-302d|hsa-miR-302d jt:ENSG00000168000|HNRPUL2  
GAGGAARTC|ENSG00000199145|hsa-mir-302d|hsa-miR-302d jt:ENSG00000163513|TGFB2  
GAGGAARTC|ENSG00000199169|hsa-mir-367|hsa-miR-367 jt:ENSG00000180104|EXOC3  
GAGGACAAC|ENSG00000199012|hsa-mir-412|hsa-miR-412 jt:ENSG00000165474|GJB2  
GAGGACAAC|ENSG00000199020|hsa-mir-381|hsa-miR-381 jt:ENSG00000162783|IERS  
GAGGACAAC|ENSG00000199107|hsa-mir-409|hsa-miR-409-5p jt:ENSG00000128710|HOXD10  
GAGGACAAC|ENSG00000207743|hsa-mir-495|hsa-miR-495 jt:ENSG00000100242|UNC84B  
GAGGACAAC|ENSG00000207961|hsa-mir-496|hsa-miR-496 jt:ENSG00000127980|PEX1  
GAGGACAAC|ENSG00000207961|hsa-mir-496|hsa-miR-496 jt:ENSG00000160785|SLC25A44  
GAGGCGCAA|ENSG00000207955|hsa-mir-219-2|hsa-miR-219 jt:ENSG00000140416|TPM1  
GAGGCGTGA|ENSG00000207611|hsa-mir-149|hsa-miR-149 jt:ENSG00000141325|CCDC45  
GAGGCGATC|ENSG00000207635|hsa-mir-499|hsa-miR-499 jt:ENSG00000163788|SNRK

GAGGGGTTA|ENSG00000199077|hsa-mir-129-2|hsa-miR-129|jt:ENSG00000136720|HS6ST1  
GAGGGGTTA|ENSG00000199077|hsa-mir-129-2|hsa-miR-129|jt:ENSG00000162105|SHANK2  
GAGGGGTTA|ENSG00000199122|hsa-mir-148b|hsa-miR-148b|jt:ENSG00000170989|EDG1  
GAGGTCCCTA|ENSG00000207960|hsa-mir-153-2|hsa-miR-153|jt:ENSG00000082175|PGR  
GAGTAAGCA|ENSG00000199094|hsa-mir-30c-2|hsa-miR-30c|jt:ENSG00000154274|C4orf19  
GAGTAAGCA|ENSG00000207827|hsa-mir-30a|hsa-miR-30a-5p|jt:ENSG00000154274|C4orf19  
GAGTAAGGA|ENSG00000207585|hsa-mir-181d|hsa-miR-181d|jt:ENSG00000115956|PLEK  
GAGTAAGGA|ENSG00000207585|hsa-mir-181d|hsa-miR-181d|jt:ENSG00000175426|PCSK1  
GAGTCAATA|ENSG00000198973|hsa-mir-375|hsa-miR-375|jt:ENSG00000088179|PTPN4  
GAGTCAGCA|ENSG00000207939|hsa-mir-223|hsa-miR-223|jt:ENSG00000145860|RNF145  
GAGTCCAAA|ENSG00000199072|hsa-let-7f-1|hsa-let-7f|jt:ENSG00000136731|UGCGL1  
GAGTCCAAA|ENSG00000199165|hsa-let-7a-1|hsa-let-7a|jt:ENSG00000136731|UGCGL1  
GAGTCGGGA|ENSG00000207586|hsa-mir-135a-2|hsa-miR-135a|jt:ENSG00000061337|LZTS1  
GAGTCGGGA|ENSG00000207586|hsa-mir-135a-2|hsa-miR-135a|jt:ENSG00000073792|IGF2BP2  
GAGTCGGGA|ENSG00000207586|hsa-mir-135a-2|hsa-miR-135a|jt:ENSG00000121774|KHDRBS1  
GAGTCGTA|ENSG00000207698|hsa-mir-32|hsa-miR-32|jt:ENSG00000196387|ZNF140  
GAGTCGTA|ENSG00000207698|hsa-mir-32|hsa-miR-32|jt:ENSG00000206560|ANKRD28  
GAGTGACAA|ENSG00000207819|hsa-mir-9-3|hsa-miR-9|jt:ENSG00000203786|KPRF  
GAGTGCGGC|ENSG00000207638|hsa-mir-99a|hsa-miR-99a|jt:ENSG00000177283|FZDB  
GAGTGTGA|ENSG00000208009|hsa-mir-130a|hsa-miR-130a|jt:ENSG00000105856|HBP1  
GAGTGTGA|ENSG00000211590|hsa-mir-802|hsa-miR-802|jt:ENSG00000079134|THOC1  
GAGTGTCC|ENSG00000199036|hsa-mir-219-1|hsa-miR-219|jt:ENSG00000109667|SLC2A9  
GAGTGTCC|ENSG00000198976|hsa-mir-429|hsa-miR-429|jt:ENSG00000115145|STAM2  
GAGTGTCC|ENSG00000207607|hsa-mir-200a|hsa-miR-200a|jt:ENSG00000196935|SRGAP1  
GAGTGTCC|ENSG00000207730|hsa-mir-200b|hsa-miR-200b|jt:ENSG00000115145|STAM2  
GAGTTAAGA|ENSG00000199058|hsa-mir-302b|hsa-miR-302b|jt:ENSG00000177954|RPS27  
GAGTTAAGA|ENSG00000199102|hsa-mir-302c|hsa-miR-302c|jt:ENSG00000177954|RPS27  
GAGTTAAGA|ENSG00000199145|hsa-mir-302d|hsa-miR-302d|jt:ENSG00000177954|RPS27  
GAGTTGCCC|ENSG00000199024|hsa-mir-103-2|hsa-miR-103|jt:ENSG00000110344|UBE4A  
GAGTTGTA|ENSG00000207596|hsa-mir-194-2|hsa-miR-194|jt:ENSG00000169239|CA5B  
GAGTTTGA|ENSG00000198987|hsa-mir-16-2|hsa-miR-16|jt:ENSG00000118017|A4GN  
GATATCAAA|ENSG00000207710|hsa-mir-20b|hsa-miR-20b|jt:ENSG00000198633|Q6PDB4\_HUMAN  
GATATTA|ENSG00000207950|hsa-mir-296|hsa-miR-296|jt:ENSG00000070018|LRP6  
GATCAAGGC|ENSG00000207691|hsa-mir-183|hsa-miR-183|jt:ENSG00000100889|PCK2  
GATCCAAGC|ENSG00000207808|hsa-mir-27a|hsa-miR-27a|jt:ENSG00000041880|PARF3  
GATCCCGCA|ENSG00000207638|hsa-mir-99a|hsa-miR-99a|jt:ENSG00000082213|C5orf22  
GATCCCGCA|ENSG00000207863|hsa-mir-125b-2|hsa-miR-125b|jt:ENSG00000171169|C9orf90  
GATCCTGAC|ENSG00000199072|hsa-let-7f-1|hsa-let-7f|jt:ENSG00000107960|OBF1  
GATCCTGAC|ENSG00000199165|hsa-let-7a-1|hsa-let-7a|jt:ENSG00000107960|OBF1  
GATCCTTCC|ENSG00000207604|hsa-mir-206|hsa-miR-206|jt:ENSG00000204596|RFP21  
GATCGATA|ENSG00000198987|hsa-mir-16-2|hsa-miR-16|jt:ENSG00000149201|CCDC81  
GATCGATA|ENSG00000198987|hsa-mir-16-2|hsa-miR-16|jt:ENSG00000158813|EDA  
GATCGCCA|ENSG00000207819|hsa-mir-9-3|hsa-miR-9|jt:ENSG00000108604|SMARCD2  
GATCGCCA|ENSG00000207819|hsa-mir-9-3|hsa-miR-9|jt:ENSG00000182022|ST456\_HUMAN  
GATCGCCA|ENSG00000207819|hsa-mir-9-3|hsa-miR-9\*|jt:ENSG00000187257|RSBN1L  
GATCGCCAC|ENSG00000207819|hsa-mir-9-3|hsa-miR-9|jt:ENSG00000182022|ST456\_HUMAN  
GATCGCCAC|ENSG00000207819|hsa-mir-9-3|hsa-miR-9\*|jt:ENSG00000187257|RSBN1L  
GATCTAGC|ENSG00000207819|hsa-mir-9-3|hsa-miR-9|jt:ENSG00000092531|SNAP23  
GATCTAGC|ENSG00000207819|hsa-mir-9-3|hsa-miR-9\*|jt:ENSG00000187257|RSBN1L  
GATCTTAAC|ENSG00000207618|hsa-mir-144|hsa-miR-144|jt:ENSG00000088854|C20orf194  
GATGAAGGC|ENSG00000207731|hsa-mir-506|hsa-miR-506|jt:ENSG00000114541|FRMD4B  
GATGAAGTA|ENSG00000207795|hsa-mir-155|hsa-miR-155|jt:ENSG00000132824|SERINC3  
GATGAGGCA|ENSG00000207795|hsa-mir-155|hsa-miR-155|jt:ENSG00000164077|MON1A  
GATGCAAA|ENSG00000207586|hsa-mir-135a-2|hsa-miR-135a|jt:ENSG00000171931|FBXW10  
GATGCCAGA|ENSG00000207630|hsa-mir-7-3|hsa-miR-7|jt:ENSG00000182450|KCNK4  
GATGCTGAC|ENSG00000198981|hsa-mir-29a|hsa-miR-29a|jt:ENSG00000119950|MXI1  
GATGCTGAC|ENSG00000207939|hsa-mir-223|hsa-miR-223|jt:ENSG00000103023|NP\_001073961.1  
GATGCTTCC|ENSG00000207808|hsa-mir-27a|hsa-miR-27a|jt:ENSG00000144115|NP\_060741.2  
GATGCTTCC|ENSG00000209707|hsa-mir-24-2|hsa-miR-24|jt:ENSG00000140199|SLC12A6  
GATGCGGCG|ENSG00000207617|hsa-mir-24-1|hsa-miR-24|jt:ENSG00000206113|Q6ZU27\_HUMAN  
GATGCGGCG|ENSG00000207744|hsa-mir-10b|hsa-miR-10b|jt:ENSG00000072274|TFRC  
GATGTCACC|ENSG00000208024|hsa-mir-199a-2|hsa-miR-199a\*|jt:ENSG00000188384|Q6ZUQ5\_HUMAN  
GATGTCACC|ENSG00000208024|hsa-mir-199a-2|hsa-miR-199a\*|jt:ENSG00000205271|Q6ZUQ5\_HUMAN  
GATGTCACC|ENSG00000208024|hsa-mir-199a-2|hsa-miR-199a\*|jt:ENSG00000205275|Q6ZUQ5\_HUMAN  
GATGTCACC|ENSG00000208024|hsa-mir-199a-2|hsa-miR-199a\*|jt:ENSG00000154620|TMSB4Y  
GATGTGCAA|ENSG00000207617|hsa-mir-24-1|hsa-miR-24|jt:ENSG00000183813|CCR4  
GATTAACAA|ENSG00000207610|hsa-mir-19a|hsa-miR-19a|jt:ENSG00000081760|AACS  
GATTAACAA|ENSG00000207610|hsa-mir-19a|hsa-miR-19a|jt:ENSG00000168758|SEMA4C  
GATTAACA|ENSG00000207971|hsa-mir-125b-1|hsa-miR-125b|jt:ENSG00000171169|C9orf90  
GATTAAC|ENSG00000207618|hsa-mir-144|hsa-miR-144|jt:ENSG00000008256|PSCD3  
GATTAAC|ENSG00000207618|hsa-mir-144|hsa-miR-144|jt:ENSG00000126749|EMG1  
GATTAAC|ENSG00000207618|hsa-mir-144|hsa-miR-144|jt:ENSG00000189079|ARID2  
GATTAACA|ENSG00000208024|hsa-mir-199a-2|hsa-miR-199a\*|jt:ENSG00000109208|SMR3A  
GATTCATCC|ENSG00000207994|hsa-mir-100|hsa-miR-100|jt:ENSG00000185361|TNFAIP8L1  
GATTC|ENSG00000207630|hsa-mir-7-3|hsa-miR-7|jt:ENSG00000092295|TCM1  
GATTCCTAA|ENSG00000207585|hsa-mir-181d|hsa-miR-181d|jt:ENSG00000206561|COLQ  
GATTCCTGAC|ENSG00000207731|hsa-mir-506|hsa-miR-506|jt:ENSG00000135862|LAMC1  
GATTCCTGAC|ENSG00000207731|hsa-mir-506|hsa-miR-506|jt:ENSG00000174886|NDUFA11  
GATTGACAC|ENSG00000207610|hsa-mir-19a|hsa-miR-19a|jt:ENSG00000205929|C21orf62  
GATTGCCAA|ENSG00000199058|hsa-mir-302b|hsa-miR-302b|jt:ENSG00000128604|IRF5  
GATTGCCAA|ENSG00000199102|hsa-mir-302c|hsa-miR-302c|jt:ENSG00000128604|IRF5  
GATTGCCAA|ENSG00000199145|hsa-mir-302d|hsa-miR-302d|jt:ENSG00000128604|IRF5  
GATTGGATA|ENSG00000199092|hsa-mir-410|hsa-miR-410|jt:ENSG00000173041|ZNF680  
GATTGGATA|ENSG00000199092|hsa-mir-410|hsa-miR-410|jt:ENSG00000196268|ZNF493  
GATTGGATA|ENSG00000207749|hsa-mir-299|hsa-miR-299-5p|jt:ENSG00000116698|SMG7  
GATTGGATA|ENSG00000207961|hsa-mir-496|hsa-miR-496|jt:ENSG00000146757|ZNF92  
GATTGGATA|ENSG00000207961|hsa-mir-496|hsa-miR-496|jt:ENSG00000196247|ZNF588  
GATTGGATA|ENSG00000207961|hsa-mir-496|hsa-miR-496|jt:ENSG00000198521|ZNF43  
GATTGGTA|ENSG00000199059|hsa-mir-135b|hsa-miR-135b|jt:ENSG00000188610|FAM72B  
GATTGTGAC|ENSG00000199149|hsa-mir-20a|hsa-miR-20a|jt:ENSG0000011454|RABGAP1  
GATTGTGAC|ENSG00000199149|hsa-mir-20a|hsa-miR-20a|jt:ENSG00000123411|IKZF4  
GATTGTGAC|ENSG00000207610|hsa-mir-19a|hsa-miR-19a|jt:ENSG00000158764|ITLN2  
GATTGTGAC|ENSG00000207745|hsa-mir-17|hsa-miR-17-5p|jt:ENSG0000011454|RABGAP1  
GATTTCACA|ENSG00000207950|hsa-mir-296|hsa-miR-296|jt:ENSG00000137309|HMGAI  
GATTTCACA|ENSG00000207950|hsa-mir-296|hsa-miR-296|jt:ENSG00000188191|PRKAR1B  
GATTGGCAA|ENSG00000199092|hsa-mir-410|hsa-miR-410|jt:ENSG00000124275|MTRR  
GATTGGCAA|ENSG00000207961|hsa-mir-496|hsa-miR-496|jt:ENSG00000164924|YWHAZ  
GCAAACTCA|ENSG00000202641|hsa-mir-484|hsa-miR-484|jt:ENSG00000132970|WASF3  
GCAAAAGTCC|ENSG00000207596|hsa-mir-194-2|hsa-miR-194|jt:ENSG00000198569|SLC34A3  
GCAAAAGTCC|ENSG00000208009|hsa-mir-130a|hsa-miR-130a|jt:ENSG00000164307|ARTS1\_HUMAN  
GCAACCTCA|ENSG00000199082|hsa-mir-342|hsa-miR-342|jt:ENSG00000196236|XPNPEP3  
GCAACCTCC|ENSG00000207955|hsa-mir-219-2|hsa-miR-219|jt:ENSG00000180881|CAPS2  
GCAACGCC|ENSG00000199032|hsa-mir-425|hsa-miR-425-3p|jt:ENSG00000198382|UVRAG  
GCAACTGAC|ENSG00000207630|hsa-mir-7-3|hsa-miR-7|jt:ENSG00000119865|C2orf32  
GCAACTTCC|ENSG00000208024|hsa-mir-199a-2|hsa-miR-199a\*|jt:ENSG00000198718|KIAA0423

GCAATCGC|ENSG00000207731|hsa-mir-506|hsa-miR-506 jt:ENSG00000153574|RPIA  
GCAATGTCA|ENSG00000199161|hsa-mir-126|hsa-miR-126 jt:ENSG00000051108|HERPUD1  
GCAATGTCA|ENSG00000199161|hsa-mir-126|hsa-miR-126 jt:ENSG00000172889|EGFL7  
GCAATTAAA|ENSG00000207618|hsa-mir-144|hsa-miR-144 jt:ENSG00000136542|GALNT5  
GCAATTAAA|ENSG00000207618|hsa-mir-144|hsa-miR-144 jt:ENSG00000189149|FLJ41766  
GCAATTAAA|ENSG00000207794|hsa-mir-451|hsa-miR-451 jt:ENSG00000074603|DPP8  
GCAATTGGA|ENSG00000202641|hsa-mir-484|hsa-miR-484 jt:ENSG00000175084|DES  
GCACAAAAG|ENSG00000199089|hsa-mir-202|hsa-miR-202 jt:ENSG00000163743|RCHY1  
GCACAAAAG|ENSG00000199089|hsa-mir-202|hsa-miR-202\* jt:ENSG00000177917|ARL6IP6  
GCACAAATGA|ENSG00000211590|hsa-mir-802|hsa-miR-802 jt:ENSG00000177917|ARL6IP6  
GCACATGAC|ENSG00000207926|hsa-mir-135a-1|hsa-miR-135a jt:ENSG00000185294|NP\_787078.1  
GCACCGGC|ENSG00000207955|hsa-mir-219-2|hsa-miR-219 jt:ENSG00000111371|SLC38A1  
GCACCGGCA|ENSG00000199161|hsa-mir-126|hsa-miR-126 jt:ENSG00000172889|EGFL7  
GCACCGGCA|ENSG00000199161|hsa-mir-126|hsa-miR-126\* jt:ENSG00000197860|SGTB  
GCACCGGCA|ENSG00000198974|hsa-mir-30e|hsa-miR-30e-5p jt:ENSG00000126249|PDCD2L  
GCACCGGCA|ENSG00000198974|hsa-mir-30e|hsa-miR-30e-5p jt:ENSG00000058600|POLR3E  
GCACCGGCA|ENSG00000207962|hsa-mir-30c-1|hsa-miR-30c jt:ENSG00000126249|PDCD2L  
GCACCGGCA|ENSG00000207962|hsa-mir-30c-1|hsa-miR-30c jt:ENSG00000058600|POLR3E  
GCACCGGC|ENSG00000207617|hsa-mir-24-1|hsa-miR-24 jt:ENSG00000105219|CNTD2  
GCAGAAACC|ENSG00000208017|hsa-mir-140|hsa-miR-140 jt:ENSG00000116128|BCL9  
GCAGACCAC|ENSG00000207751|hsa-mir-130b|hsa-miR-130b jt:ENSG00000169509|CRCT1  
GCAGACTCA|ENSG00000199130|hsa-mir-365-1|hsa-miR-365 jt:ENSG00000184860|NP\_660151.2  
GCAGACTCA|ENSG00000207602|hsa-mir-106a|hsa-miR-106a jt:ENSG00000100987|V SX1  
GCAGACTCA|ENSG00000207710|hsa-mir-20b|hsa-miR-20b jt:ENSG00000100987|V SX1  
GCAGACTCA|ENSG00000207744|hsa-mir-10b|hsa-miR-10b jt:ENSG00000167741|GGT6  
GCAGATGAC|ENSG00000199023|hsa-mir-339|hsa-miR-339 jt:ENSG00000161010|NP\_001017987.1  
GCAGATGAC|ENSG00000199023|hsa-mir-339|hsa-miR-339 jt:ENSG00000165682|CLEC1B  
GCAGCATGA|ENSG00000207586|hsa-mir-135a-2|hsa-miR-135a jt:ENSG00000061337|LZTS1  
GCAGCATGA|ENSG00000207586|hsa-mir-135a-2|hsa-miR-135a jt:ENSG00000197291|Q8WV75\_HUMAN  
GCAGCCTTA|ENSG00000207728|hsa-mir-449b|hsa-miR-449b jt:ENSG00000179909|ZNF154  
GCAGCGC|ENSG00000207562|hsa-mir-34c|hsa-miR-34c jt:ENSG00000171314|PGAM1  
GCAGCGC|ENSG00000207811|hsa-mir-34b|hsa-miR-34b jt:ENSG00000171314|PGAM1  
GCAGCGGAA|ENSG00000207744|hsa-mir-10b|hsa-miR-10b jt:ENSG00000119508|NR4A3  
GCAGCTTGA|ENSG00000207618|hsa-mir-144|hsa-miR-144 jt:ENSG00000104067|TJPI  
GCAGCTTGA|ENSG00000207618|hsa-mir-144|hsa-miR-144 jt:ENSG00000197062|ZNF187  
GCAGGAAAC|ENSG00000207698|hsa-mir-32|hsa-miR-32 jt:ENSG00000110848|CD69  
GCAGGCTAA|ENSG00000207819|hsa-mir-9-3|hsa-miR-9 jt:ENSG00000172458|IL17D  
GCAGGCTCA|ENSG00000199082|hsa-mir-342|hsa-miR-342 jt:ENSG00000033170|FUT8  
GCAGGTAA|ENSG00000207614|hsa-mir-193a|hsa-miR-193a jt:ENSG00000101298|RAD21L1  
GCATAAAC|ENSG00000207971|hsa-mir-125b-1|hsa-miR-125b jt:ENSG00000124721|DNAH8  
GCATAAAC|ENSG00000199130|hsa-mir-365-1|hsa-miR-365 jt:ENSG00000173041|ZNF680  
GCATGCTTA|ENSG00000198974|hsa-mir-30e|hsa-miR-30e-5p jt:ENSG00000163738|MTHFD2L  
GCATGCTTA|ENSG00000207962|hsa-mir-30c-1|hsa-miR-30c jt:ENSG00000163738|MTHFD2L  
GCATGGAGC|ENSG00000199161|hsa-mir-126|hsa-miR-126 jt:ENSG00000172889|EGFL7  
GCATGGAGC|ENSG00000199161|hsa-mir-126|hsa-miR-126\* jt:ENSG00000037965|HOXC8  
GCATGGAGC|ENSG00000199161|hsa-mir-126|hsa-miR-126\* jt:ENSG00000185684|EP400NL  
GCATGGAGC|ENSG00000199161|hsa-mir-126|hsa-miR-126\* jt:ENSG00000139239|XR\_017789.1  
GCCAAAACC|ENSG00000199122|hsa-mir-148b|hsa-miR-148b jt:ENSG00000116016|EPAS1  
GCCAAAACC|ENSG00000199122|hsa-mir-148b|hsa-miR-148b jt:ENSG00000126903|SLC10A3  
GCCAAAACC|ENSG00000208009|hsa-mir-130a|hsa-miR-130a jt:ENSG00000150991|UBIQ\_HUMAN  
GCCAACTGA|ENSG00000208024|hsa-mir-199a-2|hsa-miR-199a\* jt:ENSG00000143641|GALNT2  
GCCAACTGA|ENSG00000208024|hsa-mir-199a-2|hsa-miR-199a\* jt:ENSG00000182712|MTCPI  
GCCAATTA|ENSG00000199058|hsa-mir-302b|hsa-miR-302b\* jt:ENSG00000095587|TLL2  
GCCCAACC|ENSG00000207630|hsa-mir-7-3|hsa-miR-7 jt:ENSG00000118473|SGIP1  
GCCCAACC|ENSG00000199161|hsa-mir-126|hsa-miR-126 jt:ENSG00000172889|EGFL7  
GCCCAACC|ENSG00000199161|hsa-mir-126|hsa-miR-126\* jt:ENSG00000074054|CLASP1  
GCCCAACC|ENSG00000199161|hsa-mir-126|hsa-miR-126\* jt:ENSG00000204369|Q6ZUP0\_HUMAN  
GCCCACTAC|ENSG00000199089|hsa-mir-202|hsa-miR-202 jt:ENSG00000135297|MTO1  
GCCACGCC|ENSG00000207789|hsa-mir-26a-2|hsa-miR-26a jt:ENSG00000158161|EYA3  
GCCACTTCA|ENSG00000207784|hsa-mir-542|hsa-miR-542-3p jt:ENSG00000162174|ASRGL1  
GCCAGATA|ENSG00000207635|hsa-mir-499|hsa-miR-499 jt:ENSG00000183530|C22orf30  
GCCAGCAA|ENSG00000199012|hsa-mir-412|hsa-miR-412 jt:ENSG00000140403|DNAJ4A  
GCCAGCAA|ENSG00000199012|hsa-mir-412|hsa-miR-412 jt:ENSG00000156030|C14orf43  
GCCAGCAA|ENSG00000199020|hsa-mir-381|hsa-miR-381 jt:ENSG00000023909|GCLM  
GCCAGCAA|ENSG00000199025|hsa-mir-369|hsa-miR-369-3p jt:ENSG00000174799|CEP135  
GCCAGCAA|ENSG00000199069|hsa-mir-323|hsa-miR-323 jt:ENSG00000100918|REC8  
GCCAGCAA|ENSG00000199069|hsa-mir-323|hsa-miR-323 jt:ENSG00000185760|KCNQ5  
GCCAGCAA|ENSG00000199092|hsa-mir-410|hsa-miR-410 jt:ENSG00000138814|PPP3CA  
GCCAGCAA|ENSG00000207749|hsa-mir-299|hsa-miR-299-5p jt:ENSG00000100918|REC8  
GCCAGCAA|ENSG00000207761|hsa-mir-329-1|hsa-miR-329 jt:ENSG00000171135|JAGN1  
GCCAGTAA|ENSG00000207953|hsa-mir-212|hsa-miR-212 jt:ENSG00000196644|LOC728932  
GCCAGTAA|ENSG00000208009|hsa-mir-130a|hsa-miR-130a jt:ENSG00000204584|Q6ZSH9\_HUMAN  
GCCATCAA|ENSG00000199058|hsa-mir-302b|hsa-miR-302b jt:ENSG00000145362|ANK2  
GCCATCAA|ENSG00000199058|hsa-mir-302b|hsa-miR-302b\* jt:ENSG00000122203|KIAA1191  
GCCATCAA|ENSG00000199102|hsa-mir-302c|hsa-miR-302c jt:ENSG00000145362|ANK2  
GCCATCAA|ENSG00000199145|hsa-mir-302d|hsa-miR-302d jt:ENSG00000145362|ANK2  
GCCATCAA|ENSG00000199169|hsa-mir-367|hsa-miR-367 jt:ENSG00000146666|Q96IP2\_HUMAN  
GCCATCAA|ENSG00000199169|hsa-mir-367|hsa-miR-367 jt:ENSG00000162493|PDPN  
GCCATGTA|ENSG00000199020|hsa-mir-381|hsa-miR-381 jt:ENSG00000134056|MRPS36  
GCCATGTA|ENSG00000199025|hsa-mir-369|hsa-miR-369-5p jt:ENSG00000170871|K0232\_HUMAN  
GCCATGTA|ENSG00000199069|hsa-mir-323|hsa-miR-323 jt:ENSG00000107731|UNC5B  
GCCATGTA|ENSG00000199069|hsa-mir-323|hsa-miR-323 jt:ENSG00000067066|SP100  
GCCATGTA|ENSG00000207749|hsa-mir-299|hsa-miR-299-5p jt:ENSG00000168906|MAT2A  
GCCATGTA|ENSG00000207749|hsa-mir-299|hsa-miR-299-5p jt:ENSG00000120215|MLANA  
GCCATGCC|ENSG00000207926|hsa-mir-135a-1|hsa-miR-135a jt:ENSG00000122012|SV2C  
GCCATTCCA|ENSG00000207752|hsa-mir-199a-1|hsa-miR-199a\* jt:ENSG00000124782|RREB1  
GCCATTCCA|ENSG00000207752|hsa-mir-199a-1|hsa-miR-199a\* jt:ENSG00000164035|EMCN  
GCCATTCCA|ENSG00000207752|hsa-mir-199a-1|hsa-miR-199a\* jt:ENSG00000184345|ZCF2  
GCCATTGGA|ENSG00000207610|hsa-mir-19a|hsa-miR-19a jt:ENSG00000130305|NSUN5  
GCCATTGGA|ENSG00000207610|hsa-mir-19a|hsa-miR-19a jt:ENSG00000163923|RPL39L  
GCCATTGGA|ENSG00000207610|hsa-mir-19a|hsa-miR-19a jt:ENSG00000183519|NSUN5B  
GCCATTGGA|ENSG00000207745|hsa-mir-17|hsa-miR-17-5p jt:ENSG00000100644|HIF1A  
GCCATGCA|ENSG00000207581|hsa-mir-199b|hsa-miR-199b jt:ENSG00000206198|NR\_001535.1  
GCCCCACAA|ENSG00000199080|hsa-mir-133b|hsa-miR-133b jt:ENSG00000163485|ADORA1  
GCCCCACAA|ENSG00000207604|hsa-mir-206|hsa-miR-206 jt:ENSG00000143125|PROK1  
GCCCCAGTA|ENSG00000208024|hsa-mir-199a-2|hsa-miR-199a\* jt:ENSG00000136205|TNS3  
GCCCCCC|ENSG00000207607|hsa-mir-200a|hsa-miR-200a jt:ENSG00000169184|NM\_002430.2  
GCCCCCC|ENSG00000207607|hsa-mir-200a|hsa-miR-200a jt:ENSG00000072274|TFRC  
GCCCCCGA|ENSG00000207567|hsa-mir-142|hsa-miR-142-3p jt:ENSG00000140948|ZCCHC14  
GCCCTCC|ENSG00000207933|hsa-mir-9-1|hsa-miR-9\* jt:ENSG00000134780|DAGLA  
GCCCTCC|ENSG00000207933|hsa-mir-9-1|hsa-miR-9\* jt:ENSG00000143622|RIT1  
GCCCCGCC|ENSG00000199065|hsa-mir-101-2|hsa-miR-101 jt:ENSG00000136205|TNS3  
GCCCTATA|ENSG00000207618|hsa-mir-144|hsa-miR-144 jt:ENSG00000153914|SFRS12  
GCCCTATA|ENSG00000207794|hsa-mir-451|hsa-miR-451 jt:ENSG00000160339|FCN2  
GCCCTTAA|ENSG00000207562|hsa-mir-34c|hsa-miR-34c jt:ENSG00000186104|CYP2R1

GCCCTCTAA|ENSG00000207811|hsa-mir-34b|hsa-miR-34b|jt:ENSG00000186104|CYP2R1  
GCCGAGTCA|ENSG00000207751|hsa-mir-130b|hsa-miR-130b|jt:ENSG00000150991|UBIQ\_HUMAN  
GCCGATCCC|ENSG00000207819|hsa-mir-9-3|hsa-miR-9|jt:ENSG00000119227|PIGZ  
GCCGATCCC|ENSG00000207819|hsa-mir-9-3|hsa-miR-9|jt:ENSG00000166147|FBN1  
GCCGATCCC|ENSG00000207819|hsa-mir-9-3|hsa-miR-9\*|jt:ENSG00000108021|C10orf18  
GCCGATCCC|ENSG00000207819|hsa-mir-9-3|hsa-miR-9\*|jt:ENSG00000143674|M3KL4\_HUMAN  
GCCGCC|ENSG00000207960|hsa-mir-153-2|hsa-miR-153|jt:ENSG00000095015|MAP3K1  
GCCGCC|ENSG00000207960|hsa-mir-153-2|hsa-miR-153|jt:ENSG00000086062|B4GALT1  
GCCGCC|ENSG00000207960|hsa-mir-153-2|hsa-miR-153|jt:ENSG00000109689|STIM2  
GCCGCTAA|ENSG00000207789|hsa-mir-26a-2|hsa-miR-26a|jt:ENSG00000099994|SUSD2  
GCCGCTAA|ENSG00000207789|hsa-mir-26a-2|hsa-miR-26a|jt:ENSG00000137504|CREBZF  
GCCGCTAA|ENSG00000207789|hsa-mir-26a-2|hsa-miR-26a|jt:ENSG00000189043|NDUFA4  
GCCGCTAA|ENSG00000207789|hsa-mir-26a-2|hsa-miR-26a|jt:ENSG00000100376|FAM118A  
GCCGGAGC|ENSG00000207611|hsa-mir-149|hsa-miR-149|jt:ENSG00000109062|SLC9A3R1  
GCCGGGTCA|ENSG00000207955|hsa-mir-219-2|hsa-miR-219|jt:ENSG00000124098|C2orf108  
GCCGGGTCA|ENSG00000207955|hsa-mir-219-2|hsa-miR-219|jt:ENSG00000179933|C14orf119  
GCCGGGTGA|ENSG00000207617|hsa-mir-24-1|hsa-miR-24|jt:ENSG00000157538|DSCR3  
GCCGGTCA|ENSG00000199059|hsa-mir-135b|hsa-miR-135b|jt:ENSG00000053254|CHES1  
GCCGGTGAC|ENSG00000207585|hsa-mir-181d|hsa-miR-181d|jt:ENSG00000100307|CBX7  
GCCGTCAA|ENSG00000207764|hsa-mir-133a-2|hsa-miR-133a|jt:ENSG00000180471|C9orf31  
GCCTATAA|ENSG00000207953|hsa-mir-212|hsa-miR-212|jt:ENSG00000142188|TMEM50B  
GCCTATAA|ENSG00000207953|hsa-mir-212|hsa-miR-212|jt:ENSG00000172409|CLP1  
GCCTATTTA|ENSG00000199094|hsa-mir-30c-2|hsa-miR-30c|jt:ENSG00000065882|TBC1D1  
GCCTATTTA|ENSG00000207827|hsa-mir-30a|hsa-miR-30a-5p|jt:ENSG00000065882|TBC1D1  
GCCTCAGAC|ENSG00000198976|hsa-mir-429|hsa-miR-429|jt:ENSG00000080822|CLDND1  
GCCTCAGAC|ENSG00000207607|hsa-mir-200a|hsa-miR-200a|jt:ENSG00000010295|NP\_542768.1  
GCCTCAGAC|ENSG00000207730|hsa-mir-200b|hsa-miR-200b|jt:ENSG00000080822|CLDND1  
GCCTCTTAA|ENSG00000207618|hsa-mir-144|hsa-miR-144|jt:ENSG00000140931|CMTM3  
GCCTGCCTA|ENSG00000199059|hsa-mir-135b|hsa-miR-135b|jt:ENSG00000138622|HCN4  
GCCTGCCTA|ENSG00000199059|hsa-mir-135b|hsa-miR-135b|jt:ENSG00000058056|USP13  
GCCTGCCTA|ENSG00000199059|hsa-mir-135b|hsa-miR-135b|jt:ENSG00000163074|NM\_024534  
GCCTGTTC|ENSG00000198973|hsa-mir-375|hsa-miR-375|jt:ENSG00000123388|HOXC11  
GCCTTAACC|ENSG00000207708|hsa-mir-141|hsa-miR-141|jt:ENSG00000103647|CORO2B  
GCCTTGAAA|ENSG00000199036|hsa-mir-219-1|hsa-miR-219|jt:ENSG00000112246|SIM1  
GCCTTGAAA|ENSG00000199036|hsa-mir-219-1|hsa-miR-219|jt:ENSG00000178776|NP\_996849.2  
GCCTTGAAA|ENSG00000199036|hsa-mir-219-1|hsa-miR-219|jt:ENSG00000179869|ABCA13  
GCCTTGTC|ENSG00000207809|hsa-mir-139|hsa-miR-139|jt:ENSG00000088826|SMOX  
GCCTTTACC|ENSG00000207708|hsa-mir-141|hsa-miR-141|jt:ENSG00000105967|TFEC  
GCCTTTACC|ENSG00000207713|hsa-mir-200c|hsa-miR-200c|jt:ENSG00000132275|KIAA0409  
GCCTTTTAA|ENSG00000199135|hsa-mir-101-1|hsa-miR-101|jt:ENSG00000196531|NACA  
GCCTTTTAC|ENSG00000199102|hsa-mir-302c|hsa-miR-302c\*|jt:ENSG00000164985|PSP1P  
GCCGAGA|ENSG00000207698|hsa-mir-32|hsa-miR-32|jt:ENSG00000198468|Q8TAF5\_HUMAN  
GCCGAGA|ENSG00000207698|hsa-mir-32|hsa-miR-32|jt:ENSG00000152894|PTRPK  
GCCGAGA|ENSG00000207698|hsa-mir-32|hsa-miR-32|jt:ENSG00000156162|DPY19L4  
GCCGAGA|ENSG00000207698|hsa-mir-32|hsa-miR-32|jt:ENSG00000186019|ZNF224  
GCCGAGAC|ENSG00000207953|hsa-mir-212|hsa-miR-212|jt:ENSG00000134744|ZCCHC11  
GCCGAGCC|ENSG00000207614|hsa-mir-193a|hsa-miR-193a|jt:ENSG00000188215|DCUN1D3  
GCCGAACA|ENSG00000199085|hsa-mir-148a|hsa-miR-148a|jt:ENSG00000131269|ABCB7  
GCCGAC|ENSG00000207819|hsa-mir-9-3|hsa-miR-9|jt:ENSG00000107651|SEC23IP  
GCCGAC|ENSG00000207819|hsa-mir-9-3|hsa-miR-9\*|jt:ENSG00000104765|BNIP3L  
GCCGACG|ENSG00000207792|hsa-mir-151|hsa-miR-151|jt:ENSG00000164040|PGRMC2  
GCCCAGAGA|ENSG00000198974|hsa-mir-30e|hsa-miR-30e-3p|jt:ENSG00000169093|ASMTL  
GCCCAGAGA|ENSG00000198974|hsa-mir-30e|hsa-miR-30e-5p|jt:ENSG00000126249|PDCD2L  
GCCCAGAGA|ENSG00000207962|hsa-mir-30c-1|hsa-miR-30c|jt:ENSG00000126249|PDCD2L  
GCCCAGAC|ENSG00000207567|hsa-mir-142|hsa-miR-142-3p|jt:ENSG00000065534|MYLK  
GCCCAGAC|ENSG00000207789|hsa-mir-26a-2|hsa-miR-26a|jt:ENSG00000155846|PPARGC1B  
GCCGCC|ENSG00000207960|hsa-mir-153-2|hsa-miR-153|jt:ENSG00000185774|KCNIP4  
GCCCGAGA|ENSG00000207698|hsa-mir-32|hsa-miR-32|jt:ENSG00000198468|Q8TAF5\_HUMAN  
GCCCGAGAC|ENSG00000207611|hsa-mir-149|hsa-miR-149|jt:ENSG00000164061|BSN  
GCCGCC|ENSG00000207792|hsa-mir-151|hsa-miR-151|jt:ENSG00000170873|MTSS1  
GCCGCC|ENSG00000207792|hsa-mir-151|hsa-miR-151|jt:ENSG00000137075|RNF38  
GCCGTAGCC|ENSG00000207611|hsa-mir-149|hsa-miR-149|jt:ENSG00000103067|REM3B5B  
GCCGTAGGA|ENSG00000199066|hsa-mir-330|hsa-miR-330|jt:ENSG00000131469|RPL27  
GCCGTGCC|ENSG00000198974|hsa-mir-30e|hsa-miR-30e-5p|jt:ENSG00000127377|CRYGN  
GCCGTGCC|ENSG00000207962|hsa-mir-30c-1|hsa-miR-30c|jt:ENSG00000127377|CRYGN  
GCCGAGAC|ENSG00000198973|hsa-mir-375|hsa-miR-375|jt:ENSG00000081307|UBE1D1  
GCCGAGTGA|ENSG00000207731|hsa-mir-506|hsa-miR-506|jt:ENSG00000055211|C6orf72  
GCCGCTGAC|ENSG00000199024|hsa-mir-103-2|hsa-miR-103|jt:ENSG00000149182|ZNF289  
GCCGGACAA|ENSG00000207808|hsa-mir-27a|hsa-miR-27a|jt:ENSG00000054690|PLEKHH1  
GCCGGACAA|ENSG00000207980|hsa-mir-23a|hsa-miR-23a|jt:ENSG00000148200|NR6A1  
GCCGGGTCA|ENSG00000198974|hsa-mir-30e|hsa-miR-30e-5p|jt:ENSG00000131558|EXOC4  
GCCGGGTCA|ENSG00000207962|hsa-mir-30c-1|hsa-miR-30c|jt:ENSG00000131558|EXOC4  
GCCGTACC|ENSG00000208017|hsa-mir-140|hsa-miR-140|jt:ENSG00000156925|ZIC3  
GCCGTACC|ENSG00000208017|hsa-mir-140|hsa-miR-140|jt:ENSG00000184368|MAP7D2  
GCCGTTTA|ENSG00000199122|hsa-mir-148b|hsa-miR-148b|jt:ENSG00000157470|FAM81A  
GCCGTTTA|ENSG00000199122|hsa-mir-148b|hsa-miR-148b|jt:ENSG00000115310|RTN4  
CGGTGGCA|ENSG00000207614|hsa-mir-193a|hsa-miR-193a|jt:ENSG00000042022|ABHD14A  
CGGTGGCA|ENSG00000207614|hsa-mir-193a|hsa-miR-193a|jt:ENSG00000106305|MCA2\_HUMAN  
CGCTGGTA|ENSG00000199065|hsa-mir-101-2|hsa-miR-101|jt:ENSG00000064651|SLC12A2  
CGCTTTCC|ENSG00000207698|hsa-mir-32|hsa-miR-32|jt:ENSG00000112182|BACH2  
GCTAACAAA|ENSG00000199020|hsa-mir-381|hsa-miR-381|jt:ENSG00000083097|DOPEY1  
GCTAACAAA|ENSG00000199020|hsa-mir-381|hsa-miR-381|jt:ENSG00000138448|ITGAV  
GCTAACAAA|ENSG00000207743|hsa-mir-495|hsa-miR-495|jt:ENSG00000164164|OTUD4  
GCTAAGGA|ENSG00000199058|hsa-mir-302b|hsa-miR-302b|jt:ENSG00000162191|SAKS1\_HUMAN  
GCTAAGGA|ENSG00000199058|hsa-mir-302b|hsa-miR-302b\*|jt:ENSG00000122203|KIAA1191  
GCTAAGGA|ENSG00000199102|hsa-mir-302c|hsa-miR-302c|jt:ENSG00000162191|SAKS1\_HUMAN  
GCTAAGGA|ENSG00000199145|hsa-mir-302d|hsa-miR-302d|jt:ENSG00000162191|SAKS1\_HUMAN  
GCTAAGGA|ENSG00000199169|hsa-mir-367|hsa-miR-367|jt:ENSG0000006634|DBF4  
GCTAATAGC|ENSG00000208009|hsa-mir-130a|hsa-miR-130a|jt:ENSG00000138085|C2orf28  
GCTAATCC|ENSG00000207752|hsa-mir-199a-1|hsa-miR-199a\*|jt:ENSG00000188807|NP\_001010866.1  
GCTACTTCC|ENSG00000207795|hsa-mir-155|hsa-miR-155|jt:ENSG00000135002|RFK  
GCTAGGAA|ENSG00000199015|hsa-mir-377|hsa-miR-377|jt:ENSG00000146278|PNRC1  
GCTAGGAA|ENSG00000199020|hsa-mir-381|hsa-miR-381|jt:ENSG00000187239|FNBFP1  
GCTAGGAA|ENSG00000199025|hsa-mir-369|hsa-miR-369-3p|jt:ENSG00000120688|WBP4  
GCTAGGAA|ENSG00000199025|hsa-mir-369|hsa-miR-369-3p|jt:ENSG00000146278|PNRC1  
GCTAGGAA|ENSG00000199025|hsa-mir-369|hsa-miR-369-5p|jt:ENSG00000174516|PEL13  
GCTAGGAA|ENSG00000199025|hsa-mir-369|hsa-miR-369-5p|jt:ENSG00000135373|EHF  
GCTAGGAA|ENSG00000207961|hsa-mir-496|hsa-miR-496|jt:ENSG00000167615|LENG8  
GCTATAAAA|ENSG00000199082|hsa-mir-342|hsa-miR-342|jt:ENSG00000147224|PRPS1  
GCTATTAAA|ENSG00000207610|hsa-mir-19a|hsa-miR-19a|jt:ENSG00000068366|ACSL4  
GCTATTAAA|ENSG00000207610|hsa-mir-19a|hsa-miR-19a|jt:ENSG00000078699|CBFA2T2  
GCTATTAAA|ENSG00000207610|hsa-mir-19a|hsa-miR-19a|jt:ENSG00000153707|PTPRD  
GCTATTCC|ENSG00000207731|hsa-mir-506|hsa-miR-506|jt:ENSG00000114541|FRMD4B  
GCTATTGTA|ENSG00000199036|hsa-mir-219-1|hsa-miR-219|jt:ENSG00000197555|SIPA111  
GCTACTTA|ENSG00000211590|hsa-mir-802|hsa-miR-802|jt:ENSG00000163939|PBRM1

GCTCCACCA | ENSG00000207947 | hsa-mir-152 | hsa-miR-152 | jt:ENSG0000015592 | STMN4  
GCTCCGACC | ENSG00000198974 | hsa-mir-30e | hsa-miR-30e-3p | jt:ENSG00000168658 | NP\_659429.4  
GCTCCGACC | ENSG00000207611 | hsa-mir-149 | hsa-miR-149 | jt:ENSG00000138111 | TMEM180  
GCTCCGACC | ENSG00000207611 | hsa-mir-149 | hsa-miR-149 | jt:ENSG00000141325 | CCDC45  
GCTCCGACC | ENSG00000207611 | hsa-mir-149 | hsa-miR-149 | jt:ENSG00000169991 | Q5TF58\_HUMAN  
GCTCCGCGA | ENSG00000207568 | hsa-mir-203 | hsa-miR-203 | jt:ENSG00000101350 | KIF3B  
GCTCGTTA | ENSG00000207792 | hsa-mir-151 | hsa-miR-151 | jt:ENSG00000156564 | LRFN2  
GCTGATCAC | ENSG00000207708 | hsa-mir-141 | hsa-miR-141 | jt:ENSG00000132793 | LPIN3  
GCTGATCAC | ENSG00000207713 | hsa-mir-200c | hsa-miR-200c | jt:ENSG00000006114 | AP1GBP1  
GCTGATTTA | ENSG00000199153 | hsa-mir-30d | hsa-miR-30d | jt:ENSG00000091157 | WDR7  
GCTGATTTA | ENSG00000207582 | hsa-mir-30b | hsa-miR-30b | jt:ENSG00000091157 | WDR7  
GCTGCTGAC | ENSG00000207949 | hsa-mir-214 | hsa-miR-214 | jt:ENSG00000130338 | TULP4  
GCTGCTGAC | ENSG00000208024 | hsa-mir-199a-2 | hsa-miR-199a\* | jt:ENSG00000114796 | KLHL24  
GCTGCTGAA | ENSG00000208009 | hsa-mir-130a | hsa-miR-130a | jt:ENSG00000059728 | MXD1  
GCTGCTCAA | ENSG00000199121 | hsa-mir-26b | hsa-miR-26b | jt:ENSG00000128714 | HOXD13  
GCTGTTGAC | ENSG00000199094 | hsa-mir-30c-2 | hsa-miR-30c | jt:ENSG00000172819 | RARG  
GCTGTTGAC | ENSG00000207827 | hsa-mir-30a | hsa-miR-30a-5p | jt:ENSG00000172819 | RARG  
GCTTAATA | ENSG00000199032 | hsa-mir-425 | hsa-miR-425-3p | jt:ENSG00000133581 | CCDC106  
GCTTCTTAC | ENSG00000198972 | hsa-let-7e | hsa-let-7e | jt:ENSG0000010539 | ZNF200  
GCTTCTTAC | ENSG00000198972 | hsa-let-7e | hsa-let-7e | jt:ENSG00000077152 | UBE2T  
GCTTGATTA | ENSG00000207548 | hsa-mir-217 | hsa-miR-217 | jt:ENSG0000019144 | PHLDB1  
GCTTGTTTA | ENSG00000207794 | hsa-mir-451 | hsa-miR-451 | jt:ENSG00000165699 | TSC1  
GCTTTATGA | ENSG00000207648 | hsa-mir-192 | hsa-miR-192 | jt:ENSG00000140285 | FGF7  
GCTTTGCTA | ENSG00000207789 | hsa-mir-26a-2 | hsa-miR-26a | jt:ENSG00000087095 | NLK  
GCTTTGGCC | ENSG00000199069 | hsa-mir-323 | hsa-miR-323 | jt:ENSG00000198799 | LRIG2  
GCTTTGGCC | ENSG00000207743 | hsa-mir-495 | hsa-miR-495 | jt:ENSG00000111530 | CAND1  
GCTTTTATA | ENSG00000207953 | hsa-mir-212 | hsa-miR-212 | jt:ENSG00000131653 | TRAF7  
GCTTTTCC | ENSG00000208024 | hsa-mir-199a-2 | hsa-miR-199a\* | jt:ENSG00000137936 | BCAR3  
GCTTTTTTA | ENSG00000199059 | hsa-mir-135b | hsa-miR-135b | jt:ENSG00000196698 | EXOD1  
GGAAATCAC | ENSG00000208024 | hsa-mir-199a-2 | hsa-miR-199a | jt:ENSG00000129116 | PALLD  
GGAAATCAC | ENSG00000208024 | hsa-mir-199a-2 | hsa-miR-199a\* | jt:ENSG00000204987 | Q6ZN80\_HUMAN  
GGAAACAAC | ENSG00000207751 | hsa-mir-130b | hsa-miR-130b | jt:ENSG00000109790 | KLHL5  
GGAAATTAC | ENSG00000207789 | hsa-mir-26a-2 | hsa-miR-26a | jt:ENSG00000111775 | COX6A1  
GGAACTCC | ENSG00000207955 | hsa-mir-219-2 | hsa-miR-219 | jt:ENSG00000133961 | NUMB  
GGAACTCC | ENSG00000194717 | hsa-mir-494 | hsa-miR-494 | jt:ENSG00000106333 | PCOLCE  
GGAACTCC | ENSG00000194717 | hsa-mir-494 | hsa-miR-494 | jt:ENSG00000150773 | PIH1D2  
GGAACTCC | ENSG00000199107 | hsa-mir-409 | hsa-miR-409-5p | jt:ENSG00000171970 | ZNF57  
GGAAACAAC | ENSG00000207939 | hsa-mir-223 | hsa-miR-223 | jt:ENSG00000046604 | DSG2  
GGAAACAAC | ENSG00000207939 | hsa-mir-223 | hsa-miR-223 | jt:ENSG00000130775 | Clorf38  
GGACCCAAA | ENSG00000207607 | hsa-mir-200a | hsa-miR-200a | jt:ENSG00000119878 | CRIPT  
GGACCCAAA | ENSG00000207730 | hsa-mir-200b | hsa-miR-200b | jt:ENSG00000115963 | RND3  
GGACCCAAA | ENSG00000207730 | hsa-mir-200b | hsa-miR-200b | jt:ENSG00000164258 | NDUFS4  
GGACCGTCC | ENSG00000207562 | hsa-mir-34c | hsa-miR-34c | jt:ENSG00000177303 | CASKIN2  
GGACCGTCC | ENSG00000207811 | hsa-mir-34b | hsa-miR-34b | jt:ENSG00000177303 | CASKIN2  
GGACGGAAA | ENSG00000207602 | hsa-mir-106a | hsa-miR-106a | jt:ENSG00000037280 | FLT4  
GGACGGAAA | ENSG00000207602 | hsa-mir-106a | hsa-miR-106a | jt:ENSG00000115159 | GPD2  
GGACGGAAA | ENSG00000207710 | hsa-mir-20b | hsa-miR-20b | jt:ENSG00000037280 | FLT4  
GGACTAAAA | ENSG00000199135 | hsa-mir-101-1 | hsa-miR-101 | jt:ENSG00000179421 | Q8NBA4\_HUMAN  
GGACTGCAA | ENSG00000207713 | hsa-mir-200c | hsa-miR-200c | jt:ENSG00000182712 | MTCP1  
GGACTTCA | ENSG00000199102 | hsa-mir-302c | hsa-miR-302c\* | jt:ENSG00000139324 | MTC3  
GGACTTGA | ENSG00000199094 | hsa-mir-30c-2 | hsa-miR-30c | jt:ENSG00000141068 | KSR1  
GGACTTGA | ENSG00000199094 | hsa-mir-30c-2 | hsa-miR-30c | jt:ENSG00000104497 | SNX16  
GGACTTGA | ENSG00000207827 | hsa-mir-30a | hsa-miR-30a-5p | jt:ENSG00000141068 | KSR1  
GGACTTGA | ENSG00000207827 | hsa-mir-30a | hsa-miR-30a-5p | jt:ENSG00000104497 | SNX16  
GGAGACACC | ENSG00000207947 | hsa-mir-152 | hsa-miR-152 | jt:ENSG00000187010 | RHD  
GGAGATGTA | ENSG00000207585 | hsa-mir-181d | hsa-miR-181d | jt:ENSG00000105705 | SF4  
GGAGATGTA | ENSG00000207585 | hsa-mir-181d | hsa-miR-181d | jt:ENSG00000204201 | Q49A40\_HUMAN  
GGAGATTC | ENSG00000207955 | hsa-mir-219-2 | hsa-miR-219 | jt:ENSG00000109667 | SLC2A9  
GGAGCACAA | ENSG00000211590 | hsa-mir-802 | hsa-miR-802 | jt:ENSG00000167105 | TMEM92  
GGAGCACAA | ENSG00000211590 | hsa-mir-802 | hsa-miR-802 | jt:ENSG00000176340 | COX8A  
GGAGCGAAC | ENSG00000207617 | hsa-mir-24-1 | hsa-miR-24 | jt:ENSG00000082153 | BZW1  
GGAGGCTAC | ENSG00000207808 | hsa-mir-27a | hsa-miR-27a | jt:ENSG00000148339 | SLC25A25  
GGAGGCTAC | ENSG00000207980 | hsa-mir-23a | hsa-miR-23a | jt:ENSG00000120586 | MRC1  
GGAGGCTAC | ENSG00000207980 | hsa-mir-23a | hsa-miR-23a | jt:ENSG00000183748 | MRC1L1  
GGAGGCTAC | ENSG00000209707 | hsa-mir-24-2 | hsa-miR-24 | jt:ENSG00000163485 | ADORA1  
GGAGGTAAA | ENSG00000207635 | hsa-mir-499 | hsa-miR-499 | jt:ENSG00000156875 | HIAT1  
GGAGGTAAA | ENSG00000207926 | hsa-mir-135a-1 | hsa-miR-135a | jt:ENSG00000162419 | GMEB1  
GGAGTCCAA | ENSG00000207602 | hsa-mir-106a | hsa-miR-106a | jt:ENSG00000168000 | HNRPUL2  
GGAGTCCAA | ENSG00000207710 | hsa-mir-20b | hsa-miR-20b | jt:ENSG00000168000 | HNRPUL2  
GGAGTTGTA | ENSG00000207596 | hsa-mir-194-2 | hsa-miR-194 | jt:ENSG00000105404 | RABAC1  
GGAGTTGTA | ENSG00000207596 | hsa-mir-194-2 | hsa-miR-194 | jt:ENSG00000167645 | YIF1B  
GGATCCGGA | ENSG00000198974 | hsa-mir-30e | hsa-miR-30e-3p | jt:ENSG00000116984 | MTR  
GGATCCGGA | ENSG00000198974 | hsa-mir-30e | hsa-miR-30e-5p | jt:ENSG00000133392 | MYH11  
GGATCCGGA | ENSG00000207962 | hsa-mir-30c-1 | hsa-miR-30c | jt:ENSG00000133392 | MYH11  
GGATCTCCA | ENSG00000207618 | hsa-mir-144 | hsa-miR-144 | jt:ENSG00000116701 | NCF2  
GGATCTTAA | ENSG00000198975 | hsa-let-7a-2 | hsa-let-7a | jt:ENSG00000118971 | CCND2  
GGATCTTAA | ENSG00000207971 | hsa-mir-125b-1 | hsa-miR-125b | jt:ENSG00000171169 | C9orf90  
GGATTCTGA | ENSG00000207731 | hsa-mir-506 | hsa-miR-506 | jt:ENSG00000127947 | PTPN12  
GGATTCTGA | ENSG00000207731 | hsa-mir-506 | hsa-miR-506 | jt:ENSG00000135862 | LAMC1  
GGATTGACA | ENSG00000207610 | hsa-mir-19a | hsa-miR-19a | jt:ENSG00000205929 | C21orf62  
GGATTGGCA | ENSG00000199059 | hsa-mir-135b | hsa-miR-135b | jt:ENSG00000103005 | C16orf57  
GGATTTGAA | ENSG00000207548 | hsa-mir-217 | hsa-miR-217 | jt:ENSG00000001461 | NPAL3  
GGATTTGAA | ENSG00000207548 | hsa-mir-217 | hsa-miR-217 | jt:ENSG00000106069 | CHN2  
GGATTTGCA | ENSG00000208009 | hsa-mir-130a | hsa-miR-130a | jt:ENSG00000118707 | TGIF2  
GGCAACC | ENSG00000199023 | hsa-mir-339 | hsa-miR-339 | jt:ENSG00000206064 | Q6ZU89\_HUMAN  
GGCAACGA | ENSG00000199094 | hsa-mir-30c-2 | hsa-miR-30c | jt:ENSG00000113966 | ARL6  
GGCAACGA | ENSG00000199094 | hsa-mir-30c-2 | hsa-miR-30c | jt:ENSG00000170365 | SMAD1  
GGCAACGA | ENSG00000199094 | hsa-mir-30c-2 | hsa-miR-30c | jt:ENSG00000198301 | SDAD1  
GGCAACGA | ENSG00000207827 | hsa-mir-30a | hsa-miR-30a-3p | jt:ENSG00000101574 | METTL4  
GGCAACGA | ENSG00000207827 | hsa-mir-30a | hsa-miR-30a-5p | jt:ENSG00000113966 | ARL6  
GGCAACGA | ENSG00000207827 | hsa-mir-30a | hsa-miR-30a-5p | jt:ENSG00000170365 | SMAD1  
GGCAACGA | ENSG00000207827 | hsa-mir-30a | hsa-miR-30a-5p | jt:ENSG00000198301 | SDAD1  
GGCAACTGA | ENSG00000199024 | hsa-mir-103-2 | hsa-miR-103 | jt:ENSG00000114988 | LMAN2L  
GGCAACTGA | ENSG00000207630 | hsa-mir-7-3 | hsa-miR-7 | jt:ENSG00000119865 | C2orf32  
GGCAATTTA | ENSG00000207610 | hsa-mir-19a | hsa-miR-19a | jt:ENSG00000110092 | CCND1  
GGCAATTTA | ENSG00000207610 | hsa-mir-19a | hsa-miR-19a | jt:ENSG00000106348 | IMPDH1  
GGCAATTTA | ENSG00000207610 | hsa-mir-19a | hsa-miR-19a | jt:ENSG00000205673 | Q6ZRX0\_HUMAN  
GGCAATTTA | ENSG00000207745 | hsa-mir-17 | hsa-miR-17-5p | jt:ENSG00000057019 | DCBLD2  
GGCACATGA | ENSG00000199059 | hsa-mir-135b | hsa-miR-135b | jt:ENSG00000185294 | NP\_787078.1  
GGCACATGA | ENSG00000199059 | hsa-mir-135b | hsa-miR-135b | jt:ENSG00000125827 | TXNDC13  
GGCACATGA | ENSG00000207926 | hsa-mir-135a-1 | hsa-miR-135a | jt:ENSG00000185294 | NP\_787078.1  
GGCACATGA | ENSG00000207926 | hsa-mir-135a-1 | hsa-miR-135a | jt:ENSG00000125827 | TXNDC13  
GGCAGCACA | ENSG00000207596 | hsa-mir-194-2 | hsa-miR-194 | jt:ENSG00000132915 | PDE6A1  
GGCAACACC | ENSG00000207596 | hsa-mir-194-2 | hsa-miR-194 | jt:ENSG00000152454 | ZNF256  
GGCAATTA | ENSG00000199122 | hsa-mir-148b | hsa-miR-148b | jt:ENSG00000179476 | C14orf28

GGCCACAAA | ENSG00000207607 | hsa-mir-200a | hsa-miR-200a | jt:ENSG00000123610 | TNFAIP6  
GGCCACCTA | ENSG00000199089 | hsa-mir-202 | hsa-miR-202 | jt:ENSG00000135297 | MTO1  
GGCCACCTA | ENSG00000199089 | hsa-mir-202 | hsa-miR-202\* | jt:ENSG00000001561 | ENPP4  
GGCCAGATA | ENSG00000207731 | hsa-mir-506 | hsa-miR-506 | jt:ENSG00000100625 | SIX4  
GGCCAGATA | ENSG00000207948 | hsa-mir-328 | hsa-miR-328 | jt:ENSG00000100625 | SIX4  
GGCCAGATA | ENSG00000207948 | hsa-mir-328 | hsa-miR-328 | jt:ENSG00000172771 | C3orf25  
GGCCATGCA | ENSG00000207980 | hsa-mir-23a | hsa-miR-23a | jt:ENSG00000182004 | SNRPE  
GGCCATGCA | ENSG00000207980 | hsa-mir-23a | hsa-miR-23a | jt:ENSG00000206193 | Q5HYA3\_HUMAN  
GGCCCC | ENSG00000207791 | hsa-mir-497 | hsa-miR-497 | jt:ENSG00000105173 | CCNE1  
GGCCCC | ENSG00000207929 | hsa-mir-195 | hsa-miR-195 | jt:ENSG00000105173 | CCNE1  
GGCCGCC | ENSG00000198973 | hsa-mir-375 | hsa-miR-375 | jt:ENSG00000103241 | FOXF1  
GGCCGCC | ENSG00000198973 | hsa-mir-375 | hsa-miR-375 | jt:ENSG00000108551 | RASD1  
GGCCGCC | ENSG00000198973 | hsa-mir-375 | hsa-miR-375 | jt:ENSG00000162493 | PDPN  
GGCCTACA | ENSG00000199080 | hsa-mir-133b | hsa-miR-133b | jt:ENSG00000162426 | SLC45A1  
GGCCTACA | ENSG00000207604 | hsa-mir-206 | hsa-miR-206 | jt:ENSG00000163673 | DCLK3  
GGCCTACA | ENSG00000207604 | hsa-mir-206 | hsa-miR-206 | jt:ENSG00000204596 | RPP21  
GGCCTAAA | ENSG00000207708 | hsa-mir-141 | hsa-miR-141 | jt:ENSG00000100448 | CTSG  
GGCCTAAA | ENSG00000207708 | hsa-mir-141 | hsa-miR-141 | jt:ENSG00000105967 | TFEC  
GGCCTTAA | ENSG00000207795 | hsa-mir-155 | hsa-miR-155 | jt:ENSG00000125207 | PIWLL1  
GGCCTTAC | ENSG00000207708 | hsa-mir-141 | hsa-miR-141 | jt:ENSG00000082996 | RNF13  
GGCGAGGAC | ENSG00000199092 | hsa-mir-410 | hsa-miR-410 | jt:ENSG00000196268 | ZNF493  
GGCGATTA | ENSG00000207819 | hsa-mir-9-3 | hsa-miR-9 | jt:ENSG00000136867 | SLC31A2  
GGCGCA | ENSG00000207568 | hsa-mir-203 | hsa-miR-203 | jt:ENSG00000119487 | MAPKAP1  
GGCGCA | ENSG00000207568 | hsa-mir-203 | hsa-miR-203 | jt:ENSG00000162702 | ZNF281  
GGCGCC | ENSG00000207547 | hsa-mir-25 | hsa-miR-25 | jt:ENSG00000170009 | Q9NTHO\_HUMAN  
GGCGCC | ENSG00000207757 | hsa-mir-93 | hsa-miR-93 | jt:ENSG00000167106 | FAM102A  
GGCGCC | ENSG00000207953 | hsa-mir-212 | hsa-miR-212 | jt:ENSG00000130699 | TAF4  
GGCGCC | ENSG00000208036 | hsa-mir-106b | hsa-miR-106b | jt:ENSG00000167106 | FAM102A  
GGCGCACA | ENSG00000207698 | hsa-mir-32 | hsa-miR-32 | jt:ENSG00000088387 | DOCK9  
GGCGCACA | ENSG00000207698 | hsa-mir-32 | hsa-miR-32 | jt:ENSG00000129317 | PUS7L  
GGCGGA | ENSG00000198973 | hsa-mir-375 | hsa-miR-375 | jt:ENSG00000165699 | TSC1  
GGCGGA | ENSG00000198973 | hsa-mir-375 | hsa-miR-375 | jt:ENSG00000183597 | C22orf25  
GGCGGGA | ENSG00000207698 | hsa-mir-32 | hsa-miR-32 | jt:ENSG00000137845 | ADAM10  
GGCGGGA | ENSG00000207960 | hsa-mir-153-2 | hsa-miR-153 | jt:ENSG00000135547 | HEY2  
GGCGGGA | ENSG00000207960 | hsa-mir-153-2 | hsa-miR-153 | jt:ENSG00000154188 | ANGPT1  
GGCGTGTAC | ENSG00000207567 | hsa-mir-142 | hsa-miR-142-3p | jt:ENSG00000140948 | ZCCHC14  
GGCGTGTAC | ENSG00000207567 | hsa-mir-142 | hsa-miR-142-3p | jt:ENSG00000154529 | CNTNAP3B  
GGCTAACAA | ENSG00000199020 | hsa-mir-381 | hsa-miR-381 | jt:ENSG00000120156 | TEK  
GGCTACAAA | ENSG00000199065 | hsa-mir-101-2 | hsa-miR-101 | jt:ENSG00000159167 | STC1  
GGCTACCA | ENSG00000198972 | hsa-let-7e | hsa-miR-7e | jt:ENSG00000139998 | RAB15  
GGCTACCA | ENSG00000207713 | hsa-mir-200c | hsa-miR-200c | jt:ENSG00000196204 | Q6NUR6\_HUMAN  
GGCTCCATA | ENSG00000207602 | hsa-mir-106a | hsa-miR-106a | jt:ENSG00000135298 | BAI3  
GGCTCCTTA | ENSG00000207713 | hsa-mir-200c | hsa-miR-200c | jt:ENSG00000204323 | Q71RC9\_HUMAN  
GGCTCGCAC | ENSG00000207611 | hsa-mir-149 | hsa-miR-149 | jt:ENSG00000138111 | TMEM180  
GGCTCGCAC | ENSG00000207611 | hsa-mir-149 | hsa-miR-149 | jt:ENSG00000169991 | Q5TF58\_HUMAN  
GGCTCGGAC | ENSG00000207752 | hsa-mir-199a-1 | hsa-miR-199a\* | jt:ENSG0000005884 | ITGA3  
GGCTGTACC | ENSG00000199004 | hsa-mir-21 | hsa-miR-21 | jt:ENSG00000168610 | STAT3  
GGCTTCTTA | ENSG00000207596 | hsa-mir-194-2 | hsa-miR-194 | jt:ENSG00000198901 | PRC1  
GGCTTCTTA | ENSG00000207596 | hsa-mir-194-2 | hsa-miR-194 | jt:ENSG00000139531 | SUOX  
GGCTTCTTA | ENSG00000207728 | hsa-mir-449b | hsa-miR-449b | jt:ENSG00000116704 | SLC35D1  
GGCTTTGA | ENSG00000199059 | hsa-mir-135b | hsa-miR-135b | jt:ENSG00000030304 | MUSK  
GGGACAAAC | ENSG00000199122 | hsa-mir-148b | hsa-miR-148b | jt:ENSG00000085433 | WDR47  
GGGAGATAA | ENSG00000199089 | hsa-mir-202 | hsa-miR-202 | jt:ENSG00000056345 | ITGB3  
GGGAGATAA | ENSG00000207933 | hsa-mir-9-1 | hsa-miR-9\* | jt:ENSG00000196482 | ESRRG  
GGGAGGTA | ENSG00000207635 | hsa-mir-499 | hsa-miR-499 | jt:ENSG00000156875 | HIAT1  
GGGAGGTA | ENSG00000207926 | hsa-mir-135a-1 | hsa-miR-135a | jt:ENSG00000162419 | GMEB1  
GGGAGTAAA | ENSG00000199122 | hsa-mir-148b | hsa-miR-148b | jt:ENSG00000111711 | GOLD1B  
GGGAGTTCA | ENSG00000207728 | hsa-mir-449b | hsa-miR-449b | jt:ENSG00000198586 | TLK1  
GGGAGTTCA | ENSG00000207728 | hsa-mir-449b | hsa-miR-449b | jt:ENSG00000182329 | Q8VIF9\_HUMAN  
GGGATTGGA | ENSG00000207751 | hsa-mir-130b | hsa-miR-130b | jt:ENSG00000081818 | PCDH8  
GGGATTGA | ENSG00000207819 | hsa-mir-9-3 | hsa-miR-9 | jt:ENSG00000188888 | GPR179  
GGGCCAGCA | ENSG00000207947 | hsa-mir-152 | hsa-miR-152 | jt:ENSG00000188992 | LIPI  
GGGCCGGA | ENSG00000207791 | hsa-mir-497 | hsa-miR-497 | jt:ENSG00000196204 | Q6NUR6\_HUMAN  
GGGCCGGA | ENSG00000207929 | hsa-mir-195 | hsa-miR-195 | jt:ENSG00000196204 | Q6NUR6\_HUMAN  
GGGCCTAA | ENSG00000207708 | hsa-mir-141 | hsa-miR-141 | jt:ENSG00000100448 | CTSG  
GGGCCTAA | ENSG00000207708 | hsa-mir-141 | hsa-miR-141 | jt:ENSG00000147117 | ZNF157  
GGGCCTCA | ENSG00000199158 | hsa-mir-96 | hsa-miR-96 | jt:ENSG00000073711 | PPP2R3A  
GGGCCTCA | ENSG00000199158 | hsa-mir-96 | hsa-miR-96 | jt:ENSG00000135454 | B4GALNT1  
GGGCCTCA | ENSG00000199158 | hsa-mir-96 | hsa-miR-96 | jt:ENSG00000198826 | ARHGAP11A  
GGGCCTCA | ENSG00000207691 | hsa-mir-183 | hsa-miR-183 | jt:ENSG00000135454 | B4GALNT1  
GGGCCTCA | ENSG00000207691 | hsa-mir-183 | hsa-miR-183 | jt:ENSG00000198826 | ARHGAP11A  
GGGCCTCA | ENSG00000207990 | hsa-mir-182 | hsa-miR-182 | jt:ENSG00000073711 | PPP2R3A  
GGGCCGA | ENSG00000198973 | hsa-mir-375 | hsa-miR-375 | jt:ENSG00000183597 | C22orf25  
GGGCTAGAA | ENSG00000207698 | hsa-mir-32 | hsa-miR-32 | jt:ENSG00000143450 | OAZ3  
GGCCTTAA | ENSG00000207548 | hsa-mir-217 | hsa-miR-217 | jt:ENSG00000180184 | Q8NF75\_HUMAN  
GGCCTTAA | ENSG00000207708 | hsa-mir-141 | hsa-miR-141 | jt:ENSG00000197641 | SERPINB13  
GGCCTTAA | ENSG00000207713 | hsa-mir-200c | hsa-miR-200c | jt:ENSG00000176165 | FOXG1B  
GGCCTTTA | ENSG00000207955 | hsa-mir-219-2 | hsa-miR-219 | jt:ENSG00000170264 | NP\_115556.1  
GGCCTTTA | ENSG00000207955 | hsa-mir-219-2 | hsa-miR-219 | jt:ENSG00000108702 | CCL1  
GGCCTTTA | ENSG00000207955 | hsa-mir-219-2 | hsa-miR-219 | jt:ENSG00000184530 | C6orf58  
GGGGACAA | ENSG00000199085 | hsa-mir-148a | hsa-miR-148a | jt:ENSG00000109790 | KLHL5  
GGGGCACC | ENSG00000207948 | hsa-mir-328 | hsa-miR-328 | jt:ENSG00000068028 | RASSF1  
GGGGCACC | ENSG00000207948 | hsa-mir-328 | hsa-miR-328 | jt:ENSG00000060709 | RIMP2  
GGGGTCCGA | ENSG00000207562 | hsa-mir-34c | hsa-miR-34c | jt:ENSG00000112759 | SLC29A1  
GGGGTCCGA | ENSG00000207811 | hsa-mir-34b | hsa-miR-34b | jt:ENSG00000112759 | SLC29A1  
GGGGTAAA | ENSG00000198974 | hsa-mir-30e | hsa-miR-30e-5p | jt:ENSG00000179151 | EDC3  
GGGGTAAA | ENSG00000207962 | hsa-mir-30c-1 | hsa-miR-30c | jt:ENSG00000179151 | EDC3  
GGGGTTAGA | ENSG00000207933 | hsa-mir-9-1 | hsa-miR-9 | jt:ENSG00000177283 | FZD8  
GGGGTTAGA | ENSG00000207933 | hsa-mir-9-1 | hsa-miR-9 | jt:ENSG00000187994 | NP\_940847.1  
GGGGTTAGA | ENSG00000207933 | hsa-mir-9-1 | hsa-miR-9 | jt:ENSG00000100596 | SPTLC2  
GGGTAAATGA | ENSG00000207955 | hsa-mir-219-2 | hsa-miR-219 | jt:ENSG00000109667 | SLC2A9  
GGGTATATA | ENSG00000199017 | hsa-mir-1-1 | hsa-miR-1 | jt:ENSG00000111962 | UST  
GGGTGA | ENSG00000207808 | hsa-mir-27a | hsa-miR-27a | jt:ENSG00000142182 | DNMT3L  
GGGTGA | ENSG00000207808 | hsa-mir-27a | hsa-miR-27a | jt:ENSG00000167604 | NP\_640332.1  
GGGTGA | ENSG00000207980 | hsa-mir-23a | hsa-miR-23a | jt:ENSG00000088899 | K0552\_HUMAN  
GGGTGA | ENSG00000207980 | hsa-mir-23a | hsa-miR-23a | jt:ENSG00000140623 | SEPT12  
GGGTGA | ENSG00000207980 | hsa-mir-23a | hsa-miR-23a | jt:ENSG00000198570 | RD3  
GGGTGA | ENSG00000207907 | hsa-mir-24-2 | hsa-miR-24 | jt:ENSG00000157538 | DSCR3  
GGGTGA | ENSG00000207907 | hsa-mir-24-2 | hsa-miR-24 | jt:ENSG00000183813 | CCR4  
GGGTGACAC | ENSG00000199161 | hsa-mir-126 | hsa-miR-126 | jt:ENSG00000172889 | EGFL7  
GGGTGACAC | ENSG00000199161 | hsa-mir-126 | hsa-miR-126\* | jt:ENSG00000204103 | MAFB  
GGGTGTA | ENSG00000199161 | hsa-mir-126 | hsa-miR-126 | jt:ENSG00000172889 | EGFL7  
GGGTTAAC | ENSG00000199094 | hsa-mir-30c-2 | hsa-miR-30c | jt:ENSG00000119686 | C14orf58  
GGGTTAAC | ENSG00000199094 | hsa-mir-30c-2 | hsa-miR-30c | jt:ENSG00000058600 | POLR3E  
GGGTTAAC | ENSG00000207827 | hsa-mir-30a | hsa-miR-30a-3p | jt:ENSG00000103449 | SALL1

GGGTTAAC|ENSG00000207827|hsa-mir-30a|hsa-miR-30a-5p|jt:ENSG00000119686|C14orf58  
GGGTTAAC|ENSG00000207827|hsa-mir-30a|hsa-miR-30a-5p|jt:ENSG00000058600|POLR3E  
GGGTTATCA|ENSG00000199153|hsa-mir-30d|hsa-miR-30d|jt:ENSG00000126249|PDCD2L  
GGGTTATCA|ENSG00000207582|hsa-mir-30b|hsa-miR-30b|jt:ENSG00000126249|PDCD2L  
GGGTTGACA|ENSG00000202641|hsa-mir-484|hsa-miR-484|jt:ENSG00000163704|PRRT3  
GGGTTGACA|ENSG00000202641|hsa-mir-484|hsa-miR-484|jt:ENSG00000175084|DES  
GGGTTGACA|ENSG00000202641|hsa-mir-484|hsa-miR-484|jt:ENSG00000147162|OGT  
GGTAACAAA|ENSG00000207725|hsa-mir-222|hsa-miR-222|jt:ENSG00000008438|PGLYRP1  
GGTAACAAA|ENSG00000207870|hsa-mir-221|hsa-miR-221|jt:ENSG00000008438|PGLYRP1  
GGTAATGAA|ENSG00000207955|hsa-mir-219-2|hsa-miR-219|jt:ENSG00000113302|IL12B  
GGTATATA|ENSG00000199017|hsa-mir-1-1|hsa-miR-1|jt:ENSG00000111962|UST  
GGTATATA|ENSG00000199017|hsa-mir-1-1|hsa-miR-1|jt:ENSG00000111962|UST  
GGTCACGCA|ENSG00000207732|hsa-mir-218-1|hsa-miR-218|jt:ENSG00000206069|NP\_001001663.1  
GGTCAGACC|ENSG00000207607|hsa-mir-200a|hsa-miR-200a|jt:ENSG00000170412|GPRC5C  
GGTCACGCA|ENSG00000207708|hsa-mir-141|hsa-miR-141|jt:ENSG00000155966|AFF2  
GGTCCATA|ENSG00000207607|hsa-mir-200a|hsa-miR-200a\*|jt:ENSG00000157240|FZD1  
GGTCGCAG|ENSG00000199032|hsa-mir-425|hsa-miR-425-3p|jt:ENSG00000120129|DUSP1  
GGTCCGTA|ENSG00000198981|hsa-mir-29a|hsa-miR-29a|jt:ENSG00000077235|GTF3C1  
GGTCCGTA|ENSG00000198981|hsa-mir-29a|hsa-miR-29a|jt:ENSG00000115194|SLC30A3  
GGTCTTGA|ENSG00000199036|hsa-mir-219-1|hsa-miR-219|jt:ENSG00000161533|ACOX1  
GGTGAACCA|ENSG00000199153|hsa-mir-30d|hsa-miR-30d|jt:ENSG00000154359|LONRF1  
GGTGAACCA|ENSG00000207582|hsa-mir-30b|hsa-miR-30b|jt:ENSG00000154359|LONRF1  
GGTGAATA|ENSG00000207784|hsa-mir-542|hsa-miR-542-3p|jt:ENSG00000135341|MAP3K7  
GGTGAATA|ENSG00000207752|hsa-mir-199a-1|hsa-miR-199a\*|jt:ENSG00000117620|SLC35A3  
GGTGCCCTA|ENSG00000207819|hsa-mir-9-3|hsa-miR-9|jt:ENSG00000136938|ANP32B  
GGTGCCCTA|ENSG00000207819|hsa-mir-9-3|hsa-miR-9|jt:ENSG00000060138|CSDA  
GGTGCCCTA|ENSG00000207819|hsa-mir-9-3|hsa-miR-9\*|jt:ENSG00000124785|NRN1  
GGTGCTAAA|ENSG00000198974|hsa-mir-30e|hsa-miR-30e-3p|jt:ENSG00000187761|PAGE2B  
GGTGCTAAA|ENSG00000198974|hsa-mir-30e|hsa-miR-30e-5p|jt:ENSG00000121594|CD80  
GGTGCTAAA|ENSG00000207962|hsa-mir-30c-1|hsa-miR-30c|jt:ENSG00000121594|CD80  
GGTGCTGAC|ENSG00000199012|hsa-mir-412|hsa-miR-412|jt:ENSG00000130005|GAMT  
GGTGCTGAC|ENSG00000199020|hsa-mir-381|hsa-miR-381|jt:ENSG00000089063|C20orf30  
GGTGCTGAC|ENSG00000199020|hsa-mir-381|hsa-miR-381|jt:ENSG00000136099|PCDH8  
GGTGCTGAC|ENSG00000199069|hsa-mir-323|hsa-miR-323|jt:ENSG00000164645|NP\_89919.1  
GGTGCTGAC|ENSG00000207743|hsa-mir-495|hsa-miR-495|jt:ENSG00000136819|C9orf78  
GGTGCTGAC|ENSG00000207743|hsa-mir-495|hsa-miR-495|jt:ENSG00000118454|ANKRD13C  
GGTGCTGAC|ENSG00000207749|hsa-mir-299|hsa-miR-299-5p|jt:ENSG00000204352|C9orf129  
GGTGCTGAC|ENSG00000207961|hsa-mir-496|hsa-miR-496|jt:ENSG00000136099|PCDH8  
GGTTAAAGA|ENSG00000198981|hsa-mir-29a|hsa-miR-29a|jt:ENSG00000150779|TIMM8B  
GGTTAAC|ENSG00000199094|hsa-mir-30c-2|hsa-miR-30c|jt:ENSG00000119686|C14orf58  
GGTTAAC|ENSG00000199094|hsa-mir-30c-2|hsa-miR-30c|jt:ENSG00000058600|POLR3E  
GGTTAAC|ENSG00000207827|hsa-mir-30a|hsa-miR-30a-3p|jt:ENSG00000103449|SALL1  
GGTTAAC|ENSG00000207827|hsa-mir-30a|hsa-miR-30a-3p|jt:ENSG00000164975|SNAPC3  
GGTTAAC|ENSG00000207827|hsa-mir-30a|hsa-miR-30a-5p|jt:ENSG00000119686|C14orf58  
GGTTAAC|ENSG00000207827|hsa-mir-30a|hsa-miR-30a-5p|jt:ENSG00000058600|POLR3E  
GGTCCCGA|ENSG00000207732|hsa-mir-218-1|hsa-miR-218|jt:ENSG00000188428|TXNDC5  
GGTCTCAC|ENSG00000207954|hsa-mir-138-1|hsa-miR-138|jt:ENSG00000054598|FOXO1  
GGTTGCCAA|ENSG00000199023|hsa-mir-339|hsa-miR-339|jt:ENSG00000082497|SERTAD4  
GGTTGGACA|ENSG00000207581|hsa-mir-199b|hsa-miR-199b|jt:ENSG00000136536|MARCH7  
GGTTGTGCA|ENSG00000199122|hsa-mir-148b|hsa-miR-148b|jt:ENSG00000204569|PPP1R10  
GGTTGTGCA|ENSG00000199122|hsa-mir-148b|hsa-miR-148b|jt:ENSG00000205653|Q6ZUF2\_HUMAN  
GGTTTAA|ENSG00000207710|hsa-mir-20b|hsa-miR-20b|jt:ENSG00000108298|RPL19  
GGTTTATA|ENSG00000198974|hsa-mir-30e|hsa-miR-30e-5p|jt:ENSG00000033867|SLC4A7  
GGTTTATA|ENSG00000207962|hsa-mir-30c-1|hsa-miR-30c|jt:ENSG00000033867|SLC4A7  
GTAAGTAA|ENSG00000207725|hsa-mir-222|hsa-miR-222|jt:ENSG00000132958|TPTE2  
GTAAGTAA|ENSG00000207870|hsa-mir-221|hsa-miR-221|jt:ENSG00000132958|TPTE2  
GTAACAGGA|ENSG00000207725|hsa-mir-222|hsa-miR-222|jt:ENSG00000180938|ZNF572  
GTAACAGGA|ENSG00000207870|hsa-mir-221|hsa-miR-221|jt:ENSG00000180938|ZNF572  
GTAACCGA|ENSG00000199187|hsa-mir-365-2|hsa-miR-365|jt:ENSG00000067955|CBFB  
GTAAGTGA|ENSG00000207794|hsa-mir-451|hsa-miR-451|jt:ENSG00000126010|GRPR  
GTAATGAA|ENSG00000207980|hsa-mir-23a|hsa-miR-23a|jt:ENSG00000133636|NTS  
GTACTTAAA|ENSG00000207949|hsa-mir-214|hsa-miR-214|jt:ENSG00000182195|LDCC1  
GTACTTAAA|ENSG00000208024|hsa-mir-199a-2|hsa-miR-199a\*|jt:ENSG00000049245|VAMP3  
GTAGATTA|ENSG00000208017|hsa-mir-140|hsa-miR-140|jt:ENSG00000137757|CASP5  
GTATATA|ENSG00000199017|hsa-mir-1-1|hsa-miR-1|jt:ENSG00000111962|UST  
GTACACAA|ENSG00000199161|hsa-mir-126|hsa-miR-126|jt:ENSG00000124191|TOX2  
GTACACAA|ENSG00000199161|hsa-mir-126|hsa-miR-126|jt:ENSG00000172889|EGFL7  
GTCACGCA|ENSG00000207547|hsa-mir-25|hsa-miR-25|jt:ENSG00000115020|PIP5K3  
GTCACGCA|ENSG00000207757|hsa-mir-93|hsa-miR-93|jt:ENSG00000146072|TNFRSF21  
GTCACGCA|ENSG00000208036|hsa-mir-106b|hsa-miR-106b|jt:ENSG00000146072|TNFRSF21  
GTCACGCA|ENSG00000208036|hsa-mir-106b|hsa-miR-106b|jt:ENSG00000172647|PGA5  
GTCACTCA|ENSG00000199158|hsa-mir-96|hsa-miR-96|jt:ENSG00000007402|CACNA2D2  
GTCACTCA|ENSG00000199158|hsa-mir-96|hsa-miR-96|jt:ENSG00000085831|C1orf34  
GTCACTCA|ENSG00000199158|hsa-mir-96|hsa-miR-96|jt:ENSG00000196987|NP\_001034857.2  
GTCACTCA|ENSG00000207691|hsa-mir-183|hsa-miR-183|jt:ENSG00000196987|NP\_001034857.2  
GTCACTCA|ENSG00000207990|hsa-mir-182|hsa-miR-182|jt:ENSG00000085831|C1orf34  
GTCACTTTA|ENSG00000207586|hsa-mir-135a-2|hsa-miR-135a|jt:ENSG00000164935|TM7SF4  
GTCACTTTA|ENSG00000207586|hsa-mir-135a-2|hsa-miR-135a|jt:ENSG00000197851|NP\_997386.1  
GTCACTTTA|ENSG00000207795|hsa-mir-155|hsa-miR-155|jt:ENSG00000147892|ADAMTSL1  
GTCAAGCA|ENSG00000207949|hsa-mir-214|hsa-miR-214|jt:ENSG00000099957|P2RXL1  
GTCAAGCA|ENSG00000199094|hsa-mir-30c-2|hsa-miR-30c|jt:ENSG00000091157|WDR7  
GTCAAGCA|ENSG00000207827|hsa-mir-30a|hsa-miR-30a-5p|jt:ENSG00000091157|WDR7  
GTCACTGA|ENSG00000208009|hsa-mir-130a|hsa-miR-130a|jt:ENSG00000206528|Q6ZSMO\_HUMAN  
GTCCACAA|ENSG00000207694|hsa-mir-1-2|hsa-miR-1|jt:ENSG00000094755|GABRP  
GTCCACTA|ENSG00000207731|hsa-mir-506|hsa-miR-506|jt:ENSG00000183686|MAGEA5  
GTCCATCA|ENSG00000202641|hsa-mir-484|hsa-miR-484|jt:ENSG00000117479|SLC19A2  
GTCCAAAC|ENSG00000207710|hsa-mir-20b|hsa-miR-20b|jt:ENSG00000100644|HIF1A  
GTCCAAA|ENSG00000198986|hsa-let-7a-3|hsa-let-7a|jt:ENSG00000169635|HIC2  
GTCCAAA|ENSG00000207875|hsa-let-7b|hsa-let-7b|jt:ENSG00000169635|HIC2  
GTCCCGCA|ENSG00000207960|hsa-mir-153-2|hsa-miR-153|jt:ENSG00000113763|UNC5A  
GTCTCCGA|ENSG00000207764|hsa-mir-133a-2|hsa-miR-133a|jt:ENSG00000103200|NME4  
GTCTCGTA|ENSG00000207550|hsa-mir-99b|hsa-miR-99b|jt:ENSG00000185361|TNFAIP8L1  
GTCTCTTA|ENSG00000198987|hsa-mir-16-2|hsa-miR-16|jt:ENSG00000149136|SSRP1  
GTCTGAACA|ENSG00000207610|hsa-mir-19a|hsa-miR-19a|jt:ENSG00000189429|RNF207  
GTCTGAACA|ENSG00000207610|hsa-mir-19a|hsa-miR-19a|jt:ENSG0000015171|ZMYND11  
GTCTGAACA|ENSG00000207745|hsa-mir-17|hsa-miR-17-5p|jt:ENSG000001074796|THAP6  
GTCTGCTTA|ENSG00000194717|hsa-mir-494|hsa-miR-494|jt:ENSG00000138138|ATAD1  
GTCTGCTTA|ENSG00000194717|hsa-mir-494|hsa-miR-494|jt:ENSG00000138271|GPR87  
GTCTGCTTA|ENSG00000199015|hsa-mir-377|hsa-miR-377|jt:ENSG0000013619|CXorf6  
GTCTGCTTA|ENSG00000199025|hsa-mir-369|hsa-miR-369-5p|jt:ENSG0000013619|CXorf6  
GTCTGCTTA|ENSG00000199092|hsa-mir-410|hsa-miR-410|jt:ENSG00000095002|MSH2  
GTCTGCTTA|ENSG00000207749|hsa-mir-299|hsa-miR-299-5p|jt:ENSG00000206125|Q68DA7\_HUMAN  
GTCTGCTTA|ENSG00000207761|hsa-mir-329-1|hsa-miR-329|jt:ENSG00000168385|SEPT2  
GTCTGCTTA|ENSG00000207761|hsa-mir-329-1|hsa-miR-329|jt:ENSG00000083896|YTHDC1  
GTCTGTTGA|ENSG00000207949|hsa-mir-214|hsa-miR-214|jt:ENSG00000110851|PRDM4

GTCTTCGA|ENSG00000207694|hsa-mir-1-2|hsa-miR-1 jt:ENSG00000131873|CHSY1  
GTGAAGTCA|ENSG00000207586|hsa-mir-135a-2|hsa-miR-135a jt:ENSG00000107816|LZTS2  
GTGAATGGA|ENSG00000202641|hsa-mir-484|hsa-miR-484 jt:ENSG00000099282|TSPAN15  
GTGAATGGA|ENSG00000202641|hsa-mir-484|hsa-miR-484 jt:ENSG00000132326|PER2  
GTGACCAA|ENSG00000207618|hsa-mir-144|hsa-miR-144 jt:ENSG00000116044|NFE2L2  
GTGACCAA|ENSG00000207618|hsa-mir-144|hsa-miR-144 jt:ENSG00000198718|KIAA0423  
GTGACGCAC|ENSG00000199094|hsa-mir-30c-2|hsa-miR-30c jt:ENSG00000005339|CREBBP  
GTGACGCAC|ENSG00000199094|hsa-mir-30c-2|hsa-miR-30c jt:ENSG00000186594|NP\_116284.2  
GTGACGCAC|ENSG00000207827|hsa-mir-30a|hsa-miR-30a-5p jt:ENSG00000005339|CREBBP  
GTGACGCAC|ENSG00000207827|hsa-mir-30a|hsa-miR-30a-5p jt:ENSG00000186594|NP\_116284.2  
GTGACGCCA|ENSG00000199025|hsa-mir-369|hsa-miR-369-5p jt:ENSG00000119508|NR4A3  
GTGACGCCA|ENSG00000207749|hsa-mir-299|hsa-miR-299-5p jt:ENSG00000131351|NP\_219485.1  
GTGACGCCA|ENSG00000207761|hsa-mir-329-1|hsa-miR-329 jt:ENSG00000105202|FBL  
GTGACTTCA|ENSG00000207939|hsa-mir-223|hsa-miR-223 jt:ENSG00000083168|MYST3  
GTGATGAA|ENSG00000207933|hsa-mir-9-1|hsa-miR-9\* jt:ENSG00000188519|Q7Z4Q0\_HUMAN  
GTGCACAGA|ENSG00000207581|hsa-mir-199b|hsa-miR-199b jt:ENSG00000163599|CTLA4  
GTGCAGTGA|ENSG00000207607|hsa-mir-200a|hsa-miR-200a jt:ENSG00000162631|NTNG1  
GTGCAGTGA|ENSG00000207607|hsa-mir-200a|hsa-miR-200a\* jt:ENSG00000196878|LAMB3  
GTGCATAAA|ENSG00000207949|hsa-mir-214|hsa-miR-214 jt:ENSG00000110328|GALNTL4  
GTGCATAAA|ENSG00000208024|hsa-mir-199a-2|hsa-miR-199a\* jt:ENSG00000159140|SON  
GTGCGCAGA|ENSG00000199161|hsa-mir-126|hsa-miR-126 jt:ENSG00000172889|EGFL7  
GTGCGCAGA|ENSG00000199161|hsa-mir-126|hsa-miR-126\* jt:ENSG00000119698|KIAA1622  
GTGCTGA|ENSG00000199089|hsa-mir-202|hsa-miR-202 jt:ENSG00000198535|NP\_997205.1  
GTGCTGAAC|ENSG00000199153|hsa-mir-30d|hsa-miR-30d jt:ENSG00000070601|FRMPD1  
GTGCTGAAC|ENSG00000199153|hsa-mir-30d|hsa-miR-30d jt:ENSG00000146433|TMEM181  
GTGCTGAAC|ENSG00000207582|hsa-mir-30b|hsa-miR-30b jt:ENSG00000070601|FRMPD1  
GTGCTGAAC|ENSG00000207582|hsa-mir-30b|hsa-miR-30b jt:ENSG00000146433|TMEM181  
GTGCTGCAA|ENSG00000207790|hsa-mir-29b-2|hsa-miR-29b jt:ENSG00000105856|HBP1  
GTGCTGCAA|ENSG00000207966|hsa-mir-29c|hsa-miR-29c jt:ENSG00000105856|HBP1  
GTGGCCA|ENSG00000207863|hsa-mir-125b-2|hsa-miR-125b jt:ENSG00000142102|ATHL1  
GTGGCCA|ENSG00000207863|hsa-mir-125b-2|hsa-miR-125b jt:ENSG00000137221|TJAP1  
GTGGGCCA|ENSG00000207980|hsa-mir-23a|hsa-miR-23a jt:ENSG00000066557|LRRC40  
GTGGGCCA|ENSG00000207980|hsa-mir-23a|hsa-miR-23a jt:ENSG00000206193|Q5HYA3\_HUMAN  
GTGGCGGTA|ENSG00000207732|hsa-mir-218-1|hsa-miR-218 jt:ENSG00000166689|PLEKHA7  
GTGGCGGTA|ENSG00000207732|hsa-mir-218-1|hsa-miR-218 jt:ENSG00000175505|CLCF1  
GTGGCTTA|ENSG00000199161|hsa-mir-126|hsa-miR-126 jt:ENSG00000172889|EGFL7  
GTGGCTTA|ENSG00000199161|hsa-mir-126|hsa-miR-126 jt:ENSG00000185504|C17orf70  
GTGGTGACA|ENSG00000199017|hsa-mir-1-1|hsa-miR-1 jt:ENSG00000135903|PAX3  
GTGGTGACA|ENSG00000199017|hsa-mir-1-1|hsa-miR-1 jt:ENSG00000131269|ABCY7  
GTGGTGCCA|ENSG00000207611|hsa-mir-149|hsa-miR-149 jt:ENSG00000168297|PXX  
GTGGTGCCA|ENSG00000207611|hsa-mir-149|hsa-miR-149 jt:ENSG00000179178|TMEM125  
GTGGTTTGA|ENSG00000199020|hsa-mir-381|hsa-miR-381 jt:ENSG00000131003|RBM2FP  
GTGGTTTGA|ENSG00000199020|hsa-mir-381|hsa-miR-381 jt:ENSG00000184735|DDX53  
GTGGTTTGA|ENSG00000199020|hsa-mir-381|hsa-miR-381 jt:ENSG00000185674|LYG2\_HUMAN  
GTGGTTTGA|ENSG00000199025|hsa-mir-369|hsa-miR-369-3p jt:ENSG00000131003|RBM2FP  
GTGGTTTGA|ENSG00000207743|hsa-mir-495|hsa-miR-495 jt:ENSG00000140264|SERF2  
GTGTCACAC|ENSG00000199122|hsa-mir-148b|hsa-miR-148b jt:ENSG00000100483|C14orf138  
GTGTCGCA|ENSG00000207547|hsa-mir-25|hsa-miR-25 jt:ENSG00000138869|C22orf16  
GTGTCGCA|ENSG00000207757|hsa-mir-93|hsa-miR-93 jt:ENSG00000132975|GPR12  
GTGTCGCA|ENSG00000207757|hsa-mir-93|hsa-miR-93 jt:ENSG00000183826|BTBD9  
GTGTCGCA|ENSG00000208036|hsa-mir-106b|hsa-miR-106b jt:ENSG00000132975|GPR12  
GTGTCGCA|ENSG00000208036|hsa-mir-106b|hsa-miR-106b jt:ENSG00000183826|BTBD9  
GTGTGA|ENSG00000207939|hsa-mir-223|hsa-miR-223 jt:ENSG00000174238|PITPNA  
GTGTGA|ENSG00000207939|hsa-mir-223|hsa-miR-223 jt:ENSG00000105619|TFPT  
GTTAAGCAA|ENSG00000207994|hsa-mir-100|hsa-miR-100 jt:ENSG00000153147|SMARCA5  
GTTAGTGA|ENSG00000208024|hsa-mir-199a-2|hsa-miR-199a\* jt:ENSG00000135919|SERPINE2  
GTTATTCAA|ENSG00000207955|hsa-mir-219-2|hsa-miR-219 jt:ENSG00000136695|LLF5  
GTTCCAAAG|ENSG00000199036|hsa-mir-219-1|hsa-miR-219 jt:ENSG00000180139|Q8N9Z5\_HUMAN  
GTTCCAAAG|ENSG00000207784|hsa-mir-542|hsa-miR-542-3p jt:ENSG00000042781|USH2A  
GTTCCCTCA|ENSG00000207548|hsa-mir-217|hsa-miR-217 jt:ENSG00000106089|STX1A  
GTTGAGTGA|ENSG00000199094|hsa-mir-30c-2|hsa-miR-30c jt:ENSG00000163629|PTPN13  
GTTGAGTGA|ENSG00000207827|hsa-mir-30a|hsa-miR-30a-5p jt:ENSG00000163629|PTPN13  
GTTGCATCA|ENSG00000207585|hsa-mir-181d|hsa-miR-181d jt:ENSG00000101849|TBL1X  
GTTGCCA|ENSG00000199065|hsa-mir-101-2|hsa-miR-101 jt:ENSG00000088854|C20orf194  
GTTGTGCA|ENSG00000207732|hsa-mir-218-1|hsa-miR-218 jt:ENSG00000122733|KIAA1045  
GTTGTAAC|ENSG00000207777|hsa-mir-10a|hsa-miR-10a jt:ENSG00000196584|XRCC2  
GTTGTTGAA|ENSG00000199025|hsa-mir-369|hsa-miR-369-5p jt:ENSG00000107821|KAZALD1  
GTTGTTGAA|ENSG00000199025|hsa-mir-369|hsa-miR-369-5p jt:ENSG00000189223|Q7Z3M5\_HUMAN  
GTTGTTGAA|ENSG00000207961|hsa-mir-496|hsa-miR-496 jt:ENSG00000109163|GNRHR  
GTTTAAATA|ENSG00000199085|hsa-mir-148a|hsa-miR-148a jt:ENSG00000164258|NDUFS4  
GTTTACAAA|ENSG00000207732|hsa-mir-218-1|hsa-miR-218 jt:ENSG00000085978|ATG16L1  
GTTTACAAA|ENSG00000207732|hsa-mir-218-1|hsa-miR-218 jt:ENSG00000203931|LOC729078  
GTTTACAAA|ENSG00000207732|hsa-mir-218-1|hsa-miR-218 jt:ENSG00000203932|LOC728660  
GTTTAGGAA|ENSG00000207585|hsa-mir-181d|hsa-miR-181d jt:ENSG00000064218|DMRT3  
GTTTAGCAA|ENSG00000207926|hsa-mir-135a-1|hsa-miR-135a jt:ENSG00000122778|Q9HCM3\_HUMAN  
GTTTCTCAA|ENSG00000202641|hsa-mir-484|hsa-miR-484 jt:ENSG00000166104|NP\_776166.1  
GTTTGTAAA|ENSG00000207732|hsa-mir-218-1|hsa-miR-218 jt:ENSG00000203931|LOC729078  
GTTTGTAAA|ENSG00000207732|hsa-mir-218-1|hsa-miR-218 jt:ENSG00000203932|LOC728660  
TAAAGGCCA|ENSG00000199122|hsa-mir-148b|hsa-miR-148b jt:ENSG00000126216|TUBGCP3  
TAAAGGCCA|ENSG00000207708|hsa-mir-141|hsa-miR-141 jt:ENSG00000102781|KATNAL1  
TAAAGGCCA|ENSG00000207713|hsa-mir-200c|hsa-miR-200c jt:ENSG00000100109|TFIP11  
TAAAGGCCA|ENSG00000207713|hsa-mir-200c|hsa-miR-200c jt:ENSG00000127511|SIN3B  
TAAAGGCCA|ENSG00000207713|hsa-mir-200c|hsa-miR-200c jt:ENSG00000134874|DZIP1  
TAAAGGCCA|ENSG00000207713|hsa-mir-200c|hsa-miR-200c jt:ENSG00000196532|HIST1H3C  
TAAATGCTA|ENSG00000207585|hsa-mir-181d|hsa-miR-181d jt:ENSG00000143149|ALDH9A1  
TAACAGCTA|ENSG00000199058|hsa-mir-302b|hsa-miR-302b jt:ENSG00000135624|CCT7  
TAACAGCTA|ENSG00000199102|hsa-mir-302c|hsa-miR-302c jt:ENSG00000135624|CCT7  
TAACAGCTA|ENSG00000199145|hsa-mir-302d|hsa-miR-302d jt:ENSG00000135624|CCT7  
TAACCTAA|ENSG00000199153|hsa-mir-30d|hsa-miR-30d jt:ENSG00000146433|TMEM181  
TAACCTAA|ENSG00000207582|hsa-mir-30b|hsa-miR-30b jt:ENSG00000146433|TMEM181  
TAACGTCA|ENSG00000199153|hsa-mir-30d|hsa-miR-30d jt:ENSG00000115239|ASB3  
TAACGTCA|ENSG00000199153|hsa-mir-30d|hsa-miR-30d jt:ENSG00000139636|LMBR1L  
TAACGTCA|ENSG00000207582|hsa-mir-30b|hsa-miR-30b jt:ENSG00000115239|ASB3  
TAACGTCA|ENSG00000207582|hsa-mir-30b|hsa-miR-30b jt:ENSG00000139636|LMBR1L  
TAAGGA|ENSG00000202569|hsa-mir-146b|hsa-miR-146b jt:ENSG00000135622|SEMA4F  
TAATGAGGA|ENSG00000199135|hsa-mir-101-1|hsa-miR-101 jt:ENSG00000179151|EDC3  
TAATGGCCA|ENSG00000199020|hsa-mir-381|hsa-miR-381 jt:ENSG00000120156|TEK  
TAATGGCCA|ENSG00000199107|hsa-mir-409|hsa-miR-409-5p jt:ENSG00000069712|KIAA1107  
TAATGGCCA|ENSG00000207749|hsa-mir-299|hsa-miR-299-5p jt:ENSG00000067798|NAV3  
TAATGGTGA|ENSG00000207744|hsa-mir-10b|hsa-miR-10b jt:ENSG00000197863|ZNF790  
TAATTGCAA|ENSG00000207617|hsa-mir-24-1|hsa-miR-189 jt:ENSG00000187073|Q86TS2\_HUMAN  
TAATTGCAA|ENSG00000207617|hsa-mir-24-1|hsa-miR-24 jt:ENSG00000135503|ACVR1B  
TAATTGCAA|ENSG00000199058|hsa-mir-302b|hsa-miR-302b jt:ENSG00000176605|C14orf177  
TAATTGCAA|ENSG00000199102|hsa-mir-302c|hsa-miR-302c jt:ENSG00000176605|C14orf177  
TAATTGCAA|ENSG00000199145|hsa-mir-302d|hsa-miR-302d jt:ENSG00000176605|C14orf177

TACCACCAA|ENSG00000199177|hsa-mir-31|hsa-miR-31 jt:ENSG00000101337|TM9SF4  
TACCGCCA|ENSG00000207732|hsa-mir-218-1|hsa-miR-218 jt:ENSG00000166689|PLEKHA7  
TACCGCCA|ENSG00000207732|hsa-mir-218-1|hsa-miR-218 jt:ENSG00000175505|CLCF1  
TACCCGAA|ENSG00000199122|hsa-mir-148b|hsa-miR-148b jt:ENSG00000055070|Clorf144  
TACTCCCA|ENSG00000207948|hsa-mir-328|hsa-miR-328jt:ENSG00000173692|PSMD1  
TACTGAGCA|ENSG00000207649|hsa-mir-138-2|hsa-miR-138 jt:ENSG00000150471|LPHN3  
TAGAGCTGA|ENSG00000199169|hsa-mir-367|hsa-miR-367jt:ENSG00000148704|VAX1  
TAGATGATA|ENSG00000208017|hsa-mir-140|hsa-miR-140jt:ENSG00000136371|MTHFS  
TAGCATTA|ENSG00000199058|hsa-mir-302b|hsa-miR-302b jt:ENSG00000134375|TIMM17A  
TAGCATTA|ENSG00000199102|hsa-mir-302c|hsa-miR-302c jt:ENSG00000134375|TIMM17A  
TAGCATTA|ENSG00000199145|hsa-mir-302d|hsa-miR-302d jt:ENSG00000134375|TIMM17A  
TAGCATTA|ENSG00000207624|hsa-mir-194-1|hsa-miR-194 jt:ENSG00000169031|COL4A3  
TAGCCGAA|ENSG00000208009|hsa-mir-130a|hsa-miR-130a jt:ENSG00000111711|GOLT1B  
TAGCCGAA|ENSG00000208009|hsa-mir-130a|hsa-miR-130a jt:ENSG00000162613|FUBP1  
TAGCCGAA|ENSG00000208009|hsa-mir-130a|hsa-miR-130a jt:ENSG00000162613|FUBP1  
TAGGATTA|ENSG00000207624|hsa-mir-194-1|hsa-miR-194 jt:ENSG00000063978|RNF4  
TAGGTGGCA|ENSG00000207585|hsa-mir-181d|hsa-miR-181d jt:ENSG00000178997|EXDL1  
TAGGTGGCA|ENSG00000207585|hsa-mir-181d|hsa-miR-181d jt:ENSG00000180595|Q8N8C9\_HUMAN  
TAGTCATCA|ENSG00000198974|hsa-mir-30e|hsa-miR-30e-5p jt:ENSG00000104497|SNX16  
TAGTCATCA|ENSG00000198974|hsa-mir-30e|hsa-miR-30e-5p jt:ENSG00000168955|TM4SF20  
TAGTCATCA|ENSG00000207962|hsa-mir-30c-1|hsa-miR-30c jt:ENSG00000104497|SNX16  
TAGTCATCA|ENSG00000207962|hsa-mir-30c-1|hsa-miR-30c jt:ENSG00000168955|TM4SF20  
TAGTGGATA|ENSG00000207732|hsa-mir-218-1|hsa-miR-218 jt:ENSG00000177272|KCNA3  
TATACCTGA|ENSG00000207971|hsa-mir-125b-1|hsa-miR-125b jt:ENSG00000112195|TREM2L  
TATATGGGA|ENSG00000208024|hsa-mir-199a-2|hsa-miR-199a\* jt:ENSG00000188153|COL4A5  
TATCTGCAA|ENSG00000207731|hsa-mir-506|hsa-miR-506jt:ENSG00000155530|LRGUK  
TATGCAGAA|ENSG00000207980|hsa-mir-23a|hsa-miR-23ajt:ENSG00000188474|ZNF788  
TATGTGAGA|ENSG00000207618|hsa-mir-144|hsa-miR-144jt:ENSG00000132669|RIN2  
TATGTGAGA|ENSG00000207618|hsa-mir-144|hsa-miR-144jt:ENSG00000136542|GALNT5  
TATTCAGCA|ENSG00000199024|hsa-mir-103-2|hsa-miR-103 jt:ENSG00000147892|ADAMTSL1  
TATTGCAA|ENSG00000199065|hsa-mir-101-2|hsa-miR-101 jt:ENSG00000088854|C20orf194  
TATTGGCCA|ENSG00000199122|hsa-mir-148b|hsa-miR-148b jt:ENSG00000059728|MXD1  
TATTGGCCA|ENSG00000199122|hsa-mir-148b|hsa-miR-148b jt:ENSG00000179476|C14orf28  
TATTGTAA|ENSG00000199036|hsa-mir-219-1|hsa-miR-219 jt:ENSG00000170264|NP\_115556.1  
TCAATGTCA|ENSG00000207939|hsa-mir-223|hsa-miR-223jt:ENSG00000164588|HCN1  
TCACACTAA|ENSG00000207618|hsa-mir-144|hsa-miR-144jt:ENSG00000197841|ZNF181  
TCACATGCA|ENSG00000207617|hsa-mir-24-1|hsa-miR-189 jt:ENSG00000166482|MFAP4  
TCAGCACA|ENSG00000199161|hsa-mir-126|hsa-miR-126jt:ENSG00000103489|XYLT1  
TCAGCACA|ENSG00000199161|hsa-mir-126|hsa-miR-126jt:ENSG00000172889|EGFL7  
TCAGCACA|ENSG00000199161|hsa-mir-126|hsa-miR-126\* jt:ENSG00000124260|MAGEA10  
TCAGCACA|ENSG00000199161|hsa-mir-126|hsa-miR-126\* jt:ENSG00000205808|PPAPDC2  
TCAGCATA|ENSG00000199149|hsa-mir-20a|hsa-miR-20ajt:ENSG00000143107|FNDC7  
TCAGCATA|ENSG00000207745|hsa-mir-17|hsa-miR-17-5p jt:ENSG00000143107|FNDC7  
TCAGCATCA|ENSG00000198981|hsa-mir-29a|hsa-miR-29ajt:ENSG00000198872|PEG10  
TCAGGTTCA|ENSG00000199161|hsa-mir-126|hsa-miR-126jt:ENSG00000172889|EGFL7  
TCAGGTTCA|ENSG00000199161|hsa-mir-126|hsa-miR-126\* jt:ENSG00000133116|KL  
TCAGGTTCA|ENSG00000207638|hsa-mir-99a|hsa-miR-99ajt:ENSG00000130702|LAMA5  
TCCAATCCA|ENSG00000199015|hsa-mir-377|hsa-miR-377jt:ENSG00000090054|SPTLC1  
TCCAATCCA|ENSG00000199020|hsa-mir-381|hsa-miR-381jt:ENSG00000132406|TMEM128  
TCCAATCCA|ENSG00000199025|hsa-mir-369|hsa-miR-369-5p jt:ENSG00000172469|MANEA  
TCCAATCCA|ENSG00000199069|hsa-mir-323|hsa-miR-323jt:ENSG00000197635|DPP4  
TCCAATCCA|ENSG00000207743|hsa-mir-495|hsa-miR-495jt:ENSG00000001561|ENPF4  
TCCAATCCA|ENSG00000207743|hsa-mir-495|hsa-miR-495jt:ENSG00000176927|EFCAB5  
TCCAGGTA|ENSG00000207618|hsa-mir-144|hsa-miR-144jt:ENSG00000171551|ECE1  
TCCAGGTA|ENSG00000207794|hsa-mir-451|hsa-miR-451jt:ENSG00000134324|LPIN1  
TCCATCAAA|ENSG00000199153|hsa-mir-30d|hsa-miR-30djt:ENSG00000158715|SLC45A3  
TCCATCAAA|ENSG00000199153|hsa-mir-30d|hsa-miR-30djt:ENSG00000189298|ZKSCAN3  
TCCATCAAA|ENSG00000207582|hsa-mir-30b|hsa-miR-30bjt:ENSG00000158715|SLC45A3  
TCCATCAAA|ENSG00000207582|hsa-mir-30b|hsa-miR-30bjt:ENSG00000189298|ZKSCAN3  
TCCATCAGA|ENSG00000199135|hsa-mir-101-1|hsa-miR-101 jt:ENSG00000176276|hCG\_1757335  
TCCATGCCA|ENSG00000207926|hsa-mir-135a-1|hsa-miR-135a jt:ENSG00000122012|SV2C  
TCCCAACAA|ENSG00000207567|hsa-mir-142|hsa-miR-142-3p jt:ENSG00000174016|FAM46D  
TCCCAACAA|ENSG00000207567|hsa-mir-142|hsa-miR-142-3p jt:ENSG00000113211|PCDHB6  
TCCCGGTCA|ENSG00000207933|hsa-mir-9-1|hsa-miR-9\* jt:ENSG00000158109|FAM79A  
TCCCGGTCA|ENSG00000207933|hsa-mir-9-1|hsa-miR-9\* jt:ENSG00000172071|EIF2AK3  
TCCCGGTCA|ENSG00000207933|hsa-mir-9-1|hsa-miR-9\* jt:ENSG00000122122|CXXorf9  
TCCGAGAAA|ENSG00000207789|hsa-mir-26a-2|hsa-miR-26a jt:ENSG00000153574|RPIA  
TCCGCCTCA|ENSG00000207630|hsa-mir-7-3|hsa-miR-7 jt:ENSG00000158006|PFAFH2  
TCCGGTCA|ENSG00000208017|hsa-mir-140|hsa-miR-140jt:ENSG00000103056|SMPD3  
TCCTAATCA|ENSG00000207548|hsa-mir-217|hsa-miR-217jt:ENSG00000108599|AKAP10  
TCCTAATCA|ENSG00000207548|hsa-mir-217|hsa-miR-217jt:ENSG00000204866|IGL2  
TCGATAAA|ENSG00000207694|hsa-mir-1-2|hsa-miR-1 jt:ENSG00000176476|CCDC101  
TCGCCAGAA|ENSG00000207698|hsa-mir-32|hsa-miR-32 jt:ENSG00000143164|IQWD1  
TCGGGAAA|ENSG00000198975|hsa-let-7a-2|hsa-let-7ajt:ENSG00000177917|ARL6IP6  
TCGGGAAA|ENSG00000207971|hsa-mir-125b-1|hsa-miR-125b jt:ENSG00000106028|ASB2  
TCGTGAGA|ENSG00000207933|hsa-mir-9-1|hsa-miR-9 jt:ENSG00000154319|C8orf13  
TCGTGAGA|ENSG00000199004|hsa-mir-21|hsa-miR-21 jt:ENSG00000183621|ZNF438  
TCGTGAGA|ENSG00000199004|hsa-mir-21|hsa-miR-21 jt:ENSG00000064225|ST3GAL6  
TCGTGAGA|ENSG00000199004|hsa-mir-21|hsa-miR-21 jt:ENSG00000134321|RSAD2  
TCGTTACA|ENSG00000198987|hsa-mir-16-2|hsa-miR-16 jt:ENSG00000115998|C2orf42  
TCTAGCCCA|ENSG00000207819|hsa-mir-9-3|hsa-miR-9 jt:ENSG00000169856|ONECUT1  
TCTAGGCAA|ENSG00000207752|hsa-mir-199a-1|hsa-miR-199a\* jt:ENSG00000120278|PLEKHG1  
TCTATCTAA|ENSG00000199072|hsa-let-7f-1|hsa-let-7fjt:ENSG00000094963|FMO2  
TCTATCTAA|ENSG00000199133|hsa-let-7d|hsa-let-7d jt:ENSG00000094963|FMO2  
TCTATCTAA|ENSG00000199165|hsa-let-7a-1|hsa-let-7ajt:ENSG00000094963|FMO2  
TCTCAATA|ENSG00000199065|hsa-mir-101-2|hsa-miR-101 jt:ENSG00000130224|LRCH2  
TCTTAAAGA|ENSG00000207955|hsa-mir-219-2|hsa-miR-219 jt:ENSG00000011114|BTBD7  
TCTTAAAGA|ENSG00000207955|hsa-mir-219-2|hsa-miR-219 jt:ENSG00000136628|EPRS  
TCTTCATCA|ENSG00000207752|hsa-mir-199a-1|hsa-miR-199a jt:ENSG00000100554|ATP6V1D  
TCTTTGTCA|ENSG00000199077|hsa-mir-129-2|hsa-miR-129 jt:ENSG00000163781|TOPBP1  
TGAACGTCA|ENSG00000199161|hsa-mir-126|hsa-miR-126jt:ENSG00000172889|EGFL7  
TGACCCAAA|ENSG00000207586|hsa-mir-135a-2|hsa-miR-135a jt:ENSG00000188100|FAM25\_HUMAN  
TGACGACA|ENSG00000207728|hsa-mir-449b|hsa-miR-449b jt:ENSG00000119782|FKBP1B  
TGAGCCCAA|ENSG00000207618|hsa-mir-144|hsa-miR-144jt:ENSG00000165525|SDCCAG1  
TGAGGTCCA|ENSG00000199149|hsa-mir-20a|hsa-miR-20ajt:ENSG00000134352|IL6ST  
TGAGGTCCA|ENSG00000207745|hsa-mir-17|hsa-miR-17-5p jt:ENSG00000162624|LHX8  
TGAGTAACA|ENSG00000198974|hsa-mir-30e|hsa-miR-30e-5p jt:ENSG00000134531|EMP1  
TGAGTAACA|ENSG00000199059|hsa-mir-135b|hsa-miR-135b jt:ENSG00000113494|PRLR  
TGAGTAACA|ENSG00000207962|hsa-mir-30c-1|hsa-miR-30c jt:ENSG00000134531|EMP1  
TGATGCAA|ENSG00000207585|hsa-mir-181d|hsa-miR-181d jt:ENSG00000106852|LHX6  
TGATTAACA|ENSG00000207610|hsa-mir-19a|hsa-miR-19ajt:ENSG00000168758|SEMA4C  
TGACGCGCA|ENSG00000198981|hsa-mir-29a|hsa-miR-29ajt:ENSG00000154227|LASS3  
TGACGCGCA|ENSG00000198981|hsa-mir-29a|hsa-miR-29ajt:ENSG00000173175|ADCY5  
TGACATCCA|ENSG00000207809|hsa-mir-139|hsa-miR-139jt:ENSG00000143479|DYRK3  
TGCCAAAA|ENSG00000199077|hsa-mir-129-2|hsa-miR-129 jt:ENSG00000070214|SLC44A1

TGCCAGCA|ENSG00000199121|hsa-mir-26b|hsa-miR-26b|jt:ENSG00000119812|FAM98A  
TGCCAGACA|ENSG00000207618|hsa-mir-144|hsa-miR-144|jt:ENSG00000169220|RGS14  
TGCCAGCAA|ENSG00000194717|hsa-mir-494|hsa-miR-494|jt:ENSG00000173612|GPRC6A  
TGCCAGCAA|ENSG00000199020|hsa-mir-381|hsa-miR-381|jt:ENSG0000023909|GCLM  
TGCCAGCAA|ENSG00000199092|hsa-mir-410|hsa-miR-410|jt:ENSG00000138814|PPP3CA  
TGCCAGCAA|ENSG00000199107|hsa-mir-409|hsa-miR-409-5p|jt:ENSG00000187242|KRT12  
TGCCAGCAA|ENSG00000207761|hsa-mir-329-1|hsa-miR-329|jt:ENSG00000134247|PTGFRN  
TGCCATCAA|ENSG00000199058|hsa-mir-302b|hsa-miR-302b|jt:ENSG00000145362|ANK2  
TGCCATCAA|ENSG00000199102|hsa-mir-302c|hsa-miR-302c|jt:ENSG00000145362|ANK2  
TGCCATCAA|ENSG00000199145|hsa-mir-302d|hsa-miR-302d|jt:ENSG00000145362|ANK2  
TGCCATCAA|ENSG00000199169|hsa-mir-367|hsa-miR-367|jt:ENSG00000163694|NP\_061900.1  
TGCCATCAA|ENSG00000199169|hsa-mir-367|hsa-miR-367|jt:ENSG00000187372|PCDHB13  
TGCCGCAA|ENSG00000209707|hsa-mir-24-2|hsa-miR-24|jt:ENSG00000053918|KCQN1  
TGCCAGAA|ENSG00000199161|hsa-mir-126|hsa-miR-126|jt:ENSG00000172889|EGFL7  
TGCCAGAA|ENSG00000199161|hsa-mir-126|hsa-miR-126\*|jt:ENSG00000086848|ALG9  
TGCCGCAA|ENSG00000207808|hsa-mir-27a|hsa-miR-27a|jt:ENSG00000054690|PLEKHH1  
TGCCGCAA|ENSG00000207980|hsa-mir-23a|hsa-miR-23a|jt:ENSG00000148200|NR6A1  
TGCCGCAA|ENSG00000208017|hsa-mir-140|hsa-miR-140|jt:ENSG00000112715|VEGFA  
TGCGTAA|ENSG00000199077|hsa-mir-129-2|hsa-miR-129|jt:ENSG00000170310|STX8  
TGCCAA|ENSG00000209707|hsa-mir-339|hsa-miR-339|jt:ENSG00000206064|Q6ZU89\_HUMAN  
TGCCAA|ENSG00000199158|hsa-mir-96|hsa-miR-96|jt:ENSG00000117600|NP\_055654.2  
TGCCATAA|ENSG00000207971|hsa-mir-125b-1|hsa-miR-125b|jt:ENSG00000119541|VPS4B  
TGCCATAA|ENSG00000207971|hsa-mir-125b-1|hsa-miR-125b|jt:ENSG00000118322|ATP10B  
TGCCCA|ENSG00000199032|hsa-mir-425|hsa-miR-425-3p|jt:ENSG00000007255|TRAPPC6A  
TGCCATAA|ENSG00000198986|hsa-let-7a-3|hsa-let-7a|jt:ENSG00000139998|RAB15  
TGCCATAA|ENSG00000207875|hsa-let-7b|hsa-let-7b|jt:ENSG00000139998|RAB15  
TGCCGCAA|ENSG00000207567|hsa-mir-142|hsa-miR-142-3p|jt:ENSG00000100997|ABHD12  
TGCGTAA|ENSG00000207618|hsa-mir-144|hsa-miR-144|jt:ENSG00000110321|EIF4G2  
TGCCAA|ENSG00000207604|hsa-mir-206|hsa-miR-206|jt:ENSG00000179036|VAMP2  
TGCCAA|ENSG00000207604|hsa-mir-206|hsa-miR-206|jt:ENSG00000205707|LYRM5  
TGCGTAA|ENSG00000199023|hsa-mir-339|hsa-miR-339|jt:ENSG00000183837|PNMA3  
TGTCCAA|ENSG00000207604|hsa-mir-206|hsa-miR-206|jt:ENSG00000179036|VAMP2  
TGTCCAA|ENSG00000207604|hsa-mir-206|hsa-miR-206|jt:ENSG00000205707|LYRM5  
TGTCGCAA|ENSG00000198973|hsa-mir-375|hsa-miR-375|jt:ENSG00000183649|Q8NFX8\_HUMAN  
TGTCGCAA|ENSG00000198973|hsa-mir-375|hsa-miR-375|jt:ENSG00000204832|Q6ZRU3\_HUMAN  
TGTTGAA|ENSG00000207790|hsa-mir-29b-2|hsa-miR-29b|jt:ENSG00000171824|EXOSC10  
TGTTGAA|ENSG00000207966|hsa-mir-29c|hsa-miR-29c|jt:ENSG00000171824|EXOSC10  
TGTCAGAA|ENSG00000207708|hsa-mir-141|hsa-miR-141|jt:ENSG00000152382|TADA1L  
TGTCAGAA|ENSG00000207713|hsa-mir-200c|hsa-miR-200c|jt:ENSG00000115963|RND3  
TGTCGAA|ENSG00000202641|hsa-mir-484|hsa-miR-484|jt:ENSG00000147162|OGT  
TGTTGAA|ENSG00000207980|hsa-mir-23a|hsa-miR-23a|jt:ENSG00000113615|SEC24A  
TGTTGAA|ENSG00000207980|hsa-mir-23a|hsa-miR-23a|jt:ENSG00000131002|CYorf15B  
TGTTGCAA|ENSG00000199161|hsa-mir-126|hsa-miR-126|jt:ENSG00000172889|EGFL7  
TGTTGCAA|ENSG00000207926|hsa-mir-135a-1|hsa-miR-135a|jt:ENSG00000168676|KCTD19  
TGTTGCAA|ENSG00000207926|hsa-mir-135a-1|hsa-miR-135a|jt:ENSG00000172748|ZNF596  
TGTTGCAA|ENSG00000208024|hsa-mir-199a-2|hsa-miR-199a\*|jt:ENSG00000188384|Q6ZUQ5\_HUMAN  
TGTTGCAA|ENSG00000208024|hsa-mir-199a-2|hsa-miR-199a\*|jt:ENSG00000205271|Q6ZUQ5\_HUMAN  
TGTTGCAA|ENSG00000208024|hsa-mir-199a-2|hsa-miR-199a\*|jt:ENSG00000205275|Q6ZUQ5\_HUMAN  
TGTTGCTAA|ENSG00000202641|hsa-mir-484|hsa-miR-484|jt:ENSG00000112130|RNF8  
TTACCCTAA|ENSG00000199058|hsa-mir-302b|hsa-miR-302b\*|jt:ENSG00000189042|ZNF567  
TTACCCTAA|ENSG00000199169|hsa-mir-367|hsa-miR-367|jt:ENSG0000023171|GRAMD1B  
TTAGCAA|ENSG00000199149|hsa-mir-20a|hsa-miR-20a|jt:ENSG00000160401|C9orf117  
TTAGCAA|ENSG00000207745|hsa-mir-17|hsa-miR-17-5p|jt:ENSG00000162624|LHX8  
TTATGAA|ENSG00000198981|hsa-mir-29a|hsa-miR-29a|jt:ENSG00000175322|ZNF519  
TTCCACAA|ENSG00000207933|hsa-mir-9-1|hsa-miR-9|jt:ENSG00000168781|HISPPD2A  
TTCCACAA|ENSG00000207933|hsa-mir-9-1|hsa-miR-9\*|jt:ENSG00000172071|EIF2AK3  
TTCCGAAA|ENSG00000207694|hsa-mir-1-2|hsa-miR-1|jt:ENSG00000137364|TPMT  
TTGCTCAA|ENSG00000199058|hsa-mir-302b|hsa-miR-302b|jt:ENSG00000143469|SYT14  
TTGCTCAA|ENSG00000199102|hsa-mir-302c|hsa-miR-302c|jt:ENSG00000143469|SYT14  
TTGCTCAA|ENSG00000199145|hsa-mir-302d|hsa-miR-302d|jt:ENSG00000143469|SYT14  
TTGCTCAA|ENSG00000199169|hsa-mir-367|hsa-miR-367|jt:ENSG0000023171|GRAMD1B
