# Supplementary material for: Genome-wide survey of microRNA–transcription factor feed-forward regulatory circuits in human
Source: Royal Society of Chemistry journal article supplement (doi:10.1039/b900177h), 2009-06-19
Supplement: b900177h_add_file_8.pdf [file b900177h_add_file_8.pdf]

```
## DESCRIPTION OF FIELDS
-----
## Basic fields :
-----

# ANNOTATION Annotations totalized by the circuit.
# ID Transcription factor HGNC id:Mature_microRNA_id.
# TFID Transcription factor HGNC id.
# MIID Precursor microRNA Ensembl id:Precursor_microRNA id:Mature_microRNA id.
# Joint_target_gene_Ensembl_id:JTID Joint_target_gene_HGNC_id. (followed by GO_id(s) if GO annotated)

-----
## ANNOTATION-making fields :
-----

# TFJT Transcription_factor_HGNC_id:Joint_target_gene_HGNC_id.
# TFMI Transcription_factor_HGNC_id:Mature_microRNA_id:Precursor_microRNA_id:Description_validation(s).
# MIJT Mature_microRNA_id:Joint_target_gene_HGNC_id:Description_validation(s)

## END OF FIELD DESCRIPTION

# A plain text ASCII version of this file is available at: http://personalpages.to.infn.it/~cora/circuits/index.html

//
ANNOTATION: 3
ID YY1:hsa-miR-142-3p;
TFID YY1;
MIID ENSG00000207567:hsa-mir-142:hsa-miR-142-3p;
JTID ENSG00000147421:HMBOX1 GO:0003700;GO:0005634;GO:0006355;GO:0043565;
JTID ENSG00000154529:CNTNAP3B GO:0007155;
JTID ENSG00000109208:SMR3A GO:0005576;
JTID ENSG00000145919:FAM44B
JTID ENSG00000185555:C5orf20 GO:0005634;
JTID ENSG00000136238:RAC1
GO:0000166;GO:0003924;GO:0005515;GO:0005525;GO:0005622;GO:0005624;GO:0005737;GO:0006897;GO:0006954;GO:0006972;GO:0007010;GO:0007155;GO:0007264;GO:0009653;GO:0016023;GO:0016358;GO:0016477;GO:0019897;GO:0030027;GO:0030032;GO:0030041;GO:0030742;GO:0030838;GO:0031529;GO:0035025;GO:0043552;GO:0048261;
JTID ENSG00000198028:ZNF560 GO:0003677;GO:0005622;GO:0005634;GO:0006350;GO:0006355;GO:0008270;GO:0046872;
JTID ENSG00000174016:FAM46D
JTID ENSG00000106299:WASL GO:0003779;GO:0005083;GO:0005515;GO:0005634;GO:0006350;GO:0006355;GO:0006461;GO:0006928;GO:0008154;GO:0009617;GO:0015629;GO:0030027;
JTID ENSG00000113231:PDE8B GO:0000156;GO:0000160;GO:0000287;GO:0004114;GO:0006355;GO:0009187;GO:0016787;GO:0030145;
JTID ENSG00000169919:GUSB GO:0004566;GO:0005764;GO:0005975;GO:0006027;GO:0008152;GO:0043169;
JTID ENSG00000197712:FAM114A1
TFJT YY1:SMR3A;
TFMI YY1:hsa-miR-142-3p:hsa-mir-142:computational(PUBMED: 17447837);
MIJT hsa-miR-142-3p:RAC1:targetscan:pictar; hsa-miR-142-3p:WASL:targetscan:mirbase; hsa-miR-142-3p:C5orf20:targetscan; hsa-miR-142-3p:GUSB:mirbase; hsa-miR-142-3p:FAM114A1:targetscan:mirbase; hsa-miR-142-3p:PDE8B:targetscan; hsa-miR-142-3p:FAM44B:targetscan:mirbase:pictar; hsa-miR-142-3p:SMR3A:targetscan;

//
ANNOTATION: 3
ID LEF1:hsa-miR-30a-5p;
TFID LEF1;
MIID ENSG00000207827:hsa-mir-30a:hsa-miR-30a-5p;
JTID ENSG00000116497:S100BPB GO:0005634;GO:0048306;
JTID ENSG00000152433:ZNF547 GO:0001501;GO:0005478;GO:0005622;GO:0005783;GO:0006350;GO:0006355;GO:0006810;GO:0006888;GO:0008134;GO:0003677;GO:0005634;GO:0008270;GO:0046872;
JTID ENSG00000155545:MIER3 GO:0003677;GO:0005634;GO:0005509;
JTID ENSG00000129680:MAP7D3
JTID ENSG00000179151:EDC3 GO:0005515;
JTID ENSG00000162490:C1orf187
JTID ENSG00000147649:MTDH GO:0005634;GO:0005783;GO:0016020;GO:0016021;
JTID ENSG00000145725:HISPPD1 GO:0003993;
JTID ENSG00000119686:C14orf58 GO:0005215;GO:0006810;GO:0016020;GO:0016021;
JTID ENSG00000185483:ROB1 GO:0004872;GO:0016301;GO:0000166;GO:0004714;GO:0005524;GO:0005737;GO:0005886;GO:0005887;GO:0006468;GO:0007169;GO:0016740;
JTID ENSG00000138413:IDH1 GO:0000287;GO:0004450;GO:0005737;GO:0005777;GO:0005829;GO:0005975;GO:0006097;GO:0006099;GO:0006102;GO:0006749;GO:0006979;GO:0008152;GO:0016491;GO:0016616;GO:0030145;
JTID ENSG00000127329:PTPRB GO:0004725;GO:0005001;GO:0005624;GO:0005887;GO:0006470;GO:0016020;GO:0016787;
JTID ENSG00000148541:FAM13C1
JTID ENSG00000065526:SPEN GO:0000166;GO:0003676;GO:0003677;GO:0003723;GO:0005634;GO:0006355;GO:0007219;GO:0003697;GO:0003700;GO:0003714;GO:0005515;GO:0006357;GO:0016563;GO:0016564;GO:0045892;
JTID ENSG00000074266:EED GO:0001739;GO:0003682;GO:0005515;GO:0006349;GO:0016571;GO:0035098;GO:0042054;GO:0045120;
JTID ENSG00000143590:EFNA3 GO:0005005;GO:0005887;GO:0007267;GO:0016020;GO:0048503;
JTID ENSG00000112486:CCR6 GO:0008284;GO:0001584;GO:0004872;GO:0004945;GO:0005886;GO:0005887;GO:0006928;GO:0006935;GO:0006959;GO:0006968;GO:0007165;GO:0007186;GO:0007204;GO:0016493;
JTID ENSG00000102098:SCML2 GO:0003700;GO:0005634;GO:0006355;GO:0009653;
JTID ENSG00000146433:TMEM181 GO:0016020;GO:0016021;
JTID ENSG00000155846:PPARGC1B GO:0000119;GO:0000166;GO:0003723;GO:0005634;GO:0006350;GO:0006355;GO:0016455;GO:0030331;GO:0030374;GO:0030520;GO:0030546;GO:0045944;GO:0050682;
JTID ENSG00000173530:TNFRSF10D GO:0004888;GO:0005515;GO:0006915;GO:0006916;GO:0007165;GO:0016020;GO:0016021;
JTID ENSG00000058600:POLR3E GO:0003899;GO:0005634;GO:0006350;GO:0016740;
JTID ENSG00000158715:SLC45A3 GO:0006810;GO:0016020;GO:0016021;
TFJT LEF1:C1orf187;
TFMI LEF1:hsa-miR-30a-5p:hsa-mir-30a:computational(ECRbase);
MIJT hsa-miR-30a-5p:MIER3:targetscan:pictar; hsa-miR-30a-5p:ZNF547:targetscan:mirbase; hsa-miR-30a-5p:S100BPB:targetscan; hsa-miR-30a-5p:PTPRB:mirbase; hsa-miR-30a-5p:SCML2:targetscan; hsa-miR-30a-5p:EDC3:targetscan:pictar; hsa-miR-30a-5p:EFNA3:targetscan:pictar; hsa-miR-30a-5p:TNFRSF10D:targetscan; hsa-miR-30a-5p:POLR3E:mirbase; hsa-miR-30a-5p:EED:targetscan:mirbase:pictar; hsa-miR-30a-5p:SPEN:targetscan:mirbase:pictar; hsa-miR-30a-5p:FAM13C1:targetscan; hsa-miR-30a-5p:C14orf58:targetscan; hsa-miR-30a-5p:HISPPD1:targetscan; hsa-miR-30a-5p:PPARGC1B:targetscan:pictar; hsa-miR-30a-5p:MTDH:targetscan:mirbase:pictar; hsa-miR-30a-5p:IDH1:targetscan:pictar;

//
ANNOTATION: 3
ID HSF2:hsa-miR-148a;
TFID HSF2;
MIID ENSG00000199085:hsa-mir-148a:hsa-miR-148a;
JTID ENSG00000142700:DMRTA2 GO:0003700;GO:0005634;GO:0006355;GO:0007548;
JTID ENSG00000055070:C1orf144
JTID ENSG00000126216:TUBGCP3 GO:0005200;GO:0005515;GO:0005737;GO:0005814;GO:0005827;GO:0005874;GO:0007020;GO:0043015;
JTID ENSG00000118707:TGIF2 GO:0003700;GO:0005634;GO:0006355;GO:0043565;
JTID ENSG00000197959:DNM3 GO:0003735;GO:0003924;GO:0005525;GO:0005622;GO:0005840;GO:0006412;GO:0000166;GO:0003774;GO:0005515;GO:0005874;GO:0006897;GO:0016787;GO:0005739;
JTID ENSG00000101901:CXorf45
JTID ENSG00000112333:NR2E1
GO:0003700;GO:0003707;GO:0005496;GO:0005634;GO:0006350;GO:0006355;GO:0007275;GO:0007399;GO:0008270;GO:0016439;GO:0043565;GO:0046872;GO:0000122;GO:0003677;GO:0005515;GO:0007420;GO:0007601;GO:0007610;GO:0008284;GO:0008347;GO:0016564;GO:0021772;GO:0021960;GO:0021987;GO:0035176;GO:0043066;GO:0045165;GO:0045665;GO:0060041;
JTID ENSG00000204048:Q6ZUG3_HUMAN
JTID ENSG00000182512:GLRX5 GO:0005739;GO:0009055;GO:0015035;GO:0045454;
JTID ENSG00000164258:NDUFS4 GO:0001932;GO:0003954;GO:0005739;GO:0005747;GO:0006120;GO:0006800;GO:0007420;GO:0008137;GO:0019933;GO:0032981;GO:0045333;GO:0048146;GO:0051591;
JTID ENSG00000173212:C1orf161
JTID ENSG00000115648:MLPH GO:0003779;GO:0005515;GO:0006605;GO:0008270;GO:0015629;GO:0017022;GO:0017137;GO:0030318;GO:0031489;GO:0032400;GO:0042470;GO:0043473;GO:0046872;GO:0051010;
JTID ENSG00000151694:ADAM17 GO:0004222;GO:0005515;GO:0005737;GO:0005887;GO:0006508;GO:0007219;GO:0007267;GO:0008270;GO:0016020;GO:0046872;
JTID ENSG00000130052:STARD8 GO:0005096;GO:0005622;GO:0007165;
```

```
JTID ENSG00000188786:MTF1 GO:0003700;GO:0003713;GO:0005622;GO:0005634;GO:0006350;GO:0006357;GO:0008270;GO:0010038;GO:0046872;GO:0003677;GO:0006355;GO:0006979;GO:0042156;GO:0045944;GO:0046686;
TFJT HSF2:Clorf144;
TFMI HSF2:hsa-miR-148a:hsa-mir-148a:computational(ECRbase);
MIJT hsa-miR-148a:DNM3:targetscan; hsa-miR-148a:CXorf45:targetscan:mirbase; hsa-miR-148a:GLRX5:targetscan:mirbase:pictar; hsa-miR-148a:NDUF84:targetscan; hsa-miR-148a:Clorf161:targetscan; hsa-miR-148a:MLPH:targetscan:mirbase; hsa-miR-148a:ADAM17:targetscan; hsa-miR-148a:DMRTA2:mirbase;
hsa-miR-148a:TGIF2:targetscan:pictar; hsa-miR-148a:Q6ZUG3_HUMAN:mirbase; hsa-miR-148a:MTF1:targetscan:pictar; hsa-miR-148a:NR2E1:targetscan; hsa-miR-148a:TUBGCP3:targetscan:mirbase; hsa-miR-148a:STARD8:targetscan; hsa-miR-148a:Clorf144:targetscan:pictar;

//
ANNOTATION: 3
ID ELF-1:hsa-miR-199a;
TFID ELF-1;
MIID ENSG00000208024:hsa-mir-199a-2:hsa-miR-199a;
JTID ENSG00000185674:LYG2_HUMAN GO:0003796;GO:0009253;GO:0016998;
JTID ENSG00000154736:ADAMTS5 GO:0004222;GO:0005178;GO:0005578;GO:0006508;GO:0008270;GO:0046872;
JTID ENSG00000204380:Q6ZTQ2_HUMAN
JTID ENSG00000204580:DDR1 GO:0000166;GO:0004714;GO:0004872;GO:0005524;GO:0005887;GO:0006468;GO:0007155;GO:0007169;GO:0016020;GO:0016740;
TFJT ELF-1:LYG2_HUMAN;
TFMI ELF-1:hsa-miR-199a:hsa-mir-199a-2:computational(ECRbase);
MIJT hsa-miR-199a:ADAMTS5:targetscan; hsa-miR-199a:LYG2_HUMAN:mirbase; hsa-miR-199a:DDR1:targetscan:mirbase:pictar;

//
ANNOTATION: 3
ID AREB6:hsa-miR-375;
TFID AREB6;
MIID ENSG00000198973:hsa-mir-375:hsa-miR-375;
JTID ENSG00000140479:PCSK6 GO:0004289;GO:0005509;GO:0005783;GO:0006508;GO:0007267;GO:0008233;GO:0007354;GO:0007368;
JTID ENSG00000162337:LRP5 GO:0004872;GO:0005739;GO:0006629;GO:0006897;GO:0007165;GO:0007275;GO:0008284;GO:0009952;GO:0010003;GO:0016020;GO:0016021;GO:0016055;GO:0042074;GO:0042733;
JTID ENSG00000148702:HABP2 GO:0004252;GO:0005539;GO:0005576;GO:0005615;GO:0006508;GO:0007155;GO:0008233;
JTID ENSG00000129204:USP6 GO:0003676;GO:0004197;GO:0004221;GO:0005097;GO:0005515;GO:0005622;GO:0005764;GO:0006464;GO:0006511;GO:0006512;GO:0032313;
JTID ENSG00000151806:GUF1 GO:0000166;GO:0003743;GO:0003924;GO:0005525;GO:0005622;GO:0006413;GO:0007264;
JTID ENSG00000117519:CNN3 GO:0003779;GO:0005515;GO:0005516;GO:0005523;GO:0006939;GO:0030172;GO:0031032;
JTID ENSG00000088179:PTPN4 GO:0004726;GO:0005198;GO:0005737;GO:0005856;GO:0006470;GO:0008092;GO:0016020;GO:0016787;
JTID ENSG00000163642:XR_017284.1
JTID ENSG00000123472:ATPAF1 GO:0005515;GO:0005739;GO:0006461;
JTID ENSG00000119440:LCN1L1 GO:0005215;GO:0005488;GO:0006810;
JTID ENSG00000196338:NLGN3 GO:0004759;GO:0007155;GO:0016020;GO:0042043;
JTID ENSG00000128011:LRFN1 GO:0005515;
JTID ENSG00000171885:AQP4 GO:0005215;GO:0006810;GO:0015288;GO:0016020;GO:0016021;GO:0019867;GO:0005887;GO:0007399;GO:0007588;GO:0015250;
JTID ENSG00000108753:TCF2 GO:0001822;GO:0001826;GO:0003677;GO:0003700;GO:0005634;GO:0005667;GO:0007492;GO:0009749;GO:0009952;GO:0016563;GO:0030073;GO:0030902;GO:0042803;GO:0043565;GO:0045893;GO:0045944;GO:0046982;GO:0050673;
TFJT AREB6:HABP2; AREB6:NLGN3; AREB6:TCF2;
TFMI AREB6:hsa-miR-375:hsa-mir-375:computational(ECRbase);
MIJT hsa-miR-375:USP6:targetscan:pictar; hsa-miR-375:GUF1:mirbase; hsa-miR-375:NLGN3:targetscan; hsa-miR-375:ATPAF1:targetscan; hsa-miR-375:LRP5:targetscan:pictar; hsa-miR-375:PCSK6:targetscan; hsa-miR-375:CNN3:targetscan:mirbase; hsa-miR-375:TCF2:mirbase:pictar; hsa-miR-375:PTPN4:targetscan:mirbase; hsa-miR-375:HABP2:targetscan:pictar; hsa-miR-375:LRFN1:mirbase; hsa-miR-375:AQP4:targetscan;

//
ANNOTATION: 3
ID NF-Y:hsa-miR-194;
TFID NF-Y;
MIID ENSG00000207624:hsa-mir-194-1:hsa-miR-194;
JTID ENSG00000032219:ARID4A GO:0000785;GO:0003682;GO:0003700;GO:0005515;GO:0005622;GO:0005634;GO:0006333;GO:0006350;GO:0006366;GO:0016564;GO:0017053;GO:0045892;
JTID ENSG00000109184:DCUN1D4 GO:0005634;
JTID ENSG00000144746:ARL6IP5 GO:0005515;GO:0005783;GO:0015813;GO:0016020;GO:0016021;
JTID ENSG00000077312:SNRPA GO:0000166;GO:0000398;GO:0003723;GO:0005515;GO:0005634;GO:0005681;GO:0005685;GO:0008380;
JTID ENSG00000198901:PRC1 GO:0000022;GO:0000910;GO:0005515;GO:0005634;GO:0005876;GO:0007049;
JTID ENSG00000174628:IQCK
JTID ENSG00000139531:SUOX GO:0005506;GO:0005739;GO:0006118;GO:0008482;GO:0009087;GO:0016491;GO:0020037;GO:0030151;
JTID ENSG00000125834:STK35 GO:0000166;GO:0004674;GO:0005524;GO:0005634;GO:0006468;GO:0016740;
JTID ENSG00000141576:RNF157 GO:0005515;GO:0008270;GO:0046872;
JTID ENSG00000197008:ZNF138 GO:0003700;GO:0005622;GO:0005634;GO:0006350;GO:0006355;GO:0008270;GO:0046872;
JTID ENSG00000136297:MMD2 GO:0004872;GO:0016020;GO:0016021;GO:0019835;
JTID ENSG00000071073:MGAT4A GO:0005975;GO:0006491;GO:0008454;GO:0016020;GO:0016758;
JTID ENSG00000130224:LRCH2 GO:0005515;
JTID ENSG00000153879:CEBPG GO:0001889;GO:0003700;GO:0005634;GO:0006337;GO:0006338;GO:0006350;GO:0006355;GO:0006955;GO:0008134;GO:0030183;GO:0042267;GO:0043353;GO:0043388;GO:0043433;GO:0043565;GO:0045078;GO:0045739;GO:0046982;GO:0051091;
JTID ENSG00000147536:GINS4 GO:0005515;GO:0005634;GO:0005737;
TFJT NF-Y:ARID4A; NF-Y:DCUN1D4; NF-Y:LRCH2;
TFMI NF-Y:hsa-miR-194:hsa-mir-194-1:computational(PUBMED: 17447837);
MIJT hsa-miR-194:MMD2:targetscan:mirbase; hsa-miR-194:CEBPG:targetscan; hsa-miR-194:MGAT4A:targetscan:pictar; hsa-miR-194:ARID4A:targetscan:pictar; hsa-miR-194:LRCH2:targetscan; hsa-miR-194:DCUN1D4:targetscan; hsa-miR-194:ARL6IP5:targetscan; hsa-miR-194:SUOX:targetscan:mirbase; hsa-miR-194:ZNF138:targetscan; hsa-miR-194:RNF157:targetscan:mirbase; hsa-miR-194:PRC1:targetscan:mirbase;

//
ANNOTATION: 3
ID MAZ:hsa-miR-135b;
TFID MAZ;
MIID ENSG00000199059:hsa-mir-135b:hsa-miR-135b;
JTID ENSG00000184774:Q49AQ9_HUMAN GO:0005975;GO:0016020;GO:0016758;
JTID ENSG00000124194:GDAP1L1
JTID ENSG00000099822:HNC2 GO:0000166;GO:0005249;GO:0005272;GO:0005624;GO:0006812;GO:0006813;GO:0006814;GO:0006936;GO:0007267;GO:0008076;GO:0016020;GO:0016021;GO:0030552;GO:0030955;GO:0031402;
JTID ENSG00000197415:VEPH1
TFJT MAZ:GDAP1L1; MAZ:VEPH1;
TFMI MAZ:hsa-miR-135b:hsa-mir-135b:computational(PUBMED: 17447837);
MIJT hsa-miR-135b:HNC2:targetscan:mirbase; hsa-miR-135b:VEPH1:targetscan:mirbase; hsa-miR-135b:GDAP1L1:targetscan;

//
ANNOTATION: 3
ID SRF:hsa-miR-199a;
TFID SRF;
MIID ENSG00000208024:hsa-mir-199a-2:hsa-miR-199a;
JTID ENSG00000185674:LYG2_HUMAN GO:0003796;GO:0009253;GO:0016998;
TFJT SRF:LYG2_HUMAN;
TFMI SRF:hsa-miR-199a:hsa-mir-199a-2:computational(ECRbase);
MIJT hsa-miR-199a:LYG2_HUMAN:mirbase;

//
ANNOTATION: 3
ID TCF-4:hsa-miR-23a;
TFID TCF-4;
MIID ENSG00000207980:hsa-mir-23a:hsa-miR-23a;
JTID ENSG00000132471:WBP2 GO:0005515;
JTID ENSG00000174990:CA5A GO:0004089;GO:0005739;GO:0005759;GO:0006730;GO:0008270;GO:0016829;GO:0046872;
JTID ENSG00000157103:SLC6A1 GO:0005328;GO:0005332;GO:0005624;GO:0005887;GO:0006836;GO:0007268;GO:0015293;GO:0016020;GO:0030424;
JTID ENSG00000182107:TMEM30B GO:0016020;GO:0016021;
JTID ENSG00000167774:NDUFA7 GO:0003954;GO:0005739;GO:0005743;GO:0005747;GO:0006120;GO:0008137;GO:0016491;GO:0042773;
```

```
JTID ENSG00000163491:NEK10 GO:0004672;GO:0005524;GO:0006468;GO:0004713;GO:0000166;GO:0000287;GO:0004674;GO:0016740;
JTID ENSG00000185220:PGBD2
JTID ENSG00000163376:KBTBD8 GO:0005515;
TFJT TCF-4:WBP2;
TFMI TCF-4:hsa-miR-23a:hsa-miR-23a:computational (ECRbase);
MIJT hsa-miR-23a:CA5A:targetscan:mirbase; hsa-miR-23a:NEK10:mirbase; hsa-miR-23a:PGBD2:targetscan; hsa-miR-23a:NDUFA7:targetscan:mirbase; hsa-miR-23a:TMEM30B:targetscan:mirbase; hsa-miR-23a:WBP2:targetscan:pictar; hsa-miR-23a:KBTBD8:targetscan; hsa-miR-23a:SLC6A1:targetscan;

//
ANNOTATION: 3
ID MAZ:hsa-let-7b;
TFID MAZ;
MIID ENSG00000207875:hsa-let-7b:hsa-let-7b;
JTID ENSG00000104833:TUBB4 GO:0000166;GO:0003924;GO:0005200;GO:0005525;GO:0005856;GO:0005874;GO:0005929;GO:0007018;GO:0043234;GO:0051258;
JTID ENSG00000203902:PLEKH01
JTID ENSG00000106367:AP1S1 GO:0005515;GO:0005802;GO:0005905;GO:0006886;GO:0006898;GO:0008565;GO:0030121;GO:0030662;
JTID ENSG00000171365:CLCN5 GO:0005247;GO:0005887;GO:0006811;GO:0006821;GO:0006897;GO:0007588;GO:0016020;GO:0031404;
JTID ENSG00000187772:LIN28B GO:0003677;GO:0006355;GO:0008270;GO:0046872;
JTID ENSG00000198105:ZNF248 GO:0003676;GO:0003677;GO:0005622;GO:0005634;GO:0006350;GO:0006355;GO:0008270;GO:0046872;
TFJT MAZ:LIN28B;
TFMI MAZ:hsa-let-7b:hsa-let-7b:computational (PUBMED: 17447837);
MIJT hsa-let-7b:PLEKH01:targetscan:mirbase:pictar; hsa-let-7b:LIN28B:targetscan:pictar; hsa-let-7b:ZNF248:targetscan:pictar; hsa-let-7b:CLCN5:targetscan; hsa-let-7b:AP1S1:targetscan:pictar; hsa-let-7b:TUBB4:targetscan:mirbase;

//
ANNOTATION: 3
ID EGR:hsa-miR-106b;
TFID EGR;
MIID ENSG00000208036:hsa-miR-106b:hsa-miR-106b;
JTID ENSG00000121903:ZSCAN20 GO:0003700;GO:0005634;GO:0006355;GO:0005622;GO:0006350;GO:0008270;GO:0046872;
JTID ENSG00000180667:YOD1 GO:0003676;GO:0005622;GO:0006512;GO:0008234;GO:0008270;GO:0046872;
JTID ENSG00000121871:SLITRK3 GO:0005515;GO:0007409;GO:0016020;GO:0016021;
TFJT EGR:ZSCAN20;
TFMI EGR:hsa-miR-106b:hsa-miR-106b:computational (ECRbase);
MIJT hsa-miR-106b:ZSCAN20:targetscan; hsa-miR-106b:YOD1:targetscan; hsa-miR-106b:SLITRK3:targetscan:pictar;

//
ANNOTATION: 3
ID LEF1:hsa-miR-30a-3p;
TFID LEF1;
MIID ENSG00000207827:hsa-miR-30a:hsa-miR-30a-3p;
JTID ENSG00000204581:Q6ZU44_HUMAN
JTID ENSG00000116984:MTR GO:0004156;GO:0005515;GO:0005622;GO:0007417;GO:0008168;GO:0008270;GO:0008652;GO:0008705;GO:0008898;GO:0009086;GO:0009396;GO:0016740;GO:0031419;GO:0046872;GO:0050897;
JTID ENSG0000017797:RALBP1 GO:0005096;GO:0005515;GO:0005622;GO:0006810;GO:0006935;GO:0007165;GO:0007264;GO:0016020;GO:0016887;GO:0017160;GO:0030675;GO:0043087;GO:0043089;GO:0043492;GO:0048365;
JTID ENSG000001460:Clorf201
JTID ENSG00000103449:SALL1 GO:0001657;GO:0003700;GO:0005622;GO:0005634;GO:0006350;GO:0006355;GO:0008270;GO:0009653;GO:0031129;GO:0046872;
JTID ENSG00000167930:ITFG3 GO:0016020;GO:0016021;
TFJT LEF1:SALL1;
TFMI LEF1:hsa-miR-30a-3p:hsa-miR-30a:computational (ECRbase);
MIJT hsa-miR-30a-3p:SALL1:targetscan; hsa-miR-30a-3p:RALBP1:targetscan; hsa-miR-30a-3p:ITFG3:targetscan;

//
ANNOTATION: 3
ID YY1:hsa-miR-425-3p;
TFID YY1;
MIID ENSG00000199032:hsa-miR-425:hsa-miR-425-3p;
JTID ENSG00000184324:CSAG2 GO:0042493;
JTID ENSG0000011266:DUSP16 GO:0000188;GO:0004725;GO:0005634;GO:0005737;GO:0006470;GO:0016787;GO:0016791;GO:0017017;GO:0045204;GO:0045209;GO:0005515;
JTID ENSG00000185742:NP_997528.1
JTID ENSG00000171109:MFN1 GO:0000166;GO:0003924;GO:0005525;GO:0005739;GO:0005741;GO:0008053;GO:0016020;GO:0016021;GO:0016787;GO:0019867;GO:0005515;
JTID ENSG00000147381:MAGEA4
JTID ENSG00000163322:CCDC98
JTID ENSG00000198382:UVRAG GO:0005737;GO:0006281;
TFJT YY1:DUSP16;
TFMI YY1:hsa-miR-425-3p:hsa-miR-425:computational (PUBMED: 17447837); computational (ECRbase);
MIJT hsa-miR-425-3p:CSAG2:mirbase; hsa-miR-425-3p:CCDC98:targetscan:mirbase;

//
ANNOTATION: 3
ID NF-Y:hsa-miR-148b;
TFID NF-Y;
MIID ENSG00000199122:hsa-miR-148b:hsa-miR-148b;
JTID ENSG00000174851:YIF1A GO:0005783;GO:0005793;GO:0006888;GO:0015031;GO:0016020;GO:0016021;
JTID ENSG00000179476:Cl4orf28
JTID ENSG00000205524:Q68D70_HUMAN
JTID ENSG00000100784:RPS6KA5 GO:0000166;GO:0000287;GO:0003824;GO:0004674;GO:0005515;GO:0005524;GO:0005634;GO:0006355;GO:0006468;GO:0006508;GO:0006950;GO:0007173;GO:0007243;GO:0008237;GO:0008270;GO:0009605;GO:0016572;GO:0016740;GO:0042221;
JTID ENSG00000155111:CDC2L6 GO:0000166;GO:0004674;GO:0005524;GO:0006468;GO:0016740;GO:0051301;GO:0005515;
JTID ENSG00000126216:TUBGCP3 GO:0005200;GO:0005515;GO:0005737;GO:0005814;GO:0005827;GO:0005874;GO:0007020;GO:0043015;
JTID ENSG00000059728:MXD1 GO:0003700;GO:0003714;GO:0005515;GO:0005634;GO:0006355;GO:0007275;GO:0008283;
JTID ENSG00000189266:PNRC2 GO:0005634;GO:0006350;GO:0006355;
JTID ENSG00000182512:GLRX5 GO:0005739;GO:0009055;GO:0015035;GO:0045454;
JTID ENSG00000134851:TMEM165 GO:0016020;GO:0016021;
JTID ENSG00000158796:DEDD GO:0003677;GO:0005515;GO:0005634;GO:0005730;GO:0005737;GO:0006350;GO:0006355;GO:0006917;GO:0007283;GO:0008625;GO:0016481;GO:0042981;
JTID ENSG00000085433:WDR47
JTID ENSG00000165588:OTX2
GO:0001708;GO:0003700;GO:0005515;GO:0005634;GO:0005737;GO:0006357;GO:0007275;GO:0007411;GO:0007417;GO:0008190;GO:0008589;GO:0009887;GO:0009952;GO:0009953;GO:0030154;GO:0030182;GO:0030426;GO:0030528;GO:0030900;GO:0030901;GO:0040036;GO:0042472;GO:0042706;GO:0043565;GO:0045165;GO:0048663;
JTID ENSG00000118707:TGIF2 GO:0003700;GO:0005634;GO:0006355;GO:0043565;
JTID ENSG00000126903:SLC10A3 GO:0006814;GO:0008508;GO:0015711;GO:0016020;GO:0006810;GO:0015293;
JTID ENSG00000172053:QARS GO:0000166;GO:0004818;GO:0004819;GO:0005515;GO:0005524;GO:0005625;GO:0005737;GO:0006424;GO:0006425;GO:0016874;
JTID ENSG00000204569:PPP1R10 GO:0003677;GO:0003723;GO:0004864;GO:0005634;GO:0006350;GO:0006606;GO:0008270;GO:0046872;
JTID ENSG0000015592:STMN4 GO:0007242;
JTID ENSG00000147684:NDUFB9 GO:0003954;GO:0005739;GO:0005743;GO:0005747;GO:0006120;GO:0007605;GO:0008137;GO:0016491;
TFJT NF-Y:RPS6KA5; NF-Y:CDC2L6; NF-Y:DEDD; NF-Y:OTX2; NF-Y:STMN4;
TFMI NF-Y:hsa-miR-148b:hsa-miR-148b:computational (PUBMED: 17447837); computational (ECRbase);
MIJT hsa-miR-148b:OTX2:targetscan:pictar; hsa-miR-148b:GLRX5:targetscan:mirbase:pictar; hsa-miR-148b:DEDD:targetscan:mirbase:pictar; hsa-miR-148b:SLC10A3:mirbase; hsa-miR-148b:MXD1:targetscan; hsa-miR-148b:TGIF2:targetscan:pictar; hsa-miR-148b:YIF1A:targetscan; hsa-miR-148b:PNRC2:targetscan; hsa-miR-148b:RPS6KA5:targetscan:pictar; hsa-miR-148b:TUBGCP3:targetscan:mirbase; hsa-miR-148b:CDC2L6:targetscan:pictar; hsa-miR-148b:QARS:targetscan; hsa-miR-148b:TMEM165:targetscan; hsa-miR-148b:WDR47:targetscan:mirbase; hsa-miR-148b:PPP1R10:targetscan:pictar;

//
ANNOTATION: 3
ID AP-1:hsa-miR-142-3p;
TFID AP-1;
MIID ENSG00000207567:hsa-miR-142:hsa-miR-142-3p;
JTID ENSG00000169213:RAB3B GO:0000166;GO:0003924;GO:0005515;GO:0005525;GO:0007264;GO:0008021;GO:0015031;GO:0016020;GO:0017157;GO:0030141;
```

```
JTID ENSG00000175197:DDIT3 GO:0000074;GO:0003700;GO:0003714;GO:0005634;GO:0006350;GO:0006355;GO:0006974;GO:0006983;GO:0007049;GO:0007050;GO:0030503;GO:0030968;GO:0042789;GO:0042981;GO:0043565;GO:0046983;
JTID ENSG00000106540:C7orf36
JTID ENSG00000113211:PCDHB6 GO:0005509;GO:0005515;GO:0005887;GO:0007155;GO:0007156;GO:0007268;GO:0007416;GO:0016020;GO:0016339;
JTID ENSG00000163254:CRYGC GO:0001654;GO:0005212;GO:0043010;
JTID ENSG00000124767:GLO1 GO:0004462;GO:0005737;GO:0005975;GO:0006916;GO:0008270;GO:0016829;GO:0046872;
JTID ENSG00000134318:ROCK2 GO:0000166;GO:0000910;GO:0004674;GO:0005198;GO:0005515;GO:0005524;GO:0005622;GO:0006468;GO:0006936;GO:0007242;GO:0008270;GO:0015629;GO:0016740;GO:0019992;GO:0046872;
TFJT AP-1:DDIT3; AP-1:CRYGC;
TFMI AP-1:hsa-miR-142-3p:hsa-mir-142:computational(PUBMED: 17447837); computational(ECRbase);
MIJT hsa-miR-142-3p:DDIT3:targetscan:mirbase; hsa-miR-142-3p:ROCK2:targetscan:pictar; hsa-miR-142-3p:PCDHB6:mirbase; hsa-miR-142-3p:CRYGC:targetscan:mirbase; hsa-miR-142-3p:RAB3B:targetscan; hsa-miR-142-3p:C7orf36:mirbase;

//
ANNOTATION: 3
ID NF-Y:hsa-miR-99a;
TFID NF-Y;
MIID ENSG00000207638:hsa-mir-99a:hsa-miR-99a;
JTID ENSG00000013297:CLDN11 GO:0005198;GO:0005515;GO:0005923;GO:0007155;GO:0007283;GO:0008366;GO:0016020;GO:0016021;GO:0016338;GO:0042802;
JTID ENSG00000198793:FRAP1 GO:0016773;GO:0000074;GO:0005737;GO:0005942;GO:0007165;GO:0007584;GO:0016020;GO:0016049;GO:0016301;GO:0016310;GO:0016740;GO:0030163;GO:0051219;
JTID ENSG00000105972:C7orf20 GO:0005515;
JTID ENSG00000185361:TNFAIP8L1
JTID ENSG00000174460:ZCCHC12 GO:0003676;GO:0008270;GO:0046872;
JTID ENSG00000082213:C5orf22
TFJT NF-Y:FRAP1;
TFMI NF-Y:hsa-miR-99a:hsa-mir-99a:computational(PUBMED: 17447837); computational(ECRbase);
MIJT hsa-miR-99a:TNFAIP8L1:targetscan:mirbase; hsa-miR-99a:C7orf20:targetscan:mirbase; hsa-miR-99a:C5orf22:targetscan:mirbase; hsa-miR-99a:CLDN11:targetscan:mirbase; hsa-miR-99a:FRAP1:targetscan:mirbase:pictar; hsa-miR-99a:ZCCHC12:targetscan:mirbase;

//
ANNOTATION: 3
ID NCX:hsa-miR-106a;
TFID NCX;
MIID ENSG00000207602:hsa-mir-106a:hsa-miR-106a;
JTID ENSG00000143107:FNDC7
JTID ENSG00000205937:RNPS1 GO:0000166;GO:0000184;GO:0003676;GO:0003723;GO:0005515;GO:0005634;GO:0006350;GO:0006397;GO:0008380;
JTID ENSG00000184384:MAML2 GO:0003713;GO:0005634;GO:0006350;GO:0006355;GO:0007219;GO:0045944;
JTID ENSG00000166435:XRRA1 GO:0005515;
JTID ENSG00000050405:LIM1 GO:0001725;GO:0003785;GO:0005925;GO:0008270;GO:0015629;GO:0030835;GO:0031529;GO:0046872;GO:0051015;GO:0051017;
JTID ENSG00000196460:Q6ZNB4 HUMAN GO:0003677;GO:0006355;
JTID ENSG00000145362:ANK2 GO:0005200;GO:0005515;GO:0007165;GO:0015629;GO:0016020;GO:0005856;
JTID ENSG00000204118:NAIP16
JTID ENSG00000142583:SLC2A5 GO:0005215;GO:0005351;GO:0005353;GO:0005355;GO:0005886;GO:0005975;GO:0008643;GO:0015755;GO:0015758;GO:0016021;GO:0016020;
TFJT NCX:ANK2;
TFMI NCX:hsa-miR-106a:hsa-mir-106a:computational(ECRbase);
MIJT hsa-miR-106a:ANK2:targetscan; hsa-miR-106a:LIM1:targetscan;

//
ANNOTATION: 3
ID ER:hsa-miR-218;
TFID ER;
MIID ENSG00000207732:hsa-mir-218-1:hsa-miR-218;
JTID ENSG00000206069:NP_001001663.1
JTID ENSG00000137075:RNF38 GO:0005515;GO:0006512;GO:0008270;GO:0046872;
JTID ENSG00000188935:Q6ZU24 HUMAN
JTID ENSG00000198589:LRBA GO:0005515;GO:0016023;
JTID ENSG00000171540:OTF GO:0003700;GO:0005634;GO:0006355;GO:0007275;GO:0043565;GO:0002052;GO:0021979;GO:0021985;
JTID ENSG00000181852:RNF41 GO:0005515;GO:0006512;GO:0008270;GO:0016874;GO:0046872;
JTID ENSG00000136942:RPL35 GO:0003729;GO:0003735;GO:0005515;GO:0005622;GO:0005730;GO:0005840;GO:0005842;GO:0006412;
JTID ENSG00000161048:NP_945341.2 GO:0016787;
JTID ENSG00000076554:TPD52 GO:0005509;GO:0005737;GO:0005783;GO:0009653;GO:0030183;GO:0042803;GO:0046903;GO:0046982;GO:0048471;
JTID ENSG00000147400:CETN2 GO:0005509;GO:0005515;GO:0005622;GO:0005814;GO:0007049;GO:0007067;GO:0051301;
JTID ENSG00000152207:CYSLTR2 GO:0001631;GO:0004872;GO:0006955;GO:0007165;GO:0007186;GO:0016020;GO:0016021;
JTID ENSG00000203931:LOC729078
JTID ENSG00000203932:LOC728660
JTID ENSG00000113048:MRPS27 GO:0005739;GO:0030529;
JTID ENSG00000197106:SLC6A17 GO:0005328;GO:0005887;GO:0006836;GO:0015293;GO:0016020;
JTID ENSG00000120727:PAIP2 GO:0005515;GO:0005737;GO:0006417;GO:0030371;GO:0045947;
JTID ENSG00000204241:Q6ZU08 HUMAN
JTID ENSG00000185053:SGCZ GO:0005515;GO:0005856;GO:0005886;GO:0007010;GO:0016012;GO:0016021;
TFJT ER:LRBA; ER:OTF; ER:SLC6A17; ER:SGCZ;
TFMI ER:hsa-miR-218:hsa-mir-218-1:computational(ECRbase);
MIJT hsa-miR-218:CETN2:targetscan:mirbase; hsa-miR-218:MRPS27:targetscan:mirbase; hsa-miR-218:PAIP2:targetscan; hsa-miR-218:RNF38:targetscan:mirbase:pictar; hsa-miR-218:CYSLTR2:targetscan; hsa-miR-218:OTF:targetscan:pictar; hsa-miR-218:SGCZ:targetscan:mirbase:pictar; hsa-miR-218:SLC6A17:targetscan; hsa-miR-218:RPL35:targetscan:mirbase; hsa-miR-218:TPD52:targetscan; hsa-miR-218:LRBA:targetscan; hsa-miR-218:RNF41:targetscan:pictar;

//
ANNOTATION: 3
ID MAZ:hsa-let-7a;
TFID MAZ;
MIID ENSG00000198986:hsa-let-7a-3:hsa-let-7a;
JTID ENSG00000104833:TUBB4 GO:0000166;GO:0003924;GO:0005200;GO:0005525;GO:0005856;GO:0005874;GO:0005929;GO:0007018;GO:0043234;GO:0051258;
JTID ENSG00000023902:PLEKH01
JTID ENSG00000106367:AP1S1 GO:0005515;GO:0005802;GO:0005905;GO:0006886;GO:0006898;GO:0008565;GO:0030121;GO:0030662;
JTID ENSG00000171365:CLCN5 GO:0005247;GO:0005887;GO:0006811;GO:0006821;GO:0006897;GO:0007588;GO:0016020;GO:0031404;
JTID ENSG00000187772:LIN28B GO:0003677;GO:0006355;GO:0008270;GO:0046872;
JTID ENSG00000198105:ZNF248 GO:0003676;GO:0003677;GO:0005622;GO:0005634;GO:0006350;GO:0006355;GO:0008270;GO:0046872;
TFJT MAZ:LIN28B;
TFMI MAZ:hsa-let-7a:hsa-let-7a-3:computational(PUBMED: 17447837);
MIJT hsa-let-7a:PLEKH01:targetscan:mirbase:pictar; hsa-let-7a:LIN28B:targetscan:pictar; hsa-let-7a:ZNF248:targetscan:pictar; hsa-let-7a:AP1S1:targetscan:pictar; hsa-let-7a:CLCN5:targetscan; hsa-let-7a:TUBB4:targetscan:mirbase;

//
ANNOTATION: 3
ID AREB6:hsa-miR-106a;
TFID AREB6;
MIID ENSG00000207602:hsa-mir-106a:hsa-miR-106a;
JTID ENSG00000169662:NP_997357.1 GO:0005622;GO:0007165;
JTID ENSG00000027697:IFNGR1 GO:0004872;GO:0004906;GO:0005887;GO:0007165;GO:0009615;GO:0016020;GO:0019955;
JTID ENSG00000163513:TGFBR2 GO:0000166;GO:000287;GO:0004872;GO:0005026;GO:0005515;GO:0005524;GO:0006468;GO:0007178;GO:0008284;GO:0016020;GO:0016021;GO:0016740;GO:0030145;
JTID ENSG00000196460:Q6ZNB4 HUMAN GO:0003677;GO:0006355;
JTID ENSG00000132975:GPR12 GO:0004872;GO:0005887;GO:0006874;GO:0007165;GO:0007186;GO:0016020;
JTID ENSG00000148481:C10orf97 GO:0005509;
JTID ENSG00000050405:LIM1 GO:0001725;GO:0003785;GO:0005925;GO:0008270;GO:0015629;GO:0030835;GO:0031529;GO:0046872;GO:0051015;GO:0051017;
JTID ENSG00000147036:LANCL3
JTID ENSG00000185722:ANKFY1 GO:0005515;GO:0006897;GO:0008270;GO:0010008;GO:0016020;GO:0046872;
JTID ENSG00000115561:VPS24 GO:0015031;GO:0016020;
JTID ENSG00000011454:RABGAP1 GO:0005096;GO:0005097;GO:0005622;GO:0005813;GO:0005829;GO:0005875;GO:0007049;GO:0015631;GO:0032313;GO:0003725;GO:0003727;GO:0006928;GO:0007286;GO:0007638;GO:0015630;
```

JTID ENSG00000147536:GINS4 GO:0005515;GO:0005634;GO:0005737;  
JTID ENSG00000171885:AQP4 GO:0005215;GO:0006810;GO:0015288;GO:0016020;GO:0016021;GO:0019867;GO:0005887;GO:0007399;GO:0007588;GO:0015250;  
JTID ENSG00000124762:CDKN1A GO:0000307;GO:0004672;GO:0004861;GO:0005634;GO:0005829;GO:0006974;GO:0007049;GO:0007050;GO:0008270;GO:0008285;GO:0008629;GO:0009411;GO:0016301;GO:0030332;GO:0030890;GO:0043066;GO:0043071;GO:0045736;GO:0046872;GO:0000074;GO:0005515;  
TFJT AREB6:LANCL3;  
TFMI AREB6:hsa-miR-106a:hsa-mir-106a:computational (ECRbase);  
MIJT hsa-miR-106a:CDKN1A:targetscan; hsa-miR-106a:ANKFY1:targetscan; hsa-miR-106a:LIM1:targetscan; hsa-miR-106a:C10orf97:targetscan:mirbase; hsa-miR-106a:AQP4:targetscan; hsa-miR-106a:VPS24:targetscan; hsa-miR-106a:RABGAP1:targetscan; hsa-miR-106a:GINS4:targetscan; hsa-miR-106a:TGFBR2:targetscan;

//  
ANNOTATION: 3  
ID AP-2ALPHA:hsa-miR-141;  
TFID AP-2ALPHA;  
MIID ENSG00000207708:hsa-mir-141:hsa-miR-141;  
JTID ENSG0000010295:NP\_542768.1 GO:0005198;  
JTID ENSG00000087263:OGFOD1 GO:0016706;GO:0019538;  
JTID ENSG00000133124:IRS4 GO:0004872;GO:0005070;GO:0005158;GO:0005886;GO:0007165;GO:0005515;  
JTID ENSG00000177981:ASB8 GO:0007242;  
JTID ENSG0000011877:MCM9 GO:0000166;GO:0003677;GO:0005524;GO:0006270;GO:0008094;GO:0017111;  
JTID ENSG00000118200:CAMSAP1L1  
JTID ENSG00000170385:SLC30A1 GO:0001701;GO:0006812;GO:0006829;GO:0006882;GO:0008270;GO:0008324;GO:0009935;GO:0016020;GO:0016021;  
JTID ENSG00000205269:Q5T4T1\_HUMAN  
JTID ENSG00000175175:PPM1E GO:0000287;GO:0006470;GO:0008287;GO:0015071;GO:0016787;  
JTID ENSG00000130287:NCAN GO:0005509;GO:0005529;GO:0005540;GO:0006928;GO:0007155;  
JTID ENSG00000116497:S100PBP GO:0005634;GO:0048306;  
JTID ENSG00000107562:CXCL12  
GO:0004871;GO:0005576;GO:0005615;GO:0006874;GO:0006935;GO:0006954;GO:0006955;GO:0007155;GO:0007165;GO:0007186;GO:0007267;GO:0008009;GO:0008015;GO:0008064;GO:0008083;GO:0009615;GO:0001569;GO:0001667;GO:0007281;GO:0007420;GO:0008045;GO:0008354;GO:0030334;GO:0030335;GO:0042098;GO:0050930;  
JTID ENSG00000137040:RANBP6 GO:0005488;GO:0005634;GO:0015031;  
TFJT AP-2ALPHA:NP\_542768.1; AP-2ALPHA:SLC30A1; AP-2ALPHA:PPM1E; AP-2ALPHA:S100PBP; AP-2ALPHA:RANBP6;  
TFMI AP-2ALPHA:hsa-miR-141:hsa-mir-141:computational (PUBMED: 17447837);  
MIJT hsa-miR-141:Q5T4T1\_HUMAN:mirbase; hsa-miR-141:NCAN:targetscan; hsa-miR-141:S100PBP:targetscan; hsa-miR-141:OGFOD1:targetscan:mirbase; hsa-miR-141:IRS4:targetscan; hsa-miR-141:CXCL12:targetscan:pictar; hsa-miR-141:PPM1E:targetscan:pictar; hsa-miR-141:CAMSAP1L1:targetscan:pictar; hsa-miR-141:RANBP6:targetscan:mirbase;

//  
ANNOTATION: 3  
ID ER:hsa-miR-375;  
TFID ER;  
MIID ENSG00000198973:hsa-mir-375:hsa-miR-375;  
JTID ENSG00000180385:Q8NAP4\_HUMAN  
JTID ENSG00000047410:TPR GO:0005634;GO:0005635;GO:0005643;GO:0005737;GO:0006606;GO:0006810;  
JTID ENSG00000060709:RIMBP2 GO:0016020;  
JTID ENSG00000205566:Q8TB02\_HUMAN  
JTID ENSG00000130227:XPO7 GO:0000059;GO:0005049;GO:0005515;GO:0005634;GO:0005643;GO:0005737;GO:0006611;GO:0006886;GO:0008565;  
JTID ENSG00000166272:C10orf26 GO:0016020;GO:0016021;  
JTID ENSG00000119440:LCN1L1 GO:0005215;GO:0005488;GO:0006810;  
JTID ENSG00000123472:ATPAF1 GO:0005515;GO:0005739;GO:0006461;  
JTID ENSG00000170653:ATF7 GO:0003700;GO:0005622;GO:0005634;GO:0006350;GO:0006355;GO:0008270;GO:0043565;GO:0046872;GO:0046983;  
JTID ENSG00000092853:CLSFN GO:0003677;GO:0005515;GO:0005634;GO:0005694;GO:0006281;GO:0007049;  
JTID ENSG00000129204:USP6 GO:0003676;GO:0004197;GO:0004221;GO:0005097;GO:0005515;GO:0005622;GO:0005764;GO:0006464;GO:0006511;GO:0006512;GO:0032313;  
JTID ENSG00000198692:EIF1AY GO:0003723;GO:0003743;GO:0005515;GO:0006413;  
JTID ENSG00000118855:MFS1 GO:0005215;GO:0006810;GO:0016020;GO:0016021;  
JTID ENSG00000204832:Q6ZRU3\_HUMAN  
JTID ENSG00000142182:DNMT3L GO:0000794;GO:0001701;GO:0005515;GO:0005634;GO:0005720;GO:0005737;GO:0006306;GO:0006349;GO:0007283;GO:0008047;GO:0008270;GO:0016564;GO:0019899;GO:0046872;  
JTID ENSG00000162374:ELAVL4 GO:0000166;GO:0003723;GO:0003730;GO:0006397;  
JTID ENSG00000114805:PLCH1 GO:0004435;GO:0006629;GO:0007242;GO:0005509;  
JTID ENSG00000138134:STAMBPL1 GO:0004221;GO:0006512;GO:0008237;GO:0008270;GO:0046872;  
JTID ENSG00000196153:Q8NAB5\_HUMAN  
JTID ENSG00000117000:RLF GO:0003700;GO:0005515;GO:0005622;GO:0005634;GO:0006350;GO:0006355;GO:0008270;GO:0046872;  
JTID ENSG00000178110:Q8N9G9\_HUMAN  
JTID ENSG00000204661:LOC729569  
JTID ENSG00000173728:C1orf100  
JTID ENSG00000188315:C3orf62  
JTID ENSG00000139323:WDR51B  
JTID ENSG00000117791:MOSC2 GO:0005739;GO:0005743;GO:0016020;GO:0016491;GO:0019867;GO:0030151;GO:0030170;  
TFJT ER:ELAVL4; ER:PLCH1; ER:Q8NAB5\_HUMAN;  
TFMI ER:hsa-miR-375:hsa-mir-375:computational (ECRbase);  
MIJT hsa-miR-375:XPO7:targetscan:mirbase; hsa-miR-375:EIF1AY:targetscan; hsa-miR-375:DNMT3L:targetscan; hsa-miR-375:RIMBP2:targetscan; hsa-miR-375:C3orf62:targetscan; hsa-miR-375:RLF:targetscan:mirbase:pictar; hsa-miR-375:PLCH1:targetscan; hsa-miR-375:C1orf100:targetscan; hsa-miR-375:Q6ZRU3\_HUMAN:mirbase; hsa-miR-375:ATF7:targetscan; hsa-miR-375:MFS1:targetscan:mirbase; hsa-miR-375:WDR51B:targetscan; hsa-miR-375:Q8TB02\_HUMAN:mirbase; hsa-miR-375:USP6:targetscan:pictar; hsa-miR-375:ATPAF1:targetscan; hsa-miR-375:ELAVL4:targetscan:mirbase:pictar; hsa-miR-375:MOSC2:mirbase; hsa-miR-375:LOC729569:mirbase; hsa-miR-375:Q8N9G9\_HUMAN:mirbase; hsa-miR-375:STAMBPL1:mirbase; hsa-miR-375:TPR:targetscan;

//  
ANNOTATION: 3  
ID HSF:hsa-miR-148a;  
TFID HSF;  
MIID ENSG00000199085:hsa-mir-148a:hsa-miR-148a;  
JTID ENSG00000130052:STARD8 GO:0005096;GO:0005622;GO:0007165;  
JTID ENSG00000162191:SAKS1\_HUMAN GO:0005737;  
TFJT HSF:STARD8;  
TFMI HSF:hsa-miR-148a:hsa-mir-148a:computational (ECRbase);  
MIJT hsa-miR-148a:SAKS1\_HUMAN:pictar; hsa-miR-148a:STARD8:targetscan;

//  
ANNOTATION: 3  
ID AP-1:hsa-miR-199a\*;  
TFID AP-1;  
MIID ENSG00000207752:hsa-mir-199a-1:hsa-miR-199a\*;  
JTID ENSG00000119707:RBM25 GO:0000166;GO:0000398;GO:0003676;GO:0003729;  
JTID ENSG00000114796:KLHL24 GO:0005515;  
JTID ENSG00000175535:PNLIP GO:0004806;GO:0006641;GO:0016042;GO:0016787;GO:0030299;  
TFJT AP-1:RBM25;  
TFMI AP-1:hsa-miR-199a\*:hsa-mir-199a-1:computational (PUBMED: 17447837);  
MIJT hsa-miR-199a\*:PNLIP:mirbase;

//  
ANNOTATION: 3  
ID PEA3:hsa-miR-199a\*;  
TFID PEA3;  
MIID ENSG00000208024:hsa-mir-199a-2:hsa-miR-199a\*;  
JTID ENSG00000204220:PFDM6 GO:0006457;GO:0016272;GO:0051082;  
JTID ENSG00000132549:VPS13B GO:0015031;  
JTID ENSG00000088854:C20orf194 GO:0003676;GO:0005622;GO:0008270;  
JTID ENSG00000112299:VNN1 GO:0006807;GO:0006928;GO:0016020;GO:0016811;GO:0048503;  
JTID ENSG00000139973:SYT16

```
JTID ENSG00000159140:SON GO:0003677;GO:0003725;GO:0005515;GO:0005622;GO:0005634;GO:0006916;
JTID ENSG00000116141:MARK1 GO:0000166;GO:0000287;GO:0004674;GO:0005524;GO:0005737;GO:0006468;GO:0007010;GO:0007243;GO:0015630;GO:0016740;
JTID ENSG00000100461:RBM23 GO:0000166;GO:0003723;GO:0005634;GO:0006397;
JTID ENSG00000198718:KIAA0423 GO:0005488;
JTID ENSG00000146021:KLHL3 GO:0003779;GO:0005198;GO:0005515;GO:0005856;
JTID ENSG00000123473:STIL GO:0007275;GO:0008283;
JTID ENSG00000132963:POMP GO:0005634;GO:0005829;GO:0006457;GO:0006955;GO:0043234;
JTID ENSG00000198841:KTI12
JTID ENSG00000148985:NP_055304.1 GO:0004872;GO:0005515;GO:0005634;GO:0006916;GO:0016021;GO:0042770;
JTID ENSG00000105967:TFEC GO:0003700;GO:0003713;GO:0003714;GO:0005634;GO:0045449;GO:0030528;
JTID ENSG00000117360:PRPF3 GO:0000398;GO:0005515;GO:0005634;GO:0005681;GO:0007601;GO:0008380;GO:0031202;GO:0050896;
JTID ENSG00000123178:C13orf1
JTID ENSG00000206125:Q68DA7_HUMAN
TFJT PEA3:SYT16; PEA3:KIAA0423; PEA3:KTI12; PEA3:TFEC;
TFMI PEA3:hsa-miR-199a*:hsa-mir-199a-2:computational(ECRbase);
MIJT hsa-miR-199a*:SYT16:mirbase; hsa-miR-199a*:KIAA0423:picstar; hsa-miR-199a*:SON:mirbase:picstar; hsa-miR-199a*:MARK1:picstar; hsa-miR-199a*:NP_055304.1:mirbase;

//
ANNOTATION: 3
ID FOXO1:hsa-miR-30a-3p;
TFID FOXO1;
MIID ENSG00000207827:hsa-mir-30a:hsa-miR-30a-3p;
JTID ENSG00000183488:AMAC1L3 GO:0016020;
JTID ENSG00000110768:GTF2H1 GO:0000079;GO:0005634;GO:0005675;GO:0006281;GO:0006350;GO:0006355;GO:0006366;GO:0008353;GO:0016251;
TFJT FOXO1:GTF2H1;
TFMI FOXO1:hsa-miR-30a-3p:hsa-mir-30a:computational(ECRbase);
MIJT hsa-miR-30a-3p:GTF2H1:targetscan:mirbase;

//
ANNOTATION: 3
ID GABP:hsa-miR-218;
TFID GABP;
MIID ENSG00000207732:hsa-mir-218-1:hsa-miR-218;
JTID ENSG00000085978:ATG16L1 GO:0005515;GO:0006914;GO:0015031;GO:0016020;GO:0005776;
JTID ENSG00000076864:RAP1GAP GO:0005096;GO:0005622;GO:0007165;GO:0016020;GO:0051056;GO:0003924;GO:0005624;GO:0005829;
JTID ENSG00000119688:ABCD4 GO:0000166;GO:0005215;GO:0005524;GO:0005777;GO:0005778;GO:0006810;GO:0016020;GO:0016021;GO:0016887;GO:0042626;GO:0043190;
JTID ENSG00000166689:PLEKHA7
JTID ENSG00000171540:OTP GO:0003700;GO:0005634;GO:0006355;GO:0007275;GO:0043565;GO:0002052;GO:0021979;GO:0021985;
TFJT GABP:ATG16L1; GABP:OTP;
TFMI GABP:hsa-miR-218:hsa-mir-218-1:computational(ECRbase);
MIJT hsa-miR-218:ABCD4:targetscan; hsa-miR-218:OTP:targetscan:picstar; hsa-miR-218:PLEKHA7:targetscan:mirbase; hsa-miR-218:ATG16L1:targetscan; hsa-miR-218:RAP1GAP:targetscan:picstar;

//
ANNOTATION: 3
ID YY1:hsa-miR-142-5p;
TFID YY1;
MIID ENSG00000207567:hsa-mir-142:hsa-miR-142-5p;
JTID ENSG00000129675:ARHGEP6 GO:0005085;GO:0005089;GO:0005096;GO:0005622;GO:0006915;GO:0007254;GO:0035023;
JTID ENSG00000054803:CBLN4 GO:0045202;
JTID ENSG00000104823:ECH1 GO:0004300;GO:0005739;GO:0005777;GO:0006091;GO:0006629;GO:0006631;GO:0006635;GO:0016853;
JTID ENSG00000136816:TOR1B GO:0000166;GO:0005524;GO:0005783;GO:0006457;GO:0006986;GO:0017111;GO:0051082;GO:0051085;
JTID ENSG00000134480:CCNH GO:0000079;GO:0005515;GO:0005634;GO:0006281;GO:0006350;GO:0006355;GO:0007049;GO:0016301;
JTID ENSG00000143314:MRPL24 GO:0003735;GO:0005622;GO:0005739;GO:0005840;GO:0006412;
TFJT YY1:TOR1B;
TFMI YY1:hsa-miR-142-5p:hsa-mir-142:computational(PUBMED: 17447837);
MIJT hsa-miR-142-5p:ECH1:targetscan:mirbase; hsa-miR-142-5p:TOR1B:targetscan; hsa-miR-142-5p:MRPL24:targetscan:mirbase; hsa-miR-142-5p:CBLN4:targetscan; hsa-miR-142-5p:ARHGEP6:targetscan; hsa-miR-142-5p:CCNH:targetscan:mirbase;

//
ANNOTATION: 3
ID LEF1:hsa-miR-23a;
TFID LEF1;
MIID ENSG00000207980:hsa-mir-23a:hsa-miR-23a;
JTID ENSG00000024862:CCDC28A
JTID ENSG00000095015:MAP3K1 GO:0000166;GO:0000287;GO:0004674;GO:0004709;GO:0005515;GO:0005524;GO:0006468;GO:0007179;GO:0007257;GO:0008270;GO:0008545;GO:0008637;GO:0016740;GO:0030334;GO:0030838;GO:0042060;GO:0043010;
JTID ENSG00000148200:NR6A1 GO:0003700;GO:0003707;GO:0005634;GO:0006350;GO:0006355;GO:0008270;GO:0043565;GO:0046872;GO:0000122;GO:0003677;GO:0005515;GO:0005667;GO:0007276;GO:0007283;GO:0008283;GO:0042803;
JTID ENSG00000168016:Q8N8K0_HUMAN GO:0003677;GO:0004003;GO:0005524;GO:0006281;
JTID ENSG00000196391:ZNF774 GO:0003677;GO:0005622;GO:0005634;GO:0006350;GO:0006355;GO:0008270;GO:0046872;
JTID ENSG00000174990:CA5A GO:0004089;GO:0005739;GO:0005759;GO:0006730;GO:0008270;GO:0016829;GO:0046872;
JTID ENSG00000146809:ASB15 GO:0007242;
JTID ENSG00000100299:ARSA GO:0000287;GO:0000299;GO:0004065;GO:0004098;GO:0005764;GO:0005886;GO:0007339;GO:0008152;GO:0008484;GO:0016787;
JTID ENSG00000132471:WBP2 GO:0005515;
JTID ENSG00000157103:SLC6A1 GO:0005328;GO:0005332;GO:0005624;GO:0005887;GO:0006836;GO:0007268;GO:0015293;GO:0016020;GO:0030424;
JTID ENSG00000182107:TMEM30B GO:0016020;GO:0016021;
JTID ENSG00000167774:NDUFA7 GO:0003954;GO:0005739;GO:0005743;GO:0005747;GO:0006120;GO:0008137;GO:0016491;GO:0042773;
JTID ENSG00000163491:NEK10 GO:0004672;GO:0005524;GO:0006468;GO:0004713;GO:0000166;GO:0000287;GO:0004674;GO:0016740;
JTID ENSG00000005955:ZNF403 GO:0007275;GO:0007283;GO:0030154;
JTID ENSG00000124406:ATP8A1 GO:0000166;GO:0000287;GO:0004012;GO:0005524;GO:0006810;GO:0008152;GO:0015662;GO:0015914;GO:0015917;GO:0016020;GO:0016021;GO:0016787;GO:0016820;GO:0019829;
JTID ENSG00000188938:FAM120AOS
JTID ENSG00000128272:ATF4 GO:0003677;GO:0003700;GO:0003704;GO:0005515;GO:0005634;GO:0005737;GO:0006094;GO:0006350;GO:0006355;GO:0006520;GO:0006950;GO:0016563;GO:0043565;GO:0045944;GO:0046983;
JTID ENSG00000108179:PP1F GO:0003755;GO:0005624;GO:0005739;GO:0006457;GO:0016853;GO:0042277;
JTID ENSG00000143450:OAZ3 GO:0008073;GO:0005515;GO:0005634;GO:0005737;GO:0007283;
JTID ENSG00000173041:ZNF680 GO:0003677;GO:0005622;GO:0005634;GO:0006350;GO:0006355;GO:0008270;GO:0046872;GO:0003676;
JTID ENSG00000109339:MAPK10 GO:0004674;GO:0004707;GO:0005524;GO:0006468;GO:0000166;GO:0004705;GO:0004708;GO:0007165;GO:0007254;GO:0016740;GO:0005515;
JTID ENSG00000094804:CD6 GO:0000076;GO:0000079;GO:0000166;GO:0003682;GO:0005515;GO:0005524;GO:0005634;GO:0005737;GO:0005819;GO:0006260;GO:0007049;GO:0007067;GO:0007089;GO:0008156;GO:0008285;GO:0017111;GO:0051301;
JTID ENSG00000078618:NRD1 GO:0004222;GO:0006508;GO:0005829;GO:0007528;GO:0008270;GO:0008283;GO:0009986;GO:0016477;GO:0016919;GO:0046872;GO:0048408;
JTID ENSG00000166619:BLCAP GO:0016020;GO:0016021;
JTID ENSG00000166900:STX3 GO:0006836;GO:0006886;GO:0008565;GO:0016020;GO:0016021;
JTID ENSG00000087152:ATXN7L3
JTID ENSG00000185220:PGBD2
JTID ENSG00000177800:TMEM78 GO:0016020;GO:0016021;
JTID ENSG00000106366:SERPINE1 GO:0002020;GO:0004867;GO:0005515;GO:0005576;GO:0007596;GO:0008243;GO:0042730;GO:0045765;
JTID ENSG00000204033:LRRC22
JTID ENSG00000163376:KBTBD8 GO:0005515;
TFJT LEF1:NR6A1; LEF1:ATXN7L3;
TFMI LEF1:hsa-miR-23a:hsa-mir-23a:computational(ECRbase);
MIJT hsa-miR-23a:CA5A:targetscan:mirbase; hsa-miR-23a:NDUFA7:targetscan:picstar; hsa-miR-23a:NDUFA7:targetscan:mirbase; hsa-miR-23a:STX3:targetscan:mirbase; hsa-miR-23a:ZNF680:targetscan:mirbase; hsa-miR-23a:ZNF403:targetscan:mirbase:picstar; hsa-miR-23a:NR6A1:targetscan:picstar; hsa-miR-23a:CCDC28A:targetscan:mirbase; hsa-miR-23a:CD6:targetscan; hsa-miR-23a:FAM120AOS:targetscan:mirbase; hsa-miR-23a:ASB15:targetscan:picstar; hsa-miR-23a:OAZ3:mirbase; hsa-miR-23a:WBP2:targetscan:picstar; hsa-miR-23a:SLC6A1:targetscan; hsa-miR-23a:PGBD2:targetscan; hsa-miR-23a:NEK10:mirbase; hsa-miR-23a:BLCAP:targetscan:picstar; hsa-miR-23a:SERPINE1:targetscan; hsa-miR-23a:TMEM30B:targetscan:mirbase; hsa-miR-23a:KBTBD8:targetscan; hsa-miR-23a:LRRC22:targetscan:mirbase;

//
ANNOTATION: 3
ID SRF:hsa-miR-802;
```

TFID SRF;  
MIID ENSG00000211590:hsa-mir-802:hsa-miR-802;  
JTID ENSG00000102055:PPP1R2P9 GO:0004864;GO:0006470;GO:0009966;  
JTID ENSG00000120265:PCMT1 GO:0004719;GO:0005783;GO:0006464;GO:0006479;GO:0008168;GO:0016740;GO:0042802;  
JTID ENSG00000177853:ZNF518 GO:0003677;GO:0005622;GO:0005634;GO:0006350;GO:0006355;GO:0008270;GO:0046872;  
JTID ENSG00000171988:JMJD1C GO:0005506;GO:0005515;GO:0005622;GO:0005634;GO:0006350;GO:0006355;GO:0008270;GO:0016491;GO:0016568;GO:0016702;GO:0046872;GO:0046966;  
TFJT SRF:JMJD1C;  
TFMI SRF:hsa-miR-802:hsa-mir-802:computational (ECRbase);  
MIJT hsa-miR-802:JMJD1C:targetscan:mirbase; hsa-miR-802:PPP1R2P9:mirbase;

//  
ANNOTATION: 3  
ID YY1:hsa-miR-148a;  
TFID YY1;  
MIID ENSG00000199085:hsa-mir-148a:hsa-miR-148a;  
JTID ENSG00000112333:NR2E1  
GO:0003700;GO:0003707;GO:0005496;GO:0005634;GO:0006350;GO:0006355;GO:0007275;GO:0007399;GO:0008270;GO:0016439;GO:0043565;GO:0046872;GO:0000122;GO:0003677;GO:0005515;GO:0007420;GO:0007601;GO:0007610;GO:0008284;GO:0008347;GO:0016564;GO:0021772;GO:0021960;GO:0021987;GO:0035176;GO:0043066;GO:0045165;GO:0045665;GO:0060041;  
JTID ENSG00000204423:C9orf33  
JTID ENSG00000055070:C1orf144  
JTID ENSG00000166024:C10orf28  
JTID ENSG00000159082:SYNJ1 GO:0003723;GO:0004437;GO:0004439;GO:0004445;GO:0006796;GO:0006836;GO:0016787;GO:0030117;GO:0048488;GO:0030384;GO:0048489;  
JTID ENSG00000140564:FURIN GO:0004276;GO:0004289;GO:0005509;GO:0005515;GO:0005794;GO:0006465;GO:0006508;GO:0007267;GO:0008233;GO:0016020;GO:0016021;GO:0030140;GO:0032804;  
JTID ENSG00000145860:RNF145 GO:0004872;GO:0005515;GO:0006512;GO:0008270;GO:0046872;  
TFJT YY1:NR2E1; YY1:C1orf144; YY1:RNF145;  
TFMI YY1:hsa-miR-148a:hsa-mir-148a:computational (PUBMED: 17447837);  
MIJT hsa-miR-148a:SYNJ1:targetscan:mirbase:pictar; hsa-miR-148a:NR2E1:targetscan; hsa-miR-148a:C9orf33:mirbase; hsa-miR-148a:FURIN:targetscan; hsa-miR-148a:C10orf28:targetscan; hsa-miR-148a:C1orf144:targetscan:pictar;

//  
ANNOTATION: 3  
ID T3R:hsa-miR-218;  
TFID T3R;  
MIID ENSG00000207732:hsa-mir-218-1:hsa-miR-218;  
JTID ENSG00000169435:RASSF6 GO:0005515;GO:0007165;  
JTID ENSG00000206069:NP\_001001663.1  
JTID ENSG00000137075:RNF38 GO:0005515;GO:0006512;GO:0008270;GO:0046872;  
JTID ENSG00000188935:Q6ZU24 HUMAN  
JTID ENSG00000176357:C10orf55  
JTID ENSG00000198589:LRBA GO:0005515;GO:0016023;  
JTID ENSG00000164120:HPGD GO:0004957;GO:0005829;GO:0006629;GO:0006631;GO:0006693;GO:0007179;GO:0007565;GO:0007567;GO:0008152;GO:0016404;GO:0016491;GO:0019372;GO:0042803;GO:0045786;GO:0051287;  
JTID ENSG00000171540:OTP GO:0003700;GO:0005634;GO:0006355;GO:0007275;GO:0043565;GO:0002052;GO:0021979;GO:0021985;  
JTID ENSG00000181852:RNF41 GO:0005515;GO:0006512;GO:0008270;GO:0016874;GO:0046872;  
TFJT T3R:LRBA; T3R:OTP;  
TFMI T3R:hsa-miR-218:hsa-mir-218-1:computational (ECRbase);  
MIJT hsa-miR-218:RNF38:targetscan:mirbase:pictar; hsa-miR-218:RASSF6:targetscan; hsa-miR-218:OTP:targetscan:pictar; hsa-miR-218:C10orf55:targetscan; hsa-miR-218:LRBA:targetscan; hsa-miR-218:HPGD:targetscan:mirbase; hsa-miR-218:RNF41:targetscan:pictar;

//  
ANNOTATION: 3  
ID MEIS1:hsa-miR-9;  
TFID MEIS1;  
MIID ENSG00000207933:hsa-mir-9-1:hsa-miR-9;  
JTID ENSG00000119227:PICZ GO:0000026;GO:0005783;GO:0006506;GO:0016020;GO:0016021;GO:0016757;  
JTID ENSG00000109061:MYH1 GO:0000146;GO:0000166;GO:0003779;GO:0005516;GO:0005524;GO:0005863;GO:0006941;GO:0016459;GO:0003774;  
JTID ENSG00000159184:HOXB13 GO:0003700;GO:0005634;GO:0006355;GO:0007275;GO:0008544;GO:0009611;GO:0040008;GO:0043565;  
JTID ENSG00000197585:Q5JV89\_HUMAN  
JTID ENSG00000144191:CNGA3 GO:0000166;GO:0005216;GO:0005249;GO:0005624;GO:0005887;GO:0006811;GO:0006813;GO:0007165;GO:0007601;GO:0015276;GO:0016020;GO:0016021;GO:0030553;GO:0050896;GO:0001750;GO:0004872;GO:0005221;GO:0005515;  
JTID ENSG00000060138:CSDA GO:0000122;GO:0003677;GO:0003690;GO:0003700;GO:0003702;GO:0003714;GO:0005634;GO:0005737;GO:0006350;GO:0006355;GO:0009409;GO:0005515;  
JTID ENSG00000117281:CD160 GO:0004872;GO:0005102;GO:0006968;GO:0007166;GO:0008283;GO:0016020;GO:0032393;GO:0046658;GO:0048503;  
JTID ENSG00000110881:ACCN2 GO:0001101;GO:0005261;GO:0005887;GO:0006812;GO:0007613;GO:0008306;GO:0019717;  
JTID ENSG00000168781:HISPPD2A GO:0003993;  
JTID ENSG00000106541:AGR2  
JTID ENSG00000178538:CA8 GO:0004089;GO:0005515;GO:0005737;GO:0006730;GO:0008270;GO:0046872;GO:0048015;  
JTID ENSG00000174683:C8orf78  
JTID ENSG00000188162:OTOG GO:0005578;GO:0007155;GO:0007596;GO:0046373;GO:0046556;  
JTID ENSG00000196739:COL27A1 GO:0005201;GO:0005581;GO:0005737;GO:0006817;GO:0007155;GO:0005198;GO:0005578;  
JTID ENSG00000089063:C20orf30 GO:0016020;GO:0016021;  
JTID ENSG00000064195:DLX3 GO:0001501;GO:0003700;GO:0005634;GO:0006355;GO:0007275;GO:0043565;  
TFJT MEIS1:ACCN2; MEIS1:HISPPD2A;  
TFMI MEIS1:hsa-miR-9:hsa-mir-9-1:computational (ECRbase);  
MIJT hsa-miR-9:PIGZ:targetscan:pictar; hsa-miR-9:HOXB13:targetscan; hsa-miR-9:DLX3:targetscan:pictar; hsa-miR-9:AGR2:targetscan:mirbase; hsa-miR-9:CA8:targetscan; hsa-miR-9:MYH1:targetscan:mirbase:pictar; hsa-miR-9:ACCN2:targetscan:pictar; hsa-miR-9:CSDA:targetscan:mirbase:pictar; hsa-miR-9:C20orf30:targetscan; hsa-miR-9:CD160:targetscan; hsa-miR-9:HISPPD2A:targetscan:pictar; hsa-miR-9:CNGA3:targetscan;

//  
ANNOTATION: 3  
ID MAZ:hsa-miR-9;  
TFID MAZ;  
MIID ENSG00000207933:hsa-mir-9-1:hsa-miR-9;  
JTID ENSG00000110756:HP55  
TFJT MAZ:HP55;  
TFMI MAZ:hsa-miR-9:hsa-mir-9-1:computational (PUBMED: 17447837); computational (ECRbase);  
MIJT hsa-miR-9:HP55:targetscan;

//  
ANNOTATION: 3  
ID MAZ:hsa-miR-34a;  
TFID MAZ;  
MIID ENSG00000207865:hsa-mir-34a:hsa-miR-34a;  
JTID ENSG00000107159:CA9 GO:0002009;GO:0004089;GO:0005634;GO:0006730;GO:0008270;GO:0016020;GO:0016021;GO:0016829;GO:0046872;GO:0046903;  
JTID ENSG00000166971:AKTIP GO:0005515;GO:0006464;GO:0006512;GO:0006915;GO:0016020;GO:0019787;  
JTID ENSG00000142319:SLC6A3 GO:0005330;GO:0005515;GO:0005737;GO:0005886;GO:0005887;GO:0008504;GO:0015293;GO:0015844;GO:0005329;GO:0007595;GO:0015872;GO:0021984;GO:0040018;GO:0042053;GO:0042416;GO:0042420;  
TFJT MAZ:CA9;  
TFMI MAZ:hsa-miR-34a:hsa-mir-34a:computational (PUBMED: 17447837);  
MIJT hsa-miR-34a:AKTIP:targetscan; hsa-miR-34a:CA9:targetscan; hsa-miR-34a:SLC6A3:targetscan:mirbase;

//  
ANNOTATION: 3  
ID ATF6:hsa-miR-212;  
TFID ATF6;  
MIID ENSG00000207953:hsa-mir-212:hsa-miR-212;  
JTID ENSG00000173848:NET1 GO:0001558;GO:0005085;GO:0005089;GO:0005622;GO:0005634;GO:0007165;GO:0035023;  
JTID ENSG00000182077:PTCHD3 GO:0008158;GO:0016020;

```
JTID ENSG00000160882:CYP11B1 GO:0004497;GO:0004507;GO:0005506;GO:0005739;GO:0005783;GO:0005792;GO:0006118;GO:0006629;GO:0006700;GO:0016020;GO:0020037;GO:0046872;
JTID ENSG00000170689:HOXB9 GO:0003700;GO:0005515;GO:0005634;GO:0006355;GO:0007275;GO:0016563;GO:0043565;
TFJT ATF6:NET1; ATF6:HOXB9;
TFMI ATF6:hsa-miR-212:hsa-mir-212:computational(ECRbase);
MIJT hsa-miR-212:NET1:targetscan:mirbase:pictar;

//
ANNOTATION: 3
ID PEA3:hsa-miR-155;
TFID PEA3;
MIID ENSG00000207795:hsa-mir-155:hsa-miR-155;
JTID ENSG00000144034:TPRKB GO:0005634;GO:0005829;GO:0019901;GO:0030163;
JTID ENSG00000077458:FAM76B
JTID ENSG00000135341:MAP3K7 GO:0000166;GO:0000287;GO:0002726;GO:0004674;GO:0004709;GO:0005515;GO:0005524;GO:0006468;GO:0007179;GO:0007250;GO:0016740;GO:0050852;GO:0050870;GO:0016301;GO:0004713;GO:0000165;GO:0001525;GO:0001841;GO:0004708;GO:0007252;GO:0043066;GO:0043123;GO:0046330;
JTID ENSG00000143079:CTTNBP2NL GO:0015629;
JTID ENSG00000113742:CPEB4 GO:0000166;GO:0003723;
JTID ENSG00000160336:ZNF761 GO:0003676;GO:0005622;GO:0005634;GO:0008270;GO:0046872;
JTID ENSG00000196396:PTPN1 GO:0004725;GO:0005515;GO:0005625;GO:0005737;GO:0005783;GO:0006470;GO:0007165;GO:0008286;GO:0016787;
JTID ENSG00000164300:SERINC5 GO:0006658;GO:0016020;GO:0051347;
JTID ENSG00000112312:GMNN GO:0005515;GO:0007049;GO:0008156;GO:0045786;
JTID ENSG00000147100:SLC16A2 GO:0005215;GO:0005624;GO:0005887;GO:0006810;GO:0008028;GO:0015293;GO:0015718;GO:0016020;
JTID ENSG00000114113:RBP2 GO:0006776;GO:0006810;GO:0008289;GO:0008544;GO:0016918;GO:0019841;
JTID ENSG00000109790:KLHL5 GO:0005515;GO:0003779;GO:0005737;GO:0005856;GO:0030036;
JTID ENSG00000101457:DNMTIP1 GO:0005634;GO:0016740;
JTID ENSG00000164077:MON1A GO:0006810;
JTID ENSG00000105856:HBP1 GO:0003677;GO:0005634;GO:0006350;GO:0006355;GO:0007050;GO:0016055;
TFJT PEA3:CPEB4; PEA3:HBP1;
TFMI PEA3:hsa-miR-155:hsa-mir-155:computational(ECRbase);
MIJT hsa-miR-155:MON1A:targetscan:pictar; hsa-miR-155:CPEB4:targetscan; hsa-miR-155:TPRKB:targetscan:mirbase; hsa-miR-155:RBP2:targetscan:mirbase; hsa-miR-155:DNMTIP1:targetscan:mirbase; hsa-miR-155:HBP1:targetscan:mirbase:pictar; hsa-miR-155:KLHL5:targetscan:mirbase; hsa-miR-155:SLC16A2:targetscan; hsa-miR-155:ZNF761:targetscan; hsa-miR-155:GMNN:targetscan;

//
ANNOTATION: 3
ID MAZ:hsa-miR-375;
TFID MAZ;
MIID ENSG00000198973:hsa-mir-375:hsa-miR-375;
JTID ENSG00000116786:PLEKHM2 GO:0008152;GO:0016491;
JTID ENSG00000181039:ANKRD34
JTID ENSG00000165359:DDX26B
JTID ENSG00000189079:ARID2 GO:0003677;GO:0005515;GO:0005622;GO:0005634;GO:0006350;GO:0006355;GO:0008270;GO:0016568;
TFJT MAZ:DDX26B;
TFMI MAZ:hsa-miR-375:hsa-mir-375:computational(PUBMED: 17447837); computational(ECRbase);
MIJT hsa-miR-375:ARID2:targetscan; hsa-miR-375:PLEKHM2:mirbase; hsa-miR-375:DDX26B:targetscan; hsa-miR-375:ANKRD34:targetscan:mirbase;

//
ANNOTATION: 3
ID AP-4:hsa-miR-206;
TFID AP-4;
MIID ENSG00000207604:hsa-mir-206:hsa-miR-206;
JTID ENSG00000074696:PTPLAD1 GO:0005096;GO:0005515;GO:0007249;GO:0007254;GO:0007257;GO:0007264;GO:0007266;
JTID ENSG00000162105:SHANK2 GO:0005515;GO:0007242;GO:0030160;
TFJT AP-4:SHANK2;
TFMI AP-4:hsa-miR-206:hsa-mir-206:computational(PUBMED: 17447837);
MIJT hsa-miR-206:SHANK2:targetscan; hsa-miR-206:PTPLAD1:targetscan:pictar;

//
ANNOTATION: 3
ID IRF-1:hsa-miR-30a-5p;
TFID IRF-1;
MIID ENSG00000207827:hsa-mir-30a:hsa-miR-30a-5p;
JTID ENSG00000101134:DOK5 GO:0000165;GO:0005066;GO:0005158;GO:0007169;GO:0007399;
JTID ENSG00000141068:KSR1 GO:0004674;GO:0004713;GO:0005524;GO:0005622;GO:0006468;GO:0007242;GO:0007265;GO:0008270;GO:0016020;GO:0019992;GO:0046872;
JTID ENSG00000165891:E2F7 GO:0000074;GO:0003700;GO:0005667;GO:0006355;GO:0005515;GO:0005634;GO:0008285;GO:0016564;
JTID ENSG00000157741:Q6ZU65_HUMAN GO:0005525;GO:0005874;GO:0007017;
JTID ENSG00000171316:CHD7 GO:0000166;GO:0000785;GO:0003677;GO:0003682;GO:0004386;GO:0005524;GO:0005634;GO:0006333;GO:0006350;GO:0006355;GO:0016568;GO:0016787;
TFJT IRF-1:Q6ZU65_HUMAN;
TFMI IRF-1:hsa-miR-30a-5p:hsa-mir-30a:computational(ECRbase);
MIJT hsa-miR-30a-5p:Q6ZU65_HUMAN:mirbase; hsa-miR-30a-5p:DOK5:targetscan:mirbase; hsa-miR-30a-5p:E2F7:targetscan:pictar; hsa-miR-30a-5p:CHD7:targetscan:pictar; hsa-miR-30a-5p:KSR1:targetscan;

//
ANNOTATION: 3
ID NF-Y:hsa-miR-125b;
TFID NF-Y;
MIID ENSG00000207863:hsa-mir-125b-2:hsa-miR-125b;
JTID ENSG00000113161:HMGCR GO:0004420;GO:0005624;GO:0005777;GO:0005783;GO:0005789;GO:0006629;GO:0006695;GO:0008354;GO:0008406;GO:0016020;GO:0016021;GO:0016491;GO:0005792;GO:0008542;GO:0009790;GO:0043407;
JTID ENSG00000155621:C9orf85
JTID ENSG00000182858:ALG12 GO:0005783;GO:0016020;GO:0016021;GO:0016757;
JTID ENSG00000130348:QRSL1 GO:0004040;GO:0006412;GO:0017068;
JTID ENSG00000110075:SAPS3
JTID ENSG00000167302:C17orf56
JTID ENSG000000095794:CREM GO:0003700;GO:0005634;GO:0006355;GO:0008140;GO:0043565;GO:0046983;GO:0005515;GO:0006350;GO:0007165;GO:0005667;
JTID ENSG00000123064:DDX54 GO:0003723;GO:0005524;GO:0005634;GO:0016818;GO:0000166;GO:0003714;GO:0004004;GO:0005102;GO:0005730;GO:0006350;GO:0006355;GO:0006396;GO:0016787;GO:0030331;GO:0030520;
JTID ENSG00000171169:C9orf90
JTID ENSG00000205913:Q6ZUC4_HUMAN
JTID ENSG00000143390:RFX5 GO:0003677;GO:0003700;GO:0003713;GO:0005515;GO:0005634;GO:0006350;GO:0006355;GO:0006366;
JTID ENSG00000170927:PKHD1 GO:0004872;GO:0005515;GO:0005932;GO:0016020;GO:0016021;GO:0016324;GO:0016337;GO:0031362;GO:0042592;GO:0051271;GO:0001822;
JTID ENSG00000138111:TMEM180 GO:0016020;GO:0016021;
JTID ENSG00000110274:CEP164
JTID ENSG00000178229:ZNF543 GO:0003676;GO:0005622;GO:0006355;GO:0008270;
JTID ENSG00000118322:ATP10B GO:0000166;GO:0000287;GO:0004012;GO:0005524;GO:0006810;GO:0015662;GO:0015914;GO:0016020;GO:0016021;GO:0016787;
JTID ENSG00000166787:SAA3P GO:0005576;GO:0006953;
JTID ENSG00000137860:SLC28A2 GO:0001882;GO:0005415;GO:0005624;GO:0005887;GO:0006139;GO:0006810;GO:0015211;GO:0015860;GO:0016020;
JTID ENSG00000181026:ISG20L1 GO:0004527;GO:0005622;GO:0016787;
TFJT NF-Y:SAPS3; NF-Y:C9orf90; NF-Y:RFX5; NF-Y:TMEM180; NF-Y:ATP10B;
TFMI NF-Y:hsa-miR-125b:hsa-mir-125b-2:computational(PUBMED: 17447837);
MIJT hsa-miR-125b:SAPS3:targetscan; hsa-miR-125b:QRSL1:targetscan; hsa-miR-125b:TMEM180:targetscan:mirbase:pictar; hsa-miR-125b:C9orf90:targetscan:pictar; hsa-miR-125b:ZNF543:targetscan; hsa-miR-125b:DDX54:targetscan; hsa-miR-125b:HMGCR:targetscan; hsa-miR-125b:Q6ZUC4_HUMAN:mirbase; hsa-miR-125b:CEP164:targetscan; hsa-miR-125b:CREM:targetscan:pictar; hsa-miR-125b:C17orf56:targetscan:mirbase; hsa-miR-125b:ALG12:targetscan; hsa-miR-125b:ISG20L1:targetscan; hsa-miR-125b:PKHD1:targetscan; hsa-miR-125b:RFX5:targetscan:pictar; hsa-miR-125b:SLC28A2:targetscan;

//
ANNOTATION: 3
ID YY1:hsa-miR-125b;
```



```
TFID YY1;
MIID ENSG00000207971:hsa-mir-125b-1:hsa-miR-125b;
JTID ENSG00000007968:E2F2 GO:000074;GO:0003700;GO:0003702;GO:0005515;GO:0005634;GO:0005667;GO:0006350;GO:0006355;GO:0006367;GO:0007049;
JTID ENSG000000138613:APH1B GO:0005515;GO:0007219;GO:0008233;GO:0016020;GO:0016021;GO:0016485;GO:0030133;GO:0043085;
JTID ENSG000000174099:MSRB3 GO:0008113;GO:0000318;GO:0005739;GO:0005783;GO:0008270;GO:0030091;
JTID ENSG000000100796:SMEK1 GO:0016020;GO:0016021;
JTID ENSG000000119541:VPS4B GO:0000166;GO:0005515;GO:0005524;GO:0005768;GO:0005773;GO:0006355;GO:0006944;GO:0007031;GO:0016020;GO:0016197;GO:0042623;
JTID ENSG000000110274:CEP164
JTID ENSG000000077713:SLC25A43 GO:0003735;GO:0005488;GO:0005622;GO:0005743;GO:0005840;GO:0006412;GO:0006810;GO:0016020;GO:0005215;GO:0016021;
JTID ENSG000000124721:DNAH8 GO:0000166;GO:0003777;GO:0005524;GO:0005874;GO:0007018;GO:0016887;GO:0030286;
JTID ENSG000000120656:TAF12 GO:0005515;GO:0005634;GO:0005669;GO:0006350;GO:0006352;GO:0006355;GO:0016251;
JTID ENSG000000138111:TMEM180 GO:0016020;GO:0016021;
JTID ENSG000000167302:C17orf56
TFJT YY1:TMEM180;
TFMI YY1:hsa-miR-125b:hsa-mir-125b-1:computational(PUBMED:17447837);
MIJT hsa-miR-125b:SMEK1:targetscan:mirbase:pictar; hsa-miR-125b:TMEM180:targetscan:mirbase:pictar; hsa-miR-125b:CEP164:targetscan; hsa-miR-125b:APH1B:targetscan; hsa-miR-125b:C17orf56:targetscan:mirbase; hsa-miR-125b:E2F2:targetscan; hsa-miR-125b:TAF12:targetscan; hsa-miR-125b:VPS4B:targetscan:pictar; hsa-miR-125b:DNAH8:targetscan:mirbase; hsa-miR-125b:MSRB3:targetscan;

//
ANNOTATION: 3
ID AREB6:hsa-miR-31;
TFID AREB6;
MIID ENSG000000199177:hsa-mir-31:hsa-miR-31;
JTID ENSG000000177156:TALDO1 GO:0003824;GO:0004801;GO:0005515;GO:0005737;GO:0005975;GO:0006098;GO:0008152;GO:0016740;
JTID ENSG000000188199:FAM22B
JTID ENSG000000204043:FAM22C
JTID ENSG000000162520:SYNCL1 GO:0005198;
JTID ENSG000000102471:NDFIP2 GO:0004871;GO:0016020;GO:0016021;GO:0043123;
JTID ENSG000000153814:JAZF1 GO:0000122;GO:0003676;GO:0003714;GO:0005622;GO:0005634;GO:0006350;GO:0006355;GO:0008270;GO:0017053;GO:0046872;
TFJT AREB6:SYNCL1; AREB6:JAZF1;
TFMI AREB6:hsa-miR-31:hsa-mir-31:computational(ECRbase);
MIJT hsa-miR-31:FAM22C:mirbase; hsa-miR-31:JAZF1:targetscan:pictar; hsa-miR-31:NDFIP2:targetscan; hsa-miR-31:FAM22B:mirbase; hsa-miR-31:TALDO1:targetscan; hsa-miR-31:SYNCL1:targetscan;

//
ANNOTATION: 3
ID YY1:hsa-let-7a;
TFID YY1;
MIID ENSG000000198975:hsa-let-7a-2:hsa-let-7a;
JTID ENSG000000164045:CDC25A GO:000079;GO:0004725;GO:0005515;GO:0005622;GO:0006470;GO:0007049;GO:0007067;GO:0008283;GO:0016787;GO:0051301;
JTID ENSG000000177058:NP_775785.1
JTID ENSG000000161558:TMEM143 GO:0005739;GO:0016020;GO:0016021;
JTID ENSG000000133136:GBG5L_HUMAN GO:0003924;GO:0004871;GO:0005576;GO:0005834;GO:0007186;
JTID ENSG000000139998:RAB15
JTID ENSG000000187109:NAP1L1 GO:0005515;GO:0005634;GO:0005678;GO:0006260;GO:0006334;GO:0008284;
JTID ENSG000000158615:PPP1R15B GO:0000164;GO:0004722;GO:0006979;GO:0006983;GO:0042542;
JTID ENSG000000071894:CPSF1 GO:0003723;GO:0003730;GO:0005515;GO:0005634;GO:0005847;GO:0006378;GO:0006379;
TFJT YY1:GBG5L_HUMAN;
TFMI YY1:hsa-let-7a:hsa-let-7a-2:computational(PUBMED:17447837);
MIJT hsa-let-7a:PPP1R15B:targetscan:pictar; hsa-let-7a:TMEM143:targetscan:mirbase; hsa-let-7a:RAB15:targetscan:pictar; hsa-let-7a:GBG5L_HUMAN:mirbase; hsa-let-7a:NAP1L1:targetscan:mirbase; hsa-let-7a:CDC25A:targetscan:pictar; hsa-let-7a:NP_775785.1:pictar; hsa-let-7a:CPSF1:targetscan;

//
ANNOTATION: 3
ID YY1:hsa-miR-101;
TFID YY1;
MIID ENSG000000199135:hsa-mir-101-1:hsa-miR-101;
JTID ENSG000000138779:Q9HCM6_HUMAN
JTID ENSG000000121089:NACA3P
JTID ENSG000000115825:PRKD3 GO:0000166;GO:0004697;GO:0005524;GO:0006468;GO:0007205;GO:0007242;GO:0008270;GO:0016740;GO:0019992;GO:0046872;
JTID ENSG000000204220:PFDN6 GO:0006457;GO:0016272;GO:0051082;
JTID ENSG000000139998:RAB15
JTID ENSG000000117713:ARID1A GO:0003677;GO:0005622;GO:0005515;GO:0005634;GO:0006325;GO:0006350;GO:0006355;GO:0016514;GO:0016563;GO:0016568;GO:0030520;GO:0030521;GO:0042766;GO:0042921;GO:0048096;
JTID ENSG000000128594:LRR4 GO:0005515;GO:0016020;GO:0016021;
JTID ENSG000000144566:RAB5A GO:0000166;GO:0001726;GO:0003924;GO:0005515;GO:0005525;GO:0005769;GO:0005886;GO:0006897;GO:0007264;GO:0015031;GO:0019001;GO:0030139;GO:0045121;
JTID ENSG000000180263:FGD6 GO:0001726;GO:0005085;GO:0005089;GO:0005515;GO:0005622;GO:0005737;GO:0005794;GO:0005856;GO:0007010;GO:0008270;GO:0008360;GO:0030027;GO:0030036;GO:0031267;GO:0035023;GO:0043088;GO:0046847;GO:0046872;
JTID ENSG000000175220:ARHGAP1 GO:0001726;GO:0005070;GO:0005096;GO:0005515;GO:0005622;GO:0005886;GO:0007010;GO:0007165;GO:0007264;GO:0007266;GO:0030675;GO:0043087;
JTID ENSG000000141034:C17orf39
JTID ENSG000000119707:RBM25 GO:0000166;GO:0000398;GO:0003676;GO:0003729;
JTID ENSG000000151690:NP_060164.3
JTID ENSG000000159167:STC1 GO:0005179;GO:0005576;GO:0005615;GO:0006874;GO:0007166;GO:0007267;GO:0007584;
JTID ENSG000000197712:FAM114A1
JTID ENSG000000173821:RNF213 GO:0000166;GO:0005515;GO:0008270;GO:0017111;GO:0046872;
JTID ENSG000000198757:Q96NB8_HUMAN
TFJT YY1:NACA3P; YY1:ARID1A; YY1:LRR4; YY1:FGD6; YY1:C17orf39; YY1:RBM25; YY1:NP_060164.3; YY1:STC1; YY1:Q96NB8_HUMAN;
TFMI YY1:hsa-miR-101:hsa-mir-101-1:computational(PUBMED:17447837);
MIJT hsa-miR-101:STC1:targetscan:mirbase:pictar; hsa-miR-101:PFDN6:targetscan; hsa-miR-101:C17orf39:targetscan:mirbase; hsa-miR-101:Q9HCM6_HUMAN:mirbase; hsa-miR-101:RBM25:targetscan; hsa-miR-101:RAB15:targetscan; hsa-miR-101:RAB5A:targetscan:mirbase:pictar; hsa-miR-101:ARID1A:targetscan:mirbase:pictar; hsa-miR-101:RNF213:targetscan; hsa-miR-101:FAM114A1:mirbase; hsa-miR-101:LRR4:targetscan:pictar; hsa-miR-101:ARHGAP1:targetscan; hsa-miR-101:NACA3P:mirbase; hsa-miR-101:FGD6:targetscan; hsa-miR-101:PRKD3:targetscan:mirbase;

//
ANNOTATION: 3
ID MEIS1:hsa-miR-9*;
TFID MEIS1;
MIID ENSG000000207933:hsa-mir-9-1:hsa-miR-9*;
JTID ENSG00000013619:CXorf6
JTID ENSG000000133794:ARNTL GO:0003700;GO:0004871;GO:0005634;GO:0006355;GO:0007165;GO:0007623;GO:0000060;GO:0005515;GO:0042176;
JTID ENSG000000205036:NP_001001682.1
JTID ENSG000000118363:SPCS2 GO:0005783;GO:0005787;GO:0005792;GO:0006465;GO:0009003;GO:0016020;GO:0016021;
JTID ENSG000000180357:ZNF609 GO:0003676;GO:0005622;GO:0005634;GO:0008270;GO:0046872;
JTID ENSG000000182329:Q8IVF9_HUMAN
JTID ENSG000000113300:CNOT6 GO:0000287;GO:0003723;GO:0004527;GO:0005515;GO:0005634;GO:0006350;GO:0006355;GO:0016787;
JTID ENSG000000108021:C10orf18
JTID ENSG000000130414:NDUFA10 GO:0003954;GO:0005524;GO:0005739;GO:0005747;GO:0006091;GO:0006120;GO:0006139;GO:0008137;GO:0016491;GO:0016773;
JTID ENSG000000132321:IQCA GO:0000166;GO:0005524;
JTID ENSG000000165156:ZHX1 GO:0003700;GO:0005515;GO:0005622;GO:0005634;GO:0008270;GO:0043565;GO:0045892;GO:0046872;
JTID ENSG000000101246:ARFRP1 GO:0000166;GO:0003924;GO:0005515;GO:0005525;GO:0005622;GO:0005624;GO:0007165;GO:0007264;GO:0007369;
JTID ENSG000000163110:PDLIM5 GO:0005515;GO:0003779;GO:0005080;GO:0005624;GO:0005829;GO:0007507;GO:0008270;GO:0015629;GO:0030159;GO:0042805;GO:0046872;
TFJT MEIS1:CXorf6; MEIS1:Q8IVF9_HUMAN; MEIS1:PDLIM5;
TFMI MEIS1:hsa-miR-9*:hsa-mir-9-1:computational(ECRbase);
MIJT hsa-miR-9*:CNOT6:pictar; hsa-miR-9*:ZHX1:pictar; hsa-miR-9*:SPCS2:mirbase; hsa-miR-9*:IQCA:mirbase; hsa-miR-9*:C10orf18:mirbase; hsa-miR-9*:NDUFA10:mirbase; hsa-miR-9*:ARNTL:mirbase:pictar;

//
ANNOTATION: 3
ID NF-Y:hsa-miR-93;
```

TFID NF-Y;  
MIID ENSG00000207757:hsa-mir-93:hsa-miR-93;  
JTID ENSG00000134375:TIMM17A GO:0005739;GO:0005744;GO:0006626;GO:0015450;GO:0016020;GO:0016021;  
JTID ENSG00000101412:E2F1 GO:0000074;GO:0000080;GO:0000122;GO:0003700;GO:0003714;GO:0005515;GO:0005634;GO:0005667;GO:0005737;GO:0006350;GO:0006355;GO:0006915;GO:0007049;GO:0008283;GO:0016563;GO:0030900;GO:0045944;  
JTID ENSG00000104517:EDD1 GO:0004842;GO:0005622;GO:0006464;GO:0006512;GO:0005515;GO:0005625;GO:0005634;GO:0006511;GO:0006974;GO:0008270;GO:0008283;GO:0016874;GO:0046872;GO:0050847;  
JTID ENSG00000139508:SLC46A3  
JTID ENSG00000168000:HNRFPUL2 GO:0005783;GO:0016020;GO:0016021;GO:0030176;GO:0003676;GO:0005515;GO:0005634;  
JTID ENSG00000180667:YOD1 GO:0003676;GO:0005622;GO:0006512;GO:0008234;GO:0008270;GO:0046872;  
JTID ENSG00000166435:XRRA1 GO:0005515;  
JTID ENSG00000163577:EIP5A2 GO:0003743;GO:0006413;  
JTID ENSG00000006062:MAP3K14 GO:0000166;GO:0004672;GO:0004674;GO:0005515;GO:0005524;GO:0006468;GO:0016740;  
JTID ENSG00000145362:ANK2 GO:0005200;GO:0005515;GO:0007165;GO:0015629;GO:0016020;GO:0005856;  
JTID ENSG00000167106:FAM102A  
JTID ENSG00000165244:ZNF367 GO:0003676;GO:0003700;GO:0005622;GO:0005634;GO:0006350;GO:0006357;GO:0008270;GO:0046872;  
TFJT NF-Y:ANK2;  
TFMI NF-Y:hsa-mir-93:hsa-mir-93:computational(PUBMED: 17447837);  
MIJT hsa-mir-93:YOD1:targetscan; hsa-mir-93:HNRFPUL2:targetscan:mirbase; hsa-mir-93:ANK2:targetscan:pictar; hsa-mir-93:MAP3K14:targetscan:pictar; hsa-mir-93:SLC46A3:mirbase; hsa-mir-93:ZNF367:pictar; hsa-mir-93:TIMM17A:targetscan; hsa-mir-93:FAM102A:targetscan:pictar; hsa-mir-93:EDD1:pictar; hsa-mir-93:E2F1:targetscan:pictar;

//  
ANNOTATION: 3  
ID ER:hsa-miR-181d;  
TFID ER;  
MIID ENSG00000207585:hsa-mir-181d:hsa-miR-181d;  
JTID ENSG00000066427:ATXN3  
JTID ENSG00000160844:NP\_849153.3  
JTID ENSG00000131152:Q9H693\_HUMAN  
JTID ENSG0000011731:KIAA0528 GO:0005215;GO:0005515;GO:0006810;GO:0008021;GO:0016020;  
JTID ENSG00000138735:PDE5A GO:0000166;GO:0000287;GO:0003824;GO:0004114;GO:0007165;GO:0008270;GO:0009187;GO:0016787;GO:0030553;GO:0047555;GO:0004112;GO:0046069;  
JTID ENSG00000147454:SLC25A37 GO:0005381;GO:0005488;GO:0005506;GO:0005739;GO:0005743;GO:0006811;GO:0016020;GO:0016021;GO:0048250;  
JTID ENSG00000084652:TXLNA GO:0005576;GO:0005737;GO:0006887;GO:0008283;GO:0030372;  
JTID ENSG00000117000:RLF GO:0003700;GO:0005515;GO:0005622;GO:0005634;GO:0006350;GO:0006355;GO:0008270;GO:0046872;  
JTID ENSG00000182263:FIGN GO:0000166;GO:0005524;GO:0017111;  
JTID ENSG00000106366:SERPINE1 GO:0002020;GO:0004867;GO:0005515;GO:0005576;GO:0007596;GO:0008243;GO:0042730;GO:0045765;  
JTID ENSG00000167766:ZNF83 GO:0003700;GO:0005622;GO:0005634;GO:0006350;GO:0006355;GO:0008270;GO:0046872;GO:0003676;  
JTID ENSG00000159873:CCDC117  
JTID ENSG00000181773:GPR3 GO:0001584;GO:0004872;GO:0005887;GO:0007165;GO:0007186;GO:0007189;GO:0016020;  
TFJT ER:SLC25A37; ER:GPR3;  
TFMI ER:hsa-mir-181d:hsa-mir-181d:computational(ECRbase);  
MIJT hsa-mir-181d:PDE5A:targetscan; hsa-mir-181d:SLC25A37:targetscan:mirbase; hsa-mir-181d:RLF:targetscan:mirbase; hsa-mir-181d:ATXN3:targetscan; hsa-mir-181d:ZNF83:targetscan:mirbase; hsa-mir-181d:Q9H693\_HUMAN:mirbase; hsa-mir-181d:KIAA0528:targetscan; hsa-mir-181d:SERPINE1:targetscan:mirbase; hsa-mir-181d:FIGN:targetscan; hsa-mir-181d:CCDC117:targetscan; hsa-mir-181d:TXLNA:targetscan;

//  
ANNOTATION: 3  
ID NF-Y:hsa-miR-106b;  
TFID NF-Y;  
MIID ENSG00000208036:hsa-mir-106b:hsa-miR-106b;  
JTID ENSG00000134375:TIMM17A GO:0005739;GO:0005744;GO:0006626;GO:0015450;GO:0016020;GO:0016021;  
JTID ENSG00000101412:E2F1 GO:0000074;GO:0000080;GO:0000122;GO:0003700;GO:0003714;GO:0005515;GO:0005634;GO:0005667;GO:0005737;GO:0006350;GO:0006355;GO:0006915;GO:0007049;GO:0008283;GO:0016563;GO:0030900;GO:0045944;  
JTID ENSG00000141664:ZCCHC2 GO:0003676;GO:0005737;GO:0008270;GO:0046872;  
JTID ENSG00000099985:OSM GO:0001558;GO:0005125;GO:0005147;GO:0005576;GO:0005615;GO:0006915;GO:0006955;GO:0007267;GO:0007275;GO:0007422;GO:0008283;GO:0008285;GO:0009408;GO:0042503;GO:0042506;GO:0042508;GO:0048266;  
JTID ENSG00000145819:ARHGAP26 GO:0005096;GO:0005100;GO:0005622;GO:0007165;GO:0007399;GO:0030036;  
JTID ENSG00000104517:EDD1 GO:0004842;GO:0005622;GO:0006464;GO:0006512;GO:0005515;GO:0005625;GO:0005634;GO:0006511;GO:0006974;GO:0008270;GO:0008283;GO:0016874;GO:0046872;GO:0050847;  
JTID ENSG00000139508:SLC46A3  
JTID ENSG00000168000:HNRFPUL2 GO:0005783;GO:0016020;GO:0016021;GO:0030176;GO:0003676;GO:0005515;GO:0005634;  
JTID ENSG00000180667:YOD1 GO:0003676;GO:0005622;GO:0006512;GO:0008234;GO:0008270;GO:0046872;  
JTID ENSG00000166435:XRRA1 GO:0005515;  
JTID ENSG00000163577:EIP5A2 GO:0003743;GO:0006413;  
JTID ENSG00000166743:ACSM1 GO:0003824;GO:0008152;GO:0003996;GO:0005739;GO:0005759;GO:0006633;GO:0015645;GO:0015980;GO:0018874;GO:0019395;GO:0019605;GO:0047760;  
JTID ENSG00000006062:MAP3K14 GO:0000166;GO:0004672;GO:0004674;GO:0005515;GO:0005524;GO:0006468;GO:0016740;  
JTID ENSG00000145362:ANK2 GO:0005200;GO:0005515;GO:0007165;GO:0015629;GO:0016020;GO:0005856;  
JTID ENSG00000167106:FAM102A  
JTID ENSG00000165244:ZNF367 GO:0003676;GO:0003700;GO:0005622;GO:0005634;GO:0006350;GO:0006357;GO:0008270;GO:0046872;  
JTID ENSG00000110911:SLC11A2 GO:0005215;GO:0005381;GO:0005506;GO:0005887;GO:0006811;GO:0006826;GO:0016020;GO:0005768;GO:0005886;GO:0006810;GO:0006824;GO:0010008;GO:0012505;GO:0015087;  
JTID ENSG00000143507:DUSP10 GO:0004725;GO:0005634;GO:0005737;GO:0006470;GO:0006950;GO:0007254;GO:0016787;GO:0016791;GO:0017017;  
JTID ENSG00000160401:C9orf117  
TFJT NF-Y:ZCCHC2; NF-Y:OSM; NF-Y:ANK2; NF-Y:DUSP10;  
TFMI NF-Y:hsa-mir-106b:hsa-mir-106b:computational(PUBMED: 17447837); computational(ECRbase);  
MIJT hsa-mir-106b:SLC11A2:targetscan; hsa-mir-106b:HNRFPUL2:mirbase; hsa-mir-106b:DUSP10:targetscan; hsa-mir-106b:ANK2:targetscan:pictar; hsa-mir-106b:MAP3K14:targetscan:pictar; hsa-mir-106b:EIP5A2:targetscan:pictar; hsa-mir-106b:E2F1:targetscan:pictar; hsa-mir-106b:YOD1:targetscan; hsa-mir-106b:ARHGAP26:targetscan; hsa-mir-106b:C9orf117:targetscan; hsa-mir-106b:SLC46A3:mirbase; hsa-mir-106b:ZNF367:targetscan:pictar; hsa-mir-106b:ACSM1:targetscan; hsa-mir-106b:TIMM17A:targetscan; hsa-mir-106b:FAM102A:targetscan:pictar; hsa-mir-106b:EDD1:targetscan:pictar; hsa-mir-106b:OSM:targetscan;

//  
ANNOTATION: 3  
ID AHR:hsa-miR-425-3p;  
TFID AHR;  
MIID ENSG00000199032:hsa-mir-425:hsa-miR-425-3p;  
JTID ENSG00000181798:C2orf52  
JTID ENSG00000153132:CLGN GO:0005509;GO:0005783;GO:0006457;GO:0007338;GO:0016020;GO:0016021;GO:0051082;  
JTID ENSG00000173581:CCDC106  
JTID ENSG00000146963:LUC7L2 GO:0005515;GO:0008270;GO:0046872;  
JTID ENSG00000053524:MCF2L2 GO:0005085;GO:0005089;GO:0005622;GO:0035023;  
JTID ENSG00000116691:ANKRD38  
TFJT AHR:LUC7L2;  
TFMI AHR:hsa-miR-425-3p:hsa-mir-425:computational(ECRbase);  
MIJT hsa-miR-425-3p:CCDC106:targetscan:mirbase; hsa-miR-425-3p:CLGN:targetscan:mirbase;

//  
ANNOTATION: 3  
ID AP-4:hsa-miR-200c;  
TFID AP-4;  
MIID ENSG00000207713:hsa-mir-200c:hsa-miR-200c;  
JTID ENSG00000164707:SLC13A4 GO:0005215;GO:0005887;GO:0006811;GO:0006814;GO:0008272;GO:0015293;GO:0015382;GO:0016020;GO:0031402;  
JTID ENSG00000006114:AP1GBP1 GO:0005509;GO:0005737;GO:0005794;GO:0006886;GO:0006897;GO:0016020;GO:0030121;  
JTID ENSG00000112851:ERBB2IP GO:0005176;GO:0005178;GO:0005200;GO:0005515;GO:0005604;GO:0005634;GO:0005737;GO:0007049;GO:0007155;GO:0007165;GO:0007173;GO:0007229;GO:0016049;GO:0030056;GO:0045104;GO:0045175;GO:0045197;  
JTID ENSG00000122417:ODF2L  
JTID ENSG00000008256:PSCD3 GO:0001726;GO:0005086;GO:0005515;GO:0005545;GO:0005547;GO:0005622;GO:0005624;GO:0005737;GO:0005886;GO:0008095;GO:0016192;GO:0032012;GO:0045785;  
JTID ENSG00000183421:RIPK4 GO:0000166;GO:0004674;GO:0004872;GO:0005524;GO:0006468;GO:0016740;GO:0005515;  
TFJT AP-4:PSCD3;  
TFMI AP-4:hsa-miR-200c:hsa-mir-200c:computational(PUBMED: 17447837); computational(ECRbase);  
MIJT hsa-miR-200c:AP1GBP1:targetscan:mirbase; hsa-miR-200c:SLC13A4:mirbase; hsa-miR-200c:PSCD3:targetscan; hsa-miR-200c:RIPK4:targetscan; hsa-miR-200c:ERBB2IP:targetscan;

```
//
ANNOTATION: 3
ID AREB6:hsa-miR-218;
TFID AREB6;
MIID ENSG00000207732:hsa-mir-218-1:hsa-miR-218;
JTID ENSG00000184434:LRR19 GO:0005515;GO:0016020;GO:0016021;
JTID ENSG00000170516:COX7B2 GO:0004129;GO:0005739;GO:0005746;GO:0006118;GO:0016020;GO:0016021;GO:0016491;
JTID ENSG00000188428:TXNDC5 GO:0005783;GO:0006916;GO:0016853;GO:0045454;GO:0005515;GO:0005788;
JTID ENSG00000085978:ATG16L1 GO:0005515;GO:0006914;GO:0015031;GO:0016020;GO:0005776;
JTID ENSG00000138604:GLCE GO:0005794;GO:0008360;GO:0009252;GO:0015012;GO:0016020;GO:0016021;GO:0016853;GO:0016857;GO:0030210;GO:0050379;
JTID ENSG00000198589:LRBA GO:0005515;GO:0016023;
JTID ENSG00000204241:Q6ZU08_HUMAN
JTID ENSG00000185053:SGCZ GO:0005515;GO:0005856;GO:0005886;GO:0007010;GO:0016012;GO:0016021;
JTID ENSG00000185504:C17orf70
TFJT AREB6:GLCE;
TFMI AREB6:hsa-miR-218:hsa-mir-218-1:computational(ECRbase);
MIJT hsa-miR-218:GLCE:targetscan:pictar; hsa-miR-218:C17orf70:targetscan; hsa-miR-218:TXNDC5:targetscan; hsa-miR-218:COX7B2:targetscan; hsa-miR-218:SGCZ:targetscan:mirbase:pictar; hsa-miR-218:LRR19:targetscan; hsa-miR-218:ATG16L1:targetscan; hsa-miR-218:LRBA:targetscan;

//
ANNOTATION: 3
ID YY1:hsa-miR-181d;
TFID YY1;
MIID ENSG00000207585:hsa-mir-181d:hsa-miR-181d;
JTID ENSG00000175426:PCSK1 GO:0004285;GO:0004289;GO:0005509;GO:0006508;GO:0007267;GO:0008152;GO:0008233;
JTID ENSG00000100307:CBX7 GO:0000785;GO:0003682;GO:0005634;GO:0006333;GO:0006350;GO:0006355;GO:0016568;
JTID ENSG00000198929:NOS1AP GO:0005515;GO:0005737;GO:0007269;GO:0030165;GO:0050998;GO:0050999;
JTID ENSG00000147121:ZNF673 GO:0003676;GO:0005622;GO:0006355;
JTID ENSG00000114124:GRRK7 GO:0000166;GO:0004703;GO:0004871;GO:0005524;GO:0006468;GO:0007165;GO:0007601;GO:0016020;GO:0016740;GO:0050896;
JTID ENSG00000138735:PDE5A GO:0000166;GO:0000287;GO:0003824;GO:0004114;GO:0007165;GO:0008270;GO:0009187;GO:0016787;GO:0030553;GO:0047555;GO:0004112;GO:0046069;
JTID ENSG00000159873:CCDC117
JTID ENSG00000132002:DNAJB1 GO:0005634;GO:0006457;GO:0006986;GO:0031072;GO:0051082;GO:0051085;
JTID ENSG00000113649:TCERG1 GO:0003702;GO:0003713;GO:0005515;GO:0005634;GO:0006350;GO:0006355;GO:0006366;
JTID ENSG00000177728:KIAA0195 GO:0005524;GO:0016020;GO:0016021;GO:0016820;
TFJT YY1:PCSK1; YY1:CCDC117; YY1:TCERG1;
TFMI YY1:hsa-miR-181d:hsa-mir-181d:computational(PUBMED: 17447837);
MIJT hsa-miR-181d:PCSK1:targetscan; hsa-miR-181d:PDE5A:targetscan; hsa-miR-181d:DNAJB1:targetscan; hsa-miR-181d:ZNF673:targetscan:mirbase; hsa-miR-181d:CBX7:targetscan; hsa-miR-181d:KIAA0195:targetscan:mirbase; hsa-miR-181d:NOS1AP:targetscan:mirbase; hsa-miR-181d:TCERG1:targetscan; hsa-miR-181d:CCDC117:targetscan;

//
ANNOTATION: 3
ID NF-Y:hsa-miR-138;
TFID NF-Y;
MIID ENSG00000207649:hsa-mir-138-2:hsa-miR-138;
JTID ENSG00000164684:ZNF704 GO:0003676;GO:0005622;GO:0008270;GO:0046872;
JTID ENSG00000118322:ATP10B GO:0000166;GO:0000287;GO:0004012;GO:0005524;GO:0006810;GO:0015662;GO:0015914;GO:0016020;GO:0016021;GO:0016787;
JTID ENSG00000153561:RMND5A
JTID ENSG00000086712:CXorf15 GO:0000122;GO:0005515;GO:0005634;GO:0016564;GO:0016581;
TFJT NF-Y:ATP10B; NF-Y:CXorf15;
TFMI NF-Y:hsa-miR-138:hsa-mir-138-2:computational(PUBMED: 17447837);
MIJT hsa-miR-138:ZNF704:targetscan:mirbase; hsa-miR-138:RMND5A:targetscan:pictar;

//
ANNOTATION: 3
ID NF-Y:hsa-miR-7;
TFID NF-Y;
MIID ENSG00000207630:hsa-mir-7-3:hsa-miR-7;
JTID ENSG00000180834:MAP6D1
JTID ENSG00000185591:SP1 GO:0003677;GO:0003690;GO:0003700;GO:0003702;GO:0005515;GO:0005622;GO:0005634;GO:0006350;GO:0006355;GO:0008022;GO:0008270;GO:0016563;GO:0042803;GO:0043565;GO:0045817;GO:0045893;GO:0046872;
JTID ENSG00000136485:WDR68 GO:0005515;GO:0005737;
JTID ENSG00000203747:FCGR3A GO:0004872;GO:0005886;GO:0006955;GO:0016021;GO:0019864;
JTID ENSG00000141161:UNC45B GO:0005488;GO:0006457;GO:0007275;GO:0007519;GO:0030154;
JTID ENSG00000124767:GL01 GO:0004462;GO:0005737;GO:0005975;GO:0006916;GO:0008270;GO:0016829;GO:0046872;
JTID ENSG00000125703:ATG4C GO:0000045;GO:0004197;GO:0005515;GO:0005576;GO:0005737;GO:0005829;GO:0005875;GO:0006508;GO:0006512;GO:0006612;GO:0006623;GO:0006914;GO:0008017;GO:0015031;
JTID ENSG00000105556:NP_060020.1 GO:0003677;GO:0005634;
JTID ENSG00000174106:LEMD3 GO:0000166;GO:0005624;GO:0005634;GO:0005635;GO:0005639;GO:0016020;GO:0016021;
JTID ENSG00000082213:C5orf22
TFJT NF-Y:SP1; NF-Y:LEMD3;
TFMI NF-Y:hsa-miR-7:hsa-mir-7-3:computational(PUBMED: 17447837);
MIJT hsa-miR-7:C5orf22:targetscan:mirbase; hsa-miR-7:WDR68:targetscan; hsa-miR-7:UNC45B:targetscan; hsa-miR-7:GL01:targetscan:mirbase; hsa-miR-7:LEMD3:targetscan:mirbase:pictar; hsa-miR-7:NP_060020.1:pictar; hsa-miR-7:SP1:targetscan:pictar; hsa-miR-7:FCGR3A:targetscan; hsa-miR-7:ATG4C:mirbase;

//
ANNOTATION: 3
ID BACH2:hsa-miR-375;
TFID BACH2;
MIID ENSG00000198973:hsa-mir-375:hsa-miR-375;
JTID ENSG00000148702:HABP2 GO:0004252;GO:0005539;GO:0005576;GO:0005615;GO:0006508;GO:0007155;GO:0008233;
JTID ENSG00000117000:RLF GO:0003700;GO:0005515;GO:0005622;GO:0005634;GO:0006350;GO:0006355;GO:0008270;GO:0046872;
JTID ENSG00000151458:ANKRD50
JTID ENSG00000178110:Q8N9G9_HUMAN
JTID ENSG00000183649:Q8NFX8_HUMAN
JTID ENSG00000143772:ITPKB GO:0000166;GO:0005516;GO:0005524;GO:0007165;GO:0008440;GO:0016301;GO:0016740;
TFJT BACH2:HABP2;
TFMI BACH2:hsa-miR-375:hsa-mir-375:computational(ECRbase);
MIJT hsa-miR-375:HABP2:targetscan:pictar; hsa-miR-375:ANKRD50:targetscan; hsa-miR-375:RLF:targetscan:mirbase:pictar; hsa-miR-375:ITPKB:targetscan:pictar; hsa-miR-375:Q8N9G9_HUMAN:mirbase;

//
ANNOTATION: 3
ID NF-Y:hsa-miR-223;
TFID NF-Y;
MIID ENSG00000207939:hsa-mir-223:hsa-miR-223;
JTID ENSG00000164746:Q8NEG2_HUMAN
JTID ENSG00000117528:ABCD3 GO:0000166;GO:0005515;GO:0005524;GO:0005739;GO:0005743;GO:0005777;GO:0005778;GO:0005779;GO:0006810;GO:0007031;GO:0015910;GO:0016020;GO:0016021;GO:0016887;GO:0042626;
JTID ENSG00000134982:APC GO:0000776;GO:0005634;GO:0005737;GO:0005813;GO:0006461;GO:0006974;GO:0007026;GO:0007049;GO:0007050;GO:0007155;GO:0008013;GO:0008017;GO:0008285;GO:0008605;GO:0009798;GO:0009952;GO:0009953;GO:0016055;GO:0016328;GO:0019901;GO:0030877;GO:0045736;GO:0051988;GO:0060070;
JTID ENSG00000165525:SDCCAG1 GO:0005634;
JTID ENSG00000123268:ATF1 GO:0003700;GO:0005634;GO:0006350;GO:0006355;GO:0006356;GO:0043655;GO:0046983;
JTID ENSG00000100596:SPTLC2 GO:0004758;GO:0005783;GO:0008415;GO:0009058;GO:0016020;GO:0016021;GO:0016769;GO:0030170;
JTID ENSG00000114346:ECT2 GO:0004871;GO:0005085;GO:0005089;GO:0005515;GO:0005622;GO:0007242;GO:0035023;GO:0043123;
JTID ENSG00000110911:SLC11A2 GO:0005215;GO:0005381;GO:0005506;GO:0005887;GO:0006811;GO:0006826;GO:0016020;GO:0005768;GO:0005886;GO:0006810;GO:0006824;GO:0010008;GO:0012505;GO:0015087;
JTID ENSG00000187953:NR_002217.1 GO:0005524;GO:0006298;GO:0030983;
JTID ENSG00000075702:WDR62
JTID ENSG00000143507:DUSP10 GO:0004725;GO:0005634;GO:0005737;GO:0006470;GO:0006950;GO:0007254;GO:0016787;GO:0016791;GO:0017017;
```

JTID ENSG00000105379:ETFB GO:0005739;GO:0005759;GO:0006118;GO:0006810;GO:0009055;  
JTID ENSG00000154040:CABYR GO:0005198;GO:0005509;GO:0005634;GO:0005856;GO:0007165;GO:0008603;GO:0009434;  
JTID ENSG00000078246:TULP3 GO:0005546;GO:0005634;GO:0005886;GO:0006355;GO:0007186;  
JTID ENSG00000198420:NP\_055534.1  
JTID ENSG00000099219:KIAA1815 GO:0006508;GO:0008237;GO:0008270;GO:0016020;GO:0016021;GO:0046872;  
TFJT NF-Y:APC; NF-Y:WDR62; NF-Y:DUSP10;  
TFMI NF-Y:hsa-miR-223:hsa-mir-223:computational(PUBMED:17447837);  
MIJT hsa-miR-223:ATF1:mirbase; hsa-miR-223:KIAA1815:mirbase; hsa-miR-223:Q8NEG2\_HUMAN:mirbase; hsa-miR-223:SPTLC2:targetscan; hsa-miR-223:SLC11A2:targetscan:mirbase; hsa-miR-223:WDR62:mirbase:pictar; hsa-miR-223:TULP3:targetscan; hsa-miR-223:ECT2:targetscan; hsa-miR-223:APC:targetscan;  
hsa-miR-223:DUSP10:targetscan:mirbase:pictar; hsa-miR-223:CABYR:mirbase; hsa-miR-223:ETFB:targetscan;

//  
ANNOTATION: 3  
ID MYOD:hsa-miR-219;  
TFID MYOD;  
MIID ENSG00000199036:hsa-mir-219-1:hsa-miR-219;  
JTID ENSG00000196877:NP\_001018132.2  
JTID ENSG00000133511:PIK4CA GO:0004430;GO:0005515;GO:0005798;GO:0006661;GO:0007165;GO:0007268;GO:0016740;  
JTID ENSG00000182107:TMEM30B GO:0016020;GO:0016021;  
JTID ENSG00000178226:PRSS36 GO:0004252;GO:0005578;GO:0005737;GO:0006508;GO:0008233;  
JTID ENSG00000189325:NP\_001010903.2  
JTID ENSG00000197364:S100A7L2 GO:0005509;GO:0008270;  
JTID ENSG00000133985:TTC9 GO:0005488;GO:0006457;  
JTID ENSG00000188193:C6orf155  
JTID ENSG00000185133:PIB5PA GO:0001726;GO:0004437;GO:0004445;GO:0005737;GO:0016787;  
JTID ENSG00000140416:TPM1 GO:0003779;GO:0005856;GO:0005862;GO:0006928;GO:0006937;GO:0008016;GO:0008307;GO:0005200;  
JTID ENSG00000161031:PGLYRP2 GO:0001519;GO:0005515;GO:0005622;GO:0008270;GO:0008745;GO:0009253;GO:0016019;GO:0016020;GO:0016045;GO:0016787;GO:0045087;GO:0046872;GO:0050830;  
JTID ENSG00000106665:CLIP2 GO:0005856;GO:0005874;GO:0005875;  
JTID ENSG00000112246:SIM1 GO:0003700;GO:0004871;GO:0005515;GO:0005634;GO:0006355;GO:0007165;GO:0007275;GO:0007399;GO:0030154;GO:0046982;GO:0030528;GO:0045449;  
TFJT MYOD:PRSS36;  
TFMI MYOD:hsa-miR-219:hsa-mir-219-1:computational(ECRbase);  
MIJT hsa-miR-219:PIK4CA:targetscan:mirbase; hsa-miR-219:TPM1:targetscan; hsa-miR-219:SIM1:targetscan; hsa-miR-219:PRSS36:mirbase; hsa-miR-219:PGLYRP2:targetscan:mirbase; hsa-miR-219:PIB5PA:targetscan:mirbase:pictar; hsa-miR-219:CLIP2:targetscan; hsa-miR-219:TMEM30B:targetscan:mirbase;  
hsa-miR-219:S100A7L2:mirbase;

//  
ANNOTATION: 3  
ID NF-Y:hsa-miR-25;  
TFID NF-Y;  
MIID ENSG00000207547:hsa-mir-25:hsa-miR-25;  
JTID ENSG00000197174:O14606\_HUMAN  
JTID ENSG00000117461:PIK3R3 GO:0005515;GO:0005942;GO:0007242;GO:0008286;GO:0016301;GO:0016303;GO:0035014;GO:0046935;  
JTID ENSG00000144583:MARCH4 GO:0005515;GO:0006512;GO:0008270;GO:0016020;GO:0016021;GO:0016874;GO:0046872;  
JTID ENSG00000197285:NR\_001536.1  
JTID ENSG00000197147:LRRRC8B GO:0005515;GO:0016020;GO:0016021;  
JTID ENSG00000175676:GOLGA8F  
JTID ENSG00000135414:GDF11 GO:0001501;GO:0001656;GO:0001657;GO:0005125;GO:0005515;GO:0005615;GO:0007399;GO:0007498;GO:0008083;GO:0008285;GO:0009887;GO:0031016;GO:0040007;GO:0045596;GO:0048469;GO:0048593;  
JTID ENSG00000112210:RAB23 GO:0000166;GO:0005525;GO:0001655;GO:0007264;GO:0007399;GO:0015031;GO:0016020;GO:0021513;GO:0042733;GO:0045861;  
TFJT NF-Y:PIK3R3; NF-Y:MARCH4;  
TFMI NF-Y:hsa-miR-25:hsa-mir-25:computational(PUBMED:17447837);  
MIJT hsa-miR-25:PIK3R3:targetscan:pictar; hsa-miR-25:MARCH4:targetscan:mirbase; hsa-miR-25:RAB23:targetscan:mirbase:pictar; hsa-miR-25:GDF11:targetscan:mirbase:pictar;

//  
ANNOTATION: 3  
ID PBX-1:hsa-miR-135a;  
TFID PBX-1;  
MIID ENSG00000207586:hsa-mir-135a-2:hsa-miR-135a;  
JTID ENSG00000095787:WAC GO:0005634;  
JTID ENSG00000135486:HNRPA1 GO:0000166;GO:0000398;GO:0003697;GO:0003727;GO:0005515;GO:0005634;GO:0005654;GO:0005681;GO:0005737;GO:0006405;GO:0006810;GO:0008380;GO:0030530;GO:0051028;GO:0051170;GO:0003676;  
JTID ENSG00000118322:ATP10B GO:0000166;GO:0000287;GO:0004012;GO:0005524;GO:0006810;GO:0015662;GO:0015914;GO:0016020;GO:0016021;GO:0016787;  
JTID ENSG00000149806:PAU GO:0003723;GO:0003735;GO:0005622;GO:0005737;GO:0005840;GO:0005843;GO:0006412;GO:0006464;  
JTID ENSG00000122012:SV2C GO:0005215;GO:0006836;GO:0008021;GO:0016020;GO:0016021;GO:0045202;  
JTID ENSG00000135452:TSPAN31 GO:0005624;GO:0005887;GO:0008284;GO:0016020;  
TFJT PBX-1:ATP10B;  
TFMI PBX-1:hsa-miR-135a:hsa-mir-135a-2:computational(ECRbase);  
MIJT hsa-miR-135a:HNRPA1:targetscan:mirbase:pictar; hsa-miR-135a:SV2C:targetscan:mirbase; hsa-miR-135a:WAC:targetscan:mirbase:pictar; hsa-miR-135a:TSPAN31:targetscan:mirbase;

//  
ANNOTATION: 3  
ID MEIS1:hsa-miR-200c;  
TFID MEIS1;  
MIID ENSG00000207713:hsa-mir-200c:hsa-miR-200c;  
JTID ENSG00000112379:KIAA1244 GO:0005086;GO:0005622;GO:0032012;  
JTID ENSG00000115963:RND3 GO:0000166;GO:0003924;GO:0005525;GO:0005622;GO:0007155;GO:0007264;GO:0016020;GO:0030036;  
JTID ENSG00000122417:ODF2L  
JTID ENSG00000102385:DRP2 GO:0005198;GO:0005509;GO:0005515;GO:0005856;GO:0005886;GO:0007417;GO:0008270;  
JTID ENSG00000148429:USP6NL GO:0005096;GO:0005097;GO:0005622;GO:0032313;  
JTID ENSG00000188493:C19orf54  
JTID ENSG00000165410:CFL2 GO:0003779;GO:0005515;GO:0005622;GO:0005634;GO:0005856;  
JTID ENSG00000183783:KCTD8 GO:0005249;GO:0005515;GO:0006813;GO:0008076;GO:0016020;  
JTID ENSG00000035862:TIMP2 GO:0004857;GO:0005178;GO:0005515;GO:0005578;GO:0005604;GO:0008047;GO:0008152;GO:0008191;GO:0008285;GO:0009986;GO:0030814;GO:0043408;GO:0045664;  
JTID ENSG00000156469:MTFRFD1 GO:0005739;  
JTID ENSG00000204323:Q71RC9\_HUMAN  
JTID ENSG00000158716:DUSE23 GO:0004725;GO:0005634;GO:0006470;GO:0008138;GO:0016787;  
JTID ENSG00000105793:GTPBP10 GO:0005525;GO:0005622;  
JTID ENSG00000197343:ZNF655 GO:0003677;GO:0005515;GO:0005622;GO:0005634;GO:0006350;GO:0006355;GO:0008270;GO:0046872;GO:0003676;  
JTID ENSG00000173027:WBP1 GO:0005515;  
JTID ENSG00000173705:SUSD5 GO:0005540;GO:0007155;GO:0016020;GO:0016021;  
JTID ENSG00000115084:SLC35F5 GO:0016020;  
JTID ENSG00000117600:NP\_055654.2  
JTID ENSG00000182831:C16orf72  
JTID ENSG00000183873:SCN5A GO:0001518;GO:0005216;GO:0005248;GO:0005624;GO:0006811;GO:0006814;GO:0006936;GO:0008015;GO:0008016;GO:0016020;GO:0016021;GO:0031402;  
JTID ENSG00000141562:NARF GO:0005506;GO:0005515;GO:0005638;GO:0006118;GO:0008901;GO:0009055;GO:0031981;GO:0042597;GO:0051536;GO:0005521;GO:0005652;  
JTID ENSG00000125954:FNTB GO:0004311;GO:0004660;GO:0005515;GO:0005737;GO:0008270;GO:0008284;GO:0008285;GO:0016740;GO:0018347;GO:0042060;GO:0046872;GO:0048146;  
TFJT MEIS1:KIAA1244;  
TFMI MEIS1:hsa-miR-200c:hsa-mir-200c:computational(ECRbase);  
MIJT hsa-miR-200c:TIMP2:targetscan; hsa-miR-200c:RND3:targetscan:mirbase:pictar; hsa-miR-200c:MTFRFD1:targetscan:mirbase; hsa-miR-200c:DRP2:targetscan; hsa-miR-200c:C19orf54:targetscan:mirbase; hsa-miR-200c:Q71RC9\_HUMAN:mirbase; hsa-miR-200c:GTPBP10:targetscan; hsa-miR-200c:KIAA1244:targetscan; hsa-miR-200c:DUSP23:targetscan; hsa-miR-200c:CFL2:targetscan:pictar; hsa-miR-200c:USP6NL:targetscan:mirbase; hsa-miR-200c:NARF:targetscan; hsa-miR-200c:SCN5A:targetscan:pictar; hsa-miR-200c:C16orf72:targetscan:pictar; hsa-miR-200c:KCTD8:targetscan:mirbase:pictar; hsa-miR-200c:WBP1:targetscan:mirbase; hsa-miR-200c:FNTB:targetscan; hsa-miR-200c:SLC35F5:targetscan; hsa-miR-200c:ZNF655:mirbase;

//  
ANNOTATION: 3  
ID CREB:hsa-miR-212;  
TFID CREB;

MIID ENSG00000207953:hsa-mir-212:hsa-miR-212;  
JTID ENSG00000188290:HEH4 GO:0003677;GO:0005634;GO:0006355;GO:0007275;GO:0007399;GO:0030154;GO:0030528;  
JTID ENSG00000110768:GTF2H1 GO:0000079;GO:0005634;GO:0005675;GO:0006281;GO:0006350;GO:0006355;GO:0006366;GO:0008353;GO:0016251;  
TFJT CREB:GTF2H1;  
TFMI CREB:hsa-miR-212:hsa-mir-212:computational(ECRbase);  
MIJT hsa-miR-212:GTF2H1:targetscan:mirbase;

//  
ANNOTATION: 3  
ID ATF6:hsa-miR-199a\*;  
TFID ATF6;  
MIID ENSG00000207752:hsa-mir-199a-1:hsa-miR-199a\*;  
MIID ENSG00000208024:hsa-mir-199a-2:hsa-miR-199a\*;  
JTID ENSG00000188384:Q6ZUQ5\_HUMAN  
JTID ENSG00000205271:Q6ZUQ5\_HUMAN  
JTID ENSG00000205275:Q6ZUQ5\_HUMAN  
JTID ENSG00000182712:MTCP1 GO:0000074;GO:0005739;GO:0008283;  
JTID ENSG00000179151:EDC3 GO:0005515;  
JTID ENSG00000132549:VPS13B GO:0015031;  
JTID ENSG00000198718:KIAA0423 GO:0005488;  
TFJT ATF6:Q6ZUQ5\_HUMAN; ATF6:Q6ZUQ5\_HUMAN; ATF6:KIAA0423;  
TFMI ATF6:hsa-miR-199a\*:hsa-mir-199a-2:computational(ECRbase);  
MIJT hsa-miR-199a\*:KIAA0423:pictar;

//  
ANNOTATION: 3  
ID AP-2ALPHA:hsa-miR-200c;  
TFID AP-2ALPHA;  
MIID ENSG00000207713:hsa-mir-200c:hsa-miR-200c;  
JTID ENSG00000035862:TIMP2 GO:0004857;GO:0005178;GO:0005515;GO:0005578;GO:0005604;GO:0008047;GO:0008152;GO:0008191;GO:0008285;GO:0009986;GO:0030814;GO:0043408;GO:0045664;  
JTID ENSG00000054277:OPN3 GO:0001584;GO:0004872;GO:0005887;GO:0007165;GO:0007186;GO:0007601;GO:0007602;GO:0008020;GO:0016020;GO:0016021;GO:0018298;GO:0042752;GO:0050896;  
JTID ENSG00000112851:ERBB2IP GO:0005176;GO:0005178;GO:0005200;GO:0005515;GO:0005604;GO:0005634;GO:0005737;GO:0007049;GO:0007155;GO:0007165;GO:0007173;GO:0007229;GO:0016049;GO:0030056;GO:0045104;GO:0045175;GO:0045197;  
JTID ENSG00000116285:ERRF1 GO:0005100;GO:0005515;GO:0005737;GO:0006950;  
JTID ENSG00000006114:AP1GBP1 GO:0005509;GO:0005737;GO:0005794;GO:0006886;GO:0006897;GO:0016020;GO:0030121;  
JTID ENSG00000196204:Q6NUR6\_HUMAN  
JTID ENSG00000138061:CYP1B1 GO:0004497;GO:0005506;GO:0005515;GO:0005783;GO:0005792;GO:0006118;GO:0007601;GO:0016020;GO:0019825;GO:0020037;GO:0046872;GO:0050381;  
JTID ENSG00000137040:RANBP6 GO:0005488;GO:0005634;GO:0015031;  
JTID ENSG00000183873:SCN5A GO:0001518;GO:0005216;GO:0005248;GO:0005624;GO:0006811;GO:0006814;GO:0006936;GO:0008015;GO:0008016;GO:0016020;GO:0016021;GO:0031402;  
JTID ENSG00000185065:NP\_776154.2  
TFJT AP-2ALPHA:RANBP6; AP-2ALPHA:SCN5A;  
TFMI AP-2ALPHA:hsa-miR-200c:hsa-mir-200c:computational(PUBMED: 17447837);  
MIJT hsa-miR-200c:AP1GBP1:targetscan:mirbase; hsa-miR-200c:ERRF1:targetscan:pictar; hsa-miR-200c:SCN5A:targetscan:pictar; hsa-miR-200c:CYP1B1:targetscan:pictar; hsa-miR-200c:TIMP2:targetscan; hsa-miR-200c:ERBB2IP:targetscan; hsa-miR-200c:RANBP6:targetscan;

//  
ANNOTATION: 3  
ID MYOD:hsa-miR-375;  
TFID MYOD;  
MIID ENSG00000198973:hsa-mir-375:hsa-miR-375;  
JTID ENSG00000154874:NP\_872374.3  
JTID ENSG00000108551:RASD1 GO:0000166;GO:0003924;GO:0005085;GO:0005525;GO:0005622;GO:0007165;GO:0007186;GO:0007264;GO:0016020;  
JTID ENSG00000166272:C10orf26 GO:0016020;GO:0016021;  
JTID ENSG00000162337:LRP5 GO:0004872;GO:0005739;GO:0006629;GO:0006897;GO:0007165;GO:0007275;GO:0008284;GO:0009952;GO:0010003;GO:0016020;GO:0016021;GO:0016055;GO:0042074;GO:0042733;  
JTID ENSG00000205566:Q8TB02\_HUMAN  
JTID ENSG00000151806:GUF1 GO:0000166;GO:0003743;GO:0003924;GO:0005525;GO:0005622;GO:0006413;GO:0007264;  
JTID ENSG00000117519:CNN3 GO:0003779;GO:0005515;GO:0005516;GO:0005523;GO:0006939;GO:0030172;GO:0031032;  
JTID ENSG00000088179:PTPN4 GO:0004726;GO:0005198;GO:0005737;GO:0005856;GO:0006470;GO:0008092;GO:0016020;GO:0016787;  
JTID ENSG00000123472:ATPAF1 GO:0005515;GO:0005739;GO:0006461;  
JTID ENSG00000162595:DIRAS3 GO:0000079;GO:0001666;GO:0003924;GO:0005525;GO:0006349;GO:0007264;GO:0016020;  
JTID ENSG00000148702:HABP2 GO:0004252;GO:0005539;GO:0005576;GO:0005615;GO:0006508;GO:0007155;GO:0008233;  
JTID ENSG00000171885:AQP4 GO:0005215;GO:0006810;GO:0015288;GO:0016020;GO:0016021;GO:0019867;GO:0005887;GO:0007399;GO:0007588;GO:0015250;  
TFJT MYOD:C10orf26; MYOD:AQP4;  
TFMI MYOD:hsa-miR-375:hsa-mir-375:computational(ECRbase);  
MIJT hsa-miR-375:GUF1:mirbase; hsa-miR-375:ATPAF1:targetscan; hsa-miR-375:LRP5:targetscan:pictar; hsa-miR-375:CNN3:targetscan:mirbase; hsa-miR-375:DIRAS3:targetscan; hsa-miR-375:PTPN4:targetscan:mirbase; hsa-miR-375:RASD1:targetscan:mirbase:pictar; hsa-miR-375:AQP4:targetscan; hsa-miR-375:HABP2:targetscan:pictar; hsa-miR-375:Q8TB02\_HUMAN:mirbase;

//  
ANNOTATION: 3  
ID ER:hsa-miR-1;  
TFID ER;  
MIID ENSG00000199017:hsa-mir-1-1:hsa-miR-1;  
JTID ENSG00000152661:GJAI GO:0004871;GO:0005515;GO:0005887;GO:0005922;GO:0006810;GO:0006936;GO:0007267;GO:0007507;GO:0007605;GO:0015075;GO:0015285;GO:0016020;GO:0016264;GO:0043123;  
JTID ENSG00000130590:SAMD10  
JTID ENSG00000205358:MT1H GO:0005507;GO:0005515;GO:0008270;GO:0046870;GO:0046872;  
JTID ENSG00000095139:ARCN1 GO:0005783;GO:0006886;GO:0006888;GO:0006890;GO:0006891;GO:0016020;GO:0030125;GO:0030126;GO:0006810;  
JTID ENSG00000107854:TNKS2 GO:0000781;GO:0003950;GO:0005634;GO:0005694;GO:0006471;GO:0016757;GO:0040014;  
JTID ENSG00000094841:UPRT  
JTID ENSG00000198417:MT1F GO:0005507;GO:0005737;GO:0008270;GO:0046870;GO:0046872;  
JTID ENSG00000166747:AP1G1 GO:0005215;GO:0005488;GO:0005515;GO:0005737;GO:0005794;GO:0005802;GO:0005905;GO:0006461;GO:0006886;GO:0006897;GO:0030119;GO:0030130;GO:0030136;GO:0048471;  
JTID ENSG00000179036:VAMP2 GO:0000149;GO:0005516;GO:0005543;GO:0005887;GO:0006944;GO:0008021;GO:0016020;GO:0016079;GO:0016192;GO:0017156;GO:0017157;GO:0019717;GO:0030141;GO:0030672;GO:0042589;GO:0045202;  
JTID ENSG00000197417:CARKL GO:0005975;GO:0016301;GO:0016740;  
JTID ENSG00000158402:CDC25C GO:0000079;GO:0004725;GO:0005515;GO:0005622;GO:0005634;GO:0006470;GO:0007049;GO:0007088;GO:0007089;GO:0008283;GO:0016787;GO:0051301;  
TFJT ER:CDC25C;  
TFMI ER:hsa-miR-1:hsa-mir-1-1:computational(ECRbase);  
MIJT hsa-miR-1:CDC25C:targetscan:mirbase; hsa-miR-1:AP1G1:targetscan:pictar; hsa-miR-1:CARKL:targetscan; hsa-miR-1:TNKS2:targetscan:pictar; hsa-miR-1:MT1F:targetscan:mirbase; hsa-miR-1:MT1H:targetscan:mirbase; hsa-miR-1:UPRT:targetscan:mirbase; hsa-miR-1:GJAI:targetscan:mirbase:pictar;PUBMED: 17062625; hsa-miR-1:VAMP2:targetscan:pictar; hsa-miR-1:SAMD10:targetscan:mirbase; hsa-miR-1:ARCN1:targetscan:pictar;PUBMED: 15685193;

//  
ANNOTATION: 3  
ID PAX-4:hsa-miR-129;  
TFID PAX-4;  
MIID ENSG00000199077:hsa-mir-129-2:hsa-miR-129;  
JTID ENSG00000145416:MARCH1 GO:0005515;GO:0006512;GO:0008270;GO:0016020;GO:0016021;GO:0016874;GO:0046872;  
JTID ENSG00000105058:FAM32A GO:0005730;  
JTID ENSG0000016082:ISL1 GO:0001755;GO:0003007;GO:0003700;GO:0003702;GO:0005515;GO:0005634;GO:0006091;GO:0006355;GO:0007275;GO:0007507;GO:0008270;GO:0043565;GO:0046872;  
TFJT PAX-4:MARCH1;  
TFMI PAX-4:hsa-miR-129:hsa-mir-129-2:computational(ECRbase);  
MIJT hsa-miR-129:ISL1:targetscan:pictar;

//  
ANNOTATION: 3  
ID LEF1:hsa-miR-31;

```
TFID LEF1;
MIID ENSG00000199177:hsa-mir-31:hsa-miR-31;
JTID ENSG00000013588:GPRC5A GO:0004872;GO:0005887;GO:0007165;GO:0007186;GO:0008067;GO:0016020;
JTID ENSG000000189037:DUSP21 GO:0004672;GO:0004725;GO:0005634;GO:0005737;GO:0006470;GO:0007165;GO:0008138;GO:0016787;
JTID ENSG000000151715:TMEM45B GO:0016020;GO:0016021;
JTID ENSG000000167930:ITFG3 GO:0016020;GO:0016021;
JTID ENSG000000107854:TNKS2 GO:0000781;GO:0003950;GO:0005634;GO:0005694;GO:0006471;GO:0016757;GO:0040014;
JTID ENSG000000162520:SYNC1 GO:0005198;
TFJT LEF1:SYNC1;
TFMI LEF1:hsa-miR-31:hsa-mir-31:computational (ECRbase);
MIJT hsa-miR-31:GPRC5A:targetscan:mirbase; hsa-miR-31:TNKS2:targetscan; hsa-miR-31:ITFG3:targetscan; hsa-miR-31:DUSP21:targetscan:mirbase; hsa-miR-31:TMEM45B:targetscan; hsa-miR-31:SYNC1:targetscan;

//
ANNOTATION: 3
ID MEF-2:hsa-miR-499;
TFID MEF-2;
MIID ENSG000000207635:hsa-mir-499:hsa-miR-499;
JTID ENSG000000110693:SOX6 GO:0003677;GO:0003700;GO:0005515;GO:0005634;GO:0006325;GO:0006350;GO:0006355;GO:0007517;GO:0035051;GO:0042692;GO:0045165;GO:0051216;
JTID ENSG000000160180:TFF3 GO:0005576;GO:0006952;GO:0007586;GO:0030141;
JTID ENSG000000108219:TSPAN14 GO:0016020;GO:0016021;
JTID ENSG000000169139:UBE2V2 GO:0000074;GO:0000209;GO:0005515;GO:0005634;GO:0005737;GO:0006282;GO:0006464;GO:0008283;GO:0019787;GO:0031372;
TFJT MEF-2:SOX6;
TFMI MEF-2:hsa-miR-499:hsa-mir-499:computational (ECRbase);
MIJT hsa-miR-499:TSPAN14:targetscan; hsa-miR-499:SOX6:targetscan:mirbase; hsa-miR-499:UBE2V2:targetscan:mirbase; hsa-miR-499:TFF3:targetscan;

//
ANNOTATION: 3
ID HOXA4:hsa-miR-17-5p;
TFID HOXA4;
MIID ENSG000000207745:hsa-mir-17:hsa-miR-17-5p;
JTID ENSG000000104517:EDD1 GO:0004842;GO:0005622;GO:0006464;GO:0006512;GO:0005515;GO:0005625;GO:0005634;GO:0006511;GO:0006974;GO:0008270;GO:0008283;GO:0016874;GO:0046872;GO:0050847;
JTID ENSG000000187678:SPRY4 GO:0005515;GO:0007275;GO:0009966;GO:0016020;GO:0043407;
JTID ENSG000000154065:ANKRD29
JTID ENSG000000162624:LHX8 GO:0003677;GO:0003700;GO:0005634;GO:0006355;GO:0008270;GO:0043565;GO:0046872;GO:0007611;GO:0021879;GO:0042475;
JTID ENSG000000203793:Q6ZR74_HUMAN
TFJT HOXA4:SPRY4;
TFMI HOXA4:hsa-miR-17-5p:hsa-mir-17:computational (ECRbase);
MIJT hsa-miR-17-5p:SPRY4:targetscan:pictar; hsa-miR-17-5p:ANKRD29:targetscan; hsa-miR-17-5p:EDD1:targetscan:pictar; hsa-miR-17-5p:LHX8:targetscan:pictar;

//
ANNOTATION: 3
ID AP-4:hsa-miR-141;
TFID AP-4;
MIID ENSG000000207708:hsa-mir-141:hsa-miR-141;
JTID ENSG000000171150:SOCS5 GO:0001558;GO:0005154;GO:0005515;GO:0005737;GO:0007173;GO:0007242;GO:0007259;GO:0009968;GO:0019210;GO:0019221;GO:0045627;GO:0045629;
JTID ENSG000000006740:RICH2_HUMAN GO:0005096;GO:0005515;GO:0005622;GO:0005737;GO:0007165;
TFJT AP-4:SOCS5;
TFMI AP-4:hsa-miR-141:hsa-mir-141:computational (PUBMED: 17447837);
MIJT hsa-miR-141:SOCS5:targetscan;

//
ANNOTATION: 3
ID RFX:hsa-miR-148a;
TFID RFX;
MIID ENSG000000199085:hsa-mir-148a:hsa-miR-148a;
JTID ENSG000000165588:OTX2
GO:0001708;GO:0003700;GO:0005515;GO:0005634;GO:0005737;GO:0006357;GO:0007275;GO:0007411;GO:0007417;GO:0008190;GO:0008589;GO:0009887;GO:0009952;GO:0009953;GO:0030154;GO:0030182;GO:0030426;GO:0030528;GO:0030900;GO:0030901;GO:0040036;GO:0042472;GO:0042706;GO:0043565;GO:0045165;GO:0048663;
JTID ENSG000000116016:EPAS1 GO:0001525;GO:0001666;GO:0003705;GO:0003713;GO:0004871;GO:0005515;GO:0005634;GO:0006355;GO:0006366;GO:0007165;GO:0007275;GO:0030154;GO:0035035;
JTID ENSG000000182220:ATP6AP2 GO:0002003;GO:0004872;GO:0005515;GO:0009897;GO:0016020;GO:0016021;GO:0032914;GO:0043408;
JTID ENSG000000142700:DMRTA2 GO:0003700;GO:0005634;GO:0006355;GO:0007548;
JTID ENSG000000180537:RNFL182 GO:0005515;GO:0008270;GO:0016020;GO:0016021;GO:0046872;
JTID ENSG000000122034:GTF3A GO:0003677;GO:0003709;GO:0003723;GO:0005622;GO:0005634;GO:0006350;GO:0006355;GO:0006383;GO:0008270;GO:0009303;GO:0046872;
JTID ENSG000000173681:CXorf23 GO:0004872;
JTID ENSG000000131269:ABCB7 GO:0000166;GO:0005524;GO:0005739;GO:0005743;GO:0006810;GO:0015232;GO:0016020;GO:0016021;GO:0016887;GO:0042626;
JTID ENSG000000059728:MXD1 GO:0003700;GO:0003714;GO:0005515;GO:0005634;GO:0006355;GO:0007275;GO:0008283;
TFJT RFX:OTX2;
TFMI RFX:hsa-miR-148a:hsa-mir-148a:computational (ECRbase);
MIJT hsa-miR-148a:OTX2:targetscan:pictar; hsa-miR-148a:GTF3A:mirbase; hsa-miR-148a:ABCB7:targetscan:mirbase:pictar; hsa-miR-148a:EPAS1:targetscan:pictar; hsa-miR-148a:CXorf23:targetscan:mirbase; hsa-miR-148a:ATP6AP2:targetscan:mirbase:pictar; hsa-miR-148a:DMRTA2:mirbase; hsa-miR-148a:RNFL182:targetscan; hsa-miR-148a:MXD1:targetscan;

//
ANNOTATION: 3
ID PEA3:hsa-miR-199a;
TFID PEA3;
MIID ENSG000000208024:hsa-mir-199a-2:hsa-miR-199a;
JTID ENSG000000148481:C10orf97 GO:0005509;
JTID ENSG000000105699:LSR GO:0001889;GO:0004872;GO:0005319;GO:0005886;GO:0009790;GO:0016021;GO:0042627;
JTID ENSG000000176986:SEC24C GO:0005515;GO:0005783;GO:0006886;GO:0006888;GO:0008270;GO:0030127;
JTID ENSG000000100554:ATP6V1D GO:0006811;GO:0015986;GO:0015992;GO:0016469;GO:0016787;GO:0046872;GO:0046933;GO:0046961;
JTID ENSG000000204580:DDR1 GO:0000166;GO:0004714;GO:0004872;GO:0005524;GO:0005887;GO:0006468;GO:0007155;GO:0007169;GO:0016020;GO:0016740;
TFJT PEA3:SEC24C; PEA3:DDR1;
TFMI PEA3:hsa-miR-199a:hsa-mir-199a-2:computational (ECRbase);
MIJT hsa-miR-199a:C10orf97:targetscan:mirbase; hsa-miR-199a:ATP6V1D:targetscan; hsa-miR-199a:DDR1:targetscan:mirbase:pictar; hsa-miR-199a:SEC24C:targetscan;

//
ANNOTATION: 3
ID ELF-1:hsa-miR-199a*;
TFID ELF-1;
MIID ENSG000000208024:hsa-mir-199a-2:hsa-miR-199a*;
JTID ENSG000000204220:PFDN6 GO:0006457;GO:0016272;GO:0051082;
JTID ENSG000000139973:SYT16
JTID ENSG000000116141:MARK1 GO:0000166;GO:0000287;GO:0004674;GO:0005524;GO:0005737;GO:0006468;GO:0007010;GO:0007243;GO:0015630;GO:0016740;
JTID ENSG00000011641:NOLL GO:0000074;GO:0005515;GO:0005634;GO:0005730;GO:0008168;GO:0008284;GO:0016740;
JTID ENSG000000148985:NP_055304.1 GO:0004872;GO:0005515;GO:0005634;GO:0006916;GO:0016021;GO:0042770;
JTID ENSG000000110395:CBL GO:0003700;GO:0004842;GO:0004871;GO:0005509;GO:0005515;GO:0005634;GO:0005886;GO:0007166;GO:0007173;GO:0008270;GO:0016567;GO:0016874;GO:0048260;
JTID ENSG000000134152:C15orf29 GO:0005730;
JTID ENSG000000105967:TFEC GO:0003700;GO:0003713;GO:0003714;GO:0005634;GO:0045449;GO:0030528;
JTID ENSG000000117360:PRPF3 GO:0000398;GO:0005515;GO:0005634;GO:0005681;GO:0007601;GO:0008380;GO:0031202;GO:0050896;
TFJT ELF-1:TFEC;
TFMI ELF-1:hsa-miR-199a*:hsa-mir-199a-2:computational (ECRbase);
MIJT hsa-miR-199a*:SYT16:mirbase; hsa-miR-199a*:NOLL:mirbase; hsa-miR-199a*:MARK1:pictar; hsa-miR-199a*:NP_055304.1:mirbase;
```

```
//
ANNOTATION: 3
ID YY1:hsa-miR-219;
TFID YY1;
MIID ENSG00000199036:hsa-mir-219-1:hsa-miR-219;
JTID ENSG00000177553:Clorf167
JTID ENSG00000113810:SMC4 GO:0000166;GO:0000796;GO:0005515;GO:0005524;GO:0005634;GO:0005694;GO:0006259;GO:0007001;GO:0007049;GO:0007076;GO:0046982;GO:0051301;
JTID ENSG00000173457:PPP1R14B GO:0004864;
JTID ENSG00000095066:H00K2 GO:0000226;GO:0005515;GO:0005737;GO:0005856;GO:0005874;GO:0006897;GO:0008017;
TFJT YY1:SMC4;
TFMI YY1:hsa-miR-219:hsa-mir-219-1:computational(PUBMED: 17447837);
MIJT hsa-miR-219:SMC4:targetscan:mirbase; hsa-miR-219:PPP1R14B:targetscan; hsa-miR-219:Clorf167:mirbase; hsa-miR-219:H00K2:targetscan:mirbase;

//
ANNOTATION: 2
ID NF-E2:hsa-miR-142-5p;
TFID NF-E2;
MIID ENSG00000207567:hsa-mir-142:hsa-miR-142-5p;
JTID ENSG00000067533:RRP15 GO:0005515;
TFMI NF-E2:hsa-miR-142-5p:hsa-mir-142:computational(ECRbase);
MIJT hsa-miR-142-5p:RRP15:targetscan:mirbase;

//
ANNOTATION: 2
ID SP-1:hsa-miR-149;
TFID SP-1;
MIID ENSG00000207611:hsa-mir-149:hsa-miR-149;
JTID ENSG00000130270:ATP8B3 GO:0000166;GO:0000287;GO:0004012;GO:0005524;GO:0006810;GO:0015662;GO:0015914;GO:0016020;GO:0016021;GO:0016787;GO:0016887;GO:0000299;GO:0001669;GO:0007339;GO:0045332;
JTID ENSG00000158966:CACHD1 GO:0016020;
JTID ENSG00000109062:SLC9A3R1 GO:0005515;GO:0006461;GO:0015629;GO:0016055;GO:0016324;GO:0017155;GO:0030643;GO:0031698;GO:0045177;
JTID ENSG00000074317:SNCB GO:0004859;GO:0005737;GO:0005739;GO:0019717;GO:0042417;
JTID ENSG00000187609:NP_060290.3 GO:0003676;GO:0004518;GO:0005622;GO:0008408;GO:0016787;
TFMI SP-1:hsa-miR-149:hsa-mir-149:computational(PUBMED: 17447837);
MIJT hsa-miR-149:SNCB:targetscan:mirbase:pictar; hsa-miR-149:ATP8B3:targetscan; hsa-miR-149:CACHD1:targetscan; hsa-miR-149:SLC9A3R1:targetscan;

//
ANNOTATION: 2
ID SMAD-3:hsa-miR-296;
TFID SMAD-3;
MIID ENSG00000207950:hsa-mir-296:hsa-miR-296;
JTID ENSG00000141526:SLC16A3 GO:0005215;GO:0005624;GO:0005887;GO:0006810;GO:0015293;GO:0015355;GO:0015711;GO:0015718;GO:0016020;
JTID ENSG00000172232:AZU1 GO:0001774;GO:0004252;GO:0005576;GO:0006508;GO:0006916;GO:0006954;GO:0007205;GO:0008201;GO:0008347;GO:0015643;GO:0042117;GO:0042535;GO:0042582;GO:0045123;GO:0045348;GO:0045785;GO:0048246;GO:0050725;GO:0050754;GO:0050766;GO:0050829;GO:0050930;GO:0006935;GO:0043114;
JTID ENSG00000206013:IFITM5
TFMI SMAD-3:hsa-miR-296:hsa-mir-296:computational(PUBMED: 17447837);
MIJT hsa-miR-296:AZU1:targetscan:mirbase; hsa-miR-296:SLC16A3:targetscan:mirbase; hsa-miR-296:IFITM5:targetscan:mirbase;

//
ANNOTATION: 2
ID E4F1:hsa-miR-30c;
TFID E4F1;
MIID ENSG00000207962:hsa-mir-30c-1:hsa-miR-30c;
JTID ENSG00000139636:LMBR1L GO:0004872;GO:0006897;GO:0016020;GO:0016021;
JTID ENSG00000162624:LHX8 GO:0003677;GO:0003700;GO:0005634;GO:0006355;GO:0008270;GO:0043565;GO:0046872;GO:0007611;GO:0021879;GO:0042475;
JTID ENSG00000186594:NP_116284.2
JTID ENSG00000205269:Q5T4T1_HUMAN
JTID ENSG00000083635:NUPF1P1 GO:0003677;GO:0003723;GO:0005515;GO:0005622;GO:0005634;GO:0005726;GO:0005730;GO:0005830;GO:0006396;GO:0008023;GO:0008270;GO:0016363;GO:0045944;GO:0046872;GO:0048786;
TFJT E4F1:LMBR1L; E4F1:NP_116284.2;
MIJT hsa-miR-30c:NP_116284.2:mirbase; hsa-miR-30c:LMBR1L:targetscan:mirbase:pictar; hsa-miR-30c:LHX8:targetscan:mirbase:pictar;

//
ANNOTATION: 2
ID LEF1:hsa-miR-223;
TFID LEF1;
MIID ENSG00000207939:hsa-mir-223:hsa-miR-223;
JTID ENSG00000133116:KL GO:0004566;GO:0004871;GO:0005179;GO:0005499;GO:0005615;GO:0005624;GO:0005625;GO:0005887;GO:0005975;GO:0006112;GO:0007568;GO:0008152;GO:0008422;GO:0016020;GO:0030501;GO:0043169;
JTID ENSG00000175868:CALCB GO:0005184;GO:0005576;GO:0005625;GO:0006874;GO:0007165;
JTID ENSG00000174990:CA5A GO:0004089;GO:0005739;GO:0005759;GO:0006730;GO:0008270;GO:0016829;GO:0046872;
JTID ENSG00000117528:ABCD3 GO:0000166;GO:0005515;GO:0005524;GO:0005739;GO:0005743;GO:0005777;GO:0005778;GO:0006810;GO:0007031;GO:0015910;GO:0016020;GO:0016021;GO:0016887;GO:0042626;
JTID ENSG00000115267:IFIH1 GO:0000166;GO:0003723;GO:0004386;GO:0005515;GO:0005524;GO:0005622;GO:0009615;GO:0016787;GO:0042981;GO:0045087;
JTID ENSG00000140284:SLC27A2 GO:0000038;GO:0000166;GO:0004467;GO:0005777;GO:0005782;GO:0005783;GO:0006629;GO:0008152;GO:0016020;GO:0016021;GO:0016874;GO:0003824;GO:0005739;
JTID ENSG00000151849:CENPFJ GO:0005515;GO:0005856;GO:0005874;GO:0007020;GO:0008275;GO:0015631;GO:0046785;GO:0051301;
JTID ENSG00000163364:Q96D13_HUMAN
JTID ENSG00000135374:ELF5 GO:0003700;GO:0005634;GO:0006350;GO:0006355;GO:0006366;GO:0007398;GO:0008283;GO:0043565;
JTID ENSG00000046604:DSG2 GO:0005509;GO:0005515;GO:0005856;GO:0007155;GO:0007156;GO:0016020;GO:0016021;GO:0030057;
JTID ENSG00000177992:C9orf79 GO:0016020;GO:0016021;
JTID ENSG00000112290:WASF1 GO:0003779;GO:0006461;GO:0006928;GO:0015629;GO:0030041;GO:0005515;GO:0005739;GO:0005741;GO:0030027;
JTID ENSG00000129465:RIPK3 GO:0000166;GO:0003713;GO:0004674;GO:0005524;GO:0006464;GO:0006468;GO:0006915;GO:0007165;GO:0008624;GO:0016740;GO:0004713;GO:0004672;GO:0004704;GO:0005622;GO:0006917;GO:0007249;
JTID ENSG00000204564:C6orf136
JTID ENSG00000130783:CCDC62
JTID ENSG00000184502:GAST GO:0005179;GO:0005576;GO:0005625;GO:0006939;GO:0007165;
JTID ENSG00000115598:IL1RL2 GO:0004888;GO:0004909;GO:0005887;GO:0006968;GO:0007165;GO:0016020;
JTID ENSG00000145860:RNF145 GO:0004872;GO:0005515;GO:0006512;GO:0008270;GO:0046872;
JTID ENSG00000152931:PART1_HUMAN
JTID ENSG00000174788:PCP2 GO:0005085;GO:0005096;GO:0007165;
JTID ENSG00000123268:ATF1 GO:0003700;GO:0005634;GO:0006350;GO:0006355;GO:0043565;GO:0046983;
JTID ENSG00000168569:NP_001073970.1
JTID ENSG00000168385:SEPT2 GO:0000166;GO:0000910;GO:0003924;GO:0005515;GO:0005525;GO:0005634;GO:0005737;GO:0005826;GO:0007049;GO:0019717;
TFJT LEF1:Q96D13_HUMAN; LEF1:ELF5;
MIJT hsa-miR-223:ATF1:mirbase; hsa-miR-223:SLC27A2:mirbase; hsa-miR-223:CA5A:targetscan:mirbase; hsa-miR-223:IFIH1:targetscan:mirbase; hsa-miR-223:KL:targetscan:mirbase; hsa-miR-223:C6orf136:targetscan:mirbase; hsa-miR-223:RIPK3:targetscan:mirbase; hsa-miR-223:DSG2:targetscan; hsa-miR-223:PCP2:mirbase; hsa-miR-223:CCDC62:targetscan; hsa-miR-223:ELF5:targetscan; hsa-miR-223:CENPFJ:targetscan:mirbase; hsa-miR-223:Q96D13_HUMAN:mirbase; hsa-miR-223:SEPT2:targetscan; hsa-miR-223:GAST:mirbase; hsa-miR-223:IL1RL2:targetscan; hsa-miR-223:RNF145:pictar;

//
ANNOTATION: 2
ID FAX-4:hsa-miR-19a;
TFID FAX-4;
MIID ENSG00000207610:hsa-mir-19a:hsa-miR-19a;
JTID ENSG00000155189:AGPAT5 GO:0003841;GO:0005739;GO:0008152;GO:0008415;GO:0008654;GO:0016020;GO:0016021;GO:0016740;
JTID ENSG00000197329:PEL11
JTID ENSG00000095739:BAMBI GO:0005737;GO:0016020;GO:0016021;
```

```
JTID ENSG00000139200:C12orf53
JTID ENSG00000163596:ICALL
JTID ENSG00000117601:SERPINC1 GO:0004867;GO:0005515;GO:0005576;GO:0007596;GO:0008201;
JTID ENSG00000138593:K0256_HUMAN
TFJT PAX-4:BAMBI;
MIJT hsa-miR-19a:SERPINC1:targetscan:mirbase; hsa-miR-19a:BAMBI:targetscan:pictar; hsa-miR-19a:AGPAT5:targetscan:mirbase; hsa-miR-19a:C12orf53:targetscan:pictar; hsa-miR-19a:K0256_HUMAN:mirbase; hsa-miR-19a:ICALL:targetscan;

//
ANNOTATION: 2
ID AREB6:hsa-miR-425-3p;
TFID AREB6;
MIID ENSG00000199032:hsa-mir-425:hsa-miR-425-3p;
JTID ENSG00000176046:NUPR1_HUMAN GO:0005634;GO:0006917;GO:0016049;
JTID ENSG00000198382:UVRAG GO:0005737;GO:0006281;
JTID ENSG00000130762:ARHGEF16 GO:0005085;GO:0005089;GO:0005622;GO:0035023;
JTID ENSG00000067560:RHOA GO:0001166;GO:0000287;GO:0003924;GO:0004871;GO:0005515;GO:0005525;GO:0005622;GO:0005856;GO:0007264;GO:0007266;GO:0016020;GO:0030036;GO:0042346;GO:0043123;
JTID ENSG00000178538:CA8 GO:0004089;GO:0005515;GO:0005737;GO:0006730;GO:0008270;GO:0046872;GO:0048015;
TFJT AREB6:UVRAG;
TFMI AREB6:hsa-miR-425-3p:hsa-mir-425:computational(ECRbase);

//
ANNOTATION: 2
ID ELF-1:hsa-miR-802;
TFID ELF-1;
MIID ENSG00000211590:hsa-mir-802:hsa-miR-802;
JTID ENSG00000099338:C19orf15 GO:0016020;GO:0016021;
JTID ENSG00000022556:NLRP2 GO:000166;GO:0005515;GO:0005524;GO:0005737;GO:0006915;GO:0006952;GO:0032090;GO:0043280;GO:0050718;
JTID ENSG00000131196:NFATC1 GO:0000082;GO:0001837;GO:0003700;GO:0005528;GO:0005634;GO:0005737;GO:0006355;GO:0006366;GO:0006816;GO:0007507;
JTID ENSG00000079134:THOC1 GO:0003677;GO:0003723;GO:0005515;GO:0005634;GO:0006397;GO:0006810;GO:0007165;GO:0008380;GO:0051028;
JTID ENSG00000092964:DPYSL2 GO:0004157;GO:0005515;GO:0005739;GO:0006139;GO:0007165;GO:0007275;GO:0007399;GO:0016787;GO:0030154;GO:0030424;GO:0030425;GO:0043025;
JTID ENSG00000100321:SYNGR1 GO:0005887;GO:0016020;GO:0045202;
TFMI ELF-1:hsa-miR-802:hsa-mir-802:computational(ECRbase);
MIJT hsa-miR-802:THOC1:mirbase; hsa-miR-802:NLRP2:mirbase; hsa-miR-802:SYNGR1:targetscan;

//
ANNOTATION: 2
ID TCF-4:hsa-miR-10a;
TFID TCF-4;
MIID ENSG00000207777:hsa-mir-10a:hsa-miR-10a;
JTID ENSG00000144681:STAC GO:0005625;GO:0007242;GO:0008270;GO:0019992;GO:0046872;
JTID ENSG00000143198:MGST3 GO:0004364;GO:0004601;GO:0005624;GO:0005783;GO:0005792;GO:0006629;GO:0007165;GO:0016020;GO:0016021;GO:0016740;
JTID ENSG00000182263:FIGN GO:0001166;GO:0005524;GO:0017111;
TFMI TCF-4:hsa-miR-10a:hsa-mir-10a:computational(ECRbase);
MIJT hsa-miR-10a:STAC:targetscan; hsa-miR-10a:FIGN:targetscan;

//
ANNOTATION: 2
ID EGR:hsa-miR-93;
TFID EGR;
MIID ENSG00000207757:hsa-mir-93:hsa-miR-93;
JTID ENSG00000121903:ZSCAN20 GO:0003700;GO:0005634;GO:0006355;GO:0005622;GO:0006350;GO:0008270;GO:0046872;
JTID ENSG00000180667:YOD1 GO:0003676;GO:0005622;GO:0006512;GO:0008234;GO:0008270;GO:0046872;
JTID ENSG00000121871:SLITRK3 GO:0005515;GO:0007409;GO:0016020;GO:0016021;
TFJT EGR:ZSCAN20;
MIJT hsa-miR-93:SLITRK3:targetscan; hsa-miR-93:YOD1:targetscan;

//
ANNOTATION: 2
ID AP-2ALPHA:hsa-miR-192;
TFID AP-2ALPHA;
MIID ENSG00000207648:hsa-mir-192:hsa-miR-192;
JTID ENSG00000188389:PDCD1 GO:0004871;GO:0006915;GO:0006959;GO:0007275;GO:0016020;GO:0016021;GO:0005515;GO:0009897;
JTID ENSG00000163636:PSMD6 GO:0000502;GO:0005515;GO:0005634;GO:0005829;GO:0006510;GO:0008180;GO:0016887;
JTID ENSG00000163075:NP_001025167.1
TFMI AP-2ALPHA:hsa-miR-192:hsa-mir-192:computational(PUBMED: 17447837);
MIJT hsa-miR-192:NP_001025167.1:mirbase;

//
ANNOTATION: 2
ID SP-1:hsa-miR-365;
TFID SP-1;
MIID ENSG00000199187:hsa-mir-365-2:hsa-miR-365;
JTID ENSG00000186326:RGS9BP GO:0050908;
JTID ENSG00000185803:GPR172A GO:0004872;GO:0016020;GO:0016021;
JTID ENSG00000196388:NP_998891.1
JTID ENSG00000205664:Q6FJD4_HUMAN
JTID ENSG00000089737:DDX24 GO:000166;GO:0003723;GO:0004004;GO:0005524;GO:0005730;GO:0016070;GO:0016787;
TFMI SP-1:hsa-miR-365:hsa-mir-365-2:computational(PUBMED: 17447837);
MIJT hsa-miR-365:RGS9BP:targetscan; hsa-miR-365:GPR172A:targetscan;

//
ANNOTATION: 2
ID STAT1:hsa-miR-130a;
TFID STAT1;
MIID ENSG00000208009:hsa-mir-130a:hsa-miR-130a;
JTID ENSG00000151148:UBE3B GO:0004842;GO:0005622;GO:0006464;GO:0006512;GO:0016874;
JTID ENSG00000204584:Q6ZSH9_HUMAN
JTID ENSG00000143756:FBXO28 GO:0006512;
JTID ENSG00000189180:ZNF33A GO:0003700;GO:0005622;GO:0005634;GO:0006350;GO:0006355;GO:0008270;GO:0016564;GO:0046872;GO:0003676;
JTID ENSG00000173926:MARCH3 GO:0005515;GO:0006512;GO:0006897;GO:0008270;GO:0016020;GO:0016021;GO:0016874;GO:0046872;
JTID ENSG00000182512:GLRX5 GO:0005739;GO:0009055;GO:0015035;GO:0045454;
JTID ENSG00000187531:SIRT7 GO:0003677;GO:0005677;GO:0006342;GO:0006355;GO:0008270;GO:0016787;GO:0046872;
JTID ENSG00000204569:PPP1R10 GO:0003677;GO:0003723;GO:0004864;GO:0005634;GO:0006350;GO:0006606;GO:0008270;GO:0046872;
JTID ENSG00000152242:C18orf25
JTID ENSG00000162998:FRZB GO:0001501;GO:0005576;GO:0007275;GO:0016020;GO:0016055;GO:0017147;GO:0030154;GO:0030178;
JTID ENSG00000168619:ADAM18 GO:0004222;GO:0006508;GO:0005624;GO:0007275;GO:0007283;GO:0016020;GO:0016021;GO:0030154;
JTID ENSG00000184371:CSF1 GO:0005157;GO:0005615;GO:0008283;GO:0008284;GO:0016020;GO:0016021;GO:0030097;GO:0030154;GO:0030225;GO:0005125;GO:0008083;GO:0001954;GO:0005515;GO:0030278;GO:0030335;GO:0040018;GO:0042488;GO:0045672;GO:0045860;GO:0046579;
JTID ENSG00000177807:KCNJ10 GO:0000166;GO:0005244;GO:0005524;GO:0005887;GO:0006811;GO:0006813;GO:0015272;GO:0016020;GO:0030955;
JTID ENSG00000055070:C1orf144
JTID ENSG00000115648:MLPH GO:0003779;GO:0005515;GO:0006605;GO:0008270;GO:0015629;GO:0017022;GO:0017137;GO:0030318;GO:0031489;GO:0032400;GO:0042470;GO:0043473;GO:0046872;GO:0051010;
```



JTID ENSG00000164896:FASTK GO:0004674;GO:0005524;GO:0006468;GO:0006915;GO:0007165;GO:0008624;GO:0016740;GO:0004672;GO:0016301;  
JTID ENSG00000152291:TGOLN2 GO:0005802;GO:0016020;GO:0016021;GO:0030133;  
JTID ENSG00000092295:TGM1 GO:0001533;GO:0003810;GO:0005509;GO:0005515;GO:0005913;GO:0006464;GO:0008415;GO:0009887;GO:0016020;GO:0016740;GO:0018149;GO:0030216;GO:0031224;GO:0031424;GO:0043163;  
JTID ENSG000000171703:TCEA2 GO:0003677;GO:0003702;GO:0003746;GO:0005634;GO:0006350;GO:0006354;GO:0006355;GO:0007311;GO:0005515;GO:0008023;GO:0008270;GO:0046872;  
JTID ENSG00000131269:ABCB7 GO:0000166;GO:0005524;GO:0005739;GO:0005743;GO:0006810;GO:0015232;GO:0016020;GO:0016021;GO:0016887;GO:0042626;  
TFJT STA11:FBXO28; STA11:C1orf25; STA11:Clorf144; STA11:FASTK;  
MIJT hsa-miR-130a:TGMI:targetscan:mirbase; hsa-miR-130a:UBES3B:targetscan; hsa-miR-130a:GLRX5:targetscan:mirbase:pictar; hsa-miR-130a:FASTK:targetscan:mirbase:pictar; hsa-miR-130a:MARCH3:pictar; hsa-miR-130a:KCNJ10:targetscan; hsa-miR-130a:SIRT7:targetscan:mirbase:pictar; hsa-miR-130a:FRZB:targetscan:mirbase; hsa-miR-130a:ABCB7:targetscan:mirbase:pictar; hsa-miR-130a:FBXO28:targetscan:pictar; hsa-miR-130a:CSF1:targetscan:pictar; hsa-miR-130a:TGOLN2:targetscan; hsa-miR-130a:C1orf25:targetscan:pictar; hsa-miR-130a:Clorf144:targetscan:pictar; hsa-miR-130a:PPP1R10:pictar;

//

ANNOTATION: 2  
ID ER:hsa-miR-130a;  
TFID ER;  
MIID ENSG00000208009:hsa-mir-130a:hsa-miR-130a;  
JTID ENSG000000077312:SNRPA GO:0000166;GO:0000398;GO:0003723;GO:0005515;GO:0005634;GO:0005681;GO:0005685;GO:0008380;  
JTID ENSG000000055813:CCDC85A  
JTID ENSG000000203925:LOC647839  
JTID ENSG00000138641:HERC3 GO:0004842;GO:0005622;GO:0006464;GO:0006512;GO:0016874;  
JTID ENSG00000123395:C12orf44  
JTID ENSG00000122034:GTF3A GO:0003677;GO:0003709;GO:0003723;GO:0005622;GO:0005634;GO:0006350;GO:0006355;GO:0006383;GO:0008270;GO:0009303;GO:0046872;  
JTID ENSG00000156642:NPTN GO:0000299;GO:0007156;GO:0016021;GO:0030155;GO:0042734;GO:0045211;GO:0048170;GO:0050839;  
JTID ENSG00000165195:PIGA GO:000506;GO:0005515;GO:0005783;GO:0005789;GO:0006506;GO:0009058;GO:0009893;GO:0016020;GO:0016021;GO:0016757;GO:0017176;  
JTID ENSG00000166024:C10orf28  
JTID ENSG00000086015:MAST2 GO:0000166;GO:0000287;GO:0004674;GO:0005515;GO:0005524;GO:0005856;GO:0006468;GO:0016020;GO:0016740;GO:0019902;GO:0045075;GO:0048515;  
JTID ENSG00000188483:IER5L  
JTID ENSG00000157077:ZFVVE9 GO:0004872;GO:0005515;GO:0005737;GO:0005769;GO:0006897;GO:0007181;GO:0007183;GO:0007184;GO:0008236;GO:0008270;GO:0046872;  
JTID ENSG00000189069:NP\_001013732.1  
JTID ENSG00000137073:UBAP2  
JTID ENSG00000182220:ATP6AP2 GO:0002003;GO:0004872;GO:0005515;GO:0009897;GO:0016020;GO:0016021;GO:0032914;GO:0043408;  
JTID ENSG00000101901:CXorf45  
JTID ENSG00000120509:PDZD11 GO:0005515;  
JTID ENSG00000205036:NP\_001001682.1  
JTID ENSG00000130956:HABP4 GO:0005634;GO:0005737;GO:0006350;GO:0006355;  
JTID ENSG00000147642:SYBU\_HUMAN GO:0016020;GO:0016021;  
JTID ENSG00000205524:Q68D70\_HUMAN  
JTID ENSG00000113048:MRPS27 GO:0005739;GO:0030529;  
JTID ENSG00000070985:TRPM5 GO:0005216;GO:0006811;GO:0016020;GO:0016021;  
JTID ENSG00000206528:Q6ZSM0\_HUMAN  
JTID ENSG00000181690:PLAG1 GO:0003676;GO:0003700;GO:0005622;GO:0008270;GO:0046872;  
JTID ENSG00000129467:ADCY4 GO:0000287;GO:0004016;GO:0005622;GO:0006171;GO:0007188;GO:0007242;GO:0016020;GO:0016021;GO:0030425;  
JTID ENSG00000109654:TRIM2 GO:0005515;GO:0005622;GO:0005737;GO:0008270;GO:0017022;GO:0046872;  
JTID ENSG00000103723:AP3B2 GO:0003723;GO:0006397;GO:0006417;GO:0005215;GO:0005488;GO:0005905;GO:0006892;GO:0006897;GO:0015031;GO:0030137;  
TFJT ER:SYBU\_HUMAN; ER:TRIM2;  
MIJT hsa-miR-130a:CXorf45:targetscan:mirbase; hsa-miR-130a:CCDC85A:targetscan:mirbase; hsa-miR-130a:PDZD11:targetscan; hsa-miR-130a:PLAG1:targetscan; hsa-miR-130a:ADCY4:targetscan; hsa-miR-130a:SYBU\_HUMAN:mirbase:pictar; hsa-miR-130a:AP3B2:mirbase; hsa-miR-130a:ZFVVE9:targetscan:mirbase:pictar; hsa-miR-130a:HABP4:targetscan:pictar; hsa-miR-130a:NPTN:targetscan:pictar; hsa-miR-130a:HERC3:targetscan:mirbase; hsa-miR-130a:PIGA:targetscan:mirbase; hsa-miR-130a:TRIM2:targetscan:pictar; hsa-miR-130a:IER5L:mirbase; hsa-miR-130a:MAST2:targetscan:mirbase; hsa-miR-130a:C12orf44:targetscan:mirbase;

//

ANNOTATION: 2  
ID MEF-2:hsa-miR-1;  
TFID MEF-2;  
MIID ENSG00000199017:hsa-mir-1:hsa-miR-1;  
JTID ENSG00000152661:GJAI GO:0004871;GO:0005515;GO:0005887;GO:0005922;GO:0006810;GO:0006936;GO:0007267;GO:0007507;GO:0007605;GO:0015075;GO:0015285;GO:0016020;GO:0016264;GO:0043123;  
TFMI MEF-2:hsa-miR-1:hsa-mir-1:pubmed: 15951802; pubmed: 18093911; computational(ECRbase);  
MIJT hsa-miR-1:GJAI:targetscan:mirbase:pictar:pubmed: 17062625;

//

ANNOTATION: 2  
ID PEA3:hsa-miR-23a;  
TFID PEA3;  
MIID ENSG00000207980:hsa-mir-23a:hsa-miR-23a;  
JTID ENSG00000113615:SEC24A GO:0005515;GO:0006886;GO:0006888;GO:0008270;GO:0030127;GO:0005783;  
JTID ENSG00000188938:FAM120AOS  
JTID ENSG00000182004:SNRPE GO:0000245;GO:0003723;GO:0005515;GO:0005634;GO:0005681;GO:0006397;GO:0008380;GO:0030532;  
JTID ENSG00000103591:P34\_HUMAN GO:0005737;GO:0015031;  
JTID ENSG00000094804:CDC6 GO:0000076;GO:0000079;GO:0000166;GO:0003682;GO:0005515;GO:0005524;GO:0005634;GO:0005737;GO:0005819;GO:0006260;GO:0007049;GO:0007067;GO:0007089;GO:0008156;GO:0008285;GO:0017111;GO:0051301;  
JTID ENSG00000105053:VRK3 GO:0000166;GO:0004674;GO:0005524;GO:0006468;GO:0016740;GO:0004672;GO:0005634;  
JTID ENSG00000183955:SETD8 GO:0005634;GO:0008168;GO:0016568;GO:0016740;GO:0018024;  
JTID ENSG00000024862:CCDC28A  
JTID ENSG00000204026:Q6ZSD2\_HUMAN  
JTID ENSG00000120586:MRC1 GO:0004872;GO:0005509;GO:0005529;GO:0005537;GO:0005886;GO:0005887;GO:0006898;GO:0006907;  
JTID ENSG00000183748:MRC1L1 GO:0004872;GO:0005529;  
JTID ENSG00000183686:MAGEA5  
JTID ENSG00000106366:SERPINE1 GO:0002020;GO:0004867;GO:0005515;GO:0005576;GO:0007596;GO:0008243;GO:0042730;GO:0045765;  
JTID ENSG00000133636:NTS GO:0005184;GO:0005576;GO:0005625;GO:0007165;GO:0050880;  
JTID ENSG00000206193:Q5HYA3\_HUMAN  
JTID ENSG00000175556:LONRF3 GO:0004176;GO:0005515;GO:0006510;GO:0008270;GO:0046872;  
JTID ENSG00000177800:TMEM78 GO:0016020;GO:0016021;  
JTID ENSG00000147119:CHST7 GO:0001517;GO:0005976;GO:0006044;GO:0006790;GO:0008459;GO:0016020;GO:0016021;GO:0016740;GO:0030206;GO:0031228;  
JTID ENSG00000180257:ZNF321 GO:0003676;GO:0005622;GO:0006355;GO:0008270;  
JTID ENSG00000087152:ATXN7L3  
JTID ENSG00000182541:LIMK2 GO:0000166;GO:0004674;GO:0005515;GO:0005524;GO:0005634;GO:0005737;GO:0006468;GO:0008270;GO:0016740;GO:0046872;GO:0004672;  
JTID ENSG00000198380:GFP1 GO:0004360;GO:0005529;GO:0005737;GO:0006002;GO:0006112;GO:0006541;GO:0008152;GO:0016051;GO:0016740;  
JTID ENSG00000067066:SP100 GO:0000785;GO:0003677;GO:0005515;GO:0005634;GO:0005694;GO:0006355;GO:0016605;  
JTID ENSG00000144749:LRIG1 GO:0005515;GO:0016020;GO:0016021;  
JTID ENSG00000148200:NR6A1 GO:0003700;GO:0003707;GO:0005634;GO:0006350;GO:0006355;GO:0008270;GO:0043565;GO:0046872;GO:0000122;GO:0003677;GO:0005515;GO:0005667;GO:0007276;GO:0007283;GO:0008283;GO:0042803;  
JTID ENSG00000078618:NRD1 GO:0004222;GO:0006508;GO:0005829;GO:0007528;GO:0008270;GO:0008283;GO:0009986;GO:0016477;GO:0016919;GO:0046872;GO:0048408;  
JTID ENSG00000163961:RNF168 GO:0005515;GO:0008270;GO:0046872;  
JTID ENSG00000109771:LRP2BP GO:0005515;GO:0005488;  
TFJT PEA3:LONRF3; PEA3:ATXN7L3; PEA3:NR6A1;  
MIJT hsa-miR-23a:SETD8:targetscan:mirbase:pictar; hsa-miR-23a:NR6A1:targetscan:pictar; hsa-miR-23a:CCDC28A:targetscan:mirbase; hsa-miR-23a:MRC1:targetscan:mirbase:pictar; hsa-miR-23a:LIMK2:targetscan; hsa-miR-23a:CDC6:targetscan; hsa-miR-23a:FAM120AOS:targetscan:mirbase; hsa-miR-23a:SNRPE:targetscan; hsa-miR-23a:MRC1L1:targetscan:mirbase; hsa-miR-23a:NTS:targetscan:mirbase; hsa-miR-23a:VRK3:targetscan:mirbase; hsa-miR-23a:MAGEA5:targetscan; hsa-miR-23a:SERPINE1:targetscan; hsa-miR-23a:LRIG1:targetscan:pictar; hsa-miR-23a:SEC24A:targetscan:mirbase; hsa-miR-23a:RNF168:targetscan; hsa-miR-23a:CHST7:targetscan:mirbase; hsa-miR-23a:LONRF3:targetscan:mirbase;

//

ANNOTATION: 2  
ID MYOD:hsa-miR-106a;  
TFID MYOD;  
MIID ENSG00000207602:hsa-mir-106a:hsa-miR-106a;  
JTID ENSG00000145362:ANK2 GO:0005200;GO:0005515;GO:0007165;GO:0015629;GO:0016020;GO:0005856;  
JTID ENSG00000169662:NP\_997357.1 GO:0005622;GO:0007165;  
JTID ENSG00000189409:NMP23A GO:0000003;GO:0004222;GO:0005578;GO:0005622;GO:0006508;GO:0008270;GO:0016020;GO:0016021;GO:0046872;

JTID ENSG00000011454:RABGAP1 GO:0005096;GO:0005097;GO:0005622;GO:0005813;GO:0005829;GO:0005875;GO:0007049;GO:0015631;GO:0032313;GO:0003725;GO:0003727;GO:0006928;GO:0007286;GO:0007638;GO:0015630;  
JTID ENSG000000196460:Q6ZNB4\_HUMAN GO:0003677;GO:0006355;  
JTID ENSG000000027697:IFNGR1 GO:0004872;GO:0004906;GO:0005887;GO:0007165;GO:0009615;GO:0016020;GO:0019955;  
JTID ENSG000000050405:LIM1 GO:0001725;GO:0003785;GO:0005925;GO:0008270;GO:0015629;GO:0030835;GO:0031529;GO:0046872;GO:0051015;GO:0051017;  
JTID ENSG000000153234:NR4A2 GO:0003677;GO:0003700;GO:0003707;GO:0005515;GO:0006350;GO:0006355;GO:0007165;GO:0007399;GO:0008270;GO:0030182;GO:0042053;GO:0043565;GO:0045944;GO:0046872;  
JTID ENSG000000186951:PPARA GO:0003677;GO:0003700;GO:0003707;GO:0004872;GO:0005515;GO:0005634;GO:0006350;GO:0006355;GO:0006366;GO:0006629;GO:0006631;GO:0008270;GO:0008544;GO:0015908;GO:0016563;GO:0019217;GO:0032000;GO:0043565;GO:0045941;GO:0045944;GO:0046872;  
JTID ENSG000000173627:APOBEC4 GO:0006397;GO:0008270;GO:0016787;GO:0046872;  
JTID ENSG000000147036:LANCL3  
JTID ENSG000000115561:VPS24 GO:0015031;GO:0016020;  
JTID ENSG000000138449:SLC40A1 GO:0005381;GO:0005506;GO:0005737;GO:0005886;GO:0005887;GO:0006811;GO:0006826;GO:0006879;GO:0008021;GO:0009653;  
JTID ENSG000000146360:GPR6 GO:0001619;GO:0004872;GO:0005887;GO:0007165;GO:0007186;GO:0007204;GO:0016020;  
JTID ENSG000000104888:SLC17A7 GO:0005215;GO:0006810;GO:0006817;GO:0015319;GO:0015321;GO:0016020;GO:0016021;GO:0042137;  
JTID ENSG000000185722:ANKFY1 GO:0005515;GO:0006897;GO:0008270;GO:0010008;GO:0016020;GO:0046872;  
JTID ENSG000000171885:AQP4 GO:0005215;GO:0006810;GO:0015288;GO:0016020;GO:0016021;GO:0019867;GO:0005887;GO:0007399;GO:0007588;GO:0015250;  
TFJT MYOD:ANK2; MYOD:APOBEC4; MYOD:AQP4;  
MIJT hsa-miR-106a:APOBEC4:targetscan; hsa-miR-106a:NR4A2:targetscan; hsa-miR-106a:SLC40A1:targetscan:mirbase; hsa-miR-106a:PPARA:targetscan; hsa-miR-106a:ANKFY1:targetscan; hsa-miR-106a:MMP23A:mirbase; hsa-miR-106a:SLC17A7:targetscan; hsa-miR-106a:ANK2:targetscan; hsa-miR-106a:LIM1:targetscan; hsa-miR-106a:AQP4:targetscan; hsa-miR-106a:RABGAP1:targetscan; hsa-miR-106a:VPS24:targetscan; hsa-miR-106a:GPR6:targetscan:mirbase;  
  
//  
ANNOTATION: 2  
ID NKX6-2:hsa-miR-135a;  
TFID NKX6-2;  
MIID ENSG000000207586:hsa-mir-135a-2:hsa-miR-135a;  
JTID ENSG000000100350:FOXRED2 GO:0005783;GO:0006118;GO:0016491;  
TFMI NKX6-2:hsa-miR-135a:hsa-mir-135a-2:computational (ECRbase);  
MIJT hsa-miR-135a:FOXRED2:targetscan;  
  
//  
ANNOTATION: 2  
ID MEIS1:hsa-miR-449b;  
TFID MEIS1;  
MIID ENSG000000207728:hsa-mir-449b:hsa-miR-449b;  
JTID ENSG000000177410:Q5QHF1\_HUMAN  
JTID ENSG000000172689:MS4A10 GO:0004872;GO:0007165;GO:0016020;GO:0016021;  
JTID ENSG000000177303:CASKIN2 GO:0005737;  
JTID ENSG000000110675:ELMOD1 GO:0005856;GO:0006909;  
JTID ENSG000000162302:RPS6KA4 GO:0000166;GO:0000287;GO:0004711;GO:0005515;GO:0005524;GO:0005634;GO:0006355;GO:0006468;GO:0007243;GO:0016740;GO:0048273;  
JTID ENSG000000182329:Q8IVF9\_HUMAN  
JTID ENSG000000132911:NMUR2 GO:0001584;GO:0001607;GO:0004872;GO:0005229;GO:0005525;GO:0005887;GO:0006816;GO:0006940;GO:0007165;GO:0007200;GO:0007204;GO:0007218;GO:0007417;GO:0007631;GO:0008188;GO:0016020;GO:0019226;GO:0043006;GO:0045045;GO:0048016;GO:0050482;  
JTID ENSG000000116704:SLC35D1 GO:0005351;GO:0005463;GO:0005783;GO:0006810;GO:0015789;GO:0016020;GO:0016021;GO:0030176;GO:0030206;  
JTID ENSG000000112478:VPS52 GO:0015031;GO:0016020;  
JTID ENSG000000131951:LRR9 GO:0005515;  
JTID ENSG000000148296:SURF6 GO:0001652;GO:0003677;GO:0003723;GO:0005634;GO:0005730;GO:0042255;  
JTID ENSG000000048740:CUGBP2 GO:0000166;GO:0003723;GO:0005625;GO:0005634;GO:0006376;GO:0006396;GO:0007528;GO:0008016;  
JTID ENSG000000120708:TGFBI GO:0005178;GO:0005515;GO:0005578;GO:0005615;GO:0007155;GO:0007162;GO:0007601;GO:0008283;GO:0050896;  
TFJT MEIS1:Q8IVF9\_HUMAN;  
MIJT hsa-miR-449b:SURF6:targetscan; hsa-miR-449b:VPS52:targetscan:mirbase; hsa-miR-449b:Q8IVF9\_HUMAN:mirbase; hsa-miR-449b:RPS6KA4:targetscan:mirbase; hsa-miR-449b:TGFBI:targetscan; hsa-miR-449b:MS4A10:targetscan; hsa-miR-449b:ELMOD1:targetscan; hsa-miR-449b:CASKIN2:targetscan; hsa-miR-449b:CUGBP2:targetscan; hsa-miR-449b:SLC35D1:mirbase;  
  
//  
ANNOTATION: 2  
ID LEF1:hsa-miR-32;  
TFID LEF1;  
MIID ENSG000000207698:hsa-mir-32:hsa-miR-32;  
JTID ENSG000000063322:IXL GO:0000119;  
JTID ENSG000000084093:REST GO:0003677;GO:0003682;GO:0005515;GO:0005622;GO:0005634;GO:0006350;GO:0008270;GO:0016564;GO:0045892;GO:0046872;  
JTID ENSG000000172000:ZNF556 GO:0003677;GO:0005622;GO:0005634;GO:0006350;GO:0006355;GO:0008270;GO:0046872;  
JTID ENSG000000115602:IL1RL1 GO:0004888;GO:0004908;GO:0005057;GO:0005515;GO:0006955;GO:0007165;GO:0016020;GO:0016021;  
JTID ENSG000000160856:PCRL3 GO:0004872;  
JTID ENSG000000143164:IQWD1 GO:0004872;  
JTID ENSG000000143198:MGST3 GO:0004364;GO:0004601;GO:0005624;GO:0005783;GO:0005792;GO:0006629;GO:0007165;GO:0016020;GO:0016021;GO:0016740;  
JTID ENSG000000142583:SLC2A5 GO:0005215;GO:0005353;GO:0005355;GO:0005886;GO:0005975;GO:0008643;GO:0015755;GO:0015758;GO:0016021;GO:0016022;  
JTID ENSG000000159123:DMRTC\_HUMAN GO:0006350;GO:0006355;  
JTID ENSG000000180104:EXOC3 GO:0006887;GO:0015031;  
JTID ENSG000000184911:CXorf50 GO:0006350;GO:0006355;  
JTID ENSG000000120253:NUP43 GO:0005634;GO:0015031;GO:0015288;GO:0016021;GO:0019867;  
JTID ENSG000000134109:EDEM1 GO:0004571;GO:0005509;GO:0005515;GO:0005783;GO:0006986;GO:0016020;GO:0016021;GO:0030176;GO:0030433;  
JTID ENSG000000164691:TAGAP GO:0005085;GO:0005622;GO:0007165;  
JTID ENSG000000173517:SG269\_HUMAN GO:0000166;GO:0004713;GO:0005524;GO:0006468;GO:0016740;  
JTID ENSG000000090615:GOLGA3 GO:0000139;GO:0005215;GO:0005515;GO:0005793;GO:0005794;GO:0006891;GO:0017119;  
JTID ENSG000000155744:FAM126B GO:0005622;  
JTID ENSG000000176834:NP\_061959.2 GO:0016021;  
JTID ENSG000000157103:SLC6A1 GO:0005328;GO:0005332;GO:0005624;GO:0005887;GO:0006836;GO:0007268;GO:0015293;GO:0016020;GO:0030424;  
JTID ENSG000000105428:ZNR4 GO:0005515;GO:0008270;GO:0016020;GO:0016021;GO:0046872;  
JTID ENSG000000198569:SLC34A3 GO:0005436;GO:0005903;GO:0006811;GO:0006814;GO:0006817;GO:0015293;GO:0015321;GO:0016020;GO:0016021;GO:0016324;GO:0030643;GO:0031402;  
JTID ENSG000000151789:ZNF659 GO:0003676;GO:0005622;GO:0005634;GO:0008270;GO:0046872;  
JTID ENSG000000148704:VAX1 GO:0000122;GO:0001764;GO:0003700;GO:0005634;GO:0006355;GO:0007275;GO:0007399;GO:0007406;GO:0007411;GO:0007417;GO:0007420;GO:0030154;GO:0031490;GO:0043010;GO:0043565;  
JTID ENSG000000165943:MOAP1 GO:0005515;GO:0005737;GO:0006915;GO:0006919;GO:0006921;GO:0030262;GO:0042803;  
JTID ENSG000000100346:CACNA1I GO:0005509;GO:0005891;GO:0006811;GO:0006816;GO:0007165;GO:0008332;GO:0016020;GO:0016021;  
JTID ENSG000000154645:CHODL GO:0005529;GO:0007517;GO:0016020;GO:0016021;GO:0048471;  
JTID ENSG000000143450:OAZ3 GO:0008073;GO:0005515;GO:0005634;GO:0005737;GO:0007283;  
JTID ENSG000000153789:FAM92B  
JTID ENSG000000129317:PUS7L GO:0004730;GO:0008033;  
JTID ENSG000000163694:NP\_061900.1 GO:0000166;GO:0003676;  
JTID ENSG000000137845:ADAM10 GO:0001701;GO:0004175;GO:0004222;GO:0005178;GO:0005634;GO:0005737;GO:0005794;GO:0005798;GO:0005886;GO:0006468;GO:0006913;GO:0007162;GO:0007220;GO:0007229;GO:0007267;GO:0008270;GO:0009986;GO:0016021;GO:0019901;GO:0042169;GO:0042803;GO:0046872;GO:0051089;  
JTID ENSG000000174628:IQCK  
JTID ENSG000000159348:CYB5R1 GO:0004128;GO:0006118;GO:0016491;GO:0050660;GO:0051287;  
JTID ENSG000000112210:RAB23 GO:0000166;GO:0005525;GO:0007165;GO:0007264;GO:0007399;GO:0015031;GO:0016020;GO:0021513;GO:0042733;GO:0045861;  
JTID ENSG00000003393:AL52  
GO:0001662;GO:0001881;GO:0005085;GO:0005087;GO:0005089;GO:0005515;GO:0005622;GO:0005737;GO:0005769;GO:0005813;GO:0005829;GO:0006979;GO:0007032;GO:0007528;GO:0007626;GO:0008104;GO:0014069;GO:0016050;GO:0016197;GO:0017112;GO:0032313;GO:0035023;GO:0035249;GO:0042598;GO:0043197;  
JTID ENSG000000142507:PSMB6 GO:0004298;GO:0005829;GO:0005839;GO:0006511;  
JTID ENSG000000117461:PIK3R3 GO:0005515;GO:0005942;GO:0007242;GO:0008286;GO:0016301;GO:0016303;GO:0035014;GO:0046935;  
JTID ENSG000000176853:FAM91A1 GO:0019825;  
TFJT LEF1:VAX1; LEF1:CHODL;  
MIJT hsa-miR-32:FAM91A1:targetscan:mirbase; hsa-miR-32:PIK3R3:targetscan:pictar; hsa-miR-32:ADAM10:targetscan:pictar; hsa-miR-32:GOLGA3:targetscan:pictar; hsa-miR-32:FAM126B:targetscan:mirbase:pictar; hsa-miR-32:EDEM1:targetscan:mirbase:pictar; hsa-miR-32:IXL:targetscan; hsa-miR-32:DMRTC\_HUMAN:mirbase; hsa-miR-32:PCRL3:mirbase; hsa-miR-32:IQWD1:targetscan:mirbase; hsa-miR-32:OAZ3:targetscan:mirbase:pictar; hsa-miR-32:PSMB6:targetscan; hsa-miR-32:PUS7L:targetscan; hsa-miR-32:TAGAP:targetscan:mirbase; hsa-miR-32:NP\_061900.1:pictar; hsa-miR-32:CACNA1I:targetscan; hsa-miR-32:CXorf50:mirbase; hsa-miR-32:IL1RL1:targetscan:mirbase; hsa-miR-32:SLC6A1:targetscan:pictar; hsa-miR-32:MOAP1:targetscan:mirbase:pictar; hsa-miR-32:NUP43:targetscan:mirbase; hsa-miR-32:ZNF4:targetscan:mirbase; hsa-miR-32:ZNF659:targetscan; hsa-miR-32:VAX1:targetscan:mirbase; hsa-miR-32:CYB5R1:targetscan; hsa-miR-32:RAB23:targetscan:mirbase:pictar; hsa-miR-32:FAM92B:targetscan:mirbase;

//  
ANNOTATION: 2  
ID NCX:hsa-miR-101;  
TFID NCX;



MIJT hsa-miR-148b:CXorf45:targetscan:mirbase; hsa-miR-148b:GTF3A:mirbase; hsa-miR-148b:MRPS27:targetscan; hsa-miR-148b:UHRF1:targetscan; hsa-miR-148b:UBAP2:targetscan; hsa-miR-148b:TRPM5:targetscan; hsa-miR-148b:NP\_001001682.1:mirbase; hsa-miR-148b:TMEM165:targetscan; hsa-miR-148b:Clorf28:targetscan; hsa-miR-148b:SIGLEC8:targetscan; hsa-miR-148b:NPTN:targetscan:mirbase:pictar; hsa-miR-148b:MAP1B:mirbase; hsa-miR-148b:ATP6AP2:targetscan:mirbase:pictar; hsa-miR-148b:MOGAT3:targetscan; hsa-miR-148b:AOF1:targetscan; hsa-miR-148b:Clorf68:mirbase; hsa-miR-148b:GDF6:targetscan:pictar;

```
//
ANNOTATION: 2
ID CHX10:hsa-miR-199a*;
TFID CHX10;
MIID ENSG00000207752:hsa-mir-199a-1:hsa-miR-199a*;
JTID ENSG00000111860:C6orf204
JTID ENSG00000159224:GIP GO:0005179;GO:0005576;GO:0005625;GO:0007165;
JTID ENSG00000005884:ITGA3 GO:0001764;GO:0004872;GO:0005509;GO:0005515;GO:0007155;GO:0007160;GO:0007229;GO:0007613;GO:0008305;GO:0016020;GO:0016021;GO:0016323;GO:0019717;
JTID ENSG00000105967:TFEC GO:0003700;GO:0003713;GO:0003714;GO:0005634;GO:0045449;GO:0030528;
JTID ENSG00000180305:WFDC10A GO:0004867;
JTID ENSG00000109208:SMR3A GO:0005576;
TFJT CHX10:TFEC;
MIJT hsa-miR-199a*:WFDC10A:mirbase;
```

```
//
ANNOTATION: 2
ID PEA3:hsa-miR-181d;
TFID PEA3;
MIID ENSG00000207585:hsa-mir-181d:hsa-miR-181d;
JTID ENSG00000110906:KCTD10 GO:0005249;GO:0005515;GO:0005634;GO:0006813;GO:0008076;GO:0016020;
JTID ENSG00000105705:SF4 GO:0003723;GO:0005622;GO:0005634;GO:0005681;GO:0006397;GO:0008380;
JTID ENSG00000126432:PRDX5 GO:0005739;GO:0005777;GO:0006954;GO:0006979;GO:0016491;GO:0051920;GO:0016209;
JTID ENSG00000170100:Q96MU6-2
JTID ENSG00000088832:FKBP1A GO:0003755;GO:0004872;GO:0005515;GO:0006457;GO:0016853;GO:0043123;
JTID ENSG00000160789:LMNA GO:0005198;GO:0005515;GO:0005634;GO:0005882;
JTID ENSG00000118454:ANKRD13C GO:0005783;
JTID ENSG00000174652:ZNF266 GO:0003677;GO:0005622;GO:0005634;GO:0006350;GO:0006355;GO:0008270;GO:0046872;
JTID ENSG00000106366:SERPINE1 GO:0002020;GO:0004867;GO:0005515;GO:0005576;GO:0007596;GO:0008243;GO:0042730;GO:0045765;
JTID ENSG00000132002:DNAJB1 GO:0005634;GO:0006457;GO:0006986;GO:0031072;GO:0051082;GO:0051085;
JTID ENSG00000133636:NTS GO:0005184;GO:0005576;GO:0005625;GO:0007165;GO:0050880;
JTID ENSG00000179914:ITLN1 GO:0005102;GO:0005529;GO:0007165;GO:0016020;GO:0048503;
JTID ENSG00000073756:PTGS2 GO:0001516;GO:0004601;GO:0004666;GO:0005506;GO:0005634;GO:0005737;GO:0006633;GO:0006928;GO:0008217;GO:0016020;GO:0016491;GO:0016702;GO:0019371;GO:0030216;GO:0042640;GO:0046872;GO:0050727;
JTID ENSG00000204201:Q49A40_HUMAN GO:0003676;GO:0005622;GO:0006355;
JTID ENSG00000074054:CLASP1 GO:0000776;GO:0001578;GO:0005515;GO:0005794;GO:0005813;GO:0005828;GO:0005856;GO:0005881;GO:0007026;GO:0007049;GO:0007067;GO:0007163;GO:0030981;GO:0043515;GO:0051010;GO:0051301;GO:0008017;
TFJT PEA3:DNAJB1;
MIJT hsa-miR-181d:ITLN1:mirbase; hsa-miR-181d:ANKRD13C:targetscan; hsa-miR-181d:DNAJB1:targetscan; hsa-miR-181d:NTS:targetscan:mirbase; hsa-miR-181d:FKBP1A:targetscan:mirbase; hsa-miR-181d:Q49A40_HUMAN:mirbase; hsa-miR-181d:PTGS2:targetscan; hsa-miR-181d:ZNF266:targetscan:mirbase; hsa-miR-181d:SERPINE1:targetscan:mirbase; hsa-miR-181d:CLASP1:targetscan; hsa-miR-181d:KCTD10:targetscan;
```

```
//
ANNOTATION: 2
ID GABP:hsa-miR-148b;
TFID GABP;
MIID ENSG00000199122:hsa-mir-148b:hsa-miR-148b;
JTID ENSG00000204584:Q6ZSH9_HUMAN
JTID ENSG00000055070:Clorf144
JTID ENSG00000159082:SYNJ1 GO:0003723;GO:0004437;GO:0004439;GO:0004445;GO:0006796;GO:0006836;GO:0016787;GO:0030117;GO:0048488;GO:0030384;GO:0048489;
JTID ENSG00000151694:ADAM17 GO:0004222;GO:0005515;GO:0005737;GO:0005887;GO:0006508;GO:0007219;GO:0007267;GO:0008270;GO:0016020;GO:0046872;
JTID ENSG00000187531:SIRT7 GO:0003677;GO:0005677;GO:0006342;GO:0006355;GO:0008270;GO:0016787;GO:0046872;
JTID ENSG00000160961:ZNF333 GO:0003677;GO:0005622;GO:0005634;GO:0006350;GO:0006355;GO:0008270;GO:0046872;
JTID ENSG00000115310:RTN4 GO:0005783;GO:0005515;GO:0005635;GO:0016020;GO:0016021;GO:0019987;GO:0030176;GO:0030517;GO:0042981;
JTID ENSG00000205036:NP_001001682.1
JTID ENSG0000011711:GOLTB1 GO:0004871;GO:0005783;GO:0015031;GO:0016020;GO:0016021;GO:0016192;GO:0043123;
JTID ENSG00000136842:TMOD1 GO:0003779;GO:0005523;GO:0005856;GO:0007010;GO:0030016;GO:0030239;
JTID ENSG00000131711:MAP1B GO:0001578;GO:0005198;GO:0005515;GO:0005874;GO:0005875;GO:0016358;
JTID ENSG00000145860:RNF145 GO:0004872;GO:0005515;GO:0006512;GO:0008270;GO:0046872;
TFJT GABP:Clorf144; GABP:SIRT7; GABP:MAP1B;
MIJT hsa-miR-148b:SYNJ1:targetscan:mirbase:pictar; hsa-miR-148b:SIRT7:targetscan:mirbase:pictar; hsa-miR-148b:MAP1B:mirbase; hsa-miR-148b:GOLTB1:targetscan; hsa-miR-148b:TMOD1:targetscan; hsa-miR-148b:ADAM17:targetscan; hsa-miR-148b:NP_001001682.1:mirbase; hsa-miR-148b:RTN4:targetscan:mirbase; hsa-miR-148b:Clorf144:targetscan:pictar;
```

```
//
ANNOTATION: 2
ID PEA3:hsa-miR-24;
TFID PEA3;
MIID ENSG00000209707:hsa-mir-24-2:hsa-miR-24;
JTID ENSG00000169715:MT1JP GO:0005507;GO:0005737;GO:0008270;GO:0046870;GO:0046872;
JTID ENSG00000196345:ZNF167 GO:0003677;GO:0003700;GO:0005622;GO:0005634;GO:0006350;GO:0006355;GO:0008270;GO:0046872;GO:0003676;
JTID ENSG00000162458:FBLIM1 GO:0005515;GO:0005856;GO:0007155;GO:0008270;GO:0008360;GO:0046872;
JTID ENSG00000015676:NUDCD3
JTID ENSG00000132141:CCT6B GO:0000166;GO:0005524;GO:0006457;GO:0007283;GO:0008565;GO:0051082;GO:0051131;
JTID ENSG00000106384:MOGAT3 GO:0003846;GO:0004144;GO:0005783;GO:0006071;GO:0006629;GO:0008415;GO:0008610;GO:0016020;GO:0016021;GO:0016740;
JTID ENSG00000114019:AMOTL2 GO:0003735;GO:0005622;GO:0005840;GO:0006412;GO:0005515;GO:0005923;GO:0042802;
JTID ENSG00000172460:Q8IVY7_HUMAN GO:0004252;GO:0006508;
JTID ENSG00000179862:CITED4 GO:0003713;GO:0005634;GO:0005737;GO:0006355;GO:0030528;GO:0045941;
JTID ENSG00000082153:BZW1 GO:0003743;GO:0005737;GO:0006350;GO:0006355;GO:0006446;
JTID ENSG00000176194:CIDEA GO:0005515;GO:0005622;GO:0006915;GO:0005739;GO:0005740;GO:0006309;GO:0006629;GO:0008630;
JTID ENSG00000143442:POGZ GO:0003677;GO:0005622;GO:0005634;GO:0007275;GO:0008270;GO:0045449;GO:0046872;
JTID ENSG00000138641:HERC3 GO:0004842;GO:0005622;GO:0006464;GO:0006512;GO:0016874;
JTID ENSG00000148965:SAA4 GO:0005319;GO:0005576;GO:0006953;
JTID ENSG00000168528:SERINC2 GO:0006658;GO:0016020;GO:0051347;
JTID ENSG00000101040:ZMYND8 GO:0016301;GO:0005515;GO:0008270;GO:0046872;
JTID ENSG00000103184:SEC14L5 GO:0005215;GO:0005622;GO:0006810;
JTID ENSG00000100147:CCDC134
JTID ENSG00000068903:SIRT2
GO:0000183;GO:0003677;GO:0005677;GO:0005737;GO:0005856;GO:0005874;GO:0006348;GO:0006355;GO:0006471;GO:0006980;GO:0007049;GO:0007067;GO:0007096;GO:0008134;GO:0008270;GO:0016481;GO:0016575;GO:0016787;GO:0017136;GO:0035035;GO:0042325;GO:0042826;GO:0042903;GO:0043130;GO:0045843;GO:0046872;GO:0051301;
TFJT PEA3:NUDCD3; PEA3:CCT6B; PEA3:POGZ; PEA3:ZMYND8; PEA3:SIRT2;
MIJT hsa-miR-24:CCT6B:targetscan:mirbase; hsa-miR-24:NUDCD3:targetscan; hsa-miR-24:CCDC134:targetscan; hsa-miR-24:AMOTL2:targetscan:pictar; hsa-miR-24:CITED4:targetscan:mirbase:pictar; hsa-miR-24:MT1JP:mirbase; hsa-miR-24:CIDEA:targetscan:mirbase; hsa-miR-24:SERINC2:targetscan:mirbase; hsa-miR-24:ZMYND8:targetscan:mirbase; hsa-miR-24:SEC14L5:mirbase; hsa-miR-24:MOGAT3:targetscan; hsa-miR-24:HERC3:targetscan; hsa-miR-24:SAA4:targetscan; hsa-miR-24:FBLIM1:targetscan; hsa-miR-24:BZW1:targetscan; hsa-miR-24:SIRT2:targetscan; hsa-miR-24:POGZ:targetscan:pictar;
```

```
//
ANNOTATION: 2
ID AP-2ALPHA:hsa-miR-194;
TFID AP-2ALPHA;
MIID ENSG00000207596:hsa-mir-194-2:hsa-miR-194;
JTID ENSG00000141576:RNF157 GO:0005515;GO:0008270;GO:0046872;
JTID ENSG00000139531:SUOX GO:0005506;GO:0005739;GO:0006118;GO:0008482;GO:0009087;GO:0016491;GO:0020037;GO:0030151;
JTID ENSG00000157306:HTTFA GO:0004016;GO:0005625;GO:0006091;GO:0006171;GO:0006772;GO:0016311;GO:0016787;GO:0050333;
JTID ENSG00000198569:SLC34A3 GO:0005436;GO:0005903;GO:0006811;GO:0006814;GO:0006817;GO:0015293;GO:0015321;GO:0016020;GO:0016021;GO:0016324;GO:0030643;GO:0031402;
```

```
JTID ENSG00000120727:PAIP2 GO:0005515;GO:0005737;GO:0006417;GO:0030371;GO:0045947;
JTID ENSG00000182093:WRB GO:0005634;
TFMI AP-2:ALPHA:hsa-miR-194:hsa-mir-194-2:computational(PUBMED: 17447837);
MIJT hsa-miR-194:RNF157:targetscan:mirbase; hsa-miR-194:PAIP2:targetscan:pictar; hsa-miR-194:SUOX:targetscan:mirbase;

//
ANNOTATION: 2
ID TEL-2:hsa-miR-24;
TFID TEL-2;
MIID ENSG00000209707:hsa-mir-24-2:hsa-miR-24;
JTID ENSG00000162458:FBLIM1 GO:0005515;GO:0005856;GO:0007155;GO:0008270;GO:0008360;GO:0046872;
JTID ENSG00000132141:CCT6B GO:0000166;GO:0005524;GO:0006457;GO:0007283;GO:0008565;GO:0051082;GO:0051131;
TFJT TEL-2:CCT6B;
MIJT hsa-miR-24:FBLIM1:targetscan; hsa-miR-24:CCT6B:targetscan:mirbase;

//
ANNOTATION: 2
ID HSF2:hsa-let-7a;
TFID HSF2;
MIID ENSG00000199165:hsa-let-7a-1:hsa-let-7a;
JTID ENSG00000177058:NP_775785.1
JTID ENSG00000133136:GBG5L_HUMAN GO:0003924;GO:0004871;GO:0005576;GO:0005834;GO:0007186;
JTID ENSG00000150593:PDCD4 GO:0003723;GO:0005515;GO:0005634;GO:0005737;GO:0005829;GO:0006915;GO:0007049;GO:0007569;GO:0016481;GO:0043508;GO:0045786;
JTID ENSG00000187772:LIN28B GO:0003677;GO:0006355;GO:0008270;GO:0046872;
JTID ENSG00000135297:MT01 GO:0005739;GO:0006118;GO:0008033;GO:0016491;GO:0050660;
JTID ENSG00000134323:MYCN GO:0000785;GO:0003700;GO:0005515;GO:0005634;GO:0006357;GO:0008284;GO:0030324;GO:0048754;
JTID ENSG00000094963:FMO2 GO:0000287;GO:0004497;GO:0004499;GO:0005783;GO:0005792;GO:0006118;GO:0006800;GO:0016020;GO:0016021;GO:0050660;
JTID ENSG00000179476:C14orf28
JTID ENSG00000187838:PLSCR3 GO:0005509;GO:0005886;GO:0016021;GO:0017121;GO:0017128;GO:0042593;GO:0042632;
JTID ENSG00000138036:DYNCL1 GO:0007368;GO:0042384;
JTID ENSG00000135476:ESPL1 GO:0000070;GO:0000074;GO:0000212;GO:0000910;GO:0005515;GO:0005634;GO:0005813;GO:0006508;GO:0006915;GO:0007059;GO:0007127;GO:0008234;GO:0040001;GO:0045143;GO:0045842;GO:0045875;
JTID ENSG00000204538:PSORS1C2
JTID ENSG00000161558:TMEM143 GO:0005739;GO:0016020;GO:0016021;
JTID ENSG00000169921:Q75L30_HUMAN
TFJT HSF2:LIN28B;
MIJT hsa-let-7a:Q75L30_HUMAN:mirbase; hsa-let-7a:MYCN:targetscan:pictar; hsa-let-7a:DYNCL1:mirbase; hsa-let-7a:PSORS1C2:targetscan:mirbase:pictar; hsa-let-7a:FMO2:targetscan; hsa-let-7a:TMEM143:targetscan:mirbase; hsa-let-7a:GBG5L_HUMAN:mirbase; hsa-let-7a:PDCD4:targetscan; hsa-let-7a:LIN28B:targetscan:pictar; hsa-let-7a:PLSCR3:targetscan:mirbase; hsa-let-7a:ESPL1:targetscan:mirbase; hsa-let-7a:C14orf28:targetscan; hsa-let-7a:NP_775785.1:pictar;

//
ANNOTATION: 2
ID AP-1:hsa-miR-142-5p;
TFID AP-1;
MIID ENSG00000207567:hsa-mir-142:hsa-miR-142-5p;
JTID ENSG00000067533:RRP15 GO:0005515;
JTID ENSG00000079257:RXN GO:0004857;GO:0005515;GO:0008191;GO:0050965;
JTID ENSG00000196793:ZNF239 GO:0003677;GO:0003723;GO:0005622;GO:0005634;GO:0005730;GO:0006350;GO:0006355;GO:0008270;GO:0046872;
TFMI AP-1:hsa-miR-142-5p:hsa-mir-142:computational(PUBMED: 17447837); computational(ECRbase);
MIJT hsa-miR-142-5p:RRP15:targetscan:mirbase; hsa-miR-142-5p:RXN:targetscan:mirbase; hsa-miR-142-5p:ZNF239:targetscan;

//
ANNOTATION: 2
ID ER:hsa-miR-144;
TFID ER;
MIID ENSG00000207618:hsa-mir-144:hsa-miR-144;
JTID ENSG00000116044:NFE2L2 GO:0003700;GO:0004867;GO:0005634;GO:0006350;GO:0006355;GO:0006366;GO:0043565;GO:0046983;
JTID ENSG00000206062:Q4G0T4_HUMAN GO:0005212;GO:0007601;GO:0042803;
JTID ENSG00000107341:UBE2R2 GO:0004842;GO:0006464;GO:0006512;GO:0016874;
JTID ENSG00000179151:EDC3 GO:0005515;
JTID ENSG00000101574:METTL4 GO:0003676;GO:0005634;GO:0006139;GO:0008168;GO:0016740;GO:0032259;
JTID ENSG00000136928:GABBR2 GO:0004872;GO:0004965;GO:0005887;GO:0007165;GO:0007186;GO:0007194;GO:0007268;GO:0045211;
JTID ENSG00000160972:PPP1R16A GO:0005515;GO:0016020;
JTID ENSG00000136205:TNS3 GO:0007242;GO:0016311;GO:0016791;GO:0008284;GO:0016477;GO:0048286;
JTID ENSG00000205269:Q5T4T1_HUMAN
JTID ENSG00000181852:RNF41 GO:0005515;GO:0006512;GO:0008270;GO:0016874;GO:0046872;
JTID ENSG00000170801:HTRA3 GO:0001558;GO:0004252;GO:0005515;GO:0005520;GO:0005576;GO:0006508;GO:0008233;
JTID ENSG00000160352:ZNF714 GO:0003676;GO:0005622;GO:0005634;GO:0006355;GO:0008270;GO:0046872;
JTID ENSG00000196705:ZNF431 GO:0003677;GO:0005622;GO:0005634;GO:0006350;GO:0006355;GO:0008270;GO:0046872;
JTID ENSG00000204987:Q6ZNR0_HUMAN GO:0004553;GO:0005975;
JTID ENSG00000142182:DNMT3L GO:0000794;GO:0001701;GO:0005515;GO:0005634;GO:0005720;GO:0005737;GO:0006306;GO:0006349;GO:0007283;GO:0008047;GO:0008270;GO:0016564;GO:0019899;GO:0046872;
JTID ENSG00000183952:Q9H5Q9_HUMAN
JTID ENSG00000153563:CD8A GO:0005515;GO:0005887;GO:0006955;GO:0007169;GO:0015026;GO:0016020;GO:0019882;GO:0042101;GO:0042110;GO:0042288;GO:0002456;GO:0007166;GO:0009897;GO:0009986;GO:0045065;GO:0050850;
JTID ENSG00000164219:PGGT1B GO:0004659;GO:0004662;GO:0005953;GO:0006350;GO:0008270;GO:0016740;GO:0018348;GO:0046872;
JTID ENSG00000104067:TJPI1 GO:0005515;GO:0005624;GO:0005918;GO:0005923;GO:0007043;GO:0016020;
JTID ENSG00000064393:HIPK2
GO:0000074;GO:0000166;GO:0003714;GO:0004674;GO:0005515;GO:0005524;GO:0005634;GO:0005737;GO:0006350;GO:0006355;GO:0006468;GO:0006915;GO:0008629;GO:0016604;GO:0016740;GO:0019048;GO:0030511;GO:0046330;GO:0046790;GO:0000122;GO:0007224;GO:0008284;GO:0009952;GO:0042771;GO:0043388;
JTID ENSG00000160209:PDXX GO:0000166;GO:0005524;GO:0008270;GO:0008478;GO:0008615;GO:0016740;GO:0046872;
JTID ENSG00000168575:SLC20A2 GO:0004872;GO:0005315;GO:0005436;GO:0005624;GO:0005887;GO:0006810;GO:0006817;GO:0016020;
JTID ENSG00000117620:SLC35A3 GO:0000139;GO:0005338;GO:0005351;GO:0015780;GO:0016021;GO:0005462;GO:0005794;GO:0006047;GO:0015788;GO:0016020;
JTID ENSG00000126749:EMG1 GO:0005515;GO:0005634;GO:0005732;GO:0006365;GO:0030515;
JTID ENSG00000188807:NP_001010866.1
JTID ENSG00000088854:C20orf194 GO:0003676;GO:0005622;GO:0008270;
JTID ENSG00000167766:ZNF83 GO:0003700;GO:0005622;GO:0005634;GO:0006350;GO:0006355;GO:0008270;GO:0046872;GO:0003676;
JTID ENSG00000100109:TFIP11 GO:0001503;GO:0003676;GO:0005515;GO:0005578;GO:0005622;GO:0005634;GO:0005681;GO:0006397;GO:0008380;GO:0016607;GO:0030154;GO:0030198;GO:0045045;
JTID ENSG00000166436:TRIM66 GO:0005515;GO:0005622;GO:0005634;GO:0005701;GO:0008270;GO:0016564;GO:0042803;GO:0045892;GO:0046872;
JTID ENSG00000119707:RBM25 GO:0000166;GO:0000398;GO:0003676;GO:0003729;
JTID ENSG00000180263:FGD6 GO:0001726;GO:0005085;GO:0005089;GO:0005515;GO:0005622;GO:0005737;GO:0005794;GO:0005856;GO:0007010;GO:0008270;GO:0008360;GO:0030027;GO:0030036;GO:0031267;GO:0035023;GO:0043088;GO:0046847;GO:0046872;
TFJT ER:Q6ZNR0_HUMAN; ER:EMG1; ER:TRIM66; ER:RBM25;
MIJT hsa-miR-144:PGGT1B:targetscan:mirbase; hsa-miR-144:DNMT3L:targetscan; hsa-miR-144:ZNF431:targetscan; hsa-miR-144:EMG1:targetscan:mirbase; hsa-miR-144:ZNF714:targetscan; hsa-miR-144:TNS3:targetscan; hsa-miR-144:METTL4:targetscan; hsa-miR-144:CD8A:targetscan; hsa-miR-144:EDC3:targetscan; hsa-miR-144:FGD6:targetscan; hsa-miR-144:PPP1R16A:targetscan; hsa-miR-144:RNF41:targetscan; hsa-miR-144:HTRA3:targetscan; hsa-miR-144:SLC35A3:targetscan; hsa-miR-144:SLC20A2:targetscan; hsa-miR-144:TFIP11:targetscan:mirbase; hsa-miR-144:NFE2L2:targetscan:mirbase:pictar; hsa-miR-144:TJPI1:targetscan:mirbase:pictar; hsa-miR-144:GABBR2:targetscan;

//
ANNOTATION: 2
ID NCX:hsa-miR-125b;
TFID NCX;
MIID ENSG00000207863:hsa-mir-125b-2:hsa-miR-125b;
JTID ENSG00000125449:ARM7 GO:0005488;
JTID ENSG00000153885:KCTD15 GO:0005249;GO:0005515;GO:0006813;GO:0008076;GO:0016020;
JTID ENSG00000089639:GM1F GO:0005096;GO:0005100;GO:0005515;GO:0005622;GO:0007242;GO:0008270;GO:0019992;GO:0046872;
JTID ENSG00000136895:GARNL3 GO:0005096;GO:0005622;GO:00051056;GO:0005083;
JTID ENSG00000205191:NP_001070148.1
JTID ENSG00000171169:C9orf90
```

```
JTID ENSG00000106993: CDC37L1 GO:0000074;GO:0051301;
TFJT NCX:NP_001070148.1; NCX:C9orf90;
MIJT hsa-miR-125b:NP_001070148.1:mirbase; hsa-miR-125b:C9orf90:targetscan:pictar; hsa-miR-125b:GMIP:targetscan:mirbase; hsa-miR-125b:ARMC7:targetscan:mirbase; hsa-miR-125b:KCTD15:targetscan;

//
ANNOTATION: 2
ID IRF-7:hsa-miR-425-3p;
TFID IRF-7;
MIID ENSG00000199032:hsa-mir-425:hsa-miR-425-3p;
JTID ENSG00000167178:ISLR2 GO:0005515;GO:0016020;GO:0016021;
JTID ENSG00000172867:KRT2 GO:0005200;GO:0005882;GO:0008544;GO:0031424;GO:0032980;GO:0043616;GO:0051546;
JTID ENSG00000049323:LTPF1 GO:0005024;GO:0005509;GO:0005578;GO:0019838;
JTID ENSG00000184937:WT1 GO:0003676;GO:0003700;GO:0005622;GO:0005634;GO:0006350;GO:0006355;GO:0007049;GO:0008270;GO:0045786;GO:0046872;GO:0001570;GO:0001656;GO:0001823;GO:0005515;GO:0005737;GO:0006357;GO:0007281;GO:0008584;GO:0009888;GO:0030855;GO:0043010;GO:0045944;
JTID ENSG00000170852:KBTBD2 GO:0005515;
TFMI IRF-7:hsa-miR-425-3p:hsa-mir-425:computational(ECRbase);
MIJT hsa-miR-425-3p:ISLR2:targetscan:mirbase; hsa-miR-425-3p:WT1:targetscan:mirbase; hsa-miR-425-3p:KRT2:mirbase;

//
ANNOTATION: 2
ID SRY:hsa-miR-381;
TFID SRY;
MIID ENSG00000199020:hsa-mir-381:hsa-miR-381;
JTID ENSG00000163114:PDHA2 GO:0004739;GO:0005739;GO:0006096;GO:0008152;GO:0016491;
JTID ENSG00000172915:NBEA GO:0005802;GO:0005886;GO:0006892;GO:0012505;GO:0015018;GO:0008104;GO:0019901;
JTID ENSG00000101670:LIPG GO:0004465;GO:0004806;GO:0005515;GO:0008201;GO:0008970;GO:0016042;GO:0016787;
JTID ENSG00000174177:NP_001012780.1
JTID ENSG00000119414:PPP6C GO:0000082;GO:0004722;GO:0005506;GO:0005515;GO:0005829;GO:0006470;GO:0016787;GO:0030145;GO:0046872;GO:0004721;
JTID ENSG00000146678:IGFBP1 GO:0001558;GO:0005520;GO:0005576;GO:0005615;GO:0007165;
JTID ENSG00000078142:PIK3C3 GO:0000166;GO:0004428;GO:0004672;GO:0005515;GO:0005524;GO:0005942;GO:0006468;GO:0016303;GO:0016740;GO:0030145;
JTID ENSG00000054267:ARID4B GO:0000785;GO:0003677;GO:0003682;GO:0005622;GO:0005634;GO:0006333;GO:0006350;GO:0006355;
JTID ENSG00000120156:TEK GO:0000166;GO:0004714;GO:0004872;GO:0005524;GO:0005887;GO:0006468;GO:0007160;GO:0007165;GO:0007169;GO:0007267;GO:0016020;GO:0016337;GO:0016740;GO:0030334;GO:0045765;GO:0016301;
JTID ENSG00000181666:HKR1 GO:0003676;GO:0005622;GO:0006355;GO:0008270;GO:0003677;GO:0005634;GO:0006350;GO:0007275;GO:0046872;
JTID ENSG00000136327:NKX2-8 GO:0003700;GO:0003702;GO:0005634;GO:0006355;GO:0006366;GO:0007275;GO:0007409;GO:0043565;
JTID ENSG00000095564:BTAF1 GO:0000166;GO:0003700;GO:0004386;GO:0005524;GO:0005634;GO:0016481;GO:0016787;
JTID ENSG00000176208:ATAD5 GO:0000166;GO:0005524;GO:0017111;
JTID ENSG00000133639:BTG1 GO:0003712;GO:0005634;GO:0005737;GO:0006479;GO:0007286;GO:0008285;GO:0016477;GO:0019900;GO:0030308;GO:0042981;GO:0043085;GO:0045449;GO:0045603;GO:0045663;GO:0045766;
JTID ENSG00000135900:MRPL44 GO:0003725;GO:0004519;GO:0004525;GO:0005622;GO:0005739;GO:0006396;GO:0016787;GO:0030529;
JTID ENSG00000116785:CFHR3 GO:0005615;
JTID ENSG00000184009:ACTG1 GO:0000166;GO:0005200;GO:0005515;GO:0005524;GO:0005625;GO:0005829;GO:0006928;GO:0015629;GO:0030016;GO:0045214;
TFJT SRY:TEK; SRY:BTG1;
MIJT hsa-miR-381:BTG1:targetscan; hsa-miR-381:MRPL44:targetscan; hsa-miR-381:PPP6C:targetscan; hsa-miR-381:NBEA:targetscan; hsa-miR-381:ARID4B:targetscan; hsa-miR-381:TEK:targetscan:mirbase; hsa-miR-381:HKR1:targetscan; hsa-miR-381:LIPG:targetscan; hsa-miR-381:ACTG1:targetscan:mirbase;
hsa-miR-381:PIK3C3:targetscan:mirbase; hsa-miR-381:IGFBP1:targetscan:mirbase; hsa-miR-381:CFHR3:mirbase; hsa-miR-381:ATAD5:targetscan; hsa-miR-381:BTAF1:targetscan; hsa-miR-381:NP_001012780.1:mirbase; hsa-miR-381:NKX2-8:targetscan;

//
ANNOTATION: 2
ID AP-4:hsa-miR-133b;
TFID AP-4;
MIID ENSG00000199080:hsa-mir-133b:hsa-miR-133b;
JTID ENSG00000163485:ADORA1 GO:0001584;GO:0001610;GO:0004872;GO:0005887;GO:0006909;GO:0006954;GO:0007165;GO:0007186;GO:0007267;GO:0007399;GO:0008624;GO:0016020;
JTID ENSG00000006114:APIGBP1 GO:0005509;GO:0005737;GO:0005794;GO:0006886;GO:0006897;GO:0016020;GO:0030121;
TFMI AP-4:hsa-miR-133b:hsa-mir-133b:computational(PUBMED:17447837);
MIJT hsa-miR-133b:APIGBP1:targetscan:mirbase; hsa-miR-133b:ADORA1:targetscan;

//
ANNOTATION: 2
ID STAT1:hsa-miR-223;
TFID STAT1;
MIID ENSG00000207939:hsa-mir-223:hsa-miR-223;
JTID ENSG00000151148:UBE3B GO:0004842;GO:0005622;GO:0006464;GO:0006512;GO:0016874;
JTID ENSG00000172179:PRL GO:0005148;GO:0005179;GO:0005576;GO:0005615;GO:0005625;GO:0007166;GO:0007516;GO:0007565;GO:0007595;GO:0008283;
JTID ENSG00000170906:NDUFA3 GO:0003954;GO:0005624;GO:0005739;GO:0005747;GO:0006120;GO:0008137;GO:0016020;GO:0016021;GO:0016491;
JTID ENSG00000204397:NP_001017534.1 GO:0005515;GO:0005622;GO:0006508;GO:0030693;GO:0042981;
JTID ENSG00000150086:GRIN2B GO:0000287;GO:0004872;GO:0004972;GO:0005216;GO:0005234;GO:0005509;GO:0005515;GO:0005624;GO:0005887;GO:0006811;GO:0007215;GO:0007268;GO:0007611;GO:0008021;GO:0042734;GO:0045211;
JTID ENSG00000091136:LAMB1 GO:0005201;GO:0005604;GO:0005606;GO:0005607;GO:0007155;GO:0007566;GO:0019899;GO:0030335;GO:0031175;GO:0042476;GO:0043257;GO:0043259;GO:0048471;GO:0050679;
JTID ENSG00000170638:TRABD
JTID ENSG00000174238:PITPNA GO:0005515;GO:0005622;GO:0006629;GO:0006810;GO:0007601;GO:0008289;GO:0008525;GO:0008526;
JTID ENSG00000162191:SAKS1_HUMAN GO:0005737;
JTID ENSG00000158006:PAFAH2 GO:0003847;GO:0005543;GO:0005625;GO:0005737;GO:0008247;GO:0016042;GO:0016787;
JTID ENSG00000179630:C13orf31
JTID ENSG00000149970:CNKSR2 GO:0005515;GO:0005737;GO:0009966;GO:0016020;
JTID ENSG00000080815:PSEN1
GO:0000776;GO:0005515;GO:0005624;GO:0005639;GO:0005739;GO:0005783;GO:0005794;GO:0005887;GO:0006509;GO:0006915;GO:0006916;GO:0007001;GO:0007059;GO:0007155;GO:0007220;GO:0007242;GO:0008233;GO:0016020;GO:0016485;GO:0042325;GO:0042987;GO:0043085;GO:0001568;GO:0001708;GO:0001764;GO:0004175;GO:000562
2;GO:0005634;GO:0006874;GO:0007507;GO:0007613;GO:0030326;GO:0030424;GO:0030425;GO:0031410;GO:0035253;GO:0042640;GO:0043025;GO:0043065;GO:0045860;GO:0051563;GO:0051604;GO:0051605;
JTID ENSG00000117154:IGSF21
JTID ENSG00000165525:SDCCAG1 GO:0005634;
TFJT STAT1:GRIN2B;
MIJT hsa-miR-223:NDUFA3:targetscan; hsa-miR-223:CNKSR2:mirbase; hsa-miR-223:UBE3B:targetscan; hsa-miR-223:LAMB1:targetscan:mirbase; hsa-miR-223:IGSF21:targetscan; hsa-miR-223:C13orf31:targetscan; hsa-miR-223:PRL:targetscan; hsa-miR-223:PITPNA:targetscan; hsa-miR-223:PSEN1:targetscan;

//
ANNOTATION: 2
ID RORALPHA2:hsa-miR-125b;
TFID RORALPHA2;
MIID ENSG00000207863:hsa-mir-125b-2:hsa-miR-125b;
JTID ENSG00000100147:CCDC134
JTID ENSG00000170786:NP_620419.2 GO:0008152;GO:0016491;
JTID ENSG00000174808:BTC GO:0000074;GO:0005154;GO:0005625;GO:0008083;GO:0008283;GO:0008284;GO:0016020;GO:0016021;
JTID ENSG00000100796:SMEK1 GO:0016020;GO:0016021;
JTID ENSG00000135443:KRT85 GO:0005198;GO:0005515;GO:0005882;GO:0008544;
JTID ENSG00000143390:RFX5 GO:0003677;GO:0003700;GO:0003713;GO:0005515;GO:0005634;GO:0006350;GO:0006355;GO:0006366;
JTID ENSG00000100628:ASB2 GO:0006512;GO:0007242;
JTID ENSG00000156234:CXCL13 GO:0005576;GO:0005615;GO:0005625;GO:0006935;GO:0006954;GO:0006955;GO:0007204;GO:0007267;GO:0008009;GO:0048535;
JTID ENSG00000100599:RIN3 GO:0005096;GO:0006897;GO:0007242;GO:0017016;
TFJT RORALPHA2:RFX5;
MIJT hsa-miR-125b:KRT85:targetscan; hsa-miR-125b:NP_620419.2:mirbase; hsa-miR-125b:CXCL13:targetscan; hsa-miR-125b:CCDC134:targetscan:mirbase; hsa-miR-125b:ASB2:targetscan:mirbase; hsa-miR-125b:SMEK1:targetscan:mirbase:pictar; hsa-miR-125b:RIN3:targetscan:mirbase; hsa-miR-
125b:RFX5:targetscan:pictar;

//
ANNOTATION: 2
ID SRY:hsa-miR-181d;
TFID SRY;
MIID ENSG00000207585:hsa-mir-181d:hsa-miR-181d;
```

JTID ENSG00000083312:TNPO1 GO:0000059;GO:0000060;GO:0005515;GO:0005634;GO:0005643;GO:0005737;GO:0006886;GO:0008139;GO:0008565;  
JTID ENSG000000105705:SF4 GO:0003723;GO:0005622;GO:0005634;GO:0005681;GO:0006397;GO:0008380;  
JTID ENSG000000084652:TXLNA GO:0005576;GO:0005737;GO:0006887;GO:0008283;GO:0030372;  
JTID ENSG000000204455:XR\_015868.1 GO:0005515;GO:0005622;GO:0008270;  
JTID ENSG000000065882:TBC1D1 GO:0005096;GO:0005097;GO:0005622;GO:0005634;GO:0032313;  
JTID ENSG000000163463:KRTCAP2 GO:0004579;GO:0008250;GO:0016020;GO:0016021;GO:0018279;  
JTID ENSG000000160789:LMNA GO:0005198;GO:0005515;GO:0005634;GO:0005882;  
JTID ENSG000000160844:NP\_849153.3  
JTID ENSG000000183648:NDUFEB1 GO:0003954;GO:0005739;GO:0005747;GO:0006120;GO:0008137;GO:0016491;  
JTID ENSG000000206561:COLQ GO:0001507;GO:0005605;GO:0005615;GO:0005737;GO:0006817;GO:0008105;GO:0042135;GO:0045202;  
JTID ENSG000000152520:PAN3 GO:0000184;GO:0004672;GO:0005524;GO:0006468;  
JTID ENSG000000169891:REPS2 GO:0005509;GO:0005515;GO:0006461;GO:0007173;  
JTID ENSG000000106852:LHX6 GO:0003700;GO:0005634;GO:0006355;GO:0007420;GO:0008270;GO:0043565;GO:0046872;  
JTID ENSG000000139746:RBM26 GO:0000166;GO:0003723;GO:0008270;GO:0046872;  
JTID ENSG000000171766:GATM GO:0005739;GO:0005758;GO:0006601;GO:0015068;GO:0016740;  
TFJT SRY:LMNA;  
MIJT hsa-miR-181d:RBM26:targetscan:mirbase; hsa-miR-181d:GATM:targetscan; hsa-miR-181d:REPS2:targetscan:mirbase; hsa-miR-181d:TNPO1:targetscan; hsa-miR-181d:LHX6:targetscan; hsa-miR-181d:KRTCAP2:targetscan; hsa-miR-181d:XR\_015868.1:mirbase; hsa-miR-181d:TBC1D1:targetscan; hsa-miR-181d:PAN3:targetscan:mirbase; hsa-miR-181d:TXLNA:targetscan;

//  
ANNOTATION: 2  
ID MEIS1:hsa-miR-125b;  
TFID MEIS1;  
MIID ENSG000000207863:hsa-mir-125b-2:hsa-miR-125b;  
MIID ENSG000000207971:hsa-mir-125b-1:hsa-miR-125b;  
JTID ENSG000000113161:HMGCR GO:0004420;GO:0005624;GO:0005777;GO:0005783;GO:0005789;GO:0006629;GO:0006695;GO:0008354;GO:0008406;GO:0016020;GO:0016021;GO:0016491;GO:0005792;GO:0008542;GO:0009790;GO:0043407;  
JTID ENSG000000175779:NP\_997327.1  
JTID ENSG000000145391:SETD7 GO:0005634;GO:0008168;GO:0016568;GO:0016740;GO:0018024;  
JTID ENSG000000123064:DDX54 GO:0003723;GO:0005524;GO:0005634;GO:0016818;GO:0000166;GO:0003714;GO:0004004;GO:0005102;GO:0005730;GO:0006350;GO:0006355;GO:0006396;GO:0016787;GO:0030331;GO:0030520;  
JTID ENSG000000131914:LIN28 GO:0003677;GO:0005737;GO:0006355;GO:0008270;GO:0046872;  
JTID ENSG000000205191:NP\_001070148.1  
JTID ENSG000000182359:KBTBD3 GO:0005515;  
JTID ENSG000000166787:SAA3P GO:0005576;GO:0006953;  
JTID ENSG00000011981:ULBP1 GO:0005783;GO:0006955;GO:0016020;GO:0019882;GO:0030101;GO:0032393;GO:0042612;GO:0048503;  
JTID ENSG000000120656:TAF12 GO:0005515;GO:0005634;GO:0006569;GO:0006350;GO:0006352;GO:0006355;GO:0016251;  
JTID ENSG00000011537:IFNG  
GO:0001558;GO:0001781;GO:0005125;GO:0005133;GO:0005576;GO:0005615;GO:0006925;GO:0006928;GO:0007166;GO:0007267;GO:0009615;GO:0019882;GO:0030593;GO:0030968;GO:0031642;GO:0042742;GO:0045080;GO:0045084;GO:0045348;GO:0045410;GO:0045449;GO:0045893;GO:0048304;GO:0050718;GO:0050776;  
JTID ENSG000000167383:ZNF229 GO:0003677;GO:0005622;GO:0005634;GO:0006350;GO:0006355;GO:0008270;GO:0046872;  
JTID ENSG000000100628:ASB2 GO:0006512;GO:0007242;  
JTID ENSG000000133121:STARD13 GO:0005096;GO:0005622;GO:0007049;GO:0007165;GO:0045786;  
JTID ENSG000000205307:Q8TEE9\_HUMAN  
JTID ENSG000000198208:RPS6K1L GO:0000166;GO:0004672;GO:0005524;GO:0006468;GO:0016740;GO:0030529;  
JTID ENSG000000100796:SMEK1 GO:0016020;GO:0016021;  
JTID ENSG000000178351:Q8N345\_HUMAN  
JTID ENSG000000196616:ADH1C GO:0004024;GO:0005737;GO:0006066;GO:0006069;GO:0008270;GO:0009055;GO:0016491;GO:0046872;  
JTID ENSG000000134258:VTCN1 GO:0005102;GO:0050868;  
JTID ENSG000000167754:KLK5 GO:0004252;GO:0005576;GO:0005615;GO:0006508;GO:0008544;  
JTID ENSG000000136840:STGALNAC4 GO:0005625;GO:0006486;GO:0006664;GO:0008373;GO:0016020;GO:0016021;GO:0030173;GO:0047290;  
JTID ENSG000000169758:C15orf27 GO:0005216;GO:0006811;GO:0016020;GO:0016021;  
JTID ENSG000000133561:GIMAP6 GO:0005525;  
JTID ENSG000000087916:SLC6A14 GO:0005328;GO:0005887;GO:0006520;GO:0006836;GO:0006865;GO:0015171;GO:0015293;GO:0016020;  
JTID ENSG000000110274:CEP164  
JTID ENSG000000102313:ITIH5L GO:0004867;GO:0030212;  
JTID ENSG000000129472:RAB2B GO:0000166;GO:0005525;GO:0005783;GO:0006888;GO:0007264;GO:0015031;GO:0016020;  
TFJT MEIS1:LIN28; MEIS1:NP\_001070148.1; MEIS1:IFNG;  
MIJT hsa-miR-125b:Q8TEE9\_HUMAN:mirbase; hsa-miR-125b:IFNG:targetscan:mirbase; hsa-miR-125b:LIN28:targetscan:PUBMED:16227573; hsa-miR-125b:DDX54:targetscan; hsa-miR-125b:SLC6A14:targetscan; hsa-miR-125b:GIMAP6:targetscan; hsa-miR-125b:CEP164:targetscan; hsa-miR-125b:VTCN1:targetscan; hsa-miR-125b:KLK5:targetscan:mirbase; hsa-miR-125b:NP\_001070148.1:mirbase; hsa-miR-125b:C15orf27:targetscan; hsa-miR-125b:STARD13:targetscan:mirbase:pictar; hsa-miR-125b:SMEK1:targetscan:mirbase:pictar; hsa-miR-125b:ITIH5L:targetscan; hsa-miR-125b:SETD7:targetscan; hsa-miR-125b:ULBP1:targetscan; hsa-miR-125b:HMGCR:targetscan; hsa-miR-125b:ASB2:targetscan:mirbase; hsa-miR-125b:TAF12:targetscan; hsa-miR-125b:RPS6K1L:targetscan:mirbase; hsa-miR-125b:RAB2B:targetscan;

//  
ANNOTATION: 2  
ID HOXA4:hsa-miR-19a;  
TFID HOXA4;  
MIID ENSG000000207610:hsa-mir-19a:hsa-miR-19a;  
JTID ENSG000000155189:AGPAT5 GO:0003841;GO:0005739;GO:0008152;GO:0008415;GO:0008654;GO:0016020;GO:0016021;GO:0016740;  
JTID ENSG000000163596:ICALL  
JTID ENSG000000117601:SERPINC1 GO:0004867;GO:0005515;GO:0005576;GO:0007596;GO:0008201;  
JTID ENSG000000078699:CBFA2T2 GO:0003700;GO:0005515;GO:0005634;GO:0006355;GO:0008270;GO:0046872;GO:0003714;GO:0030855;GO:0045892;  
TFJT HOXA4:CBFA2T2;  
MIJT hsa-miR-19a:SERPINC1:targetscan:mirbase; hsa-miR-19a:AGPAT5:targetscan:mirbase; hsa-miR-19a:CBFA2T2:targetscan; hsa-miR-19a:ICALL:targetscan;

//  
ANNOTATION: 2  
ID AFP1:hsa-miR-31;  
TFID AFP1;  
MIID ENSG000000199177:hsa-mir-31:hsa-miR-31;  
JTID ENSG000000153814:JAZF1 GO:0000122;GO:0003676;GO:0003714;GO:0005622;GO:0005634;GO:0006350;GO:0006355;GO:0008270;GO:0017053;GO:0046872;  
JTID ENSG000000110799:VWF GO:0001948;GO:0002020;GO:0005178;GO:0005518;GO:0005576;GO:0005578;GO:0005783;GO:0009611;GO:0019865;GO:0030168;GO:0031091;GO:0031589;GO:0042803;GO:0047485;GO:0051087;GO:0051260;GO:0001889;GO:0001890;  
TFJT AFP1:JAZF1;  
MIJT hsa-miR-31:JAZF1:targetscan:pictar; hsa-miR-31:VWF:targetscan:mirbase;

//  
ANNOTATION: 2  
ID DBP:hsa-miR-29a;  
TFID DBP;  
MIID ENSG000000198981:hsa-mir-29a:hsa-miR-29a;  
JTID ENSG000000198198:KIAA0467  
JTID ENSG000000185650:ZFP36L1 GO:0001570;GO:0003700;GO:0003729;GO:0005515;GO:0005634;GO:0005737;GO:0006417;GO:0008270;GO:0043488;GO:0046872;  
TFJT DBP:ZFP36L1;  
MIJT hsa-miR-29a:ZFP36L1:targetscan:pictar;

//  
ANNOTATION: 2  
ID MEIS1:hsa-let-7e;  
TFID MEIS1;  
MIID ENSG000000198972:hsa-let-7e:hsa-let-7e;  
JTID ENSG000000162650:ATXN7L2  
JTID ENSG000000177410:Q5QHF1\_HUMAN  
JTID ENSG000000198105:ZNF248 GO:0003676;GO:0003677;GO:0005622;GO:0005634;GO:0006350;GO:0006355;GO:0008270;GO:0046872;  
JTID ENSG000000187109:NAF1L1 GO:0005515;GO:0005634;GO:0005678;GO:0006260;GO:0006334;GO:0008284;  
JTID ENSG000000105697:HAMP GO:0005179;GO:0005576;GO:0006805;GO:0006879;GO:0006955;GO:0042742;GO:0050832;  
JTID ENSG000000143851:PTPN7 GO:0004725;GO:0004872;GO:0005737;GO:0006470;GO:0016787;GO:0016791;

```
JTID ENSG00000148200:NR6A1 GO:0003700;GO:0003707;GO:0005634;GO:0006350;GO:0006355;GO:0008270;GO:0043565;GO:0046872;GO:0000122;GO:0003677;GO:0005515;GO:0005667;GO:0007276;GO:0007283;GO:0008283;GO:0042803;
JTID ENSG00000119906:C10orf6
JTID ENSG00000133136:GBG5L_HUMAN GO:0003924;GO:0004871;GO:0005576;GO:0005834;GO:0007186;
JTID ENSG00000160094:ZNF362 GO:0003676;GO:0005622;GO:0008270;GO:0046872;
JTID ENSG0000023902:PLEKH01
JTID ENSG00000120440:TTL2 GO:0004835;GO:0006464;GO:0016874;
JTID ENSG00000085491:SLC25A24 GO:0005488;GO:0005509;GO:0005739;GO:0005743;GO:0006810;GO:0006839;GO:0016020;GO:0016021;
JTID ENSG00000143458:NP_653219.1 GO:0042803;
JTID ENSG00000169921:Q75L30_HUMAN
JTID ENSG00000159217:IGF2BP1 GO:0000166;GO:0003723;GO:0005515;GO:0005634;GO:0006417;
JTID ENSG00000179476:C14orf28
JTID ENSG00000171552:BCL2L1 GO:0001836;GO:0005634;GO:0005739;GO:0005741;GO:0006916;GO:0008634;GO:0009314;GO:0016020;GO:0016021;GO:0042802;GO:0042981;GO:0043524;GO:0045768;GO:0046902;GO:0051881;GO:0005515;GO:0006915;GO:0043066;
JTID ENSG00000118503:TNFAIP3 GO:0003677;GO:0005515;GO:0005634;GO:0005737;GO:0006512;GO:0006915;GO:0006916;GO:0008234;GO:0008270;GO:0043124;GO:0046872;
JTID ENSG00000184895:SRY GO:0003677;GO:0005515;GO:0005634;GO:0006350;GO:0006355;GO:0007548;GO:0008301;GO:0016563;GO:0030154;GO:0030238;
JTID ENSG00000165449:SLC16A9 GO:0005215;GO:0006810;GO:0016020;GO:0016021;
JTID ENSG00000198929:NOS1AP GO:0005515;GO:0005737;GO:0007269;GO:0030165;GO:0050998;GO:0050999;
TFJT MEIS1:ATXN7L2; MEIS1:GBG5L_HUMAN; MEIS1:IGF2BP1;
MIJT hsa-let-7e:Q75L30_HUMAN:mirbase; hsa-let-7e:TTL2:mirbase; hsa-let-7e:PLEKH01:targetscan:mirbase:pictar; hsa-let-7e:C10orf6:targetscan:pictar; hsa-let-7e:SLC25A24:targetscan:pictar; hsa-let-7e:BCL2L1:targetscan:pictar; hsa-let-7e:NAP1L1:targetscan:mirbase; hsa-let-7e:ATXN7L2:targetscan; hsa-let-7e:GBG5L_HUMAN:mirbase; hsa-let-7e:IGF2BP1:targetscan; hsa-let-7e:PTPN7:targetscan; hsa-let-7e:SLC16A9:targetscan:pictar; hsa-let-7e:ZNF248:targetscan:pictar; hsa-let-7e:Q5QHF1_HUMAN:mirbase; hsa-let-7e:C14orf28:targetscan; hsa-let-7e:TNFAIP3:targetscan:pictar; hsa-let-7e:ZNF362:pictar;

//
ANNOTATION: 2
ID LEF1:hsa-miR-10a;
TFID LEF1;
MIID ENSG00000207777:hsa-mir-10a:hsa-miR-10a;
JTID ENSG00000143198:MGST3 GO:0004364;GO:0004601;GO:0005624;GO:0005783;GO:0005792;GO:0006629;GO:0007165;GO:0016020;GO:0016021;GO:0016740;
JTID ENSG00000144681:STAC GO:0005625;GO:0007242;GO:0008270;GO:0019992;GO:0046872;
JTID ENSG00000106952:TNFSF8 GO:0005125;GO:0005164;GO:0005615;GO:0005887;GO:0006917;GO:0006955;GO:0007165;GO:0007267;GO:0008283;GO:0016020;
JTID ENSG00000110484:SCGB2A2 GO:0005496;
JTID ENSG00000182263:FIGN GO:0000166;GO:0005524;GO:0017111;
TFMI LEF1:hsa-miR-10a:hsa-mir-10a:computational(ECRbase);
MIJT hsa-miR-10a:STAC:targetscan; hsa-miR-10a:FIGN:targetscan; hsa-miR-10a:SCGB2A2:targetscan:mirbase; hsa-miR-10a:TNFSF8:targetscan;

//
ANNOTATION: 2
ID ER:hsa-miR-103;
TFID ER;
MIID ENSG00000199024:hsa-mir-103-2:hsa-miR-103;
JTID ENSG00000105173:CCNE1 GO:0000074;GO:0000082;GO:0003713;GO:0005515;GO:0005634;GO:0007049;GO:0030521;GO:0045893;GO:0050681;GO:0051301;GO:0000307;GO:0006270;GO:0006468;GO:0016301;GO:0016538;
JTID ENSG00000137171:KLC4 GO:0003777;GO:0005488;GO:0005515;GO:0005871;GO:0005874;
JTID ENSG00000149201:CCDC81 GO:0003677;
JTID ENSG00000069275:NUCKS1 GO:0005634;
JTID ENSG00000105085:CRSP7 GO:0003713;GO:0004872;GO:0005515;GO:0005634;GO:0006350;GO:0006357;GO:0006367;
JTID ENSG00000135968:GCC2 GO:0005515;
JTID ENSG00000164305:CASP3
GO:0005515;GO:0006508;GO:0006915;GO:0006917;GO:0008234;GO:0030264;GO:0030693;GO:0001782;GO:0001836;GO:0004861;GO:0005737;GO:0006309;GO:0007507;GO:0007605;GO:0008233;GO:0008625;GO:0008631;GO:0009411;GO:0009611;GO:0030216;GO:0030889;GO:0043029;GO:0045165;GO:0045736;GO:0045786;GO:0046007;
JTID ENSG00000116704:SLC35D1 GO:0005351;GO:0005463;GO:0005783;GO:0006810;GO:0015789;GO:0016020;GO:0016021;GO:0030176;GO:0030206;
JTID ENSG00000176095:IHPK1 GO:0005515;GO:0005634;GO:0005737;GO:0008440;GO:0016192;GO:0016301;GO:0016310;GO:0016740;GO:0050517;GO:0051209;
JTID ENSG00000158560:DYNCL11 GO:0003777;GO:0005515;GO:0005868;GO:0005874;GO:0008017;GO:0047496;GO:0048471;
JTID ENSG00000166311:SMPD1 GO:0004767;GO:0005764;GO:0006685;GO:0007165;GO:0007399;GO:0008152;GO:0016787;GO:0016798;
JTID ENSG00000129473:BCL2L2 GO:0005515;GO:0005737;GO:0006916;GO:0007283;GO:0016020;GO:0042981;GO:0060011;
TFJT ER:NUCKS1; ER:CRSP7; ER:IHPK1;
MIJT hsa-miR-103:CRSP7:targetscan:mirbase; hsa-miR-103:SMPD1:targetscan:mirbase; hsa-miR-103:CCNE1:targetscan:mirbase:pictar; hsa-miR-103:BCL2L2:targetscan:pictar; hsa-miR-103:GCC2:targetscan; hsa-miR-103:CASP3:targetscan; hsa-miR-103:DYNCL11:targetscan:pictar; hsa-miR-103:CCDC81:targetscan:mirbase; hsa-miR-103:KLC4:pictar;

//
ANNOTATION: 2
ID MYOD:hsa-miR-363;
TFID MYOD;
MIID ENSG00000207572:hsa-mir-363:hsa-miR-363;
JTID ENSG00000165943:MOAP1 GO:0005515;GO:0005737;GO:0006915;GO:0006919;GO:0006921;GO:0030262;GO:0042803;
JTID ENSG00000114124:GRK7 GO:0000166;GO:0004703;GO:0004871;GO:0005524;GO:0006468;GO:0007165;GO:0007601;GO:0016020;GO:0016740;GO:0050896;
JTID ENSG00000163694:NP_061900.1 GO:0000166;GO:0003676;
JTID ENSG00000069812:HES2 GO:0003677;GO:0005634;GO:0006355;GO:0030528;
JTID ENSG00000006634:DBF4 GO:0000074;GO:0000082;GO:0003676;GO:0005515;GO:0005622;GO:0005634;GO:0006260;GO:0007049;GO:0008047;GO:0008270;GO:0046872;
JTID ENSG00000136478:TEX2 GO:0016020;GO:0016021;
JTID ENSG00000143164:IQWD1 GO:0004872;
JTID ENSG00000180458:Q8N3U1_HUMAN
JTID ENSG00000205875:LOC197350 GO:0006118;GO:0006508;GO:0009055;GO:0030693;
JTID ENSG00000125351:UPF3B GO:0000166;GO:0000184;GO:0003723;GO:0005487;GO:0005515;GO:0005634;GO:0005737;GO:0006810;GO:0051028;
JTID ENSG00000197713:RPE GO:0004750;GO:0005515;GO:0005975;GO:0008152;GO:0016853;GO:0003824;
JTID ENSG00000180104:EXOC3 GO:0006887;GO:0015031;
JTID ENSG00000147124:ZNF41 GO:0003700;GO:0005622;GO:0005634;GO:0006350;GO:0006355;GO:0008270;GO:0046872;
TFJT MYOD:MOAP1; MYOD:NP_061900.1; MYOD:RPE;
MIJT hsa-miR-363:MOAP1:mirbase; hsa-miR-363:HES2:targetscan; hsa-miR-363:LOC197350:mirbase; hsa-miR-363:IQWD1:mirbase;

//
ANNOTATION: 2
ID AFP1:hsa-miR-32;
TFID AFP1;
MIID ENSG00000207698:hsa-mir-32:hsa-miR-32;
JTID ENSG00000198373:WWP2 GO:0000151;GO:0004842;GO:0005515;GO:0005622;GO:0006464;GO:0006512;GO:0016874;GO:0046718;
JTID ENSG00000112081:SFRS3 GO:0000166;GO:0003723;GO:0005515;GO:0005634;GO:0006397;GO:0008380;
JTID ENSG00000204323:Q71RC9_HUMAN
JTID ENSG00000143401:ANP32E GO:0005515;GO:0005634;GO:0016023;GO:0019212;GO:0005737;
JTID ENSG00000151789:ZNF659 GO:0003676;GO:0005622;GO:0005634;GO:0008270;GO:0046872;
JTID ENSG00000178110:Q8N9G9_HUMAN
TFJT AFP1:ANP32E;
MIJT hsa-miR-32:SFRS3:targetscan; hsa-miR-32:WWP2:targetscan:pictar; hsa-miR-32:Q71RC9_HUMAN:mirbase; hsa-miR-32:ZNF659:targetscan; hsa-miR-32:ANP32E:targetscan:mirbase; hsa-miR-32:Q8N9G9_HUMAN:mirbase;

//
ANNOTATION: 2
ID YY1:hsa-miR-222;
TFID YY1;
MIID ENSG00000207725:hsa-mir-222:hsa-miR-222;
JTID ENSG00000168906:MAT2A GO:0000166;GO:0000287;GO:0004478;GO:0005524;GO:0006556;GO:0016740;GO:0030955;
JTID ENSG00000204220:PFDM6 GO:0006457;GO:0016272;GO:0051082;
JTID ENSG00000186462:NAP1L2 GO:0005634;GO:0005678;GO:0006334;
JTID ENSG00000167196:FBXO22 GO:0004842;GO:0006464;GO:0006511;GO:0006512;
JTID ENSG00000138468:SENP7 GO:0005622;GO:0005634;GO:0006508;GO:0006512;GO:0008234;GO:0016925;
TFMI YY1:hsa-miR-222:hsa-mir-222:computational(PUBMED: 17447837);
```



MIJT hsa-miR-222:SENP7:targetscan:pictar; hsa-miR-222:FBXO22:targetscan:pictar; hsa-miR-222:NAP1L2:targetscan; hsa-miR-222:MAT2A:targetscan:mirbase:pictar;

```
//
ANNOTATION: 2
ID MEIS1:hsa-miR-194;
TFID MEIS1;
MIID ENSG00000207624:hsa-mir-194-1:hsa-miR-194;
JTID ENSG00000161381:PLXDC1 GO:0001525;GO:0004872;GO:0007275;GO:0016020;GO:0016021;
JTID ENSG00000003756:RBM5 GO:0000166;GO:0003677;GO:0003723;GO:0005622;GO:0005634;GO:0006396;GO:0007049;GO:0008270;GO:0045786;GO:0046872;
JTID ENSG00000137100:DCTN3 GO:0000910;GO:0005198;GO:0005515;GO:0005869;GO:0007049;GO:0007067;GO:0048471;
JTID ENSG00000177853:ZNF518 GO:0003677;GO:0005622;GO:0005634;GO:0006350;GO:0006355;GO:0008270;GO:0046872;
JTID ENSG00000092445:TYRO3 GO:0000166;GO:0004714;GO:0004716;GO:0004872;GO:0005515;GO:0005524;GO:0005887;GO:0006468;GO:0007155;GO:0007165;GO:0016020;GO:0016740;
JTID ENSG00000077312:SNRPA GO:0000166;GO:0000398;GO:0003723;GO:0005515;GO:0005634;GO:0005681;GO:0005685;GO:0008380;
JTID ENSG00000087085:ACHE
GO:0001507;GO:0001540;GO:0002076;GO:0003990;GO:0004104;GO:0004759;GO:0005518;GO:0005576;GO:0005605;GO:0005794;GO:0006260;GO:0007155;GO:0007416;GO:0007517;GO:0008283;GO:0009611;GO:0016020;GO:0016787;GO:0017171;GO:0032223;GO:0042166;GO:0042803;GO:0042982;GO:0043237;GO:0045202;GO:0048471;GO:0050714;GO:0001919;GO:0005615;GO:0005886;GO:0006581;GO:0009986;GO:0031623;GO:0043236;GO:0043621;GO:0045212;GO:0051262;GO:0060041;
JTID ENSG00000130224:LRCH2 GO:0005515;
JTID ENSG00000198569:SLC34A3 GO:0005436;GO:0005903;GO:0006811;GO:0006814;GO:0006817;GO:0015293;GO:0015321;GO:0016020;GO:0016021;GO:0016324;GO:0030643;GO:0031402;
JTID ENSG00000134352:IL6ST GO:0004872;GO:0004915;GO:0004924;GO:0005515;GO:0005886;GO:0005887;GO:0006955;GO:0007166;GO:0016020;GO:0007165;GO:0008284;GO:0008593;
JTID ENSG00000197008:ZNF138 GO:0003700;GO:0005622;GO:0005634;GO:0006350;GO:0006355;GO:0008270;GO:0046872;
JTID ENSG00000197969:VPS13A GO:0005478;GO:0005622;GO:0006895;GO:0008104;GO:0015031;
JTID ENSG00000040933:INPP4A GO:0007165;GO:0016316;GO:0016787;
JTID ENSG00000085872:CHERP GO:0003723;GO:0005622;GO:0005737;GO:0006396;GO:0006874;GO:0007399;GO:0008285;
JTID ENSG00000178028:DMAPI1 GO:0001558;GO:0003677;GO:0005515;GO:0005634;GO:0006306;GO:0006350;GO:0006355;GO:0008168;GO:0016481;GO:0016564;GO:0016568;GO:0016740;
JTID ENSG00000131188:PRR7
JTID ENSG00000151287:C13orf27
JTID ENSG00000165028:NIPSNAP3B
JTID ENSG00000204038:Q6ZRL6_HUMAN
JTID ENSG00000071073:MGAT4A GO:0005975;GO:0006491;GO:0008454;GO:0016020;GO:0016758;
JTID ENSG00000162804:SNED1 GO:0005509;GO:0007160;
JTID ENSG00000081800:SLC13A1 GO:0005215;GO:0006811;GO:0006814;GO:0008271;GO:0008272;GO:0015293;GO:0016020;GO:0016021;GO:0031402;
TFJT MEIS1:TYRO3;
MIJT hsa-miR-194:SLC13A1:targetscan; hsa-miR-194:MGAT4A:targetscan:pictar; hsa-miR-194:SNED1:targetscan; hsa-miR-194:LRCH2:targetscan; hsa-miR-194:C13orf27:targetscan:mirbase:pictar; hsa-miR-194:PRR7:targetscan:mirbase:pictar; hsa-miR-194:ACHE:mirbase; hsa-miR-194:NIPSNAP3B:targetscan;
hsa-miR-194:ZNF138:targetscan; hsa-miR-194:ZNF518:targetscan; hsa-miR-194:RBM5:targetscan; hsa-miR-194:PLXDC1:targetscan; hsa-miR-194:DCTN3:targetscan; hsa-miR-194:INPP4A:targetscan:mirbase; hsa-miR-194:DMAPI1:mirbase;
```

```
//
ANNOTATION: 2
ID MYC:hsa-miR-499;
TFID MYC;
MIID ENSG00000207635:hsa-mir-499:hsa-miR-499;
JTID ENSG00000163788:SNRK GO:0000166;GO:0000287;GO:0004674;GO:0005515;GO:0005524;GO:0005634;GO:0006468;GO:0016740;GO:0030099;GO:0043523;
TFMI MYC:hsa-miR-499:hsa-mir-499:computational (ECRbase);
MIJT hsa-miR-499:SNRK:targetscan;
```

```
//
ANNOTATION: 2
ID MYOD:hsa-miR-20b;
TFID MYOD;
MIID ENSG00000207710:hsa-mir-20b:hsa-miR-20b;
JTID ENSG00000145362:ANK2 GO:0005200;GO:0005515;GO:0007165;GO:0015629;GO:0016020;GO:0005856;
JTID ENSG00000169509:CRCT1 GO:0005515;
JTID ENSG00000189409:MMP23A GO:0000003;GO:0004222;GO:0005578;GO:0005622;GO:0006508;GO:0008270;GO:0016020;GO:0016021;GO:0046872;
JTID ENSG00000011454:RABGAP1 GO:0005096;GO:0005097;GO:0005622;GO:0005813;GO:0005829;GO:0005875;GO:0007049;GO:0015631;GO:0032313;GO:0003725;GO:0003727;GO:0006928;GO:0007286;GO:0007638;GO:0015630;
JTID ENSG00000196460:Q6ZNB4_HUMAN GO:0003677;GO:0006355;
JTID ENSG00000050405:LIM1 GO:0001725;GO:0003785;GO:0005925;GO:0008270;GO:0015629;GO:0030835;GO:0031529;GO:0046872;GO:0051015;GO:0051017;
JTID ENSG00000153234:NR4A2 GO:0003677;GO:0003700;GO:0003707;GO:0005515;GO:0005634;GO:0006350;GO:0006355;GO:0007165;GO:0007399;GO:0008270;GO:0030182;GO:0042053;GO:0043565;GO:0045944;GO:0046872;
JTID ENSG00000187699:Q8NBX4_HUMAN
JTID ENSG00000173627:APOBEC4 GO:0006397;GO:0008270;GO:0016787;GO:0046872;
JTID ENSG00000135801:TAF5L GO:0003700;GO:0005634;GO:0006355;GO:0006366;
JTID ENSG00000170390:DCLK2 GO:0000166;GO:0004674;GO:0005524;GO:0006468;GO:0007242;GO:0016740;
JTID ENSG00000147036:LANCL3
JTID ENSG00000115561:VPS24 GO:0015031;GO:0016020;
JTID ENSG00000138449:SLC40A1 GO:0005381;GO:0005506;GO:0005737;GO:0005886;GO:0005887;GO:0006811;GO:0006826;GO:0006879;GO:0008021;GO:0009653;
JTID ENSG00000146360:GPR6 GO:0001619;GO:0004872;GO:0005887;GO:0007165;GO:0007186;GO:0007204;GO:0016020;
JTID ENSG00000104888:SLC17A7 GO:0005215;GO:0006810;GO:0006817;GO:0015319;GO:0015321;GO:0016020;GO:0016021;GO:0042137;
TFJT MYOD:ANK2; MYOD:APOBEC4;
MIJT hsa-miR-20b:NR4A2:targetscan:mirbase:pictar; hsa-miR-20b:APOBEC4:targetscan; hsa-miR-20b:SLC40A1:targetscan:mirbase:pictar; hsa-miR-20b:MMP23A:mirbase; hsa-miR-20b:SLC17A7:targetscan:pictar; hsa-miR-20b:ANK2:targetscan:pictar; hsa-miR-20b:LIM1:targetscan:pictar; hsa-miR-20b:RABGAP1:targetscan:pictar; hsa-miR-20b:VPS24:targetscan; hsa-miR-20b:GPR6:targetscan:mirbase:pictar; hsa-miR-20b:CRCT1:targetscan;
```

```
//
ANNOTATION: 2
ID NCX:hsa-miR-99a;
TFID NCX;
MIID ENSG00000207638:hsa-mir-99a:hsa-miR-99a;
JTID ENSG00000112299:VNN1 GO:0006807;GO:0006928;GO:0016020;GO:0016811;GO:0048503;
TFMI NCX:hsa-miR-99a:hsa-mir-99a:computational (ECRbase);
MIJT hsa-miR-99a:VNN1:targetscan:mirbase;
```

```
//
ANNOTATION: 2
ID ETS:hsa-miR-199a*;
TFID ETS;
MIID ENSG00000208024:hsa-mir-199a-2:hsa-miR-199a*;
JTID ENSG00000204220:PFND6 GO:0006457;GO:0016272;GO:0051082;
JTID ENSG00000116141:MARK1 GO:0000166;GO:0000287;GO:0004674;GO:0005524;GO:0005737;GO:0006468;GO:0007010;GO:0007243;GO:0015630;GO:0016740;
TFMI ETS:hsa-miR-199a*:hsa-mir-199a-2:computational (ECRbase);
MIJT hsa-miR-199a*:MARK1:pictar;
```

```
//
ANNOTATION: 2
ID AREB6:hsa-miR-9;
TFID AREB6;
MIID ENSG00000207819:hsa-mir-9-3:hsa-miR-9;
JTID ENSG00000044115:CTNNA1 GO:0005198;GO:0005515;GO:0007155;GO:0015629;GO:0017166;GO:0043297;GO:0045296;GO:0005912;GO:0005915;GO:0007163;GO:0007406;GO:0030027;GO:0043066;GO:0045880;GO:0051015;
JTID ENSG00000137709:POU2F3 GO:0003700;GO:0005634;GO:0006355;GO:0006357;GO:0008544;GO:0043565;
JTID ENSG00000100376:FAM118A GO:0016020;GO:0016021;
JTID ENSG00000124608:AARS2 GO:0000166;GO:0004813;GO:0005524;GO:0005739;GO:0006412;GO:0006419;GO:0016874;
JTID ENSG00000159797:C9orf144
JTID ENSG00000133800:XLKD1 GO:0004888;GO:0005540;GO:0005624;GO:0005886;GO:0005887;GO:0006027;GO:0006810;GO:0006928;GO:0007155;GO:0007160;GO:0009611;GO:0009653;
JTID ENSG00000149499:EML3
JTID ENSG00000168781:HISPPD2A GO:0003993;
```

JTID ENSG00000177283:FZD8 GO:0004872;GO:0004926;GO:0004930;GO:0007186;GO:0007275;GO:0016020;GO:0016021;GO:0016055;GO:0017147;GO:0042813;GO:0005515;  
JTID ENSG00000178538:CA8 GO:0004089;GO:0005515;GO:0005737;GO:0006730;GO:0008270;GO:0046872;GO:0048015;  
TFJT AREB6:POU2F3; AREB6:C9orf144; AREB6:EML3;  
MIJT hsa-miR-9:CTNNA1:targetscan:mirbase; hsa-miR-9:POU2F3:targetscan; hsa-miR-9:CA8:targetscan; hsa-miR-9:EML3:targetscan:mirbase; hsa-miR-9:AARS2:targetscan; hsa-miR-9:HISPP2A:targetscan:pictar; hsa-miR-9:FZD8:targetscan:pictar; hsa-miR-9:XLKD1:targetscan:mirbase;

//  
ANNOTATION: 2  
ID C-REL:hsa-let-7e;  
TFID C-REL;  
MIID ENSG00000198972:hsa-let-7e:hsa-let-7e;  
JTID ENSG00000105419:Q99687-2  
JTID ENSG00000143851:PTPN7 GO:0004725;GO:0004872;GO:0005737;GO:0006470;GO:0016787;GO:0016791;  
JTID ENSG00000177410:Q5QHF1\_HUMAN  
JTID ENSG00000082153:BZW1 GO:0003743;GO:0005737;GO:0006350;GO:0006355;GO:0006446;  
JTID ENSG00000150593:PDCD4 GO:0003723;GO:0005515;GO:0005634;GO:0005737;GO:0005829;GO:0006915;GO:0007049;GO:0007569;GO:0016481;GO:0043508;GO:0045786;  
JTID ENSG00000118503:TNFAIP3 GO:0003677;GO:0005515;GO:0005634;GO:0005737;GO:0006512;GO:0006915;GO:0006916;GO:0008234;GO:0008270;GO:0043124;GO:0046872;  
JTID ENSG00000187681:ORM1 GO:0005515;GO:0005576;GO:0005615;GO:0006953;GO:0006954;  
JTID ENSG00000204154:ORM2 GO:0005488;GO:0005615;GO:0006953;  
JTID ENSG00000135912:TLL4 GO:0004835;GO:0006464;GO:0016874;  
JTID ENSG00000071967:CYBRD1 GO:0000293;GO:0006118;GO:0016021;  
JTID ENSG00000125084:WNT1 GO:0001708;GO:0004871;GO:0005102;GO:0005576;GO:0005625;GO:0007163;GO:0007223;GO:0007275;GO:0007283;GO:0007417;GO:0009653;GO:0016477;GO:0030154;  
JTID ENSG00000023902:PLEKH01  
JTID ENSG00000158615:PPP1R15B GO:0000164;GO:0004722;GO:0006979;GO:0006983;GO:0042542;  
JTID ENSG00000072501:SMC1A GO:0000075;GO:0000166;GO:0000776;GO:0000794;GO:0003682;GO:0003777;GO:0005515;GO:0005524;GO:0005634;GO:0005694;GO:0006281;GO:0007049;GO:0007052;GO:0007059;GO:0007064;GO:0007126;GO:0008280;GO:0009314;GO:0016887;GO:0042770;GO:0046982;GO:0051276;GO:0051301;GO:0006259;  
JTID ENSG00000168952:STXBP6 GO:0016021;GO:0016192;  
JTID ENSG00000198929:NOS1AP GO:0005515;GO:0005737;GO:0007269;GO:0030165;GO:0050998;GO:0050999;  
TFJT C-REL:WNT1; C-REL:SMC1A;  
MIJT hsa-let-7e:PPP1R15B:targetscan:pictar; hsa-let-7e:ORM1:targetscan; hsa-let-7e:PLEKH01:targetscan:mirbase:pictar; hsa-let-7e:WNT1:targetscan:pictar; hsa-let-7e:SMC1A:targetscan; hsa-let-7e:Q99687-2:mirbase; hsa-let-7e:PDCD4:targetscan; hsa-let-7e:PTPN7:targetscan; hsa-let-7e:TLL4:targetscan:pictar; hsa-let-7e:ORM2:targetscan; hsa-let-7e:BZW1:targetscan:mirbase; hsa-let-7e:Q5QHF1\_HUMAN:mirbase; hsa-let-7e:TNFAIP3:targetscan:pictar;

//  
ANNOTATION: 2  
ID NKX2-5:hsa-miR-217;  
TFID NKX2-5;  
MIID ENSG00000207548:hsa-mir-217:hsa-miR-217;  
JTID ENSG00000106069:CHN2 GO:0005070;GO:0005096;GO:0005622;GO:0007242;GO:0008270;GO:0019992;GO:0046872;  
JTID ENSG00000204977:TRIM13 GO:0004871;GO:0005515;GO:0005622;GO:0007049;GO:0008270;GO:0009653;GO:0043123;GO:0045786;GO:0046872;GO:0005737;  
JTID ENSG00000101974:ATP11C GO:0000166;GO:0000287;GO:0004012;GO:0005524;GO:0006810;GO:0008152;GO:0015662;GO:0015914;GO:0016020;GO:0016021;GO:0016787;  
JTID ENSG00000130300:PLVAP GO:0016020;GO:0016021;  
JTID ENSG00000133980:C14orf115 GO:0003677;GO:0004803;GO:0006313;  
JTID ENSG00000205413:SAMD9  
JTID ENSG00000124406:ATP8A1 GO:0000166;GO:0000287;GO:0004012;GO:0005524;GO:0006810;GO:0008152;GO:0015662;GO:0015914;GO:0015917;GO:0016020;GO:0016021;GO:0016787;GO:0016820;GO:0019829;  
TFJT NKX2-5:C14orf115;  
MIJT hsa-miR-217:C14orf115:targetscan; hsa-miR-217:SAMD9:targetscan:mirbase; hsa-miR-217:TRIM13:targetscan; hsa-miR-217:ATP11C:targetscan:pictar; hsa-miR-217:CHN2:targetscan:mirbase:pictar;

//  
ANNOTATION: 2  
ID ER:hsa-miR-30e-5p;  
TFID ER;  
MIID ENSG00000198974:hsa-mir-30e:hsa-miR-30e-5p;  
JTID ENSG00000161998:Q8N221\_HUMAN  
JTID ENSG00000123643:SLC36A1 GO:0005280;GO:0005783;GO:0006810;GO:0006865;GO:0015171;GO:0015180;GO:0015187;GO:0015193;GO:0015293;GO:0015808;GO:0015816;GO:0015824;GO:0015992;GO:0016020;GO:0016021;  
JTID ENSG00000173320:STOX2  
JTID ENSG00000180667:YOD1 GO:0003676;GO:0005622;GO:0006512;GO:0008234;GO:0008270;GO:0046872;  
JTID ENSG00000179151:EDC3 GO:0005515;  
JTID ENSG00000121578:B4GALT4 GO:0003945;GO:0005975;GO:0006643;GO:0008378;GO:0016020;GO:0016021;GO:0016757;GO:0030145;GO:0046872;  
JTID ENSG00000119686:C14orf58 GO:0005215;GO:0006810;GO:0016020;GO:0016021;  
JTID ENSG00000156735:BAG4 GO:0005057;GO:0005515;GO:0006457;GO:0006915;GO:0006916;  
JTID ENSG00000172819:RARG GO:0003700;GO:0003707;GO:0003708;GO:0005515;GO:0005634;GO:0006350;GO:0006355;GO:0007275;GO:0008270;GO:0043565;GO:0046872;GO:0003677;GO:0005667;GO:0043065;GO:0045944;GO:0048048;  
JTID ENSG00000148541:FAM13C1  
JTID ENSG00000205269:Q5T4T1\_HUMAN  
JTID ENSG00000175564:UCP3 GO:0005215;GO:0005488;GO:0005624;GO:0005739;GO:0005743;GO:0006091;GO:0006629;GO:0006810;GO:0006839;GO:0007585;GO:0015992;GO:0016020;GO:0016021;GO:0000303;GO:0006631;GO:0017077;  
JTID ENSG00000134531:EMP1 GO:0005624;GO:0007275;GO:0008219;GO:0008283;GO:0008544;GO:0016020;GO:0016021;GO:0016049;  
JTID ENSG00000001084:GCLC  
GO:0000287;GO:0004357;GO:0005829;GO:0006534;GO:0006536;GO:0006749;GO:0006750;GO:0006916;GO:0006979;GO:0009408;GO:0009410;GO:0009725;GO:0016481;GO:0016595;GO:0016874;GO:0017109;GO:0019852;GO:0030503;GO:0031397;GO:0032436;GO:0043531;GO:0046685;GO:0046982;GO:0050662;GO:0050880;GO:0051900;  
JTID ENSG000000091157:WDR7  
JTID ENSG00000101134:DOK5 GO:0000165;GO:0005066;GO:0005158;GO:0007169;GO:0007399;  
JTID ENSG000000058600:POLR3E GO:0003899;GO:0005634;GO:0006350;GO:0016740;  
JTID ENSG000000079739:PGM1 GO:0000287;GO:0004614;GO:0005737;GO:0005975;GO:0006006;GO:0016853;GO:0016868;  
JTID ENSG00000147649:MTDH GO:0005634;GO:0005783;GO:0016020;GO:0016021;  
JTID ENSG00000138069:RAB1A GO:0000166;GO:0003924;GO:0005525;GO:0005783;GO:0006888;GO:0007264;GO:0015031;GO:0016192;GO:0005794;  
JTID ENSG00000159873:CCDC117  
JTID ENSG00000137941:TLL7 GO:0004835;GO:0006464;GO:0016874;  
JTID ENSG00000033867:SLC4A7 GO:0005452;GO:0005515;GO:0006814;GO:0006820;GO:0008510;GO:0015293;GO:0015701;GO:0016020;GO:0016021;GO:0031402;  
JTID ENSG00000143590:EFNA3 GO:0005005;GO:0005887;GO:0007267;GO:0016020;GO:0048503;  
TFJT ER:RARG; ER:EMP1; ER:SLC4A7;  
MIJT hsa-miR-30e-5p:SLC36A1:targetscan:pictar; hsa-miR-30e-5p:GCLC:targetscan; hsa-miR-30e-5p:UCP3:targetscan:mirbase; hsa-miR-30e-5p:DOK5:targetscan:mirbase; hsa-miR-30e-5p:STOX2:targetscan; hsa-miR-30e-5p:B4GALT4:targetscan; hsa-miR-30e-5p:EDC3:targetscan:pictar; hsa-miR-30e-5p:EFNA3:targetscan:pictar; hsa-miR-30e-5p:CCDC117:targetscan:mirbase:pictar; hsa-miR-30e-5p:RARG:targetscan:pictar; hsa-miR-30e-5p:YOD1:targetscan; hsa-miR-30e-5p:PGM1:targetscan:mirbase:pictar; hsa-miR-30e-5p:POLR3E:mirbase; hsa-miR-30e-5p:WDR7:targetscan:pictar; hsa-miR-30e-5p:SLC4A7:targetscan:pictar; hsa-miR-30e-5p:FAM13C1:targetscan; hsa-miR-30e-5p:C14orf58:targetscan:mirbase; hsa-miR-30e-5p:Q8N221\_HUMAN:mirbase; hsa-miR-30e-5p:BAG4:targetscan; hsa-miR-30e-5p:MTDH:targetscan:mirbase:pictar; hsa-miR-30e-5p:TLL7:targetscan:pictar;

//  
ANNOTATION: 2  
ID SP-1:hsa-miR-30e-5p;  
TFID SP-1;  
MIID ENSG00000198974:hsa-mir-30e:hsa-miR-30e-5p;  
JTID ENSG00000142319:SLC6A3 GO:0005330;GO:0005515;GO:0005737;GO:0005886;GO:0005887;GO:0008504;GO:0015293;GO:0015844;GO:0005329;GO:0007595;GO:0015872;GO:0021984;GO:0040018;GO:0042053;GO:0042416;GO:0042420;  
JTID ENSG000000058600:POLR3E GO:0003899;GO:0005634;GO:0006350;GO:0016740;  
JTID ENSG00000165288:BRWD3  
JTID ENSG00000087903:RFX2 GO:0003677;GO:0003702;GO:0005634;GO:0006355;  
JTID ENSG00000162490:C1orf187  
JTID ENSG00000104497:SNX16 GO:0005515;GO:0007154;GO:0015031;GO:0035091;  
JTID ENSG00000180574:Q5I0X0\_HUMAN GO:0000166;GO:0003924;GO:0005525;  
JTID ENSG00000115112:TFCP2L1 GO:0000122;GO:0000902;GO:0002070;GO:0003700;GO:0003714;GO:0005634;GO:0005737;GO:0006350;GO:0006694;GO:0007028;GO:0007431;GO:0007565;GO:0008340;GO:0016020;GO:0016565;GO:0045927;  
JTID ENSG00000105991:HOXA1 GO:0003700;GO:0003702;GO:0005634;GO:0006357;GO:0007275;GO:0007399;GO:0009952;GO:0030902;GO:0042472;GO:0043565;  
JTID ENSG000000057657:PRDM1 GO:0000122;GO:0003700;GO:0005622;GO:0005634;GO:0006350;GO:0006355;GO:0008270;GO:0046872;GO:0001701;GO:0001892;GO:0001893;GO:0003676;GO:0045165;  
JTID ENSG00000124787:RPP40 GO:0004526;GO:0005515;GO:0005634;GO:0005655;GO:0008033;GO:0016787;  
JTID ENSG00000144935:TRPC1 GO:0005216;GO:0005509;GO:0005515;GO:0005886;GO:0005887;GO:0006811;GO:0006816;GO:0015279;  
TFMI SP-1:hsa-miR-30e-5p:hsa-mir-30e:computational(PUBMED: 17447837);  
MIJT hsa-miR-30e-5p:SNX16:targetscan:mirbase:pictar; hsa-miR-30e-5p:PRDM1:targetscan:pictar; hsa-miR-30e-5p:Q5I0X0\_HUMAN:mirbase; hsa-miR-30e-5p:HOXA1:targetscan:pictar; hsa-miR-30e-5p:RPP40:targetscan; hsa-miR-30e-5p:POLR3E:mirbase; hsa-miR-30e-5p:RFX2:targetscan; hsa-miR-30e-5p:SLC6A3:targetscan;

//

```
ANNOTATION: 2
ID AREB6:hsa-miR-9*;
TFID AREB6;
MIID ENSG00000207819:hsa-mir-9-3:hsa-miR-9*;
JTID ENSG00000102904:TSNAXIP1 GO:0005515;GO:0005737;
JTID ENSG00000172164:SNPB1 GO:0003779;GO:0005509;GO:0005516;GO:0005856;GO:0006936;GO:0016010;GO:0016020;GO:0045202;
JTID ENSG00000124785:NRN1 GO:0016020;GO:0048503;
JTID ENSG00000188199:FAM22B
JTID ENSG00000159199:ATP5G1 GO:0005215;GO:0005624;GO:0005739;GO:0005753;GO:0006811;GO:0008289;GO:0015986;GO:0015992;GO:0016020;GO:0016469;GO:0045263;GO:0046933;GO:0046961;
JTID ENSG00000054967:TNFRSF19L GO:0004872;GO:0016020;GO:0016021;
JTID ENSG00000132793:LPIN3 GO:0005634;
JTID ENSG00000140505:CYF1A2 GO:0005506;GO:0005783;GO:0005792;GO:0006118;GO:0009055;GO:0016020;GO:0019825;GO:0020037;GO:0046872;GO:0050381;
JTID ENSG00000143940:Q6ZMW3_HUMAN GO:0001525;GO:0005634;GO:0005783;GO:0007399;GO:0042995;GO:0043025;
JTID ENSG00000135324:C6orf117
TFJT AREB6:ATP5G1;
MIJT hsa-miR-9*:TSNAXIP1:mirbase; hsa-miR-9*:ATP5G1:pictar; hsa-miR-9*:FAM22B:mirbase;

//
ANNOTATION: 2
ID ER:hsa-miR-30c;
TFID ER;
MIID ENSG00000207962:hsa-mir-30c-1:hsa-miR-30c;
JTID ENSG00000161998:Q8N221_HUMAN
JTID ENSG00000123643:SLC36A1 GO:0005280;GO:0005783;GO:0006810;GO:0006865;GO:0015171;GO:0015180;GO:0015187;GO:0015193;GO:0015293;GO:0015808;GO:0015816;GO:0015824;GO:0015992;GO:0016020;GO:0016021;
JTID ENSG00000173320:STOX2
JTID ENSG00000180667:YOD1 GO:0003676;GO:0005622;GO:0006512;GO:0008234;GO:0008270;GO:0046872;
JTID ENSG00000179151:EDC3 GO:0005515;
JTID ENSG00000121578:B4GALT4 GO:0003945;GO:0005975;GO:0006643;GO:0008378;GO:0016020;GO:0016021;GO:0016757;GO:0030145;GO:0046872;
JTID ENSG00000119686:C14orf58 GO:0005215;GO:0006810;GO:0016020;GO:0016021;
JTID ENSG00000156735:BAG4 GO:0005057;GO:0005515;GO:0006457;GO:0006915;GO:0006916;
JTID ENSG00000172819:RARG GO:0003700;GO:0003707;GO:0003708;GO:0005515;GO:0005634;GO:0006350;GO:0006355;GO:0007275;GO:0008270;GO:0043565;GO:0046872;GO:0003677;GO:0005667;GO:0043065;GO:0045944;GO:0048048;
JTID ENSG00000148541:FAM13C1
JTID ENSG00000205269:Q5T4T1_HUMAN
JTID ENSG00000175564:UCP3 GO:0005215;GO:0005488;GO:0005624;GO:0005739;GO:0005743;GO:0006091;GO:0006629;GO:0006810;GO:0006839;GO:0007585;GO:0015992;GO:0016020;GO:0016021;GO:0000303;GO:0006631;GO:0017077;
JTID ENSG00000134531:EMP1 GO:0005624;GO:0007275;GO:0008219;GO:0008283;GO:0008544;GO:0016020;GO:0016021;GO:0016049;
JTID ENSG00000001084:GCLC
GO:0000287;GO:0004357;GO:0005829;GO:0006534;GO:0006536;GO:0006749;GO:0006750;GO:0006916;GO:0006979;GO:0009408;GO:0009410;GO:0009725;GO:0016481;GO:0016595;GO:0016874;GO:0017109;GO:0019852;GO:0030503;GO:0031397;GO:0032436;GO:0043531;GO:0046685;GO:0046982;GO:0050662;GO:0050880;GO:0051900;
JTID ENSG000000091157:WDR7
JTID ENSG00000101134:DOK5 GO:0000165;GO:0005066;GO:0005158;GO:0007169;GO:0007399;
JTID ENSG00000058600:POLR3E GO:0003899;GO:0005634;GO:0006350;GO:0016740;
JTID ENSG00000079739:PGM1 GO:0000287;GO:0004614;GO:0005737;GO:0005975;GO:0006006;GO:0016853;GO:0016868;
JTID ENSG00000147649:MTDH GO:0005634;GO:0005783;GO:0016020;GO:0016021;
JTID ENSG00000138069:RAB1A GO:0000166;GO:0003924;GO:0005525;GO:0005783;GO:0006888;GO:0007264;GO:0015031;GO:0016192;GO:0005794;
JTID ENSG00000159873:CCDC117
JTID ENSG00000137941:TTL7 GO:0004835;GO:0006464;GO:0016874;
JTID ENSG00000033867:SLC4A7 GO:0005452;GO:0005515;GO:0006814;GO:0006820;GO:0008510;GO:0015293;GO:0015701;GO:0016020;GO:0016021;GO:0031402;
JTID ENSG00000143590:EFNA3 GO:0005005;GO:0005887;GO:0007267;GO:0016020;GO:0048503;
TFJT ER:RARG; ER:EMP1; ER:SLC4A7;
MIJT hsa-miR-30c:SLC36A1:targetscan:pictar; hsa-miR-30c:GCLC:targetscan:mirbase; hsa-miR-30c:UCP3:targetscan; hsa-miR-30c:DOK5:targetscan:mirbase; hsa-miR-30c:STOX2:targetscan; hsa-miR-30c:B4GALT4:targetscan; hsa-miR-30c:EDC3:targetscan:pictar; hsa-miR-30c:EFNA3:targetscan:pictar; hsa-miR-30c:CCDC117:targetscan:pictar; hsa-miR-30c:RARG:targetscan:pictar; hsa-miR-30c:YOD1:targetscan; hsa-miR-30c:PGM1:targetscan:mirbase:pictar; hsa-miR-30c:SLC4A7:targetscan:pictar; hsa-miR-30c:WDR7:targetscan:pictar; hsa-miR-30c:POLR3E:mirbase; hsa-miR-30c:C14orf58:targetscan:mirbase; hsa-miR-30c:FAM13C1:targetscan; hsa-miR-30c:Q8N221_HUMAN:mirbase; hsa-miR-30c:BAG4:targetscan; hsa-miR-30c:MTDH:targetscan:mirbase:pictar; hsa-miR-30c:TTL7:targetscan:pictar;

//
ANNOTATION: 2
ID MTF-1:hsa-miR-34b;
TFID MTF-1;
MIID ENSG00000207811:hsa-mir-34b:hsa-miR-34b;
JTID ENSG00000177303:CASKIN2 GO:0005737;
TFMI MTF-1:hsa-miR-34b:hsa-mir-34b:computational(PUBMED: 17447837);
MIJT hsa-miR-34b:CASKIN2:targetscan;

//
ANNOTATION: 2
ID AREB6:hsa-miR-20b;
TFID AREB6;
MIID ENSG00000207710:hsa-mir-20b:hsa-miR-20b;
JTID ENSG00000143727:ACP1 GO:0003993;GO:0004726;GO:0005625;GO:0005737;GO:0006470;GO:0016787;GO:0042802;GO:0004725;
JTID ENSG00000119125:GDA GO:0005622;GO:0006139;GO:0007399;GO:0008270;GO:0008892;GO:0016787;
JTID ENSG00000163513:TGFBR2 GO:0000166;GO:0000287;GO:0004872;GO:0005026;GO:0005515;GO:0005524;GO:0006468;GO:0007178;GO:0008284;GO:0016020;GO:0016021;GO:0016740;GO:0030145;
JTID ENSG00000196460:Q6ZNB4_HUMAN GO:0003677;GO:0006355;
JTID ENSG00000132975:GPR12 GO:0001619;GO:0004872;GO:0005887;GO:0006874;GO:0007165;GO:0007186;GO:0016020;
JTID ENSG00000170390:DCLK2 GO:0000166;GO:0004674;GO:0005524;GO:0006468;GO:0007242;GO:0016740;
JTID ENSG00000050405:LIM1 GO:0001725;GO:0003785;GO:0005925;GO:0008270;GO:0015629;GO:0030835;GO:0031529;GO:0046872;GO:0051015;GO:0051017;
JTID ENSG00000135801:TAF5L GO:0003700;GO:0005634;GO:0006355;GO:0006366;
JTID ENSG00000147036:LANCL3
JTID ENSG00000115561:VPS24 GO:0015031;GO:0016020;
JTID ENSG00000144645:OSBP1L10 GO:0006869;GO:0008202;
JTID ENSG0000011454:RABGAP1 GO:0005096;GO:0005097;GO:0005622;GO:0005813;GO:0005829;GO:0005875;GO:0007049;GO:0015631;GO:0032313;GO:0003725;GO:0003727;GO:0006928;GO:0007638;GO:0015630;
JTID ENSG00000124762:CDKN1A GO:0000307;GO:0004672;GO:0004861;GO:0005634;GO:0005829;GO:0006974;GO:0007049;GO:0007050;GO:0008270;GO:0008285;GO:0008629;GO:0009411;GO:0016301;GO:0030332;GO:0030890;GO:0043066;GO:0043071;GO:0045736;GO:0046872;GO:0000074;GO:0005515;
TFJT AREB6:LANCL3;
MIJT hsa-miR-20b:CDKN1A:targetscan:pictar; hsa-miR-20b:GDA:targetscan; hsa-miR-20b:RABGAP1:targetscan:pictar; hsa-miR-20b:VPS24:targetscan; hsa-miR-20b:LIM1:targetscan:pictar; hsa-miR-20b:TGFBR2:targetscan;

//
ANNOTATION: 2
ID MEIS1:hsa-miR-214;
TFID MEIS1;
MIID ENSG00000207949:hsa-mir-214:hsa-miR-214;
JTID ENSG00000171303:KCNK3 GO:0005244;GO:0005267;GO:0005887;GO:0006811;GO:0006813;GO:0007268;GO:0016020;GO:0030955;
JTID ENSG00000082556:OPRK1 GO:0001584;GO:0004872;GO:0004987;GO:0006955;GO:0007165;GO:0007186;GO:0007193;GO:0007268;GO:0007600;GO:0007610;GO:0016020;GO:0016021;GO:0019079;
JTID ENSG00000140955:NP_631913.2 GO:0003725;GO:0004000;GO:0005622;GO:0006396;
JTID ENSG00000147892:ADAMTSL1 GO:0005578;GO:0008237;GO:0008270;
JTID ENSG00000172987:HPSE2 GO:0005622;GO:0016020;GO:0016787;GO:0030305;
JTID ENSG00000163958:ZDHHC19 GO:0008270;GO:0008415;GO:0016020;GO:0016021;GO:0016740;GO:0046872;
JTID ENSG00000205358:MT1H GO:0005507;GO:0005515;GO:0008270;GO:0046870;GO:0046872;
JTID ENSG00000058668:ATP2B4 GO:0000166;GO:0000287;GO:0005388;GO:0005516;GO:0005524;GO:0005886;GO:0005887;GO:0006812;GO:0006816;GO:0008152;GO:0016787;GO:0016820;
JTID ENSG00000182952:HMGN4 GO:0000785;GO:0003677;GO:0005634;
JTID ENSG00000110851:PRDM4 GO:0003677;GO:0003702;GO:0005622;GO:0005634;GO:0006350;GO:0006355;GO:0006366;GO:0007165;GO:0008270;GO:0008283;GO:0046872;
JTID ENSG00000173020:ADRBK1 GO:0000166;GO:0002026;GO:0002029;GO:0004672;GO:0004674;GO:0004703;GO:0004871;GO:0004872;GO:0005515;GO:0005524;GO:0005625;GO:0005737;GO:0006468;GO:0007165;GO:0007186;GO:0007507;GO:0016020;GO:0016740;
JTID ENSG00000167468:GPX4 GO:0004602;GO:0005739;GO:0006118;GO:0006644;GO:0006979;GO:0007275;GO:0008430;GO:0016491;GO:0047066;
JTID ENSG00000121848:ZNF364 GO:0005515;GO:0008270;GO:0046872;
TFJT MEIS1:ADAMTSL1;
MIJT hsa-miR-214:HMGN4:targetscan; hsa-miR-214:HPSE2:targetscan; hsa-miR-214:ZDHHC19:targetscan:mirbase; hsa-miR-214:NP_631913.2:mirbase; hsa-miR-214:ATP2B4:targetscan; hsa-miR-214:ADRBK1:targetscan; hsa-miR-214:MT1H:targetscan:mirbase; hsa-miR-214:PRDM4:targetscan; hsa-miR-214:KCNK3:targetscan; hsa-miR-214:ADAMTSL1:mirbase; hsa-miR-214:GPX4:targetscan:mirbase; hsa-miR-214:OPRK1:targetscan; hsa-miR-214:ZNF364:targetscan;
```

```
//
ANNOTATION: 2
ID HSF2:hsa-let-7d;
TFID HSF2;
MIID ENSG00000199133:hsa-let-7d:hsa-let-7d;
JTID ENSG00000205610:Q4G105_HUMAN GO:0004713;GO:0005524;GO:0006468;
JTID ENSG00000133136:GBG5L_HUMAN GO:0003924;GO:0004871;GO:0005576;GO:0005834;GO:0007186;
JTID ENSG00000129317:PUS7L GO:0004730;GO:0008033;
JTID ENSG00000187772:LIN28B GO:0003677;GO:0006355;GO:0008270;GO:0046872;
JTID ENSG00000171502:COL24A1 GO:0005198;GO:0005201;GO:0005581;GO:0005737;GO:0006817;GO:0007155;
JTID ENSG00000110583:NAT11 GO:0008080;GO:0008152;GO:0008415;GO:0016740;
JTID ENSG00000164089:AGXT2L1 GO:0006520;GO:0008453;GO:0016740;GO:0030170;
JTID ENSG00000094963:FMO2 GO:0000287;GO:0004497;GO:0004499;GO:0005783;GO:0005792;GO:0006118;GO:0006800;GO:0016020;GO:0016021;GO:0050660;
JTID ENSG00000179476:C14orf28
JTID ENSG00000187838:PLSCR3 GO:0005509;GO:0005886;GO:0016021;GO:0017121;GO:0017128;GO:0042593;GO:0042632;
JTID ENSG00000138036:DYNC2LI1 GO:0007368;GO:0042384;
JTID ENSG00000135476:ESPL1 GO:0000070;GO:0000074;GO:0000212;GO:0000910;GO:0005515;GO:0005634;GO:0005813;GO:0006508;GO:0006915;GO:0007059;GO:0007127;GO:0008234;GO:0040001;GO:0045143;GO:0045842;GO:0045875;
JTID ENSG00000204538:PSORS1C2
JTID ENSG00000107551:RASSF4 GO:0005515;GO:0007049;GO:0007165;GO:0045786;
JTID ENSG00000161558:TMEM143 GO:0005739;GO:0016020;GO:0016021;
JTID ENSG00000184863:PRR8
JTID ENSG00000149428:HYOU1 GO:0000166;GO:0005515;GO:0005524;GO:0005783;GO:0006457;GO:0006950;
JTID ENSG00000169921:Q75L30_HUMAN
TFJT HSF2:LIN28B;
MIJT hsa-let-7d:Q75L30_HUMAN:mirbase; hsa-let-7d:DYNC2LI1:mirbase; hsa-let-7d:PUS7L:targetscan; hsa-let-7d:NAT11:pictar; hsa-let-7d:PSORS1C2:targetscan:mirbase:pictar; hsa-let-7d:RASSF4:targetscan; hsa-let-7d:FMO2:targetscan; hsa-let-7d:TMEM143:targetscan; hsa-let-7d:GBG5L_HUMAN:mirbase; hsa-let-7d:LIN28B:targetscan:pictar; hsa-let-7d:PLSCR3:targetscan:mirbase; hsa-let-7d:ESPL1:targetscan:mirbase; hsa-let-7d:COL24A1:targetscan:mirbase:pictar; hsa-let-7d:C14orf28:targetscan;

//
ANNOTATION: 2
ID PAX-4:hsa-miR-199a*;
TFID PAX-4;
MIID ENSG00000207752:hsa-mir-199a-1:hsa-miR-199a*;
JTID ENSG0000011860:C6orf204
JTID ENSG00000159224:GIP GO:0005179;GO:0005576;GO:0005625;GO:0007165;
JTID ENSG00000005884:ITGA3 GO:0001764;GO:0004872;GO:0005509;GO:0005515;GO:0007155;GO:0007160;GO:0007229;GO:0007613;GO:0008305;GO:0016020;GO:0016021;GO:0016323;GO:0019717;
JTID ENSG00000105967:TFEC GO:0003700;GO:0003713;GO:0003714;GO:0005634;GO:0045449;GO:0030528;
JTID ENSG00000180305:WFDC10A GO:0004867;
JTID ENSG00000184602:SNN GO:0006950;GO:0009628;GO:0016020;GO:0016021;
JTID ENSG00000088854:C20orf194 GO:0003676;GO:0005622;GO:0008270;
JTID ENSG00000131914:LIN28 GO:0003677;GO:0005737;GO:0006355;GO:0008270;GO:0046872;
JTID ENSG00000145354:ZCD2 GO:0043234;
JTID ENSG00000188153:COL4A5 GO:0005201;GO:0005581;GO:0005737;GO:0006817;GO:0005587;
TFJT PAX-4:LIN28;
MIJT hsa-miR-199a*:WFDC10A:mirbase; hsa-miR-199a*:SNN:pictar;

//
ANNOTATION: 2
ID C-REL:hsa-miR-126;
TFID C-REL;
MIID ENSG00000199161:hsa-mir-126:hsa-miR-126;
JTID ENSG00000128805:ARHGAP22 GO:0001525;GO:0005096;GO:0005622;GO:0005634;GO:0006350;GO:0006355;GO:0007165;GO:0007275;GO:0030154;
JTID ENSG00000159200:DSCR1 GO:0019722;GO:0003700;GO:0005634;GO:0007165;GO:0007417;GO:0008015;GO:0005737;GO:0043666;GO:0048741;
JTID ENSG00000146648:EGFR
GO:0000166;GO:0001503;GO:0003690;GO:0004710;GO:0004888;GO:0005006;GO:0005524;GO:0005615;GO:0005634;GO:0005737;GO:0005768;GO:0005886;GO:0006468;GO:0006950;GO:0007049;GO:0007166;GO:0007173;GO:0007202;GO:0008283;GO:0016021;GO:0016337;GO:0016740;GO:0030122;GO:0030235;GO:0030335;GO:0042327;GO:0042802;GO:0043006;GO:0043406;GO:0045429;GO:0045786;GO:0046982;GO:0050679;GO:0050730;GO:0050999;GO:0051015;GO:0051205;GO:0005515;GO:0005622;GO:0007165;GO:0008284;GO:0016301;GO:0016323;GO:0030139;GO:0046777;
JTID ENSG00000105647:PIK3R2 GO:0005515;GO:0005622;GO:0005942;GO:0007242;GO:0008286;GO:0016303;GO:0019987;GO:0035014;GO:0042325;
JTID ENSG00000198219:Q96N05_HUMAN
JTID ENSG00000124191:TOX2 GO:0003677;GO:0005634;GO:0006350;GO:0006355;
JTID ENSG00000145675:PIK3R1
GO:0003924;GO:0005158;GO:0005159;GO:0005525;GO:0005545;GO:0005622;GO:0006955;GO:0007242;GO:0008286;GO:0019903;GO:0035014;GO:0035030;GO:0043125;GO:0043559;GO:0043560;GO:0046854;GO:0048009;GO:0001953;GO:0005515;GO:0005737;GO:0005829;GO:0006468;GO:0016020;GO:0030183;GO:0030335;GO:0043066;GO:0045671;
JTID ENSG00000138617:PARP16 GO:0003950;GO:0005634;GO:0006471;GO:0016020;GO:0016021;GO:0016757;
JTID ENSG00000163638:ADAMTS9 GO:0004222;GO:0005578;GO:0006508;GO:0006516;GO:0007275;GO:0008270;GO:0046872;
JTID ENSG00000172889:EGFL7 GO:0001525;GO:0001568;GO:0001570;GO:0005509;GO:0005576;GO:0007275;GO:0030334;
TFJT C-REL:TOX2;
MIJT hsa-miR-126:PIK3R2:targetscan:mirbase; hsa-miR-126:ARHGAP22:mirbase; hsa-miR-126:EGFL7:targetscan:mirbase; hsa-miR-126:TOX2:mirbase; hsa-miR-126:DSCR1:mirbase; hsa-miR-126:PARP16:targetscan:mirbase;

//
ANNOTATION: 2
ID SP-1:hsa-miR-30e-3p;
TFID SP-1;
MIID ENSG00000198974:hsa-mir-30e:hsa-miR-30e-3p;
JTID ENSG00000169684:CHRNA5 GO:0004889;GO:0005216;GO:0005230;GO:0005892;GO:0006811;GO:0007165;GO:0007268;GO:0015464;GO:0016021;GO:0045211;
JTID ENSG00000168658:NP_659429.4
TFMI SP-1:hsa-miR-30e-3p:hsa-mir-30e:computational(PUBMED: 17447837);
MIJT hsa-miR-30e-3p:NP_659429.4:mirbase;

//
ANNOTATION: 2
ID MIF-1:hsa-miR-24;
TFID MIF-1;
MIID ENSG00000209707:hsa-mir-24-2:hsa-miR-24;
JTID ENSG00000206113:Q6ZU27_HUMAN
JTID ENSG00000162430:SEPN1 GO:0005509;GO:0005576;GO:0005783;GO:0008430;
JTID ENSG00000101040:ZMYND8 GO:0016301;GO:0005515;GO:0008270;GO:0046872;
TFJT MIF-1:ZMYND8;
MIJT hsa-miR-24:ZMYND8:targetscan:mirbase; hsa-miR-24:SEPN1:targetscan;

//
ANNOTATION: 2
ID AHR:hsa-miR-219;
TFID AHR;
MIID ENSG00000207955:hsa-mir-219-2:hsa-miR-219;
JTID ENSG00000099725:PRKY GO:0000166;GO:0004674;GO:0004713;GO:0005524;GO:0006468;GO:0016740;
JTID ENSG00000166435:XRRA1 GO:0005515;
JTID ENSG00000170264:NP_115556.1
JTID ENSG00000134901:KDEL1 GO:0005783;
JTID ENSG00000114982:NP_060461.3 GO:0004339;GO:0005634;
JTID ENSG00000173457:PPP1R14B GO:0004864;
JTID ENSG00000165948:FAM14B GO:0016020;GO:0016021;
```

TFMI AHR:hsa-miR-219:hsa-mir-219-2:computational(ECRbase);  
MIJT hsa-miR-219:PRKY:targetscan; hsa-miR-219:PPP1R14B:targetscan; hsa-miR-219:KDELCL1:mirbase; hsa-miR-219:FAM14B:targetscan:mirbase;

//  
ANNOTATION: 2  
ID ER:hsa-miR-183;  
TFID ER;  
MIID ENSG00000207691:hsa-mir-183:hsa-miR-183;  
JTID ENSG00000166924:NP\_775835.2  
JTID ENSG00000197616:MYH6  
GO:0000146;GO:0000166;GO:0001701;GO:0002026;GO:0002027;GO:0003779;GO:0005515;GO:0005516;GO:0005524;GO:0005863;GO:0006941;GO:0007512;GO:0007522;GO:0008016;GO:0008217;GO:0008307;GO:0016459;GO:0016887;GO:0030016;GO:0030017;GO:0030048;GO:0030049;GO:0030239;GO:0030898;GO:0043462;GO:0045214;GO:004873  
9;GO:0055009;GO:0055010;  
JTID ENSG00000182660:NP\_001013698.1  
JTID ENSG00000165914:TTC7B GO:0005488;  
JTID ENSG00000174365:NR\_003239.1  
JTID ENSG00000100889:PKC2 GO:0000166;GO:0004611;GO:0004613;GO:0005525;GO:0005739;GO:0006094;GO:0016829;GO:0030145;  
JTID ENSG00000185633:NDUFA4L2  
JTID ENSG00000135454:B4GALNT1 GO:0016740;GO:0001574;GO:0003947;GO:0005624;GO:0005975;GO:0006687;GO:0016020;GO:0016021;GO:0016758;GO:0019915;GO:0030173;GO:0030259;  
JTID ENSG00000108479:GALK1 GO:0000166;GO:0004335;GO:0005524;GO:0005534;GO:0005737;GO:0006012;GO:0008152;GO:0016301;GO:0016740;GO:0046835;  
JTID ENSG00000074527:NTN4 GO:0005604;GO:0016322;  
JTID ENSG00000162755:NP\_689579.3  
JTID ENSG00000076351:SLC46A1 GO:0005215;GO:0006810;GO:0016020;GO:0016021;GO:0005737;GO:0015232;GO:0015886;GO:0016324;  
JTID ENSG00000196588:MKLL\_HUMAN GO:0003676;GO:0003713;GO:0003779;GO:0005515;GO:0005634;GO:0005737;GO:0006350;GO:0006355;GO:0006916;GO:0045941;  
JTID ENSG00000147676:MAL2 GO:0005515;GO:0016020;GO:0016021;  
JTID ENSG00000166743:ACSM1 GO:0003824;GO:0008152;GO:0003996;GO:0005739;GO:0005759;GO:0006633;GO:0015645;GO:0015980;GO:0018874;GO:0019395;GO:0019605;GO:0047760;  
TFJT ER:NP\_001013698.1;  
MIJT hsa-miR-183:NR\_003239.1:mirbase; hsa-miR-183:GALK1:targetscan:mirbase; hsa-miR-183:MKLL\_HUMAN:mirbase; hsa-miR-183:TTC7B:targetscan:mirbase; hsa-miR-183:NTN4:targetscan:mirbase; hsa-miR-183:ACSM1:targetscan:mirbase; hsa-miR-183:MAL2:targetscan:picar; hsa-miR-183:NDUFA4L2:targetscan:mirbase;

//  
ANNOTATION: 2  
ID LEF1:hsa-miR-30c;  
TFID LEF1;  
MIID ENSG00000199094:hsa-mir-30c-2:hsa-miR-30c;  
JTID ENSG00000116497:S100PBP GO:0005634;GO:0048306;  
JTID ENSG00000152433:ZNF547 GO:0001501;GO:0005478;GO:0005622;GO:0005783;GO:0006350;GO:0006355;GO:0006810;GO:0006888;GO:0008134;GO:0003677;GO:0005634;GO:0008270;GO:0046872;  
JTID ENSG00000155545:MIER3 GO:0003677;GO:0005634;GO:0005509;  
JTID ENSG00000129680:MAP7D3  
JTID ENSG00000179151:EDC3 GO:0005515;  
JTID ENSG00000162490:Clorf187  
JTID ENSG00000147649:MTDH GO:0005634;GO:0005783;GO:0016020;GO:0016021;  
JTID ENSG00000145725:HISPPD1 GO:0003993;  
JTID ENSG00000119686:C14orf58 GO:0005215;GO:0006810;GO:0016020;GO:0016021;  
JTID ENSG00000185483:ROB1 GO:0004872;GO:0016301;GO:0000166;GO:0004714;GO:0005524;GO:0005737;GO:0005886;GO:0005887;GO:0006468;GO:0007169;GO:0016740;  
JTID ENSG00000138413:IDH1 GO:0000287;GO:0004450;GO:0005737;GO:0005777;GO:0005829;GO:0005975;GO:0006097;GO:0006099;GO:0006102;GO:0006749;GO:0006979;GO:0008152;GO:0016491;GO:0016616;GO:0030145;  
JTID ENSG00000127329:PTPRB GO:0004725;GO:0005001;GO:0005624;GO:0005887;GO:0006470;GO:0016020;GO:0016787;  
JTID ENSG00000148541:FAM13C1  
JTID ENSG00000065526:SPEN GO:0000166;GO:0003676;GO:0003677;GO:0003723;GO:0005634;GO:0006355;GO:0007219;GO:0003697;GO:0003700;GO:0003714;GO:0005515;GO:0006357;GO:0016563;GO:0016564;GO:0045892;  
JTID ENSG00000074266:EED GO:0001739;GO:0003682;GO:0005515;GO:0006349;GO:0016571;GO:0035098;GO:0042054;GO:0045120;  
JTID ENSG00000143590:EFNA3 GO:0005005;GO:0005887;GO:0007267;GO:0016020;GO:0048503;  
JTID ENSG00000112486:CCR6 GO:0008284;GO:0001584;GO:0004872;GO:0004945;GO:0005886;GO:0005887;GO:0006928;GO:0006935;GO:0006959;GO:0006968;GO:0007165;GO:0007186;GO:0007204;GO:0016493;  
JTID ENSG00000102098:SCML2 GO:0003700;GO:0005634;GO:0006355;GO:0009653;  
JTID ENSG00000146433:TMEM181 GO:0016020;GO:0016021;  
JTID ENSG00000155846:PPARGC1B GO:0000119;GO:0000166;GO:0003723;GO:0005634;GO:0006350;GO:0006355;GO:0016455;GO:0030331;GO:0030374;GO:0030520;GO:0030546;GO:0045944;GO:0050682;  
JTID ENSG00000173530:TNFRSF10D GO:0004888;GO:0005515;GO:0006915;GO:0006916;GO:0007165;GO:0016020;GO:0016021;  
JTID ENSG00000058600:POLR3E GO:0003899;GO:0005634;GO:0006350;GO:0016740;  
JTID ENSG00000158715:SLC45A3 GO:0006810;GO:0016020;GO:0016021;  
TFJT LEF1:Clorf187;  
MIJT hsa-miR-30c:MIER3:targetscan:picar; hsa-miR-30c:S100PBP:targetscan; hsa-miR-30c:ZNF547:targetscan; hsa-miR-30c:PTPRB:mirbase; hsa-miR-30c:SCML2:targetscan; hsa-miR-30c:EDC3:targetscan:picar; hsa-miR-30c:EFNA3:targetscan:picar; hsa-miR-30c:TNFRSF10D:targetscan:mirbase; hsa-miR-30c:POLR3E:mirbase; hsa-miR-30c:EED:targetscan:mirbase:picar; hsa-miR-30c:FAM13C1:targetscan; hsa-miR-30c:C14orf58:targetscan:mirbase; hsa-miR-30c:SPEN:targetscan:mirbase:picar; hsa-miR-30c:PPARGC1B:targetscan:picar; hsa-miR-30c:HISPPD1:targetscan:mirbase; hsa-miR-30c:MTDH:targetscan:mirbase:picar; hsa-miR-30c:IDH1:targetscan:picar;

//  
ANNOTATION: 2  
ID C-REL:hsa-miR-133a;  
TFID C-REL;  
MIID ENSG00000207764:hsa-mir-133a-2:hsa-miR-133a;  
JTID ENSG00000146648:EGFR  
GO:0000166;GO:0001503;GO:0003690;GO:0004710;GO:0004888;GO:0005006;GO:0005524;GO:0005615;GO:0005634;GO:0005737;GO:0005768;GO:0005886;GO:0006468;GO:0006950;GO:0007049;GO:0007166;GO:0007173;GO:0007202;GO:0008283;GO:0016021;GO:0016337;GO:0016740;GO:0030122;GO:0030235;GO:0030335;GO:0042327;GO:004280  
2;GO:0043006;GO:0043406;GO:0045429;GO:0045786;GO:0046982;GO:0050679;GO:0050730;GO:0050999;GO:0051015;GO:0051205;GO:0005515;GO:0005622;GO:0007165;GO:0008284;GO:0016301;GO:0016323;GO:0030139;GO:0046777;  
JTID ENSG00000137507:LRR32 GO:0005515;GO:0005887;GO:0016020;  
JTID ENSG00000167371:PRRT2 GO:0009607;GO:0016021;  
JTID ENSG00000120437:ACAT2 GO:0003985;GO:0005515;GO:0005737;GO:0006629;GO:0008415;GO:0016740;  
JTID ENSG00000139572:GPR84 GO:0001584;GO:0004872;GO:0007165;GO:0007186;GO:0016020;GO:0016021;  
JTID ENSG00000180471:C9orf31  
JTID ENSG00000163485:ADORA1 GO:0001584;GO:0001610;GO:0004872;GO:0005887;GO:0006909;GO:0006954;GO:0007165;GO:0007186;GO:0007267;GO:0007399;GO:0008624;GO:0016020;  
JTID ENSG00000084207:GSTP1 GO:0004364;GO:0005515;GO:0005737;GO:0006916;GO:0007417;GO:0008152;GO:0016740;  
JTID ENSG00000103200:NME4 GO:0000166;GO:0004550;GO:0005524;GO:0006183;GO:0006228;GO:0006241;GO:0016301;GO:0016740;GO:0000287;GO:0005739;GO:0009116;GO:0009117;  
JTID ENSG00000102050:PRAF2 GO:0005515;GO:0015031;GO:0015813;GO:0016020;GO:0016021;  
TFJT C-REL:PRRT2;  
MIJT hsa-miR-133a:GSTP1:targetscan; hsa-miR-133a:ADORA1:targetscan; hsa-miR-133a:PRRT2:targetscan:picar; hsa-miR-133a:PRAF2:targetscan; hsa-miR-133a:LRR32:targetscan; hsa-miR-133a:NME4:targetscan; hsa-miR-133a:ACAT2:targetscan; hsa-miR-133a:EGFR:targetscan; hsa-miR-133a:GPR84:targetscan;

//  
ANNOTATION: 2  
ID SRF:hsa-miR-135a;  
TFID SRF;  
MIID ENSG00000207926:hsa-mir-135a-1:hsa-miR-135a;  
JTID ENSG00000185294:NP\_787078.1 GO:0008233;GO:0008717;GO:0016021;  
JTID ENSG00000143771:CNIF4 GO:0005515;GO:0005783;GO:0007242;GO:0016020;GO:0016021;  
JTID ENSG00000107816:LZTS2 GO:0005737;GO:0007049;GO:0016020;GO:0045786;  
JTID ENSG00000168539:CHRM1 GO:0001584;GO:0004435;GO:0004872;GO:0004981;GO:0005624;GO:0005886;GO:0005887;GO:0006464;GO:0007165;GO:0007205;GO:0007207;GO:0007213;GO:0007399;GO:0008283;GO:0008284;GO:0040012;GO:0045211;  
JTID ENSG00000125931:CITED1 GO:0001570;GO:0001892;GO:0003700;GO:0005634;GO:0006357;GO:0030318;GO:0043473;GO:0045449;  
JTID ENSG00000171931:FBXW10  
JTID ENSG00000197415:VEPH1  
JTID ENSG00000167861:C17orf28 GO:0016020;GO:0016021;GO:0005515;GO:0005737;GO:0007605;GO:0035315;GO:0042472;GO:0042803;  
TFJT SRF:CITED1;  
MIJT hsa-miR-135a:VEPH1:targetscan:mirbase; hsa-miR-135a:CITED1:mirbase; hsa-miR-135a:NP\_787078.1:mirbase;

//  
ANNOTATION: 2  
ID IK-1:hsa-miR-506;

```
TFID IK-1;
MIID ENSG00000207731:hsa-mir-506:hsa-miR-506;
JTID ENSG00000096093:EFHC1 GO:0005509;GO:0005930;GO:0006874;GO:0008022;GO:0043025;GO:0043065;GO:0005929;GO:0019861;
JTID ENSG00000109536:FRG1 GO:0005634;GO:0005681;GO:0006364;GO:0006397;GO:0008380;
JTID ENSG00000203730:TEDDM1 GO:0016021;
TFJT IK-1:TEDDM1;
MIJT hsa-miR-506:EFHC1:mirbase; hsa-miR-506:TEDDM1:targetscan; hsa-miR-506:FRG1:targetscan;

//
ANNOTATION: 2
ID SRF:hsa-miR-199a*;
TFID SRF;
MIID ENSG00000208024:hsa-mir-199a-2:hsa-miR-199a*;
JTID ENSG00000140403:DNAJA4 GO:0006457;GO:0008270;GO:0031072;GO:0046872;GO:0051082;
JTID ENSG00000132963:POMP GO:0005634;GO:0005829;GO:0006457;GO:0006955;GO:0043234;
JTID ENSG00000138779:Q9HCM6_HUMAN
JTID ENSG00000072401:UBE2D1 GO:0000209;GO:0004842;GO:0006464;GO:0006511;GO:0006512;GO:0016874;GO:0031398;
JTID ENSG00000182481:KPNA2 GO:0000018;GO:0000072;GO:0000085;GO:0005488;GO:0005515;GO:0005634;GO:0005643;GO:0005654;GO:0005737;GO:0006259;GO:0006606;GO:0006607;GO:0006886;GO:0008139;GO:0008565;
JTID ENSG00000204937:Q6ZSS0_HUMAN
JTID ENSG00000196885:Q9HAZ8_HUMAN
TFMI SRF:hsa-miR-199a*:hsa-mir-199a-2:computational (ECRbase);
MIJT hsa-miR-199a*:UBE2D1:picTar;

//
ANNOTATION: 2
ID PAX-4:hsa-miR-125b;
TFID PAX-4;
MIID ENSG00000207863:hsa-mir-125b-2:hsa-miR-125b;
JTID ENSG00000100628:ASB2 GO:0006512;GO:0007242;
JTID ENSG00000131914:LIN28 GO:0003677;GO:0005737;GO:0006355;GO:0008270;GO:0046872;
JTID ENSG00000137265:IRF4 GO:0003700;GO:0003702;GO:0005622;GO:0005634;GO:0006350;GO:0006355;GO:0008134;GO:0016563;GO:0042110;GO:0045082;GO:0045086;GO:0045368;GO:0045404;GO:0045622;GO:0045941;GO:0043011;
JTID ENSG00000065361:ERBB3 GO:0000166;GO:0004714;GO:0004872;GO:0005006;GO:0005515;GO:0005524;GO:0005887;GO:0006468;GO:0007165;GO:0007169;GO:0007422;GO:0007507;GO:0016020;GO:0016324;GO:0016328;GO:0016740;GO:0046982;
JTID ENSG00000106993:CDC37L1 GO:0000074;GO:0051301;
JTID ENSG00000172531:PPP1CA GO:0005506;GO:0016787;GO:0000163;GO:0004721;GO:0005515;GO:0005975;GO:0005977;GO:0006470;GO:0007049;GO:0030145;GO:0046872;GO:0051301;GO:0004722;GO:0005654;GO:0005737;GO:0030324;GO:0048754;
TFJT PAX-4:LIN28; PAX-4:ERBB3;
MIJT hsa-miR-125b:ERBB3:targetscan; hsa-miR-125b:ASB2:targetscan:mirbase; hsa-miR-125b:PPP1CA:targetscan:mirbase:picTar; hsa-miR-125b:LIN28:targetscan:PUBMED: 16227573; hsa-miR-125b:IRF4:targetscan:picTar;

//
ANNOTATION: 2
ID NF-E2:hsa-miR-142-3p;
TFID NF-E2;
MIID ENSG00000207567:hsa-mir-142:hsa-miR-142-3p;
JTID ENSG00000169213:RAB3B GO:0000166;GO:0003924;GO:0005515;GO:0005525;GO:0007264;GO:0008021;GO:0015031;GO:0016020;GO:0017157;GO:0030141;
TFMI NF-E2:hsa-miR-142-3p:hsa-mir-142:computational (ECRbase);
MIJT hsa-miR-142-3p:RAB3B:targetscan;

//
ANNOTATION: 2
ID LEF1:hsa-miR-9;
TFID LEF1;
MIID ENSG00000207933:hsa-mir-9-1:hsa-miR-9;
JTID ENSG00000136938:ANP32B GO:0005515;GO:0005634;
JTID ENSG00000070159:PTPN3 GO:0004725;GO:0005198;GO:0005737;GO:0005856;GO:0006470;GO:0008092;GO:0016020;GO:0016787;
JTID ENSG00000136717:BIN1 GO:0005515;GO:0005634;GO:0005737;GO:0007049;GO:0007275;GO:0008283;GO:0015629;GO:0030100;GO:0030154;GO:0045786;
JTID ENSG00000168781:HISPPD2A GO:0003993;
JTID ENSG00000205703:NP_001010910.1
JTID ENSG00000188935:Q6ZU24_HUMAN
JTID ENSG00000120215:MLANA GO:0005887;GO:0016020;
JTID ENSG00000144191:CNGA3 GO:0000166;GO:0005216;GO:0005249;GO:0005624;GO:0005887;GO:0006811;GO:0006813;GO:0007165;GO:0007601;GO:0015276;GO:0016020;GO:0016021;GO:0030553;GO:0050896;GO:0001750;GO:0004872;GO:0005221;GO:0005515;
JTID ENSG00000174175:SELP GO:0005515;GO:0005529;GO:0007155;GO:0016020;GO:0016021;GO:0005624;GO:0005625;GO:0005886;GO:0005887;GO:0031092;GO:0006954;GO:0050901;
JTID ENSG00000174683:C8orf78
JTID ENSG00000109113:RAB34 GO:0000166;GO:0005525;GO:0007264;GO:0015031;GO:0001726;GO:0003924;GO:0005769;GO:0006897;GO:0016020;GO:0019001;
JTID ENSG00000154319:C8orf13
JTID ENSG00000106541:AGR2
JTID ENSG00000159184:HOXB13 GO:0003700;GO:0005634;GO:0006355;GO:0007275;GO:0008544;GO:0009611;GO:0040008;GO:0043565;
JTID ENSG00000109654:TRIM2 GO:0005515;GO:0005622;GO:0005737;GO:0008270;GO:0017022;GO:0046872;
JTID ENSG00000137965:IFI44 GO:0005737;GO:0009615;
JTID ENSG00000182324:KCNJ14 GO:0005242;GO:0005244;GO:0006811;GO:0006813;GO:0008076;GO:0016020;GO:0016021;GO:0030955;
JTID ENSG00000135482:ZC3H10 GO:0003676;GO:0008270;GO:0046872;
JTID ENSG00000183784:C9orf66
JTID ENSG00000159082:SYNJ1 GO:0003723;GO:0004437;GO:0004439;GO:0004445;GO:0006796;GO:0006836;GO:0016787;GO:0030117;GO:0048488;GO:0030384;GO:0048489;
JTID ENSG00000124608:AARS2 GO:0000166;GO:0004813;GO:0005524;GO:0005739;GO:0006412;GO:0006419;GO:0016874;
JTID ENSG00000166012:SNORA25
JTID ENSG00000203786:KPRP
TFJT LEF1:HISPPD2A;
MIJT hsa-miR-9:ZC3H10:targetscan:picTar; hsa-miR-9:SELP:targetscan:mirbase; hsa-miR-9:IFI44:targetscan:mirbase; hsa-miR-9:AARS2:targetscan; hsa-miR-9:KPRP:targetscan; hsa-miR-9:HISPPD2A:targetscan:picTar; hsa-miR-9:CNGA3:targetscan; hsa-miR-9:SYNJ1:targetscan:picTar; hsa-miR-9:HOXB13:targetscan; hsa-miR-9:ANP32B:targetscan:mirbase:picTar; hsa-miR-9:AGR2:targetscan:mirbase; hsa-miR-9:RAB34:targetscan:mirbase:picTar; hsa-miR-9:KCNJ14:targetscan; hsa-miR-9:TRIM2:targetscan; hsa-miR-9:BIN1:targetscan:picTar; hsa-miR-9:C8orf13:targetscan; hsa-miR-9:C9orf66:targetscan;

//
ANNOTATION: 2
ID IRF-7:hsa-miR-135b;
TFID IRF-7;
MIID ENSG00000199059:hsa-mir-135b:hsa-miR-135b;
JTID ENSG00000121774:KHDRBS1 GO:0000086;GO:0003677;GO:0005070;GO:0005515;GO:0005634;GO:0006350;GO:0006355;GO:0006397;GO:0007049;GO:0007050;GO:0007166;GO:0008283;GO:0016020;GO:0016481;GO:0016564;GO:0046831;
JTID ENSG00000073792:IGF2BP2 GO:0000166;GO:0003723;GO:0005515;GO:0005737;GO:0009386;GO:0009653;
JTID ENSG00000198018:ENTPD7 GO:0005509;GO:0005773;GO:0016020;GO:0016021;GO:0016787;
JTID ENSG00000102181:CD99L2
JTID ENSG00000198429:ZNF69 GO:0003676;GO:0005622;GO:0006355;
JTID ENSG00000135452:TSPAN31 GO:0005624;GO:0005887;GO:0008284;GO:0016020;
JTID ENSG00000167700:MFSB3 GO:0006810;GO:0016020;GO:0016021;
JTID ENSG00000164935:TM7SF4 GO:0009986;GO:0016020;GO:0016021;GO:0030316;
JTID ENSG00000136811:ODF2 GO:0005198;
JTID ENSG00000184774:Q49AQ9_HUMAN GO:0005975;GO:0016020;GO:0016758;
JTID ENSG00000114480:GBE1 GO:0003844;GO:0004553;GO:0005975;GO:0005978;GO:0006091;GO:0016757;GO:0043169;
JTID ENSG00000197851:NP_997386.1
TFJT IRF-7:KHDRBS1;
MIJT hsa-miR-135b:ZNF69:targetscan; hsa-miR-135b:TM7SF4:mirbase; hsa-miR-135b:IGF2BP2:targetscan:picTar; hsa-miR-135b:ENTPD7:targetscan:mirbase:picTar; hsa-miR-135b:GBE1:targetscan:mirbase; hsa-miR-135b:NP_997386.1:mirbase; hsa-miR-135b:ODF2:targetscan:mirbase; hsa-miR-135b:TSPAN31:targetscan:mirbase;

//
```

```
ANNOTATION: 2
ID MYOD:hsa-miR-140;
TFID MYOD;
MIID ENSG00000208017:hsa-mir-140:hsa-miR-140;
JTID ENSG00000145362:ANK2 GO:0005200;GO:0005515;GO:0007165;GO:0015629;GO:0016020;GO:0005856;
JTID ENSG00000182490:TSSK2 GO:0000166;GO:0000287;GO:0004674;GO:0005515;GO:0005524;GO:0006468;GO:0007275;GO:0007283;GO:0016740;GO:0030154;
JTID ENSG00000086232:EIF2AK1 GO:0000166;GO:0004694;GO:0005524;GO:0005737;GO:0005886;GO:0006950;GO:0009605;GO:0016740;GO:0020037;GO:0042803;GO:0045993;GO:0046777;GO:0046986;
JTID ENSG00000188816:HM2 GO:0003700;GO:0005634;GO:0006355;GO:0007420;GO:0042472;GO:0043565;
JTID ENSG00000154096:THY1
GO:0001525;GO:0005100;GO:0005178;GO:0005515;GO:0005783;GO:0005829;GO:0005886;GO:0005887;GO:0006469;GO:0007010;GO:0009897;GO:0016337;GO:0030336;GO:0030426;GO:0043066;GO:0043547;GO:0045121;GO:0045576;GO:0046549;GO:0048041;GO:0048147;GO:0048503;GO:0050731;GO:0050771;GO:0050852;GO:0050860;GO:0050870;GO:0051281;
JTID ENSG00000158578:ALAS2 GO:0001666;GO:0003870;GO:0005515;GO:0005739;GO:0005743;GO:0005783;GO:0006783;GO:0008415;GO:0009058;GO:0016020;GO:0016021;GO:0016769;GO:0030170;GO:0030218;GO:0032364;GO:0033014;GO:0042541;GO:0006879;
JTID ENSG00000159650:UROCL1 GO:0006548;GO:0016153;GO:0016829;
JTID ENSG00000205111:CDKL4 GO:0004674;GO:0005524;GO:0006468;
JTID ENSG00000186951:PPARA GO:0003677;GO:0003700;GO:0003707;GO:0004872;GO:0005515;GO:0005634;GO:0006350;GO:0006355;GO:0006366;GO:0006629;GO:0006631;GO:0008270;GO:0008544;GO:0015908;GO:0016563;GO:0019217;GO:0032000;GO:0043565;GO:0045941;GO:0045944;GO:0046872;
JTID ENSG00000165168:CYBB GO:0005244;GO:0005506;GO:0005737;GO:0005886;GO:0005887;GO:0006118;GO:0006954;GO:0016491;GO:0046872;GO:0050660;
JTID ENSG00000118898:PPL GO:0005200;GO:0005515;GO:0005856;GO:0031424;
JTID ENSG00000101290:CDS2 GO:0004605;GO:0005743;GO:0008654;GO:0016020;GO:0016021;GO:0016740;
JTID ENSG00000156925:ZIC3 GO:0003677;GO:0005622;GO:0005634;GO:0006350;GO:0006355;GO:0007368;GO:0008270;GO:0046872;GO:0001947;GO:0003676;GO:0005515;GO:0007389;GO:0009952;GO:0045944;
TFJT MYOD:ANK2;
MIJT hsa-miR-140:PPL:targetscan; hsa-miR-140:PPARA:targetscan; hsa-miR-140:ZIC3:mirbase; hsa-miR-140:CDS2:targetscan; hsa-miR-140:UROCL1:targetscan; hsa-miR-140:ANK2:targetscan:pictar; hsa-miR-140:TSSK2:targetscan:pictar; hsa-miR-140:ALAS2:targetscan:mirbase; hsa-miR-140:EIF2AK1:targetscan; hsa-miR-140:CYBB:targetscan;

//
ANNOTATION: 2
ID RFX:hsa-miR-425-3p;
TFID RFX;
MIID ENSG00000199032:hsa-mir-425:hsa-miR-425-3p;
JTID ENSG00000138678:NP_116106.2 GO:0008152;GO:0008415;
JTID ENSG00000132522:GPS2 GO:0001888;GO:0005095;GO:0005515;GO:0007049;GO:0007254;
JTID ENSG00000130762:ARHGAP16 GO:0005085;GO:0005089;GO:0005622;GO:0035023;
JTID ENSG00000153132:CLGN GO:0005509;GO:0005783;GO:0006457;GO:0007338;GO:0016020;GO:0016021;GO:0051082;
TFMI RFX:hsa-miR-425-3p:hsa-mir-425:computational(ECRbase);
MIJT hsa-miR-425-3p:NP_116106.2:mirbase; hsa-miR-425-3p:CLGN:targetscan:mirbase; hsa-miR-425-3p:GPS2:mirbase;

//
ANNOTATION: 2
ID LEF1:hsa-miR-126;
TFID LEF1;
MIID ENSG00000199161:hsa-mir-126:hsa-miR-126;
JTID ENSG00000107362:FAM108B1 GO:0016787;
JTID ENSG00000141527:CARD14 GO:0001934;GO:0005515;GO:0005622;GO:0005737;GO:0005886;GO:0007250;GO:0042981;GO:0050700;
JTID ENSG00000169410:PTPN9 GO:0004726;GO:0005215;GO:0005622;GO:0006470;GO:0006810;GO:0016787;
JTID ENSG00000198219:Q96N05_HUMAN
JTID ENSG00000146648:EGFR
GO:0000166;GO:0001503;GO:0003690;GO:0004710;GO:0004888;GO:0005006;GO:0005524;GO:0005615;GO:0005634;GO:0005737;GO:0005768;GO:0005886;GO:0006468;GO:0006950;GO:0007049;GO:0007166;GO:0007173;GO:0007202;GO:0008283;GO:0016021;GO:0016337;GO:0016740;GO:0030122;GO:0030235;GO:0030335;GO:0042327;GO:0042802;GO:0043006;GO:0043406;GO:0045429;GO:0045786;GO:0046982;GO:0050679;GO:0050730;GO:0050999;GO:0051015;GO:0051205;GO:0005515;GO:0005622;GO:0007165;GO:0008284;GO:0016301;GO:0016323;GO:0030139;GO:0046777;
JTID ENSG00000164039:BDH2 GO:0003858;GO:0005737;GO:0006635;GO:0008152;GO:0016491;GO:0051287;
JTID ENSG00000100284:TOM1 GO:0005515;GO:0005622;GO:0005769;GO:0005829;GO:0006886;GO:0006897;GO:0016020;GO:0016197;
JTID ENSG00000120659:TNFSF11 GO:0001503;GO:0004872;GO:0005125;GO:0005164;GO:0005515;GO:0005576;GO:0006955;GO:0007275;GO:0009887;GO:0016020;GO:0030154;GO:0030316;GO:0045453;GO:0045670;GO:0045672;GO:0051260;
JTID ENSG00000115758:ODC1 GO:0004586;GO:0005515;GO:0006596;GO:0016829;
JTID ENSG00000047365:CENTD1 GO:0005096;GO:0005547;GO:0005622;GO:0007165;GO:0008270;GO:0043087;GO:0046872;
JTID ENSG00000130690:Q96I54_HUMAN
JTID ENSG00000182217:HIST2H4B GO:0000786;GO:0003677;GO:0005634;GO:0005694;GO:0006325;GO:0006334;GO:0048015;
JTID ENSG00000183941:HIST2H4A GO:0000786;GO:0003677;GO:0005634;GO:0005694;GO:0006325;GO:0006334;GO:0048015;
JTID ENSG00000139197:PEX5 GO:0005052;GO:0005515;GO:0005777;GO:0005778;GO:0015031;GO:0001764;GO:0007031;
JTID ENSG00000145632:PLK2 GO:0000166;GO:0000278;GO:0004674;GO:0004871;GO:0005515;GO:0005524;GO:0006468;GO:0016740;GO:0043123;
JTID ENSG00000101421:CHMP4B GO:0015031;
JTID ENSG00000203930:Q5JPA2_HUMAN
JTID ENSG00000151704:RCN1 GO:0000166;GO:0005244;GO:0005515;GO:0005524;GO:0005624;GO:0006811;GO:0006813;GO:0007588;GO:0008076;GO:0015272;GO:0016020;GO:0016021;GO:0030955;
JTID ENSG00000172889:EGFL7 GO:0001525;GO:0001568;GO:0001570;GO:0005509;GO:0005576;GO:0007275;GO:0030334;
JTID ENSG00000118762:PKD2 GO:0005216;GO:0005247;GO:0005248;GO:0005509;GO:0005515;GO:0005886;GO:0005929;GO:0005932;GO:0006812;GO:0006816;GO:0006874;GO:0007050;GO:0007160;GO:0007259;GO:0007368;GO:0008022;GO:0008092;GO:0009887;GO:0015629;GO:0016021;GO:0050974;GO:0050982;
TFJT LEF1:Q5JPA2_HUMAN;
MIJT hsa-miR-126:PKD2:targetscan:mirbase; hsa-miR-126:Q96I54_HUMAN:mirbase; hsa-miR-126:PEX5:targetscan:mirbase; hsa-miR-126:HIST2H4A:mirbase; hsa-miR-126:HIST2H4B:mirbase; hsa-miR-126:EGFL7:targetscan:mirbase; hsa-miR-126:TNFSF11:mirbase; hsa-miR-126:CARD14:mirbase; hsa-miR-126:KCNJ1:targetscan; hsa-miR-126:CENTD1:targetscan:mirbase; hsa-miR-126:FAM108B1:mirbase; hsa-miR-126:ODC1:mirbase; hsa-miR-126:PTPN9:targetscan:mirbase:pictar; hsa-miR-126:PLK2:targetscan:mirbase:pictar; hsa-miR-126:CHMP4B:mirbase; hsa-miR-126:TOM1:targetscan:pictar;

//
ANNOTATION: 2
ID MTF-1:hsa-miR-34c;
TFID MTF-1;
MIID ENSG00000207562:hsa-mir-34c:hsa-miR-34c;
JTID ENSG00000177303:CASKIN2 GO:0005737;
TFMI MTF-1:hsa-miR-34c:hsa-mir-34c:computational(PUBMED: 17447837);
MIJT hsa-miR-34c:CASKIN2:targetscan;

//
ANNOTATION: 2
ID SMAD-3:hsa-miR-200b;
TFID SMAD-3;
MIID ENSG00000207730:hsa-mir-200b:hsa-miR-200b;
JTID ENSG00000183873:SCN5A GO:0001518;GO:0005216;GO:0005248;GO:0005624;GO:0006811;GO:0006814;GO:0006936;GO:0008015;GO:0008016;GO:0016020;GO:0016021;GO:0031402;
JTID ENSG00000173027:WBP1 GO:0005515;
TFMI SMAD-3:hsa-miR-200b:hsa-mir-200b:computational(PUBMED: 17447837);
MIJT hsa-miR-200b:SCN5A:targetscan:pictar; hsa-miR-200b:WBP1:targetscan:mirbase;

//
ANNOTATION: 2
ID IPF1:hsa-miR-148a;
TFID IPF1;
MIID ENSG00000199085:hsa-mir-148a:hsa-miR-148a;
JTID ENSG00000122783:C7orf49
TFMI IPF1:hsa-miR-148a:hsa-mir-148a:computational(ECRbase);
MIJT hsa-miR-148a:C7orf49:targetscan:mirbase;

//
ANNOTATION: 2
ID NCX:hsa-miR-17-5p;
TFID NCX;
MIID ENSG00000207745:hsa-mir-17:hsa-miR-17-5p;
JTID ENSG00000143107:FNDC7
JTID ENSG00000166435:XRRAL GO:0005515;
```

```
JTID ENSG00000050405:LIM1 GO:0001725;GO:0003785;GO:0005925;GO:0008270;GO:0015629;GO:0030835;GO:0031529;GO:0046872;GO:0051015;GO:0051017;
JTID ENSG000000143622:RIT1 GO:0000166;GO:0005516;GO:0005525;GO:0005622;GO:0005886;GO:0007165;GO:0007264;GO:0005515;GO:0016020;
JTID ENSG000000196460:Q6ZNB4_HUMAN GO:0003677;GO:0006355;
JTID ENSG000000145362:ANK2 GO:0005200;GO:0005515;GO:0007165;GO:0015629;GO:0016020;GO:0005856;
TFJT NCX:ANK2;
MIJT hsa-miR-17-5p:LIM1:targetscan:pictar; hsa-miR-17-5p:RIT1:targetscan; hsa-miR-17-5p:ANK2:targetscan:pictar;

//
ANNOTATION: 2
ID RFX:hsa-miR-181d;
TFID RFX;
MIID ENSG000000207585:hsa-mir-181d:hsa-miR-181d;
JTID ENSG000000139209:SLC38A4 GO:0006811;GO:0006814;GO:0006865;GO:0015171;GO:0015293;GO:0016020;GO:0016021;GO:0031402;
JTID ENSG000000171766:GATM GO:0005739;GO:0005758;GO:0006601;GO:0015068;GO:0016740;
JTID ENSG000000197586:ENTPD6 GO:0016787;GO:0000287;GO:0005509;GO:0016020;GO:0016021;GO:0017110;
JTID ENSG000000159873:CCDC117
JTID ENSG000000083312:TNPO1 GO:0000059;GO:0000060;GO:0005515;GO:0005634;GO:0005643;GO:0005737;GO:0006886;GO:0008139;GO:0008565;
JTID ENSG000000118894:FAM86A
JTID ENSG000000163612:XR_017899.1
JTID ENSG000000145819:ARHGAP26 GO:0005096;GO:0005100;GO:0005622;GO:0007165;GO:0007399;GO:0030036;
JTID ENSG000000171084:LOC645332
TFJT RFX:TNPO1;
MIJT hsa-miR-181d:GATM:targetscan; hsa-miR-181d:SLC38A4:targetscan; hsa-miR-181d:TNPO1:targetscan; hsa-miR-181d:ENTPD6:targetscan:mirbase; hsa-miR-181d:CCDC117:targetscan; hsa-miR-181d:ARHGAP26:targetscan:mirbase;

//
ANNOTATION: 2
ID NCX:hsa-miR-20b;
TFID NCX;
MIID ENSG000000207710:hsa-mir-20b:hsa-miR-20b;
JTID ENSG000000143107:FNDC7
JTID ENSG000000166435:XRRA1 GO:0005515;
JTID ENSG00000050405:LIM1 GO:0001725;GO:0003785;GO:0005925;GO:0008270;GO:0015629;GO:0030835;GO:0031529;GO:0046872;GO:0051015;GO:0051017;
JTID ENSG000000143622:RIT1 GO:0000166;GO:0005516;GO:0005525;GO:0005622;GO:0005886;GO:0007165;GO:0007264;GO:0005515;GO:0016020;
JTID ENSG000000196460:Q6ZNB4_HUMAN GO:0003677;GO:0006355;
JTID ENSG000000145362:ANK2 GO:0005200;GO:0005515;GO:0007165;GO:0015629;GO:0016020;GO:0005856;
TFJT NCX:ANK2;
MIJT hsa-miR-20b:ANK2:targetscan:pictar; hsa-miR-20b:LIM1:targetscan:pictar; hsa-miR-20b:RIT1:targetscan;

//
ANNOTATION: 2
ID ER:hsa-miR-135b;
TFID ER;
MIID ENSG000000199059:hsa-mir-135b:hsa-miR-135b;
JTID ENSG000000114480:GBE1 GO:0003844;GO:0004553;GO:0005975;GO:0005978;GO:0006091;GO:0016757;GO:0043169;
JTID ENSG000000099822:HCN2 GO:0000166;GO:0005249;GO:0005272;GO:0005624;GO:0006812;GO:0006813;GO:0006814;GO:0006814;GO:0006814;GO:0030552;GO:0030955;GO:0031402;
JTID ENSG000000102181:CD99L2
JTID ENSG000000168026:TTC21A GO:0005488;
JTID ENSG000000164061:BSN GO:0005200;GO:0005634;GO:0005856;GO:0007268;GO:0008270;GO:0019717;GO:0045202;GO:0046872;
JTID ENSG000000173464:RNASE11 GO:0003676;GO:0004519;GO:0004522;GO:0016787;
JTID ENSG000000091879:ANGPT2 GO:0001525;GO:0005102;GO:0005615;GO:0007165;GO:0007275;GO:0030154;GO:0005515;GO:0016525;GO:0048514;
JTID ENSG000000184774:Q49AQ9_HUMAN GO:0005975;GO:0016020;GO:0016758;
JTID ENSG000000115137:NP_057628.1 GO:0005525;GO:0007264;GO:0031072;GO:0000166;
JTID ENSG000000107816:LZTS2 GO:0005737;GO:0007049;GO:0016020;GO:0045786;
JTID ENSG000000198429:ZNF69 GO:0003676;GO:0005622;GO:0006355;
JTID ENSG000000135842:FAM129A
JTID ENSG000000122176:FMOD GO:0005515;GO:0005578;GO:0007181;
JTID ENSG000000095752:IL11 GO:0005125;GO:0005142;GO:0005576;GO:0005615;GO:0007267;GO:0008284;GO:0030168;GO:0030183;GO:0030219;GO:0045444;
JTID ENSG000000135070:ISCA1 GO:0005506;GO:0005739;GO:0046872;GO:0051536;
JTID ENSG000000130589:PR285_HUMAN GO:0000166;GO:0003677;GO:0003713;GO:0003723;GO:0004386;GO:0004540;GO:0005524;GO:0005622;GO:0005634;GO:0006350;GO:0006355;GO:0008270;GO:0016787;GO:0017111;GO:0046872;GO:0003676;
JTID ENSG000000125931:CITED1 GO:0001570;GO:0001892;GO:0003700;GO:0005634;GO:0006357;GO:0030318;GO:0043473;GO:0045449;
JTID ENSG000000198959:TGM2 GO:0003810;GO:0005509;GO:0005525;GO:0005578;GO:0005829;GO:0007186;GO:0008415;GO:0016020;GO:0016740;GO:0018149;GO:0045785;
JTID ENSG00000030304:MUSK GO:0004713;GO:0004872;GO:0005524;GO:0006468;GO:0000166;GO:0004714;GO:0005887;GO:0007169;GO:0007275;GO:0007517;GO:0016020;GO:0016301;GO:0005515;GO:0005886;GO:0006355;GO:0007528;GO:0008582;GO:0043113;
JTID ENSG000000180424:DEFB123 GO:0042742;
JTID ENSG000000167700:MFSB3 GO:0006810;GO:0016020;GO:0016021;
JTID ENSG000000167861:C17orf28 GO:0016020;GO:0016021;GO:0005515;GO:0005737;GO:0007605;GO:0035315;GO:0042472;GO:0042803;
JTID ENSG000000185294:NP_787078.1 GO:0008233;GO:0008717;GO:0016021;
JTID ENSG000000113494:PRLR GO:0004872;GO:0004925;GO:0006694;GO:0006916;GO:0007166;GO:0007171;GO:0007595;GO:0009986;GO:0016020;GO:0042110;GO:0042803;GO:0042977;GO:0042978;GO:0005515;GO:0007566;GO:0016021;GO:0030155;GO:0030856;
TFJT ER:ANGPT2; ER:MUSK;
MIJT hsa-miR-135b:ISCA1:targetscan:mirbase; hsa-miR-135b:FMOD:targetscan; hsa-miR-135b:TTC21A:targetscan; hsa-miR-135b:HCN2:targetscan:mirbase; hsa-miR-135b:BSN:targetscan; hsa-miR-135b:GBE1:targetscan:mirbase; hsa-miR-135b:DEFB123:targetscan:mirbase; hsa-miR-135b:CITED1:mirbase; hsa-miR-135b:TGM2:targetscan; hsa-miR-135b:NP_787078.1:mirbase; hsa-miR-135b:ZNF69:targetscan; hsa-miR-135b:FAM129A:targetscan; hsa-miR-135b:RNASE11:targetscan:mirbase;

//
ANNOTATION: 2
ID T3R:hsa-miR-103;
TFID T3R;
MIID ENSG000000199024:hsa-mir-103-2:hsa-miR-103;
JTID ENSG000000105085:CRSP7 GO:0003713;GO:0004872;GO:0005515;GO:0005634;GO:0006350;GO:0006357;GO:0006367;
JTID ENSG000000204005:Q6ZP22_HUMAN
JTID ENSG000000137171:KLC4 GO:0003777;GO:0005488;GO:0005515;GO:0005871;GO:0005874;
JTID ENSG000000135638:EMX1 GO:0003700;GO:0005634;GO:0006355;GO:0007275;GO:0007420;GO:0030182;GO:0043565;
JTID ENSG000000107738:C10orf54 GO:0004872;GO:0016020;GO:0016021;
JTID ENSG000000135968:GCC2 GO:0005515;
TFJT T3R:CRSP7; T3R:EMX1;
MIJT hsa-miR-103:CRSP7:targetscan:mirbase; hsa-miR-103:GCC2:targetscan; hsa-miR-103:EMX1:mirbase; hsa-miR-103:KLC4:pictar; hsa-miR-103:Q6ZP22_HUMAN:mirbase;

//
ANNOTATION: 2
ID YY1:hsa-miR-16;
TFID YY1;
MIID ENSG000000198987:hsa-mir-16-2:hsa-miR-16;
JTID ENSG000000176095:IHPK1 GO:0005515;GO:0005634;GO:0005737;GO:0008440;GO:0016192;GO:0016301;GO:0016310;GO:0016740;GO:0050517;GO:0051209;
JTID ENSG000000165985:C1QL3 GO:0005515;GO:0005737;GO:0006817;
JTID ENSG000000131381:ZFYZE20 GO:0003676;GO:0005622;GO:0005768;GO:0008270;GO:0015031;GO:0016020;GO:0016197;GO:0046872;
TFMI YY1:hsa-miR-16:hsa-mir-16-2:computational(PUBMED: 17447837); computational(ECRbase);
MIJT hsa-miR-16:IHPK1:targetscan; hsa-miR-16:ZFYZE20:targetscan; hsa-miR-16:C1QL3:targetscan;

//
ANNOTATION: 2
ID C-REL:hsa-miR-126*;
TFID C-REL;
MIID ENSG000000199161:hsa-mir-126:hsa-miR-126*;
```



```
JTID ENSG00000056998:GYG2 GO:0005625;GO:0005978;GO:0008466;GO:0016051;GO:0016740;GO:0016758;
JTID ENSG000000188042:ARL4C GO:0000166;GO:0003924;GO:0005525;GO:0005622;GO:0005634;GO:0007264;
JTID ENSG000000103540:CE110_HUMAN GO:0005515;GO:0005813;GO:0051298;
JTID ENSG000000133116:KL GO:0004566;GO:0004871;GO:0005179;GO:0005499;GO:0005615;GO:0005624;GO:0005625;GO:0005887;GO:0005975;GO:0006112;GO:0007568;GO:0008152;GO:0008422;GO:0016020;GO:0030501;GO:0043169;
JTID ENSG000000117594:HSD11B1 GO:0003845;GO:0005783;GO:0005792;GO:0006629;GO:0008152;GO:0008211;GO:0016020;GO:0016021;GO:0016491;GO:0030324;
JTID ENSG00000008382:MPND GO:0008233;
JTID ENSG000000181656:GPR88 GO:0001584;GO:0004872;GO:0007165;GO:0007186;GO:0016020;GO:0016021;
JTID ENSG000000177599:ZNF491 GO:0003677;GO:0005622;GO:0005634;GO:0006350;GO:0006355;GO:0008270;GO:0046872;
JTID ENSG000000125734:NM_001080452.1 GO:0016021;
JTID ENSG000000173545:ZNF622 GO:0003676;GO:0005622;GO:0005634;GO:0008270;GO:0046872;
JTID ENSG000000152078:TMEM56 GO:0016021;
JTID ENSG000000182621:PLCB1 GO:0000074;GO:0004435;GO:0004871;GO:0005509;GO:0005634;GO:0005737;GO:0007242;GO:0016042;GO:0016787;
JTID ENSG000000122965:RBM19 GO:0000166;GO:0003723;GO:0005634;GO:0005730;
JTID ENSG000000158423:RIBC1
JTID ENSG000000112062:MAPK14
GO:0000166;GO:0004674;GO:0004707;GO:0004708;GO:0005515;GO:0005524;GO:0005634;GO:0005737;GO:0006468;GO:0006928;GO:0006935;GO:0006950;GO:0007166;GO:0007243;GO:0008339;GO:0016740;GO:0000077;GO:0000922;GO:0001525;GO:0004672;GO:0005623;GO:0006006;GO:0007519;GO:0016301;GO:0019395;GO:0031663;GO:003249
6;GO:0045648;GO:0045944;
JTID ENSG000000104953:TLE6 GO:0005634;GO:0045449;GO:0006355;GO:0016055;
JTID ENSG000000186231:KLHL32 GO:0005515;
JTID ENSG000000169131:ZNF354A GO:0003677;GO:0003702;GO:0005622;GO:0005634;GO:0006350;GO:0006357;GO:0007605;GO:0008270;GO:0046872;
JTID ENSG000000169016:E2F6 GO:0000074;GO:0003700;GO:0005667;GO:0006355;GO:0000122;GO:0003714;GO:0005634;GO:0006350;GO:0007049;GO:0000083;
JTID ENSG000000130724:CHMP2A GO:0015031;
JTID ENSG000000205808:PPAPDC2 GO:0016020;GO:0016021;GO:0016787;
TFJT C-REL:RIBC1; C-REL:PPAPDC2;
MIJT hsa-miR-126*:ZNF622:mirbase; hsa-miR-126*:HSD11B1:mirbase; hsa-miR-126*:E2F6:pictar;

//
ANNOTATION: 2
ID NRF-1:hsa-miR-151;
TFID NRF-1;
MIID ENSG000000207792:hsa-mir-151:hsa-miR-151;
JTID ENSG000000164040:PGRMC2 GO:0003707;GO:0004872;GO:0005496;GO:0008289;GO:0016020;GO:0016021;GO:0020037;GO:0046914;GO:0005515;
JTID ENSG000000130705:RNF38 GO:0005515;GO:0006512;GO:0008270;GO:0046872;
TFJT NRF-1:PGRMC2;
MIJT hsa-miR-151:RNF38:targetscan;

//
ANNOTATION: 2
ID SP-1:hsa-miR-375;
TFID SP-1;
MIID ENSG000000198973:hsa-mir-375:hsa-miR-375;
JTID ENSG000000103241:FOXF1 GO:0001570;GO:0003677;GO:0003700;GO:0003713;GO:0005515;GO:0005634;GO:0005667;GO:0006350;GO:0006357;GO:0009887;GO:0030198;GO:0030324;GO:0043565;GO:0045198;GO:0045893;GO:0048566;
JTID ENSG000000140479:PCSK6 GO:0004289;GO:0005509;GO:0005783;GO:0006508;GO:0007267;GO:0008233;GO:0007354;GO:0007368;
JTID ENSG000000163642:XR_017284.1
JTID ENSG000000198692:E1F1AY GO:0003723;GO:0003743;GO:0005515;GO:0006413;
JTID ENSG000000106524:ANKMY2 GO:0008270;GO:0046872;
JTID ENSG000000183597:C22orf25
JTID ENSG000000112531:QKI GO:0003723;GO:0005634;GO:0006397;GO:0006417;GO:0006810;GO:0007275;GO:0008380;GO:0030154;GO:0051028;
JTID ENSG000000132122:SPATA6 GO:0007275;GO:0007283;GO:0030154;
JTID ENSG000000188315:C3orf62
JTID ENSG000000100483:C14orf138
TFMI SP-1:hsa-miR-375:hsa-mir-375:computational(PUBMED: 17447837);
MIJT hsa-miR-375:C22orf25:targetscan; hsa-miR-375:E1F1AY:targetscan; hsa-miR-375:QKI:targetscan:pictar; hsa-miR-375:C14orf138:targetscan:mirbase; hsa-miR-375:C3orf62:targetscan; hsa-miR-375:PCSK6:targetscan; hsa-miR-375:ANKMY2:targetscan:pictar; hsa-miR-375:FOXF1:targetscan;

//
ANNOTATION: 2
ID PAX-4:hsa-miR-17-5p;
TFID PAX-4;
MIID ENSG000000207745:hsa-mir-17:hsa-miR-17-5p;
JTID ENSG000000143107:FNDC7
JTID ENSG000000104517:EDD1 GO:0004842;GO:0005622;GO:0006464;GO:0006512;GO:0005515;GO:0005625;GO:0005634;GO:0006511;GO:0006974;GO:0008270;GO:0008283;GO:0016874;GO:0046872;GO:0050847;
JTID ENSG000000057019:DCBLD2 GO:0005515;GO:0005887;GO:0007155;GO:0009986;GO:0016020;GO:0030308;GO:0030522;GO:0042060;
JTID ENSG000000187678:SPRY4 GO:0005515;GO:0007275;GO:0009966;GO:0016020;GO:0043407;
JTID ENSG000000162624:LHX8 GO:0003677;GO:0003700;GO:0005634;GO:0006355;GO:0008270;GO:0043565;GO:0046872;GO:0007611;GO:0021879;GO:0042475;
JTID ENSG000000203793:Q6ZR74_HUMAN
TFJT PAX-4:SPRY4;
MIJT hsa-miR-17-5p:SPRY4:targetscan:pictar; hsa-miR-17-5p:DCBLD2:targetscan:pictar; hsa-miR-17-5p:EDD1:targetscan:pictar; hsa-miR-17-5p:LHX8:targetscan:pictar;

//
ANNOTATION: 2
ID C-REL:hsa-miR-219;
TFID C-REL;
MIID ENSG000000199036:hsa-mir-219-1:hsa-miR-219;
MIID ENSG000000207955:hsa-mir-219-2:hsa-miR-219;
JTID ENSG000000186187:ZNR1 GO:0005515;GO:0005768;GO:0006512;GO:0008270;GO:0016020;GO:0016874;GO:0046872;
JTID ENSG000000183018:SPNS2 GO:0005215;GO:0006810;GO:0016020;GO:0016021;
JTID ENSG000000118496:FBXO30 GO:0006512;GO:0008270;GO:0046872;
JTID ENSG000000171855:IFNB1 GO:0005132;GO:0005576;GO:0005615;GO:0006917;GO:0006919;GO:0007166;GO:0008285;GO:0009615;GO:0030101;GO:0042100;GO:0042742;GO:0045089;GO:0045343;GO:0046597;GO:0005125;
JTID ENSG000000108702:CCL1 GO:0005515;GO:0005576;GO:0005615;GO:0006874;GO:0006935;GO:0006954;GO:0006955;GO:0007165;GO:0007267;GO:0008009;GO:0016032;
JTID ENSG000000181817:LSM10 GO:0003723;GO:0005515;GO:0005634;GO:0006397;GO:0008380;GO:0030529;
JTID ENSG000000119508:NR4A3 GO:0001707;GO:0003700;GO:0003707;GO:0004887;GO:0005488;GO:0005634;GO:0006350;GO:0006355;GO:0008270;GO:0043565;GO:0046872;
JTID ENSG000000154274:C4orf19
JTID ENSG000000095066:HOOK2 GO:0000226;GO:0005515;GO:0005737;GO:0005856;GO:0005874;GO:0006897;GO:0008017;
JTID ENSG000000189325:NP_001010903.2
JTID ENSG000000161031:PGLYRP2 GO:0001519;GO:0005515;GO:0005622;GO:0008270;GO:0008745;GO:0009253;GO:0016019;GO:0016020;GO:0016045;GO:0016787;GO:0045087;GO:0046872;GO:0050830;
JTID ENSG000000113643:RARS GO:0000166;GO:0004814;GO:0005515;GO:0005524;GO:0005625;GO:0005737;GO:0006420;GO:0016874;
JTID ENSG000000187095:LILRA2 GO:0004872;GO:0003823;GO:0006952;GO:0006955;GO:0007165;GO:0016020;GO:0016021;
JTID ENSG000000180881:CAPS2 GO:0005509;
JTID ENSG000000114982:NP_060461.3 GO:0004339;GO:0005634;
JTID ENSG000000179387:ELMOD2 GO:0005856;GO:0006909;
JTID ENSG000000197077:Q5THZ5_HUMAN
JTID ENSG000000101200:AVP GO:0005185;GO:0005576;GO:0005625;GO:0006091;GO:0006833;GO:0007165;GO:0007267;GO:0030146;GO:0030819;GO:0042310;
TFJT C-REL:NR4A3; C-REL:LILRA2;
MIJT hsa-miR-219:IFNB1:mirbase; hsa-miR-219:FBXO30:targetscan; hsa-miR-219:RARS:targetscan:mirbase:pictar; hsa-miR-219:PGLYRP2:targetscan:mirbase; hsa-miR-219:LSM10:targetscan:mirbase; hsa-miR-219:ZNR1:targetscan:pictar; hsa-miR-219:NR4A3:targetscan:pictar; hsa-miR-219:CCL1:targetscan;
hsa-miR-219:ELMOD2:targetscan:mirbase:pictar; hsa-miR-219:HOOK2:targetscan:mirbase; hsa-miR-219:LILRA2:targetscan:mirbase; hsa-miR-219:CAPS2:mirbase; hsa-miR-219:C4orf19:targetscan:mirbase;

//
ANNOTATION: 2
ID SP-1:hsa-miR-193a;
TFID SP-1;
MIID ENSG000000207614:hsa-mir-193a:hsa-miR-193a;
JTID ENSG000000137478:FCHSD2 GO:0005515;
```

```
JTID ENSG00000168675:C18orf1 GO:0016020;GO:0016021;
JTID ENSG00000172771:C3orf25 GO:0005509;
JTID ENSG0000012779:ALOX5 GO:0004051;GO:0005506;GO:0005509;GO:0005515;GO:0005634;GO:0005737;GO:0006118;GO:0006691;GO:0006954;GO:0016165;GO:0016491;GO:0019370;GO:0046872;
JTID ENSG00000183597:C22orf25
JTID ENSG00000198870:C9orf96 GO:0000166;GO:0004672;GO:0005524;GO:0006468;
JTID ENSG00000158813:EDA GO:0005102;GO:0005164;GO:0005624;GO:0005737;GO:0005856;GO:0005886;GO:0006817;GO:0006955;GO:0007165;GO:0007275;GO:0007398;GO:0016021;GO:0030154;GO:0051092;GO:0001942;GO:0005789;GO:0005887;GO:0007160;GO:0007431;GO:0042346;GO:0042475;GO:0043473;GO:0045177;
JTID ENSG00000172354:GNB2 GO:0003924;GO:0004871;GO:0005515;GO:0007165;GO:0007186;
JTID ENSG00000028528:SNX1 GO:0005515;GO:0007154;GO:0035091;GO:0005737;GO:0006886;GO:0006897;GO:0008565;GO:0005768;
JTID ENSG00000105552:BCAT2 GO:0004084;GO:0005739;GO:0008152;GO:0009081;GO:0009082;GO:0009083;GO:0016740;
JTID ENSG00000137497:NUMA1 GO:0000909;GO:0000922;GO:0005198;GO:0005515;GO:0005634;GO:0005876;GO:0006997;
TFMI SP-1:hsa-miR-193a:hsa-mir-193a:computational(PUBMED:17447837);
MIJT hsa-miR-193a:C22orf25:targetscan; hsa-miR-193a:FCHSD2:targetscan; hsa-miR-193a:C3orf25:targetscan:mirbase; hsa-miR-193a:SNX1:targetscan; hsa-miR-193a:C9orf96:targetscan:mirbase; hsa-miR-193a:ALOX5:targetscan:mirbase; hsa-miR-193a:C18orf1:pictar; hsa-miR-193a:NUMA1:targetscan:mirbase;

//
ANNOTATION: 2
ID SP-1:hsa-miR-203;
TFID SP-1;
MIID ENSG00000207568:hsa-mir-203:hsa-miR-203;
JTID ENSG00000104824:HNRPL GO:0000166;GO:0003723;GO:0005515;GO:0005634;GO:0005654;GO:0006397;GO:0030530;GO:0045120;
JTID ENSG00000125347:IRF1 GO:0003700;GO:0005634;GO:0006350;GO:0006366;GO:0006955;GO:0007049;GO:0045084;GO:0045786;GO:0045893;GO:0003677;
JTID ENSG00000173046:NM_207376
TFMI SP-1:hsa-miR-203:hsa-mir-203:computational(PUBMED:17447837);
MIJT hsa-miR-203:HNRPL:targetscan:mirbase; hsa-miR-203:IRF1:targetscan;

//
ANNOTATION: 2
ID NCX:hsa-miR-19a;
TFID NCX;
MIID ENSG00000207610:hsa-mir-19a:hsa-miR-19a;
JTID ENSG00000155189:AGPAT5 GO:0003841;GO:0005739;GO:0008152;GO:0008415;GO:0008654;GO:0016020;GO:0016021;GO:0016740;
JTID ENSG00000163596:ICAIL
JTID ENSG00000117601:SERPINC1 GO:0004867;GO:0005515;GO:0005576;GO:0007596;GO:0008201;
JTID ENSG00000124788:ATXN1 GO:0003723;GO:0005634;GO:0005737;GO:0008219;GO:0016363;GO:0042802;GO:0005515;GO:0008344;GO:0008542;GO:0042405;GO:0060079;
JTID ENSG00000187155:CUO85_HUMAN GO:0016020;GO:0016021;
JTID ENSG00000113648:H2AFY GO:0000786;GO:0000793;GO:0001740;GO:0003677;GO:0003682;GO:0005634;GO:0006334;GO:0007001;GO:0007549;GO:0016568;
JTID ENSG00000100249:C22orf31
JTID ENSG00000185112:FAM43A
TFJT NCX:ATXN1; NCX:C22orf31; NCX:FAM43A;
MIJT hsa-miR-19a:ATXN1:targetscan:pictar; hsa-miR-19a:SERPINC1:targetscan:mirbase; hsa-miR-19a:C22orf31:targetscan:mirbase; hsa-miR-19a:FAM43A:targetscan:mirbase:pictar; hsa-miR-19a:AGPAT5:targetscan:mirbase; hsa-miR-19a:ICAIL:targetscan;

//
ANNOTATION: 2
ID IRF:hsa-miR-203;
TFID IRF;
MIID ENSG00000207568:hsa-mir-203:hsa-miR-203;
JTID ENSG00000113070:HBEGF GO:0004872;GO:0005154;GO:0005615;GO:0005887;GO:0007165;GO:0007173;GO:0007517;GO:0008016;GO:0008083;GO:0008201;GO:0009986;GO:0016020;GO:0035313;GO:0048661;GO:0051549;
JTID ENSG00000167941:SOST GO:0001503;GO:0030279;GO:0030514;
TFJT IRF:HBEGF;
MIJT hsa-miR-203:SOST:targetscan; hsa-miR-203:HBEGF:targetscan;

//
ANNOTATION: 2
ID MEF-2:hsa-miR-133a;
TFID MEF-2;
MIID ENSG00000207764:hsa-mir-133a-2:hsa-miR-133a;
JTID ENSG00000101489:BRUNOL4 GO:0000166;GO:0000900;GO:0003676;GO:0005634;GO:0007281;GO:0009790;GO:0016246;GO:0030529;GO:0042835;
JTID ENSG00000154822:PLCL2 GO:0004435;GO:0005509;GO:0006629;GO:0007242;
TFJT MEF-2:BRUNOL4; MEF-2:PLCL2;
MIJT hsa-miR-133a:PLCL2:targetscan; hsa-miR-133a:BRUNOL4:targetscan;

//
ANNOTATION: 2
ID ER:hsa-miR-149;
TFID ER;
MIID ENSG00000207611:hsa-mir-149:hsa-miR-149;
JTID ENSG00000102313:ITIH5L GO:0004867;GO:0030212;
JTID ENSG00000164061:BSN GO:0005200;GO:0005634;GO:0005856;GO:0007268;GO:0008270;GO:0019717;GO:0045202;GO:0046872;
JTID ENSG00000189363:Q6ZSP4_HUMAN
JTID ENSG00000188935:Q6ZU24_HUMAN
JTID ENSG00000118816:CCNI GO:0000074;GO:0007283;
JTID ENSG00000099331:MYO9B GO:0000146;GO:0000166;GO:0003779;GO:0005096;GO:0005100;GO:0005516;GO:0005524;GO:0005622;GO:0005737;GO:0005938;GO:0007242;GO:0007266;GO:0008270;GO:0016459;GO:0016887;GO:0019992;GO:0030048;GO:0031941;GO:0043531;GO:0046872;GO:0048471;
JTID ENSG00000141325:CCDC45 GO:0005515;
JTID ENSG00000172780:RAB43 GO:0005634;GO:0005681;GO:0006397;GO:0008380;GO:0000166;GO:0003924;GO:0005515;GO:0005525;GO:0006886;GO:0006913;GO:0007165;GO:0007264;GO:0016020;
JTID ENSG00000022976:C14orf131
JTID ENSG00000151474:FRMD4A GO:0005488;GO:0005737;GO:0005856;GO:0008092;GO:0016020;
TFJT ER:ITIH5L; ER:MYO9B; ER:CCDC45;
MIJT hsa-miR-149:RAB43:targetscan; hsa-miR-149:BSN:targetscan; hsa-miR-149:ITIH5L:targetscan:mirbase; hsa-miR-149:MYO9B:targetscan:mirbase; hsa-miR-149:CCNI:targetscan:mirbase:pictar; hsa-miR-149:CCDC45:targetscan:mirbase:pictar; hsa-miR-149:C14orf131:targetscan:mirbase; hsa-miR-149:FRMD4A:targetscan;

//
ANNOTATION: 2
ID AREB6:hsa-miR-126*;
TFID AREB6;
MIID ENSG00000199161:hsa-mir-126:hsa-miR-126*;
JTID ENSG00000177599:ZNF491 GO:0003677;GO:0005622;GO:0005634;GO:0006350;GO:0006355;GO:0008270;GO:0046872;
JTID ENSG00000163515:RETNLB GO:0005179;GO:0005576;GO:0008283;
JTID ENSG00000198012:XR_017841.1
JTID ENSG00000134864:Q9BVM4_HUMAN
JTID ENSG00000205658:Q6ZUU6_HUMAN
JTID ENSG00000003147:ICAI GO:0000139;GO:0005515;GO:0005737;GO:0005829;GO:0006836;GO:0016020;GO:0030667;GO:0030672;GO:0046928;
JTID ENSG00000145439:CBR4 GO:0008152;GO:0016491;
JTID ENSG00000141646:SMAD4 GO:0001658;GO:0001822;GO:0003677;GO:0003700;GO:0003712;GO:0005515;GO:0005622;GO:0005634;GO:0005667;GO:0005737;GO:0006350;GO:0006357;GO:0007183;GO:0008285;GO:0009952;GO:0010003;GO:0016563;GO:0045893;GO:0045944;GO:0051098;
JTID ENSG00000197696:NMB GO:0005179;GO:0005625;GO:0007165;GO:0007218;GO:0007267;
JTID ENSG00000205808:PPAPDC2 GO:0016020;GO:0016021;GO:0016787;
JTID ENSG00000171858:RPS21 GO:0003723;GO:0003735;GO:0005622;GO:0005840;GO:0005843;GO:0006412;GO:0008283;GO:0043022;GO:0030154;
JTID ENSG00000163918:RFC4 GO:0000166;GO:0005515;GO:0005524;GO:0005634;GO:0005663;GO:0006260;GO:0006271;GO:0006281;GO:0017111;GO:0048015;
JTID ENSG00000158423:RIBC1
JTID ENSG00000186017:ZNF566 GO:0003677;GO:0005622;GO:0005634;GO:0006350;GO:0006355;GO:0008270;GO:0046872;
JTID ENSG00000181392:C19orf46 GO:0003779;GO:0016021;
JTID ENSG00000147003:TMEM27 GO:0004246;GO:0006508;GO:0016020;GO:0016021;
```

```
JTID ENSG00000112062:MAPK14
GO:0000166;GO:0004674;GO:0004707;GO:0004708;GO:0005515;GO:0005524;GO:0005634;GO:0005737;GO:0006468;GO:0006928;GO:0006935;GO:0006950;GO:0007166;GO:0007243;GO:0008339;GO:0016740;GO:0000077;GO:0000922;GO:0001525;GO:0004672;GO:0005623;GO:0006006;GO:0007519;GO:0016301;GO:0019395;GO:0031663;GO:003249
6;GO:0045648;GO:0045944;
TFJT AREB6:RETNLB; AREB6:SMAD4; AREB6:RIEBC1;
MIJT hsa-miR-126*:Q9BVM4_HUMAN:mirbase;

//
ANNOTATION: 2
ID FREAC-4:hsa-miR-29a;
TFID FREAC-4;
MIID ENSG00000198981:hsa-mir-29a:hsa-miR-29a;
JTID ENSG00000168398:BDKRB2 GO:0001584;GO:0004435;GO:0004872;GO:0004947;GO:0005886;GO:0005887;GO:0006939;GO:0006954;GO:0007169;GO:0007186;GO:0007204;GO:0007600;GO:0008015;
JTID ENSG00000105856:HBP1 GO:0003677;GO:0005634;GO:0006350;GO:0006355;GO:0007050;GO:0016055;
JTID ENSG00000125386:C4orf8
JTID ENSG00000115194:SLC30A3 GO:0005624;GO:0005768;GO:0005887;GO:0006812;GO:0006829;GO:0008021;GO:0008270;GO:0008324;GO:0015633;GO:0016020;
JTID ENSG00000188153:COL4A5 GO:0005201;GO:0005581;GO:0005737;GO:0006817;GO:0005587;
JTID ENSG00000168542:COL3A1 GO:0005201;GO:0005581;GO:0005586;GO:0005737;GO:0006817;GO:0008015;GO:0009887;
JTID ENSG00000103034:NDRG4 GO:0005737;GO:0006950;GO:0007275;GO:0016049;GO:0030154;
TFJT FREAC-4:HBP1;
MIJT hsa-miR-29a:BDKRB2:targetscan; hsa-miR-29a:NDRG4:targetscan:pictar; hsa-miR-29a:SLC30A3:targetscan:pictar; hsa-miR-29a:HBP1:targetscan:mirbase:pictar; hsa-miR-29a:COL3A1:targetscan:mirbase:pictar; hsa-miR-29a:C4orf8:targetscan:mirbase; hsa-miR-29a:COL4A5:targetscan:mirbase:pictar;

//
ANNOTATION: 2
ID ER:hsa-miR-182;
TFID ER;
MIID ENSG00000207990:hsa-mir-182:hsa-miR-182;
JTID ENSG00000197616:MYH6
GO:0000146;GO:0000166;GO:0001701;GO:0002026;GO:0002027;GO:0003779;GO:0005515;GO:0005516;GO:0005524;GO:0005863;GO:0006941;GO:0007512;GO:0007522;GO:0008016;GO:0008217;GO:0008307;GO:0016459;GO:0016887;GO:0030016;GO:0030017;GO:0030048;GO:0030049;GO:0030239;GO:0030898;GO:0043462;GO:0045214;GO:004873
9;GO:0055009;GO:0055010;
JTID ENSG00000147853:AK3 GO:0000166;GO:0004017;GO:0005524;GO:0005525;GO:0005739;GO:0006139;GO:0016301;GO:0016740;GO:0046899;
JTID ENSG00000169495:HTRA4 GO:0004252;GO:0005515;GO:0006508;GO:0008233;
JTID ENSG00000172819:RARG GO:0003700;GO:0003707;GO:0003708;GO:0005515;GO:0005634;GO:0006350;GO:0006355;GO:0007275;GO:0008270;GO:0043565;GO:0046872;GO:0003677;GO:0005667;GO:0043065;GO:0045944;GO:0048048;
JTID ENSG00000095139:ARCN1 GO:0005783;GO:0006886;GO:0006888;GO:0006890;GO:0006891;GO:0016020;GO:0030125;GO:0030126;GO:0006810;
JTID ENSG00000176261:ZBTB80S
JTID ENSG00000085831:Clorf34 GO:0005488;
JTID ENSG00000146859:TMEM140 GO:0016020;GO:0016021;
JTID ENSG00000136813:KIAA0368 GO:000502;GO:0005488;GO:0005634;GO:0005769;GO:0005770;GO:0005783;GO:0005813;GO:0005829;GO:0016023;GO:0030134;GO:0030433;
JTID ENSG00000116704:SLC35D1 GO:0005351;GO:0005463;GO:0005783;GO:0006810;GO:0015789;GO:0016020;GO:0016021;GO:0030176;GO:0030206;
JTID ENSG00000137312:FLOT1 GO:0005515;GO:0005901;GO:0016020;GO:0016021;GO:0016600;GO:0045121;
JTID ENSG00000156110:ADK GO:0000287;GO:0004001;GO:0006166;GO:0009156;GO:0016301;GO:0016740;GO:0005634;
JTID ENSG00000120253:NUP43 GO:0005634;GO:0015031;GO:0015288;GO:0016021;GO:0019867;
JTID ENSG00000038219:FAM44A
JTID ENSG00000205133:Q629K1_HUMAN
TFJT ER:RARG; ER:ZBTB80S;
MIJT hsa-miR-182:AK3:targetscan; hsa-miR-182:KIAA0368:targetscan; hsa-miR-182:RARG:targetscan:mirbase:pictar; hsa-miR-182:TMEM140:targetscan; hsa-miR-182:FAM44A:targetscan; hsa-miR-182:FLOT1:targetscan:mirbase; hsa-miR-182:MYH6:targetscan:mirbase; hsa-miR-182:NUP43:targetscan; hsa-miR-
182:Clorf34:targetscan; hsa-miR-182:ARCN1:targetscan; hsa-miR-182:ADK:targetscan;

//
ANNOTATION: 2
ID SMAD-3:hsa-miR-200a*;
TFID SMAD-3;
MIID ENSG00000207607:hsa-mir-200a:hsa-miR-200a*;
JTID ENSG00000076108:BAZ2A GO:0003677;GO:0005515;GO:0005634;GO:0005731;GO:0006338;GO:0006350;GO:0006355;GO:0008270;GO:0030528;GO:0046872;
JTID ENSG00000147654:EBAG9 GO:0001558;GO:0005625;GO:0006915;GO:0016020;GO:0016021;GO:0016505;
JTID ENSG00000197657:ZNF323 GO:0003676;GO:0003700;GO:0005622;GO:0005634;GO:0006350;GO:0006355;GO:0008270;GO:0046872;
TFMI SMAD-3:hsa-miR-200a*:hsa-mir-200a:computational(PUBMED: 17447837);
MIJT hsa-miR-200a*:EBAG9:mirbase;

//
ANNOTATION: 2
ID E4F1:hsa-miR-30e-5p;
TFID E4F1;
MIID ENSG00000198974:hsa-mir-30e:hsa-miR-30e-5p;
JTID ENSG00000139636:LMBR1L GO:0004872;GO:0006897;GO:0016020;GO:0016021;
JTID ENSG00000162624:LHX8 GO:0003677;GO:0003700;GO:0005634;GO:0006355;GO:0008270;GO:0043565;GO:0046872;GO:0007611;GO:0021879;GO:0042475;
JTID ENSG00000186594:NP_116284.2
JTID ENSG00000205269:Q5T4T1_HUMAN
JTID ENSG00000083635:NUPF1 GO:0003677;GO:0003723;GO:0005515;GO:0005622;GO:0005634;GO:0005726;GO:0005730;GO:0005830;GO:0006396;GO:0008023;GO:0008270;GO:0016363;GO:0045944;GO:0046872;GO:0048786;
TFJT E4F1:LMBR1L; E4F1:NP_116284.2;
MIJT hsa-miR-30e-5p:NP_116284.2:mirbase; hsa-miR-30e-5p:LMBR1L:targetscan:mirbase:pictar; hsa-miR-30e-5p:LHX8:targetscan:pictar;

//
ANNOTATION: 2
ID ER:hsa-miR-133a;
TFID ER;
MIID ENSG00000207764:hsa-mir-133a-2:hsa-miR-133a;
JTID ENSG00000137507:LRR32 GO:0005515;GO:0005887;GO:0016020;
JTID ENSG00000163485:ADORA1 GO:0001584;GO:0001610;GO:0004872;GO:0005887;GO:0006909;GO:0006954;GO:0007165;GO:0007186;GO:0007267;GO:0007399;GO:0008624;GO:0016020;
JTID ENSG00000143858:SYT2 GO:0005215;GO:0005509;GO:0006810;GO:0008021;GO:0016020;GO:0016021;GO:0045202;GO:0005515;GO:0005544;GO:0005886;GO:0042598;
JTID ENSG00000163295:ALPI GO:0000287;GO:0004035;GO:0008152;GO:0008270;GO:0016020;GO:0016021;GO:0016310;GO:0016787;GO:0048503;
TFJT ER:ADORA1; ER:ALPI;
MIJT hsa-miR-133a:SYT2:targetscan; hsa-miR-133a:ADORA1:targetscan; hsa-miR-133a:LRR32:targetscan; hsa-miR-133a:ALPI:targetscan:mirbase;

//
ANNOTATION: 2
ID ER:hsa-miR-96;
TFID ER;
MIID ENSG00000199158:hsa-mir-96:hsa-miR-96;
JTID ENSG00000166924:NP_775835.2
JTID ENSG00000108515:ENO3 GO:0000015;GO:0000287;GO:0004634;GO:0006096;GO:0016829;
JTID ENSG00000197616:MYH6
GO:0000146;GO:0000166;GO:0001701;GO:0002026;GO:0002027;GO:0003779;GO:0005515;GO:0005516;GO:0005524;GO:0005863;GO:0006941;GO:0007512;GO:0007522;GO:0008016;GO:0008217;GO:0008307;GO:0016459;GO:0016887;GO:0030016;GO:0030017;GO:0030048;GO:0030049;GO:0030239;GO:0030898;GO:0043462;GO:0045214;GO:004873
9;GO:0055009;GO:0055010;
JTID ENSG00000058866:DGKG GO:0004143;GO:0005509;GO:0007205;GO:0007242;GO:0008270;GO:0016740;GO:0019992;
JTID ENSG00000147853:AK3 GO:0000166;GO:0004017;GO:0005524;GO:0005525;GO:0005739;GO:0006139;GO:0016301;GO:0016740;GO:0046899;
JTID ENSG00000117281:CD160 GO:0004872;GO:0005102;GO:0006968;GO:0007166;GO:0008283;GO:0016020;GO:0032393;GO:0046658;GO:0048503;
JTID ENSG00000169495:HTRA4 GO:0004252;GO:0005515;GO:0006508;GO:0008233;
JTID ENSG00000174365:NR_003239.1
JTID ENSG00000172819:RARG GO:0003700;GO:0003707;GO:0003708;GO:0005515;GO:0005634;GO:0006350;GO:0006355;GO:0007275;GO:0008270;GO:0043565;GO:0046872;GO:0003677;GO:0005667;GO:0043065;GO:0045944;GO:0048048;
JTID ENSG00000067191:CACNB1 GO:0005245;GO:0005509;GO:0005624;GO:0005891;GO:0006811;GO:0006816;GO:0006936;GO:0005515;GO:0006612;GO:0008331;GO:0015270;GO:0016529;GO:0030315;
JTID ENSG00000176261:ZBTB80S
```

JTID ENSG00000085831:Clorf34 GO:0005488;  
JTID ENSG00000146859:TMEM140 GO:0016020;GO:0016021;  
JTID ENSG00000185633:NDUFA4L2  
JTID ENSG00000135454:B4GALNT1 GO:0016740;GO:0001574;GO:0003947;GO:0005624;GO:0005975;GO:0006687;GO:0016020;GO:0016021;GO:0016758;GO:0019915;GO:0030173;GO:0030259;  
JTID ENSG00000171217:CLDN20 GO:0005198;GO:0005923;GO:0016020;GO:0016021;GO:0016338;GO:0042802;  
JTID ENSG00000074527:NTN4 GO:0005604;GO:0016322;  
JTID ENSG00000162755:NP\_689579.3  
JTID ENSG00000076351:SLC46A1 GO:0005215;GO:0006810;GO:0016020;GO:0016021;GO:0005737;GO:0015232;GO:0015886;GO:0016324;  
JTID ENSG00000196588:MKLL1\_HUMAN GO:0003676;GO:0003713;GO:0003779;GO:0005515;GO:0005634;GO:0005737;GO:0006350;GO:0006355;GO:0006916;GO:0045941;  
JTID ENSG00000136813:KIAA0368 GO:0000502;GO:0005488;GO:0005634;GO:0005769;GO:0005770;GO:0005783;GO:0005813;GO:0005829;GO:0016023;GO:0030134;GO:0030433;  
JTID ENSG00000117600:NP\_055654.2  
JTID ENSG00000163762:TM4SF18 GO:0016020;GO:0016021;  
JTID ENSG00000156110:ADK GO:0000287;GO:0004001;GO:0006166;GO:0009156;GO:0016301;GO:0016740;GO:0005634;  
TFJT ER:ENO3; ER:RARG; ER:ZBTB80S;  
MIJT hsa-miR-96:DGKG:targetscan; hsa-miR-96:NP\_689579.3:mirbase; hsa-miR-96:MYH6:mirbase; hsa-miR-96:CD160:targetscan:mirbase; hsa-miR-96:NP\_055654.2:pictar; hsa-miR-96:NP\_775835.2:mirbase; hsa-miR-96:B4GALNT1:targetscan; hsa-miR-96:AK3:targetscan; hsa-miR-96:KIAA0368:targetscan:mirbase; hsa-miR-96:RARG:targetscan:pictar; hsa-miR-96:TMEM140:targetscan; hsa-miR-96:NTN4:targetscan:mirbase:pictar; hsa-miR-96:ENO3:targetscan:mirbase; hsa-miR-96:Clorf34:targetscan; hsa-miR-96:CLDN20:targetscan:mirbase; hsa-miR-96:ADK:targetscan; hsa-miR-96:CACNB1:targetscan:pictar; hsa-miR-96:NDUFA4L2:targetscan:mirbase;

//  
ANNOTATION: 2  
ID PEA3:hsa-miR-342;  
TFID PEA3;  
MIID ENSG00000199082:hsa-mir-342:hsa-miR-342;  
JTID ENSG00000089195:TRM6\_HUMAN GO:0003743;GO:0005515;GO:0005634;GO:0006446;GO:0008033;  
JTID ENSG00000185298:Q6PK04\_HUMAN  
JTID ENSG00000132002:DNAJB1 GO:0005634;GO:0006457;GO:0006986;GO:0031072;GO:0051082;GO:0051085;  
JTID ENSG00000184708:EIF4ENIF1 GO:0003743;GO:0005515;GO:0005634;GO:0005737;GO:0008565;GO:0015031;  
JTID ENSG00000138095:LRPPRC GO:0003697;GO:0003723;GO:0005515;GO:0005634;GO:0005737;GO:0005739;  
JTID ENSG00000181904:C5orf24  
JTID ENSG00000137393:IBRDC2 GO:0000151;GO:0004842;GO:0005515;GO:0006118;GO:0006512;GO:0008270;GO:0009055;GO:0016020;GO:0016021;GO:0016874;GO:0042787;GO:0046872;GO:0051536;  
JTID ENSG00000130939:UBE4B GO:0000151;GO:0004842;GO:0005737;GO:0006457;GO:0006915;GO:0009411;GO:0019899;GO:0042787;GO:0051082;  
JTID ENSG00000121807:CCR2 GO:0001584;GO:0004872;GO:0005625;GO:0005737;GO:0005886;GO:0005887;GO:0006935;GO:0006954;GO:0006955;GO:0006968;GO:0007165;GO:0007186;GO:0007194;GO:0007204;GO:0007259;GO:0016493;GO:0019221;GO:0031727;  
JTID ENSG00000197713:RPE GO:0004750;GO:0005515;GO:0005975;GO:0008152;GO:0016853;GO:0003824;  
JTID ENSG00000167085:PHB GO:0000074;GO:0005515;GO:0005634;GO:0005654;GO:0005739;GO:0005743;GO:0005887;GO:0006260;GO:0007165;GO:0008285;GO:0016020;GO:0016481;GO:0016563;GO:0016564;GO:0016575;GO:0042981;  
TFJT PEA3:DNAJB1; PEA3:RPE;  
MIJT hsa-miR-342:IBRDC2:targetscan; hsa-miR-342:UBE4B:targetscan; hsa-miR-342:C5orf24:targetscan:mirbase;

//  
ANNOTATION: 2  
ID LEF1:hsa-miR-199b;  
TFID LEF1;  
MIID ENSG00000207581:hsa-mir-199b:hsa-miR-199b;  
JTID ENSG00000100554:ATP6V1D GO:0006811;GO:0015986;GO:0015992;GO:0016469;GO:0016787;GO:0046872;GO:0046933;GO:0046961;  
JTID ENSG00000145681:HAPLN1 GO:0005540;GO:0005578;GO:0007155;  
JTID ENSG00000128655:PDE11A GO:0007165;GO:0016787;GO:0046872;GO:0047555;  
JTID ENSG00000136536:MARCH7 GO:0005515;GO:0006512;GO:0008270;GO:0016874;GO:0046872;  
JTID ENSG00000163660:CCNL1 GO:0000074;GO:0005634;GO:0006350;GO:0006355;  
JTID ENSG00000186468:RPS23 GO:0003723;GO:0003735;GO:0005622;GO:0005843;GO:0006412;GO:0045182;  
TFJT LEF1:HAPLN1;  
MIJT hsa-miR-199b:PDE11A:targetscan; hsa-miR-199b:MARCH7:targetscan:mirbase:pictar; hsa-miR-199b:RPS23:targetscan; hsa-miR-199b:ATP6V1D:targetscan:mirbase; hsa-miR-199b:CCNL1:targetscan:mirbase:pictar;

//  
ANNOTATION: 2  
ID MEIS1:hsa-let-7b;  
TFID MEIS1;  
MIID ENSG00000207875:hsa-let-7b:hsa-let-7b;  
JTID ENSG00000162650:ATXN7L2  
JTID ENSG00000198105:ZNF248 GO:0003676;GO:0003677;GO:0005622;GO:0005634;GO:0006350;GO:0006355;GO:0008270;GO:0046872;  
JTID ENSG00000187109:NAP1L1 GO:0005515;GO:0005634;GO:0005678;GO:0006260;GO:0006334;GO:0008284;  
JTID ENSG00000143851:PTPN7 GO:0004725;GO:0004872;GO:0005737;GO:0006470;GO:0016787;GO:0016791;  
JTID ENSG00000148200:NR6A1 GO:0003700;GO:0003707;GO:0005634;GO:0006350;GO:0006355;GO:0008270;GO:0043565;GO:0046872;GO:0000122;GO:0003677;GO:0005515;GO:0005667;GO:0007276;GO:0007283;GO:0008283;GO:0042803;  
JTID ENSG00000119906:C10orf6  
JTID ENSG00000133136:GBG5L\_HUMAN GO:0003924;GO:0004871;GO:0005576;GO:0005834;GO:0007186;  
JTID ENSG00000160094:ZNF362 GO:0003676;GO:0005622;GO:0008270;GO:0046872;  
JTID ENSG0000023902:PLEKH01  
JTID ENSG00000169921:Q75L30\_HUMAN  
JTID ENSG00000159217:IGF2BP1 GO:0000166;GO:0003723;GO:0005515;GO:0005634;GO:0006417;  
JTID ENSG00000179476:C14orf28  
JTID ENSG00000165449:SLC16A9 GO:0005215;GO:0006810;GO:0016020;GO:0016021;  
TFJT MEIS1:ATXN7L2; MEIS1:GBG5L\_HUMAN; MEIS1:IGF2BP1;  
MIJT hsa-let-7b:PLEKH01:targetscan:mirbase:pictar; hsa-let-7b:C10orf6:targetscan:pictar; hsa-let-7b:GBG5L\_HUMAN:mirbase; hsa-let-7b:NAP1L1:targetscan:mirbase; hsa-let-7b:ATXN7L2:targetscan:mirbase; hsa-let-7b:IGF2BP1:targetscan; hsa-let-7b:PTPN7:targetscan; hsa-let-7b:ZNF248:targetscan:pictar; hsa-let-7b:SLC16A9:targetscan:pictar; hsa-let-7b:C14orf28:targetscan:mirbase; hsa-let-7b:ZNF362:pictar;

//  
ANNOTATION: 2  
ID HOXA4:hsa-miR-148b;  
TFID HOXA4;  
MIID ENSG00000199122:hsa-mir-148b:hsa-miR-148b;  
JTID ENSG00000109790:KLHL5 GO:0005515;GO:0003779;GO:0005737;GO:0005856;GO:0030036;  
JTID ENSG00000182220:ATP6AP2 GO:0002003;GO:0004872;GO:0005515;GO:0009897;GO:0016020;GO:0032914;GO:0043408;  
JTID ENSG00000047621:C12orf4  
TFMI HOXA4:hsa-miR-148b:hsa-mir-148b:computational (ECRbase);  
MIJT hsa-miR-148b:KLHL5:targetscan; hsa-miR-148b:C12orf4:targetscan; hsa-miR-148b:ATP6AP2:targetscan:mirbase:pictar;

//  
ANNOTATION: 2  
ID SMAD-3:hsa-miR-200a;  
TFID SMAD-3;  
MIID ENSG00000207607:hsa-mir-200a:hsa-miR-200a;  
JTID ENSG00000198909:MAP3K3 GO:0000165;GO:0000166;GO:0000287;GO:0004674;GO:0004709;GO:0004871;GO:0005515;GO:0005524;GO:0006468;GO:0016740;GO:0043123;GO:0043234;GO:0046777;  
JTID ENSG00000154545:MAGED4  
JTID ENSG00000187243:MAGED4B  
TFMI SMAD-3:hsa-miR-200a:hsa-mir-200a:computational (PUBMED: 17447837);  
MIJT hsa-miR-200a:MAGED4:targetscan:mirbase; hsa-miR-200a:MAP3K3:targetscan; hsa-miR-200a:MAGED4B:mirbase;

//  
ANNOTATION: 2  
ID EGR:hsa-miR-203;  
TFID EGR;  
MIID ENSG00000207568:hsa-mir-203:hsa-miR-203;  
JTID ENSG00000101361:NOL5A GO:0003723;GO:0005634;GO:0005730;GO:0006364;

JTID ENSG00000162702:ZNF281 GO:0000122;GO:0003676;GO:0003677;GO:0003704;GO:0005622;GO:0005634;GO:0005665;GO:0006350;GO:0006355;GO:0008270;GO:0046872;  
JTID ENSG00000072041:SLC6A15 GO:0005328;GO:0005887;GO:0006836;GO:0015293;GO:0016020;  
TFJT EGR:ZNF281;  
MIJT hsa-miR-203:SLC6A15:targetscan; hsa-miR-203:ZNF281:targetscan:mirbase:pictar; hsa-miR-203:NOL5A:targetscan;

//  
ANNOTATION: 2  
ID AREB6:hsa-miR-7;  
TFID AREB6;  
MIID ENSG00000207630:hsa-mir-7-3:hsa-miR-7;  
JTID ENSG00000112706:IMPG1 GO:0004872;GO:0005201;GO:0005578;GO:0007601;  
JTID ENSG00000169474:SPRRI1 GO:0001533;GO:0005198;GO:0008544;GO:0018149;GO:0030216;GO:0030674;GO:0031424;  
JTID ENSG00000203747:FCGR3A GO:0004872;GO:0005886;GO:0006955;GO:0016021;GO:0019864;  
JTID ENSG00000205658:Q6ZU6\_HUMAN  
JTID ENSG00000138785:INTS12 GO:0005515;GO:0005634;GO:0008270;GO:0016180;GO:0032039;GO:0046872;  
JTID ENSG00000141161:UNC45B GO:0005488;GO:0006457;GO:0007275;GO:0007519;GO:0030154;  
JTID ENSG00000185591:SP1 GO:0003677;GO:0003690;GO:0003700;GO:0003702;GO:0005159;GO:0005622;GO:0005634;GO:0006350;GO:0006355;GO:0008022;GO:0008270;GO:0016563;GO:0042803;GO:0043565;GO:0045817;GO:0045893;GO:0046872;  
JTID ENSG00000105556:NP\_060020.1 GO:0003677;GO:0005634;  
JTID ENSG00000178980:SEPW1 GO:0005737;GO:0005886;GO:0008430;GO:0016491;GO:0045454;  
JTID ENSG00000158006:PAFAH2 GO:0003847;GO:0005543;GO:0005625;GO:0005737;GO:0008247;GO:0016042;GO:0016787;  
JTID ENSG00000166260:COX11 GO:0004129;GO:0005507;GO:0005739;GO:0007585;GO:0008535;GO:0009055;GO:0016020;GO:0016021;  
JTID ENSG00000177992:C9orf79 GO:0016020;GO:0016021;  
JTID ENSG00000118473:SGIP1 GO:0005737;  
JTID ENSG00000123342:MMP19 GO:0000270;GO:0001525;GO:0004222;GO:0005509;GO:0005578;GO:0006508;GO:0007275;GO:0008270;GO:0030154;GO:0030574;  
TFJT AREB6:IMPG1; AREB6:UNC45B; AREB6:SP1;  
MIJT hsa-miR-7:SPRRI1:targetscan:mirbase; hsa-miR-7:FCGR3A:targetscan; hsa-miR-7:SEPW1:targetscan:mirbase; hsa-miR-7:SGIP1:targetscan:mirbase; hsa-miR-7:UNC45B:targetscan; hsa-miR-7:COX11:targetscan; hsa-miR-7:IMPG1:mirbase; hsa-miR-7:MMP19:targetscan; hsa-miR-7:SP1:targetscan:pictar;  
hsa-miR-7:NP\_060020.1:pictar;

//  
ANNOTATION: 2  
ID YY1:hsa-miR-497;  
TFID YY1;  
MIID ENSG00000207791:hsa-mir-497:hsa-miR-497;  
JTID ENSG00000176095:IHPK1 GO:0005515;GO:0005634;GO:0005737;GO:0008440;GO:0016192;GO:0016301;GO:0016310;GO:0016740;GO:0050517;GO:0051209;  
JTID ENSG00000165985:C1QL3 GO:0005515;GO:0005737;GO:0006817;  
JTID ENSG00000131381:ZFYVE20 GO:0003676;GO:0005622;GO:0005768;GO:0008270;GO:0015031;GO:0016020;GO:0016197;GO:0046872;  
TFMI YY1:hsa-miR-497:hsa-mir-497:computational(PUBMED: 17447837); computational(ECRbase);  
MIJT hsa-miR-497:IHPK1:targetscan; hsa-miR-497:ZFYVE20:targetscan; hsa-miR-497:C1QL3:targetscan;

//  
ANNOTATION: 2  
ID MYOD:hsa-miR-203;  
TFID MYOD;  
MIID ENSG00000207568:hsa-mir-203:hsa-miR-203;  
JTID ENSG00000153575:TUBGCP5 GO:0000922;GO:0005815;GO:0005874;GO:0007020;GO:0008017;GO:0008274;  
JTID ENSG00000188483:IER5L  
JTID ENSG00000143322:ABL2 GO:0000166;GO:0000287;GO:0004713;GO:0005515;GO:0005524;GO:0005737;GO:0005856;GO:0005942;GO:0006464;GO:0007155;GO:0007242;GO:0016740;GO:0018108;GO:0030145;GO:0035014;GO:0007015;GO:0015629;GO:0051017;  
JTID ENSG00000162702:ZNF281 GO:0000122;GO:0003676;GO:0003677;GO:0003704;GO:0005622;GO:0005634;GO:0005665;GO:0006350;GO:0006355;GO:0008270;GO:0046872;  
JTID ENSG00000135114:OASL GO:0003677;GO:0003725;GO:0005524;GO:0005730;GO:0005737;GO:0006464;GO:0006955;GO:0016740;GO:0046966;  
JTID ENSG00000104824:HNRPL GO:0000166;GO:0003723;GO:0005515;GO:0005634;GO:0005654;GO:0006397;GO:0030530;GO:0045120;  
TFJT MYOD:IER5L; MYOD:ZNF281; MYOD:HNRPL;  
MIJT hsa-miR-203:ZNF281:targetscan:mirbase:pictar; hsa-miR-203:TUBGCP5:targetscan; hsa-miR-203:OASL:targetscan; hsa-miR-203:ABL2:targetscan; hsa-miR-203:HNRPL:targetscan:mirbase;

//  
ANNOTATION: 2  
ID MYC:hsa-miR-17-5p;  
TFID MYC;  
MIID ENSG00000207745:hsa-mir-17:hsa-miR-17-5p;  
JTID ENSG00000106683:LIMK1 GO:0000166;GO:0004674;GO:0004713;GO:0005515;GO:0005524;GO:0005634;GO:0005737;GO:0005925;GO:0006468;GO:0006928;GO:0007165;GO:0007266;GO:0007399;GO:0008270;GO:0016740;GO:0030036;GO:0045773;GO:0046872;GO:0046982;  
JTID ENSG00000130413:STK33 GO:0000166;GO:0004674;GO:0005524;GO:0006468;GO:0016740;  
JTID ENSG00000170390:DCLK2 GO:0000166;GO:0004674;GO:0005524;GO:0006468;GO:0007242;GO:0016740;  
JTID ENSG00000100987:V5X1 GO:0003700;GO:0005634;GO:0006355;GO:0006366;GO:0007275;GO:0007601;GO:0043565;GO:0050896;  
JTID ENSG00000104517:EDD1 GO:0004842;GO:0005622;GO:0006464;GO:0006512;GO:0005515;GO:0005625;GO:0005634;GO:0006511;GO:0006974;GO:0008270;GO:0008283;GO:0016874;GO:0046872;GO:0050847;  
JTID ENSG00000135801:TAF5L GO:0003700;GO:0005634;GO:0006355;GO:0006366;  
JTID ENSG00000100644:HIF1A  
GO:0001666;GO:0003705;GO:0004871;GO:0005515;GO:0005634;GO:0006355;GO:0007165;GO:0035035;GO:0042592;GO:0045941;GO:0046982;GO:0001525;GO:0001755;GO:0001947;GO:0003677;GO:0003700;GO:0006879;GO:0009434;GO:0030154;GO:0030949;GO:0035162;GO:0042541;GO:0042981;GO:0045648;GO:0045926;GO:0045944;GO:0051216;  
JTID ENSG00000203793:Q6ZR74\_HUMAN  
JTID ENSG00000144645:OSBFL10 GO:0006869;GO:0008202;  
JTID ENSG00000101412:E2F1 GO:0000074;GO:0000080;GO:0000122;GO:0003700;GO:0003714;GO:0005515;GO:0005634;GO:0005667;GO:0005737;GO:0006350;GO:0006355;GO:0006915;GO:0007049;GO:0008283;GO:0016563;GO:0030900;GO:0045944;  
JTID ENSG00000143727:ACP1 GO:0003993;GO:0004726;GO:0005625;GO:0005737;GO:0006470;GO:0016787;GO:0042802;GO:0004725;  
JTID ENSG00000085274:MYNN GO:0003700;GO:0005515;GO:0005622;GO:0005634;GO:0006355;GO:0008270;GO:0046872;  
JTID ENSG00000131584:CENTB5 GO:0005096;GO:0008270;GO:0043087;GO:0046872;  
JTID ENSG00000119125:GDA GO:0005622;GO:0006139;GO:0007399;GO:0008270;GO:0008892;GO:0016787;  
TFJT MYC:HIF1A;  
MIJT hsa-miR-17-5p:STK33:targetscan; hsa-miR-17-5p:LIMK1:targetscan:pictar; hsa-miR-17-5p:GDA:targetscan; hsa-miR-17-5p:V5X1:targetscan:mirbase:pictar; hsa-miR-17-5p:EDD1:targetscan:pictar; hsa-miR-17-5p:HIF1A:targetscan:mirbase:pictar; hsa-miR-17-5p:MYNN:targetscan; hsa-miR-17-5p:E2F1:targetscan:pictar:PUBMED: 15944709;

//  
ANNOTATION: 2  
ID MEIS1:hsa-miR-99a;  
TFID MEIS1;  
MIID ENSG00000207638:hsa-mir-99a:hsa-miR-99a;  
JTID ENSG00000152689:RASGRP3 GO:0000165;GO:0004871;GO:0005088;GO:0005509;GO:0005515;GO:0005622;GO:0005737;GO:0005887;GO:0007265;GO:0008270;GO:0017016;GO:0019992;GO:0043087;GO:0046582;GO:0051056;  
JTID ENSG00000203837:PNLIPRP3 GO:0003824;GO:0004806;GO:0006629;  
JTID ENSG00000177406:Q8N503\_HUMAN  
JTID ENSG00000196432:Q9H5F0\_HUMAN  
JTID ENSG00000162437:RAVER2 GO:0000166;GO:0003723;GO:0005634;GO:0005515;  
JTID ENSG00000185361:TNFAIP8L1  
JTID ENSG00000144712:CAND2 GO:0005622;GO:0005634;GO:0006350;GO:0006355;GO:0006512;GO:0016563;GO:0017025;  
JTID ENSG00000116017:ARID3A GO:0003677;GO:0005622;GO:0003700;GO:0005515;GO:0005634;GO:0006350;GO:0006355;GO:0042803;  
JTID ENSG00000136840:ST6GALNAC4 GO:0005625;GO:0006486;GO:0006664;GO:0008373;GO:0016020;GO:0016021;GO:0030173;GO:0047290;  
JTID ENSG00000164108:Q9HAJ2\_HUMAN  
TFMI MEIS1:hsa-miR-99a:hsa-mir-99a:computational(ECRbase);  
MIJT hsa-miR-99a:TNFAIP8L1:targetscan:mirbase; hsa-miR-99a:RAVER2:targetscan:pictar; hsa-miR-99a:PNLIPRP3:targetscan; hsa-miR-99a:RASGRP3:targetscan:mirbase; hsa-miR-99a:Q9HAJ2\_HUMAN:mirbase; hsa-miR-99a:ST6GALNAC4:targetscan:mirbase; hsa-miR-99a:CAND2:targetscan:mirbase; hsa-miR-99a:ARID3A:targetscan:mirbase;

//  
ANNOTATION: 2  
ID MEIS1:hsa-miR-202;  
TFID MEIS1;

```
MIID ENSG00000199089:hsa-mir-202:hsa-miR-202;
JTID ENSG00000162650:ATXN7L2
JTID ENSG00000006695:COX10 GO:0000266;GO:0004129;GO:0005739;GO:0006123;GO:0006784;GO:0007005;GO:0008495;GO:0008535;GO:0009060;GO:0016020;GO:0016021;GO:0016740;GO:0017004;
JTID ENSG00000129317:PUS7L GO:0004730;GO:0008033;
JTID ENSG00000149428:HYOU1 GO:0000166;GO:0005515;GO:0005524;GO:0005783;GO:0006457;GO:0006950;
JTID ENSG00000107551:RASSF4 GO:0005515;GO:0007049;GO:0007165;GO:0045786;
JTID ENSG00000204681:GABBR1 GO:0004872;GO:0004965;GO:0016020;GO:0016021;GO:0005887;GO:0007165;GO:0007194;GO:0007214;GO:0045211;
JTID ENSG00000140950:KIAA1609
JTID ENSG00000133121:STARD13 GO:0005096;GO:0005622;GO:0007049;GO:0007165;GO:0045786;
JTID ENSG00000170214:ADRA1B
GO:0000299;GO:0001584;GO:0001974;GO:0001975;GO:0001987;GO:0001996;GO:0001997;GO:0004872;GO:0004935;GO:0004937;GO:0005887;GO:0007165;GO:0007186;GO:0007188;GO:0007243;GO:0007267;GO:0007275;GO:0007512;GO:0007626;GO:0008283;GO:0008542;GO:0016020;GO:0016049;GO:0035265;GO:0042593;GO:0043278;GO:004581
8;GO:0045819;GO:0048148;
JTID ENSG00000138315:OIT3 GO:0005509;
JTID ENSG00000198929:NOS1AP GO:0005515;GO:0005737;GO:0007269;GO:0030165;GO:0050998;GO:0050999;
TFJT MEIS1:ATXN7L2;
MIJT hsa-miR-202:STARD13:targetscan; hsa-miR-202:OIT3:targetscan:mirbase; hsa-miR-202:PUS7L:targetscan; hsa-miR-202:ATXN7L2:targetscan:mirbase; hsa-miR-202:GABBR1:targetscan:mirbase; hsa-miR-202:COX10:targetscan; hsa-miR-202:ADRA1B:mirbase; hsa-miR-202:KIAA1609:targetscan;

//
ANNOTATION: 2
ID CREB:hsa-miR-189;
TFID CREB;
MIID ENSG00000207617:hsa-mir-24-1:hsa-miR-189;
JTID ENSG00000019505:SYT13 GO:0005887;GO:0016020;GO:0016192;GO:0030133;
TFJT CREB:SYT13;
MIJT hsa-miR-189:SYT13:targetscan;

//
ANNOTATION: 2
ID IRF-7:hsa-miR-219;
TFID IRF-7;
MIID ENSG00000207955:hsa-mir-219-2:hsa-miR-219;
JTID ENSG00000184895:SRV GO:0003677;GO:0005515;GO:0005634;GO:0006350;GO:0006355;GO:0007548;GO:0008301;GO:0016563;GO:0030154;GO:0030238;
JTID ENSG00000173930:SLCO4C1 GO:0005215;GO:0006810;GO:0016020;GO:0016021;
JTID ENSG000000067177:PHKA1 GO:0005516;GO:0005977;GO:0031177;GO:0003824;GO:0004689;GO:0005975;GO:0005980;GO:0006091;GO:0008607;GO:0016020;
JTID ENSG00000119508:NR4A3 GO:0001707;GO:0003700;GO:0003707;GO:0004887;GO:0005488;GO:0005634;GO:0006350;GO:0006355;GO:0008270;GO:0043565;GO:0046872;
JTID ENSG00000138600:PSL2_HUMAN GO:0008233;GO:0008717;GO:0016020;GO:0016021;
JTID ENSG00000182107:TMEM30B GO:0016020;GO:0016021;
JTID ENSG00000112183:RBM24 GO:0000166;GO:0003723;GO:0005634;GO:0016068;
JTID ENSG00000179387:ELMOD2 GO:0005856;GO:0006909;
JTID ENSG00000114982:NP_060461.3 GO:0004339;GO:0005634;
TFJT IRF-7:NR4A3;
MIJT hsa-miR-219:NR4A3:targetscan:pictar; hsa-miR-219:ELMOD2:targetscan:mirbase:pictar; hsa-miR-219:TMEM30B:targetscan:mirbase; hsa-miR-219:PSL2_HUMAN:mirbase; hsa-miR-219:SRV:targetscan; hsa-miR-219:RBM24:targetscan:pictar; hsa-miR-219:PHKA1:targetscan; hsa-miR-219:SLCO4C1:targetscan:mirbase;

//
ANNOTATION: 2
ID GABP:hsa-miR-130a;
TFID GABP;
MIID ENSG00000208009:hsa-mir-130a:hsa-miR-130a;
JTID ENSG00000151148:UBE3B GO:0004842;GO:0005622;GO:0006464;GO:0006512;GO:0016874;
JTID ENSG00000204584:Q6ZSH9_HUMAN
JTID ENSG00000143756:FBXO28 GO:0006512;
JTID ENSG00000055070:Clorf144
JTID ENSG00000164209:SLC25A46 GO:0005488;GO:0006810;GO:0016020;GO:0016021;
JTID ENSG00000159082:SYNJ1 GO:0003723;GO:0004437;GO:0004439;GO:0004445;GO:0006796;GO:0006836;GO:0016787;GO:0030117;GO:0048488;GO:0030384;GO:0048489;
JTID ENSG00000187531:SIRT7 GO:0003677;GO:0005677;GO:0006342;GO:0006355;GO:0008270;GO:0016787;GO:0046872;
JTID ENSG00000164896:FASTK GO:0004674;GO:0005524;GO:0006468;GO:0006915;GO:0007165;GO:0008624;GO:0016740;GO:0004672;GO:0016301;
JTID ENSG00000115310:RTN4 GO:0005783;GO:0005515;GO:0005635;GO:0016020;GO:0016021;GO:0019987;GO:0030176;GO:0030517;GO:0042981;
JTID ENSG00000189401:OTUD6A
JTID ENSG00000205036:NP_001001682.1
JTID ENSG0000011711:GOLT1B GO:0004871;GO:0005783;GO:0015031;GO:0016020;GO:0016021;GO:0016192;GO:0043123;
JTID ENSG00000152291:TGOLN2 GO:0005802;GO:0016020;GO:0016021;GO:0030133;
JTID ENSG00000166689:PLEKHA7
TFJT GABP:FBXO28; GABP:Clorf144; GABP:SIRT7; GABP:FASTK;
MIJT hsa-miR-130a:SYNJ1:pictar; hsa-miR-130a:OTUD6A:targetscan; hsa-miR-130a:UBE3B:targetscan; hsa-miR-130a:FASTK:targetscan:mirbase:pictar; hsa-miR-130a:RTN4:pictar; hsa-miR-130a:SIRT7:targetscan:mirbase:pictar; hsa-miR-130a:FBXO28:targetscan:pictar; hsa-miR-130a:GOLT1B:targetscan:pictar; hsa-miR-130a:TGOLN2:targetscan; hsa-miR-130a:Clorf144:targetscan:pictar;

//
ANNOTATION: 2
ID FREAC-4:hsa-miR-802;
TFID FREAC-4;
MIID ENSG00000211590:hsa-mir-802:hsa-miR-802;
JTID ENSG00000175305:CCNE2 GO:0000074;GO:0000075;GO:0000079;GO:0005515;GO:0005634;GO:0006270;GO:0007049;GO:0016538;GO:0051301;
JTID ENSG00000178074:NP_710156.2
JTID ENSG000000081154:PCNP GO:0005515;GO:0005634;GO:0007049;GO:0016567;GO:0043161;
JTID ENSG00000198739:LRRTM3 GO:0005515;GO:0016020;GO:0016021;
JTID ENSG00000022556:NLRP2 GO:0000166;GO:0005515;GO:0005524;GO:0005737;GO:0006915;GO:0006952;GO:0032090;GO:0043280;GO:0050718;
JTID ENSG00000131196:NFATC1 GO:0000082;GO:0001837;GO:0003700;GO:0005528;GO:0005634;GO:0005737;GO:0006355;GO:0006366;GO:0006816;GO:0007507;
TFMI FREAC-4:hsa-miR-802:hsa-miR-802:computational (ECRbase);
MIJT hsa-miR-802:PCNP:targetscan; hsa-miR-802:NLRP2:mirbase; hsa-miR-802:LRRTM3:targetscan; hsa-miR-802:CCNE2:targetscan;

//
ANNOTATION: 2
ID MEIS1:hsa-miR-30a-5p;
TFID MEIS1;
MIID ENSG00000207827:hsa-mir-30a:hsa-miR-30a-5p;
JTID ENSG00000163288:GABRR1 GO:0004890;GO:0005216;GO:0005230;GO:0005254;GO:0005887;GO:0006811;GO:0007165;GO:0030594;GO:0031404;GO:0045211;
JTID ENSG00000079739:PGM1 GO:0000287;GO:0004614;GO:0005737;GO:0005975;GO:0006006;GO:0016853;GO:0016868;
JTID ENSG00000170365:SMAD1 GO:0000165;GO:0003700;GO:0003702;GO:0005057;GO:0005515;GO:0005622;GO:0005634;GO:0005667;GO:0006350;GO:0006355;GO:0007165;GO:0007179;GO:0007276;GO:0008285;GO:0009880;GO:0016021;GO:0016563;GO:0030509;GO:0030901;GO:0030902;GO:0042592;GO:0045944;
JTID ENSG00000154274:C4orf19
JTID ENSG00000145725:HISPPD1 GO:0003993;
JTID ENSG00000179151:EDC3 GO:0005515;
JTID ENSG00000151572:TMEM16D
JTID ENSG00000121594:CD80 GO:0005102;GO:0005886;GO:0006955;GO:0007242;GO:0007267;GO:0009967;GO:0015026;GO:0016021;GO:0016563;GO:0042110;GO:0045086;GO:0045425;GO:0045627;GO:0045941;GO:0050731;GO:0009897;GO:0031295;
JTID ENSG00000143590:EFNA3 GO:0005005;GO:0005887;GO:0007267;GO:0016020;GO:0048503;
JTID ENSG00000155545:MIER3 GO:0003677;GO:0005634;GO:0005509;
JTID ENSG00000172819:RARG GO:0003700;GO:0003707;GO:0003708;GO:0005515;GO:0005634;GO:0006350;GO:0006355;GO:0007275;GO:0008270;GO:0043565;GO:0046872;GO:0003677;GO:0005667;GO:0043065;GO:0045944;GO:0048048;
JTID ENSG00000185002:RFXDC1 GO:0003677;GO:0006355;
JTID ENSG00000105501:SIGLEC5 GO:0005515;GO:0005529;GO:0007155;GO:0016020;GO:0016021;
JTID ENSG00000115239:ASB3 GO:0007242;
JTID ENSG00000137261:KIAA0319 GO:0016020;GO:0016021;
JTID ENSG00000148541:FAM13C1
```

```
JTID ENSG00000162490:Clorf187
JTID ENSG00000142039:CCDC97
JTID ENSG00000116128:BCL9 GO:0005515;GO:0005634;GO:0016055;
JTID ENSG00000175564:UCP3 GO:0005215;GO:0005488;GO:0005624;GO:0005739;GO:0005743;GO:0006091;GO:0006629;GO:0006810;GO:0006839;GO:0007585;GO:0015992;GO:0016020;GO:0016021;GO:0000303;GO:0006631;GO:0017077;
TFJT MEIS1:TMEM16D; MEIS1:Clorf187;
MIJT hsa-miR-30a-5p:MIER3:targetscan:pictar; hsa-miR-30a-5p:TMEM16D:targetscan:mirbase:pictar; hsa-miR-30a-5p:UCP3:targetscan; hsa-miR-30a-5p:CCDC97:targetscan:pictar; hsa-miR-30a-5p:EDC3:targetscan:pictar; hsa-miR-30a-5p:EFNA3:targetscan:pictar; hsa-miR-30a-5p:KIAA0319:targetscan; hsa-miR-30a-5p:C4orf19:targetscan:mirbase; hsa-miR-30a-5p:RARG:targetscan:pictar; hsa-miR-30a-5p:GABRB1:targetscan; hsa-miR-30a-5p:RFXDC1:targetscan:mirbase:pictar; hsa-miR-30a-5p:PGM1:targetscan:mirbase:pictar; hsa-miR-30a-5p:FAM13C1:targetscan; hsa-miR-30a-5p:CD80:targetscan; hsa-miR-30a-5p:ASB3:targetscan:mirbase:pictar; hsa-miR-30a-5p:HISPPD1:targetscan; hsa-miR-30a-5p:SMAD1:targetscan:pictar; hsa-miR-30a-5p:BCL9:targetscan:pictar;

//
ANNOTATION: 2
ID SP-1:hsa-miR-30c;
TFID SP-1;
MIID ENSG00000207962:hsa-mir-30c-1:hsa-miR-30c;
JTID ENSG00000142319:SLC6A3 GO:0005330;GO:0005515;GO:0005737;GO:0005886;GO:0005887;GO:0008504;GO:0015293;GO:0015844;GO:0005329;GO:0007595;GO:0015872;GO:0021984;GO:0040018;GO:0042053;GO:0042416;GO:0042420;
JTID ENSG00000058600:POLR3E GO:0003899;GO:0005634;GO:0006350;GO:0016740;
JTID ENSG00000165288:BRWD3
JTID ENSG00000087903:RFX2 GO:0003677;GO:0003702;GO:0005634;GO:0006355;
JTID ENSG00000162490:Clorf187
JTID ENSG00000104497:SNX16 GO:0005515;GO:0007154;GO:0015031;GO:0035091;
JTID ENSG00000180574:Q5I0X0_HUMAN GO:0000166;GO:0003924;GO:0005525;
JTID ENSG00000115112:TFCP2L1 GO:0000122;GO:0000902;GO:0002070;GO:0003700;GO:0003714;GO:0005634;GO:0005737;GO:0006350;GO:0006694;GO:0007028;GO:0007431;GO:0007565;GO:0008340;GO:0016020;GO:0016565;GO:0045927;
JTID ENSG00000105991:HOXA1 GO:0003700;GO:0003702;GO:0005634;GO:0006357;GO:0007275;GO:0007399;GO:0009952;GO:0030902;GO:0042472;GO:0043565;
JTID ENSG00000057657:PRDM1 GO:0000122;GO:0003700;GO:0005622;GO:0005634;GO:0006350;GO:0006355;GO:0008270;GO:0046872;GO:0001701;GO:0001892;GO:0001893;GO:0003676;GO:0045165;
JTID ENSG00000124787:RPP40 GO:0004526;GO:0005515;GO:0005634;GO:0005655;GO:0008033;GO:0016787;
JTID ENSG00000144935:TRPC1 GO:0005216;GO:0005509;GO:0005515;GO:0005886;GO:0005887;GO:0006811;GO:0006816;GO:0015279;
TFMI SP-1:hsa-miR-30c:hsa-mir-30c-1:computational (PUBMED: 17447837);
MIJT hsa-miR-30c:SNX16:targetscan:mirbase:pictar; hsa-miR-30c:Q5I0X0_HUMAN:mirbase; hsa-miR-30c:HOXA1:targetscan:pictar; hsa-miR-30c:RPP40:targetscan; hsa-miR-30c:RFX2:targetscan:mirbase; hsa-miR-30c:POLR3E:mirbase; hsa-miR-30c:SLC6A3:targetscan:mirbase;

//
ANNOTATION: 2
ID RORALPHA2:hsa-miR-19a;
TFID RORALPHA2;
MIID ENSG00000207610:hsa-mir-19a:hsa-miR-19a;
JTID ENSG00000117601:SERPINC1 GO:0004867;GO:0005515;GO:0005576;GO:0007596;GO:0008201;
JTID ENSG00000108582:CPD GO:0004182;GO:0004187;GO:0005624;GO:0006508;GO:0008237;GO:0008270;GO:0008472;GO:0016020;GO:0016021;GO:0046872;
JTID ENSG00000198718:KIAA0423 GO:0005488;
JTID ENSG00000205929:C21orf62
JTID ENSG00000147642:SYBU_HUMAN GO:0016020;GO:0016021;
JTID ENSG00000170743:SYT9 GO:0005215;GO:0005509;GO:0005515;GO:0006810;GO:0008021;GO:0016020;GO:0016021;GO:0045202;
TFJT RORALPHA2:SYBU_HUMAN;
MIJT hsa-miR-19a:SERPINC1:targetscan:mirbase; hsa-miR-19a:CPD:targetscan:pictar; hsa-miR-19a:SYT9:targetscan; hsa-miR-19a:KIAA0423:targetscan:pictar; hsa-miR-19a:SYBU_HUMAN:mirbase:pictar;

//
ANNOTATION: 2
ID v-Myb:hsa-miR-16;
TFID v-Myb;
MIID ENSG00000198987:hsa-mir-16-2:hsa-miR-16;
JTID ENSG00000100150:DEPDC5 GO:0007242;
JTID ENSG00000149136:SSRP1 GO:0000785;GO:0003677;GO:0005515;GO:0005634;GO:0005694;GO:0006260;GO:0006281;GO:0006350;GO:0006355;
JTID ENSG00000138685:FGF2
GO:0000074;GO:0000186;GO:0000187;GO:0001525;GO:0001759;GO:0001934;GO:0005515;GO:0005576;GO:0005615;GO:0006935;GO:0007165;GO:0007265;GO:0007267;GO:0007275;GO:0007399;GO:0007517;GO:0008083;GO:0008201;GO:0008283;GO:0008285;GO:0009887;GO:0010001;GO:0021940;GO:0030324;GO:0045597;GO:0045766;GO:0046668;
JTID ENSG00000125657:TNFSF9 GO:0005125;GO:0005164;GO:0005615;GO:0005887;GO:0006915;GO:0006955;GO:0007165;GO:0007267;GO:0008283;GO:0016020;
JTID ENSG00000131381:ZFYE20 GO:0003676;GO:0005622;GO:0005768;GO:0008270;GO:0015031;GO:0016020;GO:0016197;GO:0046872;
TFMI v-Myb:hsa-miR-16:hsa-mir-16-2:computational (ECRbase);
MIJT hsa-miR-16:TNFSF9:targetscan:mirbase; hsa-miR-16:DEPDC5:mirbase; hsa-miR-16:ZFYE20:targetscan; hsa-miR-16:FGF2:targetscan:mirbase:pictar; hsa-miR-16:SSRP1:targetscan:mirbase;

//
ANNOTATION: 2
ID ETS:hsa-miR-24;
TFID ETS;
MIID ENSG00000209707:hsa-mir-24-2:hsa-miR-24;
JTID ENSG00000162458:FBLIM1 GO:0005515;GO:0005856;GO:0007155;GO:0008270;GO:0008360;GO:0046872;
JTID ENSG00000132141:CCT6B GO:0000166;GO:0005524;GO:0006457;GO:0007283;GO:0008565;GO:0051082;GO:0051131;
JTID ENSG00000106384:MOGAT3 GO:0003846;GO:0004144;GO:0005783;GO:0006071;GO:0006629;GO:0008415;GO:0008610;GO:0016020;GO:0016021;GO:0016740;
JTID ENSG00000114019:AMOTL2 GO:0003735;GO:0005622;GO:0005840;GO:0006412;GO:0005515;GO:0005923;GO:0042802;
JTID ENSG00000172460:Q8IVY7_HUMAN GO:0004252;GO:0006508;
JTID ENSG00000103184:SEC14L5 GO:0005215;GO:0005622;GO:0006810;
TFJT ETS:CCT6B;
MIJT hsa-miR-24:AMOTL2:targetscan:pictar; hsa-miR-24:FBLIM1:targetscan; hsa-miR-24:SEC14L5:mirbase; hsa-miR-24:CCT6B:targetscan:mirbase; hsa-miR-24:MOGAT3:targetscan;

//
ANNOTATION: 2
ID MYC:hsa-miR-19a;
TFID MYC;
MIID ENSG00000207610:hsa-mir-19a:hsa-miR-19a;
JTID ENSG00000152049:KCNE4 GO:0005249;GO:0006811;GO:0006813;GO:0016020;GO:0016021;GO:0030955;
JTID ENSG00000130413:STK33 GO:0000166;GO:0004674;GO:0005524;GO:0006468;GO:0016740;
JTID ENSG00000103200:NME4 GO:0000166;GO:0004550;GO:0005524;GO:0006183;GO:0006228;GO:0006241;GO:0016301;GO:0016740;GO:0000287;GO:0005739;GO:0009116;GO:0009117;
JTID ENSG00000183519:NSUN5B
JTID ENSG00000100784:RPS6KA5 GO:0000166;GO:0000287;GO:0003824;GO:0004674;GO:0005515;GO:0005524;GO:0005634;GO:0006355;GO:0006468;GO:0006508;GO:0006950;GO:0007173;GO:0007243;GO:0008237;GO:0008270;GO:0009605;GO:0016572;GO:0016740;GO:0042221;
JTID ENSG00000162992:NEUROD1 GO:0003677;GO:0003702;GO:0005515;GO:0005634;GO:0006355;GO:0007275;GO:0007399;GO:0009952;GO:0016563;GO:0030902;GO:0043010;GO:0045165;GO:0045944;
JTID ENSG00000130305:NSUN5 GO:0008168;GO:0016740;
JTID ENSG00000179036:VAMP2 GO:0000149;GO:0005516;GO:0005543;GO:0005887;GO:0006944;GO:0008021;GO:0016020;GO:0016079;GO:0016192;GO:0017156;GO:0017157;GO:0019717;GO:0030141;GO:0030672;GO:0042589;GO:0045202;
JTID ENSG00000198718:KIAA0423 GO:0005488;
JTID ENSG00000167483:FAM129C
JTID ENSG00000078699:CBFA2T2 GO:0003700;GO:0005515;GO:0005634;GO:0006355;GO:0008270;GO:0046872;GO:0003714;GO:0030855;GO:0045892;
JTID ENSG00000081479:LRP2 GO:0004872;GO:0005509;GO:0005515;GO:0005624;GO:0005764;GO:0005768;GO:0005783;GO:0005794;GO:0005903;GO:0006486;GO:0006629;GO:0006766;GO:0006898;GO:0008283;GO:0016020;GO:0016021;GO:0016324;GO:0030139;GO:0030900;
JTID ENSG00000134769:DTNA GO:0005509;GO:0008270;GO:0005515;GO:0006941;GO:0007165;GO:0007274;GO:0045202;GO:0005792;
JTID ENSG00000189429:RNF207 GO:0005515;GO:0008270;GO:0046872;
TFJT MYC:KCNE4; MYC:RPS6KA5; MYC:NEUROD1; MYC:KIAA0423; MYC:CBFA2T2;
MIJT hsa-miR-19a:LRP2:targetscan:mirbase:pictar; hsa-miR-19a:CBFA2T2:targetscan; hsa-miR-19a:STK33:targetscan; hsa-miR-19a:DTNA:targetscan:pictar; hsa-miR-19a:VAMP2:targetscan; hsa-miR-19a:KCNE4:targetscan; hsa-miR-19a:RPS6KA5:targetscan:mirbase; hsa-miR-19a:NME4:targetscan:mirbase; hsa-miR-19a:KIAA0423:targetscan:pictar; hsa-miR-19a:FAM129C:targetscan:mirbase; hsa-miR-19a:NEUROD1:targetscan:mirbase:pictar;

//
ANNOTATION: 2
ID MEIS1:hsa-miR-202*;
TFID MEIS1;
MIID ENSG00000199089:hsa-mir-202:hsa-miR-202*;
```

JTID ENSG00000104415:WISF1 GO:0001558;GO:0005515;GO:0005520;GO:0005576;GO:0005625;GO:0007155;GO:0007165;GO:0007267;GO:0016055;  
JTID ENSG00000123983:ACSL3 GO:0000287;GO:0004321;GO:0004467;GO:0005515;GO:0005777;GO:0006629;GO:0006631;GO:0008152;GO:0016020;GO:0016021;GO:0016874;  
JTID ENSG00000186318:BACE1 GO:0004194;GO:0005768;GO:0005794;GO:0005887;GO:0006509;GO:0008233;GO:0008798;GO:0009049;GO:0016020;GO:0016021;GO:0050435;GO:0004175;GO:0006508;GO:0030424;GO:0031410;  
JTID ENSG00000175746:NP\_997328.1  
JTID ENSG00000001561:ENFP4 GO:0008152;GO:0009117;GO:0016787;  
JTID ENSG00000155087:ODF1 GO:0001520;GO:0005198;GO:0007275;GO:0007283;GO:0030154;  
JTID ENSG00000206550:LOC285346  
JTID ENSG00000157429:ZNF19 GO:0003676;GO:0003700;GO:0005622;GO:0005634;GO:0006350;GO:0006355;GO:0008270;GO:0046872;  
TFJT MEIS1:WISF1; MEIS1:BACE1; MEIS1:LOC285346;  
MIJT hsa-miR-202\*:WISF1:mirbase; hsa-miR-202\*:ODF1:mirbase;

//  
ANNOTATION: 2  
ID CHX10:hsa-miR-19a;  
TFID CHX10;  
MIID ENSG00000207610:hsa-mir-19a:hsa-miR-19a;  
JTID ENSG00000155189:AGPAT5 GO:0003841;GO:0005739;GO:0008152;GO:0008415;GO:0008654;GO:0016020;GO:0016021;GO:0016740;  
JTID ENSG00000095739:BAMBI GO:0005737;GO:0016020;GO:0016021;  
JTID ENSG00000139200:C12orf53  
JTID ENSG00000163596:ICALL  
JTID ENSG00000117601:SERPINC1 GO:0004867;GO:0005515;GO:0005576;GO:0007596;GO:0008201;  
TFJT CHX10:BAMBI;  
MIJT hsa-miR-19a:SERPINC1:targetscan:mirbase; hsa-miR-19a:BAMBI:targetscan:pictar; hsa-miR-19a:AGPAT5:targetscan:mirbase; hsa-miR-19a:C12orf53:targetscan:pictar; hsa-miR-19a:ICALL:targetscan;

//  
ANNOTATION: 2  
ID IRF-7:hsa-miR-129;  
TFID IRF-7;  
MIID ENSG00000199077:hsa-mir-129-2:hsa-miR-129;  
JTID ENSG00000170310:STX8 GO:0005783;GO:0005887;GO:0006810;GO:0016020;  
JTID ENSG00000134138:MEIS2 GO:0003700;GO:0005634;GO:0006355;GO:0043565;GO:0000122;GO:0003704;GO:0003714;  
JTID ENSG00000158435:C2orf29 GO:0008283;  
JTID ENSG00000136720:HS6ST1 GO:0005887;GO:0008146;GO:0015015;GO:0016020;GO:0016740;  
TFMI IRF-7:hsa-miR-129:hsa-mir-129-2:computational (ECRbase);  
MIJT hsa-miR-129:HS6ST1:targetscan; hsa-miR-129:MEIS2:targetscan:pictar; hsa-miR-129:C2orf29:targetscan;

//  
ANNOTATION: 2  
ID T3R:hsa-miR-505;  
TFID T3R;  
MIID ENSG00000207633:hsa-mir-505:hsa-miR-505;  
JTID ENSG00000107581:EIF3S10 GO:0003743;GO:0005198;GO:0005515;GO:0005737;GO:0005852;GO:0006412;GO:0006446;  
JTID ENSG00000129810:SGOL1 GO:0000775;GO:0005515;GO:0005634;GO:0007049;GO:0007067;GO:0045132;GO:0051301;  
JTID ENSG00000119714:GPR68 GO:0001584;GO:0004872;GO:0005887;GO:0006954;GO:0007165;GO:0007186;GO:0016020;  
JTID ENSG00000125743:SNRPD2 GO:0000245;GO:0005515;GO:0005634;GO:0005681;GO:0006397;GO:0008380;GO:0016071;GO:0030529;GO:0030532;  
JTID ENSG00000148158:SNX30 GO:0005515;GO:0007154;GO:0015031;GO:0035091;  
JTID ENSG00000181852:RNF41 GO:0005515;GO:0006512;GO:0008270;GO:0016874;GO:0046872;  
JTID ENSG00000196511:TPK1 GO:0000166;GO:0004788;GO:0005524;GO:0006772;GO:0009229;GO:0016740;  
TFJT T3R:EIF3S10;  
MIJT hsa-miR-505:SGOL1:targetscan:mirbase; hsa-miR-505:GPR68:targetscan:mirbase; hsa-miR-505:SNRPD2:targetscan:mirbase; hsa-miR-505:EIF3S10:targetscan; hsa-miR-505:RNF41:targetscan;

//  
ANNOTATION: 2  
ID SRY:hsa-miR-369-3p;  
TFID SRY;  
MIID ENSG00000199025:hsa-mir-369:hsa-miR-369-3p;  
JTID ENSG00000120688:WBP4 GO:0003676;GO:0005515;GO:0005634;GO:0005681;GO:0006397;GO:0008270;GO:0008380;GO:0046872;  
JTID ENSG00000162104:ADCY9 GO:0000287;GO:0004016;GO:0005887;GO:0006171;GO:0007242;GO:0016020;  
JTID ENSG00000130768:SMPDL3B GO:0008152;GO:0016798;GO:0016787;  
JTID ENSG00000042062:C20orf175  
JTID ENSG00000140057:AK7 GO:0000166;GO:0004017;GO:0005524;GO:0006139;GO:0016301;GO:0016740;  
JTID ENSG00000100227:POLDIP3 GO:0000166;GO:0003723;GO:0005634;  
JTID ENSG00000145331:RG9MTD2 GO:0003723;GO:0008033;GO:0008168;GO:0008175;GO:0016740;  
JTID ENSG00000162980:ARL5A GO:0000166;GO:0005525;GO:0005622;GO:0007264;  
JTID ENSG00000102385:DRP2 GO:0005198;GO:0005509;GO:0005515;GO:0005856;GO:0005886;GO:0007417;GO:0008270;  
JTID ENSG00000140299:BNIP2 GO:0005096;GO:0005509;GO:0005515;GO:0005635;GO:0005737;GO:0006915;GO:0006916;GO:0043231;  
JTID ENSG00000169554:ZEB2 GO:0001755;GO:0001756;GO:0001843;GO:0003676;GO:0003700;GO:0005622;GO:0005634;GO:0006350;GO:0006355;GO:0007417;GO:0008270;GO:0016481;GO:0016564;GO:0019208;GO:0043565;GO:0046332;GO:0046872;GO:0048598;  
JTID ENSG00000146250:PRSS35 GO:0004252;GO:0006508;GO:0008233;  
JTID ENSG00000065135:GNAI3 GO:0000166;GO:0003924;GO:0004871;GO:0005515;GO:0005525;GO:0005737;GO:0005794;GO:0006810;GO:0007165;GO:0007186;GO:0007194;  
JTID ENSG00000145740:SLC30A5 GO:0005385;GO:0005624;GO:0005887;GO:0006812;GO:0006829;GO:0006882;GO:0008270;GO:0008324;GO:0010043;GO:0010155;GO:0015290;GO:0015338;GO:0016020;GO:0016324;  
JTID ENSG00000133398:MED10  
JTID ENSG00000087495:PHACTR3 GO:0003779;GO:0004864;GO:0005634;  
TFJT SRY:ZEB2;  
MIJT hsa-miR-369-3p:AK7:targetscan:mirbase; hsa-miR-369-3p:ADCY9:targetscan; hsa-miR-369-3p:PRSS35:targetscan:mirbase; hsa-miR-369-3p:C20orf175:mirbase; hsa-miR-369-3p:ARL5A:targetscan; hsa-miR-369-3p:DRP2:targetscan; hsa-miR-369-3p:GNAI3:targetscan; hsa-miR-369-3p:WBP4:targetscan:mirbase:pictar; hsa-miR-369-3p:MED10:targetscan:mirbase; hsa-miR-369-3p:SLC30A5:targetscan:mirbase; hsa-miR-369-3p:BNIP2:targetscan; hsa-miR-369-3p:RG9MTD2:targetscan; hsa-miR-369-3p:ZEB2:targetscan:pictar; hsa-miR-369-3p:PHACTR3:targetscan:mirbase; hsa-miR-369-3p:SMPDL3B:targetscan;

//  
ANNOTATION: 2  
ID YY1:hsa-miR-100;  
TFID YY1;  
MIID ENSG00000207994:hsa-mir-100:hsa-miR-100;  
JTID ENSG00000118689:FOXO3A GO:0001542;GO:0001544;GO:0001547;GO:0001556;GO:0003700;GO:0005624;GO:0005634;GO:0005737;GO:0006350;GO:0006355;GO:0006915;GO:0006917;GO:0006974;GO:0016563;GO:0019901;GO:0042593;GO:0043565;GO:0045648;GO:0045944;  
JTID ENSG00000106348:IMPDH1 GO:0003824;GO:0003938;GO:0006177;GO:0008152;GO:0006164;GO:0006183;GO:0007601;GO:0016491;GO:0030955;GO:0046651;GO:0046872;GO:0050896;  
JTID ENSG00000177283:FZD8 GO:0004872;GO:0004926;GO:0004930;GO:0007186;GO:0007275;GO:0016020;GO:0016021;GO:0016055;GO:0017147;GO:0042813;GO:0005515;  
JTID ENSG00000144712:CAND2 GO:0005622;GO:0006350;GO:0006355;GO:0006512;GO:0006512;GO:0016563;GO:0017025;  
TFMI YY1:hsa-miR-100:hsa-mir-100:computational (PUBMED: 17447837);  
MIJT hsa-miR-100:FOXO3A:targetscan:mirbase; hsa-miR-100:IMPDH1:targetscan; hsa-miR-100:CAND2:targetscan:mirbase; hsa-miR-100:FZD8:targetscan:mirbase:pictar;

//  
ANNOTATION: 2  
ID YY1:hsa-miR-195;  
TFID YY1;  
MIID ENSG00000207929:hsa-mir-195:hsa-miR-195;  
JTID ENSG00000176095:IHPK1 GO:0005515;GO:0005634;GO:0005737;GO:0008440;GO:0016192;GO:0016301;GO:0016310;GO:0016740;GO:0050517;GO:0051209;  
JTID ENSG00000165985:C1QL3 GO:0005515;GO:0005737;GO:0006817;  
JTID ENSG00000131381:ZFYVE20 GO:0003676;GO:0005622;GO:0005768;GO:0008270;GO:0015031;GO:0016020;GO:0016197;GO:0046872;  
TFMI YY1:hsa-miR-195:hsa-mir-195:computational (PUBMED: 17447837);  
MIJT hsa-miR-195:IHPK1:targetscan; hsa-miR-195:ZFYVE20:targetscan; hsa-miR-195:C1QL3:targetscan;



```
//
ANNOTATION: 2
ID T3R:hsa-miR-499;
TFID T3R;
MIID ENSG00000207635:hsa-mir-499:hsa-miR-499;
JTID ENSG00000124449:IRGC
JTID ENSG00000111912:NCOA7 GO:0004872;GO:0005515;GO:0005622;GO:0005634;GO:0006350;GO:0006355;GO:0016998;
JTID ENSG00000104154:SLC30A4 GO:0005385;GO:0005764;GO:0005768;GO:0006812;GO:0006829;GO:0008021;GO:0008270;GO:0008324;GO:0016020;GO:0016021;
JTID ENSG00000203782:LOR GO:0001533;GO:0005200;GO:0005626;GO:0009898;GO:0018149;GO:0030216;GO:0030280;GO:0030674;GO:0031424;
JTID ENSG00000110693:SOX6 GO:0003677;GO:0003700;GO:0005515;GO:0005634;GO:0006325;GO:0006350;GO:0006355;GO:0007517;GO:0035051;GO:0042692;GO:0045165;GO:0051216;
JTID ENSG00000108219:TSPAN14 GO:0016020;GO:0016021;
TFMI T3R:hsa-miR-499:hsa-mir-499:computational (ECRbase);
MIJT hsa-miR-499:TSPAN14:targetscan; hsa-miR-499:SOX6:targetscan:mirbase; hsa-miR-499:SLC30A4:targetscan; hsa-miR-499:LOR:targetscan:mirbase; hsa-miR-499:IRGC:targetscan; hsa-miR-499:NCOA7:targetscan;

//
ANNOTATION: 2
ID NKX2-5:hsa-miR-9;
TFID NKX2-5;
MIID ENSG00000207933:hsa-mir-9-1:hsa-miR-9;
JTID ENSG00000204071:TCEAL6
JTID ENSG00000109061:MYH1 GO:0000146;GO:0000166;GO:0003779;GO:0005516;GO:0005524;GO:0005863;GO:0006941;GO:0016459;GO:0003774;
JTID ENSG00000182450:KCNK4 GO:0005244;GO:0005267;GO:0006811;GO:0006813;GO:0016020;GO:0016021;GO:0030955;
JTID ENSG00000137965:IFI44 GO:0005737;GO:0009615;
JTID ENSG00000107614:TRDMT1 GO:0008168;GO:0016740;GO:0003677;GO:0006306;GO:0003723;GO:0003886;GO:0005634;GO:0008033;GO:0016428;
JTID ENSG00000183784:C9orf66
TFJT NKX2-5:MYH1;
MIJT hsa-miR-9:MYH1:targetscan:mirbase:pictar; hsa-miR-9:IFI44:targetscan:mirbase; hsa-miR-9:TRDMT1:targetscan; hsa-miR-9:KCNK4:targetscan:mirbase:pictar; hsa-miR-9:TCEAL6:targetscan:mirbase; hsa-miR-9:C9orf66:targetscan;

//
ANNOTATION: 2
ID NKX2-5:hsa-miR-505;
TFID NKX2-5;
MIID ENSG00000207633:hsa-mir-505:hsa-miR-505;
JTID ENSG00000185442:NP_997329.1
JTID ENSG00000170903:KIAA1826 GO:0003677;GO:0005634;
TFMI NKX2-5:hsa-miR-505:hsa-mir-505:computational (ECRbase);
MIJT hsa-miR-505:KIAA1826:targetscan;

//
ANNOTATION: 2
ID HMG1Y:hsa-miR-16;
TFID HMG1Y;
MIID ENSG00000198987:hsa-mir-16-2:hsa-miR-16;
JTID ENSG00000134343:TMEM16C GO:0016020;GO:0016021;
JTID ENSG00000069275:NUCKS1 GO:0005634;
JTID ENSG00000205808:PPAPDC2 GO:0016020;GO:0016021;GO:0016787;
TFJT HMG1Y:PPAPDC2;
MIJT hsa-miR-16:PPAPDC2:targetscan:mirbase; hsa-miR-16:TMEM16C:targetscan:pictar;

//
ANNOTATION: 2
ID YY1:hsa-miR-221;
TFID YY1;
MIID ENSG00000207870:hsa-mir-221:hsa-miR-221;
JTID ENSG00000168906:MAT2A GO:0000166;GO:0000287;GO:0004478;GO:0005524;GO:0006556;GO:0016740;GO:0030955;
JTID ENSG00000204220:PFND6 GO:0006457;GO:0016272;GO:0051082;
JTID ENSG00000186462:NAP1L2 GO:0005634;GO:0005678;GO:0006334;
JTID ENSG00000167196:FBXO22 GO:0004842;GO:0006464;GO:0006511;GO:0006512;
JTID ENSG00000138468:SENP7 GO:0005622;GO:0005634;GO:0006508;GO:0006512;GO:0008234;GO:0016925;
TFMI YY1:hsa-miR-221:hsa-mir-221:computational (PUBMED: 17447837);
MIJT hsa-miR-221:SENP7:targetscan:pictar; hsa-miR-221:FBXO22:targetscan:mirbase:pictar; hsa-miR-221:NAP1L2:targetscan; hsa-miR-221:MAT2A:targetscan:pictar;

//
ANNOTATION: 2
ID FOXO1:hsa-miR-30a-5p;
TFID FOXO1;
MIID ENSG00000207827:hsa-mir-30a:hsa-miR-30a-5p;
JTID ENSG00000102098:SCML2 GO:0003700;GO:0005634;GO:0006355;GO:0009653;
JTID ENSG00000125804:C20orf91
JTID ENSG00000143590:EFNA3 GO:0005005;GO:0005887;GO:0007267;GO:0016020;GO:0048503;
JTID ENSG00000091157:WDR7
JTID ENSG00000105136:ZNF419 GO:0003677;GO:0005622;GO:0005634;GO:0006350;GO:0006355;GO:0008270;GO:0046872;
JTID ENSG00000173320:STOX2
TFMI FOXO1:hsa-miR-30a-5p:hsa-mir-30a:computational (ECRbase);
MIJT hsa-miR-30a-5p:ZNF419:targetscan; hsa-miR-30a-5p:STOX2:targetscan; hsa-miR-30a-5p:SCML2:targetscan; hsa-miR-30a-5p:C20orf91:mirbase; hsa-miR-30a-5p:EFNA3:targetscan:pictar; hsa-miR-30a-5p:WDR7:targetscan:pictar;

//
ANNOTATION: 2
ID MEIS1:hsa-miR-30c;
TFID MEIS1;
MIID ENSG00000199094:hsa-mir-30c-2:hsa-miR-30c;
JTID ENSG00000163288:GABRB1 GO:0004890;GO:0005216;GO:0005230;GO:0005254;GO:0005887;GO:0006811;GO:0007165;GO:0030594;GO:0031404;GO:0045211;
JTID ENSG00000079739:PGM1 GO:0000287;GO:0004614;GO:0005737;GO:0005975;GO:0006006;GO:0016853;GO:0016868;
JTID ENSG00000170365:SMAD1 GO:0000165;GO:0003700;GO:0003702;GO:0005057;GO:0005515;GO:0005622;GO:0005634;GO:0005667;GO:0006350;GO:0006355;GO:0007165;GO:0007179;GO:0007276;GO:0008285;GO:0009880;GO:0016021;GO:0016563;GO:0030509;GO:0030901;GO:0030902;GO:0042592;GO:0045944;
JTID ENSG00000154274:C4orf19
JTID ENSG00000145725:HISPPD1 GO:0003993;
JTID ENSG00000179151:EDC3 GO:0005515;
JTID ENSG00000151572:TMEM16D
JTID ENSG00000121594:CD80 GO:0005102;GO:0005886;GO:0006955;GO:0007242;GO:0007267;GO:0009967;GO:0015026;GO:0016021;GO:0016563;GO:0042110;GO:0045086;GO:0045425;GO:0045627;GO:0045941;GO:0050731;GO:0009897;GO:0031295;
JTID ENSG00000143590:EFNA3 GO:0005005;GO:0005887;GO:0007267;GO:0016020;GO:0048503;
JTID ENSG00000155545:MIER3 GO:0003677;GO:0005634;GO:0005509;
JTID ENSG00000172819:RARG GO:0003700;GO:0003707;GO:0003708;GO:0005515;GO:0005634;GO:0006350;GO:0006355;GO:0007275;GO:0008270;GO:0043565;GO:0046872;GO:0003677;GO:0005667;GO:0043065;GO:0045944;GO:0048048;
JTID ENSG00000185002:RFKDC1 GO:0003677;GO:0006355;
JTID ENSG00000105501:SIGLEC5 GO:0005515;GO:0005529;GO:0007155;GO:0016020;GO:0016021;
JTID ENSG00000115239:ASB3 GO:0007242;
JTID ENSG00000137261:KIAA0319 GO:0016020;GO:0016021;
JTID ENSG00000148541:FAM13C1
JTID ENSG00000162490:C1orf187
JTID ENSG00000142039:CCDC97
JTID ENSG00000116128:BCL9 GO:0005515;GO:0005634;GO:0016055;
JTID ENSG00000175564:UCP3 GO:0005215;GO:0005488;GO:0005624;GO:0005739;GO:0005743;GO:0006091;GO:0006629;GO:0006810;GO:0006839;GO:0007585;GO:0015992;GO:0016020;GO:0016021;GO:0000303;GO:0006631;GO:0017077;
```

```
TFJT MEIS1:TMEM16D; MEIS1:Clorf187;
MIJT hsa-miR-30c:MIR3:targetscan:pictrar; hsa-miR-30c:TMEM16D:targetscan:pictrar; hsa-miR-30c:UCP3:targetscan; hsa-miR-30c:CCDC97:targetscan:pictrar; hsa-miR-30c:EDC3:targetscan:pictrar; hsa-miR-30c:EFNA3:targetscan:pictrar; hsa-miR-30c:KIAA0319:targetscan; hsa-miR-30c:C4orf19:targetscan:mirbase; hsa-miR-30c:RARG:targetscan:pictrar; hsa-miR-30c:GABRB1:targetscan; hsa-miR-30c:PGM1:targetscan:mirbase:pictrar; hsa-miR-30c:RFXDC1:targetscan:mirbase:pictrar; hsa-miR-30c:FAM13C1:targetscan; hsa-miR-30c:CD80:targetscan; hsa-miR-30c:ASB3:targetscan:mirbase:pictrar; hsa-miR-30c:HISPPD1:targetscan:mirbase; hsa-miR-30c:SMAD1:targetscan:pictrar; hsa-miR-30c:BCL9:targetscan:mirbase:pictrar;

//
ANNOTATION: 2
ID AREB6:hsa-miR-203;
TFID AREB6;
MIID ENSG00000207568:hsa-mir-203:hsa-miR-203;
JTID ENSG00000153575:TUBGCP5 GO:0000922;GO:0005815;GO:0005874;GO:0007020;GO:0008017;GO:0008274;
JTID ENSG00000188483:IER5L
JTID ENSG00000110777:POU2AF1 GO:0003677;GO:0003713;GO:0005515;GO:0005634;GO:0006350;GO:0006355;GO:0006366;GO:0006959;
JTID ENSG00000125347:IRF1 GO:0003700;GO:0005634;GO:0006350;GO:0006366;GO:0006955;GO:0007049;GO:0045084;GO:0045786;GO:0045893;GO:0003677;
JTID ENSG00000100376:FAM118A GO:0016020;GO:0016021;
JTID ENSG00000135114:OASL GO:0003677;GO:0003725;GO:0005524;GO:0005730;GO:0005737;GO:0006464;GO:0006955;GO:0016740;GO:0046966;
JTID ENSG00000173698:GPR64 GO:0004872;GO:0004930;GO:0005887;GO:0007165;GO:0007218;GO:0007283;GO:0016020;
JTID ENSG00000138802:SEC24B GO:0005215;GO:0005515;GO:0005783;GO:0006886;GO:0006888;GO:0008270;GO:0016020;GO:0016192;GO:0030127;
JTID ENSG00000197701:ZNF595 GO:0003676;GO:0003677;GO:0005622;GO:0005634;GO:0006350;GO:0006355;GO:0008270;GO:0046872;
TFJT AREB6:IER5L;
MIJT hsa-miR-203:GPR64:targetscan; hsa-miR-203:POU2AF1:targetscan; hsa-miR-203:SEC24B:targetscan; hsa-miR-203:FAM118A:targetscan; hsa-miR-203:TUBGCP5:targetscan; hsa-miR-203:OASL:targetscan; hsa-miR-203:IRF1:targetscan; hsa-miR-203:ZNF595:targetscan;

//
ANNOTATION: 2
ID MEIS1:hsa-miR-32;
TFID MEIS1;
MIID ENSG00000207698:hsa-mir-32:hsa-miR-32;
JTID ENSG00000172000:ZNF556 GO:0003677;GO:0005622;GO:0005634;GO:0006350;GO:0006355;GO:0008270;GO:0046872;
JTID ENSG00000129317:PUS7L GO:0004730;GO:0008033;
JTID ENSG00000173517:SG269_HUMAN GO:0000166;GO:0004713;GO:0005524;GO:0006468;GO:0016740;
JTID ENSG00000144583:MARCH4 GO:0005515;GO:0006512;GO:0008270;GO:0016020;GO:0016021;GO:0016874;GO:0046872;
JTID ENSG00000165943:MOAP1 GO:0005515;GO:0005737;GO:0006915;GO:0006919;GO:0006921;GO:0030262;GO:0042803;
JTID ENSG00000142583:SLC2A5 GO:0005215;GO:0005351;GO:0005353;GO:0005355;GO:0005886;GO:0005975;GO:0008643;GO:0015755;GO:0015758;GO:0016021;GO:0016020;
JTID ENSG00000196186:Q71RF5_HUMAN
JTID ENSG00000160445:ZER1 GO:0005515;
JTID ENSG00000198569:SLC34A3 GO:0005436;GO:0005903;GO:0006811;GO:0006814;GO:0006817;GO:0015293;GO:0015321;GO:0016020;GO:0016021;GO:0016324;GO:0030643;GO:0031402;
JTID ENSG00000105392:CRX GO:0003700;GO:0005634;GO:0005667;GO:0005667;GO:0005667;GO:0006355;GO:0006355;GO:0007601;GO:0009887;GO:0043565;GO:0045944;GO:0050896;
JTID ENSG00000084093:REST GO:0003677;GO:0003682;GO:0005515;GO:0005622;GO:0005634;GO:0006350;GO:0008270;GO:0016564;GO:0045892;GO:0046872;
JTID ENSG00000135414:GDF11 GO:0001501;GO:0001656;GO:0001657;GO:0005125;GO:0005515;GO:0005615;GO:0007399;GO:0007498;GO:0008083;GO:0008285;GO:0009887;GO:0031016;GO:0040007;GO:0045596;GO:0048469;GO:0048593;
JTID ENSG00000166159:LRTM2 GO:0005515;GO:0016020;GO:0016021;
JTID ENSG00000137845:ADAM10 GO:0001701;GO:0004175;GO:0004222;GO:0005178;GO:0005634;GO:0005737;GO:0005794;GO:0005798;GO:0005886;GO:0006468;GO:0006913;GO:0007162;GO:0007220;GO:0007229;GO:0007267;GO:0008270;GO:0009986;GO:0016021;GO:0019901;GO:0042169;GO:0042803;GO:0046872;GO:0051089;
JTID ENSG00000204323:Q71RC9_HUMAN
JTID ENSG00000165494:PCF11 GO:0005634;GO:0005849;GO:0006379;
JTID ENSG00000091844:RGS17 GO:0004871;GO:0009968;GO:0016020;
JTID ENSG00000143458:NP_653219.1 GO:0042803;
JTID ENSG00000091664:SLC17A6 GO:0001504;GO:0005215;GO:0005313;GO:0006810;GO:0008021;GO:0016020;GO:0016021;
JTID ENSG00000170238:XR_017738.1
JTID ENSG00000117461:PIK3R3 GO:0005515;GO:0005942;GO:0007242;GO:0008286;GO:0016301;GO:0016303;GO:0035014;GO:0046935;
JTID ENSG00000152894:PTPRK GO:0004872;GO:0016020;GO:0004725;GO:0006470;GO:0016791;GO:0005001;GO:0005887;GO:0016787;
JTID ENSG00000152767:FARF1 GO:0005085;GO:0005089;GO:0005488;GO:0005622;GO:0005737;GO:0005856;GO:0008092;GO:0016020;GO:0035023;
JTID ENSG00000173040:EVCC2 GO:0016020;GO:0016021;
JTID ENSG00000103021:CCDC113 GO:0043234;
JTID ENSG00000116128:BCL9 GO:0005515;GO:0005634;GO:0016055;
JTID ENSG00000139508:SLC46A3
TFJT MEIS1:SG269_HUMAN; MEIS1:MOAP1; MEIS1:CRX; MEIS1:PIK3R3;
MIJT hsa-miR-32:PUS7L:targetscan; hsa-miR-32:PIK3R3:targetscan:pictrar; hsa-miR-32:CCDC113:targetscan; hsa-miR-32:SLC17A6:targetscan:pictrar; hsa-miR-32:MARCH4:targetscan:mirbase; hsa-miR-32:ADAM10:targetscan:pictrar; hsa-miR-32:MOAP1:targetscan:mirbase:pictrar; hsa-miR-32:XR_017738.1:mirbase; hsa-miR-32:FARF1:targetscan; hsa-miR-32:Q71RC9_HUMAN:mirbase; hsa-miR-32:RGS17:targetscan:mirbase; hsa-miR-32:BCL9:targetscan:pictrar; hsa-miR-32:GDF11:targetscan:mirbase:pictrar; hsa-miR-32:PTPRK:targetscan:mirbase;

//
ANNOTATION: 2
ID MIF-1:hsa-miR-23a;
TFID MIF-1;
MIID ENSG00000207980:hsa-mir-23a:hsa-miR-23a;
JTID ENSG00000103591:P34_HUMAN GO:0005737;GO:0015031;
JTID ENSG00000105053:VRK3 GO:0000166;GO:0004674;GO:0005524;GO:0006468;GO:0016740;GO:0004672;GO:0005634;
JTID ENSG00000106366:SERPINE1 GO:0002020;GO:0004867;GO:0005515;GO:0005576;GO:0007596;GO:0008243;GO:0042730;GO:0045765;
JTID ENSG00000100784:RPS6KA5 GO:0000166;GO:0000287;GO:0003824;GO:0004674;GO:0005515;GO:0005524;GO:0005634;GO:0006355;GO:0006468;GO:0006508;GO:0006950;GO:0007173;GO:0007243;GO:0008237;GO:0008270;GO:0009605;GO:0016572;GO:0016740;GO:0042221;
JTID ENSG00000168016:Q8N8K0_HUMAN GO:0003677;GO:0004003;GO:0005524;GO:0006281;
JTID ENSG00000024862:CCDC28A
JTID ENSG00000150045:KLRFL1 GO:0005529;GO:0005887;GO:0007166;GO:0016020;GO:0032393;
TFJT MIF-1:RPS6KA5;
MIJT hsa-miR-23a:KLRFL1:targetscan:mirbase:pictrar; hsa-miR-23a:RPS6KA5:targetscan; hsa-miR-23a:SERPINE1:targetscan; hsa-miR-23a:VRK3:targetscan:mirbase; hsa-miR-23a:CCDC28A:targetscan:mirbase;

//
ANNOTATION: 2
ID SRF:hsa-miR-100;
TFID SRF;
MIID ENSG00000207994:hsa-mir-100:hsa-miR-100;
JTID ENSG00000138660:C4orf16 GO:0030133;
JTID ENSG00000161921:CXCL16 GO:0005041;GO:0005044;GO:0005576;GO:0005615;GO:0006898;GO:0006935;GO:0008009;GO:0016020;GO:0016021;GO:0048247;
JTID ENSG00000106348:IMPDH1 GO:0003824;GO:0003938;GO:0006177;GO:0008152;GO:0006164;GO:0006183;GO:0007601;GO:0016491;GO:0030955;GO:0046651;GO:0046872;GO:0050896;
JTID ENSG00000153147:SMARCA5 GO:0000166;GO:0000793;GO:0003677;GO:0003702;GO:0004386;GO:0005524;GO:0005634;GO:0005654;GO:0006334;GO:0006338;GO:0006352;GO:0006357;GO:0016584;GO:0016787;GO:0016887;GO:0031213;GO:0042393;
JTID ENSG00000162437:RAVER2 GO:0000166;GO:0003723;GO:0005634;GO:0005515;
JTID ENSG00000173404:INSM1 GO:0003677;GO:0005622;GO:0005634;GO:0006350;GO:0006355;GO:0008270;GO:0030154;GO:0031018;GO:0046872;
TFJT SRF:INSM1;
MIJT hsa-miR-100:CXCL16:targetscan; hsa-miR-100:C4orf16:targetscan:pictrar; hsa-miR-100:IMPDH1:targetscan; hsa-miR-100:SMARCA5:targetscan:mirbase:pictrar; hsa-miR-100:RAVER2:targetscan:pictrar; hsa-miR-100:INSM1:targetscan:mirbase:pictrar;

//
ANNOTATION: 2
ID FREAC-4:hsa-miR-139;
TFID FREAC-4;
MIID ENSG00000207809:hsa-mir-139:hsa-miR-139;
JTID ENSG00000170035:UBE2E4P GO:0001558;GO:0004842;GO:0005515;GO:0005634;GO:0006464;GO:0006512;GO:0016874;
JTID ENSG00000159423:ALDH4A1 GO:0003842;GO:0004029;GO:0005739;GO:0005759;GO:0006561;GO:0006562;GO:0008152;GO:0009055;GO:0016491;
JTID ENSG00000143479:DYRK3 GO:0000166;GO:0004674;GO:0004713;GO:0005524;GO:0006468;GO:0016740;GO:0004672;
JTID ENSG00000140386:ZNF291 GO:0003676;GO:0005622;GO:0008270;GO:0046872;
JTID ENSG00000175556:LONRF3 GO:0004176;GO:0005515;GO:0006510;GO:0008270;GO:0046872;
JTID ENSG00000182992:Q8IZMO_HUMAN
TFJT FREAC-4:LONRF3;
MIJT hsa-miR-139:ZNF291:targetscan:mirbase; hsa-miR-139:UBE2E4P:pictrar; hsa-miR-139:ALDH4A1:targetscan;
```

```
//
ANNOTATION: 2
ID IRF-1:hsa-miR-30c;
TFID IRF-1;
MIID ENSG00000199094:hsa-mir-30c-2:hsa-miR-30c;
JTID ENSG00000101134:DOK5 GO:000165;GO:0005066;GO:0005158;GO:0007169;GO:0007399;
JTID ENSG00000141068:KSR1 GO:0004674;GO:0004713;GO:0005524;GO:0005622;GO:0006468;GO:0007242;GO:0007265;GO:0008270;GO:0016020;GO:0019992;GO:0046872;
JTID ENSG00000165891:E2F7 GO:0000074;GO:0003700;GO:0005667;GO:0006355;GO:0005515;GO:0005634;GO:0008285;GO:0016564;
JTID ENSG00000157741:Q6ZU65_HUMAN GO:0005525;GO:0005874;GO:0007017;
JTID ENSG00000171316:CHD7 GO:0000166;GO:0000785;GO:0003677;GO:0003682;GO:0004386;GO:0005524;GO:0005634;GO:0006333;GO:0006350;GO:0006355;GO:0016568;GO:0016787;
TFJT IRF-1:Q6ZU65_HUMAN;
MIJT hsa-miR-30c:DOK5:targetscan:mirbase; hsa-miR-30c:Q6ZU65_HUMAN:mirbase; hsa-miR-30c:E2F7:targetscan:pictar; hsa-miR-30c:CHD7:targetscan:pictar; hsa-miR-30c:KSR1:targetscan;

//
ANNOTATION: 2
ID POU1F1:hsa-miR-129;
TFID POU1F1;
MIID ENSG00000199077:hsa-mir-129-2:hsa-miR-129;
JTID ENSG00000178602:OTOS GO:0007605;
TFMI POU1F1:hsa-miR-129:hsa-mir-129-2:computational(ECRbase);
MIJT hsa-miR-129:OTOS:targetscan:mirbase;

//
ANNOTATION: 2
ID OCTAMER:hsa-let-7a;
TFID OCTAMER;
MIID ENSG00000198975:hsa-let-7a-2:hsa-let-7a;
JTID ENSG00000179165:PXT1
JTID ENSG00000148200:NR6A1 GO:0003700;GO:0003707;GO:0005634;GO:0006350;GO:0006355;GO:0008270;GO:0043565;GO:0046872;GO:0000122;GO:0003677;GO:0005515;GO:0005667;GO:0007276;GO:0007283;GO:0008283;GO:0042803;
JTID ENSG00000197948:FCHSD1
JTID ENSG00000165449:SLC16A9 GO:0005215;GO:0006810;GO:0016020;GO:0016021;
TFJT OCTAMER:NR6A1;
MIJT hsa-let-7a:FCHSD1:targetscan; hsa-let-7a:SLC16A9:targetscan:pictar; hsa-let-7a:PXT1:targetscan;

//
ANNOTATION: 2
ID ER:hsa-miR-152;
TFID ER;
MIID ENSG00000207947:hsa-mir-152:hsa-miR-152;
JTID ENSG00000106384:MOGAT3 GO:0003846;GO:0004144;GO:0005783;GO:0006071;GO:0006629;GO:0008415;GO:0008610;GO:0016020;GO:0016021;GO:0016740;
JTID ENSG00000105366:SIGLEC8 GO:0004888;GO:0005515;GO:0005529;GO:0007155;GO:0007165;GO:0016020;GO:0016021;
JTID ENSG00000198854:Clorf68 GO:0008544;
JTID ENSG00000034063:UHRF1 GO:0003676;GO:0003700;GO:0003702;GO:0005515;GO:0005634;GO:0006281;GO:0006350;GO:0006357;GO:0006464;GO:0006512;GO:0007049;GO:0008270;GO:0008283;GO:0008907;GO:0016874;GO:0046872;
JTID ENSG00000122034:GTF3A GO:0003677;GO:0003709;GO:0003723;GO:0005622;GO:0005634;GO:0006350;GO:0006355;GO:0006383;GO:0008270;GO:0009303;GO:0046872;
JTID ENSG00000156642:NPTN GO:0000299;GO:0007156;GO:0016021;GO:0030155;GO:0042734;GO:0045211;GO:0048170;GO:0050839;
JTID ENSG00000166024:C1orf28
JTID ENSG00000205653:Q6ZUF2_HUMAN
JTID ENSG00000137073:UBAP2
JTID ENSG00000182220:ATP6AP2 GO:0002003;GO:0004872;GO:0005515;GO:0009897;GO:0016020;GO:0016021;GO:0032914;GO:0043408;
JTID ENSG00000101901:CXorf45
JTID ENSG00000205036:NP_001001682.1
JTID ENSG00000205524:Q68D70_HUMAN
JTID ENSG00000113048:MRPS27 GO:0005739;GO:0030529;
JTID ENSG00000131711:MAP1B GO:0001578;GO:0005198;GO:0005515;GO:0005874;GO:0005875;GO:0016358;
JTID ENSG00000070985:TRPM5 GO:0005216;GO:0006811;GO:0016020;GO:0016021;
JTID ENSG00000156466:GDF6 GO:0005125;GO:0005615;GO:0008083;GO:0040007;
JTID ENSG00000206193:Q5HYA3_HUMAN
JTID ENSG00000134851:TMEM165 GO:0016020;GO:0016021;
JTID ENSG00000165097:AOF1 GO:0006118;GO:0008270;GO:0016491;GO:0046872;
TFJT ER:MAP1B;
MIJT hsa-miR-152:MRPS27:targetscan; hsa-miR-152:CXorf45:targetscan:mirbase; hsa-miR-152:GTF3A:mirbase; hsa-miR-152:UHRF1:targetscan; hsa-miR-152:UBAP2:targetscan; hsa-miR-152:TRPM5:targetscan; hsa-miR-152:NP_001001682.1:mirbase; hsa-miR-152:TMEM165:targetscan; hsa-miR-152:C1orf28:targetscan; hsa-miR-152:SIGLEC8:targetscan; hsa-miR-152:NPTN:targetscan:mirbase:pictar; hsa-miR-152:ATP6AP2:targetscan:mirbase:pictar; hsa-miR-152:MOGAT3:targetscan; hsa-miR-152:AOF1:targetscan; hsa-miR-152:Clorf68:mirbase; hsa-miR-152:GDF6:targetscan:pictar;

//
ANNOTATION: 2
ID ELF-1:hsa-miR-155;
TFID ELF-1;
MIID ENSG00000207795:hsa-mir-155:hsa-miR-155;
JTID ENSG00000144034:TPRKB GO:0005634;GO:0005829;GO:0019901;GO:0030163;
JTID ENSG00000107165:TYRP1 GO:0008152;GO:0016491;GO:0004497;GO:0005507;GO:0005515;GO:0006583;GO:0016020;GO:0016021;GO:0042470;GO:0042803;GO:0046872;GO:0046982;GO:0006582;GO:0030318;GO:0032438;GO:0043438;GO:0043473;
JTID ENSG00000106341:C7orf16 GO:0004865;GO:0005625;GO:0006468;GO:0007165;GO:0007243;GO:0007417;GO:0007610;
JTID ENSG00000112312:GMNN GO:0005515;GO:0007049;GO:0008156;GO:0045786;
JTID ENSG00000114113:RBP2 GO:0006776;GO:0006810;GO:0008289;GO:0008544;GO:0016918;GO:0019841;
JTID ENSG00000109790:KLHL5 GO:0005515;GO:0003779;GO:0005737;GO:0005856;GO:0030036;
JTID ENSG00000101457:DNTTIP1 GO:0005634;GO:0016740;
JTID ENSG00000055163:CYFIP2
JTID ENSG00000146926:ASB10 GO:0007242;
JTID ENSG00000196396:PTPN1 GO:0004725;GO:0005515;GO:0005625;GO:0005737;GO:0005783;GO:0006470;GO:0007165;GO:0008286;GO:0016787;
TFMI ELF-1:hsa-miR-155:hsa-mir-155:computational(ECRbase);
MIJT hsa-miR-155:TYRP1:targetscan; hsa-miR-155:C7orf16:targetscan:mirbase; hsa-miR-155:CYFIP2:targetscan; hsa-miR-155:TPRKB:targetscan:mirbase; hsa-miR-155:RBP2:targetscan:mirbase; hsa-miR-155:DNTTIP1:targetscan:mirbase; hsa-miR-155:KLHL5:targetscan:mirbase; hsa-miR-155:ASB10:targetscan; hsa-miR-155:GMNN:targetscan;

//
ANNOTATION: 2
ID MEIS1:hsa-miR-101;
TFID MEIS1;
MIID ENSG00000199065:hsa-mir-101-2:hsa-miR-101;
MIID ENSG00000199135:hsa-mir-101-1:hsa-miR-101;
JTID ENSG00000168118:RAB4A GO:0000166;GO:0003924;GO:0005525;GO:0005622;GO:0005737;GO:0007264;GO:0015031;GO:0000074;GO:0005515;GO:0005768;GO:0006260;GO:0008565;GO:0030100;
JTID ENSG00000182923:CEP63 GO:0005515;GO:0005813;
JTID ENSG00000108784:NAGLU GO:0004561;GO:0005764;GO:0007399;GO:0008152;GO:0016798;GO:0030203;
JTID ENSG00000131914:LIN28 GO:0003677;GO:0005737;GO:0006355;GO:0008270;GO:0046872;
JTID ENSG00000179151:EDC3 GO:0005515;
JTID ENSG00000130224:LRCH2 GO:0005515;
JTID ENSG00000173821:RNF213 GO:0000166;GO:0005515;GO:0008270;GO:0017111;GO:0046872;
JTID ENSG00000132964:CDK8 GO:0000074;GO:0000119;GO:0000166;GO:0004672;GO:0004674;GO:0005524;GO:0005634;GO:0006350;GO:0006355;GO:0006468;GO:0007049;GO:0016740;GO:0051301;
JTID ENSG00000198757:Q96NB8_HUMAN
JTID ENSG00000186111:PIF5K1C GO:0007409;GO:0016020;GO:0016301;GO:0016308;GO:0016740;GO:0046488;
JTID ENSG00000134375:TMM17A GO:0005739;GO:0005744;GO:0006626;GO:0015450;GO:0016020;GO:0016021;
JTID ENSG00000175220:ARHGAP1 GO:0001726;GO:0005070;GO:0005096;GO:0005515;GO:0005622;GO:0005886;GO:0007010;GO:0007165;GO:0007264;GO:0007266;GO:0030675;GO:0043087;
JTID ENSG00000104067:TJP1 GO:0005515;GO:0005624;GO:0005918;GO:0005923;GO:0007043;GO:0016020;
JTID ENSG00000120278:PLEKHG1 GO:0005085;GO:0005089;GO:0005622;GO:0035023;
```



```
JTID ENSG00000069956:MAPK6 GO:0000166;GO:0004674;GO:0004707;GO:0005515;GO:0005524;GO:0005737;GO:0006468;GO:0007049;GO:0007165;GO:0016740;
JTID ENSG000000125084:WNT1 GO:0001708;GO:0004871;GO:0005102;GO:0005576;GO:0005625;GO:0007163;GO:0007223;GO:0007275;GO:0007283;GO:0007417;GO:0009653;GO:0016477;GO:0030154;
JTID ENSG000000131269:ABCB7 GO:0000166;GO:0005524;GO:0005739;GO:0005743;GO:0006810;GO:0015232;GO:0016020;GO:0016021;GO:0016887;GO:0042626;
JTID ENSG000000142700:DMRTA2 GO:0003700;GO:0005634;GO:0006355;GO:0007548;
JTID ENSG000000196972:Q86V52_HUMAN
JTID ENSG000000198964:SGMS1 GO:0000138;GO:0006629;GO:0006665;GO:0006686;GO:0016020;GO:0016021;GO:0016301;GO:0016740;GO:0030173;GO:0047493;GO:0016049;GO:0033188;GO:0043066;
JTID ENSG000000130052:STARD8 GO:0005096;GO:0005622;GO:0007165;
JTID ENSG000000137073:UBAP2
JTID ENSG000000162191:SAKS1_HUMAN GO:0005737;
JTID ENSG000000170989:EDG1 GO:0001525;GO:0001619;GO:0004872;GO:0005886;GO:0005887;GO:0007165;GO:0007186;GO:0007193;GO:0007420;GO:0008284;GO:0030155;
TFJT C-REL:ITGA5; C-REL:WNT1;
MIJT hsa-miR-148b:GTF3A:mirbase; hsa-miR-148b:WNT1:targetscan:picstar; hsa-miR-148b:ITGA5:targetscan:picstar; hsa-miR-148b:MEOX2:targetscan:picstar; hsa-miR-148b:TH:targetscan:mirbase; hsa-miR-148b:RHD:targetscan:mirbase; hsa-miR-148b:DMRTA2:mirbase; hsa-miR-148b:SGMS1:targetscan:mirbase:picstar; hsa-miR-148b:EDG1:targetscan:mirbase:picstar; hsa-miR-148b:UBAP2:targetscan; hsa-miR-148b:ABCB7:targetscan:mirbase:picstar; hsa-miR-148b:TRPM5:targetscan; hsa-miR-148b:SAKS1_HUMAN:picstar; hsa-miR-148b:STARD8:targetscan; hsa-miR-148b:CDC2L6:targetscan:picstar;

//
ANNOTATION: 2
ID TFE:hsa-miR-135a;
TFID TFE;
MIID ENSG000000207586:hsa-mir-135a-2:hsa-miR-135a;
JTID ENSG000000188100:FAM25_HUMAN
TFMI TFE:hsa-miR-135a:hsa-mir-135a-2:computational(ECRbase);
MIJT hsa-miR-135a:FAM25_HUMAN:mirbase;

//
ANNOTATION: 2
ID IRF-7:hsa-miR-26a;
TFID IRF-7;
MIID ENSG000000207789:hsa-mir-26a-2:hsa-miR-26a;
JTID ENSG000000148704:VAX1 GO:0000122;GO:0001764;GO:0003700;GO:0005634;GO:0006355;GO:0007275;GO:0007399;GO:0007406;GO:0007411;GO:0007417;GO:0007420;GO:0030154;GO:0031490;GO:0043010;GO:0043565;
JTID ENSG000000164574:GALNT10 GO:0004653;GO:0005509;GO:0005529;GO:0016020;GO:0016021;GO:0016757;GO:0030145;GO:0006493;
JTID ENSG000000164879:CA3 GO:0004089;GO:0005737;GO:0006730;GO:0008270;GO:0016151;GO:0016829;GO:0046872;
JTID ENSG000000134001:EIF2S1 GO:0003723;GO:0003743;GO:0005515;GO:0005634;GO:0005737;GO:0005844;GO:0005851;GO:0006412;GO:0006417;GO:0043558;
JTID ENSG000000189043:NDUFA4 GO:0003954;GO:0005739;GO:0005747;GO:0006120;GO:0008137;GO:0016491;
JTID ENSG000000128989:ARP19_HUMAN GO:0005102;GO:0015459;GO:0045722;GO:0046326;
JTID ENSG000000037637:FBXO42 GO:0006512;
JTID ENSG000000153574:RPIA GO:0004751;GO:0005622;GO:0009052;GO:0016853;
JTID ENSG00000009364:FBXL19 GO:0003677;GO:0004842;GO:0005515;GO:0005737;GO:0006464;GO:0006508;GO:0006512;GO:0008270;GO:0046872;
JTID ENSG000000082146:ALS2CR2 GO:0000166;GO:0000902;GO:0004672;GO:0005515;GO:0005524;GO:0005634;GO:0005737;GO:0006468;GO:0006611;GO:0006916;GO:0007049;GO:0007254;GO:0032147;
JTID ENSG000000177822:XR_017723.1
JTID ENSG000000082701:GSK3B
GO:0000166;GO:0002039;GO:0004696;GO:0005524;GO:0005634;GO:0005737;GO:0005977;GO:0006983;GO:0016740;GO:0018105;GO:0030877;GO:0043066;GO:0046827;GO:0051059;GO:0060070;GO:0000320;GO:0004672;GO:0005515;GO:0005829;GO:0006468;GO:0006611;GO:0006916;GO:0006950;GO:0008013;GO:0009887;GO:0016055;GO:0045444;GO:0050321;
JTID ENSG000000138231:DBR1 GO:0000375;GO:0000398;GO:0005634;GO:0008419;GO:0016788;GO:0046872;
JTID ENSG000000143643:TTC13 GO:0005488;
JTID ENSG000000178425:NT5DC1
TFJT IRF-7:VAX1;
MIJT hsa-miR-26a:ALS2CR2:targetscan:mirbase:picstar; hsa-miR-26a:FBXL19:mirbase; hsa-miR-26a:GALNT10:targetscan:picstar; hsa-miR-26a:CA3:targetscan; hsa-miR-26a:DBR1:targetscan; hsa-miR-26a:NT5DC1:targetscan:mirbase; hsa-miR-26a:EIF2S1:targetscan; hsa-miR-26a:ARP19_HUMAN:picstar; hsa-miR-26a:TTC13:targetscan:mirbase:picstar; hsa-miR-26a:GSK3B:targetscan:picstar;

//
ANNOTATION: 2
ID LEF1:hsa-miR-27a;
TFID LEF1;
MIID ENSG000000207808:hsa-mir-27a:hsa-miR-27a;
JTID ENSG000000184005:ST6GALNAC3 GO:0006486;GO:0008373;GO:0016020;GO:0016021;GO:0030173;
JTID ENSG000000130479:MAP1S GO:0001578;GO:0003677;GO:0005515;GO:0005634;GO:0005829;GO:0005874;GO:0006915;GO:0007399;GO:0007420;GO:0008017;GO:0030425;GO:0043025;GO:0047497;GO:0048471;GO:0048487;GO:0048812;GO:0051015;GO:0042802;
JTID ENSG000000178554:Q8N8D4_HUMAN
JTID ENSG000000133812:SBF2 GO:0004437;GO:0005515;GO:0016020;GO:0042552;GO:0046839;
JTID ENSG000000152409:NP_689618.2 GO:0003713;GO:0005515;GO:0005634;GO:0006357;GO:0006917;GO:0007050;GO:0043620;GO:0051091;
JTID ENSG000000170500:LONRF2 GO:0004176;GO:0005185;GO:0005515;GO:0005576;GO:0006510;GO:0008270;GO:0046872;
JTID ENSG000000157103:SLC6A1 GO:0005328;GO:0005332;GO:0005624;GO:0005887;GO:0006836;GO:0007268;GO:0015293;GO:0016020;GO:0030424;
JTID ENSG000000174574:Clorf108
JTID ENSG000000006114:AP1GBP1 GO:0005509;GO:0005737;GO:0005794;GO:0006886;GO:0006897;GO:0016020;GO:0030121;
JTID ENSG000000142544:ATPBD3
JTID ENSG000000179144:GIMAP7 GO:0000166;GO:0005525;
JTID ENSG000000055070:Clorf144
JTID ENSG000000145632:PLK2 GO:0000166;GO:0000278;GO:0004674;GO:0004871;GO:0005515;GO:0005524;GO:0006468;GO:0016740;GO:0043123;
JTID ENSG000000129816:NR_001538.1
JTID ENSG000000129845:O14605_HUMAN
TFJT LEF1:SBF2; LEF1:Clorf144;
MIJT hsa-miR-27a:AP1GBP1:targetscan:mirbase; hsa-miR-27a:Clorf108:targetscan:picstar; hsa-miR-27a:SBF2:targetscan; hsa-miR-27a:NP_689618.2:mirbase; hsa-miR-27a:LONRF2:targetscan; hsa-miR-27a:PLK2:targetscan:mirbase:picstar; hsa-miR-27a:ST6GALNAC3:targetscan:picstar; hsa-miR-27a:SLC6A1:targetscan:picstar; hsa-miR-27a:GIMAP7:targetscan:mirbase; hsa-miR-27a:ATPBD3:targetscan:mirbase; hsa-miR-27a:MAP1S:targetscan:mirbase; hsa-miR-27a:Clorf144:targetscan:picstar;

//
ANNOTATION: 2
ID MYC:hsa-miR-296;
TFID MYC;
MIID ENSG000000207950:hsa-mir-296:hsa-miR-296;
JTID ENSG000000139515:PDX1 GO:0003677;GO:0003700;GO:0005634;GO:0006006;GO:0006091;GO:0006355;GO:0006357;GO:0007275;GO:0009887;GO:0016563;GO:0030154;GO:0031016;GO:0042127;GO:0043565;GO:0045944;
JTID ENSG000000178947:Q86V52_HUMAN
JTID ENSG000000167680:SEMA6B GO:0004872;GO:0007275;GO:0007399;GO:0016020;GO:0016021;GO:0030154;
JTID ENSG000000123933:MXD4 GO:0000122;GO:0003677;GO:0003714;GO:0005515;GO:0005634;GO:0006355;GO:0008285;GO:0030528;GO:0016481;
JTID ENSG000000104783:KCNN4 GO:0005216;GO:0005249;GO:0005516;GO:0005624;GO:0006811;GO:0006813;GO:0006952;GO:0008076;GO:0016020;GO:0016021;GO:0046541;GO:0050714;
JTID ENSG000000141526:SLC16A3 GO:0005215;GO:0005624;GO:0005887;GO:0006810;GO:0015293;GO:0015355;GO:0015711;GO:0015718;GO:0016020;
TFJT MYC:KCNN4;
MIJT hsa-miR-296:KCNN4:targetscan; hsa-miR-296:SLC16A3:targetscan:mirbase; hsa-miR-296:MXD4:targetscan; hsa-miR-296:SEMA6B:targetscan:mirbase; hsa-miR-296:PDX1:targetscan:mirbase;

//
ANNOTATION: 2
ID PEA3:hsa-miR-27a;
TFID PEA3;
MIID ENSG000000207808:hsa-mir-27a:hsa-miR-27a;
JTID ENSG000000100348:TXN2 GO:0005739;GO:0006118;GO:0006662;GO:0006810;GO:0009055;GO:0015035;GO:0030508;GO:0045454;
JTID ENSG000000145194:ECE2 GO:0008152;GO:0008168;GO:0004245;GO:0006508;GO:0007267;GO:0007420;GO:0007507;GO:0008270;GO:0008277;GO:0009790;GO:0010002;GO:0016020;GO:0016021;GO:0016486;GO:0016512;GO:0030659;GO:0042310;GO:0046872;GO:0016511;
JTID ENSG000000148339:SLC25A25 GO:0005488;GO:0005509;GO:0005743;GO:0006810;GO:0016020;GO:0016021;
JTID ENSG000000169118:CSNK1G1 GO:0000166;GO:0004674;GO:0005524;GO:0006468;GO:0016055;GO:0016740;
JTID ENSG000000088854:C20orf194 GO:0003676;GO:0005622;GO:0008270;
JTID ENSG000000079134:THOC1 GO:0003677;GO:0003723;GO:0005515;GO:0005634;GO:0006397;GO:0006810;GO:0007165;GO:0008380;GO:0051028;
JTID ENSG000000205761:Q6ZRI7_HUMAN
JTID ENSG000000055070:Clorf144
JTID ENSG000000167723:TRPV3 GO:0005261;GO:0005262;GO:0005509;GO:0006811;GO:0006816;GO:0009266;GO:0016020;GO:0016021;
```

```
JTID ENSG00000135334:C6orf166
TFJT PEA3:ECE2; PEA3:Clorf144; PEA3:C6orf166;
MIJT hsa-miR-27a:TXN2:targetscan:mirbase:picstar; hsa-miR-27a:SLC25A25:targetscan:picstar; hsa-miR-27a:C6orf166:targetscan:picstar; hsa-miR-27a:THOC1:targetscan:mirbase; hsa-miR-27a:ECE2:targetscan:mirbase:picstar; hsa-miR-27a:Clorf144:targetscan:picstar; hsa-miR-27a:CSNK1G1:targetscan;

//
ANNOTATION: 2
ID MYOD:hsa-miR-218;
TFID MYOD;
MIID ENSG00000207732:hsa-mir-218-1:hsa-miR-218;
JTID ENSG00000182533:CAV3 GO:0005515;GO:0005624;GO:0007517;GO:0016010;GO:0016020;GO:0016021;GO:0016599;GO:0051925;GO:0005901;GO:0006469;GO:0006641;GO:0008104;GO:0030315;GO:0031579;GO:0042383;GO:0042391;GO:0042593;GO:0042632;GO:0043409;GO:0045121;GO:0046716;GO:0051001;
JTID ENSG00000158578:ALAS2 GO:0001666;GO:0003870;GO:0005515;GO:0005739;GO:0005743;GO:0005783;GO:0006783;GO:0008415;GO:0009058;GO:0016020;GO:0016021;GO:0016769;GO:0030170;GO:0030218;GO:0032364;GO:0033014;GO:0042541;GO:0006879;
JTID ENSG00000181852:RNF41 GO:0005515;GO:0006512;GO:0008270;GO:0016874;GO:0046872;
JTID ENSG00000170516:COX7B2 GO:0004129;GO:0005739;GO:0005746;GO:0006118;GO:0016020;GO:0016021;GO:0016491;
JTID ENSG00000184434:LRRRC19 GO:0005515;GO:0016020;GO:0016021;
JTID ENSG00000180354:C7orf41
JTID ENSG00000188428:TXNDC5 GO:0005783;GO:0006916;GO:0016853;GO:0045454;GO:0005515;GO:0005788;
JTID ENSG00000138604:GLCE GO:0005794;GO:0008360;GO:0009252;GO:0015012;GO:0016020;GO:0016021;GO:0016853;GO:0016857;GO:0030210;GO:0050379;
JTID ENSG00000085978:ATG16L1 GO:0005515;GO:0006914;GO:0015031;GO:0016020;GO:0005776;
JTID ENSG00000198589:LRBA GO:0005515;GO:0016023;
JTID ENSG00000185053:SGCZ GO:0005515;GO:0005856;GO:0005886;GO:0007010;GO:0016012;GO:0016021;
JTID ENSG00000185933:FAM26C GO:0016020;GO:0016021;
JTID ENSG00000205052:Q6ZSS1 HUMAN
TFJT MYOD:SGCZ; MYOD:FAM26C;
MIJT hsa-miR-218:FAM26C:targetscan; hsa-miR-218:COX7B2:targetscan; hsa-miR-218:ATG16L1:targetscan; hsa-miR-218:CAV3:targetscan; hsa-miR-218:GLCE:targetscan:picstar; hsa-miR-218:TXNDC5:targetscan; hsa-miR-218:ALAS2:targetscan:mirbase; hsa-miR-218:SGCZ:targetscan:mirbase:picstar; hsa-miR-218:C7orf41:targetscan:picstar; hsa-miR-218:LRRRC19:targetscan; hsa-miR-218:LRBA:targetscan; hsa-miR-218:RNF41:targetscan:picstar;

//
ANNOTATION: 2
ID SRF:hsa-let-7a;
TFID SRF;
MIID ENSG00000198975:hsa-let-7a-2:hsa-let-7a;
JTID ENSG00000160094:ZNF362 GO:0003676;GO:0005622;GO:0008270;GO:0046872;
JTID ENSG00000135535:CD164 GO:0005624;GO:0005625;GO:0005886;GO:0005887;GO:0006955;GO:0007155;GO:0007157;GO:0007165;GO:0007275;GO:0008285;GO:0005768;GO:0007162;GO:0030097;
JTID ENSG00000135441:BLOC1S1 GO:0005515;
TFJT SRF:BLOC1S1;
MIJT hsa-let-7a:ZNF362:picstar; hsa-let-7a:BLOC1S1:targetscan:mirbase; hsa-let-7a:CD164:targetscan:picstar;

//
ANNOTATION: 2
ID HOXA4:hsa-miR-125b;
TFID HOXA4;
MIID ENSG00000207863:hsa-mir-125b-2:hsa-miR-125b;
JTID ENSG00000161021:LTC4S GO:0003713;GO:0005634;GO:0006350;GO:0006355;GO:0007219;GO:0045944;GO:0004364;GO:0004464;GO:0005624;GO:0005792;GO:0008047;GO:0016020;GO:0016021;GO:0016829;GO:0019370;
JTID ENSG00000065361:ERBB3 GO:0000166;GO:0004714;GO:0004872;GO:0005006;GO:0005515;GO:0005524;GO:0005887;GO:0006468;GO:0007165;GO:0007169;GO:0007422;GO:0007507;GO:0016020;GO:0016324;GO:0016328;GO:0016740;GO:0046982;
JTID ENSG00000106993:CDC37L1 GO:0000074;GO:0051301;
JTID ENSG00000172531:PPP1CA GO:0005506;GO:0016787;GO:0000163;GO:0004721;GO:0005515;GO:0005975;GO:0005977;GO:0006470;GO:0007049;GO:0030145;GO:0046872;GO:0051301;GO:0004722;GO:0005654;GO:0005737;GO:0030324;GO:0048754;
JTID ENSG00000047621:C12orf4
JTID ENSG00000110274:CEP164
TFJT HOXA4;ERBB3;
MIJT hsa-miR-125b:ERBB3:targetscan; hsa-miR-125b:PPP1CA:targetscan:mirbase:picstar; hsa-miR-125b:C12orf4:targetscan; hsa-miR-125b:CEP164:targetscan;

//
ANNOTATION: 2
ID MEIS1:hsa-miR-141;
TFID MEIS1;
MIID ENSG00000207708:hsa-mir-141:hsa-miR-141;
JTID ENSG00000133124:IRS4 GO:0004872;GO:0005070;GO:0005158;GO:0005886;GO:0007165;GO:0005515;
JTID ENSG00000112379:KIAA1244 GO:0005086;GO:0005622;GO:0032012;
JTID ENSG00000028839:TBPL1 GO:0003677;GO:0003702;GO:0003713;GO:0005488;GO:0005515;GO:0005634;GO:0005669;GO:0006355;GO:0006367;GO:0001675;GO:0005737;GO:0006235;
JTID ENSG00000198105:ZNF248 GO:0003676;GO:0003677;GO:0005622;GO:0005634;GO:0006350;GO:0006355;GO:0008270;GO:0046872;
JTID ENSG00000073910:FRY GO:0006350;GO:0006355;GO:0016020;GO:0016021;GO:0005524;
JTID ENSG00000189403:HMG1 GO:0000785;GO:0000793;GO:0003677;GO:0005634;GO:0006268;GO:0006281;GO:0006288;GO:0006310;GO:0006325;GO:0006355;GO:0006357;GO:0006916;GO:0007165;GO:0008134;GO:0008301;GO:0017055;GO:0005515;GO:0005615;GO:0006809;GO:0006810;GO:0030235;
JTID ENSG00000185880:TRIM69 GO:0005515;GO:0005634;GO:0006915;GO:0008270;GO:0046872;
JTID ENSG00000100448:CTSG GO:0004261;GO:0005626;GO:0006508;GO:0006955;GO:0008233;
JTID ENSG00000197641:SERPINB13 GO:0004867;GO:0009411;GO:0030162;
JTID ENSG00000107554:DNM1P GO:0005089;GO:0005622;GO:0035023;GO:0005085;GO:0005515;GO:0005737;GO:0005856;GO:0007242;
JTID ENSG00000162433:AK3L2 GO:0000166;GO:0004017;GO:0005524;GO:0005525;GO:0005739;GO:0006139;GO:0016301;GO:0016740;
JTID ENSG00000138434:SSFA2 GO:0003779;GO:0005886;
JTID ENSG00000146360:GPR6 GO:0001619;GO:0004872;GO:0005887;GO:0007165;GO:0007186;GO:0007204;GO:0016020;
JTID ENSG00000142459:EVI5L GO:0005096;GO:0005097;GO:0005622;GO:0032313;
JTID ENSG00000145990:GFOD1 GO:0006118;GO:0008152;GO:0016491;
JTID ENSG00000205307:Q8TEE9 HUMAN
JTID ENSG00000169184:NM_002430.2
JTID ENSG00000159966:AFF2 GO:0007420;GO:0007611;
JTID ENSG00000152382:TADA1L
JTID ENSG00000205017:CCL3L1 GO:0005576;GO:0005615;GO:0006935;GO:0006954;GO:0006955;GO:0008009;GO:0008285;
JTID ENSG00000205021:CCL3L3 GO:0005576;GO:0005615;GO:0006935;GO:0006954;GO:0006955;GO:0008009;GO:0008285;
JTID ENSG00000134207:SYT6 GO:0005215;GO:0005509;GO:0006810;GO:0008021;GO:0016020;GO:0016021;GO:0045202;
JTID ENSG00000177125:ZBTB34 GO:0003676;GO:0005515;GO:0005622;GO:0006350;GO:0006355;GO:0008270;GO:0046872;
JTID ENSG00000100181:CSNK1E GO:0000166;GO:0004674;GO:0004681;GO:0005515;GO:0005524;GO:0006281;GO:0006468;GO:0007165;GO:0016740;GO:0004725;
TFJT MEIS1:KIAA1244;
MIJT hsa-miR-141:EVI5L:targetscan:mirbase:picstar; hsa-miR-141:Q8TEE9 HUMAN:mirbase; hsa-miR-141:AK3L2:mirbase:picstar; hsa-miR-141:FRY:targetscan:picstar; hsa-miR-141:CSNK1E:targetscan; hsa-miR-141:SSFA2:targetscan:mirbase; hsa-miR-141:ZNF248:targetscan; hsa-miR-141:GPR6:targetscan:mirbase:picstar; hsa-miR-141:GFOD1:targetscan; hsa-miR-141:TRIM69:targetscan; hsa-miR-141:CTSG:targetscan:mirbase; hsa-miR-141:KIAA1244:targetscan; hsa-miR-141:SERPINB13:targetscan; hsa-miR-141:SYT6:targetscan; hsa-miR-141:IRS4:targetscan; hsa-miR-141:TADA1L:targetscan:mirbase:picstar; hsa-miR-141:AFF2:targetscan; hsa-miR-141:HMGB1:targetscan;

//
ANNOTATION: 2
ID NKX2-5:hsa-miR-296;
TFID NKX2-5;
MIID ENSG00000207950:hsa-mir-296:hsa-miR-296;
JTID ENSG00000170279:C7orf33
TFJT NKX2-5:C7orf33;
MIJT hsa-miR-296:C7orf33:targetscan:mirbase;

//
ANNOTATION: 2
ID MEIS1:hsa-miR-199a*;
TFID MEIS1;
MIID ENSG00000208024:hsa-mir-199a-2:hsa-miR-199a*;
JTID ENSG00000123178:C13orf1
JTID ENSG00000146021:KLHL3 GO:0003779;GO:0005198;GO:0005515;GO:0005856;
```

JTID ENSG00000131914:LIN28 GO:0003677;GO:0005737;GO:0006355;GO:0008270;GO:0046872;  
JTID ENSG00000179151:EDC3 GO:0005515;  
JTID ENSG00000005884:ITGA3 GO:0001764;GO:0004872;GO:0005509;GO:0005515;GO:0007155;GO:0007160;GO:0007229;GO:0007613;GO:0008305;GO:0016020;GO:0016021;GO:0016323;GO:0019717;  
JTID ENSG00000130224:LRCH2 GO:0005515;  
JTID ENSG00000132549:VPS13B GO:0015031;  
JTID ENSG00000180205:WFD9  
JTID ENSG00000162415:ZSWIM5 GO:0008270;GO:0046872;  
JTID ENSG00000159140:SON GO:0003677;GO:0003725;GO:0005515;GO:0005622;GO:0005634;GO:0006916;  
JTID ENSG00000198757:Q96NB8 HUMAN  
JTID ENSG00000082458:DLG3 GO:0005515;GO:0004385;GO:0008285;GO:0005737;  
JTID ENSG00000134121:CHL1 GO:0001764;GO:0005515;GO:0005578;GO:0007155;GO:0007165;GO:0007275;GO:0007399;GO:0007411;GO:0007610;GO:0016020;GO:0016021;GO:0030154;GO:0030425;GO:0031175;GO:0045177;  
JTID ENSG00000163539:CLASP2 GO:0005488;GO:0005515;GO:0005737;GO:0005794;GO:0005828;GO:0005856;GO:0005881;GO:0007026;GO:0007049;GO:0007067;GO:0007163;GO:0008107;GO:0031110;GO:0051010;GO:0051301;GO:0008017;  
JTID ENSG00000104067:TJP1 GO:0005515;GO:0005624;GO:0005918;GO:0005923;GO:0007043;GO:0016020;  
JTID ENSG00000140598:EFTUD1 GO:0000166;GO:0003924;GO:0005525;  
JTID ENSG00000120278:PLEKHG1 GO:0005085;GO:0005089;GO:0005622;GO:0035023;  
JTID ENSG00000204539:CDSN  
JTID ENSG00000105329:TGFB1  
GO:0001501;GO:0001837;GO:0005160;GO:0005515;GO:0005578;GO:0005615;GO:0006468;GO:0006954;GO:0007179;GO:0008083;GO:0008219;GO:0008284;GO:0008285;GO:0008354;GO:0009887;GO:0016049;GO:0016202;GO:0016481;GO:0016563;GO:0030279;GO:0042127;GO:0042306;GO:0045066;GO:0045786;GO:0045893;GO:0048298;GO:0048535;GO:0051098;GO:0051101;  
JTID ENSG00000165156:ZHX1 GO:0003700;GO:0005515;GO:0005622;GO:0005634;GO:0008270;GO:0043565;GO:0045892;GO:0046872;  
JTID ENSG00000179456:ZNF238 GO:0000122;GO:0000228;GO:0003700;GO:0003704;GO:0005515;GO:0005622;GO:0005634;GO:0006350;GO:0006355;GO:0006810;GO:0007001;GO:0008270;GO:0046872;GO:0003676;  
JTID ENSG00000132963:POMP GO:0005634;GO:0005829;GO:0006457;GO:0006955;GO:0043234;  
JTID ENSG00000135919:SERPINE2 GO:0004867;GO:0005576;GO:0007275;GO:0007399;GO:0008201;GO:0030154;GO:0030162;GO:0030334;  
JTID ENSG00000177125:ZBTB34 GO:0003676;GO:0005515;GO:0005622;GO:0006350;GO:0006355;GO:0008270;GO:0046872;  
JTID ENSG00000148411:BTBD14A GO:0005515;  
JTID ENSG00000072401:UBE2D1 GO:0000209;GO:0004842;GO:0006464;GO:0006511;GO:0006512;GO:0016874;GO:0031398;  
JTID ENSG00000085511:MAP3K4 GO:0016301;GO:0000166;GO:0000186;GO:0000287;GO:0004674;GO:0004709;GO:0005524;GO:0006468;GO:0006950;GO:0007254;GO:0016740;  
TFJT MEIS1:LIN28; MEIS1:CDSN; MEIS1:ZNF238;  
MIJT hsa-miR-199a\*:DLG3:picstar; hsa-miR-199a\*:ZHX1:picstar; hsa-miR-199a\*:WFD9:mirbase; hsa-miR-199a\*:SON:mirbase:picstar; hsa-miR-199a\*:MAP3K4:mirbase:picstar; hsa-miR-199a\*:ZNF238:picstar; hsa-miR-199a\*:TJP1:picstar; hsa-miR-199a\*:TGFB1:mirbase; hsa-miR-199a\*:UBE2D1:picstar;  
  
//  
ANNOTATION: 2  
ID PBX-1:hsa-miR-103;  
TFID PBX-1;  
MIID ENSG00000199024:hsa-mir-103-2:hsa-miR-103;  
JTID ENSG00000204388:HSPA1B GO:0000166;GO:0005524;GO:0005634;GO:0005737;GO:0005739;GO:0005783;GO:0006402;GO:0006457;GO:0006916;GO:0006986;GO:0051082;  
JTID ENSG00000149182:ZNF289 GO:0005096;GO:0008270;GO:0043087;GO:0046872;  
JTID ENSG00000163444:TMEM183B GO:0016020;GO:0016021;  
JTID ENSG00000140854:KATNB1 GO:0000922;GO:0005515;GO:0005737;GO:0005813;GO:0005856;GO:0005874;GO:0006605;GO:0007026;GO:0007049;GO:0007067;GO:0008017;GO:0008352;GO:0008568;GO:0030424;GO:0031117;GO:0045502;GO:0046982;GO:0051301;  
JTID ENSG00000144285:SCN1A GO:0001518;GO:0005248;GO:0006811;GO:0006814;GO:0016020;GO:0016021;GO:0031402;GO:0005624;  
TFJT PBX-1:KATNB1; PBX-1:SCN1A;  
MIJT hsa-miR-103:SCN1A:targetscan; hsa-miR-103:TMEM183B:mirbase; hsa-miR-103:ZNF289:picstar;  
  
//  
ANNOTATION: 2  
ID MYC:hsa-miR-181d;  
TFID MYC;  
MIID ENSG00000207585:hsa-mir-181d:hsa-miR-181d;  
JTID ENSG00000106366:SERPINE1 GO:0002020;GO:0004867;GO:0005515;GO:0005576;GO:0007596;GO:0008243;GO:0042730;GO:0045765;  
JTID ENSG00000163463:KRTCAP2 GO:0004579;GO:0008250;GO:0016020;GO:0016021;GO:0018279;  
JTID ENSG00000101849:TBL1X GO:0005634;GO:0006350;GO:0006355;GO:0006512;GO:0007165;GO:0007601;GO:0007605;GO:0006382;GO:0005515;GO:0005667;GO:0006357;  
JTID ENSG00000113649:TCERG1 GO:0003702;GO:0003713;GO:0005515;GO:0005634;GO:0006350;GO:0006355;GO:0006366;  
JTID ENSG00000117000:RLF GO:0003700;GO:0005515;GO:0005622;GO:0005634;GO:0006350;GO:0006355;GO:0008270;GO:0046872;  
JTID ENSG00000101265:RASSF2 GO:0005515;GO:0005634;GO:0007049;GO:0007165;GO:0045786;  
JTID ENSG00000129244:ATP1B2 GO:0005391;GO:0005515;GO:0005737;GO:0006811;GO:0006813;GO:0006814;GO:0016020;GO:0016021;GO:0030955;GO:0031402;  
JTID ENSG00000131969:ABHD12B  
JTID ENSG00000197586:ENTPD6 GO:0016787;GO:0000287;GO:0005509;GO:0016020;GO:0016021;GO:0017110;  
JTID ENSG00000119599:WDR21A  
JTID ENSG00000144677:CTDSPL GO:0005634;GO:0016791;  
TFJT MYC:KRTCAP2; MYC:TBL1X; MYC:TCERG1;  
MIJT hsa-miR-181d:RASSF2:targetscan; hsa-miR-181d:RLF:targetscan:mirbase; hsa-miR-181d:CTDSPL:targetscan; hsa-miR-181d:KRTCAP2:targetscan; hsa-miR-181d:SERPINE1:targetscan:mirbase; hsa-miR-181d:TBL1X:targetscan:mirbase; hsa-miR-181d:ENTPD6:targetscan:mirbase; hsa-miR-181d:TCERG1:targetscan; hsa-miR-181d:WDR21A:targetscan; hsa-miR-181d:ATP1B2:targetscan:mirbase;  
  
//  
ANNOTATION: 2  
ID AREB6:hsa-miR-126;  
TFID AREB6;  
MIID ENSG00000199161:hsa-mir-126:hsa-miR-126;  
JTID ENSG00000165209:STRBP GO:0003677;GO:0003725;GO:0003727;GO:0005622;GO:0005634;GO:0006928;GO:0007275;GO:0007283;GO:0007286;GO:0007638;GO:0015630;GO:0030154;  
JTID ENSG000000051108:HERPUD1 GO:0005783;GO:0005789;GO:0006464;GO:0006986;GO:0016020;GO:0016021;GO:0006950;  
JTID ENSG00000141527:CARD14 GO:0001934;GO:0005515;GO:0005622;GO:0005737;GO:0005886;GO:0007250;GO:0042981;GO:0050700;  
JTID ENSG00000146833:TRIM4 GO:0005515;GO:0005622;GO:0008270;GO:0046872;  
JTID ENSG00000188402:NP\_995324.1 GO:0005529;  
JTID ENSG00000172889:EGFL7 GO:0001525;GO:0001568;GO:0001570;GO:0005509;GO:0005576;GO:0007275;GO:0030334;  
JTID ENSG00000145675:PIK3R1  
GO:0003924;GO:0005158;GO:0005159;GO:0005525;GO:0005545;GO:0005622;GO:0006955;GO:0007242;GO:0008286;GO:0019903;GO:0035014;GO:0035030;GO:0043125;GO:0043559;GO:0043560;GO:0046854;GO:0048009;GO:0001953;GO:0005515;GO:0005737;GO:0005829;GO:0006468;GO:0016020;GO:0030183;GO:0030335;GO:0043066;GO:0045671;  
JTID ENSG00000168703:WFD9 GO:0004867;GO:0005615;GO:0042742;  
JTID ENSG00000147889:CDKN2A GO:0003677;GO:0004861;GO:0005515;GO:0005634;GO:0005654;GO:0005730;GO:0005737;GO:0006350;GO:0006355;GO:0006364;GO:0006915;GO:0007049;GO:0007050;GO:0007569;GO:0008544;GO:0045736;GO:0000075;GO:0000079;GO:0008285;GO:0007568;  
JTID ENSG00000155090:KLF10 GO:0000122;GO:0001501;GO:0003676;GO:0003700;GO:0005622;GO:0005634;GO:0006355;GO:0007179;GO:0007267;GO:0008270;GO:0008283;GO:0008285;GO:0030282;GO:0045449;GO:0045672;GO:0046872;  
JTID ENSG00000185504:C17orf70  
JTID ENSG00000198963:ROBB GO:0003700;GO:0003707;GO:0005515;GO:0005634;GO:0006350;GO:0006355;GO:0007275;GO:0007601;GO:0008270;GO:0042462;GO:0043193;GO:0043565;GO:0046872;GO:0050896;  
JTID ENSG00000153558:FBXL2 GO:0004842;GO:0005515;GO:0005737;GO:0006464;GO:0006508;GO:0006512;  
JTID ENSG00000107758:PPP3CB GO:0000074;GO:0004722;GO:0005506;GO:0005509;GO:0005516;GO:0005955;GO:0006351;GO:0006470;GO:0007165;GO:0008270;GO:0016787;GO:0004721;GO:0007507;GO:0030217;  
TFJT AREB6:PPP3CB;  
MIJT hsa-miR-126:CARD14:mirbase; hsa-miR-126:PPP3CB:targetscan; hsa-miR-126:CDKN2A:mirbase; hsa-miR-126:HERPUD1:targetscan:mirbase; hsa-miR-126:EGFL7:targetscan:mirbase; hsa-miR-126:FBXL2:targetscan;  
  
//  
ANNOTATION: 2  
ID IRF-7:hsa-miR-133b;  
TFID IRF-7;  
MIID ENSG00000199080:hsa-mir-133b:hsa-miR-133b;  
JTID ENSG00000212131:PDXP GO:0000287;GO:0008152;GO:0016787;GO:0016791;  
JTID ENSG00000069696:DRD4 GO:0001584;GO:0001593;GO:0001975;GO:0004872;GO:0004952;GO:0007165;GO:0007195;GO:0007212;GO:0008344;GO:0016020;GO:0016021;GO:0042053;GO:0042596;GO:0048148;GO:0060080;  
JTID ENSG00000144580:RQCD1 GO:0007548;GO:0019221;  
JTID ENSG00000167371:PRRT2 GO:0009607;GO:0016021;  
JTID ENSG00000154822:PLCL2 GO:0004435;GO:0005509;GO:0006629;GO:0007242;  
TFJT IRF-7:PLCL2;  
MIJT hsa-miR-133b:PLCL2:targetscan; hsa-miR-133b:PDXP:targetscan; hsa-miR-133b:DRD4:targetscan:mirbase; hsa-miR-133b:PRRT2:targetscan:picstar;  
  
//  
ANNOTATION: 2

```
ID C-REL:hsa-miR-203;
TFID C-REL;
MIID ENSG00000207568:hsa-mir-203:hsa-miR-203;
JTID ENSG00000110777:POU2AF1 GO:0003677;GO:0003713;GO:0005515;GO:0005634;GO:0006350;GO:0006355;GO:0006366;GO:0006959;
JTID ENSG00000125810:CD93 GO:0001849;GO:0004872;GO:0005509;GO:0005515;GO:0005529;GO:0005886;GO:0006909;GO:0016021;GO:0016023;GO:0016337;GO:0042116;
JTID ENSG00000172818:OVOL1 GO:0000122;GO:0000239;GO:0003700;GO:0005622;GO:0005634;GO:0006350;GO:0006355;GO:0007283;GO:0007498;GO:0008270;GO:0008544;GO:0046872;
JTID ENSG00000143621:ILF2 GO:0003677;GO:0003702;GO:0003725;GO:0005515;GO:0005634;GO:0005730;GO:0006350;GO:0045893;
JTID ENSG00000173698:GPR64 GO:0004872;GO:0004930;GO:0005887;GO:0007165;GO:0007218;GO:0007283;GO:0016020;
JTID ENSG00000068650:ATP11A GO:0000166;GO:0000287;GO:0003824;GO:0004012;GO:0005524;GO:0006810;GO:0008152;GO:0015662;GO:0015914;GO:0016020;GO:0016021;GO:0016787;
JTID ENSG00000165478:HEPACAM GO:0016021;GO:0004872;
JTID ENSG00000041982:TNC GO:0005102;GO:0005578;GO:0007155;GO:0007165;GO:0005576;GO:0005604;GO:0007528;
JTID ENSG00000138617:PARP16 GO:0003950;GO:0005634;GO:0006471;GO:0016020;GO:0016021;GO:0016757;
JTID ENSG00000173046:NM_207376
JTID ENSG00000145824:CXCL14 GO:0005576;GO:0005615;GO:0005794;GO:0006935;GO:0006954;GO:0006955;GO:0007165;GO:0007267;GO:0008009;
TFJT C-REL:CD93; C-REL:TNC;
MIJT hsa-miR-203:TNC:targetscan:mirbase; hsa-miR-203:PARP16:targetscan; hsa-miR-203:ATP11A:targetscan; hsa-miR-203:GPR64:targetscan; hsa-miR-203:POU2AF1:targetscan; hsa-miR-203:CD93:targetscan; hsa-miR-203:HEPACAM:targetscan; hsa-miR-203:CXCL14:targetscan; hsa-miR-203:OVOL1:targetscan:mirbase:pictar; hsa-miR-203:ILF2:targetscan:mirbase;

//
ANNOTATION: 2
ID LEF1:hsa-miR-212;
TFID LEF1;
MIID ENSG00000207953:hsa-mir-212:hsa-miR-212;
JTID ENSG00000170689:HOXB9 GO:0003700;GO:0005515;GO:0005634;GO:0006355;GO:0007275;GO:0016563;GO:0043565;
JTID ENSG00000112339:HBS1L GO:0000166;GO:0003746;GO:0003924;GO:0005525;GO:0006412;GO:0007165;
JTID ENSG00000188092:GPR89B GO:0004871;GO:0016020;GO:0016021;GO:0043123;
JTID ENSG00000138433:CIR_HUMAN GO:0000118;GO:0003700;GO:0003714;GO:0005515;GO:0005634;GO:0006350;GO:0006397;GO:0008380;GO:0045892;
JTID ENSG00000101445:PPP1R16B GO:0005886;GO:0007165;GO:0019903;
JTID ENSG00000203864:Clorf137
JTID ENSG00000140563:MCTP2 GO:0005509;GO:0005624;GO:0016021;GO:0019722;
JTID ENSG000000055732:MCOLN3 GO:0005216;GO:0006811;GO:0016020;GO:0016021;GO:0005737;GO:0005886;GO:0007605;GO:0007626;GO:0042491;
JTID ENSG00000173848:NET1 GO:0001558;GO:0005085;GO:0005089;GO:0005622;GO:0005634;GO:0007165;GO:0035023;
JTID ENSG00000155858:LSM11 GO:0003723;GO:0005634;GO:0006397;GO:0008380;GO:0030529;
JTID ENSG00000182077:PTCHD3 GO:0008158;GO:0016020;
JTID ENSG00000134744:ZCCHC11 GO:0003676;GO:0005622;GO:0008270;GO:0016779;GO:0046872;
TFJT LEF1:HOXB9;
MIJT hsa-miR-212:GPR89B:mirbase; hsa-miR-212:LSM11:targetscan:pictar; hsa-miR-212:NET1:targetscan:mirbase:pictar; hsa-miR-212:Clorf137:mirbase; hsa-miR-212:HBS1L:targetscan:mirbase; hsa-miR-212:MCOLN3:targetscan:mirbase; hsa-miR-212:PPP1R16B:targetscan; hsa-miR-212:ZCCHC11:targetscan:mirbase;

//
ANNOTATION: 2
ID CHX10:hsa-miR-17-5p;
TFID CHX10;
MIID ENSG00000207745:hsa-mir-17:hsa-miR-17-5p;
JTID ENSG000000057019:DCBLD2 GO:0005515;GO:0005887;GO:0007155;GO:0009986;GO:0016020;GO:0030308;GO:0030522;GO:0042060;
JTID ENSG00000162624:LHX8 GO:0003677;GO:0003700;GO:0005634;GO:0006355;GO:0008270;GO:0043565;GO:0046872;GO:0007611;GO:0021879;GO:0042475;
JTID ENSG00000203793:Q6ZR74_HUMAN
TFMI CHX10:hsa-miR-17-5p:hsa-mir-17:computational(ECRbase);
MIJT hsa-miR-17-5p:DCBLD2:targetscan:pictar; hsa-miR-17-5p:LHX8:targetscan:pictar;

//
ANNOTATION: 2
ID PEA3:hsa-miR-26a;
TFID PEA3;
MIID ENSG00000207789:hsa-mir-26a-2:hsa-miR-26a;
JTID ENSG00000047249:ATP6V1H GO:0000221;GO:0000300;GO:0001671;GO:0005515;GO:0005524;GO:0006811;GO:0006897;GO:0007035;GO:0015986;GO:0015991;GO:0015992;GO:0016787;GO:0016887;GO:0030234;GO:0046872;GO:0046933;GO:0046961;
JTID ENSG00000114648:KLHL18 GO:0005515;
JTID ENSG000000090615:GOLGA3 GO:0000139;GO:0005215;GO:0005515;GO:0005793;GO:0005794;GO:0006891;GO:0017119;
JTID ENSG00000113845:C3orf1 GO:0005739;GO:0005743;GO:0008565;GO:0015031;GO:0016020;GO:0016021;
JTID ENSG00000138231:DBR1 GO:0000375;GO:0000398;GO:0005634;GO:0008419;GO:0016788;GO:0046872;
JTID ENSG00000100376:FAM118A GO:0016020;GO:0016021;
JTID ENSG00000183955:SETD8 GO:0005634;GO:0008168;GO:0016568;GO:0016740;GO:0018024;
JTID ENSG00000135365:PHF21A GO:0000118;GO:0005515;GO:0005634;GO:0006350;GO:0006355;GO:0008270;GO:0016568;GO:0046872;
JTID ENSG00000173027:WBP1 GO:0005515;
JTID ENSG00000176597:B3GNT5 GO:0005622;GO:0006486;GO:0007417;GO:0008378;GO:0008457;GO:0008917;GO:0009247;GO:0016020;GO:0016757;
JTID ENSG00000099994:SUSD2 GO:0005515;GO:0016020;GO:0016021;
JTID ENSG00000134001:E1F2S1 GO:0003723;GO:0003743;GO:0005515;GO:0005634;GO:0005737;GO:0005844;GO:0005850;GO:0005851;GO:0006412;GO:0006417;GO:0043558;
JTID ENSG00000129480:C14orf126 GO:0005737;GO:0016788;GO:0019478;
JTID ENSG00000110172:CHORDC1 GO:0008270;
JTID ENSG00000111775:COX6A1 GO:0004129;GO:0005739;GO:0005740;GO:0006118;GO:0016020;GO:0016491;
JTID ENSG00000138792:ENPEP GO:0001525;GO:0004179;GO:0004230;GO:0005509;GO:0005886;GO:0005887;GO:0005903;GO:0006508;GO:0007267;GO:0008237;GO:0008270;GO:0008283;GO:0016324;GO:0016477;GO:0031410;GO:0045177;
JTID ENSG00000121270:ABCC11 GO:0000166;GO:0005524;GO:0006810;GO:0016020;GO:0016021;GO:0016887;GO:0042626;
JTID ENSG00000133858:CCDC131 GO:0005488;GO:0005622;GO:0006396;
JTID ENSG00000183929:DUSP5P
JTID ENSG00000165476:REBP3 GO:0016020;GO:0016021;
JTID ENSG00000107938:C10orf137
JTID ENSG00000137504:CREBZF GO:0003700;GO:0005634;GO:0006350;GO:0006355;GO:0009615;GO:0016481;GO:0016566;GO:0043565;GO:0045814;GO:0046983;GO:0051090;
TFJT PEA3:CCDC131;
MIJT hsa-miR-26a:B3GNT5:targetscan:mirbase; hsa-miR-26a:SETD8:targetscan:pictar; hsa-miR-26a:CREBZF:targetscan:mirbase; hsa-miR-26a:FAM118A:targetscan; hsa-miR-26a:CCDC131:targetscan:pictar; hsa-miR-26a:GOLGA3:targetscan; hsa-miR-26a:KLHL18:targetscan; hsa-miR-26a:ATP6V1H:mirbase; hsa-miR-26a:CHORDC1:targetscan:mirbase:pictar; hsa-miR-26a:ABCC11:targetscan; hsa-miR-26a:SUSD2:targetscan; hsa-miR-26a:C10orf137:targetscan:pictar; hsa-miR-26a:DBR1:targetscan; hsa-miR-26a:C3orf1:targetscan; hsa-miR-26a:ENPEP:targetscan:mirbase; hsa-miR-26a:PHF21A:targetscan:pictar; hsa-miR-26a:WBP1:mirbase; hsa-miR-26a:E1F2S1:targetscan; hsa-miR-26a:C14orf126:targetscan; hsa-miR-26a:REBP3:targetscan:pictar;

//
ANNOTATION: 2
ID NCX:hsa-miR-20a;
TFID NCX;
MIID ENSG00000199149:hsa-mir-20a:hsa-miR-20a;
JTID ENSG00000175155:YPEL2 GO:0005634;
JTID ENSG00000143107:FNDC7
JTID ENSG00000166435:XRRAL GO:0005515;
JTID ENSG00000050405:LIM1 GO:0001725;GO:0003785;GO:0005925;GO:0008270;GO:0015629;GO:0030835;GO:0031529;GO:0046872;GO:0051015;GO:0051017;
JTID ENSG00000196460:Q6ZNB4_HUMAN GO:0003677;GO:0006355;
JTID ENSG00000145362:ANK2 GO:0005200;GO:0005515;GO:0007165;GO:0015629;GO:0016020;GO:0005856;
JTID ENSG00000136935:GOLGA1 GO:0005794;
TFJT NCX:YPEL2; NCX:ANK2;
MIJT hsa-miR-20a:GOLGA1:targetscan; hsa-miR-20a:LIM1:targetscan:pictar; hsa-miR-20a:ANK2:targetscan:pictar; hsa-miR-20a:YPEL2:targetscan;

//
ANNOTATION: 2
ID NCX:hsa-miR-363;
TFID NCX;
MIID ENSG00000207572:hsa-mir-363:hsa-miR-363;
```





```
//
ANNOTATION: 2
ID BACH2:hsa-miR-135b;
TFID BACH2;
MIID ENSG00000199059:hsa-mir-135b:hsa-miR-135b;
JTID ENSG00000188100:FAM25_HUMAN
JTID ENSG00000125827:TXNDC13 GO:0006118;GO:0006810;GO:0016020;GO:0016021;GO:0045454;
JTID ENSG00000184654:YV006_HUMAN
JTID ENSG00000173153:ESRRA GO:0003700;GO:0003707;GO:0005496;GO:0005515;GO:0005634;GO:0006350;GO:0006355;GO:0008270;GO:0016439;GO:0043565;GO:0046872;
JTID ENSG00000095752:IL11 GO:0005125;GO:0005142;GO:0005576;GO:0005615;GO:0007267;GO:0008284;GO:0030168;GO:0030183;GO:0030219;GO:0045444;
JTID ENSG00000164935:TM7SF4 GO:0009986;GO:0016020;GO:0016021;GO:0030316;
JTID ENSG00000167861:C17orf28 GO:0016020;GO:0016021;GO:0005515;GO:0005737;GO:0007605;GO:0035315;GO:0042472;GO:0042803;
JTID ENSG00000197415:VEPH1
JTID ENSG00000102181:CD99L2
JTID ENSG00000198246:SLC29A3 GO:0005337;GO:0006810;GO:0016020;GO:0016021;
TFJT BACH2:YV006_HUMAN; BACH2:ESRRA; BACH2:IL11; BACH2:VEPH1;
MIJT hsa-miR-135b:TM7SF4:mirbase; hsa-miR-135b:ESRRA:targetscan:mirbase:pictar; hsa-miR-135b:SLC29A3:targetscan; hsa-miR-135b:VEPH1:targetscan:mirbase; hsa-miR-135b:FAM25_HUMAN:mirbase;
```

```
//
ANNOTATION: 2
ID LEF1:hsa-miR-802;
TFID LEF1;
MIID ENSG00000211590:hsa-mir-802:hsa-miR-802;
JTID ENSG00000106714:CNTNAP3 GO:0005102;GO:0007155;GO:0007165;GO:0008037;GO:0016020;GO:0016021;
JTID ENSG00000205214:Q6ZU66_HUMAN
JTID ENSG00000205036:NP_001001682.1
JTID ENSG00000153989:NUS1 GO:0001525;GO:0004872;GO:0007275;GO:0008152;GO:0016020;GO:0016021;GO:0016740;GO:0030154;
JTID ENSG00000112144:ICK GO:0000166;GO:0000287;GO:0004674;GO:0005524;GO:0006468;GO:0007165;GO:0007243;GO:0007275;GO:0016740;
JTID ENSG00000052126:PLEKHA5 GO:0005515;GO:0005545;
JTID ENSG00000151474:FRMD4A GO:0005488;GO:0005737;GO:0005856;GO:0008092;GO:0016020;
JTID ENSG00000125879:OTOR GO:0001502;GO:0007605;
JTID ENSG00000106049:HIBADH GO:0004616;GO:0005739;GO:0006098;GO:0006573;GO:0008442;GO:0016491;GO:0051287;
TFMI LEF1:hsa-miR-802:hsa-mir-802:computational(ECRbase);
MIJT hsa-miR-802:ICK:targetscan; hsa-miR-802:CNTNAP3:targetscan; hsa-miR-802:OTOR:targetscan:mirbase; hsa-miR-802:NP_001001682.1:mirbase; hsa-miR-802:PLEKHA5:targetscan; hsa-miR-802:NUS1:targetscan;
```

```
//
ANNOTATION: 2
ID LEF1:hsa-miR-126*;
TFID LEF1;
MIID ENSG00000199161:hsa-mir-126:hsa-miR-126*;
JTID ENSG00000115355:KIAA1212 GO:0001932;GO:0003779;GO:0005783;GO:0005794;GO:0005829;GO:0005886;GO:0006275;GO:0008017;GO:0016044;GO:0016477;GO:0030027;GO:0030032;GO:0031410;GO:0032148;GO:0032956;GO:0035091;GO:0042127;GO:0042803;GO:0043422;
JTID ENSG00000105705:SF4 GO:0003723;GO:0005622;GO:0005634;GO:0005681;GO:0006397;GO:0008380;
JTID ENSG00000164022:SCYE1 GO:0000049;GO:0005125;GO:0005615;GO:0006418;GO:0006935;GO:0006954;GO:0007165;GO:0007267;
JTID ENSG00000155545:MIER3 GO:0003677;GO:0005634;GO:0005509;
JTID ENSG00000147003:TMEM27 GO:0004246;GO:0006508;GO:0016020;GO:0016021;
JTID ENSG00000133116:KL GO:0004566;GO:0004871;GO:0005179;GO:0005499;GO:0005615;GO:0005624;GO:0005625;GO:0005887;GO:0005975;GO:0006112;GO:0007568;GO:0008152;GO:0008422;GO:0016020;GO:0030501;GO:0043169;
JTID ENSG00000170458:CD14 GO:0005515;GO:0005886;GO:0006909;GO:0006915;GO:0006954;GO:0006955;GO:0007166;GO:0016019;GO:0019898;GO:0048503;
JTID ENSG00000174231:PRPF8 GO:0000398;GO:0005515;GO:0005634;GO:0005681;GO:0005682;GO:0007601;GO:0008380;GO:0031202;GO:0050896;
JTID ENSG0000009780:FAM76A
JTID ENSG00000189069:NP_001013732.1
JTID ENSG00000114650:SCAP GO:0005783;GO:0005794;GO:0006629;GO:0006994;GO:0008202;GO:0008203;GO:0016020;GO:0016021;GO:0045541;GO:0045716;GO:0051082;GO:0019217;
JTID ENSG00000100299:ARSA GO:0000287;GO:0000299;GO:0004065;GO:0004098;GO:0005764;GO:0005886;GO:0007339;GO:0008152;GO:0008484;GO:0016787;
JTID ENSG00000096088:PGC GO:0004194;GO:0005615;GO:0006508;GO:0007586;GO:0008233;
JTID ENSG00000112062:MAPK14
GO:0000166;GO:0004674;GO:0004707;GO:0004708;GO:0005515;GO:0005524;GO:0005634;GO:0005737;GO:0006468;GO:0006928;GO:0006935;GO:0006950;GO:0007166;GO:0007243;GO:0008339;GO:0016740;GO:0000077;GO:0000922;GO:0001525;GO:0004672;GO:0005623;GO:0006006;GO:0007519;GO:0016301;GO:0019395;GO:0031663;GO:003249
6;GO:0045648;GO:0045944;
JTID ENSG00000110315:RNF141 GO:0003677;GO:0005515;GO:0006355;GO:0008270;GO:0046872;
JTID ENSG00000175756:AURKAIP1 GO:0005515;GO:0005634;GO:0005839;GO:0045862;
JTID ENSG00000100422:CERK GO:0000287;GO:0000299;GO:0001729;GO:0004143;GO:0005509;GO:0006672;GO:0007205;GO:0016740;
JTID ENSG00000163586:FABP1 GO:0003682;GO:0005319;GO:0005737;GO:0006631;GO:0006810;GO:0007267;GO:0008289;GO:0009887;
JTID ENSG00000070190:DAPP1 GO:0004725;GO:0005543;GO:0005942;GO:0006470;GO:0007242;GO:0035014;
JTID ENSG00000162981:FAM84A
JTID ENSG00000174683:C8orf78
JTID ENSG00000204248:COL11A2 GO:0001501;GO:0005581;GO:0005592;GO:0005737;GO:0006817;GO:0007155;GO:0007605;GO:0030020;GO:0030199;GO:0005198;
JTID ENSG00000165862:PNLIPRP2 GO:0004806;GO:0005576;GO:0006641;GO:0006968;GO:0007586;GO:0016042;GO:0016787;
JTID ENSG00000118194:TNNT2 GO:0003779;GO:0005523;GO:0005861;GO:0008016;GO:0030049;GO:0030172;GO:0031013;GO:0032780;GO:0032781;GO:0051592;GO:0005200;GO:0005737;GO:0006936;GO:0007507;GO:0030016;GO:0030017;GO:0045214;GO:0055009;GO:0055010;
JTID ENSG00000155307:SAMSN1 GO:0001784;
JTID ENSG00000198785:GRIN3A GO:0000287;GO:0004872;GO:0004970;GO:0004972;GO:0005216;GO:0005234;GO:0005262;GO:0005509;GO:0005515;GO:0006811;GO:0016020;GO:0016021;GO:0016358;GO:0045211;
JTID ENSG00000206053:HN1L GO:0005634;
JTID ENSG00000109738:GLRB GO:0001964;GO:0005216;GO:0005230;GO:0005488;GO:0005515;GO:0005624;GO:0005887;GO:0006811;GO:0006821;GO:0007218;GO:0007268;GO:0007340;GO:0007399;GO:0007601;GO:0007628;GO:0016594;GO:0016934;GO:0030594;GO:0031404;GO:0042391;GO:0045211;GO:0050905;GO:0060012;GO:0060013;
JTID ENSG00000171759:PAH GO:0004497;GO:0004505;GO:0005506;GO:0006559;GO:0008152;GO:0008652;GO:0009072;GO:0016597;GO:0046872;
JTID ENSG00000008869:HEATR5B
JTID ENSG00000177822:XR_017723.1
JTID ENSG00000186468:RPS23 GO:0003723;GO:0003735;GO:0005622;GO:0005843;GO:0006412;GO:0045182;
TFJT LEF1:SAMSN1; LEF1:GRIN3A;
MIJT hsa-miR-126*:SAMSN1:mirbase; hsa-miR-126*:SCAP:mirbase; hsa-miR-126*:PGC:mirbase; hsa-miR-126*:PRPF8:mirbase;
```

```
//
ANNOTATION: 2
ID AREB6:hsa-miR-363;
TFID AREB6;
MIID ENSG00000207572:hsa-mir-363:hsa-miR-363;
JTID ENSG00000144583:MARCH4 GO:0005515;GO:0006512;GO:0008270;GO:0016020;GO:0016021;GO:0016874;GO:0046872;
JTID ENSG00000125351:UPF3B GO:0000166;GO:0000184;GO:0003723;GO:0005487;GO:0005515;GO:0005634;GO:0005737;GO:0006810;GO:0051028;
JTID ENSG00000205875:LOC197350 GO:0006118;GO:0006508;GO:0009055;GO:0030693;
JTID ENSG00000197713:RPE GO:0004750;GO:0005515;GO:0005975;GO:0008152;GO:0016853;GO:0003824;
JTID ENSG00000180104:EXOC3 GO:0006887;GO:0015031;
JTID ENSG00000116032:GRIN3B GO:0000287;GO:0004872;GO:0004970;GO:0005216;GO:0005234;GO:0005262;GO:0005509;GO:0006811;GO:0016020;GO:0016021;GO:0017146;GO:0043025;GO:0045211;GO:0051205;GO:0051924;
TFJT AREB6:MARCH4;
MIJT hsa-miR-363:GRIN3B:mirbase; hsa-miR-363:LOC197350:mirbase;
```

```
//
ANNOTATION: 2
ID CdxA:hsa-miR-106a;
TFID CdxA;
MIID ENSG00000207602:hsa-mir-106a:hsa-miR-106a;
JTID ENSG00000136811:ODF2 GO:0005198;
JTID ENSG00000124762:CDKN1A GO:0000307;GO:0004672;GO:0004861;GO:0005634;GO:0005829;GO:0006974;GO:0007049;GO:0007050;GO:0008270;GO:0008285;GO:0008629;GO:0009411;GO:0016301;GO:0030332;GO:0030890;GO:0043066;GO:0043071;GO:0045736;GO:0046872;GO:0000074;GO:0005515;
JTID ENSG00000180917:NP_060818.3
JTID ENSG00000171885:AQP4 GO:0005215;GO:0006810;GO:0015288;GO:0016020;GO:0016021;GO:0019867;GO:0005887;GO:0007399;GO:0007588;GO:0015250;
JTID ENSG00000163281:GNPDA2 GO:0004342;GO:0005975;GO:0006044;GO:0016853;
```

```
JTID ENSG00000134375:TIMM17A GO:0005739;GO:0005744;GO:0006626;GO:0015450;GO:0016020;GO:0016021;
TFMI CdxA:hsa-miR-106a:hsa-miR-106a:computational(ECRbase);
MIJT hsa-miR-106a:CDKN1A:targetscan; hsa-miR-106a:AQP4:targetscan; hsa-miR-106a:TIMM17A:targetscan; hsa-miR-106a:NP_060818.3:mirbase; hsa-miR-106a:GNPDA2:targetscan:mirbase;

//
ANNOTATION: 2
ID ELF-1:hsa-miR-133b;
TFID ELF-1;
MIID ENSG00000199080:hsa-miR-133b:hsa-miR-133b;
JTID ENSG00000137507:LRR32 GO:0005515;GO:0005887;GO:0016020;
JTID ENSG00000163568:AIM2 GO:0006955;
JTID ENSG00000154822:PLCL2 GO:0004435;GO:0005509;GO:0006629;GO:0007242;
JTID ENSG00000084207:GSTP1 GO:0004364;GO:0005515;GO:0005737;GO:0006916;GO:0007417;GO:0008152;GO:0016740;
JTID ENSG00000120437:ACAT2 GO:0003985;GO:0005515;GO:0005737;GO:0006629;GO:0008415;GO:0016740;
TFJT ELF-1:PLCL2;
MIJT hsa-miR-133b:GSTP1:targetscan; hsa-miR-133b:PLCL2:targetscan; hsa-miR-133b:LRR32:targetscan; hsa-miR-133b:ACAT2:targetscan; hsa-miR-133b:AIM2:targetscan;

//
ANNOTATION: 2
ID TCF-4:hsa-miR-27a;
TFID TCF-4;
MIID ENSG00000207808:hsa-miR-27a:hsa-miR-27a;
JTID ENSG00000130479:MAP1S GO:0001578;GO:0003677;GO:0005515;GO:0005634;GO:0005829;GO:0005874;GO:0006915;GO:0007399;GO:0007420;GO:0008017;GO:0030425;GO:0043025;GO:0047497;GO:0048471;GO:0048487;GO:0048812;GO:0051015;GO:0042802;
JTID ENSG00000157103:SLC6A1 GO:0005328;GO:0005332;GO:0005624;GO:0005887;GO:0006836;GO:0007268;GO:0015293;GO:0016020;GO:0030424;
JTID ENSG00000174574:Clorf108
JTID ENSG00000006114:APIGBP1 GO:0005509;GO:0005737;GO:0005794;GO:0006886;GO:0006897;GO:0016020;GO:0030121;
JTID ENSG00000184005:ST6GALNAC3 GO:0006486;GO:0008373;GO:0016020;GO:0016021;GO:0030173;
JTID ENSG0000005070:Clorf144
JTID ENSG00000152409:NP_689618.2 GO:0003713;GO:0005515;GO:0005634;GO:0006357;GO:0006917;GO:0007050;GO:0043620;GO:0051091;
TFJT TCF-4:Clorf144;
MIJT hsa-miR-27a:APIGBP1:targetscan:mirbase; hsa-miR-27a:Clorf108:targetscan:pictar; hsa-miR-27a:NP_689618.2:mirbase; hsa-miR-27a:MAP1S:targetscan:mirbase; hsa-miR-27a:Clorf144:targetscan:pictar; hsa-miR-27a:ST6GALNAC3:targetscan:pictar; hsa-miR-27a:SLC6A1:targetscan:pictar;

//
ANNOTATION: 2
ID SP-1:hsa-miR-425-3p;
TFID SP-1;
MIID ENSG00000199032:hsa-miR-425:hsa-miR-425-3p;
JTID ENSG00000163322:CCDC98
JTID ENSG00000178538:CA8 GO:0004089;GO:0005515;GO:0005737;GO:0006730;GO:0008270;GO:0046872;GO:0048015;
TFMI SP-1:hsa-miR-425-3p:hsa-miR-425:computational(PUBMED: 17447837);
MIJT hsa-miR-425-3p:CCDC98:targetscan:mirbase;

//
ANNOTATION: 2
ID MEIS1:hsa-miR-149;
TFID MEIS1;
MIID ENSG00000207611:hsa-miR-149:hsa-miR-149;
JTID ENSG00000158966:CACHD1 GO:0016020;
JTID ENSG00000167994:RAB31L1
JTID ENSG00000189363:Q6ZSP4_HUMAN
JTID ENSG00000103067:RBM35B GO:0000166;GO:0003723;
JTID ENSG00000162430:SEPN1 GO:0005509;GO:0005576;GO:0005783;GO:0008430;
JTID ENSG00000204946:ZNF783 GO:0003677;GO:0005622;GO:0005634;GO:0006350;GO:0006355;
JTID ENSG00000168781:HISPPD2A GO:0003993;
JTID ENSG00000074317:SNCB GO:0004859;GO:0005737;GO:0005739;GO:0019717;GO:0042417;
JTID ENSG00000151474:FRMD4A GO:0005488;GO:0005737;GO:0005856;GO:0008092;GO:0016020;
JTID ENSG00000164061:BSN GO:0005200;GO:0005634;GO:0005856;GO:0007268;GO:0008270;GO:0019717;GO:0045202;GO:0046872;
JTID ENSG00000172273:MI2F GO:0003677;GO:0005622;GO:0005634;GO:0006350;GO:0006355;GO:0008270;GO:0046872;
JTID ENSG00000102313:TIH5L GO:0004867;GO:0030212;
TFJT MEIS1:HISPPD2A;
MIJT hsa-miR-149:BSN:targetscan; hsa-miR-149:TIH5L:targetscan:mirbase; hsa-miR-149:SNCB:targetscan:mirbase:pictar; hsa-miR-149:RBM35B:targetscan; hsa-miR-149:MI2F:targetscan:mirbase; hsa-miR-149:RAB31L1:targetscan:mirbase; hsa-miR-149:SEPN1:targetscan; hsa-miR-149:FRMD4A:targetscan;
hsa-miR-149:HISPPD2A:targetscan; hsa-miR-149:CACHD1:targetscan;

//
ANNOTATION: 2
ID AREB6:hsa-miR-140;
TFID AREB6;
MIID ENSG00000208017:hsa-miR-140:hsa-miR-140;
JTID ENSG00000182490:TSSK2 GO:0000166;GO:0000287;GO:0004674;GO:0005515;GO:0005524;GO:0006468;GO:0007275;GO:0007283;GO:0016740;GO:0030154;
JTID ENSG00000086232:EIF2AK1 GO:0000166;GO:0004694;GO:0005524;GO:0005737;GO:0006950;GO:0009605;GO:0016740;GO:0020037;GO:0042803;GO:0045993;GO:0046777;GO:0046986;
JTID ENSG00000159650:UROCl GO:0006548;GO:0016153;GO:0016829;
JTID ENSG00000159925:ZIC3 GO:0003677;GO:0005622;GO:0005634;GO:0006350;GO:0006355;GO:0007368;GO:0008270;GO:0046872;GO:0001947;GO:0003676;GO:0005515;GO:0007389;GO:0009952;GO:0045944;
JTID ENSG00000106780:MEGF9 GO:0004872;GO:0005509;GO:0016020;GO:0016021;
JTID ENSG00000165168:CYBB GO:0005244;GO:0005506;GO:0005737;GO:0005886;GO:0005887;GO:0006118;GO:0006811;GO:0006954;GO:0016491;GO:0046872;GO:0050660;
JTID ENSG00000197448:GSTK1 GO:0015035;GO:0030288;GO:0004364;GO:0005515;GO:0005622;GO:0005777;GO:0016740;
JTID ENSG00000190245:Q8N7M3_HUMAN
JTID ENSG00000118898:PPL GO:0005200;GO:0005515;GO:0005856;GO:0031424;
JTID ENSG00000154096:THY1
GO:0001525;GO:0005100;GO:0005178;GO:0005515;GO:0005783;GO:0005829;GO:0005886;GO:0005887;GO:0006469;GO:0007010;GO:0009897;GO:0016337;GO:0030336;GO:0030426;GO:0043066;GO:0043547;GO:0045121;GO:0045576;GO:0046549;GO:0048041;GO:0048147;GO:0048503;GO:0050731;GO:0050771;GO:0050852;GO:0050860;GO:0050870;GO:0051281;
JTID ENSG00000101290:CDS2 GO:0004605;GO:0005743;GO:0008654;GO:0016020;GO:0016021;GO:0016740;
TFJT AREB6:ZIC3;
MIJT hsa-miR-140:TSSK2:targetscan:pictar; hsa-miR-140:PPL:targetscan; hsa-miR-140:MEGF9:targetscan; hsa-miR-140:EIF2AK1:targetscan; hsa-miR-140:ZIC3:mirbase; hsa-miR-140:CDS2:targetscan; hsa-miR-140:CYBB:targetscan; hsa-miR-140:UROCl:targetscan;

//
ANNOTATION: 2
ID EGR:hsa-miR-193a;
TFID EGR;
MIID ENSG00000207614:hsa-miR-193a:hsa-miR-193a;
JTID ENSG000000012779:ALOX5 GO:0004051;GO:0005506;GO:0005509;GO:0005515;GO:0005634;GO:0005737;GO:0006118;GO:0006691;GO:0006954;GO:0016165;GO:0016491;GO:0019370;GO:0046872;
JTID ENSG00000171365:CLCN5 GO:0005247;GO:0005887;GO:0006811;GO:0006821;GO:0006897;GO:0007588;GO:0016020;GO:0031404;
JTID ENSG00000084090:STARD7
JTID ENSG00000137478:FCHSD2 GO:0005515;
JTID ENSG00000156218:ADAMTSL3 GO:0005578;GO:0008237;GO:0008270;
JTID ENSG00000167716:WDR81
TFJT EGR:WDR81;
MIJT hsa-miR-193a:FCHSD2:targetscan; hsa-miR-193a:WDR81:targetscan; hsa-miR-193a:ALOX5:targetscan:mirbase; hsa-miR-193a:ADAMTSL3:targetscan; hsa-miR-193a:STARD7:targetscan:mirbase; hsa-miR-193a:CLCN5:targetscan;

//
ANNOTATION: 2
```

```
ID IRF-7:hsa-miR-802;
TFID IRF-7;
MIID ENSG00000211590:hsa-mir-802:hsa-miR-802;
JTID ENSG00000198739:LRRTM3 GO:0005515;GO:0016020;GO:0016021;
JTID ENSG00000101193:C20orf11 GO:0005515;GO:0005634;
JTID ENSG00000106714:CNTNAP3 GO:0005102;GO:0007155;GO:0007165;GO:0008037;GO:0016020;GO:0016021;
JTID ENSG00000048544:MRPS10 GO:0003735;GO:0005622;GO:0005739;GO:0005761;GO:0005840;GO:0006412;
JTID ENSG00000197657:ZNF323 GO:0003676;GO:0003700;GO:0005622;GO:0005634;GO:0006350;GO:0006355;GO:0008270;GO:0046872;
JTID ENSG00000066855:MTFR1 GO:0005739;GO:0005886;
TFJT IRF-7:LRRTM3;
MIJT hsa-miR-802:C20orf11:targetscan; hsa-miR-802:ZNF323:targetscan; hsa-miR-802:CNTNAP3:targetscan; hsa-miR-802:MTFR1:targetscan; hsa-miR-802:LRRTM3:targetscan;

//
ANNOTATION: 2
ID SP-1:hsa-miR-218;
TFID SP-1;
MIID ENSG00000207739:hsa-mir-218-2:hsa-miR-218;
JTID ENSG00000136942:RPL35 GO:0003729;GO:0003735;GO:0005515;GO:0005622;GO:0005730;GO:0005840;GO:0005842;GO:0006412;
JTID ENSG0000003249:DBNDD1 GO:0005515;GO:0005737;
JTID ENSG00000119771:KLHL29 GO:0005515;
JTID ENSG00000188428:TXNDC5 GO:0005783;GO:0006916;GO:0016853;GO:0045454;GO:0005515;GO:0005788;
JTID ENSG00000120333:MRPS14 GO:0003735;GO:0005622;GO:0005739;GO:0005761;GO:0005840;GO:0006412;
JTID ENSG00000174775:HRAS GO:000166;GO:000525;GO:0005622;GO:0007264;GO:0016020;GO:0000074;GO:0005737;GO:0005886;GO:0006935;GO:0007166;GO:0008022;GO:0009887;GO:0005515;GO:0006897;GO:0007569;GO:0008283;GO:0043524;GO:0048169;
TFMI SP-1:hsa-miR-218:hsa-mir-218-2:computational(PUBMED: 17447837);
MIJT hsa-miR-218:HRAS:targetscan; hsa-miR-218:TXNDC5:targetscan; hsa-miR-218:RPL35:targetscan:mirbase; hsa-miR-218:DBNDD1:targetscan:pictar;

//
ANNOTATION: 2
ID ER:hsa-miR-101;
TFID ER;
MIID ENSG00000199135:hsa-mir-101-1:hsa-miR-101;
JTID ENSG00000176276:hCG_1757335 GO:0005515;GO:0008283;
JTID ENSG00000019991:HGF GO:0001837;GO:0004252;GO:0005515;GO:0006508;GO:0007067;GO:0008083;GO:000187;GO:0000902;GO:0006916;GO:0008283;GO:0048012;GO:0051450;
JTID ENSG00000179151:EDC3 GO:0005515;
JTID ENSG00000136928:GABBR2 GO:0004872;GO:0004965;GO:0005887;GO:0007165;GO:0007186;GO:0007194;GO:0007268;GO:0045211;
JTID ENSG00000160972:PPP1R16A GO:0005515;GO:0016020;
JTID ENSG00000182923:CEP63 GO:0005515;GO:0005813;
JTID ENSG00000136205:TNS3 GO:0007242;GO:0016311;GO:0016791;GO:0008284;GO:0016477;GO:0048286;
JTID ENSG00000170801:HTRA3 GO:0001558;GO:0004252;GO:0005515;GO:0005520;GO:0005576;GO:0006508;GO:0008233;
JTID ENSG00000168118:RAB4A GO:000166;GO:0003924;GO:0005525;GO:0005622;GO:0005737;GO:0007264;GO:0015031;GO:0000074;GO:0005515;GO:0005768;GO:0006260;GO:0008565;GO:0030100;
JTID ENSG00000198863:RUNDC1
JTID ENSG00000186111:PIP5K1C GO:0007409;GO:0016020;GO:0016301;GO:0016308;GO:0016740;GO:0046488;
JTID ENSG00000104067:TJPI GO:0005515;GO:0005624;GO:0005918;GO:0005923;GO:0007043;GO:0016020;
JTID ENSG00000170608:FOXA3 GO:0001678;GO:0003677;GO:0003700;GO:0003704;GO:0005634;GO:0006350;GO:0006355;GO:0009267;GO:0030528;GO:0043565;
JTID ENSG00000168575:SLC20A2 GO:0004872;GO:0005315;GO:0005436;GO:0005624;GO:0005887;GO:0006810;GO:0006817;GO:0016020;
JTID ENSG00000117620:SLC35A3 GO:0000139;GO:0005338;GO:0005351;GO:0015780;GO:0016021;GO:0005462;GO:0005794;GO:0006047;GO:0015788;GO:0016020;
JTID ENSG00000188807:NF_001010866.1
JTID ENSG00000088854:C20orf194 GO:0003676;GO:0005622;GO:0008270;
JTID ENSG00000175220:ARHGAP1 GO:0001726;GO:0005070;GO:0005096;GO:0005515;GO:0005622;GO:0005886;GO:0007010;GO:0007165;GO:0007264;GO:0007266;GO:0030675;GO:0043087;
JTID ENSG00000100109:TFPI1 GO:0001503;GO:0003676;GO:0005515;GO:0005578;GO:0005622;GO:0005634;GO:0005681;GO:0006397;GO:0008380;GO:0016607;GO:0030154;GO:0030198;GO:0045045;
JTID ENSG00000119707:RBM25 GO:000166;GO:000398;GO:0003676;GO:0003729;
JTID ENSG00000180263:FGD6 GO:0001726;GO:0005085;GO:0005089;GO:0005515;GO:0005622;GO:0005737;GO:0005794;GO:0005856;GO:0007010;GO:0008270;GO:0008360;GO:0030027;GO:0030036;GO:0031267;GO:0035023;GO:0043088;GO:0046847;GO:0046872;
JTID ENSG00000093167:LRRFIP2 GO:0016055;GO:0030275;
TFJT ER:RBM25;
MIJT hsa-miR-101:RAB4A:targetscan:mirbase; hsa-miR-101:TNS3:targetscan; hsa-miR-101:LRRFIP2:targetscan:mirbase:pictar; hsa-miR-101:EDC3:targetscan; hsa-miR-101:PPP1R16A:targetscan; hsa-miR-101:FOXA3:targetscan:mirbase; hsa-miR-101:FGD6:targetscan; hsa-miR-101:CEP63:targetscan:mirbase;
hsa-miR-101:HTRA3:targetscan; hsa-miR-101:RBM25:targetscan; hsa-miR-101:SLC35A3:targetscan; hsa-miR-101:PIP5K1C:targetscan; hsa-miR-101:SLC20A2:targetscan:mirbase; hsa-miR-101:ARHGAP1:targetscan; hsa-miR-101:TFPI1:targetscan:mirbase; hsa-miR-101:RUNDC1:targetscan:mirbase; hsa-miR-
101:TJPI:targetscan:pictar; hsa-miR-101:GABBR2:targetscan:mirbase;

//
ANNOTATION: 1
ID HNF-1:hsa-miR-495;
TFID HNF-1;
MIID ENSG00000207743:hsa-mir-495:hsa-miR-495;
JTID ENSG00000175895:PLEKHF2 GO:0008270;GO:0030133;GO:0046872;
JTID ENSG00000143190:POU2F1 GO:0003700;GO:0005515;GO:0005634;GO:0006355;GO:0016481;GO:0043565;GO:0045944;
JTID ENSG00000103066:LYPLA3 GO:0004607;GO:0004622;GO:0005543;GO:0005625;GO:0005764;GO:0006629;GO:0006672;GO:0008415;GO:0009062;GO:0016740;GO:0016787;GO:0047499;
JTID ENSG00000205195:Q62TB1_HUMAN
JTID ENSG00000174521:TTC9B GO:0005488;GO:0006457;
JTID ENSG00000135631:RAB11FIP5 GO:0005515;GO:0005741;GO:0015031;GO:0043015;
JTID ENSG00000145495:MARCH6 GO:0005515;GO:0005783;GO:0006512;GO:0008270;GO:0016020;GO:0016021;GO:0016874;GO:0046872;
JTID ENSG00000182667:NTRI_HUMAN GO:0005515;GO:0005887;GO:0007155;GO:0008038;GO:0016020;GO:0048503;
JTID ENSG00000167207:NOD2 GO:000166;GO:0001816;GO:0002224;GO:0005524;GO:0005622;GO:0005737;GO:0005829;GO:0005886;GO:0007242;GO:0008063;GO:0016045;GO:0019899;GO:0019901;GO:0031982;GO:0032498;GO:0032500;GO:0042742;GO:0042981;GO:0043123;GO:0050700;GO:0050718;GO:0051092;GO:0051259;
JTID ENSG00000142528:ZNF473 GO:0003677;GO:0005622;GO:0005634;GO:0006355;GO:0008270;GO:0046872;
JTID ENSG00000163904:SENP2 GO:0005515;GO:0005634;GO:0005643;GO:0006508;GO:0006512;GO:0008234;GO:0016926;GO:0016929;GO:0030111;
MIJT hsa-miR-495:LYPLA3:targetscan:mirbase; hsa-miR-495:PLEKHF2:targetscan; hsa-miR-495:NOD2:targetscan:mirbase; hsa-miR-495:NTRI_HUMAN:mirbase; hsa-miR-495:MARCH6:targetscan; hsa-miR-495:ZNF473:targetscan; hsa-miR-495:SENP2:targetscan; hsa-miR-495:TTC9B:targetscan; hsa-miR-
495:POU2F1:mirbase;

//
ANNOTATION: 1
ID SOX-5:hsa-miR-100;
TFID SOX-5;
MIID ENSG00000207994:hsa-mir-100:hsa-miR-100;
JTID ENSG00000013297:CLDN11 GO:0005198;GO:0005515;GO:0005923;GO:0007155;GO:0007283;GO:0008366;GO:0016020;GO:0016021;GO:0016338;GO:0042802;
JTID ENSG00000203837:PNLIPRP3 GO:0003824;GO:0004806;GO:0006629;
JTID ENSG00000173404:INSM1 GO:0003677;GO:0005622;GO:0005634;GO:0006350;GO:0006355;GO:0008270;GO:0030154;GO:0031018;GO:0046872;
JTID ENSG00000112299:VNN1 GO:0006907;GO:0006928;GO:0016020;GO:0016811;GO:0048503;
MIJT hsa-miR-100:VNN1:targetscan; hsa-miR-100:CLDN11:targetscan:mirbase; hsa-miR-100:PNLIPRP3:targetscan;

//
ANNOTATION: 1
ID HNF-3:hsa-miR-219;
TFID HNF-3;
MIID ENSG00000199036:hsa-mir-219-1:hsa-miR-219;
JTID ENSG00000196877:NP_001018132.2
JTID ENSG00000198156:NP_001018132.2
JTID ENSG00000105549:THEG GO:0007283;GO:0051131;GO:0005515;
JTID ENSG00000197555:SIPAL1L GO:0005096;GO:0005515;GO:0005622;GO:0051056;
JTID ENSG00000177553:Clorf167
JTID ENSG00000186187:ZNRFL GO:0005515;GO:0005768;GO:0006512;GO:0008270;GO:0016020;GO:0016874;GO:0046872;
JTID ENSG00000120262:C6orf97
JTID ENSG00000171557:FGG GO:0005102;GO:0005577;GO:0007165;GO:0030168;GO:0030674;GO:0051258;GO:0005509;GO:0008217;GO:0008284;
JTID ENSG00000043822:NP_060895.1 GO:0000287;GO:0004430;GO:0005515;GO:0005887;GO:0006661;GO:0016020;GO:0016301;GO:0016740;GO:0016773;GO:0045121;
```

```
JTID ENSG00000205670:C21orf51
JTID ENSG00000112246:SIM1 GO:0003700;GO:0004871;GO:0005515;GO:0005634;GO:0006355;GO:0007165;GO:0007275;GO:0007399;GO:0030154;GO:0046982;GO:0030528;GO:0045449;
JTID ENSG00000183018:SPNS2 GO:0005215;GO:0006810;GO:0016020;GO:0016021;
JTID ENSG00000155906:RMND1
JTID ENSG00000149506:ZP1 GO:0005578;GO:0007338;GO:0016020;GO:0016021;
MIJT hsa-miR-219:FG:mirbase; hsa-miR-219:C21orf51:mirbase; hsa-miR-219:NP_060895.1:picTar; hsa-miR-219:SIPAL1:targetscan:mirbase:picTar; hsa-miR-219:ZNRFL1:targetscan:picTar; hsa-miR-219:RMND1:targetscan; hsa-miR-219:Clorf167:mirbase; hsa-miR-219:C6orf97:targetscan; hsa-miR-219:SIM1:targetscan; hsa-miR-219:ZP1:targetscan;

//
ANNOTATION: 1
ID v-Myb:hsa-miR-10a;
TFID v-Myb;
MIID ENSG00000207777:hsa-mir-10a:hsa-miR-10a;
JTID ENSG00000204850:NP_001013695.1
JTID ENSG00000100321:SYNGR1 GO:0005887;GO:0016020;GO:0045202;
MIJT hsa-miR-10a:SYNGR1:targetscan;

//
ANNOTATION: 1
ID SRY:hsa-miR-323;
TFID SRY;
MIID ENSG00000199069:hsa-mir-323:hsa-miR-323;
JTID ENSG00000142676:RPL11 GO:0003735;GO:0005515;GO:0005622;GO:0005730;GO:0005840;GO:0005842;GO:0006412;GO:0006605;GO:0019843;
JTID ENSG00000185262:FAM100B
JTID ENSG00000132639:SNAP25 GO:0001504;GO:0005515;GO:0007268;GO:0007269;GO:0016081;GO:0019717;GO:0045202;GO:0050796;
MIJT hsa-miR-323:RPL11:mirbase; hsa-miR-323:FAM100B:targetscan;

//
ANNOTATION: 1
ID SOX-5:hsa-miR-30d;
TFID SOX-5;
MIID ENSG00000199153:hsa-mir-30d:hsa-miR-30d;
JTID ENSG00000138413:IDH1 GO:0000287;GO:0004450;GO:0005737;GO:0005777;GO:0005829;GO:0005975;GO:0006097;GO:0006099;GO:0006102;GO:0006749;GO:0006979;GO:0008152;GO:0016491;GO:0016616;GO:0030145;
JTID ENSG00000071054:MAP4K4 GO:0000166;GO:0004674;GO:0005083;GO:0005524;GO:0006468;GO:0016740;GO:0006950;GO:0007243;
JTID ENSG00000142039:CCDC97
JTID ENSG00000159873:CCDC117
JTID ENSG00000169139:UBE2V2 GO:0000074;GO:0000209;GO:0005515;GO:0005634;GO:0005737;GO:0006282;GO:0006464;GO:0008283;GO:0019787;GO:0031372;
JTID ENSG00000171320:ESCO2 GO:0005634;GO:0007049;GO:0008270;GO:0008415;GO:0016740;GO:0046872;
JTID ENSG00000105136:ZNF419 GO:0003677;GO:0005622;GO:0005634;GO:0006350;GO:0006355;GO:0008270;GO:0046872;
JTID ENSG00000138069:RAB1A GO:0000166;GO:0003924;GO:0005525;GO:0005783;GO:0006888;GO:0007264;GO:0015031;GO:0016192;GO:0005794;
JTID ENSG00000162490:Clorf187
JTID ENSG00000099954:CECR2 GO:0000910;GO:0005634;GO:0006309;GO:0006915;GO:0007010;GO:0016192;GO:0016568;
JTID ENSG00000123643:SLC36A1 GO:0005280;GO:0005783;GO:0006810;GO:0006865;GO:0015171;GO:0015180;GO:0015187;GO:0015193;GO:0015293;GO:0015808;GO:0015816;GO:0015824;GO:0015992;GO:0016020;GO:0016021;
JTID ENSG00000165891:E2F7 GO:0000074;GO:0003700;GO:0005667;GO:0006355;GO:0005515;GO:0005634;GO:0008285;GO:0016564;
JTID ENSG00000168955:TM4SF20 GO:0016020;GO:0016021;
JTID ENSG00000162039:Cl6orf73
JTID ENSG00000158715:SLC45A3 GO:0006810;GO:0016020;GO:0016021;
JTID ENSG00000173320:STOX2
JTID ENSG00000135387:CAPRIN1 GO:0005887;GO:0016020;GO:0048503;GO:0005515;
JTID ENSG00000127329:PTPRB GO:0004725;GO:0005001;GO:0005624;GO:0005887;GO:0006470;GO:0016020;GO:0016787;
JTID ENSG00000151572:TMEM16D
JTID ENSG00000165288:BRWD3
JTID ENSG00000143355:LHX9 GO:0003700;GO:0005634;GO:0006355;GO:0008270;GO:0043565;GO:0046872;GO:0003677;GO:0005515;
JTID ENSG00000069869:NEDD4 GO:0004842;GO:0005622;GO:0006464;GO:0006512;GO:0016874;GO:0000151;GO:0005515;GO:0005829;
JTID ENSG00000137941:TTL7 GO:0004835;GO:0006464;GO:0016874;
JTID ENSG00000148541:FAM13C1
MIJT hsa-miR-30d:E2F7:targetscan:picTar; hsa-miR-30d:TMEM16D:targetscan:mirbase:picTar; hsa-miR-30d:SLC36A1:targetscan:picTar; hsa-miR-30d:NEDD4:targetscan:picTar; hsa-miR-30d:TM4SF20:targetscan:mirbase; hsa-miR-30d:CCDC97:targetscan:picTar; hsa-miR-30d:STOX2:targetscan; hsa-miR-30d:LHX9:targetscan; hsa-miR-30d:PTPRB:mirbase; hsa-miR-30d:CCDC117:targetscan:picTar; hsa-miR-30d:UBE2V2:targetscan:mirbase:picTar; hsa-miR-30d:ESCO2:targetscan; hsa-miR-30d:FAM13C1:targetscan; hsa-miR-30d:ZNF419:targetscan; hsa-miR-30d:IDH1:targetscan:picTar; hsa-miR-30d:Cl6orf73:targetscan:mirbase; hsa-miR-30d:MAP4K4:targetscan; hsa-miR-30d:TTL7:targetscan:picTar;

//
ANNOTATION: 1
ID CHX10:hsa-miR-20a;
TFID CHX10;
MIID ENSG00000199149:hsa-mir-20a:hsa-miR-20a;
JTID ENSG00000175155:YPEL2 GO:0005634;
JTID ENSG00000144285:SCN1A GO:0001518;GO:0005248;GO:0006811;GO:0006814;GO:0016020;GO:0016021;GO:0031402;GO:0005624;
MIJT hsa-miR-20a:SCN1A:targetscan; hsa-miR-20a:YPEL2:targetscan;

//
ANNOTATION: 1
ID IPF1:hsa-miR-125b;
TFID IPF1;
MIID ENSG00000207863:hsa-mir-125b-2:hsa-miR-125b;
MIID ENSG00000207971:hsa-mir-125b-1:hsa-miR-125b;
JTID ENSG00000095794:CREM GO:0003700;GO:0005634;GO:0006355;GO:0008140;GO:0043565;GO:0046983;GO:0005515;GO:0006350;GO:0007165;GO:0005667;
JTID ENSG00000123064:DDX54 GO:0003723;GO:0005524;GO:0005634;GO:0016818;GO:0000166;GO:0003714;GO:0004004;GO:0005102;GO:0005730;GO:0006350;GO:0006355;GO:0006396;GO:0016787;GO:0030331;GO:0030520;
MIJT hsa-miR-125b:DDX54:targetscan; hsa-miR-125b:CREM:targetscan:picTar;

//
ANNOTATION: 1
ID CAC-BP:hsa-miR-34c;
TFID CAC-BP;
MIID ENSG00000207562:hsa-mir-34c:hsa-miR-34c;
JTID ENSG00000177410:Q5QHF1_HUMAN
JTID ENSG00000007541:PIGQ GO:0005975;GO:0006506;GO:0016020;GO:0016021;GO:0016757;GO:0017176;
JTID ENSG00000136247:ZDHHC4 GO:0004129;GO:0006118;GO:0008270;GO:0008415;GO:0016020;GO:0016021;GO:0016740;GO:0046872;
JTID ENSG00000189159:HN1 GO:0005634;
MIJT hsa-miR-34c:PIGQ:mirbase;

//
ANNOTATION: 1
ID AML1:hsa-miR-449b;
TFID AML1;
MIID ENSG00000207728:hsa-mir-449b:hsa-miR-449b;
JTID ENSG00000167965:NM_022372.3
JTID ENSG00000164616:FBXL21
JTID ENSG00000034239:EFCAB1 GO:0005509;
JTID ENSG00000112478:VP852 GO:0015031;GO:0016020;
```

```
JTID ENSG00000198719:DLL1
GO:0001701;GO:0001709;GO:0001756;GO:0001757;GO:0005112;GO:0005509;GO:0005515;GO:0005576;GO:0005886;GO:0005887;GO:0007154;GO:0007219;GO:0007275;GO:0007368;GO:0007386;GO:0007399;GO:0009887;GO:0009912;GO:0030097;GO:0030154;GO:0030155;GO:0031410;GO:0042472;GO:0042475;GO:0045596;GO:0045608;GO:004883
9;
JTID ENSG00000119782:FKBP1B GO:0003755;GO:0005737;GO:0006457;GO:0006936;GO:0016853;
JTID ENSG00000148296:SURF6 GO:0001652;GO:0003677;GO:0003723;GO:0005634;GO:0005730;GO:0042255;
JTID ENSG00000113328:CCNG1 GO:0000079;GO:0005634;GO:0007049;GO:0007067;GO:0051301;
JTID ENSG00000131951:LRCR9 GO:0005515;
MIJT hsa-miR-449b:FKBP1B:targetscan:mirbase; hsa-miR-449b:NM_022372.3:mirbase; hsa-miR-449b:DLL1:targetscan:mirbase; hsa-miR-449b:SURF6:targetscan; hsa-miR-449b:VPS52:targetscan:mirbase; hsa-miR-449b:EFCAB1:targetscan;

//
ANNOTATION: 1
ID POU6F1:hsa-miR-449b;
TFID POU6F1;
MIID ENSG00000207728:hsa-mir-449b:hsa-miR-449b;
JTID ENSG0000020129:NCDN GO:0045453;
JTID ENSG00000108797:CNTNAP1 GO:0004872;GO:0005070;GO:0005102;GO:0005887;GO:0007155;GO:0007165;GO:0016020;
MIJT hsa-miR-449b:CNTNAP1:targetscan; hsa-miR-449b:NCDN:targetscan:mirbase;

//
ANNOTATION: 1
ID SOX-5:hsa-miR-31;
TFID SOX-5;
MIID ENSG00000199177:hsa-mir-31:hsa-miR-31;
JTID ENSG00000188199:FAM22B
JTID ENSG00000204043:FAM22C
JTID ENSG0000013588:GPRC5A GO:0004872;GO:0005887;GO:0007165;GO:0007186;GO:0008067;GO:0016020;
JTID ENSG00000168939:SPRY3 GO:0005515;GO:0007275;GO:0009966;GO:0016020;
JTID ENSG00000155886:SLC24A2 GO:0005509;GO:0006811;GO:0006813;GO:0006814;GO:0006816;GO:0007601;GO:0015293;GO:0015297;GO:0016020;GO:0016021;GO:0030955;GO:0031402;GO:0050896;
JTID ENSG00000131059:C20orf71 GO:0008289;
MIJT hsa-miR-31:SLC24A2:targetscan; hsa-miR-31:FAM22C:mirbase; hsa-miR-31:GPRC5A:targetscan:mirbase; hsa-miR-31:C20orf71:targetscan:mirbase; hsa-miR-31:FAM22B:mirbase; hsa-miR-31:SPRY3:targetscan;

//
ANNOTATION: 1
ID CdxA:hsa-let-7a;
TFID CdxA;
MIID ENSG00000198975:hsa-let-7a-2:hsa-let-7a;
MIID ENSG00000199165:hsa-let-7a-1:hsa-let-7a;
JTID ENSG00000141429:GALNT1 GO:0004653;GO:0005509;GO:0005529;GO:0006493;GO:0016020;GO:0016021;GO:0016757;GO:0030145;
JTID ENSG00000072501:SMC1A GO:0000075;GO:0000166;GO:0000776;GO:0000794;GO:0003682;GO:0003777;GO:0005515;GO:0005524;GO:0005634;GO:0005694;GO:0006281;GO:0007049;GO:0007052;GO:0007059;GO:0007064;GO:0007126;GO:0008280;GO:0009314;GO:0016887;GO:0042770;GO:0046982;GO:0051276;GO:0051301;GO:0006259;
JTID ENSG00000164654:NP_061878.3
JTID ENSG00000125741:OPA3 GO:0005739;GO:0007601;GO:0050896;
JTID ENSG00000144031:ANKRD53
JTID ENSG00000181322:TXNDC6 GO:0004550;GO:0005524;GO:0006183;GO:0006228;GO:0006241;GO:0045454;
MIJT hsa-let-7a:ANKRD53:targetscan; hsa-let-7a:TXNDC6:targetscan; hsa-let-7a:GALNT1:targetscan:pictar; hsa-let-7a:SMC1A:targetscan; hsa-let-7a:OPA3:targetscan;

//
ANNOTATION: 1
ID AHR:hsa-miR-802;
TFID AHR;
MIID ENSG00000211590:hsa-mir-802:hsa-miR-802;
JTID ENSG00000092964:DPYSL2 GO:0004157;GO:0005515;GO:0005739;GO:0006139;GO:0007165;GO:0007275;GO:0007399;GO:0016787;GO:0030154;GO:0030424;GO:0030425;GO:0043025;
JTID ENSG00000184935:Q6AI01_HUMAN GO:0000166;GO:0003777;GO:0005524;GO:0005874;GO:0005875;GO:0007018;
JTID ENSG00000101193:C20orf11 GO:0005515;GO:0005634;
JTID ENSG00000112651:MRPL2 GO:0003735;GO:0005622;GO:0005739;GO:0005840;GO:0006412;
JTID ENSG00000205036:NP_001001682.1
JTID ENSG00000029363:BCLAF1 GO:0003677;GO:0005515;GO:0005634;GO:0006350;GO:0006355;GO:0006917;GO:0016481;GO:0016564;
MIJT hsa-miR-802:C20orf11:targetscan; hsa-miR-802:BCLAF1:targetscan; hsa-miR-802:MRPL2:targetscan:mirbase; hsa-miR-802:NP_001001682.1:mirbase;

//
ANNOTATION: 1
ID BACH2:hsa-miR-506;
TFID BACH2;
MIID ENSG00000207731:hsa-mir-506:hsa-miR-506;
JTID ENSG00000167600:CYP2S1 GO:0005506;GO:0005783;GO:0005792;GO:0006118;GO:0016020;GO:0020037;GO:0046872;GO:0050381;
JTID ENSG00000110711:AIP GO:0003712;GO:0003713;GO:0004871;GO:0005515;GO:0005624;GO:0005737;GO:0005829;GO:0006805;GO:0022417;GO:0043681;GO:0051082;
JTID ENSG00000132463:GRSF1 GO:0000166;GO:0003729;GO:0005737;GO:0006378;GO:0009952;GO:0016331;
JTID ENSG00000136826:KLF4 GO:0003676;GO:0003700;GO:0005622;GO:0005634;GO:0006350;GO:0007500;GO:0008270;GO:0008285;GO:0016563;GO:0016564;GO:0045892;GO:0046872;
JTID ENSG00000173349:SFT2D3 GO:0015031;GO:0016020;GO:0016021;
JTID ENSG00000065361:ERBB3 GO:0000166;GO:0004714;GO:0004872;GO:0005006;GO:0005515;GO:0005524;GO:0005887;GO:0006468;GO:0007165;GO:0007169;GO:0007422;GO:0007507;GO:0016020;GO:0016324;GO:0016328;GO:0016740;GO:0046982;
MIJT hsa-miR-506:ERBB3:targetscan; hsa-miR-506:AIP:targetscan; hsa-miR-506:KLF4:targetscan; hsa-miR-506:GRSF1:targetscan:mirbase; hsa-miR-506:SFT2D3:targetscan;

//
ANNOTATION: 1
ID CDP:hsa-miR-9;
TFID CDP;
MIID ENSG00000207819:hsa-mir-9-3:hsa-miR-9;
JTID ENSG00000136938:ANP32B GO:0005515;GO:0005634;
JTID ENSG00000137709:POU2F3 GO:0003700;GO:0005634;GO:0006355;GO:0006357;GO:0008544;GO:0043565;
JTID ENSG00000092531:SNAP23 GO:0005486;GO:0005515;GO:0005886;GO:0006892;GO:0006903;GO:0006944;GO:0015031;GO:0019717;GO:0045202;GO:0005792;
MIJT hsa-miR-9:SNAP23:targetscan:pictar; hsa-miR-9:ANP32B:targetscan:mirbase:pictar; hsa-miR-9:POU2F3:targetscan;

//
ANNOTATION: 1
ID C-REL:hsa-miR-129;
TFID C-REL;
MIID ENSG00000199077:hsa-mir-129-2:hsa-miR-129;
JTID ENSG00000162105:SHANK2 GO:0005515;GO:0007242;GO:0030160;
JTID ENSG00000163781:TOPBP1 GO:0000794;GO:0003677;GO:0005622;GO:0005634;GO:0006281;GO:0008022;GO:0010212;GO:0016605;
JTID ENSG00000147316:MCPH1 GO:0005622;
JTID ENSG00000198929:NOS1AP GO:0005515;GO:0005737;GO:0007269;GO:0030165;GO:0050998;GO:0050999;
MIJT hsa-miR-129:NOS1AP:mirbase; hsa-miR-129:MCPH1:targetscan;

//
ANNOTATION: 1
ID ELF-1:hsa-miR-24;
TFID ELF-1;
MIID ENSG00000209707:hsa-mir-24-2:hsa-miR-24;
JTID ENSG00000203709:Clorf132
JTID ENSG00000162458:FBLIM1 GO:0005515;GO:0005856;GO:0007155;GO:0008270;GO:0008360;GO:0046872;
```

```
JTID ENSG00000132141:CCT6B GO:0000166;GO:0005524;GO:0006457;GO:0007283;GO:0008565;GO:0051082;GO:0051131;
JTID ENSG00000142188:TMEM50B GO:0005783;GO:0016020;GO:0016021;
JTID ENSG00000162430:SEPN1 GO:0005509;GO:0005576;GO:0005783;GO:0008430;
JTID ENSG00000106384:MOGAT3 GO:0003846;GO:0004144;GO:0005783;GO:0006071;GO:0006629;GO:0008415;GO:0008610;GO:0016020;GO:0016021;GO:0016740;
JTID ENSG00000114019:AMOTL2 GO:0003735;GO:0005622;GO:0005840;GO:0005515;GO:0005923;GO:0042802;
JTID ENSG00000172460:Q8IVY7_HUMAN GO:0004252;GO:0006508;
JTID ENSG00000138641:HERC3 GO:0004842;GO:0005622;GO:0006464;GO:0006512;GO:0016874;
JTID ENSG00000148965:SA4 GO:0005319;GO:0005576;GO:0006953;
JTID ENSG00000168528:SERINC2 GO:0006658;GO:0016020;GO:0051347;
JTID ENSG00000152527:PLEKHH2 GO:0005488;GO:0005737;GO:0005856;
JTID ENSG00000103184:SEC14L5 GO:0005215;GO:0005622;GO:0006810;
JTID ENSG00000100147:CCDC134
MIJT hsa-miR-24:SERINC2:targetscan:mirbase; hsa-miR-24:PLEKHH2:targetscan; hsa-miR-24:SEC14L5:mirbase; hsa-miR-24:CCT6B:targetscan:mirbase; hsa-miR-24:MOGAT3:targetscan; hsa-miR-24:HERC3:targetscan; hsa-miR-24:CCDC134:targetscan; hsa-miR-24:AMOTL2:targetscan:pictar; hsa-miR-24:SA4:targetscan; hsa-miR-24:TMEM50B:targetscan; hsa-miR-24:SEPN1:targetscan; hsa-miR-24:FBLIM1:targetscan;

//
ANNOTATION: 1
ID SRF:hsa-miR-25;
TFID SRF;
MIID ENSG00000207547:hsa-mir-25:hsa-miR-25;
JTID ENSG00000120211:INSL4 GO:0005159;GO:0005179;GO:0005576;GO:0005615;GO:0005625;GO:0007165;GO:0007267;GO:0007275;GO:0007565;GO:0008283;
JTID ENSG00000186474:KLIK2 GO:0004252;GO:0005576;GO:0005625;GO:0006508;
MIJT hsa-miR-25:KLIK2:mirbase;

//
ANNOTATION: 1
ID LEF1:hsa-miR-296;
TFID LEF1;
MIID ENSG00000207950:hsa-mir-296:hsa-miR-296;
JTID ENSG00000136717:BIN1 GO:0005515;GO:0005634;GO:0005737;GO:0007049;GO:0007275;GO:0008283;GO:0015629;GO:0030100;GO:0030154;GO:0045786;
JTID ENSG00000140511:HAPLN3 GO:0005540;GO:0005578;GO:0007155;
JTID ENSG00000102225:PCTK1 GO:0000074;GO:0000166;GO:0004674;GO:0005515;GO:0005524;GO:0006468;GO:0016740;
JTID ENSG00000116883:Clorf113
JTID ENSG00000187796:CARD9 GO:0005515;GO:0005622;GO:0005737;GO:0032874;GO:0042803;GO:0042981;GO:0043123;GO:0046330;GO:0050700;
JTID ENSG00000167680:SEMA6B GO:0004872;GO:0007275;GO:0007399;GO:0016020;GO:0016021;GO:0030154;
JTID ENSG00000142449:FBN3 GO:0005201;GO:0005509;GO:0005578;GO:0019838;
JTID ENSG00000204518:AADACL4 GO:0008152;GO:0016020;GO:0016021;GO:0016787;
JTID ENSG00000137309:HMGA1 GO:0000785;GO:0003680;GO:0003700;GO:0005634;GO:0005667;GO:0005694;GO:0006268;GO:0006337;GO:0006345;GO:0006350;GO:0006355;GO:0006461;GO:0007001;GO:0007169;GO:0030374;GO:0042975;GO:0045941;GO:0046965;GO:0003677;
JTID ENSG00000188191:PRKAR1B GO:0000166;GO:0005952;GO:0006468;GO:0007165;GO:0008603;GO:0030552;GO:0007611;
MIJT hsa-miR-296:PRKAR1B:targetscan; hsa-miR-296:HMGA1:targetscan; hsa-miR-296:PCTK1:targetscan:mirbase; hsa-miR-296:Clorf113:targetscan; hsa-miR-296:AADACL4:targetscan; hsa-miR-296:HAPLN3:targetscan:mirbase; hsa-miR-296:SEMA6B:targetscan:mirbase; hsa-miR-296:FBN3:targetscan:mirbase;
hsa-miR-296:BIN1:targetscan:mirbase;

//
ANNOTATION: 1
ID AP-1:hsa-miR-199a;
TFID AP-1;
MIID ENSG00000207752:hsa-mir-199a-1:hsa-miR-199a;
JTID ENSG00000170430:MGMT GO:0003677;GO:0003908;GO:0005634;GO:0006266;GO:0006281;GO:0006307;GO:0008168;GO:0008270;GO:0009008;GO:0016740;GO:0043281;GO:0046872;
TFMI AP-1:hsa-miR-199a:hsa-mir-199a-1:computational(PUBMED: 17447837);

//
ANNOTATION: 1
ID GABP:hsa-miR-140;
TFID GABP;
MIID ENSG00000208017:hsa-mir-140:hsa-miR-140;
JTID ENSG00000167384:ZNF180 GO:0003676;GO:0003677;GO:0005622;GO:0005634;GO:0006350;GO:0006355;GO:0008270;GO:0046872;
JTID ENSG00000184602:SNN GO:0006950;GO:0009628;GO:0016020;GO:0016021;
JTID ENSG00000128595:CALU GO:0005509;GO:0005783;GO:0005794;
JTID ENSG00000205609:Q9BW98_HUMAN GO:0003743;GO:0005852;GO:0006413;
JTID ENSG00000086232:EIF2AK1 GO:0000166;GO:0004694;GO:0005524;GO:0005737;GO:0006950;GO:0009605;GO:0016740;GO:0020037;GO:0042803;GO:0045993;GO:0046777;GO:0046986;
JTID ENSG00000140688:Clorf58 GO:0016020;GO:0016021;
MIJT hsa-miR-140:CALU:targetscan:pictar; hsa-miR-140:SNN:targetscan; hsa-miR-140:EIF2AK1:targetscan;

//
ANNOTATION: 1
ID HNF-1:hsa-miR-369-3p;
TFID HNF-1;
MIID ENSG00000199025:hsa-mir-369:hsa-miR-369-3p;
JTID ENSG00000124225:TMEPAI GO:0016021;GO:0030521;GO:0005515;GO:0016020;
JTID ENSG00000120688:WBP4 GO:0003676;GO:0005515;GO:0005634;GO:0005681;GO:0006397;GO:0008270;GO:0008380;GO:0046872;
JTID ENSG00000117450:PRDX1 GO:0001501;GO:0008283;GO:0016491;GO:0051920;
JTID ENSG00000164611:PTTG1 GO:0003700;GO:0004869;GO:0005515;GO:0005634;GO:0005737;GO:0006259;GO:0006281;GO:0006366;GO:0007049;GO:0007059;GO:0007067;GO:0007283;GO:0045143;GO:0051276;GO:0051301;
JTID ENSG000000087495:PHACTR3 GO:0003779;GO:0004864;GO:0005634;
JTID ENSG00000153130:SCOC
JTID ENSG00000131003:RBM2FP GO:0000166;GO:0003676;
JTID ENSG00000169554:ZEB2 GO:0001755;GO:0001756;GO:0001843;GO:0003676;GO:0003700;GO:0005622;GO:0005634;GO:0006350;GO:0006355;GO:0007417;GO:0008270;GO:0016481;GO:0016564;GO:0019208;GO:0043565;GO:0046332;GO:0046872;GO:0048598;
MIJT hsa-miR-369-3p:SCOC:targetscan:mirbase; hsa-miR-369-3p:ZEB2:targetscan:pictar; hsa-miR-369-3p:TMEPAI:targetscan; hsa-miR-369-3p:PHACTR3:targetscan:mirbase; hsa-miR-369-3p:WBP4:targetscan:mirbase:pictar;

//
ANNOTATION: 1
ID TCF-1(P):hsa-miR-149;
TFID TCF-1(P);
MIID ENSG00000207611:hsa-mir-149:hsa-miR-149;
JTID ENSG00000187609:NP_060290.3 GO:0003676;GO:0004518;GO:0005622;GO:0008408;GO:0016787;
JTID ENSG00000109062:SLC9A3R1 GO:0005515;GO:0006461;GO:0015629;GO:0016055;GO:0016324;GO:0016324;GO:0016324;GO:0017155;GO:0030643;GO:0031698;GO:0045177;
JTID ENSG00000099331:MYO9B GO:0000146;GO:0000166;GO:0003779;GO:0005096;GO:0005100;GO:0005516;GO:0005524;GO:0005622;GO:0005737;GO:0005938;GO:0007242;GO:0007266;GO:0008270;GO:0016459;GO:0016887;GO:0019992;GO:0030048;GO:0031941;GO:0043531;GO:0046872;GO:0048471;
JTID ENSG00000130270:ATP8B3 GO:0000166;GO:0000287;GO:0004012;GO:0005524;GO:0006810;GO:0015662;GO:0015914;GO:0016020;GO:0016021;GO:0016787;GO:0016887;GO:0000299;GO:0001669;GO:0007339;GO:0045332;
JTID ENSG00000133193:FAM104A
JTID ENSG00000141325:CCDC45 GO:0005515;
JTID ENSG00000070614:NDST1 GO:0006476;GO:0006477;GO:0006954;GO:0015012;GO:0015016;GO:0016020;GO:0016021;GO:0016740;GO:0016787;
JTID ENSG00000151474:FRMD4A GO:0005488;GO:0005737;GO:0005856;GO:0008092;GO:0016020;
JTID ENSG00000138111:TMEM180 GO:0016020;GO:0016021;
MIJT hsa-miR-149:NDST1:targetscan:mirbase:pictar; hsa-miR-149:CCDC45:targetscan:mirbase:pictar; hsa-miR-149:TMEM180:targetscan; hsa-miR-149:FRMD4A:targetscan; hsa-miR-149:ATP8B3:targetscan; hsa-miR-149:MYO9B:targetscan:mirbase; hsa-miR-149:SLC9A3R1:targetscan; hsa-miR-149:FAM104A:targetscan:pictar;

//
ANNOTATION: 1
ID SREBP-1:hsa-miR-140;
TFID SREBP-1;
MIID ENSG00000208017:hsa-mir-140:hsa-miR-140;
```

```
JTID ENSG00000182118:FAM89A
JTID ENSG00000198677:KIAA0372 GO:0005488;
JTID ENSG00000198033:TUBA3C GO:0000166;GO:0003924;GO:0005198;GO:0005515;GO:0005525;GO:0005874;GO:0007018;GO:0043234;GO:0051258;
MIJT hsa-miR-140:FAM89A:targetscan:mirbase;

//
ANNOTATION: 1
ID ATF6:hsa-miR-199b;
TFID ATF6;
MIID ENSG00000207581:hsa-mir-199b:hsa-miR-199b;
JTID ENSG00000206198:NR_001535.1
TFMI ATF6:hsa-miR-199b:hsa-mir-199b:computational(ECRbase);

//
ANNOTATION: 1
ID AML1:hsa-miR-148b;
TFID AML1;
MIID ENSG00000199122:hsa-mir-148b:hsa-miR-148b;
JTID ENSG00000196972:Q86V52_HUMAN
JTID ENSG00000206036:TNFRSF6B GO:0000166;GO:0003677;GO:0004003;GO:0005524;GO:0005634;GO:0006139;GO:0016787;GO:0016818;GO:0004872;GO:0005515;GO:0005625;GO:0006915;GO:0006916;GO:0003676;GO:0008026;GO:0000723;
JTID ENSG00000136842:TMOD1 GO:0003779;GO:0005523;GO:0005856;GO:0007010;GO:0030016;GO:0030239;
JTID ENSG00000180537:RNF182 GO:0005515;GO:0008270;GO:0016020;GO:0016021;GO:0046872;
JTID ENSG00000173926:MARCH3 GO:0005515;GO:0006512;GO:0006897;GO:0008270;GO:0016020;GO:0016021;GO:0016874;GO:0046872;
JTID ENSG00000125084:WNT1 GO:0001708;GO:0004871;GO:0005102;GO:0005576;GO:0005625;GO:0007163;GO:0007223;GO:0007275;GO:0007283;GO:0007417;GO:0009653;GO:0016477;GO:0030154;
JTID ENSG00000135374:ELF5 GO:0003700;GO:0005634;GO:0006350;GO:0006355;GO:0006366;GO:0007398;GO:0008283;GO:0043565;
JTID ENSG00000130052:STARD8 GO:0005096;GO:0005622;GO:0007165;
JTID ENSG00000204584:Q6ZSH9_HUMAN
JTID ENSG00000151418:ATP6V1G3 GO:0006754;GO:0006811;GO:0015078;GO:0015992;GO:0016787;GO:0046872;GO:0008553;
JTID ENSG00000206193:Q5HYA3_HUMAN
JTID ENSG0000011711:GOLTB GO:0004871;GO:0005783;GO:0015031;GO:0016020;GO:0016021;GO:0016192;GO:0043123;
JTID ENSG00000137073:UBAP2
MIJT hsa-miR-148b:WNT1:targetscan:pictar; hsa-miR-148b:TMOD1:targetscan; hsa-miR-148b:MARCH3:targetscan:mirbase:pictar; hsa-miR-148b:RNF182:targetscan; hsa-miR-148b:ELF5:targetscan:pictar; hsa-miR-148b:UBAP2:targetscan; hsa-miR-148b:GOLTB:targetscan; hsa-miR-148b:STARD8:targetscan;
hsa-miR-148b:TNFRSF6B:targetscan:mirbase;

//
ANNOTATION: 1
ID AML1:hsa-miR-10a;
TFID AML1;
MIID ENSG00000207777:hsa-mir-10a:hsa-miR-10a;
JTID ENSG00000073282:TP73L
GO:0003700;GO:0005634;GO:0006350;GO:0006915;GO:0006917;GO:0007219;GO:0007275;GO:0008270;GO:0016563;GO:0016564;GO:0042802;GO:0045747;GO:0045892;GO:0045893;GO:0046872;GO:0051289;GO:0001501;GO:0001736;GO:0003682;GO:0007389;GO:0007499;GO:0009887;GO:0030216;GO:0030859;GO:0031069;GO:0042475;GO:0045944;
JTID ENSG00000197585:Q5JV89_HUMAN
JTID ENSG00000114982:NP_060461.3 GO:0004339;GO:0005634;
JTID ENSG00000147082:CCNB3 GO:0000074;GO:0005634;GO:0007049;GO:0007126;GO:0051301;
JTID ENSG00000106952:TNFSF8 GO:0005125;GO:0005164;GO:0005615;GO:0005887;GO:0006917;GO:0006955;GO:0007165;GO:0007267;GO:0008283;GO:0016020;
JTID ENSG00000147536:GINS4 GO:0005515;GO:0005634;GO:0005737;
MIJT hsa-miR-10a:CCNB3:targetscan:mirbase; hsa-miR-10a:TP73L:targetscan; hsa-miR-10a:GINS4:mirbase; hsa-miR-10a:TNFSF8:targetscan;

//
ANNOTATION: 1
ID SOX-5:hsa-miR-506;
TFID SOX-5;
MIID ENSG00000207731:hsa-mir-506:hsa-miR-506;
JTID ENSG00000134910:STT3A GO:0004579;GO:0005624;GO:0005783;GO:0006486;GO:0008250;GO:0016020;GO:0016021;GO:0016740;GO:0018279;
JTID ENSG00000167600:CYP2S1 GO:0005506;GO:0005783;GO:0005792;GO:0006118;GO:0016020;GO:0020037;GO:0046872;GO:0050381;
JTID ENSG00000145555:MYO10 GO:0000166;GO:0003774;GO:0003779;GO:0005524;GO:0005856;GO:0007165;GO:0016459;
JTID ENSG00000174886:NDUFA11 GO:0003954;GO:0005739;GO:0008137;GO:0016020;GO:0016021;GO:0016491;
JTID ENSG00000113732:ATP6V0E1 GO:0005215;GO:0005624;GO:0006811;GO:0015986;GO:0015992;GO:0016020;GO:0016469;GO:0016787;GO:0046933;GO:0046961;
JTID ENSG00000203730:TEDDM1 GO:0016021;
JTID ENSG00000144061:NPHP1 GO:0005198;GO:0005515;GO:0007165;GO:0007588;GO:0007632;GO:0016020;GO:0016337;GO:0030036;
JTID ENSG00000110711:AIP GO:0003712;GO:0003713;GO:0004871;GO:0005515;GO:0005624;GO:0005737;GO:0005829;GO:0006805;GO:0022417;GO:0043681;GO:0051082;
JTID ENSG00000126952:NXF5 GO:0000166;GO:0003723;GO:0005515;GO:0005634;GO:0005737;GO:0006406;GO:0006810;GO:0007275;
JTID ENSG00000159792:PSKH1 GO:0000166;GO:0004672;GO:0004674;GO:0005524;GO:0005634;GO:0006468;GO:0016020;GO:0016740;
JTID ENSG00000184232:OAF
JTID ENSG00000144228:SPOPL_HUMAN GO:0005515;GO:0005634;GO:0006512;
MIJT hsa-miR-506:STT3A:mirbase; hsa-miR-506:MYO10:targetscan; hsa-miR-506:OAF:targetscan; hsa-miR-506:TEDDM1:targetscan; hsa-miR-506:NPHP1:targetscan; hsa-miR-506:NXF5:targetscan:mirbase; hsa-miR-506:PSKH1:targetscan; hsa-miR-506:AIP:targetscan; hsa-miR-506:ATP6V0E1:targetscan;

//
ANNOTATION: 1
ID CDP:hsa-miR-219;
TFID CDP;
MIID ENSG00000199036:hsa-mir-219-1:hsa-miR-219;
JTID ENSG00000113810:SMC4 GO:0000166;GO:0000796;GO:0005515;GO:0005524;GO:0005634;GO:0005694;GO:0006259;GO:0007001;GO:0007049;GO:0007076;GO:0046982;GO:0051301;
JTID ENSG00000134901:KDELCL1 GO:0005783;
JTID ENSG00000187871:GFRAL GO:0004872;GO:0005886;GO:0006916;GO:0016021;GO:0031098;
JTID ENSG00000204138:PHACTR4
MIJT hsa-miR-219:SMC4:targetscan:mirbase; hsa-miR-219:KDELCL1:mirbase; hsa-miR-219:GFRAL:targetscan; hsa-miR-219:PHACTR4:targetscan;

//
ANNOTATION: 1
ID HIF-1:hsa-miR-425-3p;
TFID HIF-1;
MIID ENSG00000199032:hsa-mir-425:hsa-miR-425-3p;
JTID ENSG00000142676:RPL11 GO:0003735;GO:0005515;GO:0005622;GO:0005730;GO:0005840;GO:0005842;GO:0006412;GO:0006605;GO:0019843;
JTID ENSG00000105672:ETV2 GO:0003700;GO:0005634;GO:0006355;GO:0043565;
JTID ENSG00000120129:DUSP1 GO:0004726;GO:0005515;GO:0006470;GO:0006979;GO:0007049;GO:0016787;GO:0017017;
MIJT hsa-miR-425-3p:DUSP1:targetscan:mirbase;

//
ANNOTATION: 1
ID SRF:hsa-miR-34b;
TFID SRF;
MIID ENSG00000207811:hsa-mir-34b:hsa-miR-34b;
JTID ENSG00000110675:ELMOD1 GO:0005856;GO:0006909;
JTID ENSG00000143466:IKBKE GO:0000166;GO:0004704;GO:0004871;GO:0005515;GO:0005524;GO:0005737;GO:0006468;GO:0006955;GO:0008384;GO:0016740;GO:0043123;
JTID ENSG00000179909:ZNF154 GO:0003700;GO:0005622;GO:0005634;GO:0006350;GO:0006355;GO:0008270;GO:0046872;
JTID ENSG00000146216:TTBK1 GO:0000166;GO:0004674;GO:0005524;GO:0006468;GO:0016740;GO:0004672;
MIJT hsa-miR-34b:IKBKE:targetscan; hsa-miR-34b:ELMOD1:targetscan:pictar; hsa-miR-34b:TTBK1:targetscan;
```





```
ID FAC1:hsa-miR-365;
TFID FAC1;
MIID ENSG00000199130:hsa-mir-365-1:hsa-miR-365;
JTID ENSG00000189251:Q8WYN8_HUMAN GO:0006464;
JTID ENSG00000198785:GRIN3A GO:000287;GO:0004872;GO:0004970;GO:0004972;GO:0005216;GO:0005234;GO:0005262;GO:0005509;GO:0005515;GO:0006811;GO:0016020;GO:0016021;GO:0016358;GO:0045211;
JTID ENSG00000184574:GPR92 GO:0001584;GO:0004872;GO:0007165;GO:0007186;GO:0016020;GO:0016021;GO:0045028;
MIJT hsa-miR-365:GRIN3A:targetscan; hsa-miR-365:GPR92:targetscan:mirbase;

//
ANNOTATION: 1
ID FREAC-4:hsa-miR-199a*;
TFID FREAC-4;
MIID ENSG00000207752:hsa-mir-199a-1:hsa-miR-199a*;
MIID ENSG00000208024:hsa-mir-199a-2:hsa-miR-199a*;
JTID ENSG00000145354:ZCD2 GO:0043234;
JTID ENSG00000204220:PFND6 GO:0006457;GO:0016272;GO:0051082;
JTID ENSG00000151690:NP_060164.3
JTID ENSG0000011860:C6orf204
JTID ENSG00000059758:PCTK2 GO:0000074;GO:0000166;GO:0004674;GO:0005524;GO:0006468;GO:0016740;
JTID ENSG00000188153:COL4A5 GO:0005201;GO:0005581;GO:0005737;GO:0006817;GO:0005587;
JTID ENSG00000135926:TMBIM1 GO:0016020;GO:0016021;
JTID ENSG00000179456:ZNF238 GO:0000122;GO:0000228;GO:0003700;GO:0003704;GO:0005515;GO:0005622;GO:0005634;GO:0006350;GO:0006355;GO:0006810;GO:0007001;GO:0008270;GO:0046872;GO:0003676;
JTID ENSG00000140598:EFTUD1 GO:0000166;GO:0003924;GO:0005525;
MIJT hsa-miR-199a*:ZNF238:pictar; hsa-miR-199a*:PCTK2:pictar;

//
ANNOTATION: 1
ID STAT1:hsa-miR-449b;
TFID STAT1;
MIID ENSG00000207728:hsa-mir-449b:hsa-miR-449b;
JTID ENSG00000136247:ZDHHC4 GO:0004129;GO:0006118;GO:0008270;GO:0008415;GO:0016020;GO:0016021;GO:0016740;GO:0046872;
JTID ENSG00000143466:IKBKE GO:0000166;GO:0004704;GO:0004871;GO:0005515;GO:0005524;GO:0005737;GO:0006468;GO:0006955;GO:0008384;GO:0016740;GO:0043123;
JTID ENSG00000118513:MYB GO:0003677;GO:0005515;GO:0005634;GO:0006355;GO:0016363;GO:0016563;GO:0005681;GO:0006397;GO:0007049;GO:0008380;GO:0030528;GO:0045449;GO:0000082;GO:0003700;GO:0006816;
JTID ENSG00000172689:MS4A10 GO:0004872;GO:0007165;GO:0016020;GO:0016021;
JTID ENSG00000134070:IRAK2 GO:0004672;GO:0004704;GO:0005524;GO:0006468;GO:0006954;GO:0007165;GO:0007249;GO:0009986;GO:0031663;GO:0042802;GO:0043433;GO:0051092;
JTID ENSG00000198586:TLK1 GO:0000166;GO:0001672;GO:0004674;GO:0005515;GO:0005524;GO:0005634;GO:0006468;GO:0006886;GO:0006974;GO:0007049;GO:0007242;GO:0016568;GO:0016740;
JTID ENSG00000113328:CCNG1 GO:0000079;GO:0005634;GO:0007049;GO:0007067;GO:0051301;
JTID ENSG00000186190:C20orf185 GO:0005515;GO:0005549;GO:0005737;GO:0008289;GO:0045087;
MIJT hsa-miR-449b:MS4A10:targetscan; hsa-miR-449b:IRAK2:targetscan; hsa-miR-449b:MYB:targetscan; hsa-miR-449b:IKBKE:targetscan:mirbase;

//
ANNOTATION: 1
ID CHOP-C/EBPALPHA:hsa-miR-7;
TFID CHOP-C/EBPALPHA;
MIID ENSG00000207630:hsa-mir-7-3:hsa-miR-7;
JTID ENSG00000106003:LFNG GO:0005576;GO:0007275;GO:0007386;GO:0009887;GO:0016020;GO:0016021;GO:0016757;
JTID ENSG00000166913:YWHAB GO:0004497;GO:0005737;GO:0006605;GO:0019904;GO:0048471;GO:0005515;
MIJT hsa-miR-7:YWHAB:targetscan; hsa-miR-7:LFNG:targetscan;

//
ANNOTATION: 1
ID HIF-1:hsa-miR-199a*;
TFID HIF-1;
MIID ENSG00000208024:hsa-mir-199a-2:hsa-miR-199a*;
JTID ENSG00000188384:Q6ZUQ5_HUMAN
JTID ENSG00000205271:Q6ZUQ5_HUMAN
JTID ENSG00000205275:Q6ZUQ5_HUMAN
JTID ENSG00000182712:MTCF1 GO:0000074;GO:0005739;GO:0008283;
JTID ENSG00000198841:KTI12
JTID ENSG0000019707:RBM25 GO:0000166;GO:0000398;GO:0003676;GO:0003729;
JTID ENSG00000204539:CDSN
JTID ENSG00000136928:GABBR2 GO:0004872;GO:0004965;GO:0005887;GO:0007165;GO:0007186;GO:0007194;GO:0007268;GO:0045211;
JTID ENSG00000183960:KCNH8 GO:0000155;GO:0000160;GO:0005249;GO:0006355;GO:0006811;GO:0006813;GO:0016020;GO:0016021;GO:0030955;
JTID ENSG00000206125:Q68DA7_HUMAN
JTID ENSG00000132549:VPS13B GO:0015031;
JTID ENSG00000179151:EDC3 GO:0005515;
JTID ENSG00000082458:DLG3 GO:0005515;GO:0004385;GO:0008285;GO:0005737;
MIJT hsa-miR-199a*:DLG3:pictar;

//
ANNOTATION: 1
ID HPL:hsa-miR-195;
TFID HPL;
MIID ENSG00000207929:hsa-mir-195:hsa-miR-195;
JTID ENSG00000144867:SRPRB GO:0000166;GO:0004872;GO:0005515;GO:0005525;GO:0005783;GO:0005786;GO:0016020;GO:0016021;GO:0030529;
MIJT hsa-miR-195:SRPRB:targetscan:mirbase;

//
ANNOTATION: 1
ID AREB6:hsa-miR-206;
TFID AREB6;
MIID ENSG00000207604:hsa-mir-206:hsa-miR-206;
JTID ENSG00000166747:AP1G1 GO:0005215;GO:0005488;GO:0005515;GO:0005737;GO:0005794;GO:0005802;GO:0005905;GO:0006461;GO:0006886;GO:0006897;GO:0030119;GO:0030130;GO:0030136;GO:0048471;
JTID ENSG00000106034:NP_079189.3 GO:0005783;
JTID ENSG00000094841:UPRT
MIJT hsa-miR-206:AP1G1:targetscan:pictar; hsa-miR-206:NP_079189.3:pictar; hsa-miR-206:UPRT:targetscan;

//
ANNOTATION: 1
ID SOX-5:hsa-miR-30c;
TFID SOX-5;
MIID ENSG00000199094:hsa-mir-30c-2:hsa-miR-30c;
JTID ENSG00000138413:IDH1 GO:0000287;GO:0004450;GO:0005737;GO:0005777;GO:0005829;GO:0005975;GO:0006097;GO:0006099;GO:0006102;GO:0006749;GO:0006979;GO:0008152;GO:0016491;GO:0016616;GO:0030145;
JTID ENSG00000071054:MAP4K4 GO:0000166;GO:0004674;GO:0005083;GO:0005524;GO:0006468;GO:0016740;GO:0006950;GO:0007243;
JTID ENSG00000142039:CCDC97
JTID ENSG00000159873:CCDC117
JTID ENSG00000169139:UBE2V2 GO:0000074;GO:0000209;GO:0005515;GO:0005634;GO:0005737;GO:0006282;GO:0006464;GO:0008283;GO:0019787;GO:0031372;
JTID ENSG00000171320:ESCO2 GO:0005634;GO:0007049;GO:0008270;GO:0008270;GO:0008415;GO:0016740;GO:0046872;
JTID ENSG00000105136:ZNF419 GO:0003677;GO:0005622;GO:0005634;GO:0006350;GO:0006355;GO:0008270;GO:0046872;
JTID ENSG00000138069:RAB1A GO:0000166;GO:0003924;GO:0005525;GO:0005783;GO:0006888;GO:0007264;GO:0015031;GO:0016192;GO:0005794;
```

```
JTID ENSG00000162490:Clorf187
JTID ENSG00000099954:CECR2 GO:0000910;GO:0005634;GO:0006309;GO:0006915;GO:0007010;GO:0016192;GO:0016568;
JTID ENSG00000123643:SLC36A1 GO:0005280;GO:0005783;GO:0006810;GO:0006865;GO:0015171;GO:0015180;GO:0015187;GO:0015193;GO:0015293;GO:0015808;GO:0015816;GO:0015824;GO:0015992;GO:0016020;GO:0016021;
JTID ENSG00000165891:E2F7 GO:0000074;GO:0003700;GO:0005667;GO:0006355;GO:0005515;GO:0005634;GO:0008285;GO:0016564;
JTID ENSG00000168955:TM4SF20 GO:0016020;GO:0016021;
JTID ENSG00000162039:C16orf73
JTID ENSG00000158715:SLC45A3 GO:0006810;GO:0016020;GO:0016021;
JTID ENSG00000173320:STOX2
JTID ENSG00000135387:CAPRIN1 GO:0005887;GO:0016020;GO:0048503;GO:0005515;
JTID ENSG00000127329:PTPRB GO:0004725;GO:0005001;GO:0005624;GO:0005887;GO:0006470;GO:0016020;GO:0016787;
JTID ENSG00000151572:TMEM16D
JTID ENSG00000165288:BRWD3
JTID ENSG00000143355:LHX9 GO:0003700;GO:0005634;GO:0006355;GO:0008270;GO:0043565;GO:0046872;GO:0003677;GO:0005515;
JTID ENSG00000069869:NEDD4 GO:0004842;GO:0005622;GO:0006464;GO:0006512;GO:0016874;GO:0000151;GO:0005515;GO:0005829;
JTID ENSG00000137941:TTL7 GO:0004835;GO:0006464;GO:0016874;
JTID ENSG00000148541:FAM13C1
MIJT hsa-miR-30c:E2F7:targetscan:picTar; hsa-miR-30c:SLC36A1:targetscan:picTar; hsa-miR-30c:TMEM16D:targetscan:picTar; hsa-miR-30c:NEDD4:targetscan:picTar; hsa-miR-30c:TM4SF20:targetscan; hsa-miR-30c:CCDC97:targetscan:picTar; hsa-miR-30c:STOX2:targetscan; hsa-miR-30c:LHX9:targetscan;
hsa-miR-30c:PTPRB:mirbase; hsa-miR-30c:CCDC117:targetscan:picTar; hsa-miR-30c:UBE2V2:targetscan:picTar; hsa-miR-30c:ESCO2:targetscan; hsa-miR-30c:ZNF419:targetscan; hsa-miR-30c:FAM13C1:targetscan; hsa-miR-30c:IDH1:targetscan:picTar; hsa-miR-30c:MAP4K4:targetscan; hsa-miR-
30c:TTL7:targetscan:picTar; hsa-miR-30c:C16orf73:targetscan:mirbase;

//
ANNOTATION: 1
ID ICSBP:hsa-miR-223;
TFID ICSBP;
MIID ENSG00000207939:hsa-mir-223:hsa-miR-223;
JTID ENSG00000148926:ADM GO:0005179;GO:0005576;GO:0005615;GO:0005625;GO:0006171;GO:0006701;GO:0007165;GO:0007267;GO:0007507;GO:0007565;GO:0007588;GO:0008015;GO:0008284;GO:0009611;
JTID ENSG00000184502:GAST GO:0005179;GO:0005576;GO:0005625;GO:0006939;GO:0007165;
JTID ENSG00000172179:PRL GO:0005148;GO:0005179;GO:0005576;GO:0005615;GO:0005625;GO:0007166;GO:0007516;GO:0007565;GO:0007595;GO:0008283;
JTID ENSG00000121964:GTDCL1 GO:0009058;GO:0016757;GO:0016740;
JTID ENSG00000118689:FOXO3A GO:0001542;GO:0001544;GO:0001547;GO:0001556;GO:0003700;GO:0005624;GO:0005634;GO:0005737;GO:0006350;GO:0006355;GO:0006915;GO:0006917;GO:0006974;GO:0016563;GO:0019901;GO:0042593;GO:0043565;GO:0045648;GO:0045944;
MIJT hsa-miR-223:FOXO3A:targetscan:mirbase:picTar; hsa-miR-223:GAST:mirbase; hsa-miR-223:PRL:targetscan; hsa-miR-223:GTDCL1:targetscan;

//
ANNOTATION: 1
ID FOXO1:hsa-miR-181d;
TFID FOXO1;
MIID ENSG00000207585:hsa-mir-181d:hsa-miR-181d;
JTID ENSG00000204455:XR_015868.1 GO:0005515;GO:0005622;GO:0008270;
JTID ENSG00000139209:SLC38A4 GO:0006811;GO:0006814;GO:0006865;GO:0015171;GO:0015293;GO:0016020;GO:0016021;GO:0031402;
JTID ENSG00000131969:ABHD12B
JTID ENSG00000169891:REPS2 GO:0005509;GO:0005515;GO:0006461;GO:0007173;
JTID ENSG00000158483:FAM86C
MIJT hsa-miR-181d:REPS2:targetscan:mirbase; hsa-miR-181d:SLC38A4:targetscan; hsa-miR-181d:XR_015868.1:mirbase;

//
ANNOTATION: 1
ID TEL-2:hsa-miR-199a*;
TFID TEL-2;
MIID ENSG00000208024:hsa-mir-199a-2:hsa-miR-199a*;
JTID ENSG00000204220:PFDN6 GO:0006457;GO:0016272;GO:0051082;
TFMI TEL-2:hsa-miR-199a*:hsa-mir-199a-2:computational(ECRbase);

//
ANNOTATION: 1
ID DBP:hsa-let-7d;
TFID DBP;
MIID ENSG00000199133:hsa-let-7d:hsa-let-7d;
JTID ENSG00000173209:AHS2
JTID ENSG00000179476:C14orf28
MIJT hsa-let-7d:C14orf28:targetscan;

//
ANNOTATION: 1
ID HSF2:hsa-miR-199a*;
TFID HSF2;
MIID ENSG00000207752:hsa-mir-199a-1:hsa-miR-199a*;
JTID ENSG00000148985:NP_055304.1 GO:0004872;GO:0005515;GO:0005634;GO:0006916;GO:0016021;GO:0042770;
JTID ENSG00000123473:STIL GO:0007275;GO:0008283;
JTID ENSG00000198757:Q96NB8_HUMAN
JTID ENSG00000198901:PRC1 GO:0000022;GO:0000910;GO:0005515;GO:0005634;GO:0005876;GO:0007049;
JTID ENSG00000130669:PAK4 GO:0000166;GO:0004674;GO:0005515;GO:0005524;GO:0005794;GO:0006468;GO:0006928;GO:0007165;GO:0016740;
JTID ENSG00000165525:SDCCAG1 GO:0005634;
JTID ENSG00000135926:TMBIM1 GO:0016020;GO:0016021;
JTID ENSG00000180398:MCFD2 GO:0005509;GO:0005783;GO:0006888;GO:0015031;
JTID ENSG00000206125:Q68DA7_HUMAN
JTID ENSG00000142687:KIAA0319L
JTID ENSG00000137648:TMPRSS4 GO:0004252;GO:0005044;GO:0006508;GO:0008233;GO:0016020;GO:0016021;
JTID ENSG00000134323:MYCN GO:0000785;GO:0003700;GO:0005515;GO:0005634;GO:0006357;GO:0008284;GO:0030324;GO:0048754;
JTID ENSG00000180263:FGD6 GO:0001726;GO:0005085;GO:0005089;GO:0005515;GO:0005622;GO:0005737;GO:0005794;GO:0005856;GO:0007010;GO:0008270;GO:0008360;GO:0030027;GO:0030036;GO:0031267;GO:0035023;GO:0043088;GO:0046847;GO:0046872;
JTID ENSG00000162415:ZSWIM5 GO:0008270;GO:0046872;
JTID ENSG000000084072:PPIE GO:0000166;GO:0003676;GO:0003755;GO:0006457;GO:0016853;GO:0005634;GO:0003723;GO:0005515;GO:0005681;GO:0006397;GO:0008380;GO:0016018;GO:0045449;
JTID ENSG00000136205:TNS3 GO:0007242;GO:0016311;GO:0016791;GO:0008284;GO:0016477;GO:0048286;
JTID ENSG00000204539:CDSN
JTID ENSG00000198563:ATF6V1G2 GO:0000166;GO:0000398;GO:0003676;GO:0003723;GO:0004004;GO:0004386;GO:0005524;GO:0005634;GO:0005681;GO:0006406;GO:0008026;GO:0008380;GO:0016787;GO:0042802;GO:0005515;GO:0006754;GO:0006811;GO:0015078;GO:0015992;GO:0046872;
MIJT hsa-miR-199a*:KIAA0319L:mirbase; hsa-miR-199a*:SDCCAG1:mirbase; hsa-miR-199a*:MYCN:picTar; hsa-miR-199a*:TMPRSS4:mirbase; hsa-miR-199a*:PPIE:mirbase; hsa-miR-199a*:NP_055304.1:mirbase;

//
ANNOTATION: 1
ID IRF-7:hsa-miR-205;
TFID IRF-7;
MIID ENSG00000207623:hsa-mir-205:hsa-miR-205;
JTID ENSG00000138629:UBL7 GO:0005515;GO:0006464;GO:0006512;
JTID ENSG00000182631:RXFP3 GO:0004872;GO:0004982;GO:0005887;GO:0007165;GO:0007186;GO:0016020;GO:0051482;GO:0008528;
JTID ENSG00000125686:PPARBP
GO:0000119;GO:0001701;GO:0001889;GO:0001892;GO:0003677;GO:0003682;GO:0004872;GO:0005515;GO:0005524;GO:0005634;GO:0006260;GO:0006350;GO:0006355;GO:0006367;GO:0006590;GO:0007275;GO:0007420;GO:0007507;GO:0009887;GO:0016455;GO:0030374;GO:0030521;GO:0031177;GO:0035050;GO:0035116;GO:0035162;GO:004280
9;GO:0043010;GO:0045444;GO:0045944;GO:0046966;
JTID ENSG00000176105:YES1 GO:0000166;GO:0004713;GO:0005515;GO:0005524;GO:0006464;GO:0006468;GO:0007242;GO:0015758;GO:0016740;
JTID ENSG00000072840:EVC GO:0001501;GO:0007517;GO:0016020;GO:0016021;
JTID ENSG00000114982:NP_060461.3 GO:0004339;GO:0005634;
MIJT hsa-miR-205:PPARBP:targetscan:picTar; hsa-miR-205:YES1:targetscan:picTar; hsa-miR-205:UBL7:targetscan:mirbase; hsa-miR-205:EVC:targetscan; hsa-miR-205:RXFP3:targetscan;
```

```
//
ANNOTATION: 1
ID AML1:hsa-miR-31;
TFID AML1;
MIID ENSG00000199177:hsa-mir-31:hsa-miR-31;
JTID ENSG00000013588:GPRC5A GO:0004872;GO:0005887;GO:0007165;GO:0007186;GO:0008067;GO:0016020;
JTID ENSG00000073969:NSF GO:0000166;GO:0000287;GO:0005524;GO:0005783;GO:0015031;GO:0016787;GO:0017111;
JTID ENSG00000106483:SFRP4 GO:0005615;GO:0007165;GO:0007566;GO:0016055;GO:0030154;
JTID ENSG00000151715:TMEM45B GO:0016020;GO:0016021;
JTID ENSG00000100612:DHR57 GO:0008152;GO:0016491;
MIJT hsa-miR-31:NSF:targetscan; hsa-miR-31:SFRP4:targetscan; hsa-miR-31:GPRC5A:targetscan:mirbase; hsa-miR-31:DHR57:targetscan:mirbase; hsa-miR-31:TMEM45B:targetscan;

//
ANNOTATION: 1
ID HNF-1:hsa-miR-19a;
TFID HNF-1;
MIID ENSG00000207610:hsa-mir-19a:hsa-miR-19a;
JTID ENSG00000155189:AGPAT5 GO:0003841;GO:0005739;GO:0008152;GO:0008415;GO:0008654;GO:0016020;GO:0016021;GO:0016740;
JTID ENSG00000117114:LPHN2 GO:0004872;GO:0004930;GO:0005529;GO:0007165;GO:0007186;GO:0007218;GO:0016020;GO:0016021;GO:0016524;
JTID ENSG00000162992:NEUROD1 GO:0003677;GO:0003702;GO:0005515;GO:0005634;GO:0006355;GO:0007275;GO:0007399;GO:0009952;GO:0016563;GO:0030902;GO:0043010;GO:0045165;GO:0045944;
JTID ENSG00000168758:SEMA4C GO:0004872;GO:0005515;GO:0007275;GO:0007399;GO:0016020;GO:0016021;GO:0030154;
JTID ENSG00000121892:NP_056015.1 GO:0005515;
JTID ENSG00000133937:GSC GO:0003700;GO:0005634;GO:0006355;GO:0007275;GO:0007369;GO:0043565;
JTID ENSG00000108582:CPD GO:0004182;GO:0004187;GO:0005624;GO:0006508;GO:0008237;GO:0008472;GO:0016020;GO:0016021;GO:0046872;
JTID ENSG00000111241:FGF6 GO:0000074;GO:0001525;GO:0005576;GO:0007165;GO:0007267;GO:0007275;GO:0008083;GO:0008283;GO:0030154;GO:0045445;
JTID ENSG00000067798:NAV3 GO:0000166;GO:0005524;GO:0017111;
JTID ENSG00000139200:Cl2orf53
JTID ENSG00000138593:K0256_HUMAN
JTID ENSG00000156049:GNA14 GO:0000166;GO:0003924;GO:0004871;GO:0005525;GO:0005834;GO:0005886;GO:0006471;GO:0007165;GO:0007186;
JTID ENSG00000115956:PLEK GO:0005509;GO:0007242;
JTID ENSG00000153707:PTPRD GO:0004872;GO:0005001;GO:0005887;GO:0006470;GO:0007185;GO:0016020;GO:0016787;GO:0004725;GO:0005515;GO:0007155;
MIJT hsa-miR-19a:FGF6:targetscan; hsa-miR-19a:CPD:targetscan:pictar; hsa-miR-19a:PTPRD:targetscan; hsa-miR-19a:SEMA4C:targetscan:mirbase:pictar; hsa-miR-19a:NP_056015.1:pictar; hsa-miR-19a:AGPAT5:targetscan:mirbase; hsa-miR-19a:LPHN2:targetscan:pictar; hsa-miR-19a:Cl2orf53:targetscan:pictar; hsa-miR-19a:NAV3:targetscan:mirbase:pictar; hsa-miR-19a:NEUROD1:targetscan:mirbase:pictar; hsa-miR-19a:GSC:targetscan:pictar; hsa-miR-19a:K0256_HUMAN:mirbase;

//
ANNOTATION: 1
ID ATF-1:hsa-miR-30b;
TFID ATF-1;
MIID ENSG00000207582:hsa-mir-30b:hsa-miR-30b;
JTID ENSG00000186594:NP_116284.2
JTID ENSG00000102098:SCML2 GO:0003700;GO:0005634;GO:0006355;GO:0009653;
JTID ENSG00000133627:ACTR3B GO:0005515;GO:0005856;GO:0030041;GO:0051015;GO:0000166;GO:0005524;
MIJT hsa-miR-30b:NP_116284.2:mirbase; hsa-miR-30b:SCML2:targetscan;

//
ANNOTATION: 1
ID HOXA7:hsa-miR-183;
TFID HOXA7;
MIID ENSG00000207691:hsa-mir-183:hsa-miR-183;
JTID ENSG00000113070:HBEGF GO:0004872;GO:0005154;GO:0005615;GO:0005887;GO:0007165;GO:0007173;GO:0007517;GO:0008016;GO:0008083;GO:0008201;GO:0009986;GO:0016020;GO:0035313;GO:0048661;GO:0051549;
JTID ENSG00000072042:RDH11 GO:0004745;GO:0005622;GO:0005783;GO:0008152;GO:0016020;GO:0016021;GO:0016491;GO:0042572;GO:0045494;
JTID ENSG00000135454:B4GALNT1 GO:0016740;GO:0001574;GO:0003947;GO:0005624;GO:0005975;GO:0006687;GO:0016020;GO:0016021;GO:0016758;GO:0019915;GO:0030173;GO:0030259;
JTID ENSG00000166743:ACSM1 GO:0003824;GO:0008152;GO:0003996;GO:0005739;GO:0005759;GO:0006633;GO:0015645;GO:0015980;GO:0018874;GO:0019395;GO:0019605;GO:0047760;
JTID ENSG00000172456:NP_060761.2 GO:0005975;
MIJT hsa-miR-183:NP_060761.2:mirbase; hsa-miR-183:ACSM1:targetscan:mirbase; hsa-miR-183:HBEGF:targetscan:mirbase:pictar; hsa-miR-183:RDH11:targetscan;

//
ANNOTATION: 1
ID SOX-5:hsa-miR-125b;
TFID SOX-5;
MIID ENSG00000207971:hsa-mir-125b-1:hsa-miR-125b;
JTID ENSG00000136908:DPM2 GO:0009059;GO:0016757;GO:0030176;GO:0000506;GO:0005515;GO:0005783;GO:0005789;GO:0006506;GO:0016020;GO:0016021;GO:0018406;GO:0031501;GO:0035269;
JTID ENSG00000112195:TREML2 GO:0004872;
JTID ENSG00000141380:SS18 GO:0005634;
JTID ENSG00000187840:EIF4EBP1 GO:0005515;GO:0008190;GO:0008286;GO:0045947;
JTID ENSG00000133561:GIMAP6 GO:0005525;
JTID ENSG00000136383:ALPK3 GO:0004674;GO:0005524;GO:0005634;GO:0006468;GO:0007507;GO:0016301;GO:0016740;
JTID ENSG00000161021:LTC4S GO:0003713;GO:0005634;GO:0006350;GO:0006355;GO:0007219;GO:0045944;GO:0004364;GO:0004464;GO:0005624;GO:0005792;GO:0008047;GO:0016020;GO:0016021;GO:0016829;GO:0019370;
JTID ENSG00000205126:NP_001027025.1 GO:0003824;GO:0008483;GO:0009058;GO:0016847;GO:0030170;
JTID ENSG00000188743:Q9P169_HUMAN
JTID ENSG00000130427:EPO GO:0001666;GO:0005128;GO:0005179;GO:0005515;GO:0005576;GO:0005615;GO:0007165;GO:0007267;GO:0007275;GO:0008015;GO:0030218;GO:0043249;
JTID ENSG00000174808:BTC GO:0000074;GO:0005154;GO:0005625;GO:0008083;GO:0008283;GO:0008284;GO:0016020;GO:0016021;
JTID ENSG00000110274:CEP164
JTID ENSG00000073754:CD5L GO:0005044;GO:0005576;GO:0005615;GO:0006915;GO:0006968;GO:0016020;
JTID ENSG00000184508:HDDC3 GO:0003824;
JTID ENSG00000130348:QRS1 GO:0004040;GO:0006412;GO:0017068;
JTID ENSG00000142102:ATHL1 GO:0003824;GO:0005975;
JTID ENSG00000095794:CREM GO:0003700;GO:0005634;GO:0006355;GO:0008140;GO:0043565;GO:0046983;GO:0005515;GO:0006350;GO:0007165;GO:0005667;
JTID ENSG00000205081:XR_017999.1
JTID ENSG0000007968:E2F2 GO:0000074;GO:0003700;GO:0003702;GO:0005515;GO:0005634;GO:0005667;GO:0006350;GO:0006355;GO:0006367;GO:0007049;
JTID ENSG00000076716:GPC4 GO:0005578;GO:0005887;GO:0008283;GO:0009653;GO:0016020;GO:0048503;
JTID ENSG00000047621:Cl2orf4
JTID ENSG00000136895:GARNL3 GO:0005096;GO:0005622;GO:0051056;GO:0005083;
JTID ENSG00000100796:SMEK1 GO:0016020;GO:0016021;
JTID ENSG00000160796:NBAL2 GO:0005634;
MIJT hsa-miR-125b:TREML2:targetscan; hsa-miR-125b:EIF4EBP1:targetscan:mirbase:pictar; hsa-miR-125b:SS18:targetscan:pictar; hsa-miR-125b:GIMAP6:targetscan; hsa-miR-125b:CEP164:targetscan; hsa-miR-125b:CREM:targetscan:pictar; hsa-miR-125b:ATHL1:targetscan:mirbase; hsa-miR-125b:EPO:targetscan; hsa-miR-125b:Cl2orf4:targetscan; hsa-miR-125b:SMEK1:targetscan:mirbase:pictar; hsa-miR-125b:QRS1:targetscan; hsa-miR-125b:HDDC3:targetscan:mirbase; hsa-miR-125b:E2F2:targetscan; hsa-miR-125b:GPC4:targetscan:pictar; hsa-miR-125b:ALPK3:targetscan:pictar; hsa-miR-125b:CD5L:targetscan:mirbase; hsa-miR-125b:DPM2:targetscan:mirbase;

//
ANNOTATION: 1
ID HIF-1:hsa-miR-199b;
TFID HIF-1;
MIID ENSG00000207581:hsa-mir-199b:hsa-miR-199b;
JTID ENSG00000108515:ENO3 GO:0000015;GO:0000287;GO:0004634;GO:0006096;GO:0016829;
JTID ENSG00000176986:SEC24C GO:0005515;GO:0005783;GO:0006886;GO:0006888;GO:0008270;GO:0030127;
JTID ENSG00000204380:Q6ZTQ2_HUMAN
JTID ENSG00000196724:ZNF418 GO:0003677;GO:0005622;GO:0005634;GO:0006350;GO:0006355;GO:0008270;GO:0046872;
JTID ENSG00000145681:HAPLN1 GO:0005540;GO:0005578;GO:0007155;
JTID ENSG00000206198:NR_001535.1
MIJT hsa-miR-199b:ZNF418:targetscan; hsa-miR-199b:ENO3:targetscan:mirbase; hsa-miR-199b:SEC24C:targetscan;
```

```
//
ANNOTATION: 1
ID HNF-1:hsa-miR-17-5p;
TFID HNF-1;
MIID ENSG00000207745:hsa-mir-17:hsa-miR-17-5p;
JTID ENSG00000151025:GPR158 GO:0004872;GO:0007165;GO:0007186;GO:0008067;GO:0016020;GO:0016021;
JTID ENSG00000132975:GPR12 GO:0001619;GO:0004872;GO:0005887;GO:0006874;GO:0007165;GO:0007186;GO:0016020;
JTID ENSG00000163131:CTSS GO:0004218;GO:0005576;GO:0005764;GO:0006508;GO:0006955;GO:0016020;
JTID ENSG00000183826:BTBD9 GO:0005515;GO:0007155;
JTID ENSG00000005469:CROT GO:0005777;GO:0006091;GO:0006629;GO:0006631;GO:0006810;GO:0008415;GO:0008458;GO:0015908;GO:0016740;
JTID ENSG00000203793:Q6ZR74_HUMAN
MIJT hsa-miR-17-5p:CROT:targetscan:mirbase; hsa-miR-17-5p:GPR158:targetscan; hsa-miR-17-5p:CTSS:targetscan;

//
ANNOTATION: 1
ID HNF-1:hsa-miR-494;
TFID HNF-1;
MIID ENSG00000194717:hsa-mir-494:hsa-miR-494;
JTID ENSG00000198919:DZIP3_HUMAN GO:0000209;GO:0003723;GO:0004842;GO:0005515;GO:0005737;GO:0006512;GO:0008270;GO:0016874;GO:0031593;GO:0046872;
JTID ENSG00000133863:TEX15
JTID ENSG00000006576:PHTF2 GO:0005783;GO:0003677;
JTID ENSG00000085382:HACE1 GO:0004842;GO:0005622;GO:0006464;GO:0006512;GO:0016874;
JTID ENSG00000135697:BCMO1 GO:0003834;GO:0005506;GO:0016491;
JTID ENSG00000165323:FAT3 GO:0005509;GO:0007156;GO:0016020;GO:0016021;
JTID ENSG00000156313:RPGR GO:0005085;GO:0005515;GO:0005794;GO:0006886;GO:0007601;GO:0007605;GO:0050896;GO:0005737;GO:0005929;GO:0042462;
JTID ENSG00000173914:RBM4B GO:0000166;GO:0003723;GO:0005634;GO:0006397;GO:0008270;GO:0008380;GO:0016068;GO:0046872;
JTID ENSG00000133640:LRRIQ1 GO:0005515;
JTID ENSG00000188901:NP_055226.1
JTID ENSG00000178457:C21orf94
JTID ENSG00000143641:GALNT2 GO:0004653;GO:0005509;GO:0005529;GO:0006493;GO:0016020;GO:0016021;GO:0016757;GO:0030145;
JTID ENSG00000204388:HSPA1B GO:0000166;GO:0005524;GO:0005634;GO:0005737;GO:0005739;GO:0005783;GO:0006402;GO:0006457;GO:0006916;GO:0006986;GO:0051082;
JTID ENSG00000149575:SCN2B GO:0001518;GO:0005248;GO:0006811;GO:0006814;GO:0007268;GO:0016020;GO:0016021;GO:0031402;
JTID ENSG00000118113:MMP8 GO:0000270;GO:0004222;GO:0004232;GO:0005509;GO:0005578;GO:0005615;GO:0006508;GO:0008130;GO:0008270;GO:0030574;
MIJT hsa-miR-494:BCMO1:targetscan:mirbase; hsa-miR-494:SCN2B:targetscan; hsa-miR-494:HSPA1B:mirbase; hsa-miR-494:GALNT2:targetscan; hsa-miR-494:MMP8:targetscan; hsa-miR-494:TEX15:targetscan; hsa-miR-494:LRRIQ1:targetscan:mirbase; hsa-miR-494:RBM4B:targetscan:mirbase; hsa-miR-494:HACE1:targetscan:mirbase;

//
ANNOTATION: 1
ID HNF-3:hsa-miR-135a;
TFID HNF-3;
MIID ENSG00000207586:hsa-mir-135a-2:hsa-miR-135a;
JTID ENSG00000091879:ANGPT2 GO:0001525;GO:0005102;GO:0005615;GO:0007165;GO:0007275;GO:0030154;GO:0005515;GO:0016525;GO:0048514;
JTID ENSG00000185736:ADARB2 GO:0003723;GO:0003725;GO:0003727;GO:0004000;GO:0005622;GO:0005634;GO:0006381;GO:0006396;GO:0006397;GO:0008270;GO:0016787;GO:0046872;
JTID ENSG00000163719:MTMR14 GO:0001726;GO:0004438;GO:0048471;GO:0016311;GO:0016791;
JTID ENSG00000143418:LASS2 GO:0003700;GO:0005515;GO:0005634;GO:0005783;GO:0006355;GO:0008610;GO:0016020;GO:0016021;GO:0043565;
JTID ENSG00000198429:ZNF69 GO:0003676;GO:0005622;GO:0006355;
JTID ENSG00000172845:SP3 GO:0003676;GO:0003677;GO:0005515;GO:0005622;GO:0005634;GO:0006350;GO:0006355;GO:0008270;GO:0016563;GO:0016564;GO:0046872;
JTID ENSG00000162694:EXTL2 GO:0001888;GO:0005783;GO:0006044;GO:0016020;GO:0016021;GO:0016757;GO:0019276;GO:0030145;GO:0035248;GO:0046872;
MIJT hsa-miR-135a:ZNF69:targetscan; hsa-miR-135a:ADARB2:targetscan:mirbase; hsa-miR-135a:EXTL2:targetscan:pictar; hsa-miR-135a:SP3:targetscan:mirbase:pictar; hsa-miR-135a:MTMR14:targetscan:mirbase;

//
ANNOTATION: 1
ID RORALPHA2:hsa-miR-365;
TFID RORALPHA2;
MIID ENSG00000199130:hsa-mir-365-1:hsa-miR-365;
JTID ENSG00000198546:ZNF511 GO:0003677;GO:0005622;GO:0005634;GO:0006350;GO:0006355;GO:0008270;GO:0046872;
JTID ENSG00000183735:TBK1 GO:0000166;GO:0004674;GO:0004871;GO:0005515;GO:0005524;GO:0006468;GO:0007249;GO:0009615;GO:0016740;GO:0043123;GO:0045087;
MIJT hsa-miR-365:TBK1:targetscan:mirbase; hsa-miR-365:ZNF511:targetscan;

//
ANNOTATION: 1
ID HIF-1:hsa-miR-214;
TFID HIF-1;
MIID ENSG00000207949:hsa-mir-214:hsa-miR-214;
JTID ENSG00000116649:SRM GO:0004766;GO:0008295;GO:0016740;
JTID ENSG00000134780:DAGLA GO:0004806;GO:0005509;GO:0016020;GO:0016021;GO:0016042;GO:0016787;
JTID ENSG00000164588:HCN1 GO:0000166;GO:0005249;GO:0005272;GO:0006811;GO:0006813;GO:0006814;GO:0016020;GO:0016021;GO:0030424;GO:0030552;GO:0030955;GO:0031402;
JTID ENSG00000171551:ECELL1 GO:0004222;GO:0004245;GO:0005887;GO:0006508;GO:0007218;GO:0008237;GO:0008270;GO:0016020;GO:0046872;
JTID ENSG00000167468:GPX4 GO:0004602;GO:0005739;GO:0006118;GO:0006644;GO:0006979;GO:0007275;GO:0008430;GO:0016491;GO:0047066;
MIJT hsa-miR-214:HCN1:targetscan; hsa-miR-214:ECELL1:targetscan:mirbase; hsa-miR-214:GPX4:targetscan:mirbase; hsa-miR-214:SRM:targetscan; hsa-miR-214:DAGLA:targetscan;

//
ANNOTATION: 1
ID LEF1:hsa-miR-135a;
TFID LEF1;
MIID ENSG00000207586:hsa-mir-135a-2:hsa-miR-135a;
JTID ENSG00000100350:FOXRED2 GO:0005783;GO:0006118;GO:0016491;
JTID ENSG00000135842:FAM129A
JTID ENSG00000122787:AKR1D1 GO:0005496;GO:0005829;GO:0006118;GO:0006629;GO:0006699;GO:0006707;GO:0007586;GO:0008207;GO:0008209;GO:0016491;GO:0030573;GO:0047787;GO:0047568;
JTID ENSG00000102181:CD99L2
JTID ENSG00000137090:DMRT1 GO:0003700;GO:0005634;GO:0006350;GO:0006355;GO:0007275;GO:0007530;GO:0007548;GO:0008270;GO:0008584;GO:0030154;GO:0046872;
JTID ENSG00000143771:CNIH4 GO:0005515;GO:0005783;GO:0007242;GO:0016020;GO:0016021;
JTID ENSG00000185294:NP_787078.1 GO:0008233;GO:0008717;GO:0016021;
JTID ENSG00000114480:GBE1 GO:0003844;GO:0004553;GO:0005975;GO:0005978;GO:0006091;GO:0016757;GO:0043169;
JTID ENSG00000124194:GDAP1L1
JTID ENSG00000147654:EBAG9 GO:0001558;GO:0005625;GO:0006915;GO:0016020;GO:0016021;GO:0016505;
JTID ENSG00000173464:RNASE11 GO:0003676;GO:0004519;GO:0004522;GO:0016787;
JTID ENSG00000185736:ADARB2 GO:0003723;GO:0003725;GO:0003727;GO:0004000;GO:0005622;GO:0005634;GO:0006381;GO:0006396;GO:0006397;GO:0008270;GO:0016787;GO:0046872;
JTID ENSG00000058056:USP13 GO:0004197;GO:0004221;GO:0006511;GO:0006512;GO:0008270;GO:0046872;
JTID ENSG00000198018:ENTPD7 GO:0005509;GO:0005773;GO:0016020;GO:0016021;GO:0016787;
JTID ENSG00000132434:LANCL2 GO:0005524;GO:0005525;GO:0005634;GO:0005829;GO:0005886;GO:0016481;
JTID ENSG00000171931:FBXW10
JTID ENSG00000135452:TSPAN31 GO:0005624;GO:0005887;GO:0008284;GO:0016020;
MIJT hsa-miR-135a:LANCL2:targetscan; hsa-miR-135a:GBE1:targetscan:mirbase; hsa-miR-135a:ADARB2:targetscan:mirbase; hsa-miR-135a:DMRT1:targetscan:pictar; hsa-miR-135a:FOXRED2:targetscan; hsa-miR-135a:GDAP1L1:targetscan; hsa-miR-135a:NP_787078.1:mirbase; hsa-miR-135a:AKR1D1:targetscan:mirbase; hsa-miR-135a:ENTPD7:targetscan:mirbase:pictar; hsa-miR-135a:FAM129A:targetscan; hsa-miR-135a:RNASE11:targetscan:mirbase; hsa-miR-135a:USP13:targetscan:mirbase; hsa-miR-135a:TSPAN31:targetscan:mirbase;

//
ANNOTATION: 1
ID TEL-2:hsa-miR-23a;
```

```
TFID TEL-2;
MIID ENSG00000207980:hsa-mir-23a:hsa-miR-23a;
JTID ENSG00000113615:SEC24A GO:0005515;GO:0006886;GO:0008270;GO:0030127;GO:0005783;
JTID ENSG00000188938:FAM120AOS
MIJT hsa-miR-23a:FAM120AOS:targetscan:mirbase; hsa-miR-23a:SEC24A:targetscan:mirbase;

//
ANNOTATION: 1
ID AREB6:hsa-miR-133b;
TFID AREB6;
MIID ENSG00000199080:hsa-mir-133b:hsa-miR-133b;
JTID ENSG00000178789:CD300LB GO:0004872;
JTID ENSG00000197540:GZMM GO:0004252;GO:0005515;GO:0006508;GO:0019835;
JTID ENSG00000005884:ITGA3 GO:0001764;GO:0004872;GO:0005509;GO:0005515;GO:0007155;GO:0007160;GO:0007229;GO:0007613;GO:0008305;GO:0016020;GO:0016021;GO:0016323;GO:0019717;
MIJT hsa-miR-133b:ITGA3:targetscan:mirbase:pictar; hsa-miR-133b:GZMM:targetscan:mirbase; hsa-miR-133b:CD300LB:targetscan;

//
ANNOTATION: 1
ID IRF:hsa-miR-125b;
TFID IRF;
MIID ENSG00000207971:hsa-mir-125b-1:hsa-miR-125b;
JTID ENSG00000171791:BCL2
GO:0000074;GO:0001836;GO:0002020;GO:0005515;GO:0005634;GO:0005737;GO:0005739;GO:0005741;GO:0005783;GO:0005829;GO:0006915;GO:0006916;GO:0006959;GO:0007565;GO:0008284;GO:0009314;GO:0009636;GO:0010039;GO:0016020;GO:0016021;GO:0031069;GO:0031965;GO:0032848;GO:0035094;GO:0042803;GO:0043066;GO:004347
3;GO:0043496;GO:0043497;GO:0043524;GO:0045069;GO:0046902;GO:0046982;GO:0051402;GO:0051434;GO:0051607;GO:0051881;GO:0051902;
JTID ENSG00000142765:SYTL1 GO:0005215;GO:0005515;GO:0005625;GO:0006886;GO:0008021;GO:0008270;GO:0016020;GO:0016192;GO:0017137;GO:0019897;GO:0042043;GO:0042470;GO:0005624;
MIJT hsa-miR-125b:SYTL1:targetscan:mirbase; hsa-miR-125b:BCL2:targetscan;

//
ANNOTATION: 1
ID PEA3:hsa-miR-195;
TFID PEA3;
MIID ENSG00000207929:hsa-mir-195:hsa-miR-195;
JTID ENSG00000204388:HSPA1B GO:0000166;GO:0005524;GO:0005634;GO:0005737;GO:0005739;GO:0005783;GO:0006402;GO:0006457;GO:0006916;GO:0006986;GO:0051082;
JTID ENSG00000104859:SFRS16 GO:0005634;GO:0006397;GO:0008380;
JTID ENSG00000107738:C10orf54 GO:0004872;GO:0016020;GO:0016021;
JTID ENSG00000130584:ZBTB46 GO:0003676;GO:0005515;GO:0005622;GO:0005634;GO:0006350;GO:0006355;GO:0008270;GO:0046872;
JTID ENSG00000122140:MRPS2 GO:0003735;GO:0005622;GO:0005739;GO:0006412;GO:0015935;
JTID ENSG00000167778:SPRYD3 GO:0004713;GO:0004872;GO:0016301;
JTID ENSG00000172725:PTPRCAP GO:0003779;GO:0005515;GO:0005886;GO:0005887;GO:0006952;
MIJT hsa-miR-195:MRPS2:targetscan; hsa-miR-195:C10orf54:targetscan; hsa-miR-195:ZBTB46:targetscan:pictar; hsa-miR-195:SFRS16:targetscan:pictar; hsa-miR-195:SPRYD3:targetscan:mirbase:pictar; hsa-miR-195:HSPA1B:targetscan:mirbase;

//
ANNOTATION: 1
ID AML1:hsa-miR-302b;
TFID AML1;
MIID ENSG00000199058:hsa-mir-302b:hsa-miR-302b;
JTID ENSG00000173530:TNFRSF10D GO:0004888;GO:0005515;GO:0006915;GO:0006916;GO:0007165;GO:0016020;GO:0016021;
JTID ENSG00000177337:NP_001034885.1
JTID ENSG00000143314:MRPL24 GO:0003735;GO:0005622;GO:0005739;GO:0005840;GO:0006412;
JTID ENSG00000144354:CDCA7 GO:0005634;GO:0006350;GO:0006355;GO:0042127;
JTID ENSG00000128604:IRF5 GO:0003700;GO:0005622;GO:0005634;GO:0006355;GO:0003709;GO:0006350;
JTID ENSG00000144711:IQSEC1 GO:0005086;GO:0005622;GO:0005634;GO:0032012;
JTID ENSG00000139970:RTN1 GO:0004871;GO:0005783;GO:0007165;GO:0016020;GO:0016021;GO:0030176;GO:0030182;
JTID ENSG00000188193:C6orf155
JTID ENSG00000108389:MTMR4 GO:0004437;GO:0004725;GO:0006470;GO:0008270;GO:0016787;GO:0046839;
JTID ENSG00000180667:YOD1 GO:0003676;GO:0005622;GO:0006512;GO:0008234;GO:0008270;GO:0046872;
JTID ENSG00000183826:BTBD9 GO:0005515;GO:0007155;
JTID ENSG00000204542:C6orf15
JTID ENSG00000100647:KIAA0247 GO:0016020;GO:0016021;
JTID ENSG00000135604:STX11 GO:0005484;GO:0005515;GO:0006886;GO:0006944;GO:0008565;GO:0016020;
JTID ENSG00000168061:SAC3D1 GO:0005813;GO:0005819;GO:0051225;GO:0051298;
MIJT hsa-miR-302b:CDCA7:targetscan:mirbase:pictar; hsa-miR-302b:IQSEC1:targetscan; hsa-miR-302b:SAC3D1:targetscan:mirbase; hsa-miR-302b:YOD1:targetscan; hsa-miR-302b:MRPL24:targetscan:mirbase; hsa-miR-302b:TNFRSF10D:targetscan; hsa-miR-302b:MTMR4:targetscan:pictar; hsa-miR-
302b:IRF5:targetscan:mirbase; hsa-miR-302b:C6orf15:targetscan:mirbase; hsa-miR-302b:RTN1:targetscan:pictar;

//
ANNOTATION: 1
ID NF-AT:hsa-miR-148a;
TFID NF-AT;
MIID ENSG00000199085:hsa-mir-148a:hsa-miR-148a;
JTID ENSG00000189180:ZNF33A GO:0003700;GO:0005622;GO:0005634;GO:0006350;GO:0006355;GO:0008270;GO:0016564;GO:0046872;GO:0003676;
JTID ENSG00000125084:WNT1 GO:0001708;GO:0004871;GO:0005102;GO:0005576;GO:0005625;GO:0007163;GO:0007223;GO:0007275;GO:0007283;GO:0009653;GO:0016477;GO:0030154;
JTID ENSG00000101901:CXorf45
JTID ENSG00000170989:EDG1 GO:0001525;GO:0001619;GO:0004872;GO:0005886;GO:0005887;GO:0007165;GO:0007186;GO:0007193;GO:0007420;GO:0008284;GO:0030155;
JTID ENSG00000161638:ITGA5 GO:0001726;GO:0004872;GO:0005178;GO:0005509;GO:0005515;GO:0007044;GO:0007155;GO:0007229;GO:0007613;GO:0008305;GO:0016020;GO:0016021;GO:0019717;
JTID ENSG00000185760:KCNQ5 GO:0005242;GO:0006461;GO:0006811;GO:0006813;GO:0007268;GO:0008076;GO:0016020;GO:0016021;GO:0030955;
JTID ENSG00000106511:MEOX2 GO:0001757;GO:0003700;GO:0005634;GO:0006355;GO:0007275;GO:0008015;GO:0043565;
JTID ENSG00000116016:EPAS1 GO:0001525;GO:0001666;GO:0003705;GO:0003713;GO:0004871;GO:0005515;GO:0005634;GO:0006355;GO:0006366;GO:0007165;GO:0007275;GO:0030154;GO:0035035;
JTID ENSG00000151079:KCNAB6 GO:0005249;GO:0005515;GO:0005624;GO:0006811;GO:0006813;GO:0008076;GO:0016020;GO:0016021;GO:0030955;
JTID ENSG00000180537:RNF182 GO:0005515;GO:0008270;GO:0016020;GO:0016021;GO:0046872;
JTID ENSG00000182220:ATP6AP2 GO:0002003;GO:0004872;GO:0005515;GO:0009897;GO:0016020;GO:0016021;GO:0032914;GO:0043408;
MIJT hsa-miR-148a:CXorf45:targetscan:mirbase; hsa-miR-148a:EPAS1:targetscan:pictar; hsa-miR-148a:WNT1:targetscan:pictar; hsa-miR-148a:ITGA5:targetscan:pictar; hsa-miR-148a:ATP6AP2:targetscan:mirbase:pictar; hsa-miR-148a:MEOX2:targetscan:pictar; hsa-miR-148a:RNF182:targetscan; hsa-miR-
148a:KCNAB6:targetscan; hsa-miR-148a:EDG1:targetscan:mirbase:pictar;

//
ANNOTATION: 1
ID TFII-I:hsa-miR-9;
TFID TFII-I;
MIID ENSG00000207933:hsa-mir-9-1:hsa-miR-9;
JTID ENSG00000188888:GPR179 GO:0004872;GO:0007165;GO:0007186;GO:0008067;GO:0016020;GO:0016021;
MIJT hsa-miR-9:GPR179:targetscan;

//
ANNOTATION: 1
ID IRF-1:hsa-miR-125b;
TFID IRF-1;
MIID ENSG00000207863:hsa-mir-125b-2:hsa-miR-125b;
JTID ENSG00000157119:KBTBD5 GO:0005515;
MIJT hsa-miR-125b:KBTBD5:targetscan:mirbase;
```

```
//
ANNOTATION: 1
ID AML1:hsa-miR-202*;
TFID AML1;
MIID ENSG00000199089:hsa-mir-202:hsa-miR-202*;
JTID ENSG00000155087:ODF1 GO:0001520;GO:0005198;GO:0007275;GO:0007283;GO:0030154;
MIJT hsa-miR-202*:ODF1:mirbase;

//
ANNOTATION: 1
ID HNF-3:hsa-let-7a;
TFID HNF-3;
MIID ENSG00000199165:hsa-let-7a-1:hsa-let-7a;
JTID ENSG00000118971:CCND2 GO:0000074;GO:0005515;GO:0005634;GO:0007049;GO:0051301;
JTID ENSG00000164654:NP_061878.3
JTID ENSG00000183035:CYLC1 GO:0005198;GO:0005856;GO:0007275;GO:0007283;GO:0030154;GO:0043159;
JTID ENSG00000179476:C14orf28
JTID ENSG00000177058:NP_775785.1
JTID ENSG00000187109:NAP1L1 GO:0005515;GO:0005634;GO:0005678;GO:0006260;GO:0006334;GO:0008284;
JTID ENSG00000105419:Q99687-2
JTID ENSG00000181322:TXNDC6 GO:0004550;GO:0005524;GO:0006183;GO:0006228;GO:0006241;GO:0045454;
JTID ENSG00000172053:QARS GO:0000166;GO:0004818;GO:0004819;GO:0005515;GO:0005524;GO:0005625;GO:0005737;GO:0006424;GO:0006425;GO:0016874;
JTID ENSG00000182263:FIGN GO:0000166;GO:0005524;GO:0017111;
MIJT hsa-let-7a:CCND2:targetscan:pictar; hsa-let-7a:CYLC1:mirbase; hsa-let-7a:Q99687-2:mirbase; hsa-let-7a:NAP1L1:targetscan:mirbase; hsa-let-7a:TXNDC6:targetscan; hsa-let-7a:FIGN:targetscan; hsa-let-7a:C14orf28:targetscan; hsa-let-7a:NP_775785.1:pictar; hsa-let-7a:QARS:targetscan:mirbase:pictar;

//
ANNOTATION: 1
ID AHR:hsa-miR-142-3p;
TFID AHR;
MIID ENSG00000207567:hsa-mir-142:hsa-miR-142-3p;
JTID ENSG00000136636:KCTD3 GO:0005249;GO:0005515;GO:0006813;GO:0008076;GO:0016020;GO:0005216;
JTID ENSG00000141971:FAM125A GO:0005634;
JTID ENSG00000169919:GUSB GO:0004566;GO:0005764;GO:0005975;GO:0006027;GO:0008152;GO:0043169;
JTID ENSG00000088812:ATRN GO:0004872;GO:0005529;GO:0005615;GO:0005886;GO:0005887;GO:0006954;GO:0007275;GO:0005515;GO:0040014;
JTID ENSG00000165417:GTF2A1 GO:0003713;GO:0005515;GO:0005634;GO:0005672;GO:0006350;GO:0006355;GO:0006367;GO:0016251;GO:0016986;
JTID ENSG00000106540:C7orf36
MIJT hsa-miR-142-3p:GTF2A1:targetscan:pictar; hsa-miR-142-3p:GUSB:mirbase; hsa-miR-142-3p:FAM125A:targetscan:mirbase; hsa-miR-142-3p:C7orf36:mirbase;

//
ANNOTATION: 1
ID TCF-4:hsa-miR-126;
TFID TCF-4;
MIID ENSG00000199161:hsa-mir-126:hsa-miR-126;
JTID ENSG00000107362:FAM108B1 GO:0016787;
JTID ENSG00000141527:CARD14 GO:0001934;GO:0005515;GO:0005622;GO:0005737;GO:0005886;GO:0007250;GO:0042981;GO:0050700;
JTID ENSG00000169410:PTPN9 GO:0004726;GO:0005215;GO:0005622;GO:0006470;GO:0006810;GO:0016787;
JTID ENSG00000130690:Q96I54_HUMAN
JTID ENSG00000198219:Q96N05_HUMAN
JTID ENSG00000172889:EGFL7 GO:0001525;GO:0001568;GO:0001570;GO:0005509;GO:0005576;GO:0007275;GO:0030334;
MIJT hsa-miR-126:CARD14:mirbase; hsa-miR-126:Q96I54_HUMAN:mirbase; hsa-miR-126:FAM108B1:mirbase; hsa-miR-126:EGFL7:targetscan:mirbase; hsa-miR-126:PTPN9:targetscan:mirbase:pictar;

//
ANNOTATION: 1
ID AHR:hsa-miR-330;
TFID AHR;
MIID ENSG00000199066:hsa-mir-330:hsa-miR-330;
JTID ENSG00000137727:ARHGAP20 GO:0005096;GO:0005622;GO:0007049;GO:0007165;GO:0045786;
JTID ENSG00000168411:RFWD3 GO:0005515;GO:0008270;GO:0046872;
JTID ENSG00000162642:C1orf52
MIJT hsa-miR-330:C1orf52:targetscan; hsa-miR-330:RFWD3:targetscan:pictar; hsa-miR-330:ARHGAP20:targetscan:mirbase;

//
ANNOTATION: 1
ID MAZ:hsa-miR-9*;
TFID MAZ;
MIID ENSG00000207933:hsa-mir-9-1:hsa-miR-9*;
JTID ENSG00000197594:ENPF1 GO:0001503;GO:0003676;GO:0004519;GO:0004528;GO:0004551;GO:0006091;GO:0006796;GO:0007584;GO:0008152;GO:0009117;GO:0016020;GO:0016021;GO:0016787;GO:0046872;GO:0030279;GO:0046849;
TFMI MAZ:hsa-miR-9*:hsa-mir-9-1:computational(PUBMED: 17447837); computational(ECRbase);

//
ANNOTATION: 1
ID IRF:hsa-miR-100;
TFID IRF;
MIID ENSG00000207994:hsa-mir-100:hsa-miR-100;
JTID ENSG00000118689:FOXO3A GO:0001542;GO:0001544;GO:0001547;GO:0001556;GO:0003700;GO:0005624;GO:0005634;GO:0005737;GO:0006350;GO:0006355;GO:0006915;GO:0006917;GO:0006974;GO:0016563;GO:0019901;GO:0042593;GO:0043565;GO:0045648;GO:0045944;
JTID ENSG00000071575:TRIB2 GO:0004860;GO:0005515;GO:0005524;GO:0005737;GO:0043405;
JTID ENSG00000162437:RAVER2 GO:0000166;GO:0003723;GO:0005634;GO:0005515;
MIJT hsa-miR-100:FOXO3A:targetscan:mirbase; hsa-miR-100:RAVER2:targetscan:pictar; hsa-miR-100:TRIB2:targetscan:mirbase:pictar;

//
ANNOTATION: 1
ID LEF1:hsa-miR-129;
TFID LEF1;
MIID ENSG00000207705:hsa-mir-129-1:hsa-miR-129;
JTID ENSG00000164849:GPR146 GO:0001584;GO:0004872;GO:0007165;GO:0007186;GO:0016020;GO:0016021;
JTID ENSG00000105058:FAM32A GO:0005730;
JTID ENSG00000111671:SPSB2 GO:0007242;
JTID ENSG00000203945:Q5JPQ1_HUMAN
JTID ENSG00000162105:SHANK2 GO:0005515;GO:0007242;GO:0030160;
JTID ENSG00000147316:MCPH1 GO:0005622;
JTID ENSG00000134138:MEIS2 GO:0003700;GO:0005634;GO:0006355;GO:0043565;GO:0000122;GO:0003704;GO:0003714;
JTID ENSG00000184983:NDUFA6 GO:0003954;GO:0005739;GO:0005747;GO:0006120;GO:0006979;GO:0008137;GO:0016491;GO:0031966;
JTID ENSG00000146409:C6orf192 GO:0005215;GO:0006810;GO:0016020;GO:0016021;
JTID ENSG00000070214:SLC44A1 GO:0006810;GO:0015220;GO:0015871;GO:0016020;GO:0016021;
MIJT hsa-miR-129:SPSB2:mirbase; hsa-miR-129:SLC44A1:targetscan; hsa-miR-129:MEIS2:targetscan:pictar; hsa-miR-129:MCPH1:targetscan; hsa-miR-129:GPR146:mirbase;
```

```
ID LEF1:hsa-miR-24;
TFID LEF1;
MIID ENSG00000209707:hsa-mir-24-2:hsa-miR-24;
JTID ENSG00000100897:WDR23
JTID ENSG00000183813:CCR4 GO:0001584;GO:0001764;GO:0002507;GO:0004872;GO:0004945;GO:0005886;GO:0005887;GO:0006935;GO:0006954;GO:0006955;GO:0007165;GO:0007186;GO:0007204;GO:0016493;
JTID ENSG00000187257:RSBN1L
JTID ENSG00000164684:ZNF704 GO:0003676;GO:0005622;GO:0008270;GO:0046872;
JTID ENSG00000179862:CITED4 GO:0003713;GO:0005634;GO:0005737;GO:0006355;GO:0030528;GO:0045941;
JTID ENSG00000067191:CACNB1 GO:0005245;GO:0005509;GO:0005624;GO:0005891;GO:0006811;GO:0006816;GO:0006936;GO:0005515;GO:0006612;GO:0008331;GO:0015270;GO:0016529;GO:0030315;
JTID ENSG00000184601:NP_001008404.1
JTID ENSG00000106384:MOGAT3 GO:0003846;GO:0004144;GO:0005783;GO:0006071;GO:0006629;GO:0008415;GO:0008610;GO:0016020;GO:0016021;GO:0016740;
JTID ENSG0000010932:FMO1 GO:0004497;GO:0004499;GO:0004999;GO:0005783;GO:0005792;GO:0006118;GO:0016020;GO:0016021;GO:0050660;
JTID ENSG00000166206:GABRB3 GO:0004890;GO:0005216;GO:0005230;GO:0006811;GO:0016021;GO:0030594;GO:0045211;GO:0005254;GO:0005887;GO:0007165;GO:0031404;
JTID ENSG00000162236:STX5 GO:0006810;GO:0006886;GO:0006903;GO:0008565;GO:0016020;GO:0016021;
JTID ENSG00000182393:IL29 GO:0005576;GO:0005615;GO:0008285;GO:0032002;GO:0032003;GO:0042531;GO:0045345;GO:0045941;GO:0050778;GO:0051607;
JTID ENSG00000164296:TIGD6 GO:0000775;GO:0003677;GO:0005634;GO:0045449;
JTID ENSG00000148965:SAA4 GO:0005319;GO:0005576;GO:0006953;
JTID ENSG00000162430:SEPN1 GO:0005509;GO:0005576;GO:0005783;GO:0008430;
JTID ENSG00000143442:POGZ GO:0003677;GO:0005622;GO:0005634;GO:0007275;GO:0008270;GO:0045449;GO:0046872;
JTID ENSG00000196345:ZNF167 GO:0003677;GO:0003700;GO:0005622;GO:0005634;GO:0006350;GO:0006355;GO:0008270;GO:0046872;GO:0003676;
MIJT hsa-miR-24:ZNF704:targetscan:mirbase; hsa-miR-24:WDR23:targetscan:picTar; hsa-miR-24:RSBN1L:targetscan:picTar; hsa-miR-24:CCR4:targetscan; hsa-miR-24:MOGAT3:targetscan; hsa-miR-24:FMO1:targetscan:mirbase; hsa-miR-24:SAA4:targetscan; hsa-miR-24:CITED4:targetscan:mirbase:picTar; hsa-miR-24:GABRB3:targetscan; hsa-miR-24:SEPN1:targetscan; hsa-miR-24:STX5:targetscan:picTar; hsa-miR-24:POGZ:targetscan:picTar; hsa-miR-24:TIGD6:targetscan; hsa-miR-24:IL29:targetscan:mirbase; hsa-miR-24:CACNB1:targetscan:picTar;

//
ANNOTATION: 1
ID SOX-5:hsa-miR-149;
TFID SOX-5;
MIID ENSG00000207611:hsa-mir-149:hsa-miR-149;
JTID ENSG00000204483:Q8N925_HUMAN
JTID ENSG0000022976:C14orf131
JTID ENSG00000197444:OGDHL GO:0004591;GO:0006096;GO:0008152;GO:0030976;
JTID ENSG00000121481:RNF2 GO:0005515;GO:0005634;GO:0005694;GO:0006350;GO:0006355;GO:0006512;GO:0008270;GO:0016874;GO:0046872;
JTID ENSG00000038532:KIAA0350
JTID ENSG00000128731:HERC2 GO:0004842;GO:0005085;GO:0005622;GO:0006464;GO:0006512;GO:0006886;GO:0008270;GO:0016874;GO:0020037;
MIJT hsa-miR-149:KIAA0350:targetscan; hsa-miR-149:RNF2:targetscan:picTar; hsa-miR-149:C14orf131:targetscan:mirbase; hsa-miR-149:OGDHL:targetscan:mirbase; hsa-miR-149:HERC2:targetscan:mirbase;

//
ANNOTATION: 1
ID T3R:hsa-miR-153;
TFID T3R;
MIID ENSG00000207960:hsa-mir-153-2:hsa-miR-153;
JTID ENSG00000124134:KCNS1 GO:0005251;GO:0005515;GO:0005886;GO:0006811;GO:0006813;GO:0008076;GO:0015459;GO:0016021;GO:0030955;
JTID ENSG00000117971:CHRN84 GO:0004889;GO:0005216;GO:0005230;GO:0005892;GO:0006811;GO:0007165;GO:0007271;GO:0015267;GO:0015464;GO:0045211;GO:0046928;
JTID ENSG00000142233:NP_665806.1
JTID ENSG00000079156:OSBPL6 GO:0008202;GO:0006869;
JTID ENSG00000117013:KCNQ4 GO:0005249;GO:0005624;GO:0006811;GO:0006813;GO:0007605;GO:0008076;GO:0016020;GO:0030955;GO:0042472;
JTID ENSG00000157111:TMEM171 GO:0016020;GO:0016021;
JTID ENSG00000112514:CUTA GO:0008104;GO:0016020;GO:0019899;
JTID ENSG00000154188:ANGPT1 GO:0001525;GO:0005102;GO:0007165;GO:0007169;GO:0007275;GO:0030154;
JTID ENSG00000104738:MCMA2 GO:0000166;GO:0003677;GO:0003678;GO:0003697;GO:0005515;GO:0005524;GO:0005634;GO:0006260;GO:0006268;GO:0006270;GO:0006350;GO:0006355;GO:0008094;GO:0017111;
MIJT hsa-miR-153:OSBPL6:targetscan:mirbase:picTar; hsa-miR-153:ANGPT1:targetscan; hsa-miR-153:TMEM171:targetscan; hsa-miR-153:KCNS1:targetscan;

//
ANNOTATION: 1
ID ELF-1:hsa-miR-342;
TFID ELF-1;
MIID ENSG00000199082:hsa-mir-342:hsa-miR-342;
JTID ENSG00000169314:C22orf15 GO:0016491;GO:0046914;
JTID ENSG00000154736:ADAMTS5 GO:0004222;GO:0005178;GO:0005578;GO:0006508;GO:0008270;GO:0046872;
JTID ENSG00000128891:CCDC32
JTID ENSG00000137393:IBRDC2 GO:0000151;GO:0004842;GO:0005515;GO:0006118;GO:0006512;GO:0008270;GO:0009055;GO:0016020;GO:0016021;GO:0016874;GO:0042787;GO:0046872;GO:0051536;
JTID ENSG00000181904:C5orf24
JTID ENSG00000130939:UBE4B GO:0000151;GO:0004842;GO:0005737;GO:0006457;GO:0006915;GO:0009411;GO:0019899;GO:0042787;GO:0051082;
JTID ENSG00000121807:CCR2 GO:0001584;GO:0004872;GO:0005625;GO:0005737;GO:0005886;GO:0005887;GO:0006935;GO:0006954;GO:0006955;GO:0006986;GO:0007165;GO:0007186;GO:0007194;GO:0007204;GO:0007259;GO:0016493;GO:0019221;GO:0031727;
JTID ENSG00000197713:RPE GO:0004750;GO:0005515;GO:0005975;GO:0008152;GO:0016853;GO:0003824;
JTID ENSG00000167085:PHB GO:0000074;GO:0005515;GO:0005634;GO:0005654;GO:0005739;GO:0005743;GO:0005887;GO:0006260;GO:0007165;GO:0008285;GO:0016020;GO:0016481;GO:0016563;GO:0016564;GO:0016575;GO:0042981;
JTID ENSG00000185298:Q6PK04_HUMAN
MIJT hsa-miR-342:IBRDC2:targetscan; hsa-miR-342:UBE4B:targetscan; hsa-miR-342:C5orf24:targetscan:mirbase;

//
ANNOTATION: 1
ID CAC-BP:hsa-let-7e;
TFID CAC-BP;
MIID ENSG00000198972:hsa-let-7e:hsa-let-7e;
JTID ENSG00000105419:Q99687-2
JTID ENSG00000143851:PTPN7 GO:0004725;GO:0004872;GO:0005737;GO:0006470;GO:0016787;GO:0016791;
JTID ENSG00000177410:Q5QHF1_HUMAN
JTID ENSG00000023902:PLEKH01
JTID ENSG00000071967:CYBRD1 GO:0000293;GO:0006118;GO:0016021;
MIJT hsa-let-7e:PTPN7:targetscan; hsa-let-7e:PLEKH01:targetscan:mirbase:picTar; hsa-let-7e:Q99687-2:mirbase; hsa-let-7e:Q5QHF1_HUMAN:mirbase;

//
ANNOTATION: 1
ID FAX-4:hsa-miR-199a;
TFID FAX-4;
MIID ENSG00000207752:hsa-mir-199a-1:hsa-miR-199a;
JTID ENSG00000176986:SEC24C GO:0005515;GO:0005783;GO:0006886;GO:0006888;GO:0008270;GO:0030127;
MIJT hsa-miR-199a:SEC24C:targetscan;

//
ANNOTATION: 1
ID DBP:hsa-miR-365;
TFID DBP;
MIID ENSG00000199130:hsa-mir-365-1:hsa-miR-365;
JTID ENSG00000173209:AHS2
JTID ENSG00000197860:SGTB GO:0005488;
MIJT hsa-miR-365:SGTB:targetscan; hsa-miR-365:AHS2:targetscan;

//
ANNOTATION: 1
```



```
ID E2F:hsa-miR-149;
TFID E2F;
MIID ENSG00000207611:hsa-mir-149:hsa-miR-149;
JTID ENSG00000182199:SHMT2 GO:0004372;GO:0005515;GO:0005739;GO:0006544;GO:0006563;GO:0006730;GO:0016740;GO:0030170;
MIJT hsa-miR-149:SHMT2:targetscan;

//
ANNOTATION: 1
ID PEA3:hsa-miR-133b;
TFID PEA3;
MIID ENSG00000199080:hsa-mir-133b:hsa-miR-133b;
JTID ENSG00000163568:AIM2 GO:0006955;
JTID ENSG00000139572:GPR84 GO:0001584;GO:0004872;GO:0007165;GO:0007186;GO:0016020;GO:0016021;
JTID ENSG00000122705:CLTA GO:0005509;GO:0005905;GO:0006886;GO:0030125;
JTID ENSG00000120437:ACAT2 GO:0003985;GO:0005515;GO:0005737;GO:0006629;GO:0008415;GO:0016740;
MIJT hsa-miR-133b:CLTA:targetscan:pictar; hsa-miR-133b:ACAT2:targetscan; hsa-miR-133b:GPR84:targetscan; hsa-miR-133b:AIM2:targetscan;

//
ANNOTATION: 1
ID SOX-5:hsa-miR-155;
TFID SOX-5;
MIID ENSG00000207795:hsa-mir-155:hsa-miR-155;
JTID ENSG00000164077:MON1A GO:0006810;
JTID ENSG00000008644:CHRNA3 GO:0004889;GO:0005216;GO:0005230;GO:0006811;GO:0016021;GO:0030594;GO:0045211;GO:0005215;GO:0005892;GO:0007165;GO:0015464;
JTID ENSG00000135002:RFK GO:000166;GO:0000287;GO:0005524;GO:0005737;GO:0008270;GO:0008531;GO:0009231;GO:0016740;
JTID ENSG00000160336:ZNF761 GO:0003676;GO:0005622;GO:0005634;GO:0008270;GO:0046872;
JTID ENSG00000109790:KLHL5 GO:0005515;GO:0003779;GO:0005737;GO:0005856;GO:0030036;
JTID ENSG00000132824:SERINC3 GO:0005515;GO:0005794;GO:0005886;GO:0006917;GO:0016020;GO:0016021;
JTID ENSG00000105856:HBP1 GO:0003677;GO:0005634;GO:0006350;GO:0006355;GO:0007050;GO:0016055;
JTID ENSG00000101842:VSI1 GO:0016020;
JTID ENSG00000143079:CTTNBP2NL GO:0015629;
JTID ENSG00000168813:ZNF507 GO:0003677;GO:0005622;GO:0005634;GO:0006350;GO:0006355;GO:0008270;GO:0046872;GO:0003676;
JTID ENSG0000010704:HFE GO:0002474;GO:0005506;GO:0005737;GO:0005886;GO:0005887;GO:0006461;GO:0006811;GO:0006826;GO:0006879;GO:0006898;GO:0006955;GO:0019882;GO:0042612;GO:0016020;
JTID ENSG00000140575:IQGAP1 GO:0005095;GO:0005099;GO:0005516;GO:0005622;GO:0005737;GO:0005884;GO:0007165;GO:0016020;GO:0046580;GO:0005056;
JTID ENSG00000113597:NP_079217.1
JTID ENSG00000148737:TCF7L2 GO:0000074;GO:0003700;GO:0003702;GO:0005515;GO:0005634;GO:0006325;GO:0006350;GO:0006357;GO:0007165;GO:0030111;GO:0003677;GO:0006355;GO:0005667;GO:0008013;GO:0016055;GO:0021915;GO:0030538;GO:0045944;GO:0048557;GO:0048619;
JTID ENSG00000112312:GMNN GO:0005515;GO:0007049;GO:0008156;GO:0045786;
JTID ENSG00000147892:ADAMTSL1 GO:0005578;GO:0008237;GO:0008270;
JTID ENSG00000117906:RCN2 GO:0005509;GO:0005515;GO:0005783;
JTID ENSG00000007968:E2F2 GO:0000074;GO:0003700;GO:0003702;GO:0005515;GO:0005634;GO:0005667;GO:0006350;GO:0006355;GO:0006367;GO:0007049;
MIJT hsa-miR-155:VSI1:targetscan; hsa-miR-155:MON1A:targetscan:pictar; hsa-miR-155:ZNF507:targetscan; hsa-miR-155:RFK:targetscan; hsa-miR-155:E2F2:targetscan; hsa-miR-155:SERINC3:mirbase; hsa-miR-155:HBP1:targetscan:mirbase:pictar; hsa-miR-155:ADAMTSL1:mirbase; hsa-miR-155:KLHL5:targetscan:mirbase; hsa-miR-155:HFE:mirbase; hsa-miR-155:ZNF761:targetscan; hsa-miR-155:RCN2:targetscan:mirbase:pictar; hsa-miR-155:GMNN:targetscan;

//
ANNOTATION: 1
ID MYOD:hsa-miR-542-3p;
TFID MYOD;
MIID ENSG00000207784:hsa-mir-542:hsa-miR-542-3p;
JTID ENSG00000068976:PYGM GO:0000166;GO:0005515;GO:0005975;GO:0005980;GO:0008184;GO:0016757;GO:0030170;
JTID ENSG00000175315:CST6 GO:0001533;GO:0004869;GO:0008544;GO:0009653;
JTID ENSG00000198307:H2AFB2 GO:0000786;GO:0003677;GO:0005634;GO:0005694;GO:0006334;GO:0007001;
JTID ENSG00000126214:KLC1 GO:0003777;GO:0005515;GO:0005829;GO:0005871;GO:0005874;GO:0007018;GO:0005737;GO:0008088;GO:0030424;GO:0031410;GO:0035253;GO:0043005;
MIJT hsa-miR-542-3p:CST6:targetscan:mirbase; hsa-miR-542-3p:KLC1:targetscan; hsa-miR-542-3p:PYGM:targetscan;

//
ANNOTATION: 1
ID SRY:hsa-miR-31;
TFID SRY;
MIID ENSG00000199177:hsa-mir-31:hsa-miR-31;
JTID ENSG00000117152:RGS4 GO:0000188;GO:0004871;GO:0005096;GO:0005516;GO:0008277;GO:0009968;
JTID ENSG0000013588:GPRC5A GO:0004872;GO:0005887;GO:0007165;GO:0007186;GO:0008067;GO:0016020;
JTID ENSG00000110799:VWF GO:0001948;GO:0002020;GO:0005178;GO:0005518;GO:0005576;GO:0005578;GO:0005783;GO:0009611;GO:0019865;GO:0030168;GO:0031091;GO:0031589;GO:0042803;GO:0047485;GO:0051087;GO:0051260;GO:0001889;GO:0001890;
MIJT hsa-miR-31:GPRC5A:targetscan:mirbase; hsa-miR-31:VWF:targetscan:mirbase; hsa-miR-31:RGS4:targetscan:pictar;

//
ANNOTATION: 1
ID MYOD:hsa-miR-425-3p;
TFID MYOD;
MIID ENSG00000199032:hsa-mir-425:hsa-miR-425-3p;
JTID ENSG00000182557:SPNS3 GO:0005215;GO:0006810;GO:0016020;
JTID ENSG00000178538:CA8 GO:0004089;GO:0005515;GO:0005737;GO:0006730;GO:0008270;GO:0046872;GO:0048015;
JTID ENSG00000176046:NUPR1_HUMAN GO:0005634;GO:0006917;GO:0016049;
JTID ENSG00000198382:UVRAG GO:0005737;GO:0006281;
JTID ENSG00000067560:RHOA GO:0000166;GO:0000287;GO:0003924;GO:0004871;GO:0005515;GO:0005525;GO:0005622;GO:0005856;GO:0007264;GO:0007266;GO:0016020;GO:0030036;GO:0042346;GO:0043123;
TFMI MYOD:hsa-miR-425-3p:hsa-mir-425:computational (ECRbase);

//
ANNOTATION: 1
ID SOX-5:hsa-miR-30b;
TFID SOX-5;
MIID ENSG00000207582:hsa-mir-30b:hsa-miR-30b;
JTID ENSG00000138413:IDH1 GO:0000287;GO:0004450;GO:0005737;GO:0005777;GO:0005829;GO:0005975;GO:0006097;GO:0006099;GO:0006102;GO:0006749;GO:0006979;GO:0008152;GO:0016491;GO:0016616;GO:0030145;
JTID ENSG00000071054:MAP4K4 GO:0000166;GO:0004674;GO:0005083;GO:0005524;GO:0006468;GO:0016740;GO:0006950;GO:0007243;
JTID ENSG00000142039:CCDC97
JTID ENSG00000159873:CCDC117
JTID ENSG00000169139:UBE2V2 GO:0000074;GO:0000209;GO:0005515;GO:0005634;GO:0005737;GO:0006282;GO:0006464;GO:0008283;GO:0019787;GO:0031372;
JTID ENSG00000171320:ESCO2 GO:0005634;GO:0007049;GO:0008270;GO:0008415;GO:0016740;GO:0046872;
JTID ENSG00000105136:ZNF419 GO:0003677;GO:0005622;GO:0005634;GO:0006350;GO:0006355;GO:0008270;GO:0046872;
JTID ENSG00000138069:RAB1A GO:0000166;GO:0003924;GO:0005525;GO:0005783;GO:0006888;GO:0007264;GO:0015031;GO:0016192;GO:0005794;
JTID ENSG00000162490:Clorf187
JTID ENSG00000099954:CECR2 GO:0000910;GO:0005634;GO:0006309;GO:0006915;GO:0007010;GO:0016192;GO:0016568;
JTID ENSG00000123643:SLC36A1 GO:0005280;GO:0005783;GO:0006810;GO:0006865;GO:0015171;GO:0015180;GO:0015187;GO:0015193;GO:0015293;GO:0015808;GO:0015816;GO:0015824;GO:0015992;GO:0016020;GO:0016021;
JTID ENSG00000165891:E2F7 GO:0000074;GO:0003700;GO:0005667;GO:0006355;GO:0005515;GO:0005634;GO:0008285;GO:0016564;
JTID ENSG00000168955:TM4SF20 GO:0016020;GO:0016021;
JTID ENSG00000162039:Clorf73
JTID ENSG00000158715:SLC45A3 GO:0006810;GO:0016020;GO:0016021;
JTID ENSG00000173320:STOX2
JTID ENSG00000135387:CAPRIN1 GO:0005887;GO:0016020;GO:0048503;GO:0005515;
JTID ENSG00000127329:PTPRB GO:0004725;GO:0005001;GO:0005624;GO:0005887;GO:0006470;GO:0016020;GO:0016787;
JTID ENSG00000151572:TMEM16D
JTID ENSG00000165288:BRWD3
```

```
JTID ENSG00000143355:LHX9 GO:0003700;GO:0005634;GO:0006355;GO:0008270;GO:0043565;GO:0046872;GO:0003677;GO:0005515;
JTID ENSG00000069869:NEDD4 GO:0004842;GO:0005622;GO:0006464;GO:0006512;GO:0016874;GO:0000151;GO:0005515;GO:0005829;
JTID ENSG00000137941:TLL7 GO:0004835;GO:0006464;GO:0016874;
JTID ENSG00000148541:FAM13C1
MIJT hsa-miR-30b:E2F7:targetscan:picar; hsa-miR-30b:TMEM16D:targetscan:mirbase:picar; hsa-miR-30b:SLC36A1:targetscan:picar; hsa-miR-30b:NEDD4:targetscan:picar; hsa-miR-30b:TM4SF20:targetscan; hsa-miR-30b:CCDC97:targetscan:picar; hsa-miR-30b:STOX2:targetscan:mirbase; hsa-miR-30b:LHX9:targetscan; hsa-miR-30b:PTPRB:mirbase; hsa-miR-30b:CCDC117:targetscan:picar; hsa-miR-30b:UBE2V2:targetscan:mirbase:picar; hsa-miR-30b:ESCO2:targetscan; hsa-miR-30b:ZNF419:targetscan; hsa-miR-30b:FAM13C1:targetscan; hsa-miR-30b:IDH1:targetscan:picar; hsa-miR-30b:Cl6orf73:targetscan:mirbase; hsa-miR-30b:TLL7:targetscan:picar; hsa-miR-30b:MAP4K4:targetscan;

//
ANNOTATION: 1
ID ATF-1:hsa-miR-199a;
TFID ATF-1;
MIID ENSG00000208024:hsa-mir-199a-2:hsa-miR-199a;
JTID ENSG00000108515:ENO3 GO:0000015;GO:0000287;GO:0004634;GO:0006096;GO:0016829;
MIJT hsa-miR-199a:ENO3:targetscan:mirbase;

//
ANNOTATION: 1
ID HOXA4:hsa-miR-296;
TFID HOXA4;
MIID ENSG00000207950:hsa-mir-296:hsa-miR-296;
JTID ENSG00000138823:MTTP GO:0005319;GO:0005625;GO:0005783;GO:0005792;GO:0006497;GO:0006629;GO:0006641;GO:0006869;GO:0008289;
MIJT hsa-miR-296:MTTP:targetscan;

//
ANNOTATION: 1
ID ETS:hsa-miR-214;
TFID ETS;
MIID ENSG00000207949:hsa-mir-214:hsa-miR-214;
JTID ENSG00000110328:GALNTL4 GO:0004653;GO:0005509;GO:0005529;GO:0016020;GO:0016021;GO:0016757;GO:0030145;
MIJT hsa-miR-214:GALNTL4:targetscan:mirbase;

//
ANNOTATION: 1
ID C-REL:hsa-miR-99b;
TFID C-REL;
MIID ENSG00000207550:hsa-mir-99b:hsa-miR-99b;
JTID ENSG00000161921:CXCL16 GO:0005041;GO:0005044;GO:0005576;GO:0005615;GO:0006898;GO:0006935;GO:0008009;GO:0016020;GO:0016021;GO:0048247;
JTID ENSG00000136144:RCBTB1 GO:0005515;GO:0005634;GO:0005737;GO:0006350;GO:0006355;GO:0007049;GO:0016568;
JTID ENSG00000082213:C5orf22
JTID ENSG00000127314:RAP1B GO:0000166;GO:0005515;GO:0005525;GO:0005622;GO:0007264;GO:0008283;GO:0016020;
JTID ENSG00000166444:ST5 GO:0005515;
MIJT hsa-miR-99b:C5orf22:targetscan; hsa-miR-99b:CXCL16:targetscan; hsa-miR-99b:ST5:targetscan:mirbase; hsa-miR-99b:RAP1B:targetscan; hsa-miR-99b:RCBTB1:targetscan:mirbase;

//
ANNOTATION: 1
ID LHX3:hsa-miR-125b;
TFID LHX3;
MIID ENSG00000207863:hsa-mir-125b-2:hsa-miR-125b;
JTID ENSG00000157119:KBTBD5 GO:0005515;
MIJT hsa-miR-125b:KBTBD5:targetscan:mirbase;

//
ANNOTATION: 1
ID HSF2:hsa-miR-16;
TFID HSF2;
MIID ENSG00000208006:hsa-mir-16-1:hsa-miR-16;
JTID ENSG00000138685:FGF2
GO:0000074;GO:0000186;GO:0000187;GO:0001525;GO:0001759;GO:0001934;GO:0005515;GO:0005576;GO:0005615;GO:0006935;GO:0007165;GO:0007265;GO:0007275;GO:0007275;GO:0007399;GO:0007517;GO:0008083;GO:0008201;GO:0008283;GO:0008285;GO:0009887;GO:0010001;GO:0021940;GO:0030324;GO:0045597;GO:0045766;GO:0046668;
JTID ENSG00000124208:UBE2V1 GO:0000074;GO:0000209;GO:0005515;GO:0005634;GO:0005737;GO:0006282;GO:0006355;GO:0006464;GO:0006512;GO:0016563;GO:0019787;GO:0030154;GO:0031371;GO:0043123;GO:0051092;
JTID ENSG00000069275:NUCKS1 GO:0005634;
JTID ENSG00000159231:CBR3 GO:0004090;GO:0005829;GO:0008152;GO:0016491;
JTID ENSG00000204388:HSPA1B GO:0000166;GO:0005524;GO:0005634;GO:0005737;GO:0005739;GO:0005783;GO:0006402;GO:0006457;GO:0006916;GO:0006986;GO:0051082;
MIJT hsa-miR-16:UBE2V1:targetscan:mirbase:picar; hsa-miR-16:FGF2:targetscan:mirbase:picar; hsa-miR-16:CBR3:targetscan; hsa-miR-16:HSPA1B:targetscan:mirbase;

//
ANNOTATION: 1
ID TAL-1ALPHA/E47:hsa-miR-149;
TFID TAL-1ALPHA/E47;
MIID ENSG00000207611:hsa-mir-149:hsa-miR-149;
JTID ENSG00000168781:HISPPD2A GO:0003993;
MIJT hsa-miR-149:HISPPD2A:targetscan;

//
ANNOTATION: 1
ID AML1:hsa-miR-302d;
TFID AML1;
MIID ENSG00000199145:hsa-mir-302d:hsa-miR-302d;
JTID ENSG00000173530:TNFRSF10D GO:0004888;GO:0005515;GO:0006915;GO:0006916;GO:0007165;GO:0016020;GO:0016021;
JTID ENSG00000177337:NP_001034885.1
JTID ENSG00000143314:MRPL24 GO:0003735;GO:0005622;GO:0005739;GO:0005840;GO:0006412;
JTID ENSG00000144354:CDCA7 GO:0005634;GO:0006350;GO:0006355;GO:0042127;
JTID ENSG00000128604:IRF5 GO:0003700;GO:0005622;GO:0005634;GO:0006355;GO:0003709;GO:0006350;
JTID ENSG00000144711:IQSEC1 GO:0005086;GO:0005622;GO:0005634;GO:0032012;
JTID ENSG00000139970:RTN1 GO:0004871;GO:0005783;GO:0007165;GO:0016020;GO:0016021;GO:0030176;GO:0030182;
JTID ENSG00000188193:C6orf155
JTID ENSG00000108389:MTMR4 GO:0004437;GO:0004725;GO:0006470;GO:0008270;GO:0016787;GO:0046839;
JTID ENSG00000180667:YOD1 GO:0003676;GO:0005622;GO:0006512;GO:0008234;GO:0008270;GO:0046872;
JTID ENSG00000183826:BTBD9 GO:0005515;GO:0007155;
JTID ENSG00000204542:C6orf15
JTID ENSG00000100647:KIAA0247 GO:0016020;GO:0016021;
JTID ENSG00000135604:STX11 GO:0005484;GO:0005515;GO:0006886;GO:0006944;GO:0008565;GO:0016020;
JTID ENSG00000168061:SAC3D1 GO:0005813;GO:0005819;GO:0051225;GO:0051298;
MIJT hsa-miR-302d:CDCA7:targetscan:mirbase:picar; hsa-miR-302d:SAC3D1:targetscan:mirbase; hsa-miR-302d:IQSEC1:targetscan; hsa-miR-302d:MRPL24:targetscan:mirbase; hsa-miR-302d:YOD1:targetscan; hsa-miR-302d:MTMR4:targetscan:picar; hsa-miR-302d:TNFRSF10D:targetscan; hsa-miR-302d:IRF5:targetscan:mirbase; hsa-miR-302d:C6orf15:targetscan:mirbase; hsa-miR-302d:RTN1:targetscan:picar;

//
```

```
ANNOTATION: 1
ID DBP:hsa-let-7f;
TFID DBP;
MIID ENSG00000199072:hsa-let-7f-1:hsa-let-7f;
JTID ENSG00000179476:C14orf28
MIJT hsa-let-7f:C14orf28:targetscan:mirbase;

//
ANNOTATION: 1
ID HOXA7:hsa-miR-182;
TFID HOXA7;
MIID ENSG00000207990:hsa-mir-182:hsa-miR-182;
JTID ENSG00000113070:HBEGF GO:0004872;GO:0005154;GO:0005615;GO:0005887;GO:0007165;GO:0007173;GO:0007517;GO:0008016;GO:0008083;GO:0008201;GO:0009986;GO:0016020;GO:0035313;GO:0048661;GO:0051549;
JTID ENSG00000197817:Q9UHS9_HUMAN
MIJT hsa-miR-182:HBEGF:targetscan:picstar;

//
ANNOTATION: 1
ID HSF2:hsa-miR-15a;
TFID HSF2;
MIID ENSG00000207718:hsa-mir-15a:hsa-miR-15a;
JTID ENSG00000138685:FGF2
GO:0000074;GO:0000186;GO:0000187;GO:0001525;GO:0001759;GO:0001934;GO:0005515;GO:0005576;GO:0005615;GO:0006935;GO:0007165;GO:0007265;GO:0007267;GO:0007275;GO:0007399;GO:0007517;GO:0008083;GO:0008201;GO:0008283;GO:0008285;GO:0009887;GO:0010001;GO:0021940;GO:0030324;GO:0045597;GO:0045766;GO:0046668;
JTID ENSG00000124208:UBE2V1 GO:0000074;GO:0000209;GO:0005515;GO:0005634;GO:0005737;GO:0006282;GO:0006355;GO:0006464;GO:0006512;GO:0016563;GO:0019787;GO:0030154;GO:0031371;GO:0043123;GO:0051092;
JTID ENSG00000069275:NUCKS1 GO:0005634;
JTID ENSG00000159231:CBR3 GO:0004090;GO:0005829;GO:0008152;GO:0016491;
JTID ENSG00000204388:HSPA1B GO:0000166;GO:0005524;GO:0005634;GO:0005737;GO:0005783;GO:0006402;GO:0006457;GO:0006916;GO:0006986;GO:0051082;
MIJT hsa-miR-15a:UBE2V1:targetscan:picstar; hsa-miR-15a:FGF2:targetscan:picstar; hsa-miR-15a:CBR3:targetscan; hsa-miR-15a:HSPA1B:targetscan:mirbase;

//
ANNOTATION: 1
ID DBP:hsa-let-7a;
TFID DBP;
MIID ENSG00000199165:hsa-let-7a-1:hsa-let-7a;
JTID ENSG00000179476:C14orf28
MIJT hsa-let-7a:C14orf28:targetscan;

//
ANNOTATION: 1
ID CHX10:hsa-miR-125b;
TFID CHX10;
MIID ENSG00000207863:hsa-mir-125b-2:hsa-miR-125b;
JTID ENSG00000172531:PPP1CA GO:0005506;GO:0016787;GO:0000163;GO:0004721;GO:0005515;GO:0005975;GO:0005977;GO:0006470;GO:0007049;GO:0030145;GO:0046872;GO:0051301;GO:0004722;GO:0005654;GO:0005737;GO:0030324;GO:0048754;
MIJT hsa-miR-125b:PPP1CA:targetscan:mirbase:picstar;

//
ANNOTATION: 1
ID POU3F2:hsa-miR-199a*;
TFID POU3F2;
MIID ENSG00000207752:hsa-mir-199a-1:hsa-miR-199a*;
JTID ENSG00000159224:GIP GO:0005179;GO:0005576;GO:0005625;GO:0007165;
JTID ENSG00000142687:KIAA0319L
JTID ENSG00000184602:SNN GO:0006950;GO:0009628;GO:0016020;GO:0016021;
MIJT hsa-miR-199a*:KIAA0319L:mirbase; hsa-miR-199a*:SNN:picstar;

//
ANNOTATION: 1
ID NCX:hsa-miR-99b;
TFID NCX;
MIID ENSG00000207550:hsa-mir-99b:hsa-miR-99b;
JTID ENSG00000112299:VNN1 GO:0006807;GO:0006928;GO:0016020;GO:0016811;GO:0048503;
MIJT hsa-miR-99b:VNN1:targetscan:mirbase;

//
ANNOTATION: 1
ID NKX6-2:hsa-miR-155;
TFID NKX6-2;
MIID ENSG00000207795:hsa-mir-155:hsa-miR-155;
JTID ENSG00000166170:BAG5 GO:0005515;GO:0006457;GO:0006915;
JTID ENSG00000160336:ZNF761 GO:0003676;GO:0005622;GO:0005634;GO:0008270;GO:0046872;
JTID ENSG00000198632:NP_777590.1 GO:0005524;GO:0006298;GO:0030983;
JTID ENSG00000101457:DNTTIP1 GO:0005634;GO:0016740;
MIJT hsa-miR-155:DNTTIP1:targetscan:mirbase; hsa-miR-155:ZNF761:targetscan; hsa-miR-155:BAG5:targetscan; hsa-miR-155:NP_777590.1:mirbase;

//
ANNOTATION: 1
ID OCTAMER:hsa-miR-100;
TFID OCTAMER;
MIID ENSG00000207994:hsa-mir-100:hsa-miR-100;
JTID ENSG00000118689:FOXO3A GO:0001542;GO:0001544;GO:0001547;GO:0001556;GO:0003700;GO:0005624;GO:0005634;GO:0005737;GO:0006350;GO:0006355;GO:0006915;GO:0006917;GO:0006974;GO:0016563;GO:0019901;GO:0042593;GO:0043565;GO:0045648;GO:0045944;
JTID ENSG00000116017:ARID3A GO:0003677;GO:0005622;GO:0003700;GO:0005515;GO:0005634;GO:0006350;GO:0006355;GO:0042803;
MIJT hsa-miR-100:FOXO3A:targetscan:mirbase; hsa-miR-100:ARID3A:targetscan:mirbase;

//
ANNOTATION: 1
ID PAX-4:hsa-miR-20a;
TFID PAX-4;
MIID ENSG00000199149:hsa-mir-20a:hsa-miR-20a;
JTID ENSG00000175155:YPEL2 GO:0005634;
JTID ENSG00000143107:FNDC7
JTID ENSG00000104517:EDD1 GO:0004842;GO:0005622;GO:0006464;GO:0006512;GO:0005515;GO:0005625;GO:0005634;GO:0006511;GO:0006974;GO:0008270;GO:0008283;GO:0016874;GO:0046872;GO:0050847;
MIJT hsa-miR-20a:EDD1:targetscan:picstar; hsa-miR-20a:YPEL2:targetscan;

//
ANNOTATION: 1
ID HNF-1:hsa-miR-499;
```

```
TFID HNF-1;
MIID ENSG00000207635:hsa-mir-499:hsa-miR-499;
JTID ENSG00000205171:Q6PDB3_HUMAN GO:0003735;GO:0006412;GO:0015935;
JTID ENSG00000001461:NPAL3 GO:0016020;GO:0016021;
JTID ENSG00000169139:UBE2V2 GO:0000074;GO:000209;GO:0005515;GO:0005634;GO:0005737;GO:0006282;GO:0006464;GO:0008283;GO:0019787;GO:0031372;
JTID ENSG00000204414:CSHL1 GO:0005179;GO:0005576;
MIJT hsa-miR-499:NPAL3:targetscan; hsa-miR-499:CSHL1:targetscan; hsa-miR-499:UBE2V2:targetscan:mirbase; hsa-miR-499:Q6PDB3_HUMAN:mirbase;

//
ANNOTATION: 1
ID ATF6:hsa-miR-214;
TFID ATF6;
MIID ENSG00000207949:hsa-mir-214:hsa-miR-214;
JTID ENSG00000167468:GPX4 GO:0004602;GO:0005739;GO:0006118;GO:0006644;GO:0006979;GO:0007275;GO:0008430;GO:0016491;GO:0047066;
MIJT hsa-miR-214:GPX4:targetscan:mirbase;

//
ANNOTATION: 1
ID HNF-1:hsa-miR-410;
TFID HNF-1;
MIID ENSG00000199092:hsa-mir-410:hsa-miR-410;
JTID ENSG00000118200:CAMSAP1L1
JTID ENSG00000196843:ARID5A GO:0003677;GO:0005622;GO:0005634;GO:0016564;GO:0045892;
JTID ENSG00000110395:CBL GO:0003700;GO:0004842;GO:0004871;GO:0005509;GO:0005515;GO:0005634;GO:0005886;GO:0007166;GO:0007173;GO:0008270;GO:0016567;GO:0016874;GO:0048260;
JTID ENSG00000185404:Q4ZG65_HUMAN GO:0003677;GO:0005515;GO:0005634;GO:0008270;
JTID ENSG000000021776:AQR GO:0003723;GO:0005634;GO:0005681;GO:0006397;GO:0008380;
JTID ENSG00000196963:PCDHB16 GO:0005509;GO:0005515;GO:0007155;GO:0007156;GO:0007268;GO:0007416;GO:0016020;GO:0016021;GO:0016339;
MIJT hsa-miR-410:CBL:targetscan; hsa-miR-410:ARID5A:mirbase; hsa-miR-410:AQR:mirbase; hsa-miR-410:CAMSAP1L1:targetscan; hsa-miR-410:PCDHB16:targetscan:mirbase;

//
ANNOTATION: 1
ID TEF:hsa-miR-10a;
TFID TEF;
MIID ENSG00000207777:hsa-mir-10a:hsa-miR-10a;
JTID ENSG00000162409:PRKAA2 GO:0000166;GO:0000287;GO:0004674;GO:0005524;GO:0005634;GO:0006468;GO:0006633;GO:0006695;GO:0007165;GO:0016740;
JTID ENSG00000165891:E2F7 GO:0000074;GO:0003700;GO:0005667;GO:0006355;GO:0005515;GO:0005634;GO:0008285;GO:0016564;
MIJT hsa-miR-10a:E2F7:targetscan:pictar;

//
ANNOTATION: 1
ID RORALPHA2:hsa-miR-133a;
TFID RORALPHA2;
MIID ENSG00000207764:hsa-mir-133a-2:hsa-miR-133a;
JTID ENSG00000008197:TFAP2D GO:0003700;GO:0003774;GO:0005515;GO:0005634;GO:0005667;GO:0006355;GO:0016563;
JTID ENSG00000143858:SYT2 GO:0005215;GO:0005509;GO:0006810;GO:0008021;GO:0016020;GO:0016021;GO:0045202;GO:0005515;GO:0005544;GO:0005886;GO:0042598;
JTID ENSG00000154822:PLCL2 GO:0004435;GO:0005509;GO:0006629;GO:0007242;
MIJT hsa-miR-133a:PLCL2:targetscan; hsa-miR-133a:TFAP2D:targetscan:pictar; hsa-miR-133a:SYT2:targetscan;

//
ANNOTATION: 1
ID LEF1:hsa-miR-138;
TFID LEF1;
MIID ENSG00000207954:hsa-mir-138-1:hsa-miR-138;
JTID ENSG00000095777:MYO3A GO:0000166;GO:0003774;GO:0003779;GO:0004674;GO:0005516;GO:0005524;GO:0005856;GO:0006468;GO:0007601;GO:0007605;GO:0016459;GO:0016740;GO:0030175;GO:0030898;GO:0031941;GO:0043531;GO:0046777;GO:0050896;GO:0060002;GO:0004672;
JTID ENSG00000177182:NP_775790.1 GO:0005215;GO:0005622;GO:0006810;
JTID ENSG00000171861:RNMTL1 GO:0003723;GO:0005515;GO:0006396;GO:0008173;GO:0016740;
JTID ENSG00000164684:ZNF704 GO:0003676;GO:0005622;GO:0008270;GO:0046872;
JTID ENSG00000020181:GPR124 GO:0004872;GO:0004930;GO:0005515;GO:0007165;GO:0007218;GO:0016020;GO:0016021;
JTID ENSG00000185269:NOTUM
JTID ENSG00000170523:KRT83 GO:0005198;GO:0005882;GO:0008544;
JTID ENSG0000011241:FGF6 GO:0000074;GO:0001525;GO:0005576;GO:0007165;GO:0007267;GO:0007275;GO:0008083;GO:0008283;GO:0030154;GO:0045445;
JTID ENSG00000113263:ITK GO:0000166;GO:0004715;GO:0005524;GO:0006468;GO:0006968;GO:0007242;GO:0008270;GO:0016740;GO:0046872;
MIJT hsa-miR-138:FGF6:targetscan; hsa-miR-138:ZNF704:targetscan:mirbase; hsa-miR-138:NOTUM:targetscan; hsa-miR-138:RNMTL1:targetscan:mirbase; hsa-miR-138:MYO3A:targetscan:mirbase; hsa-miR-138:NP_775790.1:pictar; hsa-miR-138:KRT83:targetscan:mirbase; hsa-miR-138:GPR124:targetscan:mirbase; hsa-miR-138:ITK:targetscan;

//
ANNOTATION: 1
ID AREB6:hsa-miR-194;
TFID AREB6;
MIID ENSG00000207596:hsa-mir-194-2:hsa-miR-194;
JTID ENSG00000174628:IQCK
JTID ENSG00000169239:CA5B GO:0004089;GO:0005739;GO:0006730;GO:0008270;GO:0016829;GO:0046872;
JTID ENSG00000150201:FXYD4 GO:0005216;GO:0006811;GO:0016020;GO:0016021;
JTID ENSG00000147536:GINS4 GO:0005515;GO:0005634;GO:0005737;
JTID ENSG00000087085:ACHE
GO:0001507;GO:0001540;GO:0002076;GO:0003990;GO:0004104;GO:0004759;GO:0005518;GO:0005576;GO:0005605;GO:0005794;GO:0006260;GO:0007155;GO:0007416;GO:0007517;GO:0008283;GO:0009611;GO:0016020;GO:0016787;GO:0017171;GO:0032223;GO:0042166;GO:0042803;GO:0042982;GO:0043237;GO:0045202;GO:0048471;GO:0050714;GO:0001919;GO:0005615;GO:0005886;GO:0006581;GO:0009986;GO:0031623;GO:0043236;GO:0043621;GO:0045212;GO:0051262;GO:0060041;
JTID ENSG00000169031:COL4A3 GO:0005178;GO:0005201;GO:0005515;GO:0005581;GO:0005587;GO:0005737;GO:0006817;GO:0006917;GO:0006919;GO:0007155;GO:0007166;GO:0007605;GO:0008015;GO:0008191;GO:0008283;GO:0008285;GO:0016525;
MIJT hsa-miR-194:FXYD4:mirbase; hsa-miR-194:CA5B:targetscan; hsa-miR-194:ACHE:mirbase;

//
ANNOTATION: 1
ID PEA3:hsa-miR-151;
TFID PEA3;
MIID ENSG00000207792:hsa-mir-151:hsa-miR-151;
JTID ENSG00000135346:CGA GO:0005179;GO:0005576;GO:0005625;GO:0007165;GO:0007267;
JTID ENSG00000189325:NP_001010903.2
JTID ENSG00000182504:LRR1Q2 GO:0005515;
JTID ENSG00000174695:TMEM167 GO:0016020;GO:0016021;
JTID ENSG00000147869:CER1 GO:0005125;GO:0005515;GO:0005576;GO:0005615;GO:0008285;GO:0009948;GO:0030514;GO:0042074;
MIJT hsa-miR-151:CER1:targetscan:mirbase; hsa-miR-151:NP_001010903.2:mirbase; hsa-miR-151:CGA:targetscan:mirbase; hsa-miR-151:TMEM167:mirbase;

//
ANNOTATION: 1
ID OCTAMER:hsa-miR-129;
TFID OCTAMER;
MIID ENSG00000207705:hsa-mir-129-1:hsa-miR-129;
JTID ENSG00000145416:MARCH1 GO:0005515;GO:0006512;GO:0008270;GO:0016020;GO:0016021;GO:0016874;GO:0046872;
JTID ENSG00000172345:STARD5 GO:0006694;GO:0006869;GO:0008289;GO:0015485;GO:0017127;
```

```
JTID ENSG00000029534:ANK1 GO:0005200;GO:0005886;GO:0006887;GO:0007010;GO:0007165;GO:0008093;GO:0015629;GO:0016323;GO:0019899;GO:0030507;GO:0045199;
TFJT OCTAMER:MARCH1;

//
ANNOTATION: 1
ID AML1:hsa-miR-148a;
TFID AML1;
MIID ENSG00000199085:hsa-mir-148a:hsa-miR-148a;
JTID ENSG00000026036:TNFRSF6B GO:0000166;GO:0003677;GO:0004003;GO:0005524;GO:0005634;GO:0006139;GO:0016787;GO:0016818;GO:0004872;GO:0005515;GO:0005625;GO:0006915;GO:0006916;GO:0003676;GO:0008026;GO:0000723;
JTID ENSG00000136842:TMOD1 GO:0003779;GO:0005523;GO:0005856;GO:0007010;GO:0030016;GO:0030239;
JTID ENSG00000180537:RNF182 GO:0005515;GO:0008270;GO:0016020;GO:0016021;GO:0046872;
JTID ENSG00000173926:MARCH3 GO:0005515;GO:0006512;GO:0006897;GO:0008270;GO:0016020;GO:0016021;GO:0016874;GO:0046872;
JTID ENSG00000125084:WNT1 GO:0001708;GO:0004871;GO:0005102;GO:0005576;GO:0005625;GO:0007163;GO:0007223;GO:0007275;GO:0007283;GO:0007417;GO:0009653;GO:0016477;GO:0030154;
JTID ENSG00000135374:ELF5 GO:0003700;GO:0005634;GO:0006350;GO:0006355;GO:0006366;GO:0007398;GO:0008283;GO:0043565;
JTID ENSG00000130052:STARD8 GO:0005096;GO:0005622;GO:0007165;
JTID ENSG00000204584:Q6ZSH9_HUMAN
JTID ENSG00000151418:ATP6V1G3 GO:0006754;GO:0006811;GO:0015078;GO:0015992;GO:0016787;GO:0046872;GO:0008553;
JTID ENSG0000011711:GOLTB1 GO:0004871;GO:0005783;GO:0015031;GO:0016020;GO:0016021;GO:0016192;GO:0043123;
JTID ENSG00000137073:UBAP2
MIJT hsa-miR-148a:WNT1:targetscan:pictar; hsa-miR-148a:TMOD1:targetscan; hsa-miR-148a:MARCH3:targetscan:mirbase:pictar; hsa-miR-148a:ELF5:targetscan:pictar; hsa-miR-148a:RNF182:targetscan; hsa-miR-148a:UBAP2:targetscan; hsa-miR-148a:GOLTB1:targetscan; hsa-miR-148a:STARD8:targetscan;
hsa-miR-148a:TNFRSF6B:targetscan:mirbase;

//
ANNOTATION: 1
ID ELF-1:hsa-miR-214;
TFID ELF-1;
MIID ENSG00000207949:hsa-mir-214:hsa-miR-214;
JTID ENSG00000110328:GALNTL4 GO:0004653;GO:0005509;GO:0005529;GO:0016020;GO:0016021;GO:0016757;GO:0030145;
JTID ENSG00000121848:ZNF364 GO:0005515;GO:0008270;GO:0046872;
JTID ENSG00000110851:PRDM4 GO:0003677;GO:0003702;GO:0005622;GO:0005634;GO:0006350;GO:0006355;GO:0006366;GO:0007165;GO:0008270;GO:0008283;GO:0046872;
JTID ENSG00000167578:MIA GO:0005615;GO:0008083;GO:0008283;GO:000166;GO:0005525;GO:0007264;GO:0003924;GO:0005622;GO:0015031;GO:0016020;GO:0016192;
JTID ENSG00000104894:CD37 GO:0005886;GO:0005887;GO:0006487;GO:0016021;
MIJT hsa-miR-214:PRDM4:targetscan; hsa-miR-214:MIA:mirbase; hsa-miR-214:GALNTL4:targetscan:mirbase; hsa-miR-214:ZNF364:targetscan; hsa-miR-214:CD37:targetscan:mirbase;

//
ANNOTATION: 1
ID MEIS1:hsa-miR-100;
TFID MEIS1;
MIID ENSG00000207994:hsa-mir-100:hsa-miR-100;
JTID ENSG00000152689:RASGRP3 GO:0000165;GO:0004871;GO:0005088;GO:0005509;GO:0005622;GO:0005737;GO:0005887;GO:0007265;GO:0008270;GO:0017016;GO:0019992;GO:0043087;GO:0046582;GO:0051056;
JTID ENSG00000203837:PNLIPRP3 GO:0003824;GO:0004806;GO:0006629;
JTID ENSG00000177406:Q8N503_HUMAN
JTID ENSG00000196432:Q9H5F0_HUMAN
JTID ENSG00000162437:RAVER2 GO:0000166;GO:0003723;GO:0005634;GO:0005515;
JTID ENSG00000185361:TNFAIP8L1
JTID ENSG00000144712:CAND2 GO:0005622;GO:0005634;GO:0006350;GO:0006355;GO:0006512;GO:0016563;GO:0017025;
JTID ENSG00000116017:ARID3A GO:0003677;GO:0005622;GO:0003700;GO:0005515;GO:0005634;GO:0006350;GO:0006355;GO:0042803;
JTID ENSG00000136840:ST6GALNAC4 GO:0005625;GO:0006486;GO:0006664;GO:0008373;GO:0016020;GO:0016021;GO:0030173;GO:0047290;
JTID ENSG00000164108:Q9HAJ2_HUMAN
MIJT hsa-miR-100:TNFAIP8L1:targetscan:mirbase; hsa-miR-100:RAVER2:targetscan:pictar; hsa-miR-100:PNLIPRP3:targetscan; hsa-miR-100:RASGRP3:targetscan; hsa-miR-100:Q9HAJ2_HUMAN:mirbase; hsa-miR-100:ST6GALNAC4:targetscan; hsa-miR-100:ARID3A:targetscan:mirbase; hsa-miR-
100:CAND2:targetscan:mirbase;

//
ANNOTATION: 1
ID IRF-7:hsa-miR-449b;
TFID IRF-7;
MIID ENSG00000207728:hsa-mir-449b:hsa-miR-449b;
JTID ENSG00000116704:SLC35D1 GO:0005351;GO:0005463;GO:0005783;GO:0006810;GO:0015789;GO:0016020;GO:0016021;GO:0030176;GO:0030206;
JTID ENSG00000112759:SLC29A1 GO:0005337;GO:0005515;GO:0005624;GO:0005887;GO:0006139;GO:0006810;GO:0015858;GO:0016020;
JTID ENSG00000198719:DLL1
GO:0001701;GO:0001709;GO:0001756;GO:0001757;GO:0005112;GO:0005509;GO:0005515;GO:0005576;GO:0005886;GO:0005887;GO:0007154;GO:0007219;GO:0007275;GO:0007368;GO:0007386;GO:0007399;GO:0009887;GO:0009912;GO:0030097;GO:0030154;GO:0030155;GO:0031410;GO:0042472;GO:0042475;GO:0045596;GO:0045608;GO:004883
9;
JTID ENSG00000107282:APBA1 GO:0005515;GO:0006461;GO:0006886;GO:0007155;GO:0007268;GO:0007399;GO:0008021;GO:0008088;
JTID ENSG00000048740:CUGBP2 GO:0000166;GO:0003723;GO:0005625;GO:0005634;GO:0006376;GO:0006396;GO:0007528;GO:0008016;
JTID ENSG00000108797:CNTNAP1 GO:0004872;GO:0005070;GO:0005102;GO:0005887;GO:0007155;GO:0007165;GO:0016020;
JTID ENSG00000131951:LRRC9 GO:0005515;
MIJT hsa-miR-449b:SLC29A1:mirbase; hsa-miR-449b:DLL1:targetscan:mirbase; hsa-miR-449b:APBA1:targetscan; hsa-miR-449b:CNTNAP1:targetscan; hsa-miR-449b:CUGBP2:targetscan; hsa-miR-449b:SLC35D1:mirbase;

//
ANNOTATION: 1
ID HPL:hsa-miR-497;
TFID HPL;
MIID ENSG00000207791:hsa-mir-497:hsa-miR-497;
JTID ENSG00000144867:SRPRB GO:0000166;GO:0004872;GO:0005515;GO:0005525;GO:0005783;GO:0005786;GO:0016020;GO:0016021;GO:0030529;
MIJT hsa-miR-497:SRPRB:targetscan;

//
ANNOTATION: 1
ID CdxA:hsa-miR-194;
TFID CdxA;
MIID ENSG00000207624:hsa-mir-194-1:hsa-miR-194;
JTID ENSG00000197969:VPS13A GO:0005478;GO:0005622;GO:0006895;GO:0008104;GO:0015031;
JTID ENSG00000188343:FAM92A1
JTID ENSG00000104763:ASAH1 GO:0005764;GO:0006631;GO:0006672;GO:0016787;GO:0017040;
JTID ENSG00000177853:ZNF518 GO:0003677;GO:0005622;GO:0005634;GO:0006350;GO:0006355;GO:0008270;GO:0046872;
MIJT hsa-miR-194:ZNF518:targetscan;

//
ANNOTATION: 1
ID AML1:hsa-miR-302c;
TFID AML1;
MIID ENSG00000199102:hsa-mir-302c:hsa-miR-302c;
JTID ENSG00000173530:TNFRSF10D GO:0004888;GO:0005515;GO:0006915;GO:0006916;GO:0007165;GO:0016020;GO:0016021;
JTID ENSG00000177337:NP_001034885.1
JTID ENSG00000143314:MRFL24 GO:0003735;GO:0005622;GO:0005739;GO:0005840;GO:0006412;
JTID ENSG00000144354:CDCA7 GO:0005634;GO:0006350;GO:0006355;GO:0042127;
JTID ENSG00000128604:IRF5 GO:0003700;GO:0005622;GO:0005634;GO:0006355;GO:0003709;GO:0006350;
JTID ENSG00000144711:IQSEC1 GO:0005086;GO:0005622;GO:0005634;GO:0032012;
JTID ENSG00000139970:RTN1 GO:0004871;GO:0005783;GO:0007165;GO:0016020;GO:0016021;GO:0030176;GO:0030182;
JTID ENSG00000188193:C6orf155
```

```
JTID ENSG00000108389:MTMR4 GO:0004437;GO:0004725;GO:0006470;GO:0008270;GO:0016787;GO:0046839;
JTID ENSG00000180667:YOD1 GO:0003676;GO:0005622;GO:0006512;GO:0008234;GO:0008270;GO:0046872;
JTID ENSG00000183826:BTBD9 GO:0005515;GO:0007155;
JTID ENSG00000204542:C6orf15
JTID ENSG00000100647:KIAA0247 GO:0016020;GO:0016021;
JTID ENSG00000135604:STX11 GO:0005484;GO:0005515;GO:0006886;GO:0006944;GO:0008565;GO:0016020;
JTID ENSG00000168061:SAC3D1 GO:0005813;GO:0005819;GO:0051225;GO:0051298;
MIJT hsa-miR-302c:CDCA7:targetscan:pictar; hsa-miR-302c:SAC3D1:targetscan:mirbase; hsa-miR-302c:IQSEC1:targetscan; hsa-miR-302c:YOD1:targetscan; hsa-miR-302c:MRPL24:targetscan:mirbase; hsa-miR-302c:TNFRSF10D:targetscan; hsa-miR-302c:MTMR4:targetscan:pictar; hsa-miR-302c:IRF5:targetscan:mirbase; hsa-miR-302c:C6orf15:targetscan:mirbase; hsa-miR-302c:RTN1:targetscan:pictar;

//
ANNOTATION: 1
ID ER:hsa-miR-499;
TFID ER;
MIID ENSG00000207635:hsa-mir-499:hsa-miR-499;
JTID ENSG00000163788:SNRK GO:0001166;GO:0000287;GO:0004674;GO:0005515;GO:0005524;GO:0005634;GO:0006468;GO:0016740;GO:0030099;GO:0043523;
JTID ENSG00000203782:LOR GO:0001533;GO:0005200;GO:0005626;GO:0009898;GO:0018149;GO:0030216;GO:0030280;GO:0030674;GO:0031424;
JTID ENSG00000110693:SOX6 GO:0003677;GO:0003700;GO:0005515;GO:0005634;GO:0006325;GO:0006350;GO:0006355;GO:0007517;GO:0035051;GO:0042692;GO:0045165;GO:0051216;
JTID ENSG00000089009:RPL6 GO:0003677;GO:0003723;GO:0003735;GO:0005622;GO:0005840;GO:0005842;GO:0006355;GO:0006412;
JTID ENSG00000124449:IRGC
JTID ENSG00000173436:Clorf151 GO:0016020;GO:0016021;
JTID ENSG00000007314:SCN4A GO:0001518;GO:0005248;GO:0005624;GO:0006811;GO:0006814;GO:0006936;GO:0016020;GO:0031402;
MIJT hsa-miR-499:SOX6:targetscan:mirbase; hsa-miR-499:SCN4A:targetscan; hsa-miR-499:RPL6:targetscan; hsa-miR-499:SNRK:targetscan; hsa-miR-499:LOR:targetscan:mirbase; hsa-miR-499:IRGC:targetscan; hsa-miR-499:Clorf151:targetscan;

//
ANNOTATION: 1
ID CAC-BP:hsa-miR-203;
TFID CAC-BP;
MIID ENSG00000207568:hsa-mir-203:hsa-miR-203;
JTID ENSG00000110777:POU2AF1 GO:0003677;GO:0003713;GO:0005515;GO:0005634;GO:0006350;GO:0006355;GO:0006366;GO:0006959;
JTID ENSG00000125810:CD93 GO:0001849;GO:0004872;GO:0005509;GO:0005515;GO:0005529;GO:0005886;GO:0006909;GO:0016021;GO:0016023;GO:0016337;GO:0042116;
JTID ENSG00000133216:EPHB2 GO:0000166;GO:0004713;GO:0004872;GO:0005005;GO:0005515;GO:0005524;GO:0006468;GO:0007169;GO:0007399;GO:0016020;GO:0016021;GO:0016740;GO:0045202;GO:0005003;
MIJT hsa-miR-203:POU2AF1:targetscan; hsa-miR-203:EPHB2:targetscan; hsa-miR-203:CD93:targetscan;

//
ANNOTATION: 1
ID HIF-1:hsa-miR-189;
TFID HIF-1;
MIID ENSG00000207617:hsa-mir-24-1:hsa-miR-189;
JTID ENSG00000135974:C2orf49
JTID ENSG00000019505:SYT13 GO:0005887;GO:0016020;GO:0016192;GO:0030133;
MIJT hsa-miR-189:SYT13:targetscan;

//
ANNOTATION: 1
ID C-REL:hsa-miR-34c;
TFID C-REL;
MIID ENSG00000207562:hsa-mir-34c:hsa-miR-34c;
JTID ENSG00000177410:Q5QHF1_HUMAN
JTID ENSG00000007541:PIGQ GO:0005975;GO:0006506;GO:0016020;GO:0016021;GO:0016757;GO:0017176;
JTID ENSG00000136247:ZDHHC4 GO:0004129;GO:0006118;GO:0008270;GO:0008415;GO:0016020;GO:0016021;GO:0016740;GO:0046872;
JTID ENSG00000198586:TLK1 GO:0000166;GO:0001672;GO:0004674;GO:0005515;GO:0005524;GO:0005634;GO:0006468;GO:0006886;GO:0006974;GO:0007049;GO:0007242;GO:0016568;GO:0016740;
JTID ENSG00000177303:CASKIN2 GO:0005737;
JTID ENSG00000198719:DLL1
GO:0001701;GO:0001709;GO:0001756;GO:0001757;GO:0005112;GO:0005509;GO:0005515;GO:0005576;GO:0005886;GO:0005887;GO:0007154;GO:0007219;GO:0007275;GO:0007368;GO:0007386;GO:0007399;GO:0009887;GO:0009912;GO:0030097;GO:0030154;GO:0030155;GO:0031410;GO:0042472;GO:0042475;GO:0045596;GO:0045608;GO:0048839;
JTID ENSG00000108797:CNTNAP1 GO:0004872;GO:0005070;GO:0005102;GO:0005887;GO:0007155;GO:0007165;GO:0016020;
JTID ENSG00000118513:MYB GO:0003677;GO:0005515;GO:0005634;GO:0006355;GO:0016363;GO:0016563;GO:0005681;GO:0006397;GO:0007049;GO:0008380;GO:0030528;GO:0045449;GO:0000082;GO:0003700;GO:0006816;
JTID ENSG00000143466:IKBKE GO:0000166;GO:0004704;GO:0004871;GO:0005515;GO:0005524;GO:0005737;GO:0006468;GO:0006955;GO:0008384;GO:0016740;GO:0043123;
MIJT hsa-miR-34c:DLL1:targetscan:mirbase:pictar:PUBMED: 14697198; hsa-miR-34c:CNTNAP1:targetscan:pictar; hsa-miR-34c:MYB:targetscan:pictar; hsa-miR-34c:IKBKE:targetscan:mirbase; hsa-miR-34c:PIGQ:mirbase; hsa-miR-34c:CASKIN2:targetscan;

//
ANNOTATION: 1
ID HSF2:hsa-miR-499;
TFID HSF2;
MIID ENSG00000207635:hsa-mir-499:hsa-miR-499;
JTID ENSG00000198860:Clorf19 GO:0005515;GO:0005634;GO:0006397;GO:0008033;
JTID ENSG00000169189:NSMCE1 GO:0005634;GO:0006281;GO:0006310;GO:0008270;GO:0046872;
JTID ENSG00000126861:OMG GO:0005515;GO:0005624;GO:0005887;GO:0007155;GO:0016020;GO:0048503;
MIJT hsa-miR-499:Clorf19:targetscan; hsa-miR-499:NSMCE1:targetscan; hsa-miR-499:OMG:targetscan:mirbase;

//
ANNOTATION: 1
ID HNF-3:hsa-miR-31;
TFID HNF-3;
MIID ENSG00000199177:hsa-mir-31:hsa-miR-31;
JTID ENSG00000156711:MAPK13 GO:0000166;GO:0004674;GO:0004707;GO:0005515;GO:0005524;GO:0006468;GO:0006950;GO:0007049;GO:0007243;GO:0008339;GO:0016740;GO:0004672;
JTID ENSG00000189037:DUSP21 GO:0004672;GO:0004725;GO:0005634;GO:0005737;GO:0006470;GO:0007165;GO:0008138;GO:0016787;
MIJT hsa-miR-31:MAPK13:targetscan; hsa-miR-31:DUSP21:targetscan:mirbase;

//
ANNOTATION: 1
ID CdxA:hsa-miR-101;
TFID CdxA;
MIID ENSG00000199135:hsa-mir-101-1:hsa-miR-101;
JTID ENSG00000064989:CALCLRL GO:0001635;GO:0004872;GO:0004930;GO:0004948;GO:0005887;GO:0007165;GO:0007187;GO:0007189;GO:0007507;GO:0008284;GO:0016020;GO:0048661;
JTID ENSG00000109511:ANXA10 GO:0005509;GO:0005544;GO:0005739;
JTID ENSG00000086619:ERO1LB GO:0005783;GO:0006118;GO:0006457;GO:0006810;GO:0016020;GO:0016491;GO:0051082;
JTID ENSG00000116701:NCF2 GO:0001669;GO:0005515;GO:0005625;GO:0005737;GO:0005829;GO:0006801;GO:0006968;GO:0009055;
JTID ENSG00000198841:KTI12
JTID ENSG00000187790:FANCM GO:0000166;GO:0003677;GO:0004518;GO:0005524;GO:0005634;GO:0006281;GO:0008026;GO:0016787;
JTID ENSG00000138376:BARD1 GO:0000151;GO:0001894;GO:0003723;GO:0004842;GO:0005515;GO:0005622;GO:0005634;GO:0005737;GO:0006974;GO:0007050;GO:0008270;GO:0016567;GO:0019900;GO:0031436;GO:0031441;GO:0042325;GO:0042803;GO:0043065;GO:0043066;GO:0045732;GO:0046826;GO:0046872;GO:0046982;
JTID ENSG00000134375:TMM17A GO:0005739;GO:0005744;GO:0006626;GO:0015450;GO:0016020;GO:0016021;
MIJT hsa-miR-101:BARD1:targetscan; hsa-miR-101:ANXA10:targetscan; hsa-miR-101:TMM17A:targetscan; hsa-miR-101:KTI12:targetscan:mirbase; hsa-miR-101:CALCLRL:targetscan; hsa-miR-101:FANCM:targetscan:mirbase; hsa-miR-101:NCF2:targetscan:mirbase;

//
ANNOTATION: 1
ID AFP1:hsa-let-7d;
TFID AFP1;
```

```
MIID ENSG00000199133:hsa-let-7d:hsa-let-7d;
JTID ENSG00000204538:PSORS1C2
JTID ENSG00000179165:PXT1
MIJT hsa-let-7d:PSORS1C2:targetscan:mirbase:pictar; hsa-let-7d:PXT1:targetscan;

//
ANNOTATION: 1
ID TCF-4:hsa-miR-24;
TFID TCF-4;
MIID ENSG00000209707:hsa-mir-24-2:hsa-miR-24;
JTID ENSG00000187257:RSBN1L
JTID ENSG0000010932:FM01 GO:0004497;GO:0004499;GO:0005783;GO:0005792;GO:0006118;GO:0016020;GO:0016021;GO:0050660;
JTID ENSG00000166206:GABRB3 GO:0004890;GO:0005216;GO:0005230;GO:0006811;GO:0016021;GO:0030594;GO:0045211;GO:0005254;GO:0005887;GO:0007165;GO:0031404;
MIJT hsa-miR-24:GABRB3:targetscan; hsa-miR-24:RSBN1L:targetscan:pictar; hsa-miR-24:FM01:targetscan:mirbase;

//
ANNOTATION: 1
ID SOX-5:hsa-miR-219;
TFID SOX-5;
MIID ENSG00000207955:hsa-mir-219-2:hsa-miR-219;
JTID ENSG00000133511:PIK4CA GO:0004430;GO:0005515;GO:0005798;GO:0006661;GO:0007165;GO:0007268;GO:0016740;
JTID ENSG00000136869:TLR4
GO:0001530;GO:0004872;GO:0004888;GO:0005515;GO:0005887;GO:0006954;GO:0007165;GO:0007249;GO:0007250;GO:0009617;GO:0016020;GO:0016021;GO:0016046;GO:0042088;GO:0042116;GO:0043123;GO:0045084;GO:0045087;GO:0045362;GO:0045368;GO:0045410;GO:0045576;GO:0045671;GO:0046330;GO:0046696;
JTID ENSG00000203867:RBM20 GO:0003676;GO:0005622;GO:0005634;GO:0008270;
JTID ENSG00000180139:Q8N9Z5_HUMAN
JTID ENSG00000163486:SRGAP2 GO:0005096;GO:0005622;GO:0007165;GO:0005515;GO:0005743;
JTID ENSG00000163788:SNRK GO:0000166;GO:0000287;GO:0004674;GO:0005515;GO:0005524;GO:0005634;GO:0006468;GO:0016740;GO:0030099;GO:0043523;
JTID ENSG00000109667:SLC2A9 GO:0005215;GO:0005351;GO:0008643;GO:0016020;GO:0016021;GO:0005355;GO:0005635;GO:0005886;GO:0005887;GO:0015758;
JTID ENSG00000114982:NP_060461.3 GO:0004339;GO:0005634;
JTID ENSG00000184895:SRY GO:0003677;GO:0005515;GO:0005634;GO:0006350;GO:0006355;GO:0007548;GO:0008301;GO:0016563;GO:0030154;GO:0030238;
JTID ENSG00000172717:C14orf54
JTID ENSG00000043822:NP_060895.1 GO:0000287;GO:0004430;GO:0005515;GO:0005887;GO:0006661;GO:0016020;GO:0016301;GO:0016740;GO:0016773;GO:0045121;
JTID ENSG00000179387:ELMOD2 GO:0005856;GO:0006909;
JTID ENSG00000173930:SLC04C1 GO:0005215;GO:0006810;GO:0016020;GO:0016021;
JTID ENSG00000178776:NP_996849.2
JTID ENSG00000161031:PGLYRP2 GO:0001519;GO:0005515;GO:0005622;GO:0008270;GO:0008745;GO:0009253;GO:0016019;GO:0016020;GO:0016045;GO:0016787;GO:0045087;GO:0046872;GO:0050830;
JTID ENSG00000171557:FGG GO:0005102;GO:0005577;GO:0007165;GO:0030168;GO:0030674;GO:0051258;GO:0005509;GO:0008217;GO:0008284;
JTID ENSG00000074054:CLASP1 GO:0000776;GO:0001578;GO:0005515;GO:0005794;GO:0005813;GO:0005828;GO:0005856;GO:0005881;GO:0007026;GO:0007049;GO:0007067;GO:0007163;GO:0030981;GO:0043515;GO:0051010;GO:0051301;GO:0008017;
JTID ENSG00000129744:ART1 GO:0003950;GO:0003956;GO:0005886;GO:0005887;GO:0006471;GO:0016757;GO:0048503;
MIJT hsa-miR-219:PIK4CA:targetscan:mirbase; hsa-miR-219:SLC2A9:mirbase; hsa-miR-219:PGLYRP2:targetscan:mirbase; hsa-miR-219:SRGAP2:targetscan; hsa-miR-219:FGG:mirbase; hsa-miR-219:ART1:targetscan:mirbase; hsa-miR-219:SRY:targetscan; hsa-miR-219:C14orf54:targetscan:mirbase; hsa-miR-219:NP_060895.1:pictar; hsa-miR-219:ELMOD2:targetscan:mirbase:pictar; hsa-miR-219:CLASP1:targetscan:pictar; hsa-miR-219:SNRK:targetscan:pictar; hsa-miR-219:SLC04C1:targetscan:mirbase; hsa-miR-219:TLR4:targetscan;

//
ANNOTATION: 1
ID FOXO1:hsa-miR-30c;
TFID FOXO1;
MIID ENSG00000199094:hsa-mir-30c-2:hsa-miR-30c;
JTID ENSG00000102098:SCML2 GO:0003700;GO:0005634;GO:0006355;GO:0009653;
JTID ENSG00000125804:C20orf91
JTID ENSG00000143590:EFNA3 GO:0005005;GO:0005887;GO:0007267;GO:0016020;GO:0048503;
JTID ENSG00000091157:WDR7
JTID ENSG00000105136:ZNF419 GO:0003677;GO:0005622;GO:0005634;GO:0006350;GO:0006355;GO:0008270;GO:0046872;
JTID ENSG00000173320:STOX2
MIJT hsa-miR-30c:STOX2:targetscan; hsa-miR-30c:ZNF419:targetscan; hsa-miR-30c:SCML2:targetscan; hsa-miR-30c:C20orf91:mirbase; hsa-miR-30c:EFNA3:targetscan:pictar; hsa-miR-30c:WDR7:targetscan:pictar;

//
ANNOTATION: 1
ID ATF-1:hsa-miR-199b;
TFID ATF-1;
MIID ENSG00000207581:hsa-mir-199b:hsa-miR-199b;
JTID ENSG00000108515:ENO3 GO:0000015;GO:0000287;GO:0004634;GO:0006096;GO:0016829;
MIJT hsa-miR-199b:ENO3:targetscan:mirbase;

//
ANNOTATION: 1
ID RREB-1:hsa-miR-148b;
TFID RREB-1;
MIID ENSG00000199122:hsa-mir-148b:hsa-miR-148b;
JTID ENSG00000170989:EDG1 GO:0001525;GO:0001619;GO:0004872;GO:0005886;GO:0005887;GO:0007165;GO:0007186;GO:0007193;GO:0007420;GO:0008284;GO:0030155;
JTID ENSG00000204101:Q6ZU91_HUMAN
MIJT hsa-miR-148b:EDG1:targetscan:mirbase:pictar;

//
ANNOTATION: 1
ID RORALPHA2:hsa-miR-20a;
TFID RORALPHA2;
MIID ENSG00000199149:hsa-mir-20a:hsa-miR-20a;
JTID ENSG00000037280:FLT4 GO:0000166;GO:0004872;GO:0005021;GO:0005515;GO:0005524;GO:0005887;GO:0006468;GO:0007169;GO:0016020;GO:0016740;GO:0004713;
JTID ENSG00000104517:EDD1 GO:0004842;GO:0005622;GO:0006464;GO:0006512;GO:0005515;GO:0005625;GO:0005634;GO:0006511;GO:0006974;GO:0008270;GO:0008283;GO:0016874;GO:0046872;GO:0050847;
JTID ENSG00000099875:MKNK2 GO:0000166;GO:0000287;GO:0004674;GO:0005524;GO:0006417;GO:0006468;GO:0007166;GO:0007243;GO:0008270;GO:0016740;GO:0005515;
JTID ENSG00000163577:EIF5A2 GO:0003743;GO:0006413;
MIJT hsa-miR-20a:EDD1:targetscan:pictar; hsa-miR-20a:EIF5A2:targetscan:pictar; hsa-miR-20a:MKNK2:targetscan:pictar;

//
ANNOTATION: 1
ID SRF:hsa-miR-34c;
TFID SRF;
MIID ENSG00000207562:hsa-mir-34c:hsa-miR-34c;
JTID ENSG00000110675:ELMOD1 GO:0005856;GO:0006909;
JTID ENSG00000143466:IKBKE GO:0000166;GO:0004704;GO:0004871;GO:0005515;GO:0005524;GO:0005737;GO:0006468;GO:0006955;GO:0008384;GO:0016740;GO:0043123;
JTID ENSG00000179909:ZNF154 GO:0003700;GO:0005622;GO:0005634;GO:0006350;GO:0006355;GO:0008270;GO:0046872;
JTID ENSG00000146216:TTBK1 GO:0000166;GO:0004674;GO:0005524;GO:0006468;GO:0016740;GO:0004672;
MIJT hsa-miR-34c:IKBKE:targetscan:mirbase; hsa-miR-34c:TTBK1:targetscan; hsa-miR-34c:ELMOD1:targetscan:pictar;

//
ANNOTATION: 1
ID ER:hsa-miR-205;
TFID ER;
MIID ENSG00000207623:hsa-mir-205:hsa-miR-205;
```

```
JTID ENSG00000189325:NP_001010903.2
JTID ENSG00000006634:DBF4 GO:0000074;GO:0000082;GO:0003676;GO:0005515;GO:0005622;GO:0005634;GO:0006260;GO:0007049;GO:0008047;GO:0008270;GO:0046872;
JTID ENSG00000152270:PDE3B GO:0004119;GO:0007165;GO:0016020;GO:0016021;GO:0016787;GO:0031018;GO:0042593;GO:0050796;
JTID ENSG00000182631:RXFP3 GO:0004872;GO:0004982;GO:0005887;GO:0007165;GO:0007186;GO:0016020;GO:0051482;GO:0008528;
JTID ENSG00000166704:ZNF606 GO:0003677;GO:0005622;GO:0005634;GO:0006350;GO:0006355;GO:0008270;GO:0046872;
JTID ENSG00000187753:C9orf153
JTID ENSG00000167139:TBC1D21 GO:0005096;GO:0005097;GO:0005622;GO:0032313;
JTID ENSG00000164124:TMEM144 GO:0016021;
JTID ENSG00000131242:RAB11FIP4 GO:0005509;
MIJT hsa-miR-205:TBC1D21:targetscan:mirbase; hsa-miR-205:TMEM144:targetscan; hsa-miR-205:RAB11FIP4:targetscan; hsa-miR-205:PDE3B:targetscan:pictar; hsa-miR-205:DBF4:targetscan:mirbase; hsa-miR-205:ZNF606:targetscan; hsa-miR-205:RXFP3:targetscan;

//
ANNOTATION: 1
ID CHOP-C/EBPALPHA:hsa-miR-151;
TFID CHOP-C/EBPALPHA;
MIID ENSG00000207792:hsa-mir-151:hsa-miR-151;
JTID ENSG00000174695:TMEM167 GO:0016020;GO:0016021;
MIJT hsa-miR-151:TMEM167:mirbase;

//
ANNOTATION: 1
ID RREB-1:hsa-miR-26a;
TFID RREB-1;
MIID ENSG00000207789:hsa-mir-26a-2:hsa-miR-26a;
JTID ENSG00000082146:ALS2CR2 GO:0000166;GO:0000902;GO:0004672;GO:0005515;GO:0005524;GO:0005634;GO:0005737;GO:0006468;GO:0006611;GO:0006916;GO:0007049;GO:0007254;GO:0032147;
JTID ENSG00000129250:KIF1C GO:0000166;GO:0003777;GO:0005524;GO:0005783;GO:0005794;GO:0005856;GO:0005874;GO:0005875;GO:0006890;GO:0007018;
JTID ENSG00000037637:FBXO42 GO:0006512;
JTID ENSG00000116783:FPGT GO:0005737;GO:0006004;GO:0016740;GO:0047341;GO:0000166;GO:0000287;GO:0004674;GO:0004713;GO:0005524;GO:0005634;GO:0006468;
MIJT hsa-miR-26a:ALS2CR2:targetscan:mirbase:pictar; hsa-miR-26a:FPGT:targetscan;

//
ANNOTATION: 1
ID MEIS1:hsa-miR-99b;
TFID MEIS1;
MIID ENSG00000207550:hsa-mir-99b:hsa-miR-99b;
JTID ENSG00000152689:RASGRP3 GO:0000165;GO:0004871;GO:0005088;GO:0005509;GO:0005515;GO:0005622;GO:0005737;GO:0005887;GO:0007265;GO:0008270;GO:0017016;GO:0019992;GO:0043087;GO:0046582;GO:0051056;
JTID ENSG00000203837:PNLIPRP3 GO:0003824;GO:0004806;GO:0006629;
JTID ENSG00000177406:Q8N503_HUMAN
JTID ENSG00000196432:Q9H5F0_HUMAN
JTID ENSG00000162437:RAVER2 GO:0000166;GO:0003723;GO:0005634;GO:0005515;
JTID ENSG00000185361:TNFAIP8L1
JTID ENSG00000144712:CAND2 GO:0005622;GO:0005634;GO:0006350;GO:0006355;GO:0006512;GO:0016563;GO:0017025;
JTID ENSG00000116017:ARID3A GO:0003677;GO:0005622;GO:0003700;GO:0005515;GO:0005634;GO:0006350;GO:0006355;GO:0042803;
JTID ENSG00000136840:ST6GALNAC4 GO:0005625;GO:0006486;GO:0006664;GO:0008373;GO:0016020;GO:0016021;GO:0030173;GO:0047290;
JTID ENSG00000164108:Q9HAJ2_HUMAN
MIJT hsa-miR-99b:TNFAIP8L1:targetscan:mirbase; hsa-miR-99b:RAVER2:targetscan:pictar; hsa-miR-99b:PNLIPRP3:targetscan; hsa-miR-99b:RASGRP3:targetscan:mirbase; hsa-miR-99b:Q9HAJ2_HUMAN:mirbase; hsa-miR-99b:ST6GALNAC4:targetscan; hsa-miR-99b:ARID3A:targetscan:mirbase; hsa-miR-99b:CAND2:targetscan:mirbase;

//
ANNOTATION: 1
ID SOX-5:hsa-miR-129;
TFID SOX-5;
MIID ENSG00000199077:hsa-mir-129-2:hsa-miR-129;
JTID ENSG00000029534:ANK1 GO:0005200;GO:0005886;GO:0006887;GO:0007010;GO:0007165;GO:0008093;GO:0015629;GO:0016323;GO:0019899;GO:0030507;GO:0045199;
JTID ENSG00000178602:OTOS GO:0007605;
JTID ENSG00000164849:GPR146 GO:0001584;GO:0004872;GO:0007165;GO:0007186;GO:0016020;GO:0016021;
JTID ENSG00000172410:INSL5 GO:0005179;GO:0005576;
JTID ENSG00000128254:C22orf24 GO:0016020;GO:0016021;
JTID ENSG00000158435:C2orf29 GO:0008283;
JTID ENSG00000145416:MARCH1 GO:0005515;GO:0006512;GO:0008270;GO:0016020;GO:0016021;GO:0016874;GO:0046872;
MIJT hsa-miR-129:OTOS:targetscan:mirbase; hsa-miR-129:C2orf29:targetscan; hsa-miR-129:GPR146:mirbase;

//
ANNOTATION: 1
ID NCX:hsa-miR-151;
TFID NCX;
MIID ENSG00000207792:hsa-mir-151:hsa-miR-151;
JTID ENSG00000135346:CGA GO:0005179;GO:0005576;GO:0005625;GO:0007165;GO:0007267;
JTID ENSG00000102271:KLHL4 GO:0003779;GO:0005515;GO:0005856;GO:0030036;
JTID ENSG00000136940:PDCL GO:0005737;GO:0007165;GO:0007601;GO:0016299;GO:0050896;
JTID ENSG00000147869:CER1 GO:0005125;GO:0005515;GO:0005576;GO:0008285;GO:0009948;GO:0030514;GO:0042074;
JTID ENSG00000102243:VGLL1 GO:0003713;GO:0005634;GO:0006355;GO:0030528;
MIJT hsa-miR-151:KLHL4:targetscan; hsa-miR-151:CER1:targetscan:mirbase; hsa-miR-151:VGLL1:mirbase; hsa-miR-151:PDCL:targetscan:mirbase; hsa-miR-151:CGA:targetscan:mirbase;

//
ANNOTATION: 1
ID EGR:hsa-miR-149;
TFID EGR;
MIID ENSG00000207611:hsa-mir-149:hsa-miR-149;
JTID ENSG00000187609:NP_060290.3 GO:0003676;GO:0004518;GO:0005622;GO:0008408;GO:0016787;
JTID ENSG00000100034:PPM1F GO:0000287;GO:0006470;GO:0006915;GO:0008287;GO:0015071;GO:0016787;GO:0030145;
JTID ENSG00000197444:OGDHL GO:0004591;GO:0006096;GO:0008152;GO:0030976;
MIJT hsa-miR-149:OGDHL:targetscan:mirbase; hsa-miR-149:PPM1F:targetscan:pictar;

//
ANNOTATION: 1
ID HSF2:hsa-miR-129;
TFID HSF2;
MIID ENSG00000199077:hsa-mir-129-2:hsa-miR-129;
JTID ENSG00000163781:TOPBP1 GO:0000794;GO:0003677;GO:0005622;GO:0005634;GO:0006281;GO:0008022;GO:0010212;GO:0016605;
JTID ENSG00000161642:ZNF385 GO:0003677;GO:0005622;GO:0005634;GO:0006350;GO:0006355;GO:0008270;GO:0046872;
JTID ENSG00000189292:NP_001002919.1
MIJT hsa-miR-129:ZNF385:targetscan:pictar; hsa-miR-129:NP_001002919.1:mirbase;

//
ANNOTATION: 1
ID SRY:hsa-miR-299-5p;
TFID SRY;
MIID ENSG00000207749:hsa-mir-299:hsa-miR-299-5p;
```



JTID ENSG00000049130:KITLG GO:0005173;GO:0005515;GO:0005886;GO:0007155;GO:0007165;GO:0008083;GO:0008283;GO:0009887;GO:0016021;GO:0030097;GO:0001755;GO:0005615;GO:0008284;GO:0016020;GO:0043066;GO:0043406;GO:0046579;GO:0050731;  
JTID ENSG000000084093:REST GO:0003677;GO:0003682;GO:0005515;GO:0005622;GO:0005634;GO:0006350;GO:0008270;GO:0016564;GO:0045892;GO:0046872;  
JTID ENSG000000100426:ZBED4 GO:0003677;GO:0008270;GO:0046872;GO:0046983;  
JTID ENSG000000101638:ST8SIA5 GO:0003828;GO:0005975;GO:0006486;GO:0006688;GO:0008373;GO:0016020;GO:0016021;GO:0030173;  
JTID ENSG000000065882:TBC1D1 GO:0005096;GO:0005097;GO:0005622;GO:0005634;GO:0032313;  
JTID ENSG000000184157:C1orf210 GO:0016020;GO:0016021;  
JTID ENSG000000197697:HIST1H2BE GO:0000786;GO:0003677;GO:0005515;GO:0005634;GO:0005694;GO:0006334;GO:0007001;GO:0042742;  
JTID ENSG000000206066:IGLL3  
JTID ENSG000000205442:C9orf134  
JTID ENSG000000144045:DQX1 GO:0000166;GO:0003676;GO:0004386;GO:0005524;GO:0005634;GO:0016787;  
JTID ENSG000000128322:IGLL1 GO:0006955;GO:0016020;  
JTID ENSG00000018625:ATP1A2  
GO:0000166;GO:0000287;GO:0005391;GO:0005524;GO:0005737;GO:0005886;GO:0005890;GO:0006810;GO:0006813;GO:0006814;GO:0006942;GO:0008152;GO:0015077;GO:0015662;GO:0015672;GO:0015991;GO:0016020;GO:0016021;GO:0016787;GO:0016820;GO:0030317;GO:0030641;GO:0030955;GO:0031402;GO:0001504;GO:0002026;GO:0002087;GO:0005515;GO:0005792;GO:0006940;GO:0008217;GO:0008344;GO:0008542;GO:0019229;GO:0040011;GO:0042383;GO:0045822;GO:0045988;GO:0051481;  
JTID ENSG000000165443:PHYHIP1 GO:0005737;  
JTID ENSG000000109184:DCUN1D4 GO:0005634;  
MIJT hsa-miR-299-5p:PHYHIP1:targetscan; hsa-miR-299-5p:DCUN1D4:targetscan; hsa-miR-299-5p:KITLG:targetscan; hsa-miR-299-5p:DQX1:targetscan;mirbase; hsa-miR-299-5p:C1orf210:targetscan;mirbase; hsa-miR-299-5p:IGLL1:mirbase; hsa-miR-299-5p:IGLL3:mirbase; hsa-miR-299-5p:HIST1H2BE:targetscan; hsa-miR-299-5p:ATP1A2:targetscan; hsa-miR-299-5p:C9orf134:mirbase; hsa-miR-299-5p:ST8SIA5:targetscan; hsa-miR-299-5p:ZBED4:targetscan; hsa-miR-299-5p:TBC1D1:targetscan; hsa-miR-299-5p:REST:mirbase;

//  
ANNOTATION: 1  
ID MYOD:hsa-miR-34a;  
TFID MYOD;  
MIID ENSG000000207865:hsa-mir-34a:hsa-miR-34a;  
JTID ENSG000000204619:PPP1R11 GO:0004864;GO:0005515;GO:0005625;  
JTID ENSG000000053918:KCNQ1 GO:0005251;GO:0005624;GO:0006811;GO:0006813;GO:0006936;GO:0007605;GO:0008015;GO:0008016;GO:0008076;GO:0016020;GO:0016021;GO:0030955;GO:0006349;GO:0016458;  
JTID ENSG000000149575:SCN2B GO:0001518;GO:0005248;GO:0006811;GO:0006814;GO:0007268;GO:0016020;GO:0016021;GO:0031402;  
JTID ENSG000000175592:FOSL1 GO:0003700;GO:0005634;GO:0006357;GO:0006935;GO:0006968;GO:0008284;GO:0009615;GO:0043565;GO:0046983;  
JTID ENSG000000133740:E2F5 GO:0000074;GO:0003700;GO:0005515;GO:0005634;GO:0005667;GO:0005737;GO:0006350;GO:0006355;GO:0009887;  
JTID ENSG000000168994:C6orf145  
JTID ENSG000000182749:PAQR7 GO:0004872;GO:0005496;GO:0008289;GO:0016020;GO:0016021;  
MIJT hsa-miR-34a:PPP1R11:targetscan;pictar; hsa-miR-34a:KCNQ1:targetscan; hsa-miR-34a:E2F5:mirbase;pictar; hsa-miR-34a:C6orf145:targetscan;mirbase; hsa-miR-34a:FOSL1:targetscan;mirbase; hsa-miR-34a:SCN2B:targetscan;mirbase; hsa-miR-34a:PAQR7:targetscan;

//  
ANNOTATION: 1  
ID TCF-4:hsa-miR-203;  
TFID TCF-4;  
MIID ENSG000000207568:hsa-mir-203:hsa-miR-203;  
JTID ENSG000000145824:CXCL14 GO:0005576;GO:0005615;GO:0005794;GO:0006935;GO:0006954;GO:0006955;GO:0007165;GO:0007267;GO:0008009;  
JTID ENSG000000188483:IER5L  
MIJT hsa-miR-203:CXCL14:targetscan;

//  
ANNOTATION: 1  
ID OCTAMER:hsa-miR-484;  
TFID OCTAMER;  
MIID ENSG000000202641:hsa-mir-484:hsa-miR-484;  
JTID ENSG000000142166:IFNAR1 GO:0004872;GO:0004905;GO:0005887;GO:0007166;GO:0007259;GO:0009615;GO:0016020;GO:0045351;GO:0004904;  
JTID ENSG000000099282:TSPAN15 GO:0005624;GO:0005887;GO:0016020;  
JTID ENSG000000109501:WFS1 GO:0005624;GO:0005783;GO:0006091;GO:0007399;GO:0007601;GO:0007605;GO:0016020;GO:0016021;  
MIJT hsa-miR-484:WFS1:targetscan;mirbase; hsa-miR-484:TSPAN15:targetscan;mirbase; hsa-miR-484:IFNAR1:targetscan;

//  
ANNOTATION: 1  
ID AML1:hsa-miR-223;  
TFID AML1;  
MIID ENSG000000207939:hsa-mir-223:hsa-miR-223;  
JTID ENSG000000143878:RHOB GO:0000166;GO:0001525;GO:0003924;GO:0005515;GO:0005525;GO:0005622;GO:0005634;GO:0005886;GO:0006927;GO:0007049;GO:0007155;GO:0007264;GO:0007266;GO:0007275;GO:0008333;GO:0010008;GO:0015031;GO:0030154;GO:0045766;GO:0045786;  
JTID ENSG000000187726:DNAJB13 GO:0006457;GO:0006915;GO:0007283;GO:0031072;GO:0051082;  
JTID ENSG000000170906:NDUFA3 GO:0003954;GO:0005624;GO:0005739;GO:0005747;GO:0006120;GO:0008137;GO:0016020;GO:0016021;GO:0016491;  
JTID ENSG000000104946:TBC1D17 GO:0005096;GO:0005097;GO:0005622;GO:0032313;  
JTID ENSG000000205502:NP\_001007596.1  
JTID ENSG000000117154:IGSF21  
JTID ENSG000000100596:SPTLC2 GO:0004758;GO:0005783;GO:0008415;GO:0009058;GO:0016020;GO:0016021;GO:0016769;GO:0030170;  
JTID ENSG000000134245:WNT2B GO:0004871;GO:0005576;GO:0007223;GO:0007275;GO:0005615;GO:0009653;  
JTID ENSG000000129465:RIPK3 GO:0000166;GO:0003713;GO:0004674;GO:0005524;GO:0006464;GO:0006468;GO:0006915;GO:0007165;GO:0008624;GO:0016740;GO:0004713;GO:0004672;GO:0004704;GO:0005622;GO:0006917;GO:0007249;  
JTID ENSG000000135374:ELF5 GO:0003700;GO:0005634;GO:0006350;GO:0006355;GO:0006366;GO:0007398;GO:0008283;GO:0043565;  
JTID ENSG000000133460:SLC2A11 GO:0005215;GO:0005351;GO:0005355;GO:0008643;GO:0016020;GO:0016021;  
JTID ENSG000000179630:C13orf31  
JTID ENSG000000118689:FOXO3A GO:0001542;GO:0001544;GO:0001547;GO:0001556;GO:0003700;GO:0005624;GO:0005634;GO:0005737;GO:0006350;GO:0006355;GO:0006915;GO:0006917;GO:0006974;GO:0016563;GO:0019901;GO:0042593;GO:0043565;GO:0045648;GO:0045944;  
MIJT hsa-miR-223:NDUFA3:targetscan; hsa-miR-223:RHOB:targetscan;mirbase;pictar; hsa-miR-223:SPTLC2:targetscan; hsa-miR-223:DNAJB13:targetscan; hsa-miR-223:IGSF21:targetscan; hsa-miR-223:RIPK3:targetscan;mirbase; hsa-miR-223:ELF5:targetscan; hsa-miR-223:C13orf31:targetscan; hsa-miR-223:TBC1D17:targetscan;mirbase; hsa-miR-223:FOXO3A:targetscan;mirbase;pictar; hsa-miR-223:SLC2A11:targetscan;

//  
ANNOTATION: 1  
ID SRY:hsa-miR-410;  
TFID SRY;  
MIID ENSG000000199092:hsa-mir-410:hsa-miR-410;  
JTID ENSG000000163510:NP\_065994.1 GO:0003723;GO:0005515;  
JTID ENSG000000177551:NHLH2 GO:0003677;GO:0005634;GO:0006355;GO:0007275;GO:0007417;GO:0007617;GO:0030154;GO:0030528;GO:0042698;  
JTID ENSG000000145332:KLHL8 GO:0005515;  
JTID ENSG000000151881:C5orf28 GO:0016020;GO:0016021;  
JTID ENSG000000095209:TMEM38B GO:0016021;  
JTID ENSG000000104205:SGK3 GO:0000166;GO:0004674;GO:0005515;GO:0005524;GO:0006468;GO:0006950;GO:0007154;GO:0016740;GO:0035091;GO:0006916;GO:0016023;  
JTID ENSG000000116473:RAP1A GO:0000166;GO:0003924;GO:0005515;GO:0005525;GO:0005622;GO:0007049;GO:0007165;GO:0007264;GO:0016020;GO:0045786;  
JTID ENSG000000106080:FKBP14 GO:0003755;GO:0005509;GO:0005783;GO:0006457;GO:0016853;  
JTID ENSG000000176208:ATAD5 GO:0000166;GO:0005524;GO:0017111;  
JTID ENSG000000110395:CBL GO:0003700;GO:0004842;GO:0004871;GO:0005509;GO:0005515;GO:0005634;GO:0005886;GO:0007166;GO:0007173;GO:0008270;GO:0016567;GO:0016874;GO:0048260;  
JTID ENSG000000126883:NUP214 GO:0005634;GO:0005215;GO:0005515;GO:0005643;GO:0006611;GO:0006810;GO:0015288;GO:0016021;GO:0019867;  
JTID ENSG000000174123:TLR10 GO:0004888;GO:0005515;GO:0006954;GO:0016020;GO:0016021;GO:0045087;  
JTID ENSG000000196071:OR2L13 GO:0004872;GO:0004984;GO:0007165;GO:0007186;GO:0007608;GO:0016020;GO:0016021;GO:0050896;  
JTID ENSG000000204217:BMPR2 GO:0000074;GO:0000166;GO:0000287;GO:0001501;GO:0001707;GO:0004672;GO:0004674;GO:0004872;GO:0005024;GO:0005515;GO:0005524;GO:0005887;GO:0006468;GO:0007178;GO:0009952;GO:0009986;GO:0016020;GO:0016740;GO:0030145;GO:0042127;  
JTID ENSG000000198889:WDR40B  
JTID ENSG000000135205:NP\_065930.2  
MIJT hsa-miR-410:BMPR2:targetscan; hsa-miR-410:NHLH2:targetscan; hsa-miR-410:NUP214:mirbase; hsa-miR-410:KLHL8:targetscan; hsa-miR-410:C5orf28:targetscan; hsa-miR-410:CBL:targetscan; hsa-miR-410:OR2L13:targetscan;mirbase; hsa-miR-410:WDR40B:targetscan; hsa-miR-410:ATAD5:targetscan; hsa-miR-410:TMEM38B:targetscan; hsa-miR-410:RAP1A:targetscan; hsa-miR-410:FKBP14:targetscan;

//  
ANNOTATION: 1  
ID CAC-BP:hsa-miR-34b;  
TFID CAC-BP;

```
MIID ENSG00000207811:hsa-mir-34b:hsa-miR-34b;
JTID ENSG00000177410:Q5QHF1_HUMAN
TFID ENSG00000007541:PIGQ GO:0005975;GO:0006506;GO:0016020;GO:0016021;GO:0016757;GO:0017176;
JTID ENSG00000136247:ZDHHC4 GO:0004129;GO:0006118;GO:0008270;GO:0008415;GO:0016020;GO:0016021;GO:0016740;GO:0046872;
JTID ENSG00000189159:HN1 GO:0005634;
MIJT hsa-miR-34b:PIGQ:targetscan:mirbase; hsa-miR-34b:Q5QHF1_HUMAN:mirbase; hsa-miR-34b:ZDHHC4:targetscan; hsa-miR-34b:HN1:targetscan:mirbase;

//
ANNOTATION: 1
ID NKX6-2:hsa-miR-125b;
TFID NKX6-2;
MIID ENSG00000207863:hsa-mir-125b-2:hsa-miR-125b;
JTID ENSG00000124721:DNAH8 GO:0000166;GO:0003777;GO:0005524;GO:0005874;GO:0007018;GO:0016887;GO:0030286;
JTID ENSG00000157119:KBTBD5 GO:0005515;
MIJT hsa-miR-125b:KBTBD5:targetscan:mirbase; hsa-miR-125b:DNAH8:targetscan:mirbase;

//
ANNOTATION: 1
ID BRCA1:hsa-miR-10a;
TFID BRCA1;
MIID ENSG00000207777:hsa-mir-10a:hsa-miR-10a;
JTID ENSG00000147536:GINS4 GO:0005515;GO:0005634;GO:0005737;
JTID ENSG00000114982:NP_060461.3 GO:0004339;GO:0005634;
MIJT hsa-miR-10a:GINS4:mirbase;

//
ANNOTATION: 1
ID CACD:hsa-miR-205;
TFID CACD;
MIID ENSG00000207623:hsa-mir-205:hsa-miR-205;
JTID ENSG00000156675:RAB11FIP1 GO:0005515;GO:0015031;
JTID ENSG00000085871:MGST2 GO:0004364;GO:0005624;GO:0005783;GO:0005792;GO:0007165;GO:0007267;GO:0008047;GO:0016020;GO:0016021;GO:0016740;GO:0019370;
MIJT hsa-miR-205:RAB11FIP1:targetscan:pictar; hsa-miR-205:MGST2:targetscan:mirbase;

//
ANNOTATION: 1
ID CDP:hsa-miR-16;
TFID CDP;
MIID ENSG00000198987:hsa-mir-16-2:hsa-miR-16;
JTID ENSG00000149201:CCDC81 GO:0003677;
JTID ENSG00000119403:PHF19 GO:0003676;GO:0005515;GO:0008270;
MIJT hsa-miR-16:PHF19:targetscan; hsa-miR-16:CCDC81:targetscan:mirbase;

//
ANNOTATION: 1
ID RORALPHA2:hsa-miR-1;
TFID RORALPHA2;
MIID ENSG00000199017:hsa-mir-1-1:hsa-miR-1;
JTID ENSG00000173612:GPRC6A GO:0004872;GO:0007186;GO:0008067;GO:0016020;GO:0016021;GO:0004930;GO:0009986;GO:0019722;
JTID ENSG00000102452:NALCN GO:0005216;GO:0006811;GO:0016020;GO:0016021;
MIJT hsa-miR-1:GPRC6A:targetscan:mirbase;

//
ANNOTATION: 1
ID HNF-1:hsa-miR-381;
TFID HNF-1;
MIID ENSG00000199020:hsa-mir-381:hsa-miR-381;
JTID ENSG00000169193:CCDC126 GO:0016740;
JTID ENSG00000159140:SON GO:0003677;GO:0003725;GO:0005515;GO:0005622;GO:0005634;GO:0006916;
JTID ENSG00000145495:MARCH6 GO:0005515;GO:0005783;GO:0006512;GO:0008270;GO:0016020;GO:0016021;GO:0016874;GO:0046872;
JTID ENSG00000169026:MFSB7 GO:0006810;GO:0016020;GO:0016021;
JTID ENSG00000188933:NM_145809.1
JTID ENSG00000102158:TAG2_HUMAN GO:0004579;GO:0005783;GO:0008250;GO:0016020;GO:0016021;GO:0018279;
JTID ENSG00000054803:CBLN4 GO:0045202;
JTID ENSG00000143641:GALNT2 GO:0004653;GO:0005509;GO:0005529;GO:0006493;GO:0016020;GO:0016021;GO:0016757;GO:0030145;
JTID ENSG00000116833:NR5A2 GO:0003705;GO:0003707;GO:0004872;GO:0005515;GO:0005634;GO:0006355;GO:0006366;GO:0008270;GO:0008289;GO:0009653;GO:0009790;GO:0042592;GO:0043565;GO:0046872;GO:0003677;GO:0003700;GO:0006350;GO:0008206;GO:0042632;
JTID ENSG00000131003:RBM2FP GO:0000166;GO:0003676;
JTID ENSG00000204304:PBX2 GO:0003700;GO:0005515;GO:0005634;GO:0006355;GO:0007387;GO:0007388;GO:0043565;
JTID ENSG00000139793:MBNL2 GO:0003723;GO:0005634;GO:0008270;GO:0046872;GO:0003676;
JTID ENSG00000141720:PIP5K2B GO:0005057;GO:0005737;GO:0005783;GO:0007166;GO:0016020;GO:0016301;GO:0016308;GO:0016740;GO:0046488;GO:0005515;
JTID ENSG00000185674:LYG2_HUMAN GO:0003796;GO:0009253;GO:0016998;
MIJT hsa-miR-381:PIP5K2B:targetscan; hsa-miR-381:GALNT2:targetscan; hsa-miR-381:CCDC126:targetscan; hsa-miR-381:MBNL2:targetscan; hsa-miR-381:CBLN4:targetscan; hsa-miR-381:NR5A2:targetscan:mirbase; hsa-miR-381:MARCH6:targetscan; hsa-miR-381:PBX2:targetscan;

//
ANNOTATION: 1
ID TCF-4:hsa-miR-296;
TFID TCF-4;
MIID ENSG00000207950:hsa-mir-296:hsa-miR-296;
JTID ENSG00000140511:HAPLN3 GO:0005540;GO:0005578;GO:0007155;
MIJT hsa-miR-296:HAPLN3:targetscan:mirbase;

//
ANNOTATION: 1
ID PITX2:hsa-miR-140;
TFID PITX2;
MIID ENSG00000208017:hsa-mir-140:hsa-miR-140;
JTID ENSG00000107165:TYRP1 GO:0008152;GO:0016491;GO:0004497;GO:0005507;GO:0005515;GO:0006583;GO:0016020;GO:0016021;GO:0042470;GO:0042803;GO:0046872;GO:0046982;GO:0006582;GO:0030318;GO:0032438;GO:0043438;GO:0043473;
MIJT hsa-miR-140:TYRP1:targetscan;

//
ANNOTATION: 1
ID CdxA:hsa-let-7d;
TFID CdxA;
MIID ENSG00000199133:hsa-let-7d:hsa-let-7d;
JTID ENSG00000072501:SMC1A GO:0000075;GO:0000166;GO:0000776;GO:0000794;GO:0003682;GO:0003777;GO:0005515;GO:0005524;GO:0005634;GO:0005694;GO:0006281;GO:0007049;GO:0007052;GO:0007059;GO:0007064;GO:0007126;GO:0008280;GO:0009314;GO:0016887;GO:0042770;GO:0046982;GO:0051276;GO:0051301;GO:0006259;
JTID ENSG00000173209:AHS2
JTID ENSG00000125741:OPA3 GO:0005739;GO:0007601;GO:0050896;
JTID ENSG00000144031:ANKRD53
```

```
JTID ENSG00000181322:TXNDC6 GO:0004550;GO:0005524;GO:0006183;GO:0006228;GO:0006241;GO:0045454;
MIJT hsa-let-7d:ANKRD53:targetscan; hsa-let-7d:TXNDC6:targetscan; hsa-let-7d:SMC1A:targetscan; hsa-let-7d:OPA3:targetscan;

//
ANNOTATION: 1
ID HMG1Y:hsa-miR-152;
TFID HMG1Y;
MIID ENSG00000207947:hsa-mir-152:hsa-miR-152;
JTID ENSG00000170989:EDG1 GO:0001525;GO:0001619;GO:0004872;GO:0005886;GO:0005887;GO:0007165;GO:0007186;GO:0007193;GO:0007420;GO:0008284;GO:0030155;
JTID ENSG00000196972:Q86V52_HUMAN
JTID ENSG00000142700:DMRTA2 GO:0003700;GO:0005634;GO:0006355;GO:0007548;
JTID ENSG00000164933:SLC25A32 GO:0005215;GO:0005488;GO:0005739;GO:0005743;GO:0006810;GO:0008517;GO:0015884;GO:0016020;GO:0016021;
JTID ENSG00000113578:FGF1 GO:0000074;GO:0001525;GO:0001759;GO:0005515;GO:0005576;GO:0005578;GO:0005615;GO:0007165;GO:0007267;GO:0007275;GO:0008083;GO:0008201;GO:0008283;GO:0009653;GO:0030154;GO:0030324;
JTID ENSG00000161638:ITGA5 GO:0001726;GO:0004872;GO:0005178;GO:0005509;GO:0005515;GO:0007044;GO:0007155;GO:0007229;GO:0007613;GO:0008305;GO:0016020;GO:0016021;GO:0019717;
JTID ENSG00000106511:MEOX2 GO:0001757;GO:0003700;GO:0005634;GO:0006355;GO:0007275;GO:0008015;GO:0043565;
JTID ENSG00000116016:EPAS1 GO:0001525;GO:0001666;GO:0003705;GO:0003713;GO:0004871;GO:0005515;GO:0005634;GO:0006355;GO:0006366;GO:0007165;GO:0007275;GO:0030154;GO:0035035;
JTID ENSG00000189180:ZNF33A GO:0003700;GO:0005622;GO:0005634;GO:0006355;GO:0006356;GO:0008270;GO:0016564;GO:0046872;GO:0003676;
JTID ENSG00000151694:ADAM17 GO:0004222;GO:0005515;GO:0005737;GO:0005887;GO:0006508;GO:0007219;GO:0007267;GO:0008270;GO:0016020;GO:0046872;
JTID ENSG00000069956:MAPK6 GO:0000166;GO:0004674;GO:0004707;GO:0005515;GO:0005524;GO:0005737;GO:0006468;GO:0007049;GO:0007165;GO:0016740;
JTID ENSG00000180537:RNF182 GO:0005515;GO:0008270;GO:0016020;GO:0016021;GO:0046872;
MIJT hsa-miR-152:EPAS1:targetscan:pictar; hsa-miR-152:SLC25A32:targetscan; hsa-miR-152:ITGA5:targetscan:pictar; hsa-miR-152:ADAM17:targetscan; hsa-miR-152:MEOX2:targetscan:mirbase:pictar; hsa-miR-152:RNF182:targetscan; hsa-miR-152:EDG1:targetscan:mirbase:pictar; hsa-miR-152:FGF1:targetscan;

//
ANNOTATION: 1
ID ELK-1:hsa-miR-181d;
TFID ELK-1;
MIID ENSG00000207585:hsa-mir-181d:hsa-miR-181d;
JTID ENSG00000110906:KCTD10 GO:0005249;GO:0005515;GO:0005634;GO:0006813;GO:0008076;GO:0016020;
JTID ENSG00000115956:PLEK GO:0005509;GO:0007242;
JTID ENSG00000126432:PRDX5 GO:0005739;GO:0005777;GO:0006954;GO:0006979;GO:0016491;GO:001920;GO:0016209;
JTID ENSG00000088832:FKBP1A GO:0003755;GO:0004872;GO:0005515;GO:0006457;GO:0016853;GO:0043123;
JTID ENSG00000073756:PTGS2 GO:0001516;GO:0004601;GO:0004666;GO:0005506;GO:0005634;GO:0005737;GO:0006633;GO:0006928;GO:0008217;GO:0016020;GO:0016491;GO:0016702;GO:0019371;GO:0030216;GO:0042640;GO:0046872;GO:0050727;
JTID ENSG00000105705:SF4 GO:0003723;GO:0005622;GO:0005634;GO:0005681;GO:0006397;GO:0008380;
JTID ENSG00000170100:Q96MU6-2
JTID ENSG00000198929:NOS1AP GO:0005515;GO:0005737;GO:0007269;GO:0030165;GO:0050998;GO:0050999;
JTID ENSG00000074054:CLASP1 GO:0000776;GO:0001578;GO:0005515;GO:0005794;GO:0005813;GO:0005828;GO:0005856;GO:0005881;GO:0007026;GO:0007049;GO:0007067;GO:0007163;GO:0030981;GO:0043515;GO:0051010;GO:0051301;GO:0008017;
MIJT hsa-miR-181d:NOS1AP:targetscan:mirbase; hsa-miR-181d:PTGS2:targetscan; hsa-miR-181d:CLASP1:targetscan; hsa-miR-181d:KCTD10:targetscan; hsa-miR-181d:PLEK:targetscan; hsa-miR-181d:FKBP1A:targetscan:mirbase;

//
ANNOTATION: 1
ID SRY:hsa-miR-369-5p;
TFID SRY;
MIID ENSG00000199025:hsa-mir-369:hsa-miR-369-5p;
JTID ENSG00000008083:JARID2 GO:0000122;GO:0001889;GO:0003677;GO:0005515;GO:0005622;GO:0005634;GO:0006350;GO:0007275;GO:0007417;GO:0008285;GO:0016564;GO:0042127;GO:0045892;GO:0048536;GO:0048538;
JTID ENSG00000120694:HSPH1 GO:0000166;GO:0005524;GO:0005737;GO:0006986;GO:0005515;GO:0051085;
JTID ENSG00000122417:ODF2L
JTID ENSG00000119508:NR4A3 GO:0001707;GO:0003700;GO:0003707;GO:0004887;GO:0005488;GO:0005634;GO:0006350;GO:0006355;GO:0008270;GO:0043565;GO:0046872;
JTID ENSG00000196616:ADH1C GO:0004024;GO:0005737;GO:0006066;GO:0006069;GO:0008270;GO:0009055;GO:0016491;GO:0046872;
JTID ENSG00000163421:PROK2 GO:0000187;GO:0001525;GO:0001664;GO:0005576;GO:0006916;GO:0006935;GO:0006954;GO:0007204;GO:0007218;GO:0007283;GO:0008283;GO:0019233;GO:0045987;GO:0048511;
JTID ENSG00000166938:DIS3L GO:0003723;GO:0004540;
JTID ENSG00000187969:ZCCHC13 GO:0003676;GO:0008270;GO:0046872;
MIJT hsa-miR-369-5p:NR4A3:targetscan; hsa-miR-369-5p:HSPH1:targetscan:mirbase; hsa-miR-369-5p:DIS3L:targetscan:mirbase; hsa-miR-369-5p:ZCCHC13:mirbase; hsa-miR-369-5p:ODF2L:mirbase; hsa-miR-369-5p:JARID2:mirbase;

//
ANNOTATION: 1
ID ATF-1:hsa-miR-214;
TFID ATF-1;
MIID ENSG00000207949:hsa-mir-214:hsa-miR-214;
JTID ENSG00000149201:CCDC81 GO:0003677;
MIJT hsa-miR-214:CCDC81:targetscan:mirbase;

//
ANNOTATION: 1
ID MYOD:hsa-miR-205;
TFID MYOD;
MIID ENSG00000207623:hsa-mir-205:hsa-miR-205;
JTID ENSG00000006634:DBF4 GO:0000074;GO:0000082;GO:0003676;GO:0005515;GO:0005622;GO:0005634;GO:0006260;GO:0007049;GO:0008047;GO:0008270;GO:0046872;
JTID ENSG00000189325:NP_001010903.2
JTID ENSG00000109906:ZBTB16
GO:0001823;GO:0003677;GO:0005622;GO:0005634;GO:0006350;GO:0006915;GO:0007417;GO:0008270;GO:0016566;GO:0016605;GO:0016607;GO:0017053;GO:0030099;GO:0042803;GO:0045638;GO:0045892;GO:0046872;GO:0001501;GO:0008285;GO:0009880;GO:0009952;GO:0030097;GO:0035110;GO:0035116;GO:0035136;GO:0043065;GO:0048133;
MIJT hsa-miR-205:ZBTB16:targetscan:mirbase; hsa-miR-205:DBF4:targetscan:mirbase;

//
ANNOTATION: 1
ID MYC:hsa-miR-202;
TFID MYC;
MIID ENSG00000199089:hsa-mir-202:hsa-miR-202;
JTID ENSG00000119048:UBE2B GO:0000785;GO:0004842;GO:0005515;GO:0005634;GO:0006301;GO:0006464;GO:0006511;GO:0006512;GO:0007288;GO:0016020;GO:0016874;
JTID ENSG00000133121:STARD13 GO:0005096;GO:0005622;GO:0007049;GO:0007165;GO:0045786;
JTID ENSG00000176422:SPRYD4
JTID ENSG00000198535:NP_997205.1
JTID ENSG00000171970:ZNF57 GO:0003677;GO:0005622;GO:0005634;GO:0006350;GO:0006355;GO:0008270;GO:0046872;
JTID ENSG00000138646:HERC5 GO:0000079;GO:0004842;GO:0005622;GO:0006464;GO:0006512;GO:0016874;
JTID ENSG00000186827:TNFRSF4 GO:0004872;GO:0005031;GO:0005887;GO:0006955;GO:0016020;GO:0005515;GO:0005886;GO:0006954;GO:0006968;GO:0009897;GO:0042981;GO:0045859;GO:0050710;
JTID ENSG00000172840:PDP2_HUMAN GO:0000287;GO:0004741;GO:0005739;GO:0006470;GO:0008287;GO:0015071;GO:0016787;GO:0030145;
JTID ENSG00000187164:KIAA1598
JTID ENSG00000104660:LEPROTL1 GO:0016020;GO:0016021;
JTID ENSG00000143727:ACP1 GO:0003993;GO:0004726;GO:0005625;GO:0005737;GO:0006470;GO:0016787;GO:0042802;GO:0004725;
JTID ENSG00000110583:NAT11 GO:0008080;GO:0008152;GO:0008415;GO:0016740;
MIJT hsa-miR-202:ZNF57:targetscan:mirbase; hsa-miR-202:STARD13:targetscan; hsa-miR-202:SPRYD4:targetscan; hsa-miR-202:NAT11:targetscan; hsa-miR-202:LEPROTL1:targetscan; hsa-miR-202:TNFRSF4:targetscan:mirbase;

//
ANNOTATION: 1
ID SOX-5:hsa-miR-189;
TFID SOX-5;
MIID ENSG00000207617:hsa-mir-24-1:hsa-miR-189;
JTID ENSG00000188549:NP_997263.1
JTID ENSG00000172410:INSL5 GO:0005179;GO:0005576;
```

JTID ENSG00000147892:ADAMTSL1 GO:0005578;GO:0008237;GO:0008270;  
JTID ENSG00000175893:ZDHC21 GO:0008270;GO:0008415;GO:0016020;GO:0016021;GO:0016740;GO:0046872;  
JTID ENSG00000144596:GRIP2 GO:0005515;GO:0016020;  
JTID ENSG00000122786:CALD1 GO:0003779;GO:0005516;GO:0005523;GO:0005856;GO:0006928;GO:0006936;GO:0017022;GO:0005624;GO:0030478;  
MIJT hsa-miR-189:INSL5:targetscan:mirbase; hsa-miR-189:ADAMTSL1:mirbase; hsa-miR-189:CALD1:targetscan:mirbase;

//  
ANNOTATION: 1  
ID SOX-5:hsa-miR-9;  
TFID SOX-5;  
MIID ENSG00000207933:hsa-mir-9-1:hsa-miR-9;  
JTID ENSG00000187994:NP\_940847.1  
JTID ENSG00000118894:FAM86A  
JTID ENSG00000143190:POU2F1 GO:0003700;GO:0005515;GO:0005634;GO:0006355;GO:0016481;GO:0043565;GO:0045944;  
JTID ENSG00000137965:IFI44 GO:0005737;GO:0009615;  
JTID ENSG00000136872:ALDOB GO:0004332;GO:0005737;GO:0006000;GO:0006096;GO:0008152;GO:0016829;  
JTID ENSG00000178538:CA8 GO:0004089;GO:0005515;GO:0005737;GO:0006730;GO:0008270;GO:0046872;GO:0048015;  
JTID ENSG00000073584:SMARCE1 GO:0000228;GO:0003677;GO:0003682;GO:0003713;GO:0005515;GO:0005634;GO:0006337;GO:0006357;GO:0008080;GO:0016568;GO:0017053;GO:0045892;GO:0005198;GO:0005882;  
JTID ENSG00000109061:MYH1 GO:0000146;GO:0000166;GO:0003779;GO:0005516;GO:0005524;GO:0005863;GO:0006941;GO:0016459;GO:0003774;  
JTID ENSG00000086991:NOX4 GO:0000166;GO:0000902;GO:0005506;GO:0005634;GO:0005783;GO:0006118;GO:0006800;GO:0006954;GO:0007569;GO:0008285;GO:0009055;GO:0016020;GO:0016021;GO:0016174;GO:0019826;GO:0020037;GO:0042554;GO:0050660;  
JTID ENSG00000157554:ERG GO:0003700;GO:0004871;GO:0005515;GO:0005634;GO:0006350;GO:0006355;GO:0006468;GO:0007165;GO:0007275;GO:0008283;GO:0043565;  
JTID ENSG00000092531:SNAP23 GO:0005486;GO:0005515;GO:0005886;GO:0006892;GO:0006903;GO:0006944;GO:0015031;GO:0019717;GO:0045202;GO:0005792;  
JTID ENSG00000174683:C8orf78  
JTID ENSG00000117335:CD46 GO:0004872;GO:0005886;GO:0005887;GO:0006958;GO:0007338;GO:0045087;  
JTID ENSG00000109113:RAB34 GO:0000166;GO:0005525;GO:0007264;GO:0015031;GO:0001726;GO:0003924;GO:0005769;GO:0006897;GO:0016020;GO:0019001;  
JTID ENSG00000169439:SDC2 GO:0005887;GO:0008092;GO:0016020;GO:0016021;  
JTID ENSG00000206193:Q5HYA3\_HUMAN  
JTID ENSG00000082516:GEMIN5 GO:0000387;GO:0005515;GO:0005634;GO:0005654;GO:0005681;GO:0005737;GO:0006461;GO:0008380;GO:0016604;GO:0017069;  
JTID ENSG00000041982:TNC GO:0005102;GO:0005578;GO:0007155;GO:0007165;GO:0005576;GO:0005604;GO:0007528;  
MIJT hsa-miR-9:SMARCE1:targetscan:picstar; hsa-miR-9:FAM86A:mirbase; hsa-miR-9:SDC2:targetscan:picstar; hsa-miR-9:TNC:targetscan; hsa-miR-9:ERG:targetscan:picstar; hsa-miR-9:RAB34:targetscan:mirbase:picstar; hsa-miR-9:MYH1:targetscan:mirbase:picstar; hsa-miR-9:CA8:targetscan; hsa-miR-9:CD46:targetscan; hsa-miR-9:SNAP23:targetscan:picstar; hsa-miR-9:ALDOB:targetscan; hsa-miR-9:IFI44:targetscan:mirbase; hsa-miR-9:NOX4:targetscan:mirbase:picstar;

//  
ANNOTATION: 1  
ID NKX6-2:hsa-miR-31;  
TFID NKX6-2;  
MIID ENSG00000199177:hsa-mir-31:hsa-miR-31;  
JTID ENSG00000153814:JAZF1 GO:0000122;GO:0003676;GO:0003714;GO:0005622;GO:0005634;GO:0006350;GO:0006355;GO:0008270;GO:0017053;GO:0046872;  
MIJT hsa-miR-31:JAZF1:targetscan:picstar;

//  
ANNOTATION: 1  
ID ETS:hsa-miR-23a;  
TFID ETS;  
MIID ENSG00000207980:hsa-mir-23a:hsa-miR-23a;  
JTID ENSG00000113615:SEC24A GO:0005515;GO:0006886;GO:0006888;GO:0008270;GO:0030127;GO:0005783;  
JTID ENSG00000188938:FAM120AOS  
JTID ENSG00000204026:Q6ZSD2\_HUMAN  
MIJT hsa-miR-23a:FAM120AOS:targetscan:mirbase; hsa-miR-23a:SEC24A:targetscan:mirbase;

//  
ANNOTATION: 1  
ID AFP1:hsa-let-7a;  
TFID AFP1;  
MIID ENSG00000199165:hsa-let-7a-1:hsa-let-7a;  
JTID ENSG00000197948:FCHSD1  
JTID ENSG00000204538:PSORS1C2  
JTID ENSG00000179165:PXT1  
MIJT hsa-let-7a:FCHSD1:targetscan; hsa-let-7a:PSORS1C2:targetscan:mirbase:picstar; hsa-let-7a:PXT1:targetscan;

//  
ANNOTATION: 1  
ID CHOP-C/EBPALPHA:hsa-miR-130a;  
TFID CHOP-C/EBPALPHA;  
MIID ENSG00000208009:hsa-mir-130a:hsa-miR-130a;  
JTID ENSG00000175264:CHST1 GO:0005976;GO:0006954;GO:0016020;GO:0016021;GO:0016740;GO:0031228;GO:0042339;GO:0045130;  
MIJT hsa-miR-130a:CHST1:targetscan:mirbase:picstar;

//  
ANNOTATION: 1  
ID PEA3:hsa-miR-206;  
TFID PEA3;  
MIID ENSG00000207604:hsa-mir-206:hsa-miR-206;  
JTID ENSG00000168000:HNRPUL2 GO:0005783;GO:0016020;GO:0016021;GO:0030176;GO:0003676;GO:0005515;GO:0005634;  
MIJT hsa-miR-206:HNRPUL2:mirbase:picstar;

//  
ANNOTATION: 1  
ID SOX-5:hsa-miR-205;  
TFID SOX-5;  
MIID ENSG00000207623:hsa-mir-205:hsa-miR-205;  
JTID ENSG00000196935:SRGAP1 GO:0005096;GO:0005622;GO:0007165;  
JTID ENSG00000182518:FAM104B  
JTID ENSG00000112079:STK38 GO:0000166;GO:0000287;GO:0004674;GO:0005515;GO:0005524;GO:0005634;GO:0006464;GO:0006468;GO:0007243;GO:0016740;  
JTID ENSG00000165879:FRAT1 GO:0016055;  
JTID ENSG00000114982:NP\_060461.3 GO:0004339;GO:0005634;  
JTID ENSG00000064989:CALCRL GO:0001635;GO:0004872;GO:0004930;GO:0004948;GO:0005887;GO:0007165;GO:0007187;GO:0007189;GO:0007507;GO:0008284;GO:0016020;GO:0048661;  
JTID ENSG00000006634:DBF4 GO:0000074;GO:0000082;GO:0003676;GO:0005515;GO:0005622;GO:0005634;GO:0006260;GO:0007049;GO:0008047;GO:0008270;GO:0046872;  
MIJT hsa-miR-205:FAM104B:targetscan:mirbase; hsa-miR-205:DBF4:targetscan:mirbase; hsa-miR-205:STK38:targetscan; hsa-miR-205:FRAT1:targetscan:mirbase; hsa-miR-205:CALCRL:targetscan:picstar; hsa-miR-205:SRGAP1:targetscan:mirbase;

//  
ANNOTATION: 1  
ID AML1:hsa-miR-202;  
TFID AML1;  
MIID ENSG00000199089:hsa-mir-202:hsa-miR-202;  
JTID ENSG00000135297:MT01 GO:0005739;GO:0006118;GO:0008033;GO:0016491;GO:0050660;  
JTID ENSG00000056345:ITGB3 GO:0004872;GO:0005178;GO:0005488;GO:0005515;GO:0007044;GO:0007155;GO:0007160;GO:0007229;GO:0007275;GO:0007596;GO:0008305;GO:0009897;GO:0016020;GO:0030334;GO:0042802;  
JTID ENSG00000143473:KCNH1 GO:0000155;GO:0000160;GO:0005251;GO:0005516;GO:0005624;GO:0006355;GO:0006811;GO:0006813;GO:0007520;GO:0008076;GO:0016020;GO:0016021;GO:0030955;  
JTID ENSG00000187164:KIAA1598



```
JTID ENSG00000127329:PTPRB GO:0004725;GO:0005001;GO:0005624;GO:0005887;GO:0006470;GO:0016020;GO:0016787;
JTID ENSG00000151572:TMEM16D
JTID ENSG00000165288:BRWD3
JTID ENSG00000143355:LHX9 GO:0003700;GO:0005634;GO:0006355;GO:0008270;GO:0043565;GO:0046872;GO:0003677;GO:0005515;
JTID ENSG00000069869:NEDD4 GO:0004842;GO:0005622;GO:0006464;GO:0006512;GO:0016874;GO:0000151;GO:0005515;GO:0005829;
JTID ENSG00000137941:TTL7 GO:0004835;GO:0006464;GO:0016874;
JTID ENSG00000148541:FAM13C1
MIJT hsa-miR-30a-5p:E2F7:targetscan:picTar; hsa-miR-30a-5p:SLC36A1:targetscan:picTar; hsa-miR-30a-5p:TMEM16D:targetscan:mirbase:picTar; hsa-miR-30a-5p:NEDD4:targetscan:picTar; hsa-miR-30a-5p:TM4SF20:targetscan:mirbase; hsa-miR-30a-5p:CCDC97:targetscan:picTar; hsa-miR-30a-5p:STOX2:targetscan; hsa-miR-30a-5p:LHX9:targetscan; hsa-miR-30a-5p:PTPRB:mirbase; hsa-miR-30a-5p:CCDC117:targetscan:picTar; hsa-miR-30a-5p:UBE2V2:targetscan:picTar; hsa-miR-30a-5p:ESCO2:targetscan; hsa-miR-30a-5p:FAM13C1:targetscan; hsa-miR-30a-5p:ZNF419:targetscan; hsa-miR-30a-5p:IDH1:targetscan:picTar; hsa-miR-30a-5p:TTL7:targetscan:picTar; hsa-miR-30a-5p:MAP4K4:targetscan; hsa-miR-30a-5p:C16orf73:targetscan:mirbase;

//
ANNOTATION: 1
ID IY:hsa-miR-16;
TFID IY;
MIID ENSG00000198987:hsa-mir-16-2:hsa-miR-16;
JTID ENSG00000204388:HSPA1B GO:0000166;GO:0005524;GO:0005634;GO:0005737;GO:0005739;GO:0005783;GO:0006402;GO:0006457;GO:0006916;GO:0006986;GO:0051082;
JTID ENSG00000134343:TMEM16C GO:0016020;GO:0016021;
JTID ENSG00000069275:NUCKS1 GO:0005634;
JTID ENSG00000205808:PPAPDC2 GO:0016020;GO:0016021;GO:0016787;
MIJT hsa-miR-16:PPAPDC2:targetscan:mirbase; hsa-miR-16:TMEM16C:targetscan:picTar; hsa-miR-16:HSPA1B:targetscan:mirbase;

//
ANNOTATION: 1
ID SOX-5:hsa-miR-302d;
TFID SOX-5;
MIID ENSG00000199145:hsa-mir-302d:hsa-miR-302d;
JTID ENSG00000204542:C6orf15
JTID ENSG00000168000:HNRPUL2 GO:0005783;GO:0016020;GO:0016021;GO:0030176;GO:0003676;GO:0005515;GO:0005634;
JTID ENSG00000180471:C9orf31
JTID ENSG00000086102:NFX1 GO:0003676;GO:0003700;GO:0005515;GO:0005634;GO:0006355;GO:0008270;GO:0000122;GO:0006350;GO:0006366;GO:0006512;GO:0006954;GO:0016874;GO:0046872;
JTID ENSG00000163486:SRGAP2 GO:0005096;GO:0005622;GO:0007165;GO:0005515;GO:0005743;
JTID ENSG00000204319:C4A GO:0004866;GO:0005576;GO:0006954;GO:0006956;GO:0006958;GO:0045087;
JTID ENSG00000204342:C4B GO:0004866;GO:0005576;GO:0006954;GO:0006956;
JTID ENSG00000143199:NP_060887.1 GO:0004016;GO:0005829;GO:0006171;GO:0007242;GO:0009190;GO:0016849;GO:0005625;GO:0005737;
JTID ENSG00000101247:C20orf7
JTID ENSG00000177337:NP_001034885.1
JTID ENSG00000188800:TMCO2 GO:0016020;GO:0016021;
JTID ENSG00000150457:LATS2 GO:0000082;GO:0000166;GO:0000287;GO:0000922;GO:0004674;GO:0005524;GO:0005634;GO:0006468;GO:0007049;GO:0007067;GO:0007243;GO:0009755;GO:0016740;GO:0045736;GO:0051301;
JTID ENSG00000132514:CLEC10A GO:0005529;GO:0005886;GO:0006897;GO:0006955;GO:0016021;
JTID ENSG00000149305:HTR3B GO:0004993;GO:0005216;GO:0005230;GO:0005232;GO:0005887;GO:0006811;GO:0007210;GO:0007268;GO:0030594;GO:0045211;
JTID ENSG00000168078:PBK GO:0000166;GO:0004674;GO:0005515;GO:0005524;GO:0006468;GO:0007067;GO:0016740;
JTID ENSG00000163281:GNPDA2 GO:0004342;GO:0005975;GO:0006044;GO:0016853;
MIJT hsa-miR-302d:SRGAP2:targetscan; hsa-miR-302d:HNRPUL2:targetscan:mirbase; hsa-miR-302d:LATS2:targetscan:picTar; hsa-miR-302d:PBK:targetscan:mirbase; hsa-miR-302d:C6orf15:targetscan:mirbase; hsa-miR-302d:NFX1:targetscan:mirbase; hsa-miR-302d:GNPDA2:targetscan; hsa-miR-302d:HTR3B:targetscan:mirbase;

//
ANNOTATION: 1
ID MEIS1:hsa-miR-199a;
TFID MEIS1;
MIID ENSG00000208024:hsa-mir-199a-2:hsa-miR-199a;
JTID ENSG00000170430:MGMT GO:0003677;GO:0003908;GO:0005634;GO:0006266;GO:0006281;GO:0006307;GO:0008168;GO:0008270;GO:0009008;GO:0016740;GO:0043281;GO:0046872;
JTID ENSG00000196724:ZNF418 GO:0003677;GO:0005622;GO:0005634;GO:0006350;GO:0006355;GO:0008270;GO:0046872;
JTID ENSG00000129116:PALLD GO:0005515;GO:0005634;GO:0005884;GO:0007010;GO:0051371;GO:0005021;GO:0005524;GO:0006468;
JTID ENSG00000163599:CTLA4 GO:0005887;GO:0006955;GO:0016020;GO:0009897;
JTID ENSG00000163263:C1orf189
JTID ENSG00000206198:NR_001535.1
JTID ENSG00000173227:SYT12 GO:0005215;GO:0006810;GO:0008021;GO:0016020;GO:0016021;GO:0045202;
MIJT hsa-miR-199a:ZNF418:targetscan; hsa-miR-199a:SYT12:targetscan:mirbase;

//
ANNOTATION: 1
ID CHX10:hsa-miR-103;
TFID CHX10;
MIID ENSG00000199024:hsa-mir-103-2:hsa-miR-103;
JTID ENSG00000120265:PCMT1 GO:0004719;GO:0005783;GO:0006464;GO:0006479;GO:0008168;GO:0016740;GO:0042802;
JTID ENSG00000149182:ZNF289 GO:0005096;GO:0008270;GO:0043087;GO:0046872;
JTID ENSG00000119403:PHF19 GO:0003676;GO:0005515;GO:0008270;
JTID ENSG00000144285:SCN1A GO:0001518;GO:0005248;GO:0006811;GO:0006814;GO:0016020;GO:0016021;GO:0031402;GO:0005624;
MIJT hsa-miR-103:PHF19:targetscan; hsa-miR-103:SCN1A:targetscan; hsa-miR-103:PCMT1:mirbase:picTar; hsa-miR-103:ZNF289:picTar;

//
ANNOTATION: 1
ID AREB6:hsa-miR-192;
TFID AREB6;
MIID ENSG00000207648:hsa-mir-192:hsa-miR-192;
JTID ENSG00000181437:XR_017773.1
JTID ENSG00000109079:TNFAIP1 GO:0005249;GO:0005515;GO:0006813;GO:0006955;GO:0008076;GO:0009790;GO:0016020;
JTID ENSG00000188389:PDCD1 GO:0004871;GO:0006915;GO:0006959;GO:0007275;GO:0016020;GO:0016021;GO:0005515;GO:0009897;
JTID ENSG00000066322:ELOVL1 GO:0005515;GO:0005783;GO:0006633;GO:0016020;GO:0016021;
JTID ENSG00000163075:NP_001025167.1
MIJT hsa-miR-192:NP_001025167.1:mirbase; hsa-miR-192:ELOVL1:mirbase;

//
ANNOTATION: 1
ID CDX-2:hsa-miR-140;
TFID CDX-2;
MIID ENSG00000208017:hsa-mir-140:hsa-miR-140;
JTID ENSG00000136052:SLC41A2 GO:0006812;GO:0008324;
JTID ENSG00000118898:PPL GO:0005200;GO:0005515;GO:0005856;GO:0031424;
MIJT hsa-miR-140:PPL:targetscan; hsa-miR-140:SLC41A2:targetscan:mirbase:picTar;

//
ANNOTATION: 1
ID MEIS1:hsa-miR-30a-3p;
TFID MEIS1;
MIID ENSG00000207827:hsa-mir-30a:hsa-miR-30a-3p;
JTID ENSG00000168658:NP_659429.4
JTID ENSG00000162951:LRRTM1 GO:0005515;GO:0016020;GO:0016021;
JTID ENSG00000185532:PRKG1 GO:0004674;GO:0004692;GO:0005524;GO:0005952;GO:0006468;GO:0008603;GO:0016301;GO:0000166;GO:0006940;GO:0007165;GO:0016740;GO:0030036;GO:0030553;GO:0001764;GO:0004672;GO:0005515;GO:0016358;GO:0030900;
```

JTID ENSG00000116984:MTR GO:0004156;GO:0005515;GO:0005622;GO:0007417;GO:0008168;GO:0008270;GO:0008652;GO:0008705;GO:0008898;GO:0009086;GO:0009396;GO:0016740;GO:0031419;GO:0046872;GO:0050897;  
JTID ENSG00000153560:UBP1 GO:0003700;GO:0003714;GO:0005634;GO:0006350;GO:0006357;GO:0016481;GO:0016566;GO:0019079;GO:0001525;  
JTID ENSG00000166292:TMEM100 GO:0016020;GO:0016021;  
JTID ENSG00000197852:C1orf183  
JTID ENSG00000189007:DEADC1 GO:0008270;GO:0016787;  
JTID ENSG00000197728:RS26\_HUMAN GO:0003723;GO:0003735;GO:0005515;GO:0005622;GO:0005840;GO:0005843;GO:0006412;  
JTID ENSG00000174171:Q8TCB4\_HUMAN  
JTID ENSG00000158639:PAGE5  
JTID ENSG00000187761:PAGE2B  
JTID ENSG0000017797:RALBP1 GO:0005096;GO:0005515;GO:0005622;GO:0006810;GO:0006935;GO:0007165;GO:0007264;GO:0016020;GO:0016887;GO:0017160;GO:0030675;GO:0043087;GO:0043089;GO:0043492;GO:0048365;  
MIJT hsa-miR-30a-3p:DEADC1:targetscan:mirbase; hsa-miR-30a-3p:PAGE2B:targetscan:mirbase; hsa-miR-30a-3p:LRR1:targetscan:pictar; hsa-miR-30a-3p:TMEM100:targetscan; hsa-miR-30a-3p:RALBP1:targetscan; hsa-miR-30a-3p:NP\_659429.4:mirbase; hsa-miR-30a-3p:PAGE5:targetscan:mirbase; hsa-miR-30a-3p:PRKG1:targetscan;

//  
ANNOTATION: 1  
ID SRY:hsa-miR-487b;  
TFID SRY;  
MIID ENSG00000207754:hsa-mir-487b:hsa-miR-487b;  
JTID ENSG00000071051:NCK2 GO:0005515;GO:0005737;GO:0007172;GO:0007176;GO:0007242;GO:0008093;GO:0008285;GO:0030159;GO:0030838;GO:0042102;GO:0042110;  
JTID ENSG00000159147:DONSON GO:0005634;GO:0007275;  
JTID ENSG00000114988:LMAN2L GO:0005529;GO:0005537;GO:0005783;GO:0005789;GO:0005794;GO:0006457;GO:0006888;GO:0015031;GO:0016020;GO:0016021;GO:0030134;  
JTID ENSG00000152669:CCNU GO:0000074;GO:0004844;GO:0005634;GO:0005654;GO:0006284;GO:0008152;GO:0016798;  
JTID ENSG00000139370:SLC15A4 GO:0005215;GO:0006810;GO:0006857;GO:0016020;GO:0016021;  
JTID ENSG00000168564:CDKN2AIP GO:0003725;GO:0005622;GO:0005634;  
JTID ENSG00000108255:CRYBA1 GO:0005212;GO:0007601;GO:0042803;  
MIJT hsa-miR-487b:CRYBA1:targetscan:mirbase; hsa-miR-487b:CCNU:targetscan:mirbase; hsa-miR-487b:DONSON:mirbase; hsa-miR-487b:CDKN2AIP:targetscan:mirbase;

//  
ANNOTATION: 1  
ID v-Myb:hsa-miR-26b;  
TFID v-Myb;  
MIID ENSG00000199121:hsa-mir-26b:hsa-miR-26b;  
JTID ENSG00000107938:C10orf137  
JTID ENSG00000168772:CXKC4 GO:0003677;GO:0005737;GO:0008270;GO:0016023;GO:0016055;GO:0030165;GO:0030178;  
JTID ENSG00000169299:PGM2 GO:000287;GO:0004614;GO:0005975;GO:0006006;GO:0016853;  
JTID ENSG00000119203:CPSF3 GO:0003723;GO:0005634;GO:0005654;GO:0006378;GO:0006379;GO:0016787;  
MIJT hsa-miR-26b:PGM2:targetscan:mirbase; hsa-miR-26b:CPSF3:targetscan:mirbase; hsa-miR-26b:C10orf137:targetscan:pictar;

//  
ANNOTATION: 1  
ID IRF1:hsa-miR-126\*;  
TFID IRF1;  
MIID ENSG00000199161:hsa-mir-126:hsa-miR-126\*;  
JTID ENSG00000121879:PIK3CA GO:0004428;GO:0005942;GO:0006006;GO:0006468;GO:0006916;GO:0007165;GO:0016303;GO:0016740;GO:0030027;GO:0040014;GO:0043066;GO:0043491;GO:0043560;GO:0046934;  
JTID ENSG00000177822:XR\_017723.1  
JTID ENSG00000186017:ZNF566 GO:0003677;GO:0005622;GO:0005634;GO:0006350;GO:0006355;GO:0008270;GO:0046872;  
JTID ENSG00000148634:HERC4 GO:0004842;GO:0005622;GO:0006464;GO:0006512;GO:0016874;  
JTID ENSG00000188732:C7orf46  
JTID ENSG00000185015:CAL3 GO:0004089;GO:0006730;GO:0008270;GO:0016829;GO:0046872;  
JTID ENSG00000141646:SMAD4 GO:0001658;GO:0001822;GO:0003677;GO:0003700;GO:0003712;GO:0005515;GO:0005622;GO:0005634;GO:0005667;GO:0005737;GO:0006350;GO:0006357;GO:0007183;GO:0008285;GO:0009952;GO:0010003;GO:0016563;GO:0045893;GO:0045944;GO:0051098;  
JTID ENSG00000007038:PRSS21 GO:0004252;GO:0005624;GO:0005737;GO:0005886;GO:0006508;GO:0048503;  
JTID ENSG00000144840:RABL3 GO:0005524;GO:0005525;GO:0005622;GO:0006355;GO:0007264;GO:0008134;  
JTID ENSG00000074054:CLASP1 GO:0000776;GO:0001578;GO:0005794;GO:0005813;GO:0005828;GO:0005856;GO:0005881;GO:0007026;GO:0007049;GO:0007067;GO:0007163;GO:0030981;GO:0043515;GO:0051010;GO:0051301;GO:0008017;  
MIJT hsa-miR-126\*:C7orf46:mirbase; hsa-miR-126\*:CLASP1:pictar;

//  
ANNOTATION: 1  
ID HOXA7:hsa-miR-202;  
TFID HOXA7;  
MIID ENSG00000199089:hsa-mir-202:hsa-miR-202;  
JTID ENSG00000124104:SNX21 GO:0005515;GO:0007154;GO:0015031;GO:0035091;  
JTID ENSG00000112619:PRPH2 GO:0005515;GO:0007155;GO:0007601;GO:0016020;GO:0016021;GO:0050896;  
JTID ENSG00000164825:DEFB1 GO:0005576;GO:0006935;GO:0007186;GO:0042742;GO:0045087;  
MIJT hsa-miR-202:DEFB1:targetscan;

//  
ANNOTATION: 1  
ID SRF:hsa-miR-106b;  
TFID SRF;  
MIID ENSG00000208036:hsa-mir-106b:hsa-miR-106b;  
JTID ENSG00000197646:PDCD1LG2 GO:0004872;GO:0006955;GO:0016020;GO:0016021;GO:0005515;GO:0042102;GO:0042130;  
JTID ENSG00000011007:TCEB3 GO:0003711;GO:0005515;GO:0005634;GO:0006357;GO:0016021;  
JTID ENSG00000071967:CYBRD1 GO:0000293;GO:0006118;GO:0016021;  
JTID ENSG00000153234:NR4A2 GO:0003677;GO:0003700;GO:0003707;GO:0005515;GO:0005634;GO:0006350;GO:0006355;GO:0007165;GO:0007399;GO:0008270;GO:0030182;GO:0042053;GO:0043565;GO:0045944;GO:0046872;  
JTID ENSG0000013619:CXorf6  
JTID ENSG00000176605:C14orf177  
JTID ENSG00000100987:VSX1 GO:0003700;GO:0005634;GO:0006355;GO:0006366;GO:0007275;GO:0007601;GO:0043565;GO:0050896;  
JTID ENSG00000198815:FOXJ3 GO:0003700;GO:0005634;GO:0006350;GO:0006355;GO:0043565;  
JTID ENSG00000072121:ZFYVE26 GO:0008270;  
JTID ENSG00000104517:EDD1 GO:0004842;GO:0005622;GO:0006464;GO:0006512;GO:0005515;GO:0005625;GO:0005634;GO:0006511;GO:0006974;GO:0008270;GO:0008283;GO:0016874;GO:0046872;GO:0050847;  
JTID ENSG00000137414:FAM8A1 GO:0016020;GO:0016021;  
MIJT hsa-miR-106b:PDCD1LG2:targetscan; hsa-miR-106b:NR4A2:targetscan:pictar; hsa-miR-106b:TCEB3:targetscan; hsa-miR-106b:CXorf6:targetscan; hsa-miR-106b:CYBRD1:targetscan; hsa-miR-106b:FOXJ3:targetscan; hsa-miR-106b:VSX1:targetscan:mirbase:pictar; hsa-miR-106b:ZFYVE26:targetscan; hsa-miR-106b:EDD1:targetscan:pictar; hsa-miR-106b:FAM8A1:targetscan; hsa-miR-106b:C14orf177:targetscan;

//  
ANNOTATION: 1  
ID IRF1:hsa-miR-126;  
TFID IRF1;  
MIID ENSG00000199161:hsa-mir-126:hsa-miR-126;  
JTID ENSG00000146648:EGFR  
GO:000166;GO:0001503;GO:0003690;GO:0004710;GO:0004888;GO:0005006;GO:0005524;GO:0005615;GO:0005634;GO:0005737;GO:0005768;GO:0005886;GO:0006468;GO:0006950;GO:0007049;GO:0007166;GO:0007173;GO:0007202;GO:0008283;GO:0016021;GO:0016337;GO:0016740;GO:0030122;GO:0030235;GO:0030335;GO:0042327;GO:00428  
2;GO:0043006;GO:0043406;GO:0045429;GO:0045786;GO:0046982;GO:0050679;GO:0050730;GO:0050999;GO:0051015;GO:0051205;GO:0005515;GO:0005622;GO:0007165;GO:0008284;GO:0016301;GO:0016323;GO:0030139;GO:0046777;  
JTID ENSG00000172889:EGFL7 GO:0001525;GO:0001568;GO:0001570;GO:0005509;GO:0005576;GO:0007275;GO:0030334;  
JTID ENSG00000113384:GOLPH3 GO:0005794;GO:0016020;  
JTID ENSG00000164039:BDH2 GO:0003858;GO:0005737;GO:0006635;GO:0008152;GO:0016491;GO:0051287;  
JTID ENSG00000180011:ZADH2 GO:0008270;GO:0016491;  
MIJT hsa-miR-126:GOLPH3:targetscan:mirbase:pictar; hsa-miR-126:EGFL7:targetscan:mirbase; hsa-miR-126:ZADH2:targetscan;

//  
ANNOTATION: 1

```
ID HOXA7:hsa-miR-96;
TFID HOXA7;
MIID ENSG00000199158:hsa-mir-96:hsa-miR-96;
JTID ENSG00000113070:HBEFG GO:0004872;GO:0005154;GO:0005615;GO:0005887;GO:0007165;GO:0007173;GO:0007517;GO:0008016;GO:0008083;GO:0008201;GO:0009986;GO:0016020;GO:0035313;GO:0048661;GO:0051549;
JTID ENSG00000072042:RDH11 GO:0004745;GO:0005622;GO:0005783;GO:0008152;GO:0016020;GO:0016021;GO:0016491;GO:0042572;GO:0045494;
JTID ENSG00000135454:B4GALNT1 GO:0016740;GO:0001574;GO:0003947;GO:0005624;GO:0005975;GO:0006687;GO:0016020;GO:0016021;GO:0016758;GO:0019915;GO:0030173;GO:0030259;
MIJT hsa-miR-96:HBEFG:targetscan:mirbase:picstar; hsa-miR-96:B4GALNT1:targetscan; hsa-miR-96:RDH11:targetscan;

//
ANNOTATION: 1
ID ER:hsa-miR-30e-3p;
TFID ER;
MIID ENSG00000198974:hsa-mir-30e:hsa-miR-30e-3p;
JTID ENSG00000196933:RPS26L1 GO:0003735;GO:0005622;GO:0005840;GO:0006412;
JTID ENSG00000101574:METTL4 GO:0003676;GO:0005634;GO:0006139;GO:0008168;GO:0016740;GO:0032259;
JTID ENSG00000181472:ZBTB2 GO:0003677;GO:0005515;GO:0005622;GO:0005634;GO:0006350;GO:0006355;GO:0008270;GO:0046872;
JTID ENSG00000203784:LLELP1
JTID ENSG00000166401:SERPINB8 GO:0004867;GO:0005515;GO:0005829;
JTID ENSG00000204581:Q6ZU44 HUMAN
JTID ENSG00000166292:TMEM100 GO:0016020;GO:0016021;
MIJT hsa-miR-30e-3p:TMEM100:targetscan; hsa-miR-30e-3p:METTL4:targetscan:mirbase; hsa-miR-30e-3p:SERPINB8:targetscan; hsa-miR-30e-3p:LLELP1:targetscan:mirbase; hsa-miR-30e-3p:ZBTB2:targetscan:mirbase;

//
ANNOTATION: 1
ID SOX-5:hsa-miR-138;
TFID SOX-5;
MIID ENSG00000207649:hsa-mir-138-2:hsa-miR-138;
JTID ENSG00000187840:EIF4EBP1 GO:0005515;GO:0008190;GO:0008286;GO:0045947;
JTID ENSG00000164684:ZNF704 GO:0003676;GO:0005622;GO:0008270;GO:0046872;
JTID ENSG00000177182:NP_775790.1 GO:0005215;GO:0005622;GO:0006810;
JTID ENSG00000170523:KRT83 GO:0005198;GO:0005882;GO:0008544;
MIJT hsa-miR-138:KRT83:targetscan:mirbase; hsa-miR-138:ZNF704:targetscan:mirbase; hsa-miR-138:EIF4EBP1:targetscan:mirbase:picstar; hsa-miR-138:NP_775790.1:picstar;

//
ANNOTATION: 1
ID IRF1:hsa-miR-29a;
TFID IRF1;
MIID ENSG00000198981:hsa-mir-29a:hsa-miR-29a;
JTID ENSG00000147065:MSN GO:0001931;GO:0005102;GO:0005200;GO:0005737;GO:0005856;GO:0005886;GO:0006928;GO:0008092;GO:0016323;GO:0016324;
JTID ENSG00000150779:TMM8B GO:0005515;GO:0005739;GO:0005744;GO:0006457;GO:0007605;GO:0008270;GO:0015031;GO:0016020;GO:0042719;GO:0045039;GO:0046872;
MIJT hsa-miR-29a:TMM8B:targetscan:mirbase;

//
ANNOTATION: 1
ID SRF:hsa-miR-93;
TFID SRF;
MIID ENSG00000207757:hsa-mir-93:hsa-miR-93;
JTID ENSG00000197646:PDCD1LG2 GO:0004872;GO:0006955;GO:0016020;GO:0016021;GO:0005515;GO:0042102;GO:0042130;
JTID ENSG00000071967:CYBRD1 GO:0000293;GO:0006118;GO:0016021;
JTID ENSG00000153234:NR4A2 GO:0003677;GO:0003700;GO:0003707;GO:0005515;GO:0005634;GO:0006350;GO:0006355;GO:0007165;GO:0007399;GO:0008270;GO:0030182;GO:0042053;GO:0043565;GO:0045944;GO:0046872;
JTID ENSG00000176605:C14orf177
JTID ENSG00000100987:VSX1 GO:0003700;GO:0005634;GO:0006355;GO:0006366;GO:0007275;GO:0007601;GO:0043565;GO:0050896;
JTID ENSG00000104517:EDD1 GO:0004842;GO:0005622;GO:0006464;GO:0006512;GO:0005515;GO:0005625;GO:0005634;GO:0006511;GO:0006974;GO:0008270;GO:0008283;GO:0016874;GO:0046872;GO:0050847;
MIJT hsa-miR-93:PDCD1LG2:targetscan; hsa-miR-93:NR4A2:targetscan:picstar; hsa-miR-93:VSX1:targetscan:picstar; hsa-miR-93:EDD1:picstar; hsa-miR-93:C14orf177:targetscan:mirbase; hsa-miR-93:CYBRD1:targetscan;

//
ANNOTATION: 1
ID FAC1:hsa-miR-34c;
TFID FAC1;
MIID ENSG00000207562:hsa-mir-34c:hsa-miR-34c;
JTID ENSG00000186190:C20orf185 GO:0005515;GO:0005549;GO:0005737;GO:0008289;GO:0045087;
JTID ENSG00000009694:ODZ1 GO:0005576;GO:0006955;GO:0007399;GO:0008201;GO:0008285;GO:0016020;GO:0016021;
MIJT hsa-miR-34c:ODZ1:targetscan:picstar;

//
ANNOTATION: 1
ID CDX-2:hsa-miR-29a;
TFID CDX-2;
MIID ENSG00000198981:hsa-mir-29a:hsa-miR-29a;
JTID ENSG00000050030:KIAA2022 GO:0000166;GO:0003676;GO:0003887;GO:0006139;
JTID ENSG00000105856:HBP1 GO:0003677;GO:0005634;GO:0006350;GO:0006355;GO:0007050;GO:0016055;
MIJT hsa-miR-29a:HBP1:targetscan:mirbase:picstar;

//
ANNOTATION: 1
ID C-REL:hsa-miR-1;
TFID C-REL;
MIID ENSG00000199017:hsa-mir-1-1:hsa-miR-1;
JTID ENSG00000162105:SHANK2 GO:0005515;GO:0007242;GO:0030160;
JTID ENSG0000002834:LASP1 GO:0003779;GO:0005070;GO:0005856;GO:0006811;GO:0008270;GO:0015075;GO:0030864;GO:0030865;GO:0046872;
JTID ENSG00000136297:MMD2 GO:0004872;GO:0016020;GO:0016021;GO:0019835;
JTID ENSG00000107854:TNKS2 GO:0000781;GO:0003950;GO:0005634;GO:0005694;GO:0006471;GO:0016757;GO:0040014;
JTID ENSG00000131269:ABCB7 GO:0000166;GO:0005524;GO:0005739;GO:0005743;GO:0006810;GO:0015232;GO:0016020;GO:0016021;GO:0016887;GO:0042626;
JTID ENSG00000125695:STRAD_HUMAN GO:0000166;GO:0004672;GO:0005515;GO:0005524;GO:0005634;GO:0005737;GO:0006468;GO:0006611;GO:0007049;GO:0016740;GO:0032147;
MIJT hsa-miR-1:LASP1:targetscan:picstar:PUBMED: 15685193; hsa-miR-1:MMD2:targetscan; hsa-miR-1:SHANK2:targetscan; hsa-miR-1:ABCB7:targetscan:mirbase:picstar; hsa-miR-1:TNKS2:targetscan:picstar;

//
ANNOTATION: 1
ID FREAC-4:hsa-miR-199a;
TFID FREAC-4;
MIID ENSG00000207752:hsa-mir-199a-1:hsa-miR-199a;
MIID ENSG00000208024:hsa-mir-199a-2:hsa-miR-199a;
JTID ENSG00000136536:MARCH7 GO:0005515;GO:0006512;GO:0008270;GO:0016874;GO:0046872;
JTID ENSG00000163263:C1orf189
JTID ENSG00000134490:C18orf45
JTID ENSG00000130021:HDHD1A GO:0003824;GO:0008152;
MIJT hsa-miR-199a:MARCH7:targetscan; hsa-miR-199a:HDHD1A:targetscan:mirbase;
```



```
//
ANNOTATION: 1
ID HSF2:hsa-miR-199a;
TFID HSF2;
MIID ENSG00000207752:hsa-mir-199a-1:hsa-miR-199a;
JTID ENSG00000136536:MARCH7 GO:0005515;GO:0006512;GO:0008270;GO:0016874;GO:0046872;
JTID ENSG00000082701:GSK3B
GO:0000166;GO:0002039;GO:0004696;GO:0005524;GO:0005634;GO:0005737;GO:0005977;GO:0006983;GO:0016740;GO:0018105;GO:0030877;GO:0043066;GO:0046827;GO:0051059;GO:0060070;GO:0000320;GO:0004672;GO:0005515;GO:0005829;GO:0006468;GO:0006611;GO:0006916;GO:0006950;GO:0008013;GO:0009887;GO:0016055;GO:004544
4;GO:0050321;
JTID ENSG00000109084:TMEM97 GO:0001558;GO:0016020;GO:0016021;
JTID ENSG00000134490:CL8orf45
JTID ENSG00000154736:ADAMTS5 GO:0004222;GO:0005178;GO:0005578;GO:0006508;GO:0008270;GO:0046872;
MIJT hsa-miR-199a:MARCH7:targetscan; hsa-miR-199a:TMEM97:targetscan; hsa-miR-199a:ADAMTS5:targetscan; hsa-miR-199a:GSK3B:targetscan:picrar;

//
ANNOTATION: 1
ID LEF1:hsa-miR-9*;
TFID LEF1;
MIID ENSG00000207933:hsa-mir-9-1:hsa-miR-9*;
JTID ENSG00000130414:NDUFA10 GO:0003954;GO:0005524;GO:0005739;GO:0005747;GO:0006091;GO:0006120;GO:0006139;GO:0008137;GO:0016491;GO:0016773;
JTID ENSG00000130962:PRRG1 GO:0005509;GO:0005576;GO:0005887;GO:0016020;
JTID ENSG00000113163:COL4A3BP GO:0004674;GO:0005515;GO:0006468;GO:0006955;GO:0016740;GO:0016301;
JTID ENSG00000156395:SORCS3 GO:0007218;GO:0008188;GO:0016020;GO:0016021;GO:0004872;
JTID ENSG00000169607:CKAP2L
JTID ENSG00000187257:RSBN1L
JTID ENSG00000205036:NP_001001682.1
JTID ENSG00000197594:ENPP1 GO:0001503;GO:0003676;GO:0004519;GO:0004528;GO:0004551;GO:0006091;GO:0006796;GO:0007584;GO:0008152;GO:0009117;GO:0016020;GO:0016021;GO:0016787;GO:0046872;GO:0030279;GO:0046849;
JTID ENSG00000110395:CBL GO:0003700;GO:0004842;GO:0004871;GO:0005509;GO:0005515;GO:0005634;GO:0005886;GO:0007166;GO:0007173;GO:0008270;GO:0016567;GO:0016874;GO:0048260;
JTID ENSG00000013619:CXorf6
JTID ENSG00000163607:GTPBP8 GO:0005525;GO:0005622;
JTID ENSG00000132321:IQCA GO:0000166;GO:0005524;
JTID ENSG00000049130:KITLG GO:0005173;GO:0005515;GO:0005886;GO:0007155;GO:0007165;GO:0008083;GO:0008283;GO:0009887;GO:0016021;GO:0030097;GO:0001755;GO:0005615;GO:0008284;GO:0016020;GO:0043066;GO:0043406;GO:0046579;GO:0050731;
JTID ENSG00000102104:RS1 GO:0005515;GO:0005615;GO:0007155;GO:0007275;GO:0007601;GO:0050896;
JTID ENSG00000174442:ZWILCH GO:0000776;
JTID ENSG00000135324:C6orf117
JTID ENSG00000166619:BLCAP GO:0016020;GO:0016021;
JTID ENSG00000206053:HN1L GO:0005634;
MIJT hsa-miR-9*:SORCS3:picrar; hsa-miR-9*:BLCAP:picrar; hsa-miR-9*:IQCA:mirbase; hsa-miR-9*:RSBN1L:mirbase; hsa-miR-9*:NDUFA10:mirbase; hsa-miR-9*:CKAP2L:mirbase:picrar;

//
ANNOTATION: 1
ID NKX6-2:hsa-miR-99a;
TFID NKX6-2;
MIID ENSG00000207638:hsa-mir-99a:hsa-miR-99a;
JTID ENSG00000082213:C5orf22
JTID ENSG00000152689:RASGRP3 GO:0000165;GO:0004871;GO:0005088;GO:0005509;GO:0005515;GO:0005622;GO:0005737;GO:0005887;GO:0007265;GO:0008270;GO:0017016;GO:0019992;GO:0043087;GO:0046582;GO:0051056;
MIJT hsa-miR-99a:RASGRP3:targetscan:mirbase; hsa-miR-99a:C5orf22:targetscan:mirbase;

//
ANNOTATION: 1
ID RREB-1:hsa-miR-506;
TFID RREB-1;
MIID ENSG00000207731:hsa-mir-506:hsa-miR-506;
JTID ENSG00000136877:FPGS GO:0000166;GO:0004326;GO:0005524;GO:0005737;GO:0005739;GO:0005829;GO:0006139;GO:0006730;GO:0009058;GO:0009396;GO:0016874;
JTID ENSG00000065361:ERBB3 GO:0000166;GO:0004714;GO:0004872;GO:0005006;GO:0005515;GO:0005524;GO:0005887;GO:0006468;GO:0007165;GO:0007169;GO:0007422;GO:0007507;GO:0016020;GO:0016324;GO:0016328;GO:0016740;GO:0046982;
JTID ENSG00000109536:FRG1 GO:0005634;GO:0005681;GO:0006364;GO:0006397;GO:0008380;
JTID ENSG00000135773:CAPN9 GO:0004198;GO:0005509;GO:0005622;GO:0006508;GO:0007586;
JTID ENSG00000086062:B4GALT1
GO:0000138;GO:0002064;GO:0002526;GO:0003831;GO:0003945;GO:0004461;GO:0005794;GO:0005886;GO:0005975;GO:0005989;GO:0006012;GO:0006496;GO:0007155;GO:0007339;GO:0007341;GO:0008092;GO:0008285;GO:0008378;GO:0009101;GO:0009312;GO:0009897;GO:0009986;GO:0016021;GO:0016323;GO:0016757;GO:0030057;GO:003011
2;GO:0030145;GO:0030198;GO:0030879;GO:0031526;GO:0045136;GO:0046872;GO:0048754;GO:0050900;GO:0051270;GO:0060046;GO:0060054;GO:0060055;GO:0060058;
MIJT hsa-miR-506:ERBB3:targetscan; hsa-miR-506:CAPN9:targetscan:mirbase; hsa-miR-506:FPGS:targetscan:mirbase; hsa-miR-506:B4GALT1:targetscan; hsa-miR-506:FRG1:targetscan;

//
ANNOTATION: 1
ID IY:hsa-miR-296;
TFID IY;
MIID ENSG00000207950:hsa-mir-296:hsa-miR-296;
JTID ENSG00000063245:EPN1 GO:0005634;GO:0006897;GO:0008289;
JTID ENSG00000140044:NP_569736.1 GO:0000122;GO:0003700;GO:0005634;GO:0006355;GO:0016564;GO:0043565;GO:0046983;
JTID ENSG00000116251:RPL22 GO:0003723;GO:0003735;GO:0005622;GO:0005840;GO:0005842;GO:0006412;GO:0008201;
JTID ENSG00000137491:SLCO2B1 GO:0005215;GO:0006811;GO:0016020;GO:0016021;
JTID ENSG00000159674:SPON2 GO:0005515;GO:0005578;GO:0005615;GO:0006955;GO:0007155;GO:0007275;GO:0007411;
JTID ENSG00000171791:BCL2
GO:0000074;GO:0001836;GO:0002020;GO:0005515;GO:0005634;GO:0005737;GO:0005739;GO:0005741;GO:0005783;GO:0005829;GO:0006915;GO:0006916;GO:0006959;GO:0007565;GO:0008284;GO:0009314;GO:0009636;GO:0010039;GO:0016020;GO:0016021;GO:0031069;GO:0031965;GO:0032848;GO:0035094;GO:0042803;GO:0043066;GO:004347
3;GO:0043496;GO:0043497;GO:0043524;GO:0045069;GO:0046902;GO:0046982;GO:0051402;GO:0051434;GO:0051607;GO:0051881;GO:0051902;
JTID ENSG00000136717:BIN1 GO:0005515;GO:0005634;GO:0005737;GO:0007049;GO:0007275;GO:0008283;GO:0015629;GO:0030100;GO:0030154;GO:0045786;
JTID ENSG00000102225:PCTK1 GO:0000074;GO:0000166;GO:0004674;GO:0005515;GO:0005524;GO:0006468;GO:0016740;
MIJT hsa-miR-296:NP_569736.1:mirbase; hsa-miR-296:PCTK1:targetscan:mirbase; hsa-miR-296:EPN1:targetscan:mirbase; hsa-miR-296:SPON2:targetscan; hsa-miR-296:SLCO2B1:targetscan; hsa-miR-296:BCL2:targetscan; hsa-miR-296:RPL22:targetscan; hsa-miR-296:BIN1:targetscan:mirbase;

//
ANNOTATION: 1
ID ETS:hsa-miR-223;
TFID ETS;
MIID ENSG00000207939:hsa-mir-223:hsa-miR-223;
JTID ENSG00000151148:UBE3B GO:0004842;GO:0005622;GO:0006464;GO:0006512;GO:0016874;
JTID ENSG00000091136:LAMB1 GO:0005201;GO:0005604;GO:0005606;GO:0005607;GO:0007155;GO:0007566;GO:0019899;GO:0030335;GO:0031175;GO:0042476;GO:0043257;GO:0043259;GO:0048471;GO:0050679;
JTID ENSG00000168385:SEPT2 GO:0000166;GO:0000910;GO:0003924;GO:0005515;GO:0005525;GO:0005634;GO:0005737;GO:0005826;GO:0007049;GO:0019717;
JTID ENSG00000170638:TRABD
JTID ENSG00000161572:LYZL6 GO:0003796;GO:0005576;GO:0008152;GO:0016798;GO:0016998;
JTID ENSG00000187726:DNAJB13 GO:0006457;GO:0006915;GO:0007283;GO:0031072;GO:0051082;
JTID ENSG00000123268:ATF1 GO:0003700;GO:0005634;GO:0006350;GO:0006355;GO:0043565;GO:0046983;
JTID ENSG00000198000:NOL8 GO:0000166;GO:0003723;GO:0005515;GO:0005634;GO:0005730;GO:0006260;GO:0030307;
MIJT hsa-miR-223:ATF1:mirbase; hsa-miR-223:SEPT2:targetscan; hsa-miR-223:NOL8:targetscan:mirbase; hsa-miR-223:UBE3B:targetscan; hsa-miR-223:LYZL6:targetscan:mirbase; hsa-miR-223:LAMB1:targetscan:mirbase; hsa-miR-223:DNAJB13:targetscan;

//
ANNOTATION: 1
ID IY:hsa-miR-152;
TFID IY;
MIID ENSG00000207947:hsa-mir-152:hsa-miR-152;
JTID ENSG00000189180:ZNF33A GO:0003700;GO:0005622;GO:0005634;GO:0006350;GO:0006355;GO:0008270;GO:0016564;GO:0046872;GO:0003676;
JTID ENSG00000170989:EDG1 GO:0001525;GO:0001619;GO:0004872;GO:0005886;GO:0005887;GO:0007165;GO:0007186;GO:0007193;GO:0007420;GO:0008284;GO:0030155;
```

```
JTID ENSG00000196972:Q86V52_HUMAN
JTID ENSG00000142700:DMRTA2 GO:0003700;GO:0005634;GO:0006355;GO:0007548;
JTID ENSG00000164933:SLC25A32 GO:0005215;GO:0005488;GO:0005739;GO:0005743;GO:0006810;GO:0008517;GO:0015884;GO:0016020;GO:0016021;
JTID ENSG00000152242:C18orf25
JTID ENSG00000113578:FGF1 GO:0000074;GO:0001525;GO:0001759;GO:0005515;GO:0005576;GO:0005578;GO:0005615;GO:0007165;GO:0007267;GO:0007275;GO:0008083;GO:0008201;GO:0008283;GO:0009653;GO:0030154;GO:0030324;
JTID ENSG00000161638:ITGA5 GO:0001726;GO:0004872;GO:0005178;GO:0005509;GO:0005515;GO:0007044;GO:0007155;GO:0007229;GO:0007613;GO:0008305;GO:0016020;GO:0016021;GO:0019717;
JTID ENSG00000106511:MEOX2 GO:0001757;GO:0003700;GO:0005634;GO:0006355;GO:0007275;GO:0008015;GO:0043565;
JTID ENSG00000116016:EPAS1 GO:0001525;GO:0001666;GO:0003705;GO:0003713;GO:0004871;GO:0005515;GO:0005634;GO:0006355;GO:0006366;GO:0007165;GO:0007275;GO:0030154;GO:0035035;
JTID ENSG00000151694:ADAM17 GO:0004222;GO:0005515;GO:0005737;GO:0005887;GO:0006508;GO:0007219;GO:0007267;GO:0008270;GO:0016020;GO:0046872;
JTID ENSG00000069956:MAPK6 GO:0000166;GO:0004674;GO:0004707;GO:0005515;GO:0005524;GO:0005737;GO:0006468;GO:0007049;GO:0007165;GO:0016740;
JTID ENSG00000180537:RNF182 GO:0005515;GO:0008270;GO:0016020;GO:0016021;GO:0046872;
JTID ENSG00000107282:APBA1 GO:0005515;GO:0006461;GO:0006886;GO:0007155;GO:0007268;GO:0007399;GO:0008021;GO:0008088;
JTID ENSG00000137073:UBAP2
MIJT hsa-miR-152:EPAS1:targetscan:pictar; hsa-miR-152:SLC25A32:targetscan; hsa-miR-152:ITGA5:targetscan:pictar; hsa-miR-152:ADAM17:targetscan; hsa-miR-152:MEOX2:targetscan:mirbase:pictar; hsa-miR-152:RNF182:targetscan; hsa-miR-152:EDG1:targetscan:mirbase:pictar; hsa-miR-152:APBA1:targetscan; hsa-miR-152:UBAP2:targetscan; hsa-miR-152:C18orf25:targetscan:pictar; hsa-miR-152:FGF1:targetscan;

//
ANNOTATION: 1
ID TBP:hsa-miR-1;
TFID TBP;
MIID ENSG00000207694:hsa-mir-1-2:hsa-miR-1;
JTID ENSG00000102452:NALCN GO:0005216;GO:0006811;GO:0016020;GO:0016021;
JTID ENSG00000163673:DCLK3 GO:0000166;GO:0004674;GO:0005524;GO:0005634;GO:0007242;GO:0016740;
JTID ENSG00000204596:RPP21 GO:0004526;GO:0005515;GO:0005634;GO:0008033;GO:0016787;
MIJT hsa-miR-1:RPP21:targetscan:mirbase;

//
ANNOTATION: 1
ID SRF:hsa-miR-125b;
TFID SRF;
MIID ENSG00000207971:hsa-mir-125b-1:hsa-miR-125b;
JTID ENSG00000178229:ZNF543 GO:0003676;GO:0005622;GO:0006355;GO:0008270;
JTID ENSG00000174099:MSRB3 GO:0008113;GO:0000318;GO:0005739;GO:0005783;GO:0008270;GO:0030091;
JTID ENSG00000174498:PUNC GO:0016020;GO:0016021;GO:0050885;
JTID ENSG00000100628:ASB2 GO:0006512;GO:0007242;
JTID ENSG00000133121:STARD13 GO:0005096;GO:0005622;GO:0007049;GO:0007165;GO:0045786;
JTID ENSG00000105146:AURKC GO:0000166;GO:0000910;GO:0004674;GO:0005524;GO:0005634;GO:0005813;GO:0006468;GO:0007049;GO:0016740;
JTID ENSG00000172901:LAEVH HUMAN GO:0004179;GO:0006508;GO:0008237;GO:0008270;GO:0016020;GO:0016021;GO:0046872;
JTID ENSG00000153885:KCTD15 GO:0005249;GO:0005515;GO:0006813;GO:0008076;GO:0016020;
MIJT hsa-miR-125b:ASB2:targetscan:mirbase; hsa-miR-125b:STARD13:targetscan:mirbase:pictar; hsa-miR-125b:AURKC:targetscan; hsa-miR-125b:MSRB3:targetscan; hsa-miR-125b:ZNF543:targetscan; hsa-miR-125b:KCTD15:targetscan;

//
ANNOTATION: 1
ID CACD:hsa-miR-181d;
TFID CACD;
MIID ENSG00000207585:hsa-mir-181d:hsa-miR-181d;
JTID ENSG00000153684:NP_001012455.1
JTID ENSG00000175676:GOLGA8F
JTID ENSG00000183629:GOLGA8G
JTID ENSG00000129244:ATP1B2 GO:0005391;GO:0005515;GO:0005737;GO:0006811;GO:0006813;GO:0006814;GO:0016020;GO:0016021;GO:0030955;GO:0031402;
MIJT hsa-miR-181d:GOLGA8G:targetscan; hsa-miR-181d:ATP1B2:targetscan:mirbase;

//
ANNOTATION: 1
ID HNF-1:hsa-miR-377;
TFID HNF-1;
MIID ENSG00000199015:hsa-mir-377:hsa-miR-377;
JTID ENSG00000183762:KREMEN1 GO:0005624;GO:0007154;GO:0016020;GO:0016021;GO:0016055;
JTID ENSG00000143190:POU2F1 GO:0003700;GO:0005515;GO:0005634;GO:0006355;GO:0016481;GO:0043565;GO:0045944;
JTID ENSG00000105072:C19orf44
JTID ENSG00000181192:DHTKD1 GO:0004591;GO:0006096;GO:0008152;GO:0030976;
JTID ENSG00000159348:CYB5R1 GO:0004128;GO:0006118;GO:0016491;GO:0050660;GO:0051287;
JTID ENSG00000114982:NP_060461.3 GO:0004339;GO:0005634;
JTID ENSG00000137075:RNF38 GO:0005515;GO:0006512;GO:0008270;GO:0046872;
JTID ENSG00000163145:C1QTNF7 GO:0005615;GO:0005737;GO:0006817;GO:0051260;
MIJT hsa-miR-377:RNF38:targetscan:mirbase; hsa-miR-377:CYB5R1:targetscan; hsa-miR-377:C19orf44:targetscan;

//
ANNOTATION: 1
ID FAC1:hsa-miR-34b;
TFID FAC1;
MIID ENSG00000207811:hsa-mir-34b:hsa-miR-34b;
JTID ENSG00000186190:C20orf185 GO:0005515;GO:0005549;GO:0005737;GO:0008289;GO:0045087;
JTID ENSG00000009694:ODZ1 GO:0005576;GO:0006955;GO:0007399;GO:0008201;GO:0008285;GO:0016020;GO:0016021;
MIJT hsa-miR-34b:ODZ1:targetscan:pictar;

//
ANNOTATION: 1
ID HNF-1:hsa-miR-20a;
TFID HNF-1;
MIID ENSG00000199149:hsa-mir-20a:hsa-miR-20a;
JTID ENSG00000145819:ARHGAP26 GO:0005096;GO:0005100;GO:0005622;GO:0007165;GO:0007399;GO:0030036;
JTID ENSG00000151025:GPR158 GO:0004872;GO:0007165;GO:0007186;GO:0008067;GO:0016020;GO:0016021;
JTID ENSG00000132975:GPR12 GO:0001619;GO:0004872;GO:0005887;GO:0006874;GO:0007165;GO:0007186;GO:0016020;
JTID ENSG00000163131:CTSS GO:0004218;GO:0005576;GO:0005764;GO:0006508;GO:0006955;GO:0016020;
JTID ENSG00000183826:BTBD9 GO:0005515;GO:0007155;
JTID ENSG00000177169:ULK1 GO:0000166;GO:0004674;GO:0005515;GO:0005524;GO:0005624;GO:0006468;GO:0007165;GO:0007265;GO:0007409;GO:0016740;GO:0030659;GO:0043005;
JTID ENSG00000054803:CBLN4 GO:0045202;
JTID ENSG00000005469:CROT GO:0005777;GO:0006091;GO:0006629;GO:0006631;GO:0006810;GO:0008415;GO:0008458;GO:0015908;GO:0016740;
MIJT hsa-miR-20a:CROT:targetscan:mirbase; hsa-miR-20a:GPR158:targetscan; hsa-miR-20a:CBLN4:targetscan:pictar; hsa-miR-20a:CTSS:targetscan; hsa-miR-20a:ULK1:targetscan:pictar; hsa-miR-20a:ARHGAP26:targetscan;

//
ANNOTATION: 1
ID ATF-1:hsa-miR-26b;
TFID ATF-1;
MIID ENSG00000199121:hsa-mir-26b:hsa-miR-26b;
JTID ENSG00000135365:PHF21A GO:0000118;GO:0005515;GO:0005634;GO:0006350;GO:0006355;GO:0008270;GO:0016568;GO:0046872;
JTID ENSG00000173027:WBP1 GO:0005515;
JTID ENSG00000143643:TTC13 GO:0005488;
MIJT hsa-miR-26b:WBP1:mirbase; hsa-miR-26b:TTC13:targetscan:mirbase:pictar; hsa-miR-26b:PHF21A:targetscan:pictar;
```

```
//
ANNOTATION: 1
ID SREBP-1:hsa-miR-296;
TFID SREBP-1;
MIID ENSG00000207950:hsa-mir-296:hsa-miR-296;
JTID ENSG00000172354:GNB2 GO:0003924;GO:0004871;GO:0005515;GO:0007165;GO:0007186;
MIJT hsa-miR-296:GNB2:targetscan:mirbase;

//
ANNOTATION: 1
ID SOX-5:hsa-miR-367;
TFID SOX-5;
MIID ENSG00000199169:hsa-mir-367:hsa-miR-367;
JTID ENSG00000138413:IDH1 GO:0000287;GO:0004450;GO:0005737;GO:0005777;GO:0005829;GO:0005975;GO:0006097;GO:0006099;GO:0006102;GO:0006749;GO:0006979;GO:0008152;GO:0016491;GO:0016616;GO:0030145;
JTID ENSG00000176853:FAM91A1 GO:0019825;
JTID ENSG00000137440:FGFBP1 GO:0005615;GO:0007165;GO:0007267;GO:0008201;GO:0008285;GO:0016020;GO:0019838;
JTID ENSG00000198677:KIAA0372 GO:0005488;
JTID ENSG00000197713:RPE GO:0004750;GO:0005515;GO:0005975;GO:0008152;GO:0016853;GO:0003824;
JTID ENSG00000146666:Q961P2_HUMAN
JTID ENSG00000147124:ZNF41 GO:0003700;GO:0005622;GO:0005634;GO:0006350;GO:0006355;GO:0008270;GO:0046872;
JTID ENSG00000173517:SG269_HUMAN GO:0000166;GO:0004713;GO:0005524;GO:0006468;GO:0016740;
JTID ENSG00000148704:VAX1 GO:0000122;GO:0001764;GO:0003700;GO:0005634;GO:0006355;GO:0007275;GO:0007399;GO:0007406;GO:0007411;GO:0007417;GO:0007420;GO:0030154;GO:0031490;GO:0043010;GO:0043565;
JTID ENSG00000128641:MYO1B GO:0003774;GO:0005524;GO:0016459;GO:0000166;GO:0003779;GO:0005516;
JTID ENSG00000102055:PPP1R2P9 GO:0004864;GO:0006470;GO:0009966;
JTID ENSG00000006634:DBF4 GO:0000074;GO:0000082;GO:0003676;GO:0005515;GO:0005622;GO:0005634;GO:0006260;GO:0007049;GO:0008047;GO:0008270;GO:0046872;
JTID ENSG00000187372:PCDHB13 GO:0005509;GO:0005515;GO:0007155;GO:0007156;GO:0007268;GO:0007416;GO:0016020;GO:0016021;GO:0016339;
JTID ENSG00000197174:O14606_HUMAN
JTID ENSG00000197285:NR_001536.1
JTID ENSG00000091664:SLC17A6 GO:0001504;GO:0005215;GO:0005313;GO:0006810;GO:0008021;GO:0016020;GO:0016021;
JTID ENSG00000136895:GARNL3 GO:0005096;GO:0005622;GO:0015056;GO:0005083;
MIJT hsa-miR-367:MYO1B:targetscan:mirbase:pictar; hsa-miR-367:FAM91A1:targetscan:mirbase; hsa-miR-367:PCDHB13:targetscan:mirbase; hsa-miR-367:VAX1:targetscan; hsa-miR-367:SLC17A6:targetscan:pictar; hsa-miR-367:IDH1:targetscan; hsa-miR-367:DBF4:targetscan:mirbase;

//
ANNOTATION: 1
ID ELF-1:hsa-miR-16;
TFID ELF-1;
MIID ENSG00000198987:hsa-mir-16-2:hsa-miR-16;
JTID ENSG00000122140:MRPS2 GO:0003735;GO:0005622;GO:0005739;GO:0006412;GO:0015935;
JTID ENSG00000167778:SPRYD3 GO:0004713;GO:0004872;GO:0016301;
JTID ENSG00000172725:PTPRCAP GO:0003779;GO:0005515;GO:0005886;GO:0005887;GO:0006952;
JTID ENSG00000163867:ZMYM6 GO:0003677;GO:0005634;GO:0007275;GO:0008270;GO:0046872;
MIJT hsa-miR-16:MRPS2:targetscan:mirbase; hsa-miR-16:SPRYD3:targetscan:pictar;

//
ANNOTATION: 1
ID AHR:hsa-miR-34b;
TFID AHR;
MIID ENSG00000207811:hsa-mir-34b:hsa-miR-34b;
JTID ENSG00000198586:TLK1 GO:0000166;GO:0001672;GO:0004674;GO:0005515;GO:0005524;GO:0005634;GO:0006468;GO:0006886;GO:0006974;GO:0007049;GO:0007242;GO:0016568;GO:0016740;
JTID ENSG00000179909:ZNF154 GO:0003700;GO:0005622;GO:0005634;GO:0006350;GO:0006355;GO:0008270;GO:0046872;
JTID ENSG00000131951:LRRC9 GO:0005515;
MIJT hsa-miR-34b:TLK1:targetscan;

//
ANNOTATION: 1
ID HNF-1:hsa-miR-369-5p;
TFID HNF-1;
MIID ENSG00000199025:hsa-mir-369:hsa-miR-369-5p;
JTID ENSG00000157450:RNF111 GO:0005515;GO:0005634;GO:0006512;GO:0007275;GO:0007389;GO:0008270;GO:0016874;GO:0046872;
JTID ENSG00000189223:Q7Z3M5_HUMAN
JTID ENSG00000162585:Clorf86
JTID ENSG00000167768:KRT1 GO:0001867;GO:0004872;GO:0005200;GO:0005515;GO:0005529;GO:0005856;GO:0005882;GO:0006979;GO:0008544;GO:0016020;GO:0042730;GO:0045765;
JTID ENSG00000164823:OSGIN2 GO:0007126;GO:0007281;
JTID ENSG00000181191:PJA1 GO:0005515;GO:0006512;GO:0008270;GO:0016874;GO:0046872;
JTID ENSG00000175483:O94914_HUMAN
MIJT hsa-miR-369-5p:Clorf86:mirbase:pictar; hsa-miR-369-5p:O94914_HUMAN:mirbase; hsa-miR-369-5p:KRT1:mirbase; hsa-miR-369-5p:Q7Z3M5_HUMAN:mirbase; hsa-miR-369-5p:PJA1:mirbase; hsa-miR-369-5p:RNF111:targetscan:mirbase:pictar; hsa-miR-369-5p:OSGIN2:targetscan:mirbase;

//
ANNOTATION: 1
ID SOX-5:hsa-miR-24;
TFID SOX-5;
MIID ENSG00000207617:hsa-mir-24-1:hsa-miR-24;
JTID ENSG00000160404:TOR2A GO:0000166;GO:0005524;GO:0005783;GO:0017111;GO:0051085;GO:0005179;
JTID ENSG00000110925:FAM130A1 GO:0005634;GO:0006915;
JTID ENSG00000088766:CRLS1 GO:0008654;GO:0016020;GO:0016780;GO:0005739;GO:0016021;GO:0016740;
JTID ENSG00000184923:FAM22A GO:0016020;GO:0016021;
JTID ENSG00000082153:BZW1 GO:0003743;GO:0005737;GO:0006350;GO:0006355;GO:0006446;
JTID ENSG00000140835:CHST4 GO:0001517;GO:0005802;GO:0005975;GO:0006044;GO:0006477;GO:0006790;GO:0006928;GO:0006954;GO:0006955;GO:0007155;GO:0007267;GO:0016020;GO:0016021;GO:0016740;GO:0031228;
JTID ENSG00000196345:ZNF167 GO:0003677;GO:0003700;GO:0005622;GO:0005634;GO:0006350;GO:0006355;GO:0008270;GO:0046872;GO:0003676;
JTID ENSG00000117560:FASLG GO:0004871;GO:0005125;GO:0005164;GO:0005576;GO:0005615;GO:0005887;GO:0006915;GO:0006917;GO:0006955;GO:0007165;GO:0007267;GO:0016020;GO:0043123;GO:0008624;GO:0009897;GO:0043065;GO:0046666;
JTID ENSG00000164684:ZNF704 GO:0003676;GO:0005622;GO:0008270;GO:0046872;
JTID ENSG00000148700:ADD3 GO:0005200;GO:0005516;GO:0005856;GO:0016020;GO:0046872;GO:0005198;
JTID ENSG00000163485:ADORA1 GO:0001584;GO:0001610;GO:0004872;GO:0005887;GO:0006909;GO:0006954;GO:0007165;GO:0007186;GO:0007267;GO:0007399;GO:0008624;GO:0016020;
JTID ENSG00000138641:HERC3 GO:0004842;GO:0005622;GO:0006464;GO:0006512;GO:0016874;
JTID ENSG00000143442:POGZ GO:0003677;GO:0005622;GO:0005634;GO:0007275;GO:0008270;GO:0045449;GO:0046872;
JTID ENSG00000134042:MRO GO:0005634;GO:0005730;
JTID ENSG00000091527:CDV3 GO:0008283;
MIJT hsa-miR-24:FAM130A1:targetscan; hsa-miR-24:ZNF704:targetscan:mirbase; hsa-miR-24:CDV3:targetscan:pictar; hsa-miR-24:CHST4:targetscan; hsa-miR-24:ADD3:targetscan; hsa-miR-24:ADORA1:targetscan; hsa-miR-24:FASLG:targetscan; hsa-miR-24:HERC3:targetscan; hsa-miR-24:TOR2A:targetscan:mirbase; hsa-miR-24:MRO:targetscan:mirbase; hsa-miR-24:BZW1:targetscan; hsa-miR-24:POGZ:targetscan:pictar; hsa-miR-24:FAM22A:mirbase;

//
ANNOTATION: 1
ID HOXA4:hsa-miR-20a;
TFID HOXA4;
MIID ENSG00000199149:hsa-mir-20a:hsa-miR-20a;
JTID ENSG00000175155:YPEL2 GO:0005634;
JTID ENSG00000104517:EDD1 GO:0004842;GO:0005622;GO:0006464;GO:0006512;GO:0005515;GO:0005625;GO:0005634;GO:0006511;GO:0006974;GO:0008270;GO:0008283;GO:0016874;GO:0046872;GO:0050847;
JTID ENSG00000154065:ANKRD29
JTID ENSG00000100629:C14orf145
```

MIJT hsa-miR-20a:C14orf145:targetscan; hsa-miR-20a:ANKRD29:targetscan; hsa-miR-20a:EDD1:targetscan:pictar; hsa-miR-20a:YPEL2:targetscan;

```
//
ANNOTATION: 1
ID SRV:hsa-miR-506;
TFID SRV;
MIID ENSG00000207731:hsa-mir-506:hsa-miR-506;
JTID ENSG00000102239:BR3 GO:0001584;GO:0004872;GO:0004946;GO:0005886;GO:0006006;GO:0006939;GO:0007165;GO:0007186;GO:0007584;GO:0008217;GO:0008343;GO:0016021;
JTID ENSG00000145555:MYO10 GO:0000166;GO:0003774;GO:0003779;GO:0005524;GO:0005856;GO:0007165;GO:0016459;
JTID ENSG00000126952:NXF5 GO:0000166;GO:0003723;GO:0005515;GO:0005634;GO:0005737;GO:0006406;GO:0006810;GO:0007275;
JTID ENSG00000189067:LITAF GO:0003702;GO:0004871;GO:0005515;GO:0006350;GO:0006357;GO:0006915;GO:0043123;
JTID ENSG00000084652:TXLNA GO:0005576;GO:0005737;GO:0006887;GO:0008283;GO:0030372;
JTID ENSG00000153574:RPIA GO:0004751;GO:0005622;GO:0009052;GO:0016853;
JTID ENSG00000136877:PPGS GO:0000166;GO:0004326;GO:0005524;GO:0005737;GO:0005739;GO:0005829;GO:0006139;GO:0006730;GO:0009058;GO:0009396;GO:0016874;
JTID ENSG00000197697:HIST1H2BE GO:0000786;GO:0003677;GO:0005515;GO:0005634;GO:0005694;GO:0006334;GO:0007001;GO:0042742;
JTID ENSG00000114867:EIF4G1 GO:0003743;GO:0003723;GO:0005515;GO:0005737;GO:0006446;GO:0016281;
JTID ENSG00000155530:LRGUK GO:0005515;GO:0016301;
JTID ENSG00000135862:LAMC1 GO:0005201;GO:0005515;GO:0005604;GO:0005606;GO:0006461;GO:0007155;GO:0007492;GO:0016477;GO:0022617;GO:0031581;GO:0050679;
JTID ENSG00000114541:FRMD4B GO:0005488;GO:0005737;GO:0005856;GO:0008092;GO:0016020;
JTID ENSG00000114988:LMAN2L GO:0005529;GO:0005537;GO:0005783;GO:0005789;GO:0005794;GO:0006457;GO:0006888;GO:0015031;GO:0016020;GO:0016021;GO:0030134;
JTID ENSG00000198663:C6orf89 GO:0016020;GO:0016021;
JTID ENSG00000110711:AIP GO:0003712;GO:0003713;GO:0004871;GO:0005515;GO:0005624;GO:0005737;GO:0005829;GO:0006805;GO:0022417;GO:0043681;GO:0051082;
JTID ENSG00000144061:NPHP1 GO:0005198;GO:0005515;GO:0007165;GO:0007588;GO:0007632;GO:0016020;GO:0016337;GO:0030036;
MIJT hsa-miR-506:LMAN2L:targetscan; hsa-miR-506:NPHP1:targetscan; hsa-miR-506:NXF5:targetscan:mirbase; hsa-miR-506:LITAF:targetscan; hsa-miR-506:HIST1H2BE:targetscan; hsa-miR-506:LRGUK:targetscan:mirbase; hsa-miR-506:FRMD4B:mirbase; hsa-miR-506:MYO10:targetscan; hsa-miR-506:PPGS:targetscan:mirbase; hsa-miR-506:C6orf89:targetscan; hsa-miR-506:LAMC1:targetscan; hsa-miR-506:AIP:targetscan; hsa-miR-506:RPIA:targetscan; hsa-miR-506:TXLNA:targetscan;
```

```
//
ANNOTATION: 1
ID ICSBP:hsa-miR-203;
TFID ICSBP;
MIID ENSG00000207568:hsa-mir-203:hsa-miR-203;
JTID ENSG00000197701:ZNF595 GO:0003676;GO:0003677;GO:0005622;GO:0005634;GO:0006350;GO:0006355;GO:0008270;GO:0046872;
MIJT hsa-miR-203:ZNF595:targetscan;
```

```
//
ANNOTATION: 1
ID SRV:hsa-miR-148b;
TFID SRV;
MIID ENSG00000199122:hsa-mir-148b:hsa-miR-148b;
JTID ENSG00000166024:C10orf28
JTID ENSG00000055070:C1orf144
JTID ENSG00000189180:ZNF33A GO:0003700;GO:0005622;GO:0005634;GO:0006350;GO:0006355;GO:0008270;GO:0016564;GO:0046872;GO:0003676;
JTID ENSG00000137642:SORL1 GO:0004888;GO:0005319;GO:0005887;GO:0006629;GO:0006869;GO:0006898;GO:0008202;GO:0008203;GO:0016020;
JTID ENSG00000118707:TGIF2 GO:0003700;GO:0005634;GO:0006355;GO:0043565;
JTID ENSG00000151725:MLF1IP GO:0000775;GO:0005634;GO:0005694;GO:0006350;GO:0006355;
JTID ENSG00000137073:UBAP2
JTID ENSG00000085433:WDR47
JTID ENSG00000101901:CXorf45
JTID ENSG00000115310:RTN4 GO:0005783;GO:0005515;GO:0005635;GO:0016020;GO:0016021;GO:0019987;GO:0030176;GO:0030517;GO:0042981;
JTID ENSG00000135541:AH11
JTID ENSG00000205653:Q6ZUF2_HUMAN
JTID ENSG00000172053:QARS GO:0000166;GO:0004818;GO:0004819;GO:0005515;GO:0005524;GO:0005625;GO:0005737;GO:0006424;GO:0006425;GO:0016874;
JTID ENSG00000204103:MAFB GO:0003677;GO:0003700;GO:0005515;GO:0005634;GO:0005667;GO:0006350;GO:0006357;GO:0007379;GO:0007423;GO:0007585;GO:0008134;GO:0042472;GO:0043565;GO:0045647;GO:0045944;GO:0046983;
JTID ENSG00000173926:MARCH3 GO:0005515;GO:0006512;GO:0006897;GO:0008270;GO:0016020;GO:0016021;GO:0016874;GO:0046872;
MIJT hsa-miR-148b:MAFB:targetscan:mirbase:pictar; hsa-miR-148b:CXorf45:targetscan:mirbase; hsa-miR-148b:AH11:targetscan; hsa-miR-148b:MARCH3:targetscan:mirbase:pictar; hsa-miR-148b:RTN4:targetscan:mirbase; hsa-miR-148b:MLF1IP:targetscan:mirbase; hsa-miR-148b:TGIF2:targetscan:pictar; hsa-miR-148b:UBAP2:targetscan; hsa-miR-148b:QARS:targetscan; hsa-miR-148b:C1orf144:targetscan:pictar; hsa-miR-148b:C10orf28:targetscan; hsa-miR-148b:WDR47:targetscan:mirbase;
```

```
//
ANNOTATION: 1
ID SOX-5:hsa-miR-206;
TFID SOX-5;
MIID ENSG00000207604:hsa-mir-206:hsa-miR-206;
JTID ENSG00000168000:HNRPUL2 GO:0005783;GO:0016020;GO:0016021;GO:0030176;GO:0003676;GO:0005515;GO:0005634;
JTID ENSG00000131269:ABC7 GO:0000166;GO:0005524;GO:0005739;GO:0005743;GO:0006810;GO:0015232;GO:0016020;GO:0016021;GO:0016887;GO:0042626;
JTID ENSG00000125695:STRAD_HUMAN GO:0000166;GO:0004672;GO:0005515;GO:0005524;GO:0005634;GO:0005737;GO:0006468;GO:0006611;GO:0007049;GO:0016740;GO:0032147;
JTID ENSG00000002834:LASP1 GO:0003779;GO:0005070;GO:0005856;GO:0006811;GO:0008270;GO:0015075;GO:0030864;GO:0030865;GO:0046872;
MIJT hsa-miR-206:LASP1:targetscan:pictar; hsa-miR-206:ABC7:targetscan:mirbase:pictar; hsa-miR-206:HNRPUL2:mirbase:pictar;
```

```
//
ANNOTATION: 1
ID SRF:hsa-miR-214;
TFID SRF;
MIID ENSG00000207949:hsa-mir-214:hsa-miR-214;
JTID ENSG00000153823:PID1
JTID ENSG00000186081:KRT5 GO:0005198;GO:0005200;GO:0005515;GO:0005882;GO:0008544;
JTID ENSG00000072163:LIMS2 GO:0008270;GO:0046872;GO:0005634;
JTID ENSG00000171303:KCNK3 GO:0005244;GO:0005267;GO:0005887;GO:0006811;GO:0006813;GO:0007268;GO:0016020;GO:0030955;
MIJT hsa-miR-214:KRT5:targetscan:mirbase:pictar; hsa-miR-214:KCNK3:targetscan; hsa-miR-214:LIMS2:targetscan; hsa-miR-214:PID1:targetscan;
```

```
//
ANNOTATION: 1
ID CAC-BP:hsa-miR-205;
TFID CAC-BP;
MIID ENSG00000207623:hsa-mir-205:hsa-miR-205;
JTID ENSG00000152270:PDE3B GO:0007165;GO:0016020;GO:0016021;GO:0016787;GO:0031018;GO:0042593;GO:0050796;
MIJT hsa-miR-205:PDE3B:targetscan:pictar;
```

```
//
ANNOTATION: 1
ID CdxA:hsa-miR-100;
TFID CdxA;
MIID ENSG00000207994:hsa-mir-100:hsa-miR-100;
JTID ENSG00000177406:Q8N503_HUMAN
JTID ENSG00000105972:C7orf20 GO:0005515;
JTID ENSG0000017283:FZD8 GO:0004872;GO:0004926;GO:0004930;GO:0007186;GO:0007275;GO:0016020;GO:0016021;GO:0016055;GO:0017147;GO:0042813;GO:0005515;
JTID ENSG00000112299:VNN1 GO:0006807;GO:0006928;GO:0016020;GO:0016811;GO:0048503;
MIJT hsa-miR-100:C7orf20:targetscan:mirbase; hsa-miR-100:VNN1:targetscan; hsa-miR-100:FZD8:targetscan:mirbase:pictar;
```

```
//
```

```
ANNOTATION: 1
ID SRY:hsa-miR-155;
TFID SRY;
MIID ENSG00000207795:hsa-mir-155:hsa-miR-155;
JTID ENSG00000008083:JARID2 GO:000122;GO:0001889;GO:0003677;GO:0005515;GO:0005622;GO:0005634;GO:0006350;GO:0007275;GO:0007417;GO:0008285;GO:0016564;GO:0042127;GO:0045892;GO:0048536;GO:0048538;
JTID ENSG00000164300:SERINC5 GO:0006658;GO:0016020;GO:0051347;
JTID ENSG00000105856:HBP1 GO:0003677;GO:0005634;GO:0006350;GO:0006355;GO:0007050;GO:0016055;
JTID ENSG00000164327:NP_689969.2
JTID ENSG00000113597:NP_079217.1
JTID ENSG00000125337:KIF25 GO:0000070;GO:000166;GO:0003777;GO:0005524;GO:0005871;GO:0005874;GO:0006996;GO:0007018;
JTID ENSG00000107165:TYRP1 GO:0008152;GO:0016491;GO:0004497;GO:0005507;GO:0005515;GO:0006583;GO:0016020;GO:0016021;GO:0042470;GO:0042803;GO:0046872;GO:0046982;GO:0006582;GO:0030318;GO:0032438;GO:0043438;GO:0043473;
JTID ENSG00000147100:SLC16A2 GO:0005215;GO:0005624;GO:0005887;GO:0006810;GO:0008028;GO:0015293;GO:0015718;GO:0016020;
JTID ENSG00000179241:LDLRAD3 GO:0004872;
JTID ENSG00000166170:BAG5 GO:0005515;GO:0006457;GO:0006915;
MIJT hsa-miR-155:TYRP1:targetscan; hsa-miR-155:HBP1:targetscan:mirbase:pictar; hsa-miR-155:SLC16A2:targetscan; hsa-miR-155:BAG5:targetscan; hsa-miR-155:KIF25:targetscan; hsa-miR-155:JARID2:targetscan:mirbase:pictar;
```

```
//
ANNOTATION: 1
ID SOX-5:hsa-miR-133b;
TFID SOX-5;
MIID ENSG00000199080:hsa-mir-133b:hsa-miR-133b;
JTID ENSG00000105976:MET GO:0000166;GO:0000187;GO:0004713;GO:0004872;GO:0005008;GO:0005515;GO:0005524;GO:0005624;GO:0005887;GO:0006468;GO:0007166;GO:0007275;GO:0007420;GO:0007517;GO:0009925;GO:0016020;GO:0016740;GO:0030534;GO:0046777;GO:0048012;GO:0051450;
JTID ENSG00000169717:ACTRT2 GO:0005198;GO:0005515;GO:0005856;
JTID ENSG00000143368:SF3B4 GO:0000166;GO:0000398;GO:0003676;GO:0005515;GO:0005634;GO:0005681;GO:0008380;GO:0031202;
JTID ENSG00000180471:C9orf31
JTID ENSG00000122705:CLTA GO:0005509;GO:0005905;GO:0006886;GO:0030125;
JTID ENSG00000006114:APIGBP1 GO:0005509;GO:0005737;GO:0005794;GO:0006886;GO:0006897;GO:0016020;GO:0030121;
JTID ENSG00000163485:ADORA1 GO:0001584;GO:0001610;GO:0004872;GO:0005887;GO:0006909;GO:0006954;GO:0007165;GO:0007186;GO:0007267;GO:0007399;GO:0008624;GO:0016020;
MIJT hsa-miR-133b:CLTA:targetscan:pictar; hsa-miR-133b:APIGBP1:targetscan:mirbase; hsa-miR-133b:ADORA1:targetscan; hsa-miR-133b:ACTRT2:targetscan; hsa-miR-133b:SF3B4:targetscan; hsa-miR-133b:MET:targetscan;
```

```
//
ANNOTATION: 1
ID GABP:hsa-miR-330;
TFID GABP;
MIID ENSG00000199066:hsa-mir-330:hsa-miR-330;
JTID ENSG00000127152:BCL11B GO:0003676;GO:0005622;GO:0005634;GO:0006350;GO:0006355;GO:0008270;GO:0046872;
JTID ENSG00000162642:Clorf52
JTID ENSG00000168411:RFWD3 GO:0005515;GO:0008270;GO:0046872;
JTID ENSG00000107897:ACBD5 GO:0000062;GO:0005488;
JTID ENSG00000131469:RPL27 GO:0003735;GO:0005622;GO:0005840;GO:0006412;
JTID ENSG00000173473:SMARCC1 GO:0000785;GO:0003677;GO:0003682;GO:0003713;GO:0005515;GO:0005634;GO:0005654;GO:0006333;GO:0006338;GO:0006350;GO:0006357;GO:0016514;GO:0045893;
JTID ENSG00000146242:TPBG GO:0005515;GO:0005887;GO:0006928;GO:0007155;GO:0016020;
JTID ENSG00000163961:RNF168 GO:0005515;GO:0008270;GO:0046872;
JTID ENSG00000123297:TSFM GO:0003711;GO:0003746;GO:0005622;GO:0005739;GO:0006414;
MIJT hsa-miR-330:Clorf52:targetscan; hsa-miR-330:RPL27:targetscan; hsa-miR-330:SMARCC1:targetscan; hsa-miR-330:RFWD3:targetscan:pictar; hsa-miR-330:BCL11B:targetscan:pictar; hsa-miR-330:ACBD5:targetscan; hsa-miR-330:RNF168:targetscan;
```

```
//
ANNOTATION: 1
ID SOX-5:hsa-miR-9*;
TFID SOX-5;
MIID ENSG00000207933:hsa-mir-9-1:hsa-miR-9*;
JTID ENSG00000174442:ZWILCH GO:0000776;
JTID ENSG00000186326:RGS9BP GO:0050908;
JTID ENSG00000178401:NP_079178.2 GO:0006457;GO:0016021;GO:0031072;
JTID ENSG00000196482:ESRRG GO:0003700;GO:0003707;GO:0005496;GO:0005516;GO:0005634;GO:0006350;GO:0007275;GO:0008270;GO:0016439;GO:0016563;GO:0043565;GO:0045893;GO:0046872;GO:0050682;
JTID ENSG00000143940:Q6ZMW3_HUMAN GO:0001525;GO:0005634;GO:0005783;GO:0005783;GO:0007399;GO:0042995;GO:0043025;
JTID ENSG000000057019:DCBLD2 GO:0005515;GO:0005887;GO:0007155;GO:0009986;GO:0016020;GO:0030308;GO:0030522;GO:0042060;
JTID ENSG00000126945:HNRPH2 GO:0000166;GO:0003723;GO:0005634;GO:0030530;
JTID ENSG00000197594:ENPP1 GO:0001503;GO:0003676;GO:0004519;GO:0004528;GO:0004551;GO:0006091;GO:0006796;GO:0007584;GO:0008152;GO:0009117;GO:0016020;GO:0016021;GO:0016787;GO:0046872;GO:0030279;GO:0046849;
JTID ENSG00000166104:NP_776166.1
JTID ENSG00000188199:FAM22B
JTID ENSG00000189369:GSPT2 GO:0000082;GO:0000166;GO:0000184;GO:0003746;GO:0003747;GO:0003924;GO:0005515;GO:0005525;GO:0005622;GO:0006412;
JTID ENSG00000114982:NP_060461.3 GO:0004339;GO:0005634;
JTID ENSG00000104765:BNIP3L GO:0005521;GO:0005634;GO:0005635;GO:0005739;GO:0005740;GO:0005783;GO:0006915;GO:0006917;GO:0008634;GO:0016020;GO:0016021;GO:0042803;GO:0043065;GO:0043066;GO:0046982;GO:0051607;
JTID ENSG00000170509:HSD17B13 GO:0008152;GO:0016491;
JTID ENSG00000102104:RS1 GO:0005515;GO:0005615;GO:0007155;GO:0007275;GO:0007601;GO:0050896;
JTID ENSG00000143622:RIT1 GO:0000166;GO:0005516;GO:0005525;GO:0005622;GO:0005886;GO:0007165;GO:0007264;GO:0005515;GO:0016020;
JTID ENSG000000049130:KITLG GO:0005173;GO:0005515;GO:0005886;GO:0007155;GO:0007165;GO:0008083;GO:0008283;GO:0009887;GO:0016021;GO:0030097;GO:0001755;GO:0005615;GO:0008284;GO:0016020;GO:0043066;GO:0043406;GO:0046579;GO:0050731;
JTID ENSG00000182329:Q8IVF9_HUMAN
JTID ENSG00000163281:GNPDA2 GO:0004342;GO:0005975;GO:0006044;GO:0016853;
MIJT hsa-miR-9*:GSPT2:mirbase; hsa-miR-9*:NP_079178.2:mirbase; hsa-miR-9*:HNRPH2:mirbase:pictar; hsa-miR-9*:DCBLD2:pictar; hsa-miR-9*:FAM22B:mirbase; hsa-miR-9*:BNIP3L:pictar;
```

```
//
ANNOTATION: 1
ID TCF-4:hsa-miR-126*;
TFID TCF-4;
MIID ENSG00000199161:hsa-mir-126:hsa-miR-126*;
JTID ENSG00000115355:KIAA1212 GO:0001932;GO:0003779;GO:0005783;GO:0005794;GO:0005829;GO:0005886;GO:0006275;GO:0008017;GO:0016044;GO:0016477;GO:0030027;GO:0030032;GO:0031410;GO:0032148;GO:0032956;GO:0035091;GO:0042127;GO:0042803;GO:0043422;
JTID ENSG00000170458:CD14 GO:0005515;GO:0005886;GO:0006909;GO:0006915;GO:0006954;GO:0006955;GO:0007166;GO:0016019;GO:0019898;GO:0048503;
JTID ENSG00000112062:MAPK14
GO:0000166;GO:0004674;GO:0004707;GO:0004708;GO:0005515;GO:0005524;GO:0005634;GO:0005737;GO:0006468;GO:0006928;GO:0006935;GO:0006950;GO:0007166;GO:0007243;GO:0008339;GO:0016740;GO:0000077;GO:0000922;GO:0001525;GO:0004672;GO:0005623;GO:0006006;GO:0007519;GO:0016301;GO:0019395;GO:0031663;GO:0032429;
GO:0045648;GO:0045944;
JTID ENSG00000110315:RNF141 GO:0003677;GO:0005515;GO:0006355;GO:0008270;GO:0046872;
JTID ENSG000000070190:DAPP1 GO:0004725;GO:0005543;GO:0005942;GO:0006470;GO:0007242;GO:0035014;
JTID ENSG00000100422:CERK GO:0000287;GO:0000299;GO:0001729;GO:0004143;GO:0005509;GO:0006672;GO:0007205;GO:0016740;
JTID ENSG00000163586:FABP1 GO:0003682;GO:0005319;GO:0005737;GO:0006631;GO:0006810;GO:0007267;GO:0008289;GO:0009887;
JTID ENSG00000165862:PNLIPRP2 GO:0004806;GO:0005576;GO:0006641;GO:0006968;GO:0007586;GO:0016042;GO:0016787;
JTID ENSG00000206053:HN1L GO:0005634;
JTID ENSG00000174231:PRPF8 GO:0000398;GO:0005515;GO:0005634;GO:0005681;GO:0005682;GO:0007601;GO:0008380;GO:0031202;GO:0050896;
JTID ENSG00000177822:XR_017723.1
JTID ENSG00000186468:RPS23 GO:0003723;GO:0003735;GO:0005622;GO:0005843;GO:0006412;GO:0045182;
MIJT hsa-miR-126*:PRPF8:mirbase;
```

```
//
ANNOTATION: 1
ID PEA3:hsa-miR-214;
TFID PEA3;
MIID ENSG00000207949:hsa-mir-214:hsa-miR-214;
JTID ENSG00000110328:GALNTL4 GO:0004653;GO:0005509;GO:0005529;GO:0016020;GO:0016021;GO:0016757;GO:0030145;
JTID ENSG00000121848:ZNF364 GO:0005515;GO:0008270;GO:0046872;
JTID ENSG00000198042:RBM13 GO:0005634;
MIJT hsa-miR-214:GALNTL4:targetscan:mirbase; hsa-miR-214:RBM13:targetscan; hsa-miR-214:ZNF364:targetscan;
```

```
//
ANNOTATION: 1
ID HNF-4:hsa-miR-129;
TFID HNF-4;
MIID ENSG00000207705:hsa-mir-129-1:hsa-miR-129;
JTID ENSG00000169509:CRCT1 GO:0005515;
JTID ENSG00000203945:Q5JFQ1_HUMAN
JTID ENSG00000178602:OTOS GO:0007605;
JTID ENSG00000134138:MEIS2 GO:0003700;GO:0005634;GO:0006355;GO:0043565;GO:0000122;GO:0003704;GO:0003714;
JTID ENSG00000146409:C6orf192 GO:0005215;GO:0006810;GO:0016020;GO:0016021;
MIJT hsa-miR-129:OTOS:targetscan:mirbase; hsa-miR-129:MEIS2:targetscan:pictar;

//
ANNOTATION: 1
ID SRY:hsa-miR-32;
TFID SRY;
MIID ENSG00000207698:hsa-mir-32:hsa-miR-32;
JTID ENSG00000198373:WFP2 GO:0000151;GO:0004842;GO:0005515;GO:0005622;GO:0006464;GO:0006512;GO:0016874;GO:0046718;
JTID ENSG00000084093:REST GO:0003677;GO:0003682;GO:0005515;GO:0005622;GO:0005634;GO:0006350;GO:0008270;GO:0016564;GO:0045892;GO:0046872;
JTID ENSG00000112210:RAB23 GO:0000166;GO:0005525;GO:0007165;GO:0007264;GO:0007399;GO:0015031;GO:0016020;GO:0021513;GO:0042733;GO:0045861;
JTID ENSG00000142676:RPL11 GO:0003735;GO:0005515;GO:0005622;GO:0005730;GO:0005840;GO:0006412;GO:0006605;GO:0019843;
JTID ENSG00000081377:CDCL14C GO:0051301;GO:0004722;GO:0004725;GO:0005634;GO:0006470;GO:0008138;GO:0016787;GO:0016791;
JTID ENSG00000139508:SLC46A3
JTID ENSG00000163694:NP_061900.1 GO:0000166;GO:0003676;
JTID ENSG00000162779:Clorf125
JTID ENSG00000173040:EVC2 GO:0016020;GO:0016021;
JTID ENSG00000009413:REV3L GO:0000166;GO:0003677;GO:0003887;GO:0006260;GO:0003894;GO:0005634;GO:0006139;GO:0006261;GO:0006281;GO:0008270;GO:0016035;GO:0016740;GO:0046872;
JTID ENSG00000176853:FAM91A1 GO:0019825;
JTID ENSG00000196387:ZNF140 GO:0003676;GO:0003700;GO:0005622;GO:0005634;GO:0006350;GO:0006355;GO:0008270;GO:0046872;
JTID ENSG00000114988:LMAN2L GO:0005529;GO:0005537;GO:0005783;GO:0005789;GO:0005794;GO:0006457;GO:0006888;GO:0015031;GO:0016020;GO:0016021;GO:0030134;
JTID ENSG00000153253:SCN3A GO:0001518;GO:0005248;GO:0006811;GO:0006814;GO:0016020;GO:0016021;GO:0031402;
JTID ENSG00000165943:MOAP1 GO:0005515;GO:0005737;GO:0006915;GO:0006919;GO:0006921;GO:0030262;GO:0042803;
JTID ENSG00000203931:LOC729078
JTID ENSG00000203932:LOC728660
JTID ENSG00000159348:CYB5R1 GO:0004128;GO:0006118;GO:0016491;GO:0050660;GO:0051287;
JTID ENSG00000143198:MGST3 GO:0004364;GO:0004601;GO:0005624;GO:0005783;GO:0005792;GO:0006629;GO:0007165;GO:0016020;GO:0016021;GO:0016740;
JTID ENSG00000143458:NP_653219.1 GO:0042803;
MIJT hsa-miR-32:FAM91A1:targetscan:mirbase; hsa-miR-32:NP_061900.1:pictar; hsa-miR-32:SCN3A:targetscan:pictar; hsa-miR-32:REV3L:targetscan:mirbase:pictar; hsa-miR-32:MOAP1:targetscan:mirbase:pictar; hsa-miR-32:WFP2:targetscan:pictar; hsa-miR-32:RPL11:mirbase; hsa-miR-32:CYB5R1:targetscan; hsa-miR-32:Clorf125:targetscan:mirbase; hsa-miR-32:RAB23:targetscan:mirbase:pictar; hsa-miR-32:ZNF140:targetscan;

//
ANNOTATION: 1
ID NF-AT:hsa-miR-129;
TFID NF-AT;
MIID ENSG00000199077:hsa-mir-129-2:hsa-miR-129;
JTID ENSG00000163781:TOPBP1 GO:0000794;GO:0003677;GO:0005622;GO:0005634;GO:0006281;GO:0008022;GO:0010212;GO:0016605;
JTID ENSG00000147316:MCPH1 GO:0005622;
JTID ENSG00000161642:ZNF385 GO:0003677;GO:0005622;GO:0005634;GO:0006350;GO:0006355;GO:0008270;GO:0046872;
JTID ENSG00000164849:GPR146 GO:0001584;GO:0004872;GO:0007165;GO:0007186;GO:0016020;GO:0016021;
MIJT hsa-miR-129:MCPH1:targetscan; hsa-miR-129:ZNF385:targetscan:pictar; hsa-miR-129:GPR146:mirbase;

//
ANNOTATION: 1
ID CDP:hsa-miR-9*;
TFID CDP;
MIID ENSG00000207819:hsa-mir-9-3:hsa-miR-9*;
JTID ENSG00000124785:NRN1 GO:0016020;GO:0048503;
JTID ENSG00000104765:BNIP3L GO:0005521;GO:0005634;GO:0005635;GO:0005739;GO:0005740;GO:0005783;GO:0006915;GO:0006917;GO:0008634;GO:0016020;GO:0016021;GO:0042803;GO:0043065;GO:0043066;GO:0046982;GO:0051607;
JTID ENSG00000118363:SPCS2 GO:0005783;GO:0005787;GO:0005792;GO:0006465;GO:0009003;GO:0016020;GO:0016021;
JTID ENSG00000159199:ATP5G1 GO:0005215;GO:0005624;GO:0005739;GO:0005753;GO:0006811;GO:0008289;GO:0015986;GO:0015992;GO:0016020;GO:0016469;GO:0045263;GO:0046933;GO:0046961;
MIJT hsa-miR-9*:SPCS2:mirbase; hsa-miR-9*:ATP5G1:pictar; hsa-miR-9*:BNIP3L:pictar;

//
ANNOTATION: 1
ID HNF-3:hsa-miR-365;
TFID HNF-3;
MIID ENSG00000199130:hsa-mir-365-1:hsa-miR-365;
JTID ENSG00000173209:AHS2
JTID ENSG00000197860:SGTB GO:0005488;
MIJT hsa-miR-365:SGTB:targetscan; hsa-miR-365:AHS2:targetscan;

//
ANNOTATION: 1
ID BRCA1:hsa-miR-194;
TFID BRCA1;
MIID ENSG00000207624:hsa-mir-194-1:hsa-miR-194;
JTID ENSG00000122862:SRGN GO:0005515;GO:0042629;GO:0050710;GO:0051605;
JTID ENSG00000160712:IL6R GO:0004872;GO:0004896;GO:0004915;GO:0005576;GO:0005896;GO:0006955;GO:0007166;GO:0007275;GO:0008283;GO:0016020;GO:0019899;
JTID ENSG00000169239:CA5B GO:0004089;GO:0005739;GO:0006730;GO:0008270;GO:0016829;GO:0046872;
JTID ENSG00000085872:CHERP GO:0003723;GO:0005622;GO:0005737;GO:0006396;GO:0006874;GO:0007399;GO:0008285;
JTID ENSG00000137100:DCTN3 GO:0000910;GO:0005198;GO:0005515;GO:0005869;GO:0007049;GO:0007067;GO:0048471;
JTID ENSG00000165028:NIPSNAP3B
JTID ENSG00000147536:GINS4 GO:0005515;GO:0005634;GO:0005737;
JTID ENSG00000164711:LPAL2
MIJT hsa-miR-194:SRGN:targetscan:mirbase; hsa-miR-194:LPAL2:targetscan; hsa-miR-194:IL6R:targetscan; hsa-miR-194:CA5B:targetscan; hsa-miR-194:DCTN3:targetscan; hsa-miR-194:NIPSNAP3B:targetscan;

//
ANNOTATION: 1
ID IRF-7:hsa-miR-206;
TFID IRF-7;
MIID ENSG00000207604:hsa-mir-206:hsa-miR-206;
JTID ENSG00000160211:G6PD GO:0004345;GO:0006006;GO:0005737;GO:0005975;GO:0006010;GO:0006098;GO:0016491;
JTID ENSG00000137364:TPMT GO:0005737;GO:0006139;GO:0008119;GO:0008152;GO:0008168;GO:0016740;
JTID ENSG00000176476:CCDC101
JTID ENSG00000074696:PTPLAD1 GO:0005096;GO:0005515;GO:0007249;GO:0007254;GO:0007257;GO:0007264;GO:0007266;
JTID ENSG00000165807:C14orf50
JTID ENSG00000104880:ARHGEF18 GO:0005085;GO:0005089;GO:0005622;GO:0035023;
MIJT hsa-miR-206:ARHGEF18:targetscan:pictar; hsa-miR-206:G6PD:targetscan:mirbase; hsa-miR-206:PTPLAD1:targetscan:pictar; hsa-miR-206:CCDC101:targetscan:mirbase; hsa-miR-206:TPMT:targetscan; hsa-miR-206:C14orf50:targetscan;
```

```
//
ANNOTATION: 1
ID HNF-1:hsa-miR-299-5p;
TFID HNF-1;
MIID ENSG00000207749:hsa-mir-299:hsa-miR-299-5p;
JTID ENSG00000049130:KITLG GO:0005173;GO:0005515;GO:0005886;GO:0007155;GO:0007165;GO:0008083;GO:0008283;GO:0009887;GO:0016021;GO:0030097;GO:0001755;GO:0005615;GO:0008284;GO:0016020;GO:0043066;GO:0043406;GO:0046579;GO:0050731;
JTID ENSG00000168427:KLHL30 GO:0005515;
JTID ENSG00000140263:SORD GO:0003939;GO:0006060;GO:0007601;GO:0008270;GO:0016491;GO:0046872;
JTID ENSG00000175183:CSR2 GO:0005634;GO:0007275;GO:0007517;GO:0008270;GO:0008283;GO:0009887;GO:0016049;GO:0030154;GO:0046872;
JTID ENSG00000149021:SCGB1A1 GO:0005125;GO:0005496;GO:0007165;GO:0007566;GO:0009887;GO:0019834;
JTID ENSG00000067798:NAV3 GO:0000166;GO:0005524;GO:0017111;
JTID ENSG00000196967:ZNF585A GO:0003676;GO:0005622;GO:0005634;GO:0006350;GO:0006355;GO:0008270;GO:0046872;
JTID ENSG00000198569:SLC34A3 GO:0005436;GO:0005903;GO:0006811;GO:0006814;GO:0006817;GO:0015293;GO:0015321;GO:0006811;GO:0016020;GO:0016021;GO:0016324;GO:0030643;GO:0031402;
JTID ENSG00000144366:GULP1 GO:0004871;GO:0005515;GO:0006911;GO:0006915;
JTID ENSG00000167380:ZNF226 GO:0003676;GO:0005622;GO:0006355;GO:0003677;GO:0005634;GO:0006350;GO:0008270;GO:0046872;
MIJT hsa-miR-299-5p:KLHL30:targetscan; hsa-miR-299-5p:SORD:targetscan; hsa-miR-299-5p:KITLG:targetscan; hsa-miR-299-5p:SCGB1A1:targetscan; hsa-miR-299-5p:CSR2:targetscan; hsa-miR-299-5p:GULP1:targetscan; hsa-miR-299-5p:SLC34A3:targetscan; hsa-miR-299-5p:ZNF585A:targetscan; hsa-miR-299-5p:ZNF226:targetscan:mirbase; hsa-miR-299-5p:NAV3:targetscan;
```

```
//
ANNOTATION: 1
ID SRV:hsa-miR-377;
TFID SRV;
MIID ENSG00000199015:hsa-mir-377:hsa-miR-377;
JTID ENSG00000105072:C19orf44
JTID ENSG00000167085:PHB GO:0000074;GO:0005515;GO:0005634;GO:0005654;GO:0005739;GO:0005743;GO:0005887;GO:0006260;GO:0007165;GO:0008285;GO:0016020;GO:0016481;GO:0016563;GO:0016564;GO:0016575;GO:0042981;
JTID ENSG00000139722:VPS37B
JTID ENSG00000181904:C5orf24
JTID ENSG00000205874:Q6SA06_HUMAN
JTID ENSG00000179010:MRFPAP1 GO:0005515;
JTID ENSG00000143294:PRCC
JTID ENSG00000135541:AH11
JTID ENSG00000159348:CYB5R1 GO:0004128;GO:0006118;GO:0016491;GO:0050660;GO:0051287;
JTID ENSG00000186017:ZNF566 GO:0003677;GO:0005622;GO:0005634;GO:0006350;GO:0006355;GO:0008270;GO:0046872;
MIJT hsa-miR-377:PHB:targetscan; hsa-miR-377:AH11:targetscan; hsa-miR-377:VPS37B:targetscan; hsa-miR-377:ZNF566:targetscan; hsa-miR-377:C19orf44:targetscan; hsa-miR-377:MRFPAP1:targetscan:mirbase; hsa-miR-377:CYB5R1:targetscan; hsa-miR-377:C5orf24:targetscan; hsa-miR-377:PRCC:targetscan:mirbase;
```

```
//
ANNOTATION: 1
ID SOX-5:hsa-miR-302c;
TFID SOX-5;
MIID ENSG00000199102:hsa-mir-302c:hsa-miR-302c;
JTID ENSG00000204542:C6orf15
JTID ENSG00000168000:HNRFPUL2 GO:0005783;GO:0016020;GO:0016021;GO:0030176;GO:0003676;GO:0005515;GO:0005634;
JTID ENSG00000180471:C9orf31
JTID ENSG00000086102:NFX1 GO:0003676;GO:0003700;GO:0005515;GO:0005634;GO:0006355;GO:0008270;GO:0000122;GO:0006350;GO:0006366;GO:0006512;GO:0006954;GO:0016874;GO:0046872;
JTID ENSG00000163486:SRGAP2 GO:0005096;GO:0005622;GO:0007165;GO:0005515;GO:0005743;
JTID ENSG00000204319:C4A GO:0004866;GO:0005576;GO:0006954;GO:0006958;GO:0045087;
JTID ENSG00000204342:C4B GO:0004866;GO:0005576;GO:0006954;GO:0006956;
JTID ENSG00000143199:NP_060887.1 GO:0004016;GO:0005829;GO:0006171;GO:0007242;GO:0009190;GO:0016849;GO:0005625;GO:0005737;
JTID ENSG00000101247:C20orf7
JTID ENSG00000177337:NP_001034885.1
JTID ENSG00000188800:TMCO2 GO:0016020;GO:0016021;
JTID ENSG00000150457:LATS2 GO:0000082;GO:0000166;GO:0000287;GO:0000922;GO:0004674;GO:0005524;GO:0005634;GO:0006468;GO:0007049;GO:0007067;GO:0007243;GO:0009755;GO:0016740;GO:0045736;GO:0051301;
JTID ENSG00000132514:CLEC10A GO:0005529;GO:0005886;GO:0006897;GO:0006955;GO:0016021;
JTID ENSG00000149305:HTR3B GO:0004993;GO:0005216;GO:0005230;GO:0005232;GO:0005887;GO:0006811;GO:0007210;GO:0007268;GO:0030594;GO:0045211;
JTID ENSG00000168078:PBK GO:0000166;GO:0004674;GO:0005515;GO:0005524;GO:0006468;GO:0007067;GO:0016740;
JTID ENSG00000163281:GNPDA2 GO:0004342;GO:0005975;GO:0006044;GO:0016853;
MIJT hsa-miR-302c:C6orf15:targetscan:mirbase; hsa-miR-302c:SRGAP2:targetscan; hsa-miR-302c:HNRFPUL2:targetscan:mirbase; hsa-miR-302c:GNPDA2:targetscan; hsa-miR-302c:PBK:targetscan:mirbase; hsa-miR-302c:LATS2:targetscan:picar; hsa-miR-302c:HTR3B:targetscan:mirbase;
```

```
//
ANNOTATION: 1
ID NKX2-5:hsa-miR-9*;
TFID NKX2-5;
MIID ENSG00000207933:hsa-mir-9-1:hsa-miR-9*;
JTID ENSG00000204628:GNB2L1 GO:0005080;GO:0005102;GO:0005737;GO:0007165;GO:0007205;GO:0043025;
JTID ENSG00000188519:Q7Z4Q0_HUMAN
JTID ENSG00000184083:FAM120C
JTID ENSG00000178401:NP_079178.2 GO:0006457;GO:0016021;GO:0031072;
JTID ENSG00000185985:SLITRK2 GO:0005515;GO:0007409;GO:0016020;GO:0016021;
MIJT hsa-miR-9*:NP_079178.2:mirbase; hsa-miR-9*:SLITRK2:mirbase:picar;
```

```
//
ANNOTATION: 1
ID NCX:hsa-let-7e;
TFID NCX;
MIID ENSG00000198972:hsa-let-7e:hsa-let-7e;
JTID ENSG00000187109:NAP1L1 GO:0005515;GO:0005634;GO:0005678;GO:0006260;GO:0006334;GO:0008284;
JTID ENSG00000187772:LIN28B GO:0003677;GO:0006355;GO:0008270;GO:0046872;
JTID ENSG00000197948:FCHSD1
JTID ENSG00000125741:OPA3 GO:0005739;GO:0007601;GO:0050896;
JTID ENSG00000136770:DNAJC1 GO:0001671;GO:0003677;GO:0005634;GO:0005783;GO:0005788;GO:0005792;GO:0006457;GO:0016020;GO:0016021;GO:0030192;GO:0031072;GO:0043022;GO:0045861;GO:0050708;GO:0051082;GO:0005515;GO:0006417;GO:0051087;
JTID ENSG00000163104:SMARCA1 GO:0000018;GO:0000166;GO:0003677;GO:0004386;GO:0005515;GO:0005524;GO:0005634;GO:0009117;GO:0016363;GO:0016568;GO:0016787;GO:0045941;GO:0051260;
JTID ENSG00000171365:CLCN5 GO:0005247;GO:0005887;GO:0006811;GO:0006821;GO:0006897;GO:0007588;GO:0016020;GO:0031404;
JTID ENSG00000160094:ZNF362 GO:0003676;GO:0005622;GO:0008270;GO:0046872;
JTID ENSG00000179165:PXT1
MIJT hsa-let-7e:FCHSD1:targetscan; hsa-let-7e:DNAJC1:targetscan:picar; hsa-let-7e:SMARCA1:targetscan:picar; hsa-let-7e:OPA3:targetscan; hsa-let-7e:NAP1L1:targetscan:mirbase; hsa-let-7e:LIN28B:targetscan:picar; hsa-let-7e:CLCN5:targetscan; hsa-let-7e:PXT1:targetscan; hsa-let-7e:ZNF362:picar;
```

```
//
ANNOTATION: 1
ID CAC-BP:hsa-miR-99b;
TFID CAC-BP;
MIID ENSG00000207550:hsa-mir-99b:hsa-miR-99b;
JTID ENSG00000161921:CXCL16 GO:0005044;GO:0005576;GO:0005615;GO:0006898;GO:0006935;GO:0008009;GO:0016020;GO:0016021;GO:0048247;
MIJT hsa-miR-99b:CXCL16:targetscan;
```

```
//
ANNOTATION: 1
ID SOX-5:hsa-miR-29a;
```

TFID SOX-5;  
MIID ENSG00000198981:hsa-mir-29a:hsa-miR-29a;  
JTID ENSG00000095203:EPB41L4B GO:0005200;GO:0005488;GO:0005737;GO:0005856;GO:0008092;GO:0016020;  
JTID ENSG00000132142:ACACA GO:0003989;GO:0005524;GO:0008152;GO:0009374;GO:0016874;GO:0000166;GO:0004075;GO:0005515;GO:0006633;GO:0030145;GO:0046872;  
JTID ENSG00000182197:EXT1 GO:0001501;GO:0005515;GO:0005783;GO:0005789;GO:0005794;GO:0006024;GO:0007049;GO:0007165;GO:0007369;GO:0007492;GO:0007498;GO:0015012;GO:0016020;GO:0016021;GO:0016757;GO:0030176;GO:0045786;GO:0050508;GO:0050509;  
JTID ENSG00000136883:KIF12 GO:0000166;GO:0003777;GO:0005524;GO:0005874;GO:0005875;GO:0007018;  
JTID ENSG00000097046:CDC7 GO:0000082;GO:0000166;GO:0004672;GO:0004674;GO:0005515;GO:0005524;GO:0005634;GO:0005737;GO:0006270;GO:0006468;GO:0007049;GO:0007089;GO:0008285;GO:0016740;GO:0048137;GO:0051301;GO:0007283;  
JTID ENSG00000131153:GINS2 GO:0005634;GO:0006260;  
JTID ENSG00000105856:HBPI GO:0003677;GO:0006350;GO:0006355;GO:0007050;GO:0016055;  
JTID ENSG00000113140:SPARC GO:0001503;GO:0005507;GO:0005509;GO:0005518;GO:0005576;GO:0005604;GO:0007169;  
JTID ENSG00000132313:MRPL35 GO:0003735;GO:0005739;GO:0005761;GO:0006412;GO:0030529;GO:0045182;  
JTID ENSG00000143162:CREG1 GO:0001558;GO:0003702;GO:0003714;GO:0005667;GO:0006355;GO:0006357;GO:0007275;GO:0008134;GO:0008283;  
JTID ENSG00000140873:ADAMTS18 GO:0004222;GO:0005578;GO:0006508;GO:0008270;GO:0046872;  
JTID ENSG00000050030:RIAA2022 GO:0000166;GO:0003676;GO:0003887;GO:0006139;  
JTID ENSG00000143341:HMCN1 GO:0005021;GO:0005509;GO:0005524;GO:0005604;GO:0006468;GO:0007155;GO:0007601;GO:0008218;GO:0016020;GO:0018298;GO:0050896;GO:0004888;GO:0007596;  
JTID ENSG00000142632:ARHGEF19 GO:0005089;GO:0005622;GO:0035023;GO:0005085;  
JTID ENSG00000197615:C8orf49 GO:0016020;GO:0016021;  
JTID ENSG00000188153:COL4A5 GO:0005201;GO:0005581;GO:0005737;GO:0006817;GO:0005587;  
JTID ENSG00000108821:COL1A1 GO:0001501;GO:0005201;GO:0005515;GO:0005581;GO:0005584;GO:0005737;GO:0006817;GO:0007605;GO:0008147;GO:0008544;  
JTID ENSG00000067798:NAV3 GO:0000166;GO:0005524;GO:0017111;  
JTID ENSG00000137558:PI15 GO:0005576;GO:0008233;GO:0030304;  
JTID ENSG00000113580:NR3C1 GO:0003700;GO:0004883;GO:0005496;GO:0005515;GO:0005634;GO:0005737;GO:0005759;GO:0006355;GO:0006366;GO:0006954;GO:0007165;GO:0007530;GO:0008270;GO:0008289;GO:0043565;GO:0046872;GO:0003677;GO:0042921;  
JTID ENSG00000132780:NASP GO:0001824;GO:0005488;GO:0005515;GO:0005634;GO:0006260;GO:0007049;GO:0008283;GO:0015031;GO:0043486;GO:0051879;  
JTID ENSG00000125386:C4orf8  
JTID ENSG00000158125:XDH GO:0004854;GO:0004855;GO:0005506;GO:0005777;GO:0006118;GO:0007595;GO:0009055;GO:0030151;GO:0030856;GO:0046872;GO:0050660;GO:0051537;  
JTID ENSG00000154227:LASS3 GO:0003700;GO:0005634;GO:0006355;GO:0008610;GO:0016020;GO:0016021;GO:0043565;  
MIJT hsa-miR-29a:SPARC:targetscan:pictar; hsa-miR-29a:CREG1:targetscan:mirbase; hsa-miR-29a:HMCN1:targetscan:mirbase:pictar; hsa-miR-29a:ADAMTS18:targetscan:pictar; hsa-miR-29a:CDC7:targetscan:mirbase; hsa-miR-29a:NR3C1:targetscan; hsa-miR-29a:XDH:targetscan; hsa-miR-29a:HBPI:targetscan:mirbase:pictar; hsa-miR-29a:PI15:targetscan; hsa-miR-29a:GINS2:mirbase; hsa-miR-29a:EPB41L4B:pictar; hsa-miR-29a:C4orf8:targetscan:mirbase; hsa-miR-29a:COL1A1:targetscan:pictar; hsa-miR-29a:NAV3:targetscan:mirbase:pictar; hsa-miR-29a:KIF12:targetscan; hsa-miR-29a:LASS3:targetscan; hsa-miR-29a:ACACA:targetscan; hsa-miR-29a:NASP:targetscan:mirbase:pictar; hsa-miR-29a:ARHGEF19:targetscan:mirbase; hsa-miR-29a:COL4A5:targetscan:mirbase:pictar; hsa-miR-29a:C8orf49:targetscan;  
  
//  
ANNOTATION: 1  
ID CRX:hsa-miR-140;  
TFID CRX;  
MIID ENSG00000208017:hsa-mir-140:hsa-miR-140;  
JTID ENSG00000107165:TYRP1 GO:0008152;GO:0016491;GO:0004497;GO:0005507;GO:0005515;GO:0006583;GO:0016020;GO:0016021;GO:0042470;GO:0042803;GO:0046872;GO:0046982;GO:0006582;GO:0030318;GO:0032438;GO:0043438;GO:0043473;  
JTID ENSG00000126705:AHDC1  
JTID ENSG00000184602:SNN GO:0006950;GO:0009628;GO:0016020;GO:0016021;  
JTID ENSG00000157110:RBPMS GO:0000166;GO:0003723;GO:0005515;GO:0006396;  
MIJT hsa-miR-140:TYRP1:targetscan; hsa-miR-140:RBPMS:targetscan; hsa-miR-140:SNN:targetscan;  
  
//  
ANNOTATION: 1  
ID SOX-5:hsa-miR-302c\*;  
TFID SOX-5;  
MIID ENSG00000199102:hsa-mir-302c:hsa-miR-302c\*;  
JTID ENSG00000130309:GLT25D1 GO:0009103;GO:0016740;  
JTID ENSG00000047644:WWC3  
JTID ENSG00000124177:CHD6 GO:0000166;GO:0000785;GO:0003677;GO:0003682;GO:0005524;GO:0005634;GO:0006333;GO:0006338;GO:0006350;GO:0006355;GO:0007399;GO:0008026;GO:0016787;  
JTID ENSG00000136205:TNS3 GO:0007242;GO:0016311;GO:0016791;GO:0008284;GO:0016477;GO:0048286;  
JTID ENSG00000103342:GSPT1 GO:0000082;GO:0000166;GO:0000184;GO:0003747;GO:0003924;GO:0005515;GO:0005525;GO:0005622;GO:0006412;  
JTID ENSG00000157211:CDCEP2 GO:0006118;GO:0016491;  
JTID ENSG00000182504:LRRIQ2 GO:0005515;  
JTID ENSG00000166024:C10orf28  
JTID ENSG00000184923:FAM22A GO:0016020;GO:0016021;  
JTID ENSG00000151224:MAT1A GO:0000166;GO:0000287;GO:0004478;GO:0005524;GO:0006520;GO:0006730;GO:0016740;GO:0030955;  
JTID ENSG00000140386:ZNF291 GO:0003676;GO:0005622;GO:0008270;GO:0046872;  
JTID ENSG00000204252:HLA-DOA GO:0002504;GO:0005886;GO:0006955;GO:0016021;GO:0032395;GO:0042613;GO:0019886;GO:0045580;  
JTID ENSG00000000003:TSPAN6 GO:0004871;GO:0006928;GO:0016020;GO:0016021;GO:0043123;  
JTID ENSG00000147614:ATP6VD2 GO:0006811;GO:0015986;GO:0015992;GO:0016469;GO:0016787;GO:0046872;GO:0046933;GO:0046961;  
JTID ENSG00000007968:E2F2 GO:0000074;GO:0003700;GO:0003702;GO:0005515;GO:0005634;GO:0005667;GO:0006350;GO:0006355;GO:0006367;GO:0007049;  
JTID ENSG00000152082:FAM128B  
MIJT hsa-miR-302c\*:GSPT1:mirbase; hsa-miR-302c\*:ZNF291:mirbase; hsa-miR-302c\*:CHD6:pictar; hsa-miR-302c\*:C10orf28:mirbase:pictar; hsa-miR-302c\*:CDCEP2:mirbase;  
  
//  
ANNOTATION: 1  
ID C-REL:hsa-miR-34b;  
TFID C-REL;  
MIID ENSG00000207811:hsa-mir-34b:hsa-miR-34b;  
JTID ENSG00000177410:Q5QHF1\_HUMAN  
JTID ENSG00000007541:PIGQ GO:0005975;GO:0006506;GO:0016020;GO:0016021;GO:0016757;GO:0017176;  
JTID ENSG00000136247:ZDHHC4 GO:0004129;GO:0006118;GO:0008270;GO:0008415;GO:0016020;GO:0016021;GO:0016740;GO:0046872;  
JTID ENSG00000198586:TLK1 GO:0000166;GO:0001672;GO:0004674;GO:0005515;GO:0005524;GO:0005634;GO:0006468;GO:0006886;GO:0006974;GO:0007049;GO:0007242;GO:0016568;GO:0016740;  
JTID ENSG00000177303:CASKIN2 GO:0005737;  
JTID ENSG00000198719:DL1L1  
GO:0001701;GO:0001709;GO:0001756;GO:0001757;GO:0005112;GO:0005509;GO:0005515;GO:0005576;GO:0005886;GO:0005887;GO:0007154;GO:0007219;GO:0007275;GO:0007368;GO:0007386;GO:0007399;GO:0009887;GO:0009912;GO:0030097;GO:0030154;GO:0030155;GO:0031410;GO:0042472;GO:0042475;GO:0045596;GO:0045608;GO:0048839;  
JTID ENSG00000108797:CNTNAP1 GO:0004872;GO:0005070;GO:0005102;GO:0005887;GO:0007155;GO:0007165;GO:0016020;  
JTID ENSG00000118513:MYB GO:0003677;GO:0005515;GO:0005634;GO:0006355;GO:0016363;GO:0016563;GO:0005681;GO:0006397;GO:0007049;GO:0008380;GO:0030528;GO:0045449;GO:0000082;GO:0003700;GO:0006816;  
JTID ENSG00000143466:IKBKE GO:0000166;GO:0004704;GO:0004871;GO:0005515;GO:0005524;GO:0005737;GO:0006468;GO:0006955;GO:0008384;GO:0016740;GO:0043123;  
MIJT hsa-miR-34b:DL1L1:targetscan:mirbase:pictar;PUBMED: 14697198; hsa-miR-34b:TLK1:targetscan; hsa-miR-34b:CNTNAP1:targetscan:pictar; hsa-miR-34b:MYB:targetscan:pictar; hsa-miR-34b:IKBKE:targetscan; hsa-miR-34b:PIGQ:targetscan:mirbase; hsa-miR-34b:Q5QHF1\_HUMAN:mirbase; hsa-miR-34b:CASKIN2:targetscan; hsa-miR-34b:ZDHHC4:targetscan;  
  
//  
ANNOTATION: 1  
ID ER:hsa-miR-129;  
TFID ER;  
MIID ENSG00000207705:hsa-mir-129-1:hsa-miR-129;  
JTID ENSG00000119772:DNMT3A GO:0000791;GO:0003677;GO:0003886;GO:0005515;GO:0005634;GO:0005737;GO:0006306;GO:0006349;GO:0008168;GO:0008270;GO:0016363;GO:0016740;GO:0046872;  
JTID ENSG00000186666:BCDIN3D  
JTID ENSG00000145416:MARCH1 GO:0005515;GO:0006512;GO:0008270;GO:0016020;GO:0016021;GO:0016874;GO:0046872;  
JTID ENSG00000204655:MOG  
JTID ENSG00000105058:FAM32A GO:0005730;  
JTID ENSG00000136720:HS6ST1 GO:0005887;GO:0008146;GO:0015015;GO:0016020;GO:0016740;  
JTID ENSG00000178110:Q8N9G9\_HUMAN  
JTID ENSG00000178602:OTOS GO:0007605;  
JTID ENSG00000178796:Q8N9Z1\_HUMAN GO:0007165;GO:0008603;  
MIJT hsa-miR-129:HS6ST1:targetscan; hsa-miR-129:DNMT3A:targetscan; hsa-miR-129:OTOS:targetscan:mirbase; hsa-miR-129:Q8N9Z1\_HUMAN:mirbase;  
  
//  
ANNOTATION: 1  
ID LRF:hsa-miR-148b;



TFID LRF;  
MIID ENSG00000199122:hsa-mir-148b:hsa-miR-148b;  
JTID ENSG00000136842:TMOD1 GO:0003779;GO:0005523;GO:0005856;GO:0007010;GO:0030016;GO:0030239;  
MIJT hsa-miR-148b:TMOD1:targetscan;

//  
ANNOTATION: 1  
ID SOX-5:hsa-miR-302b;  
TFID SOX-5;  
MIID ENSG00000199058:hsa-mir-302b:hsa-miR-302b;  
JTID ENSG00000204542:C6orf15  
JTID ENSG00000168000:HNRPUL2 GO:0005783;GO:0016020;GO:0016021;GO:0030176;GO:0003676;GO:0005515;GO:0005634;  
JTID ENSG00000180471:C9orf31  
JTID ENSG00000086102:NFX1 GO:0003676;GO:0003700;GO:0005515;GO:0005634;GO:0006355;GO:0008270;GO:0000122;GO:0006350;GO:0006366;GO:0006512;GO:0006954;GO:0016874;GO:0046872;  
JTID ENSG00000163486:SRGAP2 GO:0005096;GO:0005622;GO:0007165;GO:0005515;GO:0005743;  
JTID ENSG00000204319:C4A GO:0004866;GO:0005576;GO:0006954;GO:0006956;GO:0006958;GO:0045087;  
JTID ENSG00000204342:C4B GO:0004866;GO:0005576;GO:0006954;GO:0006956;  
JTID ENSG00000143199:NP\_060887.1 GO:0004016;GO:0005829;GO:0006171;GO:0007242;GO:0009190;GO:0016849;GO:0005625;GO:0005737;  
JTID ENSG00000101247:C20orf7  
JTID ENSG00000177337:NP\_001034885.1  
JTID ENSG00000188800:TMCO2 GO:0016020;GO:0016021;  
JTID ENSG00000150457:LATS2 GO:0000082;GO:0000166;GO:0000287;GO:0000922;GO:0004674;GO:0005524;GO:0005634;GO:0006468;GO:0007049;GO:0007067;GO:0007243;GO:0009755;GO:0016740;GO:0045736;GO:0051301;  
JTID ENSG00000132514:CLEC10A GO:0005529;GO:0005886;GO:0006897;GO:0006955;GO:0016021;  
JTID ENSG00000149305:HTR3B GO:0004993;GO:0005216;GO:0005230;GO:0005232;GO:0005887;GO:0006811;GO:0007210;GO:0007268;GO:0030594;GO:0045211;  
JTID ENSG00000168078:PBK GO:0000166;GO:0004674;GO:0005515;GO:0005524;GO:0006468;GO:0007067;GO:0016740;  
JTID ENSG00000163281:GNPDA2 GO:0004342;GO:0005975;GO:0006044;GO:0016853;  
MIJT hsa-miR-302b:NFX1:targetscan:mirbase; hsa-miR-302b:C6orf15:targetscan:mirbase; hsa-miR-302b:SRGAP2:targetscan; hsa-miR-302b:HNRPUL2:targetscan:mirbase; hsa-miR-302b:PBK:targetscan:mirbase; hsa-miR-302b:GNPDA2:targetscan; hsa-miR-302b:LATS2:targetscan:pictar; hsa-miR-302b:HTR3B:targetscan:mirbase;

//  
ANNOTATION: 1  
ID MYC:hsa-miR-20a;  
TFID MYC;  
MIID ENSG00000199149:hsa-mir-20a:hsa-miR-20a;  
JTID ENSG00000122870:BICC1 GO:0003723;GO:0007275;  
JTID ENSG00000130413:STK33 GO:0000166;GO:0004674;GO:0005524;GO:0006468;GO:0016740;  
JTID ENSG00000100987:VSX1 GO:0003700;GO:0005634;GO:0006355;GO:0006366;GO:0007275;GO:0007601;GO:0043565;GO:0050896;  
JTID ENSG00000104517:EDD1 GO:0004842;GO:0005622;GO:0006464;GO:0006512;GO:0005515;GO:0005625;GO:0005634;GO:0006511;GO:0006974;GO:0008270;GO:0008283;GO:0016874;GO:0046872;GO:0050847;  
JTID ENSG00000140090:SLC24A4 GO:0005509;GO:0006811;GO:0006813;GO:0006814;GO:0006816;GO:0015293;GO:0015297;GO:0016020;GO:0016021;GO:0030955;GO:0031402;  
JTID ENSG00000102908:NFAT5 GO:0001816;GO:0003700;GO:0003702;GO:0005515;GO:0005634;GO:0005737;GO:0006355;GO:0006366;GO:0007165;GO:0007588;GO:0045944;  
JTID ENSG00000101412:E2F1 GO:0000074;GO:0000080;GO:0000122;GO:0003700;GO:0003714;GO:0005515;GO:0005634;GO:0005667;GO:0005737;GO:0006350;GO:0006355;GO:0006915;GO:0007049;GO:0008283;GO:0016563;GO:0030900;GO:0045944;  
JTID ENSG00000157617:C21orf25  
JTID ENSG00000160401:C9orf117  
JTID ENSG00000085274:MYNN GO:0003700;GO:0005515;GO:0005622;GO:0005634;GO:0006355;GO:0008270;GO:0046872;  
JTID ENSG00000100030:MAPK1 GO:0000165;GO:0000166;GO:0001784;GO:0004674;GO:0004707;GO:0005515;GO:0005524;GO:0005634;GO:0005737;GO:0006468;GO:0006917;GO:0006935;GO:0006974;GO:0007049;GO:0007165;GO:0007268;GO:0009887;GO:0016740;GO:0019858;GO:0031663;GO:0032496;GO:0043330;GO:0045596;  
MIJT hsa-miR-20a:C9orf117:targetscan; hsa-miR-20a:STK33:targetscan; hsa-miR-20a:MAPK1:targetscan; hsa-miR-20a:VSX1:targetscan:mirbase:pictar; hsa-miR-20a:NFAT5:targetscan:pictar; hsa-miR-20a:C21orf25:targetscan:pictar; hsa-miR-20a:EDD1:targetscan:pictar; hsa-miR-20a:MYNN:targetscan;  
hsa-miR-20a:SLC24A4:targetscan:pictar; hsa-miR-20a:E2F1:targetscan:pictar:PUBMED: 15944709;

//  
ANNOTATION: 1  
ID AFP1:hsa-miR-140;  
TFID AFP1;  
MIID ENSG00000208017:hsa-mir-140:hsa-miR-140;  
JTID ENSG00000049130:KITLG GO:0005173;GO:0005515;GO:0005886;GO:0007155;GO:0007165;GO:0008083;GO:0008283;GO:0009887;GO:0016021;GO:0030097;GO:0001755;GO:0005615;GO:0008284;GO:0016020;GO:0043066;GO:0043406;GO:0046579;GO:0050731;  
JTID ENSG00000205609:Q9BW98\_HUMAN GO:0003743;GO:0005852;GO:0006413;  
MIJT hsa-miR-140:KITLG:targetscan;

//  
ANNOTATION: 1  
ID OCTAMER:hsa-miR-135a;  
TFID OCTAMER;  
MIID ENSG00000207586:hsa-mir-135a-2:hsa-miR-135a;  
JTID ENSG00000141965:FEM1A GO:0004872;  
JTID ENSG00000198429:ZNF69 GO:0003676;GO:0005622;GO:0006355;  
JTID ENSG00000100350:FOXRED2 GO:0005783;GO:0006118;GO:0016491;  
MIJT hsa-miR-135a:ZNF69:targetscan; hsa-miR-135a:FOXRED2:targetscan; hsa-miR-135a:FEM1A:targetscan;

//  
ANNOTATION: 1  
ID ER:hsa-miR-330;  
TFID ER;  
MIID ENSG00000199066:hsa-mir-330:hsa-miR-330;  
JTID ENSG00000084754:HADHA GO:0003857;GO:0003985;GO:0004300;GO:0005739;GO:0005743;GO:0006629;GO:0006631;GO:0006635;GO:0008152;GO:0016491;GO:0016507;GO:0016509;GO:0016829;GO:0050662;  
JTID ENSG00000091972:CD200 GO:0005515;GO:0005887;GO:0016020;  
JTID ENSG00000104267:CA2 GO:0002009;GO:0004089;GO:0005737;GO:0006730;GO:0008270;GO:0015670;GO:0016829;GO:0046872;GO:0046903;  
JTID ENSG00000094963:FMO2 GO:0002287;GO:0004497;GO:0004499;GO:0005783;GO:0005792;GO:0006118;GO:0006800;GO:0016020;GO:0016021;GO:0050660;  
JTID ENSG00000073111:MCM2 GO:0000166;GO:0000785;GO:0003677;GO:0003688;GO:0005515;GO:0005524;GO:0005634;GO:0005664;GO:0006260;GO:0006268;GO:0006270;GO:0006334;GO:0006350;GO:0006355;GO:0007049;GO:0008094;GO:0008270;GO:0046872;  
JTID ENSG00000164916:FOXK1 GO:0003700;GO:0005634;GO:0006350;GO:0006355;GO:0007275;GO:0007519;GO:0030154;GO:0043565;  
JTID ENSG00000107897:ACBD5 GO:0000062;GO:0005488;  
JTID ENSG00000162642:C1orf52  
JTID ENSG00000146242:TPBG GO:0005515;GO:0005887;GO:0006928;GO:0007155;GO:0016020;  
JTID ENSG00000161203:AP2M1 GO:0005215;GO:0005515;GO:0005905;GO:0006810;GO:0006886;GO:0008289;GO:0030125;GO:0005739;  
JTID ENSG00000163961:RNF168 GO:0005515;GO:0008270;GO:0046872;  
JTID ENSG00000167723:TRPV3 GO:0005261;GO:0005262;GO:0005509;GO:0006811;GO:0006816;GO:0009266;GO:0016020;GO:0016021;  
JTID ENSG00000143178:TBX19 GO:0003700;GO:0005634;GO:0006355;GO:0015031;GO:0016020;GO:0016021;GO:0003677;GO:0003702;GO:0005515;GO:0006350;GO:0006357;GO:0009653;GO:0045165;  
MIJT hsa-miR-330:TRPV3:targetscan; hsa-miR-330:CD200:targetscan; hsa-miR-330:AP2M1:targetscan:mirbase:pictar; hsa-miR-330:FMO2:targetscan; hsa-miR-330:FOXK1:targetscan; hsa-miR-330:C1orf52:targetscan; hsa-miR-330:TBX19:targetscan; hsa-miR-330:HADHA:targetscan:mirbase; hsa-miR-330:CA2:targetscan:mirbase; hsa-miR-330:ACBD5:targetscan; hsa-miR-330:MCM2:targetscan:mirbase; hsa-miR-330:RNF168:targetscan;

//  
ANNOTATION: 1  
ID LEF1:hsa-miR-203;  
TFID LEF1;  
MIID ENSG00000207568:hsa-mir-203:hsa-miR-203;  
JTID ENSG00000145824:CXCL14 GO:0005576;GO:0005615;GO:0005794;GO:0006935;GO:0006954;GO:0006955;GO:0007165;GO:0007267;GO:0008009;  
JTID ENSG00000131381:ZFYZE20 GO:0003676;GO:0005622;GO:0005768;GO:0008270;GO:0015031;GO:0016020;GO:0016197;GO:0046872;  
JTID ENSG00000188483:IER5L  
JTID ENSG00000165152:C9orf125 GO:0016020;GO:0016021;  
JTID ENSG00000147383:NSDHL GO:0001942;GO:0003854;GO:0004769;GO:0005783;GO:0006695;GO:0008203;GO:0016020;GO:0016021;GO:0016491;GO:0047012;  
JTID ENSG00000113070:HBEGF GO:0004872;GO:0005154;GO:0005615;GO:0005887;GO:0007165;GO:0007173;GO:0007517;GO:0008016;GO:0008083;GO:0008201;GO:0009986;GO:0016020;GO:0035313;GO:0048661;GO:0051549;  
JTID ENSG00000110777:POU2AF1 GO:0003677;GO:0003713;GO:0005515;GO:0005634;GO:0006350;GO:0006355;GO:0006366;GO:0006959;  
JTID ENSG00000135114:OASL GO:0003677;GO:0003725;GO:0005524;GO:0005730;GO:0005737;GO:0006464;GO:0006955;GO:0016740;GO:0046966;

MIJT hsa-miR-203:POU2AF1:targetscan; hsa-miR-203:NSDHL:targetscan:mirbase; hsa-miR-203:ZFYVE20:targetscan; hsa-miR-203:HBEGF:targetscan; hsa-miR-203:OASL:targetscan; hsa-miR-203:CXCL14:targetscan;

//  
ANNOTATION: 1  
ID RFX:hsa-miR-149;  
TFID RFX;  
MIID ENSG00000207611:hsa-mir-149:hsa-miR-149;  
JTID ENSG00000068796:KIF2A GO:0000166;GO:0003777;GO:0005524;GO:0005856;GO:0005874;GO:0005875;GO:0007018;  
JTID ENSG00000103067:RBM35B GO:0000166;GO:0003723;  
JTID ENSG00000158966:CACHD1 GO:0016020;  
JTID ENSG00000204483:Q8N925\_HUMAN  
JTID ENSG00000172273:MIZF GO:0003677;GO:0005622;GO:0005634;GO:0006350;GO:0006355;GO:0008270;GO:0046872;  
JTID ENSG00000121481:RNF2 GO:0005515;GO:0005634;GO:0005694;GO:0006350;GO:0006355;GO:0006512;GO:0008270;GO:0016874;GO:0046872;  
MIJT hsa-miR-149:KIF2A:targetscan; hsa-miR-149:RNF2:targetscan:pictar; hsa-miR-149:RBM35B:targetscan; hsa-miR-149:CACHD1:targetscan; hsa-miR-149:MIZF:targetscan:mirbase;

//  
ANNOTATION: 1  
ID IRF1:hsa-miR-101;  
TFID IRF1;  
MIID ENSG00000199065:hsa-mir-101-2:hsa-miR-101;  
JTID ENSG00000187790:FANCM GO:0000166;GO:0003677;GO:0004518;GO:0005524;GO:0005634;GO:0006281;GO:0008026;GO:0016787;  
MIJT hsa-miR-101:FANCM:targetscan:mirbase;

//  
ANNOTATION: 1  
ID HNF-1:hsa-miR-329;  
TFID HNF-1;  
MIID ENSG00000207761:hsa-mir-329-1:hsa-miR-329;  
JTID ENSG00000171155:C1GALT1C1 GO:0006457;GO:0016020;GO:0016021;  
JTID ENSG00000151500:THYN1 GO:0005634;  
JTID ENSG00000157870:Clorf93  
JTID ENSG00000168758:SEMA4C GO:0004872;GO:0005515;GO:0007275;GO:0007399;GO:0016020;GO:0016021;GO:0030154;  
JTID ENSG00000102781:KATNAL1 GO:0000166;GO:0005524;GO:0005874;GO:0008568;GO:0016787;GO:0017111;  
JTID ENSG00000131508:UBE2D2 GO:0005515;GO:0006464;GO:0006512;GO:0016874;GO:0019787;GO:0043161;  
JTID ENSG00000134247:PTGFRN GO:0005515;GO:0005783;GO:0016020;GO:0016021;GO:0017148;  
JTID ENSG00000169139:UBE2V2 GO:0000074;GO:0000209;GO:0005515;GO:0005634;GO:0005737;GO:0006282;GO:0006464;GO:0008283;GO:0019787;GO:0031372;  
JTID ENSG00000083896:YTHDC1 GO:0005634;GO:0006397;GO:0008380;  
JTID ENSG00000188086:NP\_954652.1 GO:0004252;GO:0006508;GO:0008233;  
MIJT hsa-miR-329:UBE2D2:targetscan:mirbase; hsa-miR-329:SEMA4C:targetscan; hsa-miR-329:KATNAL1:targetscan; hsa-miR-329:Clorf93:targetscan:mirbase; hsa-miR-329:PTGFRN:targetscan;

//  
ANNOTATION: 1  
ID NCX:hsa-miR-542-3p;  
TFID NCX;  
MIID ENSG00000207784:hsa-mir-542:hsa-miR-542-3p;  
JTID ENSG00000142208:AKT1  
GO:0000060;GO:0000166;GO:0001568;GO:0001890;GO:0004672;GO:0004674;GO:0005351;GO:0005524;GO:0005634;GO:0005737;GO:0005819;GO:0005975;GO:0005977;GO:0005978;GO:0006006;GO:0006417;GO:0006464;GO:0006468;GO:0006809;GO:0006810;GO:0006915;GO:0006954;GO:0007165;GO:0007186;GO:0007281;GO:0008286;GO:0008637;GO:0009408;GO:0009725;GO:0015758;GO:0016567;GO:0016740;GO:0018105;GO:0030027;GO:0030163;GO:0040018;GO:0042640;GO:0042802;GO:0043066;GO:0043491;GO:0045884;GO:0046777;GO:0048009;  
JTID ENSG00000113580:NR3C1 GO:0003700;GO:0004883;GO:0005496;GO:0005515;GO:0005634;GO:0005737;GO:0005759;GO:0006355;GO:0006366;GO:0006954;GO:0007165;GO:0007530;GO:0008270;GO:0008289;GO:0043565;GO:0046872;GO:0003677;GO:0042921;  
MIJT hsa-miR-542-3p:NR3C1:targetscan; hsa-miR-542-3p:AKT1:targetscan;

//  
ANNOTATION: 1  
ID HNF-1:hsa-miR-412;  
TFID HNF-1;  
MIID ENSG00000199012:hsa-mir-412:hsa-miR-412;  
JTID ENSG00000124225:TMEPAI GO:0016021;GO:0030521;GO:0005515;GO:0016020;  
JTID ENSG00000131508:UBE2D2 GO:0005515;GO:0006464;GO:0006512;GO:0016874;GO:0019787;GO:0043161;  
MIJT hsa-miR-412:UBE2D2:targetscan; hsa-miR-412:TMEPAI:targetscan;

//  
ANNOTATION: 1  
ID HNF-3:hsa-miR-30c;  
TFID HNF-3;  
MIID ENSG00000199094:hsa-mir-30c-2:hsa-miR-30c;  
JTID ENSG00000102098:SCML2 GO:0003700;GO:0005634;GO:0006355;GO:0009653;  
JTID ENSG00000157470:FAM81A  
JTID ENSG00000197121:PGAP1\_HUMAN GO:0004518;GO:0005783;GO:0015031;GO:0015798;GO:0016020;GO:0016021;GO:0016787;GO:0042578;  
JTID ENSG00000168955:TM4SF20 GO:0016020;GO:0016021;  
JTID ENSG00000133392:MYH11 GO:0003774;GO:0005524;GO:0016459;GO:0000166;GO:0003779;GO:0005516;GO:0005863;GO:0006939;GO:0006941;GO:0008307;GO:0030241;GO:0048251;GO:0048746;  
JTID ENSG00000143355:LHX9 GO:0003700;GO:0005634;GO:0006355;GO:0008270;GO:0043565;GO:0046872;GO:0003677;GO:0005515;  
JTID ENSG00000189298:ZKSCAN3 GO:0003700;GO:0005622;GO:0005634;GO:0006350;GO:0006355;GO:0008270;GO:0046872;  
JTID ENSG00000198826:ARHGAP11A GO:0005096;GO:0005622;GO:0007165;  
JTID ENSG00000180574:Q5I0X0\_HUMAN GO:0000166;GO:0003924;GO:0005525;  
JTID ENSG00000133627:ACTR3B GO:0005515;GO:0005856;GO:0030041;GO:0051015;GO:0000166;GO:0005524;  
JTID ENSG00000116128:BCL9 GO:0005515;GO:0005634;GO:0016055;  
JTID ENSG00000162039:Clorf73  
JTID ENSG00000185002:RFKDC1 GO:0003677;GO:0006355;  
MIJT hsa-miR-30c:FAM81A:targetscan; hsa-miR-30c:MYH11:targetscan:mirbase; hsa-miR-30c:TM4SF20:targetscan; hsa-miR-30c:RFKDC1:targetscan:mirbase:pictar; hsa-miR-30c:LHX9:targetscan; hsa-miR-30c:Q5I0X0\_HUMAN:mirbase; hsa-miR-30c:SCML2:targetscan; hsa-miR-30c:Clorf73:targetscan:mirbase; hsa-miR-30c:BCL9:targetscan:mirbase:pictar; hsa-miR-30c:ARHGAP11A:targetscan;

//  
ANNOTATION: 1  
ID IRF-7:hsa-miR-181d;  
TFID IRF-7;  
MIID ENSG00000207585:hsa-mir-181d:hsa-miR-181d;  
JTID ENSG00000171766:GATM GO:0005739;GO:0005758;GO:0006601;GO:0015068;GO:0016740;  
JTID ENSG00000169891:REPS2 GO:0005509;GO:0005515;GO:0006461;GO:0007173;  
JTID ENSG00000163463:KRTCAP2 GO:0004579;GO:0008250;GO:0016020;GO:0016021;GO:0018279;  
JTID ENSG00000177728:KIAA0195 GO:0005524;GO:0016020;GO:0016021;GO:0016820;  
JTID ENSG00000128228:SDP2L1  
JTID ENSG00000204789:ZNF204 GO:0003676;GO:0005622;GO:0005634;GO:0008270;GO:0046872;  
MIJT hsa-miR-181d:GATM:targetscan; hsa-miR-181d:REPS2:targetscan:mirbase; hsa-miR-181d:ZNF204:mirbase; hsa-miR-181d:KRTCAP2:targetscan; hsa-miR-181d:KIAA0195:targetscan:mirbase;

//  
ANNOTATION: 1  
ID CdxA:hsa-let-7f;  
TFID CdxA;  
MIID ENSG00000199072:hsa-let-7f-1:hsa-let-7f;

JTID ENSG00000141429:GALNT1 GO:0004653;GO:0005509;GO:0005529;GO:0006493;GO:0016020;GO:0016021;GO:0016757;GO:0030145;  
JTID ENSG00000072501:SMC1A GO:0000075;GO:0000166;GO:0000776;GO:0000794;GO:0003682;GO:0003777;GO:0005515;GO:0005524;GO:0005634;GO:0005694;GO:0006281;GO:0007049;GO:0007052;GO:0007059;GO:0007064;GO:0007126;GO:0008280;GO:0009314;GO:0016887;GO:0042770;GO:0046982;GO:0051276;GO:0051301;GO:0006259;  
JTID ENSG00000164654:NP\_061878.3  
JTID ENSG00000125741:OPA3 GO:0005739;GO:0007601;GO:0050896;  
JTID ENSG00000144031:ANKRD53  
JTID ENSG00000181322:TXNDC6 GO:0004550;GO:0005524;GO:0006183;GO:0006228;GO:0006241;GO:0045454;  
MIJT hsa-let-7f:ANKRD53:targetscan; hsa-let-7f:TXNDC6:targetscan; hsa-let-7f:SMC1A:targetscan; hsa-let-7f:GALNT1:targetscan;pictar; hsa-let-7f:OPA3:targetscan;

//  
ANNOTATION: 1  
ID HNF-3:hsa-miR-30a-5p;  
TFID HNF-3;  
MIID ENSG00000207827:hsa-mir-30a:hsa-miR-30a-5p;  
JTID ENSG00000102098:SCML2 GO:0003700;GO:0005634;GO:0006355;GO:0009653;  
JTID ENSG00000157470:FAM81A  
JTID ENSG00000197121:PGAP1\_HUMAN GO:0004518;GO:0005783;GO:0015031;GO:0015798;GO:0016020;GO:0016021;GO:0016787;GO:0042578;  
JTID ENSG00000168955:TM4SF20 GO:0016020;GO:0016021;  
JTID ENSG00000133392:MYH11 GO:0003774;GO:0005524;GO:0016459;GO:0000166;GO:0003779;GO:0005516;GO:0005863;GO:0006939;GO:0006941;GO:0008307;GO:0030241;GO:0048251;GO:0048746;  
JTID ENSG00000143355:LHX9 GO:0003700;GO:0005634;GO:0006355;GO:0008270;GO:0043565;GO:0046872;GO:0003677;GO:0005515;  
JTID ENSG00000189298:ZKSCAN3 GO:0003700;GO:0005622;GO:0005634;GO:0006350;GO:0006355;GO:0008270;GO:0046872;  
JTID ENSG00000198826:ARHGAP11A GO:0005096;GO:0005622;GO:0007165;  
JTID ENSG00000180574:Q5IOX0\_HUMAN GO:0000166;GO:0003924;GO:0005525;  
JTID ENSG00000133627:ACTR3B GO:0005515;GO:0005856;GO:0030041;GO:0051015;GO:0000166;GO:0005524;  
JTID ENSG00000116128:BCL9 GO:0005515;GO:0005634;GO:0016055;  
JTID ENSG00000162039:C16orf73  
JTID ENSG00000185002:RFXDC1 GO:0003677;GO:0006355;  
MIJT hsa-miR-30a-5p:FAM81A:targetscan; hsa-miR-30a-5p:MYH11:targetscan:mirbase; hsa-miR-30a-5p:TM4SF20:targetscan:mirbase; hsa-miR-30a-5p:RFXDC1:targetscan:mirbase;pictar; hsa-miR-30a-5p:LHX9:targetscan; hsa-miR-30a-5p:SCML2:targetscan; hsa-miR-30a-5p:Q5IOX0\_HUMAN:mirbase; hsa-miR-30a-5p:C16orf73:targetscan:mirbase; hsa-miR-30a-5p:BCL9:targetscan:pictar; hsa-miR-30a-5p:ARHGAP11A:targetscan;

//  
ANNOTATION: 1  
ID TCF-1(P):hsa-miR-129;  
TFID TCF-1(P);  
MIID ENSG00000207705:hsa-mir-129-1:hsa-miR-129;  
JTID ENSG00000103326:SOLH GO:0003700;GO:0004198;GO:0005622;GO:0006508;GO:0008270;GO:0046872;  
JTID ENSG00000158435:C2orf29 GO:0008283;  
JTID ENSG00000169509:CRCT1 GO:0005515;  
JTID ENSG00000101977:MCF2 GO:0005085;GO:0005089;GO:0005622;GO:0007242;GO:0035023;GO:0005624;GO:0005829;GO:0005856;GO:0016358;  
MIJT hsa-miR-129:C2orf29:targetscan;

//  
ANNOTATION: 1  
ID CACD:hsa-miR-425-3p;  
TFID CACD;  
MIID ENSG00000199032:hsa-mir-425:hsa-miR-425-3p;  
JTID ENSG00000067560:RHOA GO:0000166;GO:0000287;GO:0003924;GO:0004871;GO:0005515;GO:0005525;GO:0005622;GO:0005856;GO:0007264;GO:0007266;GO:0016020;GO:0030036;GO:0042346;GO:0043123;  
JTID ENSG00000053524:MCF2L2 GO:0005085;GO:0005089;GO:0005622;GO:0035023;  
JTID ENSG00000167178:ISLR2 GO:0005515;GO:0016020;GO:0016021;  
MIJT hsa-miR-425-3p:ISLR2:targetscan:mirbase;

//  
ANNOTATION: 1  
ID ATF-1:hsa-miR-30d;  
TFID ATF-1;  
MIID ENSG00000199153:hsa-mir-30d:hsa-miR-30d;  
JTID ENSG00000186594:NP\_116284.2  
JTID ENSG00000102098:SCML2 GO:0003700;GO:0005634;GO:0006355;GO:0009653;  
JTID ENSG00000133627:ACTR3B GO:0005515;GO:0005856;GO:0030041;GO:0051015;GO:0000166;GO:0005524;  
MIJT hsa-miR-30d:NP\_116284.2:mirbase; hsa-miR-30d:SCML2:targetscan;

//  
ANNOTATION: 1  
ID NF-AT:hsa-miR-16;  
TFID NF-AT;  
MIID ENSG00000198987:hsa-mir-16-2:hsa-miR-16;  
JTID ENSG00000125657:TNFSF9 GO:0005125;GO:0005164;GO:0005615;GO:0005887;GO:0006915;GO:0006955;GO:0007165;GO:0007267;GO:0008283;GO:0016020;  
JTID ENSG00000134343:TMEM16C GO:0016020;GO:0016021;  
JTID ENSG00000131381:ZFYE20 GO:0003676;GO:0005622;GO:0005768;GO:0008270;GO:0015031;GO:0016020;GO:0016197;GO:0046872;  
MIJT hsa-miR-16:TNFSF9:targetscan:mirbase; hsa-miR-16:ZFYE20:targetscan; hsa-miR-16:TMEM16C:targetscan:pictar;

//  
ANNOTATION: 1  
ID AML1:hsa-miR-302b\*;  
TFID AML1;  
MIID ENSG00000199058:hsa-mir-302b:hsa-miR-302b\*;  
JTID ENSG00000024862:CCDC28A  
JTID ENSG00000136688:ILLF9 GO:0005152;GO:0005576;GO:0005615;GO:0006955;GO:0007267;  
JTID ENSG00000122729:AC01 GO:0003723;GO:0003994;GO:0005506;GO:0005737;GO:0006099;GO:0008152;GO:0016829;GO:0046872;GO:0051539;GO:0030350;  
JTID ENSG00000183496:RKHD3 GO:0003723;GO:0005515;GO:0005634;GO:0008270;GO:0046872;  
JTID ENSG00000165861:ZFYE1 GO:0005545;GO:0005547;GO:0005783;GO:0005795;GO:0008270;GO:0016192;GO:0043325;GO:0046872;GO:0048471;  
JTID ENSG00000095587:TLL2 GO:0005509;GO:0006508;GO:0007275;GO:0008237;GO:0008270;GO:0008533;GO:0030154;  
JTID ENSG00000171456:ASXL1 GO:0005634;GO:0006350;GO:0006355;GO:0008270;GO:0046872;  
MIJT hsa-miR-302b\*:AC01:mirbase; hsa-miR-302b\*:RKHD3:pictar; hsa-miR-302b\*:ASXL1:pictar; hsa-miR-302b\*:CCDC28A:mirbase;

//  
ANNOTATION: 1  
ID IRF:hsa-miR-101;  
TFID IRF;  
MIID ENSG00000199065:hsa-mir-101-2:hsa-miR-101;  
JTID ENSG00000100109:TFIP11 GO:0001503;GO:0003676;GO:0005515;GO:0005578;GO:0005622;GO:0005634;GO:0005681;GO:0006397;GO:0008380;GO:0016607;GO:0030154;GO:0030198;GO:0045045;  
JTID ENSG00000151690:NP\_060164.3  
JTID ENSG00000162851:TFB2M GO:0000154;GO:0000179;GO:0003712;GO:0005739;GO:0005759;GO:0006350;GO:0006355;GO:0006364;GO:0006390;GO:0008168;GO:0008649;GO:0016740;  
MIJT hsa-miR-101:TFB2M:targetscan:mirbase; hsa-miR-101:TFIP11:targetscan:mirbase;

//  
ANNOTATION: 1  
ID ELF-1:hsa-miR-23a;  
TFID ELF-1;  
MIID ENSG00000207980:hsa-mir-23a:hsa-miR-23a;

JTID ENSG00000113615:SEC24A GO:0005515;GO:0006886;GO:0006888;GO:0008270;GO:0030127;GO:0005783;  
JTID ENSG00000188938:FAM120AOS  
JTID ENSG00000109184:DCUN1D4 GO:0005634;  
JTID ENSG00000163376:KBTBD8 GO:0005515;  
JTID ENSG00000163781:TOPBP1 GO:0000794;GO:0003677;GO:0005622;GO:0005634;GO:0006281;GO:0008022;GO:0010212;GO:0016605;  
JTID ENSG00000205592:MUC19  
JTID ENSG0000011424:VDR GO:0001501;GO:0003700;GO:0003707;GO:0004879;GO:0005515;GO:0005634;GO:0006350;GO:0006355;GO:0006816;GO:0006874;GO:0007165;GO:0007275;GO:0008270;GO:0008434;GO:0009887;GO:0016481;GO:0030528;GO:0043565;GO:0046872;GO:0050892;  
JTID ENSG00000204026:Q6ZSD2\_HUMAN  
JTID ENSG00000120868:APAF1 GO:0000166;GO:0005515;GO:0005524;GO:0005622;GO:0005829;GO:0007399;GO:0008635;GO:0008656;GO:0042981;GO:0001843;GO:0005625;GO:0005634;GO:0007275;GO:0007420;GO:0016505;GO:0030900;GO:0042802;  
JTID ENSG00000177800:TMEM78 GO:0016020;GO:0016021;  
JTID ENSG00000147119:CHST7 GO:0001517;GO:0005976;GO:0006044;GO:0006790;GO:0008459;GO:0016020;GO:0016021;GO:0016740;GO:0030206;GO:0031228;  
JTID ENSG00000180257:ZNF321 GO:0003676;GO:0005622;GO:0006355;GO:0008270;  
JTID ENSG00000110497:NP\_060219.2  
JTID ENSG00000198380:GFP1 GO:0004360;GO:0005529;GO:0005737;GO:0006002;GO:0006112;GO:0006541;GO:0008152;GO:0016051;GO:0016740;  
JTID ENSG00000067066:SP100 GO:0000785;GO:0003677;GO:0005515;GO:0005634;GO:0005694;GO:0006355;GO:0016605;  
JTID ENSG00000120279:MYCT1  
MIJT hsa-miR-23a:MYCT1:targetscan; hsa-miR-23a:VDR:targetscan; hsa-miR-23a:NP\_060219.2:mirbase:pictar; hsa-miR-23a:TOPBP1:targetscan:mirbase; hsa-miR-23a:FAM120AOS:targetscan:mirbase; hsa-miR-23a:KBTBD8:targetscan; hsa-miR-23a:SEC24A:targetscan:mirbase; hsa-miR-23a:CHST7:targetscan:mirbase; hsa-miR-23a:APAF1:targetscan;

//  
ANNOTATION: 1  
ID HSF2:hsa-miR-449b;  
TFID HSF2;  
MIID ENSG00000207728:hsa-mir-449b:hsa-miR-449b;  
JTID ENSG00000205610:Q4G105\_HUMAN GO:0004713;GO:0005524;GO:0006468;  
JTID ENSG00000120215:MLANA GO:0005887;GO:0016020;  
JTID ENSG00000113328:CCNG1 GO:0000079;GO:0005634;GO:0007049;GO:0007067;GO:0051301;  
JTID ENSG00000105323:HNRPU1 GO:0003723;GO:0005515;GO:0005634;GO:0006350;GO:0006355;GO:0006396;GO:0009615;GO:0030530;GO:0003676;GO:0030529;  
JTID ENSG00000168334:CMYA1  
JTID ENSG00000172689:MS4A10 GO:0004872;GO:0007165;GO:0016020;GO:0016021;  
JTID ENSG00000069849:ATP1B3 GO:0005391;GO:0005515;GO:0005890;GO:0006811;GO:0006813;GO:0006814;GO:0016020;GO:0016021;GO:0030955;GO:0031402;  
JTID ENSG00000116704:SLC35D1 GO:0005351;GO:0005463;GO:0005783;GO:0006810;GO:0015789;GO:0016020;GO:0016021;GO:0030176;GO:0030206;  
JTID ENSG00000134070:IRAK2 GO:0004672;GO:0004704;GO:0005524;GO:0006466;GO:0006954;GO:0007165;GO:0007249;GO:0009986;GO:0031663;GO:0042802;GO:0043433;GO:0051092;  
MIJT hsa-miR-449b:CMYA1:targetscan:mirbase; hsa-miR-449b:MS4A10:targetscan; hsa-miR-449b:IRAK2:targetscan; hsa-miR-449b:HNRPU1:targetscan:mirbase; hsa-miR-449b:SLC35D1:mirbase;

//  
ANNOTATION: 1  
ID HNF-3:hsa-let-7d;  
TFID HNF-3;  
MIID ENSG00000199133:hsa-let-7d:hsa-let-7d;  
JTID ENSG00000153914:SFRS12 GO:0000166;GO:0003676;GO:0005515;GO:0005634;GO:0005681;GO:0006397;GO:0008380;  
JTID ENSG00000183035:CYLC1 GO:0005198;GO:0005856;GO:0007275;GO:0007283;GO:0030154;GO:0043159;  
JTID ENSG00000149313:AASDHPT GO:0000287;GO:0008897;GO:0009059;GO:0016740;  
JTID ENSG00000107551:RASSF4 GO:0005515;GO:0007049;GO:0007165;GO:0045786;  
JTID ENSG00000173209:AHS2  
JTID ENSG00000179476:C14orf28  
JTID ENSG00000105419:Q99687-2  
JTID ENSG00000181322:TXNDC6 GO:0004550;GO:0005524;GO:0006183;GO:0006228;GO:0006241;GO:0045454;  
JTID ENSG00000172053:QARS GO:0000166;GO:0004818;GO:0004819;GO:0005515;GO:0005524;GO:0005625;GO:0005737;GO:0006424;GO:0006425;GO:0016874;  
MIJT hsa-let-7d:SFRS12:targetscan; hsa-let-7d:RASSF4:targetscan; hsa-let-7d:CYLC1:mirbase; hsa-let-7d:TXNDC6:targetscan; hsa-let-7d:C14orf28:targetscan; hsa-let-7d:Q99687-2:mirbase; hsa-let-7d:QARS:targetscan:mirbase:pictar;

//  
ANNOTATION: 1  
ID CAC-BP:hsa-miR-219;  
TFID CAC-BP;  
MIID ENSG00000199036:hsa-mir-219-1:hsa-miR-219;  
JTID ENSG00000186187:ZNR1 GO:0005515;GO:0005768;GO:0006512;GO:0008270;GO:0016020;GO:0016874;GO:0046872;  
JTID ENSG00000183018:SPNS2 GO:0005215;GO:0006810;GO:0016020;GO:0016021;  
JTID ENSG00000142606:MMEL1 GO:0004245;GO:0006508;GO:0008237;GO:0008270;GO:0016020;GO:0016021;GO:0046872;GO:0005783;GO:0005794;  
JTID ENSG00000178226:PRSS36 GO:0004252;GO:0005578;GO:0005737;GO:0006508;GO:0008233;  
JTID ENSG00000102265:TIMP1 GO:0004857;GO:0005515;GO:0005576;GO:0005578;GO:0007275;GO:0008191;GO:0008284;GO:0043249;GO:0051045;GO:0005604;  
MIJT hsa-miR-219:ZNR1:targetscan:pictar; hsa-miR-219:TIMP1:mirbase; hsa-miR-219:MMEL1:targetscan:mirbase; hsa-miR-219:PRSS36:mirbase;

//  
ANNOTATION: 1  
ID POU3F2:hsa-miR-194;  
TFID POU3F2;  
MIID ENSG00000207624:hsa-mir-194-1:hsa-miR-194;  
JTID ENSG00000158470:B4GALT5 GO:0005975;GO:0008378;GO:0016020;GO:0016021;GO:0016757;GO:0030145;GO:0046872;  
JTID ENSG00000153879:CEBPG GO:0001889;GO:0003700;GO:0005634;GO:0006337;GO:0006338;GO:0006350;GO:0006355;GO:0006955;GO:0008134;GO:0030183;GO:0042267;GO:0043353;GO:0043388;GO:0043433;GO:0043565;GO:0045078;GO:0045739;GO:0046982;GO:0051091;  
MIJT hsa-miR-194:CEBPG:targetscan;

//  
ANNOTATION: 1  
ID POU3F2:hsa-miR-101;  
TFID POU3F2;  
MIID ENSG00000199065:hsa-mir-101-2:hsa-miR-101;  
JTID ENSG00000165995:CACNB2 GO:0005245;GO:0005509;GO:0005887;GO:0005891;GO:0006811;GO:0006816;GO:0007528;GO:0005515;GO:0007268;GO:0007601;  
JTID ENSG00000184602:SNN GO:0006950;GO:0009628;GO:0016020;GO:0016021;  
MIJT hsa-miR-101:SNN:targetscan:pictar; hsa-miR-101:CACNB2:targetscan:mirbase:pictar;

//  
ANNOTATION: 1  
ID MEIS1:hsa-miR-296;  
TFID MEIS1;  
MIID ENSG00000207950:hsa-mir-296:hsa-miR-296;  
JTID ENSG00000167895:TMC8 GO:0005783;GO:0016020;GO:0016021;  
JTID ENSG00000142449:FBN3 GO:0005201;GO:0005509;GO:0005578;GO:0019838;  
JTID ENSG00000170279:C7orf33  
JTID ENSG00000090097:PCBP4 GO:0003677;GO:0003723;GO:0030529;GO:0006977;GO:0007050;GO:0008630;  
JTID ENSG00000184363:PKP3 GO:0005198;GO:0005488;GO:0005515;GO:0005634;GO:0005856;GO:0007155;GO:0030057;  
JTID ENSG00000187796:CARD9 GO:0005515;GO:0005622;GO:0005737;GO:0032874;GO:0042803;GO:0042981;GO:0043123;GO:0046330;GO:0050700;  
JTID ENSG00000101246:ARFRP1 GO:0000166;GO:0003924;GO:0005515;GO:0005525;GO:0005622;GO:0005624;GO:0007165;GO:0007264;GO:0007369;  
JTID ENSG00000167680:SEMA6B GO:0004872;GO:0007275;GO:0007399;GO:0016020;GO:0016021;GO:0030154;  
MIJT hsa-miR-296:C7orf33:targetscan:mirbase; hsa-miR-296:PCBP4:targetscan:mirbase; hsa-miR-296:PKP3:targetscan:mirbase; hsa-miR-296:TMC8:targetscan; hsa-miR-296:FBN3:targetscan:mirbase; hsa-miR-296:ARFRP1:targetscan; hsa-miR-296:SEMA6B:targetscan:mirbase;

//  
ANNOTATION: 1  
ID SRY:hsa-miR-409-5p;  
TFID SRY;

MIID ENSG00000199107:hsa-mir-409:hsa-miR-409-5p;  
JTID ENSG00000125385:RPS29 GO:0003723;GO:0003735;GO:0005515;GO:0005622;GO:0005840;GO:0005843;GO:0006412;GO:0008270;GO:0046872;  
JTID ENSG00000130768:SMPDL3B GO:0008152;GO:0016798;GO:0016787;  
JTID ENSG00000143222:UFC1 GO:0005515;GO:0006512;  
JTID ENSG00000134825:C11orf10  
JTID ENSG00000155008:APOOL GO:0005739;GO:0005743;  
JTID ENSG00000127184:COX7C GO:0004129;GO:0005739;GO:0006118;GO:0016020;GO:0016021;GO:0016491;  
JTID ENSG00000138696:BMPR1B  
GO:0000166;GO:0000287;GO:0001501;GO:0001502;GO:0001550;GO:0001654;GO:0004872;GO:0005025;GO:0005524;GO:0005887;GO:0006468;GO:0006703;GO:0006954;GO:0009953;GO:0016020;GO:0016740;GO:0030145;GO:0030154;GO:0030509;GO:0035108;GO:0042698;GO:0043010;GO:0043235;GO:0045597;GO:0046332;  
JTID ENSG00000143198:MGST3 GO:0004364;GO:0004601;GO:0005624;GO:0005783;GO:0005792;GO:0006629;GO:0007165;GO:0016020;GO:0016021;GO:0016740;  
JTID ENSG0000010404:IDS GO:0004423;GO:0005509;GO:0005764;GO:0008152;GO:0016787;GO:0030203;GO:0005783;GO:0008484;  
JTID ENSG00000135205:NP\_065930.2  
MIJT hsa-miR-409-5p:RPS29:mirbase; hsa-miR-409-5p:COX7C:mirbase; hsa-miR-409-5p:UFC1:mirbase; hsa-miR-409-5p:BMPR1B:mirbase; hsa-miR-409-5p:IDS:targetscan; hsa-miR-409-5p:NP\_065930.2:mirbase;

//  
ANNOTATION: 1  
ID HNF-1:hsa-miR-323;  
TFID HNF-1;  
MIID ENSG00000199069:hsa-mir-323:hsa-miR-323;  
JTID ENSG00000119729:RHOQ GO:0000166;GO:0003924;GO:0005515;GO:0005525;GO:0005622;GO:0005886;GO:0007264;  
JTID ENSG00000197635:DPF4 GO:0004177;GO:0004274;GO:0006508;GO:0006955;GO:0016020;GO:0016021;  
MIJT hsa-miR-323:DPF4:pictar; hsa-miR-323:RHOQ:targetscan;

//  
ANNOTATION: 1  
ID SF-1:hsa-miR-133a;  
TFID SF-1;  
MIID ENSG00000207764:hsa-mir-133a-2:hsa-miR-133a;  
JTID ENSG00000143858:SYT2 GO:0005215;GO:0005509;GO:0006810;GO:0008021;GO:0016020;GO:0016021;GO:0045202;GO:0005515;GO:0005544;GO:0005886;GO:0042598;  
MIJT hsa-miR-133a:SYT2:targetscan;

//  
ANNOTATION: 1  
ID MYC:hsa-miR-365;  
TFID MYC;  
MIID ENSG00000199187:hsa-mir-365-2:hsa-miR-365;  
JTID ENSG00000183735:TBK1 GO:0000166;GO:0004674;GO:0004871;GO:0005515;GO:0005524;GO:0006468;GO:0007249;GO:0009615;GO:0016740;GO:0043123;GO:0045087;  
JTID ENSG00000138756:BMP2K GO:0000166;GO:0004674;GO:0005524;GO:0005634;GO:0006468;GO:0016740;GO:0004672;GO:0019208;GO:0030500;  
MIJT hsa-miR-365:TBK1:targetscan:mirbase;

//  
ANNOTATION: 1  
ID SRY:hsa-miR-495;  
TFID SRY;  
MIID ENSG00000207743:hsa-mir-495:hsa-miR-495;  
JTID ENSG00000120137:PANK3 GO:0000166;GO:0004594;GO:0005524;GO:0015937;GO:0016740;  
JTID ENSG00000177551:NHLH2 GO:0003677;GO:0005634;GO:0006355;GO:0007275;GO:0007417;GO:0007617;GO:0030154;GO:0030528;GO:0042698;  
JTID ENSG00000087301:KIAA1344  
JTID ENSG00000121351:IAPP GO:0005179;GO:0005576;GO:0005625;GO:0006915;GO:0007165;GO:0007267;GO:0019233;GO:0043025;GO:0045596;GO:0045779;  
JTID ENSG00000138771:SHROOM3 GO:0000902;GO:0003779;GO:0005856;GO:0005912;GO:0007389;GO:0016324;GO:0043482;GO:0045176;  
JTID ENSG00000155850:SLC26A2 GO:0005215;GO:0005624;GO:0005987;GO:0006810;GO:0008271;GO:0008272;GO:0016020;  
JTID ENSG00000029993:HMGB3 GO:0000785;GO:0003677;GO:0005634;GO:0005694;GO:0006355;GO:0007275;GO:0008301;  
JTID ENSG00000032514:PGBD3 GO:0000166;GO:0003677;GO:0003678;GO:0003702;GO:0005515;GO:0005524;GO:0005634;GO:0006281;GO:0006350;GO:0006355;GO:0006366;GO:0007605;GO:0016787;GO:0004386;  
JTID ENSG00000164327:NP\_689969.2  
JTID ENSG00000084652:TXLNA GO:0005576;GO:0005737;GO:0006887;GO:0008283;GO:0030372;  
JTID ENSG00000129250:KIF1C GO:0000166;GO:0003777;GO:0005524;GO:0005783;GO:0005794;GO:0005856;GO:0005874;GO:0005875;GO:0006890;GO:0007018;  
JTID ENSG00000163125:KIAA0460  
JTID ENSG00000102904:TSNAXIP1 GO:0005515;GO:0005737;  
JTID ENSG00000121940:CLCC1 GO:0005254;GO:0005634;GO:0005737;GO:0005783;GO:0005792;GO:0005794;GO:0006821;  
JTID ENSG00000175895:PLEKHF2 GO:0008270;GO:0030133;GO:0046872;  
JTID ENSG00000021574:SPAST GO:0000166;GO:0005524;GO:0005634;GO:0017111;  
JTID ENSG00000138696:BMPR1B  
GO:0000166;GO:0000287;GO:0001501;GO:0001502;GO:0001550;GO:0001654;GO:0004872;GO:0005025;GO:0005524;GO:0005887;GO:0006468;GO:0006703;GO:0006954;GO:0009953;GO:0016020;GO:0016740;GO:0030145;GO:0030154;GO:0030509;GO:0035108;GO:0042698;GO:0043010;GO:0043235;GO:0045597;GO:0046332;  
JTID ENSG00000164164:OTUD4 GO:0005515;  
JTID ENSG00000166170:BAG5 GO:0005515;GO:0006457;GO:0006915;  
JTID ENSG00000162415:ZSWIM5 GO:0008270;GO:0046872;  
JTID ENSG00000162437:RAVER2 GO:0000166;GO:0003723;GO:0005634;GO:0005515;  
MIJT hsa-miR-495:PLEKHF2:targetscan; hsa-miR-495:OTUD4:targetscan:mirbase; hsa-miR-495:NHLH2:targetscan; hsa-miR-495:CLCC1:targetscan:mirbase; hsa-miR-495:RAVER2:targetscan; hsa-miR-495:BAG5:targetscan; hsa-miR-495:SLC26A2:targetscan; hsa-miR-495:IAPP:targetscan:mirbase; hsa-miR-495:HMGB3:targetscan; hsa-miR-495:SPAST:targetscan; hsa-miR-495:SHROOM3:targetscan:mirbase; hsa-miR-495:TXLNA:targetscan; hsa-miR-495:PANK3:targetscan;

//  
ANNOTATION: 1  
ID HNF-3:hsa-miR-499;  
TFID HNF-3;  
MIID ENSG00000207635:hsa-mir-499:hsa-miR-499;  
JTID ENSG00000172965:Q96C48 HUMAN  
JTID ENSG00000184943:NP\_443103.1  
JTID ENSG00000104154:SLC30A4 GO:0005385;GO:0005764;GO:0005768;GO:0006812;GO:0006829;GO:0008021;GO:0008270;GO:0008324;GO:0016020;GO:0016021;  
MIJT hsa-miR-499:SLC30A4:targetscan; hsa-miR-499:Q96C48\_HUMAN:mirbase;

//  
ANNOTATION: 1  
ID HNF-3:hsa-miR-129;  
TFID HNF-3;  
MIID ENSG00000199077:hsa-mir-129-2:hsa-miR-129;  
JTID ENSG00000146409:C6orf192 GO:0005215;GO:0006810;GO:0016020;GO:0016021;  
JTID ENSG00000145416:MARCH1 GO:0005515;GO:0006512;GO:0008270;GO:0016020;GO:0016021;GO:0016874;GO:0046872;  
JTID ENSG00000120533:ENY2  
JTID ENSG00000133627:ACTR3B GO:0005515;GO:0005856;GO:0030041;GO:0051015;GO:0000166;GO:0005524;  
JTID ENSG00000198693:Q6ZW86 HUMAN  
JTID ENSG00000164849:GPR146 GO:0001584;GO:0004872;GO:0007165;GO:0007186;GO:0016020;GO:0016021;  
JTID ENSG0000016082:ISL1 GO:0001755;GO:0003007;GO:0003700;GO:0003702;GO:0005515;GO:0005634;GO:0006091;GO:0006355;GO:0007275;GO:0007507;GO:0008270;GO:0043565;GO:0046872;  
MIJT hsa-miR-129:ISL1:targetscan:pictar; hsa-miR-129:GPR146:mirbase;

//  
ANNOTATION: 1  
ID HNF-1:hsa-miR-496;  
TFID HNF-1;  
MIID ENSG00000207961:hsa-mir-496:hsa-miR-496;  
JTID ENSG00000109163:GNRHR GO:0001584;GO:0004872;GO:0004968;GO:0005887;GO:0007165;GO:0007186;GO:0007275;GO:0016020;

JTID ENSG00000174521:TTC9B GO:0005488;GO:0006457;  
JTID ENSG00000181192:DHTKD1 GO:0004591;GO:0006096;GO:0008152;GO:0030976;  
JTID ENSG00000057252:SOAT1 GO:0004772;GO:0005783;GO:0006629;GO:0008015;GO:0008202;GO:0008203;GO:0008415;GO:0016020;GO:0016021;GO:0016740;  
JTID ENSG00000175104:TRAF6  
GO:0000209;GO:0001503;GO:0001843;GO:0002726;GO:0004842;GO:0004871;GO:0005515;GO:0005624;GO:0005829;GO:0006512;GO:0006955;GO:0007165;GO:0007250;GO:0008270;GO:0009887;GO:0019886;GO:0042088;GO:0042475;GO:0042981;GO:0043011;GO:0043123;GO:0045084;GO:0045410;GO:0046872;GO:0048468;GO:0050852;GO:0050870;GO:0051023;  
JTID ENSG00000077147:TM9SF3 GO:0005488;GO:0016020;GO:0016021;  
JTID ENSG00000164007:CLDN19 GO:0000287;GO:0005198;GO:0005923;GO:0007601;GO:0016020;GO:0016021;GO:0016338;GO:0042802;GO:0050896;  
JTID ENSG00000197430:TMEM10 GO:0005794;GO:0016020;GO:0016021;  
JTID ENSG00000169432:SCN9A GO:0001518;GO:0005248;GO:0005624;GO:0006811;GO:0006814;GO:0016020;GO:0031402;  
MIJT hsa-miR-496:SCN9A:targetscan:mirbase; hsa-miR-496:TTC9B:targetscan; hsa-miR-496:TM9SF3:targetscan; hsa-miR-496:GNNRHR:targetscan; hsa-miR-496:DHTKD1:targetscan;

//  
ANNOTATION: 1  
ID SF-1:hsa-miR-499;  
TFID SF-1;  
MIID ENSG00000207635:hsa-mir-499:hsa-miR-499;  
JTID ENSG00000124449:IRGC  
JTID ENSG00000173436:Clorf151 GO:0016020;GO:0016021;  
MIJT hsa-miR-499:IRGC:targetscan; hsa-miR-499:Clorf151:targetscan;

//  
ANNOTATION: 1  
ID AML1:hsa-miR-149;  
TFID AML1;  
MIID ENSG00000207611:hsa-mir-149:hsa-miR-149;  
JTID ENSG00000128731:HERC2 GO:0004842;GO:0005085;GO:0005622;GO:0006464;GO:0006512;GO:0006886;GO:0008270;GO:0016874;GO:0020037;  
JTID ENSG00000157856:C2orf39  
JTID ENSG00000138111:TMEM180 GO:0016020;GO:0016021;  
JTID ENSG00000168297:PKX GO:0003779;GO:0005515;GO:0005737;GO:0007154;GO:0035091;GO:0050804;  
JTID ENSG00000059573:ALDH18A1 GO:0003942;GO:0004349;GO:0004350;GO:0005737;GO:0005739;GO:0006561;GO:0008652;GO:0016020;GO:0016301;GO:0016491;GO:0016740;  
JTID ENSG00000205852:Q6ZWI3\_HUMAN  
JTID ENSG00000167994:RAB31L1  
JTID ENSG00000121481:RNF2 GO:0005515;GO:0005634;GO:0005694;GO:0006350;GO:0006355;GO:0006512;GO:0008270;GO:0016874;GO:0046872;  
JTID ENSG00000118816:CCNI GO:0000074;GO:0007283;  
MIJT hsa-miR-149:ALDH18A1:targetscan; hsa-miR-149:C2orf39:targetscan:mirbase; hsa-miR-149:TMEM180:targetscan; hsa-miR-149:CCNI:targetscan:mirbase:pictar; hsa-miR-149:PKX:targetscan:mirbase; hsa-miR-149:RAB31L1:targetscan:mirbase; hsa-miR-149:RNF2:targetscan:pictar; hsa-miR-149:HERC2:targetscan:mirbase;

//  
ANNOTATION: 1  
ID AHR:hsa-miR-142-5p;  
TFID AHR;  
MIID ENSG00000207567:hsa-mir-142:hsa-miR-142-5p;  
JTID ENSG00000124357:NAGK GO:000166;GO:0005515;GO:0005524;GO:0005625;GO:0006044;GO:0006051;GO:0009384;GO:0016301;GO:0016740;GO:0045127;  
JTID ENSG00000023191:RNH1 GO:0005515;GO:0006402;GO:0008428;GO:0032311;GO:0045765;  
JTID ENSG00000144659:SLC25A38 GO:0005488;GO:0005743;GO:0006810;GO:0016020;GO:0016021;  
MIJT hsa-miR-142-5p:SLC25A38:targetscan; hsa-miR-142-5p:RNH1:targetscan:mirbase:pictar; hsa-miR-142-5p:NAGK:targetscan;

//  
ANNOTATION: 1  
ID CdxA:hsa-miR-125b;  
TFID CdxA;  
MIID ENSG00000207971:hsa-mir-125b-1:hsa-miR-125b;  
JTID ENSG00000205205:C17orf51  
JTID ENSG00000138111:TMEM180 GO:0016020;GO:0016021;  
JTID ENSG00000186314:PRELID2  
JTID ENSG00000172215:CXCR6 GO:0001584;GO:0005887;GO:0007165;GO:0007186;GO:0015026;GO:0016020;GO:0016493;GO:0016494;GO:0019079;  
JTID ENSG0000011537:IFNG  
GO:0001558;GO:0001781;GO:0005125;GO:0005133;GO:0005576;GO:0005615;GO:0006925;GO:0006928;GO:0007166;GO:0007267;GO:0009615;GO:0019882;GO:0030593;GO:0030968;GO:0031642;GO:0042742;GO:0045080;GO:0045084;GO:0045348;GO:0045410;GO:0045449;GO:0045893;GO:0048304;GO:0050718;GO:0050776;  
JTID ENSG00000156234:CXCL13 GO:0005576;GO:0005615;GO:0005625;GO:0006935;GO:0006954;GO:0006955;GO:0007204;GO:0007267;GO:0008009;GO:0048535;  
JTID ENSG00000088205:DDX18 GO:0000166;GO:0003723;GO:0004004;GO:0005524;GO:0016787;  
JTID ENSG00000095303:PTGS1 GO:0001516;GO:0004601;GO:0004666;GO:0005506;GO:0005634;GO:0005737;GO:0005792;GO:0006629;GO:0006633;GO:0008217;GO:0016020;GO:0016491;GO:0016702;GO:0030216;GO:0046872;  
MIJT hsa-miR-125b:CXCL13:targetscan; hsa-miR-125b:TMEM180:targetscan:mirbase:pictar; hsa-miR-125b:IFNG:targetscan:mirbase; hsa-miR-125b:PRELID2:targetscan; hsa-miR-125b:PTGS1:targetscan;

//  
ANNOTATION: 1  
ID AML1:hsa-miR-302c\*;  
TFID AML1;  
MIID ENSG00000199102:hsa-mir-302c:hsa-miR-302c\*;  
JTID ENSG00000073605:GSDML  
JTID ENSG00000073712:PLEKHC1 GO:0001725;GO:0005515;GO:0005856;GO:0007155;GO:0008360;GO:0030036;GO:0031941;  
JTID ENSG00000073282:TP73L  
GO:0003700;GO:0005634;GO:0006350;GO:0006915;GO:0006917;GO:0007219;GO:0007275;GO:0008270;GO:0016563;GO:0016564;GO:0042802;GO:0045747;GO:0045892;GO:0045893;GO:0046872;GO:0051289;GO:0001501;GO:0001736;GO:0003682;GO:0007389;GO:0007499;GO:0009887;GO:0030216;GO:0030859;GO:0031069;GO:0042475;GO:0045944;  
JTID ENSG00000097033:SH3GLB1 GO:0005515;GO:0005737;GO:0006915;GO:0006916;GO:0008289;GO:0008415;GO:0016740;GO:0042803;GO:0001844;GO:0005504;GO:0005792;GO:0006654;GO:0008654;GO:0016020;GO:0042171;GO:0051084;  
JTID ENSG00000129538:RNASE1 GO:0003723;GO:0004519;GO:0004522;GO:0005576;GO:0016787;  
JTID ENSG00000185198:PRSSL1 GO:0004252;GO:0006508;  
JTID ENSG00000147614:ATP6VOD2 GO:0006811;GO:0015986;GO:0015992;GO:0016469;GO:0016787;GO:0046872;GO:0046933;GO:0046961;  
JTID ENSG00000159455:LCE2B GO:0008544;GO:0031424;  
JTID ENSG00000125772:GDE5\_HUMAN GO:0005975;GO:0006071;GO:0008889;GO:0016787;GO:0030246;  
MIJT hsa-miR-302c\*:GSDML:mirbase; hsa-miR-302c\*:SH3GLB1:mirbase; hsa-miR-302c\*:PRSSL1:mirbase; hsa-miR-302c\*:RNASE1:mirbase;

//  
ANNOTATION: 1  
ID CdxA:hsa-miR-20b;  
TFID CdxA;  
MIID ENSG00000207710:hsa-mir-20b:hsa-miR-20b;  
JTID ENSG00000136811:ODF2 GO:0005198;  
JTID ENSG00000124762:CDKN1A GO:0000307;GO:0004672;GO:0004861;GO:0005634;GO:0005829;GO:0006974;GO:0007049;GO:0007050;GO:0008270;GO:0008285;GO:0008629;GO:0009411;GO:0016301;GO:0030332;GO:0030890;GO:0043066;GO:0043071;GO:0045736;GO:0046872;GO:0000074;GO:0005515;  
JTID ENSG00000180917:NP\_060818.3  
JTID ENSG00000100644:HIF1A  
GO:0001666;GO:0003705;GO:0004871;GO:0005515;GO:0005634;GO:0006355;GO:0007165;GO:0030353;GO:0042592;GO:0045941;GO:0046982;GO:0001525;GO:0001755;GO:0001947;GO:0003677;GO:0003700;GO:0006879;GO:0009434;GO:0030154;GO:0030949;GO:0035162;GO:0042541;GO:0042981;GO:0045648;GO:0045926;GO:0045944;GO:0051216;  
JTID ENSG00000163281:GNPDA2 GO:0004342;GO:0005975;GO:0006044;GO:0016853;  
JTID ENSG00000134375:TIMM17A GO:0005739;GO:0005744;GO:0006626;GO:0015450;GO:0016020;GO:0016021;  
JTID ENSG00000127511:SIN3B GO:0003714;GO:0005515;GO:0005634;GO:0006350;GO:0045892;  
MIJT hsa-miR-20b:CDKN1A:targetscan:pictar; hsa-miR-20b:TIMM17A:targetscan; hsa-miR-20b:SIN3B:targetscan; hsa-miR-20b:HIF1A:targetscan:pictar; hsa-miR-20b:NP\_060818.3:mirbase; hsa-miR-20b:GNPDA2:targetscan;

//  
ANNOTATION: 1

```
ID CAD:hsa-miR-26a;
TFID CAD;
MIID ENSG00000207789:hsa-mir-26a-2:hsa-miR-26a;
JTID ENSG00000158161:EYA3 GO:000287;GO:0004721;GO:0005634;GO:0006350;GO:0006355;GO:0007275;GO:0008152;GO:0016787;GO:0004725;GO:0005515;GO:0006470;GO:0007601;GO:0008138;GO:0009653;
JTID ENSG00000174989:FBXW8 GO:0005515;GO:0006512;
JTID ENSG00000103365:GGA2 GO:0005515;GO:0005622;GO:0005802;GO:0006461;GO:0006886;GO:0016020;GO:0030130;GO:0030306;
MIJT hsa-miR-26a:GGA2:targetscan;

//
ANNOTATION: 1
ID SOX-5:hsa-miR-30a-3p;
TFID SOX-5;
MIID ENSG00000207827:hsa-mir-30a:hsa-miR-30a-3p;
JTID ENSG00000158639:PAGE5
JTID ENSG00000203784:LLELP1
JTID ENSG00000185532:PRKG1 GO:0004674;GO:0004692;GO:0005524;GO:0005952;GO:0006468;GO:0008603;GO:0016301;GO:0000166;GO:0006940;GO:0007165;GO:0016740;GO:0030036;GO:0030553;GO:0001764;GO:0004672;GO:0005515;GO:0016358;GO:0030900;
JTID ENSG00000164975:SNAPC3 GO:0003677;GO:0005634;GO:0006350;GO:0006355;GO:0006366;GO:0006383;GO:0009301;
JTID ENSG00000149305:HTR3B GO:0004993;GO:0005216;GO:0005230;GO:0005232;GO:0005887;GO:0006811;GO:0007210;GO:0007268;GO:0030594;GO:0045211;
MIJT hsa-miR-30a-3p:LLELP1:targetscan:mirbase; hsa-miR-30a-3p:PAGE5:targetscan:mirbase; hsa-miR-30a-3p:PRKG1:targetscan;

//
ANNOTATION: 1
ID HNF-3:hsa-let-7f;
TFID HNF-3;
MIID ENSG00000199072:hsa-let-7f-1:hsa-let-7f;
JTID ENSG00000118971:CCND2 GO:0000074;GO:0005515;GO:0005634;GO:0007049;GO:0051301;
JTID ENSG00000164654:NP_061878.3
JTID ENSG00000183035:CYLC1 GO:0005198;GO:0005856;GO:0007275;GO:0007283;GO:0030154;GO:0043159;
JTID ENSG00000179476:C14orf28
JTID ENSG00000177058:NP_775785.1
JTID ENSG00000187109:NAP1L1 GO:0005515;GO:0005634;GO:0005678;GO:0006260;GO:0006334;GO:0008284;
JTID ENSG00000105419:Q99687-2
JTID ENSG00000181322:TXNDC6 GO:0004550;GO:0005524;GO:0006183;GO:0006228;GO:0006241;GO:0045454;
JTID ENSG00000172053:QARS GO:0000166;GO:0004818;GO:0004819;GO:0005515;GO:0005524;GO:0005625;GO:0005737;GO:0006424;GO:0006425;GO:0016874;
JTID ENSG00000182263:FIGN GO:0000166;GO:0005524;GO:0017111;
MIJT hsa-let-7f:CCND2:targetscan:pictar; hsa-let-7f:CYLC1:mirbase; hsa-let-7f:Q99687-2:mirbase; hsa-let-7f:NAP1L1:targetscan:mirbase; hsa-let-7f:TXNDC6:targetscan; hsa-let-7f:FIGN:targetscan; hsa-let-7f:C14orf28:targetscan:mirbase; hsa-let-7f:QARS:targetscan:mirbase:pictar; hsa-let-7f:NP_775785.1:pictar;

//
ANNOTATION: 1
ID TCF-1(P):hsa-miR-26a;
TFID TCF-1(P);
MIID ENSG00000207789:hsa-mir-26a-2:hsa-miR-26a;
JTID ENSG00000104343:UBE2W GO:0004842;GO:0006464;GO:0006512;GO:0016874;
JTID ENSG00000129480:C14orf126 GO:0005737;GO:0016788;GO:0019478;
JTID ENSG00000178425:NT5DC1
JTID ENSG00000150361:KLHL1 GO:0003779;GO:0005515;GO:0005737;GO:0005856;GO:0030036;
JTID ENSG00000180660:MAB21L1 GO:0009653;GO:0008284;GO:0043010;
JTID ENSG00000092020:PPP2R3C GO:0005509;GO:0005634;
JTID ENSG00000182141:ZNF708 GO:0003677;GO:0005622;GO:0005634;GO:0006350;GO:0006355;GO:0008270;GO:0046872;
JTID ENSG00000138336:CXXC6 GO:0003677;GO:0005634;GO:0008270;GO:0046872;
JTID ENSG00000114648:KLHL18 GO:0005515;
MIJT hsa-miR-26a:UBE2W:targetscan:pictar; hsa-miR-26a:NT5DC1:targetscan:mirbase; hsa-miR-26a:CXXC6:targetscan:pictar; hsa-miR-26a:KLHL18:targetscan; hsa-miR-26a:MAB21L1:targetscan:pictar; hsa-miR-26a:PPP2R3C:targetscan:mirbase; hsa-miR-26a:ZNF708:targetscan; hsa-miR-26a:C14orf126:targetscan;

//
ANNOTATION: 1
ID SOX-5:hsa-let-7a;
TFID SOX-5;
MIID ENSG00000198975:hsa-let-7a-2:hsa-let-7a;
JTID ENSG00000133136:GBG5L_HUMAN GO:0003924;GO:0004871;GO:0005576;GO:0005834;GO:0007186;
JTID ENSG00000135476:ESPL1 GO:0000070;GO:0000074;GO:0000212;GO:0000910;GO:0005515;GO:0005634;GO:0005813;GO:0006508;GO:0006915;GO:0007059;GO:0007127;GO:0008234;GO:0040001;GO:0045143;GO:0045842;GO:0045875;
JTID ENSG00000143851:PTPN7 GO:0004725;GO:0004872;GO:0005737;GO:0006470;GO:0016787;GO:0016791;
JTID ENSG00000143546:S100A8 GO:0005509;GO:0005615;GO:0006954;
JTID ENSG00000163104:SMARCA1 GO:0000018;GO:0000166;GO:0003677;GO:0004386;GO:0005515;GO:0005524;GO:0005634;GO:0009117;GO:0016363;GO:0016568;GO:0016787;GO:0045941;GO:0051260;
JTID ENSG00000092531:SNAP23 GO:0005486;GO:0005515;GO:0005886;GO:0006892;GO:0006903;GO:0006944;GO:0015031;GO:0019717;GO:0045202;GO:0005792;
JTID ENSG00000187772:LIN28B GO:0003677;GO:0006355;GO:0008270;GO:0046872;
JTID ENSG00000148200:NR6A1 GO:0003700;GO:0003707;GO:0005634;GO:0006350;GO:0006355;GO:0008270;GO:0043565;GO:0046872;GO:0000122;GO:0003677;GO:0005515;GO:0005667;GO:0007276;GO:0007283;GO:0008283;GO:0042803;
JTID ENSG00000082153:BZW1 GO:0003743;GO:0005737;GO:0006350;GO:0006355;GO:0006464;
JTID ENSG00000164654:NP_061878.3
JTID ENSG00000144031:ANKRD53
JTID ENSG00000138036:DYNC2LI1 GO:0007368;GO:0042384;
JTID ENSG00000135441:BLOC1S1 GO:0005515;
JTID ENSG00000187164:KIAA1598
JTID ENSG00000198105:ZNF248 GO:0003676;GO:0003677;GO:0005622;GO:0005634;GO:0006350;GO:0006355;GO:0008270;GO:0046872;
JTID ENSG00000181322:TXNDC6 GO:0004550;GO:0005524;GO:0006183;GO:0006228;GO:0006241;GO:0045454;
MIJT hsa-let-7a:DYNC2LI1:mirbase; hsa-let-7a:ANKRD53:targetscan; hsa-let-7a:SMARCA1:targetscan:pictar; hsa-let-7a:GBG5L_HUMAN:mirbase; hsa-let-7a:BLOC1S1:targetscan:mirbase; hsa-let-7a:PTPN7:targetscan; hsa-let-7a:TXNDC6:targetscan; hsa-let-7a:LIN28B:targetscan:pictar; hsa-let-7a:SNAP23:targetscan:pictar; hsa-let-7a:ZNF248:targetscan:pictar; hsa-let-7a:BZW1:targetscan:mirbase; hsa-let-7a:ESPL1:targetscan:mirbase;

//
ANNOTATION: 1
ID SRY:hsa-miR-494;
TFID SRY;
MIID ENSG00000194717:hsa-mir-494:hsa-miR-494;
JTID ENSG00000186960:Q86U37_HUMAN
JTID ENSG00000163848:SLC12A8 GO:0006810;GO:0016020;GO:0000122;GO:0003677;GO:0003704;GO:0005622;GO:0005634;GO:0005665;GO:0006350;GO:0006355;GO:0006968;GO:0008270;GO:0046872;GO:0003676;GO:0007276;GO:0016563;
JTID ENSG00000102898:NUTF2 GO:0005215;GO:0005515;GO:0005622;GO:0005643;GO:0005829;GO:0006810;GO:0015031;
JTID ENSG00000085382:HACE1 GO:0004842;GO:0005622;GO:0006464;GO:0006512;GO:0016874;
JTID ENSG00000135697:BCMO1 GO:0003834;GO:0005506;GO:0016491;
JTID ENSG00000153976:HS3ST3A1 GO:0008146;GO:0016020;GO:0016021;GO:0016740;
JTID ENSG00000120696:KBTBD7 GO:0005515;
JTID ENSG00000180772:AGTR2 GO:0001584;GO:0002033;GO:0002035;GO:0004860;GO:0004872;GO:0004945;GO:0004947;GO:0005887;GO:0006915;GO:0007186;GO:0007610;GO:0008217;GO:0016020;
JTID ENSG00000182139:Q96FU4_HUMAN
JTID ENSG00000115415:STAT1 GO:0000074;GO:0003700;GO:0004871;GO:0005062;GO:0005509;GO:0005515;GO:0005634;GO:0005737;GO:0006350;GO:0006355;GO:0006366;GO:0006919;GO:0007165;GO:0007242;GO:0007249;GO:0007260;GO:0007262;GO:0009615;GO:0019221;GO:0031663;GO:0032496;GO:0043330;
JTID ENSG00000135968:GCC2 GO:0005515;
MIJT hsa-miR-494:STAT1:targetscan; hsa-miR-494:BCMO1:targetscan:mirbase; hsa-miR-494:GCC2:targetscan; hsa-miR-494:SLC12A8:targetscan; hsa-miR-494:HS3ST3A1:targetscan:mirbase; hsa-miR-494:KBTBD7:targetscan; hsa-miR-494:NUTF2:targetscan; hsa-miR-494:HACE1:targetscan:mirbase;

//
ANNOTATION: 1
ID AFP1:hsa-let-7f;
TFID AFP1;
```

```
MIID ENSG00000199072:hsa-let-7f-1:hsa-let-7f;
JTID ENSG00000197948:FCHSD1
JTID ENSG00000204538:PSORS1C2
JTID ENSG00000179165:PXT1
MIJT hsa-let-7f:FCHSD1:targetscan; hsa-let-7f:PSORS1C2:targetscan:mirbase:pictar; hsa-let-7f:PXT1:targetscan;

//
ANNOTATION: 1
ID IY:hsa-miR-506;
TFID IY;
MIID ENSG00000207731:hsa-mir-506:hsa-miR-506;
JTID ENSG00000125755:SYMPK GO:0005515;GO:0005634;GO:0005654;GO:0005737;GO:0005923;GO:0007155;
JTID ENSG00000006715:VPS41 GO:0005515;GO:0008270;GO:0015031;GO:0046872;GO:0005769;GO:0005770;GO:0005874;GO:0008017;
JTID ENSG00000152254:G6PC2
JTID ENSG00000168916:ZNF608 GO:0003676;GO:0005622;GO:0008270;GO:0046872;
JTID ENSG0000011424:VDR GO:0001501;GO:0003700;GO:0003707;GO:0004879;GO:0005515;GO:0005634;GO:0006350;GO:0006355;GO:0006816;GO:0006874;GO:0007165;GO:0007275;GO:0008270;GO:0008434;GO:0009887;GO:0016481;GO:0030528;GO:0043565;GO:0046872;GO:0050892;
JTID ENSG00000134253:TRIM45 GO:0005622;GO:0008270;GO:0005515;GO:0005634;GO:0046872;
JTID ENSG00000100625:SIX4 GO:0003700;GO:0005634;GO:0006355;GO:0007275;GO:0007519;GO:0042472;GO:0043565;GO:0045941;GO:0048538;GO:0048704;GO:0051451;GO:0003677;GO:0048856;
JTID ENSG00000184232:OAF
JTID ENSG00000114867:EIF4G1 GO:0003743;GO:0003723;GO:0005515;GO:0005737;GO:0006446;GO:0016281;
JTID ENSG00000131196:NFATC1 GO:0000082;GO:0001837;GO:0003700;GO:0005528;GO:0005634;GO:0005737;GO:0006355;GO:0006366;GO:0006816;GO:0007507;
JTID ENSG000000084652:TXLNA GO:0005576;GO:0005737;GO:0006887;GO:0008283;GO:0030372;
JTID ENSG00000172819:RARG GO:0003700;GO:0003708;GO:0005515;GO:0005634;GO:0006350;GO:0006355;GO:0007275;GO:0008270;GO:0043565;GO:0046872;GO:0003677;GO:0005667;GO:0043065;GO:0045944;GO:0048048;
JTID ENSG00000117569:PTBP2 GO:0000166;GO:0003729;GO:0005515;GO:0005634;GO:0005681;GO:0006376;GO:0006397;GO:0008380;
MIJT hsa-miR-506:ZNF608:targetscan; hsa-miR-506:TRIM45:targetscan:mirbase; hsa-miR-506:RARG:targetscan; hsa-miR-506:VDR:targetscan; hsa-miR-506:PTBP2:targetscan; hsa-miR-506:SYMPK:targetscan:mirbase; hsa-miR-506:OAF:targetscan; hsa-miR-506:NFATC1:targetscan; hsa-miR-506:G6PC2:targetscan; hsa-miR-506:SIX4:targetscan; hsa-miR-506:TXLNA:targetscan;

//
ANNOTATION: 1
ID AML1:hsa-miR-367;
TFID AML1;
MIID ENSG00000199169:hsa-mir-367:hsa-miR-367;
JTID ENSG00000091664:SLC17A6 GO:0001504;GO:0005215;GO:0005313;GO:0006810;GO:0008021;GO:0016020;GO:0016021;
JTID ENSG00000173040:EVC2 GO:0016020;GO:0016021;
JTID ENSG000000069812:HES2 GO:0003677;GO:0005634;GO:0006355;GO:0030528;
JTID ENSG00000110848:CD69 GO:0004888;GO:0005529;GO:0005887;GO:0006952;GO:0007166;GO:0009897;GO:0016020;
JTID ENSG00000198677:KIAA0372 GO:0005488;
JTID ENSG00000196186:Q71RF5_HUMAN
JTID ENSG00000136478:TEX2 GO:0016020;GO:0016021;
JTID ENSG00000128641:MYO1B GO:0003774;GO:0005524;GO:0016459;GO:0000166;GO:0003779;GO:0005516;
JTID ENSG00000198106:RUNDC2B
JTID ENSG000000081377:CDCL4C GO:0051301;GO:0004722;GO:0004725;GO:0005634;GO:0006470;GO:0008138;GO:0016787;GO:0016791;
JTID ENSG00000154217:PITPNC1 GO:0005622;GO:0006810;GO:0005737;GO:0007165;GO:0008526;
JTID ENSG00000023171:GRAMD1B
MIJT hsa-miR-367:MYO1B:targetscan:mirbase:pictar; hsa-miR-367:CD69:targetscan:mirbase:pictar; hsa-miR-367:PITPNC1:targetscan:mirbase; hsa-miR-367:HES2:targetscan; hsa-miR-367:GRAMD1B:mirbase; hsa-miR-367:SLC17A6:targetscan:pictar; hsa-miR-367:TEX2:targetscan; hsa-miR-367:RUNDC2B:mirbase;

//
ANNOTATION: 1
ID GABP:hsa-miR-223;
TFID GABP;
MIID ENSG00000207939:hsa-mir-223:hsa-miR-223;
JTID ENSG00000151148:UBE3B GO:0004842;GO:0005622;GO:0006464;GO:0006512;GO:0016874;
JTID ENSG000000091136:LAMB1 GO:0005201;GO:0005604;GO:0005606;GO:0005607;GO:0007155;GO:0007566;GO:0019899;GO:0030335;GO:0031175;GO:0042476;GO:0043257;GO:0043259;GO:0048471;GO:0050679;
JTID ENSG00000170638:TRABD
JTID ENSG00000163364:Q96D13_HUMAN
JTID ENSG00000064490:RFXANK GO:0003700;GO:0003713;GO:0005634;GO:0006350;GO:0006355;GO:0006366;GO:0006959;GO:0005737;GO:0007265;
JTID ENSG00000004455:AK2 GO:0000166;GO:0004017;GO:0005524;GO:0005739;GO:0005743;GO:0006139;GO:0016301;GO:0016740;GO:0019206;
JTID ENSG00000112290:WASF1 GO:0003779;GO:0006461;GO:0006928;GO:0015629;GO:0030041;GO:0005515;GO:0005739;GO:0005741;GO:0030027;
JTID ENSG00000103429:BFAR GO:0005198;GO:0005515;GO:0005624;GO:0005783;GO:0005887;GO:0006915;GO:0006916;GO:0008270;GO:0016020;GO:0046872;
JTID ENSG00000122432:SPATA1
JTID ENSG00000145860:RNF145 GO:0004872;GO:0005515;GO:0006512;GO:0008270;GO:0046872;
JTID ENSG00000115415:STAT1 GO:0000074;GO:0003700;GO:0004871;GO:0005062;GO:0005509;GO:0005515;GO:0005634;GO:0005737;GO:0006350;GO:0006355;GO:0006366;GO:0006919;GO:0007165;GO:0007242;GO:0007249;GO:0007260;GO:0007262;GO:0009615;GO:0019221;GO:0031663;GO:0032496;GO:0043330;
MIJT hsa-miR-223:RFXANK:targetscan:mirbase; hsa-miR-223:AK2:targetscan; hsa-miR-223:STAT1:targetscan; hsa-miR-223:UBE3B:targetscan; hsa-miR-223:LAMB1:targetscan:mirbase; hsa-miR-223:Q96D13_HUMAN:mirbase; hsa-miR-223:BFAR:targetscan; hsa-miR-223:RNF145:pictar;

//
ANNOTATION: 1
ID SRF:hsa-miR-194;
TFID SRF;
MIID ENSG00000207624:hsa-mir-194-1:hsa-miR-194;
JTID ENSG00000054523:KIF1B GO:0000166;GO:0003777;GO:0005515;GO:0005524;GO:0005739;GO:0005874;GO:0005875;GO:0007018;GO:0007270;GO:0007274;GO:0008017;GO:0008089;GO:0009790;GO:0016887;GO:0019894;GO:0030659;GO:0047497;
JTID ENSG00000169031:COL4A3 GO:0005178;GO:0005201;GO:0005515;GO:0005581;GO:0005587;GO:0005737;GO:0006817;GO:0006917;GO:0006919;GO:0007155;GO:0007166;GO:0007605;GO:0008015;GO:0008191;GO:0008283;GO:0008285;GO:0016525;
JTID ENSG00000165899:CL2orf64
JTID ENSG00000077312:SNRPA GO:0000166;GO:0000398;GO:0003723;GO:0005515;GO:0005634;GO:0005681;GO:0005685;GO:0008380;
JTID ENSG00000153885:KCTD15 GO:0005249;GO:0005515;GO:0006813;GO:0008076;GO:0016020;
JTID ENSG00000177853:ZNF518 GO:0003677;GO:0005622;GO:0005634;GO:0006350;GO:0006355;GO:0008270;GO:0046872;
MIJT hsa-miR-194:ZNF518:targetscan; hsa-miR-194:KIF1B:targetscan; hsa-miR-194:KCTD15:targetscan;

//
ANNOTATION: 1
ID HIF-1:hsa-miR-199a;
TFID HIF-1;
MIID ENSG00000208024:hsa-mir-199a-2:hsa-miR-199a;
JTID ENSG00000108515:ENO3 GO:0000015;GO:0000287;GO:0004634;GO:0006096;GO:0016829;
JTID ENSG00000176986:SEC24C GO:0005515;GO:0005783;GO:0006886;GO:0006888;GO:0008270;GO:0030127;
JTID ENSG00000204380:Q6ZTQ2_HUMAN
JTID ENSG00000196724:ZNF418 GO:0003677;GO:0005622;GO:0005634;GO:0006350;GO:0006355;GO:0008270;GO:0046872;
JTID ENSG00000145681:HAPLN1 GO:0005540;GO:0005578;GO:0007155;
JTID ENSG00000206198:NR_001535.1
MIJT hsa-miR-199a:ZNF418:targetscan; hsa-miR-199a:ENO3:targetscan:mirbase; hsa-miR-199a:SEC24C:targetscan;

//
ANNOTATION: 1
ID SRV:hsa-miR-221;
TFID SRV;
MIID ENSG00000207870:hsa-mir-221:hsa-miR-221;
JTID ENSG00000033867:SLC4A7 GO:0005452;GO:0005515;GO:0006814;GO:0006820;GO:0008510;GO:0015293;GO:0015701;GO:0016020;GO:0016021;GO:0031402;
JTID ENSG00000149136:SSRF1 GO:0000785;GO:0003677;GO:0005515;GO:0005634;GO:0005694;GO:0006260;GO:0006281;GO:0006350;GO:0006355;
JTID ENSG00000118971:CCND2 GO:0000074;GO:0005515;GO:0005634;GO:0007049;GO:0051301;
JTID ENSG00000186462:NAP1L2 GO:0005634;GO:0005678;GO:0006334;
JTID ENSG00000187325:TAF9B GO:0005634;GO:0005669;GO:0006350;GO:0006352;GO:0006355;
JTID ENSG00000204220:PFND6 GO:0006457;GO:0016272;GO:0051082;
```



JTID ENSG00000135046:ANXA1 GO:0001533;GO:0004859;GO:0005102;GO:0005198;GO:0005509;GO:0005544;GO:0005737;GO:0006629;GO:0006916;GO:0006928;GO:0006954;GO:0007049;GO:0007166;GO:0018149;GO:0019834;GO:0030216;GO:0030674;GO:0042127;GO:0042383;GO:0050482;GO:0005515;GO:0007165;  
JTID ENSG00000175556:LONRF3 GO:0004176;GO:0005515;GO:0006510;GO:0008270;GO:0046872;  
MIJT hsa-miR-221:CCND2:targetscan; hsa-miR-221:NAP1L2:targetscan; hsa-miR-221:SSRP1:targetscan:mirbase; hsa-miR-221:SLC4A7:targetscan; hsa-miR-221:ANXA1:targetscan:mirbase; hsa-miR-221:TAF9B:targetscan;

//  
ANNOTATION: 1  
ID SRV:hsa-miR-496;  
TFID SRV;  
MIID ENSG00000207961:hsa-mir-496:hsa-miR-496;  
JTID ENSG00000033867:SLC4A7 GO:0005452;GO:0005515;GO:0006814;GO:0006820;GO:0008510;GO:0015293;GO:0015701;GO:0016020;GO:0016021;GO:0031402;  
JTID ENSG00000197430:TMEM10 GO:0005794;GO:0016020;GO:0016021;  
JTID ENSG00000165119:HNRPK GO:0003677;GO:0003723;GO:0005515;GO:0005634;GO:0005654;GO:0005681;GO:0005737;GO:0006397;GO:0007165;GO:0008380;GO:0030530;GO:0030529;  
JTID ENSG00000153233:PTPRR GO:0001701;GO:0004725;GO:0004872;GO:0005001;GO:0006470;GO:0009986;GO:0016020;GO:0016021;GO:0016787;GO:0016791;GO:0019901;  
JTID ENSG00000125995:C20orf52 GO:0016020;GO:0016021;GO:0005739;  
JTID ENSG00000162616:DNAJB4 GO:0006457;GO:0006986;GO:0009408;GO:0031072;GO:0051082;  
MIJT hsa-miR-496:DNAJB4:targetscan; hsa-miR-496:HNRPK:targetscan:mirbase; hsa-miR-496:SLC4A7:targetscan;

//  
ANNOTATION: 1  
ID SOX-5:hsa-miR-302b\*;  
TFID SOX-5;  
MIID ENSG00000199058:hsa-mir-302b:hsa-miR-302b\*;  
JTID ENSG00000164077:MON1A GO:0006810;  
JTID ENSG00000131944:C19orf40  
JTID ENSG00000179059:ZFP42 GO:0003676;GO:0005622;GO:0008270;GO:0046872;  
JTID ENSG00000182504:LRR1Q2 GO:0005515;  
JTID ENSG00000122729:ACOL GO:0003723;GO:0003994;GO:0005506;GO:0005737;GO:0006099;GO:0008152;GO:0016829;GO:0046872;GO:0051539;GO:0030350;  
JTID ENSG00000072858:SIDT1 GO:0016020;GO:0016021;  
JTID ENSG00000137558:PI15 GO:0005576;GO:0008233;GO:0030304;  
MIJT hsa-miR-302b\*:ACOL:mirbase; hsa-miR-302b\*:MON1A:pictar;

//  
ANNOTATION: 1  
ID HNF-1:hsa-miR-484;  
TFID HNF-1;  
MIID ENSG00000202641:hsa-mir-484:hsa-miR-484;  
JTID ENSG00000161714:PLCD3 GO:0004435;GO:0005509;GO:0006629;GO:0007242;  
JTID ENSG00000180815:MAP3K15 GO:0000166;GO:0004674;GO:0005524;GO:0006468;GO:0016740;  
JTID ENSG00000162889:MAPKAPK2 GO:0000165;GO:0000166;GO:0004674;GO:0004871;GO:0005515;GO:0005524;GO:0005634;GO:0005737;GO:0006468;GO:0016740;GO:0048255;  
MIJT hsa-miR-484:PLCD3:mirbase; hsa-miR-484:MAPKAPK2:targetscan;

//  
ANNOTATION: 1  
ID SOX-5:hsa-miR-148b;  
TFID SOX-5;  
MIID ENSG00000199122:hsa-mir-148b:hsa-miR-148b;  
JTID ENSG00000160961:ZNF333 GO:0003677;GO:0005622;GO:0005634;GO:0006350;GO:0006355;GO:0008270;GO:0046872;  
JTID ENSG00000204584:Q6ZSH9\_HUMAN  
JTID ENSG00000126216:TUBGCP3 GO:0005200;GO:0005515;GO:0005737;GO:0005814;GO:0005827;GO:0005874;GO:0007020;GO:0043015;  
JTID ENSG00000118263:KLF7 GO:0003700;GO:0003713;GO:0005622;GO:0005634;GO:0006350;GO:0006357;GO:0007409;GO:0008270;GO:0045893;GO:0046872;GO:0048813;  
JTID ENSG00000158470:B4GALT5 GO:0005975;GO:0008378;GO:0016020;GO:0016021;GO:0016757;GO:0030145;GO:0046872;  
JTID ENSG00000109790:KLHL5 GO:0005515;GO:0003779;GO:0005737;GO:0005856;GO:0030036;  
JTID ENSG00000173681:CXorf23 GO:0004872;  
JTID ENSG00000100784:RPS6KA5 GO:0000166;GO:0000287;GO:0003824;GO:0004674;GO:0005515;GO:0005524;GO:0005634;GO:0006355;GO:0006468;GO:0006508;GO:0006950;GO:0007173;GO:0007243;GO:0008237;GO:0008270;GO:0009605;GO:0016572;GO:0016740;GO:0042221;  
JTID ENSG00000164258:NDUFS4 GO:0001932;GO:0003954;GO:0005739;GO:0005747;GO:0006120;GO:0006800;GO:0007420;GO:0008137;GO:0019933;GO:0032981;GO:0045333;GO:0048146;GO:0051591;  
JTID ENSG00000204275:HLA-DQB2 GO:0002504;GO:0006955;GO:0016020;GO:0016021;GO:0019882;GO:0032395;GO:0042613;  
JTID ENSG00000131711:MAP1B GO:0001578;GO:0005198;GO:0005515;GO:0005874;GO:0005875;GO:0016358;  
JTID ENSG00000131269:ABCB7 GO:0000166;GO:0005524;GO:0005739;GO:0005743;GO:0006810;GO:0015232;GO:0016020;GO:0016021;GO:0016887;GO:0042626;  
JTID ENSG00000189266:PNRC2 GO:0005634;GO:0006350;GO:0006355;  
JTID ENSG00000206193:Q5HYA3\_HUMAN  
JTID ENSG00000047621:C12orf4  
JTID ENSG00000124357:NAGK GO:0000166;GO:0005515;GO:0005524;GO:0005625;GO:0006044;GO:0006051;GO:0009384;GO:0016301;GO:0016740;GO:0045127;  
MIJT hsa-miR-148b:CXorf23:targetscan:mirbase; hsa-miR-148b:MAP1B:mirbase; hsa-miR-148b:NDUFS4:targetscan; hsa-miR-148b:HLA-DQB2:targetscan; hsa-miR-148b:B4GALT5:targetscan:pictar; hsa-miR-148b:PNRC2:targetscan; hsa-miR-148b:ABCB7:targetscan:mirbase:pictar; hsa-miR-148b:C12orf4:targetscan; hsa-miR-148b:RPS6KA5:targetscan:pictar; hsa-miR-148b:KLHL5:targetscan; hsa-miR-148b:TUBGCP3:targetscan:mirbase; hsa-miR-148b:C10orf28:targetscan;

//  
ANNOTATION: 1  
ID CAC-BP:hsa-miR-146b;  
TFID CAC-BP;  
MIID ENSG00000202569:hsa-mir-146b:hsa-miR-146b;  
JTID ENSG00000177111:XR\_016777.1  
JTID ENSG00000177990:DPY19L2  
MIJT hsa-miR-146b:DPY19L2:targetscan:mirbase;

//  
ANNOTATION: 1  
ID ELF-1:hsa-miR-27a;  
TFID ELF-1;  
MIID ENSG00000207808:hsa-mir-27a:hsa-miR-27a;  
JTID ENSG00000109184:DCUN1D4 GO:0005634;  
JTID ENSG00000101958:GLRA2 GO:0004890;GO:0004891;GO:0005216;GO:0005230;GO:0005887;GO:0006811;GO:0006821;GO:0007218;GO:0016594;GO:0016934;GO:0030594;GO:0031404;GO:0045211;  
JTID ENSG00000205761:Q6ZRI7\_HUMAN  
JTID ENSG00000079134:THOC1 GO:0003677;GO:0003723;GO:0005515;GO:0005634;GO:0006397;GO:0006810;GO:0007165;GO:0008380;GO:0051028;  
JTID ENSG00000167723:TRPV3 GO:0005261;GO:0005262;GO:0005509;GO:0006811;GO:0006816;GO:0009266;GO:0016020;GO:0016021;  
JTID ENSG00000173221:GLRX GO:0005829;GO:0006118;GO:0006810;GO:0009055;GO:0015035;GO:0015038;GO:0045454;GO:0047485;  
JTID ENSG00000182841:Q9NSQ0\_HUMAN  
MIJT hsa-miR-27a:THOC1:targetscan:mirbase; hsa-miR-27a:DCUN1D4:targetscan:pictar; hsa-miR-27a:GLRA2:targetscan; hsa-miR-27a:GLRX:targetscan;

//  
ANNOTATION: 1  
ID C-REL:hsa-miR-199a\*;  
TFID C-REL;  
MIID ENSG00000207752:hsa-mir-199a-1:hsa-miR-199a\*;  
JTID ENSG00000131914:LIN28 GO:0003677;GO:0005737;GO:0006355;GO:0008270;GO:0046872;  
JTID ENSG00000140403:DNAJA4 GO:0006457;GO:0008270;GO:0031072;GO:0046872;GO:0051082;  
JTID ENSG00000088899:K0552\_HUMAN GO:0005198;GO:0005737;GO:0016020;  
JTID ENSG00000118600:TMEM5 GO:0005887;GO:0016020;  
JTID ENSG00000198901:PRC1 GO:0000022;GO:0000910;GO:0005515;GO:0005634;GO:0005876;GO:0007049;  
JTID ENSG00000123473:STIL GO:0007275;GO:0008283;

```
JTID ENSG00000180263:FGD6 GO:0001726;GO:0005085;GO:0005089;GO:0005515;GO:0005622;GO:0005737;GO:0005794;GO:0005856;GO:0007010;GO:0008270;GO:0008360;GO:0030027;GO:0030036;GO:0031267;GO:0035023;GO:0043088;GO:0046847;GO:0046872;
JTID ENSG00000188153:COL4A5 GO:0005201;GO:0005581;GO:0005737;GO:0006817;GO:0005587;
JTID ENSG00000117713:ARID1A GO:0003677;GO:0005622;GO:0005515;GO:0005634;GO:0006325;GO:0006350;GO:0006355;GO:0016514;GO:0016563;GO:0016568;GO:0030520;GO:0030521;GO:0042766;GO:0042921;GO:0048096;
JTID ENSG00000170801:HTRA3 GO:0001558;GO:0004252;GO:0005515;GO:0005520;GO:0005576;GO:0006508;GO:0008233;
JTID ENSG00000137648:TMPRSS4 GO:0004252;GO:0005044;GO:0006508;GO:0008233;GO:0016020;GO:0016021;
JTID ENSG00000073331:ALPK1 GO:0004674;GO:0005524;GO:0006468;GO:0016301;GO:0016740;
JTID ENSG00000100461:RBM23 GO:0000166;GO:0003723;GO:0005634;GO:0006397;
MIJT hsa-miR-199a*:ARID1A:pictar; hsa-miR-199a*:TMPRSS4:mirbase; hsa-miR-199a*:K0552_HUMAN:pictar;

//
ANNOTATION: 1
ID ER:hsa-miR-451;
TFID ER;
MIID ENSG00000207794:hsa-mir-451:hsa-miR-451;
JTID ENSG00000186009:ATP4B GO:0005391;GO:0006811;GO:0006813;GO:0006814;GO:0008900;GO:0015992;GO:0016020;GO:0016021;GO:0030955;
JTID ENSG00000080298:RFY3 GO:0003677;GO:0003705;GO:0005634;GO:0006355;GO:0016481;GO:0016564;GO:0030528;GO:0045449;GO:0007368;
JTID ENSG00000134324:LPIN1 GO:0005634;GO:0006629;GO:0045598;
JTID ENSG00000136630:HLX1 GO:0003700;GO:0005634;GO:0006355;GO:0006366;GO:0007275;GO:0043565;
JTID ENSG00000123131:PRDX4 GO:0007252;GO:0008379;GO:0016491;GO:0051920;
JTID ENSG00000103496:STX4 GO:0005515;GO:0005737;GO:0005886;GO:0006836;GO:0006886;GO:0008565;GO:0016021;
JTID ENSG00000125895:C20orf46 GO:0016020;GO:0016021;
JTID ENSG00000169062:UPF3A GO:0000166;GO:0000184;GO:0003723;GO:0005487;GO:0005515;GO:0005634;GO:0005737;GO:0006810;GO:0051028;
JTID ENSG00000109684:NP_443196.1 GO:0005070;GO:0005622;GO:0006955;GO:0007242;
MIJT hsa-miR-451:LPIN1:targetscan; hsa-miR-451:ATP4B:targetscan:mirbase; hsa-miR-451:PRDX4:mirbase; hsa-miR-451:UPF3A:targetscan:mirbase;

//
ANNOTATION: 1
ID CAC-BP:hsa-miR-181d;
TFID CAC-BP;
MIID ENSG00000207585:hsa-mir-181d:hsa-miR-181d;
JTID ENSG00000129244:ATP1B2 GO:0005391;GO:0005515;GO:0005737;GO:0006811;GO:0006813;GO:0006814;GO:0016020;GO:0016021;GO:0030955;GO:0031402;
JTID ENSG00000073756:PTGS2 GO:0001516;GO:0004601;GO:0004666;GO:0005506;GO:0005634;GO:0005737;GO:0006633;GO:0006928;GO:0008217;GO:0016020;GO:0016491;GO:0016702;GO:0019371;GO:0030216;GO:0042640;GO:0046872;GO:0050727;
JTID ENSG00000160789:LMNA GO:0005198;GO:0005515;GO:0005634;GO:0005882;
MIJT hsa-miR-181d:PTGS2:targetscan; hsa-miR-181d:ATP1B2:targetscan:mirbase;

//
ANNOTATION: 1
ID TFII-I:hsa-miR-375;
TFID TFII-I;
MIID ENSG00000198973:hsa-mir-375:hsa-miR-375;
JTID ENSG00000116786:PLEKHM2 GO:0008152;GO:0016491;
MIJT hsa-miR-375:PLEKHM2:mirbase;

//
ANNOTATION: 1
ID HSF2:hsa-miR-296;
TFID HSF2;
MIID ENSG00000207950:hsa-mir-296:hsa-miR-296;
JTID ENSG00000102225:PCTK1 GO:0000074;GO:0000166;GO:0004674;GO:0005515;GO:0005524;GO:0006468;GO:0016740;
JTID ENSG00000175901:XR_017883.1
JTID ENSG00000119917:IFT3 GO:0005488;GO:0006955;
JTID ENSG00000179364:PACS2 GO:0005739;GO:0005783;GO:0006915;
JTID ENSG00000090097:PCBP4 GO:0003677;GO:0003723;GO:0030529;GO:0006977;GO:0007050;GO:0008630;
JTID ENSG00000127774:TMEM93 GO:0016020;GO:0016021;
JTID ENSG00000178175:ZNF366 GO:0003677;GO:0005622;GO:0005634;GO:0006350;GO:0006355;GO:0008270;GO:0046872;
JTID ENSG00000141574:SECTM1 GO:0004871;GO:0005125;GO:0005615;GO:0005794;GO:0006955;GO:0007498;GO:0016020;GO:0016021;GO:0043123;
JTID ENSG00000158022:TRIM63 GO:0004842;GO:0004871;GO:0005515;GO:0005622;GO:0005634;GO:0005737;GO:0005874;GO:0006512;GO:0007165;GO:0008270;GO:0016874;GO:0031432;GO:0043161;GO:0046872;
JTID ENSG00000090006:LTBP4 GO:0001558;GO:0005024;GO:0005178;GO:0005509;GO:0005539;GO:0005578;GO:0006457;GO:0007275;GO:0017015;GO:0019838;GO:0030162;GO:0030252;GO:0045595;GO:0050431;GO:0008083;GO:0016049;GO:0007179;GO:0046879;
JTID ENSG00000136717:BIN1 GO:0005515;GO:0005634;GO:0005737;GO:0007049;GO:0007275;GO:0008283;GO:0015629;GO:0030100;GO:0030154;GO:0045786;
JTID ENSG00000167680:SEMA6B GO:0004872;GO:0007275;GO:0007399;GO:0016020;GO:0016021;GO:0030154;
MIJT hsa-miR-296:IFT3:targetscan; hsa-miR-296:ZNF366:targetscan; hsa-miR-296:PCTK1:targetscan:mirbase; hsa-miR-296:SECTM1:targetscan; hsa-miR-296:TRIM63:targetscan; hsa-miR-296:TMEM93:targetscan:mirbase; hsa-miR-296:PCBP4:targetscan:mirbase; hsa-miR-296:LTBP4:targetscan:mirbase; hsa-miR-296:SEMA6B:targetscan:mirbase; hsa-miR-296:BIN1:targetscan:mirbase;

//
ANNOTATION: 1
ID SRV:hsa-miR-140;
TFID SRV;
MIID ENSG00000208017:hsa-mir-140:hsa-miR-140;
JTID ENSG00000049130:KITLG GO:0005173;GO:0005515;GO:0005886;GO:0007155;GO:0007165;GO:0008083;GO:0008283;GO:0009887;GO:0016021;GO:0030097;GO:0001755;GO:0005615;GO:0008284;GO:0016020;GO:0043066;GO:0043406;GO:0046579;GO:0050731;
JTID ENSG00000102898:NUTF2 GO:0005215;GO:0005515;GO:0005622;GO:0005643;GO:0005829;GO:0006810;GO:0015031;
JTID ENSG00000082701:GSK3B
GO:0000166;GO:0002039;GO:0004696;GO:0005524;GO:0005634;GO:0005737;GO:0005977;GO:0006983;GO:0016740;GO:0018105;GO:0030877;GO:0043066;GO:0046827;GO:0051059;GO:0060070;GO:0000320;GO:0004672;GO:0005515;GO:0005829;GO:0006468;GO:0006611;GO:0006916;GO:0006950;GO:0008013;GO:0009887;GO:0016055;GO:004544
4;GO:0050321;
JTID ENSG000000041353:RAB27B GO:0000166;GO:0003924;GO:0005515;GO:0005525;GO:0005794;GO:0007264;GO:0015031;
JTID ENSG00000205111:CDKL4 GO:0004674;GO:0005524;GO:0006468;
JTID ENSG00000131558:EXOC4 GO:0000145;GO:0005737;GO:0006904;GO:0015031;GO:0030165;
JTID ENSG00000124208:UBE2V1 GO:0000074;GO:0000209;GO:0005515;GO:0005634;GO:0005737;GO:0006282;GO:0006355;GO:0006464;GO:0006512;GO:0016563;GO:0019787;GO:0030154;GO:0031371;GO:0043123;GO:0051092;
JTID ENSG00000107165:TYRFP1 GO:0008152;GO:0016491;GO:0004497;GO:0005507;GO:0005515;GO:0006583;GO:0016020;GO:0016021;GO:0042470;GO:0042803;GO:0046872;GO:0046982;GO:0006582;GO:0030318;GO:0032438;GO:0043438;GO:0043473;
JTID ENSG00000163581:SLC2A2 GO:0005215;GO:0005351;GO:0005355;GO:0005624;GO:0005887;GO:0005975;GO:0008643;GO:0015758;GO:0016020;GO:0016021;GO:0005886;GO:0005903;
JTID ENSG00000007350:TKTL1 GO:0004802;GO:0005509;GO:0005634;GO:0005737;GO:0006007;GO:0006772;GO:0016740;
JTID ENSG00000136352:TITF1 GO:0003700;GO:0005515;GO:0005634;GO:0005654;GO:0005654;GO:0016563;GO:0043565;GO:0045893;GO:0001764;GO:0005667;GO:0006355;GO:0007389;GO:0007420;GO:0007492;GO:0009887;GO:0030324;GO:0030528;GO:0030878;GO:0045944;
JTID ENSG00000110717:NDUFS8 GO:0003954;GO:0005506;GO:0005739;GO:0005747;GO:0006120;GO:0006979;GO:0008137;GO:0032981;GO:0046872;GO:0051539;
JTID ENSG00000145362:ANK2 GO:0005200;GO:0005515;GO:0007165;GO:0015629;GO:0016020;GO:0005856;
MIJT hsa-miR-140:TYRFP1:targetscan; hsa-miR-140:KITLG:targetscan; hsa-miR-140:UBE2V1:targetscan; hsa-miR-140:RAB27B:targetscan; hsa-miR-140:ANK2:targetscan:pictar; hsa-miR-140:NDUFS8:targetscan; hsa-miR-140:SLC2A2:targetscan; hsa-miR-140:TITF1:targetscan:mirbase; hsa-miR-140:NUTF2:targetscan:pictar; hsa-miR-140:GSK3B:targetscan;

//
ANNOTATION: 1
ID HNF-1:hsa-miR-144;
TFID HNF-1;
MIID ENSG00000207618:hsa-mir-144:hsa-miR-144;
JTID ENSG00000184602:SNN GO:0006950;GO:0009628;GO:0016020;GO:0016021;
JTID ENSG00000145819:ARHGAP26 GO:0005096;GO:0005100;GO:0005622;GO:0007165;GO:0007399;GO:0030036;
JTID ENSG00000164400:CSF2 GO:0005125;GO:0005129;GO:0005576;GO:0005615;GO:0006955;GO:0006968;GO:0007166;GO:0007275;GO:0008284;GO:0043011;GO:0045885;
JTID ENSG00000119707:RBM25 GO:0000166;GO:0000398;GO:0003676;GO:0003729;
JTID ENSG00000110321:EIF4G2 GO:0003723;GO:0003743;GO:0005515;GO:0006446;GO:0007050;GO:0008219;GO:0016281;GO:0005737;
JTID ENSG00000088854:C20orf194 GO:0003676;GO:0005622;GO:0008270;
MIJT hsa-miR-144:SNN:targetscan:pictar; hsa-miR-144:CSF2:mirbase; hsa-miR-144:RBM25:targetscan; hsa-miR-144:ARHGAP26:targetscan:pictar; hsa-miR-144:EIF4G2:targetscan;

//
```

ANNOTATION: 1  
ID MIF-1:hsa-miR-27a;  
TFID MIF-1;  
MIID ENSG00000207808:hsa-mir-27a:hsa-miR-27a;  
JTID ENSG00000101958:GLRA2 GO:0004890;GO:0004891;GO:0005216;GO:0005230;GO:0005887;GO:0006811;GO:0006821;GO:0007218;GO:0016594;GO:0016934;GO:0030594;GO:0031404;GO:0045211;  
JTID ENSG00000174574:Clorf108  
JTID ENSG00000129816:NR\_001538.1  
JTID ENSG00000129845:O14605\_HUMAN  
JTID ENSG00000114316:USP4 GO:0004197;GO:0004221;GO:0005634;GO:0005764;GO:0006511;GO:0006512;GO:0008233;  
MIJT hsa-miR-27a:Clorf108:targetscan:pictar; hsa-miR-27a:USP4:targetscan; hsa-miR-27a:GLRA2:targetscan;
