# Supplementary material for: Genome-wide survey of microRNA–transcription factor feed-forward regulatory circuits in human
Source: Royal Society of Chemistry journal article supplement (doi:10.1039/b900177h), 2009-06-19
Supplement: b900177h_add_file_9.pdf [file b900177h_add_file_9.pdf]

```

# Circuits relevant to cancer, related to known TFs.

# Final dataset of circuits where at least one gene has been annotated as relevant to cancer.
# Circuits correspond to blocks separated by a // symbol. Each block is divided in several fields:

-----
## Compulsory fields :
-----

# ID Transcription_factor_HGNC_id:Mature_microRNA_id.

-----
## Optional fields :
-----

# ONCO-TF This field is provided if the transcription factor is included in the list of genes contributing to cancer.
# ONCO-MI This field is provided if the miRNA is included in the list of genes contributing to cancer.

# Remaining fields provide information about cancer-annotated protein-coding genes.
# Information concerns chromosomal location, tumour types in which mutations are found,
# classes of mutations that contribute to oncogenesis and other genetic properties.

# A plain text ASCII version of this file is available at: http://personalpages.to.infn.it/~cora/circuits/index.html

//
ONCO-ID NF-E2:hsa-miR-142-5p
ONCO-MI hsa-miR-142-5p

//
ONCO-ID PAX-4:hsa-miR-19a
ONCO-MI hsa-miR-19a

//
ONCO-ID LEF1:hsa-miR-223
ONCO-JT ENSG00000123268 "Symbol":ATF1;
"Name":activating transcription factor 1;
"GeneID":4666;
"Chr":12;
"Chr Band":12q13 ;
"Cancer Somatic Mut":yes;
"Tumour Types (Somatic Mutations)":malignant melanoma of soft parts ;
"Tumour Types (Somatic Mutations)":angiomatoid fibrous histiocytoma ;
"Tissue Type": epithelial;
"Tissue Type": mesenchymal;
"Cancer Molecular Genetics": dominant;
"Mutation Type ": translocation;
"Translocation Partner":EWSR1;

//
ONCO-ID SOX-5:hsa-miR-30d
ONCO-JT ENSG00000158715 "Symbol":SLC45A3;
"Name":solute carrier family 45, member 3;
"GeneID":85414;
"Chr":1;
"Chr Band":1q32;
"Cancer Somatic Mut":yes;
"Tumour Types (Somatic Mutations)":prostate ;
"Tissue Type": epithelial;
"Cancer Molecular Genetics": dominant;
"Mutation Type ": translocation;
"Translocation Partner":ETV1;

//
ONCO-ID CHX10:hsa-miR-20a
ONCO-MI hsa-miR-20a

//
ONCO-ID YY1:hsa-miR-142-3p
ONCO-MI hsa-miR-142-3p

//
ONCO-ID IPF1:hsa-miR-125b
ONCO-MI hsa-miR-125b

//
ONCO-ID CdxA:hsa-let-7a
ONCO-MI hsa-let-7a

//
ONCO-ID LEF1:hsa-miR-30a-5p
ONCO-JT ENSG00000158715 "Symbol":SLC45A3;
"Name":solute carrier family 45, member 3;
"GeneID":85414;
"Chr":1;
"Chr Band":1q32;
"Cancer Somatic Mut":yes;
"Tumour Types (Somatic Mutations)":prostate ;
"Tissue Type": epithelial;
"Cancer Molecular Genetics": dominant;
"Mutation Type ": translocation;
"Translocation Partner":ETV1;

//
ONCO-ID ELF-1:hsa-miR-199a
ONCO-MI hsa-miR-199a

```

```

//
ONCO-ID ER:hsa-miR-130a
ONCO-JT ENSG00000181690 "Symbol":PLAG1;
"Name":pleiomorphic adenoma gene 1;
"GeneID":5324;
"Chr":8;
"Chr Band":8q12;
"Cancer Somatic Mut":yes;
"Tumour Types (Somatic Mutations)":salivary adenoma;
"Tissue Type": epithelial;
"Cancer Molecular Genetics": dominant;
"Mutation Type ": translocation;
"Translocation Partner":TCEA1, LIFR;

//
ONCO-ID AREB6:hsa-miR-375
ONCO-JT ENSG00000129204 "Symbol":USP6;
"Name":ubiquitin specific peptidase 6 (Tre-2 oncogene);
"GeneID":9098;
"Chr":17;
"Chr Band":17p13;
"Cancer Somatic Mut":yes;
"Tumour Types (Somatic Mutations)":aneurysmal bone cysts;
"Tissue Type": mesenchymal;
"Cancer Molecular Genetics": dominant;
"Mutation Type ": translocation;
"Translocation Partner":COL1A1, CDH11, ZNF9, OMD;

//
ONCO-ID LEF1:hsa-miR-296
ONCO-JT ENSG00000137309 "Symbol":HMGA1;
"Name":high mobility group AT-hook 1;
"GeneID":3159;
"Chr":6;
"Chr Band":6p21;
"Cancer Somatic Mut":yes;
"Tumour Types (Somatic Mutations)":microfollicular thyroid adenoma;
"Tumour Types (Somatic Mutations)": various benign mesenchymal tumors;
"Tissue Type": epithelial;
"Tissue Type": mesenchymal;
"Cancer Molecular Genetics": dominant;
"Mutation Type ": translocation;
"Translocation Partner":?;

//
ONCO-ID AP-1:hsa-miR-199a
ONCO-MI hsa-miR-199a

//
ONCO-ID ATF6:hsa-miR-199b
ONCO-MI hsa-miR-199b

//
ONCO-ID RORALPHA2:hsa-miR-17-5p
ONCO-MI hsa-miR-17-5p

//
ONCO-ID SRF:hsa-miR-199a
ONCO-MI hsa-miR-199a

//
ONCO-ID SRY:hsa-miR-222
ONCO-JT ENSG00000118971 "Symbol":CCND2;
"Name":cyclin D2;
"GeneID":894;
"Chr":12;
"Chr Band":12p13;
"Cancer Somatic Mut":yes;
"Tumour Types (Somatic Mutations)":NHL,CLL;
"Tissue Type": leukaemia/lymphoma;
"Cancer Molecular Genetics": dominant;
"Mutation Type ": translocation;
"Translocation Partner":IGL0;

//
ONCO-ID IRF:hsa-let-7d
ONCO-MI hsa-let-7d

//
ONCO-ID OCTAMER:hsa-miR-125b
ONCO-MI hsa-miR-125b
ONCO-JT ENSG00000137265 "Symbol":IRF4;
"Name":interferon regulatory factor 4;
"GeneID":3662;
"Chr":6;
"Chr Band":6p25-p23;
"Cancer Somatic Mut":yes;
"Tumour Types (Somatic Mutations)":MM ;
"Tissue Type": leukaemia/lymphoma;
"Cancer Molecular Genetics": dominant;
"Mutation Type ": translocation;
"Translocation Partner":IGH0;

```

```

//
ONCO-ID RP58:hsa-miR-199a*
ONCO-MI hsa-miR-199a*

//
ONCO-ID HSF2:hsa-let-7f
ONCO-MI hsa-let-7f
ONCO-JT ENSG00000134323 "Symbol":MYCN;
"Name":v-myc myelocytomatosis viral related oncogene, neuroblastoma derived (avian);
"GeneID":4613;
"Chr":2;
"Chr Band":2p24.1 ;
"Cancer Somatic Mut":yes;
"Tumour Types (Somatic Mutations)":neuroblastoma;
"Tissue Type": other;
"Cancer Molecular Genetics": dominant;
"Mutation Type ": amplification;

//
ONCO-ID MYC:hsa-miR-193a
ONCO-TF MYC

//
ONCO-ID IRF1:hsa-miR-99a
ONCO-JT ENSG00000118689 "Symbol":FOXO3A;
"Name":forkhead box O3A;
"GeneID":2309;
"Chr":6;
"Chr Band":6q21 ;
"Cancer Somatic Mut":yes;
"Tumour Types (Somatic Mutations)": acute leukemia;
"Tissue Type": leukaemia/lymphoma;
"Cancer Molecular Genetics": dominant;
"Mutation Type ": translocation;
"Translocation Partner":MLL;

//
ONCO-ID FREAC4:hsa-miR-199a*
ONCO-MI hsa-miR-199a*

//
ONCO-ID MAZ:hsa-let-7b
ONCO-MI hsa-let-7b

//
ONCO-ID CHX10:hsa-miR-199a*
ONCO-MI hsa-miR-199a*

//
ONCO-ID HP1:hsa-miR-195
ONCO-MI hsa-miR-195

//
ONCO-ID HIF1:hsa-miR-199a*
ONCO-MI hsa-miR-199a*
ONCO-JT ENSG00000182712 "Symbol":MTCPL1;
"Name":mature T-cell proliferation 1;
"GeneID":4515;
"Chr":X;
"Chr Band":Xq28;
"Cancer Somatic Mut":yes;
"Tumour Types (Somatic Mutations)":T cell prolymphocytic leukemia;
"Tissue Type": leukaemia/lymphoma;
"Cancer Molecular Genetics": dominant;
"Mutation Type ": translocation;
"Translocation Partner":TRA0;

//
ONCO-ID SOX5:hsa-miR-30c
ONCO-JT ENSG00000158715 "Symbol":SLC45A3;
"Name":solute carrier family 45, member 3;
"GeneID":85414;
"Chr":1;
"Chr Band":1q32;
"Cancer Somatic Mut":yes;
"Tumour Types (Somatic Mutations)":prostate ;
"Tissue Type": epithelial;
"Cancer Molecular Genetics": dominant;
"Mutation Type ": translocation;
"Translocation Partner":ETV1;

//
ONCO-ID ICSBP:hsa-miR-223
ONCO-JT ENSG00000118689 "Symbol":FOXO3A;
"Name":forkhead box O3A;
"GeneID":2309;
"Chr":6;
"Chr Band":6q21 ;
"Cancer Somatic Mut":yes;
"Tumour Types (Somatic Mutations)": acute leukemia;
"Tissue Type": leukaemia/lymphoma;
"Cancer Molecular Genetics": dominant;
"Mutation Type ": translocation;
"Translocation Partner":MLL;

```

```

//
ONCO-ID HSF2:hsa-let-7a
ONCO-MI hsa-let-7a
ONCO-JT ENSG00000134323 "Symbol":MYCN;
"Name":v-myc myelocytomatosis viral related oncogene, neuroblastoma derived (avian);
"GeneID":4613;
"Chr":2;
"Chr Band":2p24.1 ;
"Cancer Somatic Mut":yes;
"Tumour Types (Somatic Mutations)":neuroblastoma;
"Tissue Type": other;
"Cancer Molecular Genetics": dominant;
"Mutation Type ": amplification;

//
ONCO-ID AP-1:hsa-miR-142-5p
ONCO-MI hsa-miR-142-5p

//
ONCO-ID TEL-2:hsa-miR-199a*
ONCO-MI hsa-miR-199a*

//
ONCO-ID NCX:hsa-miR-125b
ONCO-MI hsa-miR-125b

//
ONCO-ID HSF2:hsa-miR-199a*
ONCO-MI hsa-miR-199a*
ONCO-JT ENSG00000134323 "Symbol":MYCN;
"Name":v-myc myelocytomatosis viral related oncogene, neuroblastoma derived (avian);
"GeneID":4613;
"Chr":2;
"Chr Band":2p24.1 ;
"Cancer Somatic Mut":yes;
"Tumour Types (Somatic Mutations)":neuroblastoma;
"Tissue Type": other;
"Cancer Molecular Genetics": dominant;
"Mutation Type ": amplification;

//
ONCO-ID DBP:hsa-let-7d
ONCO-MI hsa-let-7d

//
ONCO-ID IRF-7:hsa-miR-425-3p
ONCO-JT ENSG00000184937 "Symbol":WT1;
"Name":Wilms tumour 1 gene;
"GeneID":7490;
"Chr":11;
"Chr Band":11p13;
"Cancer Somatic Mut":yes;
"Cancer Germline Mut":yes;
"Tumour Types (Somatic Mutations)":Wilms;
"Tumour Types (Somatic Mutations)":desmoplastic small round cell tumor;
"Tumour Types (Germline Mutations)":Wilms;
"Cancer Syndrome":Denys-Drash syndrome;
"Cancer Syndrome":Frasier syndrome;
"Cancer Syndrome":Familial Wilms tumor;
"Tissue Type": other;
"Cancer Molecular Genetics": recessive;
"Mutation Type ": large deletion;
"Mutation Type ": Missense;
"Mutation Type ": nonsense;
"Mutation Type ": frameshift;
"Mutation Type ": splice site;
"Translocation Partner":EWSR1;

//
ONCO-ID SRY:hsa-miR-381
ONCO-JT ENSG00000133639 "Symbol":BTG1;
"Name":B-cell translocation gene 1, anti-proliferative;
"GeneID":694;
"Chr":12;
"Chr Band":12q22;
"Cancer Somatic Mut":yes;
"Tumour Types (Somatic Mutations)":BCLL;
"Tissue Type": leukaemia/lymphoma;
"Cancer Molecular Genetics": dominant;
"Mutation Type ": translocation;
"Translocation Partner":MYC;

//
ONCO-ID HNF-1:hsa-miR-19a
ONCO-MI hsa-miR-19a

//
ONCO-ID SOX-5:hsa-miR-125b
ONCO-MI hsa-miR-125b
ONCO-JT ENSG00000141380 "Symbol":SS18;
"Name":synovial sarcoma translocation, chromosome 18;
"GeneID":6760;
"Chr":18;
"Chr Band":18q11.2;
"Cancer Somatic Mut":yes;
"Tumour Types (Somatic Mutations)":synovial sarcoma;

```

"Tissue Type": mesenchymal;  
"Cancer Molecular Genetics": dominant;  
"Mutation Type ": translocation;  
"Translocation Partner":SSX1, SSX2;

//  
ONCO-ID RORALPHA2:hsa-miR-125b  
ONCO-MI hsa-miR-125b

//  
ONCO-ID HIF-1:hsa-miR-199b  
ONCO-MI hsa-miR-199b

//  
ONCO-ID HNF-1:hsa-miR-17-5p  
ONCO-MI hsa-miR-17-5p

//  
ONCO-ID MEIS1:hsa-miR-125b  
ONCO-MI hsa-miR-125b

//  
ONCO-ID HOXA4:hsa-miR-19a  
ONCO-MI hsa-miR-19a

//  
ONCO-ID AFP1:hsa-miR-31  
ONCO-JT ENSG00000153814 "Symbol":JAZF1;  
"Name":juxtaposed with another zinc finger gene 1;  
"GeneID":221895;  
"Chr":7;  
"Chr Band":7p15.2-p15.1;  
"Cancer Somatic Mut":yes;  
"Tumour Types (Somatic Mutations)":endometrial stromal tumours;  
"Tissue Type": mesenchymal;  
"Cancer Molecular Genetics": dominant;  
"Mutation Type ": translocation;  
"Translocation Partner":SUZ12;

//  
ONCO-ID SRY:hsa-miR-412  
ONCO-JT ENSG00000157764 "Symbol":BRAF;  
"Name":v-raf murine sarcoma viral oncogene homolog B1;  
"GeneID":673;  
"Chr":7;  
"Chr Band":7q34;  
"Cancer Somatic Mut":yes;  
"Tumour Types (Somatic Mutations)":melanoma;  
"Tumour Types (Somatic Mutations)":colorectal;  
"Tumour Types (Somatic Mutations)":papillary thyroid;  
"Tumour Types (Somatic Mutations)":borderline ov;  
"Tumour Types (Somatic Mutations)":Non small-cell lung cancer (NSCLC);  
"Tumour Types (Somatic Mutations)":cholangiocarcinoma;  
"Tissue Type": epithelial;  
"Cancer Molecular Genetics": dominant;  
"Mutation Type ": Missense;  
"Mutation Type ": translocation;  
"Translocation Partner":AKAP9;  
"Other Germline Mut":yes;  
"Other Syndrome/Disease":Cardio-facio-cutaneous syndrome;  
ONCO-JT ENSG00000138363 "Symbol":ATIC;  
"Name":5-aminoimidazole-4-carboxamide ribonucleotide formyltransferase/IMP cyclohydrolase;  
"GeneID":471;  
"Chr":2;  
"Chr Band":2q35;  
"Cancer Somatic Mut":yes;  
"Tumour Types (Somatic Mutations)": anaplastic large-cell lymphoma;  
"Tissue Type": leukaemia/lymphoma;  
"Cancer Molecular Genetics": dominant;  
"Mutation Type ": translocation;  
"Translocation Partner":ALK;

//  
ONCO-ID IRF:hsa-miR-125b  
ONCO-MI hsa-miR-125b  
ONCO-JT ENSG00000171791 "Symbol":BCL2;  
"Name":B-cell CLL/lymphoma 2;  
"GeneID":596;  
"Chr":18;  
"Chr Band":18q21.3 ;  
"Cancer Somatic Mut":yes;  
"Tumour Types (Somatic Mutations)": non-Hodgkin lymphoma;  
"Tumour Types (Somatic Mutations)": chronic lymphatic leukemia;  
"Tissue Type": leukaemia/lymphoma;  
"Cancer Molecular Genetics": dominant;  
"Mutation Type ": translocation;  
"Translocation Partner":IGH@;

//  
ONCO-ID PEA3:hsa-miR-195  
ONCO-MI hsa-miR-195

//  
ONCO-ID MEIS1:hsa-let-7e  
ONCO-MI hsa-let-7e

```

//
ONCO-ID AP-1:hsa-miR-142-3p
ONCO-MI hsa-miR-142-3p
ONCO-JT ENSG00000175197 "Symbol":DDIT3;
"Name":DNA-damage-inducible transcript 3;
"GeneID":1649;
"Chr":12;
"Chr Band":12q13.1-q13.2 ;
"Cancer Somatic Mut":yes;
"Tumour Types (Somatic Mutations)":liposarcoma;
"Tissue Type": mesenchymal;
"Cancer Molecular Genetics": dominant;
"Mutation Type ": translocation;
"Translocation Partner":FUS;

//
ONCO-ID IRF-1:hsa-miR-125b
ONCO-MI hsa-miR-125b

//
ONCO-ID HNF-3:hsa-let-7a
ONCO-MI hsa-let-7a
ONCO-JT ENSG00000118971 "Symbol":CCND2;
"Name":cyclin D2;
"GeneID":894;
"Chr":12;
"Chr Band":12p13;
"Cancer Somatic Mut":yes;
"Tumour Types (Somatic Mutations)":NHL,CLL;
"Tissue Type": leukaemia/lymphoma;
"Cancer Molecular Genetics": dominant;
"Mutation Type ": translocation;
"Translocation Partner":IGL@;

//
ONCO-ID AHR:hsa-miR-142-3p
ONCO-MI hsa-miR-142-3p

//
ONCO-ID IRF:hsa-miR-100
ONCO-JT ENSG00000118689 "Symbol":FOXO3A;
"Name":forkhead box O3A;
"GeneID":2309;
"Chr":6;
"Chr Band":6q21 ;
"Cancer Somatic Mut":yes;
"Tumour Types (Somatic Mutations)": acute leukemia;
"Tissue Type": leukaemia/lymphoma;
"Cancer Molecular Genetics": dominant;
"Mutation Type ": translocation;
"Translocation Partner":MLL;

//
ONCO-ID NCX:hsa-miR-106a
ONCO-JT ENSG00000184384 "Symbol":MAML2;
"Name":mastermind-like 2 (Drosophila);
"GeneID":84441;
"Chr":11;
"Chr Band":11q22-q23;
"Cancer Somatic Mut":yes;
"Tumour Types (Somatic Mutations)":salivary gland mucoepidermoid;
"Tissue Type": epithelial;
"Cancer Molecular Genetics": dominant;
"Mutation Type ": translocation;
"Translocation Partner":MECT1;

//
ONCO-ID AFP1:hsa-miR-32
ONCO-JT ENSG00000112081 "Symbol":SFRS3;
"Name":splicing factor, arginine/serine-rich 3;
"GeneID":6428;
"Chr":6;
"Chr Band":6p21;
"Cancer Somatic Mut":yes;
"Tumour Types (Somatic Mutations)":follicular lymphoma;
"Tissue Type": leukaemia/lymphoma;
"Cancer Molecular Genetics": dominant;
"Mutation Type ": translocation;
"Translocation Partner":BCL6;

//
ONCO-ID CAC-BP:hsa-let-7e
ONCO-MI hsa-let-7e

//
ONCO-ID PAX-4:hsa-miR-199a
ONCO-MI hsa-miR-199a

//
ONCO-ID SOX-5:hsa-miR-155
ONCO-MI hsa-miR-155

//

```

```

ONCO-ID MYC:hsa-miR-499
ONCO-TF MYC

//
ONCO-ID MAZ:hsa-let-7a
ONCO-MI hsa-let-7a

//
ONCO-ID SOX-5:hsa-miR-30b
ONCO-JT ENSG00000158715 "Symbol":SLC45A3;
"Name":solute carrier family 45, member 3;
"GeneID":85414;
"Chr":1;
"Chr Band":1q32;
"Cancer Somatic Mut":yes;
"Tumour Types (Somatic Mutations)":prostate ;
"Tissue Type": epithelial;
"Cancer Molecular Genetics": dominant;
"Mutation Type ": translocation;
"Translocation Partner":ETV1;

//
ONCO-ID ATF-1:hsa-miR-199a
ONCO-MI hsa-miR-199a

//
ONCO-ID ETS:hsa-miR-199a*
ONCO-MI hsa-miR-199a*

//
ONCO-ID LHX3:hsa-miR-125b
ONCO-MI hsa-miR-125b

//
ONCO-ID MYC:hsa-miR-202*
ONCO-TF MYC

//
ONCO-ID HSF2:hsa-miR-16
ONCO-MI hsa-miR-16

//
ONCO-ID C-REL:hsa-let-7e
ONCO-MI hsa-let-7e

//
ONCO-ID DBP:hsa-let-7f
ONCO-MI hsa-let-7f

//
ONCO-ID HSF2:hsa-miR-15a
ONCO-MI hsa-miR-15a

//
ONCO-ID CHX10:hsa-miR-125b
ONCO-MI hsa-miR-125b

//
ONCO-ID DBP:hsa-let-7a
ONCO-MI hsa-let-7a

//
ONCO-ID ER:hsa-miR-375
ONCO-JT ENSG0000047410 "Symbol":TPR;
"Name":translocated promoter region ;
"GeneID":7175;
"Chr":1;
"Chr Band":1q25 ;
"Cancer Somatic Mut":yes;
"Tumour Types (Somatic Mutations)":papillary thyroid;
"Tissue Type": epithelial;
"Cancer Molecular Genetics": dominant;
"Mutation Type ": translocation;
"Translocation Partner":NTRK1;
ONCO-JT ENSG00000129204 "Symbol":USP6;
"Name":ubiquitin specific peptidase 6 (Tre-2 oncogene);
"GeneID":9098;
"Chr":17;
"Chr Band":17p13;
"Cancer Somatic Mut":yes;
"Tumour Types (Somatic Mutations)":aneurysmal bone cysts;
"Tissue Type": mesenchymal;
"Cancer Molecular Genetics": dominant;
"Mutation Type ": translocation;
"Translocation Partner":COL1A1, CDH11, ZNF9, OMD;

//
ONCO-ID POU3F2:hsa-miR-199a*
ONCO-MI hsa-miR-199a*

//
ONCO-ID NKX6-2:hsa-miR-155

```

ONCO-MI hsa-miR-155

```
//  
ONCO-ID OCTAMER:hsa-miR-100  
ONCO-JT ENSG00000118689 "Symbol":FOXO3A;  
"Name":forkhead box O3A;  
"GeneID":2309;  
"Chr":6;  
"Chr Band":6q21 ;  
"Cancer Somatic Mut":yes;  
"Tumour Types (Somatic Mutations)": acute leukemia;  
"Tissue Type": leukaemia/lymphoma;  
"Cancer Molecular Genetics": dominant;  
"Mutation Type ": translocation;  
"Translocation Partner":MLL;
```

```
//  
ONCO-ID PAX-4:hsa-miR-20a  
ONCO-MI hsa-miR-20a
```

```
//  
ONCO-ID AP-1:hsa-miR-199a*  
ONCO-MI hsa-miR-199a*
```

```
//  
ONCO-ID PEA3:hsa-miR-199a*  
ONCO-MI hsa-miR-199a*
```

```
//  
ONCO-ID LEF1:hsa-miR-138  
ONCO-JT ENSG00000113263 "Symbol":ITK;  
"Name":IL2-inducible T-cell kinase;  
"GeneID":3702;  
"Chr":5;  
"Chr Band":5q31-q32;  
"Cancer Somatic Mut":yes;  
"Tumour Types (Somatic Mutations)":peripheral T-cell lymphoma;  
"Tissue Type": leukaemia/lymphoma;  
"Cancer Molecular Genetics": dominant;  
"Mutation Type ": translocation;  
"Translocation Partner":SYK;
```

```
//  
ONCO-ID PAX-4:hsa-miR-199a*  
ONCO-MI hsa-miR-199a*
```

```
//  
ONCO-ID HSF2:hsa-let-7d  
ONCO-MI hsa-let-7d
```

```
//  
ONCO-ID C-REL:hsa-miR-126  
ONCO-JT ENSG00000146648 "Symbol":EGFR;  
"Name":epidermal growth factor receptor (erythroblastic leukemia viral (v-erb-b) oncogene homolog, avian);  
"GeneID":1956;  
"Chr":7;  
"Chr Band":7p12.3-p12.1 ;  
"Cancer Somatic Mut":yes;  
"Tumour Types (Somatic Mutations)":glioma;  
"Tumour Types (Somatic Mutations)": non small cell lung cancer;  
"Tissue Type": epithelial;  
"Tissue Type": other;  
"Cancer Molecular Genetics": dominant;  
"Mutation Type ": amplification;  
"Mutation Type ": other;  
"Mutation Type ": Missense;
```

```
//  
ONCO-ID CAC-BP:hsa-miR-203  
ONCO-JT ENSG00000110777 "Symbol":POU2AF1;  
"Name":POU domain, class 2, associating factor 1 (OBF1);  
"GeneID":5450;  
"Chr":11;  
"Chr Band":11q23.1 ;  
"Cancer Somatic Mut":yes;  
"Tumour Types (Somatic Mutations)": non-Hodgkin lymphoma;  
"Tissue Type": leukaemia/lymphoma;  
"Cancer Molecular Genetics": dominant;  
"Mutation Type ": translocation;  
"Translocation Partner":BCL6;
```

```
//  
ONCO-ID LEF1:hsa-miR-30c  
ONCO-JT ENSG00000158715 "Symbol":SLC45A3;  
"Name":solute carrier family 45, member 3;  
"GeneID":85414;  
"Chr":1;  
"Chr Band":1q32;  
"Cancer Somatic Mut":yes;  
"Tumour Types (Somatic Mutations)":prostate ;  
"Tissue Type": epithelial;  
"Cancer Molecular Genetics": dominant;  
"Mutation Type ": translocation;  
"Translocation Partner":ETV1;
```



```

//
ONCO-ID C-REL:hsa-miR-133a
ONCO-JT ENSG00000146648 "Symbol":EGFR;
"Name":epidermal growth factor receptor (erythroblastic leukemia viral (v-erb-b) oncogene homolog, avian);
"GeneID":1956;
"Chr":7;
"Chr Band":7p12.3-p12.1 ;
"Cancer Somatic Mut":yes;
"Tumour Types (Somatic Mutations)":glioma;
"Tumour Types (Somatic Mutations)": non small cell lung cancer;
"Tissue Type": epithelial;
"Tissue Type": other;
"Cancer Molecular Genetics": dominant;
"Mutation Type ": amplification;
"Mutation Type ": other;
"Mutation Type ": Missense;

//
ONCO-ID SRF:hsa-miR-199a*
ONCO-MI hsa-miR-199a*

//
ONCO-ID AFP1:hsa-let-7d
ONCO-MI hsa-let-7d

//
ONCO-ID ATF-1:hsa-miR-199b
ONCO-MI hsa-miR-199b

//
ONCO-ID PAX-4:hsa-miR-125b
ONCO-MI hsa-miR-125b
ONCO-JT ENSG00000137265 "Symbol":IRF4;
"Name":interferon regulatory factor 4;
"GeneID":3662;
"Chr":6;
"Chr Band":6p25-p23;
"Cancer Somatic Mut":yes;
"Tumour Types (Somatic Mutations)":MM ;
"Tissue Type": leukaemia/lymphoma;
"Cancer Molecular Genetics": dominant;
"Mutation Type ": translocation;
"Translocation Partner":IGH@;

//
ONCO-ID NF-E2:hsa-miR-142-3p
ONCO-MI hsa-miR-142-3p

//
ONCO-ID YY1:hsa-miR-142-5p
ONCO-MI hsa-miR-142-5p

//
ONCO-ID RORALPHA2:hsa-miR-20a
ONCO-MI hsa-miR-20a

//
ONCO-ID LEF1:hsa-miR-126
ONCO-JT ENSG00000146648 "Symbol":EGFR;
"Name":epidermal growth factor receptor (erythroblastic leukemia viral (v-erb-b) oncogene homolog, avian);
"GeneID":1956;
"Chr":7;
"Chr Band":7p12.3-p12.1 ;
"Cancer Somatic Mut":yes;
"Tumour Types (Somatic Mutations)":glioma;
"Tumour Types (Somatic Mutations)": non small cell lung cancer;
"Tissue Type": epithelial;
"Tissue Type": other;
"Cancer Molecular Genetics": dominant;
"Mutation Type ": amplification;
"Mutation Type ": other;
"Mutation Type ": Missense;

//
ONCO-ID SMAD-3:hsa-miR-200b
ONCO-MI hsa-miR-200b

//
ONCO-ID NCX:hsa-miR-17-5p
ONCO-MI hsa-miR-17-5p

//
ONCO-ID AML1:hsa-miR-223
ONCO-JT ENSG00000118689 "Symbol":FOXO3A;
"Name":forkhead box O3A;
"GeneID":2309;
"Chr":6;
"Chr Band":6q21 ;
"Cancer Somatic Mut":yes;
"Tumour Types (Somatic Mutations)": acute leukemia;
"Tissue Type": leukaemia/lymphoma;
"Cancer Molecular Genetics": dominant;
"Mutation Type ": translocation;

```

```

"Translocation Partner":MLL;

//
ONCO-ID SRY:hsa-miR-410
ONCO-JT ENSG00000126883 "Symbol":NUP214;
"Name":nucleoporin 214kDa (CAN);
"GeneID":8021;
"Chr":9;
"Chr Band":9q34.1;
"Cancer Somatic Mut":yes;
"Tumour Types (Somatic Mutations)": acute myelogenous leukemia;
"Tumour Types (Somatic Mutations)": T-cell acute lymphoblastic leukemia;
"Tissue Type": leukaemia/lymphoma;
"Cancer Molecular Genetics": dominant;
"Mutation Type ": translocation;
"Translocation Partner":DEK, SET, ABL1;

//
ONCO-ID CHX10:hsa-miR-199a
ONCO-MI hsa-miR-199a

//
ONCO-ID NKX6-2:hsa-miR-125b
ONCO-MI hsa-miR-125b

//
ONCO-ID BRCA1:hsa-miR-10a
ONCO-TF BRCA1

//
ONCO-ID CDP:hsa-miR-16
ONCO-MI hsa-miR-16

//
ONCO-ID PEA3:hsa-miR-155
ONCO-MI hsa-miR-155

//
ONCO-ID CdxA:hsa-let-7d
ONCO-MI hsa-let-7d

//
ONCO-ID YY1:hsa-miR-16
ONCO-MI hsa-miR-16

//
ONCO-ID SRY:hsa-miR-369-5p
ONCO-JT ENSG00000119508 "Symbol":NR4A3;
"Name":nuclear receptor subfamily 4, group A, member 3 (NOR1);
"GeneID":8013;
"Chr":9;
"Chr Band":9q22 ;
"Cancer Somatic Mut":yes;
"Tumour Types (Somatic Mutations)":extraskelatal myxoid chondrosarcoma;
"Tissue Type": mesenchymal;
"Cancer Molecular Genetics": dominant;
"Mutation Type ": translocation;
"Translocation Partner":EWSR1;

//
ONCO-ID MYC:hsa-miR-202
ONCO-TF MYC

//
ONCO-ID NKX6-2:hsa-miR-31
ONCO-JT ENSG00000153814 "Symbol":JAZF1;
"Name":juxtaposed with another zinc finger gene 1;
"GeneID":221895;
"Chr":7;
"Chr Band":7p15.2-p15.1;
"Cancer Somatic Mut":yes;
"Tumour Types (Somatic Mutations)":endometrial stromal tumours;
"Tissue Type": mesenchymal;
"Cancer Molecular Genetics": dominant;
"Mutation Type ": translocation;
"Translocation Partner":SUZ12;

//
ONCO-ID PAX-4:hsa-miR-17-5p
ONCO-MI hsa-miR-17-5p

//
ONCO-ID SP-1:hsa-miR-193a
ONCO-JT ENSG00000137497 "Symbol":NUMA1;
"Name":nuclear mitotic apparatus protein 1;
"GeneID":4926;
"Chr":11;
"Chr Band":11q13;
"Cancer Somatic Mut":yes;
"Tumour Types (Somatic Mutations)": acute promyelocytic leukemia;
"Tissue Type": leukaemia/lymphoma;
"Cancer Molecular Genetics": dominant;
"Mutation Type ": translocation;
"Translocation Partner":RARA;

```

```
//
ONCO-ID C-REL:hsa-miR-219
ONCO-JT ENSG00000119508 "Symbol":NR4A3;
"Name":nuclear receptor subfamily 4, group A, member 3 (NOR1);
"GeneID":8013;
"Chr":9;
"Chr Band":9q22 ;
"Cancer Somatic Mut":yes;
"Tumour Types (Somatic Mutations)":extraskelletal myxoid chondrosarcoma;
"Tissue Type": mesenchymal;
"Cancer Molecular Genetics": dominant;
"Mutation Type ": translocation;
"Translocation Partner":EWSR1;
```

```
//
ONCO-ID NCX:hsa-miR-19a
ONCO-MI hsa-miR-19a
```

```
//
ONCO-ID AFP1:hsa-let-7a
ONCO-MI hsa-let-7a
```

```
//
ONCO-ID NF-Y:hsa-miR-125b
ONCO-MI hsa-miR-125b
```

```
//
ONCO-ID SRY:hsa-miR-26a
ONCO-JT ENSG00000187741 "Symbol":FANCA;
"Name":Fanconi anemia, complementation group A;
"GeneID":2175;
"Chr":16;
"Chr Band":16q24.3;
"Cancer Germline Mut":yes;
"Tumour Types (Germline Mutations)": acute myelogenous leukemia;
"Tumour Types (Germline Mutations)":leukemia;
"Cancer Syndrome":Fanconi anaemia A ;
"Tissue Type": leukaemia/lymphoma;
"Cancer Molecular Genetics": recessive;
"Mutation Type ": large deletion;
"Mutation Type ": Missense;
"Mutation Type ": nonsense;
"Mutation Type ": frameshift;
"Mutation Type ": splice site;
```

```
//
ONCO-ID ATF6:hsa-miR-199a
ONCO-MI hsa-miR-199a
```

```
//
ONCO-ID FREAC-4:hsa-miR-214
ONCO-JT ENSG00000141985 "Symbol":SH3GL1;
"Name":SH3-domain GRB2-like 1 (EEN);
"GeneID":6455;
"Chr":19;
"Chr Band": 19p13.3 ;
"Cancer Somatic Mut":yes;
"Tumour Types (Somatic Mutations)": acute leukemia;
"Tissue Type": leukaemia/lymphoma;
"Cancer Molecular Genetics": dominant;
"Mutation Type ": translocation;
"Translocation Partner":MLL;
```

```
//
ONCO-ID SMAD-3:hsa-miR-200a*
ONCO-MI hsa-miR-200a*
```

```
//
ONCO-ID SOX-5:hsa-miR-30a-5p
ONCO-JT ENSG00000158715 "Symbol":SLC45A3;
"Name":solute carrier family 45, member 3;
"GeneID":85414;
"Chr":1;
"Chr Band":1q32;
"Cancer Somatic Mut":yes;
"Tumour Types (Somatic Mutations)":prostate ;
"Tissue Type": epithelial;
"Cancer Molecular Genetics": dominant;
"Mutation Type ": translocation;
"Translocation Partner":ETV1;
```

```
//
ONCO-ID YY1:hsa-miR-125b
ONCO-MI hsa-miR-125b
```

```
//
ONCO-ID IY:hsa-miR-16
ONCO-MI hsa-miR-16
```

```
//
ONCO-ID MEIS1:hsa-miR-199a
ONCO-MI hsa-miR-199a
```

```

//
ONCO-ID YY1:hsa-let-7a
ONCO-MI hsa-let-7a

//
ONCO-ID AREB6:hsa-miR-31
ONCO-JT ENSG00000153814 "Symbol":JAZF1;
"Name":juxtaposed with another zinc finger gene 1;
"GeneID":221895;
"Chr":7;
"Chr Band":7p15.2-p15.1;
"Cancer Somatic Mut":yes;
"Tumour Types (Somatic Mutations)":endometrial stromal tumours;
"Tissue Type": mesenchymal;
"Cancer Molecular Genetics": dominant;
"Mutation Type ": translocation;
"Translocation Partner":SUZ12;

//
ONCO-ID LEF1:hsa-miR-199b
ONCO-MI hsa-miR-199b

//
ONCO-ID MEIS1:hsa-let-7b
ONCO-MI hsa-let-7b

//
ONCO-ID IRF1:hsa-miR-126*
ONCO-JT ENSG00000121879 "Symbol":PIK3CA;
"Name":phosphoinositide-3-kinase, catalytic, alpha polypeptide;
"GeneID":5290;
"Chr":3;
"Chr Band":3q26.3;
"Cancer Somatic Mut":yes;
"Tumour Types (Somatic Mutations)":colorectal;
"Tumour Types (Somatic Mutations)":gastric;
"Tumour Types (Somatic Mutations)":glioblastoma;
"Tumour Types (Somatic Mutations)":breast;
"Tissue Type": epithelial;
"Tissue Type": other;
"Cancer Molecular Genetics": dominant;
"Mutation Type ": Missense;

//
ONCO-ID SMAD3:hsa-miR-200a
ONCO-MI hsa-miR-200a

//
ONCO-ID IRF1:hsa-miR-126
ONCO-JT ENSG00000146648 "Symbol":EGFR;
"Name":epidermal growth factor receptor (erythroblastic leukemia viral (v-erb-b) oncogene homolog, avian);
"GeneID":1956;
"Chr":7;
"Chr Band":7p12.3-p12.1 ;
"Cancer Somatic Mut":yes;
"Tumour Types (Somatic Mutations)":glioma;
"Tumour Types (Somatic Mutations)": non small cell lung cancer;
"Tissue Type": epithelial;
"Tissue Type": other;
"Cancer Molecular Genetics": dominant;
"Mutation Type ": amplification;
"Mutation Type ": other;
"Mutation Type ": Missense;

//
ONCO-ID MYOD:hsa-miR-203
ONCO-JT ENSG00000143322 "Symbol":ABL2;
"Name":v-abl Abelson murine leukemia viral oncogene homolog 2;
"GeneID":27;
"Chr":1;
"Chr Band":1q24-q25 ;
"Cancer Somatic Mut":yes;
"Tumour Types (Somatic Mutations)": acute myelogenous leukemia;
"Tissue Type": leukaemia/lymphoma;
"Cancer Molecular Genetics": dominant;
"Mutation Type ": translocation;
"Translocation Partner":ETV6;

//
ONCO-ID IRF1:hsa-miR-29a
ONCO-JT ENSG00000147065 "Symbol":MSN;
"Name":moesin;
"GeneID":4478;
"Chr":X;
"Chr Band":Xq11.2-q12;
"Cancer Somatic Mut":yes;
"Tumour Types (Somatic Mutations)": anaplastic large-cell lymphoma;
"Tissue Type": leukaemia/lymphoma;
"Cancer Molecular Genetics": dominant;
"Mutation Type ": translocation;
"Translocation Partner":ALK;

//
ONCO-ID MYC:hsa-miR-17-5p

```

ONCO-TF MYCONCO-MI hsa-miR-17-5p

```
//
ONCO-ID IRF-7:hsa-miR-219
ONCO-JT ENSG00000119508 "Symbol":NR4A3;
"Name":nuclear receptor subfamily 4, group A, member 3 (NOR1);
"GeneID":8013;
"Chr":9;
"Chr Band":9q22 ;
"Cancer Somatic Mut":yes;
"Tumour Types (Somatic Mutations)":extraskkeletal myxoid chondrosarcoma;
"Tissue Type": mesenchymal;
"Cancer Molecular Genetics": dominant;
"Mutation Type ": translocation;
"Translocation Partner":EWSR1;
```

```
//
ONCO-ID C-REL:hsa-miR-1
ONCO-JT ENSG0000002834 "Symbol":LASP1;
"Name":LIM and SH3 protein 1;
"GeneID":3927;
"Chr":17;
"Chr Band":17q11-q21.3;
"Cancer Somatic Mut":yes;
"Tumour Types (Somatic Mutations)": acute myelogenous leukemia;
"Tissue Type": leukaemia/lymphoma;
"Cancer Molecular Genetics": dominant;
"Mutation Type ": translocation;
"Translocation Partner":MLL;
```

```
//
ONCO-ID MEIS1:hsa-miR-30a-5p
ONCO-JT ENSG00000116128 "Symbol":BCL9;
"Name":B-cell CLL/lymphoma 9;
"GeneID":607;
"Chr":1;
"Chr Band":1q21;
"Cancer Somatic Mut":yes;
"Tumour Types (Somatic Mutations)": B-cell acute lymphocytic leukaemia;
"Tissue Type": leukaemia/lymphoma;
"Cancer Molecular Genetics": dominant;
"Mutation Type ": translocation;
"Translocation Partner":IGH@, IGL@;
```

```
//
ONCO-ID FREAC-4:hsa-miR-199a
ONCO-MI hsa-miR-199a
```

```
//
ONCO-ID HSF2:hsa-miR-199a
ONCO-MI hsa-miR-199a
```

```
//
ONCO-ID RORALPHA2:hsa-miR-19a
ONCO-MI hsa-miR-19a
```

```
//
ONCO-ID IY:hsa-miR-296
ONCO-JT ENSG00000116251 "Symbol":RPL22;
"Name":ribosomal protein L22 (EAP);
"GeneID":6146;
"Chr":3;
"Chr Band":3q26 ;
"Cancer Somatic Mut":yes;
"Tumour Types (Somatic Mutations)": acute myelogenous leukemia;
"Tumour Types (Somatic Mutations)": chronic myeloid leukemia;
"Tissue Type": leukaemia/lymphoma;
"Cancer Molecular Genetics": dominant;
"Mutation Type ": translocation;
"Translocation Partner":RUNX1;
ONCO-JT ENSG00000171791 "Symbol":BCL2;
"Name":B-cell CLL/lymphoma 2;
"GeneID":596;
"Chr":18;
"Chr Band":18q21.3 ;
"Cancer Somatic Mut":yes;
"Tumour Types (Somatic Mutations)": non-Hodgkin lymphoma;
"Tumour Types (Somatic Mutations)": chronic lymphatic leukemia;
"Tissue Type": leukaemia/lymphoma;
"Cancer Molecular Genetics": dominant;
"Mutation Type ": translocation;
"Translocation Partner":IGH@;
```

```
//
ONCO-ID v-Myb:hsa-miR-16
ONCO-MI hsa-miR-16
```

```
//
ONCO-ID ETS:hsa-miR-223
ONCO-JT ENSG00000123268 "Symbol":ATF1;
"Name":activating transcription factor 1;
"GeneID":466;
"Chr":12;
"Chr Band":12q13 ;
"Cancer Somatic Mut":yes;
"Tumour Types (Somatic Mutations)":malignant melanoma of soft parts ;
```

```

"Tumour Types (Somatic Mutations)":angiomatoid fibrous histiocytoma ;
"Tissue Type": epithelial;
"Tissue Type": mesenchymal;
"Cancer Molecular Genetics": dominant;
"Mutation Type ": translocation;
"Translocation Partner":EWSR1;

//
ONCO-ID SRF:hsa-miR-125b
ONCO-MI hsa-miR-125b

//
ONCO-ID MYC:hsa-miR-19a
ONCO-TF MYCONCO-MI hsa-miR-19a

//
ONCO-ID HNF-1:hsa-miR-20a
ONCO-MI hsa-miR-20a

//
ONCO-ID AP-4:hsa-miR-200c
ONCO-MI hsa-miR-200c

//
ONCO-ID CHX10:hsa-miR-19a
ONCO-MI hsa-miR-19a

//
ONCO-ID ELF-1:hsa-miR-16
ONCO-MI hsa-miR-16

//
ONCO-ID HOXA4:hsa-miR-20a
ONCO-MI hsa-miR-20a

//
ONCO-ID YY1:hsa-miR-100
ONCO-JT ENSG00000118689 "Symbol":FOXO3A;
"Name":forkhead box O3A;
"GeneID":2309;
"Chr":6;
"Chr Band":6q21 ;
"Cancer Somatic Mut":yes;
"Tumour Types (Somatic Mutations)": acute leukemia;
"Tissue Type": leukaemia/lymphoma;
"Cancer Molecular Genetics": dominant;
"Mutation Type ": translocation;
"Translocation Partner":MLL;

//
ONCO-ID SRY:hsa-miR-148b
ONCO-JT ENSG00000204103 "Symbol":MAFB;
"Name":v-maf musculoaponeurotic fibrosarcoma oncogene homolog B (avian);
"GeneID":9935;
"Chr":20;
"Chr Band":20q11.2-q13.1;
"Cancer Somatic Mut":yes;
"Tumour Types (Somatic Mutations)": multiple myeloma;
"Tissue Type": leukaemia/lymphoma;
"Cancer Molecular Genetics": dominant;
"Mutation Type ": translocation;
"Translocation Partner":IGH@;

//
ONCO-ID SOX-5:hsa-miR-206
ONCO-JT ENSG0000002834 "Symbol":LASP1;
"Name":LIM and SH3 protein 1;
"GeneID":3927;
"Chr":17;
"Chr Band":17q11-q21.3;
"Cancer Somatic Mut":yes;
"Tumour Types (Somatic Mutations)": acute myelogenous leukemia;
"Tissue Type": leukaemia/lymphoma;
"Cancer Molecular Genetics": dominant;
"Mutation Type ": translocation;
"Translocation Partner":MLL;

//
ONCO-ID SRY:hsa-miR-155
ONCO-MI hsa-miR-155

//
ONCO-ID YY1:hsa-miR-195
ONCO-MI hsa-miR-195

//
ONCO-ID GABP:hsa-miR-330
ONCO-JT ENSG00000127152 "Symbol":BCL11B;
"Name":B-cell CLL/lymphoma 11B (CTIP2);
"GeneID":64919;
"Chr":14;
"Chr Band":14q32.1;

```

```
"Cancer Somatic Mut":yes;
"Tumour Types (Somatic Mutations)": T-cell acute lymphoblastic leukemia;
"Tissue Type": leukaemia/lymphoma;
"Cancer Molecular Genetics": dominant;
"Mutation Type ": translocation;
"Translocation Partner":TLX3;
```

```
//
ONCO-ID SOX-5:hsa-miR-133b
ONCO-JT ENSG00000105976 "Symbol":MET;
"Name":met proto-oncogene (hepatocyte growth factor receptor);
"GeneID":4233;
"Chr":7;
"Chr Band":7q31;
"Cancer Somatic Mut":yes;
"Tumour Types (Somatic Mutations)":papillary renal;
"Tumour Types (Somatic Mutations)":head-neck squamous cell ;
"Tumour Types (Germline Mutations)":papillary renal;
"Cancer Syndrome":Familial Papillary Renal Cancer;
"Tissue Type": epithelial;
"Cancer Molecular Genetics": dominant;
"Mutation Type ": Missense;
```

```
//
ONCO-ID BRCA1:hsa-miR-194
ONCO-TF BRCA1
```

```
//
ONCO-ID HMG1Y:hsa-miR-16
ONCO-MI hsa-miR-16
```

```
//
ONCO-ID YY1:hsa-miR-221
ONCO-MI hsa-miR-221
```

```
//
ONCO-ID SRY:hsa-miR-377
ONCO-JT ENSG00000143294 "Symbol":PRCC;
"Name":papillary renal cell carcinoma (translocation-associated);
"GeneID":5546;
"Chr":1;
"Chr Band":1q21.1;
"Cancer Somatic Mut":yes;
"Tumour Types (Somatic Mutations)":papillary renal ;
"Tissue Type": epithelial;
"Cancer Molecular Genetics": dominant;
"Mutation Type ": translocation;
"Translocation Partner":TFE3;
```

```
//
ONCO-ID MEIS1:hsa-miR-30c
ONCO-JT ENSG00000116128 "Symbol":BCL9;
"Name":B-cell CLL/lymphoma 9;
"GeneID":607;
"Chr":1;
"Chr Band":1q21;
"Cancer Somatic Mut":yes;
"Tumour Types (Somatic Mutations)": B-cell acute lymphocytic leukaemia;
"Tissue Type": leukaemia/lymphoma;
"Cancer Molecular Genetics": dominant;
"Mutation Type ": translocation;
"Translocation Partner":IGH@, IGL@;
```

```
//
ONCO-ID AREB6:hsa-miR-203
ONCO-JT ENSG00000110777 "Symbol":POU2AF1;
"Name":POU domain, class 2, associating factor 1 (OBF1);
"GeneID":5450;
"Chr":11;
"Chr Band":11q23.1 ;
"Cancer Somatic Mut":yes;
"Tumour Types (Somatic Mutations)": non-Hodgkin lymphoma;
"Tissue Type": leukaemia/lymphoma;
"Cancer Molecular Genetics": dominant;
"Mutation Type ": translocation;
"Translocation Partner":BCL6;
```

```
//
ONCO-ID MEIS1:hsa-miR-32
ONCO-JT ENSG00000116128 "Symbol":BCL9;
"Name":B-cell CLL/lymphoma 9;
"GeneID":607;
"Chr":1;
"Chr Band":1q21;
"Cancer Somatic Mut":yes;
"Tumour Types (Somatic Mutations)": B-cell acute lymphocytic leukaemia;
"Tissue Type": leukaemia/lymphoma;
"Cancer Molecular Genetics": dominant;
"Mutation Type ": translocation;
"Translocation Partner":IGH@, IGL@;
```

```
//
ONCO-ID NCX:hsa-let-7e
ONCO-MI hsa-let-7e
```

```
//
```

```

ONCO-ID NF-Y:hsa-miR-223
ONCO-JT ENSG00000134982 "Symbol":APC;
"Name":adenomatous polyposis of the colon gene;
"GeneID":324;
"Chr":5;
"Chr Band":5q21;
"Cancer Somatic Mut":yes;
"Cancer Germline Mut":yes;
"Tumour Types (Somatic Mutations)":colorectal;
"Tumour Types (Somatic Mutations)":pancreatic;
"Tumour Types (Somatic Mutations)":desmoid;
"Tumour Types (Somatic Mutations)":hepatoblastoma;
"Tumour Types (Somatic Mutations)":glioma;
"Tumour Types (Somatic Mutations)":other CNS;
"Tumour Types (Germline Mutations)":colorectal;
"Tumour Types (Germline Mutations)":pancreatic;
"Tumour Types (Germline Mutations)":desmoid;
"Tumour Types (Germline Mutations)":hepatoblastoma;
"Tumour Types (Germline Mutations)":glioma;
"Tumour Types (Germline Mutations)":other CNS;
"Cancer Syndrome":Adenomatous polyposis coli; Turcot syndrome;
"Tissue Type": epithelial;
"Tissue Type": mesenchymal;
"Tissue Type": other;
"Cancer Molecular Genetics": recessive;
"Mutation Type ": large deletion;
"Mutation Type ": Missense;
"Mutation Type ": nonsense;
"Mutation Type ": frameshift;
"Mutation Type ": splice site;
ONCO-JT ENSG00000123268 "Symbol":ATF1;
"Name":activating transcription factor 1;
"GeneID":466;
"Chr":12;
"Chr Band":12q13 ;
"Cancer Somatic Mut":yes;
"Tumour Types (Somatic Mutations)":malignant melanoma of soft parts ;
"Tumour Types (Somatic Mutations)":angiomatoid fibrous histiocytoma ;
"Tissue Type": epithelial;
"Tissue Type": mesenchymal;
"Cancer Molecular Genetics": dominant;
"Mutation Type ": translocation;
"Translocation Partner":EWSR1;

//
ONCO-ID SOX-5:hsa-miR-29a
ONCO-JT ENSG00000182197 "Symbol":EXT1;
"Name":multiple exostoses type 1 gene;
"GeneID":2131;
"Chr":8;
"Chr Band":8q24.11-q24.13 ;
"Cancer Germline Mut":yes;
"Tumour Types (Germline Mutations)":exostoses;
"Tumour Types (Germline Mutations)":osteosarcoma;
"Cancer Syndrome":Multiple Exostoses Type 1;
"Tissue Type": mesenchymal;
"Cancer Molecular Genetics": recessive;
"Mutation Type ": Missense;
"Mutation Type ": nonsense;
"Mutation Type ": frameshift;
"Mutation Type ": splice site;
ONCO-JT ENSG00000108821 "Symbol":COL1A1;
"Name":collagen, type I, alpha 1;
"GeneID":1277;
"Chr":17;
"Chr Band":17q21.31-q22;
"Cancer Somatic Mut":yes;
"Tumour Types (Somatic Mutations)":dermatofibrosarcoma protuberans;
"Tumour Types (Somatic Mutations)":aneurysmal bone cyst ;
"Tissue Type": mesenchymal;
"Cancer Molecular Genetics": dominant;
"Mutation Type ": translocation;
"Translocation Partner":PDGFB, USP6;
"Other Germline Mut":yes;
"Other Syndrome/Disease":Osteogenesis imperfecta;

//
ONCO-ID OCTAMER:hsa-let-7a
ONCO-MI hsa-let-7a

//
ONCO-ID MYC:hsa-miR-20a
ONCO-TF MYCONCO-MI hsa-miR-20a

//
ONCO-ID ELF-1:hsa-miR-155
ONCO-MI hsa-miR-155

//
ONCO-ID LEF1:hsa-miR-203
ONCO-JT ENSG00000110777 "Symbol":POU2AF1;
"Name":POU domain, class 2, associating factor 1 (OBF1);
"GeneID":5450;
"Chr":11;
"Chr Band":11q23.1 ;
"Cancer Somatic Mut":yes;
"Tumour Types (Somatic Mutations)": non-Hodgkin lymphoma;
"Tissue Type": leukaemia/lymphoma;
"Cancer Molecular Genetics": dominant;
"Mutation Type ": translocation;

```



```

"Translocation Partner":BCL6;

//
ONCO-ID MEIS1:hsa-let-7a
ONCO-MI hsa-let-7a

//
ONCO-ID MEIS1:hsa-miR-200c
ONCO-MI hsa-miR-200c

//
ONCO-ID HNF-3:hsa-miR-30c
ONCO-JT ENSG00000133392 "Symbol":MYH11;
"Name":myosin, heavy polypeptide 11, smooth muscle;
"GeneID":4629;
"Chr":16;
"Chr Band":16p13.13-p13.12 ;
"Cancer Somatic Mut":yes;
"Tumour Types (Somatic Mutations)": acute myelogenous leukemia;
"Tissue Type": leukaemia/lymphoma;
"Cancer Molecular Genetics": dominant;
"Mutation Type ": translocation;
"Translocation Partner":CBFB;
ONCO-JT ENSG00000116128 "Symbol":BCL9;
"Name":B-cell CLL/lymphoma 9;
"GeneID":607;
"Chr":1;
"Chr Band":1q21;
"Cancer Somatic Mut":yes;
"Tumour Types (Somatic Mutations)": B-cell acute lymphocytic leukaemia;
"Tissue Type": leukaemia/lymphoma;
"Cancer Molecular Genetics": dominant;
"Mutation Type ": translocation;
"Translocation Partner":IGH@, IGL@;

//
ONCO-ID HNF-3:hsa-miR-30a-5p
ONCO-JT ENSG00000133392 "Symbol":MYH11;
"Name":myosin, heavy polypeptide 11, smooth muscle;
"GeneID":4629;
"Chr":16;
"Chr Band":16p13.13-p13.12 ;
"Cancer Somatic Mut":yes;
"Tumour Types (Somatic Mutations)": acute myelogenous leukemia;
"Tissue Type": leukaemia/lymphoma;
"Cancer Molecular Genetics": dominant;
"Mutation Type ": translocation;
"Translocation Partner":CBFB;
ONCO-JT ENSG00000116128 "Symbol":BCL9;
"Name":B-cell CLL/lymphoma 9;
"GeneID":607;
"Chr":1;
"Chr Band":1q21;
"Cancer Somatic Mut":yes;
"Tumour Types (Somatic Mutations)": B-cell acute lymphocytic leukaemia;
"Tissue Type": leukaemia/lymphoma;
"Cancer Molecular Genetics": dominant;
"Mutation Type ": translocation;
"Translocation Partner":IGH@, IGL@;

//
ONCO-ID CdxA:hsa-let-7f
ONCO-MI hsa-let-7f

//
ONCO-ID MYC:hsa-miR-296
ONCO-TF MYC

//
ONCO-ID NF-AT:hsa-miR-16
ONCO-MI hsa-miR-16

//
ONCO-ID SRF:hsa-let-7a
ONCO-MI hsa-let-7a

//
ONCO-ID ATF6:hsa-miR-199a*
ONCO-MI hsa-miR-199a*
ONCO-JT ENSG00000182712 "Symbol":MTCPL1;
"Name":mature T-cell proliferation 1;
"GeneID":4515;
"Chr":X;
"Chr Band":Xq28;
"Cancer Somatic Mut":yes;
"Tumour Types (Somatic Mutations)":T cell prolymphocytic leukemia;
"Tissue Type": leukaemia/lymphoma;
"Cancer Molecular Genetics": dominant;
"Mutation Type ": translocation;
"Translocation Partner":TRA@;

//
ONCO-ID HNF-3:hsa-let-7d
ONCO-MI hsa-let-7d

```

```

//
ONCO-ID AP-2ALPHA:hsa-miR-200c
ONCO-MI hsa-miR-200c

//
ONCO-ID HOXA4:hsa-miR-125b
ONCO-MI hsa-miR-125b

//
ONCO-ID MYC:hsa-miR-365
ONCO-TF MYC

//
ONCO-ID MEIS1:hsa-miR-199a*
ONCO-MI hsa-miR-199a*

//
ONCO-ID MYC:hsa-miR-181d
ONCO-TF MYC

//
ONCO-ID C-REL:hsa-miR-203
ONCO-JT ENSG00000110777 "Symbol":POU2AF1;
"Name":POU domain, class 2, associating factor 1 (OBF1);
"GeneID":5450;
"Chr":11;
"Chr Band":11q23.1 ;
"Cancer Somatic Mut":yes;
"Tumour Types (Somatic Mutations)": non-Hodgkin lymphoma;
"Tissue Type": leukaemia/lymphoma;
"Cancer Molecular Genetics": dominant;
"Mutation Type ": translocation;
"Translocation Partner":BCL6;

//
ONCO-ID CdxA:hsa-miR-125b
ONCO-MI hsa-miR-125b

//
ONCO-ID AHR:hsa-miR-142-5p
ONCO-MI hsa-miR-142-5p

//
ONCO-ID CHX10:hsa-miR-17-5p
ONCO-MI hsa-miR-17-5p

//
ONCO-ID NCX:hsa-miR-20a
ONCO-MI hsa-miR-20a

//
ONCO-ID HNF-3:hsa-let-7f
ONCO-MI hsa-let-7f
ONCO-JT ENSG00000118971 "Symbol":CCND2;
"Name":cyclin D2;
"GeneID":894;
"Chr":12;
"Chr Band":12p13;
"Cancer Somatic Mut":yes;
"Tumour Types (Somatic Mutations)":NHL, CLL;
"Tissue Type": leukaemia/lymphoma;
"Cancer Molecular Genetics": dominant;
"Mutation Type ": translocation;
"Translocation Partner":IGL0;

//
ONCO-ID SOX-5:hsa-let-7a
ONCO-MI hsa-let-7a

//
ONCO-ID SP-1:hsa-miR-148b
ONCO-JT ENSG00000204103 "Symbol":MAFB;
"Name":v-maf musculoaponeurotic fibrosarcoma oncogene homolog B (avian);
"GeneID":9935;
"Chr":20;
"Chr Band":20q11.2-q13.1;
"Cancer Somatic Mut":yes;
"Tumour Types (Somatic Mutations)": multiple myeloma;
"Tissue Type": leukaemia/lymphoma;
"Cancer Molecular Genetics": dominant;
"Mutation Type ": translocation;
"Translocation Partner":IGH0;

//
ONCO-ID STAT1:hsa-miR-10a
ONCO-JT ENSG00000119508 "Symbol":NR4A3;
"Name":nuclear receptor subfamily 4, group A, member 3 (NOR1);
"GeneID":8013;
"Chr":9;
"Chr Band":9q22 ;
"Cancer Somatic Mut":yes;
"Tumour Types (Somatic Mutations)":extraskelletal myxoid chondrosarcoma;
"Tissue Type": mesenchymal;
"Cancer Molecular Genetics": dominant;

```

"Mutation Type ": translocation;  
"Translocation Partner":EWSR1;

//  
ONCO-ID HOXA4:hsa-miR-17-5p  
ONCO-MI hsa-miR-17-5p

//  
ONCO-ID ATF-1:hsa-miR-199a\*  
ONCO-MI hsa-miR-199a\*  
ONCO-JT ENSG00000182712 "Symbol":MTCP1;  
"Name":mature T-cell proliferation 1;  
"GeneID":4515;  
"Chr":X;  
"Chr Band":Xq28;  
"Cancer Somatic Mut":yes;  
"Tumour Types (Somatic Mutations)":T cell prolymphocytic leukemia;  
"Tissue Type": leukaemia/lymphoma;  
"Cancer Molecular Genetics": dominant;  
"Mutation Type ": translocation;  
"Translocation Partner":TRA0;

//  
ONCO-ID AFP1:hsa-let-7f  
ONCO-MI hsa-let-7f

//  
ONCO-ID C-REL:hsa-miR-199a  
ONCO-MI hsa-miR-199a

//  
ONCO-ID HIF-1:hsa-miR-199a  
ONCO-MI hsa-miR-199a

//  
ONCO-ID SRY:hsa-miR-221  
ONCO-MI hsa-miR-221  
ONCO-JT ENSG00000118971 "Symbol":CCND2;  
"Name":cyclin D2;  
"GeneID":894;  
"Chr":12;  
"Chr Band":12p13;  
"Cancer Somatic Mut":yes;  
"Tumour Types (Somatic Mutations)":NHL,CLL;  
"Tissue Type": leukaemia/lymphoma;  
"Cancer Molecular Genetics": dominant;  
"Mutation Type ": translocation;  
"Translocation Partner":IGL0;

//  
ONCO-ID PEA3:hsa-miR-199a  
ONCO-MI hsa-miR-199a

//  
ONCO-ID CAC-BP:hsa-miR-146b  
ONCO-MI hsa-miR-146b

//  
ONCO-ID C-REL:hsa-miR-199a\*  
ONCO-MI hsa-miR-199a\*

//  
ONCO-ID ELF-1:hsa-miR-199a\*  
ONCO-MI hsa-miR-199a\*

//  
ONCO-ID SP-1:hsa-miR-218  
ONCO-JT ENSG00000174775 "Symbol":HRAS;  
"Name":v-Ha-ras Harvey rat sarcoma viral oncogene homolog;  
"GeneID":3265;  
"Chr":11;  
"Chr Band":11p15.5 ;  
"Cancer Somatic Mut":yes;  
"Cancer Germline Mut":yes;  
"Tumour Types (Somatic Mutations)":infrequent sarcomas;  
"Tumour Types (Somatic Mutations)":rare other types;  
"Tumour Types (Germline Mutations)":rhabdomyosarcoma;  
"Tumour Types (Germline Mutations)":ganglioneuroblastoma;  
"Tumour Types (Germline Mutations)":bladder;  
"Cancer Syndrome":Costello syndrome;  
"Tissue Type": epithelial;  
"Tissue Type": leukaemia/lymphoma;  
"Tissue Type": mesenchymal;  
"Cancer Molecular Genetics": dominant;  
"Mutation Type ": Missense;
