# Supplementary material for: Genome-wide survey of microRNA–transcription factor feed-forward regulatory circuits in human
Source: Royal Society of Chemistry journal article supplement (doi:10.1039/b900177h), 2009-06-19
Supplement: b900177h_add_file_10.pdf [file b900177h_add_file_10.pdf]

```

# Circuits relevant to cancer, but related to unknown TFs.

# Final dataset of circuits where at least one gene has been annotated as relevant to cancer,
# but for which we do not have a robust association of the promoter element with any known
# Transcription Factor Binding Site. Circuits correspond to blocks separated by a // symbol.
# Each block is divided in several fields:

-----
## Compulsary fields :
-----

# Motif given no transcription factor:Mature_microRNA_id.

-----
## Optional fields :
-----

# ONCO-MI This field is provided if the miRNA is included in the list of genes contributing to cancer.

# Remaining fields provide information about cancer-annotated protein-coding genes.
# Information concerns chromosomal location, tumour types in which mutations are found,
# classes of mutations that contribute to oncogenesis and other genetic properties.
# The cancer-annotated gene is reported in round brackets.

# A plain text ASCII version of this file is available at: http://personalpages.to.infn.it/~cora/circuits/index.html

//
ONCO-ID AGGTAACAA:hsa-miR-221
ONCO-MI hsa-miR-221

//
ONCO-ID CTTAACCCC:hsa-miR-200c
ONCO-MI hsa-miR-200c

//
ONCO-ID CCGAGTCCA:hsa-miR-200a
ONCO-MI hsa-miR-200a

//
ONCO-ID GGAAGTCAA:hsa-miR-200c
ONCO-MI hsa-miR-200c
ONCO-JT ENSG00000182712 "Symbol":MTCP1;
"Name":mature T-cell proliferation 1;
"GeneID":4515;
"Chr":X;
"Chr Band":Xq28;
"Cancer Somatic Mut":yes;
"Tumour Types (Somatic Mutations)":T cell prolymphocytic leukemia;
"Tissue Type": leukaemia/lymphoma;
"Cancer Molecular Genetics": dominant;
"Mutation Type ": translocation;
"Translocation Partner":TRA@;

//
ONCO-ID ATCCAATGA:hsa-let-7a
ONCO-MI hsa-let-7a

//
ONCO-ID AGATTGTGA:hsa-miR-19a
ONCO-MI hsa-miR-19a

//
ONCO-ID AATGGAATG:hsa-miR-29a
ONCO-JT ENSG00000182197 "Symbol":EXT1;
"Name":multiple exostoses type 1 gene;
"GeneID":2131;
"Chr":8;
"Chr Band":8q24.11-q24.13 ;
"Cancer Germline Mut":yes;
"Tumour Types (Germline Mutations)":exostoses;
"Tumour Types (Germline Mutations)":osteosarcoma;
"Cancer Syndrome":Multiple Exostoses Type 1;
"Tissue Type": mesenchymal;
"Cancer Molecular Genetics": recessive;
"Mutation Type ": Missense;
"Mutation Type ": nonsense;
"Mutation Type ": frameshift;
"Mutation Type ": splice site;

//
ONCO-ID AACTTCAA:hsa-miR-19a
ONCO-MI hsa-miR-19a

//
ONCO-ID CGGGTGAGC:hsa-miR-200a
ONCO-MI hsa-miR-200a

//
ONCO-ID TCTATCTAA:hsa-let-7a
ONCO-MI hsa-let-7a

//
ONCO-ID GGTCCATA:hsa-miR-200a*
ONCO-MI hsa-miR-200a*

```

```

//
ONCO-ID CAATAATGA:hsa-miR-16
ONCO-MI hsa-miR-16

//
ONCO-ID GCTAATCC:hsa-miR-199a*
ONCO-MI hsa-miR-199a*

//
ONCO-ID GCCAACTGA:hsa-miR-199a*
ONCO-MI hsa-miR-199a*
ONCO-JT ENSG00000182712 "Symbol":MTCPL1;
"Name":mature T-cell proliferation 1;
"GeneID":4515;
"Chr":X;
"Chr Band":Xq28;
"Cancer Somatic Mut":yes;
"Tumour Types (Somatic Mutations)":T cell prolymphocytic leukemia;
"Tissue Type": leukaemia/lymphoma;
"Cancer Molecular Genetics": dominant;
"Mutation Type ": translocation;
"Translocation Partner":TRA@;

//
ONCO-ID TCTATCTAA:hsa-let-7f
ONCO-MI hsa-let-7f

//
ONCO-ID GAAATTGGC:hsa-miR-155
ONCO-MI hsa-miR-155

//
ONCO-ID CCAACATGG:hsa-miR-142-5p
ONCO-MI hsa-miR-142-5p

//
ONCO-ID CAGCAC:hsa-miR-200b
ONCO-MI hsa-miR-200b

//
ONCO-ID AGTGAAGCC:hsa-miR-199a*
ONCO-MI hsa-miR-199a*

//
ONCO-ID ACCAACCAG:hsa-let-7a
ONCO-MI hsa-let-7a

//
ONCO-ID TCGGGAAA:hsa-miR-125b
ONCO-MI hsa-miR-125b

//
ONCO-ID AAAAGGGTT:hsa-miR-16
ONCO-MI hsa-miR-16

//
ONCO-ID AGCAAGTAT:hsa-miR-17-5p
ONCO-MI hsa-miR-17-5p

//
ONCO-ID ATCTGAGCC:hsa-miR-205
ONCO-JT ENSG00000140937 "Symbol":CDH11;
"Name":cadherin 11, type 2, OB-cadherin (osteoblast);
"GeneID":1009;
"Chr":16;
"Chr Band":16q22.1 ;
"Cancer Somatic Mut":yes;
"Tumour Types (Somatic Mutations)":aneurysmal bone cysts;
"Tissue Type": mesenchymal;
"Cancer Molecular Genetics": dominant;
"Mutation Type ": translocation;
"Translocation Partner":USP6;

//
ONCO-ID ACGGTTGG:hsa-miR-142-5p
ONCO-MI hsa-miR-142-5p

//
ONCO-ID CTGTACATC:hsa-let-7a
ONCO-MI hsa-let-7a

//
ONCO-ID CTCTTGGA:hsa-miR-199a*
ONCO-MI hsa-miR-199a*

//
ONCO-ID ACACTTCAA:hsa-miR-20a
ONCO-MI hsa-miR-20a

```

```
//
ONCO-ID GGACCCAAA:hsa-miR-200a
ONCO-MI hsa-miR-200a

//
ONCO-ID ACTCTACA:hsa-let-7a
ONCO-MI hsa-let-7a

//
ONCO-ID ACTGCACCA:hsa-miR-17-5p
ONCO-MI hsa-miR-17-5p

//
ONCO-ID AATTTGATC:hsa-miR-15a
ONCO-MI hsa-miR-15a

//
ONCO-ID GAGTGTGCC:hsa-miR-200b
ONCO-MI hsa-miR-200b

//
ONCO-ID CACATAAC:hsa-miR-199b
ONCO-MI hsa-miR-199b

//
ONCO-ID GCGGGA:hsa-miR-375
ONCO-JT ENSG00000165699 "Symbol":TSC1;
"Name":tuberous sclerosis 1 gene;
"GeneID":7248;
"Chr":9;
"Chr Band":9q34 ;
"Cancer Germline Mut":yes;
"Tumour Types (Germline Mutations)":hamartoma;
"Tumour Types (Germline Mutations)":renal cell;
"Cancer Syndrome":Tuberous sclerosis 1;
"Tissue Type": epithelial;
"Tissue Type": other;
"Cancer Molecular Genetics": recessive;
"Mutation Type ": large deletion;
"Mutation Type ": Missense;
"Mutation Type ": nonsense;
"Mutation Type ": frameshift;
"Mutation Type ": splice site;

//
ONCO-ID CATTACAGA:hsa-let-7a
ONCO-MI hsa-let-7a

//
ONCO-ID AGATGTTC:hsa-miR-199b
ONCO-MI hsa-miR-199b

//
ONCO-ID AAGTTGGGT:hsa-miR-20a
ONCO-MI hsa-miR-20a

//
ONCO-ID CGAGACAGA:hsa-miR-200b
ONCO-MI hsa-miR-200b

//
ONCO-ID AGCGCACC:hsa-let-7e
ONCO-MI hsa-let-7e

//
ONCO-ID CATGCCGA:hsa-miR-125b
ONCO-MI hsa-miR-125b

//
ONCO-ID CGGAAAAG:hsa-let-7a
ONCO-MI hsa-let-7a

//
ONCO-ID CATGGGCC:hsa-miR-142-5p
ONCO-MI hsa-miR-142-5p

//
ONCO-ID GCGGTGTAC:hsa-miR-142-3p
ONCO-MI hsa-miR-142-3p

//
ONCO-ID CGGAAAAG:hsa-miR-125b
ONCO-MI hsa-miR-125b
ONCO-JT ENSG00000141867 "Symbol":BRD4;
"Name":bromodomain containing 4;
"GeneID":23476;
"Chr":19;
```

"Chr Band":19p13.1;  
"Cancer Somatic Mut":yes;  
"Tumour Types (Somatic Mutations)":lethal midline carcinoma of young people;  
"Tissue Type": epithelial;  
"Cancer Molecular Genetics": dominant;  
"Mutation Type ": translocation;  
"Translocation Partner":NUT;

//  
ONCO-ID CGTCATCCC:hsa-miR-199a  
ONCO-MI hsa-miR-199a

//  
ONCO-ID ATAGCCGG:hsa-miR-199a\*  
ONCO-MI hsa-miR-199a\*

//  
ONCO-ID CCAGACCAG:hsa-miR-200b  
ONCO-MI hsa-miR-200b

//  
ONCO-ID AAGGAACCT:hsa-let-7d  
ONCO-MI hsa-let-7d

//  
ONCO-ID ACGAGGAAG:hsa-let-7a  
ONCO-MI hsa-let-7a

//  
ONCO-ID CCCCC:hsa-miR-200a  
ONCO-MI hsa-miR-200a

//  
ONCO-ID CCCATGCAA:hsa-miR-200b  
ONCO-MI hsa-miR-200b

//  
ONCO-ID ACCTCATCA:hsa-let-7a  
ONCO-MI hsa-let-7a

//  
ONCO-ID AGATTGTGA:hsa-miR-20a  
ONCO-MI hsa-miR-20a

//  
ONCO-ID GCCCCCCGA:hsa-miR-142-3p  
ONCO-MI hsa-miR-142-3p

//  
ONCO-ID GACGTGGCA:hsa-miR-199b  
ONCO-MI hsa-miR-199b

//  
ONCO-ID ACTCGGCGAG:hsa-miR-200b  
ONCO-MI hsa-miR-200b

//  
ONCO-ID CCAAATGGC:hsa-miR-381  
ONCO-JT ENSG00000127914 "Symbol":AKAP9;  
"Name":A kinase (PRKA) anchor protein (yotiao) 9;  
"GeneID":101421;  
"Chr":7;  
"Chr Band":7q21-q22;  
"Cancer Somatic Mut":yes;  
"Tumour Types (Somatic Mutations)":papillary thyroid;  
"Tissue Type": epithelial;  
"Cancer Molecular Genetics": dominant;  
"Mutation Type ": translocation;  
"Translocation Partner":BRAF;

//  
ONCO-ID CGTGGCGAG:hsa-let-7a  
ONCO-MI hsa-let-7a

//  
ONCO-ID CCGCAC:hsa-miR-26b  
ONCO-JT ENSG00000130675 "Symbol":HLXB9;  
"Name":homeo box HB9;  
"GeneID":3110;  
"Chr":7;  
"Chr Band":7q36;  
"Cancer Somatic Mut":yes;  
"Tumour Types (Somatic Mutations)": acute myelogenous leukemia;  
"Tissue Type": leukaemia/lymphoma;  
"Cancer Molecular Genetics": dominant;  
"Mutation Type ": translocation;  
"Translocation Partner":ETV6;  
"Other Germline Mut":yes;  
"Other Syndrome/Disease":CURRARINO SYNDROME;

```
//
ONCO-ID CATTACAGA:hsa-let-7f
ONCO-MI hsa-let-7f

//
ONCO-ID CAACCCCTGC:hsa-miR-142-3p
ONCO-MI hsa-miR-142-3p

//
ONCO-ID AACGTAAG:hsa-let-7a
ONCO-MI hsa-let-7a

//
ONCO-ID CAGAGGGCC:hsa-miR-200a
ONCO-MI hsa-miR-200a

//
ONCO-ID ATTACCGC:hsa-miR-125b
ONCO-MI hsa-miR-125b

//
ONCO-ID AAGGAACCT:hsa-let-7a
ONCO-MI hsa-let-7a

//
ONCO-ID CAGGATTAG:hsa-miR-199a*
ONCO-MI hsa-miR-199a*

//
ONCO-ID GTGCATAAA:hsa-miR-199a*
ONCO-MI hsa-miR-199a*

//
ONCO-ID CCACATAAA:hsa-miR-199b
ONCO-MI hsa-miR-199b

//
ONCO-ID CGGCGTGTC:hsa-miR-200b
ONCO-MI hsa-miR-200b

//
ONCO-ID CCCCCCAG:hsa-let-7b
ONCO-MI hsa-let-7b

//
ONCO-ID CCCATGCAA:hsa-miR-200a*
ONCO-MI hsa-miR-200a*

//
ONCO-ID CGTCAAAA:hsa-miR-199a
ONCO-MI hsa-miR-199a

//
ONCO-ID CCATTCACC:hsa-let-7d
ONCO-MI hsa-let-7d

//
ONCO-ID ATGATTGCA:hsa-let-7a
ONCO-MI hsa-let-7a

//
ONCO-ID GTGGCCA:hsa-miR-125b
ONCO-MI hsa-miR-125b

//
ONCO-ID GACTTCA:hsa-let-7f
ONCO-MI hsa-let-7f

//
ONCO-ID ACATCATCC:hsa-miR-199a*
ONCO-MI hsa-miR-199a*

//
ONCO-ID ATGCGCCA:hsa-miR-125b
ONCO-MI hsa-miR-125b

//
ONCO-ID ACCGCTAG:hsa-miR-199a*
ONCO-MI hsa-miR-199a*

//
ONCO-ID CTCAGTAGC:hsa-miR-200a
ONCO-MI hsa-miR-200a
```

```

//
ONCO-ID CTCATTAC:hsa-miR-218
ONCO-JT ENSG00000183722 "Symbol":LHFP;
"Name":lipoma HMGIC fusion partner;
"GeneID":10186;
"Chr":13;
"Chr Band":13q12;
"Cancer Somatic Mut":yes;
"Tumour Types (Somatic Mutations)":lipoma;
"Tissue Type": mesenchymal;
"Cancer Molecular Genetics": dominant;
"Mutation Type ": translocation;
"Translocation Partner":HMGA2;

//
ONCO-ID ACGAGACA:hsa-let-7e
ONCO-MI hsa-let-7e

//
ONCO-ID GCTTCCTAC:hsa-let-7e
ONCO-MI hsa-let-7e

//
ONCO-ID CATTAC:hsa-let-7d
ONCO-MI hsa-let-7d

//
ONCO-ID CTCCTTAA:hsa-miR-15a
ONCO-MI hsa-miR-15a

//
ONCO-ID GTGCAGTGA:hsa-miR-200a
ONCO-MI hsa-miR-200a

//
ONCO-ID GACACAATA:hsa-miR-125b
ONCO-MI hsa-miR-125b

//
ONCO-ID CACTTAGCA:hsa-miR-17-5p
ONCO-MI hsa-miR-17-5p

//
ONCO-ID ATGTCACG:hsa-miR-21
ONCO-MI hsa-miR-21

//
ONCO-ID GGACCCAAA:hsa-miR-200b
ONCO-MI hsa-miR-200b

//
ONCO-ID CAGCAAGAC:hsa-let-7b
ONCO-MI hsa-let-7b

//
ONCO-ID TTAGCAA:hsa-miR-17-5p
ONCO-MI hsa-miR-17-5p

//
ONCO-ID AAGTGAGT:hsa-miR-19a
ONCO-MI hsa-miR-19a

//
ONCO-ID GATTGACAC:hsa-miR-19a
ONCO-MI hsa-miR-19a

//
ONCO-ID TCCATCAA:hsa-miR-30d
ONCO-JT ENSG00000158715 "Symbol":SLC45A3;
"Name":solute carrier family 45, member 3;
"GeneID":85414;
"Chr":1;
"Chr Band":1q32;
"Cancer Somatic Mut":yes;
"Tumour Types (Somatic Mutations)":prostate ;
"Tissue Type": epithelial;
"Cancer Molecular Genetics": dominant;
"Mutation Type ": translocation;
"Translocation Partner":ETV1;

//
ONCO-ID GGATCCGGA:hsa-miR-30e-5p
ONCO-JT ENSG00000133392 "Symbol":MYH11;
"Name":myosin, heavy polypeptide 11, smooth muscle;
"GeneID":4629;
"Chr":16;
"Chr Band":16p13.13-p13.12 ;
"Cancer Somatic Mut":yes;
"Tumour Types (Somatic Mutations)": acute myelogenous leukemia;

```

"Tissue Type": leukaemia/lymphoma;  
"Cancer Molecular Genetics": dominant;  
"Mutation Type ": translocation;  
"Translocation Partner":CBFB;

//  
ONCO-ID CCCTTGCAA:hsa-miR-125b  
ONCO-MI hsa-miR-125b

//  
ONCO-ID GGGTGACAC:hsa-miR-126\*  
ONCO-JT ENSG00000204103 "Symbol":MAFB;  
"Name":v-maf musculoaponeurotic fibrosarcoma oncogene homolog B (avian);  
"GeneID":9935;  
"Chr":20;  
"Chr Band":20q11.2-q13.1;  
"Cancer Somatic Mut":yes;  
"Tumour Types (Somatic Mutations)": multiple myeloma;  
"Tissue Type": leukaemia/lymphoma;  
"Cancer Molecular Genetics": dominant;  
"Mutation Type ": translocation;  
"Translocation Partner":IGH@;

//  
ONCO-ID AGTCTGAAC:hsa-miR-17-5p  
ONCO-MI hsa-miR-17-5p

//  
ONCO-ID AGACAGAAC:hsa-miR-200a  
ONCO-MI hsa-miR-200a

//  
ONCO-ID AGGATGACA:hsa-let-7b  
ONCO-MI hsa-let-7b

//  
ONCO-ID AAGTAGGGC:hsa-miR-199b  
ONCO-MI hsa-miR-199b

//  
ONCO-ID CGGCATGC:hsa-miR-125b  
ONCO-MI hsa-miR-125b

//  
ONCO-ID GACACGTA:hsa-miR-20a  
ONCO-MI hsa-miR-20a

//  
ONCO-ID GACACACAA:hsa-miR-200a\*  
ONCO-MI hsa-miR-200a\*

//  
ONCO-ID ACTCTTGTG:hsa-miR-10b  
ONCO-JT ENSG00000072274 "Symbol":TFRC;  
"Name":transferrin receptor (p90, CD71);  
"GeneID":7037;  
"Chr":3;  
"Chr Band":3q29 ;  
"Cancer Somatic Mut":yes;  
"Tumour Types (Somatic Mutations)": non-Hodgkin lymphoma;  
"Tissue Type": leukaemia/lymphoma;  
"Cancer Molecular Genetics": dominant;  
"Mutation Type ": translocation;  
"Translocation Partner":BCL6;

//  
ONCO-ID GTGCACAGA:hsa-miR-199b  
ONCO-MI hsa-miR-199b

//  
ONCO-ID GGTGATGAA:hsa-miR-199a\*  
ONCO-MI hsa-miR-199a\*

//  
ONCO-ID AAATCCTAA:hsa-miR-199a  
ONCO-MI hsa-miR-199a

//  
ONCO-ID AGTTGGGTG:hsa-miR-20a  
ONCO-MI hsa-miR-20a

//  
ONCO-ID GACGGACAC:hsa-miR-195  
ONCO-MI hsa-miR-195

//  
ONCO-ID GTCGAAA:hsa-let-7b  
ONCO-MI hsa-let-7b

```

//
ONCO-ID GACACGTA:hsa-miR-19a
ONCO-MI hsa-miR-19a

//
ONCO-ID CTCAGACGC:hsa-miR-200a*
ONCO-MI hsa-miR-200a*

//
ONCO-ID CAAATGGGG:hsa-miR-24
ONCO-JT ENSG00000198900 "Symbol":TOP1;
"Name":topoisomerase (DNA) I;
"GeneID":7150;
"Chr":20;
"Chr Band":20q12-q13.1 ;
"Cancer Somatic Mut":yes;
"Tumour Types (Somatic Mutations)": acute myelogenous leukemia (primarily treatment associated);
"Tissue Type": leukaemia/lymphoma;
"Cancer Molecular Genetics": dominant;
"Mutation Type ": translocation;
"Translocation Partner":NUP98;

//
ONCO-ID ACCAATCCT:hsa-miR-17-5p
ONCO-MI hsa-miR-17-5p

//
ONCO-ID GACCGCTA:hsa-miR-199a*
ONCO-MI hsa-miR-199a*

//
ONCO-ID CCAACCATC:hsa-miR-17-5p
ONCO-MI hsa-miR-17-5p

//
ONCO-ID CAAGTTTGC:hsa-miR-126
ONCO-JT ENSG00000146648 "Symbol":EGFR;
"Name":epidermal growth factor receptor (erythroblastic leukemia viral (v-erb-b) oncogene homolog, avian);
"GeneID":1956;
"Chr":7;
"Chr Band":7p12.3-p12.1 ;
"Cancer Somatic Mut":yes;
"Tumour Types (Somatic Mutations)":glioma;
"Tumour Types (Somatic Mutations)": non small cell lung cancer;
"Tissue Type": epithelial;
"Tissue Type": other;
"Cancer Molecular Genetics": dominant;
"Mutation Type ": amplification;
"Mutation Type ": other;
"Mutation Type ": Missense;

//
ONCO-ID AAGGATTC:hsa-miR-101
ONCO-JT ENSG00000196531 "Symbol":NACA;
"Name":nascent-polypeptide-associated complex alpha polypeptide;
"GeneID":4666;
"Chr":12;
"Chr Band":12q23-q24.1 ;
"Cancer Somatic Mut":yes;
"Tumour Types (Somatic Mutations)": non-Hodgkin lymphoma;
"Tissue Type": leukaemia/lymphoma;
"Cancer Molecular Genetics": dominant;
"Mutation Type ": translocation;
"Translocation Partner":BCL6;

//
ONCO-ID GGCTACCA:hsa-let-7e
ONCO-MI hsa-let-7e

//
ONCO-ID AAATAGCG:hsa-miR-133a
ONCO-JT ENSG00000105976 "Symbol":MET;
"Name":met proto-oncogene (hepatocyte growth factor receptor);
"GeneID":4233;
"Chr":7;
"Chr Band":7q31;
"Cancer Somatic Mut":yes;
"Tumour Types (Somatic Mutations)":papillary renal;
"Tumour Types (Somatic Mutations)":head-neck squamous cell ;
"Tumour Types (Germline Mutations)":papillary renal;
"Cancer Syndrome":Familial Papillary Renal Cancer;
"Tissue Type": epithelial;
"Cancer Molecular Genetics": dominant;
"Mutation Type ": Missense;

//
ONCO-ID AGGCATGTG:hsa-miR-487b
ONCO-JT ENSG00000156650 "Symbol":MYST4;
"Name":MYST histone acetyltransferase (monocytic leukemia) 4 (MORF);
"GeneID":23522;
"Chr":10;
"Chr Band":10q22 ;
"Cancer Somatic Mut":yes;
"Tumour Types (Somatic Mutations)": acute myelogenous leukemia;

```



"Tissue Type": leukaemia/lymphoma;  
"Cancer Molecular Genetics": dominant;  
"Mutation Type ": translocation;  
"Translocation Partner":CREBBP;

//  
ONCO-ID AAAAAGTGC:hsa-miR-16  
ONCO-MI hsa-miR-16

//  
ONCO-ID GATTGTGAC:hsa-miR-19a  
ONCO-MI hsa-miR-19a

//  
ONCO-ID ATTACAGCC:hsa-let-7b  
ONCO-MI hsa-let-7b

//  
ONCO-ID CAGTCCACC:hsa-miR-142-5p  
ONCO-MI hsa-miR-142-5p

//  
ONCO-ID ACACCCGGA:hsa-miR-16  
ONCO-MI hsa-miR-16

//  
ONCO-ID ACGCCCAT:hsa-miR-138  
ONCO-JT ENSG00000131759 "Symbol":RARA;  
"Name":retinoic acid receptor, alpha;  
"GeneID":5914;  
"Chr":17;  
"Chr Band": 17q12 ;  
"Cancer Somatic Mut":yes;  
"Tumour Types (Somatic Mutations)": acute promyelocytic leukemia;  
"Tissue Type": leukaemia/lymphoma;  
"Cancer Molecular Genetics": dominant;  
"Mutation Type ": translocation;  
"Translocation Partner":PML, ZNF145, TIF1, NUMA1, NPML;

//  
ONCO-ID GTCACTTTA:hsa-miR-155  
ONCO-MI hsa-miR-155

//  
ONCO-ID TGGCGCCA:hsa-miR-142-3p  
ONCO-MI hsa-miR-142-3p

//  
ONCO-ID CGCTCACAA:hsa-miR-199a  
ONCO-MI hsa-miR-199a

//  
ONCO-ID TGGCCATAA:hsa-let-7b  
ONCO-MI hsa-let-7b

//  
ONCO-ID TGATTAACA:hsa-miR-19a  
ONCO-MI hsa-miR-19a

//  
ONCO-ID CACTTAGCA:hsa-miR-19a  
ONCO-MI hsa-miR-19a

//  
ONCO-ID CCGCTGGAG:hsa-miR-199a\*  
ONCO-MI hsa-miR-199a\*

//  
ONCO-ID CGTGATAG:hsa-let-7a  
ONCO-MI hsa-let-7a

//  
ONCO-ID CATCATCCC:hsa-miR-199a\*  
ONCO-MI hsa-miR-199a\*

//  
ONCO-ID TTAGCAA:hsa-miR-20a  
ONCO-MI hsa-miR-20a

//  
ONCO-ID ACTTACTCA:hsa-miR-146b  
ONCO-MI hsa-miR-146b

//  
ONCO-ID ACTTACCCA:hsa-miR-20a  
ONCO-MI hsa-miR-20a

```

//
ONCO-ID CACCAACCA:hsa-let-7b
ONCO-MI hsa-let-7b

//
ONCO-ID ATGGGACCA:hsa-miR-200a*
ONCO-MI hsa-miR-200a*

//
ONCO-ID AACCAAGACA:hsa-let-7e
ONCO-MI hsa-let-7e
ONCO-JT ENSG00000143252 "Symbol":SDHC;
"Name":succinate dehydrogenase complex, subunit C, integral membrane protein, 15kDa;
"GeneID":6391;
"Chr":1;
"Chr Band":1q21 ;
"Cancer Germline Mut":yes;
"Tumour Types (Germline Mutations)":paraganglioma;
"Tumour Types (Germline Mutations)":pheochromocytoma;
"Cancer Syndrome":Familial paraganglioma;
"Tissue Type": other;
"Cancer Molecular Genetics": recessive;
"Mutation Type ": Missense;
"Mutation Type ": nonsense;
"Mutation Type ": frameshift;

//
ONCO-ID GGATCTTAA:hsa-let-7a
ONCO-MI hsa-let-7a
ONCO-JT ENSG00000118971 "Symbol":CCND2;
"Name":cyclin D2;
"GeneID":894;
"Chr":12;
"Chr Band":12p13;
"Cancer Somatic Mut":yes;
"Tumour Types (Somatic Mutations)":NHL,CLL;
"Tissue Type": leukaemia/lymphoma;
"Cancer Molecular Genetics": dominant;
"Mutation Type ": translocation;
"Translocation Partner":IGL0;

//
ONCO-ID AACAGTTC:hsa-miR-199a*
ONCO-MI hsa-miR-199a*

//
ONCO-ID CAGACAATG:hsa-miR-125b
ONCO-MI hsa-miR-125b
ONCO-JT ENSG00000137265 "Symbol":IRF4;
"Name":interferon regulatory factor 4;
"GeneID":3662;
"Chr":6;
"Chr Band":6p25-p23;
"Cancer Somatic Mut":yes;
"Tumour Types (Somatic Mutations)":MM ;
"Tissue Type": leukaemia/lymphoma;
"Cancer Molecular Genetics": dominant;
"Mutation Type ": translocation;
"Translocation Partner":IGH0;

//
ONCO-ID ACAAAACCGC:hsa-miR-200a*
ONCO-MI hsa-miR-200a*

//
ONCO-ID GATGAAGTA:hsa-miR-155
ONCO-MI hsa-miR-155

//
ONCO-ID AAGAGCCTT:hsa-miR-16
ONCO-MI hsa-miR-16

//
ONCO-ID CCCAGGTAA:hsa-miR-200c
ONCO-MI hsa-miR-200c

//
ONCO-ID GACTTCA:hsa-let-7a
ONCO-MI hsa-let-7a

//
ONCO-ID AATACTTGC:hsa-miR-19a
ONCO-MI hsa-miR-19a

//
ONCO-ID AAATGAGGT:hsa-let-7e
ONCO-MI hsa-let-7e

//
ONCO-ID AATGATTGC:hsa-let-7a
ONCO-MI hsa-let-7a

```

```
//
ONCO-ID AATGGAGGT:hsa-miR-155
ONCO-MI hsa-miR-155
```

```
//
ONCO-ID ATTTCTCG:hsa-miR-199a*
ONCO-MI hsa-miR-199a*
```

```
//
ONCO-ID ATCTGCATG:hsa-miR-125b
ONCO-MI hsa-miR-125b
```

```
//
ONCO-ID ACATTCGC:hsa-miR-15a
ONCO-MI hsa-miR-15a
```

```
//
ONCO-ID AGCTCACAC:hsa-miR-412
ONCO-JT ENSG00000165699 "Symbol":TSC1;
"Name":tuberous sclerosis 1 gene;
"GeneID":7248;
"Chr":9;
"Chr Band":9q34 ;
"Cancer Germline Mut":yes;
"Tumour Types (Germline Mutations)":hamartoma;
"Tumour Types (Germline Mutations)":renal cell;
"Cancer Syndrome":Tuberous sclerosis 1;
"Tissue Type": epithelial;
"Tissue Type": other;
"Cancer Molecular Genetics": recessive;
"Mutation Type ": large deletion;
"Mutation Type ": Missense;
"Mutation Type ": nonsense;
"Mutation Type ": frameshift;
"Mutation Type ": splice site;
```

```
//
ONCO-ID CGTGGCGAG:hsa-let-7b
ONCO-MI hsa-let-7b
```

```
//
ONCO-ID GCTGCTGAC:hsa-miR-199a*
ONCO-MI hsa-miR-199a*
```

```
//
ONCO-ID AGGCTTCTA:hsa-miR-200b
ONCO-MI hsa-miR-200b
```

```
//
ONCO-ID CCATCGCGG:hsa-let-7e
ONCO-MI hsa-let-7e
```

```
//
ONCO-ID ATCCAACATA:hsa-miR-20a
ONCO-MI hsa-miR-20a
```

```
//
ONCO-ID GTGGTGACA:hsa-miR-1
ONCO-JT ENSG00000135903 "Symbol":PAX3;
"Name":paired box gene 3 ;
"GeneID":5077;
"Chr":2;
"Chr Band":2q35;
"Cancer Somatic Mut":yes;
"Tumour Types (Somatic Mutations)":alveolar rhabdomyosarcoma;
"Tissue Type": mesenchymal;
"Cancer Molecular Genetics": dominant;
"Mutation Type ": translocation;
"Translocation Partner":FOXO1A;
"Other Germline Mut":yes;
"Other Syndrome/Disease":Waardenburg syndrome; craniofacial-deafness-hand syndrome;
```

```
//
ONCO-ID ACTTAGCAA:hsa-let-7a
ONCO-MI hsa-let-7a
```

```
//
ONCO-ID ATTGTGACC:hsa-miR-17-5p
ONCO-MI hsa-miR-17-5p
```

```
//
ONCO-ID GTGACGCAC:hsa-miR-30c
ONCO-JT ENSG00000005339 "Symbol":CREBBP;
"Name":CREB binding protein (CBP);
"GeneID":1387;
"Chr":16;
"Chr Band":16p13.3 ;
"Cancer Somatic Mut":yes;
"Tumour Types (Somatic Mutations)": acute leukemia;
"Tumour Types (Somatic Mutations)": acute myelogenous leukemia;
```

"Tissue Type": leukaemia/lymphoma;  
"Cancer Molecular Genetics": dominant;  
"Mutation Type ": translocation;  
"Translocation Partner":MLL, MORF, RUNXBP2;  
"Other Germline Mut":yes;  
"Other Syndrome/Disease":Rubinstein-Taybi syndrome;

//  
ONCO-ID CGTGATAG:hsa-miR-16  
ONCO-MI hsa-miR-16

//  
ONCO-ID ATTCAGGGG:hsa-miR-199a  
ONCO-MI hsa-miR-199a

//  
ONCO-ID ACTTGCTAA:hsa-let-7a  
ONCO-MI hsa-let-7a

//  
ONCO-ID AACACTGGC:hsa-miR-16  
ONCO-MI hsa-miR-16

//  
ONCO-ID CGAGACAGA:hsa-miR-200a  
ONCO-MI hsa-miR-200a

//  
ONCO-ID AGACAATGG:hsa-miR-125b  
ONCO-MI hsa-miR-125b

//  
ONCO-ID CAGCGGAAC:hsa-miR-10b  
ONCO-JT ENSG00000119508 "Symbol":NR4A3;  
"Name":nuclear receptor subfamily 4, group A, member 3 (NOR1);  
"GeneID":8013;  
"Chr":9;  
"Chr Band":9q22 ;  
"Cancer Somatic Mut":yes;  
"Tumour Types (Somatic Mutations)":extraskelatal myxoid chondrosarcoma;  
"Tissue Type": mesenchymal;  
"Cancer Molecular Genetics": dominant;  
"Mutation Type ": translocation;  
"Translocation Partner":EWSR1;

//  
ONCO-ID CCAACATGG:hsa-miR-142-3p  
ONCO-MI hsa-miR-142-3p

//  
ONCO-ID CACATAATC:hsa-let-7a  
ONCO-MI hsa-let-7a

//  
ONCO-ID CTCGGATC:hsa-miR-30e-5p  
ONCO-JT ENSG00000133392 "Symbol":MYH11;  
"Name":myosin, heavy polypeptide 11, smooth muscle;  
"GeneID":4629;  
"Chr":16;  
"Chr Band":16p13.13-p13.12 ;  
"Cancer Somatic Mut":yes;  
"Tumour Types (Somatic Mutations)": acute myelogenous leukemia;  
"Tissue Type": leukaemia/lymphoma;  
"Cancer Molecular Genetics": dominant;  
"Mutation Type ": translocation;  
"Translocation Partner":CBFB;

//  
ONCO-ID ATGGAGATG:hsa-miR-21  
ONCO-MI hsa-miR-21

//  
ONCO-ID AGTGAGCGG:hsa-miR-200a  
ONCO-MI hsa-miR-200a

//  
ONCO-ID ATCACCTTG:hsa-miR-19a  
ONCO-MI hsa-miR-19a

//  
ONCO-ID GGCTACCA:hsa-miR-200c  
ONCO-MI hsa-miR-200c

//  
ONCO-ID GGCCTTTAA:hsa-miR-155  
ONCO-MI hsa-miR-155

//  
ONCO-ID ACCTGAGAT:hsa-miR-19a

ONCO-MI hsa-miR-19a

//  
ONCO-ID GCCCCAGTA:hsa-miR-199a\*  
ONCO-MI hsa-miR-199a\*

//  
ONCO-ID ATTTATCCC:hsa-let-7f  
ONCO-MI hsa-let-7f

//  
ONCO-ID GCCCCCC:hsa-miR-200a  
ONCO-MI hsa-miR-200a  
ONCO-JT ENSG00000072274 "Symbol":TFRC;  
"Name":transferrin receptor (p90, CD71);  
"GeneID":7037;  
"Chr":3;  
"Chr Band":3q29 ;  
"Cancer Somatic Mut":yes;  
"Tumour Types (Somatic Mutations)": non-Hodgkin lymphoma;  
"Tissue Type": leukaemia/lymphoma;  
"Cancer Molecular Genetics": dominant;  
"Mutation Type ": translocation;  
"Translocation Partner":BCL6;

//  
ONCO-ID ACTCAGGTA:hsa-miR-142-5p  
ONCO-MI hsa-miR-142-5p

//  
ONCO-ID CGATTAC:hsa-miR-200c  
ONCO-MI hsa-miR-200c

//  
ONCO-ID ATCAAGAG:hsa-miR-99b  
ONCO-JT ENSG00000118689 "Symbol":FOXO3A;  
"Name":forkhead box O3A;  
"GeneID":2309;  
"Chr":6;  
"Chr Band":6q21 ;  
"Cancer Somatic Mut":yes;  
"Tumour Types (Somatic Mutations)": acute leukemia;  
"Tissue Type": leukaemia/lymphoma;  
"Cancer Molecular Genetics": dominant;  
"Mutation Type ": translocation;  
"Translocation Partner":MLL;

//  
ONCO-ID CTGTCCGTC:hsa-miR-142-3p  
ONCO-MI hsa-miR-142-3p

//  
ONCO-ID ATTTGAACC:hsa-let-7a  
ONCO-MI hsa-let-7a

//  
ONCO-ID AAGTTGGGT:hsa-miR-17-5p  
ONCO-MI hsa-miR-17-5p

//  
ONCO-ID TCGGGAAA:hsa-let-7a  
ONCO-MI hsa-let-7a

//  
ONCO-ID ATAGGCTGC:hsa-miR-200c  
ONCO-MI hsa-miR-200c

//  
ONCO-ID GACTCGGCA:hsa-miR-200a\*  
ONCO-MI hsa-miR-200a\*

//  
ONCO-ID AAGCCAATG:hsa-let-7a  
ONCO-MI hsa-let-7a

//  
ONCO-ID GACGTGGCA:hsa-miR-199a\*  
ONCO-MI hsa-miR-199a\*

//  
ONCO-ID TCTAGGCAA:hsa-miR-199a\*  
ONCO-MI hsa-miR-199a\*

//  
ONCO-ID ACTTACCCA:hsa-miR-17-5p  
ONCO-MI hsa-miR-17-5p

//

ONCO-ID AGCAAATCC:hsa-miR-19a  
ONCO-MI hsa-miR-19a

//  
ONCO-ID AATCCTGGT:hsa-let-7f  
ONCO-MI hsa-let-7f

//  
ONCO-ID CTCTAACAA:hsa-miR-19a  
ONCO-MI hsa-miR-19a

//  
ONCO-ID AATCGCCTG:hsa-miR-199a\*  
ONCO-MI hsa-miR-199a\*

//  
ONCO-ID ATCTGCAAC:hsa-miR-146b  
ONCO-MI hsa-miR-146b

//  
ONCO-ID ACTACGGA:hsa-miR-101  
ONCO-JT ENSG00000114999 "Symbol":TTL;  
"Name":tubulin tyrosine ligase;  
"GeneID":150465;  
"Chr":2;  
"Chr Band":2q13;  
"Cancer Somatic Mut":yes;  
"Tumour Types (Somatic Mutations)": acute lymphocytic leukemia;  
"Tissue Type": leukaemia/lymphoma;  
"Cancer Molecular Genetics": dominant;  
"Mutation Type ": translocation;  
"Translocation Partner":ETV6;

//  
ONCO-ID CAGTCCAAG:hsa-miR-200c  
ONCO-MI hsa-miR-200c

//  
ONCO-ID CTCAGACGC:hsa-miR-200a  
ONCO-MI hsa-miR-200a

//  
ONCO-ID ACTTCACCC:hsa-miR-125b  
ONCO-MI hsa-miR-125b  
ONCO-JT ENSG00000141867 "Symbol":BRD4;  
"Name":bromodomain containing 4;  
"GeneID":23476;  
"Chr":19;  
"Chr Band":19p13.1;  
"Cancer Somatic Mut":yes;  
"Tumour Types (Somatic Mutations)":lethal midline carcinoma of young people;  
"Tissue Type": epithelial;  
"Cancer Molecular Genetics": dominant;  
"Mutation Type ": translocation;  
"Translocation Partner":NUT;

//  
ONCO-ID CACTTAGCA:hsa-miR-20a  
ONCO-MI hsa-miR-20a

//  
ONCO-ID ATGTGCCAC:hsa-miR-199a  
ONCO-MI hsa-miR-199a

//  
ONCO-ID GCCTTTTAA:hsa-miR-101  
ONCO-JT ENSG00000196531 "Symbol":NACA;  
"Name":nascent-polypeptide-associated complex alpha polypeptide;  
"GeneID":4666;  
"Chr":12;  
"Chr Band":12q23-q24.1 ;  
"Cancer Somatic Mut":yes;  
"Tumour Types (Somatic Mutations)": non-Hodgkin lymphoma;  
"Tissue Type": leukaemia/lymphoma;  
"Cancer Molecular Genetics": dominant;  
"Mutation Type ": translocation;  
"Translocation Partner":BCL6;

//  
ONCO-ID ATGGTGTTC:hsa-miR-200a\*  
ONCO-MI hsa-miR-200a\*

//  
ONCO-ID CGCTGGACA:hsa-miR-200b  
ONCO-MI hsa-miR-200b

//  
ONCO-ID GATCCTGAC:hsa-let-7f  
ONCO-MI hsa-let-7f

```
//
ONCO-ID GAGTCCAAA:hsa-let-7f
ONCO-MI hsa-let-7f

//
ONCO-ID GTGCAGTGA:hsa-miR-200a*
ONCO-MI hsa-miR-200a*

//
ONCO-ID GCCCATGCA:hsa-miR-199b
ONCO-MI hsa-miR-199b

//
ONCO-ID GACGTGGCA:hsa-miR-199a
ONCO-MI hsa-miR-199a

//
ONCO-ID GGCTGTACC:hsa-miR-21
ONCO-MI hsa-miR-21

//
ONCO-ID CGTCAAAA:hsa-miR-199a
ONCO-MI hsa-miR-199a

//
ONCO-ID GTCTGAACA:hsa-miR-17-5p
ONCO-MI hsa-miR-17-5p

//
ONCO-ID GACACACAA:hsa-miR-200a
ONCO-MI hsa-miR-200a

//
ONCO-ID CAGCAAGAC:hsa-let-7a
ONCO-MI hsa-let-7a

//
ONCO-ID CGTAAA:hsa-miR-19a
ONCO-MI hsa-miR-19a

//
ONCO-ID AACATGCCT:hsa-miR-125b
ONCO-MI hsa-miR-125b

//
ONCO-ID CGGAAAAAGC:hsa-miR-200c
ONCO-MI hsa-miR-200c

//
ONCO-ID TGTGGCAA:hsa-miR-199a*
ONCO-MI hsa-miR-199a*

//
ONCO-ID GAAATCAC:hsa-miR-199a*
ONCO-MI hsa-miR-199a*

//
ONCO-ID ACCGCGCAC:hsa-miR-125b
ONCO-MI hsa-miR-125b

//
ONCO-ID ATCAGGCCA:hsa-let-7e
ONCO-MI hsa-let-7e

//
ONCO-ID AGCAGTTAA:hsa-let-7d
ONCO-MI hsa-let-7d

//
ONCO-ID GCATAAAAC:hsa-miR-125b
ONCO-MI hsa-miR-125b

//
ONCO-ID CGTGATAG:hsa-let-7d
ONCO-MI hsa-let-7d

//
ONCO-ID CTCAGTAGC:hsa-miR-200a*
ONCO-MI hsa-miR-200a*

//
ONCO-ID CAATCATAA:hsa-miR-19a
ONCO-MI hsa-miR-19a
```

//  
ONCO-ID ACATTATG:hsa-let-7a  
ONCO-MI hsa-let-7a

//  
ONCO-ID AGGATTTC:hsa-miR-199a\*  
ONCO-MI hsa-miR-199a\*

//  
ONCO-ID CAAACTCTA:hsa-miR-17-5p  
ONCO-MI hsa-miR-17-5p

//  
ONCO-ID CAGGTTGCA:hsa-miR-200c  
ONCO-MI hsa-miR-200c  
ONCO-JT ENSG00000182712 "Symbol":MTCPL;  
"Name":mature T-cell proliferation 1;  
"GeneID":4515;  
"Chr":X;  
"Chr Band":Xq28;  
"Cancer Somatic Mut":yes;  
"Tumour Types (Somatic Mutations)":T cell prolymphocytic leukemia;  
"Tissue Type": leukaemia/lymphoma;  
"Cancer Molecular Genetics": dominant;  
"Mutation Type ": translocation;  
"Translocation Partner":TRA0;

//  
ONCO-ID AGACACCGG:hsa-miR-200b  
ONCO-MI hsa-miR-200b

//  
ONCO-ID ACCAGTAGC:hsa-miR-20a  
ONCO-MI hsa-miR-20a

//  
ONCO-ID CTGAATCAG:hsa-let-7d  
ONCO-MI hsa-let-7d

//  
ONCO-ID AAGCTTGCA:hsa-miR-155  
ONCO-MI hsa-miR-155

//  
ONCO-ID CTGTAATGA:hsa-let-7d  
ONCO-MI hsa-let-7d

//  
ONCO-ID AGTGTAGTC:hsa-miR-19a  
ONCO-MI hsa-miR-19a

//  
ONCO-ID ATCGGCAG:hsa-miR-125b  
ONCO-MI hsa-miR-125b

//  
ONCO-ID GTCGCAA:hsa-let-7a  
ONCO-MI hsa-let-7a

//  
ONCO-ID GGGCCGAA:hsa-miR-195  
ONCO-MI hsa-miR-195

//  
ONCO-ID TCAGCATAA:hsa-miR-17-5p  
ONCO-MI hsa-miR-17-5p

//  
ONCO-ID AGGCCAGAT:hsa-miR-199a  
ONCO-MI hsa-miR-199a

//  
ONCO-ID ACACGCCG:hsa-miR-142-3p  
ONCO-MI hsa-miR-142-3p

//  
ONCO-ID CTGTTTTGA:hsa-miR-16  
ONCO-MI hsa-miR-16

//  
ONCO-ID GTACTTAAA:hsa-miR-199a\*  
ONCO-MI hsa-miR-199a\*

//  
ONCO-ID GAGTTTGTA:hsa-miR-16  
ONCO-MI hsa-miR-16



```

//
ONCO-ID AATTTGATC:hsa-miR-16
ONCO-MI hsa-miR-16

//
ONCO-ID GACTTCA:hsa-let-7d
ONCO-MI hsa-let-7d

//
ONCO-ID AATACCTGT:hsa-miR-125b
ONCO-MI hsa-miR-125b

//
ONCO-ID AGCCATTGG:hsa-miR-17-5p
ONCO-MI hsa-miR-17-5p

//
ONCO-ID GATTGTGAC:hsa-miR-17-5p
ONCO-MI hsa-miR-17-5p

//
ONCO-ID ACATTGCG:hsa-miR-16
ONCO-MI hsa-miR-16

//
ONCO-ID CAATCCCGG:hsa-miR-130b
ONCO-JT ENSG00000165699 "Symbol":TSC1;
"Name":tuberous sclerosis 1 gene;
"GeneID":7248;
"Chr":9;
"Chr Band":9q34 ;
"Cancer Germline Mut":yes;
"Tumour Types (Germline Mutations)":hamartoma;
"Tumour Types (Germline Mutations)":renal cell;
"Cancer Syndrome":Tuberous sclerosis 1;
"Tissue Type": epithelial;
"Tissue Type": other;
"Cancer Molecular Genetics": recessive;
"Mutation Type ": large deletion;
"Mutation Type ": Missense;
"Mutation Type ": nonsense;
"Mutation Type ": frameshift;
"Mutation Type ": splice site;

//
ONCO-ID GATTGTGAC:hsa-miR-20a
ONCO-MI hsa-miR-20a

//
ONCO-ID ACTTAGCAA:hsa-miR-19a
ONCO-MI hsa-miR-19a

//
ONCO-ID ATGTCACCC:hsa-miR-199a*
ONCO-MI hsa-miR-199a*

//
ONCO-ID CTCAAACCA:hsa-miR-494
ONCO-JT ENSG00000109132 "Symbol":PHOX2B;
"Name":paired-like homeobox 2b;
"GeneID":8929;
"Chr":4;
"Chr Band":4p12;
"Cancer Somatic Mut":yes;
"Cancer Germline Mut":yes;
"Tumour Types (Somatic Mutations)":neuroblastoma;
"Tumour Types (Germline Mutations)":neuroblastoma;
"Cancer Syndrome":familial neuroblastoma;
"Tissue Type": other;
"Cancer Molecular Genetics": recessive;
"Mutation Type ": Missense;
"Mutation Type ": frameshift;
"Other Germline Mut":yes;
"Other Syndrome/Disease":congenital central hypoventilation syndrome;

//
ONCO-ID GGCAATTTA:hsa-miR-17-5p
ONCO-MI hsa-miR-17-5p

//
ONCO-ID CGCCCACAA:hsa-miR-142-3p
ONCO-MI hsa-miR-142-3p

//
ONCO-ID ATCCCTGTG:hsa-miR-10b
ONCO-JT ENSG00000119508 "Symbol":NR4A3;
"Name":nuclear receptor subfamily 4, group A, member 3 (NOR1);
"GeneID":8013;
"Chr":9;
"Chr Band":9q22 ;
"Cancer Somatic Mut":yes;

```

"Tumour Types (Somatic Mutations)":extraskeletal myxoid chondrosarcoma;  
"Tissue Type": mesenchymal;  
"Cancer Molecular Genetics": dominant;  
"Mutation Type ": translocation;  
"Translocation Partner":EWSR1;

//  
ONCO-ID CAGTGAGCG:hsa-miR-200a  
ONCO-MI hsa-miR-200a

//  
ONCO-ID CTACTIONGTC:hsa-miR-155  
ONCO-MI hsa-miR-155

//  
ONCO-ID GGTGGACA:hsa-miR-199b  
ONCO-MI hsa-miR-199b

//  
ONCO-ID AATTGGTGG:hsa-miR-125b  
ONCO-MI hsa-miR-125b

//  
ONCO-ID ACCAACCAG:hsa-let-7b  
ONCO-MI hsa-let-7b

//  
ONCO-ID AATACTTGC:hsa-miR-17-5p  
ONCO-MI hsa-miR-17-5p

//  
ONCO-ID ACCAGTAGC:hsa-miR-17-5p  
ONCO-MI hsa-miR-17-5p

//  
ONCO-ID AGCTACTGG:hsa-miR-20a  
ONCO-MI hsa-miR-20a

//  
ONCO-ID TGTGAGCAA:hsa-miR-200c  
ONCO-MI hsa-miR-200c

//  
ONCO-ID ACACAATAG:hsa-miR-125b  
ONCO-MI hsa-miR-125b

//  
ONCO-ID ATCCTGTGA:hsa-miR-221  
ONCO-MI hsa-miR-221

//  
ONCO-ID GATCCTGAC:hsa-let-7a  
ONCO-MI hsa-let-7a

//  
ONCO-ID GATCCCGCA:hsa-miR-125b  
ONCO-MI hsa-miR-125b

//  
ONCO-ID AATTAACAC:hsa-miR-20a  
ONCO-MI hsa-miR-20a

//  
ONCO-ID ACTGCACCA:hsa-miR-20a  
ONCO-MI hsa-miR-20a

//  
ONCO-ID ACAAAACCGC:hsa-miR-200a  
ONCO-MI hsa-miR-200a

//  
ONCO-ID ATGGTGTTC:hsa-miR-200b  
ONCO-MI hsa-miR-200b

//  
ONCO-ID TCGTGACA:hsa-miR-21  
ONCO-MI hsa-miR-21

//  
ONCO-ID TCTATCTAA:hsa-let-7d  
ONCO-MI hsa-let-7d

//  
ONCO-ID CAGAGGGCC:hsa-miR-200b  
ONCO-MI hsa-miR-200b

```
//
ONCO-ID ATTACAGCC:hsa-let-7a
ONCO-MI hsa-let-7a

//
ONCO-ID CCTAGTGTC:hsa-miR-199b
ONCO-MI hsa-miR-199b

//
ONCO-ID CATTATGG:hsa-let-7a
ONCO-MI hsa-let-7a

//
ONCO-ID ATACCTGTC:hsa-miR-125b
ONCO-MI hsa-miR-125b

//
ONCO-ID CAAACTGTC:hsa-miR-125b
ONCO-MI hsa-miR-125b

//
ONCO-ID GATGTCACC:hsa-miR-199a*
ONCO-MI hsa-miR-199a*

//
ONCO-ID CTGTGC:hsa-let-7b
ONCO-MI hsa-let-7b

//
ONCO-ID GCCTTTACC:hsa-miR-200c
ONCO-MI hsa-miR-200c

//
ONCO-ID AGCTACTGG:hsa-miR-17-5p
ONCO-MI hsa-miR-17-5p

//
ONCO-ID TATACCTGA:hsa-miR-125b
ONCO-MI hsa-miR-125b

//
ONCO-ID ACTCGGCAG:hsa-miR-200a*
ONCO-MI hsa-miR-200a*

//
ONCO-ID ATAATAGTA:hsa-let-7a
ONCO-MI hsa-let-7a

//
ONCO-ID GCTGTGCAA:hsa-miR-26b
ONCO-JT ENSG00000128714 "Symbol":HOXD13;
"Name":homeo box D13;
"GeneID":3239;
"Chr":2;
"Chr Band":2q31-q32 ;
"Cancer Somatic Mut":yes;
"Tumour Types (Somatic Mutations)": acute myelogenous leukemia (primarily treatment associated);
"Tissue Type": leukaemia/lymphoma;
"Cancer Molecular Genetics": dominant;
"Mutation Type ": translocation;
"Translocation Partner":NUP98;

//
ONCO-ID ATGGTGGA:hsa-miR-125b
ONCO-MI hsa-miR-125b

//
ONCO-ID ATAATAGTA:hsa-let-7f
ONCO-MI hsa-let-7f

//
ONCO-ID GACTTGAAC:hsa-miR-199a
ONCO-MI hsa-miR-199a

//
ONCO-ID AACCATCCA:hsa-miR-19a
ONCO-MI hsa-miR-19a

//
ONCO-ID GGCCACAAA:hsa-miR-200a
ONCO-MI hsa-miR-200a

//
ONCO-ID ACCTCATCA:hsa-miR-125b
ONCO-MI hsa-miR-125b
```

```

//
ONCO-ID AGGATGACA:hsa-let-7a
ONCO-MI hsa-let-7a

//
ONCO-ID TAAGGA:hsa-miR-146b
ONCO-MI hsa-miR-146b

//
ONCO-ID ATCCGCTCC:hsa-let-7a
ONCO-MI hsa-let-7a

//
ONCO-ID ATGGCCAC:hsa-miR-125b
ONCO-MI hsa-miR-125b

//
ONCO-ID CTACACTTC:hsa-miR-20a
ONCO-MI hsa-miR-20a

//
ONCO-ID CTAACCCCA:hsa-miR-199b
ONCO-MI hsa-miR-199b

//
ONCO-ID CGTAGTAG:hsa-let-7d
ONCO-MI hsa-let-7d

//
ONCO-ID CATTACAGA:hsa-let-7d
ONCO-MI hsa-let-7d

//
ONCO-ID GTCTGCTTA:hsa-miR-410
ONCO-JT ENSG00000095002 "Symbol":MSH2;
"Name":mutS homolog 2 (E. coli);
"GeneID":4436;
"Chr":2;
"Chr Band":2p22-p21;
"Cancer Somatic Mut":yes;
"Cancer Germline Mut":yes;
"Tumour Types (Somatic Mutations)":colorectal;
"Tumour Types (Somatic Mutations)":endometrial;
"Tumour Types (Somatic Mutations)":ovarian;
"Tumour Types (Germline Mutations)":colorectal;
"Tumour Types (Germline Mutations)":endometrial;
"Tumour Types (Germline Mutations)":ovarian;
"Cancer Syndrome":Hereditary non-polyposis colorectal cancer;
"Tissue Type": epithelial;
"Cancer Molecular Genetics": recessive;
"Mutation Type ": large deletion;
"Mutation Type ": Missense;
"Mutation Type ": nonsense;
"Mutation Type ": frameshift;
"Mutation Type ": splice site;

//
ONCO-ID GGATCTTAA:hsa-miR-125b
ONCO-MI hsa-miR-125b

//
ONCO-ID AATTAGT:hsa-let-7a
ONCO-MI hsa-let-7a

//
ONCO-ID AGGTAACAA:hsa-miR-155
ONCO-MI hsa-miR-155

//
ONCO-ID GCTTGTTTA:hsa-miR-451
ONCO-JT ENSG00000165699 "Symbol":TSC1;
"Name":tuberous sclerosis 1 gene;
"GeneID":7248;
"Chr":9;
"Chr Band":9q34 ;
"Cancer Germline Mut":yes;
"Tumour Types (Germline Mutations)":hamartoma;
"Tumour Types (Germline Mutations)":renal cell;
"Cancer Syndrome":Tuberous sclerosis 1;
"Tissue Type": epithelial;
"Tissue Type": other;
"Cancer Molecular Genetics": recessive;
"Mutation Type ": large deletion;
"Mutation Type ": Missense;
"Mutation Type ": nonsense;
"Mutation Type ": frameshift;
"Mutation Type ": splice site;

//
ONCO-ID CTGTGC:hsa-let-7a

```

ONCO-MI hsa-let-7a

//  
ONCO-ID ACTCTCACA:hsa-miR-125b  
ONCO-MI hsa-miR-125b

//  
ONCO-ID AAATTAGGC:hsa-miR-125b  
ONCO-MI hsa-miR-125b

//  
ONCO-ID CCCAGGATA:hsa-let-7b  
ONCO-MI hsa-let-7b

//  
ONCO-ID GGTGAGACC:hsa-miR-200a  
ONCO-MI hsa-miR-200a

//  
ONCO-ID ATCACTCAC:hsa-let-7f  
ONCO-MI hsa-let-7f

//  
ONCO-ID AAGGAACCT:hsa-let-7f  
ONCO-MI hsa-let-7f

//  
ONCO-ID ATGCCTAAT:hsa-miR-125b  
ONCO-MI hsa-miR-125b

//  
ONCO-ID ACCTATTG:hsa-miR-16  
ONCO-MI hsa-miR-16

//  
ONCO-ID ACTGCATAA:hsa-miR-17-5p  
ONCO-MI hsa-miR-17-5p

//  
ONCO-ID CCAACCATC:hsa-let-7e  
ONCO-MI hsa-let-7e

//  
ONCO-ID CTCAGAGGC:hsa-miR-200b  
ONCO-MI hsa-miR-200b

//  
ONCO-ID CTCCTTAA:hsa-miR-16  
ONCO-MI hsa-miR-16

//  
ONCO-ID AATTGACTG:hsa-miR-19a  
ONCO-MI hsa-miR-19a

//  
ONCO-ID AACACCA:hsa-miR-221  
ONCO-MI hsa-miR-221

//  
ONCO-ID GATTCAAAC:hsa-miR-125b  
ONCO-MI hsa-miR-125b

//  
ONCO-ID AAGAGCGGA:hsa-miR-200c  
ONCO-MI hsa-miR-200c

//  
ONCO-ID AGCAGTTAA:hsa-let-7f  
ONCO-MI hsa-let-7f

//  
ONCO-ID CACATAATC:hsa-miR-125b  
ONCO-MI hsa-miR-125b

//  
ONCO-ID ATGGGACCA:hsa-miR-200a  
ONCO-MI hsa-miR-200a

//  
ONCO-ID AAGGTAGTA:hsa-miR-20a  
ONCO-MI hsa-miR-20a

//  
ONCO-ID ATTGGATTA:hsa-let-7a

ONCO-MI hsa-let-7a

```
//
ONCO-ID CAGGATATC:hsa-miR-29a
ONCO-JT ENSG00000108821 "Symbol":COL1A1;
"Name":collagen, type I, alpha 1;
"GeneID":1277;
"Chr":17;
"Chr Band":17q21.31-q22;
"Cancer Somatic Mut":yes;
"Tumour Types (Somatic Mutations)":dermatofibrosarcoma protuberans;
"Tumour Types (Somatic Mutations)":aneurysmal bone cyst ;
"Tissue Type": mesenchymal;
"Cancer Molecular Genetics": dominant;
"Mutation Type ": translocation;
"Translocation Partner":PDGFB, USP6;
"Other Germline Mut":yes;
"Other Syndrome/Disease":Osteogenesis imperfecta;
```

```
//
ONCO-ID AACGACGC:hsa-miR-125b
ONCO-MI hsa-miR-125b
```

```
//
ONCO-ID GCCATTGGA:hsa-miR-17-5p
ONCO-MI hsa-miR-17-5p
```

```
//
ONCO-ID CCAGGG:hsa-miR-195
ONCO-MI hsa-miR-195
```

```
//
ONCO-ID AGTCTGGAG:hsa-miR-200b
ONCO-MI hsa-miR-200b
```

```
//
ONCO-ID TATATGGGA:hsa-miR-199a*
ONCO-MI hsa-miR-199a*
```

```
//
ONCO-ID AGTGAGCGG:hsa-miR-200b
ONCO-MI hsa-miR-200b
```

```
//
ONCO-ID AATAGCGC:hsa-miR-16
ONCO-MI hsa-miR-16
```

```
//
ONCO-ID GTAACAGGA:hsa-miR-221
ONCO-MI hsa-miR-221
```

```
//
ONCO-ID ATTCTACTC:hsa-miR-125b
ONCO-MI hsa-miR-125b
```

```
//
ONCO-ID ATCCAACATA:hsa-miR-17-5p
ONCO-MI hsa-miR-17-5p
```

```
//
ONCO-ID CATATG:hsa-miR-125b
ONCO-MI hsa-miR-125b
```

```
//
ONCO-ID CATGCTTTC:hsa-miR-146b
ONCO-MI hsa-miR-146b
```

```
//
ONCO-ID CCCCTTAGG:hsa-miR-130a
ONCO-JT ENSG00000110367 "Symbol":DDX6;
"Name":DEAD (Asp-Glu-Ala-Asp) box polypeptide 6;
"GeneID":1656;
"Chr":11;
"Chr Band":11q23.3;
"Cancer Somatic Mut":yes;
"Tumour Types (Somatic Mutations)": B-cell Non-Hodgkin Lymphoma;
"Tissue Type": leukaemia/lymphoma;
"Cancer Molecular Genetics": dominant;
"Mutation Type ": translocation;
"Translocation Partner":IGH@;
```

```
//
ONCO-ID AGTACACG:hsa-miR-142-3p
ONCO-MI hsa-miR-142-3p
```

```
//
ONCO-ID ACCTATTG:hsa-miR-15a
ONCO-MI hsa-miR-15a
```

```
//
ONCO-ID AGAATCGCC:hsa-miR-199a*
ONCO-MI hsa-miR-199a*

//
ONCO-ID CCTGGCAG:hsa-miR-142-3p
ONCO-MI hsa-miR-142-3p

//
ONCO-ID AACTGTTTA:hsa-miR-199a*
ONCO-MI hsa-miR-199a*

//
ONCO-ID CCTTAAAGC:hsa-miR-200c
ONCO-MI hsa-miR-200c

//
ONCO-ID GATTCAACA:hsa-miR-199a*
ONCO-MI hsa-miR-199a*

//
ONCO-ID ACGATCCC:hsa-miR-125b
ONCO-MI hsa-miR-125b

//
ONCO-ID AGTCTGAAC:hsa-miR-19a
ONCO-MI hsa-miR-19a

//
ONCO-ID ACATCACCT:hsa-miR-19a
ONCO-MI hsa-miR-19a

//
ONCO-ID ACATAATCT:hsa-miR-125b
ONCO-MI hsa-miR-125b

//
ONCO-ID CTCCGGATC:hsa-miR-30c
ONCO-JT ENSG00000133392 "Symbol":MYH11;
"Name":myosin, heavy polypeptide 11, smooth muscle;
"GeneID":4629;
"Chr":16;
"Chr Band":16p13.13-p13.12 ;
"Cancer Somatic Mut":yes;
"Tumour Types (Somatic Mutations)": acute myelogenous leukemia;
"Tissue Type": leukaemia/lymphoma;
"Cancer Molecular Genetics": dominant;
"Mutation Type ": translocation;
"Translocation Partner":CBFB;

//
ONCO-ID ATTGTGACC:hsa-miR-20a
ONCO-MI hsa-miR-20a

//
ONCO-ID GTAAAGTAA:hsa-miR-221
ONCO-MI hsa-miR-221

//
ONCO-ID ACAATTGCC:hsa-miR-199b
ONCO-MI hsa-miR-199b

//
ONCO-ID GCCATTGGA:hsa-miR-19a
ONCO-MI hsa-miR-19a

//
ONCO-ID ACGTGGCAA:hsa-miR-17-5p
ONCO-MI hsa-miR-17-5p

//
ONCO-ID ACATTGGCT:hsa-miR-125b
ONCO-MI hsa-miR-125b

//
ONCO-ID ATCCAGGTC:hsa-miR-16
ONCO-MI hsa-miR-16

//
ONCO-ID ACCCAATA:hsa-miR-125b
ONCO-MI hsa-miR-125b

//
ONCO-ID ATCCAATGA:hsa-let-7f
ONCO-MI hsa-let-7f
```

```

//
ONCO-ID GCAACTTCC:hsa-miR-199a*
ONCO-MI hsa-miR-199a*

//
ONCO-ID GCCATTCCA:hsa-miR-199a*
ONCO-MI hsa-miR-199a*

//
ONCO-ID AAGTTGGCA:hsa-miR-15a
ONCO-MI hsa-miR-15a

//
ONCO-ID CGTGATAG:hsa-let-7f
ONCO-MI hsa-let-7f

//
ONCO-ID CAATCATAA:hsa-miR-20a
ONCO-MI hsa-miR-20a

//
ONCO-ID CCACATGCC:hsa-miR-381
ONCO-JT ENSG00000156650 "Symbol":MYST4;
"Name":MYST histone acetyltransferase (monocytic leukemia) 4 (MORF);
"GeneID":23522;
"Chr":10;
"Chr Band":10q22 ;
"Cancer Somatic Mut":yes;
"Tumour Types (Somatic Mutations)": acute myelogenous leukemia;
"Tissue Type": leukaemia/lymphoma;
"Cancer Molecular Genetics": dominant;
"Mutation Type ": translocation;
"Translocation Partner":CREBBP;

//
ONCO-ID CACAAAC:hsa-miR-200a
ONCO-MI hsa-miR-200a

//
ONCO-ID GATTTACA:hsa-miR-296
ONCO-JT ENSG00000137309 "Symbol":HMGAL;
"Name":high mobility group AT-hook 1;
"GeneID":3159;
"Chr":6;
"Chr Band":6p21;
"Cancer Somatic Mut":yes;
"Tumour Types (Somatic Mutations)":microfollicular thyroid adenoma;
"Tumour Types (Somatic Mutations)": various benign mesenchymal tumors;
"Tissue Type": epithelial;
"Tissue Type": mesenchymal;
"Cancer Molecular Genetics": dominant;
"Mutation Type ": translocation;
"Translocation Partner":?;

//
ONCO-ID GCAGCGGAA:hsa-miR-10b
ONCO-JT ENSG00000119508 "Symbol":NR4A3;
"Name":nuclear receptor subfamily 4, group A, member 3 (NOR1);
"GeneID":8013;
"Chr":9;
"Chr Band":9q22 ;
"Cancer Somatic Mut":yes;
"Tumour Types (Somatic Mutations)":extraskelatal myxoid chondrosarcoma;
"Tissue Type": mesenchymal;
"Cancer Molecular Genetics": dominant;
"Mutation Type ": translocation;
"Translocation Partner":EWSR1;

//
ONCO-ID ATCAAGGTG:hsa-miR-296
ONCO-JT ENSG00000137309 "Symbol":HMGAL;
"Name":high mobility group AT-hook 1;
"GeneID":3159;
"Chr":6;
"Chr Band":6p21;
"Cancer Somatic Mut":yes;
"Tumour Types (Somatic Mutations)":microfollicular thyroid adenoma;
"Tumour Types (Somatic Mutations)": various benign mesenchymal tumors;
"Tissue Type": epithelial;
"Tissue Type": mesenchymal;
"Cancer Molecular Genetics": dominant;
"Mutation Type ": translocation;
"Translocation Partner":?;

//
ONCO-ID CGGCAGGAA:hsa-miR-26b
ONCO-JT ENSG00000187741 "Symbol":FANCA;
"Name":Fanconi anemia, complementation group A;
"GeneID":2175;
"Chr":16;
"Chr Band":16q24.3;
"Cancer Germline Mut":yes;
"Tumour Types (Germline Mutations)": acute myelogenous leukemia;
"Tumour Types (Germline Mutations)":leukemia;

```



```
"Cancer Syndrome":Fanconi anaemia A ;
"Tissue Type": leukaemia/lymphoma;
"Cancer Molecular Genetics": recessive;
"Mutation Type ": large deletion;
"Mutation Type ": Missense;
"Mutation Type ": nonsense;
"Mutation Type ": frameshift;
"Mutation Type ": splice site;

//
ONCO-ID CTGAATCAG:hsa-let-7a
ONCO-MI hsa-let-7a

//
ONCO-ID AATCCTGGT:hsa-let-7a
ONCO-MI hsa-let-7a

//
ONCO-ID AACGACTC:hsa-miR-16
ONCO-MI hsa-miR-16

//
ONCO-ID CAGATAACC:hsa-let-7d
ONCO-MI hsa-let-7d

//
ONCO-ID CACTTATTA:hsa-miR-125b
ONCO-MI hsa-miR-125b

//
ONCO-ID GGTAACAAA:hsa-miR-221
ONCO-MI hsa-miR-221

//
ONCO-ID CTGCAACTC:hsa-miR-412
ONCO-JT ENSG00000165699 "Symbol":TSC1;
"Name":tuberous sclerosis 1 gene;
"GeneID":7248;
"Chr":9;
"Chr Band":9q34 ;
"Cancer Germline Mut":yes;
"Tumour Types (Germline Mutations)":hamartoma;
"Tumour Types (Germline Mutations)":renal cell;
"Cancer Syndrome":Tuberous sclerosis 1;
"Tissue Type": epithelial;
"Tissue Type": other;
"Cancer Molecular Genetics": recessive;
"Mutation Type ": large deletion;
"Mutation Type ": Missense;
"Mutation Type ": nonsense;
"Mutation Type ": frameshift;
"Mutation Type ": splice site;

//
ONCO-ID CCCAGGATA:hsa-let-7a
ONCO-MI hsa-let-7a

//
ONCO-ID AATGGCTGG:hsa-miR-19a
ONCO-MI hsa-miR-19a

//
ONCO-ID CCAATGAG:hsa-miR-142-3p
ONCO-MI hsa-miR-142-3p

//
ONCO-ID AGTAGCTGG:hsa-miR-200a
ONCO-MI hsa-miR-200a

//
ONCO-ID AATTAGTTC:hsa-miR-19a
ONCO-MI hsa-miR-19a
ONCO-JT ENSG00000110092 "Symbol":CCND1;
"Name":cyclin D1;
"GeneID":595;
"Chr":11;
"Chr Band":11q13 ;
"Cancer Somatic Mut":yes;
"Tumour Types (Somatic Mutations)": chronic lymphatic leukemia;
"Tumour Types (Somatic Mutations)": B-cell acute lymphocytic leukaemia;
"Tumour Types (Somatic Mutations)":breast;
"Tissue Type": leukaemia/lymphoma;
"Tissue Type": epithelial;
"Cancer Molecular Genetics": dominant;
"Mutation Type ": translocation;
"Translocation Partner":IGH0, FSTL3;

//
ONCO-ID AGTCATTGG:hsa-let-7a
ONCO-MI hsa-let-7a
```

```
//
ONCO-ID AATCAGCCA:hsa-miR-296
ONCO-JT ENSG00000137309 "Symbol":HMGAL;
"Name":high mobility group AT-hook 1;
"GeneID":3159;
"Chr":6;
"Chr_Band":6p21;
"Cancer Somatic Mut":yes;
"Tumour Types (Somatic Mutations)":microfollicular thyroid adenoma;
"Tumour Types (Somatic Mutations)": various benign mesenchymal tumors;
"Tissue Type": epithelial;
"Tissue Type": mesenchymal;
"Cancer Molecular Genetics": dominant;
"Mutation Type ": translocation;
"Translocation Partner":?;

//
ONCO-ID AGCCATTGG:hsa-miR-20a
ONCO-MI hsa-miR-20a

//
ONCO-ID AGCGCGTA:hsa-miR-26b
ONCO-JT ENSG00000128714 "Symbol":HOXD13;
"Name":homeo box D13;
"GeneID":3239;
"Chr":2;
"Chr_Band":2q31-q32 ;
"Cancer Somatic Mut":yes;
"Tumour Types (Somatic Mutations)": acute myelogenous leukemia (primarily treatment associated);
"Tissue Type": leukaemia/lymphoma;
"Cancer Molecular Genetics": dominant;
"Mutation Type ": translocation;
"Translocation Partner":NUP98;

//
ONCO-ID GAGACACTC:hsa-miR-142-5p
ONCO-MI hsa-miR-142-5p

//
ONCO-ID GCTTTTCC:hsa-miR-199a*
ONCO-MI hsa-miR-199a*

//
ONCO-ID AGCTTGTGC:hsa-miR-125b
ONCO-MI hsa-miR-125b

//
ONCO-ID TCGTTACA:hsa-miR-16
ONCO-MI hsa-miR-16

//
ONCO-ID AAGCCAATG:hsa-miR-125b
ONCO-MI hsa-miR-125b

//
ONCO-ID GCCTCAGAC:hsa-miR-200a
ONCO-MI hsa-miR-200a

//
ONCO-ID AATTAGT:hsa-let-7d
ONCO-MI hsa-let-7d

//
ONCO-ID AGTCATGGC:hsa-miR-125b
ONCO-MI hsa-miR-125b

//
ONCO-ID AACCAATCC:hsa-miR-17-5p
ONCO-MI hsa-miR-17-5p

//
ONCO-ID GGCTCCTTA:hsa-miR-200c
ONCO-MI hsa-miR-200c

//
ONCO-ID GAGACACTC:hsa-miR-142-3p
ONCO-MI hsa-miR-142-3p

//
ONCO-ID AACCTCCCC:hsa-miR-199a*
ONCO-MI hsa-miR-199a*

//
ONCO-ID AATTATAGC:hsa-miR-199a
ONCO-MI hsa-miR-199a

//
ONCO-ID CTTGCCTA:hsa-miR-199a*
ONCO-MI hsa-miR-199a*
```

```

//
ONCO-ID AAACCGGA:hsa-miR-138
ONCO-JT ENSG00000196092 "Symbol":PAX5;
"Name":paired box gene 5 (B-cell lineage specific activator protein);
"GeneID":5079;
"Chr":9;
"Chr Band":9p13;
"Cancer Somatic Mut":yes;
"Tumour Types (Somatic Mutations)": non-Hodgkin lymphoma;
"Tissue Type": leukaemia/lymphoma;
"Cancer Molecular Genetics": dominant;
"Mutation Type ": translocation;
"Translocation Partner":IGH0;

//
ONCO-ID CCAGATGCG:hsa-miR-199a*
ONCO-MI hsa-miR-199a*

//
ONCO-ID ACGTCAAGA:hsa-miR-199a
ONCO-MI hsa-miR-199a

//
ONCO-ID ATCATTTTA:hsa-miR-125b
ONCO-MI hsa-miR-125b
ONCO-JT ENSG00000137265 "Symbol":IRF4;
"Name":interferon regulatory factor 4;
"GeneID":3662;
"Chr":6;
"Chr Band":6p25-p23;
"Cancer Somatic Mut":yes;
"Tumour Types (Somatic Mutations)":MM ;
"Tissue Type": leukaemia/lymphoma;
"Cancer Molecular Genetics": dominant;
"Mutation Type ": translocation;
"Translocation Partner":IGH0;

//
ONCO-ID AAGGTAGTA:hsa-miR-17-5p
ONCO-MI hsa-miR-17-5p

//
ONCO-ID CAGACAC:hsa-miR-200a*
ONCO-MI hsa-miR-200a*

//
ONCO-ID ACGCTGGCT:hsa-miR-133a
ONCO-JT ENSG00000146648 "Symbol":EGFR;
"Name":epidermal growth factor receptor (erythroblastic leukemia viral (v-erb-b) oncogene homolog, avian);
"GeneID":1956;
"Chr":7;
"Chr Band":7p12.3-p12.1 ;
"Cancer Somatic Mut":yes;
"Tumour Types (Somatic Mutations)":glioma;
"Tumour Types (Somatic Mutations)": non small cell lung cancer;
"Tissue Type": epithelial;
"Tissue Type": other;
"Cancer Molecular Genetics": dominant;
"Mutation Type ": amplification;
"Mutation Type ": other;
"Mutation Type ": Missense;

//
ONCO-ID GATCGATA:hsa-miR-16
ONCO-MI hsa-miR-16

//
ONCO-ID TGGCATAAA:hsa-miR-125b
ONCO-MI hsa-miR-125b

//
ONCO-ID GCTGATCAC:hsa-miR-200c
ONCO-MI hsa-miR-200c

//
ONCO-ID GACTCCTGC:hsa-miR-142-3p
ONCO-MI hsa-miR-142-3p

//
ONCO-ID AGTGAGCGG:hsa-miR-200a*
ONCO-MI hsa-miR-200a*

//
ONCO-ID CTGTACATC:hsa-miR-199a
ONCO-MI hsa-miR-199a

//
ONCO-ID GAACGTGGC:hsa-let-7b
ONCO-MI hsa-let-7b

```

```
//
ONCO-ID ACACGTCG:hsa-miR-375
ONCO-JT ENSG00000157404 "Symbol":KIT;
"Name":v-kit Hardy-Zuckerman 4 feline sarcoma viral oncogene homolog ;
"GeneID":3815;
"Chr":4;
"Chr Band":4q12;
"Cancer Somatic Mut":yes;
"Cancer Germline Mut":yes;
"Tumour Types (Somatic Mutations)": gastrointestinal stromal tumour;
"Tumour Types (Somatic Mutations)": acute myelogenous leukemia;
"Tumour Types (Somatic Mutations)": testicular germ cell tumour;
"Tumour Types (Somatic Mutations)":mastocytosis;
"Tumour Types (Germline Mutations)": gastrointestinal stromal tumour;
"Tumour Types (Germline Mutations)":epithelioma;
"Cancer Syndrome":Familial gastrointestinal stromal tumour;
"Tissue Type": leukaemia/lymphoma;
"Tissue Type": mesenchymal;
"Tissue Type": other;
"Cancer Molecular Genetics": dominant;
"Mutation Type ": Missense;
"Mutation Type ": other;
"Other Germline Mut":yes;
"Other Syndrome/Disease":Piebald trait;
```

```
//
ONCO-ID TCCATCAA:hsa-miR-30b
ONCO-JT ENSG00000158715 "Symbol":SLC45A3;
"Name":solute carrier family 45, member 3;
"GeneID":85414;
"Chr":1;
"Chr Band":1q32;
"Cancer Somatic Mut":yes;
"Tumour Types (Somatic Mutations)":prostate ;
"Tissue Type": epithelial;
"Cancer Molecular Genetics": dominant;
"Mutation Type ": translocation;
"Translocation Partner":ETV1;
```

```
//
ONCO-ID AACCAATCC:hsa-miR-20a
ONCO-MI hsa-miR-20a
```

```
//
ONCO-ID TCCCAACAA:hsa-miR-142-3p
ONCO-MI hsa-miR-142-3p
```

```
//
ONCO-ID CGTCATCCC:hsa-miR-199a*
ONCO-MI hsa-miR-199a*
```

```
//
ONCO-ID CAATGAGCA:hsa-let-7a
ONCO-MI hsa-let-7a
```

```
//
ONCO-ID GTGACGCAC:hsa-miR-30a-5p
ONCO-JT ENSG00000005339 "Symbol":CREBBP;
"Name":CREB binding protein (CBP);
"GeneID":1387;
"Chr":16;
"Chr Band":16p13.3 ;
"Cancer Somatic Mut":yes;
"Tumour Types (Somatic Mutations)": acute leukemia;
"Tumour Types (Somatic Mutations)": acute myelogenous leukemia;
"Tissue Type": leukaemia/lymphoma;
"Cancer Molecular Genetics": dominant;
"Mutation Type ": translocation;
"Translocation Partner":MLL, MORF, RUNXBP2;
"Other Germline Mut":yes;
"Other Syndrome/Disease":Rubinstein-Taybi syndrome;
```

```
//
ONCO-ID ACTTAGCAA:hsa-miR-20a
ONCO-MI hsa-miR-20a
```

```
//
ONCO-ID CTTGTAAG:hsa-miR-181d
ONCO-JT ENSG00000109471 "Symbol":IL2;
"Name":interleukin 2;
"GeneID":3558;
"Chr":4;
"Chr Band":4q26-q27;
"Cancer Somatic Mut":yes;
"Tumour Types (Somatic Mutations)":intestinal T-cell lymphoma;
"Tissue Type": leukaemia/lymphoma;
"Cancer Molecular Genetics": dominant;
"Mutation Type ": translocation;
"Translocation Partner":TNFRSF17;
```

```
//
ONCO-ID GGAAATCAC:hsa-miR-199a
ONCO-MI hsa-miR-199a
```

```

//
ONCO-ID AGCCATTGG:hsa-miR-19a
ONCO-MI hsa-miR-19a

//
ONCO-ID GATGGCGGC:hsa-miR-10b
ONCO-JT ENSG00000072274 "Symbol":TFRC;
"Name":transferrin receptor (p90, CD71);
"GeneID":7037;
"Chr":3;
"Chr Band":3q29 ;
"Cancer Somatic Mut":yes;
"Tumour Types (Somatic Mutations)": non-Hodgkin lymphoma;
"Tissue Type": leukaemia/lymphoma;
"Cancer Molecular Genetics": dominant;
"Mutation Type ": translocation;
"Translocation Partner":BCL6;

//
ONCO-ID GAGTCCAAA:hsa-let-7a
ONCO-MI hsa-let-7a

//
ONCO-ID AATCCTGGT:hsa-let-7d
ONCO-MI hsa-let-7d

//
ONCO-ID CATCATCCC:hsa-miR-199a
ONCO-MI hsa-miR-199a

//
ONCO-ID CAGGATTAG:hsa-miR-199a
ONCO-MI hsa-miR-199a

//
ONCO-ID GTAACCGA:hsa-miR-365
ONCO-JT ENSG00000067955 "Symbol":CBFB;
"Name":core-binding factor, beta subunit;
"GeneID":865;
"Chr":16;
"Chr Band":16q22 ;
"Cancer Somatic Mut":yes;
"Tumour Types (Somatic Mutations)": acute myelogenous leukemia;
"Tissue Type": leukaemia/lymphoma;
"Cancer Molecular Genetics": dominant;
"Mutation Type ": translocation;
"Translocation Partner":MYH11;

//
ONCO-ID CCATTACC:hsa-let-7a
ONCO-MI hsa-let-7a

//
ONCO-ID GTTAGTGTA:hsa-miR-199a*
ONCO-MI hsa-miR-199a*

//
ONCO-ID ATCCGTTG:hsa-miR-125b
ONCO-MI hsa-miR-125b

//
ONCO-ID CCCAGG:hsa-miR-200c
ONCO-MI hsa-miR-200c

//
ONCO-ID CCACATGCC:hsa-miR-487b
ONCO-JT ENSG00000156650 "Symbol":MYST4;
"Name":MYST histone acetyltransferase (monocytic leukemia) 4 (MORF);
"GeneID":23522;
"Chr":10;
"Chr Band":10q22 ;
"Cancer Somatic Mut":yes;
"Tumour Types (Somatic Mutations)": acute myelogenous leukemia;
"Tissue Type": leukaemia/lymphoma;
"Cancer Molecular Genetics": dominant;
"Mutation Type ": translocation;
"Translocation Partner":CREBBP;

//
ONCO-ID GTGTGA:hsa-miR-223
ONCO-JT ENSG00000105619 "Symbol":TFPT;
"Name":TCF3 (E2A) fusion partner (in childhood Leukemia);
"GeneID":29844;
"Chr":19;
"Chr Band":19q13;
"Cancer Somatic Mut":yes;
"Tumour Types (Somatic Mutations)":pre-B ALL;
"Tissue Type": leukaemia/lymphoma;
"Cancer Molecular Genetics": dominant;
"Mutation Type ": translocation;
"Translocation Partner":TCF3;

```

```

//
ONCO-ID CCCCCCAG:hsa-let-7a
ONCO-MI hsa-let-7a

//
ONCO-ID ATAGCCTTG:hsa-miR-142-3p
ONCO-MI hsa-miR-142-3p

//
ONCO-ID CAGGTAAGG:hsa-miR-200c
ONCO-MI hsa-miR-200c

//
ONCO-ID ACCACTTAG:hsa-miR-487b
ONCO-JT ENSG0000204370 "Symbol":SDHD;
"Name":succinate dehydrogenase complex, subunit D, integral membrane protein;
"GeneID":6392;
"Chr":11;
"Chr Band":11q23 ;
"Cancer Germline Mut":yes;
"Tumour Types (Germline Mutations)":paraganglioma;
"Tumour Types (Germline Mutations)":pheochromocytoma;
"Cancer Syndrome":Familial paraganglioma;
"Tissue Type": other;
"Cancer Molecular Genetics": recessive;
"Mutation Type ": Missense;
"Mutation Type ": nonsense;
"Mutation Type ": frameshift;
"Mutation Type ": splice site;

//
ONCO-ID ACAATGGAG:hsa-miR-125b
ONCO-MI hsa-miR-125b

//
ONCO-ID AGATTGTGA:hsa-miR-17-5p
ONCO-MI hsa-miR-17-5p

//
ONCO-ID ATCACTCAC:hsa-let-7d
ONCO-MI hsa-let-7d

//
ONCO-ID CAAGTCTAG:hsa-miR-199a*
ONCO-MI hsa-miR-199a*

//
ONCO-ID AACTTCAAC:hsa-miR-155
ONCO-MI hsa-miR-155

//
ONCO-ID AGATGTGGC:hsa-miR-199a*
ONCO-MI hsa-miR-199a*

//
ONCO-ID CAATGCACC:hsa-miR-125b
ONCO-MI hsa-miR-125b

//
ONCO-ID ACTTAGCAA:hsa-miR-17-5p
ONCO-MI hsa-miR-17-5p

//
ONCO-ID CAGTGAGCG:hsa-miR-200b
ONCO-MI hsa-miR-200b

//
ONCO-ID ACGATCCC:hsa-miR-199a*
ONCO-MI hsa-miR-199a*

//
ONCO-ID AAATCCCGG:hsa-miR-199a*
ONCO-MI hsa-miR-199a*

//
ONCO-ID GGATCCGGA:hsa-miR-30c
ONCO-JT ENSG00000133392 "Symbol":MYH11;
"Name":myosin, heavy polypeptide 11, smooth muscle;
"GeneID":4629;
"Chr":16;
"Chr Band":16p13.13-p13.12 ;
"Cancer Somatic Mut":yes;
"Tumour Types (Somatic Mutations)": acute myelogenous leukemia;
"Tissue Type": leukaemia/lymphoma;
"Cancer Molecular Genetics": dominant;
"Mutation Type ": translocation;
"Translocation Partner":CBFB;

//

```

ONCO-ID CGAGATCA:hsa-miR-16  
ONCO-MI hsa-miR-16

//  
ONCO-ID ACTTATAC:hsa-miR-199b  
ONCO-MI hsa-miR-199b

//  
ONCO-ID GCTATTAAA:hsa-miR-19a  
ONCO-MI hsa-miR-19a

//  
ONCO-ID GCTACTTCC:hsa-miR-155  
ONCO-MI hsa-miR-155

//  
ONCO-ID CCAACCATC:hsa-miR-19a  
ONCO-MI hsa-miR-19a

//  
ONCO-ID AAGATGGAT:hsa-miR-125b  
ONCO-MI hsa-miR-125b

//  
ONCO-ID CGACGACCC:hsa-miR-130b  
ONCO-JT ENSG00000108292 "Symbol":MLLT6;  
"Name":myeloid/lymphoid or mixed-lineage leukemia (trithorax homolog, Drosophila); translocated to, 6 (AF17);  
"GeneID":4302;  
"Chr":17;  
"Chr Band":17q21;  
"Cancer Somatic Mut":yes;  
"Tumour Types (Somatic Mutations)": acute leukemia;  
"Tissue Type": leukaemia/lymphoma;  
"Cancer Molecular Genetics": dominant;  
"Mutation Type ": translocation;  
"Translocation Partner":MLL;

//  
ONCO-ID ACTGCACCA:hsa-miR-19a  
ONCO-MI hsa-miR-19a

//  
ONCO-ID GGCCCC:hsa-miR-195  
ONCO-MI hsa-miR-195

//  
ONCO-ID GCAGAAACC:hsa-miR-140  
ONCO-JT ENSG00000116128 "Symbol":BCL9;  
"Name":B-cell CLL/lymphoma 9;  
"GeneID":607;  
"Chr":1;  
"Chr Band":1q21;  
"Cancer Somatic Mut":yes;  
"Tumour Types (Somatic Mutations)": B-cell acute lymphocytic leukaemia;  
"Tissue Type": leukaemia/lymphoma;  
"Cancer Molecular Genetics": dominant;  
"Mutation Type ": translocation;  
"Translocation Partner":IGH@, IGL@;

//  
ONCO-ID CGGGAG:hsa-miR-32  
ONCO-JT ENSG00000109670 "Symbol":FBXW7;  
"Name":F-box and WD-40 domain protein 7 (archipelago homolog, Drosophila);  
"GeneID":55294;  
"Chr":4;  
"Chr Band":4q31.3;  
"Cancer Somatic Mut":yes;  
"Tumour Types (Somatic Mutations)":colorectal;  
"Tumour Types (Somatic Mutations)":endometrial;  
"Tumour Types (Somatic Mutations)": T-cell acute lymphoblastic leukemia;  
"Tissue Type": epithelial;  
"Tissue Type": leukaemia/lymphoma;  
"Cancer Molecular Genetics": recessive;  
"Mutation Type ": Missense;  
"Mutation Type ": nonsense;  
"Mutation Type ": large deletion;  
"Mutation Type ": frameshift;

//  
ONCO-ID ACGTGGCAA:hsa-miR-20a  
ONCO-MI hsa-miR-20a

//  
ONCO-ID GATTAACAA:hsa-miR-19a  
ONCO-MI hsa-miR-19a

//  
ONCO-ID AGGCATGTG:hsa-miR-381  
ONCO-JT ENSG00000156650 "Symbol":MYST4;  
"Name":MYST histone acetyltransferase (monocytic leukemia) 4 (MORF);  
"GeneID":23522;  
"Chr":10;

"Chr Band":10q22 ;  
"Cancer Somatic Mut":yes;  
"Tumour Types (Somatic Mutations)": acute myelogenous leukemia;  
"Tissue Type": leukaemia/lymphoma;  
"Cancer Molecular Genetics": dominant;  
"Mutation Type ": translocation;  
"Translocation Partner":CREBBP;

//  
ONCO-ID ATCTGGACC:hsa-miR-195  
ONCO-MI hsa-miR-195

//  
ONCO-ID CCCCC:hsa-miR-200b  
ONCO-MI hsa-miR-200b

//  
ONCO-ID CGATTCTA:hsa-miR-199a\*  
ONCO-MI hsa-miR-199a\*

//  
ONCO-ID AATTAGT:hsa-let-7f  
ONCO-MI hsa-let-7f

//  
ONCO-ID CTGTGGCAC:hsa-miR-199a\*  
ONCO-MI hsa-miR-199a\*

//  
ONCO-ID AATGAGTCT:hsa-let-7a  
ONCO-MI hsa-let-7a

//  
ONCO-ID ATTTATCCC:hsa-let-7a  
ONCO-MI hsa-let-7a

//  
ONCO-ID GGCTCGGAC:hsa-miR-199a\*  
ONCO-MI hsa-miR-199a\*

//  
ONCO-ID AAAGAGTCC:hsa-miR-155  
ONCO-MI hsa-miR-155

//  
ONCO-ID CCTATGGCA:hsa-miR-200c  
ONCO-MI hsa-miR-200c

//  
ONCO-ID CCATAATTA:hsa-miR-125b  
ONCO-MI hsa-miR-125b

//  
ONCO-ID CCAAACTC:hsa-miR-199a\*  
ONCO-MI hsa-miR-199a\*

//  
ONCO-ID GCTAGGGAA:hsa-miR-381  
ONCO-JT ENSG00000187239 "Symbol":FNBP1;  
"Name":formin binding protein 1 (FBP17);  
"GeneID":23048;  
"Chr":9;  
"Chr Band":9q23;  
"Cancer Somatic Mut":yes;  
"Tumour Types (Somatic Mutations)": acute myelogenous leukemia;  
"Tissue Type": leukaemia/lymphoma;  
"Cancer Molecular Genetics": dominant;  
"Mutation Type ": translocation;  
"Translocation Partner":MLL;

//  
ONCO-ID AAAGTTGCT:hsa-miR-218  
ONCO-JT ENSG00000183722 "Symbol":LHFP;  
"Name":lipoma HMGIC fusion partner;  
"GeneID":10186;  
"Chr":13;  
"Chr Band":13q12;  
"Cancer Somatic Mut":yes;  
"Tumour Types (Somatic Mutations)":lipoma;  
"Tissue Type": mesenchymal;  
"Cancer Molecular Genetics": dominant;  
"Mutation Type ": translocation;  
"Translocation Partner":HMG2;

//  
ONCO-ID GAGTGTGCC:hsa-miR-200a  
ONCO-MI hsa-miR-200a

//



```

ONCO-ID AGACACCGG:hsa-miR-218
ONCO-JT ENSG00000174775 "Symbol":HRAS;
"Name":v-Ha-ras Harvey rat sarcoma viral oncogene homolog;
"GeneID":3265;
"Chr":11;
"Chr Band":11p15.5 ;
"Cancer Somatic Mut":yes;
"Cancer Germline Mut":yes;
"Tumour Types (Somatic Mutations)":infrequent sarcomas;
"Tumour Types (Somatic Mutations)":rare other types;
"Tumour Types (Germline Mutations)":rhadomyosarcoma;
"Tumour Types (Germline Mutations)":ganglioneuroblastoma;
"Tumour Types (Germline Mutations)":bladder;
"Cancer Syndrome":Costello syndrome;
"Tissue Type": epithelial;
"Tissue Type": leukaemia/lymphoma;
"Tissue Type": mesenchymal;
"Cancer Molecular Genetics": dominant;
"Mutation Type ": Missense;

//
ONCO-ID CTTGTGACA:hsa-miR-221
ONCO-MI hsa-miR-221

//
ONCO-ID ATTGTGACC:hsa-miR-19a
ONCO-MI hsa-miR-19a

//
ONCO-ID GGCAATTTA:hsa-miR-19a
ONCO-MI hsa-miR-19a
ONCO-JT ENSG00000110092 "Symbol":CCND1;
"Name":cyclin D1;
"GeneID":595;
"Chr":11;
"Chr Band":11q13 ;
"Cancer Somatic Mut":yes;
"Tumour Types (Somatic Mutations)": chronic lymphatic leukemia;
"Tumour Types (Somatic Mutations)": B-cell acute lymphocytic leukaemia;
"Tumour Types (Somatic Mutations)":breast;
"Tissue Type": leukaemia/lymphoma;
"Tissue Type": epithelial;
"Cancer Molecular Genetics": dominant;
"Mutation Type ": translocation;
"Translocation Partner":IGH@, FSTL3;

//
ONCO-ID CTCAGACAA:hsa-miR-200b
ONCO-MI hsa-miR-200b

//
ONCO-ID GGGCTTTAA:hsa-miR-200c
ONCO-MI hsa-miR-200c

//
ONCO-ID TGAGGTCCA:hsa-miR-17-5p
ONCO-MI hsa-miR-17-5p

//
ONCO-ID AGTTGCCAG:hsa-miR-106a
ONCO-JT ENSG00000163497 "Symbol":FEV;
"Name":FEV protein - (HSRNAFEV);
"GeneID":54738;
"Chr":2;
"Chr Band":2q36;
"Cancer Somatic Mut":yes;
"Tumour Types (Somatic Mutations)":Ewings sarcoma;
"Tissue Type": mesenchymal;
"Cancer Molecular Genetics": dominant;
"Mutation Type ": translocation;
"Translocation Partner":EWSR1;

//
ONCO-ID CCAGACCAA:hsa-miR-200a
ONCO-MI hsa-miR-200a

//
ONCO-ID AGTCATTGG:hsa-let-7f
ONCO-MI hsa-let-7f

//
ONCO-ID CTCGGCCAA:hsa-miR-26b
ONCO-JT ENSG00000130675 "Symbol":HLXB9;
"Name":homeo box HB9;
"GeneID":3110;
"Chr":7;
"Chr Band":7q36;
"Cancer Somatic Mut":yes;
"Tumour Types (Somatic Mutations)": acute myelogenous leukemia;
"Tissue Type": leukaemia/lymphoma;
"Cancer Molecular Genetics": dominant;
"Mutation Type ": translocation;
"Translocation Partner":ETV6;
"Other Germline Mut":yes;
"Other Syndrome/Disease":CURRARINO SYNDROME;

```

```

//
ONCO-ID CCCTCTTGA:hsa-let-7e
ONCO-MI hsa-let-7e

//
ONCO-ID ACACTTCAA:hsa-miR-17-5p
ONCO-MI hsa-miR-17-5p

//
ONCO-ID CAGACATTC:hsa-miR-199a*
ONCO-MI hsa-miR-199a*

//
ONCO-ID TCAGCATAA:hsa-miR-20a
ONCO-MI hsa-miR-20a

//
ONCO-ID CGTCATCCC:hsa-miR-199b
ONCO-MI hsa-miR-199b

//
ONCO-ID ACTTCGTC:hsa-miR-125b
ONCO-MI hsa-miR-125b

//
ONCO-ID ACGAGGAAG:hsa-let-7b
ONCO-MI hsa-let-7b

//
ONCO-ID CCCAGTTGA:hsa-miR-199a*
ONCO-MI hsa-miR-199a*

//
ONCO-ID CTGTACATC:hsa-let-7f
ONCO-MI hsa-let-7f

//
ONCO-ID CCCGGG:hsa-miR-375
ONCO-JT ENSG00000047410 "Symbol":TPR;
"Name":translocated promoter region ;
"GeneID":7175;
"Chr":1;
"Chr Band":1q25 ;
"Cancer Somatic Mut":yes;
"Tumour Types (Somatic Mutations)":papillary thyroid;
"Tissue Type": epithelial;
"Cancer Molecular Genetics": dominant;
"Mutation Type ": translocation;
"Translocation Partner":NTRK1;

//
ONCO-ID AGAACTAAT:hsa-miR-19a
ONCO-MI hsa-miR-19a
ONCO-JT ENSG00000110092 "Symbol":CCND1;
"Name":cyclin D1;
"GeneID":595;
"Chr":11;
"Chr Band":11q13 ;
"Cancer Somatic Mut":yes;
"Tumour Types (Somatic Mutations)": chronic lymphatic leukemia;
"Tumour Types (Somatic Mutations)": B-cell acute lymphocytic leukaemia;
"Tumour Types (Somatic Mutations)":breast;
"Tissue Type": leukaemia/lymphoma;
"Tissue Type": epithelial;
"Cancer Molecular Genetics": dominant;
"Mutation Type ": translocation;
"Translocation Partner":IGH@, FSTL3;

//
ONCO-ID CAATTGCCA:hsa-miR-199b
ONCO-MI hsa-miR-199b

//
ONCO-ID ACATTATG:hsa-let-7b
ONCO-MI hsa-let-7b

//
ONCO-ID ACTGCATAA:hsa-miR-20a
ONCO-MI hsa-miR-20a

//
ONCO-ID AACAGGAAT:hsa-miR-146b
ONCO-MI hsa-miR-146b

//
ONCO-ID CACGTCAGA:hsa-miR-199a*
ONCO-MI hsa-miR-199a*

```

```

//
ONCO-ID AACGTAAG:hsa-let-7f
ONCO-MI hsa-let-7f

//
ONCO-ID TAAAGGCCA:hsa-miR-200c
ONCO-MI hsa-miR-200c

//
ONCO-ID GTCTGAACA:hsa-miR-19a
ONCO-MI hsa-miR-19a

//
ONCO-ID ATCCGCTCC:hsa-let-7f
ONCO-MI hsa-let-7f

//
ONCO-ID CACATCTGG:hsa-miR-199a*
ONCO-MI hsa-miR-199a*

//
ONCO-ID GAACTCCTA:hsa-miR-146b
ONCO-MI hsa-miR-146b

//
ONCO-ID ATGCGCCAC:hsa-miR-125b
ONCO-MI hsa-miR-125b

//
ONCO-ID ACATTCCTC:hsa-miR-199a*
ONCO-MI hsa-miR-199a*

//
ONCO-ID GTCTCTCTA:hsa-miR-16
ONCO-MI hsa-miR-16

//
ONCO-ID ACCAATCCT:hsa-miR-20a
ONCO-MI hsa-miR-20a

//
ONCO-ID ATCACTCAC:hsa-let-7a
ONCO-MI hsa-let-7a

//
ONCO-ID GCCTGTTC:hsa-miR-375
ONCO-JT ENSG00000123388 "Symbol":HOXC11;
"Name":homeo box C11;
"GeneID":3227;
"Chr":12;
"Chr Band":12q13.3;
"Cancer Somatic Mut":yes;
"Tumour Types (Somatic Mutations)": acute myelogenous leukemia;
"Tissue Type": leukaemia/lymphoma;
"Cancer Molecular Genetics": dominant;
"Mutation Type ": translocation;
"Translocation Partner":NUP98;

//
ONCO-ID CATGAATCA:hsa-miR-125b
ONCO-MI hsa-miR-125b

//
ONCO-ID AATCCCGGA:hsa-miR-130b
ONCO-JT ENSG00000165699 "Symbol":TSC1;
"Name":tuberous sclerosis 1 gene;
"GeneID":7248;
"Chr":9;
"Chr Band":9q34 ;
"Cancer Germline Mut":yes;
"Tumour Types (Germline Mutations)":hamartoma;
"Tumour Types (Germline Mutations)":renal cell;
"Cancer Syndrome":Tuberous sclerosis 1;
"Tissue Type": epithelial;
"Tissue Type": other;
"Cancer Molecular Genetics": recessive;
"Mutation Type ": large deletion;
"Mutation Type ": Missense;
"Mutation Type ": nonsense;
"Mutation Type ": frameshift;
"Mutation Type ": splice site;

//
ONCO-ID CTCCTGC:hsa-miR-199a*
ONCO-MI hsa-miR-199a*

//
ONCO-ID CTGGCGTCA:hsa-miR-199b
ONCO-MI hsa-miR-199b

```

```
//
ONCO-ID ATGCCTG:hsa-miR-199a*
ONCO-MI hsa-miR-199a*

//
ONCO-ID CGGGCC:hsa-miR-26b
ONCO-JT ENSG00000130675 "Symbol":HLXB9;
"Name":homeo box HB9;
"GeneID":3110;
"Chr":7;
"Chr_Band":7q36;
"Cancer Somatic Mut":yes;
"Tumour Types (Somatic Mutations)": acute myelogenous leukemia;
"Tissue Type": leukaemia/lymphoma;
"Cancer Molecular Genetics": dominant;
"Mutation Type ": translocation;
"Translocation Partner":ETV6;
"Other Germline Mut":yes;
"Other Syndrome/Disease":CURRARINO SYNDROME;

//
ONCO-ID CTAAAGGTA:hsa-miR-155
ONCO-MI hsa-miR-155

//
ONCO-ID CTGAATCAG:hsa-let-7f
ONCO-MI hsa-let-7f

//
ONCO-ID ATAGGTGCA:hsa-miR-125b
ONCO-MI hsa-miR-125b

//
ONCO-ID CAAACTCTA:hsa-miR-20a
ONCO-MI hsa-miR-20a

//
ONCO-ID CTTGCTGTA:hsa-miR-155
ONCO-MI hsa-miR-155

//
ONCO-ID AATCTGGGC:hsa-miR-125b
ONCO-MI hsa-miR-125b

//
ONCO-ID CACCAACCA:hsa-let-7a
ONCO-MI hsa-let-7a

//
ONCO-ID TGAGGTCCA:hsa-miR-20a
ONCO-MI hsa-miR-20a

//
ONCO-ID CATGTCTGA:hsa-miR-125b
ONCO-MI hsa-miR-125b

//
ONCO-ID CCATTACC:hsa-let-7f
ONCO-MI hsa-let-7f

//
ONCO-ID ATAATAGTA:hsa-let-7d
ONCO-MI hsa-let-7d

//
ONCO-ID ACCCTTTA:hsa-let-7d
ONCO-MI hsa-let-7d

//
ONCO-ID AATCCAGGA:hsa-let-7e
ONCO-MI hsa-let-7e

//
ONCO-ID CAAGTTGC:hsa-miR-32
ONCO-JT ENSG00000112081 "Symbol":SFRS3;
"Name":splicing factor, arginine/serine-rich 3;
"GeneID":6428;
"Chr":6;
"Chr_Band":6p21;
"Cancer Somatic Mut":yes;
"Tumour Types (Somatic Mutations)":follicular lymphoma;
"Tissue Type": leukaemia/lymphoma;
"Cancer Molecular Genetics": dominant;
"Mutation Type ": translocation;
"Translocation Partner":BCL6;

//
```

ONCO-ID AGCAGTTAA:hsa-let-7a  
ONCO-MI hsa-let-7a

//  
ONCO-ID GAACGTGGC:hsa-let-7a  
ONCO-MI hsa-let-7a

//  
ONCO-ID GTGACGCCA:hsa-miR-369-5p  
ONCO-JT ENSG00000119508 "Symbol":NR4A3;  
"Name":nuclear receptor subfamily 4, group A, member 3 (NOR1);  
"GeneID":8013;  
"Chr":9;  
"Chr Band":9q22 ;  
"Cancer Somatic Mut":yes;  
"Tumour Types (Somatic Mutations)":extraskelatal myxoid chondrosarcoma;  
"Tissue Type": mesenchymal;  
"Cancer Molecular Genetics": dominant;  
"Mutation Type ": translocation;  
"Translocation Partner":EWSR1;

//  
ONCO-ID CTCAGTAGC:hsa-miR-200b  
ONCO-MI hsa-miR-200b

//  
ONCO-ID CCTTAAATA:hsa-miR-146b  
ONCO-MI hsa-miR-146b

//  
ONCO-ID ATTCACAA:hsa-miR-296  
ONCO-JT ENSG00000137309 "Symbol":HMGA1;  
"Name":high mobility group AT-hook 1;  
"GeneID":3159;  
"Chr":6;  
"Chr Band":6p21;  
"Cancer Somatic Mut":yes;  
"Tumour Types (Somatic Mutations)":microfollicular thyroid adenoma;  
"Tumour Types (Somatic Mutations)": various benign mesenchymal tumors;  
"Tissue Type": epithelial;  
"Tissue Type": mesenchymal;  
"Cancer Molecular Genetics": dominant;  
"Mutation Type ": translocation;  
"Translocation Partner":?;

//  
ONCO-ID AAGTTGGCA:hsa-miR-16  
ONCO-MI hsa-miR-16

//  
ONCO-ID CAGACAC:hsa-miR-200a  
ONCO-MI hsa-miR-200a

//  
ONCO-ID AATGGCTGG:hsa-miR-17-5p  
ONCO-MI hsa-miR-17-5p

//  
ONCO-ID AGTCATTGG:hsa-let-7d  
ONCO-MI hsa-let-7d

//  
ONCO-ID GGATTGACA:hsa-miR-19a  
ONCO-MI hsa-miR-19a

//  
ONCO-ID GCCTCAGAC:hsa-miR-200b  
ONCO-MI hsa-miR-200b

//  
ONCO-ID AGTCTGAAC:hsa-miR-20a  
ONCO-MI hsa-miR-20a

//  
ONCO-ID GATGAGGCA:hsa-miR-155  
ONCO-MI hsa-miR-155

//  
ONCO-ID TCTTCATCA:hsa-miR-199a  
ONCO-MI hsa-miR-199a

//  
ONCO-ID AGCCAACAT:hsa-miR-138  
ONCO-JT ENSG00000113263 "Symbol":ITK;  
"Name":IL2-inducible T-cell kinase;  
"GeneID":3702;  
"Chr":5;  
"Chr Band":5q31-q32;  
"Cancer Somatic Mut":yes;  
"Tumour Types (Somatic Mutations)":peripheral T-cell lymphoma;

```

"Tissue Type": leukaemia/lymphoma;
"Cancer Molecular Genetics": dominant;
"Mutation Type ": translocation;
"Translocation Partner":SYK;

//
ONCO-ID AATTATAGC:hsa-miR-199a*
ONCO-MI hsa-miR-199a*

//
ONCO-ID GCGCCAGAC:hsa-miR-142-3p
ONCO-MI hsa-miR-142-3p

//
ONCO-ID CGAGACGA:hsa-miR-199a*
ONCO-MI hsa-miR-199a*

//
ONCO-ID AATTCATTG:hsa-miR-199a
ONCO-MI hsa-miR-199a

//
ONCO-ID AGCGCA:hsa-miR-199a
ONCO-MI hsa-miR-199a

//
ONCO-ID CACCACTTC:hsa-miR-19a
ONCO-MI hsa-miR-19a

//
ONCO-ID CACCAATCC:hsa-miR-221
ONCO-MI hsa-miR-221

//
ONCO-ID TGGCCATAA:hsa-let-7a
ONCO-MI hsa-let-7a

//
ONCO-ID CACGCGGAA:hsa-miR-219
ONCO-JT ENSG00000119508 "Symbol":NR4A3;
"Name":nuclear receptor subfamily 4, group A, member 3 (NOR1);
"GeneID":8013;
"Chr":9;
"Chr Band":9q22 ;
"Cancer Somatic Mut":yes;
"Tumour Types (Somatic Mutations)":extraskelletal myxoid chondrosarcoma;
"Tissue Type": mesenchymal;
"Cancer Molecular Genetics": dominant;
"Mutation Type ": translocation;
"Translocation Partner":EWSR1;

//
ONCO-ID CCGAGTCCA:hsa-miR-200b
ONCO-MI hsa-miR-200b

//
ONCO-ID CCCATGCAA:hsa-miR-200a
ONCO-MI hsa-miR-200a

//
ONCO-ID ATTTATCCC:hsa-let-7d
ONCO-MI hsa-let-7d

//
ONCO-ID CATTACCCC:hsa-let-7d
ONCO-MI hsa-let-7d

//
ONCO-ID ATGGCGCGC:hsa-miR-218
ONCO-JT ENSG00000174775 "Symbol":HRAS;
"Name":v-Ha-ras Harvey rat sarcoma viral oncogene homolog;
"GeneID":3265;
"Chr":11;
"Chr Band":11p15.5 ;
"Cancer Somatic Mut":yes;
"Cancer Germline Mut":yes;
"Tumour Types (Somatic Mutations)":infrequent sarcomas;
"Tumour Types (Somatic Mutations)":rare other types;
"Tumour Types (Germline Mutations)":rhadomyosarcoma;
"Tumour Types (Germline Mutations)":ganglioneuroblastoma;
"Tumour Types (Germline Mutations)":bladder;
"Cancer Syndrome":Costello syndrome;
"Tissue Type": epithelial;
"Tissue Type": leukaemia/lymphoma;
"Tissue Type": mesenchymal;
"Cancer Molecular Genetics": dominant;
"Mutation Type ": Missense;

```
