# Supplementary material for: Genome-wide survey of microRNA–transcription factor feed-forward regulatory circuits in human
Source: PubMed Central journal article supplement — Mol Biosyst. 2009 Jun 19;5(8):854–67. doi: 10.1039/b900177h (PMC2898627; doi:10.1039/b900177h), 2009-06-19
Supplement: b900177h_add_file_11.pdf [file b900177h_add_file_11.pdf]

# Circuits raw data.

# Raw circuits obtained with our pipeline, but using (-500/+100) nt around TSS as choice for the promoter regions. Each line represents a single circuit.

# File is TAB delimited and columns are:  
# Column 0 is the circuit id, composed by:  
# - Transcription Factor name  
# - Ensembl pre-miRNA id  
# - miRNA precursor id (pre-miRNA)  
# - miRNA mature id

# Columns 1 contains the Ensembl gene\_id of the joint target (jt) genes.

# A plain text ASCII version of this file is available at: <http://personalpages.to.infn.it/~cora/circuits/index.html>

```
AFP1|ENSG00000199177|hsa-mir-31|hsa-miR-31|jt:ENSG00000110799
AFP1|ENSG00000199177|hsa-mir-31|hsa-miR-31|jt:ENSG00000153814
AFP1|ENSG00000207617|hsa-mir-24-1|hsa-miR-24|jt:ENSG00000182093
AFP1|ENSG00000207617|hsa-mir-24-1|hsa-miR-24|jt:ENSG00000167994
AFP1|ENSG00000207638|hsa-mir-99a|hsa-miR-99a|jt:ENSG00000112299
AFP1|ENSG00000207698|hsa-mir-32|hsa-miR-32|jt:ENSG00000151789
AFP1|ENSG00000207698|hsa-mir-32|hsa-miR-32|jt:ENSG00000063322
AFP1|ENSG00000207698|hsa-mir-32|hsa-miR-32|jt:ENSG00000182754
AFP1|ENSG00000207698|hsa-mir-32|hsa-miR-32|jt:ENSG00000153789
AFP1|ENSG00000207725|hsa-mir-222|hsa-miR-222|jt:ENSG00000149136
AFP1|ENSG00000207725|hsa-mir-222|hsa-miR-222|jt:ENSG00000119787
AFP1|ENSG00000207725|hsa-mir-222|hsa-miR-222|jt:ENSG00000143321
AFP1|ENSG00000207725|hsa-mir-222|hsa-miR-222|jt:ENSG00000173655
AFP1|ENSG00000207863|hsa-mir-125b-2|hsa-miR-125b|jt:ENSG00000136908
AFP1|ENSG00000207863|hsa-mir-125b-2|hsa-miR-125b|jt:ENSG00000106993
AFP1|ENSG00000207863|hsa-mir-125b-2|hsa-miR-125b|jt:ENSG00000100722
AFP1|ENSG00000207863|hsa-mir-125b-2|hsa-miR-125b|jt:ENSG00000118322
AFP1|ENSG00000207870|hsa-mir-221|hsa-miR-221|jt:ENSG00000149136
AFP1|ENSG00000207870|hsa-mir-221|hsa-miR-221|jt:ENSG00000119787
AFP1|ENSG00000207870|hsa-mir-221|hsa-miR-221|jt:ENSG00000143321
AFP1|ENSG00000207870|hsa-mir-221|hsa-miR-221|jt:ENSG00000173655
AHR|ENSG00000207567|hsa-mir-142|hsa-miR-142-3p|jt:ENSG00000141971
AHR|ENSG00000207567|hsa-mir-142|hsa-miR-142-3p|jt:ENSG00000136636
AHR|ENSG00000207567|hsa-mir-142|hsa-miR-142-3p|jt:ENSG00000181789
AHR|ENSG00000207567|hsa-mir-142|hsa-miR-142-3p|jt:ENSG00000169919
AHR|ENSG00000207567|hsa-mir-142|hsa-miR-142-3p|jt:ENSG00000088812
AHR|ENSG00000207567|hsa-mir-142|hsa-miR-142-3p|jt:ENSG00000165417
AHR|ENSG00000207567|hsa-mir-142|hsa-miR-142-3p|jt:ENSG00000186994
AHR|ENSG00000207567|hsa-mir-142|hsa-miR-142-3p|jt:ENSG00000106540
AHR|ENSG00000207567|hsa-mir-142|hsa-miR-142-3p|jt:ENSG00000105329
AHR|ENSG00000207567|hsa-mir-142|hsa-miR-142-5p|jt:ENSG00000023191
AHR|ENSG00000207567|hsa-mir-142|hsa-miR-142-5p|jt:ENSG00000124357
AHR|ENSG00000207633|hsa-mir-505|hsa-miR-505|jt:ENSG00000119714
AHR|ENSG00000207633|hsa-mir-505|hsa-miR-505|jt:ENSG00000188846
AHR|ENSG00000207955|hsa-mir-219-2|hsa-miR-219|jt:ENSG00000099725
AHR|ENSG00000207955|hsa-mir-219-2|hsa-miR-219|jt:ENSG00000170264
AHR|ENSG00000211590|hsa-mir-802|hsa-miR-802|jt:ENSG00000137100
AHR|ENSG00000211590|hsa-mir-802|hsa-miR-802|jt:ENSG00000081154
AHR|ENSG00000211590|hsa-mir-802|hsa-miR-802|jt:ENSG00000184935
AHR|ENSG00000211590|hsa-mir-802|hsa-miR-802|jt:ENSG00000101193
AHR|ENSG00000211590|hsa-mir-802|hsa-miR-802|jt:ENSG00000112651
AHR|ENSG00000211590|hsa-mir-802|hsa-miR-802|jt:ENSG00000116667
AHR|ENSG00000211590|hsa-mir-802|hsa-miR-802|jt:ENSG00000029363
ALPHA-CP1|ENSG00000199122|hsa-mir-148b|hsa-miR-148b|jt:ENSG00000174851
ALPHA-CP1|ENSG00000199122|hsa-mir-148b|hsa-miR-148b|jt:ENSG00000130052
AML1|ENSG00000194717|hsa-mir-494|hsa-miR-494|jt:ENSG00000102898
AML1|ENSG00000194717|hsa-mir-494|hsa-miR-494|jt:ENSG00000173914
AML1|ENSG00000194717|hsa-mir-494|hsa-miR-494|jt:ENSG00000149575
AML1|ENSG00000194717|hsa-mir-494|hsa-miR-494|jt:ENSG00000151065
AML1|ENSG00000194717|hsa-mir-494|hsa-miR-494|jt:ENSG00000185862
AML1|ENSG00000194717|hsa-mir-494|hsa-miR-494|jt:ENSG00000145868
AML1|ENSG00000194717|hsa-mir-494|hsa-miR-494|jt:ENSG00000118113
AML1|ENSG00000194717|hsa-mir-494|hsa-miR-494|jt:ENSG00000130803
AML1|ENSG00000194717|hsa-mir-494|hsa-miR-494|jt:ENSG00000197484
AML1|ENSG00000194717|hsa-mir-494|hsa-miR-494|jt:ENSG00000178457
AML1|ENSG00000194717|hsa-mir-494|hsa-miR-494|jt:ENSG00000197506
AML1|ENSG00000194717|hsa-mir-494|hsa-miR-494|jt:ENSG00000120696
AML1|ENSG00000194717|hsa-mir-494|hsa-miR-494|jt:ENSG00000126457
AML1|ENSG00000194717|hsa-mir-494|hsa-miR-494|jt:ENSG00000198307
AML1|ENSG00000194717|hsa-mir-494|hsa-miR-494|jt:ENSG00000070190
AML1|ENSG00000194717|hsa-mir-494|hsa-miR-494|jt:ENSG00000134531
AML1|ENSG00000194717|hsa-mir-494|hsa-miR-494|jt:ENSG00000204490
AML1|ENSG00000194717|hsa-mir-494|hsa-miR-494|jt:ENSG00000182139
AML1|ENSG00000194717|hsa-mir-494|hsa-miR-494|jt:ENSG00000170091
AML1|ENSG00000194717|hsa-mir-494|hsa-miR-494|jt:ENSG00000109132
AML1|ENSG00000194717|hsa-mir-494|hsa-miR-494|jt:ENSG00000162598
AML1|ENSG00000194717|hsa-mir-494|hsa-miR-494|jt:ENSG00000166349
AML1|ENSG00000198974|hsa-mir-30e|hsa-miR-30e-3p|jt:ENSG00000158639
AML1|ENSG00000198974|hsa-mir-30e|hsa-miR-30e-3p|jt:ENSG00000116984
AML1|ENSG00000198974|hsa-mir-30e|hsa-miR-30e-3p|jt:ENSG00000085514
AML1|ENSG00000198974|hsa-mir-30e|hsa-miR-30e-3p|jt:ENSG00000197728
AML1|ENSG00000198974|hsa-mir-30e|hsa-miR-30e-3p|jt:ENSG00000153560
AML1|ENSG00000198974|hsa-mir-30e|hsa-miR-30e-3p|jt:ENSG00000196933
AML1|ENSG00000198974|hsa-mir-30e|hsa-miR-30e-5p|jt:ENSG00000120889
AML1|ENSG00000198974|hsa-mir-30e|hsa-miR-30e-5p|jt:ENSG00000121578
AML1|ENSG00000198974|hsa-mir-30e|hsa-miR-30e-5p|jt:ENSG00000127329
AML1|ENSG00000198974|hsa-mir-30e|hsa-miR-30e-5p|jt:ENSG00000083635
AML1|ENSG00000198974|hsa-mir-30e|hsa-miR-30e-5p|jt:ENSG00000198301
AML1|ENSG00000198974|hsa-mir-30e|hsa-miR-30e-5p|jt:ENSG00000065526
AML1|ENSG00000198974|hsa-mir-30e|hsa-miR-30e-5p|jt:ENSG00000079739
AML1|ENSG00000198974|hsa-mir-30e|hsa-miR-30e-5p|jt:ENSG00000138413
AML1|ENSG00000198974|hsa-mir-30e|hsa-miR-30e-5p|jt:ENSG00000165288
AML1|ENSG00000198974|hsa-mir-30e|hsa-miR-30e-5p|jt:ENSG00000162039
AML1|ENSG00000198974|hsa-mir-30e|hsa-miR-30e-5p|jt:ENSG00000134531
AML1|ENSG00000198974|hsa-mir-30e|hsa-miR-30e-5p|jt:ENSG00000145725
AML1|ENSG00000198974|hsa-mir-30e|hsa-miR-30e-5p|jt:ENSG00000137941
AML1|ENSG00000198974|hsa-mir-30e|hsa-miR-30e-5p|jt:ENSG00000180574
AML1|ENSG00000198974|hsa-mir-30e|hsa-miR-30e-5p|jt:ENSG00000148541
AML1|ENSG00000199012|hsa-mir-412|hsa-miR-412|jt:ENSG00000065833
AML1|ENSG00000199012|hsa-mir-412|hsa-miR-412|jt:ENSG00000165474
```

























CDP|ENSG00000198987|hsa-mir-16-2|hsa-miR-16|jt:ENSG00000149201  
CDP|ENSG00000198987|hsa-mir-16-2|hsa-miR-16|jt:ENSG00000149182  
CDP|ENSG00000198987|hsa-mir-16-2|hsa-miR-16|jt:ENSG00000168397  
CDP|ENSG00000198987|hsa-mir-16-2|hsa-miR-16|jt:ENSG00000204388  
CDP|ENSG00000198987|hsa-mir-16-2|hsa-miR-16|jt:ENSG00000198719  
CDP|ENSG00000199036|hsa-mir-219-1|hsa-miR-219|jt:ENSG00000113810  
CDP|ENSG00000199036|hsa-mir-219-1|hsa-miR-219|jt:ENSG00000205072  
CDP|ENSG00000199036|hsa-mir-219-1|hsa-miR-219|jt:ENSG00000187871  
CDP|ENSG00000207623|hsa-mir-205|hsa-miR-205|jt:ENSG00000173163  
CDP|ENSG00000207728|hsa-mir-449b|hsa-miR-449b|jt:ENSG00000092421  
CDP|ENSG00000207728|hsa-mir-449b|hsa-miR-449b|jt:ENSG00000168502  
CDP|ENSG00000207728|hsa-mir-449b|hsa-miR-449b|jt:ENSG00000172689  
CDP|ENSG00000207728|hsa-mir-449b|hsa-miR-449b|jt:ENSG00000198719  
CDP|ENSG00000207728|hsa-mir-449b|hsa-miR-449b|jt:ENSG00000205610  
CDP|ENSG00000207784|hsa-mir-542|hsa-miR-542-3p|jt:ENSG00000144061  
CDP|ENSG00000207819|hsa-mir-9-3|hsa-miR-9|jt:ENSG00000124608  
CDP|ENSG00000207819|hsa-mir-9-3|hsa-miR-9|jt:ENSG00000136867  
CDP|ENSG00000207819|hsa-mir-9-3|hsa-miR-9|jt:ENSG00000110756  
CDP|ENSG00000207819|hsa-mir-9-3|hsa-miR-9|jt:ENSG00000143190  
CDP|ENSG00000207819|hsa-mir-9-3|hsa-miR-9\*|jt:ENSG00000104765  
CDP|ENSG00000207819|hsa-mir-9-3|hsa-miR-9\*|jt:ENSG00000118363  
CDP|ENSG00000207819|hsa-mir-9-3|hsa-miR-9\*|jt:ENSG00000127993  
CDP|ENSG00000207819|hsa-mir-9-3|hsa-miR-9\*|jt:ENSG00000124785  
CDP|ENSG00000207819|hsa-mir-9-3|hsa-miR-9\*|jt:ENSG00000081842  
CDP|ENSG00000207819|hsa-mir-9-3|hsa-miR-9\*|jt:ENSG00000122122  
CDX-2|ENSG00000198975|hsa-let-7a-2|hsa-let-7a|jt:ENSG00000164654  
CDX-2|ENSG00000198975|hsa-let-7a-2|hsa-let-7a|jt:ENSG00000177058  
CDX-2|ENSG00000198975|hsa-let-7a-2|hsa-let-7a|jt:ENSG00000134323  
CDX-2|ENSG00000198986|hsa-let-7a-3|hsa-let-7a|jt:ENSG00000164654  
CDX-2|ENSG00000198986|hsa-let-7a-3|hsa-let-7a|jt:ENSG00000177058  
CDX-2|ENSG00000198986|hsa-let-7a-3|hsa-let-7a|jt:ENSG00000134323  
CDX-2|ENSG00000207548|hsa-mir-217|hsa-miR-217|jt:ENSG00000187105  
CDX-2|ENSG00000207548|hsa-mir-217|hsa-miR-217|jt:ENSG00000204279  
CDX-2|ENSG00000207548|hsa-mir-217|hsa-miR-217|jt:ENSG00000146757  
CDX-2|ENSG00000207548|hsa-mir-217|hsa-miR-217|jt:ENSG00000197989  
CDX-2|ENSG00000207548|hsa-mir-217|hsa-miR-217|jt:ENSG00000164458  
CDX-2|ENSG00000207548|hsa-mir-217|hsa-miR-217|jt:ENSG00000198521  
CDX-2|ENSG00000207581|hsa-mir-199b|hsa-miR-199b|jt:ENSG00000186468  
CDX-2|ENSG00000207581|hsa-mir-199b|hsa-miR-199b|jt:ENSG00000163599  
CDX-2|ENSG00000207581|hsa-mir-199b|hsa-miR-199b|jt:ENSG00000176986  
CDX-2|ENSG00000207581|hsa-mir-199b|hsa-miR-199b|jt:ENSG00000204388  
CDX-2|ENSG00000207875|hsa-let-7b|hsa-let-7b|jt:ENSG00000164654  
CDX-2|ENSG00000207875|hsa-let-7b|hsa-let-7b|jt:ENSG00000177058  
CDX-2|ENSG00000207875|hsa-let-7b|hsa-let-7b|jt:ENSG00000134323  
CDX-2|ENSG00000207971|hsa-mir-125b-1|hsa-miR-125b|jt:ENSG00000170786  
CDX-2|ENSG00000207971|hsa-mir-125b-1|hsa-miR-125b|jt:ENSG00000135443  
CDX-2|ENSG00000207971|hsa-mir-125b-1|hsa-miR-125b|jt:ENSG00000185973  
CDX-2|ENSG00000207971|hsa-mir-125b-1|hsa-miR-125b|jt:ENSG00000142102  
CDX-2|ENSG00000207971|hsa-mir-125b-1|hsa-miR-125b|jt:ENSG00000124721  
CDX-2|ENSG00000207971|hsa-mir-125b-1|hsa-miR-125b|jt:ENSG00000169641  
CDX-2|ENSG00000207971|hsa-mir-125b-1|hsa-miR-125b|jt:ENSG00000100796  
CDX-2|ENSG00000207971|hsa-mir-125b-1|hsa-miR-125b|jt:ENSG00000136895  
CDX-2|ENSG00000207994|hsa-mir-100|hsa-miR-100|jt:ENSG00000116017  
CDX-2|ENSG00000207994|hsa-mir-100|hsa-miR-100|jt:ENSG00000177406  
CHOP-C/EBPALPHA|ENSG00000208009|hsa-mir-130a|hsa-miR-130a|jt:ENSG00000134049  
CHOP-C/EBPALPHA|ENSG00000208009|hsa-mir-130a|hsa-miR-130a|jt:ENSG00000175264  
CHX10|ENSG00000199024|hsa-mir-103-2|hsa-miR-103|jt:ENSG00000127418  
CHX10|ENSG00000199024|hsa-mir-103-2|hsa-miR-103|jt:ENSG00000149182  
CHX10|ENSG00000199024|hsa-mir-103-2|hsa-miR-103|jt:ENSG00000158813  
CHX10|ENSG00000199024|hsa-mir-103-2|hsa-miR-103|jt:ENSG00000144285  
CHX10|ENSG00000199149|hsa-mir-20a|hsa-miR-20a|jt:ENSG00000144285  
CHX10|ENSG00000207610|hsa-mir-19a|hsa-miR-19a|jt:ENSG00000155189  
CHX10|ENSG00000207610|hsa-mir-19a|hsa-miR-19a|jt:ENSG00000117601  
CHX10|ENSG00000207745|hsa-mir-17|hsa-miR-17-5p|jt:ENSG00000203793  
CREB|ENSG00000207617|hsa-mir-24-1|hsa-miR-189|jt:ENSG0000019505  
CREB|ENSG00000207617|hsa-mir-24-1|hsa-miR-189|jt:ENSG00000135974  
CREB|ENSG00000207953|hsa-mir-212|hsa-miR-212|jt:ENSG00000110768  
CRX|ENSG00000207602|hsa-mir-106a|hsa-miR-106a|jt:ENSG00000157184  
CRX|ENSG00000207602|hsa-mir-106a|hsa-miR-106a|jt:ENSG00000163820  
CRX|ENSG00000207602|hsa-mir-106a|hsa-miR-106a|jt:ENSG00000181481  
CRX|ENSG00000207602|hsa-mir-106a|hsa-miR-106a|jt:ENSG00000183530  
CRX|ENSG00000207630|hsa-mir-7-3|hsa-miR-7|jt:ENSG00000166913  
CRX|ENSG00000207630|hsa-mir-7-3|hsa-miR-7|jt:ENSG00000072042  
CRX|ENSG00000207705|hsa-mir-129-1|hsa-miR-129|jt:ENSG00000128254  
CRX|ENSG00000207710|hsa-mir-20b|hsa-miR-20b|jt:ENSG00000177807  
CRX|ENSG00000207710|hsa-mir-20b|hsa-miR-20b|jt:ENSG00000157184  
CRX|ENSG00000207710|hsa-mir-20b|hsa-miR-20b|jt:ENSG00000166828  
CRX|ENSG00000207710|hsa-mir-20b|hsa-miR-20b|jt:ENSG00000163820  
CRX|ENSG00000207777|hsa-mir-10a|hsa-miR-10a|jt:ENSG00000181481  
CdxA|ENSG00000198975|hsa-let-7a-2|hsa-let-7a|jt:ENSG00000183035  
CdxA|ENSG00000198975|hsa-let-7a-2|hsa-let-7a|jt:ENSG00000144031  
CdxA|ENSG00000199024|hsa-mir-103-2|hsa-miR-103|jt:ENSG00000158813  
CdxA|ENSG00000199024|hsa-mir-103-2|hsa-miR-103|jt:ENSG00000163444  
CdxA|ENSG00000199058|hsa-mir-302b|hsa-miR-302b|jt:ENSG00000136811  
CdxA|ENSG00000199058|hsa-mir-302b|hsa-miR-302b|jt:ENSG00000145362  
CdxA|ENSG00000199058|hsa-mir-302b|hsa-miR-302b|jt:ENSG00000149305  
CdxA|ENSG00000199058|hsa-mir-302b|hsa-miR-302b\*|jt:ENSG00000205609  
CdxA|ENSG00000199058|hsa-mir-302b|hsa-miR-302b\*|jt:ENSG00000138379  
CdxA|ENSG00000199058|hsa-mir-302b|hsa-miR-302b\*|jt:ENSG00000181904  
CdxA|ENSG00000199058|hsa-mir-302b|hsa-miR-302b\*|jt:ENSG00000125977  
CdxA|ENSG00000199058|hsa-mir-302b|hsa-miR-302b\*|jt:ENSG0000024862  
CdxA|ENSG00000199072|hsa-let-7f-1|hsa-let-7f|jt:ENSG00000183035  
CdxA|ENSG00000199072|hsa-let-7f-1|hsa-let-7f|jt:ENSG00000144031  
CdxA|ENSG00000199094|hsa-mir-30c-2|hsa-miR-30c|jt:ENSG00000159873  
CdxA|ENSG00000199094|hsa-mir-30c-2|hsa-miR-30c|jt:ENSG00000099954  
CdxA|ENSG00000199094|hsa-mir-30c-2|hsa-miR-30c|jt:ENSG00000185483  
CdxA|ENSG00000199094|hsa-mir-30c-2|hsa-miR-30c|jt:ENSG00000180574  
CdxA|ENSG00000199094|hsa-mir-30c-2|hsa-miR-30c|jt:ENSG00000179455  
CdxA|ENSG00000199094|hsa-mir-30c-2|hsa-miR-30c|jt:ENSG00000169139  
CdxA|ENSG00000199094|hsa-mir-30c-2|hsa-miR-30c|jt:ENSG00000033867  
CdxA|ENSG00000199102|hsa-mir-302c|hsa-miR-302c|jt:ENSG00000136811  
CdxA|ENSG00000199102|hsa-mir-302c|hsa-miR-302c|jt:ENSG00000145362  
CdxA|ENSG00000199102|hsa-mir-302c|hsa-miR-302c|jt:ENSG00000149305  
CdxA|ENSG00000199102|hsa-mir-302c|hsa-miR-302c\*|jt:ENSG00000176244  
CdxA|ENSG00000199102|hsa-mir-302c|hsa-miR-302c\*|jt:ENSG00000179914

CdxA|ENSG00000199102|hsa-mir-302c|hsa-miR-302c\*|jt:ENSG00000140386  
CdxA|ENSG00000199133|hsa-let-7d|hsa-let-7d|jt:ENSG00000184863  
CdxA|ENSG00000199133|hsa-let-7d|hsa-let-7d|jt:ENSG00000067334  
CdxA|ENSG00000199133|hsa-let-7d|hsa-let-7d|jt:ENSG00000183035  
CdxA|ENSG00000199133|hsa-let-7d|hsa-let-7d|jt:ENSG00000144031  
CdxA|ENSG00000199135|hsa-mir-101-1|hsa-miR-101|jt:ENSG00000132963  
CdxA|ENSG00000199135|hsa-mir-101-1|hsa-miR-101|jt:ENSG00000109511  
CdxA|ENSG00000199135|hsa-mir-101-1|hsa-miR-101|jt:ENSG00000198841  
CdxA|ENSG00000199135|hsa-mir-101-1|hsa-miR-101|jt:ENSG00000179421  
CdxA|ENSG00000199145|hsa-mir-302d|hsa-miR-302d|jt:ENSG00000136811  
CdxA|ENSG00000199145|hsa-mir-302d|hsa-miR-302d|jt:ENSG00000145362  
CdxA|ENSG00000199145|hsa-mir-302d|hsa-miR-302d|jt:ENSG00000149305  
CdxA|ENSG00000199165|hsa-let-7a-1|hsa-let-7a|jt:ENSG00000183035  
CdxA|ENSG00000199165|hsa-let-7a-1|hsa-let-7a|jt:ENSG00000144031  
CdxA|ENSG00000199169|hsa-mir-367|hsa-miR-367|jt:ENSG00000204248  
CdxA|ENSG00000199169|hsa-mir-367|hsa-miR-367|jt:ENSG00000144583  
CdxA|ENSG00000199169|hsa-mir-367|hsa-miR-367|jt:ENSG00000164816  
CdxA|ENSG00000199169|hsa-mir-367|hsa-miR-367|jt:ENSG00000138757  
CdxA|ENSG00000199169|hsa-mir-367|hsa-miR-367|jt:ENSG00000198089  
CdxA|ENSG00000199177|hsa-mir-31|hsa-miR-31|jt:ENSG00000168939  
CdxA|ENSG00000207624|hsa-mir-194-1|hsa-miR-194|jt:ENSG00000177853  
CdxA|ENSG00000207624|hsa-mir-194-1|hsa-miR-194|jt:ENSG00000132915  
CdxA|ENSG00000207624|hsa-mir-194-1|hsa-miR-194|jt:ENSG00000146842  
CdxA|ENSG00000207624|hsa-mir-194-1|hsa-miR-194|jt:ENSG00000154545  
CdxA|ENSG00000207624|hsa-mir-194-1|hsa-miR-194|jt:ENSG00000187243  
CdxA|ENSG00000207624|hsa-mir-194-1|hsa-miR-194|jt:ENSG00000081800  
CdxA|ENSG00000207731|hsa-mir-506|hsa-miR-506|jt:ENSG00000103855  
CdxA|ENSG00000207731|hsa-mir-506|hsa-miR-506|jt:ENSG00000101150  
CdxA|ENSG00000207731|hsa-mir-506|hsa-miR-506|jt:ENSG00000186409  
CdxA|ENSG00000207731|hsa-mir-506|hsa-miR-506|jt:ENSG00000116574  
CdxA|ENSG00000207731|hsa-mir-506|hsa-miR-506|jt:ENSG00000107882  
CdxA|ENSG00000207790|hsa-mir-29b-2|hsa-miR-29b|jt:ENSG00000113580  
CdxA|ENSG00000207790|hsa-mir-29b-2|hsa-miR-29b|jt:ENSG00000169918  
CdxA|ENSG00000207827|hsa-mir-30a|hsa-miR-30a-3p|jt:ENSG00000048544  
CdxA|ENSG00000207827|hsa-mir-30a|hsa-miR-30a-3p|jt:ENSG00000204581  
CdxA|ENSG00000207827|hsa-mir-30a|hsa-miR-30a-3p|jt:ENSG00000149305  
CdxA|ENSG00000207827|hsa-mir-30a|hsa-miR-30a-5p|jt:ENSG00000159873  
CdxA|ENSG00000207827|hsa-mir-30a|hsa-miR-30a-5p|jt:ENSG00000099954  
CdxA|ENSG00000207827|hsa-mir-30a|hsa-miR-30a-5p|jt:ENSG00000185483  
CdxA|ENSG00000207827|hsa-mir-30a|hsa-miR-30a-5p|jt:ENSG00000180574  
CdxA|ENSG00000207827|hsa-mir-30a|hsa-miR-30a-5p|jt:ENSG00000179455  
CdxA|ENSG00000207827|hsa-mir-30a|hsa-miR-30a-5p|jt:ENSG00000169139  
CdxA|ENSG00000207827|hsa-mir-30a|hsa-miR-30a-5p|jt:ENSG00000033867  
CdxA|ENSG00000207966|hsa-mir-29c|hsa-miR-29c|jt:ENSG00000113580  
CdxA|ENSG00000207966|hsa-mir-29c|hsa-miR-29c|jt:ENSG00000169918  
CdxA|ENSG00000207971|hsa-mir-125b-1|hsa-miR-125b|jt:ENSG00000156234  
CdxA|ENSG00000207971|hsa-mir-125b-1|hsa-miR-125b|jt:ENSG00000205205  
CdxA|ENSG00000207971|hsa-mir-125b-1|hsa-miR-125b|jt:ENSG00000186314  
CdxA|ENSG00000207971|hsa-mir-125b-1|hsa-miR-125b|jt:ENSG00000110274  
CdxA|ENSG00000207971|hsa-mir-125b-1|hsa-miR-125b|jt:ENSG00000111537  
CdxA|ENSG00000207971|hsa-mir-125b-1|hsa-miR-125b|jt:ENSG00000170786  
CdxA|ENSG00000207971|hsa-mir-125b-1|hsa-miR-125b|jt:ENSG00000095303  
CdxA|ENSG00000207994|hsa-mir-100|hsa-miR-100|jt:ENSG00000105972  
CdxA|ENSG00000207994|hsa-mir-100|hsa-miR-100|jt:ENSG00000177406  
CdxA|ENSG00000207994|hsa-mir-100|hsa-miR-100|jt:ENSG00000112299  
CdxA|ENSG00000207994|hsa-mir-100|hsa-miR-100|jt:ENSG00000152689  
CdxA|ENSG00000207994|hsa-mir-100|hsa-miR-100|jt:ENSG00000198793  
CdxA|ENSG00000207994|hsa-mir-100|hsa-miR-100|jt:ENSG00000203837  
DBP|ENSG00000198973|hsa-mir-375|hsa-miR-375|jt:ENSG00000170509  
DBP|ENSG00000198973|hsa-mir-375|hsa-miR-375|jt:ENSG00000204832  
DBP|ENSG00000198973|hsa-mir-375|hsa-miR-375|jt:ENSG00000165359  
DBP|ENSG00000198973|hsa-mir-375|hsa-miR-375|jt:ENSG00000198692  
DBP|ENSG00000198973|hsa-mir-375|hsa-miR-375|jt:ENSG00000108551  
DBP|ENSG00000198973|hsa-mir-375|hsa-miR-375|jt:ENSG00000083622  
DBP|ENSG00000198981|hsa-mir-29a|hsa-miR-29a|jt:ENSG00000198198  
DBP|ENSG00000198981|hsa-mir-29a|hsa-miR-29a|jt:ENSG00000134369  
DBP|ENSG00000198981|hsa-mir-29a|hsa-miR-29a|jt:ENSG00000185650  
DBP|ENSG00000207947|hsa-mir-152|hsa-miR-152|jt:ENSG00000198933  
DBP|ENSG00000207947|hsa-mir-152|hsa-miR-152|jt:ENSG00000180176  
DBP|ENSG00000207947|hsa-mir-152|hsa-miR-152|jt:ENSG00000179476  
DBP|ENSG00000207947|hsa-mir-152|hsa-miR-152|jt:ENSG00000151725  
DBP|ENSG00000207947|hsa-mir-152|hsa-miR-152|jt:ENSG00000184371  
E4BP4|ENSG00000199004|hsa-mir-21|hsa-miR-21|jt:ENSG00000095002  
E4BP4|ENSG00000199004|hsa-mir-21|hsa-miR-21|jt:ENSG00000155287  
E4BP4|ENSG00000199004|hsa-mir-21|hsa-miR-21|jt:ENSG00000125520  
E4BP4|ENSG00000199004|hsa-mir-21|hsa-miR-21|jt:ENSG00000175582  
E4F1|ENSG00000198974|hsa-mir-30e|hsa-miR-30e-3p|jt:ENSG00000164975  
E4F1|ENSG00000198974|hsa-mir-30e|hsa-miR-30e-5p|jt:ENSG00000186594  
E4F1|ENSG00000198974|hsa-mir-30e|hsa-miR-30e-5p|jt:ENSG00000083635  
E4F1|ENSG00000207962|hsa-mir-30c-1|hsa-miR-30c|jt:ENSG00000186594  
E4F1|ENSG00000207962|hsa-mir-30c-1|hsa-miR-30c|jt:ENSG00000083635  
ELF-1|ENSG00000198974|hsa-mir-30e|hsa-miR-30e-3p|jt:ENSG00000139178  
ELF-1|ENSG00000198974|hsa-mir-30e|hsa-miR-30e-3p|jt:ENSG00000149305  
ELF-1|ENSG00000198974|hsa-mir-30e|hsa-miR-30e-3p|jt:ENSG00000110768  
ELF-1|ENSG00000198974|hsa-mir-30e|hsa-miR-30e-3p|jt:ENSG00000166292  
ELF-1|ENSG00000198974|hsa-mir-30e|hsa-miR-30e-5p|jt:ENSG00000105136  
ELF-1|ENSG00000198974|hsa-mir-30e|hsa-miR-30e-5p|jt:ENSG00000131558  
ELF-1|ENSG00000198974|hsa-mir-30e|hsa-miR-30e-5p|jt:ENSG00000111331  
ELF-1|ENSG00000198974|hsa-mir-30e|hsa-miR-30e-5p|jt:ENSG00000126249  
ELF-1|ENSG00000198974|hsa-mir-30e|hsa-miR-30e-5p|jt:ENSG00000105550  
ELF-1|ENSG00000198974|hsa-mir-30e|hsa-miR-30e-5p|jt:ENSG00000083635  
ELF-1|ENSG00000198974|hsa-mir-30e|hsa-miR-30e-5p|jt:ENSG00000101134  
ELF-1|ENSG00000198974|hsa-mir-30e|hsa-miR-30e-5p|jt:ENSG00000198826  
ELF-1|ENSG00000198974|hsa-mir-30e|hsa-miR-30e-5p|jt:ENSG00000127329  
ELF-1|ENSG00000198974|hsa-mir-30e|hsa-miR-30e-5p|jt:ENSG00000156735  
ELF-1|ENSG00000198974|hsa-mir-30e|hsa-miR-30e-5p|jt:ENSG00000134460  
ELF-1|ENSG00000198974|hsa-mir-30e|hsa-miR-30e-5p|jt:ENSG00000057657  
ELF-1|ENSG00000198974|hsa-mir-30e|hsa-miR-30e-5p|jt:ENSG00000173320  
ELF-1|ENSG00000198974|hsa-mir-30e|hsa-miR-30e-5p|jt:ENSG00000105501  
ELF-1|ENSG00000198974|hsa-mir-30e|hsa-miR-30e-5p|jt:ENSG00000173530  
ELF-1|ENSG00000198974|hsa-mir-30e|hsa-miR-30e-5p|jt:ENSG00000019186  
ELF-1|ENSG00000198974|hsa-mir-30e|hsa-miR-30e-5p|jt:ENSG00000136982  
ELF-1|ENSG00000199024|hsa-mir-103-2|hsa-miR-103|jt:ENSG00000122140  
ELF-1|ENSG00000199024|hsa-mir-103-2|hsa-miR-103|jt:ENSG00000151461  
ELF-1|ENSG00000199024|hsa-mir-103-2|hsa-miR-103|jt:ENSG00000100150













ER|ENSG00000208009|hsa-mir-130a|hsa-miR-130a|jt:ENSG00000138641  
ER|ENSG00000208009|hsa-mir-130a|hsa-miR-130a|jt:ENSG00000070985  
ER|ENSG00000208009|hsa-mir-130a|hsa-miR-130a|jt:ENSG00000120509  
ER|ENSG00000208009|hsa-mir-130a|hsa-miR-130a|jt:ENSG00000156642  
ER|ENSG00000208009|hsa-mir-130a|hsa-miR-130a|jt:ENSG00000147642  
ER|ENSG00000208009|hsa-mir-130a|hsa-miR-130a|jt:ENSG00000205524  
ER|ENSG00000208009|hsa-mir-130a|hsa-miR-130a|jt:ENSG00000206528  
ER|ENSG00000208009|hsa-mir-130a|hsa-miR-130a|jt:ENSG00000077312  
ER|ENSG00000208009|hsa-mir-130a|hsa-miR-130a|jt:ENSG00000203925  
ER|ENSG00000208009|hsa-mir-130a|hsa-miR-130a|jt:ENSG00000122034  
ER|ENSG00000208009|hsa-mir-130a|hsa-miR-130a|jt:ENSG00000165195  
ER|ENSG00000208009|hsa-mir-130a|hsa-miR-130a|jt:ENSG00000148700  
ER|ENSG00000208009|hsa-mir-130a|hsa-miR-130a|jt:ENSG00000189069  
ER|ENSG00000208009|hsa-mir-130a|hsa-miR-130a|jt:ENSG00000113048  
ER|ENSG00000208009|hsa-mir-130a|hsa-miR-130a|jt:ENSG00000110367  
ER|ENSG00000208009|hsa-mir-130a|hsa-miR-130a|jt:ENSG00000129467  
ER|ENSG00000208009|hsa-mir-130a|hsa-miR-130a|jt:ENSG00000152291  
ETF|ENSG00000199122|hsa-mir-148b|hsa-miR-148b|jt:ENSG00000047621  
ETF|ENSG00000199122|hsa-mir-148b|hsa-miR-148b|jt:ENSG00000077254  
ETF|ENSG00000199122|hsa-mir-148b|hsa-miR-148b|jt:ENSG00000182512  
ETF|ENSG00000199122|hsa-mir-148b|hsa-miR-148b|jt:ENSG00000156642  
ETF|ENSG00000199122|hsa-mir-148b|hsa-miR-148b|jt:ENSG00000118707  
ETF|ENSG00000199122|hsa-mir-148b|hsa-miR-148b|jt:ENSG00000122034  
ETF|ENSG00000199122|hsa-mir-148b|hsa-miR-148b|jt:ENSG00000145860  
ETF|ENSG00000199122|hsa-mir-148b|hsa-miR-148b|jt:ENSG00000165097  
ETF|ENSG00000207568|hsa-mir-203|hsa-miR-203|jt:ENSG00000131381  
ETF|ENSG00000207777|hsa-mir-10a|hsa-miR-10a|jt:ENSG00000147536  
ETF|ENSG00000207777|hsa-mir-10a|hsa-miR-10a|jt:ENSG00000162409  
ETS|ENSG00000199024|hsa-mir-103-2|hsa-miR-103|jt:ENSG00000151461  
ETS|ENSG00000199024|hsa-mir-103-2|hsa-miR-103|jt:ENSG00000172725  
ETS|ENSG00000207581|hsa-mir-199b|hsa-miR-199b|jt:ENSG00000148481  
ETS|ENSG00000207581|hsa-mir-199b|hsa-miR-199b|jt:ENSG00000088367  
ETS|ENSG00000207581|hsa-mir-199b|hsa-miR-199b|jt:ENSG00000136536  
ETS|ENSG00000207808|hsa-mir-27a|hsa-miR-27a|jt:ENSG00000178965  
ETS|ENSG00000207808|hsa-mir-27a|hsa-miR-27a|jt:ENSG00000180884  
ETS|ENSG00000207808|hsa-mir-27a|hsa-miR-27a|jt:ENSG00000166326  
ETS|ENSG00000207808|hsa-mir-27a|hsa-miR-27a|jt:ENSG00000114316  
ETS|ENSG00000207939|hsa-mir-223|hsa-miR-223|jt:ENSG00000151148  
ETS|ENSG00000207939|hsa-mir-223|hsa-miR-223|jt:ENSG00000168385  
ETS|ENSG00000207939|hsa-mir-223|hsa-miR-223|jt:ENSG00000112290  
ETS|ENSG00000207939|hsa-mir-223|hsa-miR-223|jt:ENSG00000129465  
ETS|ENSG00000207939|hsa-mir-223|hsa-miR-223|jt:ENSG00000170638  
ETS|ENSG00000207939|hsa-mir-223|hsa-miR-223|jt:ENSG00000143575  
ETS|ENSG00000207939|hsa-mir-223|hsa-miR-223|jt:ENSG00000205502  
ETS|ENSG00000207939|hsa-mir-223|hsa-miR-223|jt:ENSG00000114346  
ETS|ENSG00000207939|hsa-mir-223|hsa-miR-223|jt:ENSG00000005100  
ETS|ENSG00000207939|hsa-mir-223|hsa-miR-223|jt:ENSG00000173812  
ETS|ENSG00000207939|hsa-mir-223|hsa-miR-223|jt:ENSG00000123268  
ETS|ENSG00000207939|hsa-mir-223|hsa-miR-223|jt:ENSG00000147588  
ETS|ENSG00000207949|hsa-mir-214|hsa-miR-214|jt:ENSG00000186081  
ETS|ENSG00000207949|hsa-mir-214|hsa-miR-214|jt:ENSG00000058668  
ETS|ENSG00000207980|hsa-mir-23a|hsa-miR-23a|jt:ENSG00000188938  
ETS|ENSG00000207980|hsa-mir-23a|hsa-miR-23a|jt:ENSG00000113615  
ETS|ENSG00000207980|hsa-mir-23a|hsa-miR-23a|jt:ENSG00000204026  
ETS|ENSG00000207980|hsa-mir-23a|hsa-miR-23a|jt:ENSG00000156162  
ETS|ENSG00000207980|hsa-mir-23a|hsa-miR-23a|jt:ENSG00000198380  
ETS|ENSG00000207980|hsa-mir-23a|hsa-miR-23a|jt:ENSG00000067066  
ETS|ENSG00000207980|hsa-mir-23a|hsa-miR-23a|jt:ENSG00000198570  
ETS|ENSG00000208024|hsa-mir-199a-2|hsa-miR-199a|jt:ENSG00000148481  
ETS|ENSG00000208024|hsa-mir-199a-2|hsa-miR-199a|jt:ENSG00000088367  
ETS|ENSG00000208024|hsa-mir-199a-2|hsa-miR-199a|jt:ENSG00000136536  
ETS|ENSG00000208024|hsa-mir-199a-2|hsa-miR-199a\*|jt:ENSG00000204220  
ETS|ENSG00000208024|hsa-mir-199a-2|hsa-miR-199a\*|jt:ENSG00000073331  
ETS|ENSG00000208024|hsa-mir-199a-2|hsa-miR-199a\*|jt:ENSG00000117360  
ETS|ENSG00000208024|hsa-mir-199a-2|hsa-miR-199a\*|jt:ENSG00000180205  
ETS|ENSG00000208024|hsa-mir-199a-2|hsa-miR-199a\*|jt:ENSG00000198718  
ETS|ENSG00000208024|hsa-mir-199a-2|hsa-miR-199a\*|jt:ENSG00000184345  
ETS|ENSG00000209707|hsa-mir-24-2|hsa-miR-24|jt:ENSG00000103067  
ETS|ENSG00000209707|hsa-mir-24-2|hsa-miR-24|jt:ENSG00000143442  
ETS|ENSG00000209707|hsa-mir-24-2|hsa-miR-24|jt:ENSG00000106384  
ETS|ENSG00000209707|hsa-mir-24-2|hsa-miR-24|jt:ENSG00000162458  
ETS|ENSG00000209707|hsa-mir-24-2|hsa-miR-24|jt:ENSG00000132141  
ETS|ENSG00000209707|hsa-mir-24-2|hsa-miR-24|jt:ENSG00000100147  
ETS|ENSG00000209707|hsa-mir-24-2|hsa-miR-24|jt:ENSG00000172460  
ETS|ENSG00000209707|hsa-mir-24-2|hsa-miR-24|jt:ENSG00000101040  
ETS|ENSG00000209707|hsa-mir-24-2|hsa-miR-24|jt:ENSG00000103184  
ETS|ENSG00000211590|hsa-mir-802|hsa-miR-802|jt:ENSG00000150779  
ETS|ENSG00000211590|hsa-mir-802|hsa-miR-802|jt:ENSG00000136167  
ETS|ENSG00000211590|hsa-mir-802|hsa-miR-802|jt:ENSG00000177917  
ETS|ENSG00000211590|hsa-mir-802|hsa-miR-802|jt:ENSG00000022556  
ETS|ENSG00000211590|hsa-mir-802|hsa-miR-802|jt:ENSG00000137100  
ETS|ENSG00000211590|hsa-mir-802|hsa-miR-802|jt:ENSG00000153989  
ETS|ENSG00000211590|hsa-mir-802|hsa-miR-802|jt:ENSG00000110172  
FAC1|ENSG00000199017|hsa-mir-1-1|hsa-miR-1|jt:ENSG00000107854  
FAC1|ENSG00000199017|hsa-mir-1-1|hsa-miR-1|jt:ENSG00000111962  
FAC1|ENSG00000199130|hsa-mir-365-1|hsa-miR-365|jt:ENSG00000206560  
FAC1|ENSG00000199130|hsa-mir-365-1|hsa-miR-365|jt:ENSG00000184574  
FAC1|ENSG00000199130|hsa-mir-365-1|hsa-miR-365|jt:ENSG00000198546  
FAC1|ENSG00000199177|hsa-mir-31|hsa-miR-31|jt:ENSG00000107854  
FAC1|ENSG00000199177|hsa-mir-31|hsa-miR-31|jt:ENSG00000110799  
FAC1|ENSG00000199177|hsa-mir-31|hsa-miR-31|jt:ENSG00000188199  
FAC1|ENSG00000199177|hsa-mir-31|hsa-miR-31|jt:ENSG00000204043  
FAC1|ENSG00000207562|hsa-mir-34c|hsa-miR-34c|jt:ENSG00000009694  
FAC1|ENSG00000207562|hsa-mir-34c|hsa-miR-34c|jt:ENSG00000186190  
FAC1|ENSG00000207732|hsa-mir-218-1|hsa-miR-218|jt:ENSG00000203930  
FAC1|ENSG00000207732|hsa-mir-218-1|hsa-miR-218|jt:ENSG00000138346  
FAC1|ENSG00000207732|hsa-mir-218-1|hsa-miR-218|jt:ENSG00000112214  
FAC1|ENSG00000207732|hsa-mir-218-1|hsa-miR-218|jt:ENSG00000189321  
FAC1|ENSG00000207732|hsa-mir-218-1|hsa-miR-218|jt:ENSG00000204241  
FAC1|ENSG00000207732|hsa-mir-218-1|hsa-miR-218|jt:ENSG00000169891  
FAC1|ENSG00000207764|hsa-mir-133a-2|hsa-miR-133a|jt:ENSG00000144580  
FAC1|ENSG00000207764|hsa-mir-133a-2|hsa-miR-133a|jt:ENSG00000163295  
FAC1|ENSG00000207811|hsa-mir-34b|hsa-miR-34b|jt:ENSG00000009694  
FAC1|ENSG00000207811|hsa-mir-34b|hsa-miR-34b|jt:ENSG00000186190  
FAC1|ENSG00000207954|hsa-mir-138-1|hsa-miR-138|jt:ENSG00000136488

FOX|ENSG00000207585|hsa-mir-181d|hsa-miR-181d|jt:ENSG00000158483  
FOX|ENSG00000207585|hsa-mir-181d|hsa-miR-181d|jt:ENSG00000134152  
FOX|ENSG00000207585|hsa-mir-181d|hsa-miR-181d|jt:ENSG00000146469  
FOX|ENSG00000207789|hsa-mir-26a-2|hsa-miR-26a|jt:ENSG00000186205  
FOX|ENSG00000207789|hsa-mir-26a-2|hsa-miR-26a|jt:ENSG00000138231  
FOX|ENSG00000207789|hsa-mir-26a-2|hsa-miR-26a|jt:ENSG00000196501  
FOX|ENSG00000207789|hsa-mir-26a-2|hsa-miR-26a|jt:ENSG00000168772  
FOX|ENSG00000207789|hsa-mir-26a-2|hsa-miR-26a|jt:ENSG00000204334  
FOX01|ENSG00000194717|hsa-mir-494|hsa-miR-494|jt:ENSG00000173612  
FOX01|ENSG00000194717|hsa-mir-494|hsa-miR-494|jt:ENSG00000116218  
FOX01|ENSG00000194717|hsa-mir-494|hsa-miR-494|jt:ENSG00000100625  
FOX01|ENSG00000194717|hsa-mir-494|hsa-miR-494|jt:ENSG00000135697  
FOX01|ENSG00000194717|hsa-mir-494|hsa-miR-494|jt:ENSG00000165323  
FOX01|ENSG00000194717|hsa-mir-494|hsa-miR-494|jt:ENSG00000070190  
FOX01|ENSG00000194717|hsa-mir-494|hsa-miR-494|jt:ENSG00000182139  
FOX01|ENSG00000198975|hsa-let-7a-2|hsa-let-7a|jt:ENSG00000204125  
FOX01|ENSG00000198975|hsa-let-7a-2|hsa-let-7a|jt:ENSG00000179476  
FOX01|ENSG00000198975|hsa-let-7a-2|hsa-let-7a|jt:ENSG00000165449  
FOX01|ENSG00000199012|hsa-mir-412|hsa-miR-412|jt:ENSG00000151690  
FOX01|ENSG00000199012|hsa-mir-412|hsa-miR-412|jt:ENSG00000165699  
FOX01|ENSG00000199012|hsa-mir-412|hsa-miR-412|jt:ENSG00000125804  
FOX01|ENSG00000199012|hsa-mir-412|hsa-miR-412|jt:ENSG00000137845  
FOX01|ENSG00000199012|hsa-mir-412|hsa-miR-412|jt:ENSG00000154783  
FOX01|ENSG00000199015|hsa-mir-377|hsa-miR-377|jt:ENSG00000205874  
FOX01|ENSG00000199015|hsa-mir-377|hsa-miR-377|jt:ENSG00000164930  
FOX01|ENSG00000199015|hsa-mir-377|hsa-miR-377|jt:ENSG00000181192  
FOX01|ENSG00000199015|hsa-mir-377|hsa-miR-377|jt:ENSG00000082805  
FOX01|ENSG00000199015|hsa-mir-377|hsa-miR-377|jt:ENSG00000090054  
FOX01|ENSG00000199020|hsa-mir-381|hsa-miR-381|jt:ENSG00000133639  
FOX01|ENSG00000199020|hsa-mir-381|hsa-miR-381|jt:ENSG00000116830  
FOX01|ENSG00000199020|hsa-mir-381|hsa-miR-381|jt:ENSG00000119414  
FOX01|ENSG00000199020|hsa-mir-381|hsa-miR-381|jt:ENSG00000198909  
FOX01|ENSG00000199020|hsa-mir-381|hsa-miR-381|jt:ENSG00000115464  
FOX01|ENSG00000199020|hsa-mir-381|hsa-miR-381|jt:ENSG00000158022  
FOX01|ENSG00000199020|hsa-mir-381|hsa-miR-381|jt:ENSG00000188933  
FOX01|ENSG00000199020|hsa-mir-381|hsa-miR-381|jt:ENSG00000117620  
FOX01|ENSG00000199025|hsa-mir-369|hsa-miR-369-3p|jt:ENSG00000090104  
FOX01|ENSG00000199025|hsa-mir-369|hsa-miR-369-3p|jt:ENSG00000128918  
FOX01|ENSG00000199025|hsa-mir-369|hsa-miR-369-3p|jt:ENSG00000164930  
FOX01|ENSG00000199025|hsa-mir-369|hsa-miR-369-3p|jt:ENSG00000163900  
FOX01|ENSG00000199025|hsa-mir-369|hsa-miR-369-3p|jt:ENSG00000042062  
FOX01|ENSG00000199025|hsa-mir-369|hsa-miR-369-3p|jt:ENSG00000115084  
FOX01|ENSG00000199025|hsa-mir-369|hsa-miR-369-3p|jt:ENSG00000180875  
FOX01|ENSG00000199025|hsa-mir-369|hsa-miR-369-3p|jt:ENSG00000101323  
FOX01|ENSG00000199025|hsa-mir-369|hsa-miR-369-5p|jt:ENSG00000038295  
FOX01|ENSG00000199025|hsa-mir-369|hsa-miR-369-5p|jt:ENSG00000157450  
FOX01|ENSG00000199025|hsa-mir-369|hsa-miR-369-5p|jt:ENSG00000167302  
FOX01|ENSG00000199025|hsa-mir-369|hsa-miR-369-5p|jt:ENSG00000138041  
FOX01|ENSG00000199025|hsa-mir-369|hsa-miR-369-5p|jt:ENSG00000173714  
FOX01|ENSG00000199025|hsa-mir-369|hsa-miR-369-5p|jt:ENSG00000122417  
FOX01|ENSG00000199025|hsa-mir-369|hsa-miR-369-5p|jt:ENSG00000187969  
FOX01|ENSG00000199069|hsa-mir-323|hsa-miR-323|jt:ENSG00000134200  
FOX01|ENSG00000199069|hsa-mir-323|hsa-miR-323|jt:ENSG00000126016  
FOX01|ENSG00000199069|hsa-mir-323|hsa-miR-323|jt:ENSG00000157800  
FOX01|ENSG00000199069|hsa-mir-323|hsa-miR-323|jt:ENSG00000179407  
FOX01|ENSG00000199069|hsa-mir-323|hsa-miR-323|jt:ENSG00000142676  
FOX01|ENSG00000199092|hsa-mir-410|hsa-miR-410|jt:ENSG00000104205  
FOX01|ENSG00000199092|hsa-mir-410|hsa-miR-410|jt:ENSG00000155287  
FOX01|ENSG00000199092|hsa-mir-410|hsa-miR-410|jt:ENSG00000206528  
FOX01|ENSG00000199092|hsa-mir-410|hsa-miR-410|jt:ENSG00000196963  
FOX01|ENSG00000199092|hsa-mir-410|hsa-miR-410|jt:ENSG00000174953  
FOX01|ENSG00000199092|hsa-mir-410|hsa-miR-410|jt:ENSG00000204217  
FOX01|ENSG00000199107|hsa-mir-409|hsa-miR-409-5p|jt:ENSG00000143198  
FOX01|ENSG00000199107|hsa-mir-409|hsa-miR-409-5p|jt:ENSG00000184895  
FOX01|ENSG00000207585|hsa-mir-181d|hsa-miR-181d|jt:ENSG00000109471  
FOX01|ENSG00000207585|hsa-mir-181d|hsa-miR-181d|jt:ENSG00000173212  
FOX01|ENSG00000207585|hsa-mir-181d|hsa-miR-181d|jt:ENSG00000158483  
FOX01|ENSG00000207585|hsa-mir-181d|hsa-miR-181d|jt:ENSG00000101265  
FOX01|ENSG00000207585|hsa-mir-181d|hsa-miR-181d|jt:ENSG00000169891  
FOX01|ENSG00000207585|hsa-mir-181d|hsa-miR-181d|jt:ENSG00000198131  
FOX01|ENSG00000207743|hsa-mir-495|hsa-miR-495|jt:ENSG00000168209  
FOX01|ENSG00000207743|hsa-mir-495|hsa-miR-495|jt:ENSG00000032514  
FOX01|ENSG00000207743|hsa-mir-495|hsa-miR-495|jt:ENSG00000087301  
FOX01|ENSG00000207743|hsa-mir-495|hsa-miR-495|jt:ENSG00000070190  
FOX01|ENSG00000207749|hsa-mir-299|hsa-miR-299-5p|jt:ENSG00000184157  
FOX01|ENSG00000207749|hsa-mir-299|hsa-miR-299-5p|jt:ENSG00000165443  
FOX01|ENSG00000207749|hsa-mir-299|hsa-miR-299-5p|jt:ENSG00000182931  
FOX01|ENSG00000207749|hsa-mir-299|hsa-miR-299-5p|jt:ENSG00000205442  
FOX01|ENSG00000207749|hsa-mir-299|hsa-miR-299-5p|jt:ENSG00000158639  
FOX01|ENSG00000207754|hsa-mir-487b|hsa-miR-487b|jt:ENSG00000143742  
FOX01|ENSG00000207754|hsa-mir-487b|hsa-miR-487b|jt:ENSG00000108255  
FOX01|ENSG00000207754|hsa-mir-487b|hsa-miR-487b|jt:ENSG00000165804  
FOX01|ENSG00000207761|hsa-mir-329-1|hsa-miR-329|jt:ENSG00000083896  
FOX01|ENSG00000207761|hsa-mir-329-1|hsa-miR-329|jt:ENSG00000169744  
FOX01|ENSG00000207789|hsa-mir-26a-2|hsa-miR-26a|jt:ENSG00000186205  
FOX01|ENSG00000207789|hsa-mir-26a-2|hsa-miR-26a|jt:ENSG00000104343  
FOX01|ENSG00000207789|hsa-mir-26a-2|hsa-miR-26a|jt:ENSG00000184330  
FOX01|ENSG00000207789|hsa-mir-26a-2|hsa-miR-26a|jt:ENSG00000121270  
FOX01|ENSG00000207789|hsa-mir-26a-2|hsa-miR-26a|jt:ENSG00000164879  
FOX01|ENSG00000207789|hsa-mir-26a-2|hsa-miR-26a|jt:ENSG00000204405  
FOX01|ENSG00000207961|hsa-mir-496|hsa-miR-496|jt:ENSG00000162616  
FOX01|ENSG00000207961|hsa-mir-496|hsa-miR-496|jt:ENSG00000140153  
FOX01|ENSG00000207961|hsa-mir-496|hsa-miR-496|jt:ENSG00000101265  
FOX01|ENSG00000207961|hsa-mir-496|hsa-miR-496|jt:ENSG00000134419  
FOX01|ENSG00000207961|hsa-mir-496|hsa-miR-496|jt:ENSG00000115464  
FOX01|ENSG00000207961|hsa-mir-496|hsa-miR-496|jt:ENSG00000181192  
FOX01|ENSG00000207961|hsa-mir-496|hsa-miR-496|jt:ENSG00000206528  
FOX01|ENSG00000207961|hsa-mir-496|hsa-miR-496|jt:ENSG00000198521  
FOX01|ENSG00000207971|hsa-mir-125b-1|hsa-miR-125b|jt:ENSG00000111981  
FOX01|ENSG00000207971|hsa-mir-125b-1|hsa-miR-125b|jt:ENSG00000167302  
FOX01|ENSG00000207971|hsa-mir-125b-1|hsa-miR-125b|jt:ENSG00000174808  
FOX01|ENSG00000207971|hsa-mir-125b-1|hsa-miR-125b|jt:ENSG00000172531  
FOX01|ENSG00000207971|hsa-mir-125b-1|hsa-miR-125b|jt:ENSG00000135443  
FOX01|ENSG00000207971|hsa-mir-125b-1|hsa-miR-125b|jt:ENSG00000163219  
FOX01|ENSG00000207971|hsa-mir-125b-1|hsa-miR-125b|jt:ENSG00000161021

FOXO1|ENSG00000207971|hsa-mir-125b-1|hsa-miR-125b|jt:ENSG00000166928  
FOXO1|ENSG00000207994|hsa-mir-100|hsa-miR-100|jt:ENSG00000071575  
FOXO1|ENSG00000207994|hsa-mir-100|hsa-miR-100|jt:ENSG00000136144  
FOXO1|ENSG00000207994|hsa-mir-100|hsa-miR-100|jt:ENSG00000138041  
FOXO1|ENSG00000207994|hsa-mir-100|hsa-miR-100|jt:ENSG00000136381  
FREAC-4|ENSG00000199153|hsa-mir-30d|hsa-miR-30d|jt:ENSG00000069869  
FREAC-4|ENSG00000199153|hsa-mir-30d|hsa-miR-30d|jt:ENSG00000173320  
FREAC-4|ENSG00000199153|hsa-mir-30d|hsa-miR-30d|jt:ENSG00000124784  
FREAC-4|ENSG00000199153|hsa-mir-30d|hsa-miR-30d|jt:ENSG00000134531  
FREAC-4|ENSG00000199153|hsa-mir-30d|hsa-miR-30d|jt:ENSG00000152433  
FREAC-4|ENSG00000199153|hsa-mir-30d|hsa-miR-30d|jt:ENSG00000198511  
FREAC-4|ENSG00000207582|hsa-mir-30b|hsa-miR-30b|jt:ENSG00000069869  
FREAC-4|ENSG00000207582|hsa-mir-30b|hsa-miR-30b|jt:ENSG00000173320  
FREAC-4|ENSG00000207582|hsa-mir-30b|hsa-miR-30b|jt:ENSG00000124784  
FREAC-4|ENSG00000207582|hsa-mir-30b|hsa-miR-30b|jt:ENSG00000134531  
FREAC-4|ENSG00000207582|hsa-mir-30b|hsa-miR-30b|jt:ENSG00000152433  
FREAC-4|ENSG00000207582|hsa-mir-30b|hsa-miR-30b|jt:ENSG00000198511  
FREAC-4|ENSG00000207718|hsa-mir-15a|hsa-miR-15a|jt:ENSG00000127241  
FREAC-4|ENSG00000207718|hsa-mir-15a|hsa-miR-15a|jt:ENSG00000105173  
FREAC-4|ENSG00000207725|hsa-mir-222|hsa-miR-222|jt:ENSG00000204220  
FREAC-4|ENSG00000207725|hsa-mir-222|hsa-miR-222|jt:ENSG00000175556  
FREAC-4|ENSG00000207752|hsa-mir-199a-1|hsa-miR-199a|jt:ENSG00000206198  
FREAC-4|ENSG00000207752|hsa-mir-199a-1|hsa-miR-199a|jt:ENSG00000163263  
FREAC-4|ENSG00000207752|hsa-mir-199a-1|hsa-miR-199a|jt:ENSG00000130021  
FREAC-4|ENSG00000207752|hsa-mir-199a-1|hsa-miR-199a\*|jt:ENSG00000204220  
FREAC-4|ENSG00000207752|hsa-mir-199a-1|hsa-miR-199a\*|jt:ENSG00000151690  
FREAC-4|ENSG00000207752|hsa-mir-199a-1|hsa-miR-199a\*|jt:ENSG00000111860  
FREAC-4|ENSG00000207752|hsa-mir-199a-1|hsa-miR-199a\*|jt:ENSG00000179421  
FREAC-4|ENSG00000207777|hsa-mir-10a|hsa-miR-10a|jt:ENSG00000110484  
FREAC-4|ENSG00000207809|hsa-mir-139|hsa-miR-139|jt:ENSG00000165507  
FREAC-4|ENSG00000207809|hsa-mir-139|hsa-miR-139|jt:ENSG00000175556  
FREAC-4|ENSG00000207870|hsa-mir-221|hsa-miR-221|jt:ENSG00000204220  
FREAC-4|ENSG00000207870|hsa-mir-221|hsa-miR-221|jt:ENSG00000175556  
FREAC-4|ENSG00000208006|hsa-mir-16-1|hsa-miR-16|jt:ENSG00000127241  
FREAC-4|ENSG00000208006|hsa-mir-16-1|hsa-miR-16|jt:ENSG00000105173  
GABP|ENSG00000198987|hsa-mir-16-2|hsa-miR-16|jt:ENSG00000104859  
GABP|ENSG00000198987|hsa-mir-16-2|hsa-miR-16|jt:ENSG00000130584  
GABP|ENSG00000198987|hsa-mir-16-2|hsa-miR-16|jt:ENSG00000205808  
GABP|ENSG00000198987|hsa-mir-16-2|hsa-miR-16|jt:ENSG00000131381  
GABP|ENSG00000198987|hsa-mir-16-2|hsa-miR-16|jt:ENSG00000196204  
GABP|ENSG00000198987|hsa-mir-16-2|hsa-miR-16|jt:ENSG00000115806  
GABP|ENSG00000199032|hsa-mir-425|hsa-miR-425-3p|jt:ENSG00000053524  
GABP|ENSG00000199032|hsa-mir-425|hsa-miR-425-3p|jt:ENSG00000104859  
GABP|ENSG00000199032|hsa-mir-425|hsa-miR-425-3p|jt:ENSG00000116691  
GABP|ENSG00000199032|hsa-mir-425|hsa-miR-425-3p|jt:ENSG00000171109  
GABP|ENSG00000199032|hsa-mir-425|hsa-miR-425-3p|jt:ENSG00000105672  
GABP|ENSG00000199032|hsa-mir-425|hsa-miR-425-3p|jt:ENSG00000198382  
GABP|ENSG00000199032|hsa-mir-425|hsa-miR-425-3p|jt:ENSG00000154799  
GABP|ENSG00000199066|hsa-mir-330|hsa-miR-330|jt:ENSG00000162642  
GABP|ENSG00000199066|hsa-mir-330|hsa-miR-330|jt:ENSG00000154059  
GABP|ENSG00000199066|hsa-mir-330|hsa-miR-330|jt:ENSG00000107897  
GABP|ENSG00000199066|hsa-mir-330|hsa-miR-330|jt:ENSG00000173473  
GABP|ENSG00000199066|hsa-mir-330|hsa-miR-330|jt:ENSG00000127152  
GABP|ENSG00000199066|hsa-mir-330|hsa-miR-330|jt:ENSG00000163961  
GABP|ENSG00000199066|hsa-mir-330|hsa-miR-330|jt:ENSG00000123297  
GABP|ENSG00000199122|hsa-mir-148b|hsa-miR-148b|jt:ENSG00000055070  
GABP|ENSG00000199122|hsa-mir-148b|hsa-miR-148b|jt:ENSG00000159082  
GABP|ENSG00000199122|hsa-mir-148b|hsa-miR-148b|jt:ENSG00000151694  
GABP|ENSG00000199122|hsa-mir-148b|hsa-miR-148b|jt:ENSG00000204569  
GABP|ENSG00000199122|hsa-mir-148b|hsa-miR-148b|jt:ENSG00000151079  
GABP|ENSG00000199122|hsa-mir-148b|hsa-miR-148b|jt:ENSG00000187531  
GABP|ENSG00000199122|hsa-mir-148b|hsa-miR-148b|jt:ENSG00000160961  
GABP|ENSG00000199122|hsa-mir-148b|hsa-miR-148b|jt:ENSG00000115310  
GABP|ENSG00000199122|hsa-mir-148b|hsa-miR-148b|jt:ENSG00000110756  
GABP|ENSG00000199122|hsa-mir-148b|hsa-miR-148b|jt:ENSG00000166971  
GABP|ENSG00000199122|hsa-mir-148b|hsa-miR-148b|jt:ENSG00000111711  
GABP|ENSG00000199122|hsa-mir-148b|hsa-miR-148b|jt:ENSG00000205036  
GABP|ENSG00000199122|hsa-mir-148b|hsa-miR-148b|jt:ENSG00000152242  
GABP|ENSG00000207732|hsa-mir-218-1|hsa-miR-218|jt:ENSG00000085978  
GABP|ENSG00000207732|hsa-mir-218-1|hsa-miR-218|jt:ENSG00000119688  
GABP|ENSG00000207732|hsa-mir-218-1|hsa-miR-218|jt:ENSG00000002834  
GABP|ENSG00000207732|hsa-mir-218-1|hsa-miR-218|jt:ENSG00000169891  
GABP|ENSG00000207791|hsa-mir-497|hsa-miR-497|jt:ENSG00000104859  
GABP|ENSG00000207791|hsa-mir-497|hsa-miR-497|jt:ENSG00000130584  
GABP|ENSG00000207791|hsa-mir-497|hsa-miR-497|jt:ENSG00000205808  
GABP|ENSG00000207791|hsa-mir-497|hsa-miR-497|jt:ENSG00000131381  
GABP|ENSG00000207791|hsa-mir-497|hsa-miR-497|jt:ENSG00000196204  
GABP|ENSG00000207791|hsa-mir-497|hsa-miR-497|jt:ENSG00000115806  
GABP|ENSG00000207929|hsa-mir-195|hsa-miR-195|jt:ENSG00000104859  
GABP|ENSG00000207929|hsa-mir-195|hsa-miR-195|jt:ENSG00000130584  
GABP|ENSG00000207929|hsa-mir-195|hsa-miR-195|jt:ENSG00000205808  
GABP|ENSG00000207929|hsa-mir-195|hsa-miR-195|jt:ENSG00000131381  
GABP|ENSG00000207929|hsa-mir-195|hsa-miR-195|jt:ENSG00000196204  
GABP|ENSG00000207929|hsa-mir-195|hsa-miR-195|jt:ENSG00000115806  
GABP|ENSG00000207939|hsa-mir-223|hsa-miR-223|jt:ENSG00000105341  
GABP|ENSG00000207939|hsa-mir-223|hsa-miR-223|jt:ENSG00000151148  
GABP|ENSG00000207939|hsa-mir-223|hsa-miR-223|jt:ENSG00000170638  
GABP|ENSG00000207939|hsa-mir-223|hsa-miR-223|jt:ENSG00000163364  
GABP|ENSG00000207939|hsa-mir-223|hsa-miR-223|jt:ENSG00000152217  
GABP|ENSG00000207939|hsa-mir-223|hsa-miR-223|jt:ENSG00000004455  
GABP|ENSG00000207939|hsa-mir-223|hsa-miR-223|jt:ENSG00000064490  
GABP|ENSG00000207939|hsa-mir-223|hsa-miR-223|jt:ENSG00000103429  
GABP|ENSG00000207939|hsa-mir-223|hsa-miR-223|jt:ENSG00000107130  
GABP|ENSG00000207939|hsa-mir-223|hsa-miR-223|jt:ENSG00000112290  
GABP|ENSG00000208017|hsa-mir-140|hsa-miR-140|jt:ENSG00000167384  
GABP|ENSG00000208017|hsa-mir-140|hsa-miR-140|jt:ENSG00000140688  
HIF-1|ENSG00000198973|hsa-mir-375|hsa-miR-375|jt:ENSG00000196263  
HIF-1|ENSG00000198973|hsa-mir-375|hsa-miR-375|jt:ENSG00000198692  
HIF-1|ENSG00000198973|hsa-mir-375|hsa-miR-375|jt:ENSG00000117519  
HIF-1|ENSG00000198973|hsa-mir-375|hsa-miR-375|jt:ENSG00000159556  
HIF-1|ENSG00000198973|hsa-mir-375|hsa-miR-375|jt:ENSG00000139323  
HIF-1|ENSG00000198973|hsa-mir-375|hsa-miR-375|jt:ENSG00000152433  
HIF-1|ENSG00000198973|hsa-mir-375|hsa-miR-375|jt:ENSG00000047410  
HIF-1|ENSG00000198973|hsa-mir-375|hsa-miR-375|jt:ENSG00000123388  
HIF-1|ENSG00000198973|hsa-mir-375|hsa-miR-375|jt:ENSG00000151806













HNMF-3|ENSG00000207718|hsa-mir-15a|hsa-miR-15a|jt:ENSG00000120265  
HNMF-3|ENSG00000207718|hsa-mir-15a|hsa-miR-15a|jt:ENSG00000075234  
HNMF-3|ENSG00000207718|hsa-mir-15a|hsa-miR-15a|jt:ENSG00000172725  
HNMF-3|ENSG00000207718|hsa-mir-15a|hsa-miR-15a|jt:ENSG00000196204  
HNMF-3|ENSG00000207718|hsa-mir-15a|hsa-miR-15a|jt:ENSG00000171307  
HNMF-3|ENSG00000207718|hsa-mir-15a|hsa-miR-15a|jt:ENSG00000127241  
HNMF-3|ENSG00000207764|hsa-mir-133a-2|hsa-miR-133a|jt:ENSG00000101489  
HNMF-3|ENSG00000207764|hsa-mir-133a-2|hsa-miR-133a|jt:ENSG00000106803  
HNMF-3|ENSG00000207764|hsa-mir-133a-2|hsa-miR-133a|jt:ENSG00000069696  
HNMF-3|ENSG00000207764|hsa-mir-133a-2|hsa-miR-133a|jt:ENSG00000146648  
HNMF-3|ENSG00000207764|hsa-mir-133a-2|hsa-miR-133a|jt:ENSG00000178789  
HNMF-3|ENSG00000207939|hsa-mir-223|hsa-miR-223|jt:ENSG00000103429  
HNMF-3|ENSG00000207939|hsa-mir-223|hsa-miR-223|jt:ENSG00000197670  
HNMF-3|ENSG00000207939|hsa-mir-223|hsa-miR-223|jt:ENSG00000204564  
HNMF-3|ENSG00000207939|hsa-mir-223|hsa-miR-223|jt:ENSG00000140284  
HNMF-3|ENSG00000207939|hsa-mir-223|hsa-miR-223|jt:ENSG00000205981  
HNMF-3|ENSG00000207939|hsa-mir-223|hsa-miR-223|jt:ENSG00000180423  
HNMF-3|ENSG00000207939|hsa-mir-223|hsa-miR-223|jt:ENSG00000145014  
HNMF-3|ENSG00000207939|hsa-mir-223|hsa-miR-223|jt:ENSG00000104946  
HNMF-3|ENSG00000207939|hsa-mir-223|hsa-miR-223|jt:ENSG00000150907  
HNMF-3|ENSG00000207939|hsa-mir-223|hsa-miR-223|jt:ENSG00000205502  
HNMF-3|ENSG00000207939|hsa-mir-223|hsa-miR-223|jt:ENSG00000130783  
HNMF-3|ENSG00000207939|hsa-mir-223|hsa-miR-223|jt:ENSG00000198467  
HNMF-3|ENSG00000207939|hsa-mir-223|hsa-miR-223|jt:ENSG00000006282  
HNMF-3|ENSG00000207939|hsa-mir-223|hsa-miR-223|jt:ENSG00000143878  
HNMF-3|ENSG00000207939|hsa-mir-223|hsa-miR-223|jt:ENSG00000154122  
HNMF-3|ENSG00000207939|hsa-mir-223|hsa-miR-223|jt:ENSG00000173585  
HNMF-3|ENSG00000207939|hsa-mir-223|hsa-miR-223|jt:ENSG00000114346  
HNMF-3|ENSG00000207939|hsa-mir-223|hsa-miR-223|jt:ENSG00000162676  
HNMF-3|ENSG00000207939|hsa-mir-223|hsa-miR-223|jt:ENSG00000198692  
HNMF-3|ENSG00000207947|hsa-mir-152|hsa-miR-152|jt:ENSG00000157470  
HNMF-3|ENSG00000207947|hsa-mir-152|hsa-miR-152|jt:ENSG00000135541  
HNMF-3|ENSG00000207947|hsa-mir-152|hsa-miR-152|jt:ENSG00000124357  
HNMF-3|ENSG00000207947|hsa-mir-152|hsa-miR-152|jt:ENSG00000101901  
HNMF-3|ENSG00000207947|hsa-mir-152|hsa-miR-152|jt:ENSG00000151418  
HNMF-3|ENSG00000207947|hsa-mir-152|hsa-miR-152|jt:ENSG00000173212  
HNMF-3|ENSG00000207947|hsa-mir-152|hsa-miR-152|jt:ENSG00000206193  
HNMF-3|ENSG00000207947|hsa-mir-152|hsa-miR-152|jt:ENSG00000137073  
HNMF-3|ENSG00000207947|hsa-mir-152|hsa-miR-152|jt:ENSG00000205653  
HNMF-3|ENSG00000207947|hsa-mir-152|hsa-miR-152|jt:ENSG00000100784  
HNMF-3|ENSG00000207947|hsa-mir-152|hsa-miR-152|jt:ENSG00000156642  
HNMF-3|ENSG00000207947|hsa-mir-152|hsa-miR-152|jt:ENSG00000118707  
HNMF-3|ENSG00000207947|hsa-mir-152|hsa-miR-152|jt:ENSG00000113578  
HNMF-3|ENSG00000207947|hsa-mir-152|hsa-miR-152|jt:ENSG00000180176  
HNMF-3|ENSG00000207947|hsa-mir-152|hsa-miR-152|jt:ENSG00000125676  
HNMF-3|ENSG00000207947|hsa-mir-152|hsa-miR-152|jt:ENSG00000115310  
HNMF-3|ENSG00000207947|hsa-mir-152|hsa-miR-152|jt:ENSG00000172053  
HNMF-3|ENSG00000207947|hsa-mir-152|hsa-miR-152|jt:ENSG00000188992  
HNMF-3|ENSG00000207971|hsa-mir-125b-1|hsa-miR-125b|jt:ENSG00000170786  
HNMF-3|ENSG00000207971|hsa-mir-125b-1|hsa-miR-125b|jt:ENSG00000205205  
HNMF-3|ENSG00000207971|hsa-mir-125b-1|hsa-miR-125b|jt:ENSG00000100722  
HNMF-3|ENSG00000207971|hsa-mir-125b-1|hsa-miR-125b|jt:ENSG00000186314  
HNMF-3|ENSG00000207971|hsa-mir-125b-1|hsa-miR-125b|jt:ENSG00000111981  
HNMF-3|ENSG00000207971|hsa-mir-125b-1|hsa-miR-125b|jt:ENSG00000170892  
HNMF-3|ENSG00000207971|hsa-mir-125b-1|hsa-miR-125b|jt:ENSG00000145391  
HNMF-3|ENSG00000207971|hsa-mir-125b-1|hsa-miR-125b|jt:ENSG00000197680  
HNMF-3|ENSG00000207971|hsa-mir-125b-1|hsa-miR-125b|jt:ENSG00000119541  
HNMF-3|ENSG00000207971|hsa-mir-125b-1|hsa-miR-125b|jt:ENSG00000174498  
HNMF-3|ENSG00000207971|hsa-mir-125b-1|hsa-miR-125b|jt:ENSG00000167383  
HNMF-3|ENSG00000207971|hsa-mir-125b-1|hsa-miR-125b|jt:ENSG00000166928  
HNMF-3|ENSG00000207994|hsa-mir-100|hsa-miR-100|jt:ENSG00000116017  
HNMF-3|ENSG00000207994|hsa-mir-100|hsa-miR-100|jt:ENSG00000082213  
HNMF-3|ENSG00000207994|hsa-mir-100|hsa-miR-100|jt:ENSG00000152689  
HNMF-3|ENSG00000207994|hsa-mir-100|hsa-miR-100|jt:ENSG00000136144  
HNMF-3|ENSG00000207994|hsa-mir-100|hsa-miR-100|jt:ENSG00000138660  
HNMF-3|ENSG00000207994|hsa-mir-100|hsa-miR-100|jt:ENSG00000138041  
HNMF-3|ENSG00000208006|hsa-mir-16-1|hsa-miR-16|jt:ENSG00000120265  
HNMF-3|ENSG00000208006|hsa-mir-16-1|hsa-miR-16|jt:ENSG00000075234  
HNMF-3|ENSG00000208006|hsa-mir-16-1|hsa-miR-16|jt:ENSG00000172725  
HNMF-3|ENSG00000208006|hsa-mir-16-1|hsa-miR-16|jt:ENSG00000196204  
HNMF-3|ENSG00000208006|hsa-mir-16-1|hsa-miR-16|jt:ENSG00000171307  
HNMF-3|ENSG00000208006|hsa-mir-16-1|hsa-miR-16|jt:ENSG00000127241  
HNMF-4|ENSG00000207694|hsa-mir-1-2|hsa-miR-1|jt:ENSG00000165807  
HNMF-4|ENSG00000207694|hsa-mir-1-2|hsa-miR-1|jt:ENSG00000095139  
HNMF-4|ENSG00000207705|hsa-mir-129-1|hsa-miR-129|jt:ENSG00000146409  
HNMF-4|ENSG00000207705|hsa-mir-129-1|hsa-miR-129|jt:ENSG00000204655  
HNMF-4|ENSG00000207705|hsa-mir-129-1|hsa-miR-129|jt:ENSG00000178602  
HNMF-6|ENSG00000198973|hsa-mir-375|hsa-miR-375|jt:ENSG00000106524  
HNMF-6|ENSG00000198973|hsa-mir-375|hsa-miR-375|jt:ENSG00000162493  
HNMF-6|ENSG00000198973|hsa-mir-375|hsa-miR-375|jt:ENSG00000180332  
HOXA4|ENSG00000199024|hsa-mir-103-2|hsa-miR-103|jt:ENSG00000127418  
HOXA4|ENSG00000199024|hsa-mir-103-2|hsa-miR-103|jt:ENSG00000149182  
HOXA4|ENSG00000199024|hsa-mir-103-2|hsa-miR-103|jt:ENSG00000158813  
HOXA4|ENSG00000199024|hsa-mir-103-2|hsa-miR-103|jt:ENSG00000158560  
HOXA4|ENSG00000199122|hsa-mir-148b|hsa-miR-148b|jt:ENSG00000204048  
HOXA4|ENSG00000199122|hsa-mir-148b|hsa-miR-148b|jt:ENSG00000205524  
HOXA4|ENSG00000199149|hsa-mir-20a|hsa-miR-20a|jt:ENSG00000123411  
HOXA4|ENSG00000199149|hsa-mir-20a|hsa-miR-20a|jt:ENSG00000100629  
HOXA4|ENSG00000207610|hsa-mir-19a|hsa-miR-19a|jt:ENSG00000155189  
HOXA4|ENSG00000207610|hsa-mir-19a|hsa-miR-19a|jt:ENSG00000078699  
HOXA4|ENSG00000207610|hsa-mir-19a|hsa-miR-19a|jt:ENSG00000117601  
HOXA4|ENSG00000207610|hsa-mir-19a|hsa-miR-19a|jt:ENSG00000182346  
HOXA4|ENSG00000207745|hsa-mir-17|hsa-miR-17-5p|jt:ENSG00000203793  
HOXA7|ENSG00000207926|hsa-mir-135a-1|hsa-miR-135a|jt:ENSG00000198853  
HP1|ENSG00000207795|hsa-mir-155|hsa-miR-155|jt:ENSG00000169519  
HP1|ENSG00000207795|hsa-mir-155|hsa-miR-155|jt:ENSG00000087237  
HP1|ENSG00000207795|hsa-mir-155|hsa-miR-155|jt:ENSG00000143079  
HP1|ENSG00000207795|hsa-mir-155|hsa-miR-155|jt:ENSG00000168813  
HSF1|ENSG00000199187|hsa-mir-365-2|hsa-miR-365|jt:ENSG00000187446  
HSF1|ENSG00000207623|hsa-mir-205|hsa-miR-205|jt:ENSG00000152270  
HSF2|ENSG00000198974|hsa-mir-30e|hsa-miR-30e-3p|jt:ENSG00000181472  
HSF2|ENSG00000198974|hsa-mir-30e|hsa-miR-30e-3p|jt:ENSG00000116984  
HSF2|ENSG00000198974|hsa-mir-30e|hsa-miR-30e-3p|jt:ENSG00000166401  
HSF2|ENSG00000198974|hsa-mir-30e|hsa-miR-30e-3p|jt:ENSG00000167930  
HSF2|ENSG00000198974|hsa-mir-30e|hsa-miR-30e-3p|jt:ENSG00000101574













IK-1|ENSG00000207630|hsa-mir-7-3|hsa-miR-7|jt:ENSG00000003393  
IK-1|ENSG00000207649|hsa-mir-138-2|hsa-miR-138|jt:ENSG00000131669  
IK-1|ENSG00000207649|hsa-mir-138-2|hsa-miR-138|jt:ENSG00000159871  
IK-1|ENSG00000207649|hsa-mir-138-2|hsa-miR-138|jt:ENSG00000137077  
IK-1|ENSG00000207731|hsa-mir-506|hsa-miR-506|jt:ENSG00000166881  
IK-1|ENSG00000207731|hsa-mir-506|hsa-miR-506|jt:ENSG00000125755  
IK-1|ENSG00000207731|hsa-mir-506|hsa-miR-506|jt:ENSG00000109536  
IK-1|ENSG00000207731|hsa-mir-506|hsa-miR-506|jt:ENSG00000203730  
IK-1|ENSG00000211590|hsa-mir-802|hsa-miR-802|jt:ENSG00000143546  
IK-1|ENSG00000211590|hsa-mir-802|hsa-miR-802|jt:ENSG00000106049  
IK-1|ENSG00000211590|hsa-mir-802|hsa-miR-802|jt:ENSG00000144746  
IPF1|ENSG00000199085|hsa-mir-148a|hsa-miR-148a|jt:ENSG00000122783  
IRF|ENSG00000199024|hsa-mir-103-2|hsa-miR-103|jt:ENSG00000196712  
IRF|ENSG00000199024|hsa-mir-103-2|hsa-miR-103|jt:ENSG00000163867  
IRF|ENSG00000199024|hsa-mir-103-2|hsa-miR-103|jt:ENSG00000175318  
IRF|ENSG00000199024|hsa-mir-103-2|hsa-miR-103|jt:ENSG00000135638  
IRF|ENSG00000199024|hsa-mir-103-2|hsa-miR-103|jt:ENSG00000144285  
IRF|ENSG00000199072|hsa-let-7f-1|hsa-let-7f|jt:ENSG00000187772  
IRF|ENSG00000199072|hsa-let-7f-1|hsa-let-7f|jt:ENSG00000177058  
IRF|ENSG00000199072|hsa-let-7f-1|hsa-let-7f|jt:ENSG00000134323  
IRF|ENSG00000199072|hsa-let-7f-1|hsa-let-7f|jt:ENSG00000136770  
IRF|ENSG00000199082|hsa-mir-342|hsa-miR-342|jt:ENSG00000181904  
IRF|ENSG00000199133|hsa-let-7d|hsa-let-7d|jt:ENSG00000056345  
IRF|ENSG00000199133|hsa-let-7d|hsa-let-7d|jt:ENSG00000171502  
IRF|ENSG00000199133|hsa-let-7d|hsa-let-7d|jt:ENSG00000187772  
IRF|ENSG00000199135|hsa-mir-101-1|hsa-miR-101|jt:ENSG00000116141  
IRF|ENSG00000199135|hsa-mir-101-1|hsa-miR-101|jt:ENSG00000122779  
IRF|ENSG00000199135|hsa-mir-101-1|hsa-miR-101|jt:ENSG00000136205  
IRF|ENSG00000199135|hsa-mir-101-1|hsa-miR-101|jt:ENSG00000196531  
IRF|ENSG00000199135|hsa-mir-101-1|hsa-miR-101|jt:ENSG00000134323  
IRF|ENSG00000199165|hsa-let-7a-1|hsa-let-7a|jt:ENSG00000187772  
IRF|ENSG00000199165|hsa-let-7a-1|hsa-let-7a|jt:ENSG00000177058  
IRF|ENSG00000199165|hsa-let-7a-1|hsa-let-7a|jt:ENSG00000134323  
IRF|ENSG00000199165|hsa-let-7a-1|hsa-let-7a|jt:ENSG00000136770  
IRF|ENSG00000207586|hsa-mir-135a-2|hsa-miR-135a|jt:ENSG00000061337  
IRF|ENSG00000207586|hsa-mir-135a-2|hsa-miR-135a|jt:ENSG00000168676  
IRF|ENSG00000207586|hsa-mir-135a-2|hsa-miR-135a|jt:ENSG00000122012  
IRF|ENSG00000207586|hsa-mir-135a-2|hsa-miR-135a|jt:ENSG00000122711  
IRF|ENSG00000207705|hsa-mir-129-1|hsa-miR-129|jt:ENSG00000146409  
IRF|ENSG00000207705|hsa-mir-129-1|hsa-miR-129|jt:ENSG00000120533  
IRF|ENSG00000207705|hsa-mir-129-1|hsa-miR-129|jt:ENSG00000198693  
IRF|ENSG00000207725|hsa-mir-222|hsa-miR-222|jt:ENSG00000135046  
IRF|ENSG00000207725|hsa-mir-222|hsa-miR-222|jt:ENSG00000033867  
IRF|ENSG00000207870|hsa-mir-221|hsa-miR-221|jt:ENSG00000135046  
IRF|ENSG00000207870|hsa-mir-221|hsa-miR-221|jt:ENSG00000033867  
IRF|ENSG00000207949|hsa-mir-214|hsa-miR-214|jt:ENSG00000140955  
IRF|ENSG00000207949|hsa-mir-214|hsa-miR-214|jt:ENSG00000130338  
IRF|ENSG00000208024|hsa-mir-199a-2|hsa-miR-199a|jt:ENSG00000129116  
IRF|ENSG00000208024|hsa-mir-199a-2|hsa-miR-199a|jt:ENSG00000163599  
IRF|ENSG00000208024|hsa-mir-199a-2|hsa-miR-199a|jt:ENSG00000183542  
IRF|ENSG00000208024|hsa-mir-199a-2|hsa-miR-199a\*|jt:ENSG00000116141  
IRF|ENSG00000208024|hsa-mir-199a-2|hsa-miR-199a\*|jt:ENSG00000122779  
IRF|ENSG00000208024|hsa-mir-199a-2|hsa-miR-199a\*|jt:ENSG00000136205  
IRF|ENSG00000208024|hsa-mir-199a-2|hsa-miR-199a\*|jt:ENSG00000162415  
IRF|ENSG00000208024|hsa-mir-199a-2|hsa-miR-199a\*|jt:ENSG00000109208  
IRF|ENSG00000208024|hsa-mir-199a-2|hsa-miR-199a\*|jt:ENSG00000134323  
IRF|ENSG00000208024|hsa-mir-199a-2|hsa-miR-199a\*|jt:ENSG00000133464  
IRF-1|ENSG00000207638|hsa-mir-99a|hsa-miR-99a|jt:ENSG00000071575  
IRF-1|ENSG00000207638|hsa-mir-99a|hsa-miR-99a|jt:ENSG00000136144  
IRF-7|ENSG00000199032|hsa-mir-425|hsa-miR-425-3p|jt:ENSG00000120129  
IRF-7|ENSG00000199032|hsa-mir-425|hsa-miR-425-3p|jt:ENSG00000167178  
IRF-7|ENSG00000199032|hsa-mir-425|hsa-miR-425-3p|jt:ENSG0000015479  
IRF-7|ENSG00000199032|hsa-mir-425|hsa-miR-425-3p|jt:ENSG00000175334  
IRF-7|ENSG00000199032|hsa-mir-425|hsa-miR-425-3p|jt:ENSG00000142676  
IRF-7|ENSG00000199077|hsa-mir-129-2|hsa-miR-129|jt:ENSG00000158435  
IRF-7|ENSG00000199077|hsa-mir-129-2|hsa-miR-129|jt:ENSG00000037474  
IRF-7|ENSG00000199121|hsa-mir-26b|hsa-miR-26b|jt:ENSG00000164574  
IRF-7|ENSG00000199121|hsa-mir-26b|hsa-miR-26b|jt:ENSG00000164879  
IRF-7|ENSG00000199121|hsa-mir-26b|hsa-miR-26b|jt:ENSG00000189043  
IRF-7|ENSG00000199121|hsa-mir-26b|hsa-miR-26b|jt:ENSG00000037637  
IRF-7|ENSG00000199121|hsa-mir-26b|hsa-miR-26b|jt:ENSG00000153574  
IRF-7|ENSG00000199121|hsa-mir-26b|hsa-miR-26b|jt:ENSG00000099364  
IRF-7|ENSG00000199121|hsa-mir-26b|hsa-miR-26b|jt:ENSG00000082146  
IRF-7|ENSG00000199121|hsa-mir-26b|hsa-miR-26b|jt:ENSG00000138231  
IRF-7|ENSG00000199121|hsa-mir-26b|hsa-miR-26b|jt:ENSG00000107938  
IRF-7|ENSG00000199121|hsa-mir-26b|hsa-miR-26b|jt:ENSG00000153989  
IRF-7|ENSG00000199121|hsa-mir-26b|hsa-miR-26b|jt:ENSG00000107443  
IRF-7|ENSG00000199121|hsa-mir-26b|hsa-miR-26b|jt:ENSG00000143643  
IRF-7|ENSG00000199121|hsa-mir-26b|hsa-miR-26b|jt:ENSG00000183955  
IRF-7|ENSG00000199121|hsa-mir-26b|hsa-miR-26b|jt:ENSG00000143028  
IRF-7|ENSG00000199121|hsa-mir-26b|hsa-miR-26b|jt:ENSG00000178425  
IRF-7|ENSG00000199121|hsa-mir-26b|hsa-miR-26b|jt:ENSG00000124207  
IRF-7|ENSG00000199121|hsa-mir-26b|hsa-miR-26b|jt:ENSG00000119139  
IRF-7|ENSG00000207789|hsa-mir-26a-2|hsa-miR-26a|jt:ENSG00000164574  
IRF-7|ENSG00000207789|hsa-mir-26a-2|hsa-miR-26a|jt:ENSG00000164879  
IRF-7|ENSG00000207789|hsa-mir-26a-2|hsa-miR-26a|jt:ENSG00000189043  
IRF-7|ENSG00000207789|hsa-mir-26a-2|hsa-miR-26a|jt:ENSG00000037637  
IRF-7|ENSG00000207789|hsa-mir-26a-2|hsa-miR-26a|jt:ENSG00000153574  
IRF-7|ENSG00000207789|hsa-mir-26a-2|hsa-miR-26a|jt:ENSG00000099364  
IRF-7|ENSG00000207789|hsa-mir-26a-2|hsa-miR-26a|jt:ENSG00000082146  
IRF-7|ENSG00000207789|hsa-mir-26a-2|hsa-miR-26a|jt:ENSG00000138231  
IRF-7|ENSG00000207789|hsa-mir-26a-2|hsa-miR-26a|jt:ENSG00000107938  
IRF-7|ENSG00000207789|hsa-mir-26a-2|hsa-miR-26a|jt:ENSG00000153989  
IRF-7|ENSG00000207789|hsa-mir-26a-2|hsa-miR-26a|jt:ENSG00000107443  
IRF-7|ENSG00000207789|hsa-mir-26a-2|hsa-miR-26a|jt:ENSG00000143643  
IRF-7|ENSG00000207789|hsa-mir-26a-2|hsa-miR-26a|jt:ENSG00000183955  
IRF-7|ENSG00000207789|hsa-mir-26a-2|hsa-miR-26a|jt:ENSG00000143028  
IRF-7|ENSG00000207789|hsa-mir-26a-2|hsa-miR-26a|jt:ENSG00000178425  
IRF-7|ENSG00000207789|hsa-mir-26a-2|hsa-miR-26a|jt:ENSG00000124207  
IRF-7|ENSG00000207789|hsa-mir-26a-2|hsa-miR-26a|jt:ENSG00000119139  
IRF-7|ENSG00000207955|hsa-mir-219-2|hsa-miR-219|jt:ENSG00000067177  
IRF-7|ENSG00000207955|hsa-mir-219-2|hsa-miR-219|jt:ENSG00000119508  
IRF-7|ENSG00000207955|hsa-mir-219-2|hsa-miR-219|jt:ENSG00000114982  
IRF-7|ENSG00000207955|hsa-mir-219-2|hsa-miR-219|jt:ENSG00000177553  
IRF-7|ENSG00000207955|hsa-mir-219-2|hsa-miR-219|jt:ENSG00000138600

IRF-7|ENSG00000207955|hsa-mir-219-2|hsa-miR-219|jt:ENSG00000112183  
IRF-7|ENSG00000207955|hsa-mir-219-2|hsa-miR-219|jt:ENSG00000179387  
IRF-7|ENSG00000207955|hsa-mir-219-2|hsa-miR-219|jt:ENSG00000185133  
IRF-7|ENSG00000207955|hsa-mir-219-2|hsa-miR-219|jt:ENSG00000197077  
IRF-7|ENSG00000211590|hsa-mir-802|hsa-miR-802|jt:ENSG00000196792  
IRF-7|ENSG00000211590|hsa-mir-802|hsa-miR-802|jt:ENSG00000112144  
IRF-7|ENSG00000211590|hsa-mir-802|hsa-miR-802|jt:ENSG00000106714  
IRF-7|ENSG00000211590|hsa-mir-802|hsa-miR-802|jt:ENSG00000106049  
IRF-7|ENSG00000211590|hsa-mir-802|hsa-miR-802|jt:ENSG00000197657  
IRF-7|ENSG00000211590|hsa-mir-802|hsa-miR-802|jt:ENSG00000153989  
IRF1|ENSG00000199072|hsa-let-7f-1|hsa-let-7f|jt:ENSG00000141429  
IRF1|ENSG00000199072|hsa-let-7f-1|hsa-let-7f|jt:ENSG00000135476  
IRF1|ENSG00000199133|hsa-let-7d|hsa-let-7d|jt:ENSG00000135476  
IRF1|ENSG00000199133|hsa-let-7d|hsa-let-7d|jt:ENSG00000171502  
IRF1|ENSG00000199135|hsa-mir-101-1|hsa-miR-101|jt:ENSG00000196531  
IRF1|ENSG00000199135|hsa-mir-101-1|hsa-miR-101|jt:ENSG00000138779  
IRF1|ENSG00000199135|hsa-mir-101-1|hsa-miR-101|jt:ENSG00000106819  
IRF1|ENSG00000199161|hsa-mir-126|hsa-miR-126|jt:ENSG00000172889  
IRF1|ENSG00000199161|hsa-mir-126|hsa-miR-126|jt:ENSG00000164039  
IRF1|ENSG00000199161|hsa-mir-126|hsa-miR-126\*|jt:ENSG00000170962  
IRF1|ENSG00000199161|hsa-mir-126|hsa-miR-126\*|jt:ENSG00000177822  
IRF1|ENSG00000199161|hsa-mir-126|hsa-miR-126\*|jt:ENSG00000185015  
IRF1|ENSG00000199161|hsa-mir-126|hsa-miR-126\*|jt:ENSG00000148090  
IRF1|ENSG00000199161|hsa-mir-126|hsa-miR-126\*|jt:ENSG00000164022  
IRF1|ENSG00000199161|hsa-mir-126|hsa-miR-126\*|jt:ENSG00000148634  
IRF1|ENSG00000199161|hsa-mir-126|hsa-miR-126\*|jt:ENSG00000007038  
IRF1|ENSG00000199161|hsa-mir-126|hsa-miR-126\*|jt:ENSG00000122965  
IRF1|ENSG00000199161|hsa-mir-126|hsa-miR-126\*|jt:ENSG00000100191  
IRF1|ENSG00000199161|hsa-mir-126|hsa-miR-126\*|jt:ENSG00000141646  
IRF1|ENSG00000199161|hsa-mir-126|hsa-miR-126\*|jt:ENSG00000198012  
IRF1|ENSG00000199165|hsa-let-7a-1|hsa-let-7a|jt:ENSG00000141429  
IRF1|ENSG00000199165|hsa-let-7a-1|hsa-let-7a|jt:ENSG00000135476  
IY|ENSG00000198987|hsa-mir-16-2|hsa-miR-16|jt:ENSG00000205808  
IY|ENSG00000198987|hsa-mir-16-2|hsa-miR-16|jt:ENSG00000115806  
IY|ENSG00000198987|hsa-mir-16-2|hsa-miR-16|jt:ENSG00000069275  
IY|ENSG00000198987|hsa-mir-16-2|hsa-miR-16|jt:ENSG00000165985  
IY|ENSG00000207548|hsa-mir-217|hsa-miR-217|jt:ENSG00000147121  
IY|ENSG00000207548|hsa-mir-217|hsa-miR-217|jt:ENSG00000189357  
IY|ENSG00000207548|hsa-mir-217|hsa-miR-217|jt:ENSG00000187105  
IY|ENSG00000207548|hsa-mir-217|hsa-miR-217|jt:ENSG00000120278  
IY|ENSG00000207548|hsa-mir-217|hsa-miR-217|jt:ENSG00000164609  
IY|ENSG00000207548|hsa-mir-217|hsa-miR-217|jt:ENSG00000163755  
IY|ENSG00000207548|hsa-mir-217|hsa-miR-217|jt:ENSG00000102245  
IY|ENSG00000207548|hsa-mir-217|hsa-miR-217|jt:ENSG00000196565  
IY|ENSG00000207705|hsa-mir-129-1|hsa-miR-129|jt:ENSG00000163781  
IY|ENSG00000207705|hsa-mir-129-1|hsa-miR-129|jt:ENSG00000182108  
IY|ENSG00000207705|hsa-mir-129-1|hsa-miR-129|jt:ENSG00000198518  
IY|ENSG00000207705|hsa-mir-129-1|hsa-miR-129|jt:ENSG00000162105  
IY|ENSG00000207705|hsa-mir-129-1|hsa-miR-129|jt:ENSG00000145416  
IY|ENSG00000207731|hsa-mir-506|hsa-miR-506|jt:ENSG00000152254  
IY|ENSG00000207731|hsa-mir-506|hsa-miR-506|jt:ENSG00000125755  
IY|ENSG00000207731|hsa-mir-506|hsa-miR-506|jt:ENSG00000131196  
IY|ENSG00000207731|hsa-mir-506|hsa-miR-506|jt:ENSG00000157978  
IY|ENSG00000207731|hsa-mir-506|hsa-miR-506|jt:ENSG00000006715  
IY|ENSG00000207731|hsa-mir-506|hsa-miR-506|jt:ENSG00000117569  
IY|ENSG00000207731|hsa-mir-506|hsa-miR-506|jt:ENSG00000172819  
IY|ENSG00000207731|hsa-mir-506|hsa-miR-506|jt:ENSG00000134253  
IY|ENSG00000207731|hsa-mir-506|hsa-miR-506|jt:ENSG00000103855  
IY|ENSG00000207731|hsa-mir-506|hsa-miR-506|jt:ENSG00000100625  
IY|ENSG00000207731|hsa-mir-506|hsa-miR-506|jt:ENSG00000105514  
IY|ENSG00000207731|hsa-mir-506|hsa-miR-506|jt:ENSG00000048342  
IY|ENSG00000207731|hsa-mir-506|hsa-miR-506|jt:ENSG00000186409  
IY|ENSG00000207744|hsa-mir-10b|hsa-miR-10b|jt:ENSG00000178351  
IY|ENSG00000207744|hsa-mir-10b|hsa-miR-10b|jt:ENSG00000110484  
IY|ENSG00000207744|hsa-mir-10b|hsa-miR-10b|jt:ENSG00000171984  
IY|ENSG00000207744|hsa-mir-10b|hsa-miR-10b|jt:ENSG00000139269  
IY|ENSG00000211590|hsa-mir-802|hsa-miR-802|jt:ENSG00000131196  
IY|ENSG00000211590|hsa-mir-802|hsa-miR-802|jt:ENSG00000110172  
IY|ENSG00000211590|hsa-mir-802|hsa-miR-802|jt:ENSG00000102055  
IY|ENSG00000211590|hsa-mir-802|hsa-miR-802|jt:ENSG00000153989  
IY|ENSG00000211590|hsa-mir-802|hsa-miR-802|jt:ENSG00000131368  
IY|ENSG00000211590|hsa-mir-802|hsa-miR-802|jt:ENSG00000144746  
IY|ENSG00000211590|hsa-mir-802|hsa-miR-802|jt:ENSG00000073910  
IY|ENSG00000211590|hsa-mir-802|hsa-miR-802|jt:ENSG00000106714  
IY|ENSG00000211590|hsa-mir-802|hsa-miR-802|jt:ENSG00000151474  
LEF1|ENSG00000199177|hsa-mir-31|hsa-miR-31|jt:ENSG00000167930  
LEF1|ENSG00000199177|hsa-mir-31|hsa-miR-31|jt:ENSG0000013588  
LEF1|ENSG00000199177|hsa-mir-31|hsa-miR-31|jt:ENSG00000179270  
LEF1|ENSG00000199177|hsa-mir-31|hsa-miR-31|jt:ENSG00000188199  
LEF1|ENSG00000199177|hsa-mir-31|hsa-miR-31|jt:ENSG00000204043  
LEF1|ENSG00000199177|hsa-mir-31|hsa-miR-31|jt:ENSG00000170624  
LEF1|ENSG00000199177|hsa-mir-31|hsa-miR-31|jt:ENSG00000151715  
LEF1|ENSG00000199177|hsa-mir-31|hsa-miR-31|jt:ENSG00000156711  
LEF1|ENSG00000199177|hsa-mir-31|hsa-miR-31|jt:ENSG00000162520  
LEF1|ENSG00000207581|hsa-mir-199b|hsa-miR-199b|jt:ENSG00000100554  
LEF1|ENSG00000207581|hsa-mir-199b|hsa-miR-199b|jt:ENSG00000163599  
LEF1|ENSG00000207581|hsa-mir-199b|hsa-miR-199b|jt:ENSG00000185674  
LEF1|ENSG00000207581|hsa-mir-199b|hsa-miR-199b|jt:ENSG00000204380  
LEF1|ENSG00000207581|hsa-mir-199b|hsa-miR-199b|jt:ENSG00000163660  
LEF1|ENSG00000207586|hsa-mir-135a-2|hsa-miR-135a|jt:ENSG00000171931  
LEF1|ENSG00000207586|hsa-mir-135a-2|hsa-miR-135a|jt:ENSG00000124194  
LEF1|ENSG00000207586|hsa-mir-135a-2|hsa-miR-135a|jt:ENSG00000143771  
LEF1|ENSG00000207586|hsa-mir-135a-2|hsa-miR-135a|jt:ENSG00000113494  
LEF1|ENSG00000207586|hsa-mir-135a-2|hsa-miR-135a|jt:ENSG00000185736  
LEF1|ENSG00000207586|hsa-mir-135a-2|hsa-miR-135a|jt:ENSG00000122787  
LEF1|ENSG00000207586|hsa-mir-135a-2|hsa-miR-135a|jt:ENSG00000185294  
LEF1|ENSG00000207586|hsa-mir-135a-2|hsa-miR-135a|jt:ENSG00000132434  
LEF1|ENSG00000207586|hsa-mir-135a-2|hsa-miR-135a|jt:ENSG00000147654  
LEF1|ENSG00000207586|hsa-mir-135a-2|hsa-miR-135a|jt:ENSG00000159140  
LEF1|ENSG00000207586|hsa-mir-135a-2|hsa-miR-135a|jt:ENSG00000114480  
LEF1|ENSG00000207586|hsa-mir-135a-2|hsa-miR-135a|jt:ENSG00000136811  
LEF1|ENSG00000207586|hsa-mir-135a-2|hsa-miR-135a|jt:ENSG00000198246  
LEF1|ENSG00000207586|hsa-mir-135a-2|hsa-miR-135a|jt:ENSG00000198018  
LEF1|ENSG00000207586|hsa-mir-135a-2|hsa-miR-135a|jt:ENSG00000173464  
LEF1|ENSG00000207694|hsa-mir-1-2|hsa-miR-1|jt:ENSG00000143125



LEF1|ENSG00000207980|hsa-mir-23a|hsa-miR-23a|jt:ENSG00000146809  
LEF1|ENSG00000207980|hsa-mir-23a|hsa-miR-23a|jt:ENSG00000141048  
LEF1|ENSG00000208009|hsa-mir-130a|hsa-miR-130a|jt:ENSG00000188786  
LEF1|ENSG00000208009|hsa-mir-130a|hsa-miR-130a|jt:ENSG00000055070  
LEF1|ENSG00000208009|hsa-mir-130a|hsa-miR-130a|jt:ENSG00000166971  
LEF1|ENSG00000208009|hsa-mir-130a|hsa-miR-130a|jt:ENSG00000180176  
LEF1|ENSG00000208009|hsa-mir-130a|hsa-miR-130a|jt:ENSG00000109654  
LEF1|ENSG00000208009|hsa-mir-130a|hsa-miR-130a|jt:ENSG00000122783  
LEF1|ENSG00000208009|hsa-mir-130a|hsa-miR-130a|jt:ENSG00000101901  
LEF1|ENSG00000208009|hsa-mir-130a|hsa-miR-130a|jt:ENSG00000131269  
LEF1|ENSG00000208009|hsa-mir-130a|hsa-miR-130a|jt:ENSG00000081818  
LEF1|ENSG00000208009|hsa-mir-130a|hsa-miR-130a|jt:ENSG00000156642  
LEF1|ENSG00000208009|hsa-mir-130a|hsa-miR-130a|jt:ENSG00000170989  
LEF1|ENSG00000208009|hsa-mir-130a|hsa-miR-130a|jt:ENSG00000164209  
LEF1|ENSG00000208009|hsa-mir-130a|hsa-miR-130a|jt:ENSG00000184371  
LEF1|ENSG00000208009|hsa-mir-130a|hsa-miR-130a|jt:ENSG00000130956  
LEF1|ENSG00000208009|hsa-mir-130a|hsa-miR-130a|jt:ENSG00000115170  
LEF1|ENSG00000208009|hsa-mir-130a|hsa-miR-130a|jt:ENSG00000187010  
LEF1|ENSG00000208009|hsa-mir-130a|hsa-miR-130a|jt:ENSG00000086015  
LEF1|ENSG00000208009|hsa-mir-130a|hsa-miR-130a|jt:ENSG00000115310  
LEF1|ENSG00000209707|hsa-mir-24-2|hsa-miR-24|jt:ENSG00000182393  
LEF1|ENSG00000209707|hsa-mir-24-2|hsa-miR-24|jt:ENSG00000179862  
LEF1|ENSG00000209707|hsa-mir-24-2|hsa-miR-24|jt:ENSG00000163485  
LEF1|ENSG00000209707|hsa-mir-24-2|hsa-miR-24|jt:ENSG00000187257  
LEF1|ENSG00000209707|hsa-mir-24-2|hsa-miR-24|jt:ENSG00000134042  
LEF1|ENSG00000209707|hsa-mir-24-2|hsa-miR-24|jt:ENSG00000164684  
LEF1|ENSG00000209707|hsa-mir-24-2|hsa-miR-24|jt:ENSG00000166206  
LEF1|ENSG00000209707|hsa-mir-24-2|hsa-miR-24|jt:ENSG00000106384  
LEF1|ENSG00000209707|hsa-mir-24-2|hsa-miR-24|jt:ENSG0000010932  
LEF1|ENSG00000209707|hsa-mir-24-2|hsa-miR-24|jt:ENSG00000059758  
LEF1|ENSG00000209707|hsa-mir-24-2|hsa-miR-24|jt:ENSG00000149742  
LEF1|ENSG00000209707|hsa-mir-24-2|hsa-miR-24|jt:ENSG00000075290  
LEF1|ENSG00000209707|hsa-mir-24-2|hsa-miR-24|jt:ENSG00000088766  
LEF1|ENSG00000209707|hsa-mir-24-2|hsa-miR-24|jt:ENSG00000139610  
LEF1|ENSG00000211590|hsa-mir-802|hsa-miR-802|jt:ENSG00000106714  
LEF1|ENSG00000211590|hsa-mir-802|hsa-miR-802|jt:ENSG00000115339  
LEF1|ENSG00000211590|hsa-mir-802|hsa-miR-802|jt:ENSG00000106049  
LEF1|ENSG00000211590|hsa-mir-802|hsa-miR-802|jt:ENSG00000205214  
LEF1|ENSG00000211590|hsa-mir-802|hsa-miR-802|jt:ENSG00000153989  
LEF1|ENSG00000211590|hsa-mir-802|hsa-miR-802|jt:ENSG00000052126  
LEF1|ENSG00000211590|hsa-mir-802|hsa-miR-802|jt:ENSG00000143546  
LEF1|ENSG00000211590|hsa-mir-802|hsa-miR-802|jt:ENSG00000151474  
LRF|ENSG00000199122|hsa-mir-148b|hsa-miR-148b|jt:ENSG00000089685  
LYF-1|ENSG00000207791|hsa-mir-497|hsa-miR-497|jt:ENSG00000205808  
LYF-1|ENSG00000207929|hsa-mir-195|hsa-miR-195|jt:ENSG00000205808  
MAZ|ENSG00000199059|hsa-mir-135b|hsa-miR-135b|jt:ENSG00000176049  
MAZ|ENSG00000199059|hsa-mir-135b|hsa-miR-135b|jt:ENSG00000184774  
MAZ|ENSG00000199059|hsa-mir-135b|hsa-miR-135b|jt:ENSG00000124194  
MEF-2|ENSG00000207548|hsa-mir-217|hsa-miR-217|jt:ENSG00000129422  
MEF-2|ENSG00000207548|hsa-mir-217|hsa-miR-217|jt:ENSG00000136828  
MEF-2|ENSG00000207548|hsa-mir-217|hsa-miR-217|jt:ENSG00000205413  
MEF-2|ENSG00000207548|hsa-mir-217|hsa-miR-217|jt:ENSG00000115963  
MEF-2|ENSG00000207548|hsa-mir-217|hsa-miR-217|jt:ENSG00000151631  
MEF-2|ENSG00000207548|hsa-mir-217|hsa-miR-217|jt:ENSG00000130540  
MEF-2|ENSG00000207624|hsa-mir-194-1|hsa-miR-194|jt:ENSG00000128654  
MEF-2|ENSG00000207635|hsa-mir-499|hsa-miR-499|jt:ENSG00000154945  
MEF-2|ENSG00000207635|hsa-mir-499|hsa-miR-499|jt:ENSG00000132698  
MEF-2|ENSG00000207635|hsa-mir-499|hsa-miR-499|jt:ENSG00000169139  
MEF-2|ENSG00000207764|hsa-mir-133a-2|hsa-miR-133a|jt:ENSG00000101489  
MEF-2|ENSG00000207764|hsa-mir-133a-2|hsa-miR-133a|jt:ENSG00000154822  
MEF-2|ENSG00000207789|hsa-mir-26a-2|hsa-miR-26a|jt:ENSG00000146278  
MEF-2|ENSG00000207789|hsa-mir-26a-2|hsa-miR-26a|jt:ENSG00000078124  
MEF-2|ENSG00000207789|hsa-mir-26a-2|hsa-miR-26a|jt:ENSG00000138792  
MEF-2|ENSG00000207789|hsa-mir-26a-2|hsa-miR-26a|jt:ENSG00000176597  
MEIS1|ENSG00000198972|hsa-let-7e|hsa-let-7e|jt:ENSG00000179476  
MEIS1|ENSG00000198972|hsa-let-7e|hsa-let-7e|jt:ENSG00000143458  
MEIS1|ENSG00000198972|hsa-let-7e|hsa-let-7e|jt:ENSG00000177410  
MEIS1|ENSG00000198972|hsa-let-7e|hsa-let-7e|jt:ENSG00000159217  
MEIS1|ENSG00000198972|hsa-let-7e|hsa-let-7e|jt:ENSG00000120440  
MEIS1|ENSG00000198972|hsa-let-7e|hsa-let-7e|jt:ENSG00000143851  
MEIS1|ENSG00000198972|hsa-let-7e|hsa-let-7e|jt:ENSG00000135912  
MEIS1|ENSG00000198972|hsa-let-7e|hsa-let-7e|jt:ENSG00000148200  
MEIS1|ENSG00000198972|hsa-let-7e|hsa-let-7e|jt:ENSG00000160094  
MEIS1|ENSG00000198972|hsa-let-7e|hsa-let-7e|jt:ENSG00000169921  
MEIS1|ENSG00000198972|hsa-let-7e|hsa-let-7e|jt:ENSG00000085491  
MEIS1|ENSG00000198972|hsa-let-7e|hsa-let-7e|jt:ENSG00000187109  
MEIS1|ENSG00000198972|hsa-let-7e|hsa-let-7e|jt:ENSG00000143546  
MEIS1|ENSG00000198972|hsa-let-7e|hsa-let-7e|jt:ENSG00000137496  
MEIS1|ENSG00000198972|hsa-let-7e|hsa-let-7e|jt:ENSG00000198929  
MEIS1|ENSG00000198972|hsa-let-7e|hsa-let-7e|jt:ENSG00000166265  
MEIS1|ENSG00000198972|hsa-let-7e|hsa-let-7e|jt:ENSG00000172053  
MEIS1|ENSG00000198972|hsa-let-7e|hsa-let-7e|jt:ENSG00000198105  
MEIS1|ENSG00000198975|hsa-let-7a-2|hsa-let-7a|jt:ENSG00000179476  
MEIS1|ENSG00000198975|hsa-let-7a-2|hsa-let-7a|jt:ENSG00000159217  
MEIS1|ENSG00000198975|hsa-let-7a-2|hsa-let-7a|jt:ENSG00000143851  
MEIS1|ENSG00000198975|hsa-let-7a-2|hsa-let-7a|jt:ENSG00000135912  
MEIS1|ENSG00000198975|hsa-let-7a-2|hsa-let-7a|jt:ENSG00000148200  
MEIS1|ENSG00000198975|hsa-let-7a-2|hsa-let-7a|jt:ENSG00000160094  
MEIS1|ENSG00000198975|hsa-let-7a-2|hsa-let-7a|jt:ENSG00000169921  
MEIS1|ENSG00000198975|hsa-let-7a-2|hsa-let-7a|jt:ENSG00000187109  
MEIS1|ENSG00000198975|hsa-let-7a-2|hsa-let-7a|jt:ENSG00000143546  
MEIS1|ENSG00000198975|hsa-let-7a-2|hsa-let-7a|jt:ENSG00000172053  
MEIS1|ENSG00000198986|hsa-let-7a-3|hsa-let-7a|jt:ENSG00000179476  
MEIS1|ENSG00000198986|hsa-let-7a-3|hsa-let-7a|jt:ENSG00000159217  
MEIS1|ENSG00000198986|hsa-let-7a-3|hsa-let-7a|jt:ENSG00000143851  
MEIS1|ENSG00000198986|hsa-let-7a-3|hsa-let-7a|jt:ENSG00000135912  
MEIS1|ENSG00000198986|hsa-let-7a-3|hsa-let-7a|jt:ENSG00000148200  
MEIS1|ENSG00000198986|hsa-let-7a-3|hsa-let-7a|jt:ENSG00000160094  
MEIS1|ENSG00000198986|hsa-let-7a-3|hsa-let-7a|jt:ENSG00000169921  
MEIS1|ENSG00000198986|hsa-let-7a-3|hsa-let-7a|jt:ENSG00000187109  
MEIS1|ENSG00000198986|hsa-let-7a-3|hsa-let-7a|jt:ENSG00000143546  
MEIS1|ENSG00000198986|hsa-let-7a-3|hsa-let-7a|jt:ENSG00000172053  
MEIS1|ENSG00000198986|hsa-let-7a-3|hsa-let-7a|jt:ENSG00000198105  
MEIS1|ENSG00000199017|hsa-mir-1-1|hsa-miR-1|jt:ENSG00000198417















MYOD|ENSG00000207865|hsa-mir-34a|hsa-miR-34a|jt:ENSG00000107159  
MYOD|ENSG00000207865|hsa-mir-34a|hsa-miR-34a|jt:ENSG00000133740  
MYOD|ENSG00000207865|hsa-mir-34a|hsa-miR-34a|jt:ENSG00000149575  
MYOD|ENSG00000207865|hsa-mir-34a|hsa-miR-34a|jt:ENSG00000205592  
MYOD|ENSG00000207865|hsa-mir-34a|hsa-miR-34a|jt:ENSG00000166971  
MYOD|ENSG00000207865|hsa-mir-34a|hsa-miR-34a|jt:ENSG00000122783  
MYOD|ENSG00000207865|hsa-mir-34a|hsa-miR-34a|jt:ENSG00000096717  
MYOD|ENSG00000207865|hsa-mir-34a|hsa-miR-34a|jt:ENSG00000181652  
MYOD|ENSG00000207865|hsa-mir-34a|hsa-miR-34a|jt:ENSG00000182749  
MYOD|ENSG00000208017|hsa-mir-140|hsa-miR-140|jt:ENSG00000182490  
MYOD|ENSG00000208017|hsa-mir-140|hsa-miR-140|jt:ENSG00000158578  
MYOD|ENSG00000208017|hsa-mir-140|hsa-miR-140|jt:ENSG00000165168  
MYOD|ENSG00000208017|hsa-mir-140|hsa-miR-140|jt:ENSG00000205592  
MYOD|ENSG00000208017|hsa-mir-140|hsa-miR-140|jt:ENSG00000086232  
MYOD|ENSG00000208017|hsa-mir-140|hsa-miR-140|jt:ENSG00000159650  
MYOD|ENSG00000208017|hsa-mir-140|hsa-miR-140|jt:ENSG00000188971  
MYOD|ENSG00000208017|hsa-mir-140|hsa-miR-140|jt:ENSG00000139914  
MYOD|ENSG00000208017|hsa-mir-140|hsa-miR-140|jt:ENSG00000118898  
MYOD|ENSG00000208017|hsa-mir-140|hsa-miR-140|jt:ENSG00000119772  
MYOD|ENSG00000208017|hsa-mir-140|hsa-miR-140|jt:ENSG00000140931  
MYOD|ENSG00000208017|hsa-mir-140|hsa-miR-140|jt:ENSG00000156925  
MYOD|ENSG00000208017|hsa-mir-140|hsa-miR-140|jt:ENSG00000101290  
NCX|ENSG00000198972|hsa-let-7e|hsa-let-7e|jt:ENSG00000125741  
NCX|ENSG00000198972|hsa-let-7e|hsa-let-7e|jt:ENSG00000187109  
NCX|ENSG00000198972|hsa-let-7e|hsa-let-7e|jt:ENSG00000187772  
NCX|ENSG00000198972|hsa-let-7e|hsa-let-7e|jt:ENSG00000136770  
NCX|ENSG00000198972|hsa-let-7e|hsa-let-7e|jt:ENSG00000204538  
NCX|ENSG00000198972|hsa-let-7e|hsa-let-7e|jt:ENSG00000171365  
NCX|ENSG00000199149|hsa-mir-20a|hsa-miR-20a|jt:ENSG00000123411  
NCX|ENSG00000199149|hsa-mir-20a|hsa-miR-20a|jt:ENSG00000145362  
NCX|ENSG00000199149|hsa-mir-20a|hsa-miR-20a|jt:ENSG00000143107  
NCX|ENSG00000199149|hsa-mir-20a|hsa-miR-20a|jt:ENSG00000196460  
NCX|ENSG00000199149|hsa-mir-20a|hsa-miR-20a|jt:ENSG00000136935  
NCX|ENSG00000207550|hsa-mir-99b|hsa-miR-99b|jt:ENSG00000112299  
NCX|ENSG00000207572|hsa-mir-363|hsa-miR-363|jt:ENSG00000023171  
NCX|ENSG00000207572|hsa-mir-363|hsa-miR-363|jt:ENSG00000143450  
NCX|ENSG00000207572|hsa-mir-363|hsa-miR-363|jt:ENSG00000136478  
NCX|ENSG00000207572|hsa-mir-363|hsa-miR-363|jt:ENSG00000204248  
NCX|ENSG00000207572|hsa-mir-363|hsa-miR-363|jt:ENSG00000205830  
NCX|ENSG00000207572|hsa-mir-363|hsa-miR-363|jt:ENSG00000173517  
NCX|ENSG00000207572|hsa-mir-363|hsa-miR-363|jt:ENSG00000198089  
NCX|ENSG00000207602|hsa-mir-106a|hsa-miR-106a|jt:ENSG00000115652  
NCX|ENSG00000207602|hsa-mir-106a|hsa-miR-106a|jt:ENSG00000145362  
NCX|ENSG00000207602|hsa-mir-106a|hsa-miR-106a|jt:ENSG00000143107  
NCX|ENSG00000207602|hsa-mir-106a|hsa-miR-106a|jt:ENSG00000205937  
NCX|ENSG00000207602|hsa-mir-106a|hsa-miR-106a|jt:ENSG00000196460  
NCX|ENSG00000207610|hsa-mir-19a|hsa-miR-19a|jt:ENSG00000155189  
NCX|ENSG00000207610|hsa-mir-19a|hsa-miR-19a|jt:ENSG00000078699  
NCX|ENSG00000207610|hsa-mir-19a|hsa-miR-19a|jt:ENSG00000117601  
NCX|ENSG00000207610|hsa-mir-19a|hsa-miR-19a|jt:ENSG00000124788  
NCX|ENSG00000207610|hsa-mir-19a|hsa-miR-19a|jt:ENSG00000185112  
NCX|ENSG00000207610|hsa-mir-19a|hsa-miR-19a|jt:ENSG00000113648  
NCX|ENSG00000207638|hsa-mir-99a|hsa-miR-99a|jt:ENSG00000112299  
NCX|ENSG00000207710|hsa-mir-20b|hsa-miR-20b|jt:ENSG00000145362  
NCX|ENSG00000207710|hsa-mir-20b|hsa-miR-20b|jt:ENSG00000143107  
NCX|ENSG00000207710|hsa-mir-20b|hsa-miR-20b|jt:ENSG00000196460  
NCX|ENSG00000207745|hsa-mir-17|hsa-miR-17-5p|jt:ENSG00000145362  
NCX|ENSG00000207745|hsa-mir-17|hsa-miR-17-5p|jt:ENSG00000143107  
NCX|ENSG00000207745|hsa-mir-17|hsa-miR-17-5p|jt:ENSG00000196460  
NCX|ENSG00000207792|hsa-mir-151|hsa-miR-151|jt:ENSG00000186638  
NCX|ENSG00000207792|hsa-mir-151|hsa-miR-151|jt:ENSG00000135346  
NCX|ENSG00000207792|hsa-mir-151|hsa-miR-151|jt:ENSG00000154143  
NCX|ENSG00000207792|hsa-mir-151|hsa-miR-151|jt:ENSG00000147869  
NCX|ENSG00000207863|hsa-mir-125b-2|hsa-miR-125b|jt:ENSG00000065361  
NCX|ENSG00000207863|hsa-mir-125b-2|hsa-miR-125b|jt:ENSG00000141380  
NCX|ENSG00000207863|hsa-mir-125b-2|hsa-miR-125b|jt:ENSG00000167302  
NCX|ENSG00000207863|hsa-mir-125b-2|hsa-miR-125b|jt:ENSG00000196616  
NCX|ENSG00000207863|hsa-mir-125b-2|hsa-miR-125b|jt:ENSG00000131914  
NCX|ENSG00000207863|hsa-mir-125b-2|hsa-miR-125b|jt:ENSG00000153885  
NCX|ENSG00000207863|hsa-mir-125b-2|hsa-miR-125b|jt:ENSG00000125449  
NCX|ENSG00000207863|hsa-mir-125b-2|hsa-miR-125b|jt:ENSG00000205191  
NCX|ENSG00000207863|hsa-mir-125b-2|hsa-miR-125b|jt:ENSG00000106993  
NF-AT|ENSG00000198975|hsa-let-7a-2|hsa-let-7a|jt:ENSG00000150593  
NF-AT|ENSG00000198975|hsa-let-7a-2|hsa-let-7a|jt:ENSG00000187109  
NF-AT|ENSG00000198975|hsa-let-7a-2|hsa-let-7a|jt:ENSG00000135912  
NF-AT|ENSG00000198975|hsa-let-7a-2|hsa-let-7a|jt:ENSG00000178999  
NF-AT|ENSG00000198975|hsa-let-7a-2|hsa-let-7a|jt:ENSG00000094963  
NF-AT|ENSG00000198975|hsa-let-7a-2|hsa-let-7a|jt:ENSG00000105419  
NF-AT|ENSG00000198975|hsa-let-7a-2|hsa-let-7a|jt:ENSG00000144031  
NF-AT|ENSG00000198975|hsa-let-7a-2|hsa-let-7a|jt:ENSG00000130508  
NF-AT|ENSG00000198975|hsa-let-7a-2|hsa-let-7a|jt:ENSG00000179361  
NF-AT|ENSG00000198975|hsa-let-7a-2|hsa-let-7a|jt:ENSG00000155846  
NF-AT|ENSG00000198975|hsa-let-7a-2|hsa-let-7a|jt:ENSG00000135297  
NF-AT|ENSG00000198975|hsa-let-7a-2|hsa-let-7a|jt:ENSG00000171365  
NF-AT|ENSG00000199080|hsa-mir-133b|hsa-miR-133b|jt:ENSG00000154822  
NF-AT|ENSG00000199080|hsa-mir-133b|hsa-miR-133b|jt:ENSG00000163568  
NF-AT|ENSG00000199080|hsa-mir-133b|hsa-miR-133b|jt:ENSG00000137507  
NF-AT|ENSG00000199080|hsa-mir-133b|hsa-miR-133b|jt:ENSG00000008197  
NF-AT|ENSG00000199080|hsa-mir-133b|hsa-miR-133b|jt:ENSG00000144580  
NF-AT|ENSG00000199080|hsa-mir-133b|hsa-miR-133b|jt:ENSG00000180471  
NF-AT|ENSG00000199080|hsa-mir-133b|hsa-miR-133b|jt:ENSG00000102050  
NF-AT|ENSG00000199080|hsa-mir-133b|hsa-miR-133b|jt:ENSG00000120437  
NF-AT|ENSG00000199080|hsa-mir-133b|hsa-miR-133b|jt:ENSG00000163295  
NF-AT|ENSG00000199085|hsa-mir-148a|hsa-miR-148a|jt:ENSG00000115310  
NF-AT|ENSG00000199085|hsa-mir-148a|hsa-miR-148a|jt:ENSG00000189180  
NF-AT|ENSG00000199085|hsa-mir-148a|hsa-miR-148a|jt:ENSG00000101901  
NF-AT|ENSG00000199085|hsa-mir-148a|hsa-miR-148a|jt:ENSG00000171867  
NF-AT|ENSG00000199085|hsa-mir-148a|hsa-miR-148a|jt:ENSG00000161638  
NF-AT|ENSG00000199085|hsa-mir-148a|hsa-miR-148a|jt:ENSG00000135541  
NF-AT|ENSG00000199085|hsa-mir-148a|hsa-miR-148a|jt:ENSG00000182512  
NF-AT|ENSG00000199085|hsa-mir-148a|hsa-miR-148a|jt:ENSG00000106511  
NF-AT|ENSG00000199085|hsa-mir-148a|hsa-miR-148a|jt:ENSG00000145860  
NF-AT|ENSG00000199085|hsa-mir-148a|hsa-miR-148a|jt:ENSG00000070985  
NF-AT|ENSG00000199085|hsa-mir-148a|hsa-miR-148a|jt:ENSG00000180537  
NF-AT|ENSG00000199094|hsa-mir-30c-2|hsa-miR-30c|jt:ENSG00000138675





NF-Y|ENSG00000207791|hsa-mir-497|hsa-miR-497|jt:ENSG00000120265  
NF-Y|ENSG00000207791|hsa-mir-497|hsa-miR-497|jt:ENSG00000163444  
NF-Y|ENSG00000207791|hsa-mir-497|hsa-miR-497|jt:ENSG00000205808  
NF-Y|ENSG00000207791|hsa-mir-497|hsa-miR-497|jt:ENSG00000171307  
NF-Y|ENSG00000207863|hsa-mir-125b-2|hsa-miR-125b|jt:ENSG00000113161  
NF-Y|ENSG00000207863|hsa-mir-125b-2|hsa-miR-125b|jt:ENSG00000155621  
NF-Y|ENSG00000207863|hsa-mir-125b-2|hsa-miR-125b|jt:ENSG00000182858  
NF-Y|ENSG00000207863|hsa-mir-125b-2|hsa-miR-125b|jt:ENSG00000130348  
NF-Y|ENSG00000207863|hsa-mir-125b-2|hsa-miR-125b|jt:ENSG00000110075  
NF-Y|ENSG00000207863|hsa-mir-125b-2|hsa-miR-125b|jt:ENSG00000167302  
NF-Y|ENSG00000207863|hsa-mir-125b-2|hsa-miR-125b|jt:ENSG00000110274  
NF-Y|ENSG00000207863|hsa-mir-125b-2|hsa-miR-125b|jt:ENSG00000095794  
NF-Y|ENSG00000207863|hsa-mir-125b-2|hsa-miR-125b|jt:ENSG00000076716  
NF-Y|ENSG00000207863|hsa-mir-125b-2|hsa-miR-125b|jt:ENSG00000175779  
NF-Y|ENSG00000207863|hsa-mir-125b-2|hsa-miR-125b|jt:ENSG00000138111  
NF-Y|ENSG00000207863|hsa-mir-125b-2|hsa-miR-125b|jt:ENSG00000178229  
NF-Y|ENSG00000207863|hsa-mir-125b-2|hsa-miR-125b|jt:ENSG00000133121  
NF-Y|ENSG00000207863|hsa-mir-125b-2|hsa-miR-125b|jt:ENSG00000137860  
NF-Y|ENSG00000207863|hsa-mir-125b-2|hsa-miR-125b|jt:ENSG00000181026  
NF-Y|ENSG00000207863|hsa-mir-125b-2|hsa-miR-125b|jt:ENSG00000118322  
NF-Y|ENSG00000207863|hsa-mir-125b-2|hsa-miR-125b|jt:ENSG00000171169  
NF-Y|ENSG00000207929|hsa-mir-195|hsa-miR-195|jt:ENSG00000204388  
NF-Y|ENSG00000207929|hsa-mir-195|hsa-miR-195|jt:ENSG00000131381  
NF-Y|ENSG00000207929|hsa-mir-195|hsa-miR-195|jt:ENSG00000149182  
NF-Y|ENSG00000207929|hsa-mir-195|hsa-miR-195|jt:ENSG00000124208  
NF-Y|ENSG00000207929|hsa-mir-195|hsa-miR-195|jt:ENSG00000167778  
NF-Y|ENSG00000207929|hsa-mir-195|hsa-miR-195|jt:ENSG00000120265  
NF-Y|ENSG00000207929|hsa-mir-195|hsa-miR-195|jt:ENSG00000163444  
NF-Y|ENSG00000207929|hsa-mir-195|hsa-miR-195|jt:ENSG00000205808  
NF-Y|ENSG00000207929|hsa-mir-195|hsa-miR-195|jt:ENSG00000171307  
NKX2-5|ENSG00000198981|hsa-mir-29a|hsa-miR-29a|jt:ENSG00000197615  
NKX2-5|ENSG00000198981|hsa-mir-29a|hsa-miR-29a|jt:ENSG00000114270  
NKX2-5|ENSG00000198981|hsa-mir-29a|hsa-miR-29a|jt:ENSG00000173546  
NKX2-5|ENSG00000199004|hsa-mir-21|hsa-miR-21|jt:ENSG00000037757  
NKX2-5|ENSG00000199004|hsa-mir-21|hsa-miR-21|jt:ENSG00000143614  
NKX2-5|ENSG00000199004|hsa-mir-21|hsa-miR-21|jt:ENSG00000052795  
NKX2-5|ENSG00000199004|hsa-mir-21|hsa-miR-21|jt:ENSG00000145839  
NKX2-5|ENSG00000199004|hsa-mir-21|hsa-miR-21|jt:ENSG00000205413  
NKX2-5|ENSG00000199004|hsa-mir-21|hsa-miR-21|jt:ENSG00000197747  
NKX2-5|ENSG00000207933|hsa-mir-9-1|hsa-miR-9|jt:ENSG00000109061  
NKX2-5|ENSG00000207933|hsa-mir-9-1|hsa-miR-9|jt:ENSG00000205631  
NKX2-5|ENSG00000207933|hsa-mir-9-1|hsa-miR-9|jt:ENSG00000137965  
NKX2-5|ENSG00000207933|hsa-mir-9-1|hsa-miR-9|jt:ENSG00000133800  
NKX2-5|ENSG00000207933|hsa-mir-9-1|hsa-miR-9|jt:ENSG00000159184  
NKX2-5|ENSG00000207933|hsa-mir-9-1|hsa-miR-9|jt:ENSG00000183508  
NKX2-5|ENSG00000207933|hsa-mir-9-1|hsa-miR-9\*|jt:ENSG00000188519  
NKX2-5|ENSG00000207933|hsa-mir-9-1|hsa-miR-9\*|jt:ENSG00000178401  
NKX2-5|ENSG00000207933|hsa-mir-9-1|hsa-miR-9\*|jt:ENSG00000143622  
NKX2-5|ENSG00000207933|hsa-mir-9-1|hsa-miR-9\*|jt:ENSG00000185985  
NKX2-5|ENSG00000207950|hsa-mir-296|hsa-miR-296|jt:ENSG00000170279  
NKX6-1|ENSG00000207604|hsa-mir-206|hsa-miR-206|jt:ENSG00000162105  
NKX6-1|ENSG00000207604|hsa-mir-206|hsa-miR-206|jt:ENSG00000165807  
NKX6-1|ENSG00000207795|hsa-mir-155|hsa-miR-155|jt:ENSG0000010704  
NKX6-2|ENSG00000198975|hsa-let-7a-2|hsa-let-7a|jt:ENSG00000164654  
NKX6-2|ENSG00000198975|hsa-let-7a-2|hsa-let-7a|jt:ENSG00000197948  
NKX6-2|ENSG00000198975|hsa-let-7a-2|hsa-let-7a|jt:ENSG00000177058  
NKX6-2|ENSG00000198975|hsa-let-7a-2|hsa-let-7a|jt:ENSG00000204538  
NKX6-2|ENSG00000199077|hsa-mir-129-2|hsa-miR-129|jt:ENSG00000134138  
NKX6-2|ENSG00000199077|hsa-mir-129-2|hsa-miR-129|jt:ENSG00000163781  
NKX6-2|ENSG00000199153|hsa-mir-30d|hsa-miR-30d|jt:ENSG00000143355  
NKX6-2|ENSG00000199153|hsa-mir-30d|hsa-miR-30d|jt:ENSG00000168955  
NKX6-2|ENSG00000199153|hsa-mir-30d|hsa-miR-30d|jt:ENSG00000169139  
NKX6-2|ENSG00000199153|hsa-mir-30d|hsa-miR-30d|jt:ENSG00000154359  
NKX6-2|ENSG00000199153|hsa-mir-30d|hsa-miR-30d|jt:ENSG00000180574  
NKX6-2|ENSG00000199153|hsa-mir-30d|hsa-miR-30d|jt:ENSG00000100099  
NKX6-2|ENSG00000199153|hsa-mir-30d|hsa-miR-30d|jt:ENSG00000157470  
NKX6-2|ENSG00000207548|hsa-mir-217|hsa-miR-217|jt:ENSG00000187105  
NKX6-2|ENSG00000207548|hsa-mir-217|hsa-miR-217|jt:ENSG00000100647  
NKX6-2|ENSG00000207548|hsa-mir-217|hsa-miR-217|jt:ENSG00000173041  
NKX6-2|ENSG00000207548|hsa-mir-217|hsa-miR-217|jt:ENSG00000142684  
NKX6-2|ENSG00000207582|hsa-mir-30b|hsa-miR-30b|jt:ENSG00000143355  
NKX6-2|ENSG00000207582|hsa-mir-30b|hsa-miR-30b|jt:ENSG00000168955  
NKX6-2|ENSG00000207582|hsa-mir-30b|hsa-miR-30b|jt:ENSG00000169139  
NKX6-2|ENSG00000207582|hsa-mir-30b|hsa-miR-30b|jt:ENSG00000154359  
NKX6-2|ENSG00000207582|hsa-mir-30b|hsa-miR-30b|jt:ENSG00000180574  
NKX6-2|ENSG00000207582|hsa-mir-30b|hsa-miR-30b|jt:ENSG00000100099  
NKX6-2|ENSG00000207582|hsa-mir-30b|hsa-miR-30b|jt:ENSG00000157470  
NKX6-2|ENSG00000207638|hsa-mir-99a|hsa-miR-99a|jt:ENSG00000116017  
NKX6-2|ENSG00000207638|hsa-mir-99a|hsa-miR-99a|jt:ENSG00000177406  
NKX6-2|ENSG00000207731|hsa-mir-506|hsa-miR-506|jt:ENSG00000122884  
NKX6-2|ENSG00000207731|hsa-mir-506|hsa-miR-506|jt:ENSG00000101150  
NKX6-2|ENSG00000207731|hsa-mir-506|hsa-miR-506|jt:ENSG00000167994  
NKX6-2|ENSG00000207863|hsa-mir-125b-2|hsa-miR-125b|jt:ENSG00000170786  
NKX6-2|ENSG00000207863|hsa-mir-125b-2|hsa-miR-125b|jt:ENSG00000119541  
NKX6-2|ENSG00000207863|hsa-mir-125b-2|hsa-miR-125b|jt:ENSG00000205205  
NKX6-2|ENSG00000207863|hsa-mir-125b-2|hsa-miR-125b|jt:ENSG00000135443  
NKX6-2|ENSG00000207863|hsa-mir-125b-2|hsa-miR-125b|jt:ENSG00000095303  
NKX6-2|ENSG00000207971|hsa-mir-125b-1|hsa-miR-125b|jt:ENSG00000170786  
NKX6-2|ENSG00000207971|hsa-mir-125b-1|hsa-miR-125b|jt:ENSG00000119541  
NKX6-2|ENSG00000207971|hsa-mir-125b-1|hsa-miR-125b|jt:ENSG00000205205  
NKX6-2|ENSG00000207971|hsa-mir-125b-1|hsa-miR-125b|jt:ENSG00000135443  
NKX6-2|ENSG00000207971|hsa-mir-125b-1|hsa-miR-125b|jt:ENSG00000095303  
NKX6-2|ENSG00000207994|hsa-mir-100|hsa-miR-100|jt:ENSG00000116017  
NKX6-2|ENSG00000207994|hsa-mir-100|hsa-miR-100|jt:ENSG00000177406  
NRF-1|ENSG00000207792|hsa-mir-151|hsa-miR-151|jt:ENSG00000137075  
OCTAMER|ENSG00000198972|hsa-let-7e|hsa-let-7e|jt:ENSG00000125741  
OCTAMER|ENSG00000198972|hsa-let-7e|hsa-let-7e|jt:ENSG00000134323  
OCTAMER|ENSG00000198972|hsa-let-7e|hsa-let-7e|jt:ENSG0000010539  
OCTAMER|ENSG00000198972|hsa-let-7e|hsa-let-7e|jt:ENSG00000148200  
OCTAMER|ENSG00000198972|hsa-let-7e|hsa-let-7e|jt:ENSG00000197948  
OCTAMER|ENSG00000198972|hsa-let-7e|hsa-let-7e|jt:ENSG00000165449  
OCTAMER|ENSG00000207550|hsa-mir-99b|hsa-miR-99b|jt:ENSG00000152689  
OCTAMER|ENSG00000207550|hsa-mir-99b|hsa-miR-99b|jt:ENSG00000082213  
OCTAMER|ENSG00000207550|hsa-mir-99b|hsa-miR-99b|jt:ENSG00000116017  
OCTAMER|ENSG00000207586|hsa-mir-135a-2|hsa-miR-135a|jt:ENSG00000141965

OCTAMER|ENSG00000207586|hsa-mir-135a-2|hsa-miR-135a|jt:ENSG00000113494  
OCTAMER|ENSG00000207586|hsa-mir-135a-2|hsa-miR-135a|jt:ENSG00000198429  
OCTAMER|ENSG00000207947|hsa-mir-152|hsa-miR-152|jt:ENSG00000118263  
OCTAMER|ENSG00000207947|hsa-mir-152|hsa-miR-152|jt:ENSG00000124357  
OCTAMER|ENSG00000207947|hsa-mir-152|hsa-miR-152|jt:ENSG00000101901  
OCTAMER|ENSG00000207947|hsa-mir-152|hsa-miR-152|jt:ENSG00000133812  
OCTAMER|ENSG00000207947|hsa-mir-152|hsa-miR-152|jt:ENSG00000174851  
OCTAMER|ENSG00000207947|hsa-mir-152|hsa-miR-152|jt:ENSG00000131711  
OCTAMER|ENSG00000207947|hsa-mir-152|hsa-miR-152|jt:ENSG00000166971  
OCTAMER|ENSG00000207947|hsa-mir-152|hsa-miR-152|jt:ENSG00000204275  
OCTAMER|ENSG00000207947|hsa-mir-152|hsa-miR-152|jt:ENSG00000136842  
OCTAMER|ENSG00000208009|hsa-mir-130a|hsa-miR-130a|jt:ENSG00000101901  
OCTAMER|ENSG00000208009|hsa-mir-130a|hsa-miR-130a|jt:ENSG00000189069  
OCTAMER|ENSG00000208009|hsa-mir-130a|hsa-miR-130a|jt:ENSG00000166971  
OCTAMER|ENSG00000208009|hsa-mir-130a|hsa-miR-130a|jt:ENSG00000204275  
P65|ENSG00000207630|hsa-mir-7-3|hsa-miR-7|jt:ENSG00000115350  
P65|ENSG00000207630|hsa-mir-7-3|hsa-miR-7|jt:ENSG00000082213  
P65|ENSG00000207630|hsa-mir-7-3|hsa-miR-7|jt:ENSG00000158747  
P65|ENSG00000207630|hsa-mir-7-3|hsa-miR-7|jt:ENSG00000173039  
P65|ENSG00000207752|hsa-mir-199a-1|hsa-miR-199a|jt:ENSG00000163599  
P65|ENSG00000207752|hsa-mir-199a-1|hsa-miR-199a\*|jt:ENSG00000111860  
P65|ENSG00000207752|hsa-mir-199a-1|hsa-miR-199a\*|jt:ENSG00000130669  
P65|ENSG00000207752|hsa-mir-199a-1|hsa-miR-199a\*|jt:ENSG00000122779  
P65|ENSG00000207752|hsa-mir-199a-1|hsa-miR-199a\*|jt:ENSG00000117360  
PAX-4|ENSG00000199004|hsa-mir-21|hsa-miR-21|jt:ENSG00000095002  
PAX-4|ENSG00000199004|hsa-mir-21|hsa-miR-21|jt:ENSG00000173391  
PAX-4|ENSG00000199004|hsa-mir-21|hsa-miR-21|jt:ENSG00000112394  
PAX-4|ENSG00000199004|hsa-mir-21|hsa-miR-21|jt:ENSG00000119899  
PAX-4|ENSG00000199149|hsa-mir-20a|hsa-miR-20a|jt:ENSG00000106628  
PAX-4|ENSG00000199149|hsa-mir-20a|hsa-miR-20a|jt:ENSG00000180917  
PAX-4|ENSG00000199149|hsa-mir-20a|hsa-miR-20a|jt:ENSG00000144285  
PAX-4|ENSG00000199177|hsa-mir-31|hsa-miR-31|jt:ENSG00000086666  
PAX-4|ENSG00000199177|hsa-mir-31|hsa-miR-31|jt:ENSG00000110799  
PAX-4|ENSG00000199177|hsa-mir-31|hsa-miR-31|jt:ENSG00000155719  
PAX-4|ENSG00000207610|hsa-mir-19a|hsa-miR-19a|jt:ENSG00000140284  
PAX-4|ENSG00000207610|hsa-mir-19a|hsa-miR-19a|jt:ENSG00000155189  
PAX-4|ENSG00000207610|hsa-mir-19a|hsa-miR-19a|jt:ENSG00000180917  
PAX-4|ENSG00000207610|hsa-mir-19a|hsa-miR-19a|jt:ENSG00000117601  
PAX-4|ENSG00000207610|hsa-mir-19a|hsa-miR-19a|jt:ENSG00000124788  
PAX-4|ENSG00000207610|hsa-mir-19a|hsa-miR-19a|jt:ENSG00000108582  
PAX-4|ENSG00000207610|hsa-mir-19a|hsa-miR-19a|jt:ENSG00000189429  
PAX-4|ENSG00000207610|hsa-mir-19a|hsa-miR-19a|jt:ENSG00000101773  
PAX-4|ENSG00000207638|hsa-mir-99a|hsa-miR-99a|jt:ENSG00000085721  
PAX-4|ENSG00000207638|hsa-mir-99a|hsa-miR-99a|jt:ENSG00000112299  
PAX-4|ENSG00000207745|hsa-mir-17|hsa-miR-17-5p|jt:ENSG00000106628  
PAX-4|ENSG00000207745|hsa-mir-17|hsa-miR-17-5p|jt:ENSG00000180917  
PAX-4|ENSG00000207745|hsa-mir-17|hsa-miR-17-5p|jt:ENSG00000127511  
PAX-4|ENSG00000207745|hsa-mir-17|hsa-miR-17-5p|jt:ENSG00000203793  
PAX-4|ENSG00000207863|hsa-mir-125b-2|hsa-miR-125b|jt:ENSG00000119541  
PAX-4|ENSG00000207863|hsa-mir-125b-2|hsa-miR-125b|jt:ENSG00000153885  
PBX-1|ENSG00000198981|hsa-mir-29a|hsa-miR-29a|jt:ENSG00000185591  
PBX-1|ENSG00000198981|hsa-mir-29a|hsa-miR-29a|jt:ENSG00000143162  
PBX-1|ENSG00000198981|hsa-mir-29a|hsa-miR-29a|jt:ENSG00000175322  
PBX-1|ENSG00000198981|hsa-mir-29a|hsa-miR-29a|jt:ENSG00000133247  
PBX-1|ENSG00000198981|hsa-mir-29a|hsa-miR-29a|jt:ENSG00000133466  
PBX-1|ENSG00000207586|hsa-mir-135a-2|hsa-miR-135a|jt:ENSG00000135486  
PBX-1|ENSG00000207586|hsa-mir-135a-2|hsa-miR-135a|jt:ENSG00000185736  
PBX-1|ENSG00000208017|hsa-mir-140|hsa-miR-140|jt:ENSG00000060688  
PBX-1|ENSG00000208017|hsa-mir-140|hsa-miR-140|jt:ENSG00000128595  
PBX-1|ENSG00000208017|hsa-mir-140|hsa-miR-140|jt:ENSG00000104756  
PBX-1|ENSG00000208017|hsa-mir-140|hsa-miR-140|jt:ENSG00000198033  
PBX-1|ENSG00000208017|hsa-mir-140|hsa-miR-140|jt:ENSG00000082701  
PBX-1|ENSG00000208017|hsa-mir-140|hsa-miR-140|jt:ENSG00000110717  
PBX-1|ENSG00000208017|hsa-mir-140|hsa-miR-140|jt:ENSG00000154065  
PBX-1|ENSG00000208017|hsa-mir-140|hsa-miR-140|jt:ENSG00000154096  
PBX-1|ENSG00000211590|hsa-mir-802|hsa-miR-802|jt:ENSG00000185963  
PBX-1|ENSG00000211590|hsa-mir-802|hsa-miR-802|jt:ENSG00000143546  
PBX-1|ENSG00000211590|hsa-mir-802|hsa-miR-802|jt:ENSG00000176340  
PBX-1|ENSG00000211590|hsa-mir-802|hsa-miR-802|jt:ENSG00000004534  
PBX-1|ENSG00000211590|hsa-mir-802|hsa-miR-802|jt:ENSG00000131375  
PEA3|ENSG00000199024|hsa-mir-103-2|hsa-miR-103|jt:ENSG00000122140  
PEA3|ENSG00000199024|hsa-mir-103-2|hsa-miR-103|jt:ENSG00000151461  
PEA3|ENSG00000199024|hsa-mir-103-2|hsa-miR-103|jt:ENSG00000152127  
PEA3|ENSG00000199024|hsa-mir-103-2|hsa-miR-103|jt:ENSG00000149136  
PEA3|ENSG00000199024|hsa-mir-103-2|hsa-miR-103|jt:ENSG00000179044  
PEA3|ENSG00000199024|hsa-mir-103-2|hsa-miR-103|jt:ENSG00000205808  
PEA3|ENSG00000199024|hsa-mir-103-2|hsa-miR-103|jt:ENSG00000186185  
PEA3|ENSG00000199024|hsa-mir-103-2|hsa-miR-103|jt:ENSG00000196712  
PEA3|ENSG00000199024|hsa-mir-103-2|hsa-miR-103|jt:ENSG00000204600  
PEA3|ENSG00000199024|hsa-mir-103-2|hsa-miR-103|jt:ENSG00000100744  
PEA3|ENSG00000199024|hsa-mir-103-2|hsa-miR-103|jt:ENSG00000104859  
PEA3|ENSG00000199024|hsa-mir-103-2|hsa-miR-103|jt:ENSG00000130584  
PEA3|ENSG00000199024|hsa-mir-103-2|hsa-miR-103|jt:ENSG00000135968  
PEA3|ENSG00000199024|hsa-mir-103-2|hsa-miR-103|jt:ENSG00000100150  
PEA3|ENSG00000199024|hsa-mir-103-2|hsa-miR-103|jt:ENSG00000172725  
PEA3|ENSG00000199024|hsa-mir-103-2|hsa-miR-103|jt:ENSG00000163444  
PEA3|ENSG00000199077|hsa-mir-129-2|hsa-miR-129|jt:ENSG00000105058  
PEA3|ENSG00000199077|hsa-mir-129-2|hsa-miR-129|jt:ENSG00000113845  
PEA3|ENSG00000199077|hsa-mir-129-2|hsa-miR-129|jt:ENSG00000158435  
PEA3|ENSG00000199077|hsa-mir-129-2|hsa-miR-129|jt:ENSG00000178796  
PEA3|ENSG00000199077|hsa-mir-129-2|hsa-miR-129|jt:ENSG00000178110  
PEA3|ENSG00000199077|hsa-mir-129-2|hsa-miR-129|jt:ENSG00000198518  
PEA3|ENSG00000199080|hsa-mir-133b|hsa-miR-133b|jt:ENSG00000120437  
PEA3|ENSG00000199080|hsa-mir-133b|hsa-miR-133b|jt:ENSG00000180471  
PEA3|ENSG00000199080|hsa-mir-133b|hsa-miR-133b|jt:ENSG00000139572  
PEA3|ENSG00000199080|hsa-mir-133b|hsa-miR-133b|jt:ENSG00000144580  
PEA3|ENSG00000199082|hsa-mir-342|hsa-miR-342|jt:ENSG00000185298  
PEA3|ENSG00000199082|hsa-mir-342|hsa-miR-342|jt:ENSG00000137393  
PEA3|ENSG00000199082|hsa-mir-342|hsa-miR-342|jt:ENSG00000089195  
PEA3|ENSG00000199082|hsa-mir-342|hsa-miR-342|jt:ENSG00000132002  
PEA3|ENSG00000199082|hsa-mir-342|hsa-miR-342|jt:ENSG00000154736  
PEA3|ENSG00000199082|hsa-mir-342|hsa-miR-342|jt:ENSG00000184708  
PEA3|ENSG00000199082|hsa-mir-342|hsa-miR-342|jt:ENSG00000181904  
PEA3|ENSG00000199082|hsa-mir-342|hsa-miR-342|jt:ENSG00000197713  
PEA3|ENSG00000199082|hsa-mir-342|hsa-miR-342|jt:ENSG00000121807







PEA3|ENSG00000209707|hsa-mir-24-2|hsa-miR-24|jt:ENSG00000132563  
PEA3|ENSG00000209707|hsa-mir-24-2|hsa-miR-24|jt:ENSG00000175229  
PEA3|ENSG00000211590|hsa-mir-802|hsa-miR-802|jt:ENSG00000150779  
PEA3|ENSG00000211590|hsa-mir-802|hsa-miR-802|jt:ENSG00000081154  
PEA3|ENSG00000211590|hsa-mir-802|hsa-miR-802|jt:ENSG00000132549  
PEA3|ENSG00000211590|hsa-mir-802|hsa-miR-802|jt:ENSG00000138448  
PEA3|ENSG00000211590|hsa-mir-802|hsa-miR-802|jt:ENSG00000136167  
PEA3|ENSG00000211590|hsa-mir-802|hsa-miR-802|jt:ENSG00000137100  
PEA3|ENSG00000211590|hsa-mir-802|hsa-miR-802|jt:ENSG00000076258  
PEA3|ENSG00000211590|hsa-mir-802|hsa-miR-802|jt:ENSG00000066855  
PEA3|ENSG00000211590|hsa-mir-802|hsa-miR-802|jt:ENSG00000176340  
PEA3|ENSG00000211590|hsa-mir-802|hsa-miR-802|jt:ENSG00000079134  
PEA3|ENSG00000211590|hsa-mir-802|hsa-miR-802|jt:ENSG00000185963  
PEA3|ENSG00000211590|hsa-mir-802|hsa-miR-802|jt:ENSG00000167080  
PEA3|ENSG00000211590|hsa-mir-802|hsa-miR-802|jt:ENSG00000177917  
PEA3|ENSG00000211590|hsa-mir-802|hsa-miR-802|jt:ENSG00000182827  
PEA3|ENSG00000211590|hsa-mir-802|hsa-miR-802|jt:ENSG00000163939  
PEA3|ENSG00000211590|hsa-mir-802|hsa-miR-802|jt:ENSG00000022556  
PEA3|ENSG00000211590|hsa-mir-802|hsa-miR-802|jt:ENSG00000026508  
PEA3|ENSG00000211590|hsa-mir-802|hsa-miR-802|jt:ENSG00000100335  
PEA3|ENSG00000211590|hsa-mir-802|hsa-miR-802|jt:ENSG00000110172  
PEA3|ENSG00000211590|hsa-mir-802|hsa-miR-802|jt:ENSG00000099338  
PEA3|ENSG00000211590|hsa-mir-802|hsa-miR-802|jt:ENSG00000115339  
PEA3|ENSG00000211590|hsa-mir-802|hsa-miR-802|jt:ENSG00000153989  
PEA3|ENSG00000211590|hsa-mir-802|hsa-miR-802|jt:ENSG00000131188  
PEA3|ENSG00000211590|hsa-mir-802|hsa-miR-802|jt:ENSG00000198739  
PEA3|ENSG00000211590|hsa-mir-802|hsa-miR-802|jt:ENSG00000152822  
PEA3|ENSG00000211590|hsa-mir-802|hsa-miR-802|jt:ENSG00000196976  
PITX2|ENSG00000207630|hsa-mir-7-3|hsa-miR-7|jt:ENSG00000166913  
PITX2|ENSG00000207630|hsa-mir-7-3|hsa-miR-7|jt:ENSG00000141161  
POU1F1|ENSG00000198975|hsa-let-7a-2|hsa-let-7a|jt:ENSG00000164654  
POU1F1|ENSG00000198975|hsa-let-7a-2|hsa-let-7a|jt:ENSG00000197948  
POU1F1|ENSG00000199094|hsa-mir-30c-2|hsa-miR-30c|jt:ENSG00000143355  
POU1F1|ENSG00000199094|hsa-mir-30c-2|hsa-miR-30c|jt:ENSG00000168955  
POU1F1|ENSG00000199094|hsa-mir-30c-2|hsa-miR-30c|jt:ENSG00000169139  
POU1F1|ENSG00000199153|hsa-mir-30d|hsa-miR-30d|jt:ENSG00000143355  
POU1F1|ENSG00000199153|hsa-mir-30d|hsa-miR-30d|jt:ENSG00000168955  
POU1F1|ENSG00000199153|hsa-mir-30d|hsa-miR-30d|jt:ENSG00000169139  
POU1F1|ENSG00000207548|hsa-mir-217|hsa-miR-217|jt:ENSG00000187105  
POU1F1|ENSG00000207548|hsa-mir-217|hsa-miR-217|jt:ENSG00000100647  
POU1F1|ENSG00000207548|hsa-mir-217|hsa-miR-217|jt:ENSG00000173041  
POU1F1|ENSG00000207548|hsa-mir-217|hsa-miR-217|jt:ENSG00000142684  
POU1F1|ENSG00000207548|hsa-mir-217|hsa-miR-217|jt:ENSG00000146757  
POU1F1|ENSG00000207582|hsa-mir-30b|hsa-miR-30b|jt:ENSG00000143355  
POU1F1|ENSG00000207582|hsa-mir-30b|hsa-miR-30b|jt:ENSG00000168955  
POU1F1|ENSG00000207582|hsa-mir-30b|hsa-miR-30b|jt:ENSG00000169139  
POU1F1|ENSG00000207827|hsa-mir-30a|hsa-miR-30a-3p|jt:ENSG00000017797  
POU1F1|ENSG00000207827|hsa-mir-30a|hsa-miR-30a-3p|jt:ENSG00000168273  
POU1F1|ENSG00000207827|hsa-mir-30a|hsa-miR-30a-3p|jt:ENSG00000168658  
POU1F1|ENSG00000207827|hsa-mir-30a|hsa-miR-30a-3p|jt:ENSG00000169684  
POU1F1|ENSG00000207827|hsa-mir-30a|hsa-miR-30a-5p|jt:ENSG00000143355  
POU1F1|ENSG00000207827|hsa-mir-30a|hsa-miR-30a-5p|jt:ENSG00000168955  
POU1F1|ENSG00000207827|hsa-mir-30a|hsa-miR-30a-5p|jt:ENSG00000169139  
POU1F1|ENSG00000207971|hsa-mir-125b-1|hsa-miR-125b|jt:ENSG00000170786  
POU1F1|ENSG00000207971|hsa-mir-125b-1|hsa-miR-125b|jt:ENSG00000119541  
POU1F1|ENSG00000207971|hsa-mir-125b-1|hsa-miR-125b|jt:ENSG00000205205  
POU1F1|ENSG00000207971|hsa-mir-125b-1|hsa-miR-125b|jt:ENSG00000065361  
POU1F1|ENSG00000207971|hsa-mir-125b-1|hsa-miR-125b|jt:ENSG00000100722  
POU1F1|ENSG00000207971|hsa-mir-125b-1|hsa-miR-125b|jt:ENSG00000171791  
POU1F1|ENSG00000207971|hsa-mir-125b-1|hsa-miR-125b|jt:ENSG00000186314  
POU1F1|ENSG00000207971|hsa-mir-125b-1|hsa-miR-125b|jt:ENSG00000175489  
POU1F1|ENSG00000207994|hsa-mir-100|hsa-miR-100|jt:ENSG00000116017  
POU6F1|ENSG00000199089|hsa-mir-202|hsa-miR-202|jt:ENSG00000124104  
POU6F1|ENSG00000199089|hsa-mir-202|hsa-miR-202|jt:ENSG00000184451  
POU6F1|ENSG00000199089|hsa-mir-202|hsa-miR-202\*|jt:ENSG00000123983  
POU6F1|ENSG00000199089|hsa-mir-202|hsa-miR-202\*|jt:ENSG00000166510  
POU6F1|ENSG00000199089|hsa-mir-202|hsa-miR-202\*|jt:ENSG00000175746  
PU.1|ENSG00000199024|hsa-mir-103-2|hsa-miR-103|jt:ENSG00000100150  
PU.1|ENSG00000199024|hsa-mir-103-2|hsa-miR-103|jt:ENSG00000122140  
PU.1|ENSG00000199024|hsa-mir-103-2|hsa-miR-103|jt:ENSG00000134343  
PU.1|ENSG00000207808|hsa-mir-27a|hsa-miR-27a|jt:ENSG00000180251  
PU.1|ENSG00000207980|hsa-mir-23a|hsa-miR-23a|jt:ENSG00000185896  
PU.1|ENSG00000207980|hsa-mir-23a|hsa-miR-23a|jt:ENSG00000183686  
PU.1|ENSG00000207980|hsa-mir-23a|hsa-miR-23a|jt:ENSG00000178074  
PU.1|ENSG00000207980|hsa-mir-23a|hsa-miR-23a|jt:ENSG00000113552  
PU.1|ENSG00000209707|hsa-mir-24-2|hsa-miR-24|jt:ENSG00000186470  
RFX|ENSG00000199065|hsa-mir-101-2|hsa-miR-101|jt:ENSG00000198863  
RFX|ENSG00000199065|hsa-mir-101-2|hsa-miR-101|jt:ENSG00000203995  
RFX|ENSG00000199065|hsa-mir-101-2|hsa-miR-101|jt:ENSG00000085511  
RFX|ENSG00000199085|hsa-mir-148a|hsa-miR-148a|jt:ENSG00000165588  
RFX|ENSG00000199085|hsa-mir-148a|hsa-miR-148a|jt:ENSG00000116016  
RFX|ENSG00000199085|hsa-mir-148a|hsa-miR-148a|jt:ENSG00000182220  
RFX|ENSG00000199085|hsa-mir-148a|hsa-miR-148a|jt:ENSG00000142700  
RFX|ENSG00000199085|hsa-mir-148a|hsa-miR-148a|jt:ENSG00000180537  
RFX|ENSG00000199085|hsa-mir-148a|hsa-miR-148a|jt:ENSG00000122034  
RFX|ENSG00000199085|hsa-mir-148a|hsa-miR-148a|jt:ENSG00000059728  
RFX|ENSG00000207630|hsa-mir-7-3|hsa-miR-7|jt:ENSG00000141161  
RFX|ENSG00000207630|hsa-mir-7-3|hsa-miR-7|jt:ENSG00000147687  
RFX|ENSG00000207630|hsa-mir-7-3|hsa-miR-7|jt:ENSG00000152779  
RORALPHA2|ENSG00000198974|hsa-mir-30e|hsa-miR-30e-3p|jt:ENSG00000100949  
RORALPHA2|ENSG00000198974|hsa-mir-30e|hsa-miR-30e-3p|jt:ENSG00000168658  
RORALPHA2|ENSG00000198974|hsa-mir-30e|hsa-miR-30e-5p|jt:ENSG00000167130  
RORALPHA2|ENSG00000198974|hsa-mir-30e|hsa-miR-30e-5p|jt:ENSG00000158715  
RORALPHA2|ENSG00000198974|hsa-mir-30e|hsa-miR-30e-5p|jt:ENSG00000143590  
RORALPHA2|ENSG00000198974|hsa-mir-30e|hsa-miR-30e-5p|jt:ENSG00000156735  
RORALPHA2|ENSG00000198974|hsa-mir-30e|hsa-miR-30e-5p|jt:ENSG00000164331  
RORALPHA2|ENSG00000198974|hsa-mir-30e|hsa-miR-30e-5p|jt:ENSG00000033867  
RORALPHA2|ENSG00000198974|hsa-mir-30e|hsa-miR-30e-5p|jt:ENSG00000196937  
RORALPHA2|ENSG00000199082|hsa-mir-342|hsa-miR-342|jt:ENSG00000100288  
RORALPHA2|ENSG00000199082|hsa-mir-342|hsa-miR-342|jt:ENSG00000132002  
RORALPHA2|ENSG00000199082|hsa-mir-342|hsa-miR-342|jt:ENSG00000196236  
RORALPHA2|ENSG00000199122|hsa-mir-148b|hsa-miR-148b|jt:ENSG00000204048  
RORALPHA2|ENSG00000199122|hsa-mir-148b|hsa-miR-148b|jt:ENSG00000205524  
RORALPHA2|ENSG00000199122|hsa-mir-148b|hsa-miR-148b|jt:ENSG00000034063  
RORALPHA2|ENSG00000199122|hsa-mir-148b|hsa-miR-148b|jt:ENSG00000101901







SP-1|ENSG00000207962|hsa-mir-30c-1|hsa-miR-30c|jt:ENSG00000146433  
SP-1|ENSG00000207962|hsa-mir-30c-1|hsa-miR-30c|jt:ENSG00000057657  
SP-1|ENSG00000207962|hsa-mir-30c-1|hsa-miR-30c|jt:ENSG00000115112  
SP-1|ENSG00000207962|hsa-mir-30c-1|hsa-miR-30c|jt:ENSG00000180667  
SP-1|ENSG00000207962|hsa-mir-30c-1|hsa-miR-30c|jt:ENSG00000105991  
SREBP-1|ENSG00000199122|hsa-mir-148b|hsa-miR-148b|jt:ENSG00000110756  
SREBP-1|ENSG00000199122|hsa-mir-148b|hsa-miR-148b|jt:ENSG00000106511  
SREBP-1|ENSG00000199122|hsa-mir-148b|hsa-miR-148b|jt:ENSG00000165097  
SREBP-1|ENSG00000199122|hsa-mir-148b|hsa-miR-148b|jt:ENSG00000162191  
SREBP-1|ENSG00000199122|hsa-mir-148b|hsa-miR-148b|jt:ENSG00000137073  
SREBP-1|ENSG00000199122|hsa-mir-148b|hsa-miR-148b|jt:ENSG00000127533  
SREBP-1|ENSG00000207638|hsa-mir-99a|hsa-miR-99a|jt:ENSG00000076108  
SREBP-1|ENSG00000207638|hsa-mir-99a|hsa-miR-99a|jt:ENSG00000136144  
SREBP-1|ENSG00000207863|hsa-mir-125b-2|hsa-miR-125b|jt:ENSG00000197681  
SREBP-1|ENSG00000207863|hsa-mir-125b-2|hsa-miR-125b|jt:ENSG00000196616  
SREBP-1|ENSG00000207863|hsa-mir-125b-2|hsa-miR-125b|jt:ENSG00000205913  
SREBP-1|ENSG00000207863|hsa-mir-125b-2|hsa-miR-125b|jt:ENSG00000133121  
SREBP-1|ENSG00000207950|hsa-mir-296|hsa-miR-296|jt:ENSG00000172354  
SREBP-1|ENSG00000207950|hsa-mir-296|hsa-miR-296|jt:ENSG00000188191  
SREBP-1|ENSG00000208017|hsa-mir-140|hsa-miR-140|jt:ENSG00000182118  
SREBP-1|ENSG00000208017|hsa-mir-140|hsa-miR-140|jt:ENSG00000170271  
SREBP-1|ENSG00000208017|hsa-mir-140|hsa-miR-140|jt:ENSG00000198677  
SREBP-1|ENSG00000208017|hsa-mir-140|hsa-miR-140|jt:ENSG00000154065  
SRF|ENSG00000198972|hsa-let-7e|hsa-let-7e|jt:ENSG00000126453  
SRF|ENSG00000198972|hsa-let-7e|hsa-let-7e|jt:ENSG00000135535  
SRF|ENSG00000198972|hsa-let-7e|hsa-let-7e|jt:ENSG00000137841  
SRF|ENSG00000198972|hsa-let-7e|hsa-let-7e|jt:ENSG00000071967  
SRF|ENSG00000198972|hsa-let-7e|hsa-let-7e|jt:ENSG00000187772  
SRF|ENSG00000198972|hsa-let-7e|hsa-let-7e|jt:ENSG00000160094  
SRF|ENSG00000198975|hsa-let-7a-2|hsa-let-7a|jt:ENSG00000135535  
SRF|ENSG00000198975|hsa-let-7a-2|hsa-let-7a|jt:ENSG00000137841  
SRF|ENSG00000198975|hsa-let-7a-2|hsa-let-7a|jt:ENSG00000187772  
SRF|ENSG00000198975|hsa-let-7a-2|hsa-let-7a|jt:ENSG00000160094  
SRF|ENSG00000207547|hsa-mir-25|hsa-miR-25|jt:ENSG00000206083  
SRF|ENSG00000207547|hsa-mir-25|hsa-miR-25|jt:ENSG00000120211  
SRF|ENSG00000207547|hsa-mir-25|hsa-miR-25|jt:ENSG00000186474  
SRF|ENSG00000207550|hsa-mir-99b|hsa-miR-99b|jt:ENSG00000144712  
SRF|ENSG00000207550|hsa-mir-99b|hsa-miR-99b|jt:ENSG00000173404  
SRF|ENSG00000207550|hsa-mir-99b|hsa-miR-99b|jt:ENSG00000082213  
SRF|ENSG00000207550|hsa-mir-99b|hsa-miR-99b|jt:ENSG00000085721  
SRF|ENSG00000207624|hsa-mir-194-1|hsa-miR-194|jt:ENSG00000169031  
SRF|ENSG00000207624|hsa-mir-194-1|hsa-miR-194|jt:ENSG00000165899  
SRF|ENSG00000207624|hsa-mir-194-1|hsa-miR-194|jt:ENSG00000071073  
SRF|ENSG00000207624|hsa-mir-194-1|hsa-miR-194|jt:ENSG00000077312  
SRF|ENSG00000207624|hsa-mir-194-1|hsa-miR-194|jt:ENSG00000177853  
SRF|ENSG00000207728|hsa-mir-449b|hsa-miR-449b|jt:ENSG00000198719  
SRF|ENSG00000207728|hsa-mir-449b|hsa-miR-449b|jt:ENSG00000112478  
SRF|ENSG00000207728|hsa-mir-449b|hsa-miR-449b|jt:ENSG00000179909  
SRF|ENSG00000207757|hsa-mir-93|hsa-miR-93|jt:ENSG00000106628  
SRF|ENSG00000207757|hsa-mir-93|hsa-miR-93|jt:ENSG00000100987  
SRF|ENSG00000207757|hsa-mir-93|hsa-miR-93|jt:ENSG00000176605  
SRF|ENSG00000207757|hsa-mir-93|hsa-miR-93|jt:ENSG00000071967  
SRF|ENSG00000207757|hsa-mir-93|hsa-miR-93|jt:ENSG00000197646  
SRF|ENSG00000207757|hsa-mir-93|hsa-miR-93|jt:ENSG00000163513  
SRF|ENSG00000207764|hsa-mir-133a-2|hsa-miR-133a|jt:ENSG00000163295  
SRF|ENSG00000207764|hsa-mir-133a-2|hsa-miR-133a|jt:ENSG00000008197  
SRF|ENSG00000207764|hsa-mir-133a-2|hsa-miR-133a|jt:ENSG00000084207  
SRF|ENSG00000207949|hsa-mir-214|hsa-miR-214|jt:ENSG00000058668  
SRF|ENSG00000207949|hsa-mir-214|hsa-miR-214|jt:ENSG00000153823  
SRF|ENSG00000207949|hsa-mir-214|hsa-miR-214|jt:ENSG00000130338  
SRF|ENSG00000207949|hsa-mir-214|hsa-miR-214|jt:ENSG00000072163  
SRF|ENSG00000207949|hsa-mir-214|hsa-miR-214|jt:ENSG00000171303  
SRF|ENSG00000207971|hsa-mir-125b-1|hsa-miR-125b|jt:ENSG00000126453  
SRF|ENSG00000207971|hsa-mir-125b-1|hsa-miR-125b|jt:ENSG00000174498  
SRF|ENSG00000207971|hsa-mir-125b-1|hsa-miR-125b|jt:ENSG00000184508  
SRF|ENSG00000207971|hsa-mir-125b-1|hsa-miR-125b|jt:ENSG00000100628  
SRF|ENSG00000207971|hsa-mir-125b-1|hsa-miR-125b|jt:ENSG00000182858  
SRF|ENSG00000207971|hsa-mir-125b-1|hsa-miR-125b|jt:ENSG00000073754  
SRF|ENSG00000207971|hsa-mir-125b-1|hsa-miR-125b|jt:ENSG00000170786  
SRF|ENSG00000207971|hsa-mir-125b-1|hsa-miR-125b|jt:ENSG00000174099  
SRF|ENSG00000207971|hsa-mir-125b-1|hsa-miR-125b|jt:ENSG00000076716  
SRF|ENSG00000207971|hsa-mir-125b-1|hsa-miR-125b|jt:ENSG00000169641  
SRF|ENSG00000207971|hsa-mir-125b-1|hsa-miR-125b|jt:ENSG00000166787  
SRF|ENSG00000207971|hsa-mir-125b-1|hsa-miR-125b|jt:ENSG00000156234  
SRF|ENSG00000207994|hsa-mir-100|hsa-miR-100|jt:ENSG00000144712  
SRF|ENSG00000207994|hsa-mir-100|hsa-miR-100|jt:ENSG00000173404  
SRF|ENSG00000207994|hsa-mir-100|hsa-miR-100|jt:ENSG00000082213  
SRF|ENSG00000207994|hsa-mir-100|hsa-miR-100|jt:ENSG00000085721  
SRF|ENSG00000208024|hsa-mir-199a-2|hsa-miR-199a|jt:ENSG00000196724  
SRF|ENSG00000208024|hsa-mir-199a-2|hsa-miR-199a|jt:ENSG00000109084  
SRF|ENSG00000208024|hsa-mir-199a-2|hsa-miR-199a|jt:ENSG00000148481  
SRF|ENSG00000208024|hsa-mir-199a-2|hsa-miR-199a\*|jt:ENSG00000082458  
SRF|ENSG00000208024|hsa-mir-199a-2|hsa-miR-199a\*|jt:ENSG00000140403  
SRF|ENSG00000208024|hsa-mir-199a-2|hsa-miR-199a\*|jt:ENSG00000072401  
SRF|ENSG00000208024|hsa-mir-199a-2|hsa-miR-199a\*|jt:ENSG00000156239  
SRF|ENSG00000208024|hsa-mir-199a-2|hsa-miR-199a\*|jt:ENSG00000138779  
SRF|ENSG00000208024|hsa-mir-199a-2|hsa-miR-199a\*|jt:ENSG00000188153  
SRF|ENSG00000208024|hsa-mir-199a-2|hsa-miR-199a\*|jt:ENSG00000196885  
SRF|ENSG00000208036|hsa-mir-106b|hsa-miR-106b|jt:ENSG00000106628  
SRF|ENSG00000208036|hsa-mir-106b|hsa-miR-106b|jt:ENSG00000130948  
SRF|ENSG00000208036|hsa-mir-106b|hsa-miR-106b|jt:ENSG00000172647  
SRF|ENSG00000208036|hsa-mir-106b|hsa-miR-106b|jt:ENSG00000204973  
SRF|ENSG00000208036|hsa-mir-106b|hsa-miR-106b|jt:ENSG00000180860  
SRF|ENSG00000208036|hsa-mir-106b|hsa-miR-106b|jt:ENSG00000100987  
SRF|ENSG00000208036|hsa-mir-106b|hsa-miR-106b|jt:ENSG00000176605  
SRF|ENSG00000208036|hsa-mir-106b|hsa-miR-106b|jt:ENSG00000144285  
SRF|ENSG00000208036|hsa-mir-106b|hsa-miR-106b|jt:ENSG00000166743  
SRF|ENSG00000208036|hsa-mir-106b|hsa-miR-106b|jt:ENSG00000071967  
SRF|ENSG00000208036|hsa-mir-106b|hsa-miR-106b|jt:ENSG00000197646  
SRF|ENSG00000208036|hsa-mir-106b|hsa-miR-106b|jt:ENSG00000011007  
SRF|ENSG00000208036|hsa-mir-106b|hsa-miR-106b|jt:ENSG00000198815  
SRF|ENSG00000208036|hsa-mir-106b|hsa-miR-106b|jt:ENSG00000072121  
SRF|ENSG00000208036|hsa-mir-106b|hsa-miR-106b|jt:ENSG00000163513  
SRF|ENSG00000211590|hsa-mir-802|hsa-miR-802|jt:ENSG00000177853  
SRF|ENSG00000211590|hsa-mir-802|hsa-miR-802|jt:ENSG00000196792















STAT1|ENSG00000208024|hsa-mir-199a-2|hsa-miR-199a\*|jt:ENSG00000206125  
STAT1|ENSG00000208024|hsa-mir-199a-2|hsa-miR-199a\*|jt:ENSG00000100109  
STAT1|ENSG00000208024|hsa-mir-199a-2|hsa-miR-199a\*|jt:ENSG00000164379  
STAT1|ENSG00000208024|hsa-mir-199a-2|hsa-miR-199a\*|jt:ENSG00000165525  
STAT1|ENSG00000208024|hsa-mir-199a-2|hsa-miR-199a\*|jt:ENSG00000132963  
STAT1|ENSG00000208024|hsa-mir-199a-2|hsa-miR-199a\*|jt:ENSG00000198841  
T3R|ENSG00000199024|hsa-mir-103-2|hsa-miR-103|jt:ENSG00000105085  
T3R|ENSG00000199024|hsa-mir-103-2|hsa-miR-103|jt:ENSG00000137171  
T3R|ENSG00000199024|hsa-mir-103-2|hsa-miR-103|jt:ENSG00000135968  
T3R|ENSG00000199024|hsa-mir-103-2|hsa-miR-103|jt:ENSG00000204600  
T3R|ENSG00000199024|hsa-mir-103-2|hsa-miR-103|jt:ENSG00000120265  
T3R|ENSG00000199024|hsa-mir-103-2|hsa-miR-103|jt:ENSG00000115592  
T3R|ENSG00000199032|hsa-mir-425|hsa-miR-425-3p|jt:ENSG00000137547  
T3R|ENSG00000199032|hsa-mir-425|hsa-miR-425-3p|jt:ENSG00000168681  
T3R|ENSG00000199032|hsa-mir-425|hsa-miR-425-3p|jt:ENSG00000130762  
T3R|ENSG00000199032|hsa-mir-425|hsa-miR-425-3p|jt:ENSG00000196563  
T3R|ENSG00000199032|hsa-mir-425|hsa-miR-425-3p|jt:ENSG00000178538  
T3R|ENSG00000199032|hsa-mir-425|hsa-miR-425-3p|jt:ENSG00000197463  
T3R|ENSG00000199032|hsa-mir-425|hsa-miR-425-3p|jt:ENSG00000189149  
T3R|ENSG00000199032|hsa-mir-425|hsa-miR-425-3p|jt:ENSG00000112666  
T3R|ENSG00000199032|hsa-mir-425|hsa-miR-425-3p|jt:ENSG00000182557  
T3R|ENSG00000199077|hsa-mir-129-2|hsa-miR-129|jt:ENSG00000133627  
T3R|ENSG00000199077|hsa-mir-129-2|hsa-miR-129|jt:ENSG00000172345  
T3R|ENSG00000199077|hsa-mir-129-2|hsa-miR-129|jt:ENSG00000145416  
T3R|ENSG00000199077|hsa-mir-129-2|hsa-miR-129|jt:ENSG00000204655  
T3R|ENSG00000199077|hsa-mir-129-2|hsa-miR-129|jt:ENSG00000178110  
T3R|ENSG00000199122|hsa-mir-148b|hsa-miR-148b|jt:ENSG00000110756  
T3R|ENSG00000199122|hsa-mir-148b|hsa-miR-148b|jt:ENSG00000165097  
T3R|ENSG00000199122|hsa-mir-148b|hsa-miR-148b|jt:ENSG00000162191  
T3R|ENSG00000199122|hsa-mir-148b|hsa-miR-148b|jt:ENSG00000139218  
T3R|ENSG00000199122|hsa-mir-148b|hsa-miR-148b|jt:ENSG00000152242  
T3R|ENSG00000199122|hsa-mir-148b|hsa-miR-148b|jt:ENSG00000166024  
T3R|ENSG00000199122|hsa-mir-148b|hsa-miR-148b|jt:ENSG00000165862  
T3R|ENSG00000199122|hsa-mir-148b|hsa-miR-148b|jt:ENSG00000198854  
T3R|ENSG00000199122|hsa-mir-148b|hsa-miR-148b|jt:ENSG00000105366  
T3R|ENSG00000199122|hsa-mir-148b|hsa-miR-148b|jt:ENSG00000156642  
T3R|ENSG00000199122|hsa-mir-148b|hsa-miR-148b|jt:ENSG00000151418  
T3R|ENSG00000199122|hsa-mir-148b|hsa-miR-148b|jt:ENSG00000134851  
T3R|ENSG00000199122|hsa-mir-148b|hsa-miR-148b|jt:ENSG00000180537  
T3R|ENSG00000199135|hsa-mir-101-1|hsa-miR-101|jt:ENSG00000100109  
T3R|ENSG00000199135|hsa-mir-101-1|hsa-miR-101|jt:ENSG00000179151  
T3R|ENSG00000199135|hsa-mir-101-1|hsa-miR-101|jt:ENSG00000186111  
T3R|ENSG00000199135|hsa-mir-101-1|hsa-miR-101|jt:ENSG00000119707  
T3R|ENSG00000207618|hsa-mir-144|hsa-miR-144|jt:ENSG00000089335  
T3R|ENSG00000207618|hsa-mir-144|hsa-miR-144|jt:ENSG00000197841  
T3R|ENSG00000207618|hsa-mir-144|hsa-miR-144|jt:ENSG00000100109  
T3R|ENSG00000207618|hsa-mir-144|hsa-miR-144|jt:ENSG00000166436  
T3R|ENSG00000207618|hsa-mir-144|hsa-miR-144|jt:ENSG00000116044  
T3R|ENSG00000207618|hsa-mir-144|hsa-miR-144|jt:ENSG00000189149  
T3R|ENSG00000207618|hsa-mir-144|hsa-miR-144|jt:ENSG00000179151  
T3R|ENSG00000207618|hsa-mir-144|hsa-miR-144|jt:ENSG00000204987  
T3R|ENSG00000207618|hsa-mir-144|hsa-miR-144|jt:ENSG00000119707  
T3R|ENSG00000207618|hsa-mir-144|hsa-miR-144|jt:ENSG00000181852  
T3R|ENSG00000207618|hsa-mir-144|hsa-miR-144|jt:ENSG00000205269  
T3R|ENSG00000207618|hsa-mir-144|hsa-miR-144|jt:ENSG00000166398  
T3R|ENSG00000207618|hsa-mir-144|hsa-miR-144|jt:ENSG00000167800  
T3R|ENSG00000207623|hsa-mir-205|hsa-miR-205|jt:ENSG00000006634  
T3R|ENSG00000207623|hsa-mir-205|hsa-miR-205|jt:ENSG00000115944  
T3R|ENSG00000207623|hsa-mir-205|hsa-miR-205|jt:ENSG00000189325  
T3R|ENSG00000207623|hsa-mir-205|hsa-miR-205|jt:ENSG00000167139  
T3R|ENSG00000207635|hsa-mir-499|hsa-miR-499|jt:ENSG00000111912  
T3R|ENSG00000207635|hsa-mir-499|hsa-miR-499|jt:ENSG00000104154  
T3R|ENSG00000207635|hsa-mir-499|hsa-miR-499|jt:ENSG00000173436  
T3R|ENSG00000207635|hsa-mir-499|hsa-miR-499|jt:ENSG00000110693  
T3R|ENSG00000207635|hsa-mir-499|hsa-miR-499|jt:ENSG00000154945  
T3R|ENSG00000207635|hsa-mir-499|hsa-miR-499|jt:ENSG00000156875  
T3R|ENSG00000207635|hsa-mir-499|hsa-miR-499|jt:ENSG00000109920  
T3R|ENSG00000207635|hsa-mir-499|hsa-miR-499|jt:ENSG00000204414  
T3R|ENSG00000207732|hsa-mir-218-1|hsa-miR-218|jt:ENSG00000206069  
T3R|ENSG00000207732|hsa-mir-218-1|hsa-miR-218|jt:ENSG00000122733  
T3R|ENSG00000207732|hsa-mir-218-1|hsa-miR-218|jt:ENSG00000112214  
T3R|ENSG00000207732|hsa-mir-218-1|hsa-miR-218|jt:ENSG00000135916  
T3R|ENSG00000207732|hsa-mir-218-1|hsa-miR-218|jt:ENSG00000171540  
T3R|ENSG00000207732|hsa-mir-218-1|hsa-miR-218|jt:ENSG00000181852  
T3R|ENSG00000207732|hsa-mir-218-1|hsa-miR-218|jt:ENSG00000196189  
T3R|ENSG00000207794|hsa-mir-451|hsa-miR-451|jt:ENSG00000134324  
T3R|ENSG00000207794|hsa-mir-451|hsa-miR-451|jt:ENSG00000123131  
T3R|ENSG00000207794|hsa-mir-451|hsa-miR-451|jt:ENSG00000136630  
T3R|ENSG00000207947|hsa-mir-152|hsa-miR-152|jt:ENSG00000110756  
T3R|ENSG00000207947|hsa-mir-152|hsa-miR-152|jt:ENSG00000165097  
T3R|ENSG00000207947|hsa-mir-152|hsa-miR-152|jt:ENSG00000162191  
T3R|ENSG00000207947|hsa-mir-152|hsa-miR-152|jt:ENSG00000139218  
T3R|ENSG00000207947|hsa-mir-152|hsa-miR-152|jt:ENSG00000152242  
T3R|ENSG00000207947|hsa-mir-152|hsa-miR-152|jt:ENSG00000166024  
T3R|ENSG00000207947|hsa-mir-152|hsa-miR-152|jt:ENSG00000165862  
T3R|ENSG00000207947|hsa-mir-152|hsa-miR-152|jt:ENSG00000198854  
T3R|ENSG00000207947|hsa-mir-152|hsa-miR-152|jt:ENSG00000105366  
T3R|ENSG00000207947|hsa-mir-152|hsa-miR-152|jt:ENSG00000156642  
T3R|ENSG00000207947|hsa-mir-152|hsa-miR-152|jt:ENSG00000151418  
T3R|ENSG00000207947|hsa-mir-152|hsa-miR-152|jt:ENSG00000134851  
T3R|ENSG00000207947|hsa-mir-152|hsa-miR-152|jt:ENSG00000180537  
TBP|ENSG00000199058|hsa-mir-302b|hsa-miR-302b|jt:ENSG00000173530  
TBP|ENSG00000199058|hsa-mir-302b|hsa-miR-302b\*|jt:ENSG00000182504  
TBP|ENSG00000199102|hsa-mir-302c|hsa-miR-302c|jt:ENSG00000173530  
TBP|ENSG00000199102|hsa-mir-302c|hsa-miR-302c\*|jt:ENSG00000124343  
TBP|ENSG00000199102|hsa-mir-302c|hsa-miR-302c\*|jt:ENSG00000182504  
TBP|ENSG00000199102|hsa-mir-302c|hsa-miR-302c\*|jt:ENSG00000147614  
TBP|ENSG00000199102|hsa-mir-302c|hsa-miR-302c\*|jt:ENSG00000179914  
TBP|ENSG00000199102|hsa-mir-302c|hsa-miR-302c\*|jt:ENSG00000130309  
TBP|ENSG00000199145|hsa-mir-302d|hsa-miR-302d|jt:ENSG00000173530  
TBP|ENSG00000199153|hsa-mir-30d|hsa-miR-30d|jt:ENSG00000169139  
TBP|ENSG00000199153|hsa-mir-30d|hsa-miR-30d|jt:ENSG00000180574  
TBP|ENSG00000199153|hsa-mir-30d|hsa-miR-30d|jt:ENSG00000173530  
TBP|ENSG00000199153|hsa-mir-30d|hsa-miR-30d|jt:ENSG00000179455  
TBP|ENSG00000199153|hsa-mir-30d|hsa-miR-30d|jt:ENSG00000099954

TBP|ENSG00000199169|hsa-mir-367|hsa-miR-367|jt:ENSG00000196186  
TBP|ENSG00000199169|hsa-mir-367|hsa-miR-367|jt:ENSG00000144583  
TBP|ENSG00000199169|hsa-mir-367|hsa-miR-367|jt:ENSG00000204248  
TBP|ENSG00000199169|hsa-mir-367|hsa-miR-367|jt:ENSG00000110848  
TBP|ENSG00000199169|hsa-mir-367|hsa-miR-367|jt:ENSG00000136895  
TBP|ENSG00000199169|hsa-mir-367|hsa-miR-367|jt:ENSG00000134200  
TBP|ENSG00000199169|hsa-mir-367|hsa-miR-367|jt:ENSG00000205773  
TBP|ENSG00000207548|hsa-mir-217|hsa-miR-217|jt:ENSG00000142684  
TBP|ENSG00000207548|hsa-mir-217|hsa-miR-217|jt:ENSG00000187105  
TBP|ENSG00000207548|hsa-mir-217|hsa-miR-217|jt:ENSG00000115963  
TBP|ENSG00000207548|hsa-mir-217|hsa-miR-217|jt:ENSG00000138079  
TBP|ENSG00000207548|hsa-mir-217|hsa-miR-217|jt:ENSG00000146757  
TBP|ENSG00000207548|hsa-mir-217|hsa-miR-217|jt:ENSG00000143153  
TBP|ENSG00000207582|hsa-mir-30b|hsa-miR-30b|jt:ENSG00000169139  
TBP|ENSG00000207582|hsa-mir-30b|hsa-miR-30b|jt:ENSG00000180574  
TBP|ENSG00000207582|hsa-mir-30b|hsa-miR-30b|jt:ENSG00000173530  
TBP|ENSG00000207582|hsa-mir-30b|hsa-miR-30b|jt:ENSG00000179455  
TBP|ENSG00000207582|hsa-mir-30b|hsa-miR-30b|jt:ENSG00000099954  
TCF-1(P)|ENSG00000199122|hsa-mir-148b|hsa-miR-148b|jt:ENSG00000187531  
TCF-1(P)|ENSG00000199122|hsa-mir-148b|hsa-miR-148b|jt:ENSG00000204101  
TCF-1(P)|ENSG00000199122|hsa-mir-148b|hsa-miR-148b|jt:ENSG00000100483  
TCF-1(P)|ENSG00000199122|hsa-mir-148b|hsa-miR-148b|jt:ENSG00000139218  
TCF-1(P)|ENSG00000199122|hsa-mir-148b|hsa-miR-148b|jt:ENSG00000161638  
TCF-1(P)|ENSG00000199122|hsa-mir-148b|hsa-miR-148b|jt:ENSG00000185760  
TCF-1(P)|ENSG00000199122|hsa-mir-148b|hsa-miR-148b|jt:ENSG00000205524  
TCF-1(P)|ENSG00000199122|hsa-mir-148b|hsa-miR-148b|jt:ENSG00000102755  
TCF-1(P)|ENSG00000199122|hsa-mir-148b|hsa-miR-148b|jt:ENSG00000047621  
TCF-1(P)|ENSG00000207547|hsa-mir-25|hsa-miR-25|jt:ENSG00000205773  
TCF-1(P)|ENSG00000207547|hsa-mir-25|hsa-miR-25|jt:ENSG00000112210  
TCF-1(P)|ENSG00000207547|hsa-mir-25|hsa-miR-25|jt:ENSG00000100346  
TCF-1(P)|ENSG00000207547|hsa-mir-25|hsa-miR-25|jt:ENSG00000197453  
TCF-1(P)|ENSG00000207611|hsa-mir-149|hsa-miR-149|jt:ENSG00000103067  
TCF-1(P)|ENSG00000207611|hsa-mir-149|hsa-miR-149|jt:ENSG00000133193  
TCF-1(P)|ENSG00000207611|hsa-mir-149|hsa-miR-149|jt:ENSG00000141325  
TCF-1(P)|ENSG00000207611|hsa-mir-149|hsa-miR-149|jt:ENSG00000151474  
TCF-1(P)|ENSG00000207611|hsa-mir-149|hsa-miR-149|jt:ENSG00000138111  
TCF-1(P)|ENSG00000207732|hsa-mir-218-1|hsa-miR-218-1|jt:ENSG00000136942  
TCF-1(P)|ENSG00000207732|hsa-mir-218-1|hsa-miR-218-1|jt:ENSG00000178177  
TCF-1(P)|ENSG00000207757|hsa-mir-93|hsa-miR-93|jt:ENSG00000127946  
TCF-1(P)|ENSG00000207757|hsa-mir-93|hsa-miR-93|jt:ENSG00000143314  
TCF-1(P)|ENSG00000207757|hsa-mir-93|hsa-miR-93|jt:ENSG00000196460  
TCF-1(P)|ENSG00000207757|hsa-mir-93|hsa-miR-93|jt:ENSG00000102230  
TCF-1(P)|ENSG00000207757|hsa-mir-93|hsa-miR-93|jt:ENSG00000165244  
TCF-1(P)|ENSG00000207757|hsa-mir-93|hsa-miR-93|jt:ENSG00000151474  
TCF-1(P)|ENSG00000207784|hsa-mir-542|hsa-miR-542-3p|jt:ENSG00000094916  
TCF-1(P)|ENSG00000207784|hsa-mir-542|hsa-miR-542-3p|jt:ENSG00000145781  
TCF-1(P)|ENSG00000207784|hsa-mir-542|hsa-miR-542-3p|jt:ENSG00000144061  
TCF-1(P)|ENSG00000207784|hsa-mir-542|hsa-miR-542-3p|jt:ENSG00000183444  
TCF-1(P)|ENSG00000207789|hsa-mir-26a-2|hsa-miR-26a-2|jt:ENSG00000105550  
TCF-1(P)|ENSG00000207789|hsa-mir-26a-2|hsa-miR-26a-2|jt:ENSG00000183955  
TCF-1(P)|ENSG00000207789|hsa-mir-26a-2|hsa-miR-26a-2|jt:ENSG00000206539  
TCF-1(P)|ENSG00000207789|hsa-mir-26a-2|hsa-miR-26a-2|jt:ENSG00000151229  
TCF-1(P)|ENSG00000207789|hsa-mir-26a-2|hsa-miR-26a-2|jt:ENSG00000163624  
TCF-1(P)|ENSG00000207789|hsa-mir-26a-2|hsa-miR-26a-2|jt:ENSG00000129480  
TCF-1(P)|ENSG00000207789|hsa-mir-26a-2|hsa-miR-26a-2|jt:ENSG00000150361  
TCF-1(P)|ENSG00000207789|hsa-mir-26a-2|hsa-miR-26a-2|jt:ENSG00000180660  
TCF-1(P)|ENSG00000207789|hsa-mir-26a-2|hsa-miR-26a-2|jt:ENSG00000154639  
TCF-1(P)|ENSG00000207789|hsa-mir-26a-2|hsa-miR-26a-2|jt:ENSG00000092020  
TCF-1(P)|ENSG00000207789|hsa-mir-26a-2|hsa-miR-26a-2|jt:ENSG00000182141  
TCF-1(P)|ENSG00000208036|hsa-mir-106b|hsa-miR-106b|jt:ENSG00000099875  
TCF-1(P)|ENSG00000208036|hsa-mir-106b|hsa-miR-106b|jt:ENSG00000127946  
TCF-1(P)|ENSG00000208036|hsa-mir-106b|hsa-miR-106b|jt:ENSG00000143314  
TCF-1(P)|ENSG00000208036|hsa-mir-106b|hsa-miR-106b|jt:ENSG00000196460  
TCF-1(P)|ENSG00000208036|hsa-mir-106b|hsa-miR-106b|jt:ENSG00000102230  
TCF-1(P)|ENSG00000208036|hsa-mir-106b|hsa-miR-106b|jt:ENSG00000165244  
TCF-1(P)|ENSG00000208036|hsa-mir-106b|hsa-miR-106b|jt:ENSG00000151474  
TCF-4|ENSG00000207624|hsa-mir-194-1|hsa-miR-194-1|jt:ENSG00000081800  
TCF-4|ENSG00000207624|hsa-mir-194-1|hsa-miR-194-1|jt:ENSG00000104763  
TCF-4|ENSG00000207624|hsa-mir-194-1|hsa-miR-194-1|jt:ENSG00000165899  
TCF-4|ENSG00000207624|hsa-mir-194-1|hsa-miR-194-1|jt:ENSG00000122862  
TCF-4|ENSG00000207624|hsa-mir-194-1|hsa-miR-194-1|jt:ENSG00000120519  
TCF-4|ENSG00000207718|hsa-mir-15a|hsa-miR-15a|jt:ENSG00000158813  
TCF-4|ENSG00000207718|hsa-mir-15a|hsa-miR-15a|jt:ENSG00000138685  
TCF-4|ENSG00000207718|hsa-mir-15a|hsa-miR-15a|jt:ENSG00000134343  
TCF-4|ENSG00000207795|hsa-mir-155|hsa-miR-155|jt:ENSG00000177947  
TCF-4|ENSG00000207795|hsa-mir-155|hsa-miR-155|jt:ENSG00000114113  
TCF-4|ENSG00000207795|hsa-mir-155|hsa-miR-155|jt:ENSG00000198632  
TCF-4|ENSG00000207795|hsa-mir-155|hsa-miR-155|jt:ENSG00000148737  
TCF-4|ENSG00000207795|hsa-mir-155|hsa-miR-155|jt:ENSG00000077458  
TCF-4|ENSG00000207808|hsa-mir-27a|hsa-miR-27a|jt:ENSG00000130479  
TCF-4|ENSG00000207808|hsa-mir-27a|hsa-miR-27a|jt:ENSG00000180251  
TCF-4|ENSG00000207808|hsa-mir-27a|hsa-miR-27a|jt:ENSG00000157103  
TCF-4|ENSG00000207808|hsa-mir-27a|hsa-miR-27a|jt:ENSG0000006114  
TCF-4|ENSG00000207808|hsa-mir-27a|hsa-miR-27a|jt:ENSG00000184005  
TCF-4|ENSG00000207808|hsa-mir-27a|hsa-miR-27a|jt:ENSG00000055070  
TCF-4|ENSG00000207808|hsa-mir-27a|hsa-miR-27a|jt:ENSG00000169118  
TCF-4|ENSG00000207808|hsa-mir-27a|hsa-miR-27a|jt:ENSG00000129675  
TCF-4|ENSG00000207808|hsa-mir-27a|hsa-miR-27a|jt:ENSG00000152409  
TCF-4|ENSG00000207808|hsa-mir-27a|hsa-miR-27a|jt:ENSG00000146469  
TCF-4|ENSG00000207980|hsa-mir-23a|hsa-miR-23a|jt:ENSG00000138768  
TCF-4|ENSG00000207980|hsa-mir-23a|hsa-miR-23a|jt:ENSG00000148200  
TCF-4|ENSG00000207980|hsa-mir-23a|hsa-miR-23a|jt:ENSG00000174990  
TCF-4|ENSG00000207980|hsa-mir-23a|hsa-miR-23a|jt:ENSG00000204446  
TCF-4|ENSG00000207980|hsa-mir-23a|hsa-miR-23a|jt:ENSG00000132471  
TCF-4|ENSG00000207980|hsa-mir-23a|hsa-miR-23a|jt:ENSG00000157103  
TCF-4|ENSG00000207980|hsa-mir-23a|hsa-miR-23a|jt:ENSG00000163491  
TCF-4|ENSG00000207980|hsa-mir-23a|hsa-miR-23a|jt:ENSG00000188938  
TCF-4|ENSG00000207980|hsa-mir-23a|hsa-miR-23a|jt:ENSG00000141048  
TCF-4|ENSG00000207980|hsa-mir-23a|hsa-miR-23a|jt:ENSG00000108179  
TCF-4|ENSG00000208006|hsa-mir-16-1|hsa-miR-16-1|jt:ENSG00000158813  
TCF-4|ENSG00000208006|hsa-mir-16-1|hsa-miR-16-1|jt:ENSG00000138685  
TCF-4|ENSG00000208006|hsa-mir-16-1|hsa-miR-16-1|jt:ENSG00000134343  
TCF-4|ENSG00000209707|hsa-mir-24-2|hsa-miR-24-2|jt:ENSG00000163485  
TCF-4|ENSG00000209707|hsa-mir-24-2|hsa-miR-24-2|jt:ENSG00000187257  
TCF-4|ENSG00000209707|hsa-mir-24-2|hsa-miR-24-2|jt:ENSG0000010932

TCF-4|ENSG00000209707|hsa-mir-24-2|hsa-miR-24|jt:ENSG00000166206  
TCF-4|ENSG00000211590|hsa-mir-802|hsa-miR-802|jt:ENSG00000115339  
TCF-4|ENSG00000211590|hsa-mir-802|hsa-miR-802|jt:ENSG00000052126  
TCF-4|ENSG00000211590|hsa-mir-802|hsa-miR-802|jt:ENSG00000143546  
TEF|ENSG00000198975|hsa-let-7a-2|hsa-let-7a|jt:ENSG00000148200  
TEF|ENSG00000199135|hsa-mir-101-1|hsa-miR-101|jt:ENSG00000151690  
TEF|ENSG00000199135|hsa-mir-101-1|hsa-miR-101|jt:ENSG0000019991  
TEF|ENSG00000207572|hsa-mir-363|hsa-miR-363|jt:ENSG00000144583  
TEF|ENSG00000207572|hsa-mir-363|hsa-miR-363|jt:ENSG00000114124  
TEF|ENSG00000207602|hsa-mir-106a|hsa-miR-106a|jt:ENSG00000163820  
TEF|ENSG00000207602|hsa-mir-106a|hsa-miR-106a|jt:ENSG00000083896  
TEF|ENSG00000207602|hsa-mir-106a|hsa-miR-106a|jt:ENSG00000137094  
TEF|ENSG00000207602|hsa-mir-106a|hsa-miR-106a|jt:ENSG00000153922  
TEF|ENSG00000207602|hsa-mir-106a|hsa-miR-106a|jt:ENSG00000102230  
TEF|ENSG00000207602|hsa-mir-106a|hsa-miR-106a|jt:ENSG00000180917  
TEF|ENSG00000207710|hsa-mir-20b|hsa-miR-20b|jt:ENSG00000155729  
TEF|ENSG00000207710|hsa-mir-20b|hsa-miR-20b|jt:ENSG00000163820  
TEF|ENSG00000207710|hsa-mir-20b|hsa-miR-20b|jt:ENSG00000162949  
TEF|ENSG00000207710|hsa-mir-20b|hsa-miR-20b|jt:ENSG00000102230  
TEF|ENSG00000207710|hsa-mir-20b|hsa-miR-20b|jt:ENSG00000180917  
TEF|ENSG00000207752|hsa-mir-199a-1|hsa-miR-199a|jt:ENSG00000130021  
TEF|ENSG00000207752|hsa-mir-199a-1|hsa-miR-199a\*|jt:ENSG00000180305  
TEF|ENSG00000207752|hsa-mir-199a-1|hsa-miR-199a\*|jt:ENSG00000151690  
TEF|ENSG00000207777|hsa-mir-10a|hsa-miR-10a|jt:ENSG00000146802  
TEF|ENSG00000207971|hsa-mir-125b-1|hsa-miR-125b|jt:ENSG00000170786  
TEF|ENSG00000207971|hsa-mir-125b-1|hsa-miR-125b|jt:ENSG00000178795  
TEF|ENSG00000207971|hsa-mir-125b-1|hsa-miR-125b|jt:ENSG00000111981  
TEF|ENSG00000207971|hsa-mir-125b-1|hsa-miR-125b|jt:ENSG00000073754  
TEF|ENSG00000207971|hsa-mir-125b-1|hsa-miR-125b|jt:ENSG00000135443  
TEF|ENSG00000207971|hsa-mir-125b-1|hsa-miR-125b|jt:ENSG00000183308  
TEL-2|ENSG00000207808|hsa-mir-27a|hsa-miR-27a|jt:ENSG00000180884  
TEL-2|ENSG00000207808|hsa-mir-27a|hsa-miR-27a|jt:ENSG00000114316  
TEL-2|ENSG00000207808|hsa-mir-27a|hsa-miR-27a|jt:ENSG00000196632  
TEL-2|ENSG00000207808|hsa-mir-27a|hsa-miR-27a|jt:ENSG00000166326  
TEL-2|ENSG00000207949|hsa-mir-214|hsa-miR-214|jt:ENSG00000186081  
TEL-2|ENSG00000207949|hsa-mir-214|hsa-miR-214|jt:ENSG00000058668  
TEL-2|ENSG00000207949|hsa-mir-214|hsa-miR-214|jt:ENSG00000134780  
TEL-2|ENSG00000207980|hsa-mir-23a|hsa-miR-23a|jt:ENSG00000188938  
TEL-2|ENSG00000207980|hsa-mir-23a|hsa-miR-23a|jt:ENSG00000198380  
TEL-2|ENSG00000208024|hsa-mir-199a-2|hsa-miR-199a|jt:ENSG00000148481  
TEL-2|ENSG00000208024|hsa-mir-199a-2|hsa-miR-199a|jt:ENSG00000088367  
TEL-2|ENSG00000208024|hsa-mir-199a-2|hsa-miR-199a\*|jt:ENSG00000204220  
TEL-2|ENSG00000208024|hsa-mir-199a-2|hsa-miR-199a\*|jt:ENSG00000073331  
TEL-2|ENSG00000208024|hsa-mir-199a-2|hsa-miR-199a\*|jt:ENSG00000159224  
TEL-2|ENSG00000209707|hsa-mir-24-2|hsa-miR-24|jt:ENSG00000103067  
TEL-2|ENSG00000209707|hsa-mir-24-2|hsa-miR-24|jt:ENSG00000143442  
TEL-2|ENSG00000209707|hsa-mir-24-2|hsa-miR-24|jt:ENSG00000106384  
TEL-2|ENSG00000209707|hsa-mir-24-2|hsa-miR-24|jt:ENSG00000162458  
TEL-2|ENSG00000209707|hsa-mir-24-2|hsa-miR-24|jt:ENSG00000132141  
TFII-I|ENSG00000198986|hsa-let-7a-3|hsa-let-7a|jt:ENSG00000023902  
TFII-I|ENSG00000207875|hsa-let-7b|hsa-let-7b|jt:ENSG00000023902  
YY1|ENSG00000199032|hsa-mir-425|hsa-miR-425-3p|jt:ENSG00000198382  
YY1|ENSG00000199032|hsa-mir-425|hsa-miR-425-3p|jt:ENSG00000171109  
YY1|ENSG00000199032|hsa-mir-425|hsa-miR-425-3p|jt:ENSG00000163322  
YY1|ENSG00000199135|hsa-mir-101-1|hsa-miR-101|jt:ENSG00000115825  
YY1|ENSG00000199135|hsa-mir-101-1|hsa-miR-101|jt:ENSG00000121089  
YY1|ENSG00000199135|hsa-mir-101-1|hsa-miR-101|jt:ENSG00000204220  
YY1|ENSG00000199135|hsa-mir-101-1|hsa-miR-101|jt:ENSG00000175220  
YY1|ENSG00000199135|hsa-mir-101-1|hsa-miR-101|jt:ENSG00000141034  
YY1|ENSG00000199135|hsa-mir-101-1|hsa-miR-101|jt:ENSG00000128594  
YY1|ENSG00000199135|hsa-mir-101-1|hsa-miR-101|jt:ENSG00000180263  
YY1|ENSG00000199135|hsa-mir-101-1|hsa-miR-101|jt:ENSG00000159167  
YY1|ENSG00000199135|hsa-mir-101-1|hsa-miR-101|jt:ENSG00000119707  
YY1|ENSG00000199135|hsa-mir-101-1|hsa-miR-101|jt:ENSG00000151690  
YY1|ENSG00000199135|hsa-mir-101-1|hsa-miR-101|jt:ENSG00000198757  
YY1|ENSG00000207725|hsa-mir-222|hsa-miR-222|jt:ENSG00000204220  
YY1|ENSG00000207725|hsa-mir-222|hsa-miR-222|jt:ENSG00000168906  
YY1|ENSG00000207725|hsa-mir-222|hsa-miR-222|jt:ENSG00000167196  
YY1|ENSG00000207725|hsa-mir-222|hsa-miR-222|jt:ENSG00000186462  
YY1|ENSG00000207725|hsa-mir-222|hsa-miR-222|jt:ENSG00000132958  
YY1|ENSG00000207725|hsa-mir-222|hsa-miR-222|jt:ENSG00000138468  
YY1|ENSG00000207870|hsa-mir-221|hsa-miR-221|jt:ENSG00000204220  
YY1|ENSG00000207870|hsa-mir-221|hsa-miR-221|jt:ENSG00000168906  
YY1|ENSG00000207870|hsa-mir-221|hsa-miR-221|jt:ENSG00000167196  
YY1|ENSG00000207870|hsa-mir-221|hsa-miR-221|jt:ENSG00000186462  
YY1|ENSG00000207870|hsa-mir-221|hsa-miR-221|jt:ENSG00000132958  
YY1|ENSG00000207870|hsa-mir-221|hsa-miR-221|jt:ENSG00000138468  
v-Myb|ENSG00000198987|hsa-mir-16-2|hsa-miR-16|jt:ENSG00000134343  
v-Myb|ENSG00000198987|hsa-mir-16-2|hsa-miR-16|jt:ENSG00000167778  
v-Myb|ENSG00000198987|hsa-mir-16-2|hsa-miR-16|jt:ENSG00000196204  
v-Myb|ENSG00000198987|hsa-mir-16-2|hsa-miR-16|jt:ENSG00000138685  
v-Myb|ENSG00000198987|hsa-mir-16-2|hsa-miR-16|jt:ENSG00000125657
