# Supplementary material for: Genome-wide survey of microRNA–transcription factor feed-forward regulatory circuits in human
Source: PubMed Central journal article supplement — Mol Biosyst. 2009 Jun 19;5(8):854–67. doi: 10.1039/b900177h (PMC2898627; doi:10.1039/b900177h), 2009-06-19
Supplement: b900177h_Figure_S1.pdf [file b900177h_Figure_S1.pdf]

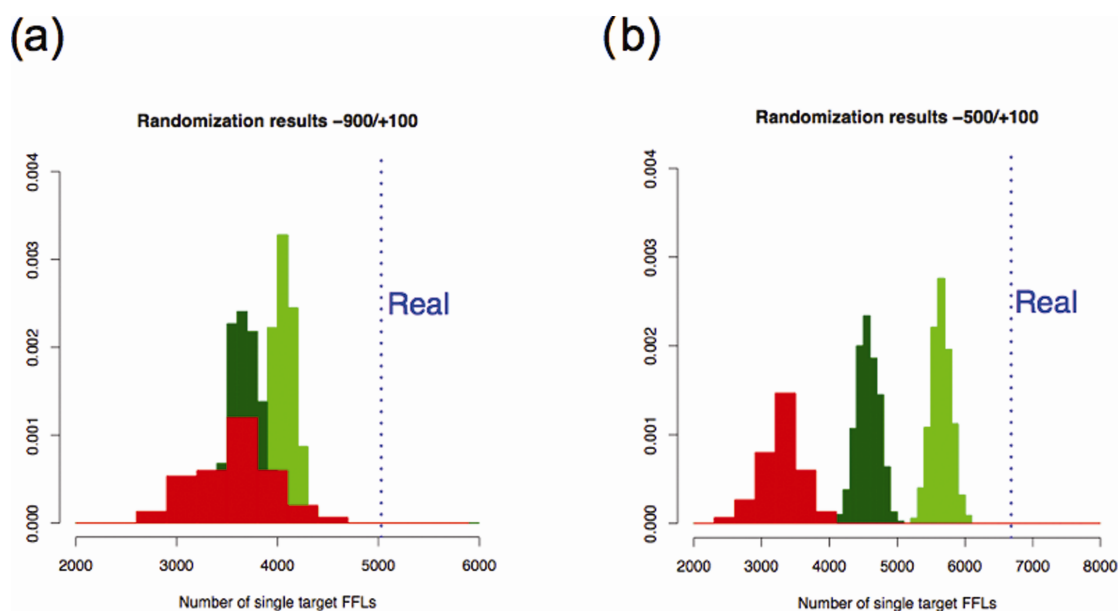

**Supplementary Figure S1: Randomization results for the network motifs analysis of mixed feed-forward loops.** We plotted the number of single-target mixed Feed-Forward Loops (FFLs) obtained in the real network and associated to known Transcription Factors (blue line) alongside the distributions (normalized histograms) of the number of single-target mixed FFLs detected for the three randomization strategies adopted. The red data refer to the results obtained with the Random reshuffling of microRNA promoters and seeds, whilst the light green refers to the Edge switching randomization strategy and the dark green to the Complete node replacement one. The figure is divided into two separated panels: panel A) contains results relative to the  $(-900/+100)$  nts window for the definition of promoter of miRNAs and protein-coding genes, whereas panel B) contains results relative to the  $(-500/+100)$  nts case. See Supporting Text for details.
